# Supplementary material for: The Genetic Landscape of Clinical Resistance to RAF Inhibition in Metastatic Melanoma
Source: Oxford University Press journal article supplement (doi:10.1158/2159-8290.cd-13-0617), 2013-11-21
Supplement: 21598290cd130617-sup-supp_table_4v2.pdf [file 21598290cd130617-sup-supp_table_4v2.pdf]

#Supplementary Table 4 - all mutations and short insertion/deletions in all cases

| Patient ID | Biopsy Time Point | Hugo Symbol | Entrez Gene Id | NCBI Build | Chr | Start position | End position | Variant Classification | Variant Type | Reference Allele | Tumor Allele | Number of alterate reads | Number of reference reads | cDNA Change      | Codon Change         | Protein Change |
|------------|-------------------|-------------|----------------|------------|-----|----------------|--------------|------------------------|--------------|------------------|--------------|--------------------------|---------------------------|------------------|----------------------|----------------|
| Pat_04     | Pre-Treatment     | KIAA0562    | 9731           | 37         | 1   | 3765332        | 3765332      | Missense_Mutation      | SNP          | G                | A            | 7                        | 24                        | c.127C>T         | c.(127-129)CCA>TCA   | p.P43S         |
| Pat_04     | Pre-Treatment     | SPSB1       | 80176          | 37         | 1   | 9416327        | 9416327      | Missense_Mutation      | SNP          | C                | T            | 4                        | 19                        | c.377C>T         | c.(376-378)TCT>TTT   | p.S126F        |
| Pat_04     | Pre-Treatment     | TNFRSF8     | 943            | 37         | 1   | 12164438       | 12164438     | Missense_Mutation      | SNP          | G                | A            | 10                       | 75                        | c.271G>A         | c.(271-273)GAC>AAC   | p.D91N         |
| Pat_04     | Pre-Treatment     | VPS13D      | 55187          | 37         | 1   | 12343000       | 12343000     | Missense_Mutation      | SNP          | C                | T            | 14                       | 96                        | c.4841C>T        | c.(4840-4842)TCC>TTC | p.S1614F       |
| Pat_04     | Pre-Treatment     | PRAMEF6     | 440561         | 37         | 1   | 13001331       | 13001331     | Missense_Mutation      | SNP          | C                | T            | 14                       | 363                       | c.352G>A         | c.(352-354)GAA>AAA   | p.E118K        |
| Pat_04     | Pre-Treatment     | CLCNKA      | 1187           | 37         | 1   | 16351312       | 16351312     | Missense_Mutation      | SNP          | C                | T            | 8                        | 43                        | c.284C>T         | c.(283-285)TCC>TTC   | p.S95F         |
| Pat_04     | Pre-Treatment     | ACTL8       | 81569          | 37         | 1   | 18152898       | 18152898     | Missense_Mutation      | SNP          | G                | A            | 5                        | 67                        | c.985G>A         | c.(985-987)GAG>AAG   | p.E329K        |
| Pat_04     | Pre-Treatment     | CAMK2N1     | 55450          | 37         | 1   | 20810152       | 20810152     | Missense_Mutation      | SNP          | G                | A            | 13                       | 71                        | c.227C>T         | c.(226-228)CCT>CTT   | p.P76L         |
| Pat_04     | Pre-Treatment     | CSMD2       | 114784         | 37         | 1   | 34276436       | 34276436     | Missense_Mutation      | SNP          | G                | A            | 13                       | 113                       | c.1234C>T        | c.(1234-1236)CCC>TCC | p.P412S        |
| Pat_04     | Pre-Treatment     | SFPQ        | 6421           | 37         | 1   | 35656483       | 35656483     | Missense_Mutation      | SNP          | A                | T            | 7                        | 41                        | c.1131T>A        | c.(1129-1131)AAT>AAA | p.N377K        |
| Pat_04     | Pre-Treatment     | CSF3R       | 1441           | 37         | 1   | 36939068       | 36939068     | Missense_Mutation      | SNP          | G                | A            | 7                        | 107                       | c.641C>T         | c.(640-642)TCC>TTC   | p.S214F        |
| Pat_04     | Pre-Treatment     | GRIK3       | 2899           | 37         | 1   | 37291235       | 37291235     | Missense_Mutation      | SNP          | C                | T            | 3                        | 28                        | c.1723G>A        | c.(1723-1725)GGG>AGG | p.G575R        |
| Pat_04     | Pre-Treatment     | DNAL1       | 7802           | 37         | 1   | 38022543       | 38022543     | Missense_Mutation      | SNP          | A                | G            | 6                        | 53                        | c.14A>G          | c.(13-15)AAC>AGC     | p.N5S          |
| Pat_04     | Pre-Treatment     | DNAL1       | 7802           | 37         | 1   | 38023207       | 38023207     | Missense_Mutation      | SNP          | C                | T            | 20                       | 88                        | c.151C>T         | c.(151-153)CGG>TGG   | p.R51W         |
| Pat_04     | Pre-Treatment     | CYP4X1      | 260293         | 37         | 1   | 47514288       | 47514288     | Nonsense_Mutation      | SNP          | G                | A            | 19                       | 106                       | c.1259G>A        | c.(1258-1260)TGG>TAG | p.W420*        |
| Pat_04     | Pre-Treatment     | PODN        | 127435         | 37         | 1   | 53542998       | 53542998     | Missense_Mutation      | SNP          | C                | A            | 19                       | 98                        | c.862C>A         | c.(862-864)CTG>ATG   | p.L288M        |
| Pat_04     | Pre-Treatment     | LRRRC42     | 115353         | 37         | 1   | 54432030       | 54432030     | Missense_Mutation      | SNP          | C                | T            | 15                       | 75                        | c.989C>T         | c.(988-990)CCT>CTT   | p.P330L        |
| Pat_04     | Pre-Treatment     | C8B         | 732            | 37         | 1   | 57422517       | 57422517     | Missense_Mutation      | SNP          | C                | T            | 19                       | 136                       | c.316G>A         | c.(316-318)GAA>AAA   | p.E106K        |
| Pat_04     | Pre-Treatment     | UBE2U       | 148581         | 37         | 1   | 64671364       | 64671364     | Missense_Mutation      | SNP          | G                | A            | 5                        | 89                        | c.109G>A         | c.(109-111)GAA>AAA   | p.E37K         |
| Pat_04     | Pre-Treatment     | SERBP1      | 26135          | 37         | 1   | 67881007       | 67881007     | Missense_Mutation      | SNP          | A                | G            | 11                       | 85                        | c.1012T>C        | c.(1012-1014)TCG>CCG | p.S338P        |
| Pat_04     | Pre-Treatment     | RPE65       | 6121           | 37         | 1   | 68896804       | 68896804     | Missense_Mutation      | SNP          | G                | A            | 10                       | 49                        | c.1394C>T        | c.(1393-1395)TCA>TTA | p.S465L        |
| Pat_04     | Pre-Treatment     | LRRIQ3      | 127255         | 37         | 1   | 74507480       | 74507480     | Missense_Mutation      | SNP          | G                | A            | 9                        | 47                        | c.1135C>T        | c.(1135-1137)CCT>TCT | p.P379S        |
| Pat_04     | Pre-Treatment     | C1orf173    | 127254         | 37         | 1   | 75037778       | 75037778     | Missense_Mutation      | SNP          | C                | T            | 9                        | 70                        | c.3616G>A        | c.(3616-3618)GAA>AAA | p.E1206K       |
| Pat_04     | Pre-Treatment     | C1orf173    | 127254         | 37         | 1   | 75039017       | 75039017     | Missense_Mutation      | SNP          | C                | T            | 15                       | 113                       | c.2377G>A        | c.(2377-2379)GGG>AGG | p.G793R        |
| Pat_04     | Pre-Treatment     | SLC44A5     | 204962         | 37         | 1   | 75679418       | 75679418     | Missense_Mutation      | SNP          | G                | A            | 17                       | 107                       | c.1934C>T        | c.(1933-1935)TCT>TTT | p.S645F        |
| Pat_04     | Pre-Treatment     | NEXN        | 91624          | 37         | 1   | 78392256       | 78392256     | Missense_Mutation      | SNP          | G                | A            | 7                        | 35                        | c.647G>A         | c.(646-648)CGA>CAA   | p.R216Q        |
| Pat_04     | Pre-Treatment     | NEXN        | 91624          | 37         | 1   | 78401698       | 78401698     | Missense_Mutation      | SNP          | T                | G            | 5                        | 30                        | c.1442T>G        | c.(1441-1443)ATT>AGT | p.I481S        |
| Pat_04     | Pre-Treatment     | CLCA4       | 22802          | 37         | 1   | 87025664       | 87025664     | Missense_Mutation      | SNP          | G                | A            | 6                        | 44                        | c.209G>A         | c.(208-210)AGA>AAA   | p.R70K         |
| Pat_04     | Pre-Treatment     | CDC7        | 8317           | 37         | 1   | 91967356       | 91967356     | Nonsense_Mutation      | SNP          | T                | A            | 4                        | 65                        | c.83T>A          | c.(82-84)TTA>TAA     | p.L28*         |
| Pat_04     | Pre-Treatment     | OLFML3      | 56944          | 37         | 1   | 114523090      | 114523090    | Missense_Mutation      | SNP          | C                | T            | 15                       | 42                        | c.251C>T         | c.(250-252)TCC>TTC   | p.S84F         |
| Pat_04     | Pre-Treatment     | CD2         | 914            | 37         | 1   | 117303169      | 117303169    | Nonsense_Mutation      | SNP          | G                | A            | 11                       | 66                        | c.528G>A         | c.(526-528)TGG>TGA   | p.W176*        |
| Pat_04     | Pre-Treatment     | HSD3B1      | 3283           | 37         | 1   | 120056726      | 120056727    | Missense_Mutation      | DNP          | GG               | AA           | 11                       | 64                        | c.580_581GG>AA   | c.(580-582)GGA>AAA   | p.G194K        |
| Pat_04     | Pre-Treatment     | NBPF10      | 100132406      | 37         | 1   | 145327549      | 145327550    | Missense_Mutation      | DNP          | AT               | TC           | 6                        | 34                        | :.4331_4332AT>TC | c.(4330-4332)AAT>ATC | p.N1444I       |
| Pat_04     | Pre-Treatment     | ECM1        | 1893           | 37         | 1   | 150482203      | 150482203    | Missense_Mutation      | SNP          | C                | T            | 24                       | 133                       | c.188C>T         | c.(187-189)TCT>TTT   | p.S63F         |
| Pat_04     | Pre-Treatment     | HRNR        | 388697         | 37         | 1   | 152192982      | 152192982    | Missense_Mutation      | SNP          | C                | T            | 13                       | 93                        | c.1123G>A        | c.(1123-1125)GGA>AGA | p.G375R        |
| Pat_04     | Pre-Treatment     | FLG         | 2312           | 37         | 1   | 152279644      | 152279644    | Missense_Mutation      | SNP          | C                | T            | 20                       | 152                       | c.7718G>A        | c.(7717-7719)AGT>AAT | p.S2573N       |
| Pat_04     | Pre-Treatment     | SPRR2G      | 6706           | 37         | 1   | 153122531      | 153122531    | Missense_Mutation      | SNP          | G                | A            | 23                       | 173                       | c.56C>T          | c.(55-57)CCC>CTC     | p.P19L         |
| Pat_04     | Pre-Treatment     | NPR1        | 4881           | 37         | 1   | 153654983      | 153654983    | Missense_Mutation      | SNP          | G                | A            | 8                        | 47                        | c.1181G>A        | c.(1180-1182)GGA>GAA | p.G394E        |
| Pat_04     | Pre-Treatment     | NUP210L     | 91181          | 37         | 1   | 154061958      | 154061958    | Missense_Mutation      | SNP          | G                | A            | 32                       | 203                       | c.2300C>T        | c.(2299-2301)CCA>CTA | p.P767L        |
| Pat_04     | Pre-Treatment     | PKLR        | 5313           | 37         | 1   | 155262980      | 155262980    | Missense_Mutation      | SNP          | G                | A            | 16                       | 134                       | c.1424C>T        | c.(1423-1425)ACC>ATC | p.T475I        |
| Pat_04     | Pre-Treatment     | PAQR6       | 79957          | 37         | 1   | 156215359      | 156215359    | Missense_Mutation      | SNP          | G                | A            | 8                        | 61                        | c.479C>T         | c.(478-480)TCC>TTC   | p.S160F        |
| Pat_04     | Pre-Treatment     | IQGAP3      | 128239         | 37         | 1   | 156518436      | 156518436    | Missense_Mutation      | SNP          | G                | A            | 6                        | 65                        | c.1930C>T        | c.(1930-1932)CCC>TCC | p.P644S        |
| Pat_04     | Pre-Treatment     | OR10K1      | 391109         | 37         | 1   | 158435715      | 158435715    | Missense_Mutation      | SNP          | C                | T            | 22                       | 108                       | c.364C>T         | c.(364-366)CGC>TGC   | p.R122C        |

|        |               |           |        |    |    |           |           |                   |     |    |    |    |     |               |                        |                |
|--------|---------------|-----------|--------|----|----|-----------|-----------|-------------------|-----|----|----|----|-----|---------------|------------------------|----------------|
| Pat_04 | Pre-Treatment | OR10Z1    | 128368 | 37 | 1  | 158576979 | 158576979 | Missense_Mutation | SNP | C  | T  | 16 | 111 | c.751C>T      | c.(751-753)CAT>TAT     | p.H251Y        |
| Pat_04 | Pre-Treatment | FCER1A    | 2205   | 37 | 1  | 159273945 | 159273945 | Missense_Mutation | SNP | G  | A  | 9  | 90  | c.304G>A      | c.(304-306)GAA>AAA     | p.E102K        |
| Pat_04 | Pre-Treatment | FCER1A    | 2205   | 37 | 1  | 159275948 | 159275948 | Missense_Mutation | SNP | G  | A  | 7  | 75  | c.502G>A      | c.(502-504)GTT>ATT     | p.V168I        |
| Pat_04 | Pre-Treatment | APCS      | 325    | 37 | 1  | 159558454 | 159558454 | Missense_Mutation | SNP | G  | A  | 9  | 62  | c.628G>A      | c.(628-630)GAA>AAA     | p.E210K        |
| Pat_04 | Pre-Treatment | FCRL6     | 343413 | 37 | 1  | 159779306 | 159779306 | Missense_Mutation | SNP | C  | T  | 9  | 38  | c.719C>T      | c.(718-720)TCC>TTC     | p.S240F        |
| Pat_04 | Pre-Treatment | SLAMF9    | 89886  | 37 | 1  | 159923915 | 159923915 | Missense_Mutation | SNP | G  | A  | 10 | 58  | c.13C>T       | c.(13-15)CCT>TCT       | p.P5S          |
| Pat_04 | Pre-Treatment | SLAMF1    | 6504   | 37 | 1  | 160616672 | 160616672 | Missense_Mutation | SNP | T  | C  | 4  | 31  | c.64A>G       | c.(64-66)AGC>GCG       | p.S22G         |
| Pat_04 | Pre-Treatment | ILDR2     | 387597 | 37 | 1  | 166927005 | 166927006 | Splice_Site       | DNP | CC | TT | 7  | 51  | c.379_splice  | c.e2+1                 | p.D127_splice  |
| Pat_04 | Pre-Treatment | ADCY10    | 55811  | 37 | 1  | 167839549 | 167839549 | Missense_Mutation | SNP | C  | T  | 5  | 40  | c.1562G>A     | c.(1561-1563)GGA>GAA   | p.G521E        |
| Pat_04 | Pre-Treatment | F5        | 2153   | 37 | 1  | 169495256 | 169495256 | Splice_Site       | SNP | C  | T  | 4  | 31  | c.5600_splice | c.e18-1                | p.G1867_splice |
| Pat_04 | Pre-Treatment | FMO1      | 2326   | 37 | 1  | 171254520 | 171254520 | Missense_Mutation | SNP | G  | A  | 6  | 36  | c.1436G>A     | c.(1435-1437)GGA>GAA   | p.G479E        |
| Pat_04 | Pre-Treatment | C1orf9    | 51430  | 37 | 1  | 172522463 | 172522463 | Missense_Mutation | SNP | T  | C  | 16 | 108 | c.241T>C      | c.(241-243)TCT>CCT     | p.S81P         |
| Pat_04 | Pre-Treatment | PAPPA2    | 60676  | 37 | 1  | 176680981 | 176680981 | Missense_Mutation | SNP | C  | T  | 16 | 122 | c.3662C>T     | c.(3661-3663)TCA>TTA   | p.S1221L       |
| Pat_04 | Pre-Treatment | ANGPTL1   | 9068   | 37 | 1  | 178820285 | 178820285 | Missense_Mutation | SNP | C  | T  | 15 | 85  | c.1455G>A     | c.(1453-1455)ATG>ATA   | p.M485I        |
| Pat_04 | Pre-Treatment | LHX4      | 89884  | 37 | 1  | 180243389 | 180243389 | Missense_Mutation | SNP | G  | A  | 13 | 79  | c.848G>A      | c.(847-849)GGA>GAA     | p.G283E        |
| Pat_04 | Pre-Treatment | FAM129A   | 116496 | 37 | 1  | 184792417 | 184792417 | Missense_Mutation | SNP | C  | T  | 7  | 54  | c.869G>A      | c.(868-870)GGA>GAA     | p.G290E        |
| Pat_04 | Pre-Treatment | PTGS2     | 5743   | 37 | 1  | 186645203 | 186645203 | Missense_Mutation | SNP | G  | C  | 22 | 190 | c.1084C>G     | c.(1084-1086)CGT>GGT   | p.R362G        |
| Pat_04 | Pre-Treatment | PTGS2     | 5743   | 37 | 1  | 186648489 | 186648489 | Missense_Mutation | SNP | G  | A  | 8  | 40  | c.134C>T      | c.(133-135)ACC>ATC     | p.T45I         |
| Pat_04 | Pre-Treatment | CFH       | 3075   | 37 | 1  | 196715001 | 196715001 | Missense_Mutation | SNP | C  | T  | 8  | 76  | c.3365C>T     | c.(3364-3366)TCA>TTA   | p.S1122L       |
| Pat_04 | Pre-Treatment | CFHR5     | 81494  | 37 | 1  | 196953127 | 196953127 | Missense_Mutation | SNP | C  | T  | 5  | 47  | c.290C>T      | c.(289-291)TCT>TTT     | p.S97F         |
| Pat_04 | Pre-Treatment | F13B      | 2165   | 37 | 1  | 197032172 | 197032172 | Missense_Mutation | SNP | A  | C  | 18 | 101 | c.80T>G       | c.(79-81)TTT>TGT       | p.F27C         |
| Pat_04 | Pre-Treatment | ZBTB41    | 360023 | 37 | 1  | 197168712 | 197168712 | Missense_Mutation | SNP | G  | A  | 9  | 40  | c.892C>T      | c.(892-894)CCT>TCT     | p.P298S        |
| Pat_04 | Pre-Treatment | PTPRC     | 5788   | 37 | 1  | 198700830 | 198700830 | Missense_Mutation | SNP | G  | A  | 15 | 89  | c.1943G>A     | c.(1942-1944)GGA>GAA   | p.G648E        |
| Pat_04 | Pre-Treatment | CAMSAP1L1 | 23271  | 37 | 1  | 200816379 | 200816379 | Missense_Mutation | SNP | C  | T  | 6  | 59  | c.1184C>T     | c.(1183-1185)CCT>CTT   | p.P395L        |
| Pat_04 | Pre-Treatment | MAPKAPK2  | 9261   | 37 | 1  | 206904574 | 206904574 | Missense_Mutation | SNP | C  | T  | 7  | 57  | c.859C>T      | c.(859-861)CCC>TCC     | p.P287S        |
| Pat_04 | Pre-Treatment | C4BPA     | 722    | 37 | 1  | 207288861 | 207288861 | Splice_Site       | SNP | G  | A  | 13 | 45  | c.428_splice  | c.e4+1                 | p.G143_splice  |
| Pat_04 | Pre-Treatment | CD34      | 947    | 37 | 1  | 208061265 | 208061265 | Missense_Mutation | SNP | C  | T  | 5  | 12  | c.976G>A      | c.(976-978)GAA>AAA     | p.E326K        |
| Pat_04 | Pre-Treatment | INTS7     | 25896  | 37 | 1  | 212115237 | 212115237 | Missense_Mutation | SNP | G  | A  | 25 | 136 | c.2818C>T     | c.(2818-2820)CGC>TGC   | p.R940C        |
| Pat_04 | Pre-Treatment | CENPF     | 1063   | 37 | 1  | 214818698 | 214818698 | Missense_Mutation | SNP | C  | G  | 12 | 78  | c.5785C>G     | c.(5785-5787)CAA>GAA   | p.Q1929E       |
| Pat_04 | Pre-Treatment | CENPF     | 1063   | 37 | 1  | 214819239 | 214819239 | Nonsense_Mutation | SNP | C  | G  | 9  | 27  | c.6326C>G     | c.(6325-6327)TCA>TGA   | p.S2109*       |
| Pat_04 | Pre-Treatment | CENPF     | 1063   | 37 | 1  | 214819542 | 214819542 | Missense_Mutation | SNP | C  | G  | 2  | 13  | c.6629C>G     | c.(6628-6630)TCT>TGT   | p.S2210C       |
| Pat_04 | Pre-Treatment | USH2A     | 7399   | 37 | 1  | 215848705 | 215848705 | Missense_Mutation | SNP | C  | T  | 14 | 105 | c.12548G>A    | c.(12547-12549)GGA>GAA | p.G4183E       |
| Pat_04 | Pre-Treatment | USH2A     | 7399   | 37 | 1  | 215848928 | 215848928 | Missense_Mutation | SNP | C  | T  | 5  | 36  | c.12325G>A    | c.(12325-12327)GAG>AAC | p.E4109K       |
| Pat_04 | Pre-Treatment | C1orf65   | 164127 | 37 | 1  | 223568129 | 223568129 | Missense_Mutation | SNP | G  | A  | 4  | 20  | c.1312G>A     | c.(1312-1314)GAC>AAC   | p.D438N        |
| Pat_04 | Pre-Treatment | LEFTY1    | 10637  | 37 | 1  | 226075325 | 226075325 | Missense_Mutation | SNP | G  | A  | 3  | 26  | c.511C>T      | c.(511-513)CAC>TAC     | p.H171Y        |
| Pat_04 | Pre-Treatment | NID1      | 4811   | 37 | 1  | 236142388 | 236142388 | Missense_Mutation | SNP | C  | T  | 9  | 36  | c.3529G>A     | c.(3529-3531)GAT>AAT   | p.D1177N       |
| Pat_04 | Pre-Treatment | ERO1LB    | 56605  | 37 | 1  | 236399699 | 236399699 | Splice_Site       | SNP | C  | T  | 10 | 50  | c.506_splice  | c.e7-1                 | p.D169_splice  |
| Pat_04 | Pre-Treatment | EDARADD   | 128178 | 37 | 1  | 236590728 | 236590728 | Missense_Mutation | SNP | G  | A  | 8  | 27  | c.197G>A      | c.(196-198)CGA>CAA     | p.R66Q         |
| Pat_04 | Pre-Treatment | FMN2      | 56776  | 37 | 1  | 240370756 | 240370756 | Missense_Mutation | SNP | C  | T  | 16 | 133 | c.2644C>T     | c.(2644-2646)CCT>TCT   | p.P882S        |
| Pat_04 | Pre-Treatment | NLRP3     | 114548 | 37 | 1  | 247588630 | 247588630 | Missense_Mutation | SNP | G  | A  | 5  | 14  | c.1885G>A     | c.(1885-1887)GAA>AAA   | p.E629K        |
| Pat_04 | Pre-Treatment | OR2M3     | 127062 | 37 | 1  | 248366913 | 248366913 | Missense_Mutation | SNP | C  | T  | 19 | 214 | c.544C>T      | c.(544-546)CCC>TCC     | p.P182S        |
| Pat_04 | Pre-Treatment | AKR1C2    | 1646   | 37 | 10 | 5040933   | 5040933   | Missense_Mutation | SNP | C  | T  | 8  | 58  | c.454G>A      | c.(454-456)GAG>AAG     | p.E152K        |
| Pat_04 | Pre-Treatment | PRKCQ     | 5588   | 37 | 10 | 6539184   | 6539184   | Missense_Mutation | SNP | C  | T  | 20 | 133 | c.572G>A      | c.(571-573)CGA>CAA     | p.R191Q        |
| Pat_04 | Pre-Treatment | FAM171A1  | 221061 | 37 | 10 | 15296720  | 15296720  | Missense_Mutation | SNP | C  | T  | 4  | 11  | c.577G>A      | c.(577-579)GGA>AGA     | p.G193R        |
| Pat_04 | Pre-Treatment | FAM188A   | 80013  | 37 | 10 | 15879309  | 15879309  | Missense_Mutation | SNP | G  | A  | 19 | 79  | c.470C>T      | c.(469-471)TCG>TTG     | p.S157L        |
| Pat_04 | Pre-Treatment | NEBL      | 10529  | 37 | 10 | 21141577  | 21141577  | Missense_Mutation | SNP | C  | T  | 4  | 13  | c.905G>A      | c.(904-906)CGA>CAA     | p.R302Q        |
| Pat_04 | Pre-Treatment | SPAG6     | 9576   | 37 | 10 | 22653876  | 22653876  | Missense_Mutation | SNP | T  | G  | 5  | 46  | c.216T>G      | c.(214-216)AAT>AAG     | p.N72K         |

|        |               |           |        |    |    |           |           |                   |     |   |   |    |     |           |                      |          |
|--------|---------------|-----------|--------|----|----|-----------|-----------|-------------------|-----|---|---|----|-----|-----------|----------------------|----------|
| Pat_04 | Pre-Treatment | KIAA1217  | 56243  | 37 | 10 | 24508702  | 24508702  | Missense_Mutation | SNP | G | A | 11 | 57  | c.218G>A  | c.(217-219)CGA>CAA   | p.R73Q   |
| Pat_04 | Pre-Treatment | ARMC4     | 55130  | 37 | 10 | 28151512  | 28151512  | Missense_Mutation | SNP | C | T | 4  | 16  | c.2650G>A | c.(2650-2652)GAA>AAA | p.E884K  |
| Pat_04 | Pre-Treatment | ANKRD30A  | 91074  | 37 | 10 | 37430948  | 37430948  | Missense_Mutation | SNP | C | G | 4  | 52  | c.955C>G  | c.(955-957)CCA>GCA   | p.P319A  |
| Pat_04 | Pre-Treatment | ANKRD30A  | 91074  | 37 | 10 | 37442579  | 37442579  | Missense_Mutation | SNP | G | A | 7  | 123 | c.1619G>A | c.(1618-1620)GGA>GAA | p.G540E  |
| Pat_04 | Pre-Treatment | GDF10     | 2662   | 37 | 10 | 48426748  | 48426748  | Missense_Mutation | SNP | G | A | 14 | 82  | c.1259C>T | c.(1258-1260)TCC>TTC | p.S420F  |
| Pat_04 | Pre-Treatment | C10orf71  | 118461 | 37 | 10 | 50531497  | 50531497  | Missense_Mutation | SNP | C | T | 6  | 37  | c.907C>T  | c.(907-909)CCC>TCC   | p.P303S  |
| Pat_04 | Pre-Treatment | OGDHL     | 55753  | 37 | 10 | 50944432  | 50944432  | Missense_Mutation | SNP | C | T | 14 | 127 | c.2725G>A | c.(2725-2727)GAG>AAG | p.E909K  |
| Pat_04 | Pre-Treatment | PCDH15    | 65217  | 37 | 10 | 55582222  | 55582222  | Missense_Mutation | SNP | G | A | 4  | 10  | c.5264C>T | c.(5263-5265)CCT>CTT | p.P1755L |
| Pat_04 | Pre-Treatment | PCDH15    | 65217  | 37 | 10 | 55582895  | 55582895  | Missense_Mutation | SNP | C | T | 8  | 63  | c.4591G>A | c.(4591-4593)GAA>AAA | p.E1531K |
| Pat_04 | Pre-Treatment | BICC1     | 80114  | 37 | 10 | 60566860  | 60566860  | Missense_Mutation | SNP | A | C | 21 | 81  | c.2318A>C | c.(2317-2319)AAG>ACG | p.K773T  |
| Pat_04 | Pre-Treatment | FAM13C    | 220965 | 37 | 10 | 61029693  | 61029693  | Missense_Mutation | SNP | C | T | 7  | 66  | c.769G>A  | c.(769-771)GCC>ACC   | p.A257T  |
| Pat_04 | Pre-Treatment | ANK3      | 288    | 37 | 10 | 61835412  | 61835412  | Missense_Mutation | SNP | C | T | 3  | 27  | c.5227G>A | c.(5227-5229)GAA>AAA | p.E1743K |
| Pat_04 | Pre-Treatment | ANK3      | 288    | 37 | 10 | 61835855  | 61835855  | Missense_Mutation | SNP | G | A | 15 | 100 | c.4784C>T | c.(4783-4785)TCC>TTC | p.S1595F |
| Pat_04 | Pre-Treatment | ADAMTS14  | 140766 | 37 | 10 | 72511379  | 72511379  | Missense_Mutation | SNP | C | T | 4  | 32  | c.2573C>T | c.(2572-2574)CCC>CTC | p.P858L  |
| Pat_04 | Pre-Treatment | LIPF      | 8513   | 37 | 10 | 90435380  | 90435380  | Missense_Mutation | SNP | G | A | 10 | 46  | c.854G>A  | c.(853-855)GGA>GAA   | p.G285E  |
| Pat_04 | Pre-Treatment | CYP26A1   | 1592   | 37 | 10 | 94836867  | 94836867  | Missense_Mutation | SNP | C | T | 5  | 26  | c.1300C>T | c.(1300-1302)CCA>TCA | p.P434S  |
| Pat_04 | Pre-Treatment | GPR120    | 338557 | 37 | 10 | 95335855  | 95335855  | Missense_Mutation | SNP | C | T | 8  | 78  | c.575C>T  | c.(574-576)TCG>TTG   | p.S192L  |
| Pat_04 | Pre-Treatment | CYP2C18   | 1562   | 37 | 10 | 96447650  | 96447650  | Missense_Mutation | SNP | G | A | 10 | 96  | c.292G>A  | c.(292-294)GGA>AGA   | p.G98R   |
| Pat_04 | Pre-Treatment | CYP2C8    | 1558   | 37 | 10 | 96802823  | 96802823  | Missense_Mutation | SNP | C | T | 7  | 26  | c.973G>A  | c.(973-975)GAA>AAA   | p.E325K  |
| Pat_04 | Pre-Treatment | INA       | 9118   | 37 | 10 | 105048248 | 105048248 | Missense_Mutation | SNP | C | T | 11 | 109 | c.1322C>T | c.(1321-1323)TCC>TTC | p.S441F  |
| Pat_04 | Pre-Treatment | PCGF6     | 84108  | 37 | 10 | 105106997 | 105106997 | Missense_Mutation | SNP | G | A | 4  | 46  | c.671C>T  | c.(670-672)CCT>CTT   | p.P224L  |
| Pat_04 | Pre-Treatment | TAF5      | 6877   | 37 | 10 | 105147305 | 105147305 | Missense_Mutation | SNP | C | T | 12 | 63  | c.2035C>T | c.(2035-2037)CCC>TCC | p.P679S  |
| Pat_04 | Pre-Treatment | CCDC147   | 159686 | 37 | 10 | 106160585 | 106160585 | Missense_Mutation | SNP | C | T | 6  | 40  | c.1963C>T | c.(1963-1965)CTC>TTC | p.L655F  |
| Pat_04 | Pre-Treatment | AFAP1L2   | 84632  | 37 | 10 | 116075447 | 116075447 | Nonsense_Mutation | SNP | G | A | 3  | 13  | c.484C>T  | c.(484-486)CAG>TAG   | p.Q162*  |
| Pat_04 | Pre-Treatment | HTRA1     | 5654   | 37 | 10 | 124248449 | 124248449 | Missense_Mutation | SNP | A | T | 11 | 122 | c.504A>T  | c.(502-504)AAA>AAT   | p.K168N  |
| Pat_04 | Pre-Treatment | DMBT1     | 1755   | 37 | 10 | 124336068 | 124336068 | Missense_Mutation | SNP | G | A | 34 | 150 | c.437G>A  | c.(436-438)GGC>GAC   | p.G146D  |
| Pat_04 | Pre-Treatment | DMBT1     | 1755   | 37 | 10 | 124351788 | 124351788 | Missense_Mutation | SNP | G | A | 29 | 199 | c.2177G>A | c.(2176-2178)GGA>GAA | p.G726E  |
| Pat_04 | Pre-Treatment | DMBT1     | 1755   | 37 | 10 | 124358589 | 124358589 | Missense_Mutation | SNP | G | A | 11 | 86  | c.3256G>A | c.(3256-3258)GAA>AAA | p.E1086K |
| Pat_04 | Pre-Treatment | C10orf120 | 399814 | 37 | 10 | 124457694 | 124457694 | Missense_Mutation | SNP | C | T | 11 | 60  | c.563G>A  | c.(562-564)AGG>AAG   | p.R188K  |
| Pat_04 | Pre-Treatment | MKI67     | 4288   | 37 | 10 | 129901363 | 129901363 | Missense_Mutation | SNP | G | A | 16 | 101 | c.8741C>T | c.(8740-8742)CCC>CTC | p.P2914L |
| Pat_04 | Pre-Treatment | CDHR5     | 53841  | 37 | 11 | 618803    | 618803    | Missense_Mutation | SNP | T | C | 3  | 119 | c.1756A>G | c.(1756-1758)ATG>GTG | p.M586V  |
| Pat_04 | Pre-Treatment | MUC5B     | 727897 | 37 | 11 | 1158952   | 1158952   | Missense_Mutation | SNP | G | A | 8  | 50  | c.1130G>A | c.(1129-1131)GGG>GAG | p.G377E  |
| Pat_04 | Pre-Treatment | MUC5B     | 727897 | 37 | 11 | 1159051   | 1159051   | Missense_Mutation | SNP | C | T | 9  | 53  | c.1229C>T | c.(1228-1230)TCC>TTC | p.S410F  |
| Pat_04 | Pre-Treatment | OR52K2    | 119774 | 37 | 11 | 4471474   | 4471474   | Missense_Mutation | SNP | G | A | 9  | 49  | c.905G>A  | c.(904-906)CGT>CAT   | p.R302H  |
| Pat_04 | Pre-Treatment | OR52K1    | 390036 | 37 | 11 | 4510305   | 4510305   | Missense_Mutation | SNP | G | A | 14 | 75  | c.175G>A  | c.(175-177)GAA>AAA   | p.E59K   |
| Pat_04 | Pre-Treatment | OR51E2    | 81285  | 37 | 11 | 4703494   | 4703494   | Missense_Mutation | SNP | G | A | 5  | 29  | c.448C>T  | c.(448-450)CGC>TGC   | p.R150C  |
| Pat_04 | Pre-Treatment | OR51B2    | 79345  | 37 | 11 | 5344611   | 5344611   | Missense_Mutation | SNP | G | A | 8  | 34  | c.917C>T  | c.(916-918)TCT>TTT   | p.S306F  |
| Pat_04 | Pre-Treatment | DCHS1     | 8642   | 37 | 11 | 6647528   | 6647528   | Missense_Mutation | SNP | C | T | 3  | 18  | c.6448G>A | c.(6448-6450)GGA>AGA | p.G2150R |
| Pat_04 | Pre-Treatment | OR10A4    | 283297 | 37 | 11 | 6898467   | 6898467   | Missense_Mutation | SNP | G | C | 10 | 67  | c.589G>C  | c.(589-591)GAA>CAA   | p.E197Q  |
| Pat_04 | Pre-Treatment | OR10A6    | 390093 | 37 | 11 | 7949304   | 7949304   | Missense_Mutation | SNP | C | T | 15 | 109 | c.906G>A  | c.(904-906)ATG>ATA   | p.M302I  |
| Pat_04 | Pre-Treatment | OR10A6    | 390093 | 37 | 11 | 7949711   | 7949711   | Missense_Mutation | SNP | G | A | 3  | 21  | c.499C>T  | c.(499-501)CCC>TCC   | p.P167S  |
| Pat_04 | Pre-Treatment | NLRP10    | 338322 | 37 | 11 | 7982236   | 7982236   | Missense_Mutation | SNP | C | T | 13 | 60  | c.923G>A  | c.(922-924)CGT>CAT   | p.R308H  |
| Pat_04 | Pre-Treatment | LMO1      | 4004   | 37 | 11 | 8251941   | 8251941   | Missense_Mutation | SNP | C | T | 17 | 109 | c.136G>A  | c.(136-138)GAA>AAA   | p.E46K   |
| Pat_04 | Pre-Treatment | SLC6A5    | 9152   | 37 | 11 | 20658828  | 20658828  | Missense_Mutation | SNP | G | A | 5  | 57  | c.1848G>A | c.(1846-1848)ATG>ATA | p.M616I  |
| Pat_04 | Pre-Treatment | NELL1     | 4745   | 37 | 11 | 20949942  | 20949942  | Missense_Mutation | SNP | G | A | 30 | 147 | c.914G>A  | c.(913-915)CGA>CAA   | p.R305Q  |
| Pat_04 | Pre-Treatment | SYT13     | 57586  | 37 | 11 | 45265844  | 45265844  | Missense_Mutation | SNP | C | T | 7  | 72  | c.1040G>A | c.(1039-1041)CGA>CAA | p.R347Q  |
| Pat_04 | Pre-Treatment | PHF21A    | 51317  | 37 | 11 | 46098346  | 46098346  | Missense_Mutation | SNP | G | A | 17 | 80  | c.112C>T  | c.(112-114)CAT>TAT   | p.H38Y   |

|        |               |           |        |    |    |           |           |                   |     |   |   |    |     |              |                      |          |
|--------|---------------|-----------|--------|----|----|-----------|-----------|-------------------|-----|---|---|----|-----|--------------|----------------------|----------|
| Pat_04 | Pre-Treatment | LRP4      | 4038   | 37 | 11 | 46896442  | 46896442  | Missense_Mutation | SNP | G | A | 13 | 127 | c.4138C>T    | c.(4138-4140)CCT>TCT | p.P1380S |
| Pat_04 | Pre-Treatment | LOC440040 | 440040 | 37 | 11 | 49597970  | 49597970  | Missense_Mutation | SNP | G | A | 10 | 36  | c.83G>A      | c.(82-84)GGG>GAG     | p.G28E   |
| Pat_04 | Pre-Treatment | OR4C6     | 219432 | 37 | 11 | 55433183  | 55433183  | Nonsense_Mutation | SNP | C | T | 5  | 91  | c.541C>T     | c.(541-543)CAG>TAG   | p.Q181*  |
| Pat_04 | Pre-Treatment | OR5L2     | 26338  | 37 | 11 | 55594988  | 55594988  | Missense_Mutation | SNP | G | A | 20 | 159 | c.294G>A     | c.(292-294)ATG>ATA   | p.M98I   |
| Pat_04 | Pre-Treatment | OR8K3     | 219473 | 37 | 11 | 56086408  | 56086408  | Missense_Mutation | SNP | C | T | 5  | 26  | c.626C>T     | c.(625-627)TCA>TTA   | p.S209L  |
| Pat_04 | Pre-Treatment | OR5M8     | 219484 | 37 | 11 | 56258200  | 56258200  | Missense_Mutation | SNP | G | A | 5  | 22  | c.647C>T     | c.(646-648)TCC>TTC   | p.S216F  |
| Pat_04 | Pre-Treatment | OR5AP2    | 338675 | 37 | 11 | 56409825  | 56409825  | Missense_Mutation | SNP | C | T | 10 | 58  | c.91G>A      | c.(91-93)GGA>AGA     | p.G31R   |
| Pat_04 | Pre-Treatment | SERPING1  | 710    | 37 | 11 | 57373665  | 57373665  | Missense_Mutation | SNP | C | T | 16 | 152 | c.868C>T     | c.(868-870)CTC>TTC   | p.L290F  |
| Pat_04 | Pre-Treatment | OR6Q1     | 219952 | 37 | 11 | 57799199  | 57799199  | Missense_Mutation | SNP | C | T | 15 | 111 | c.775C>T     | c.(775-777)CTT>TTT   | p.L259F  |
| Pat_04 | Pre-Treatment | OR5AN1    | 390195 | 37 | 11 | 59132740  | 59132740  | Missense_Mutation | SNP | G | A | 9  | 55  | c.809G>A     | c.(808-810)AGC>AAC   | p.S270N  |
| Pat_04 | Pre-Treatment | OR4D11    | 219986 | 37 | 11 | 59271557  | 59271557  | Missense_Mutation | SNP | G | A | 28 | 166 | c.509G>A     | c.(508-510)GGA>GAA   | p.G170E  |
| Pat_04 | Pre-Treatment | SCGB1D1   | 10648  | 37 | 11 | 61960872  | 61960872  | Missense_Mutation | SNP | G | A | 5  | 36  | c.245G>A     | c.(244-246)GGA>GAA   | p.G82E   |
| Pat_04 | Pre-Treatment | EML3      | 256364 | 37 | 11 | 62377131  | 62377131  | Missense_Mutation | SNP | G | A | 14 | 217 | c.604C>T     | c.(604-606)CCT>TCT   | p.P202S  |
| Pat_04 | Pre-Treatment | TTC9C     | 283237 | 37 | 11 | 62502877  | 62502877  | Missense_Mutation | SNP | G | A | 3  | 41  | c.262G>A     | c.(262-264)GTG>ATG   | p.V88M   |
| Pat_04 | Pre-Treatment | SLC22A25  | 387601 | 37 | 11 | 62931333  | 62931333  | Missense_Mutation | SNP | T | A | 20 | 70  | c.1607A>T    | c.(1606-1608)AAT>ATT | p.N536I  |
| Pat_04 | Pre-Treatment | NPAS4     | 266743 | 37 | 11 | 66190283  | 66190283  | Missense_Mutation | SNP | C | T | 17 | 98  | c.569C>T     | c.(568-570)GCT>GTT   | p.A190V  |
| Pat_04 | Pre-Treatment | NPAS4     | 266743 | 37 | 11 | 66192379  | 66192379  | Missense_Mutation | SNP | C | T | 15 | 100 | c.2018C>T    | c.(2017-2019)TCC>TTC | p.S673F  |
| Pat_04 | Pre-Treatment | ACTN3     | 89     | 37 | 11 | 66325562  | 66325562  | Missense_Mutation | SNP | C | T | 5  | 21  | c.1193C>T    | c.(1192-1194)TCG>TTG | p.S398L  |
| Pat_04 | Pre-Treatment | GPR152    | 390212 | 37 | 11 | 67219541  | 67219541  | Missense_Mutation | SNP | C | T | 5  | 32  | c.655G>A     | c.(655-657)GCC>ACC   | p.A219T  |
| Pat_04 | Pre-Treatment | SHANK2    | 22941  | 37 | 11 | 70331654  | 70331654  | Missense_Mutation | SNP | G | A | 8  | 88  | c.4744C>T    | c.(4744-4746)CCC>TCC | p.P1582S |
| Pat_04 | Pre-Treatment | SHANK2    | 22941  | 37 | 11 | 70349008  | 70349008  | Missense_Mutation | SNP | C | T | 11 | 100 | c.2090G>A    | c.(2089-2091)GGC>GAC | p.G697D  |
| Pat_04 | Pre-Treatment | ARHGEF17  | 9828   | 37 | 11 | 73073768  | 73073768  | Missense_Mutation | SNP | C | T | 10 | 64  | c.4985C>T    | c.(4984-4986)TCC>TTC | p.S1662F |
| Pat_04 | Pre-Treatment | CNTN5     | 53942  | 37 | 11 | 99827585  | 99827585  | Missense_Mutation | SNP | G | A | 13 | 76  | c.721G>A     | c.(721-723)GAA>AAA   | p.E241K  |
| Pat_04 | Pre-Treatment | MMP13     | 4322   | 37 | 11 | 102826054 | 102826054 | Missense_Mutation | SNP | C | T | 21 | 103 | c.289G>A     | c.(289-291)GGG>AGG   | p.G97R   |
| Pat_04 | Pre-Treatment | DDI1      | 414301 | 37 | 11 | 103908697 | 103908697 | Missense_Mutation | SNP | G | A | 5  | 34  | c.1147G>A    | c.(1147-1149)GAA>AAA | p.E383K  |
| Pat_04 | Pre-Treatment | ARHGAP20  | 57569  | 37 | 11 | 110485305 | 110485305 | Missense_Mutation | SNP | C | T | 19 | 87  | c.610G>A     | c.(610-612)GAC>AAC   | p.D204N  |
| Pat_04 | Pre-Treatment | PPP2R1B   | 5519   | 37 | 11 | 111613299 | 111613299 | Missense_Mutation | SNP | G | A | 11 | 48  | c.1645C>T    | c.(1645-1647)CGC>TGC | p.R549C  |
| Pat_04 | Pre-Treatment | BCO2      | 83875  | 37 | 11 | 112064712 | 112064712 | Missense_Mutation | SNP | G | A | 5  | 45  | c.628G>A     | c.(628-630)GAA>AAA   | p.E210K  |
| Pat_04 | Pre-Treatment | NCAM1     | 4684   | 37 | 11 | 113102999 | 113102999 | Missense_Mutation | SNP | C | T | 8  | 63  | c.1072C>T    | c.(1072-1074)CGG>TGG | p.R358W  |
| Pat_04 | Pre-Treatment | HTR3A     | 3359   | 37 | 11 | 113860388 | 113860388 | Missense_Mutation | SNP | C | T | 18 | 91  | c.1454C>T    | c.(1453-1455)TCC>TTC | p.S485F  |
| Pat_04 | Pre-Treatment | APOA4     | 337    | 37 | 11 | 116692155 | 116692155 | Missense_Mutation | SNP | C | T | 28 | 172 | c.619G>A     | c.(619-621)GAA>AAA   | p.E207K  |
| Pat_04 | Pre-Treatment | POU2F3    | 25833  | 37 | 11 | 120139927 | 120139927 | Nonsense_Mutation | SNP | C | T | 3  | 37  | c.106C>T     | c.(106-108)CGA>TGA   | p.R36*   |
| Pat_04 | Pre-Treatment | SORL1     | 6653   | 37 | 11 | 121425911 | 121425911 | Missense_Mutation | SNP | G | A | 5  | 59  | c.2455G>A    | c.(2455-2457)GGA>AGA | p.G819R  |
| Pat_04 | Pre-Treatment | OR8G2     | 26492  | 37 | 11 | 124095851 | 124095851 | Missense_Mutation | SNP | C | T | 37 | 180 | c.454C>T     | c.(454-456)CAC>TAC   | p.H152Y  |
| Pat_04 | Pre-Treatment | OR8B8     | 26493  | 37 | 11 | 124310962 | 124310962 | Missense_Mutation | SNP | G | A | 6  | 50  | c.20C>T      | c.(19-21)TCC>TTC     | p.S7F    |
| Pat_04 | Pre-Treatment | STT3A     | 3703   | 37 | 11 | 125472736 | 125472736 | Missense_Mutation | SNP | C | T | 12 | 74  | c.310C>T     | c.(310-312)CAT>TAT   | p.H104Y  |
| Pat_04 | Pre-Treatment | NTM       | 50863  | 37 | 11 | 132016408 | 132016408 | Missense_Mutation | SNP | G | A | 4  | 23  | c.400G>A     | c.(400-402)GTA>ATA   | p.V134I  |
| Pat_04 | Pre-Treatment | ENO2      | 2026   | 37 | 12 | 7026828   | 7026828   | Missense_Mutation | SNP | C | T | 8  | 64  | c.394C>T     | c.(394-396)CGC>TGC   | p.R132C  |
| Pat_04 | Pre-Treatment | CD163L1   | 283316 | 37 | 12 | 7586282   | 7586282   | Missense_Mutation | SNP | C | T | 22 | 93  | c.133G>A     | c.(133-135)GAT>AAT   | p.D45N   |
| Pat_04 | Pre-Treatment | CD163     | 9332   | 37 | 12 | 7635262   | 7635262   | Missense_Mutation | SNP | C | T | 17 | 106 | c.3224G>A    | c.(3223-3225)CGA>CAA | p.R1075Q |
| Pat_04 | Pre-Treatment | AICDA     | 57379  | 37 | 12 | 8757868   | 8757868   | Missense_Mutation | SNP | C | T | 5  | 25  | c.370G>A     | c.(370-372)GAG>AAG   | p.E124K  |
| Pat_04 | Pre-Treatment | PIK3C2G   | 5288   | 37 | 12 | 18699326  | 18699326  | Missense_Mutation | SNP | C | T | 3  | 15  | c.3427C>T    | c.(3427-3429)CCA>TCA | p.P1143S |
| Pat_04 | Pre-Treatment | PDE3A     | 5139   | 37 | 12 | 20766384  | 20766384  | Missense_Mutation | SNP | G | A | 7  | 35  | c.1019G>A    | c.(1018-1020)GGA>GAA | p.G340E  |
| Pat_04 | Pre-Treatment | IAPP      | 3375   | 37 | 12 | 21526270  | 21526270  | Splice_Site       | SNP | G | A | 6  | 41  | c.-14_splice | c.e2-1               |          |
| Pat_04 | Pre-Treatment | TM7SF3    | 51768  | 37 | 12 | 27128554  | 27128554  | Missense_Mutation | SNP | G | A | 10 | 22  | c.1325C>T    | c.(1324-1326)TCG>TTG | p.S442L  |
| Pat_04 | Pre-Treatment | ARID2     | 196528 | 37 | 12 | 46243512  | 46243512  | Missense_Mutation | SNP | T | C | 29 | 222 | c.1865T>C    | c.(1864-1866)GTT>GCT | p.V622A  |
| Pat_04 | Pre-Treatment | OR8S1     | 341568 | 37 | 12 | 48920268  | 48920268  | Missense_Mutation | SNP | C | T | 3  | 47  | c.854C>T     | c.(853-855)TCC>TTC   | p.S285F  |



|        |               |          |        |    |    |           |           |                   |     |    |    |    |     |                 |                                      |               |
|--------|---------------|----------|--------|----|----|-----------|-----------|-------------------|-----|----|----|----|-----|-----------------|--------------------------------------|---------------|
| Pat_04 | Pre-Treatment | SPATS2   | 65244  | 37 | 12 | 49918579  | 49918579  | Missense_Mutation | SNP | C  | T  | 24 | 142 | c.1226C>T       | c.(1225-1227)CCT>CTT                 | p.P409L       |
| Pat_04 | Pre-Treatment | FAM186B  | 84070  | 37 | 12 | 49992716  | 49992716  | Missense_Mutation | SNP | T  | C  | 9  | 33  | c.2186A>G       | c.(2185-2187)AAC>AGC                 | p.N729S       |
| Pat_04 | Pre-Treatment | SMARCD1  | 6602   | 37 | 12 | 50492520  | 50492521  | Missense_Mutation | DNP | CC | TT | 7  | 64  | c.1416_1417CC>T | c.(1414-1419)AACCCA>AATT             | p.P473S       |
| Pat_04 | Pre-Treatment | GPD1     | 2819   | 37 | 12 | 50501428  | 50501428  | Missense_Mutation | SNP | G  | A  | 28 | 163 | c.691G>A        | c.(691-693)GGA>AGA                   | p.G231R       |
| Pat_04 | Pre-Treatment | DIP2B    | 57609  | 37 | 12 | 51112507  | 51112507  | Missense_Mutation | SNP | C  | T  | 5  | 37  | c.2867C>T       | c.(2866-2868)TCC>TTC                 | p.S956F       |
| Pat_04 | Pre-Treatment | KRT73    | 319101 | 37 | 12 | 53012103  | 53012103  | Missense_Mutation | SNP | C  | T  | 22 | 171 | c.206G>A        | c.(205-207)GGA>GAA                   | p.G69E        |
| Pat_04 | Pre-Treatment | KRT76    | 51350  | 37 | 12 | 53169247  | 53169247  | Missense_Mutation | SNP | G  | A  | 20 | 84  | c.740C>T        | c.(739-741)TCA>TTA                   | p.S247L       |
| Pat_04 | Pre-Treatment | RARG     | 5916   | 37 | 12 | 53605618  | 53605619  | Missense_Mutation | DNP | CC | TT | 4  | 25  | c.1206_1207GG>A | c.(1204-1209)ATGGAG>ATAA.402_403ME>I |               |
| Pat_04 | Pre-Treatment | SP7      | 121340 | 37 | 12 | 53722944  | 53722945  | Missense_Mutation | DNP | GG | AA | 7  | 98  | c.281_282CC>TT  | c.(280-282)CCC>CTT                   | p.P94L        |
| Pat_04 | Pre-Treatment | OR6C6    | 283365 | 37 | 12 | 55688815  | 55688815  | Missense_Mutation | SNP | C  | T  | 9  | 29  | c.202G>A        | c.(202-204)GAA>AAA                   | p.E68K        |
| Pat_04 | Pre-Treatment | OR6C75   | 390323 | 37 | 12 | 55759078  | 55759078  | Missense_Mutation | SNP | C  | T  | 16 | 108 | c.184C>T        | c.(184-186)CGG>TGG                   | p.R62W        |
| Pat_04 | Pre-Treatment | AGAP2    | 116986 | 37 | 12 | 58135698  | 58135698  | Nonsense_Mutation | SNP | G  | A  | 24 | 126 | c.157C>T        | c.(157-159)CGA>TGA                   | p.R53*        |
| Pat_04 | Pre-Treatment | AVIL     | 10677  | 37 | 12 | 58203639  | 58203639  | Missense_Mutation | SNP | C  | T  | 12 | 55  | c.796G>A        | c.(796-798)GAG>AAG                   | p.E266K       |
| Pat_04 | Pre-Treatment | C12orf66 | 144577 | 37 | 12 | 64588160  | 64588160  | Missense_Mutation | SNP | G  | A  | 6  | 42  | c.800C>T        | c.(799-801)GCC>GTC                   | p.A267V       |
| Pat_04 | Pre-Treatment | GRIP1    | 23426  | 37 | 12 | 66911727  | 66911727  | Missense_Mutation | SNP | G  | A  | 9  | 61  | c.532C>T        | c.(532-534)CGT>TGT                   | p.R178C       |
| Pat_04 | Pre-Treatment | TRHDE    | 29953  | 37 | 12 | 72771887  | 72771887  | Missense_Mutation | SNP | C  | T  | 9  | 57  | c.1166C>T       | c.(1165-1167)TCC>TTC                 | p.S389F       |
| Pat_04 | Pre-Treatment | KCNC2    | 3747   | 37 | 12 | 75441969  | 75441969  | Missense_Mutation | SNP | C  | T  | 32 | 186 | c.1744G>A       | c.(1744-1746)GAT>AAT                 | p.D582N       |
| Pat_04 | Pre-Treatment | NAV3     | 89795  | 37 | 12 | 78516155  | 78516156  | Missense_Mutation | DNP | GG | AA | 10 | 95  | c.4185_4186GG>A | c.(183-4188)GAGGTC>GAA               | p.V1396I      |
| Pat_04 | Pre-Treatment | LRRIQ1   | 84125  | 37 | 12 | 85517918  | 85517918  | Missense_Mutation | SNP | G  | A  | 15 | 47  | c.3628G>A       | c.(3628-3630)GAA>AAA                 | p.E1210K      |
| Pat_04 | Pre-Treatment | TMCC3    | 57458  | 37 | 12 | 94975716  | 94975716  | Missense_Mutation | SNP | G  | A  | 4  | 62  | c.677C>T        | c.(676-678)TCC>TTC                   | p.S226F       |
| Pat_04 | Pre-Treatment | TMPO     | 7112   | 37 | 12 | 98938042  | 98938043  | Nonsense_Mutation | DNP | GG | AA | 8  | 56  | c.698_699GG>AA  | c.(697-699)TGG>TAA                   | p.W233*       |
| Pat_04 | Pre-Treatment | MYBPC1   | 4604   | 37 | 12 | 102061659 | 102061659 | Missense_Mutation | SNP | C  | T  | 4  | 14  | c.2485C>T       | c.(2485-2487)CTC>TTC                 | p.L829F       |
| Pat_04 | Pre-Treatment | STAB2    | 55576  | 37 | 12 | 104131460 | 104131460 | Missense_Mutation | SNP | C  | T  | 16 | 90  | c.5599C>T       | c.(5599-5601)CTC>TTC                 | p.L1867F      |
| Pat_04 | Pre-Treatment | SELPLG   | 6404   | 37 | 12 | 109017999 | 109017999 | Missense_Mutation | SNP | C  | T  | 5  | 31  | c.85G>A         | c.(85-87)GAG>AAG                     | p.E29K        |
| Pat_04 | Pre-Treatment | MAPKAPK5 | 8550   | 37 | 12 | 112308962 | 112308962 | Missense_Mutation | SNP | C  | T  | 17 | 122 | c.557C>T        | c.(556-558)ACC>ATC                   | p.T186I       |
| Pat_04 | Pre-Treatment | NOS1     | 4842   | 37 | 12 | 117696239 | 117696239 | Missense_Mutation | SNP | C  | T  | 6  | 26  | c.2494G>A       | c.(2494-2496)GAA>AAA                 | p.E832K       |
| Pat_04 | Pre-Treatment | WDR66    | 144406 | 37 | 12 | 122437800 | 122437800 | Missense_Mutation | SNP | G  | A  | 14 | 64  | c.3185G>A       | c.(3184-3186)GGG>GAG                 | p.G1062E      |
| Pat_04 | Pre-Treatment | PITPNM2  | 57605  | 37 | 12 | 123475211 | 123475211 | Missense_Mutation | SNP | G  | A  | 4  | 42  | c.2450C>T       | c.(2449-2451)GCC>GTC                 | p.A817V       |
| Pat_04 | Pre-Treatment | TMEM132B | 114795 | 37 | 12 | 126135239 | 126135239 | Missense_Mutation | SNP | G  | A  | 7  | 45  | c.1639G>A       | c.(1639-1641)GAA>AAA                 | p.E547K       |
| Pat_04 | Pre-Treatment | TMEM132B | 114795 | 37 | 12 | 126137083 | 126137083 | Missense_Mutation | SNP | G  | C  | 8  | 79  | c.1996G>C       | c.(1996-1998)GCT>CCT                 | p.A666P       |
| Pat_04 | Pre-Treatment | ZNF140   | 7699   | 37 | 12 | 133682816 | 133682816 | Missense_Mutation | SNP | G  | A  | 23 | 132 | c.953G>A        | c.(952-954)CGA>CAA                   | p.R318Q       |
| Pat_04 | Pre-Treatment | GJB6     | 10804  | 37 | 13 | 20797567  | 20797567  | Missense_Mutation | SNP | G  | A  | 40 | 198 | c.53C>T         | c.(52-54)ACC>ATC                     | p.T18I        |
| Pat_04 | Pre-Treatment | KL       | 9365   | 37 | 13 | 33629411  | 33629411  | Missense_Mutation | SNP | C  | T  | 13 | 44  | c.1558C>T       | c.(1558-1560)CCC>TCC                 | p.P520S       |
| Pat_04 | Pre-Treatment | C13orf23 | 80209  | 37 | 13 | 39602432  | 39602432  | Missense_Mutation | SNP | G  | A  | 3  | 28  | c.301C>T        | c.(301-303)CGT>TGT                   | p.R101C       |
| Pat_04 | Pre-Treatment | KIAA0564 | 23078  | 37 | 13 | 42263512  | 42263512  | Missense_Mutation | SNP | A  | G  | 9  | 42  | c.4109T>C       | c.(4108-4110)GTT>GCT                 | p.V1370A      |
| Pat_04 | Pre-Treatment | DACH1    | 1602   | 37 | 13 | 72134038  | 72134038  | Missense_Mutation | SNP | C  | T  | 3  | 17  | c.1349G>A       | c.(1348-1350)AGA>AAA                 | p.R450K       |
| Pat_04 | Pre-Treatment | POTEG    | 404785 | 37 | 14 | 19553531  | 19553531  | Missense_Mutation | SNP | G  | A  | 5  | 214 | c.115G>A        | c.(115-117)GGC>AGC                   | p.G39S        |
| Pat_04 | Pre-Treatment | OR4K2    | 390431 | 37 | 14 | 20345124  | 20345124  | Missense_Mutation | SNP | C  | T  | 12 | 111 | c.698C>T        | c.(697-699)TCA>TTA                   | p.S233L       |
| Pat_04 | Pre-Treatment | OR4K1    | 79544  | 37 | 14 | 20404138  | 20404138  | Missense_Mutation | SNP | C  | T  | 17 | 78  | c.313C>T        | c.(313-315)CAC>TAC                   | p.H105Y       |
| Pat_04 | Pre-Treatment | OR4K13   | 390433 | 37 | 14 | 20502223  | 20502224  | Nonsense_Mutation | DNP | CG | TA | 7  | 59  | c.694_695CG>TA  | c.(694-696)CGA>TAA                   | p.R232*       |
| Pat_04 | Pre-Treatment | OR10G3   | 26533  | 37 | 14 | 22038587  | 22038587  | Missense_Mutation | SNP | C  | A  | 6  | 43  | c.289G>T        | c.(289-291)GGC>TGC                   | p.G97C        |
| Pat_04 | Pre-Treatment | OR4E2    | 26686  | 37 | 14 | 22133562  | 22133562  | Missense_Mutation | SNP | G  | A  | 30 | 165 | c.266G>A        | c.(265-267)AGA>AAA                   | p.R89K        |
| Pat_04 | Pre-Treatment | AKAP6    | 9472   | 37 | 14 | 33291502  | 33291502  | Missense_Mutation | SNP | G  | A  | 4  | 25  | c.4483G>A       | c.(4483-4485)GAG>AAG                 | p.E1495K      |
| Pat_04 | Pre-Treatment | AKAP6    | 9472   | 37 | 14 | 33292790  | 33292790  | Missense_Mutation | SNP | G  | A  | 5  | 44  | c.5771G>A       | c.(5770-5772)GGG>GAG                 | p.G1924E      |
| Pat_04 | Pre-Treatment | RALGAPA1 | 253959 | 37 | 14 | 36217895  | 36217895  | Missense_Mutation | SNP | G  | A  | 10 | 38  | c.1147C>T       | c.(1147-1149)CTC>TTC                 | p.L383F       |
| Pat_04 | Pre-Treatment | SSTR1    | 6751   | 37 | 14 | 38679634  | 38679634  | Missense_Mutation | SNP | C  | T  | 15 | 77  | c.1040C>T       | c.(1039-1041)GCG>GTG                 | p.A347V       |
| Pat_04 | Pre-Treatment | TRAPPC6B | 122553 | 37 | 14 | 39623414  | 39623414  | Splice_Site       | SNP | C  | T  | 5  | 15  | c.351_splice    | c.e4+1                               | p.K117_splice |

|        |               |               |           |    |    |          |          |                   |     |    |    |    |     |                                   |                      |              |
|--------|---------------|---------------|-----------|----|----|----------|----------|-------------------|-----|----|----|----|-----|-----------------------------------|----------------------|--------------|
| Pat_04 | Pre-Treatment | C14orf105     | 55195     | 37 | 14 | 57947409 | 57947409 | Missense_Mutation | SNP | C  | T  | 9  | 42  | c.559G>A                          | c.(559-561)GAC>AAC   | p.D187N      |
| Pat_04 | Pre-Treatment | C14orf37      | 145407    | 37 | 14 | 58605719 | 58605719 | Missense_Mutation | SNP | G  | A  | 10 | 71  | c.358C>T                          | c.(358-360)CCC>TCC   | p.P120S      |
| Pat_04 | Pre-Treatment | ADAM21        | 8747      | 37 | 14 | 70924389 | 70924389 | Missense_Mutation | SNP | C  | T  | 13 | 124 | c.173C>T                          | c.(172-174)CCT>CTT   | p.P58L       |
| Pat_04 | Pre-Treatment | DCAF4         | 26094     | 37 | 14 | 73425449 | 73425449 | Missense_Mutation | SNP | C  | T  | 28 | 131 | c.1424C>T                         | c.(1423-1425)TCC>TTC | p.S475F      |
| Pat_04 | Pre-Treatment | MLH3          | 27030     | 37 | 14 | 75516045 | 75516045 | Missense_Mutation | SNP | C  | T  | 8  | 32  | c.314G>A                          | c.(313-315)AGT>AAT   | p.S105N      |
| Pat_04 | Pre-Treatment | NRXN3         | 9369      | 37 | 14 | 79432412 | 79432412 | Missense_Mutation | SNP | G  | A  | 11 | 41  | c.1321G>A                         | c.(1321-1323)GAA>AAA | p.E441K      |
| Pat_04 | Pre-Treatment | C14orf145     | 145508    | 37 | 14 | 81302605 | 81302605 | Missense_Mutation | SNP | G  | A  | 23 | 117 | c.1001C>T                         | c.(1000-1002)TCC>TTC | p.S334F      |
| Pat_04 | Pre-Treatment | GALC          | 2581      | 37 | 14 | 88417058 | 88417058 | Missense_Mutation | SNP | A  | C  | 3  | 32  | c.1196T>G                         | c.(1195-1197)CTT>CGT | p.L399R      |
| Pat_04 | Pre-Treatment | ATG2B         | 55102     | 37 | 14 | 96783592 | 96783592 | Missense_Mutation | SNP | G  | A  | 8  | 30  | c.3100C>T                         | c.(3100-3102)CGT>TGT | p.R1034C     |
| Pat_04 | Pre-Treatment | AK7           | 122481    | 37 | 14 | 96912921 | 96912921 | Missense_Mutation | SNP | C  | T  | 9  | 62  | c.847C>T                          | c.(847-849)CAT>TAT   | p.H283Y      |
| Pat_04 | Pre-Treatment | C14orf177     | 283598    | 37 | 14 | 99183486 | 99183486 | Missense_Mutation | SNP | G  | A  | 11 | 48  | c.253G>A                          | c.(253-255)GAA>AAA   | p.E85K       |
| Pat_04 | Pre-Treatment | OR4N4         | 283694    | 37 | 15 | 22383010 | 22383010 | Missense_Mutation | SNP | G  | A  | 16 | 104 | c.538G>A                          | c.(538-540)GAT>AAT   | p.D180N      |
| Pat_04 | Pre-Treatment | GOLGA8DP      | 100132979 | 37 | 15 | 22709716 | 22709716 | Splice_Site       | SNP | C  | T  | 10 | 93  | c.172_splice                      | c.e10-1              | p.V58_splice |
| Pat_04 | Pre-Treatment | MAGEL2        | 54551     | 37 | 15 | 23890470 | 23890470 | Missense_Mutation | SNP | G  | A  | 10 | 70  | c.611C>T                          | c.(610-612)CCC>CTC   | p.P204L      |
| Pat_04 | Pre-Treatment | NDN           | 4692      | 37 | 15 | 23932346 | 23932346 | Missense_Mutation | SNP | C  | T  | 6  | 35  | c.19G>A                           | c.(19-21)GAT>AAT     | p.D7N        |
| Pat_04 | Pre-Treatment | GABRB3        | 2562      | 37 | 15 | 26825489 | 26825489 | Nonsense_Mutation | SNP | G  | T  | 10 | 107 | c.659C>A                          | c.(658-660)TCG>TAG   | p.S220*      |
| Pat_04 | Pre-Treatment | GABRB3        | 2562      | 37 | 15 | 27184461 | 27184461 | Nonsense_Mutation | SNP | C  | T  | 17 | 61  | c.123G>A                          | c.(121-123)TGG>TGA   | p.W41*       |
| Pat_04 | Pre-Treatment | TRPM1         | 4308      | 37 | 15 | 31318400 | 31318401 | Missense_Mutation | DNP | CC | TT | 4  | 32  | .3504_3505GG>A302-3507)CGGGAG>CGA |                      | p.E1169K     |
| Pat_04 | Pre-Treatment | FMN1          | 342184    | 37 | 15 | 33261588 | 33261588 | Missense_Mutation | SNP | C  | T  | 24 | 186 | c.1645G>A                         | c.(1645-1647)GAG>AAG | p.E549K      |
| Pat_04 | Pre-Treatment | CHRM5         | 1133      | 37 | 15 | 34355453 | 34355453 | Missense_Mutation | SNP | C  | T  | 35 | 182 | c.535C>T                          | c.(535-537)CCA>TCA   | p.P179S      |
| Pat_04 | Pre-Treatment | C15orf53      | 400359    | 37 | 15 | 38990511 | 38990511 | Missense_Mutation | SNP | G  | A  | 6  | 51  | c.305G>A                          | c.(304-306)GGA>GAA   | p.G102E      |
| Pat_04 | Pre-Treatment | JMJD7-PLA2G4B | 8681      | 37 | 15 | 42138213 | 42138213 | Nonsense_Mutation | SNP | G  | A  | 7  | 39  | c.1568G>A                         | c.(1567-1569)TGG>TAG | p.W523*      |
| Pat_04 | Pre-Treatment | SPTBN5        | 51332     | 37 | 15 | 42173383 | 42173383 | Missense_Mutation | SNP | G  | A  | 5  | 26  | c.2402C>T                         | c.(2401-2403)CCC>CTC | p.P801L      |
| Pat_04 | Pre-Treatment | ZFP106        | 64397     | 37 | 15 | 42743893 | 42743893 | Missense_Mutation | SNP | C  | T  | 8  | 36  | c.508G>A                          | c.(508-510)GGC>AGC   | p.G170S      |
| Pat_04 | Pre-Treatment | TGM5          | 9333      | 37 | 15 | 43527730 | 43527730 | Missense_Mutation | SNP | C  | T  | 9  | 53  | c.1651G>A                         | c.(1651-1653)GAT>AAT | p.D551N      |
| Pat_04 | Pre-Treatment | TUBGCP4       | 27229     | 37 | 15 | 43668311 | 43668311 | Missense_Mutation | SNP | C  | T  | 49 | 140 | c.94C>T                           | c.(94-96)CCT>TCT     | p.P32S       |
| Pat_04 | Pre-Treatment | FBN1          | 2200      | 37 | 15 | 48808466 | 48808466 | Missense_Mutation | SNP | G  | A  | 16 | 133 | c.1241C>T                         | c.(1240-1242)CCT>CTT | p.P414L      |
| Pat_04 | Pre-Treatment | SHC4          | 399694    | 37 | 15 | 49176530 | 49176530 | Missense_Mutation | SNP | T  | A  | 8  | 45  | c.755A>T                          | c.(754-756)AAA>ATA   | p.K252I      |
| Pat_04 | Pre-Treatment | TRPM7         | 54822     | 37 | 15 | 50888521 | 50888521 | Missense_Mutation | SNP | G  | A  | 13 | 31  | c.3221C>T                         | c.(3220-3222)CCA>CTA | p.P1074L     |
| Pat_04 | Pre-Treatment | GCNT3         | 9245      | 37 | 15 | 59910526 | 59910526 | Missense_Mutation | SNP | C  | T  | 10 | 54  | c.89C>T                           | c.(88-90)TCT>TTT     | p.S30F       |
| Pat_04 | Pre-Treatment | ZNF609        | 23060     | 37 | 15 | 64968294 | 64968294 | Missense_Mutation | SNP | C  | T  | 9  | 78  | c.3241C>T                         | c.(3241-3243)CCC>TCC | p.P1081S     |
| Pat_04 | Pre-Treatment | MAP2K1        | 5604      | 37 | 15 | 66729162 | 66729162 | Missense_Mutation | SNP | C  | T  | 13 | 63  | c.370C>T                          | c.(370-372)CCG>TCG   | p.P124S      |
| Pat_04 | Pre-Treatment | LBXCOR1       | 390598    | 37 | 15 | 68125575 | 68125576 | Missense_Mutation | DNP | CC | TT | 5  | 67  | .:2651_2652CC>T                   | c.(2650-2652)GCC>GTT | p.A884V      |
| Pat_04 | Pre-Treatment | STRA6         | 64220     | 37 | 15 | 74487802 | 74487802 | Nonsense_Mutation | SNP | C  | T  | 4  | 18  | c.438G>A                          | c.(436-438)TGG>TGA   | p.W146*      |
| Pat_04 | Pre-Treatment | NRG4          | 145957    | 37 | 15 | 76301551 | 76301551 | Missense_Mutation | SNP | G  | A  | 24 | 72  | c.94C>T                           | c.(94-96)CCA>TCA     | p.P32S       |
| Pat_04 | Pre-Treatment | SCAPER        | 49855     | 37 | 15 | 76726576 | 76726576 | Missense_Mutation | SNP | C  | T  | 17 | 105 | c.3154G>A                         | c.(3154-3156)GGA>AGA | p.G1052R     |
| Pat_04 | Pre-Treatment | AP3B2         | 8120      | 37 | 15 | 83350179 | 83350179 | Missense_Mutation | SNP | G  | A  | 5  | 45  | c.514C>T                          | c.(514-516)CTC>TTC   | p.L172F      |
| Pat_04 | Pre-Treatment | ADAMTSL3      | 57188     | 37 | 15 | 84566668 | 84566668 | Missense_Mutation | SNP | G  | A  | 10 | 90  | c.1526G>A                         | c.(1525-1527)CGC>CAC | p.R509H      |
| Pat_04 | Pre-Treatment | POLG          | 5428      | 37 | 15 | 89870446 | 89870446 | Missense_Mutation | SNP | G  | A  | 8  | 104 | c.1385C>T                         | c.(1384-1386)TCG>TTG | p.S462L      |
| Pat_04 | Pre-Treatment | PDIA2         | 64714     | 37 | 16 | 333362   | 333362   | Missense_Mutation | SNP | G  | A  | 4  | 40  | c.193G>A                          | c.(193-195)GAA>AAA   | p.E65K       |
| Pat_04 | Pre-Treatment | IFT140        | 9742      | 37 | 16 | 1636207  | 1636207  | Missense_Mutation | SNP | C  | T  | 14 | 88  | c.1079G>A                         | c.(1078-1080)AGC>AAC | p.S360N      |
| Pat_04 | Pre-Treatment | PRSS22        | 64063     | 37 | 16 | 2905608  | 2905608  | Missense_Mutation | SNP | A  | C  | 16 | 78  | c.526T>G                          | c.(526-528)TGG>GGG   | p.W176G      |
| Pat_04 | Pre-Treatment | C16orf68      | 79091     | 37 | 16 | 8722796  | 8722796  | Nonsense_Mutation | SNP | C  | T  | 10 | 52  | c.343C>T                          | c.(343-345)CAG>TAG   | p.Q115*      |
| Pat_04 | Pre-Treatment | MYH11         | 4629      | 37 | 16 | 15818560 | 15818560 | Missense_Mutation | SNP | C  | T  | 14 | 115 | c.4060G>A                         | c.(4060-4062)GAG>AAG | p.E1354K     |
| Pat_04 | Pre-Treatment | ACSM5         | 54988     | 37 | 16 | 20441100 | 20441100 | Missense_Mutation | SNP | G  | A  | 6  | 50  | c.1102G>A                         | c.(1102-1104)GAA>AAA | p.E368K      |
| Pat_04 | Pre-Treatment | ACSM5         | 54988     | 37 | 16 | 20442640 | 20442640 | Nonsense_Mutation | SNP | T  | G  | 13 | 84  | c.1305T>G                         | c.(1303-1305)TAT>TAG | p.Y435*      |
| Pat_04 | Pre-Treatment | ACSM2B        | 348158    | 37 | 16 | 20570625 | 20570625 | Missense_Mutation | SNP | G  | A  | 7  | 40  | c.322C>T                          | c.(322-324)CGT>TGT   | p.R108C      |

|        |               |          |        |    |    |          |          |                   |     |    |    |    |     |                 |                      |                |
|--------|---------------|----------|--------|----|----|----------|----------|-------------------|-----|----|----|----|-----|-----------------|----------------------|----------------|
| Pat_04 | Pre-Treatment | ADCY7    | 113    | 37 | 16 | 50339482 | 50339482 | Missense_Mutation | SNP | G  | A  | 21 | 88  | c.1664G>A       | c.(1663-1665)GGG>GAG | p.G555E        |
| Pat_04 | Pre-Treatment | SALL1    | 6299   | 37 | 16 | 51173753 | 51173753 | Missense_Mutation | SNP | G  | A  | 8  | 55  | c.2380C>T       | c.(2380-2382)CCC>TCC | p.P794S        |
| Pat_04 | Pre-Treatment | NLRC5    | 84166  | 37 | 16 | 57059817 | 57059817 | Missense_Mutation | SNP | C  | T  | 9  | 63  | c.962C>T        | c.(961-963)CCA>CTA   | p.P321L        |
| Pat_04 | Pre-Treatment | ELMO3    | 79767  | 37 | 16 | 67236560 | 67236560 | Missense_Mutation | SNP | C  | T  | 9  | 41  | c.1588C>T       | c.(1588-1590)CGC>TGC | p.R530C        |
| Pat_04 | Pre-Treatment | LCAT     | 3931   | 37 | 16 | 67974168 | 67974168 | Missense_Mutation | SNP | G  | A  | 8  | 46  | c.962C>T        | c.(961-963)TCA>TTA   | p.S321L        |
| Pat_04 | Pre-Treatment | MLKL     | 197259 | 37 | 16 | 74719425 | 74719425 | Missense_Mutation | SNP | G  | A  | 11 | 29  | c.779C>T        | c.(778-780)CCC>CTC   | p.P260L        |
| Pat_04 | Pre-Treatment | COTL1    | 23406  | 37 | 16 | 84600458 | 84600458 | Missense_Mutation | SNP | G  | T  | 7  | 36  | c.422C>A        | c.(421-423)ACG>AAG   | p.T141K        |
| Pat_04 | Pre-Treatment | CTU2     | 348180 | 37 | 16 | 88778062 | 88778062 | Missense_Mutation | SNP | C  | T  | 10 | 61  | c.302C>T        | c.(301-303)GCC>GTC   | p.A101V        |
| Pat_04 | Pre-Treatment | SERPINF2 | 5345   | 37 | 17 | 1657799  | 1657799  | Missense_Mutation | SNP | G  | A  | 13 | 90  | c.1447G>A       | c.(1447-1449)GAT>AAT | p.D483N        |
| Pat_04 | Pre-Treatment | OR1G1    | 8390   | 37 | 17 | 3029911  | 3029911  | Missense_Mutation | SNP | G  | A  | 6  | 43  | c.935C>T        | c.(934-936)TCC>TTC   | p.S312F        |
| Pat_04 | Pre-Treatment | SPNS3    | 201305 | 37 | 17 | 4352673  | 4352673  | Missense_Mutation | SNP | A  | G  | 3  | 15  | c.914A>G        | c.(913-915)AAC>AGC   | p.N305S        |
| Pat_04 | Pre-Treatment | ASGR2    | 433    | 37 | 17 | 7017463  | 7017463  | Missense_Mutation | SNP | G  | A  | 18 | 95  | c.97C>T         | c.(97-99)CCC>TCC     | p.P33S         |
| Pat_04 | Pre-Treatment | SENP3    | 26168  | 37 | 17 | 7473708  | 7473709  | Missense_Mutation | DNP | CC | TT | 4  | 69  | :.1376_1377CC>T | c.(1375-1377)CCC>CTT | p.P459L        |
| Pat_04 | Pre-Treatment | C17orf68 | 80169  | 37 | 17 | 8132180  | 8132181  | Missense_Mutation | DNP | GG | AA | 3  | 14  | :.3251_3252CC>T | c.(3250-3252)GCC>GTT | p.A1084V       |
| Pat_04 | Pre-Treatment | PFAS     | 5198   | 37 | 17 | 8169252  | 8169253  | Missense_Mutation | DNP | CC | TT | 11 | 44  | :.2618_2619CC>T | c.(2617-2619)TCC>TTT | p.S873F        |
| Pat_04 | Pre-Treatment | USP43    | 124739 | 37 | 17 | 9596484  | 9596484  | Missense_Mutation | SNP | C  | T  | 3  | 29  | c.1394C>T       | c.(1393-1395)TCT>TTT | p.S465F        |
| Pat_04 | Pre-Treatment | MYH8     | 4626   | 37 | 17 | 10323496 | 10323496 | Missense_Mutation | SNP | G  | A  | 5  | 46  | c.49C>T         | c.(49-51)CCC>TCC     | p.P17S         |
| Pat_04 | Pre-Treatment | MYH1     | 4619   | 37 | 17 | 10419317 | 10419317 | Missense_Mutation | SNP | C  | T  | 19 | 138 | c.431G>A        | c.(430-432)CGA>CAA   | p.R144Q        |
| Pat_04 | Pre-Treatment | MYH2     | 4620   | 37 | 17 | 10432122 | 10432122 | Missense_Mutation | SNP | C  | T  | 13 | 65  | c.3629G>A       | c.(3628-3630)GGG>GAG | p.G1210E       |
| Pat_04 | Pre-Treatment | MYH2     | 4620   | 37 | 17 | 10436665 | 10436665 | Missense_Mutation | SNP | C  | T  | 15 | 82  | c.2378G>A       | c.(2377-2379)CGA>CAA | p.R793Q        |
| Pat_04 | Pre-Treatment | MYH3     | 4621   | 37 | 17 | 10545802 | 10545802 | Missense_Mutation | SNP | A  | G  | 7  | 96  | c.1820T>C       | c.(1819-1821)GTT>GCT | p.V607A        |
| Pat_04 | Pre-Treatment | DNAH9    | 1770   | 37 | 17 | 11775104 | 11775104 | Splice_Site       | SNP | G  | A  | 9  | 40  | c.10242_splice  | c.e52+1              | p.K3414_splice |
| Pat_04 | Pre-Treatment | RICH2    | 9912   | 37 | 17 | 12832325 | 12832325 | Missense_Mutation | SNP | G  | A  | 4  | 34  | c.544G>A        | c.(544-546)GAA>AAA   | p.E182K        |
| Pat_04 | Pre-Treatment | MPRIP    | 23164  | 37 | 17 | 17062245 | 17062245 | Missense_Mutation | SNP | G  | A  | 3  | 39  | c.1975G>A       | c.(1975-1977)GTC>ATC | p.V659I        |
| Pat_04 | Pre-Treatment | TOP3A    | 7156   | 37 | 17 | 18194301 | 18194301 | Missense_Mutation | SNP | A  | T  | 9  | 64  | c.1322T>A       | c.(1321-1323)TTC>TAC | p.F441Y        |
| Pat_04 | Pre-Treatment | EPN2     | 22905  | 37 | 17 | 19237275 | 19237275 | Missense_Mutation | SNP | C  | T  | 6  | 25  | c.1634C>T       | c.(1633-1635)CCC>CTC | p.P545L        |
| Pat_04 | Pre-Treatment | FLJ40504 | 284085 | 37 | 17 | 26604047 | 26604047 | Nonsense_Mutation | SNP | C  | T  | 5  | 28  | c.428G>A        | c.(427-429)TGG>TAG   | p.W143*        |
| Pat_04 | Pre-Treatment | PHF12    | 57649  | 37 | 17 | 27233933 | 27233933 | Missense_Mutation | SNP | G  | A  | 31 | 158 | c.2621C>T       | c.(2620-2622)TCG>TTG | p.S874L        |
| Pat_04 | Pre-Treatment | NUFIP2   | 57532  | 37 | 17 | 27613355 | 27613355 | Missense_Mutation | SNP | G  | A  | 11 | 49  | c.1657C>T       | c.(1657-1659)CCC>TCC | p.P553S        |
| Pat_04 | Pre-Treatment | SLFN11   | 91607  | 37 | 17 | 33690601 | 33690601 | Missense_Mutation | SNP | C  | T  | 19 | 149 | c.226G>A        | c.(226-228)GAT>AAT   | p.D76N         |
| Pat_04 | Pre-Treatment | SLFN13   | 146857 | 37 | 17 | 33768054 | 33768054 | Missense_Mutation | SNP | G  | A  | 20 | 74  | c.2254C>T       | c.(2254-2256)CCT>TCT | p.P752S        |
| Pat_04 | Pre-Treatment | SLFN12L  | 342615 | 37 | 17 | 33802424 | 33802424 | Missense_Mutation | SNP | T  | A  | 3  | 22  | c.1372A>T       | c.(1372-1374)ATA>TTA | p.I458L        |
| Pat_04 | Pre-Treatment | CASC3    | 22794  | 37 | 17 | 38319744 | 38319744 | Missense_Mutation | SNP | C  | T  | 10 | 51  | c.796C>T        | c.(796-798)CCT>TCT   | p.P266S        |
| Pat_04 | Pre-Treatment | KRT10    | 3858   | 37 | 17 | 38975078 | 38975078 | Missense_Mutation | SNP | G  | A  | 10 | 33  | c.1709C>T       | c.(1708-1710)TCT>TTT | p.S570F        |
| Pat_04 | Pre-Treatment | KRT34    | 3885   | 37 | 17 | 39535652 | 39535652 | Missense_Mutation | SNP | G  | A  | 47 | 99  | c.955C>T        | c.(955-957)CGC>TGC   | p.R319C        |
| Pat_04 | Pre-Treatment | HAP1     | 9001   | 37 | 17 | 39881183 | 39881183 | Missense_Mutation | SNP | C  | T  | 99 | 217 | c.1786G>A       | c.(1786-1788)GAA>AAA | p.E596K        |
| Pat_04 | Pre-Treatment | CD300LG  | 146894 | 37 | 17 | 41930375 | 41930375 | Missense_Mutation | SNP | G  | A  | 21 | 42  | c.475G>A        | c.(475-477)GGA>AGA   | p.G159R        |
| Pat_04 | Pre-Treatment | CRHR1    | 1394   | 37 | 17 | 43898765 | 43898765 | Missense_Mutation | SNP | C  | T  | 29 | 82  | c.286C>T        | c.(286-288)CGC>TGC   | p.R96C         |
| Pat_04 | Pre-Treatment | MAPT     | 4137   | 37 | 17 | 44060753 | 44060753 | Missense_Mutation | SNP | G  | A  | 3  | 21  | c.583G>A        | c.(583-585)GAC>AAC   | p.D195N        |
| Pat_04 | Pre-Treatment | ITGB3    | 3690   | 37 | 17 | 45369775 | 45369775 | Missense_Mutation | SNP | G  | A  | 40 | 68  | c.1531G>A       | c.(1531-1533)GAA>AAA | p.E511K        |
| Pat_04 | Pre-Treatment | HOXB5    | 3215   | 37 | 17 | 46669678 | 46669678 | Missense_Mutation | SNP | C  | T  | 49 | 126 | c.703G>A        | c.(703-705)GAG>AAG   | p.E235K        |
| Pat_04 | Pre-Treatment | CACNA1G  | 8913   | 37 | 17 | 48669445 | 48669445 | Nonsense_Mutation | SNP | C  | T  | 9  | 37  | c.2902C>T       | c.(2902-2904)CAG>TAG | p.Q968*        |
| Pat_04 | Pre-Treatment | ABCC3    | 8714   | 37 | 17 | 48745099 | 48745099 | Nonsense_Mutation | SNP | G  | A  | 16 | 30  | c.1616G>A       | c.(1615-1617)TGG>TAG | p.W539*        |
| Pat_04 | Pre-Treatment | ANKFN1   | 162282 | 37 | 17 | 54403614 | 54403614 | Missense_Mutation | SNP | G  | A  | 25 | 54  | c.95G>A         | c.(94-96)AGG>AAG     | p.R32K         |
| Pat_04 | Pre-Treatment | TBX4     | 9496   | 37 | 17 | 59560825 | 59560825 | Missense_Mutation | SNP | C  | T  | 14 | 31  | c.1586C>T       | c.(1585-1587)TCC>TTC | p.S529F        |
| Pat_04 | Pre-Treatment | MED13    | 9969   | 37 | 17 | 60088215 | 60088215 | Missense_Mutation | SNP | G  | A  | 17 | 43  | c.1663C>T       | c.(1663-1665)CCT>TCT | p.P555S        |
| Pat_04 | Pre-Treatment | ACE      | 1636   | 37 | 17 | 61560491 | 61560491 | Missense_Mutation | SNP | C  | T  | 43 | 130 | c.1444C>T       | c.(1444-1446)CGT>TGT | p.R482C        |

|        |               |          |        |    |    |          |          |                   |     |    |    |    |     |                 |                        |           |
|--------|---------------|----------|--------|----|----|----------|----------|-------------------|-----|----|----|----|-----|-----------------|------------------------|-----------|
| Pat_04 | Pre-Treatment | ABCA5    | 23461  | 37 | 17 | 67270238 | 67270238 | Nonsense_Mutation | SNP | G  | A  | 7  | 19  | c.2626C>T       | c.(2626-2628)CAG>TAG   | p.Q876*   |
| Pat_04 | Pre-Treatment | C17orf28 | 283987 | 37 | 17 | 72947703 | 72947703 | Missense_Mutation | SNP | C  | T  | 5  | 10  | c.2329G>A       | c.(2329-2331)GAC>AAC   | p.D777N   |
| Pat_04 | Pre-Treatment | SUMO2    | 6613   | 37 | 17 | 73178912 | 73178913 | Missense_Mutation | DNP | GG | AT | 3  | 8   | c.17_18CC>AT    | c.(16-18)CCC>CAT       | p.P6H     |
| Pat_04 | Pre-Treatment | ASPSR1   | 79058  | 37 | 17 | 79954390 | 79954390 | Missense_Mutation | SNP | C  | T  | 4  | 8   | c.601C>T        | c.(601-603)CCC>TCC     | p.P201S   |
| Pat_04 | Pre-Treatment | LAMA1    | 284217 | 37 | 18 | 7015798  | 7015798  | Missense_Mutation | SNP | G  | A  | 22 | 156 | c.3049C>T       | c.(3049-3051)CCC>TCC   | p.P1017S  |
| Pat_04 | Pre-Treatment | CTAGE1   | 64693  | 37 | 18 | 19996208 | 19996208 | Missense_Mutation | SNP | C  | T  | 10 | 72  | c.1567G>A       | c.(1567-1569)GGA>AGA   | p.G523R   |
| Pat_04 | Pre-Treatment | LAMA3    | 3909   | 37 | 18 | 21404431 | 21404431 | Missense_Mutation | SNP | C  | T  | 14 | 85  | c.2473C>T       | c.(2473-2475)CCA>TCA   | p.P825S   |
| Pat_04 | Pre-Treatment | DSC2     | 1824   | 37 | 18 | 28648063 | 28648063 | Missense_Mutation | SNP | C  | T  | 10 | 64  | c.2624G>A       | c.(2623-2625)CGA>CAA   | p.R875Q   |
| Pat_04 | Pre-Treatment | DSG3     | 1830   | 37 | 18 | 29052358 | 29052358 | Missense_Mutation | SNP | G  | A  | 6  | 54  | c.2009G>A       | c.(2008-2010)GGA>GAA   | p.G670E   |
| Pat_04 | Pre-Treatment | DSG2     | 1829   | 37 | 18 | 29101149 | 29101149 | Missense_Mutation | SNP | G  | A  | 13 | 71  | c.466G>A        | c.(466-468)GAA>AAA     | p.E156K   |
| Pat_04 | Pre-Treatment | ASXL3    | 80816  | 37 | 18 | 31324838 | 31324838 | Missense_Mutation | SNP | G  | A  | 8  | 72  | c.5026G>A       | c.(5026-5028)GAC>AAC   | p.D1676N  |
| Pat_04 | Pre-Treatment | LIPG     | 9388   | 37 | 18 | 47109952 | 47109953 | Missense_Mutation | DNP | CC | TT | 9  | 101 | :.1184_1185CC>T | c.(1183-1185)ACC>ATT   | p.T395I   |
| Pat_04 | Pre-Treatment | CTDP1    | 9150   | 37 | 18 | 77474496 | 77474496 | Missense_Mutation | SNP | C  | T  | 4  | 32  | c.1036C>T       | c.(1036-1038)CAT>TAT   | p.H346Y   |
| Pat_04 | Pre-Treatment | RANBP3   | 8498   | 37 | 19 | 5923844  | 5923844  | Nonsense_Mutation | SNP | G  | A  | 5  | 35  | c.1078C>T       | c.(1078-1080)CAG>TAG   | p.Q360*   |
| Pat_04 | Pre-Treatment | PNPLA6   | 10908  | 37 | 19 | 7607951  | 7607951  | Missense_Mutation | SNP | T  | A  | 8  | 50  | c.1616T>A       | c.(1615-1617)ATT>AAT   | p.I539N   |
| Pat_04 | Pre-Treatment | KIAA1543 | 57662  | 37 | 19 | 7677786  | 7677786  | Missense_Mutation | SNP | G  | A  | 8  | 25  | c.2407G>A       | c.(2407-2409)GAC>AAC   | p.D803N   |
| Pat_04 | Pre-Treatment | CD209    | 30835  | 37 | 19 | 7810698  | 7810698  | Missense_Mutation | SNP | A  | G  | 5  | 164 | c.454T>C        | c.(454-456)TGG>CGG     | p.W152R   |
| Pat_04 | Pre-Treatment | MUC16    | 94025  | 37 | 19 | 8966784  | 8966784  | Missense_Mutation | SNP | T  | A  | 3  | 9   | c.43169A>T      | :.(43168-43170)GAC>GTC | p.D14390V |
| Pat_04 | Pre-Treatment | MUC16    | 94025  | 37 | 19 | 9056502  | 9056502  | Missense_Mutation | SNP | G  | A  | 10 | 84  | c.30944C>T      | c.(30943-30945)GCT>GTT | p.A10315V |
| Pat_04 | Pre-Treatment | MUC16    | 94025  | 37 | 19 | 9073306  | 9073306  | Missense_Mutation | SNP | C  | A  | 18 | 78  | c.14140G>T      | :.(14140-14142)GGG>TGC | p.G4714W  |
| Pat_04 | Pre-Treatment | MUC16    | 94025  | 37 | 19 | 9075757  | 9075757  | Missense_Mutation | SNP | C  | T  | 8  | 11  | c.11689G>A      | c.(11689-11691)GTT>ATT | p.V3897I  |
| Pat_04 | Pre-Treatment | MUC16    | 94025  | 37 | 19 | 9086149  | 9086149  | Missense_Mutation | SNP | C  | T  | 6  | 28  | c.5666G>A       | c.(5665-5667)GGA>GAA   | p.G1889E  |
| Pat_04 | Pre-Treatment | CARM1    | 10498  | 37 | 19 | 11024650 | 11024650 | Missense_Mutation | SNP | C  | T  | 13 | 22  | c.767C>T        | c.(766-768)TCG>TTG     | p.S256L   |
| Pat_04 | Pre-Treatment | ZNF788   | 388507 | 37 | 19 | 12223831 | 12223831 | Missense_Mutation | SNP | G  | A  | 13 | 18  | c.1469G>A       | c.(1468-1470)CGA>CAA   | p.R490Q   |
| Pat_04 | Pre-Treatment | ZNF20    | 7568   | 37 | 19 | 12243437 | 12243437 | Nonsense_Mutation | SNP | G  | A  | 36 | 109 | c.1564C>T       | c.(1564-1566)CGA>TGA   | p.R522*   |
| Pat_04 | Pre-Treatment | RFX1     | 5989   | 37 | 19 | 14093039 | 14093039 | Missense_Mutation | SNP | G  | T  | 4  | 19  | c.515C>A        | c.(514-516)GCT>GAT     | p.A172D   |
| Pat_04 | Pre-Treatment | ILVBL    | 10994  | 37 | 19 | 15226693 | 15226693 | Missense_Mutation | SNP | G  | A  | 6  | 24  | c.1582C>T       | c.(1582-1584)CTC>TTC   | p.L528F   |
| Pat_04 | Pre-Treatment | RASAL3   | 64926  | 37 | 19 | 15564018 | 15564018 | Missense_Mutation | SNP | G  | A  | 6  | 14  | c.2570C>T       | c.(2569-2571)TCC>TTC   | p.S857F   |
| Pat_04 | Pre-Treatment | OR10H2   | 26538  | 37 | 19 | 15839265 | 15839266 | Missense_Mutation | DNP | CC | TT | 19 | 37  | c.412_413CC>TT  | c.(412-414)CCA>TTA     | p.P138L   |
| Pat_04 | Pre-Treatment | USHBP1   | 83878  | 37 | 19 | 17369091 | 17369091 | Missense_Mutation | SNP | C  | T  | 14 | 59  | c.1150G>A       | c.(1150-1152)GAA>AAA   | p.E384K   |
| Pat_04 | Pre-Treatment | SSBP4    | 170463 | 37 | 19 | 18542851 | 18542852 | Missense_Mutation | DNP | CC | TT | 3  | 22  | c.607_608CC>TT  | c.(607-609)CCT>TTT     | p.P203F   |
| Pat_04 | Pre-Treatment | HAPLN4   | 404037 | 37 | 19 | 19369386 | 19369386 | Missense_Mutation | SNP | G  | A  | 8  | 58  | c.763C>T        | c.(763-765)CGC>TGC     | p.R255C   |
| Pat_04 | Pre-Treatment | CILP2    | 148113 | 37 | 19 | 19654548 | 19654549 | Missense_Mutation | DNP | GG | AA | 45 | 180 | .1194_1195GG>A  | :192-1197)GAGGAC>GAA/  | p.D399N   |
| Pat_04 | Pre-Treatment | GMIP     | 51291  | 37 | 19 | 19745413 | 19745413 | Missense_Mutation | SNP | G  | A  | 23 | 184 | c.1987C>T       | c.(1987-1989)CCC>TCC   | p.P663S   |
| Pat_04 | Pre-Treatment | ZNF208   | 7757   | 37 | 19 | 22156029 | 22156029 | Missense_Mutation | SNP | G  | A  | 7  | 16  | c.1507C>T       | c.(1507-1509)CAT>TAT   | p.H503Y   |
| Pat_04 | Pre-Treatment | ZNF208   | 7757   | 37 | 19 | 22171587 | 22171587 | Missense_Mutation | SNP | A  | G  | 26 | 71  | c.128T>C        | c.(127-129)CTG>CCG     | p.L43P    |
| Pat_04 | Pre-Treatment | ZNF257   | 113835 | 37 | 19 | 22270877 | 22270877 | Missense_Mutation | SNP | G  | A  | 5  | 24  | c.325G>A        | c.(325-327)GAG>AAG     | p.E109K   |
| Pat_04 | Pre-Treatment | ZNF536   | 9745   | 37 | 19 | 30935299 | 30935299 | Missense_Mutation | SNP | C  | T  | 4  | 15  | c.830C>T        | c.(829-831)ACC>ATC     | p.T277I   |
| Pat_04 | Pre-Treatment | SIPA1L3  | 23094  | 37 | 19 | 38655182 | 38655182 | Missense_Mutation | SNP | C  | T  | 14 | 81  | c.3844C>T       | c.(3844-3846)CAC>TAC   | p.H1282Y  |
| Pat_04 | Pre-Treatment | LRFN1    | 57622  | 37 | 19 | 39798424 | 39798424 | Missense_Mutation | SNP | C  | T  | 4  | 15  | c.2165G>A       | c.(2164-2166)CGC>CAC   | p.R722H   |
| Pat_04 | Pre-Treatment | LGALS14  | 56891  | 37 | 19 | 40197259 | 40197259 | Missense_Mutation | SNP | C  | T  | 40 | 238 | c.38C>T         | c.(37-39)TCC>TTC       | p.S13F    |
| Pat_04 | Pre-Treatment | FCGBP    | 8857   | 37 | 19 | 40364385 | 40364385 | Missense_Mutation | SNP | G  | A  | 10 | 72  | c.14257C>T      | c.(14257-14259)CCT>TCT | p.P4753S  |
| Pat_04 | Pre-Treatment | CEACAM21 | 90273  | 37 | 19 | 42091803 | 42091803 | Missense_Mutation | SNP | G  | A  | 19 | 102 | c.805G>A        | c.(805-807)GAT>AAT     | p.D269N   |
| Pat_04 | Pre-Treatment | PSG3     | 5671   | 37 | 19 | 43243017 | 43243017 | Missense_Mutation | SNP | C  | T  | 36 | 290 | c.289G>A        | c.(289-291)GGA>AGA     | p.G97R    |
| Pat_04 | Pre-Treatment | PSG6     | 5675   | 37 | 19 | 43414992 | 43414992 | Missense_Mutation | SNP | G  | A  | 25 | 145 | c.446C>T        | c.(445-447)TCC>TTC     | p.S149F   |
| Pat_04 | Pre-Treatment | EXOC3L2  | 90332  | 37 | 19 | 45716515 | 45716515 | Missense_Mutation | SNP | C  | T  | 8  | 15  | c.1042G>A       | c.(1042-1044)GAG>AAG   | p.E348K   |
| Pat_04 | Pre-Treatment | DHX34    | 9704   | 37 | 19 | 47856918 | 47856918 | Nonsense_Mutation | SNP | C  | T  | 4  | 31  | c.631C>T        | c.(631-633)CAG>TAG     | p.Q211*   |

|        |               |         |        |    |    |           |           |                   |     |    |    |    |     |                 |                      |                |
|--------|---------------|---------|--------|----|----|-----------|-----------|-------------------|-----|----|----|----|-----|-----------------|----------------------|----------------|
| Pat_04 | Pre-Treatment | CPT1C   | 126129 | 37 | 19 | 50195561  | 50195561  | Missense_Mutation | SNP | G  | A  | 9  | 67  | c.52G>A         | c.(52-54)GGG>AGG     | p.G18R         |
| Pat_04 | Pre-Treatment | KLK6    | 5653   | 37 | 19 | 51462539  | 51462539  | Missense_Mutation | SNP | G  | A  | 4  | 49  | c.616C>T        | c.(616-618)CAC>TAC   | p.H206Y        |
| Pat_04 | Pre-Treatment | ZNF160  | 90338  | 37 | 19 | 53577477  | 53577477  | Missense_Mutation | SNP | C  | T  | 9  | 44  | c.187G>A        | c.(187-189)GGG>AGG   | p.G63R         |
| Pat_04 | Pre-Treatment | BIRC8   | 112401 | 37 | 19 | 53793465  | 53793465  | Missense_Mutation | SNP | G  | A  | 5  | 20  | c.163C>T        | c.(163-165)CCT>TCT   | p.P55S         |
| Pat_04 | Pre-Treatment | ZNF331  | 55422  | 37 | 19 | 54081132  | 54081132  | Missense_Mutation | SNP | G  | A  | 6  | 53  | c.1318G>A       | c.(1318-1320)GAA>AAA | p.E440K        |
| Pat_04 | Pre-Treatment | PRKCG   | 5582   | 37 | 19 | 54395828  | 54395828  | Missense_Mutation | SNP | C  | T  | 4  | 18  | c.752C>T        | c.(751-753)TCC>TTC   | p.S251F        |
| Pat_04 | Pre-Treatment | CACNG7  | 59284  | 37 | 19 | 54416194  | 54416194  | Missense_Mutation | SNP | G  | A  | 4  | 46  | c.109G>A        | c.(109-111)GAA>AAA   | p.E37K         |
| Pat_04 | Pre-Treatment | LILRB2  | 10288  | 37 | 19 | 54782149  | 54782149  | Missense_Mutation | SNP | G  | A  | 14 | 94  | c.1223C>T       | c.(1222-1224)TCT>TTT | p.S408F        |
| Pat_04 | Pre-Treatment | NLRP9   | 338321 | 37 | 19 | 56243785  | 56243785  | Missense_Mutation | SNP | C  | T  | 23 | 138 | c.1412G>A       | c.(1411-1413)GGA>GAA | p.G471E        |
| Pat_04 | Pre-Treatment | ZNF776  | 284309 | 37 | 19 | 58265313  | 58265313  | Missense_Mutation | SNP | C  | T  | 8  | 53  | c.815C>T        | c.(814-816)TCA>TTA   | p.S272L        |
| Pat_04 | Pre-Treatment | CMPK2   | 129607 | 37 | 2  | 6991588   | 6991588   | Missense_Mutation | SNP | G  | A  | 3  | 34  | c.1219C>T       | c.(1219-1221)CGT>TGT | p.R407C        |
| Pat_04 | Pre-Treatment | TAF1B   | 9014   | 37 | 2  | 10059864  | 10059864  | Missense_Mutation | SNP | C  | T  | 4  | 45  | c.1480C>T       | c.(1480-1482)CTT>TTT | p.L494F        |
| Pat_04 | Pre-Treatment | APOB    | 338    | 37 | 2  | 21230175  | 21230175  | Missense_Mutation | SNP | G  | A  | 4  | 24  | c.9565C>T       | c.(9565-9567)CCT>TCT | p.P3189S       |
| Pat_04 | Pre-Treatment | APOB    | 338    | 37 | 2  | 21232704  | 21232704  | Missense_Mutation | SNP | C  | T  | 9  | 56  | c.7036G>A       | c.(7036-7038)GAG>AAG | p.E2346K       |
| Pat_04 | Pre-Treatment | APOB    | 338    | 37 | 2  | 21234639  | 21234639  | Missense_Mutation | SNP | C  | T  | 15 | 98  | c.5101G>A       | c.(5101-5103)GGG>AGG | p.G1701R       |
| Pat_04 | Pre-Treatment | APOB    | 338    | 37 | 2  | 21260958  | 21260958  | Missense_Mutation | SNP | C  | T  | 6  | 52  | c.409G>A        | c.(409-411)GAA>AAA   | p.E137K        |
| Pat_04 | Pre-Treatment | C2orf16 | 84226  | 37 | 2  | 27801613  | 27801613  | Missense_Mutation | SNP | G  | A  | 5  | 36  | c.2174G>A       | c.(2173-2175)GGG>GAG | p.G725E        |
| Pat_04 | Pre-Treatment | ZNF512  | 84450  | 37 | 2  | 27844168  | 27844169  | Missense_Mutation | DNP | CC | TT | 5  | 48  | c.1544_1545CC>T | c.(1543-1545)CCC>CTT | p.P515L        |
| Pat_04 | Pre-Treatment | XDH     | 7498   | 37 | 2  | 31596764  | 31596764  | Missense_Mutation | SNP | G  | A  | 6  | 47  | c.1661C>T       | c.(1660-1662)CCC>CTC | p.P554L        |
| Pat_04 | Pre-Treatment | TTC27   | 55622  | 37 | 2  | 32983371  | 32983371  | Missense_Mutation | SNP | C  | T  | 5  | 34  | c.1465C>T       | c.(1465-1467)CTT>TTT | p.L489F        |
| Pat_04 | Pre-Treatment | SOS1    | 6654   | 37 | 2  | 39237821  | 39237821  | Missense_Mutation | SNP | A  | G  | 7  | 30  | c.2414T>C       | c.(2413-2415)GTT>GCT | p.V805A        |
| Pat_04 | Pre-Treatment | SRBD1   | 55133  | 37 | 2  | 45808918  | 45808918  | Nonsense_Mutation | SNP | G  | A  | 3  | 29  | c.847C>T        | c.(847-849)CAG>TAG   | p.Q283*        |
| Pat_04 | Pre-Treatment | GTF2A1L | 11036  | 37 | 2  | 48960051  | 48960051  | Missense_Mutation | SNP | C  | T  | 22 | 116 | c.1349C>T       | c.(1348-1350)TCG>TTG | p.S450L        |
| Pat_04 | Pre-Treatment | CD207   | 50489  | 37 | 2  | 71062706  | 71062706  | Missense_Mutation | SNP | G  | A  | 7  | 64  | c.106C>T        | c.(106-108)CCG>TCG   | p.P36S         |
| Pat_04 | Pre-Treatment | SLC4A5  | 57835  | 37 | 2  | 74452032  | 74452032  | Missense_Mutation | SNP | C  | T  | 4  | 39  | c.3229G>A       | c.(3229-3231)GAA>AAA | p.E1077K       |
| Pat_04 | Pre-Treatment | CTNNA2  | 1496   | 37 | 2  | 80801392  | 80801392  | Missense_Mutation | SNP | G  | A  | 16 | 152 | c.1846G>A       | c.(1846-1848)GTG>ATG | p.V616M        |
| Pat_04 | Pre-Treatment | TEKT4   | 150483 | 37 | 2  | 95541342  | 95541342  | Missense_Mutation | SNP | G  | A  | 11 | 85  | c.946G>A        | c.(946-948)GAA>AAA   | p.E316K        |
| Pat_04 | Pre-Treatment | VWA3B   | 200403 | 37 | 2  | 98846646  | 98846646  | Nonsense_Mutation | SNP | C  | T  | 5  | 29  | c.2284C>T       | c.(2284-2286)CAG>TAG | p.Q762*        |
| Pat_04 | Pre-Treatment | AFF3    | 3899   | 37 | 2  | 100170815 | 100170815 | Missense_Mutation | SNP | C  | T  | 21 | 168 | c.3517G>A       | c.(3517-3519)GAC>AAC | p.D1173N       |
| Pat_04 | Pre-Treatment | PDCL3   | 79031  | 37 | 2  | 101183064 | 101183064 | Missense_Mutation | SNP | G  | A  | 13 | 87  | c.106G>A        | c.(106-108)GAG>AAG   | p.E36K         |
| Pat_04 | Pre-Treatment | WASH2P  | 375260 | 37 | 2  | 114355096 | 114355097 | Missense_Mutation | DNP | CC | TT | 3  | 30  | c.473_474CC>TT  | c.(472-474)TCC>TTT   | p.S158F        |
| Pat_04 | Pre-Treatment | CNTNAP5 | 129684 | 37 | 2  | 125671785 | 125671785 | Missense_Mutation | SNP | G  | A  | 9  | 42  | c.3841G>A       | c.(3841-3843)GAA>AAA | p.E1281K       |
| Pat_04 | Pre-Treatment | TUBA3D  | 113457 | 37 | 2  | 132240324 | 132240324 | Missense_Mutation | SNP | C  | T  | 29 | 251 | c.1256C>T       | c.(1255-1257)TCT>TTT | p.S419F        |
| Pat_04 | Pre-Treatment | THSD7B  | 80731  | 37 | 2  | 137872735 | 137872735 | Missense_Mutation | SNP | C  | T  | 7  | 48  | c.1148C>T       | c.(1147-1149)TCT>TTT | p.S383F        |
| Pat_04 | Pre-Treatment | RIF1    | 55183  | 37 | 2  | 152315402 | 152315403 | Missense_Mutation | DNP | CC | TT | 5  | 66  | c.2933_2934CC>T | c.(2932-2934)TCC>TTT | p.S978F        |
| Pat_04 | Pre-Treatment | NEB     | 4703   | 37 | 2  | 152483656 | 152483656 | Missense_Mutation | SNP | C  | T  | 8  | 68  | c.9478G>A       | c.(9478-9480)GAT>AAT | p.D3160N       |
| Pat_04 | Pre-Treatment | NEB     | 4703   | 37 | 2  | 152522767 | 152522767 | Missense_Mutation | SNP | G  | A  | 37 | 178 | c.4868C>T       | c.(4867-4869)ACC>ATC | p.T1623I       |
| Pat_04 | Pre-Treatment | GALNT5  | 11227  | 37 | 2  | 158152976 | 158152976 | Missense_Mutation | SNP | C  | T  | 4  | 40  | c.1948C>T       | c.(1948-1950)CCT>TCT | p.P650S        |
| Pat_04 | Pre-Treatment | LY75    | 4065   | 37 | 2  | 160628523 | 160628523 | Missense_Mutation | SNP | C  | T  | 14 | 53  | c.5461G>A       | c.(5461-5463)GTA>ATA | p.V1821I       |
| Pat_04 | Pre-Treatment | DPP4    | 1803   | 37 | 2  | 162875748 | 162875748 | Missense_Mutation | SNP | C  | T  | 9  | 52  | c.1283G>A       | c.(1282-1284)GGA>GAA | p.G428E        |
| Pat_04 | Pre-Treatment | SCN9A   | 6335   | 37 | 2  | 167129097 | 167129097 | Missense_Mutation | SNP | C  | T  | 7  | 30  | c.3130G>A       | c.(3130-3132)GAA>AAA | p.E1044K       |
| Pat_04 | Pre-Treatment | XIRP2   | 129446 | 37 | 2  | 168099400 | 168099400 | Missense_Mutation | SNP | C  | T  | 7  | 32  | c.1498C>T       | c.(1498-1500)CGT>TGT | p.R500C        |
| Pat_04 | Pre-Treatment | XIRP2   | 129446 | 37 | 2  | 168100876 | 168100876 | Missense_Mutation | SNP | C  | A  | 6  | 61  | c.2974C>A       | c.(2974-2976)CAA>AAA | p.Q992K        |
| Pat_04 | Pre-Treatment | MYO3B   | 140469 | 37 | 2  | 171259392 | 171259392 | Missense_Mutation | SNP | G  | A  | 12 | 92  | c.2164G>A       | c.(2164-2166)GAT>AAT | p.D722N        |
| Pat_04 | Pre-Treatment | HOXD3   | 3232   | 37 | 2  | 177036364 | 177036364 | Missense_Mutation | SNP | C  | T  | 15 | 98  | c.661C>T        | c.(661-663)CGG>TGG   | p.R221W        |
| Pat_04 | Pre-Treatment | PRKRA   | 8575   | 37 | 2  | 179300872 | 179300872 | Missense_Mutation | SNP | C  | T  | 4  | 32  | c.784G>A        | c.(784-786)GAT>AAT   | p.D262N        |
| Pat_04 | Pre-Treatment | TTN     | 7273   | 37 | 2  | 179584992 | 179584992 | Splice_Site       | SNP | C  | T  | 3  | 21  | c.19646_splice  | c.e78-1              | p.E6549_splice |



|        |               |           |        |    |    |           |           |                   |     |    |    |    |     |                 |                       |            |
|--------|---------------|-----------|--------|----|----|-----------|-----------|-------------------|-----|----|----|----|-----|-----------------|-----------------------|------------|
| Pat_04 | Pre-Treatment | TTN       | 7273   | 37 | 2  | 179638691 | 179638691 | Missense_Mutation | SNP | G  | A  | 15 | 98  | c.7204C>T       | c.(7204-7206)CAC>TAC  | p.H2402Y   |
| Pat_04 | Pre-Treatment | COL5A2    | 1290   | 37 | 2  | 189916129 | 189916129 | Missense_Mutation | SNP | G  | A  | 6  | 38  | c.2848C>T       | c.(2848-2850)CAT>TAT  | p.H950Y    |
| Pat_04 | Pre-Treatment | COL5A2    | 1290   | 37 | 2  | 189917690 | 189917690 | Missense_Mutation | SNP | C  | T  | 4  | 31  | c.2608G>A       | c.(2608-2610)GGA>AGA  | p.G870R    |
| Pat_04 | Pre-Treatment | SLC40A1   | 30061  | 37 | 2  | 190428819 | 190428819 | Missense_Mutation | SNP | C  | T  | 10 | 32  | c.893G>A        | c.(892-894)GGA>GAA    | p.G298E    |
| Pat_04 | Pre-Treatment | AOX1      | 316    | 37 | 2  | 201515720 | 201515720 | Missense_Mutation | SNP | G  | T  | 8  | 39  | c.2871G>T       | c.(2869-2871)AAG>AAT  | p.K957N    |
| Pat_04 | Pre-Treatment | PIKFYVE   | 200576 | 37 | 2  | 209169680 | 209169680 | Missense_Mutation | SNP | C  | T  | 14 | 67  | c.1579C>T       | c.(1579-1581)CAT>TAT  | p.H527Y    |
| Pat_04 | Pre-Treatment | PIKFYVE   | 200576 | 37 | 2  | 209219937 | 209219937 | Missense_Mutation | SNP | C  | T  | 13 | 56  | c.6205C>T       | c.(6205-6207)CCG>TCG  | p.P2069S   |
| Pat_04 | Pre-Treatment | MAP2      | 4133   | 37 | 2  | 210557907 | 210557907 | Missense_Mutation | SNP | C  | T  | 5  | 50  | c.1013C>T       | c.(1012-1014)TCG>TTG  | p.S338L    |
| Pat_04 | Pre-Treatment | ACADL     | 33     | 37 | 2  | 211074927 | 211074927 | Missense_Mutation | SNP | C  | T  | 5  | 101 | c.596G>A        | c.(595-597)GGA>GAA    | p.G199E    |
| Pat_04 | Pre-Treatment | MYL1      | 4632   | 37 | 2  | 211179727 | 211179727 | Missense_Mutation | SNP | C  | T  | 20 | 92  | c.40G>A         | c.(40-42)GCT>ACT      | p.A14T     |
| Pat_04 | Pre-Treatment | CPS1      | 1373   | 37 | 2  | 211525356 | 211525356 | Missense_Mutation | SNP | C  | T  | 11 | 56  | c.3904C>T       | c.(3904-3906)CCT>TCT  | p.P1302S   |
| Pat_04 | Pre-Treatment | C2orf62   | 375307 | 37 | 2  | 219221619 | 219221620 | Missense_Mutation | DNP | GG | TA | 7  | 96  | c.12_13GG>TA    | c.(10-15)AAGGTT>AATAT | p.4_5KV>NI |
| Pat_04 | Pre-Treatment | WNT10A    | 80326  | 37 | 2  | 219754924 | 219754924 | Missense_Mutation | SNP | C  | T  | 8  | 19  | c.595C>T        | c.(595-597)CCC>TCC    | p.P199S    |
| Pat_04 | Pre-Treatment | CCDC108   | 255101 | 37 | 2  | 219874711 | 219874711 | Missense_Mutation | SNP | C  | T  | 4  | 20  | c.4405G>A       | c.(4405-4407)GAG>AAG  | p.E1469K   |
| Pat_04 | Pre-Treatment | SP100     | 6672   | 37 | 2  | 231380144 | 231380144 | Missense_Mutation | SNP | C  | T  | 8  | 37  | c.2429C>T       | c.(2428-2430)ACC>ATC  | p.T810I    |
| Pat_04 | Pre-Treatment | ALPP      | 250    | 37 | 2  | 233246398 | 233246398 | Missense_Mutation | SNP | C  | T  | 3  | 24  | c.1501C>T       | c.(1501-1503)CCC>TCC  | p.P501S    |
| Pat_04 | Pre-Treatment | UGT1A10   | 54575  | 37 | 2  | 234545275 | 234545275 | Missense_Mutation | SNP | G  | A  | 19 | 97  | c.107G>A        | c.(106-108)AGT>AAT    | p.S36N     |
| Pat_04 | Pre-Treatment | UGT1A10   | 54575  | 37 | 2  | 234545511 | 234545511 | Missense_Mutation | SNP | G  | T  | 7  | 55  | c.343G>T        | c.(343-345)GGT>TGT    | p.G115C    |
| Pat_04 | Pre-Treatment | LRRFIP1   | 9208   | 37 | 2  | 238664828 | 238664828 | Missense_Mutation | SNP | G  | A  | 3  | 21  | c.745G>A        | c.(745-747)GAG>AAG    | p.E249K    |
| Pat_04 | Pre-Treatment | RBM44     | 375316 | 37 | 2  | 238725794 | 238725794 | Missense_Mutation | SNP | G  | A  | 5  | 50  | c.235G>A        | c.(235-237)GAG>AAG    | p.E79K     |
| Pat_04 | Pre-Treatment | FERMT1    | 55612  | 37 | 20 | 6064715   | 6064715   | Missense_Mutation | SNP | C  | T  | 11 | 33  | c.1690G>A       | c.(1690-1692)GAG>AAG  | p.E564K    |
| Pat_04 | Pre-Treatment | PAK7      | 57144  | 37 | 20 | 9561213   | 9561213   | Missense_Mutation | SNP | G  | A  | 10 | 92  | c.569C>T        | c.(568-570)TCC>TTC    | p.S190F    |
| Pat_04 | Pre-Treatment | SEL1L2    | 80343  | 37 | 20 | 13936742  | 13936742  | Missense_Mutation | SNP | C  | T  | 3  | 15  | c.94G>A         | c.(94-96)GAA>AAA      | p.E32K     |
| Pat_04 | Pre-Treatment | SLC24A3   | 57419  | 37 | 20 | 19566085  | 19566085  | Missense_Mutation | SNP | G  | A  | 15 | 118 | c.509G>A        | c.(508-510)GGG>GAG    | p.G170E    |
| Pat_04 | Pre-Treatment | GZF1      | 64412  | 37 | 20 | 23346126  | 23346126  | Missense_Mutation | SNP | A  | G  | 9  | 51  | c.1106A>G       | c.(1105-1107)CAC>CGC  | p.H369R    |
| Pat_04 | Pre-Treatment | NINL      | 22981  | 37 | 20 | 25439044  | 25439044  | Missense_Mutation | SNP | G  | A  | 13 | 67  | c.3818C>T       | c.(3817-3819)GCC>GTC  | p.A1273V   |
| Pat_04 | Pre-Treatment | TLL9      | 164395 | 37 | 20 | 30497607  | 30497607  | Missense_Mutation | SNP | G  | A  | 9  | 33  | c.386G>A        | c.(385-387)GGA>GAA    | p.G129E    |
| Pat_04 | Pre-Treatment | PHF20     | 51230  | 37 | 20 | 34526957  | 34526957  | Missense_Mutation | SNP | C  | T  | 6  | 62  | c.2639C>T       | c.(2638-2640)TCC>TTC  | p.S880F    |
| Pat_04 | Pre-Treatment | C2orf132  | 140699 | 37 | 20 | 35738689  | 35738689  | Missense_Mutation | SNP | G  | A  | 19 | 100 | c.2914C>T       | c.(2914-2916)CCC>TCC  | p.P972S    |
| Pat_04 | Pre-Treatment | TOX2      | 84969  | 37 | 20 | 42635337  | 42635337  | Missense_Mutation | SNP | C  | T  | 7  | 72  | c.343C>T        | c.(343-345)CCT>TCT    | p.P115S    |
| Pat_04 | Pre-Treatment | PABPC1L   | 80336  | 37 | 20 | 43559174  | 43559175  | Missense_Mutation | DNP | CC | TT | 24 | 168 | c.1046_1047CC>T | c.(1045-1047)GCC>GTT  | p.A349V    |
| Pat_04 | Pre-Treatment | SEMG2     | 6407   | 37 | 20 | 43851853  | 43851853  | Missense_Mutation | SNP | C  | T  | 4  | 46  | c.1580C>T       | c.(1579-1581)TCT>TTT  | p.S527F    |
| Pat_04 | Pre-Treatment | RBPJL     | 11317  | 37 | 20 | 43936864  | 43936864  | Missense_Mutation | SNP | G  | A  | 12 | 33  | c.104G>A        | c.(103-105)AGG>AAG    | p.R35K     |
| Pat_04 | Pre-Treatment | SLC13A3   | 64849  | 37 | 20 | 45188756  | 45188756  | Nonsense_Mutation | SNP | G  | A  | 28 | 226 | c.1714C>T       | c.(1714-1716)CAG>TAG  | p.Q572*    |
| Pat_04 | Pre-Treatment | FAM65C    | 140876 | 37 | 20 | 49204357  | 49204357  | Missense_Mutation | SNP | C  | T  | 8  | 41  | c.2722G>A       | c.(2722-2724)GAA>AAA  | p.E908K    |
| Pat_04 | Pre-Treatment | CASS4     | 57091  | 37 | 20 | 55033439  | 55033439  | Missense_Mutation | SNP | C  | T  | 4  | 36  | c.1997C>T       | c.(1996-1998)CCT>CTT  | p.P666L    |
| Pat_04 | Pre-Treatment | LIPI      | 149998 | 37 | 21 | 15535839  | 15535839  | Nonsense_Mutation | SNP | G  | A  | 10 | 64  | c.970C>T        | c.(970-972)CAA>TAA    | p.Q324*    |
| Pat_04 | Pre-Treatment | NCAM2     | 4685   | 37 | 21 | 22910264  | 22910264  | Missense_Mutation | SNP | G  | A  | 3  | 12  | c.2500G>A       | c.(2500-2502)GAC>AAC  | p.D834N    |
| Pat_04 | Pre-Treatment | KRTAP13-2 | 337959 | 37 | 21 | 31744348  | 31744348  | Missense_Mutation | SNP | C  | T  | 9  | 36  | c.184G>A        | c.(184-186)GAG>AAG    | p.E62K     |
| Pat_04 | Pre-Treatment | RUNX1     | 861    | 37 | 21 | 36171700  | 36171700  | Missense_Mutation | SNP | C  | T  | 18 | 102 | c.784G>A        | c.(784-786)GGA>AGA    | p.G262R    |
| Pat_04 | Pre-Treatment | KCNJ6     | 3763   | 37 | 21 | 39087056  | 39087056  | Missense_Mutation | SNP | T  | C  | 9  | 55  | c.404A>G        | c.(403-405)AAC>AGC    | p.N135S    |
| Pat_04 | Pre-Treatment | DSCAM     | 1826   | 37 | 21 | 41539173  | 41539173  | Missense_Mutation | SNP | G  | A  | 10 | 69  | c.2990C>T       | c.(2989-2991)TCA>TTA  | p.S997L    |
| Pat_04 | Pre-Treatment | PRDM15    | 63977  | 37 | 21 | 43259872  | 43259872  | Missense_Mutation | SNP | G  | A  | 20 | 104 | c.1829C>T       | c.(1828-1830)CCC>CTC  | p.P610L    |
| Pat_04 | Pre-Treatment | TFF1      | 7031   | 37 | 21 | 43783369  | 43783369  | Missense_Mutation | SNP | G  | A  | 6  | 34  | c.233C>T        | c.(232-234)CCA>CTA    | p.P78L     |
| Pat_04 | Pre-Treatment | TRPM2     | 7226   | 37 | 21 | 45798932  | 45798932  | Missense_Mutation | SNP | C  | T  | 11 | 84  | c.1067C>T       | c.(1066-1068)TCG>TTG  | p.S356L    |
| Pat_04 | Pre-Treatment | C21orf29  | 54084  | 37 | 21 | 45949798  | 45949798  | Missense_Mutation | SNP | C  | T  | 4  | 18  | c.673G>A        | c.(673-675)GCC>ACC    | p.A225T    |
| Pat_04 | Pre-Treatment | DGCR8     | 54487  | 37 | 22 | 20073602  | 20073602  | Missense_Mutation | SNP | C  | T  | 5  | 42  | c.116C>T        | c.(115-117)CCC>CTC    | p.P39L     |

|        |               |          |        |    |    |           |           |                   |     |    |    |    |     |                                   |                        |               |
|--------|---------------|----------|--------|----|----|-----------|-----------|-------------------|-----|----|----|----|-----|-----------------------------------|------------------------|---------------|
| Pat_04 | Pre-Treatment | UBE2L3   | 7332   | 37 | 22 | 21947243  | 21947243  | Missense_Mutation | SNP | C  | T  | 9  | 33  | c.121C>T                          | c.(121-123)CCT>TCT     | p.P41S        |
| Pat_04 | Pre-Treatment | C22orf43 | 51233  | 37 | 22 | 23959845  | 23959845  | Splice_Site       | SNP | C  | T  | 4  | 49  | c.437_splice                      | c.e7-1                 | p.C146_splice |
| Pat_04 | Pre-Treatment | CABIN1   | 23523  | 37 | 22 | 24459467  | 24459467  | Missense_Mutation | SNP | G  | A  | 34 | 207 | c.1742G>A                         | c.(1741-1743)GGA>GAA   | p.G581E       |
| Pat_04 | Pre-Treatment | UPB1     | 51733  | 37 | 22 | 24906761  | 24906761  | Missense_Mutation | SNP | G  | A  | 18 | 78  | c.409G>A                          | c.(409-411)GAA>AAA     | p.E137K       |
| Pat_04 | Pre-Treatment | PES1     | 23481  | 37 | 22 | 30980371  | 30980371  | Missense_Mutation | SNP | G  | A  | 5  | 25  | c.611C>T                          | c.(610-612)CCC>CTC     | p.P204L       |
| Pat_04 | Pre-Treatment | SLC5A1   | 6523   | 37 | 22 | 32498055  | 32498055  | Missense_Mutation | SNP | G  | T  | 4  | 33  | c.1496G>T                         | c.(1495-1497)CGT>CTT   | p.R499L       |
| Pat_04 | Pre-Treatment | BPIL2    | 254240 | 37 | 22 | 32810372  | 32810372  | Missense_Mutation | SNP | G  | A  | 15 | 59  | c.1442C>T                         | c.(1441-1443)TCC>TTC   | p.S481F       |
| Pat_04 | Pre-Treatment | NCF4     | 4689   | 37 | 22 | 37273776  | 37273776  | Missense_Mutation | SNP | C  | T  | 3  | 20  | c.931C>T                          | c.(931-933)CGT>TGT     | p.R311C       |
| Pat_04 | Pre-Treatment | CSF2RB   | 1439   | 37 | 22 | 37326728  | 37326728  | Missense_Mutation | SNP | T  | A  | 4  | 29  | c.868T>A                          | c.(868-870)TCC>ACC     | p.S290T       |
| Pat_04 | Pre-Treatment | SOX10    | 6663   | 37 | 22 | 38374125  | 38374125  | Missense_Mutation | SNP | T  | C  | 4  | 6   | c.446A>G                          | c.(445-447)GAC>GGC     | p.D149G       |
| Pat_04 | Pre-Treatment | MGAT3    | 4248   | 37 | 22 | 39884316  | 39884316  | Missense_Mutation | SNP | C  | T  | 9  | 79  | c.964C>T                          | c.(964-966)CCG>TCG     | p.P322S       |
| Pat_04 | Pre-Treatment | SAMM50   | 25813  | 37 | 22 | 44364653  | 44364653  | Missense_Mutation | SNP | C  | T  | 17 | 92  | c.277C>T                          | c.(277-279)CTT>TTT     | p.L93F        |
| Pat_04 | Pre-Treatment | TUBGCP6  | 85378  | 37 | 22 | 50656440  | 50656440  | Missense_Mutation | SNP | G  | A  | 4  | 25  | c.5275C>T                         | c.(5275-5277)CCT>TCT   | p.P1759S      |
| Pat_04 | Pre-Treatment | SRGAP3   | 9901   | 37 | 3  | 9027574   | 9027574   | Missense_Mutation | SNP | C  | T  | 7  | 54  | c.2929G>A                         | c.(2929-2931)GAA>AAA   | p.E977K       |
| Pat_04 | Pre-Treatment | C3orf24  | 115795 | 37 | 3  | 10146112  | 10146112  | Missense_Mutation | SNP | C  | T  | 13 | 104 | c.347G>A                          | c.(346-348)GGG>GAG     | p.G116E       |
| Pat_04 | Pre-Treatment | ATP2B2   | 491    | 37 | 3  | 10370737  | 10370737  | Missense_Mutation | SNP | G  | T  | 11 | 56  | c.3493C>A                         | c.(3493-3495)CAT>AAT   | p.H1165N      |
| Pat_04 | Pre-Treatment | SLC6A11  | 6538   | 37 | 3  | 10858146  | 10858146  | Missense_Mutation | SNP | G  | A  | 5  | 28  | c.196G>A                          | c.(196-198)GAG>AAG     | p.E66K        |
| Pat_04 | Pre-Treatment | KCNH8    | 131096 | 37 | 3  | 19436767  | 19436767  | Missense_Mutation | SNP | G  | A  | 22 | 77  | c.1141G>A                         | c.(1141-1143)GAG>AAG   | p.E381K       |
| Pat_04 | Pre-Treatment | RARB     | 5915   | 37 | 3  | 25611288  | 25611288  | Missense_Mutation | SNP | C  | T  | 4  | 28  | c.509C>T                          | c.(508-510)TCG>TTG     | p.S170L       |
| Pat_04 | Pre-Treatment | NEK10    | 152110 | 37 | 3  | 27332853  | 27332853  | Missense_Mutation | SNP | T  | C  | 4  | 21  | c.1505A>G                         | c.(1504-1506)AAT>AGT   | p.N502S       |
| Pat_04 | Pre-Treatment | STAC     | 6769   | 37 | 3  | 36534652  | 36534652  | Missense_Mutation | SNP | C  | T  | 5  | 30  | c.697C>T                          | c.(697-699)CTT>TTT     | p.L233F       |
| Pat_04 | Pre-Treatment | SCN5A    | 6331   | 37 | 3  | 38645271  | 38645271  | Missense_Mutation | SNP | C  | T  | 15 | 67  | c.1822G>A                         | c.(1822-1824)GAC>AAC   | p.D608N       |
| Pat_04 | Pre-Treatment | SCN11A   | 11280  | 37 | 3  | 38949439  | 38949439  | Splice_Site       | SNP | C  | T  | 4  | 26  | c.1473_splice                     | c.e10+1                | p.K491_splice |
| Pat_04 | Pre-Treatment | XIRP1    | 165904 | 37 | 3  | 39228008  | 39228008  | Missense_Mutation | SNP | C  | T  | 5  | 73  | c.2929G>A                         | c.(2929-2931)GAC>AAC   | p.D977N       |
| Pat_04 | Pre-Treatment | CYP8B1   | 1582   | 37 | 3  | 42916636  | 42916637  | Missense_Mutation | DNP | CC | TT | 6  | 49  | c.672_673GG>AA570-675)CGGGAG>CGAA |                        | p.E225K       |
| Pat_04 | Pre-Treatment | SLC6A20  | 54716  | 37 | 3  | 45801369  | 45801369  | Nonsense_Mutation | SNP | G  | A  | 19 | 93  | c.1609C>T                         | c.(1609-1611)CAA>TAA   | p.Q537*       |
| Pat_04 | Pre-Treatment | FYCO1    | 79443  | 37 | 3  | 46021220  | 46021220  | Missense_Mutation | SNP | G  | A  | 5  | 81  | c.265C>T                          | c.(265-267)CGC>TGC     | p.R89C        |
| Pat_04 | Pre-Treatment | SMARCC1  | 6599   | 37 | 3  | 47727558  | 47727558  | Missense_Mutation | SNP | A  | C  | 27 | 165 | c.1366T>G                         | c.(1366-1368)TCA>GCA   | p.S456A       |
| Pat_04 | Pre-Treatment | DHX30    | 22907  | 37 | 3  | 47888205  | 47888206  | Missense_Mutation | DNP | CC | TT | 4  | 35  | c.1643_1644CC>T                   | c.(1642-1644)CCC>CTT   | p.P548L       |
| Pat_04 | Pre-Treatment | CELSR3   | 1951   | 37 | 3  | 48667522  | 48667523  | Missense_Mutation | DNP | GG | AA | 11 | 75  | c.11609_11610CC>T                 | c.(11608-11610)TCC>TTT | p.S3870F      |
| Pat_04 | Pre-Treatment | DOCK3    | 1795   | 37 | 3  | 51350306  | 51350306  | Missense_Mutation | SNP | G  | A  | 4  | 16  | c.3226G>A                         | c.(3226-3228)GAA>AAA   | p.E1076K      |
| Pat_04 | Pre-Treatment | ROBO2    | 6092   | 37 | 3  | 77657012  | 77657012  | Missense_Mutation | SNP | C  | T  | 5  | 35  | c.3200C>T                         | c.(3199-3201)TCC>TTC   | p.S1067F      |
| Pat_04 | Pre-Treatment | OR5H1    | 26341  | 37 | 3  | 97852001  | 97852001  | Missense_Mutation | SNP | C  | T  | 13 | 41  | c.460C>T                          | c.(460-462)CTT>TTT     | p.L154F       |
| Pat_04 | Pre-Treatment | OR5H14   | 403273 | 37 | 3  | 97868569  | 97868569  | Missense_Mutation | SNP | C  | T  | 19 | 135 | c.340C>T                          | c.(340-342)CTC>TTC     | p.L114F       |
| Pat_04 | Pre-Treatment | SENP7    | 57337  | 37 | 3  | 101086756 | 101086756 | Missense_Mutation | SNP | G  | A  | 9  | 64  | c.896C>T                          | c.(895-897)TCC>TTC     | p.S299F       |
| Pat_04 | Pre-Treatment | MORC1    | 27136  | 37 | 3  | 108682434 | 108682434 | Nonsense_Mutation | SNP | G  | A  | 3  | 11  | c.2626C>T                         | c.(2626-2628)CAA>TAA   | p.Q876*       |
| Pat_04 | Pre-Treatment | CD96     | 10225  | 37 | 3  | 111296349 | 111296349 | Missense_Mutation | SNP | G  | A  | 21 | 127 | c.544G>A                          | c.(544-546)GAA>AAA     | p.E182K       |
| Pat_04 | Pre-Treatment | STXBP5L  | 9515   | 37 | 3  | 120957925 | 120957925 | Missense_Mutation | SNP | C  | T  | 7  | 27  | c.1292C>T                         | c.(1291-1293)TCT>TTT   | p.S431F       |
| Pat_04 | Pre-Treatment | STXBP5L  | 9515   | 37 | 3  | 121100155 | 121100155 | Missense_Mutation | SNP | C  | T  | 3  | 29  | c.2435C>T                         | c.(2434-2436)TCC>TTC   | p.S812F       |
| Pat_04 | Pre-Treatment | STXBP5L  | 9515   | 37 | 3  | 121132090 | 121132090 | Missense_Mutation | SNP | G  | A  | 14 | 84  | c.3106G>A                         | c.(3106-3108)GAA>AAA   | p.E1036K      |
| Pat_04 | Pre-Treatment | GOLGB1   | 2804   | 37 | 3  | 121413651 | 121413651 | Nonsense_Mutation | SNP | G  | A  | 12 | 150 | c.5704C>T                         | c.(5704-5706)CAA>TAA   | p.Q1902*      |
| Pat_04 | Pre-Treatment | SEMA5B   | 54437  | 37 | 3  | 122634315 | 122634315 | Missense_Mutation | SNP | G  | A  | 10 | 66  | c.1960C>T                         | c.(1960-1962)CCA>TCA   | p.P654S       |
| Pat_04 | Pre-Treatment | MYLK     | 4638   | 37 | 3  | 123457826 | 123457826 | Missense_Mutation | SNP | C  | T  | 10 | 24  | c.506G>A                          | c.(505-507)CGA>CAA     | p.R169Q       |
| Pat_04 | Pre-Treatment | TF       | 7018   | 37 | 3  | 133475789 | 133475789 | Missense_Mutation | SNP | C  | T  | 8  | 58  | c.806C>T                          | c.(805-807)ACC>ATC     | p.T269I       |
| Pat_04 | Pre-Treatment | TRIM42   | 287015 | 37 | 3  | 140407128 | 140407128 | Missense_Mutation | SNP | G  | A  | 12 | 96  | c.1604G>A                         | c.(1603-1605)CGA>CAA   | p.R535Q       |
| Pat_04 | Pre-Treatment | PLS1     | 5357   | 37 | 3  | 142430803 | 142430803 | Missense_Mutation | SNP | C  | G  | 20 | 116 | c.1844C>G                         | c.(1843-1845)ACG>AGG   | p.T615R       |
| Pat_04 | Pre-Treatment | MED12L   | 116931 | 37 | 3  | 150883728 | 150883728 | Missense_Mutation | SNP | C  | T  | 4  | 50  | c.1453C>T                         | c.(1453-1455)CAT>TAT   | p.H485Y       |

|        |               |          |        |    |   |           |           |                   |     |    |    |    |     |                 |                           |                |
|--------|---------------|----------|--------|----|---|-----------|-----------|-------------------|-----|----|----|----|-----|-----------------|---------------------------|----------------|
| Pat_04 | Pre-Treatment | IFT80    | 57560  | 37 | 3 | 160075309 | 160075309 | Missense_Mutation | SNP | T  | A  | 5  | 49  | c.607A>T        | c.(607-609)ATT>TTT        | p.I203F        |
| Pat_04 | Pre-Treatment | PRKCI    | 5584   | 37 | 3 | 170009711 | 170009711 | Missense_Mutation | SNP | T  | A  | 6  | 31  | c.1273T>A       | c.(1273-1275)TTA>ATA      | p.L425I        |
| Pat_04 | Pre-Treatment | MFN1     | 55669  | 37 | 3 | 179082192 | 179082192 | Missense_Mutation | SNP | C  | T  | 8  | 40  | c.644C>T        | c.(643-645)ACG>ATG        | p.T215M        |
| Pat_04 | Pre-Treatment | DCUN1D1  | 54165  | 37 | 3 | 182683508 | 182683508 | Missense_Mutation | SNP | G  | A  | 11 | 60  | c.37C>T         | c.(37-39)CGT>TGT          | p.R13C         |
| Pat_04 | Pre-Treatment | LAMP3    | 27074  | 37 | 3 | 182853615 | 182853615 | Missense_Mutation | SNP | G  | A  | 67 | 432 | c.1007C>T       | c.(1006-1008)TCC>TTC      | p.S336F        |
| Pat_04 | Pre-Treatment | EHHADH   | 1962   | 37 | 3 | 184911242 | 184911242 | Missense_Mutation | SNP | G  | A  | 7  | 59  | c.944C>T        | c.(943-945)TCT>TTT        | p.S315F        |
| Pat_04 | Pre-Treatment | ETV5     | 2119   | 37 | 3 | 185797804 | 185797804 | Missense_Mutation | SNP | G  | A  | 5  | 21  | c.452C>T        | c.(451-453)CCC>CTC        | p.P151L        |
| Pat_04 | Pre-Treatment | KNG1     | 3827   | 37 | 3 | 186460017 | 186460017 | Missense_Mutation | SNP | C  | T  | 14 | 74  | c.1832C>T       | c.(1831-1833)TCC>TTC      | p.S611F        |
| Pat_04 | Pre-Treatment | MUC4     | 4585   | 37 | 3 | 195515915 | 195515915 | Missense_Mutation | SNP | C  | T  | 4  | 41  | c.2536G>A       | c.(2536-2538)GAA>AAA      | p.E846K        |
| Pat_04 | Pre-Treatment | ADD1     | 118    | 37 | 4 | 2930044   | 2930045   | Missense_Mutation | DNP | CC | TT | 3  | 24  | .:2008_2009CC>T | c.(2008-2010)CCC>TTC      | p.P670F        |
| Pat_04 | Pre-Treatment | SLC2A9   | 56606  | 37 | 4 | 9943645   | 9943645   | Missense_Mutation | SNP | C  | T  | 12 | 53  | c.706G>A        | c.(706-708)GGA>AGA        | p.G236R        |
| Pat_04 | Pre-Treatment | KCNIP4   | 80333  | 37 | 4 | 20852291  | 20852291  | Splice_Site       | SNP | C  | T  | 3  | 21  | c.113_splice    | c.e2-1                    | p.D38_splice   |
| Pat_04 | Pre-Treatment | ANAPC4   | 29945  | 37 | 4 | 25382044  | 25382044  | Missense_Mutation | SNP | C  | T  | 8  | 45  | c.178C>T        | c.(178-180)CCA>TCA        | p.P60S         |
| Pat_04 | Pre-Treatment | FRYL     | 285527 | 37 | 4 | 48542086  | 48542086  | Splice_Site       | SNP | C  | T  | 5  | 18  | c.6296_splice   | c.e47-1                   | p.G2099_splice |
| Pat_04 | Pre-Treatment | UGT2B10  | 7365   | 37 | 4 | 69693142  | 69693142  | Missense_Mutation | SNP | T  | A  | 18 | 102 | c.1183T>A       | c.(1183-1185)TTT>ATT      | p.F395I        |
| Pat_04 | Pre-Treatment | MTTP     | 4547   | 37 | 4 | 100521808 | 100521808 | Missense_Mutation | SNP | G  | A  | 4  | 70  | c.1154G>A       | c.(1153-1155)AGC>AAC      | p.S385N        |
| Pat_04 | Pre-Treatment | ENPEP    | 2028   | 37 | 4 | 111397871 | 111397871 | Missense_Mutation | SNP | C  | T  | 16 | 92  | c.301C>T        | c.(301-303)CAC>TAC        | p.H101Y        |
| Pat_04 | Pre-Treatment | ENPEP    | 2028   | 37 | 4 | 111397893 | 111397893 | Missense_Mutation | SNP | C  | T  | 19 | 116 | c.323C>T        | c.(322-324)CCC>CTC        | p.P108L        |
| Pat_04 | Pre-Treatment | FAT4     | 79633  | 37 | 4 | 126367498 | 126367498 | Missense_Mutation | SNP | G  | A  | 8  | 77  | c.7244G>A       | c.(7243-7245)GGA>GAA      | p.G2415E       |
| Pat_04 | Pre-Treatment | PCDH18   | 54510  | 37 | 4 | 138442599 | 138442599 | Missense_Mutation | SNP | C  | T  | 12 | 52  | c.2992G>A       | c.(2992-2994)GAT>AAT      | p.D998N        |
| Pat_04 | Pre-Treatment | SLC10A7  | 84068  | 37 | 4 | 147214126 | 147214126 | Missense_Mutation | SNP | G  | A  | 8  | 24  | c.728C>T        | c.(727-729)TCT>TTT        | p.S243F        |
| Pat_04 | Pre-Treatment | PET112L  | 5188   | 37 | 4 | 152609912 | 152609912 | Missense_Mutation | SNP | C  | T  | 5  | 32  | c.1201G>A       | c.(1201-1203)GAA>AAA      | p.E401K        |
| Pat_04 | Pre-Treatment | DCHS2    | 54798  | 37 | 4 | 155157307 | 155157307 | Missense_Mutation | SNP | C  | T  | 18 | 80  | c.7132G>A       | c.(7132-7134)GAT>AAT      | p.D2378N       |
| Pat_04 | Pre-Treatment | FGA      | 2243   | 37 | 4 | 155507312 | 155507313 | Missense_Mutation | DNP | CC | TT | 13 | 133 | .1268_1269GG>A  | c.(1267-1269)GGG>GAA      | p.G423E        |
| Pat_04 | Pre-Treatment | SH3RF1   | 57630  | 37 | 4 | 170057764 | 170057764 | Missense_Mutation | SNP | G  | A  | 9  | 35  | c.773C>T        | c.(772-774)TCG>TTG        | p.S258L        |
| Pat_04 | Pre-Treatment | SORBS2   | 8470   | 37 | 4 | 186545315 | 186545315 | Missense_Mutation | SNP | G  | A  | 8  | 51  | c.1256C>T       | c.(1255-1257)CCC>CTC      | p.P419L        |
| Pat_04 | Pre-Treatment | LPCAT1   | 79888  | 37 | 5 | 1494881   | 1494881   | Missense_Mutation | SNP | G  | A  | 9  | 83  | c.427C>T        | c.(427-429)CCT>TCT        | p.P143S        |
| Pat_04 | Pre-Treatment | SEMA5A   | 9037   | 37 | 5 | 9063103   | 9063103   | Missense_Mutation | SNP | C  | T  | 10 | 70  | c.2414G>A       | c.(2413-2415)CGG>CAG      | p.R805Q        |
| Pat_04 | Pre-Treatment | DNAH5    | 1767   | 37 | 5 | 13701415  | 13701415  | Missense_Mutation | SNP | C  | T  | 8  | 69  | c.13469G>A      | .:(13468-13470)GGA>GAA    | p.G4490E       |
| Pat_04 | Pre-Treatment | DNAH5    | 1767   | 37 | 5 | 13714558  | 13714558  | Missense_Mutation | SNP | C  | T  | 19 | 119 | c.13081G>A      | c.(13081-13083)GAT>AAT    | p.D4361N       |
| Pat_04 | Pre-Treatment | DNAH5    | 1767   | 37 | 5 | 13871769  | 13871769  | Missense_Mutation | SNP | C  | T  | 6  | 30  | c.3502G>A       | c.(3502-3504)GAA>AAA      | p.E1168K       |
| Pat_04 | Pre-Treatment | TRIO     | 7204   | 37 | 5 | 14498726  | 14498726  | Missense_Mutation | SNP | C  | T  | 17 | 124 | c.8309C>T       | c.(8308-8310)TCG>TTG      | p.S2770L       |
| Pat_04 | Pre-Treatment | CDH18    | 1016   | 37 | 5 | 19544029  | 19544029  | Missense_Mutation | SNP | C  | T  | 7  | 56  | c.1339G>A       | c.(1339-1341)GAC>AAC      | p.D447N        |
| Pat_04 | Pre-Treatment | CDH9     | 1007   | 37 | 5 | 26906133  | 26906133  | Missense_Mutation | SNP | G  | A  | 9  | 152 | c.746C>T        | c.(745-747)TCT>TTT        | p.S249F        |
| Pat_04 | Pre-Treatment | AGXT2    | 64902  | 37 | 5 | 35010230  | 35010230  | Missense_Mutation | SNP | C  | T  | 16 | 68  | c.1213G>A       | c.(1213-1215)GAA>AAA      | p.E405K        |
| Pat_04 | Pre-Treatment | C9       | 735    | 37 | 5 | 39341321  | 39341321  | Missense_Mutation | SNP | C  | T  | 15 | 141 | c.403G>A        | c.(403-405)GAA>AAA        | p.E135K        |
| Pat_04 | Pre-Treatment | HEATR7B2 | 133558 | 37 | 5 | 41038915  | 41038915  | Missense_Mutation | SNP | G  | A  | 5  | 21  | c.2137C>T       | c.(2137-2139)CCC>TCC      | p.P713S        |
| Pat_04 | Pre-Treatment | HCN1     | 348980 | 37 | 5 | 45267313  | 45267313  | Missense_Mutation | SNP | C  | T  | 17 | 81  | c.1661G>A       | c.(1660-1662)CGA>CAA      | p.R554Q        |
| Pat_04 | Pre-Treatment | IL31RA   | 133396 | 37 | 5 | 55203220  | 55203220  | Missense_Mutation | SNP | C  | T  | 4  | 51  | c.1286C>T       | c.(1285-1287)TCT>TTT      | p.S429F        |
| Pat_04 | Pre-Treatment | BDP1     | 55814  | 37 | 5 | 70785458  | 70785458  | Missense_Mutation | SNP | T  | A  | 6  | 43  | c.1441T>A       | c.(1441-1443)TTA>ATA      | p.L481I        |
| Pat_04 | Pre-Treatment | MAP1B    | 4131   | 37 | 5 | 71494189  | 71494190  | Missense_Mutation | DNP | CC | TT | 13 | 71  | .:5007_5008CC>T | c.(5005-5010)CACCCCT>CATT | p.P1670S       |
| Pat_04 | Pre-Treatment | FAM169A  | 26049  | 37 | 5 | 74100362  | 74100362  | Missense_Mutation | SNP | C  | T  | 12 | 105 | c.868G>A        | c.(868-870)GAA>AAA        | p.E290K        |
| Pat_04 | Pre-Treatment | PDE8B    | 8622   | 37 | 5 | 76714110  | 76714110  | Missense_Mutation | SNP | C  | G  | 6  | 92  | c.1968C>G       | c.(1966-1968)GAC>GAG      | p.D656E        |
| Pat_04 | Pre-Treatment | VCAN     | 1462   | 37 | 5 | 82875858  | 82875858  | Missense_Mutation | SNP | C  | T  | 13 | 87  | c.9940C>T       | c.(9940-9942)CGT>TGT      | p.R3314C       |
| Pat_04 | Pre-Treatment | VCAN     | 1462   | 37 | 5 | 82876246  | 82876246  | Missense_Mutation | SNP | G  | A  | 3  | 27  | c.10184G>A      | .:(10183-10185)AGG>AAC    | p.R3395K       |
| Pat_04 | Pre-Treatment | GPR98    | 84059  | 37 | 5 | 89949427  | 89949427  | Missense_Mutation | SNP | C  | T  | 10 | 22  | c.4036C>T       | c.(4036-4038)CCC>TCC      | p.P1346S       |
| Pat_04 | Pre-Treatment | CAST     | 831    | 37 | 5 | 96062522  | 96062522  | Missense_Mutation | SNP | G  | A  | 6  | 49  | c.46G>A         | c.(46-48)GAA>AAA          | p.E16K         |

|        |               |          |        |    |   |           |           |                   |     |   |   |    |     |           |                      |          |
|--------|---------------|----------|--------|----|---|-----------|-----------|-------------------|-----|---|---|----|-----|-----------|----------------------|----------|
| Pat_04 | Pre-Treatment | CAST     | 831    | 37 | 5 | 96093305  | 96093305  | Missense_Mutation | SNP | C | T | 8  | 61  | c.1531C>T | c.(1531-1533)CTT>TTT | p.L511F  |
| Pat_04 | Pre-Treatment | CHD1     | 1105   | 37 | 5 | 98192317  | 98192317  | Missense_Mutation | SNP | G | A | 7  | 30  | c.4900C>T | c.(4900-4902)CAC>TAC | p.H1634Y |
| Pat_04 | Pre-Treatment | MAN2A1   | 4124   | 37 | 5 | 109200786 | 109200786 | Missense_Mutation | SNP | G | A | 10 | 90  | c.3221G>A | c.(3220-3222)GGG>GAG | p.G1074E |
| Pat_04 | Pre-Treatment | STARD4   | 134429 | 37 | 5 | 110837710 | 110837710 | Missense_Mutation | SNP | C | T | 23 | 93  | c.232G>A  | c.(232-234)GAT>AAT   | p.D78N   |
| Pat_04 | Pre-Treatment | SHROOM1  | 134549 | 37 | 5 | 132160400 | 132160400 | Missense_Mutation | SNP | G | A | 10 | 62  | c.1148C>T | c.(1147-1149)CCC>CTC | p.P383L  |
| Pat_04 | Pre-Treatment | PCDHA1   | 56147  | 37 | 5 | 140167451 | 140167451 | Missense_Mutation | SNP | G | A | 22 | 138 | c.1576G>A | c.(1576-1578)GAG>AAG | p.E526K  |
| Pat_04 | Pre-Treatment | PCDHA2   | 56146  | 37 | 5 | 140176383 | 140176383 | Nonsense_Mutation | SNP | C | T | 14 | 94  | c.1834C>T | c.(1834-1836)CAG>TAG | p.Q612*  |
| Pat_04 | Pre-Treatment | PCDHA3   | 56145  | 37 | 5 | 140180999 | 140180999 | Missense_Mutation | SNP | G | A | 23 | 142 | c.217G>A  | c.(217-219)GAC>AAC   | p.D73N   |
| Pat_04 | Pre-Treatment | PCDHA4   | 56144  | 37 | 5 | 140187313 | 140187313 | Missense_Mutation | SNP | G | A | 7  | 30  | c.541G>A  | c.(541-543)GAA>AAA   | p.E181K  |
| Pat_04 | Pre-Treatment | PCDHA5   | 56143  | 37 | 5 | 140201564 | 140201564 | Missense_Mutation | SNP | G | C | 32 | 132 | c.204G>C  | c.(202-204)AAG>AAC   | p.K68N   |
| Pat_04 | Pre-Treatment | PCDHA7   | 56141  | 37 | 5 | 140214360 | 140214360 | Missense_Mutation | SNP | C | T | 18 | 200 | c.392C>T  | c.(391-393)CCG>CTG   | p.P131L  |
| Pat_04 | Pre-Treatment | PCDHB4   | 56131  | 37 | 5 | 140502392 | 140502392 | Missense_Mutation | SNP | G | A | 8  | 68  | c.812G>A  | c.(811-813)GGA>GAA   | p.G271E  |
| Pat_04 | Pre-Treatment | PCDHB6   | 56130  | 37 | 5 | 140530635 | 140530635 | Missense_Mutation | SNP | G | A | 5  | 26  | c.797G>A  | c.(796-798)AGA>AAA   | p.R266K  |
| Pat_04 | Pre-Treatment | PCDHB16  | 57717  | 37 | 5 | 140562587 | 140562587 | Missense_Mutation | SNP | G | T | 7  | 24  | c.453G>T  | c.(451-453)GAG>GAT   | p.E151D  |
| Pat_04 | Pre-Treatment | PCDHGA1  | 56114  | 37 | 5 | 140712562 | 140712562 | Missense_Mutation | SNP | C | T | 24 | 215 | c.2311C>T | c.(2311-2313)CCC>TCC | p.P771S  |
| Pat_04 | Pre-Treatment | PCDHGA3  | 56112  | 37 | 5 | 140725366 | 140725366 | Missense_Mutation | SNP | C | T | 12 | 80  | c.1766C>T | c.(1765-1767)ACC>ATC | p.T589I  |
| Pat_04 | Pre-Treatment | PCDHGA3  | 56112  | 37 | 5 | 140725489 | 140725489 | Missense_Mutation | SNP | G | A | 7  | 67  | c.1889G>A | c.(1888-1890)CGA>CAA | p.R630Q  |
| Pat_04 | Pre-Treatment | TCERG1   | 10915  | 37 | 5 | 145843320 | 145843320 | Missense_Mutation | SNP | C | T | 44 | 174 | c.1099C>T | c.(1099-1101)CGT>TGT | p.R367C  |
| Pat_04 | Pre-Treatment | PPP2R2B  | 5521   | 37 | 5 | 145969685 | 145969685 | Missense_Mutation | SNP | G | A | 20 | 99  | c.1157C>T | c.(1156-1158)GCT>GTT | p.A386V  |
| Pat_04 | Pre-Treatment | JAKMP2   | 9832   | 37 | 5 | 147024427 | 147024427 | Missense_Mutation | SNP | C | T | 4  | 54  | c.1069G>A | c.(1069-1071)GAA>AAA | p.E357K  |
| Pat_04 | Pre-Treatment | GRIA1    | 2890   | 37 | 5 | 153077667 | 153077667 | Missense_Mutation | SNP | G | A | 17 | 88  | c.1198G>A | c.(1198-1200)GAT>AAT | p.D400N  |
| Pat_04 | Pre-Treatment | CCNJL    | 79616  | 37 | 5 | 159686764 | 159686764 | Missense_Mutation | SNP | G | A | 16 | 99  | c.439C>T  | c.(439-441)CGG>TGG   | p.R147W  |
| Pat_04 | Pre-Treatment | ODZ2     | 57451  | 37 | 5 | 167420031 | 167420031 | Missense_Mutation | SNP | G | A | 12 | 94  | c.1030G>A | c.(1030-1032)GTT>ATT | p.V344I  |
| Pat_04 | Pre-Treatment | SLIT3    | 6586   | 37 | 5 | 168175380 | 168175380 | Missense_Mutation | SNP | C | T | 5  | 54  | c.2197G>A | c.(2197-2199)GAG>AAG | p.E733K  |
| Pat_04 | Pre-Treatment | FOX11    | 2299   | 37 | 5 | 169535146 | 169535146 | Missense_Mutation | SNP | C | T | 10 | 36  | c.668C>T  | c.(667-669)TCC>TTC   | p.S223F  |
| Pat_04 | Pre-Treatment | EIF4E1B  | 253314 | 37 | 5 | 176072457 | 176072457 | Missense_Mutation | SNP | G | A | 10 | 32  | c.554G>A  | c.(553-555)GGG>GAG   | p.G185E  |
| Pat_04 | Pre-Treatment | ZFP2     | 80108  | 37 | 5 | 178358462 | 178358462 | Missense_Mutation | SNP | G | A | 10 | 49  | c.148G>A  | c.(148-150)GAA>AAA   | p.E50K   |
| Pat_04 | Pre-Treatment | KAAG1    | 353219 | 37 | 6 | 24358066  | 24358066  | Missense_Mutation | SNP | G | A | 12 | 22  | c.199G>A  | c.(199-201)GGA>AGA   | p.G67R   |
| Pat_04 | Pre-Treatment | OR2B3    | 442184 | 37 | 6 | 29054557  | 29054557  | Missense_Mutation | SNP | C | T | 4  | 27  | c.469G>A  | c.(469-471)GTG>ATG   | p.V157M  |
| Pat_04 | Pre-Treatment | HLA-DOA  | 3111   | 37 | 6 | 32975249  | 32975249  | Missense_Mutation | SNP | C | T | 43 | 152 | c.452G>A  | c.(451-453)GGC>GAC   | p.G151D  |
| Pat_04 | Pre-Treatment | BRPF3    | 27154  | 37 | 6 | 36169418  | 36169418  | Missense_Mutation | SNP | C | T | 3  | 15  | c.1319C>T | c.(1318-1320)TCC>TTC | p.S440F  |
| Pat_04 | Pre-Treatment | YIPF3    | 25844  | 37 | 6 | 43480605  | 43480605  | Missense_Mutation | SNP | C | T | 3  | 17  | c.674G>A  | c.(673-675)GGC>GAC   | p.G225D  |
| Pat_04 | Pre-Treatment | MEP1A    | 4224   | 37 | 6 | 46777273  | 46777273  | Missense_Mutation | SNP | G | A | 23 | 92  | c.379G>A  | c.(379-381)GGG>AGG   | p.G127R  |
| Pat_04 | Pre-Treatment | CRISP2   | 7180   | 37 | 6 | 49663558  | 49663558  | Missense_Mutation | SNP | C | T | 8  | 65  | c.595G>A  | c.(595-597)GGA>AGA   | p.G199R  |
| Pat_04 | Pre-Treatment | PGK2     | 5232   | 37 | 6 | 49754814  | 49754814  | Missense_Mutation | SNP | C | T | 8  | 55  | c.87G>A   | c.(85-87)ATG>ATA     | p.M29I   |
| Pat_04 | Pre-Treatment | FAM83B   | 222584 | 37 | 6 | 54735177  | 54735177  | Missense_Mutation | SNP | G | A | 12 | 80  | c.133G>A  | c.(133-135)GAA>AAA   | p.E45K   |
| Pat_04 | Pre-Treatment | BMP5     | 653    | 37 | 6 | 55623909  | 55623909  | Nonsense_Mutation | SNP | C | T | 9  | 51  | c.1109G>A | c.(1108-1110)TGG>TAG | p.W370*  |
| Pat_04 | Pre-Treatment | BEND6    | 221336 | 37 | 6 | 56879993  | 56879993  | Missense_Mutation | SNP | G | A | 12 | 53  | c.361G>A  | c.(361-363)GGT>AGT   | p.G121S  |
| Pat_04 | Pre-Treatment | PHF3     | 23469  | 37 | 6 | 64413499  | 64413499  | Missense_Mutation | SNP | C | T | 4  | 30  | c.3305C>T | c.(3304-3306)JCT>TTT | p.S1102F |
| Pat_04 | Pre-Treatment | COL9A1   | 1297   | 37 | 6 | 70990558  | 70990558  | Missense_Mutation | SNP | C | T | 3  | 14  | c.932G>A  | c.(931-933)GGA>GAA   | p.G311E  |
| Pat_04 | Pre-Treatment | KCNQ5    | 56479  | 37 | 6 | 73904661  | 73904661  | Missense_Mutation | SNP | G | A | 7  | 50  | c.2323G>A | c.(2323-2325)GAA>AAA | p.E775K  |
| Pat_04 | Pre-Treatment | GJA10    | 84694  | 37 | 6 | 90605358  | 90605358  | Missense_Mutation | SNP | G | A | 4  | 34  | c.1171G>A | c.(1171-1173)GAC>AAC | p.D391N  |
| Pat_04 | Pre-Treatment | C6orf167 | 253714 | 37 | 6 | 97702456  | 97702456  | Missense_Mutation | SNP | G | A | 8  | 17  | c.1096C>T | c.(1096-1098)CGC>TGC | p.R366C  |
| Pat_04 | Pre-Treatment | SIM1     | 6492   | 37 | 6 | 100841729 | 100841729 | Missense_Mutation | SNP | G | A | 7  | 36  | c.1204C>T | c.(1204-1206)CAT>TAT | p.H402Y  |
| Pat_04 | Pre-Treatment | REV3L    | 5980   | 37 | 6 | 111688989 | 111688989 | Missense_Mutation | SNP | G | A | 11 | 91  | c.6002C>T | c.(6001-6003)CCA>CTA | p.P2001L |
| Pat_04 | Pre-Treatment | ROS1     | 6098   | 37 | 6 | 117662685 | 117662685 | Nonsense_Mutation | SNP | G | A | 10 | 59  | c.4780C>T | c.(4780-4782)CAG>TAG | p.Q1594* |
| Pat_04 | Pre-Treatment | MAN1A1   | 4121   | 37 | 6 | 119522499 | 119522499 | Missense_Mutation | SNP | C | T | 6  | 28  | c.1130G>A | c.(1129-1131)CGA>CAA | p.R377Q  |

|        |               |          |        |    |   |           |           |                   |     |    |    |    |     |                  |                        |          |
|--------|---------------|----------|--------|----|---|-----------|-----------|-------------------|-----|----|----|----|-----|------------------|------------------------|----------|
| Pat_04 | Pre-Treatment | PTPRK    | 5796   | 37 | 6 | 128306900 | 128306900 | Missense_Mutation | SNP | G  | A  | 5  | 52  | c.3214C>T        | c.(3214-3216)CCT>TCT   | p.P1072S |
| Pat_04 | Pre-Treatment | SYNE1    | 23345  | 37 | 6 | 152583252 | 152583252 | Missense_Mutation | SNP | C  | T  | 6  | 49  | c.18887G>A       | c.(18886-18888)AGA>AAA | p.R6296K |
| Pat_04 | Pre-Treatment | SYNE1    | 23345  | 37 | 6 | 152706973 | 152706973 | Missense_Mutation | SNP | C  | T  | 5  | 39  | c.8488G>A        | c.(8488-8490)GAA>AAA   | p.E2830K |
| Pat_04 | Pre-Treatment | MYCT1    | 80177  | 37 | 6 | 153043059 | 153043059 | Missense_Mutation | SNP | C  | T  | 14 | 104 | c.379C>T         | c.(379-381)CGC>TGC     | p.R127C  |
| Pat_04 | Pre-Treatment | LPA      | 4018   | 37 | 6 | 161022099 | 161022099 | Missense_Mutation | SNP | C  | T  | 10 | 71  | c.2977G>A        | c.(2977-2979)GAT>AAT   | p.D993N  |
| Pat_04 | Pre-Treatment | PACRG    | 135138 | 37 | 6 | 163510440 | 163510440 | Missense_Mutation | SNP | G  | A  | 10 | 40  | c.613G>A         | c.(613-615)GGG>AGG     | p.G205R  |
| Pat_04 | Pre-Treatment | TCP10L2  | 401285 | 37 | 6 | 167591993 | 167591993 | Missense_Mutation | SNP | C  | T  | 22 | 138 | c.620C>T         | c.(619-621)CCC>CTC     | p.P207L  |
| Pat_04 | Pre-Treatment | MAD1L1   | 8379   | 37 | 7 | 2265161   | 2265161   | Missense_Mutation | SNP | G  | A  | 5  | 25  | c.175C>T         | c.(175-177)CGT>TGT     | p.R59C   |
| Pat_04 | Pre-Treatment | ACTB     | 60     | 37 | 7 | 5568184   | 5568184   | Missense_Mutation | SNP | C  | T  | 9  | 54  | c.530G>A         | c.(529-531)CGT>CAT     | p.R177H  |
| Pat_04 | Pre-Treatment | DNAH11   | 8701   | 37 | 7 | 21730448  | 21730448  | Missense_Mutation | SNP | C  | T  | 33 | 133 | c.6011C>T        | c.(6010-6012)CCG>CTG   | p.P2004L |
| Pat_04 | Pre-Treatment | DNAH11   | 8701   | 37 | 7 | 21827019  | 21827019  | Missense_Mutation | SNP | G  | A  | 6  | 31  | c.9763G>A        | c.(9763-9765)GTT>ATT   | p.V3255I |
| Pat_04 | Pre-Treatment | STK31    | 56164  | 37 | 7 | 23830450  | 23830450  | Missense_Mutation | SNP | G  | A  | 12 | 48  | c.2645G>A        | c.(2644-2646)CGA>CAA   | p.R882Q  |
| Pat_04 | Pre-Treatment | NPC1L1   | 29881  | 37 | 7 | 44579280  | 44579280  | Missense_Mutation | SNP | C  | T  | 7  | 58  | c.716G>A         | c.(715-717)GGG>GAG     | p.G239E  |
| Pat_04 | Pre-Treatment | WBCSR17  | 64409  | 37 | 7 | 71135003  | 71135003  | Missense_Mutation | SNP | G  | A  | 22 | 49  | c.1313G>A        | c.(1312-1314)AGG>AAG   | p.R438K  |
| Pat_04 | Pre-Treatment | BAZ1B    | 9031   | 37 | 7 | 72865214  | 72865215  | Missense_Mutation | DNP | GG | AA | 22 | 138 | ..3542_3543CC>T  | c.(3541-3543)TCC>TTT   | p.S1181F |
| Pat_04 | Pre-Treatment | MAGI2    | 9863   | 37 | 7 | 77756606  | 77756606  | Missense_Mutation | SNP | G  | A  | 24 | 252 | c.3331C>T        | c.(3331-3333)CCC>TCC   | p.P1111S |
| Pat_04 | Pre-Treatment | PCLO     | 27445  | 37 | 7 | 82538294  | 82538294  | Missense_Mutation | SNP | C  | T  | 5  | 53  | c.13336G>A       | c.(13336-13338)GAT>AAT | p.D4446N |
| Pat_04 | Pre-Treatment | PCLO     | 27445  | 37 | 7 | 82544905  | 82544905  | Missense_Mutation | SNP | G  | A  | 9  | 62  | c.12397C>T       | c.(12397-12399)CGT>TGT | p.R4133C |
| Pat_04 | Pre-Treatment | PCLO     | 27445  | 37 | 7 | 82578956  | 82578956  | Missense_Mutation | SNP | C  | T  | 18 | 186 | c.10948G>A       | c.(10948-10950)GAT>AAT | p.D3650N |
| Pat_04 | Pre-Treatment | PCLO     | 27445  | 37 | 7 | 82580479  | 82580479  | Missense_Mutation | SNP | G  | A  | 3  | 25  | c.9425C>T        | c.(9424-9426)TCA>TTA   | p.S3142L |
| Pat_04 | Pre-Treatment | PCLO     | 27445  | 37 | 7 | 82582341  | 82582341  | Missense_Mutation | SNP | C  | T  | 6  | 60  | c.7928G>A        | c.(7927-7929)GGA>GAA   | p.G2643E |
| Pat_04 | Pre-Treatment | PCLO     | 27445  | 37 | 7 | 82764798  | 82764798  | Missense_Mutation | SNP | G  | A  | 5  | 57  | c.2068C>T        | c.(2068-2070)CCA>TCA   | p.P690S  |
| Pat_04 | Pre-Treatment | ABCB1    | 5243   | 37 | 7 | 87175304  | 87175304  | Missense_Mutation | SNP | G  | A  | 13 | 95  | c.1762C>T        | c.(1762-1764)CGT>TGT   | p.R588C  |
| Pat_04 | Pre-Treatment | AKAP9    | 10142  | 37 | 7 | 91712907  | 91712907  | Nonsense_Mutation | SNP | C  | T  | 7  | 73  | c.8584C>T        | c.(8584-8586)CAG>TAG   | p.Q2862* |
| Pat_04 | Pre-Treatment | HEPACAM2 | 253012 | 37 | 7 | 92826842  | 92826842  | Missense_Mutation | SNP | G  | A  | 3  | 23  | c.1094C>T        | c.(1093-1095)TCC>TTC   | p.S365F  |
| Pat_04 | Pre-Treatment | HEPACAM2 | 253012 | 37 | 7 | 92844875  | 92844875  | Missense_Mutation | SNP | T  | A  | 15 | 71  | c.554A>T         | c.(553-555)AAT>ATT     | p.N185I  |
| Pat_04 | Pre-Treatment | ARPC1B   | 10095  | 37 | 7 | 98984382  | 98984382  | Missense_Mutation | SNP | G  | A  | 19 | 127 | c.139G>A         | c.(139-141)GAG>AAG     | p.E47K   |
| Pat_04 | Pre-Treatment | TRIM4    | 89122  | 37 | 7 | 99490070  | 99490070  | Missense_Mutation | SNP | G  | A  | 35 | 258 | c.1219C>T        | c.(1219-1221)CGT>TGT   | p.R407C  |
| Pat_04 | Pre-Treatment | STAG3    | 10734  | 37 | 7 | 99787166  | 99787166  | Missense_Mutation | SNP | C  | T  | 39 | 88  | c.814C>T         | c.(814-816)CCA>TCA     | p.P272S  |
| Pat_04 | Pre-Treatment | C7orf61  | 402573 | 37 | 7 | 100061186 | 100061186 | Missense_Mutation | SNP | G  | A  | 6  | 40  | c.187C>T         | c.(187-189)CCA>TCA     | p.P63S   |
| Pat_04 | Pre-Treatment | MYL10    | 93408  | 37 | 7 | 101266307 | 101266307 | Missense_Mutation | SNP | C  | T  | 11 | 57  | c.319G>A         | c.(319-321)GAG>AAG     | p.E107K  |
| Pat_04 | Pre-Treatment | RELN     | 5649   | 37 | 7 | 103113269 | 103113269 | Missense_Mutation | SNP | C  | T  | 10 | 52  | c.10373G>A       | c.(10372-10374)CGA>CAA | p.R3458Q |
| Pat_04 | Pre-Treatment | RELN     | 5649   | 37 | 7 | 103180703 | 103180703 | Missense_Mutation | SNP | G  | A  | 12 | 100 | c.6871C>T        | c.(6871-6873)CTT>TTT   | p.L2291F |
| Pat_04 | Pre-Treatment | RELN     | 5649   | 37 | 7 | 103629593 | 103629593 | Missense_Mutation | SNP | C  | T  | 15 | 61  | c.211G>A         | c.(211-213)GGA>AGA     | p.G71R   |
| Pat_04 | Pre-Treatment | BCAP29   | 55973  | 37 | 7 | 107258776 | 107258776 | Missense_Mutation | SNP | C  | T  | 5  | 43  | c.694C>T         | c.(694-696)CGT>TGT     | p.R232C  |
| Pat_04 | Pre-Treatment | TFEC     | 22797  | 37 | 7 | 115596807 | 115596807 | Missense_Mutation | SNP | C  | T  | 10 | 69  | c.308G>A         | c.(307-309)GGA>GAA     | p.G103E  |
| Pat_04 | Pre-Treatment | MET      | 4233   | 37 | 7 | 116339706 | 116339706 | Missense_Mutation | SNP | G  | A  | 13 | 76  | c.568G>A         | c.(568-570)GAC>AAC     | p.D190N  |
| Pat_04 | Pre-Treatment | NRF1     | 4899   | 37 | 7 | 129349000 | 129349000 | Missense_Mutation | SNP | C  | T  | 26 | 237 | c.692C>T         | c.(691-693)CCC>CTC     | p.P231L  |
| Pat_04 | Pre-Treatment | NRF1     | 4899   | 37 | 7 | 129394921 | 129394921 | Missense_Mutation | SNP | G  | A  | 9  | 78  | c.1412G>A        | c.(1411-1413)GGA>GAA   | p.G471E  |
| Pat_04 | Pre-Treatment | CPA1     | 1357   | 37 | 7 | 130023244 | 130023244 | Missense_Mutation | SNP | G  | A  | 8  | 52  | c.496G>A         | c.(496-498)GGC>AGC     | p.G166S  |
| Pat_04 | Pre-Treatment | MEST     | 4232   | 37 | 7 | 130138283 | 130138283 | Missense_Mutation | SNP | G  | A  | 12 | 81  | c.500G>A         | c.(499-501)CGG>CAG     | p.R167Q  |
| Pat_04 | Pre-Treatment | PLXNA4   | 91584  | 37 | 7 | 132193185 | 132193185 | Missense_Mutation | SNP | C  | T  | 7  | 66  | c.268G>A         | c.(268-270)GAG>AAG     | p.E90K   |
| Pat_04 | Pre-Treatment | CREB3L2  | 64764  | 37 | 7 | 137567192 | 137567192 | Missense_Mutation | SNP | C  | T  | 16 | 102 | c.1453G>A        | c.(1453-1455)GAG>AAG   | p.E485K  |
| Pat_04 | Pre-Treatment | TMEM213  | 155006 | 37 | 7 | 138486131 | 138486131 | Missense_Mutation | SNP | G  | A  | 4  | 20  | c.142G>A         | c.(142-144)GAG>AAG     | p.E48K   |
| Pat_04 | Pre-Treatment | TBXAS1   | 6916   | 37 | 7 | 139717589 | 139717589 | Missense_Mutation | SNP | C  | T  | 13 | 142 | c.1624C>T        | c.(1624-1626)CAC>TAC   | p.H542Y  |
| Pat_04 | Pre-Treatment | BRAF     | 673    | 37 | 7 | 140453136 | 140453137 | Missense_Mutation | DNP | AC | TT | 31 | 71  | ..1798_1799GT>A> | c.(1798-1800)GTG>AAG   | p.V600K  |
| Pat_04 | Pre-Treatment | TAS2R38  | 5726   | 37 | 7 | 141673021 | 141673021 | Missense_Mutation | SNP | G  | A  | 5  | 50  | c.469C>T         | c.(469-471)CTC>TTC     | p.L157F  |



|        |               |         |        |    |   |           |           |                   |     |    |    |    |     |                                                  |                      |               |
|--------|---------------|---------|--------|----|---|-----------|-----------|-------------------|-----|----|----|----|-----|--------------------------------------------------|----------------------|---------------|
| Pat_04 | Pre-Treatment | TAS2R39 | 259285 | 37 | 7 | 142881106 | 142881106 | Missense_Mutation | SNP | A  | G  | 5  | 53  | c.595A>G                                         | c.(595-597)ACA>GCA   | p.T199A       |
| Pat_04 | Pre-Treatment | FAM131B | 9715   | 37 | 7 | 143053747 | 143053747 | Nonsense_Mutation | SNP | G  | A  | 39 | 224 | c.895C>T                                         | c.(895-897)CGA>TGA   | p.R299*       |
| Pat_04 | Pre-Treatment | FAM131B | 9715   | 37 | 7 | 143056030 | 143056030 | Nonsense_Mutation | SNP | C  | T  | 6  | 52  | c.272G>A                                         | c.(271-273)TGG>TAG   | p.W91*        |
| Pat_04 | Pre-Treatment | OR2A5   | 393046 | 37 | 7 | 143747858 | 143747858 | Missense_Mutation | SNP | C  | T  | 30 | 196 | c.364C>T                                         | c.(364-366)CGG>TGG   | p.R122W       |
| Pat_04 | Pre-Treatment | SSPO    | 23145  | 37 | 7 | 149509361 | 149509362 | Missense_Mutation | DNP | GG | AA | 3  | 16  | .9759_9760GG>A/57-9762)GGGGGA>GGA                |                      | p.G3254R      |
| Pat_04 | Pre-Treatment | ZNF862  | 643641 | 37 | 7 | 149544869 | 149544869 | Missense_Mutation | SNP | C  | T  | 5  | 14  | c.287C>T                                         | c.(286-288)CCC>CTC   | p.P96L        |
| Pat_04 | Pre-Treatment | ACCN3   | 9311   | 37 | 7 | 150747192 | 150747192 | Splice_Site       | SNP | G  | A  | 16 | 70  | c.535_splice                                     | c.e2-1               | p.I179_splice |
| Pat_04 | Pre-Treatment | GBX1    | 2636   | 37 | 7 | 150846152 | 150846152 | Missense_Mutation | SNP | C  | T  | 53 | 393 | c.616G>A                                         | c.(616-618)GAA>AAA   | p.E206K       |
| Pat_04 | Pre-Treatment | CSMD1   | 64478  | 37 | 8 | 2820770   | 2820770   | Nonsense_Mutation | SNP | C  | T  | 19 | 115 | c.9431G>A                                        | c.(9430-9432)TGG>TAG | p.W3144*      |
| Pat_04 | Pre-Treatment | RP1L1   | 94137  | 37 | 8 | 10465655  | 10465655  | Missense_Mutation | SNP | C  | T  | 17 | 122 | c.5953G>A                                        | c.(5953-5955)GAG>AAG | p.E1985K      |
| Pat_04 | Pre-Treatment | MSR1    | 4481   | 37 | 8 | 15978011  | 15978011  | Missense_Mutation | SNP | C  | T  | 32 | 194 | c.1138G>A                                        | c.(1138-1140)GAA>AAA | p.E380K       |
| Pat_04 | Pre-Treatment | NAT2    | 10     | 37 | 8 | 18258373  | 18258373  | Missense_Mutation | SNP | C  | T  | 6  | 43  | c.860C>T                                         | c.(859-861)TCC>TTC   | p.S287F       |
| Pat_04 | Pre-Treatment | SLC18A1 | 6570   | 37 | 8 | 20028976  | 20028976  | Missense_Mutation | SNP | C  | T  | 18 | 95  | c.754G>A                                         | c.(754-756)GAG>AAG   | p.E252K       |
| Pat_04 | Pre-Treatment | PHYHIP  | 9796   | 37 | 8 | 22084457  | 22084457  | Missense_Mutation | SNP | C  | T  | 13 | 73  | c.247G>A                                         | c.(247-249)GAG>AAG   | p.E83K        |
| Pat_04 | Pre-Treatment | PIWIL2  | 55124  | 37 | 8 | 22211798  | 22211798  | Missense_Mutation | SNP | T  | A  | 20 | 87  | c.2672T>A                                        | c.(2671-2673)CTT>CAT | p.L891H       |
| Pat_04 | Pre-Treatment | ADAM28  | 10863  | 37 | 8 | 24193049  | 24193049  | Missense_Mutation | SNP | G  | A  | 8  | 37  | c.1462G>A                                        | c.(1462-1464)GAT>AAT | p.D488N       |
| Pat_04 | Pre-Treatment | ADAM7   | 8756   | 37 | 8 | 24350704  | 24350704  | Missense_Mutation | SNP | G  | A  | 10 | 26  | c.1804G>A                                        | c.(1804-1806)GGC>AGC | p.G602S       |
| Pat_04 | Pre-Treatment | EBF2    | 64641  | 37 | 8 | 25708119  | 25708119  | Missense_Mutation | SNP | C  | T  | 13 | 91  | c.1687G>A                                        | c.(1687-1689)GGA>AGA | p.G563R       |
| Pat_04 | Pre-Treatment | EBF2    | 64641  | 37 | 8 | 25718744  | 25718744  | Splice_Site       | SNP | T  | C  | 11 | 61  | c.1165_splice                                    | c.e13-1              | p.D389_splice |
| Pat_04 | Pre-Treatment | TEX15   | 56154  | 37 | 8 | 30701904  | 30701904  | Missense_Mutation | SNP | C  | T  | 19 | 123 | c.4630G>A                                        | c.(4630-4632)GAA>AAA | p.E1544K      |
| Pat_04 | Pre-Treatment | ANK1    | 286    | 37 | 8 | 41550683  | 41550683  | Missense_Mutation | SNP | C  | T  | 23 | 88  | c.3569G>A                                        | c.(3568-3570)GGA>GAA | p.G1190E      |
| Pat_04 | Pre-Treatment | PXDNL   | 137902 | 37 | 8 | 52321545  | 52321545  | Missense_Mutation | SNP | G  | A  | 5  | 58  | c.2639C>T                                        | c.(2638-2640)TCA>TTA | p.S880L       |
| Pat_04 | Pre-Treatment | PXDNL   | 137902 | 37 | 8 | 52321663  | 52321663  | Missense_Mutation | SNP | G  | A  | 3  | 28  | c.2521C>T                                        | c.(2521-2523)CCT>TCT | p.P841S       |
| Pat_04 | Pre-Treatment | PCMTD1  | 115294 | 37 | 8 | 52733153  | 52733153  | Nonsense_Mutation | SNP | T  | A  | 5  | 184 | c.832A>T                                         | c.(832-834)AGA>TGA   | p.R278*       |
| Pat_04 | Pre-Treatment | RP1     | 6101   | 37 | 8 | 55539678  | 55539678  | Missense_Mutation | SNP | C  | T  | 6  | 20  | c.3236C>T                                        | c.(3235-3237)CCA>CTA | p.P1079L      |
| Pat_04 | Pre-Treatment | XKR4    | 114786 | 37 | 8 | 56015146  | 56015146  | Missense_Mutation | SNP | G  | A  | 4  | 11  | c.98G>A                                          | c.(97-99)GGA>GAA     | p.G33E        |
| Pat_04 | Pre-Treatment | CSPP1   | 79848  | 37 | 8 | 68007843  | 68007843  | Missense_Mutation | SNP | C  | T  | 10 | 34  | c.931C>T                                         | c.(931-933)CGT>TGT   | p.R311C       |
| Pat_04 | Pre-Treatment | C8orf34 | 116328 | 37 | 8 | 69358567  | 69358567  | Missense_Mutation | SNP | C  | T  | 3  | 25  | c.221C>T                                         | c.(220-222)TCC>TTC   | p.S74F        |
| Pat_04 | Pre-Treatment | C8orf34 | 116328 | 37 | 8 | 69434034  | 69434034  | Missense_Mutation | SNP | G  | A  | 3  | 42  | c.508G>A                                         | c.(508-510)GAA>AAA   | p.E170K       |
| Pat_04 | Pre-Treatment | KCNB2   | 9312   | 37 | 8 | 73849835  | 73849835  | Missense_Mutation | SNP | C  | T  | 31 | 232 | c.2245C>T                                        | c.(2245-2247)CCG>TCG | p.P749S       |
| Pat_04 | Pre-Treatment | ZFHX4   | 79776  | 37 | 8 | 77618289  | 77618289  | Nonsense_Mutation | SNP | C  | T  | 3  | 21  | c.1966C>T                                        | c.(1966-1968)CAG>TAG | p.Q656*       |
| Pat_04 | Pre-Treatment | TPD52   | 7163   | 37 | 8 | 80976726  | 80976726  | Missense_Mutation | SNP | C  | T  | 17 | 98  | c.242G>A                                         | c.(241-243)AGA>AAA   | p.R81K        |
| Pat_04 | Pre-Treatment | PMP2    | 5375   | 37 | 8 | 82357197  | 82357197  | Missense_Mutation | SNP | C  | T  | 4  | 31  | c.101G>A                                         | c.(100-102)GGA>GAA   | p.G34E        |
| Pat_04 | Pre-Treatment | RGS22   | 26166  | 37 | 8 | 101075717 | 101075717 | Missense_Mutation | SNP | C  | T  | 9  | 50  | c.1279G>A                                        | c.(1279-1281)GGA>AGA | p.G427R       |
| Pat_04 | Pre-Treatment | SNX31   | 169166 | 37 | 8 | 101629886 | 101629886 | Missense_Mutation | SNP | C  | T  | 10 | 70  | c.394G>A                                         | c.(394-396)GAA>AAA   | p.E132K       |
| Pat_04 | Pre-Treatment | CSMD3   | 114788 | 37 | 8 | 113301606 | 113301606 | Missense_Mutation | SNP | G  | C  | 17 | 152 | c.9136C>G                                        | c.(9136-9138)CCT>GCT | p.P3046A      |
| Pat_04 | Pre-Treatment | ZHX2    | 22882  | 37 | 8 | 123964603 | 123964603 | Missense_Mutation | SNP | C  | T  | 11 | 51  | c.853C>T                                         | c.(853-855)CCT>TCT   | p.P285S       |
| Pat_04 | Pre-Treatment | FAM83A  | 84985  | 37 | 8 | 124195392 | 124195392 | Missense_Mutation | SNP | C  | T  | 12 | 76  | c.296C>T                                         | c.(295-297)TCC>TTC   | p.S99F        |
| Pat_04 | Pre-Treatment | ADCY8   | 114    | 37 | 8 | 132051738 | 132051738 | Missense_Mutation | SNP | G  | A  | 5  | 30  | c.842C>T                                         | c.(841-843)ACC>ATC   | p.T281I       |
| Pat_04 | Pre-Treatment | COL22A1 | 169044 | 37 | 8 | 139845361 | 139845361 | Missense_Mutation | SNP | C  | T  | 10 | 59  | c.766G>A                                         | c.(766-768)GAA>AAA   | p.E256K       |
| Pat_04 | Pre-Treatment | ZNF16   | 7564   | 37 | 8 | 146157650 | 146157650 | Missense_Mutation | SNP | G  | A  | 15 | 135 | c.523C>T                                         | c.(523-525)CCT>TCT   | p.P175S       |
| Pat_04 | Pre-Treatment | KDM4C   | 23081  | 37 | 9 | 7174607   | 7174607   | Nonsense_Mutation | SNP | C  | T  | 20 | 102 | c.3049C>T                                        | c.(3049-3051)CAA>TAA | p.Q1017*      |
| Pat_04 | Pre-Treatment | FREM1   | 158326 | 37 | 9 | 14841507  | 14841507  | Missense_Mutation | SNP | C  | T  | 4  | 38  | c.1819G>A                                        | c.(1819-1821)GAA>AAA | p.E607K       |
| Pat_04 | Pre-Treatment | CDKN2A  | 1029   | 37 | 9 | 21971186  | 21971186  | Nonsense_Mutation | SNP | G  | A  | 3  | 18  | c.172C>T                                         | c.(172-174)CGA>TGA   | p.R58*        |
| Pat_04 | Pre-Treatment | ANXA2P2 | 304    | 37 | 9 | 33625005  | 33625005  | Missense_Mutation | SNP | G  | A  | 4  | 37  | c.734G>A                                         | c.(733-735)AGG>AAG   | p.R245K       |
| Pat_04 | Pre-Treatment | FAM75A6 | 389730 | 37 | 9 | 43627750  | 43627751  | Missense_Mutation | DNP | CC | TT | 37 | 238 | c.936_937GG>AA(934-939)ATGGAA>ATAAA#.312_313ME>I |                      |               |
| Pat_04 | Pre-Treatment | FOXDL5  | 653427 | 37 | 9 | 70177790  | 70177790  | Missense_Mutation | SNP | C  | T  | 6  | 73  | c.194G>A                                         | c.(193-195)GGC>GAC   | p.G65D        |

|        |               |          |        |    |   |           |           |                   |     |   |   |    |     |               |                      |               |
|--------|---------------|----------|--------|----|---|-----------|-----------|-------------------|-----|---|---|----|-----|---------------|----------------------|---------------|
| Pat_04 | Pre-Treatment | APBA1    | 320    | 37 | 9 | 72131466  | 72131466  | Missense_Mutation | SNP | C | T | 3  | 7   | c.661G>A      | c.(661-663)GAC>AAC   | p.D221N       |
| Pat_04 | Pre-Treatment | MAMDC2   | 256691 | 37 | 9 | 72785420  | 72785420  | Missense_Mutation | SNP | G | C | 11 | 64  | c.1524G>C     | c.(1522-1524)GAG>GAC | p.E508D       |
| Pat_04 | Pre-Treatment | TRPM3    | 80036  | 37 | 9 | 73233959  | 73233959  | Missense_Mutation | SNP | C | T | 6  | 41  | c.2146G>A     | c.(2146-2148)GAA>AAA | p.E716K       |
| Pat_04 | Pre-Treatment | TMC1     | 117531 | 37 | 9 | 75445446  | 75445446  | Splice_Site       | SNP | G | A | 5  | 35  | c.2208_splice | c.e22+1              | p.M736_splice |
| Pat_04 | Pre-Treatment | PCSK5    | 5125   | 37 | 9 | 78601135  | 78601135  | Missense_Mutation | SNP | C | T | 14 | 85  | c.385C>T      | c.(385-387)CCC>TCC   | p.P129S       |
| Pat_04 | Pre-Treatment | PCSK5    | 5125   | 37 | 9 | 78804019  | 78804019  | Missense_Mutation | SNP | C | T | 5  | 45  | c.2390C>T     | c.(2389-2391)GCT>GTT | p.A797V       |
| Pat_04 | Pre-Treatment | PRUNE2   | 158471 | 37 | 9 | 79322383  | 79322383  | Missense_Mutation | SNP | C | T | 3  | 34  | c.4807G>A     | c.(4807-4809)GAG>AAG | p.E1603K      |
| Pat_04 | Pre-Treatment | PRUNE2   | 158471 | 37 | 9 | 79326139  | 79326139  | Missense_Mutation | SNP | C | T | 3  | 23  | c.1051G>A     | c.(1051-1053)GAA>AAA | p.E351K       |
| Pat_04 | Pre-Treatment | GRIN3A   | 116443 | 37 | 9 | 104449125 | 104449125 | Missense_Mutation | SNP | G | A | 9  | 27  | c.1057C>T     | c.(1057-1059)CGT>TGT | p.R353C       |
| Pat_04 | Pre-Treatment | OR13F1   | 138805 | 37 | 9 | 107266743 | 107266743 | Missense_Mutation | SNP | C | T | 26 | 117 | c.200C>T      | c.(199-201)TCC>TTC   | p.S67F        |
| Pat_04 | Pre-Treatment | EPB41L4B | 54566  | 37 | 9 | 112020521 | 112020521 | Missense_Mutation | SNP | G | A | 9  | 30  | c.688C>T      | c.(688-690)CGG>TGG   | p.R230W       |
| Pat_04 | Pre-Treatment | MUSK     | 4593   | 37 | 9 | 113563038 | 113563038 | Missense_Mutation | SNP | G | A | 4  | 26  | c.2380G>A     | c.(2380-2382)GAG>AAG | p.E794K       |
| Pat_04 | Pre-Treatment | C9orf84  | 158401 | 37 | 9 | 114510461 | 114510461 | Missense_Mutation | SNP | C | T | 12 | 53  | c.689G>A      | c.(688-690)GGA>GAA   | p.G230E       |
| Pat_04 | Pre-Treatment | OR1N2    | 138882 | 37 | 9 | 125315890 | 125315890 | Missense_Mutation | SNP | C | T | 17 | 67  | c.442C>T      | c.(442-444)CAT>TAT   | p.H148Y       |
| Pat_04 | Pre-Treatment | CIZ1     | 25792  | 37 | 9 | 130938729 | 130938729 | Missense_Mutation | SNP | G | A | 13 | 57  | c.1844C>T     | c.(1843-1845)CCT>CTT | p.P615L       |
| Pat_04 | Pre-Treatment | GPR107   | 57720  | 37 | 9 | 132839594 | 132839594 | Missense_Mutation | SNP | A | G | 7  | 45  | c.323A>G      | c.(322-324)TAC>TGC   | p.Y108C       |
| Pat_04 | Pre-Treatment | ASS1     | 445    | 37 | 9 | 133355154 | 133355154 | Missense_Mutation | SNP | C | T | 21 | 69  | c.740C>T      | c.(739-741)TCC>TTC   | p.S247F       |
| Pat_04 | Pre-Treatment | NUP214   | 8021   | 37 | 9 | 134025772 | 134025772 | Missense_Mutation | SNP | C | T | 5  | 73  | c.2102C>T     | c.(2101-2103)CCT>CTT | p.P701L       |
| Pat_04 | Pre-Treatment | ADAMTS13 | 11093  | 37 | 9 | 136319646 | 136319646 | Missense_Mutation | SNP | G | A | 5  | 44  | c.3154G>A     | c.(3154-3156)GAG>AAG | p.E1052K      |
| Pat_04 | Pre-Treatment | COL5A1   | 1289   | 37 | 9 | 137622248 | 137622248 | Missense_Mutation | SNP | C | T | 6  | 40  | c.1091C>T     | c.(1090-1092)CCC>CTC | p.P364L       |
| Pat_04 | Pre-Treatment | COL5A1   | 1289   | 37 | 9 | 137702140 | 137702140 | Missense_Mutation | SNP | G | A | 5  | 53  | c.3514G>A     | c.(3514-3516)GAC>AAC | p.D1172N      |
| Pat_04 | Pre-Treatment | CAMSAP1  | 157922 | 37 | 9 | 138714655 | 138714655 | Missense_Mutation | SNP | C | T | 5  | 38  | c.1852G>A     | c.(1852-1854)GGG>AGG | p.G618R       |
| Pat_04 | Pre-Treatment | NOTCH1   | 4851   | 37 | 9 | 139410495 | 139410495 | Missense_Mutation | SNP | G | A | 17 | 96  | c.1607C>T     | c.(1606-1608)CCC>CTC | p.P536L       |
| Pat_04 | Pre-Treatment | EDF1     | 8721   | 37 | 9 | 139757778 | 139757778 | Missense_Mutation | SNP | G | A | 12 | 69  | c.253C>T      | c.(253-255)CGG>TGG   | p.R85W        |
| Pat_04 | Pre-Treatment | NDOR1    | 27158  | 37 | 9 | 140100762 | 140100762 | Splice_Site       | SNP | G | A | 5  | 189 | c.213_splice  | c.e2+1               | p.K71_splice  |
| Pat_04 | Pre-Treatment | MXRA5    | 25878  | 37 | X | 3248116   | 3248116   | Missense_Mutation | SNP | G | A | 3  | 10  | c.652C>T      | c.(652-654)CCG>TCG   | p.P218S       |
| Pat_04 | Pre-Treatment | FRMPD4   | 9758   | 37 | X | 12735733  | 12735733  | Missense_Mutation | SNP | G | A | 30 | 70  | c.2788G>A     | c.(2788-2790)GAA>AAA | p.E930K       |
| Pat_04 | Pre-Treatment | ZRSR2    | 8233   | 37 | X | 15838410  | 15838410  | Missense_Mutation | SNP | C | T | 25 | 93  | c.908C>T      | c.(907-909)CCC>CTC   | p.P303L       |
| Pat_04 | Pre-Treatment | BEND2    | 139105 | 37 | X | 18221675  | 18221675  | Missense_Mutation | SNP | C | T | 6  | 40  | c.853G>A      | c.(853-855)GAA>AAA   | p.E285K       |
| Pat_04 | Pre-Treatment | SH3BP1   | 30011  | 37 | X | 19764542  | 19764542  | Missense_Mutation | SNP | C | T | 11 | 29  | c.180G>A      | c.(178-180)ATG>ATA   | p.M60I        |
| Pat_04 | Pre-Treatment | CNKSR2   | 22866  | 37 | X | 21450761  | 21450761  | Missense_Mutation | SNP | C | A | 6  | 51  | c.260C>A      | c.(259-261)ACC>AAC   | p.T87N        |
| Pat_04 | Pre-Treatment | ZFX      | 7543   | 37 | X | 24229378  | 24229378  | Missense_Mutation | SNP | C | T | 31 | 57  | c.2303C>T     | c.(2302-2304)TCC>TTC | p.S768F       |
| Pat_04 | Pre-Treatment | PPP1R3F  | 89801  | 37 | X | 49142945  | 49142945  | Missense_Mutation | SNP | C | T | 6  | 14  | c.1793C>T     | c.(1792-1794)TCG>TTG | p.S598L       |
| Pat_04 | Pre-Treatment | MAGEE2   | 139599 | 37 | X | 75004584  | 75004584  | Missense_Mutation | SNP | C | T | 4  | 18  | c.303G>A      | c.(301-303)ATG>ATA   | p.M101I       |
| Pat_04 | Pre-Treatment | PCDH11X  | 27328  | 37 | X | 91090729  | 91090729  | Nonsense_Mutation | SNP | C | T | 40 | 63  | c.226C>T      | c.(226-228)CGA>TGA   | p.R76*        |
| Pat_04 | Pre-Treatment | BEX1     | 55859  | 37 | X | 102318005 | 102318005 | Missense_Mutation | SNP | C | T | 28 | 56  | c.198G>A      | c.(196-198)ATG>ATA   | p.M66I        |
| Pat_04 | Pre-Treatment | NRK      | 203447 | 37 | X | 105168911 | 105168911 | Missense_Mutation | SNP | G | A | 14 | 23  | c.3200G>A     | c.(3199-3201)CGA>CAA | p.R1067Q      |
| Pat_04 | Pre-Treatment | TRPC5    | 7224   | 37 | X | 111155953 | 111155953 | Missense_Mutation | SNP | C | T | 19 | 53  | c.466G>A      | c.(466-468)GAA>AAA   | p.E156K       |
| Pat_04 | Pre-Treatment | ZCCHC16  | 340595 | 37 | X | 111698539 | 111698539 | Missense_Mutation | SNP | G | A | 18 | 43  | c.583G>A      | c.(583-585)GAA>AAA   | p.E195K       |
| Pat_04 | Pre-Treatment | SASH3    | 54440  | 37 | X | 128922438 | 128922438 | Missense_Mutation | SNP | C | T | 7  | 14  | c.185C>T      | c.(184-186)CCA>CTA   | p.P62L        |
| Pat_04 | Pre-Treatment | IGSF1    | 3547   | 37 | X | 130415793 | 130415793 | Missense_Mutation | SNP | C | T | 9  | 15  | c.1372G>A     | c.(1372-1374)GAA>AAA | p.E458K       |
| Pat_04 | Pre-Treatment | SAGE1    | 55511  | 37 | X | 134988220 | 134988220 | Missense_Mutation | SNP | G | A | 13 | 29  | c.492G>A      | c.(490-492)ATG>ATA   | p.M164I       |
| Pat_04 | Pre-Treatment | GPR112   | 139378 | 37 | X | 135427792 | 135427792 | Missense_Mutation | SNP | G | A | 16 | 29  | c.1927G>A     | c.(1927-1929)GAT>AAT | p.D643N       |
| Pat_04 | Pre-Treatment | CDR1     | 1038   | 37 | X | 139865876 | 139865876 | Missense_Mutation | SNP | C | T | 14 | 36  | c.656G>A      | c.(655-657)GGA>GAA   | p.G219E       |
| Pat_04 | Pre-Treatment | GABRE    | 2564   | 37 | X | 151124290 | 151124290 | Missense_Mutation | SNP | C | T | 22 | 47  | c.827G>A      | c.(826-828)CGG>CAG   | p.R276Q       |
| Pat_04 | Pre-Treatment | MAGEA10  | 4109   | 37 | X | 151303876 | 151303876 | Missense_Mutation | SNP | C | T | 23 | 37  | c.217G>A      | c.(217-219)GAG>AAG   | p.E73K        |
| Pat_04 | Pre-Treatment | MAGEA6   | 4105   | 37 | X | 151870118 | 151870118 | Missense_Mutation | SNP | G | A | 28 | 69  | c.808G>A      | c.(808-810)GAG>AAG   | p.E270K       |

|        |                 |           |        |    |    |           |           |                   |     |    |    |    |     |                 |                      |          |
|--------|-----------------|-----------|--------|----|----|-----------|-----------|-------------------|-----|----|----|----|-----|-----------------|----------------------|----------|
| Pat_04 | Pre-Treatment   | USP9Y     | 8287   | 37 | Y  | 14872445  | 14872445  | Missense_Mutation | SNP | C  | T  | 8  | 10  | c.1798C>T       | c.(1798-1800)CGC>TGC | p.R600C  |
| Pat_04 | Post-Resistance | DNALI1    | 7802   | 37 | 1  | 38023207  | 38023207  | Missense_Mutation | SNP | C  | T  | 5  | 124 | c.151C>T        | c.(151-153)CGG>TGG   | p.R51W   |
| Pat_04 | Post-Resistance | SLAMF9    | 89886  | 37 | 1  | 159923915 | 159923915 | Missense_Mutation | SNP | G  | A  | 3  | 57  | c.13C>T         | c.(13-15)CCT>TCT     | p.P5S    |
| Pat_04 | Post-Resistance | SLAMF1    | 6504   | 37 | 1  | 160616672 | 160616672 | Missense_Mutation | SNP | T  | C  | 3  | 31  | c.64A>G         | c.(64-66)AGC>GCG     | p.S22G   |
| Pat_04 | Post-Resistance | CAMSAP1L1 | 23271  | 37 | 1  | 200816379 | 200816379 | Missense_Mutation | SNP | C  | T  | 4  | 94  | c.1184C>T       | c.(1183-1185)CCT>CTT | p.P395L  |
| Pat_04 | Post-Resistance | CENPF     | 1063   | 37 | 1  | 214819239 | 214819239 | Nonsense_Mutation | SNP | C  | G  | 4  | 78  | c.6326C>G       | c.(6325-6327)TCA>TGA | p.S2109* |
| Pat_04 | Post-Resistance | BICC1     | 80114  | 37 | 10 | 60566860  | 60566860  | Missense_Mutation | SNP | A  | C  | 6  | 130 | c.2318A>C       | c.(2317-2319)AAG>ACG | p.K773T  |
| Pat_04 | Post-Resistance | OR10A4    | 283297 | 37 | 11 | 6898467   | 6898467   | Missense_Mutation | SNP | G  | C  | 5  | 112 | c.589G>C        | c.(589-591)GAA>CAA   | p.E197Q  |
| Pat_04 | Post-Resistance | OR4D11    | 219986 | 37 | 11 | 59271557  | 59271557  | Missense_Mutation | SNP | G  | A  | 7  | 235 | c.509G>A        | c.(508-510)GGA>GAA   | p.G170E  |
| Pat_04 | Post-Resistance | CCDC15    | 80071  | 37 | 11 | 124857585 | 124857585 | Missense_Mutation | SNP | C  | A  | 4  | 118 | c.1463C>A       | c.(1462-1464)CCC>CAC | p.P488H  |
| Pat_04 | Post-Resistance | DCAF4     | 26094  | 37 | 14 | 73425449  | 73425449  | Missense_Mutation | SNP | C  | T  | 6  | 161 | c.1424C>T       | c.(1423-1425)TCC>TTC | p.S475F  |
| Pat_04 | Post-Resistance | TUBGCP4   | 27229  | 37 | 15 | 43668311  | 43668311  | Missense_Mutation | SNP | C  | T  | 7  | 215 | c.94C>T         | c.(94-96)CCT>TCT     | p.P32S   |
| Pat_04 | Post-Resistance | ACSM2B    | 348158 | 37 | 16 | 20570625  | 20570625  | Missense_Mutation | SNP | G  | A  | 3  | 51  | c.322C>T        | c.(322-324)CGT>TGT   | p.R108C  |
| Pat_04 | Post-Resistance | SENP3     | 26168  | 37 | 17 | 7473708   | 7473709   | Missense_Mutation | DNP | CC | TT | 4  | 100 | c.1376_1377CC>T | c.(1375-1377)CCC>CTT | p.P459L  |
| Pat_04 | Post-Resistance | HAP1      | 9001   | 37 | 17 | 39881183  | 39881183  | Missense_Mutation | SNP | C  | T  | 24 | 364 | c.1786G>A       | c.(1786-1788)GAA>AAA | p.E596K  |
| Pat_04 | Post-Resistance | MAPT      | 4137   | 37 | 17 | 44060753  | 44060753  | Missense_Mutation | SNP | G  | A  | 4  | 25  | c.583G>A        | c.(583-585)GAC>AAC   | p.D195N  |
| Pat_04 | Post-Resistance | ITGB3     | 3690   | 37 | 17 | 45369775  | 45369775  | Missense_Mutation | SNP | G  | A  | 4  | 114 | c.1531G>A       | c.(1531-1533)GAA>AAA | p.E511K  |
| Pat_04 | Post-Resistance | HOXB5     | 3215   | 37 | 17 | 46669678  | 46669678  | Missense_Mutation | SNP | C  | T  | 6  | 203 | c.703G>A        | c.(703-705)GAG>AAG   | p.E235K  |
| Pat_04 | Post-Resistance | MED13     | 9969   | 37 | 17 | 60088215  | 60088215  | Missense_Mutation | SNP | G  | A  | 4  | 89  | c.1663C>T       | c.(1663-1665)CCT>TCT | p.P555S  |
| Pat_04 | Post-Resistance | APOB      | 338    | 37 | 2  | 21232704  | 21232704  | Missense_Mutation | SNP | C  | T  | 3  | 59  | c.7036G>A       | c.(7036-7038)GAG>AAG | p.E2346K |
| Pat_04 | Post-Resistance | SLC4A5    | 57835  | 37 | 2  | 74452032  | 74452032  | Missense_Mutation | SNP | C  | T  | 3  | 39  | c.3229G>A       | c.(3229-3231)GAA>AAA | p.E1077K |
| Pat_04 | Post-Resistance | RBM44     | 375316 | 37 | 2  | 238725794 | 238725794 | Missense_Mutation | SNP | G  | A  | 8  | 81  | c.235G>A        | c.(235-237)GAG>AAG   | p.E79K   |
| Pat_04 | Post-Resistance | KCNK15    | 60598  | 37 | 20 | 43378866  | 43378866  | Missense_Mutation | SNP | G  | T  | 6  | 15  | c.380G>T        | c.(379-381)AGC>ATC   | p.S127I  |
| Pat_04 | Post-Resistance | ZSWIM3    | 140831 | 37 | 20 | 44506623  | 44506623  | Missense_Mutation | SNP | G  | A  | 3  | 57  | c.1426G>A       | c.(1426-1428)GCA>ACA | p.A476T  |
| Pat_04 | Post-Resistance | SLC13A3   | 64849  | 37 | 20 | 45188756  | 45188756  | Nonsense_Mutation | SNP | G  | A  | 9  | 275 | c.1714C>T       | c.(1714-1716)CAG>TAG | p.Q572*  |
| Pat_04 | Post-Resistance | SCN5A     | 6331   | 37 | 3  | 38645271  | 38645271  | Missense_Mutation | SNP | C  | T  | 4  | 67  | c.1822G>A       | c.(1822-1824)GAC>AAC | p.D608N  |
| Pat_04 | Post-Resistance | GOLGB1    | 2804   | 37 | 3  | 121413651 | 121413651 | Nonsense_Mutation | SNP | G  | A  | 5  | 172 | c.5704C>T       | c.(5704-5706)CAA>TAA | p.Q1902* |
| Pat_04 | Post-Resistance | EBF1      | 1879   | 37 | 5  | 158223448 | 158223448 | Missense_Mutation | SNP | C  | T  | 4  | 70  | c.814G>A        | c.(814-816)GGA>AGA   | p.G272R  |
| Pat_04 | Post-Resistance | HLA-DOA   | 3111   | 37 | 6  | 32975249  | 32975249  | Missense_Mutation | SNP | C  | T  | 9  | 245 | c.452G>A        | c.(451-453)GGC>GAC   | p.G151D  |
| Pat_04 | Post-Resistance | MEP1A     | 4224   | 37 | 6  | 46777273  | 46777273  | Missense_Mutation | SNP | G  | A  | 7  | 172 | c.379G>A        | c.(379-381)GGG>AGG   | p.G127R  |
| Pat_04 | Post-Resistance | PTPRK     | 5796   | 37 | 6  | 128306900 | 128306900 | Missense_Mutation | SNP | G  | A  | 4  | 85  | c.3214C>T       | c.(3214-3216)CCT>TCT | p.P1072S |
| Pat_04 | Post-Resistance | NPC1L1    | 29881  | 37 | 7  | 44579280  | 44579280  | Missense_Mutation | SNP | C  | T  | 4  | 106 | c.716G>A        | c.(715-717)GGG>GAG   | p.G239E  |
| Pat_04 | Post-Resistance | BAZ1B     | 9031   | 37 | 7  | 72865214  | 72865215  | Missense_Mutation | DNP | GG | AA | 6  | 139 | c.3542_3543CC>T | c.(3541-3543)TCC>TTT | p.S1181F |
| Pat_04 | Post-Resistance | STAG3     | 10734  | 37 | 7  | 99787166  | 99787166  | Missense_Mutation | SNP | C  | T  | 8  | 113 | c.814C>T        | c.(814-816)CCA>TCA   | p.P272S  |
| Pat_04 | Post-Resistance | TFEC      | 22797  | 37 | 7  | 115596807 | 115596807 | Missense_Mutation | SNP | C  | T  | 5  | 62  | c.308G>A        | c.(307-309)GGA>GAA   | p.G103E  |
| Pat_04 | Post-Resistance | TAS2R39   | 259285 | 37 | 7  | 142881106 | 142881106 | Missense_Mutation | SNP | A  | G  | 4  | 59  | c.595A>G        | c.(595-597)ACA>GCA   | p.T199A  |
| Pat_04 | Post-Resistance | ADAM7     | 8756   | 37 | 8  | 24350704  | 24350704  | Missense_Mutation | SNP | G  | A  | 3  | 36  | c.1804G>A       | c.(1804-1806)GGC>AGC | p.G602S  |
| Pat_04 | Post-Resistance | ANK1      | 286    | 37 | 8  | 41550683  | 41550683  | Missense_Mutation | SNP | C  | T  | 5  | 113 | c.3569G>A       | c.(3568-3570)GGA>GAA | p.G1190E |
| Pat_04 | Post-Resistance | ZRSR2     | 8233   | 37 | X  | 15838410  | 15838410  | Missense_Mutation | SNP | C  | T  | 4  | 103 | c.908C>T        | c.(907-909)CCC>CTC   | p.P303L  |
| Pat_04 | Post-Resistance | NRK       | 203447 | 37 | X  | 105168911 | 105168911 | Missense_Mutation | SNP | G  | A  | 4  | 48  | c.3200G>A       | c.(3199-3201)CGA>CAA | p.R1067Q |
| Pat_04 | Post-Resistance | MAGEA6    | 4105   | 37 | X  | 151870118 | 151870118 | Missense_Mutation | SNP | G  | A  | 5  | 102 | c.808G>A        | c.(808-810)GAG>AAG   | p.E270K  |
| Pat_07 | Post-Resistance | CDK11B    | 984    | 37 | 1  | 1572288   | 1572288   | Missense_Mutation | SNP | G  | A  | 3  | 58  | c.1771C>T       | c.(1771-1773)CGC>TGC | p.R591C  |
| Pat_07 | Post-Resistance | SPATA21   | 374955 | 37 | 1  | 16730232  | 16730232  | Missense_Mutation | SNP | C  | T  | 70 | 189 | c.991G>A        | c.(991-993)GAA>AAA   | p.E331K  |
| Pat_07 | Post-Resistance | C1orf172  | 126695 | 37 | 1  | 27278407  | 27278407  | Missense_Mutation | SNP | C  | T  | 19 | 40  | c.465G>A        | c.(463-465)ATG>ATA   | p.M155I  |
| Pat_07 | Post-Resistance | SLC1A7    | 6512   | 37 | 1  | 53556345  | 53556345  | Missense_Mutation | SNP | C  | T  | 3  | 49  | c.1165G>A       | c.(1165-1167)GCC>ACC | p.A389T  |
| Pat_07 | Post-Resistance | MTMR11    | 10903  | 37 | 1  | 149903250 | 149903250 | Nonsense_Mutation | SNP | G  | A  | 6  | 234 | c.1192C>T       | c.(1192-1194)CGA>TGA | p.R398*  |
| Pat_07 | Post-Resistance | TCHH      | 7062   | 37 | 1  | 152084627 | 152084627 | Missense_Mutation | SNP | C  | G  | 4  | 120 | c.1066G>C       | c.(1066-1068)GAG>CAG | p.E356Q  |

|        |                 |          |        |    |    |           |           |                   |     |   |   |     |     |           |                      |          |
|--------|-----------------|----------|--------|----|----|-----------|-----------|-------------------|-----|---|---|-----|-----|-----------|----------------------|----------|
| Pat_07 | Post-Resistance | RPTN     | 126638 | 37 | 1  | 152128617 | 152128617 | Missense_Mutation | SNP | T | C | 18  | 773 | c.958A>G  | c.(958-960)AGT>GGT   | p.S320G  |
| Pat_07 | Post-Resistance | DENND4B  | 9909   | 37 | 1  | 153907256 | 153907256 | Missense_Mutation | SNP | T | A | 3   | 43  | c.2753A>T | c.(2752-2754)GAG>GTG | p.E918V  |
| Pat_07 | Post-Resistance | C1orf156 | 92342  | 37 | 1  | 169761849 | 169761849 | Missense_Mutation | SNP | C | T | 4   | 118 | c.988G>A  | c.(988-990)GTA>ATA   | p.V330I  |
| Pat_07 | Post-Resistance | USH2A    | 7399   | 37 | 1  | 216498769 | 216498769 | Missense_Mutation | SNP | G | T | 48  | 263 | c.1021C>A | c.(1021-1023)CCT>ACT | p.P341T  |
| Pat_07 | Post-Resistance | OBSCN    | 84033  | 37 | 1  | 228473933 | 228473933 | Missense_Mutation | SNP | C | G | 3   | 55  | c.9159C>G | c.(9157-9159)ATC>ATG | p.I3053M |
| Pat_07 | Post-Resistance | CSTF2T   | 23283  | 37 | 10 | 53458337  | 53458337  | Missense_Mutation | SNP | G | A | 4   | 147 | c.973C>T  | c.(973-975)CCT>TCT   | p.P325S  |
| Pat_07 | Post-Resistance | PTEN     | 5728   | 37 | 10 | 89685305  | 89685305  | Missense_Mutation | SNP | T | G | 34  | 44  | c.200T>G  | c.(199-201)ATA>AGA   | p.I67R   |
| Pat_07 | Post-Resistance | LRP4     | 4038   | 37 | 11 | 46920467  | 46920467  | Missense_Mutation | SNP | C | T | 3   | 57  | c.664G>A  | c.(664-666)GAG>AAG   | p.E222K  |
| Pat_07 | Post-Resistance | OR511    | 10798  | 37 | 11 | 55703585  | 55703585  | Missense_Mutation | SNP | C | T | 21  | 42  | c.292G>A  | c.(292-294)GGG>AGG   | p.G98R   |
| Pat_07 | Post-Resistance | OR5M1    | 390168 | 37 | 11 | 56380362  | 56380362  | Missense_Mutation | SNP | T | G | 3   | 34  | c.617A>C  | c.(616-618)AAT>ACT   | p.N206T  |
| Pat_07 | Post-Resistance | VWCE     | 220001 | 37 | 11 | 61040737  | 61040737  | Nonsense_Mutation | SNP | G | A | 3   | 42  | c.1633C>T | c.(1633-1635)CGA>TGA | p.R545*  |
| Pat_07 | Post-Resistance | TRPC6    | 7225   | 37 | 11 | 101342884 | 101342884 | Missense_Mutation | SNP | G | A | 64  | 265 | c.2189C>T | c.(2188-2190)TCA>TTA | p.S730L  |
| Pat_07 | Post-Resistance | PIH1D2   | 120379 | 37 | 11 | 111942424 | 111942424 | Missense_Mutation | SNP | G | A | 4   | 156 | c.236C>T  | c.(235-237)CCC>CTC   | p.P79L   |
| Pat_07 | Post-Resistance | TROAP    | 10024  | 37 | 12 | 49724403  | 49724403  | Missense_Mutation | SNP | A | G | 5   | 71  | c.1775A>G | c.(1774-1776)TAC>TGC | p.Y592C  |
| Pat_07 | Post-Resistance | HOXC6    | 3223   | 37 | 12 | 54422448  | 54422448  | Missense_Mutation | SNP | G | A | 4   | 103 | c.143G>A  | c.(142-144)CGG>CAG   | p.R48Q   |
| Pat_07 | Post-Resistance | R3HDM2   | 22864  | 37 | 12 | 57660556  | 57660556  | Missense_Mutation | SNP | G | A | 13  | 50  | c.2047C>T | c.(2047-2049)CCC>TCC | p.P683S  |
| Pat_07 | Post-Resistance | ANO4     | 121601 | 37 | 12 | 101514302 | 101514302 | Missense_Mutation | SNP | C | T | 4   | 81  | c.2575C>T | c.(2575-2577)CGG>TGG | p.R859W  |
| Pat_07 | Post-Resistance | STAB2    | 55576  | 37 | 12 | 104031803 | 104031803 | Missense_Mutation | SNP | C | T | 110 | 227 | c.719C>T  | c.(718-720)CCA>CTA   | p.P240L  |
| Pat_07 | Post-Resistance | FICD     | 11153  | 37 | 12 | 108910963 | 108910963 | Missense_Mutation | SNP | G | A | 4   | 69  | c.214G>A  | c.(214-216)GCC>ACC   | p.A72T   |
| Pat_07 | Post-Resistance | GPC6     | 10082  | 37 | 13 | 94197599  | 94197599  | Missense_Mutation | SNP | G | A | 81  | 266 | c.244G>A  | c.(244-246)GAA>AAA   | p.E82K   |
| Pat_07 | Post-Resistance | OR6S1    | 341799 | 37 | 14 | 21109390  | 21109390  | Missense_Mutation | SNP | C | T | 4   | 80  | c.461G>A  | c.(460-462)GGA>GAA   | p.G154E  |
| Pat_07 | Post-Resistance | ABHD4    | 63874  | 37 | 14 | 23072420  | 23072420  | Missense_Mutation | SNP | G | T | 7   | 50  | c.238G>T  | c.(238-240)GGC>TGC   | p.G80C   |
| Pat_07 | Post-Resistance | SLC35F4  | 341880 | 37 | 14 | 58030954  | 58030954  | Missense_Mutation | SNP | C | T | 11  | 51  | c.1465G>A | c.(1465-1467)GAA>AAA | p.E489K  |
| Pat_07 | Post-Resistance | PACS2    | 23241  | 37 | 14 | 105849187 | 105849187 | Missense_Mutation | SNP | G | T | 4   | 63  | c.1550G>T | c.(1549-1551)TGC>TTC | p.C517F  |
| Pat_07 | Post-Resistance | MAN2A2   | 4122   | 37 | 15 | 91455366  | 91455366  | Missense_Mutation | SNP | C | T | 4   | 112 | c.2203C>T | c.(2203-2205)CGC>TGC | p.R735C  |
| Pat_07 | Post-Resistance | PARN     | 5073   | 37 | 16 | 14530588  | 14530588  | Missense_Mutation | SNP | G | A | 3   | 42  | c.1906C>T | c.(1906-1908)CCT>TCT | p.P636S  |
| Pat_07 | Post-Resistance | KCTD19   | 146212 | 37 | 16 | 67323581  | 67323581  | Missense_Mutation | SNP | G | A | 4   | 67  | c.2672C>T | c.(2671-2673)ACA>ATA | p.T891I  |
| Pat_07 | Post-Resistance | KCTD19   | 146212 | 37 | 16 | 67337074  | 67337074  | Nonsense_Mutation | SNP | G | T | 4   | 126 | c.618C>A  | c.(616-618)TGC>TGA   | p.C206*  |
| Pat_07 | Post-Resistance | HYDIN    | 54768  | 37 | 16 | 71007806  | 71007806  | Missense_Mutation | SNP | C | T | 29  | 240 | c.5152G>A | c.(5152-5154)GAA>AAA | p.E1718K |
| Pat_07 | Post-Resistance | USP10    | 9100   | 37 | 16 | 84812668  | 84812668  | Missense_Mutation | SNP | C | T | 7   | 150 | c.2377C>T | c.(2377-2379)CGC>TGC | p.R793C  |
| Pat_07 | Post-Resistance | ZCCHC14  | 23174  | 37 | 16 | 87445310  | 87445310  | Missense_Mutation | SNP | G | A | 3   | 52  | c.2606C>T | c.(2605-2607)ACG>ATG | p.T869M  |
| Pat_07 | Post-Resistance | TP53     | 7157   | 37 | 17 | 7579313   | 7579313   | Missense_Mutation | SNP | G | C | 58  | 69  | c.374C>G  | c.(373-375)ACG>AGG   | p.T125R  |
| Pat_07 | Post-Resistance | MYH13    | 8735   | 37 | 17 | 10216027  | 10216027  | Missense_Mutation | SNP | G | A | 4   | 15  | c.4229C>T | c.(4228-4230)ACG>ATG | p.T1410M |
| Pat_07 | Post-Resistance | MYH3     | 4621   | 37 | 17 | 10538859  | 10538859  | Missense_Mutation | SNP | C | G | 4   | 110 | c.3997G>C | c.(3997-3999)GCC>CCC | p.A1333P |
| Pat_07 | Post-Resistance | PSMB3    | 5691   | 37 | 17 | 36916709  | 36916709  | Missense_Mutation | SNP | G | C | 4   | 98  | c.322G>C  | c.(322-324)GTC>CTC   | p.V108L  |
| Pat_07 | Post-Resistance | CCR10    | 2826   | 37 | 17 | 40831789  | 40831789  | Missense_Mutation | SNP | C | T | 3   | 49  | c.871G>A  | c.(871-873)GCA>ACA   | p.A291T  |
| Pat_07 | Post-Resistance | FASN     | 2194   | 37 | 17 | 80045872  | 80045872  | Missense_Mutation | SNP | G | T | 13  | 21  | c.2824C>A | c.(2824-2826)CGT>AGT | p.R942S  |
| Pat_07 | Post-Resistance | MC5R     | 4161   | 37 | 18 | 13826482  | 13826482  | Missense_Mutation | SNP | G | A | 3   | 58  | c.718G>A  | c.(718-720)GTC>ATC   | p.V240I  |
| Pat_07 | Post-Resistance | CABYR    | 26256  | 37 | 18 | 21736742  | 21736742  | Missense_Mutation | SNP | T | C | 20  | 36  | c.1277T>C | c.(1276-1278)ATA>ACA | p.I426T  |
| Pat_07 | Post-Resistance | C19orf26 | 255057 | 37 | 19 | 1231136   | 1231136   | Missense_Mutation | SNP | C | T | 4   | 63  | c.1100G>A | c.(1099-1101)CGC>CAC | p.R367H  |
| Pat_07 | Post-Resistance | LRG1     | 116844 | 37 | 19 | 4538365   | 4538365   | Missense_Mutation | SNP | G | A | 106 | 150 | c.631C>T  | c.(631-633)CCG>TCG   | p.P211S  |
| Pat_07 | Post-Resistance | CD209    | 30835  | 37 | 19 | 7810767   | 7810767   | Missense_Mutation | SNP | G | A | 5   | 155 | c.385C>T  | c.(385-387)CGG>TGG   | p.R129W  |
| Pat_07 | Post-Resistance | BEST2    | 54831  | 37 | 19 | 12863491  | 12863491  | Missense_Mutation | SNP | T | A | 4   | 75  | c.85T>A   | c.(85-87)TAC>AAC     | p.Y29N   |
| Pat_07 | Post-Resistance | CCDC105  | 126402 | 37 | 19 | 15124565  | 15124565  | Missense_Mutation | SNP | G | A | 9   | 14  | c.652G>A  | c.(652-654)GAA>AAA   | p.E218K  |
| Pat_07 | Post-Resistance | ZNF708   | 7562   | 37 | 19 | 21476519  | 21476519  | Missense_Mutation | SNP | T | C | 4   | 143 | c.1249A>G | c.(1249-1251)AAG>GAG | p.K417E  |
| Pat_07 | Post-Resistance | MLL4     | 9757   | 37 | 19 | 36223350  | 36223350  | Missense_Mutation | SNP | C | G | 4   | 54  | c.5900C>G | c.(5899-5901)CCA>CGA | p.P1967R |
| Pat_07 | Post-Resistance | MLL4     | 9757   | 37 | 19 | 36223454  | 36223454  | Missense_Mutation | SNP | C | T | 6   | 42  | c.6004C>T | c.(6004-6006)CCC>TCC | p.P2002S |

|        |                 |           |        |    |    |           |           |                   |     |   |   |     |     |            |                        |           |
|--------|-----------------|-----------|--------|----|----|-----------|-----------|-------------------|-----|---|---|-----|-----|------------|------------------------|-----------|
| Pat_07 | Post-Resistance | MLL4      | 9757   | 37 | 19 | 36223614  | 36223614  | Missense_Mutation | SNP | C | T | 4   | 14  | c.6164C>T  | c.(6163-6165)GCC>GTC   | p.A2055V  |
| Pat_07 | Post-Resistance | RYR1      | 6261   | 37 | 19 | 39068576  | 39068576  | Missense_Mutation | SNP | G | A | 35  | 195 | c.14191G>A | c.(14191-14193)GAC>AAC | p.D4731N  |
| Pat_07 | Post-Resistance | RYR1      | 6261   | 37 | 19 | 39070688  | 39070688  | Missense_Mutation | SNP | G | A | 32  | 148 | c.14431G>A | c.(14431-14433)GCT>ACT | p.A4811T  |
| Pat_07 | Post-Resistance | DMPK      | 1760   | 37 | 19 | 46274654  | 46274654  | Missense_Mutation | SNP | G | A | 3   | 38  | c.1631C>T  | c.(1630-1632)GCT>GTT   | p.A544V   |
| Pat_07 | Post-Resistance | NUCB1     | 4924   | 37 | 19 | 49407692  | 49407692  | Missense_Mutation | SNP | C | T | 4   | 78  | c.224C>T   | c.(223-225)GCC>GTC     | p.A75V    |
| Pat_07 | Post-Resistance | PRR12     | 57479  | 37 | 19 | 50102575  | 50102575  | Missense_Mutation | SNP | C | T | 4   | 70  | c.3725C>T  | c.(3724-3726)TCG>TTG   | p.S1242L  |
| Pat_07 | Post-Resistance | GALP      | 85569  | 37 | 19 | 56688491  | 56688491  | Missense_Mutation | SNP | C | T | 10  | 41  | c.14C>T    | c.(13-15)TCC>TTC       | p.S5F     |
| Pat_07 | Post-Resistance | ZNF324B   | 388569 | 37 | 19 | 58966859  | 58966859  | Missense_Mutation | SNP | G | A | 3   | 65  | c.548G>A   | c.(547-549)CGG>CAG     | p.R183Q   |
| Pat_07 | Post-Resistance | ZNF512    | 84450  | 37 | 2  | 27844283  | 27844283  | Missense_Mutation | SNP | G | C | 3   | 68  | c.1659G>C  | c.(1657-1659)CAG>CAC   | p.Q553H   |
| Pat_07 | Post-Resistance | SLC8A1    | 6546   | 37 | 2  | 40656685  | 40656685  | Missense_Mutation | SNP | C | A | 4   | 76  | c.736G>T   | c.(736-738)GTT>TTT     | p.V246F   |
| Pat_07 | Post-Resistance | XPO1      | 7514   | 37 | 2  | 61725837  | 61725837  | Missense_Mutation | SNP | T | C | 5   | 181 | c.730A>G   | c.(730-732)ACC>GCC     | p.T244A   |
| Pat_07 | Post-Resistance | ACTR1B    | 10120  | 37 | 2  | 98274713  | 98274713  | Missense_Mutation | SNP | T | C | 18  | 70  | c.724A>G   | c.(724-726)ACG>GCG     | p.T242A   |
| Pat_07 | Post-Resistance | ARHGAP15  | 55843  | 37 | 2  | 144008140 | 144008140 | Missense_Mutation | SNP | G | A | 27  | 190 | c.445G>A   | c.(445-447)GAA>AAA     | p.E149K   |
| Pat_07 | Post-Resistance | TTN       | 7273   | 37 | 2  | 179418692 | 179418692 | Nonsense_Mutation | SNP | G | A | 9   | 39  | c.81442C>T | c.(81442-81444)CAG>TAG | p.Q27148* |
| Pat_07 | Post-Resistance | C20orf118 | 140711 | 37 | 20 | 35507585  | 35507585  | Nonsense_Mutation | SNP | C | T | 10  | 46  | c.331C>T   | c.(331-333)CAG>TAG     | p.Q111*   |
| Pat_07 | Post-Resistance | AURKA     | 6790   | 37 | 20 | 54963222  | 54963222  | Missense_Mutation | SNP | C | A | 49  | 114 | c.32G>T    | c.(31-33)GGA>GTA       | p.G11V    |
| Pat_07 | Post-Resistance | PIGP      | 51227  | 37 | 21 | 38444778  | 38444778  | Missense_Mutation | SNP | G | T | 129 | 284 | c.110C>A   | c.(109-111)GCG>GAG     | p.A37E    |
| Pat_07 | Post-Resistance | PLAC4     | 191585 | 37 | 21 | 42551255  | 42551255  | Missense_Mutation | SNP | G | A | 3   | 30  | c.301C>T   | c.(301-303)CCC>TCC     | p.P101S   |
| Pat_07 | Post-Resistance | SCN5A     | 6331   | 37 | 3  | 38591907  | 38591907  | Missense_Mutation | SNP | C | T | 37  | 79  | c.5956G>A  | c.(5956-5958)GAT>AAT   | p.D1986N  |
| Pat_07 | Post-Resistance | SCN5A     | 6331   | 37 | 3  | 38601660  | 38601660  | Missense_Mutation | SNP | C | T | 3   | 21  | c.4223G>A  | c.(4222-4224)GGG>GAG   | p.G1408E  |
| Pat_07 | Post-Resistance | GPX1      | 2876   | 37 | 3  | 49395482  | 49395482  | Missense_Mutation | SNP | G | C | 3   | 71  | c.230C>G   | c.(229-231)CCG>CGG     | p.P77R    |
| Pat_07 | Post-Resistance | ITIH4     | 3700   | 37 | 3  | 52853421  | 52853421  | Missense_Mutation | SNP | G | A | 4   | 65  | c.2065C>T  | c.(2065-2067)CGT>TGT   | p.R689C   |
| Pat_07 | Post-Resistance | CACNA2D3  | 55799  | 37 | 3  | 54905569  | 54905569  | Missense_Mutation | SNP | G | A | 19  | 55  | c.1630G>A  | c.(1630-1632)GAA>AAA   | p.E544K   |
| Pat_07 | Post-Resistance | WDR52     | 55779  | 37 | 3  | 113138974 | 113138974 | Missense_Mutation | SNP | C | T | 4   | 149 | c.460G>A   | c.(460-462)GAC>AAC     | p.D154N   |
| Pat_07 | Post-Resistance | PAQR3     | 152559 | 37 | 4  | 79845092  | 79845092  | Missense_Mutation | SNP | G | A | 4   | 104 | c.712C>T   | c.(712-714)CCC>TCC     | p.P238S   |
| Pat_07 | Post-Resistance | SKP2      | 6502   | 37 | 5  | 36182097  | 36182097  | Missense_Mutation | SNP | A | T | 22  | 98  | c.1239A>T  | c.(1237-1239)AAA>AAT   | p.K413N   |
| Pat_07 | Post-Resistance | SPZ1      | 84654  | 37 | 5  | 79616461  | 79616461  | Missense_Mutation | SNP | G | C | 6   | 226 | c.427G>C   | c.(427-429)GAG>CAG     | p.E143Q   |
| Pat_07 | Post-Resistance | ZFYVE16   | 9765   | 37 | 5  | 79744086  | 79744086  | Missense_Mutation | SNP | A | G | 64  | 136 | c.2966A>G  | c.(2965-2967)AAT>AGT   | p.N989S   |
| Pat_07 | Post-Resistance | GPR98     | 84059  | 37 | 5  | 89949385  | 89949385  | Missense_Mutation | SNP | G | A | 4   | 102 | c.3994G>A  | c.(3994-3996)GGA>AGA   | p.G1332R  |
| Pat_07 | Post-Resistance | UNC5A     | 90249  | 37 | 5  | 176304697 | 176304697 | Missense_Mutation | SNP | G | A | 3   | 17  | c.1628G>A  | c.(1627-1629)AGC>AAC   | p.S543N   |
| Pat_07 | Post-Resistance | HLA-J     | 3137   | 37 | 6  | 29977342  | 29977342  | Missense_Mutation | SNP | A | T | 6   | 168 | c.361A>T   | c.(361-363)AGG>TGG     | p.R121W   |
| Pat_07 | Post-Resistance | ITPR3     | 3710   | 37 | 6  | 33661448  | 33661448  | Missense_Mutation | SNP | C | T | 4   | 102 | c.7751C>T  | c.(7750-7752)ACG>ATG   | p.T2584M  |
| Pat_07 | Post-Resistance | CAPN11    | 11131  | 37 | 6  | 44145101  | 44145101  | Missense_Mutation | SNP | C | T | 4   | 117 | c.1360C>T  | c.(1360-1362)CGG>TGG   | p.R454W   |
| Pat_07 | Post-Resistance | KLHL31    | 401265 | 37 | 6  | 53519236  | 53519236  | Missense_Mutation | SNP | T | C | 125 | 390 | c.835A>G   | c.(835-837)ATG>GTG     | p.M279V   |
| Pat_07 | Post-Resistance | SNAP91    | 9892   | 37 | 6  | 84317520  | 84317520  | Missense_Mutation | SNP | G | A | 7   | 76  | c.920C>T   | c.(919-921)CCA>CTA     | p.P307L   |
| Pat_07 | Post-Resistance | INTS1     | 26173  | 37 | 7  | 1542573   | 1542573   | Missense_Mutation | SNP | G | A | 60  | 160 | c.313C>T   | c.(313-315)CCG>TCG     | p.P105S   |
| Pat_07 | Post-Resistance | BZW2      | 28969  | 37 | 7  | 16734531  | 16734531  | Missense_Mutation | SNP | C | T | 44  | 139 | c.724C>T   | c.(724-726)CTT>TTT     | p.L242F   |
| Pat_07 | Post-Resistance | DNAH11    | 8701   | 37 | 7  | 21727099  | 21727099  | Missense_Mutation | SNP | G | A | 3   | 67  | c.5899G>A  | c.(5899-5901)GTA>ATA   | p.V1967I  |
| Pat_07 | Post-Resistance | AEBP1     | 165    | 37 | 7  | 44148898  | 44148898  | Missense_Mutation | SNP | G | A | 3   | 44  | c.1108G>A  | c.(1108-1110)GGC>AGC   | p.G370S   |
| Pat_07 | Post-Resistance | DYNC111   | 1780   | 37 | 7  | 95709792  | 95709792  | Missense_Mutation | SNP | G | A | 70  | 255 | c.1819G>A  | c.(1819-1821)GTT>ATT   | p.V607I   |
| Pat_07 | Post-Resistance | CCDC136   | 64753  | 37 | 7  | 128457843 | 128457843 | Missense_Mutation | SNP | C | T | 86  | 235 | c.3395C>T  | c.(3394-3396)TCC>TTC   | p.S1132F  |
| Pat_07 | Post-Resistance | BRAF      | 673    | 37 | 7  | 140453136 | 140453136 | Missense_Mutation | SNP | A | T | 60  | 220 | c.1799T>A  | c.(1798-1800)GTG>GAG   | p.V600E   |
| Pat_07 | Post-Resistance | CNTNAP2   | 26047  | 37 | 7  | 146829338 | 146829338 | Missense_Mutation | SNP | G | A | 33  | 150 | c.1085G>A  | c.(1084-1086)GGA>GAA   | p.G362E   |
| Pat_07 | Post-Resistance | HTR5A     | 3361   | 37 | 7  | 154875949 | 154875949 | Missense_Mutation | SNP | C | T | 4   | 46  | c.826C>T   | c.(826-828)CGG>TGG     | p.R276W   |
| Pat_07 | Post-Resistance | ADAM2     | 2515   | 37 | 8  | 39624492  | 39624492  | Missense_Mutation | SNP | G | A | 61  | 306 | c.1382C>T  | c.(1381-1383)TCA>TTA   | p.S461L   |
| Pat_07 | Post-Resistance | VDAC3     | 7419   | 37 | 8  | 42262973  | 42262973  | Missense_Mutation | SNP | A | G | 42  | 102 | c.845A>G   | c.(844-846)GAA>GGA     | p.E282G   |
| Pat_07 | Post-Resistance | FLJ46321  | 389763 | 37 | 9  | 84609997  | 84609997  | Missense_Mutation | SNP | G | A | 3   | 41  | c.4612G>A  | c.(4612-4614)GTG>ATG   | p.V1538M  |



|        |                 |          |        |    |    |           |           |                   |     |   |   |    |     |            |                        |           |
|--------|-----------------|----------|--------|----|----|-----------|-----------|-------------------|-----|---|---|----|-----|------------|------------------------|-----------|
| Pat_07 | Post-Resistance | FAM22F   | 54754  | 37 | 9  | 97082748  | 97082748  | Missense_Mutation | SNP | G | C | 3  | 59  | c.1110C>G  | c.(1108-1110)AAC>AAG   | p.N370K   |
| Pat_07 | Post-Resistance | SVEP1    | 79987  | 37 | 9  | 113228255 | 113228255 | Missense_Mutation | SNP | G | A | 3  | 50  | c.3212C>T  | c.(3211-3213)TCG>TTG   | p.S1071L  |
| Pat_07 | Post-Resistance | TEX11    | 56159  | 37 | X  | 69811630  | 69811630  | Missense_Mutation | SNP | T | A | 26 | 103 | c.2156A>T  | c.(2155-2157)AAT>ATT   | p.N719I   |
| Pat_07 | Pre-Treatment   | SPATA21  | 374955 | 37 | 1  | 16730232  | 16730232  | Missense_Mutation | SNP | C | T | 18 | 50  | c.991G>A   | c.(991-993)GAA>AAA     | p.E331K   |
| Pat_07 | Pre-Treatment   | C1orf172 | 126695 | 37 | 1  | 27278407  | 27278407  | Missense_Mutation | SNP | C | T | 6  | 2   | c.465G>A   | c.(463-465)ATG>ATA     | p.M155I   |
| Pat_07 | Pre-Treatment   | CDC20    | 991    | 37 | 1  | 43826466  | 43826466  | Missense_Mutation | SNP | C | T | 3  | 28  | c.911C>T   | c.(910-912)ACA>ATA     | p.T304I   |
| Pat_07 | Pre-Treatment   | USH2A    | 7399   | 37 | 1  | 216498769 | 216498769 | Missense_Mutation | SNP | G | T | 12 | 39  | c.1021C>A  | c.(1021-1023)CCT>ACT   | p.P341T   |
| Pat_07 | Pre-Treatment   | PTEN     | 5728   | 37 | 10 | 89685305  | 89685305  | Missense_Mutation | SNP | T | G | 2  | 2   | c.200T>G   | c.(199-201)ATA>AGA     | p.I67R    |
| Pat_07 | Pre-Treatment   | TH       | 7054   | 37 | 11 | 2189789   | 2189789   | Missense_Mutation | SNP | T | C | 2  | 6   | c.512A>G   | c.(511-513)GAC>GGC     | p.D171G   |
| Pat_07 | Pre-Treatment   | OR511    | 10798  | 37 | 11 | 55703585  | 55703585  | Missense_Mutation | SNP | C | T | 6  | 3   | c.292G>A   | c.(292-294)GGG>AGG     | p.G98R    |
| Pat_07 | Pre-Treatment   | TRPC6    | 7225   | 37 | 11 | 101342884 | 101342884 | Missense_Mutation | SNP | G | A | 23 | 21  | c.2189C>T  | c.(2188-2190)TCA>TTA   | p.S730L   |
| Pat_07 | Pre-Treatment   | ESPL1    | 9700   | 37 | 12 | 53686437  | 53686437  | Missense_Mutation | SNP | T | A | 5  | 16  | c.5992T>A  | c.(5992-5994)TAT>AAT   | p.Y1998N  |
| Pat_07 | Pre-Treatment   | NUP37    | 79023  | 37 | 12 | 102470618 | 102470618 | Missense_Mutation | SNP | G | C | 2  | 4   | c.730C>G   | c.(730-732)CAA>GAA     | p.Q244E   |
| Pat_07 | Pre-Treatment   | STAB2    | 55576  | 37 | 12 | 104031803 | 104031803 | Missense_Mutation | SNP | C | T | 33 | 26  | c.719C>T   | c.(718-720)CCA>CTA     | p.P240L   |
| Pat_07 | Pre-Treatment   | GPC6     | 10082  | 37 | 13 | 94197599  | 94197599  | Missense_Mutation | SNP | G | A | 20 | 30  | c.244G>A   | c.(244-246)GAA>AAA     | p.E82K    |
| Pat_07 | Pre-Treatment   | AKAP6    | 9472   | 37 | 14 | 33014743  | 33014743  | Missense_Mutation | SNP | C | G | 3  | 26  | c.884C>G   | c.(883-885)TCT>TGT     | p.S295C   |
| Pat_07 | Pre-Treatment   | SLC35F4  | 341880 | 37 | 14 | 58030954  | 58030954  | Missense_Mutation | SNP | C | T | 4  | 7   | c.1465G>A  | c.(1465-1467)GAA>AAA   | p.E489K   |
| Pat_07 | Pre-Treatment   | NPIP     | 9284   | 37 | 16 | 15045731  | 15045731  | Missense_Mutation | SNP | C | T | 5  | 49  | c.902C>T   | c.(901-903)GCG>GTG     | p.A301V   |
| Pat_07 | Pre-Treatment   | ZNF768   | 79724  | 37 | 16 | 30536380  | 30536380  | Missense_Mutation | SNP | G | T | 3  | 22  | c.1081C>A  | c.(1081-1083)CTG>ATG   | p.L361M   |
| Pat_07 | Pre-Treatment   | HYDIN    | 54768  | 37 | 16 | 71007806  | 71007806  | Missense_Mutation | SNP | C | T | 11 | 56  | c.5152G>A  | c.(5152-5154)GAA>AAA   | p.E1718K  |
| Pat_07 | Pre-Treatment   | TP53     | 7157   | 37 | 17 | 7579313   | 7579313   | Missense_Mutation | SNP | G | C | 9  | 11  | c.374C>G   | c.(373-375)ACG>AGG     | p.T125R   |
| Pat_07 | Pre-Treatment   | PIK3R5   | 23533  | 37 | 17 | 8794225   | 8794225   | Missense_Mutation | SNP | C | A | 2  | 2   | c.487G>T   | c.(487-489)GTG>TTG     | p.V163L   |
| Pat_07 | Pre-Treatment   | KSR1     | 8844   | 37 | 17 | 25938606  | 25938606  | Missense_Mutation | SNP | A | G | 2  | 5   | c.2099A>G  | c.(2098-2100)GAA>GGA   | p.E700G   |
| Pat_07 | Pre-Treatment   | FASN     | 2194   | 37 | 17 | 80045872  | 80045872  | Missense_Mutation | SNP | G | T | 4  | 7   | c.2824C>A  | c.(2824-2826)CGT>AGT   | p.R942S   |
| Pat_07 | Pre-Treatment   | POTEC    | 388468 | 37 | 18 | 14542843  | 14542843  | Nonsense_Mutation | SNP | C | T | 5  | 87  | c.303G>A   | c.(301-303)TGG>TGA     | p.W101*   |
| Pat_07 | Pre-Treatment   | CABYR    | 26256  | 37 | 18 | 21736742  | 21736742  | Missense_Mutation | SNP | T | C | 9  | 0   | c.1277T>C  | c.(1276-1278)ATA>ACA   | p.I426T   |
| Pat_07 | Pre-Treatment   | MYO5B    | 4645   | 37 | 18 | 47364067  | 47364067  | Missense_Mutation | SNP | C | T | 3  | 36  | c.4958G>A  | c.(4957-4959)TGC>TAC   | p.C1653Y  |
| Pat_07 | Pre-Treatment   | LRG1     | 116844 | 37 | 19 | 4538365   | 4538365   | Missense_Mutation | SNP | G | A | 36 | 39  | c.631C>T   | c.(631-633)CCG>TCG     | p.P211S   |
| Pat_07 | Pre-Treatment   | PRAM1    | 84106  | 37 | 19 | 8555381   | 8555381   | Missense_Mutation | SNP | G | A | 2  | 3   | c.1919C>T  | c.(1918-1920)CCC>CTC   | p.P640L   |
| Pat_07 | Pre-Treatment   | CCDC105  | 126402 | 37 | 19 | 15124565  | 15124565  | Missense_Mutation | SNP | G | A | 4  | 2   | c.652G>A   | c.(652-654)GAA>AAA     | p.E218K   |
| Pat_07 | Pre-Treatment   | MLL4     | 9757   | 37 | 19 | 36223454  | 36223454  | Missense_Mutation | SNP | C | T | 5  | 10  | c.6004C>T  | c.(6004-6006)CCC>TCC   | p.P2002S  |
| Pat_07 | Pre-Treatment   | MLL4     | 9757   | 37 | 19 | 36223614  | 36223614  | Missense_Mutation | SNP | C | T | 2  | 1   | c.6164C>T  | c.(6163-6165)GCC>GTC   | p.A2055V  |
| Pat_07 | Pre-Treatment   | RYR1     | 6261   | 37 | 19 | 39068576  | 39068576  | Missense_Mutation | SNP | G | A | 13 | 28  | c.14191G>A | c.(14191-14193)GAC>AAC | p.D4731N  |
| Pat_07 | Pre-Treatment   | RYR1     | 6261   | 37 | 19 | 39070688  | 39070688  | Missense_Mutation | SNP | G | A | 9  | 26  | c.14431G>A | c.(14431-14433)GCT>ACT | p.A4811T  |
| Pat_07 | Pre-Treatment   | PSG8     | 440533 | 37 | 19 | 43258518  | 43258518  | Missense_Mutation | SNP | C | T | 5  | 82  | c.1210G>A  | c.(1210-1212)GAA>AAA   | p.E404K   |
| Pat_07 | Pre-Treatment   | ZNF880   | 400713 | 37 | 19 | 52877636  | 52877636  | Missense_Mutation | SNP | C | T | 3  | 8   | c.224C>T   | c.(223-225)GCA>GTA     | p.A75V    |
| Pat_07 | Pre-Treatment   | BRSK1    | 84446  | 37 | 19 | 55814773  | 55814773  | Missense_Mutation | SNP | G | A | 3  | 26  | c.1123G>A  | c.(1123-1125)GTT>ATT   | p.V375I   |
| Pat_07 | Pre-Treatment   | ZNF71    | 58491  | 37 | 19 | 57133922  | 57133922  | Missense_Mutation | SNP | G | T | 4  | 62  | c.1267G>T  | c.(1267-1269)GCC>TCC   | p.A423S   |
| Pat_07 | Pre-Treatment   | TLX2     | 3196   | 37 | 2  | 74743207  | 74743207  | Missense_Mutation | SNP | C | G | 3  | 13  | c.746C>G   | c.(745-747)CCG>CGG     | p.P249R   |
| Pat_07 | Pre-Treatment   | ACTR1B   | 10120  | 37 | 2  | 98274713  | 98274713  | Missense_Mutation | SNP | T | C | 4  | 22  | c.724A>G   | c.(724-726)ACG>GCG     | p.T242A   |
| Pat_07 | Pre-Treatment   | POTEF    | 728378 | 37 | 2  | 130877802 | 130877802 | Missense_Mutation | SNP | T | C | 5  | 112 | c.287A>G   | c.(286-288)AAC>AGC     | p.N96S    |
| Pat_07 | Pre-Treatment   | ARHGAP15 | 55843  | 37 | 2  | 144008140 | 144008140 | Missense_Mutation | SNP | G | A | 4  | 17  | c.445G>A   | c.(445-447)GAA>AAA     | p.E149K   |
| Pat_07 | Pre-Treatment   | SP3      | 6670   | 37 | 2  | 174820556 | 174820556 | Missense_Mutation | SNP | T | C | 17 | 54  | c.684A>G   | c.(682-684)ATA>ATG     | p.I228M   |
| Pat_07 | Pre-Treatment   | TTN      | 7273   | 37 | 2  | 179418692 | 179418692 | Nonsense_Mutation | SNP | G | A | 5  | 10  | c.81442C>T | c.(81442-81444)CAG>TAG | p.Q27148* |
| Pat_07 | Pre-Treatment   | AURKA    | 6790   | 37 | 20 | 54963222  | 54963222  | Missense_Mutation | SNP | C | A | 12 | 19  | c.32G>T    | c.(31-33)GGA>GTA       | p.G11V    |
| Pat_07 | Pre-Treatment   | PIGP     | 51227  | 37 | 21 | 38444778  | 38444778  | Missense_Mutation | SNP | G | T | 21 | 42  | c.110C>A   | c.(109-111)GCG>GAG     | p.A37E    |
| Pat_07 | Pre-Treatment   | SCN5A    | 6331   | 37 | 3  | 38591907  | 38591907  | Missense_Mutation | SNP | C | T | 7  | 19  | c.5956G>A  | c.(5956-5958)GAT>AAT   | p.D1986N  |

|        |               |          |        |    |   |           |           |                   |     |    |    |     |     |                 |                      |          |
|--------|---------------|----------|--------|----|---|-----------|-----------|-------------------|-----|----|----|-----|-----|-----------------|----------------------|----------|
| Pat_07 | Pre-Treatment | CACNA2D3 | 55799  | 37 | 3 | 54905569  | 54905569  | Missense_Mutation | SNP | G  | A  | 4   | 19  | c.1630G>A       | c.(1630-1632)GAA>AAA | p.E544K  |
| Pat_07 | Pre-Treatment | PPP2R3A  | 5523   | 37 | 3 | 135825106 | 135825106 | Missense_Mutation | SNP | G  | A  | 3   | 17  | c.3271G>A       | c.(3271-3273)GCT>ACT | p.A1091T |
| Pat_07 | Pre-Treatment | PHC3     | 80012  | 37 | 3 | 169866990 | 169866990 | Missense_Mutation | SNP | G  | A  | 2   | 5   | c.421C>T        | c.(421-423)CGT>TGT   | p.R141C  |
| Pat_07 | Pre-Treatment | CRMP1    | 1400   | 37 | 4 | 5830394   | 5830394   | Missense_Mutation | SNP | G  | A  | 2   | 5   | c.1283C>T       | c.(1282-1284)GCG>GTG | p.A428V  |
| Pat_07 | Pre-Treatment | SKP2     | 6502   | 37 | 5 | 36182097  | 36182097  | Missense_Mutation | SNP | A  | T  | 3   | 16  | c.1239A>T       | c.(1237-1239)AAA>AAT | p.K413N  |
| Pat_07 | Pre-Treatment | ZFYVE16  | 9765   | 37 | 5 | 79744086  | 79744086  | Missense_Mutation | SNP | A  | G  | 8   | 10  | c.2966A>G       | c.(2965-2967)AAT>AGT | p.N989S  |
| Pat_07 | Pre-Treatment | FBLL1    | 345630 | 37 | 5 | 167957226 | 167957226 | Missense_Mutation | SNP | C  | G  | 2   | 8   | c.432C>G        | c.(430-432)ATC>ATG   | p.I144M  |
| Pat_07 | Pre-Treatment | KLHL31   | 401265 | 37 | 6 | 53519236  | 53519236  | Missense_Mutation | SNP | T  | C  | 41  | 66  | c.835A>G        | c.(835-837)ATG>GTG   | p.M279V  |
| Pat_07 | Pre-Treatment | INTS1    | 26173  | 37 | 7 | 1542573   | 1542573   | Missense_Mutation | SNP | G  | A  | 21  | 42  | c.313C>T        | c.(313-315)CCG>TCG   | p.P105S  |
| Pat_07 | Pre-Treatment | BZW2     | 28969  | 37 | 7 | 16734531  | 16734531  | Missense_Mutation | SNP | C  | T  | 9   | 22  | c.724C>T        | c.(724-726)CTT>TTT   | p.L242F  |
| Pat_07 | Pre-Treatment | STK31    | 56164  | 37 | 7 | 23821044  | 23821044  | Missense_Mutation | SNP | G  | C  | 3   | 10  | c.1972G>C       | c.(1972-1974)GAT>CAT | p.D658H  |
| Pat_07 | Pre-Treatment | CCDC146  | 57639  | 37 | 7 | 76908259  | 76908259  | Missense_Mutation | SNP | G  | C  | 2   | 10  | c.1535G>C       | c.(1534-1536)AGA>ACA | p.R512T  |
| Pat_07 | Pre-Treatment | DYNC111  | 1780   | 37 | 7 | 95709792  | 95709792  | Missense_Mutation | SNP | G  | A  | 17  | 32  | c.1819G>A       | c.(1819-1821)GTT>ATT | p.V607I  |
| Pat_07 | Pre-Treatment | CCDC136  | 64753  | 37 | 7 | 128457843 | 128457843 | Missense_Mutation | SNP | C  | T  | 18  | 75  | c.3395C>T       | c.(3394-3396)TCC>TTC | p.S1132F |
| Pat_07 | Pre-Treatment | BRAF     | 673    | 37 | 7 | 140453136 | 140453136 | Missense_Mutation | SNP | A  | T  | 8   | 17  | c.1799T>A       | c.(1798-1800)GTG>GAG | p.V600E  |
| Pat_07 | Pre-Treatment | CNTNAP2  | 26047  | 37 | 7 | 146829338 | 146829338 | Missense_Mutation | SNP | G  | A  | 8   | 35  | c.1085G>A       | c.(1084-1086)GGA>GAA | p.G362E  |
| Pat_07 | Pre-Treatment | ADAM2    | 2515   | 37 | 8 | 39624492  | 39624492  | Missense_Mutation | SNP | G  | A  | 14  | 26  | c.1382C>T       | c.(1381-1383)TCA>TTA | p.S461L  |
| Pat_07 | Pre-Treatment | VDAC3    | 7419   | 37 | 8 | 42262973  | 42262973  | Missense_Mutation | SNP | A  | G  | 5   | 16  | c.845A>G        | c.(844-846)GAA>GGA   | p.E282G  |
| Pat_07 | Pre-Treatment | GSDMC    | 56169  | 37 | 8 | 130760981 | 130760981 | Missense_Mutation | SNP | C  | A  | 5   | 24  | c.1293G>T       | c.(1291-1293)AGG>AGT | p.R431S  |
| Pat_07 | Pre-Treatment | BAI1     | 575    | 37 | 8 | 143559674 | 143559674 | Missense_Mutation | SNP | A  | G  | 2   | 3   | c.1514A>G       | c.(1513-1515)CAG>CGG | p.Q505R  |
| Pat_07 | Pre-Treatment | RGS3     | 5998   | 37 | 9 | 116346689 | 116346689 | Missense_Mutation | SNP | C  | G  | 2   | 5   | c.2997C>G       | c.(2995-2997)TTC>TTG | p.F999L  |
| Pat_07 | Pre-Treatment | PRICKLE3 | 4007   | 37 | X | 49034778  | 49034778  | Missense_Mutation | SNP | C  | T  | 2   | 4   | c.611G>A        | c.(610-612)CGT>CAT   | p.R204H  |
| Pat_07 | Pre-Treatment | FOXP3    | 50943  | 37 | X | 49107805  | 49107805  | Missense_Mutation | SNP | G  | A  | 2   | 2   | c.1286C>T       | c.(1285-1287)CCT>CTT | p.P429L  |
| Pat_07 | Pre-Treatment | TEX11    | 56159  | 37 | X | 69811630  | 69811630  | Missense_Mutation | SNP | T  | A  | 9   | 16  | c.2156A>T       | c.(2155-2157)AAT>ATT | p.N719I  |
| Pat_14 | Pre-Treatment | CHD5     | 26038  | 37 | 1 | 6195368   | 6195368   | Missense_Mutation | SNP | C  | T  | 63  | 237 | c.2792G>A       | c.(2791-2793)CGG>CAG | p.R931Q  |
| Pat_14 | Pre-Treatment | CASZ1    | 54897  | 37 | 1 | 10720030  | 10720030  | Missense_Mutation | SNP | G  | A  | 79  | 184 | c.1069C>T       | c.(1069-1071)CCC>TCC | p.P357S  |
| Pat_14 | Pre-Treatment | FBLIM1   | 54751  | 37 | 1 | 16093915  | 16093915  | Missense_Mutation | SNP | C  | T  | 65  | 176 | c.295C>T        | c.(295-297)CCT>TCT   | p.P99S   |
| Pat_14 | Pre-Treatment | HSPB7    | 27129  | 37 | 1 | 16342172  | 16342172  | Missense_Mutation | SNP | G  | A  | 76  | 199 | c.416C>T        | c.(415-417)TCG>TTG   | p.S139L  |
| Pat_14 | Pre-Treatment | PLA2G2D  | 26279  | 37 | 1 | 20442962  | 20442962  | Missense_Mutation | SNP | G  | A  | 41  | 163 | c.49C>T         | c.(49-51)CCA>TCA     | p.P17S   |
| Pat_14 | Pre-Treatment | EIF4G3   | 8672   | 37 | 1 | 21306872  | 21306872  | Missense_Mutation | SNP | G  | A  | 15  | 70  | c.280C>T        | c.(280-282)CCT>TCT   | p.P94S   |
| Pat_14 | Pre-Treatment | ALPL     | 249    | 37 | 1 | 21887685  | 21887685  | Missense_Mutation | SNP | C  | T  | 20  | 90  | c.277C>T        | c.(277-279)CCC>TCC   | p.P93S   |
| Pat_14 | Pre-Treatment | HSPG2    | 3339   | 37 | 1 | 22170789  | 22170789  | Missense_Mutation | SNP | G  | A  | 60  | 222 | c.8468C>T       | c.(8467-8469)CCA>CTA | p.P2823L |
| Pat_14 | Pre-Treatment | GRHL3    | 57822  | 37 | 1 | 24663027  | 24663027  | Missense_Mutation | SNP | C  | A  | 5   | 421 | c.337C>A        | c.(337-339)CAC>AAC   | p.H113N  |
| Pat_14 | Pre-Treatment | CCDC21   | 64793  | 37 | 1 | 26595111  | 26595111  | Missense_Mutation | SNP | G  | C  | 3   | 152 | c.1479G>C       | c.(1477-1479)CAG>CAC | p.Q493H  |
| Pat_14 | Pre-Treatment | FAM76A   | 199870 | 37 | 1 | 28081811  | 28081811  | Missense_Mutation | SNP | G  | T  | 6   | 360 | c.705G>T        | c.(703-705)AAG>AAT   | p.K235N  |
| Pat_14 | Pre-Treatment | HIVEP3   | 59269  | 37 | 1 | 42047984  | 42047984  | Missense_Mutation | SNP | G  | A  | 93  | 363 | c.2485C>T       | c.(2485-2487)CCA>TCA | p.P829S  |
| Pat_14 | Pre-Treatment | HIVEP3   | 59269  | 37 | 1 | 42050203  | 42050203  | Missense_Mutation | SNP | G  | A  | 126 | 564 | c.266C>T        | c.(265-267)TCC>TTC   | p.S89F   |
| Pat_14 | Pre-Treatment | ERMAP    | 114625 | 37 | 1 | 43308877  | 43308877  | Nonsense_Mutation | SNP | C  | T  | 30  | 93  | c.1402C>T       | c.(1402-1404)CAG>TAG | p.Q468*  |
| Pat_14 | Pre-Treatment | TIE1     | 7075   | 37 | 1 | 43779472  | 43779472  | Missense_Mutation | SNP | C  | A  | 4   | 50  | c.2242C>A       | c.(2242-2244)CAA>AAA | p.Q748K  |
| Pat_14 | Pre-Treatment | PTPRF    | 5792   | 37 | 1 | 44072115  | 44072115  | Missense_Mutation | SNP | G  | A  | 122 | 354 | c.3688G>A       | c.(3688-3690)GAA>AAA | p.E1230K |
| Pat_14 | Pre-Treatment | ZCCHC11  | 23318  | 37 | 1 | 52896717  | 52896717  | Missense_Mutation | SNP | G  | A  | 76  | 329 | c.4676C>T       | c.(4675-4677)TCC>TTC | p.S1559F |
| Pat_14 | Pre-Treatment | ZCCHC11  | 23318  | 37 | 1 | 52962816  | 52962816  | Missense_Mutation | SNP | G  | A  | 25  | 127 | c.1039C>T       | c.(1039-1041)CCT>TCT | p.P347S  |
| Pat_14 | Pre-Treatment | CDCP2    | 200008 | 37 | 1 | 54606902  | 54606902  | Missense_Mutation | SNP | G  | A  | 35  | 128 | c.632C>T        | c.(631-633)CCC>CTC   | p.P211L  |
| Pat_14 | Pre-Treatment | DAB1     | 1600   | 37 | 1 | 57756681  | 57756681  | Nonsense_Mutation | SNP | G  | A  | 68  | 243 | c.22C>T         | c.(22-24)CAA>TAA     | p.Q8*    |
| Pat_14 | Pre-Treatment | FGGY     | 55277  | 37 | 1 | 60019876  | 60019876  | Nonsense_Mutation | SNP | G  | T  | 42  | 182 | c.880G>T        | c.(880-882)GGA>TGA   | p.G294*  |
| Pat_14 | Pre-Treatment | C1orf87  | 127795 | 37 | 1 | 60520908  | 60520908  | Missense_Mutation | SNP | C  | T  | 133 | 588 | c.310G>A        | c.(310-312)GGG>AGG   | p.G104R  |
| Pat_14 | Pre-Treatment | ANGPTL3  | 27329  | 37 | 1 | 63070330  | 63070331  | Nonsense_Mutation | DNP | GG | TA | 41  | 201 | .1225_1226GG>T, | c.(1225-1227)GGA>TAA | p.G409*  |

|        |               |          |        |    |    |           |           |                   |     |    |    |     |     |                |                        |               |
|--------|---------------|----------|--------|----|----|-----------|-----------|-------------------|-----|----|----|-----|-----|----------------|------------------------|---------------|
| Pat_14 | Pre-Treatment | C1orf173 | 127254 | 37 | 1  | 75065504  | 75065504  | Missense_Mutation | SNP | T  | G  | 106 | 238 | c.1601A>C      | c.(1600-1602)AAA>ACA   | p.K534T       |
| Pat_14 | Pre-Treatment | LPHN2    | 23266  | 37 | 1  | 82408790  | 82408790  | Missense_Mutation | SNP | C  | T  | 42  | 166 | c.535C>T       | c.(535-537)CGT>TGT     | p.R179C       |
| Pat_14 | Pre-Treatment | LPHN2    | 23266  | 37 | 1  | 82433875  | 82433875  | Missense_Mutation | SNP | G  | A  | 104 | 341 | c.2464G>A      | c.(2464-2466)GAA>AAA   | p.E822K       |
| Pat_14 | Pre-Treatment | LPHN2    | 23266  | 37 | 1  | 82437570  | 82437570  | Missense_Mutation | SNP | A  | T  | 27  | 111 | c.2938A>T      | c.(2938-2940)AGC>TGC   | p.S980C       |
| Pat_14 | Pre-Treatment | AKNAD1   | 254268 | 37 | 1  | 109377579 | 109377579 | Missense_Mutation | SNP | C  | T  | 52  | 143 | c.1636G>A      | c.(1636-1638)GAG>AAG   | p.E546K       |
| Pat_14 | Pre-Treatment | NOTCH2   | 4853   | 37 | 1  | 120506410 | 120506410 | Nonsense_Mutation | SNP | C  | A  | 6   | 278 | c.1702G>T      | c.(1702-1704)GAG>TAG   | p.E568*       |
| Pat_14 | Pre-Treatment | SV2A     | 9900   | 37 | 1  | 149883419 | 149883419 | Missense_Mutation | SNP | C  | T  | 23  | 137 | c.736G>A       | c.(736-738)GCC>ACC     | p.A246T       |
| Pat_14 | Pre-Treatment | OTUD7B   | 56957  | 37 | 1  | 149937753 | 149937753 | Missense_Mutation | SNP | G  | A  | 24  | 109 | c.553C>T       | c.(553-555)CCT>TCT     | p.P185S       |
| Pat_14 | Pre-Treatment | HRNR     | 388697 | 37 | 1  | 152191730 | 152191730 | Missense_Mutation | SNP | C  | T  | 34  | 162 | c.2375G>A      | c.(2374-2376)GGC>GAC   | p.G792D       |
| Pat_14 | Pre-Treatment | CRNN     | 49860  | 37 | 1  | 152382612 | 152382612 | Missense_Mutation | SNP | G  | T  | 9   | 816 | c.946C>A       | c.(946-948)CAG>AAG     | p.Q316K       |
| Pat_14 | Pre-Treatment | FCRL4    | 83417  | 37 | 1  | 157559111 | 157559111 | Missense_Mutation | SNP | C  | T  | 45  | 203 | c.190G>A       | c.(190-192)GGA>AGA     | p.G64R        |
| Pat_14 | Pre-Treatment | FCRL3    | 115352 | 37 | 1  | 157665275 | 157665275 | Missense_Mutation | SNP | G  | A  | 78  | 278 | c.1255C>T      | c.(1255-1257)CAT>TAT   | p.H419Y       |
| Pat_14 | Pre-Treatment | OR10T2   | 128360 | 37 | 1  | 158368890 | 158368890 | Missense_Mutation | SNP | G  | A  | 94  | 390 | c.367C>T       | c.(367-369)CGC>TGC     | p.R123C       |
| Pat_14 | Pre-Treatment | SPTA1    | 6708   | 37 | 1  | 158651382 | 158651382 | Missense_Mutation | SNP | G  | A  | 6   | 476 | c.466C>T       | c.(466-468)CGG>TGG     | p.R156W       |
| Pat_14 | Pre-Treatment | OR6K2    | 81448  | 37 | 1  | 158669671 | 158669671 | Missense_Mutation | SNP | G  | A  | 38  | 110 | c.772C>T       | c.(772-774)CTC>TTC     | p.L258F       |
| Pat_14 | Pre-Treatment | ARHGAP30 | 257106 | 37 | 1  | 161019028 | 161019028 | Missense_Mutation | SNP | C  | T  | 104 | 333 | c.1783G>A      | c.(1783-1785)GGC>AGC   | p.G595S       |
| Pat_14 | Pre-Treatment | ARHGAP30 | 257106 | 37 | 1  | 161022509 | 161022509 | Missense_Mutation | SNP | G  | T  | 5   | 185 | c.743C>A       | c.(742-744)CCA>CAA     | p.P248Q       |
| Pat_14 | Pre-Treatment | PVRL4    | 81607  | 37 | 1  | 161044155 | 161044155 | Missense_Mutation | SNP | C  | T  | 46  | 247 | c.1009G>A      | c.(1009-1011)GAA>AAA   | p.E337K       |
| Pat_14 | Pre-Treatment | DEDD     | 9191   | 37 | 1  | 161094217 | 161094217 | Missense_Mutation | SNP | C  | A  | 6   | 414 | c.36G>T        | c.(34-36)TGG>TGT       | p.W12C        |
| Pat_14 | Pre-Treatment | HSPA7    | 3311   | 37 | 1  | 161576424 | 161576424 | Missense_Mutation | SNP | C  | A  | 27  | 116 | c.344C>A       | c.(343-345)ACG>AAG     | p.T115K       |
| Pat_14 | Pre-Treatment | NUF2     | 83540  | 37 | 1  | 163297332 | 163297332 | Nonsense_Mutation | SNP | C  | T  | 87  | 296 | c.178C>T       | c.(178-180)CGA>TGA     | p.R60*        |
| Pat_14 | Pre-Treatment | ILDR2    | 387597 | 37 | 1  | 166927137 | 166927137 | Missense_Mutation | SNP | C  | T  | 108 | 364 | c.248G>A       | c.(247-249)AGA>AAA     | p.R83K        |
| Pat_14 | Pre-Treatment | SLC9A11  | 284525 | 37 | 1  | 173506179 | 173506179 | Splice_Site       | SNP | C  | T  | 68  | 260 | c.1558_splice  | c.e14-1                | p.S520_splice |
| Pat_14 | Pre-Treatment | SEC16B   | 89866  | 37 | 1  | 177913715 | 177913715 | Missense_Mutation | SNP | G  | A  | 139 | 441 | c.1862C>T      | c.(1861-1863)TCC>TTC   | p.S621F       |
| Pat_14 | Pre-Treatment | C1orf49  | 84066  | 37 | 1  | 178483877 | 178483877 | Missense_Mutation | SNP | A  | G  | 44  | 167 | c.133A>G       | c.(133-135)AAA>GAA     | p.K45E        |
| Pat_14 | Pre-Treatment | CRB1     | 23418  | 37 | 1  | 197390634 | 197390634 | Missense_Mutation | SNP | C  | T  | 139 | 492 | c.1676C>T      | c.(1675-1677)TCC>TTC   | p.S559F       |
| Pat_14 | Pre-Treatment | PKP1     | 5317   | 37 | 1  | 201286742 | 201286742 | Missense_Mutation | SNP | C  | T  | 35  | 160 | c.889C>T       | c.(889-891)CGC>TGC     | p.R297C       |
| Pat_14 | Pre-Treatment | CR2      | 1380   | 37 | 1  | 207648462 | 207648463 | Missense_Mutation | DNP | GT | TC | 22  | 537 | .2440_2441GT>T | c.(2440-2442)GTT>TCT   | p.V814S       |
| Pat_14 | Pre-Treatment | IRF6     | 3664   | 37 | 1  | 209961966 | 209961966 | Missense_Mutation | SNP | C  | T  | 40  | 99  | c.1203G>A      | c.(1201-1203)ATG>ATA   | p.M401I       |
| Pat_14 | Pre-Treatment | C1orf107 | 27042  | 37 | 1  | 210012390 | 210012390 | Missense_Mutation | SNP | C  | T  | 58  | 228 | c.1199C>T      | c.(1198-1200)CCC>CTC   | p.P400L       |
| Pat_14 | Pre-Treatment | KCNH1    | 3756   | 37 | 1  | 211256133 | 211256133 | Missense_Mutation | SNP | G  | T  | 7   | 504 | c.547C>A       | c.(547-549)CGC>AGC     | p.R183S       |
| Pat_14 | Pre-Treatment | USH2A    | 7399   | 37 | 1  | 216348660 | 216348660 | Missense_Mutation | SNP | G  | A  | 35  | 143 | c.4561C>T      | c.(4561-4563)CGT>TGT   | p.R1521C      |
| Pat_14 | Pre-Treatment | DEGS1    | 8560   | 37 | 1  | 224377361 | 224377361 | Missense_Mutation | SNP | G  | T  | 6   | 475 | c.165G>T       | c.(163-165)TTG>TTT     | p.L55F        |
| Pat_14 | Pre-Treatment | OBSCN    | 84033  | 37 | 1  | 228466922 | 228466922 | Missense_Mutation | SNP | G  | A  | 4   | 122 | c.7173G>A      | c.(7171-7173)ATG>ATA   | p.M2391I      |
| Pat_14 | Pre-Treatment | OBSCN    | 84033  | 37 | 1  | 228481282 | 228481282 | Missense_Mutation | SNP | G  | A  | 60  | 186 | c.11096G>A     | c.(11095-11097)GGG>GAC | p.G3699E      |
| Pat_14 | Pre-Treatment | SLC35F3  | 148641 | 37 | 1  | 234041310 | 234041310 | Missense_Mutation | SNP | G  | A  | 24  | 65  | c.89G>A        | c.(88-90)AGA>AAA       | p.R30K        |
| Pat_14 | Pre-Treatment | TBCE     | 6905   | 37 | 1  | 235594040 | 235594040 | Missense_Mutation | SNP | C  | T  | 32  | 104 | c.581C>T       | c.(580-582)CCC>CTC     | p.P194L       |
| Pat_14 | Pre-Treatment | MTR      | 4548   | 37 | 1  | 236979780 | 236979780 | Missense_Mutation | SNP | G  | T  | 7   | 646 | c.701G>T       | c.(700-702)CGG>CTG     | p.R234L       |
| Pat_14 | Pre-Treatment | RYR2     | 6262   | 37 | 1  | 237791305 | 237791305 | Missense_Mutation | SNP | C  | A  | 42  | 167 | c.6365C>A      | c.(6364-6366)TCC>TAC   | p.S2122Y      |
| Pat_14 | Pre-Treatment | GREM2    | 64388  | 37 | 1  | 240656286 | 240656286 | Missense_Mutation | SNP | C  | A  | 4   | 222 | c.490G>T       | c.(490-492)GAC>TAC     | p.D164Y       |
| Pat_14 | Pre-Treatment | SDCCAG8  | 10806  | 37 | 1  | 243456460 | 243456460 | Missense_Mutation | SNP | C  | T  | 89  | 337 | c.614C>T       | c.(613-615)CCA>CTA     | p.P205L       |
| Pat_14 | Pre-Treatment | KIF26B   | 55083  | 37 | 1  | 245847653 | 245847653 | Nonsense_Mutation | SNP | C  | T  | 27  | 86  | c.2377C>T      | c.(2377-2379)CAG>TAG   | p.Q793*       |
| Pat_14 | Pre-Treatment | OR2G2    | 81470  | 37 | 1  | 247751937 | 247751937 | Missense_Mutation | SNP | G  | A  | 64  | 233 | c.276G>A       | c.(274-276)ATG>ATA     | p.M92I        |
| Pat_14 | Pre-Treatment | OR2T4    | 127074 | 37 | 1  | 248524908 | 248524908 | Missense_Mutation | SNP | G  | A  | 6   | 222 | c.26G>A        | c.(25-27)AGC>AAC       | p.S9N         |
| Pat_14 | Pre-Treatment | OR2T4    | 127074 | 37 | 1  | 248524937 | 248524937 | Missense_Mutation | SNP | A  | T  | 7   | 204 | c.55A>T        | c.(55-57)ATG>TTG       | p.M19L        |
| Pat_14 | Pre-Treatment | PITRM1   | 10531  | 37 | 10 | 3197815   | 3197815   | Missense_Mutation | SNP | G  | A  | 74  | 331 | c.1493C>T      | c.(1492-1494)TCC>TTC   | p.S498F       |
| Pat_14 | Pre-Treatment | AKR1C3   | 8644   | 37 | 10 | 5147829   | 5147829   | Missense_Mutation | SNP | G  | A  | 13  | 81  | c.889G>A       | c.(889-891)GAT>AAT     | p.D297N       |

|        |               |          |        |    |    |           |           |                   |     |    |    |     |     |                 |                        |          |
|--------|---------------|----------|--------|----|----|-----------|-----------|-------------------|-----|----|----|-----|-----|-----------------|------------------------|----------|
| Pat_14 | Pre-Treatment | BEND7    | 222389 | 37 | 10 | 13481404  | 13481404  | Missense_Mutation | SNP | T  | C  | 3   | 245 | c.1175A>G       | c.(1174-1176)AAG>AGG   | p.K392R  |
| Pat_14 | Pre-Treatment | CDNF     | 441549 | 37 | 10 | 14867561  | 14867561  | Missense_Mutation | SNP | C  | A  | 6   | 597 | c.302G>T        | c.(301-303)CGC>CTC     | p.R101L  |
| Pat_14 | Pre-Treatment | PLXDC2   | 84898  | 37 | 10 | 20335828  | 20335828  | Nonsense_Mutation | SNP | C  | T  | 94  | 319 | c.355C>T        | c.(355-357)CGA>TGA     | p.R119*  |
| Pat_14 | Pre-Treatment | NEBL     | 10529  | 37 | 10 | 21074831  | 21074831  | Missense_Mutation | SNP | C  | T  | 48  | 258 | c.2890G>A       | c.(2890-2892)GAT>AAT   | p.D964N  |
| Pat_14 | Pre-Treatment | KIAA1217 | 56243  | 37 | 10 | 24762896  | 24762896  | Missense_Mutation | SNP | G  | A  | 28  | 96  | c.1586G>A       | c.(1585-1587)GGA>GAA   | p.G529E  |
| Pat_14 | Pre-Treatment | ARMC4    | 55130  | 37 | 10 | 28224135  | 28224135  | Missense_Mutation | SNP | C  | T  | 89  | 217 | c.2299G>A       | c.(2299-2301)GAT>AAT   | p.D767N  |
| Pat_14 | Pre-Treatment | ZEB1     | 6935   | 37 | 10 | 31810788  | 31810788  | Missense_Mutation | SNP | C  | A  | 5   | 249 | c.2525C>A       | c.(2524-2526)GCA>GAA   | p.A842E  |
| Pat_14 | Pre-Treatment | GDF10    | 2662   | 37 | 10 | 48438431  | 48438431  | Missense_Mutation | SNP | C  | T  | 8   | 63  | c.280G>A        | c.(280-282)GGA>AGA     | p.G94R   |
| Pat_14 | Pre-Treatment | A1CF     | 29974  | 37 | 10 | 52603788  | 52603788  | Missense_Mutation | SNP | C  | T  | 54  | 217 | c.194G>A        | c.(193-195)CGA>CAA     | p.R65Q   |
| Pat_14 | Pre-Treatment | PCDH15   | 65217  | 37 | 10 | 55698632  | 55698632  | Nonsense_Mutation | SNP | G  | A  | 66  | 328 | c.3316C>T       | c.(3316-3318)CGA>TGA   | p.R1106* |
| Pat_14 | Pre-Treatment | PCDH15   | 65217  | 37 | 10 | 55782797  | 55782797  | Missense_Mutation | SNP | C  | T  | 71  | 281 | c.2381G>A       | c.(2380-2382)GGA>GAA   | p.G794E  |
| Pat_14 | Pre-Treatment | ANK3     | 288    | 37 | 10 | 61822910  | 61822910  | Missense_Mutation | SNP | C  | G  | 12  | 114 | c.12554G>C      | c.(12553-12555)AGT>ACT | p.S4185T |
| Pat_14 | Pre-Treatment | ANK3     | 288    | 37 | 10 | 62149254  | 62149254  | Missense_Mutation | SNP | C  | T  | 19  | 176 | c.43G>A         | c.(43-45)GAA>AAA       | p.E15K   |
| Pat_14 | Pre-Treatment | ARID5B   | 84159  | 37 | 10 | 63851834  | 63851834  | Missense_Mutation | SNP | C  | T  | 92  | 243 | c.2612C>T       | c.(2611-2613)CCT>CTT   | p.P871L  |
| Pat_14 | Pre-Treatment | LRRTM3   | 347731 | 37 | 10 | 68687134  | 68687134  | Missense_Mutation | SNP | C  | T  | 77  | 459 | c.460C>T        | c.(460-462)CGG>TGG     | p.R154W  |
| Pat_14 | Pre-Treatment | MYPN     | 84665  | 37 | 10 | 69908165  | 69908165  | Missense_Mutation | SNP | C  | T  | 137 | 418 | c.1186C>T       | c.(1186-1188)CCA>TCA   | p.P396S  |
| Pat_14 | Pre-Treatment | NEUROG3  | 50674  | 37 | 10 | 71332702  | 71332702  | Missense_Mutation | SNP | G  | T  | 5   | 173 | c.98C>A         | c.(97-99)ACG>AAG       | p.T33K   |
| Pat_14 | Pre-Treatment | SLC29A3  | 55315  | 37 | 10 | 73121911  | 73121911  | Missense_Mutation | SNP | C  | T  | 61  | 620 | c.974C>T        | c.(973-975)GCC>GTC     | p.A325V  |
| Pat_14 | Pre-Treatment | NRG3     | 10718  | 37 | 10 | 84118593  | 84118593  | Missense_Mutation | SNP | G  | A  | 56  | 193 | c.922G>A        | c.(922-924)GAA>AAA     | p.E308K  |
| Pat_14 | Pre-Treatment | OPN4     | 94233  | 37 | 10 | 88421097  | 88421097  | Missense_Mutation | SNP | C  | T  | 59  | 320 | c.1025C>T       | c.(1024-1026)TCT>TTT   | p.S342F  |
| Pat_14 | Pre-Treatment | FAM35A   | 54537  | 37 | 10 | 88911122  | 88911122  | Missense_Mutation | SNP | G  | C  | 4   | 158 | c.11G>C         | c.(10-12)GGA>GCA       | p.G4A    |
| Pat_14 | Pre-Treatment | PDE6C    | 5146   | 37 | 10 | 95422350  | 95422351  | Missense_Mutation | DNP | CC | TT | 21  | 161 | .:2317_2318CC>T | c.(2317-2319)CCT>TTT   | p.P773F  |
| Pat_14 | Pre-Treatment | PDLIM1   | 9124   | 37 | 10 | 97023643  | 97023643  | Missense_Mutation | SNP | C  | T  | 74  | 211 | c.511G>A        | c.(511-513)GGG>AGG     | p.G171R  |
| Pat_14 | Pre-Treatment | CRTAC1   | 55118  | 37 | 10 | 99655022  | 99655022  | Missense_Mutation | SNP | G  | A  | 58  | 190 | c.1466C>T       | c.(1465-1467)CCC>CTC   | p.P489L  |
| Pat_14 | Pre-Treatment | SORCS3   | 22986  | 37 | 10 | 107022096 | 107022096 | Missense_Mutation | SNP | C  | T  | 49  | 280 | c.3451C>T       | c.(3451-3453)CCT>TCT   | p.P1151S |
| Pat_14 | Pre-Treatment | PNLIPRP2 | 5408   | 37 | 10 | 118386465 | 118386465 | Missense_Mutation | SNP | C  | T  | 18  | 84  | c.424C>T        | c.(424-426)CGG>TGG     | p.R142W  |
| Pat_14 | Pre-Treatment | C10orf46 | 143384 | 37 | 10 | 120450911 | 120450911 | Nonsense_Mutation | SNP | C  | T  | 57  | 320 | c.891G>A        | c.(889-891)TGG>TGA     | p.W297*  |
| Pat_14 | Pre-Treatment | INPP5F   | 22876  | 37 | 10 | 121563697 | 121563697 | Missense_Mutation | SNP | T  | A  | 71  | 206 | c.1129T>A       | c.(1129-1131)TTG>ATG   | p.L377M  |
| Pat_14 | Pre-Treatment | GPR123   | 84435  | 37 | 10 | 134910478 | 134910478 | Missense_Mutation | SNP | G  | A  | 38  | 185 | c.4G>A          | c.(4-6)GAT>AAT         | p.D2N    |
| Pat_14 | Pre-Treatment | TRPM5    | 29850  | 37 | 11 | 2434754   | 2434754   | Missense_Mutation | SNP | C  | T  | 33  | 104 | c.1955G>A       | c.(1954-1956)GGA>GAA   | p.G652E  |
| Pat_14 | Pre-Treatment | MARGPRE  | 116534 | 37 | 11 | 3249972   | 3249972   | Missense_Mutation | SNP | C  | G  | 3   | 188 | c.55G>C         | c.(55-57)GAT>CAT       | p.D19H   |
| Pat_14 | Pre-Treatment | UBQLNL   | 143630 | 37 | 11 | 5537092   | 5537092   | Missense_Mutation | SNP | A  | G  | 85  | 386 | c.580T>C        | c.(580-582)TTC>CTC     | p.F194L  |
| Pat_14 | Pre-Treatment | OR52H1   | 390067 | 37 | 11 | 5565843   | 5565843   | Missense_Mutation | SNP | G  | C  | 4   | 367 | c.911C>G        | c.(910-912)ACC>AGC     | p.T304S  |
| Pat_14 | Pre-Treatment | TRIM5    | 85363  | 37 | 11 | 5686554   | 5686554   | Missense_Mutation | SNP | G  | A  | 63  | 225 | c.967C>T        | c.(967-969)CCG>TCG     | p.P323S  |
| Pat_14 | Pre-Treatment | OR52L1   | 338751 | 37 | 11 | 6007290   | 6007290   | Missense_Mutation | SNP | G  | A  | 15  | 64  | c.871C>T        | c.(871-873)CAT>TAT     | p.H291Y  |
| Pat_14 | Pre-Treatment | DNHD1    | 144132 | 37 | 11 | 6532555   | 6532555   | Missense_Mutation | SNP | T  | A  | 55  | 225 | c.1288T>A       | c.(1288-1290)TGC>AGC   | p.C430S  |
| Pat_14 | Pre-Treatment | PIK3C2A  | 5286   | 37 | 11 | 17151004  | 17151004  | Missense_Mutation | SNP | G  | A  | 52  | 202 | c.2242C>T       | c.(2242-2244)CCT>TCT   | p.P748S  |
| Pat_14 | Pre-Treatment | MARGPRX1 | 259249 | 37 | 11 | 18956018  | 18956018  | Missense_Mutation | SNP | G  | A  | 82  | 308 | c.314C>T        | c.(313-315)TCC>TTC     | p.S105F  |
| Pat_14 | Pre-Treatment | ANO5     | 203859 | 37 | 11 | 22248977  | 22248977  | Missense_Mutation | SNP | C  | T  | 112 | 319 | c.493C>T        | c.(493-495)CCT>TCT     | p.P165S  |
| Pat_14 | Pre-Treatment | ANO5     | 203859 | 37 | 11 | 22291925  | 22291925  | Missense_Mutation | SNP | G  | A  | 97  | 263 | c.1966G>A       | c.(1966-1968)GAG>AAG   | p.E656K  |
| Pat_14 | Pre-Treatment | APIP     | 51074  | 37 | 11 | 34904298  | 34904298  | Missense_Mutation | SNP | G  | A  | 63  | 238 | c.695C>T        | c.(694-696)TCA>TTA     | p.S232L  |
| Pat_14 | Pre-Treatment | RAG2     | 5897   | 37 | 11 | 36615495  | 36615495  | Missense_Mutation | SNP | G  | A  | 70  | 294 | c.224C>T        | c.(223-225)CCA>CTA     | p.P75L   |
| Pat_14 | Pre-Treatment | F2       | 2147   | 37 | 11 | 46747649  | 46747649  | Missense_Mutation | SNP | G  | A  | 109 | 398 | c.800G>A        | c.(799-801)GGG>GAG     | p.G267E  |
| Pat_14 | Pre-Treatment | FOLH1    | 2346   | 37 | 11 | 49190795  | 49190795  | Missense_Mutation | SNP | G  | A  | 32  | 127 | c.1324C>T       | c.(1324-1326)CTT>TTT   | p.L442F  |
| Pat_14 | Pre-Treatment | OR4C12   | 283093 | 37 | 11 | 50003139  | 50003139  | Nonsense_Mutation | SNP | C  | T  | 21  | 129 | c.899G>A        | c.(898-900)TGG>TAG     | p.W300*  |
| Pat_14 | Pre-Treatment | OR4C16   | 219428 | 37 | 11 | 55339875  | 55339875  | Missense_Mutation | SNP | C  | T  | 117 | 594 | c.272C>T        | c.(271-273)TCC>TTC     | p.S91F   |
| Pat_14 | Pre-Treatment | OR5D14   | 219436 | 37 | 11 | 55563888  | 55563888  | Missense_Mutation | SNP | T  | A  | 45  | 201 | c.857T>A        | c.(856-858)ATG>AAG     | p.M286K  |

|        |               |          |        |    |    |           |           |                   |     |    |    |     |     |                |                      |               |
|--------|---------------|----------|--------|----|----|-----------|-----------|-------------------|-----|----|----|-----|-----|----------------|----------------------|---------------|
| Pat_14 | Pre-Treatment | OR8K5    | 219453 | 37 | 11 | 55927247  | 55927247  | Missense_Mutation | SNP | G  | A  | 49  | 248 | c.547C>T       | c.(547-549)CCT>TCT   | p.P183S       |
| Pat_14 | Pre-Treatment | OR5T1    | 390155 | 37 | 11 | 56043488  | 56043489  | Missense_Mutation | DNP | TT | AC | 138 | 547 | c.374_375TT>AC | c.(373-375)TTT>TAC   | p.F125Y       |
| Pat_14 | Pre-Treatment | HRASLS5  | 117245 | 37 | 11 | 63231049  | 63231049  | Missense_Mutation | SNP | C  | T  | 89  | 298 | c.766G>A       | c.(766-768)GAA>AAA   | p.E256K       |
| Pat_14 | Pre-Treatment | PRDX5    | 25824  | 37 | 11 | 64088247  | 64088247  | Missense_Mutation | SNP | C  | A  | 9   | 719 | c.421C>A       | c.(421-423)CAC>AAC   | p.H141N       |
| Pat_14 | Pre-Treatment | EHD1     | 10938  | 37 | 11 | 64622143  | 64622143  | Missense_Mutation | SNP | C  | A  | 75  | 232 | c.1267G>T      | c.(1267-1269)GGG>TGG | p.G423W       |
| Pat_14 | Pre-Treatment | BATF2    | 116071 | 37 | 11 | 64756651  | 64756651  | Missense_Mutation | SNP | G  | A  | 29  | 159 | c.775C>T       | c.(775-777)CAC>TAC   | p.H259Y       |
| Pat_14 | Pre-Treatment | SPDYC    | 387778 | 37 | 11 | 64939917  | 64939917  | Missense_Mutation | SNP | C  | A  | 7   | 676 | c.357C>A       | c.(355-357)AAC>AAA   | p.N119K       |
| Pat_14 | Pre-Treatment | PCNXL3   | 399909 | 37 | 11 | 65391983  | 65391983  | Missense_Mutation | SNP | C  | A  | 4   | 104 | c.2758C>A      | c.(2758-2760)CTG>ATG | p.L920M       |
| Pat_14 | Pre-Treatment | NPAS4    | 266743 | 37 | 11 | 66190234  | 66190234  | Missense_Mutation | SNP | C  | T  | 78  | 337 | c.520C>T       | c.(520-522)CAT>TAT   | p.H174Y       |
| Pat_14 | Pre-Treatment | ANKRD13D | 338692 | 37 | 11 | 67067357  | 67067357  | Missense_Mutation | SNP | G  | A  | 5   | 366 | c.679G>A       | c.(679-681)GGG>AGG   | p.G227R       |
| Pat_14 | Pre-Treatment | PITPNM1  | 9600   | 37 | 11 | 67267481  | 67267481  | Splice_Site       | SNP | C  | T  | 31  | 87  | c.968_splice   | c.e6-1               | p.G323_splice |
| Pat_14 | Pre-Treatment | THRSP    | 7069   | 37 | 11 | 77775144  | 77775144  | Missense_Mutation | SNP | G  | A  | 50  | 188 | c.217G>A       | c.(217-219)GGG>AGG   | p.G73R        |
| Pat_14 | Pre-Treatment | NARS2    | 79731  | 37 | 11 | 78270604  | 78270604  | Missense_Mutation | SNP | C  | T  | 110 | 357 | c.575G>A       | c.(574-576)GGA>GAA   | p.G192E       |
| Pat_14 | Pre-Treatment | ODZ4     | 26011  | 37 | 11 | 78423527  | 78423527  | Missense_Mutation | SNP | C  | T  | 29  | 236 | c.4054G>A      | c.(4054-4056)GGC>AGC | p.G1352S      |
| Pat_14 | Pre-Treatment | CCDC81   | 60494  | 37 | 11 | 86123469  | 86123469  | Missense_Mutation | SNP | T  | C  | 124 | 496 | c.1259T>C      | c.(1258-1260)CTT>CCT | p.L420P       |
| Pat_14 | Pre-Treatment | PGR      | 5241   | 37 | 11 | 100999605 | 100999605 | Missense_Mutation | SNP | C  | T  | 47  | 123 | c.197G>A       | c.(196-198)GGA>GAA   | p.G66E        |
| Pat_14 | Pre-Treatment | C11orf70 | 85016  | 37 | 11 | 101946634 | 101946634 | Missense_Mutation | SNP | G  | A  | 40  | 147 | c.466G>A       | c.(466-468)GAA>AAA   | p.E156K       |
| Pat_14 | Pre-Treatment | MMP10    | 4319   | 37 | 11 | 102647343 | 102647343 | Nonsense_Mutation | SNP | C  | A  | 6   | 422 | c.787G>T       | c.(787-789)GGA>TGA   | p.G263*       |
| Pat_14 | Pre-Treatment | MMP12    | 4321   | 37 | 11 | 102734918 | 102734918 | Missense_Mutation | SNP | C  | T  | 29  | 115 | c.1271G>A      | c.(1270-1272)GGA>GAA | p.G424E       |
| Pat_14 | Pre-Treatment | CASP4    | 837    | 37 | 11 | 104820317 | 104820317 | Missense_Mutation | SNP | C  | T  | 136 | 576 | c.734G>A       | c.(733-735)AGT>AAT   | p.S245N       |
| Pat_14 | Pre-Treatment | GUCY1A2  | 2977   | 37 | 11 | 106681104 | 106681104 | Missense_Mutation | SNP | C  | T  | 51  | 199 | c.1307G>A      | c.(1306-1308)CGA>CAA | p.R436Q       |
| Pat_14 | Pre-Treatment | LAYN     | 143903 | 37 | 11 | 111414717 | 111414717 | Missense_Mutation | SNP | G  | A  | 44  | 185 | c.179G>A       | c.(178-180)CGA>CAA   | p.R60Q        |
| Pat_14 | Pre-Treatment | NCAM1    | 4684   | 37 | 11 | 113104016 | 113104016 | Missense_Mutation | SNP | C  | T  | 30  | 77  | c.1394C>T      | c.(1393-1395)TCC>TTC | p.S465F       |
| Pat_14 | Pre-Treatment | NNMT     | 4837   | 37 | 11 | 114183057 | 114183057 | Missense_Mutation | SNP | G  | T  | 40  | 153 | c.653G>T       | c.(652-654)CGG>CTG   | p.R218L       |
| Pat_14 | Pre-Treatment | TMPRSS4  | 56649  | 37 | 11 | 117969708 | 117969708 | Missense_Mutation | SNP | C  | T  | 62  | 273 | c.52C>T        | c.(52-54)CCC>TCC     | p.P18S        |
| Pat_14 | Pre-Treatment | GRIK4    | 2900   | 37 | 11 | 120837994 | 120837994 | Missense_Mutation | SNP | G  | A  | 22  | 140 | c.2357G>A      | c.(2356-2358)GGA>GAA | p.G786E       |
| Pat_14 | Pre-Treatment | SORL1    | 6653   | 37 | 11 | 121492954 | 121492954 | Missense_Mutation | SNP | G  | A  | 24  | 101 | c.6148G>A      | c.(6148-6150)GAA>AAA | p.E2050K      |
| Pat_14 | Pre-Treatment | OR4D5    | 219875 | 37 | 11 | 123810920 | 123810920 | Missense_Mutation | SNP | G  | A  | 156 | 553 | c.597G>A       | c.(595-597)ATG>ATA   | p.M199I       |
| Pat_14 | Pre-Treatment | OR10S1   | 219873 | 37 | 11 | 123848328 | 123848328 | Missense_Mutation | SNP | T  | C  | 88  | 334 | c.71A>G        | c.(70-72)CAC>CGC     | p.H24R        |
| Pat_14 | Pre-Treatment | PANX3    | 116337 | 37 | 11 | 124482962 | 124482962 | Missense_Mutation | SNP | C  | T  | 41  | 232 | c.268C>T       | c.(268-270)CAC>TAC   | p.H90Y        |
| Pat_14 | Pre-Treatment | KCNJ1    | 3758   | 37 | 11 | 128709089 | 128709089 | Missense_Mutation | SNP | C  | T  | 33  | 150 | c.1107G>A      | c.(1105-1107)ATG>ATA | p.M369I       |
| Pat_14 | Pre-Treatment | SLC6A12  | 6539   | 37 | 12 | 319047    | 319047    | Missense_Mutation | SNP | G  | A  | 111 | 356 | c.106C>T       | c.(106-108)CGG>TGG   | p.R36W        |
| Pat_14 | Pre-Treatment | CACNA1C  | 775    | 37 | 12 | 2705123   | 2705123   | Missense_Mutation | SNP | C  | T  | 50  | 242 | c.2747C>T      | c.(2746-2748)TCC>TTC | p.S916F       |
| Pat_14 | Pre-Treatment | FGF6     | 2251   | 37 | 12 | 4554433   | 4554433   | Missense_Mutation | SNP | G  | A  | 14  | 64  | c.304C>T       | c.(304-306)CCC>TCC   | p.P102S       |
| Pat_14 | Pre-Treatment | GALNT8   | 26290  | 37 | 12 | 4881716   | 4881716   | Missense_Mutation | SNP | G  | A  | 73  | 255 | c.1867G>A      | c.(1867-1869)GAA>AAA | p.E623K       |
| Pat_14 | Pre-Treatment | VWF      | 7450   | 37 | 12 | 6155903   | 6155903   | Missense_Mutation | SNP | G  | A  | 60  | 273 | c.2267C>T      | c.(2266-2268)CCC>CTC | p.P756L       |
| Pat_14 | Pre-Treatment | C1S      | 716    | 37 | 12 | 7169837   | 7169837   | Missense_Mutation | SNP | G  | A  | 93  | 234 | c.64G>A        | c.(64-66)GAG>AAG     | p.E22K        |
| Pat_14 | Pre-Treatment | C1R      | 715    | 37 | 12 | 7188116   | 7188116   | Missense_Mutation | SNP | G  | A  | 23  | 72  | c.1838C>T      | c.(1837-1839)CCC>CTC | p.P613L       |
| Pat_14 | Pre-Treatment | CLEC6A   | 93978  | 37 | 12 | 8608733   | 8608733   | Missense_Mutation | SNP | G  | A  | 51  | 205 | c.26G>A        | c.(25-27)AGT>AAT     | p.S9N         |
| Pat_14 | Pre-Treatment | KLRD1    | 3824   | 37 | 12 | 10460576  | 10460576  | Splice_Site       | SNP | G  | A  | 5   | 34  | c.-99_splice   | c.e2-1               |               |
| Pat_14 | Pre-Treatment | TAS2R7   | 50837  | 37 | 12 | 10954929  | 10954929  | Missense_Mutation | SNP | C  | T  | 61  | 190 | c.241G>A       | c.(241-243)GAA>AAA   | p.E81K        |
| Pat_14 | Pre-Treatment | PRB3     | 5544   | 37 | 12 | 11420521  | 11420521  | Missense_Mutation | SNP | C  | T  | 6   | 314 | c.662G>A       | c.(661-663)CGT>CAT   | p.R221H       |
| Pat_14 | Pre-Treatment | PRB2     | 653247 | 37 | 12 | 11545928  | 11545928  | Missense_Mutation | SNP | G  | A  | 128 | 564 | c.1084C>T      | c.(1084-1086)CCT>TCT | p.P362S       |
| Pat_14 | Pre-Treatment | PLBD1    | 79887  | 37 | 12 | 14659191  | 14659191  | Missense_Mutation | SNP | C  | T  | 37  | 133 | c.1384G>A      | c.(1384-1386)GAT>AAT | p.D462N       |
| Pat_14 | Pre-Treatment | RERGL    | 79785  | 37 | 12 | 18241861  | 18241861  | Missense_Mutation | SNP | A  | T  | 88  | 348 | c.85T>A        | c.(85-87)TTC>ATC     | p.F29I        |
| Pat_14 | Pre-Treatment | RERGL    | 79785  | 37 | 12 | 18241863  | 18241863  | Missense_Mutation | SNP | C  | T  | 88  | 348 | c.83G>A        | c.(82-84)CGA>CAA     | p.R28Q        |
| Pat_14 | Pre-Treatment | PIK3C2G  | 5288   | 37 | 12 | 18716344  | 18716344  | Missense_Mutation | SNP | G  | A  | 18  | 71  | c.3691G>A      | c.(3691-3693)GAA>AAA | p.E1231K      |



|        |               |          |        |    |    |           |           |                   |     |   |   |     |     |           |                      |          |
|--------|---------------|----------|--------|----|----|-----------|-----------|-------------------|-----|---|---|-----|-----|-----------|----------------------|----------|
| Pat_14 | Pre-Treatment | PIK3C2G  | 5288   | 37 | 12 | 18747486  | 18747486  | Missense_Mutation | SNP | C | T | 39  | 205 | c.3947C>T | c.(3946-3948)TCA>TTA | p.S1316L |
| Pat_14 | Pre-Treatment | PPFIBP1  | 8496   | 37 | 12 | 27844758  | 27844758  | Missense_Mutation | SNP | C | A | 6   | 429 | c.2780C>A | c.(2779-2781)CCA>CAA | p.P927Q  |
| Pat_14 | Pre-Treatment | CNTN1    | 1272   | 37 | 12 | 41337941  | 41337941  | Missense_Mutation | SNP | A | T | 28  | 159 | c.1652A>T | c.(1651-1653)AAA>ATA | p.K551I  |
| Pat_14 | Pre-Treatment | ADAMTS20 | 80070  | 37 | 12 | 43822473  | 43822473  | Missense_Mutation | SNP | G | T | 16  | 56  | c.3619C>A | c.(3619-3621)CCT>ACT | p.P1207T |
| Pat_14 | Pre-Treatment | SLC38A1  | 81539  | 37 | 12 | 46598337  | 46598337  | Missense_Mutation | SNP | C | A | 5   | 428 | c.683G>T  | c.(682-684)TGT>TTT   | p.C228F  |
| Pat_14 | Pre-Treatment | FAM113B  | 91523  | 37 | 12 | 47629943  | 47629943  | Missense_Mutation | SNP | G | A | 116 | 432 | c.1097G>A | c.(1096-1098)GGT>GAT | p.G366D  |
| Pat_14 | Pre-Treatment | COL2A1   | 1280   | 37 | 12 | 48376302  | 48376302  | Missense_Mutation | SNP | C | T | 38  | 100 | c.2284G>A | c.(2284-2286)GGG>AGG | p.G762R  |
| Pat_14 | Pre-Treatment | MLL2     | 8085   | 37 | 12 | 49445925  | 49445925  | Missense_Mutation | SNP | G | A | 16  | 83  | c.1541C>T | c.(1540-1542)CCA>CTA | p.P514L  |
| Pat_14 | Pre-Treatment | SLC11A2  | 4891   | 37 | 12 | 51388361  | 51388361  | Missense_Mutation | SNP | T | A | 81  | 340 | c.1043A>T | c.(1042-1044)GAT>GTT | p.D348V  |
| Pat_14 | Pre-Treatment | KRT72    | 140807 | 37 | 12 | 52985397  | 52985397  | Nonsense_Mutation | SNP | G | A | 71  | 333 | c.814C>T  | c.(814-816)CAG>TAG   | p.Q272*  |
| Pat_14 | Pre-Treatment | KRT8     | 3856   | 37 | 12 | 53298675  | 53298675  | Missense_Mutation | SNP | A | C | 4   | 75  | c.91T>G   | c.(91-93)TCC>GCC     | p.S31A   |
| Pat_14 | Pre-Treatment | EIF4B    | 1975   | 37 | 12 | 53421607  | 53421607  | Missense_Mutation | SNP | T | C | 3   | 331 | c.709T>C  | c.(709-711)TAT>CAT   | p.Y237H  |
| Pat_14 | Pre-Treatment | HOXC9    | 3225   | 37 | 12 | 54396315  | 54396315  | Missense_Mutation | SNP | A | G | 52  | 186 | c.640A>G  | c.(640-642)AAT>GAT   | p.N214D  |
| Pat_14 | Pre-Treatment | DGKA     | 1606   | 37 | 12 | 56333012  | 56333012  | Missense_Mutation | SNP | G | T | 6   | 368 | c.517G>T  | c.(517-519)GGC>TGC   | p.G173C  |
| Pat_14 | Pre-Treatment | ANKRD52  | 283373 | 37 | 12 | 56647157  | 56647157  | Missense_Mutation | SNP | C | A | 102 | 428 | c.1015G>T | c.(1015-1017)GGG>TGG | p.G339W  |
| Pat_14 | Pre-Treatment | MYO1A    | 4640   | 37 | 12 | 57430162  | 57430162  | Nonsense_Mutation | SNP | G | A | 13  | 436 | c.2278C>T | c.(2278-2280)CGA>TGA | p.R760*  |
| Pat_14 | Pre-Treatment | MYO1A    | 4640   | 37 | 12 | 57437652  | 57437652  | Missense_Mutation | SNP | G | A | 49  | 145 | c.880C>T  | c.(880-882)CGT>TGT   | p.R294C  |
| Pat_14 | Pre-Treatment | SLC26A10 | 65012  | 37 | 12 | 58016715  | 58016715  | Missense_Mutation | SNP | C | A | 5   | 175 | c.937C>A  | c.(937-939)CAG>AAG   | p.Q313K  |
| Pat_14 | Pre-Treatment | BEST3    | 144453 | 37 | 12 | 70049336  | 70049336  | Missense_Mutation | SNP | G | A | 34  | 140 | c.1358C>T | c.(1357-1359)TCC>TTC | p.S453F  |
| Pat_14 | Pre-Treatment | TRHDE    | 29953  | 37 | 12 | 72680600  | 72680600  | Missense_Mutation | SNP | G | A | 125 | 397 | c.919G>A  | c.(919-921)GAA>AAA   | p.E307K  |
| Pat_14 | Pre-Treatment | C12orf50 | 160419 | 37 | 12 | 88420303  | 88420303  | Missense_Mutation | SNP | G | A | 49  | 142 | c.95C>T   | c.(94-96)CCT>CTT     | p.P32L   |
| Pat_14 | Pre-Treatment | DUSP6    | 1848   | 37 | 12 | 89743104  | 89743104  | Missense_Mutation | SNP | G | A | 94  | 318 | c.1073C>T | c.(1072-1074)CCA>CTA | p.P358L  |
| Pat_14 | Pre-Treatment | DCN      | 1634   | 37 | 12 | 91550900  | 91550900  | Missense_Mutation | SNP | G | A | 90  | 351 | c.604C>T  | c.(604-606)CTC>TTC   | p.L202F  |
| Pat_14 | Pre-Treatment | EEA1     | 8411   | 37 | 12 | 93245024  | 93245024  | Missense_Mutation | SNP | C | G | 3   | 155 | c.661G>C  | c.(661-663)GAA>CAA   | p.E221Q  |
| Pat_14 | Pre-Treatment | NTN4     | 59277  | 37 | 12 | 96181219  | 96181219  | Missense_Mutation | SNP | G | A | 51  | 221 | c.83C>T   | c.(82-84)TCC>TTC     | p.S28F   |
| Pat_14 | Pre-Treatment | ANKS1B   | 56899  | 37 | 12 | 99640084  | 99640084  | Missense_Mutation | SNP | C | T | 14  | 63  | c.2315G>A | c.(2314-2316)AGA>AAA | p.R772K  |
| Pat_14 | Pre-Treatment | SLC17A8  | 246213 | 37 | 12 | 100751255 | 100751255 | Missense_Mutation | SNP | T | C | 49  | 155 | c.86T>C   | c.(85-87)TTG>TCG     | p.L29S   |
| Pat_14 | Pre-Treatment | GNPTAB   | 79158  | 37 | 12 | 102158687 | 102158687 | Missense_Mutation | SNP | G | T | 32  | 117 | c.2008C>A | c.(2008-2010)CCC>ACC | p.P670T  |
| Pat_14 | Pre-Treatment | WSCD2    | 9671   | 37 | 12 | 108618518 | 108618518 | Missense_Mutation | SNP | G | A | 86  | 353 | c.685G>A  | c.(685-687)GGA>AGA   | p.G229R  |
| Pat_14 | Pre-Treatment | DTX1     | 1840   | 37 | 12 | 113515335 | 113515335 | Missense_Mutation | SNP | T | G | 7   | 271 | c.366T>G  | c.(364-366)GAT>GAG   | p.D122E  |
| Pat_14 | Pre-Treatment | LHX5     | 64211  | 37 | 12 | 113907044 | 113907044 | Missense_Mutation | SNP | C | T | 85  | 271 | c.280G>A  | c.(280-282)GTG>ATG   | p.V94M   |
| Pat_14 | Pre-Treatment | TBX3     | 6926   | 37 | 12 | 115115433 | 115115433 | Missense_Mutation | SNP | G | A | 63  | 274 | c.893C>T  | c.(892-894)CCT>CTT   | p.P298L  |
| Pat_14 | Pre-Treatment | TBX3     | 6926   | 37 | 12 | 115120950 | 115120950 | Missense_Mutation | SNP | G | A | 57  | 259 | c.56C>T   | c.(55-57)CCG>CTG     | p.P19L   |
| Pat_14 | Pre-Treatment | PIWIL1   | 9271   | 37 | 12 | 130846145 | 130846145 | Missense_Mutation | SNP | C | A | 9   | 446 | c.1969C>A | c.(1969-1971)CGC>AGC | p.R657S  |
| Pat_14 | Pre-Treatment | DDX51    | 317781 | 37 | 12 | 132627346 | 132627346 | Missense_Mutation | SNP | G | C | 4   | 465 | c.597C>G  | c.(595-597)ATC>ATG   | p.I199M  |
| Pat_14 | Pre-Treatment | MIPPEP   | 4285   | 37 | 13 | 24436442  | 24436442  | Missense_Mutation | SNP | G | A | 13  | 37  | c.1052C>T | c.(1051-1053)TCC>TTC | p.S351F  |
| Pat_14 | Pre-Treatment | MTUS2    | 23281  | 37 | 13 | 29599623  | 29599623  | Missense_Mutation | SNP | G | A | 25  | 54  | c.818G>A  | c.(817-819)GGG>GAG   | p.G273E  |
| Pat_14 | Pre-Treatment | MTUS2    | 23281  | 37 | 13 | 29600712  | 29600712  | Missense_Mutation | SNP | G | A | 33  | 73  | c.1907G>A | c.(1906-1908)AGG>AAG | p.R636K  |
| Pat_14 | Pre-Treatment | FRY      | 10129  | 37 | 13 | 32691490  | 32691490  | Missense_Mutation | SNP | C | T | 50  | 107 | c.344C>T  | c.(343-345)TCC>TTC   | p.S115F  |
| Pat_14 | Pre-Treatment | FRY      | 10129  | 37 | 13 | 32786506  | 32786506  | Missense_Mutation | SNP | G | A | 8   | 110 | c.4669G>A | c.(4669-4671)GAA>AAA | p.E1557K |
| Pat_14 | Pre-Treatment | PDS5B    | 23047  | 37 | 13 | 33258144  | 33258144  | Missense_Mutation | SNP | G | A | 80  | 491 | c.1187G>A | c.(1186-1188)AGA>AAA | p.R396K  |
| Pat_14 | Pre-Treatment | C13orf23 | 80209  | 37 | 13 | 39588439  | 39588439  | Missense_Mutation | SNP | G | A | 4   | 207 | c.950C>T  | c.(949-951)CCA>CTA   | p.P317L  |
| Pat_14 | Pre-Treatment | ELF1     | 1997   | 37 | 13 | 41507692  | 41507692  | Missense_Mutation | SNP | G | A | 99  | 502 | c.1729C>T | c.(1729-1731)CAT>TAT | p.H577Y  |
| Pat_14 | Pre-Treatment | ATP7B    | 540    | 37 | 13 | 52534336  | 52534336  | Missense_Mutation | SNP | G | A | 130 | 188 | c.2069C>T | c.(2068-2070)CCA>CTA | p.P690L  |
| Pat_14 | Pre-Treatment | SLITRK6  | 84189  | 37 | 13 | 86369430  | 86369430  | Missense_Mutation | SNP | C | T | 37  | 101 | c.1214G>A | c.(1213-1215)GGA>GAA | p.G405E  |
| Pat_14 | Pre-Treatment | ABCC4    | 10257  | 37 | 13 | 95673860  | 95673860  | Missense_Mutation | SNP | G | A | 102 | 445 | c.3947C>T | c.(3946-3948)TCG>TTG | p.S1316L |
| Pat_14 | Pre-Treatment | DOCK9    | 23348  | 37 | 13 | 99554550  | 99554550  | Missense_Mutation | SNP | G | A | 28  | 192 | c.1375C>T | c.(1375-1377)CCG>TCG | p.P459S  |

|        |               |               |        |    |    |           |           |                   |     |    |    |     |     |                |                        |              |
|--------|---------------|---------------|--------|----|----|-----------|-----------|-------------------|-----|----|----|-----|-----|----------------|------------------------|--------------|
| Pat_14 | Pre-Treatment | CARS2         | 79587  | 37 | 13 | 111299538 | 111299538 | Missense_Mutation | SNP | A  | G  | 3   | 164 | c.1103T>C      | c.(1102-1104)CTG>CCG   | p.L368P      |
| Pat_14 | Pre-Treatment | GRK1          | 6011   | 37 | 13 | 114321898 | 114321898 | Missense_Mutation | SNP | C  | G  | 3   | 190 | c.197C>G       | c.(196-198)CCC>CGC     | p.P66R       |
| Pat_14 | Pre-Treatment | OR4N5         | 390437 | 37 | 14 | 20612317  | 20612317  | Nonsense_Mutation | SNP | C  | A  | 6   | 598 | c.423C>A       | c.(421-423)TGC>TGA     | p.C141*      |
| Pat_14 | Pre-Treatment | SLC7A8        | 23428  | 37 | 14 | 23635719  | 23635719  | Nonsense_Mutation | SNP | G  | T  | 8   | 473 | c.182C>A       | c.(181-183)TCG>TAG     | p.S61*       |
| Pat_14 | Pre-Treatment | DHRS4L1       | 728635 | 37 | 14 | 24506951  | 24506951  | Splice_Site       | SNP | G  | A  | 23  | 99  | c.129_splice   | c.e2-1                 | p.W43_splice |
| Pat_14 | Pre-Treatment | NYNRIN        | 57523  | 37 | 14 | 24885336  | 24885336  | Missense_Mutation | SNP | G  | A  | 28  | 89  | c.4381G>A      | c.(4381-4383)GAT>AAT   | p.D1461N     |
| Pat_14 | Pre-Treatment | CTSG          | 1511   | 37 | 14 | 25043966  | 25043966  | Missense_Mutation | SNP | G  | A  | 95  | 189 | c.254C>T       | c.(253-255)ACC>ATC     | p.T85I       |
| Pat_14 | Pre-Treatment | SRP54         | 6729   | 37 | 14 | 35483027  | 35483027  | Missense_Mutation | SNP | C  | T  | 43  | 143 | c.805C>T       | c.(805-807)CCG>TCG     | p.P269S      |
| Pat_14 | Pre-Treatment | FANCM         | 57697  | 37 | 14 | 45633748  | 45633748  | Missense_Mutation | SNP | T  | G  | 21  | 33  | c.1768T>G      | c.(1768-1770)TCT>GCT   | p.S590A      |
| Pat_14 | Pre-Treatment | PYGL          | 5836   | 37 | 14 | 51404530  | 51404530  | Missense_Mutation | SNP | A  | G  | 19  | 325 | c.269T>C       | c.(268-270)TTT>TCT     | p.F90S       |
| Pat_14 | Pre-Treatment | TBPL2         | 387332 | 37 | 14 | 55890921  | 55890921  | Missense_Mutation | SNP | C  | T  | 93  | 256 | c.1007G>A      | c.(1006-1008)CGA>CAA   | p.R336Q      |
| Pat_14 | Pre-Treatment | RAB15         | 376267 | 37 | 14 | 65417845  | 65417845  | Missense_Mutation | SNP | T  | C  | 3   | 311 | c.271A>G       | c.(271-273)AGC>GGC     | p.S91G       |
| Pat_14 | Pre-Treatment | GALNTL1       | 57452  | 37 | 14 | 69805425  | 69805426  | Missense_Mutation | DNP | GG | TT | 5   | 290 | .1025_1026GG>T | c.(1024-1026)CGG>CTT   | p.R342L      |
| Pat_14 | Pre-Treatment | SIPA1L1       | 26037  | 37 | 14 | 72190563  | 72190563  | Missense_Mutation | SNP | G  | A  | 86  | 191 | c.4471G>A      | c.(4471-4473)GAA>AAA   | p.E1491K     |
| Pat_14 | Pre-Treatment | ZFYVE1        | 53349  | 37 | 14 | 73441645  | 73441645  | Missense_Mutation | SNP | G  | A  | 72  | 215 | c.1829C>T      | c.(1828-1830)TCC>TTC   | p.S610F      |
| Pat_14 | Pre-Treatment | C14orf179     | 112752 | 37 | 14 | 76548655  | 76548655  | Missense_Mutation | SNP | G  | A  | 214 | 506 | c.313G>A       | c.(313-315)GAT>AAT     | p.D105N      |
| Pat_14 | Pre-Treatment | C14orf174     | 161394 | 37 | 14 | 77845247  | 77845247  | Missense_Mutation | SNP | G  | A  | 107 | 253 | c.1486G>A      | c.(1486-1488)GAT>AAT   | p.D496N      |
| Pat_14 | Pre-Treatment | SEL1L         | 6400   | 37 | 14 | 81969220  | 81969220  | Missense_Mutation | SNP | G  | A  | 5   | 173 | c.622C>T       | c.(622-624)CCG>TGG     | p.R208W      |
| Pat_14 | Pre-Treatment | CCDC88C       | 440193 | 37 | 14 | 91780236  | 91780236  | Missense_Mutation | SNP | C  | T  | 23  | 37  | c.1924G>A      | c.(1924-1926)GAG>AAG   | p.E642K      |
| Pat_14 | Pre-Treatment | DICER1        | 23405  | 37 | 14 | 95556978  | 95556978  | Missense_Mutation | SNP | C  | A  | 6   | 582 | c.5626G>T      | c.(5626-5628)GGG>TGG   | p.G1876W     |
| Pat_14 | Pre-Treatment | CCNK          | 8812   | 37 | 14 | 99968696  | 99968696  | Missense_Mutation | SNP | C  | T  | 32  | 75  | c.728C>T       | c.(727-729)CCG>CTG     | p.P243L      |
| Pat_14 | Pre-Treatment | TDRD9         | 122402 | 37 | 14 | 104490968 | 104490968 | Missense_Mutation | SNP | A  | G  | 3   | 346 | c.2669A>G      | c.(2668-2670)GAC>GGC   | p.D890G      |
| Pat_14 | Pre-Treatment | INF2          | 64423  | 37 | 14 | 105179249 | 105179249 | Nonsense_Mutation | SNP | G  | T  | 5   | 200 | c.2695G>T      | c.(2695-2697)GAG>TAG   | p.E899*      |
| Pat_14 | Pre-Treatment | CYFIP1        | 23191  | 37 | 15 | 22990172  | 22990172  | Missense_Mutation | SNP | A  | G  | 3   | 331 | c.2792A>G      | c.(2791-2793)GAG>GGG   | p.E931G      |
| Pat_14 | Pre-Treatment | HERC2         | 8924   | 37 | 15 | 28377302  | 28377302  | Missense_Mutation | SNP | C  | A  | 4   | 136 | c.12514G>T     | c.(12514-12516)GGG>TGC | p.G4172W     |
| Pat_14 | Pre-Treatment | KLF13         | 51621  | 37 | 15 | 31664395  | 31664395  | Missense_Mutation | SNP | C  | T  | 18  | 86  | c.760C>T       | c.(760-762)CCG>TCG     | p.P254S      |
| Pat_14 | Pre-Treatment | RYR3          | 6263   | 37 | 15 | 33954667  | 33954667  | Missense_Mutation | SNP | G  | A  | 10  | 75  | c.4936G>A      | c.(4936-4938)GAG>AAG   | p.E1646K     |
| Pat_14 | Pre-Treatment | SLC12A6       | 9990   | 37 | 15 | 34543111  | 34543111  | Missense_Mutation | SNP | G  | A  | 36  | 179 | c.1481C>T      | c.(1480-1482)CCC>CTC   | p.P494L      |
| Pat_14 | Pre-Treatment | GJD2          | 57369  | 37 | 15 | 35045277  | 35045277  | Missense_Mutation | SNP | G  | A  | 56  | 344 | c.368C>T       | c.(367-369)TCC>TTC     | p.S123F      |
| Pat_14 | Pre-Treatment | RASGRP1       | 10125  | 37 | 15 | 38818501  | 38818501  | Missense_Mutation | SNP | G  | T  | 5   | 270 | c.325C>A       | c.(325-327)CTC>ATC     | p.L109I      |
| Pat_14 | Pre-Treatment | VPS18         | 57617  | 37 | 15 | 41193079  | 41193079  | Missense_Mutation | SNP | C  | T  | 64  | 336 | c.2063C>T      | c.(2062-2064)GCC>GTC   | p.A688V      |
| Pat_14 | Pre-Treatment | JMJD7-PLA2G4B | 8681   | 37 | 15 | 42127058  | 42127058  | Missense_Mutation | SNP | C  | A  | 23  | 217 | c.185C>A       | c.(184-186)CCG>CAG     | p.P62Q       |
| Pat_14 | Pre-Treatment | TGM5          | 9333   | 37 | 15 | 43525409  | 43525409  | Missense_Mutation | SNP | A  | T  | 27  | 166 | c.2143T>A      | c.(2143-2145)TAT>AAT   | p.Y715N      |
| Pat_14 | Pre-Treatment | MYEF2         | 50804  | 37 | 15 | 48444477  | 48444477  | Missense_Mutation | SNP | C  | A  | 7   | 541 | c.1092G>T      | c.(1090-1092)ATG>ATT   | p.M364I      |
| Pat_14 | Pre-Treatment | TRPM7         | 54822  | 37 | 15 | 50926736  | 50926736  | Missense_Mutation | SNP | G  | A  | 17  | 78  | c.850C>T       | c.(850-852)CCT>TCT     | p.P284S      |
| Pat_14 | Pre-Treatment | DMXL2         | 23312  | 37 | 15 | 51758498  | 51758498  | Missense_Mutation | SNP | G  | A  | 22  | 123 | c.7400C>T      | c.(7399-7401)CCT>CTT   | p.P2467L     |
| Pat_14 | Pre-Treatment | UNC13C        | 440279 | 37 | 15 | 54305717  | 54305717  | Missense_Mutation | SNP | C  | T  | 42  | 255 | c.617C>T       | c.(616-618)TCC>TTC     | p.S206F      |
| Pat_14 | Pre-Treatment | UNC13C        | 440279 | 37 | 15 | 54307600  | 54307600  | Missense_Mutation | SNP | C  | T  | 55  | 156 | c.2500C>T      | c.(2500-2502)CGG>TGG   | p.R834W      |
| Pat_14 | Pre-Treatment | DENND4A       | 10260  | 37 | 15 | 65960342  | 65960342  | Missense_Mutation | SNP | C  | A  | 5   | 260 | c.4775G>T      | c.(4774-4776)GGC>GTC   | p.G1592V     |
| Pat_14 | Pre-Treatment | NOX5          | 79400  | 37 | 15 | 69335023  | 69335023  | Missense_Mutation | SNP | C  | T  | 57  | 229 | c.1525C>T      | c.(1525-1527)CGG>TGG   | p.R509W      |
| Pat_14 | Pre-Treatment | GRAMD2        | 196996 | 37 | 15 | 72454678  | 72454679  | Missense_Mutation | DNP | GG | AA | 21  | 215 | c.996_997CC>TT | (994-999)TTCCGT>TTTTTC | p.R333C      |
| Pat_14 | Pre-Treatment | STRA6         | 64220  | 37 | 15 | 74476238  | 74476238  | Nonsense_Mutation | SNP | C  | T  | 112 | 374 | c.1259G>A      | c.(1258-1260)TGG>TAG   | p.W420*      |
| Pat_14 | Pre-Treatment | MESDC2        | 23184  | 37 | 15 | 81271702  | 81271702  | Missense_Mutation | SNP | T  | C  | 4   | 323 | c.563A>G       | c.(562-564)CAG>CGG     | p.Q188R      |
| Pat_14 | Pre-Treatment | FAM154B       | 283726 | 37 | 15 | 82575383  | 82575383  | Missense_Mutation | SNP | C  | T  | 42  | 226 | c.1177C>T      | c.(1177-1179)CCT>TCT   | p.P393S      |
| Pat_14 | Pre-Treatment | ADAMTSL3      | 57188  | 37 | 15 | 84558978  | 84558978  | Missense_Mutation | SNP | G  | A  | 5   | 405 | c.1190G>A      | c.(1189-1191)AGC>AAC   | p.S397N      |
| Pat_14 | Pre-Treatment | ADAMTSL3      | 57188  | 37 | 15 | 84568434  | 84568434  | Missense_Mutation | SNP | A  | G  | 25  | 110 | c.1651A>G      | c.(1651-1653)AAA>GAA   | p.K551E      |
| Pat_14 | Pre-Treatment | SLC28A1       | 9154   | 37 | 15 | 85478657  | 85478657  | Missense_Mutation | SNP | G  | A  | 90  | 290 | c.1489G>A      | c.(1489-1491)GAG>AAG   | p.E497K      |

|        |               |          |        |    |    |          |          |                        |     |    |    |     |     |                                     |                        |               |
|--------|---------------|----------|--------|----|----|----------|----------|------------------------|-----|----|----|-----|-----|-------------------------------------|------------------------|---------------|
| Pat_14 | Pre-Treatment | BLM      | 641    | 37 | 15 | 91358373 | 91358373 | Missense_Mutation      | SNP | C  | T  | 72  | 321 | c.4118C>T                           | c.(4117-4119)TCC>TTC   | p.S1373F      |
| Pat_14 | Pre-Treatment | SV2B     | 9899   | 37 | 15 | 91809816 | 91809816 | Missense_Mutation      | SNP | C  | T  | 66  | 182 | c.1013C>T                           | c.(1012-1014)TCC>TTC   | p.S338F       |
| Pat_14 | Pre-Treatment | IGF1R    | 3480   | 37 | 15 | 99251225 | 99251225 | Missense_Mutation      | SNP | G  | A  | 64  | 294 | c.529G>A                            | c.(529-531)GAA>AAA     | p.E177K       |
| Pat_14 | Pre-Treatment | AMDHD2   | 51005  | 37 | 16 | 2578360  | 2578360  | Missense_Mutation      | SNP | G  | A  | 5   | 275 | c.841G>A                            | c.(841-843)GCC>ACC     | p.A281T       |
| Pat_14 | Pre-Treatment | MEFV     | 4210   | 37 | 16 | 3304352  | 3304352  | Missense_Mutation      | SNP | C  | T  | 60  | 196 | c.716G>A                            | c.(715-717)CGA>CAA     | p.R239Q       |
| Pat_14 | Pre-Treatment | ZNF597   | 146434 | 37 | 16 | 3486952  | 3486952  | Missense_Mutation      | SNP | A  | T  | 73  | 207 | c.747T>A                            | c.(745-747)TTT>TTA     | p.F249L       |
| Pat_14 | Pre-Treatment | NAT15    | 79903  | 37 | 16 | 3526336  | 3526336  | Missense_Mutation      | SNP | G  | A  | 4   | 131 | c.109G>A                            | c.(109-111)GAG>AAG     | p.E37K        |
| Pat_14 | Pre-Treatment | CREBBP   | 1387   | 37 | 16 | 3777898  | 3777898  | Missense_Mutation      | SNP | G  | T  | 9   | 627 | c.7150C>A                           | c.(7150-7152)CAC>AAC   | p.H2384N      |
| Pat_14 | Pre-Treatment | TFAP4    | 7023   | 37 | 16 | 4308090  | 4308090  | Missense_Mutation      | SNP | C  | A  | 9   | 88  | c.983G>T                            | c.(982-984)CGG>CTG     | p.R328L       |
| Pat_14 | Pre-Treatment | GRIN2A   | 2903   | 37 | 16 | 9857524  | 9857524  | Missense_Mutation      | SNP | C  | T  | 77  | 281 | c.3877G>A                           | c.(3877-3879)GAT>AAT   | p.D1293N      |
| Pat_14 | Pre-Treatment | CPPED1   | 55313  | 37 | 16 | 12798754 | 12798754 | Missense_Mutation      | SNP | C  | T  | 36  | 152 | c.442G>A                            | c.(442-444)GAT>AAT     | p.D148N       |
| Pat_14 | Pre-Treatment | TMC7     | 79905  | 37 | 16 | 19067890 | 19067890 | Missense_Mutation      | SNP | C  | A  | 8   | 347 | c.1898C>A                           | c.(1897-1899)CCG>CAG   | p.P633Q       |
| Pat_14 | Pre-Treatment | DNAH3    | 55567  | 37 | 16 | 21011603 | 21011603 | Nonsense_Mutation      | SNP | G  | A  | 68  | 278 | c.6364C>T                           | c.(6364-6366)CGA>TGA   | p.R2122*      |
| Pat_14 | Pre-Treatment | ZKSCAN2  | 342357 | 37 | 16 | 25258412 | 25258413 | Nonsense_Mutation      | DNP | GG | AA | 55  | 314 | ::1104_1105CC>T102-1107)CCCCGA>CCTT |                        | p.R369*       |
| Pat_14 | Pre-Treatment | JMJD5    | 79831  | 37 | 16 | 27224960 | 27224960 | Missense_Mutation      | SNP | C  | T  | 74  | 260 | c.553C>T                            | c.(553-555)CCC>TCC     | p.P185S       |
| Pat_14 | Pre-Treatment | IL21R    | 50615  | 37 | 16 | 27445671 | 27445671 | Nonsense_Mutation      | SNP | G  | A  | 44  | 221 | c.53G>A                             | c.(52-54)TGG>TAG       | p.W18*        |
| Pat_14 | Pre-Treatment | ATP2A1   | 487    | 37 | 16 | 28914229 | 28914229 | Missense_Mutation      | SNP | A  | G  | 26  | 79  | c.2741A>G                           | c.(2740-2742)AAC>AGC   | p.N914S       |
| Pat_14 | Pre-Treatment | LAT      | 27040  | 37 | 16 | 28997920 | 28997920 | Missense_Mutation      | SNP | G  | T  | 62  | 193 | c.370G>T                            | c.(370-372)GGG>TGG     | p.G124W       |
| Pat_14 | Pre-Treatment | ITGAL    | 3683   | 37 | 16 | 30506115 | 30506115 | Missense_Mutation      | SNP | C  | T  | 85  | 327 | c.1447C>T                           | c.(1447-1449)CCA>TCA   | p.P483S       |
| Pat_14 | Pre-Treatment | PRSS36   | 146547 | 37 | 16 | 31153226 | 31153226 | Missense_Mutation      | SNP | C  | T  | 62  | 274 | c.1577G>A                           | c.(1576-1578)GGA>GAA   | p.G526E       |
| Pat_14 | Pre-Treatment | ITGAD    | 3681   | 37 | 16 | 31414929 | 31414929 | Missense_Mutation      | SNP | G  | A  | 87  | 271 | c.667G>A                            | c.(667-669)GGC>AGC     | p.G223S       |
| Pat_14 | Pre-Treatment | ITGAD    | 3681   | 37 | 16 | 31424409 | 31424409 | Splice_Site            | SNP | G  | A  | 85  | 290 | c.1839_splice                       | c.e16-1                | p.R613_splice |
| Pat_14 | Pre-Treatment | DNAJA2   | 10294  | 37 | 16 | 46991096 | 46991096 | Missense_Mutation      | SNP | G  | A  | 116 | 456 | c.1084C>T                           | c.(1084-1086)CCT>TCT   | p.P362S       |
| Pat_14 | Pre-Treatment | NOD2     | 64127  | 37 | 16 | 50745620 | 50745620 | Missense_Mutation      | SNP | G  | A  | 25  | 112 | c.1798G>A                           | c.(1798-1800)GAA>AAA   | p.E600K       |
| Pat_14 | Pre-Treatment | CHD9     | 80205  | 37 | 16 | 53260396 | 53260396 | Missense_Mutation      | SNP | C  | T  | 57  | 229 | c.2015C>T                           | c.(2014-2016)CCT>CTT   | p.P672L       |
| Pat_14 | Pre-Treatment | GOT2     | 2806   | 37 | 16 | 58743443 | 58743443 | Missense_Mutation      | SNP | G  | T  | 9   | 772 | c.1048C>A                           | c.(1048-1050)CGC>AGC   | p.R350S       |
| Pat_14 | Pre-Treatment | CDH8     | 1006   | 37 | 16 | 61859038 | 61859038 | Missense_Mutation      | SNP | T  | G  | 63  | 236 | c.713A>C                            | c.(712-714)GAG>GCG     | p.E238A       |
| Pat_14 | Pre-Treatment | CDH5     | 1003   | 37 | 16 | 66434769 | 66434769 | Missense_Mutation      | SNP | C  | T  | 85  | 303 | c.1687C>T                           | c.(1687-1689)CCA>TCA   | p.P563S       |
| Pat_14 | Pre-Treatment | ACD      | 65057  | 37 | 16 | 67694191 | 67694191 | Missense_Mutation      | SNP | C  | T  | 18  | 32  | c.191G>A                            | c.(190-192)AGG>AAG     | p.R64K        |
| Pat_14 | Pre-Treatment | HYDIN    | 54768  | 37 | 16 | 70852271 | 70852271 | Missense_Mutation      | SNP | G  | T  | 22  | 87  | c.14629C>A                          | c.(14629-14631)CAG>AAC | p.Q4877K      |
| Pat_14 | Pre-Treatment | HYDIN    | 54768  | 37 | 16 | 70926314 | 70926314 | Missense_Mutation      | SNP | G  | A  | 35  | 403 | c.9364C>T                           | c.(9364-9366)CAT>TAT   | p.H3122Y      |
| Pat_14 | Pre-Treatment | HYDIN    | 54768  | 37 | 16 | 71025252 | 71025252 | Missense_Mutation      | SNP | C  | T  | 50  | 202 | c.3833G>A                           | c.(3832-3834)AGA>AAA   | p.R1278K      |
| Pat_14 | Pre-Treatment | ADAMTS18 | 170692 | 37 | 16 | 77331258 | 77331258 | Missense_Mutation      | SNP | G  | A  | 112 | 420 | c.2729C>T                           | c.(2728-2730)TCC>TTC   | p.S910F       |
| Pat_14 | Pre-Treatment | BCMO1    | 53630  | 37 | 16 | 81279203 | 81279203 | Missense_Mutation      | SNP | G  | A  | 35  | 171 | c.188G>A                            | c.(187-189)AGA>AAA     | p.R63K        |
| Pat_14 | Pre-Treatment | OSGIN1   | 29948  | 37 | 16 | 83999411 | 83999411 | Missense_Mutation      | SNP | C  | G  | 23  | 142 | c.1482C>G                           | c.(1480-1482)GAC>GAG   | p.D494E       |
| Pat_14 | Pre-Treatment | LRRC50   | 123872 | 37 | 16 | 84189196 | 84189196 | Missense_Mutation      | SNP | C  | T  | 126 | 512 | c.583C>T                            | c.(583-585)CCA>TCA     | p.P195S       |
| Pat_14 | Pre-Treatment | PELP1    | 27043  | 37 | 17 | 4576107  | 4576108  | Missense_Mutation      | DNP | GG | AA | 18  | 50  | ::2178_2179CC>T176-2181)GGCCCT>GGT  |                        | p.P727S       |
| Pat_14 | Pre-Treatment | PER1     | 5187   | 37 | 17 | 8052016  | 8052016  | Missense_Mutation      | SNP | G  | A  | 163 | 221 | c.994C>T                            | c.(994-996)CCT>TCT     | p.P332S       |
| Pat_14 | Pre-Treatment | SPDYE4   | 388333 | 37 | 17 | 8656483  | 8656483  | Nonsense_Mutation      | SNP | C  | T  | 73  | 113 | c.687G>A                            | c.(685-687)TGG>TGA     | p.W229*       |
| Pat_14 | Pre-Treatment | MYH4     | 4622   | 37 | 17 | 10348621 | 10348622 | Missense_Mutation      | DNP | CC | TT | 214 | 308 | .5227_5228GG>A                      | c.(5227-5229)GGA>AAA   | p.G1743K      |
| Pat_14 | Pre-Treatment | MYH4     | 4622   | 37 | 17 | 10369870 | 10369870 | Missense_Mutation      | SNP | C  | T  | 320 | 384 | c.193G>A                            | c.(193-195)GAA>AAA     | p.E65K        |
| Pat_14 | Pre-Treatment | DNAH9    | 1770   | 37 | 17 | 11772556 | 11772556 | Missense_Mutation      | SNP | C  | T  | 136 | 196 | c.10039C>T                          | c.(10039-10041)CTT>TTT | p.L3347F      |
| Pat_14 | Pre-Treatment | MAP2K4   | 6416   | 37 | 17 | 11998935 | 11998935 | Missense_Mutation      | SNP | T  | C  | 189 | 217 | c.437T>C                            | c.(436-438)CTT>CCT     | p.L146P       |
| Pat_14 | Pre-Treatment | DRG2     | 1819   | 37 | 17 | 18010522 | 18010522 | Missense_Mutation      | SNP | C  | T  | 87  | 146 | c.1063C>T                           | c.(1063-1065)CAT>TAT   | p.H355Y       |
| Pat_14 | Pre-Treatment | CCL11    | 6356   | 37 | 17 | 32612736 | 32612736 | Translation_Start_Site | SNP | A  | T  | 46  | 35  | c.-91A>T                            | c.(-93--89)AAAGG>AATGG |               |
| Pat_14 | Pre-Treatment | HNF1B    | 6928   | 37 | 17 | 36091704 | 36091704 | Missense_Mutation      | SNP | G  | C  | 3   | 265 | c.927C>G                            | c.(925-927)TTC>TTG     | p.F309L       |
| Pat_14 | Pre-Treatment | WIPF2    | 147179 | 37 | 17 | 38421101 | 38421101 | Missense_Mutation      | SNP | C  | T  | 169 | 267 | c.673C>T                            | c.(673-675)CCT>TCT     | p.P225S       |

|        |               |           |        |    |    |          |          |                   |     |    |    |     |     |                                  |                        |           |
|--------|---------------|-----------|--------|----|----|----------|----------|-------------------|-----|----|----|-----|-----|----------------------------------|------------------------|-----------|
| Pat_14 | Pre-Treatment | KRTAP4-11 | 653240 | 37 | 17 | 39274087 | 39274087 | Missense_Mutation | SNP | G  | C  | 3   | 19  | c.481C>G                         | c.(481-483)CTG>GTG     | p.L161V   |
| Pat_14 | Pre-Treatment | KRT13     | 3860   | 37 | 17 | 39659290 | 39659290 | Missense_Mutation | SNP | G  | T  | 8   | 846 | c.796C>A                         | c.(796-798)CCA>ACA     | p.P266T   |
| Pat_14 | Pre-Treatment | PRR15L    | 79170  | 37 | 17 | 46030561 | 46030561 | Missense_Mutation | SNP | G  | A  | 194 | 261 | c.40C>T                          | c.(40-42)CGG>TGG       | p.R14W    |
| Pat_14 | Pre-Treatment | CA10      | 56934  | 37 | 17 | 49713248 | 49713248 | Missense_Mutation | SNP | T  | A  | 105 | 152 | c.757A>T                         | c.(757-759)ATG>TTG     | p.M253L   |
| Pat_14 | Pre-Treatment | TMEM49    | 81671  | 37 | 17 | 57915754 | 57915754 | Missense_Mutation | SNP | C  | A  | 6   | 170 | c.1073C>A                        | c.(1072-1074)CCA>CAA   | p.P358Q   |
| Pat_14 | Pre-Treatment | ACE       | 1636   | 37 | 17 | 61566036 | 61566036 | Missense_Mutation | SNP | G  | A  | 5   | 363 | c.2333G>A                        | c.(2332-2334)CGG>CAG   | p.R778Q   |
| Pat_14 | Pre-Treatment | KCNH6     | 81033  | 37 | 17 | 61619707 | 61619707 | Missense_Mutation | SNP | G  | T  | 7   | 389 | c.2060G>T                        | c.(2059-2061)CGG>CTG   | p.R687L   |
| Pat_14 | Pre-Treatment | ABCA10    | 10349  | 37 | 17 | 67150435 | 67150435 | Missense_Mutation | SNP | C  | T  | 72  | 343 | c.3727G>A                        | c.(3727-3729)GCT>ACT   | p.A1243T  |
| Pat_14 | Pre-Treatment | CDC42EP4  | 23580  | 37 | 17 | 71282170 | 71282170 | Missense_Mutation | SNP | G  | A  | 5   | 174 | c.470C>T                         | c.(469-471)GCG>GTG     | p.A157V   |
| Pat_14 | Pre-Treatment | NAT9      | 26151  | 37 | 17 | 72769065 | 72769065 | Missense_Mutation | SNP | T  | G  | 3   | 231 | c.304A>C                         | c.(304-306)ACC>CCC     | p.T102P   |
| Pat_14 | Pre-Treatment | AZ11      | 22994  | 37 | 17 | 79180631 | 79180631 | Missense_Mutation | SNP | C  | T  | 5   | 294 | c.428G>A                         | c.(427-429)CGG>CAG     | p.R143Q   |
| Pat_14 | Pre-Treatment | TGIF1     | 7050   | 37 | 18 | 3457741  | 3457741  | Missense_Mutation | SNP | T  | C  | 98  | 231 | c.1009T>C                        | c.(1009-1011)TTC>CTC   | p.F337L   |
| Pat_14 | Pre-Treatment | APCDD1    | 147495 | 37 | 18 | 10471774 | 10471774 | Missense_Mutation | SNP | G  | A  | 4   | 184 | c.490G>A                         | c.(490-492)GGC>AGC     | p.G164S   |
| Pat_14 | Pre-Treatment | ZNF532    | 55205  | 37 | 18 | 56601744 | 56601744 | Missense_Mutation | SNP | C  | T  | 138 | 400 | c.2426C>T                        | c.(2425-2427)TCT>TTT   | p.S809F   |
| Pat_14 | Pre-Treatment | MC4R      | 4160   | 37 | 18 | 58039374 | 58039374 | Missense_Mutation | SNP | G  | A  | 75  | 135 | c.209C>T                         | c.(208-210)GCC>GTC     | p.A70V    |
| Pat_14 | Pre-Treatment | SERPINB2  | 5055   | 37 | 18 | 61570201 | 61570201 | Missense_Mutation | SNP | G  | A  | 49  | 93  | c.910G>A                         | c.(910-912)GAA>AAA     | p.E304K   |
| Pat_14 | Pre-Treatment | KCNG2     | 26251  | 37 | 18 | 77659043 | 77659043 | Nonsense_Mutation | SNP | G  | T  | 4   | 95  | c.628G>T                         | c.(628-630)GAG>TAG     | p.E210*   |
| Pat_14 | Pre-Treatment | WDR18     | 57418  | 37 | 19 | 990886   | 990886   | Missense_Mutation | SNP | C  | T  | 43  | 154 | c.632C>T                         | c.(631-633)TCC>TTC     | p.S211F   |
| Pat_14 | Pre-Treatment | MIDN      | 90007  | 37 | 19 | 1257216  | 1257216  | Missense_Mutation | SNP | C  | T  | 50  | 208 | c.1352C>T                        | c.(1351-1353)TCC>TTC   | p.S451F   |
| Pat_14 | Pre-Treatment | ADAT3     | 113179 | 37 | 19 | 1912950  | 1912950  | Missense_Mutation | SNP | G  | A  | 6   | 363 | c.856G>A                         | c.(856-858)GTG>ATG     | p.V286M   |
| Pat_14 | Pre-Treatment | MLLT1     | 4298   | 37 | 19 | 6213774  | 6213774  | Missense_Mutation | SNP | T  | C  | 81  | 384 | c.1442A>G                        | c.(1441-1443)AAG>AGG   | p.K481R   |
| Pat_14 | Pre-Treatment | SH2D3A    | 10045  | 37 | 19 | 6755140  | 6755140  | Missense_Mutation | SNP | G  | A  | 7   | 738 | c.683C>T                         | c.(682-684)CCC>CTC     | p.P228L   |
| Pat_14 | Pre-Treatment | CD320     | 51293  | 37 | 19 | 8367766  | 8367767  | Missense_Mutation | DNP | GC | AA | 45  | 126 | c.600_601GC>TT598-603)GGGCC>GGTT |                        | p.P201S   |
| Pat_14 | Pre-Treatment | MUC16     | 94025  | 37 | 19 | 9047354  | 9047354  | Missense_Mutation | SNP | G  | T  | 79  | 332 | c.34277C>A                       | c.(34276-34278)TCT>TAT | p.S11426Y |
| Pat_14 | Pre-Treatment | MUC16     | 94025  | 37 | 19 | 9061335  | 9061335  | Missense_Mutation | SNP | G  | A  | 37  | 136 | c.26111C>T                       | c.(26110-26112)TCC>TTC | p.S8704F  |
| Pat_14 | Pre-Treatment | MUC16     | 94025  | 37 | 19 | 9062852  | 9062852  | Missense_Mutation | SNP | C  | A  | 40  | 168 | c.24594G>T                       | c.(24592-24594)ATG>ATT | p.M8198I  |
| Pat_14 | Pre-Treatment | MUC16     | 94025  | 37 | 19 | 9063976  | 9063976  | Missense_Mutation | SNP | C  | T  | 66  | 226 | c.23470G>A                       | c.(23470-23472)GAG>AAC | p.E7824K  |
| Pat_14 | Pre-Treatment | MUC16     | 94025  | 37 | 19 | 9083554  | 9083554  | Missense_Mutation | SNP | C  | T  | 94  | 291 | c.8261G>A                        | c.(8260-8262)GGA>GAA   | p.G2754E  |
| Pat_14 | Pre-Treatment | OR7D4     | 125958 | 37 | 19 | 9324939  | 9324939  | Missense_Mutation | SNP | G  | A  | 84  | 389 | c.575C>T                         | c.(574-576)ACC>ATC     | p.T192I   |
| Pat_14 | Pre-Treatment | TYK2      | 7297   | 37 | 19 | 10479071 | 10479071 | Missense_Mutation | SNP | G  | A  | 86  | 240 | c.217C>T                         | c.(217-219)CTC>TTC     | p.L73F    |
| Pat_14 | Pre-Treatment | CCDC151   | 115948 | 37 | 19 | 11537729 | 11537729 | Missense_Mutation | SNP | C  | T  | 64  | 169 | c.576G>A                         | c.(574-576)ATG>ATA     | p.M192I   |
| Pat_14 | Pre-Treatment | ZNF823    | 55552  | 37 | 19 | 11833661 | 11833661 | Missense_Mutation | SNP | G  | A  | 74  | 422 | c.688C>T                         | c.(688-690)CCT>TCT     | p.P230S   |
| Pat_14 | Pre-Treatment | CACNA1A   | 773    | 37 | 19 | 13397485 | 13397485 | Missense_Mutation | SNP | C  | T  | 34  | 102 | c.3388G>A                        | c.(3388-3390)GGG>AGG   | p.G1130R  |
| Pat_14 | Pre-Treatment | CACNA1A   | 773    | 37 | 19 | 13419021 | 13419021 | Missense_Mutation | SNP | G  | A  | 27  | 77  | c.1829C>T                        | c.(1828-1830)TCC>TTC   | p.S610F   |
| Pat_14 | Pre-Treatment | OR111     | 126370 | 37 | 19 | 15198581 | 15198581 | Nonsense_Mutation | SNP | G  | A  | 34  | 157 | c.705G>A                         | c.(703-705)TGG>TGA     | p.W235*   |
| Pat_14 | Pre-Treatment | CYP4F3    | 4051   | 37 | 19 | 15760899 | 15760899 | Missense_Mutation | SNP | G  | A  | 105 | 346 | c.824G>A                         | c.(823-825)CGC>CAC     | p.R275H   |
| Pat_14 | Pre-Treatment | OR10H3    | 26532  | 37 | 19 | 15852299 | 15852299 | Missense_Mutation | SNP | C  | T  | 152 | 624 | c.97C>T                          | c.(97-99)CTC>TTC       | p.L33F    |
| Pat_14 | Pre-Treatment | C19orf42  | 79086  | 37 | 19 | 16770257 | 16770257 | Missense_Mutation | SNP | T  | C  | 14  | 60  | c.70A>G                          | c.(70-72)AAA>GAA       | p.K24E    |
| Pat_14 | Pre-Treatment | CPAMD8    | 27151  | 37 | 19 | 17100494 | 17100494 | Nonsense_Mutation | SNP | G  | A  | 59  | 299 | c.1495C>T                        | c.(1495-1497)CAG>TAG   | p.Q499*   |
| Pat_14 | Pre-Treatment | USHBP1    | 83878  | 37 | 19 | 17373526 | 17373527 | Missense_Mutation | DNP | GG | AA | 63  | 199 | c.476_477CC>TT                   | c.(475-477)TCC>TTT     | p.S159F   |
| Pat_14 | Pre-Treatment | BST2      | 684    | 37 | 19 | 17516235 | 17516235 | Missense_Mutation | SNP | G  | T  | 5   | 222 | c.150C>A                         | c.(148-150)AGC>AGA     | p.S50R    |
| Pat_14 | Pre-Treatment | ZNF493    | 284443 | 37 | 19 | 21606030 | 21606030 | Missense_Mutation | SNP | C  | T  | 73  | 220 | c.185C>T                         | c.(184-186)TCA>TTA     | p.S62L    |
| Pat_14 | Pre-Treatment | ZNF493    | 284443 | 37 | 19 | 21606468 | 21606468 | Missense_Mutation | SNP | C  | T  | 4   | 198 | c.623C>T                         | c.(622-624)CCT>CTT     | p.P208L   |
| Pat_14 | Pre-Treatment | ZNF257    | 113835 | 37 | 19 | 22255698 | 22255698 | Missense_Mutation | SNP | G  | A  | 87  | 384 | c.91G>A                          | c.(91-93)GAT>AAT       | p.D31N    |
| Pat_14 | Pre-Treatment | ZNF676    | 163223 | 37 | 19 | 22363786 | 22363786 | Missense_Mutation | SNP | T  | C  | 4   | 263 | c.733A>G                         | c.(733-735)ATA>GTA     | p.I245V   |
| Pat_14 | Pre-Treatment | ZNF254    | 9534   | 37 | 19 | 24310427 | 24310427 | Missense_Mutation | SNP | A  | G  | 4   | 88  | c.1625A>G                        | c.(1624-1626)GAA>GGA   | p.E542G   |
| Pat_14 | Pre-Treatment | ZNF254    | 9534   | 37 | 19 | 24310450 | 24310450 | Missense_Mutation | SNP | A  | G  | 4   | 85  | c.1648A>G                        | c.(1648-1650)AAA>GAA   | p.K550E   |

|        |               |          |        |    |    |           |           |                   |     |    |    |     |     |                                     |                      |          |
|--------|---------------|----------|--------|----|----|-----------|-----------|-------------------|-----|----|----|-----|-----|-------------------------------------|----------------------|----------|
| Pat_14 | Pre-Treatment | CCDC123  | 84902  | 37 | 19 | 33417101  | 33417101  | Missense_Mutation | SNP | G  | T  | 7   | 776 | c.1159C>A                           | c.(1159-1161)CTC>ATC | p.L387I  |
| Pat_14 | Pre-Treatment | SBSN     | 374897 | 37 | 19 | 36018946  | 36018947  | Missense_Mutation | DNP | CG | AT | 6   | 661 | c.237_238CG>AT235-240)ACCGGC>ACATG  |                      | p.G80C   |
| Pat_14 | Pre-Treatment | MLL4     | 9757   | 37 | 19 | 36210698  | 36210698  | Missense_Mutation | SNP | G  | A  | 110 | 504 | c.449G>A                            | c.(448-450)CGA>CAA   | p.R150Q  |
| Pat_14 | Pre-Treatment | MLL4     | 9757   | 37 | 19 | 36211733  | 36211733  | Missense_Mutation | SNP | C  | T  | 3   | 27  | c.1484C>T                           | c.(1483-1485)CCC>CTC | p.P495L  |
| Pat_14 | Pre-Treatment | ZNF790   | 388536 | 37 | 19 | 37310689  | 37310689  | Missense_Mutation | SNP | G  | C  | 37  | 178 | c.557C>G                            | c.(556-558)ACT>AGT   | p.T186S  |
| Pat_14 | Pre-Treatment | ZFP30    | 22835  | 37 | 19 | 38127104  | 38127104  | Missense_Mutation | SNP | C  | T  | 32  | 121 | c.338G>A                            | c.(337-339)GGA>GAA   | p.G113E  |
| Pat_14 | Pre-Treatment | RYR1     | 6261   | 37 | 19 | 38943640  | 38943640  | Missense_Mutation | SNP | C  | A  | 4   | 115 | c.1426C>A                           | c.(1426-1428)CTC>ATC | p.L476I  |
| Pat_14 | Pre-Treatment | MAP4K1   | 11184  | 37 | 19 | 39100292  | 39100292  | Missense_Mutation | SNP | C  | T  | 33  | 99  | c.950G>A                            | c.(949-951)CGG>CAG   | p.R317Q  |
| Pat_14 | Pre-Treatment | CLC      | 1178   | 37 | 19 | 40222064  | 40222064  | Missense_Mutation | SNP | C  | T  | 187 | 611 | c.385G>A                            | c.(385-387)GAT>AAT   | p.D129N  |
| Pat_14 | Pre-Treatment | PRX      | 57716  | 37 | 19 | 40902350  | 40902350  | Missense_Mutation | SNP | G  | A  | 105 | 423 | c.1909C>T                           | c.(1909-1911)CCT>TCT | p.P637S  |
| Pat_14 | Pre-Treatment | ADCK4    | 79934  | 37 | 19 | 41220022  | 41220022  | Missense_Mutation | SNP | C  | A  | 7   | 433 | c.239G>T                            | c.(238-240)CGA>CTA   | p.R80L   |
| Pat_14 | Pre-Treatment | CEACAM6  | 4680   | 37 | 19 | 42265289  | 42265289  | Missense_Mutation | SNP | C  | A  | 136 | 599 | c.557C>A                            | c.(556-558)CCG>CAG   | p.P186Q  |
| Pat_14 | Pre-Treatment | GRIK5    | 2901   | 37 | 19 | 42546734  | 42546734  | Nonsense_Mutation | SNP | C  | T  | 109 | 333 | c.1443G>A                           | c.(1441-1443)TGG>TGA | p.W481*  |
| Pat_14 | Pre-Treatment | ZNF235   | 9310   | 37 | 19 | 44792651  | 44792651  | Missense_Mutation | SNP | G  | A  | 90  | 288 | c.937C>T                            | c.(937-939)CGT>TGT   | p.R313C  |
| Pat_14 | Pre-Treatment | GLTSCR2  | 29997  | 37 | 19 | 48253489  | 48253489  | Missense_Mutation | SNP | C  | T  | 35  | 182 | c.344C>T                            | c.(343-345)CCC>CTC   | p.P115L  |
| Pat_14 | Pre-Treatment | RPL18    | 6141   | 37 | 19 | 49120056  | 49120056  | Missense_Mutation | SNP | C  | A  | 6   | 431 | c.224G>T                            | c.(223-225)CGG>CTG   | p.R75L   |
| Pat_14 | Pre-Treatment | SIGLEC12 | 89858  | 37 | 19 | 52003546  | 52003546  | Missense_Mutation | SNP | C  | T  | 59  | 283 | c.436G>A                            | c.(436-438)GAC>AAC   | p.D146N  |
| Pat_14 | Pre-Treatment | ZNF845   | 91664  | 37 | 19 | 53856479  | 53856479  | Missense_Mutation | SNP | G  | A  | 24  | 157 | c.2551G>A                           | c.(2551-2553)GCA>ACA | p.A851T  |
| Pat_14 | Pre-Treatment | ZNF845   | 91664  | 37 | 19 | 53856702  | 53856702  | Missense_Mutation | SNP | G  | A  | 5   | 113 | c.2774G>A                           | c.(2773-2775)CGT>CAT | p.R925H  |
| Pat_14 | Pre-Treatment | LILRB3   | 11025  | 37 | 19 | 54722249  | 54722249  | Missense_Mutation | SNP | C  | A  | 10  | 484 | c.1574G>T                           | c.(1573-1575)AGG>ATG | p.R525M  |
| Pat_14 | Pre-Treatment | LILRB4   | 11006  | 37 | 19 | 55175850  | 55175850  | Missense_Mutation | SNP | G  | A  | 91  | 318 | c.569G>A                            | c.(568-570)GGG>GAG   | p.G190E  |
| Pat_14 | Pre-Treatment | KIR3DL1  | 3811   | 37 | 19 | 55333028  | 55333028  | Missense_Mutation | SNP | G  | A  | 89  | 367 | c.664G>A                            | c.(664-666)GAG>AAG   | p.E222K  |
| Pat_14 | Pre-Treatment | NLRP9    | 338321 | 37 | 19 | 56243555  | 56243555  | Missense_Mutation | SNP | C  | T  | 38  | 168 | c.1642G>A                           | c.(1642-1644)GGT>AGT | p.G548S  |
| Pat_14 | Pre-Treatment | PEG3     | 5178   | 37 | 19 | 57335765  | 57335765  | Missense_Mutation | SNP | C  | T  | 6   | 462 | c.259G>A                            | c.(259-261)GAG>AAG   | p.E87K   |
| Pat_14 | Pre-Treatment | ZIM3     | 114026 | 37 | 19 | 57646558  | 57646558  | Missense_Mutation | SNP | T  | C  | 70  | 276 | c.1147A>G                           | c.(1147-1149)AAA>GAA | p.K383E  |
| Pat_14 | Pre-Treatment | ZNF776   | 284309 | 37 | 19 | 58264977  | 58264977  | Nonsense_Mutation | SNP | C  | A  | 6   | 297 | c.479C>A                            | c.(478-480)TCA>TAA   | p.S160*  |
| Pat_14 | Pre-Treatment | ZNF417   | 147687 | 37 | 19 | 58420829  | 58420829  | Missense_Mutation | SNP | A  | C  | 7   | 385 | c.817T>G                            | c.(817-819)TGT>GGT   | p.C273G  |
| Pat_14 | Pre-Treatment | ZNF418   | 147686 | 37 | 19 | 58437669  | 58437669  | Missense_Mutation | SNP | G  | T  | 91  | 320 | c.1880C>A                           | c.(1879-1881)TCC>TAC | p.S627Y  |
| Pat_14 | Pre-Treatment | ZNF135   | 7694   | 37 | 19 | 58579005  | 58579005  | Missense_Mutation | SNP | C  | A  | 6   | 213 | c.1189C>A                           | c.(1189-1191)CAT>AAT | p.H397N  |
| Pat_14 | Pre-Treatment | PXDN     | 7837   | 37 | 2  | 1653202   | 1653202   | Missense_Mutation | SNP | G  | A  | 70  | 306 | c.2350C>T                           | c.(2350-2352)CAC>TAC | p.H784Y  |
| Pat_14 | Pre-Treatment | MYT1L    | 23040  | 37 | 2  | 1906950   | 1906950   | Missense_Mutation | SNP | G  | A  | 76  | 240 | c.1934C>T                           | c.(1933-1935)TCG>TTG | p.S645L  |
| Pat_14 | Pre-Treatment | MYT1L    | 23040  | 37 | 2  | 1926607   | 1926608   | Missense_Mutation | DNP | CC | TT | 111 | 369 | c.933_934GG>AA(931-936)ATGGAA>ATAAA | .311_312ME>I         |          |
| Pat_14 | Pre-Treatment | KLF11    | 8462   | 37 | 2  | 10188198  | 10188198  | Missense_Mutation | SNP | A  | G  | 3   | 307 | c.734A>G                            | c.(733-735)GAC>GGC   | p.D245G  |
| Pat_14 | Pre-Treatment | NBAS     | 51594  | 37 | 2  | 15319125  | 15319125  | Missense_Mutation | SNP | G  | A  | 57  | 259 | c.6827C>T                           | c.(6826-6828)ACG>ATG | p.T2276M |
| Pat_14 | Pre-Treatment | RHOQ     | 23433  | 37 | 2  | 46803262  | 46803262  | Missense_Mutation | SNP | A  | G  | 3   | 148 | c.238A>G                            | c.(238-240)ATG>GTG   | p.M80V   |
| Pat_14 | Pre-Treatment | PSME4    | 23198  | 37 | 2  | 54114545  | 54114545  | Missense_Mutation | SNP | G  | A  | 55  | 217 | c.4580C>T                           | c.(4579-4581)TCG>TTG | p.S1527L |
| Pat_14 | Pre-Treatment | PUS10    | 150962 | 37 | 2  | 61236080  | 61236080  | Missense_Mutation | SNP | G  | A  | 4   | 81  | c.197C>T                            | c.(196-198)CCA>CTA   | p.P66L   |
| Pat_14 | Pre-Treatment | GKN1     | 56287  | 37 | 2  | 69207165  | 69207165  | Missense_Mutation | SNP | C  | T  | 96  | 279 | c.478C>T                            | c.(478-480)CCA>TCA   | p.P160S  |
| Pat_14 | Pre-Treatment | CNGA3    | 1261   | 37 | 2  | 98994194  | 98994194  | Missense_Mutation | SNP | G  | A  | 18  | 117 | c.146G>A                            | c.(145-147)GGG>GAG   | p.G49E   |
| Pat_14 | Pre-Treatment | C2orf55  | 343990 | 37 | 2  | 99439615  | 99439615  | Missense_Mutation | SNP | T  | A  | 22  | 56  | c.1121A>T                           | c.(1120-1122)GAG>GTG | p.E374V  |
| Pat_14 | Pre-Treatment | TBC1D8   | 11138  | 37 | 2  | 101650036 | 101650037 | Missense_Mutation | DNP | GG | AA | 69  | 252 | c.1742_1743CC>T                     | c.(1741-1743)GCC>GTT | p.A581V  |
| Pat_14 | Pre-Treatment | RGPD4    | 285190 | 37 | 2  | 108496501 | 108496501 | Missense_Mutation | SNP | C  | T  | 118 | 480 | c.5002C>T                           | c.(5002-5004)CAC>TAC | p.H1668Y |
| Pat_14 | Pre-Treatment | SLC5A7   | 60482  | 37 | 2  | 108627121 | 108627121 | Missense_Mutation | SNP | C  | T  | 35  | 157 | c.1547C>T                           | c.(1546-1548)GCT>GTT | p.A516V  |
| Pat_14 | Pre-Treatment | PCDP1    | 200373 | 37 | 2  | 120409605 | 120409605 | Missense_Mutation | SNP | G  | A  | 56  | 234 | c.1516G>A                           | c.(1516-1518)GAA>AAA | p.E506K  |
| Pat_14 | Pre-Treatment | CNTNAP5  | 129684 | 37 | 2  | 124979360 | 124979360 | Missense_Mutation | SNP | G  | A  | 17  | 81  | c.161G>A                            | c.(160-162)AGC>AAC   | p.S54N   |
| Pat_14 | Pre-Treatment | CNTNAP5  | 129684 | 37 | 2  | 125367477 | 125367477 | Missense_Mutation | SNP | A  | C  | 57  | 264 | c.1853A>C                           | c.(1852-1854)CAG>CCG | p.Q618P  |
| Pat_14 | Pre-Treatment | HS6ST1   | 9394   | 37 | 2  | 129026421 | 129026421 | Missense_Mutation | SNP | A  | G  | 4   | 276 | c.551T>C                            | c.(550-552)CTA>CCA   | p.L184P  |



|        |               |           |        |    |    |           |           |                   |     |   |   |     |     |                |                        |                |
|--------|---------------|-----------|--------|----|----|-----------|-----------|-------------------|-----|---|---|-----|-----|----------------|------------------------|----------------|
| Pat_14 | Pre-Treatment | IMP4      | 92856  | 37 | 2  | 131103457 | 131103457 | Missense_Mutation | SNP | C | T | 22  | 135 | c.545C>T       | c.(544-546)GCC>GTC     | p.A182V        |
| Pat_14 | Pre-Treatment | LOC401010 | 401010 | 37 | 2  | 132201466 | 132201466 | Missense_Mutation | SNP | G | A | 63  | 196 | c.536C>T       | c.(535-537)CCC>CTC     | p.P179L        |
| Pat_14 | Pre-Treatment | NCKAP5    | 344148 | 37 | 2  | 133541688 | 133541688 | Missense_Mutation | SNP | G | A | 46  | 308 | c.2696C>T      | c.(2695-2697)CCT>CTT   | p.P899L        |
| Pat_14 | Pre-Treatment | THSD7B    | 80731  | 37 | 2  | 137814118 | 137814118 | Missense_Mutation | SNP | G | A | 17  | 85  | c.175G>A       | c.(175-177)GAA>AAA     | p.E59K         |
| Pat_14 | Pre-Treatment | THSD7B    | 80731  | 37 | 2  | 137814551 | 137814551 | Missense_Mutation | SNP | T | G | 122 | 441 | c.608T>G       | c.(607-609)CTT>CGT     | p.L203R        |
| Pat_14 | Pre-Treatment | THSD7B    | 80731  | 37 | 2  | 138420994 | 138420994 | Missense_Mutation | SNP | G | A | 6   | 29  | c.4413G>A      | c.(4411-4413)ATG>ATA   | p.M1471I       |
| Pat_14 | Pre-Treatment | LRP1B     | 53353  | 37 | 2  | 141122229 | 141122229 | Splice_Site       | SNP | C | T | 25  | 97  | c.11131_splice | c.e72+1                | p.V3711_splice |
| Pat_14 | Pre-Treatment | LRP1B     | 53353  | 37 | 2  | 141259366 | 141259366 | Missense_Mutation | SNP | C | T | 37  | 161 | c.8740G>A      | c.(8740-8742)GAT>AAT   | p.D2914N       |
| Pat_14 | Pre-Treatment | LRP1B     | 53353  | 37 | 2  | 141946145 | 141946145 | Missense_Mutation | SNP | T | G | 78  | 199 | c.858A>C       | c.(856-858)CAA>CAC     | p.Q286H        |
| Pat_14 | Pre-Treatment | KYNU      | 8942   | 37 | 2  | 143743562 | 143743562 | Missense_Mutation | SNP | G | A | 61  | 208 | c.874G>A       | c.(874-876)GAA>AAA     | p.E292K        |
| Pat_14 | Pre-Treatment | NEB       | 4703   | 37 | 2  | 152473940 | 152473940 | Missense_Mutation | SNP | G | A | 4   | 36  | c.10390C>T     | c.(10390-10392)CAT>TAT | p.H3464Y       |
| Pat_14 | Pre-Treatment | FMNL2     | 114793 | 37 | 2  | 153435429 | 153435429 | Missense_Mutation | SNP | C | T | 24  | 141 | c.733C>T       | c.(733-735)CCA>TCA     | p.P245S        |
| Pat_14 | Pre-Treatment | KCNJ3     | 3760   | 37 | 2  | 155711613 | 155711613 | Missense_Mutation | SNP | G | A | 39  | 170 | c.1294G>A      | c.(1294-1296)GAC>AAC   | p.D432N        |
| Pat_14 | Pre-Treatment | UPP2      | 151531 | 37 | 2  | 158974352 | 158974352 | Missense_Mutation | SNP | C | T | 82  | 314 | c.356C>T       | c.(355-357)CCC>CTC     | p.P119L        |
| Pat_14 | Pre-Treatment | SLC4A10   | 57282  | 37 | 2  | 162738887 | 162738887 | Missense_Mutation | SNP | G | A | 15  | 56  | c.1127G>A      | c.(1126-1128)GGA>GAA   | p.G376E        |
| Pat_14 | Pre-Treatment | KCNH7     | 90134  | 37 | 2  | 163291770 | 163291770 | Missense_Mutation | SNP | C | T | 57  | 251 | c.1892G>A      | c.(1891-1893)GGG>GAG   | p.G631E        |
| Pat_14 | Pre-Treatment | COBLL1    | 22837  | 37 | 2  | 165542499 | 165542499 | Missense_Mutation | SNP | C | T | 58  | 227 | c.3659G>A      | c.(3658-3660)AGA>AAA   | p.R1220K       |
| Pat_14 | Pre-Treatment | SCN3A     | 6328   | 37 | 2  | 165947616 | 165947616 | Missense_Mutation | SNP | C | T | 101 | 310 | c.5047G>A      | c.(5047-5049)GAA>AAA   | p.E1683K       |
| Pat_14 | Pre-Treatment | SCN2A     | 6326   | 37 | 2  | 166167031 | 166167031 | Missense_Mutation | SNP | C | T | 50  | 200 | c.896C>T       | c.(895-897)TCA>TTA     | p.S299L        |
| Pat_14 | Pre-Treatment | SCN9A     | 6335   | 37 | 2  | 167160796 | 167160796 | Nonsense_Mutation | SNP | G | A | 24  | 96  | c.640C>T       | c.(640-642)CGA>TGA     | p.R214*        |
| Pat_14 | Pre-Treatment | LRP2      | 4036   | 37 | 2  | 170103911 | 170103911 | Missense_Mutation | SNP | G | A | 60  | 239 | c.2885C>T      | c.(2884-2886)TCG>TTG   | p.S962L        |
| Pat_14 | Pre-Treatment | TTN       | 7273   | 37 | 2  | 179496982 | 179496982 | Missense_Mutation | SNP | C | T | 15  | 46  | c.35935G>A     | c.(35935-35937)GAA>AAA | p.E11979K      |
| Pat_14 | Pre-Treatment | TTN       | 7273   | 37 | 2  | 179594264 | 179594264 | Missense_Mutation | SNP | G | A | 53  | 214 | c.14887C>T     | c.(14887-14889)CCT>TCT | p.P4963S       |
| Pat_14 | Pre-Treatment | TTN       | 7273   | 37 | 2  | 179595259 | 179595259 | Missense_Mutation | SNP | G | T | 9   | 657 | c.14269C>A     | c.(14269-14271)CAA>AAA | p.Q4757K       |
| Pat_14 | Pre-Treatment | TTN       | 7273   | 37 | 2  | 179597833 | 179597833 | Missense_Mutation | SNP | G | A | 22  | 95  | c.12338C>T     | c.(12337-12339)CCA>CTA | p.P4113L       |
| Pat_14 | Pre-Treatment | TTN       | 7273   | 37 | 2  | 179612065 | 179612065 | Missense_Mutation | SNP | C | T | 40  | 206 | c.15062G>A     | c.(15061-15063)GGA>GAA | p.G5021E       |
| Pat_14 | Pre-Treatment | TTN       | 7273   | 37 | 2  | 179615447 | 179615447 | Missense_Mutation | SNP | C | T | 20  | 73  | c.11680G>A     | c.(11680-11682)GAA>AAA | p.E3894K       |
| Pat_14 | Pre-Treatment | TTN       | 7273   | 37 | 2  | 179616446 | 179616446 | Missense_Mutation | SNP | G | A | 76  | 218 | c.10681C>T     | c.(10681-10683)CAC>TAC | p.H3561Y       |
| Pat_14 | Pre-Treatment | TTN       | 7273   | 37 | 2  | 179641217 | 179641217 | Missense_Mutation | SNP | G | A | 73  | 295 | c.5374C>T      | c.(5374-5376)CTT>TTT   | p.L1792F       |
| Pat_14 | Pre-Treatment | WDR75     | 84128  | 37 | 2  | 190329839 | 190329839 | Missense_Mutation | SNP | A | T | 4   | 153 | c.1148A>T      | c.(1147-1149)TAT>TTT   | p.Y383F        |
| Pat_14 | Pre-Treatment | OBFC2A    | 64859  | 37 | 2  | 192550343 | 192550343 | Missense_Mutation | SNP | G | A | 6   | 38  | c.464G>A       | c.(463-465)GGC>GAC     | p.G155D        |
| Pat_14 | Pre-Treatment | DNAH7     | 56171  | 37 | 2  | 196723344 | 196723344 | Missense_Mutation | SNP | C | T | 23  | 99  | c.7921G>A      | c.(7921-7923)GAA>AAA   | p.E2641K       |
| Pat_14 | Pre-Treatment | DNAH7     | 56171  | 37 | 2  | 196884016 | 196884016 | Missense_Mutation | SNP | C | T | 40  | 153 | c.747G>A       | c.(745-747)ATG>ATA     | p.M249I        |
| Pat_14 | Pre-Treatment | PGAP1     | 80055  | 37 | 2  | 197791194 | 197791194 | Missense_Mutation | SNP | C | A | 7   | 773 | c.147G>T       | c.(145-147)CAG>CAT     | p.Q49H         |
| Pat_14 | Pre-Treatment | NBEAL1    | 65065  | 37 | 2  | 204045126 | 204045126 | Missense_Mutation | SNP | G | T | 85  | 373 | c.6399G>T      | c.(6397-6399)CAG>CAT   | p.Q2133H       |
| Pat_14 | Pre-Treatment | ZDBF2     | 57683  | 37 | 2  | 207170939 | 207170939 | Missense_Mutation | SNP | C | T | 18  | 78  | c.1687C>T      | c.(1687-1689)CGG>TGG   | p.R563W        |
| Pat_14 | Pre-Treatment | C2orf80   | 389073 | 37 | 2  | 209036721 | 209036721 | Missense_Mutation | SNP | G | T | 11  | 816 | c.445C>A       | c.(445-447)CGC>AGC     | p.R149S        |
| Pat_14 | Pre-Treatment | ERBB4     | 2066   | 37 | 2  | 212295699 | 212295699 | Missense_Mutation | SNP | C | T | 92  | 333 | c.2614G>A      | c.(2614-2616)GAA>AAA   | p.E872K        |
| Pat_14 | Pre-Treatment | TNS1      | 7145   | 37 | 2  | 218712377 | 218712377 | Missense_Mutation | SNP | G | A | 49  | 147 | c.2488C>T      | c.(2488-2490)CCA>TCA   | p.P830S        |
| Pat_14 | Pre-Treatment | TNS1      | 7145   | 37 | 2  | 218745694 | 218745694 | Nonsense_Mutation | SNP | A | C | 59  | 200 | c.981T>G       | c.(979-981)TAT>TAG     | p.Y327*        |
| Pat_14 | Pre-Treatment | GLB1L     | 79411  | 37 | 2  | 220102571 | 220102571 | Missense_Mutation | SNP | C | T | 53  | 275 | c.1450G>A      | c.(1450-1452)GGG>AGG   | p.G484R        |
| Pat_14 | Pre-Treatment | GMPPA     | 29926  | 37 | 2  | 220366237 | 220366237 | Missense_Mutation | SNP | C | A | 7   | 667 | c.178C>A       | c.(178-180)CAA>AAA     | p.Q60K         |
| Pat_14 | Pre-Treatment | ACCN4     | 55515  | 37 | 2  | 220400018 | 220400018 | Nonsense_Mutation | SNP | A | T | 10  | 70  | c.1525A>T      | c.(1525-1527)AAG>TAG   | p.K509*        |
| Pat_14 | Pre-Treatment | SPHKAP    | 80309  | 37 | 2  | 228881246 | 228881246 | Missense_Mutation | SNP | C | T | 28  | 133 | c.4324G>A      | c.(4324-4326)GAA>AAA   | p.E1442K       |
| Pat_14 | Pre-Treatment | GPR55     | 9290   | 37 | 2  | 231775425 | 231775425 | Nonsense_Mutation | SNP | G | A | 55  | 228 | c.253C>T       | c.(253-255)CAG>TAG     | p.Q85*         |
| Pat_14 | Pre-Treatment | INPP5D    | 3635   | 37 | 2  | 233995276 | 233995276 | Missense_Mutation | SNP | G | A | 40  | 91  | c.583G>A       | c.(583-585)GAC>AAC     | p.D195N        |
| Pat_14 | Pre-Treatment | DEFB125   | 245938 | 37 | 20 | 76774     | 76774     | Missense_Mutation | SNP | G | A | 135 | 646 | c.187G>A       | c.(187-189)GAA>AAA     | p.E63K         |

|        |               |            |        |    |    |          |          |                   |     |    |    |     |     |                 |                      |               |
|--------|---------------|------------|--------|----|----|----------|----------|-------------------|-----|----|----|-----|-----|-----------------|----------------------|---------------|
| Pat_14 | Pre-Treatment | C20orf27   | 54976  | 37 | 20 | 3734734  | 3734734  | Missense_Mutation | SNP | C  | T  | 46  | 74  | c.496G>A        | c.(496-498)GAG>AAG   | p.E166K       |
| Pat_14 | Pre-Treatment | SMOX       | 54498  | 37 | 20 | 4155742  | 4155742  | Missense_Mutation | SNP | C  | A  | 7   | 694 | c.40C>A         | c.(40-42)CCT>ACT     | p.P14T        |
| Pat_14 | Pre-Treatment | PAK7       | 57144  | 37 | 20 | 9546769  | 9546769  | Missense_Mutation | SNP | G  | A  | 24  | 89  | c.1253C>T       | c.(1252-1254)TCC>TTC | p.S418F       |
| Pat_14 | Pre-Treatment | SSTR4      | 6754   | 37 | 20 | 23016400 | 23016400 | Missense_Mutation | SNP | G  | A  | 125 | 456 | c.280G>A        | c.(280-282)GAG>AAG   | p.E94K        |
| Pat_14 | Pre-Treatment | FRG1B      | 284802 | 37 | 20 | 29625877 | 29625877 | Missense_Mutation | SNP | G  | A  | 7   | 274 | c.31G>A         | c.(31-33)GCC>ACC     | p.A11T        |
| Pat_14 | Pre-Treatment | COMMD7     | 149951 | 37 | 20 | 31294383 | 31294383 | Splice_Site       | SNP | A  | G  | 3   | 154 | c.336_splice    | c.e5+1               | p.K112_splice |
| Pat_14 | Pre-Treatment | MYH7B      | 57644  | 37 | 20 | 33586662 | 33586662 | Nonsense_Mutation | SNP | G  | A  | 21  | 157 | c.4260G>A       | c.(4258-4260)TGG>TGA | p.W1420*      |
| Pat_14 | Pre-Treatment | CHD6       | 84181  | 37 | 20 | 40054738 | 40054738 | Missense_Mutation | SNP | C  | A  | 9   | 772 | c.4124G>T       | c.(4123-4125)CGG>CTG | p.R1375L      |
| Pat_14 | Pre-Treatment | PTPRT      | 11122  | 37 | 20 | 40827982 | 40827982 | Missense_Mutation | SNP | C  | T  | 115 | 252 | c.2389G>A       | c.(2389-2391)GAG>AAG | p.E797K       |
| Pat_14 | Pre-Treatment | MYBL2      | 4605   | 37 | 20 | 42344630 | 42344630 | Missense_Mutation | SNP | G  | A  | 222 | 436 | c.2006G>A       | c.(2005-2007)GGG>GAG | p.G669E       |
| Pat_14 | Pre-Treatment | TOX2       | 84969  | 37 | 20 | 42635208 | 42635208 | Missense_Mutation | SNP | A  | T  | 180 | 295 | c.214A>T        | c.(214-216)AAC>TAC   | p.N72Y        |
| Pat_14 | Pre-Treatment | SEMG1      | 6406   | 37 | 20 | 43836308 | 43836308 | Missense_Mutation | SNP | C  | T  | 57  | 357 | c.370C>T        | c.(370-372)CAC>TAC   | p.H124Y       |
| Pat_14 | Pre-Treatment | SDC4       | 6385   | 37 | 20 | 43959102 | 43959102 | Missense_Mutation | SNP | A  | G  | 112 | 177 | c.349T>C        | c.(349-351)TCA>CCA   | p.S117P       |
| Pat_14 | Pre-Treatment | SLC9A8     | 23315  | 37 | 20 | 48491319 | 48491319 | Missense_Mutation | SNP | C  | T  | 253 | 480 | c.1036C>T       | c.(1036-1038)CTC>TTC | p.L346F       |
| Pat_14 | Pre-Treatment | CASS4      | 57091  | 37 | 20 | 55028094 | 55028094 | Missense_Mutation | SNP | C  | T  | 40  | 160 | c.1862C>T       | c.(1861-1863)TCA>TTA | p.S621L       |
| Pat_14 | Pre-Treatment | TAF4       | 6874   | 37 | 20 | 60578276 | 60578276 | Nonsense_Mutation | SNP | G  | T  | 6   | 548 | c.2426C>A       | c.(2425-2427)TCG>TAG | p.S809*       |
| Pat_14 | Pre-Treatment | OSBPL2     | 9885   | 37 | 20 | 60866788 | 60866788 | Nonsense_Mutation | SNP | G  | T  | 81  | 454 | c.1279G>T       | c.(1279-1281)GAG>TAG | p.E427*       |
| Pat_14 | Pre-Treatment | EEF1A2     | 1917   | 37 | 20 | 62121835 | 62121836 | Missense_Mutation | DNP | GG | AA | 41  | 74  | c.1025_1026CC>T | c.(1024-1026)TCC>TTT | p.S342F       |
| Pat_14 | Pre-Treatment | SRMS       | 6725   | 37 | 20 | 62174747 | 62174747 | Missense_Mutation | SNP | C  | T  | 5   | 402 | c.565G>A        | c.(565-567)GGC>AGC   | p.G189S       |
| Pat_14 | Pre-Treatment | TPTE       | 7179   | 37 | 21 | 10914373 | 10914373 | Missense_Mutation | SNP | C  | T  | 24  | 121 | c.1346G>A       | c.(1345-1347)GGA>GAA | p.G449E       |
| Pat_14 | Pre-Treatment | POTED      | 317754 | 37 | 21 | 14983006 | 14983006 | Missense_Mutation | SNP | C  | T  | 12  | 153 | c.457C>T        | c.(457-459)CCC>TCC   | p.P153S       |
| Pat_14 | Pre-Treatment | USP25      | 29761  | 37 | 21 | 17236609 | 17236609 | Missense_Mutation | SNP | G  | A  | 4   | 283 | c.2360G>A       | c.(2359-2361)AGG>AAG | p.R787K       |
| Pat_14 | Pre-Treatment | CYYR1      | 116159 | 37 | 21 | 27840893 | 27840893 | Missense_Mutation | SNP | G  | A  | 70  | 243 | c.392C>T        | c.(391-393)CCA>CTA   | p.P131L       |
| Pat_14 | Pre-Treatment | GRIK1      | 2897   | 37 | 21 | 30968846 | 30968846 | Missense_Mutation | SNP | C  | A  | 86  | 396 | c.1251G>T       | c.(1249-1251)AAG>AAT | p.K417N       |
| Pat_14 | Pre-Treatment | KCNE2      | 9992   | 37 | 21 | 35742905 | 35742905 | Missense_Mutation | SNP | C  | T  | 56  | 218 | c.128C>T        | c.(127-129)GCT>GTT   | p.A43V        |
| Pat_14 | Pre-Treatment | CHAF1B     | 8208   | 37 | 21 | 37785564 | 37785564 | Missense_Mutation | SNP | C  | T  | 4   | 215 | c.1444C>T       | c.(1444-1446)CGG>TGG | p.R482W       |
| Pat_14 | Pre-Treatment | TFF1       | 7031   | 37 | 21 | 43783391 | 43783391 | Missense_Mutation | SNP | G  | A  | 51  | 134 | c.211C>T        | c.(211-213)CCT>TCT   | p.P71S        |
| Pat_14 | Pre-Treatment | RSPH1      | 89765  | 37 | 21 | 43913099 | 43913099 | Missense_Mutation | SNP | C  | T  | 169 | 604 | c.145G>A        | c.(145-147)GAA>AAA   | p.E49K        |
| Pat_14 | Pre-Treatment | KRTAP10-7  | 386675 | 37 | 21 | 46020592 | 46020592 | Missense_Mutation | SNP | C  | T  | 47  | 143 | c.71C>T         | c.(70-72)TCC>TTC     | p.S24F        |
| Pat_14 | Pre-Treatment | KRTAP10-12 | 386685 | 37 | 21 | 46117718 | 46117718 | Missense_Mutation | SNP | C  | A  | 9   | 672 | c.602C>A        | c.(601-603)CCT>CAT   | p.P201H       |
| Pat_14 | Pre-Treatment | PCNT       | 5116   | 37 | 21 | 47754654 | 47754654 | Missense_Mutation | SNP | C  | A  | 8   | 599 | c.611C>A        | c.(610-612)CCA>CAA   | p.P204Q       |
| Pat_14 | Pre-Treatment | SLC25A1    | 6576   | 37 | 22 | 19164124 | 19164124 | Missense_Mutation | SNP | G  | T  | 4   | 251 | c.714C>A        | c.(712-714)AAC>AAA   | p.N238K       |
| Pat_14 | Pre-Treatment | CCDC116    | 164592 | 37 | 22 | 21991067 | 21991067 | Missense_Mutation | SNP | C  | T  | 81  | 93  | c.1550C>T       | c.(1549-1551)TCC>TTC | p.S517F       |
| Pat_14 | Pre-Treatment | HPS4       | 89781  | 37 | 22 | 26864540 | 26864540 | Missense_Mutation | SNP | G  | A  | 105 | 120 | c.646C>T        | c.(646-648)CAC>TAC   | p.H216Y       |
| Pat_14 | Pre-Treatment | NEFH       | 4744   | 37 | 22 | 29885739 | 29885739 | Missense_Mutation | SNP | T  | A  | 6   | 299 | c.2110T>A       | c.(2110-2112)TCC>ACC | p.S704T       |
| Pat_14 | Pre-Treatment | MYH9       | 4627   | 37 | 22 | 36697687 | 36697687 | Missense_Mutation | SNP | G  | A  | 74  | 91  | c.2524C>T       | c.(2524-2526)CGG>TGG | p.R842W       |
| Pat_14 | Pre-Treatment | TMPRSS6    | 164656 | 37 | 22 | 37482392 | 37482392 | Missense_Mutation | SNP | C  | T  | 32  | 43  | c.931G>A        | c.(931-933)GTC>ATC   | p.V311I       |
| Pat_14 | Pre-Treatment | PICK1      | 9463   | 37 | 22 | 38461035 | 38461035 | Missense_Mutation | SNP | G  | T  | 8   | 551 | c.180G>T        | c.(178-180)TTG>TTT   | p.L60F        |
| Pat_14 | Pre-Treatment | DDX17      | 10521  | 37 | 22 | 38882109 | 38882109 | Missense_Mutation | SNP | C  | A  | 5   | 313 | c.2027G>T       | c.(2026-2028)AGC>ATC | p.S676I       |
| Pat_14 | Pre-Treatment | GRAP2      | 9402   | 37 | 22 | 40356161 | 40356161 | Missense_Mutation | SNP | C  | A  | 238 | 272 | c.273C>A        | c.(271-273)GAC>GAA   | p.D91E        |
| Pat_14 | Pre-Treatment | TLL12      | 23170  | 37 | 22 | 43579143 | 43579143 | Missense_Mutation | SNP | C  | A  | 6   | 470 | c.190G>T        | c.(190-192)GGG>TGG   | p.G64W        |
| Pat_14 | Pre-Treatment | PLXNB2     | 23654  | 37 | 22 | 50720285 | 50720285 | Missense_Mutation | SNP | G  | A  | 4   | 224 | c.3343C>T       | c.(3343-3345)CGG>TGG | p.R1115W      |
| Pat_14 | Pre-Treatment | CNTN6      | 27255  | 37 | 3  | 1424632  | 1424632  | Missense_Mutation | SNP | C  | T  | 64  | 229 | c.2173C>T       | c.(2173-2175)CCA>TCA | p.P725S       |
| Pat_14 | Pre-Treatment | CNTN4      | 152330 | 37 | 3  | 3097837  | 3097837  | Missense_Mutation | SNP | C  | T  | 69  | 300 | c.3014C>T       | c.(3013-3015)TCG>TTG | p.S1005L      |
| Pat_14 | Pre-Treatment | ITPR1      | 3708   | 37 | 3  | 4808220  | 4808220  | Missense_Mutation | SNP | T  | C  | 3   | 214 | c.5407T>C       | c.(5407-5409)TTT>CTT | p.F1803L      |
| Pat_14 | Pre-Treatment | GRIP2      | 80852  | 37 | 3  | 14552975 | 14552975 | Missense_Mutation | SNP | T  | A  | 36  | 72  | c.2027A>T       | c.(2026-2028)AAA>ATA | p.K676I       |
| Pat_14 | Pre-Treatment | THRB       | 7068   | 37 | 3  | 24169132 | 24169132 | Missense_Mutation | SNP | C  | T  | 133 | 496 | c.1002G>A       | c.(1000-1002)ATG>ATA | p.M334I       |

|        |               |          |        |    |   |           |           |                   |     |    |    |     |     |                                   |                      |          |
|--------|---------------|----------|--------|----|---|-----------|-----------|-------------------|-----|----|----|-----|-----|-----------------------------------|----------------------|----------|
| Pat_14 | Pre-Treatment | TGFB2    | 7048   | 37 | 3 | 30733067  | 30733067  | Missense_Mutation | SNP | C  | G  | 72  | 248 | c.1680C>G                         | c.(1678-1680)GAC>GAG | p.D560E  |
| Pat_14 | Pre-Treatment | GADL1    | 339896 | 37 | 3 | 30769837  | 30769837  | Missense_Mutation | SNP | C  | T  | 40  | 162 | c.1463G>A                         | c.(1462-1464)GGA>GAA | p.G488E  |
| Pat_14 | Pre-Treatment | ZNF860   | 344787 | 37 | 3 | 32031383  | 32031383  | Missense_Mutation | SNP | G  | A  | 85  | 284 | c.812G>A                          | c.(811-813)CGA>CAA   | p.R271Q  |
| Pat_14 | Pre-Treatment | ARPP21   | 10777  | 37 | 3 | 35729257  | 35729257  | Missense_Mutation | SNP | T  | A  | 43  | 214 | c.288T>A                          | c.(286-288)AGT>AGA   | p.S96R   |
| Pat_14 | Pre-Treatment | TRANK1   | 9881   | 37 | 3 | 36880179  | 36880179  | Missense_Mutation | SNP | C  | G  | 19  | 96  | c.3527G>C                         | c.(3526-3528)GGT>GCT | p.G1176A |
| Pat_14 | Pre-Treatment | GOLGA4   | 2803   | 37 | 3 | 37388719  | 37388719  | Nonsense_Mutation | SNP | G  | T  | 5   | 407 | c.6508G>T                         | c.(6508-6510)GGA>TGA | p.G2170* |
| Pat_14 | Pre-Treatment | TTC21A   | 199223 | 37 | 3 | 39151609  | 39151609  | Missense_Mutation | SNP | C  | T  | 49  | 160 | c.247C>T                          | c.(247-249)CAC>TAC   | p.H83Y   |
| Pat_14 | Pre-Treatment | TRAK1    | 22906  | 37 | 3 | 42229637  | 42229637  | Missense_Mutation | SNP | C  | A  | 6   | 379 | c.581C>A                          | c.(580-582)CCG>CAG   | p.P194Q  |
| Pat_14 | Pre-Treatment | ZNF167   | 55888  | 37 | 3 | 44612818  | 44612818  | Missense_Mutation | SNP | G  | A  | 75  | 213 | c.2216G>A                         | c.(2215-2217)CGA>CAA | p.R739Q  |
| Pat_14 | Pre-Treatment | LIMD1    | 8994   | 37 | 3 | 45637266  | 45637266  | Missense_Mutation | SNP | G  | A  | 4   | 181 | c.895G>A                          | c.(895-897)GCA>ACA   | p.A299T  |
| Pat_14 | Pre-Treatment | CCRL2    | 9034   | 37 | 3 | 46450597  | 46450597  | Missense_Mutation | SNP | G  | A  | 100 | 296 | c.1027G>A                         | c.(1027-1029)GAA>AAA | p.E343K  |
| Pat_14 | Pre-Treatment | ALS2CL   | 259173 | 37 | 3 | 46712485  | 46712485  | Nonsense_Mutation | SNP | C  | A  | 115 | 401 | c.2851G>T                         | c.(2851-2853)GAG>TAG | p.E951*  |
| Pat_14 | Pre-Treatment | COL7A1   | 1294   | 37 | 3 | 48618019  | 48618019  | Nonsense_Mutation | SNP | G  | A  | 4   | 116 | c.5047C>T                         | c.(5047-5049)CGA>TGA | p.R1683* |
| Pat_14 | Pre-Treatment | IMPDH2   | 3615   | 37 | 3 | 49065338  | 49065338  | Missense_Mutation | SNP | C  | A  | 4   | 86  | c.336G>T                          | c.(334-336)CAG>CAT   | p.Q112H  |
| Pat_14 | Pre-Treatment | WNT5A    | 7474   | 37 | 3 | 55504548  | 55504548  | Missense_Mutation | SNP | T  | G  | 14  | 38  | c.715A>C                          | c.(715-717)AAG>CAG   | p.K239Q  |
| Pat_14 | Pre-Treatment | CADPS    | 8618   | 37 | 3 | 62518660  | 62518660  | Missense_Mutation | SNP | C  | T  | 85  | 303 | c.2177G>A                         | c.(2176-2178)CGA>CAA | p.R726Q  |
| Pat_14 | Pre-Treatment | ADAMTS9  | 56999  | 37 | 3 | 64592701  | 64592701  | Missense_Mutation | SNP | C  | A  | 24  | 536 | c.3409G>T                         | c.(3409-3411)GGG>TGG | p.G1137W |
| Pat_14 | Pre-Treatment | TMF1     | 7110   | 37 | 3 | 69097491  | 69097491  | Missense_Mutation | SNP | G  | A  | 146 | 616 | c.365C>T                          | c.(364-366)TCA>TTA   | p.S122L  |
| Pat_14 | Pre-Treatment | LMOD3    | 56203  | 37 | 3 | 69168038  | 69168038  | Missense_Mutation | SNP | G  | C  | 13  | 86  | c.1468C>G                         | c.(1468-1470)CTG>GTG | p.L490V  |
| Pat_14 | Pre-Treatment | VGLL3    | 389136 | 37 | 3 | 87017835  | 87017835  | Missense_Mutation | SNP | T  | A  | 21  | 93  | c.842A>T                          | c.(841-843)AAG>ATG   | p.K281M  |
| Pat_14 | Pre-Treatment | EPHA6    | 285220 | 37 | 3 | 96945187  | 96945187  | Missense_Mutation | SNP | G  | A  | 83  | 336 | c.1194G>A                         | c.(1192-1194)ATG>ATA | p.M398I  |
| Pat_14 | Pre-Treatment | CD96     | 10225  | 37 | 3 | 111298054 | 111298054 | Missense_Mutation | SNP | A  | G  | 67  | 274 | c.772A>G                          | c.(772-774)AGG>GGG   | p.R258G  |
| Pat_14 | Pre-Treatment | TAGLN3   | 29114  | 37 | 3 | 111719719 | 111719719 | Missense_Mutation | SNP | C  | T  | 117 | 405 | c.281C>T                          | c.(280-282)TCC>TTC   | p.S94F   |
| Pat_14 | Pre-Treatment | C3orf15  | 89876  | 37 | 3 | 119449097 | 119449097 | Missense_Mutation | SNP | A  | T  | 83  | 320 | c.891A>T                          | c.(889-891)AAA>AAT   | p.K297N  |
| Pat_14 | Pre-Treatment | STXBP5L  | 9515   | 37 | 3 | 120924797 | 120924797 | Missense_Mutation | SNP | C  | T  | 30  | 151 | c.905C>T                          | c.(904-906)TCT>TTT   | p.S302F  |
| Pat_14 | Pre-Treatment | SLC15A2  | 6565   | 37 | 3 | 121613331 | 121613331 | Missense_Mutation | SNP | C  | T  | 82  | 260 | c.8C>T                            | c.(7-9)CCT>CTT       | p.P3L    |
| Pat_14 | Pre-Treatment | CCDC14   | 64770  | 37 | 3 | 123663780 | 123663780 | Missense_Mutation | SNP | G  | A  | 32  | 135 | c.1403C>T                         | c.(1402-1404)CCA>CTA | p.P468L  |
| Pat_14 | Pre-Treatment | SLC12A8  | 84561  | 37 | 3 | 124839501 | 124839501 | Missense_Mutation | SNP | C  | T  | 20  | 87  | c.766G>A                          | c.(766-768)GAC>AAC   | p.D256N  |
| Pat_14 | Pre-Treatment | EEFSEC   | 60678  | 37 | 3 | 127983587 | 127983587 | Missense_Mutation | SNP | T  | C  | 3   | 197 | c.749T>C                          | c.(748-750)ATC>ACC   | p.I250T  |
| Pat_14 | Pre-Treatment | PLXND1   | 23129  | 37 | 3 | 129289909 | 129289910 | Missense_Mutation | DNP | CG | AT | 6   | 740 | .3573_3574CG>A571-3576)CCCGGG>CCA |                      | p.G1192W |
| Pat_14 | Pre-Treatment | TMEM108  | 66000  | 37 | 3 | 133099648 | 133099648 | Missense_Mutation | SNP | G  | A  | 47  | 185 | c.1093G>A                         | c.(1093-1095)GAT>AAT | p.D365N  |
| Pat_14 | Pre-Treatment | RAB6B    | 51560  | 37 | 3 | 133558447 | 133558447 | Nonsense_Mutation | SNP | G  | A  | 92  | 317 | c.304C>T                          | c.(304-306)CAA>TAA   | p.Q102*  |
| Pat_14 | Pre-Treatment | DZIP1L   | 199221 | 37 | 3 | 137787171 | 137787171 | Nonsense_Mutation | SNP | G  | A  | 4   | 208 | c.1654C>T                         | c.(1654-1656)CAG>TAG | p.Q552*  |
| Pat_14 | Pre-Treatment | SIAH2    | 6478   | 37 | 3 | 150460311 | 150460311 | Missense_Mutation | SNP | G  | T  | 6   | 443 | c.592C>A                          | c.(592-594)CTT>ATT   | p.L198I  |
| Pat_14 | Pre-Treatment | IGSF10   | 285313 | 37 | 3 | 151163294 | 151163294 | Missense_Mutation | SNP | G  | T  | 4   | 238 | c.4475C>A                         | c.(4474-4476)ACT>AAT | p.T1492N |
| Pat_14 | Pre-Treatment | SERPINI2 | 5276   | 37 | 3 | 167189388 | 167189388 | Missense_Mutation | SNP | C  | T  | 74  | 305 | c.235G>A                          | c.(235-237)GAA>AAA   | p.E79K   |
| Pat_14 | Pre-Treatment | NAALADL2 | 254827 | 37 | 3 | 175181255 | 175181255 | Missense_Mutation | SNP | G  | A  | 16  | 58  | c.1301G>A                         | c.(1300-1302)GGA>GAA | p.G434E  |
| Pat_14 | Pre-Treatment | CCDC39   | 339829 | 37 | 3 | 180377266 | 180377266 | Missense_Mutation | SNP | C  | T  | 34  | 148 | c.712G>A                          | c.(712-714)GAT>AAT   | p.D238N  |
| Pat_14 | Pre-Treatment | EIF4G1   | 1981   | 37 | 3 | 184052572 | 184052572 | Missense_Mutation | SNP | C  | T  | 100 | 366 | c.4676C>T                         | c.(4675-4677)GCC>GTC | p.A1559V |
| Pat_14 | Pre-Treatment | C3orf70  | 285382 | 37 | 3 | 184800847 | 184800847 | Missense_Mutation | SNP | G  | A  | 93  | 455 | c.701C>T                          | c.(700-702)TCC>TTC   | p.S234F  |
| Pat_14 | Pre-Treatment | RTP1     | 132112 | 37 | 3 | 186915381 | 186915381 | Nonsense_Mutation | SNP | G  | A  | 85  | 301 | c.78G>A                           | c.(76-78)TGG>TGA     | p.W26*   |
| Pat_14 | Pre-Treatment | MASP1    | 5648   | 37 | 3 | 187003740 | 187003740 | Missense_Mutation | SNP | G  | A  | 69  | 246 | c.110C>T                          | c.(109-111)CCA>CTA   | p.P37L   |
| Pat_14 | Pre-Treatment | RTP2     | 344892 | 37 | 3 | 187416366 | 187416366 | Missense_Mutation | SNP | G  | A  | 49  | 185 | c.598C>T                          | c.(598-600)CGC>TGC   | p.R200C  |
| Pat_14 | Pre-Treatment | LEPREL1  | 55214  | 37 | 3 | 189711976 | 189711976 | Missense_Mutation | SNP | C  | T  | 44  | 205 | c.730G>A                          | c.(730-732)GAT>AAT   | p.D244N  |
| Pat_14 | Pre-Treatment | ATP13A5  | 344905 | 37 | 3 | 193031914 | 193031914 | Missense_Mutation | SNP | T  | A  | 40  | 465 | c.2227A>T                         | c.(2227-2229)ATC>TTC | p.I743F  |
| Pat_14 | Pre-Treatment | MUC4     | 4585   | 37 | 3 | 195516473 | 195516473 | Missense_Mutation | SNP | C  | T  | 103 | 305 | c.1978G>A                         | c.(1978-1980)GAC>AAC | p.D660N  |
| Pat_14 | Pre-Treatment | LMLN     | 89782  | 37 | 3 | 197717465 | 197717465 | Missense_Mutation | SNP | G  | A  | 84  | 275 | c.965G>A                          | c.(964-966)CGA>CAA   | p.R322Q  |

|        |               |           |        |    |   |           |           |                   |     |    |    |     |     |                |                      |          |
|--------|---------------|-----------|--------|----|---|-----------|-----------|-------------------|-----|----|----|-----|-----|----------------|----------------------|----------|
| Pat_14 | Pre-Treatment | ZNF595    | 152687 | 37 | 4 | 59969     | 59969     | Missense_Mutation | SNP | C  | T  | 10  | 280 | c.149C>T       | c.(148-150)CCA>CTA   | p.P50L   |
| Pat_14 | Pre-Treatment | PDE6B     | 5158   | 37 | 4 | 628610    | 628610    | Missense_Mutation | SNP | G  | A  | 66  | 151 | c.613G>A       | c.(613-615)GAC>AAC   | p.D205N  |
| Pat_14 | Pre-Treatment | FGFRL1    | 53834  | 37 | 4 | 1018918   | 1018918   | Missense_Mutation | SNP | C  | T  | 15  | 40  | c.1298C>T      | c.(1297-1299)CCC>CTC | p.P433L  |
| Pat_14 | Pre-Treatment | SLBP      | 7884   | 37 | 4 | 1695421   | 1695421   | Missense_Mutation | SNP | G  | T  | 6   | 246 | c.716C>A       | c.(715-717)CCC>CAC   | p.P239H  |
| Pat_14 | Pre-Treatment | SH3TC1    | 54436  | 37 | 4 | 8226937   | 8226937   | Missense_Mutation | SNP | G  | A  | 31  | 46  | c.1279G>A      | c.(1279-1281)GAA>AAA | p.E427K  |
| Pat_14 | Pre-Treatment | STIM2     | 57620  | 37 | 4 | 27024457  | 27024457  | Missense_Mutation | SNP | C  | A  | 5   | 243 | c.2365C>A      | c.(2365-2367)CGC>AGC | p.R789S  |
| Pat_14 | Pre-Treatment | TLR10     | 81793  | 37 | 4 | 38777034  | 38777034  | Missense_Mutation | SNP | G  | T  | 47  | 106 | c.178C>A       | c.(178-180)CTT>ATT   | p.L60I   |
| Pat_14 | Pre-Treatment | KIAA1211  | 57482  | 37 | 4 | 57182501  | 57182501  | Missense_Mutation | SNP | G  | A  | 32  | 63  | c.2833G>A      | c.(2833-2835)GCT>ACT | p.A945T  |
| Pat_14 | Pre-Treatment | TMPRSS11B | 132724 | 37 | 4 | 69100328  | 69100328  | Missense_Mutation | SNP | C  | T  | 57  | 159 | c.322G>A       | c.(322-324)GGT>AGT   | p.G108S  |
| Pat_14 | Pre-Treatment | CCDC158   | 339965 | 37 | 4 | 77292608  | 77292608  | Missense_Mutation | SNP | C  | T  | 47  | 75  | c.1111G>A      | c.(1111-1113)GAA>AAA | p.E371K  |
| Pat_14 | Pre-Treatment | CXCL13    | 10563  | 37 | 4 | 78528940  | 78528940  | Nonsense_Mutation | SNP | C  | T  | 71  | 154 | c.148C>T       | c.(148-150)CGA>TGA   | p.R50*   |
| Pat_14 | Pre-Treatment | NKX6-1    | 4825   | 37 | 4 | 85416846  | 85416847  | Missense_Mutation | DNP | CC | TT | 83  | 281 | c.821_822GG>AA | c.(820-822)GGG>GAA   | p.G274E  |
| Pat_14 | Pre-Treatment | MEPE      | 56955  | 37 | 4 | 88767137  | 88767137  | Missense_Mutation | SNP | C  | T  | 23  | 52  | c.1117C>T      | c.(1117-1119)CAT>TAT | p.H373Y  |
| Pat_14 | Pre-Treatment | ABCG2     | 9429   | 37 | 4 | 89052255  | 89052255  | Missense_Mutation | SNP | C  | A  | 8   | 589 | c.489G>T       | c.(487-489)AGG>AGT   | p.R163S  |
| Pat_14 | Pre-Treatment | FAM190A   | 401145 | 37 | 4 | 91234040  | 91234040  | Missense_Mutation | SNP | C  | T  | 7   | 14  | c.1351C>T      | c.(1351-1353)CGT>TGT | p.R451C  |
| Pat_14 | Pre-Treatment | FAM190A   | 401145 | 37 | 4 | 91549378  | 91549378  | Nonsense_Mutation | SNP | C  | T  | 22  | 52  | c.1927C>T      | c.(1927-1929)CAA>TAA | p.Q643*  |
| Pat_14 | Pre-Treatment | ADH4      | 127    | 37 | 4 | 100052663 | 100052663 | Missense_Mutation | SNP | C  | T  | 55  | 121 | c.835G>A       | c.(835-837)GAA>AAA   | p.E279K  |
| Pat_14 | Pre-Treatment | ANK2      | 287    | 37 | 4 | 114254292 | 114254292 | Missense_Mutation | SNP | G  | A  | 5   | 297 | c.3307G>A      | c.(3307-3309)GAC>AAC | p.D1103N |
| Pat_14 | Pre-Treatment | PDE5A     | 8654   | 37 | 4 | 120419851 | 120419851 | Missense_Mutation | SNP | C  | T  | 111 | 185 | c.2533G>A      | c.(2533-2535)GGC>AGC | p.G845S  |
| Pat_14 | Pre-Treatment | PRDM5     | 11107  | 37 | 4 | 121774608 | 121774608 | Missense_Mutation | SNP | G  | A  | 232 | 491 | c.265C>T       | c.(265-267)CCA>TCA   | p.P89S   |
| Pat_14 | Pre-Treatment | FAT4      | 79633  | 37 | 4 | 126237672 | 126237672 | Missense_Mutation | SNP | G  | T  | 6   | 433 | c.106G>T       | c.(106-108)GGG>TGG   | p.G36W   |
| Pat_14 | Pre-Treatment | HHIP      | 64399  | 37 | 4 | 145567955 | 145567955 | Missense_Mutation | SNP | A  | G  | 32  | 97  | c.128A>G       | c.(127-129)AAC>AGC   | p.N43S   |
| Pat_14 | Pre-Treatment | DCHS2     | 54798  | 37 | 4 | 155219534 | 155219534 | Missense_Mutation | SNP | C  | A  | 7   | 321 | c.4567G>T      | c.(4567-4569)GGT>TGT | p.G1523C |
| Pat_14 | Pre-Treatment | FGA       | 2243   | 37 | 4 | 155507677 | 155507677 | Missense_Mutation | SNP | G  | T  | 4   | 248 | c.904C>A       | c.(904-906)CCT>ACT   | p.P302T  |
| Pat_14 | Pre-Treatment | GUCY1B3   | 2983   | 37 | 4 | 156723706 | 156723706 | Missense_Mutation | SNP | C  | T  | 17  | 42  | c.1388C>T      | c.(1387-1389)TCC>TTC | p.S463F  |
| Pat_14 | Pre-Treatment | CTSO      | 1519   | 37 | 4 | 156858553 | 156858553 | Missense_Mutation | SNP | G  | A  | 47  | 123 | c.635C>T       | c.(634-636)TCT>TTT   | p.S212F  |
| Pat_14 | Pre-Treatment | NEIL3     | 55247  | 37 | 4 | 178274739 | 178274739 | Missense_Mutation | SNP | T  | G  | 7   | 268 | c.1317T>G      | c.(1315-1317)GAT>GAG | p.D439E  |
| Pat_14 | Pre-Treatment | PDLIM3    | 27295  | 37 | 4 | 186435488 | 186435488 | Missense_Mutation | SNP | C  | A  | 5   | 327 | c.334G>T       | c.(334-336)GGG>TGG   | p.G112W  |
| Pat_14 | Pre-Treatment | SORBS2    | 8470   | 37 | 4 | 186544155 | 186544155 | Missense_Mutation | SNP | C  | A  | 8   | 230 | c.2416G>T      | c.(2416-2418)GGG>TGG | p.G806W  |
| Pat_14 | Pre-Treatment | CTNND2    | 1501   | 37 | 5 | 11565098  | 11565098  | Missense_Mutation | SNP | C  | T  | 46  | 151 | c.245G>A       | c.(244-246)CGA>CAA   | p.R82Q   |
| Pat_14 | Pre-Treatment | DNAH5     | 1767   | 37 | 5 | 13781040  | 13781040  | Missense_Mutation | SNP | C  | T  | 50  | 140 | c.8849G>A      | c.(8848-8850)GGA>GAA | p.G2950E |
| Pat_14 | Pre-Treatment | FAM105B   | 90268  | 37 | 5 | 14678841  | 14678841  | Missense_Mutation | SNP | A  | G  | 44  | 112 | c.281A>G       | c.(280-282)AAA>AGA   | p.K94R   |
| Pat_14 | Pre-Treatment | PRDM9     | 56979  | 37 | 5 | 23523433  | 23523433  | Missense_Mutation | SNP | G  | A  | 51  | 210 | c.916G>A       | c.(916-918)GAT>AAT   | p.D306N  |
| Pat_14 | Pre-Treatment | SPEF2     | 79925  | 37 | 5 | 35771819  | 35771819  | Missense_Mutation | SNP | G  | A  | 9   | 40  | c.3910G>A      | c.(3910-3912)GAG>AAG | p.E1304K |
| Pat_14 | Pre-Treatment | FYB       | 2533   | 37 | 5 | 39202834  | 39202834  | Missense_Mutation | SNP | C  | T  | 17  | 37  | c.229G>A       | c.(229-231)GAA>AAA   | p.E77K   |
| Pat_14 | Pre-Treatment | HEATR7B2  | 133558 | 37 | 5 | 41045898  | 41045898  | Nonsense_Mutation | SNP | G  | A  | 161 | 522 | c.1786C>T      | c.(1786-1788)CAG>TAG | p.Q596*  |
| Pat_14 | Pre-Treatment | OXCT1     | 5019   | 37 | 5 | 41853607  | 41853607  | Missense_Mutation | SNP | G  | A  | 4   | 169 | c.328C>T       | c.(328-330)CGC>TGC   | p.R110C  |
| Pat_14 | Pre-Treatment | GHR       | 2690   | 37 | 5 | 42695140  | 42695140  | Missense_Mutation | SNP | A  | G  | 48  | 134 | c.388A>G       | c.(388-390)ACT>GCT   | p.T130A  |
| Pat_14 | Pre-Treatment | IL31RA    | 133396 | 37 | 5 | 55202002  | 55202002  | Missense_Mutation | SNP | T  | A  | 114 | 293 | c.1138T>A      | c.(1138-1140)TCT>ACT | p.S380T  |
| Pat_14 | Pre-Treatment | HAPLN1    | 1404   | 37 | 5 | 82948521  | 82948521  | Missense_Mutation | SNP | G  | A  | 89  | 273 | c.223C>T       | c.(223-225)CAT>TAT   | p.H75Y   |
| Pat_14 | Pre-Treatment | ARSK      | 153642 | 37 | 5 | 94918703  | 94918703  | Missense_Mutation | SNP | G  | A  | 6   | 396 | c.500G>A       | c.(499-501)AGG>AAG   | p.R167K  |
| Pat_14 | Pre-Treatment | APC       | 324    | 37 | 5 | 112174268 | 112174268 | Missense_Mutation | SNP | A  | C  | 69  | 201 | c.2977A>C      | c.(2977-2979)AAG>CAG | p.K993Q  |
| Pat_14 | Pre-Treatment | CHSY3     | 337876 | 37 | 5 | 129520087 | 129520087 | Missense_Mutation | SNP | C  | T  | 38  | 114 | c.1252C>T      | c.(1252-1254)CGC>TGC | p.R418C  |
| Pat_14 | Pre-Treatment | FNIP1     | 96459  | 37 | 5 | 131066631 | 131066631 | Missense_Mutation | SNP | G  | A  | 61  | 132 | c.320C>T       | c.(319-321)TCT>TTT   | p.S107F  |
| Pat_14 | Pre-Treatment | IL13      | 3596   | 37 | 5 | 131995518 | 131995518 | Missense_Mutation | SNP | G  | T  | 37  | 82  | c.331G>T       | c.(331-333)GGG>TGG   | p.G111W  |
| Pat_14 | Pre-Treatment | DDX46     | 9879   | 37 | 5 | 134154607 | 134154607 | Missense_Mutation | SNP | G  | A  | 35  | 91  | c.2887G>A      | c.(2887-2889)GAA>AAA | p.E963K  |
| Pat_14 | Pre-Treatment | TRPC7     | 57113  | 37 | 5 | 135587487 | 135587487 | Missense_Mutation | SNP | C  | T  | 4   | 161 | c.1426G>A      | c.(1426-1428)GGG>AGG | p.G476R  |

|        |               |          |        |    |   |           |           |                   |     |    |    |     |     |                |                      |          |
|--------|---------------|----------|--------|----|---|-----------|-----------|-------------------|-----|----|----|-----|-----|----------------|----------------------|----------|
| Pat_14 | Pre-Treatment | KLHL3    | 26249  | 37 | 5 | 137045463 | 137045463 | Missense_Mutation | SNP | G  | A  | 99  | 243 | c.217C>T       | c.(217-219)CCC>TCC   | p.P73S   |
| Pat_14 | Pre-Treatment | PCDHA7   | 56141  | 37 | 5 | 140215352 | 140215352 | Missense_Mutation | SNP | G  | A  | 77  | 166 | c.1384G>A      | c.(1384-1386)GTG>ATG | p.V462M  |
| Pat_14 | Pre-Treatment | PCDHB7   | 56129  | 37 | 5 | 140553374 | 140553374 | Missense_Mutation | SNP | C  | G  | 4   | 321 | c.958C>G       | c.(958-960)CAG>GAG   | p.Q320E  |
| Pat_14 | Pre-Treatment | GNPDA1   | 10007  | 37 | 5 | 141385873 | 141385873 | Missense_Mutation | SNP | G  | T  | 5   | 216 | c.245C>A       | c.(244-246)CCG>CAG   | p.P82Q   |
| Pat_14 | Pre-Treatment | SPINK1   | 6690   | 37 | 5 | 147209175 | 147209175 | Missense_Mutation | SNP | G  | A  | 63  | 124 | c.74C>T        | c.(73-75)TCC>TTC     | p.S25F   |
| Pat_14 | Pre-Treatment | CSF1R    | 1436   | 37 | 5 | 149460362 | 149460362 | Missense_Mutation | SNP | C  | T  | 15  | 44  | c.275G>A       | c.(274-276)GGA>GAA   | p.G92E   |
| Pat_14 | Pre-Treatment | TIMD4    | 91937  | 37 | 5 | 156375486 | 156375486 | Nonsense_Mutation | SNP | G  | C  | 4   | 172 | c.785C>G       | c.(784-786)TCA>TGA   | p.S262*  |
| Pat_14 | Pre-Treatment | ODZ2     | 57451  | 37 | 5 | 167671462 | 167671462 | Missense_Mutation | SNP | G  | A  | 26  | 58  | c.5531G>A      | c.(5530-5532)CGA>CAA | p.R1844Q |
| Pat_14 | Pre-Treatment | FGF18    | 8817   | 37 | 5 | 170863238 | 170863238 | Missense_Mutation | SNP | C  | T  | 4   | 101 | c.211C>T       | c.(211-213)CGC>TGC   | p.R71C   |
| Pat_14 | Pre-Treatment | C5orf41  | 153222 | 37 | 5 | 172518273 | 172518273 | Missense_Mutation | SNP | T  | C  | 14  | 47  | c.1091T>C      | c.(1090-1092)GTT>GCT | p.V364A  |
| Pat_14 | Pre-Treatment | HMP19    | 51617  | 37 | 5 | 173473792 | 173473792 | Missense_Mutation | SNP | G  | A  | 111 | 233 | c.34G>A        | c.(34-36)GGA>AGA     | p.G12R   |
| Pat_14 | Pre-Treatment | UNC5A    | 90249  | 37 | 5 | 176305503 | 176305503 | Missense_Mutation | SNP | G  | A  | 67  | 150 | c.2047G>A      | c.(2047-2049)GGC>AGC | p.G683S  |
| Pat_14 | Pre-Treatment | MYLK4    | 340156 | 37 | 6 | 2689143   | 2689143   | Missense_Mutation | SNP | C  | A  | 7   | 753 | c.283G>T       | c.(283-285)GCC>TCC   | p.A95S   |
| Pat_14 | Pre-Treatment | C6orf146 | 222826 | 37 | 6 | 4069088   | 4069088   | Missense_Mutation | SNP | C  | T  | 26  | 140 | c.1369G>A      | c.(1369-1371)GAA>AAA | p.E457K  |
| Pat_14 | Pre-Treatment | DSP      | 1832   | 37 | 6 | 7574391   | 7574391   | Missense_Mutation | SNP | G  | A  | 67  | 283 | c.2203G>A      | c.(2203-2205)GGT>AGT | p.G735S  |
| Pat_14 | Pre-Treatment | HIVEP1   | 3096   | 37 | 6 | 12164204  | 12164204  | Missense_Mutation | SNP | C  | T  | 44  | 159 | c.7667C>T      | c.(7666-7668)CCC>CTC | p.P2556L |
| Pat_14 | Pre-Treatment | EDN1     | 1906   | 37 | 6 | 12294298  | 12294298  | Missense_Mutation | SNP | T  | G  | 81  | 334 | c.358T>G       | c.(358-360)TGG>GGG   | p.W120G  |
| Pat_14 | Pre-Treatment | BTN3A1   | 11119  | 37 | 6 | 26406217  | 26406217  | Missense_Mutation | SNP | C  | T  | 98  | 434 | c.166C>T       | c.(166-168)CCG>TCG   | p.P56S   |
| Pat_14 | Pre-Treatment | PRSS16   | 10279  | 37 | 6 | 27216651  | 27216651  | Missense_Mutation | SNP | G  | T  | 6   | 327 | c.263G>T       | c.(262-264)TGG>TTG   | p.W88L   |
| Pat_14 | Pre-Treatment | SCAND3   | 114821 | 37 | 6 | 28542612  | 28542612  | Missense_Mutation | SNP | G  | A  | 35  | 124 | c.1870C>T      | c.(1870-1872)CAT>TAT | p.H624Y  |
| Pat_14 | Pre-Treatment | OR5V1    | 81696  | 37 | 6 | 29323149  | 29323149  | Missense_Mutation | SNP | G  | A  | 134 | 482 | c.824C>T       | c.(823-825)TCA>TTA   | p.S275L  |
| Pat_14 | Pre-Treatment | TNF      | 7124   | 37 | 6 | 31545084  | 31545084  | Missense_Mutation | SNP | C  | T  | 82  | 257 | c.472C>T       | c.(472-474)CGC>TGC   | p.R158C  |
| Pat_14 | Pre-Treatment | EHMT2    | 10919  | 37 | 6 | 31847961  | 31847961  | Nonsense_Mutation | SNP | G  | T  | 5   | 197 | c.3533C>A      | c.(3532-3534)TCA>TAA | p.S1178* |
| Pat_14 | Pre-Treatment | TNXB     | 7148   | 37 | 6 | 32032724  | 32032724  | Missense_Mutation | SNP | G  | A  | 7   | 99  | c.6715C>T      | c.(6715-6717)CGG>TGG | p.R2239W |
| Pat_14 | Pre-Treatment | SPDEF    | 25803  | 37 | 6 | 34507032  | 34507032  | Missense_Mutation | SNP | T  | A  | 154 | 517 | c.824A>T       | c.(823-825)GAG>GTG   | p.E275V  |
| Pat_14 | Pre-Treatment | C6orf222 | 389384 | 37 | 6 | 36291138  | 36291138  | Missense_Mutation | SNP | C  | T  | 87  | 330 | c.1403G>A      | c.(1402-1404)CGA>CAA | p.R468Q  |
| Pat_14 | Pre-Treatment | DNAH8    | 1769   | 37 | 6 | 38790614  | 38790614  | Missense_Mutation | SNP | G  | A  | 15  | 67  | c.2873G>A      | c.(2872-2874)AGA>AAA | p.R958K  |
| Pat_14 | Pre-Treatment | DNAH8    | 1769   | 37 | 6 | 38793989  | 38793989  | Missense_Mutation | SNP | G  | A  | 43  | 133 | c.3254G>A      | c.(3253-3255)CGA>CAA | p.R1085Q |
| Pat_14 | Pre-Treatment | DNAH8    | 1769   | 37 | 6 | 38863996  | 38863996  | Missense_Mutation | SNP | G  | A  | 26  | 144 | c.8284G>A      | c.(8284-8286)GAA>AAA | p.E2762K |
| Pat_14 | Pre-Treatment | CUL9     | 23113  | 37 | 6 | 43188237  | 43188237  | Missense_Mutation | SNP | A  | C  | 9   | 775 | c.6323A>C      | c.(6322-6324)AAC>ACC | p.N2108T |
| Pat_14 | Pre-Treatment | CLIC5    | 53405  | 37 | 6 | 45922948  | 45922948  | Missense_Mutation | SNP | G  | A  | 48  | 142 | c.574C>T       | c.(574-576)CCT>TCT   | p.P192S  |
| Pat_14 | Pre-Treatment | TDRD6    | 221400 | 37 | 6 | 46659919  | 46659919  | Missense_Mutation | SNP | C  | T  | 143 | 594 | c.4054C>T      | c.(4054-4056)CCT>TCT | p.P1352S |
| Pat_14 | Pre-Treatment | GPR115   | 221393 | 37 | 6 | 47681717  | 47681717  | Missense_Mutation | SNP | C  | T  | 52  | 209 | c.736C>T       | c.(736-738)CAC>TAC   | p.H246Y  |
| Pat_14 | Pre-Treatment | PGK2     | 5232   | 37 | 6 | 49754605  | 49754605  | Missense_Mutation | SNP | C  | T  | 42  | 287 | c.296G>A       | c.(295-297)TGT>TAT   | p.C99Y   |
| Pat_14 | Pre-Treatment | MCM3     | 4172   | 37 | 6 | 52147627  | 52147627  | Missense_Mutation | SNP | G  | A  | 18  | 108 | c.224C>T       | c.(223-225)GCC>GTC   | p.A75V   |
| Pat_14 | Pre-Treatment | TINAG    | 27283  | 37 | 6 | 54245350  | 54245350  | Missense_Mutation | SNP | G  | T  | 22  | 164 | c.1277G>T      | c.(1276-1278)GGG>GTG | p.G426V  |
| Pat_14 | Pre-Treatment | FAM83B   | 222584 | 37 | 6 | 54804839  | 54804839  | Missense_Mutation | SNP | G  | A  | 37  | 249 | c.1070G>A      | c.(1069-1071)GGA>GAA | p.G357E  |
| Pat_14 | Pre-Treatment | GFRAL    | 389400 | 37 | 6 | 55223831  | 55223831  | Missense_Mutation | SNP | C  | T  | 94  | 375 | c.847C>T       | c.(847-849)CTT>TTT   | p.L283F  |
| Pat_14 | Pre-Treatment | HMGCLL1  | 54511  | 37 | 6 | 55406860  | 55406860  | Missense_Mutation | SNP | T  | C  | 35  | 112 | c.277A>G       | c.(277-279)AAG>GAG   | p.K93E   |
| Pat_14 | Pre-Treatment | BMP5     | 653    | 37 | 6 | 55620477  | 55620477  | Missense_Mutation | SNP | G  | A  | 51  | 182 | c.1219C>T      | c.(1219-1221)CAT>TAT | p.H407Y  |
| Pat_14 | Pre-Treatment | COL21A1  | 81578  | 37 | 6 | 55932118  | 55932118  | Missense_Mutation | SNP | C  | T  | 38  | 162 | c.2102G>A      | c.(2101-2103)GGA>GAA | p.G701E  |
| Pat_14 | Pre-Treatment | COL21A1  | 81578  | 37 | 6 | 56021744  | 56021744  | Missense_Mutation | SNP | C  | T  | 16  | 88  | c.1375G>A      | c.(1375-1377)GAC>AAC | p.D459N  |
| Pat_14 | Pre-Treatment | COL21A1  | 81578  | 37 | 6 | 56035908  | 56035908  | Missense_Mutation | SNP | C  | T  | 74  | 298 | c.659G>A       | c.(658-660)CGA>CAA   | p.R220Q  |
| Pat_14 | Pre-Treatment | BAI3     | 577    | 37 | 6 | 69349189  | 69349189  | Missense_Mutation | SNP | G  | A  | 63  | 194 | c.622G>A       | c.(622-624)GAC>AAC   | p.D208N  |
| Pat_14 | Pre-Treatment | COL19A1  | 1310   | 37 | 6 | 70639347  | 70639348  | Missense_Mutation | DNP | GT | AA | 26  | 165 | c.421_422GT>AA | c.(421-423)GTG>AAG   | p.V141K  |
| Pat_14 | Pre-Treatment | COL12A1  | 1303   | 37 | 6 | 75893077  | 75893077  | Missense_Mutation | SNP | C  | T  | 125 | 462 | c.1580G>A      | c.(1579-1581)AGA>AAA | p.R527K  |
| Pat_14 | Pre-Treatment | IMPG1    | 3617   | 37 | 6 | 76660536  | 76660536  | Missense_Mutation | SNP | C  | T  | 29  | 100 | c.1567G>A      | c.(1567-1569)GAT>AAT | p.D523N  |



|        |               |          |        |    |   |           |           |                   |     |    |    |     |     |                |                       |          |
|--------|---------------|----------|--------|----|---|-----------|-----------|-------------------|-----|----|----|-----|-----|----------------|-----------------------|----------|
| Pat_14 | Pre-Treatment | DOPEY1   | 23033  | 37 | 6 | 83840033  | 83840033  | Missense_Mutation | SNP | C  | A  | 6   | 220 | c.2533C>A      | c.(2533-2535)CAG>AAG  | p.Q845K  |
| Pat_14 | Pre-Treatment | GJB7     | 375519 | 37 | 6 | 87994082  | 87994082  | Missense_Mutation | SNP | C  | A  | 6   | 418 | c.549G>T       | c.(547-549)TTG>TTT    | p.L183F  |
| Pat_14 | Pre-Treatment | ANKRD6   | 22881  | 37 | 6 | 90340178  | 90340179  | Missense_Mutation | DNP | GG | AA | 40  | 189 | .1639_1640GG>A | c.(1639-1641)GGT>AAT  | p.G547N  |
| Pat_14 | Pre-Treatment | GPR63    | 81491  | 37 | 6 | 97246787  | 97246787  | Missense_Mutation | SNP | A  | C  | 74  | 264 | c.821T>G       | c.(820-822)TTG>TGG    | p.L274W  |
| Pat_14 | Pre-Treatment | WISP3    | 8838   | 37 | 6 | 112389575 | 112389575 | Missense_Mutation | SNP | G  | A  | 29  | 85  | c.757G>A       | c.(757-759)GAC>AAC    | p.D253N  |
| Pat_14 | Pre-Treatment | LAMA4    | 3910   | 37 | 6 | 112454670 | 112454670 | Missense_Mutation | SNP | G  | A  | 77  | 256 | c.3577C>T      | c.(3577-3579)CCC>TCC  | p.P1193S |
| Pat_14 | Pre-Treatment | C6orf191 | 253582 | 37 | 6 | 130164717 | 130164717 | Missense_Mutation | SNP | C  | T  | 85  | 374 | c.151G>A       | c.(151-153)GAT>AAT    | p.D51N   |
| Pat_14 | Pre-Treatment | EPB41L2  | 2037   | 37 | 6 | 131216236 | 131216236 | Missense_Mutation | SNP | C  | A  | 82  | 566 | c.1260G>T      | c.(1258-1260)AAG>AAT  | p.K420N  |
| Pat_14 | Pre-Treatment | TBPL1    | 9519   | 37 | 6 | 134308154 | 134308154 | Missense_Mutation | SNP | T  | G  | 4   | 200 | c.537T>G       | c.(535-537)TTT>TTG    | p.F179L  |
| Pat_14 | Pre-Treatment | PDE7B    | 27115  | 37 | 6 | 136468578 | 136468578 | Missense_Mutation | SNP | C  | T  | 94  | 385 | c.256C>T       | c.(256-258)CGT>TGT    | p.R86C   |
| Pat_14 | Pre-Treatment | TAB2     | 23118  | 37 | 6 | 149691140 | 149691140 | Missense_Mutation | SNP | C  | A  | 5   | 285 | c.7C>A         | c.(7-9)CAA>AAA        | p.Q3K    |
| Pat_14 | Pre-Treatment | SYNE1    | 23345  | 37 | 6 | 152728184 | 152728184 | Missense_Mutation | SNP | G  | A  | 102 | 403 | c.6688C>T      | c.(6688-6690)CAC>TAC  | p.H2230Y |
| Pat_14 | Pre-Treatment | VIP      | 7432   | 37 | 6 | 153073313 | 153073313 | Missense_Mutation | SNP | A  | T  | 33  | 129 | c.1A>T         | c.(1-3)ATG>TTG        | p.M1L    |
| Pat_14 | Pre-Treatment | C6orf35  | 729515 | 37 | 6 | 157739911 | 157739911 | Missense_Mutation | SNP | G  | A  | 63  | 193 | c.230C>T       | c.(229-231)TCC>TTC    | p.S77F   |
| Pat_14 | Pre-Treatment | SYNJ2    | 8871   | 37 | 6 | 158485655 | 158485656 | Missense_Mutation | DNP | CC | TT | 133 | 395 | .1232_1233CC>T | c.(1231-1233)ACC>ATT  | p.T411I  |
| Pat_14 | Pre-Treatment | SLC22A1  | 6580   | 37 | 6 | 160575922 | 160575922 | Missense_Mutation | SNP | C  | T  | 51  | 205 | c.1478C>T      | c.(1477-1479)GCC>GTC  | p.A493V  |
| Pat_14 | Pre-Treatment | LPA      | 4018   | 37 | 6 | 161027610 | 161027610 | Missense_Mutation | SNP | C  | A  | 9   | 627 | c.2684G>T      | c.(2683-2685)TGG>TTG  | p.W895L  |
| Pat_14 | Pre-Treatment | TTYH3    | 80727  | 37 | 7 | 2686861   | 2686861   | Missense_Mutation | SNP | C  | T  | 8   | 48  | c.379C>T       | c.(379-381)CGC>TGC    | p.R127C  |
| Pat_14 | Pre-Treatment | DGKB     | 1607   | 37 | 7 | 14622740  | 14622740  | Missense_Mutation | SNP | G  | A  | 38  | 118 | c.1459C>T      | c.(1459-1461)CCT>TCT  | p.P487S  |
| Pat_14 | Pre-Treatment | DGKB     | 1607   | 37 | 7 | 14758224  | 14758224  | Missense_Mutation | SNP | C  | T  | 49  | 157 | c.409G>A       | c.(409-411)GAC>AAC    | p.D137N  |
| Pat_14 | Pre-Treatment | ABCB5    | 340273 | 37 | 7 | 20721158  | 20721158  | Missense_Mutation | SNP | G  | A  | 5   | 265 | c.403G>A       | c.(403-405)GCA>ACA    | p.A135T  |
| Pat_14 | Pre-Treatment | ABCB5    | 340273 | 37 | 7 | 20782689  | 20782689  | Missense_Mutation | SNP | G  | A  | 44  | 102 | c.1879G>A      | c.(1879-1881)GGA>AGA  | p.G627R  |
| Pat_14 | Pre-Treatment | ABCB5    | 340273 | 37 | 7 | 20795245  | 20795245  | Nonstop_Mutation  | SNP | T  | C  | 5   | 212 | c.2437T>C      | c.(2437-2439)TGA>CGA  | p.*813R  |
| Pat_14 | Pre-Treatment | INMT     | 11185  | 37 | 7 | 30795335  | 30795335  | Missense_Mutation | SNP | G  | T  | 7   | 266 | c.660G>T       | c.(658-660)GAG>GAT    | p.E220D  |
| Pat_14 | Pre-Treatment | AVL9     | 23080  | 37 | 7 | 32598232  | 32598232  | Missense_Mutation | SNP | T  | C  | 4   | 261 | c.671T>C       | c.(670-672)CTT>CCT    | p.L224P  |
| Pat_14 | Pre-Treatment | FKBP9    | 11328  | 37 | 7 | 33035909  | 33035909  | Missense_Mutation | SNP | C  | A  | 5   | 190 | c.1174C>A      | c.(1174-1176)CTC>ATC  | p.L392I  |
| Pat_14 | Pre-Treatment | BBS9     | 27241  | 37 | 7 | 33312753  | 33312753  | Nonsense_Mutation | SNP | C  | T  | 92  | 307 | c.832C>T       | c.(832-834)CGA>TGA    | p.R278*  |
| Pat_14 | Pre-Treatment | HERPUD2  | 64224  | 37 | 7 | 35678059  | 35678059  | Missense_Mutation | SNP | C  | T  | 40  | 154 | c.518G>A       | c.(517-519)GGG>GAG    | p.G173E  |
| Pat_14 | Pre-Treatment | WBSCR17  | 64409  | 37 | 7 | 71130513  | 71130513  | Missense_Mutation | SNP | C  | T  | 62  | 253 | c.1198C>T      | c.(1198-1200)CGC>TGC  | p.R400C  |
| Pat_14 | Pre-Treatment | NCF1     | 653361 | 37 | 7 | 74203043  | 74203043  | Missense_Mutation | SNP | C  | G  | 20  | 11  | c.1046C>G      | c.(1045-1047)CCG>CGG  | p.P349R  |
| Pat_14 | Pre-Treatment | PCLO     | 27445  | 37 | 7 | 82579285  | 82579285  | Missense_Mutation | SNP | C  | T  | 47  | 177 | c.10619G>A     | .(10618-10620)CGG>CAC | p.R3540Q |
| Pat_14 | Pre-Treatment | PCLO     | 27445  | 37 | 7 | 82582375  | 82582375  | Missense_Mutation | SNP | G  | A  | 57  | 233 | c.7894C>T      | c.(7894-7896)CCA>TCA  | p.P2632S |
| Pat_14 | Pre-Treatment | PCLO     | 27445  | 37 | 7 | 82764221  | 82764221  | Missense_Mutation | SNP | C  | T  | 149 | 644 | c.2645G>A      | c.(2644-2646)CGA>CAA  | p.R882Q  |
| Pat_14 | Pre-Treatment | NPTX2    | 4885   | 37 | 7 | 98254422  | 98254422  | Missense_Mutation | SNP | G  | A  | 81  | 314 | c.832G>A       | c.(832-834)GAG>AAG    | p.E278K  |
| Pat_14 | Pre-Treatment | TRRAP    | 8295   | 37 | 7 | 98509802  | 98509802  | Missense_Mutation | SNP | C  | T  | 82  | 376 | c.2165C>T      | c.(2164-2166)TCC>TTC  | p.S722F  |
| Pat_14 | Pre-Treatment | TRRAP    | 8295   | 37 | 7 | 98569556  | 98569557  | Nonsense_Mutation | DNP | CC | TT | 77  | 227 | .7806_7807CC>T | 804-7809)CTCCGA>CTTT  | p.R2603* |
| Pat_14 | Pre-Treatment | TAF6     | 6878   | 37 | 7 | 99705102  | 99705102  | Missense_Mutation | SNP | C  | A  | 8   | 707 | c.1801G>T      | c.(1801-1803)GGG>TGG  | p.G601W  |
| Pat_14 | Pre-Treatment | ZAN      | 7455   | 37 | 7 | 100350453 | 100350453 | Missense_Mutation | SNP | T  | C  | 5   | 278 | c.2725T>C      | c.(2725-2727)TCC>CCC  | p.S909P  |
| Pat_14 | Pre-Treatment | ZAN      | 7455   | 37 | 7 | 100350456 | 100350456 | Missense_Mutation | SNP | C  | A  | 8   | 274 | c.2728C>A      | c.(2728-2730)CCA>ACA  | p.P910T  |
| Pat_14 | Pre-Treatment | AP1S1    | 1174   | 37 | 7 | 100802423 | 100802423 | Missense_Mutation | SNP | C  | A  | 4   | 119 | c.375C>A       | c.(373-375)GAC>GAA    | p.D125E  |
| Pat_14 | Pre-Treatment | LAMB4    | 22798  | 37 | 7 | 107756552 | 107756552 | Missense_Mutation | SNP | G  | A  | 84  | 345 | c.89C>T        | c.(88-90)CCC>CTC      | p.P30L   |
| Pat_14 | Pre-Treatment | IFRD1    | 3475   | 37 | 7 | 112108165 | 112108165 | Missense_Mutation | SNP | G  | A  | 4   | 210 | c.1036G>A      | c.(1036-1038)GTG>ATG  | p.V346M  |
| Pat_14 | Pre-Treatment | CTTNBP2  | 83992  | 37 | 7 | 117431611 | 117431611 | Missense_Mutation | SNP | G  | A  | 93  | 334 | c.1639C>T      | c.(1639-1641)CCA>TCA  | p.P547S  |
| Pat_14 | Pre-Treatment | CTTNBP2  | 83992  | 37 | 7 | 117432130 | 117432130 | Missense_Mutation | SNP | G  | A  | 65  | 233 | c.1120C>T      | c.(1120-1122)CCA>TCA  | p.P374S  |
| Pat_14 | Pre-Treatment | PTPRZ1   | 5803   | 37 | 7 | 121652066 | 121652066 | Missense_Mutation | SNP | C  | T  | 97  | 417 | c.2966C>T      | c.(2965-2967)GCC>GTC  | p.A989V  |
| Pat_14 | Pre-Treatment | AASS     | 10157  | 37 | 7 | 121716632 | 121716632 | Missense_Mutation | SNP | G  | A  | 38  | 130 | c.2692C>T      | c.(2692-2694)CCC>TCC  | p.P898S  |
| Pat_14 | Pre-Treatment | CADPS2   | 93664  | 37 | 7 | 122261678 | 122261678 | Missense_Mutation | SNP | C  | T  | 36  | 142 | c.961G>A       | c.(961-963)GAA>AAA    | p.E321K  |

|        |               |          |        |    |   |           |           |                   |     |    |    |     |     |                 |                      |                |
|--------|---------------|----------|--------|----|---|-----------|-----------|-------------------|-----|----|----|-----|-----|-----------------|----------------------|----------------|
| Pat_14 | Pre-Treatment | BPGM     | 669    | 37 | 7 | 134346804 | 134346804 | Missense_Mutation | SNP | C  | T  | 34  | 231 | c.545C>T        | c.(544-546)ACC>ATC   | p.T182I        |
| Pat_14 | Pre-Treatment | DENND2A  | 27147  | 37 | 7 | 140301680 | 140301680 | Missense_Mutation | SNP | C  | T  | 27  | 76  | c.518G>A        | c.(517-519)GGG>GAG   | p.G173E        |
| Pat_14 | Pre-Treatment | BRAF     | 673    | 37 | 7 | 140453136 | 140453136 | Missense_Mutation | SNP | A  | T  | 63  | 267 | c.1799T>A       | c.(1798-1800)GTG>GAG | p.V600E        |
| Pat_14 | Pre-Treatment | OR9A4    | 130075 | 37 | 7 | 141619270 | 141619270 | Missense_Mutation | SNP | C  | T  | 79  | 340 | c.595C>T        | c.(595-597)CTC>TTC   | p.L199F        |
| Pat_14 | Pre-Treatment | MGAM     | 8972   | 37 | 7 | 141732625 | 141732625 | Missense_Mutation | SNP | G  | A  | 9   | 74  | c.1585G>A       | c.(1585-1587)GAT>AAT | p.D529N        |
| Pat_14 | Pre-Treatment | KEL      | 3792   | 37 | 7 | 142640601 | 142640601 | Missense_Mutation | SNP | G  | A  | 6   | 307 | c.1675C>T       | c.(1675-1677)CCC>TCC | p.P559S        |
| Pat_14 | Pre-Treatment | OR9A2    | 135924 | 37 | 7 | 142723766 | 142723766 | Missense_Mutation | SNP | C  | T  | 82  | 242 | c.454G>A        | c.(454-456)GAA>AAA   | p.E152K        |
| Pat_14 | Pre-Treatment | OR6V1    | 346517 | 37 | 7 | 142749456 | 142749456 | Missense_Mutation | SNP | C  | A  | 118 | 346 | c.19C>A         | c.(19-21)CCC>ACC     | p.P7T          |
| Pat_14 | Pre-Treatment | ABCF2    | 10061  | 37 | 7 | 150921095 | 150921095 | Missense_Mutation | SNP | G  | A  | 103 | 275 | c.473C>T        | c.(472-474)CCC>CTC   | p.P158L        |
| Pat_14 | Pre-Treatment | SMARCD3  | 6604   | 37 | 7 | 150936538 | 150936538 | Nonsense_Mutation | SNP | C  | A  | 6   | 180 | c.1342G>T       | c.(1342-1344)GAG>TAG | p.E448*        |
| Pat_14 | Pre-Treatment | RBM33    | 155435 | 37 | 7 | 155534718 | 155534718 | Missense_Mutation | SNP | G  | A  | 5   | 163 | c.2255G>A       | c.(2254-2256)AGC>AAC | p.S752N        |
| Pat_14 | Pre-Treatment | MYOM2    | 9172   | 37 | 8 | 2021482   | 2021483   | Missense_Mutation | DNP | CC | TT | 56  | 168 | c.1022_1023CC>T | c.(1021-1023)TCC>TTT | p.S341F        |
| Pat_14 | Pre-Treatment | MYOM2    | 9172   | 37 | 8 | 2071239   | 2071239   | Splice_Site       | SNP | G  | A  | 45  | 130 | c.3567_splice   | c.e29+1              | p.K1189_splice |
| Pat_14 | Pre-Treatment | CSMD1    | 64478  | 37 | 8 | 2876014   | 2876014   | Missense_Mutation | SNP | C  | T  | 183 | 574 | c.8017G>A       | c.(8017-8019)GAA>AAA | p.E2673K       |
| Pat_14 | Pre-Treatment | CSMD1    | 64478  | 37 | 8 | 3165278   | 3165278   | Missense_Mutation | SNP | G  | A  | 67  | 391 | c.3892C>T       | c.(3892-3894)CCG>TCG | p.P1298S       |
| Pat_14 | Pre-Treatment | DEFA6    | 1671   | 37 | 8 | 6782377   | 6782377   | Missense_Mutation | SNP | G  | A  | 88  | 297 | c.266C>T        | c.(265-267)ACT>ATT   | p.T89I         |
| Pat_14 | Pre-Treatment | ZDHC2    | 51201  | 37 | 8 | 17055156  | 17055156  | Missense_Mutation | SNP | G  | A  | 90  | 330 | c.439G>A        | c.(439-441)GAT>AAT   | p.D147N        |
| Pat_14 | Pre-Treatment | SLC18A1  | 6570   | 37 | 8 | 20008178  | 20008178  | Missense_Mutation | SNP | G  | A  | 146 | 552 | c.1093C>T       | c.(1093-1095)CGG>TGG | p.R365W        |
| Pat_14 | Pre-Treatment | SLC25A37 | 51312  | 37 | 8 | 23429298  | 23429298  | Missense_Mutation | SNP | C  | T  | 36  | 129 | c.947C>T        | c.(946-948)TCT>TTT   | p.S316F        |
| Pat_14 | Pre-Treatment | ADAM28   | 10863  | 37 | 8 | 24199262  | 24199262  | Missense_Mutation | SNP | G  | A  | 59  | 337 | c.1822G>A       | c.(1822-1824)GAT>AAT | p.D608N        |
| Pat_14 | Pre-Treatment | ADAM7    | 8756   | 37 | 8 | 24339789  | 24339789  | Missense_Mutation | SNP | A  | C  | 63  | 326 | c.840A>C        | c.(838-840)AAA>AAC   | p.K280N        |
| Pat_14 | Pre-Treatment | CLU      | 1191   | 37 | 8 | 27457371  | 27457371  | Missense_Mutation | SNP | C  | T  | 13  | 101 | c.1090G>A       | c.(1090-1092)GAG>AAG | p.E364K        |
| Pat_14 | Pre-Treatment | ELP3     | 55140  | 37 | 8 | 28017935  | 28017935  | Missense_Mutation | SNP | C  | T  | 37  | 134 | c.1447C>T       | c.(1447-1449)CCT>TCT | p.P483S        |
| Pat_14 | Pre-Treatment | POTEA    | 340441 | 37 | 8 | 43155707  | 43155707  | Missense_Mutation | SNP | G  | A  | 69  | 277 | c.635G>A        | c.(634-636)CGA>CAA   | p.R212Q        |
| Pat_14 | Pre-Treatment | PCMTD1   | 115294 | 37 | 8 | 52733158  | 52733158  | Missense_Mutation | SNP | C  | T  | 30  | 556 | c.827G>A        | c.(826-828)AGG>AAG   | p.R276K        |
| Pat_14 | Pre-Treatment | RB1CC1   | 9821   | 37 | 8 | 53570266  | 53570266  | Missense_Mutation | SNP | G  | T  | 8   | 393 | c.2123C>A       | c.(2122-2124)CCA>CAA | p.P708Q        |
| Pat_14 | Pre-Treatment | XKR4     | 114786 | 37 | 8 | 56015355  | 56015355  | Missense_Mutation | SNP | G  | A  | 30  | 92  | c.307G>A        | c.(307-309)GAG>AAG   | p.E103K        |
| Pat_14 | Pre-Treatment | CLVS1    | 157807 | 37 | 8 | 62289312  | 62289312  | Missense_Mutation | SNP | C  | T  | 40  | 170 | c.604C>T        | c.(604-606)CTT>TTT   | p.L202F        |
| Pat_14 | Pre-Treatment | CYP7B1   | 9420   | 37 | 8 | 65537058  | 65537058  | Missense_Mutation | SNP | G  | A  | 42  | 195 | c.161C>T        | c.(160-162)CCT>CTT   | p.P54L         |
| Pat_14 | Pre-Treatment | KCNB2    | 9312   | 37 | 8 | 73480219  | 73480219  | Missense_Mutation | SNP | G  | A  | 36  | 177 | c.250G>A        | c.(250-252)GAG>AAG   | p.E84K         |
| Pat_14 | Pre-Treatment | RUNX1T1  | 862    | 37 | 8 | 92982891  | 92982891  | Missense_Mutation | SNP | T  | C  | 49  | 182 | c.1534A>G       | c.(1534-1536)AGC>GGC | p.S512G        |
| Pat_14 | Pre-Treatment | RAD54B   | 25788  | 37 | 8 | 95416372  | 95416372  | Missense_Mutation | SNP | C  | A  | 4   | 177 | c.877G>T        | c.(877-879)GTA>TTA   | p.V293L        |
| Pat_14 | Pre-Treatment | MATN2    | 4147   | 37 | 8 | 99040006  | 99040006  | Missense_Mutation | SNP | G  | C  | 3   | 186 | c.2305G>C       | c.(2305-2307)GGA>CGA | p.G769R        |
| Pat_14 | Pre-Treatment | ODF1     | 4956   | 37 | 8 | 103564256 | 103564256 | Missense_Mutation | SNP | G  | A  | 24  | 103 | c.301G>A        | c.(301-303)GAG>AAG   | p.E101K        |
| Pat_14 | Pre-Treatment | TM7SF4   | 81501  | 37 | 8 | 105367211 | 105367211 | Missense_Mutation | SNP | C  | T  | 34  | 150 | c.1136C>T       | c.(1135-1137)CCT>CTT | p.P379L        |
| Pat_14 | Pre-Treatment | PKHD1L1  | 93035  | 37 | 8 | 110478926 | 110478926 | Missense_Mutation | SNP | C  | T  | 28  | 82  | c.8533C>T       | c.(8533-8535)CAC>TAC | p.H2845Y       |
| Pat_14 | Pre-Treatment | CSMD3    | 114788 | 37 | 8 | 113267629 | 113267629 | Missense_Mutation | SNP | G  | T  | 18  | 101 | c.9890C>A       | c.(9889-9891)CCT>CAT | p.P3297H       |
| Pat_14 | Pre-Treatment | PTK2     | 5747   | 37 | 8 | 141745399 | 141745399 | Missense_Mutation | SNP | A  | G  | 3   | 93  | c.1981T>C       | c.(1981-1983)TAT>CAT | p.Y661H        |
| Pat_14 | Pre-Treatment | RECQL4   | 9401   | 37 | 8 | 145740757 | 145740757 | Missense_Mutation | SNP | G  | A  | 32  | 112 | c.1343C>T       | c.(1342-1344)CCC>CTC | p.P448L        |
| Pat_14 | Pre-Treatment | DOCK8    | 81704  | 37 | 9 | 422104    | 422104    | Missense_Mutation | SNP | C  | T  | 72  | 173 | c.4210C>T       | c.(4210-4212)CAT>TAT | p.H1404Y       |
| Pat_14 | Pre-Treatment | PTPRD    | 5789   | 37 | 9 | 8375948   | 8375948   | Missense_Mutation | SNP | A  | G  | 52  | 117 | c.4649T>C       | c.(4648-4650)GTT>GCT | p.V1550A       |
| Pat_14 | Pre-Treatment | ARID3C   | 138715 | 37 | 9 | 34627758  | 34627758  | Missense_Mutation | SNP | G  | A  | 43  | 99  | c.254C>T        | c.(253-255)TCG>TTG   | p.S85L         |
| Pat_14 | Pre-Treatment | CNTNAP3  | 79937  | 37 | 9 | 39109157  | 39109157  | Nonsense_Mutation | SNP | G  | A  | 29  | 91  | c.2365C>T       | c.(2365-2367)CAG>TAG | p.Q789*        |
| Pat_14 | Pre-Treatment | TRPM3    | 80036  | 37 | 9 | 73399102  | 73399102  | Missense_Mutation | SNP | G  | A  | 72  | 261 | c.1067C>T       | c.(1066-1068)CCC>CTC | p.P356L        |
| Pat_14 | Pre-Treatment | PRUNE2   | 158471 | 37 | 9 | 79320862  | 79320862  | Missense_Mutation | SNP | C  | T  | 99  | 420 | c.6328G>A       | c.(6328-6330)GAT>AAT | p.D2110N       |
| Pat_14 | Pre-Treatment | PRUNE2   | 158471 | 37 | 9 | 79323973  | 79323973  | Missense_Mutation | SNP | C  | T  | 110 | 383 | c.3217G>A       | c.(3217-3219)GAA>AAA | p.E1073K       |
| Pat_14 | Pre-Treatment | FOX2     | 442425 | 37 | 9 | 79634773  | 79634773  | Missense_Mutation | SNP | A  | G  | 49  | 181 | c.203A>G        | c.(202-204)AAC>AGC   | p.N68S         |

|        |               |           |        |    |   |           |           |                   |     |    |    |     |     |                                     |                      |          |
|--------|---------------|-----------|--------|----|---|-----------|-----------|-------------------|-----|----|----|-----|-----|-------------------------------------|----------------------|----------|
| Pat_14 | Pre-Treatment | SLC28A3   | 64078  | 37 | 9 | 86893162  | 86893162  | Missense_Mutation | SNP | T  | G  | 51  | 147 | c.2047A>C                           | c.(2047-2049)AAC>CAC | p.N683H  |
| Pat_14 | Pre-Treatment | DIRAS2    | 54769  | 37 | 9 | 93375767  | 93375767  | Missense_Mutation | SNP | G  | T  | 7   | 357 | c.343C>A                            | c.(343-345)CCC>ACC   | p.P115T  |
| Pat_14 | Pre-Treatment | FAM120AOS | 158293 | 37 | 9 | 96214912  | 96214912  | Missense_Mutation | SNP | C  | A  | 31  | 117 | c.80G>T                             | c.(79-81)AGT>ATT     | p.S27I   |
| Pat_14 | Pre-Treatment | FAM22F    | 54754  | 37 | 9 | 97082748  | 97082748  | Missense_Mutation | SNP | G  | C  | 3   | 161 | c.1110C>G                           | c.(1108-1110)AAC>AAG | p.N370K  |
| Pat_14 | Pre-Treatment | GABBR2    | 9568   | 37 | 9 | 101235533 | 101235533 | Missense_Mutation | SNP | G  | T  | 5   | 253 | c.894C>A                            | c.(892-894)AAC>AAA   | p.N298K  |
| Pat_14 | Pre-Treatment | NR4A3     | 8013   | 37 | 9 | 102590490 | 102590490 | Missense_Mutation | SNP | C  | T  | 108 | 423 | c.166C>T                            | c.(166-168)CCC>TCC   | p.P56S   |
| Pat_14 | Pre-Treatment | STX17     | 55014  | 37 | 9 | 102722408 | 102722408 | Missense_Mutation | SNP | C  | A  | 88  | 404 | c.553C>A                            | c.(553-555)CTG>ATG   | p.L185M  |
| Pat_14 | Pre-Treatment | PPP3R2    | 5535   | 37 | 9 | 104356864 | 104356864 | Nonsense_Mutation | SNP | G  | A  | 77  | 286 | c.349C>T                            | c.(349-351)CAG>TAG   | p.Q117*  |
| Pat_14 | Pre-Treatment | PPP3R2    | 5535   | 37 | 9 | 104357094 | 104357094 | Missense_Mutation | SNP | G  | A  | 80  | 222 | c.119C>T                            | c.(118-120)TCT>TTT   | p.S40F   |
| Pat_14 | Pre-Treatment | OR13C8    | 138802 | 37 | 9 | 107332262 | 107332262 | Missense_Mutation | SNP | A  | C  | 22  | 206 | c.814A>C                            | c.(814-816)AAT>CAT   | p.N272H  |
| Pat_14 | Pre-Treatment | OR13C9    | 286362 | 37 | 9 | 107379777 | 107379777 | Missense_Mutation | SNP | C  | T  | 52  | 178 | c.709G>A                            | c.(709-711)GCT>ACT   | p.A237T  |
| Pat_14 | Pre-Treatment | SVEP1     | 79987  | 37 | 9 | 113265384 | 113265384 | Missense_Mutation | SNP | C  | T  | 83  | 292 | c.1417G>A                           | c.(1417-1419)GAA>AAA | p.E473K  |
| Pat_14 | Pre-Treatment | SVEP1     | 79987  | 37 | 9 | 113265434 | 113265434 | Missense_Mutation | SNP | A  | G  | 121 | 379 | c.1367T>C                           | c.(1366-1368)ATG>ACG | p.M456T  |
| Pat_14 | Pre-Treatment | ZNF483    | 158399 | 37 | 9 | 114304974 | 114304974 | Missense_Mutation | SNP | G  | C  | 55  | 193 | c.1759G>C                           | c.(1759-1761)GCC>CCC | p.A587P  |
| Pat_14 | Pre-Treatment | PAPPA     | 5069   | 37 | 9 | 119028231 | 119028231 | Missense_Mutation | SNP | G  | A  | 47  | 148 | c.2828G>A                           | c.(2827-2829)GGA>GAA | p.G943E  |
| Pat_14 | Pre-Treatment | MEGF9     | 1955   | 37 | 9 | 123367743 | 123367743 | Nonsense_Mutation | SNP | G  | A  | 31  | 113 | c.1645C>T                           | c.(1645-1647)CAA>TAA | p.Q549*  |
| Pat_14 | Pre-Treatment | LRR8A     | 56262  | 37 | 9 | 131669646 | 131669646 | Missense_Mutation | SNP | C  | T  | 82  | 226 | c.203C>T                            | c.(202-204)TCG>TTG   | p.S68L   |
| Pat_14 | Pre-Treatment | RAPGEF1   | 2889   | 37 | 9 | 134501482 | 134501482 | Missense_Mutation | SNP | A  | G  | 3   | 88  | c.1478T>C                           | c.(1477-1479)CTG>CCG | p.L493P  |
| Pat_14 | Pre-Treatment | COL5A1    | 1289   | 37 | 9 | 137701116 | 137701116 | Missense_Mutation | SNP | C  | T  | 6   | 32  | c.3454C>T                           | c.(3454-3456)CCT>TCT | p.P1152S |
| Pat_14 | Pre-Treatment | GLT6D1    | 360203 | 37 | 9 | 138516147 | 138516147 | Missense_Mutation | SNP | C  | A  | 6   | 345 | c.627G>T                            | c.(625-627)GAG>GAT   | p.E209D  |
| Pat_14 | Pre-Treatment | PMPCA     | 23203  | 37 | 9 | 139307004 | 139307004 | Missense_Mutation | SNP | G  | A  | 34  | 150 | c.337G>A                            | c.(337-339)GAA>AAA   | p.E113K  |
| Pat_14 | Pre-Treatment | FUT7      | 2529   | 37 | 9 | 139925577 | 139925577 | Missense_Mutation | SNP | G  | A  | 6   | 326 | c.614C>T                            | c.(613-615)GCC>GTC   | p.A205V  |
| Pat_14 | Pre-Treatment | NDOR1     | 27158  | 37 | 9 | 140109367 | 140109367 | Missense_Mutation | SNP | C  | T  | 73  | 210 | c.962C>T                            | c.(961-963)TCC>TTC   | p.S321F  |
| Pat_14 | Pre-Treatment | SLC25A6   | 293    | 37 | X | 1508364   | 1508364   | Missense_Mutation | SNP | G  | A  | 104 | 433 | c.368C>T                            | c.(367-369)GCC>GTC   | p.A123V  |
| Pat_14 | Pre-Treatment | XG        | 7499   | 37 | X | 2712599   | 2712599   | Missense_Mutation | SNP | G  | A  | 28  | 159 | c.277G>A                            | c.(277-279)GAT>AAT   | p.D93N   |
| Pat_14 | Pre-Treatment | GYG2      | 8908   | 37 | X | 2777926   | 2777926   | Missense_Mutation | SNP | G  | A  | 31  | 124 | c.750G>A                            | c.(748-750)ATG>ATA   | p.M250I  |
| Pat_14 | Pre-Treatment | ARSH      | 347527 | 37 | X | 2933220   | 2933220   | Missense_Mutation | SNP | C  | T  | 17  | 66  | c.550C>T                            | c.(550-552)CCC>TCC   | p.P184S  |
| Pat_14 | Pre-Treatment | MXRA5     | 25878  | 37 | X | 3235375   | 3235375   | Missense_Mutation | SNP | T  | A  | 13  | 66  | c.6347A>T                           | c.(6346-6348)GAC>GTC | p.D2116V |
| Pat_14 | Pre-Treatment | MXRA5     | 25878  | 37 | X | 3239504   | 3239504   | Missense_Mutation | SNP | G  | T  | 30  | 111 | c.4222C>A                           | c.(4222-4224)CCC>ACC | p.P1408T |
| Pat_14 | Pre-Treatment | NLGN4X    | 57502  | 37 | X | 5811450   | 5811450   | Missense_Mutation | SNP | G  | A  | 26  | 201 | c.1859C>T                           | c.(1858-1860)TCA>TTA | p.S620L  |
| Pat_14 | Pre-Treatment | NLGN4X    | 57502  | 37 | X | 5827142   | 5827142   | Missense_Mutation | SNP | G  | A  | 49  | 197 | c.764C>T                            | c.(763-765)GCT>GTT   | p.A255V  |
| Pat_14 | Pre-Treatment | NLGN4X    | 57502  | 37 | X | 5827172   | 5827172   | Missense_Mutation | SNP | G  | A  | 42  | 184 | c.734C>T                            | c.(733-735)CCC>CTC   | p.P245L  |
| Pat_14 | Pre-Treatment | VCX       | 26609  | 37 | X | 7811770   | 7811770   | Missense_Mutation | SNP | G  | A  | 57  | 639 | c.334G>A                            | c.(334-336)GAA>AAA   | p.E112K  |
| Pat_14 | Pre-Treatment | VWC3      | 55841  | 37 | X | 10102545  | 10102545  | Missense_Mutation | SNP | G  | A  | 7   | 444 | c.2672G>A                           | c.(2671-2673)CGC>CAC | p.R891H  |
| Pat_14 | Pre-Treatment | HCCS      | 3052   | 37 | X | 11135447  | 11135447  | Missense_Mutation | SNP | G  | A  | 127 | 581 | c.313G>A                            | c.(313-315)GAA>AAA   | p.E105K  |
| Pat_14 | Pre-Treatment | HCCS      | 3052   | 37 | X | 11139100  | 11139100  | Missense_Mutation | SNP | C  | T  | 72  | 439 | c.595C>T                            | c.(595-597)CGT>TGT   | p.R199C  |
| Pat_14 | Pre-Treatment | GLRA2     | 2742   | 37 | X | 14550453  | 14550453  | Missense_Mutation | SNP | G  | A  | 58  | 345 | c.161G>A                            | c.(160-162)AGG>AAG   | p.R54K   |
| Pat_14 | Pre-Treatment | MOSPD2    | 158747 | 37 | X | 14929528  | 14929528  | Missense_Mutation | SNP | T  | C  | 19  | 66  | c.872T>C                            | c.(871-873)CTT>CCT   | p.L291P  |
| Pat_14 | Pre-Treatment | SCML1     | 6322   | 37 | X | 17768162  | 17768162  | Missense_Mutation | SNP | C  | A  | 8   | 568 | c.452C>A                            | c.(451-453)CCG>CAG   | p.P151Q  |
| Pat_14 | Pre-Treatment | GPR64     | 10149  | 37 | X | 19025376  | 19025376  | Missense_Mutation | SNP | A  | T  | 84  | 427 | c.1666T>A                           | c.(1666-1668)TTA>ATA | p.L556I  |
| Pat_14 | Pre-Treatment | PDHA1     | 5160   | 37 | X | 19371203  | 19371203  | Missense_Mutation | SNP | G  | A  | 100 | 571 | c.422G>A                            | c.(421-423)CGA>CAA   | p.R141Q  |
| Pat_14 | Pre-Treatment | MAP3K15   | 389840 | 37 | X | 19416419  | 19416419  | Missense_Mutation | SNP | C  | T  | 137 | 685 | c.416G>A                            | c.(415-417)GGG>GAG   | p.G139E  |
| Pat_14 | Pre-Treatment | MAP7D2    | 256714 | 37 | X | 20028977  | 20028978  | Missense_Mutation | DNP | GG | AA | 67  | 397 | :2142_2143CC>T:140-2145)AACCTT>AATT |                      | p.L715F  |
| Pat_14 | Pre-Treatment | ZNF645    | 158506 | 37 | X | 22291373  | 22291373  | Nonsense_Mutation | SNP | G  | T  | 6   | 520 | c.265G>T                            | c.(265-267)GGA>TGA   | p.G89*   |
| Pat_14 | Pre-Treatment | SAT1      | 6303   | 37 | X | 23801803  | 23801803  | Missense_Mutation | SNP | A  | G  | 37  | 129 | c.95A>G                             | c.(94-96)GAA>GGA     | p.E32G   |
| Pat_14 | Pre-Treatment | PDK3      | 5165   | 37 | X | 24521545  | 24521545  | Missense_Mutation | SNP | C  | A  | 72  | 216 | c.422C>A                            | c.(421-423)CCT>CAT   | p.P141H  |
| Pat_14 | Pre-Treatment | POLA1     | 5422   | 37 | X | 24735407  | 24735407  | Missense_Mutation | SNP | G  | A  | 64  | 207 | c.689G>A                            | c.(688-690)GGC>GAC   | p.G230D  |

|        |               |          |        |    |   |           |           |                   |     |    |    |     |     |                |                      |          |
|--------|---------------|----------|--------|----|---|-----------|-----------|-------------------|-----|----|----|-----|-----|----------------|----------------------|----------|
| Pat_14 | Pre-Treatment | MAGEB18  | 286514 | 37 | X | 26157394  | 26157394  | Missense_Mutation | SNP | G  | A  | 21  | 58  | c.292G>A       | c.(292-294)GAA>AAA   | p.E98K   |
| Pat_14 | Pre-Treatment | GPR34    | 2857   | 37 | X | 41555572  | 41555572  | Missense_Mutation | SNP | T  | C  | 4   | 119 | c.686T>C       | c.(685-687)CTA>CCA   | p.L229P  |
| Pat_14 | Pre-Treatment | GPR34    | 2857   | 37 | X | 41555592  | 41555592  | Missense_Mutation | SNP | C  | T  | 18  | 69  | c.706C>T       | c.(706-708)CTT>TTT   | p.L236F  |
| Pat_14 | Pre-Treatment | MAOB     | 4129   | 37 | X | 43656391  | 43656391  | Missense_Mutation | SNP | G  | A  | 71  | 343 | c.599C>T       | c.(598-600)TCG>TTG   | p.S200L  |
| Pat_14 | Pre-Treatment | USP11    | 8237   | 37 | X | 47104279  | 47104279  | Missense_Mutation | SNP | C  | T  | 41  | 158 | c.2171C>T      | c.(2170-2172)TCC>TTC | p.S724F  |
| Pat_14 | Pre-Treatment | ZNF41    | 7592   | 37 | X | 47307289  | 47307289  | Missense_Mutation | SNP | C  | T  | 37  | 193 | c.2006G>A      | c.(2005-2007)AGA>AAA | p.R669K  |
| Pat_14 | Pre-Treatment | PPP1R3F  | 89801  | 37 | X | 49142678  | 49142679  | Missense_Mutation | DNP | GG | AA | 24  | 127 | .1526_1527GG>A | c.(1525-1527)GGG>GAA | p.G509E  |
| Pat_14 | Pre-Treatment | DGKK     | 139189 | 37 | X | 50119065  | 50119065  | Missense_Mutation | SNP | G  | T  | 18  | 117 | c.3372C>A      | c.(3370-3372)GAC>GAA | p.D1124E |
| Pat_14 | Pre-Treatment | SSX7     | 280658 | 37 | X | 52682006  | 52682006  | Missense_Mutation | SNP | G  | A  | 50  | 287 | c.98C>T        | c.(97-99)TCT>TTT     | p.S33F   |
| Pat_14 | Pre-Treatment | TSPYL2   | 64061  | 37 | X | 53111883  | 53111883  | Missense_Mutation | SNP | C  | T  | 5   | 17  | c.203C>T       | c.(202-204)CCC>CTC   | p.P68L   |
| Pat_14 | Pre-Treatment | ITIH5L   | 347365 | 37 | X | 54781500  | 54781500  | Missense_Mutation | SNP | C  | T  | 83  | 381 | c.3152G>A      | c.(3151-3153)GGA>GAA | p.G1051E |
| Pat_14 | Pre-Treatment | TRO      | 7216   | 37 | X | 54949425  | 54949425  | Missense_Mutation | SNP | C  | A  | 5   | 180 | c.460C>A       | c.(460-462)CAA>AAA   | p.Q154K  |
| Pat_14 | Pre-Treatment | HEPH     | 9843   | 37 | X | 65408222  | 65408222  | Missense_Mutation | SNP | C  | T  | 4   | 17  | c.656C>T       | c.(655-657)CCT>CTT   | p.P219L  |
| Pat_14 | Pre-Treatment | PJA1     | 64219  | 37 | X | 68381389  | 68381389  | Missense_Mutation | SNP | C  | T  | 56  | 209 | c.1693G>A      | c.(1693-1695)GCC>ACC | p.A565T  |
| Pat_14 | Pre-Treatment | DGAT2L6  | 347516 | 37 | X | 69419665  | 69419665  | Missense_Mutation | SNP | G  | T  | 5   | 214 | c.200G>T       | c.(199-201)GGC>GTC   | p.G67V   |
| Pat_14 | Pre-Treatment | TAF1     | 6872   | 37 | X | 70597592  | 70597592  | Missense_Mutation | SNP | C  | T  | 65  | 345 | c.851C>T       | c.(850-852)TCA>TTA   | p.S284L  |
| Pat_14 | Pre-Treatment | NAP1L2   | 4674   | 37 | X | 72433494  | 72433494  | Missense_Mutation | SNP | G  | A  | 38  | 103 | c.835C>T       | c.(835-837)CCT>TCT   | p.P279S  |
| Pat_14 | Pre-Treatment | TNMD     | 64102  | 37 | X | 99852643  | 99852643  | Missense_Mutation | SNP | C  | T  | 54  | 180 | c.566C>T       | c.(565-567)ACT>ATT   | p.T189I  |
| Pat_14 | Pre-Treatment | DRP2     | 1821   | 37 | X | 100497387 | 100497387 | Missense_Mutation | SNP | T  | A  | 139 | 596 | c.902T>A       | c.(901-903)ATT>AAT   | p.I301N  |
| Pat_14 | Pre-Treatment | ARMCX1   | 51309  | 37 | X | 100808511 | 100808511 | Missense_Mutation | SNP | G  | A  | 88  | 493 | c.598G>A       | c.(598-600)GAT>AAT   | p.D200N  |
| Pat_14 | Pre-Treatment | ARMCX1   | 51309  | 37 | X | 100809053 | 100809053 | Missense_Mutation | SNP | A  | T  | 17  | 99  | c.1140A>T      | c.(1138-1140)GAA>GAT | p.E380D  |
| Pat_14 | Pre-Treatment | ARMCX3   | 51566  | 37 | X | 100881069 | 100881069 | Missense_Mutation | SNP | C  | A  | 7   | 616 | c.1100C>A      | c.(1099-1101)GCC>GAC | p.A367D  |
| Pat_14 | Pre-Treatment | ZMAT1    | 84460  | 37 | X | 101139146 | 101139146 | Missense_Mutation | SNP | C  | T  | 112 | 649 | c.740G>A       | c.(739-741)GGA>GAA   | p.G247E  |
| Pat_14 | Pre-Treatment | GPRASP1  | 9737   | 37 | X | 101912133 | 101912133 | Nonsense_Mutation | SNP | C  | T  | 131 | 474 | c.3292C>T      | c.(3292-3294)CAG>TAG | p.Q1098* |
| Pat_14 | Pre-Treatment | NRK      | 203447 | 37 | X | 105150462 | 105150462 | Missense_Mutation | SNP | C  | T  | 8   | 29  | c.901C>T       | c.(901-903)CGT>TGT   | p.R301C  |
| Pat_14 | Pre-Treatment | SERPINA7 | 6906   | 37 | X | 105279352 | 105279352 | Missense_Mutation | SNP | G  | A  | 117 | 364 | c.647C>T       | c.(646-648)CCA>CTA   | p.P216L  |
| Pat_14 | Pre-Treatment | SERPINA7 | 6906   | 37 | X | 105280502 | 105280502 | Missense_Mutation | SNP | C  | T  | 121 | 483 | c.548G>A       | c.(547-549)GGG>GAG   | p.G183E  |
| Pat_14 | Pre-Treatment | MORC4    | 79710  | 37 | X | 106201686 | 106201686 | Missense_Mutation | SNP | G  | A  | 4   | 242 | c.1265C>T      | c.(1264-1266)CCT>CTT | p.P422L  |
| Pat_14 | Pre-Treatment | ATG4A    | 115201 | 37 | X | 107396209 | 107396209 | Missense_Mutation | SNP | G  | A  | 19  | 111 | c.1018G>A      | c.(1018-1020)GAA>AAA | p.E340K  |
| Pat_14 | Pre-Treatment | COL4A5   | 1287   | 37 | X | 107925011 | 107925011 | Missense_Mutation | SNP | C  | T  | 66  | 226 | c.4109C>T      | c.(4108-4110)CCT>CTT | p.P1370L |
| Pat_14 | Pre-Treatment | COL4A5   | 1287   | 37 | X | 107938575 | 107938575 | Missense_Mutation | SNP | C  | T  | 76  | 412 | c.4900C>T      | c.(4900-4902)CCC>TCC | p.P1634S |
| Pat_14 | Pre-Treatment | RGAG1    | 57529  | 37 | X | 109695288 | 109695288 | Missense_Mutation | SNP | G  | A  | 90  | 306 | c.1443G>A      | c.(1441-1443)ATG>ATA | p.M481I  |
| Pat_14 | Pre-Treatment | HTR2C    | 3358   | 37 | X | 113965791 | 113965791 | Missense_Mutation | SNP | G  | A  | 107 | 521 | c.124G>A       | c.(124-126)GAT>AAT   | p.D42N   |
| Pat_14 | Pre-Treatment | SLC6A14  | 11254  | 37 | X | 115573945 | 115573945 | Missense_Mutation | SNP | C  | T  | 89  | 386 | c.437C>T       | c.(436-438)TCT>TTT   | p.S146F  |
| Pat_14 | Pre-Treatment | THOC2    | 57187  | 37 | X | 122800960 | 122800960 | Missense_Mutation | SNP | C  | T  | 57  | 272 | c.1187G>A      | c.(1186-1188)CGA>CAA | p.R396Q  |
| Pat_14 | Pre-Treatment | MST4     | 51765  | 37 | X | 131188719 | 131188719 | Missense_Mutation | SNP | T  | A  | 56  | 324 | c.103T>A       | c.(103-105)TTT>ATT   | p.F35I   |
| Pat_14 | Pre-Treatment | GPC3     | 2719   | 37 | X | 132887882 | 132887882 | Missense_Mutation | SNP | G  | A  | 61  | 316 | c.659C>T       | c.(658-660)TCC>TTC   | p.S220F  |
| Pat_14 | Pre-Treatment | DDX26B   | 203522 | 37 | X | 134703264 | 134703264 | Missense_Mutation | SNP | G  | A  | 47  | 229 | c.1195G>A      | c.(1195-1197)GAC>AAC | p.D399N  |
| Pat_14 | Pre-Treatment | MAP7D3   | 79649  | 37 | X | 135313960 | 135313960 | Missense_Mutation | SNP | G  | A  | 56  | 331 | c.1156C>T      | c.(1156-1158)CCG>TCG | p.P386S  |
| Pat_14 | Pre-Treatment | SPANXE   | 171489 | 37 | X | 140785698 | 140785698 | Missense_Mutation | SNP | C  | T  | 146 | 591 | c.218G>A       | c.(217-219)CGA>CAA   | p.R73Q   |
| Pat_14 | Pre-Treatment | FMR1     | 2332   | 37 | X | 147014282 | 147014282 | Missense_Mutation | SNP | G  | A  | 19  | 88  | c.880G>A       | c.(880-882)GGC>AGC   | p.G294S  |
| Pat_14 | Pre-Treatment | FMR1     | 2332   | 37 | X | 147019004 | 147019004 | Missense_Mutation | SNP | C  | T  | 24  | 200 | c.1010C>T      | c.(1009-1011)TCC>TTC | p.S337F  |
| Pat_14 | Pre-Treatment | FMR1NB   | 158521 | 37 | X | 147088287 | 147088287 | Missense_Mutation | SNP | G  | A  | 90  | 533 | c.463G>A       | c.(463-465)GAA>AAA   | p.E155K  |
| Pat_14 | Pre-Treatment | MTM1     | 4534   | 37 | X | 149831957 | 149831957 | Missense_Mutation | SNP | G  | A  | 23  | 139 | c.1519G>A      | c.(1519-1521)GAA>AAA | p.E507K  |
| Pat_14 | Pre-Treatment | MTM1     | 4534   | 37 | X | 149832076 | 149832076 | Missense_Mutation | SNP | G  | C  | 69  | 336 | c.1638G>C      | c.(1636-1638)AAG>AAC | p.K546N  |
| Pat_14 | Pre-Treatment | HMGB3    | 3149   | 37 | X | 150156314 | 150156314 | Missense_Mutation | SNP | G  | A  | 33  | 183 | c.530G>A       | c.(529-531)CGG>CAG   | p.R177Q  |
| Pat_14 | Pre-Treatment | IDH3G    | 3421   | 37 | X | 153052370 | 153052370 | Missense_Mutation | SNP | C  | A  | 7   | 660 | c.810G>T       | c.(808-810)ATG>ATT   | p.M270I  |

|        |                 |          |        |    |   |           |           |                   |     |    |    |    |     |                |                        |               |
|--------|-----------------|----------|--------|----|---|-----------|-----------|-------------------|-----|----|----|----|-----|----------------|------------------------|---------------|
| Pat_14 | Pre-Treatment   | FLNA     | 2316   | 37 | X | 153580606 | 153580606 | Missense_Mutation | SNP | C  | T  | 15 | 75  | c.6712G>A      | c.(6712-6714)GCC>ACC   | p.A2238T      |
| Pat_14 | Pre-Treatment   | FAM50A   | 9130   | 37 | X | 153673981 | 153673981 | Missense_Mutation | SNP | G  | A  | 69 | 220 | c.112G>A       | c.(112-114)GAG>AAG     | p.E38K        |
| Pat_14 | Post-Resistance | MRPL20   | 55052  | 37 | 1 | 1337517   | 1337517   | Missense_Mutation | SNP | C  | A  | 6  | 631 | c.396G>T       | c.(394-396)TTG>TTT     | p.L132F       |
| Pat_14 | Post-Resistance | SLC35E2  | 9906   | 37 | 1 | 1670392   | 1670392   | Missense_Mutation | SNP | G  | A  | 3  | 46  | c.427C>T       | c.(427-429)CTT>TTT     | p.L143F       |
| Pat_14 | Post-Resistance | PRDM16   | 63976  | 37 | 1 | 3342201   | 3342201   | Missense_Mutation | SNP | G  | A  | 4  | 293 | c.2996G>A      | c.(2995-2997)CGG>CAG   | p.R999Q       |
| Pat_14 | Post-Resistance | PIK3CD   | 5293   | 37 | 1 | 9780004   | 9780004   | Missense_Mutation | SNP | T  | G  | 22 | 690 | c.1268T>G      | c.(1267-1269)CTC>CGC   | p.L423R       |
| Pat_14 | Post-Resistance | MTHFR    | 4524   | 37 | 1 | 11860307  | 11860307  | Missense_Mutation | SNP | C  | T  | 7  | 740 | c.548G>A       | c.(547-549)CGA>CAA     | p.R183Q       |
| Pat_14 | Post-Resistance | VPS13D   | 55187  | 37 | 1 | 12387746  | 12387746  | Missense_Mutation | SNP | G  | A  | 8  | 625 | c.8032G>A      | c.(8032-8034)GAA>AAA   | p.E2678K      |
| Pat_14 | Post-Resistance | TMEM82   | 388595 | 37 | 1 | 16073424  | 16073424  | Missense_Mutation | SNP | G  | A  | 3  | 69  | c.820G>A       | c.(820-822)GGC>AGC     | p.G274S       |
| Pat_14 | Post-Resistance | ARHGEF19 | 128272 | 37 | 1 | 16528960  | 16528960  | Missense_Mutation | SNP | G  | A  | 4  | 132 | c.2017C>T      | c.(2017-2019)CTC>TTC   | p.L673F       |
| Pat_14 | Post-Resistance | TAS1R2   | 80834  | 37 | 1 | 19175834  | 19175834  | Splice_Site       | SNP | C  | T  | 4  | 134 | c.1467_splice  | c.e4+1                 | p.T489_splice |
| Pat_14 | Post-Resistance | UBR4     | 23352  | 37 | 1 | 19500845  | 19500845  | Missense_Mutation | SNP | T  | C  | 10 | 135 | c.2950A>G      | c.(2950-2952)AGG>GGG   | p.R984G       |
| Pat_14 | Post-Resistance | TMCO4    | 255104 | 37 | 1 | 20009544  | 20009544  | Missense_Mutation | SNP | C  | T  | 5  | 421 | c.1894G>A      | c.(1894-1896)GGG>AGG   | p.G632R       |
| Pat_14 | Post-Resistance | ZNF683   | 257101 | 37 | 1 | 26688465  | 26688465  | Missense_Mutation | SNP | G  | A  | 4  | 249 | c.1252C>T      | c.(1252-1254)CGC>TGC   | p.R418C       |
| Pat_14 | Post-Resistance | GPN2     | 54707  | 37 | 1 | 27216448  | 27216448  | Missense_Mutation | SNP | G  | A  | 3  | 64  | c.140C>T       | c.(139-141)CCG>CTG     | p.P47L        |
| Pat_14 | Post-Resistance | EYA3     | 2140   | 37 | 1 | 28362145  | 28362146  | Missense_Mutation | DNP | GG | AA | 9  | 595 | c.270_271CC>TT | (268-273)TACCCT>TATTC  | p.P91S        |
| Pat_14 | Post-Resistance | MATN1    | 4146   | 37 | 1 | 31188972  | 31188972  | Missense_Mutation | SNP | G  | A  | 4  | 301 | c.991C>T       | c.(991-993)CGC>TGC     | p.R331C       |
| Pat_14 | Post-Resistance | HCRT1    | 3061   | 37 | 1 | 32089159  | 32089159  | Nonsense_Mutation | SNP | G  | A  | 5  | 137 | c.774G>A       | c.(772-774)TGG>TGA     | p.W258*       |
| Pat_14 | Post-Resistance | NASP     | 4678   | 37 | 1 | 46068000  | 46068000  | Missense_Mutation | SNP | G  | A  | 6  | 536 | c.181G>A       | c.(181-183)GCA>ACA     | p.A61T        |
| Pat_14 | Post-Resistance | LEPR     | 3953   | 37 | 1 | 66102393  | 66102393  | Missense_Mutation | SNP | G  | A  | 6  | 480 | c.3193G>A      | c.(3193-3195)GGA>AGA   | p.G1065R      |
| Pat_14 | Post-Resistance | SGIP1    | 84251  | 37 | 1 | 67155937  | 67155937  | Missense_Mutation | SNP | C  | T  | 5  | 651 | c.1508C>T      | c.(1507-1509)GCT>GTT   | p.A503V       |
| Pat_14 | Post-Resistance | ZZZ3     | 26009  | 37 | 1 | 78097637  | 78097637  | Missense_Mutation | SNP | G  | A  | 5  | 435 | c.1403C>T      | c.(1402-1404)TCT>TTT   | p.S468F       |
| Pat_14 | Post-Resistance | SPATA1   | 64173  | 37 | 1 | 84988111  | 84988111  | Missense_Mutation | SNP | G  | A  | 6  | 468 | c.248G>A       | c.(247-249)CGT>CAT     | p.R83H        |
| Pat_14 | Post-Resistance | MCOLN2   | 255231 | 37 | 1 | 85403726  | 85403726  | Missense_Mutation | SNP | T  | C  | 3  | 233 | c.1150A>G      | c.(1150-1152)ACC>GCC   | p.T384A       |
| Pat_14 | Post-Resistance | GF11     | 2672   | 37 | 1 | 92944274  | 92944274  | Missense_Mutation | SNP | A  | G  | 6  | 358 | c.961T>C       | c.(961-963)TTC>CTC     | p.F321L       |
| Pat_14 | Post-Resistance | WDR77    | 79084  | 37 | 1 | 111985384 | 111985384 | Splice_Site       | SNP | C  | T  | 3  | 101 | c.692_splice   | c.e8-1                 | p.G231_splice |
| Pat_14 | Post-Resistance | VANGL1   | 81839  | 37 | 1 | 116225094 | 116225094 | Missense_Mutation | SNP | G  | A  | 6  | 335 | c.922G>A       | c.(922-924)GGG>AGG     | p.G308R       |
| Pat_14 | Post-Resistance | REG4     | 83998  | 37 | 1 | 120345764 | 120345764 | Missense_Mutation | SNP | G  | A  | 4  | 198 | c.92C>T        | c.(91-93)GCT>GTT       | p.A31V        |
| Pat_14 | Post-Resistance | POGZ     | 23126  | 37 | 1 | 151414670 | 151414670 | Missense_Mutation | SNP | G  | A  | 4  | 184 | c.11C>T        | c.(10-12)ACC>ATC       | p.T4I         |
| Pat_14 | Post-Resistance | RPTN     | 126638 | 37 | 1 | 152127833 | 152127833 | Missense_Mutation | SNP | G  | A  | 13 | 846 | c.1742C>T      | c.(1741-1743)TCC>TTC   | p.S581F       |
| Pat_14 | Post-Resistance | NUP210L  | 91181  | 37 | 1 | 154029322 | 154029322 | Missense_Mutation | SNP | C  | T  | 6  | 332 | c.3209G>A      | c.(3208-3210)AGA>AAA   | p.R1070K      |
| Pat_14 | Post-Resistance | THBS3    | 7059   | 37 | 1 | 155172167 | 155172167 | Missense_Mutation | SNP | G  | A  | 5  | 371 | c.983C>T       | c.(982-984)CCG>CTG     | p.P328L       |
| Pat_14 | Post-Resistance | CCT3     | 7203   | 37 | 1 | 156287302 | 156287302 | Nonsense_Mutation | SNP | G  | A  | 43 | 695 | c.796C>T       | c.(796-798)CGA>TGA     | p.R266*       |
| Pat_14 | Post-Resistance | DCAF8    | 50717  | 37 | 1 | 160208525 | 160208525 | Missense_Mutation | SNP | G  | A  | 4  | 112 | c.736C>T       | c.(736-738)CCT>TCT     | p.P246S       |
| Pat_14 | Post-Resistance | SLAMF6   | 114836 | 37 | 1 | 160460002 | 160460002 | Missense_Mutation | SNP | C  | T  | 29 | 498 | c.782G>A       | c.(781-783)CGA>CAA     | p.R261Q       |
| Pat_14 | Post-Resistance | ADAMTS4  | 9507   | 37 | 1 | 161161952 | 161161952 | Missense_Mutation | SNP | G  | A  | 4  | 271 | c.1990C>T      | c.(1990-1992)CGC>TGC   | p.R664C       |
| Pat_14 | Post-Resistance | TMCO1    | 54499  | 37 | 1 | 165697280 | 165697280 | Missense_Mutation | SNP | G  | A  | 7  | 331 | c.547C>T       | c.(547-549)CCT>TCT     | p.P183S       |
| Pat_14 | Post-Resistance | GPR161   | 23432  | 37 | 1 | 168066390 | 168066390 | Missense_Mutation | SNP | C  | A  | 4  | 299 | c.455G>T       | c.(454-456)TGG>TTG     | p.W152L       |
| Pat_14 | Post-Resistance | FMO1     | 2326   | 37 | 1 | 171254581 | 171254581 | Missense_Mutation | SNP | C  | G  | 3  | 181 | c.1497C>G      | c.(1495-1497)ATC>ATG   | p.I499M       |
| Pat_14 | Post-Resistance | ANGPTL1  | 9068   | 37 | 1 | 178834461 | 178834461 | Missense_Mutation | SNP | G  | C  | 3  | 150 | c.451C>G       | c.(451-453)CTT>GTT     | p.L151V       |
| Pat_14 | Post-Resistance | HMCN1    | 83872  | 37 | 1 | 186076094 | 186076094 | Missense_Mutation | SNP | C  | G  | 4  | 446 | c.10849C>G     | c.(10849-10851)CAT>GAT | p.H3617D      |
| Pat_14 | Post-Resistance | PRG4     | 10216  | 37 | 1 | 186276415 | 186276415 | Missense_Mutation | SNP | C  | G  | 3  | 282 | c.1564C>G      | c.(1564-1566)CCT>GCT   | p.P522A       |
| Pat_14 | Post-Resistance | TPR      | 7175   | 37 | 1 | 186289534 | 186289534 | Missense_Mutation | SNP | C  | A  | 4  | 204 | c.6478G>T      | c.(6478-6480)GGT>TGT   | p.G2160C      |
| Pat_14 | Post-Resistance | NEK7     | 140609 | 37 | 1 | 198231733 | 198231733 | Missense_Mutation | SNP | G  | A  | 5  | 601 | c.227G>A       | c.(226-228)CGT>CAT     | p.R76H        |
| Pat_14 | Post-Resistance | PKP1     | 5317   | 37 | 1 | 201294905 | 201294905 | Missense_Mutation | SNP | C  | T  | 4  | 239 | c.2108C>T      | c.(2107-2109)GCT>GTT   | p.A703V       |
| Pat_14 | Post-Resistance | NFASC    | 23114  | 37 | 1 | 204944482 | 204944482 | Missense_Mutation | SNP | G  | A  | 15 | 507 | c.1642G>A      | c.(1642-1644)GAC>AAC   | p.D548N       |
| Pat_14 | Post-Resistance | RASSF5   | 83593  | 37 | 1 | 206757842 | 206757842 | Missense_Mutation | SNP | G  | A  | 6  | 704 | c.814G>A       | c.(814-816)GCT>ACT     | p.A272T       |



|        |                 |           |        |    |    |           |           |                   |     |    |    |    |     |              |                        |          |
|--------|-----------------|-----------|--------|----|----|-----------|-----------|-------------------|-----|----|----|----|-----|--------------|------------------------|----------|
| Pat_14 | Post-Resistance | CD55      | 1604   | 37 | 1  | 207499054 | 207499054 | Missense_Mutation | SNP | C  | T  | 6  | 455 | c.566C>T     | c.(565-567)TCA>TTA     | p.S189L  |
| Pat_14 | Post-Resistance | ANGEL2    | 90806  | 37 | 1  | 213178649 | 213178649 | Missense_Mutation | SNP | C  | T  | 4  | 264 | c.860G>A     | c.(859-861)GGA>GAA     | p.G287E  |
| Pat_14 | Post-Resistance | HHIPL2    | 79802  | 37 | 1  | 222705401 | 222705401 | Missense_Mutation | SNP | C  | T  | 4  | 112 | c.1630G>A    | c.(1630-1632)GAT>AAT   | p.D544N  |
| Pat_14 | Post-Resistance | SCCPDH    | 51097  | 37 | 1  | 246930548 | 246930548 | Missense_Mutation | SNP | C  | A  | 4  | 277 | c.1236C>A    | c.(1234-1236)GAC>GAA   | p.D412E  |
| Pat_14 | Post-Resistance | CAMK1D    | 57118  | 37 | 10 | 12833213  | 12833213  | Missense_Mutation | SNP | G  | A  | 4  | 438 | c.622G>A     | c.(622-624)GGA>AGA     | p.G208R  |
| Pat_14 | Post-Resistance | LOC387646 | 387646 | 37 | 10 | 27538021  | 27538021  | Missense_Mutation | SNP | G  | A  | 7  | 585 | c.1372C>T    | c.(1372-1374)CCA>TCA   | p.P458S  |
| Pat_14 | Post-Resistance | LOC387646 | 387646 | 37 | 10 | 27539257  | 27539257  | Missense_Mutation | SNP | C  | T  | 5  | 230 | c.136G>A     | c.(136-138)GAG>AAG     | p.E46K   |
| Pat_14 | Post-Resistance | ANKRD30A  | 91074  | 37 | 10 | 37441009  | 37441009  | Missense_Mutation | SNP | C  | T  | 7  | 288 | c.1499C>T    | c.(1498-1500)TCC>TTC   | p.S500F  |
| Pat_14 | Post-Resistance | PCDH15    | 65217  | 37 | 10 | 55719502  | 55719502  | Missense_Mutation | SNP | C  | T  | 4  | 174 | c.3112G>A    | c.(3112-3114)GAG>AAG   | p.E1038K |
| Pat_14 | Post-Resistance | LRRTM3    | 347731 | 37 | 10 | 68686937  | 68686937  | Missense_Mutation | SNP | C  | T  | 4  | 481 | c.263C>T     | c.(262-264)ACC>ATC     | p.T88I   |
| Pat_14 | Post-Resistance | AGAP5     | 729092 | 37 | 10 | 75434521  | 75434521  | Missense_Mutation | SNP | G  | A  | 7  | 576 | c.1897C>T    | c.(1897-1899)CGC>TGC   | p.R633C  |
| Pat_14 | Post-Resistance | KIAA0913  | 23053  | 37 | 10 | 75553993  | 75553993  | Missense_Mutation | SNP | G  | A  | 5  | 557 | c.2714G>A    | c.(2713-2715)CGG>CAG   | p.R905Q  |
| Pat_14 | Post-Resistance | LGI1      | 9211   | 37 | 10 | 95556737  | 95556737  | Missense_Mutation | SNP | T  | C  | 4  | 311 | c.851T>C     | c.(850-852)GTA>GCA     | p.V284A  |
| Pat_14 | Post-Resistance | PDLIM1    | 9124   | 37 | 10 | 97007004  | 97007004  | Missense_Mutation | SNP | A  | G  | 14 | 272 | c.653T>C     | c.(652-654)GTT>GCT     | p.V218A  |
| Pat_14 | Post-Resistance | CWF19L1   | 55280  | 37 | 10 | 101997957 | 101997957 | Missense_Mutation | SNP | G  | A  | 4  | 492 | c.1076C>T    | c.(1075-1077)TCT>TTT   | p.S359F  |
| Pat_14 | Post-Resistance | RPL13AP6  | 644511 | 37 | 10 | 112696573 | 112696573 | Missense_Mutation | SNP | T  | C  | 6  | 38  | c.419A>G     | c.(418-420)CAC>CGC     | p.H140R  |
| Pat_14 | Post-Resistance | TECTB     | 6975   | 37 | 10 | 114046122 | 114046122 | Missense_Mutation | SNP | G  | C  | 4  | 303 | c.456G>C     | c.(454-456)GAG>GAC     | p.E152D  |
| Pat_14 | Post-Resistance | PNLIP     | 5406   | 37 | 10 | 118315596 | 118315596 | Missense_Mutation | SNP | G  | A  | 30 | 610 | c.896G>A     | c.(895-897)GGA>GAA     | p.G299E  |
| Pat_14 | Post-Resistance | VAX1      | 11023  | 37 | 10 | 118896051 | 118896051 | Missense_Mutation | SNP | G  | A  | 4  | 134 | c.361C>T     | c.(361-363)CGC>TGC     | p.R121C  |
| Pat_14 | Post-Resistance | SIRT3     | 23410  | 37 | 11 | 224158    | 224158    | Missense_Mutation | SNP | G  | A  | 4  | 187 | c.889C>T     | c.(889-891)CCG>TCG     | p.P297S  |
| Pat_14 | Post-Resistance | CDHR5     | 53841  | 37 | 11 | 617476    | 617476    | Missense_Mutation | SNP | C  | T  | 4  | 201 | c.2413G>A    | c.(2413-2415)GTT>ATT   | p.V805I  |
| Pat_14 | Post-Resistance | CEND1     | 51286  | 37 | 11 | 788498    | 788498    | Missense_Mutation | SNP | G  | A  | 7  | 610 | c.79C>T      | c.(79-81)CCC>TCC       | p.P27S   |
| Pat_14 | Post-Resistance | MUC5B     | 727897 | 37 | 11 | 1270916   | 1270916   | Missense_Mutation | SNP | C  | T  | 5  | 457 | c.14225C>T   | c.(14224-14226)CCG>CTC | p.P4742L |
| Pat_14 | Post-Resistance | KRTAP5-1  | 387264 | 37 | 11 | 1606443   | 1606443   | Missense_Mutation | SNP | T  | C  | 5  | 490 | c.37A>G      | c.(37-39)AGC>GGC       | p.S13G   |
| Pat_14 | Post-Resistance | NUP98     | 4928   | 37 | 11 | 3726490   | 3726490   | Missense_Mutation | SNP | C  | T  | 4  | 323 | c.3022G>A    | c.(3022-3024)GAA>AAA   | p.E1008K |
| Pat_14 | Post-Resistance | OR52I2    | 143502 | 37 | 11 | 4608538   | 4608538   | Missense_Mutation | SNP | C  | T  | 5  | 210 | c.496C>T     | c.(496-498)CTC>TTC     | p.L166F  |
| Pat_14 | Post-Resistance | MUC15     | 143662 | 37 | 11 | 26582751  | 26582751  | Missense_Mutation | SNP | G  | A  | 5  | 175 | c.866C>T     | c.(865-867)CCG>CTG     | p.P289L  |
| Pat_14 | Post-Resistance | PDHX      | 8050   | 37 | 11 | 35016537  | 35016537  | Missense_Mutation | SNP | G  | A  | 5  | 487 | c.1324G>A    | c.(1324-1326)GTT>ATT   | p.V442I  |
| Pat_14 | Post-Resistance | PAMR1     | 25891  | 37 | 11 | 35456299  | 35456299  | Missense_Mutation | SNP | G  | A  | 7  | 491 | c.1387C>T    | c.(1387-1389)CCG>TCG   | p.P463S  |
| Pat_14 | Post-Resistance | CD82      | 3732   | 37 | 11 | 44621717  | 44621717  | Missense_Mutation | SNP | G  | A  | 5  | 364 | c.73G>A      | c.(73-75)GCA>ACA       | p.A25T   |
| Pat_14 | Post-Resistance | KIAA0652  | 9776   | 37 | 11 | 46690091  | 46690091  | Missense_Mutation | SNP | C  | A  | 7  | 503 | c.1195C>A    | c.(1195-1197)CCC>ACC   | p.P399T  |
| Pat_14 | Post-Resistance | NR1H3     | 10062  | 37 | 11 | 47283236  | 47283236  | Missense_Mutation | SNP | C  | T  | 4  | 255 | c.847C>T     | c.(847-849)CGG>TGG     | p.R283W  |
| Pat_14 | Post-Resistance | OR5L2     | 26338  | 37 | 11 | 55595079  | 55595079  | Missense_Mutation | SNP | C  | T  | 8  | 623 | c.385C>T     | c.(385-387)CCC>TCC     | p.P129S  |
| Pat_14 | Post-Resistance | TMEM132A  | 54972  | 37 | 11 | 60703700  | 60703700  | Missense_Mutation | SNP | C  | T  | 4  | 227 | c.2393C>T    | c.(2392-2394)GCA>GTA   | p.A798V  |
| Pat_14 | Post-Resistance | DAK       | 26007  | 37 | 11 | 61105443  | 61105444  | Missense_Mutation | DNP | GG | AA | 6  | 336 | c.34_35GG>AA | c.(34-36)GGC>AAC       | p.G12N   |
| Pat_14 | Post-Resistance | SLC22A9   | 114571 | 37 | 11 | 63137889  | 63137889  | Missense_Mutation | SNP | G  | A  | 22 | 354 | c.361G>A     | c.(361-363)GTG>ATG     | p.V121M  |
| Pat_14 | Post-Resistance | PYGM      | 5837   | 37 | 11 | 64514193  | 64514193  | Missense_Mutation | SNP | G  | A  | 4  | 282 | c.2467C>T    | c.(2467-2469)CGG>TGG   | p.R823W  |
| Pat_14 | Post-Resistance | KDM2A     | 22992  | 37 | 11 | 66983373  | 66983373  | Missense_Mutation | SNP | G  | A  | 7  | 813 | c.640G>A     | c.(640-642)GAC>AAC     | p.D214N  |
| Pat_14 | Post-Resistance | LRP5      | 4041   | 37 | 11 | 68216515  | 68216515  | Missense_Mutation | SNP | T  | C  | 4  | 428 | c.4825T>C    | c.(4825-4827)TCC>CCC   | p.S1609P |
| Pat_14 | Post-Resistance | FOLR1     | 2348   | 37 | 11 | 71906493  | 71906493  | Nonsense_Mutation | SNP | G  | A  | 23 | 417 | c.347G>A     | c.(346-348)TGG>TAG     | p.W116*  |
| Pat_14 | Post-Resistance | INPPL1    | 3636   | 37 | 11 | 71944716  | 71944716  | Missense_Mutation | SNP | G  | A  | 5  | 579 | c.2140G>A    | c.(2140-2142)GTC>ATC   | p.V714I  |
| Pat_14 | Post-Resistance | FAM168A   | 23201  | 37 | 11 | 73120604  | 73120604  | Missense_Mutation | SNP | G  | A  | 35 | 419 | c.550C>T     | c.(550-552)CCT>TCT     | p.P184S  |
| Pat_14 | Post-Resistance | RSF1      | 51773  | 37 | 11 | 77402217  | 77402217  | Missense_Mutation | SNP | G  | A  | 4  | 356 | c.2887C>T    | c.(2887-2889)CGT>TGT   | p.R963C  |
| Pat_14 | Post-Resistance | USP35     | 57558  | 37 | 11 | 77921641  | 77921641  | Missense_Mutation | SNP | C  | T  | 7  | 458 | c.2740C>T    | c.(2740-2742)CCT>TCT   | p.P914S  |
| Pat_14 | Post-Resistance | PRSS23    | 11098  | 37 | 11 | 86518693  | 86518693  | Missense_Mutation | SNP | G  | A  | 5  | 580 | c.8G>A       | c.(7-9)GGG>GAG         | p.G3E    |
| Pat_14 | Post-Resistance | ENDOD1    | 23052  | 37 | 11 | 94862534  | 94862534  | Missense_Mutation | SNP | C  | T  | 6  | 484 | c.1294C>T    | c.(1294-1296)CGT>TGT   | p.R432C  |
| Pat_14 | Post-Resistance | ELMOD1    | 55531  | 37 | 11 | 107535837 | 107535837 | Missense_Mutation | SNP | C  | T  | 9  | 542 | c.919C>T     | c.(919-921)CGC>TGC     | p.R307C  |

|        |                 |              |           |    |    |           |           |                   |     |    |    |    |     |                |                      |              |
|--------|-----------------|--------------|-----------|----|----|-----------|-----------|-------------------|-----|----|----|----|-----|----------------|----------------------|--------------|
| Pat_14 | Post-Resistance | RAB39        | 54734     | 37 | 11 | 107799505 | 107799505 | Missense_Mutation | SNP | G  | A  | 3  | 46  | c.211G>A       | c.(211-213)GGA>AGA   | p.G71R       |
| Pat_14 | Post-Resistance | CUL5         | 8065      | 37 | 11 | 107940828 | 107940828 | Missense_Mutation | SNP | G  | A  | 6  | 503 | c.786G>A       | c.(784-786)ATG>ATA   | p.M262I      |
| Pat_14 | Post-Resistance | SIDT2        | 51092     | 37 | 11 | 117063304 | 117063304 | Missense_Mutation | SNP | C  | T  | 4  | 387 | c.1996C>T      | c.(1996-1998)CGC>TGC | p.R666C      |
| Pat_14 | Post-Resistance | SLC37A4      | 2542      | 37 | 11 | 118896706 | 118896706 | Missense_Mutation | SNP | G  | A  | 3  | 73  | c.955C>T       | c.(955-957)CCG>TGG   | p.R319W      |
| Pat_14 | Post-Resistance | NLRX1        | 79671     | 37 | 11 | 119045519 | 119045519 | Missense_Mutation | SNP | C  | T  | 4  | 186 | c.1207C>T      | c.(1207-1209)CGC>TGC | p.R403C      |
| Pat_14 | Post-Resistance | SORL1        | 6653      | 37 | 11 | 121448004 | 121448004 | Missense_Mutation | SNP | C  | T  | 4  | 371 | c.3475C>T      | c.(3475-3477)CCG>TGG | p.R1159W     |
| Pat_14 | Post-Resistance | OR8D4        | 338662    | 37 | 11 | 123777707 | 123777707 | Missense_Mutation | SNP | C  | T  | 35 | 655 | c.569C>T       | c.(568-570)TCC>TTC   | p.S190F      |
| Pat_14 | Post-Resistance | C11orf45     | 219833    | 37 | 11 | 128774412 | 128774412 | Missense_Mutation | SNP | G  | A  | 4  | 367 | c.50C>T        | c.(49-51)CCG>CTG     | p.P17L       |
| Pat_14 | Post-Resistance | LOC100288778 | 100288778 | 37 | 12 | 88651     | 88651     | Missense_Mutation | SNP | A  | G  | 5  | 36  | c.160A>G       | c.(160-162)AGC>GGC   | p.S54G       |
| Pat_14 | Post-Resistance | CD4          | 920       | 37 | 12 | 6927640   | 6927640   | Missense_Mutation | SNP | G  | A  | 4  | 281 | c.1210G>A      | c.(1210-1212)GGC>AGC | p.G404S      |
| Pat_14 | Post-Resistance | CLEC4A       | 50856     | 37 | 12 | 8278202   | 8278202   | Missense_Mutation | SNP | C  | T  | 9  | 327 | c.128C>T       | c.(127-129)CCC>CTC   | p.P43L       |
| Pat_14 | Post-Resistance | CLEC4E       | 26253     | 37 | 12 | 8692544   | 8692544   | Splice_Site       | SNP | C  | T  | 4  | 364 | c.38_splice    | c.e2-1               | p.E13_splice |
| Pat_14 | Post-Resistance | A2ML1        | 144568    | 37 | 12 | 9007419   | 9007419   | Missense_Mutation | SNP | G  | A  | 4  | 301 | c.2756G>A      | c.(2755-2757)TGC>TAC | p.C919Y      |
| Pat_14 | Post-Resistance | A2M          | 2         | 37 | 12 | 9254219   | 9254219   | Missense_Mutation | SNP | C  | T  | 4  | 162 | c.1318G>A      | c.(1318-1320)GAA>AAA | p.E440K      |
| Pat_14 | Post-Resistance | PRB3         | 5544      | 37 | 12 | 11420521  | 11420521  | Missense_Mutation | SNP | C  | T  | 9  | 332 | c.662G>A       | c.(661-663)CGT>CAT   | p.R221H      |
| Pat_14 | Post-Resistance | PRB4         | 5545      | 37 | 12 | 11461694  | 11461694  | Missense_Mutation | SNP | G  | A  | 8  | 704 | c.223C>T       | c.(223-225)CCA>TCA   | p.P75S       |
| Pat_14 | Post-Resistance | SLCO1B1      | 10599     | 37 | 12 | 21331569  | 21331569  | Missense_Mutation | SNP | C  | T  | 8  | 361 | c.541C>T       | c.(541-543)CGT>TGT   | p.R181C      |
| Pat_14 | Post-Resistance | C12orf35     | 55196     | 37 | 12 | 32134340  | 32134340  | Missense_Mutation | SNP | G  | A  | 5  | 185 | c.451G>A       | c.(451-453)GCA>ACA   | p.A151T      |
| Pat_14 | Post-Resistance | KIF21A       | 55605     | 37 | 12 | 39726854  | 39726854  | Missense_Mutation | SNP | A  | G  | 4  | 397 | c.2543T>C      | c.(2542-2544)GTT>GCT | p.V848A      |
| Pat_14 | Post-Resistance | FAM113B      | 91523     | 37 | 12 | 47629250  | 47629251  | Missense_Mutation | DNP | CC | TT | 9  | 293 | c.404_405CC>TT | c.(403-405)TCC>TTT   | p.S135F      |
| Pat_14 | Post-Resistance | CCNT1        | 904       | 37 | 12 | 49087735  | 49087735  | Missense_Mutation | SNP | G  | A  | 4  | 463 | c.1262C>T      | c.(1261-1263)GCT>GTT | p.A421V      |
| Pat_14 | Post-Resistance | FMNL3        | 91010     | 37 | 12 | 50043290  | 50043290  | Missense_Mutation | SNP | G  | A  | 5  | 320 | c.2267C>T      | c.(2266-2268)TCC>TTC | p.S756F      |
| Pat_14 | Post-Resistance | KRT8         | 3856      | 37 | 12 | 53298675  | 53298675  | Missense_Mutation | SNP | A  | C  | 4  | 49  | c.91T>G        | c.(91-93)TCC>GCC     | p.S31A       |
| Pat_14 | Post-Resistance | ATF7         | 11016     | 37 | 12 | 53925613  | 53925613  | Missense_Mutation | SNP | G  | A  | 4  | 94  | c.875C>T       | c.(874-876)ACT>ATT   | p.T292I      |
| Pat_14 | Post-Resistance | ORMDL2       | 29095     | 37 | 12 | 56213210  | 56213210  | Missense_Mutation | SNP | G  | A  | 13 | 599 | c.259G>A       | c.(259-261)GAG>AAG   | p.E87K       |
| Pat_14 | Post-Resistance | BAZ2A        | 11176     | 37 | 12 | 56993106  | 56993106  | Missense_Mutation | SNP | G  | A  | 4  | 114 | c.5215C>T      | c.(5215-5217)CCA>TCA | p.P1739S     |
| Pat_14 | Post-Resistance | ATP5B        | 506       | 37 | 12 | 57032915  | 57032915  | Missense_Mutation | SNP | G  | C  | 5  | 706 | c.1464C>G      | c.(1462-1464)ATC>ATG | p.I488M      |
| Pat_14 | Post-Resistance | ARHGAP9      | 64333     | 37 | 12 | 57872988  | 57872988  | Missense_Mutation | SNP | C  | T  | 4  | 332 | c.415G>A       | c.(415-417)GAA>AAA   | p.E139K      |
| Pat_14 | Post-Resistance | LGR5         | 8549      | 37 | 12 | 71978321  | 71978321  | Missense_Mutation | SNP | C  | T  | 7  | 292 | c.2531C>T      | c.(2530-2532)TCA>TTA | p.S844L      |
| Pat_14 | Post-Resistance | TPH2         | 121278    | 37 | 12 | 72338465  | 72338465  | Missense_Mutation | SNP | C  | A  | 5  | 418 | c.539C>A       | c.(538-540)CCA>CAA   | p.P180Q      |
| Pat_14 | Post-Resistance | C12orf50     | 160419    | 37 | 12 | 88381686  | 88381686  | Missense_Mutation | SNP | G  | A  | 4  | 336 | c.758C>T       | c.(757-759)ACG>ATG   | p.T253M      |
| Pat_14 | Post-Resistance | STAB2        | 55576     | 37 | 12 | 104049270 | 104049270 | Missense_Mutation | SNP | G  | A  | 4  | 354 | c.1645G>A      | c.(1645-1647)GTT>ATT | p.V549I      |
| Pat_14 | Post-Resistance | RFX4         | 5992      | 37 | 12 | 107090148 | 107090148 | Missense_Mutation | SNP | G  | A  | 4  | 478 | c.757G>A       | c.(757-759)GGC>AGC   | p.G253S      |
| Pat_14 | Post-Resistance | UBE3B        | 89910     | 37 | 12 | 109928880 | 109928880 | Missense_Mutation | SNP | C  | T  | 4  | 399 | c.661C>T       | c.(661-663)CGT>TGT   | p.R221C      |
| Pat_14 | Post-Resistance | P2RX4        | 5025      | 37 | 12 | 121660807 | 121660807 | Missense_Mutation | SNP | C  | T  | 4  | 182 | c.485C>T       | c.(484-486)GCG>GTG   | p.A162V      |
| Pat_14 | Post-Resistance | ANAPC5       | 51433     | 37 | 12 | 121766151 | 121766151 | Missense_Mutation | SNP | C  | G  | 9  | 203 | c.1272G>C      | c.(1270-1272)CAG>CAC | p.Q424H      |
| Pat_14 | Post-Resistance | CLIP1        | 6249      | 37 | 12 | 122862135 | 122862135 | Missense_Mutation | SNP | G  | A  | 5  | 561 | c.458C>T       | c.(457-459)ACG>ATG   | p.T153M      |
| Pat_14 | Post-Resistance | SLC15A4      | 121260    | 37 | 12 | 129278838 | 129278838 | Missense_Mutation | SNP | G  | A  | 5  | 303 | c.1637C>T      | c.(1636-1638)ACC>ATC | p.T546I      |
| Pat_14 | Post-Resistance | TMEM132D     | 121256    | 37 | 12 | 129694154 | 129694154 | Missense_Mutation | SNP | C  | T  | 4  | 288 | c.1354G>A      | c.(1354-1356)GTG>ATG | p.V452M      |
| Pat_14 | Post-Resistance | TMEM132D     | 121256    | 37 | 12 | 130185201 | 130185201 | Missense_Mutation | SNP | G  | A  | 4  | 252 | c.122C>T       | c.(121-123)TCC>TTC   | p.S41F       |
| Pat_14 | Post-Resistance | PIWIL1       | 9271      | 37 | 12 | 130847613 | 130847613 | Missense_Mutation | SNP | G  | A  | 4  | 327 | c.2119G>A      | c.(2119-2121)GGC>AGC | p.G707S      |
| Pat_14 | Post-Resistance | SFRS8        | 6433      | 37 | 12 | 132199411 | 132199411 | Missense_Mutation | SNP | A  | C  | 4  | 325 | c.433A>C       | c.(433-435)AGC>CGC   | p.S145R      |
| Pat_14 | Post-Resistance | PARP4        | 143       | 37 | 13 | 25023942  | 25023942  | Missense_Mutation | SNP | G  | A  | 16 | 435 | c.3028C>T      | c.(3028-3030)CGT>TGT | p.R1010C     |
| Pat_14 | Post-Resistance | FRY          | 10129     | 37 | 13 | 32783778  | 32783778  | Missense_Mutation | SNP | C  | A  | 4  | 393 | c.4332C>A      | c.(4330-4332)AAC>AAA | p.N1444K     |
| Pat_14 | Post-Resistance | CSNK1A1L     | 122011    | 37 | 13 | 37679360  | 37679360  | Missense_Mutation | SNP | C  | T  | 5  | 433 | c.34G>A        | c.(34-36)GTT>ATT     | p.V12I       |
| Pat_14 | Post-Resistance | ENOX1        | 55068     | 37 | 13 | 43788193  | 43788193  | Missense_Mutation | SNP | G  | A  | 4  | 314 | c.1865C>T      | c.(1864-1866)ACG>ATG | p.T622M      |
| Pat_14 | Post-Resistance | COL4A1       | 1282      | 37 | 13 | 110827023 | 110827023 | Missense_Mutation | SNP | C  | T  | 5  | 298 | c.3272G>A      | c.(3271-3273)GGA>GAA | p.G1091E     |

|        |                 |          |        |    |    |           |           |                   |     |    |    |    |     |                                   |                        |               |
|--------|-----------------|----------|--------|----|----|-----------|-----------|-------------------|-----|----|----|----|-----|-----------------------------------|------------------------|---------------|
| Pat_14 | Post-Resistance | TUBGCP3  | 10426  | 37 | 13 | 113212517 | 113212517 | Missense_Mutation | SNP | G  | A  | 9  | 95  | c.541C>T                          | c.(541-543)CTC>TTC     | p.L181F       |
| Pat_14 | Post-Resistance | PARP2    | 10038  | 37 | 14 | 20822408  | 20822408  | Splice_Site       | SNP | T  | C  | 3  | 167 | c.802_splice                      | c.e8+2                 | p.G268_splice |
| Pat_14 | Post-Resistance | TEP1     | 7011   | 37 | 14 | 20854275  | 20854275  | Missense_Mutation | SNP | G  | A  | 10 | 310 | c.2941C>T                         | c.(2941-2943)CCC>TCC   | p.P981S       |
| Pat_14 | Post-Resistance | CHD8     | 57680  | 37 | 14 | 21862547  | 21862547  | Missense_Mutation | SNP | G  | A  | 3  | 109 | c.4651C>T                         | c.(4651-4653)CGC>TGC   | p.R1551C      |
| Pat_14 | Post-Resistance | TOX4     | 9878   | 37 | 14 | 21957005  | 21957005  | Missense_Mutation | SNP | G  | A  | 5  | 451 | c.575G>A                          | c.(574-576)CGG>CAG     | p.R192Q       |
| Pat_14 | Post-Resistance | ACIN1    | 22985  | 37 | 14 | 23538765  | 23538765  | Missense_Mutation | SNP | C  | T  | 5  | 237 | c.2359G>A                         | c.(2359-2361)GAA>AAA   | p.E787K       |
| Pat_14 | Post-Resistance | IPO4     | 79711  | 37 | 14 | 24654449  | 24654449  | Nonsense_Mutation | SNP | C  | A  | 4  | 271 | c.1348G>T                         | c.(1348-1350)GGA>TGA   | p.G450*       |
| Pat_14 | Post-Resistance | NOVA1    | 4857   | 37 | 14 | 26917194  | 26917194  | Missense_Mutation | SNP | G  | A  | 10 | 404 | c.1495C>T                         | c.(1495-1497)CGG>TGG   | p.R499W       |
| Pat_14 | Post-Resistance | SEC23A   | 10484  | 37 | 14 | 39560787  | 39560787  | Missense_Mutation | SNP | A  | G  | 5  | 490 | c.497T>C                          | c.(496-498)CTT>CCT     | p.L166P       |
| Pat_14 | Post-Resistance | MIA2     | 117153 | 37 | 14 | 39716391  | 39716391  | Missense_Mutation | SNP | G  | A  | 5  | 361 | c.613G>A                          | c.(613-615)GAA>AAA     | p.E205K       |
| Pat_14 | Post-Resistance | FSCB     | 84075  | 37 | 14 | 44975634  | 44975634  | Missense_Mutation | SNP | G  | A  | 6  | 691 | c.557C>T                          | c.(556-558)TCG>TTG     | p.S186L       |
| Pat_14 | Post-Resistance | DLGAP5   | 9787   | 37 | 14 | 55637464  | 55637464  | Missense_Mutation | SNP | C  | G  | 17 | 486 | c.1343G>C                         | c.(1342-1344)TGC>TCC   | p.C448S       |
| Pat_14 | Post-Resistance | DACT1    | 51339  | 37 | 14 | 59112128  | 59112128  | Missense_Mutation | SNP | G  | A  | 4  | 400 | c.787G>A                          | c.(787-789)GGG>AGG     | p.G263R       |
| Pat_14 | Post-Resistance | TMEM30B  | 161291 | 37 | 14 | 61747099  | 61747099  | Missense_Mutation | SNP | G  | A  | 4  | 226 | c.767C>T                          | c.(766-768)ACG>ATG     | p.T256M       |
| Pat_14 | Post-Resistance | KCNH5    | 27133  | 37 | 14 | 63269251  | 63269251  | Missense_Mutation | SNP | G  | C  | 3  | 138 | c.1618C>G                         | c.(1618-1620)CTA>GTA   | p.L540V       |
| Pat_14 | Post-Resistance | SYNE2    | 23224  | 37 | 14 | 64564748  | 64564748  | Missense_Mutation | SNP | G  | A  | 5  | 227 | c.12190G>A                        | c.(12190-12192)GTA>ATA | p.V4064I      |
| Pat_14 | Post-Resistance | ADAM20   | 8748   | 37 | 14 | 70990196  | 70990196  | Missense_Mutation | SNP | G  | A  | 5  | 696 | c.1429C>T                         | c.(1429-1431)CGG>TGG   | p.R477W       |
| Pat_14 | Post-Resistance | BTBD7    | 55727  | 37 | 14 | 93709199  | 93709199  | Missense_Mutation | SNP | T  | C  | 3  | 242 | c.2819A>G                         | c.(2818-2820)CAG>CGG   | p.Q940R       |
| Pat_14 | Post-Resistance | HHIPL1   | 84439  | 37 | 14 | 100123450 | 100123450 | Missense_Mutation | SNP | C  | T  | 7  | 828 | c.1016C>T                         | c.(1015-1017)CCC>CTC   | p.P339L       |
| Pat_14 | Post-Resistance | CXADRP2  | 646243 | 37 | 15 | 22016479  | 22016479  | Missense_Mutation | SNP | C  | G  | 3  | 226 | c.238G>C                          | c.(238-240)GTA>CTA     | p.V80L        |
| Pat_14 | Post-Resistance | VPS18    | 57617  | 37 | 15 | 41192067  | 41192067  | Missense_Mutation | SNP | G  | A  | 4  | 217 | c.1051G>A                         | c.(1051-1053)GGG>AGG   | p.G351R       |
| Pat_14 | Post-Resistance | DLL4     | 54567  | 37 | 15 | 41229632  | 41229632  | Missense_Mutation | SNP | C  | T  | 7  | 713 | c.1960C>T                         | c.(1960-1962)CGG>TGG   | p.R654W       |
| Pat_14 | Post-Resistance | RPAP1    | 26015  | 37 | 15 | 41819381  | 41819381  | Missense_Mutation | SNP | A  | G  | 3  | 289 | c.1730T>C                         | c.(1729-1731)CTG>CCG   | p.L577P       |
| Pat_14 | Post-Resistance | MAPKBP1  | 23005  | 37 | 15 | 42104784  | 42104784  | Missense_Mutation | SNP | G  | A  | 4  | 429 | c.569G>A                          | c.(568-570)AGC>AAC     | p.S190N       |
| Pat_14 | Post-Resistance | UBR1     | 197131 | 37 | 15 | 43330042  | 43330042  | Missense_Mutation | SNP | G  | A  | 4  | 233 | c.1951C>T                         | c.(1951-1953)CGT>TGT   | p.R651C       |
| Pat_14 | Post-Resistance | WDR76    | 79968  | 37 | 15 | 44158523  | 44158523  | Missense_Mutation | SNP | G  | A  | 4  | 372 | c.1814G>A                         | c.(1813-1815)CGG>CAG   | p.R605Q       |
| Pat_14 | Post-Resistance | GALK2    | 2585   | 37 | 15 | 49620159  | 49620159  | Missense_Mutation | SNP | G  | A  | 4  | 368 | c.1180G>A                         | c.(1180-1182)GCT>ACT   | p.A394T       |
| Pat_14 | Post-Resistance | SLC27A2  | 11001  | 37 | 15 | 50518269  | 50518269  | Missense_Mutation | SNP | C  | T  | 5  | 331 | c.1252C>T                         | c.(1252-1254)CCC>TCC   | p.P418S       |
| Pat_14 | Post-Resistance | CYP19A1  | 1588   | 37 | 15 | 51514680  | 51514680  | Missense_Mutation | SNP | G  | A  | 4  | 201 | c.494C>T                          | c.(493-495)GCT>GTT     | p.A165V       |
| Pat_14 | Post-Resistance | CILP     | 8483   | 37 | 15 | 65496902  | 65496902  | Missense_Mutation | SNP | G  | T  | 4  | 149 | c.623C>A                          | c.(622-624)CCA>CAA     | p.P208Q       |
| Pat_14 | Post-Resistance | HCN4     | 10021  | 37 | 15 | 73616107  | 73616107  | Missense_Mutation | SNP | G  | A  | 4  | 184 | c.2327C>T                         | c.(2326-2328)CCG>CTG   | p.P776L       |
| Pat_14 | Post-Resistance | CYP1A1   | 1543   | 37 | 15 | 75013595  | 75013595  | Missense_Mutation | SNP | A  | G  | 4  | 449 | c.1111T>C                         | c.(1111-1113)TTC>CTC   | p.F371L       |
| Pat_14 | Post-Resistance | C15orf17 | 57184  | 37 | 15 | 75195124  | 75195125  | Missense_Mutation | DNP | CC | TT | 4  | 242 | c.432_433GG>AA430-435)CAGGTG>CAAA |                        | p.V145M       |
| Pat_14 | Post-Resistance | IL16     | 3603   | 37 | 15 | 81585370  | 81585370  | Missense_Mutation | SNP | T  | C  | 3  | 252 | c.1894T>C                         | c.(1894-1896)TGT>CGT   | p.C632R       |
| Pat_14 | Post-Resistance | MEX3B    | 84206  | 37 | 15 | 82336691  | 82336691  | Missense_Mutation | SNP | G  | T  | 7  | 269 | c.520C>A                          | c.(520-522)CTC>ATC     | p.L174I       |
| Pat_14 | Post-Resistance | EFTUD1   | 79631  | 37 | 15 | 82512090  | 82512090  | Missense_Mutation | SNP | A  | G  | 4  | 230 | c.1514T>C                         | c.(1513-1515)TTT>TCT   | p.F505S       |
| Pat_14 | Post-Resistance | AKAP13   | 11214  | 37 | 15 | 86124220  | 86124220  | Missense_Mutation | SNP | A  | G  | 6  | 586 | c.2921A>G                         | c.(2920-2922)AAG>AGG   | p.K974R       |
| Pat_14 | Post-Resistance | ACAN     | 176    | 37 | 15 | 89402396  | 89402396  | Missense_Mutation | SNP | G  | A  | 4  | 251 | c.6580G>A                         | c.(6580-6582)GAC>AAC   | p.D2194N      |
| Pat_14 | Post-Resistance | FURIN    | 5045   | 37 | 15 | 91423995  | 91423995  | Missense_Mutation | SNP | C  | T  | 3  | 103 | c.1631C>T                         | c.(1630-1632)TCT>TTT   | p.S544F       |
| Pat_14 | Post-Resistance | ADAMTS17 | 170691 | 37 | 15 | 100692818 | 100692818 | Missense_Mutation | SNP | T  | C  | 3  | 346 | c.1472A>G                         | c.(1471-1473)GAG>GGG   | p.E491G       |
| Pat_14 | Post-Resistance | IFT140   | 9742   | 37 | 16 | 1634306   | 1634306   | Missense_Mutation | SNP | G  | A  | 4  | 168 | c.1271C>T                         | c.(1270-1272)CCG>CTG   | p.P424L       |
| Pat_14 | Post-Resistance | A2BP1    | 54715  | 37 | 16 | 7568246   | 7568246   | Missense_Mutation | SNP | C  | T  | 6  | 608 | c.125C>T                          | c.(124-126)ACG>ATG     | p.T42M        |
| Pat_14 | Post-Resistance | GP2      | 2813   | 37 | 16 | 20327283  | 20327283  | Missense_Mutation | SNP | C  | T  | 4  | 406 | c.1505G>A                         | c.(1504-1506)CGG>CAG   | p.R502Q       |
| Pat_14 | Post-Resistance | ARHGAP17 | 55114  | 37 | 16 | 24942360  | 24942360  | Missense_Mutation | SNP | G  | A  | 6  | 697 | c.2260C>T                         | c.(2260-2262)CCT>TCT   | p.P754S       |
| Pat_14 | Post-Resistance | CLN3     | 1201   | 37 | 16 | 28499967  | 28499967  | Missense_Mutation | SNP | G  | A  | 5  | 652 | c.239C>T                          | c.(238-240)ACG>ATG     | p.T80M        |
| Pat_14 | Post-Resistance | SH2B1    | 25970  | 37 | 16 | 28878676  | 28878676  | Missense_Mutation | SNP | C  | T  | 18 | 749 | c.964C>T                          | c.(964-966)CCC>TCC     | p.P322S       |
| Pat_14 | Post-Resistance | FBXL19   | 54620  | 37 | 16 | 30938689  | 30938689  | Missense_Mutation | SNP | G  | A  | 3  | 44  | c.298G>A                          | c.(298-300)GTG>ATG     | p.V100M       |

|        |                 |           |        |    |    |          |          |                   |     |   |   |    |     |            |                        |          |
|--------|-----------------|-----------|--------|----|----|----------|----------|-------------------|-----|---|---|----|-----|------------|------------------------|----------|
| Pat_14 | Post-Resistance | HSD3B7    | 80270  | 37 | 16 | 30997438 | 30997438 | Missense_Mutation | SNP | G | A | 5  | 146 | c.235G>A   | c.(235-237)GGA>AGA     | p.G79R   |
| Pat_14 | Post-Resistance | PDXDC2    | 283970 | 37 | 16 | 70016263 | 70016263 | Missense_Mutation | SNP | C | T | 5  | 156 | c.439G>A   | c.(439-441)GCC>ACC     | p.A147T  |
| Pat_14 | Post-Resistance | CNTNAP4   | 85445  | 37 | 16 | 76528834 | 76528834 | Missense_Mutation | SNP | G | A | 14 | 514 | c.2108G>A  | c.(2107-2109)GGA>GAA   | p.G703E  |
| Pat_14 | Post-Resistance | CDH13     | 1012   | 37 | 16 | 83636110 | 83636110 | Missense_Mutation | SNP | G | A | 5  | 761 | c.1012G>A  | c.(1012-1014)GGA>AGA   | p.G338R  |
| Pat_14 | Post-Resistance | KIAA1609  | 57707  | 37 | 16 | 84516203 | 84516203 | Missense_Mutation | SNP | C | T | 27 | 318 | c.1072G>A  | c.(1072-1074)GGA>AGA   | p.G358R  |
| Pat_14 | Post-Resistance | NLRP1     | 22861  | 37 | 17 | 5463015  | 5463015  | Missense_Mutation | SNP | C | T | 10 | 622 | c.1001G>A  | c.(1000-1002)GGG>GAG   | p.G334E  |
| Pat_14 | Post-Resistance | AIPL1     | 23746  | 37 | 17 | 6328839  | 6328839  | Missense_Mutation | SNP | G | A | 4  | 196 | c.1096C>T  | c.(1096-1098)CCC>TCC   | p.P366S  |
| Pat_14 | Post-Resistance | AIPL1     | 23746  | 37 | 17 | 6331798  | 6331798  | Missense_Mutation | SNP | C | T | 5  | 201 | c.305G>A   | c.(304-306)CGG>CAG     | p.R102Q  |
| Pat_14 | Post-Resistance | NEURL4    | 84461  | 37 | 17 | 7220648  | 7220648  | Missense_Mutation | SNP | G | A | 9  | 240 | c.4360C>T  | c.(4360-4362)CCT>TCT   | p.P1454S |
| Pat_14 | Post-Resistance | C17orf74  | 201243 | 37 | 17 | 7329696  | 7329696  | Missense_Mutation | SNP | G | A | 5  | 209 | c.386G>A   | c.(385-387)CGC>CAC     | p.R129H  |
| Pat_14 | Post-Resistance | DNAH2     | 146754 | 37 | 17 | 7727548  | 7727548  | Missense_Mutation | SNP | G | A | 4  | 138 | c.11588G>A | c.(11587-11589)CGC>CAC | p.R3863H |
| Pat_14 | Post-Resistance | CHD3      | 1107   | 37 | 17 | 7807866  | 7807866  | Missense_Mutation | SNP | C | T | 4  | 231 | c.4001C>T  | c.(4000-4002)GCC>GTC   | p.A1334V |
| Pat_14 | Post-Resistance | GUCY2D    | 3000   | 37 | 17 | 7919139  | 7919139  | Missense_Mutation | SNP | G | A | 4  | 137 | c.3023G>A  | c.(3022-3024)CGC>CAC   | p.R1008H |
| Pat_14 | Post-Resistance | FLII      | 2314   | 37 | 17 | 18151926 | 18151926 | Missense_Mutation | SNP | G | A | 5  | 183 | c.2128C>T  | c.(2128-2130)CCC>TCC   | p.P710S  |
| Pat_14 | Post-Resistance | LGALS9C   | 654346 | 37 | 17 | 18387258 | 18387258 | Missense_Mutation | SNP | G | A | 4  | 266 | c.109G>A   | c.(109-111)GTT>ATT     | p.V37I   |
| Pat_14 | Post-Resistance | LGALS9B   | 284194 | 37 | 17 | 20363690 | 20363690 | Missense_Mutation | SNP | C | T | 7  | 618 | c.106G>A   | c.(106-108)GCC>ACC     | p.A36T   |
| Pat_14 | Post-Resistance | SEZ6      | 124925 | 37 | 17 | 27285151 | 27285151 | Missense_Mutation | SNP | G | A | 4  | 342 | c.2116C>T  | c.(2116-2118)CGC>TGC   | p.R706C  |
| Pat_14 | Post-Resistance | TMEM132E  | 124842 | 37 | 17 | 32964715 | 32964715 | Missense_Mutation | SNP | G | A | 4  | 293 | c.2419G>A  | c.(2419-2421)GTC>ATC   | p.V807I  |
| Pat_14 | Post-Resistance | KRTAP4-11 | 653240 | 37 | 17 | 39274087 | 39274087 | Missense_Mutation | SNP | G | C | 5  | 36  | c.481C>G   | c.(481-483)CTG>GTG     | p.L161V  |
| Pat_14 | Post-Resistance | CNTNAP1   | 8506   | 37 | 17 | 40844667 | 40844667 | Missense_Mutation | SNP | G | A | 6  | 336 | c.2681G>A  | c.(2680-2682)CGG>CAG   | p.R894Q  |
| Pat_14 | Post-Resistance | PLEKHM1   | 9842   | 37 | 17 | 43516901 | 43516901 | Missense_Mutation | SNP | A | G | 5  | 286 | c.3001T>C  | c.(3001-3003)TGC>CGC   | p.C1001R |
| Pat_14 | Post-Resistance | NPEPPS    | 9520   | 37 | 17 | 45662879 | 45662879 | Missense_Mutation | SNP | G | A | 5  | 302 | c.662G>A   | c.(661-663)CGG>CAG     | p.R221Q  |
| Pat_14 | Post-Resistance | B4GALNT2  | 124872 | 37 | 17 | 47218694 | 47218694 | Nonsense_Mutation | SNP | C | T | 13 | 541 | c.280C>T   | c.(280-282)CAA>TAA     | p.Q94*   |
| Pat_14 | Post-Resistance | TOB1      | 10140  | 37 | 17 | 48940765 | 48940765 | Missense_Mutation | SNP | G | A | 4  | 400 | c.614C>T   | c.(613-615)TCT>TTT     | p.S205F  |
| Pat_14 | Post-Resistance | SPAG9     | 9043   | 37 | 17 | 49073942 | 49073942 | Missense_Mutation | SNP | G | A | 8  | 187 | c.1952C>T  | c.(1951-1953)CCT>CTT   | p.P651L  |
| Pat_14 | Post-Resistance | PCTP      | 58488  | 37 | 17 | 53851097 | 53851097 | Missense_Mutation | SNP | C | T | 5  | 165 | c.352C>T   | c.(352-354)CGG>TGG     | p.R118W  |
| Pat_14 | Post-Resistance | VEZF1     | 7716   | 37 | 17 | 56052085 | 56052085 | Missense_Mutation | SNP | G | A | 5  | 805 | c.1315C>T  | c.(1315-1317)CCA>TCA   | p.P439S  |
| Pat_14 | Post-Resistance | BZRAP1    | 9256   | 37 | 17 | 56386642 | 56386642 | Missense_Mutation | SNP | T | C | 3  | 150 | c.3991A>G  | c.(3991-3993)AGC>GGC   | p.S1331G |
| Pat_14 | Post-Resistance | CSHL1     | 1444   | 37 | 17 | 61987841 | 61987841 | Missense_Mutation | SNP | G | A | 5  | 614 | c.245C>T   | c.(244-246)TCC>TTC     | p.S82F   |
| Pat_14 | Post-Resistance | ABCA9     | 10350  | 37 | 17 | 67041360 | 67041360 | Missense_Mutation | SNP | G | A | 4  | 167 | c.422C>T   | c.(421-423)TCT>TTT     | p.S141F  |
| Pat_14 | Post-Resistance | CASKIN2   | 57513  | 37 | 17 | 73498943 | 73498943 | Missense_Mutation | SNP | G | A | 4  | 194 | c.2212C>T  | c.(2212-2214)CGG>TGG   | p.R738W  |
| Pat_14 | Post-Resistance | UNC13D    | 201294 | 37 | 17 | 73831985 | 73831985 | Missense_Mutation | SNP | G | A | 5  | 374 | c.1547C>T  | c.(1546-1548)ACC>ATC   | p.T516I  |
| Pat_14 | Post-Resistance | SEC14L1   | 6397   | 37 | 17 | 75196737 | 75196737 | Missense_Mutation | SNP | T | C | 16 | 422 | c.991T>C   | c.(991-993)TGG>CGG     | p.W331R  |
| Pat_14 | Post-Resistance | CCDC40    | 55036  | 37 | 17 | 78013907 | 78013907 | Missense_Mutation | SNP | T | G | 6  | 274 | c.390T>G   | c.(388-390)GAT>GAG     | p.D130E  |
| Pat_14 | Post-Resistance | RNF213    | 57674  | 37 | 17 | 78326796 | 78326796 | Missense_Mutation | SNP | G | A | 5  | 285 | c.4579G>A  | c.(4579-4581)GAT>AAT   | p.D1527N |
| Pat_14 | Post-Resistance | FOXK2     | 3607   | 37 | 17 | 80559253 | 80559253 | Missense_Mutation | SNP | G | A | 4  | 314 | c.1861G>A  | c.(1861-1863)GGT>AGT   | p.G621S  |
| Pat_14 | Post-Resistance | APCDD1    | 147495 | 37 | 18 | 10487662 | 10487662 | Missense_Mutation | SNP | G | A | 4  | 371 | c.1172G>A  | c.(1171-1173)GGG>GAG   | p.G391E  |
| Pat_14 | Post-Resistance | SPIRE1    | 56907  | 37 | 18 | 12452287 | 12452287 | Missense_Mutation | SNP | G | A | 4  | 145 | c.1979C>T  | c.(1978-1980)ACT>ATT   | p.T660I  |
| Pat_14 | Post-Resistance | FAM59A    | 64762  | 37 | 18 | 29850273 | 29850273 | Missense_Mutation | SNP | G | A | 4  | 174 | c.1640C>T  | c.(1639-1641)CCC>CTC   | p.P547L  |
| Pat_14 | Post-Resistance | ASXL3     | 80816  | 37 | 18 | 31323920 | 31323920 | Missense_Mutation | SNP | C | T | 5  | 382 | c.4108C>T  | c.(4108-4110)CCT>TCT   | p.P1370S |
| Pat_14 | Post-Resistance | KIAA1328  | 57536  | 37 | 18 | 34647216 | 34647216 | Missense_Mutation | SNP | C | T | 13 | 306 | c.940C>T   | c.(940-942)CGT>TGT     | p.R314C  |
| Pat_14 | Post-Resistance | ZNF555    | 148254 | 37 | 19 | 2853183  | 2853183  | Missense_Mutation | SNP | G | A | 3  | 103 | c.1120G>A  | c.(1120-1122)GGG>AGG   | p.G374R  |
| Pat_14 | Post-Resistance | TLE6      | 79816  | 37 | 19 | 2987935  | 2987935  | Missense_Mutation | SNP | G | A | 3  | 72  | c.296G>A   | c.(295-297)GGT>GAT     | p.G99D   |
| Pat_14 | Post-Resistance | TJP3      | 27134  | 37 | 19 | 3736227  | 3736227  | Missense_Mutation | SNP | G | A | 4  | 192 | c.1291G>A  | c.(1291-1293)GGG>AGG   | p.G431R  |
| Pat_14 | Post-Resistance | UBXN6     | 80700  | 37 | 19 | 4453936  | 4453936  | Nonsense_Mutation | SNP | G | A | 5  | 365 | c.238C>T   | c.(238-240)CGA>TGA     | p.R80*   |
| Pat_14 | Post-Resistance | PLIN4     | 729359 | 37 | 19 | 4512254  | 4512254  | Missense_Mutation | SNP | G | A | 6  | 667 | c.1676C>T  | c.(1675-1677)ACG>ATG   | p.T559M  |
| Pat_14 | Post-Resistance | LASS4     | 79603  | 37 | 19 | 8320743  | 8320743  | Missense_Mutation | SNP | G | A | 4  | 305 | c.448G>A   | c.(448-450)GGC>AGC     | p.G150S  |

|        |                 |           |        |    |    |           |           |                   |     |   |   |    |     |            |                        |          |
|--------|-----------------|-----------|--------|----|----|-----------|-----------|-------------------|-----|---|---|----|-----|------------|------------------------|----------|
| Pat_14 | Post-Resistance | ADAMTS10  | 81794  | 37 | 19 | 8651052   | 8651052   | Missense_Mutation | SNP | G | T | 13 | 112 | c.2614C>A  | c.(2614-2616)CTG>ATG   | p.L872M  |
| Pat_14 | Post-Resistance | ZNF844    | 284391 | 37 | 19 | 12187475  | 12187475  | Missense_Mutation | SNP | C | G | 7  | 178 | c.1540C>G  | c.(1540-1542)CAT>GAT   | p.H514D  |
| Pat_14 | Post-Resistance | ZNF563    | 147837 | 37 | 19 | 12429554  | 12429554  | Missense_Mutation | SNP | C | T | 6  | 663 | c.1285G>A  | c.(1285-1287)GCG>ACG   | p.A429T  |
| Pat_14 | Post-Resistance | FBXW9     | 84261  | 37 | 19 | 12807325  | 12807325  | Missense_Mutation | SNP | G | C | 4  | 218 | c.71C>G    | c.(70-72)ACA>AGA       | p.T24R   |
| Pat_14 | Post-Resistance | NOTCH3    | 4854   | 37 | 19 | 15289953  | 15289953  | Missense_Mutation | SNP | G | A | 4  | 144 | c.3601C>T  | c.(3601-3603)CGC>TGC   | p.R1201C |
| Pat_14 | Post-Resistance | CHERP     | 10523  | 37 | 19 | 16643452  | 16643452  | Missense_Mutation | SNP | G | A | 4  | 204 | c.631C>T   | c.(631-633)CGG>TGG     | p.R211W  |
| Pat_14 | Post-Resistance | MYO9B     | 4650   | 37 | 19 | 17316119  | 17316119  | Missense_Mutation | SNP | C | A | 4  | 253 | c.5038C>A  | c.(5038-5040)CAC>AAC   | p.H1680N |
| Pat_14 | Post-Resistance | ZNF93     | 81931  | 37 | 19 | 20045359  | 20045359  | Missense_Mutation | SNP | C | T | 5  | 88  | c.1595C>T  | c.(1594-1596)ACT>ATT   | p.T532I  |
| Pat_14 | Post-Resistance | ZNF493    | 284443 | 37 | 19 | 21606468  | 21606468  | Missense_Mutation | SNP | C | T | 5  | 200 | c.623C>T   | c.(622-624)CCT>CTT     | p.P208L  |
| Pat_14 | Post-Resistance | ZNF208    | 7757   | 37 | 19 | 22154648  | 22154648  | Missense_Mutation | SNP | C | T | 8  | 489 | c.2804G>A  | c.(2803-2805)GGC>GAC   | p.G935D  |
| Pat_14 | Post-Resistance | ZNF492    | 57615  | 37 | 19 | 22847710  | 22847710  | Missense_Mutation | SNP | A | G | 3  | 164 | c.1239A>G  | c.(1237-1239)ATA>ATG   | p.I413M  |
| Pat_14 | Post-Resistance | ZNF254    | 9534   | 37 | 19 | 24310427  | 24310427  | Missense_Mutation | SNP | A | G | 4  | 121 | c.1625A>G  | c.(1624-1626)GAA>GGA   | p.E542G  |
| Pat_14 | Post-Resistance | ZNF254    | 9534   | 37 | 19 | 24310450  | 24310450  | Missense_Mutation | SNP | A | G | 5  | 116 | c.1648A>G  | c.(1648-1650)AAA>GAA   | p.K550E  |
| Pat_14 | Post-Resistance | ZNF599    | 148103 | 37 | 19 | 35250121  | 35250121  | Missense_Mutation | SNP | G | A | 4  | 327 | c.1585C>T  | c.(1585-1587)CAC>TAC   | p.H529Y  |
| Pat_14 | Post-Resistance | FAM187B   | 148109 | 37 | 19 | 35719243  | 35719243  | Missense_Mutation | SNP | G | A | 35 | 435 | c.341C>T   | c.(340-342)ACC>ATC     | p.T114I  |
| Pat_14 | Post-Resistance | RBM42     | 79171  | 37 | 19 | 36124129  | 36124129  | Missense_Mutation | SNP | C | G | 9  | 388 | c.659C>G   | c.(658-660)TCC>TGC     | p.S220C  |
| Pat_14 | Post-Resistance | SIPA1L3   | 23094  | 37 | 19 | 38682888  | 38682888  | Missense_Mutation | SNP | G | A | 5  | 137 | c.4534G>A  | c.(4534-4536)GAT>AAT   | p.D1512N |
| Pat_14 | Post-Resistance | NCCRP1    | 342897 | 37 | 19 | 39691050  | 39691050  | Missense_Mutation | SNP | C | T | 5  | 605 | c.613C>T   | c.(613-615)CGC>TGC     | p.R205C  |
| Pat_14 | Post-Resistance | AXL       | 558    | 37 | 19 | 41762394  | 41762394  | Missense_Mutation | SNP | G | A | 8  | 562 | c.2074G>A  | c.(2074-2076)GGG>AGG   | p.G692R  |
| Pat_14 | Post-Resistance | PSG1      | 5669   | 37 | 19 | 43382115  | 43382115  | Missense_Mutation | SNP | C | T | 19 | 480 | c.380G>A   | c.(379-381)GGA>GAA     | p.G127E  |
| Pat_14 | Post-Resistance | FOSB      | 2354   | 37 | 19 | 45973932  | 45973932  | Missense_Mutation | SNP | G | A | 9  | 684 | c.172G>A   | c.(172-174)GTC>ATC     | p.V58I   |
| Pat_14 | Post-Resistance | STRN4     | 29888  | 37 | 19 | 47241447  | 47241447  | Missense_Mutation | SNP | T | C | 4  | 451 | c.434A>G   | c.(433-435)GAG>GGG     | p.E145G  |
| Pat_14 | Post-Resistance | ZC3H4     | 23211  | 37 | 19 | 47585519  | 47585519  | Missense_Mutation | SNP | G | A | 4  | 368 | c.1252C>T  | c.(1252-1254)CTC>TTC   | p.L418F  |
| Pat_14 | Post-Resistance | MYBPC2    | 4606   | 37 | 19 | 50939956  | 50939956  | Missense_Mutation | SNP | C | T | 21 | 420 | c.428C>T   | c.(427-429)ACC>ATC     | p.T143I  |
| Pat_14 | Post-Resistance | ZNF845    | 91664  | 37 | 19 | 53855196  | 53855196  | Missense_Mutation | SNP | T | C | 4  | 479 | c.1268T>C  | c.(1267-1269)ATG>ACG   | p.M423T  |
| Pat_14 | Post-Resistance | LILRB1    | 10859  | 37 | 19 | 55146187  | 55146187  | Nonsense_Mutation | SNP | C | T | 5  | 480 | c.1456C>T  | c.(1456-1458)CGA>TGA   | p.R486*  |
| Pat_14 | Post-Resistance | SUV420H2  | 84787  | 37 | 19 | 55853392  | 55853392  | Missense_Mutation | SNP | C | T | 5  | 302 | c.88C>T    | c.(88-90)CGC>TGC       | p.R30C   |
| Pat_14 | Post-Resistance | GREB1     | 9687   | 37 | 2  | 11758857  | 11758857  | Missense_Mutation | SNP | T | C | 3  | 104 | c.3856T>C  | c.(3856-3858)TCC>CCC   | p.S1286P |
| Pat_14 | Post-Resistance | DNAJC27   | 51277  | 37 | 2  | 25186339  | 25186339  | Missense_Mutation | SNP | G | A | 4  | 201 | c.175C>T   | c.(175-177)CAC>TAC     | p.H59Y   |
| Pat_14 | Post-Resistance | IFT172    | 26160  | 37 | 2  | 27706202  | 27706202  | Missense_Mutation | SNP | G | A | 4  | 374 | c.524C>T   | c.(523-525)ACC>ATC     | p.T175I  |
| Pat_14 | Post-Resistance | RHOQ      | 23433  | 37 | 2  | 46803262  | 46803262  | Missense_Mutation | SNP | A | G | 6  | 177 | c.238A>G   | c.(238-240)ATG>GTG     | p.M80V   |
| Pat_14 | Post-Resistance | EHBP1     | 23301  | 37 | 2  | 63092007  | 63092007  | Missense_Mutation | SNP | C | T | 13 | 278 | c.1004C>T  | c.(1003-1005)TCT>TTT   | p.S335F  |
| Pat_14 | Post-Resistance | DYSF      | 8291   | 37 | 2  | 71891405  | 71891405  | Missense_Mutation | SNP | G | A | 5  | 314 | c.4894G>A  | c.(4894-4896)GAG>AAG   | p.E1632K |
| Pat_14 | Post-Resistance | SPR       | 6697   | 37 | 2  | 73118620  | 73118620  | Missense_Mutation | SNP | A | G | 3  | 234 | c.740A>G   | c.(739-741)AAG>AGG     | p.K247R  |
| Pat_14 | Post-Resistance | RAB11FIP5 | 26056  | 37 | 2  | 73316241  | 73316241  | Missense_Mutation | SNP | G | A | 4  | 267 | c.634C>T   | c.(634-636)CTC>TTC     | p.L212F  |
| Pat_14 | Post-Resistance | DQX1      | 165545 | 37 | 2  | 74747144  | 74747144  | Missense_Mutation | SNP | G | A | 4  | 357 | c.1513C>T  | c.(1513-1515)CGT>TGT   | p.R505C  |
| Pat_14 | Post-Resistance | CIAO1     | 9391   | 37 | 2  | 96934352  | 96934352  | Missense_Mutation | SNP | G | A | 4  | 275 | c.647G>A   | c.(646-648)CGT>CAT     | p.R216H  |
| Pat_14 | Post-Resistance | RALB      | 5899   | 37 | 2  | 121043657 | 121043657 | Missense_Mutation | SNP | A | G | 3  | 197 | c.322A>G   | c.(322-324)AGG>GGG     | p.R108G  |
| Pat_14 | Post-Resistance | CNTNAP5   | 129684 | 37 | 2  | 125204410 | 125204410 | Missense_Mutation | SNP | G | A | 4  | 326 | c.814G>A   | c.(814-816)GTC>ATC     | p.V272I  |
| Pat_14 | Post-Resistance | MCM6      | 4175   | 37 | 2  | 136626254 | 136626254 | Missense_Mutation | SNP | C | T | 5  | 656 | c.542G>A   | c.(541-543)CGA>CAA     | p.R181Q  |
| Pat_14 | Post-Resistance | THSD7B    | 80731  | 37 | 2  | 137814304 | 137814304 | Missense_Mutation | SNP | A | G | 5  | 367 | c.361A>G   | c.(361-363)ACT>GCT     | p.T121A  |
| Pat_14 | Post-Resistance | LRP1B     | 53353  | 37 | 2  | 141208202 | 141208202 | Missense_Mutation | SNP | G | A | 8  | 354 | c.9992C>T  | c.(9991-9993)CCA>CTA   | p.P3331L |
| Pat_14 | Post-Resistance | GTDC1     | 79712  | 37 | 2  | 144714897 | 144714897 | Missense_Mutation | SNP | G | A | 7  | 117 | c.995C>T   | c.(994-996)TCA>TTA     | p.S332L  |
| Pat_14 | Post-Resistance | NEB       | 4703   | 37 | 2  | 152372987 | 152372987 | Missense_Mutation | SNP | G | T | 4  | 121 | c.17788C>A | c.(17788-17790)CAG>AAC | p.Q5930K |
| Pat_14 | Post-Resistance | NEB       | 4703   | 37 | 2  | 152524349 | 152524349 | Missense_Mutation | SNP | G | A | 4  | 229 | c.4688C>T  | c.(4687-4689)GCT>GTT   | p.A1563V |
| Pat_14 | Post-Resistance | XIRP2     | 129446 | 37 | 2  | 168104942 | 168104942 | Missense_Mutation | SNP | C | T | 5  | 611 | c.7040C>T  | c.(7039-7041)CCT>CTT   | p.P2347L |
| Pat_14 | Post-Resistance | GAD1      | 2571   | 37 | 2  | 171686086 | 171686086 | Missense_Mutation | SNP | G | A | 6  | 493 | c.247G>A   | c.(247-249)GAC>AAC     | p.D83N   |



|        |                 |           |        |    |    |           |           |                   |     |    |    |    |     |                 |                        |           |
|--------|-----------------|-----------|--------|----|----|-----------|-----------|-------------------|-----|----|----|----|-----|-----------------|------------------------|-----------|
| Pat_14 | Post-Resistance | TTN       | 7273   | 37 | 2  | 179414500 | 179414500 | Missense_Mutation | SNP | G  | A  | 4  | 239 | c.84245C>T      | c.(84244-84246)GCT>GTT | p.A28082V |
| Pat_14 | Post-Resistance | TTN       | 7273   | 37 | 2  | 179648466 | 179648466 | Missense_Mutation | SNP | G  | A  | 4  | 424 | c.2822C>T       | c.(2821-2823)ACT>ATT   | p.T941I   |
| Pat_14 | Post-Resistance | ZNF804A   | 91752  | 37 | 2  | 185802120 | 185802120 | Missense_Mutation | SNP | C  | T  | 4  | 260 | c.1997C>T       | c.(1996-1998)TCC>TTC   | p.S666F   |
| Pat_14 | Post-Resistance | HIBCH     | 26275  | 37 | 2  | 191161649 | 191161649 | Missense_Mutation | SNP | C  | T  | 4  | 186 | c.109G>A        | c.(109-111)GAG>AAG     | p.E37K    |
| Pat_14 | Post-Resistance | DNAH7     | 56171  | 37 | 2  | 196729009 | 196729009 | Missense_Mutation | SNP | A  | G  | 5  | 439 | c.7370T>C       | c.(7369-7371)CTT>CCT   | p.L2457P  |
| Pat_14 | Post-Resistance | FAM126B   | 285172 | 37 | 2  | 201846171 | 201846171 | Missense_Mutation | SNP | C  | A  | 5  | 155 | c.1415G>T       | c.(1414-1416)GGC>GTC   | p.G472V   |
| Pat_14 | Post-Resistance | GPR1      | 2825   | 37 | 2  | 207041771 | 207041771 | Nonsense_Mutation | SNP | C  | T  | 14 | 715 | c.201G>A        | c.(199-201)TGG>TGA     | p.W67*    |
| Pat_14 | Post-Resistance | STK36     | 27148  | 37 | 2  | 219549917 | 219549917 | Missense_Mutation | SNP | G  | A  | 4  | 315 | c.1346G>A       | c.(1345-1347)CGC>CAC   | p.R449H   |
| Pat_14 | Post-Resistance | GMPPA     | 29926  | 37 | 2  | 220366688 | 220366688 | Missense_Mutation | SNP | G  | A  | 8  | 723 | c.358G>A        | c.(358-360)GAC>AAC     | p.D120N   |
| Pat_14 | Post-Resistance | CHPF      | 79586  | 37 | 2  | 220405271 | 220405271 | Missense_Mutation | SNP | G  | A  | 4  | 80  | c.1162C>T       | c.(1162-1164)CGC>TGC   | p.R388C   |
| Pat_14 | Post-Resistance | GIGYF2    | 26058  | 37 | 2  | 233613724 | 233613724 | Missense_Mutation | SNP | T  | C  | 5  | 729 | c.199T>C        | c.(199-201)TTT>CTT     | p.F67L    |
| Pat_14 | Post-Resistance | CAPN10    | 11132  | 37 | 2  | 241534672 | 241534672 | Missense_Mutation | SNP | C  | T  | 4  | 175 | c.1229C>T       | c.(1228-1230)GCG>GTG   | p.A410V   |
| Pat_14 | Post-Resistance | UBOX5     | 22888  | 37 | 20 | 3102308   | 3102308   | Missense_Mutation | SNP | G  | A  | 3  | 76  | c.977C>T        | c.(976-978)GCC>GTC     | p.A326V   |
| Pat_14 | Post-Resistance | KIF16B    | 55614  | 37 | 20 | 16488677  | 16488678  | Missense_Mutation | DNP | GG | AA | 8  | 788 | c.624_625CC>TT  | 622-627)AACCGG>AATTC   | p.R209W   |
| Pat_14 | Post-Resistance | SLC24A3   | 57419  | 37 | 20 | 19261698  | 19261698  | Missense_Mutation | SNP | G  | A  | 5  | 269 | c.238G>A        | c.(238-240)GGA>AGA     | p.G80R    |
| Pat_14 | Post-Resistance | GGTLC1    | 92086  | 37 | 20 | 23966333  | 23966333  | Missense_Mutation | SNP | C  | T  | 7  | 527 | c.502G>A        | c.(502-504)GTC>ATC     | p.V168I   |
| Pat_14 | Post-Resistance | FRG1B     | 284802 | 37 | 20 | 29625877  | 29625877  | Missense_Mutation | SNP | G  | A  | 6  | 284 | c.31G>A         | c.(31-33)GCC>ACC       | p.A11T    |
| Pat_14 | Post-Resistance | C20orf160 | 140706 | 37 | 20 | 30617510  | 30617510  | Missense_Mutation | SNP | G  | A  | 4  | 316 | c.1207G>A       | c.(1207-1209)GTA>ATA   | p.V403I   |
| Pat_14 | Post-Resistance | ASXL1     | 171023 | 37 | 20 | 31022349  | 31022349  | Missense_Mutation | SNP | A  | G  | 3  | 147 | c.1834A>G       | c.(1834-1836)AGG>GGG   | p.R612G   |
| Pat_14 | Post-Resistance | RALGAPB   | 57148  | 37 | 20 | 37153566  | 37153566  | Missense_Mutation | SNP | C  | T  | 11 | 702 | c.1765C>T       | c.(1765-1767)CTT>TTT   | p.L589F   |
| Pat_14 | Post-Resistance | TOP1      | 7150   | 37 | 20 | 39742758  | 39742759  | Missense_Mutation | DNP | CC | TT | 6  | 484 | c.1601_1602CC>T | c.(1600-1602)TCC>TTT   | p.S534F   |
| Pat_14 | Post-Resistance | TP53TG5   | 27296  | 37 | 20 | 44002605  | 44002605  | Missense_Mutation | SNP | C  | T  | 4  | 487 | c.815G>A        | c.(814-816)AGA>AAA     | p.R272K   |
| Pat_14 | Post-Resistance | ATP9A     | 10079  | 37 | 20 | 50273517  | 50273517  | Missense_Mutation | SNP | T  | C  | 3  | 163 | c.1466A>G       | c.(1465-1467)GAA>GGA   | p.E489G   |
| Pat_14 | Post-Resistance | RTEL1     | 51750  | 37 | 20 | 62319071  | 62319071  | Missense_Mutation | SNP | C  | T  | 3  | 36  | c.1429C>T       | c.(1429-1431)CTT>TTT   | p.L477F   |
| Pat_14 | Post-Resistance | ZNF512B   | 57473  | 37 | 20 | 62593633  | 62593633  | Missense_Mutation | SNP | G  | A  | 4  | 323 | c.2258C>T       | c.(2257-2259)CCC>CTC   | p.P753L   |
| Pat_14 | Post-Resistance | KRTAP19-3 | 337970 | 37 | 21 | 31864146  | 31864146  | Missense_Mutation | SNP | A  | T  | 13 | 706 | c.130T>A        | c.(130-132)TAC>AAC     | p.Y44N    |
| Pat_14 | Post-Resistance | PPIL2     | 23759  | 37 | 22 | 22024860  | 22024860  | Missense_Mutation | SNP | C  | T  | 21 | 427 | c.88C>T         | c.(88-90)CCA>TCA       | p.P30S    |
| Pat_14 | Post-Resistance | BCR       | 613    | 37 | 22 | 23654017  | 23654017  | Missense_Mutation | SNP | G  | A  | 4  | 284 | c.3316G>A       | c.(3316-3318)GAC>AAC   | p.D1106N  |
| Pat_14 | Post-Resistance | SUSD2     | 56241  | 37 | 22 | 24580812  | 24580812  | Missense_Mutation | SNP | C  | T  | 9  | 163 | c.686C>T        | c.(685-687)TCT>TTT     | p.S229F   |
| Pat_14 | Post-Resistance | AP1B1     | 162    | 37 | 22 | 29737502  | 29737502  | Missense_Mutation | SNP | G  | A  | 5  | 158 | c.1784C>T       | c.(1783-1785)CCT>CTT   | p.P595L   |
| Pat_14 | Post-Resistance | NEFH      | 4744   | 37 | 22 | 29885739  | 29885739  | Missense_Mutation | SNP | T  | A  | 8  | 281 | c.2110T>A       | c.(2110-2112)TCC>ACC   | p.S704T   |
| Pat_14 | Post-Resistance | ELFN2     | 114794 | 37 | 22 | 37771400  | 37771400  | Missense_Mutation | SNP | C  | T  | 4  | 226 | c.175G>A        | c.(175-177)GAC>AAC     | p.D59N    |
| Pat_14 | Post-Resistance | TRIOBP    | 11078  | 37 | 22 | 38111837  | 38111837  | Missense_Mutation | SNP | C  | T  | 4  | 103 | c.524C>T        | c.(523-525)CCG>CTG     | p.P175L   |
| Pat_14 | Post-Resistance | CSNK1E    | 1454   | 37 | 22 | 38699005  | 38699005  | Missense_Mutation | SNP | G  | A  | 4  | 234 | c.197C>T        | c.(196-198)CCG>CTG     | p.P66L    |
| Pat_14 | Post-Resistance | L3MBTL2   | 83746  | 37 | 22 | 41609924  | 41609924  | Missense_Mutation | SNP | G  | A  | 4  | 413 | c.290G>A        | c.(289-291)GGT>GAT     | p.G97D    |
| Pat_14 | Post-Resistance | ZC3H7B    | 23264  | 37 | 22 | 41742126  | 41742126  | Missense_Mutation | SNP | G  | C  | 4  | 432 | c.1579G>C       | c.(1579-1581)GAC>CAC   | p.D527H   |
| Pat_14 | Post-Resistance | ZC3H7B    | 23264  | 37 | 22 | 41752721  | 41752721  | Missense_Mutation | SNP | G  | A  | 5  | 376 | c.2590G>A       | c.(2590-2592)GAG>AAG   | p.E864K   |
| Pat_14 | Post-Resistance | ARPP21    | 10777  | 37 | 3  | 35758848  | 35758848  | Missense_Mutation | SNP | C  | T  | 5  | 262 | c.994C>T        | c.(994-996)CGG>TGG     | p.R332W   |
| Pat_14 | Post-Resistance | ITGA9     | 3680   | 37 | 3  | 37555329  | 37555329  | Missense_Mutation | SNP | G  | A  | 4  | 218 | c.973G>A        | c.(973-975)GCC>ACC     | p.A325T   |
| Pat_14 | Post-Resistance | SLC22A13  | 9390   | 37 | 3  | 38316485  | 38316485  | Missense_Mutation | SNP | G  | A  | 5  | 392 | c.643G>A        | c.(643-645)GAA>AAA     | p.E215K   |
| Pat_14 | Post-Resistance | SCN5A     | 6331   | 37 | 3  | 38639332  | 38639332  | Missense_Mutation | SNP | G  | A  | 19 | 429 | c.2150C>T       | c.(2149-2151)CCG>CTG   | p.P717L   |
| Pat_14 | Post-Resistance | CTNNB1    | 1499   | 37 | 3  | 41266655  | 41266655  | Missense_Mutation | SNP | G  | A  | 4  | 330 | c.452G>A        | c.(451-453)CGT>CAT     | p.R151H   |
| Pat_14 | Post-Resistance | TRAK1     | 22906  | 37 | 3  | 42251330  | 42251330  | Missense_Mutation | SNP | G  | A  | 4  | 442 | c.1816G>A       | c.(1816-1818)GGT>AGT   | p.G606S   |
| Pat_14 | Post-Resistance | TRAK1     | 22906  | 37 | 3  | 42251351  | 42251351  | Missense_Mutation | SNP | C  | T  | 4  | 473 | c.1837C>T       | c.(1837-1839)CGG>TGG   | p.R613W   |
| Pat_14 | Post-Resistance | LARS2     | 23395  | 37 | 3  | 45517981  | 45517981  | Missense_Mutation | SNP | G  | A  | 6  | 567 | c.880G>A        | c.(880-882)GAA>AAA     | p.E294K   |
| Pat_14 | Post-Resistance | CCR9      | 10803  | 37 | 3  | 45942572  | 45942572  | Missense_Mutation | SNP | C  | T  | 5  | 746 | c.292C>T        | c.(292-294)CTT>TTT     | p.L98F    |
| Pat_14 | Post-Resistance | CXCR6     | 10663  | 37 | 3  | 45988712  | 45988712  | Missense_Mutation | SNP | T  | C  | 3  | 239 | c.739T>C        | c.(739-741)TTC>CTC     | p.F247L   |

|        |                 |          |        |    |   |           |           |                   |     |    |    |    |     |                                    |                        |               |
|--------|-----------------|----------|--------|----|---|-----------|-----------|-------------------|-----|----|----|----|-----|------------------------------------|------------------------|---------------|
| Pat_14 | Post-Resistance | MYL3     | 4634   | 37 | 3 | 46901025  | 46901025  | Missense_Mutation | SNP | C  | T  | 5  | 351 | c.421G>A                           | c.(421-423)GAC>AAC     | p.D141N       |
| Pat_14 | Post-Resistance | CCDC51   | 79714  | 37 | 3 | 48475137  | 48475137  | Missense_Mutation | SNP | G  | A  | 6  | 585 | c.457C>T                           | c.(457-459)CTC>TTC     | p.L153F       |
| Pat_14 | Post-Resistance | CELSR3   | 1951   | 37 | 3 | 48694384  | 48694384  | Missense_Mutation | SNP | C  | A  | 3  | 33  | c.4146G>T                          | c.(4144-4146)GAG>GAT   | p.E1382D      |
| Pat_14 | Post-Resistance | MST1R    | 4486   | 37 | 3 | 49924924  | 49924924  | Missense_Mutation | SNP | T  | C  | 3  | 231 | c.4019A>G                          | c.(4018-4020)GAG>GGG   | p.E1340G      |
| Pat_14 | Post-Resistance | DOCK3    | 1795   | 37 | 3 | 51393845  | 51393845  | Missense_Mutation | SNP | G  | T  | 8  | 582 | c.4424G>T                          | c.(4423-4425)TGG>TTG   | p.W1475L      |
| Pat_14 | Post-Resistance | ABHD6    | 57406  | 37 | 3 | 58253031  | 58253031  | Missense_Mutation | SNP | G  | A  | 4  | 246 | c.235G>A                           | c.(235-237)GGA>AGA     | p.G79R        |
| Pat_14 | Post-Resistance | PRICKLE2 | 166336 | 37 | 3 | 64132635  | 64132635  | Missense_Mutation | SNP | C  | T  | 6  | 377 | c.1531G>A                          | c.(1531-1533)GGG>AGG   | p.G511R       |
| Pat_14 | Post-Resistance | LRIG1    | 26018  | 37 | 3 | 66444614  | 66444614  | Missense_Mutation | SNP | C  | T  | 5  | 125 | c.1318G>A                          | c.(1318-1320)GAC>AAC   | p.D440N       |
| Pat_14 | Post-Resistance | EPHA3    | 2042   | 37 | 3 | 89445067  | 89445067  | Missense_Mutation | SNP | C  | T  | 6  | 695 | c.1387C>T                          | c.(1387-1389)CCT>TCT   | p.P463S       |
| Pat_14 | Post-Resistance | EPHA6    | 285220 | 37 | 3 | 96945167  | 96945167  | Missense_Mutation | SNP | C  | T  | 16 | 355 | c.1174C>T                          | c.(1174-1176)CCA>TCA   | p.P392S       |
| Pat_14 | Post-Resistance | SIDT1    | 54847  | 37 | 3 | 113321944 | 113321944 | Missense_Mutation | SNP | G  | A  | 5  | 303 | c.1210G>A                          | c.(1210-1212)GAC>AAC   | p.D404N       |
| Pat_14 | Post-Resistance | DRD3     | 1814   | 37 | 3 | 113866406 | 113866406 | Splice_Site       | SNP | T  | C  | 3  | 216 | c.384_splice                       | c.e5-1                 | p.R128_splice |
| Pat_14 | Post-Resistance | UPK1B    | 7348   | 37 | 3 | 118913151 | 118913152 | Missense_Mutation | DNP | CC | TT | 8  | 515 | c.554_555CC>TT                     | c.(553-555)CCC>CTT     | p.P185L       |
| Pat_14 | Post-Resistance | TMEM39A  | 55254  | 37 | 3 | 119180867 | 119180867 | Missense_Mutation | SNP | G  | C  | 3  | 271 | c.55C>G                            | c.(55-57)CCT>GCT       | p.P19A        |
| Pat_14 | Post-Resistance | HEG1     | 57493  | 37 | 3 | 124689597 | 124689598 | Missense_Mutation | DNP | CC | TT | 4  | 77  | .4044_4045GG>AJ42-4047)CCGGCC>CCA/ |                        | p.A1349T      |
| Pat_14 | Post-Resistance | ACAD11   | 84129  | 37 | 3 | 132358402 | 132358402 | Missense_Mutation | SNP | A  | T  | 4  | 309 | c.636T>A                           | c.(634-636)AAT>AAA     | p.N212K       |
| Pat_14 | Post-Resistance | BFSP2    | 8419   | 37 | 3 | 133185671 | 133185671 | Splice_Site       | SNP | G  | A  | 4  | 265 | c.892_splice                       | c.e5-1                 | p.Q298_splice |
| Pat_14 | Post-Resistance | FAM194A  | 131831 | 37 | 3 | 150377899 | 150377899 | Missense_Mutation | SNP | C  | T  | 6  | 479 | c.1772G>A                          | c.(1771-1773)GGA>GAA   | p.G591E       |
| Pat_14 | Post-Resistance | GFM1     | 85476  | 37 | 3 | 158408011 | 158408011 | Missense_Mutation | SNP | C  | T  | 7  | 663 | c.1969C>T                          | c.(1969-1971)CCA>TCA   | p.P657S       |
| Pat_14 | Post-Resistance | MECOM    | 2122   | 37 | 3 | 168810866 | 168810866 | Missense_Mutation | SNP | G  | A  | 5  | 413 | c.2480C>T                          | c.(2479-2481)TCT>TTT   | p.S827F       |
| Pat_14 | Post-Resistance | ABCC5    | 10057  | 37 | 3 | 183679394 | 183679394 | Missense_Mutation | SNP | T  | C  | 9  | 389 | c.2284A>G                          | c.(2284-2286)ACG>GCG   | p.T762A       |
| Pat_14 | Post-Resistance | ATP13A4  | 84239  | 37 | 3 | 193174929 | 193174929 | Missense_Mutation | SNP | C  | G  | 4  | 577 | c.1775G>C                          | c.(1774-1776)GGA>GCA   | p.G592A       |
| Pat_14 | Post-Resistance | ZNF595   | 152687 | 37 | 4 | 86680     | 86680     | Missense_Mutation | SNP | G  | T  | 3  | 88  | c.1286G>T                          | c.(1285-1287)TGT>TTT   | p.C429F       |
| Pat_14 | Post-Resistance | ZNF518B  | 85460  | 37 | 4 | 10446454  | 10446454  | Missense_Mutation | SNP | G  | A  | 5  | 502 | c.1499C>T                          | c.(1498-1500)GCT>GTT   | p.A500V       |
| Pat_14 | Post-Resistance | SLIT2    | 9353   | 37 | 4 | 20568984  | 20568984  | Missense_Mutation | SNP | G  | A  | 13 | 678 | c.2825G>A                          | c.(2824-2826)CGA>CAA   | p.R942Q       |
| Pat_14 | Post-Resistance | TEC      | 7006   | 37 | 4 | 48147510  | 48147510  | Nonsense_Mutation | SNP | G  | A  | 7  | 698 | c.1168C>T                          | c.(1168-1170)CGA>TGA   | p.R390*       |
| Pat_14 | Post-Resistance | SLAIN2   | 57606  | 37 | 4 | 48384798  | 48384798  | Missense_Mutation | SNP | G  | A  | 20 | 429 | c.1076G>A                          | c.(1075-1077)AGA>AAA   | p.R359K       |
| Pat_14 | Post-Resistance | CENPC1   | 1060   | 37 | 4 | 68374698  | 68374698  | Missense_Mutation | SNP | T  | C  | 3  | 259 | c.1738A>G                          | c.(1738-1740)AGG>GGG   | p.R580G       |
| Pat_14 | Post-Resistance | GK2      | 2712   | 37 | 4 | 80327898  | 80327898  | Missense_Mutation | SNP | C  | T  | 24 | 486 | c.1457G>A                          | c.(1456-1458)CGA>CAA   | p.R486Q       |
| Pat_14 | Post-Resistance | PTPN13   | 5783   | 37 | 4 | 87728980  | 87728980  | Missense_Mutation | SNP | G  | A  | 4  | 319 | c.7013G>A                          | c.(7012-7014)CGA>CAA   | p.R2338Q      |
| Pat_14 | Post-Resistance | HSPA4L   | 22824  | 37 | 4 | 128722393 | 128722393 | Splice_Site       | SNP | G  | A  | 4  | 188 | c.529_splice                       | c.e5+1                 | p.V177_splice |
| Pat_14 | Post-Resistance | HSPA4L   | 22824  | 37 | 4 | 128726356 | 128726356 | Missense_Mutation | SNP | G  | A  | 6  | 251 | c.1114G>A                          | c.(1114-1116)GTT>ATT   | p.V372I       |
| Pat_14 | Post-Resistance | OTUD4    | 54726  | 37 | 4 | 146064530 | 146064530 | Missense_Mutation | SNP | G  | A  | 11 | 239 | c.1475C>T                          | c.(1474-1476)TCT>TTT   | p.S492F       |
| Pat_14 | Post-Resistance | SH3D19   | 152503 | 37 | 4 | 152095993 | 152095993 | Nonsense_Mutation | SNP | G  | A  | 7  | 810 | c.523C>T                           | c.(523-525)CAA>TAA     | p.Q175*       |
| Pat_14 | Post-Resistance | SH3D19   | 152503 | 37 | 4 | 152096238 | 152096238 | Missense_Mutation | SNP | G  | A  | 5  | 471 | c.278C>T                           | c.(277-279)GCG>GTG     | p.A93V        |
| Pat_14 | Post-Resistance | FGB      | 2244   | 37 | 4 | 155487659 | 155487660 | Missense_Mutation | DNP | GG | AA | 4  | 412 | c.325_326GG>AA                     | c.(325-327)GGA>AAA     | p.G109K       |
| Pat_14 | Post-Resistance | MFAP3L   | 9848   | 37 | 4 | 170912598 | 170912598 | Nonsense_Mutation | SNP | G  | T  | 8  | 333 | c.1161C>A                          | c.(1159-1161)TAC>TAA   | p.Y387*       |
| Pat_14 | Post-Resistance | ENPP6    | 133121 | 37 | 4 | 185038920 | 185038920 | Missense_Mutation | SNP | A  | T  | 8  | 566 | c.667T>A                           | c.(667-669)TGG>AGG     | p.W223R       |
| Pat_14 | Post-Resistance | C5orf22  | 55322  | 37 | 5 | 31535966  | 31535966  | Missense_Mutation | SNP | T  | G  | 23 | 445 | c.343T>G                           | c.(343-345)TTA>GTA     | p.L115V       |
| Pat_14 | Post-Resistance | ADAMTS12 | 81792  | 37 | 5 | 33561164  | 33561164  | Missense_Mutation | SNP | A  | G  | 6  | 524 | c.4093T>C                          | c.(4093-4095)TGT>CGT   | p.C1365R      |
| Pat_14 | Post-Resistance | LMBRD2   | 92255  | 37 | 5 | 36136535  | 36136535  | Missense_Mutation | SNP | T  | G  | 4  | 438 | c.623A>C                           | c.(622-624)GAA>GCA     | p.E208A       |
| Pat_14 | Post-Resistance | C6       | 729    | 37 | 5 | 41159266  | 41159266  | Missense_Mutation | SNP | G  | A  | 6  | 362 | c.1774C>T                          | c.(1774-1776)CCT>TCT   | p.P592S       |
| Pat_14 | Post-Resistance | C5orf39  | 389289 | 37 | 5 | 43039815  | 43039815  | Missense_Mutation | SNP | C  | T  | 5  | 476 | c.334G>A                           | c.(334-336)GAA>AAA     | p.E112K       |
| Pat_14 | Post-Resistance | NNT      | 23530  | 37 | 5 | 43702770  | 43702770  | Missense_Mutation | SNP | G  | A  | 4  | 286 | c.3043G>A                          | c.(3043-3045)GCA>ACA   | p.A1015T      |
| Pat_14 | Post-Resistance | MAP3K1   | 4214   | 37 | 5 | 56170995  | 56170995  | Missense_Mutation | SNP | G  | A  | 4  | 189 | c.1823G>A                          | c.(1822-1824)GGC>GAC   | p.G608D       |
| Pat_14 | Post-Resistance | POLK     | 51426  | 37 | 5 | 74892412  | 74892412  | Missense_Mutation | SNP | G  | A  | 8  | 709 | c.1894G>A                          | c.(1894-1896)GGG>AGG   | p.G632R       |
| Pat_14 | Post-Resistance | CMYA5    | 202333 | 37 | 5 | 79034663  | 79034663  | Missense_Mutation | SNP | G  | A  | 4  | 262 | c.10075G>A                         | c.(10075-10077)GGT>AGT | p.G3359S      |

|        |                 |          |        |    |   |           |           |                   |     |    |    |    |     |                 |                        |               |
|--------|-----------------|----------|--------|----|---|-----------|-----------|-------------------|-----|----|----|----|-----|-----------------|------------------------|---------------|
| Pat_14 | Post-Resistance | PCSK1    | 5122   | 37 | 5 | 95746650  | 95746650  | Missense_Mutation | SNP | C  | T  | 10 | 561 | c.923G>A        | c.(922-924)GGA>GAA     | p.G308E       |
| Pat_14 | Post-Resistance | GDF9     | 2661   | 37 | 5 | 132197700 | 132197700 | Missense_Mutation | SNP | G  | A  | 4  | 161 | c.946C>T        | c.(946-948)CGT>TGT     | p.R316C       |
| Pat_14 | Post-Resistance | TRPC7    | 57113  | 37 | 5 | 135651286 | 135651286 | Missense_Mutation | SNP | T  | C  | 3  | 160 | c.959A>G        | c.(958-960)AAG>AGG     | p.K320R       |
| Pat_14 | Post-Resistance | KDM3B    | 51780  | 37 | 5 | 137763748 | 137763749 | Missense_Mutation | DNP | CC | TT | 10 | 781 | c.4726_4727CC>T | c.(4726-4728)CCC>TTC   | p.P1576F      |
| Pat_14 | Post-Resistance | PCDHA12  | 56137  | 37 | 5 | 140256817 | 140256817 | Missense_Mutation | SNP | C  | T  | 5  | 377 | c.1760C>T       | c.(1759-1761)GCG>GTG   | p.A587V       |
| Pat_14 | Post-Resistance | PCDHAC1  | 56135  | 37 | 5 | 140308149 | 140308149 | Missense_Mutation | SNP | C  | T  | 8  | 672 | c.1672C>T       | c.(1672-1674)CCC>TCC   | p.P558S       |
| Pat_14 | Post-Resistance | PCDHB7   | 56129  | 37 | 5 | 140553044 | 140553044 | Missense_Mutation | SNP | T  | G  | 6  | 275 | c.628T>G        | c.(628-630)TTA>GTA     | p.L210V       |
| Pat_14 | Post-Resistance | PCDHGA6  | 56109  | 37 | 5 | 140754614 | 140754614 | Missense_Mutation | SNP | C  | T  | 12 | 712 | c.964C>T        | c.(964-966)CGG>TGG     | p.R322W       |
| Pat_14 | Post-Resistance | LARP1    | 23367  | 37 | 5 | 154181706 | 154181706 | Missense_Mutation | SNP | G  | A  | 5  | 507 | c.1856G>A       | c.(1855-1857)CGG>CAG   | p.R619Q       |
| Pat_14 | Post-Resistance | FAM71B   | 153745 | 37 | 5 | 156590333 | 156590333 | Missense_Mutation | SNP | C  | T  | 4  | 456 | c.943G>A        | c.(943-945)GGA>AGA     | p.G315R       |
| Pat_14 | Post-Resistance | CYFIP2   | 26999  | 37 | 5 | 156752647 | 156752647 | Splice_Site       | SNP | G  | A  | 3  | 114 | c.1982_splice   | c.e19+1                | p.E661_splice |
| Pat_14 | Post-Resistance | GABRA6   | 2559   | 37 | 5 | 161113355 | 161113355 | Splice_Site       | SNP | G  | A  | 5  | 482 | c.157_splice    | c.e2+1                 | p.G53_splice  |
| Pat_14 | Post-Resistance | GABRG2   | 2566   | 37 | 5 | 161576150 | 161576150 | Missense_Mutation | SNP | C  | A  | 5  | 465 | c.959C>A        | c.(958-960)ACC>AAC     | p.T320N       |
| Pat_14 | Post-Resistance | ODZ2     | 57451  | 37 | 5 | 167545386 | 167545386 | Missense_Mutation | SNP | G  | A  | 6  | 697 | c.1903G>A       | c.(1903-1905)GTG>ATG   | p.V635M       |
| Pat_14 | Post-Resistance | CCDC99   | 54908  | 37 | 5 | 169028328 | 169028328 | Missense_Mutation | SNP | C  | T  | 5  | 381 | c.1369C>T       | c.(1369-1371)CCT>TCT   | p.P457S       |
| Pat_14 | Post-Resistance | BNIP1    | 662    | 37 | 5 | 172581385 | 172581385 | Missense_Mutation | SNP | G  | A  | 4  | 74  | c.238G>A        | c.(238-240)GAA>AAA     | p.E80K        |
| Pat_14 | Post-Resistance | AGXT2L2  | 85007  | 37 | 5 | 177641822 | 177641822 | Nonsense_Mutation | SNP | C  | A  | 5  | 183 | c.1147G>T       | c.(1147-1149)GAA>TAA   | p.E383*       |
| Pat_14 | Post-Resistance | GRM6     | 2916   | 37 | 5 | 178413942 | 178413942 | Missense_Mutation | SNP | G  | A  | 4  | 82  | c.1397C>T       | c.(1396-1398)GCG>GTG   | p.A466V       |
| Pat_14 | Post-Resistance | DSP      | 1832   | 37 | 6 | 7542195   | 7542195   | Missense_Mutation | SNP | G  | A  | 3  | 63  | c.47G>A         | c.(46-48)CGC>CAC       | p.R16H        |
| Pat_14 | Post-Resistance | KIF13A   | 63971  | 37 | 6 | 17796976  | 17796976  | Missense_Mutation | SNP | G  | A  | 4  | 376 | c.2866C>T       | c.(2866-2868)CAC>TAC   | p.H956Y       |
| Pat_14 | Post-Resistance | TRIM38   | 10475  | 37 | 6 | 25973502  | 25973502  | Missense_Mutation | SNP | G  | A  | 4  | 204 | c.863G>A        | c.(862-864)AGG>AAG     | p.R288K       |
| Pat_14 | Post-Resistance | HLA-F    | 3134   | 37 | 6 | 29694752  | 29694752  | Missense_Mutation | SNP | C  | T  | 5  | 402 | c.1129C>T       | c.(1129-1131)CGG>TGG   | p.R377W       |
| Pat_14 | Post-Resistance | RNF39    | 80352  | 37 | 6 | 30039106  | 30039106  | Missense_Mutation | SNP | C  | T  | 5  | 24  | c.1045G>A       | c.(1045-1047)GCA>ACA   | p.A349T       |
| Pat_14 | Post-Resistance | MDC1     | 9656   | 37 | 6 | 30670608  | 30670608  | Missense_Mutation | SNP | G  | A  | 4  | 344 | c.5912C>T       | c.(5911-5913)ACC>ATC   | p.T1971I      |
| Pat_14 | Post-Resistance | MDC1     | 9656   | 37 | 6 | 30673197  | 30673197  | Missense_Mutation | SNP | A  | G  | 5  | 734 | c.3763T>C       | c.(3763-3765)TCC>CCC   | p.S1255P      |
| Pat_14 | Post-Resistance | MICA     | 4276   | 37 | 6 | 31378439  | 31378439  | Missense_Mutation | SNP | T  | C  | 3  | 136 | c.190T>C        | c.(190-192)TGC>CGC     | p.C64R        |
| Pat_14 | Post-Resistance | FKBPL    | 63943  | 37 | 6 | 32097007  | 32097007  | Missense_Mutation | SNP | G  | A  | 4  | 289 | c.551C>T        | c.(550-552)CCT>CTT     | p.P184L       |
| Pat_14 | Post-Resistance | HLA-DQB1 | 3119   | 37 | 6 | 32629750  | 32629750  | Missense_Mutation | SNP | C  | T  | 9  | 332 | c.655G>A        | c.(655-657)GAG>AAG     | p.E219K       |
| Pat_14 | Post-Resistance | IP6K3    | 117283 | 37 | 6 | 33703198  | 33703198  | Missense_Mutation | SNP | T  | C  | 3  | 190 | c.56A>G         | c.(55-57)GAG>GGG       | p.E19G        |
| Pat_14 | Post-Resistance | ZNF318   | 24149  | 37 | 6 | 43306907  | 43306907  | Nonsense_Mutation | SNP | G  | C  | 4  | 374 | c.4829C>G       | c.(4828-4830)TCA>TGA   | p.S1610*      |
| Pat_14 | Post-Resistance | MRPL14   | 64928  | 37 | 6 | 44081926  | 44081926  | Missense_Mutation | SNP | G  | A  | 6  | 635 | c.92C>T         | c.(91-93)GCG>GTG       | p.A31V        |
| Pat_14 | Post-Resistance | GCLC     | 2729   | 37 | 6 | 53387279  | 53387279  | Missense_Mutation | SNP | C  | T  | 4  | 398 | c.197G>A        | c.(196-198)CGG>CAG     | p.R66Q        |
| Pat_14 | Post-Resistance | GJA10    | 84694  | 37 | 6 | 90605005  | 90605005  | Missense_Mutation | SNP | G  | T  | 4  | 230 | c.818G>T        | c.(817-819)TGC>TTC     | p.C273F       |
| Pat_14 | Post-Resistance | MCHR2    | 84539  | 37 | 6 | 100390897 | 100390897 | Missense_Mutation | SNP | G  | A  | 6  | 499 | c.515C>T        | c.(514-516)TCG>TTG     | p.S172L       |
| Pat_14 | Post-Resistance | AKD1     | 221264 | 37 | 6 | 109863293 | 109863293 | Missense_Mutation | SNP | G  | A  | 5  | 74  | c.3307C>T       | c.(3307-3309)CTT>TTT   | p.L1103F      |
| Pat_14 | Post-Resistance | TAAR9    | 134860 | 37 | 6 | 132859993 | 132859994 | Missense_Mutation | DNP | GG | AA | 5  | 315 | c.565_566GG>AA  | c.(565-567)GGC>AAC     | p.G189N       |
| Pat_14 | Post-Resistance | TAAR2    | 9287   | 37 | 6 | 132939068 | 132939068 | Missense_Mutation | SNP | C  | T  | 4  | 469 | c.277G>A        | c.(277-279)GGA>AGA     | p.G93R        |
| Pat_14 | Post-Resistance | MTHFD1L  | 25902  | 37 | 6 | 151258007 | 151258007 | Missense_Mutation | SNP | G  | A  | 5  | 456 | c.1324G>A       | c.(1324-1326)GCA>ACA   | p.A442T       |
| Pat_14 | Post-Resistance | SYNE1    | 23345  | 37 | 6 | 152644827 | 152644827 | Missense_Mutation | SNP | G  | A  | 10 | 224 | c.15703C>T      | c.(15703-15705)CCT>TCT | p.P5235S      |
| Pat_14 | Post-Resistance | LPA      | 4018   | 37 | 6 | 160998262 | 160998262 | Missense_Mutation | SNP | T  | G  | 5  | 552 | c.4537A>C       | c.(4537-4539)ATA>CTA   | p.I1513L      |
| Pat_14 | Post-Resistance | PLG      | 5340   | 37 | 6 | 161139864 | 161139864 | Missense_Mutation | SNP | C  | T  | 5  | 163 | c.1090C>T       | c.(1090-1092)CCC>TCC   | p.P364S       |
| Pat_14 | Post-Resistance | MICALL2  | 79778  | 37 | 7 | 1488316   | 1488316   | Missense_Mutation | SNP | G  | A  | 4  | 425 | c.274C>T        | c.(274-276)CGG>TGG     | p.R92W        |
| Pat_14 | Post-Resistance | MAD1L1   | 8379   | 37 | 7 | 2255527   | 2255527   | Missense_Mutation | SNP | T  | C  | 3  | 374 | c.917A>G        | c.(916-918)GAG>GGG     | p.E306G       |
| Pat_14 | Post-Resistance | FOXX1    | 221937 | 37 | 7 | 4794206   | 4794206   | Missense_Mutation | SNP | C  | T  | 6  | 129 | c.863C>T        | c.(862-864)TCG>TTG     | p.S288L       |
| Pat_14 | Post-Resistance | SLC29A4  | 222962 | 37 | 7 | 5336750   | 5336750   | Missense_Mutation | SNP | G  | A  | 4  | 170 | c.803G>A        | c.(802-804)AGC>AAC     | p.S268N       |
| Pat_14 | Post-Resistance | TBX20    | 57057  | 37 | 7 | 35242077  | 35242077  | Missense_Mutation | SNP | G  | A  | 3  | 51  | c.1309C>T       | c.(1309-1311)CGC>TGC   | p.R437C       |
| Pat_14 | Post-Resistance | ABCA13   | 154664 | 37 | 7 | 48528941  | 48528941  | Missense_Mutation | SNP | G  | A  | 3  | 91  | c.13291G>A      | c.(13291-13293)GGA>AG/ | p.G4431R      |

|        |                 |           |        |    |   |           |           |                   |     |   |   |    |     |           |                      |          |
|--------|-----------------|-----------|--------|----|---|-----------|-----------|-------------------|-----|---|---|----|-----|-----------|----------------------|----------|
| Pat_14 | Post-Resistance | NCF1      | 653361 | 37 | 7 | 74203043  | 74203043  | Missense_Mutation | SNP | C | G | 14 | 17  | c.1046C>G | c.(1045-1047)CCG>CGG | p.P349R  |
| Pat_14 | Post-Resistance | SEMA3E    | 9723   | 37 | 7 | 83029517  | 83029517  | Missense_Mutation | SNP | G | A | 33 | 575 | c.1193C>T | c.(1192-1194)CCT>CTT | p.P398L  |
| Pat_14 | Post-Resistance | SHFM1     | 7979   | 37 | 7 | 96303133  | 96303133  | Missense_Mutation | SNP | G | A | 6  | 284 | c.209C>T  | c.(208-210)CCG>CTG   | p.P70L   |
| Pat_14 | Post-Resistance | MEPCE     | 56257  | 37 | 7 | 100028939 | 100028939 | Missense_Mutation | SNP | G | A | 5  | 179 | c.1298G>A | c.(1297-1299)CGC>CAC | p.R433H  |
| Pat_14 | Post-Resistance | SERPINE1  | 5054   | 37 | 7 | 100775236 | 100775236 | Missense_Mutation | SNP | G | A | 6  | 666 | c.586G>A  | c.(586-588)GGC>AGC   | p.G196S  |
| Pat_14 | Post-Resistance | MYL10     | 93408  | 37 | 7 | 101256984 | 101256984 | Missense_Mutation | SNP | T | G | 5  | 252 | c.540A>C  | c.(538-540)AAA>AAC   | p.K180N  |
| Pat_14 | Post-Resistance | LAMB1     | 3912   | 37 | 7 | 107594047 | 107594047 | Missense_Mutation | SNP | G | A | 4  | 449 | c.3007C>T | c.(3007-3009)CAC>TAC | p.H1003Y |
| Pat_14 | Post-Resistance | SLC13A1   | 6561   | 37 | 7 | 122811882 | 122811882 | Nonsense_Mutation | SNP | C | T | 18 | 505 | c.305G>A  | c.(304-306)TGG>TAG   | p.W102*  |
| Pat_14 | Post-Resistance | IQUB      | 154865 | 37 | 7 | 123097521 | 123097521 | Missense_Mutation | SNP | T | C | 22 | 778 | c.2107A>G | c.(2107-2109)AAA>GAA | p.K703E  |
| Pat_14 | Post-Resistance | IMPDH1    | 3614   | 37 | 7 | 128040908 | 128040908 | Missense_Mutation | SNP | G | A | 5  | 474 | c.287C>T  | c.(286-288)ACC>ATC   | p.T96I   |
| Pat_14 | Post-Resistance | ZYX       | 7791   | 37 | 7 | 143087029 | 143087029 | Missense_Mutation | SNP | G | A | 5  | 447 | c.1573G>A | c.(1573-1575)GCC>ACC | p.A525T  |
| Pat_14 | Post-Resistance | SSPO      | 23145  | 37 | 7 | 149492654 | 149492654 | Missense_Mutation | SNP | C | T | 4  | 228 | c.6434C>T | c.(6433-6435)TCC>TTC | p.S2145F |
| Pat_14 | Post-Resistance | KCNH2     | 3757   | 37 | 7 | 150654525 | 150654525 | Missense_Mutation | SNP | G | A | 4  | 164 | c.982C>T  | c.(982-984)CGC>TGC   | p.R328C  |
| Pat_14 | Post-Resistance | ARHGEF10  | 9639   | 37 | 8 | 1876747   | 1876747   | Missense_Mutation | SNP | C | T | 4  | 284 | c.2852C>T | c.(2851-2853)CCG>CTG | p.P951L  |
| Pat_14 | Post-Resistance | USP17L2   | 377630 | 37 | 8 | 11996169  | 11996169  | Missense_Mutation | SNP | C | T | 5  | 246 | c.101G>A  | c.(100-102)CCG>CAG   | p.R34Q   |
| Pat_14 | Post-Resistance | MYST3     | 7994   | 37 | 8 | 41790228  | 41790228  | Missense_Mutation | SNP | A | G | 5  | 271 | c.5510T>C | c.(5509-5511)ATT>ACT | p.I1837T |
| Pat_14 | Post-Resistance | VDAC3     | 7419   | 37 | 8 | 42260935  | 42260935  | Missense_Mutation | SNP | G | T | 5  | 414 | c.658G>T  | c.(658-660)GGC>TGC   | p.G220C  |
| Pat_14 | Post-Resistance | CHRN3     | 1142   | 37 | 8 | 42563922  | 42563922  | Missense_Mutation | SNP | G | A | 11 | 355 | c.115G>A  | c.(115-117)GGT>AGT   | p.G39S   |
| Pat_14 | Post-Resistance | POTEA     | 340441 | 37 | 8 | 43152432  | 43152432  | Missense_Mutation | SNP | G | A | 5  | 487 | c.418G>A  | c.(418-420)GTA>ATA   | p.V140I  |
| Pat_14 | Post-Resistance | SNTG1     | 54212  | 37 | 8 | 51314853  | 51314853  | Missense_Mutation | SNP | G | A | 45 | 453 | c.111G>A  | c.(109-111)ATG>ATA   | p.M37I   |
| Pat_14 | Post-Resistance | SOX17     | 64321  | 37 | 8 | 55370914  | 55370914  | Missense_Mutation | SNP | G | T | 4  | 120 | c.216G>T  | c.(214-216)ATG>ATT   | p.M72I   |
| Pat_14 | Post-Resistance | CSMD3     | 114788 | 37 | 8 | 113649069 | 113649069 | Missense_Mutation | SNP | C | T | 4  | 368 | c.3692G>A | c.(3691-3693)AGT>AAT | p.S1231N |
| Pat_14 | Post-Resistance | ZFAT      | 57623  | 37 | 8 | 135612684 | 135612684 | Missense_Mutation | SNP | C | T | 6  | 520 | c.2470G>A | c.(2470-2472)GCA>ACA | p.A824T  |
| Pat_14 | Post-Resistance | ZFAT      | 57623  | 37 | 8 | 135622838 | 135622838 | Missense_Mutation | SNP | G | A | 4  | 299 | c.509C>T  | c.(508-510)TCG>TTG   | p.S170L  |
| Pat_14 | Post-Resistance | CYP11B1   | 1584   | 37 | 8 | 143958489 | 143958489 | Missense_Mutation | SNP | C | T | 3  | 60  | c.545G>A  | c.(544-546)GGG>GAG   | p.G182E  |
| Pat_14 | Post-Resistance | KIAA1432  | 57589  | 37 | 9 | 5763645   | 5763645   | Missense_Mutation | SNP | C | T | 4  | 390 | c.2381C>T | c.(2380-2382)GCT>GTT | p.A794V  |
| Pat_14 | Post-Resistance | RANBP6    | 26953  | 37 | 9 | 6012658   | 6012658   | Missense_Mutation | SNP | T | G | 6  | 330 | c.2950A>C | c.(2950-2952)ATA>CTA | p.I984L  |
| Pat_14 | Post-Resistance | KIAA1797  | 54914  | 37 | 9 | 20874719  | 20874719  | Missense_Mutation | SNP | G | A | 5  | 475 | c.2230G>A | c.(2230-2232)GAT>AAT | p.D744N  |
| Pat_14 | Post-Resistance | LOC442421 | 442421 | 37 | 9 | 66499680  | 66499680  | Missense_Mutation | SNP | C | T | 13 | 110 | c.490C>T  | c.(490-492)CCC>TCC   | p.P164S  |
| Pat_14 | Post-Resistance | TMC1      | 117531 | 37 | 9 | 75309467  | 75309467  | Missense_Mutation | SNP | G | A | 4  | 171 | c.73G>A   | c.(73-75)GAA>AAA     | p.E25K   |
| Pat_14 | Post-Resistance | GNA14     | 9630   | 37 | 9 | 80043941  | 80043941  | Missense_Mutation | SNP | A | G | 9  | 749 | c.605T>C  | c.(604-606)GTT>GCT   | p.V202A  |
| Pat_14 | Post-Resistance | NTRK2     | 4915   | 37 | 9 | 87359971  | 87359971  | Missense_Mutation | SNP | G | A | 6  | 348 | c.1279G>A | c.(1279-1281)GGT>AGT | p.G427S  |
| Pat_14 | Post-Resistance | FAM22F    | 54754  | 37 | 9 | 97082748  | 97082748  | Missense_Mutation | SNP | G | C | 3  | 118 | c.1110C>G | c.(1108-1110)AAC>AAG | p.N370K  |
| Pat_14 | Post-Resistance | ZNF462    | 58499  | 37 | 9 | 109746481 | 109746481 | Missense_Mutation | SNP | C | T | 7  | 460 | c.6847C>T | c.(6847-6849)CCC>TCC | p.P2283S |
| Pat_14 | Post-Resistance | SLC31A1   | 1317   | 37 | 9 | 116022686 | 116022686 | Missense_Mutation | SNP | G | A | 6  | 579 | c.506G>A  | c.(505-507)GGT>GAT   | p.G169D  |
| Pat_14 | Post-Resistance | COL27A1   | 85301  | 37 | 9 | 116930718 | 116930718 | Missense_Mutation | SNP | G | A | 4  | 125 | c.883G>A  | c.(883-885)GCC>ACC   | p.A295T  |
| Pat_14 | Post-Resistance | TNC       | 3371   | 37 | 9 | 117826314 | 117826314 | Missense_Mutation | SNP | G | A | 11 | 685 | c.3521C>T | c.(3520-3522)GCC>GTC | p.A1174V |
| Pat_14 | Post-Resistance | ASTN2     | 23245  | 37 | 9 | 120053778 | 120053778 | Missense_Mutation | SNP | C | T | 5  | 178 | c.457G>A  | c.(457-459)GCC>ACG   | p.A153T  |
| Pat_14 | Post-Resistance | SETX      | 23064  | 37 | 9 | 135203113 | 135203113 | Missense_Mutation | SNP | T | C | 3  | 410 | c.3872A>G | c.(3871-3873)AAG>AGG | p.K1291R |
| Pat_14 | Post-Resistance | TMEM8C    | 389827 | 37 | 9 | 136389862 | 136389862 | Missense_Mutation | SNP | C | A | 4  | 185 | c.105G>T  | c.(103-105)ATG>ATT   | p.M35I   |
| Pat_14 | Post-Resistance | NOTCH1    | 4851   | 37 | 9 | 139411819 | 139411819 | Missense_Mutation | SNP | C | T | 3  | 55  | c.1460G>A | c.(1459-1461)TGC>TAC | p.C487Y  |
| Pat_14 | Post-Resistance | GRIN1     | 2902   | 37 | 9 | 140055804 | 140055804 | Missense_Mutation | SNP | G | A | 4  | 222 | c.1403G>A | c.(1402-1404)CGG>CAG | p.R468Q  |
| Pat_14 | Post-Resistance | EHMT1     | 79813  | 37 | 9 | 140611486 | 140611486 | Missense_Mutation | SNP | C | T | 5  | 193 | c.494C>T  | c.(493-495)CCA>CTA   | p.P165L  |
| Pat_14 | Post-Resistance | PIR       | 8544   | 37 | X | 15474002  | 15474002  | Missense_Mutation | SNP | G | A | 6  | 526 | c.449C>T  | c.(448-450)GCT>GTT   | p.A150V  |
| Pat_14 | Post-Resistance | IL1RAPL1  | 11141  | 37 | X | 29414442  | 29414442  | Missense_Mutation | SNP | T | C | 3  | 278 | c.430T>C  | c.(430-432)TAT>CAT   | p.Y144H  |
| Pat_14 | Post-Resistance | TAB3      | 257397 | 37 | X | 30872463  | 30872463  | Missense_Mutation | SNP | G | A | 4  | 415 | c.1319C>T | c.(1318-1320)ACT>ATT | p.T440I  |
| Pat_14 | Post-Resistance | DMD       | 1756   | 37 | X | 32583858  | 32583858  | Nonsense_Mutation | SNP | C | T | 6  | 715 | c.1953G>A | c.(1951-1953)TGG>TGA | p.W651*  |

|        |                 |          |        |    |    |           |           |                        |     |    |    |    |     |                                   |                        |          |
|--------|-----------------|----------|--------|----|----|-----------|-----------|------------------------|-----|----|----|----|-----|-----------------------------------|------------------------|----------|
| Pat_14 | Post-Resistance | FAM47C   | 442444 | 37 | X  | 37028134  | 37028134  | Missense_Mutation      | SNP | C  | T  | 9  | 408 | c.1651C>T                         | c.(1651-1653)CCT>TCT   | p.P551S  |
| Pat_14 | Post-Resistance | RBM10    | 8241   | 37 | X  | 47030588  | 47030588  | Missense_Mutation      | SNP | G  | T  | 3  | 82  | c.363G>T                          | c.(361-363)GAG>GAT     | p.E121D  |
| Pat_14 | Post-Resistance | WDR13    | 64743  | 37 | X  | 48460495  | 48460495  | Missense_Mutation      | SNP | G  | A  | 4  | 166 | c.1055G>A                         | c.(1054-1056)AGC>AAC   | p.S352N  |
| Pat_14 | Post-Resistance | TEX11    | 56159  | 37 | X  | 69849510  | 69849510  | Missense_Mutation      | SNP | C  | T  | 6  | 407 | c.1604G>A                         | c.(1603-1605)AGA>AAA   | p.R535K  |
| Pat_14 | Post-Resistance | KIAA2022 | 340533 | 37 | X  | 73963437  | 73963438  | Missense_Mutation      | DNP | CC | TT | 5  | 590 | c.954_955GG>AA952-957)CAGGAC>CAAA |                        | p.D319N  |
| Pat_14 | Post-Resistance | ATP7A    | 538    | 37 | X  | 77258680  | 77258680  | Missense_Mutation      | SNP | G  | A  | 8  | 790 | c.1654G>A                         | c.(1654-1656)GGA>AGA   | p.G552R  |
| Pat_14 | Post-Resistance | ARL13A   | 392509 | 37 | X  | 100240658 | 100240658 | Missense_Mutation      | SNP | C  | T  | 4  | 339 | c.133C>T                          | c.(133-135)CTT>TTT     | p.L45F   |
| Pat_14 | Post-Resistance | DRP2     | 1821   | 37 | X  | 100500047 | 100500047 | Missense_Mutation      | SNP | A  | G  | 6  | 644 | c.1096A>G                         | c.(1096-1098)AAA>GAA   | p.K366E  |
| Pat_14 | Post-Resistance | MORC4    | 79710  | 37 | X  | 106185282 | 106185282 | Missense_Mutation      | SNP | G  | A  | 4  | 397 | c.2546C>T                         | c.(2545-2547)ACC>ATC   | p.T849I  |
| Pat_14 | Post-Resistance | IRS4     | 8471   | 37 | X  | 107976582 | 107976582 | Missense_Mutation      | SNP | G  | A  | 5  | 407 | c.2993C>T                         | c.(2992-2994)CCT>CTT   | p.P998L  |
| Pat_14 | Post-Resistance | DCX      | 1641   | 37 | X  | 110576315 | 110576315 | Missense_Mutation      | SNP | G  | A  | 5  | 203 | c.1015C>T                         | c.(1015-1017)CGC>TGC   | p.R339C  |
| Pat_14 | Post-Resistance | TRPC5    | 7224   | 37 | X  | 111090573 | 111090573 | Missense_Mutation      | SNP | G  | A  | 6  | 515 | c.1469C>T                         | c.(1468-1470)TCG>TTG   | p.S490L  |
| Pat_14 | Post-Resistance | RPL39    | 6170   | 37 | X  | 118923908 | 118923908 | Missense_Mutation      | SNP | G  | A  | 14 | 455 | c.70C>T                           | c.(70-72)CCC>TCC       | p.P24S   |
| Pat_14 | Post-Resistance | DDX26B   | 203522 | 37 | X  | 134654864 | 134654864 | Translation_Start_Site | SNP | G  | A  | 4  | 378 | c.-53G>A                          | c.(-55--51)CAGTG>CAATG |          |
| Pat_14 | Post-Resistance | MAP7D3   | 79649  | 37 | X  | 135314011 | 135314011 | Missense_Mutation      | SNP | G  | A  | 5  | 442 | c.1105C>T                         | c.(1105-1107)CTC>TTC   | p.L369F  |
| Pat_14 | Post-Resistance | MAGEA11  | 4110   | 37 | X  | 148797987 | 148797987 | Missense_Mutation      | SNP | G  | A  | 5  | 453 | c.841G>A                          | c.(841-843)GAA>AAA     | p.E281K  |
| Pat_14 | Post-Resistance | MTMR1    | 8776   | 37 | X  | 149912863 | 149912863 | Missense_Mutation      | SNP | G  | A  | 9  | 704 | c.1480G>A                         | c.(1480-1482)GAT>AAT   | p.D494N  |
| Pat_14 | Post-Resistance | TMEM187  | 8269   | 37 | X  | 153248187 | 153248187 | Missense_Mutation      | SNP | G  | A  | 5  | 255 | c.674G>A                          | c.(673-675)GGC>GAC     | p.G225D  |
| Pat_14 | Post-Resistance | MPP1     | 4354   | 37 | X  | 154014640 | 154014640 | Missense_Mutation      | SNP | T  | A  | 10 | 845 | c.516A>T                          | c.(514-516)AAA>AAT     | p.K172N  |
| Pat_14 | Post-Resistance | TMLHE    | 55217  | 37 | X  | 154741371 | 154741371 | Missense_Mutation      | SNP | G  | A  | 6  | 635 | c.721C>T                          | c.(721-723)CGG>TGG     | p.R241W  |
| Pat_15 | Pre-Treatment   | PLEKHG5  | 57449  | 37 | 1  | 6528263   | 6528263   | Missense_Mutation      | SNP | G  | A  | 18 | 14  | c.2801C>T                         | c.(2800-2802)TCC>TTC   | p.S934F  |
| Pat_15 | Pre-Treatment   | PRAMEF4  | 400735 | 37 | 1  | 12943025  | 12943025  | Missense_Mutation      | SNP | C  | T  | 25 | 30  | c.191G>A                          | c.(190-192)CGC>CAC     | p.R64H   |
| Pat_15 | Pre-Treatment   | ATP13A2  | 23400  | 37 | 1  | 17332247  | 17332247  | Missense_Mutation      | SNP | G  | A  | 10 | 11  | c.37C>T                           | c.(37-39)CCC>TCC       | p.P13S   |
| Pat_15 | Pre-Treatment   | KLHDC7A  | 127707 | 37 | 1  | 18809751  | 18809751  | Missense_Mutation      | SNP | C  | T  | 70 | 78  | c.2276C>T                         | c.(2275-2277)ACC>ATC   | p.T759I  |
| Pat_15 | Pre-Treatment   | SYTL1    | 84958  | 37 | 1  | 27673988  | 27673988  | Nonsense_Mutation      | SNP | C  | T  | 23 | 41  | c.268C>T                          | c.(268-270)CAG>TAG     | p.Q90*   |
| Pat_15 | Pre-Treatment   | TESK2    | 10420  | 37 | 1  | 45813599  | 45813599  | Missense_Mutation      | SNP | G  | A  | 49 | 57  | c.614C>T                          | c.(613-615)CCC>CTC     | p.P205L  |
| Pat_15 | Pre-Treatment   | PODN     | 127435 | 37 | 1  | 53544264  | 53544264  | Missense_Mutation      | SNP | T  | C  | 17 | 21  | c.1226T>C                         | c.(1225-1227)TTG>TCG   | p.L409S  |
| Pat_15 | Pre-Treatment   | ELTD1    | 64123  | 37 | 1  | 79412055  | 79412055  | Missense_Mutation      | SNP | T  | G  | 12 | 1   | c.229A>C                          | c.(229-231)AAC>CAC     | p.N77H   |
| Pat_15 | Pre-Treatment   | CLCA4    | 22802  | 37 | 1  | 87031683  | 87031683  | Missense_Mutation      | SNP | G  | A  | 36 | 1   | c.934G>A                          | c.(934-936)GAT>AAT     | p.D312N  |
| Pat_15 | Pre-Treatment   | ACP6     | 51205  | 37 | 1  | 147131860 | 147131860 | Missense_Mutation      | SNP | G  | A  | 14 | 20  | c.250C>T                          | c.(250-252)CCA>TCA     | p.P84S   |
| Pat_15 | Pre-Treatment   | NBPF16   | 728936 | 37 | 1  | 148754841 | 148754841 | Missense_Mutation      | SNP | C  | G  | 3  | 28  | c.1497C>G                         | c.(1495-1497)AGC>AGG   | p.S499R  |
| Pat_15 | Pre-Treatment   | CD1E     | 913    | 37 | 1  | 158325309 | 158325309 | Missense_Mutation      | SNP | G  | A  | 5  | 12  | c.575G>A                          | c.(574-576)CGA>CAA     | p.R192Q  |
| Pat_15 | Pre-Treatment   | OR10Z1   | 128368 | 37 | 1  | 158576814 | 158576814 | Missense_Mutation      | SNP | G  | A  | 41 | 41  | c.586G>A                          | c.(586-588)GAG>AAG     | p.E196K  |
| Pat_15 | Pre-Treatment   | DNM3     | 26052  | 37 | 1  | 172017826 | 172017826 | Missense_Mutation      | SNP | C  | T  | 31 | 42  | c.1271C>T                         | c.(1270-1272)TCC>TTC   | p.S424F  |
| Pat_15 | Pre-Treatment   | SLC9A11  | 284525 | 37 | 1  | 173552668 | 173552668 | Missense_Mutation      | SNP | C  | T  | 16 | 21  | c.617G>A                          | c.(616-618)AGA>AAA     | p.R206K  |
| Pat_15 | Pre-Treatment   | ASTN1    | 460    | 37 | 1  | 176992682 | 176992683 | Missense_Mutation      | DNP | CC | TT | 10 | 18  | .1295_1296GG>A                    | c.(1294-1296)GGG>GAA   | p.G432E  |
| Pat_15 | Pre-Treatment   | CFHR3    | 10878  | 37 | 1  | 196748941 | 196748941 | Missense_Mutation      | SNP | C  | T  | 2  | 2   | c.268C>T                          | c.(268-270)CCT>TCT     | p.P90S   |
| Pat_15 | Pre-Treatment   | CFHR5    | 81494  | 37 | 1  | 196953100 | 196953100 | Missense_Mutation      | SNP | C  | T  | 14 | 11  | c.263C>T                          | c.(262-264)TCC>TTC     | p.S88F   |
| Pat_15 | Pre-Treatment   | F13B     | 2165   | 37 | 1  | 197026464 | 197026464 | Missense_Mutation      | SNP | C  | T  | 27 | 50  | c.937G>A                          | c.(937-939)GAA>AAA     | p.E313K  |
| Pat_15 | Pre-Treatment   | HEATR1   | 55127  | 37 | 1  | 236730082 | 236730082 | Missense_Mutation      | SNP | G  | A  | 28 | 39  | c.4172C>T                         | c.(4171-4173)CCG>CTG   | p.P1391L |
| Pat_15 | Pre-Treatment   | FAM171A1 | 221061 | 37 | 10 | 15296773  | 15296773  | Missense_Mutation      | SNP | G  | A  | 15 | 1   | c.524C>T                          | c.(523-525)CCT>CTT     | p.P175L  |
| Pat_15 | Pre-Treatment   | C10orf72 | 196740 | 37 | 10 | 50227768  | 50227768  | Missense_Mutation      | SNP | G  | A  | 11 | 0   | c.890C>T                          | c.(889-891)CCC>CTC     | p.P297L  |
| Pat_15 | Pre-Treatment   | C10orf71 | 118461 | 37 | 10 | 50532304  | 50532304  | Missense_Mutation      | SNP | C  | T  | 10 | 1   | c.1714C>T                         | c.(1714-1716)CCC>TCC   | p.P572S  |
| Pat_15 | Pre-Treatment   | CPEB3    | 22849  | 37 | 10 | 93902788  | 93902788  | Missense_Mutation      | SNP | T  | C  | 33 | 0   | c.1451A>G                         | c.(1450-1452)AAA>AGA   | p.K484R  |
| Pat_15 | Pre-Treatment   | HELLS    | 3070   | 37 | 10 | 96361363  | 96361363  | Missense_Mutation      | SNP | C  | T  | 4  | 2   | c.2501C>T                         | c.(2500-2502)CCT>CTT   | p.P834L  |
| Pat_15 | Pre-Treatment   | CYP2C18  | 1562   | 37 | 10 | 96448031  | 96448031  | Missense_Mutation      | SNP | G  | A  | 26 | 3   | c.481G>A                          | c.(481-483)GCC>ACC     | p.A161T  |
| Pat_15 | Pre-Treatment   | CYP2C18  | 1562   | 37 | 10 | 96454828  | 96454828  | Nonsense_Mutation      | SNP | G  | A  | 3  | 0   | c.636G>A                          | c.(634-636)TGG>TGA     | p.W212*  |



|        |               |          |        |    |    |           |           |                   |     |    |    |     |     |                                           |                      |          |
|--------|---------------|----------|--------|----|----|-----------|-----------|-------------------|-----|----|----|-----|-----|-------------------------------------------|----------------------|----------|
| Pat_15 | Pre-Treatment | CYP2C8   | 1558   | 37 | 10 | 96797060  | 96797060  | Missense_Mutation | SNP | C  | T  | 10  | 1   | c.1298G>A                                 | c.(1297-1299)CGA>CAA | p.R433Q  |
| Pat_15 | Pre-Treatment | C10orf62 | 414157 | 37 | 10 | 99349869  | 99349869  | Missense_Mutation | SNP | C  | T  | 34  | 2   | c.215C>T                                  | c.(214-216)ACG>ATG   | p.T72M   |
| Pat_15 | Pre-Treatment | NRAP     | 4892   | 37 | 10 | 115388776 | 115388776 | Missense_Mutation | SNP | T  | C  | 39  | 0   | c.2045A>G                                 | c.(2044-2046)CAG>CGG | p.Q682R  |
| Pat_15 | Pre-Treatment | OR51G2   | 81282  | 37 | 11 | 4936406   | 4936406   | Missense_Mutation | SNP | G  | A  | 24  | 0   | c.488C>T                                  | c.(487-489)CCA>CTA   | p.P163L  |
| Pat_15 | Pre-Treatment | ZNF215   | 7762   | 37 | 11 | 6976921   | 6976921   | Missense_Mutation | SNP | A  | G  | 2   | 17  | c.713A>G                                  | c.(712-714)GAC>GGC   | p.D238G  |
| Pat_15 | Pre-Treatment | PTH      | 5741   | 37 | 11 | 13514049  | 13514049  | Missense_Mutation | SNP | T  | A  | 15  | 1   | c.251A>T                                  | c.(250-252)AAA>ATA   | p.K84I   |
| Pat_15 | Pre-Treatment | AGBL2    | 79841  | 37 | 11 | 47698946  | 47698946  | Missense_Mutation | SNP | T  | G  | 13  | 0   | c.2024A>C                                 | c.(2023-2025)CAG>CCG | p.Q675P  |
| Pat_15 | Pre-Treatment | OR5L2    | 26338  | 37 | 11 | 55595616  | 55595616  | Missense_Mutation | SNP | A  | C  | 8   | 3   | c.922A>C                                  | c.(922-924)AAA>CAA   | p.K308Q  |
| Pat_15 | Pre-Treatment | OR8H3    | 390152 | 37 | 11 | 55889999  | 55889999  | Missense_Mutation | SNP | C  | T  | 71  | 8   | c.151C>T                                  | c.(151-153)CGC>TGC   | p.R51C   |
| Pat_15 | Pre-Treatment | OR5T3    | 390154 | 37 | 11 | 56019973  | 56019973  | Missense_Mutation | SNP | G  | A  | 20  | 0   | c.298G>A                                  | c.(298-300)GAT>AAT   | p.D100N  |
| Pat_15 | Pre-Treatment | OR9G9    | 504191 | 37 | 11 | 56467892  | 56467892  | Missense_Mutation | SNP | A  | G  | 15  | 32  | c.29A>G                                   | c.(28-30)GAG>GGG     | p.E10G   |
| Pat_15 | Pre-Treatment | DTX4     | 23220  | 37 | 11 | 58949848  | 58949848  | Missense_Mutation | SNP | A  | G  | 4   | 1   | c.848A>G                                  | c.(847-849)AAG>AGG   | p.K283R  |
| Pat_15 | Pre-Treatment | ARAP1    | 116985 | 37 | 11 | 72421519  | 72421519  | Missense_Mutation | SNP | G  | A  | 26  | 43  | c.1327C>T                                 | c.(1327-1329)CGC>TGC | p.R443C  |
| Pat_15 | Pre-Treatment | TMEM126B | 55863  | 37 | 11 | 85347238  | 85347238  | Missense_Mutation | SNP | G  | A  | 6   | 0   | c.568G>A                                  | c.(568-570)GAA>AAA   | p.E190K  |
| Pat_15 | Pre-Treatment | KDM4DL   | 390245 | 37 | 11 | 94759611  | 94759611  | Nonsense_Mutation | SNP | G  | A  | 14  | 0   | c.890G>A                                  | c.(889-891)TGG>TAG   | p.W297*  |
| Pat_15 | Pre-Treatment | CNTN5    | 53942  | 37 | 11 | 100095458 | 100095458 | Missense_Mutation | SNP | T  | G  | 21  | 0   | c.1919T>G                                 | c.(1918-1920)ATC>AGC | p.I640S  |
| Pat_15 | Pre-Treatment | PGR      | 5241   | 37 | 11 | 100962501 | 100962501 | Missense_Mutation | SNP | C  | T  | 20  | 0   | c.1896G>A                                 | c.(1894-1896)ATG>ATA | p.M632I  |
| Pat_15 | Pre-Treatment | GUCY1A2  | 2977   | 37 | 11 | 106810341 | 106810341 | Nonsense_Mutation | SNP | G  | A  | 14  | 0   | c.1051C>T                                 | c.(1051-1053)CGA>TGA | p.R351*  |
| Pat_15 | Pre-Treatment | AQP2     | 359    | 37 | 12 | 50344822  | 50344822  | Missense_Mutation | SNP | C  | T  | 29  | 2   | c.209C>T                                  | c.(208-210)GCC>GTC   | p.A70V   |
| Pat_15 | Pre-Treatment | KRT75    | 9119   | 37 | 12 | 52825810  | 52825810  | Missense_Mutation | SNP | C  | T  | 32  | 26  | c.754G>A                                  | c.(754-756)GAA>AAA   | p.E252K  |
| Pat_15 | Pre-Treatment | STAB2    | 55576  | 37 | 12 | 104063395 | 104063395 | Missense_Mutation | SNP | G  | A  | 23  | 21  | c.2249G>A                                 | c.(2248-2250)GGA>GAA | p.G750E  |
| Pat_15 | Pre-Treatment | UNC119B  | 84747  | 37 | 12 | 121157744 | 121157744 | Missense_Mutation | SNP | C  | T  | 41  | 35  | c.665C>T                                  | c.(664-666)CCT>CTT   | p.P222L  |
| Pat_15 | Pre-Treatment | DNAH10   | 196385 | 37 | 12 | 124402294 | 124402295 | Missense_Mutation | DNP | GG | AA | 2   | 0   | 10812_10813GG> $\beta$ 10-10815)ACGGGG>AC |                      | p.G3605R |
| Pat_15 | Pre-Treatment | SLITRK1  | 114798 | 37 | 13 | 84453751  | 84453751  | Missense_Mutation | SNP | G  | A  | 24  | 0   | c.1892C>T                                 | c.(1891-1893)TCC>TTC | p.S631F  |
| Pat_15 | Pre-Treatment | DOCK9    | 23348  | 37 | 13 | 99478165  | 99478165  | Missense_Mutation | SNP | G  | A  | 7   | 1   | c.4987C>T                                 | c.(4987-4989)CCC>TCC | p.P1663S |
| Pat_15 | Pre-Treatment | POTEG    | 404785 | 37 | 14 | 19553522  | 19553522  | Missense_Mutation | SNP | A  | G  | 11  | 112 | c.106A>G                                  | c.(106-108)AGG>GGG   | p.R36G   |
| Pat_15 | Pre-Treatment | SEL1L    | 6400   | 37 | 14 | 82000079  | 82000079  | Missense_Mutation | SNP | G  | A  | 22  | 0   | c.10C>T                                   | c.(10-12)CGG>TGG     | p.R4W    |
| Pat_15 | Pre-Treatment | SLC24A4  | 123041 | 37 | 14 | 92953088  | 92953088  | Missense_Mutation | SNP | C  | T  | 46  | 0   | c.1450C>T                                 | c.(1450-1452)CCA>TCA | p.P484S  |
| Pat_15 | Pre-Treatment | KIAA1409 | 57578  | 37 | 14 | 93994911  | 93994911  | Missense_Mutation | SNP | T  | G  | 28  | 3   | c.440T>G                                  | c.(439-441)ATA>AGA   | p.I147R  |
| Pat_15 | Pre-Treatment | MAP2K1   | 5604   | 37 | 15 | 66729163  | 66729163  | Missense_Mutation | SNP | C  | T  | 60  | 42  | c.371C>T                                  | c.(370-372)CCG>CTG   | p.P124L  |
| Pat_15 | Pre-Treatment | GRAMD2   | 196996 | 37 | 15 | 72456010  | 72456010  | Missense_Mutation | SNP | G  | A  | 21  | 11  | c.689C>T                                  | c.(688-690)CCA>CTA   | p.P230L  |
| Pat_15 | Pre-Treatment | C15orf39 | 56905  | 37 | 15 | 75500784  | 75500784  | Missense_Mutation | SNP | C  | T  | 7   | 11  | c.2395C>T                                 | c.(2395-2397)CCC>TCC | p.P799S  |
| Pat_15 | Pre-Treatment | ACSBG1   | 23205  | 37 | 15 | 78466162  | 78466162  | Missense_Mutation | SNP | G  | T  | 33  | 19  | c.1862C>A                                 | c.(1861-1863)ACC>AAC | p.T621N  |
| Pat_15 | Pre-Treatment | SLCO3A1  | 28232  | 37 | 15 | 92397255  | 92397255  | Missense_Mutation | SNP | C  | G  | 2   | 24  | c.117C>G                                  | c.(115-117)ATC>ATG   | p.I39M   |
| Pat_15 | Pre-Treatment | BTBD12   | 84464  | 37 | 16 | 3640521   | 3640521   | Missense_Mutation | SNP | G  | A  | 37  | 41  | c.3118C>T                                 | c.(3118-3120)CCC>TCC | p.P1040S |
| Pat_15 | Pre-Treatment | MGRN1    | 23295  | 37 | 16 | 4731705   | 4731705   | Missense_Mutation | SNP | C  | T  | 26  | 36  | c.1286C>T                                 | c.(1285-1287)CCC>CTC | p.P429L  |
| Pat_15 | Pre-Treatment | COG7     | 91949  | 37 | 16 | 23409399  | 23409399  | Missense_Mutation | SNP | A  | C  | 21  | 41  | c.1855T>G                                 | c.(1855-1857)TTT>GTT | p.F619V  |
| Pat_15 | Pre-Treatment | HS3ST4   | 9951   | 37 | 16 | 26147561  | 26147561  | Missense_Mutation | SNP | G  | A  | 7   | 12  | c.1363G>A                                 | c.(1363-1365)GAT>AAT | p.D455N  |
| Pat_15 | Pre-Treatment | NOD2     | 64127  | 37 | 16 | 50733452  | 50733452  | Missense_Mutation | SNP | G  | A  | 88  | 97  | c.127G>A                                  | c.(127-129)GAG>AAG   | p.E43K   |
| Pat_15 | Pre-Treatment | CES7     | 221223 | 37 | 16 | 55907781  | 55907781  | Nonsense_Mutation | SNP | C  | T  | 20  | 20  | c.242G>A                                  | c.(241-243)TGG>TAG   | p.W81*   |
| Pat_15 | Pre-Treatment | TXNL4B   | 54957  | 37 | 16 | 72120568  | 72120568  | Missense_Mutation | SNP | G  | A  | 29  | 40  | c.418C>T                                  | c.(418-420)CCC>TCC   | p.P140S  |
| Pat_15 | Pre-Treatment | CLEC18B  | 497190 | 37 | 16 | 74447009  | 74447009  | Missense_Mutation | SNP | C  | T  | 23  | 38  | c.602G>A                                  | c.(601-603)GGT>GAT   | p.G201D  |
| Pat_15 | Pre-Treatment | TRAPPC2L | 51693  | 37 | 16 | 88925060  | 88925060  | Missense_Mutation | SNP | G  | A  | 122 | 137 | c.67G>A                                   | c.(67-69)GAG>AAG     | p.E23K   |
| Pat_15 | Pre-Treatment | ANKRD11  | 29123  | 37 | 16 | 89351925  | 89351925  | Missense_Mutation | SNP | G  | A  | 40  | 46  | c.1025C>T                                 | c.(1024-1026)CCC>CTC | p.P342L  |
| Pat_15 | Pre-Treatment | OR3A2    | 4995   | 37 | 17 | 3181572   | 3181572   | Missense_Mutation | SNP | A  | T  | 17  | 0   | c.658T>A                                  | c.(658-660)TTG>ATG   | p.L220M  |
| Pat_15 | Pre-Treatment | TP53     | 7157   | 37 | 17 | 7574003   | 7574003   | Nonsense_Mutation | SNP | G  | A  | 28  | 0   | c.1024C>T                                 | c.(1024-1026)CGA>TGA | p.R342*  |
| Pat_15 | Pre-Treatment | NCOR1    | 9611   | 37 | 17 | 15938172  | 15938172  | Missense_Mutation | SNP | C  | T  | 32  | 1   | c.7042G>A                                 | c.(7042-7044)GAA>AAA | p.E2348K |

|        |               |           |        |    |    |           |           |                   |     |    |    |    |     |                |                        |           |
|--------|---------------|-----------|--------|----|----|-----------|-----------|-------------------|-----|----|----|----|-----|----------------|------------------------|-----------|
| Pat_15 | Pre-Treatment | SLFN13    | 146857 | 37 | 17 | 33768288  | 33768288  | Missense_Mutation | SNP | G  | A  | 52 | 37  | c.2020C>T      | c.(2020-2022)CGT>TGT   | p.R674C   |
| Pat_15 | Pre-Treatment | GAS2L2    | 246176 | 37 | 17 | 34072788  | 34072788  | Nonsense_Mutation | SNP | C  | T  | 30 | 12  | c.1728G>A      | c.(1726-1728)TGG>TGA   | p.W576*   |
| Pat_15 | Pre-Treatment | KRT222    | 125113 | 37 | 17 | 38816377  | 38816378  | Missense_Mutation | DNP | CC | TG | 32 | 26  | c.307_308GG>CA | c.(307-309)GGA>CAA     | p.G103Q   |
| Pat_15 | Pre-Treatment | TLLL6     | 284076 | 37 | 17 | 46846574  | 46846574  | Missense_Mutation | SNP | C  | T  | 24 | 61  | c.2453G>A      | c.(2452-2454)AGC>AAC   | p.S818N   |
| Pat_15 | Pre-Treatment | B4GALNT2  | 124872 | 37 | 17 | 47210448  | 47210448  | Missense_Mutation | SNP | G  | A  | 8  | 9   | c.61G>A        | c.(61-63)GAA>AAA       | p.E21K    |
| Pat_15 | Pre-Treatment | ANKFN1    | 162282 | 37 | 17 | 54520276  | 54520276  | Missense_Mutation | SNP | G  | A  | 38 | 14  | c.1090G>A      | c.(1090-1092)GCA>ACA   | p.A364T   |
| Pat_15 | Pre-Treatment | KCNH6     | 81033  | 37 | 17 | 61621705  | 61621705  | Missense_Mutation | SNP | G  | A  | 9  | 22  | c.2437G>A      | c.(2437-2439)GAA>AAA   | p.E813K   |
| Pat_15 | Pre-Treatment | SCN4A     | 6329   | 37 | 17 | 62018276  | 62018276  | Missense_Mutation | SNP | G  | A  | 8  | 13  | c.5366C>T      | c.(5365-5367)TCG>TTG   | p.S1789L  |
| Pat_15 | Pre-Treatment | KCNJ16    | 3773   | 37 | 17 | 68128770  | 68128770  | Missense_Mutation | SNP | C  | T  | 11 | 48  | c.542C>T       | c.(541-543)ACC>ATC     | p.T181I   |
| Pat_15 | Pre-Treatment | CD300C    | 10871  | 37 | 17 | 72540900  | 72540900  | Missense_Mutation | SNP | G  | A  | 17 | 69  | c.248C>T       | c.(247-249)TCC>TTC     | p.S83F    |
| Pat_15 | Pre-Treatment | MGAT5B    | 146664 | 37 | 17 | 74936524  | 74936524  | Missense_Mutation | SNP | C  | T  | 32 | 66  | c.1652C>T      | c.(1651-1653)CCC>CTC   | p.P551L   |
| Pat_15 | Pre-Treatment | NPTX1     | 4884   | 37 | 17 | 78444806  | 78444806  | Missense_Mutation | SNP | G  | A  | 9  | 33  | c.1106C>T      | c.(1105-1107)ACC>ATC   | p.T369I   |
| Pat_15 | Pre-Treatment | DSC1      | 1823   | 37 | 18 | 28720185  | 28720185  | Missense_Mutation | SNP | C  | G  | 32 | 33  | c.1340G>C      | c.(1339-1341)AGC>ACC   | p.S447T   |
| Pat_15 | Pre-Treatment | DSG1      | 1828   | 37 | 18 | 28934588  | 28934588  | Missense_Mutation | SNP | C  | T  | 68 | 59  | c.2429C>T      | c.(2428-2430)TCT>TTT   | p.S810F   |
| Pat_15 | Pre-Treatment | RNF165    | 494470 | 37 | 18 | 44036562  | 44036562  | Missense_Mutation | SNP | G  | A  | 40 | 53  | c.1004G>A      | c.(1003-1005)CGA>CAA   | p.R335Q   |
| Pat_15 | Pre-Treatment | SERPINB11 | 89778  | 37 | 18 | 61377533  | 61377533  | Missense_Mutation | SNP | C  | T  | 10 | 13  | c.106C>T       | c.(106-108)CTT>TTT     | p.L36F    |
| Pat_15 | Pre-Treatment | MIER2     | 54531  | 37 | 19 | 334444    | 334444    | Missense_Mutation | SNP | G  | A  | 31 | 54  | c.199C>T       | c.(199-201)CCA>TCA     | p.P67S    |
| Pat_15 | Pre-Treatment | MADCAM1   | 8174   | 37 | 19 | 501699    | 501699    | Missense_Mutation | SNP | C  | T  | 31 | 18  | c.698C>T       | c.(697-699)CCC>CTC     | p.P233L   |
| Pat_15 | Pre-Treatment | C3        | 718    | 37 | 19 | 6686166   | 6686166   | Missense_Mutation | SNP | C  | T  | 42 | 87  | c.3779G>A      | c.(3778-3780)AGA>AAA   | p.R1260K  |
| Pat_15 | Pre-Treatment | VAV1      | 7409   | 37 | 19 | 6828459   | 6828459   | Missense_Mutation | SNP | G  | A  | 24 | 16  | c.1053G>A      | c.(1051-1053)ATG>ATA   | p.M351I   |
| Pat_15 | Pre-Treatment | FBN3      | 84467  | 37 | 19 | 8155007   | 8155007   | Missense_Mutation | SNP | C  | T  | 11 | 11  | c.6160G>A      | c.(6160-6162)GAA>AAA   | p.E2054K  |
| Pat_15 | Pre-Treatment | MUC16     | 94025  | 37 | 19 | 9068553   | 9068553   | Missense_Mutation | SNP | G  | A  | 16 | 85  | c.18893C>T     | c.(18892-18894)TCT>TTT | p.S6298F  |
| Pat_15 | Pre-Treatment | MUC16     | 94025  | 37 | 19 | 9085237   | 9085237   | Missense_Mutation | SNP | G  | A  | 9  | 8   | c.6578C>T      | c.(6577-6579)TCC>TTC   | p.S2193F  |
| Pat_15 | Pre-Treatment | MUC16     | 94025  | 37 | 19 | 9089503   | 9089503   | Missense_Mutation | SNP | G  | A  | 51 | 26  | c.2312C>T      | c.(2311-2313)TCC>TTC   | p.S771F   |
| Pat_15 | Pre-Treatment | ZNF560    | 147741 | 37 | 19 | 9578116   | 9578116   | Missense_Mutation | SNP | G  | A  | 6  | 18  | c.1507C>T      | c.(1507-1509)CTT>TTT   | p.L503F   |
| Pat_15 | Pre-Treatment | ZNF302    | 55900  | 37 | 19 | 35175919  | 35175919  | Missense_Mutation | SNP | C  | T  | 7  | 12  | c.1109C>T      | c.(1108-1110)TCG>TTG   | p.S370L   |
| Pat_15 | Pre-Treatment | LIG1      | 3978   | 37 | 19 | 48660312  | 48660312  | Missense_Mutation | SNP | G  | A  | 34 | 102 | c.329C>T       | c.(328-330)CCC>CTC     | p.P110L   |
| Pat_15 | Pre-Treatment | MYH14     | 79784  | 37 | 19 | 50789874  | 50789874  | Missense_Mutation | SNP | G  | A  | 4  | 2   | c.4552G>A      | c.(4552-4554)GAG>AAG   | p.E1518K  |
| Pat_15 | Pre-Treatment | KLK5      | 25818  | 37 | 19 | 51453324  | 51453324  | Missense_Mutation | SNP | G  | A  | 13 | 10  | c.122C>T       | c.(121-123)ACC>ATC     | p.T41I    |
| Pat_15 | Pre-Treatment | ZNF761    | 388561 | 37 | 19 | 53959722  | 53959722  | Missense_Mutation | SNP | G  | A  | 10 | 41  | c.1961G>A      | c.(1960-1962)AGA>AAA   | p.R654K   |
| Pat_15 | Pre-Treatment | ZNF470    | 388566 | 37 | 19 | 57089054  | 57089054  | Missense_Mutation | SNP | T  | A  | 20 | 15  | c.1257T>A      | c.(1255-1257)CAT>CAA   | p.H419Q   |
| Pat_15 | Pre-Treatment | PEG3      | 5178   | 37 | 19 | 57335821  | 57335821  | Missense_Mutation | SNP | C  | T  | 36 | 24  | c.203G>A       | c.(202-204)CGA>CAA     | p.R68Q    |
| Pat_15 | Pre-Treatment | ZNF749    | 388567 | 37 | 19 | 57956341  | 57956341  | Nonsense_Mutation | SNP | G  | T  | 11 | 27  | c.1825G>T      | c.(1825-1827)GAA>TAA   | p.E609*   |
| Pat_15 | Pre-Treatment | ZNF549    | 256051 | 37 | 19 | 58050291  | 58050291  | Missense_Mutation | SNP | C  | T  | 18 | 34  | c.1919C>T      | c.(1918-1920)CCC>CTC   | p.P640L   |
| Pat_15 | Pre-Treatment | MSGN1     | 343930 | 37 | 2  | 17998224  | 17998224  | Missense_Mutation | SNP | C  | T  | 16 | 314 | c.439C>T       | c.(439-441)CTC>TTC     | p.L147F   |
| Pat_15 | Pre-Treatment | TMEM17    | 200728 | 37 | 2  | 62728427  | 62728427  | Missense_Mutation | SNP | G  | A  | 41 | 25  | c.514C>T       | c.(514-516)CGT>TGT     | p.R172C   |
| Pat_15 | Pre-Treatment | LOXL3     | 84695  | 37 | 2  | 74761292  | 74761292  | Missense_Mutation | SNP | G  | A  | 3  | 53  | c.2011C>T      | c.(2011-2013)CGG>TGG   | p.R671W   |
| Pat_15 | Pre-Treatment | IL1A      | 3552   | 37 | 2  | 113539322 | 113539322 | Missense_Mutation | SNP | A  | T  | 34 | 21  | c.178T>A       | c.(178-180)TCT>ACT     | p.S60T    |
| Pat_15 | Pre-Treatment | THSD7B    | 80731  | 37 | 2  | 137814051 | 137814051 | Nonsense_Mutation | SNP | G  | A  | 15 | 34  | c.108G>A       | c.(106-108)TGG>TGA     | p.W36*    |
| Pat_15 | Pre-Treatment | SCN1A     | 6323   | 37 | 2  | 166872167 | 166872167 | Missense_Mutation | SNP | G  | A  | 19 | 38  | c.3467C>T      | c.(3466-3468)CCC>CTC   | p.P1156L  |
| Pat_15 | Pre-Treatment | LRP2      | 4036   | 37 | 2  | 170092425 | 170092425 | Missense_Mutation | SNP | C  | T  | 35 | 15  | c.4845G>A      | c.(4843-4845)ATG>ATA   | p.M1615I  |
| Pat_15 | Pre-Treatment | SP3       | 6670   | 37 | 2  | 174819867 | 174819867 | Missense_Mutation | SNP | G  | A  | 19 | 20  | c.1373C>T      | c.(1372-1374)TCT>TTT   | p.S458F   |
| Pat_15 | Pre-Treatment | OSBPL6    | 114880 | 37 | 2  | 179236922 | 179236922 | Nonsense_Mutation | SNP | C  | T  | 24 | 18  | c.1357C>T      | c.(1357-1359)CAG>TAG   | p.Q453*   |
| Pat_15 | Pre-Treatment | TTN       | 7273   | 37 | 2  | 179472244 | 179472244 | Missense_Mutation | SNP | C  | T  | 60 | 146 | c.45467G>A     | c.(45466-45468)GGA>GAA | p.G15156E |
| Pat_15 | Pre-Treatment | TTN       | 7273   | 37 | 2  | 179611961 | 179611961 | Missense_Mutation | SNP | C  | T  | 4  | 21  | c.15166G>A     | c.(15166-15168)GGG>AGC | p.G5056R  |
| Pat_15 | Pre-Treatment | DNAH7     | 56171  | 37 | 2  | 196834754 | 196834754 | Missense_Mutation | SNP | G  | A  | 17 | 18  | c.2123C>T      | c.(2122-2124)TCA>TTA   | p.S708L   |
| Pat_15 | Pre-Treatment | ORC2L     | 4999   | 37 | 2  | 201785036 | 201785036 | Missense_Mutation | SNP | A  | C  | 18 | 11  | c.1375T>G      | c.(1375-1377)TCC>GCC   | p.S459A   |

|        |               |          |        |    |    |           |           |                   |     |    |    |     |     |                                    |                      |               |
|--------|---------------|----------|--------|----|----|-----------|-----------|-------------------|-----|----|----|-----|-----|------------------------------------|----------------------|---------------|
| Pat_15 | Pre-Treatment | PARD3B   | 117583 | 37 | 2  | 206165386 | 206165386 | Missense_Mutation | SNP | G  | A  | 15  | 49  | c.2318G>A                          | c.(2317-2319)CGA>CAA | p.R773Q       |
| Pat_15 | Pre-Treatment | ABCB6    | 10058  | 37 | 2  | 220078321 | 220078322 | Missense_Mutation | DNP | GT | AG | 20  | 14  | .1645_1646AC>C                     | c.(1645-1647)ACC>CTC | p.T549L       |
| Pat_15 | Pre-Treatment | UGT1A8   | 54576  | 37 | 2  | 234527050 | 234527050 | Missense_Mutation | SNP | G  | A  | 62  | 186 | c.697G>A                           | c.(697-699)GAA>AAA   | p.E233K       |
| Pat_15 | Pre-Treatment | ANGPT4   | 51378  | 37 | 20 | 896818    | 896818    | Missense_Mutation | SNP | G  | A  | 17  | 42  | c.40C>T                            | c.(40-42)CTT>TTT     | p.L14F        |
| Pat_15 | Pre-Treatment | PROKR2   | 128674 | 37 | 20 | 5294778   | 5294778   | Missense_Mutation | SNP | G  | A  | 44  | 33  | c.238C>T                           | c.(238-240)CGC>TGC   | p.R80C        |
| Pat_15 | Pre-Treatment | ISM1     | 140862 | 37 | 20 | 13273020  | 13273020  | Splice_Site       | SNP | G  | A  | 8   | 10  | c.788_splice                       | c.e5-1               | p.G263_splice |
| Pat_15 | Pre-Treatment | SEL1L2   | 80343  | 37 | 20 | 13867031  | 13867031  | Missense_Mutation | SNP | T  | A  | 14  | 29  | c.803A>T                           | c.(802-804)GAA>GTA   | p.E268V       |
| Pat_15 | Pre-Treatment | DEFB123  | 245936 | 37 | 20 | 30037844  | 30037844  | Missense_Mutation | SNP | G  | A  | 61  | 70  | c.71G>A                            | c.(70-72)AGA>AAA     | p.R24K        |
| Pat_15 | Pre-Treatment | EPB41L1  | 2036   | 37 | 20 | 34785884  | 34785884  | Missense_Mutation | SNP | G  | A  | 44  | 47  | c.1589G>A                          | c.(1588-1590)CGA>CAA | p.R530Q       |
| Pat_15 | Pre-Treatment | SGK2     | 10110  | 37 | 20 | 42195107  | 42195107  | Missense_Mutation | SNP | C  | T  | 58  | 75  | c.152C>T                           | c.(151-153)CCC>CTC   | p.P51L        |
| Pat_15 | Pre-Treatment | NCAM2    | 4685   | 37 | 21 | 22664426  | 22664426  | Missense_Mutation | SNP | C  | T  | 19  | 21  | c.484C>T                           | c.(484-486)CGG>TGG   | p.R162W       |
| Pat_15 | Pre-Treatment | RCAN1    | 1827   | 37 | 21 | 35893880  | 35893880  | Missense_Mutation | SNP | G  | A  | 12  | 10  | c.503C>T                           | c.(502-504)CCG>CTG   | p.P168L       |
| Pat_15 | Pre-Treatment | CLDN14   | 23562  | 37 | 21 | 37833465  | 37833465  | Missense_Mutation | SNP | C  | T  | 23  | 30  | c.529G>A                           | c.(529-531)GGT>AGT   | p.G177S       |
| Pat_15 | Pre-Treatment | TMPRSS3  | 64699  | 37 | 21 | 43795974  | 43795974  | Missense_Mutation | SNP | C  | T  | 25  | 103 | c.1198G>A                          | c.(1198-1200)GAC>AAC | p.D400N       |
| Pat_15 | Pre-Treatment | SEZ6L    | 23544  | 37 | 22 | 26761419  | 26761419  | Missense_Mutation | SNP | G  | A  | 14  | 17  | c.2681G>A                          | c.(2680-2682)GGA>GAA | p.G894E       |
| Pat_15 | Pre-Treatment | TRIOBP   | 11078  | 37 | 22 | 38121864  | 38121864  | Missense_Mutation | SNP | C  | T  | 142 | 64  | c.3301C>T                          | c.(3301-3303)CCC>TCC | p.P1101S      |
| Pat_15 | Pre-Treatment | MGAT3    | 4248   | 37 | 22 | 39884748  | 39884748  | Missense_Mutation | SNP | G  | A  | 9   | 17  | c.1396G>A                          | c.(1396-1398)GAC>AAC | p.D466N       |
| Pat_15 | Pre-Treatment | MOV10L1  | 54456  | 37 | 22 | 50563983  | 50563983  | Missense_Mutation | SNP | C  | T  | 22  | 15  | c.1732C>T                          | c.(1732-1734)CCT>TCT | p.P578S       |
| Pat_15 | Pre-Treatment | EOMES    | 8320   | 37 | 3  | 27761764  | 27761764  | Missense_Mutation | SNP | G  | A  | 62  | 108 | c.934C>T                           | c.(934-936)CAC>TAC   | p.H312Y       |
| Pat_15 | Pre-Treatment | SCN5A    | 6331   | 37 | 3  | 38651383  | 38651383  | Missense_Mutation | SNP | A  | G  | 20  | 41  | c.776T>C                           | c.(775-777)TTC>TCC   | p.F259S       |
| Pat_15 | Pre-Treatment | SCN10A   | 6336   | 37 | 3  | 38833541  | 38833541  | Missense_Mutation | SNP | G  | A  | 51  | 119 | c.389C>T                           | c.(388-390)TCG>TTG   | p.S130L       |
| Pat_15 | Pre-Treatment | SCN11A   | 11280  | 37 | 3  | 38938485  | 38938485  | Missense_Mutation | SNP | C  | T  | 27  | 22  | c.2254G>A                          | c.(2254-2256)GGG>AGG | p.G752R       |
| Pat_15 | Pre-Treatment | NAT6     | 24142  | 37 | 3  | 50334112  | 50334113  | Missense_Mutation | DNP | GG | AA | 29  | 23  | c.782_783CC>TT                     | c.(781-783)CCC>CTT   | p.P261L       |
| Pat_15 | Pre-Treatment | DNAH1    | 25981  | 37 | 3  | 52396446  | 52396446  | Missense_Mutation | SNP | C  | T  | 18  | 14  | c.5023C>T                          | c.(5023-5025)CCA>TCA | p.P1675S      |
| Pat_15 | Pre-Treatment | NSUN3    | 63899  | 37 | 3  | 93813923  | 93813923  | Missense_Mutation | SNP | C  | T  | 19  | 85  | c.668C>T                           | c.(667-669)TCT>TTT   | p.S223F       |
| Pat_15 | Pre-Treatment | OR5H15   | 403274 | 37 | 3  | 97888187  | 97888187  | Missense_Mutation | SNP | T  | C  | 5   | 2   | c.644T>C                           | c.(643-645)CTT>CCT   | p.L215P       |
| Pat_15 | Pre-Treatment | OR5K1    | 26339  | 37 | 3  | 98189268  | 98189268  | Missense_Mutation | SNP | C  | T  | 9   | 15  | c.848C>T                           | c.(847-849)CCC>CTC   | p.P283L       |
| Pat_15 | Pre-Treatment | ZBED2    | 79413  | 37 | 3  | 111312555 | 111312555 | Missense_Mutation | SNP | C  | T  | 66  | 66  | c.494G>A                           | c.(493-495)AGG>AAG   | p.R165K       |
| Pat_15 | Pre-Treatment | KIAA2018 | 205717 | 37 | 3  | 113388981 | 113388981 | Missense_Mutation | SNP | G  | A  | 28  | 29  | c.146C>T                           | c.(145-147)CCT>CTT   | p.P49L        |
| Pat_15 | Pre-Treatment | PARP14   | 54625  | 37 | 3  | 122411238 | 122411238 | Missense_Mutation | SNP | C  | T  | 20  | 11  | c.446C>T                           | c.(445-447)TCT>TTT   | p.S149F       |
| Pat_15 | Pre-Treatment | COL6A6   | 131873 | 37 | 3  | 130287019 | 130287019 | Missense_Mutation | SNP | C  | T  | 68  | 126 | c.1972C>T                          | c.(1972-1974)CGG>TGG | p.R658W       |
| Pat_15 | Pre-Treatment | TMEM108  | 66000  | 37 | 3  | 133099154 | 133099154 | Missense_Mutation | SNP | G  | A  | 29  | 42  | c.599G>A                           | c.(598-600)CGA>CAA   | p.R200Q       |
| Pat_15 | Pre-Treatment | PRR23A   | 729627 | 37 | 3  | 138724642 | 138724642 | Missense_Mutation | SNP | C  | T  | 12  | 19  | c.469G>A                           | c.(469-471)GAG>AAG   | p.E157K       |
| Pat_15 | Pre-Treatment | GK5      | 256356 | 37 | 3  | 141905075 | 141905075 | Missense_Mutation | SNP | G  | A  | 55  | 30  | c.716C>T                           | c.(715-717)TCG>TTG   | p.S239L       |
| Pat_15 | Pre-Treatment | CP       | 1356   | 37 | 3  | 148930484 | 148930484 | Missense_Mutation | SNP | C  | T  | 9   | 9   | c.148G>A                           | c.(148-150)GAA>AAA   | p.E50K        |
| Pat_15 | Pre-Treatment | ZBBX     | 79740  | 37 | 3  | 167045887 | 167045887 | Missense_Mutation | SNP | C  | T  | 40  | 41  | c.705G>A                           | c.(703-705)ATG>ATA   | p.M235I       |
| Pat_15 | Pre-Treatment | MECOM    | 2122   | 37 | 3  | 168833285 | 168833285 | Missense_Mutation | SNP | C  | T  | 5   | 32  | c.1811G>A                          | c.(1810-1812)CGA>CAA | p.R604Q       |
| Pat_15 | Pre-Treatment | TP63     | 8626   | 37 | 3  | 189608604 | 189608604 | Missense_Mutation | SNP | C  | T  | 55  | 47  | c.1679C>T                          | c.(1678-1680)TCA>TTA | p.S560L       |
| Pat_15 | Pre-Treatment | DLG1     | 1739   | 37 | 3  | 197009603 | 197009603 | Missense_Mutation | SNP | T  | G  | 4   | 145 | c.265A>C                           | c.(265-267)AGC>CGC   | p.S89R        |
| Pat_15 | Pre-Treatment | SLC2A9   | 56606  | 37 | 4  | 10027572  | 10027572  | Missense_Mutation | SNP | C  | T  | 17  | 19  | c.19G>A                            | c.(19-21)GAC>AAC     | p.D7N         |
| Pat_15 | Pre-Treatment | ZNF518B  | 85460  | 37 | 4  | 10445035  | 10445035  | Missense_Mutation | SNP | A  | G  | 14  | 23  | c.2918T>C                          | c.(2917-2919)GTT>GCT | p.V973A       |
| Pat_15 | Pre-Treatment | FAM114A1 | 92689  | 37 | 4  | 38937371  | 38937371  | Missense_Mutation | SNP | C  | T  | 19  | 9   | c.1496C>T                          | c.(1495-1497)TCT>TTT | p.S499F       |
| Pat_15 | Pre-Treatment | YIPF7    | 285525 | 37 | 4  | 44624506  | 44624506  | Missense_Mutation | SNP | C  | T  | 6   | 6   | c.768G>A                           | c.(766-768)ATG>ATA   | p.M256I       |
| Pat_15 | Pre-Treatment | SPATA18  | 132671 | 37 | 4  | 52945993  | 52945994  | Missense_Mutation | DNP | GG | AA | 66  | 38  | .1263_1264GG>A261-1266)CAGGAG>CAA/ |                      | p.E422K       |
| Pat_15 | Pre-Treatment | CCDC158  | 339965 | 37 | 4  | 77288596  | 77288596  | Missense_Mutation | SNP | C  | T  | 39  | 18  | c.1681G>A                          | c.(1681-1683)GAC>AAC | p.D561N       |
| Pat_15 | Pre-Treatment | LEF1     | 51176  | 37 | 4  | 108985500 | 108985500 | Missense_Mutation | SNP | G  | A  | 28  | 19  | c.1157C>T                          | c.(1156-1158)TCT>TTT | p.S386F       |
| Pat_15 | Pre-Treatment | ANK2     | 287    | 37 | 4  | 114279594 | 114279594 | Missense_Mutation | SNP | C  | T  | 36  | 40  | c.9820C>T                          | c.(9820-9822)CCC>TCC | p.P3274S      |

|        |               |           |        |    |   |           |           |                   |     |    |    |    |     |                  |                        |              |
|--------|---------------|-----------|--------|----|---|-----------|-----------|-------------------|-----|----|----|----|-----|------------------|------------------------|--------------|
| Pat_15 | Pre-Treatment | SYNPO2    | 171024 | 37 | 4 | 119947945 | 119947945 | Missense_Mutation | SNP | C  | T  | 28 | 9   | c.421C>T         | c.(421-423)CCC>TCC     | p.P141S      |
| Pat_15 | Pre-Treatment | WDR17     | 116966 | 37 | 4 | 177046428 | 177046428 | Missense_Mutation | SNP | T  | C  | 25 | 43  | c.784T>C         | c.(784-786)TTT>CTT     | p.F262L      |
| Pat_15 | Pre-Treatment | FAM173B   | 134145 | 37 | 5 | 10239375  | 10239376  | Missense_Mutation | DNP | CC | TT | 29 | 65  | c.109_110GG>AA   | c.(109-111)GGG>AAG     | p.G37K       |
| Pat_15 | Pre-Treatment | DNAH5     | 1767   | 37 | 5 | 13901435  | 13901435  | Missense_Mutation | SNP | T  | G  | 11 | 16  | c.1978A>C        | c.(1978-1980)ATT>CTT   | p.I660L      |
| Pat_15 | Pre-Treatment | TTC33     | 23548  | 37 | 5 | 40730441  | 40730441  | Missense_Mutation | SNP | G  | A  | 46 | 53  | c.226C>T         | c.(226-228)CGG>TGG     | p.R76W       |
| Pat_15 | Pre-Treatment | HCN1      | 348980 | 37 | 5 | 45303881  | 45303881  | Missense_Mutation | SNP | C  | T  | 62 | 58  | c.1438G>A        | c.(1438-1440)GAT>AAT   | p.D480N      |
| Pat_15 | Pre-Treatment | MARVELD2  | 153562 | 37 | 5 | 68728909  | 68728909  | Missense_Mutation | SNP | G  | A  | 80 | 92  | c.1492G>A        | c.(1492-1494)GAA>AAA   | p.E498K      |
| Pat_15 | Pre-Treatment | BDP1      | 55814  | 37 | 5 | 70838063  | 70838063  | Missense_Mutation | SNP | C  | T  | 21 | 32  | c.6383C>T        | c.(6382-6384)ACC>ATC   | p.T2128I     |
| Pat_15 | Pre-Treatment | CMYA5     | 202333 | 37 | 5 | 79025094  | 79025094  | Missense_Mutation | SNP | C  | T  | 6  | 4   | c.506C>T         | c.(505-507)CCT>CTT     | p.P169L      |
| Pat_15 | Pre-Treatment | GPR98     | 84059  | 37 | 5 | 90086870  | 90086870  | Missense_Mutation | SNP | G  | A  | 11 | 9   | c.14224G>A       | c.(14224-14226)GAA>AAA | p.E4742K     |
| Pat_15 | Pre-Treatment | NRG2      | 9542   | 37 | 5 | 139232080 | 139232080 | Missense_Mutation | SNP | G  | A  | 47 | 45  | c.1481C>T        | c.(1480-1482)TCT>TTT   | p.S494F      |
| Pat_15 | Pre-Treatment | PCDHB2    | 56133  | 37 | 5 | 140474559 | 140474559 | Missense_Mutation | SNP | C  | T  | 23 | 20  | c.185C>T         | c.(184-186)GCT>GTT     | p.A62V       |
| Pat_15 | Pre-Treatment | PCDHB8    | 56128  | 37 | 5 | 140559872 | 140559872 | Missense_Mutation | SNP | G  | A  | 41 | 56  | c.2257G>A        | c.(2257-2259)GAG>AAG   | p.E753K      |
| Pat_15 | Pre-Treatment | PCDHGB5   | 56101  | 37 | 5 | 140779112 | 140779112 | Missense_Mutation | SNP | C  | T  | 12 | 8   | c.1418C>T        | c.(1417-1419)TCG>TTG   | p.S473L      |
| Pat_15 | Pre-Treatment | C5orf40   | 408263 | 37 | 5 | 156770294 | 156770294 | Missense_Mutation | SNP | G  | A  | 27 | 45  | c.251C>T         | c.(250-252)CCT>CTT     | p.P84L       |
| Pat_15 | Pre-Treatment | TMED9     | 54732  | 37 | 5 | 177020742 | 177020742 | Missense_Mutation | SNP | C  | T  | 83 | 120 | c.377C>T         | c.(376-378)TCC>TTC     | p.S126F      |
| Pat_15 | Pre-Treatment | NEDD9     | 4739   | 37 | 6 | 11185787  | 11185787  | Missense_Mutation | SNP | G  | A  | 51 | 56  | c.2113C>T        | c.(2113-2115)CGG>TGG   | p.R705W      |
| Pat_15 | Pre-Treatment | C6orf105  | 84830  | 37 | 6 | 11766609  | 11766609  | Splice_Site       | SNP | C  | T  | 30 | 20  | c.289_splice     | c.e3-1                 | p.F97_splice |
| Pat_15 | Pre-Treatment | HIVEP1    | 3096   | 37 | 6 | 12122375  | 12122375  | Missense_Mutation | SNP | C  | T  | 14 | 16  | c.2347C>T        | c.(2347-2349)CCC>TCC   | p.P783S      |
| Pat_15 | Pre-Treatment | ZNF193    | 7746   | 37 | 6 | 28200708  | 28200708  | Missense_Mutation | SNP | A  | C  | 3  | 43  | c.937A>C         | c.(937-939)AAG>CAG     | p.K313Q      |
| Pat_15 | Pre-Treatment | OR12D3    | 81797  | 37 | 6 | 29343062  | 29343062  | Missense_Mutation | SNP | C  | T  | 7  | 1   | c.3G>A           | c.(1-3)ATG>ATA         | p.M1I        |
| Pat_15 | Pre-Treatment | OR2H1     | 26716  | 37 | 6 | 29430333  | 29430333  | Missense_Mutation | SNP | C  | T  | 19 | 47  | c.787C>T         | c.(787-789)CCG>TCG     | p.P263S      |
| Pat_15 | Pre-Treatment | UBD       | 10537  | 37 | 6 | 29524095  | 29524095  | Missense_Mutation | SNP | C  | T  | 20 | 9   | c.60G>A          | c.(58-60)ATG>ATA       | p.M20I       |
| Pat_15 | Pre-Treatment | DNAH8     | 1769   | 37 | 6 | 38750805  | 38750805  | Missense_Mutation | SNP | C  | T  | 30 | 11  | c.1634C>T        | c.(1633-1635)CCG>CTG   | p.P545L      |
| Pat_15 | Pre-Treatment | TTBK1     | 84630  | 37 | 6 | 43251530  | 43251530  | Missense_Mutation | SNP | C  | T  | 11 | 30  | c.3052C>T        | c.(3052-3054)CCG>TCG   | p.P1018S     |
| Pat_15 | Pre-Treatment | GPR116    | 221395 | 37 | 6 | 46834662  | 46834662  | Missense_Mutation | SNP | C  | T  | 14 | 15  | c.1834G>A        | c.(1834-1836)GCA>ACA   | p.A612T      |
| Pat_15 | Pre-Treatment | BMP5      | 653    | 37 | 6 | 55659083  | 55659083  | Missense_Mutation | SNP | C  | T  | 11 | 21  | c.826G>A         | c.(826-828)GGG>AGG     | p.G276R      |
| Pat_15 | Pre-Treatment | MDN1      | 23195  | 37 | 6 | 90400405  | 90400406  | Missense_Mutation | DNP | GG | AA | 25 | 14  | 10735_10736CC>c. | c.(10735-10737)CCC>TTC | p.P3579F     |
| Pat_15 | Pre-Treatment | BACH2     | 60468  | 37 | 6 | 90642342  | 90642342  | Missense_Mutation | SNP | C  | T  | 15 | 5   | c.2311G>A        | c.(2311-2313)GAG>AAG   | p.E771K      |
| Pat_15 | Pre-Treatment | EPHA7     | 2045   | 37 | 6 | 94066675  | 94066675  | Missense_Mutation | SNP | C  | T  | 24 | 55  | c.1084G>A        | c.(1084-1086)GAT>AAT   | p.D362N      |
| Pat_15 | Pre-Treatment | RFX6      | 222546 | 37 | 6 | 117248274 | 117248274 | Missense_Mutation | SNP | A  | C  | 25 | 58  | c.1970A>C        | c.(1969-1971)AAC>ACC   | p.N657T      |
| Pat_15 | Pre-Treatment | KIAA1244  | 57221  | 37 | 6 | 138584659 | 138584659 | Missense_Mutation | SNP | T  | G  | 14 | 22  | c.2039T>G        | c.(2038-2040)CTG>CGG   | p.L680R      |
| Pat_15 | Pre-Treatment | HECA      | 51696  | 37 | 6 | 139488098 | 139488098 | Missense_Mutation | SNP | T  | A  | 13 | 53  | c.949T>A         | c.(949-951)TTC>ATC     | p.F317I      |
| Pat_15 | Pre-Treatment | HIVEP2    | 3097   | 37 | 6 | 143081427 | 143081427 | Missense_Mutation | SNP | T  | C  | 4  | 199 | c.5998A>G        | c.(5998-6000)AGG>GGG   | p.R2000G     |
| Pat_15 | Pre-Treatment | TIAM2     | 26230  | 37 | 6 | 155504535 | 155504535 | Missense_Mutation | SNP | G  | A  | 32 | 45  | c.2965G>A        | c.(2965-2967)GAC>AAC   | p.D989N      |
| Pat_15 | Pre-Treatment | SLC22A3   | 6581   | 37 | 6 | 160831795 | 160831795 | Missense_Mutation | SNP | C  | T  | 17 | 35  | c.892C>T         | c.(892-894)CGG>TGG     | p.R298W      |
| Pat_15 | Pre-Treatment | STK31     | 56164  | 37 | 7 | 23809328  | 23809328  | Missense_Mutation | SNP | G  | A  | 48 | 49  | c.1666G>A        | c.(1666-1668)GAG>AAG   | p.E556K      |
| Pat_15 | Pre-Treatment | ADCYAP1R1 | 117    | 37 | 7 | 31117659  | 31117659  | Missense_Mutation | SNP | G  | A  | 38 | 56  | c.211G>A         | c.(211-213)GAG>AAG     | p.E71K       |
| Pat_15 | Pre-Treatment | TXNDC3    | 51314  | 37 | 7 | 37924797  | 37924797  | Nonsense_Mutation | SNP | G  | A  | 11 | 13  | c.1190G>A        | c.(1189-1191)TGG>TAG   | p.W397*      |
| Pat_15 | Pre-Treatment | ZNF479    | 90827  | 37 | 7 | 57187720  | 57187720  | Missense_Mutation | SNP | C  | T  | 29 | 30  | c.1402G>A        | c.(1402-1404)GAA>AAA   | p.E468K      |
| Pat_15 | Pre-Treatment | MAGI2     | 9863   | 37 | 7 | 77973134  | 77973134  | Missense_Mutation | SNP | G  | A  | 25 | 35  | c.1369C>T        | c.(1369-1371)CCG>TCG   | p.P457S      |
| Pat_15 | Pre-Treatment | ABCB4     | 5244   | 37 | 7 | 87083905  | 87083905  | Missense_Mutation | SNP | T  | G  | 4  | 11  | c.290A>C         | c.(289-291)AAC>ACC     | p.N97T       |
| Pat_15 | Pre-Treatment | ZNF804B   | 219578 | 37 | 7 | 88963666  | 88963666  | Nonsense_Mutation | SNP | G  | A  | 27 | 31  | c.1370G>A        | c.(1369-1371)TGG>TAG   | p.W457*      |
| Pat_15 | Pre-Treatment | ZNF804B   | 219578 | 37 | 7 | 88964142  | 88964142  | Missense_Mutation | SNP | G  | C  | 6  | 9   | c.1846G>C        | c.(1846-1848)GCA>CCA   | p.A616P      |
| Pat_15 | Pre-Treatment | TRRAP     | 8295   | 37 | 7 | 98602945  | 98602945  | Missense_Mutation | SNP | C  | T  | 34 | 42  | c.10685C>T       | c.(10684-10686)ACC>ATC | p.T3562I     |
| Pat_15 | Pre-Treatment | RELN      | 5649   | 37 | 7 | 103155634 | 103155634 | Missense_Mutation | SNP | G  | A  | 14 | 30  | c.8117C>T        | c.(8116-8118)TCA>TTA   | p.S2706L     |
| Pat_15 | Pre-Treatment | WNT2      | 7472   | 37 | 7 | 116955394 | 116955394 | Missense_Mutation | SNP | C  | T  | 6  | 11  | c.319G>A         | c.(319-321)GAA>AAA     | p.E107K      |

|        |                 |          |        |    |   |           |           |                   |     |    |    |     |     |                 |                      |             |
|--------|-----------------|----------|--------|----|---|-----------|-----------|-------------------|-----|----|----|-----|-----|-----------------|----------------------|-------------|
| Pat_15 | Pre-Treatment   | BRAF     | 673    | 37 | 7 | 140453136 | 140453136 | Missense_Mutation | SNP | A  | T  | 31  | 41  | c.1799T>A       | c.(1798-1800)GTG>GAG | p.V600E     |
| Pat_15 | Pre-Treatment   | FAM115C  | 285966 | 37 | 7 | 143421630 | 143421630 | Missense_Mutation | SNP | G  | T  | 3   | 4   | c.2345G>T       | c.(2344-2346)TGG>TTG | p.W782L     |
| Pat_15 | Pre-Treatment   | OR2F2    | 135948 | 37 | 7 | 143632858 | 143632858 | Missense_Mutation | SNP | C  | T  | 36  | 36  | c.533C>T        | c.(532-534)TCC>TTC   | p.S178F     |
| Pat_15 | Pre-Treatment   | CNTNAP2  | 26047  | 37 | 7 | 146805370 | 146805370 | Missense_Mutation | SNP | G  | A  | 19  | 17  | c.682G>A        | c.(682-684)GGA>AGA   | p.G228R     |
| Pat_15 | Pre-Treatment   | GIMAP8   | 155038 | 37 | 7 | 150171171 | 150171171 | Missense_Mutation | SNP | C  | T  | 59  | 47  | c.754C>T        | c.(754-756)CTT>TTT   | p.L252F     |
| Pat_15 | Pre-Treatment   | NOS3     | 4846   | 37 | 7 | 150698472 | 150698472 | Missense_Mutation | SNP | G  | A  | 36  | 33  | c.1387G>A       | c.(1387-1389)GAG>AAG | p.E463K     |
| Pat_15 | Pre-Treatment   | PAXIP1   | 22976  | 37 | 7 | 154774994 | 154774994 | Missense_Mutation | SNP | C  | A  | 12  | 22  | c.373G>T        | c.(373-375)GGG>TGG   | p.G125W     |
| Pat_15 | Pre-Treatment   | SPAG11B  | 10407  | 37 | 8 | 7320378   | 7320378   | Missense_Mutation | SNP | G  | A  | 27  | 41  | c.65C>T         | c.(64-66)TCG>TTG     | p.S22L      |
| Pat_15 | Pre-Treatment   | STC1     | 6781   | 37 | 8 | 23708930  | 23708930  | Missense_Mutation | SNP | C  | T  | 69  | 47  | c.376G>A        | c.(376-378)GAA>AAA   | p.E126K     |
| Pat_15 | Pre-Treatment   | ADAMDEC1 | 27299  | 37 | 8 | 24251634  | 24251634  | Missense_Mutation | SNP | G  | A  | 7   | 18  | c.337G>A        | c.(337-339)GAA>AAA   | p.E113K     |
| Pat_15 | Pre-Treatment   | ADAM18   | 8749   | 37 | 8 | 39537690  | 39537690  | Missense_Mutation | SNP | C  | T  | 5   | 10  | c.1766C>T       | c.(1765-1767)TCA>TTA | p.S589L     |
| Pat_15 | Pre-Treatment   | DCAF4L2  | 138009 | 37 | 8 | 88886025  | 88886025  | Missense_Mutation | SNP | C  | T  | 37  | 20  | c.175G>A        | c.(175-177)GTC>ATC   | p.V59I      |
| Pat_15 | Pre-Treatment   | HRSP12   | 10247  | 37 | 8 | 99116755  | 99116755  | Missense_Mutation | SNP | G  | A  | 39  | 26  | c.313C>T        | c.(313-315)CCT>TCT   | p.P105S     |
| Pat_15 | Pre-Treatment   | GRHL2    | 79977  | 37 | 8 | 102643916 | 102643916 | Missense_Mutation | SNP | G  | A  | 7   | 9   | c.1309G>A       | c.(1309-1311)GGG>AGG | p.G437R     |
| Pat_15 | Pre-Treatment   | FAM135B  | 51059  | 37 | 8 | 139163688 | 139163688 | Missense_Mutation | SNP | C  | T  | 6   | 18  | c.3030G>A       | c.(3028-3030)ATG>ATA | p.M1010I    |
| Pat_15 | Pre-Treatment   | APBA1    | 320    | 37 | 9 | 72131644  | 72131644  | Missense_Mutation | SNP | C  | T  | 5   | 12  | c.483G>A        | c.(481-483)ATG>ATA   | p.M161I     |
| Pat_15 | Pre-Treatment   | PCSK5    | 5125   | 37 | 9 | 78601135  | 78601136  | Missense_Mutation | DNP | CC | TT | 36  | 35  | c.385_386CC>TT  | c.(385-387)CCC>TTC   | p.P129F     |
| Pat_15 | Pre-Treatment   | OR1L4    | 254973 | 37 | 9 | 125487162 | 125487162 | Missense_Mutation | SNP | G  | A  | 5   | 19  | c.894G>A        | c.(892-894)ATG>ATA   | p.M298I     |
| Pat_15 | Pre-Treatment   | IER5L    | 389792 | 37 | 9 | 131939665 | 131939665 | Missense_Mutation | SNP | G  | A  | 3   | 3   | c.667C>T        | c.(667-669)CCG>TCG   | p.P223S     |
| Pat_15 | Pre-Treatment   | LAMC3    | 10319  | 37 | 9 | 133907487 | 133907487 | Missense_Mutation | SNP | G  | A  | 46  | 95  | c.734G>A        | c.(733-735)GGG>GAG   | p.G245E     |
| Pat_15 | Pre-Treatment   | IL3RA    | 3563   | 37 | X | 1497566   | 1497566   | Missense_Mutation | SNP | G  | A  | 6   | 27  | c.889G>A        | c.(889-891)GAG>AAG   | p.E297K     |
| Pat_15 | Pre-Treatment   | MXRA5    | 25878  | 37 | X | 3240542   | 3240542   | Missense_Mutation | SNP | C  | T  | 78  | 23  | c.3184G>A       | c.(3184-3186)GAG>AAG | p.E1062K    |
| Pat_15 | Pre-Treatment   | FAM9B    | 171483 | 37 | X | 8995964   | 8995964   | Missense_Mutation | SNP | C  | T  | 16  | 51  | c.437G>A        | c.(436-438)AGT>AAT   | p.S146N     |
| Pat_15 | Pre-Treatment   | MAGEB1   | 4112   | 37 | X | 30269273  | 30269273  | Nonsense_Mutation | SNP | G  | A  | 5   | 10  | c.663G>A        | c.(661-663)TGG>TGA   | p.W221*     |
| Pat_15 | Pre-Treatment   | SSX5     | 6758   | 37 | X | 48051681  | 48051681  | Missense_Mutation | SNP | C  | T  | 110 | 35  | c.317G>A        | c.(316-318)GGA>GAA   | p.G106E     |
| Pat_15 | Pre-Treatment   | TBC1D25  | 4943   | 37 | X | 48417570  | 48417570  | Nonsense_Mutation | SNP | C  | T  | 7   | 22  | c.541C>T        | c.(541-543)CAA>TAA   | p.Q181*     |
| Pat_15 | Pre-Treatment   | DGKK     | 139189 | 37 | X | 50121099  | 50121099  | Missense_Mutation | SNP | G  | A  | 39  | 22  | c.3109C>T       | c.(3109-3111)CGG>TGG | p.R1037W    |
| Pat_15 | Pre-Treatment   | BMP15    | 9210   | 37 | X | 50659560  | 50659560  | Missense_Mutation | SNP | T  | C  | 63  | 35  | c.1132T>C       | c.(1132-1134)TAC>CAC | p.Y378H     |
| Pat_15 | Pre-Treatment   | SPANXN5  | 494197 | 37 | X | 52826389  | 52826389  | Splice_Site       | SNP | G  | A  | 51  | 28  | c.1_splice      | c.e1-1               | p.M1_splice |
| Pat_15 | Pre-Treatment   | NHSL2    | 340527 | 37 | X | 71359877  | 71359877  | Missense_Mutation | SNP | G  | A  | 5   | 18  | c.2479G>A       | c.(2479-2481)GAC>AAC | p.D827N     |
| Pat_15 | Pre-Treatment   | RPS6KA6  | 27330  | 37 | X | 83319404  | 83319404  | Missense_Mutation | SNP | T  | C  | 7   | 9   | c.2119A>G       | c.(2119-2121)ATG>GTG | p.M707V     |
| Pat_15 | Pre-Treatment   | WDR44    | 54521  | 37 | X | 117566799 | 117566799 | Missense_Mutation | SNP | G  | A  | 33  | 113 | c.1793G>A       | c.(1792-1794)CGG>CAG | p.R598Q     |
| Pat_15 | Pre-Treatment   | UTP14A   | 10813  | 37 | X | 129041393 | 129041393 | Missense_Mutation | SNP | A  | G  | 18  | 61  | c.77A>G         | c.(76-78)TAC>TGC     | p.Y26C      |
| Pat_15 | Pre-Treatment   | RBMX2    | 51634  | 37 | X | 129546533 | 129546533 | Missense_Mutation | SNP | C  | T  | 12  | 26  | c.680C>T        | c.(679-681)TCC>TTC   | p.S227F     |
| Pat_15 | Pre-Treatment   | GPC3     | 2719   | 37 | X | 132670264 | 132670265 | Nonsense_Mutation | DNP | GG | TA | 50  | 31  | .:1630_1631CC>T | c.(1630-1632)CCG>TAG | p.P544*     |
| Pat_15 | Pre-Treatment   | BRS3     | 680    | 37 | X | 135572476 | 135572476 | Missense_Mutation | SNP | C  | T  | 4   | 10  | c.619C>T        | c.(619-621)CCT>TCT   | p.P207S     |
| Pat_15 | Pre-Treatment   | FGF13    | 2258   | 37 | X | 137715099 | 137715099 | Missense_Mutation | SNP | C  | T  | 13  | 34  | c.650G>A        | c.(649-651)CGA>CAA   | p.R217Q     |
| Pat_15 | Pre-Treatment   | MAGEA3   | 4102   | 37 | X | 151935794 | 151935794 | Nonsense_Mutation | SNP | G  | A  | 121 | 52  | c.373C>T        | c.(373-375)CGA>TGA   | p.R125*     |
| Pat_15 | Pre-Treatment   | SPRY3    | 10251  | 37 | X | 155004072 | 155004072 | Missense_Mutation | SNP | G  | A  | 21  | 77  | c.539G>A        | c.(538-540)AGC>AAC   | p.S180N     |
| Pat_15 | Pre-Treatment   | SPRY3    | 10251  | 37 | X | 155004080 | 155004080 | Missense_Mutation | SNP | G  | C  | 21  | 75  | c.547G>C        | c.(547-549)GAT>CAT   | p.D183H     |
| Pat_15 | Post-Resistance | GABRD    | 2563   | 37 | 1 | 1956458   | 1956458   | Missense_Mutation | SNP | C  | T  | 4   | 218 | c.146C>T        | c.(145-147)GCC>GTC   | p.A49V      |
| Pat_15 | Post-Resistance | PLEKHG5  | 57449  | 37 | 1 | 6528263   | 6528263   | Missense_Mutation | SNP | G  | A  | 37  | 90  | c.2801C>T       | c.(2800-2802)TCC>TTC | p.S934F     |
| Pat_15 | Post-Resistance | PRAMEF4  | 400735 | 37 | 1 | 12943025  | 12943025  | Missense_Mutation | SNP | C  | T  | 72  | 246 | c.191G>A        | c.(190-192)CGC>CAC   | p.R64H      |
| Pat_15 | Post-Resistance | TMEM51   | 55092  | 37 | 1 | 15541590  | 15541590  | Missense_Mutation | SNP | G  | C  | 3   | 345 | c.7G>C          | c.(7-9)GCC>CCC       | p.A3P       |
| Pat_15 | Post-Resistance | EPHA2    | 1969   | 37 | 1 | 16461548  | 16461548  | Missense_Mutation | SNP | T  | C  | 49  | 664 | c.1565A>G       | c.(1564-1566)CAC>CGC | p.H522R     |
| Pat_15 | Post-Resistance | ATP13A2  | 23400  | 37 | 1 | 17332247  | 17332247  | Missense_Mutation | SNP | G  | A  | 25  | 64  | c.37C>T         | c.(37-39)CCC>TCC     | p.P13S      |
| Pat_15 | Post-Resistance | KLHDC7A  | 127707 | 37 | 1 | 18809751  | 18809751  | Missense_Mutation | SNP | C  | T  | 153 | 477 | c.2276C>T       | c.(2275-2277)ACC>ATC | p.T759I     |



|        |                 |           |        |    |    |           |           |                   |     |    |    |    |     |                |                        |               |
|--------|-----------------|-----------|--------|----|----|-----------|-----------|-------------------|-----|----|----|----|-----|----------------|------------------------|---------------|
| Pat_15 | Post-Resistance | UBR4      | 23352  | 37 | 1  | 19431583  | 19431583  | Missense_Mutation | SNP | C  | T  | 5  | 288 | c.12604G>A     | c.(12604-12606)GCT>ACT | p.A4202T      |
| Pat_15 | Post-Resistance | NBPF3     | 84224  | 37 | 1  | 21807432  | 21807432  | Missense_Mutation | SNP | A  | G  | 5  | 671 | c.1391A>G      | c.(1390-1392)AAG>AGG   | p.K464R       |
| Pat_15 | Post-Resistance | EPHA8     | 2046   | 37 | 1  | 22927891  | 22927891  | Missense_Mutation | SNP | G  | A  | 5  | 418 | c.2828G>A      | c.(2827-2829)CGC>CAC   | p.R943H       |
| Pat_15 | Post-Resistance | CATSPER4  | 378807 | 37 | 1  | 26524479  | 26524479  | Missense_Mutation | SNP | G  | A  | 6  | 609 | c.589G>A       | c.(589-591)GTG>ATG     | p.V197M       |
| Pat_15 | Post-Resistance | SYTL1     | 84958  | 37 | 1  | 27673988  | 27673988  | Nonsense_Mutation | SNP | C  | T  | 74 | 262 | c.268C>T       | c.(268-270)CAG>TAG     | p.Q90*        |
| Pat_15 | Post-Resistance | EIF3I     | 8668   | 37 | 1  | 32692039  | 32692039  | Missense_Mutation | SNP | G  | T  | 8  | 843 | c.436G>T       | c.(436-438)GAC>TAC     | p.D146Y       |
| Pat_15 | Post-Resistance | EIF2C4    | 192670 | 37 | 1  | 36307229  | 36307229  | Missense_Mutation | SNP | G  | A  | 4  | 406 | c.2053G>A      | c.(2053-2055)GAA>AAA   | p.E685K       |
| Pat_15 | Post-Resistance | CDC20     | 991    | 37 | 1  | 43824999  | 43824999  | Missense_Mutation | SNP | C  | T  | 4  | 239 | c.113C>T       | c.(112-114)CCG>CTG     | p.P38L        |
| Pat_15 | Post-Resistance | TESK2     | 10420  | 37 | 1  | 45813599  | 45813599  | Missense_Mutation | SNP | G  | A  | 75 | 316 | c.614C>T       | c.(613-615)CCC>CTC     | p.P205L       |
| Pat_15 | Post-Resistance | RAD54L    | 8438   | 37 | 1  | 46739343  | 46739343  | Missense_Mutation | SNP | A  | G  | 3  | 159 | c.1534A>G      | c.(1534-1536)AGC>GGC   | p.S512G       |
| Pat_15 | Post-Resistance | SPATA6    | 54558  | 37 | 1  | 48861020  | 48861020  | Missense_Mutation | SNP | G  | A  | 5  | 190 | c.787C>T       | c.(787-789)CCC>TCC     | p.P263S       |
| Pat_15 | Post-Resistance | PODN      | 127435 | 37 | 1  | 53544264  | 53544264  | Missense_Mutation | SNP | T  | C  | 46 | 159 | c.1226T>C      | c.(1225-1227)TTG>TCG   | p.L409S       |
| Pat_15 | Post-Resistance | PARS2     | 25973  | 37 | 1  | 55223505  | 55223505  | Missense_Mutation | SNP | G  | A  | 4  | 353 | c.1330C>T      | c.(1330-1332)CCT>TCT   | p.P444S       |
| Pat_15 | Post-Resistance | HOOK1     | 51361  | 37 | 1  | 60330906  | 60330906  | Missense_Mutation | SNP | T  | A  | 4  | 196 | c.1733T>A      | c.(1732-1734)ATA>AAA   | p.I578K       |
| Pat_15 | Post-Resistance | CACHD1    | 57685  | 37 | 1  | 65016314  | 65016314  | Nonsense_Mutation | SNP | C  | A  | 4  | 205 | c.83C>A        | c.(82-84)TCA>TAA       | p.S28*        |
| Pat_15 | Post-Resistance | ELTD1     | 64123  | 37 | 1  | 79412055  | 79412055  | Missense_Mutation | SNP | T  | G  | 33 | 75  | c.229A>C       | c.(229-231)AAC>CAC     | p.N77H        |
| Pat_15 | Post-Resistance | CLCA4     | 22802  | 37 | 1  | 87031683  | 87031683  | Missense_Mutation | SNP | G  | A  | 64 | 187 | c.934G>A       | c.(934-936)GAT>AAT     | p.D312N       |
| Pat_15 | Post-Resistance | NOTCH2    | 4853   | 37 | 1  | 120612013 | 120612013 | Missense_Mutation | SNP | G  | A  | 6  | 85  | c.8C>T         | c.(7-9)GCC>GTC         | p.A3V         |
| Pat_15 | Post-Resistance | ACP6      | 51205  | 37 | 1  | 147131860 | 147131860 | Missense_Mutation | SNP | G  | A  | 45 | 130 | c.250C>T       | c.(250-252)CCA>TCA     | p.P84S        |
| Pat_15 | Post-Resistance | FLG2      | 388698 | 37 | 1  | 152326724 | 152326724 | Nonsense_Mutation | SNP | C  | A  | 5  | 372 | c.3538G>T      | c.(3538-3540)GGA>TGA   | p.G1180*      |
| Pat_15 | Post-Resistance | CD1E      | 913    | 37 | 1  | 158325309 | 158325309 | Missense_Mutation | SNP | G  | A  | 34 | 131 | c.575G>A       | c.(574-576)CGA>CAA     | p.R192Q       |
| Pat_15 | Post-Resistance | OR10Z1    | 128368 | 37 | 1  | 158576814 | 158576814 | Missense_Mutation | SNP | G  | A  | 99 | 331 | c.586G>A       | c.(586-588)GAG>AAG     | p.E196K       |
| Pat_15 | Post-Resistance | OR6K6     | 128371 | 37 | 1  | 158725536 | 158725536 | Missense_Mutation | SNP | T  | C  | 5  | 433 | c.931T>C       | c.(931-933)TTT>CTT     | p.F311L       |
| Pat_15 | Post-Resistance | FCRL6     | 343413 | 37 | 1  | 159778148 | 159778148 | Missense_Mutation | SNP | G  | A  | 4  | 157 | c.233G>A       | c.(232-234)CGT>CAT     | p.R78H        |
| Pat_15 | Post-Resistance | ARHGAP30  | 257106 | 37 | 1  | 161021422 | 161021422 | Missense_Mutation | SNP | C  | T  | 4  | 222 | c.1102G>A      | c.(1102-1104)GCA>ACA   | p.A368T       |
| Pat_15 | Post-Resistance | DNM3      | 26052  | 37 | 1  | 172017826 | 172017826 | Missense_Mutation | SNP | C  | T  | 69 | 199 | c.1271C>T      | c.(1270-1272)TCC>TTC   | p.S424F       |
| Pat_15 | Post-Resistance | SLC9A11   | 284525 | 37 | 1  | 173552668 | 173552668 | Missense_Mutation | SNP | C  | T  | 46 | 171 | c.617G>A       | c.(616-618)AGA>AAA     | p.R206K       |
| Pat_15 | Post-Resistance | ASTN1     | 460    | 37 | 1  | 176992682 | 176992683 | Missense_Mutation | DNP | CC | TT | 32 | 151 | .1295_1296GG>A | c.(1294-1296)GGG>GAA   | p.G432E       |
| Pat_15 | Post-Resistance | PRG4      | 10216  | 37 | 1  | 186276959 | 186276959 | Missense_Mutation | SNP | A  | G  | 3  | 396 | c.2108A>G      | c.(2107-2109)GAG>GGG   | p.E703G       |
| Pat_15 | Post-Resistance | CFHR3     | 10878  | 37 | 1  | 196748941 | 196748941 | Missense_Mutation | SNP | C  | T  | 10 | 27  | c.268C>T       | c.(268-270)CCT>TCT     | p.P90S        |
| Pat_15 | Post-Resistance | CFHR5     | 81494  | 37 | 1  | 196953100 | 196953100 | Missense_Mutation | SNP | C  | T  | 40 | 130 | c.263C>T       | c.(262-264)TCC>TTC     | p.S88F        |
| Pat_15 | Post-Resistance | F13B      | 2165   | 37 | 1  | 197026464 | 197026464 | Missense_Mutation | SNP | C  | T  | 98 | 366 | c.937G>A       | c.(937-939)GAA>AAA     | p.E313K       |
| Pat_15 | Post-Resistance | ASPM      | 259266 | 37 | 1  | 197115477 | 197115478 | Missense_Mutation | DNP | CC | TT | 22 | 51  | c.90_91GG>AA   | (88-93)GAGGAG>GAAAA    | p.E31K        |
| Pat_15 | Post-Resistance | DYRK3     | 8444   | 37 | 1  | 206821132 | 206821132 | Missense_Mutation | SNP | T  | C  | 4  | 540 | c.589T>C       | c.(589-591)TAT>CAT     | p.Y197H       |
| Pat_15 | Post-Resistance | PLXNA2    | 5362   | 37 | 1  | 208390847 | 208390847 | Missense_Mutation | SNP | G  | A  | 6  | 705 | c.421C>T       | c.(421-423)CGG>TGG     | p.R141W       |
| Pat_15 | Post-Resistance | HHAT      | 55733  | 37 | 1  | 210761301 | 210761301 | Missense_Mutation | SNP | C  | T  | 6  | 314 | c.1103C>T      | c.(1102-1104)ACG>ATG   | p.T368M       |
| Pat_15 | Post-Resistance | USH2A     | 7399   | 37 | 1  | 215990535 | 215990535 | Missense_Mutation | SNP | G  | A  | 4  | 248 | c.9374C>T      | c.(9373-9375)JCT>TTT   | p.S3125F      |
| Pat_15 | Post-Resistance | EPRS      | 2058   | 37 | 1  | 220179511 | 220179511 | Missense_Mutation | SNP | C  | A  | 5  | 483 | c.1887G>T      | c.(1885-1887)TTG>TTT   | p.L629F       |
| Pat_15 | Post-Resistance | HLX       | 3142   | 37 | 1  | 221057861 | 221057861 | Missense_Mutation | SNP | G  | A  | 3  | 65  | c.1282G>A      | c.(1282-1284)GGC>AGC   | p.G428S       |
| Pat_15 | Post-Resistance | HEATR1    | 55127  | 37 | 1  | 236730082 | 236730082 | Missense_Mutation | SNP | G  | A  | 57 | 210 | c.4172C>T      | c.(4171-4173)CCG>CTG   | p.P1391L      |
| Pat_15 | Post-Resistance | GTPBP4    | 23560  | 37 | 10 | 1046616   | 1046616   | Splice_Site       | SNP | G  | A  | 3  | 67  | c.655_splice   | c.e7-1                 | p.V219_splice |
| Pat_15 | Post-Resistance | UCMA      | 221044 | 37 | 10 | 13275586  | 13275586  | Missense_Mutation | SNP | G  | A  | 4  | 453 | c.172C>T       | c.(172-174)CTC>TTC     | p.L58F        |
| Pat_15 | Post-Resistance | FAM171A1  | 221061 | 37 | 10 | 15296773  | 15296773  | Missense_Mutation | SNP | G  | A  | 27 | 99  | c.524C>T       | c.(523-525)CCT>CTT     | p.P175L       |
| Pat_15 | Post-Resistance | HSD17B7P2 | 158160 | 37 | 10 | 38654432  | 38654432  | Missense_Mutation | SNP | A  | G  | 7  | 153 | c.524A>G       | c.(523-525)AAT>AGT     | p.N175S       |
| Pat_15 | Post-Resistance | C10orf72  | 196740 | 37 | 10 | 50227768  | 50227768  | Missense_Mutation | SNP | G  | A  | 42 | 122 | c.890C>T       | c.(889-891)CCC>CTC     | p.P297L       |
| Pat_15 | Post-Resistance | C10orf71  | 118461 | 37 | 10 | 50532304  | 50532304  | Missense_Mutation | SNP | C  | T  | 51 | 113 | c.1714C>T      | c.(1714-1716)CCC>TCC   | p.P572S       |
| Pat_15 | Post-Resistance | CTNNA3    | 29119  | 37 | 10 | 68526077  | 68526077  | Missense_Mutation | SNP | T  | C  | 4  | 446 | c.1226A>G      | c.(1225-1227)AAG>AGG   | p.K409R       |

|        |                 |          |        |    |    |           |           |                   |     |   |   |     |     |           |                      |          |
|--------|-----------------|----------|--------|----|----|-----------|-----------|-------------------|-----|---|---|-----|-----|-----------|----------------------|----------|
| Pat_15 | Post-Resistance | CPEB3    | 22849  | 37 | 10 | 93902788  | 93902788  | Missense_Mutation | SNP | T | C | 65  | 196 | c.1451A>G | c.(1450-1452)AAA>AGA | p.K484R  |
| Pat_15 | Post-Resistance | IDE      | 3416   | 37 | 10 | 94216180  | 94216180  | Missense_Mutation | SNP | C | A | 5   | 256 | c.2832G>T | c.(2830-2832)TTG>TTT | p.L944F  |
| Pat_15 | Post-Resistance | PLCE1    | 51196  | 37 | 10 | 96033331  | 96033331  | Missense_Mutation | SNP | G | A | 3   | 106 | c.4519G>A | c.(4519-4521)GAA>AAA | p.E1507K |
| Pat_15 | Post-Resistance | HELLS    | 3070   | 37 | 10 | 96361363  | 96361363  | Missense_Mutation | SNP | C | T | 32  | 90  | c.2501C>T | c.(2500-2502)CCT>CTT | p.P834L  |
| Pat_15 | Post-Resistance | CYP2C18  | 1562   | 37 | 10 | 96448031  | 96448031  | Missense_Mutation | SNP | G | A | 102 | 196 | c.481G>A  | c.(481-483)GCC>ACC   | p.A161T  |
| Pat_15 | Post-Resistance | CYP2C18  | 1562   | 37 | 10 | 96454828  | 96454828  | Nonsense_Mutation | SNP | G | A | 21  | 34  | c.636G>A  | c.(634-636)TGG>TGA   | p.W212*  |
| Pat_15 | Post-Resistance | CYP2C8   | 1558   | 37 | 10 | 96797060  | 96797060  | Missense_Mutation | SNP | C | T | 22  | 50  | c.1298G>A | c.(1297-1299)CGA>CAA | p.R433Q  |
| Pat_15 | Post-Resistance | C10orf62 | 414157 | 37 | 10 | 99349869  | 99349869  | Missense_Mutation | SNP | C | T | 62  | 161 | c.215C>T  | c.(214-216)ACG>ATG   | p.T72M   |
| Pat_15 | Post-Resistance | SH3PXD2A | 9644   | 37 | 10 | 105362640 | 105362640 | Missense_Mutation | SNP | G | A | 6   | 758 | c.2251C>T | c.(2251-2253)CGG>TGG | p.R751W  |
| Pat_15 | Post-Resistance | RPL13AP6 | 644511 | 37 | 10 | 112696673 | 112696673 | Missense_Mutation | SNP | A | G | 3   | 129 | c.319T>C  | c.(319-321)TGC>CGC   | p.C107R  |
| Pat_15 | Post-Resistance | NRAP     | 4892   | 37 | 10 | 115388776 | 115388776 | Missense_Mutation | SNP | T | C | 61  | 132 | c.2045A>G | c.(2044-2046)CAG>CGG | p.Q682R  |
| Pat_15 | Post-Resistance | NHLRC2   | 374354 | 37 | 10 | 115664694 | 115664694 | Missense_Mutation | SNP | C | A | 4   | 344 | c.1823C>A | c.(1822-1824)GCG>GAG | p.A608E  |
| Pat_15 | Post-Resistance | LRRC56   | 115399 | 37 | 11 | 541577    | 541577    | Missense_Mutation | SNP | C | T | 5   | 287 | c.218C>T  | c.(217-219)ACG>ATG   | p.T73M   |
| Pat_15 | Post-Resistance | OR51G2   | 81282  | 37 | 11 | 4936406   | 4936406   | Missense_Mutation | SNP | G | A | 40  | 135 | c.488C>T  | c.(487-489)CCA>CTA   | p.P163L  |
| Pat_15 | Post-Resistance | UBQLN3   | 50613  | 37 | 11 | 5530256   | 5530256   | Missense_Mutation | SNP | G | A | 4   | 392 | c.533C>T  | c.(532-534)CCG>CTG   | p.P178L  |
| Pat_15 | Post-Resistance | MRV11    | 10335  | 37 | 11 | 10598004  | 10598004  | Missense_Mutation | SNP | A | G | 3   | 285 | c.2614T>C | c.(2614-2616)TAC>CAC | p.Y872H  |
| Pat_15 | Post-Resistance | PTH      | 5741   | 37 | 11 | 13514049  | 13514049  | Missense_Mutation | SNP | T | A | 76  | 153 | c.251A>T  | c.(250-252)AAA>ATA   | p.K84I   |
| Pat_15 | Post-Resistance | ARFGAP2  | 84364  | 37 | 11 | 47196645  | 47196645  | Missense_Mutation | SNP | C | A | 6   | 586 | c.401G>T  | c.(400-402)TGG>TTG   | p.W134L  |
| Pat_15 | Post-Resistance | AGBL2    | 79841  | 37 | 11 | 47698946  | 47698946  | Missense_Mutation | SNP | T | G | 30  | 57  | c.2024A>C | c.(2023-2025)CAG>CCG | p.Q675P  |
| Pat_15 | Post-Resistance | OR5L2    | 26338  | 37 | 11 | 55595616  | 55595616  | Missense_Mutation | SNP | A | C | 22  | 98  | c.922A>C  | c.(922-924)AAA>CAA   | p.K308Q  |
| Pat_15 | Post-Resistance | OR8H3    | 390152 | 37 | 11 | 55889999  | 55889999  | Missense_Mutation | SNP | C | T | 202 | 503 | c.151C>T  | c.(151-153)CGC>TGC   | p.R51C   |
| Pat_15 | Post-Resistance | OR5T3    | 390154 | 37 | 11 | 56019973  | 56019973  | Missense_Mutation | SNP | G | A | 71  | 169 | c.298G>A  | c.(298-300)GAT>AAT   | p.D100N  |
| Pat_15 | Post-Resistance | OR9G9    | 504191 | 37 | 11 | 56467892  | 56467892  | Missense_Mutation | SNP | A | G | 25  | 256 | c.29A>G   | c.(28-30)GAG>GGG     | p.E10G   |
| Pat_15 | Post-Resistance | DTX4     | 23220  | 37 | 11 | 58949848  | 58949848  | Missense_Mutation | SNP | A | G | 19  | 53  | c.848A>G  | c.(847-849)AAG>AGG   | p.K283R  |
| Pat_15 | Post-Resistance | CYBASC3  | 220002 | 37 | 11 | 61118495  | 61118495  | Missense_Mutation | SNP | G | A | 4   | 189 | c.673C>T  | c.(673-675)CGC>TGC   | p.R225C  |
| Pat_15 | Post-Resistance | KCNK7    | 10089  | 37 | 11 | 65360983  | 65360983  | Missense_Mutation | SNP | G | A | 4   | 225 | c.682C>T  | c.(682-684)CCC>TCC   | p.P228S  |
| Pat_15 | Post-Resistance | ADRBK1   | 156    | 37 | 11 | 67049161  | 67049161  | Missense_Mutation | SNP | C | T | 4   | 311 | c.788C>T  | c.(787-789)ACG>ATG   | p.T263M  |
| Pat_15 | Post-Resistance | LRP5     | 4041   | 37 | 11 | 68216515  | 68216515  | Missense_Mutation | SNP | T | C | 4   | 438 | c.4825T>C | c.(4825-4827)TCC>CCC | p.S1609P |
| Pat_15 | Post-Resistance | ARAP1    | 116985 | 37 | 11 | 72421519  | 72421519  | Missense_Mutation | SNP | G | A | 42  | 290 | c.1327C>T | c.(1327-1329)CGC>TGC | p.R443C  |
| Pat_15 | Post-Resistance | ARHGEF17 | 9828   | 37 | 11 | 73021314  | 73021314  | Missense_Mutation | SNP | C | A | 6   | 154 | c.1631C>A | c.(1630-1632)GCA>GAA | p.A544E  |
| Pat_15 | Post-Resistance | TMEM126B | 55863  | 37 | 11 | 85347238  | 85347238  | Missense_Mutation | SNP | G | A | 21  | 49  | c.568G>A  | c.(568-570)GAA>AAA   | p.E190K  |
| Pat_15 | Post-Resistance | GRM5     | 2915   | 37 | 11 | 88780558  | 88780558  | Missense_Mutation | SNP | C | A | 4   | 208 | c.483G>T  | c.(481-483)TTG>TTT   | p.L161F  |
| Pat_15 | Post-Resistance | KDM4DL   | 390245 | 37 | 11 | 94759611  | 94759611  | Nonsense_Mutation | SNP | G | A | 26  | 52  | c.890G>A  | c.(889-891)TGG>TAG   | p.W297*  |
| Pat_15 | Post-Resistance | CNTN5    | 53942  | 37 | 11 | 100095458 | 100095458 | Missense_Mutation | SNP | T | G | 66  | 170 | c.1919T>G | c.(1918-1920)ATC>AGC | p.I640S  |
| Pat_15 | Post-Resistance | PGR      | 5241   | 37 | 11 | 100962501 | 100962501 | Missense_Mutation | SNP | C | T | 27  | 149 | c.1896G>A | c.(1894-1896)ATG>ATA | p.M632I  |
| Pat_15 | Post-Resistance | GUCY1A2  | 2977   | 37 | 11 | 106810341 | 106810341 | Nonsense_Mutation | SNP | G | A | 42  | 64  | c.1051C>T | c.(1051-1053)CGA>TGA | p.R351*  |
| Pat_15 | Post-Resistance | ARHGAP20 | 57569  | 37 | 11 | 110462808 | 110462808 | Missense_Mutation | SNP | G | T | 5   | 453 | c.1036C>A | c.(1036-1038)CAC>AAC | p.H346N  |
| Pat_15 | Post-Resistance | TMEM25   | 84866  | 37 | 11 | 118403728 | 118403728 | Missense_Mutation | SNP | C | A | 4   | 151 | c.479C>A  | c.(478-480)CCG>CAG   | p.P160Q  |
| Pat_15 | Post-Resistance | GRIK4    | 2900   | 37 | 11 | 120827502 | 120827502 | Nonsense_Mutation | SNP | G | T | 4   | 473 | c.1714G>T | c.(1714-1716)GAG>TAG | p.E572*  |
| Pat_15 | Post-Resistance | CDC15    | 80071  | 37 | 11 | 124857495 | 124857495 | Missense_Mutation | SNP | A | C | 7   | 253 | c.1373A>C | c.(1372-1374)CAC>CCC | p.H458P  |
| Pat_15 | Post-Resistance | NINJ2    | 4815   | 37 | 12 | 772558    | 772558    | Missense_Mutation | SNP | G | A | 6   | 527 | c.107C>T  | c.(106-108)CCG>CTG   | p.P36L   |
| Pat_15 | Post-Resistance | C1S      | 716    | 37 | 12 | 7172542   | 7172542   | Missense_Mutation | SNP | G | A | 4   | 390 | c.656G>A  | c.(655-657)CGG>CAG   | p.R219Q  |
| Pat_15 | Post-Resistance | PRR4     | 11272  | 37 | 12 | 10999736  | 10999736  | Missense_Mutation | SNP | T | C | 5   | 786 | c.331A>G  | c.(331-333)AGC>GGC   | p.S111G  |
| Pat_15 | Post-Resistance | CREBL2   | 1389   | 37 | 12 | 12765117  | 12765117  | Missense_Mutation | SNP | G | A | 4   | 420 | c.11G>A   | c.(10-12)AGT>AAT     | p.S4N    |
| Pat_15 | Post-Resistance | LRMP     | 4033   | 37 | 12 | 25260902  | 25260902  | Missense_Mutation | SNP | G | A | 5   | 364 | c.1408G>A | c.(1408-1410)GCT>ACT | p.A470T  |
| Pat_15 | Post-Resistance | SFRS2IP  | 9169   | 37 | 12 | 46320998  | 46320998  | Missense_Mutation | SNP | T | C | 4   | 200 | c.2486A>G | c.(2485-2487)AAG>AGG | p.K829R  |
| Pat_15 | Post-Resistance | CCNT1    | 904    | 37 | 12 | 49087790  | 49087790  | Missense_Mutation | SNP | G | T | 6   | 686 | c.1207C>A | c.(1207-1209)CAG>AAG | p.Q403K  |

|        |                 |           |        |    |    |           |           |                   |     |   |   |     |     |           |                      |          |
|--------|-----------------|-----------|--------|----|----|-----------|-----------|-------------------|-----|---|---|-----|-----|-----------|----------------------|----------|
| Pat_15 | Post-Resistance | AQP2      | 359    | 37 | 12 | 50344822  | 50344822  | Missense_Mutation | SNP | C | T | 33  | 99  | c.209C>T  | c.(208-210)GCC>GTC   | p.A70V   |
| Pat_15 | Post-Resistance | SLC11A2   | 4891   | 37 | 12 | 51394183  | 51394183  | Missense_Mutation | SNP | C | A | 5   | 219 | c.449G>T  | c.(448-450)TGG>TTG   | p.W150L  |
| Pat_15 | Post-Resistance | KRT75     | 9119   | 37 | 12 | 52825810  | 52825810  | Missense_Mutation | SNP | C | T | 52  | 212 | c.754G>A  | c.(754-756)GAA>AAA   | p.E252K  |
| Pat_15 | Post-Resistance | NFE2      | 4778   | 37 | 12 | 54686462  | 54686462  | Missense_Mutation | SNP | C | T | 4   | 295 | c.818G>A  | c.(817-819)CGG>CAG   | p.R273Q  |
| Pat_15 | Post-Resistance | RDH5      | 5959   | 37 | 12 | 56115517  | 56115517  | Missense_Mutation | SNP | G | A | 4   | 293 | c.355G>A  | c.(355-357)GGA>AGA   | p.G119R  |
| Pat_15 | Post-Resistance | NACA      | 4666   | 37 | 12 | 57118247  | 57118247  | Missense_Mutation | SNP | T | C | 4   | 70  | c.59A>G   | c.(58-60)CAG>CGG     | p.Q20R   |
| Pat_15 | Post-Resistance | SLC5A8    | 160728 | 37 | 12 | 101603571 | 101603571 | Missense_Mutation | SNP | G | A | 4   | 211 | c.56C>T   | c.(55-57)GCG>GTG     | p.A19V   |
| Pat_15 | Post-Resistance | UTP20     | 27340  | 37 | 12 | 101711330 | 101711330 | Missense_Mutation | SNP | C | A | 5   | 298 | c.2627C>A | c.(2626-2628)GCA>GAA | p.A876E  |
| Pat_15 | Post-Resistance | STAB2     | 55576  | 37 | 12 | 104063395 | 104063395 | Missense_Mutation | SNP | G | A | 67  | 234 | c.2249G>A | c.(2248-2250)GGA>GAA | p.G750E  |
| Pat_15 | Post-Resistance | TPCN1     | 53373  | 37 | 12 | 113706592 | 113706592 | Missense_Mutation | SNP | G | A | 4   | 213 | c.574G>A  | c.(574-576)GTA>ATA   | p.V192I  |
| Pat_15 | Post-Resistance | SDSL      | 113675 | 37 | 12 | 113873331 | 113873331 | Missense_Mutation | SNP | G | A | 6   | 699 | c.641G>A  | c.(640-642)GGC>GAC   | p.G214D  |
| Pat_15 | Post-Resistance | UNC119B   | 84747  | 37 | 12 | 121157744 | 121157744 | Missense_Mutation | SNP | C | T | 73  | 186 | c.665C>T  | c.(664-666)CCT>CTT   | p.P222L  |
| Pat_15 | Post-Resistance | VPS33A    | 65082  | 37 | 12 | 122748200 | 122748200 | Missense_Mutation | SNP | G | A | 4   | 152 | c.215C>T  | c.(214-216)CCG>CTG   | p.P72L   |
| Pat_15 | Post-Resistance | RNF6      | 6049   | 37 | 13 | 26788595  | 26788595  | Missense_Mutation | SNP | G | T | 5   | 331 | c.1424C>A | c.(1423-1425)CCA>CAA | p.P475Q  |
| Pat_15 | Post-Resistance | TSC22D1   | 8848   | 37 | 13 | 45149288  | 45149288  | Missense_Mutation | SNP | G | A | 4   | 382 | c.923C>T  | c.(922-924)ACT>ATT   | p.T308I  |
| Pat_15 | Post-Resistance | UTP14C    | 9724   | 37 | 13 | 52604045  | 52604045  | Missense_Mutation | SNP | G | A | 4   | 287 | c.1105G>A | c.(1105-1107)GGA>AGA | p.G369R  |
| Pat_15 | Post-Resistance | SLITRK1   | 114798 | 37 | 13 | 84453751  | 84453751  | Missense_Mutation | SNP | G | A | 86  | 88  | c.1892C>T | c.(1891-1893)TCC>TTC | p.S631F  |
| Pat_15 | Post-Resistance | DOCK9     | 23348  | 37 | 13 | 99478165  | 99478165  | Missense_Mutation | SNP | G | A | 25  | 29  | c.4987C>T | c.(4987-4989)CCC>TCC | p.P1663S |
| Pat_15 | Post-Resistance | NOVA1     | 4857   | 37 | 14 | 26917974  | 26917974  | Missense_Mutation | SNP | G | T | 5   | 353 | c.715C>A  | c.(715-717)CAG>AAG   | p.Q239K  |
| Pat_15 | Post-Resistance | DAAM1     | 23002  | 37 | 14 | 59834280  | 59834280  | Missense_Mutation | SNP | A | G | 3   | 145 | c.2990A>G | c.(2989-2991)AAG>AGG | p.K997R  |
| Pat_15 | Post-Resistance | LTBP2     | 4053   | 37 | 14 | 74975535  | 74975535  | Missense_Mutation | SNP | T | C | 3   | 135 | c.3524A>G | c.(3523-3525)GAG>GGG | p.E1175G |
| Pat_15 | Post-Resistance | SEL1L     | 6400   | 37 | 14 | 82000079  | 82000079  | Missense_Mutation | SNP | G | A | 39  | 73  | c.10C>T   | c.(10-12)CGG>TGG     | p.R4W    |
| Pat_15 | Post-Resistance | SLC24A4   | 123041 | 37 | 14 | 92953088  | 92953088  | Missense_Mutation | SNP | C | T | 77  | 143 | c.1450C>T | c.(1450-1452)CCA>TCA | p.P484S  |
| Pat_15 | Post-Resistance | KIAA1409  | 57578  | 37 | 14 | 93994911  | 93994911  | Missense_Mutation | SNP | T | G | 98  | 196 | c.440T>G  | c.(439-441)ATA>AGA   | p.I147R  |
| Pat_15 | Post-Resistance | SERPINA11 | 256394 | 37 | 14 | 94912800  | 94912800  | Missense_Mutation | SNP | G | T | 7   | 344 | c.785C>A  | c.(784-786)ACC>AAC   | p.T262N  |
| Pat_15 | Post-Resistance | AHNAK2    | 113146 | 37 | 14 | 105422953 | 105422953 | Missense_Mutation | SNP | C | T | 4   | 400 | c.287G>A  | c.(286-288)CGG>CAG   | p.R96Q   |
| Pat_15 | Post-Resistance | MAGEL2    | 54551  | 37 | 15 | 23889390  | 23889390  | Missense_Mutation | SNP | A | C | 3   | 123 | c.1691T>G | c.(1690-1692)CTA>CGA | p.L564R  |
| Pat_15 | Post-Resistance | GABRB3    | 2562   | 37 | 15 | 26793230  | 26793230  | Missense_Mutation | SNP | T | A | 29  | 666 | c.1132A>T | c.(1132-1134)ATG>TTG | p.M378L  |
| Pat_15 | Post-Resistance | GREM1     | 26585  | 37 | 15 | 33023142  | 33023142  | Missense_Mutation | SNP | C | T | 4   | 161 | c.251C>T  | c.(250-252)ACG>ATG   | p.T84M   |
| Pat_15 | Post-Resistance | BMF       | 90427  | 37 | 15 | 40396398  | 40396398  | Missense_Mutation | SNP | G | A | 6   | 781 | c.436C>T  | c.(436-438)CGG>TGG   | p.R146W  |
| Pat_15 | Post-Resistance | EHD4      | 30844  | 37 | 15 | 42193253  | 42193253  | Missense_Mutation | SNP | T | C | 3   | 121 | c.1216A>G | c.(1216-1218)AGC>GGC | p.S406G  |
| Pat_15 | Post-Resistance | KIAA1370  | 56204  | 37 | 15 | 52877033  | 52877033  | Missense_Mutation | SNP | C | A | 4   | 96  | c.2986G>T | c.(2986-2988)GTA>TTA | p.V996L  |
| Pat_15 | Post-Resistance | RFX7      | 64864  | 37 | 15 | 56386544  | 56386544  | Nonsense_Mutation | SNP | G | A | 5   | 465 | c.3382C>T | c.(3382-3384)CAG>TAG | p.Q1128* |
| Pat_15 | Post-Resistance | SLTM      | 79811  | 37 | 15 | 59175909  | 59175909  | Missense_Mutation | SNP | G | A | 5   | 458 | c.2912C>T | c.(2911-2913)CCA>CTA | p.P971L  |
| Pat_15 | Post-Resistance | RNF111    | 54778  | 37 | 15 | 59359058  | 59359058  | Missense_Mutation | SNP | G | A | 4   | 398 | c.1462G>A | c.(1462-1464)GGA>AGA | p.G488R  |
| Pat_15 | Post-Resistance | VPS13C    | 54832  | 37 | 15 | 62208095  | 62208095  | Missense_Mutation | SNP | G | A | 4   | 325 | c.8182C>T | c.(8182-8184)CGC>TGC | p.R2728C |
| Pat_15 | Post-Resistance | FBXL22    | 283807 | 37 | 15 | 63893617  | 63893617  | Missense_Mutation | SNP | T | G | 6   | 33  | c.458T>G  | c.(457-459)TTG>TGG   | p.L153W  |
| Pat_15 | Post-Resistance | ZNF609    | 23060  | 37 | 15 | 64966288  | 64966288  | Missense_Mutation | SNP | G | A | 6   | 576 | c.1235G>A | c.(1234-1236)GGC>GAC | p.G412D  |
| Pat_15 | Post-Resistance | MAP2K1    | 5604   | 37 | 15 | 66729163  | 66729163  | Missense_Mutation | SNP | C | T | 118 | 236 | c.371C>T  | c.(370-372)CCG>CTG   | p.P124L  |
| Pat_15 | Post-Resistance | GRAMD2    | 196996 | 37 | 15 | 72456010  | 72456010  | Missense_Mutation | SNP | G | A | 52  | 136 | c.689C>T  | c.(688-690)CCA>CTA   | p.P230L  |
| Pat_15 | Post-Resistance | CD276     | 80381  | 37 | 15 | 73996161  | 73996161  | Missense_Mutation | SNP | G | A | 4   | 250 | c.895G>A  | c.(895-897)GAA>AAA   | p.E299K  |
| Pat_15 | Post-Resistance | UBL7      | 84993  | 37 | 15 | 74741588  | 74741588  | Missense_Mutation | SNP | G | A | 4   | 257 | c.821C>T  | c.(820-822)ACC>ATC   | p.T274I  |
| Pat_15 | Post-Resistance | C15orf39  | 56905  | 37 | 15 | 75500784  | 75500784  | Missense_Mutation | SNP | C | T | 18  | 69  | c.2395C>T | c.(2395-2397)CCC>TCC | p.P799S  |
| Pat_15 | Post-Resistance | HMG20A    | 10363  | 37 | 15 | 77750795  | 77750795  | Missense_Mutation | SNP | G | C | 3   | 363 | c.46G>C   | c.(46-48)GAT>CAT     | p.D16H   |
| Pat_15 | Post-Resistance | ACSBG1    | 23205  | 37 | 15 | 78466162  | 78466162  | Missense_Mutation | SNP | G | T | 61  | 177 | c.1862C>A | c.(1861-1863)ACC>AAC | p.T621N  |
| Pat_15 | Post-Resistance | KIAA1024  | 23251  | 37 | 15 | 79750210  | 79750210  | Missense_Mutation | SNP | G | A | 4   | 487 | c.1721G>A | c.(1720-1722)AGC>AAC | p.S574N  |
| Pat_15 | Post-Resistance | LRRK1     | 79705  | 37 | 15 | 101569437 | 101569437 | Missense_Mutation | SNP | G | A | 4   | 241 | c.2963G>A | c.(2962-2964)AGC>AAC | p.S988N  |

|        |                 |          |        |    |    |          |          |                   |     |    |    |     |     |                |                      |               |
|--------|-----------------|----------|--------|----|----|----------|----------|-------------------|-----|----|----|-----|-----|----------------|----------------------|---------------|
| Pat_15 | Post-Resistance | WDR90    | 197335 | 37 | 16 | 716594   | 716594   | Missense_Mutation | SNP | C  | T  | 4   | 154 | c.4880C>T      | c.(4879-4881)ACG>ATG | p.T1627M      |
| Pat_15 | Post-Resistance | BTBD12   | 84464  | 37 | 16 | 3634827  | 3634827  | Missense_Mutation | SNP | G  | A  | 6   | 717 | c.4682C>T      | c.(4681-4683)ACG>ATG | p.T1561M      |
| Pat_15 | Post-Resistance | BTBD12   | 84464  | 37 | 16 | 3640521  | 3640521  | Missense_Mutation | SNP | G  | A  | 65  | 225 | c.3118C>T      | c.(3118-3120)CCC>TCC | p.P1040S      |
| Pat_15 | Post-Resistance | MGRN1    | 23295  | 37 | 16 | 4731705  | 4731705  | Missense_Mutation | SNP | C  | T  | 58  | 148 | c.1286C>T      | c.(1285-1287)CCC>CTC | p.P429L       |
| Pat_15 | Post-Resistance | ABCC6    | 368    | 37 | 16 | 16251532 | 16251532 | Missense_Mutation | SNP | G  | C  | 3   | 196 | c.3870C>G      | c.(3868-3870)CAC>CAG | p.H1290Q      |
| Pat_15 | Post-Resistance | COG7     | 91949  | 37 | 16 | 23409399 | 23409399 | Missense_Mutation | SNP | A  | C  | 55  | 251 | c.1855T>G      | c.(1855-1857)TTT>GTT | p.F619V       |
| Pat_15 | Post-Resistance | HS3ST4   | 9951   | 37 | 16 | 26147561 | 26147561 | Missense_Mutation | SNP | G  | A  | 31  | 111 | c.1363G>A      | c.(1363-1365)GAT>AAT | p.D455N       |
| Pat_15 | Post-Resistance | ZNF629   | 23361  | 37 | 16 | 30795033 | 30795033 | Missense_Mutation | SNP | A  | G  | 3   | 196 | c.616T>C       | c.(616-618)TAC>CAC   | p.Y206H       |
| Pat_15 | Post-Resistance | ABCC12   | 94160  | 37 | 16 | 48175173 | 48175173 | Missense_Mutation | SNP | C  | G  | 5   | 256 | c.367G>C       | c.(367-369)GTG>CTG   | p.V123L       |
| Pat_15 | Post-Resistance | NOD2     | 64127  | 37 | 16 | 50733452 | 50733452 | Missense_Mutation | SNP | G  | A  | 201 | 420 | c.127G>A       | c.(127-129)GAG>AAG   | p.E43K        |
| Pat_15 | Post-Resistance | CES7     | 221223 | 37 | 16 | 55907781 | 55907781 | Nonsense_Mutation | SNP | C  | T  | 28  | 125 | c.242G>A       | c.(241-243)TGG>TAG   | p.W81*        |
| Pat_15 | Post-Resistance | KATNB1   | 10300  | 37 | 16 | 57789260 | 57789260 | Missense_Mutation | SNP | G  | A  | 4   | 187 | c.1420G>A      | c.(1420-1422)GTG>ATG | p.V474M       |
| Pat_15 | Post-Resistance | CES3     | 23491  | 37 | 16 | 66997147 | 66997147 | Missense_Mutation | SNP | G  | A  | 5   | 446 | c.148G>A       | c.(148-150)GTG>ATG   | p.V50M        |
| Pat_15 | Post-Resistance | FHOD1    | 29109  | 37 | 16 | 67264550 | 67264550 | Missense_Mutation | SNP | G  | A  | 6   | 769 | c.2812C>T      | c.(2812-2814)CGC>TGC | p.R938C       |
| Pat_15 | Post-Resistance | SLC7A6OS | 84138  | 37 | 16 | 68337993 | 68337993 | Missense_Mutation | SNP | G  | A  | 5   | 412 | c.614C>T       | c.(613-615)ACG>ATG   | p.T205M       |
| Pat_15 | Post-Resistance | TXNL4B   | 54957  | 37 | 16 | 72120568 | 72120568 | Missense_Mutation | SNP | G  | A  | 54  | 287 | c.418C>T       | c.(418-420)CCC>TCC   | p.P140S       |
| Pat_15 | Post-Resistance | CLEC18B  | 497190 | 37 | 16 | 74447009 | 74447009 | Missense_Mutation | SNP | C  | T  | 69  | 175 | c.602G>A       | c.(601-603)GGT>GAT   | p.G201D       |
| Pat_15 | Post-Resistance | TRAPPC2L | 51693  | 37 | 16 | 88925060 | 88925060 | Missense_Mutation | SNP | G  | A  | 168 | 518 | c.67G>A        | c.(67-69)GAG>AAG     | p.E23K        |
| Pat_15 | Post-Resistance | ANKRD11  | 29123  | 37 | 16 | 89351925 | 89351925 | Missense_Mutation | SNP | G  | A  | 85  | 219 | c.1025C>T      | c.(1024-1026)CCC>CTC | p.P342L       |
| Pat_15 | Post-Resistance | CDK10    | 8558   | 37 | 16 | 89755676 | 89755676 | Missense_Mutation | SNP | G  | A  | 4   | 352 | c.104G>A       | c.(103-105)AGT>AAT   | p.S35N        |
| Pat_15 | Post-Resistance | OR3A2    | 4995   | 37 | 17 | 3181572  | 3181572  | Missense_Mutation | SNP | A  | T  | 57  | 131 | c.658T>A       | c.(658-660)TTG>ATG   | p.L220M       |
| Pat_15 | Post-Resistance | OR1E2    | 8388   | 37 | 17 | 3336519  | 3336519  | Missense_Mutation | SNP | C  | A  | 4   | 151 | c.617G>T       | c.(616-618)TGG>TTG   | p.W206L       |
| Pat_15 | Post-Resistance | GLTPD2   | 388323 | 37 | 17 | 4692317  | 4692317  | Missense_Mutation | SNP | C  | T  | 4   | 94  | c.11C>T        | c.(10-12)GCG>GTG     | p.A4V         |
| Pat_15 | Post-Resistance | KIF1C    | 10749  | 37 | 17 | 4926841  | 4926841  | Missense_Mutation | SNP | G  | A  | 4   | 195 | c.2707G>A      | c.(2707-2709)GCC>ACC | p.A903T       |
| Pat_15 | Post-Resistance | TP53     | 7157   | 37 | 17 | 7574003  | 7574003  | Nonsense_Mutation | SNP | G  | A  | 54  | 99  | c.1024C>T      | c.(1024-1026)CGA>TGA | p.R342*       |
| Pat_15 | Post-Resistance | ALOX12B  | 242    | 37 | 17 | 7984230  | 7984230  | Missense_Mutation | SNP | G  | A  | 5   | 351 | c.499C>T       | c.(499-501)CGG>TGG   | p.R167W       |
| Pat_15 | Post-Resistance | MYH10    | 4628   | 37 | 17 | 8381736  | 8381736  | Missense_Mutation | SNP | G  | A  | 4   | 372 | c.5533C>T      | c.(5533-5535)CGT>TGT | p.R1845C      |
| Pat_15 | Post-Resistance | CCDC42   | 146849 | 37 | 17 | 8647476  | 8647476  | Missense_Mutation | SNP | G  | A  | 4   | 183 | c.110C>T       | c.(109-111)TCG>TTG   | p.S37L        |
| Pat_15 | Post-Resistance | USP43    | 124739 | 37 | 17 | 9613321  | 9613321  | Missense_Mutation | SNP | G  | A  | 5   | 166 | c.2060G>A      | c.(2059-2061)AGC>AAC | p.S687N       |
| Pat_15 | Post-Resistance | MYH13    | 8735   | 37 | 17 | 10216600 | 10216600 | Missense_Mutation | SNP | C  | A  | 8   | 538 | c.4056G>T      | c.(4054-4056)GAG>GAT | p.E1352D      |
| Pat_15 | Post-Resistance | NCOR1    | 9611   | 37 | 17 | 15938172 | 15938172 | Missense_Mutation | SNP | C  | T  | 89  | 178 | c.7042G>A      | c.(7042-7044)GAA>AAA | p.E2348K      |
| Pat_15 | Post-Resistance | UBB      | 7314   | 37 | 17 | 16285453 | 16285453 | Missense_Mutation | SNP | C  | A  | 4   | 285 | c.232C>A       | c.(232-234)CAG>AAG   | p.Q78K        |
| Pat_15 | Post-Resistance | FOXN1    | 8456   | 37 | 17 | 26861352 | 26861352 | Missense_Mutation | SNP | G  | A  | 4   | 427 | c.931G>A       | c.(931-933)GCA>ACA   | p.A311T       |
| Pat_15 | Post-Resistance | LRRC37B2 | 147172 | 37 | 17 | 28961033 | 28961033 | Missense_Mutation | SNP | T  | G  | 3   | 95  | c.496T>G       | c.(496-498)TAT>GAT   | p.Y166D       |
| Pat_15 | Post-Resistance | SLFN13   | 146857 | 37 | 17 | 33768288 | 33768288 | Missense_Mutation | SNP | G  | A  | 113 | 305 | c.2020C>T      | c.(2020-2022)CGT>TGT | p.R674C       |
| Pat_15 | Post-Resistance | GAS2L2   | 246176 | 37 | 17 | 34072788 | 34072788 | Nonsense_Mutation | SNP | C  | T  | 61  | 183 | c.1728G>A      | c.(1726-1728)TGG>TGA | p.W576*       |
| Pat_15 | Post-Resistance | ERBB2    | 2064   | 37 | 17 | 37864622 | 37864622 | Missense_Mutation | SNP | A  | G  | 3   | 359 | c.274A>G       | c.(274-276)AGG>GGG   | p.R92G        |
| Pat_15 | Post-Resistance | IKZF3    | 22806  | 37 | 17 | 37947831 | 37947831 | Missense_Mutation | SNP | G  | A  | 4   | 303 | c.430C>T       | c.(430-432)CGC>TGC   | p.R144C       |
| Pat_15 | Post-Resistance | KRT222   | 125113 | 37 | 17 | 38816377 | 38816378 | Missense_Mutation | DNP | CC | TG | 55  | 237 | c.307_308GG>CA | c.(307-309)GGA>CAA   | p.G103Q       |
| Pat_15 | Post-Resistance | KRTAP4-8 | 728224 | 37 | 17 | 39254021 | 39254021 | Missense_Mutation | SNP | C  | T  | 6   | 226 | c.316G>A       | c.(316-318)GTG>ATG   | p.V106M       |
| Pat_15 | Post-Resistance | KLHL11   | 55175  | 37 | 17 | 40010117 | 40010117 | Missense_Mutation | SNP | C  | A  | 7   | 609 | c.2002G>T      | c.(2002-2004)GGC>TGC | p.G668C       |
| Pat_15 | Post-Resistance | BECN1    | 8678   | 37 | 17 | 40970804 | 40970804 | Splice_Site       | SNP | C  | T  | 4   | 234 | c.351_splice   | c.e5+1               | p.K117_splice |
| Pat_15 | Post-Resistance | GPATCH8  | 23131  | 37 | 17 | 42512474 | 42512474 | Missense_Mutation | SNP | C  | T  | 19  | 172 | c.307G>A       | c.(307-309)GTA>ATA   | p.V103I       |
| Pat_15 | Post-Resistance | TTL6     | 284076 | 37 | 17 | 46846574 | 46846574 | Missense_Mutation | SNP | C  | T  | 42  | 298 | c.2453G>A      | c.(2452-2454)AGC>AAC | p.S818N       |
| Pat_15 | Post-Resistance | B4GALNT2 | 124872 | 37 | 17 | 47210448 | 47210448 | Missense_Mutation | SNP | G  | A  | 16  | 57  | c.61G>A        | c.(61-63)GAA>AAA     | p.E21K        |
| Pat_15 | Post-Resistance | ANKFN1   | 162282 | 37 | 17 | 54520276 | 54520276 | Missense_Mutation | SNP | G  | A  | 77  | 239 | c.1090G>A      | c.(1090-1092)GCA>ACA | p.A364T       |
| Pat_15 | Post-Resistance | KCNH6    | 81033  | 37 | 17 | 61621705 | 61621705 | Missense_Mutation | SNP | G  | A  | 24  | 156 | c.2437G>A      | c.(2437-2439)GAA>AAA | p.E813K       |

|        |                 |           |        |    |    |          |          |                   |     |   |   |     |     |            |                        |           |
|--------|-----------------|-----------|--------|----|----|----------|----------|-------------------|-----|---|---|-----|-----|------------|------------------------|-----------|
| Pat_15 | Post-Resistance | ABCA6     | 23460  | 37 | 17 | 67096999 | 67096999 | Missense_Mutation | SNP | C | A | 5   | 228 | c.2951G>T  | c.(2950-2952)GGG>GTG   | p.G984V   |
| Pat_15 | Post-Resistance | KCNJ16    | 3773   | 37 | 17 | 68128770 | 68128770 | Missense_Mutation | SNP | C | T | 54  | 376 | c.542C>T   | c.(541-543)ACC>ATC     | p.T181I   |
| Pat_15 | Post-Resistance | CD300C    | 10871  | 37 | 17 | 72540900 | 72540900 | Missense_Mutation | SNP | G | A | 39  | 265 | c.248C>T   | c.(247-249)TCC>TTC     | p.S83F    |
| Pat_15 | Post-Resistance | NUP85     | 79902  | 37 | 17 | 73208113 | 73208113 | Missense_Mutation | SNP | G | T | 4   | 166 | c.317G>T   | c.(316-318)CGA>CTA     | p.R106L   |
| Pat_15 | Post-Resistance | MGAT5B    | 146664 | 37 | 17 | 74936524 | 74936524 | Missense_Mutation | SNP | C | T | 54  | 395 | c.1652C>T  | c.(1651-1653)CCC>CTC   | p.P551L   |
| Pat_15 | Post-Resistance | USP36     | 57602  | 37 | 17 | 76810604 | 76810604 | Missense_Mutation | SNP | G | A | 4   | 201 | c.1054C>T  | c.(1054-1056)CGT>TGT   | p.R352C   |
| Pat_15 | Post-Resistance | SLC26A11  | 284129 | 37 | 17 | 78201660 | 78201660 | Missense_Mutation | SNP | C | G | 6   | 416 | c.637C>G   | c.(637-639)CTG>GTG     | p.L213V   |
| Pat_15 | Post-Resistance | NPTX1     | 4884   | 37 | 17 | 78444806 | 78444806 | Missense_Mutation | SNP | G | A | 23  | 147 | c.1106C>T  | c.(1105-1107)ACC>ATC   | p.T369I   |
| Pat_15 | Post-Resistance | ACTG1     | 71     | 37 | 17 | 79478120 | 79478120 | Missense_Mutation | SNP | C | T | 4   | 381 | c.817G>A   | c.(817-819)GGC>AGC     | p.G273S   |
| Pat_15 | Post-Resistance | SPIRE1    | 56907  | 37 | 18 | 12506574 | 12506574 | Missense_Mutation | SNP | G | A | 6   | 675 | c.874C>T   | c.(874-876)CGG>TGG     | p.R292W   |
| Pat_15 | Post-Resistance | DSC1      | 1823   | 37 | 18 | 28720185 | 28720185 | Missense_Mutation | SNP | C | G | 84  | 290 | c.1340G>C  | c.(1339-1341)AGC>ACC   | p.S447T   |
| Pat_15 | Post-Resistance | DSG1      | 1828   | 37 | 18 | 28934588 | 28934588 | Missense_Mutation | SNP | C | T | 113 | 433 | c.2429C>T  | c.(2428-2430)TCT>TTT   | p.S810F   |
| Pat_15 | Post-Resistance | ASXL3     | 80816  | 37 | 18 | 31319233 | 31319233 | Missense_Mutation | SNP | G | A | 4   | 95  | c.1865G>A  | c.(1864-1866)JTG>TAT   | p.C622Y   |
| Pat_15 | Post-Resistance | RNF165    | 494470 | 37 | 18 | 44036562 | 44036562 | Missense_Mutation | SNP | G | A | 123 | 393 | c.1004G>A  | c.(1003-1005)CGA>CAA   | p.R335Q   |
| Pat_15 | Post-Resistance | LIPG      | 9388   | 37 | 18 | 47093924 | 47093924 | Missense_Mutation | SNP | A | G | 4   | 312 | c.392A>G   | c.(391-393)TAC>TGC     | p.Y131C   |
| Pat_15 | Post-Resistance | SERPINB11 | 89778  | 37 | 18 | 61377533 | 61377533 | Missense_Mutation | SNP | C | T | 56  | 175 | c.106C>T   | c.(106-108)CTT>TTT     | p.L36F    |
| Pat_15 | Post-Resistance | MIER2     | 54531  | 37 | 19 | 334444   | 334444   | Missense_Mutation | SNP | G | A | 63  | 369 | c.199C>T   | c.(199-201)CCA>TCA     | p.P67S    |
| Pat_15 | Post-Resistance | MADCAM1   | 8174   | 37 | 19 | 501699   | 501699   | Missense_Mutation | SNP | C | T | 42  | 111 | c.698C>T   | c.(697-699)CCC>CTC     | p.P233L   |
| Pat_15 | Post-Resistance | MED16     | 10025  | 37 | 19 | 889802   | 889802   | Missense_Mutation | SNP | G | A | 3   | 75  | c.283C>T   | c.(283-285)CGG>TGG     | p.R95W    |
| Pat_15 | Post-Resistance | ZNF555    | 148254 | 37 | 19 | 2853202  | 2853202  | Missense_Mutation | SNP | C | T | 4   | 135 | c.1139C>T  | c.(1138-1140)CCC>CTC   | p.P380L   |
| Pat_15 | Post-Resistance | ZNF57     | 126295 | 37 | 19 | 2917807  | 2917807  | Missense_Mutation | SNP | A | C | 5   | 291 | c.1188A>C  | c.(1186-1188)CAA>CAC   | p.Q396H   |
| Pat_15 | Post-Resistance | ZNF57     | 126295 | 37 | 19 | 2917901  | 2917901  | Missense_Mutation | SNP | A | G | 3   | 261 | c.1282A>G  | c.(1282-1284)ACC>GCC   | p.T428A   |
| Pat_15 | Post-Resistance | TNFSF9    | 8744   | 37 | 19 | 6531088  | 6531088  | Missense_Mutation | SNP | C | T | 4   | 350 | c.41C>T    | c.(40-42)CCG>CTG       | p.P14L    |
| Pat_15 | Post-Resistance | C3        | 718    | 37 | 19 | 6686166  | 6686166  | Missense_Mutation | SNP | C | T | 77  | 614 | c.3779G>A  | c.(3778-3780)AGA>AAA   | p.R1260K  |
| Pat_15 | Post-Resistance | VAV1      | 7409   | 37 | 19 | 6828459  | 6828459  | Missense_Mutation | SNP | G | A | 39  | 127 | c.1053G>A  | c.(1051-1053)ATG>ATA   | p.M351I   |
| Pat_15 | Post-Resistance | FBN3      | 84467  | 37 | 19 | 8155007  | 8155007  | Missense_Mutation | SNP | C | T | 51  | 129 | c.6160G>A  | c.(6160-6162)GAA>AAA   | p.E2054K  |
| Pat_15 | Post-Resistance | MYO1F     | 4542   | 37 | 19 | 8595411  | 8595411  | Missense_Mutation | SNP | G | A | 6   | 626 | c.2090C>T  | c.(2089-2091)GCC>GTC   | p.A697V   |
| Pat_15 | Post-Resistance | MUC16     | 94025  | 37 | 19 | 9016993  | 9016993  | Missense_Mutation | SNP | G | A | 5   | 347 | c.38002C>T | c.(38002-38004)CCC>TCC | p.P12668S |
| Pat_15 | Post-Resistance | MUC16     | 94025  | 37 | 19 | 9068553  | 9068553  | Missense_Mutation | SNP | G | A | 66  | 431 | c.18893C>T | c.(18892-18894)TCT>TTT | p.S6298F  |
| Pat_15 | Post-Resistance | MUC16     | 94025  | 37 | 19 | 9085237  | 9085237  | Missense_Mutation | SNP | G | A | 12  | 80  | c.6578C>T  | c.(6577-6579)TCC>TTC   | p.S2193F  |
| Pat_15 | Post-Resistance | MUC16     | 94025  | 37 | 19 | 9089503  | 9089503  | Missense_Mutation | SNP | G | A | 125 | 455 | c.2312C>T  | c.(2311-2313)TCC>TTC   | p.S771F   |
| Pat_15 | Post-Resistance | ZNF560    | 147741 | 37 | 19 | 9578116  | 9578116  | Missense_Mutation | SNP | G | A | 34  | 190 | c.1507C>T  | c.(1507-1509)CTT>TTT   | p.L503F   |
| Pat_15 | Post-Resistance | DNMT1     | 1786   | 37 | 19 | 10305545 | 10305545 | Missense_Mutation | SNP | G | A | 4   | 171 | c.31C>T    | c.(31-33)CCC>TCC       | p.P11S    |
| Pat_15 | Post-Resistance | ZNF844    | 284391 | 37 | 19 | 12187307 | 12187307 | Missense_Mutation | SNP | G | C | 5   | 349 | c.1372G>C  | c.(1372-1374)GAT>CAT   | p.D458H   |
| Pat_15 | Post-Resistance | EMR2      | 30817  | 37 | 19 | 14875368 | 14875368 | Missense_Mutation | SNP | G | T | 4   | 154 | c.961C>A   | c.(961-963)CTG>ATG     | p.L321M   |
| Pat_15 | Post-Resistance | ABHD8     | 79575  | 37 | 19 | 17412212 | 17412212 | Missense_Mutation | SNP | G | A | 4   | 200 | c.214C>T   | c.(214-216)CTC>TTC     | p.L72F    |
| Pat_15 | Post-Resistance | ZNF493    | 284443 | 37 | 19 | 21606468 | 21606468 | Missense_Mutation | SNP | C | T | 6   | 199 | c.623C>T   | c.(622-624)CCT>CTT     | p.P208L   |
| Pat_15 | Post-Resistance | ZNF208    | 7757   | 37 | 19 | 22156590 | 22156590 | Missense_Mutation | SNP | C | T | 5   | 279 | c.1246G>A  | c.(1246-1248)GAG>AAG   | p.E416K   |
| Pat_15 | Post-Resistance | ZNF492    | 57615  | 37 | 19 | 22847739 | 22847739 | Missense_Mutation | SNP | G | A | 5   | 198 | c.1268G>A  | c.(1267-1269)JGT>TAT   | p.C423Y   |
| Pat_15 | Post-Resistance | ZNF675    | 171392 | 37 | 19 | 23836350 | 23836350 | Missense_Mutation | SNP | A | C | 3   | 122 | c.1385T>G  | c.(1384-1386)ATC>AGC   | p.I462S   |
| Pat_15 | Post-Resistance | ZNF302    | 55900  | 37 | 19 | 35175919 | 35175919 | Missense_Mutation | SNP | C | T | 8   | 106 | c.1109C>T  | c.(1108-1110)TCG>TTG   | p.S370L   |
| Pat_15 | Post-Resistance | SUPT5H    | 6829   | 37 | 19 | 39964104 | 39964104 | Missense_Mutation | SNP | G | A | 5   | 317 | c.2435G>A  | c.(2434-2436)AGC>AAC   | p.S812N   |
| Pat_15 | Post-Resistance | BLVRB     | 645    | 37 | 19 | 40957283 | 40957283 | Missense_Mutation | SNP | G | A | 3   | 61  | c.451C>T   | c.(451-453)CCG>TCG     | p.P151S   |
| Pat_15 | Post-Resistance | CADM4     | 199731 | 37 | 19 | 44130387 | 44130387 | Missense_Mutation | SNP | G | A | 4   | 212 | c.553C>T   | c.(553-555)CGG>TGG     | p.R185W   |
| Pat_15 | Post-Resistance | HIF3A     | 64344  | 37 | 19 | 46825161 | 46825161 | Missense_Mutation | SNP | G | A | 4   | 196 | c.1273G>A  | c.(1273-1275)GCT>ACT   | p.A425T   |
| Pat_15 | Post-Resistance | ZC3H4     | 23211  | 37 | 19 | 47572412 | 47572412 | Missense_Mutation | SNP | C | G | 5   | 333 | c.2335G>C  | c.(2335-2337)GAG>CAG   | p.E779Q   |
| Pat_15 | Post-Resistance | LIG1      | 3978   | 37 | 19 | 48660312 | 48660312 | Missense_Mutation | SNP | G | A | 90  | 651 | c.329C>T   | c.(328-330)CCC>CTC     | p.P110L   |



|        |                 |          |        |    |    |           |           |                   |     |    |    |     |     |                |                        |               |
|--------|-----------------|----------|--------|----|----|-----------|-----------|-------------------|-----|----|----|-----|-----|----------------|------------------------|---------------|
| Pat_15 | Post-Resistance | PPP1R15A | 23645  | 37 | 19 | 49377986  | 49377986  | Nonsense_Mutation | SNP | G  | A  | 4   | 323 | c.1496G>A      | c.(1495-1497)TGG>TAG   | p.W499*       |
| Pat_15 | Post-Resistance | MYH14    | 79784  | 37 | 19 | 50789874  | 50789874  | Missense_Mutation | SNP | G  | A  | 13  | 33  | c.4552G>A      | c.(4552-4554)GAG>AAG   | p.E1518K      |
| Pat_15 | Post-Resistance | KLK5     | 25818  | 37 | 19 | 51453324  | 51453324  | Missense_Mutation | SNP | G  | A  | 37  | 107 | c.122C>T       | c.(121-123)ACC>ATC     | p.T41I        |
| Pat_15 | Post-Resistance | ZNF836   | 162962 | 37 | 19 | 52659224  | 52659224  | Missense_Mutation | SNP | A  | T  | 8   | 712 | c.1712T>A      | c.(1711-1713)ATT>AAT   | p.I571N       |
| Pat_15 | Post-Resistance | ZNF836   | 162962 | 37 | 19 | 52659243  | 52659243  | Missense_Mutation | SNP | A  | C  | 5   | 651 | c.1693T>G      | c.(1693-1695)TAC>GAC   | p.Y565D       |
| Pat_15 | Post-Resistance | ZNF845   | 91664  | 37 | 19 | 53855196  | 53855197  | Missense_Mutation | DNP | TG | CA | 7   | 463 | .1268_1269TG>C | c.(1267-1269)ATG>ACA   | p.M423T       |
| Pat_15 | Post-Resistance | ZNF761   | 388561 | 37 | 19 | 53959722  | 53959722  | Missense_Mutation | SNP | G  | A  | 39  | 303 | c.1961G>A      | c.(1960-1962)AGA>AAA   | p.R654K       |
| Pat_15 | Post-Resistance | RPS9     | 6203   | 37 | 19 | 54710159  | 54710159  | Missense_Mutation | SNP | G  | A  | 4   | 214 | c.236G>A       | c.(235-237)CGG>CAG     | p.R79Q        |
| Pat_15 | Post-Resistance | ZNF667   | 63934  | 37 | 19 | 56972086  | 56972086  | Missense_Mutation | SNP | C  | A  | 5   | 370 | c.132G>T       | c.(130-132)TTG>TTT     | p.L44F        |
| Pat_15 | Post-Resistance | ZNF470   | 388566 | 37 | 19 | 57089054  | 57089054  | Missense_Mutation | SNP | T  | A  | 82  | 182 | c.1257T>A      | c.(1255-1257)CAT>CAA   | p.H419Q       |
| Pat_15 | Post-Resistance | PEG3     | 5178   | 37 | 19 | 57335821  | 57335821  | Missense_Mutation | SNP | C  | T  | 122 | 265 | c.203G>A       | c.(202-204)CGA>CAA     | p.R68Q        |
| Pat_15 | Post-Resistance | ZNF749   | 388567 | 37 | 19 | 57956341  | 57956341  | Nonsense_Mutation | SNP | G  | T  | 36  | 237 | c.1825G>T      | c.(1825-1827)GAA>TAA   | p.E609*       |
| Pat_15 | Post-Resistance | ZNF419   | 79744  | 37 | 19 | 58005146  | 58005146  | Missense_Mutation | SNP | C  | G  | 3   | 458 | c.1221C>G      | c.(1219-1221)TTC>TTG   | p.F407L       |
| Pat_15 | Post-Resistance | ZNF549   | 256051 | 37 | 19 | 58050291  | 58050291  | Missense_Mutation | SNP | C  | T  | 34  | 272 | c.1919C>T      | c.(1918-1920)CCC>CTC   | p.P640L       |
| Pat_15 | Post-Resistance | ZNF132   | 7691   | 37 | 19 | 58945225  | 58945225  | Missense_Mutation | SNP | C  | A  | 4   | 228 | c.1586G>T      | c.(1585-1587)AGC>ATC   | p.S529I       |
| Pat_15 | Post-Resistance | MSGN1    | 343930 | 37 | 2  | 17998224  | 17998224  | Missense_Mutation | SNP | C  | T  | 46  | 586 | c.439C>T       | c.(439-441)CTC>TTC     | p.L147F       |
| Pat_15 | Post-Resistance | KCNS3    | 3790   | 37 | 2  | 18112936  | 18112936  | Missense_Mutation | SNP | G  | A  | 4   | 344 | c.661G>A       | c.(661-663)GTG>ATG     | p.V221M       |
| Pat_15 | Post-Resistance | ADCY3    | 109    | 37 | 2  | 25062892  | 25062892  | Missense_Mutation | SNP | C  | A  | 4   | 406 | c.1205G>T      | c.(1204-1206)CGG>CTG   | p.R402L       |
| Pat_15 | Post-Resistance | KIF3C    | 3797   | 37 | 2  | 26204389  | 26204389  | Missense_Mutation | SNP | C  | T  | 5   | 440 | c.398G>A       | c.(397-399)CGC>CAC     | p.R133H       |
| Pat_15 | Post-Resistance | NRBP1    | 29959  | 37 | 2  | 27662739  | 27662739  | Missense_Mutation | SNP | C  | T  | 5   | 430 | c.1010C>T      | c.(1009-1011)GCG>GTG   | p.A337V       |
| Pat_15 | Post-Resistance | C2orf16  | 84226  | 37 | 2  | 27804726  | 27804726  | Nonsense_Mutation | SNP | G  | T  | 8   | 779 | c.5287G>T      | c.(5287-5289)GAG>TAG   | p.E1763*      |
| Pat_15 | Post-Resistance | SPTBN1   | 6711   | 37 | 2  | 54839304  | 54839304  | Missense_Mutation | SNP | C  | T  | 4   | 320 | c.307C>T       | c.(307-309)CCC>TCC     | p.P103S       |
| Pat_15 | Post-Resistance | TMEM17   | 200728 | 37 | 2  | 62728427  | 62728427  | Missense_Mutation | SNP | G  | A  | 84  | 259 | c.514C>T       | c.(514-516)CGT>TGT     | p.R172C       |
| Pat_15 | Post-Resistance | TGFBRAP1 | 9392   | 37 | 2  | 105915093 | 105915093 | Missense_Mutation | SNP | G  | A  | 5   | 214 | c.758C>T       | c.(757-759)GCG>GTG     | p.A253V       |
| Pat_15 | Post-Resistance | IL1A     | 3552   | 37 | 2  | 113539322 | 113539322 | Missense_Mutation | SNP | A  | T  | 102 | 226 | c.178T>A       | c.(178-180)TCT>ACT     | p.S60T        |
| Pat_15 | Post-Resistance | ERCC3    | 2071   | 37 | 2  | 128044304 | 128044304 | Missense_Mutation | SNP | G  | C  | 6   | 517 | c.1317C>G      | c.(1315-1317)ATC>ATG   | p.I439M       |
| Pat_15 | Post-Resistance | THSD7B   | 80731  | 37 | 2  | 137814051 | 137814051 | Nonsense_Mutation | SNP | G  | A  | 43  | 275 | c.108G>A       | c.(106-108)TGG>TGA     | p.W36*        |
| Pat_15 | Post-Resistance | SCN1A    | 6323   | 37 | 2  | 166872167 | 166872167 | Missense_Mutation | SNP | G  | A  | 60  | 348 | c.3467C>T      | c.(3466-3468)CCC>CTC   | p.P1156L      |
| Pat_15 | Post-Resistance | XIRP2    | 129446 | 37 | 2  | 168107398 | 168107398 | Missense_Mutation | SNP | C  | A  | 5   | 477 | c.9496C>A      | c.(9496-9498)CAC>AAC   | p.H3166N      |
| Pat_15 | Post-Resistance | LRP2     | 4036   | 37 | 2  | 170092425 | 170092425 | Missense_Mutation | SNP | C  | T  | 60  | 202 | c.4845G>A      | c.(4843-4845)ATG>ATA   | p.M1615I      |
| Pat_15 | Post-Resistance | SP3      | 6670   | 37 | 2  | 174819867 | 174819867 | Missense_Mutation | SNP | G  | A  | 52  | 152 | c.1373C>T      | c.(1372-1374)TCT>TTT   | p.S458F       |
| Pat_15 | Post-Resistance | SP3      | 6670   | 37 | 2  | 174820401 | 174820401 | Missense_Mutation | SNP | G  | A  | 4   | 412 | c.839C>T       | c.(838-840)TCG>TTG     | p.S280L       |
| Pat_15 | Post-Resistance | OSBPL6   | 114880 | 37 | 2  | 179236922 | 179236922 | Nonsense_Mutation | SNP | C  | T  | 55  | 215 | c.1357C>T      | c.(1357-1359)CAG>TAG   | p.Q453*       |
| Pat_15 | Post-Resistance | TTN      | 7273   | 37 | 2  | 179472244 | 179472244 | Missense_Mutation | SNP | C  | T  | 94  | 716 | c.45467G>A     | :(45466-45468)GGA>GAA  | p.G15156E     |
| Pat_15 | Post-Resistance | TTN      | 7273   | 37 | 2  | 179579099 | 179579099 | Missense_Mutation | SNP | G  | A  | 5   | 344 | c.22670C>T     | c.(22669-22671)CCA>CTA | p.P7557L      |
| Pat_15 | Post-Resistance | TTN      | 7273   | 37 | 2  | 179611961 | 179611961 | Missense_Mutation | SNP | C  | T  | 27  | 205 | c.15166G>A     | :(15166-15168)GGG>AGC  | p.G5056R      |
| Pat_15 | Post-Resistance | ASNSD1   | 54529  | 37 | 2  | 190532243 | 190532243 | Missense_Mutation | SNP | G  | A  | 6   | 780 | c.1385G>A      | c.(1384-1386)JTG>TAT   | p.C462Y       |
| Pat_15 | Post-Resistance | DNAH7    | 56171  | 37 | 2  | 196834754 | 196834754 | Missense_Mutation | SNP | G  | A  | 51  | 163 | c.2123C>T      | c.(2122-2124)TCA>TTA   | p.S708L       |
| Pat_15 | Post-Resistance | ORC2L    | 4999   | 37 | 2  | 201785036 | 201785036 | Missense_Mutation | SNP | A  | C  | 57  | 160 | c.1375T>G      | c.(1375-1377)TCC>GCC   | p.S459A       |
| Pat_15 | Post-Resistance | PARD3B   | 117583 | 37 | 2  | 206165386 | 206165386 | Missense_Mutation | SNP | G  | A  | 43  | 403 | c.2318G>A      | c.(2317-2319)CGA>CAA   | p.R773Q       |
| Pat_15 | Post-Resistance | C2orf24  | 27013  | 37 | 2  | 220039772 | 220039772 | Missense_Mutation | SNP | G  | A  | 4   | 352 | c.319C>T       | c.(319-321)CGG>TGG     | p.R107W       |
| Pat_15 | Post-Resistance | ABCB6    | 10058  | 37 | 2  | 220078321 | 220078322 | Missense_Mutation | DNP | GT | AG | 58  | 163 | .1645_1646AC>C | c.(1645-1647)ACC>CTC   | p.T549L       |
| Pat_15 | Post-Resistance | UGT1A8   | 54576  | 37 | 2  | 234527050 | 234527050 | Missense_Mutation | SNP | G  | A  | 133 | 726 | c.697G>A       | c.(697-699)GAA>AAA     | p.E233K       |
| Pat_15 | Post-Resistance | ANGPT4   | 51378  | 37 | 20 | 896818    | 896818    | Missense_Mutation | SNP | G  | A  | 55  | 157 | c.40C>T        | c.(40-42)CTT>TTT       | p.L14F        |
| Pat_15 | Post-Resistance | PROKR2   | 128674 | 37 | 20 | 5294778   | 5294778   | Missense_Mutation | SNP | G  | A  | 97  | 262 | c.238C>T       | c.(238-240)CGC>TGC     | p.R80C        |
| Pat_15 | Post-Resistance | GPCPD1   | 56261  | 37 | 20 | 5550886   | 5550886   | Splice_Site       | SNP | C  | A  | 4   | 215 | c.1057_splice  | c.e12-1                | p.G353_splice |
| Pat_15 | Post-Resistance | BMP2     | 650    | 37 | 20 | 6759302   | 6759302   | Missense_Mutation | SNP | G  | A  | 4   | 86  | c.757G>A       | c.(757-759)GAT>AAT     | p.D253N       |

|        |                 |          |        |    |    |           |           |                   |     |    |    |     |     |                |                      |               |
|--------|-----------------|----------|--------|----|----|-----------|-----------|-------------------|-----|----|----|-----|-----|----------------|----------------------|---------------|
| Pat_15 | Post-Resistance | ISM1     | 140862 | 37 | 20 | 13273020  | 13273020  | Splice_Site       | SNP | G  | A  | 16  | 53  | c.788_splice   | c.e5-1               | p.G263_splice |
| Pat_15 | Post-Resistance | SEL1L2   | 80343  | 37 | 20 | 13867031  | 13867031  | Missense_Mutation | SNP | T  | A  | 44  | 142 | c.803A>T       | c.(802-804)GAA>GTA   | p.E268V       |
| Pat_15 | Post-Resistance | DEFB123  | 245936 | 37 | 20 | 30037844  | 30037844  | Missense_Mutation | SNP | G  | A  | 131 | 343 | c.71G>A        | c.(70-72)AGA>AAA     | p.R24K        |
| Pat_15 | Post-Resistance | EPB41L1  | 2036   | 37 | 20 | 34785884  | 34785884  | Missense_Mutation | SNP | G  | A  | 100 | 271 | c.1589G>A      | c.(1588-1590)CGA>CAA | p.R530Q       |
| Pat_15 | Post-Resistance | SGK2     | 10110  | 37 | 20 | 42195107  | 42195107  | Missense_Mutation | SNP | C  | T  | 117 | 470 | c.152C>T       | c.(151-153)CCC>CTC   | p.P51L        |
| Pat_15 | Post-Resistance | NCOA3    | 8202   | 37 | 20 | 46264358  | 46264358  | Missense_Mutation | SNP | G  | T  | 6   | 333 | c.1405G>T      | c.(1405-1407)GGG>TGG | p.G469W       |
| Pat_15 | Post-Resistance | SLCO4A1  | 28231  | 37 | 20 | 61288117  | 61288117  | Missense_Mutation | SNP | G  | A  | 4   | 185 | c.311G>A       | c.(310-312)GGC>GAC   | p.G104D       |
| Pat_15 | Post-Resistance | SRMS     | 6725   | 37 | 20 | 62173897  | 62173897  | Missense_Mutation | SNP | G  | T  | 4   | 236 | c.683C>A       | c.(682-684)TCC>TAC   | p.S228Y       |
| Pat_15 | Post-Resistance | ARFRP1   | 10139  | 37 | 20 | 62338413  | 62338413  | Missense_Mutation | SNP | A  | G  | 3   | 130 | c.31T>C        | c.(31-33)TAC>CAC     | p.Y11H        |
| Pat_15 | Post-Resistance | NCAM2    | 4685   | 37 | 21 | 22664426  | 22664426  | Missense_Mutation | SNP | C  | T  | 60  | 218 | c.484C>T       | c.(484-486)CGG>TGG   | p.R162W       |
| Pat_15 | Post-Resistance | RCAN1    | 1827   | 37 | 21 | 35893880  | 35893880  | Missense_Mutation | SNP | G  | A  | 27  | 96  | c.503C>T       | c.(502-504)CCG>CTG   | p.P168L       |
| Pat_15 | Post-Resistance | CLDN14   | 23562  | 37 | 21 | 37833465  | 37833465  | Missense_Mutation | SNP | C  | T  | 61  | 217 | c.529G>A       | c.(529-531)GGT>AGT   | p.G177S       |
| Pat_15 | Post-Resistance | TPRSS3   | 64699  | 37 | 21 | 43795974  | 43795974  | Missense_Mutation | SNP | C  | T  | 49  | 430 | c.1198G>A      | c.(1198-1200)GAC>AAC | p.D400N       |
| Pat_15 | Post-Resistance | WDR4     | 10785  | 37 | 21 | 44282413  | 44282413  | Missense_Mutation | SNP | G  | A  | 14  | 83  | c.545C>T       | c.(544-546)TCC>TTC   | p.S182F       |
| Pat_15 | Post-Resistance | LSS      | 4047   | 37 | 21 | 47614504  | 47614504  | Missense_Mutation | SNP | C  | T  | 4   | 178 | c.1889G>A      | c.(1888-1890)GGG>GAG | p.G630E       |
| Pat_15 | Post-Resistance | SEZ6L    | 23544  | 37 | 22 | 26761419  | 26761419  | Missense_Mutation | SNP | G  | A  | 47  | 248 | c.2681G>A      | c.(2680-2682)GGA>GAA | p.G894E       |
| Pat_15 | Post-Resistance | TRIOBP   | 11078  | 37 | 22 | 38121864  | 38121864  | Missense_Mutation | SNP | C  | T  | 175 | 504 | c.3301C>T      | c.(3301-3303)CCC>TCC | p.P1101S      |
| Pat_15 | Post-Resistance | MGAT3    | 4248   | 37 | 22 | 39884748  | 39884748  | Missense_Mutation | SNP | G  | A  | 13  | 88  | c.1396G>A      | c.(1396-1398)GAC>AAC | p.D466N       |
| Pat_15 | Post-Resistance | POLDIP3  | 84271  | 37 | 22 | 42998840  | 42998840  | Missense_Mutation | SNP | G  | A  | 5   | 553 | c.386C>T       | c.(385-387)GCT>GTT   | p.A129V       |
| Pat_15 | Post-Resistance | MOV10L1  | 54456  | 37 | 22 | 50563983  | 50563983  | Missense_Mutation | SNP | C  | T  | 38  | 206 | c.1732C>T      | c.(1732-1734)CCT>TCT | p.P578S       |
| Pat_15 | Post-Resistance | CAV3     | 859    | 37 | 3  | 8787386   | 8787386   | Missense_Mutation | SNP | T  | C  | 3   | 117 | c.289T>C       | c.(289-291)TTC>CTC   | p.F97L        |
| Pat_15 | Post-Resistance | BRPF1    | 7862   | 37 | 3  | 9776336   | 9776336   | Missense_Mutation | SNP | G  | A  | 4   | 322 | c.512G>A       | c.(511-513)AGC>AAC   | p.S171N       |
| Pat_15 | Post-Resistance | XPC      | 7508   | 37 | 3  | 14190192  | 14190192  | Missense_Mutation | SNP | G  | T  | 5   | 297 | c.2290C>A      | c.(2290-2292)CCC>ACC | p.P764T       |
| Pat_15 | Post-Resistance | EOMES    | 8320   | 37 | 3  | 27761764  | 27761764  | Missense_Mutation | SNP | G  | A  | 96  | 626 | c.934C>T       | c.(934-936)CAC>TAC   | p.H312Y       |
| Pat_15 | Post-Resistance | SCN5A    | 6331   | 37 | 3  | 38651383  | 38651383  | Missense_Mutation | SNP | A  | G  | 45  | 319 | c.776T>C       | c.(775-777)TTC>TCC   | p.F259S       |
| Pat_15 | Post-Resistance | SCN10A   | 6336   | 37 | 3  | 38833541  | 38833541  | Missense_Mutation | SNP | G  | A  | 71  | 624 | c.389C>T       | c.(388-390)TCG>TTG   | p.S130L       |
| Pat_15 | Post-Resistance | SCN11A   | 11280  | 37 | 3  | 38938485  | 38938485  | Missense_Mutation | SNP | C  | T  | 59  | 230 | c.2254G>A      | c.(2254-2256)GGG>AGG | p.G752R       |
| Pat_15 | Post-Resistance | CCR9     | 10803  | 37 | 3  | 45942900  | 45942900  | Missense_Mutation | SNP | G  | A  | 5   | 365 | c.620G>A       | c.(619-621)AGC>AAC   | p.S207N       |
| Pat_15 | Post-Resistance | SHISA5   | 51246  | 37 | 3  | 48510919  | 48510919  | Missense_Mutation | SNP | G  | A  | 6   | 303 | c.484C>T       | c.(484-486)CCT>TCT   | p.P162S       |
| Pat_15 | Post-Resistance | UBA7     | 7318   | 37 | 3  | 49845261  | 49845261  | Missense_Mutation | SNP | G  | T  | 6   | 121 | c.2623C>A      | c.(2623-2625)CCA>ACA | p.P875T       |
| Pat_15 | Post-Resistance | NAT6     | 24142  | 37 | 3  | 50334112  | 50334113  | Missense_Mutation | DNP | GG | AA | 73  | 211 | c.782_783CC>TT | c.(781-783)CCC>CTT   | p.P261L       |
| Pat_15 | Post-Resistance | GRM2     | 2912   | 37 | 3  | 51751789  | 51751789  | Missense_Mutation | SNP | G  | A  | 4   | 244 | c.2501G>A      | c.(2500-2502)CGC>CAC | p.R834H       |
| Pat_15 | Post-Resistance | GLYCTK   | 132158 | 37 | 3  | 52325843  | 52325843  | Missense_Mutation | SNP | G  | A  | 4   | 333 | c.610G>A       | c.(610-612)GCC>ACC   | p.A204T       |
| Pat_15 | Post-Resistance | DNAH1    | 25981  | 37 | 3  | 52366226  | 52366226  | Missense_Mutation | SNP | C  | T  | 3   | 47  | c.1102C>T      | c.(1102-1104)CCT>TCT | p.P368S       |
| Pat_15 | Post-Resistance | DNAH1    | 25981  | 37 | 3  | 52396446  | 52396446  | Missense_Mutation | SNP | C  | T  | 36  | 109 | c.5023C>T      | c.(5023-5025)CCA>TCA | p.P1675S      |
| Pat_15 | Post-Resistance | BAP1     | 8314   | 37 | 3  | 52437720  | 52437720  | Missense_Mutation | SNP | G  | A  | 4   | 121 | c.1441C>T      | c.(1441-1443)CAC>TAC | p.H481Y       |
| Pat_15 | Post-Resistance | STAB1    | 23166  | 37 | 3  | 52555956  | 52555956  | Missense_Mutation | SNP | G  | A  | 4   | 214 | c.6260G>A      | c.(6259-6261)CGT>CAT | p.R2087H      |
| Pat_15 | Post-Resistance | SPATA12  | 353324 | 37 | 3  | 57108230  | 57108230  | Nonsense_Mutation | SNP | G  | T  | 6   | 717 | c.508G>T       | c.(508-510)GAG>TAG   | p.E170*       |
| Pat_15 | Post-Resistance | NSUN3    | 63899  | 37 | 3  | 93813923  | 93813923  | Missense_Mutation | SNP | C  | T  | 47  | 414 | c.668C>T       | c.(667-669)TCT>TTT   | p.S223F       |
| Pat_15 | Post-Resistance | OR5H15   | 403274 | 37 | 3  | 97888187  | 97888187  | Missense_Mutation | SNP | T  | C  | 20  | 48  | c.644T>C       | c.(643-645)CTT>CCT   | p.L215P       |
| Pat_15 | Post-Resistance | OR5K1    | 26339  | 37 | 3  | 98189268  | 98189268  | Missense_Mutation | SNP | C  | T  | 29  | 123 | c.848C>T       | c.(847-849)CCC>CTC   | p.P283L       |
| Pat_15 | Post-Resistance | GPR128   | 84873  | 37 | 3  | 100374026 | 100374026 | Splice_Site       | SNP | G  | A  | 4   | 247 | c.1726_splice  | c.e12+1              | p.G576_splice |
| Pat_15 | Post-Resistance | ZBED2    | 79413  | 37 | 3  | 111312555 | 111312555 | Missense_Mutation | SNP | C  | T  | 171 | 402 | c.494G>A       | c.(493-495)AGG>AAG   | p.R165K       |
| Pat_15 | Post-Resistance | KIAA2018 | 205717 | 37 | 3  | 113388981 | 113388981 | Missense_Mutation | SNP | G  | A  | 82  | 196 | c.146C>T       | c.(145-147)CCT>CTT   | p.P49L        |
| Pat_15 | Post-Resistance | STXBP5L  | 9515   | 37 | 3  | 120957925 | 120957925 | Missense_Mutation | SNP | C  | T  | 32  | 166 | c.1292C>T      | c.(1291-1293)TCT>TTT | p.S431F       |
| Pat_15 | Post-Resistance | PARP14   | 54625  | 37 | 3  | 122411238 | 122411238 | Missense_Mutation | SNP | C  | T  | 90  | 155 | c.446C>T       | c.(445-447)TCT>TTT   | p.S149F       |
| Pat_15 | Post-Resistance | COL6A6   | 131873 | 37 | 3  | 130287019 | 130287019 | Missense_Mutation | SNP | C  | T  | 117 | 603 | c.1972C>T      | c.(1972-1974)CGG>TGG | p.R658W       |

|        |                 |          |        |    |   |           |           |                   |     |    |    |     |     |                                    |                        |          |
|--------|-----------------|----------|--------|----|---|-----------|-----------|-------------------|-----|----|----|-----|-----|------------------------------------|------------------------|----------|
| Pat_15 | Post-Resistance | TMEM108  | 66000  | 37 | 3 | 133099154 | 133099154 | Missense_Mutation | SNP | G  | A  | 57  | 193 | c.599G>A                           | c.(598-600)CGA>CAA     | p.R200Q  |
| Pat_15 | Post-Resistance | PPP2R3A  | 5523   | 37 | 3 | 135820941 | 135820941 | Missense_Mutation | SNP | G  | A  | 4   | 330 | c.3020G>A                          | c.(3019-3021)CGG>CAG   | p.R1007Q |
| Pat_15 | Post-Resistance | PRR23A   | 729627 | 37 | 3 | 138724642 | 138724642 | Missense_Mutation | SNP | C  | T  | 35  | 119 | c.469G>A                           | c.(469-471)GAG>AAG     | p.E157K  |
| Pat_15 | Post-Resistance | GK5      | 256356 | 37 | 3 | 141905075 | 141905075 | Missense_Mutation | SNP | G  | A  | 134 | 249 | c.716C>T                           | c.(715-717)TCG>TTG     | p.S239L  |
| Pat_15 | Post-Resistance | CHST2    | 9435   | 37 | 3 | 142840380 | 142840380 | Missense_Mutation | SNP | G  | A  | 4   | 180 | c.722G>A                           | c.(721-723)GGG>GAG     | p.G241E  |
| Pat_15 | Post-Resistance | CP       | 1356   | 37 | 3 | 148930484 | 148930484 | Missense_Mutation | SNP | C  | T  | 48  | 108 | c.148G>A                           | c.(148-150)GAA>AAA     | p.E50K   |
| Pat_15 | Post-Resistance | ZBBX     | 79740  | 37 | 3 | 167045887 | 167045887 | Missense_Mutation | SNP | C  | T  | 104 | 222 | c.705G>A                           | c.(703-705)ATG>ATA     | p.M235I  |
| Pat_15 | Post-Resistance | MECOM    | 2122   | 37 | 3 | 168833285 | 168833285 | Missense_Mutation | SNP | C  | T  | 38  | 145 | c.1811G>A                          | c.(1810-1812)CGA>CAA   | p.R604Q  |
| Pat_15 | Post-Resistance | EIF4G1   | 1981   | 37 | 3 | 184045084 | 184045084 | Missense_Mutation | SNP | G  | A  | 6   | 490 | c.3509G>A                          | c.(3508-3510)CGT>CAT   | p.R1170H |
| Pat_15 | Post-Resistance | CHRD     | 8646   | 37 | 3 | 184100315 | 184100315 | Missense_Mutation | SNP | G  | A  | 6   | 562 | c.838G>A                           | c.(838-840)GCA>ACA     | p.A280T  |
| Pat_15 | Post-Resistance | TP63     | 8626   | 37 | 3 | 189608604 | 189608604 | Missense_Mutation | SNP | C  | T  | 120 | 304 | c.1679C>T                          | c.(1678-1680)TCA>TTA   | p.S560L  |
| Pat_15 | Post-Resistance | MUC4     | 4585   | 37 | 3 | 195495909 | 195495909 | Missense_Mutation | SNP | G  | A  | 4   | 227 | c.13129C>T                         | c.(13129-13131)CTC>TTC | p.L4377F |
| Pat_15 | Post-Resistance | ZNF141   | 7700   | 37 | 4 | 367194    | 367194    | Missense_Mutation | SNP | C  | T  | 5   | 237 | c.968C>T                           | c.(967-969)TCC>TTC     | p.S323F  |
| Pat_15 | Post-Resistance | ZNF141   | 7700   | 37 | 4 | 367226    | 367226    | Missense_Mutation | SNP | A  | G  | 3   | 189 | c.1000A>G                          | c.(1000-1002)ACT>GCT   | p.T334A  |
| Pat_15 | Post-Resistance | OTOP1    | 133060 | 37 | 4 | 4199303   | 4199303   | Missense_Mutation | SNP | G  | A  | 4   | 358 | c.1258C>T                          | c.(1258-1260)CGC>TGC   | p.R420C  |
| Pat_15 | Post-Resistance | SLC2A9   | 56606  | 37 | 4 | 10027572  | 10027572  | Missense_Mutation | SNP | C  | T  | 29  | 137 | c.19G>A                            | c.(19-21)GAC>AAC       | p.D7N    |
| Pat_15 | Post-Resistance | ZNF518B  | 85460  | 37 | 4 | 10445035  | 10445035  | Missense_Mutation | SNP | A  | G  | 34  | 284 | c.2918T>C                          | c.(2917-2919)GTT>GCT   | p.V973A  |
| Pat_15 | Post-Resistance | SLIT2    | 9353   | 37 | 4 | 20569198  | 20569198  | Missense_Mutation | SNP | G  | A  | 4   | 300 | c.2908G>A                          | c.(2908-2910)GGA>AGA   | p.G970R  |
| Pat_15 | Post-Resistance | FAM114A1 | 92689  | 37 | 4 | 38937371  | 38937371  | Missense_Mutation | SNP | C  | T  | 38  | 138 | c.1496C>T                          | c.(1495-1497)TCT>TTT   | p.S499F  |
| Pat_15 | Post-Resistance | YIPF7    | 285525 | 37 | 4 | 44624506  | 44624506  | Missense_Mutation | SNP | C  | T  | 50  | 128 | c.768G>A                           | c.(766-768)ATG>ATA     | p.M256I  |
| Pat_15 | Post-Resistance | SPATA18  | 132671 | 37 | 4 | 52945993  | 52945994  | Missense_Mutation | DNP | GG | AA | 134 | 430 | .1263_1264GG>A261-1266)CAGGAG>CAA/ |                        | p.E422K  |
| Pat_15 | Post-Resistance | KDR      | 3791   | 37 | 4 | 55964878  | 55964878  | Missense_Mutation | SNP | G  | A  | 5   | 348 | c.2359C>T                          | c.(2359-2361)CGG>TGG   | p.R787W  |
| Pat_15 | Post-Resistance | ENAM     | 10117  | 37 | 4 | 71510004  | 71510004  | Missense_Mutation | SNP | G  | A  | 4   | 324 | c.2861G>A                          | c.(2860-2862)AGG>AAG   | p.R954K  |
| Pat_15 | Post-Resistance | CCDC158  | 339965 | 37 | 4 | 77288596  | 77288596  | Missense_Mutation | SNP | C  | T  | 70  | 174 | c.1681G>A                          | c.(1681-1683)GAC>AAC   | p.D561N  |
| Pat_15 | Post-Resistance | BMP2K    | 55589  | 37 | 4 | 79792085  | 79792085  | Missense_Mutation | SNP | G  | C  | 3   | 159 | c.1380G>C                          | c.(1378-1380)CAG>CAC   | p.Q460H  |
| Pat_15 | Post-Resistance | DAPP1    | 27071  | 37 | 4 | 100774378 | 100774378 | Missense_Mutation | SNP | C  | T  | 10  | 73  | c.362C>T                           | c.(361-363)ACT>ATT     | p.T121I  |
| Pat_15 | Post-Resistance | LEF1     | 51176  | 37 | 4 | 108985500 | 108985500 | Missense_Mutation | SNP | G  | A  | 67  | 160 | c.1157C>T                          | c.(1156-1158)TCT>TTT   | p.S386F  |
| Pat_15 | Post-Resistance | ANK2     | 287    | 37 | 4 | 114279594 | 114279594 | Missense_Mutation | SNP | C  | T  | 126 | 296 | c.9820C>T                          | c.(9820-9822)CCC>TCC   | p.P3274S |
| Pat_15 | Post-Resistance | SYNPO2   | 171024 | 37 | 4 | 119947945 | 119947945 | Missense_Mutation | SNP | C  | T  | 69  | 150 | c.421C>T                           | c.(421-423)CCC>TCC     | p.P141S  |
| Pat_15 | Post-Resistance | KIAA0922 | 23240  | 37 | 4 | 154553895 | 154553895 | Nonsense_Mutation | SNP | G  | A  | 4   | 219 | c.4230G>A                          | c.(4228-4230)TGG>TGA   | p.W1410* |
| Pat_15 | Post-Resistance | GALNTL6  | 442117 | 37 | 4 | 173730599 | 173730599 | Missense_Mutation | SNP | G  | T  | 5   | 280 | c.641G>T                           | c.(640-642)CGG>CTG     | p.R214L  |
| Pat_15 | Post-Resistance | WDR17    | 116966 | 37 | 4 | 177046428 | 177046428 | Missense_Mutation | SNP | T  | C  | 61  | 348 | c.784T>C                           | c.(784-786)TTT>CTT     | p.F262L  |
| Pat_15 | Post-Resistance | TRIML1   | 339976 | 37 | 4 | 189061099 | 189061099 | Missense_Mutation | SNP | C  | A  | 4   | 244 | c.387C>A                           | c.(385-387)AGC>AGA     | p.S129R  |
| Pat_15 | Post-Resistance | FAM173B  | 134145 | 37 | 5 | 10239375  | 10239376  | Missense_Mutation | DNP | CC | TT | 62  | 426 | c.109_110GG>AA                     | c.(109-111)GGG>AAG     | p.G37K   |
| Pat_15 | Post-Resistance | DNAH5    | 1767   | 37 | 5 | 13901435  | 13901435  | Missense_Mutation | SNP | T  | G  | 50  | 151 | c.1978A>C                          | c.(1978-1980)ATT>CTT   | p.I660L  |
| Pat_15 | Post-Resistance | C5orf42  | 65250  | 37 | 5 | 37183163  | 37183163  | Missense_Mutation | SNP | C  | A  | 6   | 271 | c.5120G>T                          | c.(5119-5121)TGG>TTG   | p.W1707L |
| Pat_15 | Post-Resistance | TTC33    | 23548  | 37 | 5 | 40730441  | 40730441  | Missense_Mutation | SNP | G  | A  | 60  | 277 | c.226C>T                           | c.(226-228)CGG>TGG     | p.R76W   |
| Pat_15 | Post-Resistance | HCN1     | 348980 | 37 | 5 | 45303881  | 45303881  | Missense_Mutation | SNP | C  | T  | 127 | 474 | c.1438G>A                          | c.(1438-1440)GAT>AAT   | p.D480N  |
| Pat_15 | Post-Resistance | MARVELD2 | 153562 | 37 | 5 | 68728909  | 68728909  | Missense_Mutation | SNP | G  | A  | 140 | 490 | c.1492G>A                          | c.(1492-1494)GAA>AAA   | p.E498K  |
| Pat_15 | Post-Resistance | BDP1     | 55814  | 37 | 5 | 70838063  | 70838063  | Missense_Mutation | SNP | C  | T  | 41  | 161 | c.6383C>T                          | c.(6382-6384)ACC>ATC   | p.T2128I |
| Pat_15 | Post-Resistance | ENC1     | 8507   | 37 | 5 | 73931196  | 73931196  | Missense_Mutation | SNP | G  | A  | 4   | 237 | c.1115C>T                          | c.(1114-1116)GCC>GTC   | p.A372V  |
| Pat_15 | Post-Resistance | F2RL1    | 2150   | 37 | 5 | 76129526  | 76129526  | Missense_Mutation | SNP | G  | A  | 7   | 722 | c.1094G>A                          | c.(1093-1095)CGC>CAC   | p.R365H  |
| Pat_15 | Post-Resistance | CMYA5    | 202333 | 37 | 5 | 79025094  | 79025094  | Missense_Mutation | SNP | C  | T  | 13  | 79  | c.506C>T                           | c.(505-507)CCT>CTT     | p.P169L  |
| Pat_15 | Post-Resistance | SPZ1     | 84654  | 37 | 5 | 79616947  | 79616947  | Missense_Mutation | SNP | G  | A  | 6   | 351 | c.913G>A                           | c.(913-915)GAA>AAA     | p.E305K  |
| Pat_15 | Post-Resistance | GPR98    | 84059  | 37 | 5 | 90086870  | 90086870  | Missense_Mutation | SNP | G  | A  | 27  | 74  | c.14224G>A                         | c.(14224-14226)GAA>AAA | p.E4742K |
| Pat_15 | Post-Resistance | FAM174A  | 345757 | 37 | 5 | 99871538  | 99871538  | Missense_Mutation | SNP | G  | A  | 4   | 137 | c.304G>A                           | c.(304-306)GAA>AAA     | p.E102K  |
| Pat_15 | Post-Resistance | FSTL4    | 23105  | 37 | 5 | 132535139 | 132535139 | Missense_Mutation | SNP | T  | C  | 3   | 400 | c.2177A>G                          | c.(2176-2178)TAT>TGT   | p.Y726C  |

|        |                 |           |        |    |   |           |           |                   |     |    |    |     |     |                                       |                      |               |
|--------|-----------------|-----------|--------|----|---|-----------|-----------|-------------------|-----|----|----|-----|-----|---------------------------------------|----------------------|---------------|
| Pat_15 | Post-Resistance | NRG2      | 9542   | 37 | 5 | 139232080 | 139232080 | Missense_Mutation | SNP | G  | A  | 106 | 243 | c.1481C>T                             | c.(1480-1482)TCT>TTT | p.S494F       |
| Pat_15 | Post-Resistance | PCDHB2    | 56133  | 37 | 5 | 140474559 | 140474559 | Missense_Mutation | SNP | C  | T  | 54  | 193 | c.185C>T                              | c.(184-186)GCT>GTT   | p.A62V        |
| Pat_15 | Post-Resistance | PCDHB8    | 56128  | 37 | 5 | 140559872 | 140559872 | Missense_Mutation | SNP | G  | A  | 98  | 336 | c.2257G>A                             | c.(2257-2259)GAG>AAG | p.E753K       |
| Pat_15 | Post-Resistance | PCDHGB5   | 56101  | 37 | 5 | 140779112 | 140779112 | Missense_Mutation | SNP | C  | T  | 23  | 80  | c.1418C>T                             | c.(1417-1419)TCG>TTG | p.S473L       |
| Pat_15 | Post-Resistance | YIPF5     | 81555  | 37 | 5 | 143545158 | 143545158 | Missense_Mutation | SNP | C  | A  | 5   | 451 | c.121G>T                              | c.(121-123)GGC>TGC   | p.G41C        |
| Pat_15 | Post-Resistance | PCYOX1L   | 78991  | 37 | 5 | 148742211 | 148742211 | Missense_Mutation | SNP | G  | C  | 4   | 268 | c.100G>C                              | c.(100-102)GCT>CCT   | p.A34P        |
| Pat_15 | Post-Resistance | PDGFRB    | 5159   | 37 | 5 | 149498342 | 149498342 | Missense_Mutation | SNP | G  | A  | 5   | 607 | c.2872C>T                             | c.(2872-2874)CTC>TTC | p.L958F       |
| Pat_15 | Post-Resistance | C5orf40   | 408263 | 37 | 5 | 156770294 | 156770294 | Missense_Mutation | SNP | G  | A  | 103 | 384 | c.251C>T                              | c.(250-252)CCT>CTT   | p.P84L        |
| Pat_15 | Post-Resistance | DOCK2     | 1794   | 37 | 5 | 169472901 | 169472901 | Missense_Mutation | SNP | C  | A  | 6   | 397 | c.3958C>A                             | c.(3958-3960)CAG>AAG | p.Q1320K      |
| Pat_15 | Post-Resistance | TSPAN17   | 26262  | 37 | 5 | 176079915 | 176079915 | Splice_Site       | SNP | G  | A  | 5   | 378 | c.456_splice                          | c.e4+1               | p.Y152_splice |
| Pat_15 | Post-Resistance | TMED9     | 54732  | 37 | 5 | 177020742 | 177020742 | Missense_Mutation | SNP | C  | T  | 147 | 544 | c.377C>T                              | c.(376-378)TCC>TTC   | p.S126F       |
| Pat_15 | Post-Resistance | ZNF454    | 285676 | 37 | 5 | 178392900 | 178392900 | Missense_Mutation | SNP | A  | G  | 3   | 277 | c.1495A>G                             | c.(1495-1497)AAT>GAT | p.N499D       |
| Pat_15 | Post-Resistance | MGAT1     | 4245   | 37 | 5 | 180219454 | 180219454 | Missense_Mutation | SNP | G  | A  | 4   | 413 | c.518C>T                              | c.(517-519)CCG>CTG   | p.P173L       |
| Pat_15 | Post-Resistance | TRIM41    | 90933  | 37 | 5 | 180660728 | 180660728 | Missense_Mutation | SNP | G  | A  | 5   | 331 | c.1256G>A                             | c.(1255-1257)AGG>AAG | p.R419K       |
| Pat_15 | Post-Resistance | SYCP2L    | 221711 | 37 | 6 | 10894172  | 10894172  | Nonsense_Mutation | SNP | G  | T  | 7   | 56  | c.151G>T                              | c.(151-153)GAG>TAG   | p.E51*        |
| Pat_15 | Post-Resistance | NEDD9     | 4739   | 37 | 6 | 11185787  | 11185787  | Missense_Mutation | SNP | G  | A  | 80  | 280 | c.2113C>T                             | c.(2113-2115)CGG>TGG | p.R705W       |
| Pat_15 | Post-Resistance | C6orf105  | 84830  | 37 | 6 | 11766609  | 11766609  | Splice_Site       | SNP | C  | T  | 35  | 197 | c.289_splice                          | c.e3-1               | p.F97_splice  |
| Pat_15 | Post-Resistance | HIVEP1    | 3096   | 37 | 6 | 12122375  | 12122375  | Missense_Mutation | SNP | C  | T  | 30  | 174 | c.2347C>T                             | c.(2347-2349)CCC>TCC | p.P783S       |
| Pat_15 | Post-Resistance | OR12D3    | 81797  | 37 | 6 | 29343062  | 29343062  | Missense_Mutation | SNP | C  | T  | 25  | 74  | c.3G>A                                | c.(1-3)ATG>ATA       | p.M1I         |
| Pat_15 | Post-Resistance | OR2H1     | 26716  | 37 | 6 | 29430333  | 29430333  | Missense_Mutation | SNP | C  | T  | 33  | 321 | c.787C>T                              | c.(787-789)CCG>TCG   | p.P263S       |
| Pat_15 | Post-Resistance | UBD       | 10537  | 37 | 6 | 29524095  | 29524095  | Missense_Mutation | SNP | C  | T  | 59  | 146 | c.60G>A                               | c.(58-60)ATG>ATA     | p.M20I        |
| Pat_15 | Post-Resistance | MDC1      | 9656   | 37 | 6 | 30673061  | 30673061  | Missense_Mutation | SNP | G  | A  | 6   | 757 | c.3899C>T                             | c.(3898-3900)CCT>CTT | p.P1300L      |
| Pat_15 | Post-Resistance | CCHCR1    | 54535  | 37 | 6 | 31116267  | 31116267  | Missense_Mutation | SNP | G  | A  | 4   | 217 | c.1228C>T                             | c.(1228-1230)CGT>TGT | p.R410C       |
| Pat_15 | Post-Resistance | WDR46     | 9277   | 37 | 6 | 33255136  | 33255136  | Missense_Mutation | SNP | G  | A  | 4   | 246 | c.875C>T                              | c.(874-876)ACA>ATA   | p.T292I       |
| Pat_15 | Post-Resistance | SCUBE3    | 222663 | 37 | 6 | 35195465  | 35195465  | Missense_Mutation | SNP | G  | A  | 4   | 206 | c.194G>A                              | c.(193-195)GGC>GAC   | p.G65D        |
| Pat_15 | Post-Resistance | RNF8      | 9025   | 37 | 6 | 37358522  | 37358522  | Missense_Mutation | SNP | G  | C  | 4   | 216 | c.1446G>C                             | c.(1444-1446)AAG>AAC | p.K482N       |
| Pat_15 | Post-Resistance | DNAH8     | 1769   | 37 | 6 | 38750805  | 38750805  | Missense_Mutation | SNP | C  | T  | 36  | 143 | c.1634C>T                             | c.(1633-1635)CCG>CTG | p.P545L       |
| Pat_15 | Post-Resistance | TTBK1     | 84630  | 37 | 6 | 43251530  | 43251530  | Missense_Mutation | SNP | C  | T  | 17  | 159 | c.3052C>T                             | c.(3052-3054)CCG>TCG | p.P1018S      |
| Pat_15 | Post-Resistance | GPR116    | 221395 | 37 | 6 | 46834662  | 46834662  | Missense_Mutation | SNP | C  | T  | 43  | 134 | c.1834G>A                             | c.(1834-1836)GCA>ACA | p.A612T       |
| Pat_15 | Post-Resistance | FBXO9     | 26268  | 37 | 6 | 52947334  | 52947334  | Nonsense_Mutation | SNP | C  | T  | 4   | 285 | c.601C>T                              | c.(601-603)CGA>TGA   | p.R201*       |
| Pat_15 | Post-Resistance | BMP5      | 653    | 37 | 6 | 55659083  | 55659083  | Missense_Mutation | SNP | C  | T  | 24  | 169 | c.826G>A                              | c.(826-828)GGG>AGG   | p.G276R       |
| Pat_15 | Post-Resistance | COL12A1   | 1303   | 37 | 6 | 75807004  | 75807004  | Missense_Mutation | SNP | C  | A  | 4   | 348 | c.8542G>T                             | c.(8542-8544)GGT>TGT | p.G2848C      |
| Pat_15 | Post-Resistance | MDN1      | 23195  | 37 | 6 | 90400405  | 90400406  | Missense_Mutation | DNP | GG | AA | 60  | 182 | 10735_10736CC>>c.(10735-10737)CCC>TTC |                      | p.P3579F      |
| Pat_15 | Post-Resistance | BACH2     | 60468  | 37 | 6 | 90642342  | 90642342  | Missense_Mutation | SNP | C  | T  | 22  | 89  | c.2311G>A                             | c.(2311-2313)GAG>AAG | p.E771K       |
| Pat_15 | Post-Resistance | EPHA7     | 2045   | 37 | 6 | 94066675  | 94066675  | Missense_Mutation | SNP | C  | T  | 21  | 273 | c.1084G>A                             | c.(1084-1086)GAT>AAT | p.D362N       |
| Pat_15 | Post-Resistance | ASCC3     | 10973  | 37 | 6 | 101215121 | 101215121 | Missense_Mutation | SNP | G  | A  | 5   | 442 | c.1496C>T                             | c.(1495-1497)GCC>GTC | p.A499V       |
| Pat_15 | Post-Resistance | WASF1     | 8936   | 37 | 6 | 110423000 | 110423000 | Missense_Mutation | SNP | C  | T  | 8   | 562 | c.1313G>A                             | c.(1312-1314)CGA>CAA | p.R438Q       |
| Pat_15 | Post-Resistance | RFX6      | 222546 | 37 | 6 | 117248274 | 117248274 | Missense_Mutation | SNP | A  | C  | 36  | 446 | c.1970A>C                             | c.(1969-1971)AAC>ACC | p.N657T       |
| Pat_15 | Post-Resistance | KIAA1244  | 57221  | 37 | 6 | 138584659 | 138584659 | Missense_Mutation | SNP | T  | G  | 23  | 153 | c.2039T>G                             | c.(2038-2040)CTG>CGG | p.L680R       |
| Pat_15 | Post-Resistance | HECA      | 51696  | 37 | 6 | 139488098 | 139488098 | Missense_Mutation | SNP | T  | A  | 37  | 257 | c.949T>A                              | c.(949-951)TTC>ATC   | p.F317I       |
| Pat_15 | Post-Resistance | TIAM2     | 26230  | 37 | 6 | 155504535 | 155504535 | Missense_Mutation | SNP | G  | A  | 91  | 228 | c.2965G>A                             | c.(2965-2967)GAC>AAC | p.D989N       |
| Pat_15 | Post-Resistance | SLC22A3   | 6581   | 37 | 6 | 160831795 | 160831795 | Missense_Mutation | SNP | C  | T  | 40  | 253 | c.892C>T                              | c.(892-894)CGG>TGG   | p.R298W       |
| Pat_15 | Post-Resistance | STK31     | 56164  | 37 | 7 | 23809328  | 23809328  | Missense_Mutation | SNP | G  | A  | 90  | 416 | c.1666G>A                             | c.(1666-1668)GAG>AAG | p.E556K       |
| Pat_15 | Post-Resistance | ADCYAP1R1 | 117    | 37 | 7 | 31117659  | 31117659  | Missense_Mutation | SNP | G  | A  | 69  | 404 | c.211G>A                              | c.(211-213)GAG>AAG   | p.E71K        |
| Pat_15 | Post-Resistance | TXNDC3    | 51314  | 37 | 7 | 37924797  | 37924797  | Nonsense_Mutation | SNP | G  | A  | 24  | 132 | c.1190G>A                             | c.(1189-1191)TGG>TAG | p.W397*       |
| Pat_15 | Post-Resistance | POU6F2    | 11281  | 37 | 7 | 39379598  | 39379598  | Missense_Mutation | SNP | C  | A  | 7   | 464 | c.869C>A                              | c.(868-870)CCA>CAA   | p.P290Q       |
| Pat_15 | Post-Resistance | LANCL2    | 55915  | 37 | 7 | 55459549  | 55459549  | Missense_Mutation | SNP | G  | A  | 4   | 351 | c.268G>A                              | c.(268-270)GAA>AAA   | p.E90K        |

|        |                 |           |        |    |   |           |           |                   |     |    |    |     |     |                |                        |          |
|--------|-----------------|-----------|--------|----|---|-----------|-----------|-------------------|-----|----|----|-----|-----|----------------|------------------------|----------|
| Pat_15 | Post-Resistance | ZNF479    | 90827  | 37 | 7 | 57187720  | 57187720  | Missense_Mutation | SNP | C  | T  | 61  | 342 | c.1402G>A      | c.(1402-1404)GAA>AAA   | p.E468K  |
| Pat_15 | Post-Resistance | ZNF727    | 442319 | 37 | 7 | 63538638  | 63538638  | Missense_Mutation | SNP | G  | C  | 4   | 80  | c.1211G>C      | c.(1210-1212)AGC>ACC   | p.S404T  |
| Pat_15 | Post-Resistance | ZNF679    | 168417 | 37 | 7 | 63726725  | 63726725  | Missense_Mutation | SNP | A  | C  | 18  | 126 | c.714A>C       | c.(712-714)AAA>AAC     | p.K238N  |
| Pat_15 | Post-Resistance | MAGI2     | 9863   | 37 | 7 | 77973134  | 77973134  | Missense_Mutation | SNP | G  | A  | 69  | 191 | c.1369C>T      | c.(1369-1371)CCG>TCG   | p.P457S  |
| Pat_15 | Post-Resistance | ABCB4     | 5244   | 37 | 7 | 87083905  | 87083905  | Missense_Mutation | SNP | T  | G  | 31  | 77  | c.290A>C       | c.(289-291)AAC>ACC     | p.N97T   |
| Pat_15 | Post-Resistance | ZNF804B   | 219578 | 37 | 7 | 88963666  | 88963666  | Nonsense_Mutation | SNP | G  | A  | 77  | 177 | c.1370G>A      | c.(1369-1371)TGG>TAG   | p.W457*  |
| Pat_15 | Post-Resistance | ZNF804B   | 219578 | 37 | 7 | 88964142  | 88964142  | Missense_Mutation | SNP | G  | C  | 38  | 102 | c.1846G>C      | c.(1846-1848)GCA>CCA   | p.A616P  |
| Pat_15 | Post-Resistance | TRRAP     | 8295   | 37 | 7 | 98602945  | 98602945  | Missense_Mutation | SNP | C  | T  | 40  | 231 | c.10685C>T     | c.(10684-10686)ACC>ATC | p.T3562I |
| Pat_15 | Post-Resistance | ZAN       | 7455   | 37 | 7 | 100350361 | 100350361 | Missense_Mutation | SNP | T  | C  | 9   | 453 | c.2633T>C      | c.(2632-2634)CTC>CCC   | p.L878P  |
| Pat_15 | Post-Resistance | MUC17     | 140453 | 37 | 7 | 100684677 | 100684677 | Missense_Mutation | SNP | G  | A  | 7   | 851 | c.9980G>A      | c.(9979-9981)GGT>GAT   | p.G3327D |
| Pat_15 | Post-Resistance | DPY19L2P2 | 349152 | 37 | 7 | 102825947 | 102825947 | Missense_Mutation | SNP | A  | G  | 5   | 320 | c.1048T>C      | c.(1048-1050)TGT>CGT   | p.C350R  |
| Pat_15 | Post-Resistance | RELN      | 5649   | 37 | 7 | 103155634 | 103155634 | Missense_Mutation | SNP | G  | A  | 35  | 127 | c.8117C>T      | c.(8116-8118)TCA>TTA   | p.S2706L |
| Pat_15 | Post-Resistance | CADPS2    | 93664  | 37 | 7 | 121960292 | 121960292 | Missense_Mutation | SNP | G  | T  | 5   | 360 | c.3818C>A      | c.(3817-3819)ACA>AAA   | p.T1273K |
| Pat_15 | Post-Resistance | GPR37     | 2861   | 37 | 7 | 124386991 | 124386991 | Missense_Mutation | SNP | G  | A  | 5   | 469 | c.1430C>T      | c.(1429-1431)ACC>ATC   | p.T477I  |
| Pat_15 | Post-Resistance | FLNC      | 2318   | 37 | 7 | 128494136 | 128494136 | Missense_Mutation | SNP | G  | A  | 4   | 132 | c.6593G>A      | c.(6592-6594)GGC>GAC   | p.G2198D |
| Pat_15 | Post-Resistance | BRAF      | 673    | 37 | 7 | 140453136 | 140453136 | Missense_Mutation | SNP | A  | T  | 740 | 148 | c.1799T>A      | c.(1798-1800)GTG>GAG   | p.V600E  |
| Pat_15 | Post-Resistance | FAM115C   | 285966 | 37 | 7 | 143421630 | 143421630 | Missense_Mutation | SNP | G  | T  | 7   | 58  | c.2345G>T      | c.(2344-2346)TGG>TTG   | p.W782L  |
| Pat_15 | Post-Resistance | OR2F2     | 135948 | 37 | 7 | 143632858 | 143632858 | Missense_Mutation | SNP | C  | T  | 45  | 259 | c.533C>T       | c.(532-534)TCC>TTC     | p.S178F  |
| Pat_15 | Post-Resistance | CNTNAP2   | 26047  | 37 | 7 | 146805370 | 146805370 | Missense_Mutation | SNP | G  | A  | 44  | 138 | c.682G>A       | c.(682-684)GGA>AGA     | p.G228R  |
| Pat_15 | Post-Resistance | GIMAP8    | 155038 | 37 | 7 | 150171171 | 150171171 | Missense_Mutation | SNP | C  | T  | 136 | 393 | c.754C>T       | c.(754-756)CTT>TTT     | p.L252F  |
| Pat_15 | Post-Resistance | NOS3      | 4846   | 37 | 7 | 150698472 | 150698472 | Missense_Mutation | SNP | G  | A  | 44  | 184 | c.1387G>A      | c.(1387-1389)GAG>AAG   | p.E463K  |
| Pat_15 | Post-Resistance | PAXIP1    | 22976  | 37 | 7 | 154774994 | 154774994 | Missense_Mutation | SNP | C  | A  | 24  | 87  | c.373G>T       | c.(373-375)GGG>TGG     | p.G125W  |
| Pat_15 | Post-Resistance | SPAG11B   | 10407  | 37 | 8 | 7320378   | 7320378   | Missense_Mutation | SNP | G  | A  | 78  | 419 | c.65C>T        | c.(64-66)TCG>TTG       | p.S22L   |
| Pat_15 | Post-Resistance | STC1      | 6781   | 37 | 8 | 23708930  | 23708930  | Missense_Mutation | SNP | C  | T  | 141 | 318 | c.376G>A       | c.(376-378)GAA>AAA     | p.E126K  |
| Pat_15 | Post-Resistance | ADAMDEC1  | 27299  | 37 | 8 | 24251634  | 24251634  | Missense_Mutation | SNP | G  | A  | 24  | 220 | c.337G>A       | c.(337-339)GAA>AAA     | p.E113K  |
| Pat_15 | Post-Resistance | ZNF703    | 80139  | 37 | 8 | 37556061  | 37556061  | Missense_Mutation | SNP | T  | C  | 3   | 129 | c.1642T>C      | c.(1642-1644)TAT>CAT   | p.Y548H  |
| Pat_15 | Post-Resistance | ADAM18    | 8749   | 37 | 8 | 39537690  | 39537690  | Missense_Mutation | SNP | C  | T  | 13  | 139 | c.1766C>T      | c.(1765-1767)TCA>TTA   | p.S589L  |
| Pat_15 | Post-Resistance | SGK196    | 84197  | 37 | 8 | 42958806  | 42958806  | Missense_Mutation | SNP | G  | T  | 5   | 624 | c.115G>T       | c.(115-117)GAC>TAC     | p.D39Y   |
| Pat_15 | Post-Resistance | NSMAF     | 8439   | 37 | 8 | 59496726  | 59496726  | Missense_Mutation | SNP | C  | G  | 4   | 455 | c.2693G>C      | c.(2692-2694)JTG>TCT   | p.C898S  |
| Pat_15 | Post-Resistance | DCAF4L2   | 138009 | 37 | 8 | 88886025  | 88886025  | Missense_Mutation | SNP | C  | T  | 71  | 198 | c.175G>A       | c.(175-177)GTC>ATC     | p.V59I   |
| Pat_15 | Post-Resistance | NECAB1    | 64168  | 37 | 8 | 91893351  | 91893351  | Missense_Mutation | SNP | C  | A  | 3   | 39  | c.350C>A       | c.(349-351)ACA>AAA     | p.T117K  |
| Pat_15 | Post-Resistance | HRSP12    | 10247  | 37 | 8 | 99116755  | 99116755  | Missense_Mutation | SNP | G  | A  | 69  | 243 | c.313C>T       | c.(313-315)CCT>TCT     | p.P105S  |
| Pat_15 | Post-Resistance | GRHL2     | 79977  | 37 | 8 | 102643916 | 102643916 | Missense_Mutation | SNP | G  | A  | 31  | 121 | c.1309G>A      | c.(1309-1311)GGG>AGG   | p.G437R  |
| Pat_15 | Post-Resistance | SNTB1     | 6641   | 37 | 8 | 121823920 | 121823920 | Missense_Mutation | SNP | G  | A  | 5   | 235 | c.164C>T       | c.(163-165)GCG>GTG     | p.A55V   |
| Pat_15 | Post-Resistance | FAM135B   | 51059  | 37 | 8 | 139163688 | 139163688 | Missense_Mutation | SNP | C  | T  | 21  | 141 | c.3030G>A      | c.(3028-3030)ATG>ATA   | p.M1010I |
| Pat_15 | Post-Resistance | BAI1      | 575    | 37 | 8 | 143603440 | 143603440 | Missense_Mutation | SNP | C  | T  | 4   | 181 | c.3139C>T      | c.(3139-3141)CGC>TGC   | p.R1047C |
| Pat_15 | Post-Resistance | ZNF250    | 58500  | 37 | 8 | 146107447 | 146107447 | Missense_Mutation | SNP | C  | T  | 5   | 251 | c.1136G>A      | c.(1135-1137)CGC>CAC   | p.R379H  |
| Pat_15 | Post-Resistance | FAM122A   | 116224 | 37 | 9 | 71395823  | 71395823  | Missense_Mutation | SNP | G  | A  | 5   | 775 | c.743G>A       | c.(742-744)AGC>AAC     | p.S248N  |
| Pat_15 | Post-Resistance | APBA1     | 320    | 37 | 9 | 72131644  | 72131644  | Missense_Mutation | SNP | C  | T  | 15  | 71  | c.483G>A       | c.(481-483)ATG>ATA     | p.M161I  |
| Pat_15 | Post-Resistance | PCSK5     | 5125   | 37 | 9 | 78601135  | 78601136  | Missense_Mutation | DNP | CC | TT | 87  | 313 | c.385_386CC>TT | c.(385-387)CCC>TTC     | p.P129F  |
| Pat_15 | Post-Resistance | SLC35D2   | 11046  | 37 | 9 | 99113404  | 99113404  | Missense_Mutation | SNP | C  | T  | 4   | 345 | c.469G>A       | c.(469-471)GGG>AGG     | p.G157R  |
| Pat_15 | Post-Resistance | OR1L4     | 254973 | 37 | 9 | 125487162 | 125487162 | Missense_Mutation | SNP | G  | A  | 20  | 151 | c.894G>A       | c.(892-894)ATG>ATA     | p.M298I  |
| Pat_15 | Post-Resistance | LRSAM1    | 90678  | 37 | 9 | 130241662 | 130241662 | Nonsense_Mutation | SNP | G  | T  | 5   | 303 | c.781G>T       | c.(781-783)GAA>TAA     | p.E261*  |
| Pat_15 | Post-Resistance | IER5L     | 389792 | 37 | 9 | 131939665 | 131939665 | Missense_Mutation | SNP | G  | A  | 20  | 26  | c.667C>T       | c.(667-669)CCG>TCG     | p.P223S  |
| Pat_15 | Post-Resistance | LAMC3     | 10319  | 37 | 9 | 133907487 | 133907487 | Missense_Mutation | SNP | G  | A  | 74  | 418 | c.734G>A       | c.(733-735)GGG>GAG     | p.G245E  |
| Pat_15 | Post-Resistance | COL5A1    | 1289   | 37 | 9 | 137701066 | 137701066 | Missense_Mutation | SNP | G  | A  | 7   | 25  | c.3404G>A      | c.(3403-3405)GGT>GAT   | p.G1135D |
| Pat_15 | Post-Resistance | NELF      | 26012  | 37 | 9 | 140343925 | 140343925 | Missense_Mutation | SNP | G  | A  | 5   | 184 | c.1514C>T      | c.(1513-1515)ACG>ATG   | p.T505M  |



|        |                 |          |        |    |   |           |           |                   |     |    |    |     |     |                  |                      |               |
|--------|-----------------|----------|--------|----|---|-----------|-----------|-------------------|-----|----|----|-----|-----|------------------|----------------------|---------------|
| Pat_15 | Post-Resistance | IL3RA    | 3563   | 37 | X | 1497566   | 1497566   | Missense_Mutation | SNP | G  | A  | 12  | 112 | c.889G>A         | c.(889-891)GAG>AAG   | p.E297K       |
| Pat_15 | Post-Resistance | MXRA5    | 25878  | 37 | X | 3240542   | 3240542   | Missense_Mutation | SNP | C  | T  | 109 | 272 | c.3184G>A        | c.(3184-3186)GAG>AAG | p.E1062K      |
| Pat_15 | Post-Resistance | FAM9B    | 171483 | 37 | X | 8995964   | 8995964   | Missense_Mutation | SNP | C  | T  | 43  | 310 | c.437G>A         | c.(436-438)AGT>AAT   | p.S146N       |
| Pat_15 | Post-Resistance | MAGEB1   | 4112   | 37 | X | 30269273  | 30269273  | Nonsense_Mutation | SNP | G  | A  | 14  | 75  | c.663G>A         | c.(661-663)TGG>TGA   | p.W221*       |
| Pat_15 | Post-Resistance | RPGR     | 6103   | 37 | X | 38146469  | 38146469  | Missense_Mutation | SNP | C  | T  | 14  | 74  | c.1783G>A        | c.(1783-1785)GAT>AAT | p.D595N       |
| Pat_15 | Post-Resistance | RBM10    | 8241   | 37 | X | 47032530  | 47032530  | Missense_Mutation | SNP | C  | T  | 4   | 295 | c.436C>T         | c.(436-438)CGT>TGT   | p.R146C       |
| Pat_15 | Post-Resistance | SSX5     | 6758   | 37 | X | 48051681  | 48051681  | Missense_Mutation | SNP | C  | T  | 226 | 540 | c.317G>A         | c.(316-318)GGA>GAA   | p.G106E       |
| Pat_15 | Post-Resistance | TBC1D25  | 4943   | 37 | X | 48417570  | 48417570  | Nonsense_Mutation | SNP | C  | T  | 28  | 159 | c.541C>T         | c.(541-543)CAA>TAA   | p.Q181*       |
| Pat_15 | Post-Resistance | HDAC6    | 10013  | 37 | X | 48664806  | 48664806  | Missense_Mutation | SNP | C  | A  | 5   | 287 | c.469C>A         | c.(469-471)CAG>AAG   | p.Q157K       |
| Pat_15 | Post-Resistance | FOXP3    | 50943  | 37 | X | 49113925  | 49113925  | Missense_Mutation | SNP | G  | A  | 20  | 151 | c.413C>T         | c.(412-414)ACT>ATT   | p.T138I       |
| Pat_15 | Post-Resistance | DGKK     | 139189 | 37 | X | 50121099  | 50121099  | Missense_Mutation | SNP | G  | A  | 86  | 306 | c.3109C>T        | c.(3109-3111)CGG>TGG | p.R1037W      |
| Pat_15 | Post-Resistance | BMP15    | 9210   | 37 | X | 50659560  | 50659560  | Missense_Mutation | SNP | T  | C  | 120 | 394 | c.1132T>C        | c.(1132-1134)TAC>CAC | p.Y378H       |
| Pat_15 | Post-Resistance | SPANXN5  | 494197 | 37 | X | 52826389  | 52826389  | Splice_Site       | SNP | G  | A  | 100 | 374 | c.1_splice       | c.e1-1               | p.M1_splice   |
| Pat_15 | Post-Resistance | IQSEC2   | 23096  | 37 | X | 53279908  | 53279908  | Missense_Mutation | SNP | C  | T  | 5   | 126 | c.1850G>A        | c.(1849-1851)CGC>CAC | p.R617H       |
| Pat_15 | Post-Resistance | NHSL2    | 340527 | 37 | X | 71359877  | 71359877  | Missense_Mutation | SNP | G  | A  | 15  | 91  | c.2479G>A        | c.(2479-2481)GAC>AAC | p.D827N       |
| Pat_15 | Post-Resistance | RPS6KA6  | 27330  | 37 | X | 83319404  | 83319404  | Missense_Mutation | SNP | T  | C  | 18  | 99  | c.2119A>G        | c.(2119-2121)ATG>GTG | p.M707V       |
| Pat_15 | Post-Resistance | BTK      | 695    | 37 | X | 100617183 | 100617183 | Missense_Mutation | SNP | G  | A  | 5   | 436 | c.566C>T         | c.(565-567)CCC>CTC   | p.P189L       |
| Pat_15 | Post-Resistance | MORF4L2  | 9643   | 37 | X | 102931453 | 102931453 | Nonsense_Mutation | SNP | G  | T  | 5   | 459 | c.503C>A         | c.(502-504)TCG>TAG   | p.S168*       |
| Pat_15 | Post-Resistance | TEX13A   | 56157  | 37 | X | 104463861 | 104463861 | Missense_Mutation | SNP | A  | G  | 3   | 233 | c.1015T>C        | c.(1015-1017)TTT>CTT | p.F339L       |
| Pat_15 | Post-Resistance | NRK      | 203447 | 37 | X | 105150405 | 105150405 | Splice_Site       | SNP | A  | G  | 2   | 32  | c.846_splice     | c.e11-2              | p.W282_splice |
| Pat_15 | Post-Resistance | CLDN2    | 9075   | 37 | X | 106171813 | 106171813 | Missense_Mutation | SNP | G  | A  | 5   | 375 | c.355G>A         | c.(355-357)GTA>ATA   | p.V119I       |
| Pat_15 | Post-Resistance | WDR44    | 54521  | 37 | X | 117566799 | 117566799 | Missense_Mutation | SNP | G  | A  | 86  | 654 | c.1793G>A        | c.(1792-1794)CGG>CAG | p.R598Q       |
| Pat_15 | Post-Resistance | AKAP14   | 158798 | 37 | X | 119048663 | 119048663 | Missense_Mutation | SNP | A  | T  | 19  | 115 | c.263A>T         | c.(262-264)AAG>ATG   | p.K88M        |
| Pat_15 | Post-Resistance | UTP14A   | 10813  | 37 | X | 129041393 | 129041393 | Missense_Mutation | SNP | A  | G  | 32  | 242 | c.77A>G          | c.(76-78)TAC>TGC     | p.Y26C        |
| Pat_15 | Post-Resistance | RBMX2    | 51634  | 37 | X | 129546533 | 129546533 | Missense_Mutation | SNP | C  | T  | 34  | 214 | c.680C>T         | c.(679-681)TCC>TTC   | p.S227F       |
| Pat_15 | Post-Resistance | MBNL3    | 55796  | 37 | X | 131526325 | 131526325 | Missense_Mutation | SNP | G  | A  | 4   | 226 | c.380C>T         | c.(379-381)CCT>CTT   | p.P127L       |
| Pat_15 | Post-Resistance | GPC3     | 2719   | 37 | X | 132670264 | 132670265 | Nonsense_Mutation | DNP | GG | TA | 85  | 306 | .:1630_1631CC>T> | c.(1630-1632)CCG>TAG | p.P544*       |
| Pat_15 | Post-Resistance | BRS3     | 680    | 37 | X | 135572476 | 135572476 | Missense_Mutation | SNP | C  | T  | 18  | 146 | c.619C>T         | c.(619-621)CCT>TCT   | p.P207S       |
| Pat_15 | Post-Resistance | FGF13    | 2258   | 37 | X | 137715099 | 137715099 | Missense_Mutation | SNP | C  | T  | 64  | 349 | c.650G>A         | c.(649-651)CGA>CAA   | p.R217Q       |
| Pat_15 | Post-Resistance | MAGEA3   | 4102   | 37 | X | 151935794 | 151935794 | Nonsense_Mutation | SNP | G  | A  | 203 | 447 | c.373C>T         | c.(373-375)CGA>TGA   | p.R125*       |
| Pat_15 | Post-Resistance | SPRY3    | 10251  | 37 | X | 155004072 | 155004072 | Missense_Mutation | SNP | G  | A  | 67  | 495 | c.539G>A         | c.(538-540)AGC>AAC   | p.S180N       |
| Pat_15 | Post-Resistance | SPRY3    | 10251  | 37 | X | 155004080 | 155004080 | Missense_Mutation | SNP | G  | C  | 62  | 486 | c.547G>C         | c.(547-549)GAT>CAT   | p.D183H       |
| Pat_26 | Pre-Treatment   | CCNL2    | 81669  | 37 | 1 | 1326156   | 1326156   | Missense_Mutation | SNP | C  | T  | 6   | 363 | c.749G>A         | c.(748-750)CGG>CAG   | p.R250Q       |
| Pat_26 | Pre-Treatment   | NADK     | 65220  | 37 | 1 | 1687996   | 1687996   | Missense_Mutation | SNP | C  | T  | 4   | 168 | c.445G>A         | c.(445-447)GCC>ACC   | p.A149T       |
| Pat_26 | Pre-Treatment   | CHD5     | 26038  | 37 | 1 | 6208967   | 6208967   | Missense_Mutation | SNP | T  | A  | 153 | 246 | c.1330A>T        | c.(1330-1332)AAC>TAC | p.N444Y       |
| Pat_26 | Pre-Treatment   | RPL22    | 6146   | 37 | 1 | 6253023   | 6253023   | Missense_Mutation | SNP | A  | G  | 69  | 155 | c.209T>C         | c.(208-210)ATC>ACC   | p.I70T        |
| Pat_26 | Pre-Treatment   | CLSTN1   | 22883  | 37 | 1 | 9804587   | 9804587   | Missense_Mutation | SNP | C  | T  | 60  | 99  | c.1100G>A        | c.(1099-1101)GGC>GAC | p.G367D       |
| Pat_26 | Pre-Treatment   | CLCN6    | 1185   | 37 | 1 | 11896071  | 11896071  | Missense_Mutation | SNP | C  | T  | 4   | 185 | c.1841C>T        | c.(1840-1842)CCG>CTG | p.P614L       |
| Pat_26 | Pre-Treatment   | PRAMEF12 | 390999 | 37 | 1 | 12835134  | 12835134  | Missense_Mutation | SNP | G  | A  | 63  | 118 | c.124G>A         | c.(124-126)GAG>AAG   | p.E42K        |
| Pat_26 | Pre-Treatment   | RSC1A1   | 6248   | 37 | 1 | 15988098  | 15988098  | Missense_Mutation | SNP | C  | T  | 6   | 579 | c.1735C>T        | c.(1735-1737)CGC>TGC | p.R579C       |
| Pat_26 | Pre-Treatment   | CLCNKB   | 1188   | 37 | 1 | 16372179  | 16372179  | Missense_Mutation | SNP | G  | A  | 4   | 173 | c.227G>A         | c.(226-228)CGA>CAA   | p.R76Q        |
| Pat_26 | Pre-Treatment   | CLCNKB   | 1188   | 37 | 1 | 16382951  | 16382951  | Missense_Mutation | SNP | C  | T  | 219 | 511 | c.1964C>T        | c.(1963-1965)TCC>TTC | p.S655F       |
| Pat_26 | Pre-Treatment   | HTR6     | 3362   | 37 | 1 | 20005079  | 20005079  | Missense_Mutation | SNP | C  | T  | 69  | 127 | c.734C>T         | c.(733-735)CCA>CTA   | p.P245L       |
| Pat_26 | Pre-Treatment   | RAP1GAP  | 5909   | 37 | 1 | 21924548  | 21924548  | Missense_Mutation | SNP | C  | T  | 4   | 43  | c.1889G>A        | c.(1888-1890)CGA>CAA | p.R630Q       |
| Pat_26 | Pre-Treatment   | HSPG2    | 3339   | 37 | 1 | 22166016  | 22166016  | Missense_Mutation | SNP | G  | A  | 68  | 87  | c.9737C>T        | c.(9736-9738)TCC>TTC | p.S3246F      |
| Pat_26 | Pre-Treatment   | HSPG2    | 3339   | 37 | 1 | 22201165  | 22201165  | Missense_Mutation | SNP | G  | A  | 4   | 63  | c.3472C>T        | c.(3472-3474)CGC>TGC | p.R1158C      |
| Pat_26 | Pre-Treatment   | HSPG2    | 3339   | 37 | 1 | 22207917  | 22207917  | Missense_Mutation | SNP | T  | C  | 243 | 424 | c.1733A>G        | c.(1732-1734)CAC>CGC | p.H578R       |

|        |               |          |        |    |   |           |           |                   |     |    |    |     |     |                |                      |          |
|--------|---------------|----------|--------|----|---|-----------|-----------|-------------------|-----|----|----|-----|-----|----------------|----------------------|----------|
| Pat_26 | Pre-Treatment | WDTC1    | 23038  | 37 | 1 | 27627806  | 27627806  | Missense_Mutation | SNP | G  | A  | 5   | 276 | c.1322G>A      | c.(1321-1323)CGC>CAC | p.R441H  |
| Pat_26 | Pre-Treatment | MAP3K6   | 9064   | 37 | 1 | 27690481  | 27690481  | Missense_Mutation | SNP | C  | T  | 4   | 118 | c.791G>A       | c.(790-792)CGG>CAG   | p.R264Q  |
| Pat_26 | Pre-Treatment | GMEB1    | 10691  | 37 | 1 | 29019522  | 29019522  | Nonsense_Mutation | SNP | G  | A  | 81  | 162 | c.435G>A       | c.(433-435)TGG>TGA   | p.W145*  |
| Pat_26 | Pre-Treatment | GMEB1    | 10691  | 37 | 1 | 29029024  | 29029024  | Missense_Mutation | SNP | G  | A  | 4   | 165 | c.703G>A       | c.(703-705)GCT>ACT   | p.A235T  |
| Pat_26 | Pre-Treatment | ZBTB8A   | 653121 | 37 | 1 | 33065841  | 33065841  | Missense_Mutation | SNP | G  | A  | 3   | 22  | c.1147G>A      | c.(1147-1149)GCT>ACT | p.A383T  |
| Pat_26 | Pre-Treatment | KIAA0754 | 643314 | 37 | 1 | 39879250  | 39879250  | Missense_Mutation | SNP | A  | G  | 4   | 59  | c.3313A>G      | c.(3313-3315)ACC>GCC | p.T1105A |
| Pat_26 | Pre-Treatment | ZSWIM5   | 57643  | 37 | 1 | 45485767  | 45485767  | Missense_Mutation | SNP | C  | T  | 5   | 153 | c.2666G>A      | c.(2665-2667)CGA>CAA | p.R889Q  |
| Pat_26 | Pre-Treatment | ZSWIM5   | 57643  | 37 | 1 | 45500051  | 45500051  | Nonsense_Mutation | SNP | C  | T  | 158 | 295 | c.2382G>A      | c.(2380-2382)TGG>TGA | p.W794*  |
| Pat_26 | Pre-Treatment | CYP4A11  | 1579   | 37 | 1 | 47399864  | 47399864  | Missense_Mutation | SNP | C  | T  | 35  | 53  | c.1072G>A      | c.(1072-1074)GGA>AGA | p.G358R  |
| Pat_26 | Pre-Treatment | TAL1     | 6886   | 37 | 1 | 47691430  | 47691430  | Missense_Mutation | SNP | G  | A  | 3   | 24  | c.131C>T       | c.(130-132)GCG>GTG   | p.A44V   |
| Pat_26 | Pre-Treatment | CYB5RL   | 606495 | 37 | 1 | 54653410  | 54653411  | Missense_Mutation | DNP | CC | TT | 24  | 101 | c.349_350GG>AA | c.(349-351)GGG>AAG   | p.G117K  |
| Pat_26 | Pre-Treatment | KANK4    | 163782 | 37 | 1 | 62739144  | 62739145  | Missense_Mutation | DNP | CC | TT | 29  | 78  | .1631_1632GG>A | c.(1630-1632)GGG>GAA | p.G544E  |
| Pat_26 | Pre-Treatment | LEPR     | 3953   | 37 | 1 | 66075751  | 66075751  | Nonsense_Mutation | SNP | G  | A  | 117 | 190 | c.1874G>A      | c.(1873-1875)TGG>TAG | p.W625*  |
| Pat_26 | Pre-Treatment | C1orf173 | 127254 | 37 | 1 | 75055569  | 75055569  | Missense_Mutation | SNP | T  | G  | 57  | 91  | c.1922A>C      | c.(1921-1923)GAA>GCA | p.E641A  |
| Pat_26 | Pre-Treatment | CLCA4    | 22802  | 37 | 1 | 87025931  | 87025931  | Missense_Mutation | SNP | G  | A  | 126 | 183 | c.338G>A       | c.(337-339)AGA>AAA   | p.R113K  |
| Pat_26 | Pre-Treatment | CCBL2    | 56267  | 37 | 1 | 89420900  | 89420900  | Missense_Mutation | SNP | G  | A  | 51  | 82  | c.796C>T       | c.(796-798)CCA>TCA   | p.P266S  |
| Pat_26 | Pre-Treatment | DBT      | 1629   | 37 | 1 | 100715333 | 100715334 | Missense_Mutation | DNP | CC | TT | 130 | 262 | c.43_44GG>AA   | c.(43-45)GGG>AAG     | p.G15K   |
| Pat_26 | Pre-Treatment | COL11A1  | 1301   | 37 | 1 | 103488309 | 103488309 | Missense_Mutation | SNP | T  | C  | 69  | 92  | c.1234A>G      | c.(1234-1236)ACA>GCA | p.T412A  |
| Pat_26 | Pre-Treatment | EPS8L3   | 79574  | 37 | 1 | 110301230 | 110301230 | Missense_Mutation | SNP | C  | T  | 31  | 72  | c.517G>A       | c.(517-519)GAA>AAA   | p.E173K  |
| Pat_26 | Pre-Treatment | CHIA     | 27159  | 37 | 1 | 111862000 | 111862000 | Missense_Mutation | SNP | G  | A  | 24  | 82  | c.1087G>A      | c.(1087-1089)GAT>AAT | p.D363N  |
| Pat_26 | Pre-Treatment | NBPF7    | 343505 | 37 | 1 | 120381953 | 120381953 | Missense_Mutation | SNP | T  | C  | 7   | 420 | c.692A>G       | c.(691-693)TAT>TGT   | p.Y231C  |
| Pat_26 | Pre-Treatment | C1orf51  | 148523 | 37 | 1 | 150255843 | 150255843 | Missense_Mutation | SNP | C  | T  | 7   | 541 | c.166C>T       | c.(166-168)CGG>TGG   | p.R56W   |
| Pat_26 | Pre-Treatment | SETDB1   | 9869   | 37 | 1 | 150933578 | 150933578 | Missense_Mutation | SNP | G  | A  | 4   | 190 | c.3040G>A      | c.(3040-3042)GCT>ACT | p.A1014T |
| Pat_26 | Pre-Treatment | TCHHL1   | 126637 | 37 | 1 | 152058977 | 152058977 | Missense_Mutation | SNP | C  | T  | 71  | 162 | c.1181G>A      | c.(1180-1182)AGG>AAG | p.R394K  |
| Pat_26 | Pre-Treatment | TCHH     | 7062   | 37 | 1 | 152084545 | 152084546 | Missense_Mutation | DNP | AG | TC | 4   | 68  | .1147_1148CT>G | c.(1147-1149)CTG>GAG | p.L383E  |
| Pat_26 | Pre-Treatment | HRNR     | 388697 | 37 | 1 | 152188190 | 152188191 | Missense_Mutation | DNP | CC | TT | 46  | 789 | .5914_5915GG>A | c.(5914-5916)GGG>AAG | p.G1972K |
| Pat_26 | Pre-Treatment | IVL      | 3713   | 37 | 1 | 152882733 | 152882733 | Missense_Mutation | SNP | G  | A  | 15  | 31  | c.460G>A       | c.(460-462)GAG>AAG   | p.E154K  |
| Pat_26 | Pre-Treatment | SHC1     | 6464   | 37 | 1 | 154941887 | 154941887 | Missense_Mutation | SNP | G  | A  | 4   | 160 | c.533C>T       | c.(532-534)GCC>GTC   | p.A178V  |
| Pat_26 | Pre-Treatment | PKLR     | 5313   | 37 | 1 | 155264330 | 155264330 | Missense_Mutation | SNP | G  | A  | 4   | 167 | c.908C>T       | c.(907-909)CCG>CTG   | p.P303L  |
| Pat_26 | Pre-Treatment | UBQLN4   | 56893  | 37 | 1 | 156023426 | 156023426 | Missense_Mutation | SNP | T  | C  | 44  | 58  | c.67A>G        | c.(67-69)AAG>GAG     | p.K23E   |
| Pat_26 | Pre-Treatment | SLC25A44 | 9673   | 37 | 1 | 156177775 | 156177775 | Missense_Mutation | SNP | C  | T  | 61  | 141 | c.724C>T       | c.(724-726)CCC>TCC   | p.P242S  |
| Pat_26 | Pre-Treatment | IQGAP3   | 128239 | 37 | 1 | 156526371 | 156526371 | Missense_Mutation | SNP | G  | A  | 35  | 100 | c.1244C>T      | c.(1243-1245)TCG>TTG | p.S415L  |
| Pat_26 | Pre-Treatment | OR10K1   | 391109 | 37 | 1 | 158435545 | 158435545 | Missense_Mutation | SNP | T  | C  | 124 | 203 | c.194T>C       | c.(193-195)ATC>ACC   | p.I65T   |
| Pat_26 | Pre-Treatment | SPTA1    | 6708   | 37 | 1 | 158637692 | 158637692 | Missense_Mutation | SNP | A  | G  | 9   | 41  | c.1994T>C      | c.(1993-1995)GTT>GCT | p.V665A  |
| Pat_26 | Pre-Treatment | SLAMF9   | 89886  | 37 | 1 | 159922273 | 159922273 | Missense_Mutation | SNP | C  | T  | 155 | 338 | c.443G>A       | c.(442-444)GGT>GAT   | p.G148D  |
| Pat_26 | Pre-Treatment | FAM5B    | 57795  | 37 | 1 | 177249624 | 177249624 | Missense_Mutation | SNP | G  | A  | 46  | 76  | c.1312G>A      | c.(1312-1314)GAA>AAA | p.E438K  |
| Pat_26 | Pre-Treatment | PLA2G4A  | 5321   | 37 | 1 | 186919851 | 186919851 | Missense_Mutation | SNP | G  | A  | 4   | 173 | c.1327G>A      | c.(1327-1329)GAA>AAA | p.E443K  |
| Pat_26 | Pre-Treatment | B3GALT2  | 8707   | 37 | 1 | 193149624 | 193149624 | Missense_Mutation | SNP | G  | A  | 4   | 151 | c.1069C>T      | c.(1069-1071)CCC>TCC | p.P357S  |
| Pat_26 | Pre-Treatment | ASPM     | 259266 | 37 | 1 | 197101477 | 197101477 | Missense_Mutation | SNP | G  | A  | 4   | 186 | c.2425C>T      | c.(2425-2427)CGT>TGT | p.R809C  |
| Pat_26 | Pre-Treatment | PLEKHA6  | 22874  | 37 | 1 | 204214787 | 204214787 | Missense_Mutation | SNP | C  | T  | 93  | 153 | c.1988G>A      | c.(1987-1989)AGG>AAG | p.R663K  |
| Pat_26 | Pre-Treatment | LRRN2    | 10446  | 37 | 1 | 204588452 | 204588452 | Missense_Mutation | SNP | C  | T  | 55  | 99  | c.669G>A       | c.(667-669)ATG>ATA   | p.M223I  |
| Pat_26 | Pre-Treatment | LGTN     | 1939   | 37 | 1 | 206784591 | 206784591 | Missense_Mutation | SNP | C  | T  | 4   | 160 | c.193G>A       | c.(193-195)GTG>ATG   | p.V65M   |
| Pat_26 | Pre-Treatment | CR2      | 1380   | 37 | 1 | 207642243 | 207642243 | Missense_Mutation | SNP | G  | A  | 28  | 42  | c.733G>A       | c.(733-735)GGG>AGG   | p.G245R  |
| Pat_26 | Pre-Treatment | KCNH1    | 3756   | 37 | 1 | 210857201 | 210857201 | Missense_Mutation | SNP | C  | T  | 4   | 174 | c.2392G>A      | c.(2392-2394)GTA>ATA | p.V798I  |
| Pat_26 | Pre-Treatment | USH2A    | 7399   | 37 | 1 | 216373318 | 216373318 | Missense_Mutation | SNP | T  | G  | 82  | 114 | c.3462A>C      | c.(3460-3462)TTA>TTC | p.L1154F |
| Pat_26 | Pre-Treatment | IARS2    | 55699  | 37 | 1 | 220287738 | 220287738 | Missense_Mutation | SNP | G  | T  | 139 | 234 | c.1562G>T      | c.(1561-1563)TGT>TTT | p.C521F  |
| Pat_26 | Pre-Treatment | TP53BP2  | 7159   | 37 | 1 | 223986100 | 223986100 | Missense_Mutation | SNP | G  | A  | 5   | 348 | c.1765C>T      | c.(1765-1767)CGG>TGG | p.R589W  |

|        |               |          |        |    |    |           |           |                   |     |    |    |     |     |                |                        |          |
|--------|---------------|----------|--------|----|----|-----------|-----------|-------------------|-----|----|----|-----|-----|----------------|------------------------|----------|
| Pat_26 | Pre-Treatment | CDC42BPA | 8476   | 37 | 1  | 227387267 | 227387267 | Missense_Mutation | SNP | G  | C  | 4   | 120 | c.441C>G       | c.(439-441)GAC>GAG     | p.D147E  |
| Pat_26 | Pre-Treatment | GJC2     | 57165  | 37 | 1  | 228346181 | 228346181 | Missense_Mutation | SNP | C  | T  | 6   | 437 | c.722C>T       | c.(721-723)CCG>CTG     | p.P241L  |
| Pat_26 | Pre-Treatment | OBSCN    | 84033  | 37 | 1  | 228556579 | 228556579 | Missense_Mutation | SNP | G  | A  | 5   | 316 | c.19924G>A     | c.(19924-19926)GAA>AAA | p.E6642K |
| Pat_26 | Pre-Treatment | OBSCN    | 84033  | 37 | 1  | 228557898 | 228557898 | Missense_Mutation | SNP | C  | T  | 4   | 167 | c.20125C>T     | c.(20125-20127)CGG>TGC | p.R6709W |
| Pat_26 | Pre-Treatment | ACTN2    | 88     | 37 | 1  | 236911034 | 236911034 | Nonsense_Mutation | SNP | C  | T  | 37  | 57  | c.1474C>T      | c.(1474-1476)CGA>TGA   | p.R492*  |
| Pat_26 | Pre-Treatment | FMN2     | 56776  | 37 | 1  | 240370570 | 240370570 | Missense_Mutation | SNP | G  | A  | 5   | 186 | c.2458G>A      | c.(2458-2460)GCT>ACT   | p.A820T  |
| Pat_26 | Pre-Treatment | CNST     | 163882 | 37 | 1  | 246810825 | 246810825 | Missense_Mutation | SNP | G  | A  | 9   | 635 | c.1322G>A      | c.(1321-1323)CGT>CAT   | p.R441H  |
| Pat_26 | Pre-Treatment | TUBB8    | 347688 | 37 | 10 | 93674     | 93674     | Missense_Mutation | SNP | G  | C  | 3   | 91  | c.658C>G       | c.(658-660)CCC>GCC     | p.P220A  |
| Pat_26 | Pre-Treatment | IL2RA    | 3559   | 37 | 10 | 6066213   | 6066213   | Missense_Mutation | SNP | G  | A  | 51  | 69  | c.361C>T       | c.(361-363)CTT>TTT     | p.L121F  |
| Pat_26 | Pre-Treatment | RBM17    | 84991  | 37 | 10 | 6143307   | 6143307   | Missense_Mutation | SNP | G  | A  | 4   | 165 | c.197G>A       | c.(196-198)CGG>CAG     | p.R66Q   |
| Pat_26 | Pre-Treatment | ITIH5    | 80760  | 37 | 10 | 7608059   | 7608059   | Nonsense_Mutation | SNP | G  | A  | 4   | 184 | c.2461C>T      | c.(2461-2463)CGA>TGA   | p.R821*  |
| Pat_26 | Pre-Treatment | KIAA1217 | 56243  | 37 | 10 | 24762599  | 24762599  | Missense_Mutation | SNP | G  | A  | 4   | 185 | c.1289G>A      | c.(1288-1290)CGG>CAG   | p.R430Q  |
| Pat_26 | Pre-Treatment | KIAA1217 | 56243  | 37 | 10 | 24822108  | 24822108  | Missense_Mutation | SNP | C  | T  | 48  | 113 | c.3356C>T      | c.(3355-3357)TCC>TTC   | p.S1119F |
| Pat_26 | Pre-Treatment | GPR158   | 57512  | 37 | 10 | 25701332  | 25701332  | Missense_Mutation | SNP | C  | T  | 163 | 407 | c.1265C>T      | c.(1264-1266)TCC>TTC   | p.S422F  |
| Pat_26 | Pre-Treatment | KIAA1462 | 57608  | 37 | 10 | 30318160  | 30318160  | Missense_Mutation | SNP | C  | T  | 78  | 163 | c.917G>A       | c.(916-918)GGA>GAA     | p.G306E  |
| Pat_26 | Pre-Treatment | PARD3    | 56288  | 37 | 10 | 34671581  | 34671581  | Missense_Mutation | SNP | C  | T  | 4   | 124 | c.1286G>A      | c.(1285-1287)GGA>GAA   | p.G429E  |
| Pat_26 | Pre-Treatment | ANKRD30A | 91074  | 37 | 10 | 37430688  | 37430688  | Missense_Mutation | SNP | C  | T  | 15  | 141 | c.695C>T       | c.(694-696)GCG>GTG     | p.A232V  |
| Pat_26 | Pre-Treatment | ANKRD30A | 91074  | 37 | 10 | 37430910  | 37430910  | Missense_Mutation | SNP | C  | T  | 5   | 163 | c.917C>T       | c.(916-918)ACG>ATG     | p.T306M  |
| Pat_26 | Pre-Treatment | ZNF248   | 57209  | 37 | 10 | 38120643  | 38120643  | Missense_Mutation | SNP | G  | A  | 80  | 137 | c.1640C>T      | c.(1639-1641)CCG>CTG   | p.P547L  |
| Pat_26 | Pre-Treatment | RBP3     | 5949   | 37 | 10 | 48388771  | 48388771  | Missense_Mutation | SNP | G  | A  | 51  | 90  | c.2107C>T      | c.(2107-2109)CAC>TAC   | p.H703Y  |
| Pat_26 | Pre-Treatment | RBP3     | 5949   | 37 | 10 | 48389305  | 48389305  | Missense_Mutation | SNP | C  | T  | 21  | 59  | c.1573G>A      | c.(1573-1575)GAG>AAG   | p.E525K  |
| Pat_26 | Pre-Treatment | RBP3     | 5949   | 37 | 10 | 48389757  | 48389757  | Missense_Mutation | SNP | G  | A  | 37  | 98  | c.1121C>T      | c.(1120-1122)GCC>GTC   | p.A374V  |
| Pat_26 | Pre-Treatment | ANK3     | 288    | 37 | 10 | 61898789  | 61898789  | Missense_Mutation | SNP | C  | T  | 84  | 136 | c.2671G>A      | c.(2671-2673)GAA>AAA   | p.E891K  |
| Pat_26 | Pre-Treatment | ANK3     | 288    | 37 | 10 | 61941146  | 61941146  | Nonsense_Mutation | SNP | G  | A  | 92  | 190 | c.2125C>T      | c.(2125-2127)CGA>TGA   | p.R709*  |
| Pat_26 | Pre-Treatment | RHOBTB1  | 9886   | 37 | 10 | 62645968  | 62645968  | Missense_Mutation | SNP | C  | A  | 4   | 163 | c.1477G>T      | c.(1477-1479)GAT>TAT   | p.D493Y  |
| Pat_26 | Pre-Treatment | LRRTM3   | 347731 | 37 | 10 | 68687639  | 68687640  | Missense_Mutation | DNP | CC | TT | 24  | 58  | c.965_966CC>TT | c.(964-966)TCC>TTT     | p.S322F  |
| Pat_26 | Pre-Treatment | STOX1    | 219736 | 37 | 10 | 70644422  | 70644422  | Missense_Mutation | SNP | C  | G  | 81  | 167 | c.870C>G       | c.(868-870)CAC>CAG     | p.H290Q  |
| Pat_26 | Pre-Treatment | SEC24C   | 9632   | 37 | 10 | 75519901  | 75519901  | Nonsense_Mutation | SNP | C  | T  | 114 | 259 | c.607C>T       | c.(607-609)CAG>TAG     | p.Q203*  |
| Pat_26 | Pre-Treatment | MMRN2    | 79812  | 37 | 10 | 88703034  | 88703034  | Missense_Mutation | SNP | C  | T  | 5   | 261 | c.1507G>A      | c.(1507-1509)GTC>ATC   | p.V503I  |
| Pat_26 | Pre-Treatment | FAM35A   | 54537  | 37 | 10 | 88917886  | 88917886  | Missense_Mutation | SNP | G  | A  | 4   | 92  | c.1607G>A      | c.(1606-1608)AGT>AAT   | p.S536N  |
| Pat_26 | Pre-Treatment | PIPSL    | 266971 | 37 | 10 | 95719536  | 95719536  | Missense_Mutation | SNP | C  | T  | 54  | 115 | c.1618G>A      | c.(1618-1620)GAT>AAT   | p.D540N  |
| Pat_26 | Pre-Treatment | PLCE1    | 51196  | 37 | 10 | 96076413  | 96076413  | Missense_Mutation | SNP | A  | G  | 18  | 39  | c.6242A>G      | c.(6241-6243)CAG>CGG   | p.Q2081R |
| Pat_26 | Pre-Treatment | CYP2C19  | 1557   | 37 | 10 | 96609752  | 96609752  | Missense_Mutation | SNP | C  | T  | 101 | 180 | c.1228C>T      | c.(1228-1230)CGT>TGT   | p.R410C  |
| Pat_26 | Pre-Treatment | LOXL4    | 84171  | 37 | 10 | 100016625 | 100016625 | Missense_Mutation | SNP | C  | T  | 5   | 252 | c.1340G>A      | c.(1339-1341)GGG>GAG   | p.G447E  |
| Pat_26 | Pre-Treatment | GBF1     | 8729   | 37 | 10 | 104126216 | 104126216 | Missense_Mutation | SNP | G  | A  | 4   | 157 | c.2383G>A      | c.(2383-2385)GCA>ACA   | p.A795T  |
| Pat_26 | Pre-Treatment | C10orf26 | 54838  | 37 | 10 | 104557799 | 104557799 | Missense_Mutation | SNP | C  | A  | 6   | 249 | c.77C>A        | c.(76-78)ACA>AAA       | p.T26K   |
| Pat_26 | Pre-Treatment | C10orf79 | 80217  | 37 | 10 | 105890056 | 105890056 | Missense_Mutation | SNP | T  | G  | 55  | 120 | c.4839A>C      | c.(4837-4839)AAA>AAC   | p.K1613N |
| Pat_26 | Pre-Treatment | AFAP1L2  | 84632  | 37 | 10 | 116068248 | 116068248 | Missense_Mutation | SNP | G  | A  | 130 | 137 | c.911C>T       | c.(910-912)GCT>GTT     | p.A304V  |
| Pat_26 | Pre-Treatment | KCNK18   | 338567 | 37 | 10 | 118957156 | 118957156 | Missense_Mutation | SNP | G  | A  | 4   | 140 | c.157G>A       | c.(157-159)GCA>ACA     | p.A53T   |
| Pat_26 | Pre-Treatment | TACC2    | 10579  | 37 | 10 | 123988957 | 123988957 | Missense_Mutation | SNP | G  | A  | 243 | 593 | c.7993G>A      | c.(7993-7995)GAC>AAC   | p.D2665N |
| Pat_26 | Pre-Treatment | DMBT1    | 1755   | 37 | 10 | 124350190 | 124350190 | Missense_Mutation | SNP | C  | T  | 270 | 405 | c.2117C>T      | c.(2116-2118)TCC>TTC   | p.S706F  |
| Pat_26 | Pre-Treatment | CUZD1    | 50624  | 37 | 10 | 124595694 | 124595694 | Missense_Mutation | SNP | C  | A  | 88  | 209 | c.990G>T       | c.(988-990)AAG>AAT     | p.K330N  |
| Pat_26 | Pre-Treatment | C10orf90 | 118611 | 37 | 10 | 128193393 | 128193393 | Nonsense_Mutation | SNP | C  | A  | 45  | 140 | c.376G>T       | c.(376-378)GAG>TAG     | p.E126*  |
| Pat_26 | Pre-Treatment | PWWP2B   | 170394 | 37 | 10 | 134218351 | 134218351 | Missense_Mutation | SNP | C  | T  | 4   | 114 | c.347C>T       | c.(346-348)CCG>CTG     | p.P116L  |
| Pat_26 | Pre-Treatment | KNDC1    | 85442  | 37 | 10 | 135013019 | 135013019 | Missense_Mutation | SNP | C  | T  | 56  | 205 | c.2816C>T      | c.(2815-2817)TCC>TTC   | p.S939F  |
| Pat_26 | Pre-Treatment | ADAM8    | 101    | 37 | 10 | 135085316 | 135085316 | Missense_Mutation | SNP | C  | T  | 4   | 178 | c.983G>A       | c.(982-984)AGC>AAC     | p.S328N  |
| Pat_26 | Pre-Treatment | SYCE1    | 93426  | 37 | 10 | 135369530 | 135369530 | Missense_Mutation | SNP | C  | T  | 79  | 216 | c.550G>A       | c.(550-552)GAG>AAG     | p.E184K  |

|        |               |          |        |    |    |           |           |                   |     |    |    |     |     |                                                   |                        |               |
|--------|---------------|----------|--------|----|----|-----------|-----------|-------------------|-----|----|----|-----|-----|---------------------------------------------------|------------------------|---------------|
| Pat_26 | Pre-Treatment | OSBPL5   | 114879 | 37 | 11 | 3129158   | 3129158   | Missense_Mutation | SNP | C  | T  | 4   | 120 | c.709G>A                                          | c.(709-711)GCC>ACC     | p.A237T       |
| Pat_26 | Pre-Treatment | OR51Q1   | 390061 | 37 | 11 | 5444196   | 5444196   | Missense_Mutation | SNP | C  | T  | 67  | 209 | c.766C>T                                          | c.(766-768)CCC>TCC     | p.P256S       |
| Pat_26 | Pre-Treatment | OR56A5   | 390084 | 37 | 11 | 5988988   | 5988988   | Missense_Mutation | SNP | G  | A  | 7   | 8   | c.737C>T                                          | c.(736-738)TCC>TTC     | p.S246F       |
| Pat_26 | Pre-Treatment | OR52L1   | 338751 | 37 | 11 | 6008061   | 6008061   | Missense_Mutation | SNP | C  | T  | 14  | 27  | c.100G>A                                          | c.(100-102)GGG>AGG     | p.G34R        |
| Pat_26 | Pre-Treatment | ZNF214   | 7761   | 37 | 11 | 7021649   | 7021649   | Missense_Mutation | SNP | C  | T  | 54  | 81  | c.1265G>A                                         | c.(1264-1266)GGC>GAC   | p.G422D       |
| Pat_26 | Pre-Treatment | RBMXL2   | 27288  | 37 | 11 | 7111168   | 7111168   | Missense_Mutation | SNP | C  | T  | 69  | 92  | c.817C>T                                          | c.(817-819)CAT>TAT     | p.H273Y       |
| Pat_26 | Pre-Treatment | NRIP3    | 56675  | 37 | 11 | 9007284   | 9007284   | Missense_Mutation | SNP | C  | T  | 4   | 182 | c.536G>A                                          | c.(535-537)CGC>CAC     | p.R179H       |
| Pat_26 | Pre-Treatment | SCUBE2   | 57758  | 37 | 11 | 9049060   | 9049060   | Missense_Mutation | SNP | G  | A  | 52  | 69  | c.2465C>T                                         | c.(2464-2466)TCC>TTC   | p.S822F       |
| Pat_26 | Pre-Treatment | DENND5A  | 23258  | 37 | 11 | 9228225   | 9228225   | Missense_Mutation | SNP | C  | T  | 7   | 366 | c.286G>A                                          | c.(286-288)GGA>AGA     | p.G96R        |
| Pat_26 | Pre-Treatment | CSNK2A1P | 283106 | 37 | 11 | 11373631  | 11373631  | Missense_Mutation | SNP | C  | T  | 4   | 189 | c.1036G>A                                         | c.(1036-1038)GTC>ATC   | p.V346I       |
| Pat_26 | Pre-Treatment | MICALCL  | 84953  | 37 | 11 | 12316354  | 12316354  | Missense_Mutation | SNP | C  | T  | 3   | 11  | c.1376C>T                                         | c.(1375-1377)CCT>CTT   | p.P459L       |
| Pat_26 | Pre-Treatment | ARNTL    | 406    | 37 | 11 | 13397274  | 13397275  | Missense_Mutation | DNP | AG | TA | 27  | 59  | c.1290_1291AG>TA/1288-1293)GAAGTA>GAT/430_431EV>I |                        |               |
| Pat_26 | Pre-Treatment | LDHA     | 3939   | 37 | 11 | 18426998  | 18426998  | Missense_Mutation | SNP | C  | T  | 4   | 142 | c.713C>T                                          | c.(712-714)GCT>GTT     | p.A238V       |
| Pat_26 | Pre-Treatment | PRMT3    | 10196  | 37 | 11 | 20529860  | 20529861  | Nonsense_Mutation | DNP | GA | TT | 30  | 49  | c.1497_1498GA>T/1495-1500)TTGAAA>TTTT/499_500LK>F |                        |               |
| Pat_26 | Pre-Treatment | SLC6A5   | 9152   | 37 | 11 | 20649627  | 20649627  | Nonsense_Mutation | SNP | C  | A  | 4   | 132 | c.1497C>A                                         | c.(1495-1497)TAC>TAA   | p.Y499*       |
| Pat_26 | Pre-Treatment | CHST1    | 8534   | 37 | 11 | 45671392  | 45671392  | Missense_Mutation | SNP | C  | T  | 4   | 132 | c.1082G>A                                         | c.(1081-1083)CGC>CAC   | p.R361H       |
| Pat_26 | Pre-Treatment | MAPK8IP1 | 9479   | 37 | 11 | 45925556  | 45925556  | Missense_Mutation | SNP | G  | A  | 155 | 372 | c.1510G>A                                         | c.(1510-1512)GAA>AAA   | p.E504K       |
| Pat_26 | Pre-Treatment | GYLTL1B  | 120071 | 37 | 11 | 45949470  | 45949470  | Splice_Site       | SNP | G  | A  | 56  | 72  | c.1605_splice                                     | c.e12-1                | p.R535_splice |
| Pat_26 | Pre-Treatment | FOLH1    | 2346   | 37 | 11 | 49175447  | 49175447  | Missense_Mutation | SNP | C  | T  | 42  | 82  | c.1921G>A                                         | c.(1921-1923)GAA>AAA   | p.E641K       |
| Pat_26 | Pre-Treatment | OR4A15   | 81328  | 37 | 11 | 55136144  | 55136144  | Missense_Mutation | SNP | G  | A  | 31  | 51  | c.785G>A                                          | c.(784-786)CGA>CAA     | p.R262Q       |
| Pat_26 | Pre-Treatment | P2RX3    | 5024   | 37 | 11 | 57137381  | 57137381  | Missense_Mutation | SNP | G  | A  | 5   | 190 | c.1105G>A                                         | c.(1105-1107)GCG>ACG   | p.A369T       |
| Pat_26 | Pre-Treatment | CTNND1   | 1500   | 37 | 11 | 57572210  | 57572210  | Missense_Mutation | SNP | C  | A  | 4   | 139 | c.1680C>A                                         | c.(1678-1680)TTC>TTA   | p.F560L       |
| Pat_26 | Pre-Treatment | OR5B3    | 441608 | 37 | 11 | 58170239  | 58170239  | Missense_Mutation | SNP | G  | A  | 19  | 18  | c.644C>T                                          | c.(643-645)TCC>TTC     | p.S215F       |
| Pat_26 | Pre-Treatment | MS4A4A   | 51338  | 37 | 11 | 60064709  | 60064709  | Missense_Mutation | SNP | G  | A  | 60  | 114 | c.241G>A                                          | c.(241-243)GGA>AGA     | p.G81R        |
| Pat_26 | Pre-Treatment | TMEM132A | 54972  | 37 | 11 | 60702845  | 60702845  | Missense_Mutation | SNP | G  | A  | 5   | 76  | c.1958G>A                                         | c.(1957-1959)CGG>CAG   | p.R653Q       |
| Pat_26 | Pre-Treatment | RPLP0P2  | 113157 | 37 | 11 | 61404326  | 61404326  | Missense_Mutation | SNP | G  | A  | 4   | 162 | c.175G>A                                          | c.(175-177)GCC>ACC     | p.A59T        |
| Pat_26 | Pre-Treatment | FADS2    | 9415   | 37 | 11 | 61608002  | 61608002  | Missense_Mutation | SNP | A  | C  | 159 | 170 | c.515A>C                                          | c.(514-516)CAG>CCG     | p.Q172P       |
| Pat_26 | Pre-Treatment | INCENP   | 3619   | 37 | 11 | 61897748  | 61897748  | Missense_Mutation | SNP | C  | T  | 5   | 171 | c.749C>T                                          | c.(748-750)ACG>ATG     | p.T250M       |
| Pat_26 | Pre-Treatment | EML3     | 256364 | 37 | 11 | 62374475  | 62374475  | Missense_Mutation | SNP | G  | A  | 4   | 135 | c.1459C>T                                         | c.(1459-1461)CGG>TGG   | p.R487W       |
| Pat_26 | Pre-Treatment | GPR137   | 56834  | 37 | 11 | 64054028  | 64054028  | Missense_Mutation | SNP | C  | T  | 5   | 250 | c.32C>T                                           | c.(31-33)GCT>GTT       | p.A11V        |
| Pat_26 | Pre-Treatment | CDC42BPG | 55561  | 37 | 11 | 64596984  | 64596984  | Missense_Mutation | SNP | C  | T  | 4   | 58  | c.3926G>A                                         | c.(3925-3927)CGT>CAT   | p.R1309H      |
| Pat_26 | Pre-Treatment | SIPA1    | 6494   | 37 | 11 | 65413346  | 65413346  | Missense_Mutation | SNP | C  | G  | 64  | 234 | c.1181C>G                                         | c.(1180-1182)TCC>TGC   | p.S394C       |
| Pat_26 | Pre-Treatment | KLC2     | 64837  | 37 | 11 | 66030347  | 66030347  | Missense_Mutation | SNP | C  | T  | 208 | 380 | c.592C>T                                          | c.(592-594)CTC>TTC     | p.L198F       |
| Pat_26 | Pre-Treatment | CCS      | 9973   | 37 | 11 | 66373047  | 66373047  | Missense_Mutation | SNP | G  | A  | 30  | 63  | c.655G>A                                          | c.(655-657)GGG>AGG     | p.G219R       |
| Pat_26 | Pre-Treatment | FGF19    | 9965   | 37 | 11 | 69518121  | 69518121  | Missense_Mutation | SNP | T  | C  | 27  | 30  | c.244A>G                                          | c.(244-246)ATC>GTC     | p.I82V        |
| Pat_26 | Pre-Treatment | SHANK2   | 22941  | 37 | 11 | 70319273  | 70319273  | Missense_Mutation | SNP | C  | T  | 87  | 162 | c.5251G>A                                         | c.(5251-5253)GAT>AAT   | p.D1751N      |
| Pat_26 | Pre-Treatment | INPPL1   | 3636   | 37 | 11 | 71946922  | 71946922  | Missense_Mutation | SNP | C  | T  | 114 | 143 | c.2771C>T                                         | c.(2770-2772)GCC>GTC   | p.A924V       |
| Pat_26 | Pre-Treatment | ARAP1    | 116985 | 37 | 11 | 72424274  | 72424274  | Missense_Mutation | SNP | C  | T  | 4   | 148 | c.694G>A                                          | c.(694-696)GAT>AAT     | p.D232N       |
| Pat_26 | Pre-Treatment | RELT     | 84957  | 37 | 11 | 73105710  | 73105710  | Missense_Mutation | SNP | C  | T  | 56  | 50  | c.977C>T                                          | c.(976-978)CCG>CTG     | p.P326L       |
| Pat_26 | Pre-Treatment | C2CD3    | 26005  | 37 | 11 | 73803545  | 73803545  | Missense_Mutation | SNP | G  | A  | 4   | 180 | c.3433C>T                                         | c.(3433-3435)CGT>TGT   | p.R1145C      |
| Pat_26 | Pre-Treatment | THRSP    | 7069   | 37 | 11 | 77775184  | 77775184  | Missense_Mutation | SNP | G  | A  | 4   | 126 | c.257G>A                                          | c.(256-258)GGC>GAC     | p.G86D        |
| Pat_26 | Pre-Treatment | FAT3     | 120114 | 37 | 11 | 92615946  | 92615946  | Missense_Mutation | SNP | G  | C  | 10  | 25  | c.12324G>C                                        | c.(12322-12324)GAG>GAC | p.E4108D      |
| Pat_26 | Pre-Treatment | HEPHL1   | 341208 | 37 | 11 | 93797538  | 93797538  | Nonsense_Mutation | SNP | C  | T  | 30  | 41  | c.670C>T                                          | c.(670-672)CGA>TGA     | p.R224*       |
| Pat_26 | Pre-Treatment | PDGFD    | 80310  | 37 | 11 | 103870789 | 103870789 | Missense_Mutation | SNP | C  | T  | 37  | 82  | c.319G>A                                          | c.(319-321)GAT>AAT     | p.D107N       |
| Pat_26 | Pre-Treatment | GRIA4    | 2893   | 37 | 11 | 105483095 | 105483096 | Missense_Mutation | DNP | CC | TT | 51  | 111 | c.181_182CC>TT                                    | c.(181-183)CCT>TTT     | p.P61F        |
| Pat_26 | Pre-Treatment | FAM55A   | 120400 | 37 | 11 | 114393075 | 114393075 | Missense_Mutation | SNP | G  | A  | 130 | 171 | c.833C>T                                          | c.(832-834)CCT>CTT     | p.P278L       |
| Pat_26 | Pre-Treatment | PHLDB1   | 23187  | 37 | 11 | 118498590 | 118498590 | Missense_Mutation | SNP | C  | T  | 12  | 30  | c.1051C>T                                         | c.(1051-1053)CGG>TGG   | p.R351W       |

|        |               |          |        |    |    |           |           |                   |     |   |   |     |     |               |                        |               |
|--------|---------------|----------|--------|----|----|-----------|-----------|-------------------|-----|---|---|-----|-----|---------------|------------------------|---------------|
| Pat_26 | Pre-Treatment | USP2     | 9099   | 37 | 11 | 119243422 | 119243422 | Missense_Mutation | SNP | C | T | 4   | 186 | c.769G>A      | c.(769-771)GGC>AGC     | p.G257S       |
| Pat_26 | Pre-Treatment | CCDC15   | 80071  | 37 | 11 | 124857827 | 124857827 | Missense_Mutation | SNP | G | T | 10  | 451 | c.1705G>T     | c.(1705-1707)GTT>TTT   | p.V569F       |
| Pat_26 | Pre-Treatment | KCNJ5    | 3762   | 37 | 11 | 128781257 | 128781257 | Missense_Mutation | SNP | G | A | 5   | 350 | c.89G>A       | c.(88-90)CGC>CAC       | p.R30H        |
| Pat_26 | Pre-Treatment | VPS26B   | 112936 | 37 | 11 | 134113147 | 134113147 | Missense_Mutation | SNP | C | T | 4   | 156 | c.680C>T      | c.(679-681)ACG>ATG     | p.T227M       |
| Pat_26 | Pre-Treatment | GLB1L2   | 89944  | 37 | 11 | 134241034 | 134241034 | Missense_Mutation | SNP | C | T | 6   | 192 | c.1348C>T     | c.(1348-1350)CGG>TGG   | p.R450W       |
| Pat_26 | Pre-Treatment | MLF2     | 8079   | 37 | 12 | 6861105   | 6861105   | Missense_Mutation | SNP | G | A | 99  | 198 | c.166C>T      | c.(166-168)CGC>TGC     | p.R56C        |
| Pat_26 | Pre-Treatment | PHB2     | 11331  | 37 | 12 | 7079605   | 7079605   | Nonsense_Mutation | SNP | G | C | 3   | 36  | c.102C>G      | c.(100-102)TAC>TAG     | p.Y34*        |
| Pat_26 | Pre-Treatment | GDF3     | 9573   | 37 | 12 | 7848090   | 7848090   | Missense_Mutation | SNP | G | A | 8   | 140 | c.235C>T      | c.(235-237)CGC>TGC     | p.R79C        |
| Pat_26 | Pre-Treatment | DPPA3    | 359787 | 37 | 12 | 7864169   | 7864169   | Missense_Mutation | SNP | G | A | 29  | 78  | c.3G>A        | c.(1-3)ATG>ATA         | p.M1I         |
| Pat_26 | Pre-Treatment | CLEC4E   | 26253  | 37 | 12 | 8687260   | 8687260   | Missense_Mutation | SNP | G | A | 26  | 48  | c.634C>T      | c.(634-636)CCT>TCT     | p.P212S       |
| Pat_26 | Pre-Treatment | A2M      | 2      | 37 | 12 | 9264799   | 9264799   | Missense_Mutation | SNP | G | A | 46  | 70  | c.439C>T      | c.(439-441)CGT>TGT     | p.R147C       |
| Pat_26 | Pre-Treatment | PIK3C2G  | 5288   | 37 | 12 | 18552721  | 18552721  | Missense_Mutation | SNP | C | T | 21  | 32  | c.2132C>T     | c.(2131-2133)ACC>ATC   | p.T711I       |
| Pat_26 | Pre-Treatment | SLCO1C1  | 53919  | 37 | 12 | 20874764  | 20874764  | Missense_Mutation | SNP | C | T | 36  | 85  | c.802C>T      | c.(802-804)CCC>TCC     | p.P268S       |
| Pat_26 | Pre-Treatment | GYS2     | 2998   | 37 | 12 | 21712612  | 21712612  | Missense_Mutation | SNP | C | T | 23  | 56  | c.1202G>A     | c.(1201-1203)GGA>GAA   | p.G401E       |
| Pat_26 | Pre-Treatment | LRRK2    | 120892 | 37 | 12 | 40677921  | 40677921  | Nonsense_Mutation | SNP | T | G | 22  | 19  | c.2486T>G     | c.(2485-2487)TTA>TGA   | p.L829*       |
| Pat_26 | Pre-Treatment | ADAMTS20 | 80070  | 37 | 12 | 43945044  | 43945044  | Missense_Mutation | SNP | C | T | 17  | 45  | c.121G>A      | c.(121-123)GAA>AAA     | p.E41K        |
| Pat_26 | Pre-Treatment | IRAK4    | 51135  | 37 | 12 | 44165165  | 44165165  | Missense_Mutation | SNP | C | T | 28  | 74  | c.304C>T      | c.(304-306)CCA>TCA     | p.P102S       |
| Pat_26 | Pre-Treatment | SFRS2IP  | 9169   | 37 | 12 | 46321745  | 46321745  | Missense_Mutation | SNP | T | A | 46  | 91  | c.1739A>T     | c.(1738-1740)AAT>ATT   | p.N580I       |
| Pat_26 | Pre-Treatment | ADCY6    | 112    | 37 | 12 | 49164660  | 49164660  | Missense_Mutation | SNP | C | T | 4   | 165 | c.3145G>A     | c.(3145-3147)GAT>AAT   | p.D1049N      |
| Pat_26 | Pre-Treatment | TROAP    | 10024  | 37 | 12 | 49724357  | 49724357  | Missense_Mutation | SNP | G | A | 5   | 139 | c.1729G>A     | c.(1729-1731)GTA>ATA   | p.V577I       |
| Pat_26 | Pre-Treatment | KRT7     | 3855   | 37 | 12 | 52629068  | 52629068  | Missense_Mutation | SNP | C | G | 3   | 109 | c.454C>G      | c.(454-456)CTT>GTT     | p.L152V       |
| Pat_26 | Pre-Treatment | KRT75    | 9119   | 37 | 12 | 52825359  | 52825359  | Missense_Mutation | SNP | C | T | 77  | 159 | c.838G>A      | c.(838-840)GAG>AAG     | p.E280K       |
| Pat_26 | Pre-Treatment | KRT5     | 3852   | 37 | 12 | 52913836  | 52913836  | Missense_Mutation | SNP | C | T | 5   | 339 | c.245G>A      | c.(244-246)AGC>AAC     | p.S82N        |
| Pat_26 | Pre-Treatment | KRT74    | 121391 | 37 | 12 | 52960769  | 52960769  | Missense_Mutation | SNP | C | T | 182 | 251 | c.1574G>A     | c.(1573-1575)AGG>AAG   | p.R525K       |
| Pat_26 | Pre-Treatment | ITGB7    | 3695   | 37 | 12 | 53587011  | 53587011  | Missense_Mutation | SNP | G | A | 6   | 169 | c.1639C>T     | c.(1639-1641)CGC>TGC   | p.R547C       |
| Pat_26 | Pre-Treatment | NEUROD4  | 58158  | 37 | 12 | 55420303  | 55420303  | Missense_Mutation | SNP | C | T | 22  | 73  | c.80C>T       | c.(79-81)TCC>TTC       | p.S27F        |
| Pat_26 | Pre-Treatment | TMEM194A | 23306  | 37 | 12 | 57466641  | 57466641  | Missense_Mutation | SNP | C | T | 5   | 214 | c.182G>A      | c.(181-183)CGT>CAT     | p.R61H        |
| Pat_26 | Pre-Treatment | NAV3     | 89795  | 37 | 12 | 78400838  | 78400838  | Missense_Mutation | SNP | C | T | 53  | 92  | c.1520C>T     | c.(1519-1521)CCT>CTT   | p.P507L       |
| Pat_26 | Pre-Treatment | ACSS3    | 79611  | 37 | 12 | 81528778  | 81528778  | Missense_Mutation | SNP | G | A | 5   | 98  | c.640G>A      | c.(640-642)GTA>ATA     | p.V214I       |
| Pat_26 | Pre-Treatment | CEP290   | 80184  | 37 | 12 | 88453692  | 88453692  | Missense_Mutation | SNP | G | A | 5   | 13  | c.6628C>T     | c.(6628-6630)CGT>TGT   | p.R2210C      |
| Pat_26 | Pre-Treatment | SLC17A8  | 246213 | 37 | 12 | 100813848 | 100813848 | Missense_Mutation | SNP | G | A | 12  | 37  | c.1681G>A     | c.(1681-1683)GAA>AAA   | p.E561K       |
| Pat_26 | Pre-Treatment | ACACB    | 32     | 37 | 12 | 109675040 | 109675040 | Missense_Mutation | SNP | G | A | 6   | 524 | c.4517G>A     | c.(4516-4518)CGT>CAT   | p.R1506H      |
| Pat_26 | Pre-Treatment | ACACB    | 32     | 37 | 12 | 109677677 | 109677677 | Missense_Mutation | SNP | C | T | 4   | 132 | c.4705C>T     | c.(4705-4707)CTC>TTC   | p.L1569F      |
| Pat_26 | Pre-Treatment | KCTD10   | 83892  | 37 | 12 | 109889456 | 109889456 | Missense_Mutation | SNP | G | A | 4   | 183 | c.886C>T      | c.(886-888)CGC>TGC     | p.R296C       |
| Pat_26 | Pre-Treatment | C12orf51 | 283450 | 37 | 12 | 112622629 | 112622629 | Missense_Mutation | SNP | C | T | 4   | 161 | c.8875G>A     | c.(8875-8877)GCC>ACC   | p.A2959T      |
| Pat_26 | Pre-Treatment | C12orf51 | 283450 | 37 | 12 | 112673400 | 112673400 | Missense_Mutation | SNP | G | A | 15  | 41  | c.4367C>T     | c.(4366-4368)CCC>CTC   | p.P1456L      |
| Pat_26 | Pre-Treatment | NOS1     | 4842   | 37 | 12 | 117655918 | 117655918 | Missense_Mutation | SNP | C | T | 263 | 461 | c.4222G>A     | c.(4222-4224)GAA>AAA   | p.E1408K      |
| Pat_26 | Pre-Treatment | SRRM4    | 84530  | 37 | 12 | 119592047 | 119592047 | Splice_Site       | SNP | G | A | 3   | 22  | c.1392_splice | c.e12-1                | p.R464_splice |
| Pat_26 | Pre-Treatment | DNAH10   | 196385 | 37 | 12 | 124416393 | 124416393 | Missense_Mutation | SNP | G | A | 79  | 161 | c.12773G>A    | c.(12772-12774)AGG>AAC | p.R4258K      |
| Pat_26 | Pre-Treatment | EP400    | 57634  | 37 | 12 | 132535158 | 132535158 | Missense_Mutation | SNP | C | T | 178 | 285 | c.7352C>T     | c.(7351-7353)CCC>CTC   | p.P2451L      |
| Pat_26 | Pre-Treatment | TPTE2    | 93492  | 37 | 13 | 20010385  | 20010385  | Missense_Mutation | SNP | C | T | 16  | 30  | c.1097G>A     | c.(1096-1098)GGA>GAA   | p.G366E       |
| Pat_26 | Pre-Treatment | SPG20    | 23111  | 37 | 13 | 36909531  | 36909531  | Missense_Mutation | SNP | G | A | 10  | 33  | c.437C>T      | c.(436-438)TCA>TTA     | p.S146L       |
| Pat_26 | Pre-Treatment | C13orf23 | 80209  | 37 | 13 | 39587324  | 39587324  | Missense_Mutation | SNP | G | A | 4   | 159 | c.2065C>T     | c.(2065-2067)CCC>TCC   | p.P689S       |
| Pat_26 | Pre-Treatment | C13orf23 | 80209  | 37 | 13 | 39588230  | 39588230  | Missense_Mutation | SNP | G | A | 4   | 160 | c.1159C>T     | c.(1159-1161)CGG>TGG   | p.R387W       |
| Pat_26 | Pre-Treatment | RCBTB2   | 1102   | 37 | 13 | 49077000  | 49077000  | Missense_Mutation | SNP | G | A | 5   | 265 | c.977C>T      | c.(976-978)ACG>ATG     | p.T326M       |
| Pat_26 | Pre-Treatment | COL4A2   | 1284   | 37 | 13 | 111080895 | 111080895 | Missense_Mutation | SNP | G | A | 54  | 81  | c.442G>A      | c.(442-444)GGG>AGG     | p.G148R       |
| Pat_26 | Pre-Treatment | POTEG    | 404785 | 37 | 14 | 19563496  | 19563496  | Missense_Mutation | SNP | C | G | 6   | 394 | c.1010C>G     | c.(1009-1011)TCT>TGT   | p.S337C       |



|        |               |           |        |    |    |           |           |                   |     |    |    |     |     |                                     |                      |               |
|--------|---------------|-----------|--------|----|----|-----------|-----------|-------------------|-----|----|----|-----|-----|-------------------------------------|----------------------|---------------|
| Pat_26 | Pre-Treatment | CHD8      | 57680  | 37 | 14 | 21873900  | 21873901  | Missense_Mutation | DNP | CC | TA | 172 | 366 | .2193_2194GG>T,191-2196)GGGGAT>GGT, | p.D732N              |               |
| Pat_26 | Pre-Treatment | MYH6      | 4624   | 37 | 14 | 23865496  | 23865496  | Missense_Mutation | SNP | C  | T  | 6   | 489 | c.2426G>A                           | c.(2425-2427)CGC>CAC | p.R809H       |
| Pat_26 | Pre-Treatment | NYNRIN    | 57523  | 37 | 14 | 24877187  | 24877187  | Missense_Mutation | SNP | G  | T  | 69  | 154 | c.311G>T                            | c.(310-312)TGG>TTG   | p.W104L       |
| Pat_26 | Pre-Treatment | FOXG1     | 2290   | 37 | 14 | 29236526  | 29236526  | Missense_Mutation | SNP | C  | T  | 4   | 72  | c.41C>T                             | c.(40-42)CCC>CTC     | p.P14L        |
| Pat_26 | Pre-Treatment | KCNH5     | 27133  | 37 | 14 | 63174459  | 63174459  | Missense_Mutation | SNP | C  | T  | 106 | 159 | c.2734G>A                           | c.(2734-2736)GAA>AAA | p.E912K       |
| Pat_26 | Pre-Treatment | ESR2      | 2100   | 37 | 14 | 64746815  | 64746815  | Missense_Mutation | SNP | G  | A  | 213 | 429 | c.419C>T                            | c.(418-420)CCA>CTA   | p.P140L       |
| Pat_26 | Pre-Treatment | SPTB      | 6710   | 37 | 14 | 65260468  | 65260468  | Missense_Mutation | SNP | C  | A  | 4   | 149 | c.1913G>T                           | c.(1912-1914)CGA>CTA | p.R638L       |
| Pat_26 | Pre-Treatment | RDH12     | 145226 | 37 | 14 | 68195937  | 68195938  | Missense_Mutation | DNP | CC | TT | 209 | 401 | c.688_689CC>TT                      | c.(688-690)CCA>TTA   | p.P230L       |
| Pat_26 | Pre-Treatment | PCNX      | 22990  | 37 | 14 | 71540340  | 71540340  | Missense_Mutation | SNP | C  | T  | 6   | 287 | c.4931C>T                           | c.(4930-4932)CCT>CTT | p.P1644L      |
| Pat_26 | Pre-Treatment | BATF      | 10538  | 37 | 14 | 75991472  | 75991472  | Missense_Mutation | SNP | C  | T  | 22  | 47  | c.109C>T                            | c.(109-111)CGT>TGT   | p.R37C        |
| Pat_26 | Pre-Treatment | PTPN21    | 11099  | 37 | 14 | 88945940  | 88945940  | Missense_Mutation | SNP | G  | C  | 17  | 35  | c.1835C>G                           | c.(1834-1836)CCC>CGC | p.P612R       |
| Pat_26 | Pre-Treatment | KIAA1409  | 57578  | 37 | 14 | 94121601  | 94121601  | Missense_Mutation | SNP | T  | G  | 72  | 87  | c.5956T>G                           | c.(5956-5958)TTA>GTA | p.L1986V      |
| Pat_26 | Pre-Treatment | OTUB2     | 78990  | 37 | 14 | 94503808  | 94503808  | Missense_Mutation | SNP | G  | A  | 4   | 107 | c.86G>A                             | c.(85-87)CGG>CAG     | p.R29Q        |
| Pat_26 | Pre-Treatment | SERPINA11 | 256394 | 37 | 14 | 94912755  | 94912755  | Missense_Mutation | SNP | A  | G  | 69  | 148 | c.830T>C                            | c.(829-831)GTC>GCC   | p.V277A       |
| Pat_26 | Pre-Treatment | TNFAIP2   | 7127   | 37 | 14 | 103598032 | 103598032 | Missense_Mutation | SNP | G  | A  | 26  | 44  | c.1355G>A                           | c.(1354-1356)GGC>GAC | p.G452D       |
| Pat_26 | Pre-Treatment | ZFYVE21   | 79038  | 37 | 14 | 104195467 | 104195467 | Missense_Mutation | SNP | A  | C  | 102 | 135 | c.474A>C                            | c.(472-474)GAA>GAC   | p.E158D       |
| Pat_26 | Pre-Treatment | C15orf2   | 23742  | 37 | 15 | 24921709  | 24921709  | Missense_Mutation | SNP | C  | T  | 38  | 67  | c.695C>T                            | c.(694-696)TCC>TTC   | p.S232F       |
| Pat_26 | Pre-Treatment | APBA2     | 321    | 37 | 15 | 29346439  | 29346439  | Missense_Mutation | SNP | G  | A  | 6   | 291 | c.352G>A                            | c.(352-354)GGG>AGG   | p.G118R       |
| Pat_26 | Pre-Treatment | TRPM1     | 4308   | 37 | 15 | 31294509  | 31294509  | Missense_Mutation | SNP | G  | A  | 76  | 149 | c.4328C>T                           | c.(4327-4329)TCC>TTC | p.S1443F      |
| Pat_26 | Pre-Treatment | EIF2AK4   | 440275 | 37 | 15 | 40284383  | 40284383  | Missense_Mutation | SNP | G  | A  | 4   | 174 | c.2639G>A                           | c.(2638-2640)AGC>AAC | p.S880N       |
| Pat_26 | Pre-Treatment | CASC5     | 57082  | 37 | 15 | 40951646  | 40951646  | Missense_Mutation | SNP | G  | A  | 5   | 279 | c.6901G>A                           | c.(6901-6903)GTT>ATT | p.V2301I      |
| Pat_26 | Pre-Treatment | TYRO3     | 7301   | 37 | 15 | 41870343  | 41870343  | Missense_Mutation | SNP | C  | T  | 4   | 85  | c.2542C>T                           | c.(2542-2544)CGG>TGG | p.R848W       |
| Pat_26 | Pre-Treatment | MGA       | 23269  | 37 | 15 | 42032237  | 42032237  | Missense_Mutation | SNP | C  | T  | 6   | 357 | c.269C>T                            | c.(268-270)ACT>ATT   | p.T90I        |
| Pat_26 | Pre-Treatment | PLA2G4E   | 123745 | 37 | 15 | 42280247  | 42280247  | Missense_Mutation | SNP | C  | T  | 4   | 92  | c.1744G>A                           | c.(1744-1746)GAA>AAA | p.E582K       |
| Pat_26 | Pre-Treatment | CAPN3     | 825    | 37 | 15 | 42652253  | 42652253  | Missense_Mutation | SNP | G  | A  | 277 | 424 | c.250G>A                            | c.(250-252)GAG>AAG   | p.E84K        |
| Pat_26 | Pre-Treatment | TMOD3     | 29766  | 37 | 15 | 52188725  | 52188725  | Splice_Site       | SNP | T  | C  | 5   | 235 | c.735_splice                        | c.e7+2               | p.T245_splice |
| Pat_26 | Pre-Treatment | UNC13C    | 440279 | 37 | 15 | 54307264  | 54307264  | Missense_Mutation | SNP | C  | T  | 11  | 16  | c.2164C>T                           | c.(2164-2166)CCA>TCA | p.P722S       |
| Pat_26 | Pre-Treatment | UNC13C    | 440279 | 37 | 15 | 54792293  | 54792293  | Missense_Mutation | SNP | G  | T  | 4   | 78  | c.5077G>T                           | c.(5077-5079)GTC>TTC | p.V1693F      |
| Pat_26 | Pre-Treatment | RFX7      | 64864  | 37 | 15 | 56386019  | 56386019  | Missense_Mutation | SNP | C  | T  | 5   | 193 | c.3907G>A                           | c.(3907-3909)GAT>AAT | p.D1303N      |
| Pat_26 | Pre-Treatment | NOX5      | 79400  | 37 | 15 | 69320658  | 69320658  | Missense_Mutation | SNP | G  | A  | 5   | 193 | c.278G>A                            | c.(277-279)AGC>AAC   | p.S93N        |
| Pat_26 | Pre-Treatment | MYO9A     | 4649   | 37 | 15 | 72244206  | 72244206  | Missense_Mutation | SNP | C  | A  | 5   | 182 | c.2214G>T                           | c.(2212-2214)TTG>TTT | p.L738F       |
| Pat_26 | Pre-Treatment | ISLR2     | 57611  | 37 | 15 | 74425750  | 74425750  | Missense_Mutation | SNP | G  | C  | 77  | 130 | c.655G>C                            | c.(655-657)GGG>CGG   | p.G219R       |
| Pat_26 | Pre-Treatment | CCDC33    | 80125  | 37 | 15 | 74559027  | 74559027  | Missense_Mutation | SNP | C  | T  | 99  | 211 | c.328C>T                            | c.(328-330)CTC>TTC   | p.L110F       |
| Pat_26 | Pre-Treatment | ADAMTSL3  | 57188  | 37 | 15 | 84651796  | 84651796  | Missense_Mutation | SNP | G  | A  | 4   | 101 | c.3416G>A                           | c.(3415-3417)CGG>CAG | p.R1139Q      |
| Pat_26 | Pre-Treatment | NTRK3     | 4916   | 37 | 15 | 88727501  | 88727501  | Missense_Mutation | SNP | G  | A  | 4   | 157 | c.278C>T                            | c.(277-279)ACG>ATG   | p.T93M        |
| Pat_26 | Pre-Treatment | PCSK6     | 5046   | 37 | 15 | 101933424 | 101933424 | Missense_Mutation | SNP | C  | T  | 13  | 29  | c.1202G>A                           | c.(1201-1203)CGA>CAA | p.R401Q       |
| Pat_26 | Pre-Treatment | OR4F15    | 390649 | 37 | 15 | 102359169 | 102359169 | Nonsense_Mutation | SNP | G  | A  | 155 | 240 | c.780G>A                            | c.(778-780)TGG>TGA   | p.W260*       |
| Pat_26 | Pre-Treatment | MPG       | 4350   | 37 | 16 | 135516    | 135516    | Missense_Mutation | SNP | G  | A  | 6   | 161 | c.637G>A                            | c.(637-639)GAG>AAG   | p.E213K       |
| Pat_26 | Pre-Treatment | TMEM8A    | 58986  | 37 | 16 | 427097    | 427097    | Missense_Mutation | SNP | G  | A  | 132 | 331 | c.575C>T                            | c.(574-576)TCC>TTC   | p.S192F       |
| Pat_26 | Pre-Treatment | PIGQ      | 9091   | 37 | 16 | 624666    | 624666    | Missense_Mutation | SNP | G  | A  | 19  | 38  | c.592G>A                            | c.(592-594)GCC>ACC   | p.A198T       |
| Pat_26 | Pre-Treatment | CCNF      | 899    | 37 | 16 | 2499427   | 2499427   | Missense_Mutation | SNP | G  | A  | 5   | 227 | c.1363G>A                           | c.(1363-1365)GCA>ACA | p.A455T       |
| Pat_26 | Pre-Treatment | SRRM2     | 23524  | 37 | 16 | 2820426   | 2820426   | Missense_Mutation | SNP | C  | T  | 4   | 105 | c.8095C>T                           | c.(8095-8097)CGC>TGC | p.R2699C      |
| Pat_26 | Pre-Treatment | KREMEN2   | 79412  | 37 | 16 | 3016700   | 3016700   | Missense_Mutation | SNP | C  | T  | 4   | 182 | c.544C>T                            | c.(544-546)CGG>TGG   | p.R182W       |
| Pat_26 | Pre-Treatment | A2BP1     | 54715  | 37 | 16 | 7726824   | 7726824   | Missense_Mutation | SNP | G  | A  | 105 | 189 | c.979G>A                            | c.(979-981)GCT>ACT   | p.A327T       |
| Pat_26 | Pre-Treatment | USP7      | 7874   | 37 | 16 | 9004607   | 9004607   | Missense_Mutation | SNP | A  | C  | 82  | 135 | c.1156T>G                           | c.(1156-1158)TTA>GTA | p.L386V       |
| Pat_26 | Pre-Treatment | GRIN2A    | 2903   | 37 | 16 | 9858471   | 9858471   | Missense_Mutation | SNP | T  | G  | 41  | 69  | c.2930A>C                           | c.(2929-2931)AAC>ACC | p.N977T       |
| Pat_26 | Pre-Treatment | TMC7      | 79905  | 37 | 16 | 19049221  | 19049221  | Missense_Mutation | SNP | G  | A  | 30  | 95  | c.1031G>A                           | c.(1030-1032)CGG>CAG | p.R344Q       |

|        |               |           |        |    |    |          |          |                   |     |    |    |     |     |                |                       |               |
|--------|---------------|-----------|--------|----|----|----------|----------|-------------------|-----|----|----|-----|-----|----------------|-----------------------|---------------|
| Pat_26 | Pre-Treatment | TMC7      | 79905  | 37 | 16 | 19051720 | 19051720 | Missense_Mutation | SNP | G  | A  | 5   | 284 | c.1289G>A      | c.(1288-1290)CGC>CAC  | p.R430H       |
| Pat_26 | Pre-Treatment | C16orf88  | 400506 | 37 | 16 | 19718435 | 19718435 | Missense_Mutation | SNP | G  | A  | 4   | 82  | c.1174C>T      | c.(1174-1176)CGC>TGC  | p.R392C       |
| Pat_26 | Pre-Treatment | ACSM2B    | 348158 | 37 | 16 | 20559454 | 20559454 | Missense_Mutation | SNP | G  | A  | 92  | 183 | c.1028C>T      | c.(1027-1029)CCA>CTA  | p.P343L       |
| Pat_26 | Pre-Treatment | USP31     | 57478  | 37 | 16 | 23091371 | 23091371 | Missense_Mutation | SNP | G  | A  | 4   | 180 | c.2072C>T      | c.(2071-2073)CCG>CTG  | p.P691L       |
| Pat_26 | Pre-Treatment | ERN2      | 10595  | 37 | 16 | 23702196 | 23702196 | Missense_Mutation | SNP | C  | T  | 24  | 60  | c.2881G>A      | c.(2881-2883)GAC>AAC  | p.D961N       |
| Pat_26 | Pre-Treatment | PRKCB     | 5579   | 37 | 16 | 24196465 | 24196465 | Missense_Mutation | SNP | G  | A  | 89  | 155 | c.1567G>A      | c.(1567-1569)GAT>AAT  | p.D523N       |
| Pat_26 | Pre-Treatment | GTF3C1    | 2975   | 37 | 16 | 27480794 | 27480794 | Missense_Mutation | SNP | C  | T  | 7   | 264 | c.4892G>A      | c.(4891-4893)CGG>CAG  | p.R1631Q      |
| Pat_26 | Pre-Treatment | C16orf93  | 90835  | 37 | 16 | 30770779 | 30770779 | Missense_Mutation | SNP | G  | A  | 6   | 150 | c.541C>T       | c.(541-543)CGG>TGG    | p.R181W       |
| Pat_26 | Pre-Treatment | ABCC11    | 85320  | 37 | 16 | 48209286 | 48209286 | Missense_Mutation | SNP | G  | A  | 42  | 93  | c.3581C>T      | c.(3580-3582)CCC>CTC  | p.P1194L      |
| Pat_26 | Pre-Treatment | BRD7      | 29117  | 37 | 16 | 50354573 | 50354573 | Splice_Site       | SNP | C  | T  | 6   | 381 | c.1612_splice  | c.e15+1               | p.E538_splice |
| Pat_26 | Pre-Treatment | IRX3      | 79191  | 37 | 16 | 54319429 | 54319430 | Nonsense_Mutation | DNP | GG | AA | 11  | 17  | c.363_364CC>TT | 361-366)GGCCAG>GGTT   | p.Q122*       |
| Pat_26 | Pre-Treatment | C16orf80  | 29105  | 37 | 16 | 58148803 | 58148803 | Nonsense_Mutation | SNP | G  | A  | 5   | 264 | c.487C>T       | c.(487-489)CGA>TGA    | p.R163*       |
| Pat_26 | Pre-Treatment | B3GNT9    | 84752  | 37 | 16 | 67183730 | 67183730 | Missense_Mutation | SNP | G  | A  | 4   | 61  | c.659C>T       | c.(658-660)CCC>CTC    | p.P220L       |
| Pat_26 | Pre-Treatment | LOC283922 | 283922 | 37 | 16 | 74366443 | 74366443 | Missense_Mutation | SNP | G  | A  | 9   | 11  | c.925C>T       | c.(925-927)CCC>TCC    | p.P309S       |
| Pat_26 | Pre-Treatment | ADAMTS18  | 170692 | 37 | 16 | 77359782 | 77359782 | Missense_Mutation | SNP | T  | A  | 99  | 117 | c.2013A>T      | c.(2011-2013)AAA>AAT  | p.K671N       |
| Pat_26 | Pre-Treatment | VAT1L     | 57687  | 37 | 16 | 77850891 | 77850891 | Missense_Mutation | SNP | G  | A  | 147 | 228 | c.307G>A       | c.(307-309)GGA>AGA    | p.G103R       |
| Pat_26 | Pre-Treatment | CRISPLD2  | 83716  | 37 | 16 | 84906599 | 84906599 | Missense_Mutation | SNP | C  | T  | 216 | 298 | c.983C>T       | c.(982-984)TCG>TTG    | p.S328L       |
| Pat_26 | Pre-Treatment | FAM92B    | 339145 | 37 | 16 | 85143843 | 85143843 | Missense_Mutation | SNP | G  | A  | 4   | 187 | c.244C>T       | c.(244-246)CGG>TGG    | p.R82W        |
| Pat_26 | Pre-Treatment | SLC7A5    | 8140   | 37 | 16 | 87871496 | 87871496 | Missense_Mutation | SNP | C  | A  | 4   | 92  | c.1095G>T      | c.(1093-1095)ATG>ATT  | p.M365I       |
| Pat_26 | Pre-Treatment | ABR       | 29     | 37 | 17 | 953422   | 953422   | Splice_Site       | SNP | C  | T  | 37  | 68  | c.1660_splice  | c.e16-1               | p.E554_splice |
| Pat_26 | Pre-Treatment | DPH1      | 1801   | 37 | 17 | 1940207  | 1940207  | Missense_Mutation | SNP | G  | A  | 4   | 126 | c.652G>A       | c.(652-654)GGC>AGC    | p.G218S       |
| Pat_26 | Pre-Treatment | SMG6      | 23293  | 37 | 17 | 1972173  | 1972173  | Missense_Mutation | SNP | G  | A  | 43  | 129 | c.3734C>T      | c.(3733-3735)CCT>CTT  | p.P1245L      |
| Pat_26 | Pre-Treatment | P2RX5     | 5026   | 37 | 17 | 3593794  | 3593794  | Missense_Mutation | SNP | G  | A  | 4   | 89  | c.460C>T       | c.(460-462)CGG>TGG    | p.R154W       |
| Pat_26 | Pre-Treatment | ATP2A3    | 489    | 37 | 17 | 3840720  | 3840720  | Missense_Mutation | SNP | C  | T  | 4   | 121 | c.2311G>A      | c.(2311-2313)GAG>AAG  | p.E771K       |
| Pat_26 | Pre-Treatment | MYBBP1A   | 10514  | 37 | 17 | 4448928  | 4448928  | Missense_Mutation | SNP | G  | A  | 6   | 184 | c.2050C>T      | c.(2050-2052)CGT>TGT  | p.R684C       |
| Pat_26 | Pre-Treatment | PLD2      | 5338   | 37 | 17 | 4725974  | 4725974  | Missense_Mutation | SNP | C  | T  | 6   | 303 | c.2617C>T      | c.(2617-2619)CGG>TGG  | p.R873W       |
| Pat_26 | Pre-Treatment | CAMTA2    | 23125  | 37 | 17 | 4885114  | 4885114  | Missense_Mutation | SNP | C  | T  | 4   | 42  | c.424G>A       | c.(424-426)GTC>ATC    | p.V142I       |
| Pat_26 | Pre-Treatment | KIF1C     | 10749  | 37 | 17 | 4904079  | 4904079  | Missense_Mutation | SNP | C  | T  | 141 | 256 | c.119C>T       | c.(118-120)CCT>CTT    | p.P40L        |
| Pat_26 | Pre-Treatment | ZBTB4     | 57659  | 37 | 17 | 7366704  | 7366704  | Missense_Mutation | SNP | G  | A  | 4   | 29  | c.1597C>T      | c.(1597-1599)CCC>TCC  | p.P533S       |
| Pat_26 | Pre-Treatment | AMAC1L3   | 643664 | 37 | 17 | 7386000  | 7386000  | Missense_Mutation | SNP | G  | A  | 49  | 101 | c.697G>A       | c.(697-699)GGC>AGC    | p.G233S       |
| Pat_26 | Pre-Treatment | ALOXE3    | 59344  | 37 | 17 | 8000085  | 8000085  | Missense_Mutation | SNP | C  | T  | 27  | 53  | c.1996G>A      | c.(1996-1998)GAG>AAG  | p.E666K       |
| Pat_26 | Pre-Treatment | ARHGEF15  | 22899  | 37 | 17 | 8219159  | 8219159  | Missense_Mutation | SNP | C  | T  | 4   | 160 | c.1508C>T      | c.(1507-1509)CCT>CTT  | p.P503L       |
| Pat_26 | Pre-Treatment | MYH8      | 4626   | 37 | 17 | 10315967 | 10315967 | Missense_Mutation | SNP | A  | G  | 174 | 465 | c.1226T>C      | c.(1225-1227)GTT>GCT  | p.V409A       |
| Pat_26 | Pre-Treatment | MYH4      | 4622   | 37 | 17 | 10356968 | 10356968 | Missense_Mutation | SNP | C  | T  | 147 | 238 | c.2926G>A      | c.(2926-2928)GAG>AAG  | p.E976K       |
| Pat_26 | Pre-Treatment | MYH1      | 4619   | 37 | 17 | 10406565 | 10406565 | Missense_Mutation | SNP | C  | T  | 45  | 96  | c.2692G>A      | c.(2692-2694)GAA>AAA  | p.E898K       |
| Pat_26 | Pre-Treatment | DNAH9     | 1770   | 37 | 17 | 11593135 | 11593136 | Missense_Mutation | DNP | GG | AA | 11  | 12  | .3996_3997GG>A | .994-3999)ATGGAG>ATAA | .332_1333ME>  |
| Pat_26 | Pre-Treatment | MYOCD     | 93649  | 37 | 17 | 12647615 | 12647616 | Missense_Mutation | DNP | CC | TT | 33  | 111 | c.833_834CC>TT | c.(832-834)TCC>TTT    | p.S278F       |
| Pat_26 | Pre-Treatment | CDRT1     | 374286 | 37 | 17 | 15522784 | 15522784 | Missense_Mutation | SNP | G  | A  | 49  | 513 | c.43C>T        | c.(43-45)CGT>TGT      | p.R15C        |
| Pat_26 | Pre-Treatment | ZNF286A   | 57335  | 37 | 17 | 15619675 | 15619676 | Missense_Mutation | DNP | GG | AA | 6   | 26  | c.637_638GG>AA | c.(637-639)GGA>AAA    | p.G213K       |
| Pat_26 | Pre-Treatment | MPRIIP    | 23164  | 37 | 17 | 17046078 | 17046078 | Missense_Mutation | SNP | G  | A  | 4   | 149 | c.1034G>A      | c.(1033-1035)CGG>CAG  | p.R345Q       |
| Pat_26 | Pre-Treatment | C17orf39  | 79018  | 37 | 17 | 17968502 | 17968502 | Missense_Mutation | SNP | C  | T  | 77  | 157 | c.848C>T       | c.(847-849)TCC>TTC    | p.S283F       |
| Pat_26 | Pre-Treatment | FLII      | 2314   | 37 | 17 | 18151111 | 18151111 | Missense_Mutation | SNP | C  | T  | 4   | 174 | c.2347G>A      | c.(2347-2349)GAC>AAC  | p.D783N       |
| Pat_26 | Pre-Treatment | TOP3A     | 7156   | 37 | 17 | 18208438 | 18208438 | Missense_Mutation | SNP | C  | T  | 5   | 233 | c.487G>A       | c.(487-489)GTG>ATG    | p.V163M       |
| Pat_26 | Pre-Treatment | FBXW10    | 10517  | 37 | 17 | 18647600 | 18647600 | Missense_Mutation | SNP | C  | T  | 85  | 182 | c.43C>T        | c.(43-45)CGT>TGT      | p.R15C        |
| Pat_26 | Pre-Treatment | MFAP4     | 4239   | 37 | 17 | 19288516 | 19288516 | Missense_Mutation | SNP | G  | A  | 7   | 260 | c.416C>T       | c.(415-417)ACG>ATG    | p.T139M       |
| Pat_26 | Pre-Treatment | IFT20     | 90410  | 37 | 17 | 26657555 | 26657555 | Splice_Site       | SNP | C  | T  | 59  | 110 | c.128_splice   | c.e3-1                | p.K43_splice  |
| Pat_26 | Pre-Treatment | ACCN1     | 40     | 37 | 17 | 31355368 | 31355368 | Missense_Mutation | SNP | C  | T  | 61  | 99  | c.877G>A       | c.(877-879)GAG>AAG    | p.E293K       |

|        |               |          |        |    |    |          |          |                   |     |    |    |     |     |                |                      |          |
|--------|---------------|----------|--------|----|----|----------|----------|-------------------|-----|----|----|-----|-----|----------------|----------------------|----------|
| Pat_26 | Pre-Treatment | C17orf78 | 284099 | 37 | 17 | 35746197 | 35746197 | Missense_Mutation | SNP | C  | T  | 3   | 18  | c.650C>T       | c.(649-651)GCC>GTC   | p.A217V  |
| Pat_26 | Pre-Treatment | SRCIN1   | 80725  | 37 | 17 | 36707439 | 36707439 | Missense_Mutation | SNP | C  | T  | 16  | 18  | c.2914G>A      | c.(2914-2916)GGC>AGC | p.G972S  |
| Pat_26 | Pre-Treatment | PIP4K2B  | 8396   | 37 | 17 | 36940540 | 36940540 | Nonsense_Mutation | SNP | G  | A  | 4   | 159 | c.310C>T       | c.(310-312)CGA>TGA   | p.R104*  |
| Pat_26 | Pre-Treatment | STAC2    | 342667 | 37 | 17 | 37369806 | 37369806 | Missense_Mutation | SNP | C  | T  | 159 | 285 | c.947G>A       | c.(946-948)GGA>GAA   | p.G316E  |
| Pat_26 | Pre-Treatment | KRT16    | 3868   | 37 | 17 | 39767374 | 39767374 | Missense_Mutation | SNP | C  | T  | 179 | 376 | c.880G>A       | c.(880-882)GAG>AAG   | p.E294K  |
| Pat_26 | Pre-Treatment | KLHL10   | 317719 | 37 | 17 | 40001942 | 40001942 | Missense_Mutation | SNP | G  | A  | 4   | 187 | c.1249G>A      | c.(1249-1251)GCC>ACC | p.A417T  |
| Pat_26 | Pre-Treatment | TUBG2    | 27175  | 37 | 17 | 40818663 | 40818663 | Missense_Mutation | SNP | C  | T  | 6   | 284 | c.1201C>T      | c.(1201-1203)CGG>TGG | p.R401W  |
| Pat_26 | Pre-Treatment | CNTNAP1  | 8506   | 37 | 17 | 40838985 | 40838985 | Missense_Mutation | SNP | G  | A  | 4   | 132 | c.965G>A       | c.(964-966)GGC>GAC   | p.G322D  |
| Pat_26 | Pre-Treatment | SLC4A1   | 6521   | 37 | 17 | 42335380 | 42335380 | Missense_Mutation | SNP | G  | A  | 4   | 185 | c.1256C>T      | c.(1255-1257)CCC>CTC | p.P419L  |
| Pat_26 | Pre-Treatment | KIF18B   | 146909 | 37 | 17 | 43011708 | 43011708 | Missense_Mutation | SNP | G  | A  | 4   | 48  | c.778C>T       | c.(778-780)CGG>TGG   | p.R260W  |
| Pat_26 | Pre-Treatment | DCAKD    | 79877  | 37 | 17 | 43101938 | 43101938 | Missense_Mutation | SNP | G  | A  | 6   | 231 | c.559C>T       | c.(559-561)CGC>TGC   | p.R187C  |
| Pat_26 | Pre-Treatment | ARHGAP27 | 201176 | 37 | 17 | 43481696 | 43481696 | Missense_Mutation | SNP | G  | A  | 4   | 105 | c.395C>T       | c.(394-396)CCA>CTA   | p.P132L  |
| Pat_26 | Pre-Treatment | GOSR2    | 9570   | 37 | 17 | 45006917 | 45006917 | Missense_Mutation | SNP | C  | T  | 4   | 182 | c.61C>T        | c.(61-63)CGC>TGC     | p.R21C   |
| Pat_26 | Pre-Treatment | COL1A1   | 1277   | 37 | 17 | 48278816 | 48278816 | Missense_Mutation | SNP | G  | A  | 4   | 150 | c.59C>T        | c.(58-60)ACG>ATG     | p.T20M   |
| Pat_26 | Pre-Treatment | XYLT2    | 64132  | 37 | 17 | 48431912 | 48431912 | Missense_Mutation | SNP | G  | A  | 4   | 140 | c.772G>A       | c.(772-774)GAG>AAG   | p.E258K  |
| Pat_26 | Pre-Treatment | CHAD     | 1101   | 37 | 17 | 48545571 | 48545571 | Missense_Mutation | SNP | C  | T  | 5   | 229 | c.604G>A       | c.(604-606)GTG>ATG   | p.V202M  |
| Pat_26 | Pre-Treatment | STXBP4   | 252983 | 37 | 17 | 53076778 | 53076778 | Missense_Mutation | SNP | G  | A  | 4   | 165 | c.253G>A       | c.(253-255)GAA>AAA   | p.E85K   |
| Pat_26 | Pre-Treatment | 4-Sep    | 5414   | 37 | 17 | 56599121 | 56599122 | Missense_Mutation | DNP | GG | AA | 117 | 201 | c.890_891CC>TT | c.(889-891)CCC>CTT   | p.P297L  |
| Pat_26 | Pre-Treatment | CA4      | 762    | 37 | 17 | 58235695 | 58235695 | Missense_Mutation | SNP | A  | T  | 106 | 172 | c.632A>T       | c.(631-633)GAG>GTG   | p.E211V  |
| Pat_26 | Pre-Treatment | MED13    | 9969   | 37 | 17 | 60033088 | 60033088 | Missense_Mutation | SNP | G  | A  | 4   | 169 | c.5735C>T      | c.(5734-5736)GCT>GTT | p.A1912V |
| Pat_26 | Pre-Treatment | ACE      | 1636   | 37 | 17 | 61570849 | 61570849 | Missense_Mutation | SNP | G  | A  | 81  | 142 | c.2965G>A      | c.(2965-2967)GAA>AAA | p.E989K  |
| Pat_26 | Pre-Treatment | PSMC5    | 5705   | 37 | 17 | 61908260 | 61908260 | Missense_Mutation | SNP | C  | T  | 42  | 78  | c.644C>T       | c.(643-645)TCT>TTT   | p.S215F  |
| Pat_26 | Pre-Treatment | SCN4A    | 6329   | 37 | 17 | 62025357 | 62025357 | Missense_Mutation | SNP | C  | T  | 4   | 143 | c.3211G>A      | c.(3211-3213)GTC>ATC | p.V1071I |
| Pat_26 | Pre-Treatment | CCDC46   | 201134 | 37 | 17 | 63637111 | 63637111 | Missense_Mutation | SNP | C  | T  | 74  | 146 | c.2770G>A      | c.(2770-2772)GAA>AAA | p.E924K  |
| Pat_26 | Pre-Treatment | ABCA9    | 10350  | 37 | 17 | 66982452 | 66982452 | Missense_Mutation | SNP | C  | T  | 4   | 117 | c.4061G>A      | c.(4060-4062)GGG>GAG | p.G1354E |
| Pat_26 | Pre-Treatment | OTOP3    | 347741 | 37 | 17 | 72938043 | 72938043 | Nonsense_Mutation | SNP | C  | T  | 5   | 136 | c.538C>T       | c.(538-540)CGA>TGA   | p.R180*  |
| Pat_26 | Pre-Treatment | FBF1     | 85302  | 37 | 17 | 73911211 | 73911211 | Missense_Mutation | SNP | G  | A  | 4   | 58  | c.2470C>T      | c.(2470-2472)CGG>TGG | p.R824W  |
| Pat_26 | Pre-Treatment | CANT1    | 124583 | 37 | 17 | 76993085 | 76993085 | Missense_Mutation | SNP | G  | A  | 247 | 513 | c.620C>T       | c.(619-621)ACC>ATC   | p.T207I  |
| Pat_26 | Pre-Treatment | C17orf70 | 80233  | 37 | 17 | 79514124 | 79514124 | Missense_Mutation | SNP | G  | A  | 4   | 134 | c.1984C>T      | c.(1984-1986)CAC>TAC | p.H662Y  |
| Pat_26 | Pre-Treatment | CSNK1D   | 1453   | 37 | 17 | 80210954 | 80210954 | Missense_Mutation | SNP | C  | T  | 5   | 215 | c.503G>A       | c.(502-504)CGT>CAT   | p.R168H  |
| Pat_26 | Pre-Treatment | LAMA1    | 284217 | 37 | 18 | 6986168  | 6986168  | Missense_Mutation | SNP | G  | A  | 6   | 368 | c.5347C>T      | c.(5347-5349)CTC>TTC | p.L1783F |
| Pat_26 | Pre-Treatment | LAMA3    | 3909   | 37 | 18 | 21526172 | 21526172 | Missense_Mutation | SNP | G  | A  | 63  | 28  | c.9275G>A      | c.(9274-9276)GGA>GAA | p.G3092E |
| Pat_26 | Pre-Treatment | SETBP1   | 26040  | 37 | 18 | 42643613 | 42643613 | Missense_Mutation | SNP | G  | C  | 15  | 39  | c.4741G>C      | c.(4741-4743)GCC>CCC | p.A1581P |
| Pat_26 | Pre-Treatment | RNF165   | 494470 | 37 | 18 | 44035938 | 44035938 | Missense_Mutation | SNP | G  | A  | 32  | 42  | c.818G>A       | c.(817-819)CGA>CAA   | p.R273Q  |
| Pat_26 | Pre-Treatment | STARD6   | 147323 | 37 | 18 | 51863532 | 51863532 | Missense_Mutation | SNP | G  | A  | 74  | 125 | c.230C>T       | c.(229-231)TCA>TTA   | p.S77L   |
| Pat_26 | Pre-Treatment | NEDD4L   | 23327  | 37 | 18 | 55833021 | 55833021 | Missense_Mutation | SNP | G  | A  | 6   | 19  | c.50G>A        | c.(49-51)GGA>GAA     | p.G17E   |
| Pat_26 | Pre-Treatment | CCBE1    | 147372 | 37 | 18 | 57115221 | 57115221 | Missense_Mutation | SNP | G  | A  | 86  | 141 | c.769C>T       | c.(769-771)CCT>TCT   | p.P257S  |
| Pat_26 | Pre-Treatment | SERPIN2  | 5055   | 37 | 18 | 61582740 | 61582740 | Missense_Mutation | SNP | C  | T  | 36  | 97  | c.419C>T       | c.(418-420)TCC>TTC   | p.S140F  |
| Pat_26 | Pre-Treatment | ATP9B    | 374868 | 37 | 18 | 77132838 | 77132838 | Missense_Mutation | SNP | C  | T  | 37  | 60  | c.3026C>T      | c.(3025-3027)TCC>TTC | p.S1009F |
| Pat_26 | Pre-Treatment | NFATC1   | 4772   | 37 | 18 | 77171045 | 77171045 | Missense_Mutation | SNP | C  | T  | 19  | 30  | c.770C>T       | c.(769-771)TCC>TTC   | p.S257F  |
| Pat_26 | Pre-Treatment | PCSK4    | 54760  | 37 | 19 | 1483328  | 1483328  | Missense_Mutation | SNP | G  | A  | 4   | 33  | c.1526C>T      | c.(1525-1527)TCG>TTG | p.S509L  |
| Pat_26 | Pre-Treatment | PCSK4    | 54760  | 37 | 19 | 1486989  | 1486989  | Missense_Mutation | SNP | C  | T  | 6   | 449 | c.931G>A       | c.(931-933)GAC>AAC   | p.D311N  |
| Pat_26 | Pre-Treatment | SPPL2B   | 56928  | 37 | 19 | 2345328  | 2345328  | Missense_Mutation | SNP | G  | A  | 4   | 160 | c.1354G>A      | c.(1354-1356)GCC>ACC | p.A452T  |
| Pat_26 | Pre-Treatment | ZNF555   | 148254 | 37 | 19 | 2853202  | 2853202  | Missense_Mutation | SNP | C  | T  | 6   | 103 | c.1139C>T      | c.(1138-1140)CCC>CTC | p.P380L  |
| Pat_26 | Pre-Treatment | TJP3     | 27134  | 37 | 19 | 3734334  | 3734334  | Missense_Mutation | SNP | A  | G  | 52  | 137 | c.986A>G       | c.(985-987)GAC>GGC   | p.D329G  |
| Pat_26 | Pre-Treatment | UHRF1    | 29128  | 37 | 19 | 4954685  | 4954685  | Missense_Mutation | SNP | C  | T  | 12  | 15  | c.1982C>T      | c.(1981-1983)TCC>TTC | p.S661F  |
| Pat_26 | Pre-Treatment | RFX2     | 5990   | 37 | 19 | 6013085  | 6013085  | Missense_Mutation | SNP | G  | A  | 205 | 381 | c.811C>T       | c.(811-813)CGT>TGT   | p.R271C  |

|        |               |          |        |    |    |          |          |                   |     |    |    |     |     |                  |                         |                |
|--------|---------------|----------|--------|----|----|----------|----------|-------------------|-----|----|----|-----|-----|------------------|-------------------------|----------------|
| Pat_26 | Pre-Treatment | C3       | 718    | 37 | 19 | 6712584  | 6712584  | Missense_Mutation | SNP | G  | A  | 216 | 347 | c.1054C>T        | c.(1054-1056)CCC>TCC    | p.P352S        |
| Pat_26 | Pre-Treatment | PNPLA6   | 10908  | 37 | 19 | 7620564  | 7620564  | Missense_Mutation | SNP | C  | T  | 4   | 113 | c.3038C>T        | c.(3037-3039)ACG>ATG    | p.T1013M       |
| Pat_26 | Pre-Treatment | NDUFA7   | 4701   | 37 | 19 | 8381449  | 8381449  | Missense_Mutation | SNP | C  | T  | 5   | 185 | c.182G>A         | c.(181-183)CGG>CAG      | p.R61Q         |
| Pat_26 | Pre-Treatment | MUC16    | 94025  | 37 | 19 | 9009608  | 9009608  | Missense_Mutation | SNP | C  | T  | 189 | 351 | c.39118G>A       | c.(39118-39120)GAG>AAC  | p.E13040K      |
| Pat_26 | Pre-Treatment | MUC16    | 94025  | 37 | 19 | 9071925  | 9071925  | Missense_Mutation | SNP | G  | A  | 194 | 420 | c.15521C>T       | c.(15520-15522)TCC>TTC  | p.S5174F       |
| Pat_26 | Pre-Treatment | ZNF699   | 374879 | 37 | 19 | 9406866  | 9406866  | Missense_Mutation | SNP | G  | A  | 57  | 101 | c.1214C>T        | c.(1213-1215)TCC>TTC    | p.S405F        |
| Pat_26 | Pre-Treatment | KRI1     | 65095  | 37 | 19 | 10670123 | 10670123 | Missense_Mutation | SNP | C  | T  | 5   | 170 | c.1124G>A        | c.(1123-1125)CGG>CAG    | p.R375Q        |
| Pat_26 | Pre-Treatment | SMARCA4  | 6597   | 37 | 19 | 11136975 | 11136975 | Splice_Site       | SNP | G  | A  | 47  | 111 | c.3169_splice    | c.e23-1                 | p.E1057_splice |
| Pat_26 | Pre-Treatment | ZNF625   | 90589  | 37 | 19 | 12257002 | 12257002 | Missense_Mutation | SNP | C  | T  | 41  | 72  | c.31G>A          | c.(31-33)GAT>AAT        | p.D11N         |
| Pat_26 | Pre-Treatment | C19orf43 | 79002  | 37 | 19 | 12841792 | 12841792 | Missense_Mutation | SNP | G  | A  | 4   | 174 | c.514C>T         | c.(514-516)CGG>TGG      | p.R172W        |
| Pat_26 | Pre-Treatment | TRMT1    | 55621  | 37 | 19 | 13216194 | 13216194 | Missense_Mutation | SNP | C  | T  | 201 | 277 | c.1720G>A        | c.(1720-1722)GAA>AAA    | p.E574K        |
| Pat_26 | Pre-Treatment | LPHN1    | 22859  | 37 | 19 | 14273598 | 14273598 | Missense_Mutation | SNP | C  | T  | 4   | 133 | c.1030G>A        | c.(1030-1032)GTG>ATG    | p.V344M        |
| Pat_26 | Pre-Treatment | NOTCH3   | 4854   | 37 | 19 | 15299917 | 15299917 | Missense_Mutation | SNP | G  | A  | 5   | 309 | c.1261C>T        | c.(1261-1263)CGT>TGT    | p.R421C        |
| Pat_26 | Pre-Treatment | EPS15L1  | 58513  | 37 | 19 | 16515431 | 16515431 | Missense_Mutation | SNP | C  | T  | 4   | 189 | c.1396G>A        | c.(1396-1398)GTC>ATC    | p.V466I        |
| Pat_26 | Pre-Treatment | NWD1     | 284434 | 37 | 19 | 16861221 | 16861221 | Nonsense_Mutation | SNP | C  | T  | 21  | 42  | c.1768C>T        | c.(1768-1770)CGA>TGA    | p.R590*        |
| Pat_26 | Pre-Treatment | MAST3    | 23031  | 37 | 19 | 18239751 | 18239751 | Missense_Mutation | SNP | G  | A  | 4   | 160 | c.1126G>A        | c.(1126-1128)GGA>AGA    | p.G376R        |
| Pat_26 | Pre-Treatment | MAST3    | 23031  | 37 | 19 | 18242814 | 18242814 | Missense_Mutation | SNP | C  | A  | 6   | 304 | c.1441C>A        | c.(1441-1443)CTG>ATG    | p.L481M        |
| Pat_26 | Pre-Treatment | PGPEP1   | 54858  | 37 | 19 | 18453701 | 18453701 | Missense_Mutation | SNP | G  | A  | 5   | 308 | c.67G>A          | c.(67-69)GCC>ACC        | p.A23T         |
| Pat_26 | Pre-Treatment | PBX4     | 80714  | 37 | 19 | 19681432 | 19681432 | Missense_Mutation | SNP | C  | T  | 50  | 105 | c.404G>A         | c.(403-405)CGA>CAA      | p.R135Q        |
| Pat_26 | Pre-Treatment | ZNF682   | 91120  | 37 | 19 | 20117740 | 20117740 | Missense_Mutation | SNP | G  | A  | 7   | 15  | c.571C>T         | c.(571-573)CAT>TAT      | p.H191Y        |
| Pat_26 | Pre-Treatment | ZNF676   | 163223 | 37 | 19 | 22363227 | 22363227 | Missense_Mutation | SNP | C  | G  | 5   | 221 | c.1292G>C        | c.(1291-1293)AGC>ACC    | p.S431T        |
| Pat_26 | Pre-Treatment | ZNF98    | 148198 | 37 | 19 | 22574760 | 22574760 | Missense_Mutation | SNP | C  | A  | 4   | 94  | c.1277G>T        | c.(1276-1278)AGA>ATA    | p.R426I        |
| Pat_26 | Pre-Treatment | ZNF536   | 9745   | 37 | 19 | 31039483 | 31039483 | Missense_Mutation | SNP | C  | T  | 67  | 132 | c.2957C>T        | c.(2956-2958)TCC>TTC    | p.S986F        |
| Pat_26 | Pre-Treatment | TSHZ3    | 57616  | 37 | 19 | 31769341 | 31769341 | Missense_Mutation | SNP | G  | C  | 72  | 121 | c.1358C>G        | c.(1357-1359)ACG>AGG    | p.T453R        |
| Pat_26 | Pre-Treatment | GPATCH1  | 55094  | 37 | 19 | 33603401 | 33603401 | Missense_Mutation | SNP | G  | A  | 6   | 385 | c.1774G>A        | c.(1774-1776)GGG>AGG    | p.G592R        |
| Pat_26 | Pre-Treatment | ZNF567   | 163081 | 37 | 19 | 37210680 | 37210680 | Missense_Mutation | SNP | C  | T  | 4   | 155 | c.1054C>T        | c.(1054-1056)CTC>TTC    | p.L352F        |
| Pat_26 | Pre-Treatment | SIPA1L3  | 23094  | 37 | 19 | 38621187 | 38621187 | Missense_Mutation | SNP | G  | A  | 82  | 180 | c.2918G>A        | c.(2917-2919)GGG>GAG    | p.G973E        |
| Pat_26 | Pre-Treatment | C19orf33 | 64073  | 37 | 19 | 38795321 | 38795321 | Missense_Mutation | SNP | G  | C  | 4   | 146 | c.196G>C         | c.(196-198)GTG>CTG      | p.V66L         |
| Pat_26 | Pre-Treatment | SIRT2    | 22933  | 37 | 19 | 39384056 | 39384056 | Missense_Mutation | SNP | C  | T  | 4   | 135 | c.224G>A         | c.(223-225)CGC>CAC      | p.R75H         |
| Pat_26 | Pre-Treatment | TIMM50   | 92609  | 37 | 19 | 39976330 | 39976330 | Missense_Mutation | SNP | G  | A  | 108 | 214 | c.684G>A         | c.(682-684)ATG>ATA      | p.M228I        |
| Pat_26 | Pre-Treatment | FCGBP    | 8857   | 37 | 19 | 40373993 | 40373993 | Missense_Mutation | SNP | C  | T  | 20  | 183 | c.12085G>A       | c.(12085-12087)GGG>AGC  | p.G4029R       |
| Pat_26 | Pre-Treatment | FCGBP    | 8857   | 37 | 19 | 40391996 | 40391996 | Splice_Site       | SNP | A  | G  | 53  | 114 | c.8388_splice    | c.e17+1                 | p.E2796_splice |
| Pat_26 | Pre-Treatment | ZNF574   | 64763  | 37 | 19 | 42584599 | 42584599 | Missense_Mutation | SNP | G  | A  | 5   | 333 | c.1841G>A        | c.(1840-1842)CGC>CAC    | p.R614H        |
| Pat_26 | Pre-Treatment | ZNF526   | 116115 | 37 | 19 | 42729055 | 42729055 | Missense_Mutation | SNP | C  | T  | 6   | 342 | c.500C>T         | c.(499-501)ACG>ATG      | p.T167M        |
| Pat_26 | Pre-Treatment | CIC      | 23152  | 37 | 19 | 42795519 | 42795519 | Missense_Mutation | SNP | C  | T  | 83  | 162 | c.2599C>T        | c.(2599-2601)CCA>TCA    | p.P867S        |
| Pat_26 | Pre-Treatment | CADM4    | 199731 | 37 | 19 | 44130363 | 44130363 | Missense_Mutation | SNP | C  | T  | 5   | 190 | c.577G>A         | c.(577-579)GAC>AAC      | p.D193N        |
| Pat_26 | Pre-Treatment | ZNF226   | 7769   | 37 | 19 | 44680470 | 44680470 | Missense_Mutation | SNP | T  | C  | 115 | 190 | c.1055T>C        | c.(1054-1056)GTT>GCT    | p.V352A        |
| Pat_26 | Pre-Treatment | CBLC     | 23624  | 37 | 19 | 45296788 | 45296788 | Missense_Mutation | SNP | G  | A  | 4   | 130 | c.1195G>A        | c.(1195-1197)GTG>ATG    | p.V399M        |
| Pat_26 | Pre-Treatment | PPM1N    | 147699 | 37 | 19 | 46003802 | 46003803 | Missense_Mutation | DNP | GG | AA | 26  | 50  | c.1146_1147GG>AA | c.(1144-1149)GGGGGA>GGA | p.G383R        |
| Pat_26 | Pre-Treatment | QPCTL    | 54814  | 37 | 19 | 46205173 | 46205173 | Splice_Site       | SNP | G  | A  | 6   | 131 | c.1003_splice    | c.e6+1                  | p.G335_splice  |
| Pat_26 | Pre-Treatment | CCDC8    | 83987  | 37 | 19 | 46914959 | 46914959 | Missense_Mutation | SNP | T  | C  | 10  | 474 | c.1109A>G        | c.(1108-1110)GAG>GGG    | p.E370G        |
| Pat_26 | Pre-Treatment | CCDC155  | 147872 | 37 | 19 | 49900950 | 49900950 | Missense_Mutation | SNP | G  | A  | 123 | 291 | c.443G>A         | c.(442-444)GGA>GAA      | p.G148E        |
| Pat_26 | Pre-Treatment | ALDH16A1 | 126133 | 37 | 19 | 49971731 | 49971731 | Missense_Mutation | SNP | G  | A  | 8   | 756 | c.2032G>A        | c.(2032-2034)GTG>ATG    | p.V678M        |
| Pat_26 | Pre-Treatment | MYBPC2   | 4606   | 37 | 19 | 50964868 | 50964868 | Missense_Mutation | SNP | G  | A  | 54  | 91  | c.3001G>A        | c.(3001-3003)GAA>AAA    | p.E1001K       |
| Pat_26 | Pre-Treatment | KLK1     | 3816   | 37 | 19 | 51323644 | 51323645 | Missense_Mutation | DNP | GG | TA | 149 | 356 | c.261_262CC>TA   | c.(259-264)GCCCAG>GCTA  | p.Q88K         |
| Pat_26 | Pre-Treatment | KLK8     | 11202  | 37 | 19 | 51499463 | 51499463 | Missense_Mutation | SNP | G  | A  | 47  | 113 | c.635C>T         | c.(634-636)TCT>TTT      | p.S212F        |
| Pat_26 | Pre-Treatment | KLK9     | 284366 | 37 | 19 | 51512494 | 51512494 | Missense_Mutation | SNP | C  | T  | 17  | 36  | c.145G>A         | c.(145-147)GGG>AGG      | p.G49R         |

|        |               |           |        |    |    |           |           |                   |     |    |    |     |     |                                   |                        |          |
|--------|---------------|-----------|--------|----|----|-----------|-----------|-------------------|-----|----|----|-----|-----|-----------------------------------|------------------------|----------|
| Pat_26 | Pre-Treatment | KLK12     | 43849  | 37 | 19 | 51532685  | 51532685  | Missense_Mutation | SNP | C  | A  | 4   | 165 | c.620G>T                          | c.(619-621)GGG>GTG     | p.G207V  |
| Pat_26 | Pre-Treatment | SIGLEC10  | 89790  | 37 | 19 | 51918507  | 51918507  | Missense_Mutation | SNP | C  | T  | 83  | 188 | c.1258G>A                         | c.(1258-1260)GAA>AAA   | p.E420K  |
| Pat_26 | Pre-Treatment | ZNF468    | 90333  | 37 | 19 | 53357599  | 53357599  | Splice_Site       | SNP | C  | T  | 21  | 30  | c.-72_splice                      | c.e2-1                 |          |
| Pat_26 | Pre-Treatment | DPRX      | 503834 | 37 | 19 | 54140195  | 54140195  | Missense_Mutation | SNP | C  | T  | 81  | 212 | c.529C>T                          | c.(529-531)CAT>TAT     | p.H177Y  |
| Pat_26 | Pre-Treatment | SYT5      | 6861   | 37 | 19 | 55686566  | 55686566  | Missense_Mutation | SNP | C  | T  | 12  | 13  | c.682G>A                          | c.(682-684)GAG>AAG     | p.E228K  |
| Pat_26 | Pre-Treatment | NLRP5     | 126206 | 37 | 19 | 56539255  | 56539255  | Missense_Mutation | SNP | G  | A  | 15  | 42  | c.1656G>A                         | c.(1654-1656)ATG>ATA   | p.M552I  |
| Pat_26 | Pre-Treatment | ZNF583    | 147949 | 37 | 19 | 56934818  | 56934818  | Missense_Mutation | SNP | G  | A  | 38  | 83  | c.791G>A                          | c.(790-792)GGA>GAA     | p.G264E  |
| Pat_26 | Pre-Treatment | ZSCAN4    | 201516 | 37 | 19 | 58187625  | 58187625  | Missense_Mutation | SNP | G  | A  | 38  | 91  | c.112G>A                          | c.(112-114)GGG>AGG     | p.G38R   |
| Pat_26 | Pre-Treatment | ZNF135    | 7694   | 37 | 19 | 58578529  | 58578529  | Missense_Mutation | SNP | G  | A  | 5   | 331 | c.713G>A                          | c.(712-714)AGC>AAC     | p.S238N  |
| Pat_26 | Pre-Treatment | MYT1L     | 23040  | 37 | 2  | 1983518   | 1983518   | Missense_Mutation | SNP | C  | T  | 4   | 118 | c.32G>A                           | c.(31-33)CGC>CAC       | p.R11H   |
| Pat_26 | Pre-Treatment | NBAS      | 51594  | 37 | 2  | 15696937  | 15696937  | Nonsense_Mutation | SNP | A  | T  | 51  | 88  | c.179T>A                          | c.(178-180)TTA>TAA     | p.L60*   |
| Pat_26 | Pre-Treatment | DDX1      | 1653   | 37 | 2  | 15769796  | 15769796  | Missense_Mutation | SNP | G  | A  | 4   | 104 | c.1946G>A                         | c.(1945-1947)JTG>TAT   | p.C649Y  |
| Pat_26 | Pre-Treatment | APOB      | 338    | 37 | 2  | 21236086  | 21236086  | Missense_Mutation | SNP | G  | A  | 172 | 274 | c.4162C>T                         | c.(4162-4164)CGT>TGT   | p.R1388C |
| Pat_26 | Pre-Treatment | DPYSL5    | 56896  | 37 | 2  | 27164901  | 27164901  | Missense_Mutation | SNP | G  | T  | 126 | 229 | c.1173G>T                         | c.(1171-1173)AAG>AAT   | p.K391N  |
| Pat_26 | Pre-Treatment | DNAJC5G   | 285126 | 37 | 2  | 27503075  | 27503075  | Missense_Mutation | SNP | G  | A  | 109 | 183 | c.562G>A                          | c.(562-564)GAT>AAT     | p.D188N  |
| Pat_26 | Pre-Treatment | NLRC4     | 58484  | 37 | 2  | 32475886  | 32475886  | Missense_Mutation | SNP | C  | T  | 32  | 46  | c.1047G>A                         | c.(1045-1047)ATG>ATA   | p.M349I  |
| Pat_26 | Pre-Treatment | FAM98A    | 25940  | 37 | 2  | 33809982  | 33809982  | Missense_Mutation | SNP | C  | T  | 5   | 317 | c.1418G>A                         | c.(1417-1419)CGT>CAT   | p.R473H  |
| Pat_26 | Pre-Treatment | VIT       | 5212   | 37 | 2  | 37035774  | 37035774  | Missense_Mutation | SNP | G  | A  | 5   | 338 | c.1549G>A                         | c.(1549-1551)GGC>AGC   | p.G517S  |
| Pat_26 | Pre-Treatment | EIF2AK2   | 5610   | 37 | 2  | 37365691  | 37365691  | Missense_Mutation | SNP | G  | A  | 4   | 188 | c.554C>T                          | c.(553-555)ACG>ATG     | p.T185M  |
| Pat_26 | Pre-Treatment | LRPPRC    | 10128  | 37 | 2  | 44201383  | 44201383  | Missense_Mutation | SNP | G  | A  | 4   | 133 | c.1061C>T                         | c.(1060-1062)GCG>GTG   | p.A354V  |
| Pat_26 | Pre-Treatment | MSH6      | 2956   | 37 | 2  | 48033373  | 48033373  | Missense_Mutation | SNP | C  | A  | 4   | 144 | c.3677C>A                         | c.(3676-3678)GCA>GAA   | p.A1226E |
| Pat_26 | Pre-Treatment | TSPYL6    | 388951 | 37 | 2  | 54483054  | 54483054  | Missense_Mutation | SNP | G  | A  | 5   | 181 | c.235C>T                          | c.(235-237)CGC>TGC     | p.R79C   |
| Pat_26 | Pre-Treatment | BCL11A    | 53335  | 37 | 2  | 60689281  | 60689281  | Missense_Mutation | SNP | C  | T  | 30  | 39  | c.766G>A                          | c.(766-768)GAA>AAA     | p.E256K  |
| Pat_26 | Pre-Treatment | USP34     | 9736   | 37 | 2  | 61605504  | 61605504  | Missense_Mutation | SNP | G  | C  | 55  | 113 | c.1070C>G                         | c.(1069-1071)ACA>AGA   | p.T357R  |
| Pat_26 | Pre-Treatment | DYSF      | 8291   | 37 | 2  | 71797734  | 71797734  | Missense_Mutation | SNP | G  | A  | 39  | 62  | c.3037G>A                         | c.(3037-3039)GAG>AAG   | p.E1013K |
| Pat_26 | Pre-Treatment | DYSF      | 8291   | 37 | 2  | 71801437  | 71801437  | Missense_Mutation | SNP | G  | A  | 6   | 319 | c.3284G>A                         | c.(3283-3285)CGC>CAC   | p.R1095H |
| Pat_26 | Pre-Treatment | SLC4A5    | 57835  | 37 | 2  | 74481792  | 74481792  | Missense_Mutation | SNP | G  | A  | 158 | 290 | c.1067C>T                         | c.(1066-1068)TCC>TTC   | p.S356F  |
| Pat_26 | Pre-Treatment | DCTN1     | 1639   | 37 | 2  | 74592757  | 74592757  | Missense_Mutation | SNP | G  | A  | 5   | 206 | c.2914C>T                         | c.(2914-2916)CGG>TGG   | p.R972W  |
| Pat_26 | Pre-Treatment | TLX2      | 3196   | 37 | 2  | 74742790  | 74742790  | Missense_Mutation | SNP | G  | A  | 7   | 495 | c.431G>A                          | c.(430-432)CGC>CAC     | p.R144H  |
| Pat_26 | Pre-Treatment | DQX1      | 165545 | 37 | 2  | 74751396  | 74751396  | Missense_Mutation | SNP | G  | A  | 6   | 368 | c.470C>T                          | c.(469-471)TCG>TTG     | p.S157L  |
| Pat_26 | Pre-Treatment | HK2       | 3099   | 37 | 2  | 75094769  | 75094769  | Missense_Mutation | SNP | G  | A  | 236 | 454 | c.233G>A                          | c.(232-234)GGA>GAA     | p.G78E   |
| Pat_26 | Pre-Treatment | LOC285033 | 285033 | 37 | 2  | 96906408  | 96906408  | Missense_Mutation | SNP | C  | T  | 60  | 72  | c.347C>T                          | c.(346-348)TCC>TTC     | p.S116F  |
| Pat_26 | Pre-Treatment | NCAPH     | 23397  | 37 | 2  | 97019928  | 97019928  | Missense_Mutation | SNP | C  | T  | 8   | 361 | c.1010C>T                         | c.(1009-1011)TCG>TTG   | p.S337L  |
| Pat_26 | Pre-Treatment | TSGA10    | 80705  | 37 | 2  | 99634699  | 99634699  | Missense_Mutation | SNP | C  | T  | 46  | 89  | c.2036G>A                         | c.(2035-2037)CGA>CAA   | p.R679Q  |
| Pat_26 | Pre-Treatment | REV1      | 51455  | 37 | 2  | 100052317 | 100052317 | Nonsense_Mutation | SNP | G  | A  | 5   | 316 | c.1300C>T                         | c.(1300-1302)CGA>TGA   | p.R434*  |
| Pat_26 | Pre-Treatment | ST6GAL2   | 84620  | 37 | 2  | 107459818 | 107459818 | Missense_Mutation | SNP | G  | A  | 25  | 48  | c.616C>T                          | c.(616-618)CGG>TGG     | p.R206W  |
| Pat_26 | Pre-Treatment | ST6GAL2   | 84620  | 37 | 2  | 107460402 | 107460402 | Missense_Mutation | SNP | C  | T  | 47  | 69  | c.32G>A                           | c.(31-33)CGA>CAA       | p.R11Q   |
| Pat_26 | Pre-Treatment | RGPD4     | 285190 | 37 | 2  | 108488208 | 108488208 | Missense_Mutation | SNP | G  | A  | 202 | 322 | c.3748G>A                         | c.(3748-3750)GAT>AAT   | p.D1250N |
| Pat_26 | Pre-Treatment | SLC5A7    | 60482  | 37 | 2  | 108626702 | 108626702 | Missense_Mutation | SNP | A  | T  | 63  | 120 | c.1128A>T                         | c.(1126-1128)GAA>GAT   | p.E376D  |
| Pat_26 | Pre-Treatment | SULT1C2   | 6819   | 37 | 2  | 108921643 | 108921643 | Nonsense_Mutation | SNP | G  | A  | 100 | 197 | c.518G>A                          | c.(517-519)TGG>TAG     | p.W173*  |
| Pat_26 | Pre-Treatment | SULT1C4   | 27233  | 37 | 2  | 108999611 | 108999611 | Missense_Mutation | SNP | G  | T  | 34  | 57  | c.456G>T                          | c.(454-456)ATG>ATT     | p.M152I  |
| Pat_26 | Pre-Treatment | NCKAP5    | 344148 | 37 | 2  | 133540369 | 133540370 | Missense_Mutation | DNP | CA | TT | 6   | 19  | .4014_4015TG>A012-4017)GTTGGG>GTA | p.G1339R               |          |
| Pat_26 | Pre-Treatment | LCT       | 3938   | 37 | 2  | 136566672 | 136566672 | Missense_Mutation | SNP | C  | T  | 19  | 24  | c.3245G>A                         | c.(3244-3246)GGG>GAG   | p.G1082E |
| Pat_26 | Pre-Treatment | THSD7B    | 80731  | 37 | 2  | 137872755 | 137872755 | Missense_Mutation | SNP | G  | A  | 68  | 91  | c.1168G>A                         | c.(1168-1170)GAT>AAT   | p.D390N  |
| Pat_26 | Pre-Treatment | LRP1B     | 53353  | 37 | 2  | 141298592 | 141298592 | Missense_Mutation | SNP | T  | C  | 115 | 166 | c.7463A>G                         | c.(7462-7464)AAT>AGT   | p.N2488S |
| Pat_26 | Pre-Treatment | NEB       | 4703   | 37 | 2  | 152466537 | 152466537 | Missense_Mutation | SNP | C  | T  | 27  | 60  | c.11387G>A                        | c.(11386-11388)GGA>GAA | p.G3796E |
| Pat_26 | Pre-Treatment | TANC1     | 85461  | 37 | 2  | 160076367 | 160076367 | Missense_Mutation | SNP | G  | A  | 5   | 137 | c.3667G>A                         | c.(3667-3669)GAT>AAT   | p.D1223N |



|        |               |         |        |    |    |           |           |                   |     |   |   |     |     |               |                         |                |
|--------|---------------|---------|--------|----|----|-----------|-----------|-------------------|-----|---|---|-----|-----|---------------|-------------------------|----------------|
| Pat_26 | Pre-Treatment | GRB14   | 2888   | 37 | 2  | 165365320 | 165365320 | Missense_Mutation | SNP | C | T | 59  | 131 | c.859G>A      | c.(859-861)GAT>AAT      | p.D287N        |
| Pat_26 | Pre-Treatment | SCN3A   | 6328   | 37 | 2  | 166032843 | 166032843 | Missense_Mutation | SNP | G | A | 56  | 84  | c.62C>T       | c.(61-63)TCT>TTT        | p.S21F         |
| Pat_26 | Pre-Treatment | LRP2    | 4036   | 37 | 2  | 170147469 | 170147469 | Missense_Mutation | SNP | C | T | 34  | 101 | c.808G>A      | c.(808-810)GAA>AAA      | p.E270K        |
| Pat_26 | Pre-Treatment | TTN     | 7273   | 37 | 2  | 179416831 | 179416831 | Missense_Mutation | SNP | C | T | 102 | 175 | c.83092G>A    | c.(83092-83094)GAA>AAA  | p.E27698K      |
| Pat_26 | Pre-Treatment | TTN     | 7273   | 37 | 2  | 179427038 | 179427038 | Missense_Mutation | SNP | C | T | 44  | 83  | c.76117G>A    | c.(76117-76119)GAA>AAA  | p.E25373K      |
| Pat_26 | Pre-Treatment | TTN     | 7273   | 37 | 2  | 179430017 | 179430017 | Missense_Mutation | SNP | C | T | 37  | 121 | c.73138G>A    | c.(73138-73140)GGA>AG/  | p.G24380R      |
| Pat_26 | Pre-Treatment | TTN     | 7273   | 37 | 2  | 179452410 | 179452410 | Missense_Mutation | SNP | C | T | 22  | 36  | c.55922G>A    | c.(55921-55923)CGA>CAA/ | p.R18641Q      |
| Pat_26 | Pre-Treatment | TTN     | 7273   | 37 | 2  | 179473588 | 179473588 | Missense_Mutation | SNP | T | C | 45  | 97  | c.44446A>G    | c.(44446-44448)ACC>GCC  | p.T14816A      |
| Pat_26 | Pre-Treatment | TTN     | 7273   | 37 | 2  | 179569999 | 179569999 | Missense_Mutation | SNP | C | T | 8   | 18  | c.25774G>A    | c.(25774-25776)GAA>AAA  | p.E8592K       |
| Pat_26 | Pre-Treatment | COL3A1  | 1281   | 37 | 2  | 189868772 | 189868772 | Missense_Mutation | SNP | G | A | 4   | 89  | c.2726G>A     | c.(2725-2727)GGT>GAT    | p.G909D        |
| Pat_26 | Pre-Treatment | COL5A2  | 1290   | 37 | 2  | 189910528 | 189910528 | Missense_Mutation | SNP | G | A | 40  | 94  | c.3307C>T     | c.(3307-3309)CCG>TCG    | p.P1103S       |
| Pat_26 | Pre-Treatment | COL5A2  | 1290   | 37 | 2  | 189936782 | 189936782 | Missense_Mutation | SNP | C | A | 3   | 12  | c.1142G>T     | c.(1141-1143)GGA>GTA    | p.G381V        |
| Pat_26 | Pre-Treatment | SLC40A1 | 30061  | 37 | 2  | 190426638 | 190426638 | Missense_Mutation | SNP | C | T | 4   | 89  | c.1682G>A     | c.(1681-1683)AGG>AAG    | p.R561K        |
| Pat_26 | Pre-Treatment | ANKAR   | 150709 | 37 | 2  | 190606067 | 190606067 | Splice_Site       | SNP | G | A | 20  | 44  | c.3488_splice | c.e19-1                 | p.G1163_splice |
| Pat_26 | Pre-Treatment | NAB1    | 4664   | 37 | 2  | 191550329 | 191550329 | Missense_Mutation | SNP | C | T | 43  | 89  | c.1223C>T     | c.(1222-1224)CCT>CTT    | p.P408L        |
| Pat_26 | Pre-Treatment | SDPR    | 8436   | 37 | 2  | 192701440 | 192701440 | Missense_Mutation | SNP | C | T | 7   | 22  | c.487G>A      | c.(487-489)GAA>AAA      | p.E163K        |
| Pat_26 | Pre-Treatment | TMEFF2  | 23671  | 37 | 2  | 192818525 | 192818525 | Missense_Mutation | SNP | T | C | 5   | 166 | c.908A>G      | c.(907-909)AAG>AGG      | p.K303R        |
| Pat_26 | Pre-Treatment | CCDC150 | 284992 | 37 | 2  | 197511152 | 197511152 | Missense_Mutation | SNP | C | A | 7   | 287 | c.100C>A      | c.(100-102)CAA>AAA      | p.Q34K         |
| Pat_26 | Pre-Treatment | ANKRD44 | 91526  | 37 | 2  | 197987432 | 197987432 | Missense_Mutation | SNP | G | A | 6   | 180 | c.635C>T      | c.(634-636)GCT>GTT      | p.A212V        |
| Pat_26 | Pre-Treatment | AOX1    | 316    | 37 | 2  | 201523919 | 201523919 | Missense_Mutation | SNP | C | T | 4   | 144 | c.3203C>T     | c.(3202-3204)TCG>TTG    | p.S1068L       |
| Pat_26 | Pre-Treatment | ICA1L   | 130026 | 37 | 2  | 203684548 | 203684548 | Missense_Mutation | SNP | G | A | 50  | 84  | c.434C>T      | c.(433-435)ACC>ATC      | p.T145I        |
| Pat_26 | Pre-Treatment | CPS1    | 1373   | 37 | 2  | 211444459 | 211444459 | Missense_Mutation | SNP | G | A | 52  | 127 | c.493G>A      | c.(493-495)GAC>AAC      | p.D165N        |
| Pat_26 | Pre-Treatment | VWC2L   | 402117 | 37 | 2  | 215279114 | 215279114 | Missense_Mutation | SNP | G | A | 26  | 45  | c.197G>A      | c.(196-198)CGA>CAA      | p.R66Q         |
| Pat_26 | Pre-Treatment | BARD1   | 580    | 37 | 2  | 215633994 | 215633994 | Missense_Mutation | SNP | C | T | 4   | 124 | c.1357G>A     | c.(1357-1359)GAT>AAT    | p.D453N        |
| Pat_26 | Pre-Treatment | ATIC    | 471    | 37 | 2  | 216182921 | 216182921 | Missense_Mutation | SNP | G | A | 134 | 255 | c.188G>A      | c.(187-189)GGA>GAA      | p.G63E         |
| Pat_26 | Pre-Treatment | VIL1    | 7429   | 37 | 2  | 219301222 | 219301222 | Missense_Mutation | SNP | T | C | 198 | 357 | c.1844T>C     | c.(1843-1845)CTG>CCG    | p.L615P        |
| Pat_26 | Pre-Treatment | TLLL4   | 9654   | 37 | 2  | 219603034 | 219603034 | Missense_Mutation | SNP | C | T | 56  | 124 | c.635C>T      | c.(634-636)TCC>TTC      | p.S212F        |
| Pat_26 | Pre-Treatment | KCNE4   | 23704  | 37 | 2  | 223917957 | 223917957 | Missense_Mutation | SNP | A | G | 4   | 169 | c.409A>G      | c.(409-411)ACC>GCC      | p.T137A        |
| Pat_26 | Pre-Treatment | ALPPL2  | 251    | 37 | 2  | 233272555 | 233272555 | Missense_Mutation | SNP | G | A | 76  | 121 | c.476G>A      | c.(475-477)GGA>GAA      | p.G159E        |
| Pat_26 | Pre-Treatment | DGKD    | 8527   | 37 | 2  | 234368933 | 234368933 | Missense_Mutation | SNP | G | A | 80  | 127 | c.2923G>A     | c.(2923-2925)GAG>AAG    | p.E975K        |
| Pat_26 | Pre-Treatment | PER2    | 8864   | 37 | 2  | 239186525 | 239186525 | Missense_Mutation | SNP | G | A | 29  | 71  | c.53C>T       | c.(52-54)CCC>CTC        | p.P18L         |
| Pat_26 | Pre-Treatment | ANO7    | 50636  | 37 | 2  | 242139610 | 242139610 | Missense_Mutation | SNP | C | T | 89  | 110 | c.686C>T      | c.(685-687)TCC>TTC      | p.S229F        |
| Pat_26 | Pre-Treatment | ANO7    | 50636  | 37 | 2  | 242149925 | 242149925 | Missense_Mutation | SNP | G | A | 5   | 346 | c.1663G>A     | c.(1663-1665)GTC>ATC    | p.V555I        |
| Pat_26 | Pre-Treatment | FARP2   | 9855   | 37 | 2  | 242380792 | 242380792 | Missense_Mutation | SNP | C | T | 118 | 163 | c.1232C>T     | c.(1231-1233)CCC>CTC    | p.P411L        |
| Pat_26 | Pre-Treatment | TGM3    | 7053   | 37 | 20 | 2320592   | 2320592   | Missense_Mutation | SNP | G | A | 4   | 79  | c.1893G>A     | c.(1891-1893)ATG>ATA    | p.M631I        |
| Pat_26 | Pre-Treatment | TMC2    | 117532 | 37 | 20 | 2572971   | 2572971   | Missense_Mutation | SNP | C | T | 117 | 154 | c.850C>T      | c.(850-852)CCC>TCC      | p.P284S        |
| Pat_26 | Pre-Treatment | PRND    | 23627  | 37 | 20 | 4705663   | 4705663   | Missense_Mutation | SNP | C | T | 4   | 186 | c.466C>T      | c.(466-468)CGG>TGG      | p.R156W        |
| Pat_26 | Pre-Treatment | RIN2    | 54453  | 37 | 20 | 19941428  | 19941428  | Missense_Mutation | SNP | G | A | 9   | 19  | c.436G>A      | c.(436-438)GAA>AAA      | p.E146K        |
| Pat_26 | Pre-Treatment | REM1    | 28954  | 37 | 20 | 30070268  | 30070268  | Missense_Mutation | SNP | G | A | 6   | 161 | c.602G>A      | c.(601-603)CGC>CAC      | p.R201H        |
| Pat_26 | Pre-Treatment | XKR7    | 343702 | 37 | 20 | 30585052  | 30585052  | Missense_Mutation | SNP | C | T | 71  | 157 | c.1532C>T     | c.(1531-1533)CCA>CTA    | p.P511L        |
| Pat_26 | Pre-Treatment | HCK     | 3055   | 37 | 20 | 30671801  | 30671801  | Missense_Mutation | SNP | C | G | 64  | 133 | c.637C>G      | c.(637-639)CGA>GGA      | p.R213G        |
| Pat_26 | Pre-Treatment | ITCH    | 83737  | 37 | 20 | 32981622  | 32981622  | Missense_Mutation | SNP | C | T | 131 | 240 | c.5C>T        | c.(4-6)TCT>TTT          | p.S2F          |
| Pat_26 | Pre-Treatment | RBM12   | 10137  | 37 | 20 | 34242575  | 34242575  | Missense_Mutation | SNP | G | A | 4   | 156 | c.670C>T      | c.(670-672)CCC>TCC      | p.P224S        |
| Pat_26 | Pre-Treatment | DLGAP4  | 22839  | 37 | 20 | 35127676  | 35127676  | Missense_Mutation | SNP | C | T | 5   | 352 | c.2042C>T     | c.(2041-2043)TCG>TTG    | p.S681L        |
| Pat_26 | Pre-Treatment | NCOA5   | 57727  | 37 | 20 | 44699128  | 44699128  | Missense_Mutation | SNP | G | A | 151 | 284 | c.86C>T       | c.(85-87)TCC>TTC        | p.S29F         |
| Pat_26 | Pre-Treatment | STAU1   | 6780   | 37 | 20 | 47739771  | 47739771  | Missense_Mutation | SNP | G | A | 81  | 173 | c.824C>T      | c.(823-825)CCA>CTA      | p.P275L        |
| Pat_26 | Pre-Treatment | NFATC2  | 4773   | 37 | 20 | 50139963  | 50139963  | Missense_Mutation | SNP | G | A | 4   | 48  | c.817C>T      | c.(817-819)CGG>TGG      | p.R273W        |

|        |               |          |        |    |    |          |          |                   |     |    |    |     |     |                |                        |               |
|--------|---------------|----------|--------|----|----|----------|----------|-------------------|-----|----|----|-----|-----|----------------|------------------------|---------------|
| Pat_26 | Pre-Treatment | LAMA5    | 3911   | 37 | 20 | 60885365 | 60885365 | Missense_Mutation | SNP | G  | A  | 4   | 151 | c.10603C>T     | c.(10603-10605)CTC>TTC | p.L3535F      |
| Pat_26 | Pre-Treatment | LAMA5    | 3911   | 37 | 20 | 60921968 | 60921968 | Splice_Site       | SNP | C  | T  | 5   | 289 | c.1072_splice  | c.e7+1                 | p.S358_splice |
| Pat_26 | Pre-Treatment | UCKL1    | 54963  | 37 | 20 | 62571742 | 62571742 | Missense_Mutation | SNP | G  | A  | 4   | 124 | c.1399C>T      | c.(1399-1401)CGC>TGC   | p.R467C       |
| Pat_26 | Pre-Treatment | TCEA2    | 6919   | 37 | 20 | 62700845 | 62700845 | Splice_Site       | SNP | G  | A  | 4   | 187 | c.460_splice   | c.e5+1                 | p.H154_splice |
| Pat_26 | Pre-Treatment | SON      | 6651   | 37 | 21 | 34924871 | 34924871 | Nonsense_Mutation | SNP | C  | T  | 5   | 310 | c.3334C>T      | c.(3334-3336)CGA>TGA   | p.R1112*      |
| Pat_26 | Pre-Treatment | MCM3AP   | 8888   | 37 | 21 | 47693423 | 47693423 | Missense_Mutation | SNP | C  | T  | 5   | 112 | c.2075G>A      | c.(2074-2076)CGG>CAG   | p.R692Q       |
| Pat_26 | Pre-Treatment | HIRA     | 7290   | 37 | 22 | 19375245 | 19375245 | Missense_Mutation | SNP | C  | T  | 5   | 87  | c.1102G>A      | c.(1102-1104)GAG>AAG   | p.E368K       |
| Pat_26 | Pre-Treatment | CDC45    | 8318   | 37 | 22 | 19471512 | 19471512 | Missense_Mutation | SNP | G  | A  | 4   | 192 | c.470G>A       | c.(469-471)CGC>CAC     | p.R157H       |
| Pat_26 | Pre-Treatment | TRMT2A   | 27037  | 37 | 22 | 20103604 | 20103604 | Missense_Mutation | SNP | G  | A  | 5   | 389 | c.556C>T       | c.(556-558)CGG>TGG     | p.R186W       |
| Pat_26 | Pre-Treatment | RIMBP3   | 85376  | 37 | 22 | 20457214 | 20457214 | Missense_Mutation | SNP | G  | A  | 22  | 47  | c.4088C>T      | c.(4087-4089)CCC>CTC   | p.P1363L      |
| Pat_26 | Pre-Treatment | ADRBK2   | 157    | 37 | 22 | 26107059 | 26107059 | Missense_Mutation | SNP | C  | T  | 4   | 139 | c.1420C>T      | c.(1420-1422)CGG>TGG   | p.R474W       |
| Pat_26 | Pre-Treatment | SRRD     | 402055 | 37 | 22 | 26884387 | 26884387 | Missense_Mutation | SNP | C  | T  | 155 | 271 | c.542C>T       | c.(541-543)CCT>CTT     | p.P181L       |
| Pat_26 | Pre-Treatment | EMID1    | 129080 | 37 | 22 | 29627106 | 29627106 | Missense_Mutation | SNP | G  | A  | 4   | 188 | c.557G>A       | c.(556-558)AGC>AAC     | p.S186N       |
| Pat_26 | Pre-Treatment | GAS2L1   | 10634  | 37 | 22 | 29708404 | 29708404 | Missense_Mutation | SNP | G  | A  | 4   | 136 | c.1964G>A      | c.(1963-1965)CGC>CAC   | p.R655H       |
| Pat_26 | Pre-Treatment | GAL3ST1  | 9514   | 37 | 22 | 30951719 | 30951719 | Missense_Mutation | SNP | C  | T  | 124 | 248 | c.493G>A       | c.(493-495)GAC>AAC     | p.D165N       |
| Pat_26 | Pre-Treatment | TCN2     | 6948   | 37 | 22 | 31008971 | 31008971 | Missense_Mutation | SNP | G  | T  | 48  | 131 | c.369G>T       | c.(367-369)AAG>AAT     | p.K123N       |
| Pat_26 | Pre-Treatment | SMTN     | 6525   | 37 | 22 | 31487688 | 31487688 | Missense_Mutation | SNP | C  | T  | 86  | 206 | c.1487C>T      | c.(1486-1488)CCG>CTG   | p.P496L       |
| Pat_26 | Pre-Treatment | SFI1     | 9814   | 37 | 22 | 32000931 | 32000931 | Missense_Mutation | SNP | G  | A  | 7   | 57  | c.2054G>A      | c.(2053-2055)CGC>CAC   | p.R685H       |
| Pat_26 | Pre-Treatment | TRIOBP   | 11078  | 37 | 22 | 38119918 | 38119918 | Missense_Mutation | SNP | C  | G  | 9   | 293 | c.1355C>G      | c.(1354-1356)ACA>AGA   | p.T452R       |
| Pat_26 | Pre-Treatment | TRIOBP   | 11078  | 37 | 22 | 38120437 | 38120437 | Missense_Mutation | SNP | G  | C  | 7   | 442 | c.1874G>C      | c.(1873-1875)AGA>ACA   | p.R625T       |
| Pat_26 | Pre-Treatment | TRIOBP   | 11078  | 37 | 22 | 38151639 | 38151639 | Missense_Mutation | SNP | G  | A  | 6   | 311 | c.5660G>A      | c.(5659-5661)CGT>CAT   | p.R1887H      |
| Pat_26 | Pre-Treatment | MKL1     | 57591  | 37 | 22 | 40816901 | 40816901 | Missense_Mutation | SNP | C  | G  | 6   | 240 | c.831G>C       | c.(829-831)CAG>CAC     | p.Q277H       |
| Pat_26 | Pre-Treatment | EP300    | 2033   | 37 | 22 | 41531849 | 41531850 | Missense_Mutation | DNP | GG | AA | 47  | 130 | .1561_1562GG>A | c.(1561-1563)GGA>AAA   | p.G521K       |
| Pat_26 | Pre-Treatment | CYP2D6   | 1565   | 37 | 22 | 42523908 | 42523908 | Missense_Mutation | SNP | C  | T  | 115 | 280 | c.921G>A       | c.(919-921)ATG>ATA     | p.M307I       |
| Pat_26 | Pre-Treatment | CYP2D7P1 | 1564   | 37 | 22 | 42537916 | 42537916 | Nonsense_Mutation | SNP | G  | A  | 3   | 40  | c.535C>T       | c.(535-537)CGA>TGA     | p.R179*       |
| Pat_26 | Pre-Treatment | CERK     | 64781  | 37 | 22 | 47116880 | 47116880 | Missense_Mutation | SNP | C  | T  | 7   | 595 | c.175G>A       | c.(175-177)GCC>ACC     | p.A59T        |
| Pat_26 | Pre-Treatment | PLXNB2   | 23654  | 37 | 22 | 50716022 | 50716022 | Missense_Mutation | SNP | G  | A  | 5   | 276 | c.5194C>T      | c.(5194-5196)CGC>TGC   | p.R1732C      |
| Pat_26 | Pre-Treatment | SAPS2    | 9701   | 37 | 22 | 50873439 | 50873439 | Missense_Mutation | SNP | G  | A  | 4   | 181 | c.1445G>A      | c.(1444-1446)CGG>CAG   | p.R482Q       |
| Pat_26 | Pre-Treatment | SAPS2    | 9701   | 37 | 22 | 50874861 | 50874861 | Missense_Mutation | SNP | C  | T  | 9   | 20  | c.1582C>T      | c.(1582-1584)CGC>TGC   | p.R528C       |
| Pat_26 | Pre-Treatment | CHL1     | 10752  | 37 | 3  | 382573   | 382573   | Missense_Mutation | SNP | C  | T  | 19  | 82  | c.482C>T       | c.(481-483)CCT>CTT     | p.P161L       |
| Pat_26 | Pre-Treatment | ITPR1    | 3708   | 37 | 3  | 4829776  | 4829776  | Missense_Mutation | SNP | G  | C  | 5   | 23  | c.6617G>C      | c.(6616-6618)CGG>CCG   | p.R2206P      |
| Pat_26 | Pre-Treatment | C3orf32  | 51066  | 37 | 3  | 8669448  | 8669448  | Missense_Mutation | SNP | C  | T  | 4   | 168 | c.544G>A       | c.(544-546)GGA>AGA     | p.G182R       |
| Pat_26 | Pre-Treatment | ATG7     | 10533  | 37 | 3  | 11402205 | 11402205 | Missense_Mutation | SNP | C  | T  | 236 | 442 | c.1630C>T      | c.(1630-1632)CCT>TCT   | p.P544S       |
| Pat_26 | Pre-Treatment | IQSEC1   | 9922   | 37 | 3  | 12963729 | 12963729 | Missense_Mutation | SNP | C  | T  | 5   | 141 | c.1786G>A      | c.(1786-1788)GAG>AAG   | p.E596K       |
| Pat_26 | Pre-Treatment | ZNF385D  | 79750  | 37 | 3  | 21552508 | 21552508 | Missense_Mutation | SNP | G  | A  | 37  | 48  | c.284C>T       | c.(283-285)GCT>GTT     | p.A95V        |
| Pat_26 | Pre-Treatment | ARPP21   | 10777  | 37 | 3  | 35833903 | 35833903 | Missense_Mutation | SNP | G  | A  | 135 | 245 | c.2062G>A      | c.(2062-2064)GGA>AGA   | p.G688R       |
| Pat_26 | Pre-Treatment | SLC22A13 | 9390   | 37 | 3  | 38307500 | 38307500 | Missense_Mutation | SNP | G  | A  | 5   | 215 | c.149G>A       | c.(148-150)TGT>TAT     | p.C50Y        |
| Pat_26 | Pre-Treatment | XYLB     | 9942   | 37 | 3  | 38416711 | 38416711 | Missense_Mutation | SNP | G  | T  | 5   | 202 | c.965G>T       | c.(964-966)TGC>TTC     | p.C322F       |
| Pat_26 | Pre-Treatment | SCN11A   | 11280  | 37 | 3  | 38946734 | 38946734 | Nonsense_Mutation | SNP | G  | A  | 103 | 151 | c.1552C>T      | c.(1552-1554)CAA>TAA   | p.Q518*       |
| Pat_26 | Pre-Treatment | SCN11A   | 11280  | 37 | 3  | 38949450 | 38949450 | Missense_Mutation | SNP | C  | A  | 13  | 68  | c.1463G>T      | c.(1462-1464)TGC>TTC   | p.C488F       |
| Pat_26 | Pre-Treatment | ZNF502   | 91392  | 37 | 3  | 44763369 | 44763369 | Missense_Mutation | SNP | A  | G  | 3   | 86  | c.1060A>G      | c.(1060-1062)AAA>GAA   | p.K354E       |
| Pat_26 | Pre-Treatment | CDCP1    | 64866  | 37 | 3  | 45127257 | 45127257 | Missense_Mutation | SNP | G  | A  | 4   | 121 | c.2384C>T      | c.(2383-2385)CCT>CTT   | p.P795L       |
| Pat_26 | Pre-Treatment | CDCP1    | 64866  | 37 | 3  | 45153823 | 45153823 | Missense_Mutation | SNP | C  | T  | 239 | 378 | c.407G>A       | c.(406-408)GGT>GAT     | p.G136D       |
| Pat_26 | Pre-Treatment | CCRL2    | 9034   | 37 | 3  | 46450190 | 46450190 | Missense_Mutation | SNP | C  | T  | 4   | 178 | c.620C>T       | c.(619-621)TCG>TTG     | p.S207L       |
| Pat_26 | Pre-Treatment | PRSS50   | 29122  | 37 | 3  | 46753818 | 46753818 | Missense_Mutation | SNP | C  | T  | 27  | 23  | c.1076G>A      | c.(1075-1077)GGG>GAG   | p.G359E       |
| Pat_26 | Pre-Treatment | CELSR3   | 1951   | 37 | 3  | 48683635 | 48683635 | Missense_Mutation | SNP | C  | T  | 4   | 137 | c.7351G>A      | c.(7351-7353)GGA>AGA   | p.G2451R      |
| Pat_26 | Pre-Treatment | BSN      | 8927   | 37 | 3  | 49694737 | 49694737 | Missense_Mutation | SNP | G  | A  | 4   | 123 | c.7748G>A      | c.(7747-7749)AGC>AAC   | p.S2583N      |

|        |               |           |        |    |   |           |           |                   |     |    |    |     |     |                                   |                      |               |
|--------|---------------|-----------|--------|----|---|-----------|-----------|-------------------|-----|----|----|-----|-----|-----------------------------------|----------------------|---------------|
| Pat_26 | Pre-Treatment | ABHD14B   | 84836  | 37 | 3 | 52005634  | 52005634  | Missense_Mutation | SNP | G  | A  | 41  | 53  | c.53C>T                           | c.(52-54)GCC>GTC     | p.A18V        |
| Pat_26 | Pre-Treatment | DUSP7     | 1849   | 37 | 3 | 52085136  | 52085136  | Missense_Mutation | SNP | C  | T  | 4   | 159 | c.955G>A                          | c.(955-957)GAA>AAA   | p.E319K       |
| Pat_26 | Pre-Treatment | GLYCTK    | 132158 | 37 | 3 | 52324365  | 52324365  | Missense_Mutation | SNP | G  | A  | 4   | 116 | c.7G>A                            | c.(7-9)GCA>ACA       | p.A3T         |
| Pat_26 | Pre-Treatment | BAP1      | 8314   | 37 | 3 | 52437677  | 52437677  | Missense_Mutation | SNP | G  | A  | 4   | 95  | c.1484C>T                         | c.(1483-1485)ACG>ATG | p.T495M       |
| Pat_26 | Pre-Treatment | FAM107A   | 11170  | 37 | 3 | 58555481  | 58555481  | Missense_Mutation | SNP | T  | C  | 32  | 63  | c.107A>G                          | c.(106-108)AAC>AGC   | p.N36S        |
| Pat_26 | Pre-Treatment | SUCLG2    | 8801   | 37 | 3 | 67571047  | 67571048  | Missense_Mutation | DNP | AG | TT | 5   | 176 | c.428_429CT>AA                    | c.(427-429)GCT>GAA   | p.A143E       |
| Pat_26 | Pre-Treatment | ROBO2     | 6092   | 37 | 3 | 77637968  | 77637968  | Missense_Mutation | SNP | T  | G  | 49  | 94  | c.2567T>G                         | c.(2566-2568)GTG>GGG | p.V856G       |
| Pat_26 | Pre-Treatment | CRYBG3    | 131544 | 37 | 3 | 97596417  | 97596417  | Missense_Mutation | SNP | C  | T  | 33  | 60  | c.535C>T                          | c.(535-537)CTC>TTC   | p.L179F       |
| Pat_26 | Pre-Treatment | CBLB      | 868    | 37 | 3 | 105464833 | 105464833 | Missense_Mutation | SNP | G  | A  | 93  | 148 | c.773C>T                          | c.(772-774)CCA>CTA   | p.P258L       |
| Pat_26 | Pre-Treatment | GUCA1C    | 9626   | 37 | 3 | 108672495 | 108672495 | Missense_Mutation | SNP | C  | T  | 89  | 178 | c.115G>A                          | c.(115-117)GAA>AAA   | p.E39K        |
| Pat_26 | Pre-Treatment | MORC1     | 27136  | 37 | 3 | 108751574 | 108751574 | Missense_Mutation | SNP | C  | T  | 12  | 29  | c.1558G>A                         | c.(1558-1560)GAA>AAA | p.E520K       |
| Pat_26 | Pre-Treatment | WDR52     | 55779  | 37 | 3 | 113146126 | 113146126 | Missense_Mutation | SNP | C  | T  | 28  | 39  | c.161G>A                          | c.(160-162)GGG>GAG   | p.G54E        |
| Pat_26 | Pre-Treatment | POLQ      | 10721  | 37 | 3 | 121256023 | 121256023 | Missense_Mutation | SNP | C  | T  | 87  | 182 | c.664G>A                          | c.(664-666)GGA>AGA   | p.G222R       |
| Pat_26 | Pre-Treatment | SLC15A2   | 6565   | 37 | 3 | 121647395 | 121647395 | Missense_Mutation | SNP | C  | T  | 66  | 145 | c.1334C>T                         | c.(1333-1335)TCC>TTC | p.S445F       |
| Pat_26 | Pre-Treatment | MYLK      | 4638   | 37 | 3 | 123457860 | 123457861 | Missense_Mutation | DNP | CC | TT | 20  | 60  | c.471_472GG>AA169-474)GGGGAG>GGAA |                      | p.E158K       |
| Pat_26 | Pre-Treatment | KALRN     | 8997   | 37 | 3 | 123987869 | 123987869 | Missense_Mutation | SNP | G  | A  | 4   | 27  | c.730G>A                          | c.(730-732)GAG>AAG   | p.E244K       |
| Pat_26 | Pre-Treatment | UMPS      | 7372   | 37 | 3 | 124449427 | 124449427 | Missense_Mutation | SNP | T  | C  | 5   | 173 | c.109T>C                          | c.(109-111)TAC>CAC   | p.Y37H        |
| Pat_26 | Pre-Treatment | SEC61A1   | 29927  | 37 | 3 | 127786827 | 127786827 | Missense_Mutation | SNP | T  | C  | 176 | 362 | c.1169T>C                         | c.(1168-1170)GTT>GCT | p.V390A       |
| Pat_26 | Pre-Treatment | COL6A6    | 131873 | 37 | 3 | 130311915 | 130311915 | Missense_Mutation | SNP | G  | A  | 184 | 325 | c.4382G>A                         | c.(4381-4383)GGG>GAG | p.G1461E      |
| Pat_26 | Pre-Treatment | ATP2C1    | 27032  | 37 | 3 | 130698165 | 130698165 | Missense_Mutation | SNP | C  | T  | 93  | 134 | c.1643C>T                         | c.(1642-1644)CCT>CTT | p.P548L       |
| Pat_26 | Pre-Treatment | DNAJC13   | 23317  | 37 | 3 | 132169656 | 132169656 | Missense_Mutation | SNP | G  | A  | 30  | 68  | c.502G>A                          | c.(502-504)GGA>AGA   | p.G168R       |
| Pat_26 | Pre-Treatment | AMOTL2    | 51421  | 37 | 3 | 134090038 | 134090038 | Nonsense_Mutation | SNP | G  | A  | 35  | 57  | c.412C>T                          | c.(412-414)CAG>TAG   | p.Q138*       |
| Pat_26 | Pre-Treatment | PCCB      | 5096   | 37 | 3 | 136012707 | 136012707 | Splice_Site       | SNP | G  | A  | 5   | 225 | c.763_splice                      | c.e7+1               | p.G255_splice |
| Pat_26 | Pre-Treatment | HPS3      | 84343  | 37 | 3 | 148876530 | 148876530 | Missense_Mutation | SNP | G  | A  | 5   | 380 | c.1769G>A                         | c.(1768-1770)CGC>CAC | p.R590H       |
| Pat_26 | Pre-Treatment | WWTR1     | 25937  | 37 | 3 | 149238728 | 149238728 | Missense_Mutation | SNP | C  | T  | 5   | 337 | c.1067G>A                         | c.(1066-1068)CGT>CAT | p.R356H       |
| Pat_26 | Pre-Treatment | B3GNT5    | 84002  | 37 | 3 | 182988256 | 182988256 | Missense_Mutation | SNP | C  | T  | 92  | 166 | c.670C>T                          | c.(670-672)CAT>TAT   | p.H224Y       |
| Pat_26 | Pre-Treatment | YEATS2    | 55689  | 37 | 3 | 183493736 | 183493736 | Missense_Mutation | SNP | G  | A  | 6   | 336 | c.2402G>A                         | c.(2401-2403)AGT>AAT | p.S801N       |
| Pat_26 | Pre-Treatment | DVL3      | 1857   | 37 | 3 | 183885727 | 183885727 | Missense_Mutation | SNP | T  | C  | 72  | 186 | c.1372T>C                         | c.(1372-1374)TTC>CTC | p.F458L       |
| Pat_26 | Pre-Treatment | FAM131A   | 131408 | 37 | 3 | 184062624 | 184062624 | Missense_Mutation | SNP | G  | A  | 4   | 139 | c.874G>A                          | c.(874-876)GCC>ACC   | p.A292T       |
| Pat_26 | Pre-Treatment | FAM43A    | 131583 | 37 | 3 | 194407998 | 194407998 | Missense_Mutation | SNP | G  | A  | 3   | 24  | c.443G>A                          | c.(442-444)CGG>CAG   | p.R148Q       |
| Pat_26 | Pre-Treatment | OSTalpha  | 200931 | 37 | 3 | 195955029 | 195955029 | Missense_Mutation | SNP | G  | A  | 207 | 392 | c.406G>A                          | c.(406-408)GAA>AAA   | p.E136K       |
| Pat_26 | Pre-Treatment | GAK       | 2580   | 37 | 4 | 843685    | 843685    | Missense_Mutation | SNP | C  | T  | 4   | 66  | c.3829G>A                         | c.(3829-3831)GAC>AAC | p.D1277N      |
| Pat_26 | Pre-Treatment | MAEA      | 10296  | 37 | 4 | 1326630   | 1326630   | Missense_Mutation | SNP | G  | A  | 4   | 102 | c.742G>A                          | c.(742-744)GAC>AAC   | p.D248N       |
| Pat_26 | Pre-Treatment | ZFYVE28   | 57732  | 37 | 4 | 2307157   | 2307157   | Missense_Mutation | SNP | C  | T  | 4   | 144 | c.910G>A                          | c.(910-912)GCT>ACT   | p.A304T       |
| Pat_26 | Pre-Treatment | RGS12     | 6002   | 37 | 4 | 3418686   | 3418686   | Missense_Mutation | SNP | C  | T  | 118 | 231 | c.2474C>T                         | c.(2473-2475)TCC>TTC | p.S825F       |
| Pat_26 | Pre-Treatment | JAKMIP1   | 152789 | 37 | 4 | 6087308   | 6087308   | Missense_Mutation | SNP | C  | T  | 136 | 266 | c.673G>A                          | c.(673-675)GAA>AAA   | p.E225K       |
| Pat_26 | Pre-Treatment | GBA3      | 57733  | 37 | 4 | 22748945  | 22748945  | Missense_Mutation | SNP | G  | A  | 66  | 146 | c.313G>A                          | c.(313-315)GAT>AAT   | p.D105N       |
| Pat_26 | Pre-Treatment | LIMCH1    | 22998  | 37 | 4 | 41682113  | 41682113  | Missense_Mutation | SNP | G  | A  | 13  | 18  | c.2458G>A                         | c.(2458-2460)GAG>AAG | p.E820K       |
| Pat_26 | Pre-Treatment | GABRB1    | 2560   | 37 | 4 | 47408782  | 47408782  | Missense_Mutation | SNP | G  | A  | 51  | 124 | c.919G>A                          | c.(919-921)GAT>AAT   | p.D307N       |
| Pat_26 | Pre-Treatment | KDR       | 3791   | 37 | 4 | 55984966  | 55984966  | Missense_Mutation | SNP | C  | T  | 50  | 80  | c.163G>A                          | c.(163-165)GGA>AGA   | p.G55R        |
| Pat_26 | Pre-Treatment | PAICS     | 10606  | 37 | 4 | 57325591  | 57325591  | Nonsense_Mutation | SNP | C  | T  | 27  | 69  | c.1165C>T                         | c.(1165-1167)CAG>TAG | p.Q389*       |
| Pat_26 | Pre-Treatment | EPHA5     | 2044   | 37 | 4 | 66230894  | 66230894  | Missense_Mutation | SNP | G  | A  | 4   | 120 | c.2077C>T                         | c.(2077-2079)CGT>TGT | p.R693C       |
| Pat_26 | Pre-Treatment | GNRHR     | 2798   | 37 | 4 | 68619972  | 68619972  | Missense_Mutation | SNP | G  | A  | 5   | 353 | c.82C>T                           | c.(82-84)CTC>TTC     | p.L28F        |
| Pat_26 | Pre-Treatment | TMPRSS11B | 132724 | 37 | 4 | 69097030  | 69097030  | Missense_Mutation | SNP | C  | T  | 40  | 59  | c.577G>A                          | c.(577-579)GAG>AAG   | p.E193K       |
| Pat_26 | Pre-Treatment | UGT2B28   | 54490  | 37 | 4 | 70146547  | 70146547  | Missense_Mutation | SNP | C  | T  | 39  | 103 | c.329C>T                          | c.(328-330)TCA>TTA   | p.S110L       |
| Pat_26 | Pre-Treatment | UGT2B28   | 54490  | 37 | 4 | 70148286  | 70148286  | Missense_Mutation | SNP | G  | A  | 68  | 125 | c.776G>A                          | c.(775-777)CGA>CAA   | p.R259Q       |
| Pat_26 | Pre-Treatment | AMBN      | 258    | 37 | 4 | 71471945  | 71471945  | Missense_Mutation | SNP | G  | A  | 34  | 74  | c.842G>A                          | c.(841-843)GGA>GAA   | p.G281E       |

|        |               |          |        |    |   |           |           |                   |     |    |    |     |     |                |                        |                |
|--------|---------------|----------|--------|----|---|-----------|-----------|-------------------|-----|----|----|-----|-----|----------------|------------------------|----------------|
| Pat_26 | Pre-Treatment | PTPN13   | 5783   | 37 | 4 | 87687584  | 87687584  | Splice_Site       | SNP | G  | T  | 3   | 35  | c.4244_splice  | c.e27-1                | p.G1415_splice |
| Pat_26 | Pre-Treatment | HERC3    | 8916   | 37 | 4 | 89571065  | 89571065  | Missense_Mutation | SNP | G  | A  | 4   | 158 | c.301G>A       | c.(301-303)GAC>AAC     | p.D101N        |
| Pat_26 | Pre-Treatment | MTTP     | 4547   | 37 | 4 | 100515972 | 100515972 | Missense_Mutation | SNP | G  | A  | 7   | 249 | c.841G>A       | c.(841-843)GAT>AAT     | p.D281N        |
| Pat_26 | Pre-Treatment | CENPE    | 1062   | 37 | 4 | 104057392 | 104057392 | Missense_Mutation | SNP | G  | A  | 35  | 93  | c.6428C>T      | c.(6427-6429)TCA>TTA   | p.S2143L       |
| Pat_26 | Pre-Treatment | GSTCD    | 79807  | 37 | 4 | 106766720 | 106766721 | Missense_Mutation | DNP | GG | AA | 36  | 56  | .1888_1889GG>A | c.(1888-1890)GGA>AAA   | p.G630K        |
| Pat_26 | Pre-Treatment | ANK2     | 287    | 37 | 4 | 114163336 | 114163336 | Nonsense_Mutation | SNP | C  | T  | 4   | 164 | c.862C>T       | c.(862-864)CGA>TGA     | p.R288*        |
| Pat_26 | Pre-Treatment | BBS12    | 166379 | 37 | 4 | 123664573 | 123664573 | Missense_Mutation | SNP | C  | T  | 4   | 137 | c.1526C>T      | c.(1525-1527)ACT>ATT   | p.T509I        |
| Pat_26 | Pre-Treatment | FAT4     | 79633  | 37 | 4 | 126372621 | 126372621 | Missense_Mutation | SNP | G  | A  | 94  | 156 | c.10450G>A     | c.(10450-10452)GAT>AAT | p.D3484N       |
| Pat_26 | Pre-Treatment | FAT4     | 79633  | 37 | 4 | 126398438 | 126398438 | Missense_Mutation | SNP | G  | A  | 73  | 145 | c.12422G>A     | c.(12421-12423)GGA>GAA | p.G4141E       |
| Pat_26 | Pre-Treatment | ARFIP1   | 27236  | 37 | 4 | 153750801 | 153750802 | Missense_Mutation | DNP | CC | TT | 65  | 136 | c.16_17CC>TT   | c.(16-18)CCC>TTC       | p.P6F          |
| Pat_26 | Pre-Treatment | GLRA3    | 8001   | 37 | 4 | 175598335 | 175598335 | Missense_Mutation | SNP | G  | A  | 44  | 83  | c.821C>T       | c.(820-822)TCA>TTA     | p.S274L        |
| Pat_26 | Pre-Treatment | AGA      | 175    | 37 | 4 | 178361497 | 178361497 | Missense_Mutation | SNP | C  | T  | 6   | 420 | c.211G>A       | c.(211-213)GGC>AGC     | p.G71S         |
| Pat_26 | Pre-Treatment | LPCAT1   | 79888  | 37 | 5 | 1481075   | 1481075   | Missense_Mutation | SNP | G  | A  | 7   | 517 | c.743C>T       | c.(742-744)ACG>ATG     | p.T248M        |
| Pat_26 | Pre-Treatment | IRX4     | 50805  | 37 | 5 | 1879941   | 1879941   | Missense_Mutation | SNP | C  | T  | 28  | 34  | c.413G>A       | c.(412-414)GGA>GAA     | p.G138E        |
| Pat_26 | Pre-Treatment | MED10    | 84246  | 37 | 5 | 6372626   | 6372626   | Missense_Mutation | SNP | G  | A  | 8   | 225 | c.398C>T       | c.(397-399)CCG>CTG     | p.P133L        |
| Pat_26 | Pre-Treatment | CTNND2   | 1501   | 37 | 5 | 10992705  | 10992705  | Missense_Mutation | SNP | G  | A  | 61  | 133 | c.3169C>T      | c.(3169-3171)CCC>TCC   | p.P1057S       |
| Pat_26 | Pre-Treatment | DNAH5    | 1767   | 37 | 5 | 13771050  | 13771050  | Missense_Mutation | SNP | C  | T  | 36  | 73  | c.9413G>A      | c.(9412-9414)AGT>AAT   | p.S3138N       |
| Pat_26 | Pre-Treatment | 11-Mar   | 441061 | 37 | 5 | 16091014  | 16091014  | Missense_Mutation | SNP | C  | T  | 24  | 67  | c.870G>A       | c.(868-870)ATG>ATA     | p.M290I        |
| Pat_26 | Pre-Treatment | CDH18    | 1016   | 37 | 5 | 19721546  | 19721546  | Missense_Mutation | SNP | C  | T  | 50  | 148 | c.553G>A       | c.(553-555)GAT>AAT     | p.D185N        |
| Pat_26 | Pre-Treatment | CDH18    | 1016   | 37 | 5 | 19839093  | 19839093  | Missense_Mutation | SNP | C  | T  | 25  | 78  | c.3G>A         | c.(1-3)ATG>ATA         | p.M1I          |
| Pat_26 | Pre-Treatment | PRDM9    | 56979  | 37 | 5 | 23509648  | 23509648  | Missense_Mutation | SNP | G  | A  | 80  | 173 | c.139G>A       | c.(139-141)GAG>AAG     | p.E47K         |
| Pat_26 | Pre-Treatment | CDH10    | 1008   | 37 | 5 | 24487995  | 24487995  | Missense_Mutation | SNP | T  | A  | 43  | 65  | c.2144A>T      | c.(2143-2145)AAT>ATT   | p.N715I        |
| Pat_26 | Pre-Treatment | RNASEN   | 29102  | 37 | 5 | 31410922  | 31410922  | Missense_Mutation | SNP | C  | T  | 5   | 228 | c.3598G>A      | c.(3598-3600)GCC>ACC   | p.A1200T       |
| Pat_26 | Pre-Treatment | PDZD2    | 23037  | 37 | 5 | 32052798  | 32052798  | Missense_Mutation | SNP | G  | A  | 5   | 327 | c.1747G>A      | c.(1747-1749)GTC>ATC   | p.V583I        |
| Pat_26 | Pre-Treatment | PDZD2    | 23037  | 37 | 5 | 32087434  | 32087434  | Missense_Mutation | SNP | G  | A  | 91  | 90  | c.3880G>A      | c.(3880-3882)GAG>AAG   | p.E1294K       |
| Pat_26 | Pre-Treatment | PDZD2    | 23037  | 37 | 5 | 32089159  | 32089159  | Missense_Mutation | SNP | G  | A  | 4   | 74  | c.5605G>A      | c.(5605-5607)GCA>ACA   | p.A1869T       |
| Pat_26 | Pre-Treatment | C5orf42  | 65250  | 37 | 5 | 37169549  | 37169549  | Missense_Mutation | SNP | C  | T  | 4   | 89  | c.6577G>A      | c.(6577-6579)GGA>AGA   | p.G2193R       |
| Pat_26 | Pre-Treatment | RICTOR   | 253260 | 37 | 5 | 38959295  | 38959295  | Splice_Site       | SNP | A  | T  | 4   | 104 | c.2178_splice  | c.e22+1                | p.D726_splice  |
| Pat_26 | Pre-Treatment | C6       | 729    | 37 | 5 | 41186251  | 41186251  | Missense_Mutation | SNP | C  | T  | 26  | 60  | c.647G>A       | c.(646-648)GGA>GAA     | p.G216E        |
| Pat_26 | Pre-Treatment | IPO11    | 51194  | 37 | 5 | 61887486  | 61887486  | Missense_Mutation | SNP | G  | A  | 31  | 52  | c.2665G>A      | c.(2665-2667)GGA>AGA   | p.G889R        |
| Pat_26 | Pre-Treatment | MARVELD2 | 153562 | 37 | 5 | 68728399  | 68728399  | Missense_Mutation | SNP | A  | G  | 26  | 57  | c.1228A>G      | c.(1228-1230)AAT>GAT   | p.N410D        |
| Pat_26 | Pre-Treatment | ENC1     | 8507   | 37 | 5 | 73930869  | 73930869  | Missense_Mutation | SNP | G  | A  | 46  | 111 | c.1442C>T      | c.(1441-1443)CCC>CTC   | p.P481L        |
| Pat_26 | Pre-Treatment | PDE8B    | 8622   | 37 | 5 | 76714055  | 76714055  | Missense_Mutation | SNP | G  | A  | 16  | 37  | c.1913G>A      | c.(1912-1914)GGA>GAA   | p.G638E        |
| Pat_26 | Pre-Treatment | ANKRD34B | 340120 | 37 | 5 | 79854638  | 79854638  | Missense_Mutation | SNP | G  | A  | 34  | 70  | c.1201C>T      | c.(1201-1203)CCT>TCT   | p.P401S        |
| Pat_26 | Pre-Treatment | NBPF22P  | 285622 | 37 | 5 | 85578532  | 85578532  | Missense_Mutation | SNP | G  | T  | 6   | 191 | c.9G>T         | c.(7-9)TTG>TTT         | p.L3F          |
| Pat_26 | Pre-Treatment | GPR98    | 84059  | 37 | 5 | 89933551  | 89933551  | Missense_Mutation | SNP | C  | T  | 4   | 19  | c.2026C>T      | c.(2026-2028)CCC>TCC   | p.P676S        |
| Pat_26 | Pre-Treatment | GPR98    | 84059  | 37 | 5 | 90024556  | 90024556  | Missense_Mutation | SNP | C  | T  | 94  | 197 | c.10232C>T     | c.(10231-10233)GCC>GTC | p.A3411V       |
| Pat_26 | Pre-Treatment | GPR98    | 84059  | 37 | 5 | 90111487  | 90111487  | Missense_Mutation | SNP | G  | A  | 5   | 15  | c.16130G>A     | c.(16129-16131)GGA>GAA | p.G5377E       |
| Pat_26 | Pre-Treatment | PAM      | 5066   | 37 | 5 | 102345512 | 102345512 | Missense_Mutation | SNP | G  | A  | 30  | 60  | c.2273G>A      | c.(2272-2274)GGA>GAA   | p.G758E        |
| Pat_26 | Pre-Treatment | ZNF474   | 133923 | 37 | 5 | 121488745 | 121488745 | Missense_Mutation | SNP | G  | A  | 4   | 117 | c.1060G>A      | c.(1060-1062)GCA>ACA   | p.A354T        |
| Pat_26 | Pre-Treatment | SNCAIP   | 9627   | 37 | 5 | 121739548 | 121739548 | Missense_Mutation | SNP | G  | A  | 143 | 109 | c.118G>A       | c.(118-120)GAA>AAA     | p.E40K         |
| Pat_26 | Pre-Treatment | PCDHA1   | 56147  | 37 | 5 | 140166416 | 140166416 | Missense_Mutation | SNP | G  | A  | 32  | 21  | c.541G>A       | c.(541-543)GAT>AAT     | p.D181N        |
| Pat_26 | Pre-Treatment | PCDHA3   | 56145  | 37 | 5 | 140182635 | 140182635 | Missense_Mutation | SNP | C  | T  | 5   | 243 | c.1853C>T      | c.(1852-1854)GCG>GTG   | p.A618V        |
| Pat_26 | Pre-Treatment | PCDHA4   | 56144  | 37 | 5 | 140188460 | 140188460 | Missense_Mutation | SNP | C  | A  | 4   | 112 | c.1688C>A      | c.(1687-1689)CCA>CAA   | p.P563Q        |
| Pat_26 | Pre-Treatment | PCDHGB3  | 56102  | 37 | 5 | 140752101 | 140752101 | Missense_Mutation | SNP | C  | T  | 92  | 66  | c.2140C>T      | c.(2140-2142)CGC>TGC   | p.R714C        |
| Pat_26 | Pre-Treatment | FAT2     | 2196   | 37 | 5 | 150885533 | 150885533 | Missense_Mutation | SNP | C  | T  | 6   | 280 | c.12643G>A     | c.(12643-12645)GTG>ATG | p.V4215M       |
| Pat_26 | Pre-Treatment | FAT2     | 2196   | 37 | 5 | 150917383 | 150917383 | Missense_Mutation | SNP | G  | A  | 6   | 212 | c.9164C>T      | c.(9163-9165)GCG>GTG   | p.A3055V       |

|        |               |          |        |    |   |           |           |                   |     |   |   |     |     |               |                      |                |
|--------|---------------|----------|--------|----|---|-----------|-----------|-------------------|-----|---|---|-----|-----|---------------|----------------------|----------------|
| Pat_26 | Pre-Treatment | GLRA1    | 2741   | 37 | 5 | 151239530 | 151239530 | Missense_Mutation | SNP | C | T | 57  | 97  | c.292G>A      | c.(292-294)GAC>AAC   | p.D98N         |
| Pat_26 | Pre-Treatment | MFAP3    | 4238   | 37 | 5 | 153432575 | 153432575 | Missense_Mutation | SNP | C | T | 117 | 205 | c.391C>T      | c.(391-393)CGT>TGT   | p.R131C        |
| Pat_26 | Pre-Treatment | NIPAL4   | 348938 | 37 | 5 | 156899928 | 156899928 | Missense_Mutation | SNP | C | T | 51  | 106 | c.1361C>T     | c.(1360-1362)TCA>TTA | p.S454L        |
| Pat_26 | Pre-Treatment | GABRB2   | 2561   | 37 | 5 | 160753392 | 160753392 | Missense_Mutation | SNP | C | T | 90  | 164 | c.1174G>A     | c.(1174-1176)GAT>AAT | p.D392N        |
| Pat_26 | Pre-Treatment | DOCK2    | 1794   | 37 | 5 | 169461429 | 169461429 | Missense_Mutation | SNP | C | A | 5   | 186 | c.3494C>A     | c.(3493-3495)CCA>CAA | p.P1165Q       |
| Pat_26 | Pre-Treatment | MGAT4B   | 11282  | 37 | 5 | 179228422 | 179228422 | Missense_Mutation | SNP | G | A | 5   | 309 | c.470C>T      | c.(469-471)TCG>TTG   | p.S157L        |
| Pat_26 | Pre-Treatment | FARS2    | 10667  | 37 | 6 | 5771562   | 5771562   | Missense_Mutation | SNP | G | A | 5   | 265 | c.1256G>A     | c.(1255-1257)CGC>CAC | p.R419H        |
| Pat_26 | Pre-Treatment | RREB1    | 6239   | 37 | 6 | 7231502   | 7231502   | Missense_Mutation | SNP | C | T | 191 | 359 | c.3170C>T     | c.(3169-3171)CCC>CTC | p.P1057L       |
| Pat_26 | Pre-Treatment | PHACTR1  | 221692 | 37 | 6 | 13053737  | 13053737  | Missense_Mutation | SNP | G | A | 4   | 101 | c.391G>A      | c.(391-393)GAA>AAA   | p.E131K        |
| Pat_26 | Pre-Treatment | TBC1D7   | 51256  | 37 | 6 | 13327103  | 13327103  | Missense_Mutation | SNP | G | A | 4   | 122 | c.28C>T       | c.(28-30)CGT>TGT     | p.R10C         |
| Pat_26 | Pre-Treatment | NKAPL    | 222698 | 37 | 6 | 28227372  | 28227372  | Missense_Mutation | SNP | C | T | 4   | 107 | c.223C>T      | c.(223-225)CTC>TTC   | p.L75F         |
| Pat_26 | Pre-Treatment | SCAND3   | 114821 | 37 | 6 | 28540442  | 28540442  | Missense_Mutation | SNP | C | T | 73  | 110 | c.3224G>A     | c.(3223-3225)CGA>CAA | p.R1075Q       |
| Pat_26 | Pre-Treatment | DDR1     | 780    | 37 | 6 | 30857092  | 30857092  | Missense_Mutation | SNP | G | A | 5   | 139 | c.302G>A      | c.(301-303)GGC>GAC   | p.G101D        |
| Pat_26 | Pre-Treatment | PSORS1C2 | 170680 | 37 | 6 | 31105837  | 31105837  | Nonsense_Mutation | SNP | C | T | 5   | 140 | c.302G>A      | c.(301-303)TGG>TAG   | p.W101*        |
| Pat_26 | Pre-Treatment | BAT2     | 7916   | 37 | 6 | 31592996  | 31592996  | Missense_Mutation | SNP | C | T | 71  | 120 | c.512C>T      | c.(511-513)CCG>CTG   | p.P171L        |
| Pat_26 | Pre-Treatment | BAT2     | 7916   | 37 | 6 | 31593808  | 31593808  | Missense_Mutation | SNP | G | A | 5   | 183 | c.851G>A      | c.(850-852)CGT>CAT   | p.R284H        |
| Pat_26 | Pre-Treatment | BAT2     | 7916   | 37 | 6 | 31599185  | 31599185  | Missense_Mutation | SNP | G | A | 3   | 25  | c.2735G>A     | c.(2734-2736)GGC>GAC | p.G912D        |
| Pat_26 | Pre-Treatment | C4A      | 720    | 37 | 6 | 31963519  | 31963519  | Missense_Mutation | SNP | C | T | 74  | 300 | c.3178C>T     | c.(3178-3180)CGG>TGG | p.R1060W       |
| Pat_26 | Pre-Treatment | TNXB     | 7148   | 37 | 6 | 32037342  | 32037342  | Missense_Mutation | SNP | C | T | 4   | 188 | c.5575G>A     | c.(5575-5577)GTC>ATC | p.V1859I       |
| Pat_26 | Pre-Treatment | TAPBP    | 6892   | 37 | 6 | 33281045  | 33281045  | Nonsense_Mutation | SNP | G | A | 5   | 281 | c.418C>T      | c.(418-420)CGA>TGA   | p.R140*        |
| Pat_26 | Pre-Treatment | ITPR3    | 3710   | 37 | 6 | 33647686  | 33647686  | Missense_Mutation | SNP | G | A | 4   | 114 | c.4000G>A     | c.(4000-4002)GTG>ATG | p.V1334M       |
| Pat_26 | Pre-Treatment | SPDEF    | 25803  | 37 | 6 | 34512223  | 34512223  | Missense_Mutation | SNP | C | T | 4   | 106 | c.10G>A       | c.(10-12)GCC>ACC     | p.A4T          |
| Pat_26 | Pre-Treatment | DNAH8    | 1769   | 37 | 6 | 38875853  | 38875853  | Missense_Mutation | SNP | C | T | 22  | 31  | c.8819C>T     | c.(8818-8820)TCA>TTA | p.S2940L       |
| Pat_26 | Pre-Treatment | GLP1R    | 2740   | 37 | 6 | 39046935  | 39046935  | Missense_Mutation | SNP | A | T | 180 | 318 | c.1002A>T     | c.(1000-1002)AAA>AAT | p.K334N        |
| Pat_26 | Pre-Treatment | LRFN2    | 57497  | 37 | 6 | 40399991  | 40399991  | Missense_Mutation | SNP | G | A | 5   | 251 | c.862C>T      | c.(862-864)CCG>TCG   | p.P288S        |
| Pat_26 | Pre-Treatment | FOXP4    | 116113 | 37 | 6 | 41555536  | 41555536  | Missense_Mutation | SNP | C | T | 12  | 26  | c.878C>T      | c.(877-879)TCC>TTC   | p.S293F        |
| Pat_26 | Pre-Treatment | CUL9     | 23113  | 37 | 6 | 43166401  | 43166401  | Missense_Mutation | SNP | G | A | 7   | 495 | c.2858G>A     | c.(2857-2859)CGA>CAA | p.R953Q        |
| Pat_26 | Pre-Treatment | SLC22A7  | 10864  | 37 | 6 | 43266358  | 43266358  | Missense_Mutation | SNP | G | A | 14  | 19  | c.262G>A      | c.(262-264)GCT>ACT   | p.A88T         |
| Pat_26 | Pre-Treatment | GTPBP2   | 54676  | 37 | 6 | 43592343  | 43592343  | Missense_Mutation | SNP | C | T | 59  | 89  | c.1004G>A     | c.(1003-1005)CGG>CAG | p.R335Q        |
| Pat_26 | Pre-Treatment | TMEM63B  | 55362  | 37 | 6 | 44117686  | 44117686  | Missense_Mutation | SNP | G | A | 44  | 74  | c.1504G>A     | c.(1504-1506)GAA>AAA | p.E502K        |
| Pat_26 | Pre-Treatment | RUNX2    | 860    | 37 | 6 | 45480097  | 45480097  | Missense_Mutation | SNP | G | A | 5   | 355 | c.974G>A      | c.(973-975)CGG>CAG   | p.R325Q        |
| Pat_26 | Pre-Treatment | COL21A1  | 81578  | 37 | 6 | 55933885  | 55933885  | Missense_Mutation | SNP | C | T | 13  | 18  | c.2050G>A     | c.(2050-2052)GAA>AAA | p.E684K        |
| Pat_26 | Pre-Treatment | BAI3     | 577    | 37 | 6 | 70082297  | 70082297  | Splice_Site       | SNP | G | A | 10  | 12  | c.4240_splice | c.e30-1              | p.R1414_splice |
| Pat_26 | Pre-Treatment | COL9A1   | 1297   | 37 | 6 | 70990721  | 70990721  | Missense_Mutation | SNP | G | A | 3   | 46  | c.898C>T      | c.(898-900)CCC>TCC   | p.P300S        |
| Pat_26 | Pre-Treatment | GPR63    | 81491  | 37 | 6 | 97247496  | 97247496  | Missense_Mutation | SNP | G | A | 37  | 69  | c.112C>T      | c.(112-114)CCT>TCT   | p.P38S         |
| Pat_26 | Pre-Treatment | WISP3    | 8838   | 37 | 6 | 112390739 | 112390739 | Nonsense_Mutation | SNP | G | A | 48  | 75  | c.981G>A      | c.(979-981)TGG>TGA   | p.W327*        |
| Pat_26 | Pre-Treatment | NT5DC1   | 221294 | 37 | 6 | 116544279 | 116544279 | Missense_Mutation | SNP | C | T | 95  | 58  | c.787C>T      | c.(787-789)CCT>TCT   | p.P263S        |
| Pat_26 | Pre-Treatment | ROS1     | 6098   | 37 | 6 | 117650583 | 117650583 | Missense_Mutation | SNP | G | A | 26  | 31  | c.5275C>T     | c.(5275-5277)CCC>TCC | p.P1759S       |
| Pat_26 | Pre-Treatment | GJA1     | 2697   | 37 | 6 | 121768405 | 121768405 | Missense_Mutation | SNP | G | A | 4   | 195 | c.412G>A      | c.(412-414)GGT>AGT   | p.G138S        |
| Pat_26 | Pre-Treatment | NCOA7    | 135112 | 37 | 6 | 126242132 | 126242132 | Missense_Mutation | SNP | G | A | 4   | 139 | c.2288G>A     | c.(2287-2289)AGC>AAC | p.S763N        |
| Pat_26 | Pre-Treatment | ARG1     | 383    | 37 | 6 | 131900341 | 131900341 | Missense_Mutation | SNP | G | A | 49  | 31  | c.221G>A      | c.(220-222)GGA>GAA   | p.G74E         |
| Pat_26 | Pre-Treatment | CTAGE9   | 643854 | 37 | 6 | 132031227 | 132031227 | Missense_Mutation | SNP | G | A | 42  | 19  | c.931C>T      | c.(931-933)CCG>TCG   | p.P311S        |
| Pat_26 | Pre-Treatment | IL20RA   | 53832  | 37 | 6 | 137338238 | 137338238 | Missense_Mutation | SNP | G | A | 19  | 13  | c.91C>T       | c.(91-93)CCC>TCC     | p.P31S         |
| Pat_26 | Pre-Treatment | LATS1    | 9113   | 37 | 6 | 149997811 | 149997811 | Nonsense_Mutation | SNP | G | A | 31  | 17  | c.2656C>T     | c.(2656-2658)CGA>TGA | p.R886*        |
| Pat_26 | Pre-Treatment | PPP1R14C | 81706  | 37 | 6 | 150535953 | 150535953 | Nonsense_Mutation | SNP | C | A | 4   | 120 | c.380C>A      | c.(379-381)TCA>TAA   | p.S127*        |
| Pat_26 | Pre-Treatment | SYNE1    | 23345  | 37 | 6 | 152730807 | 152730807 | Missense_Mutation | SNP | C | T | 56  | 33  | c.6268G>A     | c.(6268-6270)GAA>AAA | p.E2090K       |
| Pat_26 | Pre-Treatment | RSPH3    | 83861  | 37 | 6 | 159403527 | 159403527 | Missense_Mutation | SNP | C | T | 4   | 85  | c.1112G>A     | c.(1111-1113)CGA>CAA | p.R371Q        |



|        |               |           |        |    |   |           |           |                   |     |    |    |     |     |                                      |                      |                |
|--------|---------------|-----------|--------|----|---|-----------|-----------|-------------------|-----|----|----|-----|-----|--------------------------------------|----------------------|----------------|
| Pat_26 | Pre-Treatment | PHF10     | 55274  | 37 | 6 | 170115848 | 170115848 | Missense_Mutation | SNP | C  | T  | 44  | 37  | c.649G>A                             | c.(649-651)GAA>AAA   | p.E217K        |
| Pat_26 | Pre-Treatment | CHST12    | 55501  | 37 | 7 | 2472575   | 2472575   | Missense_Mutation | SNP | G  | A  | 4   | 159 | c.301G>A                             | c.(301-303)GTG>ATG   | p.V101M        |
| Pat_26 | Pre-Treatment | RADIL     | 55698  | 37 | 7 | 4874803   | 4874803   | Missense_Mutation | SNP | G  | A  | 22  | 51  | c.851C>T                             | c.(850-852)CCC>CTC   | p.P284L        |
| Pat_26 | Pre-Treatment | USP42     | 84132  | 37 | 7 | 6189601   | 6189601   | Missense_Mutation | SNP | G  | A  | 4   | 60  | c.1774G>A                            | c.(1774-1776)GTG>ATG | p.V592M        |
| Pat_26 | Pre-Treatment | USP42     | 84132  | 37 | 7 | 6194300   | 6194300   | Missense_Mutation | SNP | G  | A  | 4   | 114 | c.3115G>A                            | c.(3115-3117)GAG>AAG | p.E1039K       |
| Pat_26 | Pre-Treatment | RAC1      | 5879   | 37 | 7 | 6426892   | 6426892   | Missense_Mutation | SNP | C  | T  | 108 | 159 | c.85C>T                              | c.(85-87)CCT>TCT     | p.P29S         |
| Pat_26 | Pre-Treatment | THSD7A    | 221981 | 37 | 7 | 11521546  | 11521546  | Missense_Mutation | SNP | G  | A  | 4   | 152 | c.1886C>T                            | c.(1885-1887)GCC>GTC | p.A629V        |
| Pat_26 | Pre-Treatment | KLHL7     | 55975  | 37 | 7 | 23164306  | 23164306  | Splice_Site       | SNP | G  | C  | 3   | 91  | c.224_splice                         | c.e3-1               | p.T75_splice   |
| Pat_26 | Pre-Treatment | DFNA5     | 1687   | 37 | 7 | 24789342  | 24789342  | Missense_Mutation | SNP | C  | T  | 90  | 182 | c.52G>A                              | c.(52-54)GAC>AAC     | p.D18N         |
| Pat_26 | Pre-Treatment | EVX1      | 2128   | 37 | 7 | 27285964  | 27285964  | Missense_Mutation | SNP | C  | T  | 4   | 69  | c.1144C>T                            | c.(1144-1146)CTC>TTC | p.L382F        |
| Pat_26 | Pre-Treatment | ADCYAP1R1 | 117    | 37 | 7 | 31146156  | 31146156  | Missense_Mutation | SNP | G  | A  | 6   | 314 | c.1265G>A                            | c.(1264-1266)CGT>CAT | p.R422H        |
| Pat_26 | Pre-Treatment | OGDH      | 4967   | 37 | 7 | 44734078  | 44734078  | Missense_Mutation | SNP | C  | T  | 79  | 128 | c.1571C>T                            | c.(1570-1572)CCG>CTG | p.P524L        |
| Pat_26 | Pre-Treatment | ADCY1     | 107    | 37 | 7 | 45743044  | 45743044  | Missense_Mutation | SNP | C  | T  | 5   | 149 | c.2524C>T                            | c.(2524-2526)CCG>TCG | p.P842S        |
| Pat_26 | Pre-Treatment | TNS3      | 64759  | 37 | 7 | 47343138  | 47343138  | Missense_Mutation | SNP | G  | A  | 7   | 14  | c.2867C>T                            | c.(2866-2868)CCC>CTC | p.P956L        |
| Pat_26 | Pre-Treatment | PKD1L1    | 168507 | 37 | 7 | 47867041  | 47867041  | Missense_Mutation | SNP | C  | T  | 4   | 82  | c.6761G>A                            | c.(6760-6762)CGC>CAC | p.R2254H       |
| Pat_26 | Pre-Treatment | PKD1L1    | 168507 | 37 | 7 | 47904813  | 47904813  | Splice_Site       | SNP | C  | T  | 12  | 23  | c.4149_splice                        | c.e26+1              | p.K1383_splice |
| Pat_26 | Pre-Treatment | ABCA13    | 154664 | 37 | 7 | 48353922  | 48353922  | Missense_Mutation | SNP | G  | A  | 14  | 17  | c.9775G>A                            | c.(9775-9777)GAT>AAT | p.D3259N       |
| Pat_26 | Pre-Treatment | NCF1      | 653361 | 37 | 7 | 74193632  | 74193632  | Missense_Mutation | SNP | G  | A  | 5   | 324 | c.259G>A                             | c.(259-261)GCC>ACC   | p.A87T         |
| Pat_26 | Pre-Treatment | DTX2      | 113878 | 37 | 7 | 76134733  | 76134733  | Missense_Mutation | SNP | T  | C  | 13  | 29  | c.1684T>C                            | c.(1684-1686)TTC>CTC | p.F562L        |
| Pat_26 | Pre-Treatment | PCLO      | 27445  | 37 | 7 | 82764309  | 82764309  | Missense_Mutation | SNP | C  | T  | 66  | 148 | c.2557G>A                            | c.(2557-2559)GAA>AAA | p.E853K        |
| Pat_26 | Pre-Treatment | SEMA3A    | 10371  | 37 | 7 | 83592633  | 83592633  | Missense_Mutation | SNP | C  | T  | 57  | 115 | c.1748G>A                            | c.(1747-1749)AGA>AAA | p.R583K        |
| Pat_26 | Pre-Treatment | STEAP2    | 261729 | 37 | 7 | 89856645  | 89856645  | Missense_Mutation | SNP | G  | A  | 4   | 176 | c.853G>A                             | c.(853-855)GGC>AGC   | p.G285S        |
| Pat_26 | Pre-Treatment | SAMD9     | 54809  | 37 | 7 | 92732185  | 92732186  | Missense_Mutation | DNP | GG | AA | 35  | 44  | .:3225_3226CC>T3223-3228)ATCCAT>ATTT |                      | p.H1076Y       |
| Pat_26 | Pre-Treatment | COL1A2    | 1278   | 37 | 7 | 94055131  | 94055131  | Missense_Mutation | SNP | G  | A  | 8   | 15  | c.2905G>A                            | c.(2905-2907)GTG>ATG | p.V969M        |
| Pat_26 | Pre-Treatment | ARPC1B    | 10095  | 37 | 7 | 98988637  | 98988637  | Missense_Mutation | SNP | G  | A  | 4   | 101 | c.622G>A                             | c.(622-624)GTC>ATC   | p.V208I        |
| Pat_26 | Pre-Treatment | ZKSCAN1   | 7586   | 37 | 7 | 99621904  | 99621904  | Missense_Mutation | SNP | G  | A  | 4   | 148 | c.554G>A                             | c.(553-555)CGG>CAG   | p.R185Q        |
| Pat_26 | Pre-Treatment | STAG3     | 10734  | 37 | 7 | 99796940  | 99796940  | Missense_Mutation | SNP | G  | A  | 6   | 293 | c.1523G>A                            | c.(1522-1524)CGG>CAG | p.R508Q        |
| Pat_26 | Pre-Treatment | EPHB4     | 2050   | 37 | 7 | 100410379 | 100410379 | Missense_Mutation | SNP | G  | A  | 21  | 54  | c.2108C>T                            | c.(2107-2109)TCC>TTC | p.S703F        |
| Pat_26 | Pre-Treatment | PMPCB     | 9512   | 37 | 7 | 102949522 | 102949522 | Missense_Mutation | SNP | C  | T  | 4   | 160 | c.973C>T                             | c.(973-975)CGC>TGC   | p.R325C        |
| Pat_26 | Pre-Treatment | MLL5      | 55904  | 37 | 7 | 104742439 | 104742439 | Missense_Mutation | SNP | G  | A  | 5   | 310 | c.1994G>A                            | c.(1993-1995)CGT>CAT | p.R665H        |
| Pat_26 | Pre-Treatment | SRPK2     | 6733   | 37 | 7 | 104783638 | 104783638 | Missense_Mutation | SNP | G  | A  | 59  | 136 | c.920C>T                             | c.(919-921)ACC>ATC   | p.T307I        |
| Pat_26 | Pre-Treatment | PPP1R3A   | 5506   | 37 | 7 | 113519690 | 113519690 | Missense_Mutation | SNP | C  | T  | 31  | 53  | c.1457G>A                            | c.(1456-1458)CGA>CAA | p.R486Q        |
| Pat_26 | Pre-Treatment | ASB15     | 142685 | 37 | 7 | 123269228 | 123269228 | Missense_Mutation | SNP | G  | A  | 21  | 59  | c.1180G>A                            | c.(1180-1182)GAA>AAA | p.E394K        |
| Pat_26 | Pre-Treatment | PAX4      | 5078   | 37 | 7 | 127253881 | 127253881 | Missense_Mutation | SNP | C  | T  | 4   | 138 | c.467G>A                             | c.(466-468)GGT>GAT   | p.G156D        |
| Pat_26 | Pre-Treatment | OPN1SW    | 611    | 37 | 7 | 128413880 | 128413880 | Missense_Mutation | SNP | C  | T  | 6   | 155 | c.750G>A                             | c.(748-750)ATG>ATA   | p.M250I        |
| Pat_26 | Pre-Treatment | RAB19     | 401409 | 37 | 7 | 140107616 | 140107616 | Missense_Mutation | SNP | G  | A  | 4   | 185 | c.170G>A                             | c.(169-171)CGT>CAT   | p.R57H         |
| Pat_26 | Pre-Treatment | DENND2A   | 27147  | 37 | 7 | 140301735 | 140301735 | Missense_Mutation | SNP | C  | T  | 63  | 103 | c.463G>A                             | c.(463-465)GAT>AAT   | p.D155N        |
| Pat_26 | Pre-Treatment | BRAF      | 673    | 37 | 7 | 140453136 | 140453136 | Missense_Mutation | SNP | A  | T  | 47  | 120 | c.1799T>A                            | c.(1798-1800)GTG>GAG | p.V600E        |
| Pat_26 | Pre-Treatment | MGAM      | 8972   | 37 | 7 | 141731520 | 141731520 | Missense_Mutation | SNP | C  | T  | 78  | 175 | c.1511C>T                            | c.(1510-1512)CCC>CTC | p.P504L        |
| Pat_26 | Pre-Treatment | C7orf34   | 135927 | 37 | 7 | 142636842 | 142636842 | Missense_Mutation | SNP | C  | T  | 14  | 31  | c.199C>T                             | c.(199-201)CCC>TCC   | p.P67S         |
| Pat_26 | Pre-Treatment | OR2F2     | 135948 | 37 | 7 | 143633023 | 143633023 | Missense_Mutation | SNP | G  | A  | 50  | 94  | c.698G>A                             | c.(697-699)GGA>GAA   | p.G233E        |
| Pat_26 | Pre-Treatment | PDIA4     | 9601   | 37 | 7 | 148705250 | 148705250 | Splice_Site       | SNP | C  | T  | 4   | 111 | c.1131_splice                        | c.e7+1               | p.Q377_splice  |
| Pat_26 | Pre-Treatment | SSPO      | 23145  | 37 | 7 | 149477388 | 149477388 | Missense_Mutation | SNP | G  | A  | 4   | 25  | c.1459G>A                            | c.(1459-1461)GAG>AAG | p.E487K        |
| Pat_26 | Pre-Treatment | GIMAP5    | 55340  | 37 | 7 | 150439711 | 150439711 | Missense_Mutation | SNP | G  | C  | 126 | 256 | c.484G>C                             | c.(484-486)GAT>CAT   | p.D162H        |
| Pat_26 | Pre-Treatment | KCNH2     | 3757   | 37 | 7 | 150649680 | 150649680 | Missense_Mutation | SNP | T  | A  | 8   | 655 | c.1390A>T                            | c.(1390-1392)ATT>TTT | p.I464F        |
| Pat_26 | Pre-Treatment | VIPR2     | 7434   | 37 | 7 | 158902542 | 158902542 | Missense_Mutation | SNP | G  | A  | 73  | 151 | c.220C>T                             | c.(220-222)CCC>TCC   | p.P74S         |
| Pat_26 | Pre-Treatment | CSMD1     | 64478  | 37 | 8 | 3059206   | 3059206   | Missense_Mutation | SNP | C  | T  | 19  | 37  | c.5029G>A                            | c.(5029-5031)GAT>AAT | p.D1677N       |

|        |               |          |        |    |   |           |           |                   |     |   |   |     |     |               |                      |                |
|--------|---------------|----------|--------|----|---|-----------|-----------|-------------------|-----|---|---|-----|-----|---------------|----------------------|----------------|
| Pat_26 | Pre-Treatment | AGPAT5   | 55326  | 37 | 8 | 6588251   | 6588251   | Missense_Mutation | SNP | C | G | 8   | 273 | c.309C>G      | c.(307-309)GAC>GAG   | p.D103E        |
| Pat_26 | Pre-Treatment | BLK      | 640    | 37 | 8 | 11405589  | 11405589  | Missense_Mutation | SNP | G | A | 5   | 346 | c.224G>A      | c.(223-225)CGG>CAG   | p.R75Q         |
| Pat_26 | Pre-Treatment | PCM1     | 5108   | 37 | 8 | 17823629  | 17823629  | Missense_Mutation | SNP | G | A | 4   | 134 | c.2977G>A     | c.(2977-2979)GTA>ATA | p.V993I        |
| Pat_26 | Pre-Treatment | ASAH1    | 427    | 37 | 8 | 17924743  | 17924743  | Missense_Mutation | SNP | G | A | 4   | 119 | c.368C>T      | c.(367-369)ACT>ATT   | p.T123I        |
| Pat_26 | Pre-Treatment | SLC18A1  | 6570   | 37 | 8 | 20007227  | 20007227  | Missense_Mutation | SNP | G | A | 43  | 67  | c.1106C>T     | c.(1105-1107)TCC>TTC | p.S369F        |
| Pat_26 | Pre-Treatment | XPO7     | 23039  | 37 | 8 | 21844746  | 21844746  | Missense_Mutation | SNP | C | T | 4   | 184 | c.1672C>T     | c.(1672-1674)CGT>TGT | p.R558C        |
| Pat_26 | Pre-Treatment | ADAMDEC1 | 27299  | 37 | 8 | 24251607  | 24251607  | Missense_Mutation | SNP | G | A | 43  | 97  | c.310G>A      | c.(310-312)GAA>AAA   | p.E104K        |
| Pat_26 | Pre-Treatment | ADAM7    | 8756   | 37 | 8 | 24300055  | 24300055  | Missense_Mutation | SNP | G | A | 121 | 212 | c.122G>A      | c.(121-123)CGA>CAA   | p.R41Q         |
| Pat_26 | Pre-Treatment | ADAM7    | 8756   | 37 | 8 | 24339742  | 24339742  | Missense_Mutation | SNP | G | A | 18  | 32  | c.793G>A      | c.(793-795)GAA>AAA   | p.E265K        |
| Pat_26 | Pre-Treatment | BNIP3L   | 665    | 37 | 8 | 26252780  | 26252780  | Missense_Mutation | SNP | G | A | 40  | 98  | c.319G>A      | c.(319-321)GAT>AAT   | p.D107N        |
| Pat_26 | Pre-Treatment | BNIP3L   | 665    | 37 | 8 | 26252782  | 26252782  | Missense_Mutation | SNP | T | A | 42  | 97  | c.321T>A      | c.(319-321)GAT>GAA   | p.D107E        |
| Pat_26 | Pre-Treatment | SCARA3   | 51435  | 37 | 8 | 27516870  | 27516870  | Missense_Mutation | SNP | G | A | 31  | 57  | c.1183G>A     | c.(1183-1185)GAG>AAG | p.E395K        |
| Pat_26 | Pre-Treatment | FBXO16   | 157574 | 37 | 8 | 28340887  | 28340887  | Missense_Mutation | SNP | T | G | 162 | 245 | c.77A>C       | c.(76-78)AAC>ACC     | p.N26T         |
| Pat_26 | Pre-Treatment | ADAM32   | 203102 | 37 | 8 | 39022685  | 39022685  | Missense_Mutation | SNP | T | C | 2   | 5   | c.803T>C      | c.(802-804)CTA>CCA   | p.L268P        |
| Pat_26 | Pre-Treatment | MCM4     | 4173   | 37 | 8 | 48877195  | 48877195  | Missense_Mutation | SNP | C | T | 42  | 72  | c.755C>T      | c.(754-756)TCA>TTA   | p.S252L        |
| Pat_26 | Pre-Treatment | MCM4     | 4173   | 37 | 8 | 48885469  | 48885469  | Missense_Mutation | SNP | C | T | 4   | 177 | c.1981C>T     | c.(1981-1983)CGT>TGT | p.R661C        |
| Pat_26 | Pre-Treatment | PXDNL    | 137902 | 37 | 8 | 52321593  | 52321593  | Missense_Mutation | SNP | C | T | 4   | 112 | c.2591G>A     | c.(2590-2592)CGC>CAC | p.R864H        |
| Pat_26 | Pre-Treatment | FAM110B  | 90362  | 37 | 8 | 59058956  | 59058956  | Missense_Mutation | SNP | C | T | 58  | 64  | c.167C>T      | c.(166-168)GCC>GTC   | p.A56V         |
| Pat_26 | Pre-Treatment | NSMAF    | 8439   | 37 | 8 | 59508216  | 59508216  | Missense_Mutation | SNP | C | T | 31  | 64  | c.1795G>A     | c.(1795-1797)GAA>AAA | p.E599K        |
| Pat_26 | Pre-Treatment | YTHDF3   | 253943 | 37 | 8 | 64100034  | 64100034  | Missense_Mutation | SNP | G | T | 4   | 152 | c.1465G>T     | c.(1465-1467)GCT>TCT | p.A489S        |
| Pat_26 | Pre-Treatment | ARFGEF1  | 10565  | 37 | 8 | 68170417  | 68170417  | Missense_Mutation | SNP | G | A | 32  | 51  | c.2344C>T     | c.(2344-2346)CGT>TGT | p.R782C        |
| Pat_26 | Pre-Treatment | SLCO5A1  | 81796  | 37 | 8 | 70585280  | 70585280  | Missense_Mutation | SNP | G | A | 5   | 241 | c.2371C>T     | c.(2371-2373)CGG>TGG | p.R791W        |
| Pat_26 | Pre-Treatment | CA1      | 759    | 37 | 8 | 86253846  | 86253846  | Missense_Mutation | SNP | C | T | 29  | 106 | c.19G>A       | c.(19-21)GGA>AGA     | p.G7R          |
| Pat_26 | Pre-Treatment | INTS8    | 55656  | 37 | 8 | 95840000  | 95840000  | Missense_Mutation | SNP | C | T | 151 | 250 | c.497C>T      | c.(496-498)CCC>CTC   | p.P166L        |
| Pat_26 | Pre-Treatment | VPS13B   | 157680 | 37 | 8 | 100791192 | 100791192 | Missense_Mutation | SNP | C | T | 131 | 233 | c.7787C>T     | c.(7786-7788)TCT>TTT | p.S2596F       |
| Pat_26 | Pre-Treatment | UBR5     | 51366  | 37 | 8 | 103316274 | 103316274 | Missense_Mutation | SNP | C | T | 4   | 88  | c.2951G>A     | c.(2950-2952)CGA>CAA | p.R984Q        |
| Pat_26 | Pre-Treatment | TRHR     | 7201   | 37 | 8 | 110131570 | 110131570 | Missense_Mutation | SNP | C | A | 76  | 192 | c.1083C>A     | c.(1081-1083)GAC>GAA | p.D361E        |
| Pat_26 | Pre-Treatment | SLC30A8  | 169026 | 37 | 8 | 118147586 | 118147586 | Missense_Mutation | SNP | C | T | 6   | 382 | c.20C>T       | c.(19-21)ACG>ATG     | p.T7M          |
| Pat_26 | Pre-Treatment | SAMD12   | 401474 | 37 | 8 | 119593082 | 119593082 | Missense_Mutation | SNP | C | T | 36  | 92  | c.64G>A       | c.(64-66)GAA>AAA     | p.E22K         |
| Pat_26 | Pre-Treatment | COL14A1  | 7373   | 37 | 8 | 121210152 | 121210152 | Missense_Mutation | SNP | G | A | 20  | 32  | c.695G>A      | c.(694-696)GGA>GAA   | p.G232E        |
| Pat_26 | Pre-Treatment | ADCY8    | 114    | 37 | 8 | 131880114 | 131880114 | Missense_Mutation | SNP | G | T | 33  | 92  | c.2188C>A     | c.(2188-2190)CAA>AAA | p.Q730K        |
| Pat_26 | Pre-Treatment | TG       | 7038   | 37 | 8 | 133900276 | 133900276 | Missense_Mutation | SNP | G | A | 9   | 139 | c.2224G>A     | c.(2224-2226)GTG>ATG | p.V742M        |
| Pat_26 | Pre-Treatment | COL22A1  | 169044 | 37 | 8 | 139815131 | 139815131 | Missense_Mutation | SNP | C | T | 69  | 112 | c.1541G>A     | c.(1540-1542)GGA>GAA | p.G514E        |
| Pat_26 | Pre-Treatment | COL22A1  | 169044 | 37 | 8 | 139839023 | 139839023 | Missense_Mutation | SNP | C | T | 16  | 35  | c.847G>A      | c.(847-849)GAT>AAT   | p.D283N        |
| Pat_26 | Pre-Treatment | MAPK15   | 225689 | 37 | 8 | 144803950 | 144803950 | Missense_Mutation | SNP | C | T | 63  | 160 | c.1358C>T     | c.(1357-1359)CCC>CTC | p.P453L        |
| Pat_26 | Pre-Treatment | EPPK1    | 83481  | 37 | 8 | 144942527 | 144942527 | Missense_Mutation | SNP | C | T | 143 | 236 | c.4895G>A     | c.(4894-4896)GGA>GAA | p.G1632E       |
| Pat_26 | Pre-Treatment | GPAA1    | 8733   | 37 | 8 | 145139945 | 145139945 | Splice_Site       | SNP | C | T | 4   | 181 | c.1165_splice | c.e9-1               | p.A389_splice  |
| Pat_26 | Pre-Treatment | SHARPIN  | 81858  | 37 | 8 | 145154311 | 145154311 | Missense_Mutation | SNP | G | A | 6   | 287 | c.791C>T      | c.(790-792)CCG>CTG   | p.P264L        |
| Pat_26 | Pre-Treatment | CPSF1    | 29894  | 37 | 8 | 145621935 | 145621935 | Missense_Mutation | SNP | G | A | 126 | 220 | c.2704C>T     | c.(2704-2706)CGT>TGT | p.R902C        |
| Pat_26 | Pre-Treatment | KANK1    | 23189  | 37 | 9 | 738505    | 738505    | Splice_Site       | SNP | G | A | 5   | 150 | c.3553_splice | c.e12+1              | p.D1185_splice |
| Pat_26 | Pre-Treatment | VLDLR    | 7436   | 37 | 9 | 2639918   | 2639918   | Nonsense_Mutation | SNP | C | T | 5   | 340 | c.262C>T      | c.(262-264)CGA>TGA   | p.R88*         |
| Pat_26 | Pre-Treatment | ADAMTSL1 | 92949  | 37 | 9 | 18905849  | 18905849  | Missense_Mutation | SNP | G | A | 4   | 68  | c.4921G>A     | c.(4921-4923)GGC>AGC | p.G1641S       |
| Pat_26 | Pre-Treatment | CDKN2A   | 1029   | 37 | 9 | 21971017  | 21971017  | Missense_Mutation | SNP | G | A | 92  | 39  | c.341C>T      | c.(340-342)CCC>CTC   | p.P114L        |
| Pat_26 | Pre-Treatment | TAF1L    | 138474 | 37 | 9 | 32633981  | 32633981  | Missense_Mutation | SNP | G | A | 44  | 83  | c.1597C>T     | c.(1597-1599)CCT>TCT | p.P533S        |
| Pat_26 | Pre-Treatment | UNC13B   | 10497  | 37 | 9 | 35400332  | 35400332  | Missense_Mutation | SNP | T | G | 173 | 271 | c.4129T>G     | c.(4129-4131)TTC>GTC | p.F1377V       |
| Pat_26 | Pre-Treatment | TLN1     | 7094   | 37 | 9 | 35724203  | 35724203  | Missense_Mutation | SNP | G | A | 6   | 210 | c.640C>T      | c.(640-642)CTC>TTC   | p.L214F        |
| Pat_26 | Pre-Treatment | HRCT1    | 646962 | 37 | 9 | 35906475  | 35906475  | Missense_Mutation | SNP | G | A | 7   | 338 | c.191G>A      | c.(190-192)CGG>CAG   | p.R64Q         |

|        |               |         |        |    |   |           |           |                   |     |    |    |     |     |                 |                      |                |
|--------|---------------|---------|--------|----|---|-----------|-----------|-------------------|-----|----|----|-----|-----|-----------------|----------------------|----------------|
| Pat_26 | Pre-Treatment | MELK    | 9833   | 37 | 9 | 36677266  | 36677266  | Missense_Mutation | SNP | C  | T  | 4   | 137 | c.1888C>T       | c.(1888-1890)CGG>TGG | p.R630W        |
| Pat_26 | Pre-Treatment | SHB     | 6461   | 37 | 9 | 37974811  | 37974811  | Missense_Mutation | SNP | G  | A  | 11  | 151 | c.862C>T        | c.(862-864)CGG>TGG   | p.R288W        |
| Pat_26 | Pre-Treatment | ALDH1B1 | 219    | 37 | 9 | 38395779  | 38395779  | Missense_Mutation | SNP | C  | T  | 90  | 155 | c.34C>T         | c.(34-36)CTC>TTC     | p.L12F         |
| Pat_26 | Pre-Treatment | PRUNE2  | 158471 | 37 | 9 | 79323461  | 79323462  | Missense_Mutation | DNP | TG | AA | 3   | 23  | ..3728_3729CA>T | c.(3727-3729)TCA>TTT | p.S1243F       |
| Pat_26 | Pre-Treatment | SHC3    | 53358  | 37 | 9 | 91690061  | 91690061  | Missense_Mutation | SNP | G  | A  | 4   | 91  | c.692C>T        | c.(691-693)ACG>ATG   | p.T231M        |
| Pat_26 | Pre-Treatment | PTCH1   | 5727   | 37 | 9 | 98209618  | 98209618  | Missense_Mutation | SNP | G  | A  | 38  | 36  | c.3920C>T       | c.(3919-3921)CCC>CTC | p.P1307L       |
| Pat_26 | Pre-Treatment | SVEP1   | 79987  | 37 | 9 | 113171099 | 113171099 | Missense_Mutation | SNP | G  | A  | 167 | 118 | c.6781C>T       | c.(6781-6783)CCT>TCT | p.P2261S       |
| Pat_26 | Pre-Treatment | ZNF883  | 169834 | 37 | 9 | 115760269 | 115760269 | Missense_Mutation | SNP | G  | A  | 21  | 20  | c.271C>T        | c.(271-273)CAT>TAT   | p.H91Y         |
| Pat_26 | Pre-Treatment | ALAD    | 210    | 37 | 9 | 116152752 | 116152752 | Missense_Mutation | SNP | G  | A  | 4   | 100 | c.503C>T        | c.(502-504)TCG>TTG   | p.S168L        |
| Pat_26 | Pre-Treatment | PAPPA   | 5069   | 37 | 9 | 119124940 | 119124940 | Missense_Mutation | SNP | G  | A  | 28  | 26  | c.4417G>A       | c.(4417-4419)GAG>AAG | p.E1473K       |
| Pat_26 | Pre-Treatment | C5      | 727    | 37 | 9 | 123752040 | 123752040 | Missense_Mutation | SNP | A  | G  | 3   | 77  | c.2960T>C       | c.(2959-2961)ATC>ACC | p.I987T        |
| Pat_26 | Pre-Treatment | MORN5   | 254956 | 37 | 9 | 124931981 | 124931981 | Missense_Mutation | SNP | G  | A  | 4   | 190 | c.253G>A        | c.(253-255)GAC>AAC   | p.D85N         |
| Pat_26 | Pre-Treatment | MRRF    | 92399  | 37 | 9 | 125033246 | 125033246 | Missense_Mutation | SNP | G  | A  | 6   | 308 | c.76G>A         | c.(76-78)GTT>ATT     | p.V26I         |
| Pat_26 | Pre-Treatment | CRB2    | 286204 | 37 | 9 | 126133014 | 126133014 | Missense_Mutation | SNP | C  | T  | 76  | 33  | c.1682C>T       | c.(1681-1683)CCG>CTG | p.P561L        |
| Pat_26 | Pre-Treatment | NEK6    | 10783  | 37 | 9 | 127088681 | 127088681 | Missense_Mutation | SNP | G  | A  | 4   | 190 | c.478G>A        | c.(478-480)GTG>ATG   | p.V160M        |
| Pat_26 | Pre-Treatment | WDR38   | 401551 | 37 | 9 | 127619155 | 127619155 | Missense_Mutation | SNP | C  | T  | 5   | 292 | c.763C>T        | c.(763-765)CGC>TGC   | p.R255C        |
| Pat_26 | Pre-Treatment | SH2D3C  | 10044  | 37 | 9 | 130511626 | 130511626 | Missense_Mutation | SNP | C  | T  | 4   | 160 | c.1003G>A       | c.(1003-1005)GGA>AGA | p.G335R        |
| Pat_26 | Pre-Treatment | DNM1    | 1759   | 37 | 9 | 130996357 | 130996357 | Missense_Mutation | SNP | C  | T  | 3   | 68  | c.1393C>T       | c.(1393-1395)CGG>TGG | p.R465W        |
| Pat_26 | Pre-Treatment | ASB6    | 140459 | 37 | 9 | 132400230 | 132400230 | Missense_Mutation | SNP | C  | T  | 32  | 47  | c.1105G>A       | c.(1105-1107)GAG>AAG | p.E369K        |
| Pat_26 | Pre-Treatment | NUP214  | 8021   | 37 | 9 | 134103565 | 134103565 | Missense_Mutation | SNP | C  | T  | 4   | 158 | c.5921C>T       | c.(5920-5922)CCA>CTA | p.P1974L       |
| Pat_26 | Pre-Treatment | TTF1    | 7270   | 37 | 9 | 135251433 | 135251433 | Nonsense_Mutation | SNP | G  | A  | 37  | 63  | c.2587C>T       | c.(2587-2589)CGA>TGA | p.R863*        |
| Pat_26 | Pre-Treatment | REXO4   | 57109  | 37 | 9 | 136277539 | 136277539 | Missense_Mutation | SNP | G  | T  | 234 | 431 | c.790C>A        | c.(790-792)CGT>AGT   | p.R264S        |
| Pat_26 | Pre-Treatment | COL5A1  | 1289   | 37 | 9 | 137622245 | 137622245 | Missense_Mutation | SNP | A  | G  | 48  | 117 | c.1088A>G       | c.(1087-1089)AAC>AGC | p.N363S        |
| Pat_26 | Pre-Treatment | NOTCH1  | 4851   | 37 | 9 | 139405210 | 139405210 | Missense_Mutation | SNP | G  | A  | 4   | 186 | c.2635C>T       | c.(2635-2637)CGG>TGG | p.R879W        |
| Pat_26 | Pre-Treatment | ABCA2   | 20     | 37 | 9 | 139910568 | 139910568 | Missense_Mutation | SNP | C  | T  | 7   | 389 | c.3160G>A       | c.(3160-3162)GAC>AAC | p.D1054N       |
| Pat_26 | Pre-Treatment | EHMT1   | 79813  | 37 | 9 | 140646844 | 140646844 | Missense_Mutation | SNP | G  | A  | 38  | 60  | c.1232G>A       | c.(1231-1233)GGT>GAT | p.G411D        |
| Pat_26 | Pre-Treatment | P2RY8   | 286530 | 37 | X | 1584415   | 1584415   | Missense_Mutation | SNP | C  | T  | 73  | 149 | c.1037G>A       | c.(1036-1038)GGA>GAA | p.G346E        |
| Pat_26 | Pre-Treatment | SCML2   | 10389  | 37 | X | 18323215  | 18323215  | Missense_Mutation | SNP | G  | A  | 182 | 65  | c.607C>T        | c.(607-609)CAT>TAT   | p.H203Y        |
| Pat_26 | Pre-Treatment | RS1     | 6247   | 37 | X | 18660260  | 18660260  | Missense_Mutation | SNP | G  | A  | 4   | 192 | c.539C>T        | c.(538-540)TCG>TTG   | p.S180L        |
| Pat_26 | Pre-Treatment | DCAF8L1 | 139425 | 37 | X | 27999163  | 27999163  | Missense_Mutation | SNP | C  | T  | 91  | 38  | c.289G>A        | c.(289-291)GAG>AAG   | p.E97K         |
| Pat_26 | Pre-Treatment | BCOR    | 54880  | 37 | X | 39934294  | 39934294  | Missense_Mutation | SNP | C  | T  | 4   | 99  | c.305G>A        | c.(304-306)CGG>CAG   | p.R102Q        |
| Pat_26 | Pre-Treatment | EBP     | 10682  | 37 | X | 48386759  | 48386759  | Missense_Mutation | SNP | C  | T  | 13  | 8   | c.607C>T        | c.(607-609)CTT>TTT   | p.L203F        |
| Pat_26 | Pre-Treatment | SHROOM4 | 57477  | 37 | X | 50351180  | 50351180  | Missense_Mutation | SNP | T  | C  | 3   | 51  | c.2962A>G       | c.(2962-2964)ATG>GTG | p.M988V        |
| Pat_26 | Pre-Treatment | MTMR8   | 55613  | 37 | X | 63548752  | 63548752  | Missense_Mutation | SNP | G  | A  | 13  | 3   | c.1381C>T       | c.(1381-1383)CCT>TCT | p.P461S        |
| Pat_26 | Pre-Treatment | GJB1    | 2705   | 37 | X | 70444122  | 70444122  | Missense_Mutation | SNP | G  | A  | 4   | 164 | c.565G>A        | c.(565-567)GTC>ATC   | p.V189I        |
| Pat_26 | Pre-Treatment | ACRC    | 93953  | 37 | X | 70823920  | 70823920  | Missense_Mutation | SNP | C  | T  | 7   | 112 | c.793C>T        | c.(793-795)CCC>TCC   | p.P265S        |
| Pat_26 | Pre-Treatment | PHKA1   | 5255   | 37 | X | 71802396  | 71802396  | Missense_Mutation | SNP | C  | T  | 4   | 59  | c.3350G>A       | c.(3349-3351)CGT>CAT | p.R1117H       |
| Pat_26 | Pre-Treatment | BRWD3   | 254065 | 37 | X | 79943625  | 79943625  | Splice_Site       | SNP | C  | T  | 55  | 26  | c.3808_splice   | c.e34-1              | p.D1270_splice |
| Pat_26 | Pre-Treatment | BRWD3   | 254065 | 37 | X | 79978255  | 79978255  | Missense_Mutation | SNP | T  | A  | 4   | 79  | c.1682A>T       | c.(1681-1683)TAT>TTT | p.Y561F        |
| Pat_26 | Pre-Treatment | KLHL4   | 56062  | 37 | X | 86880764  | 86880764  | Missense_Mutation | SNP | T  | C  | 3   | 44  | c.1292T>C       | c.(1291-1293)CTT>CCT | p.L431P        |
| Pat_26 | Pre-Treatment | TAF7L   | 54457  | 37 | X | 100547925 | 100547925 | Missense_Mutation | SNP | G  | A  | 5   | 341 | c.109C>T        | c.(109-111)CGT>TGT   | p.R37C         |
| Pat_26 | Pre-Treatment | BTK     | 695    | 37 | X | 100611788 | 100611788 | Missense_Mutation | SNP | C  | T  | 4   | 149 | c.1333G>A       | c.(1333-1335)GAA>AAA | p.E445K        |
| Pat_26 | Pre-Treatment | NRK     | 203447 | 37 | X | 105159770 | 105159770 | Missense_Mutation | SNP | C  | T  | 58  | 15  | c.2398C>T       | c.(2398-2400)CAT>TAT | p.H800Y        |
| Pat_26 | Pre-Treatment | VSIG1   | 340547 | 37 | X | 107320552 | 107320552 | Nonsense_Mutation | SNP | G  | T  | 127 | 45  | c.1105G>T       | c.(1105-1107)GAG>TAG | p.E369*        |
| Pat_26 | Pre-Treatment | COL4A5  | 1287   | 37 | X | 107858195 | 107858195 | Missense_Mutation | SNP | G  | A  | 46  | 23  | c.2450G>A       | c.(2449-2451)GGA>GAA | p.G817E        |
| Pat_26 | Pre-Treatment | COL4A5  | 1287   | 37 | X | 107923915 | 107923915 | Missense_Mutation | SNP | C  | T  | 41  | 18  | c.3949C>T       | c.(3949-3951)CCT>TCT | p.P1317S       |
| Pat_26 | Pre-Treatment | IRS4    | 8471   | 37 | X | 107977986 | 107977986 | Missense_Mutation | SNP | C  | T  | 6   | 348 | c.1589G>A       | c.(1588-1590)CGA>CAA | p.R530Q        |

|        |                 |          |           |    |   |           |           |                   |     |    |    |    |     |                 |                      |          |
|--------|-----------------|----------|-----------|----|---|-----------|-----------|-------------------|-----|----|----|----|-----|-----------------|----------------------|----------|
| Pat_26 | Pre-Treatment   | TMEM164  | 84187     | 37 | X | 109416580 | 109416580 | Missense_Mutation | SNP | G  | A  | 7  | 153 | c.795G>A        | c.(793-795)ATG>ATA   | p.M265I  |
| Pat_26 | Pre-Treatment   | SLC6A14  | 11254     | 37 | X | 115582616 | 115582616 | Missense_Mutation | SNP | G  | A  | 29 | 15  | c.940G>A        | c.(940-942)GAT>AAT   | p.D314N  |
| Pat_26 | Pre-Treatment   | NKRF     | 55922     | 37 | X | 118723625 | 118723625 | Missense_Mutation | SNP | C  | T  | 5  | 253 | c.1763G>A       | c.(1762-1764)CGG>CAG | p.R588Q  |
| Pat_26 | Pre-Treatment   | OCRL     | 4952      | 37 | X | 128722937 | 128722937 | Missense_Mutation | SNP | G  | A  | 5  | 202 | c.2416G>A       | c.(2416-2418)GAG>AAG | p.E806K  |
| Pat_26 | Pre-Treatment   | IGSF1    | 3547      | 37 | X | 130410004 | 130410004 | Missense_Mutation | SNP | T  | A  | 70 | 21  | c.2827A>T       | c.(2827-2829)ATC>TTC | p.I943F  |
| Pat_26 | Pre-Treatment   | GPR112   | 139378    | 37 | X | 135427418 | 135427418 | Missense_Mutation | SNP | C  | T  | 4  | 115 | c.1553C>T       | c.(1552-1554)CCT>CTT | p.P518L  |
| Pat_26 | Pre-Treatment   | BRS3     | 680       | 37 | X | 135574449 | 135574449 | Missense_Mutation | SNP | C  | T  | 5  | 184 | c.1115C>T       | c.(1114-1116)CCG>CTG | p.P372L  |
| Pat_26 | Pre-Treatment   | MAGEC1   | 9947      | 37 | X | 140993780 | 140993780 | Missense_Mutation | SNP | C  | T  | 8  | 370 | c.590C>T        | c.(589-591)CCA>CTA   | p.P197L  |
| Pat_26 | Pre-Treatment   | MAGEC1   | 9947      | 37 | X | 140994583 | 140994583 | Nonsense_Mutation | SNP | A  | T  | 9  | 162 | c.1393A>T       | c.(1393-1395)AGA>TGA | p.R465*  |
| Pat_26 | Pre-Treatment   | MAGEC1   | 9947      | 37 | X | 140994585 | 140994585 | Missense_Mutation | SNP | A  | T  | 9  | 165 | c.1395A>T       | c.(1393-1395)AGA>AGT | p.R465S  |
| Pat_26 | Pre-Treatment   | MAGEC1   | 9947      | 37 | X | 140995273 | 140995273 | Missense_Mutation | SNP | C  | T  | 40 | 13  | c.2083C>T       | c.(2083-2085)CCT>TCT | p.P695S  |
| Pat_26 | Pre-Treatment   | FLNA     | 2316      | 37 | X | 153593043 | 153593043 | Missense_Mutation | SNP | C  | T  | 4  | 120 | c.1873G>A       | c.(1873-1875)GAC>AAC | p.D625N  |
| Pat_26 | Post-Resistance | ATAD3B   | 83858     | 37 | 1 | 1431000   | 1431000   | Missense_Mutation | SNP | C  | T  | 3  | 60  | c.1750C>T       | c.(1750-1752)CCC>TCC | p.P584S  |
| Pat_26 | Post-Resistance | CHD5     | 26038     | 37 | 1 | 6208967   | 6208967   | Missense_Mutation | SNP | T  | A  | 15 | 272 | c.1330A>T       | c.(1330-1332)AAC>TAC | p.N444Y  |
| Pat_26 | Post-Resistance | RPL22    | 6146      | 37 | 1 | 6253023   | 6253023   | Missense_Mutation | SNP | A  | G  | 35 | 210 | c.209T>C        | c.(208-210)ATC>ACC   | p.I70T   |
| Pat_26 | Post-Resistance | CLSTN1   | 22883     | 37 | 1 | 9804587   | 9804587   | Missense_Mutation | SNP | C  | T  | 12 | 112 | c.1100G>A       | c.(1099-1101)GGC>GAC | p.G367D  |
| Pat_26 | Post-Resistance | PRAMEF12 | 390999    | 37 | 1 | 12835134  | 12835134  | Missense_Mutation | SNP | G  | A  | 10 | 113 | c.124G>A        | c.(124-126)GAG>AAG   | p.E42K   |
| Pat_26 | Post-Resistance | TMEM82   | 388595    | 37 | 1 | 16069534  | 16069534  | Missense_Mutation | SNP | G  | A  | 19 | 202 | c.181G>A        | c.(181-183)GAA>AAA   | p.E61K   |
| Pat_26 | Post-Resistance | CLCNKB   | 1188      | 37 | 1 | 16382951  | 16382951  | Missense_Mutation | SNP | C  | T  | 38 | 654 | c.1964C>T       | c.(1963-1965)TCC>TTC | p.S655F  |
| Pat_26 | Post-Resistance | HSPG2    | 3339      | 37 | 1 | 22166016  | 22166016  | Missense_Mutation | SNP | G  | A  | 15 | 84  | c.9737C>T       | c.(9736-9738)TCC>TTC | p.S3246F |
| Pat_26 | Post-Resistance | GMEB1    | 10691     | 37 | 1 | 29019522  | 29019522  | Nonsense_Mutation | SNP | G  | A  | 20 | 192 | c.435G>A        | c.(433-435)TGG>TGA   | p.W145*  |
| Pat_26 | Post-Resistance | MTF1     | 4520      | 37 | 1 | 38281155  | 38281155  | Missense_Mutation | SNP | G  | A  | 6  | 151 | c.1915C>T       | c.(1915-1917)CGG>TGG | p.R639W  |
| Pat_26 | Post-Resistance | ZSWIM5   | 57643     | 37 | 1 | 45500051  | 45500051  | Nonsense_Mutation | SNP | C  | T  | 33 | 400 | c.2382G>A       | c.(2380-2382)TGG>TGA | p.W794*  |
| Pat_26 | Post-Resistance | CYB5RL   | 606495    | 37 | 1 | 54653410  | 54653411  | Missense_Mutation | DNP | CC | TT | 5  | 122 | c.349_350GG>AA  | c.(349-351)GGG>AAG   | p.G117K  |
| Pat_26 | Post-Resistance | C1orf173 | 127254    | 37 | 1 | 75055569  | 75055569  | Missense_Mutation | SNP | T  | G  | 7  | 151 | c.1922A>C       | c.(1921-1923)GAA>GCA | p.E641A  |
| Pat_26 | Post-Resistance | CLCA4    | 22802     | 37 | 1 | 87025931  | 87025931  | Missense_Mutation | SNP | G  | A  | 24 | 332 | c.338G>A        | c.(337-339)AGA>AAA   | p.R113K  |
| Pat_26 | Post-Resistance | CCBL2    | 56267     | 37 | 1 | 89420900  | 89420900  | Missense_Mutation | SNP | G  | A  | 4  | 128 | c.796C>T        | c.(796-798)CCA>TCA   | p.P266S  |
| Pat_26 | Post-Resistance | DBT      | 1629      | 37 | 1 | 100715333 | 100715334 | Missense_Mutation | DNP | CC | TT | 14 | 408 | c.43_44GG>AA    | c.(43-45)GGG>AAG     | p.G15K   |
| Pat_26 | Post-Resistance | COL11A1  | 1301      | 37 | 1 | 103488309 | 103488309 | Missense_Mutation | SNP | T  | C  | 23 | 212 | c.1234A>G       | c.(1234-1236)ACA>GCA | p.T412A  |
| Pat_26 | Post-Resistance | EPS8L3   | 79574     | 37 | 1 | 110301230 | 110301230 | Missense_Mutation | SNP | C  | T  | 4  | 104 | c.517G>A        | c.(517-519)GAA>AAA   | p.E173K  |
| Pat_26 | Post-Resistance | NBPF10   | 100132406 | 37 | 1 | 145362111 | 145362111 | Missense_Mutation | SNP | T  | G  | 7  | 271 | c.9644T>G       | c.(9643-9645)CTG>CGG | p.L3215R |
| Pat_26 | Post-Resistance | TCHHL1   | 126637    | 37 | 1 | 152058977 | 152058977 | Missense_Mutation | SNP | C  | T  | 37 | 237 | c.1181G>A       | c.(1180-1182)AGG>AAG | p.R394K  |
| Pat_26 | Post-Resistance | HRNR     | 388697    | 37 | 1 | 152188190 | 152188191 | Missense_Mutation | DNP | CC | TT | 37 | 813 | c.5914_5915GG>A | c.(5914-5916)GGG>AAG | p.G1972K |
| Pat_26 | Post-Resistance | IVL      | 3713      | 37 | 1 | 152882733 | 152882733 | Missense_Mutation | SNP | G  | A  | 9  | 45  | c.460G>A        | c.(460-462)GAG>AAG   | p.E154K  |
| Pat_26 | Post-Resistance | UBQLN4   | 56893     | 37 | 1 | 156023426 | 156023426 | Missense_Mutation | SNP | T  | C  | 21 | 83  | c.67A>G         | c.(67-69)AAG>GAG     | p.K23E   |
| Pat_26 | Post-Resistance | IQGAP3   | 128239    | 37 | 1 | 156526371 | 156526371 | Missense_Mutation | SNP | G  | A  | 18 | 127 | c.1244C>T       | c.(1243-1245)TCG>TTG | p.S415L  |
| Pat_26 | Post-Resistance | OR10K1   | 391109    | 37 | 1 | 158435545 | 158435545 | Missense_Mutation | SNP | T  | C  | 20 | 404 | c.194T>C        | c.(193-195)ATC>ACC   | p.I65T   |
| Pat_26 | Post-Resistance | SLAMF9   | 89886     | 37 | 1 | 159922273 | 159922273 | Missense_Mutation | SNP | C  | T  | 76 | 467 | c.443G>A        | c.(442-444)GGT>GAT   | p.G148D  |
| Pat_26 | Post-Resistance | FAM5B    | 57795     | 37 | 1 | 177249624 | 177249624 | Missense_Mutation | SNP | G  | A  | 7  | 114 | c.1312G>A       | c.(1312-1314)GAA>AAA | p.E438K  |
| Pat_26 | Post-Resistance | KIF14    | 9928      | 37 | 1 | 200574423 | 200574423 | Missense_Mutation | SNP | C  | G  | 4  | 128 | c.1734G>C       | c.(1732-1734)ATG>ATC | p.M578I  |
| Pat_26 | Post-Resistance | PLEKHA6  | 22874     | 37 | 1 | 204214787 | 204214787 | Missense_Mutation | SNP | C  | T  | 19 | 201 | c.1988G>A       | c.(1987-1989)AGG>AAG | p.R663K  |
| Pat_26 | Post-Resistance | LRRN2    | 10446     | 37 | 1 | 204588452 | 204588452 | Missense_Mutation | SNP | C  | T  | 10 | 103 | c.669G>A        | c.(667-669)ATG>ATA   | p.M223I  |
| Pat_26 | Post-Resistance | CR2      | 1380      | 37 | 1 | 207642243 | 207642243 | Missense_Mutation | SNP | G  | A  | 6  | 83  | c.733G>A        | c.(733-735)GGG>AGG   | p.G245R  |
| Pat_26 | Post-Resistance | IARS2    | 55699     | 37 | 1 | 220287738 | 220287738 | Missense_Mutation | SNP | G  | T  | 61 | 462 | c.1562G>T       | c.(1561-1563)TGT>TTT | p.C521F  |
| Pat_26 | Post-Resistance | PCNXL2   | 80003     | 37 | 1 | 233231594 | 233231594 | Missense_Mutation | SNP | G  | A  | 5  | 49  | c.3853C>T       | c.(3853-3855)CAC>TAC | p.H1285Y |
| Pat_26 | Post-Resistance | ACTN2    | 88        | 37 | 1 | 236911034 | 236911034 | Nonsense_Mutation | SNP | C  | T  | 13 | 103 | c.1474C>T       | c.(1474-1476)CGA>TGA | p.R492*  |
| Pat_26 | Post-Resistance | MTR      | 4548      | 37 | 1 | 236966868 | 236966868 | Missense_Mutation | SNP | C  | T  | 24 | 274 | c.175C>T        | c.(175-177)CAT>TAT   | p.H59Y   |

|        |                 |          |        |    |    |           |           |                   |     |    |    |    |     |                                        |                        |               |
|--------|-----------------|----------|--------|----|----|-----------|-----------|-------------------|-----|----|----|----|-----|----------------------------------------|------------------------|---------------|
| Pat_26 | Post-Resistance | IL2RA    | 3559   | 37 | 10 | 6066213   | 6066213   | Missense_Mutation | SNP | G  | A  | 9  | 125 | c.361C>T                               | c.(361-363)CTT>TTT     | p.L121F       |
| Pat_26 | Post-Resistance | KIAA1217 | 56243  | 37 | 10 | 24822108  | 24822108  | Missense_Mutation | SNP | C  | T  | 12 | 136 | c.3356C>T                              | c.(3355-3357)TCC>TTC   | p.S1119F      |
| Pat_26 | Post-Resistance | GPR158   | 57512  | 37 | 10 | 25701332  | 25701332  | Missense_Mutation | SNP | C  | T  | 44 | 644 | c.1265C>T                              | c.(1264-1266)TCC>TTC   | p.S422F       |
| Pat_26 | Post-Resistance | MYO3A    | 53904  | 37 | 10 | 26312962  | 26312962  | Missense_Mutation | SNP | C  | A  | 20 | 560 | c.743C>A                               | c.(742-744)CCA>CAA     | p.P248Q       |
| Pat_26 | Post-Resistance | KIAA1462 | 57608  | 37 | 10 | 30318160  | 30318160  | Missense_Mutation | SNP | C  | T  | 36 | 248 | c.917G>A                               | c.(916-918)GGA>GAA     | p.G306E       |
| Pat_26 | Post-Resistance | ZNF248   | 57209  | 37 | 10 | 38120643  | 38120643  | Missense_Mutation | SNP | G  | A  | 25 | 224 | c.1640C>T                              | c.(1639-1641)CCG>CTG   | p.P547L       |
| Pat_26 | Post-Resistance | RBP3     | 5949   | 37 | 10 | 48389305  | 48389305  | Missense_Mutation | SNP | C  | T  | 6  | 52  | c.1573G>A                              | c.(1573-1575)GAG>AAG   | p.E525K       |
| Pat_26 | Post-Resistance | RBP3     | 5949   | 37 | 10 | 48389757  | 48389757  | Missense_Mutation | SNP | G  | A  | 6  | 85  | c.1121C>T                              | c.(1120-1122)GCC>GTC   | p.A374V       |
| Pat_26 | Post-Resistance | ANK3     | 288    | 37 | 10 | 61898789  | 61898789  | Missense_Mutation | SNP | C  | T  | 27 | 257 | c.2671G>A                              | c.(2671-2673)GAA>AAA   | p.E891K       |
| Pat_26 | Post-Resistance | ANK3     | 288    | 37 | 10 | 61941146  | 61941146  | Nonsense_Mutation | SNP | G  | A  | 11 | 276 | c.2125C>T                              | c.(2125-2127)CGA>TGA   | p.R709*       |
| Pat_26 | Post-Resistance | LRRTM3   | 347731 | 37 | 10 | 68687639  | 68687640  | Missense_Mutation | DNP | CC | TT | 6  | 83  | c.965_966CC>TT                         | c.(964-966)TCC>TTT     | p.S322F       |
| Pat_26 | Post-Resistance | STOX1    | 219736 | 37 | 10 | 70644422  | 70644422  | Missense_Mutation | SNP | C  | G  | 24 | 197 | c.870C>G                               | c.(868-870)CAC>CAG     | p.H290Q       |
| Pat_26 | Post-Resistance | SEC24C   | 9632   | 37 | 10 | 75519901  | 75519901  | Nonsense_Mutation | SNP | C  | T  | 29 | 359 | c.607C>T                               | c.(607-609)CAG>TAG     | p.Q203*       |
| Pat_26 | Post-Resistance | PIPSL    | 266971 | 37 | 10 | 95719536  | 95719536  | Missense_Mutation | SNP | C  | T  | 12 | 156 | c.1618G>A                              | c.(1618-1620)GAT>AAT   | p.D540N       |
| Pat_26 | Post-Resistance | CYP2C19  | 1557   | 37 | 10 | 96609752  | 96609752  | Missense_Mutation | SNP | C  | T  | 21 | 309 | c.1228C>T                              | c.(1228-1230)CGT>TGT   | p.R410C       |
| Pat_26 | Post-Resistance | C10orf79 | 80217  | 37 | 10 | 105890056 | 105890056 | Missense_Mutation | SNP | T  | G  | 12 | 180 | c.4839A>C                              | c.(4837-4839)AAA>AAC   | p.K1613N      |
| Pat_26 | Post-Resistance | WDR11    | 55717  | 37 | 10 | 122626180 | 122626180 | Missense_Mutation | SNP | C  | T  | 56 | 399 | c.1094C>T                              | c.(1093-1095)CCT>CTT   | p.P365L       |
| Pat_26 | Post-Resistance | TACC2    | 10579  | 37 | 10 | 123988957 | 123988957 | Missense_Mutation | SNP | G  | A  | 35 | 798 | c.7993G>A                              | c.(7993-7995)GAC>AAC   | p.D2665N      |
| Pat_26 | Post-Resistance | DMBT1    | 1755   | 37 | 10 | 124350190 | 124350190 | Missense_Mutation | SNP | C  | T  | 30 | 379 | c.2117C>T                              | c.(2116-2118)TCC>TTC   | p.S706F       |
| Pat_26 | Post-Resistance | CUZD1    | 50624  | 37 | 10 | 124595694 | 124595694 | Missense_Mutation | SNP | C  | A  | 11 | 298 | c.990G>T                               | c.(988-990)AAG>AAT     | p.K330N       |
| Pat_26 | Post-Resistance | C10orf90 | 118611 | 37 | 10 | 128193393 | 128193393 | Nonsense_Mutation | SNP | C  | A  | 11 | 102 | c.376G>T                               | c.(376-378)GAG>TAG     | p.E126*       |
| Pat_26 | Post-Resistance | KNDC1    | 85442  | 37 | 10 | 135013019 | 135013019 | Missense_Mutation | SNP | C  | T  | 9  | 135 | c.2816C>T                              | c.(2815-2817)TCC>TTC   | p.S939F       |
| Pat_26 | Post-Resistance | SYCE1    | 93426  | 37 | 10 | 135369530 | 135369530 | Missense_Mutation | SNP | C  | T  | 8  | 191 | c.550G>A                               | c.(550-552)GAG>AAG     | p.E184K       |
| Pat_26 | Post-Resistance | OR51Q1   | 390061 | 37 | 11 | 5444196   | 5444196   | Missense_Mutation | SNP | C  | T  | 31 | 284 | c.766C>T                               | c.(766-768)CCC>TCC     | p.P256S       |
| Pat_26 | Post-Resistance | OR52N4   | 390072 | 37 | 11 | 5776203   | 5776203   | Missense_Mutation | SNP | G  | A  | 12 | 148 | c.233G>A                               | c.(232-234)AGT>AAT     | p.S78N        |
| Pat_26 | Post-Resistance | RBMXL2   | 27288  | 37 | 11 | 7111168   | 7111168   | Missense_Mutation | SNP | C  | T  | 6  | 92  | c.817C>T                               | c.(817-819)CAT>TAT     | p.H273Y       |
| Pat_26 | Post-Resistance | ARNTL    | 406    | 37 | 11 | 13397274  | 13397275  | Missense_Mutation | DNP | AG | TA | 7  | 77  | c.1290_1291AG>TA/1288-1293)GAAGTA>GAT/ | c.430_431EV>C          |               |
| Pat_26 | Post-Resistance | PRDM11   | 56981  | 37 | 11 | 45246185  | 45246185  | Missense_Mutation | SNP | C  | T  | 37 | 316 | c.1262C>T                              | c.(1261-1263)TCA>TTA   | p.S421L       |
| Pat_26 | Post-Resistance | GYLTL1B  | 120071 | 37 | 11 | 45949470  | 45949470  | Splice_Site       | SNP | G  | A  | 14 | 123 | c.1605_splice                          | c.e12-1                | p.R535_splice |
| Pat_26 | Post-Resistance | FOLH1    | 2346   | 37 | 11 | 49175447  | 49175447  | Missense_Mutation | SNP | C  | T  | 13 | 153 | c.1921G>A                              | c.(1921-1923)GAA>AAA   | p.E641K       |
| Pat_26 | Post-Resistance | OR4A15   | 81328  | 37 | 11 | 55136144  | 55136144  | Missense_Mutation | SNP | G  | A  | 9  | 107 | c.785G>A                               | c.(784-786)CGA>CAA     | p.R262Q       |
| Pat_26 | Post-Resistance | ZDHHC5   | 25921  | 37 | 11 | 57456099  | 57456099  | Nonsense_Mutation | SNP | C  | T  | 6  | 289 | c.346C>T                               | c.(346-348)CGA>TGA     | p.R116*       |
| Pat_26 | Post-Resistance | OR5B3    | 441608 | 37 | 11 | 58170239  | 58170239  | Missense_Mutation | SNP | G  | A  | 4  | 65  | c.644C>T                               | c.(643-645)TCC>TTC     | p.S215F       |
| Pat_26 | Post-Resistance | MS4A4A   | 51338  | 37 | 11 | 60064709  | 60064709  | Missense_Mutation | SNP | G  | A  | 31 | 234 | c.241G>A                               | c.(241-243)GGA>AGA     | p.G81R        |
| Pat_26 | Post-Resistance | FADS2    | 9415   | 37 | 11 | 61608002  | 61608002  | Missense_Mutation | SNP | A  | C  | 38 | 357 | c.515A>C                               | c.(514-516)CAG>CCG     | p.Q172P       |
| Pat_26 | Post-Resistance | SLC22A6  | 9356   | 37 | 11 | 62748482  | 62748483  | Missense_Mutation | DNP | GG | AA | 6  | 143 | c.1011_1012CC>T                        | c.009-1014)CACCTC>CATT | p.L338F       |
| Pat_26 | Post-Resistance | SIPA1    | 6494   | 37 | 11 | 65413346  | 65413346  | Missense_Mutation | SNP | C  | G  | 9  | 316 | c.1181C>G                              | c.(1180-1182)TCC>TGC   | p.S394C       |
| Pat_26 | Post-Resistance | KLC2     | 64837  | 37 | 11 | 66030347  | 66030347  | Missense_Mutation | SNP | C  | T  | 52 | 607 | c.592C>T                               | c.(592-594)CTC>TTC     | p.L198F       |
| Pat_26 | Post-Resistance | CCS      | 9973   | 37 | 11 | 66373047  | 66373047  | Missense_Mutation | SNP | G  | A  | 15 | 101 | c.655G>A                               | c.(655-657)GGG>AGG     | p.G219R       |
| Pat_26 | Post-Resistance | FGF19    | 9965   | 37 | 11 | 69518121  | 69518121  | Missense_Mutation | SNP | T  | C  | 8  | 43  | c.244A>G                               | c.(244-246)ATC>GTC     | p.I82V        |
| Pat_26 | Post-Resistance | INPPL1   | 3636   | 37 | 11 | 71946922  | 71946922  | Missense_Mutation | SNP | C  | T  | 33 | 192 | c.2771C>T                              | c.(2770-2772)GCC>GTC   | p.A924V       |
| Pat_26 | Post-Resistance | RELT     | 84957  | 37 | 11 | 73105710  | 73105710  | Missense_Mutation | SNP | C  | T  | 10 | 89  | c.977C>T                               | c.(976-978)CCG>CTG     | p.P326L       |
| Pat_26 | Post-Resistance | HEPHL1   | 341208 | 37 | 11 | 93797538  | 93797538  | Nonsense_Mutation | SNP | C  | T  | 7  | 99  | c.670C>T                               | c.(670-672)CGA>TGA     | p.R224*       |
| Pat_26 | Post-Resistance | GRIA4    | 2893   | 37 | 11 | 105483095 | 105483096 | Missense_Mutation | DNP | CC | TT | 11 | 148 | c.181_182CC>TT                         | c.(181-183)CCT>TTT     | p.P61F        |
| Pat_26 | Post-Resistance | SIK2     | 23235  | 37 | 11 | 111590703 | 111590703 | Missense_Mutation | SNP | C  | A  | 4  | 110 | c.1471C>A                              | c.(1471-1473)CAA>AAA   | p.Q491K       |
| Pat_26 | Post-Resistance | IGSF9B   | 22997  | 37 | 11 | 133802070 | 133802070 | Missense_Mutation | SNP | C  | T  | 3  | 20  | c.1006G>A                              | c.(1006-1008)GTG>ATG   | p.V336M       |
| Pat_26 | Post-Resistance | MLF2     | 8079   | 37 | 12 | 6861105   | 6861105   | Missense_Mutation | SNP | G  | A  | 32 | 366 | c.166C>T                               | c.(166-168)CGC>TGC     | p.R56C        |



|        |                 |           |        |    |    |           |           |                        |     |    |    |    |     |                                      |                        |               |
|--------|-----------------|-----------|--------|----|----|-----------|-----------|------------------------|-----|----|----|----|-----|--------------------------------------|------------------------|---------------|
| Pat_26 | Post-Resistance | CLEC4E    | 26253  | 37 | 12 | 8687260   | 8687260   | Missense_Mutation      | SNP | G  | A  | 6  | 119 | c.634C>T                             | c.(634-636)CCT>TCT     | p.P212S       |
| Pat_26 | Post-Resistance | A2M       | 2      | 37 | 12 | 9264799   | 9264799   | Missense_Mutation      | SNP | G  | A  | 20 | 147 | c.439C>T                             | c.(439-441)CGT>TGT     | p.R147C       |
| Pat_26 | Post-Resistance | PRB4      | 5545   | 37 | 12 | 11461775  | 11461775  | Missense_Mutation      | SNP | G  | T  | 31 | 399 | c.142C>A                             | c.(142-144)CAA>AAA     | p.Q48K        |
| Pat_26 | Post-Resistance | PIK3C2G   | 5288   | 37 | 12 | 18552721  | 18552721  | Missense_Mutation      | SNP | C  | T  | 5  | 68  | c.2132C>T                            | c.(2131-2133)ACC>ATC   | p.T711I       |
| Pat_26 | Post-Resistance | SLCO1C1   | 53919  | 37 | 12 | 20874764  | 20874764  | Missense_Mutation      | SNP | C  | T  | 16 | 120 | c.802C>T                             | c.(802-804)CCC>TCC     | p.P268S       |
| Pat_26 | Post-Resistance | LRRK2     | 120892 | 37 | 12 | 40677921  | 40677921  | Nonsense_Mutation      | SNP | T  | G  | 8  | 82  | c.2486T>G                            | c.(2485-2487)TTA>TGA   | p.L829*       |
| Pat_26 | Post-Resistance | IRAK4     | 51135  | 37 | 12 | 44165165  | 44165165  | Missense_Mutation      | SNP | C  | T  | 5  | 145 | c.304C>T                             | c.(304-306)CCA>TCA     | p.P102S       |
| Pat_26 | Post-Resistance | KRT75     | 9119   | 37 | 12 | 52825359  | 52825359  | Missense_Mutation      | SNP | C  | T  | 8  | 247 | c.838G>A                             | c.(838-840)GAG>AAG     | p.E280K       |
| Pat_26 | Post-Resistance | KRT74     | 121391 | 37 | 12 | 52960769  | 52960769  | Missense_Mutation      | SNP | C  | T  | 20 | 370 | c.1574G>A                            | c.(1573-1575)AGG>AAG   | p.R525K       |
| Pat_26 | Post-Resistance | NAV3      | 89795  | 37 | 12 | 78400838  | 78400838  | Missense_Mutation      | SNP | C  | T  | 10 | 138 | c.1520C>T                            | c.(1519-1521)CCT>CTT   | p.P507L       |
| Pat_26 | Post-Resistance | C12orf51  | 283450 | 37 | 12 | 112673400 | 112673400 | Missense_Mutation      | SNP | G  | A  | 6  | 69  | c.4367C>T                            | c.(4366-4368)CCC>CTC   | p.P1456L      |
| Pat_26 | Post-Resistance | NOS1      | 4842   | 37 | 12 | 117655918 | 117655918 | Missense_Mutation      | SNP | C  | T  | 24 | 740 | c.4222G>A                            | c.(4222-4224)GAA>AAA   | p.E1408K      |
| Pat_26 | Post-Resistance | SRRM4     | 84530  | 37 | 12 | 119592047 | 119592047 | Splice_Site            | SNP | G  | A  | 3  | 12  | c.1392_splice                        | c.e12-1                | p.R464_splice |
| Pat_26 | Post-Resistance | DNAH10    | 196385 | 37 | 12 | 124416393 | 124416393 | Missense_Mutation      | SNP | G  | A  | 30 | 215 | c.12773G>A                           | c.(12772-12774)AGG>AAC | p.R4258K      |
| Pat_26 | Post-Resistance | EP400     | 57634  | 37 | 12 | 132535158 | 132535158 | Missense_Mutation      | SNP | C  | T  | 19 | 435 | c.7352C>T                            | c.(7351-7353)CCC>CTC   | p.P2451L      |
| Pat_26 | Post-Resistance | TPTE2     | 93492  | 37 | 13 | 20010385  | 20010385  | Missense_Mutation      | SNP | C  | T  | 8  | 33  | c.1097G>A                            | c.(1096-1098)GGA>GAA   | p.G366E       |
| Pat_26 | Post-Resistance | CENPJ     | 55835  | 37 | 13 | 25479499  | 25479499  | Nonsense_Mutation      | SNP | G  | A  | 26 | 281 | c.2677C>T                            | c.(2677-2679)CAA>TAA   | p.Q893*       |
| Pat_26 | Post-Resistance | SPG20     | 23111  | 37 | 13 | 36909531  | 36909531  | Missense_Mutation      | SNP | G  | A  | 5  | 43  | c.437C>T                             | c.(436-438)TCA>TTA     | p.S146L       |
| Pat_26 | Post-Resistance | C13orf18  | 80183  | 37 | 13 | 47011869  | 47011869  | Translation_Start_Site | SNP | C  | T  | 6  | 38  | c.-604G>A                            | c.(604-602)GCGTG>GCATG |               |
| Pat_26 | Post-Resistance | CHD8      | 57680  | 37 | 14 | 21873900  | 21873901  | Missense_Mutation      | DNP | CC | TA | 41 | 617 | c.2193_2194GG>T,191-2196)GGGGAT>GGT, |                        | p.D732N       |
| Pat_26 | Post-Resistance | SALL2     | 6297   | 37 | 14 | 21992852  | 21992852  | Missense_Mutation      | SNP | C  | T  | 5  | 65  | c.1010G>A                            | c.(1009-1011)CGA>CAA   | p.R337Q       |
| Pat_26 | Post-Resistance | ADCY4     | 196883 | 37 | 14 | 24799117  | 24799117  | Missense_Mutation      | SNP | C  | A  | 53 | 634 | c.1166G>T                            | c.(1165-1167)TGG>TTG   | p.W389L       |
| Pat_26 | Post-Resistance | NYNRIN    | 57523  | 37 | 14 | 24877187  | 24877187  | Missense_Mutation      | SNP | G  | T  | 24 | 185 | c.311G>T                             | c.(310-312)TGG>TTG     | p.W104L       |
| Pat_26 | Post-Resistance | C14orf166 | 51637  | 37 | 14 | 52460480  | 52460480  | Missense_Mutation      | SNP | C  | G  | 22 | 213 | c.226C>G                             | c.(226-228)CGA>GGA     | p.R76G        |
| Pat_26 | Post-Resistance | KCNH5     | 27133  | 37 | 14 | 63174459  | 63174459  | Missense_Mutation      | SNP | C  | T  | 24 | 278 | c.2734G>A                            | c.(2734-2736)GAA>AAA   | p.E912K       |
| Pat_26 | Post-Resistance | ESR2      | 2100   | 37 | 14 | 64746815  | 64746815  | Missense_Mutation      | SNP | G  | A  | 50 | 633 | c.419C>T                             | c.(418-420)CCA>CTA     | p.P140L       |
| Pat_26 | Post-Resistance | RDH12     | 145226 | 37 | 14 | 68195937  | 68195938  | Missense_Mutation      | DNP | CC | TT | 42 | 437 | c.688_689CC>TT                       | c.(688-690)CCA>TTA     | p.P230L       |
| Pat_26 | Post-Resistance | BATF      | 10538  | 37 | 14 | 75991472  | 75991472  | Missense_Mutation      | SNP | C  | T  | 7  | 108 | c.109C>T                             | c.(109-111)CGT>TGT     | p.R37C        |
| Pat_26 | Post-Resistance | PTPN21    | 11099  | 37 | 14 | 88945940  | 88945940  | Missense_Mutation      | SNP | G  | C  | 5  | 31  | c.1835C>G                            | c.(1834-1836)CCC>CGC   | p.P612R       |
| Pat_26 | Post-Resistance | KIAA1409  | 57578  | 37 | 14 | 94121601  | 94121601  | Missense_Mutation      | SNP | T  | G  | 27 | 157 | c.5956T>G                            | c.(5956-5958)TTA>GTA   | p.L1986V      |
| Pat_26 | Post-Resistance | SERPINA11 | 256394 | 37 | 14 | 94912755  | 94912755  | Missense_Mutation      | SNP | A  | G  | 7  | 173 | c.830T>C                             | c.(829-831)GTC>GCC     | p.V277A       |
| Pat_26 | Post-Resistance | TNFAIP2   | 7127   | 37 | 14 | 103598032 | 103598032 | Missense_Mutation      | SNP | G  | A  | 6  | 44  | c.1355G>A                            | c.(1354-1356)GGC>GAC   | p.G452D       |
| Pat_26 | Post-Resistance | ZFYVE21   | 79038  | 37 | 14 | 104195467 | 104195467 | Missense_Mutation      | SNP | A  | C  | 23 | 205 | c.474A>C                             | c.(472-474)GAA>GAC     | p.E158D       |
| Pat_26 | Post-Resistance | KIF26A    | 26153  | 37 | 14 | 104641431 | 104641431 | Missense_Mutation      | SNP | C  | T  | 3  | 30  | c.2306C>T                            | c.(2305-2307)ACG>ATG   | p.T769M       |
| Pat_26 | Post-Resistance | CASC5     | 57082  | 37 | 15 | 40915757  | 40915757  | Missense_Mutation      | SNP | G  | A  | 4  | 100 | c.3373G>A                            | c.(3373-3375)GAA>AAA   | p.E1125K      |
| Pat_26 | Post-Resistance | CAPN3     | 825    | 37 | 15 | 42652253  | 42652253  | Missense_Mutation      | SNP | G  | A  | 67 | 609 | c.250G>A                             | c.(250-252)GAG>AAG     | p.E84K        |
| Pat_26 | Post-Resistance | PCSK6     | 5046   | 37 | 15 | 101933424 | 101933424 | Missense_Mutation      | SNP | C  | T  | 3  | 36  | c.1202G>A                            | c.(1201-1203)CGA>CAA   | p.R401Q       |
| Pat_26 | Post-Resistance | OR4F15    | 390649 | 37 | 15 | 102359169 | 102359169 | Nonsense_Mutation      | SNP | G  | A  | 17 | 378 | c.780G>A                             | c.(778-780)TGG>TGA     | p.W260*       |
| Pat_26 | Post-Resistance | TMEM8A    | 58986  | 37 | 16 | 427097    | 427097    | Missense_Mutation      | SNP | G  | A  | 25 | 385 | c.575C>T                             | c.(574-576)TCC>TTC     | p.S192F       |
| Pat_26 | Post-Resistance | PIGQ      | 9091   | 37 | 16 | 624666    | 624666    | Missense_Mutation      | SNP | G  | A  | 4  | 26  | c.592G>A                             | c.(592-594)GCC>ACC     | p.A198T       |
| Pat_26 | Post-Resistance | TBC1D24   | 57465  | 37 | 16 | 2546985   | 2546985   | Missense_Mutation      | SNP | C  | T  | 9  | 216 | c.836C>T                             | c.(835-837)ACG>ATG     | p.T279M       |
| Pat_26 | Post-Resistance | GRIN2A    | 2903   | 37 | 16 | 9858471   | 9858471   | Missense_Mutation      | SNP | T  | G  | 11 | 108 | c.2930A>C                            | c.(2929-2931)AAC>ACC   | p.N977T       |
| Pat_26 | Post-Resistance | DEXI      | 28955  | 37 | 16 | 11035603  | 11035603  | Missense_Mutation      | SNP | A  | G  | 17 | 243 | c.260T>C                             | c.(259-261)CTC>CCC     | p.L87P        |
| Pat_26 | Post-Resistance | TMC7      | 79905  | 37 | 16 | 19049221  | 19049221  | Missense_Mutation      | SNP | G  | A  | 4  | 113 | c.1031G>A                            | c.(1030-1032)CGG>CAG   | p.R344Q       |
| Pat_26 | Post-Resistance | ACSM2B    | 348158 | 37 | 16 | 20559454  | 20559454  | Missense_Mutation      | SNP | G  | A  | 21 | 280 | c.1028C>T                            | c.(1027-1029)CCA>CTA   | p.P343L       |
| Pat_26 | Post-Resistance | ZP2       | 7783   | 37 | 16 | 21213081  | 21213081  | Missense_Mutation      | SNP | G  | A  | 37 | 284 | c.1450C>T                            | c.(1450-1452)CCA>TCA   | p.P484S       |
| Pat_26 | Post-Resistance | SCNN1B    | 6338   | 37 | 16 | 23360188  | 23360188  | Missense_Mutation      | SNP | A  | T  | 5  | 154 | c.268A>T                             | c.(268-270)ATG>TTG     | p.M90L        |

|        |                 |          |        |    |    |          |          |                   |     |    |    |    |     |                |                        |               |
|--------|-----------------|----------|--------|----|----|----------|----------|-------------------|-----|----|----|----|-----|----------------|------------------------|---------------|
| Pat_26 | Post-Resistance | PRKCB    | 5579   | 37 | 16 | 24196465 | 24196465 | Missense_Mutation | SNP | G  | A  | 9  | 249 | c.1567G>A      | c.(1567-1569)GAT>AAT   | p.D523N       |
| Pat_26 | Post-Resistance | ABCC11   | 85320  | 37 | 16 | 48209286 | 48209286 | Missense_Mutation | SNP | G  | A  | 8  | 77  | c.3581C>T      | c.(3580-3582)CCC>CTC   | p.P1194L      |
| Pat_26 | Post-Resistance | HEATR3   | 55027  | 37 | 16 | 50118111 | 50118111 | Missense_Mutation | SNP | C  | T  | 6  | 191 | c.1199C>T      | c.(1198-1200)TCC>TTC   | p.S400F       |
| Pat_26 | Post-Resistance | CDH3     | 1001   | 37 | 16 | 68679319 | 68679319 | Missense_Mutation | SNP | C  | T  | 4  | 104 | c.37C>T        | c.(37-39)CTT>TTT       | p.L13F        |
| Pat_26 | Post-Resistance | ADAMTS18 | 170692 | 37 | 16 | 77359782 | 77359782 | Missense_Mutation | SNP | T  | A  | 9  | 229 | c.2013A>T      | c.(2011-2013)AAA>AAT   | p.K671N       |
| Pat_26 | Post-Resistance | VAT1L    | 57687  | 37 | 16 | 77850891 | 77850891 | Missense_Mutation | SNP | G  | A  | 16 | 290 | c.307G>A       | c.(307-309)GGA>AGA     | p.G103R       |
| Pat_26 | Post-Resistance | KCNG4    | 93107  | 37 | 16 | 84270809 | 84270809 | Missense_Mutation | SNP | C  | T  | 5  | 183 | c.283G>A       | c.(283-285)GAG>AAG     | p.E95K        |
| Pat_26 | Post-Resistance | CRISPLD2 | 83716  | 37 | 16 | 84906599 | 84906599 | Missense_Mutation | SNP | C  | T  | 22 | 367 | c.983C>T       | c.(982-984)TCG>TTG     | p.S328L       |
| Pat_26 | Post-Resistance | ABR      | 29     | 37 | 17 | 953422   | 953422   | Splice_Site       | SNP | C  | T  | 4  | 89  | c.1660_splice  | c.e16-1                | p.E554_splice |
| Pat_26 | Post-Resistance | SMG6     | 23293  | 37 | 17 | 1972173  | 1972173  | Missense_Mutation | SNP | G  | A  | 13 | 165 | c.3734C>T      | c.(3733-3735)CCT>CTT   | p.P1245L      |
| Pat_26 | Post-Resistance | AMAC1L3  | 643664 | 37 | 17 | 7386000  | 7386000  | Missense_Mutation | SNP | G  | A  | 25 | 182 | c.697G>A       | c.(697-699)GGC>AGC     | p.G233S       |
| Pat_26 | Post-Resistance | MYH8     | 4626   | 37 | 17 | 10315967 | 10315967 | Missense_Mutation | SNP | A  | G  | 50 | 649 | c.1226T>C      | c.(1225-1227)GTT>GCT   | p.V409A       |
| Pat_26 | Post-Resistance | MYH4     | 4622   | 37 | 17 | 10356968 | 10356968 | Missense_Mutation | SNP | C  | T  | 47 | 488 | c.2926G>A      | c.(2926-2928)GAG>AAG   | p.E976K       |
| Pat_26 | Post-Resistance | MYH1     | 4619   | 37 | 17 | 10406565 | 10406565 | Missense_Mutation | SNP | C  | T  | 12 | 160 | c.2692G>A      | c.(2692-2694)GAA>AAA   | p.E898K       |
| Pat_26 | Post-Resistance | MYH2     | 4620   | 37 | 17 | 10428264 | 10428264 | Missense_Mutation | SNP | C  | T  | 25 | 310 | c.4781G>A      | c.(4780-4782)AGA>AAA   | p.R1594K      |
| Pat_26 | Post-Resistance | CDRT1    | 374286 | 37 | 17 | 15522784 | 15522784 | Missense_Mutation | SNP | G  | A  | 9  | 672 | c.43C>T        | c.(43-45)CGT>TGT       | p.R15C        |
| Pat_26 | Post-Resistance | C17orf39 | 79018  | 37 | 17 | 17968502 | 17968502 | Missense_Mutation | SNP | C  | T  | 30 | 176 | c.848C>T       | c.(847-849)TCC>TTC     | p.S283F       |
| Pat_26 | Post-Resistance | FBXW10   | 10517  | 37 | 17 | 18647600 | 18647600 | Missense_Mutation | SNP | C  | T  | 30 | 267 | c.43C>T        | c.(43-45)CGT>TGT       | p.R15C        |
| Pat_26 | Post-Resistance | IFT20    | 90410  | 37 | 17 | 26657555 | 26657555 | Splice_Site       | SNP | C  | T  | 26 | 212 | c.128_splice   | c.e3-1                 | p.K43_splice  |
| Pat_26 | Post-Resistance | ACCN1    | 40     | 37 | 17 | 31355368 | 31355368 | Missense_Mutation | SNP | C  | T  | 9  | 122 | c.877G>A       | c.(877-879)GAG>AAG     | p.E293K       |
| Pat_26 | Post-Resistance | SRCIN1   | 80725  | 37 | 17 | 36707439 | 36707439 | Missense_Mutation | SNP | C  | T  | 5  | 33  | c.2914G>A      | c.(2914-2916)GGC>AGC   | p.G972S       |
| Pat_26 | Post-Resistance | STAC2    | 342667 | 37 | 17 | 37369806 | 37369806 | Missense_Mutation | SNP | C  | T  | 36 | 396 | c.947G>A       | c.(946-948)GGA>GAA     | p.G316E       |
| Pat_26 | Post-Resistance | KRT16    | 3868   | 37 | 17 | 39767374 | 39767374 | Missense_Mutation | SNP | C  | T  | 48 | 426 | c.880G>A       | c.(880-882)GAG>AAG     | p.E294K       |
| Pat_26 | Post-Resistance | 4-Sep    | 5414   | 37 | 17 | 56599121 | 56599122 | Missense_Mutation | DNP | GG | AA | 31 | 294 | c.890_891CC>TT | c.(889-891)CCC>CTT     | p.P297L       |
| Pat_26 | Post-Resistance | CA4      | 762    | 37 | 17 | 58235695 | 58235695 | Missense_Mutation | SNP | A  | T  | 19 | 190 | c.632A>T       | c.(631-633)GAG>GTG     | p.E211V       |
| Pat_26 | Post-Resistance | ACE      | 1636   | 37 | 17 | 61570849 | 61570849 | Missense_Mutation | SNP | G  | A  | 21 | 189 | c.2965G>A      | c.(2965-2967)GAA>AAA   | p.E989K       |
| Pat_26 | Post-Resistance | PSMC5    | 5705   | 37 | 17 | 61908260 | 61908260 | Missense_Mutation | SNP | C  | T  | 18 | 193 | c.644C>T       | c.(643-645)TCT>TTT     | p.S215F       |
| Pat_26 | Post-Resistance | TEX2     | 55852  | 37 | 17 | 62271078 | 62271078 | Missense_Mutation | SNP | G  | A  | 5  | 134 | c.2017C>T      | c.(2017-2019)CGC>TGC   | p.R673C       |
| Pat_26 | Post-Resistance | CCDC46   | 201134 | 37 | 17 | 63637111 | 63637111 | Missense_Mutation | SNP | C  | T  | 23 | 269 | c.2770G>A      | c.(2770-2772)GAA>AAA   | p.E924K       |
| Pat_26 | Post-Resistance | CANT1    | 124583 | 37 | 17 | 76993085 | 76993085 | Missense_Mutation | SNP | G  | A  | 61 | 621 | c.620C>T       | c.(619-621)ACC>ATC     | p.T207I       |
| Pat_26 | Post-Resistance | TXNDC2   | 84203  | 37 | 18 | 9886894  | 9886894  | Missense_Mutation | SNP | A  | G  | 9  | 267 | c.418A>G       | c.(418-420)AAA>GAA     | p.K140E       |
| Pat_26 | Post-Resistance | POTEC    | 388468 | 37 | 18 | 14542880 | 14542880 | Missense_Mutation | SNP | G  | A  | 21 | 656 | c.266C>T       | c.(265-267)TCC>TTC     | p.S89F        |
| Pat_26 | Post-Resistance | ROCK1    | 6093   | 37 | 18 | 18586707 | 18586707 | Nonsense_Mutation | SNP | G  | A  | 20 | 359 | c.1591C>T      | c.(1591-1593)CAG>TAG   | p.Q531*       |
| Pat_26 | Post-Resistance | LAMA3    | 3909   | 37 | 18 | 21526172 | 21526172 | Missense_Mutation | SNP | G  | A  | 7  | 189 | c.9275G>A      | c.(9274-9276)GGA>GAA   | p.G3092E      |
| Pat_26 | Post-Resistance | SETBP1   | 26040  | 37 | 18 | 42643613 | 42643613 | Missense_Mutation | SNP | G  | C  | 10 | 30  | c.4741G>C      | c.(4741-4743)GCC>CCC   | p.A1581P      |
| Pat_26 | Post-Resistance | RNF165   | 494470 | 37 | 18 | 44035938 | 44035938 | Missense_Mutation | SNP | G  | A  | 7  | 69  | c.818G>A       | c.(817-819)CGA>CAA     | p.R273Q       |
| Pat_26 | Post-Resistance | STAR6    | 147323 | 37 | 18 | 51863532 | 51863532 | Missense_Mutation | SNP | G  | A  | 7  | 259 | c.230C>T       | c.(229-231)TCA>TTA     | p.S77L        |
| Pat_26 | Post-Resistance | CCBE1    | 147372 | 37 | 18 | 57115221 | 57115221 | Missense_Mutation | SNP | G  | A  | 11 | 189 | c.769C>T       | c.(769-771)CCT>TCT     | p.P257S       |
| Pat_26 | Post-Resistance | SERPINB2 | 5055   | 37 | 18 | 61582740 | 61582740 | Missense_Mutation | SNP | C  | T  | 12 | 197 | c.419C>T       | c.(418-420)TCC>TTC     | p.S140F       |
| Pat_26 | Post-Resistance | ATP9B    | 374868 | 37 | 18 | 77132838 | 77132838 | Missense_Mutation | SNP | C  | T  | 10 | 120 | c.3026C>T      | c.(3025-3027)TCC>TTC   | p.S1009F      |
| Pat_26 | Post-Resistance | NFATC1   | 4772   | 37 | 18 | 77171045 | 77171045 | Missense_Mutation | SNP | C  | T  | 11 | 41  | c.770C>T       | c.(769-771)TCC>TTC     | p.S257F       |
| Pat_26 | Post-Resistance | TJP3     | 27134  | 37 | 19 | 3728653  | 3728653  | Missense_Mutation | SNP | G  | A  | 4  | 80  | c.157G>A       | c.(157-159)GGT>AGT     | p.G53S        |
| Pat_26 | Post-Resistance | TJP3     | 27134  | 37 | 19 | 3734334  | 3734334  | Missense_Mutation | SNP | A  | G  | 7  | 182 | c.986A>G       | c.(985-987)GAC>GGC     | p.D329G       |
| Pat_26 | Post-Resistance | ZFR2     | 23217  | 37 | 19 | 3831498  | 3831498  | Missense_Mutation | SNP | G  | A  | 3  | 14  | c.655C>T       | c.(655-657)CCT>TCT     | p.P219S       |
| Pat_26 | Post-Resistance | RFX2     | 5990   | 37 | 19 | 6013085  | 6013085  | Missense_Mutation | SNP | G  | A  | 16 | 453 | c.811C>T       | c.(811-813)CGT>TGT     | p.R271C       |
| Pat_26 | Post-Resistance | C3       | 718    | 37 | 19 | 6712584  | 6712584  | Missense_Mutation | SNP | G  | A  | 28 | 448 | c.1054C>T      | c.(1054-1056)CCC>TCC   | p.P352S       |
| Pat_26 | Post-Resistance | MUC16    | 94025  | 37 | 19 | 9071925  | 9071925  | Missense_Mutation | SNP | G  | A  | 38 | 551 | c.15521C>T     | c.(15520-15522)TCC>TTC | p.S5174F      |

|        |                 |           |        |    |    |           |           |                   |     |    |    |    |     |                  |                         |                |
|--------|-----------------|-----------|--------|----|----|-----------|-----------|-------------------|-----|----|----|----|-----|------------------|-------------------------|----------------|
| Pat_26 | Post-Resistance | ZNF699    | 374879 | 37 | 19 | 9406866   | 9406866   | Missense_Mutation | SNP | G  | A  | 6  | 216 | c.1214C>T        | c.(1213-1215)TCC>TTC    | p.S405F        |
| Pat_26 | Post-Resistance | SMARCA4   | 6597   | 37 | 19 | 11136975  | 11136975  | Splice_Site       | SNP | G  | A  | 15 | 111 | c.3169_splice    | c.e23-1                 | p.E1057_splice |
| Pat_26 | Post-Resistance | ACP5      | 54     | 37 | 19 | 11688119  | 11688119  | Missense_Mutation | SNP | G  | A  | 4  | 122 | c.14C>T          | c.(13-15)ACG>ATG        | p.T5M          |
| Pat_26 | Post-Resistance | ZNF625    | 90589  | 37 | 19 | 12257002  | 12257002  | Missense_Mutation | SNP | C  | T  | 7  | 117 | c.31G>A          | c.(31-33)GAT>AAT        | p.D11N         |
| Pat_26 | Post-Resistance | TRMT1     | 55621  | 37 | 19 | 13216194  | 13216194  | Missense_Mutation | SNP | C  | T  | 49 | 411 | c.1720G>A        | c.(1720-1722)GAA>AAA    | p.E574K        |
| Pat_26 | Post-Resistance | LPHN1     | 22859  | 37 | 19 | 14273589  | 14273589  | Missense_Mutation | SNP | C  | G  | 4  | 95  | c.1039G>C        | c.(1039-1041)GCC>CCC    | p.A347P        |
| Pat_26 | Post-Resistance | ELL       | 8178   | 37 | 19 | 18572645  | 18572645  | Missense_Mutation | SNP | G  | A  | 10 | 288 | c.487C>T         | c.(487-489)CGG>TGG      | p.R163W        |
| Pat_26 | Post-Resistance | PBX4      | 80714  | 37 | 19 | 19681432  | 19681432  | Missense_Mutation | SNP | C  | T  | 5  | 128 | c.404G>A         | c.(403-405)CGA>CAA      | p.R135Q        |
| Pat_26 | Post-Resistance | ZNF536    | 9745   | 37 | 19 | 31039483  | 31039483  | Missense_Mutation | SNP | C  | T  | 10 | 140 | c.2957C>T        | c.(2956-2958)TCC>TTC    | p.S986F        |
| Pat_26 | Post-Resistance | TSHZ3     | 57616  | 37 | 19 | 31769341  | 31769341  | Missense_Mutation | SNP | G  | C  | 18 | 176 | c.1358C>G        | c.(1357-1359)ACG>AGG    | p.T453R        |
| Pat_26 | Post-Resistance | SIPA1L3   | 23094  | 37 | 19 | 38621187  | 38621187  | Missense_Mutation | SNP | G  | A  | 25 | 188 | c.2918G>A        | c.(2917-2919)GGG>GAG    | p.G973E        |
| Pat_26 | Post-Resistance | SIPA1L3   | 23094  | 37 | 19 | 38643532  | 38643532  | Missense_Mutation | SNP | G  | A  | 7  | 333 | c.3586G>A        | c.(3586-3588)GAT>AAT    | p.D1196N       |
| Pat_26 | Post-Resistance | TIMM50    | 92609  | 37 | 19 | 39976330  | 39976330  | Missense_Mutation | SNP | G  | A  | 40 | 234 | c.684G>A         | c.(682-684)ATG>ATA      | p.M228I        |
| Pat_26 | Post-Resistance | FCGBP     | 8857   | 37 | 19 | 40373993  | 40373993  | Missense_Mutation | SNP | C  | T  | 5  | 172 | c.12085G>A       | c.(12085-12087)GGG>AGC  | p.G4029R       |
| Pat_26 | Post-Resistance | CYP2A6    | 1548   | 37 | 19 | 41354650  | 41354650  | Missense_Mutation | SNP | C  | T  | 4  | 52  | c.362G>A         | c.(361-363)GGG>GAG      | p.G121E        |
| Pat_26 | Post-Resistance | CIC       | 23152  | 37 | 19 | 42795519  | 42795519  | Missense_Mutation | SNP | C  | T  | 12 | 226 | c.2599C>T        | c.(2599-2601)CCA>TCA    | p.P867S        |
| Pat_26 | Post-Resistance | PPM1N     | 147699 | 37 | 19 | 46003802  | 46003803  | Missense_Mutation | DNP | GG | AA | 5  | 87  | c.1146_1147GG>AA | c.(1144-1149)GGGGGA>GGA | p.G383R        |
| Pat_26 | Post-Resistance | CCDC155   | 147872 | 37 | 19 | 49900950  | 49900950  | Missense_Mutation | SNP | G  | A  | 42 | 377 | c.443G>A         | c.(442-444)GGA>GAA      | p.G148E        |
| Pat_26 | Post-Resistance | SCAF1     | 58506  | 37 | 19 | 50150084  | 50150085  | Missense_Mutation | DNP | AC | TT | 4  | 61  | c.475_476AC>TT   | c.(475-477)ACG>TTG      | p.T159L        |
| Pat_26 | Post-Resistance | MYBPC2    | 4606   | 37 | 19 | 50964868  | 50964868  | Missense_Mutation | SNP | G  | A  | 7  | 92  | c.3001G>A        | c.(3001-3003)GAA>AAA    | p.E1001K       |
| Pat_26 | Post-Resistance | KLK1      | 3816   | 37 | 19 | 51323644  | 51323645  | Missense_Mutation | DNP | GG | TA | 42 | 566 | c.261_262CC>TA   | c.(259-264)GCCCAG>GCTA  | p.Q88K         |
| Pat_26 | Post-Resistance | KLK8      | 11202  | 37 | 19 | 51499463  | 51499463  | Missense_Mutation | SNP | G  | A  | 6  | 147 | c.635C>T         | c.(634-636)TCT>TTT      | p.S212F        |
| Pat_26 | Post-Resistance | SIGLEC10  | 89790  | 37 | 19 | 51918507  | 51918507  | Missense_Mutation | SNP | C  | T  | 28 | 236 | c.1258G>A        | c.(1258-1260)GAA>AAA    | p.E420K        |
| Pat_26 | Post-Resistance | ZNF432    | 9668   | 37 | 19 | 52537586  | 52537586  | Missense_Mutation | SNP | C  | T  | 20 | 241 | c.1346G>A        | c.(1345-1347)CGA>CAA    | p.R449Q        |
| Pat_26 | Post-Resistance | ZNF578    | 147660 | 37 | 19 | 53014626  | 53014626  | Missense_Mutation | SNP | C  | G  | 6  | 385 | c.992C>G         | c.(991-993)ACA>AGA      | p.T331R        |
| Pat_26 | Post-Resistance | ZSCAN4    | 201516 | 37 | 19 | 58187625  | 58187625  | Missense_Mutation | SNP | G  | A  | 16 | 147 | c.112G>A         | c.(112-114)GGG>AGG      | p.G38R         |
| Pat_26 | Post-Resistance | NBAS      | 51594  | 37 | 2  | 15696937  | 15696937  | Nonsense_Mutation | SNP | A  | T  | 29 | 242 | c.179T>A         | c.(178-180)TTA>TAA      | p.L60*         |
| Pat_26 | Post-Resistance | APOB      | 338    | 37 | 2  | 21236086  | 21236086  | Missense_Mutation | SNP | G  | A  | 31 | 472 | c.4162C>T        | c.(4162-4164)CGT>TGT    | p.R1388C       |
| Pat_26 | Post-Resistance | DPYSL5    | 56896  | 37 | 2  | 27164901  | 27164901  | Missense_Mutation | SNP | G  | T  | 12 | 290 | c.1173G>T        | c.(1171-1173)AAG>AAT    | p.K391N        |
| Pat_26 | Post-Resistance | DNAJC5G   | 285126 | 37 | 2  | 27503075  | 27503075  | Missense_Mutation | SNP | G  | A  | 20 | 305 | c.562G>A         | c.(562-564)GAT>AAT      | p.D188N        |
| Pat_26 | Post-Resistance | RBKS      | 64080  | 37 | 2  | 28050589  | 28050589  | Missense_Mutation | SNP | C  | T  | 3  | 70  | c.640G>A         | c.(640-642)GCT>ACT      | p.A214T        |
| Pat_26 | Post-Resistance | XDH       | 7498   | 37 | 2  | 31605866  | 31605867  | Splice_Site       | DNP | CC | TT | 4  | 127 | c.1038_splice    | c.e11+1                 | p.A346_splice  |
| Pat_26 | Post-Resistance | PRKCE     | 5581   | 37 | 2  | 46207491  | 46207491  | Missense_Mutation | SNP | G  | T  | 26 | 224 | c.664G>T         | c.(664-666)GGG>TGG      | p.G222W        |
| Pat_26 | Post-Resistance | BCL11A    | 53335  | 37 | 2  | 60689281  | 60689281  | Missense_Mutation | SNP | C  | T  | 6  | 108 | c.766G>A         | c.(766-768)GAA>AAA      | p.E256K        |
| Pat_26 | Post-Resistance | USP34     | 9736   | 37 | 2  | 61605504  | 61605504  | Missense_Mutation | SNP | G  | C  | 26 | 187 | c.1070C>G        | c.(1069-1071)ACA>AGA    | p.T357R        |
| Pat_26 | Post-Resistance | DYSF      | 8291   | 37 | 2  | 71797734  | 71797734  | Missense_Mutation | SNP | G  | A  | 6  | 72  | c.3037G>A        | c.(3037-3039)GAG>AAG    | p.E1013K       |
| Pat_26 | Post-Resistance | SLC4A5    | 57835  | 37 | 2  | 74481792  | 74481792  | Missense_Mutation | SNP | G  | A  | 36 | 418 | c.1067C>T        | c.(1066-1068)TCC>TTC    | p.S356F        |
| Pat_26 | Post-Resistance | TRIM43    | 129868 | 37 | 2  | 96259896  | 96259896  | Missense_Mutation | SNP | C  | T  | 3  | 75  | c.125C>T         | c.(124-126)TCG>TTG      | p.S42L         |
| Pat_26 | Post-Resistance | LOC285033 | 285033 | 37 | 2  | 96906408  | 96906408  | Missense_Mutation | SNP | C  | T  | 15 | 144 | c.347C>T         | c.(346-348)TCC>TTC      | p.S116F        |
| Pat_26 | Post-Resistance | TSGA10    | 80705  | 37 | 2  | 99634699  | 99634699  | Missense_Mutation | SNP | C  | T  | 23 | 155 | c.2036G>A        | c.(2035-2037)CGA>CAA    | p.R679Q        |
| Pat_26 | Post-Resistance | ST6GAL2   | 84620  | 37 | 2  | 107460402 | 107460402 | Missense_Mutation | SNP | C  | T  | 4  | 77  | c.32G>A          | c.(31-33)CGA>CAA        | p.R11Q         |
| Pat_26 | Post-Resistance | RGPD4     | 285190 | 37 | 2  | 108488208 | 108488208 | Missense_Mutation | SNP | G  | A  | 60 | 654 | c.3748G>A        | c.(3748-3750)GAT>AAT    | p.D1250N       |
| Pat_26 | Post-Resistance | SLC5A7    | 60482  | 37 | 2  | 108626702 | 108626702 | Missense_Mutation | SNP | A  | T  | 15 | 152 | c.1128A>T        | c.(1126-1128)GAA>GAT    | p.E376D        |
| Pat_26 | Post-Resistance | SULT1C2   | 6819   | 37 | 2  | 108921643 | 108921643 | Nonsense_Mutation | SNP | G  | A  | 29 | 283 | c.518G>A         | c.(517-519)TGG>TAG      | p.W173*        |
| Pat_26 | Post-Resistance | SULT1C4   | 27233  | 37 | 2  | 108999611 | 108999611 | Missense_Mutation | SNP | G  | T  | 12 | 105 | c.456G>T         | c.(454-456)ATG>ATT      | p.M152I        |
| Pat_26 | Post-Resistance | PSD4      | 23550  | 37 | 2  | 113955328 | 113955328 | Missense_Mutation | SNP | G  | A  | 8  | 183 | c.2462G>A        | c.(2461-2463)GGA>GAA    | p.G821E        |
| Pat_26 | Post-Resistance | RALB      | 5899   | 37 | 2  | 121047325 | 121047325 | Missense_Mutation | SNP | G  | A  | 3  | 74  | c.493G>A         | c.(493-495)GTG>ATG      | p.V165M        |

|        |                 |         |        |    |    |           |           |                   |     |    |    |    |     |                 |                        |                |
|--------|-----------------|---------|--------|----|----|-----------|-----------|-------------------|-----|----|----|----|-----|-----------------|------------------------|----------------|
| Pat_26 | Post-Resistance | LRP1B   | 53353  | 37 | 2  | 141298592 | 141298592 | Missense_Mutation | SNP | T  | C  | 54 | 352 | c.7463A>G       | c.(7462-7464)AAT>AGT   | p.N2488S       |
| Pat_26 | Post-Resistance | LRP1B   | 53353  | 37 | 2  | 141359209 | 141359209 | Splice_Site       | SNP | C  | T  | 5  | 41  | c.6800_splice   | c.e42-1                | p.N2267_splice |
| Pat_26 | Post-Resistance | NEB     | 4703   | 37 | 2  | 152466537 | 152466537 | Missense_Mutation | SNP | C  | T  | 6  | 80  | c.11387G>A      | c.(11386-11388)GGA>GAA | p.G3796E       |
| Pat_26 | Post-Resistance | GRB14   | 2888   | 37 | 2  | 165365320 | 165365320 | Missense_Mutation | SNP | C  | T  | 10 | 229 | c.859G>A        | c.(859-861)GAT>AAT     | p.D287N        |
| Pat_26 | Post-Resistance | SCN3A   | 6328   | 37 | 2  | 166032843 | 166032843 | Missense_Mutation | SNP | G  | A  | 19 | 196 | c.62C>T         | c.(61-63)TCT>TTT       | p.S21F         |
| Pat_26 | Post-Resistance | XIRP2   | 129446 | 37 | 2  | 167760216 | 167760216 | Missense_Mutation | SNP | C  | T  | 3  | 86  | c.224C>T        | c.(223-225)CCG>CTG     | p.P75L         |
| Pat_26 | Post-Resistance | LRP2    | 4036   | 37 | 2  | 170147469 | 170147469 | Missense_Mutation | SNP | C  | T  | 12 | 136 | c.808G>A        | c.(808-810)GAA>AAA     | p.E270K        |
| Pat_26 | Post-Resistance | TTN     | 7273   | 37 | 2  | 179416831 | 179416831 | Missense_Mutation | SNP | C  | T  | 32 | 346 | c.83092G>A      | c.(83092-83094)GAA>AAA | p.E27698K      |
| Pat_26 | Post-Resistance | TTN     | 7273   | 37 | 2  | 179427038 | 179427038 | Missense_Mutation | SNP | C  | T  | 8  | 110 | c.76117G>A      | c.(76117-76119)GAA>AAA | p.E25373K      |
| Pat_26 | Post-Resistance | TTN     | 7273   | 37 | 2  | 179430017 | 179430017 | Missense_Mutation | SNP | C  | T  | 7  | 222 | c.73138G>A      | c.(73138-73140)GGA>AGT | p.G24380R      |
| Pat_26 | Post-Resistance | TTN     | 7273   | 37 | 2  | 179569999 | 179569999 | Missense_Mutation | SNP | C  | T  | 5  | 71  | c.25774G>A      | c.(25774-25776)GAA>AAA | p.E8592K       |
| Pat_26 | Post-Resistance | FAM171B | 165215 | 37 | 2  | 187615998 | 187615998 | Missense_Mutation | SNP | C  | T  | 11 | 102 | c.862C>T        | c.(862-864)CGC>TGC     | p.R288C        |
| Pat_26 | Post-Resistance | COL5A2  | 1290   | 37 | 2  | 189910528 | 189910528 | Missense_Mutation | SNP | G  | A  | 8  | 134 | c.3307C>T       | c.(3307-3309)CCG>TCG   | p.P1103S       |
| Pat_26 | Post-Resistance | ANKAR   | 150709 | 37 | 2  | 190606067 | 190606067 | Splice_Site       | SNP | G  | A  | 11 | 132 | c.3488_splice   | c.e19-1                | p.G1163_splice |
| Pat_26 | Post-Resistance | NAB1    | 4664   | 37 | 2  | 191550329 | 191550329 | Missense_Mutation | SNP | C  | T  | 22 | 192 | c.1223C>T       | c.(1222-1224)CCT>CTT   | p.P408L        |
| Pat_26 | Post-Resistance | ICA1L   | 130026 | 37 | 2  | 203684548 | 203684548 | Missense_Mutation | SNP | G  | A  | 19 | 119 | c.434C>T        | c.(433-435)ACC>ATC     | p.T145I        |
| Pat_26 | Post-Resistance | CPS1    | 1373   | 37 | 2  | 211444459 | 211444459 | Missense_Mutation | SNP | G  | A  | 26 | 241 | c.493G>A        | c.(493-495)GAC>AAC     | p.D165N        |
| Pat_26 | Post-Resistance | ATIC    | 471    | 37 | 2  | 216182921 | 216182921 | Missense_Mutation | SNP | G  | A  | 54 | 386 | c.188G>A        | c.(187-189)GGA>GAA     | p.G63E         |
| Pat_26 | Post-Resistance | VIL1    | 7429   | 37 | 2  | 219301222 | 219301222 | Missense_Mutation | SNP | T  | C  | 41 | 483 | c.1844T>C       | c.(1843-1845)CTG>CCG   | p.L615P        |
| Pat_26 | Post-Resistance | TLL4    | 9654   | 37 | 2  | 219603034 | 219603034 | Missense_Mutation | SNP | C  | T  | 21 | 200 | c.635C>T        | c.(634-636)TCC>TTC     | p.S212F        |
| Pat_26 | Post-Resistance | SGPP2   | 130367 | 37 | 2  | 223389667 | 223389667 | Missense_Mutation | SNP | C  | T  | 4  | 133 | c.563C>T        | c.(562-564)CCA>CTA     | p.P188L        |
| Pat_26 | Post-Resistance | ALPPL2  | 251    | 37 | 2  | 233272555 | 233272555 | Missense_Mutation | SNP | G  | A  | 23 | 154 | c.476G>A        | c.(475-477)GGA>GAA     | p.G159E        |
| Pat_26 | Post-Resistance | PER2    | 8864   | 37 | 2  | 239186525 | 239186525 | Missense_Mutation | SNP | G  | A  | 9  | 87  | c.53C>T         | c.(52-54)CCC>CTC       | p.P18L         |
| Pat_26 | Post-Resistance | ANO7    | 50636  | 37 | 2  | 242139610 | 242139610 | Missense_Mutation | SNP | C  | T  | 16 | 127 | c.686C>T        | c.(685-687)TCC>TTC     | p.S229F        |
| Pat_26 | Post-Resistance | FARP2   | 9855   | 37 | 2  | 242380792 | 242380792 | Missense_Mutation | SNP | C  | T  | 36 | 222 | c.1232C>T       | c.(1231-1233)CCC>CTC   | p.P411L        |
| Pat_26 | Post-Resistance | D2HGDH  | 728294 | 37 | 2  | 242695408 | 242695408 | Missense_Mutation | SNP | G  | A  | 4  | 107 | c.1285G>A       | c.(1285-1287)GTG>ATG   | p.V429M        |
| Pat_26 | Post-Resistance | TMC2    | 117532 | 37 | 20 | 2572971   | 2572971   | Missense_Mutation | SNP | C  | T  | 16 | 258 | c.850C>T        | c.(850-852)CCC>TCC     | p.P284S        |
| Pat_26 | Post-Resistance | SEL1L2  | 80343  | 37 | 20 | 13846138  | 13846138  | Missense_Mutation | SNP | A  | C  | 8  | 91  | c.1427T>G       | c.(1426-1428)CTA>CGA   | p.L476R        |
| Pat_26 | Post-Resistance | XKR7    | 343702 | 37 | 20 | 30585052  | 30585052  | Missense_Mutation | SNP | C  | T  | 6  | 193 | c.1532C>T       | c.(1531-1533)CCA>CTA   | p.P511L        |
| Pat_26 | Post-Resistance | ITCH    | 83737  | 37 | 20 | 32981622  | 32981622  | Missense_Mutation | SNP | C  | T  | 11 | 425 | c.5C>T          | c.(4-6)TCT>TTT         | p.S2F          |
| Pat_26 | Post-Resistance | STAU1   | 6780   | 37 | 20 | 47739771  | 47739771  | Missense_Mutation | SNP | G  | A  | 18 | 190 | c.824C>T        | c.(823-825)CCA>CTA     | p.P275L        |
| Pat_26 | Post-Resistance | DDX27   | 55661  | 37 | 20 | 47858702  | 47858702  | Missense_Mutation | SNP | G  | A  | 4  | 114 | c.2168G>A       | c.(2167-2169)CGG>CAG   | p.R723Q        |
| Pat_26 | Post-Resistance | SRRD    | 402055 | 37 | 22 | 26884387  | 26884387  | Missense_Mutation | SNP | C  | T  | 62 | 558 | c.542C>T        | c.(541-543)CCT>CTT     | p.P181L        |
| Pat_26 | Post-Resistance | GAL3ST1 | 9514   | 37 | 22 | 30951719  | 30951719  | Missense_Mutation | SNP | C  | T  | 17 | 249 | c.493G>A        | c.(493-495)GAC>AAC     | p.D165N        |
| Pat_26 | Post-Resistance | TCN2    | 6948   | 37 | 22 | 31008971  | 31008971  | Missense_Mutation | SNP | G  | T  | 6  | 155 | c.369G>T        | c.(367-369)AAG>AAT     | p.K123N        |
| Pat_26 | Post-Resistance | SMTN    | 6525   | 37 | 22 | 31487688  | 31487688  | Missense_Mutation | SNP | C  | T  | 13 | 248 | c.1487C>T       | c.(1486-1488)CCG>CTG   | p.P496L        |
| Pat_26 | Post-Resistance | SYNGR1  | 9145   | 37 | 22 | 39777743  | 39777743  | Missense_Mutation | SNP | G  | A  | 5  | 252 | c.526G>A        | c.(526-528)GCC>ACC     | p.A176T        |
| Pat_26 | Post-Resistance | EP300   | 2033   | 37 | 22 | 41531849  | 41531850  | Missense_Mutation | DNP | GG | AA | 16 | 178 | c.1561_1562GG>A | c.(1561-1563)GGA>AAA   | p.G521K        |
| Pat_26 | Post-Resistance | CYP2D6  | 1565   | 37 | 22 | 42523908  | 42523908  | Missense_Mutation | SNP | C  | T  | 20 | 303 | c.921G>A        | c.(919-921)ATG>ATA     | p.M307I        |
| Pat_26 | Post-Resistance | SAPS2   | 9701   | 37 | 22 | 50874861  | 50874861  | Missense_Mutation | SNP | C  | T  | 7  | 20  | c.1582C>T       | c.(1582-1584)CGC>TGC   | p.R528C        |
| Pat_26 | Post-Resistance | SBF1    | 6305   | 37 | 22 | 50885576  | 50885576  | Missense_Mutation | SNP | C  | T  | 3  | 54  | c.5677G>A       | c.(5677-5679)GCC>ACC   | p.A1893T       |
| Pat_26 | Post-Resistance | CHL1    | 10752  | 37 | 3  | 382573    | 382573    | Missense_Mutation | SNP | C  | T  | 18 | 146 | c.482C>T        | c.(481-483)CCT>CTT     | p.P161L        |
| Pat_26 | Post-Resistance | ZNF385D | 79750  | 37 | 3  | 21552508  | 21552508  | Missense_Mutation | SNP | G  | A  | 7  | 95  | c.284C>T        | c.(283-285)GCT>GTT     | p.A95V         |
| Pat_26 | Post-Resistance | ARPP21  | 10777  | 37 | 3  | 35833903  | 35833903  | Missense_Mutation | SNP | G  | A  | 39 | 440 | c.2062G>A       | c.(2062-2064)GGA>AGA   | p.G688R        |
| Pat_26 | Post-Resistance | SCN11A  | 11280  | 37 | 3  | 38946734  | 38946734  | Nonsense_Mutation | SNP | G  | A  | 30 | 257 | c.1552C>T       | c.(1552-1554)CAA>TAA   | p.Q518*        |
| Pat_26 | Post-Resistance | SCN11A  | 11280  | 37 | 3  | 38949450  | 38949450  | Missense_Mutation | SNP | C  | A  | 11 | 91  | c.1463G>T       | c.(1462-1464)TGC>TTC   | p.C488F        |
| Pat_26 | Post-Resistance | VIPR1   | 7433   | 37 | 3  | 42577630  | 42577630  | Missense_Mutation | SNP | G  | A  | 3  | 43  | c.1231G>A       | c.(1231-1233)GTC>ATC   | p.V411I        |

|        |                 |          |        |    |   |           |           |                   |     |    |    |    |     |                                   |                        |          |
|--------|-----------------|----------|--------|----|---|-----------|-----------|-------------------|-----|----|----|----|-----|-----------------------------------|------------------------|----------|
| Pat_26 | Post-Resistance | CDCP1    | 64866  | 37 | 3 | 45153823  | 45153823  | Missense_Mutation | SNP | C  | T  | 95 | 669 | c.407G>A                          | c.(406-408)GGT>GAT     | p.G136D  |
| Pat_26 | Post-Resistance | CBLB     | 868    | 37 | 3 | 105464833 | 105464833 | Missense_Mutation | SNP | G  | A  | 37 | 366 | c.773C>T                          | c.(772-774)CCA>CTA     | p.P258L  |
| Pat_26 | Post-Resistance | GUCA1C   | 9626   | 37 | 3 | 108672495 | 108672495 | Missense_Mutation | SNP | C  | T  | 27 | 299 | c.115G>A                          | c.(115-117)GAA>AAA     | p.E39K   |
| Pat_26 | Post-Resistance | WDR52    | 55779  | 37 | 3 | 113146126 | 113146126 | Missense_Mutation | SNP | C  | T  | 6  | 110 | c.161G>A                          | c.(160-162)GGG>GAG     | p.G54E   |
| Pat_26 | Post-Resistance | POLQ     | 10721  | 37 | 3 | 121256023 | 121256023 | Missense_Mutation | SNP | C  | T  | 24 | 314 | c.664G>A                          | c.(664-666)GGA>AGA     | p.G222R  |
| Pat_26 | Post-Resistance | SLC15A2  | 6565   | 37 | 3 | 121647395 | 121647395 | Missense_Mutation | SNP | C  | T  | 26 | 281 | c.1334C>T                         | c.(1333-1335)TCC>TTC   | p.S445F  |
| Pat_26 | Post-Resistance | MYLK     | 4638   | 37 | 3 | 123457860 | 123457861 | Missense_Mutation | DNP | CC | TT | 4  | 80  | c.471_472GG>AA169-474)GGGGAG>GGAA |                        | p.E158K  |
| Pat_26 | Post-Resistance | SEC61A1  | 29927  | 37 | 3 | 127786827 | 127786827 | Missense_Mutation | SNP | T  | C  | 53 | 495 | c.1169T>C                         | c.(1168-1170)GTT>GCT   | p.V390A  |
| Pat_26 | Post-Resistance | COL6A6   | 131873 | 37 | 3 | 130311915 | 130311915 | Missense_Mutation | SNP | G  | A  | 52 | 589 | c.4382G>A                         | c.(4381-4383)GGG>GAG   | p.G1461E |
| Pat_26 | Post-Resistance | ATP2C1   | 27032  | 37 | 3 | 130698165 | 130698165 | Missense_Mutation | SNP | C  | T  | 41 | 290 | c.1643C>T                         | c.(1642-1644)CCT>CTT   | p.P548L  |
| Pat_26 | Post-Resistance | DNAJC13  | 23317  | 37 | 3 | 132169656 | 132169656 | Missense_Mutation | SNP | G  | A  | 18 | 142 | c.502G>A                          | c.(502-504)GGA>AGA     | p.G168R  |
| Pat_26 | Post-Resistance | AMOTL2   | 51421  | 37 | 3 | 134090038 | 134090038 | Nonsense_Mutation | SNP | G  | A  | 9  | 64  | c.412C>T                          | c.(412-414)CAG>TAG     | p.Q138*  |
| Pat_26 | Post-Resistance | B3GNT5   | 84002  | 37 | 3 | 182988256 | 182988256 | Missense_Mutation | SNP | C  | T  | 33 | 370 | c.670C>T                          | c.(670-672)CAT>TAT     | p.H224Y  |
| Pat_26 | Post-Resistance | DVL3     | 1857   | 37 | 3 | 183885727 | 183885727 | Missense_Mutation | SNP | T  | C  | 19 | 299 | c.1372T>C                         | c.(1372-1374)TTC>CTC   | p.F458L  |
| Pat_26 | Post-Resistance | OSTalpha | 200931 | 37 | 3 | 195955029 | 195955029 | Missense_Mutation | SNP | G  | A  | 59 | 624 | c.406G>A                          | c.(406-408)GAA>AAA     | p.E136K  |
| Pat_26 | Post-Resistance | RGS12    | 6002   | 37 | 4 | 3418686   | 3418686   | Missense_Mutation | SNP | C  | T  | 32 | 294 | c.2474C>T                         | c.(2473-2475)TCC>TTC   | p.S825F  |
| Pat_26 | Post-Resistance | GBA3     | 57733  | 37 | 4 | 22748945  | 22748945  | Missense_Mutation | SNP | G  | A  | 11 | 282 | c.313G>A                          | c.(313-315)GAT>AAT     | p.D105N  |
| Pat_26 | Post-Resistance | GABRB1   | 2560   | 37 | 4 | 47408782  | 47408782  | Missense_Mutation | SNP | G  | A  | 17 | 163 | c.919G>A                          | c.(919-921)GAT>AAT     | p.D307N  |
| Pat_26 | Post-Resistance | KDR      | 3791   | 37 | 4 | 55984966  | 55984966  | Missense_Mutation | SNP | C  | T  | 4  | 96  | c.163G>A                          | c.(163-165)GGA>AGA     | p.G55R   |
| Pat_26 | Post-Resistance | UGT2B28  | 54490  | 37 | 4 | 70146547  | 70146547  | Missense_Mutation | SNP | C  | T  | 13 | 190 | c.329C>T                          | c.(328-330)TCA>TTA     | p.S110L  |
| Pat_26 | Post-Resistance | UGT2B28  | 54490  | 37 | 4 | 70148286  | 70148286  | Missense_Mutation | SNP | G  | A  | 28 | 251 | c.776G>A                          | c.(775-777)CGA>CAA     | p.R259Q  |
| Pat_26 | Post-Resistance | CENPE    | 1062   | 37 | 4 | 104057392 | 104057392 | Missense_Mutation | SNP | G  | A  | 14 | 152 | c.6428C>T                         | c.(6427-6429)TCA>TTA   | p.S2143L |
| Pat_26 | Post-Resistance | GSTCD    | 79807  | 37 | 4 | 106766720 | 106766721 | Missense_Mutation | DNP | GG | AA | 6  | 97  | .1888_1889GG>A                    | c.(1888-1890)GGA>AAA   | p.G630K  |
| Pat_26 | Post-Resistance | FAT4     | 79633  | 37 | 4 | 126372621 | 126372621 | Missense_Mutation | SNP | G  | A  | 33 | 247 | c.10450G>A                        | c.(10450-10452)GAT>AAT | p.D3484N |
| Pat_26 | Post-Resistance | FAT4     | 79633  | 37 | 4 | 126398438 | 126398438 | Missense_Mutation | SNP | G  | A  | 38 | 342 | c.12422G>A                        | .(12421-12423)GGA>GA/  | p.G4141E |
| Pat_26 | Post-Resistance | ARFIP1   | 27236  | 37 | 4 | 153750802 | 153750802 | Missense_Mutation | SNP | C  | T  | 5  | 251 | c.17C>T                           | c.(16-18)CCC>CTC       | p.P6L    |
| Pat_26 | Post-Resistance | GLRA3    | 8001   | 37 | 4 | 175598335 | 175598335 | Missense_Mutation | SNP | G  | A  | 12 | 133 | c.821C>T                          | c.(820-822)TCA>TTA     | p.S274L  |
| Pat_26 | Post-Resistance | CTNND2   | 1501   | 37 | 5 | 10992705  | 10992705  | Missense_Mutation | SNP | G  | A  | 8  | 155 | c.3169C>T                         | c.(3169-3171)CCC>TCC   | p.P1057S |
| Pat_26 | Post-Resistance | FBXL7    | 23194  | 37 | 5 | 15928154  | 15928154  | Missense_Mutation | SNP | C  | T  | 3  | 80  | c.283C>T                          | c.(283-285)CGC>TGC     | p.R95C   |
| Pat_26 | Post-Resistance | CDH18    | 1016   | 37 | 5 | 19721546  | 19721546  | Missense_Mutation | SNP | C  | T  | 13 | 211 | c.553G>A                          | c.(553-555)GAT>AAT     | p.D185N  |
| Pat_26 | Post-Resistance | CDH18    | 1016   | 37 | 5 | 19839093  | 19839093  | Missense_Mutation | SNP | C  | T  | 13 | 118 | c.3G>A                            | c.(1-3)ATG>ATA         | p.M1I    |
| Pat_26 | Post-Resistance | PRDM9    | 56979  | 37 | 5 | 23509648  | 23509648  | Missense_Mutation | SNP | G  | A  | 23 | 239 | c.139G>A                          | c.(139-141)GAG>AAG     | p.E47K   |
| Pat_26 | Post-Resistance | CDH10    | 1008   | 37 | 5 | 24487995  | 24487995  | Missense_Mutation | SNP | T  | A  | 9  | 181 | c.2144A>T                         | c.(2143-2145)AAT>ATT   | p.N715I  |
| Pat_26 | Post-Resistance | PDZD2    | 23037  | 37 | 5 | 32087434  | 32087434  | Missense_Mutation | SNP | G  | A  | 18 | 117 | c.3880G>A                         | c.(3880-3882)GAG>AAG   | p.E1294K |
| Pat_26 | Post-Resistance | LMBRD2   | 92255  | 37 | 5 | 36123060  | 36123060  | Missense_Mutation | SNP | G  | A  | 5  | 25  | c.826C>T                          | c.(826-828)CCT>TCT     | p.P276S  |
| Pat_26 | Post-Resistance | MARVELD2 | 153562 | 37 | 5 | 68728399  | 68728399  | Missense_Mutation | SNP | A  | G  | 10 | 88  | c.1228A>G                         | c.(1228-1230)AAT>GAT   | p.N410D  |
| Pat_26 | Post-Resistance | ENC1     | 8507   | 37 | 5 | 73930869  | 73930869  | Missense_Mutation | SNP | G  | A  | 15 | 177 | c.1442C>T                         | c.(1441-1443)CCC>CTC   | p.P481L  |
| Pat_26 | Post-Resistance | SPZ1     | 84654  | 37 | 5 | 79616605  | 79616605  | Missense_Mutation | SNP | C  | G  | 6  | 151 | c.571C>G                          | c.(571-573)CAG>GAG     | p.Q191E  |
| Pat_26 | Post-Resistance | ANKRD34B | 340120 | 37 | 5 | 79854638  | 79854638  | Missense_Mutation | SNP | G  | A  | 14 | 106 | c.1201C>T                         | c.(1201-1203)CCT>TCT   | p.P401S  |
| Pat_26 | Post-Resistance | GPR98    | 84059  | 37 | 5 | 89988548  | 89988548  | Missense_Mutation | SNP | C  | T  | 6  | 28  | c.7078C>T                         | c.(7078-7080)CGT>TGT   | p.R2360C |
| Pat_26 | Post-Resistance | GPR98    | 84059  | 37 | 5 | 90024556  | 90024556  | Missense_Mutation | SNP | C  | T  | 24 | 275 | c.10232C>T                        | .(10231-10233)GCC>GTC  | p.A3411V |
| Pat_26 | Post-Resistance | GPR98    | 84059  | 37 | 5 | 90111487  | 90111487  | Missense_Mutation | SNP | G  | A  | 3  | 21  | c.16130G>A                        | .(16129-16131)GGA>GA/  | p.G5377E |
| Pat_26 | Post-Resistance | PAM      | 5066   | 37 | 5 | 102345512 | 102345512 | Missense_Mutation | SNP | G  | A  | 15 | 145 | c.2273G>A                         | c.(2272-2274)GGA>GAA   | p.G758E  |
| Pat_26 | Post-Resistance | SNCAIP   | 9627   | 37 | 5 | 121739548 | 121739548 | Missense_Mutation | SNP | G  | A  | 16 | 344 | c.118G>A                          | c.(118-120)GAA>AAA     | p.E40K   |
| Pat_26 | Post-Resistance | KIF3A    | 11127  | 37 | 5 | 132051999 | 132051999 | Missense_Mutation | SNP | G  | A  | 4  | 153 | c.892C>T                          | c.(892-894)CGT>TGT     | p.R298C  |
| Pat_26 | Post-Resistance | PCDHA1   | 56147  | 37 | 5 | 140166416 | 140166416 | Missense_Mutation | SNP | G  | A  | 17 | 77  | c.541G>A                          | c.(541-543)GAT>AAT     | p.D181N  |
| Pat_26 | Post-Resistance | PCDHGB3  | 56102  | 37 | 5 | 140752101 | 140752101 | Missense_Mutation | SNP | C  | T  | 20 | 209 | c.2140C>T                         | c.(2140-2142)CGC>TGC   | p.R714C  |



|        |                 |          |        |    |   |           |           |                   |     |    |    |    |     |                 |                      |                |
|--------|-----------------|----------|--------|----|---|-----------|-----------|-------------------|-----|----|----|----|-----|-----------------|----------------------|----------------|
| Pat_26 | Post-Resistance | PPARGC1B | 133522 | 37 | 5 | 149212900 | 149212900 | Missense_Mutation | SNP | C  | T  | 4  | 73  | c.1264C>T       | c.(1264-1266)CGG>TGG | p.R422W        |
| Pat_26 | Post-Resistance | MFAP3    | 4238   | 37 | 5 | 153432575 | 153432575 | Missense_Mutation | SNP | C  | T  | 43 | 369 | c.391C>T        | c.(391-393)CGT>TGT   | p.R131C        |
| Pat_26 | Post-Resistance | EBF1     | 1879   | 37 | 5 | 158523996 | 158523996 | Missense_Mutation | SNP | C  | T  | 3  | 64  | c.277G>A        | c.(277-279)GTG>ATG   | p.V93M         |
| Pat_26 | Post-Resistance | GABRB2   | 2561   | 37 | 5 | 160753392 | 160753392 | Missense_Mutation | SNP | C  | T  | 12 | 204 | c.1174G>A       | c.(1174-1176)GAT>AAT | p.D392N        |
| Pat_26 | Post-Resistance | SCAND3   | 114821 | 37 | 6 | 28540442  | 28540442  | Missense_Mutation | SNP | C  | T  | 20 | 185 | c.3224G>A       | c.(3223-3225)CGA>CAA | p.R1075Q       |
| Pat_26 | Post-Resistance | TRIM26   | 7726   | 37 | 6 | 30166508  | 30166508  | Missense_Mutation | SNP | G  | A  | 3  | 56  | c.373C>T        | c.(373-375)CGG>TGG   | p.R125W        |
| Pat_26 | Post-Resistance | C4A      | 720    | 37 | 6 | 31963519  | 31963519  | Missense_Mutation | SNP | C  | T  | 18 | 320 | c.3178C>T       | c.(3178-3180)CGG>TGG | p.R1060W       |
| Pat_26 | Post-Resistance | DNAH8    | 1769   | 37 | 6 | 38875853  | 38875853  | Missense_Mutation | SNP | C  | T  | 4  | 58  | c.8819C>T       | c.(8818-8820)TCA>TTA | p.S2940L       |
| Pat_26 | Post-Resistance | GLP1R    | 2740   | 37 | 6 | 39046935  | 39046935  | Missense_Mutation | SNP | A  | T  | 40 | 450 | c.1002A>T       | c.(1000-1002)AAA>AAT | p.K334N        |
| Pat_26 | Post-Resistance | SLC22A7  | 10864  | 37 | 6 | 43266358  | 43266358  | Missense_Mutation | SNP | G  | A  | 6  | 40  | c.262G>A        | c.(262-264)GCT>ACT   | p.A88T         |
| Pat_26 | Post-Resistance | MEP1A    | 4224   | 37 | 6 | 46800961  | 46800961  | Missense_Mutation | SNP | C  | T  | 20 | 158 | c.1295C>T       | c.(1294-1296)CCC>CTC | p.P432L        |
| Pat_26 | Post-Resistance | GPR110   | 266977 | 37 | 6 | 46977301  | 46977301  | Missense_Mutation | SNP | G  | A  | 4  | 68  | c.1870C>T       | c.(1870-1872)CGT>TGT | p.R624C        |
| Pat_26 | Post-Resistance | COL21A1  | 81578  | 37 | 6 | 55933885  | 55933885  | Missense_Mutation | SNP | C  | T  | 5  | 44  | c.2050G>A       | c.(2050-2052)GAA>AAA | p.E684K        |
| Pat_26 | Post-Resistance | BAI3     | 577    | 37 | 6 | 70082297  | 70082297  | Splice_Site       | SNP | G  | A  | 4  | 41  | c.4240_splice   | c.e30-1              | p.R1414_splice |
| Pat_26 | Post-Resistance | WISP3    | 8838   | 37 | 6 | 112390739 | 112390739 | Nonsense_Mutation | SNP | G  | A  | 12 | 154 | c.981G>A        | c.(979-981)TGG>TGA   | p.W327*        |
| Pat_26 | Post-Resistance | NT5DC1   | 221294 | 37 | 6 | 116544279 | 116544279 | Missense_Mutation | SNP | C  | T  | 26 | 217 | c.787C>T        | c.(787-789)CCT>TCT   | p.P263S        |
| Pat_26 | Post-Resistance | ARG1     | 383    | 37 | 6 | 131900341 | 131900341 | Missense_Mutation | SNP | G  | A  | 8  | 117 | c.221G>A        | c.(220-222)GGA>GAA   | p.G74E         |
| Pat_26 | Post-Resistance | CTAGE9   | 643854 | 37 | 6 | 132031227 | 132031227 | Missense_Mutation | SNP | G  | A  | 19 | 73  | c.931C>T        | c.(931-933)CCG>TCG   | p.P311S        |
| Pat_26 | Post-Resistance | LATS1    | 9113   | 37 | 6 | 149997811 | 149997811 | Nonsense_Mutation | SNP | G  | A  | 13 | 58  | c.2656C>T       | c.(2656-2658)CGA>TGA | p.R886*        |
| Pat_26 | Post-Resistance | SYNE1    | 23345  | 37 | 6 | 152730807 | 152730807 | Missense_Mutation | SNP | C  | T  | 17 | 156 | c.6268G>A       | c.(6268-6270)GAA>AAA | p.E2090K       |
| Pat_26 | Post-Resistance | PHF10    | 55274  | 37 | 6 | 170115848 | 170115848 | Missense_Mutation | SNP | C  | T  | 20 | 151 | c.649G>A        | c.(649-651)GAA>AAA   | p.E217K        |
| Pat_26 | Post-Resistance | DLL1     | 28514  | 37 | 6 | 170592725 | 170592725 | Missense_Mutation | SNP | C  | T  | 3  | 28  | c.1642G>A       | c.(1642-1644)GTG>ATG | p.V548M        |
| Pat_26 | Post-Resistance | RADIL    | 55698  | 37 | 7 | 4874803   | 4874803   | Missense_Mutation | SNP | G  | A  | 4  | 56  | c.851C>T        | c.(850-852)CCC>CTC   | p.P284L        |
| Pat_26 | Post-Resistance | RAC1     | 5879   | 37 | 7 | 6426892   | 6426892   | Missense_Mutation | SNP | C  | T  | 26 | 418 | c.85C>T         | c.(85-87)CCT>TCT     | p.P29S         |
| Pat_26 | Post-Resistance | DFNA5    | 1687   | 37 | 7 | 24789342  | 24789342  | Missense_Mutation | SNP | C  | T  | 39 | 338 | c.52G>A         | c.(52-54)GAC>AAC     | p.D18N         |
| Pat_26 | Post-Resistance | OGDH     | 4967   | 37 | 7 | 44734078  | 44734078  | Missense_Mutation | SNP | C  | T  | 14 | 149 | c.1571C>T       | c.(1570-1572)CCG>CTG | p.P524L        |
| Pat_26 | Post-Resistance | TNS3     | 64759  | 37 | 7 | 47343138  | 47343138  | Missense_Mutation | SNP | G  | A  | 7  | 19  | c.2867C>T       | c.(2866-2868)CCC>CTC | p.P956L        |
| Pat_26 | Post-Resistance | ABCA13   | 154664 | 37 | 7 | 48353922  | 48353922  | Missense_Mutation | SNP | G  | A  | 6  | 37  | c.9775G>A       | c.(9775-9777)GAT>AAT | p.D3259N       |
| Pat_26 | Post-Resistance | AUTS2    | 26053  | 37 | 7 | 70255866  | 70255866  | Missense_Mutation | SNP | C  | A  | 5  | 100 | c.3664C>A       | c.(3664-3666)CCG>ACG | p.P1222T       |
| Pat_26 | Post-Resistance | DTX2     | 113878 | 37 | 7 | 76134733  | 76134733  | Missense_Mutation | SNP | T  | C  | 4  | 42  | c.1684T>C       | c.(1684-1686)TTC>CTC | p.F562L        |
| Pat_26 | Post-Resistance | RSBN1L   | 222194 | 37 | 7 | 77408468  | 77408468  | Missense_Mutation | SNP | G  | A  | 3  | 72  | c.2524G>A       | c.(2524-2526)GAT>AAT | p.D842N        |
| Pat_26 | Post-Resistance | PCLO     | 27445  | 37 | 7 | 82764309  | 82764309  | Missense_Mutation | SNP | C  | T  | 24 | 271 | c.2557G>A       | c.(2557-2559)GAA>AAA | p.E853K        |
| Pat_26 | Post-Resistance | SEMA3A   | 10371  | 37 | 7 | 83592633  | 83592633  | Missense_Mutation | SNP | C  | T  | 22 | 241 | c.1748G>A       | c.(1747-1749)AGA>AAA | p.R583K        |
| Pat_26 | Post-Resistance | EPHB4    | 2050   | 37 | 7 | 100410379 | 100410379 | Missense_Mutation | SNP | G  | A  | 8  | 66  | c.2108C>T       | c.(2107-2109)TCC>TTC | p.S703F        |
| Pat_26 | Post-Resistance | SPDYE6   | 729597 | 37 | 7 | 101989089 | 101989089 | Missense_Mutation | SNP | C  | T  | 9  | 271 | c.784G>A        | c.(784-786)GAC>AAC   | p.D262N        |
| Pat_26 | Post-Resistance | SRPK2    | 6733   | 37 | 7 | 104783638 | 104783638 | Missense_Mutation | SNP | G  | A  | 26 | 191 | c.920C>T        | c.(919-921)ACC>ATC   | p.T307I        |
| Pat_26 | Post-Resistance | MGAM     | 8972   | 37 | 7 | 141731520 | 141731520 | Missense_Mutation | SNP | C  | T  | 32 | 298 | c.1511C>T       | c.(1510-1512)CCC>CTC | p.P504L        |
| Pat_26 | Post-Resistance | OR2F2    | 135948 | 37 | 7 | 143633023 | 143633023 | Missense_Mutation | SNP | G  | A  | 10 | 160 | c.698G>A        | c.(697-699)GGA>GAA   | p.G233E        |
| Pat_26 | Post-Resistance | GIMAP5   | 55340  | 37 | 7 | 150439711 | 150439711 | Missense_Mutation | SNP | G  | C  | 33 | 476 | c.484G>C        | c.(484-486)GAT>CAT   | p.D162H        |
| Pat_26 | Post-Resistance | VIPR2    | 7434   | 37 | 7 | 158902542 | 158902542 | Missense_Mutation | SNP | G  | A  | 20 | 220 | c.220C>T        | c.(220-222)CCC>TCC   | p.P74S         |
| Pat_26 | Post-Resistance | CSMD1    | 64478  | 37 | 8 | 3059206   | 3059206   | Missense_Mutation | SNP | C  | T  | 3  | 42  | c.5029G>A       | c.(5029-5031)GAT>AAT | p.D1677N       |
| Pat_26 | Post-Resistance | SLC18A1  | 6570   | 37 | 8 | 20007227  | 20007227  | Missense_Mutation | SNP | G  | A  | 7  | 96  | c.1106C>T       | c.(1105-1107)TCC>TTC | p.S369F        |
| Pat_26 | Post-Resistance | HR       | 55806  | 37 | 8 | 21976539  | 21976540  | Missense_Mutation | DNP | GG | AA | 9  | 197 | .:3136_3137CC>T | c.(3136-3138)CCG>TTG | p.P1046L       |
| Pat_26 | Post-Resistance | ADAMDEC1 | 27299  | 37 | 8 | 24251607  | 24251607  | Missense_Mutation | SNP | G  | A  | 15 | 205 | c.310G>A        | c.(310-312)GAA>AAA   | p.E104K        |
| Pat_26 | Post-Resistance | ADAM7    | 8756   | 37 | 8 | 24339742  | 24339742  | Missense_Mutation | SNP | G  | A  | 9  | 99  | c.793G>A        | c.(793-795)GAA>AAA   | p.E265K        |
| Pat_26 | Post-Resistance | BNIP3L   | 665    | 37 | 8 | 26252780  | 26252780  | Missense_Mutation | SNP | G  | A  | 17 | 143 | c.319G>A        | c.(319-321)GAT>AAT   | p.D107N        |
| Pat_26 | Post-Resistance | BNIP3L   | 665    | 37 | 8 | 26252782  | 26252782  | Missense_Mutation | SNP | T  | A  | 17 | 149 | c.321T>A        | c.(319-321)GAT>GAA   | p.D107E        |

|        |                 |          |        |    |    |           |           |                   |     |   |   |    |     |               |                      |                |
|--------|-----------------|----------|--------|----|----|-----------|-----------|-------------------|-----|---|---|----|-----|---------------|----------------------|----------------|
| Pat_26 | Post-Resistance | SCARA3   | 51435  | 37 | 8  | 27516870  | 27516870  | Missense_Mutation | SNP | G | A | 7  | 92  | c.1183G>A     | c.(1183-1185)GAG>AAG | p.E395K        |
| Pat_26 | Post-Resistance | FBXO16   | 157574 | 37 | 8  | 28340887  | 28340887  | Missense_Mutation | SNP | T | G | 27 | 342 | c.77A>C       | c.(76-78)AAC>ACC     | p.N26T         |
| Pat_26 | Post-Resistance | MCM4     | 4173   | 37 | 8  | 48877195  | 48877195  | Missense_Mutation | SNP | C | T | 18 | 158 | c.755C>T      | c.(754-756)TCA>TTA   | p.S252L        |
| Pat_26 | Post-Resistance | FAM110B  | 90362  | 37 | 8  | 59058956  | 59058956  | Missense_Mutation | SNP | C | T | 16 | 115 | c.167C>T      | c.(166-168)GCC>GTC   | p.A56V         |
| Pat_26 | Post-Resistance | NSMAF    | 8439   | 37 | 8  | 59508216  | 59508216  | Missense_Mutation | SNP | C | T | 20 | 110 | c.1795G>A     | c.(1795-1797)GAA>AAA | p.E599K        |
| Pat_26 | Post-Resistance | ARFGEF1  | 10565  | 37 | 8  | 68170417  | 68170417  | Missense_Mutation | SNP | G | A | 10 | 109 | c.2344C>T     | c.(2344-2346)CGT>TGT | p.R782C        |
| Pat_26 | Post-Resistance | CA1      | 759    | 37 | 8  | 86253846  | 86253846  | Missense_Mutation | SNP | C | T | 11 | 177 | c.19G>A       | c.(19-21)GGA>AGA     | p.G7R          |
| Pat_26 | Post-Resistance | INTS8    | 55656  | 37 | 8  | 95840000  | 95840000  | Missense_Mutation | SNP | C | T | 48 | 467 | c.497C>T      | c.(496-498)CCC>CTC   | p.P166L        |
| Pat_26 | Post-Resistance | VPS13B   | 157680 | 37 | 8  | 100791192 | 100791192 | Missense_Mutation | SNP | C | T | 24 | 363 | c.7787C>T     | c.(7786-7788)TCT>TTT | p.S2596F       |
| Pat_26 | Post-Resistance | TRHR     | 7201   | 37 | 8  | 110131570 | 110131570 | Missense_Mutation | SNP | C | A | 23 | 304 | c.1083C>A     | c.(1081-1083)GAC>GAA | p.D361E        |
| Pat_26 | Post-Resistance | COL14A1  | 7373   | 37 | 8  | 121210152 | 121210152 | Missense_Mutation | SNP | G | A | 5  | 74  | c.695G>A      | c.(694-696)GGA>GAA   | p.G232E        |
| Pat_26 | Post-Resistance | ADCY8    | 114    | 37 | 8  | 131880114 | 131880114 | Missense_Mutation | SNP | G | T | 17 | 144 | c.2188C>A     | c.(2188-2190)CAA>AAA | p.Q730K        |
| Pat_26 | Post-Resistance | COL22A1  | 169044 | 37 | 8  | 139727950 | 139727950 | Missense_Mutation | SNP | C | T | 21 | 191 | c.2492G>A     | c.(2491-2493)GGA>GAA | p.G831E        |
| Pat_26 | Post-Resistance | COL22A1  | 169044 | 37 | 8  | 139815131 | 139815131 | Missense_Mutation | SNP | C | T | 16 | 124 | c.1541G>A     | c.(1540-1542)GGA>GAA | p.G514E        |
| Pat_26 | Post-Resistance | MAPK15   | 225689 | 37 | 8  | 144803950 | 144803950 | Missense_Mutation | SNP | C | T | 20 | 125 | c.1358C>T     | c.(1357-1359)CCC>CTC | p.P453L        |
| Pat_26 | Post-Resistance | EPPK1    | 83481  | 37 | 8  | 144942527 | 144942527 | Missense_Mutation | SNP | C | T | 16 | 304 | c.4895G>A     | c.(4894-4896)GGA>GAA | p.G1632E       |
| Pat_26 | Post-Resistance | CPSF1    | 29894  | 37 | 8  | 145621935 | 145621935 | Missense_Mutation | SNP | G | A | 26 | 221 | c.2704C>T     | c.(2704-2706)CGT>TGT | p.R902C        |
| Pat_26 | Post-Resistance | RANBP6   | 26953  | 37 | 9  | 6012658   | 6012658   | Missense_Mutation | SNP | T | G | 5  | 237 | c.2950A>C     | c.(2950-2952)ATA>CTA | p.I984L        |
| Pat_26 | Post-Resistance | GLDC     | 2731   | 37 | 9  | 6534743   | 6534743   | Missense_Mutation | SNP | G | A | 4  | 159 | c.2884C>T     | c.(2884-2886)CGG>TGG | p.R962W        |
| Pat_26 | Post-Resistance | CDKN2A   | 1029   | 37 | 9  | 21971017  | 21971017  | Missense_Mutation | SNP | G | A | 20 | 97  | c.341C>T      | c.(340-342)CCC>CTC   | p.P114L        |
| Pat_26 | Post-Resistance | UNC13B   | 10497  | 37 | 9  | 35400332  | 35400332  | Missense_Mutation | SNP | T | G | 44 | 370 | c.4129T>G     | c.(4129-4131)TTC>GTC | p.F1377V       |
| Pat_26 | Post-Resistance | ALDH1B1  | 219    | 37 | 9  | 38395779  | 38395779  | Missense_Mutation | SNP | C | T | 26 | 181 | c.34C>T       | c.(34-36)CTC>TTC     | p.L12F         |
| Pat_26 | Post-Resistance | FAM22F   | 54754  | 37 | 9  | 97082748  | 97082748  | Missense_Mutation | SNP | G | C | 4  | 68  | c.1110C>G     | c.(1108-1110)AAC>AAG | p.N370K        |
| Pat_26 | Post-Resistance | COL15A1  | 1306   | 37 | 9  | 101797339 | 101797339 | Missense_Mutation | SNP | A | G | 3  | 102 | c.2123A>G     | c.(2122-2124)AAG>AGG | p.K708R        |
| Pat_26 | Post-Resistance | SVEP1    | 79987  | 37 | 9  | 113171099 | 113171099 | Missense_Mutation | SNP | G | A | 33 | 347 | c.6781C>T     | c.(6781-6783)CCT>TCT | p.P2261S       |
| Pat_26 | Post-Resistance | ZNF883   | 169834 | 37 | 9  | 115760269 | 115760269 | Missense_Mutation | SNP | G | A | 7  | 94  | c.271C>T      | c.(271-273)CAT>TAT   | p.H91Y         |
| Pat_26 | Post-Resistance | CRB2     | 286204 | 37 | 9  | 126133014 | 126133014 | Missense_Mutation | SNP | C | T | 4  | 82  | c.1682C>T     | c.(1681-1683)CCG>CTG | p.P561L        |
| Pat_26 | Post-Resistance | PPP2R4   | 5524   | 37 | 9  | 131890300 | 131890300 | Missense_Mutation | SNP | G | A | 3  | 45  | c.274G>A      | c.(274-276)GAT>AAT   | p.D92N         |
| Pat_26 | Post-Resistance | ASB6     | 140459 | 37 | 9  | 132400230 | 132400230 | Missense_Mutation | SNP | C | T | 7  | 77  | c.1105G>A     | c.(1105-1107)GAG>AAG | p.E369K        |
| Pat_26 | Post-Resistance | TTF1     | 7270   | 37 | 9  | 135251433 | 135251433 | Nonsense_Mutation | SNP | G | A | 6  | 144 | c.2587C>T     | c.(2587-2589)CGA>TGA | p.R863*        |
| Pat_26 | Post-Resistance | REXO4    | 57109  | 37 | 9  | 136277539 | 136277539 | Missense_Mutation | SNP | G | T | 72 | 571 | c.790C>A      | c.(790-792)CGT>AGT   | p.R264S        |
| Pat_26 | Post-Resistance | C9orf172 | 389813 | 37 | 9  | 139740328 | 139740328 | Missense_Mutation | SNP | C | T | 3  | 24  | c.1462C>T     | c.(1462-1464)CGG>TGG | p.R488W        |
| Pat_26 | Post-Resistance | SCML2    | 10389  | 37 | X  | 18323215  | 18323215  | Missense_Mutation | SNP | G | A | 49 | 279 | c.607C>T      | c.(607-609)CAT>TAT   | p.H203Y        |
| Pat_26 | Post-Resistance | DCAF8L1  | 139425 | 37 | X  | 27999163  | 27999163  | Missense_Mutation | SNP | C | T | 20 | 143 | c.289G>A      | c.(289-291)GAG>AAG   | p.E97K         |
| Pat_26 | Post-Resistance | BRWD3    | 254065 | 37 | X  | 79943625  | 79943625  | Splice_Site       | SNP | C | T | 16 | 94  | c.3808_splice | c.e34-1              | p.D1270_splice |
| Pat_26 | Post-Resistance | NRK      | 203447 | 37 | X  | 105159770 | 105159770 | Missense_Mutation | SNP | C | T | 17 | 71  | c.2398C>T     | c.(2398-2400)CAT>TAT | p.H800Y        |
| Pat_26 | Post-Resistance | VSIG1    | 340547 | 37 | X  | 107320552 | 107320552 | Nonsense_Mutation | SNP | G | T | 34 | 158 | c.1105G>T     | c.(1105-1107)GAG>TAG | p.E369*        |
| Pat_26 | Post-Resistance | COL4A5   | 1287   | 37 | X  | 107858195 | 107858195 | Missense_Mutation | SNP | G | A | 19 | 68  | c.2450G>A     | c.(2449-2451)GGA>GAA | p.G817E        |
| Pat_26 | Post-Resistance | COL4A5   | 1287   | 37 | X  | 107923915 | 107923915 | Missense_Mutation | SNP | C | T | 7  | 64  | c.3949C>T     | c.(3949-3951)CCT>TCT | p.P1317S       |
| Pat_26 | Post-Resistance | IGSF1    | 3547   | 37 | X  | 130410004 | 130410004 | Missense_Mutation | SNP | T | A | 15 | 71  | c.2827A>T     | c.(2827-2829)ATC>TTC | p.I943F        |
| Pat_26 | Post-Resistance | MAGEC1   | 9947   | 37 | X  | 140995273 | 140995273 | Missense_Mutation | SNP | C | T | 8  | 31  | c.2083C>T     | c.(2083-2085)CCT>TCT | p.P695S        |
| Pat_29 | Pre-Treatment   | PTEN     | 5728   | 37 | 10 | 89653815  | 89653815  | Missense_Mutation | SNP | C | A | 19 | 114 | c.113C>A      | c.(112-114)CCT>CAT   | p.P38H         |
| Pat_29 | Pre-Treatment   | GOLGA8E  | 390535 | 37 | 15 | 23444064  | 23444064  | Missense_Mutation | SNP | G | C | 12 | 35  | c.719G>C      | c.(718-720)AGT>ACT   | p.S240T        |
| Pat_29 | Pre-Treatment   | MPP2     | 4355   | 37 | 17 | 41957260  | 41957260  | Missense_Mutation | SNP | G | A | 15 | 123 | c.1378C>T     | c.(1378-1380)CGC>TGC | p.R460C        |
| Pat_29 | Pre-Treatment   | ZNF799   | 90576  | 37 | 19 | 12501446  | 12501446  | Missense_Mutation | SNP | T | C | 5  | 56  | c.1766A>G     | c.(1765-1767)GAA>GGA | p.E589G        |
| Pat_29 | Pre-Treatment   | SCN9A    | 6335   | 37 | 2  | 167133552 | 167133552 | Missense_Mutation | SNP | C | T | 52 | 404 | c.2782G>A     | c.(2782-2784)GCT>ACT | p.A928T        |
| Pat_29 | Pre-Treatment   | PTGIS    | 5740   | 37 | 20 | 48129665  | 48129665  | Missense_Mutation | SNP | G | T | 6  | 69  | c.1158C>A     | c.(1156-1158)TTC>TTA | p.F386L        |

|        |                 |           |        |    |    |           |           |                   |     |    |    |    |     |                |                      |          |
|--------|-----------------|-----------|--------|----|----|-----------|-----------|-------------------|-----|----|----|----|-----|----------------|----------------------|----------|
| Pat_29 | Pre-Treatment   | HDAC10    | 83933  | 37 | 22 | 50686538  | 50686538  | Missense_Mutation | SNP | G  | A  | 5  | 38  | c.1118C>T      | c.(1117-1119)TCC>TTC | p.S373F  |
| Pat_29 | Pre-Treatment   | MAG11     | 9223   | 37 | 3  | 66023938  | 66023938  | Missense_Mutation | SNP | G  | T  | 16 | 109 | c.46C>A        | c.(46-48)CAC>AAC     | p.H16N   |
| Pat_29 | Pre-Treatment   | PIK3R1    | 5295   | 37 | 5  | 67588090  | 67588090  | Missense_Mutation | SNP | T  | G  | 14 | 113 | c.920T>G       | c.(919-921)CTG>CGG   | p.L307R  |
| Pat_29 | Post-Resistance | AMY2B     | 280    | 37 | 1  | 104120142 | 104120142 | Missense_Mutation | SNP | A  | G  | 6  | 142 | c.1132A>G      | c.(1132-1134)AAT>GAT | p.N378D  |
| Pat_29 | Post-Resistance | NBPF9     | 400818 | 37 | 1  | 144815953 | 144815953 | Missense_Mutation | SNP | A  | G  | 4  | 10  | c.1324A>G      | c.(1324-1326)AAT>GAT | p.N442D  |
| Pat_29 | Post-Resistance | PRG4      | 10216  | 37 | 1  | 186276052 | 186276052 | Missense_Mutation | SNP | A  | C  | 6  | 57  | c.1201A>C      | c.(1201-1203)ACC>CCC | p.T401P  |
| Pat_29 | Post-Resistance | PTEN      | 5728   | 37 | 10 | 89653815  | 89653815  | Missense_Mutation | SNP | C  | A  | 7  | 74  | c.113C>A       | c.(112-114)CCT>CAT   | p.P38H   |
| Pat_29 | Post-Resistance | LOC220429 | 220429 | 37 | 13 | 50466624  | 50466624  | Missense_Mutation | SNP | G  | T  | 6  | 53  | c.1898G>T      | c.(1897-1899)CGC>CTC | p.R633L  |
| Pat_29 | Post-Resistance | GOLGA8E   | 390535 | 37 | 15 | 23444064  | 23444064  | Missense_Mutation | SNP | G  | C  | 3  | 40  | c.719G>C       | c.(718-720)AGT>ACT   | p.S240T  |
| Pat_29 | Post-Resistance | SMG1      | 23049  | 37 | 16 | 18887642  | 18887642  | Missense_Mutation | SNP | T  | C  | 3  | 25  | c.1694A>G      | c.(1693-1695)TAT>TGT | p.Y565C  |
| Pat_29 | Post-Resistance | PRDM7     | 11105  | 37 | 16 | 90126823  | 90126823  | Missense_Mutation | SNP | T  | G  | 5  | 83  | c.1159A>C      | c.(1159-1161)ATG>CTG | p.M387L  |
| Pat_29 | Post-Resistance | MPP2      | 4355   | 37 | 17 | 41957260  | 41957260  | Missense_Mutation | SNP | G  | A  | 14 | 135 | c.1378C>T      | c.(1378-1380)CGC>TGC | p.R460C  |
| Pat_29 | Post-Resistance | RNF157    | 114804 | 37 | 17 | 74163736  | 74163736  | Missense_Mutation | SNP | C  | T  | 3  | 61  | c.439G>A       | c.(439-441)GCC>ACC   | p.A147T  |
| Pat_29 | Post-Resistance | ZNF780A   | 284323 | 37 | 19 | 40580552  | 40580552  | Missense_Mutation | SNP | T  | G  | 9  | 165 | c.1797A>C      | c.(1795-1797)CAA>CAC | p.Q599H  |
| Pat_29 | Post-Resistance | ZNF649    | 65251  | 37 | 19 | 52394652  | 52394652  | Missense_Mutation | SNP | C  | T  | 5  | 81  | c.737G>A       | c.(736-738)AGG>AAG   | p.R246K  |
| Pat_29 | Post-Resistance | ZNF578    | 147660 | 37 | 19 | 53014565  | 53014565  | Missense_Mutation | SNP | G  | A  | 5  | 117 | c.931G>A       | c.(931-933)GGT>AGT   | p.G311S  |
| Pat_29 | Post-Resistance | SCN9A     | 6335   | 37 | 2  | 167133552 | 167133552 | Missense_Mutation | SNP | C  | T  | 35 | 353 | c.2782G>A      | c.(2782-2784)GCT>ACT | p.A928T  |
| Pat_29 | Post-Resistance | GGTLC1    | 92086  | 37 | 20 | 23966333  | 23966333  | Missense_Mutation | SNP | C  | T  | 5  | 128 | c.502G>A       | c.(502-504)GTC>ATC   | p.V168I  |
| Pat_29 | Post-Resistance | FRG1B     | 284802 | 37 | 20 | 29625941  | 29625941  | Missense_Mutation | SNP | A  | T  | 3  | 63  | c.95A>T        | c.(94-96)GAT>GTT     | p.D32V   |
| Pat_29 | Post-Resistance | PTGIS     | 5740   | 37 | 20 | 48129665  | 48129665  | Missense_Mutation | SNP | G  | T  | 11 | 69  | c.1158C>A      | c.(1156-1158)TTC>TTA | p.F386L  |
| Pat_29 | Post-Resistance | CCT8      | 10694  | 37 | 21 | 30440001  | 30440001  | Missense_Mutation | SNP | A  | G  | 4  | 84  | c.257T>C       | c.(256-258)ATT>ACT   | p.I86T   |
| Pat_29 | Post-Resistance | PCNT      | 5116   | 37 | 21 | 47754527  | 47754527  | Missense_Mutation | SNP | A  | G  | 6  | 168 | c.484A>G       | c.(484-486)AGT>GGT   | p.S162G  |
| Pat_29 | Post-Resistance | ZNF721    | 170960 | 37 | 4  | 435653    | 435653    | Missense_Mutation | SNP | C  | T  | 3  | 60  | c.2603G>A      | c.(2602-2604)GGA>GAA | p.G868E  |
| Pat_29 | Post-Resistance | PIK3R1    | 5295   | 37 | 5  | 67588090  | 67588090  | Missense_Mutation | SNP | T  | G  | 12 | 82  | c.920T>G       | c.(919-921)CTG>CGG   | p.L307R  |
| Pat_29 | Post-Resistance | C6orf129  | 154467 | 37 | 6  | 37451045  | 37451045  | Missense_Mutation | SNP | G  | A  | 3  | 45  | c.211C>T       | c.(211-213)CGG>TGG   | p.R71W   |
| Pat_29 | Post-Resistance | KIF25     | 3834   | 37 | 6  | 168430272 | 168430272 | Missense_Mutation | SNP | T  | A  | 3  | 47  | c.7T>A         | c.(7-9)TGG>AGG       | p.W3R    |
| Pat_29 | Post-Resistance | SYBU      | 55638  | 37 | 8  | 110592227 | 110592227 | Missense_Mutation | SNP | C  | G  | 10 | 76  | c.535G>C       | c.(535-537)GGT>CGT   | p.G179R  |
| Pat_34 | Pre-Treatment   | CPSF3L    | 54973  | 37 | 1  | 1249257   | 1249257   | Missense_Mutation | SNP | A  | T  | 45 | 58  | c.812T>A       | c.(811-813)CTG>CAG   | p.L271Q  |
| Pat_34 | Pre-Treatment   | TAS1R3    | 83756  | 37 | 1  | 1267227   | 1267227   | Missense_Mutation | SNP | A  | G  | 14 | 26  | c.401A>G       | c.(400-402)TAC>TGC   | p.Y134C  |
| Pat_34 | Pre-Treatment   | TAS1R1    | 80835  | 37 | 1  | 6635049   | 6635049   | Missense_Mutation | SNP | C  | T  | 8  | 30  | c.857C>T       | c.(856-858)TCC>TTC   | p.S286F  |
| Pat_34 | Pre-Treatment   | KLHL21    | 9903   | 37 | 1  | 6653672   | 6653673   | Missense_Mutation | DNP | AC | CT | 11 | 45  | .1546_1547GT>A | c.(1546-1548)GTC>AGC | p.V516S  |
| Pat_34 | Pre-Treatment   | CAMTA1    | 23261  | 37 | 1  | 7806003   | 7806003   | Missense_Mutation | SNP | C  | T  | 67 | 104 | c.4469C>T      | c.(4468-4470)CCC>CTC | p.P1490L |
| Pat_34 | Pre-Treatment   | SLC2A7    | 155184 | 37 | 1  | 9063499   | 9063499   | Missense_Mutation | SNP | G  | A  | 22 | 55  | c.1399C>T      | c.(1399-1401)CCG>TCG | p.P467S  |
| Pat_34 | Pre-Treatment   | PTCHD2    | 57540  | 37 | 1  | 11574470  | 11574470  | Missense_Mutation | SNP | G  | A  | 3  | 49  | c.1340G>A      | c.(1339-1341)GGG>GAG | p.G447E  |
| Pat_34 | Pre-Treatment   | UQCRHL    | 440567 | 37 | 1  | 16133889  | 16133889  | Missense_Mutation | SNP | G  | A  | 73 | 181 | c.256C>T       | c.(256-258)CTC>TTC   | p.L86F   |
| Pat_34 | Pre-Treatment   | KLHDC7A   | 127707 | 37 | 1  | 18807959  | 18807959  | Missense_Mutation | SNP | G  | A  | 17 | 29  | c.484G>A       | c.(484-486)GGC>AGC   | p.G162S  |
| Pat_34 | Pre-Treatment   | PAX7      | 5081   | 37 | 1  | 19062357  | 19062357  | Missense_Mutation | SNP | G  | A  | 32 | 62  | c.1387G>A      | c.(1387-1389)GGC>AGC | p.G463S  |
| Pat_34 | Pre-Treatment   | USP48     | 84196  | 37 | 1  | 22055189  | 22055189  | Missense_Mutation | SNP | G  | A  | 42 | 99  | c.1324C>T      | c.(1324-1326)CGG>TGG | p.R442W  |
| Pat_34 | Pre-Treatment   | RHCE      | 6006   | 37 | 1  | 25718584  | 25718584  | Missense_Mutation | SNP | A  | T  | 52 | 112 | c.535T>A       | c.(535-537)TTT>ATT   | p.F179I  |
| Pat_34 | Pre-Treatment   | MAP3K6    | 9064   | 37 | 1  | 27683183  | 27683183  | Missense_Mutation | SNP | G  | A  | 11 | 31  | c.3422C>T      | c.(3421-3423)TCC>TTC | p.S1141F |
| Pat_34 | Pre-Treatment   | C1orf94   | 84970  | 37 | 1  | 34667756  | 34667756  | Missense_Mutation | SNP | C  | T  | 34 | 75  | c.772C>T       | c.(772-774)CCT>TCT   | p.P258S  |
| Pat_34 | Pre-Treatment   | YRDC      | 79693  | 37 | 1  | 38272853  | 38272853  | Missense_Mutation | SNP | T  | C  | 37 | 56  | c.424A>G       | c.(424-426)AAA>GAA   | p.K142E  |
| Pat_34 | Pre-Treatment   | HPCAL4    | 51440  | 37 | 1  | 40150247  | 40150247  | Missense_Mutation | SNP | G  | A  | 18 | 40  | c.29C>T        | c.(28-30)CCC>CTC     | p.P10L   |
| Pat_34 | Pre-Treatment   | BMP8B     | 656    | 37 | 1  | 40228808  | 40228809  | Missense_Mutation | DNP | CC | TG | 49 | 84  | .1014_1015GG>C | 012-1017)CTGGAC>CTC/ | p.D339N  |
| Pat_34 | Pre-Treatment   | ERMAP     | 114625 | 37 | 1  | 43308649  | 43308649  | Missense_Mutation | SNP | C  | T  | 34 | 99  | c.1174C>T      | c.(1174-1176)CGC>TGC | p.R392C  |
| Pat_34 | Pre-Treatment   | CYP4A11   | 1579   | 37 | 1  | 47399642  | 47399642  | Missense_Mutation | SNP | G  | A  | 16 | 23  | c.1198C>T      | c.(1198-1200)CCT>TCT | p.P400S  |
| Pat_34 | Pre-Treatment   | CYP4A11   | 1579   | 37 | 1  | 47399647  | 47399647  | Missense_Mutation | SNP | G  | A  | 16 | 23  | c.1193C>T      | c.(1192-1194)ACC>ATC | p.T398I  |

|        |               |           |           |    |    |           |           |                   |     |    |    |    |     |              |                      |          |
|--------|---------------|-----------|-----------|----|----|-----------|-----------|-------------------|-----|----|----|----|-----|--------------|----------------------|----------|
| Pat_34 | Pre-Treatment | C1orf168  | 199920    | 37 | 1  | 57189346  | 57189346  | Missense_Mutation | SNP | G  | A  | 7  | 22  | c.1889C>T    | c.(1888-1890)CCT>CTT | p.P630L  |
| Pat_34 | Pre-Treatment | TM2D1     | 83941     | 37 | 1  | 62190753  | 62190754  | Missense_Mutation | DNP | CC | TT | 33 | 41  | c.39_40GG>AA | (37-42)GAGGCC>GAAAC  | p.A14T   |
| Pat_34 | Pre-Treatment | KANK4     | 163782    | 37 | 1  | 62739098  | 62739098  | Missense_Mutation | SNP | T  | A  | 16 | 18  | c.1678A>T    | c.(1678-1680)ATT>TTT | p.I560F  |
| Pat_34 | Pre-Treatment | GNG12     | 55970     | 37 | 1  | 68171168  | 68171168  | Missense_Mutation | SNP | G  | A  | 25 | 42  | c.185C>T     | c.(184-186)CCT>CTT   | p.P62L   |
| Pat_34 | Pre-Treatment | GBP2      | 2634      | 37 | 1  | 89573974  | 89573974  | Missense_Mutation | SNP | C  | T  | 21 | 53  | c.1660G>A    | c.(1660-1662)GAA>AAA | p.E554K  |
| Pat_34 | Pre-Treatment | HFM1      | 164045    | 37 | 1  | 91841113  | 91841113  | Missense_Mutation | SNP | T  | G  | 51 | 74  | c.1567A>C    | c.(1567-1569)ATG>CTG | p.M523L  |
| Pat_34 | Pre-Treatment | ARHGAP29  | 9411      | 37 | 1  | 94650565  | 94650565  | Missense_Mutation | SNP | C  | T  | 22 | 65  | c.1972G>A    | c.(1972-1974)GGT>AGT | p.G658S  |
| Pat_34 | Pre-Treatment | DPYD      | 1806      | 37 | 1  | 98348842  | 98348842  | Missense_Mutation | SNP | C  | T  | 28 | 54  | c.128G>A     | c.(127-129)AGA>AAA   | p.R43K   |
| Pat_34 | Pre-Treatment | COL11A1   | 1301      | 37 | 1  | 103427740 | 103427740 | Missense_Mutation | SNP | C  | T  | 27 | 48  | c.3106G>A    | c.(3106-3108)GGA>AGA | p.G1036R |
| Pat_34 | Pre-Treatment | FNDC7     | 163479    | 37 | 1  | 109270504 | 109270504 | Missense_Mutation | SNP | C  | T  | 62 | 115 | c.1186C>T    | c.(1186-1188)CGT>TGT | p.R396C  |
| Pat_34 | Pre-Treatment | CD2       | 914       | 37 | 1  | 117297532 | 117297532 | Missense_Mutation | SNP | G  | A  | 18 | 55  | c.341G>A     | c.(340-342)GGA>GAA   | p.G114E  |
| Pat_34 | Pre-Treatment | NBPF10    | 100132406 | 37 | 1  | 145360574 | 145360574 | Missense_Mutation | SNP | G  | C  | 9  | 110 | c.9424G>C    | c.(9424-9426)GAT>CAT | p.D3142H |
| Pat_34 | Pre-Treatment | ANKRD35   | 148741    | 37 | 1  | 145561208 | 145561208 | Missense_Mutation | SNP | G  | A  | 14 | 15  | c.896G>A     | c.(895-897)AGG>AAG   | p.R299K  |
| Pat_34 | Pre-Treatment | FLG2      | 388698    | 37 | 1  | 152325517 | 152325517 | Missense_Mutation | SNP | C  | T  | 92 | 152 | c.4745G>A    | c.(4744-4746)AGT>AAT | p.S1582N |
| Pat_34 | Pre-Treatment | KPRP      | 448834    | 37 | 1  | 152733041 | 152733041 | Missense_Mutation | SNP | G  | A  | 10 | 24  | c.977G>A     | c.(976-978)CGA>CAA   | p.R326Q  |
| Pat_34 | Pre-Treatment | BCAN      | 63827     | 37 | 1  | 156616754 | 156616754 | Missense_Mutation | SNP | G  | A  | 5  | 14  | c.253G>A     | c.(253-255)GGC>AGC   | p.G85S   |
| Pat_34 | Pre-Treatment | OR6N2     | 81442     | 37 | 1  | 158746611 | 158746611 | Missense_Mutation | SNP | C  | T  | 26 | 72  | c.815G>A     | c.(814-816)CGA>CAA   | p.R272Q  |
| Pat_34 | Pre-Treatment | ITLN1     | 55600     | 37 | 1  | 160849190 | 160849190 | Missense_Mutation | SNP | C  | T  | 55 | 92  | c.700G>A     | c.(700-702)GGA>AGA   | p.G234R  |
| Pat_34 | Pre-Treatment | FMO4      | 2329      | 37 | 1  | 171310709 | 171310709 | Nonsense_Mutation | SNP | C  | T  | 28 | 67  | c.1408C>T    | c.(1408-1410)CAG>TAG | p.Q470*  |
| Pat_34 | Pre-Treatment | TNFSF18   | 8995      | 37 | 1  | 173010845 | 173010845 | Missense_Mutation | SNP | G  | A  | 48 | 115 | c.262C>T     | c.(262-264)CCC>TCC   | p.P88S   |
| Pat_34 | Pre-Treatment | TNN       | 63923     | 37 | 1  | 175092658 | 175092658 | Missense_Mutation | SNP | G  | A  | 23 | 53  | c.2773G>A    | c.(2773-2775)GAG>AAG | p.E925K  |
| Pat_34 | Pre-Treatment | ABL2      | 27        | 37 | 1  | 179077623 | 179077623 | Missense_Mutation | SNP | G  | T  | 20 | 36  | c.2779C>A    | c.(2779-2781)CAC>AAC | p.H927N  |
| Pat_34 | Pre-Treatment | CEP350    | 9857      | 37 | 1  | 180063085 | 180063085 | Missense_Mutation | SNP | A  | T  | 19 | 23  | c.7845A>T    | c.(7843-7845)AAA>AAT | p.K2615N |
| Pat_34 | Pre-Treatment | SMG7      | 9887      | 37 | 1  | 183486887 | 183486887 | Missense_Mutation | SNP | C  | T  | 85 | 222 | c.244C>T     | c.(244-246)CCG>TCG   | p.P82S   |
| Pat_34 | Pre-Treatment | PRG4      | 10216     | 37 | 1  | 186275983 | 186275983 | Missense_Mutation | SNP | C  | A  | 7  | 125 | c.1132C>A    | c.(1132-1134)CCC>ACC | p.P378T  |
| Pat_34 | Pre-Treatment | PRG4      | 10216     | 37 | 1  | 186276169 | 186276169 | Missense_Mutation | SNP | C  | A  | 6  | 79  | c.1318C>A    | c.(1318-1320)CCC>ACC | p.P440T  |
| Pat_34 | Pre-Treatment | FAM5C     | 339479    | 37 | 1  | 190067918 | 190067918 | Missense_Mutation | SNP | G  | A  | 39 | 102 | c.1531C>T    | c.(1531-1533)CAT>TAT | p.H511Y  |
| Pat_34 | Pre-Treatment | CFHR4     | 10877     | 37 | 1  | 196887393 | 196887393 | Missense_Mutation | SNP | G  | A  | 22 | 39  | c.853G>A     | c.(853-855)GGA>AGA   | p.G285R  |
| Pat_34 | Pre-Treatment | CFHR5     | 81494     | 37 | 1  | 196953220 | 196953220 | Missense_Mutation | SNP | C  | T  | 38 | 100 | c.383C>T     | c.(382-384)TCG>TTG   | p.S128L  |
| Pat_34 | Pre-Treatment | KIF14     | 9928      | 37 | 1  | 200574433 | 200574433 | Missense_Mutation | SNP | G  | A  | 29 | 72  | c.1724C>T    | c.(1723-1725)ACC>ATC | p.T575I  |
| Pat_34 | Pre-Treatment | CACNA1S   | 779       | 37 | 1  | 201009767 | 201009767 | Missense_Mutation | SNP | G  | A  | 10 | 28  | c.5209C>T    | c.(5209-5211)CCT>TCT | p.P1737S |
| Pat_34 | Pre-Treatment | TNNT2     | 7139      | 37 | 1  | 201342349 | 201342349 | Missense_Mutation | SNP | C  | T  | 56 | 88  | c.34G>A      | c.(34-36)GAG>AAG     | p.E12K   |
| Pat_34 | Pre-Treatment | LAMB3     | 3914      | 37 | 1  | 209791821 | 209791821 | Missense_Mutation | SNP | A  | G  | 14 | 43  | c.2885T>C    | c.(2884-2886)TTG>TCG | p.L962S  |
| Pat_34 | Pre-Treatment | SUSD4     | 55061     | 37 | 1  | 223396599 | 223396599 | Missense_Mutation | SNP | A  | T  | 22 | 41  | c.1436T>A    | c.(1435-1437)ATT>AAT | p.I479N  |
| Pat_34 | Pre-Treatment | KIAA1383  | 54627     | 37 | 1  | 232940851 | 232940851 | Missense_Mutation | SNP | C  | T  | 59 | 78  | c.82C>T      | c.(82-84)CTC>TTC     | p.L28F   |
| Pat_34 | Pre-Treatment | TOMM20    | 9804      | 37 | 1  | 235277223 | 235277223 | Missense_Mutation | SNP | C  | T  | 49 | 65  | c.253G>A     | c.(253-255)GAA>AAA   | p.E85K   |
| Pat_34 | Pre-Treatment | RGS7      | 6000      | 37 | 1  | 241261981 | 241261981 | Missense_Mutation | SNP | G  | A  | 11 | 27  | c.160C>T     | c.(160-162)CCT>TCT   | p.P54S   |
| Pat_34 | Pre-Treatment | OR2W5     | 441932    | 37 | 1  | 247655048 | 247655048 | Missense_Mutation | SNP | C  | T  | 38 | 86  | c.619C>T     | c.(619-621)CCT>TCT   | p.P207S  |
| Pat_34 | Pre-Treatment | OR2M7     | 391196    | 37 | 1  | 248486965 | 248486965 | Missense_Mutation | SNP | C  | T  | 48 | 66  | c.906G>A     | c.(904-906)ATG>ATA   | p.M302I  |
| Pat_34 | Pre-Treatment | BEND7     | 222389    | 37 | 10 | 13534798  | 13534798  | Missense_Mutation | SNP | T  | A  | 10 | 25  | c.494A>T     | c.(493-495)AAA>ATA   | p.K165I  |
| Pat_34 | Pre-Treatment | NEBL      | 10529     | 37 | 10 | 21102872  | 21102872  | Missense_Mutation | SNP | G  | A  | 17 | 63  | c.2342C>T    | c.(2341-2343)TCA>TTA | p.S781L  |
| Pat_34 | Pre-Treatment | KIAA1217  | 56243     | 37 | 10 | 24820788  | 24820788  | Missense_Mutation | SNP | G  | A  | 14 | 41  | c.3112G>A    | c.(3112-3114)GAA>AAA | p.E1038K |
| Pat_34 | Pre-Treatment | MYO3A     | 53904     | 37 | 10 | 26417388  | 26417388  | Missense_Mutation | SNP | C  | T  | 24 | 53  | c.2183C>T    | c.(2182-2184)TCC>TTC | p.S728F  |
| Pat_34 | Pre-Treatment | ACBD5     | 91452     | 37 | 10 | 27499931  | 27499931  | Missense_Mutation | SNP | G  | A  | 73 | 150 | c.1016C>T    | c.(1015-1017)TCT>TTT | p.S339F  |
| Pat_34 | Pre-Treatment | KIAA1462  | 57608     | 37 | 10 | 30316735  | 30316735  | Missense_Mutation | SNP | C  | T  | 15 | 31  | c.2342G>A    | c.(2341-2343)CGA>CAA | p.R781Q  |
| Pat_34 | Pre-Treatment | ZNF33A    | 7581      | 37 | 10 | 38344719  | 38344719  | Missense_Mutation | SNP | C  | T  | 78 | 161 | c.1664C>T    | c.(1663-1665)CCC>CTC | p.P555L  |
| Pat_34 | Pre-Treatment | HSD17B7P2 | 158160    | 37 | 10 | 38654432  | 38654432  | Missense_Mutation | SNP | A  | G  | 6  | 129 | c.524A>G     | c.(523-525)AAT>AGT   | p.N175S  |

|        |               |          |        |    |    |           |           |                   |     |    |    |     |     |                |                       |          |
|--------|---------------|----------|--------|----|----|-----------|-----------|-------------------|-----|----|----|-----|-----|----------------|-----------------------|----------|
| Pat_34 | Pre-Treatment | RTKN2    | 219790 | 37 | 10 | 63957995  | 63957995  | Missense_Mutation | SNP | T  | G  | 83  | 133 | c.1502A>C      | c.(1501-1503)AAG>ACG  | p.K501T  |
| Pat_34 | Pre-Treatment | CTNNA3   | 29119  | 37 | 10 | 68381479  | 68381479  | Missense_Mutation | SNP | C  | T  | 21  | 68  | c.1345G>A      | c.(1345-1347)GCC>ACC  | p.A449T  |
| Pat_34 | Pre-Treatment | RRP12    | 23223  | 37 | 10 | 99126533  | 99126533  | Missense_Mutation | SNP | C  | T  | 38  | 93  | c.3181G>A      | c.(3181-3183)GAG>AAG  | p.E1061K |
| Pat_34 | Pre-Treatment | PSD      | 5662   | 37 | 10 | 104176662 | 104176662 | Missense_Mutation | SNP | G  | A  | 10  | 23  | c.134C>T       | c.(133-135)TCC>TTC    | p.S45F   |
| Pat_34 | Pre-Treatment | COL17A1  | 1308   | 37 | 10 | 105810641 | 105810641 | Missense_Mutation | SNP | C  | T  | 12  | 51  | c.2057G>A      | c.(2056-2058)GGG>GAG  | p.G686E  |
| Pat_34 | Pre-Treatment | CDHR5    | 53841  | 37 | 11 | 618833    | 618833    | Missense_Mutation | SNP | G  | C  | 4   | 98  | c.1726C>G      | c.(1726-1728)CCA>GCA  | p.P576A  |
| Pat_34 | Pre-Treatment | OR52R1   | 119695 | 37 | 11 | 4824842   | 4824842   | Missense_Mutation | SNP | G  | A  | 24  | 61  | c.1006C>T      | c.(1006-1008)CCA>TCA  | p.P336S  |
| Pat_34 | Pre-Treatment | MMP26    | 56547  | 37 | 11 | 5011900   | 5011900   | Nonsense_Mutation | SNP | G  | A  | 52  | 64  | c.393G>A       | c.(391-393)TGG>TGA    | p.W131*  |
| Pat_34 | Pre-Treatment | OR52B6   | 340980 | 37 | 11 | 5602186   | 5602186   | Missense_Mutation | SNP | C  | G  | 5   | 33  | c.80C>G        | c.(79-81)ACT>AGT      | p.T27S   |
| Pat_34 | Pre-Treatment | OR56A3   | 390083 | 37 | 11 | 5969466   | 5969466   | Missense_Mutation | SNP | G  | A  | 32  | 45  | c.890G>A       | c.(889-891)GGG>GAG    | p.G297E  |
| Pat_34 | Pre-Treatment | OR56A1   | 120796 | 37 | 11 | 6048048   | 6048048   | Missense_Mutation | SNP | G  | A  | 34  | 55  | c.887C>T       | c.(886-888)CCT>CTT    | p.P296L  |
| Pat_34 | Pre-Treatment | FAM160A2 | 84067  | 37 | 11 | 6244994   | 6244994   | Missense_Mutation | SNP | G  | A  | 39  | 74  | c.623C>T       | c.(622-624)CCC>CTC    | p.P208L  |
| Pat_34 | Pre-Treatment | OR10A6   | 390093 | 37 | 11 | 7949948   | 7949948   | Missense_Mutation | SNP | C  | T  | 61  | 86  | c.262G>A       | c.(262-264)GAA>AAA    | p.E88K   |
| Pat_34 | Pre-Treatment | STK33    | 65975  | 37 | 11 | 8496277   | 8496277   | Missense_Mutation | SNP | C  | T  | 19  | 40  | c.176G>A       | c.(175-177)AGA>AAA    | p.R59K   |
| Pat_34 | Pre-Treatment | RNF141   | 50862  | 37 | 11 | 10555660  | 10555660  | Missense_Mutation | SNP | A  | C  | 127 | 249 | c.46T>G        | c.(46-48)TTA>GTA      | p.L16V   |
| Pat_34 | Pre-Treatment | ANO3     | 63982  | 37 | 11 | 26621181  | 26621181  | Missense_Mutation | SNP | T  | A  | 51  | 83  | c.1756T>A      | c.(1756-1758)TTC>ATC  | p.F586I  |
| Pat_34 | Pre-Treatment | MPPED2   | 744    | 37 | 11 | 30516918  | 30516918  | Missense_Mutation | SNP | G  | A  | 47  | 117 | c.461C>T       | c.(460-462)TCC>TTC    | p.S154F  |
| Pat_34 | Pre-Treatment | LRP4     | 4038   | 37 | 11 | 46920574  | 46920574  | Missense_Mutation | SNP | A  | C  | 12  | 25  | c.557T>G       | c.(556-558)GTG>GGG    | p.V186G  |
| Pat_34 | Pre-Treatment | OR4X2    | 119764 | 37 | 11 | 48266686  | 48266686  | Missense_Mutation | SNP | C  | T  | 51  | 102 | c.31C>T        | c.(31-33)CCC>TCC      | p.P11S   |
| Pat_34 | Pre-Treatment | OR4S2    | 219431 | 37 | 11 | 55418495  | 55418495  | Missense_Mutation | SNP | G  | A  | 39  | 84  | c.116G>A       | c.(115-117)GGA>GAA    | p.G39E   |
| Pat_34 | Pre-Treatment | OR5L1    | 219437 | 37 | 11 | 55579578  | 55579578  | Missense_Mutation | SNP | G  | A  | 87  | 162 | c.636G>A       | c.(634-636)ATG>ATA    | p.M212I  |
| Pat_34 | Pre-Treatment | OR5D18   | 219438 | 37 | 11 | 55588003  | 55588003  | Missense_Mutation | SNP | G  | A  | 43  | 84  | c.898G>A       | c.(898-900)GAT>AAT    | p.D300N  |
| Pat_34 | Pre-Treatment | OR5J2    | 282775 | 37 | 11 | 55944567  | 55944568  | Missense_Mutation | DNP | CC | TT | 52  | 122 | c.474_475CC>TT | (472-477)ATCCAC>ATTTA | p.H159Y  |
| Pat_34 | Pre-Treatment | OR10Q1   | 219960 | 37 | 11 | 57995785  | 57995785  | Missense_Mutation | SNP | G  | A  | 17  | 32  | c.563C>T       | c.(562-564)CCC>CTC    | p.P188L  |
| Pat_34 | Pre-Treatment | OR5A1    | 219982 | 37 | 11 | 59211441  | 59211441  | Missense_Mutation | SNP | C  | T  | 75  | 130 | c.800C>T       | c.(799-801)TCC>TTC    | p.S267F  |
| Pat_34 | Pre-Treatment | OR4D6    | 219983 | 37 | 11 | 59224986  | 59224986  | Missense_Mutation | SNP | G  | A  | 36  | 73  | c.553G>A       | c.(553-555)GTA>ATA    | p.V185I  |
| Pat_34 | Pre-Treatment | SLC22A11 | 55867  | 37 | 11 | 64323786  | 64323786  | Nonsense_Mutation | SNP | G  | A  | 4   | 7   | c.315G>A       | c.(313-315)TGG>TGA    | p.W105*  |
| Pat_34 | Pre-Treatment | MEN1     | 4221   | 37 | 11 | 64575049  | 64575049  | Missense_Mutation | SNP | G  | A  | 33  | 24  | c.773C>T       | c.(772-774)TCG>TTG    | p.S258L  |
| Pat_34 | Pre-Treatment | TSGA10IP | 254187 | 37 | 11 | 65714942  | 65714942  | Nonsense_Mutation | SNP | C  | T  | 5   | 12  | c.646C>T       | c.(646-648)CAG>TAG    | p.Q216*  |
| Pat_34 | Pre-Treatment | CPT1A    | 1374   | 37 | 11 | 68564371  | 68564371  | Missense_Mutation | SNP | G  | A  | 24  | 49  | c.724C>T       | c.(724-726)CTC>TTC    | p.L242F  |
| Pat_34 | Pre-Treatment | USP35    | 57558  | 37 | 11 | 77920570  | 77920570  | Missense_Mutation | SNP | G  | A  | 19  | 24  | c.1669G>A      | c.(1669-1671)GAG>AAG  | p.E557K  |
| Pat_34 | Pre-Treatment | CCDC83   | 220047 | 37 | 11 | 85593676  | 85593676  | Missense_Mutation | SNP | G  | A  | 22  | 66  | c.301G>A       | c.(301-303)GAA>AAA    | p.E101K  |
| Pat_34 | Pre-Treatment | PGR      | 5241   | 37 | 11 | 100920777 | 100920777 | Missense_Mutation | SNP | C  | T  | 30  | 48  | c.2371G>A      | c.(2371-2373)GAA>AAA  | p.E791K  |
| Pat_34 | Pre-Treatment | MMP3     | 4314   | 37 | 11 | 102713427 | 102713427 | Nonsense_Mutation | SNP | C  | T  | 14  | 45  | c.326G>A       | c.(325-327)TGG>TAG    | p.W109*  |
| Pat_34 | Pre-Treatment | MMP13    | 4322   | 37 | 11 | 102815074 | 102815074 | Missense_Mutation | SNP | C  | T  | 111 | 172 | c.1337G>A      | c.(1336-1338)GGA>GAA  | p.G446E  |
| Pat_34 | Pre-Treatment | MMP13    | 4322   | 37 | 11 | 102826171 | 102826171 | Missense_Mutation | SNP | C  | T  | 71  | 178 | c.172G>A       | c.(172-174)GAG>AAG    | p.E58K   |
| Pat_34 | Pre-Treatment | MMP13    | 4322   | 37 | 11 | 102826209 | 102826209 | Missense_Mutation | SNP | G  | A  | 82  | 185 | c.134C>T       | c.(133-135)TCA>TTA    | p.S45L   |
| Pat_34 | Pre-Treatment | CASP4    | 837    | 37 | 11 | 104819383 | 104819383 | Missense_Mutation | SNP | C  | A  | 42  | 99  | c.802G>T       | c.(802-804)GTC>TTC    | p.V268F  |
| Pat_34 | Pre-Treatment | APOA5    | 116519 | 37 | 11 | 116661479 | 116661479 | Missense_Mutation | SNP | C  | T  | 35  | 68  | c.466G>A       | c.(466-468)GAA>AAA    | p.E156K  |
| Pat_34 | Pre-Treatment | CCDC15   | 80071  | 37 | 11 | 124857585 | 124857585 | Missense_Mutation | SNP | C  | A  | 9   | 200 | c.1463C>A      | c.(1462-1464)CCC>CAC  | p.P488H  |
| Pat_34 | Pre-Treatment | IGSF9B   | 22997  | 37 | 11 | 133801026 | 133801026 | Missense_Mutation | SNP | C  | T  | 16  | 29  | c.1372G>A      | c.(1372-1374)GGG>AGG  | p.G458R  |
| Pat_34 | Pre-Treatment | SLC6A13  | 6540   | 37 | 12 | 344366    | 344366    | Missense_Mutation | SNP | G  | A  | 21  | 45  | c.721C>T       | c.(721-723)CCT>TCT    | p.P241S  |
| Pat_34 | Pre-Treatment | B4GALNT3 | 283358 | 37 | 12 | 662585    | 662585    | Missense_Mutation | SNP | T  | G  | 11  | 29  | c.1496T>G      | c.(1495-1497)TTC>TGC  | p.F499C  |
| Pat_34 | Pre-Treatment | DDX47    | 51202  | 37 | 12 | 12976886  | 12976886  | Missense_Mutation | SNP | G  | A  | 79  | 149 | c.833G>A       | c.(832-834)AGA>AAA    | p.R278K  |
| Pat_34 | Pre-Treatment | COL2A1   | 1280   | 37 | 12 | 48393734  | 48393734  | Missense_Mutation | SNP | G  | A  | 38  | 69  | c.260C>T       | c.(259-261)CCC>CTC    | p.P87L   |
| Pat_34 | Pre-Treatment | ASB8     | 140461 | 37 | 12 | 48545051  | 48545051  | Missense_Mutation | SNP | G  | A  | 38  | 79  | c.167C>T       | c.(166-168)CCC>CTC    | p.P56L   |
| Pat_34 | Pre-Treatment | ZNF641   | 121274 | 37 | 12 | 48741114  | 48741114  | Missense_Mutation | SNP | G  | A  | 13  | 17  | c.239C>T       | c.(238-240)CCC>CTC    | p.P80L   |



|        |               |          |        |    |    |           |           |                   |     |   |   |     |     |           |                      |          |
|--------|---------------|----------|--------|----|----|-----------|-----------|-------------------|-----|---|---|-----|-----|-----------|----------------------|----------|
| Pat_34 | Pre-Treatment | KRT83    | 3889   | 37 | 12 | 52709803  | 52709803  | Missense_Mutation | SNP | G | A | 26  | 46  | c.1136C>T | c.(1135-1137)GCC>GTC | p.A379V  |
| Pat_34 | Pre-Treatment | KRT71    | 112802 | 37 | 12 | 52940196  | 52940196  | Missense_Mutation | SNP | G | A | 15  | 46  | c.1199C>T | c.(1198-1200)GCC>GTC | p.A400V  |
| Pat_34 | Pre-Treatment | SOAT2    | 8435   | 37 | 12 | 53512692  | 53512692  | Nonsense_Mutation | SNP | G | A | 36  | 84  | c.882G>A  | c.(880-882)TGG>TGA   | p.W294*  |
| Pat_34 | Pre-Treatment | HOXC6    | 3223   | 37 | 12 | 54422402  | 54422402  | Missense_Mutation | SNP | C | T | 39  | 66  | c.97C>T   | c.(97-99)CCA>TCA     | p.P33S   |
| Pat_34 | Pre-Treatment | GPR84    | 53831  | 37 | 12 | 54757263  | 54757263  | Missense_Mutation | SNP | G | A | 10  | 39  | c.373C>T  | c.(373-375)CCT>TCT   | p.P125S  |
| Pat_34 | Pre-Treatment | OR6C1    | 390321 | 37 | 12 | 55714642  | 55714642  | Missense_Mutation | SNP | G | A | 19  | 49  | c.259G>A  | c.(259-261)GAT>AAT   | p.D87N   |
| Pat_34 | Pre-Treatment | OR6C68   | 403284 | 37 | 12 | 55887086  | 55887086  | Missense_Mutation | SNP | C | T | 19  | 28  | c.940C>T  | c.(940-942)CGT>TGT   | p.R314C  |
| Pat_34 | Pre-Treatment | ERBB3    | 2065   | 37 | 12 | 56489517  | 56489517  | Missense_Mutation | SNP | G | A | 61  | 78  | c.1982G>A | c.(1981-1983)GGC>GAC | p.G661D  |
| Pat_34 | Pre-Treatment | MIP      | 4284   | 37 | 12 | 56848061  | 56848061  | Nonsense_Mutation | SNP | G | A | 32  | 77  | c.337C>T  | c.(337-339)CGA>TGA   | p.R113*  |
| Pat_34 | Pre-Treatment | CAPS2    | 84698  | 37 | 12 | 75692690  | 75692690  | Missense_Mutation | SNP | G | A | 26  | 50  | c.968C>T  | c.(967-969)TCC>TTC   | p.S323F  |
| Pat_34 | Pre-Treatment | ACSS3    | 79611  | 37 | 12 | 81627225  | 81627225  | Missense_Mutation | SNP | G | A | 82  | 126 | c.1694G>A | c.(1693-1695)AGA>AAA | p.R565K  |
| Pat_34 | Pre-Treatment | C12orf12 | 196477 | 37 | 12 | 91347831  | 91347831  | Missense_Mutation | SNP | G | A | 39  | 26  | c.689C>T  | c.(688-690)TCC>TTC   | p.S230F  |
| Pat_34 | Pre-Treatment | USP44    | 84101  | 37 | 12 | 95914958  | 95914958  | Missense_Mutation | SNP | C | T | 49  | 116 | c.1754G>A | c.(1753-1755)CGA>CAA | p.R585Q  |
| Pat_34 | Pre-Treatment | SLC17A8  | 246213 | 37 | 12 | 100811903 | 100811903 | Missense_Mutation | SNP | C | T | 44  | 98  | c.1394C>T | c.(1393-1395)CCC>CTC | p.P465L  |
| Pat_34 | Pre-Treatment | MYBPC1   | 4604   | 37 | 12 | 102025848 | 102025848 | Missense_Mutation | SNP | G | A | 58  | 117 | c.413G>A  | c.(412-414)GGA>GAA   | p.G138E  |
| Pat_34 | Pre-Treatment | STAB2    | 55576  | 37 | 12 | 103984679 | 103984679 | Missense_Mutation | SNP | G | A | 44  | 54  | c.86G>A   | c.(85-87)AGA>AAA     | p.R29K   |
| Pat_34 | Pre-Treatment | NUAK1    | 9891   | 37 | 12 | 106461061 | 106461061 | Missense_Mutation | SNP | G | A | 38  | 71  | c.1505C>T | c.(1504-1506)CCC>CTC | p.P502L  |
| Pat_34 | Pre-Treatment | MED13L   | 23389  | 37 | 12 | 116420380 | 116420380 | Missense_Mutation | SNP | G | A | 9   | 45  | c.4984C>T | c.(4984-4986)CCC>TCC | p.P1662S |
| Pat_34 | Pre-Treatment | GCN1L1   | 10985  | 37 | 12 | 120594729 | 120594729 | Missense_Mutation | SNP | G | A | 42  | 101 | c.3155C>T | c.(3154-3156)TCG>TTG | p.S1052L |
| Pat_34 | Pre-Treatment | DNAH10   | 196385 | 37 | 12 | 124330625 | 124330625 | Missense_Mutation | SNP | G | A | 30  | 53  | c.5384G>A | c.(5383-5385)GGC>GAC | p.G1795D |
| Pat_34 | Pre-Treatment | TMEM132D | 121256 | 37 | 12 | 129559037 | 129559037 | Missense_Mutation | SNP | G | A | 17  | 30  | c.2683C>T | c.(2683-2685)CCC>TCC | p.P895S  |
| Pat_34 | Pre-Treatment | NBEA     | 26960  | 37 | 13 | 35756549  | 35756549  | Missense_Mutation | SNP | C | T | 56  | 97  | c.4715C>T | c.(4714-4716)TCG>TTG | p.S1572L |
| Pat_34 | Pre-Treatment | FREM2    | 341640 | 37 | 13 | 39263960  | 39263960  | Missense_Mutation | SNP | A | T | 21  | 59  | c.2479A>T | c.(2479-2481)AAC>TAC | p.N827Y  |
| Pat_34 | Pre-Treatment | NALCN    | 259232 | 37 | 13 | 101755534 | 101755534 | Missense_Mutation | SNP | C | T | 64  | 131 | c.3046G>A | c.(3046-3048)GAA>AAA | p.E1016K |
| Pat_34 | Pre-Treatment | COL4A1   | 1282   | 37 | 13 | 110838732 | 110838732 | Missense_Mutation | SNP | C | T | 58  | 109 | c.1897G>A | c.(1897-1899)GGT>AGT | p.G633S  |
| Pat_34 | Pre-Treatment | ADCY4    | 196883 | 37 | 14 | 24795044  | 24795044  | Missense_Mutation | SNP | C | T | 5   | 24  | c.1705G>A | c.(1705-1707)GAG>AAG | p.E569K  |
| Pat_34 | Pre-Treatment | NFATC4   | 4776   | 37 | 14 | 24845785  | 24845785  | Missense_Mutation | SNP | C | T | 13  | 29  | c.2342C>T | c.(2341-2343)TCC>TTC | p.S781F  |
| Pat_34 | Pre-Treatment | STRN3    | 29966  | 37 | 14 | 31420127  | 31420127  | Missense_Mutation | SNP | G | A | 36  | 80  | c.484C>T  | c.(484-486)CCC>TCC   | p.P162S  |
| Pat_34 | Pre-Treatment | AKAP6    | 9472   | 37 | 14 | 33292765  | 33292765  | Missense_Mutation | SNP | G | A | 23  | 47  | c.5746G>A | c.(5746-5748)GTA>ATA | p.V1916I |
| Pat_34 | Pre-Treatment | NPAS3    | 64067  | 37 | 14 | 33684606  | 33684606  | Missense_Mutation | SNP | G | A | 25  | 36  | c.359G>A  | c.(358-360)GGC>GAC   | p.G120D  |
| Pat_34 | Pre-Treatment | SPTB     | 6710   | 37 | 14 | 65260474  | 65260474  | Missense_Mutation | SNP | G | A | 28  | 45  | c.1907C>T | c.(1906-1908)TCC>TTC | p.S636F  |
| Pat_34 | Pre-Treatment | SLC8A3   | 6547   | 37 | 14 | 70634304  | 70634304  | Missense_Mutation | SNP | C | T | 14  | 29  | c.836G>A  | c.(835-837)GGT>GAT   | p.G279D  |
| Pat_34 | Pre-Treatment | TMEM90A  | 646658 | 37 | 14 | 74876101  | 74876101  | Missense_Mutation | SNP | G | A | 44  | 91  | c.347C>T  | c.(346-348)ACC>ATC   | p.T116I  |
| Pat_34 | Pre-Treatment | GPR68    | 8111   | 37 | 14 | 91700776  | 91700776  | Missense_Mutation | SNP | C | T | 3   | 8   | c.619G>A  | c.(619-621)GGC>AGC   | p.G207S  |
| Pat_34 | Pre-Treatment | CATSPERB | 79820  | 37 | 14 | 92047331  | 92047331  | Missense_Mutation | SNP | G | A | 23  | 38  | c.3253C>T | c.(3253-3255)CCG>TCG | p.P1085S |
| Pat_34 | Pre-Treatment | SERPINA4 | 5267   | 37 | 14 | 95033402  | 95033402  | Missense_Mutation | SNP | G | A | 14  | 24  | c.745G>A  | c.(745-747)GAC>AAC   | p.D249N  |
| Pat_34 | Pre-Treatment | DICER1   | 23405  | 37 | 14 | 95595923  | 95595923  | Missense_Mutation | SNP | G | A | 24  | 64  | c.620C>T  | c.(619-621)GCT>GTT   | p.A207V  |
| Pat_34 | Pre-Treatment | GOLGA8E  | 390535 | 37 | 15 | 23444052  | 23444052  | Missense_Mutation | SNP | G | A | 4   | 28  | c.707G>A  | c.(706-708)CGG>CAG   | p.R236Q  |
| Pat_34 | Pre-Treatment | APBA2    | 321    | 37 | 15 | 29398915  | 29398915  | Missense_Mutation | SNP | G | C | 23  | 63  | c.1810G>C | c.(1810-1812)GGC>CGC | p.G604R  |
| Pat_34 | Pre-Treatment | TRPM1    | 4308   | 37 | 15 | 31294602  | 31294602  | Missense_Mutation | SNP | G | A | 73  | 130 | c.4235C>T | c.(4234-4236)TCC>TTC | p.S1412F |
| Pat_34 | Pre-Treatment | C15orf55 | 256646 | 37 | 15 | 34646835  | 34646835  | Missense_Mutation | SNP | G | A | 41  | 83  | c.1180G>A | c.(1180-1182)GAA>AAA | p.E394K  |
| Pat_34 | Pre-Treatment | THBS1    | 7057   | 37 | 15 | 39881178  | 39881178  | Missense_Mutation | SNP | C | T | 154 | 320 | c.1664C>T | c.(1663-1665)CCC>CTC | p.P555L  |
| Pat_34 | Pre-Treatment | GCOM1    | 145781 | 37 | 15 | 57967226  | 57967226  | Missense_Mutation | SNP | G | A | 16  | 44  | c.1264G>A | c.(1264-1266)GAA>AAA | p.E422K  |
| Pat_34 | Pre-Treatment | LIPC     | 3990   | 37 | 15 | 58830612  | 58830612  | Missense_Mutation | SNP | G | A | 140 | 262 | c.169G>A  | c.(169-171)GAA>AAA   | p.E57K   |
| Pat_34 | Pre-Treatment | IQCH     | 64799  | 37 | 15 | 67687881  | 67687881  | Missense_Mutation | SNP | G | A | 38  | 96  | c.1885G>A | c.(1885-1887)GAT>AAT | p.D629N  |
| Pat_34 | Pre-Treatment | TBC1D2B  | 23102  | 37 | 15 | 78290635  | 78290635  | Missense_Mutation | SNP | C | T | 3   | 20  | c.2759G>A | c.(2758-2760)CGA>CAA | p.R920Q  |
| Pat_34 | Pre-Treatment | KIAA1024 | 23251  | 37 | 15 | 79750195  | 79750195  | Missense_Mutation | SNP | A | G | 91  | 55  | c.1706A>G | c.(1705-1707)AAT>AGT | p.N569S  |

|        |               |           |        |    |    |          |          |                   |     |    |    |     |     |                |                          |          |
|--------|---------------|-----------|--------|----|----|----------|----------|-------------------|-----|----|----|-----|-----|----------------|--------------------------|----------|
| Pat_34 | Pre-Treatment | KIAA1199  | 57214  | 37 | 15 | 81199085 | 81199085 | Missense_Mutation | SNP | T  | C  | 33  | 75  | c.1493T>C      | c.(1492-1494)ATC>ACC     | p.I498T  |
| Pat_34 | Pre-Treatment | BNC1      | 646    | 37 | 15 | 83926276 | 83926276 | Missense_Mutation | SNP | G  | A  | 31  | 108 | c.2903C>T      | c.(2902-2904)TCG>TTG     | p.S968L  |
| Pat_34 | Pre-Treatment | LRRC28    | 123355 | 37 | 15 | 99892582 | 99892582 | Nonsense_Mutation | SNP | C  | T  | 149 | 133 | c.601C>T       | c.(601-603)CGA>TGA       | p.R201*  |
| Pat_34 | Pre-Treatment | CACNA1H   | 8912   | 37 | 16 | 1262003  | 1262003  | Missense_Mutation | SNP | G  | T  | 59  | 131 | c.4624G>T      | c.(4624-4626)GTC>TTC     | p.V1542F |
| Pat_34 | Pre-Treatment | MEFV      | 4210   | 37 | 16 | 3306401  | 3306401  | Nonsense_Mutation | SNP | C  | A  | 16  | 87  | c.187G>T       | c.(187-189)GAA>TAA       | p.E63*   |
| Pat_34 | Pre-Treatment | GRIN2A    | 2903   | 37 | 16 | 9858426  | 9858426  | Missense_Mutation | SNP | T  | C  | 17  | 40  | c.2975A>G      | c.(2974-2976)AAC>AGC     | p.N992S  |
| Pat_34 | Pre-Treatment | GRIN2A    | 2903   | 37 | 16 | 9858531  | 9858531  | Missense_Mutation | SNP | C  | T  | 38  | 85  | c.2870G>A      | c.(2869-2871)GGA>GAA     | p.G957E  |
| Pat_34 | Pre-Treatment | DNAH3     | 55567  | 37 | 16 | 20976195 | 20976195 | Missense_Mutation | SNP | C  | T  | 11  | 25  | c.9011G>A      | c.(9010-9012)GGA>GAA     | p.G3004E |
| Pat_34 | Pre-Treatment | CACNG3    | 10368  | 37 | 16 | 24268230 | 24268230 | Missense_Mutation | SNP | G  | A  | 20  | 43  | c.155G>A       | c.(154-156)AGG>AAG       | p.R52K   |
| Pat_34 | Pre-Treatment | MYLPF     | 29895  | 37 | 16 | 30387514 | 30387514 | Missense_Mutation | SNP | G  | A  | 44  | 76  | c.145G>A       | c.(145-147)GAC>AAC       | p.D49N   |
| Pat_34 | Pre-Treatment | SRCAP     | 10847  | 37 | 16 | 30750632 | 30750632 | Nonsense_Mutation | SNP | C  | T  | 21  | 46  | c.9271C>T      | c.(9271-9273)CAG>TAG     | p.Q3091* |
| Pat_34 | Pre-Treatment | TSNAXIP1  | 55815  | 37 | 16 | 67854818 | 67854818 | Missense_Mutation | SNP | G  | A  | 138 | 254 | c.62G>A        | c.(61-63)CGA>CAA         | p.R21Q   |
| Pat_34 | Pre-Treatment | KIAA1609  | 57707  | 37 | 16 | 84520258 | 84520258 | Missense_Mutation | SNP | C  | T  | 31  | 48  | c.937G>A       | c.(937-939)GAG>AAG       | p.E313K  |
| Pat_34 | Pre-Treatment | PRPF8     | 10594  | 37 | 17 | 1563786  | 1563786  | Missense_Mutation | SNP | C  | G  | 105 | 204 | c.4725G>C      | c.(4723-4725)CAG>CAC     | p.Q1575H |
| Pat_34 | Pre-Treatment | KIAA0664  | 23277  | 37 | 17 | 2601572  | 2601572  | Missense_Mutation | SNP | G  | A  | 4   | 9   | c.1465C>T      | c.(1465-1467)CCC>TCC     | p.P489S  |
| Pat_34 | Pre-Treatment | ALOX12    | 239    | 37 | 17 | 6913569  | 6913569  | Missense_Mutation | SNP | C  | A  | 17  | 37  | c.1819C>A      | c.(1819-1821)CTG>ATG     | p.L607M  |
| Pat_34 | Pre-Treatment | FXR2      | 9513   | 37 | 17 | 7498047  | 7498047  | Missense_Mutation | SNP | C  | A  | 43  | 106 | c.860G>T       | c.(859-861)AGC>ATC       | p.S287I  |
| Pat_34 | Pre-Treatment | DNAH9     | 1770   | 37 | 17 | 11556287 | 11556287 | Missense_Mutation | SNP | G  | A  | 21  | 47  | c.2563G>A      | c.(2563-2565)GAA>AAA     | p.E855K  |
| Pat_34 | Pre-Treatment | MEIS3P1   | 4213   | 37 | 17 | 15690494 | 15690494 | Nonsense_Mutation | SNP | C  | T  | 12  | 18  | c.310C>T       | c.(310-312)CGA>TGA       | p.R104*  |
| Pat_34 | Pre-Treatment | MYO15A    | 51168  | 37 | 17 | 18040988 | 18040988 | Missense_Mutation | SNP | G  | A  | 8   | 20  | c.4870G>A      | c.(4870-4872)GAG>AAG     | p.E1624K |
| Pat_34 | Pre-Treatment | KIAA0100  | 9703   | 37 | 17 | 26960304 | 26960304 | Missense_Mutation | SNP | G  | A  | 53  | 122 | c.3581C>T      | c.(3580-3582)TCT>TTT     | p.S1194F |
| Pat_34 | Pre-Treatment | ERAL1     | 26284  | 37 | 17 | 27183350 | 27183350 | Missense_Mutation | SNP | C  | T  | 75  | 138 | c.352C>T       | c.(352-354)CTC>TTC       | p.L118F  |
| Pat_34 | Pre-Treatment | PHF12     | 57649  | 37 | 17 | 27251145 | 27251145 | Missense_Mutation | SNP | G  | A  | 3   | 33  | c.497C>T       | c.(496-498)ACA>ATA       | p.T166I  |
| Pat_34 | Pre-Treatment | GSDMB     | 55876  | 37 | 17 | 38073346 | 38073346 | Missense_Mutation | SNP | G  | T  | 22  | 46  | c.224C>A       | c.(223-225)TCT>TAT       | p.S75Y   |
| Pat_34 | Pre-Treatment | KRTAP1-5  | 83895  | 37 | 17 | 39183145 | 39183145 | Missense_Mutation | SNP | A  | G  | 12  | 44  | c.263T>C       | c.(262-264)ATC>ACC       | p.I88T   |
| Pat_34 | Pre-Treatment | KRTAP1-3  | 81850  | 37 | 17 | 39190779 | 39190779 | Missense_Mutation | SNP | T  | C  | 3   | 31  | c.295A>G       | c.(295-297)AGT>GGT       | p.S99G   |
| Pat_34 | Pre-Treatment | KRT33B    | 3884   | 37 | 17 | 39525713 | 39525713 | Missense_Mutation | SNP | G  | A  | 19  | 48  | c.290C>T       | c.(289-291)CCC>CTC       | p.P97L   |
| Pat_34 | Pre-Treatment | HSPB9     | 94086  | 37 | 17 | 40275328 | 40275328 | Missense_Mutation | SNP | G  | A  | 22  | 46  | c.460G>A       | c.(460-462)GCT>ACT       | p.A154T  |
| Pat_34 | Pre-Treatment | TUBG2     | 27175  | 37 | 17 | 40818392 | 40818392 | Missense_Mutation | SNP | C  | T  | 7   | 60  | c.1048C>T      | c.(1048-1050)CCG>TCG     | p.P350S  |
| Pat_34 | Pre-Treatment | FZD2      | 2535   | 37 | 17 | 42636130 | 42636130 | Missense_Mutation | SNP | G  | A  | 34  | 61  | c.1074G>A      | c.(1072-1074)ATG>ATA     | p.M358I  |
| Pat_34 | Pre-Treatment | CLTC      | 1213   | 37 | 17 | 57742161 | 57742161 | Missense_Mutation | SNP | C  | T  | 20  | 85  | c.1535C>T      | c.(1534-1536)CCA>CTA     | p.P512L  |
| Pat_34 | Pre-Treatment | KCNH6     | 81033  | 37 | 17 | 61622585 | 61622585 | Missense_Mutation | SNP | C  | T  | 7   | 27  | c.2651C>T      | c.(2650-2652)CCA>CTA     | p.P884L  |
| Pat_34 | Pre-Treatment | USH1G     | 124590 | 37 | 17 | 72916405 | 72916406 | Missense_Mutation | DNP | GG | AA | 6   | 28  | c.525_526CC>TT | c.(523-528)ACCCCTC>ACTTT | p.L176F  |
| Pat_34 | Pre-Treatment | KIAA0802  | 23255  | 37 | 18 | 8718510  | 8718510  | Missense_Mutation | SNP | G  | A  | 23  | 48  | c.62G>A        | c.(61-63)CGA>CAA         | p.R21Q   |
| Pat_34 | Pre-Treatment | POTEC     | 388468 | 37 | 18 | 14542791 | 14542791 | Missense_Mutation | SNP | C  | T  | 7   | 102 | c.355G>A       | c.(355-357)GCT>ACT       | p.A119T  |
| Pat_34 | Pre-Treatment | DSG3      | 1830   | 37 | 18 | 29044209 | 29044209 | Missense_Mutation | SNP | G  | A  | 24  | 91  | c.1135G>A      | c.(1135-1137)GAA>AAA     | p.E379K  |
| Pat_34 | Pre-Treatment | C18orf25  | 147339 | 37 | 18 | 43796140 | 43796141 | Missense_Mutation | DNP | CT | TG | 128 | 278 | c.294_295CT>TG | c.(292-297)TCCTCT>TCTGCT | p.S99A   |
| Pat_34 | Pre-Treatment | DCC       | 1630   | 37 | 18 | 50589821 | 50589821 | Nonsense_Mutation | SNP | C  | T  | 22  | 82  | c.1132C>T      | c.(1132-1134)CAG>TAG     | p.Q378*  |
| Pat_34 | Pre-Treatment | SERPINB13 | 5275   | 37 | 18 | 61264422 | 61264422 | Missense_Mutation | SNP | C  | T  | 13  | 27  | c.1001C>T      | c.(1000-1002)TCC>TTC     | p.S334F  |
| Pat_34 | Pre-Treatment | MUC16     | 94025  | 37 | 19 | 9066695  | 9066695  | Missense_Mutation | SNP | C  | T  | 46  | 123 | c.20751G>A     | c.(20749-20751)ATG>ATA   | p.M6917I |
| Pat_34 | Pre-Treatment | MUC16     | 94025  | 37 | 19 | 9088391  | 9088391  | Missense_Mutation | SNP | C  | T  | 6   | 16  | c.3424G>A      | c.(3424-3426)GAT>AAT     | p.D1142N |
| Pat_34 | Pre-Treatment | ZNF491    | 126069 | 37 | 19 | 11916917 | 11916917 | Nonsense_Mutation | SNP | C  | A  | 30  | 77  | c.149C>A       | c.(148-150)TCA>TAA       | p.S50*   |
| Pat_34 | Pre-Treatment | ZNF700    | 90592  | 37 | 19 | 12036029 | 12036029 | Missense_Mutation | SNP | C  | T  | 21  | 57  | c.4C>T         | c.(4-6)CCC>TCC           | p.P2S    |
| Pat_34 | Pre-Treatment | ZNF799    | 90576  | 37 | 19 | 12502496 | 12502496 | Missense_Mutation | SNP | G  | A  | 20  | 52  | c.716C>T       | c.(715-717)TCC>TTC       | p.S239F  |
| Pat_34 | Pre-Treatment | ZNF443    | 10224  | 37 | 19 | 12542270 | 12542270 | Missense_Mutation | SNP | G  | A  | 16  | 245 | c.716C>T       | c.(715-717)TCC>TTC       | p.S239F  |
| Pat_34 | Pre-Treatment | IL27RA    | 9466   | 37 | 19 | 14157320 | 14157320 | Missense_Mutation | SNP | G  | A  | 44  | 90  | c.1031G>A      | c.(1030-1032)GGG>GAG     | p.G344E  |
| Pat_34 | Pre-Treatment | CYP4F12   | 66002  | 37 | 19 | 15807869 | 15807869 | Missense_Mutation | SNP | G  | A  | 16  | 42  | c.1549G>A      | c.(1549-1551)GAG>AAG     | p.E517K  |

|        |               |               |        |    |    |           |           |                   |     |    |    |     |     |                |                      |          |
|--------|---------------|---------------|--------|----|----|-----------|-----------|-------------------|-----|----|----|-----|-----|----------------|----------------------|----------|
| Pat_34 | Pre-Treatment | KIAA1683      | 80726  | 37 | 19 | 18377809  | 18377809  | Missense_Mutation | SNP | G  | A  | 11  | 21  | c.541C>T       | c.(541-543)CTT>TTT   | p.L181F  |
| Pat_34 | Pre-Treatment | KIAA1683      | 80726  | 37 | 19 | 18377976  | 18377976  | Missense_Mutation | SNP | G  | A  | 10  | 29  | c.374C>T       | c.(373-375)TCC>TTC   | p.S125F  |
| Pat_34 | Pre-Treatment | ZNF682        | 91120  | 37 | 19 | 20117152  | 20117152  | Missense_Mutation | SNP | G  | C  | 36  | 81  | c.1159C>G      | c.(1159-1161)CAC>GAC | p.H387D  |
| Pat_34 | Pre-Treatment | ZNF208        | 7757   | 37 | 19 | 22155698  | 22155698  | Missense_Mutation | SNP | C  | T  | 31  | 77  | c.1838G>A      | c.(1837-1839)AGA>AAA | p.R613K  |
| Pat_34 | Pre-Treatment | ANKRD27       | 84079  | 37 | 19 | 33135332  | 33135332  | Missense_Mutation | SNP | T  | C  | 131 | 229 | c.424A>G       | c.(424-426)AGA>GGA   | p.R142G  |
| Pat_34 | Pre-Treatment | WDR62         | 284403 | 37 | 19 | 36590388  | 36590388  | Nonsense_Mutation | SNP | C  | T  | 29  | 39  | c.2608C>T      | c.(2608-2610)CAA>TAA | p.Q870*  |
| Pat_34 | Pre-Treatment | SHKBP1        | 92799  | 37 | 19 | 41094620  | 41094620  | Missense_Mutation | SNP | C  | T  | 41  | 71  | c.1427C>T      | c.(1426-1428)TCC>TTC | p.S476F  |
| Pat_34 | Pre-Treatment | BCAM          | 4059   | 37 | 19 | 45316847  | 45316847  | Missense_Mutation | SNP | G  | A  | 30  | 53  | c.754G>A       | c.(754-756)GAC>AAC   | p.D252N  |
| Pat_34 | Pre-Treatment | KLK15         | 55554  | 37 | 19 | 51330167  | 51330167  | Missense_Mutation | SNP | C  | T  | 7   | 16  | c.448G>A       | c.(448-450)GAG>AAG   | p.E150K  |
| Pat_34 | Pre-Treatment | SIGLEC10      | 89790  | 37 | 19 | 51918540  | 51918540  | Missense_Mutation | SNP | C  | T  | 13  | 43  | c.1225G>A      | c.(1225-1227)GTC>ATC | p.V409I  |
| Pat_34 | Pre-Treatment | ZNF614        | 80110  | 37 | 19 | 52519323  | 52519323  | Missense_Mutation | SNP | G  | A  | 50  | 111 | c.1528C>T      | c.(1528-1530)CCT>TCT | p.P510S  |
| Pat_34 | Pre-Treatment | ZNF578        | 147660 | 37 | 19 | 53014565  | 53014565  | Missense_Mutation | SNP | G  | A  | 6   | 174 | c.931G>A       | c.(931-933)GGT>AGT   | p.G311S  |
| Pat_34 | Pre-Treatment | LILRA4        | 23547  | 37 | 19 | 54848372  | 54848372  | Missense_Mutation | SNP | G  | C  | 10  | 33  | c.995C>G       | c.(994-996)CCC>CGC   | p.P332R  |
| Pat_34 | Pre-Treatment | NCR1          | 9437   | 37 | 19 | 55424071  | 55424071  | Nonsense_Mutation | SNP | G  | A  | 32  | 49  | c.747G>A       | c.(745-747)TGG>TGA   | p.W249*  |
| Pat_34 | Pre-Treatment | NLRP7         | 199713 | 37 | 19 | 55450863  | 55450863  | Missense_Mutation | SNP | C  | T  | 9   | 29  | c.1324G>A      | c.(1324-1326)GAG>AAG | p.E442K  |
| Pat_34 | Pre-Treatment | BRSK1         | 84446  | 37 | 19 | 55816721  | 55816721  | Missense_Mutation | SNP | C  | T  | 23  | 43  | c.1750C>T      | c.(1750-1752)CCA>TCA | p.P584S  |
| Pat_34 | Pre-Treatment | NLRP8         | 126205 | 37 | 19 | 56473497  | 56473497  | Missense_Mutation | SNP | G  | A  | 31  | 84  | c.2107G>A      | c.(2107-2109)GAT>AAT | p.D703N  |
| Pat_34 | Pre-Treatment | ZNF583        | 147949 | 37 | 19 | 56934995  | 56934995  | Missense_Mutation | SNP | C  | T  | 55  | 59  | c.968C>T       | c.(967-969)CCT>CTT   | p.P323L  |
| Pat_34 | Pre-Treatment | ZNF470        | 388566 | 37 | 19 | 57089330  | 57089330  | Nonsense_Mutation | SNP | T  | A  | 22  | 75  | c.1533T>A      | c.(1531-1533)TGT>TGA | p.C511*  |
| Pat_34 | Pre-Treatment | ZSCAN4        | 201516 | 37 | 19 | 58189890  | 58189890  | Missense_Mutation | SNP | G  | A  | 26  | 64  | c.919G>A       | c.(919-921)GGA>AGA   | p.G307R  |
| Pat_34 | Pre-Treatment | TPO           | 7173   | 37 | 2  | 1437254   | 1437254   | Missense_Mutation | SNP | C  | T  | 8   | 40  | c.224C>T       | c.(223-225)TCT>TTT   | p.S75F   |
| Pat_34 | Pre-Treatment | MYT1L         | 23040  | 37 | 2  | 1926615   | 1926615   | Missense_Mutation | SNP | C  | T  | 37  | 104 | c.926G>A       | c.(925-927)GGA>GAA   | p.G309E  |
| Pat_34 | Pre-Treatment | GRHL1         | 29841  | 37 | 2  | 10101402  | 10101402  | Missense_Mutation | SNP | G  | T  | 45  | 127 | c.506G>T       | c.(505-507)GGA>GTA   | p.G169V  |
| Pat_34 | Pre-Treatment | ASXL2         | 55252  | 37 | 2  | 25973219  | 25973219  | Missense_Mutation | SNP | C  | A  | 67  | 85  | c.1206G>T      | c.(1204-1206)AAG>AAT | p.K402N  |
| Pat_34 | Pre-Treatment | C2orf70       | 339778 | 37 | 2  | 26800463  | 26800463  | Missense_Mutation | SNP | G  | A  | 43  | 74  | c.428G>A       | c.(427-429)AGG>AAG   | p.R143K  |
| Pat_34 | Pre-Treatment | C2orf71       | 388939 | 37 | 2  | 29295418  | 29295419  | Missense_Mutation | DNP | CC | TT | 28  | 43  | .1709_1710GG>A | c.(1708-1710)GGG>GAA | p.G570E  |
| Pat_34 | Pre-Treatment | SLC8A1        | 6546   | 37 | 2  | 40342607  | 40342607  | Missense_Mutation | SNP | G  | A  | 19  | 31  | c.2708C>T      | c.(2707-2709)TCC>TTC | p.S903F  |
| Pat_34 | Pre-Treatment | STON1-GTF2A1L | 286749 | 37 | 2  | 48808409  | 48808409  | Missense_Mutation | SNP | G  | A  | 8   | 36  | c.637G>A       | c.(637-639)GAG>AAG   | p.E213K  |
| Pat_34 | Pre-Treatment | LHCGR         | 3973   | 37 | 2  | 48915903  | 48915903  | Missense_Mutation | SNP | G  | A  | 63  | 112 | c.1033C>T      | c.(1033-1035)CCT>TCT | p.P345S  |
| Pat_34 | Pre-Treatment | FSHR          | 2492   | 37 | 2  | 49191025  | 49191025  | Missense_Mutation | SNP | G  | A  | 81  | 163 | c.935C>T       | c.(934-936)TCC>TTC   | p.S312F  |
| Pat_34 | Pre-Treatment | ALMS1         | 7840   | 37 | 2  | 73676976  | 73676976  | Nonsense_Mutation | SNP | C  | T  | 25  | 88  | c.3325C>T      | c.(3325-3327)CAA>TAA | p.Q1109* |
| Pat_34 | Pre-Treatment | CNGA3         | 1261   | 37 | 2  | 99013639  | 99013639  | Missense_Mutation | SNP | T  | G  | 13  | 42  | c.2006T>G      | c.(2005-2007)GTG>GGG | p.V669G  |
| Pat_34 | Pre-Treatment | IL1RL1        | 9173   | 37 | 2  | 102958742 | 102958742 | Missense_Mutation | SNP | G  | A  | 14  | 38  | c.670G>A       | c.(670-672)GAA>AAA   | p.E224K  |
| Pat_34 | Pre-Treatment | GCC2          | 9648   | 37 | 2  | 109088421 | 109088421 | Missense_Mutation | SNP | T  | C  | 26  | 29  | c.2636T>C      | c.(2635-2637)TTA>TCA | p.L879S  |
| Pat_34 | Pre-Treatment | CBWD2         | 150472 | 37 | 2  | 114195560 | 114195561 | Missense_Mutation | DNP | GG | AA | 115 | 214 | c.115_116GG>AA | c.(115-117)GGC>AAC   | p.G39N   |
| Pat_34 | Pre-Treatment | LCT           | 3938   | 37 | 2  | 136566093 | 136566093 | Missense_Mutation | SNP | C  | T  | 73  | 173 | c.3824G>A      | c.(3823-3825)GGA>GAA | p.G1275E |
| Pat_34 | Pre-Treatment | ZEB2          | 9839   | 37 | 2  | 145156983 | 145156983 | Missense_Mutation | SNP | G  | A  | 67  | 97  | c.1771C>T      | c.(1771-1773)CGT>TCT | p.P591S  |
| Pat_34 | Pre-Treatment | XIRP2         | 129446 | 37 | 2  | 168107372 | 168107372 | Missense_Mutation | SNP | G  | A  | 31  | 53  | c.9470G>A      | c.(9469-9471)AGG>AAG | p.R3157K |
| Pat_34 | Pre-Treatment | NEUROD1       | 4760   | 37 | 2  | 182543365 | 182543365 | Missense_Mutation | SNP | C  | T  | 6   | 11  | c.223G>A       | c.(223-225)GAG>AAG   | p.E75K   |
| Pat_34 | Pre-Treatment | PDE1A         | 5136   | 37 | 2  | 183387049 | 183387049 | Missense_Mutation | SNP | G  | A  | 36  | 125 | c.55C>T        | c.(55-57)CTT>TTT     | p.L19F   |
| Pat_34 | Pre-Treatment | ITGAV         | 3685   | 37 | 2  | 187490312 | 187490312 | Missense_Mutation | SNP | C  | T  | 19  | 35  | c.521C>T       | c.(520-522)TCA>TTA   | p.S174L  |
| Pat_34 | Pre-Treatment | COL5A2        | 1290   | 37 | 2  | 189899755 | 189899755 | Missense_Mutation | SNP | C  | T  | 40  | 51  | c.4240G>A      | c.(4240-4242)GAT>AAT | p.D1414N |
| Pat_34 | Pre-Treatment | DNAH7         | 56171  | 37 | 2  | 196699031 | 196699031 | Nonsense_Mutation | SNP | C  | T  | 13  | 34  | c.8999G>A      | c.(8998-9000)TGG>TAG | p.W3000* |
| Pat_34 | Pre-Treatment | EEF1B2        | 1933   | 37 | 2  | 207025358 | 207025358 | Missense_Mutation | SNP | A  | G  | 7   | 272 | c.127A>G       | c.(127-129)AGC>GGC   | p.S43G   |
| Pat_34 | Pre-Treatment | MYL1          | 4632   | 37 | 2  | 211179730 | 211179730 | Missense_Mutation | SNP | C  | T  | 31  | 83  | c.37G>A        | c.(37-39)GCG>ACG     | p.A13T   |
| Pat_34 | Pre-Treatment | STK36         | 27148  | 37 | 2  | 219549881 | 219549881 | Missense_Mutation | SNP | C  | T  | 29  | 39  | c.1310C>T      | c.(1309-1311)CCT>CTT | p.P437L  |
| Pat_34 | Pre-Treatment | SPEG          | 10290  | 37 | 2  | 220309459 | 220309459 | Missense_Mutation | SNP | C  | T  | 6   | 7   | c.473C>T       | c.(472-474)CCC>CTC   | p.P158L  |

|        |               |          |        |    |    |           |           |                   |     |    |    |     |     |                |                                   |          |
|--------|---------------|----------|--------|----|----|-----------|-----------|-------------------|-----|----|----|-----|-----|----------------|-----------------------------------|----------|
| Pat_34 | Pre-Treatment | SPEG     | 10290  | 37 | 2  | 220354390 | 220354390 | Missense_Mutation | SNP | C  | T  | 56  | 166 | c.8650C>T      | c.(8650-8652)CCA>TCA              | p.P2884S |
| Pat_34 | Pre-Treatment | INHA     | 3623   | 37 | 2  | 220439748 | 220439748 | Missense_Mutation | SNP | C  | T  | 44  | 100 | c.601C>T       | c.(601-603)CCC>TCC                | p.P201S  |
| Pat_34 | Pre-Treatment | EPHA4    | 2043   | 37 | 2  | 222429090 | 222429090 | Missense_Mutation | SNP | C  | T  | 73  | 158 | c.184G>A       | c.(184-186)GAA>AAA                | p.E62K   |
| Pat_34 | Pre-Treatment | COL4A4   | 1286   | 37 | 2  | 227920783 | 227920783 | Missense_Mutation | SNP | G  | A  | 22  | 18  | c.2594C>T      | c.(2593-2595)CCA>CTA              | p.P865L  |
| Pat_34 | Pre-Treatment | COL4A4   | 1286   | 37 | 2  | 227945173 | 227945173 | Missense_Mutation | SNP | C  | T  | 31  | 73  | c.1789G>A      | c.(1789-1791)GAT>AAT              | p.D597N  |
| Pat_34 | Pre-Treatment | ITM2C    | 81618  | 37 | 2  | 231738206 | 231738206 | Missense_Mutation | SNP | G  | A  | 14  | 42  | c.195G>A       | c.(193-195)ATG>ATA                | p.M65I   |
| Pat_34 | Pre-Treatment | NMUR1    | 10316  | 37 | 2  | 232390057 | 232390057 | Nonsense_Mutation | SNP | C  | T  | 26  | 45  | c.978G>A       | c.(976-978)TGG>TGA                | p.W326*  |
| Pat_34 | Pre-Treatment | CRNKL1   | 51340  | 37 | 20 | 20032949  | 20032950  | Missense_Mutation | DNP | GG | AA | 24  | 59  | c.520_521CC>TT | c.(520-522)CCC>TTC                | p.P174F  |
| Pat_34 | Pre-Treatment | EPB41L1  | 2036   | 37 | 20 | 34763552  | 34763552  | Missense_Mutation | SNP | C  | T  | 21  | 43  | c.257C>T       | c.(256-258)TCG>TTG                | p.S86L   |
| Pat_34 | Pre-Treatment | LBP      | 3929   | 37 | 20 | 36999956  | 36999956  | Missense_Mutation | SNP | G  | A  | 15  | 45  | c.1250G>A      | c.(1249-1251)GGA>GAA              | p.G417E  |
| Pat_34 | Pre-Treatment | PPP1R16B | 26051  | 37 | 20 | 37536813  | 37536813  | Missense_Mutation | SNP | A  | G  | 19  | 27  | c.1171A>G      | c.(1171-1173)ACA>GCA              | p.T391A  |
| Pat_34 | Pre-Treatment | CTCFL    | 140690 | 37 | 20 | 56094410  | 56094410  | Missense_Mutation | SNP | C  | T  | 67  | 141 | c.778G>A       | c.(778-780)GAT>AAT                | p.D260N  |
| Pat_34 | Pre-Treatment | GNAS     | 2778   | 37 | 20 | 57484421  | 57484421  | Missense_Mutation | SNP | G  | A  | 23  | 41  | c.2531G>A      | c.(2530-2532)CGT>CAT              | p.R844H  |
| Pat_34 | Pre-Treatment | SYCP2    | 10388  | 37 | 20 | 58452447  | 58452447  | Missense_Mutation | SNP | G  | A  | 35  | 63  | c.3143C>T      | c.(3142-3144)CCA>CTA              | p.P1048L |
| Pat_34 | Pre-Treatment | PTK6     | 5753   | 37 | 20 | 62164008  | 62164008  | Missense_Mutation | SNP | C  | T  | 29  | 40  | c.703G>A       | c.(703-705)GAG>AAG                | p.E235K  |
| Pat_34 | Pre-Treatment | IL17RA   | 23765  | 37 | 22 | 17583143  | 17583143  | Missense_Mutation | SNP | C  | T  | 44  | 110 | c.713C>T       | c.(712-714)CCG>CTG                | p.P238L  |
| Pat_34 | Pre-Treatment | PES1     | 23481  | 37 | 22 | 30977000  | 30977000  | Missense_Mutation | SNP | C  | T  | 15  | 26  | c.911G>A       | c.(910-912)GGG>GAG                | p.G304E  |
| Pat_34 | Pre-Treatment | SYN3     | 8224   | 37 | 22 | 33327460  | 33327461  | Missense_Mutation | DNP | AT | TA | 25  | 32  | c.375_376AT>TA | (373-378)GAATTC>GATAT.125_126EF>C |          |
| Pat_34 | Pre-Treatment | APOL5    | 80831  | 37 | 22 | 36123223  | 36123223  | Missense_Mutation | SNP | C  | T  | 36  | 64  | c.1108C>T      | c.(1108-1110)CGT>TGT              | p.R370C  |
| Pat_34 | Pre-Treatment | EFCAB6   | 64800  | 37 | 22 | 44068143  | 44068143  | Missense_Mutation | SNP | G  | A  | 16  | 43  | c.1462C>T      | c.(1462-1464)CTC>TTC              | p.L488F  |
| Pat_34 | Pre-Treatment | CRELD2   | 79174  | 37 | 22 | 50320924  | 50320924  | Missense_Mutation | SNP | C  | T  | 44  | 136 | c.1031C>T      | c.(1030-1032)CCG>CTG              | p.P344L  |
| Pat_34 | Pre-Treatment | PLXNB2   | 23654  | 37 | 22 | 50728418  | 50728418  | Missense_Mutation | SNP | G  | A  | 24  | 28  | c.596C>T       | c.(595-597)GCC>GTC                | p.A199V  |
| Pat_34 | Pre-Treatment | CHL1     | 10752  | 37 | 3  | 443320    | 443320    | Missense_Mutation | SNP | G  | A  | 28  | 43  | c.3349G>A      | c.(3349-3351)GAA>AAA              | p.E1117K |
| Pat_34 | Pre-Treatment | SRGAP3   | 9901   | 37 | 3  | 9146424   | 9146424   | Missense_Mutation | SNP | C  | T  | 42  | 80  | c.363G>A       | c.(361-363)ATG>ATA                | p.M121I  |
| Pat_34 | Pre-Treatment | ZFYVE20  | 64145  | 37 | 3  | 15123998  | 15123998  | Missense_Mutation | SNP | G  | A  | 44  | 105 | c.716C>T       | c.(715-717)TCG>TTG                | p.S239L  |
| Pat_34 | Pre-Treatment | ZNF385D  | 79750  | 37 | 3  | 21467063  | 21467063  | Missense_Mutation | SNP | C  | T  | 22  | 56  | c.773G>A       | c.(772-774)GGA>GAA                | p.G258E  |
| Pat_34 | Pre-Treatment | DLEC1    | 9940   | 37 | 3  | 38135198  | 38135198  | Missense_Mutation | SNP | G  | A  | 23  | 42  | c.1859G>A      | c.(1858-1860)CGA>CAA              | p.R620Q  |
| Pat_34 | Pre-Treatment | DLEC1    | 9940   | 37 | 3  | 38138190  | 38138190  | Missense_Mutation | SNP | G  | A  | 65  | 107 | c.2302G>A      | c.(2302-2304)GAG>AAG              | p.E768K  |
| Pat_34 | Pre-Treatment | SCN5A    | 6331   | 37 | 3  | 38592959  | 38592959  | Missense_Mutation | SNP | C  | T  | 44  | 85  | c.4904G>A      | c.(4903-4905)AGA>AAA              | p.R1635K |
| Pat_34 | Pre-Treatment | SCN11A   | 11280  | 37 | 3  | 38889129  | 38889129  | Missense_Mutation | SNP | G  | A  | 10  | 29  | c.4432C>T      | c.(4432-4434)CGG>TGG              | p.R1478W |
| Pat_34 | Pre-Treatment | ALS2CL   | 259173 | 37 | 3  | 46717781  | 46717781  | Nonsense_Mutation | SNP | G  | A  | 28  | 41  | c.2140C>T      | c.(2140-2142)CAG>TAG              | p.Q714*  |
| Pat_34 | Pre-Treatment | NAT6     | 24142  | 37 | 3  | 50334738  | 50334738  | Missense_Mutation | SNP | G  | A  | 15  | 38  | c.157C>T       | c.(157-159)CCA>TCA                | p.P53S   |
| Pat_34 | Pre-Treatment | RBM15B   | 29890  | 37 | 3  | 51430589  | 51430589  | Missense_Mutation | SNP | C  | T  | 23  | 46  | c.1759C>T      | c.(1759-1761)CCC>TCC              | p.P587S  |
| Pat_34 | Pre-Treatment | DNAH1    | 25981  | 37 | 3  | 52430710  | 52430710  | Missense_Mutation | SNP | C  | T  | 28  | 36  | c.11507C>T     | c.(11506-11508)CCC>CTC            | p.P3836L |
| Pat_34 | Pre-Treatment | DNAH1    | 25981  | 37 | 3  | 52431891  | 52431891  | Missense_Mutation | SNP | G  | A  | 9   | 21  | c.11956G>A     | c.(11956-11958)GAG>AAC            | p.E3986K |
| Pat_34 | Pre-Treatment | BAP1     | 8314   | 37 | 3  | 52440379  | 52440379  | Missense_Mutation | SNP | C  | T  | 42  | 61  | c.673G>A       | c.(673-675)GAC>AAC                | p.D225N  |
| Pat_34 | Pre-Treatment | PHF7     | 51533  | 37 | 3  | 52455718  | 52455718  | Nonsense_Mutation | SNP | C  | T  | 28  | 59  | c.628C>T       | c.(628-630)CGA>TGA                | p.R210*  |
| Pat_34 | Pre-Treatment | STAB1    | 23166  | 37 | 3  | 52539103  | 52539103  | Missense_Mutation | SNP | C  | T  | 11  | 33  | c.1462C>T      | c.(1462-1464)CAC>TAC              | p.H488Y  |
| Pat_34 | Pre-Treatment | ERC2     | 26059  | 37 | 3  | 56330247  | 56330247  | Missense_Mutation | SNP | C  | T  | 85  | 186 | c.874G>A       | c.(874-876)GAA>AAA                | p.E292K  |
| Pat_34 | Pre-Treatment | ADAMTS9  | 56999  | 37 | 3  | 64672429  | 64672429  | Missense_Mutation | SNP | A  | T  | 15  | 38  | c.331T>A       | c.(331-333)TTT>ATT                | p.F111I  |
| Pat_34 | Pre-Treatment | MAG11    | 9223   | 37 | 3  | 65369230  | 65369230  | Missense_Mutation | SNP | C  | T  | 32  | 62  | c.2485G>A      | c.(2485-2487)GGT>AGT              | p.G829S  |
| Pat_34 | Pre-Treatment | EPHA3    | 2042   | 37 | 3  | 89259565  | 89259565  | Missense_Mutation | SNP | G  | A  | 139 | 196 | c.709G>A       | c.(709-711)GAA>AAA                | p.E237K  |
| Pat_34 | Pre-Treatment | OR5K2    | 402135 | 37 | 3  | 98216796  | 98216797  | Missense_Mutation | DNP | GG | AA | 58  | 125 | c.272_273GG>AA | c.(271-273)AGG>AAA                | p.R91K   |
| Pat_34 | Pre-Treatment | MYH15    | 22989  | 37 | 3  | 108204049 | 108204049 | Missense_Mutation | SNP | G  | A  | 45  | 130 | c.1063C>T      | c.(1063-1065)CCT>TCT              | p.P355S  |
| Pat_34 | Pre-Treatment | TRAT1    | 50852  | 37 | 3  | 108568024 | 108568024 | Missense_Mutation | SNP | G  | A  | 22  | 58  | c.226G>A       | c.(226-228)GAA>AAA                | p.E76K   |
| Pat_34 | Pre-Treatment | CASR     | 846    | 37 | 3  | 121980930 | 121980930 | Missense_Mutation | SNP | G  | A  | 15  | 19  | c.1048G>A      | c.(1048-1050)GAG>AAG              | p.E350K  |
| Pat_34 | Pre-Treatment | PODXL2   | 50512  | 37 | 3  | 127379563 | 127379563 | Missense_Mutation | SNP | C  | T  | 32  | 54  | c.692C>T       | c.(691-693)TCA>TTA                | p.S231L  |

|        |               |          |        |    |   |           |           |                   |     |    |    |     |     |                |                      |          |
|--------|---------------|----------|--------|----|---|-----------|-----------|-------------------|-----|----|----|-----|-----|----------------|----------------------|----------|
| Pat_34 | Pre-Treatment | KBTBD12  | 166348 | 37 | 3 | 127702997 | 127702998 | Nonsense_Mutation | DNP | GG | AA | 33  | 93  | .1748_1749GG>A | c.(1747-1749)TGG>TAA | p.W583*  |
| Pat_34 | Pre-Treatment | PIK3R4   | 30849  | 37 | 3 | 130409479 | 130409479 | Nonsense_Mutation | SNP | G  | A  | 19  | 42  | c.3118C>T      | c.(3118-3120)CGA>TGA | p.R1040* |
| Pat_34 | Pre-Treatment | ANAPC13  | 25847  | 37 | 3 | 134197511 | 134197511 | Missense_Mutation | SNP | G  | A  | 68  | 87  | c.146C>T       | c.(145-147)TCT>TTT   | p.S49F   |
| Pat_34 | Pre-Treatment | SI       | 6476   | 37 | 3 | 164725741 | 164725741 | Nonsense_Mutation | SNP | G  | A  | 69  | 162 | c.4225C>T      | c.(4225-4227)CAA>TAA | p.Q1409* |
| Pat_34 | Pre-Treatment | SI       | 6476   | 37 | 3 | 164748501 | 164748501 | Missense_Mutation | SNP | G  | A  | 116 | 187 | c.2891C>T      | c.(2890-2892)ACG>ATG | p.T964M  |
| Pat_34 | Pre-Treatment | SERPINI2 | 5276   | 37 | 3 | 167170732 | 167170732 | Missense_Mutation | SNP | C  | T  | 10  | 37  | c.956G>A       | c.(955-957)GGA>GAA   | p.G319E  |
| Pat_34 | Pre-Treatment | ATP11B   | 23200  | 37 | 3 | 182615093 | 182615093 | Missense_Mutation | SNP | G  | A  | 37  | 85  | c.3051G>A      | c.(3049-3051)ATG>ATA | p.M1017I |
| Pat_34 | Pre-Treatment | ECE2     | 9718   | 37 | 3 | 184008359 | 184008359 | Missense_Mutation | SNP | C  | T  | 73  | 149 | c.2024C>T      | c.(2023-2025)CCC>CTC | p.P675L  |
| Pat_34 | Pre-Treatment | PDGFRA   | 5156   | 37 | 4 | 55144652  | 55144652  | Missense_Mutation | SNP | G  | A  | 30  | 61  | c.2126G>A      | c.(2125-2127)GGA>GAA | p.G709E  |
| Pat_34 | Pre-Treatment | AASDH    | 132949 | 37 | 4 | 57215455  | 57215455  | Missense_Mutation | SNP | G  | A  | 29  | 118 | c.2462C>T      | c.(2461-2463)TCT>TTT | p.S821F  |
| Pat_34 | Pre-Treatment | PPEF2    | 5470   | 37 | 4 | 76811162  | 76811162  | Missense_Mutation | SNP | G  | A  | 59  | 152 | c.365C>T       | c.(364-366)CCA>CTA   | p.P122L  |
| Pat_34 | Pre-Treatment | FRAS1    | 80144  | 37 | 4 | 79400632  | 79400632  | Missense_Mutation | SNP | G  | A  | 26  | 42  | c.8203G>A      | c.(8203-8205)GGG>AGG | p.G2735R |
| Pat_34 | Pre-Treatment | WDFY3    | 23001  | 37 | 4 | 85715869  | 85715869  | Missense_Mutation | SNP | G  | A  | 8   | 30  | c.3290C>T      | c.(3289-3291)CCC>CTC | p.P1097L |
| Pat_34 | Pre-Treatment | ADH1A    | 124    | 37 | 4 | 100205934 | 100205934 | Missense_Mutation | SNP | G  | A  | 20  | 47  | c.286C>T       | c.(286-288)CCT>TCT   | p.P96S   |
| Pat_34 | Pre-Treatment | SYNPO2   | 171024 | 37 | 4 | 119951711 | 119951711 | Missense_Mutation | SNP | G  | A  | 76  | 166 | c.1781G>A      | c.(1780-1782)GGG>GAG | p.G594E  |
| Pat_34 | Pre-Treatment | SCLT1    | 132320 | 37 | 4 | 129924980 | 129924981 | Missense_Mutation | DNP | GG | AA | 35  | 73  | c.341_342CC>TT | c.(340-342)CCC>CTT   | p.P114L  |
| Pat_34 | Pre-Treatment | DCHS2    | 54798  | 37 | 4 | 155241618 | 155241618 | Missense_Mutation | SNP | C  | T  | 66  | 116 | c.3568G>A      | c.(3568-3570)GAT>AAT | p.D1190N |
| Pat_34 | Pre-Treatment | DCHS2    | 54798  | 37 | 4 | 155242155 | 155242155 | Missense_Mutation | SNP | C  | T  | 29  | 104 | c.3031G>A      | c.(3031-3033)GAA>AAA | p.E1011K |
| Pat_34 | Pre-Treatment | GLRB     | 2743   | 37 | 4 | 158057999 | 158057999 | Missense_Mutation | SNP | C  | T  | 33  | 69  | c.571C>T       | c.(571-573)CCC>TCC   | p.P191S  |
| Pat_34 | Pre-Treatment | RXFP1    | 59350  | 37 | 4 | 159533469 | 159533469 | Missense_Mutation | SNP | G  | A  | 11  | 34  | c.635G>A       | c.(634-636)CGA>CAA   | p.R212Q  |
| Pat_34 | Pre-Treatment | KLHL2    | 11275  | 37 | 4 | 166220758 | 166220758 | Missense_Mutation | SNP | T  | A  | 40  | 77  | c.871T>A       | c.(871-873)TTA>ATA   | p.L291I  |
| Pat_34 | Pre-Treatment | TLL1     | 7092   | 37 | 4 | 167022028 | 167022028 | Nonstop_Mutation  | SNP | A  | C  | 7   | 13  | c.3042A>C      | c.(3040-3042)TAA>TAC | p.*1014Y |
| Pat_34 | Pre-Treatment | SPOCK3   | 50859  | 37 | 4 | 167833862 | 167833862 | Nonsense_Mutation | SNP | C  | T  | 16  | 56  | c.392G>A       | c.(391-393)TGG>TAG   | p.W131*  |
| Pat_34 | Pre-Treatment | VEGFC    | 7424   | 37 | 4 | 177650855 | 177650855 | Missense_Mutation | SNP | T  | A  | 50  | 81  | c.193A>T       | c.(193-195)AGT>TGT   | p.S65C   |
| Pat_34 | Pre-Treatment | NSUN2    | 54888  | 37 | 5 | 6600050   | 6600050   | Missense_Mutation | SNP | G  | A  | 49  | 86  | c.2293C>T      | c.(2293-2295)CCA>TCA | p.P765S  |
| Pat_34 | Pre-Treatment | CDH18    | 1016   | 37 | 5 | 19747261  | 19747261  | Missense_Mutation | SNP | C  | T  | 48  | 99  | c.313G>A       | c.(313-315)GAT>AAT   | p.D105N  |
| Pat_34 | Pre-Treatment | CAPSL    | 133690 | 37 | 5 | 35910616  | 35910616  | Missense_Mutation | SNP | T  | A  | 5   | 22  | c.167A>T       | c.(166-168)AAT>ATT   | p.N56I   |
| Pat_34 | Pre-Treatment | FGF10    | 2255   | 37 | 5 | 44305174  | 44305174  | Missense_Mutation | SNP | C  | T  | 37  | 97  | c.550G>A       | c.(550-552)GGA>AGA   | p.G184R  |
| Pat_34 | Pre-Treatment | RAB3C    | 115827 | 37 | 5 | 58120900  | 58120900  | Missense_Mutation | SNP | C  | T  | 53  | 70  | c.407C>T       | c.(406-408)GCC>GTC   | p.A136V  |
| Pat_34 | Pre-Treatment | PIK3R1   | 5295   | 37 | 5 | 67589660  | 67589660  | Nonsense_Mutation | SNP | C  | T  | 26  | 64  | c.1423C>T      | c.(1423-1425)CAG>TAG | p.Q475*  |
| Pat_34 | Pre-Treatment | SLC30A5  | 64924  | 37 | 5 | 68409009  | 68409009  | Missense_Mutation | SNP | T  | G  | 24  | 44  | c.490T>G       | c.(490-492)TTG>GTG   | p.L164V  |
| Pat_34 | Pre-Treatment | WDR41    | 55255  | 37 | 5 | 76728976  | 76728976  | Missense_Mutation | SNP | A  | G  | 63  | 100 | c.1364T>C      | c.(1363-1365)TTA>TCA | p.L455S  |
| Pat_34 | Pre-Treatment | VCAN     | 1462   | 37 | 5 | 82818080  | 82818080  | Missense_Mutation | SNP | C  | T  | 31  | 95  | c.3955C>T      | c.(3955-3957)CAC>TAC | p.H1319Y |
| Pat_34 | Pre-Treatment | EDIL3    | 10085  | 37 | 5 | 83402499  | 83402499  | Missense_Mutation | SNP | C  | T  | 43  | 95  | c.619G>A       | c.(619-621)GCT>ACT   | p.A207T  |
| Pat_34 | Pre-Treatment | PAM      | 5066   | 37 | 5 | 102360975 | 102360975 | Missense_Mutation | SNP | C  | T  | 40  | 103 | c.2626C>T      | c.(2626-2628)CCG>TCG | p.P876S  |
| Pat_34 | Pre-Treatment | MEGF10   | 84466  | 37 | 5 | 126771158 | 126771159 | Nonsense_Mutation | DNP | GG | AA | 51  | 72  | .2081_2082GG>A | c.(2080-2082)TGG>TAA | p.W694*  |
| Pat_34 | Pre-Treatment | PRRC1    | 133619 | 37 | 5 | 126860501 | 126860501 | Missense_Mutation | SNP | C  | T  | 113 | 250 | c.382C>T       | c.(382-384)CCT>TCT   | p.P128S  |
| Pat_34 | Pre-Treatment | PCDHA7   | 56141  | 37 | 5 | 140216016 | 140216016 | Missense_Mutation | SNP | C  | T  | 44  | 90  | c.2048C>T      | c.(2047-2049)TCG>TTG | p.S683L  |
| Pat_34 | Pre-Treatment | PCDHA11  | 56138  | 37 | 5 | 140249746 | 140249746 | Missense_Mutation | SNP | C  | T  | 24  | 48  | c.1058C>T      | c.(1057-1059)TCC>TTC | p.S353F  |
| Pat_34 | Pre-Treatment | PCDHB4   | 56131  | 37 | 5 | 140503385 | 140503385 | Missense_Mutation | SNP | C  | T  | 26  | 54  | c.1805C>T      | c.(1804-1806)TCG>TTG | p.S602L  |
| Pat_34 | Pre-Treatment | PCDHB8   | 56128  | 37 | 5 | 140558145 | 140558145 | Missense_Mutation | SNP | C  | T  | 21  | 114 | c.530C>T       | c.(529-531)TCC>TTC   | p.S177F  |
| Pat_34 | Pre-Treatment | JAKMIP2  | 9832   | 37 | 5 | 147051353 | 147051353 | Missense_Mutation | SNP | C  | T  | 10  | 33  | c.17G>A        | c.(16-18)CGA>CAA     | p.R6Q    |
| Pat_34 | Pre-Treatment | GRIA1    | 2890   | 37 | 5 | 152873499 | 152873499 | Missense_Mutation | SNP | C  | T  | 45  | 85  | c.94C>T        | c.(94-96)CCA>TCA     | p.P32S   |
| Pat_34 | Pre-Treatment | FBXW11   | 23291  | 37 | 5 | 171326098 | 171326098 | Nonsense_Mutation | SNP | C  | T  | 34  | 37  | c.561G>A       | c.(559-561)TGG>TGA   | p.W187*  |
| Pat_34 | Pre-Treatment | RNF44    | 22838  | 37 | 5 | 175956549 | 175956549 | Missense_Mutation | SNP | C  | T  | 22  | 94  | c.1111G>A      | c.(1111-1113)GAC>AAC | p.D371N  |
| Pat_34 | Pre-Treatment | UNC5A    | 90249  | 37 | 5 | 176306446 | 176306446 | Missense_Mutation | SNP | G  | A  | 33  | 62  | c.2320G>A      | c.(2320-2322)GGT>AGT | p.G774S  |
| Pat_34 | Pre-Treatment | HIVEP1   | 3096   | 37 | 6 | 12122235  | 12122235  | Missense_Mutation | SNP | G  | A  | 4   | 82  | c.2207G>A      | c.(2206-2208)CGC>CAC | p.R736H  |



|        |               |          |        |    |   |           |           |                   |     |    |    |     |     |                                     |                      |          |
|--------|---------------|----------|--------|----|---|-----------|-----------|-------------------|-----|----|----|-----|-----|-------------------------------------|----------------------|----------|
| Pat_34 | Pre-Treatment | ZNF391   | 346157 | 37 | 6 | 27368259  | 27368259  | Missense_Mutation | SNP | C  | T  | 48  | 76  | c.110C>T                            | c.(109-111)TCT>TTT   | p.S37F   |
| Pat_34 | Pre-Treatment | OR2B6    | 26212  | 37 | 6 | 27925904  | 27925904  | Missense_Mutation | SNP | G  | A  | 16  | 60  | c.886G>A                            | c.(886-888)GAG>AAG   | p.E296K  |
| Pat_34 | Pre-Treatment | SCAND3   | 114821 | 37 | 6 | 28543374  | 28543374  | Missense_Mutation | SNP | C  | T  | 32  | 124 | c.1108G>A                           | c.(1108-1110)GAA>AAA | p.E370K  |
| Pat_34 | Pre-Treatment | OR14J1   | 442191 | 37 | 6 | 29274969  | 29274969  | Missense_Mutation | SNP | G  | A  | 96  | 80  | c.503G>A                            | c.(502-504)GGG>GAG   | p.G168E  |
| Pat_34 | Pre-Treatment | CSNK2B   | 1460   | 37 | 6 | 31634628  | 31634628  | Missense_Mutation | SNP | T  | A  | 28  | 87  | c.20T>A                             | c.(19-21)GTG>GAG     | p.V7E    |
| Pat_34 | Pre-Treatment | MSH5     | 4439   | 37 | 6 | 31728479  | 31728480  | Missense_Mutation | DNP | AC | TT | 36  | 111 | ..1825_1826AC>T                     | c.(1825-1827)ACA>TTA | p.T609L  |
| Pat_34 | Pre-Treatment | EHMT2    | 10919  | 37 | 6 | 31854456  | 31854456  | Missense_Mutation | SNP | C  | T  | 12  | 39  | c.2245G>A                           | c.(2245-2247)GAG>AAG | p.E749K  |
| Pat_34 | Pre-Treatment | HLA-DQB2 | 3120   | 37 | 6 | 32726774  | 32726774  | Missense_Mutation | SNP | C  | T  | 7   | 104 | c.499G>A                            | c.(499-501)GCC>ACC   | p.A167T  |
| Pat_34 | Pre-Treatment | TULP1    | 7287   | 37 | 6 | 35473947  | 35473948  | Missense_Mutation | DNP | CC | TT | 3   | 20  | c.831_832GG>AA829-834)AAGGAG>AAAA   |                      | p.E278K  |
| Pat_34 | Pre-Treatment | SLC26A8  | 116369 | 37 | 6 | 35967813  | 35967813  | Missense_Mutation | SNP | G  | A  | 53  | 197 | c.401C>T                            | c.(400-402)TCG>TTG   | p.S134L  |
| Pat_34 | Pre-Treatment | DNAH8    | 1769   | 37 | 6 | 38897346  | 38897347  | Nonsense_Mutation | DNP | CC | TT | 143 | 153 | 10527_10528CC>525-10530)GGCCGA>GG   |                      | p.R3510* |
| Pat_34 | Pre-Treatment | TTBK1    | 84630  | 37 | 6 | 43222346  | 43222346  | Missense_Mutation | SNP | G  | A  | 39  | 77  | c.533G>A                            | c.(532-534)GGG>GAG   | p.G178E  |
| Pat_34 | Pre-Treatment | ZNF318   | 24149  | 37 | 6 | 43305131  | 43305131  | Missense_Mutation | SNP | G  | A  | 11  | 33  | c.6605C>T                           | c.(6604-6606)TCC>TTC | p.S2202F |
| Pat_34 | Pre-Treatment | SPATS1   | 221409 | 37 | 6 | 44329579  | 44329579  | Missense_Mutation | SNP | C  | T  | 92  | 144 | c.424C>T                            | c.(424-426)CGT>TGT   | p.R142C  |
| Pat_34 | Pre-Treatment | TFAP2D   | 83741  | 37 | 6 | 50681806  | 50681806  | Missense_Mutation | SNP | A  | G  | 20  | 47  | c.38A>G                             | c.(37-39)GAG>GGG     | p.E13G   |
| Pat_34 | Pre-Treatment | GFRAL    | 389400 | 37 | 6 | 55266626  | 55266626  | Missense_Mutation | SNP | C  | T  | 29  | 75  | c.1160C>T                           | c.(1159-1161)TCG>TTG | p.S387L  |
| Pat_34 | Pre-Treatment | BAI3     | 577    | 37 | 6 | 70042848  | 70042848  | Missense_Mutation | SNP | A  | C  | 58  | 71  | c.3136A>C                           | c.(3136-3138)AAA>CAA | p.K1046Q |
| Pat_34 | Pre-Treatment | BAI3     | 577    | 37 | 6 | 70071078  | 70071078  | Missense_Mutation | SNP | G  | A  | 6   | 26  | c.3913G>A                           | c.(3913-3915)GAA>AAA | p.E1305K |
| Pat_34 | Pre-Treatment | TTK      | 7272   | 37 | 6 | 80749438  | 80749438  | Missense_Mutation | SNP | C  | T  | 63  | 127 | c.2156C>T                           | c.(2155-2157)TCC>TTC | p.S719F  |
| Pat_34 | Pre-Treatment | C6orf58  | 352999 | 37 | 6 | 127901476 | 127901476 | Missense_Mutation | SNP | C  | T  | 60  | 61  | c.455C>T                            | c.(454-456)TCA>TTA   | p.S152L  |
| Pat_34 | Pre-Treatment | EPB41L2  | 2037   | 37 | 6 | 131191209 | 131191209 | Missense_Mutation | SNP | C  | T  | 37  | 45  | c.2101G>A                           | c.(2101-2103)GAC>AAC | p.D701N  |
| Pat_34 | Pre-Treatment | BCLAF1   | 9774   | 37 | 6 | 136599198 | 136599198 | Missense_Mutation | SNP | G  | A  | 7   | 58  | c.821C>T                            | c.(820-822)TCT>TTT   | p.S274F  |
| Pat_34 | Pre-Treatment | ECT2L    | 345930 | 37 | 6 | 139135637 | 139135637 | Missense_Mutation | SNP | G  | A  | 24  | 23  | c.76G>A                             | c.(76-78)GAA>AAA     | p.E26K   |
| Pat_34 | Pre-Treatment | RAC1     | 5879   | 37 | 7 | 6426892   | 6426892   | Missense_Mutation | SNP | C  | T  | 211 | 85  | c.85C>T                             | c.(85-87)CCT>TCT     | p.P29S   |
| Pat_34 | Pre-Treatment | AUTS2    | 26053  | 37 | 7 | 70240352  | 70240352  | Missense_Mutation | SNP | C  | T  | 108 | 34  | c.1912C>T                           | c.(1912-1914)CCT>TCT | p.P638S  |
| Pat_34 | Pre-Treatment | TYW1B    | 441250 | 37 | 7 | 72081809  | 72081809  | Missense_Mutation | SNP | T  | C  | 6   | 140 | c.1633A>G                           | c.(1633-1635)AGA>GGA | p.R545G  |
| Pat_34 | Pre-Treatment | NSUN5P2  | 260294 | 37 | 7 | 72420466  | 72420466  | Missense_Mutation | SNP | C  | T  | 7   | 57  | c.122G>A                            | c.(121-123)CGC>CAC   | p.R41H   |
| Pat_34 | Pre-Treatment | WBSCR28  | 135886 | 37 | 7 | 73279685  | 73279685  | Missense_Mutation | SNP | G  | T  | 16  | 15  | c.435G>T                            | c.(433-435)TTG>TTT   | p.L145F  |
| Pat_34 | Pre-Treatment | PION     | 54103  | 37 | 7 | 76958695  | 76958695  | Missense_Mutation | SNP | C  | T  | 45  | 29  | c.1688G>A                           | c.(1687-1689)AGA>AAA | p.R563K  |
| Pat_34 | Pre-Treatment | SEMA3E   | 9723   | 37 | 7 | 82997177  | 82997177  | Missense_Mutation | SNP | C  | T  | 70  | 24  | c.2053G>A                           | c.(2053-2055)GAC>AAC | p.D685N  |
| Pat_34 | Pre-Treatment | CROT     | 54677  | 37 | 7 | 87022093  | 87022093  | Missense_Mutation | SNP | G  | T  | 64  | 29  | c.1552G>T                           | c.(1552-1554)GGT>TGT | p.G518C  |
| Pat_34 | Pre-Treatment | HEPACAM2 | 253012 | 37 | 7 | 92848544  | 92848544  | Missense_Mutation | SNP | C  | T  | 55  | 25  | c.300G>A                            | c.(298-300)ATG>ATA   | p.M100I  |
| Pat_34 | Pre-Treatment | ZAN      | 7455   | 37 | 7 | 100353009 | 100353009 | Nonsense_Mutation | SNP | C  | A  | 51  | 21  | c.3285C>A                           | c.(3283-3285)TGC>TGA | p.C1095* |
| Pat_34 | Pre-Treatment | LAMB4    | 22798  | 37 | 7 | 107717454 | 107717454 | Missense_Mutation | SNP | C  | T  | 62  | 35  | c.2059G>A                           | c.(2059-2061)GAT>AAT | p.D687N  |
| Pat_34 | Pre-Treatment | CFTR     | 1080   | 37 | 7 | 117232010 | 117232010 | Missense_Mutation | SNP | A  | T  | 57  | 27  | c.1789A>T                           | c.(1789-1791)AAC>TAC | p.N597Y  |
| Pat_34 | Pre-Treatment | SLC13A1  | 6561   | 37 | 7 | 122768932 | 122768932 | Missense_Mutation | SNP | C  | T  | 47  | 22  | c.1100G>A                           | c.(1099-1101)GGA>GAA | p.G367E  |
| Pat_34 | Pre-Treatment | BRAF     | 673    | 37 | 7 | 140453136 | 140453137 | Missense_Mutation | DNP | AC | TT | 96  | 42  | ..1798_1799GT>Av                    | c.(1798-1800)GTG>AAG | p.V600K  |
| Pat_34 | Pre-Treatment | PIP      | 5304   | 37 | 7 | 142836684 | 142836685 | Missense_Mutation | DNP | CC | TT | 86  | 76  | c.390_391CC>TT(388-393)ATCCCC>ATTTT |                      | p.P131S  |
| Pat_34 | Pre-Treatment | EPHA1    | 2041   | 37 | 7 | 143091909 | 143091909 | Missense_Mutation | SNP | C  | T  | 34  | 18  | c.2344G>A                           | c.(2344-2346)GAA>AAA | p.E782K  |
| Pat_34 | Pre-Treatment | SSPO     | 23145  | 37 | 7 | 149481966 | 149481966 | Missense_Mutation | SNP | C  | T  | 28  | 14  | c.2756C>T                           | c.(2755-2757)TCA>TTA | p.S919L  |
| Pat_34 | Pre-Treatment | CSMD1    | 64478  | 37 | 8 | 3265475   | 3265475   | Missense_Mutation | SNP | C  | T  | 13  | 20  | c.2020G>A                           | c.(2020-2022)GAA>AAA | p.E674K  |
| Pat_34 | Pre-Treatment | NAT2     | 10     | 37 | 8 | 18257798  | 18257799  | Missense_Mutation | DNP | CC | TT | 30  | 64  | c.285_286CC>TT(283-288)ATCCCT>ATTTT |                      | p.P96S   |
| Pat_34 | Pre-Treatment | SH2D4A   | 63898  | 37 | 8 | 19214768  | 19214768  | Missense_Mutation | SNP | C  | T  | 69  | 143 | c.568C>T                            | c.(568-570)CGT>TGT   | p.R190C  |
| Pat_34 | Pre-Treatment | LOXL2    | 4017   | 37 | 8 | 23225606  | 23225606  | Missense_Mutation | SNP | C  | T  | 36  | 67  | c.259G>A                            | c.(259-261)GAC>AAC   | p.D87N   |
| Pat_34 | Pre-Treatment | SCARA5   | 286133 | 37 | 8 | 27764748  | 27764748  | Missense_Mutation | SNP | C  | T  | 26  | 49  | c.1013G>A                           | c.(1012-1014)AGA>AAA | p.R338K  |
| Pat_34 | Pre-Treatment | TEX15    | 56154  | 37 | 8 | 30695023  | 30695023  | Missense_Mutation | SNP | G  | A  | 7   | 32  | c.7628C>T                           | c.(7627-7629)TCA>TTA | p.S2543L |
| Pat_34 | Pre-Treatment | ADAM2    | 2515   | 37 | 8 | 39604085  | 39604085  | Missense_Mutation | SNP | G  | A  | 11  | 49  | c.2080C>T                           | c.(2080-2082)CCT>TCT | p.P694S  |

|        |               |          |        |    |   |           |           |                   |     |   |   |     |     |               |                      |                |
|--------|---------------|----------|--------|----|---|-----------|-----------|-------------------|-----|---|---|-----|-----|---------------|----------------------|----------------|
| Pat_34 | Pre-Treatment | CHRNA6   | 8973   | 37 | 8 | 42611759  | 42611759  | Missense_Mutation | SNP | C | T | 62  | 74  | c.583G>A      | c.(583-585)GTG>ATG   | p.V195M        |
| Pat_34 | Pre-Treatment | CLVS1    | 157807 | 37 | 8 | 62212408  | 62212408  | Missense_Mutation | SNP | C | T | 14  | 33  | c.22C>T       | c.(22-24)CCA>TCA     | p.P8S          |
| Pat_34 | Pre-Treatment | CLVS1    | 157807 | 37 | 8 | 62370966  | 62370966  | Missense_Mutation | SNP | G | A | 31  | 69  | c.842G>A      | c.(841-843)GGA>GAA   | p.G281E        |
| Pat_34 | Pre-Treatment | TRPA1    | 8989   | 37 | 8 | 72963103  | 72963103  | Nonsense_Mutation | SNP | C | T | 24  | 53  | c.1815G>A     | c.(1813-1815)TGG>TGA | p.W605*        |
| Pat_34 | Pre-Treatment | EPPK1    | 83481  | 37 | 8 | 144942264 | 144942264 | Missense_Mutation | SNP | C | T | 15  | 56  | c.5158G>A     | c.(5158-5160)GAC>AAC | p.D1720N       |
| Pat_34 | Pre-Treatment | PTPRD    | 5789   | 37 | 9 | 8485920   | 8485920   | Missense_Mutation | SNP | A | T | 39  | 43  | c.2897T>A     | c.(2896-2898)CTC>CAC | p.L966H        |
| Pat_34 | Pre-Treatment | FREM1    | 158326 | 37 | 9 | 14842347  | 14842347  | Missense_Mutation | SNP | C | T | 30  | 29  | c.1705G>A     | c.(1705-1707)GAG>AAG | p.E569K        |
| Pat_34 | Pre-Treatment | TAF1L    | 138474 | 37 | 9 | 32633458  | 32633458  | Missense_Mutation | SNP | C | T | 32  | 30  | c.2120G>A     | c.(2119-2121)GGA>GAA | p.G707E        |
| Pat_34 | Pre-Treatment | RECK     | 8434   | 37 | 9 | 36083496  | 36083496  | Missense_Mutation | SNP | C | T | 27  | 17  | c.574C>T      | c.(574-576)CCA>TCA   | p.P192S        |
| Pat_34 | Pre-Treatment | UBQLN1   | 29979  | 37 | 9 | 86294917  | 86294917  | Missense_Mutation | SNP | C | T | 33  | 17  | c.484G>A      | c.(484-486)GGT>AGT   | p.G162S        |
| Pat_34 | Pre-Treatment | INVS     | 27130  | 37 | 9 | 102866838 | 102866838 | Missense_Mutation | SNP | C | T | 26  | 30  | c.35C>T       | c.(34-36)TCA>TTA     | p.S12L         |
| Pat_34 | Pre-Treatment | ABCA1    | 19     | 37 | 9 | 107594964 | 107594964 | Missense_Mutation | SNP | A | C | 42  | 42  | c.1400T>G     | c.(1399-1401)TTG>TGG | p.L467W        |
| Pat_34 | Pre-Treatment | FCN2     | 2220   | 37 | 9 | 137772689 | 137772689 | Missense_Mutation | SNP | G | A | 8   | 9   | c.22G>A       | c.(22-24)GGG>AGG     | p.G8R          |
| Pat_34 | Pre-Treatment | CACNA1B  | 774    | 37 | 9 | 140811767 | 140811767 | Missense_Mutation | SNP | C | T | 22  | 65  | c.850C>T      | c.(850-852)CGG>TGG   | p.R284W        |
| Pat_34 | Pre-Treatment | ATXN3L   | 92552  | 37 | X | 13337593  | 13337593  | Missense_Mutation | SNP | C | T | 65  | 32  | c.461G>A      | c.(460-462)CGA>CAA   | p.R154Q        |
| Pat_34 | Pre-Treatment | ACE2     | 59272  | 37 | X | 15599367  | 15599367  | Nonsense_Mutation | SNP | C | T | 142 | 38  | c.1047G>A     | c.(1045-1047)TGG>TGA | p.W349*        |
| Pat_34 | Pre-Treatment | CXorf22  | 170063 | 37 | X | 35966478  | 35966478  | Missense_Mutation | SNP | C | T | 59  | 22  | c.565C>T      | c.(565-567)CCA>TCA   | p.P189S        |
| Pat_34 | Pre-Treatment | CXorf22  | 170063 | 37 | X | 35993371  | 35993371  | Missense_Mutation | SNP | G | A | 47  | 42  | c.2362G>A     | c.(2362-2364)GAT>AAT | p.D788N        |
| Pat_34 | Pre-Treatment | SLC9A7   | 84679  | 37 | X | 46466433  | 46466433  | Missense_Mutation | SNP | G | A | 32  | 19  | c.2132C>T     | c.(2131-2133)TCG>TTG | p.S711L        |
| Pat_34 | Pre-Treatment | OPHN1    | 4983   | 37 | X | 67421548  | 67421548  | Missense_Mutation | SNP | G | A | 42  | 14  | c.938C>T      | c.(937-939)CCC>CTC   | p.P313L        |
| Pat_34 | Pre-Treatment | TRMT2B   | 79979  | 37 | X | 100274023 | 100274023 | Missense_Mutation | SNP | G | A | 49  | 21  | c.1325C>T     | c.(1324-1326)GCC>GTC | p.A442V        |
| Pat_34 | Pre-Treatment | HTR2C    | 3358   | 37 | X | 114141666 | 114141666 | Nonsense_Mutation | SNP | G | A | 53  | 16  | c.1065G>A     | c.(1063-1065)TGG>TGA | p.W355*        |
| Pat_34 | Pre-Treatment | MST4     | 51765  | 37 | X | 131202291 | 131202291 | Missense_Mutation | SNP | G | A | 60  | 34  | c.379G>A      | c.(379-381)GAA>AAA   | p.E127K        |
| Pat_34 | Pre-Treatment | MAGEC2   | 51438  | 37 | X | 141291601 | 141291601 | Missense_Mutation | SNP | G | A | 23  | 7   | c.173C>T      | c.(172-174)TCC>TTC   | p.S58F         |
| Pat_34 | Pre-Treatment | GABRA3   | 2556   | 37 | X | 151336938 | 151336938 | Missense_Mutation | SNP | G | A | 62  | 40  | c.1241C>T     | c.(1240-1242)TCC>TTC | p.S414F        |
| Pat_46 | Pre-Treatment | AGRN     | 375790 | 37 | 1 | 985282    | 985282    | Splice_Site       | SNP | G | A | 8   | 18  | c.4745_splice | c.e27-1              | p.G1582_splice |
| Pat_46 | Pre-Treatment | ACTRT2   | 140625 | 37 | 1 | 2938383   | 2938383   | Nonsense_Mutation | SNP | C | T | 5   | 15  | c.133C>T      | c.(133-135)CAG>TAG   | p.Q45*         |
| Pat_46 | Pre-Treatment | CAMTA1   | 23261  | 37 | 1 | 7724780   | 7724780   | Missense_Mutation | SNP | G | A | 5   | 16  | c.2173G>A     | c.(2173-2175)GGG>AGG | p.G725R        |
| Pat_46 | Pre-Treatment | RERE     | 473    | 37 | 1 | 8557562   | 8557562   | Missense_Mutation | SNP | G | A | 32  | 79  | c.907C>T      | c.(907-909)CCT>TCT   | p.P303S        |
| Pat_46 | Pre-Treatment | PRAMEF12 | 390999 | 37 | 1 | 12835119  | 12835119  | Missense_Mutation | SNP | C | T | 7   | 22  | c.109C>T      | c.(109-111)CCC>TCC   | p.P37S         |
| Pat_46 | Pre-Treatment | PRAMEF11 | 440560 | 37 | 1 | 12884991  | 12884991  | Missense_Mutation | SNP | G | A | 52  | 76  | c.1120C>T     | c.(1120-1122)CCT>TCT | p.P374S        |
| Pat_46 | Pre-Treatment | PRAMEF8  | 391002 | 37 | 1 | 12979781  | 12979781  | Missense_Mutation | SNP | G | A | 13  | 36  | c.973G>A      | c.(973-975)GAC>AAC   | p.D325N        |
| Pat_46 | Pre-Treatment | PRAMEF18 | 391003 | 37 | 1 | 13695812  | 13695812  | Missense_Mutation | SNP | G | A | 12  | 124 | c.1153C>T     | c.(1153-1155)CAC>TAC | p.H385Y        |
| Pat_46 | Pre-Treatment | TMCO4    | 255104 | 37 | 1 | 20009888  | 20009888  | Missense_Mutation | SNP | G | A | 9   | 17  | c.1550C>T     | c.(1549-1551)GCC>GTC | p.A517V        |
| Pat_46 | Pre-Treatment | KIF17    | 57576  | 37 | 1 | 20998491  | 20998491  | Missense_Mutation | SNP | C | T | 11  | 15  | c.2662G>A     | c.(2662-2664)GAA>AAA | p.E888K        |
| Pat_46 | Pre-Treatment | EIF4G3   | 8672   | 37 | 1 | 21180063  | 21180063  | Missense_Mutation | SNP | T | G | 6   | 14  | c.3373A>C     | c.(3373-3375)ACC>CCC | p.T1125P       |
| Pat_46 | Pre-Treatment | TMEM57   | 55219  | 37 | 1 | 25773296  | 25773296  | Missense_Mutation | SNP | C | T | 3   | 11  | c.124C>T      | c.(124-126)CTC>TTC   | p.L42F         |
| Pat_46 | Pre-Treatment | C1orf172 | 126695 | 37 | 1 | 27278781  | 27278781  | Missense_Mutation | SNP | C | T | 10  | 23  | c.91G>A       | c.(91-93)GAT>AAT     | p.D31N         |
| Pat_46 | Pre-Treatment | BAI2     | 576    | 37 | 1 | 32202278  | 32202278  | Missense_Mutation | SNP | G | A | 9   | 21  | c.3026C>T     | c.(3025-3027)TCC>TTC | p.S1009F       |
| Pat_46 | Pre-Treatment | COL9A2   | 1298   | 37 | 1 | 40767522  | 40767522  | Missense_Mutation | SNP | C | T | 5   | 15  | c.1832G>A     | c.(1831-1833)CGG>CAG | p.R611Q        |
| Pat_46 | Pre-Treatment | TIE1     | 7075   | 37 | 1 | 43777724  | 43777724  | Missense_Mutation | SNP | C | T | 21  | 52  | c.1552C>T     | c.(1552-1554)CGT>TGT | p.R518C        |
| Pat_46 | Pre-Treatment | PTCH2    | 8643   | 37 | 1 | 45293837  | 45293837  | Missense_Mutation | SNP | A | T | 15  | 32  | c.1736T>A     | c.(1735-1737)ATC>AAC | p.I579N        |
| Pat_46 | Pre-Treatment | PRKAA2   | 5563   | 37 | 1 | 57140179  | 57140179  | Missense_Mutation | SNP | C | T | 4   | 32  | c.220C>T      | c.(220-222)CCT>TCT   | p.P74S         |
| Pat_46 | Pre-Treatment | C1orf168 | 199920 | 37 | 1 | 57254664  | 57254664  | Missense_Mutation | SNP | G | A | 19  | 50  | c.901C>T      | c.(901-903)CCC>TCC   | p.P301S        |
| Pat_46 | Pre-Treatment | C8A      | 731    | 37 | 1 | 57341860  | 57341860  | Missense_Mutation | SNP | G | A | 14  | 35  | c.442G>A      | c.(442-444)GGA>AGA   | p.G148R        |
| Pat_46 | Pre-Treatment | C8A      | 731    | 37 | 1 | 57349289  | 57349289  | Missense_Mutation | SNP | G | A | 10  | 35  | c.790G>A      | c.(790-792)GGT>AGT   | p.G264S        |
| Pat_46 | Pre-Treatment | C8A      | 731    | 37 | 1 | 57378223  | 57378223  | Missense_Mutation | SNP | C | T | 22  | 60  | c.1528C>T     | c.(1528-1530)CTC>TTC | p.L510F        |

|        |               |          |        |    |   |           |           |                   |     |    |    |     |     |                |                        |          |
|--------|---------------|----------|--------|----|---|-----------|-----------|-------------------|-----|----|----|-----|-----|----------------|------------------------|----------|
| Pat_46 | Pre-Treatment | C8B      | 732    | 37 | 1 | 57417816  | 57417816  | Missense_Mutation | SNP | G  | A  | 27  | 111 | c.571C>T       | c.(571-573)CTT>TTT     | p.L191F  |
| Pat_46 | Pre-Treatment | NFIA     | 4774   | 37 | 1 | 61554084  | 61554085  | Nonsense_Mutation | DNP | GA | AT | 31  | 109 | c.291_292GA>AT | 289-294)GGGAAA>GGAT,   | p.K98*   |
| Pat_46 | Pre-Treatment | ANGPTL3  | 27329  | 37 | 1 | 63069640  | 63069640  | Missense_Mutation | SNP | G  | A  | 5   | 12  | c.932G>A       | c.(931-933)GGA>GAA     | p.G311E  |
| Pat_46 | Pre-Treatment | JAK1     | 3716   | 37 | 1 | 65344731  | 65344732  | Missense_Mutation | DNP | GG | AA | 5   | 20  | c.305_306CC>TT | c.(304-306)TCC>TTT     | p.S102F  |
| Pat_46 | Pre-Treatment | C1orf173 | 127254 | 37 | 1 | 75102109  | 75102109  | Missense_Mutation | SNP | G  | A  | 65  | 164 | c.458C>T       | c.(457-459)CCA>CTA     | p.P153L  |
| Pat_46 | Pre-Treatment | FRRS1    | 391059 | 37 | 1 | 100176461 | 100176461 | Missense_Mutation | SNP | G  | A  | 11  | 29  | c.1525C>T      | c.(1525-1527)CCT>TCT   | p.P509S  |
| Pat_46 | Pre-Treatment | AGL      | 178    | 37 | 1 | 100327245 | 100327245 | Missense_Mutation | SNP | C  | T  | 16  | 65  | c.269C>T       | c.(268-270)TCA>TTA     | p.S90L   |
| Pat_46 | Pre-Treatment | GSTM5    | 2949   | 37 | 1 | 110256309 | 110256309 | Missense_Mutation | SNP | C  | T  | 7   | 23  | c.286C>T       | c.(286-288)CGT>TGT     | p.R96C   |
| Pat_46 | Pre-Treatment | OVGP1    | 5016   | 37 | 1 | 111964197 | 111964197 | Missense_Mutation | SNP | G  | A  | 10  | 23  | c.707C>T       | c.(706-708)CCC>CTC     | p.P236L  |
| Pat_46 | Pre-Treatment | WDR77    | 79084  | 37 | 1 | 111991249 | 111991249 | Missense_Mutation | SNP | G  | A  | 43  | 87  | c.293C>T       | c.(292-294)TCC>TTC     | p.S98F   |
| Pat_46 | Pre-Treatment | RSBN1    | 54665  | 37 | 1 | 114340403 | 114340403 | Nonsense_Mutation | SNP | A  | T  | 45  | 72  | c.959T>A       | c.(958-960)TTA>TAA     | p.L320*  |
| Pat_46 | Pre-Treatment | VTCN1    | 79679  | 37 | 1 | 117695923 | 117695923 | Nonsense_Mutation | SNP | G  | A  | 16  | 37  | c.514C>T       | c.(514-516)CGA>TGA     | p.R172*  |
| Pat_46 | Pre-Treatment | SPAG17   | 200162 | 37 | 1 | 118570912 | 118570912 | Missense_Mutation | SNP | C  | T  | 25  | 70  | c.3715G>A      | c.(3715-3717)GGA>AGA   | p.G1239R |
| Pat_46 | Pre-Treatment | WARS2    | 10352  | 37 | 1 | 119619088 | 119619088 | Missense_Mutation | SNP | G  | A  | 18  | 77  | c.233C>T       | c.(232-234)TCC>TTC     | p.S78F   |
| Pat_46 | Pre-Treatment | ITGA10   | 8515   | 37 | 1 | 145533166 | 145533166 | Missense_Mutation | SNP | C  | T  | 3   | 62  | c.1261C>T      | c.(1261-1263)CCC>TCC   | p.P421S  |
| Pat_46 | Pre-Treatment | ANKRD35  | 148741 | 37 | 1 | 145561391 | 145561391 | Missense_Mutation | SNP | C  | T  | 15  | 7   | c.1079C>T      | c.(1078-1080)TCT>TTT   | p.S360F  |
| Pat_46 | Pre-Treatment | ECM1     | 1893   | 37 | 1 | 150483973 | 150483973 | Missense_Mutation | SNP | C  | T  | 23  | 130 | c.749C>T       | c.(748-750)TCG>TTG     | p.S250L  |
| Pat_46 | Pre-Treatment | HRNR     | 388697 | 37 | 1 | 152192583 | 152192583 | Missense_Mutation | SNP | C  | T  | 72  | 362 | c.1522G>A      | c.(1522-1524)GGA>AGA   | p.G508R  |
| Pat_46 | Pre-Treatment | HRNR     | 388697 | 37 | 1 | 152193753 | 152193753 | Missense_Mutation | SNP | C  | T  | 44  | 35  | c.352G>A       | c.(352-354)GAG>AAG     | p.E118K  |
| Pat_46 | Pre-Treatment | FLG      | 2312   | 37 | 1 | 152280773 | 152280773 | Missense_Mutation | SNP | C  | T  | 49  | 240 | c.6589G>A      | c.(6589-6591)GAA>AAA   | p.E2197K |
| Pat_46 | Pre-Treatment | FLG      | 2312   | 37 | 1 | 152286716 | 152286716 | Missense_Mutation | SNP | C  | T  | 21  | 20  | c.646G>A       | c.(646-648)GAT>AAT     | p.D216N  |
| Pat_46 | Pre-Treatment | CRNN     | 49860  | 37 | 1 | 152382906 | 152382906 | Missense_Mutation | SNP | C  | T  | 118 | 83  | c.652G>A       | c.(652-654)GAC>AAC     | p.D218N  |
| Pat_46 | Pre-Treatment | LCE1E    | 353135 | 37 | 1 | 152760070 | 152760070 | Missense_Mutation | SNP | C  | T  | 45  | 16  | c.295C>T       | c.(295-297)CCC>TCC     | p.P99S   |
| Pat_46 | Pre-Treatment | FAM189B  | 10712  | 37 | 1 | 155220484 | 155220484 | Missense_Mutation | SNP | G  | A  | 23  | 24  | c.1093C>T      | c.(1093-1095)CGC>TGC   | p.R365C  |
| Pat_46 | Pre-Treatment | OR10K1   | 391109 | 37 | 1 | 158435659 | 158435659 | Missense_Mutation | SNP | C  | T  | 18  | 129 | c.308C>T       | c.(307-309)TCC>TTC     | p.S103F  |
| Pat_46 | Pre-Treatment | SPTA1    | 6708   | 37 | 1 | 158646045 | 158646045 | Missense_Mutation | SNP | G  | A  | 47  | 285 | c.998C>T       | c.(997-999)TCC>TTC     | p.S333F  |
| Pat_46 | Pre-Treatment | OR10J3   | 441911 | 37 | 1 | 159284365 | 159284365 | Missense_Mutation | SNP | A  | C  | 39  | 196 | c.85T>G        | c.(85-87)TTT>GTT       | p.F29V   |
| Pat_46 | Pre-Treatment | PVRL4    | 81607  | 37 | 1 | 161049730 | 161049730 | Missense_Mutation | SNP | G  | A  | 62  | 50  | c.89C>T        | c.(88-90)CCC>CTC       | p.P30L   |
| Pat_46 | Pre-Treatment | ADAMTS4  | 9507   | 37 | 1 | 161163432 | 161163432 | Missense_Mutation | SNP | G  | A  | 268 | 244 | c.1733C>T      | c.(1732-1734)TCA>TTA   | p.S578L  |
| Pat_46 | Pre-Treatment | F5       | 2153   | 37 | 1 | 169512194 | 169512194 | Missense_Mutation | SNP | G  | A  | 228 | 151 | c.2134C>T      | c.(2134-2136)CGT>TGT   | p.R712C  |
| Pat_46 | Pre-Treatment | SELE     | 6401   | 37 | 1 | 169698486 | 169698486 | Nonsense_Mutation | SNP | G  | A  | 7   | 46  | c.931C>T       | c.(931-933)CAG>TAG     | p.Q311*  |
| Pat_46 | Pre-Treatment | PAPPA2   | 60676  | 37 | 1 | 176709263 | 176709263 | Missense_Mutation | SNP | C  | T  | 19  | 124 | c.4082C>T      | c.(4081-4083)TCC>TTC   | p.S1361F |
| Pat_46 | Pre-Treatment | ASTN1    | 460    | 37 | 1 | 176833520 | 176833520 | Missense_Mutation | SNP | C  | T  | 20  | 94  | c.3785G>A      | c.(3784-3786)GGA>GAA   | p.G1262E |
| Pat_46 | Pre-Treatment | CACNA1E  | 777    | 37 | 1 | 181745241 | 181745241 | Missense_Mutation | SNP | T  | C  | 35  | 253 | c.5144T>C      | c.(5143-5145)CTC>CCC   | p.L1715P |
| Pat_46 | Pre-Treatment | HMCN1    | 83872  | 37 | 1 | 186024803 | 186024803 | Missense_Mutation | SNP | C  | T  | 43  | 210 | c.7141C>T      | c.(7141-7143)CAT>TAT   | p.H2381Y |
| Pat_46 | Pre-Treatment | PRG4     | 10216  | 37 | 1 | 186275983 | 186275983 | Missense_Mutation | SNP | C  | A  | 4   | 108 | c.1132C>A      | c.(1132-1134)CCC>ACC   | p.P378T  |
| Pat_46 | Pre-Treatment | RGS21    | 431704 | 37 | 1 | 192335238 | 192335238 | Nonsense_Mutation | SNP | G  | A  | 11  | 13  | c.443G>A       | c.(442-444)TGG>TAG     | p.W148*  |
| Pat_46 | Pre-Treatment | CRB1     | 23418  | 37 | 1 | 197404528 | 197404528 | Missense_Mutation | SNP | G  | A  | 8   | 49  | c.3535G>A      | c.(3535-3537)GAT>AAT   | p.D1179N |
| Pat_46 | Pre-Treatment | KIF14    | 9928   | 37 | 1 | 200574423 | 200574423 | Missense_Mutation | SNP | C  | G  | 3   | 62  | c.1734G>C      | c.(1732-1734)ATG>ATC   | p.M578I  |
| Pat_46 | Pre-Treatment | SNRPE    | 6635   | 37 | 1 | 203834217 | 203834217 | Missense_Mutation | SNP | C  | T  | 19  | 94  | c.193C>T       | c.(193-195)CAT>TAT     | p.H65Y   |
| Pat_46 | Pre-Treatment | C4BPA    | 722    | 37 | 1 | 207297538 | 207297538 | Missense_Mutation | SNP | C  | T  | 86  | 69  | c.533C>T       | c.(532-534)CCT>CTT     | p.P178L  |
| Pat_46 | Pre-Treatment | CR1      | 1378   | 37 | 1 | 207762056 | 207762056 | Missense_Mutation | SNP | G  | A  | 11  | 36  | c.4397G>A      | c.(4396-4398)GGA>GAA   | p.G1466E |
| Pat_46 | Pre-Treatment | USH2A    | 7399   | 37 | 1 | 215844436 | 215844436 | Missense_Mutation | SNP | C  | T  | 54  | 27  | c.14011G>A     | c.(14011-14013)GAA>AAA | p.E4671K |
| Pat_46 | Pre-Treatment | OBSCN    | 84033  | 37 | 1 | 228468465 | 228468465 | Missense_Mutation | SNP | C  | T  | 12  | 4   | c.8165C>T      | c.(8164-8166)TCC>TTC   | p.S2722F |
| Pat_46 | Pre-Treatment | SLC35F3  | 148641 | 37 | 1 | 234367322 | 234367322 | Missense_Mutation | SNP | C  | T  | 32  | 126 | c.236C>T       | c.(235-237)TCG>TTG     | p.S79L   |
| Pat_46 | Pre-Treatment | RYR2     | 6262   | 37 | 1 | 237777611 | 237777611 | Missense_Mutation | SNP | C  | T  | 25  | 19  | c.5183C>T      | c.(5182-5184)CCC>CTC   | p.P1728L |
| Pat_46 | Pre-Treatment | FMN2     | 56776  | 37 | 1 | 240255852 | 240255852 | Missense_Mutation | SNP | G  | A  | 4   | 1   | c.443G>A       | c.(442-444)GGG>GAG     | p.G148E  |

|        |               |           |        |    |    |           |           |                   |     |    |    |    |     |                |                        |               |
|--------|---------------|-----------|--------|----|----|-----------|-----------|-------------------|-----|----|----|----|-----|----------------|------------------------|---------------|
| Pat_46 | Pre-Treatment | FMN2      | 56776  | 37 | 1  | 240371051 | 240371051 | Missense_Mutation | SNP | C  | T  | 17 | 140 | c.2939C>T      | c.(2938-2940)CCT>CTT   | p.P980L       |
| Pat_46 | Pre-Treatment | OR2L13    | 284521 | 37 | 1  | 248263515 | 248263515 | Missense_Mutation | SNP | C  | T  | 55 | 54  | c.838C>T       | c.(838-840)CTT>TTT     | p.L280F       |
| Pat_46 | Pre-Treatment | TUBAL3    | 79861  | 37 | 10 | 5436006   | 5436006   | Missense_Mutation | SNP | A  | T  | 19 | 81  | c.815T>A       | c.(814-816)ATA>AAA     | p.I272K       |
| Pat_46 | Pre-Treatment | OLAH      | 55301  | 37 | 10 | 15107598  | 15107598  | Missense_Mutation | SNP | C  | T  | 6  | 19  | c.418C>T       | c.(418-420)CGC>TGC     | p.R140C       |
| Pat_46 | Pre-Treatment | FAM171A1  | 221061 | 37 | 10 | 15255489  | 15255489  | Missense_Mutation | SNP | T  | G  | 17 | 31  | c.2098A>C      | c.(2098-2100)AAG>CAG   | p.K700Q       |
| Pat_46 | Pre-Treatment | ITGA8     | 8516   | 37 | 10 | 15590507  | 15590507  | Missense_Mutation | SNP | C  | T  | 24 | 39  | c.2827G>A      | c.(2827-2829)GAA>AAA   | p.E943K       |
| Pat_46 | Pre-Treatment | ITGA8     | 8516   | 37 | 10 | 15646281  | 15646281  | Missense_Mutation | SNP | C  | T  | 15 | 37  | c.2044G>A      | c.(2044-2046)GGA>AGA   | p.G682R       |
| Pat_46 | Pre-Treatment | NEBL      | 10529  | 37 | 10 | 21120192  | 21120192  | Missense_Mutation | SNP | C  | T  | 18 | 50  | c.1604G>A      | c.(1603-1605)GGA>GAA   | p.G535E       |
| Pat_46 | Pre-Treatment | PIP4K2A   | 5305   | 37 | 10 | 22898620  | 22898620  | Missense_Mutation | SNP | G  | C  | 45 | 111 | c.171C>G       | c.(169-171)ATC>ATG     | p.I57M        |
| Pat_46 | Pre-Treatment | PTCHD3    | 374308 | 37 | 10 | 27702954  | 27702954  | Missense_Mutation | SNP | G  | A  | 14 | 39  | c.226C>T       | c.(226-228)CCC>TCC     | p.P76S        |
| Pat_46 | Pre-Treatment | MPP7      | 143098 | 37 | 10 | 28408594  | 28408594  | Missense_Mutation | SNP | G  | A  | 23 | 61  | c.938C>T       | c.(937-939)TCC>TTC     | p.S313F       |
| Pat_46 | Pre-Treatment | ANKRD30A  | 91074  | 37 | 10 | 37490242  | 37490242  | Missense_Mutation | SNP | G  | A  | 7  | 27  | c.2690G>A      | c.(2689-2691)GGA>GAA   | p.G897E       |
| Pat_46 | Pre-Treatment | ZNF37A    | 7587   | 37 | 10 | 38407040  | 38407040  | Missense_Mutation | SNP | C  | T  | 9  | 33  | c.961C>T       | c.(961-963)CAT>TAT     | p.H321Y       |
| Pat_46 | Pre-Treatment | ALOX5     | 240    | 37 | 10 | 45939214  | 45939214  | Missense_Mutation | SNP | G  | A  | 7  | 17  | c.1612G>A      | c.(1612-1614)GAG>AAG   | p.E538K       |
| Pat_46 | Pre-Treatment | FRMPD2    | 143162 | 37 | 10 | 49430394  | 49430394  | Missense_Mutation | SNP | G  | A  | 23 | 69  | c.1417C>T      | c.(1417-1419)CTT>TTT   | p.L473F       |
| Pat_46 | Pre-Treatment | OGDHL     | 55753  | 37 | 10 | 50953927  | 50953927  | Missense_Mutation | SNP | C  | T  | 17 | 47  | c.1393G>A      | c.(1393-1395)GAT>AAT   | p.D465N       |
| Pat_46 | Pre-Treatment | NCOA4     | 8031   | 37 | 10 | 51579247  | 51579247  | Missense_Mutation | SNP | C  | T  | 31 | 114 | c.106C>T       | c.(106-108)CGG>TGG     | p.R36W        |
| Pat_46 | Pre-Treatment | PCDH15    | 65217  | 37 | 10 | 55955628  | 55955628  | Missense_Mutation | SNP | G  | A  | 11 | 34  | c.1120C>T      | c.(1120-1122)CCT>TCT   | p.P374S       |
| Pat_46 | Pre-Treatment | ANK3      | 288    | 37 | 10 | 61829433  | 61829433  | Missense_Mutation | SNP | C  | T  | 8  | 42  | c.11206G>A     | c.(11206-11208)GAA>AAA | p.E3736K      |
| Pat_46 | Pre-Treatment | CTNNA3    | 29119  | 37 | 10 | 67862998  | 67862998  | Missense_Mutation | SNP | C  | T  | 10 | 30  | c.1894G>A      | c.(1894-1896)GAA>AAA   | p.E632K       |
| Pat_46 | Pre-Treatment | COL13A1   | 1305   | 37 | 10 | 71712675  | 71712675  | Missense_Mutation | SNP | G  | A  | 7  | 25  | c.2063G>A      | c.(2062-2064)GGG>GAG   | p.G688E       |
| Pat_46 | Pre-Treatment | OIT3      | 170392 | 37 | 10 | 74658610  | 74658610  | Missense_Mutation | SNP | G  | A  | 5  | 19  | c.250G>A       | c.(250-252)GCA>ACA     | p.A84T        |
| Pat_46 | Pre-Treatment | C10orf55  | 414236 | 37 | 10 | 75671974  | 75671974  | Missense_Mutation | SNP | G  | A  | 12 | 61  | c.29C>T        | c.(28-30)TCG>TTG       | p.S10L        |
| Pat_46 | Pre-Treatment | SFTPA1    | 653509 | 37 | 10 | 81373492  | 81373492  | Splice_Site       | SNP | G  | A  | 24 | 69  | c.371_splice   | c.e6-1                 | p.A124_splice |
| Pat_46 | Pre-Treatment | IFIT1     | 3434   | 37 | 10 | 91162729  | 91162729  | Missense_Mutation | SNP | G  | A  | 48 | 108 | c.697G>A       | c.(697-699)GAA>AAA     | p.E233K       |
| Pat_46 | Pre-Treatment | CYP2C18   | 1562   | 37 | 10 | 96447594  | 96447594  | Missense_Mutation | SNP | G  | A  | 32 | 92  | c.236G>A       | c.(235-237)GGA>GAA     | p.G79E        |
| Pat_46 | Pre-Treatment | TACC2     | 10579  | 37 | 10 | 123970436 | 123970436 | Missense_Mutation | SNP | G  | A  | 12 | 45  | c.6496G>A      | c.(6496-6498)GGG>AGG   | p.G2166R      |
| Pat_46 | Pre-Treatment | GPR26     | 2849   | 37 | 10 | 125434378 | 125434378 | Missense_Mutation | SNP | G  | A  | 11 | 22  | c.713G>A       | c.(712-714)CGA>CAA     | p.R238Q       |
| Pat_46 | Pre-Treatment | CPXM2     | 119587 | 37 | 10 | 125528202 | 125528202 | Missense_Mutation | SNP | C  | T  | 38 | 109 | c.1139G>A      | c.(1138-1140)GGC>GAC   | p.G380D       |
| Pat_46 | Pre-Treatment | C10orf137 | 26098  | 37 | 10 | 127424384 | 127424384 | Missense_Mutation | SNP | C  | T  | 33 | 78  | c.1669C>T      | c.(1669-1671)CCA>TCA   | p.P557S       |
| Pat_46 | Pre-Treatment | ADAM12    | 8038   | 37 | 10 | 127760213 | 127760213 | Missense_Mutation | SNP | G  | A  | 18 | 42  | c.1165C>T      | c.(1165-1167)CCC>TCC   | p.P389S       |
| Pat_46 | Pre-Treatment | C10orf90  | 118611 | 37 | 10 | 128192921 | 128192921 | Missense_Mutation | SNP | G  | C  | 40 | 81  | c.848C>G       | c.(847-849)CCC>CGC     | p.P283R       |
| Pat_46 | Pre-Treatment | OR52E2    | 119678 | 37 | 11 | 5080110   | 5080110   | Missense_Mutation | SNP | G  | A  | 12 | 23  | c.748C>T       | c.(748-750)CTT>TTT     | p.L250F       |
| Pat_46 | Pre-Treatment | OR52E8    | 390079 | 37 | 11 | 5878290   | 5878290   | Missense_Mutation | SNP | C  | T  | 12 | 23  | c.643G>A       | c.(643-645)GAT>AAT     | p.D215N       |
| Pat_46 | Pre-Treatment | OR52L1    | 338751 | 37 | 11 | 6007836   | 6007836   | Missense_Mutation | SNP | C  | T  | 6  | 28  | c.325G>A       | c.(325-327)GAG>AAG     | p.E109K       |
| Pat_46 | Pre-Treatment | CNGA4     | 1262   | 37 | 11 | 6261737   | 6261737   | Missense_Mutation | SNP | C  | T  | 11 | 27  | c.713C>T       | c.(712-714)CCA>CTA     | p.P238L       |
| Pat_46 | Pre-Treatment | DCHS1     | 8642   | 37 | 11 | 6662520   | 6662520   | Missense_Mutation | SNP | G  | A  | 13 | 53  | c.325C>T       | c.(325-327)CGT>TGT     | p.R109C       |
| Pat_46 | Pre-Treatment | OR2AG1    | 144125 | 37 | 11 | 6806965   | 6806965   | Missense_Mutation | DNP | GG | AA | 11 | 30  | c.697_698GG>AA | c.(697-699)GGG>AAG     | p.G233K       |
| Pat_46 | Pre-Treatment | ZNF215    | 7762   | 37 | 11 | 6964847   | 6964847   | Missense_Mutation | SNP | A  | C  | 31 | 70  | c.687A>C       | c.(685-687)AAA>AAC     | p.K229N       |
| Pat_46 | Pre-Treatment | NLRP14    | 338323 | 37 | 11 | 7064044   | 7064044   | Missense_Mutation | SNP | G  | A  | 15 | 46  | c.787G>A       | c.(787-789)GAA>AAA     | p.E263K       |
| Pat_46 | Pre-Treatment | NLRP14    | 338323 | 37 | 11 | 7064261   | 7064261   | Missense_Mutation | SNP | G  | A  | 26 | 52  | c.1004G>A      | c.(1003-1005)AGA>AAA   | p.R335K       |
| Pat_46 | Pre-Treatment | NLRP14    | 338323 | 37 | 11 | 7091675   | 7091675   | Missense_Mutation | SNP | T  | C  | 17 | 23  | c.3134T>C      | c.(3133-3135)CTA>CCA   | p.L1045P      |
| Pat_46 | Pre-Treatment | ST5       | 6764   | 37 | 11 | 8751675   | 8751675   | Missense_Mutation | SNP | G  | A  | 28 | 55  | c.1162C>T      | c.(1162-1164)CCC>TCC   | p.P388S       |
| Pat_46 | Pre-Treatment | IGSF22    | 283284 | 37 | 11 | 18731120  | 18731120  | Missense_Mutation | SNP | C  | T  | 11 | 35  | c.2812G>A      | c.(2812-2814)GAG>AAG   | p.E938K       |
| Pat_46 | Pre-Treatment | GAS2      | 2620   | 37 | 11 | 22707294  | 22707294  | Missense_Mutation | SNP | G  | A  | 10 | 25  | c.226G>A       | c.(226-228)GAG>AAG     | p.E76K        |
| Pat_46 | Pre-Treatment | CSTF3     | 1479   | 37 | 11 | 33124691  | 33124691  | Missense_Mutation | SNP | G  | A  | 18 | 32  | c.625C>T       | c.(625-627)CGG>TGG     | p.R209W       |
| Pat_46 | Pre-Treatment | RAG2      | 5897   | 37 | 11 | 36615100  | 36615100  | Missense_Mutation | SNP | G  | A  | 32 | 86  | c.619C>T       | c.(619-621)CAT>TAT     | p.H207Y       |

|        |               |          |        |    |    |           |           |                   |     |    |    |     |     |                |                      |          |
|--------|---------------|----------|--------|----|----|-----------|-----------|-------------------|-----|----|----|-----|-----|----------------|----------------------|----------|
| Pat_46 | Pre-Treatment | PHF21A   | 51317  | 37 | 11 | 45987010  | 45987011  | Missense_Mutation | DNP | GG | AA | 13  | 40  | c.848_849CC>TT | c.(847-849)CCC>CTT   | p.P283L  |
| Pat_46 | Pre-Treatment | PTPRJ    | 5795   | 37 | 11 | 48134313  | 48134313  | Missense_Mutation | SNP | C  | T  | 58  | 98  | c.130C>T       | c.(130-132)CCT>TCT   | p.P44S   |
| Pat_46 | Pre-Treatment | OR4A47   | 403253 | 37 | 11 | 48510571  | 48510571  | Missense_Mutation | SNP | C  | T  | 20  | 31  | c.227C>T       | c.(226-228)TCC>TTC   | p.S76F   |
| Pat_46 | Pre-Treatment | TRIM48   | 79097  | 37 | 11 | 55032647  | 55032647  | Missense_Mutation | SNP | G  | A  | 49  | 24  | c.316G>A       | c.(316-318)GAG>AAG   | p.E106K  |
| Pat_46 | Pre-Treatment | OR4C6    | 219432 | 37 | 11 | 55432600  | 55432600  | Splice_Site       | SNP | G  | A  | 17  | 15  | c.-41_splice   | c.e3-1               |          |
| Pat_46 | Pre-Treatment | OR5L2    | 26338  | 37 | 11 | 55594915  | 55594915  | Missense_Mutation | SNP | C  | T  | 143 | 90  | c.221C>T       | c.(220-222)TCC>TTC   | p.S74F   |
| Pat_46 | Pre-Treatment | OR5AS1   | 219447 | 37 | 11 | 55798826  | 55798826  | Missense_Mutation | SNP | C  | T  | 13  | 64  | c.932C>T       | c.(931-933)TCA>TTA   | p.S311L  |
| Pat_46 | Pre-Treatment | OR8H2    | 390151 | 37 | 11 | 55873258  | 55873258  | Missense_Mutation | SNP | G  | A  | 5   | 27  | c.740G>A       | c.(739-741)GGA>GAA   | p.G247E  |
| Pat_46 | Pre-Treatment | OR8J1    | 219477 | 37 | 11 | 56128414  | 56128414  | Missense_Mutation | SNP | C  | T  | 22  | 29  | c.692C>T       | c.(691-693)TCA>TTA   | p.S231L  |
| Pat_46 | Pre-Treatment | APLNR    | 187    | 37 | 11 | 57004463  | 57004463  | Missense_Mutation | SNP | C  | T  | 9   | 58  | c.16G>A        | c.(16-18)GAT>AAT     | p.D6N    |
| Pat_46 | Pre-Treatment | SSRP1    | 6749   | 37 | 11 | 57099948  | 57099948  | Missense_Mutation | SNP | G  | A  | 55  | 239 | c.781C>T       | c.(781-783)CCC>TCC   | p.P261S  |
| Pat_46 | Pre-Treatment | FAM111A  | 63901  | 37 | 11 | 58919839  | 58919839  | Missense_Mutation | SNP | C  | T  | 13  | 108 | c.698C>T       | c.(697-699)TCC>TTC   | p.S233F  |
| Pat_46 | Pre-Treatment | OR4D11   | 219986 | 37 | 11 | 59271374  | 59271374  | Missense_Mutation | SNP | G  | A  | 64  | 44  | c.326G>A       | c.(325-327)GGG>GAG   | p.G109E  |
| Pat_46 | Pre-Treatment | OR4D9    | 390199 | 37 | 11 | 59283079  | 59283079  | Missense_Mutation | SNP | G  | A  | 47  | 253 | c.694G>A       | c.(694-696)GGC>AGC   | p.G232S  |
| Pat_46 | Pre-Treatment | MS4A2    | 2206   | 37 | 11 | 59861474  | 59861474  | Missense_Mutation | SNP | G  | A  | 28  | 133 | c.575G>A       | c.(574-576)GGA>GAA   | p.G192E  |
| Pat_46 | Pre-Treatment | DAK      | 26007  | 37 | 11 | 61105584  | 61105584  | Missense_Mutation | SNP | C  | T  | 33  | 24  | c.175C>T       | c.(175-177)CAT>TAT   | p.H59Y   |
| Pat_46 | Pre-Treatment | MTA2     | 9219   | 37 | 11 | 62366028  | 62366028  | Missense_Mutation | SNP | G  | A  | 63  | 315 | c.274C>T       | c.(274-276)CGG>TGG   | p.R92W   |
| Pat_46 | Pre-Treatment | SLC22A25 | 387601 | 37 | 11 | 62933592  | 62933592  | Missense_Mutation | SNP | C  | T  | 48  | 30  | c.1209G>A      | c.(1207-1209)ATG>ATA | p.M403I  |
| Pat_46 | Pre-Treatment | SLC22A10 | 387775 | 37 | 11 | 63057642  | 63057642  | Missense_Mutation | SNP | C  | T  | 25  | 14  | c.5C>T         | c.(4-6)GCC>GTC       | p.A2V    |
| Pat_46 | Pre-Treatment | SLC22A10 | 387775 | 37 | 11 | 63072267  | 63072267  | Missense_Mutation | SNP | G  | A  | 18  | 90  | c.1504G>A      | c.(1504-1506)GGA>AGA | p.G502R  |
| Pat_46 | Pre-Treatment | SLC22A12 | 116085 | 37 | 11 | 64359368  | 64359368  | Missense_Mutation | SNP | G  | A  | 22  | 24  | c.340G>A       | c.(340-342)GAG>AAG   | p.E114K  |
| Pat_46 | Pre-Treatment | CDC42BPG | 55561  | 37 | 11 | 64606627  | 64606627  | Missense_Mutation | SNP | G  | A  | 61  | 55  | c.754C>T       | c.(754-756)CAC>TAC   | p.H252Y  |
| Pat_46 | Pre-Treatment | TM7SF2   | 7108   | 37 | 11 | 64883503  | 64883503  | Missense_Mutation | SNP | G  | A  | 54  | 45  | c.1235G>A      | c.(1234-1236)CGC>CAC | p.R412H  |
| Pat_46 | Pre-Treatment | CABP2    | 51475  | 37 | 11 | 67286622  | 67286622  | Missense_Mutation | SNP | C  | T  | 27  | 19  | c.651G>A       | c.(649-651)ATG>ATA   | p.M217I  |
| Pat_46 | Pre-Treatment | PPFIA1   | 8500   | 37 | 11 | 70194471  | 70194471  | Missense_Mutation | SNP | G  | A  | 52  | 65  | c.2108G>A      | c.(2107-2109)CGA>CAA | p.R703Q  |
| Pat_46 | Pre-Treatment | ODZ4     | 26011  | 37 | 11 | 78381419  | 78381419  | Missense_Mutation | SNP | C  | T  | 3   | 5   | c.5971G>A      | c.(5971-5973)GAC>AAC | p.D1991N |
| Pat_46 | Pre-Treatment | PICALM   | 8301   | 37 | 11 | 85718599  | 85718599  | Missense_Mutation | SNP | G  | A  | 78  | 82  | c.793C>T       | c.(793-795)CCA>TCA   | p.P265S  |
| Pat_46 | Pre-Treatment | MTNR1B   | 4544   | 37 | 11 | 92715261  | 92715261  | Missense_Mutation | SNP | T  | A  | 49  | 49  | c.872T>A       | c.(871-873)GTC>GAC   | p.V291D  |
| Pat_46 | Pre-Treatment | HEPHL1   | 341208 | 37 | 11 | 93808340  | 93808340  | Missense_Mutation | SNP | G  | A  | 6   | 5   | c.1505G>A      | c.(1504-1506)GGA>GAA | p.G502E  |
| Pat_46 | Pre-Treatment | TRPC6    | 7225   | 37 | 11 | 101342086 | 101342086 | Missense_Mutation | SNP | C  | T  | 16  | 31  | c.2237G>A      | c.(2236-2238)AGG>AAG | p.R746K  |
| Pat_46 | Pre-Treatment | HTR3A    | 3359   | 37 | 11 | 113848499 | 113848499 | Missense_Mutation | SNP | G  | A  | 7   | 8   | c.92G>A        | c.(91-93)AGG>AAG     | p.R31K   |
| Pat_46 | Pre-Treatment | APOA4    | 337    | 37 | 11 | 116692155 | 116692155 | Missense_Mutation | SNP | C  | T  | 28  | 55  | c.619G>A       | c.(619-621)GAA>AAA   | p.E207K  |
| Pat_46 | Pre-Treatment | TECTA    | 7007   | 37 | 11 | 121036027 | 121036027 | Missense_Mutation | SNP | G  | A  | 9   | 8   | c.5318G>A      | c.(5317-5319)CGA>CAA | p.R1773Q |
| Pat_46 | Pre-Treatment | SPA17    | 53340  | 37 | 11 | 124564280 | 124564280 | Missense_Mutation | SNP | G  | A  | 8   | 21  | c.394G>A       | c.(394-396)GAG>AAG   | p.E132K  |
| Pat_46 | Pre-Treatment | DCP1B    | 196513 | 37 | 12 | 2062350   | 2062350   | Missense_Mutation | SNP | C  | G  | 2   | 20  | c.756G>C       | c.(754-756)CAG>CAC   | p.Q252H  |
| Pat_46 | Pre-Treatment | A2M      | 2      | 37 | 12 | 9232385   | 9232385   | Missense_Mutation | SNP | T  | A  | 7   | 11  | c.2881A>T      | c.(2881-2883)AAC>TAC | p.N961Y  |
| Pat_46 | Pre-Treatment | PZP      | 5858   | 37 | 12 | 9305466   | 9305466   | Missense_Mutation | SNP | C  | T  | 19  | 49  | c.4075G>A      | c.(4075-4077)GAT>AAT | p.D1359N |
| Pat_46 | Pre-Treatment | PRB2     | 653247 | 37 | 12 | 11546515  | 11546515  | Missense_Mutation | SNP | C  | T  | 35  | 77  | c.497G>A       | c.(496-498)GGA>GAA   | p.G166E  |
| Pat_46 | Pre-Treatment | PIK3C2G  | 5288   | 37 | 12 | 18699323  | 18699323  | Missense_Mutation | SNP | C  | T  | 6   | 11  | c.3424C>T      | c.(3424-3426)CGT>TGT | p.R1142C |
| Pat_46 | Pre-Treatment | PIK3C2G  | 5288   | 37 | 12 | 18747456  | 18747456  | Missense_Mutation | SNP | C  | T  | 20  | 48  | c.3917C>T      | c.(3916-3918)JCT>TTT | p.S1306F |
| Pat_46 | Pre-Treatment | PLCZ1    | 89869  | 37 | 12 | 18837172  | 18837172  | Missense_Mutation | SNP | G  | A  | 19  | 47  | c.1633C>T      | c.(1633-1635)CAT>TAT | p.H545Y  |
| Pat_46 | Pre-Treatment | CAPZA3   | 93661  | 37 | 12 | 18891857  | 18891857  | Missense_Mutation | SNP | G  | A  | 4   | 15  | c.655G>A       | c.(655-657)GCT>ACT   | p.A219T  |
| Pat_46 | Pre-Treatment | ABCC9    | 10060  | 37 | 12 | 21997810  | 21997810  | Missense_Mutation | SNP | C  | T  | 8   | 30  | c.3136G>A      | c.(3136-3138)GGC>AGC | p.G1046S |
| Pat_46 | Pre-Treatment | OVCH1    | 341350 | 37 | 12 | 29598333  | 29598333  | Missense_Mutation | SNP | C  | T  | 5   | 12  | c.2759G>A      | c.(2758-2760)GGA>GAA | p.G920E  |
| Pat_46 | Pre-Treatment | C12orf72 | 254013 | 37 | 12 | 31814975  | 31814975  | Missense_Mutation | SNP | C  | T  | 10  | 21  | c.88C>T        | c.(88-90)CCC>TCC     | p.P30S   |
| Pat_46 | Pre-Treatment | PKP2     | 5318   | 37 | 12 | 33003862  | 33003862  | Missense_Mutation | SNP | C  | T  | 13  | 40  | c.1216G>A      | c.(1216-1218)GTT>ATT | p.V406I  |
| Pat_46 | Pre-Treatment | C12orf40 | 283461 | 37 | 12 | 40114899  | 40114899  | Missense_Mutation | SNP | C  | T  | 23  | 68  | c.1805C>T      | c.(1804-1806)JCT>TTT | p.S602F  |



|        |               |           |        |    |    |           |           |                   |     |    |    |     |     |                |                      |               |
|--------|---------------|-----------|--------|----|----|-----------|-----------|-------------------|-----|----|----|-----|-----|----------------|----------------------|---------------|
| Pat_46 | Pre-Treatment | CACNB3    | 784    | 37 | 12 | 49218065  | 49218065  | Missense_Mutation | SNP | G  | A  | 4   | 24  | c.316G>A       | c.(316-318)GGG>AGG   | p.G106R       |
| Pat_46 | Pre-Treatment | GALNT6    | 11226  | 37 | 12 | 51773135  | 51773135  | Missense_Mutation | SNP | G  | A  | 4   | 24  | c.431C>T       | c.(430-432)GCC>GTC   | p.A144V       |
| Pat_46 | Pre-Treatment | KRT6B     | 3854   | 37 | 12 | 52841737  | 52841737  | Missense_Mutation | SNP | C  | T  | 32  | 59  | c.1249G>A      | c.(1249-1251)GAG>AAG | p.E417K       |
| Pat_46 | Pre-Treatment | ESPL1     | 9700   | 37 | 12 | 53673634  | 53673634  | Missense_Mutation | SNP | G  | A  | 4   | 120 | c.2483G>A      | c.(2482-2484)TGT>TAT | p.C828Y       |
| Pat_46 | Pre-Treatment | ESPL1     | 9700   | 37 | 12 | 53677195  | 53677195  | Missense_Mutation | SNP | C  | T  | 23  | 46  | c.2950C>T      | c.(2950-2952)CTT>TTT | p.L984F       |
| Pat_46 | Pre-Treatment | OR6C76    | 390326 | 37 | 12 | 55820086  | 55820086  | Missense_Mutation | SNP | G  | A  | 22  | 95  | c.49G>A        | c.(49-51)GAT>AAT     | p.D17N        |
| Pat_46 | Pre-Treatment | ERBB3     | 2065   | 37 | 12 | 56482351  | 56482351  | Missense_Mutation | SNP | C  | T  | 120 | 193 | c.899C>T       | c.(898-900)TCC>TTC   | p.S300F       |
| Pat_46 | Pre-Treatment | ERBB3     | 2065   | 37 | 12 | 56493646  | 56493646  | Missense_Mutation | SNP | C  | T  | 20  | 42  | c.2962C>T      | c.(2962-2964)CCT>TCT | p.P988S       |
| Pat_46 | Pre-Treatment | TSFM      | 10102  | 37 | 12 | 58179958  | 58179958  | Missense_Mutation | SNP | C  | T  | 3   | 6   | c.244C>T       | c.(244-246)CTC>TTC   | p.L82F        |
| Pat_46 | Pre-Treatment | MDM2      | 4193   | 37 | 12 | 69233409  | 69233409  | Missense_Mutation | SNP | C  | T  | 21  | 55  | c.1274C>T      | c.(1273-1275)ACC>ATC | p.T425I       |
| Pat_46 | Pre-Treatment | SYT1      | 6857   | 37 | 12 | 79693221  | 79693221  | Missense_Mutation | SNP | C  | T  | 28  | 64  | c.700C>T       | c.(700-702)CGT>TGT   | p.R234C       |
| Pat_46 | Pre-Treatment | ACSS3     | 79611  | 37 | 12 | 81503391  | 81503391  | Missense_Mutation | SNP | G  | A  | 14  | 40  | c.364G>A       | c.(364-366)GAA>AAA   | p.E122K       |
| Pat_46 | Pre-Treatment | PPFIA2    | 8499   | 37 | 12 | 81657060  | 81657060  | Missense_Mutation | SNP | C  | T  | 5   | 10  | c.3665G>A      | c.(3664-3666)GGA>GAA | p.G1222E      |
| Pat_46 | Pre-Treatment | SCYL2     | 55681  | 37 | 12 | 100691888 | 100691888 | Missense_Mutation | SNP | C  | T  | 9   | 17  | c.415C>T       | c.(415-417)CCT>TCT   | p.P139S       |
| Pat_46 | Pre-Treatment | SLC5A8    | 160728 | 37 | 12 | 101551118 | 101551118 | Missense_Mutation | SNP | G  | A  | 12  | 24  | c.1772C>T      | c.(1771-1773)GCT>GTT | p.A591V       |
| Pat_46 | Pre-Treatment | OAS1      | 4938   | 37 | 12 | 113357332 | 113357332 | Nonsense_Mutation | SNP | G  | T  | 22  | 55  | c.1177G>T      | c.(1177-1179)GAG>TAG | p.E393*       |
| Pat_46 | Pre-Treatment | CCDC60    | 160777 | 37 | 12 | 119909929 | 119909929 | Missense_Mutation | SNP | G  | A  | 33  | 75  | c.301G>A       | c.(301-303)GAA>AAA   | p.E101K       |
| Pat_46 | Pre-Treatment | OASL      | 8638   | 37 | 12 | 121458618 | 121458618 | Missense_Mutation | SNP | G  | A  | 22  | 36  | c.1291C>T      | c.(1291-1293)CCC>TCC | p.P431S       |
| Pat_46 | Pre-Treatment | DNAH10    | 196385 | 37 | 12 | 124281297 | 124281297 | Missense_Mutation | SNP | G  | A  | 23  | 42  | c.1727G>A      | c.(1726-1728)CGA>CAA | p.R576Q       |
| Pat_46 | Pre-Treatment | RIMBP2    | 23504  | 37 | 12 | 130926662 | 130926662 | Missense_Mutation | SNP | G  | A  | 4   | 8   | c.1184C>T      | c.(1183-1185)TCC>TTC | p.S395F       |
| Pat_46 | Pre-Treatment | GJB2      | 2706   | 37 | 13 | 20763467  | 20763467  | Missense_Mutation | SNP | G  | A  | 15  | 36  | c.254C>T       | c.(253-255)TCC>TTC   | p.S85F        |
| Pat_46 | Pre-Treatment | PAN3      | 255967 | 37 | 13 | 28846200  | 28846200  | Nonsense_Mutation | SNP | C  | T  | 16  | 45  | c.1603C>T      | c.(1603-1605)CAG>TAG | p.Q535*       |
| Pat_46 | Pre-Treatment | RXFP2     | 122042 | 37 | 13 | 32355867  | 32355867  | Missense_Mutation | SNP | C  | T  | 21  | 32  | c.845C>T       | c.(844-846)TCG>TTG   | p.S282L       |
| Pat_46 | Pre-Treatment | STARD13   | 90627  | 37 | 13 | 33704213  | 33704213  | Missense_Mutation | SNP | C  | T  | 11  | 17  | c.601G>A       | c.(601-603)GAA>AAA   | p.E201K       |
| Pat_46 | Pre-Treatment | SPG20     | 23111  | 37 | 13 | 36905658  | 36905658  | Missense_Mutation | SNP | G  | A  | 20  | 72  | c.886C>T       | c.(886-888)CCT>TCT   | p.P296S       |
| Pat_46 | Pre-Treatment | RB1       | 5925   | 37 | 13 | 48934240  | 48934240  | Missense_Mutation | SNP | C  | T  | 16  | 53  | c.695C>T       | c.(694-696)CCC>CTC   | p.P232L       |
| Pat_46 | Pre-Treatment | LECT1     | 11061  | 37 | 13 | 53298197  | 53298197  | Missense_Mutation | SNP | C  | T  | 12  | 25  | c.403G>A       | c.(403-405)GCG>ACG   | p.A135T       |
| Pat_46 | Pre-Treatment | SCEL      | 8796   | 37 | 13 | 78130735  | 78130735  | Missense_Mutation | SNP | G  | A  | 58  | 133 | c.48G>A        | c.(46-48)ATG>ATA     | p.M16I        |
| Pat_46 | Pre-Treatment | DZIP1     | 22873  | 37 | 13 | 96241436  | 96241436  | Missense_Mutation | SNP | G  | A  | 10  | 32  | c.1999C>T      | c.(1999-2001)CCT>TCT | p.P667S       |
| Pat_46 | Pre-Treatment | ATP11A    | 23250  | 37 | 13 | 113508817 | 113508817 | Missense_Mutation | SNP | G  | A  | 3   | 51  | c.2216G>A      | c.(2215-2217)GGG>GAG | p.G739E       |
| Pat_46 | Pre-Treatment | OR4Q3     | 441669 | 37 | 14 | 20216488  | 20216488  | Missense_Mutation | SNP | A  | T  | 17  | 29  | c.902A>T       | c.(901-903)AAG>ATG   | p.K301M       |
| Pat_46 | Pre-Treatment | OR11G2    | 390439 | 37 | 14 | 20665672  | 20665672  | Missense_Mutation | SNP | G  | A  | 4   | 20  | c.178G>A       | c.(178-180)GAG>AAG   | p.E60K        |
| Pat_46 | Pre-Treatment | MYH6      | 4624   | 37 | 14 | 23876313  | 23876314  | Missense_Mutation | DNP | GG | AA | 41  | 113 | c.119_120CC>TT | c.(118-120)CCC>CTT   | p.P40L        |
| Pat_46 | Pre-Treatment | NPAS3     | 64067  | 37 | 14 | 33684488  | 33684488  | Missense_Mutation | SNP | C  | T  | 26  | 67  | c.241C>T       | c.(241-243)CCT>TCT   | p.P81S        |
| Pat_46 | Pre-Treatment | MIPOL1    | 145282 | 37 | 14 | 37838774  | 37838774  | Missense_Mutation | SNP | C  | T  | 19  | 47  | c.881C>T       | c.(880-882)TCA>TTA   | p.S294L       |
| Pat_46 | Pre-Treatment | RPL10L    | 140801 | 37 | 14 | 47120366  | 47120366  | Missense_Mutation | SNP | G  | A  | 15  | 54  | c.574C>T       | c.(574-576)CCT>TCT   | p.P192S       |
| Pat_46 | Pre-Treatment | PTGDR     | 5729   | 37 | 14 | 52741476  | 52741476  | Missense_Mutation | SNP | G  | A  | 4   | 25  | c.874G>A       | c.(874-876)GAT>AAT   | p.D292N       |
| Pat_46 | Pre-Treatment | C14orf101 | 54916  | 37 | 14 | 57070568  | 57070568  | Missense_Mutation | SNP | C  | T  | 3   | 42  | c.380C>T       | c.(379-381)GCG>GTG   | p.A127V       |
| Pat_46 | Pre-Treatment | PPM1A     | 5494   | 37 | 14 | 60749713  | 60749713  | Nonsense_Mutation | SNP | A  | T  | 19  | 42  | c.292A>T       | c.(292-294)AAG>TAG   | p.K98*        |
| Pat_46 | Pre-Treatment | PPM1A     | 5494   | 37 | 14 | 60752390  | 60752391  | Missense_Mutation | DNP | CC | TT | 24  | 83  | c.883_884CC>TT | c.(883-885)CCC>TTC   | p.P295F       |
| Pat_46 | Pre-Treatment | PTPN21    | 11099  | 37 | 14 | 88951470  | 88951470  | Missense_Mutation | SNP | G  | A  | 25  | 39  | c.1028C>T      | c.(1027-1029)CCG>CTG | p.P343L       |
| Pat_46 | Pre-Treatment | TDP1      | 55775  | 37 | 14 | 90446978  | 90446978  | Splice_Site       | SNP | T  | C  | 9   | 22  | c.884_splice   | c.e8+2               | p.G295_splice |
| Pat_46 | Pre-Treatment | CATSPERB  | 79820  | 37 | 14 | 92136196  | 92136196  | Missense_Mutation | SNP | G  | A  | 9   | 25  | c.1249C>T      | c.(1249-1251)CAT>TAT | p.H417Y       |
| Pat_46 | Pre-Treatment | CATSPERB  | 79820  | 37 | 14 | 92159779  | 92159779  | Missense_Mutation | SNP | C  | T  | 13  | 43  | c.661G>A       | c.(661-663)GAT>AAT   | p.D221N       |
| Pat_46 | Pre-Treatment | KIAA1409  | 57578  | 37 | 14 | 93944038  | 93944038  | Missense_Mutation | SNP | G  | A  | 36  | 112 | c.52G>A        | c.(52-54)GAA>AAA     | p.E18K        |
| Pat_46 | Pre-Treatment | PRIMA1    | 145270 | 37 | 14 | 94245551  | 94245551  | Missense_Mutation | SNP | G  | A  | 7   | 10  | c.200C>T       | c.(199-201)CCG>CTG   | p.P67L        |
| Pat_46 | Pre-Treatment | SERPINA4  | 5267   | 37 | 14 | 95029923  | 95029923  | Missense_Mutation | SNP | C  | T  | 15  | 37  | c.104C>T       | c.(103-105)TCC>TTC   | p.S35F        |

|        |               |           |        |    |    |           |           |                   |     |    |    |     |     |                                      |                      |          |
|--------|---------------|-----------|--------|----|----|-----------|-----------|-------------------|-----|----|----|-----|-----|--------------------------------------|----------------------|----------|
| Pat_46 | Pre-Treatment | C14orf177 | 283598 | 37 | 14 | 99182719  | 99182719  | Missense_Mutation | SNP | G  | T  | 3   | 4   | c.191G>T                             | c.(190-192)AGG>ATG   | p.R64M   |
| Pat_46 | Pre-Treatment | TECPR2    | 9895   | 37 | 14 | 102900690 | 102900691 | Missense_Mutation | DNP | GG | AA | 22  | 51  | .1536_1537GG>A534-1539)CTGGGC>CTA    |                      | p.G513S  |
| Pat_46 | Pre-Treatment | TECPR2    | 9895   | 37 | 14 | 102901094 | 102901094 | Missense_Mutation | SNP | C  | T  | 9   | 22  | c.1940C>T                            | c.(1939-1941)TCA>TTA | p.S647L  |
| Pat_46 | Pre-Treatment | CDC42BPB  | 9578   | 37 | 14 | 103434988 | 103434988 | Missense_Mutation | SNP | T  | A  | 24  | 55  | c.2061A>T                            | c.(2059-2061)AAA>AAT | p.K687N  |
| Pat_46 | Pre-Treatment | AKT1      | 207    | 37 | 14 | 105240265 | 105240265 | Missense_Mutation | SNP | T  | C  | 9   | 9   | c.686A>G                             | c.(685-687)TAC>TGC   | p.Y229C  |
| Pat_46 | Pre-Treatment | TJP1      | 7082   | 37 | 15 | 30026556  | 30026556  | Missense_Mutation | SNP | T  | C  | 22  | 19  | c.1438A>G                            | c.(1438-1440)AGA>GGA | p.R480G  |
| Pat_46 | Pre-Treatment | BUB1B     | 701    | 37 | 15 | 40457265  | 40457265  | Missense_Mutation | SNP | C  | T  | 65  | 81  | c.47C>T                              | c.(46-48)TCC>TTC     | p.S16F   |
| Pat_46 | Pre-Treatment | RPAP1     | 26015  | 37 | 15 | 41817292  | 41817293  | Nonsense_Mutation | DNP | GG | AA | 10  | 16  | .:1971_1972CC>T 969-1974)CCCCAA>CCT  |                      | p.Q658*  |
| Pat_46 | Pre-Treatment | TYRO3     | 7301   | 37 | 15 | 41860520  | 41860520  | Missense_Mutation | SNP | G  | A  | 4   | 59  | c.1067G>A                            | c.(1066-1068)GGA>GAA | p.G356E  |
| Pat_46 | Pre-Treatment | GANC      | 2595   | 37 | 15 | 42632068  | 42632068  | Missense_Mutation | SNP | C  | T  | 22  | 21  | c.2045C>T                            | c.(2044-2046)TCT>TTT | p.S682F  |
| Pat_46 | Pre-Treatment | ZFP106    | 64397  | 37 | 15 | 42734497  | 42734498  | Missense_Mutation | DNP | GA | AT | 17  | 47  | .:3467_3468TC>A                      | c.(3466-3468)TTC>TAT | p.F1156Y |
| Pat_46 | Pre-Treatment | UNC13C    | 440279 | 37 | 15 | 54305661  | 54305661  | Nonsense_Mutation | SNP | G  | A  | 25  | 25  | c.561G>A                             | c.(559-561)TGG>TGA   | p.W187*  |
| Pat_46 | Pre-Treatment | RNF111    | 54778  | 37 | 15 | 59323443  | 59323443  | Missense_Mutation | SNP | C  | T  | 29  | 54  | c.422C>T                             | c.(421-423)CCT>CTT   | p.P141L  |
| Pat_46 | Pre-Treatment | FAM81A    | 145773 | 37 | 15 | 59752164  | 59752164  | Missense_Mutation | SNP | C  | T  | 3   | 20  | c.53C>T                              | c.(52-54)TCC>TTC     | p.S18F   |
| Pat_46 | Pre-Treatment | DENND4A   | 10260  | 37 | 15 | 66048767  | 66048767  | Missense_Mutation | SNP | G  | A  | 19  | 40  | c.22C>T                              | c.(22-24)CGT>TGT     | p.R8C    |
| Pat_46 | Pre-Treatment | LRRC49    | 54839  | 37 | 15 | 71329552  | 71329552  | Missense_Mutation | SNP | G  | A  | 12  | 26  | c.1738G>A                            | c.(1738-1740)GGA>AGA | p.G580R  |
| Pat_46 | Pre-Treatment | PARP6     | 56965  | 37 | 15 | 72552884  | 72552884  | Missense_Mutation | SNP | G  | A  | 168 | 156 | c.691C>T                             | c.(691-693)CCC>TCC   | p.P231S  |
| Pat_46 | Pre-Treatment | HCN4      | 10021  | 37 | 15 | 73616108  | 73616108  | Missense_Mutation | SNP | G  | A  | 12  | 13  | c.2326C>T                            | c.(2326-2328)CCG>TCG | p.P776S  |
| Pat_46 | Pre-Treatment | CYP11A1   | 1583   | 37 | 15 | 74630935  | 74630935  | Missense_Mutation | SNP | C  | T  | 50  | 62  | c.1411G>A                            | c.(1411-1413)GAG>AAG | p.E471K  |
| Pat_46 | Pre-Treatment | MAN2C1    | 4123   | 37 | 15 | 75648366  | 75648366  | Missense_Mutation | SNP | G  | A  | 3   | 3   | c.3004C>T                            | c.(3004-3006)CTC>TTC | p.L1002F |
| Pat_46 | Pre-Treatment | RASGRF1   | 5923   | 37 | 15 | 79296299  | 79296299  | Missense_Mutation | SNP | C  | T  | 10  | 36  | c.2342G>A                            | c.(2341-2343)GGC>GAC | p.G781D  |
| Pat_46 | Pre-Treatment | KIAA1199  | 57214  | 37 | 15 | 81201454  | 81201454  | Missense_Mutation | SNP | A  | G  | 21  | 34  | c.1604A>G                            | c.(1603-1605)AAG>AGG | p.K535R  |
| Pat_46 | Pre-Treatment | TMC3      | 342125 | 37 | 15 | 81633741  | 81633741  | Nonsense_Mutation | SNP | G  | A  | 4   | 30  | c.1834C>T                            | c.(1834-1836)CGA>TGA | p.R612*  |
| Pat_46 | Pre-Treatment | BNC1      | 646    | 37 | 15 | 83935634  | 83935634  | Missense_Mutation | SNP | G  | A  | 36  | 119 | c.389C>T                             | c.(388-390)GCC>GTC   | p.A130V  |
| Pat_46 | Pre-Treatment | ALPK3     | 57538  | 37 | 15 | 85400266  | 85400266  | Missense_Mutation | SNP | C  | T  | 5   | 40  | c.2903C>T                            | c.(2902-2904)CCA>CTA | p.P968L  |
| Pat_46 | Pre-Treatment | SLCO3A1   | 28232  | 37 | 15 | 92671649  | 92671649  | Missense_Mutation | SNP | C  | T  | 48  | 162 | c.1442C>T                            | c.(1441-1443)TCC>TTC | p.S481F  |
| Pat_46 | Pre-Treatment | RAB11FIP3 | 9727   | 37 | 16 | 553054    | 553054    | Missense_Mutation | SNP | C  | T  | 16  | 22  | c.1352C>T                            | c.(1351-1353)TCC>TTC | p.S451F  |
| Pat_46 | Pre-Treatment | WDR90     | 197335 | 37 | 16 | 715701    | 715701    | Missense_Mutation | SNP | C  | T  | 39  | 69  | c.4334C>T                            | c.(4333-4335)CCC>CTC | p.P1445L |
| Pat_46 | Pre-Treatment | CLDN9     | 9080   | 37 | 16 | 3063829   | 3063829   | Missense_Mutation | SNP | C  | T  | 4   | 17  | c.466C>T                             | c.(466-468)CTC>TTC   | p.L156F  |
| Pat_46 | Pre-Treatment | ZSCAN10   | 84891  | 37 | 16 | 3140474   | 3140474   | Missense_Mutation | SNP | C  | T  | 22  | 67  | c.796G>A                             | c.(796-798)GGG>AGG   | p.G266R  |
| Pat_46 | Pre-Treatment | BTBD12    | 84464  | 37 | 16 | 3639345   | 3639345   | Missense_Mutation | SNP | G  | A  | 19  | 48  | c.4294C>T                            | c.(4294-4296)CCC>TCC | p.P1432S |
| Pat_46 | Pre-Treatment | TXNDC11   | 51061  | 37 | 16 | 11781756  | 11781756  | Nonsense_Mutation | SNP | G  | A  | 22  | 38  | c.2191C>T                            | c.(2191-2193)CAG>TAG | p.Q731*  |
| Pat_46 | Pre-Treatment | MYH11     | 4629   | 37 | 16 | 15847317  | 15847317  | Missense_Mutation | SNP | T  | G  | 20  | 49  | c.1798A>C                            | c.(1798-1800)AAT>CAT | p.N600H  |
| Pat_46 | Pre-Treatment | ABCC1     | 4363   | 37 | 16 | 16230351  | 16230351  | Missense_Mutation | SNP | C  | T  | 10  | 15  | c.4142C>T                            | c.(4141-4143)TCG>TTG | p.S1381L |
| Pat_46 | Pre-Treatment | SMG1      | 23049  | 37 | 16 | 18902236  | 18902236  | Missense_Mutation | SNP | A  | C  | 17  | 52  | c.557T>G                             | c.(556-558)GTT>GGT   | p.V186G  |
| Pat_46 | Pre-Treatment | COQ7      | 10229  | 37 | 16 | 19088679  | 19088679  | Missense_Mutation | SNP | G  | A  | 9   | 11  | c.559G>A                             | c.(559-561)GAC>AAC   | p.D187N  |
| Pat_46 | Pre-Treatment | ACSM5     | 54988  | 37 | 16 | 20451185  | 20451185  | Missense_Mutation | SNP | C  | T  | 7   | 36  | c.1600C>T                            | c.(1600-1602)CGG>TGG | p.R534W  |
| Pat_46 | Pre-Treatment | SLC7A5P2  | 387254 | 37 | 16 | 21531296  | 21531297  | Missense_Mutation | DNP | GG | AA | 8   | 55  | c.390_391CC>TT (388-393)TTCCTC>TTTTT |                      | p.L131F  |
| Pat_46 | Pre-Treatment | CACNG3    | 10368  | 37 | 16 | 24358111  | 24358111  | Missense_Mutation | SNP | G  | A  | 9   | 36  | c.268G>A                             | c.(268-270)GAA>AAA   | p.E90K   |
| Pat_46 | Pre-Treatment | GSG1L     | 146395 | 37 | 16 | 27802741  | 27802742  | Missense_Mutation | DNP | CC | TT | 11  | 21  | c.945_946GG>AA943-948)CAGGAA>CAAA    |                      | p.E316K  |
| Pat_46 | Pre-Treatment | NFATC2IP  | 84901  | 37 | 16 | 28975053  | 28975053  | Missense_Mutation | SNP | C  | T  | 21  | 44  | c.1129C>T                            | c.(1129-1131)CAC>TAC | p.H377Y  |
| Pat_46 | Pre-Treatment | SEZ6L2    | 26470  | 37 | 16 | 29891358  | 29891359  | Missense_Mutation | DNP | GG | AA | 3   | 10  | .:1399_1400CC>T c.(1399-1401)CCC>TTC |                      | p.P467F  |
| Pat_46 | Pre-Treatment | SETD1A    | 9739   | 37 | 16 | 30975992  | 30975992  | Missense_Mutation | SNP | C  | T  | 41  | 80  | c.929C>T                             | c.(928-930)TCC>TTC   | p.S310F  |
| Pat_46 | Pre-Treatment | ADCY7     | 113    | 37 | 16 | 50339705  | 50339705  | Missense_Mutation | SNP | C  | T  | 22  | 28  | c.1697C>T                            | c.(1696-1698)TCC>TTC | p.S566F  |
| Pat_46 | Pre-Treatment | SALL1     | 6299   | 37 | 16 | 51172844  | 51172844  | Missense_Mutation | SNP | G  | A  | 9   | 23  | c.3289C>T                            | c.(3289-3291)CCT>TCT | p.P1097S |
| Pat_46 | Pre-Treatment | NLRC5     | 84166  | 37 | 16 | 57063972  | 57063972  | Missense_Mutation | SNP | C  | T  | 26  | 53  | c.2393C>T                            | c.(2392-2394)CCT>CTT | p.P798L  |
| Pat_46 | Pre-Treatment | CNOT1     | 23019  | 37 | 16 | 58589203  | 58589203  | Missense_Mutation | SNP | G  | A  | 19  | 41  | c.2843C>T                            | c.(2842-2844)TCC>TTC | p.S948F  |

|        |               |          |        |    |    |          |          |                   |     |    |    |    |     |                  |                        |          |
|--------|---------------|----------|--------|----|----|----------|----------|-------------------|-----|----|----|----|-----|------------------|------------------------|----------|
| Pat_46 | Pre-Treatment | FHOD1    | 29109  | 37 | 16 | 67281301 | 67281301 | Nonsense_Mutation | SNP | C  | A  | 17 | 17  | c.13G>T          | c.(13-15)GAA>TAA       | p.E5*    |
| Pat_46 | Pre-Treatment | HYDIN    | 54768  | 37 | 16 | 70891632 | 70891632 | Missense_Mutation | SNP | G  | A  | 6  | 67  | c.12268C>T       | c.(12268-12270)CTC>TTC | p.L4090F |
| Pat_46 | Pre-Treatment | TAT      | 6898   | 37 | 16 | 71610233 | 71610233 | Missense_Mutation | SNP | G  | A  | 17 | 24  | c.86C>T          | c.(85-87)TCT>TTT       | p.S29F   |
| Pat_46 | Pre-Treatment | ADAT1    | 23536  | 37 | 16 | 75637046 | 75637046 | Missense_Mutation | SNP | A  | G  | 43 | 83  | c.1313T>C        | c.(1312-1314)CTC>CCC   | p.L438P  |
| Pat_46 | Pre-Treatment | CDYL2    | 124359 | 37 | 16 | 80718827 | 80718827 | Missense_Mutation | SNP | G  | A  | 14 | 23  | c.224C>T         | c.(223-225)TCC>TTC     | p.S75F   |
| Pat_46 | Pre-Treatment | CDH13    | 1012   | 37 | 16 | 83065713 | 83065713 | Missense_Mutation | SNP | A  | G  | 9  | 5   | c.256A>G         | c.(256-258)AAC>GAC     | p.N86D   |
| Pat_46 | Pre-Treatment | PRDM7    | 11105  | 37 | 16 | 90126912 | 90126912 | Missense_Mutation | SNP | G  | T  | 4  | 79  | c.1070C>A        | c.(1069-1071)TCT>TAT   | p.S357Y  |
| Pat_46 | Pre-Treatment | TRPV3    | 162514 | 37 | 17 | 3430168  | 3430168  | Missense_Mutation | SNP | A  | C  | 11 | 15  | c.1557T>G        | c.(1555-1557)GAT>GAG   | p.D519E  |
| Pat_46 | Pre-Treatment | TEKT1    | 83659  | 37 | 17 | 6716194  | 6716194  | Missense_Mutation | SNP | C  | T  | 25 | 95  | c.808G>A         | c.(808-810)GAT>AAT     | p.D270N  |
| Pat_46 | Pre-Treatment | WRAP53   | 55135  | 37 | 17 | 7604862  | 7604862  | Missense_Mutation | SNP | C  | T  | 21 | 55  | c.817C>T         | c.(817-819)CAC>TAC     | p.H273Y  |
| Pat_46 | Pre-Treatment | ARHGEF15 | 22899  | 37 | 17 | 8216390  | 8216390  | Missense_Mutation | SNP | C  | T  | 21 | 58  | c.752C>T         | c.(751-753)CCC>CTC     | p.P251L  |
| Pat_46 | Pre-Treatment | USP43    | 124739 | 37 | 17 | 9631397  | 9631397  | Missense_Mutation | SNP | C  | T  | 6  | 15  | c.2462C>T        | c.(2461-2463)TCC>TTC   | p.S821F  |
| Pat_46 | Pre-Treatment | MYH1     | 4619   | 37 | 17 | 10399641 | 10399641 | Missense_Mutation | SNP | C  | T  | 28 | 52  | c.4882G>A        | c.(4882-4884)GAA>AAA   | p.E1628K |
| Pat_46 | Pre-Treatment | MYH2     | 4620   | 37 | 17 | 10432384 | 10432384 | Missense_Mutation | SNP | C  | T  | 10 | 25  | c.3367G>A        | c.(3367-3369)GAG>AAG   | p.E1123K |
| Pat_46 | Pre-Treatment | RICH2    | 9912   | 37 | 17 | 12847457 | 12847457 | Missense_Mutation | SNP | G  | A  | 14 | 24  | c.805G>A         | c.(805-807)GCC>ACC     | p.A269T  |
| Pat_46 | Pre-Treatment | KIAA0100 | 9703   | 37 | 17 | 26961586 | 26961586 | Missense_Mutation | SNP | G  | A  | 17 | 46  | c.3019C>T        | c.(3019-3021)CTT>TTT   | p.L1007F |
| Pat_46 | Pre-Treatment | PHF12    | 57649  | 37 | 17 | 27248740 | 27248740 | Missense_Mutation | SNP | G  | A  | 13 | 53  | c.802C>T         | c.(802-804)CCC>TCC     | p.P268S  |
| Pat_46 | Pre-Treatment | NF1      | 4763   | 37 | 17 | 29677227 | 29677227 | Nonsense_Mutation | SNP | C  | T  | 24 | 59  | c.7348C>T        | c.(7348-7350)CGA>TGA   | p.R2450* |
| Pat_46 | Pre-Treatment | ACCN1    | 40     | 37 | 17 | 31350879 | 31350879 | Missense_Mutation | SNP | G  | A  | 12 | 12  | c.1196C>T        | c.(1195-1197)TCA>TTA   | p.S399L  |
| Pat_46 | Pre-Treatment | ACCN1    | 40     | 37 | 17 | 31438943 | 31438943 | Missense_Mutation | SNP | C  | T  | 32 | 74  | c.698G>A         | c.(697-699)GGA>GAA     | p.G233E  |
| Pat_46 | Pre-Treatment | UNC45B   | 146862 | 37 | 17 | 33491151 | 33491151 | Missense_Mutation | SNP | G  | A  | 65 | 202 | c.1117G>A        | c.(1117-1119)GAT>AAT   | p.D373N  |
| Pat_46 | Pre-Treatment | SLFN12L  | 342615 | 37 | 17 | 33802259 | 33802259 | Missense_Mutation | SNP | C  | T  | 10 | 19  | c.1537G>A        | c.(1537-1539)GAG>AAG   | p.E513K  |
| Pat_46 | Pre-Treatment | KRT32    | 3882   | 37 | 17 | 39619092 | 39619092 | Missense_Mutation | SNP | C  | T  | 22 | 23  | c.1207G>A        | c.(1207-1209)GAG>AAG   | p.E403K  |
| Pat_46 | Pre-Treatment | KRT9     | 3857   | 37 | 17 | 39727863 | 39727863 | Missense_Mutation | SNP | C  | T  | 4  | 8   | c.382G>A         | c.(382-384)GGG>AGG     | p.G128R  |
| Pat_46 | Pre-Treatment | KRT14    | 3861   | 37 | 17 | 39742707 | 39742707 | Missense_Mutation | SNP | G  | A  | 17 | 38  | c.380C>T         | c.(379-381)GCC>GTC     | p.A127V  |
| Pat_46 | Pre-Treatment | WNK4     | 65266  | 37 | 17 | 40932960 | 40932960 | Missense_Mutation | SNP | G  | A  | 55 | 31  | c.244G>A         | c.(244-246)GAC>AAC     | p.D82N   |
| Pat_46 | Pre-Treatment | MEOX1    | 4222   | 37 | 17 | 41719375 | 41719375 | Missense_Mutation | SNP | C  | T  | 47 | 65  | c.668G>A         | c.(667-669)AGG>AAG     | p.R223K  |
| Pat_46 | Pre-Treatment | TMEM101  | 84336  | 37 | 17 | 42092239 | 42092239 | Missense_Mutation | SNP | A  | G  | 3  | 67  | c.82T>C          | c.(82-84)TTT>CTT       | p.F28L   |
| Pat_46 | Pre-Treatment | KIAA1267 | 284058 | 37 | 17 | 44249109 | 44249109 | Missense_Mutation | SNP | G  | A  | 33 | 55  | c.401C>T         | c.(400-402)TCC>TTC     | p.S134F  |
| Pat_46 | Pre-Treatment | KPNA2    | 3838   | 37 | 17 | 66033562 | 66033562 | Missense_Mutation | SNP | C  | T  | 31 | 84  | c.164C>T         | c.(163-165)TCA>TTA     | p.S55L   |
| Pat_46 | Pre-Treatment | C17orf28 | 283987 | 37 | 17 | 72959073 | 72959073 | Missense_Mutation | SNP | C  | T  | 15 | 47  | c.491G>A         | c.(490-492)CGG>CAG     | p.R164Q  |
| Pat_46 | Pre-Treatment | FOXJ1    | 2302   | 37 | 17 | 74133889 | 74133889 | Missense_Mutation | SNP | C  | A  | 3  | 11  | c.811G>T         | c.(811-813)GGG>TGG     | p.G271W  |
| Pat_46 | Pre-Treatment | 9-Sep    | 10801  | 37 | 17 | 75398213 | 75398213 | Missense_Mutation | SNP | C  | T  | 18 | 42  | c.149C>T         | c.(148-150)CCC>CTC     | p.P50L   |
| Pat_46 | Pre-Treatment | LGALS3BP | 3959   | 37 | 17 | 76968668 | 76968668 | Missense_Mutation | SNP | G  | A  | 4  | 33  | c.748C>T         | c.(748-750)CTC>TTC     | p.L250F  |
| Pat_46 | Pre-Treatment | SMCHD1   | 23347  | 37 | 18 | 2750443  | 2750443  | Missense_Mutation | SNP | C  | T  | 5  | 7   | c.4103C>T        | c.(4102-4104)CCC>CTC   | p.P1368L |
| Pat_46 | Pre-Treatment | TXNDC2   | 84203  | 37 | 18 | 9887184  | 9887184  | Missense_Mutation | SNP | G  | C  | 30 | 77  | c.708G>C         | c.(706-708)GAG>GAC     | p.E236D  |
| Pat_46 | Pre-Treatment | ANKRD30B | 374860 | 37 | 18 | 14799105 | 14799105 | Missense_Mutation | SNP | C  | T  | 11 | 33  | c.2035C>T        | c.(2035-2037)CCT>TCT   | p.P679S  |
| Pat_46 | Pre-Treatment | NPC1     | 4864   | 37 | 18 | 21134821 | 21134821 | Nonsense_Mutation | SNP | A  | T  | 15 | 43  | c.1454T>A        | c.(1453-1455)TTA>TAA   | p.L485*  |
| Pat_46 | Pre-Treatment | NPC1     | 4864   | 37 | 18 | 21134840 | 21134840 | Missense_Mutation | SNP | A  | T  | 20 | 46  | c.1435T>A        | c.(1435-1437)TGC>AGC   | p.C479S  |
| Pat_46 | Pre-Treatment | LAMA3    | 3909   | 37 | 18 | 21487610 | 21487610 | Missense_Mutation | SNP | G  | A  | 51 | 131 | c.6815G>A        | c.(6814-6816)GGT>GAT   | p.G2272D |
| Pat_46 | Pre-Treatment | CDH2     | 1000   | 37 | 18 | 25570308 | 25570308 | Missense_Mutation | SNP | C  | T  | 14 | 34  | c.1351G>A        | c.(1351-1353)GAC>AAC   | p.D451N  |
| Pat_46 | Pre-Treatment | DSC3     | 1825   | 37 | 18 | 28584314 | 28584314 | Missense_Mutation | SNP | G  | A  | 8  | 17  | c.1907C>T        | c.(1906-1908)TCA>TTA   | p.S636L  |
| Pat_46 | Pre-Treatment | DSC2     | 1824   | 37 | 18 | 28672144 | 28672144 | Nonsense_Mutation | SNP | T  | A  | 16 | 30  | c.274A>T         | c.(274-276)AGA>TGA     | p.R92*   |
| Pat_46 | Pre-Treatment | DSC1     | 1823   | 37 | 18 | 28714650 | 28714651 | Missense_Mutation | DNP | AT | TA | 11 | 18  | c.1760_1761AT>TA | c.(1759-1761)AAT>ATA   | p.N587I  |
| Pat_46 | Pre-Treatment | KIAA1012 | 22878  | 37 | 18 | 29470717 | 29470717 | Missense_Mutation | SNP | C  | T  | 22 | 80  | c.1709G>A        | c.(1708-1710)CGA>CAA   | p.R570Q  |
| Pat_46 | Pre-Treatment | RIT2     | 6014   | 37 | 18 | 40695456 | 40695456 | Missense_Mutation | SNP | G  | A  | 32 | 61  | c.29C>T          | c.(28-30)TCC>TTC       | p.S10F   |
| Pat_46 | Pre-Treatment | SLC14A1  | 6563   | 37 | 18 | 43319493 | 43319493 | Missense_Mutation | SNP | G  | A  | 19 | 39  | c.812G>A         | c.(811-813)GGA>GAA     | p.G271E  |

|        |               |          |        |    |    |          |          |                   |     |    |    |    |     |                |                                     |           |
|--------|---------------|----------|--------|----|----|----------|----------|-------------------|-----|----|----|----|-----|----------------|-------------------------------------|-----------|
| Pat_46 | Pre-Treatment | PSTPIP2  | 9050   | 37 | 18 | 43570702 | 43570702 | Missense_Mutation | SNP | G  | A  | 6  | 13  | c.941C>T       | c.(940-942)CCT>CTT                  | p.P314L   |
| Pat_46 | Pre-Treatment | TCEB3B   | 51224  | 37 | 18 | 44560363 | 44560363 | Missense_Mutation | SNP | C  | T  | 4  | 8   | c.1273G>A      | c.(1273-1275)GAT>AAT                | p.D425N   |
| Pat_46 | Pre-Treatment | TCEB3B   | 51224  | 37 | 18 | 44561172 | 44561172 | Missense_Mutation | SNP | C  | T  | 6  | 18  | c.464G>A       | c.(463-465)AGA>AAA                  | p.R155K   |
| Pat_46 | Pre-Treatment | DCC      | 1630   | 37 | 18 | 50432428 | 50432428 | Missense_Mutation | SNP | C  | T  | 13 | 58  | c.427C>T       | c.(427-429)CTT>TTT                  | p.L143F   |
| Pat_46 | Pre-Treatment | DCC      | 1630   | 37 | 18 | 50741963 | 50741963 | Missense_Mutation | SNP | C  | T  | 33 | 88  | c.1907C>T      | c.(1906-1908)TCA>TTA                | p.S636L   |
| Pat_46 | Pre-Treatment | ALPK2    | 115701 | 37 | 18 | 56246363 | 56246363 | Missense_Mutation | SNP | G  | A  | 24 | 54  | c.1645C>T      | c.(1645-1647)CCG>TCG                | p.P549S   |
| Pat_46 | Pre-Treatment | SERPINB7 | 8710   | 37 | 18 | 61465919 | 61465919 | Missense_Mutation | SNP | G  | A  | 36 | 92  | c.536G>A       | c.(535-537)GGC>GAC                  | p.G179D   |
| Pat_46 | Pre-Treatment | CDH7     | 1005   | 37 | 18 | 63547837 | 63547837 | Missense_Mutation | SNP | G  | A  | 11 | 20  | c.2065G>A      | c.(2065-2067)GAA>AAA                | p.E689K   |
| Pat_46 | Pre-Treatment | ZNF516   | 9658   | 37 | 18 | 74092154 | 74092154 | Missense_Mutation | SNP | G  | A  | 17 | 38  | c.1916C>T      | c.(1915-1917)ACC>ATC                | p.T639I   |
| Pat_46 | Pre-Treatment | SALL3    | 27164  | 37 | 18 | 76753541 | 76753541 | Missense_Mutation | SNP | C  | T  | 3  | 14  | c.1550C>T      | c.(1549-1551)CCC>CTC                | p.P517L   |
| Pat_46 | Pre-Treatment | HCN2     | 610    | 37 | 19 | 613987   | 613987   | Missense_Mutation | SNP | C  | T  | 3  | 70  | c.1961C>T      | c.(1960-1962)ACG>ATG                | p.T654M   |
| Pat_46 | Pre-Treatment | CNN2     | 1265   | 37 | 19 | 1037859  | 1037859  | Missense_Mutation | SNP | C  | T  | 32 | 28  | c.890C>T       | c.(889-891)CCT>CTT                  | p.P297L   |
| Pat_46 | Pre-Treatment | ZNF556   | 80032  | 37 | 19 | 2877942  | 2877942  | Missense_Mutation | SNP | C  | T  | 16 | 6   | c.986C>T       | c.(985-987)TCC>TTC                  | p.S329F   |
| Pat_46 | Pre-Treatment | PIP5K1C  | 23396  | 37 | 19 | 3661061  | 3661061  | Missense_Mutation | SNP | G  | A  | 50 | 25  | c.371C>T       | c.(370-372)CCC>CTC                  | p.P124L   |
| Pat_46 | Pre-Treatment | ZNF557   | 79230  | 37 | 19 | 7083094  | 7083094  | Missense_Mutation | SNP | A  | G  | 3  | 63  | c.611A>G       | c.(610-612)AAT>AGT                  | p.N204S   |
| Pat_46 | Pre-Treatment | MUC16    | 94025  | 37 | 19 | 9045834  | 9045834  | Missense_Mutation | SNP | C  | T  | 20 | 16  | c.35797G>A     | c.(35797-35799)GAA>AAA              | p.E11933K |
| Pat_46 | Pre-Treatment | MUC16    | 94025  | 37 | 19 | 9045848  | 9045848  | Missense_Mutation | SNP | G  | A  | 22 | 14  | c.35783C>T     | c.(35782-35784)TCA>TTA              | p.S11928L |
| Pat_46 | Pre-Treatment | MUC16    | 94025  | 37 | 19 | 9068949  | 9068949  | Missense_Mutation | SNP | G  | A  | 22 | 18  | c.18497C>T     | c.(18496-18498)TCT>TTT              | p.S6166F  |
| Pat_46 | Pre-Treatment | ZNF799   | 90576  | 37 | 19 | 12501446 | 12501446 | Missense_Mutation | SNP | T  | C  | 3  | 28  | c.1766A>G      | c.(1765-1767)GAA>GGA                | p.E589G   |
| Pat_46 | Pre-Treatment | CYP4F22  | 126410 | 37 | 19 | 15651274 | 15651274 | Missense_Mutation | SNP | T  | C  | 41 | 39  | c.685T>C       | c.(685-687)TAT>CAT                  | p.Y229H   |
| Pat_46 | Pre-Treatment | OR10H2   | 26538  | 37 | 19 | 15839088 | 15839088 | Missense_Mutation | SNP | C  | T  | 13 | 14  | c.235C>T       | c.(235-237)CCG>TCG                  | p.P79S    |
| Pat_46 | Pre-Treatment | USHBP1   | 83878  | 37 | 19 | 17367350 | 17367350 | Missense_Mutation | SNP | C  | T  | 41 | 26  | c.1400G>A      | c.(1399-1401)GGG>GAG                | p.G467E   |
| Pat_46 | Pre-Treatment | ZNF93    | 81931  | 37 | 19 | 20045182 | 20045182 | Missense_Mutation | SNP | A  | G  | 5  | 71  | c.1418A>G      | c.(1417-1419)AAA>AGA                | p.K473R   |
| Pat_46 | Pre-Treatment | ZNF93    | 81931  | 37 | 19 | 20045266 | 20045266 | Missense_Mutation | SNP | A  | G  | 5  | 69  | c.1502A>G      | c.(1501-1503)AAA>AGA                | p.K501R   |
| Pat_46 | Pre-Treatment | ZNF626   | 199777 | 37 | 19 | 20807643 | 20807643 | Missense_Mutation | SNP | C  | T  | 3  | 90  | c.1040G>A      | c.(1039-1041)GGC>GAC                | p.G347D   |
| Pat_46 | Pre-Treatment | ZNF626   | 199777 | 37 | 19 | 20808006 | 20808006 | Missense_Mutation | SNP | T  | C  | 4  | 78  | c.677A>G       | c.(676-678)GAG>GGG                  | p.E226G   |
| Pat_46 | Pre-Treatment | ZNF626   | 199777 | 37 | 19 | 20808090 | 20808090 | Missense_Mutation | SNP | C  | T  | 5  | 61  | c.593G>A       | c.(592-594)GGG>GAG                  | p.G198E   |
| Pat_46 | Pre-Treatment | ZNF257   | 113835 | 37 | 19 | 22271507 | 22271507 | Missense_Mutation | SNP | G  | A  | 20 | 77  | c.955G>A       | c.(955-957)GAA>AAA                  | p.E319K   |
| Pat_46 | Pre-Treatment | ZNF676   | 163223 | 37 | 19 | 22363003 | 22363003 | Missense_Mutation | SNP | T  | C  | 24 | 73  | c.1516A>G      | c.(1516-1518)AAA>GAA                | p.K506E   |
| Pat_46 | Pre-Treatment | ZNF676   | 163223 | 37 | 19 | 22363008 | 22363008 | Missense_Mutation | SNP | C  | G  | 3  | 91  | c.1511G>C      | c.(1510-1512)CGC>CCC                | p.R504P   |
| Pat_46 | Pre-Treatment | ZNF98    | 148198 | 37 | 19 | 22574629 | 22574629 | Missense_Mutation | SNP | C  | T  | 21 | 60  | c.1408G>A      | c.(1408-1410)GCT>ACT                | p.A470T   |
| Pat_46 | Pre-Treatment | ZNF99    | 7652   | 37 | 19 | 22939400 | 22939400 | Missense_Mutation | SNP | G  | C  | 3  | 81  | c.2771C>G      | c.(2770-2772)GCT>GGT                | p.A924G   |
| Pat_46 | Pre-Treatment | ZNF99    | 7652   | 37 | 19 | 22942448 | 22942448 | Missense_Mutation | SNP | T  | A  | 3  | 5   | c.326A>T       | c.(325-327)GAT>GTT                  | p.D109V   |
| Pat_46 | Pre-Treatment | LRP3     | 4037   | 37 | 19 | 33695665 | 33695665 | Missense_Mutation | SNP | T  | C  | 10 | 22  | c.382T>C       | c.(382-384)TTC>CTC                  | p.F128L   |
| Pat_46 | Pre-Treatment | KIRREL2  | 84063  | 37 | 19 | 36357300 | 36357300 | Missense_Mutation | SNP | C  | T  | 44 | 120 | c.2033C>T      | c.(2032-2034)TCC>TTC                | p.S678F   |
| Pat_46 | Pre-Treatment | ZNF565   | 147929 | 37 | 19 | 36673967 | 36673967 | Missense_Mutation | SNP | G  | A  | 11 | 47  | c.901C>T       | c.(901-903)CAC>TAC                  | p.H301Y   |
| Pat_46 | Pre-Treatment | ZNF383   | 163087 | 37 | 19 | 37734537 | 37734537 | Missense_Mutation | SNP | C  | T  | 10 | 31  | c.1399C>T      | c.(1399-1401)CGT>TGT                | p.R467C   |
| Pat_46 | Pre-Treatment | DLL3     | 10683  | 37 | 19 | 39998559 | 39998559 | Missense_Mutation | SNP | C  | T  | 4  | 25  | c.1763C>T      | c.(1762-1764)GCG>GTG                | p.A588V   |
| Pat_46 | Pre-Treatment | CLC      | 1178   | 37 | 19 | 40225069 | 40225070 | Missense_Mutation | DNP | GG | AT | 47 | 121 | c.156_157CC>AT | c.(154-159)TTCCAT>TTATAp.52_53FH>LY |           |
| Pat_46 | Pre-Treatment | SHKBP1   | 92799  | 37 | 19 | 41086687 | 41086687 | Missense_Mutation | SNP | C  | T  | 21 | 39  | c.689C>T       | c.(688-690)TCC>TTC                  | p.S230F   |
| Pat_46 | Pre-Treatment | CEACAM5  | 1048   | 37 | 19 | 42213788 | 42213788 | Missense_Mutation | SNP | G  | A  | 26 | 82  | c.254G>A       | c.(253-255)GGA>GAA                  | p.G85E    |
| Pat_46 | Pre-Treatment | GRIK5    | 2901   | 37 | 19 | 42525609 | 42525609 | Nonsense_Mutation | SNP | C  | T  | 5  | 9   | c.1715G>A      | c.(1714-1716)TGG>TAG                | p.W572*   |
| Pat_46 | Pre-Treatment | PSG8     | 440533 | 37 | 19 | 43262211 | 43262211 | Missense_Mutation | SNP | C  | T  | 86 | 165 | c.652G>A       | c.(652-654)GAA>AAA                  | p.E218K   |
| Pat_46 | Pre-Treatment | PSG1     | 5669   | 37 | 19 | 43376195 | 43376195 | Missense_Mutation | SNP | C  | T  | 21 | 45  | c.433G>A       | c.(433-435)GAG>AAG                  | p.E145K   |
| Pat_46 | Pre-Treatment | PSG9     | 5678   | 37 | 19 | 43762435 | 43762435 | Missense_Mutation | SNP | G  | A  | 42 | 96  | c.1162C>T      | c.(1162-1164)CAT>TAT                | p.H388Y   |
| Pat_46 | Pre-Treatment | ZNF233   | 353355 | 37 | 19 | 44777762 | 44777762 | Missense_Mutation | SNP | G  | A  | 5  | 15  | c.949G>A       | c.(949-951)GGT>AGT                  | p.G317S   |
| Pat_46 | Pre-Treatment | PPP5C    | 5536   | 37 | 19 | 46887130 | 46887130 | Missense_Mutation | SNP | C  | T  | 25 | 76  | c.793C>T       | c.(793-795)CCC>TCC                  | p.P265S   |

|        |               |           |        |    |    |           |           |                   |     |   |   |    |     |              |                        |               |
|--------|---------------|-----------|--------|----|----|-----------|-----------|-------------------|-----|---|---|----|-----|--------------|------------------------|---------------|
| Pat_46 | Pre-Treatment | EHD2      | 30846  | 37 | 19 | 48220035  | 48220035  | Missense_Mutation | SNP | G | A | 7  | 19  | c.166G>A     | c.(166-168)GAC>AAC     | p.D56N        |
| Pat_46 | Pre-Treatment | ZNF175    | 7728   | 37 | 19 | 52091536  | 52091536  | Missense_Mutation | SNP | C | T | 11 | 25  | c.1952C>T    | c.(1951-1953)TCG>TTG   | p.S651L       |
| Pat_46 | Pre-Treatment | SIGLEC5   | 8778   | 37 | 19 | 52131203  | 52131203  | Missense_Mutation | SNP | G | A | 11 | 32  | c.881C>T     | c.(880-882)TCC>TTC     | p.S294F       |
| Pat_46 | Pre-Treatment | FPR2      | 2358   | 37 | 19 | 52272576  | 52272576  | Missense_Mutation | SNP | G | A | 16 | 30  | c.665G>A     | c.(664-666)GGG>GAG     | p.G222E       |
| Pat_46 | Pre-Treatment | FPR3      | 2359   | 37 | 19 | 52327313  | 52327313  | Missense_Mutation | SNP | G | A | 17 | 62  | c.312G>A     | c.(310-312)ATG>ATA     | p.M104I       |
| Pat_46 | Pre-Treatment | ZNF611    | 81856  | 37 | 19 | 53209661  | 53209661  | Missense_Mutation | SNP | G | A | 20 | 51  | c.647C>T     | c.(646-648)TCA>TTA     | p.S216L       |
| Pat_46 | Pre-Treatment | ZNF415    | 55786  | 37 | 19 | 53612783  | 53612783  | Missense_Mutation | SNP | C | T | 12 | 34  | c.659G>A     | c.(658-660)GGT>GAT     | p.G220D       |
| Pat_46 | Pre-Treatment | KIR2DS4   | 3809   | 37 | 19 | 55351067  | 55351067  | Missense_Mutation | SNP | G | A | 37 | 112 | c.577G>A     | c.(577-579)GGA>AGA     | p.G193R       |
| Pat_46 | Pre-Treatment | NLRP8     | 126205 | 37 | 19 | 56490764  | 56490764  | Missense_Mutation | SNP | G | A | 18 | 53  | c.2881G>A    | c.(2881-2883)GAA>AAA   | p.E961K       |
| Pat_46 | Pre-Treatment | ZFP28     | 140612 | 37 | 19 | 57066001  | 57066001  | Missense_Mutation | SNP | C | T | 17 | 51  | c.1847C>T    | c.(1846-1848)CCT>CTT   | p.P616L       |
| Pat_46 | Pre-Treatment | ZNF329    | 79673  | 37 | 19 | 58640786  | 58640786  | Missense_Mutation | SNP | G | A | 42 | 122 | c.85C>T      | c.(85-87)CCC>TCC       | p.P29S        |
| Pat_46 | Pre-Treatment | ZNF8      | 7554   | 37 | 19 | 58805844  | 58805844  | Missense_Mutation | SNP | C | T | 11 | 21  | c.670C>T     | c.(670-672)CCA>TCA     | p.P224S       |
| Pat_46 | Pre-Treatment | PXDN      | 7837   | 37 | 2  | 1667507   | 1667507   | Missense_Mutation | SNP | G | C | 4  | 55  | c.1437C>G    | c.(1435-1437)CAC>CAG   | p.H479Q       |
| Pat_46 | Pre-Treatment | APOB      | 338    | 37 | 2  | 21256261  | 21256261  | Missense_Mutation | SNP | G | A | 15 | 28  | c.1034C>T    | c.(1033-1035)GCT>GTT   | p.A345V       |
| Pat_46 | Pre-Treatment | ATAD2B    | 54454  | 37 | 2  | 24046313  | 24046313  | Missense_Mutation | SNP | C | T | 20 | 28  | c.1946G>A    | c.(1945-1947)AGT>AAT   | p.S649N       |
| Pat_46 | Pre-Treatment | KIF3C     | 3797   | 37 | 2  | 26204074  | 26204074  | Missense_Mutation | SNP | C | T | 4  | 81  | c.713G>A     | c.(712-714)CGA>CAA     | p.R238Q       |
| Pat_46 | Pre-Treatment | SLC5A6    | 8884   | 37 | 2  | 27425706  | 27425706  | Missense_Mutation | SNP | G | A | 32 | 69  | c.1250C>T    | c.(1249-1251)TCC>TTC   | p.S417F       |
| Pat_46 | Pre-Treatment | C2orf16   | 84226  | 37 | 2  | 27804700  | 27804700  | Missense_Mutation | SNP | C | T | 75 | 199 | c.5261C>T    | c.(5260-5262)TCT>TTT   | p.S1754F      |
| Pat_46 | Pre-Treatment | FAM179A   | 165186 | 37 | 2  | 29225533  | 29225533  | Missense_Mutation | SNP | G | A | 3  | 18  | c.559G>A     | c.(559-561)GCC>ACC     | p.A187T       |
| Pat_46 | Pre-Treatment | C2orf71   | 388939 | 37 | 2  | 29296101  | 29296101  | Missense_Mutation | SNP | G | A | 32 | 46  | c.1027C>T    | c.(1027-1029)CTC>TTC   | p.L343F       |
| Pat_46 | Pre-Treatment | HEATR5B   | 54497  | 37 | 2  | 37227870  | 37227870  | Missense_Mutation | SNP | G | A | 18 | 50  | c.5404C>T    | c.(5404-5406)CCT>TCT   | p.P1802S      |
| Pat_46 | Pre-Treatment | CEBPZ     | 10153  | 37 | 2  | 37455246  | 37455246  | Nonsense_Mutation | SNP | G | A | 8  | 27  | c.1090C>T    | c.(1090-1092)CGA>TGA   | p.R364*       |
| Pat_46 | Pre-Treatment | LOC728819 | 728819 | 37 | 2  | 43902786  | 43902786  | Missense_Mutation | SNP | A | T | 8  | 20  | c.676T>A     | c.(676-678)TAT>AAT     | p.Y226N       |
| Pat_46 | Pre-Treatment | FSHR      | 2492   | 37 | 2  | 49190018  | 49190018  | Missense_Mutation | SNP | C | T | 5  | 17  | c.1942G>A    | c.(1942-1944)GAA>AAA   | p.E648K       |
| Pat_46 | Pre-Treatment | ETAA1     | 54465  | 37 | 2  | 67631235  | 67631235  | Missense_Mutation | SNP | C | T | 3  | 11  | c.1421C>T    | c.(1420-1422)TCC>TTC   | p.S474F       |
| Pat_46 | Pre-Treatment | CCT7      | 10574  | 37 | 2  | 73474975  | 73474975  | Missense_Mutation | SNP | C | T | 16 | 31  | c.704C>T     | c.(703-705)CCC>CTC     | p.P235L       |
| Pat_46 | Pre-Treatment | ALMS1     | 7840   | 37 | 2  | 73675797  | 73675797  | Missense_Mutation | SNP | C | T | 32 | 81  | c.2146C>T    | c.(2146-2148)CCC>TCC   | p.P716S       |
| Pat_46 | Pre-Treatment | CTNNA2    | 1496   | 37 | 2  | 80874951  | 80874951  | Missense_Mutation | SNP | C | T | 29 | 52  | c.2816C>T    | c.(2815-2817)TCG>TTG   | p.S939L       |
| Pat_46 | Pre-Treatment | SFTPB     | 6439   | 37 | 2  | 85893781  | 85893781  | Missense_Mutation | SNP | C | T | 3  | 111 | c.352G>A     | c.(352-354)GAC>AAC     | p.D118N       |
| Pat_46 | Pre-Treatment | EIF2AK3   | 9451   | 37 | 2  | 88874860  | 88874860  | Missense_Mutation | SNP | G | A | 38 | 91  | c.2141C>T    | c.(2140-2142)CCT>CTT   | p.P714L       |
| Pat_46 | Pre-Treatment | VWA3B     | 200403 | 37 | 2  | 98844782  | 98844782  | Missense_Mutation | SNP | G | A | 16 | 26  | c.2137G>A    | c.(2137-2139)GAT>AAT   | p.D713N       |
| Pat_46 | Pre-Treatment | SLC9A4    | 389015 | 37 | 2  | 103142776 | 103142776 | Missense_Mutation | SNP | G | A | 28 | 66  | c.2009G>A    | c.(2008-2010)GGA>GAA   | p.G670E       |
| Pat_46 | Pre-Treatment | RANBP2    | 5903   | 37 | 2  | 109384260 | 109384260 | Missense_Mutation | SNP | G | A | 5  | 244 | c.7265G>A    | c.(7264-7266)CGT>CAT   | p.R2422H      |
| Pat_46 | Pre-Treatment | IL1A      | 3552   | 37 | 2  | 113532775 | 113532775 | Missense_Mutation | SNP | C | T | 25 | 71  | c.685G>A     | c.(685-687)GGC>AGC     | p.G229S       |
| Pat_46 | Pre-Treatment | IL1B      | 3553   | 37 | 2  | 113587942 | 113587942 | Missense_Mutation | SNP | G | A | 16 | 32  | c.806C>T     | c.(805-807)TCC>TTC     | p.S269F       |
| Pat_46 | Pre-Treatment | NCKAP5    | 344148 | 37 | 2  | 133489429 | 133489429 | Missense_Mutation | SNP | G | A | 13 | 25  | c.5324C>T    | c.(5323-5325)TCC>TTC   | p.S1775F      |
| Pat_46 | Pre-Treatment | YSK4      | 80122  | 37 | 2  | 135763044 | 135763044 | Missense_Mutation | SNP | G | A | 18 | 34  | c.196C>T     | c.(196-198)CCC>TCC     | p.P66S        |
| Pat_46 | Pre-Treatment | ARHGAP15  | 55843  | 37 | 2  | 143974010 | 143974010 | Missense_Mutation | SNP | C | G | 6  | 24  | c.292C>G     | c.(292-294)CTA>GTA     | p.L98V        |
| Pat_46 | Pre-Treatment | NEB       | 4703   | 37 | 2  | 152370918 | 152370918 | Missense_Mutation | SNP | C | T | 39 | 106 | c.17938G>A   | c.(17938-17940)GAA>AAA | p.E5980K      |
| Pat_46 | Pre-Treatment | CCDC148   | 130940 | 37 | 2  | 159077171 | 159077171 | Missense_Mutation | SNP | C | T | 6  | 8   | c.1306G>A    | c.(1306-1308)GAT>AAT   | p.D436N       |
| Pat_46 | Pre-Treatment | LY75      | 4065   | 37 | 2  | 160742933 | 160742933 | Missense_Mutation | SNP | G | A | 13 | 38  | c.911C>T     | c.(910-912)CCA>CTA     | p.P304L       |
| Pat_46 | Pre-Treatment | ITGB6     | 3694   | 37 | 2  | 161052127 | 161052127 | Splice_Site       | SNP | C | T | 15 | 34  | c.347_splice | c.e4-1                 | p.G116_splice |
| Pat_46 | Pre-Treatment | SCN3A     | 6328   | 37 | 2  | 165953782 | 165953782 | Missense_Mutation | SNP | A | C | 5  | 67  | c.4219T>G    | c.(4219-4221)TAT>GAT   | p.Y1407D      |
| Pat_46 | Pre-Treatment | SCN1A     | 6323   | 37 | 2  | 166897895 | 166897895 | Nonsense_Mutation | SNP | C | T | 21 | 70  | c.2228G>A    | c.(2227-2229)TGG>TAG   | p.W743*       |
| Pat_46 | Pre-Treatment | G6PC2     | 57818  | 37 | 2  | 169761055 | 169761055 | Nonsense_Mutation | SNP | G | A | 94 | 229 | c.369G>A     | c.(367-369)TGG>TGA     | p.W123*       |
| Pat_46 | Pre-Treatment | ITGA6     | 3655   | 37 | 2  | 173339794 | 173339794 | Missense_Mutation | SNP | C | T | 10 | 38  | c.1124C>T    | c.(1123-1125)TCT>TTT   | p.S375F       |
| Pat_46 | Pre-Treatment | PDE11A    | 50940  | 37 | 2  | 178879150 | 178879150 | Missense_Mutation | SNP | C | T | 12 | 27  | c.950G>A     | c.(949-951)GGA>GAA     | p.G317E       |



|        |               |           |        |    |    |           |           |                   |     |    |    |    |     |                |                        |               |
|--------|---------------|-----------|--------|----|----|-----------|-----------|-------------------|-----|----|----|----|-----|----------------|------------------------|---------------|
| Pat_46 | Pre-Treatment | TTN       | 7273   | 37 | 2  | 179417758 | 179417758 | Missense_Mutation | SNP | G  | A  | 6  | 6   | c.82165C>T     | c.(82165-82167)CCT>TCT | p.P27389S     |
| Pat_46 | Pre-Treatment | TTN       | 7273   | 37 | 2  | 179426396 | 179426397 | Missense_Mutation | DNP | GG | AA | 8  | 21  | 76758_76759CC> | 756-76761)CCCCCA>CC1   | p.P25587S     |
| Pat_46 | Pre-Treatment | TTN       | 7273   | 37 | 2  | 179431936 | 179431936 | Nonsense_Mutation | SNP | C  | T  | 17 | 52  | c.71219G>A     | c.(71218-71220)TGG>TAG | p.W23740*     |
| Pat_46 | Pre-Treatment | TTN       | 7273   | 37 | 2  | 179435273 | 179435273 | Missense_Mutation | SNP | T  | C  | 5  | 10  | c.67882A>G     | c.(67882-67884)ACT>GCT | p.T22628A     |
| Pat_46 | Pre-Treatment | TTN       | 7273   | 37 | 2  | 179439473 | 179439473 | Missense_Mutation | SNP | C  | G  | 16 | 57  | c.63682G>C     | c.(63682-63684)GAG>CAC | p.E21228Q     |
| Pat_46 | Pre-Treatment | TTN       | 7273   | 37 | 2  | 179464532 | 179464532 | Missense_Mutation | SNP | C  | T  | 11 | 19  | c.48392G>A     | c.(48391-48393)GGA>GA/ | p.G16131E     |
| Pat_46 | Pre-Treatment | TTN       | 7273   | 37 | 2  | 179475048 | 179475048 | Missense_Mutation | SNP | C  | T  | 14 | 34  | c.43501G>A     | c.(43501-43503)GAA>AAA | p.E14501K     |
| Pat_46 | Pre-Treatment | TTN       | 7273   | 37 | 2  | 179483347 | 179483347 | Missense_Mutation | SNP | C  | T  | 17 | 46  | c.39226G>A     | c.(39226-39228)GGA>AG/ | p.G13076R     |
| Pat_46 | Pre-Treatment | TTN       | 7273   | 37 | 2  | 179542534 | 179542534 | Missense_Mutation | SNP | C  | T  | 19 | 52  | c.30373G>A     | c.(30373-30375)GAA>AAA | p.E10125K     |
| Pat_46 | Pre-Treatment | TTN       | 7273   | 37 | 2  | 179584152 | 179584152 | Missense_Mutation | SNP | G  | A  | 17 | 28  | c.20233C>T     | c.(20233-20235)CGC>TGC | p.R6745C      |
| Pat_46 | Pre-Treatment | ZNF804A   | 91752  | 37 | 2  | 185802432 | 185802432 | Missense_Mutation | SNP | G  | A  | 17 | 35  | c.2309G>A      | c.(2308-2310)CGA>CAA   | p.R770Q       |
| Pat_46 | Pre-Treatment | CLK1      | 1195   | 37 | 2  | 201724923 | 201724923 | Nonsense_Mutation | SNP | T  | A  | 41 | 142 | c.406A>T       | c.(406-408)AAA>TAA     | p.K136*       |
| Pat_46 | Pre-Treatment | ZDBF2     | 57683  | 37 | 2  | 207173096 | 207173096 | Missense_Mutation | SNP | G  | A  | 5  | 14  | c.3844G>A      | c.(3844-3846)GAT>AAT   | p.D1282N      |
| Pat_46 | Pre-Treatment | CRYGC     | 1420   | 37 | 2  | 208994365 | 208994365 | Missense_Mutation | SNP | C  | T  | 53 | 123 | c.52G>A        | c.(52-54)GAA>AAA       | p.E18K        |
| Pat_46 | Pre-Treatment | MAP2      | 4133   | 37 | 2  | 210570403 | 210570403 | Missense_Mutation | SNP | T  | A  | 56 | 130 | c.4684T>A      | c.(4684-4686)TCC>ACC   | p.S1562T      |
| Pat_46 | Pre-Treatment | MYL1      | 4632   | 37 | 2  | 211163257 | 211163257 | Missense_Mutation | SNP | C  | T  | 11 | 21  | c.191G>A       | c.(190-192)AGA>AAA     | p.R64K        |
| Pat_46 | Pre-Treatment | SLC4A3    | 6508   | 37 | 2  | 220496794 | 220496794 | Missense_Mutation | SNP | C  | T  | 7  | 10  | c.916C>T       | c.(916-918)CGC>TGC     | p.R306C       |
| Pat_46 | Pre-Treatment | SLC4A3    | 6508   | 37 | 2  | 220498087 | 220498087 | Missense_Mutation | SNP | C  | T  | 14 | 30  | c.1369C>T      | c.(1369-1371)CCC>TCC   | p.P457S       |
| Pat_46 | Pre-Treatment | PAX3      | 5077   | 37 | 2  | 223160307 | 223160307 | Missense_Mutation | SNP | A  | T  | 34 | 63  | c.391T>A       | c.(391-393)TGG>AGG     | p.W131R       |
| Pat_46 | Pre-Treatment | SPHKAP    | 80309  | 37 | 2  | 228860378 | 228860378 | Missense_Mutation | SNP | G  | A  | 7  | 7   | c.4481C>T      | c.(4480-4482)GCT>GTT   | p.A1494V      |
| Pat_46 | Pre-Treatment | PID1      | 55022  | 37 | 2  | 229890692 | 229890692 | Missense_Mutation | SNP | C  | T  | 13 | 33  | c.409G>A       | c.(409-411)GAA>AAA     | p.E137K       |
| Pat_46 | Pre-Treatment | SP140     | 11262  | 37 | 2  | 231108493 | 231108493 | Missense_Mutation | SNP | G  | A  | 25 | 62  | c.538G>A       | c.(538-540)GAA>AAA     | p.E180K       |
| Pat_46 | Pre-Treatment | ITM2C     | 81618  | 37 | 2  | 231742251 | 231742251 | Missense_Mutation | SNP | G  | A  | 3  | 59  | c.698G>A       | c.(697-699)CGG>CAG     | p.R233Q       |
| Pat_46 | Pre-Treatment | NMUR1     | 10316  | 37 | 2  | 232393481 | 232393481 | Missense_Mutation | SNP | A  | G  | 11 | 56  | c.251T>C       | c.(250-252)GTC>GCC     | p.V84A        |
| Pat_46 | Pre-Treatment | UGT1A1    | 54658  | 37 | 2  | 234669433 | 234669433 | Missense_Mutation | SNP | C  | T  | 26 | 74  | c.500C>T       | c.(499-501)CCC>CTC     | p.P167L       |
| Pat_46 | Pre-Treatment | RSPO4     | 343637 | 37 | 20 | 947880    | 947880    | Missense_Mutation | SNP | C  | T  | 20 | 44  | c.346G>A       | c.(346-348)GGG>AGG     | p.G116R       |
| Pat_46 | Pre-Treatment | FRG1B     | 284802 | 37 | 20 | 29628243  | 29628243  | Missense_Mutation | SNP | T  | C  | 4  | 133 | c.155T>C       | c.(154-156)TTG>TCG     | p.L52S        |
| Pat_46 | Pre-Treatment | FRG1B     | 284802 | 37 | 20 | 29628245  | 29628245  | Missense_Mutation | SNP | G  | A  | 4  | 130 | c.157G>A       | c.(157-159)GCC>ACC     | p.A53T        |
| Pat_46 | Pre-Treatment | DEFB115   | 245929 | 37 | 20 | 29847311  | 29847311  | Missense_Mutation | SNP | C  | T  | 7  | 23  | c.143C>T       | c.(142-144)TCA>TTA     | p.S48L        |
| Pat_46 | Pre-Treatment | DEFB116   | 245930 | 37 | 20 | 29891208  | 29891208  | Missense_Mutation | SNP | G  | A  | 22 | 38  | c.116C>T       | c.(115-117)CCA>CTA     | p.P39L        |
| Pat_46 | Pre-Treatment | C20orf185 | 359710 | 37 | 20 | 31644471  | 31644471  | Missense_Mutation | SNP | G  | A  | 9  | 17  | c.248G>A       | c.(247-249)GGA>GAA     | p.G83E        |
| Pat_46 | Pre-Treatment | NECAB3    | 63941  | 37 | 20 | 32257228  | 32257228  | Missense_Mutation | SNP | C  | T  | 33 | 106 | c.340G>A       | c.(340-342)GAA>AAA     | p.E114K       |
| Pat_46 | Pre-Treatment | ACSS2     | 55902  | 37 | 20 | 33502209  | 33502209  | Missense_Mutation | SNP | C  | T  | 12 | 25  | c.803C>T       | c.(802-804)CCC>CTC     | p.P268L       |
| Pat_46 | Pre-Treatment | PTPRT     | 11122  | 37 | 20 | 40735493  | 40735493  | Missense_Mutation | SNP | C  | G  | 17 | 49  | c.3323G>C      | c.(3322-3324)GGG>GCG   | p.G1108A      |
| Pat_46 | Pre-Treatment | PTPRT     | 11122  | 37 | 20 | 40743942  | 40743942  | Missense_Mutation | SNP | C  | T  | 25 | 45  | c.2996G>A      | c.(2995-2997)CGA>CAA   | p.R999Q       |
| Pat_46 | Pre-Treatment | PTPRT     | 11122  | 37 | 20 | 40747054  | 40747054  | Missense_Mutation | SNP | C  | T  | 21 | 55  | c.2971G>A      | c.(2971-2973)GAA>AAA   | p.E991K       |
| Pat_46 | Pre-Treatment | PTPRT     | 11122  | 37 | 20 | 41100912  | 41100912  | Missense_Mutation | SNP | C  | T  | 15 | 36  | c.1444G>A      | c.(1444-1446)GAA>AAA   | p.E482K       |
| Pat_46 | Pre-Treatment | PTPRT     | 11122  | 37 | 20 | 41306689  | 41306689  | Missense_Mutation | SNP | C  | T  | 4  | 23  | c.970G>A       | c.(970-972)GAA>AAA     | p.E324K       |
| Pat_46 | Pre-Treatment | MMP9      | 4318   | 37 | 20 | 44639672  | 44639672  | Missense_Mutation | SNP | C  | T  | 12 | 33  | c.632C>T       | c.(631-633)TCC>TTC     | p.S211F       |
| Pat_46 | Pre-Treatment | CDH22     | 64405  | 37 | 20 | 44815559  | 44815559  | Missense_Mutation | SNP | G  | A  | 50 | 132 | c.1451C>T      | c.(1450-1452)TCC>TTC   | p.S484F       |
| Pat_46 | Pre-Treatment | SLC13A3   | 64849  | 37 | 20 | 45224923  | 45224923  | Missense_Mutation | SNP | C  | T  | 34 | 93  | c.667G>A       | c.(667-669)GAG>AAG     | p.E223K       |
| Pat_46 | Pre-Treatment | SULF2     | 55959  | 37 | 20 | 46295003  | 46295004  | Splice_Site       | DNP | CC | TT | 16 | 63  | c.1805_splice  | c.e12+1                | p.R602_splice |
| Pat_46 | Pre-Treatment | KCNB1     | 3745   | 37 | 20 | 47990627  | 47990627  | Nonsense_Mutation | SNP | C  | T  | 14 | 50  | c.1470G>A      | c.(1468-1470)TGG>TGA   | p.W490*       |
| Pat_46 | Pre-Treatment | CASS4     | 57091  | 37 | 20 | 55033513  | 55033513  | Missense_Mutation | SNP | C  | A  | 30 | 66  | c.2071C>A      | c.(2071-2073)CAC>AAC   | p.H691N       |
| Pat_46 | Pre-Treatment | ZNF831    | 128611 | 37 | 20 | 57766991  | 57766991  | Missense_Mutation | SNP | C  | T  | 7  | 3   | c.917C>T       | c.(916-918)TCG>TTG     | p.S306L       |
| Pat_46 | Pre-Treatment | ZNF831    | 128611 | 37 | 20 | 57770957  | 57770957  | Nonsense_Mutation | SNP | C  | T  | 36 | 102 | c.3772C>T      | c.(3772-3774)CAG>TAG   | p.Q1258*      |
| Pat_46 | Pre-Treatment | ZNF831    | 128611 | 37 | 20 | 57829544  | 57829544  | Missense_Mutation | SNP | G  | A  | 13 | 40  | c.4780G>A      | c.(4780-4782)GGC>AGC   | p.G1594S      |

|        |               |           |        |    |    |          |          |                   |     |    |    |    |     |                |                      |               |
|--------|---------------|-----------|--------|----|----|----------|----------|-------------------|-----|----|----|----|-----|----------------|----------------------|---------------|
| Pat_46 | Pre-Treatment | ADRM1     | 11047  | 37 | 20 | 60882672 | 60882672 | Missense_Mutation | SNP | C  | T  | 3  | 46  | c.644C>T       | c.(643-645)GCG>GTG   | p.A215V       |
| Pat_46 | Pre-Treatment | ITSN1     | 6453   | 37 | 21 | 35140024 | 35140024 | Nonsense_Mutation | SNP | C  | T  | 7  | 37  | c.934C>T       | c.(934-936)CGA>TGA   | p.R312*       |
| Pat_46 | Pre-Treatment | DSCAM     | 1826   | 37 | 21 | 41550881 | 41550881 | Missense_Mutation | SNP | C  | T  | 9  | 28  | c.2920G>A      | c.(2920-2922)GAG>AAG | p.E974K       |
| Pat_46 | Pre-Treatment | UBASH3A   | 53347  | 37 | 21 | 43826440 | 43826440 | Missense_Mutation | SNP | G  | A  | 10 | 47  | c.137G>A       | c.(136-138)GGG>GAG   | p.G46E        |
| Pat_46 | Pre-Treatment | DGCR2     | 9993   | 37 | 22 | 19028601 | 19028601 | Missense_Mutation | SNP | G  | A  | 10 | 34  | c.1366C>T      | c.(1366-1368)CAC>TAC | p.H456Y       |
| Pat_46 | Pre-Treatment | ZNF74     | 7625   | 37 | 22 | 20760788 | 20760788 | Missense_Mutation | SNP | G  | A  | 4  | 126 | c.1465G>A      | c.(1465-1467)GTG>ATG | p.V489M       |
| Pat_46 | Pre-Treatment | MYO18B    | 84700  | 37 | 22 | 26286768 | 26286768 | Missense_Mutation | SNP | G  | A  | 18 | 36  | c.4360G>A      | c.(4360-4362)GAT>AAT | p.D1454N      |
| Pat_46 | Pre-Treatment | ASPHD2    | 57168  | 37 | 22 | 26829939 | 26829939 | Missense_Mutation | SNP | G  | A  | 12 | 33  | c.358G>A       | c.(358-360)GAG>AAG   | p.E120K       |
| Pat_46 | Pre-Treatment | RBM9      | 23543  | 37 | 22 | 36155947 | 36155947 | Missense_Mutation | SNP | G  | A  | 28 | 41  | c.1097C>T      | c.(1096-1098)CCC>CTC | p.P366L       |
| Pat_46 | Pre-Treatment | CSF2RB    | 1439   | 37 | 22 | 37333540 | 37333540 | Missense_Mutation | SNP | G  | A  | 4  | 13  | c.1690G>A      | c.(1690-1692)GAG>AAG | p.E564K       |
| Pat_46 | Pre-Treatment | CSF2RB    | 1439   | 37 | 22 | 37334044 | 37334044 | Missense_Mutation | SNP | C  | T  | 4  | 32  | c.2194C>T      | c.(2194-2196)CCC>TCC | p.P732S       |
| Pat_46 | Pre-Treatment | RANGAP1   | 5905   | 37 | 22 | 41657514 | 41657514 | Missense_Mutation | SNP | A  | C  | 5  | 21  | c.551T>G       | c.(550-552)GTC>GGC   | p.V184G       |
| Pat_46 | Pre-Treatment | PMM1      | 5372   | 37 | 22 | 41973333 | 41973333 | Missense_Mutation | SNP | G  | A  | 23 | 60  | c.778C>T       | c.(778-780)CAT>TAT   | p.H260Y       |
| Pat_46 | Pre-Treatment | PMM1      | 5372   | 37 | 22 | 41973900 | 41973900 | Missense_Mutation | SNP | G  | A  | 20 | 54  | c.578C>T       | c.(577-579)CCC>CTC   | p.P193L       |
| Pat_46 | Pre-Treatment | SREBF2    | 6721   | 37 | 22 | 42296417 | 42296417 | Missense_Mutation | SNP | C  | T  | 8  | 28  | c.2822C>T      | c.(2821-2823)TCC>TTC | p.S941F       |
| Pat_46 | Pre-Treatment | TNFRSF13C | 115650 | 37 | 22 | 42321522 | 42321522 | Missense_Mutation | SNP | G  | A  | 7  | 33  | c.404C>T       | c.(403-405)CCG>CTG   | p.P135L       |
| Pat_46 | Pre-Treatment | PHF21B    | 112885 | 37 | 22 | 45309869 | 45309869 | Missense_Mutation | SNP | G  | A  | 18 | 27  | c.664C>T       | c.(664-666)CCT>TCT   | p.P222S       |
| Pat_46 | Pre-Treatment | GTSE1     | 51512  | 37 | 22 | 46704247 | 46704247 | Missense_Mutation | SNP | C  | T  | 22 | 58  | c.169C>T       | c.(169-171)CCC>TCC   | p.P57S        |
| Pat_46 | Pre-Treatment | MOV10L1   | 54456  | 37 | 22 | 50537923 | 50537923 | Missense_Mutation | SNP | C  | T  | 5  | 13  | c.334C>T       | c.(334-336)CCC>TCC   | p.P112S       |
| Pat_46 | Pre-Treatment | PANX2     | 56666  | 37 | 22 | 50617383 | 50617383 | Missense_Mutation | SNP | G  | A  | 5  | 15  | c.1711G>A      | c.(1711-1713)GAA>AAA | p.E571K       |
| Pat_46 | Pre-Treatment | KLHDC7B   | 113730 | 37 | 22 | 50988202 | 50988202 | Missense_Mutation | SNP | C  | T  | 4  | 10  | c.1607C>T      | c.(1606-1608)ACC>ATC | p.T536I       |
| Pat_46 | Pre-Treatment | ACR       | 49     | 37 | 22 | 51178379 | 51178379 | Missense_Mutation | SNP | C  | T  | 5  | 20  | c.539C>T       | c.(538-540)GCC>GTC   | p.A180V       |
| Pat_46 | Pre-Treatment | IRAK2     | 3656   | 37 | 3  | 10268062 | 10268062 | Missense_Mutation | SNP | C  | T  | 10 | 22  | c.1217C>T      | c.(1216-1218)GCC>GTC | p.A406V       |
| Pat_46 | Pre-Treatment | IQSEC1    | 9922   | 37 | 3  | 12957209 | 12957209 | Missense_Mutation | SNP | G  | A  | 40 | 99  | c.2087C>T      | c.(2086-2088)CCC>CTC | p.P696L       |
| Pat_46 | Pre-Treatment | NR2C2     | 7182   | 37 | 3  | 15055225 | 15055226 | Missense_Mutation | DNP | TC | GT | 10 | 28  | c.202_203TC>GT | c.(202-204)TCC>GTC   | p.S68V        |
| Pat_46 | Pre-Treatment | SCN5A     | 6331   | 37 | 3  | 38646255 | 38646255 | Missense_Mutation | SNP | G  | A  | 13 | 14  | c.1483C>T      | c.(1483-1485)CCC>TCC | p.P495S       |
| Pat_46 | Pre-Treatment | SCN10A    | 6336   | 37 | 3  | 38739255 | 38739255 | Missense_Mutation | SNP | T  | C  | 8  | 21  | c.5456A>G      | c.(5455-5457)GAT>GGT | p.D1819G      |
| Pat_46 | Pre-Treatment | XIRP1     | 165904 | 37 | 3  | 39227066 | 39227066 | Missense_Mutation | SNP | G  | A  | 10 | 38  | c.3871C>T      | c.(3871-3873)CTT>TTT | p.L1291F      |
| Pat_46 | Pre-Treatment | MYRIP     | 25924  | 37 | 3  | 40211568 | 40211568 | Missense_Mutation | SNP | C  | T  | 3  | 87  | c.857C>T       | c.(856-858)GCT>GTT   | p.A286V       |
| Pat_46 | Pre-Treatment | MYRIP     | 25924  | 37 | 3  | 40275539 | 40275539 | Missense_Mutation | SNP | G  | A  | 25 | 42  | c.2095G>A      | c.(2095-2097)GAA>AAA | p.E699K       |
| Pat_46 | Pre-Treatment | ULK4      | 54986  | 37 | 3  | 41860958 | 41860958 | Missense_Mutation | SNP | G  | A  | 15 | 29  | c.1805C>T      | c.(1804-1806)CCC>CTC | p.P602L       |
| Pat_46 | Pre-Treatment | CCBP2     | 1238   | 37 | 3  | 42906733 | 42906733 | Missense_Mutation | SNP | C  | T  | 16 | 42  | c.739C>T       | c.(739-741)CGG>TGG   | p.R247W       |
| Pat_46 | Pre-Treatment | COL7A1    | 1294   | 37 | 3  | 48629552 | 48629552 | Missense_Mutation | SNP | G  | A  | 20 | 42  | c.1223C>T      | c.(1222-1224)TCC>TTC | p.S408F       |
| Pat_46 | Pre-Treatment | QARS      | 5859   | 37 | 3  | 49137892 | 49137892 | Splice_Site       | SNP | C  | T  | 12 | 27  | c.977_splice   | c.e12-1              | p.G326_splice |
| Pat_46 | Pre-Treatment | DOCK3     | 1795   | 37 | 3  | 51101878 | 51101878 | Splice_Site       | SNP | G  | A  | 27 | 58  | c.316_splice   | c.e6-1               | p.K106_splice |
| Pat_46 | Pre-Treatment | DOCK3     | 1795   | 37 | 3  | 51352520 | 51352520 | Missense_Mutation | SNP | G  | A  | 14 | 34  | c.3363G>A      | c.(3361-3363)ATG>ATA | p.M1121I      |
| Pat_46 | Pre-Treatment | CACNA1D   | 776    | 37 | 3  | 53835211 | 53835211 | Missense_Mutation | SNP | G  | A  | 18 | 54  | c.5167G>A      | c.(5167-5169)GAT>AAT | p.D1723N      |
| Pat_46 | Pre-Treatment | CACNA2D3  | 55799  | 37 | 3  | 55107857 | 55107857 | Missense_Mutation | SNP | C  | T  | 5  | 8   | c.3154C>T      | c.(3154-3156)CCA>TCA | p.P1052S      |
| Pat_46 | Pre-Treatment | ERC2      | 26059  | 37 | 3  | 55922538 | 55922538 | Missense_Mutation | SNP | C  | T  | 31 | 79  | c.2443G>A      | c.(2443-2445)GAA>AAA | p.E815K       |
| Pat_46 | Pre-Treatment | RPP14     | 11102  | 37 | 3  | 58303182 | 58303182 | Missense_Mutation | SNP | C  | T  | 7  | 13  | c.334C>T       | c.(334-336)CTT>TTT   | p.L112F       |
| Pat_46 | Pre-Treatment | CADPS     | 8618   | 37 | 3  | 62522224 | 62522224 | Missense_Mutation | SNP | C  | T  | 26 | 89  | c.1999G>A      | c.(1999-2001)GAA>AAA | p.E667K       |
| Pat_46 | Pre-Treatment | ADAMTS9   | 56999  | 37 | 3  | 64640105 | 64640105 | Missense_Mutation | SNP | G  | A  | 26 | 89  | c.1240C>T      | c.(1240-1242)CCC>TCC | p.P414S       |
| Pat_46 | Pre-Treatment | KBTBD8    | 84541  | 37 | 3  | 67054118 | 67054118 | Missense_Mutation | SNP | C  | T  | 8  | 21  | c.727C>T       | c.(727-729)CCT>TCT   | p.P243S       |
| Pat_46 | Pre-Treatment | FAM86D    | 692099 | 37 | 3  | 75472210 | 75472211 | Missense_Mutation | DNP | GG | AA | 19 | 46  | c.639_640CC>TT | 337-642)GGCCGG>GGTT  | p.R214W       |
| Pat_46 | Pre-Treatment | EPHA3     | 2042   | 37 | 3  | 89528644 | 89528644 | Missense_Mutation | SNP | C  | T  | 6  | 17  | c.2944C>T      | c.(2944-2946)CCC>TCC | p.P982S       |
| Pat_46 | Pre-Treatment | EPHA6     | 285220 | 37 | 3  | 97124042 | 97124042 | Missense_Mutation | SNP | G  | A  | 7  | 6   | c.1655G>A      | c.(1654-1656)AGC>AAC | p.S552N       |
| Pat_46 | Pre-Treatment | EPHA6     | 285220 | 37 | 3  | 97167559 | 97167559 | Missense_Mutation | SNP | G  | A  | 28 | 22  | c.1879G>A      | c.(1879-1881)GAA>AAA | p.E627K       |

|        |               |           |        |    |   |           |           |                   |     |    |    |    |     |                                    |                      |          |
|--------|---------------|-----------|--------|----|---|-----------|-----------|-------------------|-----|----|----|----|-----|------------------------------------|----------------------|----------|
| Pat_46 | Pre-Treatment | MYH15     | 22989  | 37 | 3 | 108117645 | 108117645 | Missense_Mutation | SNP | C  | T  | 68 | 74  | c.5032G>A                          | c.(5032-5034)GAT>AAT | p.D1678N |
| Pat_46 | Pre-Treatment | CD86      | 942    | 37 | 3 | 121838341 | 121838341 | Missense_Mutation | SNP | C  | T  | 6  | 17  | c.950C>T                           | c.(949-951)TCG>TTG   | p.S317L  |
| Pat_46 | Pre-Treatment | FAM162A   | 26355  | 37 | 3 | 122126227 | 122126228 | Missense_Mutation | DNP | GG | AA | 13 | 23  | c.363_364GG>AA361-366)GAGGGC>GAAA  |                      | p.G122S  |
| Pat_46 | Pre-Treatment | EEFSEC    | 60678  | 37 | 3 | 127981041 | 127981041 | Missense_Mutation | SNP | C  | T  | 9  | 29  | c.595C>T                           | c.(595-597)CCA>TCA   | p.P199S  |
| Pat_46 | Pre-Treatment | C3orf36   | 80111  | 37 | 3 | 133647323 | 133647323 | Missense_Mutation | SNP | C  | G  | 4  | 7   | c.325G>C                           | c.(325-327)GGG>CGG   | p.G109R  |
| Pat_46 | Pre-Treatment | IL20RB    | 53833  | 37 | 3 | 136699340 | 136699340 | Missense_Mutation | SNP | C  | T  | 38 | 125 | c.121C>T                           | c.(121-123)CTC>TTC   | p.L41F   |
| Pat_46 | Pre-Treatment | CLSTN2    | 64084  | 37 | 3 | 140284946 | 140284946 | Missense_Mutation | SNP | G  | A  | 5  | 21  | c.2719G>A                          | c.(2719-2721)GAA>AAA | p.E907K  |
| Pat_46 | Pre-Treatment | ATR       | 545    | 37 | 3 | 142188288 | 142188288 | Missense_Mutation | SNP | C  | T  | 26 | 68  | c.6443G>A                          | c.(6442-6444)CGA>CAA | p.R2148Q |
| Pat_46 | Pre-Treatment | MED12L    | 116931 | 37 | 3 | 150845664 | 150845664 | Missense_Mutation | SNP | C  | T  | 9  | 27  | c.449C>T                           | c.(448-450)TCT>TTT   | p.S150F  |
| Pat_46 | Pre-Treatment | TRIM59    | 286827 | 37 | 3 | 160156050 | 160156050 | Missense_Mutation | SNP | A  | C  | 13 | 34  | c.922T>G                           | c.(922-924)TCT>GCT   | p.S308A  |
| Pat_46 | Pre-Treatment | SI        | 6476   | 37 | 3 | 164735377 | 164735377 | Missense_Mutation | SNP | G  | A  | 17 | 59  | c.3718C>T                          | c.(3718-3720)CGG>TGG | p.R1240W |
| Pat_46 | Pre-Treatment | SLITRK3   | 22865  | 37 | 3 | 164906436 | 164906436 | Missense_Mutation | SNP | G  | A  | 13 | 17  | c.2183C>T                          | c.(2182-2184)TCC>TTC | p.S728F  |
| Pat_46 | Pre-Treatment | SERPINI2  | 5276   | 37 | 3 | 167189541 | 167189541 | Missense_Mutation | SNP | C  | T  | 33 | 64  | c.82G>A                            | c.(82-84)GAA>AAA     | p.E28K   |
| Pat_46 | Pre-Treatment | WDR49     | 151790 | 37 | 3 | 167322110 | 167322110 | Missense_Mutation | SNP | G  | A  | 18 | 43  | c.82C>T                            | c.(82-84)CAC>TAC     | p.H28Y   |
| Pat_46 | Pre-Treatment | EIF2B5    | 8893   | 37 | 3 | 183861313 | 183861313 | Missense_Mutation | SNP | C  | T  | 22 | 45  | c.1829C>T                          | c.(1828-1830)TCC>TTC | p.S610F  |
| Pat_46 | Pre-Treatment | C3orf65   | 646600 | 37 | 3 | 185434414 | 185434414 | Missense_Mutation | SNP | G  | A  | 8  | 6   | c.247G>A                           | c.(247-249)GAA>AAA   | p.E83K   |
| Pat_46 | Pre-Treatment | TPRG1     | 285386 | 37 | 3 | 188956652 | 188956652 | Missense_Mutation | SNP | C  | T  | 27 | 78  | c.433C>T                           | c.(433-435)CGC>TGC   | p.R145C  |
| Pat_46 | Pre-Treatment | C3orf21   | 152002 | 37 | 3 | 194790515 | 194790516 | Missense_Mutation | DNP | CC | TT | 6  | 24  | c.1110_1111GG>A108-1113)GAGGCC>GAA |                      | p.A371T  |
| Pat_46 | Pre-Treatment | PDE6B     | 5158   | 37 | 4 | 647869    | 647869    | Missense_Mutation | SNP | G  | A  | 9  | 40  | c.853G>A                           | c.(853-855)GAA>AAA   | p.E285K  |
| Pat_46 | Pre-Treatment | WHSC1     | 7468   | 37 | 4 | 1961339   | 1961339   | Missense_Mutation | SNP | C  | T  | 29 | 60  | c.3127C>T                          | c.(3127-3129)CCG>TCG | p.P1043S |
| Pat_46 | Pre-Treatment | SH3TC1    | 54436  | 37 | 4 | 8239332   | 8239332   | Missense_Mutation | SNP | G  | A  | 12 | 32  | c.3688G>A                          | c.(3688-3690)GAG>AAG | p.E1230K |
| Pat_46 | Pre-Treatment | CPZ       | 8532   | 37 | 4 | 8621304   | 8621304   | Missense_Mutation | SNP | C  | T  | 6  | 13  | c.1919C>T                          | c.(1918-1920)TCG>TTG | p.S640L  |
| Pat_46 | Pre-Treatment | ZNF518B   | 85460  | 37 | 4 | 10446289  | 10446289  | Missense_Mutation | SNP | G  | A  | 14 | 28  | c.1664C>T                          | c.(1663-1665)TCT>TTT | p.S555F  |
| Pat_46 | Pre-Treatment | DCAF16    | 54876  | 37 | 4 | 17805374  | 17805374  | Missense_Mutation | SNP | G  | A  | 33 | 84  | c.391C>T                           | c.(391-393)CCC>TCC   | p.P131S  |
| Pat_46 | Pre-Treatment | SLIT2     | 9353   | 37 | 4 | 20543159  | 20543159  | Missense_Mutation | SNP | G  | A  | 17 | 32  | c.2060G>A                          | c.(2059-2061)GGA>GAA | p.G687E  |
| Pat_46 | Pre-Treatment | GBA3      | 57733  | 37 | 4 | 22820361  | 22820361  | Missense_Mutation | SNP | G  | A  | 2  | 5   | c.1225G>A                          | c.(1225-1227)GTC>ATC | p.V409I  |
| Pat_46 | Pre-Treatment | DHX15     | 1665   | 37 | 4 | 24544625  | 24544625  | Missense_Mutation | SNP | C  | T  | 45 | 81  | c.1273G>A                          | c.(1273-1275)GAG>AAG | p.E425K  |
| Pat_46 | Pre-Treatment | TMPRSS11D | 9407   | 37 | 4 | 68698974  | 68698974  | Missense_Mutation | SNP | C  | T  | 23 | 58  | c.640G>A                           | c.(640-642)GGC>AGC   | p.G214S  |
| Pat_46 | Pre-Treatment | UGT2B4    | 7363   | 37 | 4 | 70350974  | 70350974  | Missense_Mutation | SNP | G  | A  | 79 | 167 | c.1262C>T                          | c.(1261-1263)TCG>TTG | p.S421L  |
| Pat_46 | Pre-Treatment | CSN1S1    | 1446   | 37 | 4 | 70802196  | 70802196  | Missense_Mutation | SNP | G  | A  | 4  | 17  | c.152G>A                           | c.(151-153)AGG>AAG   | p.R51K   |
| Pat_46 | Pre-Treatment | PROL1     | 58503  | 37 | 4 | 71265005  | 71265005  | Missense_Mutation | SNP | G  | A  | 8  | 21  | c.3G>A                             | c.(1-3)ATG>ATA       | p.M1I    |
| Pat_46 | Pre-Treatment | SHROOM3   | 57619  | 37 | 4 | 77661164  | 77661164  | Missense_Mutation | SNP | C  | T  | 3  | 97  | c.1838C>T                          | c.(1837-1839)GCG>GTG | p.A613V  |
| Pat_46 | Pre-Treatment | FRAS1     | 80144  | 37 | 4 | 79400818  | 79400818  | Missense_Mutation | SNP | G  | A  | 19 | 37  | c.8389G>A                          | c.(8389-8391)GAT>AAT | p.D2797N |
| Pat_46 | Pre-Treatment | NAA11     | 84779  | 37 | 4 | 80246788  | 80246788  | Missense_Mutation | SNP | G  | A  | 6  | 33  | c.244C>T                           | c.(244-246)CGG>TGG   | p.R82W   |
| Pat_46 | Pre-Treatment | ANTXR2    | 118429 | 37 | 4 | 80952816  | 80952816  | Missense_Mutation | SNP | G  | A  | 4  | 13  | c.827C>T                           | c.(826-828)TCT>TTT   | p.S276F  |
| Pat_46 | Pre-Treatment | RASGEF1B  | 153020 | 37 | 4 | 82369228  | 82369228  | Missense_Mutation | SNP | C  | T  | 11 | 43  | c.649G>A                           | c.(649-651)GAG>AAG   | p.E217K  |
| Pat_46 | Pre-Treatment | WDFY3     | 23001  | 37 | 4 | 85722863  | 85722863  | Missense_Mutation | SNP | G  | A  | 43 | 68  | c.2762C>T                          | c.(2761-2763)CCG>CTG | p.P921L  |
| Pat_46 | Pre-Treatment | C4orf37   | 285555 | 37 | 4 | 98480246  | 98480246  | Missense_Mutation | SNP | C  | T  | 22 | 38  | c.1343G>A                          | c.(1342-1344)GGA>GAA | p.G448E  |
| Pat_46 | Pre-Treatment | ENPEP     | 2028   | 37 | 4 | 111436534 | 111436534 | Missense_Mutation | SNP | G  | A  | 11 | 29  | c.1445G>A                          | c.(1444-1446)GGA>GAA | p.G482E  |
| Pat_46 | Pre-Treatment | PITX2     | 5308   | 37 | 4 | 111542496 | 111542496 | Missense_Mutation | SNP | C  | T  | 14 | 21  | c.214G>A                           | c.(214-216)GAG>AAG   | p.E72K   |
| Pat_46 | Pre-Treatment | C4orf31   | 79625  | 37 | 4 | 121958606 | 121958606 | Missense_Mutation | SNP | G  | A  | 36 | 98  | c.520C>T                           | c.(520-522)CCT>TCT   | p.P174S  |
| Pat_46 | Pre-Treatment | ADAD1     | 132612 | 37 | 4 | 123317478 | 123317478 | Missense_Mutation | SNP | C  | T  | 12 | 22  | c.670C>T                           | c.(670-672)CGT>TGT   | p.R224C  |
| Pat_46 | Pre-Treatment | FAT4      | 79633  | 37 | 4 | 126367686 | 126367686 | Missense_Mutation | SNP | C  | T  | 32 | 94  | c.7432C>T                          | c.(7432-7434)CCT>TCT | p.P2478S |
| Pat_46 | Pre-Treatment | PCDH18    | 54510  | 37 | 4 | 138450896 | 138450896 | Missense_Mutation | SNP | G  | A  | 8  | 35  | c.2347C>T                          | c.(2347-2349)CCT>TCT | p.P783S  |
| Pat_46 | Pre-Treatment | PCDH18    | 54510  | 37 | 4 | 138451292 | 138451292 | Missense_Mutation | SNP | C  | T  | 49 | 107 | c.1951G>A                          | c.(1951-1953)GAA>AAA | p.E651K  |
| Pat_46 | Pre-Treatment | UCP1      | 7350   | 37 | 4 | 141483360 | 141483360 | Missense_Mutation | SNP | C  | T  | 43 | 98  | c.796G>A                           | c.(796-798)GCT>ACT   | p.A266T  |
| Pat_46 | Pre-Treatment | UCP1      | 7350   | 37 | 4 | 141484553 | 141484553 | Missense_Mutation | SNP | C  | T  | 28 | 82  | c.445G>A                           | c.(445-447)GGA>AGA   | p.G149R  |

|        |               |           |        |    |   |           |           |                   |     |    |    |    |     |                 |                      |          |
|--------|---------------|-----------|--------|----|---|-----------|-----------|-------------------|-----|----|----|----|-----|-----------------|----------------------|----------|
| Pat_46 | Pre-Treatment | RNF150    | 57484  | 37 | 4 | 141832457 | 141832457 | Missense_Mutation | SNP | C  | T  | 20 | 37  | c.1039G>A       | c.(1039-1041)GGA>AGA | p.G347R  |
| Pat_46 | Pre-Treatment | GYPA      | 2993   | 37 | 4 | 145040883 | 145040883 | Missense_Mutation | SNP | G  | A  | 12 | 37  | c.188C>T        | c.(187-189)TCA>TTA   | p.S63L   |
| Pat_46 | Pre-Treatment | HHIP      | 64399  | 37 | 4 | 145629453 | 145629453 | Missense_Mutation | SNP | G  | A  | 15 | 35  | c.1291G>A       | c.(1291-1293)GAT>AAT | p.D431N  |
| Pat_46 | Pre-Treatment | DDX60L    | 91351  | 37 | 4 | 169348425 | 169348425 | Missense_Mutation | SNP | G  | A  | 6  | 24  | c.1726C>T       | c.(1726-1728)CTC>TTC | p.L576F  |
| Pat_46 | Pre-Treatment | ADAM29    | 11086  | 37 | 4 | 175897562 | 175897562 | Missense_Mutation | SNP | G  | A  | 20 | 54  | c.886G>A        | c.(886-888)GGG>AGG   | p.G296R  |
| Pat_46 | Pre-Treatment | VEGFC     | 7424   | 37 | 4 | 177608980 | 177608980 | Missense_Mutation | SNP | C  | T  | 23 | 51  | c.806G>A        | c.(805-807)GGA>GAA   | p.G269E  |
| Pat_46 | Pre-Treatment | PDCD6     | 10016  | 37 | 5 | 306758    | 306758    | Missense_Mutation | SNP | G  | A  | 22 | 63  | c.250G>A        | c.(250-252)GAG>AAG   | p.E84K   |
| Pat_46 | Pre-Treatment | SLC6A18   | 348932 | 37 | 5 | 1225747   | 1225747   | Missense_Mutation | SNP | G  | A  | 13 | 57  | c.155G>A        | c.(154-156)GGA>GAA   | p.G52E   |
| Pat_46 | Pre-Treatment | TERT      | 7015   | 37 | 5 | 1272361   | 1272361   | Missense_Mutation | SNP | C  | T  | 8  | 18  | c.2321G>A       | c.(2320-2322)CGA>CAA | p.R774Q  |
| Pat_46 | Pre-Treatment | SLC6A3    | 6531   | 37 | 5 | 1443135   | 1443135   | Missense_Mutation | SNP | G  | A  | 10 | 27  | c.178C>T        | c.(178-180)CGG>TGG   | p.R60W   |
| Pat_46 | Pre-Treatment | CDH18     | 1016   | 37 | 5 | 19483585  | 19483585  | Missense_Mutation | SNP | C  | T  | 16 | 30  | c.1707G>A       | c.(1705-1707)ATG>ATA | p.M569I  |
| Pat_46 | Pre-Treatment | AGXT2     | 64902  | 37 | 5 | 35035333  | 35035333  | Missense_Mutation | SNP | G  | A  | 20 | 44  | c.575C>T        | c.(574-576)TCT>TTT   | p.S192F  |
| Pat_46 | Pre-Treatment | PRLR      | 5618   | 37 | 5 | 35065648  | 35065648  | Missense_Mutation | SNP | C  | T  | 12 | 31  | c.1412G>A       | c.(1411-1413)GGA>GAA | p.G471E  |
| Pat_46 | Pre-Treatment | EGFLAM    | 133584 | 37 | 5 | 38438503  | 38438503  | Missense_Mutation | SNP | G  | A  | 9  | 18  | c.2410G>A       | c.(2410-2412)GAG>AAG | p.E804K  |
| Pat_46 | Pre-Treatment | C7        | 730    | 37 | 5 | 40964918  | 40964918  | Missense_Mutation | SNP | C  | T  | 29 | 64  | c.1825C>T       | c.(1825-1827)CCA>TCA | p.P609S  |
| Pat_46 | Pre-Treatment | HEATR7B2  | 133558 | 37 | 5 | 41033154  | 41033154  | Missense_Mutation | SNP | C  | T  | 15 | 27  | c.2350G>A       | c.(2350-2352)GGT>AGT | p.G784S  |
| Pat_46 | Pre-Treatment | HTR1A     | 3350   | 37 | 5 | 63257543  | 63257543  | Missense_Mutation | SNP | C  | T  | 10 | 14  | c.4G>A          | c.(4-6)GAT>AAT       | p.D2N    |
| Pat_46 | Pre-Treatment | MAP1B     | 4131   | 37 | 5 | 71493512  | 71493512  | Missense_Mutation | SNP | C  | T  | 5  | 8   | c.4330C>T       | c.(4330-4332)CCA>TCA | p.P1444S |
| Pat_46 | Pre-Treatment | NSA2      | 10412  | 37 | 5 | 74064801  | 74064801  | Missense_Mutation | SNP | C  | T  | 5  | 15  | c.49C>T         | c.(49-51)CGT>TGT     | p.R17C   |
| Pat_46 | Pre-Treatment | LOC644936 | 644936 | 37 | 5 | 79595930  | 79595930  | Missense_Mutation | SNP | G  | A  | 3  | 11  | c.227C>T        | c.(226-228)TCC>TTC   | p.S76F   |
| Pat_46 | Pre-Treatment | GPR98     | 84059  | 37 | 5 | 89949088  | 89949089  | Missense_Mutation | DNP | CC | TT | 12 | 14  | ..3697_3698CC>T | c.(3697-3699)CCA>TTA | p.P1233L |
| Pat_46 | Pre-Treatment | GPR98     | 84059  | 37 | 5 | 90000242  | 90000242  | Missense_Mutation | SNP | G  | A  | 3  | 12  | c.8323G>A       | c.(8323-8325)GAT>AAT | p.D2775N |
| Pat_46 | Pre-Treatment | GPR98     | 84059  | 37 | 5 | 90002111  | 90002111  | Missense_Mutation | SNP | G  | A  | 5  | 17  | c.8630G>A       | c.(8629-8631)GGA>GAA | p.G2877E |
| Pat_46 | Pre-Treatment | GPR98     | 84059  | 37 | 5 | 90016807  | 90016807  | Nonsense_Mutation | SNP | C  | T  | 19 | 69  | c.9679C>T       | c.(9679-9681)CGA>TGA | p.R3227* |
| Pat_46 | Pre-Treatment | SNCAIP    | 9627   | 37 | 5 | 121761182 | 121761182 | Missense_Mutation | SNP | G  | A  | 14 | 68  | c.1138G>A       | c.(1138-1140)GAG>AAG | p.E380K  |
| Pat_46 | Pre-Treatment | MEGF10    | 84466  | 37 | 5 | 126732229 | 126732229 | Missense_Mutation | SNP | G  | A  | 67 | 114 | c.418G>A        | c.(418-420)GAT>AAT   | p.D140N  |
| Pat_46 | Pre-Treatment | FSTL4     | 23105  | 37 | 5 | 132939572 | 132939572 | Missense_Mutation | SNP | C  | T  | 33 | 85  | c.103G>A        | c.(103-105)GGT>AGT   | p.G35S   |
| Pat_46 | Pre-Treatment | PCDHA3    | 56145  | 37 | 5 | 140181752 | 140181752 | Missense_Mutation | SNP | G  | A  | 25 | 43  | c.970G>A        | c.(970-972)GAT>AAT   | p.D324N  |
| Pat_46 | Pre-Treatment | PCDHA7    | 56141  | 37 | 5 | 140214185 | 140214185 | Missense_Mutation | SNP | G  | A  | 56 | 127 | c.217G>A        | c.(217-219)GAT>AAT   | p.D73N   |
| Pat_46 | Pre-Treatment | PCDHA13   | 56136  | 37 | 5 | 140263676 | 140263676 | Missense_Mutation | SNP | C  | T  | 29 | 55  | c.1823C>T       | c.(1822-1824)TCG>TTG | p.S608L  |
| Pat_46 | Pre-Treatment | PCDHB1    | 29930  | 37 | 5 | 140432910 | 140432910 | Nonsense_Mutation | SNP | C  | T  | 4  | 18  | c.1855C>T       | c.(1855-1857)CAA>TAA | p.Q619*  |
| Pat_46 | Pre-Treatment | PCDHB5    | 26167  | 37 | 5 | 140516773 | 140516773 | Missense_Mutation | SNP | C  | T  | 5  | 59  | c.1757C>T       | c.(1756-1758)ACC>ATC | p.T586I  |
| Pat_46 | Pre-Treatment | PCDHB7    | 56129  | 37 | 5 | 140554176 | 140554176 | Missense_Mutation | SNP | C  | T  | 3  | 75  | c.1760C>T       | c.(1759-1761)ACC>ATC | p.T587I  |
| Pat_46 | Pre-Treatment | PCDHB11   | 56125  | 37 | 5 | 140581524 | 140581524 | Missense_Mutation | SNP | C  | T  | 40 | 70  | c.2177C>T       | c.(2176-2178)TCG>TTG | p.S726L  |
| Pat_46 | Pre-Treatment | PCDHB12   | 56124  | 37 | 5 | 140590287 | 140590287 | Missense_Mutation | SNP | C  | T  | 33 | 153 | c.1808C>T       | c.(1807-1809)TCG>TTG | p.S603L  |
| Pat_46 | Pre-Treatment | PCDHGC4   | 56098  | 37 | 5 | 140866751 | 140866751 | Missense_Mutation | SNP | C  | T  | 9  | 32  | c.2011C>T       | c.(2011-2013)CCA>TCA | p.P671S  |
| Pat_46 | Pre-Treatment | PCDH1     | 5097   | 37 | 5 | 141236930 | 141236930 | Missense_Mutation | SNP | G  | A  | 9  | 24  | c.3206C>T       | c.(3205-3207)CCG>CTG | p.P1069L |
| Pat_46 | Pre-Treatment | PCDH12    | 51294  | 37 | 5 | 141335229 | 141335229 | Missense_Mutation | SNP | C  | T  | 7  | 50  | c.2188G>A       | c.(2188-2190)GGG>AGG | p.G730R  |
| Pat_46 | Pre-Treatment | ADRB2     | 154    | 37 | 5 | 148207458 | 148207458 | Missense_Mutation | SNP | C  | T  | 5  | 22  | c.1064C>T       | c.(1063-1065)TCC>TTC | p.S355F  |
| Pat_46 | Pre-Treatment | SLC26A2   | 1836   | 37 | 5 | 149357514 | 149357514 | Missense_Mutation | SNP | C  | T  | 25 | 54  | c.299C>T        | c.(298-300)CCA>CTA   | p.P100L  |
| Pat_46 | Pre-Treatment | FAM71B    | 153745 | 37 | 5 | 156592693 | 156592693 | Missense_Mutation | SNP | C  | T  | 12 | 73  | c.487G>A        | c.(487-489)GAT>AAT   | p.D163N  |
| Pat_46 | Pre-Treatment | ATP10B    | 23120  | 37 | 5 | 160018110 | 160018110 | Missense_Mutation | SNP | C  | T  | 11 | 30  | c.3601G>A       | c.(3601-3603)GAT>AAT | p.D1201N |
| Pat_46 | Pre-Treatment | GABRA6    | 2559   | 37 | 5 | 161128618 | 161128618 | Missense_Mutation | SNP | C  | A  | 19 | 50  | c.1201C>A       | c.(1201-1203)CCT>ACT | p.P401T  |
| Pat_46 | Pre-Treatment | FAM153B   | 202134 | 37 | 5 | 175528070 | 175528070 | Missense_Mutation | SNP | G  | A  | 13 | 81  | c.583G>A        | c.(583-585)GAG>AAG   | p.E195K  |
| Pat_46 | Pre-Treatment | UNC5A     | 90249  | 37 | 5 | 176306404 | 176306404 | Missense_Mutation | SNP | C  | T  | 17 | 43  | c.2278C>T       | c.(2278-2280)CGG>TGG | p.R760W  |
| Pat_46 | Pre-Treatment | FAM153C   | 653316 | 37 | 5 | 177473889 | 177473889 | Missense_Mutation | SNP | C  | T  | 15 | 33  | c.290C>T        | c.(289-291)TCC>TTC   | p.S97F   |
| Pat_46 | Pre-Treatment | DSP       | 1832   | 37 | 6 | 7570741   | 7570742   | Missense_Mutation | DNP | CC | TT | 35 | 125 | ..1646_1647CC>T | c.(1645-1647)TCC>TTT | p.S549F  |

|        |               |           |        |    |   |           |           |                        |     |    |    |     |     |                 |                        |          |
|--------|---------------|-----------|--------|----|---|-----------|-----------|------------------------|-----|----|----|-----|-----|-----------------|------------------------|----------|
| Pat_46 | Pre-Treatment | BMP6      | 654    | 37 | 6 | 7845540   | 7845540   | Nonsense_Mutation      | SNP | C  | T  | 7   | 28  | c.832C>T        | c.(832-834)CAA>TAA     | p.Q278*  |
| Pat_46 | Pre-Treatment | HIVEP1    | 3096   | 37 | 6 | 12015883  | 12015883  | Missense_Mutation      | SNP | C  | T  | 25  | 161 | c.22C>T         | c.(22-24)CAT>TAT       | p.H8Y    |
| Pat_46 | Pre-Treatment | RANBP9    | 10048  | 37 | 6 | 13711709  | 13711709  | Missense_Mutation      | SNP | G  | T  | 3   | 34  | c.29C>A         | c.(28-30)CCG>CAG       | p.P10Q   |
| Pat_46 | Pre-Treatment | CAP2      | 10486  | 37 | 6 | 17507904  | 17507904  | Missense_Mutation      | SNP | G  | A  | 14  | 126 | c.477G>A        | c.(475-477)ATG>ATA     | p.M159I  |
| Pat_46 | Pre-Treatment | LRRC16A   | 55604  | 37 | 6 | 25516015  | 25516015  | Missense_Mutation      | SNP | G  | A  | 17  | 24  | c.1745G>A       | c.(1744-1746)GGA>GAA   | p.G582E  |
| Pat_46 | Pre-Treatment | HIST1H2BE | 8344   | 37 | 6 | 26184054  | 26184054  | Missense_Mutation      | SNP | C  | T  | 41  | 135 | c.31C>T         | c.(31-33)CCG>TCG       | p.P11S   |
| Pat_46 | Pre-Treatment | BTN2A3    | 54718  | 37 | 6 | 26431314  | 26431314  | Missense_Mutation      | SNP | T  | A  | 15  | 19  | c.1232T>A       | c.(1231-1233)CTG>CAG   | p.L411Q  |
| Pat_46 | Pre-Treatment | BTN1A1    | 696    | 37 | 6 | 26508950  | 26508950  | Missense_Mutation      | SNP | G  | A  | 79  | 111 | c.1129G>A       | c.(1129-1131)GAG>AAG   | p.E377K  |
| Pat_46 | Pre-Treatment | PRSS16    | 10279  | 37 | 6 | 27222818  | 27222818  | Missense_Mutation      | SNP | G  | A  | 42  | 89  | c.1384G>A       | c.(1384-1386)GAA>AAA   | p.E462K  |
| Pat_46 | Pre-Treatment | GPX5      | 2880   | 37 | 6 | 28497304  | 28497304  | Missense_Mutation      | SNP | C  | T  | 60  | 56  | c.164C>T        | c.(163-165)TCC>TTC     | p.S55F   |
| Pat_46 | Pre-Treatment | PPP1R11   | 6992   | 37 | 6 | 30037019  | 30037019  | Missense_Mutation      | SNP | C  | T  | 136 | 176 | c.317C>T        | c.(316-318)ACC>ATC     | p.T106I  |
| Pat_46 | Pre-Treatment | MDC1      | 9656   | 37 | 6 | 30680836  | 30680836  | Missense_Mutation      | SNP | G  | A  | 41  | 116 | c.883C>T        | c.(883-885)CCT>TCT     | p.P295S  |
| Pat_46 | Pre-Treatment | DPCR1     | 135656 | 37 | 6 | 30919743  | 30919743  | Missense_Mutation      | SNP | G  | A  | 4   | 28  | c.3502G>A       | c.(3502-3504)GAA>AAA   | p.E1168K |
| Pat_46 | Pre-Treatment | C6orf15   | 29113  | 37 | 6 | 31079628  | 31079628  | Missense_Mutation      | SNP | G  | A  | 8   | 27  | c.508C>T        | c.(508-510)CAC>TAC     | p.H170Y  |
| Pat_46 | Pre-Treatment | TNF       | 7124   | 37 | 6 | 31543429  | 31543429  | Translation_Start_Site | SNP | C  | T  | 8   | 44  | c.-89C>T        | c.(-91--87)GACGC>GATGC |          |
| Pat_46 | Pre-Treatment | TNF       | 7124   | 37 | 6 | 31545117  | 31545117  | Missense_Mutation      | SNP | C  | T  | 40  | 51  | c.505C>T        | c.(505-507)CTC>TTC     | p.L169F  |
| Pat_46 | Pre-Treatment | AIF1      | 199    | 37 | 6 | 31584627  | 31584627  | Missense_Mutation      | SNP | G  | A  | 5   | 63  | c.394G>A        | c.(394-396)GAA>AAA     | p.E132K  |
| Pat_46 | Pre-Treatment | CYP21A2   | 1589   | 37 | 6 | 32008885  | 32008885  | Missense_Mutation      | SNP | G  | A  | 5   | 32  | c.1462G>A       | c.(1462-1464)GCC>ACC   | p.A488T  |
| Pat_46 | Pre-Treatment | COL11A2   | 1302   | 37 | 6 | 33138143  | 33138144  | Missense_Mutation      | DNP | GG | AA | 7   | 26  | c.3541_3542CC>T | c.(3541-3543)CCC>TTC   | p.P1181F |
| Pat_46 | Pre-Treatment | SLC39A7   | 7922   | 37 | 6 | 33170381  | 33170381  | Missense_Mutation      | SNP | G  | A  | 7   | 34  | c.844G>A        | c.(844-846)GAA>AAA     | p.E282K  |
| Pat_46 | Pre-Treatment | DNAH8     | 1769   | 37 | 6 | 38867559  | 38867559  | Missense_Mutation      | SNP | G  | A  | 19  | 87  | c.8420G>A       | c.(8419-8421)CGA>CAA   | p.R2807Q |
| Pat_46 | Pre-Treatment | DNAH8     | 1769   | 37 | 6 | 38980323  | 38980323  | Missense_Mutation      | SNP | G  | A  | 23  | 187 | c.12973G>A      | c.(12973-12975)GAA>AAA | p.E4325K |
| Pat_46 | Pre-Treatment | XPO5      | 57510  | 37 | 6 | 43541245  | 43541245  | Missense_Mutation      | SNP | C  | T  | 20  | 37  | c.199G>A        | c.(199-201)GGC>AGC     | p.G67S   |
| Pat_46 | Pre-Treatment | CRISP2    | 7180   | 37 | 6 | 49660530  | 49660530  | Missense_Mutation      | SNP | C  | T  | 19  | 23  | c.688G>A        | c.(688-690)GAA>AAA     | p.E230K  |
| Pat_46 | Pre-Treatment | LRRC1     | 55227  | 37 | 6 | 53764608  | 53764608  | Missense_Mutation      | SNP | C  | T  | 19  | 17  | c.706C>T        | c.(706-708)CCT>TCT     | p.P236S  |
| Pat_46 | Pre-Treatment | FAM83B    | 222584 | 37 | 6 | 54805519  | 54805519  | Missense_Mutation      | SNP | C  | T  | 5   | 21  | c.1750C>T       | c.(1750-1752)CCT>TCT   | p.P584S  |
| Pat_46 | Pre-Treatment | FAM83B    | 222584 | 37 | 6 | 54806308  | 54806308  | Missense_Mutation      | SNP | G  | A  | 9   | 10  | c.2539G>A       | c.(2539-2541)GAA>AAA   | p.E847K  |
| Pat_46 | Pre-Treatment | BMP5      | 653    | 37 | 6 | 55739516  | 55739516  | Missense_Mutation      | SNP | C  | T  | 19  | 28  | c.148G>A        | c.(148-150)GAA>AAA     | p.E50K   |
| Pat_46 | Pre-Treatment | GUSBL2    | 375513 | 37 | 6 | 58250821  | 58250821  | Missense_Mutation      | SNP | G  | A  | 9   | 30  | c.431C>T        | c.(430-432)TCG>TTG     | p.S144L  |
| Pat_46 | Pre-Treatment | EYS       | 346007 | 37 | 6 | 66054034  | 66054034  | Missense_Mutation      | SNP | G  | A  | 13  | 19  | c.1496C>T       | c.(1495-1497)GCC>GTC   | p.A499V  |
| Pat_46 | Pre-Treatment | RIMS1     | 22999  | 37 | 6 | 72968786  | 72968786  | Missense_Mutation      | SNP | G  | A  | 19  | 18  | c.3025G>A       | c.(3025-3027)GAT>AAT   | p.D1009N |
| Pat_46 | Pre-Treatment | UBE2CBP   | 90025  | 37 | 6 | 83667051  | 83667051  | Missense_Mutation      | SNP | G  | A  | 24  | 32  | c.1129C>T       | c.(1129-1131)CGC>TGC   | p.R377C  |
| Pat_46 | Pre-Treatment | EPHA7     | 2045   | 37 | 6 | 93964415  | 93964415  | Missense_Mutation      | SNP | C  | T  | 24  | 45  | c.2482G>A       | c.(2482-2484)GAA>AAA   | p.E828K  |
| Pat_46 | Pre-Treatment | DDO       | 8528   | 37 | 6 | 110726085 | 110726085 | Missense_Mutation      | SNP | C  | T  | 10  | 15  | c.434G>A        | c.(433-435)CGA>CAA     | p.R145Q  |
| Pat_46 | Pre-Treatment | DSE       | 29940  | 37 | 6 | 116752138 | 116752138 | Nonsense_Mutation      | SNP | T  | A  | 25  | 25  | c.692T>A        | c.(691-693)TTA>TAA     | p.L231*  |
| Pat_46 | Pre-Treatment | TMEM200A  | 114801 | 37 | 6 | 130762249 | 130762249 | Missense_Mutation      | SNP | G  | A  | 6   | 8   | c.682G>A        | c.(682-684)GAG>AAG     | p.E228K  |
| Pat_46 | Pre-Treatment | BCLAF1    | 9774   | 37 | 6 | 136599063 | 136599063 | Missense_Mutation      | SNP | G  | A  | 8   | 93  | c.956C>T        | c.(955-957)TCC>TTC     | p.S319F  |
| Pat_46 | Pre-Treatment | IL20RA    | 53832  | 37 | 6 | 137332467 | 137332467 | Nonsense_Mutation      | SNP | C  | T  | 23  | 29  | c.347G>A        | c.(346-348)TGG>TAG     | p.W116*  |
| Pat_46 | Pre-Treatment | KIAA1244  | 57221  | 37 | 6 | 138628471 | 138628471 | Missense_Mutation      | SNP | G  | A  | 45  | 43  | c.3910G>A       | c.(3910-3912)GAA>AAA   | p.E1304K |
| Pat_46 | Pre-Treatment | SYNE1     | 23345  | 37 | 6 | 152454491 | 152454491 | Missense_Mutation      | SNP | G  | A  | 31  | 47  | c.25921C>T      | c.(25921-25923)CGG>TGC | p.R8641W |
| Pat_46 | Pre-Treatment | MLLT4     | 4301   | 37 | 6 | 168352148 | 168352149 | Missense_Mutation      | DNP | CC | TT | 29  | 56  | c.4090_4091CC>T | c.(4090-4092)CCT>TTT   | p.P1364F |
| Pat_46 | Pre-Treatment | CARD11    | 84433  | 37 | 7 | 2968290   | 2968290   | Missense_Mutation      | SNP | C  | T  | 35  | 47  | c.1696G>A       | c.(1696-1698)GAG>AAG   | p.E566K  |
| Pat_46 | Pre-Treatment | LOC389458 | 389458 | 37 | 7 | 5112052   | 5112052   | Missense_Mutation      | SNP | C  | T  | 4   | 6   | c.359C>T        | c.(358-360)CCG>CTG     | p.P120L  |
| Pat_46 | Pre-Treatment | RSPH10B2  | 728194 | 37 | 7 | 5983103   | 5983103   | Missense_Mutation      | SNP | C  | T  | 3   | 35  | c.1610G>A       | c.(1609-1611)GGC>GAC   | p.G537D  |
| Pat_46 | Pre-Treatment | RAC1      | 5879   | 37 | 7 | 6426892   | 6426892   | Missense_Mutation      | SNP | C  | T  | 39  | 132 | c.85C>T         | c.(85-87)CCT>TCT       | p.P29S   |
| Pat_46 | Pre-Treatment | THSD7A    | 221981 | 37 | 7 | 11485877  | 11485877  | Missense_Mutation      | SNP | C  | T  | 45  | 138 | c.2875G>A       | c.(2875-2877)GAC>AAC   | p.D959N  |
| Pat_46 | Pre-Treatment | PRPS1L1   | 221823 | 37 | 7 | 18067003  | 18067003  | Nonsense_Mutation      | SNP | G  | A  | 27  | 72  | c.403C>T        | c.(403-405)CAG>TAG     | p.Q135*  |



|        |               |           |        |    |   |           |           |                   |     |    |    |     |     |                  |                        |          |
|--------|---------------|-----------|--------|----|---|-----------|-----------|-------------------|-----|----|----|-----|-----|------------------|------------------------|----------|
| Pat_46 | Pre-Treatment | ITGB8     | 3696   | 37 | 7 | 20441600  | 20441600  | Missense_Mutation | SNP | C  | T  | 80  | 265 | c.1538C>T        | c.(1537-1539)TCA>TTA   | p.S513L  |
| Pat_46 | Pre-Treatment | DNAH11    | 8701   | 37 | 7 | 21908587  | 21908587  | Missense_Mutation | SNP | G  | A  | 11  | 16  | c.11966G>A       | c.(11965-11967)GGA>GAA | p.G3989E |
| Pat_46 | Pre-Treatment | RAPGEF5   | 9771   | 37 | 7 | 22259516  | 22259516  | Missense_Mutation | SNP | G  | A  | 23  | 26  | c.506C>T         | c.(505-507)ACG>ATG     | p.T169M  |
| Pat_46 | Pre-Treatment | GGCT      | 79017  | 37 | 7 | 30538488  | 30538488  | Missense_Mutation | SNP | T  | G  | 16  | 43  | c.354A>C         | c.(352-354)AAA>AAC     | p.K118N  |
| Pat_46 | Pre-Treatment | ADCYAP1R1 | 117    | 37 | 7 | 31146129  | 31146129  | Missense_Mutation | SNP | G  | A  | 26  | 35  | c.1238G>A        | c.(1237-1239)CGA>CAA   | p.R413Q  |
| Pat_46 | Pre-Treatment | DPY19L2P1 | 554236 | 37 | 7 | 35130022  | 35130022  | Missense_Mutation | SNP | C  | T  | 24  | 126 | c.1163G>A        | c.(1162-1164)CGA>CAA   | p.R388Q  |
| Pat_46 | Pre-Treatment | TBX20     | 57057  | 37 | 7 | 35242110  | 35242110  | Nonsense_Mutation | SNP | G  | A  | 8   | 17  | c.1276C>T        | c.(1276-1278)CAG>TAG   | p.Q426*  |
| Pat_46 | Pre-Treatment | TXNDC3    | 51314  | 37 | 7 | 37907434  | 37907434  | Missense_Mutation | SNP | G  | A  | 35  | 29  | c.752G>A         | c.(751-753)CGA>CAA     | p.R251Q  |
| Pat_46 | Pre-Treatment | TBRG4     | 9238   | 37 | 7 | 45143798  | 45143798  | Missense_Mutation | SNP | G  | A  | 12  | 56  | c.965C>T         | c.(964-966)TCC>TTC     | p.S322F  |
| Pat_46 | Pre-Treatment | CDC14C    | 168448 | 37 | 7 | 48965358  | 48965358  | Missense_Mutation | SNP | C  | T  | 14  | 41  | c.1090C>T        | c.(1090-1092)CTC>TTC   | p.L364F  |
| Pat_46 | Pre-Treatment | VSTM2A    | 222008 | 37 | 7 | 54610488  | 54610488  | Missense_Mutation | SNP | G  | A  | 23  | 27  | c.65G>A          | c.(64-66)GGG>GAG       | p.G22E   |
| Pat_46 | Pre-Treatment | ZNF479    | 90827  | 37 | 7 | 57193770  | 57193770  | Missense_Mutation | SNP | C  | T  | 21  | 87  | c.217G>A         | c.(217-219)GAG>AAG     | p.E73K   |
| Pat_46 | Pre-Treatment | ZNF716    | 441234 | 37 | 7 | 57528735  | 57528735  | Missense_Mutation | SNP | G  | A  | 11  | 24  | c.568G>A         | c.(568-570)GAT>AAT     | p.D190N  |
| Pat_46 | Pre-Treatment | ZNF679    | 168417 | 37 | 7 | 63721281  | 63721281  | Missense_Mutation | SNP | G  | A  | 5   | 26  | c.236G>A         | c.(235-237)AGA>AAA     | p.R79K   |
| Pat_46 | Pre-Treatment | WBSCR17   | 64409  | 37 | 7 | 71036340  | 71036340  | Missense_Mutation | SNP | C  | T  | 24  | 57  | c.1033C>T        | c.(1033-1035)CCT>TCT   | p.P345S  |
| Pat_46 | Pre-Treatment | HGF       | 3082   | 37 | 7 | 81335690  | 81335690  | Missense_Mutation | SNP | C  | T  | 59  | 142 | c.1670G>A        | c.(1669-1671)GGA>GAA   | p.G557E  |
| Pat_46 | Pre-Treatment | CALCR     | 799    | 37 | 7 | 93098063  | 93098063  | Missense_Mutation | SNP | G  | A  | 32  | 79  | c.539C>T         | c.(538-540)ACC>ATC     | p.T180I  |
| Pat_46 | Pre-Treatment | LMTK2     | 22853  | 37 | 7 | 97833294  | 97833294  | Missense_Mutation | SNP | C  | T  | 10  | 35  | c.4279C>T        | c.(4279-4281)CCT>TCT   | p.P1427S |
| Pat_46 | Pre-Treatment | STAG3     | 10734  | 37 | 7 | 99802959  | 99802959  | Missense_Mutation | SNP | G  | A  | 14  | 35  | c.3190G>A        | c.(3190-3192)GAG>AAG   | p.E1064K |
| Pat_46 | Pre-Treatment | ZAN       | 7455   | 37 | 7 | 100365586 | 100365586 | Missense_Mutation | SNP | G  | A  | 5   | 21  | c.4993G>A        | c.(4993-4995)GAA>AAA   | p.E1665K |
| Pat_46 | Pre-Treatment | MUC17     | 140453 | 37 | 7 | 100682297 | 100682297 | Missense_Mutation | SNP | A  | G  | 104 | 233 | c.7600A>G        | c.(7600-7602)ACC>GCC   | p.T2534A |
| Pat_46 | Pre-Treatment | RABL5     | 64792  | 37 | 7 | 100958513 | 100958513 | Missense_Mutation | SNP | G  | A  | 12  | 19  | c.460C>T         | c.(460-462)CCT>TCT     | p.P154S  |
| Pat_46 | Pre-Treatment | RELN      | 5649   | 37 | 7 | 103205974 | 103205974 | Nonsense_Mutation | SNP | C  | T  | 7   | 10  | c.4961G>A        | c.(4960-4962)TGG>TAG   | p.W1654* |
| Pat_46 | Pre-Treatment | RELN      | 5649   | 37 | 7 | 103214615 | 103214615 | Missense_Mutation | SNP | C  | T  | 49  | 70  | c.4435G>A        | c.(4435-4437)GAT>AAT   | p.D1479N |
| Pat_46 | Pre-Treatment | RELN      | 5649   | 37 | 7 | 103243912 | 103243912 | Missense_Mutation | SNP | C  | T  | 16  | 58  | c.3172G>A        | c.(3172-3174)GAA>AAA   | p.E1058K |
| Pat_46 | Pre-Treatment | PPP1R3A   | 5506   | 37 | 7 | 113517816 | 113517816 | Missense_Mutation | SNP | C  | T  | 21  | 65  | c.3331G>A        | c.(3331-3333)GAA>AAA   | p.E1111K |
| Pat_46 | Pre-Treatment | WNT2      | 7472   | 37 | 7 | 116937870 | 116937870 | Missense_Mutation | SNP | G  | A  | 59  | 108 | c.649C>T         | c.(649-651)CTC>TTC     | p.L217F  |
| Pat_46 | Pre-Treatment | CFTR      | 1080   | 37 | 7 | 117174417 | 117174417 | Missense_Mutation | SNP | G  | A  | 13  | 41  | c.577G>A         | c.(577-579)GAA>AAA     | p.E193K  |
| Pat_46 | Pre-Treatment | PTPRZ1    | 5803   | 37 | 7 | 121653193 | 121653193 | Missense_Mutation | SNP | C  | T  | 68  | 171 | c.4093C>T        | c.(4093-4095)CAT>TAT   | p.H1365Y |
| Pat_46 | Pre-Treatment | DGKI      | 9162   | 37 | 7 | 137271862 | 137271862 | Missense_Mutation | SNP | C  | T  | 166 | 84  | c.1406G>A        | c.(1405-1407)CGA>CAA   | p.R469Q  |
| Pat_46 | Pre-Treatment | BRAF      | 673    | 37 | 7 | 140453136 | 140453137 | Missense_Mutation | DNP | AC | TT | 77  | 43  | c.1798_1799GT>Av | c.(1798-1800)GTG>AAG   | p.V600K  |
| Pat_46 | Pre-Treatment | BRAF      | 673    | 37 | 7 | 140494149 | 140494149 | Missense_Mutation | SNP | G  | A  | 110 | 63  | c.1099C>T        | c.(1099-1101)CCC>TCC   | p.P367S  |
| Pat_46 | Pre-Treatment | CLEC5A    | 23601  | 37 | 7 | 141635652 | 141635652 | Missense_Mutation | SNP | C  | T  | 101 | 53  | c.307G>A         | c.(307-309)GGA>AGA     | p.G103R  |
| Pat_46 | Pre-Treatment | TAS2R38   | 5726   | 37 | 7 | 141673425 | 141673425 | Missense_Mutation | SNP | G  | A  | 27  | 181 | c.65C>T          | c.(64-66)TCA>TTA       | p.S22L   |
| Pat_46 | Pre-Treatment | PRSS1     | 5644   | 37 | 7 | 142460779 | 142460779 | Missense_Mutation | SNP | G  | A  | 76  | 31  | c.652G>A         | c.(652-654)GAT>AAT     | p.D218N  |
| Pat_46 | Pre-Treatment | TRY6      | 154754 | 37 | 7 | 142479974 | 142479974 | Missense_Mutation | SNP | C  | T  | 27  | 247 | c.106C>T         | c.(106-108)CCC>TCC     | p.P36S   |
| Pat_46 | Pre-Treatment | OR6V1     | 346517 | 37 | 7 | 142750081 | 142750081 | Missense_Mutation | SNP | C  | T  | 118 | 137 | c.644C>T         | c.(643-645)TCC>TTC     | p.S215F  |
| Pat_46 | Pre-Treatment | FAM115C   | 285966 | 37 | 7 | 143417077 | 143417077 | Missense_Mutation | SNP | G  | A  | 13  | 7   | c.925G>A         | c.(925-927)GAT>AAT     | p.D309N  |
| Pat_46 | Pre-Treatment | OR2A5     | 393046 | 37 | 7 | 143748144 | 143748144 | Missense_Mutation | SNP | C  | T  | 42  | 202 | c.650C>T         | c.(649-651)TCC>TTC     | p.S217F  |
| Pat_46 | Pre-Treatment | SSPO      | 23145  | 37 | 7 | 149492370 | 149492370 | Missense_Mutation | SNP | G  | A  | 65  | 23  | c.6259G>A        | c.(6259-6261)GAA>AAA   | p.E2087K |
| Pat_46 | Pre-Treatment | GIMAP4    | 55303  | 37 | 7 | 150269283 | 150269283 | Missense_Mutation | SNP | G  | A  | 7   | 23  | c.125G>A         | c.(124-126)GGA>GAA     | p.G42E   |
| Pat_46 | Pre-Treatment | KCNH2     | 3757   | 37 | 7 | 150648777 | 150648777 | Nonsense_Mutation | SNP | C  | T  | 12  | 35  | c.1704G>A        | c.(1702-1704)TGG>TGA   | p.W568*  |
| Pat_46 | Pre-Treatment | CSMD1     | 64478  | 37 | 8 | 2876151   | 2876151   | Missense_Mutation | SNP | G  | A  | 3   | 28  | c.7880C>T        | c.(7879-7881)TCC>TTC   | p.S2627F |
| Pat_46 | Pre-Treatment | CSMD1     | 64478  | 37 | 8 | 3265610   | 3265610   | Missense_Mutation | SNP | C  | T  | 4   | 33  | c.1885G>A        | c.(1885-1887)GAT>AAT   | p.D629N  |
| Pat_46 | Pre-Treatment | BLK       | 640    | 37 | 8 | 11412979  | 11412979  | Missense_Mutation | SNP | G  | A  | 19  | 43  | c.758G>A         | c.(757-759)GGC>GAC     | p.G253D  |
| Pat_46 | Pre-Treatment | USP17L2   | 377630 | 37 | 8 | 11995806  | 11995806  | Missense_Mutation | SNP | C  | T  | 5   | 31  | c.464G>A         | c.(463-465)AGA>AAA     | p.R155K  |
| Pat_46 | Pre-Treatment | TNFRSF10D | 8793   | 37 | 8 | 23003424  | 23003424  | Missense_Mutation | SNP | C  | T  | 9   | 57  | c.493G>A         | c.(493-495)GGG>AGG     | p.G165R  |

|        |               |          |        |    |   |           |           |                   |     |    |    |    |     |                |                      |          |
|--------|---------------|----------|--------|----|---|-----------|-----------|-------------------|-----|----|----|----|-----|----------------|----------------------|----------|
| Pat_46 | Pre-Treatment | ADAM7    | 8756   | 37 | 8 | 24346730  | 24346730  | Missense_Mutation | SNP | G  | A  | 13 | 57  | c.1150G>A      | c.(1150-1152)GAT>AAT | p.D384N  |
| Pat_46 | Pre-Treatment | EBF2     | 64641  | 37 | 8 | 25718726  | 25718726  | Missense_Mutation | SNP | C  | T  | 4  | 39  | c.1181G>A      | c.(1180-1182)CGA>CAA | p.R394Q  |
| Pat_46 | Pre-Treatment | EBF2     | 64641  | 37 | 8 | 25744298  | 25744298  | Missense_Mutation | SNP | C  | T  | 6  | 26  | c.982G>A       | c.(982-984)GGA>AGA   | p.G328R  |
| Pat_46 | Pre-Treatment | PNMA2    | 10687  | 37 | 8 | 26365277  | 26365277  | Missense_Mutation | SNP | C  | T  | 12 | 15  | c.995G>A       | c.(994-996)CGG>CAG   | p.R332Q  |
| Pat_46 | Pre-Treatment | ADAM32   | 203102 | 37 | 8 | 39008925  | 39008925  | Missense_Mutation | SNP | A  | G  | 2  | 12  | c.383A>G       | c.(382-384)TAT>TGT   | p.Y128C  |
| Pat_46 | Pre-Treatment | IDO2     | 169355 | 37 | 8 | 39872871  | 39872871  | Missense_Mutation | SNP | G  | A  | 10 | 21  | c.1013G>A      | c.(1012-1014)GGA>GAA | p.G338E  |
| Pat_46 | Pre-Treatment | SLC20A2  | 6575   | 37 | 8 | 42302254  | 42302254  | Missense_Mutation | SNP | C  | T  | 4  | 13  | c.640G>A       | c.(640-642)GCC>ACC   | p.A214T  |
| Pat_46 | Pre-Treatment | RP1      | 6101   | 37 | 8 | 55539065  | 55539065  | Missense_Mutation | SNP | G  | A  | 9  | 21  | c.2623G>A      | c.(2623-2625)GAT>AAT | p.D875N  |
| Pat_46 | Pre-Treatment | XKR4     | 114786 | 37 | 8 | 56436473  | 56436473  | Missense_Mutation | SNP | G  | A  | 30 | 44  | c.1640G>A      | c.(1639-1641)CGG>CAG | p.R547Q  |
| Pat_46 | Pre-Treatment | CA8      | 767    | 37 | 8 | 61178606  | 61178606  | Missense_Mutation | SNP | G  | A  | 3  | 19  | c.295C>T       | c.(295-297)CTT>TTT   | p.L99F   |
| Pat_46 | Pre-Treatment | CYP7B1   | 9420   | 37 | 8 | 65528256  | 65528257  | Missense_Mutation | DNP | TC | AT | 38 | 72  | c.841_842GA>AT | c.(841-843)GAA>ATA   | p.E281I  |
| Pat_46 | Pre-Treatment | SGK3     | 23678  | 37 | 8 | 67759522  | 67759522  | Missense_Mutation | SNP | C  | T  | 14 | 29  | c.1169C>T      | c.(1168-1170)TCC>TTC | p.S390F  |
| Pat_46 | Pre-Treatment | SLCO5A1  | 81796  | 37 | 8 | 70594486  | 70594486  | Missense_Mutation | SNP | G  | A  | 34 | 90  | c.1715C>T      | c.(1714-1716)TCA>TTA | p.S572L  |
| Pat_46 | Pre-Treatment | NCOA2    | 10499  | 37 | 8 | 71069454  | 71069454  | Missense_Mutation | SNP | C  | G  | 14 | 44  | c.1146G>C      | c.(1144-1146)ATG>ATC | p.M382I  |
| Pat_46 | Pre-Treatment | CA1      | 759    | 37 | 8 | 86249277  | 86249277  | Missense_Mutation | SNP | G  | A  | 5  | 22  | c.251C>T       | c.(250-252)CCT>CTT   | p.P84L   |
| Pat_46 | Pre-Treatment | CDH17    | 1015   | 37 | 8 | 95188867  | 95188867  | Missense_Mutation | SNP | G  | A  | 6  | 23  | c.326C>T       | c.(325-327)CCA>CTA   | p.P109L  |
| Pat_46 | Pre-Treatment | RGS22    | 26166  | 37 | 8 | 101075915 | 101075915 | Missense_Mutation | SNP | G  | A  | 6  | 21  | c.1081C>T      | c.(1081-1083)CAT>TAT | p.H361Y  |
| Pat_46 | Pre-Treatment | RIMS2    | 9699   | 37 | 8 | 104898050 | 104898050 | Missense_Mutation | SNP | G  | A  | 8  | 18  | c.557G>A       | c.(556-558)CGA>CAA   | p.R186Q  |
| Pat_46 | Pre-Treatment | PKHD1L1  | 93035  | 37 | 8 | 110394750 | 110394750 | Missense_Mutation | SNP | G  | A  | 32 | 112 | c.367G>A       | c.(367-369)GAA>AAA   | p.E123K  |
| Pat_46 | Pre-Treatment | PKHD1L1  | 93035  | 37 | 8 | 110413769 | 110413769 | Missense_Mutation | SNP | C  | T  | 10 | 43  | c.1325C>T      | c.(1324-1326)TCC>TTC | p.S442F  |
| Pat_46 | Pre-Treatment | PKHD1L1  | 93035  | 37 | 8 | 110457449 | 110457449 | Missense_Mutation | SNP | G  | A  | 18 | 31  | c.5351G>A      | c.(5350-5352)GGA>GAA | p.G1784E |
| Pat_46 | Pre-Treatment | FER1L6   | 654463 | 37 | 8 | 125076600 | 125076600 | Missense_Mutation | SNP | C  | T  | 26 | 57  | c.3341C>T      | c.(3340-3342)TCG>TTG | p.S1114L |
| Pat_46 | Pre-Treatment | MGC70857 | 414919 | 37 | 8 | 145753440 | 145753440 | Missense_Mutation | SNP | G  | A  | 10 | 23  | c.173C>T       | c.(172-174)TCC>TTC   | p.S58F   |
| Pat_46 | Pre-Treatment | ADAMTSL1 | 92949  | 37 | 9 | 18662013  | 18662013  | Missense_Mutation | SNP | G  | A  | 39 | 47  | c.1027G>A      | c.(1027-1029)GAG>AAG | p.E343K  |
| Pat_46 | Pre-Treatment | SLC24A2  | 25769  | 37 | 9 | 19786182  | 19786182  | Missense_Mutation | SNP | C  | T  | 17 | 22  | c.683G>A       | c.(682-684)AGA>AAA   | p.R228K  |
| Pat_46 | Pre-Treatment | TAF1L    | 138474 | 37 | 9 | 32635478  | 32635478  | Missense_Mutation | SNP | G  | A  | 22 | 27  | c.100C>T       | c.(100-102)CCA>TCA   | p.P34S   |
| Pat_46 | Pre-Treatment | ALDH1B1  | 219    | 37 | 9 | 38397279  | 38397279  | Missense_Mutation | SNP | G  | A  | 5  | 5   | c.1534G>A      | c.(1534-1536)GTT>ATT | p.V512I  |
| Pat_46 | Pre-Treatment | ANXA1    | 301    | 37 | 9 | 75775212  | 75775212  | Missense_Mutation | SNP | G  | A  | 38 | 68  | c.304G>A       | c.(304-306)GGT>AGT   | p.G102S  |
| Pat_46 | Pre-Treatment | TRPM6    | 140803 | 37 | 9 | 77386635  | 77386635  | Nonsense_Mutation | SNP | G  | A  | 15 | 46  | c.3520C>T      | c.(3520-3522)CGA>TGA | p.R1174* |
| Pat_46 | Pre-Treatment | TRPM6    | 140803 | 37 | 9 | 77400944  | 77400944  | Nonsense_Mutation | SNP | G  | C  | 22 | 51  | c.2765C>G      | c.(2764-2766)TCA>TGA | p.S922*  |
| Pat_46 | Pre-Treatment | NTRK2    | 4915   | 37 | 9 | 87563428  | 87563428  | Missense_Mutation | SNP | G  | A  | 12 | 22  | c.1768G>A      | c.(1768-1770)GAG>AAG | p.E590K  |
| Pat_46 | Pre-Treatment | C9orf79  | 286234 | 37 | 9 | 90503694  | 90503694  | Missense_Mutation | SNP | C  | T  | 10 | 24  | c.4292C>T      | c.(4291-4293)CCA>CTA | p.P1431L |
| Pat_46 | Pre-Treatment | NFIL3    | 4783   | 37 | 9 | 94172686  | 94172686  | Missense_Mutation | SNP | C  | T  | 11 | 62  | c.331G>A       | c.(331-333)GAA>AAA   | p.E111K  |
| Pat_46 | Pre-Treatment | ECM2     | 1842   | 37 | 9 | 95280064  | 95280064  | Missense_Mutation | SNP | C  | T  | 24 | 40  | c.386G>A       | c.(385-387)GGA>GAA   | p.G129E  |
| Pat_46 | Pre-Treatment | FGD3     | 89846  | 37 | 9 | 95776206  | 95776206  | Missense_Mutation | SNP | G  | A  | 31 | 111 | c.1108G>A      | c.(1108-1110)GAA>AAA | p.E370K  |
| Pat_46 | Pre-Treatment | PPP3R2   | 5535   | 37 | 9 | 104357194 | 104357194 | Missense_Mutation | SNP | C  | T  | 22 | 46  | c.19G>A        | c.(19-21)GAG>AAG     | p.E7K    |
| Pat_46 | Pre-Treatment | GRIN3A   | 116443 | 37 | 9 | 104432484 | 104432484 | Missense_Mutation | SNP | G  | A  | 17 | 25  | c.2210C>T      | c.(2209-2211)CCA>CTA | p.P737L  |
| Pat_46 | Pre-Treatment | GRIN3A   | 116443 | 37 | 9 | 104449092 | 104449092 | Missense_Mutation | SNP | C  | T  | 3  | 16  | c.1090G>A      | c.(1090-1092)GAA>AAA | p.E364K  |
| Pat_46 | Pre-Treatment | OR13C4   | 138804 | 37 | 9 | 107289213 | 107289213 | Missense_Mutation | SNP | G  | A  | 36 | 86  | c.278C>T       | c.(277-279)TCC>TTC   | p.S93F   |
| Pat_46 | Pre-Treatment | C9orf5   | 23731  | 37 | 9 | 111795771 | 111795771 | Missense_Mutation | SNP | G  | A  | 19 | 39  | c.2410C>T      | c.(2410-2412)CCT>TCT | p.P804S  |
| Pat_46 | Pre-Treatment | SVEP1    | 79987  | 37 | 9 | 113169529 | 113169529 | Missense_Mutation | SNP | C  | T  | 35 | 68  | c.8351G>A      | c.(8350-8352)GGA>GAA | p.G2784E |
| Pat_46 | Pre-Treatment | SVEP1    | 79987  | 37 | 9 | 113170760 | 113170760 | Missense_Mutation | SNP | G  | A  | 9  | 23  | c.7120C>T      | c.(7120-7122)CCT>TCT | p.P2374S |
| Pat_46 | Pre-Treatment | SVEP1    | 79987  | 37 | 9 | 113276344 | 113276344 | Missense_Mutation | SNP | C  | T  | 6  | 14  | c.1007G>A      | c.(1006-1008)GGA>GAA | p.G336E  |
| Pat_46 | Pre-Treatment | SVEP1    | 79987  | 37 | 9 | 113312330 | 113312330 | Missense_Mutation | SNP | C  | T  | 29 | 76  | c.586G>A       | c.(586-588)GAT>AAT   | p.D196N  |
| Pat_46 | Pre-Treatment | TNC      | 3371   | 37 | 9 | 117853113 | 117853113 | Missense_Mutation | SNP | G  | A  | 46 | 115 | c.185C>T       | c.(184-186)TCC>TTC   | p.S62F   |
| Pat_46 | Pre-Treatment | DBC1     | 1620   | 37 | 9 | 122001016 | 122001016 | Missense_Mutation | SNP | G  | A  | 13 | 36  | c.602C>T       | c.(601-603)CCT>CTT   | p.P201L  |
| Pat_46 | Pre-Treatment | TRAF1    | 7185   | 37 | 9 | 123673716 | 123673716 | Missense_Mutation | SNP | C  | T  | 9  | 23  | c.781G>A       | c.(781-783)GAG>AAG   | p.E261K  |

|        |                 |          |        |    |   |           |           |                   |     |   |   |    |    |           |                      |          |
|--------|-----------------|----------|--------|----|---|-----------|-----------|-------------------|-----|---|---|----|----|-----------|----------------------|----------|
| Pat_46 | Pre-Treatment   | PTGS1    | 5742   | 37 | 9 | 125154609 | 125154609 | Missense_Mutation | SNP | C | T | 14 | 25 | c.1586C>T | c.(1585-1587)TCC>TTC | p.S529F  |
| Pat_46 | Pre-Treatment   | OR1L3    | 26735  | 37 | 9 | 125437757 | 125437757 | Missense_Mutation | SNP | G | A | 34 | 78 | c.349G>A  | c.(349-351)GCT>ACT   | p.A117T  |
| Pat_46 | Pre-Treatment   | GLE1     | 2733   | 37 | 9 | 131300352 | 131300352 | Missense_Mutation | SNP | C | T | 10 | 12 | c.1864C>T | c.(1864-1866)CTC>TTC | p.L622F  |
| Pat_46 | Pre-Treatment   | PKN3     | 29941  | 37 | 9 | 131469652 | 131469652 | Missense_Mutation | SNP | C | T | 15 | 23 | c.803C>T  | c.(802-804)TCA>TTA   | p.S268L  |
| Pat_46 | Pre-Treatment   | KCNT1    | 57582  | 37 | 9 | 138657003 | 138657003 | Missense_Mutation | SNP | G | A | 15 | 44 | c.1162G>A | c.(1162-1164)GAC>AAC | p.D388N  |
| Pat_46 | Pre-Treatment   | ARSF     | 416    | 37 | X | 3002685   | 3002685   | Missense_Mutation | SNP | G | C | 6  | 13 | c.808G>C  | c.(808-810)GAA>CAA   | p.E270Q  |
| Pat_46 | Pre-Treatment   | TBL1X    | 6907   | 37 | X | 9652089   | 9652089   | Missense_Mutation | SNP | C | T | 9  | 59 | c.218C>T  | c.(217-219)TCC>TTC   | p.S73F   |
| Pat_46 | Pre-Treatment   | ARHGAP6  | 395    | 37 | X | 11272704  | 11272704  | Missense_Mutation | SNP | C | A | 8  | 56 | c.712G>T  | c.(712-714)GAC>TAC   | p.D238Y  |
| Pat_46 | Pre-Treatment   | TLR7     | 51284  | 37 | X | 12904279  | 12904279  | Missense_Mutation | SNP | G | A | 11 | 33 | c.652G>A  | c.(652-654)GCC>ACC   | p.A218T  |
| Pat_46 | Pre-Treatment   | GEMIN8   | 54960  | 37 | X | 14027232  | 14027232  | Missense_Mutation | SNP | C | T | 5  | 62 | c.529G>A  | c.(529-531)GAC>AAC   | p.D177N  |
| Pat_46 | Pre-Treatment   | GLRA2    | 2742   | 37 | X | 14550395  | 14550395  | Missense_Mutation | SNP | G | A | 16 | 73 | c.103G>A  | c.(103-105)GGA>AGA   | p.G35R   |
| Pat_46 | Pre-Treatment   | GLRA2    | 2742   | 37 | X | 14550467  | 14550467  | Missense_Mutation | SNP | G | A | 38 | 57 | c.175G>A  | c.(175-177)GAT>AAT   | p.D59N   |
| Pat_46 | Pre-Treatment   | RAI2     | 10742  | 37 | X | 17818903  | 17818903  | Missense_Mutation | SNP | C | T | 6  | 42 | c.1228G>A | c.(1228-1230)GAG>AAG | p.E410K  |
| Pat_46 | Pre-Treatment   | PDHA1    | 5160   | 37 | X | 19368083  | 19368083  | Missense_Mutation | SNP | G | A | 8  | 41 | c.146G>A  | c.(145-147)GGC>GAC   | p.G49D   |
| Pat_46 | Pre-Treatment   | RPS6KA3  | 6197   | 37 | X | 20252902  | 20252902  | Missense_Mutation | SNP | C | T | 5  | 74 | c.100G>A  | c.(100-102)GGA>AGA   | p.G34R   |
| Pat_46 | Pre-Treatment   | APOO     | 79135  | 37 | X | 23898990  | 23898990  | Missense_Mutation | SNP | G | A | 12 | 14 | c.89C>T   | c.(88-90)CCT>CTT     | p.P30L   |
| Pat_46 | Pre-Treatment   | RPGR     | 6103   | 37 | X | 38147138  | 38147138  | Missense_Mutation | SNP | C | T | 16 | 76 | c.1729G>A | c.(1729-1731)GAA>AAA | p.E577K  |
| Pat_46 | Pre-Treatment   | USP9X    | 8239   | 37 | X | 41084022  | 41084022  | Missense_Mutation | SNP | G | A | 19 | 94 | c.6779G>A | c.(6778-6780)GGT>GAT | p.G2260D |
| Pat_46 | Pre-Treatment   | CASK     | 8573   | 37 | X | 41393962  | 41393962  | Missense_Mutation | SNP | G | A | 23 | 51 | c.2299C>T | c.(2299-2301)CCA>TCA | p.P767S  |
| Pat_46 | Pre-Treatment   | CXorf36  | 79742  | 37 | X | 45059986  | 45059986  | Missense_Mutation | SNP | G | A | 5  | 6  | c.86C>T   | c.(85-87)TCT>TTT     | p.S29F   |
| Pat_46 | Pre-Treatment   | ZNF182   | 7569   | 37 | X | 47837038  | 47837038  | Missense_Mutation | SNP | G | A | 28 | 40 | c.448C>T  | c.(448-450)CTT>TTT   | p.L150F  |
| Pat_46 | Pre-Treatment   | WAS      | 7454   | 37 | X | 48549500  | 48549500  | Missense_Mutation | SNP | G | A | 5  | 52 | c.1456G>A | c.(1456-1458)GAA>AAA | p.E486K  |
| Pat_46 | Pre-Treatment   | RRAGB    | 10325  | 37 | X | 55779873  | 55779873  | Missense_Mutation | SNP | G | A | 5  | 23 | c.745G>A  | c.(745-747)GAA>AAA   | p.E249K  |
| Pat_46 | Pre-Treatment   | KIF4A    | 24137  | 37 | X | 69563831  | 69563831  | Missense_Mutation | SNP | C | T | 3  | 12 | c.1430C>T | c.(1429-1431)TCG>TTG | p.S477L  |
| Pat_46 | Pre-Treatment   | NAP1L2   | 4674   | 37 | X | 72433746  | 72433746  | Missense_Mutation | SNP | C | T | 16 | 17 | c.583G>A  | c.(583-585)GAA>AAA   | p.E195K  |
| Pat_46 | Pre-Treatment   | NAP1L2   | 4674   | 37 | X | 72434160  | 72434160  | Missense_Mutation | SNP | C | T | 8  | 10 | c.169G>A  | c.(169-171)GAA>AAA   | p.E57K   |
| Pat_46 | Pre-Treatment   | NXF3     | 56000  | 37 | X | 102338545 | 102338545 | Missense_Mutation | SNP | G | A | 50 | 49 | c.427C>T  | c.(427-429)CCA>TCA   | p.P143S  |
| Pat_46 | Pre-Treatment   | NRK      | 203447 | 37 | X | 105181449 | 105181449 | Missense_Mutation | SNP | G | A | 3  | 3  | c.3674G>A | c.(3673-3675)GGA>GAA | p.G1225E |
| Pat_46 | Pre-Treatment   | COL4A5   | 1287   | 37 | X | 107834341 | 107834341 | Nonsense_Mutation | SNP | C | T | 12 | 7  | c.1219C>T | c.(1219-1221)CAG>TAG | p.Q407*  |
| Pat_46 | Pre-Treatment   | COL4A5   | 1287   | 37 | X | 107840679 | 107840679 | Missense_Mutation | SNP | C | T | 4  | 15 | c.1660C>T | c.(1660-1662)CCA>TCA | p.P554S  |
| Pat_46 | Pre-Treatment   | TRPC5    | 7224   | 37 | X | 111019987 | 111019987 | Nonsense_Mutation | SNP | T | A | 22 | 23 | c.2476A>T | c.(2476-2478)AAG>TAG | p.K826*  |
| Pat_46 | Pre-Treatment   | TFDP3    | 51270  | 37 | X | 132351393 | 132351393 | Missense_Mutation | SNP | C | T | 13 | 14 | c.895G>A  | c.(895-897)GGC>AGC   | p.G299S  |
| Pat_46 | Pre-Treatment   | SAGE1    | 55511  | 37 | X | 134994087 | 134994087 | Missense_Mutation | SNP | G | A | 9  | 15 | c.2496G>A | c.(2494-2496)ATG>ATA | p.M832I  |
| Pat_46 | Pre-Treatment   | MCF2     | 4168   | 37 | X | 138669924 | 138669924 | Nonsense_Mutation | SNP | G | A | 16 | 26 | c.2473C>T | c.(2473-2475)CAA>TAA | p.Q825*  |
| Pat_46 | Pre-Treatment   | PASD1    | 139135 | 37 | X | 150789990 | 150789990 | Missense_Mutation | SNP | G | A | 14 | 16 | c.344G>A  | c.(343-345)GGA>GAA   | p.G115E  |
| Pat_46 | Pre-Treatment   | MAGEA6   | 4105   | 37 | X | 151870202 | 151870202 | Missense_Mutation | SNP | C | T | 31 | 51 | c.892C>T  | c.(892-894)CGC>TGC   | p.R298C  |
| Pat_46 | Pre-Treatment   | MAGEA3   | 4102   | 37 | X | 151935227 | 151935227 | Missense_Mutation | SNP | C | T | 45 | 56 | c.940G>A  | c.(940-942)GAG>AAG   | p.E314K  |
| Pat_46 | Post-Resistance | RERE     | 473    | 37 | 1 | 8557562   | 8557562   | Missense_Mutation | SNP | G | A | 7  | 77 | c.907C>T  | c.(907-909)CCT>TCT   | p.P303S  |
| Pat_46 | Post-Resistance | PRAMEF12 | 390999 | 37 | 1 | 12835119  | 12835119  | Missense_Mutation | SNP | C | T | 4  | 16 | c.109C>T  | c.(109-111)CCC>TCC   | p.P37S   |
| Pat_46 | Post-Resistance | PRAMEF11 | 440560 | 37 | 1 | 12884991  | 12884991  | Missense_Mutation | SNP | G | A | 9  | 81 | c.1120C>T | c.(1120-1122)CCT>TCT | p.P374S  |
| Pat_46 | Post-Resistance | PRAMEF8  | 391002 | 37 | 1 | 12979781  | 12979781  | Missense_Mutation | SNP | G | A | 3  | 22 | c.973G>A  | c.(973-975)GAC>AAC   | p.D325N  |
| Pat_46 | Post-Resistance | TMEM50A  | 23585  | 37 | 1 | 25679423  | 25679423  | Missense_Mutation | SNP | A | G | 8  | 79 | c.325A>G  | c.(325-327)ATT>GTT   | p.I109V  |
| Pat_46 | Post-Resistance | TMEM57   | 55219  | 37 | 1 | 25773296  | 25773296  | Missense_Mutation | SNP | C | T | 3  | 17 | c.124C>T  | c.(124-126)CTC>TTC   | p.L42F   |
| Pat_46 | Post-Resistance | CSMD2    | 114784 | 37 | 1 | 34008335  | 34008335  | Missense_Mutation | SNP | C | T | 5  | 12 | c.8830G>A | c.(8830-8832)GAC>AAC | p.D2944N |
| Pat_46 | Post-Resistance | PTCH2    | 8643   | 37 | 1 | 45293837  | 45293837  | Missense_Mutation | SNP | A | T | 5  | 16 | c.1736T>A | c.(1735-1737)ATC>AAC | p.I579N  |
| Pat_46 | Post-Resistance | KIAA0494 | 9813   | 37 | 1 | 47155318  | 47155318  | Missense_Mutation | SNP | G | A | 15 | 92 | c.736C>T  | c.(736-738)CCG>TCG   | p.P246S  |
| Pat_46 | Post-Resistance | PPAP2B   | 8613   | 37 | 1 | 56977670  | 56977670  | Missense_Mutation | SNP | C | T | 4  | 45 | c.788G>A  | c.(787-789)GGA>GAA   | p.G263E  |

|        |                 |           |        |    |   |           |           |                   |     |    |    |    |     |                |                        |          |
|--------|-----------------|-----------|--------|----|---|-----------|-----------|-------------------|-----|----|----|----|-----|----------------|------------------------|----------|
| Pat_46 | Post-Resistance | PRKAA2    | 5563   | 37 | 1 | 57140179  | 57140179  | Missense_Mutation | SNP | C  | T  | 11 | 53  | c.220C>T       | c.(220-222)CCT>TCT     | p.P74S   |
| Pat_46 | Post-Resistance | C1orf168  | 199920 | 37 | 1 | 57219580  | 57219580  | Missense_Mutation | SNP | C  | T  | 6  | 46  | c.1159G>A      | c.(1159-1161)GAA>AAA   | p.E387K  |
| Pat_46 | Post-Resistance | C1orf168  | 199920 | 37 | 1 | 57254664  | 57254664  | Missense_Mutation | SNP | G  | A  | 4  | 39  | c.901C>T       | c.(901-903)CCC>TCC     | p.P301S  |
| Pat_46 | Post-Resistance | C8A       | 731    | 37 | 1 | 57341860  | 57341860  | Missense_Mutation | SNP | G  | A  | 4  | 38  | c.442G>A       | c.(442-444)GGA>AGA     | p.G148R  |
| Pat_46 | Post-Resistance | C8A       | 731    | 37 | 1 | 57378223  | 57378223  | Missense_Mutation | SNP | C  | T  | 7  | 40  | c.1528C>T      | c.(1528-1530)CTC>TTC   | p.L510F  |
| Pat_46 | Post-Resistance | C8B       | 732    | 37 | 1 | 57417816  | 57417816  | Missense_Mutation | SNP | G  | A  | 9  | 108 | c.571C>T       | c.(571-573)CTT>TTT     | p.L191F  |
| Pat_46 | Post-Resistance | NFIA      | 4774   | 37 | 1 | 61554084  | 61554085  | Nonsense_Mutation | DNP | GA | AT | 10 | 130 | c.291_292GA>AT | 289-294)GGGAAA>GGAT,   | p.K98*   |
| Pat_46 | Post-Resistance | ANGPTL3   | 27329  | 37 | 1 | 63069640  | 63069640  | Missense_Mutation | SNP | G  | A  | 7  | 44  | c.932G>A       | c.(931-933)GGA>GAA     | p.G311E  |
| Pat_46 | Post-Resistance | WDR78     | 79819  | 37 | 1 | 67337106  | 67337106  | Missense_Mutation | SNP | C  | T  | 3  | 22  | c.887G>A       | c.(886-888)GGA>GAA     | p.G296E  |
| Pat_46 | Post-Resistance | LRRIQ3    | 127255 | 37 | 1 | 74507177  | 74507177  | Nonsense_Mutation | SNP | G  | A  | 8  | 87  | c.1438C>T      | c.(1438-1440)CAG>TAG   | p.Q480*  |
| Pat_46 | Post-Resistance | LRRRC8D   | 55144  | 37 | 1 | 90400752  | 90400752  | Missense_Mutation | SNP | G  | A  | 5  | 65  | c.2125G>A      | c.(2125-2127)GAG>AAG   | p.E709K  |
| Pat_46 | Post-Resistance | FRRS1     | 391059 | 37 | 1 | 100176461 | 100176461 | Missense_Mutation | SNP | G  | A  | 3  | 19  | c.1525C>T      | c.(1525-1527)CCT>TCT   | p.P509S  |
| Pat_46 | Post-Resistance | AGL       | 178    | 37 | 1 | 100327245 | 100327245 | Missense_Mutation | SNP | C  | T  | 8  | 78  | c.269C>T       | c.(268-270)TCA>TTA     | p.S90L   |
| Pat_46 | Post-Resistance | OLFM3     | 118427 | 37 | 1 | 102296359 | 102296359 | Missense_Mutation | SNP | C  | T  | 10 | 72  | c.301G>A       | c.(301-303)GAA>AAA     | p.E101K  |
| Pat_46 | Post-Resistance | C1orf103  | 55791  | 37 | 1 | 111490682 | 111490682 | Missense_Mutation | SNP | C  | T  | 12 | 99  | c.2209G>A      | c.(2209-2211)GAA>AAA   | p.E737K  |
| Pat_46 | Post-Resistance | OVGP1     | 5016   | 37 | 1 | 111964197 | 111964197 | Missense_Mutation | SNP | G  | A  | 5  | 46  | c.707C>T       | c.(706-708)CCC>CTC     | p.P236L  |
| Pat_46 | Post-Resistance | WDR77     | 79084  | 37 | 1 | 111991249 | 111991249 | Missense_Mutation | SNP | G  | A  | 4  | 43  | c.293C>T       | c.(292-294)TCC>TTC     | p.S98F   |
| Pat_46 | Post-Resistance | RSBN1     | 54665  | 37 | 1 | 114340403 | 114340403 | Nonsense_Mutation | SNP | A  | T  | 11 | 88  | c.959T>A       | c.(958-960)TTA>TAA     | p.L320*  |
| Pat_46 | Post-Resistance | VTCN1     | 79679  | 37 | 1 | 117699309 | 117699309 | Missense_Mutation | SNP | C  | T  | 6  | 41  | c.332G>A       | c.(331-333)GGC>GAC     | p.G111D  |
| Pat_46 | Post-Resistance | SPAG17    | 200162 | 37 | 1 | 118570912 | 118570912 | Missense_Mutation | SNP | C  | T  | 11 | 55  | c.3715G>A      | c.(3715-3717)GGA>AGA   | p.G1239R |
| Pat_46 | Post-Resistance | WARS2     | 10352  | 37 | 1 | 119619088 | 119619088 | Missense_Mutation | SNP | G  | A  | 6  | 54  | c.233C>T       | c.(232-234)TCC>TTC     | p.S78F   |
| Pat_46 | Post-Resistance | HIST2H2AB | 317772 | 37 | 1 | 149859168 | 149859168 | Missense_Mutation | SNP | C  | T  | 15 | 136 | c.299G>A       | c.(298-300)GGT>GAT     | p.G100D  |
| Pat_46 | Post-Resistance | ECM1      | 1893   | 37 | 1 | 150483973 | 150483973 | Missense_Mutation | SNP | C  | T  | 6  | 40  | c.749C>T       | c.(748-750)TCG>TTG     | p.S250L  |
| Pat_46 | Post-Resistance | C1orf56   | 54964  | 37 | 1 | 151021165 | 151021165 | Missense_Mutation | SNP | G  | A  | 17 | 168 | c.842G>A       | c.(841-843)AGT>AAT     | p.S281N  |
| Pat_46 | Post-Resistance | HRNR      | 388697 | 37 | 1 | 152192583 | 152192583 | Missense_Mutation | SNP | C  | T  | 17 | 220 | c.1522G>A      | c.(1522-1524)GGA>AGA   | p.G508R  |
| Pat_46 | Post-Resistance | HRNR      | 388697 | 37 | 1 | 152193753 | 152193753 | Missense_Mutation | SNP | C  | T  | 18 | 53  | c.352G>A       | c.(352-354)GAG>AAG     | p.E118K  |
| Pat_46 | Post-Resistance | FLG       | 2312   | 37 | 1 | 152286716 | 152286716 | Missense_Mutation | SNP | C  | T  | 13 | 46  | c.646G>A       | c.(646-648)GAT>AAT     | p.D216N  |
| Pat_46 | Post-Resistance | CRNN      | 49860  | 37 | 1 | 152382906 | 152382906 | Missense_Mutation | SNP | C  | T  | 28 | 80  | c.652G>A       | c.(652-654)GAC>AAC     | p.D218N  |
| Pat_46 | Post-Resistance | LCE1E     | 353135 | 37 | 1 | 152760070 | 152760070 | Missense_Mutation | SNP | C  | T  | 5  | 26  | c.295C>T       | c.(295-297)CCC>TCC     | p.P99S   |
| Pat_46 | Post-Resistance | UBAP2L    | 9898   | 37 | 1 | 154221896 | 154221896 | Missense_Mutation | SNP | C  | T  | 10 | 91  | c.1196C>T      | c.(1195-1197)CCA>CTA   | p.P399L  |
| Pat_46 | Post-Resistance | DCST1     | 149095 | 37 | 1 | 155015964 | 155015964 | Missense_Mutation | SNP | C  | T  | 5  | 24  | c.1151C>T      | c.(1150-1152)ACT>ATT   | p.T384I  |
| Pat_46 | Post-Resistance | FAM189B   | 10712  | 37 | 1 | 155220484 | 155220484 | Missense_Mutation | SNP | G  | A  | 5  | 13  | c.1093C>T      | c.(1093-1095)CGC>TGC   | p.R365C  |
| Pat_46 | Post-Resistance | OR10K1    | 391109 | 37 | 1 | 158435659 | 158435659 | Missense_Mutation | SNP | C  | T  | 7  | 58  | c.308C>T       | c.(307-309)TCC>TTC     | p.S103F  |
| Pat_46 | Post-Resistance | SPTA1     | 6708   | 37 | 1 | 158646045 | 158646045 | Missense_Mutation | SNP | G  | A  | 16 | 141 | c.998C>T       | c.(997-999)TCC>TTC     | p.S333F  |
| Pat_46 | Post-Resistance | OR10J3    | 441911 | 37 | 1 | 159284365 | 159284365 | Missense_Mutation | SNP | A  | C  | 12 | 198 | c.85T>G        | c.(85-87)TTT>GTT       | p.F29V   |
| Pat_46 | Post-Resistance | PVRL4     | 81607  | 37 | 1 | 161049730 | 161049730 | Missense_Mutation | SNP | G  | A  | 10 | 42  | c.89C>T        | c.(88-90)CCC>CTC       | p.P30L   |
| Pat_46 | Post-Resistance | ADAMTS4   | 9507   | 37 | 1 | 161163432 | 161163432 | Missense_Mutation | SNP | G  | A  | 41 | 141 | c.1733C>T      | c.(1732-1734)TCA>TTA   | p.S578L  |
| Pat_46 | Post-Resistance | F5        | 2153   | 37 | 1 | 169512194 | 169512194 | Missense_Mutation | SNP | G  | A  | 67 | 118 | c.2134C>T      | c.(2134-2136)CGT>TGT   | p.R712C  |
| Pat_46 | Post-Resistance | SELE      | 6401   | 37 | 1 | 169698486 | 169698486 | Nonsense_Mutation | SNP | G  | A  | 4  | 24  | c.931C>T       | c.(931-933)CAG>TAG     | p.Q311*  |
| Pat_46 | Post-Resistance | BAT2L2    | 23215  | 37 | 1 | 171509906 | 171509906 | Missense_Mutation | SNP | C  | T  | 8  | 48  | c.3295C>T      | c.(3295-3297)CCA>TCA   | p.P1099S |
| Pat_46 | Post-Resistance | ASTN1     | 460    | 37 | 1 | 176833520 | 176833520 | Missense_Mutation | SNP | C  | T  | 6  | 55  | c.3785G>A      | c.(3784-3786)GGA>GAA   | p.G1262E |
| Pat_46 | Post-Resistance | CACNA1E   | 777    | 37 | 1 | 181745241 | 181745241 | Missense_Mutation | SNP | T  | C  | 12 | 156 | c.5144T>C      | c.(5143-5145)CTC>CCC   | p.L1715P |
| Pat_46 | Post-Resistance | HMCN1     | 83872  | 37 | 1 | 186024803 | 186024803 | Missense_Mutation | SNP | C  | T  | 13 | 112 | c.7141C>T      | c.(7141-7143)CAT>TAT   | p.H2381Y |
| Pat_46 | Post-Resistance | HMCN1     | 83872  | 37 | 1 | 186121957 | 186121957 | Missense_Mutation | SNP | G  | A  | 7  | 130 | c.14972G>A     | c.(14971-14973)AGT>AAT | p.S4991N |
| Pat_46 | Post-Resistance | RGS21     | 431704 | 37 | 1 | 192335238 | 192335238 | Nonsense_Mutation | SNP | G  | A  | 15 | 34  | c.443G>A       | c.(442-444)TGG>TAG     | p.W148*  |
| Pat_46 | Post-Resistance | CAMSAP1L1 | 23271  | 37 | 1 | 200818755 | 200818755 | Missense_Mutation | SNP | C  | T  | 6  | 102 | c.2891C>T      | c.(2890-2892)CCT>CTT   | p.P964L  |
| Pat_46 | Post-Resistance | SNRPE     | 6635   | 37 | 1 | 203834217 | 203834217 | Missense_Mutation | SNP | C  | T  | 14 | 91  | c.193C>T       | c.(193-195)CAT>TAT     | p.H65Y   |

|        |                 |           |        |    |    |           |           |                   |     |    |    |    |     |                                  |                        |               |
|--------|-----------------|-----------|--------|----|----|-----------|-----------|-------------------|-----|----|----|----|-----|----------------------------------|------------------------|---------------|
| Pat_46 | Post-Resistance | C4BPA     | 722    | 37 | 1  | 207297538 | 207297538 | Missense_Mutation | SNP | C  | T  | 16 | 71  | c.533C>T                         | c.(532-534)CCT>CTT     | p.P178L       |
| Pat_46 | Post-Resistance | INTS7     | 25896  | 37 | 1  | 212151816 | 212151816 | Missense_Mutation | SNP | C  | T  | 6  | 33  | c.1268G>A                        | c.(1267-1269)AGG>AAG   | p.R423K       |
| Pat_46 | Post-Resistance | USH2A     | 7399   | 37 | 1  | 215844436 | 215844436 | Missense_Mutation | SNP | C  | T  | 18 | 39  | c.14011G>A                       | c.(14011-14013)GAA>AAA | p.E4671K      |
| Pat_46 | Post-Resistance | USH2A     | 7399   | 37 | 1  | 215847707 | 215847707 | Missense_Mutation | SNP | C  | T  | 6  | 68  | c.13546G>A                       | :(13546-13548)GGG>AGC  | p.G4516R      |
| Pat_46 | Post-Resistance | RAB3GAP2  | 25782  | 37 | 1  | 220369723 | 220369723 | Missense_Mutation | SNP | G  | A  | 6  | 47  | c.829C>T                         | c.(829-831)CCC>TCC     | p.P277S       |
| Pat_46 | Post-Resistance | MOSC2     | 54996  | 37 | 1  | 220955223 | 220955223 | Missense_Mutation | SNP | C  | T  | 11 | 125 | c.988C>T                         | c.(988-990)CCT>TCT     | p.P330S       |
| Pat_46 | Post-Resistance | OBSCN     | 84033  | 37 | 1  | 228468465 | 228468465 | Missense_Mutation | SNP | C  | T  | 3  | 2   | c.8165C>T                        | c.(8164-8166)TCC>TTC   | p.S2722F      |
| Pat_46 | Post-Resistance | SLC35F3   | 148641 | 37 | 1  | 234367322 | 234367322 | Missense_Mutation | SNP | C  | T  | 11 | 72  | c.236C>T                         | c.(235-237)TCG>TTG     | p.S79L        |
| Pat_46 | Post-Resistance | RYR2      | 6262   | 37 | 1  | 237777611 | 237777611 | Missense_Mutation | SNP | C  | T  | 4  | 12  | c.5183C>T                        | c.(5182-5184)CCC>CTC   | p.P1728L      |
| Pat_46 | Post-Resistance | OR2W5     | 441932 | 37 | 1  | 247655264 | 247655264 | Missense_Mutation | SNP | C  | T  | 5  | 61  | c.835C>T                         | c.(835-837)CAC>TAC     | p.H279Y       |
| Pat_46 | Post-Resistance | OR2L13    | 284521 | 37 | 1  | 248263515 | 248263515 | Missense_Mutation | SNP | C  | T  | 16 | 27  | c.838C>T                         | c.(838-840)CTT>TTT     | p.L280F       |
| Pat_46 | Post-Resistance | TUBAL3    | 79861  | 37 | 10 | 5436006   | 5436006   | Missense_Mutation | SNP | A  | T  | 9  | 52  | c.815T>A                         | c.(814-816)ATA>AAA     | p.I272K       |
| Pat_46 | Post-Resistance | OLAH      | 55301  | 37 | 10 | 15107598  | 15107598  | Missense_Mutation | SNP | C  | T  | 4  | 32  | c.418C>T                         | c.(418-420)CGC>TGC     | p.R140C       |
| Pat_46 | Post-Resistance | ITGA8     | 8516   | 37 | 10 | 15590507  | 15590507  | Missense_Mutation | SNP | C  | T  | 8  | 35  | c.2827G>A                        | c.(2827-2829)GAA>AAA   | p.E943K       |
| Pat_46 | Post-Resistance | ITGA8     | 8516   | 37 | 10 | 15646281  | 15646281  | Missense_Mutation | SNP | C  | T  | 5  | 37  | c.2044G>A                        | c.(2044-2046)GGA>AGA   | p.G682R       |
| Pat_46 | Post-Resistance | PIP4K2A   | 5305   | 37 | 10 | 22898620  | 22898620  | Missense_Mutation | SNP | G  | C  | 17 | 82  | c.171C>G                         | c.(169-171)ATC>ATG     | p.I57M        |
| Pat_46 | Post-Resistance | PTCHD3    | 374308 | 37 | 10 | 27702954  | 27702955  | Missense_Mutation | DNP | GG | AA | 4  | 23  | c.225_226CC>TT223-228)CCCCC>CCTT |                        | p.P76S        |
| Pat_46 | Post-Resistance | MPP7      | 143098 | 37 | 10 | 28408594  | 28408594  | Missense_Mutation | SNP | G  | A  | 13 | 100 | c.938C>T                         | c.(937-939)TCC>TTC     | p.S313F       |
| Pat_46 | Post-Resistance | ANKRD30A  | 91074  | 37 | 10 | 37490242  | 37490242  | Missense_Mutation | SNP | G  | A  | 4  | 44  | c.2690G>A                        | c.(2689-2691)GGA>GAA   | p.G897E       |
| Pat_46 | Post-Resistance | ZNF37A    | 7587   | 37 | 10 | 38407040  | 38407040  | Missense_Mutation | SNP | C  | T  | 6  | 50  | c.961C>T                         | c.(961-963)CAT>TAT     | p.H321Y       |
| Pat_46 | Post-Resistance | FRMPD2    | 143162 | 37 | 10 | 49430394  | 49430394  | Missense_Mutation | SNP | G  | A  | 8  | 52  | c.1417C>T                        | c.(1417-1419)CTT>TTT   | p.L473F       |
| Pat_46 | Post-Resistance | OGDHL     | 55753  | 37 | 10 | 50953927  | 50953927  | Missense_Mutation | SNP | C  | T  | 4  | 26  | c.1393G>A                        | c.(1393-1395)GAT>AAT   | p.D465N       |
| Pat_46 | Post-Resistance | NCOA4     | 8031   | 37 | 10 | 51579247  | 51579247  | Missense_Mutation | SNP | C  | T  | 19 | 95  | c.106C>T                         | c.(106-108)CGG>TGG     | p.R36W        |
| Pat_46 | Post-Resistance | PCDH15    | 65217  | 37 | 10 | 55955628  | 55955628  | Missense_Mutation | SNP | G  | A  | 4  | 46  | c.1120C>T                        | c.(1120-1122)CCT>TCT   | p.P374S       |
| Pat_46 | Post-Resistance | BICC1     | 80114  | 37 | 10 | 60558923  | 60558923  | Missense_Mutation | SNP | C  | T  | 5  | 9   | c.1636C>T                        | c.(1636-1638)CCT>TCT   | p.P546S       |
| Pat_46 | Post-Resistance | ANK3      | 288    | 37 | 10 | 61829433  | 61829433  | Missense_Mutation | SNP | C  | T  | 6  | 63  | c.11206G>A                       | c.(11206-11208)GAA>AAA | p.E3736K      |
| Pat_46 | Post-Resistance | COL13A1   | 1305   | 37 | 10 | 71712675  | 71712675  | Missense_Mutation | SNP | G  | A  | 5  | 28  | c.2063G>A                        | c.(2062-2064)GGG>GAG   | p.G688E       |
| Pat_46 | Post-Resistance | C10orf55  | 414236 | 37 | 10 | 75671974  | 75671974  | Missense_Mutation | SNP | G  | A  | 4  | 40  | c.29C>T                          | c.(28-30)TCG>TTG       | p.S10L        |
| Pat_46 | Post-Resistance | SFTPA1    | 653509 | 37 | 10 | 81373492  | 81373492  | Splice_Site       | SNP | G  | A  | 5  | 60  | c.371_splice                     | c.e6-1                 | p.A124_splice |
| Pat_46 | Post-Resistance | IFIT1     | 3434   | 37 | 10 | 91162729  | 91162729  | Missense_Mutation | SNP | G  | A  | 15 | 130 | c.697G>A                         | c.(697-699)GAA>AAA     | p.E233K       |
| Pat_46 | Post-Resistance | CYP2C18   | 1562   | 37 | 10 | 96447594  | 96447594  | Missense_Mutation | SNP | G  | A  | 10 | 81  | c.236G>A                         | c.(235-237)GGA>GAA     | p.G79E        |
| Pat_46 | Post-Resistance | FAM178A   | 55719  | 37 | 10 | 102684341 | 102684341 | Missense_Mutation | SNP | C  | T  | 7  | 99  | c.1583C>T                        | c.(1582-1584)ACT>ATT   | p.T528I       |
| Pat_46 | Post-Resistance | TACC2     | 10579  | 37 | 10 | 123970436 | 123970436 | Missense_Mutation | SNP | G  | A  | 15 | 81  | c.6496G>A                        | c.(6496-6498)GGG>AGG   | p.G2166R      |
| Pat_46 | Post-Resistance | C10orf137 | 26098  | 37 | 10 | 127424384 | 127424384 | Missense_Mutation | SNP | C  | T  | 9  | 71  | c.1669C>T                        | c.(1669-1671)CCA>TCA   | p.P557S       |
| Pat_46 | Post-Resistance | C10orf90  | 118611 | 37 | 10 | 128192921 | 128192921 | Missense_Mutation | SNP | G  | C  | 6  | 61  | c.848C>G                         | c.(847-849)CCC>CGC     | p.P283R       |
| Pat_46 | Post-Resistance | ZNF215    | 7762   | 37 | 11 | 6964847   | 6964847   | Missense_Mutation | SNP | A  | C  | 12 | 100 | c.687A>C                         | c.(685-687)AAA>AAC     | p.K229N       |
| Pat_46 | Post-Resistance | NLRP14    | 338323 | 37 | 11 | 7064044   | 7064044   | Missense_Mutation | SNP | G  | A  | 9  | 69  | c.787G>A                         | c.(787-789)GAA>AAA     | p.E263K       |
| Pat_46 | Post-Resistance | NLRP14    | 338323 | 37 | 11 | 7091675   | 7091675   | Missense_Mutation | SNP | T  | C  | 6  | 41  | c.3134T>C                        | c.(3133-3135)CTA>CCA   | p.L1045P      |
| Pat_46 | Post-Resistance | PPF1BP2   | 8495   | 37 | 11 | 7586787   | 7586787   | Missense_Mutation | SNP | C  | T  | 7  | 104 | c.68C>T                          | c.(67-69)ACT>ATT       | p.T23I        |
| Pat_46 | Post-Resistance | ST5       | 6764   | 37 | 11 | 8751675   | 8751675   | Missense_Mutation | SNP | G  | A  | 6  | 47  | c.1162C>T                        | c.(1162-1164)CCC>TCC   | p.P388S       |
| Pat_46 | Post-Resistance | TEAD1     | 7003   | 37 | 11 | 12901301  | 12901301  | Missense_Mutation | SNP | C  | T  | 5  | 36  | c.332C>T                         | c.(331-333)TCC>TTC     | p.S111F       |
| Pat_46 | Post-Resistance | BTBD10    | 84280  | 37 | 11 | 13424775  | 13424775  | Missense_Mutation | SNP | C  | T  | 21 | 126 | c.1057G>A                        | c.(1057-1059)GAT>AAT   | p.D353N       |
| Pat_46 | Post-Resistance | GAS2      | 2620   | 37 | 11 | 22707294  | 22707294  | Missense_Mutation | SNP | G  | A  | 7  | 40  | c.226G>A                         | c.(226-228)GAG>AAG     | p.E76K        |
| Pat_46 | Post-Resistance | CDC73     | 493860 | 37 | 11 | 32720870  | 32720870  | Missense_Mutation | SNP | C  | T  | 4  | 31  | c.317G>A                         | c.(316-318)GGA>GAA     | p.G106E       |
| Pat_46 | Post-Resistance | CSTF3     | 1479   | 37 | 11 | 33124691  | 33124691  | Missense_Mutation | SNP | G  | A  | 9  | 37  | c.625C>T                         | c.(625-627)CGG>TGG     | p.R209W       |
| Pat_46 | Post-Resistance | RAG2      | 5897   | 37 | 11 | 36615100  | 36615100  | Missense_Mutation | SNP | G  | A  | 7  | 88  | c.619C>T                         | c.(619-621)CAT>TAT     | p.H207Y       |
| Pat_46 | Post-Resistance | PTPMT1    | 114971 | 37 | 11 | 47587227  | 47587227  | Missense_Mutation | SNP | C  | T  | 2  | 2   | c.53C>T                          | c.(52-54)CCG>CTG       | p.P18L        |



|        |                 |          |        |    |    |           |           |                   |     |   |   |    |     |              |                      |          |
|--------|-----------------|----------|--------|----|----|-----------|-----------|-------------------|-----|---|---|----|-----|--------------|----------------------|----------|
| Pat_46 | Post-Resistance | PTPRJ    | 5795   | 37 | 11 | 48134313  | 48134313  | Missense_Mutation | SNP | C | T | 15 | 80  | c.130C>T     | c.(130-132)CCT>TCT   | p.P44S   |
| Pat_46 | Post-Resistance | TRIM48   | 79097  | 37 | 11 | 55032647  | 55032647  | Missense_Mutation | SNP | G | A | 15 | 37  | c.316G>A     | c.(316-318)GAG>AAG   | p.E106K  |
| Pat_46 | Post-Resistance | OR4C6    | 219432 | 37 | 11 | 55432600  | 55432600  | Splice_Site       | SNP | G | A | 7  | 18  | c.-41_splice | c.e3-1               |          |
| Pat_46 | Post-Resistance | OR5L2    | 26338  | 37 | 11 | 55594915  | 55594915  | Missense_Mutation | SNP | C | T | 48 | 81  | c.221C>T     | c.(220-222)TCC>TTC   | p.S74F   |
| Pat_46 | Post-Resistance | OR5AS1   | 219447 | 37 | 11 | 55798826  | 55798826  | Missense_Mutation | SNP | C | T | 5  | 32  | c.932C>T     | c.(931-933)TCA>TTA   | p.S311L  |
| Pat_46 | Post-Resistance | OR8H2    | 390151 | 37 | 11 | 55873258  | 55873258  | Missense_Mutation | SNP | G | A | 8  | 44  | c.740G>A     | c.(739-741)GGA>GAA   | p.G247E  |
| Pat_46 | Post-Resistance | OR8J1    | 219477 | 37 | 11 | 56128414  | 56128414  | Missense_Mutation | SNP | C | T | 8  | 21  | c.692C>T     | c.(691-693)TCA>TTA   | p.S231L  |
| Pat_46 | Post-Resistance | FAM111A  | 63901  | 37 | 11 | 58919839  | 58919839  | Missense_Mutation | SNP | C | T | 5  | 74  | c.698C>T     | c.(697-699)TCC>TTC   | p.S233F  |
| Pat_46 | Post-Resistance | OR4D11   | 219986 | 37 | 11 | 59271374  | 59271374  | Missense_Mutation | SNP | G | A | 12 | 39  | c.326G>A     | c.(325-327)GGG>GAG   | p.G109E  |
| Pat_46 | Post-Resistance | OR4D9    | 390199 | 37 | 11 | 59283079  | 59283079  | Missense_Mutation | SNP | G | A | 7  | 100 | c.694G>A     | c.(694-696)GGC>AGC   | p.G232S  |
| Pat_46 | Post-Resistance | OSBP     | 5007   | 37 | 11 | 59344425  | 59344425  | Missense_Mutation | SNP | G | A | 21 | 222 | c.2134C>T    | c.(2134-2136)CCC>TCC | p.P712S  |
| Pat_46 | Post-Resistance | MS4A2    | 2206   | 37 | 11 | 59861474  | 59861474  | Missense_Mutation | SNP | G | A | 7  | 73  | c.575G>A     | c.(574-576)GGA>GAA   | p.G192E  |
| Pat_46 | Post-Resistance | DAK      | 26007  | 37 | 11 | 61105584  | 61105584  | Missense_Mutation | SNP | C | T | 4  | 16  | c.175C>T     | c.(175-177)CAT>TAT   | p.H59Y   |
| Pat_46 | Post-Resistance | AHNAK    | 79026  | 37 | 11 | 62292075  | 62292075  | Missense_Mutation | SNP | G | A | 5  | 45  | c.9814C>T    | c.(9814-9816)CCA>TCA | p.P3272S |
| Pat_46 | Post-Resistance | MTA2     | 9219   | 37 | 11 | 62366028  | 62366028  | Missense_Mutation | SNP | G | A | 23 | 177 | c.274C>T     | c.(274-276)CGG>TGG   | p.R92W   |
| Pat_46 | Post-Resistance | SLC22A25 | 387601 | 37 | 11 | 62933592  | 62933592  | Missense_Mutation | SNP | C | T | 18 | 21  | c.1209G>A    | c.(1207-1209)ATG>ATA | p.M403I  |
| Pat_46 | Post-Resistance | SLC22A10 | 387775 | 37 | 11 | 63057642  | 63057642  | Missense_Mutation | SNP | C | T | 7  | 11  | c.5C>T       | c.(4-6)GCC>GTC       | p.A2V    |
| Pat_46 | Post-Resistance | SLC22A10 | 387775 | 37 | 11 | 63072267  | 63072267  | Missense_Mutation | SNP | G | A | 10 | 63  | c.1504G>A    | c.(1504-1506)GGA>AGA | p.G502R  |
| Pat_46 | Post-Resistance | SLC22A12 | 116085 | 37 | 11 | 64359368  | 64359368  | Missense_Mutation | SNP | G | A | 5  | 8   | c.340G>A     | c.(340-342)GAG>AAG   | p.E114K  |
| Pat_46 | Post-Resistance | CDC42BPG | 55561  | 37 | 11 | 64606627  | 64606627  | Missense_Mutation | SNP | G | A | 15 | 36  | c.754C>T     | c.(754-756)CAC>TAC   | p.H252Y  |
| Pat_46 | Post-Resistance | TM7SF2   | 7108   | 37 | 11 | 64882284  | 64882284  | Missense_Mutation | SNP | G | A | 4  | 32  | c.703G>A     | c.(703-705)GGT>AGT   | p.G235S  |
| Pat_46 | Post-Resistance | TM7SF2   | 7108   | 37 | 11 | 64883503  | 64883503  | Missense_Mutation | SNP | G | A | 9  | 24  | c.1235G>A    | c.(1234-1236)CGC>CAC | p.R412H  |
| Pat_46 | Post-Resistance | NPAS4    | 266743 | 37 | 11 | 66192378  | 66192378  | Missense_Mutation | SNP | T | A | 9  | 43  | c.2017T>A    | c.(2017-2019)TCC>ACC | p.S673T  |
| Pat_46 | Post-Resistance | CABP2    | 51475  | 37 | 11 | 67286622  | 67286622  | Missense_Mutation | SNP | C | T | 4  | 43  | c.651G>A     | c.(649-651)ATG>ATA   | p.M217I  |
| Pat_46 | Post-Resistance | PPFIA1   | 8500   | 37 | 11 | 70194471  | 70194471  | Missense_Mutation | SNP | G | A | 7  | 56  | c.2108G>A    | c.(2107-2109)CGA>CAA | p.R703Q  |
| Pat_46 | Post-Resistance | SYTL2    | 54843  | 37 | 11 | 85425493  | 85425493  | Missense_Mutation | SNP | C | T | 5  | 62  | c.1673G>A    | c.(1672-1674)AGG>AAG | p.R558K  |
| Pat_46 | Post-Resistance | PICALM   | 8301   | 37 | 11 | 85718599  | 85718599  | Missense_Mutation | SNP | G | A | 14 | 106 | c.793C>T     | c.(793-795)CCA>TCA   | p.P265S  |
| Pat_46 | Post-Resistance | TRPC6    | 7225   | 37 | 11 | 101342086 | 101342086 | Missense_Mutation | SNP | C | T | 5  | 44  | c.2237G>A    | c.(2236-2238)AGG>AAG | p.R746K  |
| Pat_46 | Post-Resistance | APOA4    | 337    | 37 | 11 | 116692155 | 116692155 | Missense_Mutation | SNP | C | T | 7  | 56  | c.619G>A     | c.(619-621)GAA>AAA   | p.E207K  |
| Pat_46 | Post-Resistance | SPA17    | 53340  | 37 | 11 | 124564280 | 124564280 | Missense_Mutation | SNP | G | A | 8  | 61  | c.394G>A     | c.(394-396)GAG>AAG   | p.E132K  |
| Pat_46 | Post-Resistance | NFRKB    | 4798   | 37 | 11 | 129740050 | 129740050 | Missense_Mutation | SNP | G | A | 4  | 51  | c.2870C>T    | c.(2869-2871)CCC>CTC | p.P957L  |
| Pat_46 | Post-Resistance | WNK1     | 65125  | 37 | 12 | 995120    | 995120    | Missense_Mutation | SNP | C | T | 9  | 167 | c.5150C>T    | c.(5149-5151)CCA>CTA | p.P1717L |
| Pat_46 | Post-Resistance | PRB2     | 653247 | 37 | 12 | 11546515  | 11546515  | Missense_Mutation | SNP | C | T | 20 | 133 | c.497G>A     | c.(496-498)GGA>GAA   | p.G166E  |
| Pat_46 | Post-Resistance | PIK3C2G  | 5288   | 37 | 12 | 18747456  | 18747456  | Missense_Mutation | SNP | C | T | 7  | 62  | c.3917C>T    | c.(3916-3918)TCT>TTT | p.S1306F |
| Pat_46 | Post-Resistance | PLCZ1    | 89869  | 37 | 12 | 18837172  | 18837172  | Missense_Mutation | SNP | G | A | 6  | 54  | c.1633C>T    | c.(1633-1635)CAT>TAT | p.H545Y  |
| Pat_46 | Post-Resistance | ABCC9    | 10060  | 37 | 12 | 21997810  | 21997810  | Missense_Mutation | SNP | C | T | 6  | 30  | c.3136G>A    | c.(3136-3138)GGC>AGC | p.G1046S |
| Pat_46 | Post-Resistance | OVCH1    | 341350 | 37 | 12 | 29598333  | 29598333  | Missense_Mutation | SNP | C | T | 3  | 13  | c.2759G>A    | c.(2758-2760)GGA>GAA | p.G920E  |
| Pat_46 | Post-Resistance | C12orf40 | 283461 | 37 | 12 | 40114899  | 40114899  | Missense_Mutation | SNP | C | T | 12 | 81  | c.1805C>T    | c.(1804-1806)TCT>TTT | p.S602F  |
| Pat_46 | Post-Resistance | ZNF641   | 121274 | 37 | 12 | 48737343  | 48737343  | Nonsense_Mutation | SNP | G | A | 4  | 19  | c.730C>T     | c.(730-732)CAG>TAG   | p.Q244*  |
| Pat_46 | Post-Resistance | DIP2B    | 57609  | 37 | 12 | 51084862  | 51084862  | Missense_Mutation | SNP | G | A | 7  | 53  | c.1582G>A    | c.(1582-1584)GGA>AGA | p.G528R  |
| Pat_46 | Post-Resistance | GALNT6   | 11226  | 37 | 12 | 51773135  | 51773135  | Missense_Mutation | SNP | G | A | 3  | 19  | c.431C>T     | c.(430-432)GCC>GTC   | p.A144V  |
| Pat_46 | Post-Resistance | KRT6B    | 3854   | 37 | 12 | 52841737  | 52841737  | Missense_Mutation | SNP | C | T | 4  | 48  | c.1249G>A    | c.(1249-1251)GAG>AAG | p.E417K  |
| Pat_46 | Post-Resistance | ESPL1    | 9700   | 37 | 12 | 53677195  | 53677195  | Missense_Mutation | SNP | C | T | 5  | 64  | c.2950C>T    | c.(2950-2952)CTT>TTT | p.L984F  |
| Pat_46 | Post-Resistance | OR6C76   | 390326 | 37 | 12 | 55820086  | 55820086  | Missense_Mutation | SNP | G | A | 16 | 93  | c.49G>A      | c.(49-51)GAT>AAT     | p.D17N   |
| Pat_46 | Post-Resistance | ERBB3    | 2065   | 37 | 12 | 56482351  | 56482351  | Missense_Mutation | SNP | C | T | 21 | 123 | c.899C>T     | c.(898-900)TCC>TTC   | p.S300F  |
| Pat_46 | Post-Resistance | ERBB3    | 2065   | 37 | 12 | 56493646  | 56493646  | Missense_Mutation | SNP | C | T | 7  | 35  | c.2962C>T    | c.(2962-2964)CCT>TCT | p.P988S  |
| Pat_46 | Post-Resistance | TAC3     | 6866   | 37 | 12 | 57406203  | 57406203  | Missense_Mutation | SNP | G | A | 4  | 31  | c.326C>T     | c.(325-327)CCC>CTC   | p.P109L  |

|        |                 |          |        |    |    |           |           |                   |     |    |    |    |     |                 |                        |               |
|--------|-----------------|----------|--------|----|----|-----------|-----------|-------------------|-----|----|----|----|-----|-----------------|------------------------|---------------|
| Pat_46 | Post-Resistance | MDM2     | 4193   | 37 | 12 | 69233409  | 69233409  | Missense_Mutation | SNP | C  | T  | 16 | 82  | c.1274C>T       | c.(1273-1275)ACC>ATC   | p.T425I       |
| Pat_46 | Post-Resistance | ACSS3    | 79611  | 37 | 12 | 81503391  | 81503391  | Missense_Mutation | SNP | G  | A  | 8  | 43  | c.364G>A        | c.(364-366)GAA>AAA     | p.E122K       |
| Pat_46 | Post-Resistance | SCYL2    | 55681  | 37 | 12 | 100676720 | 100676720 | Splice_Site       | SNP | G  | A  | 3  | 20  | c.-27_splice    | c.e2-1                 |               |
| Pat_46 | Post-Resistance | SLC5A8   | 160728 | 37 | 12 | 101551118 | 101551118 | Missense_Mutation | SNP | G  | A  | 7  | 20  | c.1772C>T       | c.(1771-1773)GCT>GTT   | p.A591V       |
| Pat_46 | Post-Resistance | CCDC63   | 160762 | 37 | 12 | 111342415 | 111342415 | Missense_Mutation | SNP | G  | A  | 4  | 39  | c.1366G>A       | c.(1366-1368)GAC>AAC   | p.D456N       |
| Pat_46 | Post-Resistance | ATXN2    | 6311   | 37 | 12 | 111923086 | 111923086 | Missense_Mutation | SNP | G  | A  | 10 | 121 | c.2987C>T       | c.(2986-2988)ACA>ATA   | p.T996I       |
| Pat_46 | Post-Resistance | CLIP1    | 6249   | 37 | 12 | 122862378 | 122862378 | Missense_Mutation | SNP | C  | T  | 13 | 134 | c.215G>A        | c.(214-216)GGA>GAA     | p.G72E        |
| Pat_46 | Post-Resistance | DNAH10   | 196385 | 37 | 12 | 124281297 | 124281297 | Missense_Mutation | SNP | G  | A  | 8  | 42  | c.1727G>A       | c.(1726-1728)CGA>CAA   | p.R576Q       |
| Pat_46 | Post-Resistance | GALNT9   | 50614  | 37 | 12 | 132681768 | 132681768 | Missense_Mutation | SNP | G  | A  | 3  | 16  | c.1696C>T       | c.(1696-1698)CGC>TGC   | p.R566C       |
| Pat_46 | Post-Resistance | CHFR     | 55743  | 37 | 12 | 133438221 | 133438221 | Splice_Site       | SNP | C  | T  | 3  | 9   | c.620_splice    | c.e7-1                 | p.G207_splice |
| Pat_46 | Post-Resistance | CHFR     | 55743  | 37 | 12 | 133448918 | 133448918 | Missense_Mutation | SNP | G  | A  | 8  | 92  | c.296C>T        | c.(295-297)ACT>ATT     | p.T99I        |
| Pat_46 | Post-Resistance | GJB2     | 2706   | 37 | 13 | 20763467  | 20763467  | Missense_Mutation | SNP | G  | A  | 4  | 23  | c.254C>T        | c.(253-255)TCC>TTC     | p.S85F        |
| Pat_46 | Post-Resistance | PAN3     | 255967 | 37 | 13 | 28846200  | 28846200  | Nonsense_Mutation | SNP | C  | T  | 9  | 61  | c.1603C>T       | c.(1603-1605)CAG>TAG   | p.Q535*       |
| Pat_46 | Post-Resistance | STAR13   | 90627  | 37 | 13 | 33704213  | 33704213  | Missense_Mutation | SNP | C  | T  | 2  | 5   | c.601G>A        | c.(601-603)GAA>AAA     | p.E201K       |
| Pat_46 | Post-Resistance | SPG20    | 23111  | 37 | 13 | 36905658  | 36905658  | Missense_Mutation | SNP | G  | A  | 8  | 68  | c.886C>T        | c.(886-888)CCT>TCT     | p.P296S       |
| Pat_46 | Post-Resistance | NUFIP1   | 26747  | 37 | 13 | 45517755  | 45517755  | Missense_Mutation | SNP | C  | T  | 7  | 110 | c.1193G>A       | c.(1192-1194)AGC>AAC   | p.S398N       |
| Pat_46 | Post-Resistance | SCEL     | 8796   | 37 | 13 | 78130735  | 78130735  | Missense_Mutation | SNP | G  | A  | 20 | 137 | c.48G>A         | c.(46-48)ATG>ATA       | p.M16I        |
| Pat_46 | Post-Resistance | COL4A1   | 1282   | 37 | 13 | 110864805 | 110864805 | Missense_Mutation | SNP | G  | A  | 8  | 120 | c.346C>T        | c.(346-348)CCG>TCG     | p.P116S       |
| Pat_46 | Post-Resistance | TMEM55B  | 90809  | 37 | 14 | 20928435  | 20928435  | Missense_Mutation | SNP | C  | T  | 5  | 49  | c.356G>A        | c.(355-357)GGG>GAG     | p.G119E       |
| Pat_46 | Post-Resistance | REM2     | 161253 | 37 | 14 | 23354141  | 23354141  | Missense_Mutation | SNP | G  | A  | 5  | 28  | c.362G>A        | c.(361-363)GGG>GAG     | p.G121E       |
| Pat_46 | Post-Resistance | MYH6     | 4624   | 37 | 14 | 23876313  | 23876314  | Missense_Mutation | DNP | GG | AA | 12 | 109 | c.119_120CC>TT  | c.(118-120)CCC>CTT     | p.P40L        |
| Pat_46 | Post-Resistance | NPAS3    | 64067  | 37 | 14 | 33684488  | 33684488  | Missense_Mutation | SNP | C  | T  | 7  | 59  | c.241C>T        | c.(241-243)CCT>TCT     | p.P81S        |
| Pat_46 | Post-Resistance | MIPOL1   | 145282 | 37 | 14 | 37838774  | 37838774  | Missense_Mutation | SNP | C  | T  | 6  | 39  | c.881C>T        | c.(880-882)TCA>TTA     | p.S294L       |
| Pat_46 | Post-Resistance | SOS2     | 6655   | 37 | 14 | 50611980  | 50611980  | Missense_Mutation | SNP | C  | T  | 7  | 78  | c.2575G>A       | c.(2575-2577)GTT>ATT   | p.V859I       |
| Pat_46 | Post-Resistance | PTGDR    | 5729   | 37 | 14 | 52741476  | 52741476  | Missense_Mutation | SNP | G  | A  | 4  | 23  | c.874G>A        | c.(874-876)GAT>AAT     | p.D292N       |
| Pat_46 | Post-Resistance | TOMM20L  | 387990 | 37 | 14 | 58869404  | 58869404  | Missense_Mutation | SNP | G  | A  | 11 | 72  | c.187G>A        | c.(187-189)GAT>AAT     | p.D63N        |
| Pat_46 | Post-Resistance | PPM1A    | 5494   | 37 | 14 | 60749713  | 60749713  | Nonsense_Mutation | SNP | A  | T  | 4  | 42  | c.292A>T        | c.(292-294)AAG>TAG     | p.K98*        |
| Pat_46 | Post-Resistance | PPM1A    | 5494   | 37 | 14 | 60752390  | 60752391  | Missense_Mutation | DNP | CC | TT | 12 | 97  | c.883_884CC>TT  | c.(883-885)CCC>TTC     | p.P295F       |
| Pat_46 | Post-Resistance | NEK9     | 91754  | 37 | 14 | 75553828  | 75553828  | Missense_Mutation | SNP | C  | T  | 7  | 116 | c.2710G>A       | c.(2710-2712)GGT>AGT   | p.G904S       |
| Pat_46 | Post-Resistance | KIAA1409 | 57578  | 37 | 14 | 93944038  | 93944038  | Missense_Mutation | SNP | G  | A  | 8  | 77  | c.52G>A         | c.(52-54)GAA>AAA       | p.E18K        |
| Pat_46 | Post-Resistance | DICER1   | 23405  | 37 | 14 | 95571421  | 95571421  | Missense_Mutation | SNP | G  | A  | 7  | 85  | c.3256C>T       | c.(3256-3258)CCT>TCT   | p.P1086S      |
| Pat_46 | Post-Resistance | TECPR2   | 9895   | 37 | 14 | 102901094 | 102901094 | Missense_Mutation | SNP | C  | T  | 3  | 23  | c.1940C>T       | c.(1939-1941)TCA>TTA   | p.S647L       |
| Pat_46 | Post-Resistance | CDC42BPB | 9578   | 37 | 14 | 103434988 | 103434988 | Missense_Mutation | SNP | T  | A  | 6  | 54  | c.2061A>T       | c.(2059-2061)AAA>AAT   | p.K687N       |
| Pat_46 | Post-Resistance | MTA1     | 9112   | 37 | 14 | 105932778 | 105932778 | Missense_Mutation | SNP | C  | T  | 3  | 10  | c.1640C>T       | c.(1639-1641)CCC>CTC   | p.P547L       |
| Pat_46 | Post-Resistance | TJP1     | 7082   | 37 | 15 | 30026556  | 30026556  | Missense_Mutation | SNP | T  | C  | 20 | 39  | c.1438A>G       | c.(1438-1440)AGA>GGA   | p.R480G       |
| Pat_46 | Post-Resistance | BUB1B    | 701    | 37 | 15 | 40457265  | 40457265  | Missense_Mutation | SNP | C  | T  | 19 | 45  | c.47C>T         | c.(46-48)TCC>TTC       | p.S16F        |
| Pat_46 | Post-Resistance | RPAP1    | 26015  | 37 | 15 | 41817292  | 41817293  | Nonsense_Mutation | DNP | GG | AA | 3  | 8   | c.1971_1972CC>T | c.(969-1974)CCCCAA>CCT | p.Q658*       |
| Pat_46 | Post-Resistance | GANC     | 2595   | 37 | 15 | 42632068  | 42632068  | Missense_Mutation | SNP | C  | T  | 6  | 20  | c.2045C>T       | c.(2044-2046)JCT>TTT   | p.S682F       |
| Pat_46 | Post-Resistance | CTDSPL2  | 51496  | 37 | 15 | 44751361  | 44751361  | Missense_Mutation | SNP | C  | T  | 12 | 95  | c.149C>T        | c.(148-150)TCT>TTT     | p.S50F        |
| Pat_46 | Post-Resistance | GABPB1   | 2553   | 37 | 15 | 50593519  | 50593519  | Missense_Mutation | SNP | G  | A  | 8  | 145 | c.518C>T        | c.(517-519)ACT>ATT     | p.T173I       |
| Pat_46 | Post-Resistance | WDR72    | 256764 | 37 | 15 | 54003587  | 54003587  | Missense_Mutation | SNP | C  | T  | 5  | 67  | c.803G>A        | c.(802-804)AGA>AAA     | p.R268K       |
| Pat_46 | Post-Resistance | UNC13C   | 440279 | 37 | 15 | 54305661  | 54305661  | Nonsense_Mutation | SNP | G  | A  | 14 | 60  | c.561G>A        | c.(559-561)TGG>TGA     | p.W187*       |
| Pat_46 | Post-Resistance | RNF111   | 54778  | 37 | 15 | 59323443  | 59323443  | Missense_Mutation | SNP | C  | T  | 12 | 49  | c.422C>T        | c.(421-423)CCT>CTT     | p.P141L       |
| Pat_46 | Post-Resistance | HERC1    | 8925   | 37 | 15 | 63986325  | 63986325  | Missense_Mutation | SNP | C  | T  | 4  | 19  | c.5512G>A       | c.(5512-5514)GTT>ATT   | p.V1838I      |
| Pat_46 | Post-Resistance | CSNK1G1  | 53944  | 37 | 15 | 64499716  | 64499716  | Missense_Mutation | SNP | C  | T  | 5  | 23  | c.757G>A        | c.(757-759)GGA>AGA     | p.G253R       |
| Pat_46 | Post-Resistance | DENND4A  | 10260  | 37 | 15 | 66048767  | 66048767  | Missense_Mutation | SNP | G  | A  | 11 | 52  | c.22C>T         | c.(22-24)CGT>TGT       | p.R8C         |
| Pat_46 | Post-Resistance | IQCH     | 64799  | 37 | 15 | 67793004  | 67793004  | Missense_Mutation | SNP | G  | A  | 5  | 35  | c.3004G>A       | c.(3004-3006)GTA>ATA   | p.V1002I      |

|        |                 |           |        |    |    |          |          |                   |     |    |    |    |     |                |                      |          |
|--------|-----------------|-----------|--------|----|----|----------|----------|-------------------|-----|----|----|----|-----|----------------|----------------------|----------|
| Pat_46 | Post-Resistance | LRRC49    | 54839  | 37 | 15 | 71329552 | 71329552 | Missense_Mutation | SNP | G  | A  | 14 | 103 | c.1738G>A      | c.(1738-1740)GGA>AGA | p.G580R  |
| Pat_46 | Post-Resistance | PARP6     | 56965  | 37 | 15 | 72552884 | 72552884 | Missense_Mutation | SNP | G  | A  | 26 | 146 | c.691C>T       | c.(691-693)CCC>TCC   | p.P231S  |
| Pat_46 | Post-Resistance | CYP11A1   | 1583   | 37 | 15 | 74630935 | 74630935 | Missense_Mutation | SNP | C  | T  | 6  | 58  | c.1411G>A      | c.(1411-1413)GAG>AAG | p.E471K  |
| Pat_46 | Post-Resistance | KIAA1199  | 57214  | 37 | 15 | 81201454 | 81201454 | Missense_Mutation | SNP | A  | G  | 4  | 13  | c.1604A>G      | c.(1603-1605)AAG>AGG | p.K535R  |
| Pat_46 | Post-Resistance | ALPK3     | 57538  | 37 | 15 | 85400266 | 85400266 | Missense_Mutation | SNP | C  | T  | 9  | 60  | c.2903C>T      | c.(2902-2904)CCA>CTA | p.P968L  |
| Pat_46 | Post-Resistance | SLCO3A1   | 28232  | 37 | 15 | 92671649 | 92671649 | Missense_Mutation | SNP | C  | T  | 6  | 82  | c.1442C>T      | c.(1441-1443)TCC>TTC | p.S481F  |
| Pat_46 | Post-Resistance | IGF1R     | 3480   | 37 | 15 | 99478232 | 99478232 | Missense_Mutation | SNP | G  | A  | 4  | 47  | c.3136G>A      | c.(3136-3138)GAG>AAG | p.E1046K |
| Pat_46 | Post-Resistance | PKD1      | 5310   | 37 | 16 | 2158389  | 2158389  | Missense_Mutation | SNP | A  | G  | 3  | 17  | c.6779T>C      | c.(6778-6780)ATT>ACT | p.I2260T |
| Pat_46 | Post-Resistance | BTBD12    | 84464  | 37 | 16 | 3640514  | 3640514  | Missense_Mutation | SNP | C  | T  | 3  | 18  | c.3125G>A      | c.(3124-3126)GGC>GAC | p.G1042D |
| Pat_46 | Post-Resistance | SMG1      | 23049  | 37 | 16 | 18902236 | 18902236 | Missense_Mutation | SNP | A  | C  | 6  | 50  | c.557T>G       | c.(556-558)GTT>GGT   | p.V186G  |
| Pat_46 | Post-Resistance | CACNG3    | 10368  | 37 | 16 | 24358111 | 24358111 | Missense_Mutation | SNP | G  | A  | 5  | 39  | c.268G>A       | c.(268-270)GAA>AAA   | p.E90K   |
| Pat_46 | Post-Resistance | SETD1A    | 9739   | 37 | 16 | 30975992 | 30975992 | Missense_Mutation | SNP | C  | T  | 8  | 50  | c.929C>T       | c.(928-930)TCC>TTC   | p.S310F  |
| Pat_46 | Post-Resistance | GPT2      | 84706  | 37 | 16 | 46958446 | 46958446 | Missense_Mutation | SNP | A  | T  | 5  | 26  | c.1358A>T      | c.(1357-1359)GAG>GTG | p.E453V  |
| Pat_46 | Post-Resistance | CDH11     | 1009   | 37 | 16 | 65032695 | 65032695 | Missense_Mutation | SNP | C  | T  | 5  | 22  | c.293G>A       | c.(292-294)GGA>GAA   | p.G98E   |
| Pat_46 | Post-Resistance | CMTM3     | 123920 | 37 | 16 | 66642333 | 66642333 | Missense_Mutation | SNP | A  | C  | 7  | 30  | c.269A>C       | c.(268-270)AAT>ACT   | p.N90T   |
| Pat_46 | Post-Resistance | KIAA0895L | 653319 | 37 | 16 | 67210754 | 67210754 | Missense_Mutation | SNP | C  | T  | 6  | 46  | c.1376G>A      | c.(1375-1377)CGG>CAG | p.R459Q  |
| Pat_46 | Post-Resistance | TAT       | 6898   | 37 | 16 | 71610233 | 71610233 | Missense_Mutation | SNP | G  | A  | 4  | 42  | c.86C>T        | c.(85-87)TCT>TTT     | p.S29F   |
| Pat_46 | Post-Resistance | ADAT1     | 23536  | 37 | 16 | 75637046 | 75637046 | Missense_Mutation | SNP | A  | G  | 13 | 126 | c.1313T>C      | c.(1312-1314)CTC>CCC | p.L438P  |
| Pat_46 | Post-Resistance | GAN       | 8139   | 37 | 16 | 81411197 | 81411197 | Missense_Mutation | SNP | C  | T  | 6  | 78  | c.1790C>T      | c.(1789-1791)CCT>CTT | p.P597L  |
| Pat_46 | Post-Resistance | HSDL1     | 83693  | 37 | 16 | 84163799 | 84163800 | Missense_Mutation | DNP | CC | TT | 11 | 69  | c.457_458GG>AA | c.(457-459)GGT>AAT   | p.G153N  |
| Pat_46 | Post-Resistance | NLRP1     | 22861  | 37 | 17 | 5436241  | 5436241  | Missense_Mutation | SNP | C  | T  | 3  | 22  | c.3197G>A      | c.(3196-3198)GGG>GAG | p.G1066E |
| Pat_46 | Post-Resistance | ADORA2B   | 136    | 37 | 17 | 15878556 | 15878556 | Missense_Mutation | SNP | C  | T  | 6  | 100 | c.899C>T       | c.(898-900)ACT>ATT   | p.T300I  |
| Pat_46 | Post-Resistance | CCDC144NL | 339184 | 37 | 17 | 20799030 | 20799030 | Missense_Mutation | SNP | G  | A  | 7  | 39  | c.304C>T       | c.(304-306)CCT>TCT   | p.P102S  |
| Pat_46 | Post-Resistance | PHF12     | 57649  | 37 | 17 | 27248740 | 27248740 | Missense_Mutation | SNP | G  | A  | 11 | 78  | c.802C>T       | c.(802-804)CCC>TCC   | p.P268S  |
| Pat_46 | Post-Resistance | NF1       | 4763   | 37 | 17 | 29677227 | 29677227 | Nonsense_Mutation | SNP | C  | T  | 19 | 114 | c.7348C>T      | c.(7348-7350)CGA>TGA | p.R2450* |
| Pat_46 | Post-Resistance | UNC45B    | 146862 | 37 | 17 | 33491151 | 33491151 | Missense_Mutation | SNP | G  | A  | 10 | 117 | c.1117G>A      | c.(1117-1119)GAT>AAT | p.D373N  |
| Pat_46 | Post-Resistance | KRT32     | 3882   | 37 | 17 | 39619092 | 39619092 | Missense_Mutation | SNP | C  | T  | 3  | 12  | c.1207G>A      | c.(1207-1209)GAG>AAG | p.E403K  |
| Pat_46 | Post-Resistance | KRT14     | 3861   | 37 | 17 | 39742707 | 39742707 | Missense_Mutation | SNP | G  | A  | 6  | 31  | c.380C>T       | c.(379-381)GCC>GTC   | p.A127V  |
| Pat_46 | Post-Resistance | WNK4      | 65266  | 37 | 17 | 40932960 | 40932960 | Missense_Mutation | SNP | G  | A  | 5  | 15  | c.244G>A       | c.(244-246)GAC>AAC   | p.D82N   |
| Pat_46 | Post-Resistance | MEOX1     | 4222   | 37 | 17 | 41719375 | 41719375 | Missense_Mutation | SNP | C  | T  | 16 | 60  | c.668G>A       | c.(667-669)AGG>AAG   | p.R223K  |
| Pat_46 | Post-Resistance | KIAA1267  | 284058 | 37 | 17 | 44249109 | 44249109 | Missense_Mutation | SNP | G  | A  | 27 | 89  | c.401C>T       | c.(400-402)TCC>TTC   | p.S134F  |
| Pat_46 | Post-Resistance | HLF       | 3131   | 37 | 17 | 53345193 | 53345193 | Missense_Mutation | SNP | G  | A  | 6  | 58  | c.197G>A       | c.(196-198)GGG>GAG   | p.G66E   |
| Pat_46 | Post-Resistance | KPNA2     | 3838   | 37 | 17 | 66033562 | 66033562 | Missense_Mutation | SNP | C  | T  | 10 | 64  | c.164C>T       | c.(163-165)TCA>TTA   | p.S55L   |
| Pat_46 | Post-Resistance | ICT1      | 3396   | 37 | 17 | 73013191 | 73013191 | Missense_Mutation | SNP | G  | A  | 4  | 50  | c.205G>A       | c.(205-207)GAC>AAC   | p.D69N   |
| Pat_46 | Post-Resistance | ATP5H     | 10476  | 37 | 17 | 73036233 | 73036233 | Missense_Mutation | SNP | G  | A  | 11 | 174 | c.245C>T       | c.(244-246)CCA>CTA   | p.P82L   |
| Pat_46 | Post-Resistance | SMCHD1    | 23347  | 37 | 18 | 2750443  | 2750443  | Missense_Mutation | SNP | C  | T  | 3  | 8   | c.4103C>T      | c.(4102-4104)CCC>CTC | p.P1368L |
| Pat_46 | Post-Resistance | TXNDC2    | 84203  | 37 | 18 | 9887184  | 9887184  | Missense_Mutation | SNP | G  | C  | 12 | 78  | c.708G>C       | c.(706-708)GAG>GAC   | p.E236D  |
| Pat_46 | Post-Resistance | ANKRD30B  | 374860 | 37 | 18 | 14799105 | 14799105 | Missense_Mutation | SNP | C  | T  | 5  | 58  | c.2035C>T      | c.(2035-2037)CCT>TCT | p.P679S  |
| Pat_46 | Post-Resistance | NPC1      | 4864   | 37 | 18 | 21134821 | 21134821 | Nonsense_Mutation | SNP | A  | T  | 6  | 35  | c.1454T>A      | c.(1453-1455)TTA>TAA | p.L485*  |
| Pat_46 | Post-Resistance | NPC1      | 4864   | 37 | 18 | 21134840 | 21134840 | Missense_Mutation | SNP | A  | T  | 7  | 38  | c.1435T>A      | c.(1435-1437)TGC>AGC | p.C479S  |
| Pat_46 | Post-Resistance | LAMA3     | 3909   | 37 | 18 | 21419844 | 21419844 | Missense_Mutation | SNP | C  | T  | 9  | 70  | c.3287C>T      | c.(3286-3288)TCG>TTG | p.S1096L |
| Pat_46 | Post-Resistance | LAMA3     | 3909   | 37 | 18 | 21487610 | 21487610 | Missense_Mutation | SNP | G  | A  | 17 | 115 | c.6815G>A      | c.(6814-6816)GGT>GAT | p.G2272D |
| Pat_46 | Post-Resistance | DSC3      | 1825   | 37 | 18 | 28584314 | 28584314 | Missense_Mutation | SNP | G  | A  | 4  | 34  | c.1907C>T      | c.(1906-1908)TCA>TTA | p.S636L  |
| Pat_46 | Post-Resistance | DSC2      | 1824   | 37 | 18 | 28672144 | 28672144 | Nonsense_Mutation | SNP | T  | A  | 5  | 54  | c.274A>T       | c.(274-276)AGA>TGA   | p.R92*   |
| Pat_46 | Post-Resistance | KIAA1012  | 22878  | 37 | 18 | 29470717 | 29470717 | Missense_Mutation | SNP | C  | T  | 6  | 74  | c.1709G>A      | c.(1708-1710)CGA>CAA | p.R570Q  |
| Pat_46 | Post-Resistance | PSTPIP2   | 9050   | 37 | 18 | 43570702 | 43570702 | Missense_Mutation | SNP | G  | A  | 5  | 34  | c.941C>T       | c.(940-942)CCT>CTT   | p.P314L  |
| Pat_46 | Post-Resistance | TCEB3B    | 51224  | 37 | 18 | 44560363 | 44560363 | Missense_Mutation | SNP | C  | T  | 7  | 21  | c.1273G>A      | c.(1273-1275)GAT>AAT | p.D425N  |

|        |                 |          |        |    |    |           |           |                        |     |   |   |    |     |            |                        |           |
|--------|-----------------|----------|--------|----|----|-----------|-----------|------------------------|-----|---|---|----|-----|------------|------------------------|-----------|
| Pat_46 | Post-Resistance | TCEB3B   | 51224  | 37 | 18 | 44561172  | 44561172  | Missense_Mutation      | SNP | C | T | 5  | 17  | c.464G>A   | c.(463-465)AGA>AAA     | p.R155K   |
| Pat_46 | Post-Resistance | DCC      | 1630   | 37 | 18 | 50432428  | 50432428  | Missense_Mutation      | SNP | C | T | 5  | 47  | c.427C>T   | c.(427-429)CTT>TTT     | p.L143F   |
| Pat_46 | Post-Resistance | DCC      | 1630   | 37 | 18 | 50741963  | 50741963  | Missense_Mutation      | SNP | C | T | 9  | 81  | c.1907C>T  | c.(1906-1908)TCA>TTA   | p.S636L   |
| Pat_46 | Post-Resistance | ALPK2    | 115701 | 37 | 18 | 56246363  | 56246363  | Missense_Mutation      | SNP | G | A | 8  | 48  | c.1645C>T  | c.(1645-1647)CCG>TCG   | p.P549S   |
| Pat_46 | Post-Resistance | SERPINB7 | 8710   | 37 | 18 | 61465919  | 61465919  | Missense_Mutation      | SNP | G | A | 11 | 78  | c.536G>A   | c.(535-537)GGC>GAC     | p.G179D   |
| Pat_46 | Post-Resistance | CDH7     | 1005   | 37 | 18 | 63547837  | 63547837  | Missense_Mutation      | SNP | G | A | 7  | 42  | c.2065G>A  | c.(2065-2067)GAA>AAA   | p.E689K   |
| Pat_46 | Post-Resistance | CNN2     | 1265   | 37 | 19 | 1037859   | 1037859   | Missense_Mutation      | SNP | C | T | 7  | 25  | c.890C>T   | c.(889-891)CCT>CTT     | p.P297L   |
| Pat_46 | Post-Resistance | PIP5K1C  | 23396  | 37 | 19 | 3661061   | 3661061   | Missense_Mutation      | SNP | G | A | 11 | 30  | c.371C>T   | c.(370-372)CCC>CTC     | p.P124L   |
| Pat_46 | Post-Resistance | CREB3L3  | 84699  | 37 | 19 | 4157169   | 4157169   | Missense_Mutation      | SNP | G | A | 5  | 26  | c.334G>A   | c.(334-336)GGC>AGC     | p.G112S   |
| Pat_46 | Post-Resistance | ZNF557   | 79230  | 37 | 19 | 7076509   | 7076509   | Missense_Mutation      | SNP | G | A | 5  | 58  | c.217G>A   | c.(217-219)GCC>ACC     | p.A73T    |
| Pat_46 | Post-Resistance | MUC16    | 94025  | 37 | 19 | 9045834   | 9045834   | Missense_Mutation      | SNP | C | T | 9  | 21  | c.35797G>A | c.(35797-35799)GAA>AAA | p.E11933K |
| Pat_46 | Post-Resistance | MUC16    | 94025  | 37 | 19 | 9045848   | 9045848   | Missense_Mutation      | SNP | G | A | 9  | 17  | c.35783C>T | c.(35782-35784)TCA>TTA | p.S11928L |
| Pat_46 | Post-Resistance | MUC16    | 94025  | 37 | 19 | 9068949   | 9068949   | Missense_Mutation      | SNP | G | A | 7  | 30  | c.18497C>T | c.(18496-18498)TCT>TTT | p.S6166F  |
| Pat_46 | Post-Resistance | ZNF562   | 54811  | 37 | 19 | 9764053   | 9764053   | Missense_Mutation      | SNP | C | T | 7  | 30  | c.853G>A   | c.(853-855)GAG>AAG     | p.E285K   |
| Pat_46 | Post-Resistance | CYP4F22  | 126410 | 37 | 19 | 15651274  | 15651274  | Missense_Mutation      | SNP | T | C | 8  | 31  | c.685T>C   | c.(685-687)TAT>CAT     | p.Y229H   |
| Pat_46 | Post-Resistance | USHBP1   | 83878  | 37 | 19 | 17367350  | 17367350  | Missense_Mutation      | SNP | C | T | 3  | 16  | c.1400G>A  | c.(1399-1401)GGG>GAG   | p.G467E   |
| Pat_46 | Post-Resistance | ZNF676   | 163223 | 37 | 19 | 22363003  | 22363003  | Missense_Mutation      | SNP | T | C | 10 | 89  | c.1516A>G  | c.(1516-1518)AAA>GAA   | p.K506E   |
| Pat_46 | Post-Resistance | ZNF507   | 22847  | 37 | 19 | 32873430  | 32873430  | Nonsense_Mutation      | SNP | G | A | 7  | 83  | c.2418G>A  | c.(2416-2418)TGG>TGA   | p.W806*   |
| Pat_46 | Post-Resistance | KIRREL2  | 84063  | 37 | 19 | 36357300  | 36357300  | Missense_Mutation      | SNP | C | T | 9  | 96  | c.2033C>T  | c.(2032-2034)TCC>TTC   | p.S678F   |
| Pat_46 | Post-Resistance | ZNF565   | 147929 | 37 | 19 | 36673967  | 36673967  | Missense_Mutation      | SNP | G | A | 6  | 33  | c.901C>T   | c.(901-903)CAC>TAC     | p.H301Y   |
| Pat_46 | Post-Resistance | ZNF383   | 163087 | 37 | 19 | 37734537  | 37734537  | Missense_Mutation      | SNP | C | T | 6  | 47  | c.1399C>T  | c.(1399-1401)CGT>TGT   | p.R467C   |
| Pat_46 | Post-Resistance | CLC      | 1178   | 37 | 19 | 40225070  | 40225070  | Missense_Mutation      | SNP | G | T | 7  | 96  | c.156C>A   | c.(154-156)TTC>TTA     | p.F52L    |
| Pat_46 | Post-Resistance | SHKBP1   | 92799  | 37 | 19 | 41086687  | 41086687  | Missense_Mutation      | SNP | C | T | 5  | 33  | c.689C>T   | c.(688-690)TCC>TTC     | p.S230F   |
| Pat_46 | Post-Resistance | CEACAM5  | 1048   | 37 | 19 | 42213788  | 42213788  | Missense_Mutation      | SNP | G | A | 5  | 63  | c.254G>A   | c.(253-255)GGA>GAA     | p.G85E    |
| Pat_46 | Post-Resistance | PSG8     | 440533 | 37 | 19 | 43262211  | 43262211  | Missense_Mutation      | SNP | C | T | 21 | 154 | c.652G>A   | c.(652-654)GAA>AAA     | p.E218K   |
| Pat_46 | Post-Resistance | PSG1     | 5669   | 37 | 19 | 43376195  | 43376195  | Missense_Mutation      | SNP | C | T | 12 | 46  | c.433G>A   | c.(433-435)GAG>AAG     | p.E145K   |
| Pat_46 | Post-Resistance | PSG9     | 5678   | 37 | 19 | 43762435  | 43762435  | Missense_Mutation      | SNP | G | A | 16 | 128 | c.1162C>T  | c.(1162-1164)CAT>TAT   | p.H388Y   |
| Pat_46 | Post-Resistance | CCDC9    | 26093  | 37 | 19 | 47761596  | 47761596  | Translation_Start_Site | SNP | G | A | 3  | 24  | c.-61G>A   | ∓.(-63--59)CAGTG>CAATG |           |
| Pat_46 | Post-Resistance | ZNF175   | 7728   | 37 | 19 | 52091536  | 52091536  | Missense_Mutation      | SNP | C | T | 4  | 32  | c.1952C>T  | c.(1951-1953)TCG>TTG   | p.S651L   |
| Pat_46 | Post-Resistance | SIGLEC5  | 8778   | 37 | 19 | 52131203  | 52131203  | Missense_Mutation      | SNP | G | A | 5  | 28  | c.881C>T   | c.(880-882)TCC>TTC     | p.S294F   |
| Pat_46 | Post-Resistance | FPR2     | 2358   | 37 | 19 | 52272576  | 52272576  | Missense_Mutation      | SNP | G | A | 3  | 18  | c.665G>A   | c.(664-666)GGG>GAG     | p.G222E   |
| Pat_46 | Post-Resistance | FPR3     | 2359   | 37 | 19 | 52327313  | 52327313  | Missense_Mutation      | SNP | G | A | 6  | 39  | c.312G>A   | c.(310-312)ATG>ATA     | p.M104I   |
| Pat_46 | Post-Resistance | ZNF611   | 81856  | 37 | 19 | 53209661  | 53209661  | Missense_Mutation      | SNP | G | A | 9  | 93  | c.647C>T   | c.(646-648)TCA>TTA     | p.S216L   |
| Pat_46 | Post-Resistance | KIR2DS4  | 3809   | 37 | 19 | 55351067  | 55351067  | Missense_Mutation      | SNP | G | A | 5  | 55  | c.577G>A   | c.(577-579)GGA>AGA     | p.G193R   |
| Pat_46 | Post-Resistance | NLRP8    | 126205 | 37 | 19 | 56490764  | 56490764  | Missense_Mutation      | SNP | G | A | 8  | 36  | c.2881G>A  | c.(2881-2883)GAA>AAA   | p.E961K   |
| Pat_46 | Post-Resistance | ZFP28    | 140612 | 37 | 19 | 57066001  | 57066001  | Missense_Mutation      | SNP | C | T | 5  | 66  | c.1847C>T  | c.(1846-1848)CCT>CTT   | p.P616L   |
| Pat_46 | Post-Resistance | ZNF329   | 79673  | 37 | 19 | 58640786  | 58640786  | Missense_Mutation      | SNP | G | A | 14 | 127 | c.85C>T    | c.(85-87)CCC>TCC       | p.P29S    |
| Pat_46 | Post-Resistance | ATAD2B   | 54454  | 37 | 2  | 24046313  | 24046313  | Missense_Mutation      | SNP | C | T | 4  | 23  | c.1946G>A  | c.(1945-1947)AGT>AAT   | p.S649N   |
| Pat_46 | Post-Resistance | GPN1     | 11321  | 37 | 2  | 27864126  | 27864126  | Missense_Mutation      | SNP | G | A | 8  | 65  | c.862G>A   | c.(862-864)GAA>AAA     | p.E288K   |
| Pat_46 | Post-Resistance | C2orf71  | 388939 | 37 | 2  | 29296101  | 29296101  | Missense_Mutation      | SNP | G | A | 6  | 24  | c.1027C>T  | c.(1027-1029)CTC>TTC   | p.L343F   |
| Pat_46 | Post-Resistance | CCT7     | 10574  | 37 | 2  | 73474975  | 73474975  | Missense_Mutation      | SNP | C | T | 6  | 40  | c.704C>T   | c.(703-705)CCC>CTC     | p.P235L   |
| Pat_46 | Post-Resistance | ALMS1    | 7840   | 37 | 2  | 73651805  | 73651805  | Missense_Mutation      | SNP | C | T | 4  | 27  | c.1015C>T  | c.(1015-1017)CGT>TGT   | p.R339C   |
| Pat_46 | Post-Resistance | CTNNA2   | 1496   | 37 | 2  | 80874951  | 80874951  | Missense_Mutation      | SNP | C | T | 13 | 100 | c.2816C>T  | c.(2815-2817)TCG>TTG   | p.S939L   |
| Pat_46 | Post-Resistance | EIF2AK3  | 9451   | 37 | 2  | 88874860  | 88874860  | Missense_Mutation      | SNP | G | A | 8  | 87  | c.2141C>T  | c.(2140-2142)CCT>CTT   | p.P714L   |
| Pat_46 | Post-Resistance | SLC9A4   | 389015 | 37 | 2  | 103142776 | 103142776 | Missense_Mutation      | SNP | G | A | 9  | 59  | c.2009G>A  | c.(2008-2010)GGA>GAA   | p.G670E   |
| Pat_46 | Post-Resistance | IL1A     | 3552   | 37 | 2  | 113532775 | 113532775 | Missense_Mutation      | SNP | C | T | 5  | 60  | c.685G>A   | c.(685-687)GGC>AGC     | p.G229S   |
| Pat_46 | Post-Resistance | NCKAP5   | 344148 | 37 | 2  | 133489429 | 133489429 | Missense_Mutation      | SNP | G | A | 4  | 35  | c.5324C>T  | c.(5323-5325)TCC>TTC   | p.S1775F  |

|        |                 |          |        |    |    |           |           |                   |     |   |   |    |     |              |                        |               |
|--------|-----------------|----------|--------|----|----|-----------|-----------|-------------------|-----|---|---|----|-----|--------------|------------------------|---------------|
| Pat_46 | Post-Resistance | ARHGAP15 | 55843  | 37 | 2  | 143974010 | 143974010 | Missense_Mutation | SNP | C | G | 5  | 41  | c.292C>G     | c.(292-294)CTA>GTA     | p.L98V        |
| Pat_46 | Post-Resistance | CCDC148  | 130940 | 37 | 2  | 159077171 | 159077171 | Missense_Mutation | SNP | C | T | 9  | 26  | c.1306G>A    | c.(1306-1308)GAT>AAT   | p.D436N       |
| Pat_46 | Post-Resistance | LY75     | 4065   | 37 | 2  | 160742933 | 160742933 | Missense_Mutation | SNP | G | A | 7  | 36  | c.911C>T     | c.(910-912)CCA>CTA     | p.P304L       |
| Pat_46 | Post-Resistance | ITGB6    | 3694   | 37 | 2  | 161052127 | 161052127 | Splice_Site       | SNP | C | T | 5  | 34  | c.347_splice | c.e4-1                 | p.G116_splice |
| Pat_46 | Post-Resistance | SCN1A    | 6323   | 37 | 2  | 166897895 | 166897895 | Nonsense_Mutation | SNP | C | T | 9  | 85  | c.2228G>A    | c.(2227-2229)TGG>TAG   | p.W743*       |
| Pat_46 | Post-Resistance | G6PC2    | 57818  | 37 | 2  | 169761055 | 169761055 | Nonsense_Mutation | SNP | G | A | 22 | 164 | c.369G>A     | c.(367-369)TGG>TGA     | p.W123*       |
| Pat_46 | Post-Resistance | UBR3     | 130507 | 37 | 2  | 170938268 | 170938268 | Missense_Mutation | SNP | G | A | 5  | 45  | c.5582G>A    | c.(5581-5583)AGA>AAA   | p.R1861K      |
| Pat_46 | Post-Resistance | ITGA6    | 3655   | 37 | 2  | 173339794 | 173339794 | Missense_Mutation | SNP | C | T | 5  | 31  | c.1124C>T    | c.(1123-1125)TCT>TTT   | p.S375F       |
| Pat_46 | Post-Resistance | TTN      | 7273   | 37 | 2  | 179401036 | 179401036 | Missense_Mutation | SNP | C | T | 3  | 23  | c.92734G>A   | c.(92734-92736)GAA>AAA | p.E30912K     |
| Pat_46 | Post-Resistance | TTN      | 7273   | 37 | 2  | 179431936 | 179431936 | Nonsense_Mutation | SNP | C | T | 8  | 67  | c.71219G>A   | c.(71218-71220)TGG>TAG | p.W23740*     |
| Pat_46 | Post-Resistance | TTN      | 7273   | 37 | 2  | 179435273 | 179435273 | Missense_Mutation | SNP | T | C | 3  | 21  | c.67882A>G   | c.(67882-67884)ACT>GCT | p.T22628A     |
| Pat_46 | Post-Resistance | TTN      | 7273   | 37 | 2  | 179439473 | 179439473 | Missense_Mutation | SNP | C | G | 4  | 40  | c.63682G>C   | c.(63682-63684)GAG>CAC | p.E21228Q     |
| Pat_46 | Post-Resistance | TTN      | 7273   | 37 | 2  | 179475048 | 179475048 | Missense_Mutation | SNP | C | T | 7  | 45  | c.43501G>A   | c.(43501-43503)GAA>AAA | p.E14501K     |
| Pat_46 | Post-Resistance | TTN      | 7273   | 37 | 2  | 179483347 | 179483347 | Missense_Mutation | SNP | C | T | 7  | 99  | c.39226G>A   | c.(39226-39228)GGA>AG/ | p.G13076R     |
| Pat_46 | Post-Resistance | TTN      | 7273   | 37 | 2  | 179517063 | 179517063 | Missense_Mutation | SNP | G | A | 13 | 122 | c.31837C>T   | c.(31837-31839)CCC>TCC | p.P10613S     |
| Pat_46 | Post-Resistance | TTN      | 7273   | 37 | 2  | 179542534 | 179542534 | Missense_Mutation | SNP | C | T | 12 | 79  | c.30373G>A   | c.(30373-30375)GAA>AAA | p.E10125K     |
| Pat_46 | Post-Resistance | TTN      | 7273   | 37 | 2  | 179584152 | 179584152 | Missense_Mutation | SNP | G | A | 5  | 22  | c.20233C>T   | c.(20233-20235)CGC>TGC | p.R6745C      |
| Pat_46 | Post-Resistance | ZNF804A  | 91752  | 37 | 2  | 185802432 | 185802432 | Missense_Mutation | SNP | G | A | 10 | 37  | c.2309G>A    | c.(2308-2310)CGA>CAA   | p.R770Q       |
| Pat_46 | Post-Resistance | CLK1     | 1195   | 37 | 2  | 201724923 | 201724923 | Nonsense_Mutation | SNP | T | A | 15 | 105 | c.406A>T     | c.(406-408)AAA>TAA     | p.K136*       |
| Pat_46 | Post-Resistance | ZDBF2    | 57683  | 37 | 2  | 207173096 | 207173096 | Missense_Mutation | SNP | G | A | 4  | 21  | c.3844G>A    | c.(3844-3846)GAT>AAT   | p.D1282N      |
| Pat_46 | Post-Resistance | CRYGC    | 1420   | 37 | 2  | 208994365 | 208994365 | Missense_Mutation | SNP | C | T | 7  | 74  | c.52G>A      | c.(52-54)GAA>AAA       | p.E18K        |
| Pat_46 | Post-Resistance | MAP2     | 4133   | 37 | 2  | 210558852 | 210558852 | Missense_Mutation | SNP | G | A | 3  | 20  | c.1958G>A    | c.(1957-1959)AGT>AAT   | p.S653N       |
| Pat_46 | Post-Resistance | MAP2     | 4133   | 37 | 2  | 210570403 | 210570403 | Missense_Mutation | SNP | T | A | 16 | 127 | c.4684T>A    | c.(4684-4686)TCC>ACC   | p.S1562T      |
| Pat_46 | Post-Resistance | MYL1     | 4632   | 37 | 2  | 211163257 | 211163257 | Missense_Mutation | SNP | C | T | 9  | 25  | c.191G>A     | c.(190-192)AGA>AAA     | p.R64K        |
| Pat_46 | Post-Resistance | SLC23A3  | 151295 | 37 | 2  | 220032706 | 220032706 | Missense_Mutation | SNP | G | A | 6  | 47  | c.859C>T     | c.(859-861)CCC>TCC     | p.P287S       |
| Pat_46 | Post-Resistance | SLC4A3   | 6508   | 37 | 2  | 220496794 | 220496794 | Missense_Mutation | SNP | C | T | 3  | 24  | c.916C>T     | c.(916-918)CGC>TGC     | p.R306C       |
| Pat_46 | Post-Resistance | SP140    | 11262  | 37 | 2  | 231108493 | 231108493 | Missense_Mutation | SNP | G | A | 9  | 36  | c.538G>A     | c.(538-540)GAA>AAA     | p.E180K       |
| Pat_46 | Post-Resistance | NMUR1    | 10316  | 37 | 2  | 232393481 | 232393481 | Missense_Mutation | SNP | A | G | 3  | 19  | c.251T>C     | c.(250-252)GTC>GCC     | p.V84A        |
| Pat_46 | Post-Resistance | SPTLC3   | 55304  | 37 | 20 | 13098356  | 13098356  | Missense_Mutation | SNP | A | G | 5  | 20  | c.1136A>G    | c.(1135-1137)TAC>TGC   | p.Y379C       |
| Pat_46 | Post-Resistance | C20orf3  | 57136  | 37 | 20 | 24964594  | 24964594  | Missense_Mutation | SNP | G | A | 4  | 31  | c.157C>T     | c.(157-159)CCC>TCC     | p.P53S        |
| Pat_46 | Post-Resistance | DEFB116  | 245930 | 37 | 20 | 29891208  | 29891208  | Missense_Mutation | SNP | G | A | 7  | 47  | c.116C>T     | c.(115-117)CCA>CTA     | p.P39L        |
| Pat_46 | Post-Resistance | NECAB3   | 63941  | 37 | 20 | 32257228  | 32257228  | Missense_Mutation | SNP | C | T | 8  | 55  | c.340G>A     | c.(340-342)GAA>AAA     | p.E114K       |
| Pat_46 | Post-Resistance | PTPRT    | 11122  | 37 | 20 | 40735493  | 40735493  | Missense_Mutation | SNP | C | G | 3  | 34  | c.3323G>C    | c.(3322-3324)GGG>GCG   | p.G1108A      |
| Pat_46 | Post-Resistance | PTPRT    | 11122  | 37 | 20 | 40743942  | 40743942  | Missense_Mutation | SNP | C | T | 4  | 49  | c.2996G>A    | c.(2995-2997)CGA>CAA   | p.R999Q       |
| Pat_46 | Post-Resistance | PTPRT    | 11122  | 37 | 20 | 40747054  | 40747054  | Missense_Mutation | SNP | C | T | 5  | 35  | c.2971G>A    | c.(2971-2973)GAA>AAA   | p.E991K       |
| Pat_46 | Post-Resistance | MMP9     | 4318   | 37 | 20 | 44639672  | 44639672  | Missense_Mutation | SNP | C | T | 7  | 18  | c.632C>T     | c.(631-633)TCC>TTC     | p.S211F       |
| Pat_46 | Post-Resistance | CDH22    | 64405  | 37 | 20 | 44815559  | 44815559  | Missense_Mutation | SNP | G | A | 8  | 78  | c.1451C>T    | c.(1450-1452)TCC>TTC   | p.S484F       |
| Pat_46 | Post-Resistance | SLC13A3  | 64849  | 37 | 20 | 45224923  | 45224923  | Missense_Mutation | SNP | C | T | 7  | 73  | c.667G>A     | c.(667-669)GAG>AAG     | p.E223K       |
| Pat_46 | Post-Resistance | KCNB1    | 3745   | 37 | 20 | 47990627  | 47990627  | Nonsense_Mutation | SNP | C | T | 10 | 72  | c.1470G>A    | c.(1468-1470)TGG>TGA   | p.W490*       |
| Pat_46 | Post-Resistance | ZNF831   | 128611 | 37 | 20 | 57770957  | 57770957  | Nonsense_Mutation | SNP | C | T | 8  | 92  | c.3772C>T    | c.(3772-3774)CAG>TAG   | p.Q1258*      |
| Pat_46 | Post-Resistance | ZNF831   | 128611 | 37 | 20 | 57829544  | 57829544  | Missense_Mutation | SNP | G | A | 5  | 37  | c.4780G>A    | c.(4780-4782)GGC>AGC   | p.G1594S      |
| Pat_46 | Post-Resistance | ITSN1    | 6453   | 37 | 21 | 35140024  | 35140024  | Nonsense_Mutation | SNP | C | T | 8  | 40  | c.934C>T     | c.(934-936)CGA>TGA     | p.R312*       |
| Pat_46 | Post-Resistance | DSCAM    | 1826   | 37 | 21 | 41550881  | 41550881  | Missense_Mutation | SNP | C | T | 4  | 20  | c.2920G>A    | c.(2920-2922)GAG>AAG   | p.E974K       |
| Pat_46 | Post-Resistance | UBASH3A  | 53347  | 37 | 21 | 43826440  | 43826440  | Missense_Mutation | SNP | G | A | 4  | 41  | c.137G>A     | c.(136-138)GGG>GAG     | p.G46E        |
| Pat_46 | Post-Resistance | MYO18B   | 84700  | 37 | 22 | 26286768  | 26286768  | Missense_Mutation | SNP | G | A | 5  | 23  | c.4360G>A    | c.(4360-4362)GAT>AAT   | p.D1454N      |
| Pat_46 | Post-Resistance | ASPHD2   | 57168  | 37 | 22 | 26829939  | 26829939  | Missense_Mutation | SNP | G | A | 3  | 22  | c.358G>A     | c.(358-360)GAG>AAG     | p.E120K       |
| Pat_46 | Post-Resistance | SOX10    | 6663   | 37 | 22 | 38370118  | 38370118  | Missense_Mutation | SNP | G | A | 8  | 147 | c.785C>T     | c.(784-786)TCC>TTC     | p.S262F       |



|        |                 |           |        |    |    |           |           |                   |     |   |   |    |     |               |                      |               |
|--------|-----------------|-----------|--------|----|----|-----------|-----------|-------------------|-----|---|---|----|-----|---------------|----------------------|---------------|
| Pat_46 | Post-Resistance | RANGAP1   | 5905   | 37 | 22 | 41657514  | 41657514  | Missense_Mutation | SNP | A | C | 5  | 28  | c.551T>G      | c.(550-552)GTC>GGC   | p.V184G       |
| Pat_46 | Post-Resistance | PMM1      | 5372   | 37 | 22 | 41973333  | 41973333  | Missense_Mutation | SNP | G | A | 7  | 44  | c.778C>T      | c.(778-780)CAT>TAT   | p.H260Y       |
| Pat_46 | Post-Resistance | PMM1      | 5372   | 37 | 22 | 41973900  | 41973900  | Missense_Mutation | SNP | G | A | 4  | 25  | c.578C>T      | c.(577-579)CCC>CTC   | p.P193L       |
| Pat_46 | Post-Resistance | PACSIN2   | 11252  | 37 | 22 | 43289619  | 43289619  | Missense_Mutation | SNP | C | T | 4  | 48  | c.61G>A       | c.(61-63)GTC>ATC     | p.V21I        |
| Pat_46 | Post-Resistance | PHF21B    | 112885 | 37 | 22 | 45309869  | 45309869  | Missense_Mutation | SNP | G | A | 5  | 15  | c.664C>T      | c.(664-666)CCT>TCT   | p.P222S       |
| Pat_46 | Post-Resistance | ACR       | 49     | 37 | 22 | 51178379  | 51178379  | Missense_Mutation | SNP | C | T | 3  | 9   | c.539C>T      | c.(538-540)GCC>GTC   | p.A180V       |
| Pat_46 | Post-Resistance | IQSEC1    | 9922   | 37 | 3  | 12957209  | 12957209  | Missense_Mutation | SNP | G | A | 7  | 48  | c.2087C>T     | c.(2086-2088)CCC>CTC | p.P696L       |
| Pat_46 | Post-Resistance | MYRIP     | 25924  | 37 | 3  | 40275539  | 40275539  | Missense_Mutation | SNP | G | A | 7  | 36  | c.2095G>A     | c.(2095-2097)GAA>AAA | p.E699K       |
| Pat_46 | Post-Resistance | CCBP2     | 1238   | 37 | 3  | 42906733  | 42906733  | Missense_Mutation | SNP | C | T | 4  | 44  | c.739C>T      | c.(739-741)CGG>TGG   | p.R247W       |
| Pat_46 | Post-Resistance | SEMA3B    | 7869   | 37 | 3  | 50307880  | 50307880  | Missense_Mutation | SNP | C | T | 6  | 45  | c.284C>T      | c.(283-285)CCT>CTT   | p.P95L        |
| Pat_46 | Post-Resistance | DOCK3     | 1795   | 37 | 3  | 51101878  | 51101878  | Splice_Site       | SNP | G | A | 11 | 83  | c.316_splice  | c.e6-1               | p.K106_splice |
| Pat_46 | Post-Resistance | DOCK3     | 1795   | 37 | 3  | 51352520  | 51352520  | Missense_Mutation | SNP | G | A | 4  | 35  | c.3363G>A     | c.(3361-3363)ATG>ATA | p.M1121I      |
| Pat_46 | Post-Resistance | CACNA1D   | 776    | 37 | 3  | 53835211  | 53835211  | Missense_Mutation | SNP | G | A | 6  | 43  | c.5167G>A     | c.(5167-5169)GAT>AAT | p.D1723N      |
| Pat_46 | Post-Resistance | ERC2      | 26059  | 37 | 3  | 55922538  | 55922538  | Missense_Mutation | SNP | C | T | 11 | 65  | c.2443G>A     | c.(2443-2445)GAA>AAA | p.E815K       |
| Pat_46 | Post-Resistance | CADPS     | 8618   | 37 | 3  | 62522224  | 62522224  | Missense_Mutation | SNP | C | T | 12 | 73  | c.1999G>A     | c.(1999-2001)GAA>AAA | p.E667K       |
| Pat_46 | Post-Resistance | ADAMTS9   | 56999  | 37 | 3  | 64640105  | 64640105  | Missense_Mutation | SNP | G | A | 5  | 72  | c.1240C>T     | c.(1240-1242)CCC>TCC | p.P414S       |
| Pat_46 | Post-Resistance | EPHA6     | 285220 | 37 | 3  | 97167559  | 97167559  | Missense_Mutation | SNP | G | A | 5  | 67  | c.1879G>A     | c.(1879-1881)GAA>AAA | p.E627K       |
| Pat_46 | Post-Resistance | DCBLD2    | 131566 | 37 | 3  | 98520477  | 98520477  | Missense_Mutation | SNP | C | T | 3  | 12  | c.1687G>A     | c.(1687-1689)GGC>AGC | p.G563S       |
| Pat_46 | Post-Resistance | MYH15     | 22989  | 37 | 3  | 108117645 | 108117645 | Missense_Mutation | SNP | C | T | 19 | 133 | c.5032G>A     | c.(5032-5034)GAT>AAT | p.D1678N      |
| Pat_46 | Post-Resistance | EAF2      | 55840  | 37 | 3  | 121575857 | 121575857 | Splice_Site       | SNP | G | A | 7  | 54  | c.339_splice  | c.e4-1               | p.R113_splice |
| Pat_46 | Post-Resistance | CD86      | 942    | 37 | 3  | 121838341 | 121838341 | Missense_Mutation | SNP | C | T | 5  | 47  | c.950C>T      | c.(949-951)TCG>TTG   | p.S317L       |
| Pat_46 | Post-Resistance | EEFSEC    | 60678  | 37 | 3  | 127981041 | 127981041 | Missense_Mutation | SNP | C | T | 6  | 39  | c.595C>T      | c.(595-597)CCA>TCA   | p.P199S       |
| Pat_46 | Post-Resistance | IL2ORB    | 53833  | 37 | 3  | 136699340 | 136699340 | Missense_Mutation | SNP | C | T | 15 | 110 | c.121C>T      | c.(121-123)CTC>TTC   | p.L41F        |
| Pat_46 | Post-Resistance | ATR       | 545    | 37 | 3  | 142188288 | 142188288 | Missense_Mutation | SNP | C | T | 11 | 57  | c.6443G>A     | c.(6442-6444)CGA>CAA | p.R2148Q      |
| Pat_46 | Post-Resistance | MED12L    | 116931 | 37 | 3  | 150845664 | 150845664 | Missense_Mutation | SNP | C | T | 6  | 42  | c.449C>T      | c.(448-450)TCT>TTT   | p.S150F       |
| Pat_46 | Post-Resistance | TRIM59    | 286827 | 37 | 3  | 160156050 | 160156050 | Missense_Mutation | SNP | A | C | 11 | 81  | c.922T>G      | c.(922-924)TCT>GCT   | p.S308A       |
| Pat_46 | Post-Resistance | SERPINI2  | 5276   | 37 | 3  | 167189541 | 167189541 | Missense_Mutation | SNP | C | T | 14 | 113 | c.82G>A       | c.(82-84)GAA>AAA     | p.E28K        |
| Pat_46 | Post-Resistance | WDR49     | 151790 | 37 | 3  | 167322110 | 167322110 | Missense_Mutation | SNP | G | A | 4  | 38  | c.82C>T       | c.(82-84)CAC>TAC     | p.H28Y        |
| Pat_46 | Post-Resistance | EIF2B5    | 8893   | 37 | 3  | 183861313 | 183861313 | Missense_Mutation | SNP | C | T | 6  | 27  | c.1829C>T     | c.(1828-1830)TCC>TTC | p.S610F       |
| Pat_46 | Post-Resistance | TPRG1     | 285386 | 37 | 3  | 188956652 | 188956652 | Missense_Mutation | SNP | C | T | 4  | 50  | c.433C>T      | c.(433-435)CGC>TGC   | p.R145C       |
| Pat_46 | Post-Resistance | WHSC1     | 7468   | 37 | 4  | 1961339   | 1961339   | Missense_Mutation | SNP | C | T | 8  | 47  | c.3127C>T     | c.(3127-3129)CCG>TCG | p.P1043S      |
| Pat_46 | Post-Resistance | ZFYVE28   | 57732  | 37 | 4  | 2306844   | 2306844   | Missense_Mutation | SNP | C | T | 4  | 18  | c.1223G>A     | c.(1222-1224)GGG>GAG | p.G408E       |
| Pat_46 | Post-Resistance | ZNF518B   | 85460  | 37 | 4  | 10446289  | 10446289  | Missense_Mutation | SNP | G | A | 10 | 47  | c.1664C>T     | c.(1663-1665)TCT>TTT | p.S555F       |
| Pat_46 | Post-Resistance | DCAF16    | 54876  | 37 | 4  | 17805374  | 17805374  | Missense_Mutation | SNP | G | A | 9  | 68  | c.391C>T      | c.(391-393)CCC>TCC   | p.P131S       |
| Pat_46 | Post-Resistance | SLIT2     | 9353   | 37 | 4  | 20543159  | 20543159  | Missense_Mutation | SNP | G | A | 7  | 41  | c.2060G>A     | c.(2059-2061)GGA>GAA | p.G687E       |
| Pat_46 | Post-Resistance | DHX15     | 1665   | 37 | 4  | 24544625  | 24544625  | Missense_Mutation | SNP | C | T | 11 | 91  | c.1273G>A     | c.(1273-1275)GAG>AAG | p.E425K       |
| Pat_46 | Post-Resistance | TEC       | 7006   | 37 | 4  | 48147095  | 48147095  | Splice_Site       | SNP | C | T | 6  | 63  | c.1470_splice | c.e14+1              | p.L490_splice |
| Pat_46 | Post-Resistance | EPHA5     | 2044   | 37 | 4  | 66356268  | 66356268  | Missense_Mutation | SNP | C | T | 5  | 43  | c.1229G>A     | c.(1228-1230)GGT>GAT | p.G410D       |
| Pat_46 | Post-Resistance | TMPRSS11D | 9407   | 37 | 4  | 68698974  | 68698974  | Missense_Mutation | SNP | C | T | 5  | 35  | c.640G>A      | c.(640-642)GGC>AGC   | p.G214S       |
| Pat_46 | Post-Resistance | UGT2B4    | 7363   | 37 | 4  | 70350974  | 70350974  | Missense_Mutation | SNP | G | A | 17 | 173 | c.1262C>T     | c.(1261-1263)TCG>TTG | p.S421L       |
| Pat_46 | Post-Resistance | CSN1S1    | 1446   | 37 | 4  | 70802196  | 70802196  | Missense_Mutation | SNP | G | A | 3  | 15  | c.152G>A      | c.(151-153)AGG>AAG   | p.R51K        |
| Pat_46 | Post-Resistance | PROL1     | 58503  | 37 | 4  | 71265005  | 71265005  | Missense_Mutation | SNP | G | A | 9  | 43  | c.3G>A        | c.(1-3)ATG>ATA       | p.M1I         |
| Pat_46 | Post-Resistance | NAA11     | 84779  | 37 | 4  | 80246788  | 80246788  | Missense_Mutation | SNP | G | A | 4  | 22  | c.244C>T      | c.(244-246)CGG>TGG   | p.R82W        |
| Pat_46 | Post-Resistance | ANTXR2    | 118429 | 37 | 4  | 80952816  | 80952816  | Missense_Mutation | SNP | G | A | 4  | 7   | c.827C>T      | c.(826-828)TCT>TTT   | p.S276F       |
| Pat_46 | Post-Resistance | WDFY3     | 23001  | 37 | 4  | 85722863  | 85722863  | Missense_Mutation | SNP | G | A | 11 | 66  | c.2762C>T     | c.(2761-2763)CCG>CTG | p.P921L       |
| Pat_46 | Post-Resistance | C4orf37   | 285555 | 37 | 4  | 98480246  | 98480246  | Missense_Mutation | SNP | C | T | 9  | 91  | c.1343G>A     | c.(1342-1344)GGA>GAA | p.G448E       |
| Pat_46 | Post-Resistance | INTS12    | 57117  | 37 | 4  | 106604152 | 106604152 | Missense_Mutation | SNP | G | A | 9  | 111 | c.1127C>T     | c.(1126-1128)TCA>TTA | p.S376L       |

|        |                 |                 |        |    |   |           |           |                   |     |    |    |    |     |                 |                      |          |
|--------|-----------------|-----------------|--------|----|---|-----------|-----------|-------------------|-----|----|----|----|-----|-----------------|----------------------|----------|
| Pat_46 | Post-Resistance | ENPEP           | 2028   | 37 | 4 | 111436534 | 111436534 | Missense_Mutation | SNP | G  | A  | 9  | 48  | c.1445G>A       | c.(1444-1446)GGA>GAA | p.G482E  |
| Pat_46 | Post-Resistance | PITX2           | 5308   | 37 | 4 | 111542496 | 111542496 | Missense_Mutation | SNP | C  | T  | 5  | 24  | c.214G>A        | c.(214-216)GAG>AAG   | p.E72K   |
| Pat_46 | Post-Resistance | UGT8            | 7368   | 37 | 4 | 115544379 | 115544379 | Missense_Mutation | SNP | G  | A  | 6  | 54  | c.343G>A        | c.(343-345)GAC>AAC   | p.D115N  |
| Pat_46 | Post-Resistance | KIAA1109        | 84162  | 37 | 4 | 123175410 | 123175410 | Missense_Mutation | SNP | G  | A  | 7  | 46  | c.5983G>A       | c.(5983-5985)GAT>AAT | p.D1995N |
| Pat_46 | Post-Resistance | ANKRD50         | 57182  | 37 | 4 | 125593264 | 125593264 | Missense_Mutation | SNP | C  | T  | 14 | 118 | c.1168G>A       | c.(1168-1170)GAT>AAT | p.D390N  |
| Pat_46 | Post-Resistance | FAT4            | 79633  | 37 | 4 | 126240196 | 126240196 | Missense_Mutation | SNP | C  | T  | 3  | 23  | c.2630C>T       | c.(2629-2631)ACT>ATT | p.T877I  |
| Pat_46 | Post-Resistance | FAT4            | 79633  | 37 | 4 | 126367686 | 126367686 | Missense_Mutation | SNP | C  | T  | 7  | 74  | c.7432C>T       | c.(7432-7434)CCT>TCT | p.P2478S |
| Pat_46 | Post-Resistance | PCDH18          | 54510  | 37 | 4 | 138451292 | 138451292 | Missense_Mutation | SNP | C  | T  | 14 | 99  | c.1951G>A       | c.(1951-1953)GAA>AAA | p.E651K  |
| Pat_46 | Post-Resistance | UCP1            | 7350   | 37 | 4 | 141483360 | 141483360 | Missense_Mutation | SNP | C  | T  | 10 | 107 | c.796G>A        | c.(796-798)GCT>ACT   | p.A266T  |
| Pat_46 | Post-Resistance | UCP1            | 7350   | 37 | 4 | 141484553 | 141484553 | Missense_Mutation | SNP | C  | T  | 11 | 91  | c.445G>A        | c.(445-447)GGA>AGA   | p.G149R  |
| Pat_46 | Post-Resistance | RNF150          | 57484  | 37 | 4 | 141832457 | 141832457 | Missense_Mutation | SNP | C  | T  | 4  | 33  | c.1039G>A       | c.(1039-1041)GGA>AGA | p.G347R  |
| Pat_46 | Post-Resistance | GYPA            | 2993   | 37 | 4 | 145040883 | 145040883 | Missense_Mutation | SNP | G  | A  | 5  | 60  | c.188C>T        | c.(187-189)TCA>TTA   | p.S63L   |
| Pat_46 | Post-Resistance | HHIP            | 64399  | 37 | 4 | 145629453 | 145629453 | Missense_Mutation | SNP | G  | A  | 5  | 30  | c.1291G>A       | c.(1291-1293)GAT>AAT | p.D431N  |
| Pat_46 | Post-Resistance | DDX60L          | 91351  | 37 | 4 | 169348425 | 169348425 | Missense_Mutation | SNP | G  | A  | 6  | 29  | c.1726C>T       | c.(1726-1728)CTC>TTC | p.L576F  |
| Pat_46 | Post-Resistance | ADAM29          | 11086  | 37 | 4 | 175897562 | 175897562 | Missense_Mutation | SNP | G  | A  | 7  | 58  | c.886G>A        | c.(886-888)GGG>AGG   | p.G296R  |
| Pat_46 | Post-Resistance | WDR17           | 116966 | 37 | 4 | 177041134 | 177041134 | Missense_Mutation | SNP | C  | T  | 8  | 91  | c.496C>T        | c.(496-498)CAC>TAC   | p.H166Y  |
| Pat_46 | Post-Resistance | VEGFC           | 7424   | 37 | 4 | 177608980 | 177608980 | Missense_Mutation | SNP | C  | T  | 6  | 34  | c.806G>A        | c.(805-807)GGA>GAA   | p.G269E  |
| Pat_46 | Post-Resistance | PDCD6           | 10016  | 37 | 5 | 306758    | 306758    | Missense_Mutation | SNP | G  | A  | 7  | 39  | c.250G>A        | c.(250-252)GAG>AAG   | p.E84K   |
| Pat_46 | Post-Resistance | SLC6A18         | 348932 | 37 | 5 | 1225747   | 1225747   | Missense_Mutation | SNP | G  | A  | 3  | 22  | c.155G>A        | c.(154-156)GGA>GAA   | p.G52E   |
| Pat_46 | Post-Resistance | TAS2R1          | 50834  | 37 | 5 | 9629784   | 9629784   | Missense_Mutation | SNP | T  | C  | 2  | 19  | c.361A>G        | c.(361-363)AGG>GGG   | p.R121G  |
| Pat_46 | Post-Resistance | PRLR            | 5618   | 37 | 5 | 35065648  | 35065648  | Missense_Mutation | SNP | C  | T  | 6  | 35  | c.1412G>A       | c.(1411-1413)GGA>GAA | p.G471E  |
| Pat_46 | Post-Resistance | HEATR7B2        | 133558 | 37 | 5 | 41033154  | 41033154  | Missense_Mutation | SNP | C  | T  | 4  | 19  | c.2350G>A       | c.(2350-2352)GGT>AGT | p.G784S  |
| Pat_46 | Post-Resistance | DHX29           | 54505  | 37 | 5 | 54593223  | 54593223  | Missense_Mutation | SNP | C  | T  | 4  | 32  | c.265G>A        | c.(265-267)GTA>ATA   | p.V89I   |
| Pat_46 | Post-Resistance | ERCC8           | 1161   | 37 | 5 | 60199531  | 60199531  | Missense_Mutation | SNP | C  | T  | 8  | 82  | c.494G>A        | c.(493-495)GGA>GAA   | p.G165E  |
| Pat_46 | Post-Resistance | MAP1B           | 4131   | 37 | 5 | 71493512  | 71493512  | Missense_Mutation | SNP | C  | T  | 3  | 24  | c.4330C>T       | c.(4330-4332)CCA>TCA | p.P1444S |
| Pat_46 | Post-Resistance | TMEM174         | 134288 | 37 | 5 | 72469955  | 72469955  | Missense_Mutation | SNP | C  | T  | 5  | 41  | c.695C>T        | c.(694-696)CCT>CTT   | p.P232L  |
| Pat_46 | Post-Resistance | LOC644936       | 644936 | 37 | 5 | 79595930  | 79595930  | Missense_Mutation | SNP | G  | A  | 4  | 8   | c.227C>T        | c.(226-228)TCC>TTC   | p.S76F   |
| Pat_46 | Post-Resistance | GPR98           | 84059  | 37 | 5 | 90016807  | 90016807  | Nonsense_Mutation | SNP | C  | T  | 8  | 79  | c.9679C>T       | c.(9679-9681)CGA>TGA | p.R3227* |
| Pat_46 | Post-Resistance | LNPEP           | 4012   | 37 | 5 | 96329625  | 96329625  | Missense_Mutation | SNP | G  | A  | 6  | 56  | c.1357G>A       | c.(1357-1359)GCG>ACG | p.A453T  |
| Pat_46 | Post-Resistance | SRP19           | 6728   | 37 | 5 | 112203167 | 112203167 | Missense_Mutation | SNP | G  | A  | 5  | 50  | c.368G>A        | c.(367-369)GGA>GAA   | p.G123E  |
| Pat_46 | Post-Resistance | CEP120          | 153241 | 37 | 5 | 122726902 | 122726902 | Missense_Mutation | SNP | G  | A  | 9  | 107 | c.940C>T        | c.(940-942)CCA>TCA   | p.P314S  |
| Pat_46 | Post-Resistance | LMNB1           | 4001   | 37 | 5 | 126147552 | 126147552 | Missense_Mutation | SNP | G  | A  | 4  | 40  | c.901G>A        | c.(901-903)GAG>AAG   | p.E301K  |
| Pat_46 | Post-Resistance | MEGF10          | 84466  | 37 | 5 | 126732229 | 126732229 | Missense_Mutation | SNP | G  | A  | 12 | 96  | c.418G>A        | c.(418-420)GAT>AAT   | p.D140N  |
| Pat_46 | Post-Resistance | ANKHD1-EIF4EBP: | 404734 | 37 | 5 | 139892499 | 139892499 | Missense_Mutation | SNP | T  | G  | 8  | 57  | c.4191T>G       | c.(4189-4191)ATT>ATG | p.I1397M |
| Pat_46 | Post-Resistance | PCDHA3          | 56145  | 37 | 5 | 140181752 | 140181752 | Missense_Mutation | SNP | G  | A  | 6  | 66  | c.970G>A        | c.(970-972)GAT>AAT   | p.D324N  |
| Pat_46 | Post-Resistance | PCDHA7          | 56141  | 37 | 5 | 140214185 | 140214185 | Missense_Mutation | SNP | G  | A  | 14 | 94  | c.217G>A        | c.(217-219)GAT>AAT   | p.D73N   |
| Pat_46 | Post-Resistance | PCDHA13         | 56136  | 37 | 5 | 140263676 | 140263676 | Missense_Mutation | SNP | C  | T  | 8  | 54  | c.1823C>T       | c.(1822-1824)TCG>TTG | p.S608L  |
| Pat_46 | Post-Resistance | PCDHB11         | 56125  | 37 | 5 | 140581524 | 140581524 | Missense_Mutation | SNP | C  | T  | 8  | 75  | c.2177C>T       | c.(2176-2178)TCG>TTG | p.S726L  |
| Pat_46 | Post-Resistance | PCDHB12         | 56124  | 37 | 5 | 140590287 | 140590287 | Missense_Mutation | SNP | C  | T  | 6  | 98  | c.1808C>T       | c.(1807-1809)TCG>TTG | p.S603L  |
| Pat_46 | Post-Resistance | PCDH1           | 5097   | 37 | 5 | 141236930 | 141236930 | Missense_Mutation | SNP | G  | A  | 3  | 9   | c.3206C>T       | c.(3205-3207)CCG>CTG | p.P1069L |
| Pat_46 | Post-Resistance | SLC26A2         | 1836   | 37 | 5 | 149357514 | 149357514 | Missense_Mutation | SNP | C  | T  | 7  | 70  | c.299C>T        | c.(298-300)CCA>CTA   | p.P100L  |
| Pat_46 | Post-Resistance | ATP10B          | 23120  | 37 | 5 | 160018110 | 160018110 | Missense_Mutation | SNP | C  | T  | 3  | 22  | c.3601G>A       | c.(3601-3603)GAT>AAT | p.D1201N |
| Pat_46 | Post-Resistance | GABRA6          | 2559   | 37 | 5 | 161128618 | 161128618 | Missense_Mutation | SNP | C  | A  | 7  | 45  | c.1201C>A       | c.(1201-1203)CCT>ACT | p.P401T  |
| Pat_46 | Post-Resistance | WWC1            | 23286  | 37 | 5 | 167836957 | 167836957 | Missense_Mutation | SNP | G  | A  | 13 | 65  | c.898G>A        | c.(898-900)GAG>AAG   | p.E300K  |
| Pat_46 | Post-Resistance | SLIT3           | 6586   | 37 | 5 | 168098219 | 168098219 | Missense_Mutation | SNP | G  | A  | 4  | 19  | c.4111C>T       | c.(4111-4113)CCC>TCC | p.P1371S |
| Pat_46 | Post-Resistance | FAM153C         | 653316 | 37 | 5 | 177473889 | 177473889 | Missense_Mutation | SNP | C  | T  | 7  | 27  | c.290C>T        | c.(289-291)TCC>TTC   | p.S97F   |
| Pat_46 | Post-Resistance | DSP             | 1832   | 37 | 6 | 7570741   | 7570742   | Missense_Mutation | DNP | CC | TT | 5  | 59  | c.1646_1647CC>T | c.(1645-1647)TCC>TTT | p.S549F  |

|        |                 |           |        |    |   |           |           |                   |     |    |    |    |     |                 |                        |          |
|--------|-----------------|-----------|--------|----|---|-----------|-----------|-------------------|-----|----|----|----|-----|-----------------|------------------------|----------|
| Pat_46 | Post-Resistance | HIVEP1    | 3096   | 37 | 6 | 12015883  | 12015883  | Missense_Mutation | SNP | C  | T  | 12 | 132 | c.22C>T         | c.(22-24)CAT>TAT       | p.H8Y    |
| Pat_46 | Post-Resistance | CAP2      | 10486  | 37 | 6 | 17507904  | 17507904  | Missense_Mutation | SNP | G  | A  | 7  | 122 | c.477G>A        | c.(475-477)ATG>ATA     | p.M159I  |
| Pat_46 | Post-Resistance | LRRC16A   | 55604  | 37 | 6 | 25516015  | 25516015  | Missense_Mutation | SNP | G  | A  | 8  | 14  | c.1745G>A       | c.(1744-1746)GGA>GAA   | p.G582E  |
| Pat_46 | Post-Resistance | HIST1H2BE | 8344   | 37 | 6 | 26184054  | 26184054  | Missense_Mutation | SNP | C  | T  | 11 | 61  | c.31C>T         | c.(31-33)CCG>TCG       | p.P11S   |
| Pat_46 | Post-Resistance | BTN2A3    | 54718  | 37 | 6 | 26431314  | 26431314  | Missense_Mutation | SNP | T  | A  | 3  | 24  | c.1232T>A       | c.(1231-1233)CTG>CAG   | p.L411Q  |
| Pat_46 | Post-Resistance | BTN1A1    | 696    | 37 | 6 | 26508950  | 26508950  | Missense_Mutation | SNP | G  | A  | 22 | 70  | c.1129G>A       | c.(1129-1131)GAG>AAG   | p.E377K  |
| Pat_46 | Post-Resistance | PRSS16    | 10279  | 37 | 6 | 27222818  | 27222818  | Missense_Mutation | SNP | G  | A  | 9  | 68  | c.1384G>A       | c.(1384-1386)GAA>AAA   | p.E462K  |
| Pat_46 | Post-Resistance | GPX5      | 2880   | 37 | 6 | 28497304  | 28497304  | Missense_Mutation | SNP | C  | T  | 12 | 49  | c.164C>T        | c.(163-165)TCC>TTC     | p.S55F   |
| Pat_46 | Post-Resistance | PPP1R11   | 6992   | 37 | 6 | 30037019  | 30037019  | Missense_Mutation | SNP | C  | T  | 38 | 106 | c.317C>T        | c.(316-318)ACC>ATC     | p.T106I  |
| Pat_46 | Post-Resistance | MDC1      | 9656   | 37 | 6 | 30680836  | 30680836  | Missense_Mutation | SNP | G  | A  | 4  | 50  | c.883C>T        | c.(883-885)CCT>TCT     | p.P295S  |
| Pat_46 | Post-Resistance | C6orf15   | 29113  | 37 | 6 | 31079628  | 31079628  | Missense_Mutation | SNP | G  | A  | 4  | 29  | c.508C>T        | c.(508-510)CAC>TAC     | p.H170Y  |
| Pat_46 | Post-Resistance | BAT1      | 7919   | 37 | 6 | 31498949  | 31498949  | Missense_Mutation | SNP | C  | T  | 8  | 86  | c.1003G>A       | c.(1003-1005)GAT>AAT   | p.D335N  |
| Pat_46 | Post-Resistance | TNF       | 7124   | 37 | 6 | 31545117  | 31545117  | Missense_Mutation | SNP | C  | T  | 7  | 18  | c.505C>T        | c.(505-507)CTC>TTC     | p.L169F  |
| Pat_46 | Post-Resistance | BAT3      | 7917   | 37 | 6 | 31615444  | 31615444  | Missense_Mutation | SNP | G  | A  | 6  | 40  | c.730C>T        | c.(730-732)CCA>TCA     | p.P244S  |
| Pat_46 | Post-Resistance | SLC39A7   | 7922   | 37 | 6 | 33170381  | 33170381  | Missense_Mutation | SNP | G  | A  | 7  | 40  | c.844G>A        | c.(844-846)GAA>AAA     | p.E282K  |
| Pat_46 | Post-Resistance | DNAH8     | 1769   | 37 | 6 | 38919096  | 38919096  | Missense_Mutation | SNP | C  | T  | 9  | 63  | c.11600C>T      | c.(11599-11601)TCT>TTT | p.S3867F |
| Pat_46 | Post-Resistance | DNAH8     | 1769   | 37 | 6 | 38980323  | 38980323  | Missense_Mutation | SNP | G  | A  | 13 | 143 | c.12973G>A      | c.(12973-12975)GAA>AAA | p.E4325K |
| Pat_46 | Post-Resistance | XPO5      | 57510  | 37 | 6 | 43541245  | 43541245  | Missense_Mutation | SNP | C  | T  | 5  | 50  | c.199G>A        | c.(199-201)GGC>AGC     | p.G67S   |
| Pat_46 | Post-Resistance | CRISP2    | 7180   | 37 | 6 | 49660530  | 49660530  | Missense_Mutation | SNP | C  | T  | 8  | 45  | c.688G>A        | c.(688-690)GAA>AAA     | p.E230K  |
| Pat_46 | Post-Resistance | LRRC1     | 55227  | 37 | 6 | 53764608  | 53764608  | Missense_Mutation | SNP | C  | T  | 6  | 34  | c.706C>T        | c.(706-708)CCT>TCT     | p.P236S  |
| Pat_46 | Post-Resistance | FAM83B    | 222584 | 37 | 6 | 54805519  | 54805519  | Missense_Mutation | SNP | C  | T  | 4  | 31  | c.1750C>T       | c.(1750-1752)CCT>TCT   | p.P584S  |
| Pat_46 | Post-Resistance | FAM83B    | 222584 | 37 | 6 | 54806308  | 54806308  | Missense_Mutation | SNP | G  | A  | 5  | 32  | c.2539G>A       | c.(2539-2541)GAA>AAA   | p.E847K  |
| Pat_46 | Post-Resistance | BMP5      | 653    | 37 | 6 | 55739516  | 55739516  | Missense_Mutation | SNP | C  | T  | 15 | 75  | c.148G>A        | c.(148-150)GAA>AAA     | p.E50K   |
| Pat_46 | Post-Resistance | GUSBL2    | 375513 | 37 | 6 | 58250821  | 58250821  | Missense_Mutation | SNP | G  | A  | 3  | 20  | c.431C>T        | c.(430-432)TCG>TTG     | p.S144L  |
| Pat_46 | Post-Resistance | RIMS1     | 22999  | 37 | 6 | 72968786  | 72968786  | Missense_Mutation | SNP | G  | A  | 5  | 33  | c.3025G>A       | c.(3025-3027)GAT>AAT   | p.D1009N |
| Pat_46 | Post-Resistance | UBE2CBP   | 90025  | 37 | 6 | 83667051  | 83667051  | Missense_Mutation | SNP | G  | A  | 9  | 48  | c.1129C>T       | c.(1129-1131)CGC>TGC   | p.R377C  |
| Pat_46 | Post-Resistance | EPHA7     | 2045   | 37 | 6 | 93964415  | 93964415  | Missense_Mutation | SNP | C  | T  | 7  | 35  | c.2482G>A       | c.(2482-2484)GAA>AAA   | p.E828K  |
| Pat_46 | Post-Resistance | SIM1      | 6492   | 37 | 6 | 100838850 | 100838850 | Missense_Mutation | SNP | T  | G  | 11 | 57  | c.1688A>C       | c.(1687-1689)AAA>ACA   | p.K563T  |
| Pat_46 | Post-Resistance | DDO       | 8528   | 37 | 6 | 110726085 | 110726085 | Missense_Mutation | SNP | C  | T  | 5  | 30  | c.434G>A        | c.(433-435)CGA>CAA     | p.R145Q  |
| Pat_46 | Post-Resistance | DSE       | 29940  | 37 | 6 | 116752138 | 116752138 | Nonsense_Mutation | SNP | T  | A  | 5  | 34  | c.692T>A        | c.(691-693)TTA>TAA     | p.L231*  |
| Pat_46 | Post-Resistance | ARHGAP18  | 93663  | 37 | 6 | 129901275 | 129901275 | Missense_Mutation | SNP | C  | T  | 4  | 44  | c.1840G>A       | c.(1840-1842)GGG>AGG   | p.G614R  |
| Pat_46 | Post-Resistance | IL2ORA    | 53832  | 37 | 6 | 137332467 | 137332467 | Nonsense_Mutation | SNP | C  | T  | 9  | 57  | c.347G>A        | c.(346-348)TGG>TAG     | p.W116*  |
| Pat_46 | Post-Resistance | KIAA1244  | 57221  | 37 | 6 | 138628471 | 138628471 | Missense_Mutation | SNP | G  | A  | 15 | 64  | c.3910G>A       | c.(3910-3912)GAA>AAA   | p.E1304K |
| Pat_46 | Post-Resistance | SYNE1     | 23345  | 37 | 6 | 152454491 | 152454491 | Missense_Mutation | SNP | G  | A  | 9  | 80  | c.25921C>T      | c.(25921-25923)CGG>TGC | p.R8641W |
| Pat_46 | Post-Resistance | MLLT4     | 4301   | 37 | 6 | 168352148 | 168352149 | Missense_Mutation | DNP | CC | TT | 8  | 69  | c.4090_4091CC>T | c.(4090-4092)CCT>TTT   | p.P1364F |
| Pat_46 | Post-Resistance | THSD7A    | 221981 | 37 | 7 | 11441554  | 11441554  | Nonsense_Mutation | SNP | G  | A  | 9  | 109 | c.4279C>T       | c.(4279-4281)CAG>TAG   | p.Q1427* |
| Pat_46 | Post-Resistance | THSD7A    | 221981 | 37 | 7 | 11485877  | 11485877  | Missense_Mutation | SNP | C  | T  | 19 | 136 | c.2875G>A       | c.(2875-2877)GAC>AAC   | p.D959N  |
| Pat_46 | Post-Resistance | PRPS1L1   | 221823 | 37 | 7 | 18067003  | 18067003  | Nonsense_Mutation | SNP | G  | A  | 9  | 62  | c.403C>T        | c.(403-405)CAG>TAG     | p.Q135*  |
| Pat_46 | Post-Resistance | HDAC9     | 9734   | 37 | 7 | 18788643  | 18788643  | Missense_Mutation | SNP | C  | T  | 5  | 23  | c.1916C>T       | c.(1915-1917)CCC>CTC   | p.P639L  |
| Pat_46 | Post-Resistance | ITGB8     | 3696   | 37 | 7 | 20441600  | 20441600  | Missense_Mutation | SNP | C  | T  | 33 | 222 | c.1538C>T       | c.(1537-1539)TCA>TTA   | p.S513L  |
| Pat_46 | Post-Resistance | RAPGEF5   | 9771   | 37 | 7 | 22259516  | 22259516  | Missense_Mutation | SNP | G  | A  | 12 | 65  | c.506C>T        | c.(505-507)ACG>ATG     | p.T169M  |
| Pat_46 | Post-Resistance | GGCT      | 79017  | 37 | 7 | 30538488  | 30538488  | Missense_Mutation | SNP | T  | G  | 15 | 87  | c.354A>C        | c.(352-354)AAA>AAC     | p.K118N  |
| Pat_46 | Post-Resistance | ADCYAP1R1 | 117    | 37 | 7 | 31146129  | 31146129  | Missense_Mutation | SNP | G  | A  | 6  | 31  | c.1238G>A       | c.(1237-1239)CGA>CAA   | p.R413Q  |
| Pat_46 | Post-Resistance | TXNDC3    | 51314  | 37 | 7 | 37907434  | 37907434  | Missense_Mutation | SNP | G  | A  | 7  | 45  | c.752G>A        | c.(751-753)CGA>CAA     | p.R251Q  |
| Pat_46 | Post-Resistance | VSTM2A    | 222008 | 37 | 7 | 54610488  | 54610488  | Missense_Mutation | SNP | G  | A  | 10 | 68  | c.65G>A         | c.(64-66)GGG>GAG       | p.G22E   |
| Pat_46 | Post-Resistance | ZNF716    | 441234 | 37 | 7 | 57528735  | 57528735  | Missense_Mutation | SNP | G  | A  | 7  | 28  | c.568G>A        | c.(568-570)GAT>AAT     | p.D190N  |
| Pat_46 | Post-Resistance | ZNF679    | 168417 | 37 | 7 | 63721281  | 63721281  | Missense_Mutation | SNP | G  | A  | 5  | 40  | c.236G>A        | c.(235-237)AGA>AAA     | p.R79K   |

|        |                 |         |        |    |   |           |           |                        |     |    |    |    |     |                 |                        |          |
|--------|-----------------|---------|--------|----|---|-----------|-----------|------------------------|-----|----|----|----|-----|-----------------|------------------------|----------|
| Pat_46 | Post-Resistance | ZNF107  | 51427  | 37 | 7 | 64126635  | 64126635  | Translation_Start_Site | SNP | C  | T  | 7  | 62  | c.-661C>T       | (-663--659)GACGC>GATGC |          |
| Pat_46 | Post-Resistance | HGF     | 3082   | 37 | 7 | 81335690  | 81335690  | Missense_Mutation      | SNP | C  | T  | 19 | 116 | c.1670G>A       | c.(1669-1671)GGA>GAA   | p.G557E  |
| Pat_46 | Post-Resistance | RUNDC3B | 154661 | 37 | 7 | 87280226  | 87280226  | Missense_Mutation      | SNP | G  | A  | 5  | 55  | c.211G>A        | c.(211-213)GAA>AAA     | p.E71K   |
| Pat_46 | Post-Resistance | FZD1    | 8321   | 37 | 7 | 90895178  | 90895178  | Missense_Mutation      | SNP | T  | C  | 5  | 41  | c.983T>C        | c.(982-984)GTG>GCG     | p.V328A  |
| Pat_46 | Post-Resistance | CALCR   | 799    | 37 | 7 | 93098063  | 93098063  | Missense_Mutation      | SNP | G  | A  | 11 | 82  | c.539C>T        | c.(538-540)ACC>ATC     | p.T180I  |
| Pat_46 | Post-Resistance | SRRT    | 51593  | 37 | 7 | 100482042 | 100482042 | Missense_Mutation      | SNP | G  | C  | 2  | 8   | c.811G>C        | c.(811-813)GAG>CAG     | p.E271Q  |
| Pat_46 | Post-Resistance | MUC17   | 140453 | 37 | 7 | 100682297 | 100682297 | Missense_Mutation      | SNP | A  | G  | 33 | 168 | c.7600A>G       | c.(7600-7602)ACC>GCC   | p.T2534A |
| Pat_46 | Post-Resistance | RABL5   | 64792  | 37 | 7 | 100958513 | 100958513 | Missense_Mutation      | SNP | G  | A  | 4  | 25  | c.460C>T        | c.(460-462)CCT>TCT     | p.P154S  |
| Pat_46 | Post-Resistance | RELN    | 5649   | 37 | 7 | 103214615 | 103214615 | Missense_Mutation      | SNP | C  | T  | 21 | 98  | c.4435G>A       | c.(4435-4437)GAT>AAT   | p.D1479N |
| Pat_46 | Post-Resistance | RELN    | 5649   | 37 | 7 | 103243912 | 103243912 | Missense_Mutation      | SNP | C  | T  | 4  | 38  | c.3172G>A       | c.(3172-3174)GAA>AAA   | p.E1058K |
| Pat_46 | Post-Resistance | PPP1R3A | 5506   | 37 | 7 | 113517816 | 113517816 | Missense_Mutation      | SNP | C  | T  | 8  | 78  | c.3331G>A       | c.(3331-3333)GAA>AAA   | p.E1111K |
| Pat_46 | Post-Resistance | WNT2    | 7472   | 37 | 7 | 116937870 | 116937870 | Missense_Mutation      | SNP | G  | A  | 18 | 94  | c.649C>T        | c.(649-651)CTC>TTC     | p.L217F  |
| Pat_46 | Post-Resistance | CFTR    | 1080   | 37 | 7 | 117174417 | 117174417 | Missense_Mutation      | SNP | G  | A  | 6  | 65  | c.577G>A        | c.(577-579)GAA>AAA     | p.E193K  |
| Pat_46 | Post-Resistance | PTPRZ1  | 5803   | 37 | 7 | 121653193 | 121653193 | Missense_Mutation      | SNP | C  | T  | 20 | 122 | c.4093C>T       | c.(4093-4095)CAT>TAT   | p.H1365Y |
| Pat_46 | Post-Resistance | DGKI    | 9162   | 37 | 7 | 137271862 | 137271862 | Missense_Mutation      | SNP | C  | T  | 34 | 46  | c.1406G>A       | c.(1405-1407)CGA>CAA   | p.R469Q  |
| Pat_46 | Post-Resistance | BRAF    | 673    | 37 | 7 | 140453136 | 140453137 | Missense_Mutation      | DNP | AC | TT | 34 | 64  | .1798_1799GT>Av | c.(1798-1800)GTG>AAG   | p.V600K  |
| Pat_46 | Post-Resistance | BRAF    | 673    | 37 | 7 | 140494149 | 140494149 | Missense_Mutation      | SNP | G  | A  | 55 | 54  | c.1099C>T       | c.(1099-1101)CCC>TCC   | p.P367S  |
| Pat_46 | Post-Resistance | CLEC5A  | 23601  | 37 | 7 | 141635652 | 141635652 | Missense_Mutation      | SNP | C  | T  | 24 | 55  | c.307G>A        | c.(307-309)GGA>AGA     | p.G103R  |
| Pat_46 | Post-Resistance | TAS2R38 | 5726   | 37 | 7 | 141673425 | 141673425 | Missense_Mutation      | SNP | G  | A  | 7  | 101 | c.65C>T         | c.(64-66)TCA>TTA       | p.S22L   |
| Pat_46 | Post-Resistance | PRSS1   | 5644   | 37 | 7 | 142460779 | 142460779 | Missense_Mutation      | SNP | G  | A  | 14 | 30  | c.652G>A        | c.(652-654)GAT>AAT     | p.D218N  |
| Pat_46 | Post-Resistance | OR6V1   | 346517 | 37 | 7 | 142750081 | 142750081 | Missense_Mutation      | SNP | C  | T  | 28 | 76  | c.644C>T        | c.(643-645)TCC>TTC     | p.S215F  |
| Pat_46 | Post-Resistance | FAM115C | 285966 | 37 | 7 | 143417077 | 143417077 | Missense_Mutation      | SNP | G  | A  | 5  | 9   | c.925G>A        | c.(925-927)GAT>AAT     | p.D309N  |
| Pat_46 | Post-Resistance | OR2A5   | 393046 | 37 | 7 | 143748144 | 143748144 | Missense_Mutation      | SNP | C  | T  | 11 | 87  | c.650C>T        | c.(649-651)TCC>TTC     | p.S217F  |
| Pat_46 | Post-Resistance | EZH2    | 2146   | 37 | 7 | 148506474 | 148506474 | Missense_Mutation      | SNP | C  | T  | 10 | 135 | c.2023G>A       | c.(2023-2025)GTG>ATG   | p.V675M  |
| Pat_46 | Post-Resistance | SSPO    | 23145  | 37 | 7 | 149492370 | 149492370 | Missense_Mutation      | SNP | G  | A  | 11 | 22  | c.6259G>A       | c.(6259-6261)GAA>AAA   | p.E2087K |
| Pat_46 | Post-Resistance | AGAP3   | 116988 | 37 | 7 | 150817132 | 150817132 | Missense_Mutation      | SNP | C  | T  | 3  | 18  | c.1028C>T       | c.(1027-1029)CCC>CTC   | p.P343L  |
| Pat_46 | Post-Resistance | MYOM2   | 9172   | 37 | 8 | 2088749   | 2088749   | Missense_Mutation      | SNP | A  | G  | 5  | 47  | c.3904A>G       | c.(3904-3906)ACT>GCT   | p.T1302A |
| Pat_46 | Post-Resistance | CSMD1   | 64478  | 37 | 8 | 2944658   | 2944658   | Missense_Mutation      | SNP | C  | T  | 4  | 24  | c.7438G>A       | c.(7438-7440)GGC>AGC   | p.G2480S |
| Pat_46 | Post-Resistance | CSMD1   | 64478  | 37 | 8 | 3265610   | 3265610   | Missense_Mutation      | SNP | C  | T  | 5  | 47  | c.1885G>A       | c.(1885-1887)GAT>AAT   | p.D629N  |
| Pat_46 | Post-Resistance | FGF20   | 26281  | 37 | 8 | 16850627  | 16850627  | Missense_Mutation      | SNP | G  | A  | 6  | 70  | c.590C>T        | c.(589-591)CCA>CTA     | p.P197L  |
| Pat_46 | Post-Resistance | SH2D4A  | 63898  | 37 | 8 | 19250880  | 19250880  | Missense_Mutation      | SNP | C  | T  | 9  | 61  | c.1100C>T       | c.(1099-1101)CCC>CTC   | p.P367L  |
| Pat_46 | Post-Resistance | POLR3D  | 661    | 37 | 8 | 22107963  | 22107963  | Missense_Mutation      | SNP | G  | A  | 7  | 37  | c.1129G>A       | c.(1129-1131)GGA>AGA   | p.G377R  |
| Pat_46 | Post-Resistance | ADAM7   | 8756   | 37 | 8 | 24346730  | 24346730  | Missense_Mutation      | SNP | G  | A  | 5  | 54  | c.1150G>A       | c.(1150-1152)GAT>AAT   | p.D384N  |
| Pat_46 | Post-Resistance | EBF2    | 64641  | 37 | 8 | 25744298  | 25744298  | Missense_Mutation      | SNP | C  | T  | 11 | 36  | c.982G>A        | c.(982-984)GGA>AGA     | p.G328R  |
| Pat_46 | Post-Resistance | PNMA2   | 10687  | 37 | 8 | 26365277  | 26365277  | Missense_Mutation      | SNP | C  | T  | 4  | 21  | c.995G>A        | c.(994-996)CGG>CAG     | p.R332Q  |
| Pat_46 | Post-Resistance | IDO1    | 3620   | 37 | 8 | 39776418  | 39776418  | Missense_Mutation      | SNP | G  | A  | 6  | 52  | c.388G>A        | c.(388-390)GTC>ATC     | p.V130I  |
| Pat_46 | Post-Resistance | IDO2    | 169355 | 37 | 8 | 39872871  | 39872871  | Missense_Mutation      | SNP | G  | A  | 4  | 15  | c.1013G>A       | c.(1012-1014)GGA>GAA   | p.G338E  |
| Pat_46 | Post-Resistance | GINS4   | 84296  | 37 | 8 | 41393924  | 41393924  | Missense_Mutation      | SNP | C  | T  | 4  | 23  | c.142C>T        | c.(142-144)CCT>TCT     | p.P48S   |
| Pat_46 | Post-Resistance | SLC20A2 | 6575   | 37 | 8 | 42302254  | 42302254  | Missense_Mutation      | SNP | C  | T  | 4  | 22  | c.640G>A        | c.(640-642)GCC>ACC     | p.A214T  |
| Pat_46 | Post-Resistance | MCM4    | 4173   | 37 | 8 | 48875363  | 48875363  | Missense_Mutation      | SNP | G  | A  | 16 | 137 | c.541G>A        | c.(541-543)GAA>AAA     | p.E181K  |
| Pat_46 | Post-Resistance | EFCAB1  | 79645  | 37 | 8 | 49637324  | 49637324  | Missense_Mutation      | SNP | G  | A  | 4  | 39  | c.613C>T        | c.(613-615)CCA>TCA     | p.P205S  |
| Pat_46 | Post-Resistance | RP1     | 6101   | 37 | 8 | 55539065  | 55539065  | Missense_Mutation      | SNP | G  | A  | 6  | 38  | c.2623G>A       | c.(2623-2625)GAT>AAT   | p.D875N  |
| Pat_46 | Post-Resistance | CA8     | 767    | 37 | 8 | 61178606  | 61178606  | Missense_Mutation      | SNP | G  | A  | 3  | 23  | c.295C>T        | c.(295-297)CTT>TTT     | p.L99F   |
| Pat_46 | Post-Resistance | CYP7B1  | 9420   | 37 | 8 | 65528256  | 65528257  | Missense_Mutation      | DNP | TC | AT | 8  | 96  | c.841_842GA>AT  | c.(841-843)GAA>ATA     | p.E281I  |
| Pat_46 | Post-Resistance | SGK3    | 23678  | 37 | 8 | 67759522  | 67759522  | Missense_Mutation      | SNP | C  | T  | 7  | 52  | c.1169C>T       | c.(1168-1170)TCC>TTC   | p.S390F  |
| Pat_46 | Post-Resistance | CA1     | 759    | 37 | 8 | 86249277  | 86249277  | Missense_Mutation      | SNP | G  | A  | 4  | 30  | c.251C>T        | c.(250-252)CCT>CTT     | p.P84L   |
| Pat_46 | Post-Resistance | RGS22   | 26166  | 37 | 8 | 101075915 | 101075915 | Missense_Mutation      | SNP | G  | A  | 9  | 26  | c.1081C>T       | c.(1081-1083)CAT>TAT   | p.H361Y  |

|        |                 |          |        |    |   |           |           |                   |     |   |   |    |     |           |                      |          |
|--------|-----------------|----------|--------|----|---|-----------|-----------|-------------------|-----|---|---|----|-----|-----------|----------------------|----------|
| Pat_46 | Post-Resistance | RIMS2    | 9699   | 37 | 8 | 104898050 | 104898050 | Missense_Mutation | SNP | G | A | 4  | 10  | c.557G>A  | c.(556-558)CGA>CAA   | p.R186Q  |
| Pat_46 | Post-Resistance | PKHD1L1  | 93035  | 37 | 8 | 110394750 | 110394750 | Missense_Mutation | SNP | G | A | 14 | 128 | c.367G>A  | c.(367-369)GAA>AAA   | p.E123K  |
| Pat_46 | Post-Resistance | PKHD1L1  | 93035  | 37 | 8 | 110413769 | 110413769 | Missense_Mutation | SNP | C | T | 5  | 50  | c.1325C>T | c.(1324-1326)TCC>TTC | p.S442F  |
| Pat_46 | Post-Resistance | PKHD1L1  | 93035  | 37 | 8 | 110457449 | 110457449 | Missense_Mutation | SNP | G | A | 5  | 32  | c.5351G>A | c.(5350-5352)GGA>GAA | p.G1784E |
| Pat_46 | Post-Resistance | FER1L6   | 654463 | 37 | 8 | 125076600 | 125076600 | Missense_Mutation | SNP | C | T | 5  | 75  | c.3341C>T | c.(3340-3342)TCG>TTG | p.S1114L |
| Pat_46 | Post-Resistance | KIFC2    | 90990  | 37 | 8 | 145697560 | 145697560 | Nonsense_Mutation | SNP | C | T | 4  | 13  | c.1525C>T | c.(1525-1527)CAG>TAG | p.Q509*  |
| Pat_46 | Post-Resistance | MGC70857 | 414919 | 37 | 8 | 145753440 | 145753440 | Missense_Mutation | SNP | G | A | 3  | 17  | c.173C>T  | c.(172-174)TCC>TTC   | p.S58F   |
| Pat_46 | Post-Resistance | ADAMTSL1 | 92949  | 37 | 9 | 18662013  | 18662013  | Missense_Mutation | SNP | G | A | 21 | 88  | c.1027G>A | c.(1027-1029)GAG>AAG | p.E343K  |
| Pat_46 | Post-Resistance | SLC24A2  | 25769  | 37 | 9 | 19786182  | 19786182  | Missense_Mutation | SNP | C | T | 7  | 40  | c.683G>A  | c.(682-684)AGA>AAA   | p.R228K  |
| Pat_46 | Post-Resistance | TAF1L    | 138474 | 37 | 9 | 32635478  | 32635478  | Missense_Mutation | SNP | G | A | 6  | 56  | c.100C>T  | c.(100-102)CCA>TCA   | p.P34S   |
| Pat_46 | Post-Resistance | NUDT2    | 318    | 37 | 9 | 34339095  | 34339095  | Missense_Mutation | SNP | G | T | 5  | 33  | c.58G>T   | c.(58-60)GAC>TAC     | p.D20Y   |
| Pat_46 | Post-Resistance | ANXA1    | 301    | 37 | 9 | 75775212  | 75775212  | Missense_Mutation | SNP | G | A | 18 | 78  | c.304G>A  | c.(304-306)GGT>AGT   | p.G102S  |
| Pat_46 | Post-Resistance | TRPM6    | 140803 | 37 | 9 | 77386635  | 77386635  | Nonsense_Mutation | SNP | G | A | 6  | 56  | c.3520C>T | c.(3520-3522)CGA>TGA | p.R1174* |
| Pat_46 | Post-Resistance | TRPM6    | 140803 | 37 | 9 | 77400944  | 77400944  | Nonsense_Mutation | SNP | G | C | 15 | 62  | c.2765C>G | c.(2764-2766)TCA>TGA | p.S922*  |
| Pat_46 | Post-Resistance | HNRNPK   | 3190   | 37 | 9 | 86587088  | 86587088  | Missense_Mutation | SNP | C | T | 5  | 68  | c.662G>A  | c.(661-663)CGT>CAT   | p.R221H  |
| Pat_46 | Post-Resistance | RMI1     | 80010  | 37 | 9 | 86617448  | 86617448  | Missense_Mutation | SNP | C | T | 16 | 127 | c.1547C>T | c.(1546-1548)ACC>ATC | p.T516I  |
| Pat_46 | Post-Resistance | C9orf79  | 286234 | 37 | 9 | 90503694  | 90503694  | Missense_Mutation | SNP | C | T | 3  | 21  | c.4292C>T | c.(4291-4293)CCA>CTA | p.P1431L |
| Pat_46 | Post-Resistance | NFIL3    | 4783   | 37 | 9 | 94172686  | 94172686  | Missense_Mutation | SNP | C | T | 11 | 118 | c.331G>A  | c.(331-333)GAA>AAA   | p.E111K  |
| Pat_46 | Post-Resistance | ECM2     | 1842   | 37 | 9 | 95280064  | 95280064  | Missense_Mutation | SNP | C | T | 6  | 50  | c.386G>A  | c.(385-387)GGA>GAA   | p.G129E  |
| Pat_46 | Post-Resistance | FGD3     | 89846  | 37 | 9 | 95776206  | 95776206  | Missense_Mutation | SNP | G | A | 13 | 81  | c.1108G>A | c.(1108-1110)GAA>AAA | p.E370K  |
| Pat_46 | Post-Resistance | PTPDC1   | 138639 | 37 | 9 | 96860382  | 96860382  | Nonsense_Mutation | SNP | C | T | 4  | 19  | c.1372C>T | c.(1372-1374)CAG>TAG | p.Q458*  |
| Pat_46 | Post-Resistance | PPP3R2   | 5535   | 37 | 9 | 104357194 | 104357194 | Missense_Mutation | SNP | C | T | 6  | 45  | c.19G>A   | c.(19-21)GAG>AAG     | p.E7K    |
| Pat_46 | Post-Resistance | GRIN3A   | 116443 | 37 | 9 | 104432484 | 104432484 | Missense_Mutation | SNP | G | A | 8  | 40  | c.2210C>T | c.(2209-2211)CCA>CTA | p.P737L  |
| Pat_46 | Post-Resistance | OR13C4   | 138804 | 37 | 9 | 107289213 | 107289213 | Missense_Mutation | SNP | G | A | 13 | 80  | c.278C>T  | c.(277-279)TCC>TTC   | p.S93F   |
| Pat_46 | Post-Resistance | ABCA1    | 19     | 37 | 9 | 107574961 | 107574961 | Missense_Mutation | SNP | C | T | 5  | 59  | c.3944G>A | c.(3943-3945)GGG>GAG | p.G1315E |
| Pat_46 | Post-Resistance | IKBKAP   | 8518   | 37 | 9 | 111665890 | 111665890 | Missense_Mutation | SNP | G | A | 12 | 63  | c.1703C>T | c.(1702-1704)TCA>TTA | p.S568L  |
| Pat_46 | Post-Resistance | C9orf5   | 23731  | 37 | 9 | 111795771 | 111795771 | Missense_Mutation | SNP | G | A | 4  | 31  | c.2410C>T | c.(2410-2412)CCT>TCT | p.P804S  |
| Pat_46 | Post-Resistance | SVEP1    | 79987  | 37 | 9 | 113170760 | 113170760 | Missense_Mutation | SNP | G | A | 3  | 18  | c.7120C>T | c.(7120-7122)CCT>TCT | p.P2374S |
| Pat_46 | Post-Resistance | SVEP1    | 79987  | 37 | 9 | 113312330 | 113312330 | Missense_Mutation | SNP | C | T | 6  | 71  | c.586G>A  | c.(586-588)GAT>AAT   | p.D196N  |
| Pat_46 | Post-Resistance | KIAA0368 | 23392  | 37 | 9 | 114184472 | 114184472 | Missense_Mutation | SNP | G | A | 8  | 57  | c.1808C>T | c.(1807-1809)CCA>CTA | p.P603L  |
| Pat_46 | Post-Resistance | FKBP15   | 23307  | 37 | 9 | 115940928 | 115940928 | Missense_Mutation | SNP | C | T | 3  | 11  | c.2068G>A | c.(2068-2070)GTG>ATG | p.V690M  |
| Pat_46 | Post-Resistance | TNC      | 3371   | 37 | 9 | 117853113 | 117853113 | Missense_Mutation | SNP | G | A | 13 | 66  | c.185C>T  | c.(184-186)TCC>TTC   | p.S62F   |
| Pat_46 | Post-Resistance | DBC1     | 1620   | 37 | 9 | 122001016 | 122001016 | Missense_Mutation | SNP | G | A | 6  | 24  | c.602C>T  | c.(601-603)CCT>CTT   | p.P201L  |
| Pat_46 | Post-Resistance | PSMD5    | 5711   | 37 | 9 | 123605142 | 123605142 | Missense_Mutation | SNP | C | T | 2  | 1   | c.46G>A   | c.(46-48)GAA>AAA     | p.E16K   |
| Pat_46 | Post-Resistance | KCNT1    | 57582  | 37 | 9 | 138657003 | 138657003 | Missense_Mutation | SNP | G | A | 5  | 28  | c.1162G>A | c.(1162-1164)GAC>AAC | p.D388N  |
| Pat_46 | Post-Resistance | TBL1X    | 6907   | 37 | X | 9652089   | 9652089   | Missense_Mutation | SNP | C | T | 5  | 48  | c.218C>T  | c.(217-219)TCC>TTC   | p.S73F   |
| Pat_46 | Post-Resistance | ARHGAP6  | 395    | 37 | X | 11272704  | 11272704  | Missense_Mutation | SNP | C | A | 10 | 57  | c.712G>T  | c.(712-714)GAC>TAC   | p.D238Y  |
| Pat_46 | Post-Resistance | GEMIN8   | 54960  | 37 | X | 14027232  | 14027232  | Missense_Mutation | SNP | C | T | 13 | 54  | c.529G>A  | c.(529-531)GAC>AAC   | p.D177N  |
| Pat_46 | Post-Resistance | GLRA2    | 2742   | 37 | X | 14550395  | 14550395  | Missense_Mutation | SNP | G | A | 12 | 76  | c.103G>A  | c.(103-105)GGA>AGA   | p.G35R   |
| Pat_46 | Post-Resistance | GLRA2    | 2742   | 37 | X | 14550467  | 14550467  | Missense_Mutation | SNP | G | A | 10 | 96  | c.175G>A  | c.(175-177)GAT>AAT   | p.D59N   |
| Pat_46 | Post-Resistance | RAI2     | 10742  | 37 | X | 17818903  | 17818903  | Missense_Mutation | SNP | C | T | 4  | 39  | c.1228G>A | c.(1228-1230)GAG>AAG | p.E410K  |
| Pat_46 | Post-Resistance | PDHA1    | 5160   | 37 | X | 19368083  | 19368083  | Missense_Mutation | SNP | G | A | 5  | 26  | c.146G>A  | c.(145-147)GGC>GAC   | p.G49D   |
| Pat_46 | Post-Resistance | RPS6KA3  | 6197   | 37 | X | 20252902  | 20252902  | Missense_Mutation | SNP | C | T | 7  | 52  | c.100G>A  | c.(100-102)GGA>AGA   | p.G34R   |
| Pat_46 | Post-Resistance | APOO     | 79135  | 37 | X | 23898990  | 23898990  | Missense_Mutation | SNP | G | A | 4  | 28  | c.89C>T   | c.(88-90)CCT>CTT     | p.P30L   |
| Pat_46 | Post-Resistance | KLHL15   | 80311  | 37 | X | 24006750  | 24006750  | Missense_Mutation | SNP | G | A | 11 | 96  | c.1103C>T | c.(1102-1104)CCA>CTA | p.P368L  |
| Pat_46 | Post-Resistance | FAM47C   | 442444 | 37 | X | 37026904  | 37026904  | Missense_Mutation | SNP | A | G | 3  | 21  | c.421A>G  | c.(421-423)ATG>GTG   | p.M141V  |
| Pat_46 | Post-Resistance | USP9X    | 8239   | 37 | X | 41084022  | 41084022  | Missense_Mutation | SNP | G | A | 6  | 78  | c.6779G>A | c.(6778-6780)GGT>GAT | p.G2260D |



|        |                 |          |        |    |    |           |           |                   |     |   |   |    |     |               |                      |               |
|--------|-----------------|----------|--------|----|----|-----------|-----------|-------------------|-----|---|---|----|-----|---------------|----------------------|---------------|
| Pat_46 | Post-Resistance | CASK     | 8573   | 37 | X  | 41393962  | 41393962  | Missense_Mutation | SNP | G | A | 18 | 70  | c.2299C>T     | c.(2299-2301)CCA>TCA | p.P767S       |
| Pat_46 | Post-Resistance | ZNF182   | 7569   | 37 | X  | 47837038  | 47837038  | Missense_Mutation | SNP | G | A | 9  | 56  | c.448C>T      | c.(448-450)CTT>TTT   | p.L150F       |
| Pat_46 | Post-Resistance | MTMR8    | 55613  | 37 | X  | 63444876  | 63444876  | Missense_Mutation | SNP | G | A | 3  | 13  | c.1780C>T     | c.(1780-1782)CGT>TGT | p.R594C       |
| Pat_46 | Post-Resistance | FOXO4    | 4303   | 37 | X  | 70321554  | 70321554  | Missense_Mutation | SNP | G | A | 3  | 24  | c.1474G>A     | c.(1474-1476)GAT>AAT | p.D492N       |
| Pat_46 | Post-Resistance | ACRC     | 93953  | 37 | X  | 70823916  | 70823916  | Missense_Mutation | SNP | A | T | 5  | 54  | c.789A>T      | c.(787-789)GAA>GAT   | p.E263D       |
| Pat_46 | Post-Resistance | NAP1L2   | 4674   | 37 | X  | 72433746  | 72433746  | Missense_Mutation | SNP | C | T | 4  | 18  | c.583G>A      | c.(583-585)GAA>AAA   | p.E195K       |
| Pat_46 | Post-Resistance | NAP1L2   | 4674   | 37 | X  | 72434160  | 72434160  | Missense_Mutation | SNP | C | T | 7  | 21  | c.169G>A      | c.(169-171)GAA>AAA   | p.E57K        |
| Pat_46 | Post-Resistance | RLIM     | 51132  | 37 | X  | 73814150  | 73814150  | Missense_Mutation | SNP | C | T | 7  | 52  | c.244G>A      | c.(244-246)GAA>AAA   | p.E82K        |
| Pat_46 | Post-Resistance | KIAA2022 | 340533 | 37 | X  | 73963274  | 73963274  | Missense_Mutation | SNP | C | A | 12 | 49  | c.1118G>T     | c.(1117-1119)TGG>TTG | p.W373L       |
| Pat_46 | Post-Resistance | DRP2     | 1821   | 37 | X  | 100490897 | 100490897 | Missense_Mutation | SNP | G | A | 11 | 82  | c.166G>A      | c.(166-168)GTT>ATT   | p.V56I        |
| Pat_46 | Post-Resistance | ARMCX3   | 51566  | 37 | X  | 100880625 | 100880625 | Missense_Mutation | SNP | C | T | 5  | 53  | c.656C>T      | c.(655-657)TCT>TTT   | p.S219F       |
| Pat_46 | Post-Resistance | NXF3     | 56000  | 37 | X  | 102338545 | 102338545 | Missense_Mutation | SNP | G | A | 15 | 91  | c.427C>T      | c.(427-429)CCA>TCA   | p.P143S       |
| Pat_46 | Post-Resistance | COL4A6   | 1288   | 37 | X  | 107408689 | 107408689 | Missense_Mutation | SNP | C | T | 4  | 12  | c.3722G>A     | c.(3721-3723)GGT>GAT | p.G1241D      |
| Pat_46 | Post-Resistance | COL4A6   | 1288   | 37 | X  | 107448668 | 107448668 | Splice_Site       | SNP | C | T | 11 | 200 | c.690_splice  | c.e11+1              | p.K230_splice |
| Pat_46 | Post-Resistance | COL4A5   | 1287   | 37 | X  | 107834341 | 107834341 | Nonsense_Mutation | SNP | C | T | 4  | 33  | c.1219C>T     | c.(1219-1221)CAG>TAG | p.Q407*       |
| Pat_46 | Post-Resistance | COL4A5   | 1287   | 37 | X  | 107840679 | 107840679 | Missense_Mutation | SNP | C | T | 4  | 45  | c.1660C>T     | c.(1660-1662)CCA>TCA | p.P554S       |
| Pat_46 | Post-Resistance | GUCY2F   | 2986   | 37 | X  | 108636233 | 108636233 | Missense_Mutation | SNP | G | A | 11 | 138 | c.2476C>T     | c.(2476-2478)CGG>TGG | p.R826W       |
| Pat_46 | Post-Resistance | TRPC5    | 7224   | 37 | X  | 111019987 | 111019987 | Nonsense_Mutation | SNP | T | A | 5  | 44  | c.2476A>T     | c.(2476-2478)AAG>TAG | p.K826*       |
| Pat_46 | Post-Resistance | PLS3     | 5358   | 37 | X  | 114877821 | 114877821 | Splice_Site       | SNP | G | A | 5  | 35  | c.1183_splice | c.e10+1              | p.G395_splice |
| Pat_46 | Post-Resistance | CUL4B    | 8450   | 37 | X  | 119691888 | 119691888 | Missense_Mutation | SNP | G | A | 4  | 37  | c.617C>T      | c.(616-618)CCT>CTT   | p.P206L       |
| Pat_46 | Post-Resistance | GRIA3    | 2892   | 37 | X  | 122598729 | 122598729 | Missense_Mutation | SNP | C | T | 9  | 95  | c.2090C>T     | c.(2089-2091)GCT>GTT | p.A697V       |
| Pat_46 | Post-Resistance | SAGE1    | 55511  | 37 | X  | 134994087 | 134994087 | Missense_Mutation | SNP | G | A | 4  | 39  | c.2496G>A     | c.(2494-2496)ATG>ATA | p.M832I       |
| Pat_46 | Post-Resistance | MAP7D3   | 79649  | 37 | X  | 135309517 | 135309517 | Missense_Mutation | SNP | C | T | 6  | 87  | c.1960G>A     | c.(1960-1962)GAT>AAT | p.D654N       |
| Pat_46 | Post-Resistance | MCF2     | 4168   | 37 | X  | 138678928 | 138678928 | Missense_Mutation | SNP | C | T | 6  | 49  | c.2057G>A     | c.(2056-2058)GGA>GAA | p.G686E       |
| Pat_46 | Post-Resistance | UBE2NL   | 389898 | 37 | X  | 142967564 | 142967564 | Missense_Mutation | SNP | C | T | 13 | 77  | c.362C>T      | c.(361-363)CCA>CTA   | p.P121L       |
| Pat_46 | Post-Resistance | AFF2     | 2334   | 37 | X  | 148037446 | 148037446 | Missense_Mutation | SNP | G | A | 11 | 127 | c.1871G>A     | c.(1870-1872)AGG>AAG | p.R624K       |
| Pat_46 | Post-Resistance | MAGEA6   | 4105   | 37 | X  | 151870202 | 151870202 | Missense_Mutation | SNP | C | T | 5  | 42  | c.892C>T      | c.(892-894)CGC>TGC   | p.R298C       |
| Pat_46 | Post-Resistance | MAGEA3   | 4102   | 37 | X  | 151935227 | 151935227 | Missense_Mutation | SNP | C | T | 10 | 60  | c.940G>A      | c.(940-942)GAG>AAG   | p.E314K       |
| Pat_46 | Post-Resistance | F8       | 2157   | 37 | X  | 154132706 | 154132706 | Missense_Mutation | SNP | C | T | 7  | 124 | c.5680G>A     | c.(5680-5682)GAA>AAA | p.E1894K      |
| Pat_46 | Post-Resistance | F8       | 2157   | 37 | X  | 154159268 | 154159268 | Missense_Mutation | SNP | C | T | 6  | 42  | c.2797G>A     | c.(2797-2799)GAT>AAT | p.D933N       |
| Pat_48 | Pre-Treatment   | GIPC2    | 54810  | 37 | 1  | 78585136  | 78585136  | Missense_Mutation | SNP | G | A | 9  | 27  | c.667G>A      | c.(667-669)GCA>ACA   | p.A223T       |
| Pat_48 | Pre-Treatment   | CLCA2    | 9635   | 37 | 1  | 86890069  | 86890069  | Missense_Mutation | SNP | A | G | 6  | 29  | c.139A>G      | c.(139-141)ATT>GTT   | p.I47V        |
| Pat_48 | Pre-Treatment   | DUSP27   | 92235  | 37 | 1  | 167097709 | 167097709 | Missense_Mutation | SNP | C | T | 5  | 4   | c.3341C>T     | c.(3340-3342)TCT>TTT | p.S1114F      |
| Pat_48 | Pre-Treatment   | CACNA1E  | 777    | 37 | 1  | 181549815 | 181549815 | Missense_Mutation | SNP | C | T | 55 | 54  | c.854C>T      | c.(853-855)CCC>CTC   | p.P285L       |
| Pat_48 | Pre-Treatment   | OR14A16  | 284532 | 37 | 1  | 247978163 | 247978163 | Missense_Mutation | SNP | C | T | 7  | 26  | c.869G>A      | c.(868-870)AGA>AAA   | p.R290K       |
| Pat_48 | Pre-Treatment   | OR14A16  | 284532 | 37 | 1  | 247978557 | 247978557 | Missense_Mutation | SNP | C | T | 42 | 39  | c.475G>A      | c.(475-477)GCT>ACT   | p.A159T       |
| Pat_48 | Pre-Treatment   | ANKRD30A | 91074  | 37 | 10 | 37431050  | 37431050  | Missense_Mutation | SNP | G | C | 3  | 23  | c.1057G>C     | c.(1057-1059)GCA>CCA | p.A353P       |
| Pat_48 | Pre-Treatment   | ZNF239   | 8187   | 37 | 10 | 44052942  | 44052942  | Missense_Mutation | SNP | G | A | 8  | 21  | c.586C>T      | c.(586-588)CCA>TCA   | p.P196S       |
| Pat_48 | Pre-Treatment   | C10orf72 | 196740 | 37 | 10 | 50285269  | 50285269  | Missense_Mutation | SNP | G | A | 15 | 7   | c.629C>T      | c.(628-630)TCC>TTC   | p.S210F       |
| Pat_48 | Pre-Treatment   | OR52J3   | 119679 | 37 | 11 | 5068593   | 5068593   | Missense_Mutation | SNP | C | T | 12 | 53  | c.838C>T      | c.(838-840)CTC>TTC   | p.L280F       |
| Pat_48 | Pre-Treatment   | IGSF22   | 283284 | 37 | 11 | 18741637  | 18741637  | Missense_Mutation | SNP | C | T | 4  | 31  | c.492G>A      | c.(490-492)ATG>ATA   | p.M164I       |
| Pat_48 | Pre-Treatment   | OR4C46   | 119749 | 37 | 11 | 51515587  | 51515587  | Missense_Mutation | SNP | A | T | 12 | 40  | c.306A>T      | c.(304-306)GAA>GAT   | p.E102D       |
| Pat_48 | Pre-Treatment   | OR10W1   | 81341  | 37 | 11 | 58034652  | 58034652  | Missense_Mutation | SNP | G | A | 7  | 63  | c.679C>T      | c.(679-681)CGG>TGG   | p.R227W       |
| Pat_48 | Pre-Treatment   | SLC22A10 | 387775 | 37 | 11 | 63067056  | 63067056  | Missense_Mutation | SNP | G | A | 3  | 39  | c.1025G>A     | c.(1024-1026)CGC>CAC | p.R342H       |
| Pat_48 | Pre-Treatment   | CLEC9A   | 283420 | 37 | 12 | 10215746  | 10215746  | Nonsense_Mutation | SNP | C | T | 28 | 81  | c.412C>T      | c.(412-414)CAA>TAA   | p.Q138*       |
| Pat_48 | Pre-Treatment   | PRB3     | 5544   | 37 | 12 | 11420152  | 11420152  | Missense_Mutation | SNP | G | A | 3  | 34  | c.904C>T      | c.(904-906)CCT>TCT   | p.P302S       |
| Pat_48 | Pre-Treatment   | PRB2     | 653247 | 37 | 12 | 11546795  | 11546795  | Missense_Mutation | SNP | G | A | 3  | 27  | c.217C>T      | c.(217-219)CCT>TCT   | p.P73S        |

|        |                 |          |        |    |    |           |           |                   |     |   |   |    |     |              |                        |               |
|--------|-----------------|----------|--------|----|----|-----------|-----------|-------------------|-----|---|---|----|-----|--------------|------------------------|---------------|
| Pat_48 | Pre-Treatment   | OR4K1    | 79544  | 37 | 14 | 20404061  | 20404061  | Missense_Mutation | SNP | C | T | 13 | 11  | c.236C>T     | c.(235-237)CCC>CTC     | p.P79L        |
| Pat_48 | Pre-Treatment   | EFTUD1   | 79631  | 37 | 15 | 82512090  | 82512090  | Missense_Mutation | SNP | A | G | 2  | 20  | c.1514T>C    | c.(1513-1515)TTT>TCT   | p.F505S       |
| Pat_48 | Pre-Treatment   | GRIN2A   | 2903   | 37 | 16 | 9857895   | 9857895   | Missense_Mutation | SNP | C | T | 6  | 31  | c.3506G>A    | c.(3505-3507)CGG>CAG   | p.R1169Q      |
| Pat_48 | Pre-Treatment   | SPIRE2   | 84501  | 37 | 16 | 89895131  | 89895131  | Missense_Mutation | SNP | G | A | 2  | 3   | c.173G>A     | c.(172-174)CGC>CAC     | p.R58H        |
| Pat_48 | Pre-Treatment   | DNAH2    | 146754 | 37 | 17 | 7697572   | 7697572   | Missense_Mutation | SNP | G | A | 19 | 16  | c.7570G>A    | c.(7570-7572)GAA>AAA   | p.E2524K      |
| Pat_48 | Pre-Treatment   | EVPLL    | 645027 | 37 | 17 | 18286166  | 18286166  | Missense_Mutation | SNP | C | T | 8  | 10  | c.499C>T     | c.(499-501)CCG>TCG     | p.P167S       |
| Pat_48 | Pre-Treatment   | SGCA     | 6442   | 37 | 17 | 48245758  | 48245758  | Missense_Mutation | SNP | G | A | 2  | 5   | c.409G>A     | c.(409-411)GAG>AAG     | p.E137K       |
| Pat_48 | Pre-Treatment   | KIF2B    | 84643  | 37 | 17 | 51901215  | 51901215  | Missense_Mutation | SNP | C | T | 7  | 28  | c.821C>T     | c.(820-822)GCC>GTC     | p.A274V       |
| Pat_48 | Pre-Treatment   | CXXC1    | 30827  | 37 | 18 | 47812290  | 47812290  | Missense_Mutation | SNP | C | G | 4  | 42  | c.468G>C     | c.(466-468)CAG>CAC     | p.Q156H       |
| Pat_48 | Pre-Treatment   | ZNF563   | 147837 | 37 | 19 | 12430274  | 12430274  | Missense_Mutation | SNP | C | G | 19 | 48  | c.565G>C     | c.(565-567)GTA>CTA     | p.V189L       |
| Pat_48 | Pre-Treatment   | LILRA3   | 11026  | 37 | 19 | 54803582  | 54803582  | Missense_Mutation | SNP | C | T | 11 | 21  | c.242G>A     | c.(241-243)GGC>GAC     | p.G81D        |
| Pat_48 | Pre-Treatment   | SNTG2    | 54221  | 37 | 2  | 1094046   | 1094046   | Missense_Mutation | SNP | C | T | 15 | 13  | c.275C>T     | c.(274-276)TCT>TTT     | p.S92F        |
| Pat_48 | Pre-Treatment   | REG1B    | 5968   | 37 | 2  | 79313967  | 79313967  | Missense_Mutation | SNP | C | T | 14 | 55  | c.154G>A     | c.(154-156)GAA>AAA     | p.E52K        |
| Pat_48 | Pre-Treatment   | LRP2     | 4036   | 37 | 2  | 170094612 | 170094612 | Missense_Mutation | SNP | C | T | 6  | 21  | c.4495G>A    | c.(4495-4497)GAC>AAC   | p.D1499N      |
| Pat_48 | Pre-Treatment   | TTN      | 7273   | 37 | 2  | 179472587 | 179472587 | Missense_Mutation | SNP | G | A | 55 | 81  | c.45223C>T   | c.(45223-45225)CGG>TGC | p.R15075W     |
| Pat_48 | Pre-Treatment   | HECW2    | 57520  | 37 | 2  | 197297975 | 197297975 | Missense_Mutation | SNP | C | T | 12 | 35  | c.173G>A     | c.(172-174)CGC>CAC     | p.R58H        |
| Pat_48 | Pre-Treatment   | SNTA1    | 6640   | 37 | 20 | 32000563  | 32000563  | Missense_Mutation | SNP | C | A | 3  | 26  | c.727G>T     | c.(727-729)GGT>TGT     | p.G243C       |
| Pat_48 | Pre-Treatment   | CDH26    | 60437  | 37 | 20 | 58559801  | 58559801  | Missense_Mutation | SNP | G | A | 30 | 53  | c.649G>A     | c.(649-651)GGT>AGT     | p.G217S       |
| Pat_48 | Pre-Treatment   | SMTN     | 6525   | 37 | 22 | 31495070  | 31495070  | Missense_Mutation | SNP | G | A | 3  | 42  | c.2356G>A    | c.(2356-2358)GCC>ACC   | p.A786T       |
| Pat_48 | Pre-Treatment   | ATP2B2   | 491    | 37 | 3  | 10401759  | 10401759  | Missense_Mutation | SNP | C | T | 17 | 38  | c.1708G>A    | c.(1708-1710)GAG>AAG   | p.E570K       |
| Pat_48 | Pre-Treatment   | COL6A6   | 131873 | 37 | 3  | 130300841 | 130300841 | Missense_Mutation | SNP | T | G | 2  | 4   | c.3899T>G    | c.(3898-3900)CTT>CGT   | p.L1300R      |
| Pat_48 | Pre-Treatment   | PPARGC1A | 10891  | 37 | 4  | 23815404  | 23815404  | Missense_Mutation | SNP | G | A | 4  | 22  | c.1702C>T    | c.(1702-1704)CGT>TGT   | p.R568C       |
| Pat_48 | Pre-Treatment   | DMXL1    | 1657   | 37 | 5  | 118482588 | 118482588 | Nonsense_Mutation | SNP | C | T | 38 | 65  | c.2626C>T    | c.(2626-2628)CAA>TAA   | p.Q876*       |
| Pat_48 | Pre-Treatment   | PCDHA12  | 56137  | 37 | 5  | 140255890 | 140255890 | Missense_Mutation | SNP | C | T | 21 | 21  | c.833C>T     | c.(832-834)TCC>TTC     | p.S278F       |
| Pat_48 | Pre-Treatment   | ITK      | 3702   | 37 | 5  | 156635937 | 156635937 | Missense_Mutation | SNP | G | A | 16 | 32  | c.176G>A     | c.(175-177)CGA>CAA     | p.R59Q        |
| Pat_48 | Pre-Treatment   | OR2B2    | 81697  | 37 | 6  | 27879370  | 27879370  | Missense_Mutation | SNP | G | A | 27 | 33  | c.728C>T     | c.(727-729)TCC>TTC     | p.S243F       |
| Pat_48 | Pre-Treatment   | ITPR3    | 3710   | 37 | 6  | 33663553  | 33663553  | Missense_Mutation | SNP | G | A | 3  | 37  | c.8012G>A    | c.(8011-8013)CGC>CAC   | p.R2671H      |
| Pat_48 | Pre-Treatment   | AKAP9    | 10142  | 37 | 7  | 91726492  | 91726492  | Nonsense_Mutation | SNP | G | T | 3  | 8   | c.10219G>T   | c.(10219-10221)GAG>TAG | p.E3407*      |
| Pat_48 | Pre-Treatment   | BRAF     | 673    | 37 | 7  | 140453136 | 140453136 | Missense_Mutation | SNP | A | T | 70 | 69  | c.1799T>A    | c.(1798-1800)GTG>GAG   | p.V600E       |
| Pat_48 | Pre-Treatment   | CNPY1    | 285888 | 37 | 7  | 155301649 | 155301649 | Missense_Mutation | SNP | T | C | 8  | 16  | c.84A>G      | c.(82-84)ATA>ATG       | p.I28M        |
| Pat_48 | Pre-Treatment   | EBF2     | 64641  | 37 | 8  | 25718726  | 25718726  | Missense_Mutation | SNP | C | T | 12 | 44  | c.1181G>A    | c.(1180-1182)CGA>CAA   | p.R394Q       |
| Pat_48 | Pre-Treatment   | ST18     | 9705   | 37 | 8  | 53084412  | 53084412  | Missense_Mutation | SNP | C | T | 21 | 166 | c.1009G>A    | c.(1009-1011)GGG>AGG   | p.G337R       |
| Pat_48 | Pre-Treatment   | COL14A1  | 7373   | 37 | 8  | 121295981 | 121295981 | Missense_Mutation | SNP | A | G | 9  | 36  | c.3931A>G    | c.(3931-3933)AAA>GAA   | p.K1311E      |
| Pat_48 | Pre-Treatment   | SVEP1    | 79987  | 37 | 9  | 113169542 | 113169542 | Missense_Mutation | SNP | G | A | 30 | 19  | c.8338C>T    | c.(8338-8340)CCA>TCA   | p.P2780S      |
| Pat_48 | Pre-Treatment   | MXRA5    | 25878  | 37 | X  | 3228326   | 3228326   | Missense_Mutation | SNP | T | C | 15 | 4   | c.7918A>G    | c.(7918-7920)AAC>GAC   | p.N2640D      |
| Pat_48 | Post-Resistance | GIPC2    | 54810  | 37 | 1  | 78585136  | 78585136  | Missense_Mutation | SNP | G | A | 3  | 43  | c.667G>A     | c.(667-669)GCA>ACA     | p.A223T       |
| Pat_48 | Post-Resistance | CLCA2    | 9635   | 37 | 1  | 86890069  | 86890069  | Missense_Mutation | SNP | A | G | 10 | 36  | c.139A>G     | c.(139-141)ATT>GTT     | p.I47V        |
| Pat_48 | Post-Resistance | HORMAD1  | 84072  | 37 | 1  | 150680884 | 150680884 | Splice_Site       | SNP | C | T | 13 | 22  | c.396_splice | c.e9-1                 | p.S132_splice |
| Pat_48 | Post-Resistance | DUSP27   | 92235  | 37 | 1  | 167097709 | 167097709 | Missense_Mutation | SNP | C | T | 9  | 16  | c.3341C>T    | c.(3340-3342)TCT>TTT   | p.S1114F      |
| Pat_48 | Post-Resistance | CACNA1E  | 777    | 37 | 1  | 181549815 | 181549815 | Missense_Mutation | SNP | C | T | 53 | 136 | c.854C>T     | c.(853-855)CCC>CTC     | p.P285L       |
| Pat_48 | Post-Resistance | OR14A16  | 284532 | 37 | 1  | 247978163 | 247978163 | Missense_Mutation | SNP | C | T | 12 | 55  | c.869G>A     | c.(868-870)AGA>AAA     | p.R290K       |
| Pat_48 | Post-Resistance | OR14A16  | 284532 | 37 | 1  | 247978557 | 247978557 | Missense_Mutation | SNP | C | T | 30 | 100 | c.475G>A     | c.(475-477)GCT>ACT     | p.A159T       |
| Pat_48 | Post-Resistance | ZNF239   | 8187   | 37 | 10 | 44052942  | 44052942  | Missense_Mutation | SNP | G | A | 24 | 39  | c.586C>T     | c.(586-588)CCA>TCA     | p.P196S       |
| Pat_48 | Post-Resistance | C10orf72 | 196740 | 37 | 10 | 50285269  | 50285269  | Missense_Mutation | SNP | G | A | 14 | 23  | c.629C>T     | c.(628-630)TCC>TTC     | p.S210F       |
| Pat_48 | Post-Resistance | BUB3     | 9184   | 37 | 10 | 124914464 | 124914464 | Nonsense_Mutation | SNP | C | T | 3  | 91  | c.31C>T      | c.(31-33)CAG>TAG       | p.Q11*        |
| Pat_48 | Post-Resistance | OR52J3   | 119679 | 37 | 11 | 5068593   | 5068593   | Missense_Mutation | SNP | C | T | 19 | 82  | c.838C>T     | c.(838-840)CTC>TTC     | p.L280F       |
| Pat_48 | Post-Resistance | IGSF22   | 283284 | 37 | 11 | 18741637  | 18741637  | Missense_Mutation | SNP | C | T | 18 | 57  | c.492G>A     | c.(490-492)ATG>ATA     | p.M164I       |

|        |                 |           |        |    |    |           |           |                   |     |    |    |     |     |                |                         |               |
|--------|-----------------|-----------|--------|----|----|-----------|-----------|-------------------|-----|----|----|-----|-----|----------------|-------------------------|---------------|
| Pat_48 | Post-Resistance | OR4C46    | 119749 | 37 | 11 | 51515587  | 51515587  | Missense_Mutation | SNP | A  | T  | 11  | 72  | c.306A>T       | c.(304-306)GAA>GAT      | p.E102D       |
| Pat_48 | Post-Resistance | OR10W1    | 81341  | 37 | 11 | 58034652  | 58034652  | Missense_Mutation | SNP | G  | A  | 13  | 71  | c.679C>T       | c.(679-681)CGG>TGG      | p.R227W       |
| Pat_48 | Post-Resistance | CLEC9A    | 283420 | 37 | 12 | 10215746  | 10215746  | Nonsense_Mutation | SNP | C  | T  | 27  | 134 | c.412C>T       | c.(412-414)CAA>TAA      | p.Q138*       |
| Pat_48 | Post-Resistance | TPCN1     | 53373  | 37 | 12 | 113729700 | 113729700 | Missense_Mutation | SNP | G  | A  | 3   | 61  | c.2050G>A      | c.(2050-2052)GCC>ACC    | p.A684T       |
| Pat_48 | Post-Resistance | CIT       | 11113  | 37 | 12 | 120128123 | 120128123 | Missense_Mutation | SNP | C  | T  | 5   | 8   | c.5893G>A      | c.(5893-5895)GAG>AAG    | p.E1965K      |
| Pat_48 | Post-Resistance | KNTC1     | 9735   | 37 | 12 | 123071263 | 123071263 | Missense_Mutation | SNP | C  | T  | 4   | 31  | c.3689C>T      | c.(3688-3690)CCC>CTC    | p.P1230L      |
| Pat_48 | Post-Resistance | OR4K1     | 79544  | 37 | 14 | 20404061  | 20404061  | Missense_Mutation | SNP | C  | T  | 49  | 38  | c.236C>T       | c.(235-237)CCC>CTC      | p.P79L        |
| Pat_48 | Post-Resistance | ADAM20    | 8748   | 37 | 14 | 70991270  | 70991270  | Missense_Mutation | SNP | C  | T  | 3   | 61  | c.355G>A       | c.(355-357)GGA>AGA      | p.G119R       |
| Pat_48 | Post-Resistance | PKD1      | 5310   | 37 | 16 | 2154550   | 2154550   | Missense_Mutation | SNP | C  | T  | 3   | 6   | c.8110G>A      | c.(8110-8112)GCG>ACG    | p.A2704T      |
| Pat_48 | Post-Resistance | GRIN2A    | 2903   | 37 | 16 | 9857895   | 9857895   | Missense_Mutation | SNP | C  | T  | 23  | 71  | c.3506G>A      | c.(3505-3507)CGG>CAG    | p.R1169Q      |
| Pat_48 | Post-Resistance | DNAH2     | 146754 | 37 | 17 | 7697572   | 7697572   | Missense_Mutation | SNP | G  | A  | 7   | 32  | c.7570G>A      | c.(7570-7572)GAA>AAA    | p.E2524K      |
| Pat_48 | Post-Resistance | EVPLL     | 645027 | 37 | 17 | 18286166  | 18286166  | Missense_Mutation | SNP | C  | T  | 7   | 13  | c.499C>T       | c.(499-501)CCG>TCG      | p.P167S       |
| Pat_48 | Post-Resistance | SGCA      | 6442   | 37 | 17 | 48245758  | 48245758  | Missense_Mutation | SNP | G  | A  | 5   | 5   | c.409G>A       | c.(409-411)GAG>AAG      | p.E137K       |
| Pat_48 | Post-Resistance | ZNF563    | 147837 | 37 | 19 | 12430274  | 12430274  | Missense_Mutation | SNP | C  | G  | 39  | 112 | c.565G>C       | c.(565-567)GTA>CTA      | p.V189L       |
| Pat_48 | Post-Resistance | ZNF534    | 147658 | 37 | 19 | 52942028  | 52942028  | Missense_Mutation | SNP | G  | A  | 15  | 21  | c.1354G>A      | c.(1354-1356)GAA>AAA    | p.E452K       |
| Pat_48 | Post-Resistance | LILRA3    | 11026  | 37 | 19 | 54803582  | 54803582  | Missense_Mutation | SNP | C  | T  | 17  | 27  | c.242G>A       | c.(241-243)GGC>GAC      | p.G81D        |
| Pat_48 | Post-Resistance | SNTG2     | 54221  | 37 | 2  | 1094046   | 1094046   | Missense_Mutation | SNP | C  | T  | 42  | 23  | c.275C>T       | c.(274-276)TCT>TTT      | p.S92F        |
| Pat_48 | Post-Resistance | TTN       | 7273   | 37 | 2  | 179472587 | 179472587 | Missense_Mutation | SNP | G  | A  | 161 | 58  | c.45223C>T     | c.(45223-45225)CGG>TGC  | p.R15075W     |
| Pat_48 | Post-Resistance | CSNK2A1   | 1457   | 37 | 20 | 470440    | 470440    | Missense_Mutation | SNP | T  | C  | 3   | 83  | c.707A>G       | c.(706-708)CAT>CGT      | p.H236R       |
| Pat_48 | Post-Resistance | FRG1B     | 284802 | 37 | 20 | 29625875  | 29625875  | Missense_Mutation | SNP | T  | C  | 4   | 50  | c.29T>C        | c.(28-30)ATC>ACC        | p.I10T        |
| Pat_48 | Post-Resistance | CDH26     | 60437  | 37 | 20 | 58559801  | 58559801  | Missense_Mutation | SNP | G  | A  | 52  | 75  | c.649G>A       | c.(649-651)GGT>AGT      | p.G217S       |
| Pat_48 | Post-Resistance | KRTAP12-3 | 386683 | 37 | 21 | 46078147  | 46078147  | Missense_Mutation | SNP | T  | C  | 5   | 40  | c.251T>C       | c.(250-252)CTC>CCC      | p.L84P        |
| Pat_48 | Post-Resistance | ATP2B2    | 491    | 37 | 3  | 10401759  | 10401759  | Missense_Mutation | SNP | C  | T  | 18  | 41  | c.1708G>A      | c.(1708-1710)GAG>AAG    | p.E570K       |
| Pat_48 | Post-Resistance | GHSR      | 2693   | 37 | 3  | 172165537 | 172165538 | Missense_Mutation | DNP | GG | AA | 7   | 19  | c.666_667CC>TT | c.(664-669)TTCCTT>TTTTT | p.L223F       |
| Pat_48 | Post-Resistance | PIK3CA    | 5290   | 37 | 3  | 178952085 | 178952085 | Missense_Mutation | SNP | A  | G  | 23  | 96  | c.3140A>G      | c.(3139-3141)CAT>CGT    | p.H1047R      |
| Pat_48 | Post-Resistance | ABCC5     | 10057  | 37 | 3  | 183679443 | 183679443 | Splice_Site       | SNP | C  | T  | 24  | 85  | c.2236_splice  | c.e16-1                 | p.Y746_splice |
| Pat_48 | Post-Resistance | PPARGC1A  | 10891  | 37 | 4  | 23815404  | 23815404  | Missense_Mutation | SNP | G  | A  | 13  | 49  | c.1702C>T      | c.(1702-1704)CGT>TGT    | p.R568C       |
| Pat_48 | Post-Resistance | FSTL5     | 56884  | 37 | 4  | 162421220 | 162421220 | Missense_Mutation | SNP | T  | A  | 4   | 33  | c.1406A>T      | c.(1405-1407)GAA>GTA    | p.E469V       |
| Pat_48 | Post-Resistance | PRDM9     | 56979  | 37 | 5  | 23527251  | 23527251  | Missense_Mutation | SNP | C  | T  | 5   | 140 | c.2054C>T      | c.(2053-2055)ACA>ATA    | p.T685I       |
| Pat_48 | Post-Resistance | DMXL1     | 1657   | 37 | 5  | 118482588 | 118482588 | Nonsense_Mutation | SNP | C  | T  | 27  | 65  | c.2626C>T      | c.(2626-2628)CAA>TAA    | p.Q876*       |
| Pat_48 | Post-Resistance | PCDHA12   | 56137  | 37 | 5  | 140255890 | 140255890 | Missense_Mutation | SNP | C  | T  | 29  | 90  | c.833C>T       | c.(832-834)TCC>TTC      | p.S278F       |
| Pat_48 | Post-Resistance | ITK       | 3702   | 37 | 5  | 156635937 | 156635937 | Missense_Mutation | SNP | G  | A  | 17  | 59  | c.176G>A       | c.(175-177)CGA>CAA      | p.R59Q        |
| Pat_48 | Post-Resistance | OR2B2     | 81697  | 37 | 6  | 27879370  | 27879370  | Missense_Mutation | SNP | G  | A  | 34  | 52  | c.728C>T       | c.(727-729)TCC>TTC      | p.S243F       |
| Pat_48 | Post-Resistance | OR2W1     | 26692  | 37 | 6  | 29012935  | 29012935  | Nonsense_Mutation | SNP | A  | C  | 11  | 52  | c.18T>G        | c.(16-18)TAT>TAG        | p.Y6*         |
| Pat_48 | Post-Resistance | SYNGAP1   | 8831   | 37 | 6  | 33400584  | 33400584  | Splice_Site       | SNP | G  | A  | 3   | 71  | c.509_splice   | c.e5+1                  | p.R170_splice |
| Pat_48 | Post-Resistance | AKAP9     | 10142  | 37 | 7  | 91726492  | 91726492  | Nonsense_Mutation | SNP | G  | T  | 9   | 16  | c.10219G>T     | c.(10219-10221)GAG>TAG  | p.E3407*      |
| Pat_48 | Post-Resistance | BRAF      | 673    | 37 | 7  | 140453136 | 140453136 | Missense_Mutation | SNP | A  | T  | 56  | 94  | c.1799T>A      | c.(1798-1800)GTG>GAG    | p.V600E       |
| Pat_48 | Post-Resistance | SSBP1     | 6742   | 37 | 7  | 141445300 | 141445300 | Nonsense_Mutation | SNP | C  | T  | 15  | 125 | c.319C>T       | c.(319-321)CGA>TGA      | p.R107*       |
| Pat_48 | Post-Resistance | CNPY1     | 285888 | 37 | 7  | 155301649 | 155301649 | Missense_Mutation | SNP | T  | C  | 33  | 34  | c.84A>G        | c.(82-84)ATA>ATG        | p.I28M        |
| Pat_48 | Post-Resistance | EBF2      | 64641  | 37 | 8  | 25718726  | 25718726  | Missense_Mutation | SNP | C  | T  | 26  | 63  | c.1181G>A      | c.(1180-1182)CGA>CAA    | p.R394Q       |
| Pat_48 | Post-Resistance | GSR       | 2936   | 37 | 8  | 30539534  | 30539534  | Missense_Mutation | SNP | A  | G  | 26  | 142 | c.1198T>C      | c.(1198-1200)TAT>CAT    | p.Y400H       |
| Pat_48 | Post-Resistance | ST18      | 9705   | 37 | 8  | 53084412  | 53084412  | Missense_Mutation | SNP | C  | T  | 34  | 362 | c.1009G>A      | c.(1009-1011)GGG>AGG    | p.G337R       |
| Pat_48 | Post-Resistance | COL14A1   | 7373   | 37 | 8  | 121295981 | 121295981 | Missense_Mutation | SNP | A  | G  | 43  | 99  | c.3931A>G      | c.(3931-3933)AAA>GAA    | p.K1311E      |
| Pat_48 | Post-Resistance | C8orf73   | 642475 | 37 | 8  | 144650052 | 144650052 | Nonsense_Mutation | SNP | G  | A  | 7   | 48  | c.1771C>T      | c.(1771-1773)CGA>TGA    | p.R591*       |
| Pat_48 | Post-Resistance | SVEP1     | 79987  | 37 | 9  | 113169542 | 113169542 | Missense_Mutation | SNP | G  | A  | 58  | 38  | c.8338C>T      | c.(8338-8340)CCA>TCA    | p.P2780S      |
| Pat_48 | Post-Resistance | TRUB2     | 26995  | 37 | 9  | 131083986 | 131083986 | Missense_Mutation | SNP | C  | T  | 3   | 6   | c.133G>A       | c.(133-135)GCT>ACT      | p.A45T        |
| Pat_48 | Post-Resistance | MXRA5     | 25878  | 37 | X  | 3228326   | 3228326   | Missense_Mutation | SNP | T  | C  | 10  | 10  | c.7918A>G      | c.(7918-7920)AAC>GAC    | p.N2640D      |

|        |                 |          |        |    |    |           |           |                        |     |    |    |    |     |                 |                        |               |
|--------|-----------------|----------|--------|----|----|-----------|-----------|------------------------|-----|----|----|----|-----|-----------------|------------------------|---------------|
| Pat_48 | Post-Resistance | FAM120C  | 54954  | 37 | X  | 54209061  | 54209061  | Missense_Mutation      | SNP | G  | A  | 2  | 6   | c.571C>T        | c.(571-573)CGG>TGG     | p.R191W       |
| Pat_49 | Post-Resistance | COL16A1  | 1307   | 37 | 1  | 32148563  | 32148563  | Missense_Mutation      | SNP | G  | A  | 3  | 46  | c.2510C>T       | c.(2509-2511)CCT>CTT   | p.P837L       |
| Pat_49 | Post-Resistance | AK3L1    | 205    | 37 | 1  | 65656511  | 65656511  | Missense_Mutation      | SNP | T  | A  | 6  | 16  | c.264T>A        | c.(262-264)GAT>GAA     | p.D88E        |
| Pat_49 | Post-Resistance | IL12RB2  | 3595   | 37 | 1  | 67861606  | 67861606  | Missense_Mutation      | SNP | T  | C  | 19 | 65  | c.2423T>C       | c.(2422-2424)CTC>CCC   | p.L808P       |
| Pat_49 | Post-Resistance | AGL      | 178    | 37 | 1  | 100327118 | 100327118 | Missense_Mutation      | SNP | A  | G  | 6  | 12  | c.142A>G        | c.(142-144)ACA>GCA     | p.T48A        |
| Pat_49 | Post-Resistance | ANP32E   | 81611  | 37 | 1  | 150198989 | 150198989 | Missense_Mutation      | SNP | T  | A  | 4  | 17  | c.632A>T        | c.(631-633)GAG>GTG     | p.E211V       |
| Pat_49 | Post-Resistance | GBA      | 2629   | 37 | 1  | 155209424 | 155209424 | Missense_Mutation      | SNP | G  | A  | 6  | 11  | c.437C>T        | c.(436-438)TCG>TTG     | p.S146L       |
| Pat_49 | Post-Resistance | TPR      | 7175   | 37 | 1  | 186292909 | 186292909 | Missense_Mutation      | SNP | C  | T  | 9  | 25  | c.6206G>A       | c.(6205-6207)CGA>CAA   | p.R2069Q      |
| Pat_49 | Post-Resistance | FAM5C    | 339479 | 37 | 1  | 190423812 | 190423812 | Missense_Mutation      | SNP | C  | T  | 6  | 9   | c.209G>A        | c.(208-210)GGA>GAA     | p.G70E        |
| Pat_49 | Post-Resistance | CRB1     | 23418  | 37 | 1  | 197390934 | 197390934 | Missense_Mutation      | SNP | C  | T  | 13 | 21  | c.1976C>T       | c.(1975-1977)TCG>TTG   | p.S659L       |
| Pat_49 | Post-Resistance | PRKCG    | 5588   | 37 | 10 | 6483994   | 6483994   | Missense_Mutation      | SNP | C  | T  | 8  | 18  | c.1697G>A       | c.(1696-1698)GGG>GAG   | p.G566E       |
| Pat_49 | Post-Resistance | UPF2     | 26019  | 37 | 10 | 12021112  | 12021112  | Missense_Mutation      | SNP | T  | A  | 15 | 14  | c.1897A>T       | c.(1897-1899)ATG>TTG   | p.M633L       |
| Pat_49 | Post-Resistance | ADAMTS14 | 140766 | 37 | 10 | 72513618  | 72513618  | Missense_Mutation      | SNP | G  | A  | 3  | 6   | c.2792G>A       | c.(2791-2793)CGG>CAG   | p.R931Q       |
| Pat_49 | Post-Resistance | ITPRIP   | 85450  | 37 | 10 | 106074705 | 106074705 | Missense_Mutation      | SNP | G  | A  | 25 | 12  | c.1105C>T       | c.(1105-1107)CCC>TCC   | p.P369S       |
| Pat_49 | Post-Resistance | BET1L    | 51272  | 37 | 11 | 205975    | 205975    | Missense_Mutation      | SNP | A  | G  | 19 | 57  | c.88T>C         | c.(88-90)TCC>CCC       | p.S30P        |
| Pat_49 | Post-Resistance | OR56A3   | 390083 | 37 | 11 | 5968605   | 5968605   | Missense_Mutation      | SNP | C  | T  | 5  | 7   | c.29C>T         | c.(28-30)TCC>TTC       | p.S10F        |
| Pat_49 | Post-Resistance | NAT10    | 55226  | 37 | 11 | 34163857  | 34163857  | Missense_Mutation      | SNP | G  | T  | 6  | 19  | c.2847G>T       | c.(2845-2847)AAG>AAT   | p.K949N       |
| Pat_49 | Post-Resistance | SLC1A2   | 6506   | 37 | 11 | 35308478  | 35308478  | Missense_Mutation      | SNP | G  | A  | 29 | 58  | c.1112C>T       | c.(1111-1113)ACC>ATC   | p.T371I       |
| Pat_49 | Post-Resistance | OR5D13   | 390142 | 37 | 11 | 55541256  | 55541256  | Missense_Mutation      | SNP | T  | A  | 20 | 36  | c.343T>A        | c.(343-345)TTC>ATC     | p.F115I       |
| Pat_49 | Post-Resistance | OR5AR1   | 219493 | 37 | 11 | 56431439  | 56431439  | Missense_Mutation      | SNP | C  | T  | 22 | 50  | c.278C>T        | c.(277-279)TCC>TTC     | p.S93F        |
| Pat_49 | Post-Resistance | TMEM132A | 54972  | 37 | 11 | 60702238  | 60702238  | Splice_Site            | SNP | T  | G  | 13 | 9   | c.1836_splice   | c.e9+2                 | p.E612_splice |
| Pat_49 | Post-Resistance | AHNAK    | 79026  | 37 | 11 | 62294795  | 62294796  | Missense_Mutation      | DNP | GG | AT | 25 | 57  | c.7093_7094CC>A | c.(7093-7095)CCA>ATA   | p.P2365I      |
| Pat_49 | Post-Resistance | POLA2    | 23649  | 37 | 11 | 65047045  | 65047045  | Missense_Mutation      | SNP | T  | C  | 8  | 47  | c.692T>C        | c.(691-693)CTC>CCC     | p.L231P       |
| Pat_49 | Post-Resistance | FRMD8    | 83786  | 37 | 11 | 65161799  | 65161799  | Missense_Mutation      | SNP | C  | T  | 3  | 5   | c.484C>T        | c.(484-486)CCG>TCG     | p.P162S       |
| Pat_49 | Post-Resistance | KRTAP5-8 | 57830  | 37 | 11 | 71249558  | 71249558  | Missense_Mutation      | SNP | T  | A  | 7  | 226 | c.457T>A        | c.(457-459)TGC>AGC     | p.C153S       |
| Pat_49 | Post-Resistance | HEPHL1   | 341208 | 37 | 11 | 93834384  | 93834384  | Missense_Mutation      | SNP | G  | A  | 11 | 30  | c.2458G>A       | c.(2458-2460)GGC>AGC   | p.G820S       |
| Pat_49 | Post-Resistance | TTC12    | 54970  | 37 | 11 | 113196299 | 113196299 | Missense_Mutation      | SNP | A  | G  | 2  | 21  | c.376A>G        | c.(376-378)ATC>GTC     | p.I126V       |
| Pat_49 | Post-Resistance | OR8G2    | 26492  | 37 | 11 | 124096240 | 124096240 | Missense_Mutation      | SNP | G  | A  | 3  | 9   | c.843G>A        | c.(841-843)ATG>ATA     | p.M281I       |
| Pat_49 | Post-Resistance | SLC6A12  | 6539   | 37 | 12 | 305370    | 305370    | Missense_Mutation      | SNP | G  | A  | 2  | 3   | c.1246C>T       | c.(1246-1248)CGG>TGG   | p.R416W       |
| Pat_49 | Post-Resistance | B4GALNT3 | 283358 | 37 | 12 | 665952    | 665952    | Missense_Mutation      | SNP | C  | T  | 4  | 6   | c.2300C>T       | c.(2299-2301)ACC>ATC   | p.T767I       |
| Pat_49 | Post-Resistance | ITPR2    | 3709   | 37 | 12 | 26553126  | 26553126  | Missense_Mutation      | SNP | C  | T  | 17 | 40  | c.7465G>A       | c.(7465-7467)GTG>ATG   | p.V2489M      |
| Pat_49 | Post-Resistance | DIP2B    | 57609  | 37 | 12 | 51097957  | 51097957  | Missense_Mutation      | SNP | G  | T  | 15 | 23  | c.2360G>T       | c.(2359-2361)GGG>GTG   | p.G787V       |
| Pat_49 | Post-Resistance | NAV3     | 89795  | 37 | 12 | 78574780  | 78574780  | Missense_Mutation      | SNP | G  | A  | 17 | 14  | c.5647G>A       | c.(5647-5649)GGA>AGA   | p.G1883R      |
| Pat_49 | Post-Resistance | C12orf63 | 374467 | 37 | 12 | 97073462  | 97073462  | Missense_Mutation      | SNP | C  | T  | 14 | 32  | c.923C>T        | c.(922-924)TCC>TTC     | p.S308F       |
| Pat_49 | Post-Resistance | SLC17A8  | 246213 | 37 | 12 | 100813710 | 100813710 | Missense_Mutation      | SNP | C  | T  | 3  | 8   | c.1543C>T       | c.(1543-1545)CTC>TTC   | p.L515F       |
| Pat_49 | Post-Resistance | ALDH1L2  | 160428 | 37 | 12 | 105467639 | 105467639 | Missense_Mutation      | SNP | C  | T  | 21 | 15  | c.193G>A        | c.(193-195)GCT>ACT     | p.A65T        |
| Pat_49 | Post-Resistance | GTF2H3   | 2967   | 37 | 12 | 124118393 | 124118393 | Translation_Start_Site | SNP | G  | A  | 9  | 55  | c.-13G>A        | c.(-15--11)AGGTG>AGATG |               |
| Pat_49 | Post-Resistance | EP400    | 57634  | 37 | 12 | 132516601 | 132516601 | Missense_Mutation      | SNP | T  | C  | 11 | 49  | c.5858T>C       | c.(5857-5859)GTG>GCG   | p.V1953A      |
| Pat_49 | Post-Resistance | LMO7     | 4008   | 37 | 13 | 76381683  | 76381683  | Missense_Mutation      | SNP | A  | G  | 3  | 14  | c.565A>G        | c.(565-567)AAA>GAA     | p.K189E       |
| Pat_49 | Post-Resistance | CDKL1    | 8814   | 37 | 14 | 50883181  | 50883181  | Splice_Site            | SNP | G  | A  | 9  | 11  | c.1_splice      | c.e1-1                 | p.M1_splice   |
| Pat_49 | Post-Resistance | CLMN     | 79789  | 37 | 14 | 95663021  | 95663021  | Missense_Mutation      | SNP | G  | A  | 10 | 20  | c.2522C>T       | c.(2521-2523)TCC>TTC   | p.S841F       |
| Pat_49 | Post-Resistance | BCL11B   | 64919  | 37 | 14 | 99641426  | 99641426  | Missense_Mutation      | SNP | C  | T  | 3  | 23  | c.1747G>A       | c.(1747-1749)GCG>ACG   | p.A583T       |
| Pat_49 | Post-Resistance | GOLGA8G  | 283768 | 37 | 15 | 28769153  | 28769153  | Missense_Mutation      | SNP | T  | C  | 3  | 19  | c.701A>G        | c.(700-702)GAG>GGG     | p.E234G       |
| Pat_49 | Post-Resistance | TGM7     | 116179 | 37 | 15 | 43577124  | 43577124  | Missense_Mutation      | SNP | G  | A  | 3  | 45  | c.892C>T        | c.(892-894)CGT>TGT     | p.R298C       |
| Pat_49 | Post-Resistance | IQCH     | 64799  | 37 | 15 | 67713773  | 67713773  | Missense_Mutation      | SNP | C  | T  | 8  | 14  | c.2363C>T       | c.(2362-2364)ACC>ATC   | p.T788I       |
| Pat_49 | Post-Resistance | GOLGA6A  | 342096 | 37 | 15 | 74372995  | 74372995  | Missense_Mutation      | SNP | C  | T  | 3  | 25  | c.166G>A        | c.(166-168)GAG>AAG     | p.E56K        |
| Pat_49 | Post-Resistance | IREB2    | 3658   | 37 | 15 | 78755351  | 78755352  | Missense_Mutation      | DNP | AC | TT | 14 | 54  | c.194_195AC>TT  | c.(193-195)AAC>ATT     | p.N65I        |

|        |                 |           |        |    |    |           |           |                   |     |   |   |    |     |               |                        |               |
|--------|-----------------|-----------|--------|----|----|-----------|-----------|-------------------|-----|---|---|----|-----|---------------|------------------------|---------------|
| Pat_49 | Post-Resistance | RASGRF1   | 5923   | 37 | 15 | 79265755  | 79265755  | Missense_Mutation | SNP | G | A | 5  | 34  | c.3550C>T     | c.(3550-3552)CCA>TCA   | p.P1184S      |
| Pat_49 | Post-Resistance | LRRK1     | 79705  | 37 | 15 | 101586260 | 101586260 | Missense_Mutation | SNP | C | T | 31 | 56  | c.3038C>T     | c.(3037-3039)ACC>ATC   | p.T1013I      |
| Pat_49 | Post-Resistance | WFIKKN1   | 117166 | 37 | 16 | 683041    | 683041    | Missense_Mutation | SNP | G | A | 3  | 29  | c.631G>A      | c.(631-633)GGC>AGC     | p.G211S       |
| Pat_49 | Post-Resistance | ZNF205    | 7755   | 37 | 16 | 3169496   | 3169496   | Missense_Mutation | SNP | C | T | 3  | 1   | c.835C>T      | c.(835-837)CCG>TCG     | p.P279S       |
| Pat_49 | Post-Resistance | RSL1D1    | 26156  | 37 | 16 | 11941535  | 11941535  | Missense_Mutation | SNP | G | A | 5  | 38  | c.374C>T      | c.(373-375)ACC>ATC     | p.T125I       |
| Pat_49 | Post-Resistance | XYLT1     | 64131  | 37 | 16 | 17202673  | 17202673  | Missense_Mutation | SNP | C | T | 4  | 24  | c.2759G>A     | c.(2758-2760)TGT>TAT   | p.C920Y       |
| Pat_49 | Post-Resistance | DNAH3     | 55567  | 37 | 16 | 20986583  | 20986583  | Missense_Mutation | SNP | A | C | 7  | 52  | c.8231T>G     | c.(8230-8232)GTT>GGT   | p.V2744G      |
| Pat_49 | Post-Resistance | HEATR3    | 55027  | 37 | 16 | 50102761  | 50102761  | Missense_Mutation | SNP | G | C | 10 | 49  | c.382G>C      | c.(382-384)GTT>CTT     | p.V128L       |
| Pat_49 | Post-Resistance | SALL1     | 6299   | 37 | 16 | 51176030  | 51176030  | Missense_Mutation | SNP | G | A | 13 | 69  | c.103C>T      | c.(103-105)CGC>TGC     | p.R35C        |
| Pat_49 | Post-Resistance | OGFOD1    | 55239  | 37 | 16 | 56504456  | 56504456  | Missense_Mutation | SNP | G | C | 14 | 13  | c.1038G>C     | c.(1036-1038)AAG>AAC   | p.K346N       |
| Pat_49 | Post-Resistance | BBS2      | 583    | 37 | 16 | 56531693  | 56531693  | Missense_Mutation | SNP | G | A | 5  | 38  | c.1759C>T     | c.(1759-1761)CCT>TCT   | p.P587S       |
| Pat_49 | Post-Resistance | CDYL2     | 124359 | 37 | 16 | 80646560  | 80646560  | Missense_Mutation | SNP | G | A | 15 | 25  | c.1181C>T     | c.(1180-1182)TCC>TTC   | p.S394F       |
| Pat_49 | Post-Resistance | ANKRD11   | 29123  | 37 | 16 | 89352018  | 89352018  | Missense_Mutation | SNP | G | A | 10 | 27  | c.932C>T      | c.(931-933)TCC>TTC     | p.S311F       |
| Pat_49 | Post-Resistance | C17orf97  | 400566 | 37 | 17 | 263584    | 263584    | Missense_Mutation | SNP | C | T | 3  | 35  | c.980C>T      | c.(979-981)ACT>ATT     | p.T327I       |
| Pat_49 | Post-Resistance | P2RX1     | 5023   | 37 | 17 | 3819429   | 3819429   | Missense_Mutation | SNP | C | T | 11 | 60  | c.91G>A       | c.(91-93)GTT>ATT       | p.V31I        |
| Pat_49 | Post-Resistance | TEKT3     | 64518  | 37 | 17 | 15234809  | 15234809  | Missense_Mutation | SNP | T | G | 5  | 17  | c.94A>C       | c.(94-96)AGC>CGC       | p.S32R        |
| Pat_49 | Post-Resistance | LGALS9B   | 284194 | 37 | 17 | 20363690  | 20363690  | Missense_Mutation | SNP | C | T | 6  | 61  | c.106G>A      | c.(106-108)GCC>ACC     | p.A36T        |
| Pat_49 | Post-Resistance | GHDC      | 84514  | 37 | 17 | 40342744  | 40342744  | Missense_Mutation | SNP | C | T | 7  | 24  | c.1186G>A     | c.(1186-1188)GAT>AAT   | p.D396N       |
| Pat_49 | Post-Resistance | TBC1D3P2  | 440452 | 37 | 17 | 60349342  | 60349342  | Missense_Mutation | SNP | C | T | 6  | 165 | c.206G>A      | c.(205-207)CGG>CAG     | p.R69Q        |
| Pat_49 | Post-Resistance | SOCS3     | 9021   | 37 | 17 | 76354699  | 76354699  | Missense_Mutation | SNP | G | A | 10 | 15  | c.478C>T      | c.(478-480)CCC>TCC     | p.P160S       |
| Pat_49 | Post-Resistance | AFG3L2    | 10939  | 37 | 18 | 12351210  | 12351210  | Splice_Site       | SNP | C | A | 5  | 19  | c.1427_splice | c.e12-1                | p.G476_splice |
| Pat_49 | Post-Resistance | INO80C    | 125476 | 37 | 18 | 33048651  | 33048651  | Missense_Mutation | SNP | G | A | 25 | 37  | c.503C>T      | c.(502-504)TCC>TTC     | p.S168F       |
| Pat_49 | Post-Resistance | DCC       | 1630   | 37 | 18 | 50918073  | 50918073  | Missense_Mutation | SNP | C | A | 11 | 30  | c.2504C>A     | c.(2503-2505)ACC>AAC   | p.T835N       |
| Pat_49 | Post-Resistance | TNFRSF11A | 8792   | 37 | 18 | 60036217  | 60036217  | Missense_Mutation | SNP | C | T | 3  | 24  | c.1067C>T     | c.(1066-1068)CCC>CTC   | p.P356L       |
| Pat_49 | Post-Resistance | CSNK1G2   | 1455   | 37 | 19 | 1969835   | 1969835   | Missense_Mutation | SNP | G | A | 7  | 3   | c.64G>A       | c.(64-66)GGC>AGC       | p.G22S        |
| Pat_49 | Post-Resistance | DPP9      | 91039  | 37 | 19 | 4702054   | 4702054   | Missense_Mutation | SNP | G | A | 17 | 59  | c.997C>T      | c.(997-999)CGG>TGG     | p.R333W       |
| Pat_49 | Post-Resistance | OR7D4     | 125958 | 37 | 19 | 9325267   | 9325267   | Missense_Mutation | SNP | C | T | 12 | 25  | c.247G>A      | c.(247-249)GTG>ATG     | p.V83M        |
| Pat_49 | Post-Resistance | ILVBL     | 10994  | 37 | 19 | 15233968  | 15233968  | Missense_Mutation | SNP | G | A | 20 | 32  | c.424C>T      | c.(424-426)CCA>TCA     | p.P142S       |
| Pat_49 | Post-Resistance | ZNF99     | 7652   | 37 | 19 | 22939999  | 22939999  | Missense_Mutation | SNP | C | T | 7  | 13  | c.2332G>A     | c.(2332-2334)GAA>AAA   | p.E778K       |
| Pat_49 | Post-Resistance | KCNK6     | 9424   | 37 | 19 | 38817514  | 38817514  | Missense_Mutation | SNP | T | G | 15 | 49  | c.604T>G      | c.(604-606)TTG>GTG     | p.L202V       |
| Pat_49 | Post-Resistance | FCGBP     | 8857   | 37 | 19 | 40408560  | 40408560  | Missense_Mutation | SNP | G | A | 4  | 15  | c.4279C>T     | c.(4279-4281)CCC>TCC   | p.P1427S      |
| Pat_49 | Post-Resistance | PSG8      | 440533 | 37 | 19 | 43262152  | 43262152  | Splice_Site       | SNP | A | C | 24 | 104 | c.709_splice  | c.e3+1                 | p.P237_splice |
| Pat_49 | Post-Resistance | IRGC      | 56269  | 37 | 19 | 44222774  | 44222774  | Missense_Mutation | SNP | G | A | 25 | 34  | c.64G>A       | c.(64-66)GAA>AAA       | p.E22K        |
| Pat_49 | Post-Resistance | PNKP      | 11284  | 37 | 19 | 50368527  | 50368527  | Missense_Mutation | SNP | G | A | 15 | 27  | c.355C>T      | c.(355-357)CCG>TCG     | p.P119S       |
| Pat_49 | Post-Resistance | KIR3DL2   | 3812   | 37 | 19 | 55363717  | 55363717  | Missense_Mutation | SNP | C | T | 16 | 40  | c.335C>T      | c.(334-336)CCC>CTC     | p.P112L       |
| Pat_49 | Post-Resistance | NLRP13    | 126204 | 37 | 19 | 56419257  | 56419257  | Missense_Mutation | SNP | T | C | 26 | 43  | c.2348A>G     | c.(2347-2349)AAG>AGG   | p.K783R       |
| Pat_49 | Post-Resistance | C2orf42   | 54980  | 37 | 2  | 70392719  | 70392719  | Missense_Mutation | SNP | G | A | 4  | 16  | c.1193C>T     | c.(1192-1194)GCC>GTC   | p.A398V       |
| Pat_49 | Post-Resistance | ERCC3     | 2071   | 37 | 2  | 128018874 | 128018874 | Missense_Mutation | SNP | T | A | 6  | 19  | c.1994A>T     | c.(1993-1995)CAG>CTG   | p.Q665L       |
| Pat_49 | Post-Resistance | LRP1B     | 53353  | 37 | 2  | 141609275 | 141609275 | Missense_Mutation | SNP | C | T | 6  | 34  | c.4657G>A     | c.(4657-4659)GCC>ACC   | p.A1553T      |
| Pat_49 | Post-Resistance | CYTIP     | 9595   | 37 | 2  | 158272395 | 158272395 | Missense_Mutation | SNP | C | T | 8  | 31  | c.874G>A      | c.(874-876)GAT>AAT     | p.D292N       |
| Pat_49 | Post-Resistance | ACVR1     | 90     | 37 | 2  | 158636932 | 158636932 | Missense_Mutation | SNP | G | T | 6  | 16  | c.248C>A      | c.(247-249)ACC>AAC     | p.T83N        |
| Pat_49 | Post-Resistance | TTN       | 7273   | 37 | 2  | 179459164 | 179459164 | Missense_Mutation | SNP | C | T | 4  | 23  | c.50353G>A    | c.(50353-50355)GAT>AAT | p.D16785N     |
| Pat_49 | Post-Resistance | AOX1      | 316    | 37 | 2  | 201507424 | 201507424 | Missense_Mutation | SNP | C | T | 4  | 14  | c.2747C>T     | c.(2746-2748)TCC>TTC   | p.S916F       |
| Pat_49 | Post-Resistance | COL6A3    | 1293   | 37 | 2  | 238283655 | 238283655 | Missense_Mutation | SNP | C | T | 5  | 24  | c.3079G>A     | c.(3079-3081)GAA>AAA   | p.E1027K      |
| Pat_49 | Post-Resistance | C20orf26  | 26074  | 37 | 20 | 20208996  | 20208996  | Missense_Mutation | SNP | C | T | 29 | 65  | c.2036C>T     | c.(2035-2037)TCC>TTC   | p.S679F       |
| Pat_49 | Post-Resistance | MYH7B     | 57644  | 37 | 20 | 33570285  | 33570285  | Missense_Mutation | SNP | C | T | 12 | 61  | c.677C>T      | c.(676-678)ACG>ATG     | p.T226M       |
| Pat_49 | Post-Resistance | GNAS      | 2778   | 37 | 20 | 57415537  | 57415537  | Missense_Mutation | SNP | G | A | 34 | 144 | c.376G>A      | c.(376-378)GAG>AAG     | p.E126K       |



|        |                 |            |        |    |    |           |           |                   |     |    |    |     |     |                 |                        |          |
|--------|-----------------|------------|--------|----|----|-----------|-----------|-------------------|-----|----|----|-----|-----|-----------------|------------------------|----------|
| Pat_49 | Post-Resistance | SLCO4A1    | 28231  | 37 | 20 | 61290067  | 61290067  | Missense_Mutation | SNP | G  | A  | 15  | 20  | c.835G>A        | c.(835-837)GGC>AGC     | p.G279S  |
| Pat_49 | Post-Resistance | ZBTB46     | 140685 | 37 | 20 | 62421827  | 62421827  | Missense_Mutation | SNP | A  | G  | 8   | 36  | c.284T>C        | c.(283-285)CTG>CCG     | p.L95P   |
| Pat_49 | Post-Resistance | ETS2       | 2114   | 37 | 21 | 40191544  | 40191544  | Missense_Mutation | SNP | C  | T  | 8   | 13  | c.929C>T        | c.(928-930)TCC>TTC     | p.S310F  |
| Pat_49 | Post-Resistance | KRTAP10-11 | 386678 | 37 | 21 | 46066427  | 46066427  | Missense_Mutation | SNP | C  | A  | 20  | 81  | c.52C>A         | c.(52-54)CAG>AAG       | p.Q18K   |
| Pat_49 | Post-Resistance | NEFH       | 4744   | 37 | 22 | 29885781  | 29885781  | Missense_Mutation | SNP | T  | A  | 4   | 81  | c.2152T>A       | c.(2152-2154)TCC>ACC   | p.S718T  |
| Pat_49 | Post-Resistance | NEFH       | 4744   | 37 | 22 | 29885998  | 29885998  | Missense_Mutation | SNP | A  | T  | 5   | 23  | c.2369A>T       | c.(2368-2370)AAG>ATG   | p.K790M  |
| Pat_49 | Post-Resistance | TMEM184B   | 25829  | 37 | 22 | 38622865  | 38622865  | Missense_Mutation | SNP | A  | G  | 2   | 8   | c.538T>C        | c.(538-540)TTC>CTC     | p.F180L  |
| Pat_49 | Post-Resistance | PNPLA3     | 80339  | 37 | 22 | 44328953  | 44328953  | Missense_Mutation | SNP | C  | T  | 24  | 50  | c.682C>T        | c.(682-684)CCC>TCC     | p.P228S  |
| Pat_49 | Post-Resistance | CPT1B      | 1375   | 37 | 22 | 51009598  | 51009598  | Missense_Mutation | SNP | C  | A  | 17  | 41  | c.1864G>T       | c.(1864-1866)GGG>TGG   | p.G622W  |
| Pat_49 | Post-Resistance | XIRP1      | 165904 | 37 | 3  | 39228610  | 39228610  | Missense_Mutation | SNP | C  | T  | 3   | 13  | c.2327G>A       | c.(2326-2328)CGG>CAG   | p.R776Q  |
| Pat_49 | Post-Resistance | COL7A1     | 1294   | 37 | 3  | 48604437  | 48604437  | Missense_Mutation | SNP | C  | T  | 5   | 4   | c.8129G>A       | c.(8128-8130)GGC>GAC   | p.G2710D |
| Pat_49 | Post-Resistance | FAM3D      | 131177 | 37 | 3  | 58631315  | 58631315  | Missense_Mutation | SNP | G  | A  | 3   | 29  | c.184C>T        | c.(184-186)CCA>TCA     | p.P62S   |
| Pat_49 | Post-Resistance | FAM86D     | 692099 | 37 | 3  | 75475622  | 75475622  | Nonsense_Mutation | SNP | G  | A  | 14  | 65  | c.616C>T        | c.(616-618)CAG>TAG     | p.Q206*  |
| Pat_49 | Post-Resistance | OR5AC2     | 81050  | 37 | 3  | 97806176  | 97806176  | Missense_Mutation | SNP | G  | A  | 13  | 27  | c.160G>A        | c.(160-162)GAC>AAC     | p.D54N   |
| Pat_49 | Post-Resistance | OR5H6      | 79295  | 37 | 3  | 97983342  | 97983342  | Missense_Mutation | SNP | C  | T  | 18  | 40  | c.214C>T        | c.(214-216)CAT>TAT     | p.H72Y   |
| Pat_49 | Post-Resistance | POLQ       | 10721  | 37 | 3  | 121206296 | 121206296 | Missense_Mutation | SNP | T  | C  | 20  | 40  | c.5482A>G       | c.(5482-5484)ATT>GTT   | p.I1828V |
| Pat_49 | Post-Resistance | MYLK       | 4638   | 37 | 3  | 123452908 | 123452908 | Missense_Mutation | SNP | C  | T  | 3   | 12  | c.935G>A        | c.(934-936)AGC>AAC     | p.S312N  |
| Pat_49 | Post-Resistance | PODXL2     | 50512  | 37 | 3  | 127379452 | 127379452 | Missense_Mutation | SNP | G  | A  | 9   | 30  | c.581G>A        | c.(580-582)GGA>GAA     | p.G194E  |
| Pat_49 | Post-Resistance | ZNF721     | 170960 | 37 | 4  | 436628    | 436628    | Missense_Mutation | SNP | A  | T  | 5   | 53  | c.1628T>A       | c.(1627-1629)ATC>AAC   | p.I543N  |
| Pat_49 | Post-Resistance | ZNF721     | 170960 | 37 | 4  | 436647    | 436647    | Missense_Mutation | SNP | C  | T  | 4   | 48  | c.1609G>A       | c.(1609-1611)GCC>ACC   | p.A537T  |
| Pat_49 | Post-Resistance | OTOP1      | 133060 | 37 | 4  | 4190678   | 4190678   | Missense_Mutation | SNP | C  | T  | 8   | 39  | c.1691G>A       | c.(1690-1692)GGC>GAC   | p.G564D  |
| Pat_49 | Post-Resistance | GABRG1     | 2565   | 37 | 4  | 46099335  | 46099335  | Missense_Mutation | SNP | C  | T  | 4   | 28  | c.136G>A        | c.(136-138)GAT>AAT     | p.D46N   |
| Pat_49 | Post-Resistance | ADH1A      | 124    | 37 | 4  | 100201357 | 100201357 | Missense_Mutation | SNP | G  | A  | 16  | 49  | c.908C>T        | c.(907-909)TCA>TTA     | p.S303L  |
| Pat_49 | Post-Resistance | MAP9       | 79884  | 37 | 4  | 156268946 | 156268946 | Missense_Mutation | SNP | T  | C  | 3   | 15  | c.1933A>G       | c.(1933-1935)AAA>GAA   | p.K645E  |
| Pat_49 | Post-Resistance | SLC12A7    | 10723  | 37 | 5  | 1083982   | 1083982   | Missense_Mutation | SNP | G  | A  | 15  | 45  | c.1007C>T       | c.(1006-1008)TCC>TTC   | p.S336F  |
| Pat_49 | Post-Resistance | CDH18      | 1016   | 37 | 5  | 19473613  | 19473613  | Missense_Mutation | SNP | G  | A  | 3   | 11  | c.2095C>T       | c.(2095-2097)CCC>TCC   | p.P699S  |
| Pat_49 | Post-Resistance | CDH6       | 1004   | 37 | 5  | 31305531  | 31305531  | Missense_Mutation | SNP | T  | C  | 7   | 42  | c.1250T>C       | c.(1249-1251)GTC>GCC   | p.V417A  |
| Pat_49 | Post-Resistance | C5orf42    | 65250  | 37 | 5  | 37108562  | 37108562  | Missense_Mutation | SNP | G  | A  | 10  | 26  | c.9250C>T       | c.(9250-9252)CCG>TCG   | p.P3084S |
| Pat_49 | Post-Resistance | PPAP2A     | 8611   | 37 | 5  | 54771240  | 54771240  | Missense_Mutation | SNP | G  | A  | 4   | 11  | c.97C>T         | c.(97-99)CCC>TCC       | p.P33S   |
| Pat_49 | Post-Resistance | GPR98      | 84059  | 37 | 5  | 90124894  | 90124894  | Missense_Mutation | SNP | C  | T  | 28  | 51  | c.16502C>T      | c.(16501-16503)TCT>TTT | p.S5501F |
| Pat_49 | Post-Resistance | ELL2       | 22936  | 37 | 5  | 95224676  | 95224676  | Missense_Mutation | SNP | G  | A  | 2   | 2   | c.1822C>T       | c.(1822-1824)CAT>TAT   | p.H608Y  |
| Pat_49 | Post-Resistance | RIOK2      | 55781  | 37 | 5  | 96508946  | 96508946  | Missense_Mutation | SNP | G  | A  | 7   | 24  | c.520C>T        | c.(520-522)CCA>TCA     | p.P174S  |
| Pat_49 | Post-Resistance | MCC        | 4163   | 37 | 5  | 112379327 | 112379327 | Missense_Mutation | SNP | C  | T  | 11  | 33  | c.2086G>A       | c.(2086-2088)GAG>AAG   | p.E696K  |
| Pat_49 | Post-Resistance | CHSY3      | 337876 | 37 | 5  | 129520444 | 129520444 | Missense_Mutation | SNP | T  | C  | 7   | 16  | c.1609T>C       | c.(1609-1611)TAC>CAC   | p.Y537H  |
| Pat_49 | Post-Resistance | RPP40      | 10799  | 37 | 6  | 4995482   | 4995482   | Missense_Mutation | SNP | G  | A  | 20  | 10  | c.922C>T        | c.(922-924)CCA>TCA     | p.P308S  |
| Pat_49 | Post-Resistance | ETV7       | 51513  | 37 | 6  | 36339107  | 36339107  | Missense_Mutation | SNP | C  | T  | 8   | 3   | c.664G>A        | c.(664-666)GAC>AAC     | p.D222N  |
| Pat_49 | Post-Resistance | UBR2       | 23304  | 37 | 6  | 42633184  | 42633184  | Missense_Mutation | SNP | T  | C  | 178 | 441 | c.3736T>C       | c.(3736-3738)TGG>CGG   | p.W1246R |
| Pat_49 | Post-Resistance | UBR2       | 23304  | 37 | 6  | 42633226  | 42633226  | Missense_Mutation | SNP | C  | A  | 94  | 248 | c.3778C>A       | c.(3778-3780)CTT>ATT   | p.L1260I |
| Pat_49 | Post-Resistance | MAP3K4     | 4216   | 37 | 6  | 161469799 | 161469799 | Missense_Mutation | SNP | C  | G  | 4   | 14  | c.495C>G        | c.(493-495)TTC>TTG     | p.F165L  |
| Pat_49 | Post-Resistance | KIF25      | 3834   | 37 | 6  | 168430272 | 168430272 | Missense_Mutation | SNP | T  | A  | 3   | 40  | c.7T>A          | c.(7-9)TGG>AGG         | p.W3R    |
| Pat_49 | Post-Resistance | SDK1       | 221935 | 37 | 7  | 4091391   | 4091391   | Missense_Mutation | SNP | C  | T  | 15  | 57  | c.2840C>T       | c.(2839-2841)TCC>TTC   | p.S947F  |
| Pat_49 | Post-Resistance | MYO1G      | 64005  | 37 | 7  | 45005268  | 45005269  | Missense_Mutation | DNP | GG | AA | 5   | 35  | .:2348_2349CC>T | c.(2347-2349)CCC>CTT   | p.P783L  |
| Pat_49 | Post-Resistance | ZNF479     | 90827  | 37 | 7  | 57187809  | 57187809  | Missense_Mutation | SNP | T  | G  | 4   | 24  | c.1313A>C       | c.(1312-1314)AAA>ACA   | p.K438T  |
| Pat_49 | Post-Resistance | AUTS2      | 26053  | 37 | 7  | 70229874  | 70229874  | Missense_Mutation | SNP | C  | T  | 3   | 39  | c.1351C>T       | c.(1351-1353)CCC>TCC   | p.P451S  |
| Pat_49 | Post-Resistance | KIAA1324L  | 222223 | 37 | 7  | 86521053  | 86521053  | Missense_Mutation | SNP | G  | A  | 15  | 25  | c.3017C>T       | c.(3016-3018)TCT>TTT   | p.S1006F |
| Pat_49 | Post-Resistance | KCND2      | 3751   | 37 | 7  | 119915065 | 119915065 | Missense_Mutation | SNP | G  | A  | 13  | 94  | c.379G>A        | c.(379-381)GAA>AAA     | p.E127K  |
| Pat_49 | Post-Resistance | BRAF       | 673    | 37 | 7  | 140453136 | 140453136 | Missense_Mutation | SNP | A  | T  | 27  | 23  | c.1799T>A       | c.(1798-1800)GTG>GAG   | p.V600E  |

|        |                 |          |           |    |   |           |           |                   |     |    |    |     |     |                                   |                      |               |
|--------|-----------------|----------|-----------|----|---|-----------|-----------|-------------------|-----|----|----|-----|-----|-----------------------------------|----------------------|---------------|
| Pat_49 | Post-Resistance | OR9A4    | 130075    | 37 | 7 | 141619283 | 141619283 | Missense_Mutation | SNP | C  | T  | 18  | 15  | c.608C>T                          | c.(607-609)GCT>GTT   | p.A203V       |
| Pat_49 | Post-Resistance | MGAM     | 8972      | 37 | 7 | 141750570 | 141750570 | Missense_Mutation | SNP | T  | A  | 7   | 7   | c.2711T>A                         | c.(2710-2712)ATT>AAT | p.I904N       |
| Pat_49 | Post-Resistance | TRY6     | 154754    | 37 | 7 | 142481775 | 142481775 | Splice_Site       | SNP | G  | A  | 50  | 8   | c.455_splice                      | c.e4-1               | p.A152_splice |
| Pat_49 | Post-Resistance | ZNF786   | 136051    | 37 | 7 | 148769113 | 148769114 | Missense_Mutation | DNP | GG | AA | 7   | 6   | c.750_751CC>TT748-753)CGCCGG>CGTT |                      | p.R251W       |
| Pat_49 | Post-Resistance | ZFPM2    | 23414     | 37 | 8 | 106813457 | 106813457 | Missense_Mutation | SNP | G  | A  | 64  | 30  | c.1147G>A                         | c.(1147-1149)GAG>AAG | p.E383K       |
| Pat_49 | Post-Resistance | DENND3   | 22898     | 37 | 8 | 142200513 | 142200513 | Missense_Mutation | SNP | T  | C  | 8   | 40  | c.3136T>C                         | c.(3136-3138)TGC>CGC | p.C1046R      |
| Pat_49 | Post-Resistance | PTPRD    | 5789      | 37 | 9 | 8341914   | 8341914   | Missense_Mutation | SNP | C  | T  | 6   | 5   | c.4726G>A                         | c.(4726-4728)GAA>AAA | p.E1576K      |
| Pat_49 | Post-Resistance | TEK      | 7010      | 37 | 9 | 27212859  | 27212859  | Missense_Mutation | SNP | C  | G  | 9   | 6   | c.2841C>G                         | c.(2839-2841)GAC>GAG | p.D947E       |
| Pat_49 | Post-Resistance | FAM22G   | 441457    | 37 | 9 | 99697727  | 99697727  | Missense_Mutation | SNP | G  | C  | 77  | 41  | c.831G>C                          | c.(829-831)GAG>GAC   | p.E277D       |
| Pat_49 | Post-Resistance | OFD1     | 8481      | 37 | X | 13771510  | 13771510  | Missense_Mutation | SNP | A  | G  | 4   | 35  | c.1079A>G                         | c.(1078-1080)GAC>GGC | p.D360G       |
| Pat_49 | Post-Resistance | FAM48B1  | 100130302 | 37 | X | 24381778  | 24381778  | Missense_Mutation | SNP | G  | A  | 14  | 38  | c.901G>A                          | c.(901-903)GCC>ACC   | p.A301T       |
| Pat_49 | Post-Resistance | USP51    | 158880    | 37 | X | 55513698  | 55513698  | Missense_Mutation | SNP | G  | A  | 4   | 14  | c.1675C>T                         | c.(1675-1677)CCA>TCA | p.P559S       |
| Pat_49 | Post-Resistance | FGF16    | 8823      | 37 | X | 76711891  | 76711891  | Missense_Mutation | SNP | G  | A  | 8   | 36  | c.229G>A                          | c.(229-231)GAT>AAT   | p.D77N        |
| Pat_49 | Post-Resistance | ARL13A   | 392509    | 37 | X | 100241834 | 100241834 | Missense_Mutation | SNP | A  | G  | 6   | 6   | c.430A>G                          | c.(430-432)ATT>GTT   | p.I144V       |
| Pat_49 | Post-Resistance | NXF5     | 55998     | 37 | X | 101096684 | 101096684 | Missense_Mutation | SNP | C  | T  | 47  | 85  | c.202G>A                          | c.(202-204)GAT>AAT   | p.D68N        |
| Pat_49 | Post-Resistance | GPRASP2  | 114928    | 37 | X | 101970977 | 101970977 | Missense_Mutation | SNP | G  | A  | 14  | 15  | c.1180G>A                         | c.(1180-1182)GAA>AAA | p.E394K       |
| Pat_49 | Post-Resistance | H2BFM    | 286436    | 37 | X | 103294880 | 103294880 | Missense_Mutation | SNP | A  | G  | 3   | 14  | c.337A>G                          | c.(337-339)ACC>GCC   | p.T113A       |
| Pat_49 | Post-Resistance | NRK      | 203447    | 37 | X | 105167141 | 105167141 | Missense_Mutation | SNP | C  | T  | 24  | 49  | c.2642C>T                         | c.(2641-2643)TCA>TTA | p.S881L       |
| Pat_49 | Post-Resistance | LHFPL1   | 340596    | 37 | X | 111914593 | 111914593 | Missense_Mutation | SNP | C  | T  | 46  | 129 | c.26G>A                           | c.(25-27)GGA>GAA     | p.G9E         |
| Pat_49 | Post-Resistance | ODZ1     | 10178     | 37 | X | 123654454 | 123654454 | Missense_Mutation | SNP | G  | A  | 34  | 47  | c.3214C>T                         | c.(3214-3216)CCC>TCC | p.P1072S      |
| Pat_49 | Post-Resistance | BRS3     | 680       | 37 | X | 135570618 | 135570618 | Missense_Mutation | SNP | C  | A  | 12  | 81  | c.345C>A                          | c.(343-345)TTC>TTA   | p.F115L       |
| Pat_49 | Post-Resistance | MAGEC3   | 139081    | 37 | X | 140984949 | 140984949 | Missense_Mutation | SNP | C  | T  | 10  | 17  | c.1405C>T                         | c.(1405-1407)CTC>TTC | p.L469F       |
| Pat_49 | Post-Resistance | GABRA3   | 2556      | 37 | X | 151514055 | 151514055 | Missense_Mutation | SNP | C  | T  | 15  | 43  | c.260G>A                          | c.(259-261)GGA>GAA   | p.G87E        |
| Pat_50 | Pre-Treatment   | DVL1     | 1855      | 37 | 1 | 1277436   | 1277436   | Missense_Mutation | SNP | C  | T  | 3   | 6   | c.463G>A                          | c.(463-465)GAG>AAG   | p.E155K       |
| Pat_50 | Pre-Treatment   | KIAA1751 | 85452     | 37 | 1 | 1890560   | 1890560   | Missense_Mutation | SNP | G  | A  | 33  | 53  | c.1850C>T                         | c.(1849-1851)TCG>TTG | p.S617L       |
| Pat_50 | Pre-Treatment   | NPHP4    | 261734    | 37 | 1 | 6012873   | 6012873   | Missense_Mutation | SNP | G  | A  | 3   | 7   | c.697C>T                          | c.(697-699)CTC>TTC   | p.L233F       |
| Pat_50 | Pre-Treatment   | PRAMEF1  | 65121     | 37 | 1 | 12853499  | 12853499  | Missense_Mutation | SNP | G  | A  | 39  | 73  | c.123G>A                          | c.(121-123)ATG>ATA   | p.M41I        |
| Pat_50 | Pre-Treatment   | KIAA1522 | 57648     | 37 | 1 | 33235549  | 33235549  | Missense_Mutation | SNP | C  | T  | 10  | 4   | c.592C>T                          | c.(592-594)CCC>TCC   | p.P198S       |
| Pat_50 | Pre-Treatment   | LRRIQ3   | 127255    | 37 | 1 | 74507479  | 74507479  | Missense_Mutation | SNP | G  | A  | 24  | 50  | c.1136C>T                         | c.(1135-1137)CCT>CTT | p.P379L       |
| Pat_50 | Pre-Treatment   | COL24A1  | 255631    | 37 | 1 | 86523621  | 86523621  | Missense_Mutation | SNP | C  | T  | 29  | 36  | c.1844G>A                         | c.(1843-1845)GGT>GAT | p.G615D       |
| Pat_50 | Pre-Treatment   | SYT6     | 148281    | 37 | 1 | 114680470 | 114680470 | Missense_Mutation | SNP | C  | T  | 46  | 69  | c.463G>A                          | c.(463-465)GAT>AAT   | p.D155N       |
| Pat_50 | Pre-Treatment   | NGF      | 4803      | 37 | 1 | 115829314 | 115829314 | Missense_Mutation | SNP | C  | A  | 27  | 42  | c.103G>T                          | c.(103-105)GCC>TCC   | p.A35S        |
| Pat_50 | Pre-Treatment   | WDR3     | 10885     | 37 | 1 | 118499713 | 118499713 | Missense_Mutation | SNP | G  | T  | 38  | 74  | c.2476G>T                         | c.(2476-2478)GTG>TTG | p.V826L       |
| Pat_50 | Pre-Treatment   | OTUD7B   | 56957     | 37 | 1 | 149939374 | 149939374 | Missense_Mutation | SNP | G  | A  | 53  | 70  | c.347C>T                          | c.(346-348)TCC>TTC   | p.S116F       |
| Pat_50 | Pre-Treatment   | GABPB2   | 126626    | 37 | 1 | 151090674 | 151090674 | Missense_Mutation | SNP | G  | A  | 32  | 51  | c.1289G>A                         | c.(1288-1290)GGG>GAG | p.G430E       |
| Pat_50 | Pre-Treatment   | S100A7A  | 338324    | 37 | 1 | 153391748 | 153391748 | Missense_Mutation | SNP | G  | A  | 72  | 41  | c.269G>A                          | c.(268-270)AGC>AAC   | p.S90N        |
| Pat_50 | Pre-Treatment   | SLC39A1  | 27173     | 37 | 1 | 153933163 | 153933163 | Missense_Mutation | SNP | A  | C  | 33  | 144 | c.386T>G                          | c.(385-387)ATC>AGC   | p.I129S       |
| Pat_50 | Pre-Treatment   | YY1AP1   | 55249     | 37 | 1 | 155629899 | 155629900 | Missense_Mutation | DNP | GG | AA | 11  | 80  | c.1939_1940CC>T                   | c.(1939-1941)CCC>TTC | p.P647F       |
| Pat_50 | Pre-Treatment   | FCRL1    | 115350    | 37 | 1 | 157772325 | 157772325 | Missense_Mutation | SNP | C  | T  | 109 | 56  | c.449G>A                          | c.(448-450)GGG>GAG   | p.G150E       |
| Pat_50 | Pre-Treatment   | CD1A     | 909       | 37 | 1 | 158225110 | 158225110 | Missense_Mutation | SNP | C  | T  | 118 | 40  | c.295C>T                          | c.(295-297)CGT>TGT   | p.R99C        |
| Pat_50 | Pre-Treatment   | OR10K1   | 391109    | 37 | 1 | 158436249 | 158436249 | Missense_Mutation | SNP | G  | A  | 207 | 97  | c.898G>A                          | c.(898-900)GCC>ACC   | p.A300T       |
| Pat_50 | Pre-Treatment   | SPTA1    | 6708      | 37 | 1 | 158607893 | 158607893 | Missense_Mutation | SNP | C  | T  | 33  | 112 | c.5119G>A                         | c.(5119-5121)GAA>AAA | p.E1707K      |
| Pat_50 | Pre-Treatment   | F11R     | 50848     | 37 | 1 | 160970564 | 160970564 | Missense_Mutation | SNP | G  | A  | 91  | 51  | c.245C>T                          | c.(244-246)TCC>TTC   | p.S82F        |
| Pat_50 | Pre-Treatment   | ATF6     | 22926     | 37 | 1 | 161789463 | 161789463 | Missense_Mutation | SNP | G  | A  | 27  | 20  | c.950G>A                          | c.(949-951)CGA>CAA   | p.R317Q       |
| Pat_50 | Pre-Treatment   | EDEM3    | 80267     | 37 | 1 | 184688682 | 184688682 | Missense_Mutation | SNP | C  | G  | 144 | 58  | c.972G>C                          | c.(970-972)AGG>AGC   | p.R324S       |
| Pat_50 | Pre-Treatment   | PTPRC    | 5788      | 37 | 1 | 198685892 | 198685892 | Missense_Mutation | SNP | C  | T  | 21  | 46  | c.1367C>T                         | c.(1366-1368)TCA>TTA | p.S456L       |
| Pat_50 | Pre-Treatment   | NFASC    | 23114     | 37 | 1 | 204948583 | 204948583 | Missense_Mutation | SNP | G  | A  | 100 | 234 | c.2072G>A                         | c.(2071-2073)CGG>CAG | p.R691Q       |

|        |               |           |        |    |    |           |           |                   |     |    |    |     |     |                |                        |               |
|--------|---------------|-----------|--------|----|----|-----------|-----------|-------------------|-----|----|----|-----|-----|----------------|------------------------|---------------|
| Pat_50 | Pre-Treatment | USH2A     | 7399   | 37 | 1  | 216371732 | 216371732 | Missense_Mutation | SNP | C  | T  | 68  | 47  | c.4006G>A      | c.(4006-4008)GAG>AAG   | p.E1336K      |
| Pat_50 | Pre-Treatment | FH        | 2271   | 37 | 1  | 241669350 | 241669350 | Missense_Mutation | SNP | C  | T  | 42  | 24  | c.857G>A       | c.(856-858)AGA>AAA     | p.R286K       |
| Pat_50 | Pre-Treatment | OR2M3     | 127062 | 37 | 1  | 248367019 | 248367019 | Missense_Mutation | SNP | C  | T  | 141 | 690 | c.650C>T       | c.(649-651)TCC>TTC     | p.S217F       |
| Pat_50 | Pre-Treatment | MYO3A     | 53904  | 37 | 10 | 26490216  | 26490216  | Missense_Mutation | SNP | G  | A  | 6   | 3   | c.4568G>A      | c.(4567-4569)CGA>CAA   | p.R1523Q      |
| Pat_50 | Pre-Treatment | ARMC4     | 55130  | 37 | 10 | 28272855  | 28272855  | Missense_Mutation | SNP | C  | T  | 31  | 15  | c.736G>A       | c.(736-738)GAA>AAA     | p.E246K       |
| Pat_50 | Pre-Treatment | PCDH15    | 65217  | 37 | 10 | 55566459  | 55566459  | Missense_Mutation | SNP | C  | T  | 95  | 57  | c.4929G>A      | c.(4927-4929)ATG>ATA   | p.M1643I      |
| Pat_50 | Pre-Treatment | EGR2      | 1959   | 37 | 10 | 64573485  | 64573485  | Missense_Mutation | SNP | C  | T  | 5   | 3   | c.913G>A       | c.(913-915)GCC>ACC     | p.A305T       |
| Pat_50 | Pre-Treatment | POLR3A    | 11128  | 37 | 10 | 79741292  | 79741292  | Missense_Mutation | SNP | G  | A  | 267 | 129 | c.3785C>T      | c.(3784-3786)GCC>GTC   | p.A1262V      |
| Pat_50 | Pre-Treatment | COL17A1   | 1308   | 37 | 10 | 105792721 | 105792721 | Missense_Mutation | SNP | C  | T  | 4   | 3   | c.4300G>A      | c.(4300-4302)GGA>AGA   | p.G1434R      |
| Pat_50 | Pre-Treatment | SORCS3    | 22986  | 37 | 10 | 107005328 | 107005328 | Missense_Mutation | SNP | C  | T  | 71  | 42  | c.2897C>T      | c.(2896-2898)TCC>TTC   | p.S966F       |
| Pat_50 | Pre-Treatment | DCLRE1A   | 9937   | 37 | 10 | 115596901 | 115596901 | Missense_Mutation | SNP | G  | A  | 85  | 38  | c.2882C>T      | c.(2881-2883)CCT>CTT   | p.P961L       |
| Pat_50 | Pre-Treatment | INPP5F    | 22876  | 37 | 10 | 121571446 | 121571446 | Missense_Mutation | SNP | C  | T  | 24  | 14  | c.1865C>T      | c.(1864-1866)GCC>GTC   | p.A622V       |
| Pat_50 | Pre-Treatment | MUC6      | 4588   | 37 | 11 | 1020098   | 1020098   | Missense_Mutation | SNP | G  | A  | 4   | 3   | c.3800C>T      | c.(3799-3801)TCC>TTC   | p.S1267F      |
| Pat_50 | Pre-Treatment | KCNQ1     | 3784   | 37 | 11 | 2604711   | 2604711   | Nonsense_Mutation | SNP | G  | A  | 64  | 116 | c.968G>A       | c.(967-969)TGG>TAG     | p.W323*       |
| Pat_50 | Pre-Treatment | OR51G2    | 81282  | 37 | 11 | 4936698   | 4936698   | Missense_Mutation | SNP | G  | A  | 13  | 19  | c.196C>T       | c.(196-198)CTC>TTC     | p.L66F        |
| Pat_50 | Pre-Treatment | OR56A5    | 390084 | 37 | 11 | 5988824   | 5988824   | Missense_Mutation | SNP | C  | T  | 11  | 38  | c.901G>A       | c.(901-903)GAG>AAG     | p.E301K       |
| Pat_50 | Pre-Treatment | ABCC8     | 6833   | 37 | 11 | 17449861  | 17449861  | Missense_Mutation | SNP | C  | T  | 48  | 70  | c.2015G>A      | c.(2014-2016)GGC>GAC   | p.G672D       |
| Pat_50 | Pre-Treatment | USH1C     | 10083  | 37 | 11 | 17547952  | 17547952  | Missense_Mutation | SNP | C  | T  | 10  | 18  | c.616G>A       | c.(616-618)GAA>AAA     | p.E206K       |
| Pat_50 | Pre-Treatment | SLC17A6   | 57084  | 37 | 11 | 22364792  | 22364792  | Splice_Site       | SNP | G  | A  | 48  | 82  | c.340_splice   | c.e3-1                 | p.K114_splice |
| Pat_50 | Pre-Treatment | OR4X2     | 119764 | 37 | 11 | 48266909  | 48266909  | Missense_Mutation | SNP | C  | T  | 52  | 69  | c.254C>T       | c.(253-255)TCT>TTT     | p.S85F        |
| Pat_50 | Pre-Treatment | FOLH1     | 2346   | 37 | 11 | 49204734  | 49204734  | Missense_Mutation | SNP | G  | A  | 22  | 44  | c.887C>T       | c.(886-888)CCA>CTA     | p.P296L       |
| Pat_50 | Pre-Treatment | OR10Q1    | 219960 | 37 | 11 | 57995785  | 57995785  | Missense_Mutation | SNP | G  | A  | 30  | 43  | c.563C>T       | c.(562-564)CCC>CTC     | p.P188L       |
| Pat_50 | Pre-Treatment | CD5       | 921    | 37 | 11 | 60886756  | 60886757  | Missense_Mutation | DNP | GG | AA | 44  | 68  | c.514_515GG>AA | c.(514-516)GGC>AAC     | p.G172N       |
| Pat_50 | Pre-Treatment | SLC22A6   | 9356   | 37 | 11 | 62747211  | 62747211  | Missense_Mutation | SNP | G  | A  | 14  | 22  | c.1247C>T      | c.(1246-1248)CCC>CTC   | p.P416L       |
| Pat_50 | Pre-Treatment | SLC22A10  | 387775 | 37 | 11 | 63064783  | 63064783  | Missense_Mutation | SNP | G  | A  | 36  | 94  | c.515G>A       | c.(514-516)CGA>CAA     | p.R172Q       |
| Pat_50 | Pre-Treatment | CCDC87    | 55231  | 37 | 11 | 66358610  | 66358610  | Missense_Mutation | SNP | G  | A  | 25  | 47  | c.1877C>T      | c.(1876-1878)GCC>GTC   | p.A626V       |
| Pat_50 | Pre-Treatment | FCHSD2    | 9873   | 37 | 11 | 72695210  | 72695210  | Missense_Mutation | SNP | C  | T  | 22  | 44  | c.628G>A       | c.(628-630)GAT>AAT     | p.D210N       |
| Pat_50 | Pre-Treatment | DLG2      | 1740   | 37 | 11 | 84245620  | 84245620  | Missense_Mutation | SNP | G  | A  | 47  | 98  | c.197C>T       | c.(196-198)CCT>CTT     | p.P66L        |
| Pat_50 | Pre-Treatment | GRM5      | 2915   | 37 | 11 | 88301106  | 88301106  | Missense_Mutation | SNP | G  | A  | 24  | 37  | c.1745C>T      | c.(1744-1746)GCA>GTA   | p.A582V       |
| Pat_50 | Pre-Treatment | TECTA     | 7007   | 37 | 11 | 121030881 | 121030881 | Missense_Mutation | SNP | G  | A  | 48  | 30  | c.4727G>A      | c.(4726-4728)GGT>GAT   | p.G1576D      |
| Pat_50 | Pre-Treatment | CACNA1C   | 775    | 37 | 12 | 2714279   | 2714279   | Missense_Mutation | SNP | G  | A  | 32  | 54  | c.3053G>A      | c.(3052-3054)CGA>CAA   | p.R1018Q      |
| Pat_50 | Pre-Treatment | C1R       | 715    | 37 | 12 | 7188356   | 7188356   | Missense_Mutation | SNP | C  | T  | 63  | 118 | c.1598G>A      | c.(1597-1599)GGA>GAA   | p.G533E       |
| Pat_50 | Pre-Treatment | CD163     | 9332   | 37 | 12 | 7637812   | 7637812   | Missense_Mutation | SNP | G  | A  | 26  | 42  | c.2659C>T      | c.(2659-2661)CCC>TCC   | p.P887S       |
| Pat_50 | Pre-Treatment | PZP       | 5858   | 37 | 12 | 9356381   | 9356381   | Missense_Mutation | SNP | G  | A  | 31  | 57  | c.250C>T       | c.(250-252)CAC>TAC     | p.H84Y        |
| Pat_50 | Pre-Treatment | PRB2      | 653247 | 37 | 12 | 11546389  | 11546389  | Missense_Mutation | SNP | C  | T  | 37  | 77  | c.623G>A       | c.(622-624)GGA>GAA     | p.G208E       |
| Pat_50 | Pre-Treatment | MANSC1    | 54682  | 37 | 12 | 12483724  | 12483724  | Missense_Mutation | SNP | G  | A  | 16  | 31  | c.533C>T       | c.(532-534)TCC>TTC     | p.S178F       |
| Pat_50 | Pre-Treatment | GUCY2C    | 2984   | 37 | 12 | 14769616  | 14769616  | Missense_Mutation | SNP | C  | T  | 62  | 103 | c.2921G>A      | c.(2920-2922)AGA>AAA   | p.R974K       |
| Pat_50 | Pre-Treatment | GYS2      | 2998   | 37 | 12 | 21690022  | 21690022  | Missense_Mutation | SNP | C  | T  | 27  | 47  | c.1978G>A      | c.(1978-1980)GAA>AAA   | p.E660K       |
| Pat_50 | Pre-Treatment | ARNTL2    | 56938  | 37 | 12 | 27543031  | 27543031  | Missense_Mutation | SNP | G  | A  | 89  | 125 | c.778G>A       | c.(778-780)GGT>AGT     | p.G260S       |
| Pat_50 | Pre-Treatment | ALG10     | 84920  | 37 | 12 | 34179706  | 34179706  | Missense_Mutation | SNP | G  | T  | 60  | 164 | c.1278G>T      | c.(1276-1278)AGG>AGT   | p.R426S       |
| Pat_50 | Pre-Treatment | MLL2      | 8085   | 37 | 12 | 49424716  | 49424716  | Missense_Mutation | SNP | C  | T  | 9   | 15  | c.13631G>A     | c.(13630-13632)GGG>GAC | p.G4544E      |
| Pat_50 | Pre-Treatment | ITGB7     | 3695   | 37 | 12 | 53589178  | 53589178  | Missense_Mutation | SNP | G  | A  | 39  | 82  | c.1141C>T      | c.(1141-1143)CTC>TTC   | p.L381F       |
| Pat_50 | Pre-Treatment | HOXC11    | 3227   | 37 | 12 | 54367101  | 54367101  | Missense_Mutation | SNP | G  | T  | 22  | 38  | c.76G>T        | c.(76-78)GGG>TGG       | p.G26W        |
| Pat_50 | Pre-Treatment | RASSF9    | 9182   | 37 | 12 | 86198653  | 86198653  | Missense_Mutation | SNP | C  | T  | 64  | 119 | c.1135G>A      | c.(1135-1137)GAA>AAA   | p.E379K       |
| Pat_50 | Pre-Treatment | DCN       | 1634   | 37 | 12 | 91539975  | 91539975  | Missense_Mutation | SNP | G  | A  | 33  | 54  | c.940C>T       | c.(940-942)CCA>TCA     | p.P314S       |
| Pat_50 | Pre-Treatment | UHRF1BP1L | 23074  | 37 | 12 | 100453301 | 100453301 | Missense_Mutation | SNP | G  | A  | 20  | 30  | c.1754C>T      | c.(1753-1755)CCT>CTT   | p.P585L       |
| Pat_50 | Pre-Treatment | C12orf48  | 55010  | 37 | 12 | 102559652 | 102559652 | Missense_Mutation | SNP | C  | T  | 25  | 44  | c.812C>T       | c.(811-813)CCA>CTA     | p.P271L       |

|        |               |           |        |    |    |           |           |                        |     |    |    |     |     |                                    |                       |          |
|--------|---------------|-----------|--------|----|----|-----------|-----------|------------------------|-----|----|----|-----|-----|------------------------------------|-----------------------|----------|
| Pat_50 | Pre-Treatment | STAB2     | 55576  | 37 | 12 | 103984763 | 103984763 | Missense_Mutation      | SNP | G  | A  | 60  | 72  | c.170G>A                           | c.(169-171)GGT>GAT    | p.G57D   |
| Pat_50 | Pre-Treatment | NT5DC3    | 51559  | 37 | 12 | 104171671 | 104171671 | Missense_Mutation      | SNP | G  | A  | 24  | 42  | c.1583C>T                          | c.(1582-1584)CCC>CTC  | p.P528L  |
| Pat_50 | Pre-Treatment | SETD8     | 387893 | 37 | 12 | 123875282 | 123875282 | Missense_Mutation      | SNP | G  | A  | 5   | 82  | c.238G>A                           | c.(238-240)GAA>AAA    | p.E80K   |
| Pat_50 | Pre-Treatment | POLE      | 5426   | 37 | 12 | 133201341 | 133201341 | Missense_Mutation      | SNP | G  | A  | 28  | 58  | c.6803C>T                          | c.(6802-6804)TCG>TTG  | p.S2268L |
| Pat_50 | Pre-Treatment | SGCG      | 6445   | 37 | 13 | 23869586  | 23869586  | Missense_Mutation      | SNP | G  | A  | 46  | 79  | c.538G>A                           | c.(538-540)GAG>AAG    | p.E180K  |
| Pat_50 | Pre-Treatment | RNF17     | 56163  | 37 | 13 | 25338391  | 25338391  | Missense_Mutation      | SNP | G  | A  | 10  | 17  | c.50G>A                            | c.(49-51)CGA>CAA      | p.R17Q   |
| Pat_50 | Pre-Treatment | RPL21     | 6144   | 37 | 13 | 27830643  | 27830643  | Missense_Mutation      | SNP | C  | T  | 11  | 13  | c.464C>T                           | c.(463-465)CCC>CTC    | p.P155L  |
| Pat_50 | Pre-Treatment | P704P     | 641455 | 37 | 14 | 20020119  | 20020119  | Missense_Mutation      | SNP | C  | G  | 5   | 132 | c.102G>C                           | c.(100-102)TGG>TGC    | p.W34C   |
| Pat_50 | Pre-Treatment | OR10G3    | 26533  | 37 | 14 | 22038227  | 22038227  | Missense_Mutation      | SNP | G  | A  | 39  | 32  | c.649C>T                           | c.(649-651)CTC>TTC    | p.L217F  |
| Pat_50 | Pre-Treatment | GALNTL1   | 57452  | 37 | 14 | 69813821  | 69813821  | Missense_Mutation      | SNP | G  | A  | 32  | 10  | c.1336G>A                          | c.(1336-1338)GGC>AGC  | p.G446S  |
| Pat_50 | Pre-Treatment | DIO2      | 1734   | 37 | 14 | 80669327  | 80669327  | Missense_Mutation      | SNP | G  | A  | 28  | 16  | c.527C>T                           | c.(526-528)TCC>TTC    | p.S176F  |
| Pat_50 | Pre-Treatment | GALC      | 2581   | 37 | 14 | 88434719  | 88434719  | Missense_Mutation      | SNP | G  | A  | 54  | 27  | c.868C>T                           | c.(868-870)CGC>TGC    | p.R290C  |
| Pat_50 | Pre-Treatment | SERPINA10 | 51156  | 37 | 14 | 94756345  | 94756345  | Missense_Mutation      | SNP | G  | A  | 25  | 15  | c.586C>T                           | c.(586-588)CGC>TGC    | p.R196C  |
| Pat_50 | Pre-Treatment | BDKRB2    | 624    | 37 | 14 | 96707003  | 96707003  | Nonsense_Mutation      | SNP | G  | A  | 110 | 43  | c.338G>A                           | c.(337-339)TGG>TAG    | p.W113*  |
| Pat_50 | Pre-Treatment | TP53BP1   | 7158   | 37 | 15 | 43712661  | 43712661  | Missense_Mutation      | SNP | G  | A  | 144 | 64  | c.4508C>T                          | c.(4507-4509)TCT>TTT  | p.S1503F |
| Pat_50 | Pre-Treatment | DUOX2     | 50506  | 37 | 15 | 45393022  | 45393022  | Missense_Mutation      | SNP | C  | T  | 7   | 17  | c.2936G>A                          | c.(2935-2937)GGA>GAA  | p.G979E  |
| Pat_50 | Pre-Treatment | MYO5C     | 55930  | 37 | 15 | 52510745  | 52510745  | Missense_Mutation      | SNP | C  | T  | 23  | 30  | c.3925G>A                          | c.(3925-3927)GAA>AAA  | p.E1309K |
| Pat_50 | Pre-Treatment | UNC13C    | 440279 | 37 | 15 | 54306933  | 54306934  | Missense_Mutation      | DNP | GG | AA | 8   | 95  | .1833_1834GG>A831-1836)CAGGGT>CAA/ |                       | p.G612S  |
| Pat_50 | Pre-Treatment | SPESP1    | 246777 | 37 | 15 | 69223036  | 69223036  | Missense_Mutation      | SNP | C  | T  | 58  | 78  | c.44C>T                            | c.(43-45)TCG>TTG      | p.S15L   |
| Pat_50 | Pre-Treatment | FAM154B   | 283726 | 37 | 15 | 82574540  | 82574540  | Missense_Mutation      | SNP | G  | A  | 46  | 85  | c.334G>A                           | c.(334-336)GGA>AGA    | p.G112R  |
| Pat_50 | Pre-Treatment | SSTR5     | 6755   | 37 | 16 | 1129185   | 1129185   | Missense_Mutation      | SNP | C  | T  | 20  | 34  | c.317C>T                           | c.(316-318)CCC>CTC    | p.P106L  |
| Pat_50 | Pre-Treatment | UNKL      | 64718  | 37 | 16 | 1417751   | 1417751   | Missense_Mutation      | SNP | G  | A  | 16  | 7   | c.815C>T                           | c.(814-816)CCA>CTA    | p.P272L  |
| Pat_50 | Pre-Treatment | IGFALS    | 3483   | 37 | 16 | 1840633   | 1840633   | Missense_Mutation      | SNP | C  | G  | 2   | 10  | c.1786G>C                          | c.(1786-1788)GAC>CAC  | p.D596H  |
| Pat_50 | Pre-Treatment | ADCY9     | 115    | 37 | 16 | 4042200   | 4042200   | Missense_Mutation      | SNP | C  | A  | 79  | 34  | c.2154G>T                          | c.(2152-2154)AAG>AAT  | p.K718N  |
| Pat_50 | Pre-Treatment | USP7      | 7874   | 37 | 16 | 8989007   | 8989007   | Missense_Mutation      | SNP | C  | T  | 232 | 169 | c.2920G>A                          | c.(2920-2922)GAA>AAA  | p.E974K  |
| Pat_50 | Pre-Treatment | GRIN2A    | 2903   | 37 | 16 | 9858007   | 9858007   | Missense_Mutation      | SNP | G  | A  | 73  | 64  | c.3394C>T                          | c.(3394-3396)CCA>TCA  | p.P1132S |
| Pat_50 | Pre-Treatment | ATF7IP2   | 80063  | 37 | 16 | 10524907  | 10524907  | Missense_Mutation      | SNP | G  | A  | 86  | 60  | c.430G>A                           | c.(430-432)GAT>AAT    | p.D144N  |
| Pat_50 | Pre-Treatment | ACSM1     | 116285 | 37 | 16 | 20702348  | 20702348  | Missense_Mutation      | SNP | C  | T  | 33  | 79  | c.163G>A                           | c.(163-165)GTA>ATA    | p.V55I   |
| Pat_50 | Pre-Treatment | ZNF646    | 9726   | 37 | 16 | 31090592  | 31090592  | Missense_Mutation      | SNP | G  | A  | 92  | 90  | c.2947G>A                          | c.(2947-2949)GGG>AGG  | p.G983R  |
| Pat_50 | Pre-Treatment | GNAO1     | 2775   | 37 | 16 | 56309868  | 56309868  | Missense_Mutation      | SNP | G  | A  | 3   | 24  | c.187G>A                           | c.(187-189)GGA>AGA    | p.G63R   |
| Pat_50 | Pre-Treatment | NLRC5     | 84166  | 37 | 16 | 57092967  | 57092967  | Missense_Mutation      | SNP | C  | T  | 87  | 58  | c.3914C>T                          | c.(3913-3915)TCA>TTA  | p.S1305L |
| Pat_50 | Pre-Treatment | SPG7      | 6687   | 37 | 16 | 89611170  | 89611170  | Missense_Mutation      | SNP | C  | T  | 42  | 29  | c.1439C>T                          | c.(1438-1440)CCC>CTC  | p.P480L  |
| Pat_50 | Pre-Treatment | DPH1      | 1801   | 37 | 17 | 1936837   | 1936837   | Missense_Mutation      | SNP | C  | T  | 4   | 55  | c.115C>T                           | c.(115-117)CCT>TCT    | p.P39S   |
| Pat_50 | Pre-Treatment | SLC2A4    | 6517   | 37 | 17 | 7186907   | 7186907   | Missense_Mutation      | SNP | C  | T  | 39  | 23  | c.266C>T                           | c.(265-267)TCC>TTC    | p.S89F   |
| Pat_50 | Pre-Treatment | STX8      | 9482   | 37 | 17 | 9471692   | 9471692   | Missense_Mutation      | SNP | G  | A  | 7   | 8   | c.113C>T                           | c.(112-114)CCA>CTA    | p.P38L   |
| Pat_50 | Pre-Treatment | TBC1D3    | 729873 | 37 | 17 | 36288203  | 36288203  | Nonsense_Mutation      | SNP | C  | T  | 66  | 543 | c.289C>T                           | c.(289-291)CGA>TGA    | p.R97*   |
| Pat_50 | Pre-Treatment | KRT24     | 192666 | 37 | 17 | 38859487  | 38859487  | Missense_Mutation      | SNP | A  | T  | 95  | 139 | c.459T>A                           | c.(457-459)AAT>AAA    | p.N153K  |
| Pat_50 | Pre-Treatment | KRT25     | 147183 | 37 | 17 | 38911541  | 38911541  | Translation_Start_Site | SNP | G  | A  | 21  | 15  | c.-17C>T                           | c.(-19-15)AACGC>AATGC |          |
| Pat_50 | Pre-Treatment | PHB       | 5245   | 37 | 17 | 47489114  | 47489114  | Missense_Mutation      | SNP | G  | A  | 25  | 39  | c.176C>T                           | c.(175-177)CCG>CTG    | p.P59L   |
| Pat_50 | Pre-Treatment | LRRC59    | 55379  | 37 | 17 | 48470215  | 48470215  | Missense_Mutation      | SNP | C  | A  | 43  | 81  | c.209G>T                           | c.(208-210)AGT>ATT    | p.S70I   |
| Pat_50 | Pre-Treatment | ANKFN1    | 162282 | 37 | 17 | 54403587  | 54403587  | Missense_Mutation      | SNP | G  | A  | 41  | 80  | c.68G>A                            | c.(67-69)GGA>GAA      | p.G23E   |
| Pat_50 | Pre-Treatment | MPO       | 4353   | 37 | 17 | 56355368  | 56355368  | Missense_Mutation      | SNP | C  | T  | 39  | 102 | c.1024G>A                          | c.(1024-1026)GTG>ATG  | p.V342M  |
| Pat_50 | Pre-Treatment | SMARCD2   | 6603   | 37 | 17 | 61914292  | 61914292  | Missense_Mutation      | SNP | T  | C  | 56  | 64  | c.557A>G                           | c.(556-558)AAG>AGG    | p.K186R  |
| Pat_50 | Pre-Treatment | MGAT5B    | 146664 | 37 | 17 | 74902134  | 74902134  | Missense_Mutation      | SNP | C  | T  | 48  | 87  | c.923C>T                           | c.(922-924)TCC>TTC    | p.S308F  |
| Pat_50 | Pre-Treatment | NOL4      | 8715   | 37 | 18 | 31673540  | 31673540  | Missense_Mutation      | SNP | C  | T  | 19  | 20  | c.661G>A                           | c.(661-663)GAT>AAT    | p.D221N  |
| Pat_50 | Pre-Treatment | FHOD3     | 80206  | 37 | 18 | 34298461  | 34298461  | Nonsense_Mutation      | SNP | T  | A  | 31  | 45  | c.2624T>A                          | c.(2623-2625)TTA>TAA  | p.L875*  |
| Pat_50 | Pre-Treatment | SLC14A2   | 8170   | 37 | 18 | 43205738  | 43205738  | Missense_Mutation      | SNP | C  | T  | 13  | 28  | c.241C>T                           | c.(241-243)CGG>TGG    | p.R81W   |

|        |               |           |        |    |    |           |           |                        |     |    |    |     |     |                |                        |               |
|--------|---------------|-----------|--------|----|----|-----------|-----------|------------------------|-----|----|----|-----|-----|----------------|------------------------|---------------|
| Pat_50 | Pre-Treatment | MYO5B     | 4645   | 37 | 18 | 47563269  | 47563269  | Missense_Mutation      | SNP | C  | T  | 16  | 29  | c.406G>A       | c.(406-408)GAC>AAC     | p.D136N       |
| Pat_50 | Pre-Treatment | DCC       | 1630   | 37 | 18 | 50451618  | 50451618  | Missense_Mutation      | SNP | C  | A  | 46  | 76  | c.863C>A       | c.(862-864)TCT>TAT     | p.S288Y       |
| Pat_50 | Pre-Treatment | EMR1      | 2015   | 37 | 19 | 6901985   | 6901985   | Missense_Mutation      | SNP | C  | T  | 90  | 123 | c.614C>T       | c.(613-615)TCC>TTC     | p.S205F       |
| Pat_50 | Pre-Treatment | ZNF699    | 374879 | 37 | 19 | 9407410   | 9407410   | Nonsense_Mutation      | SNP | G  | A  | 48  | 93  | c.670C>T       | c.(670-672)CAG>TAG     | p.Q224*       |
| Pat_50 | Pre-Treatment | ABHD8     | 79575  | 37 | 19 | 17411692  | 17411692  | Missense_Mutation      | SNP | C  | T  | 114 | 189 | c.734G>A       | c.(733-735)CGA>CAA     | p.R245Q       |
| Pat_50 | Pre-Treatment | AXL       | 558    | 37 | 19 | 41758775  | 41758775  | Missense_Mutation      | SNP | G  | A  | 13  | 35  | c.1829G>A      | c.(1828-1830)CGA>CAA   | p.R610Q       |
| Pat_50 | Pre-Treatment | PSG1      | 5669   | 37 | 19 | 43383685  | 43383685  | Missense_Mutation      | SNP | C  | T  | 58  | 93  | c.49G>A        | c.(49-51)GGG>AGG       | p.G17R        |
| Pat_50 | Pre-Treatment | CEACAM20  | 125931 | 37 | 19 | 45016125  | 45016125  | Missense_Mutation      | SNP | G  | A  | 8   | 20  | c.1525C>T      | c.(1525-1527)CCT>TCT   | p.P509S       |
| Pat_50 | Pre-Treatment | CCDC8     | 83987  | 37 | 19 | 46915238  | 46915238  | Missense_Mutation      | SNP | C  | T  | 54  | 47  | c.830G>A       | c.(829-831)CGC>CAC     | p.R277H       |
| Pat_50 | Pre-Treatment | KCNC3     | 3748   | 37 | 19 | 50826610  | 50826610  | Missense_Mutation      | SNP | G  | A  | 33  | 72  | c.1600C>T      | c.(1600-1602)CCT>TCT   | p.P534S       |
| Pat_50 | Pre-Treatment | ZNF610    | 162963 | 37 | 19 | 52852406  | 52852406  | Splice_Site            | SNP | G  | A  | 22  | 45  | c.-18_splice   | c.e3-1                 |               |
| Pat_50 | Pre-Treatment | ZNF331    | 55422  | 37 | 19 | 54080277  | 54080277  | Missense_Mutation      | SNP | G  | A  | 43  | 94  | c.463G>A       | c.(463-465)GGT>AGT     | p.G155S       |
| Pat_50 | Pre-Treatment | NLRP7     | 199713 | 37 | 19 | 55444994  | 55444994  | Missense_Mutation      | SNP | C  | T  | 20  | 34  | c.2585G>A      | c.(2584-2586)GGG>GAG   | p.G862E       |
| Pat_50 | Pre-Treatment | ALK       | 238    | 37 | 2  | 29455223  | 29455223  | Missense_Mutation      | SNP | C  | T  | 35  | 58  | c.2579G>A      | c.(2578-2580)AGA>AAA   | p.R860K       |
| Pat_50 | Pre-Treatment | FUNDC2P2  | 388965 | 37 | 2  | 84518171  | 84518171  | Missense_Mutation      | SNP | G  | A  | 49  | 99  | c.229G>A       | c.(229-231)GGA>AGA     | p.G77R        |
| Pat_50 | Pre-Treatment | IL1RL1    | 9173   | 37 | 2  | 102968248 | 102968248 | Missense_Mutation      | SNP | G  | A  | 11  | 10  | c.1538G>A      | c.(1537-1539)AGG>AAG   | p.R513K       |
| Pat_50 | Pre-Treatment | IL18RAP   | 8807   | 37 | 2  | 103061800 | 103061800 | Missense_Mutation      | SNP | G  | A  | 19  | 44  | c.1072G>A      | c.(1072-1074)GTG>ATG   | p.V358M       |
| Pat_50 | Pre-Treatment | MARCO     | 8685   | 37 | 2  | 119750806 | 119750806 | Missense_Mutation      | SNP | T  | A  | 95  | 156 | c.1359T>A      | c.(1357-1359)AAT>AAA   | p.N453K       |
| Pat_50 | Pre-Treatment | RAB6C     | 84084  | 37 | 2  | 130738023 | 130738023 | Missense_Mutation      | SNP | G  | A  | 99  | 193 | c.335G>A       | c.(334-336)AGA>AAA     | p.R112K       |
| Pat_50 | Pre-Treatment | YSK4      | 80122  | 37 | 2  | 135738574 | 135738574 | Missense_Mutation      | SNP | C  | T  | 19  | 52  | c.3737G>A      | c.(3736-3738)CGG>CAG   | p.R1246Q      |
| Pat_50 | Pre-Treatment | THSD7B    | 80731  | 37 | 2  | 138208505 | 138208505 | Missense_Mutation      | SNP | G  | A  | 22  | 30  | c.2957G>A      | c.(2956-2958)GGA>GAA   | p.G986E       |
| Pat_50 | Pre-Treatment | NEB       | 4703   | 37 | 2  | 152522870 | 152522870 | Missense_Mutation      | SNP | C  | T  | 33  | 49  | c.4765G>A      | c.(4765-4767)GGA>AGA   | p.G1589R      |
| Pat_50 | Pre-Treatment | SCN3A     | 6328   | 37 | 2  | 166011012 | 166011012 | Missense_Mutation      | SNP | C  | T  | 27  | 71  | c.1330G>A      | c.(1330-1332)GAA>AAA   | p.E444K       |
| Pat_50 | Pre-Treatment | SCN1A     | 6323   | 37 | 2  | 166900483 | 166900483 | Missense_Mutation      | SNP | C  | T  | 48  | 70  | c.1739G>A      | c.(1738-1740)CGA>CAA   | p.R580Q       |
| Pat_50 | Pre-Treatment | TTN       | 7273   | 37 | 2  | 179454177 | 179454177 | Missense_Mutation      | SNP | C  | T  | 16  | 42  | c.54571G>A     | c.(54571-54573)GAA>AAA | p.E18191K     |
| Pat_50 | Pre-Treatment | TTN       | 7273   | 37 | 2  | 179472521 | 179472521 | Missense_Mutation      | SNP | C  | T  | 33  | 61  | c.45289G>A     | c.(45289-45291)GAA>AAA | p.E15097K     |
| Pat_50 | Pre-Treatment | TTN       | 7273   | 37 | 2  | 179542377 | 179542377 | Missense_Mutation      | SNP | A  | C  | 9   | 11  | c.30530T>G     | c.(30529-30531)GTT>GGT | p.V10177G     |
| Pat_50 | Pre-Treatment | TTN       | 7273   | 37 | 2  | 179603955 | 179603955 | Missense_Mutation      | SNP | C  | T  | 12  | 11  | c.13492G>A     | c.(13492-13494)GAA>AAA | p.E4498K      |
| Pat_50 | Pre-Treatment | TTN       | 7273   | 37 | 2  | 179648811 | 179648811 | Missense_Mutation      | SNP | C  | T  | 72  | 101 | c.2761G>A      | c.(2761-2763)GGA>AGA   | p.G921R       |
| Pat_50 | Pre-Treatment | CCDC141   | 285025 | 37 | 2  | 179732779 | 179732779 | Missense_Mutation      | SNP | C  | T  | 30  | 53  | c.823G>A       | c.(823-825)GAC>AAC     | p.D275N       |
| Pat_50 | Pre-Treatment | CALCRL    | 10203  | 37 | 2  | 188216840 | 188216840 | Splice_Site            | SNP | C  | T  | 38  | 76  | c.1128_splice  | c.e13+1                | p.Q376_splice |
| Pat_50 | Pre-Treatment | EEF1B2    | 1933   | 37 | 2  | 207025358 | 207025358 | Missense_Mutation      | SNP | A  | G  | 8   | 217 | c.127A>G       | c.(127-129)AGC>GGC     | p.S43G        |
| Pat_50 | Pre-Treatment | IKZF2     | 22807  | 37 | 2  | 213872485 | 213872485 | Missense_Mutation      | SNP | G  | T  | 25  | 44  | c.1180C>A      | c.(1180-1182)CAG>AAG   | p.Q394K       |
| Pat_50 | Pre-Treatment | SPAG16    | 79582  | 37 | 2  | 214794733 | 214794733 | Missense_Mutation      | SNP | G  | A  | 34  | 94  | c.1264G>A      | c.(1264-1266)GAT>AAT   | p.D422N       |
| Pat_50 | Pre-Treatment | SLC19A3   | 80704  | 37 | 2  | 228563559 | 228563559 | Missense_Mutation      | SNP | C  | A  | 11  | 37  | c.872G>T       | c.(871-873)GGT>GTT     | p.G291V       |
| Pat_50 | Pre-Treatment | INPP5D    | 3635   | 37 | 2  | 233990542 | 233990542 | Missense_Mutation      | SNP | C  | T  | 12  | 25  | c.437C>T       | c.(436-438)TCA>TTA     | p.S146L       |
| Pat_50 | Pre-Treatment | SIRPG     | 55423  | 37 | 20 | 1629761   | 1629761   | Nonsense_Mutation      | SNP | G  | A  | 38  | 78  | c.367C>T       | c.(367-369)CGA>TGA     | p.R123*       |
| Pat_50 | Pre-Treatment | CSTL1     | 128817 | 37 | 20 | 23421110  | 23421110  | Missense_Mutation      | SNP | G  | A  | 89  | 111 | c.206G>A       | c.(205-207)CGA>CAA     | p.R69Q        |
| Pat_50 | Pre-Treatment | FRG1B     | 284802 | 37 | 20 | 29614323  | 29614323  | Translation_Start_Site | SNP | C  | T  | 4   | 51  | c.-10C>T       | c.(12-8)TACGT>TATGT    |               |
| Pat_50 | Pre-Treatment | CDK5RAP1  | 51654  | 37 | 20 | 31984608  | 31984608  | Missense_Mutation      | SNP | G  | A  | 70  | 133 | c.263C>T       | c.(262-264)CCC>CTC     | p.P88L        |
| Pat_50 | Pre-Treatment | PHF20     | 51230  | 37 | 20 | 34459629  | 34459629  | Missense_Mutation      | SNP | C  | T  | 96  | 172 | c.1160C>T      | c.(1159-1161)TCC>TTC   | p.S387F       |
| Pat_50 | Pre-Treatment | USP25     | 29761  | 37 | 21 | 17172094  | 17172094  | Missense_Mutation      | SNP | G  | A  | 16  | 24  | c.574G>A       | c.(574-576)GAA>AAA     | p.E192K       |
| Pat_50 | Pre-Treatment | DSCAM     | 1826   | 37 | 21 | 41452132  | 41452133  | Missense_Mutation      | DNP | CC | TT | 25  | 91  | .4366_4367GG>A | c.(4366-4368)GGA>AAA   | p.G1456K      |
| Pat_50 | Pre-Treatment | CRYAA     | 1409   | 37 | 21 | 44589354  | 44589354  | Missense_Mutation      | SNP | C  | T  | 95  | 163 | c.145C>T       | c.(145-147)CGC>TGC     | p.R49C        |
| Pat_50 | Pre-Treatment | KRTAP10-7 | 386675 | 37 | 21 | 46020555  | 46020555  | Missense_Mutation      | SNP | G  | A  | 19  | 48  | c.34G>A        | c.(34-36)GAC>AAC       | p.D12N        |
| Pat_50 | Pre-Treatment | DIP2A     | 23181  | 37 | 21 | 47975994  | 47975994  | Missense_Mutation      | SNP | C  | T  | 62  | 111 | c.3488C>T      | c.(3487-3489)GCG>GTG   | p.A1163V      |
| Pat_50 | Pre-Treatment | SGSM1     | 129049 | 37 | 22 | 25294443  | 25294443  | Missense_Mutation      | SNP | C  | T  | 39  | 75  | c.2692C>T      | c.(2692-2694)CTC>TTC   | p.L898F       |



|        |               |          |        |    |    |           |           |                   |     |    |    |     |     |                |                        |               |
|--------|---------------|----------|--------|----|----|-----------|-----------|-------------------|-----|----|----|-----|-----|----------------|------------------------|---------------|
| Pat_50 | Pre-Treatment | SAMM50   | 25813  | 37 | 22 | 44377322  | 44377323  | Missense_Mutation | DNP | CC | TT | 46  | 89  | c.988_989CC>TT | c.(988-990)CCG>TTG     | p.P330L       |
| Pat_50 | Pre-Treatment | TTC38    | 55020  | 37 | 22 | 46674503  | 46674503  | Missense_Mutation | SNP | C  | T  | 33  | 89  | c.560C>T       | c.(559-561)TCT>TTT     | p.S187F       |
| Pat_50 | Pre-Treatment | HDAC10   | 83933  | 37 | 22 | 50687265  | 50687265  | Missense_Mutation | SNP | G  | A  | 10  | 27  | c.811C>T       | c.(811-813)CCT>TCT     | p.P271S       |
| Pat_50 | Pre-Treatment | CHL1     | 10752  | 37 | 3  | 391049    | 391049    | Missense_Mutation | SNP | C  | T  | 7   | 6   | c.808C>T       | c.(808-810)CCA>TCA     | p.P270S       |
| Pat_50 | Pre-Treatment | TMEM43   | 79188  | 37 | 3  | 14172412  | 14172412  | Missense_Mutation | SNP | G  | A  | 26  | 72  | c.253G>A       | c.(253-255)GAA>AAA     | p.E85K        |
| Pat_50 | Pre-Treatment | TRIM71   | 131405 | 37 | 3  | 32932354  | 32932354  | Missense_Mutation | SNP | G  | A  | 35  | 52  | c.1658G>A      | c.(1657-1659)CGA>CAA   | p.R553Q       |
| Pat_50 | Pre-Treatment | SCN10A   | 6336   | 37 | 3  | 38753837  | 38753837  | Missense_Mutation | SNP | G  | A  | 69  | 121 | c.3904C>T      | c.(3904-3906)CTC>TTC   | p.L1302F      |
| Pat_50 | Pre-Treatment | SCN11A   | 11280  | 37 | 3  | 38950574  | 38950574  | Missense_Mutation | SNP | C  | T  | 57  | 132 | c.1213G>A      | c.(1213-1215)GAG>AAG   | p.E405K       |
| Pat_50 | Pre-Treatment | ZDHHC3   | 51304  | 37 | 3  | 44968333  | 44968333  | Missense_Mutation | SNP | C  | T  | 38  | 48  | c.832G>A       | c.(832-834)GAA>AAA     | p.E278K       |
| Pat_50 | Pre-Treatment | CELSR3   | 1951   | 37 | 3  | 48677875  | 48677875  | Missense_Mutation | SNP | C  | T  | 25  | 73  | c.9143G>A      | c.(9142-9144)GGT>GAT   | p.G3048D      |
| Pat_50 | Pre-Treatment | STAB1    | 23166  | 37 | 3  | 52547899  | 52547899  | Missense_Mutation | SNP | G  | A  | 167 | 218 | c.3349G>A      | c.(3349-3351)GTC>ATC   | p.V1117I      |
| Pat_50 | Pre-Treatment | CACNA2D3 | 55799  | 37 | 3  | 55021771  | 55021771  | Missense_Mutation | SNP | C  | T  | 8   | 16  | c.2681C>T      | c.(2680-2682)TCC>TTC   | p.S894F       |
| Pat_50 | Pre-Treatment | DNASE1L3 | 1776   | 37 | 3  | 58178442  | 58178442  | Missense_Mutation | SNP | C  | T  | 20  | 22  | c.890G>A       | c.(889-891)AGG>AAG     | p.R297K       |
| Pat_50 | Pre-Treatment | PLSCR4   | 57088  | 37 | 3  | 145913062 | 145913062 | Missense_Mutation | SNP | G  | A  | 86  | 58  | c.794C>T       | c.(793-795)TCC>TTC     | p.S265F       |
| Pat_50 | Pre-Treatment | BCHE     | 590    | 37 | 3  | 165547930 | 165547930 | Nonsense_Mutation | SNP | G  | A  | 31  | 55  | c.892C>T       | c.(892-894)CAA>TAA     | p.Q298*       |
| Pat_50 | Pre-Treatment | ZBBX     | 79740  | 37 | 3  | 167039963 | 167039963 | Missense_Mutation | SNP | C  | T  | 23  | 43  | c.925G>A       | c.(925-927)GAA>AAA     | p.E309K       |
| Pat_50 | Pre-Treatment | ZBBX     | 79740  | 37 | 3  | 167051692 | 167051692 | Missense_Mutation | SNP | C  | T  | 20  | 39  | c.610G>A       | c.(610-612)GAG>AAG     | p.E204K       |
| Pat_50 | Pre-Treatment | MUC4     | 4585   | 37 | 3  | 195505836 | 195505836 | Missense_Mutation | SNP | G  | C  | 4   | 8   | c.12231C>G     | c.(12229-12231)CAC>CAC | p.H4077Q      |
| Pat_50 | Pre-Treatment | ZNF718   | 255403 | 37 | 4  | 59997     | 59997     | Missense_Mutation | SNP | A  | C  | 21  | 330 | c.177A>C       | c.(175-177)AGA>AGC     | p.R59S        |
| Pat_50 | Pre-Treatment | WHSC1    | 7468   | 37 | 4  | 1906028   | 1906028   | Missense_Mutation | SNP | C  | T  | 58  | 74  | c.683C>T       | c.(682-684)TCC>TTC     | p.S228F       |
| Pat_50 | Pre-Treatment | DOK7     | 285489 | 37 | 4  | 3494893   | 3494893   | Missense_Mutation | SNP | G  | A  | 9   | 13  | c.1180G>A      | c.(1180-1182)GAG>AAG   | p.E394K       |
| Pat_50 | Pre-Treatment | BEND4    | 389206 | 37 | 4  | 42119597  | 42119597  | Missense_Mutation | SNP | C  | T  | 5   | 9   | c.1543G>A      | c.(1543-1545)GAT>AAT   | p.D515N       |
| Pat_50 | Pre-Treatment | CWH43    | 80157  | 37 | 4  | 48996789  | 48996789  | Nonsense_Mutation | SNP | G  | A  | 44  | 61  | c.665G>A       | c.(664-666)TGG>TAG     | p.W222*       |
| Pat_50 | Pre-Treatment | KDR      | 3791   | 37 | 4  | 55962492  | 55962492  | Missense_Mutation | SNP | C  | G  | 29  | 57  | c.2632G>C      | c.(2632-2634)GAG>CAG   | p.E878Q       |
| Pat_50 | Pre-Treatment | UGT2A3   | 79799  | 37 | 4  | 69798408  | 69798408  | Nonsense_Mutation | SNP | G  | A  | 99  | 148 | c.934C>T       | c.(934-936)CAA>TAA     | p.Q312*       |
| Pat_50 | Pre-Treatment | ADH1B    | 125    | 37 | 4  | 100235028 | 100235028 | Missense_Mutation | SNP | C  | T  | 85  | 166 | c.778G>A       | c.(778-780)GAT>AAT     | p.D260N       |
| Pat_50 | Pre-Treatment | ADH7     | 131    | 37 | 4  | 100341788 | 100341788 | Missense_Mutation | SNP | G  | A  | 40  | 54  | c.763C>T       | c.(763-765)CCC>TCC     | p.P255S       |
| Pat_50 | Pre-Treatment | MTTP     | 4547   | 37 | 4  | 100504612 | 100504612 | Missense_Mutation | SNP | A  | T  | 41  | 47  | c.331A>T       | c.(331-333)ATG>TTG     | p.M111L       |
| Pat_50 | Pre-Treatment | BANK1    | 55024  | 37 | 4  | 102776251 | 102776251 | Missense_Mutation | SNP | G  | A  | 12  | 18  | c.529G>A       | c.(529-531)GAA>AAA     | p.E177K       |
| Pat_50 | Pre-Treatment | FAT4     | 79633  | 37 | 4  | 126370438 | 126370438 | Missense_Mutation | SNP | C  | T  | 34  | 72  | c.8267C>T      | c.(8266-8268)TCA>TTA   | p.S2756L      |
| Pat_50 | Pre-Treatment | FAT4     | 79633  | 37 | 4  | 126371365 | 126371365 | Missense_Mutation | SNP | G  | A  | 20  | 38  | c.9194G>A      | c.(9193-9195)GGA>GAA   | p.G3065E      |
| Pat_50 | Pre-Treatment | FAT4     | 79633  | 37 | 4  | 126372196 | 126372196 | Missense_Mutation | SNP | G  | A  | 24  | 47  | c.10025G>A     | c.(10024-10026)CGA>CAA | p.R3342Q      |
| Pat_50 | Pre-Treatment | FAT4     | 79633  | 37 | 4  | 126373455 | 126373455 | Missense_Mutation | SNP | C  | T  | 30  | 50  | c.11284C>T     | c.(11284-11286)CTT>TTT | p.L3762F      |
| Pat_50 | Pre-Treatment | PET112L  | 5188   | 37 | 4  | 152637172 | 152637172 | Missense_Mutation | SNP | G  | A  | 20  | 32  | c.752C>T       | c.(751-753)GCG>GTG     | p.A251V       |
| Pat_50 | Pre-Treatment | ANP32C   | 23520  | 37 | 4  | 165118284 | 165118284 | Missense_Mutation | SNP | C  | T  | 9   | 16  | c.580G>A       | c.(580-582)GGT>AGT     | p.G194S       |
| Pat_50 | Pre-Treatment | ODZ3     | 55714  | 37 | 4  | 183652198 | 183652198 | Missense_Mutation | SNP | G  | A  | 46  | 66  | c.2873G>A      | c.(2872-2874)GGA>GAA   | p.G958E       |
| Pat_50 | Pre-Treatment | CDH18    | 1016   | 37 | 5  | 19473516  | 19473516  | Missense_Mutation | SNP | G  | A  | 24  | 41  | c.2192C>T      | c.(2191-2193)CCT>CTT   | p.P731L       |
| Pat_50 | Pre-Treatment | HCN1     | 348980 | 37 | 5  | 45262124  | 45262124  | Missense_Mutation | SNP | G  | A  | 30  | 52  | c.2572C>T      | c.(2572-2574)CCA>TCA   | p.P858S       |
| Pat_50 | Pre-Treatment | HCN1     | 348980 | 37 | 5  | 45262208  | 45262208  | Missense_Mutation | SNP | C  | T  | 7   | 16  | c.2488G>A      | c.(2488-2490)GGG>AGG   | p.G830R       |
| Pat_50 | Pre-Treatment | DEPDC1B  | 55789  | 37 | 5  | 59941334  | 59941334  | Missense_Mutation | SNP | G  | A  | 27  | 50  | c.563C>T       | c.(562-564)TCT>TTT     | p.S188F       |
| Pat_50 | Pre-Treatment | THBS4    | 7060   | 37 | 5  | 79357530  | 79357530  | Missense_Mutation | SNP | C  | T  | 53  | 77  | c.1000C>T      | c.(1000-1002)CCC>TCC   | p.P334S       |
| Pat_50 | Pre-Treatment | VCAN     | 1462   | 37 | 5  | 82837487  | 82837487  | Missense_Mutation | SNP | C  | G  | 31  | 50  | c.8665C>G      | c.(8665-8667)CCT>GCT   | p.P2889A      |
| Pat_50 | Pre-Treatment | EDIL3    | 10085  | 37 | 5  | 83360543  | 83360543  | Missense_Mutation | SNP | C  | T  | 27  | 36  | c.928G>A       | c.(928-930)GAA>AAA     | p.E310K       |
| Pat_50 | Pre-Treatment | GPR98    | 84059  | 37 | 5  | 90052379  | 90052379  | Missense_Mutation | SNP | G  | A  | 25  | 51  | c.11689G>A     | c.(11689-11691)GAA>AAA | p.E3897K      |
| Pat_50 | Pre-Treatment | LMNB1    | 4001   | 37 | 5  | 126154785 | 126154785 | Missense_Mutation | SNP | G  | A  | 25  | 57  | c.1111G>A      | c.(1111-1113)GAC>AAC   | p.D371N       |
| Pat_50 | Pre-Treatment | ADAMTS19 | 171019 | 37 | 5  | 128887601 | 128887601 | Splice_Site       | SNP | G  | A  | 14  | 21  | c.1354_splice  | c.e7+1                 | p.G452_splice |
| Pat_50 | Pre-Treatment | PCDHA4   | 56144  | 37 | 5  | 140188712 | 140188712 | Missense_Mutation | SNP | T  | C  | 98  | 149 | c.1940T>C      | c.(1939-1941)CTA>CCA   | p.L647P       |

|        |               |           |        |    |   |           |           |                   |     |    |    |     |     |                 |                      |          |
|--------|---------------|-----------|--------|----|---|-----------|-----------|-------------------|-----|----|----|-----|-----|-----------------|----------------------|----------|
| Pat_50 | Pre-Treatment | PCDHB1    | 29930  | 37 | 5 | 140431179 | 140431179 | Missense_Mutation | SNP | G  | T  | 18  | 19  | c.124G>T        | c.(124-126)GGC>TGC   | p.G42C   |
| Pat_50 | Pre-Treatment | PCDHB5    | 26167  | 37 | 5 | 140515473 | 140515473 | Missense_Mutation | SNP | C  | T  | 49  | 71  | c.457C>T        | c.(457-459)CCC>TCC   | p.P153S  |
| Pat_50 | Pre-Treatment | PPARGC1B  | 133522 | 37 | 5 | 149212480 | 149212480 | Missense_Mutation | SNP | G  | A  | 66  | 33  | c.844G>A        | c.(844-846)GAA>AAA   | p.E282K  |
| Pat_50 | Pre-Treatment | GEMIN5    | 25929  | 37 | 5 | 154304034 | 154304035 | Missense_Mutation | DNP | GG | AA | 128 | 69  | c.1373_1374CC>T | c.(1372-1374)TCC>TTT | p.S458F  |
| Pat_50 | Pre-Treatment | GABRB2    | 2561   | 37 | 5 | 160763764 | 160763764 | Missense_Mutation | SNP | G  | T  | 5   | 176 | c.554C>A        | c.(553-555)ACT>AAT   | p.T185N  |
| Pat_50 | Pre-Treatment | SLIT3     | 6586   | 37 | 5 | 168216586 | 168216586 | Missense_Mutation | SNP | C  | T  | 21  | 23  | c.1058G>A       | c.(1057-1059)GGC>GAC | p.G353D  |
| Pat_50 | Pre-Treatment | N4BP3     | 23138  | 37 | 5 | 177547467 | 177547467 | Missense_Mutation | SNP | C  | T  | 30  | 61  | c.619C>T        | c.(619-621)CCC>TCC   | p.P207S  |
| Pat_50 | Pre-Treatment | COL11A2   | 1302   | 37 | 6 | 33136336  | 33136336  | Missense_Mutation | SNP | G  | A  | 24  | 6   | c.3920C>T       | c.(3919-3921)CCC>CTC | p.P1307L |
| Pat_50 | Pre-Treatment | BMP5      | 653    | 37 | 6 | 55638936  | 55638936  | Missense_Mutation | SNP | C  | T  | 112 | 40  | c.938G>A        | c.(937-939)CGA>CAA   | p.R313Q  |
| Pat_50 | Pre-Treatment | PRIM2     | 5558   | 37 | 6 | 57512660  | 57512660  | Missense_Mutation | SNP | G  | A  | 39  | 452 | c.1488G>A       | c.(1486-1488)ATG>ATA | p.M496I  |
| Pat_50 | Pre-Treatment | BAI3      | 577    | 37 | 6 | 69772894  | 69772894  | Missense_Mutation | SNP | C  | T  | 149 | 34  | c.2402C>T       | c.(2401-2403)TCG>TTG | p.S801L  |
| Pat_50 | Pre-Treatment | TULP4     | 56995  | 37 | 6 | 158923787 | 158923787 | Missense_Mutation | SNP | C  | T  | 13  | 3   | c.3092C>T       | c.(3091-3093)CCA>CTA | p.P1031L |
| Pat_50 | Pre-Treatment | MAP3K4    | 4216   | 37 | 6 | 161523006 | 161523006 | Missense_Mutation | SNP | C  | T  | 50  | 12  | c.3757C>T       | c.(3757-3759)CCC>TCC | p.P1253S |
| Pat_50 | Pre-Treatment | FSCN1     | 6624   | 37 | 7 | 5644942   | 5644942   | Missense_Mutation | SNP | C  | T  | 44  | 96  | c.1319C>T       | c.(1318-1320)GCG>GTG | p.A440V  |
| Pat_50 | Pre-Treatment | TAX1BP1   | 8887   | 37 | 7 | 27825049  | 27825049  | Missense_Mutation | SNP | G  | A  | 52  | 165 | c.793G>A        | c.(793-795)GAA>AAA   | p.E265K  |
| Pat_50 | Pre-Treatment | LOC168474 | 168474 | 37 | 7 | 64313602  | 64313602  | Missense_Mutation | SNP | G  | A  | 44  | 80  | c.25C>T         | c.(25-27)CTT>TTT     | p.L9F    |
| Pat_50 | Pre-Treatment | TYW1B     | 441250 | 37 | 7 | 72209576  | 72209576  | Missense_Mutation | SNP | C  | G  | 5   | 135 | c.967G>C        | c.(967-969)GAT>CAT   | p.D323H  |
| Pat_50 | Pre-Treatment | TRIM50    | 135892 | 37 | 7 | 72727081  | 72727081  | Missense_Mutation | SNP | C  | T  | 5   | 18  | c.1300G>A       | c.(1300-1302)GAT>AAT | p.D434N  |
| Pat_50 | Pre-Treatment | VPS37D    | 155382 | 37 | 7 | 73085570  | 73085570  | Missense_Mutation | SNP | C  | T  | 5   | 9   | c.620C>T        | c.(619-621)CCA>CTA   | p.P207L  |
| Pat_50 | Pre-Treatment | RSBN1L    | 222194 | 37 | 7 | 77325812  | 77325812  | Missense_Mutation | SNP | A  | T  | 63  | 189 | c.26A>T         | c.(25-27)CAC>CTC     | p.H9L    |
| Pat_50 | Pre-Treatment | ZNF804B   | 219578 | 37 | 7 | 88964065  | 88964065  | Missense_Mutation | SNP | A  | T  | 38  | 36  | c.1769A>T       | c.(1768-1770)GAT>GTT | p.D590V  |
| Pat_50 | Pre-Treatment | AKAP9     | 10142  | 37 | 7 | 91667802  | 91667802  | Missense_Mutation | SNP | A  | T  | 56  | 98  | c.4408A>T       | c.(4408-4410)AAT>TAT | p.N1470Y |
| Pat_50 | Pre-Treatment | TECPR1    | 25851  | 37 | 7 | 97872900  | 97872900  | Missense_Mutation | SNP | G  | A  | 9   | 63  | c.536C>T        | c.(535-537)CCC>CTC   | p.P179L  |
| Pat_50 | Pre-Treatment | TRRAP     | 8295   | 37 | 7 | 98522843  | 98522843  | Missense_Mutation | SNP | G  | A  | 67  | 273 | c.2932G>A       | c.(2932-2934)GAG>AAG | p.E978K  |
| Pat_50 | Pre-Treatment | CYP3A5    | 1577   | 37 | 7 | 99272200  | 99272200  | Nonsense_Mutation | SNP | C  | T  | 65  | 63  | c.174G>A        | c.(172-174)TGG>TGA   | p.W58*   |
| Pat_50 | Pre-Treatment | TRIM56    | 81844  | 37 | 7 | 100732610 | 100732610 | Missense_Mutation | SNP | G  | A  | 46  | 178 | c.2017G>A       | c.(2017-2019)GGG>AGG | p.G673R  |
| Pat_50 | Pre-Treatment | CFTR      | 1080   | 37 | 7 | 117180254 | 117180254 | Missense_Mutation | SNP | C  | T  | 43  | 54  | c.970C>T        | c.(970-972)CCC>TCC   | p.P324S  |
| Pat_50 | Pre-Treatment | FLNC      | 2318   | 37 | 7 | 128491610 | 128491610 | Missense_Mutation | SNP | G  | A  | 62  | 151 | c.5770G>A       | c.(5770-5772)GGA>AGA | p.G1924R |
| Pat_50 | Pre-Treatment | AKR1D1    | 6718   | 37 | 7 | 137782687 | 137782687 | Missense_Mutation | SNP | G  | A  | 40  | 110 | c.454G>A        | c.(454-456)GAG>AAG   | p.E152K  |
| Pat_50 | Pre-Treatment | BRAF      | 673    | 37 | 7 | 140453136 | 140453136 | Missense_Mutation | SNP | A  | T  | 38  | 116 | c.1799T>A       | c.(1798-1800)GTG>GAG | p.V600E  |
| Pat_50 | Pre-Treatment | KIAA1147  | 57189  | 37 | 7 | 141364711 | 141364711 | Missense_Mutation | SNP | C  | T  | 6   | 12  | c.1096G>A       | c.(1096-1098)GAG>AAG | p.E366K  |
| Pat_50 | Pre-Treatment | OR9A4     | 130075 | 37 | 7 | 141619129 | 141619129 | Missense_Mutation | SNP | G  | A  | 57  | 125 | c.454G>A        | c.(454-456)GGG>AGG   | p.G152R  |
| Pat_50 | Pre-Treatment | MGAM      | 8972   | 37 | 7 | 141727431 | 141727431 | Missense_Mutation | SNP | C  | T  | 13  | 51  | c.1117C>T       | c.(1117-1119)CCC>TCC | p.P373S  |
| Pat_50 | Pre-Treatment | OR2A5     | 393046 | 37 | 7 | 143747845 | 143747845 | Missense_Mutation | SNP | G  | A  | 82  | 243 | c.351G>A        | c.(349-351)ATG>ATA   | p.M117I  |
| Pat_50 | Pre-Treatment | ZNF425    | 155054 | 37 | 7 | 148801272 | 148801272 | Missense_Mutation | SNP | G  | A  | 19  | 37  | c.1691C>T       | c.(1690-1692)TCC>TTC | p.S564F  |
| Pat_50 | Pre-Treatment | ZNF425    | 155054 | 37 | 7 | 148801879 | 148801879 | Missense_Mutation | SNP | C  | T  | 27  | 74  | c.1084G>A       | c.(1084-1086)GAG>AAG | p.E362K  |
| Pat_50 | Pre-Treatment | PDGFRL    | 5157   | 37 | 8 | 17486262  | 17486262  | Missense_Mutation | SNP | G  | T  | 13  | 28  | c.772G>T        | c.(772-774)GTC>TTC   | p.V258F  |
| Pat_50 | Pre-Treatment | SLC39A14  | 23516  | 37 | 8 | 22277162  | 22277162  | Missense_Mutation | SNP | C  | T  | 28  | 50  | c.1430C>T       | c.(1429-1431)ACC>ATC | p.T477I  |
| Pat_50 | Pre-Treatment | TACC1     | 6867   | 37 | 8 | 38677627  | 38677627  | Missense_Mutation | SNP | C  | T  | 14  | 24  | c.865C>T        | c.(865-867)CCT>TCT   | p.P289S  |
| Pat_50 | Pre-Treatment | IDO2      | 169355 | 37 | 8 | 39840204  | 39840204  | Missense_Mutation | SNP | G  | A  | 8   | 18  | c.388G>A        | c.(388-390)GAA>AAA   | p.E130K  |
| Pat_50 | Pre-Treatment | DKK4      | 27121  | 37 | 8 | 42232314  | 42232314  | Missense_Mutation | SNP | C  | T  | 67  | 286 | c.380G>A        | c.(379-381)AGG>AAG   | p.R127K  |
| Pat_50 | Pre-Treatment | C8orf40   | 114926 | 37 | 8 | 42401673  | 42401673  | Missense_Mutation | SNP | G  | A  | 65  | 160 | c.58G>A         | c.(58-60)GAA>AAA     | p.E20K   |
| Pat_50 | Pre-Treatment | C8orf22   | 492307 | 37 | 8 | 49985441  | 49985441  | Nonsense_Mutation | SNP | C  | T  | 103 | 87  | c.52C>T         | c.(52-54)CGA>TGA     | p.R18*   |
| Pat_50 | Pre-Treatment | PXDNL     | 137902 | 37 | 8 | 52320998  | 52320999  | Missense_Mutation | DNP | AG | TA | 12  | 15  | c.3185_3186CT>T | c.(3184-3186)CCT>CTA | p.P1062L |
| Pat_50 | Pre-Treatment | RP1       | 6101   | 37 | 8 | 55537472  | 55537472  | Missense_Mutation | SNP | G  | A  | 26  | 28  | c.1030G>A       | c.(1030-1032)GAA>AAA | p.E344K  |
| Pat_50 | Pre-Treatment | ARMC1     | 55156  | 37 | 8 | 66539551  | 66539551  | Missense_Mutation | SNP | G  | A  | 84  | 153 | c.83C>T         | c.(82-84)CCG>CTG     | p.P28L   |
| Pat_50 | Pre-Treatment | VCPIP1    | 80124  | 37 | 8 | 67576520  | 67576520  | Missense_Mutation | SNP | C  | T  | 37  | 48  | c.2674G>A       | c.(2674-2676)GAA>AAA | p.E892K  |

|        |               |           |        |    |    |           |           |                   |     |    |    |     |     |                 |                        |          |
|--------|---------------|-----------|--------|----|----|-----------|-----------|-------------------|-----|----|----|-----|-----|-----------------|------------------------|----------|
| Pat_50 | Pre-Treatment | ZFHX4     | 79776  | 37 | 8  | 77690621  | 77690621  | Missense_Mutation | SNP | G  | A  | 87  | 205 | c.3193G>A       | c.(3193-3195)GAG>AAG   | p.E1065K |
| Pat_50 | Pre-Treatment | ANGPT1    | 284    | 37 | 8  | 108315583 | 108315583 | Missense_Mutation | SNP | C  | T  | 27  | 40  | c.821G>A        | c.(820-822)GGA>GAA     | p.G274E  |
| Pat_50 | Pre-Treatment | PKHD1L1   | 93035  | 37 | 8  | 110477438 | 110477438 | Missense_Mutation | SNP | G  | A  | 34  | 80  | c.8377G>A       | c.(8377-8379)GAA>AAA   | p.E2793K |
| Pat_50 | Pre-Treatment | EPPK1     | 83481  | 37 | 8  | 144946434 | 144946434 | Missense_Mutation | SNP | C  | T  | 20  | 24  | c.988G>A        | c.(988-990)GAC>AAC     | p.D330N  |
| Pat_50 | Pre-Treatment | SPATC1    | 375686 | 37 | 8  | 145095916 | 145095916 | Missense_Mutation | SNP | C  | T  | 47  | 108 | c.1214C>T       | c.(1213-1215)CCA>CTA   | p.P405L  |
| Pat_50 | Pre-Treatment | DMRT3     | 58524  | 37 | 9  | 990295    | 990295    | Missense_Mutation | SNP | G  | A  | 35  | 15  | c.709G>A        | c.(709-711)GGG>AGG     | p.G237R  |
| Pat_50 | Pre-Treatment | FREM1     | 158326 | 37 | 9  | 14737509  | 14737509  | Missense_Mutation | SNP | G  | A  | 4   | 7   | c.6425C>T       | c.(6424-6426)TCT>TTT   | p.S2142F |
| Pat_50 | Pre-Treatment | PTCH1     | 5727   | 37 | 9  | 98211496  | 98211496  | Missense_Mutation | SNP | G  | A  | 2   | 2   | c.3659C>T       | c.(3658-3660)TCC>TTC   | p.S1220F |
| Pat_50 | Pre-Treatment | TNFSF15   | 9966   | 37 | 9  | 117552881 | 117552881 | Missense_Mutation | SNP | C  | T  | 14  | 26  | c.607G>A        | c.(607-609)GAA>AAA     | p.E203K  |
| Pat_50 | Pre-Treatment | ASTN2     | 23245  | 37 | 9  | 119739028 | 119739028 | Missense_Mutation | SNP | G  | T  | 35  | 61  | c.1628C>A       | c.(1627-1629)CCT>CAT   | p.P543H  |
| Pat_50 | Pre-Treatment | FAM129B   | 64855  | 37 | 9  | 130270409 | 130270409 | Missense_Mutation | SNP | G  | A  | 21  | 54  | c.1505C>T       | c.(1504-1506)CCG>CTG   | p.P502L  |
| Pat_50 | Pre-Treatment | LCN10     | 414332 | 37 | 9  | 139636390 | 139636390 | Missense_Mutation | SNP | G  | A  | 6   | 5   | c.200C>T        | c.(199-201)GCG>GTG     | p.A67V   |
| Pat_50 | Pre-Treatment | ANAPC2    | 29882  | 37 | 9  | 140076151 | 140076151 | Missense_Mutation | SNP | G  | A  | 3   | 13  | c.1450C>T       | c.(1450-1452)CCT>TCT   | p.P484S  |
| Pat_50 | Pre-Treatment | MXRA5     | 25878  | 37 | X  | 3242018   | 3242018   | Missense_Mutation | SNP | C  | T  | 7   | 3   | c.1708G>A       | c.(1708-1710)GTA>ATA   | p.V570I  |
| Pat_50 | Pre-Treatment | ACOT9     | 23597  | 37 | X  | 23748990  | 23748990  | Missense_Mutation | SNP | G  | A  | 43  | 11  | c.278C>T        | c.(277-279)CCT>CTT     | p.P93L   |
| Pat_50 | Pre-Treatment | USP11     | 8237   | 37 | X  | 47100745  | 47100745  | Missense_Mutation | SNP | C  | A  | 47  | 13  | c.1045C>A       | c.(1045-1047)CGC>AGC   | p.R349S  |
| Pat_50 | Pre-Treatment | DGKK      | 139189 | 37 | X  | 50122653  | 50122653  | Missense_Mutation | SNP | T  | C  | 30  | 15  | c.2834A>G       | c.(2833-2835)AAC>AGC   | p.N945S  |
| Pat_50 | Pre-Treatment | BMP15     | 9210   | 37 | X  | 50659404  | 50659404  | Nonsense_Mutation | SNP | C  | T  | 91  | 24  | c.976C>T        | c.(976-978)CGA>TGA     | p.R326*  |
| Pat_50 | Pre-Treatment | DACH2     | 117154 | 37 | X  | 86069716  | 86069716  | Missense_Mutation | SNP | G  | T  | 18  | 8   | c.1563G>T       | c.(1561-1563)AAG>AAT   | p.K521N  |
| Pat_50 | Pre-Treatment | TRPC5     | 7224   | 37 | X  | 111097211 | 111097211 | Missense_Mutation | SNP | G  | A  | 21  | 5   | c.1024C>T       | c.(1024-1026)CCC>TCC   | p.P342S  |
| Pat_50 | Pre-Treatment | AGTR2     | 186    | 37 | X  | 115303706 | 115303706 | Missense_Mutation | SNP | G  | A  | 51  | 12  | c.173G>A        | c.(172-174)GGA>GAA     | p.G58E   |
| Pat_50 | Pre-Treatment | UTY       | 7404   | 37 | Y  | 15467220  | 15467220  | Missense_Mutation | SNP | G  | T  | 5   | 7   | c.1433C>A       | c.(1432-1434)ACT>AAT   | p.T478N  |
| Pat_54 | Pre-Treatment | MIIP      | 60672  | 37 | 1  | 12081815  | 12081815  | Missense_Mutation | SNP | G  | A  | 3   | 26  | c.32G>A         | c.(31-33)CGG>CAG       | p.R11Q   |
| Pat_54 | Pre-Treatment | MYOM3     | 127294 | 37 | 1  | 24426248  | 24426248  | Missense_Mutation | SNP | C  | T  | 42  | 70  | c.578G>A        | c.(577-579)CGG>CAG     | p.R193Q  |
| Pat_54 | Pre-Treatment | UBXN11    | 91544  | 37 | 1  | 26628209  | 26628209  | Nonsense_Mutation | SNP | G  | A  | 3   | 42  | c.76C>T         | c.(76-78)CGA>TGA       | p.R26*   |
| Pat_54 | Pre-Treatment | ZNF683    | 257101 | 37 | 1  | 26689618  | 26689618  | Missense_Mutation | SNP | G  | A  | 4   | 35  | c.1042C>T       | c.(1042-1044)CGT>TGT   | p.R348C  |
| Pat_54 | Pre-Treatment | CCDC17    | 149483 | 37 | 1  | 46088654  | 46088654  | Missense_Mutation | SNP | C  | T  | 3   | 42  | c.629G>A        | c.(628-630)CGC>CAC     | p.R210H  |
| Pat_54 | Pre-Treatment | DAB1      | 1600   | 37 | 1  | 57476832  | 57476832  | Missense_Mutation | SNP | C  | T  | 93  | 96  | c.1558G>A       | c.(1558-1560)GAA>AAA   | p.E520K  |
| Pat_54 | Pre-Treatment | PALMD     | 54873  | 37 | 1  | 100155377 | 100155377 | Missense_Mutation | SNP | C  | T  | 62  | 79  | c.1561C>T       | c.(1561-1563)CCA>TCA   | p.P521S  |
| Pat_54 | Pre-Treatment | C1orf103  | 55791  | 37 | 1  | 111506306 | 111506306 | Nonsense_Mutation | SNP | G  | T  | 4   | 21  | c.5C>A          | c.(4-6)TCA>TAA         | p.S2*    |
| Pat_54 | Pre-Treatment | AMPD1     | 270    | 37 | 1  | 115217461 | 115217462 | Missense_Mutation | DNP | GG | AA | 34  | 51  | c.1711_1712CC>T | c.(1711-1713)CCT>TTT   | p.P571F  |
| Pat_54 | Pre-Treatment | RORC      | 6097   | 37 | 1  | 151780010 | 151780010 | Missense_Mutation | SNP | G  | A  | 4   | 63  | c.1495C>T       | c.(1495-1497)CCT>TCT   | p.P499S  |
| Pat_54 | Pre-Treatment | TCHHL1    | 126637 | 37 | 1  | 152060576 | 152060576 | Missense_Mutation | SNP | A  | G  | 59  | 56  | c.44T>C         | c.(43-45)TTC>TCC       | p.F15S   |
| Pat_54 | Pre-Treatment | CD1C      | 911    | 37 | 1  | 158263018 | 158263018 | Missense_Mutation | SNP | G  | A  | 126 | 197 | c.906G>A        | c.(904-906)ATG>ATA     | p.M302I  |
| Pat_54 | Pre-Treatment | PBX1      | 5087   | 37 | 1  | 164769081 | 164769081 | Missense_Mutation | SNP | C  | T  | 3   | 38  | c.656C>T        | c.(655-657)ACG>ATG     | p.T219M  |
| Pat_54 | Pre-Treatment | HMCN1     | 83872  | 37 | 1  | 186077644 | 186077644 | Missense_Mutation | SNP | G  | A  | 75  | 94  | c.10904G>A      | c.(10903-10905)CGG>CAC | p.R3635Q |
| Pat_54 | Pre-Treatment | OPTC      | 26254  | 37 | 1  | 203467929 | 203467929 | Missense_Mutation | SNP | G  | A  | 4   | 79  | c.491G>A        | c.(490-492)CGC>CAC     | p.R164H  |
| Pat_54 | Pre-Treatment | SLC41A1   | 254428 | 37 | 1  | 205768949 | 205768949 | Nonsense_Mutation | SNP | C  | A  | 4   | 27  | c.490G>T        | c.(490-492)GGA>TGA     | p.G164*  |
| Pat_54 | Pre-Treatment | TLR5      | 7100   | 37 | 1  | 223285778 | 223285778 | Missense_Mutation | SNP | G  | A  | 26  | 31  | c.596C>T        | c.(595-597)TCC>TTC     | p.S199F  |
| Pat_54 | Pre-Treatment | PCNXL2    | 80003  | 37 | 1  | 233134884 | 233134884 | Missense_Mutation | SNP | C  | T  | 13  | 27  | c.5570G>A       | c.(5569-5571)AGA>AAA   | p.R1857K |
| Pat_54 | Pre-Treatment | CEP170    | 9859   | 37 | 1  | 243328992 | 243328992 | Missense_Mutation | SNP | G  | A  | 77  | 592 | c.2270C>T       | c.(2269-2271)GCT>GTT   | p.A757V  |
| Pat_54 | Pre-Treatment | KIF26B    | 55083  | 37 | 1  | 245851056 | 245851056 | Missense_Mutation | SNP | C  | T  | 2   | 1   | c.4771C>T       | c.(4771-4773)CGG>TGG   | p.R1591W |
| Pat_54 | Pre-Treatment | OR2W3     | 343171 | 37 | 1  | 248059147 | 248059147 | Missense_Mutation | SNP | G  | A  | 32  | 78  | c.259G>A        | c.(259-261)GGA>AGA     | p.G87R   |
| Pat_54 | Pre-Treatment | OR2L8     | 391190 | 37 | 1  | 248112588 | 248112588 | Missense_Mutation | SNP | G  | A  | 107 | 192 | c.429G>A        | c.(427-429)ATG>ATA     | p.M143I  |
| Pat_54 | Pre-Treatment | MLLT10    | 8028   | 37 | 10 | 22016848  | 22016848  | Missense_Mutation | SNP | T  | A  | 41  | 69  | c.2102T>A       | c.(2101-2103)CTC>CAC   | p.L701H  |
| Pat_54 | Pre-Treatment | HSD17B7P2 | 158160 | 37 | 10 | 38654432  | 38654432  | Missense_Mutation | SNP | A  | G  | 5   | 92  | c.524A>G        | c.(523-525)AAT>AGT     | p.N175S  |
| Pat_54 | Pre-Treatment | TACR2     | 6865   | 37 | 10 | 71175934  | 71175934  | Missense_Mutation | SNP | G  | A  | 4   | 45  | c.146C>T        | c.(145-147)ACG>ATG     | p.T49M   |

|        |               |           |        |    |    |           |           |                        |     |   |   |     |     |               |                        |                |
|--------|---------------|-----------|--------|----|----|-----------|-----------|------------------------|-----|---|---|-----|-----|---------------|------------------------|----------------|
| Pat_54 | Pre-Treatment | CDH23     | 64072  | 37 | 10 | 73562965  | 73562965  | Splice_Site            | SNP | G | C | 2   | 2   | c.7661_splice | c.e53-1                | p.E2554_splice |
| Pat_54 | Pre-Treatment | MYOF      | 26509  | 37 | 10 | 95132803  | 95132803  | Missense_Mutation      | SNP | G | A | 4   | 88  | c.2341C>T     | c.(2341-2343)CGG>TGG   | p.R781W        |
| Pat_54 | Pre-Treatment | PLCE1     | 51196  | 37 | 10 | 95931110  | 95931110  | Missense_Mutation      | SNP | C | T | 73  | 29  | c.1666C>T     | c.(1666-1668)CTT>TTT   | p.L556F        |
| Pat_54 | Pre-Treatment | ENTPD1    | 953    | 37 | 10 | 97607282  | 97607282  | Missense_Mutation      | SNP | A | G | 4   | 71  | c.893A>G      | c.(892-894)AAG>AGG     | p.K298R        |
| Pat_54 | Pre-Treatment | PDZD7     | 79955  | 37 | 10 | 102780377 | 102780377 | Missense_Mutation      | SNP | C | T | 3   | 25  | c.926G>A      | c.(925-927)CGA>CAA     | p.R309Q        |
| Pat_54 | Pre-Treatment | HABP2     | 3026   | 37 | 10 | 115343993 | 115343993 | Missense_Mutation      | SNP | C | T | 35  | 14  | c.1324C>T     | c.(1324-1326)CCC>TCC   | p.P442S        |
| Pat_54 | Pre-Treatment | VWA2      | 340706 | 37 | 10 | 116038556 | 116038556 | Nonsense_Mutation      | SNP | G | A | 4   | 34  | c.779G>A      | c.(778-780)TGG>TAG     | p.W260*        |
| Pat_54 | Pre-Treatment | C10orf82  | 143379 | 37 | 10 | 118424324 | 118424324 | Missense_Mutation      | SNP | A | T | 83  | 21  | c.409T>A      | c.(409-411)TTC>ATC     | p.F137I        |
| Pat_54 | Pre-Treatment | SLC17A6   | 57084  | 37 | 11 | 22380960  | 22380960  | Missense_Mutation      | SNP | G | A | 18  | 33  | c.460G>A      | c.(460-462)GTT>ATT     | p.V154I        |
| Pat_54 | Pre-Treatment | FADS2     | 9415   | 37 | 11 | 61605353  | 61605353  | Missense_Mutation      | SNP | G | A | 4   | 42  | c.311G>A      | c.(310-312)GGC>GAC     | p.G104D        |
| Pat_54 | Pre-Treatment | WDR74     | 54663  | 37 | 11 | 62607032  | 62607032  | Missense_Mutation      | SNP | G | A | 6   | 125 | c.11C>T       | c.(10-12)GCT>GTT       | p.A4V          |
| Pat_54 | Pre-Treatment | C11orf2   | 738    | 37 | 11 | 64878928  | 64878928  | Missense_Mutation      | SNP | T | C | 43  | 41  | c.2218T>C     | c.(2218-2220)TGG>CGG   | p.W740R        |
| Pat_54 | Pre-Treatment | CATSPER1  | 117144 | 37 | 11 | 65792842  | 65792842  | Missense_Mutation      | SNP | C | T | 35  | 16  | c.1009G>A     | c.(1009-1011)GAT>AAT   | p.D337N        |
| Pat_54 | Pre-Treatment | KRTAP5-9  | 3846   | 37 | 11 | 71259984  | 71259984  | Missense_Mutation      | SNP | C | T | 47  | 89  | c.281C>T      | c.(280-282)TCA>TTA     | p.S94L         |
| Pat_54 | Pre-Treatment | PAAF1     | 80227  | 37 | 11 | 73610270  | 73610270  | Missense_Mutation      | SNP | C | T | 4   | 83  | c.362C>T      | c.(361-363)GCT>GTT     | p.A121V        |
| Pat_54 | Pre-Treatment | RNF169    | 254225 | 37 | 11 | 74547747  | 74547747  | Missense_Mutation      | SNP | G | A | 4   | 91  | c.2099G>A     | c.(2098-2100)CGG>CAG   | p.R700Q        |
| Pat_54 | Pre-Treatment | CREBZF    | 58487  | 37 | 11 | 85375769  | 85375769  | Missense_Mutation      | SNP | G | A | 22  | 21  | c.151C>T      | c.(151-153)CCC>TCC     | p.P51S         |
| Pat_54 | Pre-Treatment | FOLH1B    | 219595 | 37 | 11 | 89395322  | 89395322  | Translation_Start_Site | SNP | C | T | 7   | 64  | c.-93C>T      | c.(-95--91)TACGC>TATGC |                |
| Pat_54 | Pre-Treatment | AMOTL1    | 154810 | 37 | 11 | 94599225  | 94599225  | Missense_Mutation      | SNP | G | A | 4   | 92  | c.2380G>A     | c.(2380-2382)GTT>ATT   | p.V794I        |
| Pat_54 | Pre-Treatment | HINFP     | 25988  | 37 | 11 | 119002563 | 119002563 | Missense_Mutation      | SNP | C | T | 4   | 48  | c.547C>T      | c.(547-549)CGC>TGC     | p.R183C        |
| Pat_54 | Pre-Treatment | CACNA1C   | 775    | 37 | 12 | 2786272   | 2786272   | Missense_Mutation      | SNP | C | T | 13  | 32  | c.4985C>T     | c.(4984-4986)ACC>ATC   | p.T1662I       |
| Pat_54 | Pre-Treatment | NDUFA9    | 4704   | 37 | 12 | 4796218   | 4796218   | Missense_Mutation      | SNP | C | T | 4   | 44  | c.1078C>T     | c.(1078-1080)CGC>TGC   | p.R360C        |
| Pat_54 | Pre-Treatment | CD163     | 9332   | 37 | 12 | 7654044   | 7654044   | Missense_Mutation      | SNP | C | T | 66  | 118 | c.148G>A      | c.(148-150)GAG>AAG     | p.E50K         |
| Pat_54 | Pre-Treatment | STYK1     | 55359  | 37 | 12 | 10783893  | 10783893  | Missense_Mutation      | SNP | G | A | 22  | 68  | c.202C>T      | c.(202-204)CCT>TCT     | p.P68S         |
| Pat_54 | Pre-Treatment | GUCY2C    | 2984   | 37 | 12 | 14836145  | 14836145  | Missense_Mutation      | SNP | C | T | 53  | 51  | c.442G>A      | c.(442-444)GGA>AGA     | p.G148R        |
| Pat_54 | Pre-Treatment | GRASP     | 160622 | 37 | 12 | 52408555  | 52408555  | Missense_Mutation      | SNP | C | T | 2   | 0   | c.760C>T      | c.(760-762)CCG>TCG     | p.P254S        |
| Pat_54 | Pre-Treatment | KIAA0748  | 9840   | 37 | 12 | 55357630  | 55357630  | Missense_Mutation      | SNP | C | T | 53  | 68  | c.551G>A      | c.(550-552)CGA>CAA     | p.R184Q        |
| Pat_54 | Pre-Treatment | FAM119B   | 25895  | 37 | 12 | 58174134  | 58174134  | Missense_Mutation      | SNP | G | A | 4   | 64  | c.386G>A      | c.(385-387)CGT>CAT     | p.R129H        |
| Pat_54 | Pre-Treatment | SRGAP1    | 57522  | 37 | 12 | 64456734  | 64456734  | Missense_Mutation      | SNP | C | A | 4   | 62  | c.839C>A      | c.(838-840)GCC>GAC     | p.A280D        |
| Pat_54 | Pre-Treatment | LEMD3     | 23592  | 37 | 12 | 65639998  | 65639998  | Nonsense_Mutation      | SNP | C | T | 113 | 92  | c.2629C>T     | c.(2629-2631)CAG>TAG   | p.Q877*        |
| Pat_54 | Pre-Treatment | ANO4      | 121601 | 37 | 12 | 101510497 | 101510497 | Nonsense_Mutation      | SNP | C | T | 91  | 17  | c.2491C>T     | c.(2491-2493)CGA>TGA   | p.R831*        |
| Pat_54 | Pre-Treatment | ASCL1     | 429    | 37 | 12 | 103352363 | 103352363 | Missense_Mutation      | SNP | A | T | 7   | 1   | c.341A>T      | c.(340-342)CAG>CTG     | p.Q114L        |
| Pat_54 | Pre-Treatment | MYL2      | 4633   | 37 | 12 | 111348978 | 111348978 | Missense_Mutation      | SNP | A | G | 66  | 114 | c.404T>C      | c.(403-405)GTT>GCT     | p.V135A        |
| Pat_54 | Pre-Treatment | ALDH2     | 217    | 37 | 12 | 112241685 | 112241685 | Nonsense_Mutation      | SNP | G | T | 4   | 43  | c.1429G>T     | c.(1429-1431)GGA>TGA   | p.G477*        |
| Pat_54 | Pre-Treatment | C12orf51  | 283450 | 37 | 12 | 112703772 | 112703772 | Missense_Mutation      | SNP | C | A | 4   | 47  | c.1112G>T     | c.(1111-1113)GGA>GTA   | p.G371V        |
| Pat_54 | Pre-Treatment | OAS2      | 4939   | 37 | 12 | 113435446 | 113435446 | Missense_Mutation      | SNP | C | T | 26  | 32  | c.749C>T      | c.(748-750)ACC>ATC     | p.T250I        |
| Pat_54 | Pre-Treatment | DHX37     | 57647  | 37 | 12 | 125465142 | 125465142 | Missense_Mutation      | SNP | G | A | 3   | 26  | c.632C>T      | c.(631-633)CCG>CTG     | p.P211L        |
| Pat_54 | Pre-Treatment | CKAP2     | 26586  | 37 | 13 | 53035029  | 53035029  | Splice_Site            | SNP | A | T | 5   | 71  | c.156_splice  | c.e3-2                 | p.S52_splice   |
| Pat_54 | Pre-Treatment | LOC647288 | 647288 | 37 | 13 | 75814354  | 75814354  | Missense_Mutation      | SNP | C | G | 9   | 104 | c.123G>C      | c.(121-123)TGG>TGC     | p.W41C         |
| Pat_54 | Pre-Treatment | OR4K5     | 79317  | 37 | 14 | 20389181  | 20389181  | Missense_Mutation      | SNP | G | A | 70  | 250 | c.416G>A      | c.(415-417)AGG>AAG     | p.R139K        |
| Pat_54 | Pre-Treatment | CLEC14A   | 161198 | 37 | 14 | 38724021  | 38724021  | Missense_Mutation      | SNP | C | A | 4   | 32  | c.1207G>T     | c.(1207-1209)GTG>TTG   | p.V403L        |
| Pat_54 | Pre-Treatment | ARID4A    | 5926   | 37 | 14 | 58831016  | 58831016  | Missense_Mutation      | SNP | C | T | 56  | 150 | c.2209C>T     | c.(2209-2211)CCA>TCA   | p.P737S        |
| Pat_54 | Pre-Treatment | AHNAK2    | 113146 | 37 | 14 | 105416167 | 105416167 | Missense_Mutation      | SNP | G | A | 56  | 74  | c.5621C>T     | c.(5620-5622)CCG>CTG   | p.P1874L       |
| Pat_54 | Pre-Treatment | MKRN3     | 7681   | 37 | 15 | 23810949  | 23810949  | Missense_Mutation      | SNP | C | T | 9   | 2   | c.20C>T       | c.(19-21)CCC>CTC       | p.P7L          |
| Pat_54 | Pre-Treatment | DUOXA1    | 90527  | 37 | 15 | 45412968  | 45412968  | Missense_Mutation      | SNP | A | G | 79  | 114 | c.376T>C      | c.(376-378)TAC>CAC     | p.Y126H        |
| Pat_54 | Pre-Treatment | SLC27A2   | 11001  | 37 | 15 | 50489714  | 50489714  | Missense_Mutation      | SNP | G | A | 45  | 64  | c.496G>A      | c.(496-498)GAA>AAA     | p.E166K        |
| Pat_54 | Pre-Treatment | DMXL2     | 23312  | 37 | 15 | 51763533  | 51763533  | Missense_Mutation      | SNP | G | A | 117 | 197 | c.7276C>T     | c.(7276-7278)CCT>TCT   | p.P2426S       |

|        |               |            |        |    |    |          |          |                   |     |    |    |    |     |                 |                          |                |
|--------|---------------|------------|--------|----|----|----------|----------|-------------------|-----|----|----|----|-----|-----------------|--------------------------|----------------|
| Pat_54 | Pre-Treatment | GRINL1A    | 81488  | 37 | 15 | 58001466 | 58001466 | Missense_Mutation | SNP | G  | A  | 4  | 77  | c.668G>A        | c.(667-669)AGT>AAT       | p.S223N        |
| Pat_54 | Pre-Treatment | ALDH1A2    | 8854   | 37 | 15 | 58258016 | 58258016 | Missense_Mutation | SNP | G  | C  | 4  | 77  | c.808C>G        | c.(808-810)CTT>GTT       | p.L270V        |
| Pat_54 | Pre-Treatment | MEGF11     | 84465  | 37 | 15 | 66249895 | 66249895 | Missense_Mutation | SNP | G  | A  | 4  | 25  | c.1277C>T       | c.(1276-1278)CCG>CTG     | p.P426L        |
| Pat_54 | Pre-Treatment | IQCH       | 64799  | 37 | 15 | 67713708 | 67713708 | Missense_Mutation | SNP | A  | T  | 34 | 51  | c.2298A>T       | c.(2296-2298)AAA>AAT     | p.K766N        |
| Pat_54 | Pre-Treatment | CD276      | 80381  | 37 | 15 | 73995154 | 73995154 | Missense_Mutation | SNP | G  | A  | 11 | 17  | c.460G>A        | c.(460-462)GAC>AAC       | p.D154N        |
| Pat_54 | Pre-Treatment | CLK3       | 1198   | 37 | 15 | 74922126 | 74922126 | Missense_Mutation | SNP | C  | A  | 4  | 22  | c.1819C>A       | c.(1819-1821)CAG>AAG     | p.Q607K        |
| Pat_54 | Pre-Treatment | DET1       | 55070  | 37 | 15 | 89056264 | 89056265 | Missense_Mutation | DNP | GG | AA | 17 | 56  | :.1570_1571CC>T | c.(1570-1572)CCT>TTT     | p.P524F        |
| Pat_54 | Pre-Treatment | CRAMP1L    | 57585  | 37 | 16 | 1719001  | 1719001  | Splice_Site       | SNP | G  | A  | 4  | 34  | c.3335_splice   | c.e18-1                  | p.G1112_splice |
| Pat_54 | Pre-Treatment | GRIN2A     | 2903   | 37 | 16 | 9857692  | 9857692  | Missense_Mutation | SNP | C  | T  | 30 | 42  | c.3709G>A       | c.(3709-3711)GAT>AAT     | p.D1237N       |
| Pat_54 | Pre-Treatment | SCNN1G     | 6340   | 37 | 16 | 23200768 | 23200768 | Missense_Mutation | SNP | C  | T  | 63 | 101 | c.394C>T        | c.(394-396)CCA>TCA       | p.P132S        |
| Pat_54 | Pre-Treatment | ZNF319     | 57567  | 37 | 16 | 58031403 | 58031403 | Missense_Mutation | SNP | C  | T  | 4  | 83  | c.767G>A        | c.(766-768)CGG>CAG       | p.R256Q        |
| Pat_54 | Pre-Treatment | FUK        | 197258 | 37 | 16 | 70508488 | 70508488 | Missense_Mutation | SNP | C  | G  | 2  | 3   | c.2046C>G       | c.(2044-2046)ATC>ATG     | p.I682M        |
| Pat_54 | Pre-Treatment | CHST4      | 10164  | 37 | 16 | 71570893 | 71570893 | Missense_Mutation | SNP | G  | A  | 37 | 35  | c.313G>A        | c.(313-315)GAC>AAC       | p.D105N        |
| Pat_54 | Pre-Treatment | LRRC50     | 123872 | 37 | 16 | 84203728 | 84203728 | Missense_Mutation | SNP | G  | A  | 28 | 37  | c.1294G>A       | c.(1294-1296)GAG>AAG     | p.E432K        |
| Pat_54 | Pre-Treatment | TMEM88     | 92162  | 37 | 17 | 7758793  | 7758793  | Missense_Mutation | SNP | G  | A  | 4  | 93  | c.241G>A        | c.(241-243)GCG>ACG       | p.A81T         |
| Pat_54 | Pre-Treatment | MYH13      | 8735   | 37 | 17 | 10215380 | 10215380 | Nonsense_Mutation | SNP | C  | T  | 26 | 23  | c.4379G>A       | c.(4378-4380)TGG>TAG     | p.W1460*       |
| Pat_54 | Pre-Treatment | MYOCD      | 93649  | 37 | 17 | 12661487 | 12661487 | Missense_Mutation | SNP | C  | T  | 30 | 60  | c.2144C>T       | c.(2143-2145)TCA>TTA     | p.S715L        |
| Pat_54 | Pre-Treatment | MYO15A     | 51168  | 37 | 17 | 18025416 | 18025417 | Missense_Mutation | DNP | CC | TT | 7  | 27  | :.3302_3303CC>T | c.(3301-3303)CCC>CTT     | p.P1101L       |
| Pat_54 | Pre-Treatment | SLFN11     | 91607  | 37 | 17 | 33690140 | 33690141 | Missense_Mutation | DNP | CC | TT | 57 | 90  | c.686_687GG>AA  | c.(685-687)AGG>AAA       | p.R229K        |
| Pat_54 | Pre-Treatment | TCAP       | 8557   | 37 | 17 | 37821998 | 37821998 | Missense_Mutation | SNP | G  | A  | 3  | 14  | c.140G>A        | c.(139-141)AGA>AAA       | p.R47K         |
| Pat_54 | Pre-Treatment | WIPF2      | 147179 | 37 | 17 | 38416832 | 38416832 | Nonsense_Mutation | SNP | C  | T  | 82 | 107 | c.109C>T        | c.(109-111)CGA>TGA       | p.R37*         |
| Pat_54 | Pre-Treatment | KPNB1      | 3837   | 37 | 17 | 45734389 | 45734389 | Nonsense_Mutation | SNP | C  | A  | 4  | 76  | c.446C>A        | c.(445-447)TCG>TAG       | p.S149*        |
| Pat_54 | Pre-Treatment | CD300A     | 11314  | 37 | 17 | 72469768 | 72469768 | Missense_Mutation | SNP | T  | C  | 4  | 89  | c.134T>C        | c.(133-135)CTC>CCC       | p.L45P         |
| Pat_54 | Pre-Treatment | ST6GALNAC1 | 55808  | 37 | 17 | 74621474 | 74621474 | Missense_Mutation | SNP | C  | T  | 19 | 35  | c.1741G>A       | c.(1741-1743)GAT>AAT     | p.D581N        |
| Pat_54 | Pre-Treatment | ROCK1      | 6093   | 37 | 18 | 18564360 | 18564360 | Missense_Mutation | SNP | A  | G  | 62 | 85  | c.2441T>C       | c.(2440-2442)TTA>TCA     | p.L814S        |
| Pat_54 | Pre-Treatment | LAMA3      | 3909   | 37 | 18 | 21501017 | 21501017 | Missense_Mutation | SNP | C  | T  | 31 | 52  | c.8042C>T       | c.(8041-8043)TCG>TTG     | p.S2681L       |
| Pat_54 | Pre-Treatment | CXXC1      | 30827  | 37 | 18 | 47812290 | 47812290 | Missense_Mutation | SNP | C  | G  | 4  | 47  | c.468G>C        | c.(466-468)CAG>CAC       | p.Q156H        |
| Pat_54 | Pre-Treatment | LMAN1      | 3998   | 37 | 18 | 57016392 | 57016393 | Missense_Mutation | DNP | GG | AT | 90 | 162 | c.715_716CC>AT  | c.(715-717)CCT>ATT       | p.P239I        |
| Pat_54 | Pre-Treatment | ATP9B      | 374868 | 37 | 18 | 77134011 | 77134011 | Missense_Mutation | SNP | G  | A  | 4  | 88  | c.3184G>A       | c.(3184-3186)GTC>ATC     | p.V1062I       |
| Pat_54 | Pre-Treatment | NFATC1     | 4772   | 37 | 18 | 77170984 | 77170984 | Missense_Mutation | SNP | T  | C  | 4  | 36  | c.709T>C        | c.(709-711)TCC>CCC       | p.S237P        |
| Pat_54 | Pre-Treatment | KCNG2      | 26251  | 37 | 18 | 77659606 | 77659606 | Missense_Mutation | SNP | G  | T  | 4  | 73  | c.1191G>T       | c.(1189-1191)ATG>ATT     | p.M397I        |
| Pat_54 | Pre-Treatment | CSNK1G2    | 1455   | 37 | 19 | 1980168  | 1980168  | Missense_Mutation | SNP | G  | A  | 29 | 50  | c.1214G>A       | c.(1213-1215)AGG>AAG     | p.R405K        |
| Pat_54 | Pre-Treatment | DOT1L      | 84444  | 37 | 19 | 2216629  | 2216629  | Missense_Mutation | SNP | C  | T  | 4  | 71  | c.2273C>T       | c.(2272-2274)CCG>CTG     | p.P758L        |
| Pat_54 | Pre-Treatment | NFIC       | 4782   | 37 | 19 | 3381956  | 3381956  | Missense_Mutation | SNP | G  | A  | 4  | 95  | c.277G>A        | c.(277-279)GTG>ATG       | p.V93M         |
| Pat_54 | Pre-Treatment | INSR       | 3643   | 37 | 19 | 7168079  | 7168080  | Missense_Mutation | DNP | AA | GG | 34 | 49  | :.1509_1510TT>C | c.(1507-1512)TCTTAC>TCCC | p.Y504H        |
| Pat_54 | Pre-Treatment | FBN3       | 84467  | 37 | 19 | 8183894  | 8183894  | Missense_Mutation | SNP | C  | T  | 3  | 26  | c.3224G>A       | c.(3223-3225)JGT>TAT     | p.C1075Y       |
| Pat_54 | Pre-Treatment | RAD23A     | 5886   | 37 | 19 | 13060127 | 13060127 | Nonsense_Mutation | SNP | C  | T  | 4  | 94  | c.718C>T        | c.(718-720)CAG>TAG       | p.Q240*        |
| Pat_54 | Pre-Treatment | WIZ        | 58525  | 37 | 19 | 15537901 | 15537901 | Missense_Mutation | SNP | G  | A  | 4  | 25  | c.1495C>T       | c.(1495-1497)CGG>TGG     | p.R499W        |
| Pat_54 | Pre-Treatment | OR10H5     | 284433 | 37 | 19 | 15905351 | 15905351 | Missense_Mutation | SNP | C  | T  | 25 | 42  | c.493C>T        | c.(493-495)CAC>TAC       | p.H165Y        |
| Pat_54 | Pre-Treatment | CILP2      | 148113 | 37 | 19 | 19655285 | 19655285 | Missense_Mutation | SNP | C  | T  | 38 | 40  | c.1931C>T       | c.(1930-1932)TCC>TTC     | p.S644F        |
| Pat_54 | Pre-Treatment | ZNF98      | 148198 | 37 | 19 | 22574496 | 22574496 | Missense_Mutation | SNP | C  | T  | 81 | 172 | c.1541G>A       | c.(1540-1542)GGA>GAA     | p.G514E        |
| Pat_54 | Pre-Treatment | ZNF536     | 9745   | 37 | 19 | 31040061 | 31040061 | Missense_Mutation | SNP | G  | A  | 42 | 64  | c.3535G>A       | c.(3535-3537)GAT>AAT     | p.D1179N       |
| Pat_54 | Pre-Treatment | CCDC123    | 84902  | 37 | 19 | 33450921 | 33450921 | Missense_Mutation | SNP | G  | A  | 3  | 39  | c.190C>T        | c.(190-192)CGG>TGG       | p.R64W         |
| Pat_54 | Pre-Treatment | RASGRP4    | 115727 | 37 | 19 | 38910631 | 38910631 | Missense_Mutation | SNP | G  | A  | 6  | 47  | c.532C>T        | c.(532-534)CCC>TCC       | p.P178S        |
| Pat_54 | Pre-Treatment | RYR1       | 6261   | 37 | 19 | 38951170 | 38951170 | Missense_Mutation | SNP | T  | C  | 31 | 66  | c.2516T>C       | c.(2515-2517)GTG>GCG     | p.V839A        |
| Pat_54 | Pre-Treatment | LTBP4      | 8425   | 37 | 19 | 41115562 | 41115562 | Missense_Mutation | SNP | G  | T  | 3  | 23  | c.1754G>T       | c.(1753-1755)TGC>TTC     | p.C585F        |
| Pat_54 | Pre-Treatment | TRAPPC6A   | 79090  | 37 | 19 | 45668433 | 45668433 | Missense_Mutation | SNP | G  | C  | 2  | 5   | c.104C>G        | c.(103-105)TCG>TGG       | p.S35W         |



|        |               |           |        |    |    |           |           |                   |     |   |   |     |     |            |                        |           |
|--------|---------------|-----------|--------|----|----|-----------|-----------|-------------------|-----|---|---|-----|-----|------------|------------------------|-----------|
| Pat_54 | Pre-Treatment | NOSIP     | 51070  | 37 | 19 | 50060161  | 50060161  | Missense_Mutation | SNP | C | T | 4   | 11  | c.508G>A   | c.(508-510)GAA>AAA     | p.E170K   |
| Pat_54 | Pre-Treatment | NR1H2     | 7376   | 37 | 19 | 50885834  | 50885834  | Missense_Mutation | SNP | C | T | 4   | 75  | c.1361C>T  | c.(1360-1362)TCG>TTG   | p.S454L   |
| Pat_54 | Pre-Treatment | SYT3      | 84258  | 37 | 19 | 51140638  | 51140638  | Missense_Mutation | SNP | G | A | 3   | 31  | c.31C>T    | c.(31-33)CGG>TGG       | p.R11W    |
| Pat_54 | Pre-Treatment | NLRP12    | 91662  | 37 | 19 | 54308587  | 54308587  | Missense_Mutation | SNP | C | T | 50  | 77  | c.2361G>A  | c.(2359-2361)ATG>ATA   | p.M787I   |
| Pat_54 | Pre-Treatment | LILRA2    | 11027  | 37 | 19 | 55098691  | 55098691  | Missense_Mutation | SNP | G | A | 47  | 60  | c.1330G>A  | c.(1330-1332)GAT>AAT   | p.D444N   |
| Pat_54 | Pre-Treatment | NLRP8     | 126205 | 37 | 19 | 56459510  | 56459510  | Missense_Mutation | SNP | G | C | 3   | 37  | c.242G>C   | c.(241-243)TGG>TCG     | p.W81S    |
| Pat_54 | Pre-Treatment | C2orf43   | 60526  | 37 | 2  | 20939959  | 20939959  | Missense_Mutation | SNP | G | A | 59  | 55  | c.475C>T   | c.(475-477)CGT>TGT     | p.R159C   |
| Pat_54 | Pre-Treatment | APOB      | 338    | 37 | 2  | 21245826  | 21245826  | Missense_Mutation | SNP | C | T | 41  | 62  | c.2693G>A  | c.(2692-2694)GGG>GAG   | p.G898E   |
| Pat_54 | Pre-Treatment | SLC4A1AP  | 22950  | 37 | 2  | 27888056  | 27888056  | Missense_Mutation | SNP | G | T | 119 | 181 | c.915G>T   | c.(913-915)AAG>AAT     | p.K305N   |
| Pat_54 | Pre-Treatment | SPR       | 6697   | 37 | 2  | 73118628  | 73118628  | Missense_Mutation | SNP | T | C | 33  | 55  | c.748T>C   | c.(748-750)TTC>CTC     | p.F250L   |
| Pat_54 | Pre-Treatment | TET3      | 200424 | 37 | 2  | 74328434  | 74328434  | Missense_Mutation | SNP | C | T | 3   | 26  | c.4114C>T  | c.(4114-4116)CGG>TGG   | p.R1372W  |
| Pat_54 | Pre-Treatment | KRCC1     | 51315  | 37 | 2  | 88327862  | 88327862  | Missense_Mutation | SNP | G | A | 37  | 37  | c.221C>T   | c.(220-222)TCA>TTA     | p.S74L    |
| Pat_54 | Pre-Treatment | CNGA3     | 1261   | 37 | 2  | 98996705  | 98996705  | Missense_Mutation | SNP | C | T | 4   | 87  | c.283C>T   | c.(283-285)CCG>TCG     | p.P95S    |
| Pat_54 | Pre-Treatment | TBC1D8    | 11138  | 37 | 2  | 101650113 | 101650113 | Missense_Mutation | SNP | G | A | 4   | 65  | c.1666C>T  | c.(1666-1668)CGC>TGC   | p.R556C   |
| Pat_54 | Pre-Treatment | SH3RF3    | 344558 | 37 | 2  | 109964181 | 109964181 | Missense_Mutation | SNP | G | A | 4   | 35  | c.625G>A   | c.(625-627)GAA>AAA     | p.E209K   |
| Pat_54 | Pre-Treatment | INHBB     | 3625   | 37 | 2  | 121104080 | 121104080 | Missense_Mutation | SNP | G | C | 2   | 6   | c.316G>C   | c.(316-318)GCC>CCC     | p.A106P   |
| Pat_54 | Pre-Treatment | LRP1B     | 53353  | 37 | 2  | 141130635 | 141130635 | Nonsense_Mutation | SNP | C | T | 105 | 156 | c.10710G>A | c.(10708-10710)TGG>TGA | p.W3570*  |
| Pat_54 | Pre-Treatment | LRP2      | 4036   | 37 | 2  | 170031891 | 170031891 | Missense_Mutation | SNP | G | A | 40  | 51  | c.10580C>T | c.(10579-10581)CCT>CTT | p.P3527L  |
| Pat_54 | Pre-Treatment | TTN       | 7273   | 37 | 2  | 179433220 | 179433220 | Missense_Mutation | SNP | G | T | 4   | 71  | c.69935C>A | c.(69934-69936)ACA>AAA | p.T23312K |
| Pat_54 | Pre-Treatment | TTN       | 7273   | 37 | 2  | 179621344 | 179621344 | Missense_Mutation | SNP | G | A | 32  | 37  | c.10346C>T | c.(10345-10347)TCC>TTC | p.S3449F  |
| Pat_54 | Pre-Treatment | SATB2     | 23314  | 37 | 2  | 200233369 | 200233369 | Missense_Mutation | SNP | T | G | 60  | 81  | c.659A>C   | c.(658-660)CAG>CCG     | p.Q220P   |
| Pat_54 | Pre-Treatment | TRAK2     | 66008  | 37 | 2  | 202245723 | 202245723 | Missense_Mutation | SNP | G | A | 83  | 167 | c.2288C>T  | c.(2287-2289)CCC>CTC   | p.P763L   |
| Pat_54 | Pre-Treatment | STK36     | 27148  | 37 | 2  | 219557366 | 219557366 | Missense_Mutation | SNP | C | T | 28  | 51  | c.1976C>T  | c.(1975-1977)TCC>TTC   | p.S659F   |
| Pat_54 | Pre-Treatment | ABCB6     | 10058  | 37 | 2  | 220080797 | 220080797 | Missense_Mutation | SNP | C | A | 4   | 28  | c.1076G>T  | c.(1075-1077)CGC>CTC   | p.R359L   |
| Pat_54 | Pre-Treatment | SPHKAP    | 80309  | 37 | 2  | 228882449 | 228882449 | Missense_Mutation | SNP | C | T | 43  | 54  | c.3121G>A  | c.(3121-3123)GAA>AAA   | p.E1041K  |
| Pat_54 | Pre-Treatment | GPR35     | 2859   | 37 | 2  | 241569971 | 241569971 | Missense_Mutation | SNP | G | A | 13  | 13  | c.602G>A   | c.(601-603)AGG>AAG     | p.R201K   |
| Pat_54 | Pre-Treatment | FRG1B     | 284802 | 37 | 20 | 29628236  | 29628236  | Missense_Mutation | SNP | G | C | 14  | 549 | c.148G>C   | c.(148-150)GCT>CCT     | p.A50P    |
| Pat_54 | Pre-Treatment | DNMT3B    | 1789   | 37 | 20 | 31387093  | 31387093  | Missense_Mutation | SNP | G | A | 4   | 41  | c.1718G>A  | c.(1717-1719)CGG>CAG   | p.R573Q   |
| Pat_54 | Pre-Treatment | EPB41L1   | 2036   | 37 | 20 | 34763552  | 34763552  | Missense_Mutation | SNP | C | T | 43  | 52  | c.257C>T   | c.(256-258)TCG>TTG     | p.S86L    |
| Pat_54 | Pre-Treatment | C20orf132 | 140699 | 37 | 20 | 35749373  | 35749373  | Missense_Mutation | SNP | C | T | 17  | 37  | c.2073G>A  | c.(2071-2073)ATG>ATA   | p.M691I   |
| Pat_54 | Pre-Treatment | NCOA3     | 8202   | 37 | 20 | 46256364  | 46256364  | Missense_Mutation | SNP | C | T | 100 | 140 | c.592C>T   | c.(592-594)CGT>TGT     | p.R198C   |
| Pat_54 | Pre-Treatment | LAMA5     | 3911   | 37 | 20 | 60887493  | 60887493  | Missense_Mutation | SNP | G | A | 3   | 21  | c.9323C>T  | c.(9322-9324)ACG>ATG   | p.T3108M  |
| Pat_54 | Pre-Treatment | TPTE      | 7179   | 37 | 21 | 10914373  | 10914373  | Missense_Mutation | SNP | C | T | 12  | 70  | c.1346G>A  | c.(1345-1347)GGA>GAA   | p.G449E   |
| Pat_54 | Pre-Treatment | NRIP1     | 8204   | 37 | 21 | 16338494  | 16338494  | Missense_Mutation | SNP | G | A | 4   | 76  | c.2020C>T  | c.(2020-2022)CTC>TTC   | p.L674F   |
| Pat_54 | Pre-Treatment | KRTAP24-1 | 643803 | 37 | 21 | 31654844  | 31654844  | Missense_Mutation | SNP | C | A | 6   | 137 | c.407G>T   | c.(406-408)CGA>CTA     | p.R136L   |
| Pat_54 | Pre-Treatment | ERG       | 2078   | 37 | 21 | 39755465  | 39755465  | Missense_Mutation | SNP | G | A | 6   | 33  | c.1321C>T  | c.(1321-1323)CAC>TAC   | p.H441Y   |
| Pat_54 | Pre-Treatment | UBASH3A   | 53347  | 37 | 21 | 43862610  | 43862610  | Missense_Mutation | SNP | T | G | 76  | 81  | c.1535T>G  | c.(1534-1536)TTT>TGT   | p.F512C   |
| Pat_54 | Pre-Treatment | SLC25A18  | 83733  | 37 | 22 | 18072870  | 18072870  | Nonsense_Mutation | SNP | G | A | 21  | 52  | c.816G>A   | c.(814-816)TGG>TGA     | p.W272*   |
| Pat_54 | Pre-Treatment | BCR       | 613    | 37 | 22 | 23524202  | 23524202  | Missense_Mutation | SNP | G | T | 4   | 47  | c.1055G>T  | c.(1054-1056)CGC>CTC   | p.R352L   |
| Pat_54 | Pre-Treatment | MYO18B    | 84700  | 37 | 22 | 26423117  | 26423117  | Missense_Mutation | SNP | G | A | 26  | 31  | c.7177G>A  | c.(7177-7179)GAT>AAT   | p.D2393N  |
| Pat_54 | Pre-Treatment | MYH9      | 4627   | 37 | 22 | 36708162  | 36708162  | Missense_Mutation | SNP | G | A | 48  | 77  | c.1660C>T  | c.(1660-1662)CCC>TCC   | p.P554S   |
| Pat_54 | Pre-Treatment | CACNG2    | 10369  | 37 | 22 | 36962426  | 36962426  | Missense_Mutation | SNP | C | T | 31  | 69  | c.410G>A   | c.(409-411)AGT>AAT     | p.S137N   |
| Pat_54 | Pre-Treatment | TRIOBP    | 11078  | 37 | 22 | 38120833  | 38120833  | Missense_Mutation | SNP | C | T | 66  | 85  | c.2270C>T  | c.(2269-2271)TCC>TTC   | p.S757F   |
| Pat_54 | Pre-Treatment | KDELR3    | 11015  | 37 | 22 | 38878539  | 38878539  | Nonstop_Mutation  | SNP | T | C | 59  | 85  | c.643T>C   | c.(643-645)TGA>CGA     | p.*215R   |
| Pat_54 | Pre-Treatment | ACO2      | 50     | 37 | 22 | 41923423  | 41923423  | Missense_Mutation | SNP | C | A | 26  | 50  | c.2085C>A  | c.(2083-2085)CAC>CAA   | p.H695Q   |
| Pat_54 | Pre-Treatment | TSPO      | 706    | 37 | 22 | 43558971  | 43558971  | Missense_Mutation | SNP | C | T | 2   | 2   | c.203C>T   | c.(202-204)GCG>GTG     | p.A68V    |
| Pat_54 | Pre-Treatment | PNPLA5    | 150379 | 37 | 22 | 44277442  | 44277442  | Missense_Mutation | SNP | T | A | 3   | 10  | c.1195A>T  | c.(1195-1197)ATC>TTC   | p.I399F   |

|        |               |          |        |    |   |           |           |                   |     |   |   |     |     |              |                        |               |
|--------|---------------|----------|--------|----|---|-----------|-----------|-------------------|-----|---|---|-----|-----|--------------|------------------------|---------------|
| Pat_54 | Pre-Treatment | ZNF385D  | 79750  | 37 | 3 | 21552450  | 21552450  | Missense_Mutation | SNP | C | T | 36  | 55  | c.342G>A     | c.(340-342)ATG>ATA     | p.M114I       |
| Pat_54 | Pre-Treatment | XIRP1    | 165904 | 37 | 3 | 39230164  | 39230164  | Missense_Mutation | SNP | C | T | 4   | 84  | c.773G>A     | c.(772-774)CGG>CAG     | p.R258Q       |
| Pat_54 | Pre-Treatment | AMT      | 275    | 37 | 3 | 49456545  | 49456545  | Missense_Mutation | SNP | C | G | 3   | 32  | c.736G>C     | c.(736-738)GCT>CCT     | p.A246P       |
| Pat_54 | Pre-Treatment | GRM2     | 2912   | 37 | 3 | 51743354  | 51743354  | Missense_Mutation | SNP | C | T | 24  | 23  | c.355C>T     | c.(355-357)CAC>TAC     | p.H119Y       |
| Pat_54 | Pre-Treatment | DNAH1    | 25981  | 37 | 3 | 52415658  | 52415658  | Missense_Mutation | SNP | G | A | 8   | 4   | c.7611G>A    | c.(7609-7611)ATG>ATA   | p.M2537I      |
| Pat_54 | Pre-Treatment | IL17RD   | 54756  | 37 | 3 | 57143616  | 57143616  | Missense_Mutation | SNP | G | A | 50  | 86  | c.499C>T     | c.(499-501)CCT>TCT     | p.P167S       |
| Pat_54 | Pre-Treatment | FLNB     | 2317   | 37 | 3 | 58109342  | 58109342  | Missense_Mutation | SNP | C | T | 53  | 67  | c.3649C>T    | c.(3649-3651)CCC>TCC   | p.P1217S      |
| Pat_54 | Pre-Treatment | MAG11    | 9223   | 37 | 3 | 65456160  | 65456160  | Splice_Site       | SNP | C | G | 5   | 58  | c.758_splice | c.e5-1                 | p.A253_splice |
| Pat_54 | Pre-Treatment | CCDC80   | 151887 | 37 | 3 | 112358233 | 112358233 | Missense_Mutation | SNP | C | T | 4   | 53  | c.520G>A     | c.(520-522)GAT>AAT     | p.D174N       |
| Pat_54 | Pre-Treatment | PLS1     | 5357   | 37 | 3 | 142389898 | 142389898 | Missense_Mutation | SNP | G | A | 120 | 166 | c.298G>A     | c.(298-300)GAA>AAA     | p.E100K       |
| Pat_54 | Pre-Treatment | GK2      | 2712   | 37 | 4 | 80329072  | 80329072  | Missense_Mutation | SNP | C | T | 79  | 124 | c.283G>A     | c.(283-285)GAA>AAA     | p.E95K        |
| Pat_54 | Pre-Treatment | HERC6    | 55008  | 37 | 4 | 89311882  | 89311882  | Missense_Mutation | SNP | C | T | 4   | 39  | c.515C>T     | c.(514-516)CCG>CTG     | p.P172L       |
| Pat_54 | Pre-Treatment | MMRN1    | 22915  | 37 | 4 | 90816651  | 90816651  | Nonsense_Mutation | SNP | C | T | 44  | 45  | c.529C>T     | c.(529-531)CGA>TGA     | p.R177*       |
| Pat_54 | Pre-Treatment | FABP2    | 2169   | 37 | 4 | 120241839 | 120241839 | Missense_Mutation | SNP | C | T | 48  | 89  | c.226G>A     | c.(226-228)GGA>AGA     | p.G76R        |
| Pat_54 | Pre-Treatment | FAT4     | 79633  | 37 | 4 | 126237652 | 126237652 | Missense_Mutation | SNP | G | T | 6   | 130 | c.86G>T      | c.(85-87)TGG>TTG       | p.W29L        |
| Pat_54 | Pre-Treatment | GRIA2    | 2891   | 37 | 4 | 158281253 | 158281253 | Missense_Mutation | SNP | C | T | 64  | 75  | c.2249C>T    | c.(2248-2250)TCC>TTC   | p.S750F       |
| Pat_54 | Pre-Treatment | C4orf45  | 152940 | 37 | 4 | 159836407 | 159836407 | Missense_Mutation | SNP | C | A | 4   | 39  | c.461G>T     | c.(460-462)TGG>TTG     | p.W154L       |
| Pat_54 | Pre-Treatment | MTNR1A   | 4543   | 37 | 4 | 187454897 | 187454897 | Nonsense_Mutation | SNP | C | T | 70  | 66  | c.999G>A     | c.(997-999)TGG>TGA     | p.W333*       |
| Pat_54 | Pre-Treatment | FRG1     | 2483   | 37 | 4 | 190878596 | 190878596 | Missense_Mutation | SNP | G | A | 8   | 225 | c.476G>A     | c.(475-477)TGC>TAC     | p.C159Y       |
| Pat_54 | Pre-Treatment | TUBB4Q   | 56604  | 37 | 4 | 190904535 | 190904535 | Missense_Mutation | SNP | G | A | 22  | 4   | c.445C>T     | c.(445-447)CTT>TTT     | p.L149F       |
| Pat_54 | Pre-Treatment | DNAH5    | 1767   | 37 | 5 | 13883031  | 13883031  | Missense_Mutation | SNP | G | T | 4   | 63  | c.3156C>A    | c.(3154-3156)AGC>AGA   | p.S1052R      |
| Pat_54 | Pre-Treatment | SLC45A2  | 51151  | 37 | 5 | 33984420  | 33984420  | Missense_Mutation | SNP | G | A | 3   | 14  | c.269C>T     | c.(268-270)TCG>TTG     | p.S90L        |
| Pat_54 | Pre-Treatment | PARP8    | 79668  | 37 | 5 | 50092850  | 50092850  | Missense_Mutation | SNP | G | A | 4   | 68  | c.1463G>A    | c.(1462-1464)CGT>CAT   | p.R488H       |
| Pat_54 | Pre-Treatment | SNX18    | 112574 | 37 | 5 | 53815031  | 53815031  | Missense_Mutation | SNP | G | A | 4   | 33  | c.1249G>A    | c.(1249-1251)GCT>ACT   | p.A417T       |
| Pat_54 | Pre-Treatment | PCSK1    | 5122   | 37 | 5 | 95728961  | 95728961  | Missense_Mutation | SNP | C | T | 46  | 16  | c.2006G>A    | c.(2005-2007)CGA>CAA   | p.R669Q       |
| Pat_54 | Pre-Treatment | SHROOM1  | 134549 | 37 | 5 | 132159156 | 132159156 | Missense_Mutation | SNP | C | G | 2   | 4   | c.2012G>C    | c.(2011-2013)CGG>CCG   | p.R671P       |
| Pat_54 | Pre-Treatment | KLHL3    | 26249  | 37 | 5 | 136961519 | 136961519 | Missense_Mutation | SNP | G | A | 4   | 80  | c.1658C>T    | c.(1657-1659)TCG>TTG   | p.S553L       |
| Pat_54 | Pre-Treatment | NRG2     | 9542   | 37 | 5 | 139228173 | 139228173 | Missense_Mutation | SNP | C | T | 2   | 0   | c.1882G>A    | c.(1882-1884)GCC>ACC   | p.A628T       |
| Pat_54 | Pre-Treatment | JAKMIP2  | 9832   | 37 | 5 | 147051353 | 147051353 | Missense_Mutation | SNP | C | T | 19  | 9   | c.17G>A      | c.(16-18)CGA>CAA       | p.R6Q         |
| Pat_54 | Pre-Treatment | C5orf40  | 408263 | 37 | 5 | 156769905 | 156769905 | Missense_Mutation | SNP | C | A | 4   | 32  | c.640G>T     | c.(640-642)GAC>TAC     | p.D214Y       |
| Pat_54 | Pre-Treatment | STK10    | 6793   | 37 | 5 | 171520724 | 171520724 | Missense_Mutation | SNP | C | T | 3   | 26  | c.1246G>A    | c.(1246-1248)GTG>ATG   | p.V416M       |
| Pat_54 | Pre-Treatment | UIMC1    | 51720  | 37 | 5 | 176334117 | 176334117 | Missense_Mutation | SNP | G | A | 25  | 17  | c.1910C>T    | c.(1909-1911)TCA>TTA   | p.S637L       |
| Pat_54 | Pre-Treatment | SLC34A1  | 6569   | 37 | 5 | 176825036 | 176825036 | Missense_Mutation | SNP | C | T | 4   | 89  | c.1669C>T    | c.(1669-1671)CTC>TTC   | p.L557F       |
| Pat_54 | Pre-Treatment | FARS2    | 10667  | 37 | 6 | 5771589   | 5771589   | Missense_Mutation | SNP | G | A | 25  | 64  | c.1283G>A    | c.(1282-1284)AGA>AAA   | p.R428K       |
| Pat_54 | Pre-Treatment | TRIM15   | 89870  | 37 | 6 | 30139833  | 30139833  | Missense_Mutation | SNP | G | A | 2   | 3   | c.1105G>A    | c.(1105-1107)GGG>AGG   | p.G369R       |
| Pat_54 | Pre-Treatment | MICB     | 4277   | 37 | 6 | 31473468  | 31473468  | Missense_Mutation | SNP | G | A | 29  | 38  | c.145G>A     | c.(145-147)GGA>AGA     | p.G49R        |
| Pat_54 | Pre-Treatment | LYPLA2P1 | 653639 | 37 | 6 | 33333333  | 33333333  | Missense_Mutation | SNP | G | A | 6   | 17  | c.673C>T     | c.(673-675)CCT>TCT     | p.P225S       |
| Pat_54 | Pre-Treatment | DNAH8    | 1769   | 37 | 6 | 38905839  | 38905839  | Missense_Mutation | SNP | G | A | 4   | 67  | c.11002G>A   | c.(11002-11004)GCA>ACA | p.A3668T      |
| Pat_54 | Pre-Treatment | GPR115   | 221393 | 37 | 6 | 47682606  | 47682606  | Missense_Mutation | SNP | G | A | 100 | 101 | c.1625G>A    | c.(1624-1626)GGC>GAC   | p.G542D       |
| Pat_54 | Pre-Treatment | COL12A1  | 1303   | 37 | 6 | 75829185  | 75829185  | Missense_Mutation | SNP | G | A | 58  | 20  | c.7091C>T    | c.(7090-7092)TCA>TTA   | p.S2364L      |
| Pat_54 | Pre-Treatment | FABP7    | 2173   | 37 | 6 | 123102265 | 123102265 | Missense_Mutation | SNP | C | A | 4   | 87  | c.274C>A     | c.(274-276)CTT>ATT     | p.L92I        |
| Pat_54 | Pre-Treatment | MAP7     | 9053   | 37 | 6 | 136682273 | 136682273 | Missense_Mutation | SNP | G | A | 3   | 35  | c.1571C>T    | c.(1570-1572)ACG>ATG   | p.T524M       |
| Pat_54 | Pre-Treatment | ADAT2    | 134637 | 37 | 6 | 143759801 | 143759801 | Missense_Mutation | SNP | G | A | 94  | 34  | c.127C>T     | c.(127-129)CCT>TCT     | p.P43S        |
| Pat_54 | Pre-Treatment | GRM1     | 2911   | 37 | 6 | 146720715 | 146720715 | Missense_Mutation | SNP | G | A | 4   | 39  | c.2540G>A    | c.(2539-2541)CGC>CAC   | p.R847H       |
| Pat_54 | Pre-Treatment | IGF2R    | 3482   | 37 | 6 | 160461747 | 160461747 | Missense_Mutation | SNP | C | T | 4   | 93  | c.1471C>T    | c.(1471-1473)CGC>TGC   | p.R491C       |
| Pat_54 | Pre-Treatment | MLLT4    | 4301   | 37 | 6 | 168316019 | 168316019 | Missense_Mutation | SNP | C | T | 3   | 28  | c.2447C>T    | c.(2446-2448)GCG>GTG   | p.A816V       |
| Pat_54 | Pre-Treatment | DGKB     | 1607   | 37 | 7 | 14647077  | 14647077  | Missense_Mutation | SNP | C | T | 69  | 62  | c.1418G>A    | c.(1417-1419)GGA>GAA   | p.G473E       |

|        |               |           |        |    |   |           |           |                   |     |    |    |     |     |                |                      |          |
|--------|---------------|-----------|--------|----|---|-----------|-----------|-------------------|-----|----|----|-----|-----|----------------|----------------------|----------|
| Pat_54 | Pre-Treatment | UPP1      | 7378   | 37 | 7 | 48139293  | 48139293  | Missense_Mutation | SNP | C  | T  | 76  | 83  | c.71C>T        | c.(70-72)CCA>CTA     | p.P24L   |
| Pat_54 | Pre-Treatment | ABCA13    | 154664 | 37 | 7 | 48314172  | 48314172  | Missense_Mutation | SNP | G  | A  | 99  | 82  | c.4909G>A      | c.(4909-4911)GAT>AAT | p.D1637N |
| Pat_54 | Pre-Treatment | HGF       | 3082   | 37 | 7 | 81372774  | 81372774  | Missense_Mutation | SNP | C  | T  | 27  | 39  | c.760G>A       | c.(760-762)GGC>AGC   | p.G254S  |
| Pat_54 | Pre-Treatment | CUX1      | 1523   | 37 | 7 | 101882615 | 101882615 | Missense_Mutation | SNP | G  | A  | 4   | 46  | c.3638G>A      | c.(3637-3639)CGG>CAG | p.R1213Q |
| Pat_54 | Pre-Treatment | PPP1R3A   | 5506   | 37 | 7 | 113518778 | 113518778 | Missense_Mutation | SNP | C  | T  | 28  | 31  | c.2369G>A      | c.(2368-2370)CGA>CAA | p.R790Q  |
| Pat_54 | Pre-Treatment | KCND2     | 3751   | 37 | 7 | 119915104 | 119915104 | Missense_Mutation | SNP | C  | T  | 44  | 51  | c.418C>T       | c.(418-420)CGC>TGC   | p.R140C  |
| Pat_54 | Pre-Treatment | C7orf58   | 79974  | 37 | 7 | 120911459 | 120911459 | Missense_Mutation | SNP | G  | A  | 93  | 127 | c.2843G>A      | c.(2842-2844)GGG>GAG | p.G948E  |
| Pat_54 | Pre-Treatment | BRAF      | 673    | 37 | 7 | 140453136 | 140453136 | Missense_Mutation | SNP | A  | T  | 79  | 97  | c.1799T>A      | c.(1798-1800)GTG>GAG | p.V600E  |
| Pat_54 | Pre-Treatment | PRSS37    | 136242 | 37 | 7 | 141536292 | 141536292 | Missense_Mutation | SNP | C  | T  | 39  | 43  | c.611G>A       | c.(610-612)GGA>GAA   | p.G204E  |
| Pat_54 | Pre-Treatment | OR9A2     | 135924 | 37 | 7 | 142724121 | 142724121 | Missense_Mutation | SNP | G  | C  | 31  | 36  | c.99C>G        | c.(97-99)TTC>TTG     | p.F33L   |
| Pat_54 | Pre-Treatment | OR2F2     | 135948 | 37 | 7 | 143633062 | 143633062 | Missense_Mutation | SNP | C  | T  | 4   | 93  | c.737C>T       | c.(736-738)ACG>ATG   | p.T246M  |
| Pat_54 | Pre-Treatment | TNFRSF10D | 8793   | 37 | 8 | 23012464  | 23012464  | Missense_Mutation | SNP | C  | T  | 10  | 23  | c.179G>A       | c.(178-180)CGG>CAG   | p.R60Q   |
| Pat_54 | Pre-Treatment | LOXL2     | 4017   | 37 | 8 | 23191094  | 23191095  | Missense_Mutation | DNP | GG | TA | 27  | 22  | c.785_786CC>TA | c.(784-786)TCC>TTA   | p.S262L  |
| Pat_54 | Pre-Treatment | PURG      | 29942  | 37 | 8 | 30889547  | 30889547  | Missense_Mutation | SNP | C  | T  | 5   | 89  | c.752G>A       | c.(751-753)CGA>CAA   | p.R251Q  |
| Pat_54 | Pre-Treatment | PMP2      | 5375   | 37 | 8 | 82357090  | 82357090  | Missense_Mutation | SNP | C  | T  | 184 | 91  | c.208G>A       | c.(208-210)GAA>AAA   | p.E70K   |
| Pat_54 | Pre-Treatment | CA1       | 759    | 37 | 8 | 86240815  | 86240815  | Missense_Mutation | SNP | C  | T  | 310 | 131 | c.760G>A       | c.(760-762)GGC>AGC   | p.G254S  |
| Pat_54 | Pre-Treatment | CDH17     | 1015   | 37 | 8 | 95164286  | 95164286  | Missense_Mutation | SNP | G  | A  | 37  | 151 | c.1606C>T      | c.(1606-1608)CCT>TCT | p.P536S  |
| Pat_54 | Pre-Treatment | MTERFD1   | 51001  | 37 | 8 | 97258585  | 97258585  | Missense_Mutation | SNP | C  | T  | 110 | 70  | c.775G>A       | c.(775-777)GAT>AAT   | p.D259N  |
| Pat_54 | Pre-Treatment | TRPS1     | 7227   | 37 | 8 | 116632264 | 116632264 | Missense_Mutation | SNP | G  | A  | 53  | 125 | c.22C>T        | c.(22-24)CCT>TCT     | p.P8S    |
| Pat_54 | Pre-Treatment | DEPDC6    | 64798  | 37 | 8 | 121019091 | 121019091 | Missense_Mutation | SNP | C  | T  | 133 | 61  | c.973C>T       | c.(973-975)CCG>TCG   | p.P325S  |
| Pat_54 | Pre-Treatment | NFKBIL2   | 4796   | 37 | 8 | 145661076 | 145661076 | Missense_Mutation | SNP | G  | A  | 4   | 76  | c.2740C>T      | c.(2740-2742)CC>TCC  | p.P914S  |
| Pat_54 | Pre-Treatment | SLC1A1    | 6505   | 37 | 9 | 4572341   | 4572341   | Missense_Mutation | SNP | C  | G  | 329 | 46  | c.720C>G       | c.(718-720)TTC>TTG   | p.F240L  |
| Pat_54 | Pre-Treatment | RANBP6    | 26953  | 37 | 9 | 6012658   | 6012658   | Missense_Mutation | SNP | T  | G  | 3   | 20  | c.2950A>C      | c.(2950-2952)ATA>CTA | p.I984L  |
| Pat_54 | Pre-Treatment | CER1      | 9350   | 37 | 9 | 14722348  | 14722348  | Missense_Mutation | SNP | C  | T  | 31  | 5   | c.323G>A       | c.(322-324)GGG>GAG   | p.G108E  |
| Pat_54 | Pre-Treatment | TAF1L     | 138474 | 37 | 9 | 32631815  | 32631815  | Missense_Mutation | SNP | G  | A  | 3   | 39  | c.3763C>T      | c.(3763-3765)CGG>TGG | p.R1255W |
| Pat_54 | Pre-Treatment | PIGO      | 84720  | 37 | 9 | 35090224  | 35090224  | Missense_Mutation | SNP | G  | A  | 4   | 82  | c.2908C>T      | c.(2908-2910)CGG>TGG | p.R970W  |
| Pat_54 | Pre-Treatment | LOC286238 | 286238 | 37 | 9 | 91262333  | 91262333  | Missense_Mutation | SNP | C  | T  | 14  | 13  | c.310G>A       | c.(310-312)GAA>AAA   | p.E104K  |
| Pat_54 | Pre-Treatment | ROR2      | 4920   | 37 | 9 | 94486974  | 94486974  | Missense_Mutation | SNP | G  | A  | 3   | 29  | c.1802C>T      | c.(1801-1803)GCG>GTG | p.A601V  |
| Pat_54 | Pre-Treatment | OR13C3    | 138803 | 37 | 9 | 107298641 | 107298641 | Missense_Mutation | SNP | G  | A  | 119 | 160 | c.454C>T       | c.(454-456)CGT>TGT   | p.R152C  |
| Pat_54 | Pre-Treatment | UCK1      | 83549  | 37 | 9 | 134404363 | 134404363 | Missense_Mutation | SNP | C  | T  | 4   | 77  | c.571G>A       | c.(571-573)GTG>ATG   | p.V191M  |
| Pat_54 | Pre-Treatment | PNPLA7    | 375775 | 37 | 9 | 140356758 | 140356758 | Missense_Mutation | SNP | G  | A  | 5   | 128 | c.3443C>T      | c.(3442-3444)ACG>ATG | p.T1148M |
| Pat_54 | Pre-Treatment | ARSF      | 416    | 37 | X | 3030250   | 3030250   | Missense_Mutation | SNP | G  | A  | 30  | 46  | c.1426G>A      | c.(1426-1428)GTA>ATA | p.V476I  |
| Pat_54 | Pre-Treatment | MXRA5     | 25878  | 37 | X | 3228497   | 3228497   | Missense_Mutation | SNP | C  | T  | 3   | 5   | c.7747G>A      | c.(7747-7749)GAT>AAT | p.D2583N |
| Pat_54 | Pre-Treatment | DDX53     | 168400 | 37 | X | 23018769  | 23018769  | Missense_Mutation | SNP | G  | A  | 87  | 109 | c.595G>A       | c.(595-597)GAA>AAA   | p.E199K  |
| Pat_54 | Pre-Treatment | MAGEB1    | 4112   | 37 | X | 30269335  | 30269335  | Missense_Mutation | SNP | G  | A  | 4   | 63  | c.725G>A       | c.(724-726)CGT>CAT   | p.R242H  |
| Pat_54 | Pre-Treatment | HUWE1     | 10075  | 37 | X | 53577633  | 53577633  | Missense_Mutation | SNP | T  | C  | 39  | 70  | c.9482A>G      | c.(9481-9483)CAT>CGT | p.H3161R |
| Pat_54 | Pre-Treatment | WNK3      | 65267  | 37 | X | 54275818  | 54275818  | Missense_Mutation | SNP | G  | A  | 4   | 96  | c.2963C>T      | c.(2962-2964)CCA>CTA | p.P988L  |
| Pat_54 | Pre-Treatment | ZDHHC15   | 158866 | 37 | X | 74648947  | 74648947  | Missense_Mutation | SNP | G  | A  | 64  | 58  | c.569C>T       | c.(568-570)ACG>ATG   | p.T190M  |
| Pat_54 | Pre-Treatment | ESX1      | 80712  | 37 | X | 103495237 | 103495237 | Missense_Mutation | SNP | G  | A  | 9   | 6   | c.893C>T       | c.(892-894)CCG>CTG   | p.P298L  |
| Pat_54 | Pre-Treatment | LRCH2     | 57631  | 37 | X | 114418999 | 114418999 | Missense_Mutation | SNP | C  | T  | 24  | 33  | c.596G>A       | c.(595-597)GGG>GAG   | p.G199E  |
| Pat_54 | Pre-Treatment | DOCK11    | 139818 | 37 | X | 117758535 | 117758535 | Missense_Mutation | SNP | C  | T  | 226 | 452 | c.3505C>T      | c.(3505-3507)CCC>TCC | p.P1169S |
| Pat_54 | Pre-Treatment | CT47B1    | 643311 | 37 | X | 120007788 | 120007788 | Missense_Mutation | SNP | C  | T  | 311 | 475 | c.862G>A       | c.(862-864)GAT>AAT   | p.D288N  |
| Pat_54 | Pre-Treatment | STAG2     | 10735  | 37 | X | 123181208 | 123181208 | Missense_Mutation | SNP | G  | A  | 78  | 102 | c.672G>A       | c.(670-672)ATG>ATA   | p.M224I  |
| Pat_54 | Pre-Treatment | CD99L2    | 83692  | 37 | X | 149983391 | 149983391 | Missense_Mutation | SNP | G  | A  | 165 | 299 | c.221C>T       | c.(220-222)GCT>GTT   | p.A74V   |
| Pat_54 | Pre-Treatment | PLXNA3    | 55558  | 37 | X | 153694839 | 153694839 | Missense_Mutation | SNP | G  | A  | 21  | 27  | c.2920G>A      | c.(2920-2922)GAG>AAG | p.E974K  |
| Pat_55 | Pre-Treatment | TESK2     | 10420  | 37 | 1 | 45810777  | 45810777  | Missense_Mutation | SNP | G  | T  | 48  | 93  | c.1451C>A      | c.(1450-1452)CCA>CAA | p.P484Q  |
| Pat_55 | Pre-Treatment | LPHN2     | 23266  | 37 | 1 | 82408887  | 82408887  | Missense_Mutation | SNP | G  | A  | 30  | 39  | c.632G>A       | c.(631-633)GGA>GAA   | p.G211E  |

|        |               |          |        |    |    |           |           |                   |     |    |    |    |     |                |                        |          |
|--------|---------------|----------|--------|----|----|-----------|-----------|-------------------|-----|----|----|----|-----|----------------|------------------------|----------|
| Pat_55 | Pre-Treatment | PKN2     | 5586   | 37 | 1  | 89298971  | 89298971  | Missense_Mutation | SNP | C  | A  | 24 | 31  | c.2795C>A      | c.(2794-2796)CCA>CAA   | p.P932Q  |
| Pat_55 | Pre-Treatment | TBX15    | 6913   | 37 | 1  | 119427953 | 119427953 | Missense_Mutation | SNP | C  | T  | 22 | 12  | c.893G>A       | c.(892-894)CGA>CAA     | p.R298Q  |
| Pat_55 | Pre-Treatment | ITGA10   | 8515   | 37 | 1  | 145533490 | 145533490 | Missense_Mutation | SNP | G  | A  | 10 | 22  | c.1373G>A      | c.(1372-1374)GGA>GAA   | p.G458E  |
| Pat_55 | Pre-Treatment | TCHHL1   | 126637 | 37 | 1  | 152058489 | 152058489 | Missense_Mutation | SNP | C  | T  | 21 | 35  | c.1669G>A      | c.(1669-1671)GAA>AAA   | p.E557K  |
| Pat_55 | Pre-Treatment | RGS16    | 6004   | 37 | 1  | 182571247 | 182571247 | Missense_Mutation | SNP | C  | G  | 26 | 186 | c.241G>C       | c.(241-243)GCT>CCT     | p.A81P   |
| Pat_55 | Pre-Treatment | LAMC1    | 3915   | 37 | 1  | 183095388 | 183095389 | Missense_Mutation | DNP | GG | AA | 40 | 74  | .2935_2936GG>A | c.(2935-2937)GGC>AAC   | p.G979N  |
| Pat_55 | Pre-Treatment | AKT3     | 10000  | 37 | 1  | 243859016 | 243859016 | Missense_Mutation | SNP | C  | T  | 5  | 7   | c.49G>A        | c.(49-51)GAA>AAA       | p.E17K   |
| Pat_55 | Pre-Treatment | ABCC2    | 1244   | 37 | 10 | 101591417 | 101591417 | Missense_Mutation | SNP | C  | T  | 30 | 66  | c.2933C>T      | c.(2932-2934)TCG>TTG   | p.S978L  |
| Pat_55 | Pre-Treatment | MMP26    | 56547  | 37 | 11 | 5010966   | 5010967   | Missense_Mutation | DNP | GG | AA | 6  | 24  | c.188_189GG>AA | c.(187-189)CGG>CAA     | p.R63Q   |
| Pat_55 | Pre-Treatment | LPXN     | 9404   | 37 | 11 | 58295144  | 58295144  | Missense_Mutation | SNP | G  | A  | 11 | 17  | c.944C>T       | c.(943-945)CCA>CTA     | p.P315L  |
| Pat_55 | Pre-Treatment | CCDC91   | 55297  | 37 | 12 | 28544279  | 28544279  | Missense_Mutation | SNP | G  | A  | 16 | 35  | c.697G>A       | c.(697-699)GAA>AAA     | p.E233K  |
| Pat_55 | Pre-Treatment | SLC24A6  | 80024  | 37 | 12 | 113745599 | 113745600 | Missense_Mutation | DNP | GG | AA | 29 | 8   | .1307_1308CC>T | c.(1306-1308)GCC>GTT   | p.A436V  |
| Pat_55 | Pre-Treatment | ATP12A   | 479    | 37 | 13 | 25272803  | 25272803  | Missense_Mutation | SNP | T  | C  | 3  | 22  | c.1520T>C      | c.(1519-1521)ATC>ACC   | p.I507T  |
| Pat_55 | Pre-Treatment | OR4K13   | 390433 | 37 | 14 | 20502407  | 20502407  | Missense_Mutation | SNP | G  | A  | 25 | 34  | c.511C>T       | c.(511-513)CCC>TCC     | p.P171S  |
| Pat_55 | Pre-Treatment | SLC8A3   | 6547   | 37 | 14 | 70634811  | 70634811  | Missense_Mutation | SNP | C  | T  | 10 | 10  | c.329G>A       | c.(328-330)AGG>AAG     | p.R110K  |
| Pat_55 | Pre-Treatment | SIPA1L1  | 26037  | 37 | 14 | 72200448  | 72200448  | Missense_Mutation | SNP | G  | A  | 20 | 40  | c.4990G>A      | c.(4990-4992)GAC>AAC   | p.D1664N |
| Pat_55 | Pre-Treatment | AQR      | 9716   | 37 | 15 | 35252991  | 35252991  | Missense_Mutation | SNP | C  | T  | 4  | 4   | c.157G>A       | c.(157-159)GAG>AAG     | p.E53K   |
| Pat_55 | Pre-Treatment | CGNL1    | 84952  | 37 | 15 | 57820877  | 57820877  | Missense_Mutation | SNP | G  | A  | 53 | 75  | c.3065G>A      | c.(3064-3066)CGG>CAG   | p.R1022Q |
| Pat_55 | Pre-Treatment | ST8SIA2  | 8128   | 37 | 15 | 92977587  | 92977587  | Missense_Mutation | SNP | C  | T  | 14 | 42  | c.272C>T       | c.(271-273)ACG>ATG     | p.T91M   |
| Pat_55 | Pre-Treatment | ADCY9    | 115    | 37 | 16 | 4016579   | 4016579   | Missense_Mutation | SNP | C  | T  | 38 | 77  | c.3259G>A      | c.(3259-3261)GAG>AAG   | p.E1087K |
| Pat_55 | Pre-Treatment | RRN3     | 54700  | 37 | 16 | 15179515  | 15179515  | Missense_Mutation | SNP | A  | T  | 6  | 10  | c.513T>A       | c.(511-513)GAT>GAA     | p.D171E  |
| Pat_55 | Pre-Treatment | ADAMTS18 | 170692 | 37 | 16 | 77398138  | 77398138  | Missense_Mutation | SNP | C  | T  | 37 | 73  | c.919G>A       | c.(919-921)GAA>AAA     | p.E307K  |
| Pat_55 | Pre-Treatment | LRRC50   | 123872 | 37 | 16 | 84203783  | 84203783  | Missense_Mutation | SNP | C  | T  | 18 | 28  | c.1349C>T      | c.(1348-1350)CCG>CTG   | p.P450L  |
| Pat_55 | Pre-Treatment | CHD3     | 1107   | 37 | 17 | 7797762   | 7797762   | Missense_Mutation | SNP | G  | A  | 47 | 63  | c.1105G>A      | c.(1105-1107)GAG>AAG   | p.E369K  |
| Pat_55 | Pre-Treatment | CCT6B    | 10693  | 37 | 17 | 33267624  | 33267624  | Missense_Mutation | SNP | G  | A  | 6  | 22  | c.902C>T       | c.(901-903)TCC>TTC     | p.S301F  |
| Pat_55 | Pre-Treatment | ACACA    | 31     | 37 | 17 | 35479508  | 35479508  | Missense_Mutation | SNP | C  | T  | 51 | 105 | c.5972G>A      | c.(5971-5973)CGA>CAA   | p.R1991Q |
| Pat_55 | Pre-Treatment | CD300LG  | 146894 | 37 | 17 | 41930295  | 41930295  | Missense_Mutation | SNP | C  | T  | 32 | 90  | c.395C>T       | c.(394-396)CCC>CTC     | p.P132L  |
| Pat_55 | Pre-Treatment | KIAA1328 | 57536  | 37 | 18 | 34802008  | 34802008  | Nonsense_Mutation | SNP | C  | T  | 4  | 17  | c.1552C>T      | c.(1552-1554)CAG>TAG   | p.Q518*  |
| Pat_55 | Pre-Treatment | ZNF799   | 90576  | 37 | 19 | 12501446  | 12501446  | Missense_Mutation | SNP | T  | C  | 4  | 30  | c.1766A>G      | c.(1765-1767)GAA>GGA   | p.E589G  |
| Pat_55 | Pre-Treatment | OR7A10   | 390892 | 37 | 19 | 14952652  | 14952652  | Missense_Mutation | SNP | A  | G  | 4  | 52  | c.38T>C        | c.(37-39)CTT>CCT       | p.L13P   |
| Pat_55 | Pre-Treatment | ZNF626   | 199777 | 37 | 19 | 20808090  | 20808090  | Missense_Mutation | SNP | C  | T  | 4  | 48  | c.593G>A       | c.(592-594)GGG>GAG     | p.G198E  |
| Pat_55 | Pre-Treatment | ZNF91    | 7644   | 37 | 19 | 23544867  | 23544867  | Missense_Mutation | SNP | T  | C  | 5  | 122 | c.914A>G       | c.(913-915)CAT>CGT     | p.H305R  |
| Pat_55 | Pre-Treatment | RYR1     | 6261   | 37 | 19 | 39018357  | 39018357  | Missense_Mutation | SNP | C  | T  | 14 | 14  | c.10757C>T     | c.(10756-10758)GCC>GTC | p.A3586V |
| Pat_55 | Pre-Treatment | ZNF534   | 147658 | 37 | 19 | 52942507  | 52942507  | Missense_Mutation | SNP | A  | T  | 3  | 16  | c.1833A>T      | c.(1831-1833)AAA>AAT   | p.K611N  |
| Pat_55 | Pre-Treatment | ZNF845   | 91664  | 37 | 19 | 53856702  | 53856702  | Missense_Mutation | SNP | G  | A  | 9  | 127 | c.2774G>A      | c.(2773-2775)CGT>CAT   | p.R925H  |
| Pat_55 | Pre-Treatment | ZNF761   | 388561 | 37 | 19 | 53958318  | 53958318  | Missense_Mutation | SNP | C  | T  | 35 | 60  | c.557C>T       | c.(556-558)ACC>ATC     | p.T186I  |
| Pat_55 | Pre-Treatment | HEATR5B  | 54497  | 37 | 2  | 37283664  | 37283664  | Missense_Mutation | SNP | G  | A  | 21 | 116 | c.2318C>T      | c.(2317-2319)CCC>CTC   | p.P773L  |
| Pat_55 | Pre-Treatment | ZNF638   | 27332  | 37 | 2  | 71577099  | 71577099  | Missense_Mutation | SNP | T  | C  | 15 | 119 | c.1015T>C      | c.(1015-1017)TCG>CCG   | p.S339P  |
| Pat_55 | Pre-Treatment | ZEB2     | 9839   | 37 | 2  | 145157238 | 145157238 | Missense_Mutation | SNP | G  | A  | 28 | 66  | c.1516C>T      | c.(1516-1518)CCT>TCT   | p.P506S  |
| Pat_55 | Pre-Treatment | RQCD1    | 9125   | 37 | 2  | 219449405 | 219449406 | Missense_Mutation | DNP | CC | TT | 82 | 51  | c.391_392CC>TT | c.(391-393)CCC>TTC     | p.P131F  |
| Pat_55 | Pre-Treatment | TGM3     | 7053   | 37 | 20 | 2308804   | 2308804   | Nonsense_Mutation | SNP | C  | T  | 26 | 77  | c.1126C>T      | c.(1126-1128)CGA>TGA   | p.R376*  |
| Pat_55 | Pre-Treatment | LPIN3    | 64900  | 37 | 20 | 39978485  | 39978485  | Missense_Mutation | SNP | C  | T  | 4  | 22  | c.710C>T       | c.(709-711)CCC>CTC     | p.P237L  |
| Pat_55 | Pre-Treatment | XKR3     | 150165 | 37 | 22 | 17265144  | 17265144  | Missense_Mutation | SNP | G  | A  | 7  | 19  | c.745C>T       | c.(745-747)CGT>TGT     | p.R249C  |
| Pat_55 | Pre-Treatment | SCN10A   | 6336   | 37 | 3  | 38760146  | 38760146  | Missense_Mutation | SNP | T  | C  | 36 | 63  | c.3679A>G      | c.(3679-3681)AAT>GAT   | p.N1227D |
| Pat_55 | Pre-Treatment | RRP9     | 9136   | 37 | 3  | 51969478  | 51969478  | Missense_Mutation | SNP | T  | C  | 15 | 31  | c.851A>G       | c.(850-852)GAC>GGC     | p.D284G  |
| Pat_55 | Pre-Treatment | NISCH    | 11188  | 37 | 3  | 52492810  | 52492810  | Missense_Mutation | SNP | C  | T  | 11 | 29  | c.310C>T       | c.(310-312)CCT>TCT     | p.P104S  |
| Pat_55 | Pre-Treatment | SH3BP2   | 6452   | 37 | 4  | 2831570   | 2831570   | Missense_Mutation | SNP | G  | A  | 3  | 72  | c.937G>A       | c.(937-939)GGG>AGG     | p.G313R  |

|        |               |          |           |    |   |           |           |                   |     |    |    |    |     |                 |                         |          |
|--------|---------------|----------|-----------|----|---|-----------|-----------|-------------------|-----|----|----|----|-----|-----------------|-------------------------|----------|
| Pat_55 | Pre-Treatment | LPHN3    | 23284     | 37 | 4 | 62363063  | 62363063  | Missense_Mutation | SNP | C  | T  | 4  | 15  | c.52C>T         | c.(52-54)CAT>TAT        | p.H18Y   |
| Pat_55 | Pre-Treatment | MUC7     | 4589      | 37 | 4 | 71347138  | 71347138  | Missense_Mutation | SNP | C  | T  | 7  | 292 | c.677C>T        | c.(676-678)CCA>CTA      | p.P226L  |
| Pat_55 | Pre-Treatment | MMRN1    | 22915     | 37 | 4 | 90874228  | 90874228  | Missense_Mutation | SNP | C  | T  | 17 | 35  | c.3346C>T       | c.(3346-3348)CCT>TCT    | p.P1116S |
| Pat_55 | Pre-Treatment | DCHS2    | 54798     | 37 | 4 | 155287505 | 155287505 | Missense_Mutation | SNP | G  | A  | 14 | 42  | c.551C>T        | c.(550-552)ACG>ATG      | p.T184M  |
| Pat_55 | Pre-Treatment | TRIML2   | 205860    | 37 | 4 | 189022221 | 189022221 | Missense_Mutation | SNP | C  | T  | 4  | 17  | c.319G>A        | c.(319-321)GAA>AAA      | p.E107K  |
| Pat_55 | Pre-Treatment | MYO10    | 4651      | 37 | 5 | 16763627  | 16763627  | Nonsense_Mutation | SNP | C  | T  | 16 | 139 | c.1457G>A       | c.(1456-1458)TGG>TAG    | p.W486*  |
| Pat_55 | Pre-Treatment | DPYSL3   | 1809      | 37 | 5 | 146785236 | 146785236 | Missense_Mutation | SNP | G  | A  | 95 | 85  | c.748C>T        | c.(748-750)CTC>TTC      | p.L250F  |
| Pat_55 | Pre-Treatment | KPNA5    | 3841      | 37 | 6 | 117043419 | 117043419 | Missense_Mutation | SNP | C  | T  | 16 | 6   | c.887C>T        | c.(886-888)TCT>TTT      | p.S296F  |
| Pat_55 | Pre-Treatment | PLEKHG1  | 57480     | 37 | 6 | 151151742 | 151151742 | Nonsense_Mutation | SNP | C  | T  | 24 | 14  | c.1495C>T       | c.(1495-1497)CAG>TAG    | p.Q499*  |
| Pat_55 | Pre-Treatment | ABCA13   | 154664    | 37 | 7 | 48314892  | 48314892  | Missense_Mutation | SNP | A  | G  | 6  | 36  | c.5629A>G       | c.(5629-5631)AGC>GGC    | p.S1877G |
| Pat_55 | Pre-Treatment | CCDC136  | 64753     | 37 | 7 | 128455933 | 128455933 | Missense_Mutation | SNP | C  | T  | 14 | 8   | c.3311C>T       | c.(3310-3312)TCC>TTC    | p.S1104F |
| Pat_55 | Pre-Treatment | BRAF     | 673       | 37 | 7 | 140453136 | 140453136 | Missense_Mutation | SNP | A  | T  | 34 | 40  | c.1799T>A       | c.(1798-1800)GTG>GAG    | p.V600E  |
| Pat_55 | Pre-Treatment | CNTNAP2  | 26047     | 37 | 7 | 147844762 | 147844762 | Missense_Mutation | SNP | G  | A  | 9  | 45  | c.2734G>A       | c.(2734-2736)GGC>AGC    | p.G912S  |
| Pat_55 | Pre-Treatment | ZNF425   | 155054    | 37 | 7 | 148800760 | 148800760 | Missense_Mutation | SNP | C  | T  | 5  | 13  | c.2203G>A       | c.(2203-2205)GGG>AGG    | p.G735R  |
| Pat_55 | Pre-Treatment | KIF13B   | 23303     | 37 | 8 | 29006228  | 29006229  | Missense_Mutation | DNP | GG | AA | 10 | 34  | c.1678_1679CC>T | c.(1678-1680)CCC>TTC    | p.P560F  |
| Pat_55 | Pre-Treatment | TOX      | 9760      | 37 | 8 | 59750713  | 59750713  | Missense_Mutation | SNP | G  | A  | 28 | 90  | c.851C>T        | c.(850-852)CCA>CTA      | p.P284L  |
| Pat_55 | Pre-Treatment | MPDZ     | 8777      | 37 | 9 | 13223586  | 13223586  | Missense_Mutation | SNP | C  | T  | 18 | 8   | c.517G>A        | c.(517-519)GGC>AGC      | p.G173S  |
| Pat_55 | Pre-Treatment | MAOB     | 4129      | 37 | X | 43637936  | 43637936  | Missense_Mutation | SNP | G  | A  | 6  | 5   | c.1130C>T       | c.(1129-1131)GCT>GTT    | p.A377V  |
| Pat_55 | Pre-Treatment | ZNF81    | 347344    | 37 | X | 47775358  | 47775358  | Missense_Mutation | SNP | G  | A  | 13 | 22  | c.1313G>A       | c.(1312-1314)GGA>GAA    | p.G438E  |
| Pat_55 | Pre-Treatment | HUWE1    | 10075     | 37 | X | 53610865  | 53610866  | Missense_Mutation | DNP | CC | TT | 27 | 45  | c.5172_5173GG>A | c.(170-5175)TTGGCC>TTAA | p.A1725T |
| Pat_55 | Pre-Treatment | HUWE1    | 10075     | 37 | X | 53652192  | 53652192  | Missense_Mutation | SNP | G  | C  | 15 | 90  | c.1517C>G       | c.(1516-1518)GCA>GGA    | p.A506G  |
| Pat_55 | Pre-Treatment | KIAA2022 | 340533    | 37 | X | 73960365  | 73960365  | Missense_Mutation | SNP | C  | T  | 7  | 7   | c.4027G>A       | c.(4027-4029)GAA>AAA    | p.E1343K |
| Pat_55 | Pre-Treatment | POF1B    | 79983     | 37 | X | 84600936  | 84600936  | Missense_Mutation | SNP | C  | T  | 51 | 125 | c.653G>A        | c.(652-654)GGA>GAA      | p.G218E  |
| Pat_55 | Pre-Treatment | COL4A5   | 1287      | 37 | X | 107923946 | 107923946 | Missense_Mutation | SNP | G  | A  | 17 | 19  | c.3980G>A       | c.(3979-3981)GGA>GAA    | p.G1327E |
| Pat_55 | Pre-Treatment | DOCK11   | 139818    | 37 | X | 117695382 | 117695382 | Missense_Mutation | SNP | C  | T  | 19 | 25  | c.595C>T        | c.(595-597)CCT>TCT      | p.P199S  |
| Pat_55 | Pre-Treatment | MAGEC1   | 9947      | 37 | X | 140993455 | 140993455 | Missense_Mutation | SNP | G  | A  | 3  | 66  | c.265G>A        | c.(265-267)GGC>AGC      | p.G89S   |
| Pat_55 | Pre-Treatment | MAGEA10  | 4109      | 37 | X | 151303080 | 151303080 | Missense_Mutation | SNP | T  | C  | 34 | 55  | c.1013A>G       | c.(1012-1014)GAA>GGA    | p.E338G  |
| Pat_60 | Pre-Treatment | MIB2     | 142678    | 37 | 1 | 1560692   | 1560692   | Missense_Mutation | SNP | G  | A  | 2  | 0   | c.922G>A        | c.(922-924)GTG>ATG      | p.V308M  |
| Pat_60 | Pre-Treatment | PLEKHG5  | 57449     | 37 | 1 | 6531685   | 6531685   | Missense_Mutation | SNP | G  | A  | 2  | 1   | c.1312C>T       | c.(1312-1314)CGC>TGC    | p.R438C  |
| Pat_60 | Pre-Treatment | PRDM2    | 7799      | 37 | 1 | 14107382  | 14107382  | Missense_Mutation | SNP | C  | T  | 29 | 111 | c.3092C>T       | c.(3091-3093)CCC>CTC    | p.P1031L |
| Pat_60 | Pre-Treatment | AGMAT    | 79814     | 37 | 1 | 15904220  | 15904220  | Missense_Mutation | SNP | C  | T  | 10 | 35  | c.860G>A        | c.(859-861)GGG>GAG      | p.G287E  |
| Pat_60 | Pre-Treatment | AGMAT    | 79814     | 37 | 1 | 15911204  | 15911204  | Missense_Mutation | SNP | G  | A  | 2  | 2   | c.259C>T        | c.(259-261)CGG>TGG      | p.R87W   |
| Pat_60 | Pre-Treatment | UBR4     | 23352     | 37 | 1 | 19467910  | 19467910  | Missense_Mutation | SNP | G  | A  | 8  | 30  | c.8419C>T       | c.(8419-8421)CCA>TCA    | p.P2807S |
| Pat_60 | Pre-Treatment | LCK      | 3932      | 37 | 1 | 32740638  | 32740638  | Missense_Mutation | SNP | G  | A  | 4  | 82  | c.232G>A        | c.(232-234)GGA>AGA      | p.G78R   |
| Pat_60 | Pre-Treatment | GRIK3    | 2899      | 37 | 1 | 37325557  | 37325557  | Missense_Mutation | SNP | C  | T  | 4  | 40  | c.848G>A        | c.(847-849)CGG>CAG      | p.R283Q  |
| Pat_60 | Pre-Treatment | EIF2B3   | 8891      | 37 | 1 | 45363093  | 45363093  | Missense_Mutation | SNP | G  | A  | 4  | 40  | c.590C>T        | c.(589-591)ACG>ATG      | p.T197M  |
| Pat_60 | Pre-Treatment | MAGOH    | 4116      | 37 | 1 | 53692748  | 53692748  | Missense_Mutation | SNP | A  | G  | 3  | 65  | c.410T>C        | c.(409-411)ATT>ACT      | p.I137T  |
| Pat_60 | Pre-Treatment | INADL    | 10207     | 37 | 1 | 62582843  | 62582843  | Nonsense_Mutation | SNP | C  | T  | 21 | 97  | c.4843C>T       | c.(4843-4845)CGA>TGA    | p.R1615* |
| Pat_60 | Pre-Treatment | KANK4    | 163782    | 37 | 1 | 62740084  | 62740084  | Missense_Mutation | SNP | C  | T  | 3  | 11  | c.692G>A        | c.(691-693)GGA>GAA      | p.G231E  |
| Pat_60 | Pre-Treatment | C1orf146 | 388649    | 37 | 1 | 92710383  | 92710383  | Missense_Mutation | SNP | A  | C  | 33 | 131 | c.377A>C        | c.(376-378)AAT>ACT      | p.N126T  |
| Pat_60 | Pre-Treatment | COL11A1  | 1301      | 37 | 1 | 103470043 | 103470043 | Missense_Mutation | SNP | C  | T  | 14 | 64  | c.1901G>A       | c.(1900-1902)GGA>GAA    | p.G634E  |
| Pat_60 | Pre-Treatment | PRMT6    | 55170     | 37 | 1 | 107599699 | 107599699 | Missense_Mutation | SNP | G  | A  | 3  | 29  | c.362G>A        | c.(361-363)CGG>CAG      | p.R121Q  |
| Pat_60 | Pre-Treatment | C1orf194 | 127003    | 37 | 1 | 109649210 | 109649210 | Missense_Mutation | SNP | C  | T  | 39 | 140 | c.386G>A        | c.(385-387)AGA>AAA      | p.R129K  |
| Pat_60 | Pre-Treatment | SYCP1    | 6847      | 37 | 1 | 115428861 | 115428861 | Missense_Mutation | SNP | C  | T  | 50 | 160 | c.1121C>T       | c.(1120-1122)TCG>TTG    | p.S374L  |
| Pat_60 | Pre-Treatment | PHGDH    | 26227     | 37 | 1 | 120285616 | 120285616 | Missense_Mutation | SNP | C  | T  | 4  | 77  | c.1396C>T       | c.(1396-1398)CTC>TTC    | p.L466F  |
| Pat_60 | Pre-Treatment | NOTCH2NL | 388677    | 37 | 1 | 145290447 | 145290447 | Missense_Mutation | SNP | C  | T  | 21 | 546 | c.653C>T        | c.(652-654)CCT>CTT      | p.P218L  |
| Pat_60 | Pre-Treatment | NBPF10   | 100132406 | 37 | 1 | 145304523 | 145304523 | Missense_Mutation | SNP | C  | T  | 70 | 433 | c.1456C>T       | c.(1456-1458)CAT>TAT    | p.H486Y  |



|        |               |              |        |    |    |           |           |                   |     |    |    |    |     |                |                      |          |
|--------|---------------|--------------|--------|----|----|-----------|-----------|-------------------|-----|----|----|----|-----|----------------|----------------------|----------|
| Pat_60 | Pre-Treatment | RPRD2        | 23248  | 37 | 1  | 150429902 | 150429902 | Missense_Mutation | SNP | C  | T  | 50 | 147 | c.1009C>T      | c.(1009-1011)CCT>TCT | p.P337S  |
| Pat_60 | Pre-Treatment | RFX5         | 5993   | 37 | 1  | 151315846 | 151315846 | Missense_Mutation | SNP | G  | A  | 16 | 41  | c.830C>T       | c.(829-831)GCC>GTC   | p.A277V  |
| Pat_60 | Pre-Treatment | S100A7L2     | 645922 | 37 | 1  | 153410754 | 153410754 | Missense_Mutation | SNP | G  | A  | 15 | 73  | c.85C>T        | c.(85-87)CGC>TGC     | p.R29C   |
| Pat_60 | Pre-Treatment | UBE2Q1       | 55585  | 37 | 1  | 154528003 | 154528003 | Missense_Mutation | SNP | C  | A  | 4  | 71  | c.438G>T       | c.(436-438)TTG>TTT   | p.L146F  |
| Pat_60 | Pre-Treatment | OR10K1       | 391109 | 37 | 1  | 158435891 | 158435891 | Missense_Mutation | SNP | C  | A  | 31 | 176 | c.540C>A       | c.(538-540)GAC>GAA   | p.D180E  |
| Pat_60 | Pre-Treatment | SLAMF7       | 57823  | 37 | 1  | 160722031 | 160722031 | Missense_Mutation | SNP | C  | T  | 3  | 67  | c.929C>T       | c.(928-930)CCG>CTG   | p.P310L  |
| Pat_60 | Pre-Treatment | FMO2         | 2327   | 37 | 1  | 171173088 | 171173088 | Missense_Mutation | SNP | C  | T  | 3  | 63  | c.712C>T       | c.(712-714)CGG>TGG   | p.R238W  |
| Pat_60 | Pre-Treatment | RABGAP1L     | 9910   | 37 | 1  | 174363191 | 174363191 | Missense_Mutation | SNP | C  | T  | 64 | 120 | c.1618C>T      | c.(1618-1620)CCT>TCT | p.P540S  |
| Pat_60 | Pre-Treatment | ZNF648       | 127665 | 37 | 1  | 182026271 | 182026271 | Missense_Mutation | SNP | C  | T  | 2  | 0   | c.875G>A       | c.(874-876)GGC>GAC   | p.G292D  |
| Pat_60 | Pre-Treatment | RGS18        | 64407  | 37 | 1  | 192128444 | 192128444 | Missense_Mutation | SNP | G  | A  | 12 | 62  | c.214G>A       | c.(214-216)GAA>AAA   | p.E72K   |
| Pat_60 | Pre-Treatment | DDX59        | 83479  | 37 | 1  | 200633067 | 200633067 | Missense_Mutation | SNP | G  | A  | 17 | 84  | c.952C>T       | c.(952-954)CGT>TGT   | p.R318C  |
| Pat_60 | Pre-Treatment | CAMSAP1L1    | 23271  | 37 | 1  | 200819038 | 200819038 | Missense_Mutation | SNP | A  | T  | 4  | 61  | c.3174A>T      | c.(3172-3174)AAA>AAT | p.K1058N |
| Pat_60 | Pre-Treatment | LGR6         | 59352  | 37 | 1  | 202270330 | 202270330 | Missense_Mutation | SNP | C  | T  | 6  | 36  | c.896C>T       | c.(895-897)TCG>TTG   | p.S299L  |
| Pat_60 | Pre-Treatment | TMCC2        | 9911   | 37 | 1  | 205238112 | 205238112 | Missense_Mutation | SNP | C  | T  | 11 | 50  | c.782C>T       | c.(781-783)CCC>CTC   | p.P261L  |
| Pat_60 | Pre-Treatment | HEATR1       | 55127  | 37 | 1  | 236729334 | 236729334 | Missense_Mutation | SNP | T  | A  | 4  | 39  | c.4320A>T      | c.(4318-4320)TTA>TTT | p.L1440F |
| Pat_60 | Pre-Treatment | ACTN2        | 88     | 37 | 1  | 236924453 | 236924453 | Missense_Mutation | SNP | C  | T  | 4  | 45  | c.2506C>T      | c.(2506-2508)CGG>TGG | p.R836W  |
| Pat_60 | Pre-Treatment | SMYD3        | 64754  | 37 | 1  | 246498703 | 246498703 | Missense_Mutation | SNP | G  | A  | 54 | 147 | c.302C>T       | c.(301-303)TCC>TTC   | p.S101F  |
| Pat_60 | Pre-Treatment | C1orf150     | 148823 | 37 | 1  | 247737445 | 247737445 | Missense_Mutation | SNP | G  | A  | 22 | 101 | c.169G>A       | c.(169-171)GAA>AAA   | p.E57K   |
| Pat_60 | Pre-Treatment | C10orf18     | 54906  | 37 | 10 | 5788409   | 5788409   | Missense_Mutation | SNP | G  | A  | 3  | 52  | c.3025G>A      | c.(3025-3027)GCA>ACA | p.A1009T |
| Pat_60 | Pre-Treatment | TAF3         | 83860  | 37 | 10 | 8006435   | 8006435   | Missense_Mutation | SNP | C  | T  | 7  | 16  | c.962C>T       | c.(961-963)CCC>CTC   | p.P321L  |
| Pat_60 | Pre-Treatment | CAMK1D       | 57118  | 37 | 10 | 12803005  | 12803005  | Missense_Mutation | SNP | G  | A  | 7  | 47  | c.358G>A       | c.(358-360)GAT>AAT   | p.D120N  |
| Pat_60 | Pre-Treatment | MYO3A        | 53904  | 37 | 10 | 26355954  | 26355954  | Missense_Mutation | SNP | C  | T  | 28 | 104 | c.1004C>T      | c.(1003-1005)TCC>TTC | p.S335F  |
| Pat_60 | Pre-Treatment | APBB1IP      | 54518  | 37 | 10 | 26849663  | 26849663  | Missense_Mutation | SNP | G  | A  | 7  | 35  | c.1259G>A      | c.(1258-1260)GGG>GAG | p.G420E  |
| Pat_60 | Pre-Treatment | ARMC4        | 55130  | 37 | 10 | 28225687  | 28225688  | Nonsense_Mutation | DNP | CC | TT | 49 | 162 | .2219_2220GG>A | c.(2218-2220)TGG>TAA | p.W740*  |
| Pat_60 | Pre-Treatment | ANKRD30A     | 91074  | 37 | 10 | 37425564  | 37425564  | Missense_Mutation | SNP | G  | A  | 6  | 22  | c.617G>A       | c.(616-618)CGA>CAA   | p.R206Q  |
| Pat_60 | Pre-Treatment | ARHGAP22     | 58504  | 37 | 10 | 49667836  | 49667836  | Missense_Mutation | SNP | G  | A  | 3  | 31  | c.550C>T       | c.(550-552)CGG>TGG   | p.R184W  |
| Pat_60 | Pre-Treatment | OGDHL        | 55753  | 37 | 10 | 50948765  | 50948765  | Missense_Mutation | SNP | C  | T  | 2  | 2   | c.2131G>A      | c.(2131-2133)GGA>AGA | p.G711R  |
| Pat_60 | Pre-Treatment | MBL2         | 4153   | 37 | 10 | 54531224  | 54531224  | Missense_Mutation | SNP | C  | T  | 25 | 65  | c.172G>A       | c.(172-174)GAA>AAA   | p.E58K   |
| Pat_60 | Pre-Treatment | PCDH15       | 65217  | 37 | 10 | 55570336  | 55570336  | Missense_Mutation | SNP | C  | T  | 29 | 137 | c.4498G>A      | c.(4498-4500)GAA>AAA | p.E1500K |
| Pat_60 | Pre-Treatment | MYOF         | 26509  | 37 | 10 | 95157032  | 95157032  | Missense_Mutation | SNP | C  | T  | 4  | 70  | c.1306G>A      | c.(1306-1308)GAA>AAA | p.E436K  |
| Pat_60 | Pre-Treatment | CYP2C9       | 1559   | 37 | 10 | 96745844  | 96745844  | Missense_Mutation | SNP | C  | T  | 50 | 133 | c.1204C>T      | c.(1204-1206)CCC>TCC | p.P402S  |
| Pat_60 | Pre-Treatment | SCD          | 6319   | 37 | 10 | 102120518 | 102120518 | Missense_Mutation | SNP | C  | T  | 50 | 101 | c.908C>T       | c.(907-909)TCC>TTC   | p.S303F  |
| Pat_60 | Pre-Treatment | PPRC1        | 23082  | 37 | 10 | 103904025 | 103904025 | Missense_Mutation | SNP | C  | T  | 3  | 48  | c.3569C>T      | c.(3568-3570)CCT>CTT | p.P1190L |
| Pat_60 | Pre-Treatment | SORCS1       | 114815 | 37 | 10 | 108366965 | 108366965 | Missense_Mutation | SNP | G  | A  | 22 | 45  | c.3124C>T      | c.(3124-3126)CCA>TCA | p.P1042S |
| Pat_60 | Pre-Treatment | KIAA1598     | 57698  | 37 | 10 | 118687348 | 118687348 | Missense_Mutation | SNP | G  | A  | 55 | 117 | c.1067C>T      | c.(1066-1068)CCT>CTT | p.P356L  |
| Pat_60 | Pre-Treatment | DMBT1        | 1755   | 37 | 10 | 124395670 | 124395670 | Missense_Mutation | SNP | G  | A  | 4  | 13  | c.6325G>A      | c.(6325-6327)GGG>AGG | p.G2109R |
| Pat_60 | Pre-Treatment | DMBT1        | 1755   | 37 | 10 | 124399773 | 124399773 | Missense_Mutation | SNP | C  | A  | 20 | 80  | c.6773C>A      | c.(6772-6774)TCC>TAC | p.S2258Y |
| Pat_60 | Pre-Treatment | JAKMIP3      | 282973 | 37 | 10 | 133954015 | 133954015 | Missense_Mutation | SNP | T  | C  | 2  | 6   | c.1405T>C      | c.(1405-1407)TCC>CCC | p.S469P  |
| Pat_60 | Pre-Treatment | KRTAP5-1     | 387264 | 37 | 11 | 1606166   | 1606166   | Missense_Mutation | SNP | G  | C  | 4  | 32  | c.314C>G       | c.(313-315)TCC>TGC   | p.S105C  |
| Pat_60 | Pre-Treatment | OR51A4       | 401666 | 37 | 11 | 4967801   | 4967801   | Missense_Mutation | SNP | G  | A  | 15 | 34  | c.530C>T       | c.(529-531)TCC>TTC   | p.S177F  |
| Pat_60 | Pre-Treatment | HBE1         | 3046   | 37 | 11 | 5290787   | 5290787   | Missense_Mutation | SNP | G  | A  | 13 | 41  | c.212C>T       | c.(211-213)TCC>TTC   | p.S71F   |
| Pat_60 | Pre-Treatment | TRIM6-TRIM34 | 445372 | 37 | 11 | 5664622   | 5664622   | Missense_Mutation | SNP | C  | T  | 22 | 81  | c.2212C>T      | c.(2212-2214)CGT>TGT | p.R738C  |
| Pat_60 | Pre-Treatment | TRIM22       | 10346  | 37 | 11 | 5729503   | 5729503   | Missense_Mutation | SNP | G  | A  | 3  | 58  | c.874G>A       | c.(874-876)GAG>AAG   | p.E292K  |
| Pat_60 | Pre-Treatment | TRIM3        | 10612  | 37 | 11 | 6477363   | 6477363   | Missense_Mutation | SNP | C  | T  | 3  | 57  | c.1472G>A      | c.(1471-1473)GGT>GAT | p.G491D  |
| Pat_60 | Pre-Treatment | SPON1        | 10418  | 37 | 11 | 14063077  | 14063077  | Missense_Mutation | SNP | G  | A  | 32 | 219 | c.355G>A       | c.(355-357)GAA>AAA   | p.E119K  |
| Pat_60 | Pre-Treatment | KCNJ11       | 3767   | 37 | 11 | 17408942  | 17408942  | Missense_Mutation | SNP | G  | A  | 5  | 14  | c.697C>T       | c.(697-699)CTC>TTC   | p.L233F  |
| Pat_60 | Pre-Treatment | SLC6A5       | 9152   | 37 | 11 | 20639381  | 20639381  | Nonsense_Mutation | SNP | G  | A  | 28 | 75  | c.1211G>A      | c.(1210-1212)TGG>TAG | p.W404*  |

|        |               |           |        |    |    |           |           |                   |     |   |   |    |     |               |                      |               |
|--------|---------------|-----------|--------|----|----|-----------|-----------|-------------------|-----|---|---|----|-----|---------------|----------------------|---------------|
| Pat_60 | Pre-Treatment | QSER1     | 79832  | 37 | 11 | 32956501  | 32956501  | Missense_Mutation | SNP | C | T | 52 | 186 | c.3310C>T     | c.(3310-3312)CCA>TCA | p.P1104S      |
| Pat_60 | Pre-Treatment | DAGLA     | 747    | 37 | 11 | 61498913  | 61498913  | Missense_Mutation | SNP | C | T | 5  | 92  | c.974C>T      | c.(973-975)TCG>TTG   | p.S325L       |
| Pat_60 | Pre-Treatment | LRRN4CL   | 221091 | 37 | 11 | 62455559  | 62455559  | Missense_Mutation | SNP | T | A | 3  | 23  | c.422A>T      | c.(421-423)AAG>ATG   | p.K141M       |
| Pat_60 | Pre-Treatment | ESRRA     | 2101   | 37 | 11 | 64083386  | 64083386  | Missense_Mutation | SNP | A | G | 3  | 26  | c.1220A>G     | c.(1219-1221)AAG>AGG | p.K407R       |
| Pat_60 | Pre-Treatment | RIN1      | 9610   | 37 | 11 | 66103142  | 66103142  | Missense_Mutation | SNP | C | G | 2  | 7   | c.394G>C      | c.(394-396)GAG>CAG   | p.E132Q       |
| Pat_60 | Pre-Treatment | NPAS4     | 266743 | 37 | 11 | 66190601  | 66190601  | Missense_Mutation | SNP | A | G | 5  | 8   | c.706A>G      | c.(706-708)ATC>GTC   | p.I236V       |
| Pat_60 | Pre-Treatment | PPP1CA    | 5499   | 37 | 11 | 67168288  | 67168288  | Missense_Mutation | SNP | C | T | 5  | 138 | c.290G>A      | c.(289-291)GGC>GAC   | p.G97D        |
| Pat_60 | Pre-Treatment | IL18BP    | 10068  | 37 | 11 | 71712851  | 71712851  | Missense_Mutation | SNP | C | T | 4  | 56  | c.529C>T      | c.(529-531)CCC>TCC   | p.P177S       |
| Pat_60 | Pre-Treatment | P2RY2     | 5029   | 37 | 11 | 72945673  | 72945673  | Missense_Mutation | SNP | G | A | 3  | 8   | c.469G>A      | c.(469-471)GTG>ATG   | p.V157M       |
| Pat_60 | Pre-Treatment | MOGAT2    | 80168  | 37 | 11 | 75431138  | 75431138  | Missense_Mutation | SNP | C | T | 6  | 150 | c.193C>T      | c.(193-195)CGG>TGG   | p.R65W        |
| Pat_60 | Pre-Treatment | DRD2      | 1813   | 37 | 11 | 113283314 | 113283314 | Missense_Mutation | SNP | C | T | 9  | 32  | c.1102G>A     | c.(1102-1104)GAG>AAG | p.E368K       |
| Pat_60 | Pre-Treatment | TMPRSS4   | 56649  | 37 | 11 | 117975469 | 117975469 | Missense_Mutation | SNP | C | T | 10 | 35  | c.374C>T      | c.(373-375)TCT>TTT   | p.S125F       |
| Pat_60 | Pre-Treatment | TECTA     | 7007   | 37 | 11 | 121032866 | 121032866 | Missense_Mutation | SNP | G | T | 3  | 49  | c.5059G>T     | c.(5059-5061)GGT>TGT | p.G1687C      |
| Pat_60 | Pre-Treatment | CCDC15    | 80071  | 37 | 11 | 124857495 | 124857495 | Missense_Mutation | SNP | A | C | 10 | 248 | c.1373A>C     | c.(1372-1374)CAC>CCC | p.H458P       |
| Pat_60 | Pre-Treatment | SLC2A14   | 144195 | 37 | 12 | 7970507   | 7970507   | Missense_Mutation | SNP | G | A | 3  | 17  | c.1264C>T     | c.(1264-1266)CGC>TGC | p.R422C       |
| Pat_60 | Pre-Treatment | RECQL     | 5965   | 37 | 12 | 21624361  | 21624361  | Splice_Site       | SNP | C | T | 4  | 51  | c.1667_splice | c.e14+1              | p.K556_splice |
| Pat_60 | Pre-Treatment | GYS2      | 2998   | 37 | 12 | 21692230  | 21692230  | Missense_Mutation | SNP | G | A | 32 | 142 | c.1852C>T     | c.(1852-1854)CCA>TCA | p.P618S       |
| Pat_60 | Pre-Treatment | BCAT1     | 586    | 37 | 12 | 24982759  | 24982759  | Missense_Mutation | SNP | G | T | 3  | 43  | c.1117C>A     | c.(1117-1119)CAG>AAG | p.Q373K       |
| Pat_60 | Pre-Treatment | TMTC1     | 83857  | 37 | 12 | 29673644  | 29673644  | Nonsense_Mutation | SNP | T | A | 16 | 44  | c.1471A>T     | c.(1471-1473)AAA>TAA | p.K491*       |
| Pat_60 | Pre-Treatment | CACNB3    | 784    | 37 | 12 | 49219475  | 49219475  | Missense_Mutation | SNP | C | T | 20 | 88  | c.665C>T      | c.(664-666)TCC>TTC   | p.S222F       |
| Pat_60 | Pre-Treatment | KRT74     | 121391 | 37 | 12 | 52966259  | 52966259  | Missense_Mutation | SNP | G | T | 4  | 63  | c.664C>A      | c.(664-666)CTG>ATG   | p.L222M       |
| Pat_60 | Pre-Treatment | KRT79     | 338785 | 37 | 12 | 53225247  | 53225247  | Missense_Mutation | SNP | C | T | 29 | 91  | c.641G>A      | c.(640-642)GGG>GAG   | p.G214E       |
| Pat_60 | Pre-Treatment | ESPL1     | 9700   | 37 | 12 | 53668692  | 53668692  | Missense_Mutation | SNP | C | T | 4  | 41  | c.1598C>T     | c.(1597-1599)GCC>GTC | p.A533V       |
| Pat_60 | Pre-Treatment | SLC26A10  | 65012  | 37 | 12 | 58015202  | 58015202  | Missense_Mutation | SNP | C | G | 2  | 4   | c.547C>G      | c.(547-549)CTC>GTC   | p.L183V       |
| Pat_60 | Pre-Treatment | PTPRB     | 5787   | 37 | 12 | 70956819  | 70956819  | Missense_Mutation | SNP | C | T | 4  | 27  | c.3319G>A     | c.(3319-3321)GCC>ACC | p.A1107T      |
| Pat_60 | Pre-Treatment | ACSS3     | 79611  | 37 | 12 | 81610767  | 81610767  | Missense_Mutation | SNP | G | A | 19 | 39  | c.1442G>A     | c.(1441-1443)GGA>GAA | p.G481E       |
| Pat_60 | Pre-Treatment | RFX4      | 5992   | 37 | 12 | 107075789 | 107075789 | Missense_Mutation | SNP | C | T | 33 | 88  | c.334C>T      | c.(334-336)CCT>TCT   | p.P112S       |
| Pat_60 | Pre-Treatment | RASAL1    | 8437   | 37 | 12 | 113539775 | 113539775 | Missense_Mutation | SNP | C | T | 33 | 66  | c.2141G>A     | c.(2140-2142)GGG>GAG | p.G714E       |
| Pat_60 | Pre-Treatment | HPD       | 3242   | 37 | 12 | 122277882 | 122277882 | Missense_Mutation | SNP | G | A | 4  | 111 | c.1027C>T     | c.(1027-1029)CGG>TGG | p.R343W       |
| Pat_60 | Pre-Treatment | TMEM132D  | 121256 | 37 | 12 | 129563125 | 129563125 | Missense_Mutation | SNP | A | G | 17 | 27  | c.2069T>C     | c.(2068-2070)ATC>ACC | p.I690T       |
| Pat_60 | Pre-Treatment | FARP1     | 10160  | 37 | 13 | 99083480  | 99083480  | Missense_Mutation | SNP | G | A | 2  | 0   | c.2089G>A     | c.(2089-2091)GAG>AAG | p.E697K       |
| Pat_60 | Pre-Treatment | FAM70B    | 348013 | 37 | 13 | 114514844 | 114514844 | Missense_Mutation | SNP | C | T | 23 | 46  | c.949C>T      | c.(949-951)CCG>TCG   | p.P317S       |
| Pat_60 | Pre-Treatment | OR4N5     | 390437 | 37 | 14 | 20612733  | 20612733  | Missense_Mutation | SNP | C | T | 27 | 112 | c.839C>T      | c.(838-840)CCT>CTT   | p.P280L       |
| Pat_60 | Pre-Treatment | TEP1      | 7011   | 37 | 14 | 20864835  | 20864835  | Missense_Mutation | SNP | C | T | 4  | 42  | c.1604G>A     | c.(1603-1605)CGG>CAG | p.R535Q       |
| Pat_60 | Pre-Treatment | ZNF219    | 51222  | 37 | 14 | 21559639  | 21559639  | Missense_Mutation | SNP | C | T | 4  | 67  | c.1495G>A     | c.(1495-1497)GAT>AAT | p.D499N       |
| Pat_60 | Pre-Treatment | CHD8      | 57680  | 37 | 14 | 21860068  | 21860068  | Nonsense_Mutation | SNP | A | T | 12 | 62  | c.5972T>A     | c.(5971-5973)TTG>TAG | p.L1991*      |
| Pat_60 | Pre-Treatment | FAM179B   | 23116  | 37 | 14 | 45431830  | 45431830  | Missense_Mutation | SNP | C | T | 3  | 18  | c.206C>T      | c.(205-207)TCG>TTG   | p.S69L        |
| Pat_60 | Pre-Treatment | C14orf37  | 145407 | 37 | 14 | 58605719  | 58605719  | Missense_Mutation | SNP | G | A | 25 | 52  | c.358C>T      | c.(358-360)CCC>TCC   | p.P120S       |
| Pat_60 | Pre-Treatment | PLEKHG3   | 26030  | 37 | 14 | 65208999  | 65208999  | Missense_Mutation | SNP | G | A | 18 | 32  | c.2764G>A     | c.(2764-2766)GTC>ATC | p.V922I       |
| Pat_60 | Pre-Treatment | GALNTL1   | 57452  | 37 | 14 | 69806275  | 69806275  | Missense_Mutation | SNP | G | A | 16 | 47  | c.1126G>A     | c.(1126-1128)GAT>AAT | p.D376N       |
| Pat_60 | Pre-Treatment | C14orf115 | 55237  | 37 | 14 | 74824993  | 74824993  | Missense_Mutation | SNP | C | T | 3  | 10  | c.1507C>T     | c.(1507-1509)CCC>TCC | p.P503S       |
| Pat_60 | Pre-Treatment | C14orf115 | 55237  | 37 | 14 | 74825503  | 74825503  | Missense_Mutation | SNP | G | A | 5  | 33  | c.2017G>A     | c.(2017-2019)GAG>AAG | p.E673K       |
| Pat_60 | Pre-Treatment | TLL5      | 23093  | 37 | 14 | 76184295  | 76184295  | Missense_Mutation | SNP | G | A | 4  | 77  | c.832G>A      | c.(832-834)GAT>AAT   | p.D278N       |
| Pat_60 | Pre-Treatment | CCDC88C   | 440193 | 37 | 14 | 91760643  | 91760643  | Missense_Mutation | SNP | C | T | 3  | 7   | c.3986G>A     | c.(3985-3987)GGG>GAG | p.G1329E      |
| Pat_60 | Pre-Treatment | ADSSL1    | 122622 | 37 | 14 | 105208199 | 105208199 | Missense_Mutation | SNP | G | T | 4  | 43  | c.808G>T      | c.(808-810)GTG>TTG   | p.V270L       |
| Pat_60 | Pre-Treatment | OR4N3P    | 390539 | 37 | 15 | 22414263  | 22414263  | Missense_Mutation | SNP | G | A | 16 | 280 | c.562G>A      | c.(562-564)GAC>AAC   | p.D188N       |
| Pat_60 | Pre-Treatment | SLC28A2   | 9153   | 37 | 15 | 45556117  | 45556117  | Missense_Mutation | SNP | G | T | 5  | 44  | c.485G>T      | c.(484-486)TGG>TTG   | p.W162L       |

|        |               |          |        |    |    |           |           |                        |     |   |   |     |     |              |                        |               |
|--------|---------------|----------|--------|----|----|-----------|-----------|------------------------|-----|---|---|-----|-----|--------------|------------------------|---------------|
| Pat_60 | Pre-Treatment | UNC13C   | 440279 | 37 | 15 | 54685300  | 54685300  | Missense_Mutation      | SNP | G | A | 19  | 75  | c.4768G>A    | c.(4768-4770)GAT>AAT   | p.D1590N      |
| Pat_60 | Pre-Treatment | NPTN     | 27020  | 37 | 15 | 73862544  | 73862544  | Missense_Mutation      | SNP | A | C | 17  | 113 | c.1061T>G    | c.(1060-1062)GTG>GGG   | p.V354G       |
| Pat_60 | Pre-Treatment | SCAPER   | 49855  | 37 | 15 | 76696982  | 76696982  | Missense_Mutation      | SNP | G | A | 4   | 65  | c.3350C>T    | c.(3349-3351)GCC>GTC   | p.A1117V      |
| Pat_60 | Pre-Treatment | ADAMTSL3 | 57188  | 37 | 15 | 84324532  | 84324532  | Missense_Mutation      | SNP | C | T | 4   | 24  | c.19C>T      | c.(19-21)CCC>TCC       | p.P7S         |
| Pat_60 | Pre-Treatment | ZNF592   | 9640   | 37 | 15 | 85327009  | 85327009  | Missense_Mutation      | SNP | C | T | 9   | 71  | c.1103C>T    | c.(1102-1104)TCC>TTC   | p.S368F       |
| Pat_60 | Pre-Treatment | SLC28A1  | 9154   | 37 | 15 | 85476379  | 85476379  | Missense_Mutation      | SNP | G | A | 87  | 150 | c.1087G>A    | c.(1087-1089)GAT>AAT   | p.D363N       |
| Pat_60 | Pre-Treatment | ACAN     | 176    | 37 | 15 | 89386843  | 89386843  | Missense_Mutation      | SNP | G | A | 4   | 66  | c.1015G>A    | c.(1015-1017)GAC>AAC   | p.D339N       |
| Pat_60 | Pre-Treatment | CHD2     | 1106   | 37 | 15 | 93567784  | 93567784  | Missense_Mutation      | SNP | C | A | 4   | 76  | c.5336C>A    | c.(5335-5337)CCA>CAA   | p.P1779Q      |
| Pat_60 | Pre-Treatment | MEF2A    | 4205   | 37 | 15 | 100214629 | 100214629 | Missense_Mutation      | SNP | C | T | 192 | 239 | c.428C>T     | c.(427-429)TCT>TTT     | p.S143F       |
| Pat_60 | Pre-Treatment | PDIA2    | 64714  | 37 | 16 | 332826    | 332826    | Translation_Start_Site | SNP | G | A | 2   | 0   | c.-343G>A    | (-345--341)CCGTG>CCATG |               |
| Pat_60 | Pre-Treatment | TMEM8A   | 58986  | 37 | 16 | 427387    | 427387    | Missense_Mutation      | SNP | G | C | 2   | 7   | c.498C>G     | c.(496-498)ATC>ATG     | p.I166M       |
| Pat_60 | Pre-Treatment | ZNF598   | 90850  | 37 | 16 | 2052425   | 2052425   | Splice_Site            | SNP | C | T | 4   | 65  | c.678_splice | c.e7-1                 | p.S226_splice |
| Pat_60 | Pre-Treatment | PRSS33   | 260429 | 37 | 16 | 2835914   | 2835914   | Missense_Mutation      | SNP | C | T | 2   | 2   | c.128G>A     | c.(127-129)GGC>GAC     | p.G43D        |
| Pat_60 | Pre-Treatment | GRIN2A   | 2903   | 37 | 16 | 9858006   | 9858006   | Missense_Mutation      | SNP | G | A | 15  | 64  | c.3395C>T    | c.(3394-3396)CCA>CTA   | p.P1132L      |
| Pat_60 | Pre-Treatment | PDILT    | 204474 | 37 | 16 | 20384233  | 20384233  | Missense_Mutation      | SNP | G | A | 13  | 23  | c.809C>T     | c.(808-810)TCC>TTC     | p.S270F       |
| Pat_60 | Pre-Treatment | USP31    | 57478  | 37 | 16 | 23083444  | 23083444  | Missense_Mutation      | SNP | C | A | 5   | 45  | c.2410G>T    | c.(2410-2412)GCA>TCA   | p.A804S       |
| Pat_60 | Pre-Treatment | UBFD1    | 56061  | 37 | 16 | 23569454  | 23569454  | Missense_Mutation      | SNP | C | T | 4   | 59  | c.209C>T     | c.(208-210)TCG>TTG     | p.S70L        |
| Pat_60 | Pre-Treatment | ZNF629   | 23361  | 37 | 16 | 30795131  | 30795131  | Missense_Mutation      | SNP | G | A | 3   | 26  | c.518C>T     | c.(517-519)ACG>ATG     | p.T173M       |
| Pat_60 | Pre-Treatment | ITGAD    | 3681   | 37 | 16 | 31429882  | 31429882  | Missense_Mutation      | SNP | G | A | 4   | 68  | c.2777G>A    | c.(2776-2778)AGC>AAC   | p.S926N       |
| Pat_60 | Pre-Treatment | BRD7     | 29117  | 37 | 16 | 50354288  | 50354288  | Nonsense_Mutation      | SNP | G | A | 27  | 83  | c.1627C>T    | c.(1627-1629)CAG>TAG   | p.Q543*       |
| Pat_60 | Pre-Treatment | NKD1     | 85407  | 37 | 16 | 50583455  | 50583455  | Nonsense_Mutation      | SNP | C | T | 3   | 8   | c.181C>T     | c.(181-183)CGA>TGA     | p.R61*        |
| Pat_60 | Pre-Treatment | TOX3     | 27324  | 37 | 16 | 52497934  | 52497934  | Missense_Mutation      | SNP | G | A | 9   | 33  | c.320C>T     | c.(319-321)CCC>CTC     | p.P107L       |
| Pat_60 | Pre-Treatment | KLHL36   | 79786  | 37 | 16 | 84695383  | 84695383  | Missense_Mutation      | SNP | G | A | 4   | 25  | c.1495G>A    | c.(1495-1497)GGG>AGG   | p.G499R       |
| Pat_60 | Pre-Treatment | PRDM7    | 11105  | 37 | 16 | 90126823  | 90126823  | Missense_Mutation      | SNP | T | G | 5   | 66  | c.1159A>C    | c.(1159-1161)ATG>CTG   | p.M387L       |
| Pat_60 | Pre-Treatment | PRDM7    | 11105  | 37 | 16 | 90126912  | 90126912  | Missense_Mutation      | SNP | G | T | 4   | 54  | c.1070C>A    | c.(1069-1071)TCT>TAT   | p.S357Y       |
| Pat_60 | Pre-Treatment | GEMIN4   | 50628  | 37 | 17 | 650856    | 650856    | Missense_Mutation      | SNP | G | A | 3   | 30  | c.427C>T     | c.(427-429)CGC>TGC     | p.R143C       |
| Pat_60 | Pre-Treatment | MYH2     | 4620   | 37 | 17 | 10435009  | 10435009  | Missense_Mutation      | SNP | C | T | 20  | 43  | c.2638G>A    | c.(2638-2640)GAA>AAA   | p.E880K       |
| Pat_60 | Pre-Treatment | MYH2     | 4620   | 37 | 17 | 10435020  | 10435020  | Missense_Mutation      | SNP | C | T | 9   | 67  | c.2627G>A    | c.(2626-2628)AGG>AAG   | p.R876K       |
| Pat_60 | Pre-Treatment | CCDC144A | 9720   | 37 | 17 | 16635945  | 16635945  | Missense_Mutation      | SNP | G | A | 5   | 11  | c.2383G>A    | c.(2383-2385)GAA>AAA   | p.E795K       |
| Pat_60 | Pre-Treatment | LLGL1    | 3996   | 37 | 17 | 18139948  | 18139948  | Nonsense_Mutation      | SNP | G | A | 3   | 34  | c.1380G>A    | c.(1378-1380)TGG>TGA   | p.W460*       |
| Pat_60 | Pre-Treatment | SMCR7    | 125170 | 37 | 17 | 18167296  | 18167296  | Missense_Mutation      | SNP | C | T | 2   | 0   | c.583C>T     | c.(583-585)CGT>TGT     | p.R195C       |
| Pat_60 | Pre-Treatment | SPAG5    | 10615  | 37 | 17 | 26919042  | 26919042  | Missense_Mutation      | SNP | C | T | 3   | 46  | c.1220G>A    | c.(1219-1221)GGC>GAC   | p.G407D       |
| Pat_60 | Pre-Treatment | SRCIN1   | 80725  | 37 | 17 | 36700119  | 36700119  | Missense_Mutation      | SNP | G | A | 4   | 10  | c.3356C>T    | c.(3355-3357)CCC>CTC   | p.P1119L      |
| Pat_60 | Pre-Treatment | WIPF2    | 147179 | 37 | 17 | 38418845  | 38418845  | Nonsense_Mutation      | SNP | C | T | 15  | 48  | c.265C>T     | c.(265-267)CAA>TAA     | p.Q89*        |
| Pat_60 | Pre-Treatment | KLHL11   | 55175  | 37 | 17 | 40010222  | 40010222  | Nonsense_Mutation      | SNP | G | A | 3   | 50  | c.1897C>T    | c.(1897-1899)CGA>TGA   | p.R633*       |
| Pat_60 | Pre-Treatment | CNTD1    | 124817 | 37 | 17 | 40957867  | 40957867  | Missense_Mutation      | SNP | C | T | 4   | 64  | c.545C>T     | c.(544-546)CCC>CTC     | p.P182L       |
| Pat_60 | Pre-Treatment | OSBPL7   | 114881 | 37 | 17 | 45885688  | 45885688  | Missense_Mutation      | SNP | T | C | 6   | 30  | c.2498A>G    | c.(2497-2499)TAT>TGT   | p.Y833C       |
| Pat_60 | Pre-Treatment | KCNH6    | 81033  | 37 | 17 | 61611628  | 61611628  | Missense_Mutation      | SNP | G | A | 3   | 30  | c.1057G>A    | c.(1057-1059)GCC>ACC   | p.A353T       |
| Pat_60 | Pre-Treatment | ABCA6    | 23460  | 37 | 17 | 67079429  | 67079429  | Missense_Mutation      | SNP | G | A | 19  | 68  | c.4399C>T    | c.(4399-4401)CTC>TTC   | p.L1467F      |
| Pat_60 | Pre-Treatment | DNAI2    | 64446  | 37 | 17 | 72310300  | 72310300  | Missense_Mutation      | SNP | G | C | 2   | 7   | c.1763G>C    | c.(1762-1764)GGA>GCA   | p.G588A       |
| Pat_60 | Pre-Treatment | CD300C   | 10871  | 37 | 17 | 72539093  | 72539093  | Missense_Mutation      | SNP | G | A | 7   | 23  | c.434C>T     | c.(433-435)TCC>TTC     | p.S145F       |
| Pat_60 | Pre-Treatment | RNF213   | 57674  | 37 | 17 | 78319066  | 78319066  | Missense_Mutation      | SNP | G | A | 5   | 95  | c.1150G>A    | c.(1150-1152)GAC>AAC   | p.D384N       |
| Pat_60 | Pre-Treatment | LAMA1    | 284217 | 37 | 18 | 7015756   | 7015756   | Missense_Mutation      | SNP | C | T | 4   | 71  | c.3091G>A    | c.(3091-3093)GGG>AGG   | p.G1031R      |
| Pat_60 | Pre-Treatment | LAMA3    | 3909   | 37 | 18 | 21329415  | 21329415  | Missense_Mutation      | SNP | G | A | 5   | 23  | c.589G>A     | c.(589-591)GAA>AAA     | p.E197K       |
| Pat_60 | Pre-Treatment | PHLPP1   | 23239  | 37 | 18 | 60582241  | 60582241  | Missense_Mutation      | SNP | G | A | 4   | 22  | c.1268G>A    | c.(1267-1269)CGC>CAC   | p.R423H       |
| Pat_60 | Pre-Treatment | CDH7     | 1005   | 37 | 18 | 63547825  | 63547825  | Missense_Mutation      | SNP | G | A | 22  | 66  | c.2053G>A    | c.(2053-2055)GAT>AAT   | p.D685N       |
| Pat_60 | Pre-Treatment | NETO1    | 81832  | 37 | 18 | 70417450  | 70417450  | Missense_Mutation      | SNP | C | T | 9   | 28  | c.1388G>A    | c.(1387-1389)GGA>GAA   | p.G463E       |

|        |               |          |        |    |    |           |           |                   |     |    |    |     |     |                |                      |          |
|--------|---------------|----------|--------|----|----|-----------|-----------|-------------------|-----|----|----|-----|-----|----------------|----------------------|----------|
| Pat_60 | Pre-Treatment | C19orf59 | 199675 | 37 | 19 | 7743386   | 7743386   | Missense_Mutation | SNP | C  | T  | 8   | 27  | c.383C>T       | c.(382-384)TCC>TTC   | p.S128F  |
| Pat_60 | Pre-Treatment | TSPAN16  | 26526  | 37 | 19 | 11408863  | 11408863  | Missense_Mutation | SNP | G  | A  | 12  | 38  | c.115G>A       | c.(115-117)GGA>AGA   | p.G39R   |
| Pat_60 | Pre-Treatment | ZNF563   | 147837 | 37 | 19 | 12429722  | 12429722  | Missense_Mutation | SNP | T  | C  | 10  | 225 | c.1117A>G      | c.(1117-1119)ACG>GCG | p.T373A  |
| Pat_60 | Pre-Treatment | RFX1     | 5989   | 37 | 19 | 14074714  | 14074714  | Nonsense_Mutation | SNP | G  | A  | 2   | 0   | c.2317C>T      | c.(2317-2319)CAG>TAG | p.Q773*  |
| Pat_60 | Pre-Treatment | CPAMD8   | 27151  | 37 | 19 | 17010338  | 17010338  | Missense_Mutation | SNP | C  | T  | 7   | 35  | c.4937G>A      | c.(4936-4938)GGG>GAG | p.G1646E |
| Pat_60 | Pre-Treatment | ZNF93    | 81931  | 37 | 19 | 20045182  | 20045182  | Missense_Mutation | SNP | A  | G  | 6   | 198 | c.1418A>G      | c.(1417-1419)AAA>AGA | p.K473R  |
| Pat_60 | Pre-Treatment | LG14     | 163175 | 37 | 19 | 35617799  | 35617799  | Missense_Mutation | SNP | C  | T  | 7   | 17  | c.751G>A       | c.(751-753)GAC>AAC   | p.D251N  |
| Pat_60 | Pre-Treatment | FXDY1    | 5348   | 37 | 19 | 35631041  | 35631041  | Missense_Mutation | SNP | G  | A  | 20  | 52  | c.58G>A        | c.(58-60)GCA>ACA     | p.A20T   |
| Pat_60 | Pre-Treatment | PSG11    | 5680   | 37 | 19 | 43522979  | 43522979  | Missense_Mutation | SNP | C  | T  | 41  | 190 | c.652G>A       | c.(652-654)GAA>AAA   | p.E218K  |
| Pat_60 | Pre-Treatment | GPR77    | 27202  | 37 | 19 | 47844378  | 47844378  | Missense_Mutation | SNP | C  | T  | 14  | 40  | c.322C>T       | c.(322-324)CGG>TGG   | p.R108W  |
| Pat_60 | Pre-Treatment | PRR12    | 57479  | 37 | 19 | 50100975  | 50100975  | Missense_Mutation | SNP | G  | C  | 2   | 6   | c.3383G>C      | c.(3382-3384)TGC>TCC | p.C1128S |
| Pat_60 | Pre-Treatment | PRR12    | 57479  | 37 | 19 | 50104837  | 50104837  | Nonsense_Mutation | SNP | C  | T  | 2   | 1   | c.4435C>T      | c.(4435-4437)CAG>TAG | p.Q1479* |
| Pat_60 | Pre-Treatment | SHANK1   | 50944  | 37 | 19 | 51207744  | 51207744  | Nonsense_Mutation | SNP | G  | A  | 21  | 47  | c.1105C>T      | c.(1105-1107)CGA>TGA | p.R369*  |
| Pat_60 | Pre-Treatment | ZNF616   | 90317  | 37 | 19 | 52619191  | 52619191  | Missense_Mutation | SNP | C  | T  | 7   | 185 | c.1226G>A      | c.(1225-1227)TGC>TAC | p.C409Y  |
| Pat_60 | Pre-Treatment | ZNF534   | 147658 | 37 | 19 | 52942507  | 52942507  | Missense_Mutation | SNP | A  | T  | 3   | 24  | c.1833A>T      | c.(1831-1833)AAA>AAT | p.K611N  |
| Pat_60 | Pre-Treatment | ZNF816A  | 125893 | 37 | 19 | 53454058  | 53454058  | Missense_Mutation | SNP | C  | G  | 9   | 423 | c.970G>C       | c.(970-972)GAG>CAG   | p.E324Q  |
| Pat_60 | Pre-Treatment | VN1R2    | 317701 | 37 | 19 | 53762364  | 53762364  | Missense_Mutation | SNP | T  | A  | 15  | 62  | c.736T>A       | c.(736-738)TTG>ATG   | p.L246M  |
| Pat_60 | Pre-Treatment | NLRP12   | 91662  | 37 | 19 | 54313084  | 54313084  | Missense_Mutation | SNP | G  | A  | 6   | 16  | c.1829C>T      | c.(1828-1830)TCC>TTC | p.S610F  |
| Pat_60 | Pre-Treatment | LILRA3   | 11026  | 37 | 19 | 54802025  | 54802025  | Missense_Mutation | SNP | G  | A  | 10  | 77  | c.1163C>T      | c.(1162-1164)ACC>ATC | p.T388I  |
| Pat_60 | Pre-Treatment | LILRB1   | 10859  | 37 | 19 | 55146569  | 55146569  | Missense_Mutation | SNP | G  | C  | 2   | 3   | c.1498G>C      | c.(1498-1500)GAT>CAT | p.D500H  |
| Pat_60 | Pre-Treatment | NLRP2    | 55655  | 37 | 19 | 55501464  | 55501464  | Missense_Mutation | SNP | C  | T  | 3   | 49  | c.2441C>T      | c.(2440-2442)ACG>ATG | p.T814M  |
| Pat_60 | Pre-Treatment | TNNT1    | 7138   | 37 | 19 | 55652634  | 55652634  | Missense_Mutation | SNP | C  | T  | 4   | 21  | c.229G>A       | c.(229-231)GAG>AAG   | p.E77K   |
| Pat_60 | Pre-Treatment | PTPRH    | 5794   | 37 | 19 | 55710101  | 55710101  | Missense_Mutation | SNP | C  | T  | 8   | 24  | c.1600G>A      | c.(1600-1602)GAA>AAA | p.E534K  |
| Pat_60 | Pre-Treatment | SAPS1    | 22870  | 37 | 19 | 55741984  | 55741985  | Missense_Mutation | DNP | GA | AC | 7   | 6   | .2638_2639TC>G | c.(2638-2640)TCC>GTC | p.S880V  |
| Pat_60 | Pre-Treatment | ZNF582   | 147948 | 37 | 19 | 56903117  | 56903117  | Missense_Mutation | SNP | G  | A  | 12  | 70  | c.5C>T         | c.(4-6)TCC>TTC       | p.S2F    |
| Pat_60 | Pre-Treatment | ZNF324B  | 388569 | 37 | 19 | 58966837  | 58966837  | Missense_Mutation | SNP | G  | A  | 3   | 34  | c.526G>A       | c.(526-528)GAA>AAA   | p.E176K  |
| Pat_60 | Pre-Treatment | ZNF512   | 84450  | 37 | 2  | 27844170  | 27844170  | Missense_Mutation | SNP | G  | A  | 5   | 61  | c.1546G>A      | c.(1546-1548)GAG>AAG | p.E516K  |
| Pat_60 | Pre-Treatment | CAPN13   | 92291  | 37 | 2  | 30974117  | 30974117  | Missense_Mutation | SNP | C  | T  | 5   | 38  | c.1088G>A      | c.(1087-1089)GGA>GAA | p.G363E  |
| Pat_60 | Pre-Treatment | PPM1B    | 5495   | 37 | 2  | 44428478  | 44428478  | Missense_Mutation | SNP | C  | T  | 107 | 328 | c.140C>T       | c.(139-141)CCT>CTT   | p.P47L   |
| Pat_60 | Pre-Treatment | TSPYL6   | 388951 | 37 | 2  | 54483258  | 54483258  | Missense_Mutation | SNP | C  | T  | 4   | 50  | c.31G>A        | c.(31-33)GCT>ACT     | p.A11T   |
| Pat_60 | Pre-Treatment | AFF3     | 3899   | 37 | 2  | 100182007 | 100182007 | Missense_Mutation | SNP | C  | T  | 41  | 79  | c.3061G>A      | c.(3061-3063)GGC>AGC | p.G1021S |
| Pat_60 | Pre-Treatment | TBC1D8   | 11138  | 37 | 2  | 101654100 | 101654100 | Missense_Mutation | SNP | G  | A  | 15  | 68  | c.1301C>T      | c.(1300-1302)TCT>TTT | p.S434F  |
| Pat_60 | Pre-Treatment | RNF149   | 284996 | 37 | 2  | 101898386 | 101898386 | Missense_Mutation | SNP | G  | A  | 6   | 158 | c.1094C>T      | c.(1093-1095)GCT>GTT | p.A365V  |
| Pat_60 | Pre-Treatment | IL18R1   | 8809   | 37 | 2  | 103013120 | 103013120 | Missense_Mutation | SNP | G  | A  | 12  | 58  | c.1400G>A      | c.(1399-1401)AGA>AAA | p.R467K  |
| Pat_60 | Pre-Treatment | SULT1C2  | 6819   | 37 | 2  | 108921994 | 108921994 | Missense_Mutation | SNP | C  | T  | 17  | 37  | c.721C>T       | c.(721-723)CGT>TGT   | p.R241C  |
| Pat_60 | Pre-Treatment | RABL2A   | 11159  | 37 | 2  | 114392676 | 114392676 | Missense_Mutation | SNP | C  | T  | 11  | 37  | c.266C>T       | c.(265-267)TCC>TTC   | p.S89F   |
| Pat_60 | Pre-Treatment | MARCO    | 8685   | 37 | 2  | 119750742 | 119750742 | Missense_Mutation | SNP | G  | A  | 14  | 73  | c.1295G>A      | c.(1294-1296)CGA>CAA | p.R432Q  |
| Pat_60 | Pre-Treatment | TFCP2L1  | 29842  | 37 | 2  | 122004453 | 122004453 | Missense_Mutation | SNP | C  | T  | 24  | 68  | c.598G>A       | c.(598-600)GAG>AAG   | p.E200K  |
| Pat_60 | Pre-Treatment | POTEF    | 728378 | 37 | 2  | 130877782 | 130877782 | Missense_Mutation | SNP | A  | G  | 5   | 103 | c.307T>C       | c.(307-309)TGC>CGC   | p.C103R  |
| Pat_60 | Pre-Treatment | POTEF    | 728378 | 37 | 2  | 130877802 | 130877802 | Missense_Mutation | SNP | T  | C  | 5   | 124 | c.287A>G       | c.(286-288)AAC>AGC   | p.N96S   |
| Pat_60 | Pre-Treatment | POTEF    | 728378 | 37 | 2  | 130877893 | 130877893 | Missense_Mutation | SNP | G  | A  | 5   | 130 | c.196C>T       | c.(196-198)CGC>TGC   | p.R66C   |
| Pat_60 | Pre-Treatment | R3HDM1   | 23518  | 37 | 2  | 136409471 | 136409471 | Missense_Mutation | SNP | C  | T  | 4   | 53  | c.1792C>T      | c.(1792-1794)CCA>TCA | p.P598S  |
| Pat_60 | Pre-Treatment | THSD7B   | 80731  | 37 | 2  | 137814542 | 137814542 | Missense_Mutation | SNP | C  | T  | 27  | 131 | c.599C>T       | c.(598-600)TCC>TTC   | p.S200F  |
| Pat_60 | Pre-Treatment | ZEB2     | 9839   | 37 | 2  | 145161680 | 145161680 | Missense_Mutation | SNP | G  | A  | 11  | 36  | c.610C>T       | c.(610-612)CCA>TCA   | p.P204S  |
| Pat_60 | Pre-Treatment | NEB      | 4703   | 37 | 2  | 152548828 | 152548828 | Missense_Mutation | SNP | A  | T  | 19  | 60  | c.1945T>A      | c.(1945-1947)TAC>AAC | p.Y649N  |
| Pat_60 | Pre-Treatment | SCN1A    | 6323   | 37 | 2  | 166872150 | 166872150 | Missense_Mutation | SNP | C  | T  | 48  | 122 | c.3484G>A      | c.(3484-3486)GAA>AAA | p.E1162K |
| Pat_60 | Pre-Treatment | PPIG     | 9360   | 37 | 2  | 170465247 | 170465247 | Missense_Mutation | SNP | C  | A  | 4   | 88  | c.356C>A       | c.(355-357)ACA>AAA   | p.T119K  |

|        |               |           |        |    |    |           |           |                   |     |    |    |    |     |                 |                      |                |
|--------|---------------|-----------|--------|----|----|-----------|-----------|-------------------|-----|----|----|----|-----|-----------------|----------------------|----------------|
| Pat_60 | Pre-Treatment | COL3A1    | 1281   | 37 | 2  | 189854850 | 189854850 | Missense_Mutation | SNP | G  | A  | 16 | 75  | c.719G>A        | c.(718-720)GGA>GAA   | p.G240E        |
| Pat_60 | Pre-Treatment | CCDC150   | 284992 | 37 | 2  | 197583288 | 197583288 | Missense_Mutation | SNP | C  | T  | 4  | 78  | c.1928C>T       | c.(1927-1929)GCG>GTG | p.A643V        |
| Pat_60 | Pre-Treatment | MARS2     | 92935  | 37 | 2  | 198570245 | 198570245 | Missense_Mutation | SNP | A  | G  | 13 | 31  | c.116A>G        | c.(115-117)GAT>GGT   | p.D39G         |
| Pat_60 | Pre-Treatment | CDK15     | 65061  | 37 | 2  | 202672367 | 202672367 | Splice_Site       | SNP | G  | A  | 4  | 72  | c.273_splice    | c.e2+1               | p.W91_splice   |
| Pat_60 | Pre-Treatment | CXCR2     | 3579   | 37 | 2  | 218999955 | 218999955 | Missense_Mutation | SNP | G  | A  | 4  | 35  | c.431G>A        | c.(430-432)CGT>CAT   | p.R144H        |
| Pat_60 | Pre-Treatment | RNF25     | 64320  | 37 | 2  | 219529257 | 219529257 | Missense_Mutation | SNP | G  | A  | 3  | 26  | c.803C>T        | c.(802-804)CCT>CTT   | p.P268L        |
| Pat_60 | Pre-Treatment | EPHA4     | 2043   | 37 | 2  | 222428987 | 222428987 | Missense_Mutation | SNP | C  | T  | 19 | 111 | c.287G>A        | c.(286-288)AGG>AAG   | p.R96K         |
| Pat_60 | Pre-Treatment | COL4A4    | 1286   | 37 | 2  | 227953434 | 227953434 | Missense_Mutation | SNP | G  | A  | 11 | 22  | c.1558C>T       | c.(1558-1560)CCT>TCT | p.P520S        |
| Pat_60 | Pre-Treatment | AGFG1     | 3267   | 37 | 2  | 228384716 | 228384716 | Missense_Mutation | SNP | C  | T  | 39 | 112 | c.314C>T        | c.(313-315)CCA>CTA   | p.P105L        |
| Pat_60 | Pre-Treatment | INPP5D    | 3635   | 37 | 2  | 234079721 | 234079721 | Missense_Mutation | SNP | A  | T  | 3  | 27  | c.1912A>T       | c.(1912-1914)ATC>TTC | p.I638F        |
| Pat_60 | Pre-Treatment | SH3BP4    | 23677  | 37 | 2  | 235950285 | 235950285 | Missense_Mutation | SNP | G  | A  | 3  | 39  | c.872G>A        | c.(871-873)AGG>AAG   | p.R291K        |
| Pat_60 | Pre-Treatment | HDLBP     | 3069   | 37 | 2  | 242176128 | 242176128 | Missense_Mutation | SNP | C  | T  | 3  | 34  | c.2806G>A       | c.(2806-2808)GAG>AAG | p.E936K        |
| Pat_60 | Pre-Treatment | HDLBP     | 3069   | 37 | 2  | 242186295 | 242186295 | Missense_Mutation | SNP | G  | A  | 7  | 159 | c.1822C>T       | c.(1822-1824)CGT>TGT | p.R608C        |
| Pat_60 | Pre-Treatment | CRNKL1    | 51340  | 37 | 20 | 20029140  | 20029140  | Missense_Mutation | SNP | C  | T  | 5  | 56  | c.785G>A        | c.(784-786)CGA>CAA   | p.R262Q        |
| Pat_60 | Pre-Treatment | FRG1B     | 284802 | 37 | 20 | 29628243  | 29628243  | Missense_Mutation | SNP | T  | C  | 11 | 273 | c.155T>C        | c.(154-156)TTG>TCG   | p.L52S         |
| Pat_60 | Pre-Treatment | FRG1B     | 284802 | 37 | 20 | 29628245  | 29628245  | Missense_Mutation | SNP | G  | A  | 10 | 270 | c.157G>A        | c.(157-159)GCC>ACC   | p.A53T         |
| Pat_60 | Pre-Treatment | CBFA2T2   | 9139   | 37 | 20 | 32217691  | 32217691  | Missense_Mutation | SNP | G  | A  | 3  | 30  | c.1226G>A       | c.(1225-1227)AGC>AAC | p.S409N        |
| Pat_60 | Pre-Treatment | FAM83C    | 128876 | 37 | 20 | 33874856  | 33874856  | Missense_Mutation | SNP | C  | T  | 4  | 25  | c.1726G>A       | c.(1726-1728)GGT>AGT | p.G576S        |
| Pat_60 | Pre-Treatment | NCOA3     | 8202   | 37 | 20 | 46265037  | 46265038  | Missense_Mutation | DNP | CC | TT | 21 | 71  | c.1907_1908CC>T | c.(1906-1908)TCC>TTT | p.S636F        |
| Pat_60 | Pre-Treatment | ZNFX1     | 57169  | 37 | 20 | 47887292  | 47887292  | Missense_Mutation | SNP | G  | A  | 33 | 140 | c.1057C>T       | c.(1057-1059)CTT>TTT | p.L353F        |
| Pat_60 | Pre-Treatment | SLC9A8    | 23315  | 37 | 20 | 48503428  | 48503428  | Missense_Mutation | SNP | C  | T  | 12 | 45  | c.1631C>T       | c.(1630-1632)ACG>ATG | p.T544M        |
| Pat_60 | Pre-Treatment | TPTE      | 7179   | 37 | 21 | 10934997  | 10934997  | Missense_Mutation | SNP | C  | T  | 13 | 220 | c.796G>A        | c.(796-798)GAA>AAA   | p.E266K        |
| Pat_60 | Pre-Treatment | BAGE2     | 85319  | 37 | 21 | 11058226  | 11058226  | Missense_Mutation | SNP | G  | C  | 27 | 87  | c.214C>G        | c.(214-216)CCT>GCT   | p.P72A         |
| Pat_60 | Pre-Treatment | SAMSN1    | 64092  | 37 | 21 | 15884895  | 15884895  | Splice_Site       | SNP | C  | T  | 12 | 79  | c.280_splice    | c.e4-1               | p.D94_splice   |
| Pat_60 | Pre-Treatment | KRTAP24-1 | 643803 | 37 | 21 | 31655006  | 31655006  | Missense_Mutation | SNP | C  | A  | 4  | 61  | c.245G>T        | c.(244-246)AGT>ATT   | p.S82I         |
| Pat_60 | Pre-Treatment | KRTAP13-2 | 337959 | 37 | 21 | 31744209  | 31744209  | Missense_Mutation | SNP | C  | T  | 4  | 61  | c.323G>A        | c.(322-324)CGC>CAC   | p.R108H        |
| Pat_60 | Pre-Treatment | UBASH3A   | 53347  | 37 | 21 | 43846901  | 43846901  | Missense_Mutation | SNP | G  | A  | 3  | 54  | c.1142G>A       | c.(1141-1143)AGG>AAG | p.R381K        |
| Pat_60 | Pre-Treatment | KRTAP10-6 | 386674 | 37 | 21 | 46011562  | 46011562  | Missense_Mutation | SNP | G  | C  | 4  | 56  | c.804C>G        | c.(802-804)CAC>CAG   | p.H268Q        |
| Pat_60 | Pre-Treatment | POTEH     | 23784  | 37 | 22 | 16287387  | 16287387  | Missense_Mutation | SNP | C  | T  | 3  | 52  | c.499G>A        | c.(499-501)GAG>AAG   | p.E167K        |
| Pat_60 | Pre-Treatment | POTEH     | 23784  | 37 | 22 | 16287542  | 16287542  | Missense_Mutation | SNP | C  | T  | 6  | 170 | c.344G>A        | c.(343-345)AGC>AAC   | p.S115N        |
| Pat_60 | Pre-Treatment | GGT1      | 2678   | 37 | 22 | 25024123  | 25024123  | Missense_Mutation | SNP | C  | T  | 4  | 66  | c.1412C>T       | c.(1411-1413)GCT>GTT | p.A471V        |
| Pat_60 | Pre-Treatment | IGLL3     | 91353  | 37 | 22 | 25715872  | 25715872  | Missense_Mutation | SNP | C  | T  | 4  | 58  | c.494C>T        | c.(493-495)ACC>ATC   | p.T165I        |
| Pat_60 | Pre-Treatment | CCDC157   | 550631 | 37 | 22 | 30772519  | 30772519  | Missense_Mutation | SNP | C  | T  | 6  | 201 | c.2044C>T       | c.(2044-2046)CCT>TCT | p.P682S        |
| Pat_60 | Pre-Treatment | MORC2     | 22880  | 37 | 22 | 31328692  | 31328692  | Missense_Mutation | SNP | C  | T  | 3  | 33  | c.2401G>A       | c.(2401-2403)GAT>AAT | p.D801N        |
| Pat_60 | Pre-Treatment | PPARA     | 5465   | 37 | 22 | 46627789  | 46627789  | Missense_Mutation | SNP | G  | A  | 3  | 43  | c.812G>A        | c.(811-813)CGC>CAC   | p.R271H        |
| Pat_60 | Pre-Treatment | CELSR1    | 9620   | 37 | 22 | 46930933  | 46930933  | Missense_Mutation | SNP | C  | T  | 4  | 37  | c.2135G>A       | c.(2134-2136)CGC>CAC | p.R712H        |
| Pat_60 | Pre-Treatment | SRGAP3    | 9901   | 37 | 3  | 9146424   | 9146424   | Missense_Mutation | SNP | C  | T  | 6  | 34  | c.363G>A        | c.(361-363)ATG>ATA   | p.M121I        |
| Pat_60 | Pre-Treatment | FGD5      | 152273 | 37 | 3  | 14861314  | 14861314  | Missense_Mutation | SNP | G  | T  | 2  | 0   | c.736G>T        | c.(736-738)GCT>TCT   | p.A246S        |
| Pat_60 | Pre-Treatment | LRRRC3B   | 116135 | 37 | 3  | 26751407  | 26751407  | Missense_Mutation | SNP | G  | A  | 12 | 37  | c.244G>A        | c.(244-246)GAA>AAA   | p.E82K         |
| Pat_60 | Pre-Treatment | C3orf35   | 339883 | 37 | 3  | 37458971  | 37458971  | Missense_Mutation | SNP | C  | T  | 10 | 20  | c.214C>T        | c.(214-216)CTT>TTT   | p.L72F         |
| Pat_60 | Pre-Treatment | SCN11A    | 11280  | 37 | 3  | 38913199  | 38913199  | Missense_Mutation | SNP | C  | T  | 7  | 33  | c.3496G>A       | c.(3496-3498)GTG>ATG | p.V1166M       |
| Pat_60 | Pre-Treatment | KBTBD5    | 131377 | 37 | 3  | 42728002  | 42728002  | Missense_Mutation | SNP | G  | A  | 46 | 102 | c.892G>A        | c.(892-894)GCC>ACC   | p.A298T        |
| Pat_60 | Pre-Treatment | CCR9      | 10803  | 37 | 3  | 45942741  | 45942741  | Missense_Mutation | SNP | C  | A  | 4  | 33  | c.461C>A        | c.(460-462)GCA>GAA   | p.A154E        |
| Pat_60 | Pre-Treatment | COL7A1    | 1294   | 37 | 3  | 48602626  | 48602626  | Missense_Mutation | SNP | G  | A  | 3  | 12  | c.8536C>T       | c.(8536-8538)CCC>TCC | p.P2846S       |
| Pat_60 | Pre-Treatment | UBA7      | 7318   | 37 | 3  | 49850941  | 49850941  | Missense_Mutation | SNP | G  | A  | 11 | 47  | c.196C>T        | c.(196-198)CCC>TCC   | p.P66S         |
| Pat_60 | Pre-Treatment | ADAMTS9   | 56999  | 37 | 3  | 64579933  | 64579933  | Splice_Site       | SNP | C  | T  | 25 | 86  | c.4356_splice   | c.e28+1              | p.S1452_splice |
| Pat_60 | Pre-Treatment | EPHA3     | 2042   | 37 | 3  | 89499348  | 89499348  | Missense_Mutation | SNP | G  | A  | 11 | 38  | c.2518G>A       | c.(2518-2520)GGC>AGC | p.G840S        |



|        |               |          |        |    |   |           |           |                   |     |    |    |    |     |                                    |                      |                |
|--------|---------------|----------|--------|----|---|-----------|-----------|-------------------|-----|----|----|----|-----|------------------------------------|----------------------|----------------|
| Pat_60 | Pre-Treatment | ABI3BP   | 25890  | 37 | 3 | 100497211 | 100497211 | Missense_Mutation | SNP | C  | T  | 3  | 54  | c.2117G>A                          | c.(2116-2118)CGC>CAC | p.R706H        |
| Pat_60 | Pre-Treatment | ALCAM    | 214    | 37 | 3 | 105268981 | 105268981 | Missense_Mutation | SNP | C  | T  | 54 | 210 | c.1385C>T                          | c.(1384-1386)TCT>TTT | p.S462F        |
| Pat_60 | Pre-Treatment | CCDC54   | 84692  | 37 | 3 | 107096571 | 107096571 | Missense_Mutation | SNP | C  | T  | 54 | 179 | c.137C>T                           | c.(136-138)CCC>CTC   | p.P46L         |
| Pat_60 | Pre-Treatment | GUCA1C   | 9626   | 37 | 3 | 108626922 | 108626922 | Missense_Mutation | SNP | C  | T  | 3  | 38  | c.577G>A                           | c.(577-579)GAC>AAC   | p.D193N        |
| Pat_60 | Pre-Treatment | DPPA2    | 151871 | 37 | 3 | 109023481 | 109023481 | Missense_Mutation | SNP | G  | A  | 8  | 51  | c.695C>T                           | c.(694-696)TCG>TTG   | p.S232L        |
| Pat_60 | Pre-Treatment | CD96     | 10225  | 37 | 3 | 111263979 | 111263979 | Missense_Mutation | SNP | G  | A  | 29 | 145 | c.148G>A                           | c.(148-150)GTA>ATA   | p.V50I         |
| Pat_60 | Pre-Treatment | KIAA2018 | 205717 | 37 | 3 | 113379206 | 113379206 | Missense_Mutation | SNP | G  | T  | 3  | 56  | c.1323C>A                          | c.(1321-1323)AAC>AAA | p.N441K        |
| Pat_60 | Pre-Treatment | ATP6V1A  | 523    | 37 | 3 | 113513976 | 113513976 | Missense_Mutation | SNP | C  | T  | 18 | 58  | c.1151C>T                          | c.(1150-1152)TCG>TTG | p.S384L        |
| Pat_60 | Pre-Treatment | RHO      | 6010   | 37 | 3 | 129251606 | 129251606 | Missense_Mutation | SNP | G  | A  | 4  | 35  | c.927G>A                           | c.(925-927)ATG>ATA   | p.M309I        |
| Pat_60 | Pre-Treatment | COL6A6   | 131873 | 37 | 3 | 130282320 | 130282320 | Missense_Mutation | SNP | G  | A  | 9  | 27  | c.473G>A                           | c.(472-474)GGA>GAA   | p.G158E        |
| Pat_60 | Pre-Treatment | GRK7     | 131890 | 37 | 3 | 141526568 | 141526568 | Missense_Mutation | SNP | G  | A  | 24 | 71  | c.1132G>A                          | c.(1132-1134)GGA>AGA | p.G378R        |
| Pat_60 | Pre-Treatment | GRK7     | 131890 | 37 | 3 | 141535584 | 141535584 | Missense_Mutation | SNP | C  | T  | 9  | 81  | c.1354C>T                          | c.(1354-1356)CAT>TAT | p.H452Y        |
| Pat_60 | Pre-Treatment | PLSCR4   | 57088  | 37 | 3 | 145924423 | 145924423 | Missense_Mutation | SNP | G  | A  | 4  | 64  | c.244C>T                           | c.(244-246)CGG>TGG   | p.R82W         |
| Pat_60 | Pre-Treatment | PIK3CA   | 5290   | 37 | 3 | 178936076 | 178936076 | Missense_Mutation | SNP | C  | T  | 24 | 89  | c.1618C>T                          | c.(1618-1620)CTC>TTC | p.L540F        |
| Pat_60 | Pre-Treatment | ABCF3    | 55324  | 37 | 3 | 183906159 | 183906159 | Missense_Mutation | SNP | G  | A  | 4  | 96  | c.800G>A                           | c.(799-801)AGG>AAG   | p.R267K        |
| Pat_60 | Pre-Treatment | MASP1    | 5648   | 37 | 3 | 187003811 | 187003812 | Missense_Mutation | DNP | GG | AA | 6  | 35  | c.38_39CC>TT                       | c.(37-39)TCC>TTT     | p.S13F         |
| Pat_60 | Pre-Treatment | BCL6     | 604    | 37 | 3 | 187451346 | 187451346 | Missense_Mutation | SNP | G  | A  | 55 | 169 | c.136C>T                           | c.(136-138)CAT>TAT   | p.H46Y         |
| Pat_60 | Pre-Treatment | ZNF595   | 152687 | 37 | 4 | 59971     | 59971     | Missense_Mutation | SNP | G  | A  | 22 | 482 | c.151G>A                           | c.(151-153)GAC>AAC   | p.D51N         |
| Pat_60 | Pre-Treatment | SORCS2   | 57537  | 37 | 4 | 7398082   | 7398082   | Missense_Mutation | SNP | G  | A  | 3  | 24  | c.548G>A                           | c.(547-549)CGG>CAG   | p.R183Q        |
| Pat_60 | Pre-Treatment | DHX15    | 1665   | 37 | 4 | 24556475  | 24556475  | Missense_Mutation | SNP | G  | A  | 63 | 221 | c.953C>T                           | c.(952-954)CCT>CTT   | p.P318L        |
| Pat_60 | Pre-Treatment | TBC1D19  | 55296  | 37 | 4 | 26616029  | 26616029  | Splice_Site       | SNP | G  | A  | 15 | 75  | c.173_splice                       | c.e3-1               | p.G58_splice   |
| Pat_60 | Pre-Treatment | LRRC66   | 339977 | 37 | 4 | 52862055  | 52862055  | Missense_Mutation | SNP | G  | T  | 3  | 14  | c.1133C>A                          | c.(1132-1134)GCG>GAG | p.A378E        |
| Pat_60 | Pre-Treatment | ARL9     | 132946 | 37 | 4 | 57384885  | 57384885  | Missense_Mutation | SNP | C  | A  | 5  | 112 | c.58C>A                            | c.(58-60)CTA>ATA     | p.L20I         |
| Pat_60 | Pre-Treatment | MUC7     | 4589   | 37 | 4 | 71347312  | 71347312  | Missense_Mutation | SNP | C  | T  | 79 | 225 | c.851C>T                           | c.(850-852)CCA>CTA   | p.P284L        |
| Pat_60 | Pre-Treatment | NPFRR2   | 10886  | 37 | 4 | 73013491  | 73013491  | Missense_Mutation | SNP | G  | A  | 14 | 52  | c.1531G>A                          | c.(1531-1533)GAA>AAA | p.E511K        |
| Pat_60 | Pre-Treatment | GPRIN3   | 285513 | 37 | 4 | 90170888  | 90170888  | Missense_Mutation | SNP | G  | T  | 5  | 113 | c.374C>A                           | c.(373-375)CCA>CAA   | p.P125Q        |
| Pat_60 | Pre-Treatment | EMCN     | 51705  | 37 | 4 | 101331494 | 101331494 | Missense_Mutation | SNP | C  | T  | 44 | 116 | c.770G>A                           | c.(769-771)GGA>GAA   | p.G257E        |
| Pat_60 | Pre-Treatment | HSPA4L   | 22824  | 37 | 4 | 128732745 | 128732745 | Missense_Mutation | SNP | C  | A  | 4  | 59  | c.1532C>A                          | c.(1531-1533)CCA>CAA | p.P511Q        |
| Pat_60 | Pre-Treatment | PCDH18   | 54510  | 37 | 4 | 138451711 | 138451711 | Missense_Mutation | SNP | C  | T  | 24 | 107 | c.1532G>A                          | c.(1531-1533)GGA>GAA | p.G511E        |
| Pat_60 | Pre-Treatment | MAML3    | 55534  | 37 | 4 | 140641414 | 140641414 | Missense_Mutation | SNP | C  | T  | 3  | 39  | c.2465G>A                          | c.(2464-2466)CGG>CAG | p.R822Q        |
| Pat_60 | Pre-Treatment | SORBS2   | 8470   | 37 | 4 | 186545415 | 186545415 | Missense_Mutation | SNP | C  | T  | 11 | 14  | c.1156G>A                          | c.(1156-1158)GAT>AAT | p.D386N        |
| Pat_60 | Pre-Treatment | DNAH5    | 1767   | 37 | 5 | 13769246  | 13769246  | Splice_Site       | SNP | C  | T  | 19 | 100 | c.9721_splice                      | c.e58-1              | p.V3241_splice |
| Pat_60 | Pre-Treatment | DNAH5    | 1767   | 37 | 5 | 13865814  | 13865814  | Missense_Mutation | SNP | C  | T  | 12 | 37  | c.4318G>A                          | c.(4318-4320)GAA>AAA | p.E1440K       |
| Pat_60 | Pre-Treatment | PDZD2    | 23037  | 37 | 5 | 31799647  | 31799647  | Missense_Mutation | SNP | G  | A  | 15 | 60  | c.292G>A                           | c.(292-294)GAA>AAA   | p.E98K         |
| Pat_60 | Pre-Treatment | ADAMTS12 | 81792  | 37 | 5 | 33648935  | 33648935  | Missense_Mutation | SNP | C  | T  | 15 | 52  | c.1471G>A                          | c.(1471-1473)GAA>AAA | p.E491K        |
| Pat_60 | Pre-Treatment | EGFLAM   | 133584 | 37 | 5 | 38370509  | 38370509  | Missense_Mutation | SNP | G  | A  | 3  | 27  | c.657G>A                           | c.(655-657)ATG>ATA   | p.M219I        |
| Pat_60 | Pre-Treatment | OSMR     | 9180   | 37 | 5 | 38904103  | 38904103  | Missense_Mutation | SNP | C  | T  | 9  | 47  | c.1111C>T                          | c.(1111-1113)CAT>TAT | p.H371Y        |
| Pat_60 | Pre-Treatment | FBXL21   | 26223  | 37 | 5 | 135277202 | 135277202 | Missense_Mutation | SNP | A  | C  | 6  | 29  | c.1147A>C                          | c.(1147-1149)ATC>CTC | p.I383L        |
| Pat_60 | Pre-Treatment | PCDHA5   | 56143  | 37 | 5 | 140202306 | 140202306 | Missense_Mutation | SNP | G  | A  | 12 | 26  | c.946G>A                           | c.(946-948)GAA>AAA   | p.E316K        |
| Pat_60 | Pre-Treatment | PCDHA5   | 56143  | 37 | 5 | 140202678 | 140202678 | Missense_Mutation | SNP | G  | A  | 4  | 42  | c.1318G>A                          | c.(1318-1320)GTG>ATG | p.V440M        |
| Pat_60 | Pre-Treatment | PCDHA13  | 56136  | 37 | 5 | 140263608 | 140263609 | Missense_Mutation | DNP | GG | AA | 4  | 19  | .1755_1756GG>A753-1758)GTGGGT>GTA/ |                      | p.G586S        |
| Pat_60 | Pre-Treatment | PCDHB17  | 54661  | 37 | 5 | 140536776 | 140536776 | Missense_Mutation | SNP | T  | G  | 5  | 11  | c.1197T>G                          | c.(1195-1197)AAT>AAG | p.N399K        |
| Pat_60 | Pre-Treatment | PPP2R2B  | 5521   | 37 | 5 | 146077647 | 146077647 | Missense_Mutation | SNP | C  | T  | 36 | 162 | c.229G>A                           | c.(229-231)GAA>AAA   | p.E77K         |
| Pat_60 | Pre-Treatment | SPINK5   | 11005  | 37 | 5 | 147503414 | 147503414 | Nonsense_Mutation | SNP | C  | T  | 17 | 52  | c.2557C>T                          | c.(2557-2559)CGA>TGA | p.R853*        |
| Pat_60 | Pre-Treatment | FBXO38   | 81545  | 37 | 5 | 147807131 | 147807131 | Missense_Mutation | SNP | G  | T  | 4  | 31  | c.2274G>T                          | c.(2272-2274)GAG>GAT | p.E758D        |
| Pat_60 | Pre-Treatment | FAT2     | 2196   | 37 | 5 | 150932903 | 150932903 | Missense_Mutation | SNP | G  | A  | 3  | 51  | c.3991C>T                          | c.(3991-3993)CGG>TGG | p.R1331W       |
| Pat_60 | Pre-Treatment | ODZ2     | 57451  | 37 | 5 | 167517603 | 167517603 | Missense_Mutation | SNP | G  | A  | 16 | 46  | c.1540G>A                          | c.(1540-1542)GGG>AGG | p.G514R        |

|        |               |           |        |    |   |           |           |                   |     |    |    |    |     |                |                      |          |
|--------|---------------|-----------|--------|----|---|-----------|-----------|-------------------|-----|----|----|----|-----|----------------|----------------------|----------|
| Pat_60 | Pre-Treatment | DCDC2     | 51473  | 37 | 6 | 24278352  | 24278352  | Missense_Mutation | SNP | C  | T  | 4  | 51  | c.847G>A       | c.(847-849)GTG>ATG   | p.V283M  |
| Pat_60 | Pre-Treatment | KIAA0319  | 9856   | 37 | 6 | 24556868  | 24556868  | Nonsense_Mutation | SNP | G  | A  | 4  | 35  | c.2824C>T      | c.(2824-2826)CAG>TAG | p.Q942*  |
| Pat_60 | Pre-Treatment | ZNF165    | 7718   | 37 | 6 | 28057020  | 28057020  | Missense_Mutation | SNP | C  | G  | 3  | 72  | c.1230C>G      | c.(1228-1230)AAC>AAG | p.N410K  |
| Pat_60 | Pre-Treatment | HLA-L     | 3139   | 37 | 6 | 30229388  | 30229388  | Missense_Mutation | SNP | C  | T  | 5  | 126 | c.356C>T       | c.(355-357)CCC>CTC   | p.P119L  |
| Pat_60 | Pre-Treatment | BAT5      | 7920   | 37 | 6 | 31659379  | 31659379  | Missense_Mutation | SNP | C  | T  | 4  | 44  | c.820G>A       | c.(820-822)GCT>ACT   | p.A274T  |
| Pat_60 | Pre-Treatment | FKBP5     | 2289   | 37 | 6 | 35558971  | 35558971  | Missense_Mutation | SNP | G  | A  | 20 | 96  | c.692C>T       | c.(691-693)CCT>CTT   | p.P231L  |
| Pat_60 | Pre-Treatment | BRPF3     | 27154  | 37 | 6 | 36178152  | 36178152  | Missense_Mutation | SNP | C  | T  | 13 | 44  | c.2026C>T      | c.(2026-2028)CAC>TAC | p.H676Y  |
| Pat_60 | Pre-Treatment | C6orf222  | 389384 | 37 | 6 | 36298400  | 36298400  | Missense_Mutation | SNP | T  | A  | 7  | 28  | c.68A>T        | c.(67-69)CAG>CTG     | p.Q23L   |
| Pat_60 | Pre-Treatment | MEP1A     | 4224   | 37 | 6 | 46797239  | 46797239  | Missense_Mutation | SNP | G  | A  | 41 | 162 | c.1075G>A      | c.(1075-1077)GTT>ATT | p.V359I  |
| Pat_60 | Pre-Treatment | FAM83B    | 222584 | 37 | 6 | 54804943  | 54804943  | Missense_Mutation | SNP | G  | A  | 16 | 66  | c.1174G>A      | c.(1174-1176)GAA>AAA | p.E392K  |
| Pat_60 | Pre-Treatment | BAI3      | 577    | 37 | 6 | 69728368  | 69728368  | Missense_Mutation | SNP | C  | T  | 36 | 80  | c.2084C>T      | c.(2083-2085)TCA>TTA | p.S695L  |
| Pat_60 | Pre-Treatment | COL9A1    | 1297   | 37 | 6 | 70990720  | 70990720  | Missense_Mutation | SNP | G  | A  | 5  | 16  | c.899C>T       | c.(898-900)CCC>CTC   | p.P300L  |
| Pat_60 | Pre-Treatment | ROS1      | 6098   | 37 | 6 | 117700235 | 117700235 | Missense_Mutation | SNP | G  | A  | 19 | 69  | c.2584C>T      | c.(2584-2586)CTT>TTT | p.L862F  |
| Pat_60 | Pre-Treatment | DCBLD1    | 285761 | 37 | 6 | 117841060 | 117841061 | Missense_Mutation | DNP | CC | TA | 39 | 94  | c.407_408CC>TA | c.(406-408)TCC>TTA   | p.S136L  |
| Pat_60 | Pre-Treatment | SAMD3     | 154075 | 37 | 6 | 130465688 | 130465688 | Missense_Mutation | SNP | C  | T  | 8  | 56  | c.1540G>A      | c.(1540-1542)GGA>AGA | p.G514R  |
| Pat_60 | Pre-Treatment | TMEM200A  | 114801 | 37 | 6 | 130762526 | 130762526 | Missense_Mutation | SNP | G  | A  | 15 | 49  | c.959G>A       | c.(958-960)AGG>AAG   | p.R320K  |
| Pat_60 | Pre-Treatment | TMEM200A  | 114801 | 37 | 6 | 130762853 | 130762853 | Missense_Mutation | SNP | G  | A  | 17 | 73  | c.1286G>A      | c.(1285-1287)GGA>GAA | p.G429E  |
| Pat_60 | Pre-Treatment | TXLNB     | 167838 | 37 | 6 | 139609804 | 139609804 | Missense_Mutation | SNP | C  | T  | 19 | 62  | c.233G>A       | c.(232-234)GGG>GAG   | p.G78E   |
| Pat_60 | Pre-Treatment | NOX3      | 50508  | 37 | 6 | 155717999 | 155717999 | Missense_Mutation | SNP | G  | A  | 57 | 154 | c.1678C>T      | c.(1678-1680)CAT>TAT | p.H560Y  |
| Pat_60 | Pre-Treatment | TAGAP     | 117289 | 37 | 6 | 159465024 | 159465024 | Missense_Mutation | SNP | C  | T  | 46 | 284 | c.67G>A        | c.(67-69)GAA>AAA     | p.E23K   |
| Pat_60 | Pre-Treatment | IGF2R     | 3482   | 37 | 6 | 160461636 | 160461636 | Missense_Mutation | SNP | T  | C  | 31 | 99  | c.1360T>C      | c.(1360-1362)TGC>CGC | p.C454R  |
| Pat_60 | Pre-Treatment | RPS6KA2   | 6196   | 37 | 6 | 166923789 | 166923789 | Missense_Mutation | SNP | G  | A  | 20 | 72  | c.355C>T       | c.(355-357)CCC>TCC   | p.P119S  |
| Pat_60 | Pre-Treatment | THBS2     | 7058   | 37 | 6 | 169648945 | 169648945 | Missense_Mutation | SNP | C  | T  | 4  | 75  | c.176G>A       | c.(175-177)CGC>CAC   | p.R59H   |
| Pat_60 | Pre-Treatment | DPY19L2P1 | 554236 | 37 | 7 | 35131480  | 35131480  | Missense_Mutation | SNP | A  | T  | 5  | 86  | c.1106T>A      | c.(1105-1107)CTT>CAT | p.L369H  |
| Pat_60 | Pre-Treatment | NPC1L1    | 29881  | 37 | 7 | 44578911  | 44578911  | Missense_Mutation | SNP | G  | A  | 4  | 36  | c.1085C>T      | c.(1084-1086)CCG>CTG | p.P362L  |
| Pat_60 | Pre-Treatment | TNS3      | 64759  | 37 | 7 | 47343018  | 47343018  | Missense_Mutation | SNP | G  | A  | 15 | 13  | c.2987C>T      | c.(2986-2988)CCT>CTT | p.P996L  |
| Pat_60 | Pre-Treatment | ZNF727    | 442319 | 37 | 7 | 63538806  | 63538806  | Missense_Mutation | SNP | C  | G  | 10 | 85  | c.1379C>G      | c.(1378-1380)ACC>AGC | p.T460S  |
| Pat_60 | Pre-Treatment | ZNF727    | 442319 | 37 | 7 | 63538818  | 63538818  | Missense_Mutation | SNP | C  | T  | 8  | 76  | c.1391C>T      | c.(1390-1392)TCC>TTC | p.S464F  |
| Pat_60 | Pre-Treatment | TPST1     | 8460   | 37 | 7 | 65706122  | 65706122  | Missense_Mutation | SNP | T  | A  | 46 | 63  | c.710T>A       | c.(709-711)GTT>GAT   | p.V237D  |
| Pat_60 | Pre-Treatment | SPDYE5    | 442590 | 37 | 7 | 75130895  | 75130895  | Missense_Mutation | SNP | C  | T  | 14 | 313 | c.770C>T       | c.(769-771)CCG>CTG   | p.P257L  |
| Pat_60 | Pre-Treatment | POR       | 5447   | 37 | 7 | 75609725  | 75609725  | Missense_Mutation | SNP | G  | T  | 4  | 58  | c.435G>T       | c.(433-435)GAG>GAT   | p.E145D  |
| Pat_60 | Pre-Treatment | PCLO      | 27445  | 37 | 7 | 82583326  | 82583326  | Missense_Mutation | SNP | C  | T  | 75 | 172 | c.6943G>A      | c.(6943-6945)GAA>AAA | p.E2315K |
| Pat_60 | Pre-Treatment | PCLO      | 27445  | 37 | 7 | 82764435  | 82764435  | Missense_Mutation | SNP | C  | T  | 31 | 119 | c.2431G>A      | c.(2431-2433)GAA>AAA | p.E811K  |
| Pat_60 | Pre-Treatment | C7orf63   | 79846  | 37 | 7 | 89912208  | 89912208  | Missense_Mutation | SNP | C  | T  | 65 | 115 | c.1375C>T      | c.(1375-1377)CCG>TCG | p.P459S  |
| Pat_60 | Pre-Treatment | COL1A2    | 1278   | 37 | 7 | 94054936  | 94054936  | Missense_Mutation | SNP | C  | A  | 21 | 89  | c.2796C>A      | c.(2794-2796)AAC>AAA | p.N932K  |
| Pat_60 | Pre-Treatment | TECPR1    | 25851  | 37 | 7 | 97851045  | 97851045  | Missense_Mutation | SNP | G  | A  | 13 | 24  | c.3085C>T      | c.(3085-3087)CCG>TCG | p.P1029S |
| Pat_60 | Pre-Treatment | RINT1     | 60561  | 37 | 7 | 105182999 | 105183000 | Missense_Mutation | DNP | CC | TT | 58 | 102 | c.418_419CC>TT | c.(418-420)CCT>TTT   | p.P140F  |
| Pat_60 | Pre-Treatment | CHRM2     | 1129   | 37 | 7 | 136700538 | 136700538 | Missense_Mutation | SNP | C  | T  | 43 | 72  | c.926C>T       | c.(925-927)TCC>TTC   | p.S309F  |
| Pat_60 | Pre-Treatment | BRAF      | 673    | 37 | 7 | 140453136 | 140453136 | Missense_Mutation | SNP | A  | T  | 60 | 154 | c.1799T>A      | c.(1798-1800)GTG>GAG | p.V600E  |
| Pat_60 | Pre-Treatment | MGAM      | 8972   | 37 | 7 | 141736669 | 141736669 | Missense_Mutation | SNP | C  | T  | 46 | 137 | c.2123C>T      | c.(2122-2124)TCC>TTC | p.S708F  |
| Pat_60 | Pre-Treatment | TRPV5     | 56302  | 37 | 7 | 142612674 | 142612674 | Missense_Mutation | SNP | G  | A  | 23 | 49  | c.1187C>T      | c.(1186-1188)GCT>GTT | p.A396V  |
| Pat_60 | Pre-Treatment | TMEM176A  | 55365  | 37 | 7 | 150501550 | 150501550 | Missense_Mutation | SNP | C  | A  | 4  | 63  | c.656C>A       | c.(655-657)CCA>CAA   | p.P219Q  |
| Pat_60 | Pre-Treatment | SLC4A2    | 6522   | 37 | 7 | 150761646 | 150761646 | Missense_Mutation | SNP | C  | T  | 26 | 160 | c.251C>T       | c.(250-252)CCA>CTA   | p.P84L   |
| Pat_60 | Pre-Treatment | OR4F21    | 441308 | 37 | 8 | 116882    | 116882    | Missense_Mutation | SNP | G  | A  | 7  | 160 | c.143C>T       | c.(142-144)TCT>TTT   | p.S48F   |
| Pat_60 | Pre-Treatment | TEX15     | 56154  | 37 | 8 | 30701064  | 30701064  | Missense_Mutation | SNP | C  | T  | 8  | 52  | c.5470G>A      | c.(5470-5472)GAC>AAC | p.D1824N |
| Pat_60 | Pre-Treatment | IDO2      | 169355 | 37 | 8 | 39871214  | 39871214  | Missense_Mutation | SNP | C  | T  | 6  | 11  | c.889C>T       | c.(889-891)CGT>TGT   | p.R297C  |
| Pat_60 | Pre-Treatment | PXDNL     | 137902 | 37 | 8 | 52233411  | 52233411  | Missense_Mutation | SNP | A  | G  | 34 | 112 | c.4193T>C      | c.(4192-4194)GTT>GCT | p.V1398A |

|        |                 |          |        |    |   |           |           |                   |     |   |   |    |     |              |                        |              |
|--------|-----------------|----------|--------|----|---|-----------|-----------|-------------------|-----|---|---|----|-----|--------------|------------------------|--------------|
| Pat_60 | Pre-Treatment   | RP1      | 6101   | 37 | 8 | 55539311  | 55539311  | Missense_Mutation | SNP | C | T | 7  | 27  | c.2869C>T    | c.(2869-2871)CCC>TCC   | p.P957S      |
| Pat_60 | Pre-Treatment   | RSP02    | 340419 | 37 | 8 | 109001454 | 109001454 | Missense_Mutation | SNP | G | A | 16 | 45  | c.113C>T     | c.(112-114)CCC>CTC     | p.P38L       |
| Pat_60 | Pre-Treatment   | PKHD1L1  | 93035  | 37 | 8 | 110422157 | 110422157 | Missense_Mutation | SNP | G | A | 12 | 48  | c.2035G>A    | c.(2035-2037)GAA>AAA   | p.E679K      |
| Pat_60 | Pre-Treatment   | PHF20L1  | 51105  | 37 | 8 | 133854806 | 133854806 | Nonsense_Mutation | SNP | C | T | 4  | 86  | c.2434C>T    | c.(2434-2436)CGA>TGA   | p.R812*      |
| Pat_60 | Pre-Treatment   | NAPRT1   | 93100  | 37 | 8 | 144657647 | 144657647 | Missense_Mutation | SNP | C | T | 6  | 32  | c.1237G>A    | c.(1237-1239)GAG>AAG   | p.E413K      |
| Pat_60 | Pre-Treatment   | SCRIB    | 23513  | 37 | 8 | 144892711 | 144892711 | Missense_Mutation | SNP | C | T | 4  | 29  | c.1468G>A    | c.(1468-1470)GGG>AGG   | p.G490R      |
| Pat_60 | Pre-Treatment   | HEATR7A  | 727957 | 37 | 8 | 145235352 | 145235352 | Missense_Mutation | SNP | C | T | 3  | 28  | c.488C>T     | c.(487-489)CCA>CTA     | p.P163L      |
| Pat_60 | Pre-Treatment   | FOXH1    | 8928   | 37 | 8 | 145700055 | 145700055 | Missense_Mutation | SNP | G | A | 2  | 1   | c.664C>T     | c.(664-666)CTT>TTT     | p.L222F      |
| Pat_60 | Pre-Treatment   | C9orf66  | 157983 | 37 | 9 | 214571    | 214571    | Missense_Mutation | SNP | C | G | 3  | 48  | c.826G>C     | c.(826-828)GTA>CTA     | p.V276L      |
| Pat_60 | Pre-Treatment   | TAF1L    | 138474 | 37 | 9 | 32635567  | 32635567  | Missense_Mutation | SNP | C | T | 3  | 35  | c.11G>A      | c.(10-12)GGC>GAC       | p.G4D        |
| Pat_60 | Pre-Treatment   | ECM2     | 1842   | 37 | 9 | 95277148  | 95277148  | Missense_Mutation | SNP | C | A | 4  | 79  | c.819G>T     | c.(817-819)GAG>GAT     | p.E273D      |
| Pat_60 | Pre-Treatment   | FBP1     | 2203   | 37 | 9 | 97367767  | 97367767  | Missense_Mutation | SNP | G | A | 4  | 17  | c.797C>T     | c.(796-798)CCC>CTC     | p.P266L      |
| Pat_60 | Pre-Treatment   | TDRD7    | 23424  | 37 | 9 | 100227273 | 100227273 | Missense_Mutation | SNP | G | A | 4  | 41  | c.1592G>A    | c.(1591-1593)CGG>CAG   | p.R531Q      |
| Pat_60 | Pre-Treatment   | LPPR1    | 54886  | 37 | 9 | 104048494 | 104048494 | Missense_Mutation | SNP | C | T | 17 | 59  | c.361C>T     | c.(361-363)CTT>TTT     | p.L121F      |
| Pat_60 | Pre-Treatment   | DFNB31   | 25861  | 37 | 9 | 117228648 | 117228648 | Missense_Mutation | SNP | G | A | 4  | 70  | c.862C>T     | c.(862-864)CGG>TGG     | p.R288W      |
| Pat_60 | Pre-Treatment   | TNC      | 3371   | 37 | 9 | 117849526 | 117849526 | Missense_Mutation | SNP | T | A | 4  | 64  | c.484A>T     | c.(484-486)AGC>TGC     | p.S162C      |
| Pat_60 | Pre-Treatment   | C9orf86  | 55684  | 37 | 9 | 139726805 | 139726805 | Missense_Mutation | SNP | C | T | 8  | 17  | c.688C>T     | c.(688-690)CCA>TCA     | p.P230S      |
| Pat_60 | Pre-Treatment   | MAP3K15  | 389840 | 37 | X | 19389142  | 19389142  | Missense_Mutation | SNP | C | A | 3  | 20  | c.1760G>T    | c.(1759-1761)TGG>TTG   | p.W587L      |
| Pat_60 | Pre-Treatment   | ZNF645   | 158506 | 37 | X | 22292379  | 22292379  | Missense_Mutation | SNP | G | A | 3  | 41  | c.1271G>A    | c.(1270-1272)CGG>CAG   | p.R424Q      |
| Pat_60 | Pre-Treatment   | USP11    | 8237   | 37 | X | 47092338  | 47092338  | Missense_Mutation | SNP | G | A | 48 | 42  | c.25G>A      | c.(25-27)GGG>AGG       | p.G9R        |
| Pat_60 | Pre-Treatment   | MED12    | 9968   | 37 | X | 70343001  | 70343001  | Nonsense_Mutation | SNP | C | A | 4  | 56  | c.1542C>A    | c.(1540-1542)TGC>TGA   | p.C514*      |
| Pat_60 | Pre-Treatment   | NLGN3    | 54413  | 37 | X | 70389720  | 70389720  | Missense_Mutation | SNP | G | A | 2  | 0   | c.2260G>A    | c.(2260-2262)GAG>AAG   | p.E754K      |
| Pat_60 | Pre-Treatment   | RHOXF2B  | 727940 | 37 | X | 119211063 | 119211063 | Nonsense_Mutation | SNP | C | T | 7  | 7   | c.270G>A     | c.(268-270)TGG>TGA     | p.W90*       |
| Pat_60 | Pre-Treatment   | ACTRT1   | 139741 | 37 | X | 127185072 | 127185072 | Nonsense_Mutation | SNP | G | A | 37 | 57  | c.1114C>T    | c.(1114-1116)CAA>TAA   | p.Q372*      |
| Pat_60 | Pre-Treatment   | GABRQ    | 55879  | 37 | X | 151821199 | 151821199 | Missense_Mutation | SNP | G | A | 5  | 23  | c.1354G>A    | c.(1354-1356)GAT>AAT   | p.D452N      |
| Pat_60 | Pre-Treatment   | FAM58A   | 92002  | 37 | X | 152860138 | 152860138 | Splice_Site       | SNP | C | T | 4  | 19  | c.111_splice | c.e2-1                 | p.R37_splice |
| Pat_60 | Post-Resistance | RER1     | 11079  | 37 | 1 | 2334544   | 2334544   | Missense_Mutation | SNP | G | A | 4  | 175 | c.572G>A     | c.(571-573)GGC>GAC     | p.G191D      |
| Pat_60 | Post-Resistance | PLEKHG5  | 57449  | 37 | 1 | 6528590   | 6528590   | Missense_Mutation | SNP | G | A | 4  | 47  | c.2474C>T    | c.(2473-2475)ACG>ATG   | p.T825M      |
| Pat_60 | Post-Resistance | PGD      | 5226   | 37 | 1 | 10477527  | 10477527  | Missense_Mutation | SNP | G | A | 4  | 112 | c.1070G>A    | c.(1069-1071)GGC>GAC   | p.G357D      |
| Pat_60 | Post-Resistance | PRDM2    | 7799   | 37 | 1 | 14106586  | 14106586  | Missense_Mutation | SNP | G | A | 4  | 129 | c.2296G>A    | c.(2296-2298)GCC>ACC   | p.A766T      |
| Pat_60 | Post-Resistance | PRDM2    | 7799   | 37 | 1 | 14107382  | 14107382  | Missense_Mutation | SNP | C | T | 38 | 146 | c.3092C>T    | c.(3091-3093)CCC>CTC   | p.P1031L     |
| Pat_60 | Post-Resistance | AGMAT    | 79814  | 37 | 1 | 15904220  | 15904220  | Missense_Mutation | SNP | C | T | 18 | 84  | c.860G>A     | c.(859-861)GGG>GAG     | p.G287E      |
| Pat_60 | Post-Resistance | SPEN     | 23013  | 37 | 1 | 16261229  | 16261229  | Missense_Mutation | SNP | G | A | 4  | 98  | c.8494G>A    | c.(8494-8496)GCC>ACC   | p.A2832T     |
| Pat_60 | Post-Resistance | ZBTB17   | 7709   | 37 | 1 | 16268546  | 16268546  | Missense_Mutation | SNP | C | T | 4  | 54  | c.2330G>A    | c.(2329-2331)CGC>CAC   | p.R777H      |
| Pat_60 | Post-Resistance | FBXO42   | 54455  | 37 | 1 | 16583189  | 16583189  | Missense_Mutation | SNP | C | A | 4  | 134 | c.568G>T     | c.(568-570)GGT>TGT     | p.G190C      |
| Pat_60 | Post-Resistance | PAX7     | 5081   | 37 | 1 | 19062346  | 19062346  | Missense_Mutation | SNP | G | A | 4  | 91  | c.1376G>A    | c.(1375-1377)GGC>GAC   | p.G459D      |
| Pat_60 | Post-Resistance | RAP1GAP  | 5909   | 37 | 1 | 21926018  | 21926018  | Missense_Mutation | SNP | G | A | 4  | 61  | c.1745C>T    | c.(1744-1746)ACG>ATG   | p.T582M      |
| Pat_60 | Post-Resistance | RUNX3    | 864    | 37 | 1 | 25254076  | 25254076  | Missense_Mutation | SNP | C | T | 4  | 147 | c.428G>A     | c.(427-429)CGC>CAC     | p.R143H      |
| Pat_60 | Post-Resistance | UBXN11   | 91544  | 37 | 1 | 26610879  | 26610879  | Missense_Mutation | SNP | G | A | 4  | 69  | c.947C>T     | c.(946-948)GCC>GTC     | p.A316V      |
| Pat_60 | Post-Resistance | SF3A3    | 10946  | 37 | 1 | 38435058  | 38435058  | Nonsense_Mutation | SNP | G | A | 4  | 119 | c.1249C>T    | c.(1249-1251)CGA>TGA   | p.R417*      |
| Pat_60 | Post-Resistance | MACF1    | 23499  | 37 | 1 | 39896494  | 39896494  | Missense_Mutation | SNP | G | A | 4  | 157 | c.12571G>A   | c.(12571-12573)GAT>AAT | p.D4191N     |
| Pat_60 | Post-Resistance | KDM4A    | 9682   | 37 | 1 | 44137341  | 44137341  | Missense_Mutation | SNP | C | G | 3  | 98  | c.1529C>G    | c.(1528-1530)TCT>TGT   | p.S510C      |
| Pat_60 | Post-Resistance | OSBPL9   | 114883 | 37 | 1 | 52252264  | 52252264  | Missense_Mutation | SNP | G | A | 4  | 134 | c.1975G>A    | c.(1975-1977)GAT>AAT   | p.D659N      |
| Pat_60 | Post-Resistance | CPT2     | 1376   | 37 | 1 | 53676382  | 53676382  | Missense_Mutation | SNP | G | A | 4  | 63  | c.1036G>A    | c.(1036-1038)GAT>AAT   | p.D346N      |
| Pat_60 | Post-Resistance | INADL    | 10207  | 37 | 1 | 62582843  | 62582843  | Nonsense_Mutation | SNP | C | T | 44 | 182 | c.4843C>T    | c.(4843-4845)CGA>TGA   | p.R1615*     |
| Pat_60 | Post-Resistance | KANK4    | 163782 | 37 | 1 | 62740084  | 62740084  | Missense_Mutation | SNP | C | T | 10 | 39  | c.692G>A     | c.(691-693)GGA>GAA     | p.G231E      |
| Pat_60 | Post-Resistance | C1orf146 | 388649 | 37 | 1 | 92710383  | 92710383  | Missense_Mutation | SNP | A | C | 38 | 161 | c.377A>C     | c.(376-378)AAT>ACT     | p.N126T      |

|        |                 |          |           |    |    |           |           |                   |     |    |    |    |     |                |                      |                |
|--------|-----------------|----------|-----------|----|----|-----------|-----------|-------------------|-----|----|----|----|-----|----------------|----------------------|----------------|
| Pat_60 | Post-Resistance | COL11A1  | 1301      | 37 | 1  | 103470043 | 103470043 | Missense_Mutation | SNP | C  | T  | 26 | 101 | c.1901G>A      | c.(1900-1902)GGA>GAA | p.G634E        |
| Pat_60 | Post-Resistance | CLCC1    | 23155     | 37 | 1  | 109479710 | 109479710 | Missense_Mutation | SNP | C  | T  | 4  | 175 | c.1372G>A      | c.(1372-1374)GTG>ATG | p.V458M        |
| Pat_60 | Post-Resistance | C1orf194 | 127003    | 37 | 1  | 109649210 | 109649210 | Missense_Mutation | SNP | C  | T  | 75 | 204 | c.386G>A       | c.(385-387)AGA>AAA   | p.R129K        |
| Pat_60 | Post-Resistance | KIAA1324 | 57535     | 37 | 1  | 109707201 | 109707201 | Missense_Mutation | SNP | G  | A  | 4  | 182 | c.355G>A       | c.(355-357)GGC>AGC   | p.G119S        |
| Pat_60 | Post-Resistance | KCNA10   | 3744      | 37 | 1  | 111061007 | 111061007 | Missense_Mutation | SNP | G  | A  | 4  | 129 | c.403C>T       | c.(403-405)CGG>TGG   | p.R135W        |
| Pat_60 | Post-Resistance | SYCP1    | 6847      | 37 | 1  | 115428861 | 115428861 | Missense_Mutation | SNP | C  | T  | 85 | 283 | c.1121C>T      | c.(1120-1122)TCG>TTG | p.S374L        |
| Pat_60 | Post-Resistance | ATP1A1   | 476       | 37 | 1  | 116946598 | 116946598 | Splice_Site       | SNP | G  | A  | 4  | 137 | c.3043_splice  | c.e22+1              | p.G1015_splice |
| Pat_60 | Post-Resistance | PHGDH    | 26227     | 37 | 1  | 120277981 | 120277981 | Missense_Mutation | SNP | G  | A  | 4  | 128 | c.707G>A       | c.(706-708)CGT>CAT   | p.R236H        |
| Pat_60 | Post-Resistance | NOTCH2NL | 388677    | 37 | 1  | 145290447 | 145290447 | Missense_Mutation | SNP | C  | T  | 30 | 662 | c.653C>T       | c.(652-654)CCT>CTT   | p.P218L        |
| Pat_60 | Post-Resistance | NBPF10   | 100132406 | 37 | 1  | 145304523 | 145304523 | Missense_Mutation | SNP | C  | T  | 75 | 609 | c.1456C>T      | c.(1456-1458)CAT>TAT | p.H486Y        |
| Pat_60 | Post-Resistance | ITGA10   | 8515      | 37 | 1  | 145527721 | 145527721 | Missense_Mutation | SNP | G  | A  | 4  | 115 | c.161G>A       | c.(160-162)CGA>CAA   | p.R54Q         |
| Pat_60 | Post-Resistance | RPRD2    | 23248     | 37 | 1  | 150429902 | 150429902 | Missense_Mutation | SNP | C  | T  | 80 | 231 | c.1009C>T      | c.(1009-1011)CCT>TCT | p.P337S        |
| Pat_60 | Post-Resistance | PSMD4    | 5710      | 37 | 1  | 151237946 | 151237946 | Missense_Mutation | SNP | C  | T  | 4  | 70  | c.515C>T       | c.(514-516)ACA>ATA   | p.T172I        |
| Pat_60 | Post-Resistance | RFX5     | 5993      | 37 | 1  | 151315846 | 151315846 | Missense_Mutation | SNP | G  | A  | 32 | 66  | c.830C>T       | c.(829-831)GCC>GTC   | p.A277V        |
| Pat_60 | Post-Resistance | TCHH     | 7062      | 37 | 1  | 152083040 | 152083040 | Missense_Mutation | SNP | G  | A  | 4  | 172 | c.2653C>T      | c.(2653-2655)CGC>TGC | p.R885C        |
| Pat_60 | Post-Resistance | S100A7L2 | 645922    | 37 | 1  | 153410754 | 153410754 | Missense_Mutation | SNP | G  | A  | 27 | 87  | c.85C>T        | c.(85-87)CGC>TGC     | p.R29C         |
| Pat_60 | Post-Resistance | ADAR     | 103       | 37 | 1  | 154558299 | 154558299 | Missense_Mutation | SNP | C  | A  | 4  | 45  | c.3245G>T      | c.(3244-3246)TGT>TTT | p.C1082F       |
| Pat_60 | Post-Resistance | RUSC1    | 23623     | 37 | 1  | 155292654 | 155292654 | Missense_Mutation | SNP | C  | T  | 3  | 37  | c.1090C>T      | c.(1090-1092)CCT>TCT | p.P364S        |
| Pat_60 | Post-Resistance | ASH1L    | 55870     | 37 | 1  | 155451975 | 155451975 | Missense_Mutation | SNP | G  | A  | 4  | 108 | c.686C>T       | c.(685-687)CCT>CTT   | p.P229L        |
| Pat_60 | Post-Resistance | IQGAP3   | 128239    | 37 | 1  | 156526468 | 156526468 | Missense_Mutation | SNP | G  | A  | 3  | 60  | c.1147C>T      | c.(1147-1149)CGG>TGG | p.R383W        |
| Pat_60 | Post-Resistance | CD1A     | 909       | 37 | 1  | 158226022 | 158226022 | Missense_Mutation | SNP | G  | A  | 4  | 165 | c.554G>A       | c.(553-555)CGT>CAT   | p.R185H        |
| Pat_60 | Post-Resistance | OR10K1   | 391109    | 37 | 1  | 158435891 | 158435891 | Missense_Mutation | SNP | C  | A  | 85 | 336 | c.540C>A       | c.(538-540)GAC>GAA   | p.D180E        |
| Pat_60 | Post-Resistance | DUSP12   | 11266     | 37 | 1  | 161719662 | 161719662 | Missense_Mutation | SNP | C  | T  | 3  | 26  | c.71C>T        | c.(70-72)GCC>GTC     | p.A24V         |
| Pat_60 | Post-Resistance | FMO2     | 2327      | 37 | 1  | 171174431 | 171174431 | Missense_Mutation | SNP | G  | A  | 4  | 67  | c.841G>A       | c.(841-843)GAA>AAA   | p.E281K        |
| Pat_60 | Post-Resistance | RABGAP1L | 9910      | 37 | 1  | 174363191 | 174363191 | Missense_Mutation | SNP | C  | T  | 48 | 205 | c.1618C>T      | c.(1618-1620)CCT>TCT | p.P540S        |
| Pat_60 | Post-Resistance | LAMC2    | 3918      | 37 | 1  | 183205739 | 183205739 | Missense_Mutation | SNP | G  | T  | 4  | 183 | c.2601G>T      | c.(2599-2601)CAG>CAT | p.Q867H        |
| Pat_60 | Post-Resistance | RGS18    | 64407     | 37 | 1  | 192128444 | 192128444 | Missense_Mutation | SNP | G  | A  | 24 | 82  | c.214G>A       | c.(214-216)GAA>AAA   | p.E72K         |
| Pat_60 | Post-Resistance | KIF14    | 9928      | 37 | 1  | 200574423 | 200574423 | Missense_Mutation | SNP | C  | T  | 6  | 195 | c.1734G>A      | c.(1732-1734)ATG>ATA | p.M578I        |
| Pat_60 | Post-Resistance | KIF14    | 9928      | 37 | 1  | 200574445 | 200574445 | Missense_Mutation | SNP | T  | A  | 6  | 200 | c.1712A>T      | c.(1711-1713)CAT>CTT | p.H571L        |
| Pat_60 | Post-Resistance | DDX59    | 83479     | 37 | 1  | 200633067 | 200633067 | Missense_Mutation | SNP | G  | A  | 29 | 122 | c.952C>T       | c.(952-954)CGT>TGT   | p.R318C        |
| Pat_60 | Post-Resistance | RNPEP    | 6051      | 37 | 1  | 201965280 | 201965280 | Missense_Mutation | SNP | G  | A  | 3  | 79  | c.743G>A       | c.(742-744)CGG>CAG   | p.R248Q        |
| Pat_60 | Post-Resistance | LGR6     | 59352     | 37 | 1  | 202270330 | 202270330 | Missense_Mutation | SNP | C  | T  | 19 | 69  | c.896C>T       | c.(895-897)TCG>TTG   | p.S299L        |
| Pat_60 | Post-Resistance | PPP1R15B | 84919     | 37 | 1  | 204380470 | 204380470 | Missense_Mutation | SNP | A  | G  | 5  | 169 | c.70T>C        | c.(70-72)TTT>CTT     | p.F24L         |
| Pat_60 | Post-Resistance | MDM4     | 4194      | 37 | 1  | 204513793 | 204513793 | Missense_Mutation | SNP | G  | A  | 4  | 150 | c.803G>A       | c.(802-804)GGG>GAG   | p.G268E        |
| Pat_60 | Post-Resistance | TMCC2    | 9911      | 37 | 1  | 205238112 | 205238112 | Missense_Mutation | SNP | C  | T  | 46 | 110 | c.782C>T       | c.(781-783)CCC>CTC   | p.P261L        |
| Pat_60 | Post-Resistance | PFKFB2   | 5208      | 37 | 1  | 207235391 | 207235391 | Missense_Mutation | SNP | G  | A  | 4  | 147 | c.179G>A       | c.(178-180)CGC>CAC   | p.R60H         |
| Pat_60 | Post-Resistance | EPRS     | 2058      | 37 | 1  | 220146710 | 220146710 | Missense_Mutation | SNP | G  | A  | 5  | 242 | c.4114C>T      | c.(4114-4116)CGT>TGT | p.R1372C       |
| Pat_60 | Post-Resistance | C1orf57  | 84284     | 37 | 1  | 233092163 | 233092163 | Missense_Mutation | SNP | C  | A  | 4  | 91  | c.268C>A       | c.(268-270)CAG>AAG   | p.Q90K         |
| Pat_60 | Post-Resistance | SMYD3    | 64754     | 37 | 1  | 246498703 | 246498703 | Missense_Mutation | SNP | G  | A  | 91 | 272 | c.302C>T       | c.(301-303)TCC>TTC   | p.S101F        |
| Pat_60 | Post-Resistance | C1orf150 | 148823    | 37 | 1  | 247737445 | 247737445 | Missense_Mutation | SNP | G  | A  | 64 | 310 | c.169G>A       | c.(169-171)GAA>AAA   | p.E57K         |
| Pat_60 | Post-Resistance | OR2T12   | 127064    | 37 | 1  | 248458256 | 248458256 | Missense_Mutation | SNP | A  | G  | 4  | 109 | c.625T>C       | c.(625-627)TTT>CTT   | p.F209L        |
| Pat_60 | Post-Resistance | TAF3     | 83860     | 37 | 10 | 8006435   | 8006435   | Missense_Mutation | SNP | C  | T  | 13 | 25  | c.962C>T       | c.(961-963)CCC>CTC   | p.P321L        |
| Pat_60 | Post-Resistance | CAMK1D   | 57118     | 37 | 10 | 12803005  | 12803005  | Missense_Mutation | SNP | G  | A  | 20 | 121 | c.358G>A       | c.(358-360)GAT>AAT   | p.D120N        |
| Pat_60 | Post-Resistance | PIP4K2A  | 5305      | 37 | 10 | 22830768  | 22830768  | Missense_Mutation | SNP | G  | A  | 4  | 165 | c.1001C>T      | c.(1000-1002)CCG>CTG | p.P334L        |
| Pat_60 | Post-Resistance | MYO3A    | 53904     | 37 | 10 | 26355954  | 26355954  | Missense_Mutation | SNP | C  | T  | 35 | 169 | c.1004C>T      | c.(1003-1005)TCC>TTC | p.S335F        |
| Pat_60 | Post-Resistance | APBB1IP  | 54518     | 37 | 10 | 26849663  | 26849663  | Missense_Mutation | SNP | G  | A  | 17 | 67  | c.1259G>A      | c.(1258-1260)GGG>GAG | p.G420E        |
| Pat_60 | Post-Resistance | ARMC4    | 55130     | 37 | 10 | 28225687  | 28225688  | Nonsense_Mutation | DNP | CC | TT | 73 | 322 | .2219_2220GG>A | c.(2218-2220)TGG>TAA | p.W740*        |

|        |                 |          |        |    |    |           |           |                   |     |    |    |    |     |                |                      |          |
|--------|-----------------|----------|--------|----|----|-----------|-----------|-------------------|-----|----|----|----|-----|----------------|----------------------|----------|
| Pat_60 | Post-Resistance | SVIL     | 6840   | 37 | 10 | 29784024  | 29784024  | Missense_Mutation | SNP | C  | T  | 6  | 48  | c.3751G>A      | c.(3751-3753)GAA>AAA | p.E1251K |
| Pat_60 | Post-Resistance | C10orf68 | 79741  | 37 | 10 | 33135342  | 33135342  | Missense_Mutation | SNP | G  | T  | 4  | 194 | c.1372G>T      | c.(1372-1374)GAT>TAT | p.D458Y  |
| Pat_60 | Post-Resistance | ANKRD30A | 91074  | 37 | 10 | 37425564  | 37425564  | Missense_Mutation | SNP | G  | A  | 13 | 46  | c.617G>A       | c.(616-618)CGA>CAA   | p.R206Q  |
| Pat_60 | Post-Resistance | MBL2     | 4153   | 37 | 10 | 54531224  | 54531224  | Missense_Mutation | SNP | C  | T  | 27 | 118 | c.172G>A       | c.(172-174)GAA>AAA   | p.E58K   |
| Pat_60 | Post-Resistance | PCDH15   | 65217  | 37 | 10 | 55570336  | 55570336  | Missense_Mutation | SNP | C  | T  | 58 | 157 | c.4498G>A      | c.(4498-4500)GAA>AAA | p.E1500K |
| Pat_60 | Post-Resistance | DLG5     | 9231   | 37 | 10 | 79565517  | 79565518  | Missense_Mutation | DNP | CC | TT | 30 | 104 | .5069_5070GG>A | c.(5068-5070)CGG>CAA | p.R1690Q |
| Pat_60 | Post-Resistance | ACTA2    | 59     | 37 | 10 | 90697849  | 90697849  | Missense_Mutation | SNP | G  | A  | 4  | 147 | c.959C>T       | c.(958-960)ACG>ATG   | p.T320M  |
| Pat_60 | Post-Resistance | CYP2C9   | 1559   | 37 | 10 | 96745844  | 96745844  | Missense_Mutation | SNP | C  | T  | 72 | 315 | c.1204C>T      | c.(1204-1206)CCC>TCC | p.P402S  |
| Pat_60 | Post-Resistance | DNTT     | 1791   | 37 | 10 | 98064324  | 98064324  | Missense_Mutation | SNP | G  | A  | 4  | 98  | c.70G>A        | c.(70-72)GCC>ACC     | p.A24T   |
| Pat_60 | Post-Resistance | SLIT1    | 6585   | 37 | 10 | 98823964  | 98823964  | Missense_Mutation | SNP | G  | A  | 13 | 24  | c.590C>T       | c.(589-591)CCC>CTC   | p.P197L  |
| Pat_60 | Post-Resistance | SCD      | 6319   | 37 | 10 | 102120518 | 102120518 | Missense_Mutation | SNP | C  | T  | 85 | 154 | c.908C>T       | c.(907-909)TCC>TTC   | p.S303F  |
| Pat_60 | Post-Resistance | MRPL43   | 84545  | 37 | 10 | 102739080 | 102739080 | Missense_Mutation | SNP | G  | A  | 4  | 125 | c.578C>T       | c.(577-579)CCA>CTA   | p.P193L  |
| Pat_60 | Post-Resistance | SORCS1   | 114815 | 37 | 10 | 108366965 | 108366965 | Missense_Mutation | SNP | G  | A  | 22 | 61  | c.3124C>T      | c.(3124-3126)CCA>TCA | p.P1042S |
| Pat_60 | Post-Resistance | RPL13AP6 | 644511 | 37 | 10 | 112696573 | 112696573 | Missense_Mutation | SNP | T  | C  | 9  | 41  | c.419A>G       | c.(418-420)CAC>CGC   | p.H140R  |
| Pat_60 | Post-Resistance | KIAA1598 | 57698  | 37 | 10 | 118687348 | 118687348 | Missense_Mutation | SNP | G  | A  | 59 | 223 | c.1067C>T      | c.(1066-1068)CCT>CTT | p.P356L  |
| Pat_60 | Post-Resistance | EIF3A    | 8661   | 37 | 10 | 120801755 | 120801755 | Missense_Mutation | SNP | T  | A  | 6  | 338 | c.3277A>T      | c.(3277-3279)ATG>TTG | p.M1093L |
| Pat_60 | Post-Resistance | DMBT1    | 1755   | 37 | 10 | 124395670 | 124395670 | Missense_Mutation | SNP | G  | A  | 5  | 45  | c.6325G>A      | c.(6325-6327)GGG>AGG | p.G2109R |
| Pat_60 | Post-Resistance | DMBT1    | 1755   | 37 | 10 | 124399773 | 124399773 | Missense_Mutation | SNP | C  | A  | 45 | 123 | c.6773C>A      | c.(6772-6774)TCC>TAC | p.S2258Y |
| Pat_60 | Post-Resistance | FAM175B  | 23172  | 37 | 10 | 126523485 | 126523485 | Missense_Mutation | SNP | G  | A  | 5  | 172 | c.1193G>A      | c.(1192-1194)CGA>CAA | p.R398Q  |
| Pat_60 | Post-Resistance | ANO9     | 338440 | 37 | 11 | 433344    | 433344    | Missense_Mutation | SNP | G  | A  | 3  | 37  | c.320C>T       | c.(319-321)GCC>GTC   | p.A107V  |
| Pat_60 | Post-Resistance | SYT8     | 90019  | 37 | 11 | 1858477   | 1858477   | Missense_Mutation | SNP | C  | T  | 7  | 11  | c.1022C>T      | c.(1021-1023)CCC>CTC | p.P341L  |
| Pat_60 | Post-Resistance | DNHD1    | 144132 | 37 | 11 | 6540836   | 6540836   | Missense_Mutation | SNP | G  | A  | 4  | 193 | c.1399G>A      | c.(1399-1401)GAG>AAG | p.E467K  |
| Pat_60 | Post-Resistance | CYP2R1   | 120227 | 37 | 11 | 14902017  | 14902017  | Missense_Mutation | SNP | G  | T  | 4  | 125 | c.665C>A       | c.(664-666)GCC>GAC   | p.A222D  |
| Pat_60 | Post-Resistance | KCNJ11   | 3767   | 37 | 11 | 17408942  | 17408942  | Missense_Mutation | SNP | G  | A  | 7  | 17  | c.697C>T       | c.(697-699)CTC>TTC   | p.L233F  |
| Pat_60 | Post-Resistance | SLC6A5   | 9152   | 37 | 11 | 20639381  | 20639381  | Nonsense_Mutation | SNP | G  | A  | 47 | 125 | c.1211G>A      | c.(1210-1212)TGG>TAG | p.W404*  |
| Pat_60 | Post-Resistance | QSER1    | 79832  | 37 | 11 | 32956501  | 32956501  | Missense_Mutation | SNP | C  | T  | 71 | 113 | c.3310C>T      | c.(3310-3312)CCA>TCA | p.P1104S |
| Pat_60 | Post-Resistance | CDCA5    | 113130 | 37 | 11 | 64851021  | 64851021  | Missense_Mutation | SNP | G  | A  | 4  | 105 | c.143C>T       | c.(142-144)ACA>ATA   | p.T48I   |
| Pat_60 | Post-Resistance | NPAS4    | 266743 | 37 | 11 | 66190601  | 66190601  | Missense_Mutation | SNP | A  | G  | 5  | 14  | c.706A>G       | c.(706-708)ATC>GTC   | p.I236V  |
| Pat_60 | Post-Resistance | DRD2     | 1813   | 37 | 11 | 113283314 | 113283314 | Missense_Mutation | SNP | C  | T  | 20 | 35  | c.1102G>A      | c.(1102-1104)GAG>AAG | p.E368K  |
| Pat_60 | Post-Resistance | TPRSS4   | 56649  | 37 | 11 | 117975469 | 117975469 | Missense_Mutation | SNP | C  | T  | 21 | 79  | c.374C>T       | c.(373-375)TCT>TTT   | p.S125F  |
| Pat_60 | Post-Resistance | TREH     | 11181  | 37 | 11 | 118529412 | 118529412 | Missense_Mutation | SNP | C  | T  | 2  | 1   | c.1576G>A      | c.(1576-1578)GGG>AGG | p.G526R  |
| Pat_60 | Post-Resistance | CCDC15   | 80071  | 37 | 11 | 124857495 | 124857495 | Missense_Mutation | SNP | A  | C  | 11 | 387 | c.1373A>C      | c.(1372-1374)CAC>CCC | p.H458P  |
| Pat_60 | Post-Resistance | RPUSD4   | 84881  | 37 | 11 | 126075452 | 126075452 | Missense_Mutation | SNP | C  | T  | 4  | 146 | c.707G>A       | c.(706-708)CGC>CAC   | p.R236H  |
| Pat_60 | Post-Resistance | FAM118B  | 79607  | 37 | 11 | 126132015 | 126132015 | Missense_Mutation | SNP | G  | A  | 4  | 177 | c.1043G>A      | c.(1042-1044)GGC>GAC | p.G348D  |
| Pat_60 | Post-Resistance | IGSF9B   | 22997  | 37 | 11 | 133792616 | 133792616 | Missense_Mutation | SNP | G  | A  | 2  | 2   | c.2129C>T      | c.(2128-2130)CCG>CTG | p.P710L  |
| Pat_60 | Post-Resistance | CACNA1C  | 775    | 37 | 12 | 2690883   | 2690883   | Missense_Mutation | SNP | G  | A  | 5  | 34  | c.2023G>A      | c.(2023-2025)GGA>AGA | p.G675R  |
| Pat_60 | Post-Resistance | C12orf32 | 83695  | 37 | 12 | 2997518   | 2997518   | Missense_Mutation | SNP | G  | A  | 4  | 163 | c.610G>A       | c.(610-612)GAG>AAG   | p.E204K  |
| Pat_60 | Post-Resistance | VWF      | 7450   | 37 | 12 | 6138549   | 6138549   | Missense_Mutation | SNP | G  | A  | 5  | 201 | c.2926C>T      | c.(2926-2928)CGC>TGC | p.R976C  |
| Pat_60 | Post-Resistance | A2ML1    | 144568 | 37 | 12 | 9010693   | 9010693   | Missense_Mutation | SNP | A  | G  | 7  | 8   | c.3259A>G      | c.(3259-3261)ATG>GTG | p.M1087V |
| Pat_60 | Post-Resistance | A2ML1    | 144568 | 37 | 12 | 9016423   | 9016423   | Missense_Mutation | SNP | C  | T  | 4  | 139 | c.3536C>T      | c.(3535-3537)CCA>CTA | p.P1179L |
| Pat_60 | Post-Resistance | CD69     | 969    | 37 | 12 | 9907192   | 9907192   | Missense_Mutation | SNP | A  | C  | 95 | 317 | c.482T>G       | c.(481-483)TTT>TGT   | p.F161C  |
| Pat_60 | Post-Resistance | PRB2     | 653247 | 37 | 12 | 11546771  | 11546771  | Missense_Mutation | SNP | G  | C  | 6  | 348 | c.241C>G       | c.(241-243)CCA>GCA   | p.P81A   |
| Pat_60 | Post-Resistance | LRP6     | 4040   | 37 | 12 | 12274091  | 12274091  | Missense_Mutation | SNP | G  | A  | 3  | 46  | c.4811C>T      | c.(4810-4812)CCG>CTG | p.P1604L |
| Pat_60 | Post-Resistance | GYS2     | 2998   | 37 | 12 | 21692230  | 21692230  | Missense_Mutation | SNP | G  | A  | 76 | 327 | c.1852C>T      | c.(1852-1854)CCA>TCA | p.P618S  |
| Pat_60 | Post-Resistance | TMTC1    | 83857  | 37 | 12 | 29673644  | 29673644  | Nonsense_Mutation | SNP | T  | A  | 26 | 89  | c.1471A>T      | c.(1471-1473)AAA>TAA | p.K491*  |
| Pat_60 | Post-Resistance | SLC2A13  | 114134 | 37 | 12 | 40441979  | 40441979  | Missense_Mutation | SNP | G  | A  | 5  | 322 | c.590C>T       | c.(589-591)GCG>GTG   | p.A197V  |
| Pat_60 | Post-Resistance | PFKM     | 5213   | 37 | 12 | 48538907  | 48538907  | Missense_Mutation | SNP | C  | T  | 4  | 129 | c.2086C>T      | c.(2086-2088)CGT>TGT | p.R696C  |



|        |                 |           |        |    |    |           |           |                   |     |   |   |    |     |               |                      |               |
|--------|-----------------|-----------|--------|----|----|-----------|-----------|-------------------|-----|---|---|----|-----|---------------|----------------------|---------------|
| Pat_60 | Post-Resistance | CACNB3    | 784    | 37 | 12 | 49219475  | 49219475  | Missense_Mutation | SNP | C | T | 36 | 125 | c.665C>T      | c.(664-666)TCC>TTC   | p.S222F       |
| Pat_60 | Post-Resistance | RACGAP1   | 29127  | 37 | 12 | 50390908  | 50390908  | Missense_Mutation | SNP | C | T | 4  | 149 | c.959G>A      | c.(958-960)CGT>CAT   | p.R320H       |
| Pat_60 | Post-Resistance | KRT8      | 3856   | 37 | 12 | 53292473  | 53292473  | Missense_Mutation | SNP | C | T | 5  | 200 | c.1192G>A     | c.(1192-1194)GAG>AAG | p.E398K       |
| Pat_60 | Post-Resistance | ESPL1     | 9700   | 37 | 12 | 53680574  | 53680574  | Missense_Mutation | SNP | C | T | 3  | 85  | c.4054C>T     | c.(4054-4056)CGG>TGG | p.R1352W      |
| Pat_60 | Post-Resistance | KIF5A     | 3798   | 37 | 12 | 57957435  | 57957435  | Missense_Mutation | SNP | G | T | 4  | 185 | c.250G>T      | c.(250-252)GCT>TCT   | p.A84S        |
| Pat_60 | Post-Resistance | RAP1B     | 5908   | 37 | 12 | 69050092  | 69050092  | Missense_Mutation | SNP | A | G | 4  | 236 | c.331A>G      | c.(331-333)ATG>GTG   | p.M111V       |
| Pat_60 | Post-Resistance | PTPRB     | 5787   | 37 | 12 | 70956819  | 70956819  | Missense_Mutation | SNP | C | T | 11 | 31  | c.3319G>A     | c.(3319-3321)GCC>ACC | p.A1107T      |
| Pat_60 | Post-Resistance | PTPRB     | 5787   | 37 | 12 | 71029645  | 71029645  | Missense_Mutation | SNP | C | T | 4  | 37  | c.257G>A      | c.(256-258)CGC>CAC   | p.R86H        |
| Pat_60 | Post-Resistance | PTPRR     | 5801   | 37 | 12 | 71155318  | 71155318  | Missense_Mutation | SNP | C | T | 6  | 345 | c.560G>A      | c.(559-561)CGT>CAT   | p.R187H       |
| Pat_60 | Post-Resistance | TBC1D15   | 64786  | 37 | 12 | 72307707  | 72307707  | Splice_Site       | SNP | G | A | 5  | 194 | c.1518_splice | c.e13+1              | p.M506_splice |
| Pat_60 | Post-Resistance | ACSS3     | 79611  | 37 | 12 | 81610767  | 81610767  | Missense_Mutation | SNP | G | A | 27 | 92  | c.1442G>A     | c.(1441-1443)GGA>GAA | p.G481E       |
| Pat_60 | Post-Resistance | SLC41A2   | 84102  | 37 | 12 | 105321753 | 105321753 | Missense_Mutation | SNP | G | T | 4  | 123 | c.553C>A      | c.(553-555)CAG>AAG   | p.Q185K       |
| Pat_60 | Post-Resistance | RFX4      | 5992   | 37 | 12 | 107075789 | 107075789 | Missense_Mutation | SNP | C | T | 65 | 200 | c.334C>T      | c.(334-336)CCT>TCT   | p.P112S       |
| Pat_60 | Post-Resistance | RASAL1    | 8437   | 37 | 12 | 113539775 | 113539775 | Missense_Mutation | SNP | C | T | 41 | 120 | c.2141G>A     | c.(2140-2142)GGG>GAG | p.G714E       |
| Pat_60 | Post-Resistance | RNF10     | 9921   | 37 | 12 | 121002888 | 121002888 | Missense_Mutation | SNP | G | A | 5  | 386 | c.1679G>A     | c.(1678-1680)CGT>CAT | p.R560H       |
| Pat_60 | Post-Resistance | ANAPC5    | 51433  | 37 | 12 | 121773427 | 121773427 | Missense_Mutation | SNP | C | T | 5  | 311 | c.859G>A      | c.(859-861)GAA>AAA   | p.E287K       |
| Pat_60 | Post-Resistance | TMEM132D  | 121256 | 37 | 12 | 129563125 | 129563125 | Missense_Mutation | SNP | A | G | 31 | 131 | c.2069T>C     | c.(2068-2070)ATC>ACC | p.I690T       |
| Pat_60 | Post-Resistance | NUPL1     | 9818   | 37 | 13 | 25894666  | 25894666  | Splice_Site       | SNP | A | T | 4  | 117 | c.711_splice  | c.e8-2               | p.E237_splice |
| Pat_60 | Post-Resistance | RNF6      | 6049   | 37 | 13 | 26788695  | 26788695  | Missense_Mutation | SNP | G | A | 5  | 192 | c.1324C>T     | c.(1324-1326)CGC>TGC | p.R442C       |
| Pat_60 | Post-Resistance | FLT1      | 2321   | 37 | 13 | 29004251  | 29004251  | Missense_Mutation | SNP | C | T | 4  | 89  | c.1042G>A     | c.(1042-1044)GCT>ACT | p.A348T       |
| Pat_60 | Post-Resistance | DGKH      | 160851 | 37 | 13 | 42739570  | 42739570  | Splice_Site       | SNP | G | A | 4  | 169 | c.958_splice  | c.e8+1               | p.G320_splice |
| Pat_60 | Post-Resistance | ATP7B     | 540    | 37 | 13 | 52511468  | 52511468  | Missense_Mutation | SNP | C | T | 4  | 57  | c.3965G>A     | c.(3964-3966)CGC>CAC | p.R1322H      |
| Pat_60 | Post-Resistance | DIAPH3    | 81624  | 37 | 13 | 60384961  | 60384961  | Missense_Mutation | SNP | G | A | 3  | 75  | c.3124C>T     | c.(3124-3126)CGC>TGC | p.R1042C      |
| Pat_60 | Post-Resistance | LMO7      | 4008   | 37 | 13 | 76397821  | 76397821  | Missense_Mutation | SNP | C | A | 4  | 170 | c.2062C>A     | c.(2062-2064)CAG>AAG | p.Q688K       |
| Pat_60 | Post-Resistance | TPP2      | 7174   | 37 | 13 | 103299599 | 103299599 | Nonsense_Mutation | SNP | G | T | 4  | 95  | c.2533G>T     | c.(2533-2535)GAA>TAA | p.E845*       |
| Pat_60 | Post-Resistance | COL4A2    | 1284   | 37 | 13 | 111147701 | 111147701 | Missense_Mutation | SNP | A | C | 30 | 90  | c.3647A>C     | c.(3646-3648)CAC>CCC | p.H1216P      |
| Pat_60 | Post-Resistance | FAM70B    | 348013 | 37 | 13 | 114514844 | 114514844 | Missense_Mutation | SNP | C | T | 44 | 85  | c.949C>T      | c.(949-951)CCG>TCG   | p.P317S       |
| Pat_60 | Post-Resistance | OR4N5     | 390437 | 37 | 14 | 20612733  | 20612733  | Missense_Mutation | SNP | C | T | 86 | 260 | c.839C>T      | c.(838-840)CCT>CTT   | p.P280L       |
| Pat_60 | Post-Resistance | CHD8      | 57680  | 37 | 14 | 21860068  | 21860068  | Nonsense_Mutation | SNP | A | T | 19 | 85  | c.5972T>A     | c.(5971-5973)TTG>TAG | p.L1991*      |
| Pat_60 | Post-Resistance | MRPL52    | 122704 | 37 | 14 | 23303432  | 23303432  | Nonsense_Mutation | SNP | C | T | 4  | 136 | c.274C>T      | c.(274-276)CAG>TAG   | p.Q92*        |
| Pat_60 | Post-Resistance | LRP10     | 26020  | 37 | 14 | 23345043  | 23345043  | Missense_Mutation | SNP | C | T | 4  | 87  | c.886C>T      | c.(886-888)CGT>TGT   | p.R296C       |
| Pat_60 | Post-Resistance | REM2      | 161253 | 37 | 14 | 23354093  | 23354093  | Missense_Mutation | SNP | A | G | 3  | 75  | c.314A>G      | c.(313-315)GAG>GGG   | p.E105G       |
| Pat_60 | Post-Resistance | RBM23     | 55147  | 37 | 14 | 23375485  | 23375485  | Missense_Mutation | SNP | C | T | 5  | 155 | c.320G>A      | c.(319-321)CGT>CAT   | p.R107H       |
| Pat_60 | Post-Resistance | PRMT5     | 10419  | 37 | 14 | 23392017  | 23392017  | Missense_Mutation | SNP | G | A | 3  | 69  | c.1513C>T     | c.(1513-1515)CGG>TGG | p.R505W       |
| Pat_60 | Post-Resistance | C14orf37  | 145407 | 37 | 14 | 58605719  | 58605719  | Missense_Mutation | SNP | G | A | 18 | 82  | c.358C>T      | c.(358-360)CCC>TCC   | p.P120S       |
| Pat_60 | Post-Resistance | PLEKHG3   | 26030  | 37 | 14 | 65194686  | 65194686  | Missense_Mutation | SNP | C | T | 2  | 0   | c.337C>T      | c.(337-339)CGC>TGC   | p.R113C       |
| Pat_60 | Post-Resistance | GALNTL1   | 57452  | 37 | 14 | 69806275  | 69806275  | Missense_Mutation | SNP | G | A | 36 | 104 | c.1126G>A     | c.(1126-1128)GAT>AAT | p.D376N       |
| Pat_60 | Post-Resistance | SFRS5     | 6430   | 37 | 14 | 70238000  | 70238000  | Missense_Mutation | SNP | G | A | 5  | 383 | c.641G>A      | c.(640-642)CGG>CAG   | p.R214Q       |
| Pat_60 | Post-Resistance | ADAM20    | 8748   | 37 | 14 | 70990455  | 70990455  | Missense_Mutation | SNP | C | A | 4  | 124 | c.1170G>T     | c.(1168-1170)TTG>TTT | p.L390F       |
| Pat_60 | Post-Resistance | C14orf115 | 55237  | 37 | 14 | 74825503  | 74825503  | Missense_Mutation | SNP | G | A | 27 | 50  | c.2017G>A     | c.(2017-2019)GAG>AAG | p.E673K       |
| Pat_60 | Post-Resistance | ANGEL1    | 23357  | 37 | 14 | 77275950  | 77275950  | Missense_Mutation | SNP | G | A | 4  | 152 | c.101C>T      | c.(100-102)GCG>GTG   | p.A34V        |
| Pat_60 | Post-Resistance | CCDC88C   | 440193 | 37 | 14 | 91760643  | 91760643  | Missense_Mutation | SNP | C | T | 5  | 26  | c.3986G>A     | c.(3985-3987)GGG>GAG | p.G1329E      |
| Pat_60 | Post-Resistance | DLK1      | 8788   | 37 | 14 | 101198450 | 101198450 | Missense_Mutation | SNP | G | A | 25 | 113 | c.334G>A      | c.(334-336)GAA>AAA   | p.E112K       |
| Pat_60 | Post-Resistance | OR4N3P    | 390539 | 37 | 15 | 22414263  | 22414263  | Missense_Mutation | SNP | G | A | 41 | 671 | c.562G>A      | c.(562-564)GAC>AAC   | p.D188N       |
| Pat_60 | Post-Resistance | DLL4      | 54567  | 37 | 15 | 41228860  | 41228860  | Missense_Mutation | SNP | C | T | 3  | 37  | c.1675C>T     | c.(1675-1677)CGG>TGG | p.R559W       |
| Pat_60 | Post-Resistance | UNC13C    | 440279 | 37 | 15 | 54685300  | 54685300  | Missense_Mutation | SNP | G | A | 44 | 106 | c.4768G>A     | c.(4768-4770)GAT>AAT | p.D1590N      |
| Pat_60 | Post-Resistance | HERC1     | 8925   | 37 | 15 | 63950785  | 63950785  | Missense_Mutation | SNP | G | A | 4  | 110 | c.9557C>T     | c.(9556-9558)GCC>GTC | p.A3186V      |

|        |                 |          |        |    |    |           |           |                   |     |   |   |     |     |           |                      |          |
|--------|-----------------|----------|--------|----|----|-----------|-----------|-------------------|-----|---|---|-----|-----|-----------|----------------------|----------|
| Pat_60 | Post-Resistance | TIPIN    | 54962  | 37 | 15 | 66641409  | 66641409  | Missense_Mutation | SNP | A | G | 3   | 61  | c.464T>C  | c.(463-465)GTT>GCT   | p.V155A  |
| Pat_60 | Post-Resistance | GRAMD2   | 196996 | 37 | 15 | 72462197  | 72462197  | Missense_Mutation | SNP | G | C | 4   | 176 | c.125C>G  | c.(124-126)CCG>CGG   | p.P42R   |
| Pat_60 | Post-Resistance | PKM2     | 5315   | 37 | 15 | 72492040  | 72492040  | Missense_Mutation | SNP | C | T | 4   | 89  | c.1547G>A | c.(1546-1548)CGC>CAC | p.R516H  |
| Pat_60 | Post-Resistance | NPTN     | 27020  | 37 | 15 | 73862544  | 73862544  | Missense_Mutation | SNP | A | C | 33  | 184 | c.1061T>G | c.(1060-1062)GTG>GGG | p.V354G  |
| Pat_60 | Post-Resistance | ADAMTSL3 | 57188  | 37 | 15 | 84324532  | 84324532  | Missense_Mutation | SNP | C | T | 20  | 41  | c.19C>T   | c.(19-21)CCC>TCC     | p.P7S    |
| Pat_60 | Post-Resistance | ZNF592   | 9640   | 37 | 15 | 85327009  | 85327009  | Missense_Mutation | SNP | C | T | 16  | 109 | c.1103C>T | c.(1102-1104)TCC>TTC | p.S368F  |
| Pat_60 | Post-Resistance | ALPK3    | 57538  | 37 | 15 | 85407771  | 85407771  | Missense_Mutation | SNP | G | A | 4   | 135 | c.5204G>A | c.(5203-5205)CGG>CAG | p.R1735Q |
| Pat_60 | Post-Resistance | SLC28A1  | 9154   | 37 | 15 | 85476379  | 85476379  | Missense_Mutation | SNP | G | A | 188 | 272 | c.1087G>A | c.(1087-1089)GAT>AAT | p.D363N  |
| Pat_60 | Post-Resistance | MAN2A2   | 4122   | 37 | 15 | 91448870  | 91448870  | Missense_Mutation | SNP | G | A | 4   | 91  | c.452G>A  | c.(451-453)GGC>GAC   | p.G151D  |
| Pat_60 | Post-Resistance | IGF1R    | 3480   | 37 | 15 | 99465453  | 99465453  | Missense_Mutation | SNP | G | A | 5   | 133 | c.2278G>A | c.(2278-2280)GCA>ACA | p.A760T  |
| Pat_60 | Post-Resistance | MEF2A    | 4205   | 37 | 15 | 100214629 | 100214629 | Missense_Mutation | SNP | C | T | 254 | 396 | c.428C>T  | c.(427-429)TCT>TTT   | p.S143F  |
| Pat_60 | Post-Resistance | BAIAP3   | 8938   | 37 | 16 | 1394480   | 1394480   | Missense_Mutation | SNP | G | A | 4   | 83  | c.1718G>A | c.(1717-1719)CGT>CAT | p.R573H  |
| Pat_60 | Post-Resistance | BTBD12   | 84464  | 37 | 16 | 3647932   | 3647932   | Missense_Mutation | SNP | C | T | 4   | 95  | c.1232G>A | c.(1231-1233)CGG>CAG | p.R411Q  |
| Pat_60 | Post-Resistance | GRIN2A   | 2903   | 37 | 16 | 9858006   | 9858006   | Missense_Mutation | SNP | G | A | 37  | 152 | c.3395C>T | c.(3394-3396)CCA>CTA | p.P1132L |
| Pat_60 | Post-Resistance | SMG1     | 23049  | 37 | 16 | 18845658  | 18845658  | Missense_Mutation | SNP | C | T | 4   | 81  | c.8433G>A | c.(8431-8433)ATG>ATA | p.M2811I |
| Pat_60 | Post-Resistance | PDILT    | 204474 | 37 | 16 | 20384233  | 20384233  | Missense_Mutation | SNP | G | A | 25  | 86  | c.809C>T  | c.(808-810)TCC>TTC   | p.S270F  |
| Pat_60 | Post-Resistance | ACSM2B   | 348158 | 37 | 16 | 20576125  | 20576125  | Missense_Mutation | SNP | C | T | 4   | 97  | c.43G>A   | c.(43-45)GGT>AGT     | p.G15S   |
| Pat_60 | Post-Resistance | SCNN1G   | 6340   | 37 | 16 | 23226699  | 23226699  | Missense_Mutation | SNP | C | T | 4   | 141 | c.1859C>T | c.(1858-1860)CCC>CTC | p.P620L  |
| Pat_60 | Post-Resistance | NSMCE1   | 197370 | 37 | 16 | 27268846  | 27268846  | Missense_Mutation | SNP | G | A | 5   | 186 | c.46C>T   | c.(46-48)CGG>TGG     | p.R16W   |
| Pat_60 | Post-Resistance | KIAA0556 | 23247  | 37 | 16 | 27761489  | 27761489  | Missense_Mutation | SNP | G | A | 4   | 102 | c.3208G>A | c.(3208-3210)GTT>ATT | p.V1070I |
| Pat_60 | Post-Resistance | BRD7     | 29117  | 37 | 16 | 50354288  | 50354288  | Nonsense_Mutation | SNP | G | A | 53  | 128 | c.1627C>T | c.(1627-1629)CAG>TAG | p.Q543*  |
| Pat_60 | Post-Resistance | TOX3     | 27324  | 37 | 16 | 52497934  | 52497934  | Missense_Mutation | SNP | G | A | 33  | 65  | c.320C>T  | c.(319-321)CCC>CTC   | p.P107L  |
| Pat_60 | Post-Resistance | AKTIP    | 64400  | 37 | 16 | 53532384  | 53532384  | Missense_Mutation | SNP | G | A | 4   | 123 | c.167C>T  | c.(166-168)CCT>CTT   | p.P56L   |
| Pat_60 | Post-Resistance | NFATC3   | 4775   | 37 | 16 | 68200795  | 68200795  | Nonsense_Mutation | SNP | C | T | 4   | 105 | c.1651C>T | c.(1651-1653)CGA>TGA | p.R551*  |
| Pat_60 | Post-Resistance | ST3GAL2  | 6483   | 37 | 16 | 70415743  | 70415743  | Missense_Mutation | SNP | G | A | 5   | 139 | c.902C>T  | c.(901-903)GCC>GTC   | p.A301V  |
| Pat_60 | Post-Resistance | HYDIN    | 54768  | 37 | 16 | 71004449  | 71004449  | Missense_Mutation | SNP | C | T | 17  | 43  | c.5590G>A | c.(5590-5592)GAT>AAT | p.D1864N |
| Pat_60 | Post-Resistance | CLEC18B  | 497190 | 37 | 16 | 74446957  | 74446957  | Nonsense_Mutation | SNP | C | T | 8   | 45  | c.654G>A  | c.(652-654)TGG>TGA   | p.W218*  |
| Pat_60 | Post-Resistance | ATMIN    | 23300  | 37 | 16 | 81078113  | 81078113  | Missense_Mutation | SNP | A | G | 4   | 141 | c.2010A>G | c.(2008-2010)ATA>ATG | p.I670M  |
| Pat_60 | Post-Resistance | KIAA1609 | 57707  | 37 | 16 | 84513551  | 84513551  | Missense_Mutation | SNP | C | T | 3   | 54  | c.1339G>A | c.(1339-1341)GAA>AAA | p.E447K  |
| Pat_60 | Post-Resistance | ZDHHC7   | 55625  | 37 | 16 | 85010098  | 85010098  | Missense_Mutation | SNP | G | T | 3   | 32  | c.778C>A  | c.(778-780)CCC>ACC   | p.P260T  |
| Pat_60 | Post-Resistance | JPH3     | 57338  | 37 | 16 | 87678403  | 87678403  | Missense_Mutation | SNP | G | A | 3   | 49  | c.922G>A  | c.(922-924)GGG>AGG   | p.G308R  |
| Pat_60 | Post-Resistance | FANCA    | 2175   | 37 | 16 | 89836993  | 89836993  | Missense_Mutation | SNP | G | A | 4   | 11  | c.2201C>T | c.(2200-2202)TCC>TTC | p.S734F  |
| Pat_60 | Post-Resistance | PRDM7    | 11105  | 37 | 16 | 90126823  | 90126823  | Missense_Mutation | SNP | T | G | 5   | 100 | c.1159A>C | c.(1159-1161)ATG>CTG | p.M387L  |
| Pat_60 | Post-Resistance | C17orf97 | 400566 | 37 | 17 | 263346    | 263346    | Missense_Mutation | SNP | G | A | 5   | 93  | c.742G>A  | c.(742-744)GAC>AAC   | p.D248N  |
| Pat_60 | Post-Resistance | SCARF1   | 8578   | 37 | 17 | 1538786   | 1538786   | Missense_Mutation | SNP | G | A | 4   | 133 | c.1759C>T | c.(1759-1761)CGG>TGG | p.R587W  |
| Pat_60 | Post-Resistance | CTNS     | 1497   | 37 | 17 | 3560052   | 3560052   | Missense_Mutation | SNP | T | A | 6   | 150 | c.644T>A  | c.(643-645)CTC>CAC   | p.L215H  |
| Pat_60 | Post-Resistance | USP6     | 9098   | 37 | 17 | 5040979   | 5040979   | Missense_Mutation | SNP | G | A | 7   | 533 | c.859G>A  | c.(859-861)GTG>ATG   | p.V287M  |
| Pat_60 | Post-Resistance | NLRP1    | 22861  | 37 | 17 | 5461927   | 5461927   | Missense_Mutation | SNP | C | T | 15  | 78  | c.2089G>A | c.(2089-2091)GGG>AGG | p.G697R  |
| Pat_60 | Post-Resistance | ALOXE3   | 59344  | 37 | 17 | 8018372   | 8018372   | Nonsense_Mutation | SNP | C | T | 33  | 115 | c.438G>A  | c.(436-438)TGG>TGA   | p.W146*  |
| Pat_60 | Post-Resistance | SLC25A35 | 399512 | 37 | 17 | 8194183   | 8194183   | Nonsense_Mutation | SNP | G | A | 4   | 148 | c.706C>T  | c.(706-708)CAG>TAG   | p.Q236*  |
| Pat_60 | Post-Resistance | MYH4     | 4622   | 37 | 17 | 10351355  | 10351355  | Missense_Mutation | SNP | T | C | 11  | 232 | c.4745A>G | c.(4744-4746)GAA>GGA | p.E1582G |
| Pat_60 | Post-Resistance | MYH2     | 4620   | 37 | 17 | 10435009  | 10435009  | Missense_Mutation | SNP | C | T | 48  | 144 | c.2638G>A | c.(2638-2640)GAA>AAA | p.E880K  |
| Pat_60 | Post-Resistance | MYH2     | 4620   | 37 | 17 | 10435020  | 10435020  | Missense_Mutation | SNP | C | T | 44  | 161 | c.2627G>A | c.(2626-2628)AGG>AAG | p.R876K  |
| Pat_60 | Post-Resistance | TRIM16   | 10626  | 37 | 17 | 15532480  | 15532480  | Missense_Mutation | SNP | C | T | 4   | 113 | c.1144G>A | c.(1144-1146)GCA>ACA | p.A382T  |
| Pat_60 | Post-Resistance | CCDC144A | 9720   | 37 | 17 | 16635945  | 16635945  | Missense_Mutation | SNP | G | A | 10  | 47  | c.2383G>A | c.(2383-2385)GAA>AAA | p.E795K  |
| Pat_60 | Post-Resistance | LGALS9C  | 654346 | 37 | 17 | 18395795  | 18395795  | Missense_Mutation | SNP | C | T | 22  | 134 | c.697C>T  | c.(697-699)CCG>TCG   | p.P233S  |
| Pat_60 | Post-Resistance | ACACA    | 31     | 37 | 17 | 35454791  | 35454791  | Missense_Mutation | SNP | G | A | 5   | 178 | c.6583C>T | c.(6583-6585)CGG>TGG | p.R2195W |

|        |                 |          |           |    |    |          |          |                   |     |   |   |    |     |           |                      |          |
|--------|-----------------|----------|-----------|----|----|----------|----------|-------------------|-----|---|---|----|-----|-----------|----------------------|----------|
| Pat_60 | Post-Resistance | HNF1B    | 6928      | 37 | 17 | 36059083 | 36059083 | Missense_Mutation | SNP | T | C | 3  | 72  | c.1652A>G | c.(1651-1653)CAG>CGG | p.Q551R  |
| Pat_60 | Post-Resistance | CSF3     | 1440      | 37 | 17 | 38172082 | 38172082 | Missense_Mutation | SNP | C | T | 3  | 18  | c.179C>T  | c.(178-180)GCG>GTG   | p.A60V   |
| Pat_60 | Post-Resistance | WIPF2    | 147179    | 37 | 17 | 38418845 | 38418845 | Nonsense_Mutation | SNP | C | T | 31 | 64  | c.265C>T  | c.(265-267)CAA>TAA   | p.Q89*   |
| Pat_60 | Post-Resistance | KRTAP1-1 | 81851     | 37 | 17 | 39197597 | 39197597 | Missense_Mutation | SNP | C | T | 29 | 43  | c.53G>A   | c.(52-54)GGG>GAG     | p.G18E   |
| Pat_60 | Post-Resistance | KAT2A    | 2648      | 37 | 17 | 40269499 | 40269499 | Missense_Mutation | SNP | C | T | 3  | 54  | c.1544G>A | c.(1543-1545)CGG>CAG | p.R515Q  |
| Pat_60 | Post-Resistance | CCDC103  | 388389    | 37 | 17 | 42979934 | 42979934 | Missense_Mutation | SNP | C | T | 4  | 118 | c.478C>T  | c.(478-480)CGG>TGG   | p.R160W  |
| Pat_60 | Post-Resistance | KPNB1    | 3837      | 37 | 17 | 45757957 | 45757957 | Missense_Mutation | SNP | G | A | 4  | 173 | c.2552G>A | c.(2551-2553)CGG>CAG | p.R851Q  |
| Pat_60 | Post-Resistance | OSBPL7   | 114881    | 37 | 17 | 45885688 | 45885688 | Missense_Mutation | SNP | T | C | 12 | 45  | c.2498A>G | c.(2497-2499)TAT>TGT | p.Y833C  |
| Pat_60 | Post-Resistance | CDK5RAP3 | 80279     | 37 | 17 | 46058837 | 46058837 | Missense_Mutation | SNP | G | A | 4  | 191 | c.1490G>A | c.(1489-1491)CGC>CAC | p.R497H  |
| Pat_60 | Post-Resistance | HSF5     | 124535    | 37 | 17 | 56557433 | 56557433 | Missense_Mutation | SNP | G | A | 5  | 179 | c.746C>T  | c.(745-747)TCA>TTA   | p.S249L  |
| Pat_60 | Post-Resistance | PRR11    | 55771     | 37 | 17 | 57262915 | 57262915 | Missense_Mutation | SNP | G | A | 4  | 123 | c.394G>A  | c.(394-396)GCA>ACA   | p.A132T  |
| Pat_60 | Post-Resistance | PLEKHM1P | 440456    | 37 | 17 | 62796646 | 62796646 | Missense_Mutation | SNP | G | A | 8  | 32  | c.394C>T  | c.(394-396)CCC>TCC   | p.P132S  |
| Pat_60 | Post-Resistance | BPTF     | 2186      | 37 | 17 | 65850238 | 65850238 | Missense_Mutation | SNP | C | T | 4  | 185 | c.796C>T  | c.(796-798)CGC>TGC   | p.R266C  |
| Pat_60 | Post-Resistance | ABCA6    | 23460     | 37 | 17 | 67079429 | 67079429 | Missense_Mutation | SNP | G | A | 16 | 95  | c.4399C>T | c.(4399-4401)CTC>TTC | p.L1467F |
| Pat_60 | Post-Resistance | CD300C   | 10871     | 37 | 17 | 72539117 | 72539117 | Missense_Mutation | SNP | G | A | 15 | 59  | c.410C>T  | c.(409-411)ACC>ATC   | p.T137I  |
| Pat_60 | Post-Resistance | KIAA0195 | 9772      | 37 | 17 | 73489599 | 73489599 | Missense_Mutation | SNP | C | T | 4  | 72  | c.2114C>T | c.(2113-2115)ACC>ATC | p.T705I  |
| Pat_60 | Post-Resistance | NPLOC4   | 55666     | 37 | 17 | 79573769 | 79573769 | Missense_Mutation | SNP | G | A | 3  | 48  | c.602C>T  | c.(601-603)CCG>CTG   | p.P201L  |
| Pat_60 | Post-Resistance | RBBP8    | 5932      | 37 | 18 | 20606151 | 20606151 | Missense_Mutation | SNP | G | A | 4  | 124 | c.2642G>A | c.(2641-2643)CGT>CAT | p.R881H  |
| Pat_60 | Post-Resistance | LAMA3    | 3909      | 37 | 18 | 21329415 | 21329415 | Missense_Mutation | SNP | G | A | 7  | 30  | c.589G>A  | c.(589-591)GAA>AAA   | p.E197K  |
| Pat_60 | Post-Resistance | DSC3     | 1825      | 37 | 18 | 28576947 | 28576947 | Missense_Mutation | SNP | C | T | 33 | 77  | c.2303G>A | c.(2302-2304)GGA>GAA | p.G768E  |
| Pat_60 | Post-Resistance | TTR      | 7276      | 37 | 18 | 29178613 | 29178613 | Missense_Mutation | SNP | C | T | 4  | 103 | c.419C>T  | c.(418-420)GCT>GTT   | p.A140V  |
| Pat_60 | Post-Resistance | CDH7     | 1005      | 37 | 18 | 63547825 | 63547825 | Missense_Mutation | SNP | G | A | 37 | 123 | c.2053G>A | c.(2053-2055)GAT>AAT | p.D685N  |
| Pat_60 | Post-Resistance | NETO1    | 81832     | 37 | 18 | 70417450 | 70417450 | Missense_Mutation | SNP | C | T | 14 | 69  | c.1388G>A | c.(1387-1389)GGA>GAA | p.G463E  |
| Pat_60 | Post-Resistance | HCN2     | 610       | 37 | 19 | 615927   | 615927   | Missense_Mutation | SNP | G | A | 4  | 35  | c.2123G>A | c.(2122-2124)GGT>GAT | p.G708D  |
| Pat_60 | Post-Resistance | DPP9     | 91039     | 37 | 19 | 4714134  | 4714134  | Missense_Mutation | SNP | G | A | 3  | 54  | c.272C>T  | c.(271-273)ACG>ATG   | p.T91M   |
| Pat_60 | Post-Resistance | TICAM1   | 148022    | 37 | 19 | 4816882  | 4816882  | Missense_Mutation | SNP | G | A | 3  | 52  | c.1508C>T | c.(1507-1509)ACG>ATG | p.T503M  |
| Pat_60 | Post-Resistance | TICAM1   | 148022    | 37 | 19 | 4817390  | 4817390  | Missense_Mutation | SNP | G | A | 4  | 95  | c.1000C>T | c.(1000-1002)CTC>TTC | p.L334F  |
| Pat_60 | Post-Resistance | SH2D3A   | 10045     | 37 | 19 | 6755143  | 6755143  | Missense_Mutation | SNP | C | T | 5  | 266 | c.680G>A  | c.(679-681)CGT>CAT   | p.R227H  |
| Pat_60 | Post-Resistance | C19orf59 | 199675    | 37 | 19 | 7743386  | 7743386  | Missense_Mutation | SNP | C | T | 8  | 55  | c.383C>T  | c.(382-384)TCC>TTC   | p.S128F  |
| Pat_60 | Post-Resistance | CD209    | 30835     | 37 | 19 | 7810835  | 7810835  | Missense_Mutation | SNP | T | C | 5  | 243 | c.317A>G  | c.(316-318)CAG>CGG   | p.Q106R  |
| Pat_60 | Post-Resistance | MUC16    | 94025     | 37 | 19 | 9089200  | 9089200  | Missense_Mutation | SNP | G | A | 3  | 7   | c.2615C>T | c.(2614-2616)CCA>CTA | p.P872L  |
| Pat_60 | Post-Resistance | TYK2     | 7297      | 37 | 19 | 10461832 | 10461832 | Missense_Mutation | SNP | G | A | 12 | 13  | c.3325C>T | c.(3325-3327)CTT>TTT | p.L1109F |
| Pat_60 | Post-Resistance | QTRT1    | 81890     | 37 | 19 | 10823303 | 10823303 | Missense_Mutation | SNP | C | T | 4  | 142 | c.860C>T  | c.(859-861)GCG>GTG   | p.A287V  |
| Pat_60 | Post-Resistance | TSPAN16  | 26526     | 37 | 19 | 11408863 | 11408863 | Missense_Mutation | SNP | G | A | 24 | 60  | c.115G>A  | c.(115-117)GGA>AGA   | p.G39R   |
| Pat_60 | Post-Resistance | ZNF700   | 90592     | 37 | 19 | 12060645 | 12060645 | Missense_Mutation | SNP | T | A | 8  | 337 | c.1806T>A | c.(1804-1806)AGT>AGA | p.S602R  |
| Pat_60 | Post-Resistance | ZNF700   | 90592     | 37 | 19 | 12060647 | 12060647 | Missense_Mutation | SNP | G | C | 6  | 338 | c.1808G>C | c.(1807-1809)TGT>TCT | p.C603S  |
| Pat_60 | Post-Resistance | ZNF878   | 729747    | 37 | 19 | 12155757 | 12155757 | Missense_Mutation | SNP | C | A | 10 | 292 | c.600G>T  | c.(598-600)AGG>AGT   | p.R200S  |
| Pat_60 | Post-Resistance | ZNF799   | 90576     | 37 | 19 | 12501446 | 12501446 | Missense_Mutation | SNP | T | C | 6  | 147 | c.1766A>G | c.(1765-1767)GAA>GGA | p.E589G  |
| Pat_60 | Post-Resistance | IL27RA   | 9466      | 37 | 19 | 14160009 | 14160009 | Missense_Mutation | SNP | C | T | 4  | 72  | c.1285C>T | c.(1285-1287)CCT>TCT | p.P429S  |
| Pat_60 | Post-Resistance | FAM129C  | 199786    | 37 | 19 | 17653011 | 17653011 | Missense_Mutation | SNP | C | T | 4  | 151 | c.1330C>T | c.(1330-1332)CGG>TGG | p.R444W  |
| Pat_60 | Post-Resistance | RFXANK   | 8625      | 37 | 19 | 19308410 | 19308410 | Missense_Mutation | SNP | G | A | 3  | 40  | c.418G>A  | c.(418-420)GTT>ATT   | p.V140I  |
| Pat_60 | Post-Resistance | CILP2    | 148113    | 37 | 19 | 19656316 | 19656316 | Missense_Mutation | SNP | G | A | 3  | 14  | c.2962G>A | c.(2962-2964)GCA>ACA | p.A988T  |
| Pat_60 | Post-Resistance | ZNF93    | 81931     | 37 | 19 | 20045182 | 20045182 | Missense_Mutation | SNP | A | G | 5  | 345 | c.1418A>G | c.(1417-1419)AAA>AGA | p.K473R  |
| Pat_60 | Post-Resistance | ZNF93    | 81931     | 37 | 19 | 20045266 | 20045266 | Missense_Mutation | SNP | A | G | 7  | 378 | c.1502A>G | c.(1501-1503)AAA>AGA | p.K501R  |
| Pat_60 | Post-Resistance | ZNF737   | 100129842 | 37 | 19 | 20728254 | 20728254 | Missense_Mutation | SNP | C | G | 4  | 142 | c.755G>C  | c.(754-756)AGT>ACT   | p.S252T  |
| Pat_60 | Post-Resistance | ZNF626   | 199777    | 37 | 19 | 20808090 | 20808090 | Missense_Mutation | SNP | C | T | 6  | 196 | c.593G>A  | c.(592-594)GGG>GAG   | p.G198E  |
| Pat_60 | Post-Resistance | ZNF708   | 7562      | 37 | 19 | 21476519 | 21476519 | Missense_Mutation | SNP | T | C | 7  | 173 | c.1249A>G | c.(1249-1251)AAG>GAG | p.K417E  |

|        |                 |         |        |    |    |           |           |                   |     |    |    |     |     |                |                      |                |
|--------|-----------------|---------|--------|----|----|-----------|-----------|-------------------|-----|----|----|-----|-----|----------------|----------------------|----------------|
| Pat_60 | Post-Resistance | ZNF91   | 7644   | 37 | 19 | 23544783  | 23544783  | Missense_Mutation | SNP | C  | T  | 8   | 533 | c.998G>A       | c.(997-999)CGT>CAT   | p.R333H        |
| Pat_60 | Post-Resistance | C19orf2 | 8725   | 37 | 19 | 30500088  | 30500088  | Missense_Mutation | SNP | G  | T  | 5   | 54  | c.863G>T       | c.(862-864)TGT>TTT   | p.C288F        |
| Pat_60 | Post-Resistance | ANKRD27 | 84079  | 37 | 19 | 33089136  | 33089136  | Missense_Mutation | SNP | G  | A  | 5   | 202 | c.3068C>T      | c.(3067-3069)ACG>ATG | p.T1023M       |
| Pat_60 | Post-Resistance | SLC7A10 | 56301  | 37 | 19 | 33703799  | 33703799  | Missense_Mutation | SNP | G  | A  | 4   | 44  | c.466C>T       | c.(466-468)CCC>TCC   | p.P156S        |
| Pat_60 | Post-Resistance | LGI4    | 163175 | 37 | 19 | 35617799  | 35617799  | Missense_Mutation | SNP | C  | T  | 14  | 27  | c.751G>A       | c.(751-753)GAC>AAC   | p.D251N        |
| Pat_60 | Post-Resistance | FXDY1   | 5348   | 37 | 19 | 35631041  | 35631041  | Missense_Mutation | SNP | G  | A  | 20  | 85  | c.58G>A        | c.(58-60)GCA>ACA     | p.A20T         |
| Pat_60 | Post-Resistance | PRODH2  | 58510  | 37 | 19 | 36297393  | 36297393  | Missense_Mutation | SNP | C  | T  | 4   | 165 | c.1168G>A      | c.(1168-1170)GTG>ATG | p.V390M        |
| Pat_60 | Post-Resistance | ZFP82   | 284406 | 37 | 19 | 36883767  | 36883767  | Missense_Mutation | SNP | G  | A  | 31  | 115 | c.1475C>T      | c.(1474-1476)TCC>TTC | p.S492F        |
| Pat_60 | Post-Resistance | HKR1    | 284459 | 37 | 19 | 37854172  | 37854172  | Missense_Mutation | SNP | C  | T  | 5   | 245 | c.1475C>T      | c.(1474-1476)ACG>ATG | p.T492M        |
| Pat_60 | Post-Resistance | PRX     | 57716  | 37 | 19 | 40902620  | 40902620  | Missense_Mutation | SNP | G  | C  | 7   | 290 | c.1639C>G      | c.(1639-1641)CAG>GAG | p.Q547E        |
| Pat_60 | Post-Resistance | CEACAM3 | 1084   | 37 | 19 | 42300616  | 42300616  | Missense_Mutation | SNP | C  | T  | 4   | 118 | c.7C>T         | c.(7-9)CCC>TCC       | p.P3S          |
| Pat_60 | Post-Resistance | PSG11   | 5680   | 37 | 19 | 43522979  | 43522979  | Missense_Mutation | SNP | C  | T  | 117 | 423 | c.652G>A       | c.(652-654)GAA>AAA   | p.E218K        |
| Pat_60 | Post-Resistance | QPCTL   | 54814  | 37 | 19 | 46198776  | 46198776  | Missense_Mutation | SNP | C  | A  | 5   | 231 | c.433C>A       | c.(433-435)CCA>ACA   | p.P145T        |
| Pat_60 | Post-Resistance | TRPM4   | 54795  | 37 | 19 | 49703901  | 49703901  | Missense_Mutation | SNP | G  | A  | 4   | 88  | c.2812G>A      | c.(2812-2814)GGC>AGC | p.G938S        |
| Pat_60 | Post-Resistance | MED25   | 81857  | 37 | 19 | 50333849  | 50333849  | Missense_Mutation | SNP | C  | T  | 7   | 21  | c.901C>T       | c.(901-903)CCT>TCT   | p.P301S        |
| Pat_60 | Post-Resistance | SHANK1  | 50944  | 37 | 19 | 51207744  | 51207744  | Nonsense_Mutation | SNP | G  | A  | 46  | 140 | c.1105C>T      | c.(1105-1107)CGA>TGA | p.R369*        |
| Pat_60 | Post-Resistance | VN1R2   | 317701 | 37 | 19 | 53762364  | 53762364  | Missense_Mutation | SNP | T  | A  | 37  | 123 | c.736T>A       | c.(736-738)TTG>ATG   | p.L246M        |
| Pat_60 | Post-Resistance | NLRP12  | 91662  | 37 | 19 | 54313084  | 54313084  | Missense_Mutation | SNP | G  | A  | 27  | 100 | c.1829C>T      | c.(1828-1830)TCC>TTC | p.S610F        |
| Pat_60 | Post-Resistance | LILRA3  | 11026  | 37 | 19 | 54802025  | 54802025  | Missense_Mutation | SNP | G  | A  | 55  | 190 | c.1163C>T      | c.(1162-1164)ACC>ATC | p.T388I        |
| Pat_60 | Post-Resistance | TNNT1   | 7138   | 37 | 19 | 55652634  | 55652634  | Missense_Mutation | SNP | C  | T  | 13  | 41  | c.229G>A       | c.(229-231)GAG>AAG   | p.E77K         |
| Pat_60 | Post-Resistance | PTPRH   | 5794   | 37 | 19 | 55710101  | 55710101  | Missense_Mutation | SNP | C  | T  | 22  | 55  | c.1600G>A      | c.(1600-1602)GAA>AAA | p.E534K        |
| Pat_60 | Post-Resistance | SAPS1   | 22870  | 37 | 19 | 55741984  | 55741985  | Missense_Mutation | DNP | GA | AC | 7   | 12  | .2638_2639TC>G | c.(2638-2640)TCC>GTC | p.S880V        |
| Pat_60 | Post-Resistance | NLRP8   | 126205 | 37 | 19 | 56466334  | 56466334  | Missense_Mutation | SNP | G  | A  | 32  | 118 | c.910G>A       | c.(910-912)GAA>AAA   | p.E304K        |
| Pat_60 | Post-Resistance | ZNF582  | 147948 | 37 | 19 | 56903117  | 56903117  | Missense_Mutation | SNP | G  | A  | 38  | 143 | c.5C>T         | c.(4-6)TCC>TTC       | p.S2F          |
| Pat_60 | Post-Resistance | ZNF324B | 388569 | 37 | 19 | 58965148  | 58965148  | Missense_Mutation | SNP | G  | A  | 4   | 159 | c.80G>A        | c.(79-81)CGC>CAC     | p.R27H         |
| Pat_60 | Post-Resistance | CHMP2A  | 27243  | 37 | 19 | 59063796  | 59063796  | Missense_Mutation | SNP | G  | A  | 4   | 80  | c.178C>T       | c.(178-180)CGC>TGC   | p.R60C         |
| Pat_60 | Post-Resistance | C2orf44 | 80304  | 37 | 2  | 24262277  | 24262277  | Missense_Mutation | SNP | C  | A  | 4   | 143 | c.88G>T        | c.(88-90)GAT>TAT     | p.D30Y         |
| Pat_60 | Post-Resistance | DPYSL5  | 56896  | 37 | 2  | 27121449  | 27121449  | Missense_Mutation | SNP | G  | A  | 4   | 115 | c.82G>A        | c.(82-84)GTC>ATC     | p.V28I         |
| Pat_60 | Post-Resistance | CAPN13  | 92291  | 37 | 2  | 30974117  | 30974117  | Missense_Mutation | SNP | C  | T  | 13  | 51  | c.1088G>A      | c.(1087-1089)GGA>GAA | p.G363E        |
| Pat_60 | Post-Resistance | PPM1B   | 5495   | 37 | 2  | 44428478  | 44428478  | Missense_Mutation | SNP | C  | T  | 140 | 405 | c.140C>T       | c.(139-141)CCT>CTT   | p.P47L         |
| Pat_60 | Post-Resistance | BMP10   | 27302  | 37 | 2  | 69093407  | 69093407  | Missense_Mutation | SNP | G  | T  | 4   | 101 | c.631C>A       | c.(631-633)CAA>AAA   | p.Q211K        |
| Pat_60 | Post-Resistance | GMCL1   | 64395  | 37 | 2  | 70068151  | 70068151  | Missense_Mutation | SNP | G  | A  | 4   | 135 | c.559G>A       | c.(559-561)GCA>ACA   | p.A187T        |
| Pat_60 | Post-Resistance | ALMS1   | 7840   | 37 | 2  | 73830432  | 73830432  | Splice_Site       | SNP | G  | A  | 4   | 147 | c.12365_splice | c.e23+1              | p.R4122_splice |
| Pat_60 | Post-Resistance | CTNNA2  | 1496   | 37 | 2  | 79878741  | 79878741  | Missense_Mutation | SNP | G  | A  | 4   | 191 | c.59G>A        | c.(58-60)CGG>CAG     | p.R20Q         |
| Pat_60 | Post-Resistance | TMEM127 | 55654  | 37 | 2  | 96919572  | 96919572  | Nonsense_Mutation | SNP | G  | A  | 4   | 64  | c.691C>T       | c.(691-693)CAG>TAG   | p.Q231*        |
| Pat_60 | Post-Resistance | C2orf55 | 343990 | 37 | 2  | 99438325  | 99438325  | Missense_Mutation | SNP | C  | T  | 9   | 34  | c.2411G>A      | c.(2410-2412)GGA>GAA | p.G804E        |
| Pat_60 | Post-Resistance | AFF3    | 3899   | 37 | 2  | 100182007 | 100182007 | Missense_Mutation | SNP | C  | T  | 39  | 155 | c.3061G>A      | c.(3061-3063)GGC>AGC | p.G1021S       |
| Pat_60 | Post-Resistance | TBC1D8  | 11138  | 37 | 2  | 101654100 | 101654100 | Missense_Mutation | SNP | G  | A  | 24  | 127 | c.1301C>T      | c.(1300-1302)JCT>TTT | p.S434F        |
| Pat_60 | Post-Resistance | IL18R1  | 8809   | 37 | 2  | 103013120 | 103013120 | Missense_Mutation | SNP | G  | A  | 43  | 84  | c.1400G>A      | c.(1399-1401)AGA>AAA | p.R467K        |
| Pat_60 | Post-Resistance | C2orf40 | 84417  | 37 | 2  | 106688341 | 106688341 | Nonsense_Mutation | SNP | C  | T  | 31  | 100 | c.121C>T       | c.(121-123)CGA>TGA   | p.R41*         |
| Pat_60 | Post-Resistance | SULT1C2 | 6819   | 37 | 2  | 108921994 | 108921994 | Missense_Mutation | SNP | C  | T  | 24  | 98  | c.721C>T       | c.(721-723)CGT>TGT   | p.R241C        |
| Pat_60 | Post-Resistance | WASH2P  | 375260 | 37 | 2  | 114355129 | 114355129 | Missense_Mutation | SNP | G  | A  | 3   | 23  | c.506G>A       | c.(505-507)CGC>CAC   | p.R169H        |
| Pat_60 | Post-Resistance | RABL2A  | 11159  | 37 | 2  | 114392676 | 114392676 | Missense_Mutation | SNP | C  | T  | 35  | 81  | c.266C>T       | c.(265-267)TCC>TTC   | p.S89F         |
| Pat_60 | Post-Resistance | MARCO   | 8685   | 37 | 2  | 119750742 | 119750742 | Missense_Mutation | SNP | G  | A  | 48  | 143 | c.1295G>A      | c.(1294-1296)CGA>CAA | p.R432Q        |
| Pat_60 | Post-Resistance | TFCP2L1 | 29842  | 37 | 2  | 122004453 | 122004453 | Missense_Mutation | SNP | C  | T  | 27  | 125 | c.598G>A       | c.(598-600)GAG>AAG   | p.E200K        |
| Pat_60 | Post-Resistance | THSD7B  | 80731  | 37 | 2  | 137814542 | 137814542 | Missense_Mutation | SNP | C  | T  | 67  | 235 | c.599C>T       | c.(598-600)TCC>TTC   | p.S200F        |
| Pat_60 | Post-Resistance | ZEB2    | 9839   | 37 | 2  | 145161680 | 145161680 | Missense_Mutation | SNP | G  | A  | 36  | 89  | c.610C>T       | c.(610-612)CCA>TCA   | p.P204S        |

|        |                 |          |        |    |    |           |           |                   |     |    |    |    |     |                 |                      |              |
|--------|-----------------|----------|--------|----|----|-----------|-----------|-------------------|-----|----|----|----|-----|-----------------|----------------------|--------------|
| Pat_60 | Post-Resistance | NEB      | 4703   | 37 | 2  | 152548828 | 152548828 | Missense_Mutation | SNP | A  | T  | 17 | 95  | c.1945T>A       | c.(1945-1947)TAC>AAC | p.Y649N      |
| Pat_60 | Post-Resistance | RPRM     | 56475  | 37 | 2  | 154334953 | 154334953 | Missense_Mutation | SNP | C  | T  | 3  | 45  | c.127G>A        | c.(127-129)GAG>AAG   | p.E43K       |
| Pat_60 | Post-Resistance | SCN1A    | 6323   | 37 | 2  | 166872150 | 166872150 | Missense_Mutation | SNP | C  | T  | 83 | 254 | c.3484G>A       | c.(3484-3486)GAA>AAA | p.E1162K     |
| Pat_60 | Post-Resistance | STK39    | 27347  | 37 | 2  | 169038500 | 169038500 | Missense_Mutation | SNP | C  | T  | 4  | 173 | c.309G>A        | c.(307-309)ATG>ATA   | p.M103I      |
| Pat_60 | Post-Resistance | LRP2     | 4036   | 37 | 2  | 170048380 | 170048380 | Missense_Mutation | SNP | G  | T  | 4  | 186 | c.8994C>A       | c.(8992-8994)TTC>TTA | p.F2998L     |
| Pat_60 | Post-Resistance | METTL5   | 29081  | 37 | 2  | 170676111 | 170676111 | Missense_Mutation | SNP | C  | T  | 4  | 140 | c.449G>A        | c.(448-450)AGA>AAA   | p.R150K      |
| Pat_60 | Post-Resistance | COL3A1   | 1281   | 37 | 2  | 189854850 | 189854850 | Missense_Mutation | SNP | G  | A  | 34 | 157 | c.719G>A        | c.(718-720)GGA>GAA   | p.G240E      |
| Pat_60 | Post-Resistance | MARS2    | 92935  | 37 | 2  | 198570245 | 198570245 | Missense_Mutation | SNP | A  | G  | 20 | 53  | c.116A>G        | c.(115-117)GAT>GGT   | p.D39G       |
| Pat_60 | Post-Resistance | CCNYL1   | 151195 | 37 | 2  | 208618390 | 208618390 | Missense_Mutation | SNP | G  | A  | 4  | 185 | c.895G>A        | c.(895-897)GGT>AGT   | p.G299S      |
| Pat_60 | Post-Resistance | DES      | 1674   | 37 | 2  | 220283231 | 220283231 | Missense_Mutation | SNP | G  | A  | 3  | 23  | c.47G>A         | c.(46-48)CGC>CAC     | p.R16H       |
| Pat_60 | Post-Resistance | EPHA4    | 2043   | 37 | 2  | 222428987 | 222428987 | Missense_Mutation | SNP | C  | T  | 48 | 209 | c.287G>A        | c.(286-288)AGG>AAG   | p.R96K       |
| Pat_60 | Post-Resistance | COL4A4   | 1286   | 37 | 2  | 227953434 | 227953434 | Missense_Mutation | SNP | G  | A  | 19 | 82  | c.1558C>T       | c.(1558-1560)CCT>TCT | p.P520S      |
| Pat_60 | Post-Resistance | AGFG1    | 3267   | 37 | 2  | 228384716 | 228384716 | Missense_Mutation | SNP | C  | T  | 74 | 173 | c.314C>T        | c.(313-315)CCA>CTA   | p.P105L      |
| Pat_60 | Post-Resistance | INPP5D   | 3635   | 37 | 2  | 234079721 | 234079721 | Missense_Mutation | SNP | A  | T  | 13 | 53  | c.1912A>T       | c.(1912-1914)ATC>TTC | p.I638F      |
| Pat_60 | Post-Resistance | LRRFIP1  | 9208   | 37 | 2  | 238668812 | 238668812 | Missense_Mutation | SNP | T  | A  | 4  | 141 | c.853T>A        | c.(853-855)TTA>ATA   | p.L285I      |
| Pat_60 | Post-Resistance | CPXM1    | 56265  | 37 | 20 | 2777038   | 2777038   | Missense_Mutation | SNP | C  | T  | 29 | 89  | c.1097G>A       | c.(1096-1098)GGG>GAG | p.G366E      |
| Pat_60 | Post-Resistance | PANK2    | 80025  | 37 | 20 | 3869901   | 3869901   | Missense_Mutation | SNP | G  | A  | 3  | 37  | c.154G>A        | c.(154-156)GGA>AGA   | p.G52R       |
| Pat_60 | Post-Resistance | ANKRD5   | 63926  | 37 | 20 | 10019194  | 10019194  | Missense_Mutation | SNP | G  | A  | 4  | 104 | c.245G>A        | c.(244-246)TGT>TAT   | p.C82Y       |
| Pat_60 | Post-Resistance | ZNF341   | 84905  | 37 | 20 | 32379219  | 32379219  | Missense_Mutation | SNP | G  | A  | 3  | 32  | c.2461G>A       | c.(2461-2463)GCT>ACT | p.A821T      |
| Pat_60 | Post-Resistance | MMP24    | 10893  | 37 | 20 | 33862287  | 33862287  | Missense_Mutation | SNP | G  | A  | 4  | 102 | c.1813G>A       | c.(1813-1815)GTG>ATG | p.V605M      |
| Pat_60 | Post-Resistance | FAM83C   | 128876 | 37 | 20 | 33874856  | 33874856  | Missense_Mutation | SNP | C  | T  | 9  | 29  | c.1726G>A       | c.(1726-1728)GGT>AGT | p.G576S      |
| Pat_60 | Post-Resistance | PIGT     | 51604  | 37 | 20 | 44049037  | 44049037  | Nonsense_Mutation | SNP | C  | T  | 3  | 47  | c.835C>T        | c.(835-837)CGA>TGA   | p.R279*      |
| Pat_60 | Post-Resistance | NCOA3    | 8202   | 37 | 20 | 46265037  | 46265038  | Missense_Mutation | DNP | CC | TT | 38 | 110 | c.1907_1908CC>T | c.(1906-1908)TCC>TTT | p.S636F      |
| Pat_60 | Post-Resistance | PREX1    | 57580  | 37 | 20 | 47266569  | 47266569  | Missense_Mutation | SNP | C  | T  | 4  | 70  | c.2993G>A       | c.(2992-2994)CGC>CAC | p.R998H      |
| Pat_60 | Post-Resistance | ZNFX1    | 57169  | 37 | 20 | 47887292  | 47887292  | Missense_Mutation | SNP | G  | A  | 76 | 238 | c.1057C>T       | c.(1057-1059)CTT>TTT | p.L353F      |
| Pat_60 | Post-Resistance | SLC9A8   | 23315  | 37 | 20 | 48503428  | 48503428  | Missense_Mutation | SNP | C  | T  | 16 | 84  | c.1631C>T       | c.(1630-1632)ACG>ATG | p.T544M      |
| Pat_60 | Post-Resistance | NFATC2   | 4773   | 37 | 20 | 50092091  | 50092091  | Missense_Mutation | SNP | G  | A  | 5  | 256 | c.1439C>T       | c.(1438-1440)ACG>ATG | p.T480M      |
| Pat_60 | Post-Resistance | ZFP64    | 55734  | 37 | 20 | 50701503  | 50701503  | Missense_Mutation | SNP | G  | A  | 4  | 86  | c.1531C>T       | c.(1531-1533)CGC>TGC | p.R511C      |
| Pat_60 | Post-Resistance | ZNF217   | 7764   | 37 | 20 | 52193618  | 52193618  | Missense_Mutation | SNP | T  | C  | 6  | 392 | c.1685A>G       | c.(1684-1686)GAT>GGT | p.D562G      |
| Pat_60 | Post-Resistance | CTSZ     | 1522   | 37 | 20 | 57576697  | 57576697  | Missense_Mutation | SNP | G  | A  | 4  | 78  | c.310C>T        | c.(310-312)CGG>TGG   | p.R104W      |
| Pat_60 | Post-Resistance | OGFR     | 11054  | 37 | 20 | 61441864  | 61441864  | Nonsense_Mutation | SNP | C  | T  | 4  | 117 | c.412C>T        | c.(412-414)CGA>TGA   | p.R138*      |
| Pat_60 | Post-Resistance | TPTE     | 7179   | 37 | 21 | 10934997  | 10934997  | Missense_Mutation | SNP | C  | T  | 41 | 436 | c.796G>A        | c.(796-798)GAA>AAA   | p.E266K      |
| Pat_60 | Post-Resistance | SAMSN1   | 64092  | 37 | 21 | 15884895  | 15884895  | Splice_Site       | SNP | C  | T  | 26 | 123 | c.280_splice    | c.e4-1               | p.D94_splice |
| Pat_60 | Post-Resistance | RNF160   | 26046  | 37 | 21 | 30353449  | 30353449  | Missense_Mutation | SNP | C  | T  | 4  | 96  | c.940G>A        | c.(940-942)GTA>ATA   | p.V314I      |
| Pat_60 | Post-Resistance | CHAF1B   | 8208   | 37 | 21 | 37775128  | 37775128  | Missense_Mutation | SNP | G  | A  | 7  | 556 | c.736G>A        | c.(736-738)GGA>AGA   | p.G246R      |
| Pat_60 | Post-Resistance | POTEH    | 23784  | 37 | 22 | 16287387  | 16287387  | Missense_Mutation | SNP | C  | T  | 20 | 140 | c.499G>A        | c.(499-501)GAG>AAG   | p.E167K      |
| Pat_60 | Post-Resistance | PPIL2    | 23759  | 37 | 22 | 22043087  | 22043087  | Missense_Mutation | SNP | G  | A  | 4  | 187 | c.1088G>A       | c.(1087-1089)CGC>CAC | p.R363H      |
| Pat_60 | Post-Resistance | ADORA2A  | 135    | 37 | 22 | 24837399  | 24837399  | Missense_Mutation | SNP | G  | A  | 4  | 38  | c.1181G>A       | c.(1180-1182)TGC>TAC | p.C394Y      |
| Pat_60 | Post-Resistance | PIWIL3   | 440822 | 37 | 22 | 25130079  | 25130079  | Missense_Mutation | SNP | C  | T  | 4  | 152 | c.1679G>A       | c.(1678-1680)CGG>CAG | p.R560Q      |
| Pat_60 | Post-Resistance | PIWIL3   | 440822 | 37 | 22 | 25145722  | 25145722  | Missense_Mutation | SNP | T  | C  | 4  | 151 | c.1154A>G       | c.(1153-1155)AAG>AGG | p.K385R      |
| Pat_60 | Post-Resistance | HPS4     | 89781  | 37 | 22 | 26854486  | 26854486  | Missense_Mutation | SNP | G  | A  | 4  | 99  | c.1771C>T       | c.(1771-1773)CCC>TCC | p.P591S      |
| Pat_60 | Post-Resistance | OSM      | 5008   | 37 | 22 | 30659934  | 30659934  | Missense_Mutation | SNP | G  | A  | 4  | 181 | c.697C>T        | c.(697-699)CGC>TGC   | p.R233C      |
| Pat_60 | Post-Resistance | TIMP3    | 7078   | 37 | 22 | 33253267  | 33253267  | Missense_Mutation | SNP | T  | G  | 30 | 130 | c.236T>G        | c.(235-237)GTG>GGG   | p.V79G       |
| Pat_60 | Post-Resistance | LARGE    | 9215   | 37 | 22 | 33673126  | 33673126  | Missense_Mutation | SNP | G  | A  | 4  | 174 | c.1993C>T       | c.(1993-1995)CGT>TGT | p.R665C      |
| Pat_60 | Post-Resistance | MYH9     | 4627   | 37 | 22 | 36737462  | 36737462  | Missense_Mutation | SNP | G  | A  | 5  | 176 | c.443C>T        | c.(442-444)CCT>CTT   | p.P148L      |
| Pat_60 | Post-Resistance | C22orf33 | 339669 | 37 | 22 | 37398038  | 37398038  | Missense_Mutation | SNP | C  | T  | 4  | 53  | c.329G>A        | c.(328-330)GGA>GAA   | p.G110E      |
| Pat_60 | Post-Resistance | ENTHD1   | 150350 | 37 | 22 | 40140135  | 40140135  | Missense_Mutation | SNP | G  | A  | 32 | 131 | c.1373C>T       | c.(1372-1374)TCC>TTC | p.S458F      |



|        |                 |         |        |    |    |           |           |                   |     |    |    |    |     |                                                 |                      |              |
|--------|-----------------|---------|--------|----|----|-----------|-----------|-------------------|-----|----|----|----|-----|-------------------------------------------------|----------------------|--------------|
| Pat_60 | Post-Resistance | MKL1    | 57591  | 37 | 22 | 40814967  | 40814967  | Missense_Mutation | SNP | G  | A  | 4  | 60  | c.1475C>T                                       | c.(1474-1476)TCG>TTG | p.S492L      |
| Pat_60 | Post-Resistance | ZC3H7B  | 23264  | 37 | 22 | 41753416  | 41753416  | Missense_Mutation | SNP | G  | A  | 4  | 161 | c.2917G>A                                       | c.(2917-2919)GCC>ACC | p.A973T      |
| Pat_60 | Post-Resistance | CELSR1  | 9620   | 37 | 22 | 46930127  | 46930127  | Missense_Mutation | SNP | C  | T  | 4  | 137 | c.2941G>A                                       | c.(2941-2943)GCC>ACC | p.A981T      |
| Pat_60 | Post-Resistance | PLXNB2  | 23654  | 37 | 22 | 50721158  | 50721158  | Missense_Mutation | SNP | G  | A  | 4  | 20  | c.2969C>T                                       | c.(2968-2970)CCG>CTG | p.P990L      |
| Pat_60 | Post-Resistance | CNTN4   | 152330 | 37 | 3  | 2944618   | 2944618   | Missense_Mutation | SNP | C  | T  | 4  | 65  | c.1136C>T                                       | c.(1135-1137)GCT>GTT | p.A379V      |
| Pat_60 | Post-Resistance | SRGAP3  | 9901   | 37 | 3  | 9146424   | 9146424   | Missense_Mutation | SNP | C  | T  | 30 | 74  | c.363G>A                                        | c.(361-363)ATG>ATA   | p.M121I      |
| Pat_60 | Post-Resistance | GRIP2   | 80852  | 37 | 3  | 14558673  | 14558673  | Missense_Mutation | SNP | G  | A  | 8  | 42  | c.1499C>T                                       | c.(1498-1500)TCC>TTC | p.S500F      |
| Pat_60 | Post-Resistance | C3orf20 | 84077  | 37 | 3  | 14725869  | 14725869  | Missense_Mutation | SNP | G  | A  | 4  | 123 | c.605G>A                                        | c.(604-606)AGC>AAC   | p.S202N      |
| Pat_60 | Post-Resistance | TOP2B   | 7155   | 37 | 3  | 25665167  | 25665167  | Missense_Mutation | SNP | G  | A  | 4  | 98  | c.2566C>T                                       | c.(2566-2568)CGT>TGT | p.R856C      |
| Pat_60 | Post-Resistance | LRR3B   | 116135 | 37 | 3  | 26751407  | 26751407  | Missense_Mutation | SNP | G  | A  | 13 | 90  | c.244G>A                                        | c.(244-246)GAA>AAA   | p.E82K       |
| Pat_60 | Post-Resistance | SUSD5   | 26032  | 37 | 3  | 33195084  | 33195084  | Missense_Mutation | SNP | G  | A  | 4  | 66  | c.1040C>T                                       | c.(1039-1041)TCG>TTG | p.S347L      |
| Pat_60 | Post-Resistance | C3orf35 | 339883 | 37 | 3  | 37458971  | 37458971  | Missense_Mutation | SNP | C  | T  | 11 | 58  | c.214C>T                                        | c.(214-216)CTT>TTT   | p.L72F       |
| Pat_60 | Post-Resistance | SCN11A  | 11280  | 37 | 3  | 38913199  | 38913199  | Missense_Mutation | SNP | C  | T  | 18 | 66  | c.3496G>A                                       | c.(3496-3498)GTG>ATG | p.V1166M     |
| Pat_60 | Post-Resistance | KBTD5   | 131377 | 37 | 3  | 42728002  | 42728002  | Missense_Mutation | SNP | G  | A  | 63 | 258 | c.892G>A                                        | c.(892-894)GCC>ACC   | p.A298T      |
| Pat_60 | Post-Resistance | SLC6A20 | 54716  | 37 | 3  | 45804477  | 45804477  | Missense_Mutation | SNP | G  | A  | 5  | 195 | c.1391C>T                                       | c.(1390-1392)GCG>GTG | p.A464V      |
| Pat_60 | Post-Resistance | C3orf71 | 646450 | 37 | 3  | 48955819  | 48955819  | Missense_Mutation | SNP | G  | A  | 5  | 175 | c.764C>T                                        | c.(763-765)ACG>ATG   | p.T255M      |
| Pat_60 | Post-Resistance | UBA7    | 7318   | 37 | 3  | 49850941  | 49850941  | Missense_Mutation | SNP | G  | A  | 30 | 93  | c.196C>T                                        | c.(196-198)CCC>TCC   | p.P66S       |
| Pat_60 | Post-Resistance | HYAL2   | 8692   | 37 | 3  | 50355847  | 50355847  | Missense_Mutation | SNP | G  | A  | 4  | 83  | c.1135C>T                                       | c.(1135-1137)CGC>TGC | p.R379C      |
| Pat_60 | Post-Resistance | DOCK3   | 1795   | 37 | 3  | 51378711  | 51378712  | Nonsense_Mutation | DNP | GG | AA | 10 | 36  | .3810_3811GG>A.808-3813)TGGGAG>TGA/ 270_1271WE> |                      |              |
| Pat_60 | Post-Resistance | EPHA3   | 2042   | 37 | 3  | 89499348  | 89499348  | Missense_Mutation | SNP | G  | A  | 28 | 80  | c.2518G>A                                       | c.(2518-2520)GGC>AGC | p.G840S      |
| Pat_60 | Post-Resistance | ALCAM   | 214    | 37 | 3  | 105268981 | 105268981 | Missense_Mutation | SNP | C  | T  | 97 | 482 | c.1385C>T                                       | c.(1384-1386)TCT>TTT | p.S462F      |
| Pat_60 | Post-Resistance | CCDC54  | 84692  | 37 | 3  | 107096571 | 107096571 | Missense_Mutation | SNP | C  | T  | 65 | 282 | c.137C>T                                        | c.(136-138)CCC>CTC   | p.P46L       |
| Pat_60 | Post-Resistance | DPPA2   | 151871 | 37 | 3  | 109023481 | 109023481 | Missense_Mutation | SNP | G  | A  | 19 | 118 | c.695C>T                                        | c.(694-696)TCG>TTG   | p.S232L      |
| Pat_60 | Post-Resistance | CD96    | 10225  | 37 | 3  | 111263979 | 111263979 | Missense_Mutation | SNP | G  | A  | 66 | 203 | c.148G>A                                        | c.(148-150)GTA>ATA   | p.V50I       |
| Pat_60 | Post-Resistance | ATP6V1A | 523    | 37 | 3  | 113513976 | 113513976 | Missense_Mutation | SNP | C  | T  | 35 | 113 | c.1151C>T                                       | c.(1150-1152)TCG>TTG | p.S384L      |
| Pat_60 | Post-Resistance | KALRN   | 8997   | 37 | 3  | 123946875 | 123946875 | Missense_Mutation | SNP | C  | T  | 70 | 207 | c.106C>T                                        | c.(106-108)CTT>TTT   | p.L36F       |
| Pat_60 | Post-Resistance | RHO     | 6010   | 37 | 3  | 129251606 | 129251606 | Missense_Mutation | SNP | G  | A  | 20 | 61  | c.927G>A                                        | c.(925-927)ATG>ATA   | p.M309I      |
| Pat_60 | Post-Resistance | COL6A6  | 131873 | 37 | 3  | 130282320 | 130282320 | Missense_Mutation | SNP | G  | A  | 16 | 60  | c.473G>A                                        | c.(472-474)GGA>GAA   | p.G158E      |
| Pat_60 | Post-Resistance | CLDN18  | 51208  | 37 | 3  | 137717873 | 137717873 | Nonsense_Mutation | SNP | C  | T  | 4  | 170 | c.163C>T                                        | c.(163-165)CGA>TGA   | p.R55*       |
| Pat_60 | Post-Resistance | GRK7    | 131890 | 37 | 3  | 141535584 | 141535584 | Missense_Mutation | SNP | C  | T  | 45 | 154 | c.1354C>T                                       | c.(1354-1356)CAT>TAT | p.H452Y      |
| Pat_60 | Post-Resistance | ZIC1    | 7545   | 37 | 3  | 147130368 | 147130368 | Missense_Mutation | SNP | G  | A  | 4  | 142 | c.1046G>A                                       | c.(1045-1047)CGC>CAC | p.R349H      |
| Pat_60 | Post-Resistance | IGSF10  | 285313 | 37 | 3  | 151156133 | 151156134 | Nonsense_Mutation | DNP | CC | TT | 57 | 197 | .6215_6216GG>A. c.(6214-6216)TGG>TAA            |                      | p.W2072*     |
| Pat_60 | Post-Resistance | PIK3CA  | 5290   | 37 | 3  | 178936076 | 178936076 | Missense_Mutation | SNP | C  | T  | 48 | 125 | c.1618C>T                                       | c.(1618-1620)CTC>TTC | p.L540F      |
| Pat_60 | Post-Resistance | ATP11B  | 23200  | 37 | 3  | 182598736 | 182598736 | Missense_Mutation | SNP | G  | A  | 4  | 169 | c.2476G>A                                       | c.(2476-2478)GTA>ATA | p.V826I      |
| Pat_60 | Post-Resistance | VPS8    | 23355  | 37 | 3  | 184586815 | 184586815 | Missense_Mutation | SNP | G  | A  | 3  | 41  | c.1582G>A                                       | c.(1582-1584)GCA>ACA | p.A528T      |
| Pat_60 | Post-Resistance | MASP1   | 5648   | 37 | 3  | 187003811 | 187003812 | Missense_Mutation | DNP | GG | AA | 18 | 85  | c.38_39CC>TT                                    | c.(37-39)TCC>TTT     | p.S13F       |
| Pat_60 | Post-Resistance | BCL6    | 604    | 37 | 3  | 187451346 | 187451346 | Missense_Mutation | SNP | G  | A  | 70 | 248 | c.136C>T                                        | c.(136-138)CAT>TAT   | p.H46Y       |
| Pat_60 | Post-Resistance | LEPREL1 | 55214  | 37 | 3  | 189705374 | 189705374 | Missense_Mutation | SNP | T  | A  | 22 | 90  | c.1040A>T                                       | c.(1039-1041)GAT>GTT | p.D347V      |
| Pat_60 | Post-Resistance | ZNF595  | 152687 | 37 | 4  | 59971     | 59971     | Missense_Mutation | SNP | G  | A  | 40 | 845 | c.151G>A                                        | c.(151-153)GAC>AAC   | p.D51N       |
| Pat_60 | Post-Resistance | RGS12   | 6002   | 37 | 4  | 3418818   | 3418818   | Missense_Mutation | SNP | A  | G  | 3  | 36  | c.2606A>G                                       | c.(2605-2607)AAG>AGG | p.K869R      |
| Pat_60 | Post-Resistance | ACOX3   | 8310   | 37 | 4  | 8418142   | 8418142   | Missense_Mutation | SNP | G  | A  | 4  | 162 | c.107C>T                                        | c.(106-108)GCG>GTG   | p.A36V       |
| Pat_60 | Post-Resistance | DHX15   | 1665   | 37 | 4  | 24556475  | 24556475  | Missense_Mutation | SNP | G  | A  | 89 | 244 | c.953C>T                                        | c.(952-954)CCT>CTT   | p.P318L      |
| Pat_60 | Post-Resistance | TBC1D19 | 55296  | 37 | 4  | 26616029  | 26616029  | Splice_Site       | SNP | G  | A  | 28 | 133 | c.173_splice                                    | c.e3-1               | p.G58_splice |
| Pat_60 | Post-Resistance | KLHL5   | 51088  | 37 | 4  | 39098412  | 39098412  | Missense_Mutation | SNP | G  | A  | 4  | 186 | c.1352G>A                                       | c.(1351-1353)CGA>CAA | p.R451Q      |
| Pat_60 | Post-Resistance | UGDH    | 7358   | 37 | 4  | 39512092  | 39512092  | Missense_Mutation | SNP | C  | T  | 4  | 166 | c.544G>A                                        | c.(544-546)GGG>AGG   | p.G182R      |
| Pat_60 | Post-Resistance | FRYL    | 285527 | 37 | 4  | 48551532  | 48551532  | Missense_Mutation | SNP | T  | C  | 3  | 72  | c.4742A>G                                       | c.(4741-4743)GAT>GGT | p.D1581G     |
| Pat_60 | Post-Resistance | ARL9    | 132946 | 37 | 4  | 57384853  | 57384853  | Missense_Mutation | SNP | G  | A  | 4  | 194 | c.26G>A                                         | c.(25-27)AGT>AAT     | p.S9N        |

|        |                 |          |        |    |   |           |           |                   |     |    |    |     |     |                                     |                      |                |
|--------|-----------------|----------|--------|----|---|-----------|-----------|-------------------|-----|----|----|-----|-----|-------------------------------------|----------------------|----------------|
| Pat_60 | Post-Resistance | MUC7     | 4589   | 37 | 4 | 71347138  | 71347138  | Missense_Mutation | SNP | C  | T  | 9   | 504 | c.677C>T                            | c.(676-678)CCA>CTA   | p.P226L        |
| Pat_60 | Post-Resistance | MUC7     | 4589   | 37 | 4 | 71347312  | 71347312  | Missense_Mutation | SNP | C  | T  | 120 | 481 | c.851C>T                            | c.(850-852)CCA>CTA   | p.P284L        |
| Pat_60 | Post-Resistance | NPFPR2   | 10886  | 37 | 4 | 73013491  | 73013491  | Missense_Mutation | SNP | G  | A  | 35  | 105 | c.1531G>A                           | c.(1531-1533)GAA>AAA | p.E511K        |
| Pat_60 | Post-Resistance | SHROOM3  | 57619  | 37 | 4 | 77661877  | 77661877  | Missense_Mutation | SNP | G  | A  | 4   | 129 | c.2551G>A                           | c.(2551-2553)GGG>AGG | p.G851R        |
| Pat_60 | Post-Resistance | CNOT6L   | 246175 | 37 | 4 | 78663361  | 78663361  | Missense_Mutation | SNP | G  | A  | 3   | 78  | c.806C>T                            | c.(805-807)GCC>GTC   | p.A269V        |
| Pat_60 | Post-Resistance | EMCN     | 51705  | 37 | 4 | 101331494 | 101331494 | Missense_Mutation | SNP | C  | T  | 70  | 225 | c.770G>A                            | c.(769-771)GGA>GAA   | p.G257E        |
| Pat_60 | Post-Resistance | ELOVL6   | 79071  | 37 | 4 | 110972801 | 110972801 | Missense_Mutation | SNP | C  | T  | 4   | 101 | c.491G>A                            | c.(490-492)GGT>GAT   | p.G164D        |
| Pat_60 | Post-Resistance | PCDH18   | 54510  | 37 | 4 | 138451711 | 138451711 | Missense_Mutation | SNP | C  | T  | 52  | 209 | c.1532G>A                           | c.(1531-1533)GGA>GAA | p.G511E        |
| Pat_60 | Post-Resistance | FGB      | 2244   | 37 | 4 | 155488947 | 155488947 | Nonsense_Mutation | SNP | C  | A  | 7   | 294 | c.693C>A                            | c.(691-693)TGC>TGA   | p.C231*        |
| Pat_60 | Post-Resistance | SORBS2   | 8470   | 37 | 4 | 186545415 | 186545415 | Missense_Mutation | SNP | C  | T  | 19  | 38  | c.1156G>A                           | c.(1156-1158)GAT>AAT | p.D386N        |
| Pat_60 | Post-Resistance | SLC6A19  | 340024 | 37 | 5 | 1217046   | 1217046   | Missense_Mutation | SNP | G  | A  | 4   | 118 | c.1159G>A                           | c.(1159-1161)GCC>ACC | p.A387T        |
| Pat_60 | Post-Resistance | IRX1     | 79192  | 37 | 5 | 3600291   | 3600291   | Missense_Mutation | SNP | C  | A  | 3   | 57  | c.1229C>A                           | c.(1228-1230)CCA>CAA | p.P410Q        |
| Pat_60 | Post-Resistance | DNAH5    | 1767   | 37 | 5 | 13769246  | 13769246  | Splice_Site       | SNP | C  | T  | 70  | 264 | c.9721_splice                       | c.e58-1              | p.V3241_splice |
| Pat_60 | Post-Resistance | DNAH5    | 1767   | 37 | 5 | 13865814  | 13865814  | Missense_Mutation | SNP | C  | T  | 16  | 104 | c.4318G>A                           | c.(4318-4320)GAA>AAA | p.E1440K       |
| Pat_60 | Post-Resistance | PRDM9    | 56979  | 37 | 5 | 23527083  | 23527083  | Missense_Mutation | SNP | G  | C  | 4   | 145 | c.1886G>C                           | c.(1885-1887)AGA>ACA | p.R629T        |
| Pat_60 | Post-Resistance | CDH10    | 1008   | 37 | 5 | 24491748  | 24491748  | Missense_Mutation | SNP | G  | A  | 4   | 139 | c.1813C>T                           | c.(1813-1815)CTC>TTC | p.L605F        |
| Pat_60 | Post-Resistance | ADAMTS12 | 81792  | 37 | 5 | 33648935  | 33648935  | Missense_Mutation | SNP | C  | T  | 22  | 81  | c.1471G>A                           | c.(1471-1473)GAA>AAA | p.E491K        |
| Pat_60 | Post-Resistance | EGFLAM   | 133584 | 37 | 5 | 38370509  | 38370509  | Missense_Mutation | SNP | G  | A  | 14  | 55  | c.657G>A                            | c.(655-657)ATG>ATA   | p.M219I        |
| Pat_60 | Post-Resistance | OSMR     | 9180   | 37 | 5 | 38904103  | 38904103  | Missense_Mutation | SNP | C  | T  | 23  | 102 | c.1111C>T                           | c.(1111-1113)CAT>TAT | p.H371Y        |
| Pat_60 | Post-Resistance | IL6ST    | 3572   | 37 | 5 | 55260069  | 55260069  | Missense_Mutation | SNP | G  | A  | 5   | 158 | c.563C>T                            | c.(562-564)ACT>ATT   | p.T188I        |
| Pat_60 | Post-Resistance | MAST4    | 375449 | 37 | 5 | 66459994  | 66459994  | Missense_Mutation | SNP | G  | A  | 5   | 10  | c.4420G>A                           | c.(4420-4422)GGC>AGC | p.G1474S       |
| Pat_60 | Post-Resistance | FBN2     | 2201   | 37 | 5 | 127681049 | 127681049 | Missense_Mutation | SNP | C  | T  | 4   | 155 | c.3217G>A                           | c.(3217-3219)GAC>AAC | p.D1073N       |
| Pat_60 | Post-Resistance | FBXL21   | 26223  | 37 | 5 | 135277202 | 135277202 | Missense_Mutation | SNP | A  | C  | 12  | 23  | c.1147A>C                           | c.(1147-1149)ATC>CTC | p.I383L        |
| Pat_60 | Post-Resistance | UBE2D2   | 7322   | 37 | 5 | 139003042 | 139003042 | Missense_Mutation | SNP | G  | A  | 4   | 141 | c.394G>A                            | c.(394-396)GAA>AAA   | p.E132K        |
| Pat_60 | Post-Resistance | PCDHA13  | 56136  | 37 | 5 | 140263608 | 140263609 | Missense_Mutation | DNP | GG | AA | 22  | 34  | .1755_1756GG>A.753-1758)GTGGGT>GTA/ |                      | p.G586S        |
| Pat_60 | Post-Resistance | PCDHB1   | 29930  | 37 | 5 | 140432969 | 140432969 | Missense_Mutation | SNP | G  | T  | 4   | 144 | c.1914G>T                           | c.(1912-1914)ATG>ATT | p.M638I        |
| Pat_60 | Post-Resistance | PCDHGA3  | 56112  | 37 | 5 | 140725042 | 140725042 | Missense_Mutation | SNP | G  | A  | 4   | 154 | c.1442G>A                           | c.(1441-1443)AGC>AAC | p.S481N        |
| Pat_60 | Post-Resistance | PCDHGA3  | 56112  | 37 | 5 | 140725705 | 140725705 | Missense_Mutation | SNP | G  | A  | 4   | 100 | c.2105G>A                           | c.(2104-2106)TGC>TAC | p.C702Y        |
| Pat_60 | Post-Resistance | PPP2R2B  | 5521   | 37 | 5 | 146077647 | 146077647 | Missense_Mutation | SNP | C  | T  | 85  | 165 | c.229G>A                            | c.(229-231)GAA>AAA   | p.E77K         |
| Pat_60 | Post-Resistance | G3BP1    | 10146  | 37 | 5 | 151179525 | 151179525 | Nonsense_Mutation | SNP | C  | T  | 4   | 89  | c.919C>T                            | c.(919-921)CGA>TGA   | p.R307*        |
| Pat_60 | Post-Resistance | RARS     | 5917   | 37 | 5 | 167944932 | 167944932 | Missense_Mutation | SNP | C  | T  | 4   | 145 | c.1738C>T                           | c.(1738-1740)CGG>TGG | p.R580W        |
| Pat_60 | Post-Resistance | DSP      | 1832   | 37 | 6 | 7578114   | 7578114   | Missense_Mutation | SNP | C  | A  | 4   | 122 | c.2980C>A                           | c.(2980-2982)CAA>AAA | p.Q994K        |
| Pat_60 | Post-Resistance | BTN3A3   | 10384  | 37 | 6 | 26448550  | 26448550  | Missense_Mutation | SNP | G  | A  | 4   | 156 | c.790G>A                            | c.(790-792)GCA>ACA   | p.A264T        |
| Pat_60 | Post-Resistance | MDC1     | 9656   | 37 | 6 | 30673208  | 30673208  | Missense_Mutation | SNP | T  | C  | 7   | 344 | c.3752A>G                           | c.(3751-3753)CAG>CGG | p.Q1251R       |
| Pat_60 | Post-Resistance | TNXB     | 7148   | 37 | 6 | 32023823  | 32023823  | Missense_Mutation | SNP | T  | C  | 5   | 83  | c.8272A>G                           | c.(8272-8274)ATC>GTC | p.I2758V       |
| Pat_60 | Post-Resistance | GRM4     | 2914   | 37 | 6 | 33995965  | 33995965  | Missense_Mutation | SNP | G  | A  | 4   | 40  | c.2621C>T                           | c.(2620-2622)ACG>ATG | p.T874M        |
| Pat_60 | Post-Resistance | FKBP5    | 2289   | 37 | 6 | 35558971  | 35558971  | Missense_Mutation | SNP | G  | A  | 56  | 132 | c.692C>T                            | c.(691-693)CCT>CTT   | p.P231L        |
| Pat_60 | Post-Resistance | BRPF3    | 27154  | 37 | 6 | 36178152  | 36178152  | Missense_Mutation | SNP | C  | T  | 21  | 70  | c.2026C>T                           | c.(2026-2028)CAC>TAC | p.H676Y        |
| Pat_60 | Post-Resistance | C6orf222 | 389384 | 37 | 6 | 36298400  | 36298400  | Missense_Mutation | SNP | T  | A  | 29  | 85  | c.68A>T                             | c.(67-69)CAG>CTG     | p.Q23L         |
| Pat_60 | Post-Resistance | SLC22A7  | 10864  | 37 | 6 | 43270428  | 43270428  | Missense_Mutation | SNP | G  | A  | 4   | 7   | c.1312G>A                           | c.(1312-1314)GGG>AGG | p.G438R        |
| Pat_60 | Post-Resistance | TJAP1    | 93643  | 37 | 6 | 43473429  | 43473429  | Missense_Mutation | SNP | A  | T  | 4   | 21  | c.1510A>T                           | c.(1510-1512)AGG>TGG | p.R504W        |
| Pat_60 | Post-Resistance | ENPP5    | 59084  | 37 | 6 | 46135935  | 46135935  | Missense_Mutation | SNP | G  | A  | 4   | 173 | c.65C>T                             | c.(64-66)TCT>TTT     | p.S22F         |
| Pat_60 | Post-Resistance | MEP1A    | 4224   | 37 | 6 | 46797239  | 46797239  | Missense_Mutation | SNP | G  | A  | 70  | 258 | c.1075G>A                           | c.(1075-1077)GTT>ATT | p.V359I        |
| Pat_60 | Post-Resistance | GPR111   | 222611 | 37 | 6 | 47649532  | 47649532  | Missense_Mutation | SNP | C  | A  | 4   | 119 | c.1237C>A                           | c.(1237-1239)CAA>AAA | p.Q413K        |
| Pat_60 | Post-Resistance | FAM83B   | 222584 | 37 | 6 | 54804943  | 54804943  | Missense_Mutation | SNP | G  | A  | 39  | 149 | c.1174G>A                           | c.(1174-1176)GAA>AAA | p.E392K        |
| Pat_60 | Post-Resistance | BAI3     | 577    | 37 | 6 | 69728368  | 69728368  | Missense_Mutation | SNP | C  | T  | 66  | 185 | c.2084C>T                           | c.(2083-2085)TCA>TTA | p.S695L        |
| Pat_60 | Post-Resistance | COL9A1   | 1297   | 37 | 6 | 70990720  | 70990720  | Missense_Mutation | SNP | G  | A  | 20  | 27  | c.899C>T                            | c.(898-900)CCC>CTC   | p.P300L        |

|        |                 |           |        |    |   |           |           |                   |     |    |    |     |     |                |                        |               |
|--------|-----------------|-----------|--------|----|---|-----------|-----------|-------------------|-----|----|----|-----|-----|----------------|------------------------|---------------|
| Pat_60 | Post-Resistance | SNX14     | 57231  | 37 | 6 | 86235901  | 86235901  | Missense_Mutation | SNP | A  | G  | 3   | 54  | c.2050T>C      | c.(2050-2052)TCC>CCC   | p.S684P       |
| Pat_60 | Post-Resistance | ANKRD6    | 22881  | 37 | 6 | 90340517  | 90340517  | Missense_Mutation | SNP | G  | A  | 3   | 43  | c.1978G>A      | c.(1978-1980)GAC>AAC   | p.D660N       |
| Pat_60 | Post-Resistance | REV3L     | 5980   | 37 | 6 | 111689143 | 111689143 | Missense_Mutation | SNP | G  | A  | 4   | 124 | c.5848C>T      | c.(5848-5850)CGT>TGT   | p.R1950C      |
| Pat_60 | Post-Resistance | ROS1      | 6098   | 37 | 6 | 117700235 | 117700235 | Missense_Mutation | SNP | G  | A  | 27  | 115 | c.2584C>T      | c.(2584-2586)CTT>TTT   | p.L862F       |
| Pat_60 | Post-Resistance | DCBLD1    | 285761 | 37 | 6 | 117841060 | 117841061 | Missense_Mutation | DNP | CC | TA | 47  | 166 | c.407_408CC>TA | c.(406-408)TCC>TTA     | p.S136L       |
| Pat_60 | Post-Resistance | C6orf174  | 387104 | 37 | 6 | 127836060 | 127836060 | Missense_Mutation | SNP | G  | A  | 4   | 150 | c.1234C>T      | c.(1234-1236)CGC>TGC   | p.R412C       |
| Pat_60 | Post-Resistance | SAMD3     | 154075 | 37 | 6 | 130465688 | 130465688 | Missense_Mutation | SNP | C  | T  | 14  | 90  | c.1540G>A      | c.(1540-1542)GGA>AGA   | p.G514R       |
| Pat_60 | Post-Resistance | TMEM200A  | 114801 | 37 | 6 | 130762526 | 130762526 | Missense_Mutation | SNP | G  | A  | 27  | 69  | c.959G>A       | c.(958-960)AGG>AAG     | p.R320K       |
| Pat_60 | Post-Resistance | TMEM200A  | 114801 | 37 | 6 | 130762853 | 130762853 | Missense_Mutation | SNP | G  | A  | 38  | 125 | c.1286G>A      | c.(1285-1287)GGA>GAA   | p.G429E       |
| Pat_60 | Post-Resistance | TXLNB     | 167838 | 37 | 6 | 139609804 | 139609804 | Missense_Mutation | SNP | C  | T  | 33  | 110 | c.233G>A       | c.(232-234)GGG>GAG     | p.G78E        |
| Pat_60 | Post-Resistance | SYNE1     | 23345  | 37 | 6 | 152651594 | 152651594 | Missense_Mutation | SNP | G  | T  | 4   | 170 | c.14226C>A     | c.(14224-14226)AGC>AGA | p.S4742R      |
| Pat_60 | Post-Resistance | NOX3      | 50508  | 37 | 6 | 155717999 | 155717999 | Missense_Mutation | SNP | G  | A  | 59  | 191 | c.1678C>T      | c.(1678-1680)CAT>TAT   | p.H560Y       |
| Pat_60 | Post-Resistance | TAGAP     | 117289 | 37 | 6 | 159465024 | 159465024 | Missense_Mutation | SNP | C  | T  | 73  | 257 | c.67G>A        | c.(67-69)GAA>AAA       | p.E23K        |
| Pat_60 | Post-Resistance | IGF2R     | 3482   | 37 | 6 | 160461636 | 160461636 | Missense_Mutation | SNP | T  | C  | 39  | 177 | c.1360T>C      | c.(1360-1362)TGC>CGC   | p.C454R       |
| Pat_60 | Post-Resistance | RPS6KA2   | 6196   | 37 | 6 | 166923789 | 166923789 | Missense_Mutation | SNP | G  | A  | 36  | 82  | c.355C>T       | c.(355-357)CCC>TCC     | p.P119S       |
| Pat_60 | Post-Resistance | THBS2     | 7058   | 37 | 6 | 169626274 | 169626274 | Splice_Site       | SNP | C  | T  | 4   | 151 | c.2538_splice  | c.e17+1                | p.Q846_splice |
| Pat_60 | Post-Resistance | NOD1      | 10392  | 37 | 7 | 30491021  | 30491021  | Missense_Mutation | SNP | G  | A  | 4   | 55  | c.2012C>T      | c.(2011-2013)GCG>GTG   | p.A671V       |
| Pat_60 | Post-Resistance | DPY19L2P1 | 554236 | 37 | 7 | 35121264  | 35121264  | Missense_Mutation | SNP | C  | G  | 4   | 163 | c.1342G>C      | c.(1342-1344)GCC>CCC   | p.A448P       |
| Pat_60 | Post-Resistance | CDK13     | 8621   | 37 | 7 | 40132797  | 40132797  | Nonsense_Mutation | SNP | C  | T  | 4   | 166 | c.3649C>T      | c.(3649-3651)CAA>TAA   | p.Q1217*      |
| Pat_60 | Post-Resistance | ZMIZ2     | 83637  | 37 | 7 | 44799025  | 44799025  | Missense_Mutation | SNP | T  | G  | 5   | 33  | c.959T>G       | c.(958-960)CTG>CGG     | p.L320R       |
| Pat_60 | Post-Resistance | TNS3      | 64759  | 37 | 7 | 47343018  | 47343018  | Missense_Mutation | SNP | G  | A  | 13  | 61  | c.2987C>T      | c.(2986-2988)CCT>CTT   | p.P996L       |
| Pat_60 | Post-Resistance | ZNF727    | 442319 | 37 | 7 | 63538818  | 63538818  | Missense_Mutation | SNP | C  | T  | 18  | 104 | c.1391C>T      | c.(1390-1392)TCC>TTC   | p.S464F       |
| Pat_60 | Post-Resistance | TPST1     | 8460   | 37 | 7 | 65706122  | 65706122  | Missense_Mutation | SNP | T  | A  | 49  | 85  | c.710T>A       | c.(709-711)GTT>GAT     | p.V237D       |
| Pat_60 | Post-Resistance | POM121    | 9883   | 37 | 7 | 72413479  | 72413479  | Missense_Mutation | SNP | G  | A  | 4   | 143 | c.2947G>A      | c.(2947-2949)GCC>ACC   | p.A983T       |
| Pat_60 | Post-Resistance | NCF1B     | 654816 | 37 | 7 | 72639986  | 72639986  | Missense_Mutation | SNP | G  | A  | 4   | 112 | c.217G>A       | c.(217-219)GGC>AGC     | p.G73S        |
| Pat_60 | Post-Resistance | TRIM50    | 135892 | 37 | 7 | 72738623  | 72738623  | Missense_Mutation | SNP | C  | T  | 3   | 48  | c.163G>A       | c.(163-165)GTG>ATG     | p.V55M        |
| Pat_60 | Post-Resistance | PCLO      | 27445  | 37 | 7 | 82583326  | 82583326  | Missense_Mutation | SNP | C  | T  | 177 | 429 | c.6943G>A      | c.(6943-6945)GAA>AAA   | p.E2315K      |
| Pat_60 | Post-Resistance | PCLO      | 27445  | 37 | 7 | 82764435  | 82764435  | Missense_Mutation | SNP | C  | T  | 58  | 353 | c.2431G>A      | c.(2431-2433)GAA>AAA   | p.E811K       |
| Pat_60 | Post-Resistance | PCLO      | 27445  | 37 | 7 | 82784561  | 82784561  | Missense_Mutation | SNP | G  | T  | 4   | 121 | c.1396C>A      | c.(1396-1398)CCA>ACA   | p.P466T       |
| Pat_60 | Post-Resistance | C7orf63   | 79846  | 37 | 7 | 89912208  | 89912208  | Missense_Mutation | SNP | C  | T  | 75  | 129 | c.1375C>T      | c.(1375-1377)CCG>TCG   | p.P459S       |
| Pat_60 | Post-Resistance | COL1A2    | 1278   | 37 | 7 | 94054936  | 94054936  | Missense_Mutation | SNP | C  | A  | 79  | 196 | c.2796C>A      | c.(2794-2796)AAC>AAA   | p.N932K       |
| Pat_60 | Post-Resistance | TECPR1    | 25851  | 37 | 7 | 97851045  | 97851045  | Missense_Mutation | SNP | G  | A  | 28  | 61  | c.3085C>T      | c.(3085-3087)CCG>TCG   | p.P1029S      |
| Pat_60 | Post-Resistance | RINT1     | 60561  | 37 | 7 | 105182999 | 105183000 | Missense_Mutation | DNP | CC | TT | 85  | 194 | c.418_419CC>TT | c.(418-420)CCT>TTT     | p.P140F       |
| Pat_60 | Post-Resistance | CTTNBP2   | 83992  | 37 | 7 | 117432598 | 117432598 | Nonsense_Mutation | SNP | G  | A  | 8   | 122 | c.652C>T       | c.(652-654)CGA>TGA     | p.R218*       |
| Pat_60 | Post-Resistance | RNF148    | 378925 | 37 | 7 | 122342636 | 122342636 | Missense_Mutation | SNP | C  | T  | 31  | 100 | c.169G>A       | c.(169-171)GGA>AGA     | p.G57R        |
| Pat_60 | Post-Resistance | FLNC      | 2318   | 37 | 7 | 128478750 | 128478750 | Missense_Mutation | SNP | C  | T  | 5   | 256 | c.1304C>T      | c.(1303-1305)ACG>ATG   | p.T435M       |
| Pat_60 | Post-Resistance | TMEM209   | 84928  | 37 | 7 | 129813718 | 129813718 | Missense_Mutation | SNP | G  | A  | 108 | 650 | c.1406C>T      | c.(1405-1407)CCC>CTC   | p.P469L       |
| Pat_60 | Post-Resistance | CHRM2     | 1129   | 37 | 7 | 136700538 | 136700538 | Missense_Mutation | SNP | C  | T  | 67  | 161 | c.926C>T       | c.(925-927)TCC>TTC     | p.S309F       |
| Pat_60 | Post-Resistance | BRAF      | 673    | 37 | 7 | 140453136 | 140453136 | Missense_Mutation | SNP | A  | T  | 121 | 235 | c.1799T>A      | c.(1798-1800)GTG>GAG   | p.V600E       |
| Pat_60 | Post-Resistance | MGAM      | 8972   | 37 | 7 | 141736669 | 141736669 | Missense_Mutation | SNP | C  | T  | 142 | 396 | c.2123C>T      | c.(2122-2124)TCC>TTC   | p.S708F       |
| Pat_60 | Post-Resistance | TRPV5     | 56302  | 37 | 7 | 142612674 | 142612674 | Missense_Mutation | SNP | G  | A  | 44  | 113 | c.1187C>T      | c.(1186-1188)GCT>GTT   | p.A396V       |
| Pat_60 | Post-Resistance | SLC4A2    | 6522   | 37 | 7 | 150761646 | 150761646 | Missense_Mutation | SNP | C  | T  | 36  | 228 | c.251C>T       | c.(250-252)CCA>CTA     | p.P84L        |
| Pat_60 | Post-Resistance | RBM33     | 155435 | 37 | 7 | 155537881 | 155537881 | Missense_Mutation | SNP | G  | A  | 4   | 61  | c.2564G>A      | c.(2563-2565)GGT>GAT   | p.G855D       |
| Pat_60 | Post-Resistance | FAM167A   | 83648  | 37 | 8 | 11301715  | 11301715  | Missense_Mutation | SNP | G  | A  | 10  | 14  | c.206C>T       | c.(205-207)GCG>GTG     | p.A69V        |
| Pat_60 | Post-Resistance | C8orf79   | 57604  | 37 | 8 | 12878820  | 12878820  | Missense_Mutation | SNP | G  | A  | 6   | 172 | c.632G>A       | c.(631-633)CGG>CAG     | p.R211Q       |
| Pat_60 | Post-Resistance | LOXL2     | 4017   | 37 | 8 | 23186065  | 23186065  | Missense_Mutation | SNP | C  | T  | 4   | 148 | c.980G>A       | c.(979-981)CGA>CAA     | p.R327Q       |
| Pat_60 | Post-Resistance | CHRNA2    | 1135   | 37 | 8 | 27320702  | 27320702  | Missense_Mutation | SNP | C  | T  | 19  | 46  | c.1258G>A      | c.(1258-1260)GAG>AAG   | p.E420K       |

|        |                 |         |        |    |   |           |           |                   |     |   |   |    |     |               |                      |               |
|--------|-----------------|---------|--------|----|---|-----------|-----------|-------------------|-----|---|---|----|-----|---------------|----------------------|---------------|
| Pat_60 | Post-Resistance | INTS9   | 55756  | 37 | 8 | 28638399  | 28638399  | Missense_Mutation | SNP | T | C | 4  | 190 | c.1211A>G     | c.(1210-1212)GAC>GGC | p.D404G       |
| Pat_60 | Post-Resistance | TEX15   | 56154  | 37 | 8 | 30701064  | 30701064  | Missense_Mutation | SNP | C | T | 18 | 99  | c.5470G>A     | c.(5470-5472)GAC>AAC | p.D1824N      |
| Pat_60 | Post-Resistance | ADAM2   | 2515   | 37 | 8 | 39678544  | 39678544  | Missense_Mutation | SNP | A | G | 7  | 229 | c.490T>C      | c.(490-492)TCC>CCC   | p.S164P       |
| Pat_60 | Post-Resistance | IDO2    | 169355 | 37 | 8 | 39871214  | 39871214  | Missense_Mutation | SNP | C | T | 8  | 29  | c.889C>T      | c.(889-891)CGT>TGT   | p.R297C       |
| Pat_60 | Post-Resistance | PXDNL   | 137902 | 37 | 8 | 52233411  | 52233411  | Missense_Mutation | SNP | A | G | 76 | 251 | c.4193T>C     | c.(4192-4194)GTT>GCT | p.V1398A      |
| Pat_60 | Post-Resistance | RP1     | 6101   | 37 | 8 | 55539311  | 55539311  | Missense_Mutation | SNP | C | T | 13 | 76  | c.2869C>T     | c.(2869-2871)CCC>TCC | p.P957S       |
| Pat_60 | Post-Resistance | CA13    | 377677 | 37 | 8 | 86171748  | 86171748  | Missense_Mutation | SNP | G | A | 4  | 159 | c.334G>A      | c.(334-336)GGA>AGA   | p.G112R       |
| Pat_60 | Post-Resistance | CA1     | 759    | 37 | 8 | 86250519  | 86250519  | Missense_Mutation | SNP | G | A | 78 | 346 | c.197C>T      | c.(196-198)TCC>TTC   | p.S66F        |
| Pat_60 | Post-Resistance | RPL30   | 6156   | 37 | 8 | 99054923  | 99054923  | Missense_Mutation | SNP | G | A | 4  | 192 | c.248C>T      | c.(247-249)ACA>ATA   | p.T83I        |
| Pat_60 | Post-Resistance | VPS13B  | 157680 | 37 | 8 | 100654205 | 100654205 | Missense_Mutation | SNP | G | A | 5  | 299 | c.5462G>A     | c.(5461-5463)CGT>CAT | p.R1821H      |
| Pat_60 | Post-Resistance | RSPO2   | 340419 | 37 | 8 | 109001454 | 109001454 | Missense_Mutation | SNP | G | A | 28 | 122 | c.113C>T      | c.(112-114)CCC>CTC   | p.P38L        |
| Pat_60 | Post-Resistance | PKHD1L1 | 93035  | 37 | 8 | 110422157 | 110422157 | Missense_Mutation | SNP | G | A | 16 | 50  | c.2035G>A     | c.(2035-2037)GAA>AAA | p.E679K       |
| Pat_60 | Post-Resistance | TAF2    | 6873   | 37 | 8 | 120744407 | 120744407 | Missense_Mutation | SNP | C | A | 5  | 169 | c.3357G>T     | c.(3355-3357)TTG>TTT | p.L1119F      |
| Pat_60 | Post-Resistance | WDR67   | 93594  | 37 | 8 | 124156984 | 124156984 | Missense_Mutation | SNP | C | T | 10 | 55  | c.2863C>T     | c.(2863-2865)CGT>TGT | p.R955C       |
| Pat_60 | Post-Resistance | FAM49B  | 51571  | 37 | 8 | 130866534 | 130866534 | Missense_Mutation | SNP | C | T | 5  | 315 | c.494G>A      | c.(493-495)CGT>CAT   | p.R165H       |
| Pat_60 | Post-Resistance | SLA     | 6503   | 37 | 8 | 134060132 | 134060132 | Nonsense_Mutation | SNP | G | A | 4  | 94  | c.295C>T      | c.(295-297)CAG>TAG   | p.Q99*        |
| Pat_60 | Post-Resistance | FREM1   | 158326 | 37 | 9 | 14859217  | 14859217  | Missense_Mutation | SNP | G | A | 3  | 62  | c.595C>T      | c.(595-597)CGT>TGT   | p.R199C       |
| Pat_60 | Post-Resistance | RUSC2   | 9853   | 37 | 9 | 35556355  | 35556355  | Missense_Mutation | SNP | T | C | 3  | 84  | c.2893T>C     | c.(2893-2895)TTT>CTT | p.F965L       |
| Pat_60 | Post-Resistance | NPR2    | 4882   | 37 | 9 | 35799708  | 35799708  | Missense_Mutation | SNP | G | A | 4  | 118 | c.967G>A      | c.(967-969)GTG>ATG   | p.V323M       |
| Pat_60 | Post-Resistance | PAX5    | 5079   | 37 | 9 | 36966665  | 36966665  | Missense_Mutation | SNP | G | A | 3  | 58  | c.661C>T      | c.(661-663)CGG>TGG   | p.R221W       |
| Pat_60 | Post-Resistance | FOXD4L5 | 653427 | 37 | 9 | 70177752  | 70177752  | Missense_Mutation | SNP | C | T | 6  | 211 | c.232G>A      | c.(232-234)GGC>AGC   | p.G78S        |
| Pat_60 | Post-Resistance | PIP5K1B | 8395   | 37 | 9 | 71509553  | 71509553  | Missense_Mutation | SNP | G | A | 4  | 152 | c.770G>A      | c.(769-771)CGG>CAG   | p.R257Q       |
| Pat_60 | Post-Resistance | WNK2    | 65268  | 37 | 9 | 96051292  | 96051292  | Missense_Mutation | SNP | G | C | 2  | 6   | c.4367G>C     | c.(4366-4368)GGT>GCT | p.G1456A      |
| Pat_60 | Post-Resistance | FBP1    | 2203   | 37 | 9 | 97367767  | 97367767  | Missense_Mutation | SNP | G | A | 14 | 29  | c.797C>T      | c.(796-798)CCC>CTC   | p.P266L       |
| Pat_60 | Post-Resistance | HSD17B3 | 3293   | 37 | 9 | 99003072  | 99003072  | Missense_Mutation | SNP | C | T | 4  | 96  | c.790G>A      | c.(790-792)GAA>AAA   | p.E264K       |
| Pat_60 | Post-Resistance | LPPR1   | 54886  | 37 | 9 | 104048494 | 104048494 | Missense_Mutation | SNP | C | T | 46 | 81  | c.361C>T      | c.(361-363)CTT>TTT   | p.L121F       |
| Pat_60 | Post-Resistance | ZNF189  | 7743   | 37 | 9 | 104171614 | 104171614 | Missense_Mutation | SNP | A | T | 4  | 105 | c.1564A>T     | c.(1564-1566)AGT>TGT | p.S522C       |
| Pat_60 | Post-Resistance | PTGS1   | 5742   | 37 | 9 | 125154705 | 125154705 | Missense_Mutation | SNP | C | T | 4  | 89  | c.1682C>T     | c.(1681-1683)GCC>GTC | p.A561V       |
| Pat_60 | Post-Resistance | FGS     | 2356   | 37 | 9 | 130571982 | 130571982 | Nonsense_Mutation | SNP | G | A | 3  | 27  | c.1080G>A     | c.(1078-1080)TGG>TGA | p.W360*       |
| Pat_60 | Post-Resistance | SPTAN1  | 6709   | 37 | 9 | 131344986 | 131344986 | Missense_Mutation | SNP | G | A | 4  | 176 | c.1664G>A     | c.(1663-1665)CGC>CAC | p.R555H       |
| Pat_60 | Post-Resistance | ZER1    | 10444  | 37 | 9 | 131516203 | 131516203 | Missense_Mutation | SNP | T | C | 2  | 5   | c.194A>G      | c.(193-195)GAG>GGG   | p.E65G        |
| Pat_60 | Post-Resistance | SH3GLB2 | 56904  | 37 | 9 | 131772409 | 131772409 | Missense_Mutation | SNP | C | A | 4  | 60  | c.728G>T      | c.(727-729)AGT>ATT   | p.S243I       |
| Pat_60 | Post-Resistance | MED27   | 9442   | 37 | 9 | 134814787 | 134814787 | Missense_Mutation | SNP | C | G | 3  | 73  | c.554G>C      | c.(553-555)GGA>GCA   | p.G185A       |
| Pat_60 | Post-Resistance | C9orf86 | 55684  | 37 | 9 | 139726805 | 139726805 | Missense_Mutation | SNP | C | T | 13 | 37  | c.688C>T      | c.(688-690)CCA>TCA   | p.P230S       |
| Pat_60 | Post-Resistance | ANAPC2  | 29882  | 37 | 9 | 140082098 | 140082098 | Missense_Mutation | SNP | T | C | 3  | 69  | c.575A>G      | c.(574-576)GAA>GGA   | p.E192G       |
| Pat_60 | Post-Resistance | ASMTL   | 8623   | 37 | X | 1537003   | 1537003   | Missense_Mutation | SNP | G | A | 3  | 39  | c.1385C>T     | c.(1384-1386)ACG>ATG | p.T462M       |
| Pat_60 | Post-Resistance | PTCHD1  | 139411 | 37 | X | 23398090  | 23398090  | Missense_Mutation | SNP | G | A | 5  | 272 | c.734G>A      | c.(733-735)AGC>AAC   | p.S245N       |
| Pat_60 | Post-Resistance | USP11   | 8237   | 37 | X | 47092338  | 47092338  | Missense_Mutation | SNP | G | A | 48 | 39  | c.25G>A       | c.(25-27)GGG>AGG     | p.G9R         |
| Pat_60 | Post-Resistance | MAGED1  | 9500   | 37 | X | 51643393  | 51643393  | Splice_Site       | SNP | G | A | 4  | 27  | c.1959_splice | c.e11+1              | p.E653_splice |
| Pat_60 | Post-Resistance | PJA1    | 64219  | 37 | X | 68382694  | 68382694  | Missense_Mutation | SNP | C | T | 24 | 24  | c.388G>A      | c.(388-390)GGG>AGG   | p.G130R       |
| Pat_60 | Post-Resistance | NLGN3   | 54413  | 37 | X | 70389720  | 70389720  | Missense_Mutation | SNP | G | A | 5  | 8   | c.2260G>A     | c.(2260-2262)GAG>AAG | p.E754K       |
| Pat_60 | Post-Resistance | ATRX    | 546    | 37 | X | 76855029  | 76855029  | Missense_Mutation | SNP | T | C | 6  | 509 | c.5807A>G     | c.(5806-5808)AAG>AGG | p.K1936R      |
| Pat_60 | Post-Resistance | PCDH19  | 57526  | 37 | X | 99662793  | 99662793  | Missense_Mutation | SNP | C | T | 4  | 121 | c.803G>A      | c.(802-804)GGC>GAC   | p.G268D       |
| Pat_60 | Post-Resistance | NOX1    | 27035  | 37 | X | 100117659 | 100117659 | Missense_Mutation | SNP | G | A | 5  | 387 | c.488C>T      | c.(487-489)ACG>ATG   | p.T163M       |
| Pat_60 | Post-Resistance | ARMCX5  | 64860  | 37 | X | 101857282 | 101857282 | Missense_Mutation | SNP | G | T | 4  | 68  | c.213G>T      | c.(211-213)ATG>ATT   | p.M71I        |
| Pat_60 | Post-Resistance | RGAG1   | 57529  | 37 | X | 109697656 | 109697656 | Missense_Mutation | SNP | C | T | 4  | 109 | c.3811C>T     | c.(3811-3813)CGG>TGG | p.R1271W      |
| Pat_60 | Post-Resistance | RHOXF2B | 727940 | 37 | X | 119211063 | 119211063 | Nonsense_Mutation | SNP | C | T | 21 | 31  | c.270G>A      | c.(268-270)TGG>TGA   | p.W90*        |

|        |                 |          |        |    |   |           |           |                   |     |   |   |     |     |              |                      |              |
|--------|-----------------|----------|--------|----|---|-----------|-----------|-------------------|-----|---|---|-----|-----|--------------|----------------------|--------------|
| Pat_60 | Post-Resistance | ACTRT1   | 139741 | 37 | X | 127185072 | 127185072 | Nonsense_Mutation | SNP | G | A | 87  | 133 | c.1114C>T    | c.(1114-1116)CAA>TAA | p.Q372*      |
| Pat_60 | Post-Resistance | MAGEC1   | 9947   | 37 | X | 140993959 | 140993959 | Nonsense_Mutation | SNP | C | T | 14  | 212 | c.769C>T     | c.(769-771)CAG>TAG   | p.Q257*      |
| Pat_60 | Post-Resistance | SLITRK4  | 139065 | 37 | X | 142717365 | 142717365 | Missense_Mutation | SNP | C | A | 4   | 190 | c.1560G>T    | c.(1558-1560)TTG>TTT | p.L520F      |
| Pat_60 | Post-Resistance | FMR1NB   | 158521 | 37 | X | 147090174 | 147090174 | Missense_Mutation | SNP | C | T | 3   | 67  | c.575C>T     | c.(574-576)GCG>GTG   | p.A192V      |
| Pat_60 | Post-Resistance | MAMLD1   | 10046  | 37 | X | 149638078 | 149638078 | Missense_Mutation | SNP | G | A | 4   | 83  | c.233G>A     | c.(232-234)GCG>GAC   | p.G78D       |
| Pat_60 | Post-Resistance | GABRQ    | 55879  | 37 | X | 151821199 | 151821199 | Missense_Mutation | SNP | G | A | 50  | 52  | c.1354G>A    | c.(1354-1356)GAT>AAT | p.D452N      |
| Pat_60 | Post-Resistance | FAM58A   | 92002  | 37 | X | 152860138 | 152860138 | Splice_Site       | SNP | C | T | 23  | 21  | c.111_splice | c.e2-1               | p.R37_splice |
| Pat_60 | Post-Resistance | NAA10    | 8260   | 37 | X | 153195459 | 153195459 | Missense_Mutation | SNP | G | T | 4   | 49  | c.689C>A     | c.(688-690)GCC>GAC   | p.A230D      |
| Pat_65 | Pre-Treatment   | MMEL1    | 79258  | 37 | 1 | 2528092   | 2528092   | Missense_Mutation | SNP | G | A | 4   | 204 | c.1309C>T    | c.(1309-1311)CGT>TGT | p.R437C      |
| Pat_65 | Pre-Treatment   | PER3     | 8863   | 37 | 1 | 7890053   | 7890053   | Missense_Mutation | SNP | G | A | 8   | 242 | c.3019G>A    | c.(3019-3021)GCT>ACT | p.A1007T     |
| Pat_65 | Pre-Treatment   | RERE     | 473    | 37 | 1 | 8418949   | 8418949   | Missense_Mutation | SNP | G | A | 5   | 250 | c.3646C>T    | c.(3646-3648)CGC>TGC | p.R1216C     |
| Pat_65 | Pre-Treatment   | CLSTN1   | 22883  | 37 | 1 | 9791341   | 9791341   | Missense_Mutation | SNP | G | A | 6   | 489 | c.2671C>T    | c.(2671-2673)CGG>TGG | p.R891W      |
| Pat_65 | Pre-Treatment   | PRDM2    | 7799   | 37 | 1 | 14075950  | 14075950  | Missense_Mutation | SNP | G | A | 4   | 58  | c.479G>A     | c.(478-480)CGG>CAG   | p.R160Q      |
| Pat_65 | Pre-Treatment   | ESPNP    | 284729 | 37 | 1 | 17034085  | 17034085  | Nonsense_Mutation | SNP | C | T | 3   | 33  | c.405G>A     | c.(403-405)TGG>TGA   | p.W135*      |
| Pat_65 | Pre-Treatment   | PADI6    | 353238 | 37 | 1 | 17708479  | 17708479  | Missense_Mutation | SNP | C | A | 5   | 220 | c.571C>A     | c.(571-573)CAG>AAG   | p.Q191K      |
| Pat_65 | Pre-Treatment   | PHACTR4  | 65979  | 37 | 1 | 28793081  | 28793081  | Missense_Mutation | SNP | G | A | 5   | 256 | c.625G>A     | c.(625-627)GCT>ACT   | p.A209T      |
| Pat_65 | Pre-Treatment   | RBBP4    | 5928   | 37 | 1 | 33134600  | 33134600  | Missense_Mutation | SNP | G | A | 4   | 234 | c.628G>A     | c.(628-630)GTT>ATT   | p.V210I      |
| Pat_65 | Pre-Treatment   | KIAA1522 | 57648  | 37 | 1 | 33236639  | 33236639  | Missense_Mutation | SNP | G | A | 5   | 242 | c.1682G>A    | c.(1681-1683)CGC>CAC | p.R561H      |
| Pat_65 | Pre-Treatment   | CLSPN    | 63967  | 37 | 1 | 36226459  | 36226459  | Missense_Mutation | SNP | C | G | 5   | 220 | c.1063G>C    | c.(1063-1065)GAA>CAA | p.E355Q      |
| Pat_65 | Pre-Treatment   | THRAP3   | 9967   | 37 | 1 | 36748255  | 36748255  | Missense_Mutation | SNP | C | T | 5   | 303 | c.91C>T      | c.(91-93)CGG>TGG     | p.R31W       |
| Pat_65 | Pre-Treatment   | MACF1    | 23499  | 37 | 1 | 39549961  | 39549961  | Missense_Mutation | SNP | G | A | 4   | 277 | c.71G>A      | c.(70-72)CGA>CAA     | p.R24Q       |
| Pat_65 | Pre-Treatment   | KIAA0494 | 9813   | 37 | 1 | 47181982  | 47181982  | Missense_Mutation | SNP | C | T | 4   | 148 | c.319G>A     | c.(319-321)GAA>AAA   | p.E107K      |
| Pat_65 | Pre-Treatment   | STIL     | 6491   | 37 | 1 | 47726112  | 47726112  | Missense_Mutation | SNP | C | T | 4   | 230 | c.2926G>A    | c.(2926-2928)GTT>ATT | p.V976I      |
| Pat_65 | Pre-Treatment   | GLIS1    | 148979 | 37 | 1 | 54059801  | 54059801  | Missense_Mutation | SNP | C | T | 4   | 119 | c.775G>A     | c.(775-777)GAG>AAG   | p.E259K      |
| Pat_65 | Pre-Treatment   | CELSR2   | 1952   | 37 | 1 | 109794316 | 109794316 | Missense_Mutation | SNP | C | T | 4   | 178 | c.1615C>T    | c.(1615-1617)CGC>TGC | p.R539C      |
| Pat_65 | Pre-Treatment   | CELSR2   | 1952   | 37 | 1 | 109807532 | 109807532 | Missense_Mutation | SNP | C | T | 172 | 340 | c.5507C>T    | c.(5506-5508)CCG>CTG | p.P1836L     |
| Pat_65 | Pre-Treatment   | SLC6A17  | 388662 | 37 | 1 | 110734723 | 110734723 | Missense_Mutation | SNP | G | A | 6   | 298 | c.994G>A     | c.(994-996)GAT>AAT   | p.D332N      |
| Pat_65 | Pre-Treatment   | SLC6A17  | 388662 | 37 | 1 | 110737360 | 110737360 | Missense_Mutation | SNP | G | A | 6   | 328 | c.1459G>A    | c.(1459-1461)GAC>AAC | p.D487N      |
| Pat_65 | Pre-Treatment   | MOV10    | 4343   | 37 | 1 | 113237483 | 113237483 | Missense_Mutation | SNP | G | A | 4   | 223 | c.1585G>A    | c.(1585-1587)GGC>AGC | p.G529S      |
| Pat_65 | Pre-Treatment   | LRIG2    | 9860   | 37 | 1 | 113637047 | 113637047 | Missense_Mutation | SNP | G | A | 6   | 388 | c.602G>A     | c.(601-603)CGT>CAT   | p.R201H      |
| Pat_65 | Pre-Treatment   | CD2      | 914    | 37 | 1 | 117303224 | 117303224 | Missense_Mutation | SNP | G | A | 65  | 187 | c.583G>A     | c.(583-585)GAA>AAA   | p.E195K      |
| Pat_65 | Pre-Treatment   | NOTCH2   | 4853   | 37 | 1 | 120506320 | 120506320 | Missense_Mutation | SNP | C | T | 8   | 804 | c.1792G>A    | c.(1792-1794)GGG>AGG | p.G598R      |
| Pat_65 | Pre-Treatment   | PDE4DIP  | 9659   | 37 | 1 | 144879284 | 144879284 | Missense_Mutation | SNP | G | A | 64  | 264 | c.4166C>T    | c.(4165-4167)TCG>TTG | p.S1389L     |
| Pat_65 | Pre-Treatment   | LIX1L    | 128077 | 37 | 1 | 145477408 | 145477408 | Missense_Mutation | SNP | G | A | 3   | 42  | c.250G>A     | c.(250-252)GTG>ATG   | p.V84M       |
| Pat_65 | Pre-Treatment   | BCL9     | 607    | 37 | 1 | 147092225 | 147092225 | Missense_Mutation | SNP | C | T | 53  | 23  | c.2264C>T    | c.(2263-2265)TCA>TTA | p.S755L      |
| Pat_65 | Pre-Treatment   | PI4KB    | 5298   | 37 | 1 | 151288450 | 151288450 | Missense_Mutation | SNP | C | T | 5   | 199 | c.508G>A     | c.(508-510)GAG>AAG   | p.E170K      |
| Pat_65 | Pre-Treatment   | INTS3    | 65123  | 37 | 1 | 153740181 | 153740181 | Missense_Mutation | SNP | G | A | 5   | 307 | c.2122G>A    | c.(2122-2124)GAG>AAG | p.E708K      |
| Pat_65 | Pre-Treatment   | CHRN2    | 1141   | 37 | 1 | 154543672 | 154543672 | Missense_Mutation | SNP | G | A | 5   | 416 | c.373G>A     | c.(373-375)GGC>AGC   | p.G125S      |
| Pat_65 | Pre-Treatment   | MRPL24   | 79590  | 37 | 1 | 156708166 | 156708166 | Missense_Mutation | SNP | C | T | 8   | 846 | c.248G>A     | c.(247-249)CGA>CAA   | p.R83Q       |
| Pat_65 | Pre-Treatment   | LY9      | 4063   | 37 | 1 | 160786536 | 160786536 | Missense_Mutation | SNP | G | A | 16  | 241 | c.1225G>A    | c.(1225-1227)GAA>AAA | p.E409K      |
| Pat_65 | Pre-Treatment   | UCK2     | 7371   | 37 | 1 | 165860559 | 165860559 | Missense_Mutation | SNP | G | A | 4   | 301 | c.356G>A     | c.(355-357)CGG>CAG   | p.R119Q      |
| Pat_65 | Pre-Treatment   | TNN      | 63923  | 37 | 1 | 175046699 | 175046699 | Missense_Mutation | SNP | G | A | 4   | 83  | c.145G>A     | c.(145-147)GAT>AAT   | p.D49N       |
| Pat_65 | Pre-Treatment   | RASAL2   | 9462   | 37 | 1 | 178427390 | 178427390 | Missense_Mutation | SNP | G | A | 6   | 187 | c.2540G>A    | c.(2539-2541)CGG>CAG | p.R847Q      |
| Pat_65 | Pre-Treatment   | PRG4     | 10216  | 37 | 1 | 186276274 | 186276274 | Missense_Mutation | SNP | G | T | 4   | 169 | c.1423G>T    | c.(1423-1425)GCA>TCA | p.A475S      |
| Pat_65 | Pre-Treatment   | PTPRC    | 5788   | 37 | 1 | 198721496 | 198721496 | Missense_Mutation | SNP | C | T | 15  | 253 | c.3320C>T    | c.(3319-3321)TCC>TTC | p.S1107F     |
| Pat_65 | Pre-Treatment   | GPR37L1  | 9283   | 37 | 1 | 202097164 | 202097164 | Missense_Mutation | SNP | G | A | 4   | 262 | c.926G>A     | c.(925-927)CGC>CAC   | p.R309H      |
| Pat_65 | Pre-Treatment   | PTPN7    | 5778   | 37 | 1 | 202126888 | 202126888 | Missense_Mutation | SNP | G | C | 210 | 110 | c.370C>G     | c.(370-372)CGA>GGA   | p.R124G      |



|        |               |          |        |    |    |           |           |                   |     |    |    |     |     |                |                      |          |
|--------|---------------|----------|--------|----|----|-----------|-----------|-------------------|-----|----|----|-----|-----|----------------|----------------------|----------|
| Pat_65 | Pre-Treatment | PTPN14   | 5784   | 37 | 1  | 214549623 | 214549623 | Missense_Mutation | SNP | C  | T  | 6   | 189 | c.2846G>A      | c.(2845-2847)CGA>CAA | p.R949Q  |
| Pat_65 | Pre-Treatment | OBSCN    | 84033  | 37 | 1  | 228402500 | 228402500 | Missense_Mutation | SNP | A  | G  | 3   | 56  | c.1529A>G      | c.(1528-1530)AAG>AGG | p.K510R  |
| Pat_65 | Pre-Treatment | ACTN2    | 88     | 37 | 1  | 236902617 | 236902617 | Missense_Mutation | SNP | C  | T  | 6   | 607 | c.892C>T       | c.(892-894)CGT>TGT   | p.R298C  |
| Pat_65 | Pre-Treatment | CNST     | 163882 | 37 | 1  | 246755003 | 246755003 | Missense_Mutation | SNP | G  | A  | 7   | 435 | c.139G>A       | c.(139-141)GGG>AGG   | p.G47R   |
| Pat_65 | Pre-Treatment | OR2T4    | 127074 | 37 | 1  | 248524937 | 248524937 | Missense_Mutation | SNP | A  | T  | 5   | 354 | c.55A>T        | c.(55-57)ATG>TTG     | p.M19L   |
| Pat_65 | Pre-Treatment | PGBD2    | 267002 | 37 | 1  | 249212114 | 249212114 | Missense_Mutation | SNP | G  | A  | 4   | 150 | c.1331G>A      | c.(1330-1332)CGG>CAG | p.R444Q  |
| Pat_65 | Pre-Treatment | CACNB2   | 783    | 37 | 10 | 18795450  | 18795451  | Missense_Mutation | DNP | CC | TT | 38  | 63  | c.644_645CC>TT | c.(643-645)TCC>TTT   | p.S215F  |
| Pat_65 | Pre-Treatment | KIAA1462 | 57608  | 37 | 10 | 30318556  | 30318556  | Missense_Mutation | SNP | C  | T  | 6   | 449 | c.521G>A       | c.(520-522)CGA>CAA   | p.R174Q  |
| Pat_65 | Pre-Treatment | ANKRD30A | 91074  | 37 | 10 | 37430688  | 37430688  | Missense_Mutation | SNP | C  | T  | 5   | 134 | c.695C>T       | c.(694-696)GCG>GTG   | p.A232V  |
| Pat_65 | Pre-Treatment | ANKRD30A | 91074  | 37 | 10 | 37430948  | 37430948  | Missense_Mutation | SNP | C  | G  | 8   | 144 | c.955C>G       | c.(955-957)CCA>GCA   | p.P319A  |
| Pat_65 | Pre-Treatment | ANKRD30A | 91074  | 37 | 10 | 37431050  | 37431050  | Missense_Mutation | SNP | G  | C  | 10  | 114 | c.1057G>C      | c.(1057-1059)GCA>CCA | p.A353P  |
| Pat_65 | Pre-Treatment | PGBD3    | 267004 | 37 | 10 | 50723897  | 50723897  | Missense_Mutation | SNP | C  | A  | 5   | 287 | c.1264G>T      | c.(1264-1266)GCC>TCC | p.A422S  |
| Pat_65 | Pre-Treatment | OGDHL    | 55753  | 37 | 10 | 50953529  | 50953529  | Missense_Mutation | SNP | C  | T  | 4   | 173 | c.1490G>A      | c.(1489-1491)CGG>CAG | p.R497Q  |
| Pat_65 | Pre-Treatment | SGMS1    | 259230 | 37 | 10 | 52103520  | 52103520  | Missense_Mutation | SNP | G  | A  | 53  | 87  | c.355C>T       | c.(355-357)CCC>TCC   | p.P119S  |
| Pat_65 | Pre-Treatment | JMJD1C   | 221037 | 37 | 10 | 64944404  | 64944404  | Missense_Mutation | SNP | G  | A  | 4   | 199 | c.6925C>T      | c.(6925-6927)CGT>TGT | p.R2309C |
| Pat_65 | Pre-Treatment | PLA2G12B | 84647  | 37 | 10 | 74701011  | 74701011  | Missense_Mutation | SNP | G  | A  | 6   | 644 | c.382C>T       | c.(382-384)CGC>TGC   | p.R128C  |
| Pat_65 | Pre-Treatment | KIAA0913 | 23053  | 37 | 10 | 75557222  | 75557222  | Missense_Mutation | SNP | C  | T  | 4   | 100 | c.3506C>T      | c.(3505-3507)GCC>GTC | p.A1169V |
| Pat_65 | Pre-Treatment | PANK1    | 53354  | 37 | 10 | 91353604  | 91353604  | Nonsense_Mutation | SNP | G  | A  | 6   | 536 | c.1453C>T      | c.(1453-1455)CGA>TGA | p.R485*  |
| Pat_65 | Pre-Treatment | HECTD2   | 143279 | 37 | 10 | 93242776  | 93242776  | Missense_Mutation | SNP | G  | A  | 4   | 184 | c.764G>A       | c.(763-765)CGA>CAA   | p.R255Q  |
| Pat_65 | Pre-Treatment | UBTD1    | 80019  | 37 | 10 | 99327791  | 99327791  | Missense_Mutation | SNP | G  | A  | 6   | 326 | c.191G>A       | c.(190-192)CGC>CAC   | p.R64H   |
| Pat_65 | Pre-Treatment | POLL     | 27343  | 37 | 10 | 103340109 | 103340109 | Missense_Mutation | SNP | C  | T  | 91  | 110 | c.1259G>A      | c.(1258-1260)CGG>CAG | p.R420Q  |
| Pat_65 | Pre-Treatment | ITPRIP   | 85450  | 37 | 10 | 106075233 | 106075233 | Missense_Mutation | SNP | C  | T  | 4   | 217 | c.577G>A       | c.(577-579)GTG>ATG   | p.V193M  |
| Pat_65 | Pre-Treatment | RPL13AP6 | 644511 | 37 | 10 | 112696573 | 112696573 | Missense_Mutation | SNP | T  | C  | 6   | 27  | c.419A>G       | c.(418-420)CAC>CGC   | p.H140R  |
| Pat_65 | Pre-Treatment | DPYSL4   | 10570  | 37 | 10 | 134010404 | 134010404 | Missense_Mutation | SNP | G  | A  | 4   | 202 | c.518G>A       | c.(517-519)CGG>CAG   | p.R173Q  |
| Pat_65 | Pre-Treatment | DPYSL4   | 10570  | 37 | 10 | 134016193 | 134016193 | Missense_Mutation | SNP | C  | T  | 4   | 156 | c.1325C>T      | c.(1324-1326)GCG>GTG | p.A442V  |
| Pat_65 | Pre-Treatment | TALDO1   | 6888   | 37 | 11 | 764390    | 764390    | Missense_Mutation | SNP | G  | A  | 4   | 130 | c.938G>A       | c.(937-939)CGC>CAC   | p.R313H  |
| Pat_65 | Pre-Treatment | TRIM21   | 6737   | 37 | 11 | 4411261   | 4411261   | Missense_Mutation | SNP | G  | A  | 34  | 73  | c.379C>T       | c.(379-381)CCT>TCT   | p.P127S  |
| Pat_65 | Pre-Treatment | OR51F1   | 256892 | 37 | 11 | 4791114   | 4791114   | Missense_Mutation | SNP | G  | A  | 37  | 66  | c.34C>T        | c.(34-36)CCA>TCA     | p.P12S   |
| Pat_65 | Pre-Treatment | HPX      | 3263   | 37 | 11 | 6458877   | 6458877   | Missense_Mutation | SNP | G  | A  | 4   | 170 | c.496C>T       | c.(496-498)CGC>TGC   | p.R166C  |
| Pat_65 | Pre-Treatment | SBF2     | 81846  | 37 | 11 | 9871756   | 9871756   | Missense_Mutation | SNP | G  | A  | 45  | 98  | c.2620C>T      | c.(2620-2622)CTT>TTT | p.L874F  |
| Pat_65 | Pre-Treatment | PSMA1    | 5682   | 37 | 11 | 14532449  | 14532449  | Missense_Mutation | SNP | G  | A  | 4   | 231 | c.593C>T       | c.(592-594)ACG>ATG   | p.T198M  |
| Pat_65 | Pre-Treatment | ABCC8    | 6833   | 37 | 11 | 17464321  | 17464321  | Missense_Mutation | SNP | G  | A  | 5   | 226 | c.1576C>T      | c.(1576-1578)CGC>TGC | p.R526C  |
| Pat_65 | Pre-Treatment | NELL1    | 4745   | 37 | 11 | 20699519  | 20699519  | Missense_Mutation | SNP | G  | A  | 4   | 275 | c.97G>A        | c.(97-99)GTC>ATC     | p.V33I   |
| Pat_65 | Pre-Treatment | ANO3     | 63982  | 37 | 11 | 26681879  | 26681879  | Missense_Mutation | SNP | G  | A  | 6   | 489 | c.2834G>A      | c.(2833-2835)CGA>CAA | p.R945Q  |
| Pat_65 | Pre-Treatment | F2       | 2147   | 37 | 11 | 46747651  | 46747651  | Missense_Mutation | SNP | G  | A  | 5   | 399 | c.802G>A       | c.(802-804)GAT>AAT   | p.D268N  |
| Pat_65 | Pre-Treatment | OR5AR1   | 219493 | 37 | 11 | 56431526  | 56431526  | Missense_Mutation | SNP | G  | A  | 6   | 378 | c.365G>A       | c.(364-366)CGT>CAT   | p.R122H  |
| Pat_65 | Pre-Treatment | OR4D10   | 390197 | 37 | 11 | 59245348  | 59245348  | Nonsense_Mutation | SNP | G  | A  | 120 | 260 | c.446G>A       | c.(445-447)TGG>TAG   | p.W149*  |
| Pat_65 | Pre-Treatment | DDB1     | 1642   | 37 | 11 | 61071414  | 61071414  | Missense_Mutation | SNP | C  | T  | 5   | 321 | c.2755G>A      | c.(2755-2757)GAC>AAC | p.D919N  |
| Pat_65 | Pre-Treatment | PLCB3    | 5331   | 37 | 11 | 64030025  | 64030025  | Missense_Mutation | SNP | C  | T  | 5   | 211 | c.2185C>T      | c.(2185-2187)CGG>TGG | p.R729W  |
| Pat_65 | Pre-Treatment | CD248    | 57124  | 37 | 11 | 66083598  | 66083598  | Missense_Mutation | SNP | G  | A  | 4   | 159 | c.901C>T       | c.(901-903)CGG>TGG   | p.R301W  |
| Pat_65 | Pre-Treatment | RBM4B    | 83759  | 37 | 11 | 66436559  | 66436559  | Missense_Mutation | SNP | C  | T  | 4   | 264 | c.616G>A       | c.(616-618)GGG>AGG   | p.G206R  |
| Pat_65 | Pre-Treatment | SPTBN2   | 6712   | 37 | 11 | 66472458  | 66472458  | Missense_Mutation | SNP | C  | A  | 4   | 146 | c.2289G>T      | c.(2287-2289)TTG>TTT | p.L763F  |
| Pat_65 | Pre-Treatment | TSKU     | 25987  | 37 | 11 | 76506727  | 76506727  | Missense_Mutation | SNP | G  | A  | 4   | 134 | c.67G>A        | c.(67-69)GGG>AGG     | p.G23R   |
| Pat_65 | Pre-Treatment | MYO7A    | 4647   | 37 | 11 | 76867967  | 76867967  | Missense_Mutation | SNP | G  | A  | 5   | 279 | c.652G>A       | c.(652-654)GAC>AAC   | p.D218N  |
| Pat_65 | Pre-Treatment | MMP8     | 4317   | 37 | 11 | 102592182 | 102592182 | Missense_Mutation | SNP | C  | T  | 69  | 145 | c.572G>A       | c.(571-573)GGA>GAA   | p.G191E  |
| Pat_65 | Pre-Treatment | MMP12    | 4321   | 37 | 11 | 102734976 | 102734976 | Missense_Mutation | SNP | C  | T  | 18  | 61  | c.1213G>A      | c.(1213-1215)GAA>AAA | p.E405K  |
| Pat_65 | Pre-Treatment | FXVD2    | 486    | 37 | 11 | 117695380 | 117695380 | Missense_Mutation | SNP | G  | A  | 4   | 253 | c.14C>T        | c.(13-15)TCG>TTG     | p.S5L    |

|        |               |           |        |    |    |           |           |                   |     |    |    |     |     |                 |                                   |          |
|--------|---------------|-----------|--------|----|----|-----------|-----------|-------------------|-----|----|----|-----|-----|-----------------|-----------------------------------|----------|
| Pat_65 | Pre-Treatment | TMEM25    | 84866  | 37 | 11 | 118403655 | 118403655 | Missense_Mutation | SNP | G  | A  | 5   | 249 | c.406G>A        | c.(406-408)GGC>AGC                | p.G136S  |
| Pat_65 | Pre-Treatment | ZNF202    | 7753   | 37 | 11 | 123598937 | 123598937 | Missense_Mutation | SNP | A  | G  | 4   | 269 | c.736T>C        | c.(736-738)TTT>CTT                | p.F246L  |
| Pat_65 | Pre-Treatment | OR10S1    | 219873 | 37 | 11 | 123848217 | 123848217 | Missense_Mutation | SNP | G  | A  | 32  | 42  | c.182C>T        | c.(181-183)ACT>ATT                | p.T61I   |
| Pat_65 | Pre-Treatment | OR10G7    | 390265 | 37 | 11 | 123909343 | 123909343 | Nonsense_Mutation | SNP | G  | T  | 101 | 514 | c.366C>A        | c.(364-366)TAC>TAA                | p.Y122*  |
| Pat_65 | Pre-Treatment | VAMP1     | 6843   | 37 | 12 | 6575461   | 6575461   | Missense_Mutation | SNP | C  | T  | 5   | 304 | c.59G>A         | c.(58-60)GGT>GAT                  | p.G20D   |
| Pat_65 | Pre-Treatment | ETV6      | 2120   | 37 | 12 | 12022670  | 12022670  | Missense_Mutation | SNP | G  | A  | 6   | 435 | c.776G>A        | c.(775-777)CGG>CAG                | p.R259Q  |
| Pat_65 | Pre-Treatment | RPL13AP20 | 387841 | 37 | 12 | 13028751  | 13028751  | Missense_Mutation | SNP | G  | C  | 32  | 65  | c.319G>C        | c.(319-321)GGC>CGC                | p.G107R  |
| Pat_65 | Pre-Treatment | SLCO1C1   | 53919  | 37 | 12 | 20874891  | 20874891  | Missense_Mutation | SNP | C  | T  | 28  | 37  | c.929C>T        | c.(928-930)TCT>TTT                | p.S310F  |
| Pat_65 | Pre-Treatment | IFLTD1    | 160492 | 37 | 12 | 25672949  | 25672949  | Missense_Mutation | SNP | C  | T  | 6   | 146 | c.796G>A        | c.(796-798)GTT>ATT                | p.V266I  |
| Pat_65 | Pre-Treatment | C12orf54  | 121273 | 37 | 12 | 48877092  | 48877092  | Missense_Mutation | SNP | C  | T  | 81  | 189 | c.13C>T         | c.(13-15)CCC>TCC                  | p.P5S    |
| Pat_65 | Pre-Treatment | TROAP     | 10024  | 37 | 12 | 49724304  | 49724304  | Missense_Mutation | SNP | G  | A  | 12  | 129 | c.1676G>A       | c.(1675-1677)TGC>TAC              | p.C559Y  |
| Pat_65 | Pre-Treatment | LETMD1    | 25875  | 37 | 12 | 51449775  | 51449775  | Missense_Mutation | SNP | C  | T  | 4   | 234 | c.631C>T        | c.(631-633)CGG>TGG                | p.R211W  |
| Pat_65 | Pre-Treatment | KRT86     | 3892   | 37 | 12 | 52699156  | 52699156  | Missense_Mutation | SNP | C  | T  | 7   | 689 | c.868C>T        | c.(868-870)CGG>TGG                | p.R290W  |
| Pat_65 | Pre-Treatment | AMHR2     | 269    | 37 | 12 | 53823690  | 53823690  | Nonsense_Mutation | SNP | C  | T  | 4   | 160 | c.1216C>T       | c.(1216-1218)CGA>TGA              | p.R406*  |
| Pat_65 | Pre-Treatment | NFE2      | 4778   | 37 | 12 | 54688973  | 54688974  | Missense_Mutation | DNP | CT | TG | 82  | 229 | c.59_60AG>CA    | c.(58-60)GAG>GCA                  | p.E20A   |
| Pat_65 | Pre-Treatment | ACAD10    | 80724  | 37 | 12 | 112130602 | 112130602 | Missense_Mutation | SNP | G  | A  | 6   | 488 | c.89G>A         | c.(88-90)GGG>GAG                  | p.G30E   |
| Pat_65 | Pre-Treatment | FBXW8     | 26259  | 37 | 12 | 117462033 | 117462034 | Missense_Mutation | DNP | GG | AA | 53  | 135 | .1449_1450GG>A  | 1447-1452)ATGGAT>ATAA.483_484MD>I |          |
| Pat_65 | Pre-Treatment | CCDC60    | 160777 | 37 | 12 | 119926577 | 119926577 | Missense_Mutation | SNP | C  | T  | 76  | 163 | c.463C>T        | c.(463-465)CGC>TGC                | p.R155C  |
| Pat_65 | Pre-Treatment | GOLGA3    | 2802   | 37 | 12 | 133385015 | 133385015 | Missense_Mutation | SNP | G  | A  | 5   | 472 | c.640C>T        | c.(640-642)CGC>TGC                | p.R214C  |
| Pat_65 | Pre-Treatment | PARP4     | 143    | 37 | 13 | 25000674  | 25000674  | Missense_Mutation | SNP | G  | A  | 4   | 214 | c.4909C>T       | c.(4909-4911)CGC>TGC              | p.R1637C |
| Pat_65 | Pre-Treatment | PABPC3    | 5042   | 37 | 13 | 25670931  | 25670931  | Nonsense_Mutation | SNP | G  | T  | 5   | 174 | c.595G>T        | c.(595-597)GGA>TGA                | p.G199*  |
| Pat_65 | Pre-Treatment | FREM2     | 341640 | 37 | 13 | 39264066  | 39264066  | Missense_Mutation | SNP | C  | T  | 4   | 181 | c.2585C>T       | c.(2584-2586)GCC>GTC              | p.A862V  |
| Pat_65 | Pre-Treatment | FREM2     | 341640 | 37 | 13 | 39266018  | 39266018  | Missense_Mutation | SNP | G  | A  | 8   | 522 | c.4537G>A       | c.(4537-4539)GAT>AAT              | p.D1513N |
| Pat_65 | Pre-Treatment | RCBTB1    | 55213  | 37 | 13 | 50141334  | 50141334  | Missense_Mutation | SNP | C  | T  | 4   | 164 | c.82G>A         | c.(82-84)GGC>AGC                  | p.G28S   |
| Pat_65 | Pre-Treatment | LOC220429 | 220429 | 37 | 13 | 50466425  | 50466425  | Missense_Mutation | SNP | C  | T  | 52  | 90  | c.1699C>T       | c.(1699-1701)CAC>TAC              | p.H567Y  |
| Pat_65 | Pre-Treatment | RNF113B   | 140432 | 37 | 13 | 98829120  | 98829120  | Missense_Mutation | SNP | G  | A  | 4   | 130 | c.371C>T        | c.(370-372)ACG>ATG                | p.T124M  |
| Pat_65 | Pre-Treatment | PSMB11    | 122706 | 37 | 14 | 23512120  | 23512120  | Missense_Mutation | SNP | G  | A  | 5   | 131 | c.686G>A        | c.(685-687)CGG>CAG                | p.R229Q  |
| Pat_65 | Pre-Treatment | IPO4      | 79711  | 37 | 14 | 24653268  | 24653268  | Missense_Mutation | SNP | G  | A  | 4   | 217 | c.1805C>T       | c.(1804-1806)GCG>GTG              | p.A602V  |
| Pat_65 | Pre-Treatment | TM9SF1    | 10548  | 37 | 14 | 24659625  | 24659625  | Missense_Mutation | SNP | G  | A  | 4   | 204 | c.1388C>T       | c.(1387-1389)ACT>ATT              | p.T463I  |
| Pat_65 | Pre-Treatment | HECTD1    | 25831  | 37 | 14 | 31585636  | 31585636  | Missense_Mutation | SNP | T  | G  | 70  | 150 | c.5424A>C       | c.(5422-5424)GAA>GAC              | p.E1808D |
| Pat_65 | Pre-Treatment | AKAP6     | 9472   | 37 | 14 | 33069982  | 33069982  | Missense_Mutation | SNP | G  | A  | 4   | 173 | c.2714G>A       | c.(2713-2715)GGG>GAG              | p.G905E  |
| Pat_65 | Pre-Treatment | AKAP6     | 9472   | 37 | 14 | 33292951  | 33292951  | Missense_Mutation | SNP | A  | G  | 4   | 233 | c.5932A>G       | c.(5932-5934)ACT>GCT              | p.T1978A |
| Pat_65 | Pre-Treatment | OTX2      | 5015   | 37 | 14 | 57268637  | 57268637  | Missense_Mutation | SNP | C  | A  | 4   | 156 | c.686G>T        | c.(685-687)AGC>ATC                | p.S229I  |
| Pat_65 | Pre-Treatment | RTN1      | 6252   | 37 | 14 | 60063471  | 60063471  | Missense_Mutation | SNP | C  | T  | 147 | 287 | c.2323G>A       | c.(2323-2325)GCT>ACT              | p.A775T  |
| Pat_65 | Pre-Treatment | PAPLN     | 89932  | 37 | 14 | 73732131  | 73732131  | Missense_Mutation | SNP | G  | A  | 4   | 257 | c.3179G>A       | c.(3178-3180)CGG>CAG              | p.R1060Q |
| Pat_65 | Pre-Treatment | C14orf43  | 91748  | 37 | 14 | 74205340  | 74205340  | Missense_Mutation | SNP | G  | A  | 4   | 176 | c.1372C>T       | c.(1372-1374)CGC>TGC              | p.R458C  |
| Pat_65 | Pre-Treatment | C14orf43  | 91748  | 37 | 14 | 74205754  | 74205754  | Nonsense_Mutation | SNP | C  | A  | 4   | 63  | c.958G>T        | c.(958-960)GAA>TAA                | p.E320*  |
| Pat_65 | Pre-Treatment | TLL5      | 23093  | 37 | 14 | 76165558  | 76165558  | Nonsense_Mutation | SNP | G  | A  | 37  | 103 | c.530G>A        | c.(529-531)TGG>TAG                | p.W177*  |
| Pat_65 | Pre-Treatment | WARS      | 7453   | 37 | 14 | 100835507 | 100835507 | Missense_Mutation | SNP | G  | A  | 4   | 148 | c.16C>T         | c.(16-18)CCC>TCC                  | p.P6S    |
| Pat_65 | Pre-Treatment | KIAA0284  | 283638 | 37 | 14 | 105349558 | 105349558 | Missense_Mutation | SNP | G  | A  | 12  | 681 | c.764G>A        | c.(763-765)GGT>GAT                | p.G255D  |
| Pat_65 | Pre-Treatment | ATP10A    | 57194  | 37 | 15 | 25958904  | 25958904  | Missense_Mutation | SNP | C  | T  | 6   | 251 | c.2261G>A       | c.(2260-2262)CGG>CAG              | p.R754Q  |
| Pat_65 | Pre-Treatment | GABRG3    | 2567   | 37 | 15 | 27777804  | 27777804  | Missense_Mutation | SNP | C  | T  | 35  | 84  | c.1181C>T       | c.(1180-1182)TCC>TTC              | p.S394F  |
| Pat_65 | Pre-Treatment | DLL4      | 54567  | 37 | 15 | 41228851  | 41228851  | Missense_Mutation | SNP | C  | T  | 4   | 63  | c.1666C>T       | c.(1666-1668)CGG>TGG              | p.R556W  |
| Pat_65 | Pre-Treatment | TUBGCP4   | 27229  | 37 | 15 | 43677989  | 43677989  | Missense_Mutation | SNP | C  | T  | 4   | 208 | c.724C>T        | c.(724-726)CGC>TGC                | p.R242C  |
| Pat_65 | Pre-Treatment | HERC1     | 8925   | 37 | 15 | 63970126  | 63970126  | Missense_Mutation | SNP | G  | A  | 7   | 633 | c.6988C>T       | c.(6988-6990)CGC>TGC              | p.R2330C |
| Pat_65 | Pre-Treatment | LBXCOR1   | 390598 | 37 | 15 | 68119364  | 68119365  | Missense_Mutation | DNP | CC | TT | 14  | 39  | .:1066_1067CC>T | c.(1066-1068)CCT>TTT              | p.P356F  |
| Pat_65 | Pre-Treatment | PTPN9     | 5780   | 37 | 15 | 75819488  | 75819488  | Missense_Mutation | SNP | G  | A  | 5   | 312 | c.178C>T        | c.(178-180)CGT>TGT                | p.R60C   |

|        |               |          |        |    |    |          |          |                   |     |    |    |     |     |                |                      |                |
|--------|---------------|----------|--------|----|----|----------|----------|-------------------|-----|----|----|-----|-----|----------------|----------------------|----------------|
| Pat_65 | Pre-Treatment | SNX33    | 257364 | 37 | 15 | 75941463 | 75941463 | Missense_Mutation | SNP | C  | T  | 153 | 327 | c.20C>T        | c.(19-21)GCC>GTC     | p.A7V          |
| Pat_65 | Pre-Treatment | IREB2    | 3658   | 37 | 15 | 78790399 | 78790399 | Missense_Mutation | SNP | G  | A  | 6   | 446 | c.2806G>A      | c.(2806-2808)GTG>ATG | p.V936M        |
| Pat_65 | Pre-Treatment | STARD5   | 80765  | 37 | 15 | 81605689 | 81605689 | Missense_Mutation | SNP | G  | A  | 5   | 502 | c.550C>T       | c.(550-552)CTC>TTC   | p.L184F        |
| Pat_65 | Pre-Treatment | PDIA2    | 64714  | 37 | 16 | 334584   | 334584   | Missense_Mutation | SNP | G  | A  | 17  | 35  | c.397G>A       | c.(397-399)GAG>AAG   | p.E133K        |
| Pat_65 | Pre-Treatment | SOLH     | 6650   | 37 | 16 | 598100   | 598100   | Missense_Mutation | SNP | G  | A  | 3   | 17  | c.1262G>A      | c.(1261-1263)TGT>TAT | p.C421Y        |
| Pat_65 | Pre-Treatment | IFT140   | 9742   | 37 | 16 | 1570021  | 1570021  | Missense_Mutation | SNP | C  | T  | 4   | 127 | c.3901G>A      | c.(3901-3903)GAC>AAC | p.D1301N       |
| Pat_65 | Pre-Treatment | IFT140   | 9742   | 37 | 16 | 1575305  | 1575305  | Missense_Mutation | SNP | G  | A  | 19  | 341 | c.2791C>T      | c.(2791-2793)CGC>TGC | p.R931C        |
| Pat_65 | Pre-Treatment | TBC1D24  | 57465  | 37 | 16 | 2546352  | 2546352  | Missense_Mutation | SNP | C  | T  | 4   | 257 | c.203C>T       | c.(202-204)ACG>ATG   | p.T68M         |
| Pat_65 | Pre-Treatment | TBC1D24  | 57465  | 37 | 16 | 2546873  | 2546873  | Missense_Mutation | SNP | C  | T  | 4   | 196 | c.724C>T       | c.(724-726)CGC>TGC   | p.R242C        |
| Pat_65 | Pre-Treatment | SRRM2    | 23524  | 37 | 16 | 2817091  | 2817091  | Missense_Mutation | SNP | A  | G  | 85  | 189 | c.6562A>G      | c.(6562-6564)ATC>GTC | p.I2188V       |
| Pat_65 | Pre-Treatment | BTBD12   | 84464  | 37 | 16 | 3641121  | 3641121  | Missense_Mutation | SNP | C  | T  | 5   | 221 | c.2518G>A      | c.(2518-2520)GAA>AAA | p.E840K        |
| Pat_65 | Pre-Treatment | ATF7IP2  | 80063  | 37 | 16 | 10532009 | 10532009 | Missense_Mutation | SNP | G  | T  | 5   | 179 | c.1012G>T      | c.(1012-1014)GAT>TAT | p.D338Y        |
| Pat_65 | Pre-Treatment | NPIP     | 9284   | 37 | 16 | 15045791 | 15045791 | Missense_Mutation | SNP | C  | T  | 8   | 591 | c.962C>T       | c.(961-963)CCA>CTA   | p.P321L        |
| Pat_65 | Pre-Treatment | DNAH3    | 55567  | 37 | 16 | 21051173 | 21051173 | Splice_Site       | SNP | C  | T  | 103 | 230 | c.4730_splice  | c.e33+1              | p.S1577_splice |
| Pat_65 | Pre-Treatment | NDUFAB1  | 4706   | 37 | 16 | 23598564 | 23598564 | Missense_Mutation | SNP | C  | T  | 4   | 227 | c.245G>A       | c.(244-246)CGT>CAT   | p.R82H         |
| Pat_65 | Pre-Treatment | TNRC6A   | 27327  | 37 | 16 | 24816962 | 24816962 | Missense_Mutation | SNP | G  | A  | 6   | 594 | c.4159G>A      | c.(4159-4161)GGT>AGT | p.G1387S       |
| Pat_65 | Pre-Treatment | HEATR3   | 55027  | 37 | 16 | 50112912 | 50112912 | Missense_Mutation | SNP | G  | A  | 4   | 123 | c.1024G>A      | c.(1024-1026)GTT>ATT | p.V342I        |
| Pat_65 | Pre-Treatment | ARL2BP   | 23568  | 37 | 16 | 57286171 | 57286171 | Missense_Mutation | SNP | C  | T  | 4   | 207 | c.484C>T       | c.(484-486)CGG>TGG   | p.R162W        |
| Pat_65 | Pre-Treatment | CDH16    | 1014   | 37 | 16 | 66943281 | 66943281 | Missense_Mutation | SNP | C  | T  | 4   | 169 | c.2281G>A      | c.(2281-2283)GTG>ATG | p.V761M        |
| Pat_65 | Pre-Treatment | DDX28    | 55794  | 37 | 16 | 68055631 | 68055631 | Missense_Mutation | SNP | C  | T  | 4   | 182 | c.1475G>A      | c.(1474-1476)GGG>GAG | p.G492E        |
| Pat_65 | Pre-Treatment | VAC14    | 55697  | 37 | 16 | 70818015 | 70818015 | Splice_Site       | SNP | C  | T  | 6   | 239 | c.594_splice   | c.e5+1               | p.W198_splice  |
| Pat_65 | Pre-Treatment | CHST4    | 10164  | 37 | 16 | 71570876 | 71570876 | Missense_Mutation | SNP | G  | A  | 69  | 138 | c.296G>A       | c.(295-297)CGG>CAG   | p.R99Q         |
| Pat_65 | Pre-Treatment | PHLPP2   | 23035  | 37 | 16 | 71710415 | 71710415 | Missense_Mutation | SNP | C  | T  | 4   | 217 | c.1406G>A      | c.(1405-1407)CGG>CAG | p.R469Q        |
| Pat_65 | Pre-Treatment | CLEC3A   | 10143  | 37 | 16 | 78062081 | 78062081 | Nonsense_Mutation | SNP | C  | T  | 4   | 100 | c.193C>T       | c.(193-195)CAG>TAG   | p.Q65*         |
| Pat_65 | Pre-Treatment | MBTPS1   | 8720   | 37 | 16 | 84104299 | 84104299 | Missense_Mutation | SNP | G  | A  | 5   | 357 | c.1676C>T      | c.(1675-1677)TCG>TTG | p.S559L        |
| Pat_65 | Pre-Treatment | TAF1C    | 9013   | 37 | 16 | 84213175 | 84213175 | Missense_Mutation | SNP | C  | T  | 4   | 92  | c.1982G>A      | c.(1981-1983)CGC>CAC | p.R661H        |
| Pat_65 | Pre-Treatment | SERPINF2 | 5345   | 37 | 17 | 1650407  | 1650408  | Missense_Mutation | DNP | CC | AT | 22  | 45  | c.462_463CC>AT | 460-465)GACCTG>GAAT  | p.D154E        |
| Pat_65 | Pre-Treatment | RPA1     | 6117   | 37 | 17 | 1780522  | 1780522  | Missense_Mutation | SNP | C  | T  | 4   | 260 | c.604C>T       | c.(604-606)CGT>TGT   | p.R202C        |
| Pat_65 | Pre-Treatment | OR3A1    | 4994   | 37 | 17 | 3195650  | 3195650  | Missense_Mutation | SNP | C  | A  | 4   | 149 | c.227G>T       | c.(226-228)TGC>TTC   | p.C76F         |
| Pat_65 | Pre-Treatment | ZMYND15  | 84225  | 37 | 17 | 4647542  | 4647542  | Missense_Mutation | SNP | G  | A  | 90  | 205 | c.1436G>A      | c.(1435-1437)GGG>GAG | p.G479E        |
| Pat_65 | Pre-Treatment | FAM64A   | 54478  | 37 | 17 | 6350844  | 6350844  | Missense_Mutation | SNP | G  | A  | 130 | 245 | c.356G>A       | c.(355-357)AGG>AAG   | p.R119K        |
| Pat_65 | Pre-Treatment | DNAH2    | 146754 | 37 | 17 | 7640548  | 7640548  | Missense_Mutation | SNP | G  | A  | 4   | 278 | c.1142G>A      | c.(1141-1143)CGG>CAG | p.R381Q        |
| Pat_65 | Pre-Treatment | DNAH2    | 146754 | 37 | 17 | 7683487  | 7683487  | Missense_Mutation | SNP | G  | A  | 6   | 616 | c.5735G>A      | c.(5734-5736)CGC>CAC | p.R1912H       |
| Pat_65 | Pre-Treatment | MYH4     | 4622   | 37 | 17 | 10355278 | 10355278 | Missense_Mutation | SNP | C  | T  | 103 | 219 | c.3718G>A      | c.(3718-3720)GAG>AAG | p.E1240K       |
| Pat_65 | Pre-Treatment | DNAH9    | 1770   | 37 | 17 | 11540095 | 11540095 | Missense_Mutation | SNP | G  | A  | 125 | 280 | c.1780G>A      | c.(1780-1782)GAA>AAA | p.E594K        |
| Pat_65 | Pre-Treatment | C17orf76 | 388341 | 37 | 17 | 16365643 | 16365643 | Missense_Mutation | SNP | G  | A  | 4   | 158 | c.304C>T       | c.(304-306)CGG>TGG   | p.R102W        |
| Pat_65 | Pre-Treatment | SREBF1   | 6720   | 37 | 17 | 17723595 | 17723595 | Missense_Mutation | SNP | G  | A  | 5   | 379 | c.332C>T       | c.(331-333)CCG>CTG   | p.P111L        |
| Pat_65 | Pre-Treatment | EPN2     | 22905  | 37 | 17 | 19186863 | 19186863 | Missense_Mutation | SNP | G  | A  | 4   | 168 | c.431G>A       | c.(430-432)AGG>AAG   | p.R144K        |
| Pat_65 | Pre-Treatment | GIT1     | 28964  | 37 | 17 | 27904247 | 27904247 | Missense_Mutation | SNP | G  | A  | 6   | 453 | c.1000C>T      | c.(1000-1002)CGC>TGC | p.R334C        |
| Pat_65 | Pre-Treatment | RNF135   | 84282  | 37 | 17 | 29324337 | 29324337 | Missense_Mutation | SNP | C  | T  | 4   | 187 | c.757C>T       | c.(757-759)CGG>TGG   | p.R253W        |
| Pat_65 | Pre-Treatment | PIP4K2B  | 8396   | 37 | 17 | 36934618 | 36934618 | Missense_Mutation | SNP | G  | A  | 6   | 529 | c.662C>T       | c.(661-663)ACG>ATG   | p.T221M        |
| Pat_65 | Pre-Treatment | ERBB2    | 2064   | 37 | 17 | 37871746 | 37871746 | Missense_Mutation | SNP | G  | A  | 4   | 237 | c.1270G>A      | c.(1270-1272)GTC>ATC | p.V424I        |
| Pat_65 | Pre-Treatment | KRT23    | 25984  | 37 | 17 | 39086344 | 39086344 | Missense_Mutation | SNP | C  | T  | 30  | 72  | c.484G>A       | c.(484-486)GAA>AAA   | p.E162K        |
| Pat_65 | Pre-Treatment | CNTNAP1  | 8506   | 37 | 17 | 40839014 | 40839014 | Missense_Mutation | SNP | G  | A  | 5   | 269 | c.994G>A       | c.(994-996)GTC>ATC   | p.V332I        |
| Pat_65 | Pre-Treatment | CDC56    | 28958  | 37 | 17 | 40947839 | 40947839 | Missense_Mutation | SNP | C  | T  | 4   | 96  | c.419G>A       | c.(418-420)CGC>CAC   | p.R140H        |
| Pat_65 | Pre-Treatment | CDC27    | 996    | 37 | 17 | 45234366 | 45234366 | Missense_Mutation | SNP | G  | A  | 5   | 309 | c.755C>T       | c.(754-756)TCC>TTC   | p.S252F        |
| Pat_65 | Pre-Treatment | OSBPL7   | 114881 | 37 | 17 | 45890750 | 45890750 | Missense_Mutation | SNP | G  | A  | 4   | 116 | c.1619C>T      | c.(1618-1620)GCT>GTT | p.A540V        |

|        |               |          |        |    |    |          |          |                   |     |    |    |     |     |                                    |                        |          |
|--------|---------------|----------|--------|----|----|----------|----------|-------------------|-----|----|----|-----|-----|------------------------------------|------------------------|----------|
| Pat_65 | Pre-Treatment | PHB      | 5245   | 37 | 17 | 47489082 | 47489082 | Missense_Mutation | SNP | G  | A  | 4   | 192 | c.208C>T                           | c.(208-210)CGT>TGT     | p.R70C   |
| Pat_65 | Pre-Treatment | AKAP1    | 8165   | 37 | 17 | 55195774 | 55195774 | Missense_Mutation | SNP | G  | A  | 5   | 393 | c.2533G>A                          | c.(2533-2535)GCC>ACC   | p.A845T  |
| Pat_65 | Pre-Treatment | ABCA9    | 10350  | 37 | 17 | 67028403 | 67028403 | Nonsense_Mutation | SNP | G  | A  | 4   | 185 | c.1291C>T                          | c.(1291-1293)CGA>TGA   | p.R431*  |
| Pat_65 | Pre-Treatment | FBF1     | 85302  | 37 | 17 | 73922171 | 73922171 | Missense_Mutation | SNP | G  | A  | 3   | 69  | c.766C>T                           | c.(766-768)CGC>TGC     | p.R256C  |
| Pat_65 | Pre-Treatment | EMILIN2  | 84034  | 37 | 18 | 2909817  | 2909817  | Missense_Mutation | SNP | G  | A  | 5   | 237 | c.2824G>A                          | c.(2824-2826)GGG>AGG   | p.G942R  |
| Pat_65 | Pre-Treatment | LAMA1    | 284217 | 37 | 18 | 6948540  | 6948540  | Missense_Mutation | SNP | G  | A  | 91  | 161 | c.8572C>T                          | c.(8572-8574)CCT>TCT   | p.P2858S |
| Pat_65 | Pre-Treatment | LAMA1    | 284217 | 37 | 18 | 6971871  | 6971871  | Missense_Mutation | SNP | C  | T  | 5   | 390 | c.6884G>A                          | c.(6883-6885)CGT>CAT   | p.R2295H |
| Pat_65 | Pre-Treatment | RALBP1   | 10928  | 37 | 18 | 9530883  | 9530883  | Missense_Mutation | SNP | G  | A  | 5   | 142 | c.1399G>A                          | c.(1399-1401)GTT>ATT   | p.V467I  |
| Pat_65 | Pre-Treatment | TXNDC2   | 84203  | 37 | 18 | 9887437  | 9887437  | Missense_Mutation | SNP | G  | A  | 13  | 505 | c.961G>A                           | c.(961-963)GCC>ACC     | p.A321T  |
| Pat_65 | Pre-Treatment | TXNDC2   | 84203  | 37 | 18 | 9887452  | 9887452  | Missense_Mutation | SNP | G  | A  | 8   | 514 | c.976G>A                           | c.(976-978)GAG>AAG     | p.E326K  |
| Pat_65 | Pre-Treatment | KIAA1012 | 22878  | 37 | 18 | 29419285 | 29419285 | Missense_Mutation | SNP | G  | A  | 29  | 67  | c.3973C>T                          | c.(3973-3975)CAT>TAT   | p.H1325Y |
| Pat_65 | Pre-Treatment | ACAA2    | 10449  | 37 | 18 | 47310261 | 47310261 | Missense_Mutation | SNP | C  | T  | 4   | 217 | c.1150G>A                          | c.(1150-1152)GGA>AGA   | p.G384R  |
| Pat_65 | Pre-Treatment | SERPINB2 | 5055   | 37 | 18 | 61569055 | 61569055 | Missense_Mutation | SNP | G  | A  | 56  | 112 | c.617G>A                           | c.(616-618)GGA>GAA     | p.G206E  |
| Pat_65 | Pre-Treatment | CDH19    | 28513  | 37 | 18 | 64176387 | 64176387 | Missense_Mutation | SNP | G  | A  | 5   | 536 | c.1673C>T                          | c.(1672-1674)CCG>CTG   | p.P558L  |
| Pat_65 | Pre-Treatment | MED16    | 10025  | 37 | 19 | 889781   | 889781   | Missense_Mutation | SNP | C  | T  | 26  | 42  | c.304G>A                           | c.(304-306)GAC>AAC     | p.D102N  |
| Pat_65 | Pre-Treatment | LMNB2    | 84823  | 37 | 19 | 2434378  | 2434378  | Missense_Mutation | SNP | C  | T  | 4   | 201 | c.1057G>A                          | c.(1057-1059)GAG>AAG   | p.E353K  |
| Pat_65 | Pre-Treatment | ZNF555   | 148254 | 37 | 19 | 2853202  | 2853202  | Missense_Mutation | SNP | C  | T  | 5   | 169 | c.1139C>T                          | c.(1138-1140)CCC>CTC   | p.P380L  |
| Pat_65 | Pre-Treatment | AES      | 166    | 37 | 19 | 3057730  | 3057730  | Missense_Mutation | SNP | C  | T  | 4   | 236 | c.136G>A                           | c.(136-138)GAA>AAA     | p.E46K   |
| Pat_65 | Pre-Treatment | EEF2     | 1938   | 37 | 19 | 3979865  | 3979865  | Missense_Mutation | SNP | C  | A  | 4   | 98  | c.1546G>T                          | c.(1546-1548)GAC>TAC   | p.D516Y  |
| Pat_65 | Pre-Treatment | PLIN4    | 729359 | 37 | 19 | 4510875  | 4510875  | Missense_Mutation | SNP | C  | A  | 27  | 124 | c.3055G>T                          | c.(3055-3057)GGG>TGG   | p.G1019W |
| Pat_65 | Pre-Treatment | PLIN4    | 729359 | 37 | 19 | 4511345  | 4511345  | Missense_Mutation | SNP | G  | T  | 5   | 354 | c.2585C>A                          | c.(2584-2586)GCC>GAC   | p.A862D  |
| Pat_65 | Pre-Treatment | DPP9     | 91039  | 37 | 19 | 4704265  | 4704265  | Missense_Mutation | SNP | G  | A  | 5   | 293 | c.478C>T                           | c.(478-480)CGG>TGG     | p.R160W  |
| Pat_65 | Pre-Treatment | FUT5     | 2527   | 37 | 19 | 5867303  | 5867303  | Nonsense_Mutation | SNP | C  | T  | 63  | 125 | c.434G>A                           | c.(433-435)TGG>TAG     | p.W145*  |
| Pat_65 | Pre-Treatment | GTF2F1   | 2962   | 37 | 19 | 6383373  | 6383373  | Missense_Mutation | SNP | C  | T  | 5   | 204 | c.631G>A                           | c.(631-633)GAG>AAG     | p.E211K  |
| Pat_65 | Pre-Treatment | ZNF557   | 79230  | 37 | 19 | 7083094  | 7083094  | Missense_Mutation | SNP | A  | G  | 9   | 330 | c.611A>G                           | c.(610-612)AAT>AGT     | p.N204S  |
| Pat_65 | Pre-Treatment | CLEC4M   | 10332  | 37 | 19 | 7830867  | 7830868  | Missense_Mutation | DNP | CC | GG | 9   | 222 | c.489_490CC>GG187-492)ACCCGG>ACGG1 |                        | p.R164G  |
| Pat_65 | Pre-Treatment | MAP2K7   | 5609   | 37 | 19 | 7968947  | 7968947  | Missense_Mutation | SNP | A  | T  | 5   | 76  | c.118A>T                           | c.(118-120)AGG>TGG     | p.R40W   |
| Pat_65 | Pre-Treatment | ELAVL1   | 1994   | 37 | 19 | 8032566  | 8032566  | Missense_Mutation | SNP | G  | T  | 5   | 164 | c.539C>A                           | c.(538-540)ACA>AAA     | p.T180K  |
| Pat_65 | Pre-Treatment | FBN3     | 84467  | 37 | 19 | 8196706  | 8196706  | Missense_Mutation | SNP | G  | C  | 22  | 42  | c.1722C>G                          | c.(1720-1722)GAC>GAG   | p.D574E  |
| Pat_65 | Pre-Treatment | MUC16    | 94025  | 37 | 19 | 9063807  | 9063807  | Missense_Mutation | SNP | G  | A  | 82  | 162 | c.23639C>T                         | c.(23638-23640)TCA>TTA | p.S7880L |
| Pat_65 | Pre-Treatment | MAST1    | 22983  | 37 | 19 | 12985295 | 12985295 | Missense_Mutation | SNP | C  | T  | 4   | 68  | c.4324C>T                          | c.(4324-4326)CGG>TGG   | p.R1442W |
| Pat_65 | Pre-Treatment | WIZ      | 58525  | 37 | 19 | 15538201 | 15538201 | Missense_Mutation | SNP | C  | T  | 4   | 115 | c.1195G>A                          | c.(1195-1197)GAC>AAC   | p.D399N  |
| Pat_65 | Pre-Treatment | CYP4F3   | 4051   | 37 | 19 | 15763737 | 15763737 | Missense_Mutation | SNP | G  | A  | 74  | 143 | c.1090G>A                          | c.(1090-1092)GAC>AAC   | p.D364N  |
| Pat_65 | Pre-Treatment | ZNF90    | 7643   | 37 | 19 | 20230036 | 20230036 | Missense_Mutation | SNP | G  | T  | 7   | 298 | c.1673G>T                          | c.(1672-1674)AGT>ATT   | p.S558I  |
| Pat_65 | Pre-Treatment | ZNF430   | 80264  | 37 | 19 | 21240543 | 21240543 | Missense_Mutation | SNP | G  | A  | 8   | 347 | c.1429G>A                          | c.(1429-1431)GTA>ATA   | p.V477I  |
| Pat_65 | Pre-Treatment | ZNF708   | 7562   | 37 | 19 | 21476249 | 21476249 | Missense_Mutation | SNP | T  | C  | 10  | 332 | c.1519A>G                          | c.(1519-1521)AAA>GAA   | p.K507E  |
| Pat_65 | Pre-Treatment | ZNF708   | 7562   | 37 | 19 | 21476519 | 21476519 | Missense_Mutation | SNP | T  | C  | 4   | 188 | c.1249A>G                          | c.(1249-1251)AAG>GAG   | p.K417E  |
| Pat_65 | Pre-Treatment | ZNF708   | 7562   | 37 | 19 | 21476603 | 21476603 | Missense_Mutation | SNP | C  | T  | 5   | 426 | c.1165G>A                          | c.(1165-1167)GAG>AAG   | p.E389K  |
| Pat_65 | Pre-Treatment | ZNF493   | 284443 | 37 | 19 | 21607059 | 21607059 | Missense_Mutation | SNP | C  | G  | 5   | 220 | c.1214C>G                          | c.(1213-1215)ACT>AGT   | p.T405S  |
| Pat_65 | Pre-Treatment | ZNF98    | 148198 | 37 | 19 | 22574676 | 22574676 | Missense_Mutation | SNP | A  | C  | 6   | 272 | c.1361T>G                          | c.(1360-1362)ATA>AGA   | p.I454R  |
| Pat_65 | Pre-Treatment | ZNF254   | 9534   | 37 | 19 | 24310450 | 24310450 | Missense_Mutation | SNP | A  | G  | 12  | 210 | c.1648A>G                          | c.(1648-1650)AAA>GAA   | p.K550E  |
| Pat_65 | Pre-Treatment | NFKBID   | 84807  | 37 | 19 | 36380809 | 36380809 | Missense_Mutation | SNP | C  | T  | 6   | 352 | c.871G>A                           | c.(871-873)GGG>AGG     | p.G291R  |
| Pat_65 | Pre-Treatment | ERF      | 2077   | 37 | 19 | 42753854 | 42753854 | Missense_Mutation | SNP | G  | A  | 4   | 133 | c.410C>T                           | c.(409-411)TCG>TTG     | p.S137L  |
| Pat_65 | Pre-Treatment | CIC      | 23152  | 37 | 19 | 42791752 | 42791752 | Missense_Mutation | SNP | G  | A  | 5   | 310 | c.638G>A                           | c.(637-639)CGG>CAG     | p.R213Q  |
| Pat_65 | Pre-Treatment | CIC      | 23152  | 37 | 19 | 42793183 | 42793183 | Missense_Mutation | SNP | G  | A  | 5   | 499 | c.1075G>A                          | c.(1075-1077)GGG>AGG   | p.G359R  |
| Pat_65 | Pre-Treatment | LIPE     | 3991   | 37 | 19 | 42911936 | 42911936 | Missense_Mutation | SNP | G  | A  | 4   | 120 | c.1664C>T                          | c.(1663-1665)GCC>GTC   | p.A555V  |
| Pat_65 | Pre-Treatment | PSG6     | 5675   | 37 | 19 | 43585170 | 43585170 | Missense_Mutation | SNP | C  | T  | 160 | 342 | c.293G>A                           | c.(292-294)CGA>CAA     | p.R98Q   |

|        |               |           |        |    |    |           |           |                   |     |    |    |    |     |                |                        |                |
|--------|---------------|-----------|--------|----|----|-----------|-----------|-------------------|-----|----|----|----|-----|----------------|------------------------|----------------|
| Pat_65 | Pre-Treatment | CCDC8     | 83987  | 37 | 19 | 46914959  | 46914959  | Missense_Mutation | SNP | T  | C  | 10 | 411 | c.1109A>G      | c.(1108-1110)GAG>GGG   | p.E370G        |
| Pat_65 | Pre-Treatment | GRLF1     | 2909   | 37 | 19 | 47423683  | 47423683  | Missense_Mutation | SNP | G  | A  | 4  | 255 | c.1751G>A      | c.(1750-1752)CGG>CAG   | p.R584Q        |
| Pat_65 | Pre-Treatment | SPHK2     | 56848  | 37 | 19 | 49131527  | 49131527  | Missense_Mutation | SNP | C  | T  | 4  | 176 | c.865C>T       | c.(865-867)CAC>TAC     | p.H289Y        |
| Pat_65 | Pre-Treatment | IRF3      | 3661   | 37 | 19 | 50165513  | 50165513  | Missense_Mutation | SNP | C  | T  | 5  | 219 | c.674G>A       | c.(673-675)GCG>GAC     | p.G225D        |
| Pat_65 | Pre-Treatment | SIGLEC6   | 946    | 37 | 19 | 52034696  | 52034696  | Missense_Mutation | SNP | C  | T  | 4  | 286 | c.145G>A       | c.(145-147)GTA>ATA     | p.V49I         |
| Pat_65 | Pre-Treatment | ZNF528    | 84436  | 37 | 19 | 52918874  | 52918874  | Missense_Mutation | SNP | T  | G  | 7  | 268 | c.769T>G       | c.(769-771)TCA>GCA     | p.S257A        |
| Pat_65 | Pre-Treatment | ZNF816A   | 125893 | 37 | 19 | 53453583  | 53453583  | Missense_Mutation | SNP | G  | T  | 5  | 304 | c.1445C>A      | c.(1444-1446)ACA>AAA   | p.T482K        |
| Pat_65 | Pre-Treatment | LILRB5    | 10990  | 37 | 19 | 54759278  | 54759278  | Missense_Mutation | SNP | G  | A  | 4  | 143 | c.823C>T       | c.(823-825)CTC>TTC     | p.L275F        |
| Pat_65 | Pre-Treatment | CCDC106   | 29903  | 37 | 19 | 56163951  | 56163951  | Missense_Mutation | SNP | G  | A  | 4  | 165 | c.682G>A       | c.(682-684)GAG>AAG     | p.E228K        |
| Pat_65 | Pre-Treatment | GALP      | 85569  | 37 | 19 | 56694582  | 56694582  | Splice_Site       | SNP | G  | A  | 4  | 206 | c.295_splice   | c.e5+1                 | p.D99_splice   |
| Pat_65 | Pre-Treatment | ZSCAN4    | 201516 | 37 | 19 | 58189533  | 58189533  | Splice_Site       | SNP | G  | A  | 77 | 145 | c.563_splice   | c.e5-1                 | p.G188_splice  |
| Pat_65 | Pre-Treatment | COLEC11   | 78989  | 37 | 2  | 3691583   | 3691583   | Missense_Mutation | SNP | G  | A  | 5  | 447 | c.691G>A       | c.(691-693)GGT>AGT     | p.G231S        |
| Pat_65 | Pre-Treatment | GRHL1     | 29841  | 37 | 2  | 10133365  | 10133365  | Missense_Mutation | SNP | G  | A  | 4  | 169 | c.1492G>A      | c.(1492-1494)GGT>AGT   | p.G498S        |
| Pat_65 | Pre-Treatment | APOB      | 338    | 37 | 2  | 21229136  | 21229136  | Missense_Mutation | SNP | G  | A  | 5  | 355 | c.10604C>T     | c.(10603-10605)ACT>ATT | p.T3535I       |
| Pat_65 | Pre-Treatment | ATAD2B    | 54454  | 37 | 2  | 24118737  | 24118737  | Missense_Mutation | SNP | C  | T  | 5  | 268 | c.320G>A       | c.(319-321)CGA>CAA     | p.R107Q        |
| Pat_65 | Pre-Treatment | NCOA1     | 8648   | 37 | 2  | 24933956  | 24933956  | Missense_Mutation | SNP | G  | A  | 4  | 161 | c.2575G>A      | c.(2575-2577)GCC>ACC   | p.A859T        |
| Pat_65 | Pre-Treatment | CAD       | 790    | 37 | 2  | 27464072  | 27464072  | Missense_Mutation | SNP | G  | A  | 6  | 565 | c.5785G>A      | c.(5785-5787)GTC>ATC   | p.V1929I       |
| Pat_65 | Pre-Treatment | XDH       | 7498   | 37 | 2  | 31560538  | 31560538  | Missense_Mutation | SNP | C  | T  | 5  | 413 | c.3920G>A      | c.(3919-3921)CGC>CAC   | p.R1307H       |
| Pat_65 | Pre-Treatment | BIRC6     | 57448  | 37 | 2  | 32703713  | 32703713  | Missense_Mutation | SNP | G  | A  | 4  | 174 | c.7079G>A      | c.(7078-7080)CGC>CAC   | p.R2360H       |
| Pat_65 | Pre-Treatment | PSME4     | 23198  | 37 | 2  | 54150222  | 54150222  | Missense_Mutation | SNP | G  | A  | 5  | 356 | c.1942C>T      | c.(1942-1944)CCC>TCC   | p.P648S        |
| Pat_65 | Pre-Treatment | PSME4     | 23198  | 37 | 2  | 54155364  | 54155364  | Missense_Mutation | SNP | G  | A  | 4  | 195 | c.1393C>T      | c.(1393-1395)CGC>TGC   | p.R465C        |
| Pat_65 | Pre-Treatment | RPL23AP32 | 56969  | 37 | 2  | 54756736  | 54756737  | Missense_Mutation | DNP | TT | CC | 17 | 221 | c.254_255TT>CC | c.(253-255)TTT>TCC     | p.F85S         |
| Pat_65 | Pre-Treatment | GFPT1     | 2673   | 37 | 2  | 69590794  | 69590794  | Missense_Mutation | SNP | C  | T  | 27 | 62  | c.232G>A       | c.(232-234)GAT>AAT     | p.D78N         |
| Pat_65 | Pre-Treatment | DQX1      | 165545 | 37 | 2  | 74749737  | 74749737  | Missense_Mutation | SNP | C  | T  | 7  | 359 | c.1465G>A      | c.(1465-1467)GAG>AAG   | p.E489K        |
| Pat_65 | Pre-Treatment | FAM176A   | 84141  | 37 | 2  | 75745202  | 75745202  | Missense_Mutation | SNP | G  | A  | 4  | 234 | c.65C>T        | c.(64-66)GCG>GTG       | p.A22V         |
| Pat_65 | Pre-Treatment | IMMT      | 10989  | 37 | 2  | 86393689  | 86393689  | Missense_Mutation | SNP | G  | A  | 4  | 177 | c.734C>T       | c.(733-735)GCG>GTG     | p.A245V        |
| Pat_65 | Pre-Treatment | LMAN2L    | 81562  | 37 | 2  | 97377624  | 97377624  | Missense_Mutation | SNP | G  | A  | 5  | 430 | c.646C>T       | c.(646-648)CGC>TGC     | p.R216C        |
| Pat_65 | Pre-Treatment | AFF3      | 3899   | 37 | 2  | 100210409 | 100210409 | Missense_Mutation | SNP | C  | T  | 3  | 38  | c.1714G>A      | c.(1714-1716)GCG>ACG   | p.A572T        |
| Pat_65 | Pre-Treatment | CBWD2     | 150472 | 37 | 2  | 114218249 | 114218249 | Splice_Site       | SNP | G  | A  | 12 | 177 | c.529_splice   | c.e7-1                 | p.H177_splice  |
| Pat_65 | Pre-Treatment | WASH2P    | 375260 | 37 | 2  | 114355998 | 114355998 | Missense_Mutation | SNP | C  | G  | 6  | 48  | c.616C>G       | c.(616-618)CAC>GAC     | p.H206D        |
| Pat_65 | Pre-Treatment | POTEE     | 445582 | 37 | 2  | 131976198 | 131976198 | Missense_Mutation | SNP | A  | G  | 5  | 445 | c.223A>G       | c.(223-225)AGT>GGT     | p.S75G         |
| Pat_65 | Pre-Treatment | ITGB6     | 3694   | 37 | 2  | 160980358 | 160980358 | Missense_Mutation | SNP | C  | T  | 5  | 433 | c.1925G>A      | c.(1924-1926)CGA>CAA   | p.R642Q        |
| Pat_65 | Pre-Treatment | TTN       | 7273   | 37 | 2  | 179669338 | 179669338 | Missense_Mutation | SNP | G  | A  | 5  | 152 | c.32C>T        | c.(31-33)CCG>CTG       | p.P11L         |
| Pat_65 | Pre-Treatment | ZSWIM2    | 151112 | 37 | 2  | 187693420 | 187693420 | Missense_Mutation | SNP | G  | A  | 43 | 84  | c.1193C>T      | c.(1192-1194)TCA>TTA   | p.S398L        |
| Pat_65 | Pre-Treatment | NBEAL1    | 65065  | 37 | 2  | 204001498 | 204001498 | Splice_Site       | SNP | G  | A  | 6  | 400 | c.4478_splice  | c.e28+1                | p.T1493_splice |
| Pat_65 | Pre-Treatment | CRYGA     | 1418   | 37 | 2  | 209025629 | 209025629 | Missense_Mutation | SNP | G  | A  | 6  | 525 | c.424C>T       | c.(424-426)CGG>TGG     | p.R142W        |
| Pat_65 | Pre-Treatment | PTH2R     | 5746   | 37 | 2  | 209271775 | 209271775 | Missense_Mutation | SNP | G  | A  | 5  | 326 | c.7G>A         | c.(7-9)GGG>AGG         | p.G3R          |
| Pat_65 | Pre-Treatment | SPEG      | 10290  | 37 | 2  | 220353355 | 220353355 | Missense_Mutation | SNP | G  | A  | 4  | 176 | c.7994G>A      | c.(7993-7995)AGC>AAC   | p.S2665N       |
| Pat_65 | Pre-Treatment | KIAA1486  | 57624  | 37 | 2  | 226378287 | 226378287 | Missense_Mutation | SNP | C  | T  | 45 | 109 | c.422C>T       | c.(421-423)CCC>CTC     | p.P141L        |
| Pat_65 | Pre-Treatment | IRS1      | 3667   | 37 | 2  | 227661578 | 227661578 | Missense_Mutation | SNP | C  | T  | 4  | 121 | c.1877G>A      | c.(1876-1878)CGA>CAA   | p.R626Q        |
| Pat_65 | Pre-Treatment | COL4A3    | 1285   | 37 | 2  | 228172425 | 228172425 | Splice_Site       | SNP | G  | A  | 4  | 182 | c.4253_splice  | c.e48-1                | p.G1418_splice |
| Pat_65 | Pre-Treatment | ARMC9     | 80210  | 37 | 2  | 232127058 | 232127058 | Missense_Mutation | SNP | G  | A  | 6  | 562 | c.1066G>A      | c.(1066-1068)GTT>ATT   | p.V356I        |
| Pat_65 | Pre-Treatment | NMUR1     | 10316  | 37 | 2  | 232393418 | 232393418 | Missense_Mutation | SNP | G  | A  | 6  | 466 | c.314C>T       | c.(313-315)TCG>TTG     | p.S105L        |
| Pat_65 | Pre-Treatment | NEU2      | 4759   | 37 | 2  | 233897427 | 233897427 | Missense_Mutation | SNP | G  | A  | 5  | 463 | c.46G>A        | c.(46-48)GGA>AGA       | p.G16R         |
| Pat_65 | Pre-Treatment | PRNP      | 5621   | 37 | 20 | 4680318   | 4680318   | Missense_Mutation | SNP | G  | A  | 4  | 214 | c.452G>A       | c.(451-453)CGT>CAT     | p.R151H        |
| Pat_65 | Pre-Treatment | RBL1      | 5933   | 37 | 20 | 35651207  | 35651207  | Missense_Mutation | SNP | C  | T  | 4  | 204 | c.2405G>A      | c.(2404-2406)CGC>CAC   | p.R802H        |
| Pat_65 | Pre-Treatment | LPIN3     | 64900  | 37 | 20 | 39974612  | 39974612  | Missense_Mutation | SNP | G  | A  | 4  | 231 | c.169G>A       | c.(169-171)GTC>ATC     | p.V57I         |



|        |               |          |        |    |    |           |           |                   |     |   |   |     |     |            |                        |          |
|--------|---------------|----------|--------|----|----|-----------|-----------|-------------------|-----|---|---|-----|-----|------------|------------------------|----------|
| Pat_65 | Pre-Treatment | WFDC8    | 90199  | 37 | 20 | 44180787  | 44180787  | Missense_Mutation | SNP | G | C | 44  | 103 | c.604C>G   | c.(604-606)CCA>GCA     | p.P202A  |
| Pat_65 | Pre-Treatment | MMP9     | 4318   | 37 | 20 | 44641918  | 44641918  | Missense_Mutation | SNP | G | A | 6   | 643 | c.1355G>A  | c.(1354-1356)CGG>CAG   | p.R452Q  |
| Pat_65 | Pre-Treatment | ATP9A    | 10079  | 37 | 20 | 50241846  | 50241846  | Missense_Mutation | SNP | G | A | 4   | 191 | c.1901C>T  | c.(1900-1902)ACG>ATG   | p.T634M  |
| Pat_65 | Pre-Treatment | TSHZ2    | 128553 | 37 | 20 | 51871822  | 51871822  | Missense_Mutation | SNP | G | A | 88  | 169 | c.1825G>A  | c.(1825-1827)GAA>AAA   | p.E609K  |
| Pat_65 | Pre-Treatment | EDN3     | 1908   | 37 | 20 | 57899500  | 57899500  | Missense_Mutation | SNP | G | A | 107 | 230 | c.703G>A   | c.(703-705)GAA>AAA     | p.E235K  |
| Pat_65 | Pre-Treatment | ZNF512B  | 57473  | 37 | 20 | 62597990  | 62597990  | Missense_Mutation | SNP | C | T | 4   | 178 | c.538G>A   | c.(538-540)GTC>ATC     | p.V180I  |
| Pat_65 | Pre-Treatment | UMODL1   | 89766  | 37 | 21 | 43547792  | 43547792  | Missense_Mutation | SNP | C | T | 4   | 91  | c.3541C>T  | c.(3541-3543)CCC>TCC   | p.P1181S |
| Pat_65 | Pre-Treatment | PCNT     | 5116   | 37 | 21 | 47831565  | 47831565  | Missense_Mutation | SNP | G | A | 4   | 150 | c.5578G>A  | c.(5578-5580)GAA>AAA   | p.E1860K |
| Pat_65 | Pre-Treatment | MICAL3   | 57553  | 37 | 22 | 18300668  | 18300668  | Missense_Mutation | SNP | C | T | 4   | 91  | c.4759G>A  | c.(4759-4761)GCG>ACG   | p.A1587T |
| Pat_65 | Pre-Treatment | C1QTNF6  | 114904 | 37 | 22 | 37578529  | 37578529  | Missense_Mutation | SNP | G | A | 4   | 225 | c.479C>T   | c.(478-480)GCG>GTG     | p.A160V  |
| Pat_65 | Pre-Treatment | TRIOBP   | 11078  | 37 | 22 | 38120437  | 38120437  | Missense_Mutation | SNP | G | C | 7   | 535 | c.1874G>C  | c.(1873-1875)AGA>ACA   | p.R625T  |
| Pat_65 | Pre-Treatment | TRIOBP   | 11078  | 37 | 22 | 38120668  | 38120668  | Missense_Mutation | SNP | A | T | 7   | 331 | c.2105A>T  | c.(2104-2106)CAA>CTA   | p.Q702L  |
| Pat_65 | Pre-Treatment | MKL1     | 57591  | 37 | 22 | 40816901  | 40816901  | Missense_Mutation | SNP | C | G | 6   | 272 | c.831G>C   | c.(829-831)CAG>CAC     | p.Q277H  |
| Pat_65 | Pre-Treatment | SMC1B    | 27127  | 37 | 22 | 45789558  | 45789558  | Missense_Mutation | SNP | C | T | 4   | 180 | c.1501G>A  | c.(1501-1503)GCA>ACA   | p.A501T  |
| Pat_65 | Pre-Treatment | ARSA     | 410    | 37 | 22 | 51065300  | 51065300  | Missense_Mutation | SNP | G | A | 6   | 504 | c.640C>T   | c.(640-642)CGC>TGC     | p.R214C  |
| Pat_65 | Pre-Treatment | GRM7     | 2917   | 37 | 3  | 7188164   | 7188164   | Missense_Mutation | SNP | C | T | 6   | 442 | c.545C>T   | c.(544-546)ACG>ATG     | p.T182M  |
| Pat_65 | Pre-Treatment | GRM7     | 2917   | 37 | 3  | 7456728   | 7456728   | Missense_Mutation | SNP | C | T | 4   | 134 | c.1052C>T  | c.(1051-1053)ACG>ATG   | p.T351M  |
| Pat_65 | Pre-Treatment | ATP2B2   | 491    | 37 | 3  | 10442706  | 10442706  | Missense_Mutation | SNP | C | T | 52  | 83  | c.712G>A   | c.(712-714)GAA>AAA     | p.E238K  |
| Pat_65 | Pre-Treatment | ZNF860   | 344787 | 37 | 3  | 32031840  | 32031840  | Missense_Mutation | SNP | G | C | 4   | 90  | c.1269G>C  | c.(1267-1269)GAG>GAC   | p.E423D  |
| Pat_65 | Pre-Treatment | ARPP21   | 10777  | 37 | 3  | 35763105  | 35763105  | Missense_Mutation | SNP | G | A | 20  | 62  | c.1004G>A  | c.(1003-1005)AGA>AAA   | p.R335K  |
| Pat_65 | Pre-Treatment | TRANK1   | 9881   | 37 | 3  | 36898026  | 36898026  | Missense_Mutation | SNP | C | T | 6   | 468 | c.1405G>A  | c.(1405-1407)GAC>AAC   | p.D469N  |
| Pat_65 | Pre-Treatment | ZNF621   | 285268 | 37 | 3  | 40571763  | 40571763  | Missense_Mutation | SNP | G | A | 4   | 244 | c.215G>A   | c.(214-216)GGC>GAC     | p.G72D   |
| Pat_65 | Pre-Treatment | KBTD5    | 131377 | 37 | 3  | 42730184  | 42730184  | Missense_Mutation | SNP | G | A | 4   | 230 | c.1396G>A  | c.(1396-1398)GTA>ATA   | p.V466I  |
| Pat_65 | Pre-Treatment | LTF      | 4057   | 37 | 3  | 46495836  | 46495836  | Missense_Mutation | SNP | C | T | 127 | 327 | c.662G>A   | c.(661-663)GGG>GAG     | p.G221E  |
| Pat_65 | Pre-Treatment | ALS2CL   | 259173 | 37 | 3  | 46716140  | 46716140  | Missense_Mutation | SNP | C | T | 4   | 202 | c.2345G>A  | c.(2344-2346)CGG>CAG   | p.R782Q  |
| Pat_65 | Pre-Treatment | CELSR3   | 1951   | 37 | 3  | 48699362  | 48699362  | Missense_Mutation | SNP | G | A | 79  | 137 | c.706C>T   | c.(706-708)CCA>TCA     | p.P236S  |
| Pat_65 | Pre-Treatment | GMPPB    | 29925  | 37 | 3  | 49760118  | 49760118  | Missense_Mutation | SNP | G | A | 4   | 184 | c.472C>T   | c.(472-474)CGG>TGG     | p.R158W  |
| Pat_65 | Pre-Treatment | RAD54L2  | 23132  | 37 | 3  | 51697329  | 51697329  | Missense_Mutation | SNP | C | T | 4   | 116 | c.4297C>T  | c.(4297-4299)CGG>TGG   | p.R1433W |
| Pat_65 | Pre-Treatment | STAB1    | 23166  | 37 | 3  | 52554552  | 52554552  | Missense_Mutation | SNP | G | C | 60  | 116 | c.5636G>C  | c.(5635-5637)CGG>CCG   | p.R1879P |
| Pat_65 | Pre-Treatment | TMEM110  | 375346 | 37 | 3  | 52876888  | 52876888  | Missense_Mutation | SNP | G | A | 4   | 107 | c.707C>T   | c.(706-708)TCG>TTG     | p.S236L  |
| Pat_65 | Pre-Treatment | GPR27    | 2850   | 37 | 3  | 71803846  | 71803846  | Missense_Mutation | SNP | C | T | 3   | 39  | c.646C>T   | c.(646-648)CCC>TCC     | p.P216S  |
| Pat_65 | Pre-Treatment | FLJ10213 | 55096  | 37 | 3  | 73111864  | 73111864  | Missense_Mutation | SNP | G | A | 4   | 273 | c.632G>A   | c.(631-633)CGA>CAA     | p.R211Q  |
| Pat_65 | Pre-Treatment | PDZRN3   | 23024  | 37 | 3  | 73433967  | 73433967  | Missense_Mutation | SNP | A | G | 15  | 41  | c.1750T>C  | c.(1750-1752)TCG>CCG   | p.S584P  |
| Pat_65 | Pre-Treatment | OR5H15   | 403274 | 37 | 3  | 97887932  | 97887932  | Missense_Mutation | SNP | T | C | 145 | 259 | c.389T>C   | c.(388-390)TTA>TCA     | p.L130S  |
| Pat_65 | Pre-Treatment | FAM55C   | 91775  | 37 | 3  | 101504465 | 101504465 | Missense_Mutation | SNP | C | T | 6   | 601 | c.25C>T    | c.(25-27)CGG>TGG       | p.R9W    |
| Pat_65 | Pre-Treatment | FAM55C   | 91775  | 37 | 3  | 101535709 | 101535709 | Nonsense_Mutation | SNP | G | A | 66  | 99  | c.993G>A   | c.(991-993)TGG>TGA     | p.W331*  |
| Pat_65 | Pre-Treatment | ATG3     | 64422  | 37 | 3  | 112277264 | 112277264 | Missense_Mutation | SNP | C | T | 54  | 129 | c.73G>A    | c.(73-75)GAA>AAA       | p.E25K   |
| Pat_65 | Pre-Treatment | ARHGAP31 | 57514  | 37 | 3  | 119121119 | 119121119 | Missense_Mutation | SNP | C | T | 4   | 233 | c.1520C>T  | c.(1519-1521)ACG>ATG   | p.T507M  |
| Pat_65 | Pre-Treatment | C3orf1   | 51300  | 37 | 3  | 119236128 | 119236128 | Nonsense_Mutation | SNP | C | T | 6   | 612 | c.673C>T   | c.(673-675)CGA>TGA     | p.R225*  |
| Pat_65 | Pre-Treatment | DTX3L    | 151636 | 37 | 3  | 122289501 | 122289501 | Missense_Mutation | SNP | G | A | 4   | 245 | c.2135G>A  | c.(2134-2136)CGG>CAG   | p.R712Q  |
| Pat_65 | Pre-Treatment | HSPBAP1  | 79663  | 37 | 3  | 122459659 | 122459659 | Missense_Mutation | SNP | C | A | 6   | 237 | c.1000G>T  | c.(1000-1002)GAT>TAT   | p.D334Y  |
| Pat_65 | Pre-Treatment | B3GNT5   | 84002  | 37 | 3  | 182988272 | 182988272 | Missense_Mutation | SNP | C | T | 6   | 435 | c.686C>T   | c.(685-687)CCC>CTC     | p.P229L  |
| Pat_65 | Pre-Treatment | IGF2BP2  | 10644  | 37 | 3  | 185364845 | 185364845 | Missense_Mutation | SNP | C | T | 6   | 430 | c.1675G>A  | c.(1675-1677)GTC>ATC   | p.V559I  |
| Pat_65 | Pre-Treatment | IGF2BP2  | 10644  | 37 | 3  | 185416115 | 185416115 | Missense_Mutation | SNP | C | T | 4   | 233 | c.260G>A   | c.(259-261)CGA>CAA     | p.R87Q   |
| Pat_65 | Pre-Treatment | MUC4     | 4585   | 37 | 3  | 195505772 | 195505772 | Missense_Mutation | SNP | C | G | 4   | 42  | c.12295G>C | c.(12295-12297)GTC>CTC | p.V4099L |
| Pat_65 | Pre-Treatment | MUC4     | 4585   | 37 | 3  | 195505829 | 195505829 | Missense_Mutation | SNP | G | A | 4   | 31  | c.12238C>T | c.(12238-12240)CCT>TCT | p.P4080S |
| Pat_65 | Pre-Treatment | KIAA0226 | 9711   | 37 | 3  | 197431550 | 197431550 | Missense_Mutation | SNP | T | C | 68  | 130 | c.326A>G   | c.(325-327)GAC>GGC     | p.D109G  |

|        |               |          |        |    |   |           |           |                   |     |    |    |     |     |                                   |                      |               |
|--------|---------------|----------|--------|----|---|-----------|-----------|-------------------|-----|----|----|-----|-----|-----------------------------------|----------------------|---------------|
| Pat_65 | Pre-Treatment | ZNF141   | 7700   | 37 | 4 | 367161    | 367161    | Missense_Mutation | SNP | A  | C  | 4   | 291 | c.935A>C                          | c.(934-936)AAA>ACA   | p.K312T       |
| Pat_65 | Pre-Treatment | HTT      | 3064   | 37 | 4 | 3230426   | 3230426   | Missense_Mutation | SNP | G  | A  | 4   | 75  | c.7939G>A                         | c.(7939-7941)GAC>AAC | p.D2647N      |
| Pat_65 | Pre-Treatment | FRYL     | 285527 | 37 | 4 | 48591761  | 48591761  | Splice_Site       | SNP | C  | T  | 4   | 202 | c.1640_splice                     | c.e18+1              | p.T547_splice |
| Pat_65 | Pre-Treatment | SGMS2    | 166929 | 37 | 4 | 108816945 | 108816945 | Missense_Mutation | SNP | C  | T  | 4   | 227 | c.236C>T                          | c.(235-237)ACG>ATG   | p.T79M        |
| Pat_65 | Pre-Treatment | TRPC3    | 7222   | 37 | 4 | 122854046 | 122854046 | Missense_Mutation | SNP | C  | T  | 5   | 290 | c.367G>A                          | c.(367-369)GGC>AGC   | p.G123S       |
| Pat_65 | Pre-Treatment | OTUD4    | 54726  | 37 | 4 | 146065495 | 146065495 | Missense_Mutation | SNP | C  | T  | 6   | 617 | c.1319G>A                         | c.(1318-1320)CGG>CAG | p.R440Q       |
| Pat_65 | Pre-Treatment | ZNF827   | 152485 | 37 | 4 | 146824080 | 146824080 | Missense_Mutation | SNP | C  | T  | 4   | 187 | c.331G>A                          | c.(331-333)GAT>AAT   | p.D111N       |
| Pat_65 | Pre-Treatment | MAP9     | 79884  | 37 | 4 | 156294408 | 156294409 | Missense_Mutation | DNP | AC | TT | 42  | 150 | c.360_361GT>AA358-363)GGGTGT>GGAA |                      | p.C121S       |
| Pat_65 | Pre-Treatment | TDO2     | 6999   | 37 | 4 | 156830052 | 156830052 | Missense_Mutation | SNP | G  | A  | 7   | 385 | c.317G>A                          | c.(316-318)AGG>AAG   | p.R106K       |
| Pat_65 | Pre-Treatment | TMEM192  | 201931 | 37 | 4 | 166009643 | 166009643 | Missense_Mutation | SNP | A  | G  | 4   | 117 | c.551T>C                          | c.(550-552)CTG>CCG   | p.L184P       |
| Pat_65 | Pre-Treatment | GALNTL6  | 442117 | 37 | 4 | 173269760 | 173269760 | Missense_Mutation | SNP | G  | A  | 6   | 562 | c.473G>A                          | c.(472-474)CGG>CAG   | p.R158Q       |
| Pat_65 | Pre-Treatment | PRDM9    | 56979  | 37 | 5 | 23510044  | 23510044  | Missense_Mutation | SNP | G  | A  | 69  | 120 | c.209G>A                          | c.(208-210)CGA>CAA   | p.R70Q        |
| Pat_65 | Pre-Treatment | UGT3A2   | 167127 | 37 | 5 | 36039579  | 36039579  | Missense_Mutation | SNP | C  | T  | 78  | 137 | c.1075G>A                         | c.(1075-1077)GCT>ACT | p.A359T       |
| Pat_65 | Pre-Treatment | ADAMTS6  | 11174  | 37 | 5 | 64492856  | 64492856  | Missense_Mutation | SNP | G  | A  | 32  | 95  | c.2698C>T                         | c.(2698-2700)CCA>TCA | p.P900S       |
| Pat_65 | Pre-Treatment | TAF9     | 6880   | 37 | 5 | 68661089  | 68661089  | Missense_Mutation | SNP | G  | A  | 6   | 521 | c.476C>T                          | c.(475-477)ACT>ATT   | p.T159I       |
| Pat_65 | Pre-Treatment | MEF2C    | 4208   | 37 | 5 | 88018554  | 88018554  | Missense_Mutation | SNP | G  | A  | 8   | 380 | c.1289C>T                         | c.(1288-1290)TCG>TTG | p.S430L       |
| Pat_65 | Pre-Treatment | TTC37    | 9652   | 37 | 5 | 94814124  | 94814124  | Missense_Mutation | SNP | G  | A  | 78  | 167 | c.4235C>T                         | c.(4234-4236)TCC>TTC | p.S1412F      |
| Pat_65 | Pre-Treatment | YTHDC2   | 64848  | 37 | 5 | 112889355 | 112889355 | Missense_Mutation | SNP | G  | A  | 6   | 516 | c.1936G>A                         | c.(1936-1938)GAC>AAC | p.D646N       |
| Pat_65 | Pre-Treatment | BRD8     | 10902  | 37 | 5 | 137502305 | 137502305 | Missense_Mutation | SNP | G  | T  | 4   | 174 | c.899C>A                          | c.(898-900)CCT>CAT   | p.P300H       |
| Pat_65 | Pre-Treatment | PCDHA3   | 56145  | 37 | 5 | 140182959 | 140182959 | Missense_Mutation | SNP | C  | T  | 5   | 307 | c.2177C>T                         | c.(2176-2178)CCG>CTG | p.P726L       |
| Pat_65 | Pre-Treatment | PCDHA8   | 56140  | 37 | 5 | 140223265 | 140223265 | Missense_Mutation | SNP | G  | A  | 45  | 12  | c.2359G>A                         | c.(2359-2361)GAA>AAA | p.E787K       |
| Pat_65 | Pre-Treatment | PCDHA12  | 56137  | 37 | 5 | 140257294 | 140257294 | Missense_Mutation | SNP | G  | A  | 50  | 94  | c.2237G>A                         | c.(2236-2238)GGG>GAG | p.G746E       |
| Pat_65 | Pre-Treatment | TNIP1    | 10318  | 37 | 5 | 150436398 | 150436398 | Missense_Mutation | SNP | G  | A  | 4   | 158 | c.556C>T                          | c.(556-558)CGC>TGC   | p.R186C       |
| Pat_65 | Pre-Treatment | ADAM19   | 8728   | 37 | 5 | 156936308 | 156936308 | Splice_Site       | SNP | C  | T  | 4   | 194 | c.905_splice                      | c.e9+1               | p.T302_splice |
| Pat_65 | Pre-Treatment | ODZ2     | 57451  | 37 | 5 | 167689477 | 167689477 | Nonsense_Mutation | SNP | C  | T  | 3   | 22  | c.7960C>T                         | c.(7960-7962)CGA>TGA | p.R2654*      |
| Pat_65 | Pre-Treatment | HK3      | 3101   | 37 | 5 | 176314737 | 176314737 | Missense_Mutation | SNP | C  | T  | 4   | 170 | c.1315G>A                         | c.(1315-1317)GTC>ATC | p.V439I       |
| Pat_65 | Pre-Treatment | FGFR4    | 2264   | 37 | 5 | 176524649 | 176524649 | Missense_Mutation | SNP | T  | C  | 4   | 156 | c.2381T>C                         | c.(2380-2382)TTC>TCC | p.F794S       |
| Pat_65 | Pre-Treatment | GRM6     | 2916   | 37 | 5 | 178418522 | 178418522 | Missense_Mutation | SNP | C  | T  | 202 | 483 | c.760G>A                          | c.(760-762)GAA>AAA   | p.E254K       |
| Pat_65 | Pre-Treatment | FLT4     | 2324   | 37 | 5 | 180043408 | 180043408 | Missense_Mutation | SNP | G  | A  | 5   | 268 | c.3178C>T                         | c.(3178-3180)CGG>TGG | p.R1060W      |
| Pat_65 | Pre-Treatment | OR2V2    | 285659 | 37 | 5 | 180582588 | 180582588 | Missense_Mutation | SNP | G  | A  | 6   | 632 | c.646G>A                          | c.(646-648)GTG>ATG   | p.V216M       |
| Pat_65 | Pre-Treatment | HUS1B    | 135458 | 37 | 6 | 656422    | 656422    | Missense_Mutation | SNP | C  | T  | 7   | 816 | c.523G>A                          | c.(523-525)GTG>ATG   | p.V175M       |
| Pat_65 | Pre-Treatment | TUBB2B   | 347733 | 37 | 6 | 3225029   | 3225029   | Missense_Mutation | SNP | C  | T  | 5   | 283 | c.1294G>A                         | c.(1294-1296)GAA>AAA | p.E432K       |
| Pat_65 | Pre-Treatment | HLA-H    | 3136   | 37 | 6 | 29856489  | 29856489  | Missense_Mutation | SNP | G  | A  | 7   | 228 | c.484G>A                          | c.(484-486)GAG>AAG   | p.E162K       |
| Pat_65 | Pre-Treatment | PPP1R10  | 5514   | 37 | 6 | 30574582  | 30574582  | Missense_Mutation | SNP | C  | T  | 5   | 208 | c.434G>A                          | c.(433-435)CGC>CAC   | p.R145H       |
| Pat_65 | Pre-Treatment | DHX16    | 8449   | 37 | 6 | 30630755  | 30630755  | Missense_Mutation | SNP | C  | T  | 5   | 446 | c.1361G>A                         | c.(1360-1362)CGG>CAG | p.R454Q       |
| Pat_65 | Pre-Treatment | NRM      | 11270  | 37 | 6 | 30656692  | 30656692  | Missense_Mutation | SNP | C  | T  | 4   | 141 | c.535G>A                          | c.(535-537)GAG>AAG   | p.E179K       |
| Pat_65 | Pre-Treatment | ZBTB12   | 221527 | 37 | 6 | 31868812  | 31868812  | Missense_Mutation | SNP | C  | T  | 125 | 200 | c.271G>A                          | c.(271-273)GGC>AGC   | p.G91S        |
| Pat_65 | Pre-Treatment | LYPLA2P1 | 653639 | 37 | 6 | 33333333  | 33333333  | Missense_Mutation | SNP | G  | A  | 4   | 60  | c.673C>T                          | c.(673-675)CCT>TCT   | p.P225S       |
| Pat_65 | Pre-Treatment | DNAH8    | 1769   | 37 | 6 | 38820545  | 38820545  | Missense_Mutation | SNP | G  | A  | 6   | 277 | c.4891G>A                         | c.(4891-4893)GTC>ATC | p.V1631I      |
| Pat_65 | Pre-Treatment | TTBK1    | 84630  | 37 | 6 | 43226825  | 43226825  | Missense_Mutation | SNP | G  | A  | 5   | 258 | c.1066G>A                         | c.(1066-1068)GAG>AAG | p.E356K       |
| Pat_65 | Pre-Treatment | AARS2    | 57505  | 37 | 6 | 44269817  | 44269817  | Missense_Mutation | SNP | G  | A  | 4   | 227 | c.2578C>T                         | c.(2578-2580)CGT>TGT | p.R860C       |
| Pat_65 | Pre-Treatment | PHF3     | 23469  | 37 | 6 | 64421921  | 64421921  | Missense_Mutation | SNP | A  | C  | 70  | 113 | c.4437A>C                         | c.(4435-4437)CAA>CAC | p.Q1479H      |
| Pat_65 | Pre-Treatment | TPBG     | 7162   | 37 | 6 | 83074893  | 83074893  | Missense_Mutation | SNP | C  | T  | 4   | 152 | c.215C>T                          | c.(214-216)GCG>GTG   | p.A72V        |
| Pat_65 | Pre-Treatment | SLC35A1  | 10559  | 37 | 6 | 88210957  | 88210957  | Missense_Mutation | SNP | G  | A  | 4   | 241 | c.436G>A                          | c.(436-438)GTT>ATT   | p.V146I       |
| Pat_65 | Pre-Treatment | ORC3L    | 23595  | 37 | 6 | 88304120  | 88304120  | Missense_Mutation | SNP | C  | A  | 4   | 132 | c.74C>A                           | c.(73-75)CCA>CAA     | p.P25Q        |
| Pat_65 | Pre-Treatment | GRIK2    | 2898   | 37 | 6 | 102124549 | 102124549 | Missense_Mutation | SNP | G  | A  | 4   | 112 | c.593G>A                          | c.(592-594)CGA>CAA   | p.R198Q       |
| Pat_65 | Pre-Treatment | REPS1    | 85021  | 37 | 6 | 139266381 | 139266381 | Missense_Mutation | SNP | C  | A  | 4   | 81  | c.603G>T                          | c.(601-603)TGG>TGT   | p.W201C       |

|        |               |           |        |    |   |           |           |                   |     |    |    |     |     |                 |                      |               |
|--------|---------------|-----------|--------|----|---|-----------|-----------|-------------------|-----|----|----|-----|-----|-----------------|----------------------|---------------|
| Pat_65 | Pre-Treatment | NOX3      | 50508  | 37 | 6 | 155743916 | 155743916 | Missense_Mutation | SNP | G  | A  | 7   | 672 | c.1220C>T       | c.(1219-1221)GCG>GTG | p.A407V       |
| Pat_65 | Pre-Treatment | TULP4     | 56995  | 37 | 6 | 158882724 | 158882724 | Missense_Mutation | SNP | G  | A  | 5   | 275 | c.989G>A        | c.(988-990)CGT>CAT   | p.R330H       |
| Pat_65 | Pre-Treatment | SDK1      | 221935 | 37 | 7 | 4189032   | 4189032   | Missense_Mutation | SNP | G  | A  | 3   | 44  | c.4562G>A       | c.(4561-4563)CGG>CAG | p.R1521Q      |
| Pat_65 | Pre-Treatment | OSBPL3    | 26031  | 37 | 7 | 24874289  | 24874289  | Missense_Mutation | SNP | G  | A  | 6   | 414 | c.1562C>T       | c.(1561-1563)CCG>CTG | p.P521L       |
| Pat_65 | Pre-Treatment | CPVL      | 54504  | 37 | 7 | 29152381  | 29152381  | Missense_Mutation | SNP | C  | T  | 72  | 121 | c.227G>A        | c.(226-228)GGC>GAC   | p.G76D        |
| Pat_65 | Pre-Treatment | NEUROD6   | 63974  | 37 | 7 | 31378158  | 31378158  | Missense_Mutation | SNP | G  | A  | 49  | 89  | c.725C>T        | c.(724-726)TCC>TTC   | p.S242F       |
| Pat_65 | Pre-Treatment | IGFBP3    | 3486   | 37 | 7 | 45954519  | 45954519  | Missense_Mutation | SNP | C  | T  | 4   | 173 | c.776G>A        | c.(775-777)CGG>CAG   | p.R259Q       |
| Pat_65 | Pre-Treatment | ZNF716    | 441234 | 37 | 7 | 57529068  | 57529068  | Missense_Mutation | SNP | T  | C  | 5   | 329 | c.901T>C        | c.(901-903)TGT>CGT   | p.C301R       |
| Pat_65 | Pre-Treatment | ZNF735    | 730291 | 37 | 7 | 63680397  | 63680397  | Missense_Mutation | SNP | A  | G  | 5   | 435 | c.968A>G        | c.(967-969)AAA>AGA   | p.K323R       |
| Pat_65 | Pre-Treatment | ZNF735    | 730291 | 37 | 7 | 63680406  | 63680406  | Missense_Mutation | SNP | C  | A  | 7   | 427 | c.977C>A        | c.(976-978)ACA>AAA   | p.T326K       |
| Pat_65 | Pre-Treatment | ZNF92     | 168374 | 37 | 7 | 64863839  | 64863840  | Missense_Mutation | DNP | CC | AT | 5   | 316 | c.812_813CC>AT  | c.(811-813)ACC>AAT   | p.T271N       |
| Pat_65 | Pre-Treatment | GTPBP10   | 85865  | 37 | 7 | 89982259  | 89982259  | Missense_Mutation | SNP | T  | G  | 139 | 36  | c.163T>G        | c.(163-165)TTA>GTA   | p.L55V        |
| Pat_65 | Pre-Treatment | TRRAP     | 8295   | 37 | 7 | 98563361  | 98563361  | Missense_Mutation | SNP | C  | T  | 5   | 303 | c.6998C>T       | c.(6997-6999)ACG>ATG | p.T2333M      |
| Pat_65 | Pre-Treatment | ACHE      | 43     | 37 | 7 | 100489992 | 100489992 | Nonsense_Mutation | SNP | G  | A  | 4   | 265 | c.1516C>T       | c.(1516-1518)CGA>TGA | p.R506*       |
| Pat_65 | Pre-Treatment | MUC17     | 140453 | 37 | 7 | 100684253 | 100684253 | Missense_Mutation | SNP | G  | A  | 8   | 876 | c.9556G>A       | c.(9556-9558)GCA>ACA | p.A3186T      |
| Pat_65 | Pre-Treatment | CFTR      | 1080   | 37 | 7 | 117175426 | 117175426 | Missense_Mutation | SNP | T  | C  | 4   | 138 | c.704T>C        | c.(703-705)CTT>CCT   | p.L235P       |
| Pat_65 | Pre-Treatment | CTTNBP2   | 83992  | 37 | 7 | 117431380 | 117431380 | Missense_Mutation | SNP | C  | G  | 4   | 156 | c.1870G>C       | c.(1870-1872)GCA>CCA | p.A624P       |
| Pat_65 | Pre-Treatment | BRAF      | 673    | 37 | 7 | 140453136 | 140453136 | Missense_Mutation | SNP | A  | T  | 154 | 73  | c.1799T>A       | c.(1798-1800)GTG>GAG | p.V600E       |
| Pat_65 | Pre-Treatment | GALNTL5   | 168391 | 37 | 7 | 151699961 | 151699961 | Missense_Mutation | SNP | G  | A  | 150 | 50  | c.821G>A        | c.(820-822)GGA>GAA   | p.G274E       |
| Pat_65 | Pre-Treatment | EN2       | 2020   | 37 | 7 | 155251298 | 155251298 | Missense_Mutation | SNP | C  | T  | 3   | 42  | c.226C>T        | c.(226-228)CGG>TGG   | p.R76W        |
| Pat_65 | Pre-Treatment | UBE3C     | 9690   | 37 | 7 | 157041215 | 157041215 | Missense_Mutation | SNP | G  | A  | 6   | 597 | c.2635G>A       | c.(2635-2637)GAT>AAT | p.D879N       |
| Pat_65 | Pre-Treatment | DLGAP2    | 9228   | 37 | 8 | 1497601   | 1497601   | Missense_Mutation | SNP | C  | G  | 47  | 353 | c.742C>G        | c.(742-744)CCC>GCC   | p.P248A       |
| Pat_65 | Pre-Treatment | ADAM2     | 2515   | 37 | 8 | 39682391  | 39682391  | Missense_Mutation | SNP | C  | T  | 14  | 56  | c.214G>A        | c.(214-216)GTT>ATT   | p.V72I        |
| Pat_65 | Pre-Treatment | ZMAT4     | 79698  | 37 | 8 | 40554908  | 40554908  | Missense_Mutation | SNP | C  | T  | 63  | 61  | c.205G>A        | c.(205-207)GAC>AAC   | p.D69N        |
| Pat_65 | Pre-Treatment | PLAT      | 5327   | 37 | 8 | 42033531  | 42033531  | Missense_Mutation | SNP | G  | A  | 5   | 186 | c.1669C>T       | c.(1669-1671)CGT>TGT | p.R557C       |
| Pat_65 | Pre-Treatment | HGSNAT    | 138050 | 37 | 8 | 43014188  | 43014188  | Splice_Site       | SNP | G  | A  | 4   | 245 | c.493_splice    | c.e4+1               | p.P165_splice |
| Pat_65 | Pre-Treatment | KCNS2     | 3788   | 37 | 8 | 99440329  | 99440329  | Missense_Mutation | SNP | C  | T  | 7   | 180 | c.122C>T        | c.(121-123)ACG>ATG   | p.T41M        |
| Pat_65 | Pre-Treatment | PKHD1L1   | 93035  | 37 | 8 | 110457287 | 110457287 | Missense_Mutation | SNP | G  | A  | 244 | 254 | c.5189G>A       | c.(5188-5190)GGA>GAA | p.G1730E      |
| Pat_65 | Pre-Treatment | GRINA     | 2907   | 37 | 8 | 145066663 | 145066663 | Missense_Mutation | SNP | G  | A  | 4   | 256 | c.853G>A        | c.(853-855)GTG>ATG   | p.V285M       |
| Pat_65 | Pre-Treatment | DMRTA1    | 63951  | 37 | 9 | 22451762  | 22451762  | Missense_Mutation | SNP | T  | A  | 4   | 63  | c.1367T>A       | c.(1366-1368)CTA>CAA | p.L456Q       |
| Pat_65 | Pre-Treatment | ACO1      | 48     | 37 | 9 | 32436330  | 32436330  | Missense_Mutation | SNP | C  | T  | 5   | 343 | c.2182C>T       | c.(2182-2184)CGC>TGC | p.R728C       |
| Pat_65 | Pre-Treatment | LOC442421 | 442421 | 37 | 9 | 66499680  | 66499680  | Missense_Mutation | SNP | C  | A  | 7   | 52  | c.490C>A        | c.(490-492)CCC>ACC   | p.P164T       |
| Pat_65 | Pre-Treatment | AGTPBP1   | 23287  | 37 | 9 | 88247645  | 88247646  | Missense_Mutation | DNP | GG | AA | 52  | 72  | c.1946_1947CC>T | c.(1945-1947)CCC>CTT | p.P649L       |
| Pat_65 | Pre-Treatment | KIAA1529  | 57653  | 37 | 9 | 100056345 | 100056345 | Missense_Mutation | SNP | G  | A  | 6   | 183 | c.203G>A        | c.(202-204)CGC>CAC   | p.R68H        |
| Pat_65 | Pre-Treatment | ANKS6     | 203286 | 37 | 9 | 101552632 | 101552632 | Missense_Mutation | SNP | C  | T  | 4   | 144 | c.616G>A        | c.(616-618)GTG>ATG   | p.V206M       |
| Pat_65 | Pre-Treatment | C9orf80   | 58493  | 37 | 9 | 115451893 | 115451893 | Missense_Mutation | SNP | C  | G  | 4   | 118 | c.133G>C        | c.(133-135)GCA>CCA   | p.A45P        |
| Pat_65 | Pre-Treatment | OR1N2     | 138882 | 37 | 9 | 125315993 | 125315993 | Missense_Mutation | SNP | G  | A  | 4   | 140 | c.545G>A        | c.(544-546)CGC>CAC   | p.R182H       |
| Pat_65 | Pre-Treatment | RXRA      | 6256   | 37 | 9 | 137328339 | 137328339 | Missense_Mutation | SNP | C  | T  | 101 | 197 | c.1268C>T       | c.(1267-1269)CCG>CTG | p.P423L       |
| Pat_65 | Pre-Treatment | NACC2     | 138151 | 37 | 9 | 138905119 | 138905120 | Missense_Mutation | DNP | CC | TT | 87  | 154 | c.1180_1181GG>A | c.(1180-1182)GGG>AAG | p.G394K       |
| Pat_65 | Pre-Treatment | NOTCH1    | 4851   | 37 | 9 | 139395158 | 139395158 | Missense_Mutation | SNP | G  | A  | 8   | 475 | c.5780C>T       | c.(5779-5781)ACG>ATG | p.T1927M      |
| Pat_65 | Pre-Treatment | MID1      | 4281   | 37 | X | 10463658  | 10463658  | Missense_Mutation | SNP | C  | T  | 4   | 248 | c.830G>A        | c.(829-831)CGA>CAA   | p.R277Q       |
| Pat_65 | Pre-Treatment | TLR8      | 51311  | 37 | X | 12938514  | 12938514  | Missense_Mutation | SNP | G  | A  | 4   | 251 | c.1355G>A       | c.(1354-1356)CGG>CAG | p.R452Q       |
| Pat_65 | Pre-Treatment | PCYT1B    | 9468   | 37 | X | 24690709  | 24690709  | Missense_Mutation | SNP | C  | T  | 4   | 218 | c.41G>A         | c.(40-42)CGC>CAC     | p.R14H        |
| Pat_65 | Pre-Treatment | POLA1     | 5422   | 37 | X | 24721465  | 24721465  | Splice_Site       | SNP | G  | A  | 4   | 95  | c.247_splice    | c.e3+1               | p.D83_splice  |
| Pat_65 | Pre-Treatment | DGKK      | 139189 | 37 | X | 50213347  | 50213347  | Missense_Mutation | SNP | G  | A  | 7   | 322 | c.331C>T        | c.(331-333)CCA>TCA   | p.P111S       |
| Pat_65 | Pre-Treatment | ZMYM3     | 9203   | 37 | X | 70468943  | 70468943  | Missense_Mutation | SNP | C  | T  | 8   | 529 | c.1547G>A       | c.(1546-1548)CGT>CAT | p.R516H       |
| Pat_65 | Pre-Treatment | TAF1      | 6872   | 37 | X | 70626490  | 70626490  | Missense_Mutation | SNP | C  | T  | 4   | 88  | c.3998C>T       | c.(3997-3999)GCG>GTG | p.A1333V      |

|        |               |          |        |    |   |           |           |                   |     |    |    |     |     |                |                      |                |
|--------|---------------|----------|--------|----|---|-----------|-----------|-------------------|-----|----|----|-----|-----|----------------|----------------------|----------------|
| Pat_65 | Pre-Treatment | NAP1L2   | 4674   | 37 | X | 72433704  | 72433704  | Missense_Mutation | SNP | C  | T  | 10  | 39  | c.625G>A       | c.(625-627)GAT>AAT   | p.D209N        |
| Pat_65 | Pre-Treatment | DOCK11   | 139818 | 37 | X | 117773430 | 117773430 | Missense_Mutation | SNP | G  | A  | 144 | 134 | c.4034G>A      | c.(4033-4035)GGA>GAA | p.G1345E       |
| Pat_65 | Pre-Treatment | ACTRT1   | 139741 | 37 | X | 127185115 | 127185115 | Missense_Mutation | SNP | C  | A  | 19  | 428 | c.1071G>T      | c.(1069-1071)TGG>TGT | p.W357C        |
| Pat_65 | Pre-Treatment | MAGEA8   | 4107   | 37 | X | 149013756 | 149013756 | Missense_Mutation | SNP | G  | A  | 4   | 278 | c.710G>A       | c.(709-711)AGG>AAG   | p.R237K        |
| Pat_65 | Pre-Treatment | SLC10A3  | 8273   | 37 | X | 153715905 | 153715905 | Missense_Mutation | SNP | C  | T  | 4   | 97  | c.1375G>A      | c.(1375-1377)GAG>AAG | p.E459K        |
| Pat_65 | Pre-Treatment | CTAG2    | 30848  | 37 | X | 153880823 | 153880823 | Nonsense_Mutation | SNP | G  | A  | 4   | 186 | c.352C>T       | c.(352-354)CGA>TGA   | p.R118*        |
| Pat_65 | Pre-Treatment | IL9R     | 3581   | 37 | X | 155232601 | 155232601 | Missense_Mutation | SNP | G  | A  | 4   | 220 | c.59G>A        | c.(58-60)CGA>CAA     | p.R20Q         |
| Pat_66 | Pre-Treatment | MMEL1    | 79258  | 37 | 1 | 2524280   | 2524280   | Missense_Mutation | SNP | C  | T  | 24  | 18  | c.1993G>A      | c.(1993-1995)GAA>AAA | p.E665K        |
| Pat_66 | Pre-Treatment | RPL22    | 6146   | 37 | 1 | 6253010   | 6253011   | Missense_Mutation | DNP | GG | AA | 44  | 74  | c.221_222CC>TT | c.(220-222)TCC>TTT   | p.S74F         |
| Pat_66 | Pre-Treatment | TNFRSF8  | 943    | 37 | 1 | 12175771  | 12175771  | Missense_Mutation | SNP | G  | A  | 3   | 31  | c.931G>A       | c.(931-933)GTC>ATC   | p.V311I        |
| Pat_66 | Pre-Treatment | TNFRSF1B | 7133   | 37 | 1 | 12253087  | 12253087  | Missense_Mutation | SNP | C  | T  | 45  | 10  | c.719C>T       | c.(718-720)TCC>TTC   | p.S240F        |
| Pat_66 | Pre-Treatment | DHRS3    | 9249   | 37 | 1 | 12632834  | 12632834  | Missense_Mutation | SNP | C  | T  | 14  | 0   | c.746G>A       | c.(745-747)AGG>AAG   | p.R249K        |
| Pat_66 | Pre-Treatment | PRAMEF1  | 65121  | 37 | 1 | 12855948  | 12855948  | Missense_Mutation | SNP | G  | A  | 5   | 214 | c.1228G>A      | c.(1228-1230)GAG>AAG | p.E410K        |
| Pat_66 | Pre-Treatment | SPEN     | 23013  | 37 | 1 | 16254758  | 16254758  | Missense_Mutation | SNP | G  | A  | 5   | 168 | c.2023G>A      | c.(2023-2025)GAT>AAT | p.D675N        |
| Pat_66 | Pre-Treatment | CLCNKB   | 1188   | 37 | 1 | 16376354  | 16376354  | Missense_Mutation | SNP | G  | A  | 76  | 141 | c.911G>A       | c.(910-912)CGA>CAA   | p.R304Q        |
| Pat_66 | Pre-Treatment | PADI3    | 51702  | 37 | 1 | 17606895  | 17606895  | Missense_Mutation | SNP | G  | A  | 51  | 20  | c.1606G>A      | c.(1606-1608)GAC>AAC | p.D536N        |
| Pat_66 | Pre-Treatment | AKR7L    | 246181 | 37 | 1 | 19595147  | 19595148  | Missense_Mutation | DNP | GG | AA | 29  | 47  | c.752_753CC>TT | c.(751-753)GCC>GTT   | p.A251V        |
| Pat_66 | Pre-Treatment | PLA2G2E  | 30814  | 37 | 1 | 20248809  | 20248809  | Missense_Mutation | SNP | C  | T  | 10  | 18  | c.268G>A       | c.(268-270)GAA>AAA   | p.E90K         |
| Pat_66 | Pre-Treatment | EPHB2    | 2048   | 37 | 1 | 23233295  | 23233295  | Missense_Mutation | SNP | G  | A  | 16  | 36  | c.1981G>A      | c.(1981-1983)GAG>AAG | p.E661K        |
| Pat_66 | Pre-Treatment | MYOM3    | 127294 | 37 | 1 | 24413262  | 24413262  | Missense_Mutation | SNP | G  | A  | 41  | 49  | c.1670C>T      | c.(1669-1671)TCC>TTC | p.S557F        |
| Pat_66 | Pre-Treatment | RPS6KA1  | 6195   | 37 | 1 | 26883580  | 26883580  | Missense_Mutation | SNP | G  | A  | 4   | 91  | c.1073G>A      | c.(1072-1074)CGC>CAC | p.R358H        |
| Pat_66 | Pre-Treatment | KPNA6    | 23633  | 37 | 1 | 32632830  | 32632830  | Missense_Mutation | SNP | C  | T  | 101 | 173 | c.1177C>T      | c.(1177-1179)CGT>TGT | p.R393C        |
| Pat_66 | Pre-Treatment | PHC2     | 1912   | 37 | 1 | 33796967  | 33796967  | Missense_Mutation | SNP | G  | A  | 153 | 20  | c.1985C>T      | c.(1984-1986)TCC>TTC | p.S662F        |
| Pat_66 | Pre-Treatment | CSMD2    | 114784 | 37 | 1 | 34038256  | 34038256  | Missense_Mutation | SNP | C  | T  | 21  | 40  | c.7618G>A      | c.(7618-7620)GGA>AGA | p.G2540R       |
| Pat_66 | Pre-Treatment | C1orf94  | 84970  | 37 | 1 | 34677886  | 34677886  | Missense_Mutation | SNP | C  | T  | 29  | 41  | c.1030C>T      | c.(1030-1032)CCT>TCT | p.P344S        |
| Pat_66 | Pre-Treatment | NFYC     | 4802   | 37 | 1 | 41236234  | 41236234  | Missense_Mutation | SNP | C  | A  | 3   | 9   | c.1111C>A      | c.(1111-1113)CAG>AAG | p.Q371K        |
| Pat_66 | Pre-Treatment | CCDC30   | 728621 | 37 | 1 | 43110444  | 43110444  | Missense_Mutation | SNP | G  | A  | 35  | 54  | c.1856G>A      | c.(1855-1857)CGA>CAA | p.R619Q        |
| Pat_66 | Pre-Treatment | C1orf50  | 79078  | 37 | 1 | 43240523  | 43240523  | Missense_Mutation | SNP | C  | T  | 73  | 6   | c.398C>T       | c.(397-399)TCC>TTC   | p.S133F        |
| Pat_66 | Pre-Treatment | WDR65    | 149465 | 37 | 1 | 43663258  | 43663258  | Missense_Mutation | SNP | C  | T  | 98  | 128 | c.1157C>T      | c.(1156-1158)CCA>CTA | p.P386L        |
| Pat_66 | Pre-Treatment | PDZK1IP1 | 10158  | 37 | 1 | 47655595  | 47655595  | Missense_Mutation | SNP | G  | A  | 10  | 16  | c.10C>T        | c.(10-12)CTC>TTC     | p.L4F          |
| Pat_66 | Pre-Treatment | ELAVL4   | 1996   | 37 | 1 | 50661383  | 50661383  | Missense_Mutation | SNP | C  | T  | 148 | 19  | c.659C>T       | c.(658-660)GCC>GTC   | p.A220V        |
| Pat_66 | Pre-Treatment | C1orf175 | 374977 | 37 | 1 | 55166993  | 55166993  | Missense_Mutation | SNP | G  | A  | 13  | 6   | c.3283G>A      | c.(3283-3285)GAC>AAC | p.D1095N       |
| Pat_66 | Pre-Treatment | PCSK9    | 255738 | 37 | 1 | 55512304  | 55512304  | Missense_Mutation | SNP | G  | A  | 28  | 31  | c.508G>A       | c.(508-510)GAA>AAA   | p.E170K        |
| Pat_66 | Pre-Treatment | PPAP2B   | 8613   | 37 | 1 | 56989520  | 56989520  | Missense_Mutation | SNP | G  | A  | 21  | 47  | c.608C>T       | c.(607-609)TCC>TTC   | p.S203F        |
| Pat_66 | Pre-Treatment | C1orf168 | 199920 | 37 | 1 | 57185864  | 57185864  | Missense_Mutation | SNP | G  | A  | 18  | 18  | c.2113C>T      | c.(2113-2115)CGT>TGT | p.R705C        |
| Pat_66 | Pre-Treatment | C8A      | 731    | 37 | 1 | 57351708  | 57351708  | Missense_Mutation | SNP | C  | T  | 37  | 2   | c.964C>T       | c.(964-966)CCA>TCA   | p.P322S        |
| Pat_66 | Pre-Treatment | C1orf87  | 127795 | 37 | 1 | 60505761  | 60505761  | Missense_Mutation | SNP | G  | A  | 30  | 38  | c.575C>T       | c.(574-576)TCC>TTC   | p.S192F        |
| Pat_66 | Pre-Treatment | ATG4C    | 84938  | 37 | 1 | 63307135  | 63307135  | Nonsense_Mutation | SNP | C  | T  | 36  | 65  | c.1126C>T      | c.(1126-1128)CGA>TGA | p.R376*        |
| Pat_66 | Pre-Treatment | ELTD1    | 64123  | 37 | 1 | 79392644  | 79392644  | Missense_Mutation | SNP | G  | A  | 31  | 4   | c.1010C>T      | c.(1009-1011)TCA>TTA | p.S337L        |
| Pat_66 | Pre-Treatment | ELTD1    | 64123  | 37 | 1 | 79402013  | 79402013  | Missense_Mutation | SNP | A  | T  | 59  | 100 | c.844T>A       | c.(844-846)TTT>ATT   | p.F282I        |
| Pat_66 | Pre-Treatment | LPHN2    | 23266  | 37 | 1 | 82434986  | 82434986  | Missense_Mutation | SNP | G  | A  | 65  | 86  | c.2597G>A      | c.(2596-2598)CGA>CAA | p.R866Q        |
| Pat_66 | Pre-Treatment | BTBD8    | 284697 | 37 | 1 | 92568178  | 92568178  | Missense_Mutation | SNP | G  | A  | 36  | 44  | c.496G>A       | c.(496-498)GAA>AAA   | p.E166K        |
| Pat_66 | Pre-Treatment | ABCA4    | 24     | 37 | 1 | 94544208  | 94544208  | Missense_Mutation | SNP | C  | T  | 339 | 49  | c.1294G>A      | c.(1294-1296)GAA>AAA | p.E432K        |
| Pat_66 | Pre-Treatment | PALMD    | 54873  | 37 | 1 | 100154655 | 100154655 | Missense_Mutation | SNP | G  | A  | 31  | 37  | c.839G>A       | c.(838-840)GGA>GAA   | p.G280E        |
| Pat_66 | Pre-Treatment | CDC14A   | 8556   | 37 | 1 | 100949903 | 100949903 | Nonsense_Mutation | SNP | C  | T  | 12  | 3   | c.1033C>T      | c.(1033-1035)CGA>TGA | p.R345*        |
| Pat_66 | Pre-Treatment | COL11A1  | 1301   | 37 | 1 | 103354187 | 103354187 | Splice_Site       | SNP | C  | T  | 42  | 6   | c.4555_splice  | c.e62-1              | p.G1519_splice |
| Pat_66 | Pre-Treatment | CLCC1    | 23155  | 37 | 1 | 109477342 | 109477342 | Missense_Mutation | SNP | C  | T  | 51  | 52  | c.1606G>A      | c.(1606-1608)GGT>AGT | p.G536S        |

|        |               |          |        |    |   |           |           |                   |     |    |    |     |     |                 |                       |               |
|--------|---------------|----------|--------|----|---|-----------|-----------|-------------------|-----|----|----|-----|-----|-----------------|-----------------------|---------------|
| Pat_66 | Pre-Treatment | AMPD2    | 271    | 37 | 1 | 110169919 | 110169919 | Missense_Mutation | SNP | C  | T  | 4   | 176 | c.1003C>T       | c.(1003-1005)CGC>TGC  | p.R335C       |
| Pat_66 | Pre-Treatment | DENND2C  | 163259 | 37 | 1 | 115142028 | 115142028 | Missense_Mutation | SNP | G  | A  | 42  | 63  | c.2150C>T       | c.(2149-2151)CCG>CTG  | p.P717L       |
| Pat_66 | Pre-Treatment | AMPD1    | 270    | 37 | 1 | 115220959 | 115220959 | Missense_Mutation | SNP | G  | A  | 62  | 123 | c.1087C>T       | c.(1087-1089)CAT>TAT  | p.H363Y       |
| Pat_66 | Pre-Treatment | SPAG17   | 200162 | 37 | 1 | 118548203 | 118548203 | Missense_Mutation | SNP | G  | A  | 14  | 26  | c.4610C>T       | c.(4609-4611)TCT>TTT  | p.S1537F      |
| Pat_66 | Pre-Treatment | SPAG17   | 200162 | 37 | 1 | 118567995 | 118567996 | Missense_Mutation | DNP | GG | AA | 60  | 19  | ..3774_3775CC>T | .772-3777)GTCCGT>GTTT | p.R1259C      |
| Pat_66 | Pre-Treatment | HSD3B1   | 3283   | 37 | 1 | 120050113 | 120050113 | Missense_Mutation | SNP | G  | A  | 56  | 547 | c.14G>A         | c.(13-15)AGC>AAC      | p.S5N         |
| Pat_66 | Pre-Treatment | ADAM30   | 11085  | 37 | 1 | 120437687 | 120437687 | Missense_Mutation | SNP | G  | A  | 30  | 857 | c.1273C>T       | c.(1273-1275)CGG>TGG  | p.R425W       |
| Pat_66 | Pre-Treatment | NBPF9    | 400818 | 37 | 1 | 144220816 | 144220816 | Missense_Mutation | SNP | A  | G  | 6   | 508 | c.2189A>G       | c.(2188-2190)GAG>GGG  | p.E730G       |
| Pat_66 | Pre-Treatment | PDE4DIP  | 9659   | 37 | 1 | 144873949 | 144873949 | Missense_Mutation | SNP | C  | T  | 66  | 831 | c.5008G>A       | c.(5008-5010)GAA>AAA  | p.E1670K      |
| Pat_66 | Pre-Treatment | PDE4DIP  | 9659   | 37 | 1 | 144911896 | 144911896 | Missense_Mutation | SNP | G  | A  | 203 | 669 | c.2213C>T       | c.(2212-2214)CCC>CTC  | p.P738L       |
| Pat_66 | Pre-Treatment | PDE4DIP  | 9659   | 37 | 1 | 145021144 | 145021144 | Missense_Mutation | SNP | C  | T  | 20  | 733 | c.44G>A         | c.(43-45)GGG>GAG      | p.G15E        |
| Pat_66 | Pre-Treatment | ITGA10   | 8515   | 37 | 1 | 145533143 | 145533143 | Missense_Mutation | SNP | G  | A  | 4   | 118 | c.1238G>A       | c.(1237-1239)CGA>CAA  | p.R413Q       |
| Pat_66 | Pre-Treatment | FMO5     | 2330   | 37 | 1 | 146658634 | 146658634 | Missense_Mutation | SNP | C  | A  | 38  | 69  | c.1447G>T       | c.(1447-1449)GGG>TGG  | p.G483W       |
| Pat_66 | Pre-Treatment | FMO5     | 2330   | 37 | 1 | 146658675 | 146658675 | Missense_Mutation | SNP | G  | A  | 4   | 134 | c.1406C>T       | c.(1405-1407)ACT>ATT  | p.T469I       |
| Pat_66 | Pre-Treatment | GJA5     | 2702   | 37 | 1 | 147230556 | 147230556 | Missense_Mutation | SNP | G  | A  | 4   | 181 | c.791C>T        | c.(790-792)CCC>CTC    | p.P264L       |
| Pat_66 | Pre-Treatment | RORC     | 6097   | 37 | 1 | 151787506 | 151787506 | Missense_Mutation | SNP | G  | A  | 32  | 150 | c.694C>T        | c.(694-696)CGT>TGT    | p.R232C       |
| Pat_66 | Pre-Treatment | TCHHL1   | 126637 | 37 | 1 | 152059317 | 152059317 | Missense_Mutation | SNP | C  | T  | 42  | 252 | c.841G>A        | c.(841-843)GAA>AAA    | p.E281K       |
| Pat_66 | Pre-Treatment | TCHH     | 7062   | 37 | 1 | 152085463 | 152085463 | Missense_Mutation | SNP | A  | G  | 12  | 66  | c.230T>C        | c.(229-231)TTT>TCT    | p.F77S        |
| Pat_66 | Pre-Treatment | FLG      | 2312   | 37 | 1 | 152278795 | 152278795 | Missense_Mutation | SNP | G  | A  | 121 | 798 | c.8567C>T       | c.(8566-8568)TCG>TTG  | p.S2856L      |
| Pat_66 | Pre-Treatment | CRNN     | 49860  | 37 | 1 | 152382770 | 152382770 | Missense_Mutation | SNP | T  | C  | 12  | 628 | c.788A>G        | c.(787-789)GAC>GGC    | p.D263G       |
| Pat_66 | Pre-Treatment | SPRR1A   | 6698   | 37 | 1 | 152957867 | 152957867 | Missense_Mutation | SNP | C  | T  | 57  | 356 | c.161C>T        | c.(160-162)CCT>CTT    | p.P54L        |
| Pat_66 | Pre-Treatment | PGLYRP4  | 57115  | 37 | 1 | 153317697 | 153317697 | Missense_Mutation | SNP | C  | T  | 48  | 61  | c.301G>A        | c.(301-303)GAA>AAA    | p.E101K       |
| Pat_66 | Pre-Treatment | SHE      | 126669 | 37 | 1 | 154461646 | 154461646 | Missense_Mutation | SNP | C  | T  | 81  | 58  | c.905G>A        | c.(904-906)AGG>AAG    | p.R302K       |
| Pat_66 | Pre-Treatment | GON4L    | 54856  | 37 | 1 | 155736404 | 155736404 | Nonsense_Mutation | SNP | G  | A  | 130 | 81  | c.2860C>T       | c.(2860-2862)CGA>TGA  | p.R954*       |
| Pat_66 | Pre-Treatment | BCAN     | 63827  | 37 | 1 | 156616815 | 156616815 | Missense_Mutation | SNP | G  | A  | 3   | 40  | c.314G>A        | c.(313-315)CCG>CAG    | p.R105Q       |
| Pat_66 | Pre-Treatment | PEAR1    | 375033 | 37 | 1 | 156876497 | 156876497 | Missense_Mutation | SNP | G  | A  | 47  | 203 | c.469G>A        | c.(469-471)GAT>AAT    | p.D157N       |
| Pat_66 | Pre-Treatment | SPTA1    | 6708   | 37 | 1 | 158617387 | 158617387 | Missense_Mutation | SNP | C  | T  | 84  | 160 | c.3838G>A       | c.(3838-3840)GAT>AAT  | p.D1280N      |
| Pat_66 | Pre-Treatment | SPTA1    | 6708   | 37 | 1 | 158623143 | 158623143 | Missense_Mutation | SNP | C  | A  | 4   | 192 | c.3109G>T       | c.(3109-3111)GAT>TAT  | p.D1037Y      |
| Pat_66 | Pre-Treatment | SPTA1    | 6708   | 37 | 1 | 158648325 | 158648325 | Splice_Site       | SNP | C  | T  | 15  | 72  | c.679_splice    | c.e6-1                | p.E227_splice |
| Pat_66 | Pre-Treatment | FCRL6    | 343413 | 37 | 1 | 159778010 | 159778010 | Missense_Mutation | SNP | G  | A  | 69  | 63  | c.95G>A         | c.(94-96)GGA>GAA      | p.G32E        |
| Pat_66 | Pre-Treatment | CCDC19   | 25790  | 37 | 1 | 159847207 | 159847207 | Missense_Mutation | SNP | C  | T  | 143 | 381 | c.1090G>A       | c.(1090-1092)GAG>AAG  | p.E364K       |
| Pat_66 | Pre-Treatment | KCNJ10   | 3766   | 37 | 1 | 160011806 | 160011806 | Missense_Mutation | SNP | T  | C  | 65  | 293 | c.517A>G        | c.(517-519)AAG>GAG    | p.K173E       |
| Pat_66 | Pre-Treatment | CD84     | 8832   | 37 | 1 | 160518077 | 160518077 | Missense_Mutation | SNP | G  | A  | 43  | 101 | c.1007C>T       | c.(1006-1008)CCT>CTT  | p.P336L       |
| Pat_66 | Pre-Treatment | CD244    | 51744  | 37 | 1 | 160811406 | 160811406 | Missense_Mutation | SNP | A  | G  | 31  | 59  | c.347T>C        | c.(346-348)GTT>GCT    | p.V116A       |
| Pat_66 | Pre-Treatment | ITLN2    | 142683 | 37 | 1 | 160922485 | 160922485 | Missense_Mutation | SNP | C  | T  | 112 | 68  | c.118G>A        | c.(118-120)GAA>AAA    | p.E40K        |
| Pat_66 | Pre-Treatment | POU2F1   | 5451   | 37 | 1 | 167370724 | 167370724 | Missense_Mutation | SNP | G  | A  | 4   | 148 | c.1417G>A       | c.(1417-1419)GCA>ACA  | p.A473T       |
| Pat_66 | Pre-Treatment | ADCY10   | 55811  | 37 | 1 | 167839543 | 167839543 | Missense_Mutation | SNP | C  | T  | 24  | 94  | c.1568G>A       | c.(1567-1569)AGC>AAC  | p.S523N       |
| Pat_66 | Pre-Treatment | DCAF6    | 55827  | 37 | 1 | 168044611 | 168044611 | Missense_Mutation | SNP | C  | T  | 4   | 106 | c.2521C>T       | c.(2521-2523)CGG>TGG  | p.R841W       |
| Pat_66 | Pre-Treatment | F5       | 2153   | 37 | 1 | 169510846 | 169510846 | Missense_Mutation | SNP | C  | T  | 63  | 287 | c.3482G>A       | c.(3481-3483)CGA>CAA  | p.R1161Q      |
| Pat_66 | Pre-Treatment | F5       | 2153   | 37 | 1 | 169512248 | 169512248 | Missense_Mutation | SNP | C  | T  | 57  | 316 | c.2080G>A       | c.(2080-2082)GAG>AAG  | p.E694K       |
| Pat_66 | Pre-Treatment | C1orf9   | 51430  | 37 | 1 | 172544695 | 172544695 | Missense_Mutation | SNP | C  | T  | 30  | 132 | c.1195C>T       | c.(1195-1197)CAT>TAT  | p.H399Y       |
| Pat_66 | Pre-Treatment | TNR      | 7143   | 37 | 1 | 175332955 | 175332955 | Missense_Mutation | SNP | G  | A  | 50  | 47  | c.2596C>T       | c.(2596-2598)CCC>TCC  | p.P866S       |
| Pat_66 | Pre-Treatment | TNR      | 7143   | 37 | 1 | 175372582 | 175372582 | Missense_Mutation | SNP | C  | T  | 118 | 548 | c.670G>A        | c.(670-672)GAG>AAG    | p.E224K       |
| Pat_66 | Pre-Treatment | PAPPA2   | 60676  | 37 | 1 | 176525780 | 176525780 | Missense_Mutation | SNP | C  | T  | 178 | 294 | c.322C>T        | c.(322-324)CCC>TCC    | p.P108S       |
| Pat_66 | Pre-Treatment | PAPPA2   | 60676  | 37 | 1 | 176564722 | 176564722 | Missense_Mutation | SNP | C  | T  | 40  | 66  | c.1982C>T       | c.(1981-1983)TCA>TTA  | p.S661L       |
| Pat_66 | Pre-Treatment | FAM5B    | 57795  | 37 | 1 | 177250146 | 177250146 | Missense_Mutation | SNP | G  | A  | 43  | 66  | c.1834G>A       | c.(1834-1836)GAC>AAC  | p.D612N       |
| Pat_66 | Pre-Treatment | C1orf125 | 126859 | 37 | 1 | 179460799 | 179460799 | Missense_Mutation | SNP | G  | A  | 144 | 277 | c.2218G>A       | c.(2218-2220)GGA>AGA  | p.G740R       |



|        |               |          |        |    |   |           |           |                   |     |   |   |     |     |            |                        |          |
|--------|---------------|----------|--------|----|---|-----------|-----------|-------------------|-----|---|---|-----|-----|------------|------------------------|----------|
| Pat_66 | Pre-Treatment | C1orf125 | 126859 | 37 | 1 | 179502990 | 179502990 | Missense_Mutation | SNP | G | A | 113 | 217 | c.2776G>A  | c.(2776-2778)GAA>AAA   | p.E926K  |
| Pat_66 | Pre-Treatment | TDRD5    | 163589 | 37 | 1 | 179603683 | 179603683 | Nonsense_Mutation | SNP | G | A | 38  | 202 | c.1218G>A  | c.(1216-1218)TGG>TGA   | p.W406*  |
| Pat_66 | Pre-Treatment | TDRD5    | 163589 | 37 | 1 | 179631290 | 179631290 | Missense_Mutation | SNP | G | A | 42  | 240 | c.2212G>A  | c.(2212-2214)GAT>AAT   | p.D738N  |
| Pat_66 | Pre-Treatment | CEP350   | 9857   | 37 | 1 | 180063743 | 180063743 | Missense_Mutation | SNP | C | T | 12  | 61  | c.8503C>T  | c.(8503-8505)CCC>TCC   | p.P2835S |
| Pat_66 | Pre-Treatment | CACNA1E  | 777    | 37 | 1 | 181727969 | 181727969 | Missense_Mutation | SNP | G | A | 70  | 139 | c.4570G>A  | c.(4570-4572)GAA>AAA   | p.E1524K |
| Pat_66 | Pre-Treatment | CACNA1E  | 777    | 37 | 1 | 181754457 | 181754457 | Missense_Mutation | SNP | C | T | 31  | 54  | c.5582C>T  | c.(5581-5583)TCT>TTT   | p.S1861F |
| Pat_66 | Pre-Treatment | DHX9     | 1660   | 37 | 1 | 182845668 | 182845668 | Missense_Mutation | SNP | G | A | 4   | 159 | c.2116G>A  | c.(2116-2118)GTA>ATA   | p.V706I  |
| Pat_66 | Pre-Treatment | DHX9     | 1660   | 37 | 1 | 182852412 | 182852412 | Missense_Mutation | SNP | G | A | 4   | 160 | c.3053G>A  | c.(3052-3054)CGT>CAT   | p.R1018H |
| Pat_66 | Pre-Treatment | FAM129A  | 116496 | 37 | 1 | 184764647 | 184764647 | Missense_Mutation | SNP | C | T | 201 | 167 | c.2251G>A  | c.(2251-2253)GAG>AAG   | p.E751K  |
| Pat_66 | Pre-Treatment | HMCN1    | 83872  | 37 | 1 | 185951498 | 185951498 | Missense_Mutation | SNP | C | T | 4   | 229 | c.2767C>T  | c.(2767-2769)CGG>TGG   | p.R923W  |
| Pat_66 | Pre-Treatment | TPR      | 7175   | 37 | 1 | 186305706 | 186305706 | Nonsense_Mutation | SNP | G | A | 5   | 262 | c.4627C>T  | c.(4627-4629)CGA>TGA   | p.R1543* |
| Pat_66 | Pre-Treatment | F13B     | 2165   | 37 | 1 | 197030191 | 197030191 | Missense_Mutation | SNP | G | A | 31  | 30  | c.466C>T   | c.(466-468)CCT>TCT     | p.P156S  |
| Pat_66 | Pre-Treatment | ASPM     | 259266 | 37 | 1 | 197073189 | 197073189 | Missense_Mutation | SNP | G | A | 62  | 351 | c.5192C>T  | c.(5191-5193)TCT>TTT   | p.S1731F |
| Pat_66 | Pre-Treatment | CRB1     | 23418  | 37 | 1 | 197298046 | 197298046 | Missense_Mutation | SNP | G | A | 25  | 101 | c.565G>A   | c.(565-567)GAA>AAA     | p.E189K  |
| Pat_66 | Pre-Treatment | CRB1     | 23418  | 37 | 1 | 197390166 | 197390166 | Missense_Mutation | SNP | C | T | 43  | 229 | c.1208C>T  | c.(1207-1209)TCA>TTA   | p.S403L  |
| Pat_66 | Pre-Treatment | CRB1     | 23418  | 37 | 1 | 197396686 | 197396686 | Missense_Mutation | SNP | G | A | 51  | 39  | c.2231G>A  | c.(2230-2232)CGA>CAA   | p.R744Q  |
| Pat_66 | Pre-Treatment | KIF14    | 9928   | 37 | 1 | 200574423 | 200574423 | Missense_Mutation | SNP | C | G | 5   | 184 | c.1734G>C  | c.(1732-1734)ATG>ATC   | p.M578I  |
| Pat_66 | Pre-Treatment | CACNA1S  | 779    | 37 | 1 | 201031145 | 201031145 | Missense_Mutation | SNP | C | T | 26  | 79  | c.2980G>A  | c.(2980-2982)GAC>AAC   | p.D994N  |
| Pat_66 | Pre-Treatment | ATP2B4   | 493    | 37 | 1 | 203669940 | 203669940 | Missense_Mutation | SNP | G | A | 33  | 156 | c.790G>A   | c.(790-792)GAA>AAA     | p.E264K  |
| Pat_66 | Pre-Treatment | TMCC2    | 9911   | 37 | 1 | 205211090 | 205211090 | Missense_Mutation | SNP | C | T | 23  | 108 | c.665C>T   | c.(664-666)TCC>TTC     | p.S222F  |
| Pat_66 | Pre-Treatment | SRGAP2   | 23380  | 37 | 1 | 206623810 | 206623810 | Missense_Mutation | SNP | G | A | 11  | 103 | c.1918G>A  | c.(1918-1920)GAA>AAA   | p.E640K  |
| Pat_66 | Pre-Treatment | DYRK3    | 8444   | 37 | 1 | 206811054 | 206811054 | Missense_Mutation | SNP | G | A | 88  | 178 | c.137G>A   | c.(136-138)TGT>TAT     | p.C46Y   |
| Pat_66 | Pre-Treatment | PIGR     | 5284   | 37 | 1 | 207106409 | 207106409 | Missense_Mutation | SNP | C | T | 28  | 135 | c.1808G>A  | c.(1807-1809)AGG>AAG   | p.R603K  |
| Pat_66 | Pre-Treatment | CR2      | 1380   | 37 | 1 | 207642174 | 207642174 | Missense_Mutation | SNP | C | T | 66  | 66  | c.664C>T   | c.(664-666)CCC>TCC     | p.P222S  |
| Pat_66 | Pre-Treatment | CR1      | 1378   | 37 | 1 | 207679317 | 207679317 | Missense_Mutation | SNP | C | T | 42  | 230 | c.190C>T   | c.(190-192)CCC>TCC     | p.P64S   |
| Pat_66 | Pre-Treatment | G0S2     | 50486  | 37 | 1 | 209849265 | 209849265 | Missense_Mutation | SNP | C | T | 6   | 32  | c.236C>T   | c.(235-237)GCC>GTC     | p.A79V   |
| Pat_66 | Pre-Treatment | KCNH1    | 3756   | 37 | 1 | 211192571 | 211192571 | Missense_Mutation | SNP | G | A | 45  | 105 | c.586C>T   | c.(586-588)CCC>TCC     | p.P196S  |
| Pat_66 | Pre-Treatment | DTL      | 51514  | 37 | 1 | 212274211 | 212274211 | Missense_Mutation | SNP | C | T | 29  | 133 | c.1879C>T  | c.(1879-1881)CCG>TCG   | p.P627S  |
| Pat_66 | Pre-Treatment | FAM71A   | 149647 | 37 | 1 | 212799828 | 212799828 | Missense_Mutation | SNP | C | T | 30  | 75  | c.1609C>T  | c.(1609-1611)CTT>TTT   | p.L537F  |
| Pat_66 | Pre-Treatment | PROX1    | 5629   | 37 | 1 | 214170159 | 214170159 | Missense_Mutation | SNP | C | T | 19  | 123 | c.281C>T   | c.(280-282)TCC>TTC     | p.S94F   |
| Pat_66 | Pre-Treatment | USH2A    | 7399   | 37 | 1 | 216040499 | 216040499 | Missense_Mutation | SNP | C | T | 23  | 81  | c.8695G>A  | c.(8695-8697)GAA>AAA   | p.E2899K |
| Pat_66 | Pre-Treatment | HHIPL2   | 79802  | 37 | 1 | 222713487 | 222713487 | Missense_Mutation | SNP | G | A | 91  | 77  | c.1315C>T  | c.(1315-1317)CGG>TGG   | p.R439W  |
| Pat_66 | Pre-Treatment | TP53BP2  | 7159   | 37 | 1 | 223987704 | 223987704 | Missense_Mutation | SNP | C | T | 4   | 217 | c.1382G>A  | c.(1381-1383)CGT>CAT   | p.R461H  |
| Pat_66 | Pre-Treatment | GUK1     | 2987   | 37 | 1 | 228334563 | 228334563 | Nonsense_Mutation | SNP | G | T | 128 | 157 | c.175G>T   | c.(175-177)GAG>TAG     | p.E59*   |
| Pat_66 | Pre-Treatment | OBSCN    | 84033  | 37 | 1 | 228523512 | 228523512 | Missense_Mutation | SNP | G | A | 54  | 145 | c.16426G>A | c.(16426-16428)GAG>AAC | p.E5476K |
| Pat_66 | Pre-Treatment | TRIM67   | 440730 | 37 | 1 | 231299671 | 231299671 | Missense_Mutation | SNP | G | A | 18  | 15  | c.956G>A   | c.(955-957)CGA>CAA     | p.R319Q  |
| Pat_66 | Pre-Treatment | SIPA1L2  | 57568  | 37 | 1 | 232574866 | 232574866 | Missense_Mutation | SNP | G | A | 25  | 71  | c.4019C>T  | c.(4018-4020)TCC>TTC   | p.S1340F |
| Pat_66 | Pre-Treatment | KIAA1804 | 84451  | 37 | 1 | 233515051 | 233515051 | Missense_Mutation | SNP | G | C | 122 | 161 | c.2299G>C  | c.(2299-2301)GCT>CCT   | p.A767P  |
| Pat_66 | Pre-Treatment | LYST     | 1130   | 37 | 1 | 235972754 | 235972754 | Missense_Mutation | SNP | A | G | 68  | 79  | c.1364T>C  | c.(1363-1365)CTG>CCG   | p.L455P  |
| Pat_66 | Pre-Treatment | RYR2     | 6262   | 37 | 1 | 237881784 | 237881784 | Missense_Mutation | SNP | G | A | 54  | 41  | c.10517G>A | c.(10516-10518)CGA>CAA | p.R3506Q |
| Pat_66 | Pre-Treatment | CHRM3    | 1131   | 37 | 1 | 240072495 | 240072495 | Missense_Mutation | SNP | C | T | 153 | 142 | c.1744C>T  | c.(1744-1746)CAC>TAC   | p.H582Y  |
| Pat_66 | Pre-Treatment | FMN2     | 56776  | 37 | 1 | 240370261 | 240370261 | Missense_Mutation | SNP | G | A | 28  | 124 | c.2149G>A  | c.(2149-2151)GCC>ACC   | p.A717T  |
| Pat_66 | Pre-Treatment | FMN2     | 56776  | 37 | 1 | 240371033 | 240371033 | Missense_Mutation | SNP | G | A | 166 | 470 | c.2921G>A  | c.(2920-2922)GGA>GAA   | p.G974E  |
| Pat_66 | Pre-Treatment | FMN2     | 56776  | 37 | 1 | 240635749 | 240635749 | Missense_Mutation | SNP | G | A | 45  | 120 | c.5138G>A  | c.(5137-5139)GGA>GAA   | p.G1713E |
| Pat_66 | Pre-Treatment | OR2G3    | 81469  | 37 | 1 | 247768951 | 247768951 | Missense_Mutation | SNP | C | T | 32  | 135 | c.64C>T    | c.(64-66)CGT>TGT       | p.R22C   |
| Pat_66 | Pre-Treatment | TRIM58   | 25893  | 37 | 1 | 248039747 | 248039747 | Missense_Mutation | SNP | G | A | 18  | 117 | c.1417G>A  | c.(1417-1419)GAT>AAT   | p.D473N  |
| Pat_66 | Pre-Treatment | OR2M4    | 26245  | 37 | 1 | 248403078 | 248403078 | Missense_Mutation | SNP | C | T | 31  | 197 | c.848C>T   | c.(847-849)CCT>CTT     | p.P283L  |

|        |               |           |        |    |    |           |           |                   |     |    |    |     |     |                 |                          |          |
|--------|---------------|-----------|--------|----|----|-----------|-----------|-------------------|-----|----|----|-----|-----|-----------------|--------------------------|----------|
| Pat_66 | Pre-Treatment | OR2M7     | 391196 | 37 | 1  | 248487446 | 248487446 | Missense_Mutation | SNP | C  | T  | 268 | 486 | c.425G>A        | c.(424-426)GGA>GAA       | p.G142E  |
| Pat_66 | Pre-Treatment | OR2T4     | 127074 | 37 | 1  | 248525495 | 248525495 | Missense_Mutation | SNP | G  | A  | 218 | 236 | c.613G>A        | c.(613-615)GAG>AAG       | p.E205K  |
| Pat_66 | Pre-Treatment | OR2T3     | 343173 | 37 | 1  | 248636667 | 248636667 | Nonsense_Mutation | SNP | C  | T  | 22  | 103 | c.16C>T         | c.(16-18)CAG>TAG         | p.Q6*    |
| Pat_66 | Pre-Treatment | FBXO18    | 84893  | 37 | 10 | 5963488   | 5963488   | Missense_Mutation | SNP | C  | T  | 4   | 84  | c.2278C>T       | c.(2278-2280)CGG>TGG     | p.R760W  |
| Pat_66 | Pre-Treatment | ITIH5     | 80760  | 37 | 10 | 7618968   | 7618968   | Missense_Mutation | SNP | C  | T  | 22  | 25  | c.1426G>A       | c.(1426-1428)GAT>AAT     | p.D476N  |
| Pat_66 | Pre-Treatment | KIAA1217  | 56243  | 37 | 10 | 24832481  | 24832481  | Missense_Mutation | SNP | G  | A  | 30  | 34  | c.4282G>A       | c.(4282-4284)GGG>AGG     | p.G1428R |
| Pat_66 | Pre-Treatment | GPR158    | 57512  | 37 | 10 | 25887388  | 25887388  | Missense_Mutation | SNP | C  | T  | 97  | 123 | c.2833C>T       | c.(2833-2835)CAC>TAC     | p.H945Y  |
| Pat_66 | Pre-Treatment | MYO3A     | 53904  | 37 | 10 | 26285456  | 26285456  | Missense_Mutation | SNP | G  | A  | 34  | 50  | c.341G>A        | c.(340-342)GGA>GAA       | p.G114E  |
| Pat_66 | Pre-Treatment | GAD2      | 2572   | 37 | 10 | 26558061  | 26558061  | Missense_Mutation | SNP | C  | T  | 20  | 40  | c.934C>T        | c.(934-936)CCA>TCA       | p.P312S  |
| Pat_66 | Pre-Treatment | PTCHD3    | 374308 | 37 | 10 | 27687287  | 27687287  | Missense_Mutation | SNP | G  | A  | 15  | 21  | c.2240C>T       | c.(2239-2241)TCC>TTC     | p.S747F  |
| Pat_66 | Pre-Treatment | PTCHD3    | 374308 | 37 | 10 | 27702468  | 27702468  | Missense_Mutation | SNP | C  | T  | 18  | 15  | c.712G>A        | c.(712-714)GAT>AAT       | p.D238N  |
| Pat_66 | Pre-Treatment | NRP1      | 8829   | 37 | 10 | 33559629  | 33559629  | Missense_Mutation | SNP | G  | A  | 34  | 57  | c.404C>T        | c.(403-405)TCC>TTC       | p.S135F  |
| Pat_66 | Pre-Treatment | ANKRD30A  | 91074  | 37 | 10 | 37431050  | 37431050  | Missense_Mutation | SNP | G  | C  | 7   | 146 | c.1057G>C       | c.(1057-1059)GCA>CCA     | p.A353P  |
| Pat_66 | Pre-Treatment | ANKRD30A  | 91074  | 37 | 10 | 37508235  | 37508235  | Missense_Mutation | SNP | C  | T  | 26  | 44  | c.3427C>T       | c.(3427-3429)CAT>TAT     | p.H1143Y |
| Pat_66 | Pre-Treatment | RET       | 5979   | 37 | 10 | 43597970  | 43597970  | Missense_Mutation | SNP | C  | T  | 35  | 24  | c.518C>T        | c.(517-519)TCC>TTC       | p.S173F  |
| Pat_66 | Pre-Treatment | HNRNPA3P1 | 10151  | 37 | 10 | 44285799  | 44285799  | Missense_Mutation | SNP | C  | T  | 4   | 17  | c.37G>A         | c.(37-39)GAC>AAC         | p.D13N   |
| Pat_66 | Pre-Treatment | PPYR1     | 5540   | 37 | 10 | 47086856  | 47086856  | Missense_Mutation | SNP | G  | A  | 14  | 67  | c.73G>A         | c.(73-75)GGC>AGC         | p.G25S   |
| Pat_66 | Pre-Treatment | LRRC18    | 474354 | 37 | 10 | 50122059  | 50122059  | Missense_Mutation | SNP | G  | A  | 16  | 35  | c.142C>T        | c.(142-144)CGC>TGC       | p.R48C   |
| Pat_66 | Pre-Treatment | DRGX      | 644168 | 37 | 10 | 50594888  | 50594888  | Missense_Mutation | SNP | C  | T  | 75  | 119 | c.266G>A        | c.(265-267)AGA>AAA       | p.R89K   |
| Pat_66 | Pre-Treatment | ASAH2     | 56624  | 37 | 10 | 51974546  | 51974546  | Missense_Mutation | SNP | C  | T  | 9   | 45  | c.1097G>A       | c.(1096-1098)GGA>GAA     | p.G366E  |
| Pat_66 | Pre-Treatment | PCDH15    | 65217  | 37 | 10 | 55568568  | 55568568  | Missense_Mutation | SNP | C  | T  | 15  | 20  | c.5257G>A       | c.(5257-5259)GAA>AAA     | p.E1753K |
| Pat_66 | Pre-Treatment | PCDH15    | 65217  | 37 | 10 | 55996643  | 55996643  | Nonsense_Mutation | SNP | G  | A  | 61  | 108 | c.925C>T        | c.(925-927)CAG>TAG       | p.Q309*  |
| Pat_66 | Pre-Treatment | ANK3      | 288    | 37 | 10 | 61830234  | 61830234  | Missense_Mutation | SNP | C  | T  | 18  | 56  | c.10405G>A      | c.(10405-10407)GAG>AAC   | p.E3469K |
| Pat_66 | Pre-Treatment | AIFM2     | 84883  | 37 | 10 | 71877624  | 71877624  | Missense_Mutation | SNP | G  | A  | 26  | 31  | c.560C>T        | c.(559-561)TCC>TTC       | p.S187F  |
| Pat_66 | Pre-Treatment | UNC5B     | 219699 | 37 | 10 | 73058927  | 73058927  | Missense_Mutation | SNP | G  | A  | 81  | 115 | c.2731G>A       | c.(2731-2733)GAA>AAA     | p.E911K  |
| Pat_66 | Pre-Treatment | CDH23     | 64072  | 37 | 10 | 73270964  | 73270964  | Missense_Mutation | SNP | C  | T  | 46  | 62  | c.424C>T        | c.(424-426)CCT>TCT       | p.P142S  |
| Pat_66 | Pre-Treatment | OIT3      | 170392 | 37 | 10 | 74666458  | 74666458  | Missense_Mutation | SNP | G  | A  | 143 | 250 | c.649G>A        | c.(649-651)GAT>AAT       | p.D217N  |
| Pat_66 | Pre-Treatment | PLAU      | 5328   | 37 | 10 | 75671985  | 75671985  | Missense_Mutation | SNP | G  | A  | 4   | 73  | c.98G>A         | c.(97-99)TGT>TAT         | p.C33Y   |
| Pat_66 | Pre-Treatment | RPS24     | 6229   | 37 | 10 | 79795158  | 79795158  | Missense_Mutation | SNP | C  | T  | 75  | 116 | c.52C>T         | c.(52-54)CTT>TTT         | p.L18F   |
| Pat_66 | Pre-Treatment | OPN4      | 94233  | 37 | 10 | 88415938  | 88415938  | Nonsense_Mutation | SNP | G  | A  | 27  | 50  | c.171G>A        | c.(169-171)TGG>TGA       | p.W57*   |
| Pat_66 | Pre-Treatment | ANKRD22   | 118932 | 37 | 10 | 90582747  | 90582747  | Missense_Mutation | SNP | C  | T  | 50  | 65  | c.527G>A        | c.(526-528)CGG>CAG       | p.R176Q  |
| Pat_66 | Pre-Treatment | ACTA2     | 59     | 37 | 10 | 90699264  | 90699264  | Missense_Mutation | SNP | C  | T  | 4   | 148 | c.808G>A        | c.(808-810)GGG>AGG       | p.G270R  |
| Pat_66 | Pre-Treatment | LIPA      | 3988   | 37 | 10 | 90984889  | 90984889  | Missense_Mutation | SNP | G  | A  | 131 | 177 | c.635C>T        | c.(634-636)CCT>CTT       | p.P212L  |
| Pat_66 | Pre-Treatment | IFIT1B    | 439996 | 37 | 10 | 91143767  | 91143767  | Missense_Mutation | SNP | G  | A  | 104 | 147 | c.697G>A        | c.(697-699)GAA>AAA       | p.E233K  |
| Pat_66 | Pre-Treatment | PDE6C     | 5146   | 37 | 10 | 95372651  | 95372651  | Missense_Mutation | SNP | G  | A  | 34  | 52  | c.169G>A        | c.(169-171)GAG>AAG       | p.E57K   |
| Pat_66 | Pre-Treatment | PDE6C     | 5146   | 37 | 10 | 95380518  | 95380518  | Missense_Mutation | SNP | G  | A  | 46  | 54  | c.610G>A        | c.(610-612)GAA>AAA       | p.E204K  |
| Pat_66 | Pre-Treatment | PLCE1     | 51196  | 37 | 10 | 96025599  | 96025599  | Missense_Mutation | SNP | G  | A  | 39  | 58  | c.4165G>A       | c.(4165-4167)GAG>AAG     | p.E1389K |
| Pat_66 | Pre-Treatment | COX15     | 1355   | 37 | 10 | 101486739 | 101486739 | Missense_Mutation | SNP | G  | A  | 4   | 67  | c.568C>T        | c.(568-570)CTC>TTC       | p.L190F  |
| Pat_66 | Pre-Treatment | SEMA4G    | 57715  | 37 | 10 | 102733352 | 102733352 | Missense_Mutation | SNP | G  | A  | 4   | 52  | c.322G>A        | c.(322-324)GGG>AGG       | p.G108R  |
| Pat_66 | Pre-Treatment | PPRC1     | 23082  | 37 | 10 | 103908203 | 103908203 | Missense_Mutation | SNP | C  | T  | 44  | 77  | c.4475C>T       | c.(4474-4476)TCC>TTC     | p.S1492F |
| Pat_66 | Pre-Treatment | CCDC147   | 159686 | 37 | 10 | 106130749 | 106130749 | Nonsense_Mutation | SNP | C  | T  | 24  | 33  | c.1027C>T       | c.(1027-1029)CAA>TAA     | p.Q343*  |
| Pat_66 | Pre-Treatment | C10orf81  | 79949  | 37 | 10 | 115528596 | 115528596 | Missense_Mutation | SNP | T  | C  | 37  | 47  | c.364T>C        | c.(364-366)TCC>CCC       | p.S122P  |
| Pat_66 | Pre-Treatment | C10orf81  | 79949  | 37 | 10 | 115536905 | 115536905 | Missense_Mutation | SNP | C  | T  | 17  | 24  | c.1054C>T       | c.(1054-1056)CCA>TCA     | p.P352S  |
| Pat_66 | Pre-Treatment | VWA2      | 340706 | 37 | 10 | 116042283 | 116042283 | Missense_Mutation | SNP | G  | A  | 36  | 64  | c.842G>A        | c.(841-843)AGA>AAA       | p.R281K  |
| Pat_66 | Pre-Treatment | ABLIM1    | 3983   | 37 | 10 | 116232858 | 116232858 | Missense_Mutation | DNP | CC | TT | 48  | 72  | c.1152_1153GG>A | c.(1150-1155)AAGGAT>AAAA | p.D385N  |
| Pat_66 | Pre-Treatment | FAM160B1  | 57700  | 37 | 10 | 116606865 | 116606865 | Missense_Mutation | SNP | C  | T  | 28  | 39  | c.1585C>T       | c.(1585-1587)CCA>TCA     | p.P529S  |
| Pat_66 | Pre-Treatment | ATRNL1    | 26033  | 37 | 10 | 117154214 | 117154214 | Missense_Mutation | SNP | G  | A  | 19  | 51  | c.3221G>A       | c.(3220-3222)GGA>GAA     | p.G1074E |

|        |               |           |        |    |    |           |           |                   |     |   |   |     |     |           |                      |          |
|--------|---------------|-----------|--------|----|----|-----------|-----------|-------------------|-----|---|---|-----|-----|-----------|----------------------|----------|
| Pat_66 | Pre-Treatment | ATRNL1    | 26033  | 37 | 10 | 117154237 | 117154237 | Missense_Mutation | SNP | G | A | 19  | 45  | c.3244G>A | c.(3244-3246)GGA>AGA | p.G1082R |
| Pat_66 | Pre-Treatment | C10orf96  | 374355 | 37 | 10 | 118084841 | 118084841 | Missense_Mutation | SNP | G | A | 10  | 28  | c.106G>A  | c.(106-108)GAA>AAA   | p.E36K   |
| Pat_66 | Pre-Treatment | PDZD8     | 118987 | 37 | 10 | 119049715 | 119049715 | Nonsense_Mutation | SNP | G | A | 44  | 59  | c.1243C>T | c.(1243-1245)CGA>TGA | p.R415*  |
| Pat_66 | Pre-Treatment | RAB11FIP2 | 22841  | 37 | 10 | 119799657 | 119799657 | Missense_Mutation | SNP | G | A | 59  | 94  | c.773C>T  | c.(772-774)TCC>TTC   | p.S258F  |
| Pat_66 | Pre-Treatment | WDR11     | 55717  | 37 | 10 | 122650387 | 122650387 | Missense_Mutation | SNP | C | A | 5   | 110 | c.2503C>A | c.(2503-2505)CAA>AAA | p.Q835K  |
| Pat_66 | Pre-Treatment | TACC2     | 10579  | 37 | 10 | 123970328 | 123970328 | Missense_Mutation | SNP | C | T | 103 | 100 | c.6388C>T | c.(6388-6390)CCG>TCG | p.P2130S |
| Pat_66 | Pre-Treatment | DMBT1     | 1755   | 37 | 10 | 124399739 | 124399739 | Missense_Mutation | SNP | G | A | 104 | 118 | c.6739G>A | c.(6739-6741)GAA>AAA | p.E2247K |
| Pat_66 | Pre-Treatment | C10orf90  | 118611 | 37 | 10 | 128193141 | 128193141 | Missense_Mutation | SNP | G | A | 29  | 54  | c.628C>T  | c.(628-630)CCC>TCC   | p.P210S  |
| Pat_66 | Pre-Treatment | MGMT      | 4255   | 37 | 10 | 131557529 | 131557529 | Missense_Mutation | SNP | C | T | 37  | 65  | c.431C>T  | c.(430-432)TCT>TTT   | p.S144F  |
| Pat_66 | Pre-Treatment | LOC653544 | 653544 | 37 | 10 | 135491123 | 135491123 | Missense_Mutation | SNP | G | A | 4   | 29  | c.734G>A  | c.(733-735)GGC>GAC   | p.G245D  |
| Pat_66 | Pre-Treatment | B4GALNT4  | 338707 | 37 | 11 | 380161    | 380161    | Missense_Mutation | SNP | G | A | 23  | 9   | c.2674G>A | c.(2674-2676)GAG>AAG | p.E892K  |
| Pat_66 | Pre-Treatment | MUC6      | 4588   | 37 | 11 | 1018596   | 1018596   | Missense_Mutation | SNP | G | A | 4   | 127 | c.4205C>T | c.(4204-4206)ACC>ATC | p.T1402I |
| Pat_66 | Pre-Treatment | MUC2      | 4583   | 37 | 11 | 1087928   | 1087928   | Missense_Mutation | SNP | G | A | 8   | 30  | c.3403G>A | c.(3403-3405)GAG>AAG | p.E1135K |
| Pat_66 | Pre-Treatment | KRTAP5-5  | 439915 | 37 | 11 | 1651483   | 1651483   | Missense_Mutation | SNP | G | C | 4   | 88  | c.413G>C  | c.(412-414)GGC>GCC   | p.G138A  |
| Pat_66 | Pre-Treatment | OR52K2    | 119774 | 37 | 11 | 4470799   | 4470799   | Missense_Mutation | SNP | C | T | 42  | 123 | c.230C>T  | c.(229-231)TCC>TTC   | p.S77F   |
| Pat_66 | Pre-Treatment | OR52K1    | 390036 | 37 | 11 | 4510449   | 4510449   | Missense_Mutation | SNP | C | T | 16  | 57  | c.319C>T  | c.(319-321)CAC>TAC   | p.H107Y  |
| Pat_66 | Pre-Treatment | OR51E1    | 143503 | 37 | 11 | 4673818   | 4673818   | Missense_Mutation | SNP | C | T | 58  | 165 | c.62C>T   | c.(61-63)CCT>CTT     | p.P21L   |
| Pat_66 | Pre-Treatment | OR52J3    | 119679 | 37 | 11 | 5068657   | 5068657   | Missense_Mutation | SNP | G | A | 20  | 51  | c.902G>A  | c.(901-903)CGA>CAA   | p.R301Q  |
| Pat_66 | Pre-Treatment | OR52E2    | 119678 | 37 | 11 | 5080127   | 5080127   | Missense_Mutation | SNP | G | A | 25  | 68  | c.731C>T  | c.(730-732)TCA>TTA   | p.S244L  |
| Pat_66 | Pre-Treatment | OR52A5    | 390054 | 37 | 11 | 5153503   | 5153503   | Missense_Mutation | SNP | G | A | 10  | 55  | c.370C>T  | c.(370-372)CGC>TGC   | p.R124C  |
| Pat_66 | Pre-Treatment | HBG2      | 3048   | 37 | 11 | 5275587   | 5275587   | Missense_Mutation | SNP | C | T | 39  | 306 | c.250G>A  | c.(250-252)GGC>AGC   | p.G84S   |
| Pat_66 | Pre-Treatment | HBE1      | 3046   | 37 | 11 | 5289767   | 5289767   | Missense_Mutation | SNP | C | T | 104 | 278 | c.376G>A  | c.(376-378)GAA>AAA   | p.E126K  |
| Pat_66 | Pre-Treatment | OR51I1    | 390063 | 37 | 11 | 5462162   | 5462162   | Missense_Mutation | SNP | G | A | 7   | 26  | c.583C>T  | c.(583-585)CAT>TAT   | p.H195Y  |
| Pat_66 | Pre-Treatment | OR51I1    | 390063 | 37 | 11 | 5462402   | 5462402   | Missense_Mutation | SNP | C | T | 23  | 52  | c.343G>A  | c.(343-345)GGC>AGC   | p.G115S  |
| Pat_66 | Pre-Treatment | OR52N2    | 390077 | 37 | 11 | 5842451   | 5842451   | Missense_Mutation | SNP | G | A | 80  | 59  | c.886G>A  | c.(886-888)GGA>AGA   | p.G296R  |
| Pat_66 | Pre-Treatment | ZNF215    | 7762   | 37 | 11 | 6962867   | 6962867   | Nonsense_Mutation | SNP | C | T | 36  | 66  | c.466C>T  | c.(466-468)CGA>TGA   | p.R156*  |
| Pat_66 | Pre-Treatment | RBMXL2    | 27288  | 37 | 11 | 7110403   | 7110403   | Missense_Mutation | SNP | G | A | 30  | 70  | c.52G>A   | c.(52-54)GAA>AAA     | p.E18K   |
| Pat_66 | Pre-Treatment | OR10A3    | 26496  | 37 | 11 | 7960946   | 7960946   | Missense_Mutation | SNP | C | T | 36  | 117 | c.122G>A  | c.(121-123)GGA>GAA   | p.G41E   |
| Pat_66 | Pre-Treatment | STK33     | 65975  | 37 | 11 | 8414233   | 8414233   | Missense_Mutation | SNP | G | A | 22  | 45  | c.1369C>T | c.(1369-1371)CCT>TCT | p.P457S  |
| Pat_66 | Pre-Treatment | STK33     | 65975  | 37 | 11 | 8496281   | 8496281   | Missense_Mutation | SNP | C | T | 19  | 52  | c.172G>A  | c.(172-174)GAG>AAG   | p.E58K   |
| Pat_66 | Pre-Treatment | SCUBE2    | 57758  | 37 | 11 | 9100985   | 9100985   | Missense_Mutation | SNP | G | A | 143 | 107 | c.328C>T  | c.(328-330)CGT>TGT   | p.R110C  |
| Pat_66 | Pre-Treatment | SPON1     | 10418  | 37 | 11 | 14280867  | 14280867  | Missense_Mutation | SNP | C | T | 14  | 48  | c.1534C>T | c.(1534-1536)CCC>TCC | p.P512S  |
| Pat_66 | Pre-Treatment | PLEKHA7   | 144100 | 37 | 11 | 16848076  | 16848076  | Missense_Mutation | SNP | C | T | 114 | 74  | c.934G>A  | c.(934-936)GAA>AAA   | p.E312K  |
| Pat_66 | Pre-Treatment | TPH1      | 7166   | 37 | 11 | 18042606  | 18042606  | Missense_Mutation | SNP | C | T | 112 | 285 | c.1267G>A | c.(1267-1269)GAG>AAG | p.E423K  |
| Pat_66 | Pre-Treatment | IGSF22    | 283284 | 37 | 11 | 18731951  | 18731951  | Missense_Mutation | SNP | C | T | 71  | 72  | c.2624G>A | c.(2623-2625)CGA>CAA | p.R875Q  |
| Pat_66 | Pre-Treatment | DCDC1     | 341019 | 37 | 11 | 31327239  | 31327239  | Missense_Mutation | SNP | G | A | 155 | 111 | c.677C>T  | c.(676-678)CCT>CTT   | p.P226L  |
| Pat_66 | Pre-Treatment | WT1       | 7490   | 37 | 11 | 32417935  | 32417935  | Missense_Mutation | SNP | C | T | 19  | 67  | c.1117G>A | c.(1117-1119)GGA>AGA | p.G373R  |
| Pat_66 | Pre-Treatment | CCDC73    | 493860 | 37 | 11 | 32663586  | 32663586  | Missense_Mutation | SNP | C | T | 16  | 56  | c.982G>A  | c.(982-984)GAA>AAA   | p.E328K  |
| Pat_66 | Pre-Treatment | PAMR1     | 25891  | 37 | 11 | 35453921  | 35453921  | Missense_Mutation | SNP | C | T | 37  | 111 | c.2146G>A | c.(2146-2148)GAA>AAA | p.E716K  |
| Pat_66 | Pre-Treatment | RAG2      | 5897   | 37 | 11 | 36615492  | 36615492  | Missense_Mutation | SNP | G | T | 4   | 165 | c.227C>A  | c.(226-228)GCC>GAC   | p.A76D   |
| Pat_66 | Pre-Treatment | CHST1     | 8534   | 37 | 11 | 45671975  | 45671975  | Missense_Mutation | SNP | C | T | 47  | 25  | c.499G>A  | c.(499-501)GAC>AAC   | p.D167N  |
| Pat_66 | Pre-Treatment | OR4A47    | 403253 | 37 | 11 | 48510399  | 48510399  | Missense_Mutation | SNP | C | T | 12  | 27  | c.55C>T   | c.(55-57)CCA>TCA     | p.P19S   |
| Pat_66 | Pre-Treatment | LOC440040 | 440040 | 37 | 11 | 49598368  | 49598368  | Missense_Mutation | SNP | G | A | 31  | 52  | c.481G>A  | c.(481-483)GTT>ATT   | p.V161I  |
| Pat_66 | Pre-Treatment | OR4A5     | 81318  | 37 | 11 | 51412108  | 51412108  | Missense_Mutation | SNP | C | T | 35  | 80  | c.288G>A  | c.(286-288)ATG>ATA   | p.M96I   |
| Pat_66 | Pre-Treatment | OR4P4     | 81300  | 37 | 11 | 55405837  | 55405837  | Missense_Mutation | SNP | G | A | 48  | 148 | c.4G>A    | c.(4-6)GAA>AAA       | p.E2K    |
| Pat_66 | Pre-Treatment | OR10AG1   | 282770 | 37 | 11 | 55735269  | 55735269  | Missense_Mutation | SNP | C | T | 16  | 38  | c.671G>A  | c.(670-672)GGA>GAA   | p.G224E  |
| Pat_66 | Pre-Treatment | OR10AG1   | 282770 | 37 | 11 | 55735468  | 55735468  | Missense_Mutation | SNP | G | A | 27  | 48  | c.472C>T  | c.(472-474)CCC>TCC   | p.P158S  |

|        |               |          |        |    |    |           |           |                   |     |    |    |     |     |                 |                      |                |
|--------|---------------|----------|--------|----|----|-----------|-----------|-------------------|-----|----|----|-----|-----|-----------------|----------------------|----------------|
| Pat_66 | Pre-Treatment | OR8H3    | 390152 | 37 | 11 | 55889867  | 55889867  | Missense_Mutation | SNP | G  | A  | 93  | 217 | c.19G>A         | c.(19-21)GAC>AAC     | p.D7N          |
| Pat_66 | Pre-Treatment | LRR55    | 219527 | 37 | 11 | 56949959  | 56949959  | Missense_Mutation | SNP | C  | T  | 28  | 58  | c.592C>T        | c.(592-594)CCC>TCC   | p.P198S        |
| Pat_66 | Pre-Treatment | TCN1     | 6947   | 37 | 11 | 59623449  | 59623449  | Missense_Mutation | SNP | G  | A  | 44  | 117 | c.830C>T        | c.(829-831)TCT>TTT   | p.S277F        |
| Pat_66 | Pre-Treatment | SLC22A25 | 387601 | 37 | 11 | 62997084  | 62997084  | Missense_Mutation | SNP | C  | T  | 10  | 55  | c.41G>A         | c.(40-42)GGG>GAG     | p.G14E         |
| Pat_66 | Pre-Treatment | RTN3     | 10313  | 37 | 11 | 63488139  | 63488139  | Missense_Mutation | SNP | C  | T  | 21  | 97  | c.2165C>T       | c.(2164-2166)CCT>CTT | p.P722L        |
| Pat_66 | Pre-Treatment | C11orf84 | 144097 | 37 | 11 | 63585435  | 63585435  | Missense_Mutation | SNP | G  | A  | 5   | 65  | c.286G>A        | c.(286-288)GCT>ACT   | p.A96T         |
| Pat_66 | Pre-Treatment | SLC22A11 | 55867  | 37 | 11 | 64323790  | 64323790  | Missense_Mutation | SNP | G  | A  | 25  | 62  | c.319G>A        | c.(319-321)GAA>AAA   | p.E107K        |
| Pat_66 | Pre-Treatment | ATG2A    | 23130  | 37 | 11 | 64673934  | 64673934  | Missense_Mutation | SNP | G  | A  | 20  | 44  | c.3055C>T       | c.(3055-3057)CCA>TCA | p.P1019S       |
| Pat_66 | Pre-Treatment | SLC22A20 | 440044 | 37 | 11 | 64981843  | 64981843  | Missense_Mutation | SNP | C  | T  | 38  | 28  | c.422C>T        | c.(421-423)TCC>TTC   | p.S141F        |
| Pat_66 | Pre-Treatment | CORO1B   | 57175  | 37 | 11 | 67209258  | 67209258  | Nonsense_Mutation | SNP | G  | A  | 4   | 127 | c.400C>T        | c.(400-402)CGA>TGA   | p.R134*        |
| Pat_66 | Pre-Treatment | GSTP1    | 2950   | 37 | 11 | 67354022  | 67354022  | Missense_Mutation | SNP | C  | T  | 13  | 31  | c.607C>T        | c.(607-609)CCC>TCC   | p.P203S        |
| Pat_66 | Pre-Treatment | CPT1A    | 1374   | 37 | 11 | 68542901  | 68542901  | Splice_Site       | SNP | C  | T  | 40  | 103 | c.1459_splice   | c.e13-1              | p.Y487_splice  |
| Pat_66 | Pre-Treatment | MRGPRD   | 116512 | 37 | 11 | 68747555  | 68747555  | Missense_Mutation | SNP | G  | A  | 16  | 40  | c.901C>T        | c.(901-903)CGC>TGC   | p.R301C        |
| Pat_66 | Pre-Treatment | C2CD3    | 26005  | 37 | 11 | 73806308  | 73806308  | Missense_Mutation | SNP | G  | A  | 107 | 79  | c.3125C>T       | c.(3124-3126)TCC>TTC | p.S1042F       |
| Pat_66 | Pre-Treatment | WNT11    | 7481   | 37 | 11 | 75902646  | 75902646  | Missense_Mutation | SNP | C  | T  | 36  | 59  | c.852G>A        | c.(850-852)ATG>ATA   | p.M284I        |
| Pat_66 | Pre-Treatment | MYO7A    | 4647   | 37 | 11 | 76900471  | 76900472  | Missense_Mutation | DNP | TC | AT | 23  | 92  | :.3586_3587TC>A | c.(3586-3588)TCT>ATT | p.S1196I       |
| Pat_66 | Pre-Treatment | GDPD4    | 220032 | 37 | 11 | 76944140  | 76944140  | Missense_Mutation | SNP | G  | A  | 28  | 79  | c.1319C>T       | c.(1318-1320)TCC>TTC | p.S440F        |
| Pat_66 | Pre-Treatment | THRSP    | 7069   | 37 | 11 | 77774983  | 77774983  | Missense_Mutation | SNP | G  | A  | 4   | 92  | c.56G>A         | c.(55-57)CGG>CAG     | p.R19Q         |
| Pat_66 | Pre-Treatment | CCDC83   | 220047 | 37 | 11 | 85584267  | 85584267  | Missense_Mutation | SNP | G  | A  | 13  | 41  | c.109G>A        | c.(109-111)GAA>AAA   | p.E37K         |
| Pat_66 | Pre-Treatment | CCDC81   | 60494  | 37 | 11 | 86098570  | 86098570  | Missense_Mutation | SNP | C  | T  | 84  | 56  | c.154C>T        | c.(154-156)CCA>TCA   | p.P52S         |
| Pat_66 | Pre-Treatment | TRIM49   | 57093  | 37 | 11 | 89531599  | 89531599  | Missense_Mutation | SNP | C  | A  | 23  | 105 | c.1058G>T       | c.(1057-1059)TGG>TTG | p.W353L        |
| Pat_66 | Pre-Treatment | SLC36A4  | 120103 | 37 | 11 | 92916023  | 92916023  | Missense_Mutation | SNP | G  | A  | 45  | 139 | c.308C>T        | c.(307-309)TCT>TTT   | p.S103F        |
| Pat_66 | Pre-Treatment | CCDC67   | 159989 | 37 | 11 | 93088694  | 93088694  | Nonsense_Mutation | SNP | C  | T  | 17  | 45  | c.187C>T        | c.(187-189)CAG>TAG   | p.Q63*         |
| Pat_66 | Pre-Treatment | CNTN5    | 53942  | 37 | 11 | 100061937 | 100061937 | Missense_Mutation | SNP | G  | A  | 19  | 56  | c.1660G>A       | c.(1660-1662)GAA>AAA | p.E554K        |
| Pat_66 | Pre-Treatment | C11orf65 | 160140 | 37 | 11 | 108256687 | 108256687 | Nonsense_Mutation | SNP | C  | T  | 103 | 225 | c.747G>A        | c.(745-747)TGG>TGA   | p.W249*        |
| Pat_66 | Pre-Treatment | POU2AF1  | 5450   | 37 | 11 | 111228415 | 111228415 | Missense_Mutation | SNP | C  | T  | 6   | 16  | c.211G>A        | c.(211-213)GAA>AAA   | p.E71K         |
| Pat_66 | Pre-Treatment | TTC12    | 54970  | 37 | 11 | 113234613 | 113234613 | Missense_Mutation | SNP | C  | T  | 21  | 71  | c.1780C>T       | c.(1780-1782)CAT>TAT | p.H594Y        |
| Pat_66 | Pre-Treatment | FAM55A   | 120400 | 37 | 11 | 114400973 | 114400973 | Missense_Mutation | SNP | C  | T  | 26  | 67  | c.331G>A        | c.(331-333)GAG>AAG   | p.E111K        |
| Pat_66 | Pre-Treatment | DSCAML1  | 57453  | 37 | 11 | 117299054 | 117299054 | Missense_Mutation | SNP | G  | A  | 33  | 96  | c.6332C>T       | c.(6331-6333)ACC>ATC | p.T211I        |
| Pat_66 | Pre-Treatment | TMPRSS13 | 84000  | 37 | 11 | 117789469 | 117789469 | Missense_Mutation | SNP | G  | A  | 30  | 87  | c.106C>T        | c.(106-108)CCA>TCA   | p.P36S         |
| Pat_66 | Pre-Treatment | TMPRSS13 | 84000  | 37 | 11 | 117789522 | 117789522 | Missense_Mutation | SNP | C  | T  | 34  | 75  | c.53G>A         | c.(52-54)GGA>GAA     | p.G18E         |
| Pat_66 | Pre-Treatment | IL10RA   | 3587   | 37 | 11 | 117870019 | 117870019 | Missense_Mutation | SNP | C  | T  | 71  | 39  | c.1400C>T       | c.(1399-1401)TCG>TTG | p.S467L        |
| Pat_66 | Pre-Treatment | MLL      | 4297   | 37 | 11 | 118342464 | 118342464 | Missense_Mutation | SNP | C  | T  | 24  | 61  | c.590C>T        | c.(589-591)TCC>TTC   | p.S197F        |
| Pat_66 | Pre-Treatment | BCL9L    | 283149 | 37 | 11 | 118773200 | 118773200 | Nonsense_Mutation | SNP | C  | A  | 4   | 45  | c.1252G>T       | c.(1252-1254)GAG>TAG | p.E418*        |
| Pat_66 | Pre-Treatment | TRIM29   | 23650  | 37 | 11 | 120008255 | 120008255 | Missense_Mutation | SNP | G  | A  | 16  | 79  | c.485C>T        | c.(484-486)TCA>TTA   | p.S162L        |
| Pat_66 | Pre-Treatment | POU2F3   | 25833  | 37 | 11 | 120170352 | 120170352 | Missense_Mutation | SNP | C  | T  | 50  | 142 | c.278C>T        | c.(277-279)CCG>CTG   | p.P93L         |
| Pat_66 | Pre-Treatment | TECTA    | 7007   | 37 | 11 | 120998545 | 120998545 | Missense_Mutation | SNP | C  | T  | 72  | 119 | c.1859C>T       | c.(1858-1860)TCG>TTG | p.S620L        |
| Pat_66 | Pre-Treatment | OR10S1   | 219873 | 37 | 11 | 123847618 | 123847618 | Missense_Mutation | SNP | C  | T  | 53  | 35  | c.781G>A        | c.(781-783)GGG>AGG   | p.G261R        |
| Pat_66 | Pre-Treatment | CACNA1C  | 775    | 37 | 12 | 2714297   | 2714297   | Missense_Mutation | SNP | G  | A  | 30  | 106 | c.3071G>A       | c.(3070-3072)AGG>AAG | p.R1024K       |
| Pat_66 | Pre-Treatment | CACNA1C  | 775    | 37 | 12 | 2794921   | 2794921   | Missense_Mutation | SNP | G  | A  | 23  | 97  | c.5842G>A       | c.(5842-5844)GAA>AAA | p.E1948K       |
| Pat_66 | Pre-Treatment | NRIP2    | 83714  | 37 | 12 | 2939989   | 2939989   | Missense_Mutation | SNP | C  | T  | 31  | 153 | c.380G>A        | c.(379-381)GGA>GAA   | p.G127E        |
| Pat_66 | Pre-Treatment | CHD4     | 1108   | 37 | 12 | 6702276   | 6702276   | Missense_Mutation | SNP | A  | C  | 84  | 80  | c.2633T>G       | c.(2632-2634)CTG>CGG | p.L878R        |
| Pat_66 | Pre-Treatment | ACRBP    | 84519  | 37 | 12 | 6753751   | 6753751   | Nonsense_Mutation | SNP | G  | A  | 30  | 93  | c.496C>T        | c.(496-498)CAG>TAG   | p.Q166*        |
| Pat_66 | Pre-Treatment | ACSM4    | 341392 | 37 | 12 | 7457006   | 7457006   | Missense_Mutation | SNP | C  | T  | 97  | 356 | c.79C>T         | c.(79-81)CAC>TAC     | p.H27Y         |
| Pat_66 | Pre-Treatment | CD163L1  | 283316 | 37 | 12 | 7585299   | 7585299   | Missense_Mutation | SNP | C  | T  | 38  | 144 | c.479G>A        | c.(478-480)GGA>GAA   | p.G160E        |
| Pat_66 | Pre-Treatment | CD163    | 9332   | 37 | 12 | 7632593   | 7632593   | Splice_Site       | SNP | C  | T  | 9   | 55  | c.3344_splice   | c.e16-1              | p.E1115_splice |
| Pat_66 | Pre-Treatment | CLEC4C   | 170482 | 37 | 12 | 7883403   | 7883403   | Missense_Mutation | SNP | C  | T  | 113 | 177 | c.487G>A        | c.(487-489)GAA>AAA   | p.E163K        |

|        |               |          |        |    |    |           |           |                   |     |   |   |     |     |            |                        |          |
|--------|---------------|----------|--------|----|----|-----------|-----------|-------------------|-----|---|---|-----|-----|------------|------------------------|----------|
| Pat_66 | Pre-Treatment | PZP      | 5858   | 37 | 12 | 9360916   | 9360916   | Missense_Mutation | SNP | G | A | 37  | 134 | c.22C>T    | c.(22-24)CAT>TAT       | p.H8Y    |
| Pat_66 | Pre-Treatment | GRIN2B   | 2904   | 37 | 12 | 13717329  | 13717329  | Missense_Mutation | SNP | G | A | 52  | 268 | c.2843C>T  | c.(2842-2844)TCC>TTC   | p.S948F  |
| Pat_66 | Pre-Treatment | GUCY2C   | 2984   | 37 | 12 | 14805929  | 14805929  | Missense_Mutation | SNP | C | T | 65  | 263 | c.1490G>A  | c.(1489-1491)CGA>CAA   | p.R497Q  |
| Pat_66 | Pre-Treatment | PTPRO    | 5800   | 37 | 12 | 15677760  | 15677760  | Missense_Mutation | SNP | C | T | 66  | 71  | c.1904C>T  | c.(1903-1905)CCG>CTG   | p.P635L  |
| Pat_66 | Pre-Treatment | SLCO1B3  | 28234  | 37 | 12 | 21015405  | 21015405  | Missense_Mutation | SNP | C | T | 68  | 264 | c.541C>T   | c.(541-543)CGT>TGT     | p.R181C  |
| Pat_66 | Pre-Treatment | PKP2     | 5318   | 37 | 12 | 32949074  | 32949074  | Nonsense_Mutation | SNP | G | A | 42  | 161 | c.2458C>T  | c.(2458-2460)CAG>TAG   | p.Q820*  |
| Pat_66 | Pre-Treatment | PKP2     | 5318   | 37 | 12 | 32975517  | 32975517  | Missense_Mutation | SNP | C | T | 48  | 147 | c.1855G>A  | c.(1855-1857)GAG>AAG   | p.E619K  |
| Pat_66 | Pre-Treatment | PDZRN4   | 29951  | 37 | 12 | 41966248  | 41966248  | Missense_Mutation | SNP | G | A | 36  | 61  | c.1070G>A  | c.(1069-1071)GGA>GAA   | p.G357E  |
| Pat_66 | Pre-Treatment | ADAMTS20 | 80070  | 37 | 12 | 43821115  | 43821115  | Missense_Mutation | SNP | C | T | 17  | 46  | c.4103G>A  | c.(4102-4104)GGA>GAA   | p.G1368E |
| Pat_66 | Pre-Treatment | FAM113B  | 91523  | 37 | 12 | 47629420  | 47629420  | Missense_Mutation | SNP | G | A | 28  | 2   | c.574G>A   | c.(574-576)GAA>AAA     | p.E192K  |
| Pat_66 | Pre-Treatment | COL2A1   | 1280   | 37 | 12 | 48381456  | 48381456  | Missense_Mutation | SNP | C | T | 21  | 2   | c.1159G>A  | c.(1159-1161)GGT>AGT   | p.G387S  |
| Pat_66 | Pre-Treatment | COL2A1   | 1280   | 37 | 12 | 48391659  | 48391659  | Missense_Mutation | SNP | C | T | 157 | 23  | c.424G>A   | c.(424-426)GAA>AAA     | p.E142K  |
| Pat_66 | Pre-Treatment | TROAP    | 10024  | 37 | 12 | 49724474  | 49724474  | Missense_Mutation | SNP | C | T | 28  | 43  | c.1846C>T  | c.(1846-1848)CCA>TCA   | p.P616S  |
| Pat_66 | Pre-Treatment | NCKAP5L  | 57701  | 37 | 12 | 50196918  | 50196918  | Missense_Mutation | SNP | C | T | 4   | 127 | c.154G>A   | c.(154-156)GAA>AAA     | p.E52K   |
| Pat_66 | Pre-Treatment | RACGAP1  | 29127  | 37 | 12 | 50390867  | 50390867  | Missense_Mutation | SNP | G | A | 76  | 13  | c.1000C>T  | c.(1000-1002)CCC>TCC   | p.P334S  |
| Pat_66 | Pre-Treatment | BIN2     | 51411  | 37 | 12 | 51685722  | 51685722  | Nonsense_Mutation | SNP | G | A | 3   | 60  | c.1168C>T  | c.(1168-1170)CGA>TGA   | p.R390*  |
| Pat_66 | Pre-Treatment | SLC4A8   | 9498   | 37 | 12 | 51856106  | 51856106  | Missense_Mutation | SNP | G | A | 4   | 135 | c.1114G>A  | c.(1114-1116)GTA>ATA   | p.V372I  |
| Pat_66 | Pre-Treatment | KRT5     | 3852   | 37 | 12 | 52913609  | 52913609  | Missense_Mutation | SNP | C | T | 155 | 14  | c.472G>A   | c.(472-474)GAC>AAC     | p.D158N  |
| Pat_66 | Pre-Treatment | KRT71    | 112802 | 37 | 12 | 52946833  | 52946833  | Missense_Mutation | SNP | C | T | 45  | 62  | c.29G>A    | c.(28-30)GGA>GAA       | p.G10E   |
| Pat_66 | Pre-Treatment | KRT1     | 3848   | 37 | 12 | 53074098  | 53074098  | Missense_Mutation | SNP | C | A | 4   | 167 | c.35G>T    | c.(34-36)CGA>CTA       | p.R12L   |
| Pat_66 | Pre-Treatment | KRT77    | 374454 | 37 | 12 | 53086344  | 53086344  | Missense_Mutation | SNP | C | T | 28  | 32  | c.1288G>A  | c.(1288-1290)GAC>AAC   | p.D430N  |
| Pat_66 | Pre-Treatment | KRT79    | 338785 | 37 | 12 | 53225263  | 53225263  | Missense_Mutation | SNP | G | A | 74  | 96  | c.625C>T   | c.(625-627)CTT>TTT     | p.L209F  |
| Pat_66 | Pre-Treatment | OR9K2    | 441639 | 37 | 12 | 55524113  | 55524113  | Missense_Mutation | SNP | G | A | 39  | 52  | c.561G>A   | c.(559-561)ATG>ATA     | p.M187I  |
| Pat_66 | Pre-Treatment | PA2G4    | 5036   | 37 | 12 | 56500493  | 56500493  | Missense_Mutation | SNP | G | A | 95  | 14  | c.210G>A   | c.(208-210)ATG>ATA     | p.M70I   |
| Pat_66 | Pre-Treatment | RBMS2    | 5939   | 37 | 12 | 56975929  | 56975929  | Missense_Mutation | SNP | C | T | 4   | 167 | c.866C>T   | c.(865-867)TCG>TTG     | p.S289L  |
| Pat_66 | Pre-Treatment | INHBC    | 3626   | 37 | 12 | 57843650  | 57843650  | Missense_Mutation | SNP | C | T | 36  | 56  | c.904C>T   | c.(904-906)CTC>TTC     | p.L302F  |
| Pat_66 | Pre-Treatment | FRS2     | 10818  | 37 | 12 | 69968724  | 69968724  | Missense_Mutation | SNP | C | A | 4   | 116 | c.1516C>A  | c.(1516-1518)CTG>ATG   | p.L506M  |
| Pat_66 | Pre-Treatment | LRRRC10  | 376132 | 37 | 12 | 70004495  | 70004495  | Missense_Mutation | SNP | G | C | 27  | 4   | c.124C>G   | c.(124-126)CGC>GGC     | p.R42G   |
| Pat_66 | Pre-Treatment | BEST3    | 144453 | 37 | 12 | 70049336  | 70049336  | Missense_Mutation | SNP | G | A | 13  | 23  | c.1358C>T  | c.(1357-1359)TCC>TTC   | p.S453F  |
| Pat_66 | Pre-Treatment | PTPRR    | 5801   | 37 | 12 | 71092066  | 71092066  | Missense_Mutation | SNP | G | A | 31  | 38  | c.1258C>T  | c.(1258-1260)CGC>TGC   | p.R420C  |
| Pat_66 | Pre-Treatment | SLC41A2  | 84102  | 37 | 12 | 105199060 | 105199060 | Missense_Mutation | SNP | C | T | 268 | 58  | c.1592G>A  | c.(1591-1593)GGA>GAA   | p.G531E  |
| Pat_66 | Pre-Treatment | CMKLR1   | 1240   | 37 | 12 | 108686279 | 108686279 | Missense_Mutation | SNP | C | A | 4   | 92  | c.461G>T   | c.(460-462)CGC>CTC     | p.R154L  |
| Pat_66 | Pre-Treatment | ATXN2    | 6311   | 37 | 12 | 111891568 | 111891568 | Missense_Mutation | SNP | C | T | 3   | 47  | c.3826G>A  | c.(3826-3828)GGT>AGT   | p.G1276S |
| Pat_66 | Pre-Treatment | RPH3A    | 22895  | 37 | 12 | 113327831 | 113327831 | Missense_Mutation | SNP | G | A | 232 | 21  | c.1566G>A  | c.(1564-1566)ATG>ATA   | p.M522I  |
| Pat_66 | Pre-Treatment | TBX5     | 6910   | 37 | 12 | 114793909 | 114793909 | Missense_Mutation | SNP | C | T | 66  | 11  | c.985G>A   | c.(985-987)GAA>AAA     | p.E329K  |
| Pat_66 | Pre-Treatment | KSR2     | 283455 | 37 | 12 | 117907512 | 117907512 | Missense_Mutation | SNP | C | T | 11  | 5   | c.2714G>A  | c.(2713-2715)CGA>CAA   | p.R905Q  |
| Pat_66 | Pre-Treatment | GCN1L1   | 10985  | 37 | 12 | 120602516 | 120602516 | Missense_Mutation | SNP | G | A | 4   | 95  | c.1622C>T  | c.(1621-1623)ACT>ATT   | p.T541I  |
| Pat_66 | Pre-Treatment | CLIP1    | 6249   | 37 | 12 | 122839678 | 122839678 | Missense_Mutation | SNP | C | T | 4   | 182 | c.1187G>A  | c.(1186-1188)CGG>CAG   | p.R396Q  |
| Pat_66 | Pre-Treatment | KNTC1    | 9735   | 37 | 12 | 123087161 | 123087161 | Missense_Mutation | SNP | C | T | 9   | 17  | c.4699C>T  | c.(4699-4701)CCT>TCT   | p.P1567S |
| Pat_66 | Pre-Treatment | GPR109A  | 338442 | 37 | 12 | 123187791 | 123187791 | Missense_Mutation | SNP | C | T | 19  | 134 | c.40G>A    | c.(40-42)GAC>AAC       | p.D14N   |
| Pat_66 | Pre-Treatment | GPR109B  | 8843   | 37 | 12 | 123201245 | 123201245 | Missense_Mutation | SNP | C | T | 25  | 42  | c.40G>A    | c.(40-42)GAC>AAC       | p.D14N   |
| Pat_66 | Pre-Treatment | ZNF664   | 144348 | 37 | 12 | 124496836 | 124496836 | Missense_Mutation | SNP | C | T | 16  | 120 | c.145C>T   | c.(145-147)CAT>TAT     | p.H49Y   |
| Pat_66 | Pre-Treatment | TUBA3C   | 7278   | 37 | 13 | 19748014  | 19748014  | Missense_Mutation | SNP | C | T | 94  | 121 | c.1342G>A  | c.(1342-1344)GAA>AAA   | p.E448K  |
| Pat_66 | Pre-Treatment | TPTE2    | 93492  | 37 | 13 | 20000591  | 20000591  | Missense_Mutation | SNP | C | T | 54  | 304 | c.1369G>A  | c.(1369-1371)GAT>AAT   | p.D457N  |
| Pat_66 | Pre-Treatment | LATS2    | 26524  | 37 | 13 | 21563291  | 21563291  | Missense_Mutation | SNP | G | A | 16  | 25  | c.628C>T   | c.(628-630)CCG>TCG     | p.P210S  |
| Pat_66 | Pre-Treatment | SACS     | 26278  | 37 | 13 | 23906683  | 23906683  | Missense_Mutation | SNP | C | T | 49  | 58  | c.11332G>A | c.(11332-11334)GAA>AAA | p.E3778K |
| Pat_66 | Pre-Treatment | SACS     | 26278  | 37 | 13 | 23911221  | 23911221  | Missense_Mutation | SNP | G | A | 43  | 50  | c.6794C>T  | c.(6793-6795)TCC>TTC   | p.S2265F |



|        |               |           |        |    |    |           |           |                   |     |   |   |     |     |               |                        |               |
|--------|---------------|-----------|--------|----|----|-----------|-----------|-------------------|-----|---|---|-----|-----|---------------|------------------------|---------------|
| Pat_66 | Pre-Treatment | TNFRSF19  | 55504  | 37 | 13 | 24200917  | 24200917  | Missense_Mutation | SNP | C | T | 49  | 65  | c.431C>T      | c.(430-432)CCT>CTT     | p.P144L       |
| Pat_66 | Pre-Treatment | ATP12A    | 479    | 37 | 13 | 25275001  | 25275001  | Missense_Mutation | SNP | G | A | 49  | 156 | c.1822G>A     | c.(1822-1824)GAT>AAT   | p.D608N       |
| Pat_66 | Pre-Treatment | RNF17     | 56163  | 37 | 13 | 25367193  | 25367193  | Missense_Mutation | SNP | G | A | 18  | 74  | c.949G>A      | c.(949-951)GAA>AAA     | p.E317K       |
| Pat_66 | Pre-Treatment | FAM123A   | 219287 | 37 | 13 | 25744067  | 25744067  | Missense_Mutation | SNP | C | T | 30  | 51  | c.1691G>A     | c.(1690-1692)GGA>GAA   | p.G564E       |
| Pat_66 | Pre-Treatment | GPR12     | 2835   | 37 | 13 | 27333591  | 27333591  | Missense_Mutation | SNP | G | A | 27  | 159 | c.374C>T      | c.(373-375)TCT>TTT     | p.S125F       |
| Pat_66 | Pre-Treatment | FLT3      | 2322   | 37 | 13 | 28597508  | 28597508  | Missense_Mutation | SNP | C | T | 18  | 66  | c.2397G>A     | c.(2395-2397)ATG>ATA   | p.M799I       |
| Pat_66 | Pre-Treatment | MTUS2     | 23281  | 37 | 13 | 29898806  | 29898806  | Missense_Mutation | SNP | C | T | 12  | 17  | c.2893C>T     | c.(2893-2895)CCT>TCT   | p.P965S       |
| Pat_66 | Pre-Treatment | SLC7A1    | 6541   | 37 | 13 | 30097424  | 30097424  | Missense_Mutation | SNP | G | A | 42  | 225 | c.1028C>T     | c.(1027-1029)TCC>TTC   | p.S343F       |
| Pat_66 | Pre-Treatment | RXFP2     | 122042 | 37 | 13 | 32332428  | 32332428  | Missense_Mutation | SNP | C | T | 147 | 155 | c.128C>T      | c.(127-129)CCT>CTT     | p.P43L        |
| Pat_66 | Pre-Treatment | RXFP2     | 122042 | 37 | 13 | 32367034  | 32367034  | Missense_Mutation | SNP | G | A | 40  | 67  | c.1595G>A     | c.(1594-1596)CGA>CAA   | p.R532Q       |
| Pat_66 | Pre-Treatment | BRCA2     | 675    | 37 | 13 | 32953493  | 32953493  | Missense_Mutation | SNP | C | T | 48  | 53  | c.8794C>T     | c.(8794-8796)CAC>TAC   | p.H2932Y      |
| Pat_66 | Pre-Treatment | KL        | 9365   | 37 | 13 | 33638147  | 33638147  | Missense_Mutation | SNP | G | A | 111 | 114 | c.2863G>A     | c.(2863-2865)GGC>AGC   | p.G955S       |
| Pat_66 | Pre-Treatment | SMAD9     | 4093   | 37 | 13 | 37453501  | 37453501  | Missense_Mutation | SNP | G | A | 22  | 71  | c.326C>T      | c.(325-327)CCG>CTG     | p.P109L       |
| Pat_66 | Pre-Treatment | POSTN     | 10631  | 37 | 13 | 38137477  | 38137477  | Missense_Mutation | SNP | G | A | 16  | 49  | c.2504C>T     | c.(2503-2505)TCT>TTT   | p.S835F       |
| Pat_66 | Pre-Treatment | TRPC4     | 7223   | 37 | 13 | 38320108  | 38320108  | Missense_Mutation | SNP | C | T | 246 | 324 | c.863G>A      | c.(862-864)AGA>AAA     | p.R288K       |
| Pat_66 | Pre-Treatment | FREM2     | 341640 | 37 | 13 | 39264248  | 39264248  | Missense_Mutation | SNP | C | T | 24  | 110 | c.2767C>T     | c.(2767-2769)CAT>TAT   | p.H923Y       |
| Pat_66 | Pre-Treatment | HTR2A     | 3356   | 37 | 13 | 47409577  | 47409577  | Missense_Mutation | SNP | C | T | 48  | 53  | c.811G>A      | c.(811-813)GAT>AAT     | p.D271N       |
| Pat_66 | Pre-Treatment | LOC220429 | 220429 | 37 | 13 | 50467032  | 50467032  | Missense_Mutation | SNP | C | T | 129 | 113 | c.2306C>T     | c.(2305-2307)TCC>TTC   | p.S769F       |
| Pat_66 | Pre-Treatment | ATP7B     | 540    | 37 | 13 | 52524456  | 52524456  | Missense_Mutation | SNP | C | T | 38  | 46  | c.2527G>A     | c.(2527-2529)GGG>AGG   | p.G843R       |
| Pat_66 | Pre-Treatment | CKAP2     | 26586  | 37 | 13 | 53035367  | 53035367  | Missense_Mutation | SNP | C | T | 51  | 62  | c.409C>T      | c.(409-411)CCC>TCC     | p.P137S       |
| Pat_66 | Pre-Treatment | PCDH9     | 5101   | 37 | 13 | 67801017  | 67801017  | Missense_Mutation | SNP | C | T | 31  | 144 | c.1556G>A     | c.(1555-1557)CGA>CAA   | p.R519Q       |
| Pat_66 | Pre-Treatment | DACH1     | 1602   | 37 | 13 | 72063191  | 72063191  | Missense_Mutation | SNP | G | A | 108 | 418 | c.1660C>T     | c.(1660-1662)CCA>TCA   | p.P554S       |
| Pat_66 | Pre-Treatment | C13orf37  | 440145 | 37 | 13 | 73293130  | 73293130  | Missense_Mutation | SNP | G | A | 5   | 303 | c.185C>T      | c.(184-186)TCG>TTG     | p.S62L        |
| Pat_66 | Pre-Treatment | SLITRK1   | 114798 | 37 | 13 | 84455341  | 84455341  | Missense_Mutation | SNP | G | A | 56  | 208 | c.302C>T      | c.(301-303)GCT>GTT     | p.A101V       |
| Pat_66 | Pre-Treatment | CLDN10    | 9071   | 37 | 13 | 96229529  | 96229529  | Missense_Mutation | SNP | C | T | 32  | 55  | c.509C>T      | c.(508-510)TCA>TTA     | p.S170L       |
| Pat_66 | Pre-Treatment | CLYBL     | 171425 | 37 | 13 | 100425206 | 100425206 | Missense_Mutation | SNP | C | T | 65  | 64  | c.191C>T      | c.(190-192)TCC>TTC     | p.S64F        |
| Pat_66 | Pre-Treatment | TMTC4     | 84899  | 37 | 13 | 101287277 | 101287277 | Splice_Site       | SNP | C | A | 4   | 140 | c.1317_splice | c.e10+1                | p.K439_splice |
| Pat_66 | Pre-Treatment | TMTC4     | 84899  | 37 | 13 | 101315295 | 101315295 | Missense_Mutation | SNP | G | A | 76  | 81  | c.418C>T      | c.(418-420)CGG>TGG     | p.R140W       |
| Pat_66 | Pre-Treatment | KDEL1     | 79070  | 37 | 13 | 103449193 | 103449193 | Nonsense_Mutation | SNP | G | A | 22  | 62  | c.349C>T      | c.(349-351)CAA>TAA     | p.Q117*       |
| Pat_66 | Pre-Treatment | GRTP1     | 79774  | 37 | 13 | 114005181 | 114005181 | Missense_Mutation | SNP | C | T | 127 | 157 | c.448G>A      | c.(448-450)GGA>AGA     | p.G150R       |
| Pat_66 | Pre-Treatment | ADPRHL1   | 113622 | 37 | 13 | 114098878 | 114098878 | Missense_Mutation | SNP | G | A | 5   | 231 | c.241C>T      | c.(241-243)CGG>TGG     | p.R81W        |
| Pat_66 | Pre-Treatment | OR4K5     | 79317  | 37 | 14 | 20388989  | 20388989  | Missense_Mutation | SNP | C | T | 93  | 433 | c.224C>T      | c.(223-225)TCT>TTT     | p.S75F        |
| Pat_66 | Pre-Treatment | OR4K1     | 79544  | 37 | 14 | 20404108  | 20404108  | Missense_Mutation | SNP | G | A | 46  | 158 | c.283G>A      | c.(283-285)GAG>AAG     | p.E95K        |
| Pat_66 | Pre-Treatment | RPGRIP1   | 57096  | 37 | 14 | 21795853  | 21795853  | Missense_Mutation | SNP | C | T | 34  | 97  | c.2782C>T     | c.(2782-2784)CCC>TCC   | p.P928S       |
| Pat_66 | Pre-Treatment | CDH24     | 64403  | 37 | 14 | 23518872  | 23518872  | Missense_Mutation | SNP | C | T | 18  | 66  | c.1675G>A     | c.(1675-1677)GGC>AGC   | p.G559S       |
| Pat_66 | Pre-Treatment | MYH6      | 4624   | 37 | 14 | 23856757  | 23856757  | Missense_Mutation | SNP | G | A | 36  | 73  | c.4631C>T     | c.(4630-4632)TCA>TTA   | p.S1544L      |
| Pat_66 | Pre-Treatment | DCAF11    | 80344  | 37 | 14 | 24587633  | 24587633  | Missense_Mutation | SNP | G | A | 6   | 228 | c.614G>A      | c.(613-615)CGT>CAT     | p.R205H       |
| Pat_66 | Pre-Treatment | CTSG      | 1511   | 37 | 14 | 25043589  | 25043589  | Missense_Mutation | SNP | C | T | 69  | 135 | c.456G>A      | c.(454-456)ATG>ATA     | p.M152I       |
| Pat_66 | Pre-Treatment | TBPL2     | 387332 | 37 | 14 | 55895616  | 55895616  | Missense_Mutation | SNP | C | T | 112 | 80  | c.865G>A      | c.(865-867)GAT>AAT     | p.D289N       |
| Pat_66 | Pre-Treatment | DAAM1     | 23002  | 37 | 14 | 59835509  | 59835509  | Missense_Mutation | SNP | C | T | 39  | 114 | c.3169C>T     | c.(3169-3171)CGC>TGC   | p.R1057C      |
| Pat_66 | Pre-Treatment | SYNE2     | 23224  | 37 | 14 | 64494362  | 64494362  | Missense_Mutation | SNP | C | T | 66  | 55  | c.6565C>T     | c.(6565-6567)CTC>TTC   | p.L2189F      |
| Pat_66 | Pre-Treatment | SYNE2     | 23224  | 37 | 14 | 64656922  | 64656922  | Missense_Mutation | SNP | G | A | 4   | 124 | c.18005G>A    | c.(18004-18006)CGT>CAT | p.R6002H      |
| Pat_66 | Pre-Treatment | ADAM21    | 8747   | 37 | 14 | 70924496  | 70924496  | Missense_Mutation | SNP | G | A | 27  | 108 | c.280G>A      | c.(280-282)GAT>AAT     | p.D94N        |
| Pat_66 | Pre-Treatment | ADAM20    | 8748   | 37 | 14 | 70990444  | 70990444  | Missense_Mutation | SNP | A | G | 49  | 119 | c.1181T>C     | c.(1180-1182)CTT>CCT   | p.L394P       |
| Pat_66 | Pre-Treatment | RGS6      | 9628   | 37 | 14 | 72976951  | 72976951  | Missense_Mutation | SNP | G | A | 70  | 183 | c.1055G>A     | c.(1054-1056)CGA>CAA   | p.R352Q       |
| Pat_66 | Pre-Treatment | RBM25     | 58517  | 37 | 14 | 73570131  | 73570131  | Missense_Mutation | SNP | C | T | 37  | 26  | c.1099C>T     | c.(1099-1101)CGT>TGT   | p.R367C       |
| Pat_66 | Pre-Treatment | PAPLN     | 89932  | 37 | 14 | 73729141  | 73729141  | Missense_Mutation | SNP | G | A | 8   | 19  | c.2329G>A     | c.(2329-2331)GGC>AGC   | p.G777S       |

|        |               |         |        |    |    |           |           |                   |     |    |    |     |     |                                      |                      |          |
|--------|---------------|---------|--------|----|----|-----------|-----------|-------------------|-----|----|----|-----|-----|--------------------------------------|----------------------|----------|
| Pat_66 | Pre-Treatment | YLPM1   | 56252  | 37 | 14 | 75230767  | 75230767  | Missense_Mutation | SNP | C  | T  | 48  | 117 | c.575C>T                             | c.(574-576)TCG>TTG   | p.S192L  |
| Pat_66 | Pre-Treatment | NEK9    | 91754  | 37 | 14 | 75568371  | 75568371  | Missense_Mutation | SNP | G  | A  | 4   | 181 | c.1829C>T                            | c.(1828-1830)GCT>GTT | p.A610V  |
| Pat_66 | Pre-Treatment | NRXN3   | 9369   | 37 | 14 | 79181123  | 79181123  | Missense_Mutation | SNP | G  | A  | 7   | 555 | c.566G>A                             | c.(565-567)CGC>CAC   | p.R189H  |
| Pat_66 | Pre-Treatment | FLRT2   | 23768  | 37 | 14 | 86088927  | 86088927  | Missense_Mutation | SNP | C  | T  | 93  | 179 | c.1069C>T                            | c.(1069-1071)CTT>TTT | p.L357F  |
| Pat_66 | Pre-Treatment | KCNK10  | 54207  | 37 | 14 | 88651959  | 88651959  | Missense_Mutation | SNP | C  | T  | 34  | 91  | c.1537G>A                            | c.(1537-1539)GAG>AAG | p.E513K  |
| Pat_66 | Pre-Treatment | EML5    | 161436 | 37 | 14 | 89082537  | 89082537  | Missense_Mutation | SNP | C  | T  | 5   | 368 | c.5846G>A                            | c.(5845-5847)CGA>CAA | p.R1949Q |
| Pat_66 | Pre-Treatment | DDX24   | 57062  | 37 | 14 | 94528802  | 94528802  | Missense_Mutation | SNP | G  | A  | 35  | 84  | c.884C>T                             | c.(883-885)TCT>TTT   | p.S295F  |
| Pat_66 | Pre-Treatment | PPP4R4  | 57718  | 37 | 14 | 94741717  | 94741717  | Missense_Mutation | SNP | C  | T  | 100 | 309 | c.2456C>T                            | c.(2455-2457)TCA>TTA | p.S819L  |
| Pat_66 | Pre-Treatment | BDKRB2  | 624    | 37 | 14 | 96707554  | 96707554  | Missense_Mutation | SNP | C  | T  | 46  | 17  | c.889C>T                             | c.(889-891)CGC>TGC   | p.R297C  |
| Pat_66 | Pre-Treatment | EML1    | 2009   | 37 | 14 | 100331938 | 100331938 | Missense_Mutation | SNP | C  | T  | 16  | 57  | c.338C>T                             | c.(337-339)TCC>TTC   | p.S113F  |
| Pat_66 | Pre-Treatment | WDR25   | 79446  | 37 | 14 | 100934439 | 100934439 | Missense_Mutation | SNP | C  | T  | 79  | 160 | c.904C>T                             | c.(904-906)CCC>TCC   | p.P302S  |
| Pat_66 | Pre-Treatment | DYNC1H1 | 1778   | 37 | 14 | 102478718 | 102478718 | Missense_Mutation | SNP | C  | T  | 35  | 105 | c.6925C>T                            | c.(6925-6927)CCA>TCA | p.P2309S |
| Pat_66 | Pre-Treatment | RCOR1   | 23186  | 37 | 14 | 103188553 | 103188553 | Missense_Mutation | SNP | G  | A  | 84  | 58  | c.1210G>A                            | c.(1210-1212)GCA>ACA | p.A404T  |
| Pat_66 | Pre-Treatment | MARK3   | 4140   | 37 | 14 | 103958212 | 103958212 | Missense_Mutation | SNP | G  | A  | 4   | 132 | c.1685G>A                            | c.(1684-1686)CGT>CAT | p.R562H  |
| Pat_66 | Pre-Treatment | TDRD9   | 122402 | 37 | 14 | 104516010 | 104516010 | Nonsense_Mutation | SNP | G  | A  | 7   | 17  | c.4040G>A                            | c.(4039-4041)TGG>TAG | p.W1347* |
| Pat_66 | Pre-Treatment | KIF26A  | 26153  | 37 | 14 | 104642925 | 104642925 | Missense_Mutation | SNP | C  | T  | 9   | 37  | c.3800C>T                            | c.(3799-3801)TCC>TTC | p.S1267F |
| Pat_66 | Pre-Treatment | AHNAK2  | 113146 | 37 | 14 | 105416293 | 105416293 | Missense_Mutation | SNP | G  | A  | 267 | 192 | c.5495C>T                            | c.(5494-5496)TCG>TTG | p.S1832L |
| Pat_66 | Pre-Treatment | MKRN3   | 7681   | 37 | 15 | 23811414  | 23811414  | Missense_Mutation | SNP | C  | G  | 38  | 37  | c.485C>G                             | c.(484-486)GCT>GGT   | p.A162G  |
| Pat_66 | Pre-Treatment | NDN     | 4692   | 37 | 15 | 23931560  | 23931560  | Missense_Mutation | SNP | C  | T  | 16  | 41  | c.805G>A                             | c.(805-807)GAA>AAA   | p.E269K  |
| Pat_66 | Pre-Treatment | OCA2    | 4948   | 37 | 15 | 28273183  | 28273184  | Missense_Mutation | DNP | GG | AA | 81  | 94  | c.348_349CC>TT.(346-351)TACCAT>TATTA |                      | p.H117Y  |
| Pat_66 | Pre-Treatment | RYR3    | 6263   | 37 | 15 | 33765692  | 33765692  | Missense_Mutation | SNP | G  | A  | 17  | 101 | c.124G>A                             | c.(124-126)GGA>AGA   | p.G42R   |
| Pat_66 | Pre-Treatment | RYR3    | 6263   | 37 | 15 | 33831613  | 33831613  | Nonsense_Mutation | SNP | C  | T  | 12  | 14  | c.496C>T                             | c.(496-498)CGA>TGA   | p.R166*  |
| Pat_66 | Pre-Treatment | RYR3    | 6263   | 37 | 15 | 34040343  | 34040343  | Missense_Mutation | SNP | G  | A  | 52  | 116 | c.8018G>A                            | c.(8017-8019)CGA>CAA | p.R2673Q |
| Pat_66 | Pre-Treatment | PLCB2   | 5330   | 37 | 15 | 40585831  | 40585831  | Missense_Mutation | SNP | C  | T  | 72  | 60  | c.2156G>A                            | c.(2155-2157)CGA>CAA | p.R719Q  |
| Pat_66 | Pre-Treatment | ATP8B4  | 79895  | 37 | 15 | 50223388  | 50223388  | Missense_Mutation | SNP | C  | T  | 31  | 122 | c.1570G>A                            | c.(1570-1572)GGA>AGA | p.G524R  |
| Pat_66 | Pre-Treatment | SCG3    | 29106  | 37 | 15 | 51984482  | 51984482  | Missense_Mutation | SNP | G  | A  | 57  | 86  | c.817G>A                             | c.(817-819)GAA>AAA   | p.E273K  |
| Pat_66 | Pre-Treatment | UNC13C  | 440279 | 37 | 15 | 54306599  | 54306599  | Missense_Mutation | SNP | G  | A  | 5   | 57  | c.1499G>A                            | c.(1498-1500)AGA>AAA | p.R500K  |
| Pat_66 | Pre-Treatment | UNC13C  | 440279 | 37 | 15 | 54914563  | 54914563  | Missense_Mutation | SNP | C  | T  | 67  | 128 | c.6145C>T                            | c.(6145-6147)CAT>TAT | p.H2049Y |
| Pat_66 | Pre-Treatment | CGNL1   | 84952  | 37 | 15 | 57731680  | 57731680  | Missense_Mutation | SNP | G  | A  | 52  | 137 | c.1483G>A                            | c.(1483-1485)GAG>AAG | p.E495K  |
| Pat_66 | Pre-Treatment | LACTB   | 114294 | 37 | 15 | 63419580  | 63419580  | Missense_Mutation | SNP | C  | T  | 86  | 70  | c.644C>T                             | c.(643-645)TCC>TTC   | p.S215F  |
| Pat_66 | Pre-Treatment | RBPMS2  | 348093 | 37 | 15 | 65040652  | 65040652  | Missense_Mutation | SNP | G  | A  | 4   | 111 | c.533C>T                             | c.(532-534)ACT>ATT   | p.T178I  |
| Pat_66 | Pre-Treatment | DPP8    | 54878  | 37 | 15 | 65739250  | 65739250  | Missense_Mutation | SNP | G  | A  | 139 | 135 | c.2669C>T                            | c.(2668-2670)TCA>TTA | p.S890L  |
| Pat_66 | Pre-Treatment | SMAD6   | 4091   | 37 | 15 | 67073466  | 67073466  | Nonsense_Mutation | SNP | C  | T  | 15  | 27  | c.1084C>T                            | c.(1084-1086)CAG>TAG | p.Q362*  |
| Pat_66 | Pre-Treatment | IQCH    | 64799  | 37 | 15 | 67664995  | 67664995  | Missense_Mutation | SNP | G  | A  | 29  | 256 | c.1300G>A                            | c.(1300-1302)GCC>ACC | p.A434T  |
| Pat_66 | Pre-Treatment | IQCH    | 64799  | 37 | 15 | 67713830  | 67713830  | Missense_Mutation | SNP | G  | A  | 67  | 48  | c.2420G>A                            | c.(2419-2421)GGA>GAA | p.G807E  |
| Pat_66 | Pre-Treatment | LBXCOR1 | 390598 | 37 | 15 | 68123158  | 68123158  | Missense_Mutation | SNP | G  | A  | 221 | 228 | c.2386G>A                            | c.(2386-2388)GAA>AAA | p.E796K  |
| Pat_66 | Pre-Treatment | ITGA11  | 22801  | 37 | 15 | 68603395  | 68603395  | Nonsense_Mutation | SNP | C  | T  | 17  | 18  | c.3111G>A                            | c.(3109-3111)TGG>TGA | p.W1037* |
| Pat_66 | Pre-Treatment | LRRRC49 | 54839  | 37 | 15 | 71300951  | 71300951  | Missense_Mutation | SNP | C  | T  | 12  | 32  | c.1403C>T                            | c.(1402-1404)TCT>TTT | p.S468F  |
| Pat_66 | Pre-Treatment | CT62    | 196993 | 37 | 15 | 71403603  | 71403603  | Missense_Mutation | SNP | C  | T  | 34  | 62  | c.298G>A                             | c.(298-300)GAA>AAA   | p.E100K  |
| Pat_66 | Pre-Treatment | LMAN1L  | 79748  | 37 | 15 | 75114194  | 75114194  | Missense_Mutation | SNP | C  | T  | 43  | 115 | c.1084C>T                            | c.(1084-1086)CCA>TCA | p.P362S  |
| Pat_66 | Pre-Treatment | LMAN1L  | 79748  | 37 | 15 | 75115013  | 75115013  | Missense_Mutation | SNP | G  | A  | 61  | 42  | c.1162G>A                            | c.(1162-1164)GGA>AGA | p.G388R  |
| Pat_66 | Pre-Treatment | ADAMTS7 | 11173  | 37 | 15 | 79059783  | 79059783  | Missense_Mutation | SNP | C  | T  | 21  | 36  | c.2797G>A                            | c.(2797-2799)GAA>AAA | p.E933K  |
| Pat_66 | Pre-Treatment | IL16    | 3603   | 37 | 15 | 81585092  | 81585092  | Missense_Mutation | SNP | T  | G  | 35  | 24  | c.1616T>G                            | c.(1615-1617)ATC>AGC | p.I539S  |
| Pat_66 | Pre-Treatment | FSD2    | 123722 | 37 | 15 | 83431013  | 83431013  | Missense_Mutation | SNP | C  | T  | 13  | 71  | c.1838G>A                            | c.(1837-1839)GGA>GAA | p.G613E  |
| Pat_66 | Pre-Treatment | BNC1    | 646    | 37 | 15 | 83926294  | 83926294  | Missense_Mutation | SNP | C  | T  | 39  | 114 | c.2885G>A                            | c.(2884-2886)GGC>GAC | p.G962D  |
| Pat_66 | Pre-Treatment | BNC1    | 646    | 37 | 15 | 83933555  | 83933555  | Nonsense_Mutation | SNP | T  | A  | 29  | 88  | c.448A>T                             | c.(448-450)AAG>TAG   | p.K150*  |
| Pat_66 | Pre-Treatment | SH3GL3  | 6457   | 37 | 15 | 84241415  | 84241415  | Nonsense_Mutation | SNP | C  | T  | 5   | 57  | c.430C>T                             | c.(430-432)CAG>TAG   | p.Q144*  |

|        |               |          |        |    |    |          |          |                   |     |    |    |     |     |                 |                         |          |
|--------|---------------|----------|--------|----|----|----------|----------|-------------------|-----|----|----|-----|-----|-----------------|-------------------------|----------|
| Pat_66 | Pre-Treatment | NTRK3    | 4916   | 37 | 15 | 88420258 | 88420258 | Missense_Mutation | SNP | C  | T  | 52  | 99  | c.2428G>A       | c.(2428-2430)GAA>AAA    | p.E810K  |
| Pat_66 | Pre-Treatment | MFG8     | 4240   | 37 | 15 | 89453073 | 89453073 | Missense_Mutation | SNP | G  | A  | 115 | 110 | c.155C>T        | c.(154-156)TCG>TTG      | p.S52L   |
| Pat_66 | Pre-Treatment | VPS33B   | 26276  | 37 | 15 | 91548939 | 91548939 | Missense_Mutation | SNP | G  | A  | 4   | 235 | c.1015C>T       | c.(1015-1017)CGC>TGC    | p.R339C  |
| Pat_66 | Pre-Treatment | C16orf11 | 146325 | 37 | 16 | 615167   | 615167   | Missense_Mutation | SNP | C  | T  | 41  | 26  | c.1576C>T       | c.(1576-1578)CCA>TCA    | p.P526S  |
| Pat_66 | Pre-Treatment | MSLNL    | 401827 | 37 | 16 | 830540   | 830540   | Missense_Mutation | SNP | G  | A  | 7   | 321 | c.461C>T        | c.(460-462)CCG>CTG      | p.P154L  |
| Pat_66 | Pre-Treatment | CASKIN1  | 57524  | 37 | 16 | 2235338  | 2235339  | Missense_Mutation | DNP | CC | TT | 10  | 51  | c.1119_1120GG>A | c.(1117-1122)GAGGAG>GAA | p.E374K  |
| Pat_66 | Pre-Treatment | SRRM2    | 23524  | 37 | 16 | 2816986  | 2816986  | Missense_Mutation | SNP | G  | A  | 4   | 151 | c.6457G>A       | c.(6457-6459)GGC>AGC    | p.G2153S |
| Pat_66 | Pre-Treatment | CREBBP   | 1387   | 37 | 16 | 3860755  | 3860755  | Missense_Mutation | SNP | G  | A  | 53  | 18  | c.824C>T        | c.(823-825)CCA>CTA      | p.P275L  |
| Pat_66 | Pre-Treatment | SEC14L5  | 9717   | 37 | 16 | 5040771  | 5040771  | Missense_Mutation | SNP | C  | T  | 25  | 56  | c.349C>T        | c.(349-351)CAC>TAC      | p.H117Y  |
| Pat_66 | Pre-Treatment | GRIN2A   | 2903   | 37 | 16 | 9857682  | 9857682  | Missense_Mutation | SNP | A  | G  | 22  | 74  | c.3719T>C       | c.(3718-3720)CTG>CCG    | p.L1240P |
| Pat_66 | Pre-Treatment | GRIN2A   | 2903   | 37 | 16 | 9862737  | 9862737  | Missense_Mutation | SNP | G  | A  | 47  | 161 | c.2566C>T       | c.(2566-2568)CGG>TGG    | p.R856W  |
| Pat_66 | Pre-Treatment | TEKT5    | 146279 | 37 | 16 | 10769907 | 10769907 | Nonsense_Mutation | SNP | C  | T  | 40  | 143 | c.995G>A        | c.(994-996)TGG>TAG      | p.W332*  |
| Pat_66 | Pre-Treatment | FAM18A   | 780776 | 37 | 16 | 10867934 | 10867934 | Missense_Mutation | SNP | C  | T  | 14  | 23  | c.286G>A        | c.(286-288)GAA>AAA      | p.E96K   |
| Pat_66 | Pre-Treatment | ABCC6P1  | 653190 | 37 | 16 | 18603920 | 18603920 | Missense_Mutation | SNP | C  | T  | 7   | 29  | c.887C>T        | c.(886-888)GCC>GTC      | p.A296V  |
| Pat_66 | Pre-Treatment | SMG1     | 23049  | 37 | 16 | 18844335 | 18844335 | Missense_Mutation | SNP | G  | A  | 258 | 130 | c.8719C>T       | c.(8719-8721)CTT>TTT    | p.L2907F |
| Pat_66 | Pre-Treatment | TMC5     | 79838  | 37 | 16 | 19490792 | 19490792 | Missense_Mutation | SNP | C  | T  | 242 | 124 | c.2209C>T       | c.(2209-2211)CTT>TTT    | p.L737F  |
| Pat_66 | Pre-Treatment | DNAH3    | 55567  | 37 | 16 | 20974776 | 20974776 | Missense_Mutation | SNP | C  | T  | 10  | 51  | c.10430G>A      | c.(10429-10431)CGA>CAA  | p.R3477Q |
| Pat_66 | Pre-Treatment | DNAH3    | 55567  | 37 | 16 | 20981309 | 20981309 | Missense_Mutation | SNP | C  | T  | 30  | 65  | c.8263G>A       | c.(8263-8265)GAA>AAA    | p.E2755K |
| Pat_66 | Pre-Treatment | DNAH3    | 55567  | 37 | 16 | 21042407 | 21042407 | Nonsense_Mutation | SNP | C  | T  | 21  | 64  | c.5399G>A       | c.(5398-5400)TGG>TAG    | p.W1800* |
| Pat_66 | Pre-Treatment | SLC5A11  | 115584 | 37 | 16 | 24902310 | 24902310 | Missense_Mutation | SNP | G  | A  | 81  | 192 | c.785G>A        | c.(784-786)CGA>CAA      | p.R262Q  |
| Pat_66 | Pre-Treatment | HS3ST4   | 9951   | 37 | 16 | 26147561 | 26147561 | Missense_Mutation | SNP | G  | A  | 5   | 41  | c.1363G>A       | c.(1363-1365)GAT>AAT    | p.D455N  |
| Pat_66 | Pre-Treatment | XPO6     | 23214  | 37 | 16 | 28187341 | 28187341 | Missense_Mutation | SNP | G  | A  | 18  | 67  | c.283C>T        | c.(283-285)CTT>TTT      | p.L95F   |
| Pat_66 | Pre-Treatment | CLN3     | 1201   | 37 | 16 | 28493675 | 28493675 | Missense_Mutation | SNP | G  | A  | 17  | 27  | c.935C>T        | c.(934-936)TCC>TTC      | p.S312F  |
| Pat_66 | Pre-Treatment | DOC2A    | 8448   | 37 | 16 | 30020384 | 30020384 | Missense_Mutation | SNP | G  | A  | 30  | 101 | c.460C>T        | c.(460-462)CCC>TCC      | p.P154S  |
| Pat_66 | Pre-Treatment | ZNF764   | 92595  | 37 | 16 | 30567066 | 30567066 | Missense_Mutation | SNP | G  | A  | 3   | 19  | c.676C>T        | c.(676-678)CGT>TGT      | p.R226C  |
| Pat_66 | Pre-Treatment | ZNF689   | 115509 | 37 | 16 | 30616361 | 30616361 | Missense_Mutation | SNP | G  | A  | 4   | 139 | c.727C>T        | c.(727-729)CGG>TGG      | p.R243W  |
| Pat_66 | Pre-Treatment | SRCAP    | 10847  | 37 | 16 | 30736222 | 30736222 | Missense_Mutation | SNP | C  | T  | 95  | 49  | c.5477C>T       | c.(5476-5478)TCG>TTG    | p.S1826L |
| Pat_66 | Pre-Treatment | ZNF267   | 10308  | 37 | 16 | 31927522 | 31927522 | Missense_Mutation | SNP | A  | G  | 7   | 183 | c.1952A>G       | c.(1951-1953)CAG>CGG    | p.Q651R  |
| Pat_66 | Pre-Treatment | ZNF267   | 10308  | 37 | 16 | 31927534 | 31927534 | Missense_Mutation | SNP | C  | G  | 8   | 202 | c.1964C>G       | c.(1963-1965)ACT>AGT    | p.T655S  |
| Pat_66 | Pre-Treatment | ZNF267   | 10308  | 37 | 16 | 31927690 | 31927690 | Missense_Mutation | SNP | G  | A  | 6   | 154 | c.2120G>A       | c.(2119-2121)CGG>CAG    | p.R707Q  |
| Pat_66 | Pre-Treatment | ZNF267   | 10308  | 37 | 16 | 31927702 | 31927702 | Missense_Mutation | SNP | G  | C  | 5   | 156 | c.2132G>C       | c.(2131-2133)AGT>ACT    | p.S711T  |
| Pat_66 | Pre-Treatment | ABCC12   | 94160  | 37 | 16 | 48145507 | 48145507 | Missense_Mutation | SNP | C  | T  | 126 | 439 | c.2191G>A       | c.(2191-2193)GAA>AAA    | p.E731K  |
| Pat_66 | Pre-Treatment | ABCC12   | 94160  | 37 | 16 | 48149436 | 48149436 | Missense_Mutation | SNP | C  | T  | 29  | 70  | c.1879G>A       | c.(1879-1881)GAC>AAC    | p.D627N  |
| Pat_66 | Pre-Treatment | NOD2     | 64127  | 37 | 16 | 50750505 | 50750505 | Missense_Mutation | SNP | G  | A  | 11  | 39  | c.2470G>A       | c.(2470-2472)GAT>AAT    | p.D824N  |
| Pat_66 | Pre-Treatment | MMP2     | 4313   | 37 | 16 | 55523700 | 55523700 | Missense_Mutation | SNP | G  | A  | 4   | 78  | c.1144G>A       | c.(1144-1146)GAT>AAT    | p.D382N  |
| Pat_66 | Pre-Treatment | CES1     | 1066   | 37 | 16 | 55857517 | 55857517 | Missense_Mutation | SNP | C  | T  | 21  | 51  | c.481G>A        | c.(481-483)GAA>AAA      | p.E161K  |
| Pat_66 | Pre-Treatment | NLRC5    | 84166  | 37 | 16 | 57113531 | 57113531 | Missense_Mutation | SNP | G  | A  | 64  | 131 | c.5311G>A       | c.(5311-5313)GAA>AAA    | p.E1771K |
| Pat_66 | Pre-Treatment | SLC9A5   | 6553   | 37 | 16 | 67292224 | 67292224 | Nonsense_Mutation | SNP | G  | A  | 13  | 37  | c.1500G>A       | c.(1498-1500)TGG>TGA    | p.W500*  |
| Pat_66 | Pre-Treatment | WWP2     | 11060  | 37 | 16 | 69967937 | 69967937 | Missense_Mutation | SNP | G  | A  | 4   | 193 | c.1747G>A       | c.(1747-1749)GGA>AGA    | p.G583R  |
| Pat_66 | Pre-Treatment | PDPR     | 55066  | 37 | 16 | 70163019 | 70163019 | Missense_Mutation | SNP | C  | A  | 5   | 234 | c.601C>A        | c.(601-603)CAA>AAA      | p.Q201K  |
| Pat_66 | Pre-Treatment | ZFH3     | 463    | 37 | 16 | 72833968 | 72833968 | Nonsense_Mutation | SNP | G  | A  | 28  | 106 | c.3925C>T       | c.(3925-3927)CGA>TGA    | p.R1309* |
| Pat_66 | Pre-Treatment | CLEC18B  | 497190 | 37 | 16 | 74446997 | 74446997 | Missense_Mutation | SNP | G  | A  | 34  | 25  | c.614C>T        | c.(613-615)TCG>TTG      | p.S205L  |
| Pat_66 | Pre-Treatment | LDHD     | 197257 | 37 | 16 | 75148832 | 75148832 | Missense_Mutation | SNP | C  | T  | 25  | 97  | c.362G>A        | c.(361-363)CGA>CAA      | p.R121Q  |
| Pat_66 | Pre-Treatment | ADAMTS18 | 170692 | 37 | 16 | 77327052 | 77327052 | Missense_Mutation | SNP | G  | A  | 31  | 114 | c.3110C>T       | c.(3109-3111)CCT>CTT    | p.P1037L |
| Pat_66 | Pre-Treatment | ADAMTS18 | 170692 | 37 | 16 | 77389970 | 77389970 | Missense_Mutation | SNP | C  | A  | 4   | 119 | c.1327G>T       | c.(1327-1329)GGT>TGT    | p.G443C  |
| Pat_66 | Pre-Treatment | WVOX     | 51741  | 37 | 16 | 79245565 | 79245565 | Missense_Mutation | SNP | G  | A  | 74  | 40  | c.1117G>A       | c.(1117-1119)GGG>AGG    | p.G373R  |
| Pat_66 | Pre-Treatment | CDYL2    | 124359 | 37 | 16 | 80638323 | 80638323 | Missense_Mutation | SNP | G  | T  | 72  | 49  | c.1483C>A       | c.(1483-1485)CTT>ATT    | p.L495I  |

|        |               |           |        |    |    |          |          |                   |     |    |    |     |     |                                    |                        |               |
|--------|---------------|-----------|--------|----|----|----------|----------|-------------------|-----|----|----|-----|-----|------------------------------------|------------------------|---------------|
| Pat_66 | Pre-Treatment | JPH3      | 57338  | 37 | 16 | 87723781 | 87723782 | Missense_Mutation | DNP | GG | AA | 8   | 1   | .1815_1816GG>A313-1818)GAGGAG>GAA/ | p.E606K                |               |
| Pat_66 | Pre-Treatment | PITPNA    | 5306   | 37 | 17 | 1451670  | 1451670  | Missense_Mutation | SNP | G  | A  | 4   | 67  | c.209C>T                           | c.(208-210)ACG>ATG     | p.T70M        |
| Pat_66 | Pre-Treatment | USP6      | 9098   | 37 | 17 | 5041493  | 5041493  | Missense_Mutation | SNP | G  | A  | 78  | 98  | c.1003G>A                          | c.(1003-1005)GAT>AAT   | p.D335N       |
| Pat_66 | Pre-Treatment | USP6      | 9098   | 37 | 17 | 5073977  | 5073977  | Missense_Mutation | SNP | G  | A  | 42  | 12  | c.3721G>A                          | c.(3721-3723)GAC>AAC   | p.D1241N      |
| Pat_66 | Pre-Treatment | DLG4      | 1742   | 37 | 17 | 7095296  | 7095296  | Missense_Mutation | SNP | G  | A  | 51  | 8   | c.2021C>T                          | c.(2020-2022)TCG>TTG   | p.S674L       |
| Pat_66 | Pre-Treatment | DNAH2     | 146754 | 37 | 17 | 7690282  | 7690282  | Missense_Mutation | SNP | G  | A  | 42  | 60  | c.6534G>A                          | c.(6532-6534)ATG>ATA   | p.M2178I      |
| Pat_66 | Pre-Treatment | DNAH2     | 146754 | 37 | 17 | 7700533  | 7700533  | Missense_Mutation | SNP | G  | A  | 116 | 20  | c.7903G>A                          | c.(7903-7905)GAT>AAT   | p.D2635N      |
| Pat_66 | Pre-Treatment | KDM6B     | 23135  | 37 | 17 | 7749407  | 7749407  | Missense_Mutation | SNP | C  | T  | 31  | 2   | c.248C>T                           | c.(247-249)CCA>CTA     | p.P83L        |
| Pat_66 | Pre-Treatment | KDM6B     | 23135  | 37 | 17 | 7750454  | 7750454  | Missense_Mutation | SNP | C  | T  | 63  | 130 | c.941C>T                           | c.(940-942)CCA>CTA     | p.P314L       |
| Pat_66 | Pre-Treatment | CHD3      | 1107   | 37 | 17 | 7797155  | 7797155  | Nonsense_Mutation | SNP | C  | T  | 4   | 228 | c.826C>T                           | c.(826-828)CGA>TGA     | p.R276*       |
| Pat_66 | Pre-Treatment | ARHGEF15  | 22899  | 37 | 17 | 8215586  | 8215587  | Missense_Mutation | DNP | CC | TT | 111 | 120 | c.229_230CC>TT                     | c.(229-231)CCC>TTC     | p.P77F        |
| Pat_66 | Pre-Treatment | PIK3R6    | 146850 | 37 | 17 | 8726352  | 8726352  | Missense_Mutation | SNP | C  | T  | 89  | 18  | c.1678G>A                          | c.(1678-1680)GAA>AAA   | p.E560K       |
| Pat_66 | Pre-Treatment | MYH4      | 4622   | 37 | 17 | 10351274 | 10351274 | Missense_Mutation | SNP | A  | G  | 4   | 226 | c.4826T>C                          | c.(4825-4827)ATC>ACC   | p.I1609T      |
| Pat_66 | Pre-Treatment | MYH3      | 4621   | 37 | 17 | 10555756 | 10555756 | Missense_Mutation | SNP | T  | A  | 4   | 85  | c.329A>T                           | c.(328-330)TAC>TTC     | p.Y110F       |
| Pat_66 | Pre-Treatment | DNAH9     | 1770   | 37 | 17 | 11865266 | 11865266 | Missense_Mutation | SNP | G  | A  | 91  | 11  | c.12926G>A                         | c.(12925-12927)CGA>CAA | p.R4309Q      |
| Pat_66 | Pre-Treatment | ZNF624    | 57547  | 37 | 17 | 16525645 | 16525645 | Missense_Mutation | SNP | G  | C  | 4   | 167 | c.2555C>G                          | c.(2554-2556)ACT>AGT   | p.T852S       |
| Pat_66 | Pre-Treatment | TNFRSF13B | 23495  | 37 | 17 | 16852099 | 16852099 | Missense_Mutation | SNP | G  | A  | 4   | 172 | c.398C>T                           | c.(397-399)TCG>TTG     | p.S133L       |
| Pat_66 | Pre-Treatment | TMEM132E  | 124842 | 37 | 17 | 32953976 | 32953976 | Missense_Mutation | SNP | G  | A  | 77  | 8   | c.628G>A                           | c.(628-630)GAC>AAC     | p.D210N       |
| Pat_66 | Pre-Treatment | TMEM132E  | 124842 | 37 | 17 | 32956071 | 32956071 | Missense_Mutation | SNP | G  | A  | 108 | 21  | c.916G>A                           | c.(916-918)GAA>AAA     | p.E306K       |
| Pat_66 | Pre-Treatment | DDX52     | 11056  | 37 | 17 | 35990143 | 35990143 | Missense_Mutation | SNP | G  | A  | 37  | 51  | c.664C>T                           | c.(664-666)CCT>TCT     | p.P222S       |
| Pat_66 | Pre-Treatment | THRA      | 7067   | 37 | 17 | 38233835 | 38233835 | Missense_Mutation | SNP | C  | T  | 143 | 21  | c.196C>T                           | c.(196-198)CGC>TGC     | p.R66C        |
| Pat_66 | Pre-Treatment | KRT35     | 3886   | 37 | 17 | 39634732 | 39634732 | Missense_Mutation | SNP | C  | T  | 58  | 60  | c.880G>A                           | c.(880-882)GAG>AAG     | p.E294K       |
| Pat_66 | Pre-Treatment | KRT36     | 8689   | 37 | 17 | 39642662 | 39642662 | Missense_Mutation | SNP | G  | A  | 23  | 13  | c.1370C>T                          | c.(1369-1371)TCC>TTC   | p.S457F       |
| Pat_66 | Pre-Treatment | JUP       | 3728   | 37 | 17 | 39919495 | 39919495 | Missense_Mutation | SNP | C  | T  | 85  | 12  | c.1237G>A                          | c.(1237-1239)GGC>AGC   | p.G413S       |
| Pat_66 | Pre-Treatment | VAT1      | 10493  | 37 | 17 | 41168547 | 41168547 | Missense_Mutation | SNP | G  | A  | 3   | 36  | c.875C>T                           | c.(874-876)ACG>ATG     | p.T292M       |
| Pat_66 | Pre-Treatment | GPATCH8   | 23131  | 37 | 17 | 42478520 | 42478520 | Missense_Mutation | SNP | G  | A  | 119 | 145 | c.925C>T                           | c.(925-927)CCT>TCT     | p.P309S       |
| Pat_66 | Pre-Treatment | WNT9B     | 7484   | 37 | 17 | 44950091 | 44950091 | Missense_Mutation | SNP | G  | A  | 9   | 29  | c.286G>A                           | c.(286-288)GAG>AAG     | p.E96K        |
| Pat_66 | Pre-Treatment | ITGB3     | 3690   | 37 | 17 | 45377890 | 45377890 | Missense_Mutation | SNP | G  | A  | 19  | 38  | c.1960G>A                          | c.(1960-1962)GAA>AAA   | p.E654K       |
| Pat_66 | Pre-Treatment | SKAP1     | 8631   | 37 | 17 | 46248022 | 46248022 | Splice_Site       | SNP | C  | T  | 60  | 95  | c.827_splice                       | c.e10-1                | p.D276_splice |
| Pat_66 | Pre-Treatment | COL1A1    | 1277   | 37 | 17 | 48269226 | 48269226 | Missense_Mutation | SNP | C  | T  | 10  | 3   | c.2050G>A                          | c.(2050-2052)GAG>AAG   | p.E684K       |
| Pat_66 | Pre-Treatment | ABCC3     | 8714   | 37 | 17 | 48734461 | 48734462 | Missense_Mutation | DNP | GG | AA | 27  | 46  | c.403_404GG>AA                     | c.(403-405)GGG>AAG     | p.G135K       |
| Pat_66 | Pre-Treatment | ABCC3     | 8714   | 37 | 17 | 48753849 | 48753849 | Missense_Mutation | SNP | C  | T  | 79  | 99  | c.3278C>T                          | c.(3277-3279)TCC>TTC   | p.S1093F      |
| Pat_66 | Pre-Treatment | BPTF      | 2186   | 37 | 17 | 65940393 | 65940393 | Missense_Mutation | SNP | C  | A  | 5   | 150 | c.6605C>A                          | c.(6604-6606)CCA>CAA   | p.P2202Q      |
| Pat_66 | Pre-Treatment | ABCA9     | 10350  | 37 | 17 | 66980206 | 66980206 | Missense_Mutation | SNP | C  | T  | 55  | 63  | c.4490G>A                          | c.(4489-4491)GGA>GAA   | p.G1497E      |
| Pat_66 | Pre-Treatment | KIF19     | 124602 | 37 | 17 | 72338051 | 72338051 | Missense_Mutation | SNP | G  | A  | 136 | 20  | c.157G>A                           | c.(157-159)GAC>AAC     | p.D53N        |
| Pat_66 | Pre-Treatment | BTBD17    | 388419 | 37 | 17 | 72356148 | 72356148 | Missense_Mutation | SNP | C  | T  | 33  | 53  | c.322G>A                           | c.(322-324)GAG>AAG     | p.E108K       |
| Pat_66 | Pre-Treatment | BTBD17    | 388419 | 37 | 17 | 72356307 | 72356307 | Missense_Mutation | SNP | C  | T  | 10  | 10  | c.163G>A                           | c.(163-165)GAG>AAG     | p.E55K        |
| Pat_66 | Pre-Treatment | CD300LF   | 146722 | 37 | 17 | 72691330 | 72691330 | Missense_Mutation | SNP | C  | T  | 54  | 3   | c.778G>A                           | c.(778-780)GAA>AAA     | p.E260K       |
| Pat_66 | Pre-Treatment | C17orf28  | 283987 | 37 | 17 | 72959865 | 72959865 | Nonsense_Mutation | SNP | C  | T  | 5   | 3   | c.357G>A                           | c.(355-357)TGG>TGA     | p.W119*       |
| Pat_66 | Pre-Treatment | EVPL      | 2125   | 37 | 17 | 74006052 | 74006052 | Missense_Mutation | SNP | C  | G  | 152 | 22  | c.3234G>C                          | c.(3232-3234)GAG>GAC   | p.E1078D      |
| Pat_66 | Pre-Treatment | TNRC6C    | 57690  | 37 | 17 | 76045412 | 76045412 | Missense_Mutation | SNP | C  | T  | 34  | 26  | c.269C>T                           | c.(268-270)TCC>TTC     | p.S90F        |
| Pat_66 | Pre-Treatment | ENPP7     | 339221 | 37 | 17 | 77707317 | 77707317 | Missense_Mutation | SNP | G  | A  | 122 | 162 | c.265G>A                           | c.(265-267)GAG>AAG     | p.E89K        |
| Pat_66 | Pre-Treatment | ENPP7     | 339221 | 37 | 17 | 77709088 | 77709088 | Missense_Mutation | SNP | G  | A  | 17  | 20  | c.646G>A                           | c.(646-648)GTG>ATG     | p.V216M       |
| Pat_66 | Pre-Treatment | CDC40     | 55036  | 37 | 17 | 78061471 | 78061471 | Missense_Mutation | SNP | G  | A  | 54  | 7   | c.2515G>A                          | c.(2515-2517)GAC>AAC   | p.D839N       |
| Pat_66 | Pre-Treatment | CARD14    | 79092  | 37 | 17 | 78162308 | 78162308 | Missense_Mutation | SNP | G  | A  | 58  | 6   | c.808G>A                           | c.(808-810)GAG>AAG     | p.E270K       |
| Pat_66 | Pre-Treatment | NPLOC4    | 55666  | 37 | 17 | 79536082 | 79536082 | Missense_Mutation | SNP | G  | A  | 72  | 7   | c.1409C>T                          | c.(1408-1410)CCA>CTA   | p.P470L       |
| Pat_66 | Pre-Treatment | CLUL1     | 27098  | 37 | 18 | 624944   | 624944   | Missense_Mutation | SNP | C  | T  | 20  | 58  | c.335C>T                           | c.(334-336)TCC>TTC     | p.S112F       |

|        |               |           |        |    |    |          |          |                   |     |    |    |     |     |                 |                        |           |
|--------|---------------|-----------|--------|----|----|----------|----------|-------------------|-----|----|----|-----|-----|-----------------|------------------------|-----------|
| Pat_66 | Pre-Treatment | SMCHD1    | 23347  | 37 | 18 | 2688411  | 2688411  | Missense_Mutation | SNP | C  | T  | 33  | 112 | c.658C>T        | c.(658-660)CGT>TGT     | p.R220C   |
| Pat_66 | Pre-Treatment | MYOM1     | 8736   | 37 | 18 | 3151719  | 3151719  | Missense_Mutation | SNP | C  | T  | 85  | 94  | c.1816G>A       | c.(1816-1818)GAT>AAT   | p.D606N   |
| Pat_66 | Pre-Treatment | DLGAP1    | 9229   | 37 | 18 | 3879714  | 3879714  | Missense_Mutation | SNP | G  | A  | 41  | 95  | c.355C>T        | c.(355-357)CAC>TAC     | p.H119Y   |
| Pat_66 | Pre-Treatment | LAMA1     | 284217 | 37 | 18 | 6956684  | 6956684  | Missense_Mutation | SNP | G  | A  | 64  | 34  | c.8045C>T       | c.(8044-8046)GCT>GTT   | p.A2682V  |
| Pat_66 | Pre-Treatment | LRRRC30   | 339291 | 37 | 18 | 7231617  | 7231617  | Missense_Mutation | SNP | G  | A  | 85  | 44  | c.481G>A        | c.(481-483)GAC>AAC     | p.D161N   |
| Pat_66 | Pre-Treatment | POTEC     | 388468 | 37 | 18 | 14542991 | 14542991 | Missense_Mutation | SNP | G  | A  | 8   | 517 | c.155C>T        | c.(154-156)TCC>TTC     | p.S52F    |
| Pat_66 | Pre-Treatment | LAMA3     | 3909   | 37 | 18 | 21438774 | 21438774 | Missense_Mutation | SNP | C  | T  | 94  | 201 | c.4403C>T       | c.(4402-4404)TCA>TTA   | p.S1468L  |
| Pat_66 | Pre-Treatment | LAMA3     | 3909   | 37 | 18 | 21487860 | 21487860 | Missense_Mutation | SNP | G  | A  | 43  | 92  | c.6976G>A       | c.(6976-6978)GAA>AAA   | p.E2326K  |
| Pat_66 | Pre-Treatment | LAMA3     | 3909   | 37 | 18 | 21519250 | 21519250 | Missense_Mutation | SNP | C  | T  | 103 | 285 | c.8926C>T       | c.(8926-8928)CCA>TCA   | p.P2976S  |
| Pat_66 | Pre-Treatment | TTC39C    | 125488 | 37 | 18 | 21662896 | 21662896 | Missense_Mutation | SNP | C  | T  | 74  | 184 | c.835C>T        | c.(835-837)CAT>TAT     | p.H279Y   |
| Pat_66 | Pre-Treatment | DSG1      | 1828   | 37 | 18 | 28908228 | 28908229 | Missense_Mutation | DNP | GG | AA | 40  | 94  | c.293_294GG>AA  | c.(292-294)GGG>GAA     | p.G98E    |
| Pat_66 | Pre-Treatment | DSG1      | 1828   | 37 | 18 | 28914126 | 28914126 | Missense_Mutation | SNP | G  | A  | 28  | 87  | c.966G>A        | c.(964-966)ATG>ATA     | p.M322I   |
| Pat_66 | Pre-Treatment | DSG4      | 147409 | 37 | 18 | 28968334 | 28968334 | Missense_Mutation | SNP | G  | A  | 30  | 57  | c.221G>A        | c.(220-222)CGA>CAA     | p.R74Q    |
| Pat_66 | Pre-Treatment | DSG4      | 147409 | 37 | 18 | 28993511 | 28993511 | Nonsense_Mutation | SNP | C  | T  | 98  | 85  | c.3076C>T       | c.(3076-3078)CGA>TGA   | p.R1026*  |
| Pat_66 | Pre-Treatment | MYO5B     | 4645   | 37 | 18 | 47432825 | 47432825 | Missense_Mutation | SNP | G  | A  | 76  | 56  | c.2378C>T       | c.(2377-2379)ACC>ATC   | p.T793I   |
| Pat_66 | Pre-Treatment | DCC       | 1630   | 37 | 18 | 51013302 | 51013302 | Missense_Mutation | SNP | G  | A  | 56  | 173 | c.3872G>A       | c.(3871-3873)CGA>CAA   | p.R1291Q  |
| Pat_66 | Pre-Treatment | TCF4      | 6925   | 37 | 18 | 52942936 | 52942936 | Nonsense_Mutation | SNP | G  | A  | 332 | 217 | c.703C>T        | c.(703-705)CAG>TAG     | p.Q235*   |
| Pat_66 | Pre-Treatment | LMAN1     | 3998   | 37 | 18 | 57006123 | 57006123 | Missense_Mutation | SNP | G  | A  | 72  | 54  | c.1018C>T       | c.(1018-1020)CGT>TGT   | p.R340C   |
| Pat_66 | Pre-Treatment | SERPINB3  | 6317   | 37 | 18 | 61322991 | 61322991 | Missense_Mutation | SNP | G  | A  | 57  | 120 | c.1073C>T       | c.(1072-1074)TCA>TTA   | p.S358L   |
| Pat_66 | Pre-Treatment | SERPINB10 | 5273   | 37 | 18 | 61584708 | 61584708 | Missense_Mutation | SNP | G  | A  | 10  | 27  | c.187G>A        | c.(187-189)GAC>AAC     | p.D63N    |
| Pat_66 | Pre-Treatment | SERPINB10 | 5273   | 37 | 18 | 61597359 | 61597359 | Missense_Mutation | SNP | G  | A  | 69  | 62  | c.571G>A        | c.(571-573)GGA>AGA     | p.G191R   |
| Pat_66 | Pre-Treatment | DSEL      | 92126  | 37 | 18 | 65180770 | 65180770 | Nonsense_Mutation | SNP | C  | T  | 54  | 58  | c.1106G>A       | c.(1105-1107)TGG>TAG   | p.W369*   |
| Pat_66 | Pre-Treatment | ELANE     | 1991   | 37 | 19 | 853306   | 853306   | Missense_Mutation | SNP | C  | T  | 12  | 25  | c.269C>T        | c.(268-270)TCG>TTG     | p.S90L    |
| Pat_66 | Pre-Treatment | C19orf29  | 58509  | 37 | 19 | 3614531  | 3614531  | Missense_Mutation | SNP | T  | C  | 3   | 33  | c.1219A>G       | c.(1219-1221)AAG>GAG   | p.K407E   |
| Pat_66 | Pre-Treatment | HDGFRP2   | 84717  | 37 | 19 | 4501303  | 4501303  | Missense_Mutation | SNP | G  | T  | 57  | 39  | c.1890G>T       | c.(1888-1890)AGG>AGT   | p.R630S   |
| Pat_66 | Pre-Treatment | TMEM146   | 257062 | 37 | 19 | 5754206  | 5754206  | Missense_Mutation | SNP | G  | A  | 91  | 240 | c.1228G>A       | c.(1228-1230)GAA>AAA   | p.E410K   |
| Pat_66 | Pre-Treatment | FUT5      | 2527   | 37 | 19 | 5867287  | 5867287  | Missense_Mutation | SNP | C  | T  | 22  | 43  | c.450G>A        | c.(448-450)ATG>ATA     | p.M150I   |
| Pat_66 | Pre-Treatment | TUBB4     | 10382  | 37 | 19 | 6495665  | 6495665  | Missense_Mutation | SNP | C  | T  | 4   | 110 | c.845G>A        | c.(844-846)CGG>CAG     | p.R282Q   |
| Pat_66 | Pre-Treatment | C3        | 718    | 37 | 19 | 6711077  | 6711077  | Missense_Mutation | SNP | G  | A  | 14  | 330 | c.1400C>T       | c.(1399-1401)CCC>CTC   | p.P467L   |
| Pat_66 | Pre-Treatment | VAV1      | 7409   | 37 | 19 | 6853048  | 6853048  | Missense_Mutation | SNP | C  | T  | 27  | 93  | c.2290C>T       | c.(2290-2292)CCC>TCC   | p.P764S   |
| Pat_66 | Pre-Treatment | MUC16     | 94025  | 37 | 19 | 9026235  | 9026235  | Missense_Mutation | SNP | C  | T  | 137 | 377 | c.36751G>A      | c.(36751-36753)GGC>AGC | p.G12251S |
| Pat_66 | Pre-Treatment | MUC16     | 94025  | 37 | 19 | 9069882  | 9069882  | Missense_Mutation | SNP | C  | T  | 88  | 64  | c.17564G>A      | c.(17563-17565)GGA>GAA | p.G5855E  |
| Pat_66 | Pre-Treatment | MUC16     | 94025  | 37 | 19 | 9076395  | 9076395  | Missense_Mutation | SNP | C  | T  | 42  | 114 | c.11051G>A      | c.(11050-11052)AGC>AAC | p.S3684N  |
| Pat_66 | Pre-Treatment | MUC16     | 94025  | 37 | 19 | 9087904  | 9087904  | Missense_Mutation | SNP | G  | A  | 21  | 40  | c.3911C>T       | c.(3910-3912)TCA>TTA   | p.S1304L  |
| Pat_66 | Pre-Treatment | ORFE24    | 26648  | 37 | 19 | 9362042  | 9362042  | Missense_Mutation | SNP | G  | A  | 24  | 67  | c.323G>A        | c.(322-324)AGA>AAA     | p.R108K   |
| Pat_66 | Pre-Treatment | SMARCA4   | 6597   | 37 | 19 | 11135028 | 11135028 | Missense_Mutation | SNP | G  | A  | 4   | 121 | c.2995G>A       | c.(2995-2997)GAC>AAC   | p.D999N   |
| Pat_66 | Pre-Treatment | PRKCSH    | 5589   | 37 | 19 | 11552081 | 11552081 | Missense_Mutation | SNP | C  | T  | 135 | 92  | c.377C>T        | c.(376-378)TCC>TTC     | p.S126F   |
| Pat_66 | Pre-Treatment | ZNF440    | 126070 | 37 | 19 | 11942890 | 11942890 | Missense_Mutation | SNP | G  | A  | 5   | 173 | c.899G>A        | c.(898-900)CGT>CAT     | p.R300H   |
| Pat_66 | Pre-Treatment | ZNF700    | 90592  | 37 | 19 | 12060746 | 12060747 | Missense_Mutation | DNP | AG | GA | 9   | 355 | c.1907_1908AG>G | c.(1906-1908)CAG>CGA   | p.Q636R   |
| Pat_66 | Pre-Treatment | ZNF844    | 284391 | 37 | 19 | 12187307 | 12187307 | Missense_Mutation | SNP | G  | C  | 9   | 305 | c.1372G>C       | c.(1372-1374)GAT>CAT   | p.D458H   |
| Pat_66 | Pre-Treatment | ZNF844    | 284391 | 37 | 19 | 12187334 | 12187334 | Missense_Mutation | SNP | G  | A  | 6   | 249 | c.1399G>A       | c.(1399-1401)GAA>AAA   | p.E467K   |
| Pat_66 | Pre-Treatment | ZNF844    | 284391 | 37 | 19 | 12187394 | 12187394 | Missense_Mutation | SNP | T  | C  | 5   | 201 | c.1459T>C       | c.(1459-1461)TTT>CTT   | p.F487L   |
| Pat_66 | Pre-Treatment | ZNF844    | 284391 | 37 | 19 | 12187502 | 12187502 | Missense_Mutation | SNP | A  | G  | 5   | 143 | c.1567A>G       | c.(1567-1569)AAA>GAA   | p.K523E   |
| Pat_66 | Pre-Treatment | ZNF564    | 163050 | 37 | 19 | 12637723 | 12637723 | Missense_Mutation | SNP | C  | T  | 6   | 338 | c.1199G>A       | c.(1198-1200)AGA>AAA   | p.R400K   |
| Pat_66 | Pre-Treatment | BEST2     | 54831  | 37 | 19 | 12866232 | 12866232 | Missense_Mutation | SNP | C  | T  | 34  | 85  | c.676C>T        | c.(676-678)CAC>TAC     | p.H226Y   |
| Pat_66 | Pre-Treatment | MAST1     | 22983  | 37 | 19 | 12976158 | 12976158 | Missense_Mutation | SNP | C  | T  | 27  | 53  | c.1667C>T       | c.(1666-1668)CCC>CTC   | p.P556L   |
| Pat_66 | Pre-Treatment | EMR3      | 84658  | 37 | 19 | 14774286 | 14774286 | Missense_Mutation | SNP | C  | T  | 33  | 110 | c.143G>A        | c.(142-144)GGA>GAA     | p.G48E    |



|        |               |          |           |    |    |          |          |                   |     |    |    |     |     |                |                                  |          |
|--------|---------------|----------|-----------|----|----|----------|----------|-------------------|-----|----|----|-----|-----|----------------|----------------------------------|----------|
| Pat_66 | Pre-Treatment | CYP4F22  | 126410    | 37 | 19 | 15648767 | 15648767 | Nonsense_Mutation | SNP | C  | T  | 40  | 103 | c.634C>T       | c.(634-636)CAG>TAG               | p.Q212*  |
| Pat_66 | Pre-Treatment | OR10H4   | 126541    | 37 | 19 | 16060671 | 16060671 | Missense_Mutation | SNP | C  | T  | 88  | 202 | c.854C>T       | c.(853-855)CCC>CTC               | p.P285L  |
| Pat_66 | Pre-Treatment | CALR3    | 125972    | 37 | 19 | 16593379 | 16593379 | Missense_Mutation | SNP | G  | A  | 29  | 84  | c.800C>T       | c.(799-801)CCA>CTA               | p.P267L  |
| Pat_66 | Pre-Treatment | UNC13A   | 23025     | 37 | 19 | 17780476 | 17780476 | Missense_Mutation | SNP | C  | T  | 6   | 14  | c.544G>A       | c.(544-546)GGA>AGA               | p.G182R  |
| Pat_66 | Pre-Treatment | PDE4C    | 5143      | 37 | 19 | 18330058 | 18330058 | Missense_Mutation | SNP | C  | T  | 22  | 54  | c.952G>A       | c.(952-954)GAG>AAG               | p.E318K  |
| Pat_66 | Pre-Treatment | SFRS14   | 10147     | 37 | 19 | 19105258 | 19105258 | Missense_Mutation | SNP | C  | T  | 5   | 361 | c.3166G>A      | c.(3166-3168)GGG>AGG             | p.G1056R |
| Pat_66 | Pre-Treatment | SFRS14   | 10147     | 37 | 19 | 19115132 | 19115132 | Missense_Mutation | SNP | G  | A  | 7   | 8   | c.2774C>T      | c.(2773-2775)CCC>CTC             | p.P925L  |
| Pat_66 | Pre-Treatment | GATAD2A  | 54815     | 37 | 19 | 19603483 | 19603483 | Missense_Mutation | SNP | C  | T  | 4   | 153 | c.496C>T       | c.(496-498)CGG>TGG               | p.R166W  |
| Pat_66 | Pre-Treatment | ZNF93    | 81931     | 37 | 19 | 20045187 | 20045187 | Missense_Mutation | SNP | C  | T  | 67  | 231 | c.1423C>T      | c.(1423-1425)CAT>TAT             | p.H475Y  |
| Pat_66 | Pre-Treatment | ZNF737   | 100129842 | 37 | 19 | 20727684 | 20727684 | Missense_Mutation | SNP | G  | C  | 4   | 193 | c.1325C>G      | c.(1324-1326)ACA>AGA             | p.T442R  |
| Pat_66 | Pre-Treatment | ZNF208   | 7757      | 37 | 19 | 22154249 | 22154249 | Missense_Mutation | SNP | A  | G  | 7   | 194 | c.3203T>C      | c.(3202-3204)CTC>CCC             | p.L1068P |
| Pat_66 | Pre-Treatment | ZNF208   | 7757      | 37 | 19 | 22155282 | 22155282 | Missense_Mutation | SNP | T  | C  | 9   | 185 | c.2254A>G      | c.(2254-2256)AAG>GAG             | p.K752E  |
| Pat_66 | Pre-Treatment | ZNF208   | 7757      | 37 | 19 | 22156484 | 22156484 | Missense_Mutation | SNP | G  | T  | 6   | 304 | c.1352C>A      | c.(1351-1353)ACA>AAA             | p.T451K  |
| Pat_66 | Pre-Treatment | ZNF208   | 7757      | 37 | 19 | 22156652 | 22156652 | Missense_Mutation | SNP | T  | G  | 5   | 244 | c.1184A>C      | c.(1183-1185)AAA>ACA             | p.K395T  |
| Pat_66 | Pre-Treatment | ZNF257   | 113835    | 37 | 19 | 22271685 | 22271685 | Missense_Mutation | SNP | G  | A  | 16  | 85  | c.1133G>A      | c.(1132-1134)GGA>GAA             | p.G378E  |
| Pat_66 | Pre-Treatment | ZNF676   | 163223    | 37 | 19 | 22363812 | 22363812 | Missense_Mutation | SNP | C  | T  | 84  | 333 | c.707G>A       | c.(706-708)CGA>CAA               | p.R236Q  |
| Pat_66 | Pre-Treatment | ZNF99    | 7652      | 37 | 19 | 22940128 | 22940128 | Nonsense_Mutation | SNP | T  | A  | 76  | 128 | c.2203A>T      | c.(2203-2205)AAA>TAA             | p.K735*  |
| Pat_66 | Pre-Treatment | ZNF99    | 7652      | 37 | 19 | 22941833 | 22941833 | Missense_Mutation | SNP | G  | T  | 43  | 109 | c.605C>A       | c.(604-606)GCT>GAT               | p.A202D  |
| Pat_66 | Pre-Treatment | ZNF91    | 7644      | 37 | 19 | 23545434 | 23545434 | Missense_Mutation | SNP | C  | A  | 4   | 152 | c.347G>T       | c.(346-348)GGA>GTA               | p.G116V  |
| Pat_66 | Pre-Treatment | ZNF675   | 171392    | 37 | 19 | 23836350 | 23836350 | Missense_Mutation | SNP | A  | C  | 4   | 148 | c.1385T>G      | c.(1384-1386)ATC>AGC             | p.I462S  |
| Pat_66 | Pre-Treatment | ZNF681   | 148213    | 37 | 19 | 23926859 | 23926859 | Missense_Mutation | SNP | C  | T  | 187 | 128 | c.1493G>A      | c.(1492-1494)AGA>AAA             | p.R498K  |
| Pat_66 | Pre-Treatment | RPSAP58  | 388524    | 37 | 19 | 24010418 | 24010418 | Missense_Mutation | SNP | C  | T  | 36  | 56  | c.455C>T       | c.(454-456)TCT>TTT               | p.S152F  |
| Pat_66 | Pre-Treatment | ZNF536   | 9745      | 37 | 19 | 30935574 | 30935574 | Missense_Mutation | SNP | G  | A  | 56  | 155 | c.1105G>A      | c.(1105-1107)GAC>AAC             | p.D369N  |
| Pat_66 | Pre-Treatment | ZNF30    | 90075     | 37 | 19 | 35435302 | 35435302 | Missense_Mutation | SNP | C  | A  | 4   | 78  | c.1432C>A      | c.(1432-1434)CAT>AAT             | p.H478N  |
| Pat_66 | Pre-Treatment | SCN1B    | 6324      | 37 | 19 | 35524553 | 35524553 | Missense_Mutation | SNP | G  | A  | 83  | 166 | c.358G>A       | c.(358-360)GAG>AAG               | p.E120K  |
| Pat_66 | Pre-Treatment | ZNF570   | 148268    | 37 | 19 | 37966904 | 37966904 | Missense_Mutation | SNP | C  | T  | 20  | 50  | c.155C>T       | c.(154-156)TCA>TTA               | p.S52L   |
| Pat_66 | Pre-Treatment | SIPA1L3  | 23094     | 37 | 19 | 38610020 | 38610020 | Missense_Mutation | SNP | C  | T  | 166 | 93  | c.2366C>T      | c.(2365-2367)TCC>TTC             | p.S789F  |
| Pat_66 | Pre-Treatment | ACTN4    | 81        | 37 | 19 | 39217717 | 39217717 | Missense_Mutation | SNP | C  | T  | 68  | 56  | c.2311C>T      | c.(2311-2313)CGG>TGG             | p.R771W  |
| Pat_66 | Pre-Treatment | RINL     | 126432    | 37 | 19 | 39360246 | 39360247 | Missense_Mutation | DNP | CC | TT | 42  | 50  | .1098_1099GG>A | 096-1101)ATGGAG>ATAA.366_367ME>I |          |
| Pat_66 | Pre-Treatment | PSMC4    | 5704      | 37 | 19 | 40485793 | 40485793 | Missense_Mutation | SNP | G  | A  | 5   | 220 | c.743G>A       | c.(742-744)CGG>CAG               | p.R248Q  |
| Pat_66 | Pre-Treatment | ZNF780B  | 163131    | 37 | 19 | 40541904 | 40541904 | Missense_Mutation | SNP | G  | A  | 47  | 182 | c.862C>T       | c.(862-864)CGT>TGT               | p.R288C  |
| Pat_66 | Pre-Treatment | SERTAD3  | 29946     | 37 | 19 | 40947752 | 40947753 | Missense_Mutation | DNP | GG | AA | 17  | 0   | c.235_236CC>TT | c.(235-237)CCC>TTC               | p.P79F   |
| Pat_66 | Pre-Treatment | LTBP4    | 8425      | 37 | 19 | 41114441 | 41114441 | Missense_Mutation | SNP | C  | T  | 11  | 1   | c.1559C>T      | c.(1558-1560)CCC>CTC             | p.P520L  |
| Pat_66 | Pre-Treatment | AXL      | 558       | 37 | 19 | 41743919 | 41743919 | Missense_Mutation | SNP | C  | T  | 57  | 102 | c.854C>T       | c.(853-855)TCG>TTG               | p.S285L  |
| Pat_66 | Pre-Treatment | CEACAM5  | 1048      | 37 | 19 | 42213826 | 42213826 | Nonsense_Mutation | SNP | C  | T  | 138 | 240 | c.292C>T       | c.(292-294)CGA>TGA               | p.R98*   |
| Pat_66 | Pre-Treatment | ARHGEF1  | 9138      | 37 | 19 | 42410699 | 42410699 | Missense_Mutation | SNP | C  | T  | 25  | 4   | c.2582C>T      | c.(2581-2583)CCC>CTC             | p.P861L  |
| Pat_66 | Pre-Treatment | PSG8     | 440533    | 37 | 19 | 43268118 | 43268118 | Missense_Mutation | SNP | C  | T  | 17  | 358 | c.380G>A       | c.(379-381)GGA>GAA               | p.G127E  |
| Pat_66 | Pre-Treatment | PSG8     | 440533    | 37 | 19 | 43268263 | 43268264 | Missense_Mutation | DNP | TG | CA | 7   | 272 | c.234_235CA>TG | (232-237)TACATT>TATGT            | p.I79V   |
| Pat_66 | Pre-Treatment | ZNF221   | 7638      | 37 | 19 | 44470916 | 44470916 | Missense_Mutation | SNP | C  | T  | 38  | 64  | c.1262C>T      | c.(1261-1263)TCC>TTC             | p.S421F  |
| Pat_66 | Pre-Treatment | CEACAM20 | 125931    | 37 | 19 | 45026779 | 45026779 | Missense_Mutation | SNP | G  | A  | 47  | 5   | c.635C>T       | c.(634-636)ACG>ATG               | p.T212M  |
| Pat_66 | Pre-Treatment | CEACAM16 | 388551    | 37 | 19 | 45211412 | 45211412 | Missense_Mutation | SNP | C  | T  | 3   | 28  | c.1220C>T      | c.(1219-1221)ACA>ATA             | p.T407I  |
| Pat_66 | Pre-Treatment | SFRS16   | 11129     | 37 | 19 | 45570779 | 45570779 | Missense_Mutation | SNP | C  | T  | 22  | 0   | c.1594C>T      | c.(1594-1596)CCC>TCC             | p.P532S  |
| Pat_66 | Pre-Treatment | CKM      | 1158      | 37 | 19 | 45811702 | 45811702 | Missense_Mutation | SNP | C  | T  | 29  | 46  | c.742G>A       | c.(742-744)GAG>AAG               | p.E248K  |
| Pat_66 | Pre-Treatment | FBXO46   | 23403     | 37 | 19 | 46216507 | 46216507 | Nonsense_Mutation | SNP | G  | A  | 31  | 37  | c.247C>T       | c.(247-249)CGA>TGA               | p.R83*   |
| Pat_66 | Pre-Treatment | NOVA2    | 4858      | 37 | 19 | 46443167 | 46443167 | Missense_Mutation | SNP | G  | A  | 5   | 63  | c.1433C>T      | c.(1432-1434)ACC>ATC             | p.T478I  |
| Pat_66 | Pre-Treatment | ZC3H4    | 23211     | 37 | 19 | 47570496 | 47570496 | Missense_Mutation | SNP | G  | A  | 21  | 19  | c.3029C>T      | c.(3028-3030)CCC>CTC             | p.P1010L |
| Pat_66 | Pre-Treatment | RUVBL2   | 10856     | 37 | 19 | 49518890 | 49518890 | Missense_Mutation | SNP | G  | A  | 4   | 139 | c.1313G>A      | c.(1312-1314)CGC>CAC             | p.R438H  |

|        |               |          |        |    |    |          |          |                   |     |    |    |     |     |                 |                      |               |
|--------|---------------|----------|--------|----|----|----------|----------|-------------------|-----|----|----|-----|-----|-----------------|----------------------|---------------|
| Pat_66 | Pre-Treatment | TEAD2    | 8463   | 37 | 19 | 49862699 | 49862699 | Missense_Mutation | SNP | C  | T  | 6   | 341 | c.290G>A        | c.(289-291)CGA>CAA   | p.R97Q        |
| Pat_66 | Pre-Treatment | SIGLEC9  | 27180  | 37 | 19 | 51628484 | 51628484 | Missense_Mutation | SNP | G  | A  | 63  | 125 | c.253G>A        | c.(253-255)GAG>AAG   | p.E85K        |
| Pat_66 | Pre-Treatment | ZNF841   | 284371 | 37 | 19 | 52569533 | 52569533 | Missense_Mutation | SNP | A  | C  | 4   | 89  | c.1254T>G       | c.(1252-1254)ATT>ATG | p.I418M       |
| Pat_66 | Pre-Treatment | ZNF28    | 7576   | 37 | 19 | 53302984 | 53302985 | Missense_Mutation | DNP | TT | GA | 8   | 363 | :.2113_2114AA>T | c.(2113-2115)AAC>TCC | p.N705S       |
| Pat_66 | Pre-Treatment | ZNF816A  | 125893 | 37 | 19 | 53453890 | 53453890 | Missense_Mutation | SNP | G  | C  | 10  | 401 | c.1138C>G       | c.(1138-1140)CAG>GAG | p.Q380E       |
| Pat_66 | Pre-Treatment | ZNF845   | 91664  | 37 | 19 | 53855197 | 53855197 | Missense_Mutation | SNP | G  | A  | 10  | 283 | c.1269G>A       | c.(1267-1269)ATG>ATA | p.M423I       |
| Pat_66 | Pre-Treatment | ZNF845   | 91664  | 37 | 19 | 53855364 | 53855364 | Missense_Mutation | SNP | C  | T  | 12  | 265 | c.1436C>T       | c.(1435-1437)ACA>ATA | p.T479I       |
| Pat_66 | Pre-Treatment | ZNF761   | 388561 | 37 | 19 | 53958983 | 53958983 | Missense_Mutation | SNP | A  | C  | 5   | 342 | c.1222A>C       | c.(1222-1224)AAA>CAA | p.K408Q       |
| Pat_66 | Pre-Treatment | ZNF331   | 55422  | 37 | 19 | 54074897 | 54074897 | Nonsense_Mutation | SNP | C  | T  | 155 | 235 | c.49C>T         | c.(49-51)CAG>TAG     | p.Q17*        |
| Pat_66 | Pre-Treatment | NLRP12   | 91662  | 37 | 19 | 54314371 | 54314371 | Missense_Mutation | SNP | C  | T  | 30  | 44  | c.542G>A        | c.(541-543)CGG>CAG   | p.R181Q       |
| Pat_66 | Pre-Treatment | MYADM    | 91663  | 37 | 19 | 54376901 | 54376901 | Missense_Mutation | SNP | C  | T  | 13  | 11  | c.118C>T        | c.(118-120)CGC>TGC   | p.R40C        |
| Pat_66 | Pre-Treatment | CNOT3    | 4849   | 37 | 19 | 54651962 | 54651962 | Missense_Mutation | SNP | C  | T  | 15  | 12  | c.974C>T        | c.(973-975)TCC>TTC   | p.S325F       |
| Pat_66 | Pre-Treatment | LILRA2   | 11027  | 37 | 19 | 55086452 | 55086452 | Missense_Mutation | SNP | C  | T  | 55  | 103 | c.607C>T        | c.(607-609)CCC>TCC   | p.P203S       |
| Pat_66 | Pre-Treatment | LILRA1   | 11024  | 37 | 19 | 55106402 | 55106402 | Missense_Mutation | SNP | G  | A  | 26  | 40  | c.343G>A        | c.(343-345)GAG>AAG   | p.E115K       |
| Pat_66 | Pre-Treatment | NCR1     | 9437   | 37 | 19 | 55417580 | 55417580 | Splice_Site       | SNP | G  | A  | 4   | 166 | c.34_splice     | c.e1+1               | p.G12_splice  |
| Pat_66 | Pre-Treatment | NLRP13   | 126204 | 37 | 19 | 56423340 | 56423340 | Missense_Mutation | SNP | C  | T  | 17  | 23  | c.1843G>A       | c.(1843-1845)GAA>AAA | p.E615K       |
| Pat_66 | Pre-Treatment | ZNF582   | 147948 | 37 | 19 | 56896125 | 56896125 | Missense_Mutation | SNP | G  | A  | 25  | 46  | c.661C>T        | c.(661-663)CAT>TAT   | p.H221Y       |
| Pat_66 | Pre-Treatment | PEG3     | 5178   | 37 | 19 | 57325629 | 57325629 | Missense_Mutation | SNP | G  | A  | 51  | 50  | c.4181C>T       | c.(4180-4182)GCT>GTT | p.A1394V      |
| Pat_66 | Pre-Treatment | USP29    | 57663  | 37 | 19 | 57642078 | 57642078 | Missense_Mutation | SNP | G  | A  | 12  | 35  | c.2035G>A       | c.(2035-2037)GAG>AAG | p.E679K       |
| Pat_66 | Pre-Treatment | ZNF419   | 79744  | 37 | 19 | 58005274 | 58005274 | Missense_Mutation | SNP | T  | C  | 4   | 184 | c.1349T>C       | c.(1348-1350)ATT>ACT | p.I450T       |
| Pat_66 | Pre-Treatment | ZNF419   | 79744  | 37 | 19 | 58005314 | 58005314 | Missense_Mutation | SNP | G  | C  | 4   | 212 | c.1389G>C       | c.(1387-1389)TTG>TTC | p.L463F       |
| Pat_66 | Pre-Treatment | ZNF671   | 79891  | 37 | 19 | 58231944 | 58231944 | Missense_Mutation | SNP | C  | T  | 4   | 209 | c.1510G>A       | c.(1510-1512)GAA>AAA | p.E504K       |
| Pat_66 | Pre-Treatment | ZNF552   | 79818  | 37 | 19 | 58319596 | 58319596 | Missense_Mutation | SNP | G  | A  | 130 | 18  | c.1036C>T       | c.(1036-1038)CAC>TAC | p.H346Y       |
| Pat_66 | Pre-Treatment | TPO      | 7173   | 37 | 2  | 1459902  | 1459902  | Missense_Mutation | SNP | G  | A  | 32  | 18  | c.667G>A        | c.(667-669)GAT>AAT   | p.D223N       |
| Pat_66 | Pre-Treatment | ALLC     | 55821  | 37 | 2  | 3727551  | 3727551  | Nonsense_Mutation | SNP | C  | T  | 24  | 86  | c.265C>T        | c.(265-267)CGA>TGA   | p.R89*        |
| Pat_66 | Pre-Treatment | ALLC     | 55821  | 37 | 2  | 3730661  | 3730661  | Missense_Mutation | SNP | C  | T  | 121 | 343 | c.508C>T        | c.(508-510)CCA>TCA   | p.P170S       |
| Pat_66 | Pre-Treatment | HPCAL1   | 3241   | 37 | 2  | 10560110 | 10560110 | Missense_Mutation | SNP | G  | A  | 89  | 62  | c.227G>A        | c.(226-228)GGC>GAC   | p.G76D        |
| Pat_66 | Pre-Treatment | NT5C1B   | 93034  | 37 | 2  | 18758038 | 18758038 | Splice_Site       | SNP | C  | T  | 36  | 133 | c.1324_splice   | c.e8+1               | p.G442_splice |
| Pat_66 | Pre-Treatment | APOB     | 338    | 37 | 2  | 21233256 | 21233256 | Missense_Mutation | SNP | C  | T  | 11  | 40  | c.6484G>A       | c.(6484-6486)GAT>AAT | p.D2162N      |
| Pat_66 | Pre-Treatment | OTOF     | 9381   | 37 | 2  | 26703859 | 26703859 | Missense_Mutation | SNP | C  | T  | 11  | 52  | c.1598G>A       | c.(1597-1599)GGC>GAC | p.G533D       |
| Pat_66 | Pre-Treatment | SLC4A1AP | 22950  | 37 | 2  | 27900650 | 27900650 | Nonsense_Mutation | SNP | C  | A  | 4   | 132 | c.1622C>A       | c.(1621-1623)TCA>TAA | p.S541*       |
| Pat_66 | Pre-Treatment | C2orf71  | 388939 | 37 | 2  | 29296383 | 29296383 | Missense_Mutation | SNP | C  | T  | 84  | 63  | c.745G>A        | c.(745-747)GAG>AAG   | p.E249K       |
| Pat_66 | Pre-Treatment | CAPN13   | 92291  | 37 | 2  | 30961151 | 30961151 | Missense_Mutation | SNP | C  | T  | 11  | 43  | c.1603G>A       | c.(1603-1605)GGG>AGG | p.G535R       |
| Pat_66 | Pre-Treatment | XDH      | 7498   | 37 | 2  | 31589745 | 31589745 | Missense_Mutation | SNP | C  | T  | 68  | 182 | c.2313G>A       | c.(2311-2313)ATG>ATA | p.M771I       |
| Pat_66 | Pre-Treatment | XDH      | 7498   | 37 | 2  | 31625943 | 31625944 | Missense_Mutation | DNP | GG | AA | 79  | 251 | c.167_168CC>TT  | c.(166-168)TCC>TTT   | p.S56F        |
| Pat_66 | Pre-Treatment | MEMO1    | 51072  | 37 | 2  | 32145948 | 32145948 | Missense_Mutation | SNP | G  | A  | 90  | 66  | c.244C>T        | c.(244-246)CAT>TAT   | p.H82Y        |
| Pat_66 | Pre-Treatment | SLC30A6  | 55676  | 37 | 2  | 32445559 | 32445559 | Missense_Mutation | SNP | C  | T  | 100 | 91  | c.1163C>T       | c.(1162-1164)TCA>TTA | p.S388L       |
| Pat_66 | Pre-Treatment | NRXN1    | 9378   | 37 | 2  | 50779970 | 50779970 | Missense_Mutation | SNP | G  | A  | 21  | 38  | c.1634C>T       | c.(1633-1635)TCA>TTA | p.S545L       |
| Pat_66 | Pre-Treatment | BCL11A   | 53335  | 37 | 2  | 60688543 | 60688543 | Missense_Mutation | SNP | C  | T  | 19  | 8   | c.1504G>A       | c.(1504-1506)GAG>AAG | p.E502K       |
| Pat_66 | Pre-Treatment | SLC1A4   | 6509   | 37 | 2  | 65228592 | 65228592 | Missense_Mutation | SNP | C  | T  | 40  | 133 | c.538C>T        | c.(538-540)CCC>TCC   | p.P180S       |
| Pat_66 | Pre-Treatment | ETAA1    | 54465  | 37 | 2  | 67630832 | 67630832 | Missense_Mutation | SNP | C  | T  | 31  | 83  | c.1018C>T       | c.(1018-1020)CCA>TCA | p.P340S       |
| Pat_66 | Pre-Treatment | GKN1     | 56287  | 37 | 2  | 69207927 | 69207927 | Missense_Mutation | SNP | C  | T  | 26  | 49  | c.572C>T        | c.(571-573)TCC>TTC   | p.S191F       |
| Pat_66 | Pre-Treatment | ADD2     | 119    | 37 | 2  | 70906086 | 70906086 | Missense_Mutation | SNP | C  | T  | 53  | 79  | c.1133G>A       | c.(1132-1134)AGA>AAA | p.R378K       |
| Pat_66 | Pre-Treatment | ACTG2    | 72     | 37 | 2  | 74136218 | 74136218 | Missense_Mutation | SNP | G  | A  | 5   | 302 | c.403G>A        | c.(403-405)GTC>ATC   | p.V135I       |
| Pat_66 | Pre-Treatment | DQX1     | 165545 | 37 | 2  | 74746263 | 74746263 | Missense_Mutation | SNP | C  | T  | 36  | 72  | c.1901G>A       | c.(1900-1902)AGA>AAA | p.R634K       |
| Pat_66 | Pre-Treatment | DQX1     | 165545 | 37 | 2  | 74746696 | 74746696 | Missense_Mutation | SNP | C  | T  | 74  | 185 | c.1793G>A       | c.(1792-1794)GGA>GAA | p.G598E       |
| Pat_66 | Pre-Treatment | CTNNA2   | 1496   | 37 | 2  | 80782922 | 80782922 | Nonsense_Mutation | SNP | C  | T  | 44  | 134 | c.1645C>T       | c.(1645-1647)CGA>TGA | p.R549*       |

|        |               |           |        |    |   |           |           |                   |     |    |    |     |     |                |                        |                |
|--------|---------------|-----------|--------|----|---|-----------|-----------|-------------------|-----|----|----|-----|-----|----------------|------------------------|----------------|
| Pat_66 | Pre-Treatment | ST3GAL5   | 8869   | 37 | 2 | 86074997  | 86074997  | Missense_Mutation | SNP | C  | T  | 113 | 76  | c.649G>A       | c.(649-651)GAT>AAT     | p.D217N        |
| Pat_66 | Pre-Treatment | KRCC1     | 51315  | 37 | 2 | 88327934  | 88327934  | Missense_Mutation | SNP | A  | G  | 21  | 44  | c.149T>C       | c.(148-150)GTT>GCT     | p.V50A         |
| Pat_66 | Pre-Treatment | EIF2AK3   | 9451   | 37 | 2 | 88874650  | 88874650  | Missense_Mutation | SNP | G  | A  | 146 | 368 | c.2351C>T      | c.(2350-2352)TCC>TTC   | p.S784F        |
| Pat_66 | Pre-Treatment | ZNF514    | 84874  | 37 | 2 | 95815412  | 95815412  | Missense_Mutation | SNP | G  | A  | 87  | 41  | c.818C>T       | c.(817-819)TCG>TTG     | p.S273L        |
| Pat_66 | Pre-Treatment | NMS       | 129521 | 37 | 2 | 101086963 | 101086963 | Missense_Mutation | SNP | C  | T  | 76  | 199 | c.13C>T        | c.(13-15)CGT>TGT       | p.R5C          |
| Pat_66 | Pre-Treatment | IL18R1    | 8809   | 37 | 2 | 102979152 | 102979152 | Missense_Mutation | SNP | G  | T  | 5   | 266 | c.32G>T        | c.(31-33)TGG>TTG       | p.W11L         |
| Pat_66 | Pre-Treatment | IL18R1    | 8809   | 37 | 2 | 103003322 | 103003322 | Missense_Mutation | SNP | A  | T  | 22  | 59  | c.811A>T       | c.(811-813)ACT>TCT     | p.T271S        |
| Pat_66 | Pre-Treatment | IL18R1    | 8809   | 37 | 2 | 103011009 | 103011009 | Missense_Mutation | SNP | G  | A  | 33  | 73  | c.1192G>A      | c.(1192-1194)GAG>AAG   | p.E398K        |
| Pat_66 | Pre-Treatment | RGPD4     | 285190 | 37 | 2 | 108455395 | 108455395 | Missense_Mutation | SNP | G  | A  | 118 | 302 | c.380G>A       | c.(379-381)GGA>GAA     | p.G127E        |
| Pat_66 | Pre-Treatment | RGPD4     | 285190 | 37 | 2 | 108475865 | 108475865 | Missense_Mutation | SNP | C  | T  | 31  | 209 | c.1489C>T      | c.(1489-1491)CAC>TAC   | p.H497Y        |
| Pat_66 | Pre-Treatment | SULT1C2   | 6819   | 37 | 2 | 108910209 | 108910210 | Nonsense_Mutation | DNP | GG | AA | 55  | 44  | c.86_87GG>AA   | c.(85-87)TGG>TAA       | p.W29*         |
| Pat_66 | Pre-Treatment | RANBP2    | 5903   | 37 | 2 | 109382649 | 109382649 | Missense_Mutation | SNP | C  | T  | 48  | 158 | c.5654C>T      | c.(5653-5655)ACC>ATC   | p.T1885I       |
| Pat_66 | Pre-Treatment | IL1B      | 3553   | 37 | 2 | 113591100 | 113591100 | Missense_Mutation | SNP | C  | T  | 48  | 149 | c.152G>A       | c.(151-153)CGA>CAA     | p.R51Q         |
| Pat_66 | Pre-Treatment | MARCO     | 8685   | 37 | 2 | 119732096 | 119732096 | Splice_Site       | SNP | G  | A  | 17  | 29  | c.569_splice   | c.e6-1                 | p.G190_splice  |
| Pat_66 | Pre-Treatment | GLI2      | 2736   | 37 | 2 | 121740454 | 121740454 | Missense_Mutation | SNP | G  | A  | 61  | 149 | c.1681G>A      | c.(1681-1683)GAG>AAG   | p.E561K        |
| Pat_66 | Pre-Treatment | GLI2      | 2736   | 37 | 2 | 121743896 | 121743896 | Missense_Mutation | SNP | G  | A  | 57  | 34  | c.1999G>A      | c.(1999-2001)GAG>AAG   | p.E667K        |
| Pat_66 | Pre-Treatment | BIN1      | 274    | 37 | 2 | 127808489 | 127808489 | Splice_Site       | SNP | C  | T  | 28  | 81  | c.1462_splice  | c.e17-1                | p.S488_splice  |
| Pat_66 | Pre-Treatment | ERCC3     | 2071   | 37 | 2 | 128015227 | 128015227 | Missense_Mutation | SNP | C  | T  | 41  | 103 | c.2294G>A      | c.(2293-2295)CGG>CAG   | p.R765Q        |
| Pat_66 | Pre-Treatment | POTEF     | 728378 | 37 | 2 | 130877816 | 130877816 | Missense_Mutation | SNP | C  | T  | 95  | 336 | c.273G>A       | c.(271-273)ATG>ATA     | p.M91I         |
| Pat_66 | Pre-Treatment | LOC150786 | 150786 | 37 | 2 | 132120554 | 132120554 | Missense_Mutation | SNP | G  | A  | 32  | 117 | c.740C>T       | c.(739-741)TCA>TTA     | p.S247L        |
| Pat_66 | Pre-Treatment | LCT       | 3938   | 37 | 2 | 136561509 | 136561509 | Missense_Mutation | SNP | C  | T  | 10  | 23  | c.4654G>A      | c.(4654-4656)GCA>ACA   | p.A1552T       |
| Pat_66 | Pre-Treatment | THSD7B    | 80731  | 37 | 2 | 137814013 | 137814013 | Missense_Mutation | SNP | G  | A  | 17  | 62  | c.70G>A        | c.(70-72)GAC>AAC       | p.D24N         |
| Pat_66 | Pre-Treatment | LRP1B     | 53353  | 37 | 2 | 140992454 | 140992454 | Splice_Site       | SNP | C  | T  | 29  | 17  | c.13561_splice | c.e90-1                | p.A4521_splice |
| Pat_66 | Pre-Treatment | ZEB2      | 9839   | 37 | 2 | 145157783 | 145157783 | Missense_Mutation | SNP | G  | A  | 49  | 34  | c.971C>T       | c.(970-972)TCC>TTC     | p.S324F        |
| Pat_66 | Pre-Treatment | KIF5C     | 3800   | 37 | 2 | 149793849 | 149793849 | Missense_Mutation | SNP | G  | A  | 9   | 18  | c.343G>A       | c.(343-345)GAT>AAT     | p.D115N        |
| Pat_66 | Pre-Treatment | NEB       | 4703   | 37 | 2 | 152404848 | 152404848 | Missense_Mutation | SNP | G  | A  | 4   | 163 | c.15028C>T     | c.(15028-15030)CGG>TGC | p.R5010W       |
| Pat_66 | Pre-Treatment | GALNT13   | 114805 | 37 | 2 | 155102466 | 155102466 | Missense_Mutation | SNP | G  | C  | 69  | 41  | c.828G>C       | c.(826-828)AGG>AGC     | p.R276S        |
| Pat_66 | Pre-Treatment | GALNT5    | 11227  | 37 | 2 | 158114925 | 158114925 | Missense_Mutation | SNP | G  | A  | 89  | 70  | c.331G>A       | c.(331-333)GAA>AAA     | p.E111K        |
| Pat_66 | Pre-Treatment | CYTIP     | 9595   | 37 | 2 | 158272265 | 158272265 | Missense_Mutation | SNP | C  | T  | 23  | 83  | c.1004G>A      | c.(1003-1005)GGA>GAA   | p.G335E        |
| Pat_66 | Pre-Treatment | LY75      | 4065   | 37 | 2 | 160671981 | 160671981 | Missense_Mutation | SNP | C  | T  | 24  | 42  | c.4484G>A      | c.(4483-4485)GGA>GAA   | p.G1495E       |
| Pat_66 | Pre-Treatment | LY75      | 4065   | 37 | 2 | 160732154 | 160732154 | Missense_Mutation | SNP | G  | A  | 118 | 83  | c.1775C>T      | c.(1774-1776)GCT>GTT   | p.A592V        |
| Pat_66 | Pre-Treatment | FIGN      | 55137  | 37 | 2 | 164467030 | 164467030 | Missense_Mutation | SNP | G  | A  | 38  | 107 | c.1312C>T      | c.(1312-1314)CTC>TTC   | p.L438F        |
| Pat_66 | Pre-Treatment | FIGN      | 55137  | 37 | 2 | 164467113 | 164467113 | Missense_Mutation | SNP | G  | A  | 35  | 73  | c.1229C>T      | c.(1228-1230)TCA>TTA   | p.S410L        |
| Pat_66 | Pre-Treatment | SLC38A11  | 151258 | 37 | 2 | 165809258 | 165809258 | Missense_Mutation | SNP | G  | A  | 30  | 73  | c.20C>T        | c.(19-21)CCT>CTT       | p.P7L          |
| Pat_66 | Pre-Treatment | SCN3A     | 6328   | 37 | 2 | 165997486 | 165997486 | Missense_Mutation | SNP | G  | A  | 21  | 60  | c.1694C>T      | c.(1693-1695)TCC>TTC   | p.S565F        |
| Pat_66 | Pre-Treatment | SCN2A     | 6326   | 37 | 2 | 166243485 | 166243485 | Nonsense_Mutation | SNP | G  | A  | 94  | 58  | c.4781G>A      | c.(4780-4782)TGG>TAG   | p.W1594*       |
| Pat_66 | Pre-Treatment | SCN1A     | 6323   | 37 | 2 | 166892893 | 166892893 | Missense_Mutation | SNP | C  | T  | 18  | 26  | c.3061G>A      | c.(3061-3063)GAA>AAA   | p.E1021K       |
| Pat_66 | Pre-Treatment | SCN1A     | 6323   | 37 | 2 | 166900267 | 166900267 | Missense_Mutation | SNP | G  | A  | 43  | 138 | c.1955C>T      | c.(1954-1956)TCC>TTC   | p.S652F        |
| Pat_66 | Pre-Treatment | XIRP2     | 129446 | 37 | 2 | 168103996 | 168103996 | Missense_Mutation | SNP | C  | T  | 24  | 61  | c.6094C>T      | c.(6094-6096)CGT>TGT   | p.R2032C       |
| Pat_66 | Pre-Treatment | XIRP2     | 129446 | 37 | 2 | 168104704 | 168104704 | Missense_Mutation | SNP | G  | A  | 21  | 61  | c.6802G>A      | c.(6802-6804)GAA>AAA   | p.E2268K       |
| Pat_66 | Pre-Treatment | LRP2      | 4036   | 37 | 2 | 170048385 | 170048385 | Missense_Mutation | SNP | C  | T  | 38  | 103 | c.8989G>A      | c.(8989-8991)GAA>AAA   | p.E2997K       |
| Pat_66 | Pre-Treatment | LRP2      | 4036   | 37 | 2 | 170139487 | 170139487 | Missense_Mutation | SNP | C  | T  | 140 | 104 | c.1067G>A      | c.(1066-1068)GGA>GAA   | p.G356E        |
| Pat_66 | Pre-Treatment | KLHL23    | 151230 | 37 | 2 | 170606024 | 170606024 | Missense_Mutation | SNP | G  | A  | 24  | 81  | c.1459G>A      | c.(1459-1461)GAA>AAA   | p.E487K        |
| Pat_66 | Pre-Treatment | HOXD8     | 3234   | 37 | 2 | 176996223 | 176996223 | Nonsense_Mutation | SNP | G  | A  | 93  | 239 | c.756G>A       | c.(754-756)TGG>TGA     | p.W252*        |
| Pat_66 | Pre-Treatment | PDE11A    | 50940  | 37 | 2 | 178682595 | 178682595 | Missense_Mutation | SNP | C  | T  | 22  | 56  | c.1634G>A      | c.(1633-1635)CGA>CAA   | p.R545Q        |
| Pat_66 | Pre-Treatment | OSBPL6    | 114880 | 37 | 2 | 179255827 | 179255827 | Missense_Mutation | SNP | G  | A  | 44  | 116 | c.2329G>A      | c.(2329-2331)GAA>AAA   | p.E777K        |
| Pat_66 | Pre-Treatment | TTN       | 7273   | 37 | 2 | 179406231 | 179406231 | Missense_Mutation | SNP | C  | T  | 13  | 28  | c.89869G>A     | c.(89869-89871)GAT>AAT | p.D29957N      |

|        |               |         |        |    |   |           |           |                   |     |    |    |     |     |                 |                         |                |
|--------|---------------|---------|--------|----|---|-----------|-----------|-------------------|-----|----|----|-----|-----|-----------------|-------------------------|----------------|
| Pat_66 | Pre-Treatment | TTN     | 7273   | 37 | 2 | 179419273 | 179419273 | Missense_Mutation | SNP | C  | T  | 27  | 50  | c.81097G>A      | c.(81097-81099)GGA>AG/  | p.G27033R      |
| Pat_66 | Pre-Treatment | TTN     | 7273   | 37 | 2 | 179425040 | 179425040 | Missense_Mutation | SNP | C  | T  | 52  | 31  | c.78115G>A      | c.(78115-78117)GAT>AAT  | p.D26039N      |
| Pat_66 | Pre-Treatment | TTN     | 7273   | 37 | 2 | 179435849 | 179435849 | Missense_Mutation | SNP | G  | A  | 99  | 59  | c.67306C>T      | c.(67306-67308)CGT>TGT  | p.R22436C      |
| Pat_66 | Pre-Treatment | TTN     | 7273   | 37 | 2 | 179439721 | 179439721 | Missense_Mutation | SNP | C  | T  | 14  | 45  | c.63434G>A      | c.(63433-63435)GGA>GA/  | p.G21145E      |
| Pat_66 | Pre-Treatment | TTN     | 7273   | 37 | 2 | 179444905 | 179444905 | Missense_Mutation | SNP | G  | A  | 43  | 14  | c.59405C>T      | c.(59404-59406)TCT>TTT  | p.S19802F      |
| Pat_66 | Pre-Treatment | TTN     | 7273   | 37 | 2 | 179446868 | 179446868 | Nonsense_Mutation | SNP | C  | T  | 37  | 97  | c.58524G>A      | c.(58522-58524)TGG>TGA  | p.W19508*      |
| Pat_66 | Pre-Treatment | TTN     | 7273   | 37 | 2 | 179464532 | 179464532 | Missense_Mutation | SNP | C  | T  | 40  | 40  | c.48392G>A      | c.(48391-48393)GGA>GA/  | p.G16131E      |
| Pat_66 | Pre-Treatment | TTN     | 7273   | 37 | 2 | 179470324 | 179470324 | Missense_Mutation | SNP | C  | T  | 57  | 177 | c.45994G>A      | c.(45994-45996)GAA>AAA  | p.E15332K      |
| Pat_66 | Pre-Treatment | TTN     | 7273   | 37 | 2 | 179474864 | 179474864 | Missense_Mutation | SNP | C  | T  | 62  | 44  | c.43685G>A      | c.(43684-43686)GGA>GA/  | p.G14562E      |
| Pat_66 | Pre-Treatment | TTN     | 7273   | 37 | 2 | 179489312 | 179489312 | Missense_Mutation | SNP | C  | T  | 59  | 35  | c.36991G>A      | c.(36991-36993)GAA>AAA  | p.E12331K      |
| Pat_66 | Pre-Treatment | TTN     | 7273   | 37 | 2 | 179495061 | 179495061 | Missense_Mutation | SNP | A  | T  | 24  | 60  | c.36484T>A      | c.(36484-36486)TCC>ACC  | p.S12162T      |
| Pat_66 | Pre-Treatment | TTN     | 7273   | 37 | 2 | 179499351 | 179499351 | Missense_Mutation | SNP | C  | T  | 136 | 98  | c.34453G>A      | c.(34453-34455)GAA>AAA  | p.E11485K      |
| Pat_66 | Pre-Treatment | TTN     | 7273   | 37 | 2 | 179592936 | 179592936 | Missense_Mutation | SNP | C  | T  | 11  | 38  | c.15883G>A      | c.(15883-15885)GAA>AAA  | p.E5295K       |
| Pat_66 | Pre-Treatment | TTN     | 7273   | 37 | 2 | 179593309 | 179593309 | Missense_Mutation | SNP | C  | T  | 9   | 38  | c.15612G>A      | c.(15610-15612)ATG>ATA  | p.M5204I       |
| Pat_66 | Pre-Treatment | TTN     | 7273   | 37 | 2 | 179600403 | 179600403 | Missense_Mutation | SNP | C  | T  | 15  | 48  | c.11038G>A      | c.(11038-11040)GAT>AAT  | p.D3680N       |
| Pat_66 | Pre-Treatment | TTN     | 7273   | 37 | 2 | 179613248 | 179613248 | Missense_Mutation | SNP | C  | T  | 40  | 112 | c.13879G>A      | c.(13879-13881)GAT>AAT  | p.D4627N       |
| Pat_66 | Pre-Treatment | TTN     | 7273   | 37 | 2 | 179615363 | 179615363 | Missense_Mutation | SNP | C  | T  | 10  | 34  | c.11764G>A      | c.(11764-11766)GAA>AAA  | p.E3922K       |
| Pat_66 | Pre-Treatment | TTN     | 7273   | 37 | 2 | 179650604 | 179650604 | Missense_Mutation | SNP | C  | T  | 32  | 42  | c.2341G>A       | c.(2341-2343)GAT>AAT    | p.D781N        |
| Pat_66 | Pre-Treatment | CCDC141 | 285025 | 37 | 2 | 179718227 | 179718227 | Missense_Mutation | SNP | G  | A  | 46  | 109 | c.1460C>T       | c.(1459-1461)TCA>TTA    | p.S487L        |
| Pat_66 | Pre-Treatment | SESTD1  | 91404  | 37 | 2 | 180014055 | 180014055 | Missense_Mutation | SNP | T  | C  | 3   | 62  | c.550A>G        | c.(550-552)AGT>GGT      | p.S184G        |
| Pat_66 | Pre-Treatment | ZNF385B | 151126 | 37 | 2 | 180383269 | 180383269 | Missense_Mutation | SNP | G  | A  | 43  | 96  | c.493C>T        | c.(493-495)CGC>TGC      | p.R165C        |
| Pat_66 | Pre-Treatment | PDE1A   | 5136   | 37 | 2 | 183129074 | 183129074 | Missense_Mutation | SNP | C  | T  | 19  | 85  | c.169G>A        | c.(169-171)GAA>AAA      | p.E57K         |
| Pat_66 | Pre-Treatment | ZNF804A | 91752  | 37 | 2 | 185803418 | 185803418 | Missense_Mutation | SNP | C  | T  | 44  | 98  | c.3295C>T       | c.(3295-3297)CAT>TAT    | p.H1099Y       |
| Pat_66 | Pre-Treatment | ZSWIM2  | 151112 | 37 | 2 | 187697937 | 187697937 | Missense_Mutation | SNP | G  | A  | 15  | 21  | c.851C>T        | c.(850-852)TCA>TTA      | p.S284L        |
| Pat_66 | Pre-Treatment | COL3A1  | 1281   | 37 | 2 | 189873887 | 189873887 | Missense_Mutation | SNP | C  | T  | 41  | 108 | c.3763C>T       | c.(3763-3765)CGT>TGT    | p.R1255C       |
| Pat_66 | Pre-Treatment | COL5A2  | 1290   | 37 | 2 | 189898855 | 189898855 | Missense_Mutation | SNP | C  | T  | 31  | 56  | c.4441G>A       | c.(4441-4443)GAT>AAT    | p.D1481N       |
| Pat_66 | Pre-Treatment | STAT1   | 6772   | 37 | 2 | 191841637 | 191841637 | Missense_Mutation | SNP | G  | A  | 31  | 85  | c.1988C>T       | c.(1987-1989)CCC>CTC    | p.P663L        |
| Pat_66 | Pre-Treatment | DNAH7   | 56171  | 37 | 2 | 196726661 | 196726661 | Missense_Mutation | SNP | C  | T  | 21  | 30  | c.7516G>A       | c.(7516-7518)GAA>AAA    | p.E2506K       |
| Pat_66 | Pre-Treatment | DNAH7   | 56171  | 37 | 2 | 196728926 | 196728926 | Missense_Mutation | SNP | G  | A  | 32  | 77  | c.7453C>T       | c.(7453-7455)CGT>TGT    | p.R2485C       |
| Pat_66 | Pre-Treatment | DNAH7   | 56171  | 37 | 2 | 196729451 | 196729451 | Missense_Mutation | SNP | G  | A  | 49  | 168 | c.6928C>T       | c.(6928-6930)CCC>TCC    | p.P2310S       |
| Pat_66 | Pre-Treatment | DNAH7   | 56171  | 37 | 2 | 196746518 | 196746518 | Splice_Site       | SNP | C  | T  | 35  | 86  | c.5961_splice   | c.e36+1                 | p.T1987_splice |
| Pat_66 | Pre-Treatment | BMPR2   | 659    | 37 | 2 | 203378445 | 203378445 | Missense_Mutation | SNP | C  | T  | 31  | 86  | c.422C>T        | c.(421-423)CCA>CTA      | p.P141L        |
| Pat_66 | Pre-Treatment | PARD3B  | 117583 | 37 | 2 | 205983712 | 205983712 | Missense_Mutation | SNP | G  | A  | 42  | 101 | c.748G>A        | c.(748-750)GAA>AAA      | p.E250K        |
| Pat_66 | Pre-Treatment | ZDBF2   | 57683  | 37 | 2 | 207174227 | 207174227 | Missense_Mutation | SNP | G  | A  | 41  | 46  | c.4975G>A       | c.(4975-4977)GGA>AGA    | p.G1659R       |
| Pat_66 | Pre-Treatment | C2orf80 | 389073 | 37 | 2 | 209036796 | 209036796 | Missense_Mutation | SNP | G  | A  | 182 | 137 | c.370C>T        | c.(370-372)CCC>TCC      | p.P124S        |
| Pat_66 | Pre-Treatment | MYL1    | 4632   | 37 | 2 | 211163161 | 211163161 | Missense_Mutation | SNP | C  | T  | 76  | 73  | c.287G>A        | c.(286-288)GGA>GAA      | p.G96E         |
| Pat_66 | Pre-Treatment | ERBB4   | 2066   | 37 | 2 | 212288972 | 212288973 | Missense_Mutation | DNP | GG | AA | 27  | 62  | c.2773_2774CC>T | c.(2773-2775)CCA>TTA    | p.P925L        |
| Pat_66 | Pre-Treatment | ERBB4   | 2066   | 37 | 2 | 212530121 | 212530122 | Missense_Mutation | DNP | CC | TT | 81  | 61  | c.1797_1798GG>A | c.(1795-1800)GGGGCA>GGA | p.A600T        |
| Pat_66 | Pre-Treatment | SPEG    | 10290  | 37 | 2 | 220332022 | 220332022 | Missense_Mutation | SNP | G  | T  | 4   | 86  | c.3008G>T       | c.(3007-3009)TGC>TTC    | p.C1003F       |
| Pat_66 | Pre-Treatment | SPEG    | 10290  | 37 | 2 | 220355178 | 220355178 | Missense_Mutation | SNP | G  | A  | 4   | 78  | c.8969G>A       | c.(8968-8970)CGA>CAA    | p.R2990Q       |
| Pat_66 | Pre-Treatment | COL4A4  | 1286   | 37 | 2 | 227886850 | 227886850 | Missense_Mutation | SNP | C  | T  | 89  | 259 | c.4130G>A       | c.(4129-4131)CGA>CAA    | p.R1377Q       |
| Pat_66 | Pre-Treatment | WDR69   | 164781 | 37 | 2 | 228769705 | 228769705 | Missense_Mutation | SNP | G  | A  | 53  | 148 | c.709G>A        | c.(709-711)GGG>AGG      | p.G237R        |
| Pat_66 | Pre-Treatment | SPHKAP  | 80309  | 37 | 2 | 228884799 | 228884799 | Nonsense_Mutation | SNP | C  | T  | 108 | 153 | c.771G>A        | c.(769-771)TGG>TGA      | p.W257*        |
| Pat_66 | Pre-Treatment | SP140   | 11262  | 37 | 2 | 231112645 | 231112646 | Missense_Mutation | DNP | GG | AA | 67  | 216 | c.757_758GG>AA  | c.(757-759)GGG>AAG      | p.G253K        |
| Pat_66 | Pre-Treatment | UGT1A7  | 54577  | 37 | 2 | 234591418 | 234591418 | Nonsense_Mutation | SNP | C  | T  | 122 | 324 | c.835C>T        | c.(835-837)CAG>TAG      | p.Q279*        |
| Pat_66 | Pre-Treatment | RBM44   | 375316 | 37 | 2 | 238726382 | 238726382 | Missense_Mutation | SNP | C  | T  | 20  | 29  | c.823C>T        | c.(823-825)CAT>TAT      | p.H275Y        |
| Pat_66 | Pre-Treatment | KIF1A   | 547    | 37 | 2 | 241715283 | 241715283 | Missense_Mutation | SNP | G  | A  | 15  | 60  | c.943C>T        | c.(943-945)CTC>TTC      | p.L315F        |

|        |               |           |        |    |    |          |          |                        |     |    |    |     |     |                |                      |               |
|--------|---------------|-----------|--------|----|----|----------|----------|------------------------|-----|----|----|-----|-----|----------------|----------------------|---------------|
| Pat_66 | Pre-Treatment | MCM8      | 84515  | 37 | 20 | 5965602  | 5965602  | Missense_Mutation      | SNP | G  | A  | 4   | 114 | c.1909G>A      | c.(1909-1911)GTA>ATA | p.V637I       |
| Pat_66 | Pre-Treatment | LRRN4     | 164312 | 37 | 20 | 6022054  | 6022054  | Missense_Mutation      | SNP | G  | A  | 4   | 158 | c.1837C>T      | c.(1837-1839)CGC>TGC | p.R613C       |
| Pat_66 | Pre-Treatment | PLCB1     | 23236  | 37 | 20 | 8709777  | 8709777  | Nonsense_Mutation      | SNP | G  | A  | 41  | 87  | c.1844G>A      | c.(1843-1845)TGG>TAG | p.W615*       |
| Pat_66 | Pre-Treatment | PLCB4     | 5332   | 37 | 20 | 9424891  | 9424891  | Splice_Site            | SNP | G  | A  | 13  | 100 | c.2844_splice  | c.e30+1              | p.K948_splice |
| Pat_66 | Pre-Treatment | FLRT3     | 23767  | 37 | 20 | 14306937 | 14306937 | Missense_Mutation      | SNP | G  | A  | 102 | 256 | c.1216C>T      | c.(1216-1218)CCC>TCC | p.P406S       |
| Pat_66 | Pre-Treatment | KIF16B    | 55614  | 37 | 20 | 16488739 | 16488739 | Missense_Mutation      | SNP | G  | A  | 85  | 179 | c.563C>T       | c.(562-564)TCC>TTC   | p.S188F       |
| Pat_66 | Pre-Treatment | CSRP2BP   | 57325  | 37 | 20 | 18142722 | 18142723 | Missense_Mutation      | DNP | CC | GT | 74  | 168 | c.941_942CC>GT | c.(940-942)TCC>TGT   | p.S314C       |
| Pat_66 | Pre-Treatment | PAX1      | 5075   | 37 | 20 | 21687513 | 21687513 | Missense_Mutation      | SNP | T  | A  | 27  | 40  | c.724T>A       | c.(724-726)TCG>ACG   | p.S242T       |
| Pat_66 | Pre-Treatment | NINL      | 22981  | 37 | 20 | 25462646 | 25462646 | Missense_Mutation      | SNP | G  | A  | 32  | 98  | c.1768C>T      | c.(1768-1770)CCG>TCG | p.P590S       |
| Pat_66 | Pre-Treatment | FRG1B     | 284802 | 37 | 20 | 29614323 | 29614323 | Translation_Start_Site | SNP | C  | T  | 5   | 120 | c.-10C>T       | c.(-12-8)TACGT>TATGT |               |
| Pat_66 | Pre-Treatment | FRG1B     | 284802 | 37 | 20 | 29628278 | 29628278 | Missense_Mutation      | SNP | G  | A  | 5   | 254 | c.190G>A       | c.(190-192)GCA>ACA   | p.A64T        |
| Pat_66 | Pre-Treatment | XKR7      | 343702 | 37 | 20 | 30584944 | 30584944 | Missense_Mutation      | SNP | C  | T  | 11  | 36  | c.1424C>T      | c.(1423-1425)TCC>TTC | p.S475F       |
| Pat_66 | Pre-Treatment | MYH7B     | 57644  | 37 | 20 | 33578870 | 33578870 | Missense_Mutation      | SNP | G  | A  | 4   | 148 | c.2255G>A      | c.(2254-2256)CGG>CAG | p.R752Q       |
| Pat_66 | Pre-Treatment | GDF5      | 8200   | 37 | 20 | 34021854 | 34021854 | Missense_Mutation      | SNP | C  | T  | 20  | 52  | c.1359G>A      | c.(1357-1359)ATG>ATA | p.M453I       |
| Pat_66 | Pre-Treatment | DHX35     | 60625  | 37 | 20 | 37650573 | 37650573 | Missense_Mutation      | SNP | C  | T  | 47  | 202 | c.1588C>T      | c.(1588-1590)CAC>TAC | p.H530Y       |
| Pat_66 | Pre-Treatment | PTPRT     | 11122  | 37 | 20 | 40827958 | 40827958 | Missense_Mutation      | SNP | C  | T  | 120 | 413 | c.2413G>A      | c.(2413-2415)GAC>AAC | p.D805N       |
| Pat_66 | Pre-Treatment | L3MBTL    | 26013  | 37 | 20 | 42157324 | 42157324 | Missense_Mutation      | SNP | C  | T  | 31  | 126 | c.824C>T       | c.(823-825)TCG>TTG   | p.S275L       |
| Pat_66 | Pre-Treatment | SEMG1     | 6406   | 37 | 20 | 43837052 | 43837052 | Missense_Mutation      | SNP | C  | A  | 4   | 136 | c.1114C>A      | c.(1114-1116)CGC>AGC | p.R372S       |
| Pat_66 | Pre-Treatment | SEMG2     | 6407   | 37 | 20 | 43851414 | 43851414 | Missense_Mutation      | SNP | C  | A  | 7   | 226 | c.1141C>A      | c.(1141-1143)CAA>AAA | p.Q381K       |
| Pat_66 | Pre-Treatment | SLC13A3   | 64849  | 37 | 20 | 45221058 | 45221058 | Missense_Mutation      | SNP | C  | T  | 49  | 116 | c.905G>A       | c.(904-906)GGG>GAG   | p.G302E       |
| Pat_66 | Pre-Treatment | SPATA2    | 9825   | 37 | 20 | 48523251 | 48523252 | Missense_Mutation      | DNP | GG | AT | 11  | 67  | c.467_468CC>AT | c.(466-468)ACC>AAT   | p.T156N       |
| Pat_66 | Pre-Treatment | ATP9A     | 10079  | 37 | 20 | 50287677 | 50287677 | Missense_Mutation      | SNP | G  | A  | 90  | 80  | c.1157C>T      | c.(1156-1158)TCG>TTG | p.S386L       |
| Pat_66 | Pre-Treatment | TSHZ2     | 128553 | 37 | 20 | 51870557 | 51870557 | Missense_Mutation      | SNP | C  | T  | 22  | 97  | c.560C>T       | c.(559-561)TCG>TTG   | p.S187L       |
| Pat_66 | Pre-Treatment | BMP7      | 655    | 37 | 20 | 55777567 | 55777567 | Missense_Mutation      | SNP | T  | G  | 31  | 45  | c.724A>C       | c.(724-726)AAC>CAC   | p.N242H       |
| Pat_66 | Pre-Treatment | RAB22A    | 57403  | 37 | 20 | 56928498 | 56928498 | Missense_Mutation      | SNP | C  | T  | 8   | 68  | c.281C>T       | c.(280-282)TCA>TTA   | p.S94L        |
| Pat_66 | Pre-Treatment | OSBPL2    | 9885   | 37 | 20 | 60854366 | 60854367 | Nonsense_Mutation      | DNP | CC | TT | 22  | 34  | c.645_646CC>TT | 643-648)CCCCGA>CCTT  | p.R216*       |
| Pat_66 | Pre-Treatment | NTSR1     | 4923   | 37 | 20 | 61340978 | 61340978 | Missense_Mutation      | SNP | G  | A  | 22  | 85  | c.419G>A       | c.(418-420)GGC>GAC   | p.G140D       |
| Pat_66 | Pre-Treatment | DIDO1     | 11083  | 37 | 20 | 61513394 | 61513394 | Missense_Mutation      | SNP | G  | A  | 59  | 273 | c.3914C>T      | c.(3913-3915)TCG>TTG | p.S1305L      |
| Pat_66 | Pre-Treatment | BIRC7     | 79444  | 37 | 20 | 61869930 | 61869930 | Missense_Mutation      | SNP | G  | A  | 80  | 129 | c.541G>A       | c.(541-543)GAA>AAA   | p.E181K       |
| Pat_66 | Pre-Treatment | PRIC285   | 85441  | 37 | 20 | 62198657 | 62198657 | Missense_Mutation      | SNP | G  | A  | 5   | 36  | c.2054C>T      | c.(2053-2055)TCG>TTG | p.S685L       |
| Pat_66 | Pre-Treatment | TPTE      | 7179   | 37 | 21 | 10959769 | 10959769 | Missense_Mutation      | SNP | C  | T  | 32  | 233 | c.205G>A       | c.(205-207)GAA>AAA   | p.E69K        |
| Pat_66 | Pre-Treatment | NCAM2     | 4685   | 37 | 21 | 22849621 | 22849621 | Missense_Mutation      | SNP | G  | A  | 38  | 23  | c.1906G>A      | c.(1906-1908)GAA>AAA | p.E636K       |
| Pat_66 | Pre-Treatment | CLDN17    | 26285  | 37 | 21 | 31538923 | 31538923 | Missense_Mutation      | SNP | G  | A  | 28  | 53  | c.13C>T        | c.(13-15)CCC>TCC     | p.P5S         |
| Pat_66 | Pre-Treatment | MRAP      | 56246  | 37 | 21 | 33684248 | 33684248 | Missense_Mutation      | SNP | G  | A  | 4   | 97  | c.460G>A       | c.(460-462)GTC>ATC   | p.V154I       |
| Pat_66 | Pre-Treatment | C21orf59  | 56683  | 37 | 21 | 33984471 | 33984471 | Missense_Mutation      | SNP | G  | A  | 3   | 12  | c.83C>T        | c.(82-84)ACG>ATG     | p.T28M        |
| Pat_66 | Pre-Treatment | SON       | 6651   | 37 | 21 | 34922916 | 34922916 | Missense_Mutation      | SNP | C  | T  | 8   | 27  | c.1379C>T      | c.(1378-1380)TCC>TTC | p.S460F       |
| Pat_66 | Pre-Treatment | ITSN1     | 6453   | 37 | 21 | 35257793 | 35257793 | Missense_Mutation      | SNP | G  | A  | 65  | 161 | c.4810G>A      | c.(4810-4812)GAA>AAA | p.E1604K      |
| Pat_66 | Pre-Treatment | DOPEY2    | 9980   | 37 | 21 | 37583858 | 37583858 | Missense_Mutation      | SNP | C  | T  | 55  | 147 | c.689C>T       | c.(688-690)TCT>TTT   | p.S230F       |
| Pat_66 | Pre-Treatment | KCNJ15    | 3772   | 37 | 21 | 39672104 | 39672104 | Nonsense_Mutation      | SNP | G  | A  | 32  | 97  | c.921G>A       | c.(919-921)TGG>TGA   | p.W307*       |
| Pat_66 | Pre-Treatment | DSCAM     | 1826   | 37 | 21 | 41465792 | 41465792 | Missense_Mutation      | SNP | C  | T  | 26  | 57  | c.3706G>A      | c.(3706-3708)GAG>AAG | p.E1236K      |
| Pat_66 | Pre-Treatment | DSCAM     | 1826   | 37 | 21 | 41496210 | 41496210 | Missense_Mutation      | SNP | G  | A  | 51  | 94  | c.3608C>T      | c.(3607-3609)TCC>TTC | p.S1203F      |
| Pat_66 | Pre-Treatment | DSCAM     | 1826   | 37 | 21 | 41684260 | 41684260 | Missense_Mutation      | SNP | A  | T  | 20  | 40  | c.1810T>A      | c.(1810-1812)TTT>ATT | p.F604I       |
| Pat_66 | Pre-Treatment | AIRE      | 326    | 37 | 21 | 45709666 | 45709666 | Missense_Mutation      | SNP | G  | A  | 23  | 40  | c.779G>A       | c.(778-780)GGA>GAA   | p.G260E       |
| Pat_66 | Pre-Treatment | KRTAP12-1 | 353332 | 37 | 21 | 46101837 | 46101837 | Missense_Mutation      | SNP | G  | A  | 48  | 114 | c.202C>T       | c.(202-204)CCC>TCC   | p.P68S        |
| Pat_66 | Pre-Treatment | SLC19A1   | 6573   | 37 | 21 | 46951971 | 46951971 | Missense_Mutation      | SNP | G  | A  | 4   | 104 | c.281C>T       | c.(280-282)CCG>CTG   | p.P94L        |
| Pat_66 | Pre-Treatment | COL6A2    | 1292   | 37 | 21 | 47542801 | 47542801 | Missense_Mutation      | SNP | G  | A  | 49  | 37  | c.1621G>A      | c.(1621-1623)GAC>AAC | p.D541N       |
| Pat_66 | Pre-Treatment | PCNT      | 5116   | 37 | 21 | 47754536 | 47754536 | Missense_Mutation      | SNP | C  | A  | 5   | 211 | c.493C>A       | c.(493-495)CCA>ACA   | p.P165T       |



|        |               |          |        |    |    |          |          |                   |     |    |    |     |     |              |                      |          |
|--------|---------------|----------|--------|----|----|----------|----------|-------------------|-----|----|----|-----|-----|--------------|----------------------|----------|
| Pat_66 | Pre-Treatment | CCT8L2   | 150160 | 37 | 22 | 17072623 | 17072623 | Missense_Mutation | SNP | C  | T  | 46  | 163 | c.818G>A     | c.(817-819)GGA>GAA   | p.G273E  |
| Pat_66 | Pre-Treatment | GNB1L    | 54584  | 37 | 22 | 19794277 | 19794277 | Nonsense_Mutation | SNP | G  | A  | 10  | 25  | c.421C>T     | c.(421-423)CAG>TAG   | p.Q141*  |
| Pat_66 | Pre-Treatment | ARVCF    | 421    | 37 | 22 | 19965012 | 19965012 | Missense_Mutation | SNP | G  | A  | 29  | 86  | c.1796C>T    | c.(1795-1797)CCC>CTC | p.P599L  |
| Pat_66 | Pre-Treatment | RTN4R    | 65078  | 37 | 22 | 20229382 | 20229382 | Missense_Mutation | SNP | G  | A  | 16  | 3   | c.1274C>T    | c.(1273-1275)ACC>ATC | p.T425I  |
| Pat_66 | Pre-Treatment | CABIN1   | 23523  | 37 | 22 | 24437594 | 24437594 | Missense_Mutation | SNP | C  | T  | 111 | 118 | c.218C>T     | c.(217-219)TCA>TTA   | p.S73L   |
| Pat_66 | Pre-Treatment | MYO18B   | 84700  | 37 | 22 | 26423114 | 26423114 | Missense_Mutation | SNP | G  | A  | 64  | 58  | c.7174G>A    | c.(7174-7176)GAC>AAC | p.D2392N |
| Pat_66 | Pre-Treatment | MYO18B   | 84700  | 37 | 22 | 26423139 | 26423139 | Missense_Mutation | SNP | G  | A  | 70  | 34  | c.7199G>A    | c.(7198-7200)GGA>GAA | p.G2400E |
| Pat_66 | Pre-Treatment | LARGE    | 9215   | 37 | 22 | 33673104 | 33673104 | Missense_Mutation | SNP | C  | T  | 55  | 81  | c.2015G>A    | c.(2014-2016)CGG>CAG | p.R672Q  |
| Pat_66 | Pre-Treatment | C22orf33 | 339669 | 37 | 22 | 37396016 | 37396016 | Missense_Mutation | SNP | C  | T  | 20  | 64  | c.499G>A     | c.(499-501)GCT>ACT   | p.A167T  |
| Pat_66 | Pre-Treatment | TPRSS6   | 164656 | 37 | 22 | 37499391 | 37499391 | Missense_Mutation | SNP | C  | T  | 44  | 167 | c.94G>A      | c.(94-96)GAG>AAG     | p.E32K   |
| Pat_66 | Pre-Treatment | PLA2G6   | 8398   | 37 | 22 | 38565377 | 38565378 | Missense_Mutation | DNP | AG | TA | 30  | 84  | c.56_57CT>TA | c.(55-57)TCT>TTA     | p.S19L   |
| Pat_66 | Pre-Treatment | MEI1     | 150365 | 37 | 22 | 42191808 | 42191808 | Missense_Mutation | SNP | C  | T  | 16  | 37  | c.3736C>T    | c.(3736-3738)CCC>TCC | p.P1246S |
| Pat_66 | Pre-Treatment | SCUBE1   | 80274  | 37 | 22 | 43610249 | 43610249 | Missense_Mutation | SNP | C  | T  | 15  | 104 | c.1900G>A    | c.(1900-1902)GGG>AGG | p.G634R  |
| Pat_66 | Pre-Treatment | EFCAB6   | 64800  | 37 | 22 | 44004441 | 44004441 | Nonsense_Mutation | SNP | G  | A  | 28  | 105 | c.2602C>T    | c.(2602-2604)CGA>TGA | p.R868*  |
| Pat_66 | Pre-Treatment | C22orf9  | 23313  | 37 | 22 | 45607874 | 45607874 | Missense_Mutation | SNP | G  | A  | 4   | 119 | c.179C>T     | c.(178-180)GCG>GTG   | p.A60V   |
| Pat_66 | Pre-Treatment | WNT7B    | 7477   | 37 | 22 | 46327115 | 46327115 | Missense_Mutation | SNP | C  | T  | 35  | 128 | c.433G>A     | c.(433-435)GAG>AAG   | p.E145K  |
| Pat_66 | Pre-Treatment | TLL8     | 164714 | 37 | 22 | 50488570 | 50488570 | Missense_Mutation | SNP | G  | A  | 42  | 19  | c.158C>T     | c.(157-159)CCG>CTG   | p.P53L   |
| Pat_66 | Pre-Treatment | CNTN6    | 27255  | 37 | 3  | 1415682  | 1415682  | Missense_Mutation | SNP | C  | T  | 50  | 68  | c.2020C>T    | c.(2020-2022)CGT>TGT | p.R674C  |
| Pat_66 | Pre-Treatment | GRM7     | 2917   | 37 | 3  | 7620373  | 7620373  | Missense_Mutation | SNP | C  | T  | 71  | 11  | c.1780C>T    | c.(1780-1782)CCT>TCT | p.P594S  |
| Pat_66 | Pre-Treatment | C3orf24  | 115795 | 37 | 3  | 10146416 | 10146416 | Missense_Mutation | SNP | C  | T  | 58  | 14  | c.43G>A      | c.(43-45)GAG>AAG     | p.E15K   |
| Pat_66 | Pre-Treatment | HRH1     | 3269   | 37 | 3  | 11301183 | 11301183 | Missense_Mutation | SNP | C  | T  | 29  | 32  | c.460C>T     | c.(460-462)CTC>TTC   | p.L154F  |
| Pat_66 | Pre-Treatment | CAND2    | 23066  | 37 | 3  | 12858407 | 12858407 | Missense_Mutation | SNP | C  | T  | 54  | 74  | c.1976C>T    | c.(1975-1977)TCA>TTA | p.S659L  |
| Pat_66 | Pre-Treatment | CAND2    | 23066  | 37 | 3  | 12867118 | 12867118 | Missense_Mutation | SNP | C  | T  | 16  | 4   | c.3190C>T    | c.(3190-3192)CGG>TGG | p.R1064W |
| Pat_66 | Pre-Treatment | NUP210   | 23225  | 37 | 3  | 13363156 | 13363156 | Missense_Mutation | SNP | G  | A  | 62  | 64  | c.5095C>T    | c.(5095-5097)CTT>TTT | p.L1699F |
| Pat_66 | Pre-Treatment | NUP210   | 23225  | 37 | 3  | 13381425 | 13381425 | Missense_Mutation | SNP | C  | T  | 4   | 224 | c.3400G>A    | c.(3400-3402)GGG>AGG | p.G1134R |
| Pat_66 | Pre-Treatment | SLC6A6   | 6533   | 37 | 3  | 14489157 | 14489157 | Nonsense_Mutation | SNP | G  | A  | 240 | 300 | c.432G>A     | c.(430-432)TGG>TGA   | p.W144*  |
| Pat_66 | Pre-Treatment | LRR3B    | 116135 | 37 | 3  | 26751500 | 26751500 | Missense_Mutation | SNP | G  | A  | 36  | 24  | c.337G>A     | c.(337-339)GAA>AAA   | p.E113K  |
| Pat_66 | Pre-Treatment | NEK10    | 152110 | 37 | 3  | 27173423 | 27173423 | Missense_Mutation | SNP | G  | A  | 14  | 25  | c.1136C>T    | c.(1135-1137)TCC>TTC | p.S379F  |
| Pat_66 | Pre-Treatment | ZNF860   | 344787 | 37 | 3  | 32031985 | 32031985 | Missense_Mutation | SNP | C  | T  | 88  | 190 | c.1414C>T    | c.(1414-1416)CAT>TAT | p.H472Y  |
| Pat_66 | Pre-Treatment | STAC     | 6769   | 37 | 3  | 36484943 | 36484943 | Missense_Mutation | SNP | G  | A  | 33  | 41  | c.199G>A     | c.(199-201)GAA>AAA   | p.E67K   |
| Pat_66 | Pre-Treatment | TRANK1   | 9881   | 37 | 3  | 36874872 | 36874872 | Missense_Mutation | SNP | C  | T  | 16  | 21  | c.4420G>A    | c.(4420-4422)GAA>AAA | p.E1474K |
| Pat_66 | Pre-Treatment | SCN5A    | 6331   | 37 | 3  | 38629009 | 38629009 | Missense_Mutation | SNP | G  | A  | 19  | 30  | c.2318C>T    | c.(2317-2319)CCC>CTC | p.P773L  |
| Pat_66 | Pre-Treatment | SCN10A   | 6336   | 37 | 3  | 38739346 | 38739346 | Missense_Mutation | SNP | C  | T  | 17  | 25  | c.5365G>A    | c.(5365-5367)GAC>AAC | p.D1789N |
| Pat_66 | Pre-Treatment | SCN11A   | 11280  | 37 | 3  | 38908826 | 38908826 | Nonsense_Mutation | SNP | G  | A  | 36  | 41  | c.3937C>T    | c.(3937-3939)CAA>TAA | p.Q1313* |
| Pat_66 | Pre-Treatment | SCN11A   | 11280  | 37 | 3  | 38991597 | 38991597 | Missense_Mutation | SNP | C  | T  | 23  | 21  | c.257G>A     | c.(256-258)CGA>CAA   | p.R86Q   |
| Pat_66 | Pre-Treatment | XIRP1    | 165904 | 37 | 3  | 39229645 | 39229645 | Missense_Mutation | SNP | C  | T  | 246 | 30  | c.1292G>A    | c.(1291-1293)AGG>AAG | p.R431K  |
| Pat_66 | Pre-Treatment | TGM4     | 7047   | 37 | 3  | 44952874 | 44952874 | Missense_Mutation | SNP | C  | T  | 99  | 13  | c.1889C>T    | c.(1888-1890)TCC>TTC | p.S630F  |
| Pat_66 | Pre-Treatment | CCR2     | 729230 | 37 | 3  | 46401245 | 46401245 | Missense_Mutation | SNP | G  | A  | 85  | 11  | c.1019G>A    | c.(1018-1020)GGA>GAA | p.G340E  |
| Pat_66 | Pre-Treatment | LTF      | 4057   | 37 | 3  | 46490487 | 46490487 | Missense_Mutation | SNP | C  | T  | 3   | 52  | c.1079G>A    | c.(1078-1080)CGG>CAG | p.R360Q  |
| Pat_66 | Pre-Treatment | BSN      | 8927   | 37 | 3  | 49695133 | 49695133 | Missense_Mutation | SNP | G  | A  | 101 | 16  | c.8144G>A    | c.(8143-8145)AGC>AAC | p.S2715N |
| Pat_66 | Pre-Treatment | RNF123   | 63891  | 37 | 3  | 49753895 | 49753895 | Missense_Mutation | SNP | G  | A  | 4   | 232 | c.3485G>A    | c.(3484-3486)CGT>CAT | p.R1162H |
| Pat_66 | Pre-Treatment | GRM2     | 2912   | 37 | 3  | 51752121 | 51752121 | Missense_Mutation | SNP | C  | T  | 113 | 151 | c.2612C>T    | c.(2611-2613)TCG>TTG | p.S871L  |
| Pat_66 | Pre-Treatment | CACNA2D3 | 55799  | 37 | 3  | 55108183 | 55108183 | Nonsense_Mutation | SNP | C  | T  | 74  | 27  | c.3226C>T    | c.(3226-3228)CAG>TAG | p.Q1076* |
| Pat_66 | Pre-Treatment | ERC2     | 26059  | 37 | 3  | 56026131 | 56026131 | Missense_Mutation | SNP | C  | T  | 167 | 24  | c.2209G>A    | c.(2209-2211)GAG>AAG | p.E737K  |
| Pat_66 | Pre-Treatment | ERC2     | 26059  | 37 | 3  | 56114925 | 56114925 | Missense_Mutation | SNP | C  | T  | 32  | 5   | c.1561G>A    | c.(1561-1563)GGG>AGG | p.G521R  |
| Pat_66 | Pre-Treatment | DNAH12   | 201625 | 37 | 3  | 57494895 | 57494895 | Missense_Mutation | SNP | C  | T  | 44  | 80  | c.514G>A     | c.(514-516)GAA>AAA   | p.E172K  |
| Pat_66 | Pre-Treatment | LRIG1    | 26018  | 37 | 3  | 66501990 | 66501990 | Missense_Mutation | SNP | G  | A  | 61  | 158 | c.358C>T     | c.(358-360)CTC>TTC   | p.L120F  |

|        |               |          |        |    |   |           |           |                   |     |   |   |     |     |           |                      |          |
|--------|---------------|----------|--------|----|---|-----------|-----------|-------------------|-----|---|---|-----|-----|-----------|----------------------|----------|
| Pat_66 | Pre-Treatment | CNTN3    | 5067   | 37 | 3 | 74350636  | 74350636  | Missense_Mutation | SNP | C | T | 88  | 14  | c.2008G>A | c.(2008-2010)GAA>AAA | p.E670K  |
| Pat_66 | Pre-Treatment | FAM86D   | 692099 | 37 | 3 | 75475607  | 75475607  | Missense_Mutation | SNP | C | T | 5   | 11  | c.631G>A  | c.(631-633)GAG>AAG   | p.E211K  |
| Pat_66 | Pre-Treatment | OR5H15   | 403274 | 37 | 3 | 97888247  | 97888247  | Missense_Mutation | SNP | G | A | 26  | 31  | c.704G>A  | c.(703-705)AGG>AAG   | p.R235K  |
| Pat_66 | Pre-Treatment | OR5K4    | 403278 | 37 | 3 | 98073129  | 98073129  | Missense_Mutation | SNP | G | A | 40  | 66  | c.432G>A  | c.(430-432)ATG>ATA   | p.M144I  |
| Pat_66 | Pre-Treatment | FILIP1L  | 11259  | 37 | 3 | 99567215  | 99567215  | Missense_Mutation | SNP | T | A | 205 | 16  | c.3305A>T | c.(3304-3306)AAA>ATA | p.K1102I |
| Pat_66 | Pre-Treatment | ATP6V1A  | 523    | 37 | 3 | 113524359 | 113524359 | Missense_Mutation | SNP | C | T | 60  | 6   | c.1748C>T | c.(1747-1749)TCC>TTC | p.S583F  |
| Pat_66 | Pre-Treatment | DRD3     | 1814   | 37 | 3 | 113850076 | 113850076 | Nonsense_Mutation | SNP | G | A | 75  | 110 | c.895C>T  | c.(895-897)CGA>TGA   | p.R299*  |
| Pat_66 | Pre-Treatment | FBXO40   | 51725  | 37 | 3 | 121341658 | 121341658 | Missense_Mutation | SNP | G | A | 16  | 28  | c.1382G>A | c.(1381-1383)AGC>AAC | p.S461N  |
| Pat_66 | Pre-Treatment | PDIA5    | 10954  | 37 | 3 | 122849328 | 122849328 | Missense_Mutation | SNP | C | T | 22  | 12  | c.775C>T  | c.(775-777)CCG>TCG   | p.P259S  |
| Pat_66 | Pre-Treatment | SLCO2A1  | 6578   | 37 | 3 | 133667539 | 133667539 | Missense_Mutation | SNP | G | A | 34  | 63  | c.946C>T  | c.(946-948)CCA>TCA   | p.P316S  |
| Pat_66 | Pre-Treatment | KY       | 339855 | 37 | 3 | 134348520 | 134348520 | Missense_Mutation | SNP | C | T | 10  | 11  | c.280G>A  | c.(280-282)GAA>AAA   | p.E94K   |
| Pat_66 | Pre-Treatment | ESYT3    | 83850  | 37 | 3 | 138183346 | 138183346 | Missense_Mutation | SNP | G | A | 49  | 7   | c.1075G>A | c.(1075-1077)GAA>AAA | p.E359K  |
| Pat_66 | Pre-Treatment | TRIM42   | 287015 | 37 | 3 | 140397349 | 140397349 | Missense_Mutation | SNP | G | A | 41  | 3   | c.278G>A  | c.(277-279)AGC>AAC   | p.S93N   |
| Pat_66 | Pre-Treatment | ATR      | 545    | 37 | 3 | 142188296 | 142188296 | Missense_Mutation | SNP | C | A | 5   | 98  | c.6435G>T | c.(6433-6435)TTG>TTT | p.L2145F |
| Pat_66 | Pre-Treatment | PLSCR2   | 57047  | 37 | 3 | 146159589 | 146159589 | Missense_Mutation | SNP | C | T | 26  | 8   | c.665G>A  | c.(664-666)AGA>AAA   | p.R222K  |
| Pat_66 | Pre-Treatment | IGSF10   | 285313 | 37 | 3 | 151155772 | 151155772 | Missense_Mutation | SNP | G | A | 54  | 63  | c.6577C>T | c.(6577-6579)CAT>TAT | p.H2193Y |
| Pat_66 | Pre-Treatment | IGSF10   | 285313 | 37 | 3 | 151166374 | 151166374 | Missense_Mutation | SNP | C | T | 51  | 88  | c.1395G>A | c.(1393-1395)ATG>ATA | p.M465I  |
| Pat_66 | Pre-Treatment | SLC33A1  | 9197   | 37 | 3 | 155551767 | 155551767 | Missense_Mutation | SNP | C | T | 27  | 31  | c.1027G>A | c.(1027-1029)GAA>AAA | p.E343K  |
| Pat_66 | Pre-Treatment | ZBBX     | 79740  | 37 | 3 | 167090658 | 167090658 | Nonsense_Mutation | SNP | C | T | 23  | 47  | c.32G>A   | c.(31-33)TGG>TAG     | p.W11*   |
| Pat_66 | Pre-Treatment | SERPINI2 | 5276   | 37 | 3 | 167170732 | 167170732 | Missense_Mutation | SNP | C | T | 49  | 5   | c.956G>A  | c.(955-957)GGA>GAA   | p.G319E  |
| Pat_66 | Pre-Treatment | MECOM    | 2122   | 37 | 3 | 169099121 | 169099121 | Missense_Mutation | SNP | G | A | 107 | 10  | c.229C>T  | c.(229-231)CCT>TCT   | p.P77S   |
| Pat_66 | Pre-Treatment | LRRC31   | 79782  | 37 | 3 | 169579573 | 169579573 | Nonsense_Mutation | SNP | C | T | 39  | 62  | c.204G>A  | c.(202-204)TGG>TGA   | p.W68*   |
| Pat_66 | Pre-Treatment | CCDC39   | 339829 | 37 | 3 | 180377491 | 180377491 | Missense_Mutation | SNP | C | T | 21  | 35  | c.583G>A  | c.(583-585)GAA>AAA   | p.E195K  |
| Pat_66 | Pre-Treatment | ATP11B   | 23200  | 37 | 3 | 182591616 | 182591616 | Nonsense_Mutation | SNP | C | T | 66  | 6   | c.2065C>T | c.(2065-2067)CGA>TGA | p.R689*  |
| Pat_66 | Pre-Treatment | SDHAP2   | 727956 | 37 | 3 | 195410687 | 195410687 | Missense_Mutation | SNP | T | A | 5   | 34  | c.584T>A  | c.(583-585)GTG>GAG   | p.V195E  |
| Pat_66 | Pre-Treatment | SDHAP2   | 727956 | 37 | 3 | 195410689 | 195410689 | Missense_Mutation | SNP | C | T | 5   | 34  | c.586C>T  | c.(586-588)CAC>TAC   | p.H196Y  |
| Pat_66 | Pre-Treatment | MUC4     | 4585   | 37 | 3 | 195511945 | 195511945 | Missense_Mutation | SNP | G | A | 3   | 3   | c.6506C>T | c.(6505-6507)GCA>GTA | p.A2169V |
| Pat_66 | Pre-Treatment | OSTalpha | 200931 | 37 | 3 | 195944720 | 195944720 | Missense_Mutation | SNP | G | A | 18  | 30  | c.46G>A   | c.(46-48)GCA>ACA     | p.A16T   |
| Pat_66 | Pre-Treatment | ZNF732   | 654254 | 37 | 4 | 266054    | 266054    | Missense_Mutation | SNP | C | T | 41  | 75  | c.589G>A  | c.(589-591)GAA>AAA   | p.E197K  |
| Pat_66 | Pre-Treatment | ZNF141   | 7700   | 37 | 4 | 367245    | 367245    | Missense_Mutation | SNP | C | A | 6   | 407 | c.1019C>A | c.(1018-1020)ACA>AAA | p.T340K  |
| Pat_66 | Pre-Treatment | CRIPAK   | 285464 | 37 | 4 | 1388382   | 1388382   | Missense_Mutation | SNP | C | T | 8   | 765 | c.83C>T   | c.(82-84)GCC>GTC     | p.A28V   |
| Pat_66 | Pre-Treatment | HAUS3    | 79441  | 37 | 4 | 2240511   | 2240511   | Missense_Mutation | SNP | G | A | 16  | 79  | c.1169C>T | c.(1168-1170)TCA>TTA | p.S390L  |
| Pat_66 | Pre-Treatment | SH3BP2   | 6452   | 37 | 4 | 2831384   | 2831384   | Missense_Mutation | SNP | G | T | 4   | 132 | c.751G>T  | c.(751-753)GCT>TCT   | p.A251S  |
| Pat_66 | Pre-Treatment | RGS12    | 6002   | 37 | 4 | 3318993   | 3318993   | Missense_Mutation | SNP | G | A | 5   | 219 | c.1096G>A | c.(1096-1098)GAC>AAC | p.D366N  |
| Pat_66 | Pre-Treatment | JAKMIP1  | 152789 | 37 | 4 | 6064113   | 6064113   | Nonsense_Mutation | SNP | G | A | 29  | 126 | c.1486C>T | c.(1486-1488)CAG>TAG | p.Q496*  |
| Pat_66 | Pre-Treatment | WFS1     | 7466   | 37 | 4 | 6303507   | 6303507   | Missense_Mutation | SNP | C | T | 92  | 293 | c.1985C>T | c.(1984-1986)TCC>TTC | p.S662F  |
| Pat_66 | Pre-Treatment | CCDC96   | 257236 | 37 | 4 | 7043324   | 7043324   | Missense_Mutation | SNP | C | T | 309 | 391 | c.1342G>A | c.(1342-1344)GAA>AAA | p.E448K  |
| Pat_66 | Pre-Treatment | SORCS2   | 57537  | 37 | 4 | 7705016   | 7705016   | Missense_Mutation | SNP | G | A | 30  | 18  | c.1678G>A | c.(1678-1680)GAA>AAA | p.E560K  |
| Pat_66 | Pre-Treatment | CPZ      | 8532   | 37 | 4 | 8608525   | 8608525   | Missense_Mutation | SNP | G | A | 34  | 55  | c.968G>A  | c.(967-969)CGA>CAA   | p.R323Q  |
| Pat_66 | Pre-Treatment | DRD5     | 1816   | 37 | 4 | 9784827   | 9784827   | Missense_Mutation | SNP | G | A | 21  | 52  | c.1174G>A | c.(1174-1176)GAG>AAG | p.E392K  |
| Pat_66 | Pre-Treatment | C1QTNF7  | 114905 | 37 | 4 | 15437411  | 15437411  | Missense_Mutation | SNP | G | A | 27  | 127 | c.44G>A   | c.(43-45)AGT>AAT     | p.S15N   |
| Pat_66 | Pre-Treatment | ARAP2    | 116984 | 37 | 4 | 36230679  | 36230679  | Missense_Mutation | SNP | C | T | 16  | 99  | c.430G>A  | c.(430-432)GAT>AAT   | p.D144N  |
| Pat_66 | Pre-Treatment | BEND4    | 389206 | 37 | 4 | 42145862  | 42145862  | Missense_Mutation | SNP | C | T | 25  | 21  | c.637G>A  | c.(637-639)GAG>AAG   | p.E213K  |
| Pat_66 | Pre-Treatment | GABRG1   | 2565   | 37 | 4 | 46125923  | 46125923  | Missense_Mutation | SNP | G | A | 9   | 73  | c.8C>T    | c.(7-9)CCT>CTT       | p.P3L    |
| Pat_66 | Pre-Treatment | GABRA2   | 2555   | 37 | 4 | 46252411  | 46252411  | Missense_Mutation | SNP | C | T | 70  | 161 | c.1270G>A | c.(1270-1272)GTT>ATT | p.V424I  |
| Pat_66 | Pre-Treatment | GABRB1   | 2560   | 37 | 4 | 47427775  | 47427775  | Missense_Mutation | SNP | G | A | 71  | 86  | c.1165G>A | c.(1165-1167)GAC>AAC | p.D389N  |
| Pat_66 | Pre-Treatment | SLAIN2   | 57606  | 37 | 4 | 48384617  | 48384617  | Missense_Mutation | SNP | C | T | 4   | 117 | c.895C>T  | c.(895-897)CGG>TGG   | p.R299W  |

|        |               |           |        |    |   |           |           |                   |     |    |    |     |     |                                    |                        |               |
|--------|---------------|-----------|--------|----|---|-----------|-----------|-------------------|-----|----|----|-----|-----|------------------------------------|------------------------|---------------|
| Pat_66 | Pre-Treatment | SLAIN2    | 57606  | 37 | 4 | 48384768  | 48384768  | Missense_Mutation | SNP | C  | T  | 47  | 249 | c.1046C>T                          | c.(1045-1047)TCA>TTA   | p.S349L       |
| Pat_66 | Pre-Treatment | CWH43     | 80157  | 37 | 4 | 49052739  | 49052739  | Missense_Mutation | SNP | G  | A  | 38  | 140 | c.1894G>A                          | c.(1894-1896)GAA>AAA   | p.E632K       |
| Pat_66 | Pre-Treatment | GSX2      | 170825 | 37 | 4 | 54967865  | 54967865  | Missense_Mutation | SNP | C  | T  | 106 | 292 | c.691C>T                           | c.(691-693)CGG>TGG     | p.R231W       |
| Pat_66 | Pre-Treatment | CEP135    | 9662   | 37 | 4 | 56878072  | 56878072  | Missense_Mutation | SNP | G  | A  | 5   | 173 | c.2723G>A                          | c.(2722-2724)CGA>CAA   | p.R908Q       |
| Pat_66 | Pre-Treatment | LPHN3     | 23284  | 37 | 4 | 62845425  | 62845425  | Missense_Mutation | SNP | C  | T  | 216 | 264 | c.2746C>T                          | c.(2746-2748)CTC>TTC   | p.L916F       |
| Pat_66 | Pre-Treatment | UBA6      | 55236  | 37 | 4 | 68534319  | 68534319  | Missense_Mutation | SNP | C  | T  | 23  | 90  | c.743G>A                           | c.(742-744)CGA>CAA     | p.R248Q       |
| Pat_66 | Pre-Treatment | TMPRSS11A | 339967 | 37 | 4 | 68784890  | 68784890  | Missense_Mutation | SNP | C  | T  | 30  | 168 | c.762G>A                           | c.(760-762)ATG>ATA     | p.M254I       |
| Pat_66 | Pre-Treatment | UGT2B7    | 7364   | 37 | 4 | 69962813  | 69962813  | Missense_Mutation | SNP | C  | T  | 94  | 133 | c.575C>T                           | c.(574-576)TCC>TTC     | p.S192F       |
| Pat_66 | Pre-Treatment | UGT2B11   | 10720  | 37 | 4 | 70078301  | 70078301  | Missense_Mutation | SNP | G  | A  | 207 | 352 | c.860C>T                           | c.(859-861)CCC>CTC     | p.P287L       |
| Pat_66 | Pre-Treatment | AFP       | 174    | 37 | 4 | 74319573  | 74319573  | Missense_Mutation | SNP | T  | C  | 78  | 64  | c.1744T>C                          | c.(1744-1746)TGC>CGC   | p.C582R       |
| Pat_66 | Pre-Treatment | CCDC158   | 339965 | 37 | 4 | 77274293  | 77274293  | Missense_Mutation | SNP | C  | T  | 46  | 70  | c.2428G>A                          | c.(2428-2430)GAA>AAA   | p.E810K       |
| Pat_66 | Pre-Treatment | CXCL13    | 10563  | 37 | 4 | 78526977  | 78526977  | Splice_Site       | SNP | G  | A  | 17  | 56  | c.-41_splice                       | c.e2-1                 |               |
| Pat_66 | Pre-Treatment | HNRPDL    | 9987   | 37 | 4 | 83349262  | 83349262  | Missense_Mutation | SNP | C  | T  | 4   | 107 | c.683G>A                           | c.(682-684)GGG>GAG     | p.G228E       |
| Pat_66 | Pre-Treatment | HERC5     | 51191  | 37 | 4 | 89381275  | 89381275  | Missense_Mutation | SNP | T  | A  | 4   | 79  | c.419T>A                           | c.(418-420)ATA>AAA     | p.I140K       |
| Pat_66 | Pre-Treatment | HERC5     | 51191  | 37 | 4 | 89383393  | 89383394  | Missense_Mutation | DNP | CC | AT | 33  | 62  | c.574_575CC>AT                     | c.(574-576)CCC>ATC     | p.P192I       |
| Pat_66 | Pre-Treatment | FAM13A    | 10144  | 37 | 4 | 89950665  | 89950665  | Missense_Mutation | SNP | C  | T  | 157 | 205 | c.163G>A                           | c.(163-165)GAG>AAG     | p.E55K        |
| Pat_66 | Pre-Treatment | GPRIN3    | 285513 | 37 | 4 | 90168956  | 90168956  | Missense_Mutation | SNP | G  | A  | 33  | 211 | c.2306C>T                          | c.(2305-2307)CCT>CTT   | p.P769L       |
| Pat_66 | Pre-Treatment | MMRN1     | 22915  | 37 | 4 | 90872783  | 90872783  | Missense_Mutation | SNP | C  | T  | 4   | 99  | c.3146C>T                          | c.(3145-3147)CCG>CTG   | p.P1049L      |
| Pat_66 | Pre-Treatment | RAP1GDS1  | 5910   | 37 | 4 | 99337994  | 99337994  | Nonsense_Mutation | SNP | G  | T  | 5   | 195 | c.862G>T                           | c.(862-864)GAG>TAG     | p.E288*       |
| Pat_66 | Pre-Treatment | CENPE     | 1062   | 37 | 4 | 104068791 | 104068791 | Missense_Mutation | SNP | G  | A  | 31  | 81  | c.3856C>T                          | c.(3856-3858)CAT>TAT   | p.H1286Y      |
| Pat_66 | Pre-Treatment | TACR3     | 6870   | 37 | 4 | 104640330 | 104640330 | Missense_Mutation | SNP | G  | A  | 62  | 76  | c.503C>T                           | c.(502-504)GCT>GTT     | p.A168V       |
| Pat_66 | Pre-Treatment | CFI       | 3426   | 37 | 4 | 110670438 | 110670438 | Missense_Mutation | SNP | C  | T  | 364 | 390 | c.1084G>A                          | c.(1084-1086)GGA>AGA   | p.G362R       |
| Pat_66 | Pre-Treatment | ENPEP     | 2028   | 37 | 4 | 111397844 | 111397844 | Nonsense_Mutation | SNP | C  | T  | 32  | 151 | c.274C>T                           | c.(274-276)CGA>TGA     | p.R92*        |
| Pat_66 | Pre-Treatment | METTL14   | 57721  | 37 | 4 | 119618418 | 119618419 | Nonsense_Mutation | DNP | AG | TT | 4   | 110 | c.585_586AG>TT                     | (583-588)TTAGAA>TTTTTA | p.195_196LE>F |
| Pat_66 | Pre-Treatment | SYNPO2    | 171024 | 37 | 4 | 119951254 | 119951254 | Missense_Mutation | SNP | G  | A  | 28  | 133 | c.1324G>A                          | c.(1324-1326)GAA>AAA   | p.E442K       |
| Pat_66 | Pre-Treatment | FAT4      | 79633  | 37 | 4 | 126370225 | 126370225 | Missense_Mutation | SNP | G  | A  | 98  | 318 | c.8054G>A                          | c.(8053-8055)CGA>CAA   | p.R2685Q      |
| Pat_66 | Pre-Treatment | OTUD4     | 54726  | 37 | 4 | 146063437 | 146063437 | Missense_Mutation | SNP | G  | A  | 127 | 239 | c.1538C>T                          | c.(1537-1539)TCT>TTT   | p.S513F       |
| Pat_66 | Pre-Treatment | ZNF827    | 152485 | 37 | 4 | 146824058 | 146824058 | Missense_Mutation | SNP | G  | A  | 19  | 87  | c.353C>T                           | c.(352-354)CCC>CTC     | p.P118L       |
| Pat_66 | Pre-Treatment | EDNRA     | 1909   | 37 | 4 | 148406954 | 148406954 | Missense_Mutation | SNP | C  | T  | 31  | 79  | c.121C>T                           | c.(121-123)CGT>TGT     | p.R41C        |
| Pat_66 | Pre-Treatment | DCLK2     | 166614 | 37 | 4 | 151177262 | 151177262 | Missense_Mutation | SNP | C  | T  | 22  | 58  | c.2164C>T                          | c.(2164-2166)CCT>TCT   | p.P722S       |
| Pat_66 | Pre-Treatment | LRBA      | 987    | 37 | 4 | 151765281 | 151765281 | Missense_Mutation | SNP | G  | A  | 175 | 244 | c.4540C>T                          | c.(4540-4542)CGG>TGG   | p.R1514W      |
| Pat_66 | Pre-Treatment | TIGD4     | 201798 | 37 | 4 | 153690796 | 153690796 | Missense_Mutation | SNP | G  | A  | 29  | 105 | c.1361C>T                          | c.(1360-1362)TCT>TTT   | p.S454F       |
| Pat_66 | Pre-Treatment | TLR2      | 7097   | 37 | 4 | 154624199 | 154624199 | Missense_Mutation | SNP | C  | T  | 26  | 29  | c.140C>T                           | c.(139-141)CCC>CTC     | p.P47L        |
| Pat_66 | Pre-Treatment | NPY2R     | 4887   | 37 | 4 | 156135417 | 156135417 | Missense_Mutation | SNP | C  | T  | 38  | 45  | c.326C>T                           | c.(325-327)ACC>ATC     | p.T109I       |
| Pat_66 | Pre-Treatment | NPY5R     | 4889   | 37 | 4 | 164272282 | 164272282 | Missense_Mutation | SNP | G  | A  | 32  | 106 | c.857G>A                           | c.(856-858)AGA>AAA     | p.R286K       |
| Pat_66 | Pre-Treatment | TRIM61    | 391712 | 37 | 4 | 165891019 | 165891019 | Missense_Mutation | SNP | C  | T  | 30  | 99  | c.136G>A                           | c.(136-138)GAT>AAT     | p.D46N        |
| Pat_66 | Pre-Treatment | TRIM60    | 166655 | 37 | 4 | 165962177 | 165962177 | Missense_Mutation | SNP | G  | A  | 61  | 65  | c.953G>A                           | c.(952-954)CGA>CAA     | p.R318Q       |
| Pat_66 | Pre-Treatment | TLL1      | 7092   | 37 | 4 | 166999147 | 166999147 | Missense_Mutation | SNP | G  | A  | 68  | 51  | c.2407G>A                          | c.(2407-2409)GAA>AAA   | p.E803K       |
| Pat_66 | Pre-Treatment | TLL1      | 7092   | 37 | 4 | 166999157 | 166999157 | Missense_Mutation | SNP | C  | T  | 55  | 70  | c.2417C>T                          | c.(2416-2418)GCC>GTC   | p.A806V       |
| Pat_66 | Pre-Treatment | DDX60     | 55601  | 37 | 4 | 169194513 | 169194513 | Missense_Mutation | SNP | G  | A  | 22  | 114 | c.2491C>T                          | c.(2491-2493)CGT>TGT   | p.R831C       |
| Pat_66 | Pre-Treatment | DDX60L    | 91351  | 37 | 4 | 169296578 | 169296578 | Missense_Mutation | SNP | G  | A  | 7   | 45  | c.4583C>T                          | c.(4582-4584)TCC>TTC   | p.S1528F      |
| Pat_66 | Pre-Treatment | DDX60L    | 91351  | 37 | 4 | 169340497 | 169340497 | Missense_Mutation | SNP | G  | A  | 22  | 27  | c.2566C>T                          | c.(2566-2568)CGC>TGC   | p.R856C       |
| Pat_66 | Pre-Treatment | DDX60L    | 91351  | 37 | 4 | 169344911 | 169344911 | Missense_Mutation | SNP | C  | T  | 15  | 31  | c.1945G>A                          | c.(1945-1947)GAT>AAT   | p.D649N       |
| Pat_66 | Pre-Treatment | PALLD     | 23022  | 37 | 4 | 169606664 | 169606664 | Missense_Mutation | SNP | G  | A  | 85  | 280 | c.1289G>A                          | c.(1288-1290)CGA>CAA   | p.R430Q       |
| Pat_66 | Pre-Treatment | PALLD     | 23022  | 37 | 4 | 169835133 | 169835133 | Missense_Mutation | SNP | G  | A  | 66  | 214 | c.2678G>A                          | c.(2677-2679)CGA>CAA   | p.R893Q       |
| Pat_66 | Pre-Treatment | ADAM29    | 11086  | 37 | 4 | 175898063 | 175898063 | Missense_Mutation | SNP | G  | A  | 21  | 111 | c.1387G>A                          | c.(1387-1389)GAT>AAT   | p.D463N       |
| Pat_66 | Pre-Treatment | VEGFC     | 7424   | 37 | 4 | 177649057 | 177649058 | Missense_Mutation | DNP | CC | TT | 92  | 121 | c.426_427GG>AA424-429)AAGGAG>AAAAA |                        | p.E143K       |

|        |               |          |        |    |   |           |           |                   |     |   |   |     |     |              |                        |               |
|--------|---------------|----------|--------|----|---|-----------|-----------|-------------------|-----|---|---|-----|-----|--------------|------------------------|---------------|
| Pat_66 | Pre-Treatment | ODZ3     | 55714  | 37 | 4 | 183601824 | 183601824 | Missense_Mutation | SNP | C | T | 29  | 47  | c.1768C>T    | c.(1768-1770)CGT>TGT   | p.R590C       |
| Pat_66 | Pre-Treatment | STOX2    | 56977  | 37 | 4 | 184930479 | 184930479 | Missense_Mutation | SNP | G | A | 39  | 131 | c.488G>A     | c.(487-489)AGG>AAG     | p.R163K       |
| Pat_66 | Pre-Treatment | TLR3     | 7098   | 37 | 4 | 187003918 | 187003918 | Missense_Mutation | SNP | C | T | 37  | 37  | c.1078C>T    | c.(1078-1080)CTT>TTT   | p.L360F       |
| Pat_66 | Pre-Treatment | KLKB1    | 3818   | 37 | 4 | 187155158 | 187155158 | Nonsense_Mutation | SNP | C | T | 106 | 141 | c.274C>T     | c.(274-276)CGA>TGA     | p.R92*        |
| Pat_66 | Pre-Treatment | KLKB1    | 3818   | 37 | 4 | 187178430 | 187178430 | Missense_Mutation | SNP | G | A | 80  | 112 | c.1636G>A    | c.(1636-1638)GAA>AAA   | p.E546K       |
| Pat_66 | Pre-Treatment | PAPD7    | 11044  | 37 | 5 | 6753031   | 6753031   | Missense_Mutation | SNP | C | T | 63  | 39  | c.1315C>T    | c.(1315-1317)CCT>TCT   | p.P439S       |
| Pat_66 | Pre-Treatment | 6-Mar    | 10299  | 37 | 5 | 10417496  | 10417496  | Missense_Mutation | SNP | C | T | 34  | 126 | c.2263C>T    | c.(2263-2265)CCT>TCT   | p.P755S       |
| Pat_66 | Pre-Treatment | DNAH5    | 1767   | 37 | 5 | 13811899  | 13811899  | Missense_Mutation | SNP | C | T | 62  | 51  | c.7264G>A    | c.(7264-7266)GAA>AAA   | p.E2422K      |
| Pat_66 | Pre-Treatment | DNAH5    | 1767   | 37 | 5 | 13811905  | 13811905  | Missense_Mutation | SNP | C | T | 26  | 81  | c.7258G>A    | c.(7258-7260)GAA>AAA   | p.E2420K      |
| Pat_66 | Pre-Treatment | DNAH5    | 1767   | 37 | 5 | 13829780  | 13829780  | Missense_Mutation | SNP | C | T | 24  | 79  | c.6283G>A    | c.(6283-6285)GAA>AAA   | p.E2095K      |
| Pat_66 | Pre-Treatment | DNAH5    | 1767   | 37 | 5 | 13830747  | 13830747  | Missense_Mutation | SNP | G | A | 34  | 98  | c.6020C>T    | c.(6019-6021)TCA>TTA   | p.S2007L      |
| Pat_66 | Pre-Treatment | DNAH5    | 1767   | 37 | 5 | 13914025  | 13914025  | Missense_Mutation | SNP | G | C | 13  | 44  | c.1363C>G    | c.(1363-1365)CAA>GAA   | p.Q455E       |
| Pat_66 | Pre-Treatment | TRIO     | 7204   | 37 | 5 | 14304621  | 14304621  | Missense_Mutation | SNP | C | T | 67  | 132 | c.1420C>T    | c.(1420-1422)CCC>TCC   | p.P474S       |
| Pat_66 | Pre-Treatment | PRDM9    | 56979  | 37 | 5 | 23510065  | 23510065  | Missense_Mutation | SNP | G | A | 28  | 78  | c.230G>A     | c.(229-231)CGA>CAA     | p.R77Q        |
| Pat_66 | Pre-Treatment | PDZD2    | 23037  | 37 | 5 | 31799771  | 31799771  | Missense_Mutation | SNP | G | A | 72  | 56  | c.416G>A     | c.(415-417)CGG>CAG     | p.R139Q       |
| Pat_66 | Pre-Treatment | EGFLAM   | 133584 | 37 | 5 | 38406275  | 38406275  | Missense_Mutation | SNP | G | A | 20  | 59  | c.760G>A     | c.(760-762)GAC>AAC     | p.D254N       |
| Pat_66 | Pre-Treatment | LIFR     | 3977   | 37 | 5 | 38504188  | 38504188  | Missense_Mutation | SNP | C | T | 41  | 85  | c.1327G>A    | c.(1327-1329)GAT>AAT   | p.D443N       |
| Pat_66 | Pre-Treatment | C9       | 735    | 37 | 5 | 39311419  | 39311419  | Missense_Mutation | SNP | G | A | 54  | 42  | c.931C>T     | c.(931-933)CGC>TGC     | p.R311C       |
| Pat_66 | Pre-Treatment | DAB2     | 1601   | 37 | 5 | 39383265  | 39383265  | Missense_Mutation | SNP | G | A | 75  | 162 | c.796C>T     | c.(796-798)CCT>TCT     | p.P266S       |
| Pat_66 | Pre-Treatment | HEATR7B2 | 133558 | 37 | 5 | 41000423  | 41000423  | Missense_Mutation | SNP | G | A | 13  | 46  | c.4381C>T    | c.(4381-4383)CCC>TCC   | p.P1461S      |
| Pat_66 | Pre-Treatment | C6       | 729    | 37 | 5 | 41150076  | 41150076  | Missense_Mutation | SNP | C | T | 29  | 68  | c.2342G>A    | c.(2341-2343)GGA>GAA   | p.G781E       |
| Pat_66 | Pre-Treatment | GHR      | 2690   | 37 | 5 | 42718182  | 42718182  | Missense_Mutation | SNP | C | T | 25  | 84  | c.904C>T     | c.(904-906)CCA>TCA     | p.P302S       |
| Pat_66 | Pre-Treatment | HSPB3    | 8988   | 37 | 5 | 53751825  | 53751825  | Missense_Mutation | SNP | C | T | 63  | 36  | c.206C>T     | c.(205-207)TCC>TTC     | p.S69F        |
| Pat_66 | Pre-Treatment | ZNF366   | 167465 | 37 | 5 | 71756663  | 71756663  | Missense_Mutation | SNP | C | T | 37  | 61  | c.661G>A     | c.(661-663)GAG>AAG     | p.E221K       |
| Pat_66 | Pre-Treatment | RGNEF    | 64283  | 37 | 5 | 73163733  | 73163733  | Missense_Mutation | SNP | C | T | 27  | 36  | c.2185C>T    | c.(2185-2187)CTC>TTC   | p.L729F       |
| Pat_66 | Pre-Treatment | CMYA5    | 202333 | 37 | 5 | 79026699  | 79026699  | Missense_Mutation | SNP | C | T | 12  | 18  | c.2111C>T    | c.(2110-2112)TCA>TTA   | p.S704L       |
| Pat_66 | Pre-Treatment | CMYA5    | 202333 | 37 | 5 | 79030700  | 79030700  | Missense_Mutation | SNP | G | A | 18  | 30  | c.6112G>A    | c.(6112-6114)GAA>AAA   | p.E2038K      |
| Pat_66 | Pre-Treatment | CMYA5    | 202333 | 37 | 5 | 79030895  | 79030895  | Missense_Mutation | SNP | G | A | 14  | 20  | c.6307G>A    | c.(6307-6309)GAA>AAA   | p.E2103K      |
| Pat_66 | Pre-Treatment | SPZ1     | 84654  | 37 | 5 | 79616461  | 79616461  | Missense_Mutation | SNP | G | C | 4   | 109 | c.427G>C     | c.(427-429)GAG>CAG     | p.E143Q       |
| Pat_66 | Pre-Treatment | GPR98    | 84059  | 37 | 5 | 89923367  | 89923367  | Missense_Mutation | SNP | C | T | 56  | 90  | c.1012C>T    | c.(1012-1014)CAT>TAT   | p.H338Y       |
| Pat_66 | Pre-Treatment | GPR98    | 84059  | 37 | 5 | 90052422  | 90052422  | Missense_Mutation | SNP | G | A | 15  | 9   | c.11732G>A   | c.(11731-11733)GGA>GAA | p.G3911E      |
| Pat_66 | Pre-Treatment | GPR98    | 84059  | 37 | 5 | 90136435  | 90136435  | Missense_Mutation | SNP | C | T | 29  | 39  | c.16652C>T   | c.(16651-16653)TCT>TTT | p.S5551F      |
| Pat_66 | Pre-Treatment | C5orf13  | 9315   | 37 | 5 | 111066734 | 111066734 | Missense_Mutation | SNP | G | A | 9   | 14  | c.91C>T      | c.(91-93)CCT>TCT       | p.P31S        |
| Pat_66 | Pre-Treatment | DMXL1    | 1657   | 37 | 5 | 118482639 | 118482639 | Missense_Mutation | SNP | C | T | 17  | 42  | c.2677C>T    | c.(2677-2679)CCT>TCT   | p.P893S       |
| Pat_66 | Pre-Treatment | TRPC7    | 57113  | 37 | 5 | 135692498 | 135692498 | Missense_Mutation | SNP | G | A | 34  | 51  | c.575C>T     | c.(574-576)CCC>CTC     | p.P192L       |
| Pat_66 | Pre-Treatment | PCDHA2   | 56146  | 37 | 5 | 140174976 | 140174976 | Missense_Mutation | SNP | C | T | 37  | 46  | c.427C>T     | c.(427-429)CCC>TCC     | p.P143S       |
| Pat_66 | Pre-Treatment | PCDHA5   | 56143  | 37 | 5 | 140201464 | 140201464 | Missense_Mutation | SNP | C | T | 4   | 88  | c.104C>T     | c.(103-105)CCG>CTG     | p.P35L        |
| Pat_66 | Pre-Treatment | PCDHA11  | 56138  | 37 | 5 | 140249730 | 140249730 | Missense_Mutation | SNP | G | A | 41  | 53  | c.1042G>A    | c.(1042-1044)GAA>AAA   | p.E348K       |
| Pat_66 | Pre-Treatment | PCDHB1   | 29930  | 37 | 5 | 140431504 | 140431504 | Missense_Mutation | SNP | C | T | 21  | 23  | c.449C>T     | c.(448-450)TCA>TTA     | p.S150L       |
| Pat_66 | Pre-Treatment | PCDHB3   | 56132  | 37 | 5 | 140481257 | 140481257 | Missense_Mutation | SNP | G | A | 25  | 28  | c.1024G>A    | c.(1024-1026)GAC>AAC   | p.D342N       |
| Pat_66 | Pre-Treatment | PCDHB6   | 56130  | 37 | 5 | 140529986 | 140529986 | Missense_Mutation | SNP | G | A | 40  | 53  | c.148G>A     | c.(148-150)GAC>AAC     | p.D50N        |
| Pat_66 | Pre-Treatment | PCDHB7   | 56129  | 37 | 5 | 140554416 | 140554416 | Missense_Mutation | SNP | C | T | 29  | 337 | c.2000C>T    | c.(1999-2001)TCC>TTC   | p.S667F       |
| Pat_66 | Pre-Treatment | PCDHB8   | 56128  | 37 | 5 | 140558516 | 140558516 | Missense_Mutation | SNP | G | A | 53  | 334 | c.901G>A     | c.(901-903)GAA>AAA     | p.E301K       |
| Pat_66 | Pre-Treatment | PCDHB13  | 56123  | 37 | 5 | 140595079 | 140595079 | Missense_Mutation | SNP | G | A | 139 | 241 | c.1384G>A    | c.(1384-1386)GAG>AAG   | p.E462K       |
| Pat_66 | Pre-Treatment | PCDHGA6  | 56109  | 37 | 5 | 140753757 | 140753757 | Missense_Mutation | SNP | C | T | 3   | 18  | c.107C>T     | c.(106-108)CCC>CTC     | p.P36L        |
| Pat_66 | Pre-Treatment | PCDH1    | 5097   | 37 | 5 | 141243755 | 141243755 | Missense_Mutation | SNP | T | A | 31  | 31  | c.2141A>T    | c.(2140-2142)TAT>TTT   | p.Y714F       |
| Pat_66 | Pre-Treatment | PPP2R2B  | 5521   | 37 | 5 | 145979853 | 145979853 | Splice_Site       | SNP | C | T | 27  | 58  | c.960_splice | c.e7+1                 | p.Q320_splice |

|        |               |           |        |    |   |           |           |                   |     |    |    |     |     |                                                |                        |          |
|--------|---------------|-----------|--------|----|---|-----------|-----------|-------------------|-----|----|----|-----|-----|------------------------------------------------|------------------------|----------|
| Pat_66 | Pre-Treatment | PPP2R2B   | 5521   | 37 | 5 | 146077647 | 146077647 | Missense_Mutation | SNP | C  | T  | 65  | 97  | c.229G>A                                       | c.(229-231)GAA>AAA     | p.E77K   |
| Pat_66 | Pre-Treatment | HTR4      | 3360   | 37 | 5 | 147889397 | 147889397 | Missense_Mutation | SNP | C  | T  | 16  | 25  | c.698G>A                                       | c.(697-699)GGA>GAA     | p.G233E  |
| Pat_66 | Pre-Treatment | KIF4B     | 285643 | 37 | 5 | 154395697 | 154395697 | Missense_Mutation | SNP | G  | A  | 21  | 21  | c.2278G>A                                      | c.(2278-2280)GCC>ACC   | p.A760T  |
| Pat_66 | Pre-Treatment | KIF4B     | 285643 | 37 | 5 | 154395718 | 154395718 | Missense_Mutation | SNP | C  | T  | 18  | 30  | c.2299C>T                                      | c.(2299-2301)CTC>TTC   | p.L767F  |
| Pat_66 | Pre-Treatment | MED7      | 9443   | 37 | 5 | 156566174 | 156566174 | Missense_Mutation | SNP | A  | G  | 18  | 23  | c.269T>C                                       | c.(268-270)TTG>TCG     | p.L90S   |
| Pat_66 | Pre-Treatment | ODZ2      | 57451  | 37 | 5 | 167517676 | 167517676 | Missense_Mutation | SNP | C  | T  | 62  | 99  | c.1613C>T                                      | c.(1612-1614)GCC>GTC   | p.A538V  |
| Pat_66 | Pre-Treatment | KCNIP1    | 30820  | 37 | 5 | 170162777 | 170162777 | Missense_Mutation | SNP | G  | A  | 34  | 64  | c.651G>A                                       | c.(649-651)ATG>ATA     | p.M217I  |
| Pat_66 | Pre-Treatment | GFPT2     | 9945   | 37 | 5 | 179734231 | 179734231 | Missense_Mutation | SNP | G  | A  | 8   | 15  | c.1619C>T                                      | c.(1618-1620)TCG>TTG   | p.S540L  |
| Pat_66 | Pre-Treatment | CNOT6     | 57472  | 37 | 5 | 179976951 | 179976951 | Missense_Mutation | SNP | G  | T  | 4   | 190 | c.133G>T                                       | c.(133-135)GCA>TCA     | p.A45S   |
| Pat_66 | Pre-Treatment | HUS1B     | 135458 | 37 | 6 | 656730    | 656730    | Missense_Mutation | SNP | G  | A  | 8   | 23  | c.215C>T                                       | c.(214-216)TCG>TTG     | p.S72L   |
| Pat_66 | Pre-Treatment | SYCP2L    | 221711 | 37 | 6 | 10891779  | 10891779  | Missense_Mutation | SNP | G  | A  | 32  | 147 | c.43G>A                                        | c.(43-45)GAT>AAT       | p.D15N   |
| Pat_66 | Pre-Treatment | FAM65B    | 9750   | 37 | 6 | 24843752  | 24843752  | Missense_Mutation | SNP | C  | T  | 30  | 28  | c.1258G>A                                      | c.(1258-1260)GGA>AGA   | p.G420R  |
| Pat_66 | Pre-Treatment | HIST1H2BA | 255626 | 37 | 6 | 25727393  | 25727393  | Missense_Mutation | SNP | G  | A  | 31  | 135 | c.257G>A                                       | c.(256-258)AGC>AAC     | p.S86N   |
| Pat_66 | Pre-Treatment | BTN3A3    | 10384  | 37 | 6 | 26452145  | 26452145  | Missense_Mutation | SNP | G  | A  | 33  | 80  | c.1261G>A                                      | c.(1261-1263)GGT>AGT   | p.G421S  |
| Pat_66 | Pre-Treatment | HIST1H4J  | 8363   | 37 | 6 | 27791925  | 27791925  | Missense_Mutation | SNP | G  | A  | 4   | 149 | c.23G>A                                        | c.(22-24)GGG>GAG       | p.G8E    |
| Pat_66 | Pre-Treatment | ZFP57     | 346171 | 37 | 6 | 29640902  | 29640902  | Missense_Mutation | SNP | G  | A  | 16  | 135 | c.986C>T                                       | c.(985-987)TCC>TTC     | p.S329F  |
| Pat_66 | Pre-Treatment | RNF39     | 80352  | 37 | 6 | 30041250  | 30041250  | Missense_Mutation | SNP | C  | T  | 26  | 146 | c.573G>A                                       | c.(571-573)ATG>ATA     | p.M191I  |
| Pat_66 | Pre-Treatment | TRIM10    | 10107  | 37 | 6 | 30128599  | 30128599  | Missense_Mutation | SNP | C  | T  | 24  | 42  | c.37G>A                                        | c.(37-39)GAA>AAA       | p.E13K   |
| Pat_66 | Pre-Treatment | TCF19     | 6941   | 37 | 6 | 31129329  | 31129329  | Missense_Mutation | SNP | C  | T  | 195 | 151 | c.344C>T                                       | c.(343-345)TCG>TTG     | p.S115L  |
| Pat_66 | Pre-Treatment | MICB      | 4277   | 37 | 6 | 31474038  | 31474039  | Missense_Mutation | DNP | AG | TA | 55  | 157 | c.444_445AG>TA/442-447)CAAGAA>CATA/148_149QE>T |                        |          |
| Pat_66 | Pre-Treatment | CYP21A2   | 1589   | 37 | 6 | 32008268  | 32008268  | Missense_Mutation | SNP | G  | A  | 15  | 106 | c.1025G>A                                      | c.(1024-1026)CGG>CAG   | p.R342Q  |
| Pat_66 | Pre-Treatment | TNXB      | 7148   | 37 | 6 | 32037621  | 32037621  | Missense_Mutation | SNP | C  | T  | 36  | 45  | c.5296G>A                                      | c.(5296-5298)GAT>AAT   | p.D1766N |
| Pat_66 | Pre-Treatment | C6orf10   | 10665  | 37 | 6 | 32333953  | 32333953  | Missense_Mutation | SNP | C  | T  | 59  | 24  | c.208G>A                                       | c.(208-210)GAT>AAT     | p.D70N   |
| Pat_66 | Pre-Treatment | RGL2      | 5863   | 37 | 6 | 33262929  | 33262929  | Missense_Mutation | SNP | G  | A  | 5   | 27  | c.1184C>T                                      | c.(1183-1185)TCC>TTC   | p.S395F  |
| Pat_66 | Pre-Treatment | ITPR3     | 3710   | 37 | 6 | 33645396  | 33645396  | Missense_Mutation | SNP | C  | T  | 82  | 50  | c.3638C>T                                      | c.(3637-3639)CCC>CTC   | p.P1213L |
| Pat_66 | Pre-Treatment | SCUBE3    | 222663 | 37 | 6 | 35211766  | 35211766  | Missense_Mutation | SNP | G  | A  | 4   | 149 | c.2098G>A                                      | c.(2098-2100)GTA>ATA   | p.V700I  |
| Pat_66 | Pre-Treatment | C6orf81   | 221481 | 37 | 6 | 35715395  | 35715395  | Missense_Mutation | SNP | G  | A  | 121 | 283 | c.742G>A                                       | c.(742-744)GAC>AAC     | p.D248N  |
| Pat_66 | Pre-Treatment | FGD2      | 221472 | 37 | 6 | 36976617  | 36976617  | Missense_Mutation | SNP | G  | A  | 65  | 71  | c.76G>A                                        | c.(76-78)GAA>AAA       | p.E26K   |
| Pat_66 | Pre-Treatment | DNAH8     | 1769   | 37 | 6 | 38905953  | 38905953  | Nonsense_Mutation | SNP | C  | T  | 75  | 138 | c.11116C>T                                     | c.(11116-11118)CAG>TAG | p.Q3706* |
| Pat_66 | Pre-Treatment | TSPO2     | 222642 | 37 | 6 | 41011781  | 41011781  | Missense_Mutation | SNP | G  | T  | 4   | 170 | c.418G>T                                       | c.(418-420)GCC>TCC     | p.A140S  |
| Pat_66 | Pre-Treatment | TRERF1    | 55809  | 37 | 6 | 42236737  | 42236737  | Missense_Mutation | SNP | G  | A  | 41  | 59  | c.592C>T                                       | c.(592-594)CCT>TCT     | p.P198S  |
| Pat_66 | Pre-Treatment | CUL7      | 9820   | 37 | 6 | 43020187  | 43020187  | Missense_Mutation | SNP | C  | T  | 4   | 150 | c.340G>A                                       | c.(340-342)GTG>ATG     | p.V114M  |
| Pat_66 | Pre-Treatment | TDRD6     | 221400 | 37 | 6 | 46660726  | 46660726  | Missense_Mutation | SNP | C  | T  | 6   | 207 | c.4861C>T                                      | c.(4861-4863)CCT>TCT   | p.P1621S |
| Pat_66 | Pre-Treatment | GPR115    | 221393 | 37 | 6 | 47682058  | 47682058  | Nonsense_Mutation | SNP | G  | A  | 40  | 106 | c.1077G>A                                      | c.(1075-1077)TGG>TGA   | p.W359*  |
| Pat_66 | Pre-Treatment | HCRTR2    | 3062   | 37 | 6 | 55142185  | 55142185  | Missense_Mutation | SNP | G  | A  | 18  | 61  | c.770G>A                                       | c.(769-771)GGA>GAA     | p.G257E  |
| Pat_66 | Pre-Treatment | GFRAL     | 389400 | 37 | 6 | 55264208  | 55264208  | Missense_Mutation | SNP | G  | A  | 33  | 173 | c.1090G>A                                      | c.(1090-1092)GGA>AGA   | p.G364R  |
| Pat_66 | Pre-Treatment | HMGCLL1   | 54511  | 37 | 6 | 55406625  | 55406625  | Missense_Mutation | SNP | G  | A  | 71  | 80  | c.289C>T                                       | c.(289-291)CCT>TCT     | p.P97S   |
| Pat_66 | Pre-Treatment | BMP5      | 653    | 37 | 6 | 55739342  | 55739342  | Missense_Mutation | SNP | C  | T  | 49  | 157 | c.322G>A                                       | c.(322-324)GAG>AAG     | p.E108K  |
| Pat_66 | Pre-Treatment | DST       | 667    | 37 | 6 | 56516016  | 56516016  | Missense_Mutation | SNP | A  | G  | 16  | 37  | c.1142T>C                                      | c.(1141-1143)GTT>GCT   | p.V381A  |
| Pat_66 | Pre-Treatment | BEND6     | 221336 | 37 | 6 | 56857314  | 56857314  | Missense_Mutation | SNP | G  | A  | 247 | 334 | c.259G>A                                       | c.(259-261)GAA>AAA     | p.E87K   |
| Pat_66 | Pre-Treatment | ZNF451    | 26036  | 37 | 6 | 57013017  | 57013017  | Missense_Mutation | SNP | C  | T  | 14  | 34  | c.2134C>T                                      | c.(2134-2136)CCA>TCA   | p.P712S  |
| Pat_66 | Pre-Treatment | KCNQ5     | 56479  | 37 | 6 | 73879550  | 73879550  | Missense_Mutation | SNP | C  | T  | 31  | 100 | c.1550C>T                                      | c.(1549-1551)CCA>CTA   | p.P517L  |
| Pat_66 | Pre-Treatment | CD109     | 135228 | 37 | 6 | 74446167  | 74446167  | Missense_Mutation | SNP | C  | T  | 134 | 90  | c.569C>T                                       | c.(568-570)TCC>TTC     | p.S190F  |
| Pat_66 | Pre-Treatment | COL12A1   | 1303   | 37 | 6 | 75887486  | 75887486  | Missense_Mutation | SNP | C  | T  | 182 | 483 | c.2330G>A                                      | c.(2329-2331)AGA>AAA   | p.R777K  |
| Pat_66 | Pre-Treatment | COL12A1   | 1303   | 37 | 6 | 75892963  | 75892963  | Missense_Mutation | SNP | C  | T  | 49  | 137 | c.1694G>A                                      | c.(1693-1695)AGG>AAG   | p.R565K  |
| Pat_66 | Pre-Treatment | FILIP1    | 27145  | 37 | 6 | 76022929  | 76022929  | Missense_Mutation | SNP | C  | T  | 15  | 53  | c.2619G>A                                      | c.(2617-2619)ATG>ATA   | p.M873I  |
| Pat_66 | Pre-Treatment | LCA5      | 167691 | 37 | 6 | 80203380  | 80203380  | Missense_Mutation | SNP | C  | T  | 22  | 41  | c.808G>A                                       | c.(808-810)GAA>AAA     | p.E270K  |



|        |               |           |        |    |   |           |           |                   |     |    |    |     |     |                |                      |               |
|--------|---------------|-----------|--------|----|---|-----------|-----------|-------------------|-----|----|----|-----|-----|----------------|----------------------|---------------|
| Pat_66 | Pre-Treatment | IBTK      | 25998  | 37 | 6 | 82933317  | 82933317  | Nonsense_Mutation | SNP | C  | A  | 4   | 63  | c.964G>T       | c.(964-966)GGA>TGA   | p.G322*       |
| Pat_66 | Pre-Treatment | DOPEY1    | 23033  | 37 | 6 | 83840052  | 83840052  | Missense_Mutation | SNP | T  | G  | 35  | 76  | c.2552T>G      | c.(2551-2553)GTT>GGT | p.V851G       |
| Pat_66 | Pre-Treatment | ME1       | 4199   | 37 | 6 | 83933615  | 83933615  | Missense_Mutation | SNP | G  | A  | 28  | 70  | c.1313C>T      | c.(1312-1314)CCA>CTA | p.P438L       |
| Pat_66 | Pre-Treatment | RARS2     | 57038  | 37 | 6 | 88224171  | 88224171  | Missense_Mutation | SNP | C  | A  | 31  | 67  | c.1697G>T      | c.(1696-1698)GGA>GTA | p.G566V       |
| Pat_66 | Pre-Treatment | UBE2J1    | 51465  | 37 | 6 | 90047951  | 90047951  | Missense_Mutation | SNP | G  | A  | 78  | 56  | c.401C>T       | c.(400-402)CCT>CTT   | p.P134L       |
| Pat_66 | Pre-Treatment | KLHL32    | 114792 | 37 | 6 | 97587066  | 97587066  | Missense_Mutation | SNP | G  | A  | 55  | 152 | c.1771G>A      | c.(1771-1773)GGA>AGA | p.G591R       |
| Pat_66 | Pre-Treatment | SIM1      | 6492   | 37 | 6 | 100838394 | 100838394 | Missense_Mutation | SNP | C  | T  | 116 | 80  | c.2144G>A      | c.(2143-2145)GGA>GAA | p.G715E       |
| Pat_66 | Pre-Treatment | GRIK2     | 2898   | 37 | 6 | 102134176 | 102134176 | Missense_Mutation | SNP | G  | A  | 78  | 69  | c.899G>A       | c.(898-900)CGA>CAA   | p.R300Q       |
| Pat_66 | Pre-Treatment | TUBE1     | 51175  | 37 | 6 | 112395985 | 112395985 | Missense_Mutation | SNP | G  | A  | 24  | 69  | c.881C>T       | c.(880-882)CCT>CTT   | p.P294L       |
| Pat_66 | Pre-Treatment | FRK       | 2444   | 37 | 6 | 116265408 | 116265408 | Missense_Mutation | SNP | T  | C  | 36  | 58  | c.1139A>G      | c.(1138-1140)AAG>AGG | p.K380R       |
| Pat_66 | Pre-Treatment | DSE       | 29940  | 37 | 6 | 116757465 | 116757465 | Missense_Mutation | SNP | G  | A  | 32  | 80  | c.1834G>A      | c.(1834-1836)GGT>AGT | p.G612S       |
| Pat_66 | Pre-Treatment | GPRC6A    | 222545 | 37 | 6 | 117150200 | 117150200 | Splice_Site       | SNP | C  | T  | 16  | 26  | c.-21_splice   | c.e1-1               |               |
| Pat_66 | Pre-Treatment | RFX6      | 222546 | 37 | 6 | 117237412 | 117237412 | Missense_Mutation | SNP | C  | T  | 77  | 208 | c.907C>T       | c.(907-909)CTT>TTT   | p.L303F       |
| Pat_66 | Pre-Treatment | MAN1A1    | 4121   | 37 | 6 | 119509588 | 119509589 | Nonsense_Mutation | DNP | CC | TT | 39  | 129 | .1700_1701GG>A | c.(1699-1701)TGG>TAA | p.W567*       |
| Pat_66 | Pre-Treatment | PKIB      | 5570   | 37 | 6 | 123039097 | 123039097 | Missense_Mutation | SNP | C  | T  | 92  | 45  | c.158C>T       | c.(157-159)TCC>TTC   | p.S53F        |
| Pat_66 | Pre-Treatment | CLVS2     | 134829 | 37 | 6 | 123332185 | 123332185 | Missense_Mutation | SNP | G  | A  | 53  | 129 | c.445G>A       | c.(445-447)GAA>AAA   | p.E149K       |
| Pat_66 | Pre-Treatment | CLVS2     | 134829 | 37 | 6 | 123377000 | 123377000 | Missense_Mutation | SNP | C  | T  | 65  | 131 | c.725C>T       | c.(724-726)CCT>CTT   | p.P242L       |
| Pat_66 | Pre-Treatment | C6orf174  | 387104 | 37 | 6 | 127796599 | 127796599 | Missense_Mutation | SNP | C  | T  | 109 | 98  | c.2572G>A      | c.(2572-2574)GAG>AAG | p.E858K       |
| Pat_66 | Pre-Treatment | THEMIS    | 387357 | 37 | 6 | 128150822 | 128150822 | Missense_Mutation | SNP | C  | T  | 34  | 108 | c.508G>A       | c.(508-510)GAA>AAA   | p.E170K       |
| Pat_66 | Pre-Treatment | ENPP1     | 5167   | 37 | 6 | 132176145 | 132176145 | Missense_Mutation | SNP | C  | T  | 26  | 61  | c.697C>T       | c.(697-699)CCT>TCT   | p.P233S       |
| Pat_66 | Pre-Treatment | IL22RA2   | 116379 | 37 | 6 | 137477948 | 137477948 | Missense_Mutation | SNP | C  | T  | 55  | 99  | c.241G>A       | c.(241-243)GGA>AGA   | p.G81R        |
| Pat_66 | Pre-Treatment | TXLNB     | 167838 | 37 | 6 | 139563953 | 139563953 | Missense_Mutation | SNP | G  | T  | 4   | 125 | c.1765C>A      | c.(1765-1767)CAA>AAA | p.Q589K       |
| Pat_66 | Pre-Treatment | ULBP2     | 80328  | 37 | 6 | 150267721 | 150267721 | Missense_Mutation | SNP | G  | A  | 53  | 188 | c.563G>A       | c.(562-564)GGA>GAA   | p.G188E       |
| Pat_66 | Pre-Treatment | TULP4     | 56995  | 37 | 6 | 158900787 | 158900787 | Missense_Mutation | SNP | C  | T  | 23  | 59  | c.1031C>T      | c.(1030-1032)CCC>CTC | p.P344L       |
| Pat_66 | Pre-Treatment | FNDC1     | 84624  | 37 | 6 | 159644649 | 159644649 | Missense_Mutation | SNP | G  | A  | 16  | 41  | c.856G>A       | c.(856-858)GAA>AAA   | p.E286K       |
| Pat_66 | Pre-Treatment | FNDC1     | 84624  | 37 | 6 | 159646676 | 159646676 | Missense_Mutation | SNP | G  | A  | 168 | 124 | c.994G>A       | c.(994-996)GAA>AAA   | p.E332K       |
| Pat_66 | Pre-Treatment | PNLDC1    | 154197 | 37 | 6 | 160232741 | 160232741 | Missense_Mutation | SNP | G  | A  | 47  | 135 | c.829G>A       | c.(829-831)GAT>AAT   | p.D277N       |
| Pat_66 | Pre-Treatment | MLLT4     | 4301   | 37 | 6 | 168352389 | 168352389 | Missense_Mutation | SNP | G  | A  | 5   | 283 | c.4331G>A      | c.(4330-4332)CGC>CAC | p.R1444H      |
| Pat_66 | Pre-Treatment | GPER      | 2852   | 37 | 7 | 1131968   | 1131968   | Missense_Mutation | SNP | G  | C  | 3   | 16  | c.604G>C       | c.(604-606)GAC>CAC   | p.D202H       |
| Pat_66 | Pre-Treatment | SDK1      | 221935 | 37 | 7 | 4153678   | 4153678   | Missense_Mutation | SNP | G  | A  | 20  | 80  | c.3595G>A      | c.(3595-3597)GAT>AAT | p.D1199N      |
| Pat_66 | Pre-Treatment | SDK1      | 221935 | 37 | 7 | 4277281   | 4277281   | Nonsense_Mutation | SNP | C  | T  | 34  | 117 | c.5995C>T      | c.(5995-5997)CAA>TAA | p.Q1999*      |
| Pat_66 | Pre-Treatment | COL28A1   | 340267 | 37 | 7 | 7570984   | 7570984   | Missense_Mutation | SNP | G  | A  | 40  | 58  | c.676C>T       | c.(676-678)CGT>TGT   | p.R226C       |
| Pat_66 | Pre-Treatment | HDAC9     | 9734   | 37 | 7 | 18688097  | 18688097  | Missense_Mutation | SNP | C  | T  | 72  | 75  | c.1249C>T      | c.(1249-1251)CCC>TCC | p.P417S       |
| Pat_66 | Pre-Treatment | RAPGEF5   | 9771   | 37 | 7 | 22194161  | 22194161  | Missense_Mutation | SNP | A  | T  | 67  | 106 | c.1239T>A      | c.(1237-1239)AGT>AGA | p.S413R       |
| Pat_66 | Pre-Treatment | IGF2BP3   | 10643  | 37 | 7 | 23401193  | 23401193  | Missense_Mutation | SNP | C  | T  | 48  | 197 | c.361G>A       | c.(361-363)GTT>ATT   | p.V121I       |
| Pat_66 | Pre-Treatment | TRA2A     | 29896  | 37 | 7 | 23545756  | 23545756  | Splice_Site       | SNP | C  | T  | 62  | 202 | c.770_splice   | c.e6+1               | p.R257_splice |
| Pat_66 | Pre-Treatment | TRA2A     | 29896  | 37 | 7 | 23552556  | 23552556  | Missense_Mutation | SNP | C  | T  | 37  | 124 | c.482G>A       | c.(481-483)GGA>GAA   | p.G161E       |
| Pat_66 | Pre-Treatment | C7orf46   | 340277 | 37 | 7 | 23740429  | 23740429  | Missense_Mutation | SNP | C  | T  | 54  | 245 | c.770C>T       | c.(769-771)TCA>TTA   | p.S257L       |
| Pat_66 | Pre-Treatment | HOXA3     | 3200   | 37 | 7 | 27149851  | 27149851  | Missense_Mutation | SNP | G  | A  | 58  | 57  | c.409C>T       | c.(409-411)CCT>TCT   | p.P137S       |
| Pat_66 | Pre-Treatment | ADCYAP1R1 | 117    | 37 | 7 | 31146231  | 31146231  | Missense_Mutation | SNP | C  | T  | 41  | 43  | c.1340C>T      | c.(1339-1341)TCC>TTC | p.S447F       |
| Pat_66 | Pre-Treatment | CCDC129   | 223075 | 37 | 7 | 31683329  | 31683329  | Missense_Mutation | SNP | C  | T  | 15  | 87  | c.2345C>T      | c.(2344-2346)TCC>TTC | p.S782F       |
| Pat_66 | Pre-Treatment | PDE1C     | 5137   | 37 | 7 | 31887625  | 31887625  | Missense_Mutation | SNP | C  | T  | 35  | 131 | c.937G>A       | c.(937-939)GAG>AAG   | p.E313K       |
| Pat_66 | Pre-Treatment | PDE1C     | 5137   | 37 | 7 | 31912990  | 31912990  | Missense_Mutation | SNP | G  | A  | 32  | 69  | c.524C>T       | c.(523-525)TCC>TTC   | p.S175F       |
| Pat_66 | Pre-Treatment | NPSR1     | 387129 | 37 | 7 | 34818083  | 34818083  | Missense_Mutation | SNP | C  | T  | 4   | 86  | c.290C>T       | c.(289-291)ACA>ATA   | p.T97I        |
| Pat_66 | Pre-Treatment | DPY19L1   | 23333  | 37 | 7 | 35009080  | 35009080  | Missense_Mutation | SNP | G  | A  | 18  | 113 | c.760C>T       | c.(760-762)CCT>TCT   | p.P254S       |
| Pat_66 | Pre-Treatment | DPY19L2P1 | 554236 | 37 | 7 | 35161208  | 35161208  | Missense_Mutation | SNP | C  | T  | 20  | 82  | c.499G>A       | c.(499-501)GAT>AAT   | p.D167N       |
| Pat_66 | Pre-Treatment | CDK13     | 8621   | 37 | 7 | 40134171  | 40134171  | Missense_Mutation | SNP | G  | T  | 6   | 343 | c.4131G>T      | c.(4129-4131)TTG>TTT | p.L1377F      |

|        |               |          |           |    |   |           |           |                   |     |    |    |     |     |                                    |                        |               |
|--------|---------------|----------|-----------|----|---|-----------|-----------|-------------------|-----|----|----|-----|-----|------------------------------------|------------------------|---------------|
| Pat_66 | Pre-Treatment | PKD1L1   | 168507    | 37 | 7 | 47869170  | 47869170  | Nonsense_Mutation | SNP | C  | T  | 217 | 264 | c.6588G>A                          | c.(6586-6588)TGG>TGA   | p.W2196*      |
| Pat_66 | Pre-Treatment | IKZF1    | 10320     | 37 | 7 | 50468209  | 50468209  | Missense_Mutation | SNP | G  | A  | 26  | 134 | c.1444G>A                          | c.(1444-1446)GGC>AGC   | p.G482S       |
| Pat_66 | Pre-Treatment | COBL     | 23242     | 37 | 7 | 51152896  | 51152896  | Nonsense_Mutation | SNP | C  | A  | 4   | 173 | c.1063G>T                          | c.(1063-1065)GAG>TAG   | p.E355*       |
| Pat_66 | Pre-Treatment | ZNF727   | 442319    | 37 | 7 | 63538806  | 63538806  | Missense_Mutation | SNP | C  | G  | 10  | 136 | c.1379C>G                          | c.(1378-1380)ACC>AGC   | p.T460S       |
| Pat_66 | Pre-Treatment | CLDN3    | 1365      | 37 | 7 | 73183904  | 73183904  | Missense_Mutation | SNP | A  | G  | 9   | 12  | c.476T>C                           | c.(475-477)ATG>ACG     | p.M159T       |
| Pat_66 | Pre-Treatment | ELN      | 2006      | 37 | 7 | 73474260  | 73474260  | Missense_Mutation | SNP | C  | T  | 117 | 334 | c.1477C>T                          | c.(1477-1479)CCT>TCT   | p.P493S       |
| Pat_66 | Pre-Treatment | EIF4H    | 7458      | 37 | 7 | 73609166  | 73609166  | Missense_Mutation | SNP | C  | T  | 42  | 61  | c.565C>T                           | c.(565-567)CCC>TCC     | p.P189S       |
| Pat_66 | Pre-Treatment | POM121C  | 100101267 | 37 | 7 | 75051130  | 75051130  | Missense_Mutation | SNP | G  | A  | 53  | 103 | c.2405C>T                          | c.(2404-2406)TCC>TTC   | p.S802F       |
| Pat_66 | Pre-Treatment | ZP3      | 7784      | 37 | 7 | 76062838  | 76062838  | Missense_Mutation | SNP | C  | T  | 5   | 317 | c.587C>T                           | c.(586-588)GCC>GTC     | p.A196V       |
| Pat_66 | Pre-Treatment | PCLO     | 27445     | 37 | 7 | 82581211  | 82581211  | Missense_Mutation | SNP | C  | T  | 15  | 105 | c.9058G>A                          | c.(9058-9060)GAC>AAC   | p.D3020N      |
| Pat_66 | Pre-Treatment | PCLO     | 27445     | 37 | 7 | 82581886  | 82581886  | Missense_Mutation | SNP | C  | T  | 39  | 156 | c.8383G>A                          | c.(8383-8385)GTG>ATG   | p.V2795M      |
| Pat_66 | Pre-Treatment | PCLO     | 27445     | 37 | 7 | 82764398  | 82764398  | Missense_Mutation | SNP | C  | T  | 73  | 231 | c.2468G>A                          | c.(2467-2469)CGA>CAA   | p.R823Q       |
| Pat_66 | Pre-Treatment | PCLO     | 27445     | 37 | 7 | 82784411  | 82784411  | Missense_Mutation | SNP | G  | A  | 6   | 413 | c.1546C>T                          | c.(1546-1548)CCA>TCA   | p.P516S       |
| Pat_66 | Pre-Treatment | SEMA3E   | 9723      | 37 | 7 | 82996952  | 82996952  | Missense_Mutation | SNP | G  | A  | 182 | 218 | c.2278C>T                          | c.(2278-2280)CGT>TGT   | p.R760C       |
| Pat_66 | Pre-Treatment | ABCB1    | 5243      | 37 | 7 | 87179226  | 87179226  | Missense_Mutation | SNP | C  | T  | 93  | 341 | c.1495G>A                          | c.(1495-1497)GAG>AAG   | p.E499K       |
| Pat_66 | Pre-Treatment | CYP51A1  | 1595      | 37 | 7 | 91758208  | 91758208  | Missense_Mutation | SNP | C  | T  | 105 | 421 | c.454G>A                           | c.(454-456)GAT>AAT     | p.D152N       |
| Pat_66 | Pre-Treatment | SAMD9    | 54809     | 37 | 7 | 92733373  | 92733373  | Missense_Mutation | SNP | C  | T  | 100 | 173 | c.2038G>A                          | c.(2038-2040)GAG>AAG   | p.E680K       |
| Pat_66 | Pre-Treatment | SAMD9L   | 219285    | 37 | 7 | 92762385  | 92762385  | Missense_Mutation | SNP | T  | A  | 22  | 88  | c.2900A>T                          | c.(2899-2901)TAT>TTT   | p.Y967F       |
| Pat_66 | Pre-Treatment | HEPACAM2 | 253012    | 37 | 7 | 92848689  | 92848689  | Missense_Mutation | SNP | G  | A  | 43  | 153 | c.155C>T                           | c.(154-156)CCC>CTC     | p.P52L        |
| Pat_66 | Pre-Treatment | CALCR    | 799       | 37 | 7 | 93108698  | 93108698  | Missense_Mutation | SNP | C  | T  | 123 | 443 | c.227G>A                           | c.(226-228)CGA>CAA     | p.R76Q        |
| Pat_66 | Pre-Treatment | ZKSCAN1  | 7586      | 37 | 7 | 99631659  | 99631659  | Missense_Mutation | SNP | C  | T  | 26  | 108 | c.1531C>T                          | c.(1531-1533)CAC>TAC   | p.H511Y       |
| Pat_66 | Pre-Treatment | ZNF3     | 7551      | 37 | 7 | 99669002  | 99669002  | Missense_Mutation | SNP | C  | T  | 169 | 246 | c.1105G>A                          | c.(1105-1107)GAA>AAA   | p.E369K       |
| Pat_66 | Pre-Treatment | ZAN      | 7455      | 37 | 7 | 100349878 | 100349878 | Missense_Mutation | SNP | C  | T  | 8   | 410 | c.2150C>T                          | c.(2149-2151)CCC>CTC   | p.P717L       |
| Pat_66 | Pre-Treatment | ACHE     | 43        | 37 | 7 | 100490217 | 100490217 | Missense_Mutation | SNP | C  | T  | 25  | 28  | c.1291G>A                          | c.(1291-1293)GAT>AAT   | p.D431N       |
| Pat_66 | Pre-Treatment | MUC17    | 140453    | 37 | 7 | 100682094 | 100682094 | Missense_Mutation | SNP | C  | T  | 9   | 850 | c.7397C>T                          | c.(7396-7398)ACG>ATG   | p.T2466M      |
| Pat_66 | Pre-Treatment | MUC17    | 140453    | 37 | 7 | 100682156 | 100682156 | Missense_Mutation | SNP | A  | G  | 9   | 861 | c.7459A>G                          | c.(7459-7461)ATG>GTG   | p.M2487V      |
| Pat_66 | Pre-Treatment | MUC17    | 140453    | 37 | 7 | 100682158 | 100682158 | Missense_Mutation | SNP | G  | C  | 8   | 859 | c.7461G>C                          | c.(7459-7461)ATG>ATC   | p.M2487I      |
| Pat_66 | Pre-Treatment | MUC17    | 140453    | 37 | 7 | 100686392 | 100686392 | Missense_Mutation | SNP | C  | T  | 80  | 251 | c.11695C>T                         | c.(11695-11697)CCT>TCT | p.P3899S      |
| Pat_66 | Pre-Treatment | LRRRC17  | 10234     | 37 | 7 | 102585050 | 102585050 | Missense_Mutation | SNP | G  | A  | 20  | 73  | c.1322G>A                          | c.(1321-1323)GGA>GAA   | p.G441E       |
| Pat_66 | Pre-Treatment | FBXL13   | 222235    | 37 | 7 | 102604109 | 102604109 | Missense_Mutation | SNP | C  | T  | 17  | 80  | c.595G>A                           | c.(595-597)GAT>AAT     | p.D199N       |
| Pat_66 | Pre-Treatment | ARMC10   | 83787     | 37 | 7 | 102733020 | 102733020 | Missense_Mutation | SNP | A  | G  | 6   | 171 | c.625A>G                           | c.(625-627)ACC>GCC     | p.T209A       |
| Pat_66 | Pre-Treatment | DNAJC2   | 27000     | 37 | 7 | 102968109 | 102968109 | Missense_Mutation | SNP | T  | C  | 39  | 62  | c.424A>G                           | c.(424-426)ACT>GCT     | p.T142A       |
| Pat_66 | Pre-Treatment | RELN     | 5649      | 37 | 7 | 103130197 | 103130197 | Missense_Mutation | SNP | C  | T  | 12  | 33  | c.9755G>A                          | c.(9754-9756)AGC>AAC   | p.S3252N      |
| Pat_66 | Pre-Treatment | RELN     | 5649      | 37 | 7 | 103230142 | 103230142 | Missense_Mutation | SNP | C  | T  | 122 | 141 | c.4046G>A                          | c.(4045-4047)GGA>GAA   | p.G1349E      |
| Pat_66 | Pre-Treatment | PUS7     | 54517     | 37 | 7 | 105121497 | 105121497 | Splice_Site       | SNP | A  | G  | 39  | 48  | c.1175_splice                      | c.e9+1                 | p.R392_splice |
| Pat_66 | Pre-Treatment | LAMB1    | 3912      | 37 | 7 | 107580783 | 107580784 | Missense_Mutation | DNP | CC | TT | 17  | 80  | .3411_3412GG>A409-3414)AGGGGC>AGA/ |                        | p.G1138S      |
| Pat_66 | Pre-Treatment | LAMB1    | 3912      | 37 | 7 | 107626771 | 107626771 | Missense_Mutation | SNP | G  | A  | 36  | 183 | c.461C>T                           | c.(460-462)TCC>TTC     | p.S154F       |
| Pat_66 | Pre-Treatment | LAMB4    | 22798     | 37 | 7 | 107677900 | 107677900 | Missense_Mutation | SNP | C  | T  | 82  | 317 | c.4612G>A                          | c.(4612-4614)GAT>AAT   | p.D1538N      |
| Pat_66 | Pre-Treatment | CADPS2   | 93664     | 37 | 7 | 122001003 | 122001003 | Missense_Mutation | SNP | G  | A  | 10  | 63  | c.3452C>T                          | c.(3451-3453)TCA>TTA   | p.S1151L      |
| Pat_66 | Pre-Treatment | FLNC     | 2318      | 37 | 7 | 128492959 | 128492959 | Missense_Mutation | SNP | C  | T  | 55  | 51  | c.6082C>T                          | c.(6082-6084)CCC>TCC   | p.P2028S      |
| Pat_66 | Pre-Treatment | TSPAN33  | 340348    | 37 | 7 | 128807650 | 128807650 | Nonsense_Mutation | SNP | C  | T  | 48  | 50  | c.787C>T                           | c.(787-789)CAG>TAG     | p.Q263*       |
| Pat_66 | Pre-Treatment | KIAA1549 | 57670     | 37 | 7 | 138579122 | 138579122 | Missense_Mutation | SNP | G  | A  | 129 | 227 | c.3998C>T                          | c.(3997-3999)CCT>CTT   | p.P1333L      |
| Pat_66 | Pre-Treatment | KIAA1549 | 57670     | 37 | 7 | 138601892 | 138601892 | Missense_Mutation | SNP | G  | A  | 21  | 90  | c.2480C>T                          | c.(2479-2481)TCT>TTT   | p.S827F       |
| Pat_66 | Pre-Treatment | TBXAS1   | 6916      | 37 | 7 | 139655370 | 139655370 | Missense_Mutation | SNP | G  | A  | 86  | 95  | c.793G>A                           | c.(793-795)GAA>AAA     | p.E265K       |
| Pat_66 | Pre-Treatment | BRAF     | 673       | 37 | 7 | 140453136 | 140453136 | Missense_Mutation | SNP | A  | T  | 72  | 118 | c.1799T>A                          | c.(1798-1800)GTG>GAG   | p.V600E       |
| Pat_66 | Pre-Treatment | TAS2R4   | 50832     | 37 | 7 | 141478757 | 141478757 | Missense_Mutation | SNP | C  | T  | 198 | 260 | c.469C>T                           | c.(469-471)CCT>TCT     | p.P157S       |
| Pat_66 | Pre-Treatment | TRY6     | 154754    | 37 | 7 | 142479959 | 142479959 | Missense_Mutation | SNP | G  | A  | 52  | 347 | c.91G>A                            | c.(91-93)GAG>AAG       | p.E31K        |

|        |               |         |        |    |   |           |           |                   |     |    |    |     |     |                 |                      |          |
|--------|---------------|---------|--------|----|---|-----------|-----------|-------------------|-----|----|----|-----|-----|-----------------|----------------------|----------|
| Pat_66 | Pre-Treatment | KEL     | 3792   | 37 | 7 | 142641771 | 142641771 | Missense_Mutation | SNP | G  | A  | 17  | 41  | c.1372C>T       | c.(1372-1374)CCC>TCC | p.P458S  |
| Pat_66 | Pre-Treatment | KEL     | 3792   | 37 | 7 | 142651429 | 142651429 | Nonsense_Mutation | SNP | G  | A  | 29  | 93  | c.766C>T        | c.(766-768)CAG>TAG   | p.Q256*  |
| Pat_66 | Pre-Treatment | CLCN1   | 1180   | 37 | 7 | 143047677 | 143047677 | Missense_Mutation | SNP | C  | T  | 191 | 245 | c.2525C>T       | c.(2524-2526)TCA>TTA | p.S842L  |
| Pat_66 | Pre-Treatment | OR2F1   | 26211  | 37 | 7 | 143657212 | 143657212 | Missense_Mutation | SNP | G  | A  | 257 | 313 | c.149G>A        | c.(148-150)AGA>AAA   | p.R50K   |
| Pat_66 | Pre-Treatment | ARHGEF5 | 7984   | 37 | 7 | 144062335 | 144062336 | Missense_Mutation | DNP | CC | TT | 21  | 150 | ..2573_2574CC>T | c.(2572-2574)TCC>TTT | p.S858F  |
| Pat_66 | Pre-Treatment | NOBOX   | 135935 | 37 | 7 | 144101747 | 144101747 | Missense_Mutation | SNP | G  | A  | 50  | 244 | c.112C>T        | c.(112-114)CCT>TCT   | p.P38S   |
| Pat_66 | Pre-Treatment | TPK1    | 27010  | 37 | 7 | 144380069 | 144380069 | Missense_Mutation | SNP | G  | A  | 66  | 212 | c.118C>T        | c.(118-120)CTT>TTT   | p.L40F   |
| Pat_66 | Pre-Treatment | CNTNAP2 | 26047  | 37 | 7 | 147259245 | 147259245 | Missense_Mutation | SNP | C  | T  | 32  | 95  | c.1793C>T       | c.(1792-1794)TCC>TTC | p.S598F  |
| Pat_66 | Pre-Treatment | ZNF425  | 155054 | 37 | 7 | 148802286 | 148802286 | Missense_Mutation | SNP | G  | A  | 22  | 83  | c.677C>T        | c.(676-678)TCG>TTG   | p.S226L  |
| Pat_66 | Pre-Treatment | ZNF777  | 27153  | 37 | 7 | 149129231 | 149129231 | Missense_Mutation | SNP | C  | A  | 4   | 183 | c.2132G>T       | c.(2131-2133)CGC>CTC | p.R711L  |
| Pat_66 | Pre-Treatment | ZNF777  | 27153  | 37 | 7 | 149133705 | 149133705 | Missense_Mutation | SNP | C  | T  | 4   | 127 | c.1300G>A       | c.(1300-1302)GAA>AAA | p.E434K  |
| Pat_66 | Pre-Treatment | SSPO    | 23145  | 37 | 7 | 149509113 | 149509113 | Missense_Mutation | SNP | C  | T  | 24  | 67  | c.9659C>T       | c.(9658-9660)ACC>ATC | p.T3220I |
| Pat_66 | Pre-Treatment | GIMAP8  | 155038 | 37 | 7 | 150164120 | 150164120 | Missense_Mutation | SNP | G  | A  | 20  | 94  | c.334G>A        | c.(334-336)GAA>AAA   | p.E112K  |
| Pat_66 | Pre-Treatment | GIMAP8  | 155038 | 37 | 7 | 150171298 | 150171298 | Missense_Mutation | SNP | G  | A  | 22  | 55  | c.881G>A        | c.(880-882)AGA>AAA   | p.R294K  |
| Pat_66 | Pre-Treatment | GIMAP7  | 168537 | 37 | 7 | 150217158 | 150217158 | Missense_Mutation | SNP | A  | C  | 24  | 86  | c.96A>C         | c.(94-96)GAA>GAC     | p.E32D   |
| Pat_66 | Pre-Treatment | GIMAP6  | 474344 | 37 | 7 | 150325516 | 150325516 | Missense_Mutation | SNP | C  | T  | 178 | 529 | c.170G>A        | c.(169-171)GGA>GAA   | p.G57E   |
| Pat_66 | Pre-Treatment | UBE3C   | 9690   | 37 | 7 | 156974272 | 156974272 | Missense_Mutation | SNP | C  | T  | 19  | 110 | c.677C>T        | c.(676-678)TCT>TTT   | p.S226F  |
| Pat_66 | Pre-Treatment | MYOM2   | 9172   | 37 | 8 | 2005529   | 2005530   | Missense_Mutation | DNP | CC | TT | 11  | 30  | c.327_328CC>TT  | 325-330)GCCAC>GCTT)  | p.H110Y  |
| Pat_66 | Pre-Treatment | CSMD1   | 64478  | 37 | 8 | 2855550   | 2855550   | Missense_Mutation | SNP | G  | A  | 16  | 51  | c.8363C>T       | c.(8362-8364)CCT>CTT | p.P2788L |
| Pat_66 | Pre-Treatment | CSMD1   | 64478  | 37 | 8 | 2876022   | 2876022   | Missense_Mutation | SNP | C  | T  | 373 | 271 | c.8009G>A       | c.(8008-8010)AGC>AAC | p.S2670N |
| Pat_66 | Pre-Treatment | CSMD1   | 64478  | 37 | 8 | 3474275   | 3474275   | Missense_Mutation | SNP | G  | A  | 18  | 46  | c.1054C>T       | c.(1054-1056)CCT>TCT | p.P352S  |
| Pat_66 | Pre-Treatment | XKR5    | 389610 | 37 | 8 | 6682776   | 6682776   | Missense_Mutation | SNP | C  | T  | 22  | 24  | c.338G>A        | c.(337-339)CGA>CAA   | p.R113Q  |
| Pat_66 | Pre-Treatment | RP1L1   | 94137  | 37 | 8 | 10464908  | 10464908  | Missense_Mutation | SNP | C  | T  | 45  | 140 | c.6700G>A       | c.(6700-6702)GAA>AAA | p.E2234K |
| Pat_66 | Pre-Treatment | RP1L1   | 94137  | 37 | 8 | 10468055  | 10468055  | Missense_Mutation | SNP | C  | A  | 12  | 27  | c.3553G>T       | c.(3553-3555)GGG>TGG | p.G1185W |
| Pat_66 | Pre-Treatment | HR      | 55806  | 37 | 8 | 21979204  | 21979204  | Missense_Mutation | SNP | C  | T  | 48  | 28  | c.2125G>A       | c.(2125-2127)GAA>AAA | p.E709K  |
| Pat_66 | Pre-Treatment | POLR3D  | 661    | 37 | 8 | 22108026  | 22108026  | Missense_Mutation | SNP | C  | T  | 7   | 352 | c.1192C>T       | c.(1192-1194)CGG>TGG | p.R398W  |
| Pat_66 | Pre-Treatment | LOXL2   | 4017   | 37 | 8 | 23217643  | 23217643  | Missense_Mutation | SNP | G  | A  | 43  | 83  | c.491C>T        | c.(490-492)CCT>CTT   | p.P164L  |
| Pat_66 | Pre-Treatment | ADAM28  | 10863  | 37 | 8 | 24187516  | 24187516  | Missense_Mutation | SNP | C  | T  | 42  | 120 | c.991C>T        | c.(991-993)CTT>TTT   | p.L331F  |
| Pat_66 | Pre-Treatment | ADAM7   | 8756   | 37 | 8 | 24350557  | 24350557  | Missense_Mutation | SNP | G  | A  | 29  | 22  | c.1657G>A       | c.(1657-1659)GAT>AAT | p.D553N  |
| Pat_66 | Pre-Treatment | NEFL    | 4747   | 37 | 8 | 24811034  | 24811034  | Missense_Mutation | SNP | C  | T  | 11  | 16  | c.1444G>A       | c.(1444-1446)GAC>AAC | p.D482N  |
| Pat_66 | Pre-Treatment | PNMA2   | 10687  | 37 | 8 | 26365883  | 26365883  | Missense_Mutation | SNP | G  | A  | 55  | 44  | c.389C>T        | c.(388-390)TCT>TTT   | p.S130F  |
| Pat_66 | Pre-Treatment | BRF2    | 55290  | 37 | 8 | 37702440  | 37702440  | Missense_Mutation | SNP | C  | A  | 4   | 96  | c.828G>T        | c.(826-828)ATG>ATT   | p.M276I  |
| Pat_66 | Pre-Treatment | ASH2L   | 9070   | 37 | 8 | 37972516  | 37972516  | Nonsense_Mutation | SNP | C  | T  | 34  | 24  | c.775C>T        | c.(775-777)CAG>TAG   | p.Q259*  |
| Pat_66 | Pre-Treatment | ANK1    | 286    | 37 | 8 | 41530173  | 41530173  | Missense_Mutation | SNP | C  | T  | 108 | 82  | c.4795G>A       | c.(4795-4797)GAG>AAG | p.E1599K |
| Pat_66 | Pre-Treatment | EFCAB1  | 79645  | 37 | 8 | 49642299  | 49642299  | Missense_Mutation | SNP | C  | T  | 22  | 59  | c.451G>A        | c.(451-453)GAA>AAA   | p.E151K  |
| Pat_66 | Pre-Treatment | RB1CC1  | 9821   | 37 | 8 | 53554996  | 53554996  | Missense_Mutation | SNP | G  | T  | 44  | 90  | c.4252C>A       | c.(4252-4254)CCA>ACA | p.P1418T |
| Pat_66 | Pre-Treatment | RP1     | 6101   | 37 | 8 | 55534017  | 55534017  | Missense_Mutation | SNP | C  | T  | 36  | 134 | c.491C>T        | c.(490-492)CCG>CTG   | p.P164L  |
| Pat_66 | Pre-Treatment | RP1     | 6101   | 37 | 8 | 55539216  | 55539216  | Missense_Mutation | SNP | C  | T  | 15  | 40  | c.2774C>T       | c.(2773-2775)CCA>CTA | p.P925L  |
| Pat_66 | Pre-Treatment | XKR4    | 114786 | 37 | 8 | 56436133  | 56436133  | Missense_Mutation | SNP | G  | A  | 207 | 133 | c.1300G>A       | c.(1300-1302)GAC>AAC | p.D434N  |
| Pat_66 | Pre-Treatment | XKR4    | 114786 | 37 | 8 | 56436373  | 56436373  | Missense_Mutation | SNP | C  | T  | 41  | 108 | c.1540C>T       | c.(1540-1542)CAT>TAT | p.H514Y  |
| Pat_66 | Pre-Treatment | CHD7    | 55636  | 37 | 8 | 61655535  | 61655535  | Missense_Mutation | SNP | C  | T  | 4   | 80  | c.1544C>T       | c.(1543-1545)CCT>CTT | p.P515L  |
| Pat_66 | Pre-Treatment | CHD7    | 55636  | 37 | 8 | 61769426  | 61769426  | Missense_Mutation | SNP | C  | A  | 4   | 109 | c.7587C>A       | c.(7585-7587)CAC>CAA | p.H2529Q |
| Pat_66 | Pre-Treatment | SULF1   | 23213  | 37 | 8 | 70514018  | 70514018  | Missense_Mutation | SNP | C  | T  | 89  | 303 | c.1015C>T       | c.(1015-1017)CGT>TGT | p.R339C  |
| Pat_66 | Pre-Treatment | SULF1   | 23213  | 37 | 8 | 70517147  | 70517147  | Missense_Mutation | SNP | G  | A  | 49  | 142 | c.1357G>A       | c.(1357-1359)GCC>ACC | p.A453T  |
| Pat_66 | Pre-Treatment | C8orf84 | 157869 | 37 | 8 | 73979655  | 73979655  | Missense_Mutation | SNP | C  | T  | 44  | 121 | c.716G>A        | c.(715-717)CGG>CAG   | p.R239Q  |
| Pat_66 | Pre-Treatment | HNF4G   | 3174   | 37 | 8 | 76456156  | 76456156  | Missense_Mutation | SNP | G  | A  | 47  | 151 | c.88G>A         | c.(88-90)GAT>AAT     | p.D30N   |
| Pat_66 | Pre-Treatment | ZFHX4   | 79776  | 37 | 8 | 77763577  | 77763577  | Missense_Mutation | SNP | G  | A  | 15  | 39  | c.4285G>A       | c.(4285-4287)GAA>AAA | p.E1429K |

|        |               |            |        |    |   |           |           |                   |     |   |   |     |     |            |                        |          |
|--------|---------------|------------|--------|----|---|-----------|-----------|-------------------|-----|---|---|-----|-----|------------|------------------------|----------|
| Pat_66 | Pre-Treatment | ZFHx4      | 79776  | 37 | 8 | 77763842  | 77763842  | Missense_Mutation | SNP | C | T | 23  | 23  | c.4550C>T  | c.(4549-4551)TCA>TTA   | p.S1517L |
| Pat_66 | Pre-Treatment | ZFHx4      | 79776  | 37 | 8 | 77766736  | 77766736  | Missense_Mutation | SNP | C | T | 173 | 121 | c.7444C>T  | c.(7444-7446)CCG>TCG   | p.P2482S |
| Pat_66 | Pre-Treatment | FABP12     | 646486 | 37 | 8 | 82441830  | 82441830  | Missense_Mutation | SNP | C | T | 18  | 38  | c.89G>A    | c.(88-90)AGC>AAC       | p.S30N   |
| Pat_66 | Pre-Treatment | CA1        | 759    | 37 | 8 | 86240796  | 86240796  | Missense_Mutation | SNP | G | A | 52  | 136 | c.779C>T   | c.(778-780)TCA>TTA     | p.S260L  |
| Pat_66 | Pre-Treatment | CA1        | 759    | 37 | 8 | 86250541  | 86250541  | Missense_Mutation | SNP | C | T | 83  | 227 | c.175G>A   | c.(175-177)GAA>AAA     | p.E59K   |
| Pat_66 | Pre-Treatment | CNGB3      | 54714  | 37 | 8 | 87755783  | 87755783  | Missense_Mutation | SNP | G | A | 71  | 45  | c.73C>T    | c.(73-75)CGT>TGT       | p.R25C   |
| Pat_66 | Pre-Treatment | DCAF4L2    | 138009 | 37 | 8 | 88885877  | 88885877  | Missense_Mutation | SNP | G | A | 4   | 174 | c.323C>T   | c.(322-324)ACG>ATG     | p.T108M  |
| Pat_66 | Pre-Treatment | SLC26A7    | 115111 | 37 | 8 | 92330577  | 92330577  | Missense_Mutation | SNP | C | T | 34  | 136 | c.611C>T   | c.(610-612)CCA>CTA     | p.P204L  |
| Pat_66 | Pre-Treatment | VPS13B     | 157680 | 37 | 8 | 100711962 | 100711962 | Missense_Mutation | SNP | C | T | 27  | 79  | c.6331C>T  | c.(6331-6333)CAT>TAT   | p.H2111Y |
| Pat_66 | Pre-Treatment | VPS13B     | 157680 | 37 | 8 | 100833705 | 100833705 | Nonsense_Mutation | SNP | C | T | 60  | 136 | c.9253C>T  | c.(9253-9255)CAG>TAG   | p.Q3085* |
| Pat_66 | Pre-Treatment | LRP12      | 29967  | 37 | 8 | 105507435 | 105507435 | Missense_Mutation | SNP | G | A | 61  | 42  | c.1583C>T  | c.(1582-1584)TCA>TTA   | p.S528L  |
| Pat_66 | Pre-Treatment | ZFPM2      | 23414  | 37 | 8 | 106813433 | 106813433 | Nonsense_Mutation | SNP | C | T | 78  | 236 | c.1123C>T  | c.(1123-1125)CAG>TAG   | p.Q375*  |
| Pat_66 | Pre-Treatment | ABRA       | 137735 | 37 | 8 | 107773437 | 107773437 | Missense_Mutation | SNP | C | T | 40  | 75  | c.974G>A   | c.(973-975)CGA>CAA     | p.R325Q  |
| Pat_66 | Pre-Treatment | PKHD1L1    | 93035  | 37 | 8 | 110416854 | 110416854 | Missense_Mutation | SNP | G | A | 15  | 40  | c.1445G>A  | c.(1444-1446)CGA>CAA   | p.R482Q  |
| Pat_66 | Pre-Treatment | PKHD1L1    | 93035  | 37 | 8 | 110516633 | 110516633 | Missense_Mutation | SNP | G | A | 15  | 38  | c.10906G>A | c.(10906-10908)GAT>AAT | p.D3636N |
| Pat_66 | Pre-Treatment | CSMD3      | 114788 | 37 | 8 | 113323251 | 113323251 | Missense_Mutation | SNP | G | A | 122 | 72  | c.7841C>T  | c.(7840-7842)TCC>TTC   | p.S2614F |
| Pat_66 | Pre-Treatment | SLC30A8    | 169026 | 37 | 8 | 118184870 | 118184870 | Missense_Mutation | SNP | C | T | 56  | 161 | c.1060C>T  | c.(1060-1062)CCA>TCA   | p.P354S  |
| Pat_66 | Pre-Treatment | COL14A1    | 7373   | 37 | 8 | 121357721 | 121357721 | Missense_Mutation | SNP | G | A | 22  | 39  | c.4996G>A  | c.(4996-4998)GGA>AGA   | p.G1666R |
| Pat_66 | Pre-Treatment | ANXA13     | 312    | 37 | 8 | 124749565 | 124749565 | Missense_Mutation | SNP | G | A | 39  | 90  | c.10C>T    | c.(10-12)CGT>TGT       | p.R4C    |
| Pat_66 | Pre-Treatment | COL22A1    | 169044 | 37 | 8 | 139675952 | 139675952 | Missense_Mutation | SNP | G | A | 24  | 77  | c.3182C>T  | c.(3181-3183)TCC>TTC   | p.S1061F |
| Pat_66 | Pre-Treatment | BAI1       | 575    | 37 | 8 | 143602191 | 143602191 | Missense_Mutation | SNP | C | T | 22  | 75  | c.2929C>T  | c.(2929-2931)CGC>TGC   | p.R977C  |
| Pat_66 | Pre-Treatment | PTPRD      | 5789   | 37 | 9 | 8499838   | 8499838   | Missense_Mutation | SNP | G | A | 31  | 25  | c.2131C>T  | c.(2131-2133)CCT>TCT   | p.P711S  |
| Pat_66 | Pre-Treatment | FREM1      | 158326 | 37 | 9 | 14842587  | 14842587  | Missense_Mutation | SNP | C | T | 42  | 68  | c.1465G>A  | c.(1465-1467)GAC>AAC   | p.D489N  |
| Pat_66 | Pre-Treatment | ADAMTSL1   | 92949  | 37 | 9 | 18504842  | 18504842  | Missense_Mutation | SNP | C | T | 4   | 140 | c.79C>T    | c.(79-81)CGC>TGC       | p.R27C   |
| Pat_66 | Pre-Treatment | TAF1L      | 138474 | 37 | 9 | 32632096  | 32632096  | Missense_Mutation | SNP | C | T | 27  | 39  | c.3482G>A  | c.(3481-3483)GGA>GAA   | p.G1161E |
| Pat_66 | Pre-Treatment | SIT1       | 27240  | 37 | 9 | 35650036  | 35650036  | Missense_Mutation | SNP | G | A | 7   | 5   | c.400C>T   | c.(400-402)CCT>TCT     | p.P134S  |
| Pat_66 | Pre-Treatment | C9orf128   | 392307 | 37 | 9 | 35826156  | 35826156  | Missense_Mutation | SNP | C | T | 41  | 2   | c.3G>A     | c.(1-3)ATG>ATA         | p.M1I    |
| Pat_66 | Pre-Treatment | FAM75A5    | 727905 | 37 | 9 | 65506476  | 65506476  | Missense_Mutation | SNP | A | C | 4   | 27  | c.1084T>G  | c.(1084-1086)TAT>GAT   | p.Y362D  |
| Pat_66 | Pre-Treatment | VPS13A     | 23230  | 37 | 9 | 79936480  | 79936480  | Missense_Mutation | SNP | C | T | 67  | 6   | c.5648C>T  | c.(5647-5649)TCC>TTC   | p.S1883F |
| Pat_66 | Pre-Treatment | DIRAS2     | 54769  | 37 | 9 | 93375722  | 93375722  | Missense_Mutation | SNP | C | T | 68  | 15  | c.388G>A   | c.(388-390)GAG>AAG     | p.E130K  |
| Pat_66 | Pre-Treatment | ROR2       | 4920   | 37 | 9 | 94486933  | 94486933  | Missense_Mutation | SNP | C | T | 38  | 65  | c.1843G>A  | c.(1843-1845)GAC>AAC   | p.D615N  |
| Pat_66 | Pre-Treatment | GRIN3A     | 116443 | 37 | 9 | 104432595 | 104432595 | Missense_Mutation | SNP | G | A | 79  | 145 | c.2099C>T  | c.(2098-2100)CCA>CTA   | p.P700L  |
| Pat_66 | Pre-Treatment | GRIN3A     | 116443 | 37 | 9 | 104449113 | 104449113 | Missense_Mutation | SNP | C | T | 13  | 24  | c.1069G>A  | c.(1069-1071)GGA>AGA   | p.G357R  |
| Pat_66 | Pre-Treatment | OR13C8     | 138802 | 37 | 9 | 107331728 | 107331728 | Missense_Mutation | SNP | T | G | 105 | 12  | c.280T>G   | c.(280-282)TTC>GTC     | p.F94V   |
| Pat_66 | Pre-Treatment | KIAA1958   | 158405 | 37 | 9 | 115421766 | 115421766 | Missense_Mutation | SNP | C | T | 7   | 13  | c.1568C>T  | c.(1567-1569)TCG>TTG   | p.S523L  |
| Pat_66 | Pre-Treatment | BSPRY      | 54836  | 37 | 9 | 116132216 | 116132216 | Missense_Mutation | SNP | C | T | 41  | 3   | c.1003C>T  | c.(1003-1005)CGT>TGT   | p.R335C  |
| Pat_66 | Pre-Treatment | DBC1       | 1620   | 37 | 9 | 121929550 | 121929550 | Missense_Mutation | SNP | G | A | 86  | 14  | c.2098C>T  | c.(2098-2100)CGG>TGG   | p.R700W  |
| Pat_66 | Pre-Treatment | OR1J1      | 347168 | 37 | 9 | 125239548 | 125239548 | Missense_Mutation | SNP | G | A | 31  | 41  | c.658C>T   | c.(658-660)CAC>TAC     | p.H220Y  |
| Pat_66 | Pre-Treatment | OR1L8      | 138881 | 37 | 9 | 125329864 | 125329864 | Missense_Mutation | SNP | T | A | 43  | 79  | c.893A>T   | c.(892-894)AAA>ATA     | p.K298I  |
| Pat_66 | Pre-Treatment | GAPVD1     | 26130  | 37 | 9 | 128116965 | 128116965 | Missense_Mutation | SNP | G | A | 5   | 181 | c.3656G>A  | c.(3655-3657)CGT>CAT   | p.R1219H |
| Pat_66 | Pre-Treatment | ST6GALNAC4 | 27090  | 37 | 9 | 130674947 | 130674947 | Missense_Mutation | SNP | C | T | 17  | 17  | c.211G>A   | c.(211-213)GAG>AAG     | p.E71K   |
| Pat_66 | Pre-Treatment | NUP188     | 23511  | 37 | 9 | 131715114 | 131715114 | Nonsense_Mutation | SNP | C | A | 4   | 92  | c.150C>A   | c.(148-150)TAC>TAA     | p.Y50*   |
| Pat_66 | Pre-Treatment | C9orf78    | 51759  | 37 | 9 | 132595784 | 132595784 | Nonsense_Mutation | SNP | G | A | 88  | 15  | c.208C>T   | c.(208-210)CAG>TAG     | p.Q70*   |
| Pat_66 | Pre-Treatment | COL5A1     | 1289   | 37 | 9 | 137676892 | 137676892 | Missense_Mutation | SNP | C | T | 23  | 28  | c.2542C>T  | c.(2542-2544)CGC>TGC   | p.R848C  |
| Pat_66 | Pre-Treatment | GLT6D1     | 360203 | 37 | 9 | 138516281 | 138516281 | Missense_Mutation | SNP | C | T | 17  | 33  | c.493G>A   | c.(493-495)GAG>AAG     | p.E165K  |
| Pat_66 | Pre-Treatment | SOHLH1     | 402381 | 37 | 9 | 138586301 | 138586301 | Missense_Mutation | SNP | G | A | 21  | 23  | c.878C>T   | c.(877-879)TCT>TTT     | p.S293F  |
| Pat_66 | Pre-Treatment | NOTCH1     | 4851   | 37 | 9 | 139410115 | 139410115 | Missense_Mutation | SNP | A | G | 2   | 3   | c.1723T>C  | c.(1723-1725)TGC>CGC   | p.C575R  |

|        |               |           |        |    |   |           |           |                   |     |   |   |     |     |              |                      |               |
|--------|---------------|-----------|--------|----|---|-----------|-----------|-------------------|-----|---|---|-----|-----|--------------|----------------------|---------------|
| Pat_66 | Pre-Treatment | CACNA1B   | 774    | 37 | 9 | 141012408 | 141012408 | Missense_Mutation | SNP | G | A | 18  | 2   | c.5788G>A    | c.(5788-5790)GAG>AAG | p.E1930K      |
| Pat_66 | Pre-Treatment | CSF2RA    | 1438   | 37 | X | 1409342   | 1409342   | Missense_Mutation | SNP | G | A | 249 | 481 | c.586G>A     | c.(586-588)GGA>AGA   | p.G196R       |
| Pat_66 | Pre-Treatment | ARSF      | 416    | 37 | X | 3002631   | 3002631   | Missense_Mutation | SNP | G | A | 81  | 8   | c.754G>A     | c.(754-756)GAG>AAG   | p.E252K       |
| Pat_66 | Pre-Treatment | OFD1      | 8481   | 37 | X | 13786855  | 13786855  | Nonsense_Mutation | SNP | C | T | 265 | 13  | c.2947C>T    | c.(2947-2949)CAA>TAA | p.Q983*       |
| Pat_66 | Pre-Treatment | ASB11     | 140456 | 37 | X | 15301686  | 15301686  | Nonsense_Mutation | SNP | G | A | 260 | 21  | c.913C>T     | c.(913-915)CAA>TAA   | p.Q305*       |
| Pat_66 | Pre-Treatment | CA5B      | 11238  | 37 | X | 15794864  | 15794864  | Missense_Mutation | SNP | G | T | 4   | 115 | c.646G>T     | c.(646-648)GAC>TAC   | p.D216Y       |
| Pat_66 | Pre-Treatment | MAP7D2    | 256714 | 37 | X | 20074807  | 20074807  | Missense_Mutation | SNP | C | T | 67  | 4   | c.475G>A     | c.(475-477)GGA>AGA   | p.G159R       |
| Pat_66 | Pre-Treatment | PHEX      | 5251   | 37 | X | 22151661  | 22151661  | Missense_Mutation | SNP | G | A | 4   | 81  | c.1324G>A    | c.(1324-1326)GTT>ATT | p.V442I       |
| Pat_66 | Pre-Treatment | DDX53     | 168400 | 37 | X | 23019721  | 23019721  | Missense_Mutation | SNP | G | A | 79  | 4   | c.1547G>A    | c.(1546-1548)GGA>GAA | p.G516E       |
| Pat_66 | Pre-Treatment | ACOT9     | 23597  | 37 | X | 23723123  | 23723123  | Missense_Mutation | SNP | A | G | 4   | 116 | c.1067T>C    | c.(1066-1068)TTT>TCT | p.F356S       |
| Pat_66 | Pre-Treatment | KLHL15    | 80311  | 37 | X | 24006306  | 24006306  | Missense_Mutation | SNP | T | C | 199 | 17  | c.1547A>G    | c.(1546-1548)AAC>AGC | p.N516S       |
| Pat_66 | Pre-Treatment | MAGEB18   | 286514 | 37 | X | 26157979  | 26157979  | Missense_Mutation | SNP | G | A | 26  | 26  | c.877G>A     | c.(877-879)GAT>AAT   | p.D293N       |
| Pat_66 | Pre-Treatment | MAGEB6    | 158809 | 37 | X | 26212462  | 26212462  | Missense_Mutation | SNP | G | A | 45  | 8   | c.499G>A     | c.(499-501)GAT>AAT   | p.D167N       |
| Pat_66 | Pre-Treatment | MAGEB16   | 139604 | 37 | X | 35820977  | 35820977  | Missense_Mutation | SNP | G | A | 55  | 5   | c.664G>A     | c.(664-666)GAA>AAA   | p.E222K       |
| Pat_66 | Pre-Treatment | FAM47C    | 442444 | 37 | X | 37028425  | 37028425  | Missense_Mutation | SNP | A | G | 6   | 242 | c.1942A>G    | c.(1942-1944)AAT>GAT | p.N648D       |
| Pat_66 | Pre-Treatment | CASK      | 8573   | 37 | X | 41646435  | 41646435  | Missense_Mutation | SNP | C | T | 4   | 107 | c.274G>A     | c.(274-276)GAA>AAA   | p.E92K        |
| Pat_66 | Pre-Treatment | SLC38A5   | 92745  | 37 | X | 48320437  | 48320437  | Missense_Mutation | SNP | G | A | 25  | 4   | c.727C>T     | c.(727-729)CTC>TTC   | p.L243F       |
| Pat_66 | Pre-Treatment | CCNB3     | 85417  | 37 | X | 50052469  | 50052469  | Missense_Mutation | SNP | G | A | 28  | 39  | c.1300G>A    | c.(1300-1302)GAA>AAA | p.E434K       |
| Pat_66 | Pre-Treatment | DGKK      | 139189 | 37 | X | 50122725  | 50122725  | Missense_Mutation | SNP | C | T | 35  | 30  | c.2762G>A    | c.(2761-2763)GGA>GAA | p.G921E       |
| Pat_66 | Pre-Treatment | IQSEC2    | 23096  | 37 | X | 53280121  | 53280121  | Nonsense_Mutation | SNP | C | T | 4   | 31  | c.1637G>A    | c.(1636-1638)TGG>TAG | p.W546*       |
| Pat_66 | Pre-Treatment | HUWE1     | 10075  | 37 | X | 53619395  | 53619395  | Missense_Mutation | SNP | C | T | 4   | 222 | c.3935G>A    | c.(3934-3936)CGC>CAC | p.R1312H      |
| Pat_66 | Pre-Treatment | FAM155B   | 27112  | 37 | X | 68725643  | 68725643  | Missense_Mutation | SNP | C | T | 40  | 33  | c.518C>T     | c.(517-519)TCC>TTC   | p.S173F       |
| Pat_66 | Pre-Treatment | KIAA2022  | 340533 | 37 | X | 73961708  | 73961708  | Missense_Mutation | SNP | G | A | 19  | 2   | c.2684C>T    | c.(2683-2685)TCT>TTT | p.S895F       |
| Pat_66 | Pre-Treatment | ATRX      | 546    | 37 | X | 76855029  | 76855029  | Missense_Mutation | SNP | T | C | 7   | 459 | c.5807A>G    | c.(5806-5808)AAG>AGG | p.K1936R      |
| Pat_66 | Pre-Treatment | ATP7A     | 538    | 37 | X | 77267085  | 77267085  | Missense_Mutation | SNP | C | T | 134 | 144 | c.2086C>T    | c.(2086-2088)CAT>TAT | p.H696Y       |
| Pat_66 | Pre-Treatment | CPXCR1    | 53336  | 37 | X | 88009059  | 88009059  | Missense_Mutation | SNP | G | A | 29  | 1   | c.644G>A     | c.(643-645)GGA>GAA   | p.G215E       |
| Pat_66 | Pre-Treatment | PCDH19    | 57526  | 37 | X | 99662470  | 99662470  | Missense_Mutation | SNP | G | A | 96  | 5   | c.1126C>T    | c.(1126-1128)CGC>TGC | p.R376C       |
| Pat_66 | Pre-Treatment | NOX1      | 27035  | 37 | X | 100105165 | 100105165 | Missense_Mutation | SNP | C | T | 54  | 5   | c.1108G>A    | c.(1108-1110)GAA>AAA | p.E370K       |
| Pat_66 | Pre-Treatment | DRP2      | 1821   | 37 | X | 100505510 | 100505510 | Missense_Mutation | SNP | G | A | 69  | 3   | c.1639G>A    | c.(1639-1641)GAA>AAA | p.E547K       |
| Pat_66 | Pre-Treatment | ALG13     | 79868  | 37 | X | 110951623 | 110951623 | Splice_Site       | SNP | T | A | 5   | 241 | c.750_splice | c.e4+2               | p.Q250_splice |
| Pat_66 | Pre-Treatment | C1GALT1C1 | 29071  | 37 | X | 119760088 | 119760088 | Missense_Mutation | SNP | G | A | 105 | 9   | c.934C>T     | c.(934-936)CCA>TCA   | p.P312S       |
| Pat_66 | Pre-Treatment | ACTRT1    | 139741 | 37 | X | 127185392 | 127185392 | Missense_Mutation | SNP | G | A | 157 | 25  | c.794C>T     | c.(793-795)CCT>CTT   | p.P265L       |
| Pat_66 | Pre-Treatment | XPNPEP2   | 7512   | 37 | X | 128880301 | 128880301 | Missense_Mutation | SNP | G | A | 13  | 42  | c.388G>A     | c.(388-390)GAG>AAG   | p.E130K       |
| Pat_66 | Pre-Treatment | XPNPEP2   | 7512   | 37 | X | 128886312 | 128886312 | Missense_Mutation | SNP | G | A | 38  | 62  | c.1008G>A    | c.(1006-1008)ATG>ATA | p.M336I       |
| Pat_66 | Pre-Treatment | IGSF1     | 3547   | 37 | X | 130408659 | 130408659 | Missense_Mutation | SNP | C | T | 255 | 23  | c.3665G>A    | c.(3664-3666)GGA>GAA | p.G1222E      |
| Pat_66 | Pre-Treatment | USP26     | 83844  | 37 | X | 132160643 | 132160643 | Missense_Mutation | SNP | C | T | 131 | 7   | c.1606G>A    | c.(1606-1608)GAC>AAC | p.D536N       |
| Pat_66 | Pre-Treatment | GPR112    | 139378 | 37 | X | 135482020 | 135482020 | Missense_Mutation | SNP | G | A | 79  | 5   | c.8320G>A    | c.(8320-8322)GAT>AAT | p.D2774N      |
| Pat_66 | Pre-Treatment | ARHGEF6   | 9459   | 37 | X | 135760110 | 135760110 | Missense_Mutation | SNP | C | A | 4   | 125 | c.1836G>T    | c.(1834-1836)ATG>ATT | p.M612I       |
| Pat_66 | Pre-Treatment | MCF2      | 4168   | 37 | X | 138680593 | 138680593 | Missense_Mutation | SNP | C | T | 65  | 5   | c.1901G>A    | c.(1900-1902)CGA>CAA | p.R634Q       |
| Pat_66 | Pre-Treatment | SPANXC    | 64663  | 37 | X | 140335729 | 140335729 | Missense_Mutation | SNP | G | A | 171 | 15  | c.215C>T     | c.(214-216)GCC>GTC   | p.A72V        |
| Pat_66 | Pre-Treatment | MAGEC1    | 9947   | 37 | X | 140993455 | 140993455 | Missense_Mutation | SNP | G | A | 4   | 158 | c.265G>A     | c.(265-267)GGC>AGC   | p.G89S        |
| Pat_66 | Pre-Treatment | MAGEC2    | 51438  | 37 | X | 141291215 | 141291215 | Missense_Mutation | SNP | C | T | 190 | 16  | c.559G>A     | c.(559-561)GAG>AAG   | p.E187K       |
| Pat_66 | Pre-Treatment | SLITRK4   | 139065 | 37 | X | 142716788 | 142716788 | Missense_Mutation | SNP | C | T | 56  | 61  | c.2137G>A    | c.(2137-2139)GAT>AAT | p.D713N       |
| Pat_66 | Pre-Treatment | SLITRK4   | 139065 | 37 | X | 142717159 | 142717159 | Missense_Mutation | SNP | G | A | 4   | 155 | c.1766C>T    | c.(1765-1767)GCA>GTA | p.A589V       |
| Pat_66 | Pre-Treatment | SLITRK4   | 139065 | 37 | X | 142718881 | 142718881 | Missense_Mutation | SNP | G | A | 78  | 4   | c.44C>T      | c.(43-45)TCG>TTG     | p.S15L        |
| Pat_66 | Pre-Treatment | MAGEA10   | 4109   | 37 | X | 151303640 | 151303640 | Missense_Mutation | SNP | C | T | 54  | 51  | c.453G>A     | c.(451-453)ATG>ATA   | p.M151I       |
| Pat_66 | Pre-Treatment | GABRQ     | 55879  | 37 | X | 151820055 | 151820055 | Missense_Mutation | SNP | C | T | 146 | 10  | c.968C>T     | c.(967-969)TCC>TTC   | p.S323F       |



|        |                 |          |        |    |    |           |           |                   |     |           |     |     |     |                   |                        |               |
|--------|-----------------|----------|--------|----|----|-----------|-----------|-------------------|-----|-----------|-----|-----|-----|-------------------|------------------------|---------------|
| Pat_66 | Pre-Treatment   | GABRQ    | 55879  | 37 | X  | 151821038 | 151821038 | Missense_Mutation | SNP | C         | T   | 48  | 43  | c.1193C>T         | c.(1192-1194)TCT>TTT   | p.S398F       |
| Pat_66 | Pre-Treatment   | MAGEA12  | 4111   | 37 | X  | 151900077 | 151900077 | Missense_Mutation | SNP | G         | T   | 102 | 117 | c.724C>A          | c.(724-726)CCC>ACC     | p.P242T       |
| Pat_66 | Pre-Treatment   | MAGEA3   | 4102   | 37 | X  | 151935410 | 151935410 | Missense_Mutation | SNP | C         | T   | 105 | 90  | c.757G>A          | c.(757-759)GAA>AAA     | p.E253K       |
| Pat_66 | Pre-Treatment   | OPN1LW   | 5956   | 37 | X  | 153421817 | 153421817 | Missense_Mutation | SNP | G         | A   | 64  | 311 | c.793G>A          | c.(793-795)GAA>AAA     | p.E265K       |
| Pat_66 | Pre-Treatment   | PLXNA3   | 55558  | 37 | X  | 153692563 | 153692563 | Missense_Mutation | SNP | G         | A   | 3   | 17  | c.1735G>A         | c.(1735-1737)GCG>ACG   | p.A579T       |
| Pat_04 | Pre-Treatment   | ZBTB40   | 9923   | 37 | 1  | 22838561  | 22838563  | In_Frame_Del      | DEL | AAG       | -   | 7   | 79  | .2395_2397delAA   | c.(2395-2397)AAGdel    | p.K803del     |
| Pat_04 | Pre-Treatment   | SFRS11   | 9295   | 37 | 1  | 70705169  | 70705171  | In_Frame_Del      | DEL | AGG       | -   | 7   | 151 | c.766_768delAGG   | c.(766-768)AGGdel      | p.R259del     |
| Pat_04 | Pre-Treatment   | ZC3H11A  | 9877   | 37 | 1  | 203786224 | 203786225 | Frame_Shift_Ins   | INS | -         | T   | 7   | 63  | c.26_27insT       | c.(25-27)TATfs         | p.Y9fs        |
| Pat_04 | Pre-Treatment   | SCN3B    | 55800  | 37 | 11 | 123516308 | 123516308 | Frame_Shift_Del   | DEL | C         | -   | 12  | 155 | c.206delG         | c.(205-207)GGTfs       | p.G69fs       |
| Pat_04 | Pre-Treatment   | EMG1     | 10436  | 37 | 12 | 7080212   | 7080213   | Splice_Site       | INS | -         | C   | 7   | 22  | c.129_splice      | c.e2+1                 | p.L43_splice  |
| Pat_04 | Pre-Treatment   | CTNNB1   | 1499   | 37 | 3  | 41266115  | 41266120  | In_Frame_Del      | DEL | GGTGCC    | -   | 9   | 55  | 112_117delGGTGC   | c.(112-117)GGTGCCdel   | p.GA38del     |
| Pat_04 | Pre-Treatment   | UGT2B10  | 7365   | 37 | 4  | 69696370  | 69696370  | Frame_Shift_Del   | DEL | A         | -   | 21  | 148 | c.1360delA        | c.(1360-1362)AAGfs     | p.K454fs      |
| Pat_04 | Pre-Treatment   | POM121   | 9883   | 37 | 7  | 72412603  | 72412604  | Frame_Shift_Ins   | INS | -         | A   | 7   | 188 | c.2071_2072insA   | c.(2071-2073)CAAfs     | p.Q691fs      |
| Pat_04 | Pre-Treatment   | SMARCA2  | 6595   | 37 | 9  | 2039777   | 2039779   | In_Frame_Del      | DEL | CAG       | -   | 6   | 7   | c.667_669delCAG   | c.(667-669)CAGdel      | p.Q238del     |
| Pat_04 | Pre-Treatment   | GRIN1    | 2902   | 37 | 9  | 140056884 | 140056886 | In_Frame_Del      | DEL | GAG       | -   | 8   | 68  | .1780_1782delGAI  | c.(1780-1782)GAGdel    | p.E598del     |
| Pat_04 | Post-Resistance | ZBTB40   | 9923   | 37 | 1  | 22838561  | 22838563  | In_Frame_Del      | DEL | AAG       | -   | 7   | 88  | .2395_2397delAA   | c.(2395-2397)AAGdel    | p.K803del     |
| Pat_04 | Post-Resistance | CHGA     | 1113   | 37 | 14 | 93397924  | 93397926  | In_Frame_Del      | DEL | GAG       | -   | 7   | 24  | c.685_687delGAG   | c.(685-687)GAGdel      | p.E236del     |
| Pat_04 | Post-Resistance | GLG1     | 2734   | 37 | 16 | 74640754  | 74640756  | In_Frame_Del      | DEL | TGC       | -   | 2   | 4   | c.237_239delGCAc. | (235-240)CAGCAA>CAA    | p.79_80QQ>Q   |
| Pat_04 | Post-Resistance | STRN4    | 29888  | 37 | 19 | 47226405  | 47226407  | In_Frame_Del      | DEL | GCT       | -   | 2   | 4   | .1729_1731delAGI  | c.(1729-1731)AGCdel    | p.S577del     |
| Pat_04 | Post-Resistance | TCF20    | 6942   | 37 | 22 | 42610573  | 42610575  | In_Frame_Del      | DEL | AGG       | -   | 7   | 133 | c.737_739delCCT   | c.(736-741)TCCTTC>TTC  | p.S246del     |
| Pat_04 | Post-Resistance | TBC1D22A | 25771  | 37 | 22 | 47189675  | 47189675  | Frame_Shift_Del   | DEL | C         | -   | 2   | 4   | c.397delC         | c.(397-399)CCCfs       | p.P133fs      |
| Pat_04 | Post-Resistance | MAP3K15  | 389840 | 37 | X  | 19389184  | 19389185  | Splice_Site       | INS | -         | A   | 2   | 4   | c.1720_splice     | c.e25-1                | p.V574_splice |
| Pat_07 | Post-Resistance | CAMTA1   | 23261  | 37 | 1  | 7811329   | 7811329   | Frame_Shift_Del   | DEL | A         | -   | 7   | 510 | c.4760delA        | c.(4759-4761)CAAfs     | p.Q1587fs     |
| Pat_07 | Post-Resistance | PIK3R3   | 8503   | 37 | 1  | 46546324  | 46546324  | Frame_Shift_Del   | DEL | C         | -   | 8   | 760 | c.205delG         | c.(205-207)GATfs       | p.D69fs       |
| Pat_07 | Post-Resistance | CTBS     | 1486   | 37 | 1  | 85039999  | 85040007  | In_Frame_Del      | DEL | 3CAGCGCC, | -   | 4   | 9   | _100delTGGCGC     | c.(-102)CTGGCGCTGGCG>  | p.LAL31del    |
| Pat_07 | Post-Resistance | ISG20L2  | 81875  | 37 | 1  | 156694023 | 156694023 | Frame_Shift_Del   | DEL | G         | -   | 7   | 285 | c.865delC         | c.(865-867)CTCfs       | p.L289fs      |
| Pat_07 | Post-Resistance | BAT2L2   | 23215  | 37 | 1  | 171511149 | 171511149 | Frame_Shift_Del   | DEL | A         | -   | 11  | 162 | c.4538delA        | c.(4537-4539)GAAfs     | p.E1513fs     |
| Pat_07 | Post-Resistance | PRG4     | 10216  | 37 | 1  | 186276284 | 186276286 | In_Frame_Del      | DEL | CTC       | -   | 29  | 128 | .1433_1435delCT   | c.(1432-1437)ACTCCC>AC | p.P479del     |
| Pat_07 | Post-Resistance | KLHL12   | 59349  | 37 | 1  | 202862508 | 202862508 | Frame_Shift_Del   | DEL | C         | -   | 7   | 721 | c.1439delG        | c.(1438-1440)GGAfs     | p.G480fs      |
| Pat_07 | Post-Resistance | C10orf62 | 414157 | 37 | 10 | 99350236  | 99350237  | Frame_Shift_Ins   | INS | -         | CA  | 7   | 196 | c.582_583insCA    | c.(580-585)AATCACfs    | p.N194fs      |
| Pat_07 | Post-Resistance | OR10A5   | 144124 | 37 | 11 | 6867223   | 6867225   | In_Frame_Del      | DEL | TTC       | -   | 7   | 156 | c.310_312delTTC   | c.(310-312)TTCdel      | p.F108del     |
| Pat_07 | Post-Resistance | PIK3C2A  | 5286   | 37 | 11 | 17191097  | 17191097  | Frame_Shift_Del   | DEL | T         | -   | 7   | 465 | c.192delA         | c.(190-192)AAAfs       | p.K64fs       |
| Pat_07 | Post-Resistance | FOXJ2    | 55810  | 37 | 12 | 8200558   | 8200560   | In_Frame_Del      | DEL | CAG       | -   | 14  | 97  | c.898_900delCAG   | c.(898-900)CAGdel      | p.Q306del     |
| Pat_07 | Post-Resistance | PRB2     | 653247 | 37 | 12 | 11546732  | 11546733  | In_Frame_Ins      | INS | -         | AGA | 7   | 350 | c.279_280insTCT   | c.(277-282)insTCT      | p.93_94insS   |
| Pat_07 | Post-Resistance | GPR19    | 2842   | 37 | 12 | 12814274  | 12814274  | Frame_Shift_Del   | DEL | T         | -   | 11  | 499 | c.1109delA        | c.(1108-1110)AACfs     | p.N370fs      |
| Pat_07 | Post-Resistance | FAR2     | 55711  | 37 | 12 | 29450110  | 29450110  | Frame_Shift_Del   | DEL | A         | -   | 8   | 318 | c.522delA         | c.(520-522)CCAfs       | p.P174fs      |
| Pat_07 | Post-Resistance | GSX1     | 219409 | 37 | 13 | 28367927  | 28367929  | In_Frame_Del      | DEL | GGC       | -   | 8   | 136 | c.637_639delGGC   | c.(637-639)GGCdel      | p.G218del     |
| Pat_07 | Post-Resistance | LRCH1    | 23143  | 37 | 13 | 47243183  | 47243186  | Frame_Shift_Del   | DEL | CCTG      | -   | 7   | 818 | .:471_474delCCTC  | c.(469-474)GCCCTGfs    | p.A157fs      |
| Pat_07 | Post-Resistance | DZIP1    | 22873  | 37 | 13 | 96293930  | 96293930  | Frame_Shift_Del   | DEL | C         | -   | 7   | 324 | c.216delG         | c.(214-216)CTGfs       | p.L72fs       |
| Pat_07 | Post-Resistance | FAM155A  | 728215 | 37 | 13 | 108518687 | 108518689 | In_Frame_Del      | DEL | CTG       | -   | 7   | 70  | c.256_258delCAG   | c.(256-258)CAGdel      | p.Q86del      |
| Pat_07 | Post-Resistance | ZFHX3    | 463    | 37 | 16 | 72821594  | 72821596  | In_Frame_Del      | DEL | GCC       | -   | 7   | 139 | 0579_10581delG    | c.(10579-10581)GGCdel  | p.G3527del    |
| Pat_07 | Post-Resistance | FTSJ3    | 117246 | 37 | 17 | 61899155  | 61899157  | In_Frame_Del      | DEL | CTC       | -   | 7   | 273 | .1522_1524delGAI  | c.(1522-1524)GAGdel    | p.E508del     |
| Pat_07 | Post-Resistance | CBX4     | 8535   | 37 | 17 | 77808241  | 77808243  | In_Frame_Del      | DEL | GTG       | -   | 7   | 38  | .1198_1200delCAI  | c.(1198-1200)CACdel    | p.H400del     |
| Pat_07 | Post-Resistance | C19orf55 | 148137 | 37 | 19 | 36255947  | 36255949  | In_Frame_Del      | DEL | CTC       | -   | 15  | 470 | c.639_641delCTC   | c.(637-642)ATCTCC>ATC  | p.S218del     |
| Pat_07 | Post-Resistance | AXL      | 558    | 37 | 19 | 41743933  | 41743933  | Frame_Shift_Del   | DEL | C         | -   | 8   | 232 | c.868delC         | c.(868-870)CCCfs       | p.P290fs      |
| Pat_07 | Post-Resistance | HNRNPUL1 | 11100  | 37 | 19 | 41811694  | 41811695  | Frame_Shift_Ins   | INS | -         | A   | 9   | 294 | c.2376_2377insA   | c.(2374-2379)TACAACfs  | p.Y792fs      |
| Pat_07 | Post-Resistance | AFTPH    | 54812  | 37 | 2  | 64778672  | 64778674  | In_Frame_Del      | DEL | GAT       | -   | 7   | 518 | c.64_66delGAT     | c.(64-66)GATdel        | p.D26del      |

|        |                 |           |        |    |    |           |           |                 |     |     |     |    |      |                   |                        |               |
|--------|-----------------|-----------|--------|----|----|-----------|-----------|-----------------|-----|-----|-----|----|------|-------------------|------------------------|---------------|
| Pat_07 | Post-Resistance | INPP5D    | 3635   | 37 | 2  | 234113090 | 234113090 | Frame_Shift_Del | DEL | C   | -   | 4  | 7    | c.3294delC        | c.(3292-3294)GGCfs     | p.G1098fs     |
| Pat_07 | Post-Resistance | RASSF2    | 9770   | 37 | 20 | 4776492   | 4776494   | In_Frame_Del    | DEL | AGG | -   | 7  | 322  | c.254_256delCCTc. | (253-258)TCCTGG>TGC    | p.S85del      |
| Pat_07 | Post-Resistance | MED15     | 51586  | 37 | 22 | 20918817  | 20918819  | In_Frame_Del    | DEL | CAG | -   | 8  | 52   | c.532_534delCAG   | c.(532-534)CAGdel      | p.Q188del     |
| Pat_07 | Post-Resistance | MYH9      | 4627   | 37 | 22 | 36689419  | 36689421  | In_Frame_Del    | DEL | CCT | -   | 8  | 177  | .4049_4051delAG   | (4048-4053)GAGGCC>GC   | p.E1350del    |
| Pat_07 | Post-Resistance | XPC       | 7508   | 37 | 3  | 14219966  | 14219968  | In_Frame_Del    | DEL | CCT | -   | 8  | 139  | c.101_103delAGGc. | (100-105)GAGGAT>GAT    | p.E34del      |
| Pat_07 | Post-Resistance | SATB1     | 6304   | 37 | 3  | 18391133  | 18391135  | In_Frame_Del    | DEL | CTG | -   | 13 | 103  | .1819_1821delCA   | c.(1819-1821)CAGdel    | p.Q607del     |
| Pat_07 | Post-Resistance | TMCC1     | 23023  | 37 | 3  | 129370576 | 129370578 | In_Frame_Del    | DEL | CTG | -   | 14 | 294  | .1708_1710delCA   | c.(1708-1710)CAGdel    | p.Q570del     |
| Pat_07 | Post-Resistance | DBR1      | 51163  | 37 | 3  | 137880741 | 137880743 | In_Frame_Del    | DEL | TCG | -   | 7  | 227  | .1623_1625delCG.  | (1621-1626)GATGAT>GAI. | 541_542DD>I   |
| Pat_07 | Post-Resistance | MED12L    | 116931 | 37 | 3  | 151148114 | 151148116 | In_Frame_Del    | DEL | CAG | -   | 18 | 290  | .6331_6333delCA   | c.(6331-6333)CAGdel    | p.Q2115del    |
| Pat_07 | Post-Resistance | CRIPAK    | 285464 | 37 | 4  | 1389175   | 1389176   | Frame_Shift_Del | DEL | CA  | -   | 13 | 501  | c.876_877delCA    | c.(874-879)CTCACAFs    | p.L292fs      |
| Pat_07 | Post-Resistance | CRIPAK    | 285464 | 37 | 4  | 1389206   | 1389207   | Frame_Shift_Del | DEL | CA  | -   | 7  | 525  | c.907_908delCA    | c.(907-909)CACfs       | p.H303fs      |
| Pat_07 | Post-Resistance | CRIPAK    | 285464 | 37 | 4  | 1389297   | 1389298   | Frame_Shift_Del | DEL | CA  | -   | 8  | 473  | c.998_999delCA    | c.(997-999)TCAFs       | p.S333fs      |
| Pat_07 | Post-Resistance | GABRG1    | 2565   | 37 | 4  | 46060358  | 46060358  | Frame_Shift_Del | DEL | A   | -   | 8  | 270  | c.792delT         | c.(790-792)TTTfs       | p.F264fs      |
| Pat_07 | Post-Resistance | CDKL2     | 8999   | 37 | 4  | 76539579  | 76539580  | Frame_Shift_Ins | INS | -   | T   | 8  | 149  | c.222_223insA     | c.(220-225)AAACGAFs    | p.K74fs       |
| Pat_07 | Post-Resistance | MCC       | 4163   | 37 | 5  | 112824048 | 112824049 | In_Frame_Ins    | INS | -   | GCC | 6  | 9    | c.63_64insGGC     | c.(61-66)insGGC        | p.21_22insG   |
| Pat_07 | Post-Resistance | MRPS18B   | 28973  | 37 | 6  | 30587716  | 30587717  | Frame_Shift_Ins | INS | -   | T   | 7  | 746  | c.304_305insT     | c.(304-306)GGGfs       | p.G102fs      |
| Pat_07 | Post-Resistance | KIAA1949  | 170954 | 37 | 6  | 30653494  | 30653496  | In_Frame_Del    | DEL | TGC | -   | 7  | 152  | c.300_302delGCAc. | (298-303)CAGCAA>CAA.   | 100_101QQ>I   |
| Pat_07 | Post-Resistance | SYNGAP1   | 8831   | 37 | 6  | 33410682  | 33410683  | Frame_Shift_Del | DEL | CG  | -   | 7  | 272  | ..2353_2354delCC  | c.(2353-2355)CGCfs     | p.R785fs      |
| Pat_07 | Post-Resistance | TFEB      | 7942   | 37 | 6  | 41658830  | 41658832  | In_Frame_Del    | DEL | TGC | -   | 7  | 51   | c.120_122delGCAc. | (118-123)CAGCAA>CAAp.  | 40_41QQ>Q     |
| Pat_07 | Post-Resistance | SENP6     | 26054  | 37 | 6  | 76376441  | 76376443  | In_Frame_Del    | DEL | TGA | -   | 9  | 280  | .1008_1010delTG.  | (1006-1011)AGTGAT>AG   | p.D341del     |
| Pat_07 | Post-Resistance | C7orf59   | 389541 | 37 | 7  | 99751029  | 99751029  | Frame_Shift_Del | DEL | G   | -   | 7  | 671  | c.91delG          | c.(91-93)GGGfs         | p.G31fs       |
| Pat_07 | Post-Resistance | LUC7L2    | 51631  | 37 | 7  | 139094365 | 139094366 | Frame_Shift_Del | DEL | AG  | -   | 12 | 106  | c.744_745delIAG   | c.(742-747)GAAGAGfs    | p.E248fs      |
| Pat_07 | Post-Resistance | ESCO2     | 157570 | 37 | 8  | 27634576  | 27634577  | Frame_Shift_Ins | INS | -   | A   | 7  | 212  | c.751_752insA     | c.(751-753)GAAfs       | p.E251fs      |
| Pat_07 | Post-Resistance | WDR67     | 93594  | 37 | 8  | 124140520 | 124140521 | Splice_Site     | INS | -   | T   | 7  | 161  | c.1885_splice     | c.e14-1                | p.F629_splice |
| Pat_07 | Post-Resistance | SMARCA2   | 6595   | 37 | 9  | 2039777   | 2039779   | In_Frame_Del    | DEL | CAG | -   | 7  | 67   | c.667_669delCAG   | c.(667-669)CAGdel      | p.Q238del     |
| Pat_07 | Post-Resistance | HRCT1     | 646962 | 37 | 9  | 35906348  | 35906350  | In_Frame_Del    | DEL | CTG | -   | 15 | 65   | c.64_66delCTG     | c.(64-66)CTGdel        | p.L28del      |
| Pat_07 | Post-Resistance | NR4A3     | 8013   | 37 | 9  | 102590616 | 102590618 | In_Frame_Del    | DEL | CAC | -   | 7  | 113  | c.292_294delCAC   | c.(292-294)CACdel      | p.H108del     |
| Pat_07 | Post-Resistance | GUCY2F    | 2986   | 37 | X  | 108619355 | 108619355 | Frame_Shift_Del | DEL | T   | -   | 8  | 318  | c.3192delA        | c.(3190-3192)AAAfs     | p.K1064fs     |
| Pat_07 | Pre-Treatment   | IQCC      | 55721  | 37 | 1  | 32671285  | 32671285  | Frame_Shift_Del | DEL | G   | -   | 2  | 4    | c.3delG           | c.(1-3)ATGfs           | p.M1fs        |
| Pat_07 | Pre-Treatment   | PRG4      | 10216  | 37 | 1  | 186276284 | 186276286 | In_Frame_Del    | DEL | CTC | -   | 11 | 48   | .1433_1435delCT   | (1432-1437)ACTCCC>AC   | p.P479del     |
| Pat_07 | Pre-Treatment   | FAM84A    | 151354 | 37 | 2  | 14774313  | 14774315  | In_Frame_Del    | DEL | CCA | -   | 3  | 5    | c.210_212delCCA.  | (208-213)CGCCAC>CGC    | p.H71del      |
| Pat_07 | Pre-Treatment   | MCC       | 4163   | 37 | 5  | 112824048 | 112824049 | In_Frame_Ins    | INS | -   | GCC | 2  | 4    | c.63_64insGGC     | c.(61-66)insGGC        | p.21_22insG   |
| Pat_07 | Pre-Treatment   | ZC3H3     | 23144  | 37 | 8  | 144522387 | 144522389 | In_Frame_Del    | DEL | GAG | -   | 3  | 4    | .2637_2639delCT   | (2635-2640)TCCTCA>TC.  | 879_880SS>I   |
| Pat_14 | Pre-Treatment   | MFN2      | 9927   | 37 | 1  | 12052736  | 12052736  | Frame_Shift_Del | DEL | T   | -   | 11 | 816  | c.300delT         | c.(298-300)GCTfs       | p.A100fs      |
| Pat_14 | Pre-Treatment   | PRDM2     | 7799   | 37 | 1  | 14108728  | 14108728  | Frame_Shift_Del | DEL | A   | -   | 7  | 934  | c.4438delA        | c.(4438-4440)AAAfs     | p.K1480fs     |
| Pat_14 | Pre-Treatment   | ARHGEF10L | 55160  | 37 | 1  | 17914103  | 17914103  | Frame_Shift_Del | DEL | C   | -   | 8  | 1123 | c.186delC         | c.(184-186)GACfs       | p.D62fs       |
| Pat_14 | Pre-Treatment   | HIVEP3    | 59269  | 37 | 1  | 42046910  | 42046910  | Frame_Shift_Del | DEL | G   | -   | 8  | 641  | c.3559delC        | c.(3559-3561)CAAfs     | p.Q1187fs     |
| Pat_14 | Pre-Treatment   | RIMKLA    | 284716 | 37 | 1  | 42875776  | 42875778  | In_Frame_Del    | DEL | GGT | -   | 9  | 674  | c.603_605delGGT.  | (601-606)CGGGTG>CGC    | p.V205del     |
| Pat_14 | Pre-Treatment   | B4GALT2   | 8704   | 37 | 1  | 44447007  | 44447009  | In_Frame_Del    | DEL | AGC | -   | 10 | 321  | c.175_177delAGC   | c.(175-177)AGCdel      | p.S65del      |
| Pat_14 | Pre-Treatment   | ZNF326    | 284695 | 37 | 1  | 90470782  | 90470784  | In_Frame_Del    | DEL | GTG | -   | 7  | 529  | c.188_190delGTGc. | (187-192)AGTGGT>AGT    | p.G68del      |
| Pat_14 | Pre-Treatment   | SLC16A4   | 9122   | 37 | 1  | 110906427 | 110906427 | Frame_Shift_Del | DEL | A   | -   | 7  | 180  | c.1425delT        | c.(1423-1425)TTTfs     | p.F475fs      |
| Pat_14 | Pre-Treatment   | NOTCH2    | 4853   | 37 | 1  | 120612003 | 120612004 | Frame_Shift_Del | DEL | GG  | -   | 14 | 96   | c.17_18delCC      | c.(16-18)CCCfs         | p.P6fs        |
| Pat_14 | Pre-Treatment   | NOTCH2NL  | 388677 | 37 | 1  | 145281424 | 145281424 | Frame_Shift_Del | DEL | T   | -   | 8  | 4298 | c.354delT         | c.(352-354)AGTfs       | p.S118fs      |
| Pat_14 | Pre-Treatment   | ADAMTSL4  | 54507  | 37 | 1  | 150530506 | 150530506 | Frame_Shift_Del | DEL | G   | -   | 15 | 543  | c.2263delG        | c.(2263-2265)GGGfs     | p.G755fs      |
| Pat_14 | Pre-Treatment   | MCL1      | 4170   | 37 | 1  | 150551492 | 150551494 | In_Frame_Del    | DEL | TCC | -   | 7  | 370  | c.513_515delGGA.  | (511-516)GAGGAC>GAC    | p.E171del     |
| Pat_14 | Pre-Treatment   | TCHH      | 7062   | 37 | 1  | 152082957 | 152082959 | In_Frame_Del    | DEL | CTC | -   | 14 | 851  | .2734_2736delGAI  | c.(2734-2736)GAGdel    | p.E912del     |
| Pat_14 | Pre-Treatment   | NES       | 10763  | 37 | 1  | 156642738 | 156642739 | Frame_Shift_Ins | INS | -   | AG  | 8  | 510  | c.1241_1242insCT  | c.(1240-1242)CTGfs     | p.L414fs      |

|        |               |              |           |    |    |           |           |                 |     |           |      |    |      |                                                    |
|--------|---------------|--------------|-----------|----|----|-----------|-----------|-----------------|-----|-----------|------|----|------|----------------------------------------------------|
| Pat_14 | Pre-Treatment | LMX1A        | 4009      | 37 | 1  | 165177332 | 165177334 | In_Frame_Del    | DEL | TGC       | -    | 13 | 280  | c.783_785delGCAC.(781-786)CAGCAA>CAA.261_262QQ>    |
| Pat_14 | Pre-Treatment | NMNAT2       | 23057     | 37 | 1  | 183221843 | 183221853 | Frame_Shift_Del | DEL | CCACAACAT | -    | 49 | 432  | .857delCATGTTG(847-858)CATGTTGTGGA1 p.H283fs       |
| Pat_14 | Pre-Treatment | CR1L         | 1379      | 37 | 1  | 207867814 | 207867814 | Frame_Shift_Del | DEL | A         | -    | 7  | 1085 | c.580delA c.(580-582)AAAFs p.K194fs                |
| Pat_14 | Pre-Treatment | AGT          | 183       | 37 | 1  | 230839055 | 230839055 | Frame_Shift_Del | DEL | A         | -    | 8  | 321  | c.1290delT c.(1288-1290)TTTTfs p.F430fs            |
| Pat_14 | Pre-Treatment | SFMBT2       | 57713     | 37 | 10 | 7212995   | 7212997   | In_Frame_Del    | DEL | CTC       | -    | 13 | 1170 | .2437_2439delGAI c.(2437-2439)GAGdel p.E813del     |
| Pat_14 | Pre-Treatment | KIAA1217     | 56243     | 37 | 10 | 24822125  | 24822127  | In_Frame_Del    | DEL | GAA       | -    | 9  | 264  | .3373_3375delGA c.(3373-3375)GAAdel p.E1129del     |
| Pat_14 | Pre-Treatment | MPP7         | 143098    | 37 | 10 | 28413012  | 28413013  | Frame_Shift_Ins | INS | -         | CTTC | 62 | 626  | .562_563insGAAc c.(562-564)GTCfs p.V188fs          |
| Pat_14 | Pre-Treatment | KIAA1462     | 57608     | 37 | 10 | 30316501  | 30316503  | In_Frame_Del    | DEL | CTG       | -    | 15 | 232  | .2574_2576delCA(2572-2577)AGCAGT>AG.858_859SS>     |
| Pat_14 | Pre-Treatment | FRMPD2       | 143162    | 37 | 10 | 49409420  | 49409420  | Frame_Shift_Del | DEL | T         | -    | 10 | 1255 | c.1805delA c.(1804-1806)AAGfs p.K602fs             |
| Pat_14 | Pre-Treatment | AGAP6        | 414189    | 37 | 10 | 51769413  | 51769413  | Frame_Shift_Del | DEL | G         | -    | 7  | 1569 | c.1528delG c.(1528-1530)GGCfs p.G510fs             |
| Pat_14 | Pre-Treatment | ZMIZ1        | 57178     | 37 | 10 | 81072446  | 81072446  | Frame_Shift_Del | DEL | C         | -    | 9  | 1495 | c.3144delC c.(3142-3144)GACfs p.D1048fs            |
| Pat_14 | Pre-Treatment | TBC1D12      | 23232     | 37 | 10 | 96281817  | 96281817  | Frame_Shift_Del | DEL | T         | -    | 8  | 825  | c.1867delT c.(1867-1869)TTTTfs p.F623fs            |
| Pat_14 | Pre-Treatment | APBB1        | 322       | 37 | 11 | 6432437   | 6432438   | Frame_Shift_Del | DEL | GG        | -    | 7  | 716  | c.140_141delCC c.(139-141)CCCfs p.P47fs            |
| Pat_14 | Pre-Treatment | PAMR1        | 25891     | 37 | 11 | 35513670  | 35513670  | Frame_Shift_Del | DEL | C         | -    | 8  | 1465 | c.302delG c.(301-303)GGTfs p.G101fs                |
| Pat_14 | Pre-Treatment | MYBPC3       | 4607      | 37 | 11 | 47359101  | 47359103  | In_Frame_Del    | DEL | TCT       | -    | 10 | 391  | .2441_2443delAG.(2440-2445)AAGAGC>AG p.K814del     |
| Pat_14 | Pre-Treatment | DAGLA        | 747       | 37 | 11 | 61507992  | 61507993  | Frame_Shift_Del | DEL | CA        | -    | 7  | 1325 | c.1911_1912delCA c.(1909-1914)TTCAATfs p.F637fs    |
| Pat_14 | Pre-Treatment | FADS2        | 9415      | 37 | 11 | 61607885  | 61607887  | In_Frame_Del    | DEL | TCC       | -    | 8  | 1259 | c.398_400delTCC c.(397-402)TTCTC>TTC p.L137del     |
| Pat_14 | Pre-Treatment | SF3B2        | 10992     | 37 | 11 | 65836145  | 65836146  | Frame_Shift_Ins | INS | -         | A    | 8  | 285  | c.2617_2618insA c.(2617-2619)CAAfs p.Q873fs        |
| Pat_14 | Pre-Treatment | LRFN4        | 78999     | 37 | 11 | 66625231  | 66625233  | In_Frame_Del    | DEL | CTG       | -    | 8  | 150  | c.16_18delCTG c.(16-18)CTGdel p.L10del             |
| Pat_14 | Pre-Treatment | ATG16L2      | 89849     | 37 | 11 | 72528863  | 72528865  | In_Frame_Del    | DEL | AGG       | -    | 9  | 354  | c.281_283delAGG:(280-285)CAGGAG>CAC p.E98del       |
| Pat_14 | Pre-Treatment | TPMRSS13     | 84000     | 37 | 11 | 117789346 | 117789360 | In_Frame_Del    | DEL | AGATGCC   | -    | 8  | 271  | delGCCGGGGCATI)GGCCGGGCATCTCCAcp.GRASPF72de        |
| Pat_14 | Pre-Treatment | DDX23        | 9416      | 37 | 12 | 49224409  | 49224409  | Frame_Shift_Del | DEL | G         | -    | 8  | 750  | c.2306delC c.(2305-2307)ACAfs p.T769fs             |
| Pat_14 | Pre-Treatment | LRP1         | 4035      | 37 | 12 | 57605740  | 57605742  | In_Frame_Del    | DEL | TGC       | -    | 19 | 1174 | 13289_13291delIT(13288-13293)TTGCTG>T 4430_4431LL> |
| Pat_14 | Pre-Treatment | UTP20        | 27340     | 37 | 12 | 101767538 | 101767539 | Frame_Shift_Ins | INS | -         | A    | 7  | 679  | c.7124_7125insA c.(7123-7125)GCAfs p.A2375fs       |
| Pat_14 | Pre-Treatment | TCHP         | 84260     | 37 | 12 | 110344434 | 110344435 | Frame_Shift_Ins | INS | -         | A    | 10 | 274  | c.514_515insA c.(514-516)GAAfs p.E172fs            |
| Pat_14 | Pre-Treatment | IFT81        | 28981     | 37 | 12 | 110573200 | 110573202 | In_Frame_Del    | DEL | AGA       | -    | 89 | 362  | c.654_656delAGAc.(652-657)AGAGAA>AGA p.E220del     |
| Pat_14 | Pre-Treatment | SFRS8        | 6433      | 37 | 12 | 132281734 | 132281736 | In_Frame_Del    | DEL | AGA       | -    | 13 | 811  | .2546_2548delAG.(2545-2550)GAGAAG>GA p.K853del     |
| Pat_14 | Pre-Treatment | ATP12A       | 479       | 37 | 13 | 25262564  | 25262564  | Frame_Shift_Del | DEL | G         | -    | 7  | 1675 | c.336delG c.(334-336)GTGfs p.V112fs                |
| Pat_14 | Pre-Treatment | RNF6         | 6049      | 37 | 13 | 26788241  | 26788241  | Frame_Shift_Del | DEL | A         | -    | 11 | 792  | c.1778delT c.(1777-1779)TTAFs p.L593fs             |
| Pat_14 | Pre-Treatment | SPG20        | 23111     | 37 | 13 | 36903501  | 36903501  | Frame_Shift_Del | DEL | T         | -    | 9  | 1168 | c.1162delA c.(1162-1164)AGGfs p.R388fs             |
| Pat_14 | Pre-Treatment | ZC3H13       | 23091     | 37 | 13 | 46553948  | 46553949  | Frame_Shift_Del | DEL | CT        | -    | 8  | 983  | c.1911_1912delAC c.(1909-1914)AGAGATfs p.R637fs    |
| Pat_14 | Pre-Treatment | SLITRK1      | 114798    | 37 | 13 | 84455509  | 84455509  | Frame_Shift_Del | DEL | T         | -    | 7  | 555  | c.134delA c.(133-135)AAGfs p.K45fs                 |
| Pat_14 | Pre-Treatment | SLC10A2      | 6555      | 37 | 13 | 103705043 | 103705043 | Frame_Shift_Del | DEL | G         | -    | 7  | 467  | c.512delC c.(511-513)GCTfs p.A171fs                |
| Pat_14 | Pre-Treatment | MGA          | 23269     | 37 | 15 | 42003383  | 42003385  | In_Frame_Del    | DEL | CAG       | -    | 10 | 344  | .2920_2922delCA( c.(2920-2922)CAGdel p.Q981del     |
| Pat_14 | Pre-Treatment | MYO1E        | 4643      | 37 | 15 | 59464100  | 59464101  | Frame_Shift_Del | DEL | GG        | -    | 8  | 497  | .2475_2476delCC c.(2473-2478)TCCCTCfs p.S825fs     |
| Pat_14 | Pre-Treatment | RHBDF1       | 64285     | 37 | 16 | 109811    | 109811    | Frame_Shift_Del | DEL | T         | -    | 7  | 394  | c.1736delA c.(1735-1737)AACfs p.N579fs             |
| Pat_14 | Pre-Treatment | ABCA3        | 21        | 37 | 16 | 2369649   | 2369651   | In_Frame_Del    | DEL | AGC       | -    | 7  | 707  | c.804_806delGCTc.(802-807)CTGCTC>CTC.268_269LL>    |
| Pat_14 | Pre-Treatment | NTAN1        | 123803    | 37 | 16 | 15131931  | 15131931  | Frame_Shift_Del | DEL | T         | -    | 8  | 412  | c.890delA c.(889-891)AATfs p.N297fs                |
| Pat_14 | Pre-Treatment | LOC100132247 | 100132247 | 37 | 16 | 22545744  | 22545755  | In_Frame_Del    | DEL | CACCCCTCA | -    | 8  | 49   | 1451delTCCACCC(1452)CTTCCACCCCTCAG(p.PPSA485del    |
| Pat_14 | Pre-Treatment | SLC5A11      | 115584    | 37 | 16 | 24921737  | 24921739  | In_Frame_Del    | DEL | CAG       | -    | 10 | 415  | .1761_1763delCA(1759-1764)GCCAGC>GC p.S592del      |
| Pat_14 | Pre-Treatment | ATP2A1       | 487       | 37 | 16 | 28913640  | 28913640  | Frame_Shift_Del | DEL | C         | -    | 11 | 787  | c.2457delC c.(2455-2457)CGCfs p.R819fs             |
| Pat_14 | Pre-Treatment | CD2BP2       | 10421     | 37 | 16 | 30365550  | 30365552  | In_Frame_Del    | DEL | CAT       | -    | 17 | 1610 | c.170_172delATG:(169-174)GATGGG>GGC p.D57del       |
| Pat_14 | Pre-Treatment | SETD1A       | 9739      | 37 | 16 | 30982809  | 30982811  | In_Frame_Del    | DEL | TCC       | -    | 8  | 252  | .3127_3129delTC( c.(3127-3129)TCCdel p.S1058del    |
| Pat_14 | Pre-Treatment | IRX6         | 79190     | 37 | 16 | 55362674  | 55362676  | In_Frame_Del    | DEL | GAG       | -    | 13 | 202  | c.784_786delGAG c.(784-786)GAGdel p.E268del        |
| Pat_14 | Pre-Treatment | COQ9         | 57017     | 37 | 16 | 57486732  | 57486734  | In_Frame_Del    | DEL | GAG       | -    | 11 | 802  | c.262_264delGAG c.(262-264)GAGdel p.E91del         |
| Pat_14 | Pre-Treatment | NFAT5        | 10725     | 37 | 16 | 69726420  | 69726422  | In_Frame_Del    | DEL | CAG       | -    | 8  | 179  | .2638_2640delCA( c.(2638-2640)CAGdel p.Q888del     |
| Pat_14 | Pre-Treatment | TSR1         | 55720     | 37 | 17 | 2232706   | 2232707   | Frame_Shift_Del | DEL | CC        | -    | 8  | 291  | .1833_1834delGC c.(1831-1836)AAGAAfs p.K611fs      |

|        |               |          |        |    |    |           |           |                 |     |     |   |    |      |                   |                                     |               |
|--------|---------------|----------|--------|----|----|-----------|-----------|-----------------|-----|-----|---|----|------|-------------------|-------------------------------------|---------------|
| Pat_14 | Pre-Treatment | C17orf74 | 201243 | 37 | 17 | 7329686   | 7329688   | In_Frame_Del    | DEL | CGC | - | 9  | 462  | c.376_378delCGC   | c.(376-378)CGCdel                   | p.R130del     |
| Pat_14 | Pre-Treatment | CHRN1    | 1140   | 37 | 17 | 7357666   | 7357668   | In_Frame_Del    | DEL | CTG | - | 14 | 1091 | c.871_873delCTG   | c.(871-873)CTGdel                   | p.L294del     |
| Pat_14 | Pre-Treatment | FXR2     | 9513   | 37 | 17 | 7495872   | 7495874   | In_Frame_Del    | DEL | CGG | - | 16 | 1647 | .1773_1775delCC   | c.(1771-1776)CGCCGT>CGC.591_592RR>I |               |
| Pat_14 | Pre-Treatment | KRBA2    | 124751 | 37 | 17 | 8272612   | 8272613   | Frame_Shift_Del | DEL | TC  | - | 7  | 632  | .1318_1319delGA   | c.(1318-1320)GAAfs                  | p.E440fs      |
| Pat_14 | Pre-Treatment | NEK8     | 284086 | 37 | 17 | 27064478  | 27064480  | In_Frame_Del    | DEL | GCA | - | 7  | 482  | c.773_775delGCA   | c.(772-777)TGCATC>TTC.258_259CI>F   |               |
| Pat_14 | Pre-Treatment | TIAF1    | 9220   | 37 | 17 | 27401055  | 27401056  | Frame_Shift_Del | DEL | CA  | - | 10 | 640  | c.162_163delTG    | c.(160-165)TGTGGAfs                 | p.C54fs       |
| Pat_14 | Pre-Treatment | ZNF207   | 7756   | 37 | 17 | 30677314  | 30677316  | In_Frame_Del    | DEL | AAG | - | 12 | 886  | c.10_12delAAG     | c.(10-12)AAGdel                     | p.K7del       |
| Pat_14 | Pre-Treatment | CDC27    | 996    | 37 | 17 | 45234336  | 45234336  | Frame_Shift_Del | DEL | G   | - | 16 | 475  | c.785delC         | c.(784-786)CCAfs                    | p.P262fs      |
| Pat_14 | Pre-Treatment | COIL     | 8161   | 37 | 17 | 55028117  | 55028118  | Frame_Shift_Ins | INS | -   | T | 9  | 321  | c.485_486insA     | c.(484-486)AACfs                    | p.N162fs      |
| Pat_14 | Pre-Treatment | TEX2     | 55852  | 37 | 17 | 62291438  | 62291440  | In_Frame_Del    | DEL | TCC | - | 8  | 223  | c.138_140delGGA   | c.(136-141)GAGGAA>GAA.46_47EE>E     |               |
| Pat_14 | Pre-Treatment | FECH     | 2235   | 37 | 18 | 55226435  | 55226435  | Frame_Shift_Del | DEL | G   | - | 8  | 701  | c.746delC         | c.(745-747)CCAfs                    | p.P249fs      |
| Pat_14 | Pre-Treatment | DENND1C  | 79958  | 37 | 19 | 6477251   | 6477251   | Frame_Shift_Del | DEL | G   | - | 11 | 253  | c.491delC         | c.(490-492)CCTfs                    | p.P164fs      |
| Pat_14 | Pre-Treatment | DNMT1    | 1786   | 37 | 19 | 10262139  | 10262139  | Frame_Shift_Del | DEL | T   | - | 7  | 806  | c.2152delA        | c.(2152-2154)ATGfs                  | p.M718fs      |
| Pat_14 | Pre-Treatment | TYK2     | 7297   | 37 | 19 | 10463112  | 10463113  | Frame_Shift_Ins | INS | -   | G | 7  | 856  | c.3315_3316insC   | c.(3313-3318)CCCACGfs               | p.P1105fs     |
| Pat_14 | Pre-Treatment | OR7C2    | 26658  | 37 | 19 | 15052829  | 15052829  | Frame_Shift_Del | DEL | T   | - | 7  | 857  | c.529delT         | c.(529-531)TTTfs                    | p.F177fs      |
| Pat_14 | Pre-Treatment | HAUS8    | 93323  | 37 | 19 | 17160706  | 17160707  | Frame_Shift_Del | DEL | GA  | - | 17 | 1234 | c.1209_1210delITC | c.(1207-1212)TCTCGTfs               | p.S403fs      |
| Pat_14 | Pre-Treatment | PLVAP    | 83483  | 37 | 19 | 17476920  | 17476921  | Frame_Shift_Del | DEL | TG  | - | 8  | 1313 | c.453_454delCA    | c.(451-456)AACAAAGfs                | p.N151fs      |
| Pat_14 | Pre-Treatment | SFRS14   | 10147  | 37 | 19 | 19136394  | 19136394  | Frame_Shift_Del | DEL | T   | - | 15 | 761  | c.763delA         | c.(763-765)ATAfs                    | p.I255fs      |
| Pat_14 | Pre-Treatment | CILP2    | 148113 | 37 | 19 | 19654512  | 19654512  | Frame_Shift_Del | DEL | C   | - | 10 | 1981 | c.1158delC        | c.(1156-1158)GACfs                  | p.D386fs      |
| Pat_14 | Pre-Treatment | PRODH2   | 58510  | 37 | 19 | 36293092  | 36293092  | Splice_Site     | DEL | C   | - | 7  | 1218 | c.1426_splice     | c.e10+1                             | p.G476_splice |
| Pat_14 | Pre-Treatment | B3GNT8   | 374907 | 37 | 19 | 41931997  | 41931999  | In_Frame_Del    | DEL | CAG | - | 8  | 548  | c.685_687delCTG   | c.(685-687)CTGdel                   | p.L229del     |
| Pat_14 | Pre-Treatment | ZNF574   | 64763  | 37 | 19 | 42584303  | 42584304  | Frame_Shift_Del | DEL | CA  | - | 8  | 2054 | .1545_1546delCA   | c.(1543-1548)CGCACAFs               | p.R515fs      |
| Pat_14 | Pre-Treatment | DHX34    | 9704   | 37 | 19 | 47883158  | 47883160  | In_Frame_Del    | DEL | GGA | - | 9  | 212  | .2898_2900delGG   | c.(2896-2901)CTGGAG>CT              | p.E971del     |
| Pat_14 | Pre-Treatment | KLK1     | 3816   | 37 | 19 | 51326962  | 51326963  | Frame_Shift_Ins | INS | -   | C | 9  | 363  | c.42_43insG       | c.(40-45)GGGACTfs                   | p.G14fs       |
| Pat_14 | Pre-Treatment | LIM2     | 3982   | 37 | 19 | 51883791  | 51883791  | Frame_Shift_Del | DEL | C   | - | 8  | 1249 | c.428delG         | c.(427-429)GGCfs                    | p.G143fs      |
| Pat_14 | Pre-Treatment | KIR2DL4  | 3805   | 37 | 19 | 55324675  | 55324675  | Splice_Site     | DEL | A   | - | 8  | 201  | c.801_splice      | c.e6+1                              | p.S267_splice |
| Pat_14 | Pre-Treatment | PUM2     | 23369  | 37 | 2  | 20482977  | 20482979  | In_Frame_Del    | DEL | GCT | - | 7  | 436  | .1449_1451delAG   | c.(1447-1452)GCAGCT>GC.483_484AA>/  |               |
| Pat_14 | Pre-Treatment | GPR113   | 165082 | 37 | 2  | 26534413  | 26534413  | Frame_Shift_Del | DEL | C   | - | 7  | 728  | c.2183delG        | c.(2182-2184)GGTfs                  | p.G728fs      |
| Pat_14 | Pre-Treatment | HEATR5B  | 54497  | 37 | 2  | 37234330  | 37234330  | Frame_Shift_Del | DEL | G   | - | 8  | 751  | c.4640delC        | c.(4639-4641)TCAfs                  | p.S1547fs     |
| Pat_14 | Pre-Treatment | DHX57    | 90957  | 37 | 2  | 39095411  | 39095413  | In_Frame_Del    | DEL | CCA | - | 12 | 279  | c.135_137delTGG   | c.(133-138)GGTGGGA>GG.45_46GG>G     |               |
| Pat_14 | Pre-Treatment | MAP4K3   | 8491   | 37 | 2  | 39552702  | 39552702  | Frame_Shift_Del | DEL | G   | - | 9  | 679  | c.875delC         | c.(874-876)CCAfs                    | p.P292fs      |
| Pat_14 | Pre-Treatment | VPS24    | 51652  | 37 | 2  | 86732976  | 86732978  | In_Frame_Del    | DEL | TCC | - | 8  | 242  | c.618_620delGGA   | c.(616-621)GAGGAA>GAA.206_207EE>I   |               |
| Pat_14 | Pre-Treatment | LY75     | 4065   | 37 | 2  | 160738814 | 160738814 | Frame_Shift_Del | DEL | T   | - | 7  | 891  | c.1067delA        | c.(1066-1068)TACfs                  | p.Y356fs      |
| Pat_14 | Pre-Treatment | KBTD10   | 10324  | 37 | 2  | 170366496 | 170366496 | Frame_Shift_Del | DEL | A   | - | 11 | 752  | c.208delA         | c.(208-210)AAAfs                    | p.K70fs       |
| Pat_14 | Pre-Treatment | GTF3C3   | 9330   | 37 | 2  | 197649613 | 197649614 | Frame_Shift_Ins | INS | -   | T | 8  | 166  | c.1081_1082insA   | c.(1081-1083)ACTfs                  | p.T361fs      |
| Pat_14 | Pre-Treatment | ABCA12   | 26154  | 37 | 2  | 215876785 | 215876786 | Frame_Shift_Del | DEL | GA  | - | 8  | 798  | c.2030_2031delTC  | c.(2029-2031)CTCfs                  | p.L677fs      |
| Pat_14 | Pre-Treatment | TRPM8    | 79054  | 37 | 2  | 234879010 | 234879010 | Frame_Shift_Del | DEL | C   | - | 9  | 2217 | c.2295delC        | c.(2293-2295)CACfs                  | p.H765fs      |
| Pat_14 | Pre-Treatment | PANK2    | 80025  | 37 | 20 | 3893120   | 3893120   | Frame_Shift_Del | DEL | T   | - | 11 | 1258 | c.1251delT        | c.(1249-1251)ACTfs                  | p.T417fs      |
| Pat_14 | Pre-Treatment | CHGB     | 1114   | 37 | 20 | 5903283   | 5903285   | In_Frame_Del    | DEL | GAG | - | 8  | 235  | c.493_495delGAG   | c.(493-495)GAGdel                   | p.E169del     |
| Pat_14 | Pre-Treatment | GZF1     | 64412  | 37 | 20 | 23345921  | 23345923  | In_Frame_Del    | DEL | GAG | - | 9  | 146  | c.901_903delGAG   | c.(901-903)GAGdel                   | p.E306del     |
| Pat_14 | Pre-Treatment | FRG1B    | 284802 | 37 | 20 | 29628310  | 29628312  | In_Frame_Del    | DEL | AGG | - | 7  | 348  | c.222_224delAGG   | c.(220-225)GCAGGA>GC./              | p.G75del      |
| Pat_14 | Pre-Treatment | SGK2     | 10110  | 37 | 20 | 42195105  | 42195105  | Frame_Shift_Del | DEL | C   | - | 7  | 1033 | c.150delC         | c.(148-150)GTCfs                    | p.V50fs       |
| Pat_14 | Pre-Treatment | SNX21    | 90203  | 37 | 20 | 44469908  | 44469908  | Frame_Shift_Del | DEL | C   | - | 7  | 1326 | c.1078delC        | c.(1078-1080)CCCfs                  | p.P360fs      |
| Pat_14 | Pre-Treatment | YTHDF1   | 54915  | 37 | 20 | 61833650  | 61833652  | In_Frame_Del    | DEL | CCT | - | 10 | 938  | .1640_1642delAG   | c.(1639-1644)GAGGTG>GT              | p.E547del     |
| Pat_14 | Pre-Treatment | TCP10L   | 140290 | 37 | 21 | 33949091  | 33949091  | Frame_Shift_Del | DEL | C   | - | 7  | 788  | c.641delG         | c.(640-642)GGTfs                    | p.G214fs      |
| Pat_14 | Pre-Treatment | DYRK1A   | 1859   | 37 | 21 | 38884370  | 38884372  | In_Frame_Del    | DEL | CAC | - | 7  | 182  | .1828_1830delCA   | c.(1828-1830)CACdel                 | p.H619del     |
| Pat_14 | Pre-Treatment | TRIOBP   | 11078  | 37 | 22 | 38120323  | 38120325  | In_Frame_Del    | DEL | CCT | - | 7  | 1227 | .1760_1762delCC   | c.(1759-1764)GCCTCC>GC              | p.S589del     |

|        |               |          |        |    |    |           |           |                 |     |          |       |    |      |                                                    |                |
|--------|---------------|----------|--------|----|----|-----------|-----------|-----------------|-----|----------|-------|----|------|----------------------------------------------------|----------------|
| Pat_14 | Pre-Treatment | PICK1    | 9463   | 37 | 22 | 38471034  | 38471036  | In_Frame_Del    | DEL | GGA      | -     | 9  | 183  | .1143_1145delIGG(1141-1146)GGGGAG>GG               | p.E388del      |
| Pat_14 | Pre-Treatment | BIK      | 638    | 37 | 22 | 43525245  | 43525247  | In_Frame_Del    | DEL | GCT      | -     | 13 | 328  | c.417_419delIGCT:(415-420)GCGCTG>GCC               | p.L144del      |
| Pat_14 | Pre-Treatment | PNPLA5   | 150379 | 37 | 22 | 44285319  | 44285319  | Frame_Shift_Del | DEL | G        | -     | 8  | 1396 | c.592delC c.(592-594)CAGfs                         | p.Q198fs       |
| Pat_14 | Pre-Treatment | TATDN2   | 9797   | 37 | 3  | 10291121  | 10291123  | In_Frame_Del    | DEL | CTC      | -     | 8  | 959  | c.237_239delICTC c.(235-240)AACTCC>AAC             | p.S83del       |
| Pat_14 | Pre-Treatment | XPC      | 7508   | 37 | 3  | 14219966  | 14219968  | In_Frame_Del    | DEL | CCT      | -     | 9  | 168  | c.101_103delAGGc.(100-105)GAGGAT>GAT               | p.E34del       |
| Pat_14 | Pre-Treatment | ZNF621   | 285268 | 37 | 3  | 40573864  | 40573864  | Frame_Shift_Del | DEL | C        | -     | 61 | 279  | c.603delC c.(601-603)CACfs                         | p.H201fs       |
| Pat_14 | Pre-Treatment | KIF15    | 56992  | 37 | 3  | 44872462  | 44872462  | Frame_Shift_Del | DEL | G        | -     | 7  | 927  | c.3123delG c.(3121-3123)CTGfs                      | p.L1041fs      |
| Pat_14 | Pre-Treatment | CDC25A   | 993    | 37 | 3  | 48200922  | 48200923  | Frame_Shift_Del | DEL | TC       | -     | 10 | 538  | c.1345_1346delIGA c.(1345-1347)GATfs               | p.D449fs       |
| Pat_14 | Pre-Treatment | ATRIP    | 84126  | 37 | 3  | 48505451  | 48505453  | In_Frame_Del    | DEL | CTG      | -     | 7  | 1100 | c.1894_1896delICT c.(1894-1896)CTGdel              | p.L635del      |
| Pat_14 | Pre-Treatment | MED12L   | 116931 | 37 | 3  | 150877786 | 150877786 | Frame_Shift_Del | DEL | C        | -     | 8  | 530  | c.1005delC c.(1003-1005)GGCfs                      | p.G335fs       |
| Pat_14 | Pre-Treatment | PDE6B    | 5158   | 37 | 4  | 661763    | 661765    | In_Frame_Del    | DEL | AGG      | -     | 8  | 550  | c.2471_2473delIAG(2470-2475)AAGGAG>AA              | p.E828del      |
| Pat_14 | Pre-Treatment | OTOP1    | 133060 | 37 | 4  | 4228274   | 4228282   | In_Frame_Del    | DEL | CACAGCAC | -     | 9  | 147  | c.318delICTGCTG c.(310-318)CTGCTGTGGdt             | p.LLW104del    |
| Pat_14 | Pre-Treatment | EVC      | 2121   | 37 | 4  | 5809995   | 5809997   | In_Frame_Del    | DEL | CAG      | -     | 9  | 347  | c.2629_2631delICA c.(2629-2631)CAGdel              | p.Q880del      |
| Pat_14 | Pre-Treatment | ADAD1    | 132612 | 37 | 4  | 123302211 | 123302211 | Frame_Shift_Del | DEL | A        | -     | 7  | 224  | c.237delA c.(235-237)CCAfs                         | p.P79fs        |
| Pat_14 | Pre-Treatment | INTU     | 27152  | 37 | 4  | 128564917 | 128564917 | Frame_Shift_Del | DEL | A        | -     | 7  | 149  | c.388delA c.(388-390)AAAfs                         | p.K130fs       |
| Pat_14 | Pre-Treatment | PDZD2    | 23037  | 37 | 5  | 32089576  | 32089576  | Frame_Shift_Del | DEL | G        | -     | 7  | 867  | c.6022delG c.(6022-6024)GAAfs                      | p.E2008fs      |
| Pat_14 | Pre-Treatment | SLC45A2  | 51151  | 37 | 5  | 33951732  | 33951732  | Frame_Shift_Del | DEL | G        | -     | 8  | 586  | c.1083delC c.(1081-1083)CTCfs                      | p.L361fs       |
| Pat_14 | Pre-Treatment | IK       | 3550   | 37 | 5  | 140032593 | 140032594 | Frame_Shift_Del | DEL | GA       | -     | 11 | 156  | c.268_269delIGA c.(268-270)GAGfs                   | p.E90fs        |
| Pat_14 | Pre-Treatment | KCTD16   | 57528  | 37 | 5  | 143853531 | 143853531 | Frame_Shift_Del | DEL | A        | -     | 8  | 161  | c.1141delA c.(1141-1143)AAAfs                      | p.K381fs       |
| Pat_14 | Pre-Treatment | UIMC1    | 51720  | 37 | 5  | 176397741 | 176397741 | Splice_Site     | DEL | A        | -     | 7  | 1013 | c.357_splice c.e4+1                                | p.N119_splice  |
| Pat_14 | Pre-Treatment | ZNF184   | 7738   | 37 | 6  | 27420810  | 27420810  | Frame_Shift_Del | DEL | T        | -     | 8  | 944  | c.528delA c.(526-528)AAAfs                         | p.K176fs       |
| Pat_14 | Pre-Treatment | OR2J2    | 26707  | 37 | 6  | 29141422  | 29141422  | Frame_Shift_Del | DEL | A        | -     | 7  | 323  | c.10delA c.(10-12)AAAfs                            | p.K4fs         |
| Pat_14 | Pre-Treatment | CDSN     | 1041   | 37 | 6  | 31084620  | 31084622  | In_Frame_Del    | DEL | CCA      | -     | 7  | 120  | c.770_772delITGG:(769-774)GTGGAC>GAC               | p.V257del      |
| Pat_14 | Pre-Treatment | BAT2     | 7916   | 37 | 6  | 31597456  | 31597457  | Frame_Shift_Ins | INS | -        | C     | 7  | 117  | c.2088_2089insC c.(2086-2091)CCACCCfs              | p.P696fs       |
| Pat_14 | Pre-Treatment | TULP1    | 7287   | 37 | 6  | 35478775  | 35478777  | In_Frame_Del    | DEL | TCC      | -     | 7  | 399  | c.360_362delIGGA:(358-363)GAGGAA>GAA.120_121EE>I   |                |
| Pat_14 | Pre-Treatment | ICK      | 22858  | 37 | 6  | 52883129  | 52883129  | Frame_Shift_Del | DEL | T        | -     | 7  | 1142 | c.662delA c.(661-663)AAGfs                         | p.K221fs       |
| Pat_14 | Pre-Treatment | GRM1     | 2911   | 37 | 6  | 146755219 | 146755221 | In_Frame_Del    | DEL | GAG      | -     | 7  | 732  | c.2872_2874delIGA c.(2872-2874)GAGdel              | p.E961del      |
| Pat_14 | Pre-Treatment | NOX3     | 50508  | 37 | 6  | 155743925 | 155743926 | Frame_Shift_Del | DEL | CA       | -     | 7  | 1175 | c.1210_1211delITG c.(1210-1212)TGCfs               | p.C404fs       |
| Pat_14 | Pre-Treatment | AGPAT4   | 56895  | 37 | 6  | 161560589 | 161560589 | Frame_Shift_Del | DEL | G        | -     | 8  | 742  | c.907delC c.(907-909)CGGfs                         | p.R303fs       |
| Pat_14 | Pre-Treatment | SKAP2    | 8935   | 37 | 7  | 26729949  | 26729949  | Frame_Shift_Del | DEL | C        | -     | 7  | 745  | c.829delG c.(829-831)GAAfs                         | p.E277fs       |
| Pat_14 | Pre-Treatment | GARS     | 2617   | 37 | 7  | 30634583  | 30634585  | In_Frame_Del    | DEL | CTG      | -     | 8  | 154  | c.46_48delICTG c.(46-48)CTGdel                     | p.L20del       |
| Pat_14 | Pre-Treatment | POU6F2   | 11281  | 37 | 7  | 39379288  | 39379290  | In_Frame_Del    | DEL | CAG      | -     | 9  | 171  | c.559_561delICAG c.(559-561)CAGdel                 | p.Q196del      |
| Pat_14 | Pre-Treatment | DDC      | 1644   | 37 | 7  | 50531075  | 50531075  | Frame_Shift_Del | DEL | T        | -     | 9  | 481  | c.1297delA c.(1297-1299)ATCfs                      | p.I433fs       |
| Pat_14 | Pre-Treatment | STX1A    | 6804   | 37 | 7  | 73123425  | 73123427  | In_Frame_Del    | DEL | CAT      | -     | 9  | 975  | c.56_58delIATG c.(55-60)GATGTCT>GTC                | p.D19del       |
| Pat_14 | Pre-Treatment | COL1A2   | 1278   | 37 | 7  | 94050333  | 94050333  | Frame_Shift_Del | DEL | C        | -     | 7  | 511  | c.2308delC c.(2308-2310)CCCfs                      | p.P770fs       |
| Pat_14 | Pre-Treatment | TRRAP    | 8295   | 37 | 7  | 98554101  | 98554101  | Frame_Shift_Del | DEL | T        | -     | 87 | 423  | c.6155delT c.(6154-6156)GTGfs                      | p.V2052fs      |
| Pat_14 | Pre-Treatment | SRRT     | 51593  | 37 | 7  | 100479332 | 100479332 | Frame_Shift_Del | DEL | G        | -     | 8  | 223  | c.304delG c.(304-306)GGGfs                         | p.G102fs       |
| Pat_14 | Pre-Treatment | ARHGEF5  | 7984   | 37 | 7  | 144076999 | 144077000 | Frame_Shift_Del | DEL | GG       | -     | 7  | 1275 | c.4644_4645delIGC c.(4642-4647)CTGGAGfs            | p.L1548fs      |
| Pat_14 | Pre-Treatment | TOX      | 9760   | 37 | 8  | 59750796  | 59750798  | In_Frame_Del    | DEL | CTT      | -     | 9  | 366  | c.766_768delIAG c.(766-768)AAGdel                  | p.K256del      |
| Pat_14 | Pre-Treatment | PUF60    | 22827  | 37 | 8  | 144906520 | 144906522 | In_Frame_Del    | DEL | GCC      | -     | 7  | 256  | c.72_74delIGGC c.(70-75)GCGGCA>GCA.p24_25AA>A      |                |
| Pat_14 | Pre-Treatment | PLEC     | 5339   | 37 | 8  | 145000951 | 145000953 | Splice_Site     | DEL | CCT      | -     | 7  | 815  | c.4455_splice c.e30+1                              | p.E1485_splice |
| Pat_14 | Pre-Treatment | RLN2     | 6019   | 37 | 9  | 5304560   | 5304561   | Frame_Shift_Ins | INS | -        | A     | 7  | 426  | c.20_21insT c.(19-21)TTCfs                         | p.F7fs         |
| Pat_14 | Pre-Treatment | C9orf131 | 138724 | 37 | 9  | 35045129  | 35045129  | Frame_Shift_Del | DEL | C        | -     | 7  | 2294 | c.2503delC c.(2503-2505)CCCfs                      | p.P835fs       |
| Pat_14 | Pre-Treatment | HRCT1    | 646962 | 37 | 9  | 35906605  | 35906607  | In_Frame_Del    | DEL | CCG      | -     | 9  | 45   | c.321_323delICCG:(319-324)CACCGC>CAC               | p.R108del      |
| Pat_14 | Pre-Treatment | ROR2     | 4920   | 37 | 9  | 94486026  | 94486028  | In_Frame_Del    | DEL | TCC      | -     | 7  | 590  | c.2748_2750delIGG(2746-2751)GAGGAA>GA(.916_917EE>I |                |
| Pat_14 | Pre-Treatment | FKBP15   | 23307  | 37 | 9  | 115933927 | 115933928 | Frame_Shift_Ins | INS | -        | AGAAA | 10 | 63   | c.2591_2592insTTTT c.(2590-2592)AAGfs              | p.K864fs       |
| Pat_14 | Pre-Treatment | FKBP15   | 23307  | 37 | 9  | 115969556 | 115969556 | Frame_Shift_Del | DEL | T        | -     | 8  | 1780 | c.190delA c.(190-192)ACAFs                         | p.T64fs        |



|        |                 |           |        |    |    |           |           |                        |     |          |        |    |      |                   |                        |                |
|--------|-----------------|-----------|--------|----|----|-----------|-----------|------------------------|-----|----------|--------|----|------|-------------------|------------------------|----------------|
| Pat_14 | Pre-Treatment   | GOLGA2    | 2801   | 37 | 9  | 131019390 | 131019390 | Frame_Shift_Del        | DEL | A        | -      | 8  | 837  | c.2965delT        | c.(2965-2967)TACfs     | p.Y989fs       |
| Pat_14 | Pre-Treatment   | ABL1      | 25     | 37 | 9  | 133759490 | 133759492 | In_Frame_Del           | DEL | AAG      | -      | 30 | 476  | .1813_1815delAA   | c.(1813-1815)AAGdel    | p.K609del      |
| Pat_14 | Pre-Treatment   | TTF1      | 7270   | 37 | 9  | 135277388 | 135277388 | Frame_Shift_Del        | DEL | T        | -      | 9  | 223  | c.821delA         | c.(820-822)AAGfs       | p.K274fs       |
| Pat_14 | Pre-Treatment   | ADAMTS13  | 11093  | 37 | 9  | 136302969 | 136302969 | Frame_Shift_Del        | DEL | C        | -      | 8  | 1002 | c.1536delC        | c.(1534-1536)GGCfs     | p.G512fs       |
| Pat_14 | Pre-Treatment   | NOTCH1    | 4851   | 37 | 9  | 139393375 | 139393376 | Frame_Shift_Del        | DEL | AG       | -      | 7  | 1403 | c.6155_6156delCT  | c.(6154-6156)GCTfs     | p.A2052fs      |
| Pat_14 | Pre-Treatment   | GRIN1     | 2902   | 37 | 9  | 140056884 | 140056886 | In_Frame_Del           | DEL | GAG      | -      | 9  | 282  | .1780_1782delGAI  | c.(1780-1782)GAGdel    | p.E598del      |
| Pat_14 | Pre-Treatment   | ZBED1     | 9189   | 37 | X  | 2408742   | 2408742   | Frame_Shift_Del        | DEL | C        | -      | 7  | 1201 | c.19delG          | c.(19-21)GAGfs         | p.E7fs         |
| Pat_14 | Pre-Treatment   | RBM10     | 8241   | 37 | X  | 47030467  | 47030469  | In_Frame_Del           | DEL | GGC      | -      | 9  | 250  | c.242_244delGGC   | c.(241-246)AGGCGG>AGC  | p.81_82RR>R    |
| Pat_14 | Pre-Treatment   | SHROOM4   | 57477  | 37 | X  | 50350672  | 50350674  | In_Frame_Del           | DEL | TCT      | -      | 7  | 34   | .3468_3470delIAG  | c.(3466-3471)GAAGAG>GA | p.1156_1157EE> |
| Pat_14 | Pre-Treatment   | NUDT11    | 55190  | 37 | X  | 51239296  | 51239309  | Translation_Start_Site | DEL | TCGAGGCA | -      | 11 | 60   |                   |                        |                |
| Pat_14 | Pre-Treatment   | XAGE3     | 170626 | 37 | X  | 52893878  | 52893878  | Frame_Shift_Del        | DEL | C        | -      | 8  | 469  | c.239delG         | c.(238-240)GGTfs       | p.G80fs        |
| Pat_14 | Pre-Treatment   | CD99L2    | 83692  | 37 | X  | 149984524 | 149984526 | In_Frame_Del           | DEL | GTG      | -      | 10 | 1236 | c.156_158delCAC   | c.(154-159)ACCACA>ACA  | p.52_53TT>T    |
| Pat_14 | Pre-Treatment   | MAGEA10   | 4109   | 37 | X  | 151303906 | 151303908 | In_Frame_Del           | DEL | AGG      | -      | 13 | 315  | c.185_187delCCT   | c.(184-189)TCCTGC>TGC  | p.S62del       |
| Pat_14 | Post-Resistance | PHF13     | 148479 | 37 | 1  | 6680069   | 6680071   | In_Frame_Del           | DEL | GAA      | -      | 8  | 226  | c.348_350delGAA   | c.(346-351)CTGAAG>CTG  | p.K121del      |
| Pat_14 | Post-Resistance | EXTL1     | 2134   | 37 | 1  | 26349533  | 26349535  | In_Frame_Del           | DEL | CCT      | -      | 8  | 232  | c.396_398delCCT   | c.(394-399)TGCCCT>TGC  | p.L137del      |
| Pat_14 | Post-Resistance | ARID1A    | 8289   | 37 | 1  | 27105931  | 27105931  | Frame_Shift_Del        | DEL | G        | -      | 7  | 760  | c.5542delG        | c.(5542-5544)GGGfs     | p.G1848fs      |
| Pat_14 | Post-Resistance | GPR3      | 2827   | 37 | 1  | 27721235  | 27721237  | In_Frame_Del           | DEL | CTG      | -      | 7  | 1311 | c.933_935delCTG   | c.(931-936)GTCTGC>GTC  | p.C315del      |
| Pat_14 | Post-Resistance | USP1      | 7398   | 37 | 1  | 62916272  | 62916272  | Frame_Shift_Del        | DEL | A        | -      | 8  | 270  | c.1978delA        | c.(1978-1980)AAAFs     | p.K660fs       |
| Pat_14 | Post-Resistance | ROR1      | 4919   | 37 | 1  | 64608186  | 64608187  | Frame_Shift_Del        | DEL | CA       | -      | 11 | 800  | c.1027_1028delCA  | c.(1027-1029)CACfs     | p.H343fs       |
| Pat_14 | Post-Resistance | EV15      | 7813   | 37 | 1  | 93159366  | 93159366  | Frame_Shift_Del        | DEL | T        | -      | 8  | 435  | c.1222delA        | c.(1222-1224)ATGfs     | p.M408fs       |
| Pat_14 | Post-Resistance | AGL       | 178    | 37 | 1  | 100378028 | 100378028 | Frame_Shift_Del        | DEL | A        | -      | 7  | 397  | c.3904delA        | c.(3904-3906)AAAFs     | p.K1302fs      |
| Pat_14 | Post-Resistance | FNDC7     | 163479 | 37 | 1  | 109276138 | 109276138 | Frame_Shift_Del        | DEL | A        | -      | 8  | 414  | c.2124delA        | c.(2122-2124)CCAfs     | p.P708fs       |
| Pat_14 | Post-Resistance | ADAM30    | 11085  | 37 | 1  | 120436591 | 120436591 | Frame_Shift_Del        | DEL | T        | -      | 7  | 846  | c.2369delA        | c.(2368-2370)AAGfs     | p.K790fs       |
| Pat_14 | Post-Resistance | NOTCH2    | 4853   | 37 | 1  | 120612003 | 120612004 | Frame_Shift_Del        | DEL | GG       | -      | 27 | 126  | c.17_18delCC      | c.(16-18)CCCfs         | p.P6fs         |
| Pat_14 | Post-Resistance | PDE4DIP   | 9659   | 37 | 1  | 144917828 | 144917828 | Frame_Shift_Del        | DEL | A        | -      | 7  | 1899 | c.1458delT        | c.(1456-1458)GTTfs     | p.V486fs       |
| Pat_14 | Post-Resistance | ADAMTSL4  | 54507  | 37 | 1  | 150530506 | 150530506 | Frame_Shift_Del        | DEL | G        | -      | 10 | 615  | c.2263delG        | c.(2263-2265)GGGfs     | p.G755fs       |
| Pat_14 | Post-Resistance | PSMB4     | 5692   | 37 | 1  | 151374040 | 151374040 | Frame_Shift_Del        | DEL | A        | -      | 10 | 1444 | c.716delA         | c.(715-717)GAAfs       | p.E239fs       |
| Pat_14 | Post-Resistance | TCHH      | 7062   | 37 | 1  | 152082957 | 152082959 | In_Frame_Del           | DEL | CTC      | -      | 15 | 608  | .2734_2736delGAI  | c.(2734-2736)GAGdel    | p.E912del      |
| Pat_14 | Post-Resistance | FLG2      | 388698 | 37 | 1  | 152328808 | 152328809 | Frame_Shift_Del        | DEL | CC       | -      | 8  | 1568 | .1453_1454delIGC  | c.(1453-1455)GGCfs     | p.G485fs       |
| Pat_14 | Post-Resistance | CD84      | 8832   | 37 | 1  | 160549189 | 160549189 | Frame_Shift_Del        | DEL | C        | -      | 7  | 621  | c.39delG          | c.(37-39)CTGfs         | p.L13fs        |
| Pat_14 | Post-Resistance | PCP4L1    | 654790 | 37 | 1  | 161254154 | 161254156 | In_Frame_Del           | DEL | GGA      | -      | 12 | 618  | c.90_92delGGA     | c.(88-93)GCGGAG>GCG    | p.E35del       |
| Pat_14 | Post-Resistance | LMX1A     | 4009   | 37 | 1  | 165177332 | 165177334 | In_Frame_Del           | DEL | TGC      | -      | 9  | 193  | c.783_785delGCA   | c.(781-786)CAGCAA>CAA  | p.261_262QQ>Q  |
| Pat_14 | Post-Resistance | EPHX1     | 2052   | 37 | 1  | 226026384 | 226026384 | Frame_Shift_Del        | DEL | C        | -      | 10 | 1212 | c.394delC         | c.(394-396)CCCfs       | p.P132fs       |
| Pat_14 | Post-Resistance | ACBD3     | 64746  | 37 | 1  | 226352490 | 226352491 | Frame_Shift_Ins        | INS | -        | T      | 10 | 383  | c.568_569insA     | c.(568-570)AGGfs       | p.R190fs       |
| Pat_14 | Post-Resistance | SFMBT2    | 57713  | 37 | 10 | 7212995   | 7212997   | In_Frame_Del           | DEL | CTC      | -      | 7  | 1071 | .2437_2439delGAI  | c.(2437-2439)GAGdel    | p.E813del      |
| Pat_14 | Post-Resistance | C10orf140 | 387640 | 37 | 10 | 21805466  | 21805467  | In_Frame_Ins           | INS | -        | CCTCCT | 7  | 8    | .85_1286insAGGA   | c.(85-1287)GGG>GAGGAG  | p.428_429insEI |
| Pat_14 | Post-Resistance | KIAA1462  | 57608  | 37 | 10 | 30316501  | 30316503  | In_Frame_Del           | DEL | CTG      | -      | 10 | 251  | .2574_2576delCAI  | c.(2572-2577)AGCAGT>AG | p.858_859SS>S  |
| Pat_14 | Post-Resistance | HELLS     | 3070   | 37 | 10 | 96331163  | 96331163  | Frame_Shift_Del        | DEL | A        | -      | 7  | 195  | c.454delA         | c.(454-456)AAAFs       | p.K152fs       |
| Pat_14 | Post-Resistance | C10orf62  | 414157 | 37 | 10 | 99350237  | 99350238  | Frame_Shift_Del        | DEL | CA       | -      | 7  | 501  | c.583_584delCA    | c.(583-585)CACfs       | p.H195fs       |
| Pat_14 | Post-Resistance | TACC2     | 10579  | 37 | 10 | 123970380 | 123970380 | Frame_Shift_Del        | DEL | C        | -      | 8  | 614  | c.6440delIC       | c.(6439-6441)ACCfs     | p.T2147fs      |
| Pat_14 | Post-Resistance | PTPRE     | 5791   | 37 | 10 | 129876002 | 129876004 | In_Frame_Del           | DEL | AGC      | -      | 7  | 456  | .1847_1849delIAGI | c.(1846-1851)AAGCAG>AA | p.Q620del      |
| Pat_14 | Post-Resistance | F2        | 2147   | 37 | 11 | 46760648  | 46760648  | Frame_Shift_Del        | DEL | G        | -      | 8  | 615  | c.1705delG        | c.(1705-1707)GGGfs     | p.G569fs       |
| Pat_14 | Post-Resistance | FADS2     | 9415   | 37 | 11 | 61607885  | 61607887  | In_Frame_Del           | DEL | TCC      | -      | 14 | 1109 | c.398_400delTCC   | c.(397-402)TTCCTC>TTC  | p.L137del      |
| Pat_14 | Post-Resistance | FADS2     | 9415   | 37 | 11 | 61615748  | 61615748  | Frame_Shift_Del        | DEL | C        | -      | 7  | 1213 | c.736delC         | c.(736-738)CCCfs       | p.P246fs       |
| Pat_14 | Post-Resistance | CBL       | 867    | 37 | 11 | 119170435 | 119170435 | Frame_Shift_Del        | DEL | A        | -      | 8  | 2347 | c.2665delA        | c.(2665-2667)AAAFs     | p.K889fs       |
| Pat_14 | Post-Resistance | PRDM10    | 56980  | 37 | 11 | 129772249 | 129772251 | In_Frame_Del           | DEL | TGG      | -      | 8  | 1405 | .3440_3442delIC   | c.(3439-3444)ACCAAC>AA | p.T1147del     |
| Pat_14 | Post-Resistance | SLC39A5   | 283375 | 37 | 12 | 56628997  | 56628999  | In_Frame_Del           | DEL | CTG      | -      | 8  | 828  | c.691_693delCTG   | c.(691-693)CTGdel      | p.L234del      |

|        |                 |          |        |    |    |           |           |                 |     |     |     |    |      |                                       |                       |             |
|--------|-----------------|----------|--------|----|----|-----------|-----------|-----------------|-----|-----|-----|----|------|---------------------------------------|-----------------------|-------------|
| Pat_14 | Post-Resistance | LRP1     | 4035   | 37 | 12 | 57605740  | 57605742  | In_Frame_Del    | DEL | TGC | -   | 16 | 849  | 13289_13291delT(13288-13293)TTGCTG>T  | 4430_4431LL>          |             |
| Pat_14 | Post-Resistance | TMEM19   | 55266  | 37 | 12 | 72094757  | 72094757  | Frame_Shift_Del | DEL | T   | -   | 7  | 1353 | c.993delT                             | c.(991-993)GGTfs      | p.G331fs    |
| Pat_14 | Post-Resistance | KSR2     | 283455 | 37 | 12 | 118198939 | 118198939 | Frame_Shift_Del | DEL | G   | -   | 11 | 1581 | c.776delC                             | c.(775-777)CCGfs      | p.P259fs    |
| Pat_14 | Post-Resistance | SFRS8    | 6433   | 37 | 12 | 132281734 | 132281736 | In_Frame_Del    | DEL | AGA | -   | 17 | 696  | .2546_2548delIAG;(2545-2550)GAGAAG>GA | p.K853del             |             |
| Pat_14 | Post-Resistance | FRY      | 10129  | 37 | 13 | 32653102  | 32653102  | Frame_Shift_Del | DEL | A   | -   | 9  | 1574 | c.202delA                             | c.(202-204)AAafs      | p.K68fs     |
| Pat_14 | Post-Resistance | SLAIN1   | 122060 | 37 | 13 | 78320722  | 78320722  | Frame_Shift_Del | DEL | A   | -   | 8  | 620  | c.498delA                             | c.(496-498)GGAfs      | p.G166fs    |
| Pat_14 | Post-Resistance | SIPA1L1  | 26037  | 37 | 14 | 72190482  | 72190484  | In_Frame_Del    | DEL | TCC | -   | 7  | 539  | .4390_4392delITC                      | c.(4390-4392)TCCdel   | p.S1468del  |
| Pat_14 | Post-Resistance | CCNK     | 8812   | 37 | 14 | 99969244  | 99969246  | In_Frame_Del    | DEL | CAG | -   | 7  | 582  | c.934_936delCAG                       | c.(934-936)CAGdel     | p.Q315del   |
| Pat_14 | Post-Resistance | YY1      | 7528   | 37 | 14 | 100705708 | 100705710 | In_Frame_Del    | DEL | GAG | -   | 10 | 49   | c.127_129delGAG                       | c.(127-129)GAGdel     | p.E47del    |
| Pat_14 | Post-Resistance | DYNC1H1  | 1778   | 37 | 14 | 102445788 | 102445788 | Frame_Shift_Del | DEL | T   | -   | 11 | 574  | c.477delT                             | c.(475-477)CCTfs      | p.P159fs    |
| Pat_14 | Post-Resistance | ADAL     | 161823 | 37 | 15 | 43641115  | 43641115  | Frame_Shift_Del | DEL | A   | -   | 7  | 367  | c.563delA                             | c.(562-564)CAafs      | p.Q188fs    |
| Pat_14 | Post-Resistance | ABCA3    | 21     | 37 | 16 | 2369649   | 2369651   | In_Frame_Del    | DEL | AGC | -   | 7  | 518  | c.804_806delGCTc.(802-807)CTGCTC>CTC  | c.268_269LL>          |             |
| Pat_14 | Post-Resistance | GSPT1    | 2935   | 37 | 16 | 12009530  | 12009531  | In_Frame_Ins    | INS | -   | CCG | 6  | 10   | c.47_48insCGG                         | c.(46-48)GGG>GGCGGG   | p.16_16G>GG |
| Pat_14 | Post-Resistance | KIAA0430 | 9665   | 37 | 16 | 15729982  | 15729984  | In_Frame_Del    | DEL | CCA | -   | 8  | 606  | c.360_362delTGG;(358-363)GGTGGC>GGC   | c.120_121GG>          |             |
| Pat_14 | Post-Resistance | CD2BP2   | 10421  | 37 | 16 | 30365550  | 30365552  | In_Frame_Del    | DEL | CAT | -   | 12 | 1568 | c.170_172delATG;(169-174)GATGGG>GGC   | p.D57del              |             |
| Pat_14 | Post-Resistance | SETD1A   | 9739   | 37 | 16 | 30977317  | 30977317  | Frame_Shift_Del | DEL | C   | -   | 7  | 396  | c.2115delC                            | c.(2113-2115)GGCfs    | p.G705fs    |
| Pat_14 | Post-Resistance | FTO      | 79068  | 37 | 16 | 54145739  | 54145739  | Frame_Shift_Del | DEL | A   | -   | 10 | 1484 | c.1430delA                            | c.(1429-1431)GAAfs    | p.E477fs    |
| Pat_14 | Post-Resistance | IRX6     | 79190  | 37 | 16 | 55362674  | 55362676  | In_Frame_Del    | DEL | GAG | -   | 11 | 181  | c.784_786delGAG                       | c.(784-786)GAGdel     | p.E268del   |
| Pat_14 | Post-Resistance | COQ9     | 57017  | 37 | 16 | 57486732  | 57486734  | In_Frame_Del    | DEL | GAG | -   | 8  | 749  | c.262_264delGAG                       | c.(262-264)GAGdel     | p.E91del    |
| Pat_14 | Post-Resistance | CSNK2A2  | 1459   | 37 | 16 | 58198019  | 58198020  | Frame_Shift_Del | DEL | CA  | -   | 8  | 617  | c.1008_1009delITC                     | c.(1006-1011)TGTGCAfs | p.C336fs    |
| Pat_14 | Post-Resistance | C16orf3  | 750    | 37 | 16 | 90095685  | 90095685  | Frame_Shift_Del | DEL | C   | -   | 7  | 641  | c.66delG                              | c.(64-66)TGGfs        | p.W22fs     |
| Pat_14 | Post-Resistance | FXR2     | 9513   | 37 | 17 | 7495872   | 7495874   | In_Frame_Del    | DEL | CGG | -   | 29 | 1465 | .1773_1775delCC(1771-1776)CGCCGT>CG   | c.591_592RR>          |             |
| Pat_14 | Post-Resistance | MYH10    | 4628   | 37 | 17 | 8397095   | 8397097   | In_Frame_Del    | DEL | CCT | -   | 9  | 209  | .4070_4072delIAG;(4069-4074)GAGGCC>GC | p.E1357del            |             |
| Pat_14 | Post-Resistance | EPN2     | 22905  | 37 | 17 | 19232950  | 19232950  | Frame_Shift_Del | DEL | A   | -   | 9  | 308  | c.1401delA                            | c.(1399-1401)TCAfs    | p.S467fs    |
| Pat_14 | Post-Resistance | ZNF207   | 7756   | 37 | 17 | 30677314  | 30677316  | In_Frame_Del    | DEL | AAG | -   | 9  | 885  | c.10_12delAAG                         | c.(10-12)AAGdel       | p.K7del     |
| Pat_14 | Post-Resistance | FKBP10   | 60681  | 37 | 17 | 39975559  | 39975559  | Frame_Shift_Del | DEL | C   | -   | 7  | 333  | c.825delC                             | c.(823-825)CTCfs      | p.L275fs    |
| Pat_14 | Post-Resistance | BRCA1    | 672    | 37 | 17 | 41246532  | 41246532  | Frame_Shift_Del | DEL | T   | -   | 7  | 891  | c.1016delA                            | c.(1015-1017)AAGfs    | p.K339fs    |
| Pat_14 | Post-Resistance | CDC27    | 996    | 37 | 17 | 45234336  | 45234336  | Frame_Shift_Del | DEL | G   | -   | 15 | 455  | c.785delC                             | c.(784-786)CCAfs      | p.P262fs    |
| Pat_14 | Post-Resistance | COIL     | 8161   | 37 | 17 | 55028117  | 55028118  | Frame_Shift_Ins | INS | -   | T   | 10 | 332  | c.485_486insA                         | c.(484-486)AACfs      | p.N162fs    |
| Pat_14 | Post-Resistance | MRC2     | 9902   | 37 | 17 | 60757562  | 60757564  | In_Frame_Del    | DEL | ACG | -   | 10 | 278  | .2330_2332delIAC(2329-2334)CACGAC>CA  | p.D781del             |             |
| Pat_14 | Post-Resistance | CDC42EP4 | 23580  | 37 | 17 | 71281585  | 71281587  | In_Frame_Del    | DEL | TCC | -   | 11 | 634  | .1053_1055delIGG.(1051-1056)GAGGAT>GA | p.E351del             |             |
| Pat_14 | Post-Resistance | ITGB4    | 3691   | 37 | 17 | 73726384  | 73726384  | Frame_Shift_Del | DEL | C   | -   | 8  | 345  | c.801delC                             | c.(799-801)TTCfs      | p.F267fs    |
| Pat_14 | Post-Resistance | OSBPL1A  | 114876 | 37 | 18 | 21750331  | 21750331  | Frame_Shift_Del | DEL | T   | -   | 7  | 357  | c.2378delA                            | c.(2377-2379)AATfs    | p.N793fs    |
| Pat_14 | Post-Resistance | SH2D3A   | 10045  | 37 | 19 | 6755180   | 6755180   | Frame_Shift_Del | DEL | G   | -   | 7  | 925  | c.643delC                             | c.(643-645)CGGfs      | p.R215fs    |
| Pat_14 | Post-Resistance | HAUS8    | 93323  | 37 | 19 | 17160706  | 17160707  | Frame_Shift_Del | DEL | GA  | -   | 8  | 998  | c.1209_1210delITC                     | c.(1207-1212)TCTCGTfs | p.S403fs    |
| Pat_14 | Post-Resistance | NCAN     | 1463   | 37 | 19 | 19360601  | 19360603  | In_Frame_Del    | DEL | CAC | -   | 7  | 264  | .3847_3849delICA                      | c.(3847-3849)CACdel   | p.H1287del  |
| Pat_14 | Post-Resistance | ZFP14    | 57677  | 37 | 19 | 36832330  | 36832330  | Frame_Shift_Del | DEL | T   | -   | 7  | 769  | c.398delA                             | c.(397-399)AAGfs      | p.K133fs    |
| Pat_14 | Post-Resistance | ZFP36    | 7538   | 37 | 19 | 39898948  | 39898950  | In_Frame_Del    | DEL | CAC | -   | 8  | 1083 | c.590_592delCACc.(589-594)TCACCA>TCA  | p.P201del             |             |
| Pat_14 | Post-Resistance | C19orf47 | 126526 | 37 | 19 | 40834399  | 40834399  | Frame_Shift_Del | DEL | G   | -   | 10 | 1226 | c.471delC                             | c.(469-471)CCCfs      | p.P157fs    |
| Pat_14 | Post-Resistance | NUCB1    | 4924   | 37 | 19 | 49425109  | 49425111  | In_Frame_Del    | DEL | AGC | -   | 7  | 259  | .1199_1201delAG(1198-1203)AAGCAG>AA   | p.Q407del             |             |
| Pat_14 | Post-Resistance | SIGLEC8  | 27181  | 37 | 19 | 51961617  | 51961619  | In_Frame_Del    | DEL | GCA | -   | 10 | 379  | c.23_25delITGC                        | c.(22-27)CTGCC>CCC    | p.L8del     |
| Pat_14 | Post-Resistance | U2AF2    | 11338  | 37 | 19 | 56171899  | 56171901  | In_Frame_Del    | DEL | AGA | -   | 8  | 237  | c.248_250delAGA;(247-252)GAGAAG>GAC   | p.K87del              |             |
| Pat_14 | Post-Resistance | PUM2     | 23369  | 37 | 2  | 20482977  | 20482979  | In_Frame_Del    | DEL | GCT | -   | 8  | 471  | .1449_1451delAG(1447-1452)GCAGCT>GC   | c.483_484AA>          |             |
| Pat_14 | Post-Resistance | DHX57    | 90957  | 37 | 2  | 39095411  | 39095413  | In_Frame_Del    | DEL | CCA | -   | 9  | 349  | c.135_137delTGG;(133-138)GGTGG>GG     | p.45_46GG>G           |             |
| Pat_14 | Post-Resistance | KBTD10   | 10324  | 37 | 2  | 170366496 | 170366496 | Frame_Shift_Del | DEL | A   | -   | 11 | 820  | c.208delA                             | c.(208-210)AAafs      | p.K70fs     |
| Pat_14 | Post-Resistance | DCAF17   | 80067  | 37 | 2  | 172309687 | 172309687 | Frame_Shift_Del | DEL | T   | -   | 8  | 410  | c.591delT                             | c.(589-591)CCTfs      | p.P197fs    |
| Pat_14 | Post-Resistance | GZF1     | 64412  | 37 | 20 | 23345921  | 23345923  | In_Frame_Del    | DEL | GAG | -   | 8  | 166  | c.901_903delGAG                       | c.(901-903)GAGdel     | p.E306del   |

|        |                 |                 |        |    |    |           |           |                 |     |          |        |    |      |                    |                        |                |
|--------|-----------------|-----------------|--------|----|----|-----------|-----------|-----------------|-----|----------|--------|----|------|--------------------|------------------------|----------------|
| Pat_14 | Post-Resistance | E2F1            | 1869   | 37 | 20 | 32267581  | 32267582  | Frame_Shift_Del | DEL | GG       | -      | 7  | 546  | c.551_552delCC     | c.(550-552)TCCfs       | p.S184fs       |
| Pat_14 | Post-Resistance | RTEL1           | 51750  | 37 | 20 | 62292822  | 62292824  | In_Frame_Del    | DEL | GCT      | -      | 8  | 165  | c.274_276delGCT    | c.(274-276)GCTdel      | p.A96del       |
| Pat_14 | Post-Resistance | TCP10L          | 140290 | 37 | 21 | 33949091  | 33949091  | Frame_Shift_Del | DEL | C        | -      | 10 | 747  | c.641delG          | c.(640-642)GGTfs       | p.G214fs       |
| Pat_14 | Post-Resistance | DRG1            | 4733   | 37 | 22 | 31796702  | 31796704  | In_Frame_Del    | DEL | GGT      | -      | 8  | 469  | c.139_141delGGT    | c.(139-141)GGTdel      | p.G52del       |
| Pat_14 | Post-Resistance | FBXO7           | 25793  | 37 | 22 | 32894235  | 32894235  | Frame_Shift_Del | DEL | G        | -      | 7  | 1077 | c.1287delG         | c.(1285-1287)TTGfs     | p.L429fs       |
| Pat_14 | Post-Resistance | SAPS2           | 9701   | 37 | 22 | 50876653  | 50876655  | In_Frame_Del    | DEL | TGA      | -      | 7  | 741  | .1890_1892delTGc.  | (1888-1893)TTTGAT>TT   | p.D633del      |
| Pat_14 | Post-Resistance | ITPR1           | 3708   | 37 | 3  | 4774895   | 4774895   | Frame_Shift_Del | DEL | G        | -      | 7  | 433  | c.5200delG         | c.(5200-5202)GGGfs     | p.G1734fs      |
| Pat_14 | Post-Resistance | EDEM1           | 9695   | 37 | 3  | 5248941   | 5248941   | Frame_Shift_Del | DEL | T        | -      | 11 | 678  | c.1321delT         | c.(1321-1323)TTTfs     | p.F441fs       |
| Pat_14 | Post-Resistance | XPC             | 7508   | 37 | 3  | 14219966  | 14219968  | In_Frame_Del    | DEL | CCT      | -      | 12 | 199  | c.101_103delAGGc.  | (100-105)GAGGAT>GAT    | p.E34del       |
| Pat_14 | Post-Resistance | ACVR2B          | 93     | 37 | 3  | 38524693  | 38524693  | Frame_Shift_Del | DEL | C        | -      | 8  | 710  | c.1409delC         | c.(1408-1410)TCCfs     | p.S470fs       |
| Pat_14 | Post-Resistance | PLXNB1          | 5364   | 37 | 3  | 48465002  | 48465003  | Frame_Shift_Ins | INS | -        | A      | 9  | 503  | c.1018_1019insT    | c.(1018-1020)TGCfs     | p.C340fs       |
| Pat_14 | Post-Resistance | MYLK            | 4638   | 37 | 3  | 123368043 | 123368044 | Splice_Site     | INS | -        | G      | 9  | 476  | c.4289_splice      | c.e25-1                | p.E1430_splice |
| Pat_14 | Post-Resistance | TMCC1           | 23023  | 37 | 3  | 129546680 | 129546682 | In_Frame_Del    | DEL | GCA      | -      | 8  | 332  | c.540_542delITGCc. | (538-543)GCTGCA>GCAi.  | 180_181AA>     |
| Pat_14 | Post-Resistance | DBR1            | 51163  | 37 | 3  | 137880741 | 137880743 | In_Frame_Del    | DEL | TCG      | -      | 7  | 490  | .1623_1625delICG.  | (1621-1626)GATGAT>GAt. | 541_542DD>I    |
| Pat_14 | Post-Resistance | PDE6B           | 5158   | 37 | 4  | 661763    | 661765    | In_Frame_Del    | DEL | AGG      | -      | 8  | 557  | .2471_2473delIAGc. | (2470-2475)AAGGAG>AA   | p.E828del      |
| Pat_14 | Post-Resistance | OTOP1           | 133060 | 37 | 4  | 4228274   | 4228282   | In_Frame_Del    | DEL | CACAGCAC | -      | 7  | 134  | _)318delICTGCTG.   | (310-318)CTGCTGTGGd.   | p.LLW104del    |
| Pat_14 | Post-Resistance | C1QTNF7         | 114905 | 37 | 4  | 15444120  | 15444120  | Frame_Shift_Del | DEL | C        | -      | 7  | 893  | c.567delC          | c.(565-567)TTCfs       | p.F189fs       |
| Pat_14 | Post-Resistance | YTHDC1          | 91746  | 37 | 4  | 69202891  | 69202893  | In_Frame_Del    | DEL | TCC      | -      | 7  | 207  | c.735_737delIGGAc. | (733-738)GAGGAA>GAAi.  | 245_246EE>I    |
| Pat_14 | Post-Resistance | PKD2            | 5311   | 37 | 4  | 88986559  | 88986559  | Frame_Shift_Del | DEL | A        | -      | 7  | 498  | c.2152delA         | c.(2152-2154)AAAfs     | p.K718fs       |
| Pat_14 | Post-Resistance | NAP1L5          | 266812 | 37 | 4  | 89618484  | 89618486  | In_Frame_Del    | DEL | TCC      | -      | 10 | 223  | c.420_422delIGGAc. | (418-423)GAGGAA>GAAi.  | 140_141EE>I    |
| Pat_14 | Post-Resistance | NPNT            | 255743 | 37 | 4  | 106863682 | 106863684 | In_Frame_Del    | DEL | CCA      | -      | 7  | 391  | c.982_984delCCA    | c.(982-984)CCAdel      | p.P333del      |
| Pat_14 | Post-Resistance | ANK2            | 287    | 37 | 4  | 114214679 | 114214681 | In_Frame_Del    | DEL | CAC      | -      | 10 | 338  | .2460_2462delCAi.  | (2458-2463)GTCACC>GT   | p.T826del      |
| Pat_14 | Post-Resistance | EXOSC9          | 5393   | 37 | 4  | 122728764 | 122728764 | Frame_Shift_Del | DEL | T        | -      | 7  | 765  | c.592delT          | c.(592-594)TTTfs       | p.F198fs       |
| Pat_14 | Post-Resistance | CDH10           | 1008   | 37 | 5  | 24492973  | 24492973  | Frame_Shift_Del | DEL | A        | -      | 8  | 1131 | c.1577delT         | c.(1576-1578)TTCfs     | p.F526fs       |
| Pat_14 | Post-Resistance | AFF4            | 27125  | 37 | 5  | 132270259 | 132270259 | Frame_Shift_Del | DEL | T        | -      | 8  | 1055 | c.498delA          | c.(496-498)AAAfs       | p.K166fs       |
| Pat_14 | Post-Resistance | ANKHD1-EIF4EBP: | 404734 | 37 | 5  | 139905676 | 139905676 | Frame_Shift_Del | DEL | A        | -      | 8  | 677  | c.4588delA         | c.(4588-4590)AAAfs     | p.K1530fs      |
| Pat_14 | Post-Resistance | IK              | 3550   | 37 | 5  | 140032593 | 140032594 | Frame_Shift_Del | DEL | GA       | -      | 11 | 197  | c.268_269delIGA    | c.(268-270)GAGfs       | p.E90fs        |
| Pat_14 | Post-Resistance | HNRNP1          | 3187   | 37 | 5  | 179043184 | 179043187 | Frame_Shift_Del | DEL | GCTG     | -      | 7  | 1314 | 1240_1243delCACc.  | (1240-1245)CAGCAGfs    | p.Q414fs       |
| Pat_14 | Post-Resistance | TUBB2B          | 347733 | 37 | 6  | 3225002   | 3225004   | In_Frame_Del    | DEL | CCT      | -      | 7  | 409  | .1319_1321delIAGc. | (1318-1323)GAGGGC>GC   | p.E440del      |
| Pat_14 | Post-Resistance | BAT2            | 7916   | 37 | 6  | 31597456  | 31597457  | Frame_Shift_Ins | INS | -        | C      | 10 | 117  | c.2088_2089insC    | c.(2086-2091)CCACCCfs  | p.P696fs       |
| Pat_14 | Post-Resistance | TULP1           | 7287   | 37 | 6  | 35478775  | 35478777  | In_Frame_Del    | DEL | TCC      | -      | 8  | 319  | c.360_362delIGGAc. | (358-363)GAGGAA>GAAi.  | 120_121EE>I    |
| Pat_14 | Post-Resistance | REPS1           | 85021  | 37 | 6  | 139266690 | 139266690 | Frame_Shift_Del | DEL | T        | -      | 8  | 1421 | c.422delA          | c.(421-423)AAGfs       | p.K141fs       |
| Pat_14 | Post-Resistance | GRM1            | 2911   | 37 | 6  | 146350671 | 146350672 | Frame_Shift_Ins | INS | -        | T      | 7  | 622  | c.18_19insT        | c.(16-21)TTGTTTfs      | p.L6fs         |
| Pat_14 | Post-Resistance | NOX3            | 50508  | 37 | 6  | 155743925 | 155743926 | Frame_Shift_Del | DEL | CA       | -      | 8  | 1330 | c.1210_1211delITC  | c.(1210-1212)TGCfs     | p.C404fs       |
| Pat_14 | Post-Resistance | PURB            | 5814   | 37 | 7  | 44924044  | 44924046  | In_Frame_Del    | DEL | CGC      | -      | 8  | 906  | c.902_904delIGGCc. | (901-906)GGCGAA>GAAi.  | p.G301del      |
| Pat_14 | Post-Resistance | PTCD1           | 26024  | 37 | 7  | 99032605  | 99032607  | In_Frame_Del    | DEL | CTC      | -      | 10 | 496  | c.259_261delIGAG   | c.(259-261)GAGdel      | p.E87del       |
| Pat_14 | Post-Resistance | SRRT            | 51593  | 37 | 7  | 100479332 | 100479332 | Frame_Shift_Del | DEL | G        | -      | 7  | 230  | c.304delG          | c.(304-306)GGGfs       | p.G102fs       |
| Pat_14 | Post-Resistance | NAPEPLD         | 222236 | 37 | 7  | 102760122 | 102760123 | Frame_Shift_Ins | INS | -        | A      | 7  | 426  | c.842_843insT      | c.(841-843)TTCfs       | p.F281fs       |
| Pat_14 | Post-Resistance | RINT1           | 60561  | 37 | 7  | 105190759 | 105190759 | Frame_Shift_Del | DEL | G        | -      | 8  | 973  | c.1159delG         | c.(1159-1161)GATfs     | p.D387fs       |
| Pat_14 | Post-Resistance | CBLL1           | 79872  | 37 | 7  | 107395909 | 107395909 | Frame_Shift_Del | DEL | A        | -      | 8  | 1050 | c.413delA          | c.(412-414)GAAfs       | p.E138fs       |
| Pat_14 | Post-Resistance | LUC7L2          | 51631  | 37 | 7  | 139094365 | 139094366 | Frame_Shift_Del | DEL | AG       | -      | 8  | 94   | c.744_745delIAG    | c.(742-747)GAAGAGfs    | p.E248fs       |
| Pat_14 | Post-Resistance | OR9A4           | 130075 | 37 | 7  | 141619203 | 141619203 | Frame_Shift_Del | DEL | T        | -      | 8  | 802  | c.528delT          | c.(526-528)AATfs       | p.N176fs       |
| Pat_14 | Post-Resistance | XRCC2           | 7516   | 37 | 7  | 152346220 | 152346220 | Frame_Shift_Del | DEL | A        | -      | 9  | 478  | c.350delT          | c.(349-351)TTGfs       | p.L117fs       |
| Pat_14 | Post-Resistance | SGK223          | 157285 | 37 | 8  | 8176387   | 8176388   | In_Frame_Ins    | INS | -        | GGGGCG | 16 | 49   | 197_3498insCGCCi.  | (96-3498)CCG>CCCCGCCi  | (166_1166P>P.  |
| Pat_14 | Post-Resistance | NBN             | 4683   | 37 | 8  | 90967512  | 90967512  | Frame_Shift_Del | DEL | T        | -      | 9  | 605  | c.1396delA         | c.(1396-1398)AGGfs     | p.R466fs       |
| Pat_14 | Post-Resistance | UBR5            | 51366  | 37 | 8  | 103289348 | 103289349 | Frame_Shift_Ins | INS | -        | T      | 7  | 493  | c.6360_6361insA    | c.(6358-6363)AAAGAAfs  | p.K2120fs      |
| Pat_14 | Post-Resistance | MYC             | 4609   | 37 | 8  | 128750605 | 128750607 | In_Frame_Del    | DEL | CAG      | -      | 7  | 297  | c.97_99delCAG      | c.(97-99)CAGdel        | p.Q37del       |

|        |                 |            |        |    |    |           |           |                        |     |          |   |    |      |                                      |                     |                |
|--------|-----------------|------------|--------|----|----|-----------|-----------|------------------------|-----|----------|---|----|------|--------------------------------------|---------------------|----------------|
| Pat_14 | Post-Resistance | PLEC       | 5339   | 37 | 8  | 145000951 | 145000953 | Splice_Site            | DEL | CCT      | - | 10 | 591  | c.4455_splice                        | c.e30+1             | p.E1485_splice |
| Pat_14 | Post-Resistance | TAF1L      | 138474 | 37 | 9  | 32633584  | 32633584  | Frame_Shift_Del        | DEL | T        | - | 10 | 489  | c.1994delA                           | c.(1993-1995)AAGfs  | p.K665fs       |
| Pat_14 | Post-Resistance | HRCT1      | 646962 | 37 | 9  | 35906605  | 35906607  | In_Frame_Del           | DEL | CCG      | - | 8  | 62   | c.321_323delCCG:(319-324)CACCCG>CAC  |                     | p.R108del      |
| Pat_14 | Post-Resistance | ROR2       | 4920   | 37 | 9  | 94486026  | 94486028  | In_Frame_Del           | DEL | TCC      | - | 10 | 566  | .2748_2750delGG(2746-2751)GAGGAA>GA  |                     | p.916_917EE>I  |
| Pat_14 | Post-Resistance | ECM2       | 1842   | 37 | 9  | 95277146  | 95277148  | In_Frame_Del           | DEL | TCC      | - | 7  | 476  | c.819_821delGGAc.(817-822)GAGGAT>GAT |                     | p.E273del      |
| Pat_14 | Post-Resistance | IPPK       | 64768  | 37 | 9  | 95418781  | 95418781  | Frame_Shift_Del        | DEL | T        | - | 8  | 730  | c.182delA                            | c.(181-183)AATfs    | p.N61fs        |
| Pat_14 | Post-Resistance | TNC        | 3371   | 37 | 9  | 117797539 | 117797539 | Frame_Shift_Del        | DEL | G        | - | 11 | 945  | c.5731delC                           | c.(5731-5733)CGGfs  | p.R1911fs      |
| Pat_14 | Post-Resistance | ABL1       | 25     | 37 | 9  | 133759490 | 133759492 | In_Frame_Del           | DEL | AAG      | - | 20 | 403  | .1813_1815delAA                      | c.(1813-1815)AAGdel | p.K609del      |
| Pat_14 | Post-Resistance | SNAPC4     | 6621   | 37 | 9  | 139286460 | 139286462 | In_Frame_Del           | DEL | CTC      | - | 7  | 644  | c.907_909delGAG                      | c.(907-909)GAGdel   | p.E303del      |
| Pat_14 | Post-Resistance | DMD        | 1756   | 37 | X  | 32361293  | 32361293  | Frame_Shift_Del        | DEL | T        | - | 8  | 648  | c.5697delA                           | c.(5695-5697)AAAFs  | p.K1899fs      |
| Pat_14 | Post-Resistance | NUDT11     | 55190  | 37 | X  | 51239296  | 51239309  | Translation_Start_Site | DEL | TCGAGGCA | - | 14 | 68   |                                      |                     |                |
| Pat_14 | Post-Resistance | FAM199X    | 139231 | 37 | X  | 103432837 | 103432839 | In_Frame_Del           | DEL | CAG      | - | 9  | 690  | c.846_848delCAG:(844-849)GCCAGC>GCC  |                     | p.S286del      |
| Pat_14 | Post-Resistance | PAK3       | 5063   | 37 | X  | 110406206 | 110406208 | In_Frame_Del           | DEL | GAA      | - | 7  | 432  | c.577_579delGAA                      | c.(577-579)GAAdel   | p.E197del      |
| Pat_14 | Post-Resistance | NKAP       | 79576  | 37 | X  | 119072752 | 119072753 | Frame_Shift_Del        | DEL | TC       | - | 10 | 777  | c.407_408delGA                       | c.(406-408)AGAFs    | p.R136fs       |
| Pat_14 | Post-Resistance | CD99L2     | 83692  | 37 | X  | 149984524 | 149984526 | In_Frame_Del           | DEL | GTG      | - | 13 | 1371 | c.156_158delCACc.(154-159)ACCACA>ACA |                     | p.52_53TT>T    |
| Pat_14 | Post-Resistance | MAGEA10    | 4109   | 37 | X  | 151303906 | 151303908 | In_Frame_Del           | DEL | AGG      | - | 8  | 273  | c.185_187delCCTc.(184-189)TCCTGC>TGC |                     | p.S62del       |
| Pat_15 | Pre-Treatment   | DHX37      | 57647  | 37 | 12 | 125465270 | 125465272 | In_Frame_Del           | DEL | CTC      | - | 2  | 4    | c.502_504delGAG                      | c.(502-504)GAGdel   | p.E168del      |
| Pat_15 | Pre-Treatment   | ZIC5       | 85416  | 37 | 13 | 100622668 | 100622670 | In_Frame_Del           | DEL | GGC      | - | 3  | 5    | .1260_1262delGC(1258-1263)CCGCCA>CC  |                     | p.420_421PP>I  |
| Pat_15 | Pre-Treatment   | BAHCC1     | 57597  | 37 | 17 | 79424588  | 79424590  | In_Frame_Del           | DEL | AAG      | - | 3  | 5    | .5011_5013delAA                      | c.(5011-5013)AAGdel | p.K1674del     |
| Pat_15 | Pre-Treatment   | GTF2F1     | 2962   | 37 | 19 | 6381410   | 6381412   | In_Frame_Del           | DEL | CTC      | - | 2  | 4    | c.976_978delGAG                      | c.(976-978)GAGdel   | p.E326del      |
| Pat_15 | Pre-Treatment   | MYCN       | 4613   | 37 | 2  | 16082314  | 16082314  | Frame_Shift_Del        | DEL | C        | - | 9  | 553  | c.128delC                            | c.(127-129)ACCfs    | p.T43fs        |
| Pat_15 | Pre-Treatment   | THNSL2     | 55258  | 37 | 2  | 88482314  | 88482315  | Frame_Shift_Del        | DEL | TC       | - | 7  | 977  | c.899_900delTC                       | c.(898-900)TTCfs    | p.F300fs       |
| Pat_15 | Pre-Treatment   | COX5B      | 1329   | 37 | 2  | 98263824  | 98263842  | Frame_Shift_Del        | DEL | CAAAGGGA | - | 12 | 74   | .18GGCCCCAAAGG)CTGGCCCCAAAGGGA       |                     | p.L65fs        |
| Pat_15 | Pre-Treatment   | CLTCL1     | 8218   | 37 | 22 | 19213154  | 19213154  | Frame_Shift_Del        | DEL | C        | - | 2  | 4    | c.1950delG                           | c.(1948-1950)TGGfs  | p.W650fs       |
| Pat_15 | Pre-Treatment   | ARHGAP39   | 80728  | 37 | 8  | 145773342 | 145773344 | In_Frame_Del           | DEL | CTG      | - | 10 | 4    | .1126_1128delCA                      | c.(1126-1128)CAGdel | p.Q376del      |
| Pat_15 | Post-Resistance | MEGF6      | 1953   | 37 | 1  | 3418424   | 3418424   | Frame_Shift_Del        | DEL | G        | - | 7  | 266  | c.2250delC                           | c.(2248-2250)CCCfs  | p.P750fs       |
| Pat_15 | Post-Resistance | PHF13      | 148479 | 37 | 1  | 6680069   | 6680071   | In_Frame_Del           | DEL | GAA      | - | 16 | 323  | c.348_350delGAAC.(346-351)CTGAAG>CTG |                     | p.K121del      |
| Pat_15 | Post-Resistance | ZDHC18     | 84243  | 37 | 1  | 27180318  | 27180318  | Frame_Shift_Del        | DEL | T        | - | 7  | 1027 | c.1151delT                           | c.(1150-1152)GTAfs  | p.V384fs       |
| Pat_15 | Post-Resistance | DLGAP3     | 58512  | 37 | 1  | 35370281  | 35370283  | In_Frame_Del           | DEL | TGG      | - | 7  | 674  | c.702_704delCCA:(700-705)CACCAG>CAC  |                     | p.H234del      |
| Pat_15 | Post-Resistance | TRIT1      | 54802  | 37 | 1  | 40313257  | 40313257  | Frame_Shift_Del        | DEL | T        | - | 7  | 1189 | c.891delA                            | c.(889-891)AAAFs    | p.K297fs       |
| Pat_15 | Post-Resistance | PTPRF      | 5792   | 37 | 1  | 44071946  | 44071948  | In_Frame_Del           | DEL | GCG      | - | 13 | 582  | .3519_3521delGC(3517-3522)CAGCGG>CA  |                     | p.R1178del     |
| Pat_15 | Post-Resistance | ANKRD13C   | 81573  | 37 | 1  | 70819873  | 70819873  | Frame_Shift_Del        | DEL | G        | - | 7  | 1245 | c.219delC                            | c.(217-219)CCCfs    | p.P73fs        |
| Pat_15 | Post-Resistance | ST6GALNAC5 | 81849  | 37 | 1  | 77334277  | 77334279  | In_Frame_Del           | DEL | GCA      | - | 9  | 187  | c.111_113delGCA:(109-114)CCGCAG>CCC  |                     | p.Q49del       |
| Pat_15 | Post-Resistance | GSTM3      | 2947   | 37 | 1  | 110282062 | 110282062 | Frame_Shift_Del        | DEL | C        | - | 8  | 1780 | c.178delG                            | c.(178-180)GACfs    | p.D60fs        |
| Pat_15 | Post-Resistance | VANGL1     | 81839  | 37 | 1  | 116206586 | 116206586 | Frame_Shift_Del        | DEL | T        | - | 8  | 542  | c.509delT                            | c.(508-510)CTTfs    | p.L170fs       |
| Pat_15 | Post-Resistance | LINGO4     | 339398 | 37 | 1  | 151773603 | 151773603 | Frame_Shift_Del        | DEL | A        | - | 9  | 842  | c.1578delT                           | c.(1576-1578)TTTfs  | p.F526fs       |
| Pat_15 | Post-Resistance | NPR1       | 4881   | 37 | 1  | 153659175 | 153659175 | Frame_Shift_Del        | DEL | C        | - | 7  | 962  | c.1812delC                           | c.(1810-1812)GACfs  | p.D604fs       |
| Pat_15 | Post-Resistance | CR2        | 1380   | 37 | 1  | 207642044 | 207642044 | Frame_Shift_Del        | DEL | C        | - | 8  | 1132 | c.618delC                            | c.(616-618)GTCfs    | p.V206fs       |
| Pat_15 | Post-Resistance | LOC642587  | 642587 | 37 | 1  | 209605637 | 209605648 | In_Frame_Del           | DEL | CAGCAGCA | - | 22 | 65   | .263delAGCAGCA(264)GTAGCAGCAGCAGC    |                     | p.AAAA93del    |
| Pat_15 | Post-Resistance | INTS7      | 25896  | 37 | 1  | 212115191 | 212115193 | In_Frame_Del           | DEL | TGC      | - | 9  | 1366 | .2862_2864delGC.(2860-2865)CAGCAA>CA |                     | p.954_955QQ>I  |
| Pat_15 | Post-Resistance | AGT        | 183    | 37 | 1  | 230839055 | 230839055 | Frame_Shift_Del        | DEL | A        | - | 7  | 334  | c.1290delT                           | c.(1288-1290)TTTfs  | p.F430fs       |
| Pat_15 | Post-Resistance | STAM       | 8027   | 37 | 10 | 17756616  | 17756618  | In_Frame_Del           | DEL | CTG      | - | 8  | 412  | .1460_1462delCT.(1459-1464)ACTGCT>AC |                     | p.A491del      |
| Pat_15 | Post-Resistance | ERCC6      | 2074   | 37 | 10 | 50732139  | 50732141  | In_Frame_Del           | DEL | CCT      | - | 7  | 582  | .1335_1337delAGI(1333-1338)GGAGGT>GC |                     | p.445_446GG>I  |
| Pat_15 | Post-Resistance | PLAU       | 5328   | 37 | 10 | 75673298  | 75673298  | Frame_Shift_Del        | DEL | A        | - | 8  | 1353 | c.462delA                            | c.(460-462)GGAfs    | p.G154fs       |
| Pat_15 | Post-Resistance | CCNJ       | 54619  | 37 | 10 | 97816696  | 97816697  | Frame_Shift_Del        | DEL | GG       | - | 7  | 429  | c.519_520delGG                       | c.(517-522)TTGGAAfs | p.L173fs       |
| Pat_15 | Post-Resistance | UBQLN3     | 50613  | 37 | 11 | 5529918   | 5529920   | In_Frame_Del           | DEL | TGG      | - | 8  | 868  | c.869_871delCCA:(868-873)ACCAGC>AGC  |                     | p.T290del      |
| Pat_15 | Post-Resistance | SMPD1      | 6609   | 37 | 11 | 6412853   | 6412854   | Frame_Shift_Ins        | INS | -        | C | 7  | 40   | c.558_559insC                        | c.(556-561)CCGCCfs  | p.P186fs       |

|        |                 |          |        |    |    |           |           |                 |     |         |     |    |      |                                                    |                        |               |
|--------|-----------------|----------|--------|----|----|-----------|-----------|-----------------|-----|---------|-----|----|------|----------------------------------------------------|------------------------|---------------|
| Pat_15 | Post-Resistance | KCNA4    | 3739   | 37 | 11 | 30034029  | 30034031  | In_Frame_Del    | DEL | TGG     | -   | 9  | 269  | c.195_197delCCA:c.(193-198)CACCAG>CAG              | p.H65del               |               |
| Pat_15 | Post-Resistance | C11orf46 | 120534 | 37 | 11 | 30352754  | 30352754  | Frame_Shift_Del | DEL | A       | -   | 11 | 433  | c.259delA                                          | c.(259-261)AAAFs       | p.K87fs       |
| Pat_15 | Post-Resistance | CCDC73   | 493860 | 37 | 11 | 32635951  | 32635951  | Frame_Shift_Del | DEL | T       | -   | 10 | 111  | c.1913delA                                         | c.(1912-1914)AATfs     | p.N638fs      |
| Pat_15 | Post-Resistance | ARHGAP1  | 392    | 37 | 11 | 46702224  | 46702224  | Frame_Shift_Del | DEL | G       | -   | 8  | 577  | c.709delC                                          | c.(709-711)CTGfs       | p.L237fs      |
| Pat_15 | Post-Resistance | MTA2     | 9219   | 37 | 11 | 62361728  | 62361729  | Splice_Site     | INS | -       | A   | 14 | 680  | c.1841_splice                                      | c.e17+1                | p.R614_splice |
| Pat_15 | Post-Resistance | KLC2     | 64837  | 37 | 11 | 66033664  | 66033664  | Frame_Shift_Del | DEL | C       | -   | 7  | 152  | c.1703delC                                         | c.(1702-1704)ACCfs     | p.T568fs      |
| Pat_15 | Post-Resistance | CASP1    | 834    | 37 | 11 | 104901070 | 104901070 | Frame_Shift_Del | DEL | T       | -   | 8  | 597  | c.614delA                                          | c.(613-615)AATfs       | p.N205fs      |
| Pat_15 | Post-Resistance | TMPRSS13 | 84000  | 37 | 11 | 117789346 | 117789360 | In_Frame_Del    | DEL | AGATGCC | -   | 9  | 248  | delGCCGGGCAT)GGCCGGGCATCTCCACp.GRASP72de           |                        |               |
| Pat_15 | Post-Resistance | FFO1     | 25900  | 37 | 12 | 6649704   | 6649706   | In_Frame_Del    | DEL | GGC     | -   | 8  | 484  | .1623_1625delGC (1621-1626)CCGCCA>CC.541_542PP>I   |                        |               |
| Pat_15 | Post-Resistance | CLEC4A   | 50856  | 37 | 12 | 8281936   | 8281937   | Frame_Shift_Ins | INS | -       | A   | 9  | 175  | c.276_277insA                                      | c.(274-279)GTGAAAFs    | p.V92fs       |
| Pat_15 | Post-Resistance | LRP1     | 4035   | 37 | 12 | 57605740  | 57605742  | In_Frame_Del    | DEL | TGC     | -   | 16 | 865  | 13289_13291delIT(13288-13293)TTGCTG>T 4430_4431LL> |                        |               |
| Pat_15 | Post-Resistance | TMBIM4   | 51643  | 37 | 12 | 66531936  | 66531937  | Frame_Shift_Ins | INS | -       | A   | 7  | 82   | c.520_521insT                                      | c.(520-522)TATfs       | p.Y174fs      |
| Pat_15 | Post-Resistance | C12orf42 | 374470 | 37 | 12 | 103695960 | 103695960 | Frame_Shift_Del | DEL | G       | -   | 8  | 824  | c.1009delC                                         | c.(1009-1011)CGCfs     | p.R337fs      |
| Pat_15 | Post-Resistance | ANKRD13A | 88455  | 37 | 12 | 110471746 | 110471750 | Frame_Shift_Del | DEL | AGTCC   | -   | 9  | 117  | 493_1497delAGT(c.(1492-1497)GAGTCCfs               | p.E498fs               |               |
| Pat_15 | Post-Resistance | SRRM4    | 84530  | 37 | 12 | 119594378 | 119594380 | In_Frame_Del    | DEL | CAG     | -   | 8  | 270  | .1611_1613delCA(c.(1609-1614)TACAGC>TA             | p.S542del              |               |
| Pat_15 | Post-Resistance | VPS33A   | 65082  | 37 | 12 | 122748169 | 122748169 | Frame_Shift_Del | DEL | A       | -   | 7  | 211  | c.246delT                                          | c.(244-246)TTTfs       | p.F82fs       |
| Pat_15 | Post-Resistance | EP400    | 57634  | 37 | 12 | 132547138 | 132547139 | In_Frame_Ins    | INS | -       | CAA | 10 | 281  | .8226_8227insCA                                    | c.(8224-8229)insCAA    | .2748_2749ins |
| Pat_15 | Post-Resistance | B3GALT1  | 145173 | 37 | 13 | 31803392  | 31803392  | Frame_Shift_Del | DEL | A       | -   | 11 | 434  | c.231delA                                          | c.(229-231)TTAFs       | p.L77fs       |
| Pat_15 | Post-Resistance | LMO7     | 4008   | 37 | 13 | 76415307  | 76415308  | Frame_Shift_Del | DEL | AG      | -   | 9  | 645  | .2946_2947delAC c.(2944-2949)GCAGAGfs              | p.A982fs               |               |
| Pat_15 | Post-Resistance | GAS6     | 2621   | 37 | 13 | 114542717 | 114542718 | Frame_Shift_Ins | INS | -       | C   | 8  | 884  | c.449_450insG                                      | c.(448-450)GGCfs       | p.G150fs      |
| Pat_15 | Post-Resistance | PSMA6    | 5687   | 37 | 14 | 35782216  | 35782216  | Frame_Shift_Del | DEL | A       | -   | 8  | 720  | c.539delA                                          | c.(538-540)GAAfs       | p.E180fs      |
| Pat_15 | Post-Resistance | KTN1     | 3895   | 37 | 14 | 56137475  | 56137475  | Frame_Shift_Del | DEL | A       | -   | 7  | 348  | c.3296delA                                         | c.(3295-3297)GAAfs     | p.E1099fs     |
| Pat_15 | Post-Resistance | SYNE2    | 23224  | 37 | 14 | 64488704  | 64488704  | Frame_Shift_Del | DEL | A       | -   | 8  | 337  | c.5482delA                                         | c.(5482-5484)AAAfs     | p.K1828fs     |
| Pat_15 | Post-Resistance | ZBTB1    | 22890  | 37 | 14 | 64989787  | 64989787  | Frame_Shift_Del | DEL | A       | -   | 8  | 709  | c.1565delA                                         | c.(1564-1566)CAAfs     | p.Q522fs      |
| Pat_15 | Post-Resistance | HERC2    | 8924   | 37 | 15 | 28474843  | 28474843  | Frame_Shift_Del | DEL | T       | -   | 8  | 1202 | c.4960delA                                         | c.(4960-4962)ATGfs     | p.M1654fs     |
| Pat_15 | Post-Resistance | SPINT1   | 6692   | 37 | 15 | 41149075  | 41149077  | In_Frame_Del    | DEL | CAC     | -   | 10 | 1318 | .1492_1494delCA                                    | c.(1492-1494)CACdel    | p.H501del     |
| Pat_15 | Post-Resistance | MAP1A    | 4130   | 37 | 15 | 43820164  | 43820164  | Frame_Shift_Del | DEL | G       | -   | 7  | 942  | c.6493delG                                         | c.(6493-6495)GCTfs     | p.A2165fs     |
| Pat_15 | Post-Resistance | SIN3A    | 25942  | 37 | 15 | 75702506  | 75702507  | Frame_Shift_Del | DEL | CC      | -   | 7  | 874  | .1129_1130delGC                                    | c.(1129-1131)GGAfs     | p.G377fs      |
| Pat_15 | Post-Resistance | WDR90    | 197335 | 37 | 16 | 709106    | 709106    | Frame_Shift_Del | DEL | C       | -   | 9  | 544  | c.3032delC                                         | c.(3031-3033)GCCfs     | p.A1011fs     |
| Pat_15 | Post-Resistance | UBN1     | 29855  | 37 | 16 | 4910691   | 4910693   | In_Frame_Del    | DEL | AGA     | -   | 19 | 1076 | c.698_700delAGA:c.(697-702)GAGAAG>GAC              | p.K238del              |               |
| Pat_15 | Post-Resistance | NOMO1    | 23420  | 37 | 16 | 14980695  | 14980695  | Frame_Shift_Del | DEL | C       | -   | 7  | 1517 | c.3300delC                                         | c.(3298-3300)TTCfs     | p.F1100fs     |
| Pat_15 | Post-Resistance | TMC7     | 79905  | 37 | 16 | 19058506  | 19058506  | Frame_Shift_Del | DEL | T       | -   | 7  | 2074 | c.1675delT                                         | c.(1675-1677)TTTfs     | p.F559fs      |
| Pat_15 | Post-Resistance | POLR3E   | 55718  | 37 | 16 | 22339834  | 22339834  | Frame_Shift_Del | DEL | C       | -   | 15 | 820  | c.1870delC                                         | c.(1870-1872)CCCfs     | p.P624fs      |
| Pat_15 | Post-Resistance | RABEP2   | 79874  | 37 | 16 | 28931200  | 28931202  | In_Frame_Del    | DEL | CTG     | -   | 14 | 296  | c.337_339delCAG                                    | c.(337-339)CAGdel      | p.Q113del     |
| Pat_15 | Post-Resistance | PRRT2    | 112476 | 37 | 16 | 29825016  | 29825016  | Frame_Shift_Del | DEL | C       | -   | 10 | 89   | c.641delC                                          | c.(640-642)GCCfs       | p.A214fs      |
| Pat_15 | Post-Resistance | EDC4     | 23644  | 37 | 16 | 67913786  | 67913788  | In_Frame_Del    | DEL | AGC     | -   | 11 | 213  | .1855_1857delAG                                    | c.(1855-1857)AGCdel    | p.S629del     |
| Pat_15 | Post-Resistance | ENO3     | 2027   | 37 | 17 | 4859894   | 4859894   | Frame_Shift_Del | DEL | G       | -   | 7  | 1010 | c.1094delG                                         | c.(1093-1095)TGGfs     | p.W365fs      |
| Pat_15 | Post-Resistance | CHD3     | 1107   | 37 | 17 | 7801857   | 7801859   | In_Frame_Del    | DEL | AAG     | -   | 9  | 292  | .2095_2097delAA                                    | c.(2095-2097)AAGdel    | p.K703del     |
| Pat_15 | Post-Resistance | TIAF1    | 9220   | 37 | 17 | 27401055  | 27401056  | Frame_Shift_Del | DEL | CA      | -   | 7  | 492  | c.162_163delTG                                     | c.(160-165)TGTGGAfs    | p.C54fs       |
| Pat_15 | Post-Resistance | GAS2L2   | 246176 | 37 | 17 | 34074257  | 34074257  | Frame_Shift_Del | DEL | G       | -   | 9  | 1466 | c.863delC                                          | c.(862-864)CCGfs       | p.P288fs      |
| Pat_15 | Post-Resistance | ACACA    | 31     | 37 | 17 | 35600371  | 35600371  | Frame_Shift_Del | DEL | G       | -   | 11 | 1395 | c.2736delC                                         | c.(2734-2736)CCCfs     | p.P912fs      |
| Pat_15 | Post-Resistance | CCDC103  | 388389 | 37 | 17 | 42980014  | 42980015  | Frame_Shift_Del | DEL | AG      | -   | 7  | 259  | c.558_559delAG                                     | c.(556-561)GCAGAGfs    | p.A186fs      |
| Pat_15 | Post-Resistance | VEZF1    | 7716   | 37 | 17 | 56056605  | 56056607  | In_Frame_Del    | DEL | TGC     | -   | 7  | 839  | .1044_1046delGC.(1042-1047)CAGCAA>CA.348_349QQ>    |                        |               |
| Pat_15 | Post-Resistance | USP32    | 84669  | 37 | 17 | 58257949  | 58257949  | Frame_Shift_Del | DEL | T       | -   | 10 | 834  | c.4598delA                                         | c.(4597-4599)AACfs     | p.N1533fs     |
| Pat_15 | Post-Resistance | TNRC6C   | 57690  | 37 | 17 | 76046786  | 76046788  | In_Frame_Del    | DEL | CTG     | -   | 7  | 835  | .1643_1645delCT                                    | c.(1642-1647)ACTGCT>AC | p.A552del     |
| Pat_15 | Post-Resistance | SLC26A11 | 284129 | 37 | 17 | 78201649  | 78201651  | In_Frame_Del    | DEL | TGC     | -   | 8  | 839  | c.626_628delTGC.c.(625-630)ATGCTG>ATG              | p.L213del              |               |
| Pat_15 | Post-Resistance | CEP192   | 55125  | 37 | 18 | 13052949  | 13052951  | In_Frame_Del    | DEL | CAG     | -   | 10 | 1139 | .3049_3051delCA                                    | c.(3049-3051)CAGdel    | p.Q1020del    |



|        |                 |           |        |    |    |           |           |                 |     |          |   |    |      |                   |                                   |            |
|--------|-----------------|-----------|--------|----|----|-----------|-----------|-----------------|-----|----------|---|----|------|-------------------|-----------------------------------|------------|
| Pat_15 | Post-Resistance | GALNT1    | 2589   | 37 | 18 | 33234733  | 33234733  | Frame_Shift_Del | DEL | A        | - | 9  | 501  | c.107delA         | c.(106-108)GAAfs                  | p.E36fs    |
| Pat_15 | Post-Resistance | CXXC1     | 30827  | 37 | 18 | 47812275  | 47812277  | In_Frame_Del    | DEL | CTG      | - | 8  | 244  | c.481_483delCAG   | c.(481-483)CAGdel                 | p.Q161del  |
| Pat_15 | Post-Resistance | C3        | 718    | 37 | 19 | 6707846   | 6707847   | Frame_Shift_Del | DEL | GT       | - | 7  | 566  | c.1939_1940delAC  | c.(1939-1941)ACGfs                | p.T647fs   |
| Pat_15 | Post-Resistance | SLC44A2   | 57153  | 37 | 19 | 10741961  | 10741961  | Frame_Shift_Del | DEL | A        | - | 9  | 1255 | c.341delA         | c.(340-342)GAAfs                  | p.E114fs   |
| Pat_15 | Post-Resistance | NFIX      | 4784   | 37 | 19 | 13192587  | 13192589  | In_Frame_Del    | DEL | ACC      | - | 16 | 435  | c.1196_1198delAC  | c.(1195-1200)TACCAC>TA            | p.H403del  |
| Pat_15 | Post-Resistance | CIB3      | 117286 | 37 | 19 | 16275653  | 16275654  | Frame_Shift_Ins | INS | -        | C | 8  | 911  | c.417_418insG     | c.(415-420)GGGCTGfs               | p.G139fs   |
| Pat_15 | Post-Resistance | CHERP     | 10523  | 37 | 19 | 16633994  | 16633994  | Frame_Shift_Del | DEL | G        | - | 7  | 555  | c.1849delC        | c.(1849-1851)CATfs                | p.H617fs   |
| Pat_15 | Post-Resistance | HAUS8     | 93323  | 37 | 19 | 17160706  | 17160707  | Frame_Shift_Del | DEL | GA       | - | 9  | 1228 | c.1209_1210delITC | c.(1207-1212)TCTCGTfs             | p.S403fs   |
| Pat_15 | Post-Resistance | BCKDHA    | 593    | 37 | 19 | 41916544  | 41916544  | Frame_Shift_Del | DEL | C        | - | 7  | 505  | c.111delC         | c.(109-111)CACfs                  | p.H37fs    |
| Pat_15 | Post-Resistance | SFRS16    | 11129  | 37 | 19 | 45556129  | 45556129  | Frame_Shift_Del | DEL | C        | - | 8  | 701  | c.278delC         | c.(277-279)ACCfs                  | p.T93fs    |
| Pat_15 | Post-Resistance | KLC3      | 147700 | 37 | 19 | 45850756  | 45850758  | In_Frame_Del    | DEL | GAG      | - | 7  | 441  | c.541_543delGAG   | c.(541-543)GAGdel                 | p.E184del  |
| Pat_15 | Post-Resistance | PNMAL1    | 55228  | 37 | 19 | 46973195  | 46973197  | In_Frame_Del    | DEL | CTT      | - | 12 | 842  | c.1096_1098delAA  | c.(1096-1098)AAGdel               | p.K366del  |
| Pat_15 | Post-Resistance | SIGLEC8   | 27181  | 37 | 19 | 51961617  | 51961619  | In_Frame_Del    | DEL | GCA      | - | 9  | 409  | c.23_25delTGC     | c.(22-27)CTGCC>CCC                | p.L8del    |
| Pat_15 | Post-Resistance | LILRB1    | 10859  | 37 | 19 | 55146148  | 55146150  | In_Frame_Del    | DEL | CTC      | - | 7  | 158  | c.1417_1419delCT  | c.(1417-1419)CTCdel               | p.L479del  |
| Pat_15 | Post-Resistance | ADCY3     | 109    | 37 | 2  | 25141215  | 25141217  | In_Frame_Del    | DEL | CTG      | - | 9  | 246  | c.640_642delCAG   | c.(640-642)CAGdel                 | p.Q214del  |
| Pat_15 | Post-Resistance | SULT6B1   | 391365 | 37 | 2  | 37414553  | 37414553  | Frame_Shift_Del | DEL | T        | - | 7  | 161  | c.143delA         | c.(142-144)AAGfs                  | p.K48fs    |
| Pat_15 | Post-Resistance | DHX57     | 90957  | 37 | 2  | 39095411  | 39095413  | In_Frame_Del    | DEL | CCA      | - | 12 | 289  | c.135_137delTGG   | c.(133-138)GGTGGGA>GG/p.45_46GG>G |            |
| Pat_15 | Post-Resistance | RAB11FIP5 | 26056  | 37 | 2  | 73315337  | 73315339  | In_Frame_Del    | DEL | TGG      | - | 9  | 805  | c.1407_1409delCC  | c.(1405-1410)CACCAA>CA            | p.H469del  |
| Pat_15 | Post-Resistance | KRCC1     | 51315  | 37 | 2  | 88327599  | 88327599  | Frame_Shift_Del | DEL | T        | - | 7  | 358  | c.484delA         | c.(484-486)AGGfs                  | p.R162fs   |
| Pat_15 | Post-Resistance | THNSL2    | 55258  | 37 | 2  | 88482314  | 88482315  | Frame_Shift_Del | DEL | TC       | - | 9  | 1827 | c.899_900delITC   | c.(898-900)TTCfs                  | p.F300fs   |
| Pat_15 | Post-Resistance | TMEM127   | 55654  | 37 | 2  | 96919781  | 96919783  | In_Frame_Del    | DEL | TGC      | - | 10 | 420  | c.480_482delGCA   | c.(478-483)CAGCAT>CAT             | p.Q160del  |
| Pat_15 | Post-Resistance | COX5B     | 1329   | 37 | 2  | 98263824  | 98263842  | Frame_Shift_Del | DEL | CAAAGGGA | - | 25 | 466  | c.1096_1098delAA  | c.(1096-1098)AAGdel               | p.K366del  |
| Pat_15 | Post-Resistance | NEB       | 4703   | 37 | 2  | 152550847 | 152550847 | Frame_Shift_Del | DEL | T        | - | 9  | 1003 | c.1886delA        | c.(1885-1887)AACfs                | p.N629fs   |
| Pat_15 | Post-Resistance | C2orf67   | 151050 | 37 | 2  | 210887680 | 210887680 | Frame_Shift_Del | DEL | T        | - | 8  | 125  | c.2957delA        | c.(2956-2958)AATfs                | p.N986fs   |
| Pat_15 | Post-Resistance | SLC11A1   | 6556   | 37 | 2  | 219252307 | 219252307 | Frame_Shift_Del | DEL | T        | - | 9  | 1339 | c.591delT         | c.(589-591)GCTfs                  | p.A197fs   |
| Pat_15 | Post-Resistance | FAM134A   | 79137  | 37 | 2  | 220046969 | 220046970 | Frame_Shift_Del | DEL | CC       | - | 8  | 977  | c.1250_1251delCC  | c.(1249-1251)TCCfs                | p.S417fs   |
| Pat_15 | Post-Resistance | BCL2L1    | 598    | 37 | 20 | 30309591  | 30309591  | Frame_Shift_Del | DEL | A        | - | 7  | 2171 | c.431delIT        | c.(430-432)TTCfs                  | p.F144fs   |
| Pat_15 | Post-Resistance | EIF2S2    | 8894   | 37 | 20 | 32693175  | 32693175  | Frame_Shift_Del | DEL | T        | - | 7  | 765  | c.192delA         | c.(190-192)AAAfs                  | p.K64fs    |
| Pat_15 | Post-Resistance | RTEL1     | 51750  | 37 | 20 | 62292822  | 62292824  | In_Frame_Del    | DEL | GCT      | - | 13 | 182  | c.274_276delGCT   | c.(274-276)GCTdel                 | p.A96del   |
| Pat_15 | Post-Resistance | RNF160    | 26046  | 37 | 21 | 30339206  | 30339206  | Frame_Shift_Del | DEL | T        | - | 10 | 46   | c.1745delA        | c.(1744-1746)AATfs                | p.N582fs   |
| Pat_15 | Post-Resistance | COL18A1   | 80781  | 37 | 21 | 46911183  | 46911183  | Frame_Shift_Del | DEL | C        | - | 7  | 287  | c.3357delC        | c.(3355-3357)GGCfs                | p.G1119fs  |
| Pat_15 | Post-Resistance | TBC1D10A  | 83874  | 37 | 22 | 30691732  | 30691732  | Frame_Shift_Del | DEL | C        | - | 7  | 342  | c.518delG         | c.(517-519)GGCfs                  | p.G173fs   |
| Pat_15 | Post-Resistance | HMGXB4    | 10042  | 37 | 22 | 35661544  | 35661544  | Frame_Shift_Del | DEL | A        | - | 12 | 176  | c.1163delA        | c.(1162-1164)GAAfs                | p.E388fs   |
| Pat_15 | Post-Resistance | SGSM3     | 27352  | 37 | 22 | 40803318  | 40803318  | Frame_Shift_Del | DEL | A        | - | 7  | 706  | c.1354delA        | c.(1354-1356)AAAfs                | p.K452fs   |
| Pat_15 | Post-Resistance | EP300     | 2033   | 37 | 22 | 41574379  | 41574381  | In_Frame_Del    | DEL | CAG      | - | 7  | 271  | c.6664_6666delCA  | c.(6664-6666)CAGdel               | p.Q2225del |
| Pat_15 | Post-Resistance | DYNC1L1   | 51143  | 37 | 3  | 32571050  | 32571050  | Frame_Shift_Del | DEL | T        | - | 7  | 136  | c.1288delA        | c.(1288-1290)ATTfs                | p.I430fs   |
| Pat_15 | Post-Resistance | NKTR      | 4820   | 37 | 3  | 42679486  | 42679486  | Frame_Shift_Del | DEL | A        | - | 7  | 332  | c.2290delA        | c.(2290-2292)AAAfs                | p.K764fs   |
| Pat_15 | Post-Resistance | CCR3      | 1232   | 37 | 3  | 46306948  | 46306948  | Frame_Shift_Del | DEL | T        | - | 7  | 1514 | c.299delIT        | c.(298-300)GTTfs                  | p.V100fs   |
| Pat_15 | Post-Resistance | QARS      | 5859   | 37 | 3  | 49137217  | 49137220  | Frame_Shift_Del | DEL | GAGT     | - | 7  | 800  | c.1362_1365delIAC | c.(1360-1365)TCACTCfs             | p.S454fs   |
| Pat_15 | Post-Resistance | EPHA3     | 2042   | 37 | 3  | 89498505  | 89498506  | Frame_Shift_Del | DEL | GG       | - | 8  | 938  | c.2477_2478delIGC | c.(2476-2478)TGGfs                | p.W826fs   |
| Pat_15 | Post-Resistance | ZPLD1     | 131368 | 37 | 3  | 102181181 | 102181182 | Frame_Shift_Ins | INS | -        | A | 12 | 437  | c.639_640insA     | c.(637-642)ACCAAfs                | p.T213fs   |
| Pat_15 | Post-Resistance | CDV3      | 55573  | 37 | 3  | 133292940 | 133292942 | In_Frame_Del    | DEL | AAG      | - | 7  | 68   | c.52_54delAAG     | c.(52-54)AAGdel                   | p.K22del   |
| Pat_15 | Post-Resistance | TXNDC6    | 347736 | 37 | 3  | 138023752 | 138023752 | Frame_Shift_Del | DEL | G        | - | 8  | 1042 | c.754delC         | c.(754-756)CGTfs                  | p.R252fs   |
| Pat_15 | Post-Resistance | GOLIM4    | 27333  | 37 | 3  | 167747642 | 167747644 | In_Frame_Del    | DEL | CTG      | - | 8  | 249  | c.1357_1359delCA  | c.(1357-1359)CAGdel               | p.Q453del  |
| Pat_15 | Post-Resistance | ATP13A3   | 79572  | 37 | 3  | 194147849 | 194147850 | Frame_Shift_Ins | INS | -        | A | 7  | 337  | c.3079_3080insT   | c.(3079-3081)TGGfs                | p.W1027fs  |
| Pat_15 | Post-Resistance | PDE6B     | 5158   | 37 | 4  | 661763    | 661765    | In_Frame_Del    | DEL | AGG      | - | 9  | 544  | c.2471_2473delAG  | c.(2470-2475)AAGGAG>AA            | p.E828del  |
| Pat_15 | Post-Resistance | UGDH      | 7358   | 37 | 4  | 39515752  | 39515753  | Frame_Shift_Ins | INS | -        | A | 7  | 357  | c.214_215insT     | c.(214-216)TCTfs                  | p.S72fs    |

|        |                 |          |        |    |   |           |           |                 |     |     |        |     |      |                                                    |                       |              |
|--------|-----------------|----------|--------|----|---|-----------|-----------|-----------------|-----|-----|--------|-----|------|----------------------------------------------------|-----------------------|--------------|
| Pat_15 | Post-Resistance | OCIAD2   | 132299 | 37 | 4 | 48894833  | 48894833  | Frame_Shift_Del | DEL | A   | -      | 14  | 1544 | c.339delT                                          | c.(337-339)TTTfs      | p.F113fs     |
| Pat_15 | Post-Resistance | NUP54    | 53371  | 37 | 4 | 77065307  | 77065309  | In_Frame_Del    | DEL | TGC | -      | 7   | 990  | c.288_290delGCAC.(286-291)CAGCAA>CAAp.96_97QQ>Q    |                       |              |
| Pat_15 | Post-Resistance | PCDH10   | 57575  | 37 | 4 | 134073569 | 134073571 | In_Frame_Del    | DEL | CTG | -      | 10  | 227  | .2274_2276delICT(.2272-2277)CTCTGC>CT              |                       | p.C763del    |
| Pat_15 | Post-Resistance | ZNF827   | 152485 | 37 | 4 | 146823381 | 146823383 | In_Frame_Del    | DEL | GTG | -      | 7   | 168  | .1028_1030delCA(.1027-1032)CCACAA>CA               |                       | p.P343del    |
| Pat_15 | Post-Resistance | FAT1     | 2195   | 37 | 4 | 187540708 | 187540708 | Frame_Shift_Del | DEL | T   | -      | 7   | 1432 | c.7032delA                                         | c.(7030-7032)CTAfs    | p.L2344fs    |
| Pat_15 | Post-Resistance | DNAH5    | 1767   | 37 | 5 | 13919383  | 13919383  | Frame_Shift_Del | DEL | T   | -      | 8   | 1229 | c.877delA                                          | c.(877-879)AGAfs      | p.R293fs     |
| Pat_15 | Post-Resistance | ZFR      | 51663  | 37 | 5 | 32419951  | 32419953  | In_Frame_Del    | DEL | GGT | -      | 13  | 1307 | c.393_395delACC(.391-396)CCACCC>CCC.131_132PP>I    |                       |              |
| Pat_15 | Post-Resistance | MCC      | 4163   | 37 | 5 | 112824048 | 112824049 | In_Frame_Ins    | INS | -   | GCC    | 12  | 50   | c.63_64insGGC                                      | c.(61-66)insGGC       | p.21_22insG  |
| Pat_15 | Post-Resistance | ZNF608   | 57507  | 37 | 5 | 124079813 | 124079815 | In_Frame_Del    | DEL | CTC | -      | 11  | 829  | c.868_870delGAG                                    | c.(868-870)GAGdel     | p.E290del    |
| Pat_15 | Post-Resistance | KDM3B    | 51780  | 37 | 5 | 137713477 | 137713477 | Frame_Shift_Del | DEL | G   | -      | 8   | 642  | c.543delG                                          | c.(541-543)TTGfs      | p.L181fs     |
| Pat_15 | Post-Resistance | TIMD4    | 91937  | 37 | 5 | 156378745 | 156378747 | In_Frame_Del    | DEL | TTG | -      | 16  | 2239 | c.455_457delCAA(.454-459)ACAAGC>AGC                |                       | p.T152del    |
| Pat_15 | Post-Resistance | C5orf40  | 408263 | 37 | 5 | 156769910 | 156769910 | Frame_Shift_Del | DEL | C   | -      | 8   | 435  | c.635delG                                          | c.(634-636)GGTfs      | p.G212fs     |
| Pat_15 | Post-Resistance | GABBR1   | 2550   | 37 | 6 | 29577144  | 29577144  | Frame_Shift_Del | DEL | G   | -      | 8   | 335  | c.1721delC                                         | c.(1720-1722)CCAfs    | p.P574fs     |
| Pat_15 | Post-Resistance | FUCA2    | 2519   | 37 | 6 | 143832707 | 143832708 | In_Frame_Ins    | INS | -   | GCAGCA | 7   | 11   | .64_65insTGCTG(.64-66)CCG>CTGCTGCC                 |                       | p.21_22insLL |
| Pat_15 | Post-Resistance | GRM1     | 2911   | 37 | 6 | 146755630 | 146755632 | In_Frame_Del    | DEL | GAC | -      | 10  | 830  | .3283_3285delGAI                                   | c.(3283-3285)GACdel   | p.D1099del   |
| Pat_15 | Post-Resistance | GRM1     | 2911   | 37 | 6 | 146755723 | 146755725 | In_Frame_Del    | DEL | GAG | -      | 8   | 465  | .3376_3378delGAI                                   | c.(3376-3378)GAGdel   | p.E1129del   |
| Pat_15 | Post-Resistance | EIF3B    | 8662   | 37 | 7 | 2404086   | 2404086   | Frame_Shift_Del | DEL | G   | -      | 8   | 571  | c.1079delG                                         | c.(1078-1080)TGGfs    | p.W360fs     |
| Pat_15 | Post-Resistance | TRIL     | 9865   | 37 | 7 | 28996482  | 28996482  | Frame_Shift_Del | DEL | G   | -      | 7   | 624  | c.1181delC                                         | c.(1180-1182)CCGfs    | p.P394fs     |
| Pat_15 | Post-Resistance | GARS     | 2617   | 37 | 7 | 30634583  | 30634585  | In_Frame_Del    | DEL | CTG | -      | 9   | 203  | c.46_48delCTG                                      | c.(46-48)CTGdel       | p.L20del     |
| Pat_15 | Post-Resistance | HECW1    | 23072  | 37 | 7 | 43601485  | 43601486  | Frame_Shift_Del | DEL | TA  | -      | 7   | 358  | c.4781_4782delTA                                   | c.(4780-4782)TTAfs    | p.L1594fs    |
| Pat_15 | Post-Resistance | C7orf57  | 136288 | 37 | 7 | 48092369  | 48092371  | In_Frame_Del    | DEL | GCA | -      | 7   | 488  | c.678_680delGCAC.(676-681)TTGCAG>TTG               |                       | p.Q230del    |
| Pat_15 | Post-Resistance | STYXL1   | 51657  | 37 | 7 | 75651194  | 75651196  | In_Frame_Del    | DEL | ATC | -      | 9   | 1717 | c.280_282delGAT                                    | c.(280-282)GATdel     | p.D94del     |
| Pat_15 | Post-Resistance | ABCB4    | 5244   | 37 | 7 | 87074281  | 87074282  | Frame_Shift_Ins | INS | -   | A      | 9   | 152  | c.1015_1016insT                                    | c.(1015-1017)TCAfs    | p.S339fs     |
| Pat_15 | Post-Resistance | CYP51A1  | 1595   | 37 | 7 | 91752494  | 91752494  | Frame_Shift_Del | DEL | T   | -      | 7   | 629  | c.1026delA                                         | c.(1024-1026)AAAfs    | p.K342fs     |
| Pat_15 | Post-Resistance | ERI1     | 90459  | 37 | 8 | 8875845   | 8875845   | Frame_Shift_Del | DEL | A   | -      | 8   | 283  | c.621delA                                          | c.(619-621)CTAfs      | p.L207fs     |
| Pat_15 | Post-Resistance | CHD7     | 55636  | 37 | 8 | 61735158  | 61735158  | Frame_Shift_Del | DEL | T   | -      | 7   | 975  | c.3054delT                                         | c.(3052-3054)CCTfs    | p.P1018fs    |
| Pat_15 | Post-Resistance | SLC26A7  | 115111 | 37 | 8 | 92261932  | 92261932  | Frame_Shift_Del | DEL | C   | -      | 8   | 407  | c.53delC                                           | c.(52-54)ACCfs        | p.T18fs      |
| Pat_15 | Post-Resistance | RGS22    | 26166  | 37 | 8 | 100990177 | 100990178 | Frame_Shift_Ins | INS | -   | T      | 10  | 194  | c.3486_3487insA                                    | c.(3484-3489)AAATTGfs | p.K1162fs    |
| Pat_15 | Post-Resistance | UBR5     | 51366  | 37 | 8 | 103289348 | 103289349 | Frame_Shift_Ins | INS | -   | T      | 10  | 492  | c.6360_6361insA                                    | c.(6358-6363)AAAGAAfs | p.K2120fs    |
| Pat_15 | Post-Resistance | ZC3H3    | 23144  | 37 | 8 | 144522387 | 144522389 | In_Frame_Del    | DEL | GAG | -      | 8   | 50   | .2637_2639delICT(.2635-2640)TCCTCA>TC).879_880SS>S |                       |              |
| Pat_15 | Post-Resistance | ZC3H3    | 23144  | 37 | 8 | 144621235 | 144621235 | Frame_Shift_Del | DEL | C   | -      | 7   | 391  | c.302delG                                          | c.(301-303)GGCfs      | p.G101fs     |
| Pat_15 | Post-Resistance | ARHGAP39 | 80728  | 37 | 8 | 145773342 | 145773344 | In_Frame_Del    | DEL | CTG | -      | 22  | 33   | .1126_1128delCA(.1126-1128)CAGdel                  |                       | p.Q376del    |
| Pat_15 | Post-Resistance | PIGO     | 84720  | 37 | 9 | 35091693  | 35091693  | Frame_Shift_Del | DEL | G   | -      | 7   | 285  | c.2191delC                                         | c.(2191-2193)CGTfs    | p.R731fs     |
| Pat_15 | Post-Resistance | NR4A3    | 8013   | 37 | 9 | 102590616 | 102590618 | In_Frame_Del    | DEL | CAC | -      | 13  | 160  | c.292_294delCAC                                    | c.(292-294)CACdel     | p.H108del    |
| Pat_15 | Post-Resistance | C9orf43  | 257169 | 37 | 9 | 116187646 | 116187648 | In_Frame_Del    | DEL | GCA | -      | 10  | 245  | c.888_890delGCA(.886-891)CGGCAG>CGC                |                       | p.Q304del    |
| Pat_15 | Post-Resistance | TNC      | 3371   | 37 | 9 | 117797539 | 117797539 | Frame_Shift_Del | DEL | G   | -      | 7   | 1035 | c.5731delC                                         | c.(5731-5733)CGGfs    | p.R1911fs    |
| Pat_15 | Post-Resistance | C9orf114 | 51490  | 37 | 9 | 131591119 | 131591120 | Frame_Shift_Ins | INS | -   | T      | 12  | 357  | c.102_103insA                                      | c.(100-105)AAATGGfs   | p.K34fs      |
| Pat_15 | Post-Resistance | NUP188   | 23511  | 37 | 9 | 131768602 | 131768602 | Frame_Shift_Del | DEL | C   | -      | 7   | 1361 | c.5028delC                                         | c.(5026-5028)CACfs    | p.H1676fs    |
| Pat_15 | Post-Resistance | C9orf86  | 55684  | 37 | 9 | 139734633 | 139734635 | In_Frame_Del    | DEL | AGA | -      | 8   | 323  | .1958_1960delIAG(.1957-1962)GAGAAG>GA              |                       | p.K660del    |
| Pat_15 | Post-Resistance | GRIN1    | 2902   | 37 | 9 | 140056884 | 140056886 | In_Frame_Del    | DEL | GAG | -      | 10  | 196  | .1780_1782delGAI                                   | c.(1780-1782)GAGdel   | p.E598del    |
| Pat_15 | Post-Resistance | SSX1     | 6756   | 37 | X | 48125727  | 48125727  | Frame_Shift_Del | DEL | A   | -      | 7   | 1659 | c.472delA                                          | c.(472-474)AAAfs      | p.K158fs     |
| Pat_15 | Post-Resistance | NAP1L3   | 4675   | 37 | X | 92928153  | 92928155  | In_Frame_Del    | DEL | TGC | -      | 8   | 99   | c.149_151delGCAC.(148-153)AGCACT>ACT               |                       | p.S50del     |
| Pat_15 | Post-Resistance | ARHGAP36 | 158763 | 37 | X | 130215725 | 130215725 | Frame_Shift_Del | DEL | T   | -      | 7   | 1051 | c.86delT                                           | c.(85-87)ATTfs        | p.I29fs      |
| Pat_15 | Post-Resistance | IGSF1    | 3547   | 37 | X | 130411036 | 130411036 | Frame_Shift_Del | DEL | C   | -      | 11  | 2828 | c.2485delG                                         | c.(2485-2487)GCCfs    | p.A829fs     |
| Pat_15 | Post-Resistance | AFF2     | 2334   | 37 | X | 147733548 | 147733548 | Frame_Shift_Del | DEL | A   | -      | 11  | 1185 | c.76delA                                           | c.(76-78)AAAfs        | p.K26fs      |
| Pat_15 | Post-Resistance | PNMA3    | 29944  | 37 | X | 152225444 | 152225444 | Frame_Shift_Del | DEL | G   | -      | 9   | 881  | c.32delG                                           | c.(31-33)CGGfs        | p.R11fs      |
| Pat_26 | Pre-Treatment   | DFFA     | 1676   | 37 | 1 | 10532411  | 10532411  | Frame_Shift_Del | DEL | G   | -      | 178 | 360  | c.105delC                                          | c.(103-105)GCCfs      | p.A35fs      |

|        |               |          |        |    |    |           |           |                 |     |     |     |    |      |                    |                                     |                |
|--------|---------------|----------|--------|----|----|-----------|-----------|-----------------|-----|-----|-----|----|------|--------------------|-------------------------------------|----------------|
| Pat_26 | Pre-Treatment | VPS13D   | 55187  | 37 | 1  | 12520281  | 12520282  | Frame_Shift_Del | DEL | TA  | -   | 8  | 512  | .12492_12493delTc. | (12490-12495)GTTATAfs               | p.V4164fs      |
| Pat_26 | Pre-Treatment | NBPF1    | 55672  | 37 | 1  | 16895577  | 16895577  | Frame_Shift_Del | DEL | C   | -   | 12 | 5547 | c.2605delG         | c.(2605-2607)GACfs                  | p.D869fs       |
| Pat_26 | Pre-Treatment | ZBTB40   | 9923   | 37 | 1  | 22838561  | 22838563  | In_Frame_Del    | DEL | AAG | -   | 13 | 184  | .2395_2397delAA    | c.(2395-2397)AAGdel                 | p.K803del      |
| Pat_26 | Pre-Treatment | EXTL1    | 2134   | 37 | 1  | 26349533  | 26349535  | In_Frame_Del    | DEL | CCT | -   | 8  | 277  | c.396_398delCCTc.  | (394-399)TGCCCTC>TGC                | p.L137del      |
| Pat_26 | Pre-Treatment | KIAA0467 | 23334  | 37 | 1  | 43890849  | 43890849  | Frame_Shift_Del | DEL | C   | -   | 8  | 634  | c.90delC           | c.(88-90)TTCfs                      | p.F30fs        |
| Pat_26 | Pre-Treatment | ZCCHC11  | 23318  | 37 | 1  | 52991351  | 52991351  | Frame_Shift_Del | DEL | C   | -   | 7  | 813  | c.602delG          | c.(601-603)GGAfs                    | p.G201fs       |
| Pat_26 | Pre-Treatment | C1orf173 | 127254 | 37 | 1  | 75102057  | 75102057  | Frame_Shift_Del | DEL | G   | -   | 10 | 1087 | c.510delC          | c.(508-510)CCCfs                    | p.P170fs       |
| Pat_26 | Pre-Treatment | C1orf183 | 55924  | 37 | 1  | 112270274 | 112270274 | Frame_Shift_Del | DEL | G   | -   | 7  | 497  | c.210delC          | c.(208-210)CCCfs                    | p.P70fs        |
| Pat_26 | Pre-Treatment | OTUD7B   | 56957  | 37 | 1  | 149916736 | 149916737 | Frame_Shift_Del | DEL | TG  | -   | 7  | 995  | c.1551_1552delCA   | c.(1549-1554)CTAAGfs                | p.L517fs       |
| Pat_26 | Pre-Treatment | TCHH     | 7062   | 37 | 1  | 152082254 | 152082254 | Frame_Shift_Del | DEL | G   | -   | 7  | 432  | c.3439delC         | c.(3439-3441)CAGfs                  | p.Q1147fs      |
| Pat_26 | Pre-Treatment | PVRL4    | 81607  | 37 | 1  | 161044057 | 161044059 | In_Frame_Del    | DEL | CAC | -   | 9  | 587  | .1105_1107delIGT   | c.(1105-1107)GTGdel                 | p.V369del      |
| Pat_26 | Pre-Treatment | RC3H1    | 149041 | 37 | 1  | 173930212 | 173930213 | Splice_Site     | DEL | TA  | -   | 8  | 288  | c.2370_splice      | c.e12+1                             | p.E790_splice  |
| Pat_26 | Pre-Treatment | PRG4     | 10216  | 37 | 1  | 186276256 | 186276257 | In_Frame_Ins    | INS | -   | CCA | 12 | 361  | .1405_1406insCC.   | (1405-1407)CCC>CCCACp.471_472insT   |                |
| Pat_26 | Pre-Treatment | PRG4     | 10216  | 37 | 1  | 186276433 | 186276434 | In_Frame_Ins    | INS | -   | AGG | 8  | 860  | .1582_1583insAG    | c.(1582-1584)AAG>AAGGAp.528_529insE |                |
| Pat_26 | Pre-Treatment | ASPM     | 259266 | 37 | 1  | 197065191 | 197065192 | Frame_Shift_Del | DEL | AG  | -   | 8  | 421  | c.8923_8924delCT   | c.(8923-8925)CTAfs                  | p.L2975fs      |
| Pat_26 | Pre-Treatment | TMEM9    | 252839 | 37 | 1  | 201115871 | 201115871 | Frame_Shift_Del | DEL | G   | -   | 7  | 878  | c.264delC          | c.(262-264)ATCfs                    | p.I88fs        |
| Pat_26 | Pre-Treatment | PLXNA2   | 5362   | 37 | 1  | 208315787 | 208315787 | Frame_Shift_Del | DEL | G   | -   | 10 | 793  | c.1393delC         | c.(1393-1395)CATfs                  | p.H465fs       |
| Pat_26 | Pre-Treatment | FBXO28   | 23219  | 37 | 1  | 224345250 | 224345250 | Frame_Shift_Del | DEL | G   | -   | 8  | 1361 | c.909delG          | c.(907-909)CTGfs                    | p.L303fs       |
| Pat_26 | Pre-Treatment | DIP2C    | 22982  | 37 | 10 | 412274    | 412275    | Frame_Shift_Del | DEL | CA  | -   | 7  | 160  | c.2208_2209delITC  | c.(2206-2211)TGTGCAfs               | p.C736fs       |
| Pat_26 | Pre-Treatment | LARP4B   | 23185  | 37 | 10 | 863709    | 863709    | Frame_Shift_Del | DEL | C   | -   | 8  | 960  | c.1651delG         | c.(1651-1653)GAAfs                  | p.E551fs       |
| Pat_26 | Pre-Treatment | GDI2     | 2665   | 37 | 10 | 5808206   | 5808206   | Frame_Shift_Del | DEL | G   | -   | 7  | 321  | c.1189delC         | c.(1189-1191)CAGfs                  | p.Q397fs       |
| Pat_26 | Pre-Treatment | OPTN     | 10133  | 37 | 10 | 13151192  | 13151192  | Frame_Shift_Del | DEL | C   | -   | 7  | 877  | c.70delC           | c.(70-72)CCCfs                      | p.P24fs        |
| Pat_26 | Pre-Treatment | UNC5B    | 219699 | 37 | 10 | 73046457  | 73046457  | Frame_Shift_Del | DEL | C   | -   | 8  | 990  | c.564delC          | c.(562-564)CTCfs                    | p.L188fs       |
| Pat_26 | Pre-Treatment | ARHGAP19 | 84986  | 37 | 10 | 99019160  | 99019160  | Frame_Shift_Del | DEL | T   | -   | 7  | 478  | c.839delA          | c.(838-840)AATfs                    | p.N280fs       |
| Pat_26 | Pre-Treatment | CRTAC1   | 55118  | 37 | 10 | 99771034  | 99771034  | Frame_Shift_Del | DEL | G   | -   | 7  | 1048 | c.85delC           | c.(85-87)CAGfs                      | p.Q29fs        |
| Pat_26 | Pre-Treatment | CHST15   | 51363  | 37 | 10 | 125801815 | 125801816 | Splice_Site     | DEL | AC  | -   | 8  | 589  | c.1033_splice      | c.e3+1                              | p.G345_splice  |
| Pat_26 | Pre-Treatment | OR51B6   | 390058 | 37 | 11 | 5373493   | 5373493   | Frame_Shift_Del | DEL | T   | -   | 14 | 442  | c.756delT          | c.(754-756)ACTfs                    | p.T252fs       |
| Pat_26 | Pre-Treatment | DNHD1    | 144132 | 37 | 11 | 6578614   | 6578616   | In_Frame_Del    | DEL | GAG | -   | 8  | 40   | .8089_8091delGAI   | c.(8089-8091)GAGdel                 | p.E2703del     |
| Pat_26 | Pre-Treatment | DCHS1    | 8642   | 37 | 11 | 6662746   | 6662748   | In_Frame_Del    | DEL | CAG | -   | 9  | 72   | c.97_99delCTG      | c.(97-99)CTGdel                     | p.L33del       |
| Pat_26 | Pre-Treatment | EIF4G2   | 1982   | 37 | 11 | 10827460  | 10827460  | Frame_Shift_Del | DEL | A   | -   | 7  | 1349 | c.242delT          | c.(241-243)GTAfs                    | p.V81fs        |
| Pat_26 | Pre-Treatment | TCP11L1  | 55346  | 37 | 11 | 33083158  | 33083158  | Frame_Shift_Del | DEL | G   | -   | 7  | 169  | c.858delG          | c.(856-858)GTGfs                    | p.V286fs       |
| Pat_26 | Pre-Treatment | DGKZ     | 8525   | 37 | 11 | 46400752  | 46400753  | Splice_Site     | INS | -   | C   | 9  | 677  | c.3104_splice      | c.e30-1                             | p.A1035_splice |
| Pat_26 | Pre-Treatment | OR8H2    | 390151 | 37 | 11 | 55873096  | 55873097  | Frame_Shift_Del | DEL | AC  | -   | 8  | 746  | c.578_579delIAC    | c.(577-579)TACfs                    | p.Y193fs       |
| Pat_26 | Pre-Treatment | OSBP     | 5007   | 37 | 11 | 59345731  | 59345731  | Frame_Shift_Del | DEL | C   | -   | 7  | 596  | c.1951delG         | c.(1951-1953)GAAfs                  | p.E651fs       |
| Pat_26 | Pre-Treatment | UBXN1    | 51035  | 37 | 11 | 62445420  | 62445420  | Frame_Shift_Del | DEL | T   | -   | 7  | 320  | c.461delA          | c.(460-462)AAGfs                    | p.K154fs       |
| Pat_26 | Pre-Treatment | C11orf95 | 65998  | 37 | 11 | 63533335  | 63533337  | In_Frame_Del    | DEL | TCC | -   | 13 | 54   | c.579_581delGGA    | c.(577-582)GAGGAA>GAAp.193_194EE>I  |                |
| Pat_26 | Pre-Treatment | SLC22A12 | 116085 | 37 | 11 | 64368393  | 64368393  | Frame_Shift_Del | DEL | C   | -   | 8  | 777  | c.1581delC         | c.(1579-1581)ATCfs                  | p.I527fs       |
| Pat_26 | Pre-Treatment | DRAP1    | 10589  | 37 | 11 | 65688844  | 65688844  | Frame_Shift_Del | DEL | C   | -   | 7  | 1049 | c.556delC          | c.(556-558)CCCfs                    | p.P186fs       |
| Pat_26 | Pre-Treatment | CTTN     | 2017   | 37 | 11 | 70279751  | 70279752  | Splice_Site     | DEL | AG  | -   | 7  | 493  | c.1445_splice      | c.e17-1                             | p.E482_splice  |
| Pat_26 | Pre-Treatment | ARAP1    | 116985 | 37 | 11 | 72412796  | 72412796  | Frame_Shift_Del | DEL | C   | -   | 8  | 1547 | c.2200delG         | c.(2200-2202)GAAfs                  | p.E734fs       |
| Pat_26 | Pre-Treatment | MOGAT2   | 80168  | 37 | 11 | 75431068  | 75431068  | Frame_Shift_Del | DEL | C   | -   | 7  | 817  | c.123delC          | c.(121-123)CTCfs                    | p.L41fs        |
| Pat_26 | Pre-Treatment | GAB2     | 9846   | 37 | 11 | 77991651  | 77991651  | Frame_Shift_Del | DEL | G   | -   | 7  | 858  | c.372delC          | c.(370-372)AGCfs                    | p.S124fs       |
| Pat_26 | Pre-Treatment | ODZ4     | 26011  | 37 | 11 | 78399200  | 78399200  | Frame_Shift_Del | DEL | G   | -   | 7  | 889  | c.5159delC         | c.(5158-5160)ACAfs                  | p.T1720fs      |
| Pat_26 | Pre-Treatment | ATM      | 472    | 37 | 11 | 108173585 | 108173586 | Frame_Shift_Del | DEL | AG  | -   | 7  | 172  | c.5325_5326delIAC  | c.(5323-5328)TTAGAAfs               | p.L1775fs      |
| Pat_26 | Pre-Treatment | MLL      | 4297   | 37 | 11 | 118344186 | 118344186 | Frame_Shift_Del | DEL | C   | -   | 7  | 845  | c.2312delC         | c.(2311-2313)ACCfs                  | p.T771fs       |
| Pat_26 | Pre-Treatment | ARCN1    | 372    | 37 | 11 | 118463514 | 118463515 | Frame_Shift_Del | DEL | GT  | -   | 8  | 1429 | c.1075_1076delGT   | c.(1075-1077)GTAfs                  | p.V359fs       |
| Pat_26 | Pre-Treatment | PVRL1    | 5818   | 37 | 11 | 119535678 | 119535680 | In_Frame_Del    | DEL | CCT | -   | 7  | 92   | .1331_1333delIAG   | (1330-1335)GAGGCG>GC                | p.E444del      |

|        |               |         |        |    |    |           |           |                 |     |          |    |    |      |                    |                         |               |
|--------|---------------|---------|--------|----|----|-----------|-----------|-----------------|-----|----------|----|----|------|--------------------|-------------------------|---------------|
| Pat_26 | Pre-Treatment | SRPR    | 6734   | 37 | 11 | 126136150 | 126136150 | Frame_Shift_Del | DEL | C        | -  | 9  | 648  | c.864delG          | c.(862-864)GGGfs        | p.G288fs      |
| Pat_26 | Pre-Treatment | KDM5A   | 5927   | 37 | 12 | 465621    | 465639    | Frame_Shift_Del | DEL | 3CCCACAA | -  | 11 | 92   | c.CCAAGGTTGTG      | c.CCAAGGTTGTGGGCT       | p.P246fs      |
| Pat_26 | Pre-Treatment | IFFO1   | 25900  | 37 | 12 | 6649704   | 6649706   | In_Frame_Del    | DEL | GGC      | -  | 10 | 465  | c.1623_1625delGC   | c.(1621-1626)CCGCCA>CC  | p.541_542PP>I |
| Pat_26 | Pre-Treatment | PRB1    | 5542   | 37 | 12 | 11506327  | 11506329  | In_Frame_Del    | DEL | GGA      | -  | 12 | 180  | c.708_710delITCC   | c.(706-711)CCTCCA>CCA   | p.236_237PP>I |
| Pat_26 | Pre-Treatment | LRP6    | 4040   | 37 | 12 | 12339897  | 12339897  | Frame_Shift_Del | DEL | G        | -  | 9  | 1035 | c.804delC          | c.(802-804)CCCfs        | p.P268fs      |
| Pat_26 | Pre-Treatment | TMTC1   | 83857  | 37 | 12 | 29671459  | 29671460  | Frame_Shift_Del | DEL | CC       | -  | 7  | 1113 | c.1645_1646delIGC  | c.(1645-1647)GGAfs      | p.G549fs      |
| Pat_26 | Pre-Treatment | MLL2    | 8085   | 37 | 12 | 49445526  | 49445526  | Frame_Shift_Del | DEL | G        | -  | 7  | 301  | c.1940delC         | c.(1939-1941)CCAfs      | p.P647fs      |
| Pat_26 | Pre-Treatment | SMARCC2 | 6601   | 37 | 12 | 56558379  | 56558381  | In_Frame_Del    | DEL | AGG      | -  | 7  | 184  | c.3274_3276delICC  | c.(3274-3276)CCTdel     | p.P1092del    |
| Pat_26 | Pre-Treatment | MDM2    | 4193   | 37 | 12 | 69233316  | 69233317  | Frame_Shift_Del | DEL | CA       | -  | 8  | 219  | c.1181_1182delICA  | c.(1180-1182)TCAfs      | p.S394fs      |
| Pat_26 | Pre-Treatment | CPSF6   | 11052  | 37 | 12 | 69652761  | 69652763  | In_Frame_Del    | DEL | TCC      | -  | 8  | 850  | c.1086_1088delITCC | c.(1084-1089)TTTCTCT>TT | p.P365del     |
| Pat_26 | Pre-Treatment | NAP1L1  | 4673   | 37 | 12 | 76444310  | 76444312  | Splice_Site     | DEL | CAT      | -  | 7  | 364  | c.1059_splice      | c.e12+1                 | p.D353_splice |
| Pat_26 | Pre-Treatment | E2F7    | 144455 | 37 | 12 | 77458337  | 77458337  | Frame_Shift_Del | DEL | C        | -  | 7  | 606  | c.79delG           | c.(79-81)GAAfs          | p.E27fs       |
| Pat_26 | Pre-Treatment | MYO1H   | 283446 | 37 | 12 | 109826602 | 109826602 | Frame_Shift_Del | DEL | G        | -  | 7  | 1356 | c.79delG           | c.(79-81)GCCfs          | p.A27fs       |
| Pat_26 | Pre-Treatment | MVK     | 4598   | 37 | 12 | 110034312 | 110034312 | Frame_Shift_Del | DEL | C        | -  | 8  | 677  | c.1121delC         | c.(1120-1122)GCCfs      | p.A374fs      |
| Pat_26 | Pre-Treatment | TCTN1   | 79600  | 37 | 12 | 111078894 | 111078894 | Frame_Shift_Del | DEL | G        | -  | 8  | 588  | c.1044delG         | c.(1042-1044)CTGfs      | p.L348fs      |
| Pat_26 | Pre-Treatment | TBX5    | 6910   | 37 | 12 | 114832616 | 114832616 | Frame_Shift_Del | DEL | T        | -  | 8  | 1003 | c.593delA          | c.(592-594)AATfs        | p.N198fs      |
| Pat_26 | Pre-Treatment | CIT     | 11113  | 37 | 12 | 120260622 | 120260622 | Splice_Site     | DEL | A        | -  | 7  | 410  | c.1111_splice      | c.e9+1                  | p.S371_splice |
| Pat_26 | Pre-Treatment | CCDC92  | 80212  | 37 | 12 | 124421800 | 124421800 | Frame_Shift_Del | DEL | G        | -  | 7  | 190  | c.801delC          | c.(799-801)CCCfs        | p.P267fs      |
| Pat_26 | Pre-Treatment | ZNF664  | 144348 | 37 | 12 | 124497356 | 124497357 | Frame_Shift_Ins | INS | -        | AA | 8  | 722  | c.665_666insAA     | c.(664-666)ACAfs        | p.T222fs      |
| Pat_26 | Pre-Treatment | SALL2   | 6297   | 37 | 14 | 21993077  | 21993079  | In_Frame_Del    | DEL | GAG      | -  | 12 | 194  | c.783_785delICTC   | c.(781-786)TCCTCT>TCT   | p.261_262SS>I |
| Pat_26 | Pre-Treatment | CDH24   | 64403  | 37 | 14 | 23522825  | 23522825  | Frame_Shift_Del | DEL | G        | -  | 7  | 450  | c.1106delC         | c.(1105-1107)CCAfs      | p.P369fs      |
| Pat_26 | Pre-Treatment | ACIN1   | 22985  | 37 | 14 | 23528677  | 23528678  | Frame_Shift_Del | DEL | GA       | -  | 7  | 575  | c.3705_3706delITC  | c.(3703-3708)GTTACAGfs  | p.V1235fs     |
| Pat_26 | Pre-Treatment | EIF2S1  | 1965   | 37 | 14 | 67831574  | 67831574  | Frame_Shift_Del | DEL | G        | -  | 7  | 845  | c.90delG           | c.(88-90)ATGfs          | p.M30fs       |
| Pat_26 | Pre-Treatment | YY1     | 7528   | 37 | 14 | 100705708 | 100705710 | In_Frame_Del    | DEL | GAG      | -  | 10 | 120  | c.127_129delGAG    | c.(127-129)GAGdel       | p.E47del      |
| Pat_26 | Pre-Treatment | TTBK2   | 146057 | 37 | 15 | 43075682  | 43075683  | Frame_Shift_Del | DEL | GG       | -  | 10 | 1523 | c.1131_1132delICC  | c.(1129-1134)CCCCAGfs   | p.P377fs      |
| Pat_26 | Pre-Treatment | MYO5C   | 55930  | 37 | 15 | 52537588  | 52537588  | Frame_Shift_Del | DEL | T        | -  | 8  | 790  | c.2141delA         | c.(2140-2142)AAGfs      | p.K714fs      |
| Pat_26 | Pre-Treatment | CLN6    | 54982  | 37 | 15 | 68504027  | 68504028  | Frame_Shift_Del | DEL | TG       | -  | 8  | 926  | c.471_472delICA    | c.(469-474)CTCAAGfs     | p.L157fs      |
| Pat_26 | Pre-Treatment | FANCI   | 55215  | 37 | 15 | 89804908  | 89804908  | Frame_Shift_Del | DEL | G        | -  | 8  | 545  | c.381delG          | c.(379-381)TTGfs        | p.L127fs      |
| Pat_26 | Pre-Treatment | UNC45A  | 55898  | 37 | 15 | 91485796  | 91485796  | Frame_Shift_Del | DEL | A        | -  | 7  | 222  | c.817delA          | c.(817-819)AAAfs        | p.K273fs      |
| Pat_26 | Pre-Treatment | ALDH1A3 | 220    | 37 | 15 | 101438350 | 101438350 | Frame_Shift_Del | DEL | G        | -  | 9  | 292  | c.843delG          | c.(841-843)CTGfs        | p.L281fs      |
| Pat_26 | Pre-Treatment | TMC5    | 79838  | 37 | 16 | 19451676  | 19451676  | Frame_Shift_Del | DEL | C        | -  | 8  | 806  | c.316delC          | c.(316-318)CCAfs        | p.P106fs      |
| Pat_26 | Pre-Treatment | SLC5A11 | 115584 | 37 | 16 | 24921737  | 24921739  | In_Frame_Del    | DEL | CAG      | -  | 7  | 330  | c.1761_1763delICA  | c.(1759-1764)GCCAGC>GC  | p.S592del     |
| Pat_26 | Pre-Treatment | SRCAP   | 10847  | 37 | 16 | 30736314  | 30736314  | Frame_Shift_Del | DEL | C        | -  | 8  | 1617 | c.5569delC         | c.(5569-5571)CCCfs      | p.P1857fs     |
| Pat_26 | Pre-Treatment | ZNF423  | 23090  | 37 | 16 | 49660108  | 49660108  | Frame_Shift_Del | DEL | G        | -  | 7  | 959  | c.3550delC         | c.(3550-3552)CAAfs      | p.Q1184fs     |
| Pat_26 | Pre-Treatment | SALL1   | 6299   | 37 | 16 | 51175656  | 51175658  | In_Frame_Del    | DEL | GCT      | -  | 7  | 81   | c.475_477delAGC    | c.(475-477)AGCdel       | p.S159del     |
| Pat_26 | Pre-Treatment | IRX6    | 79190  | 37 | 16 | 55362674  | 55362676  | In_Frame_Del    | DEL | GAG      | -  | 16 | 248  | c.784_786delGAG    | c.(784-786)GAGdel       | p.E268del     |
| Pat_26 | Pre-Treatment | CNGB1   | 1258   | 37 | 16 | 57983275  | 57983277  | In_Frame_Del    | DEL | TCC      | -  | 9  | 135  | c.1101_1103delIGG  | c.(1099-1104)GAGGAA>GA  | p.367_368EE>I |
| Pat_26 | Pre-Treatment | EDC4    | 23644  | 37 | 16 | 67913767  | 67913769  | In_Frame_Del    | DEL | CAG      | -  | 10 | 240  | c.1836_1838delICA  | c.(1834-1839)CCAGC>CC   | p.S617del     |
| Pat_26 | Pre-Treatment | MLKL    | 197259 | 37 | 16 | 74709645  | 74709645  | Frame_Shift_Del | DEL | C        | -  | 8  | 443  | c.1056delG         | c.(1054-1056)TTGfs      | p.L352fs      |
| Pat_26 | Pre-Treatment | CHD3    | 1107   | 37 | 17 | 7788212   | 7788214   | In_Frame_Del    | DEL | GAG      | -  | 12 | 124  | c.88_90delGAG      | c.(88-90)GAGdel         | p.E35del      |
| Pat_26 | Pre-Treatment | CHD3    | 1107   | 37 | 17 | 7801857   | 7801859   | In_Frame_Del    | DEL | AAG      | -  | 7  | 192  | c.2095_2097delIAA  | c.(2095-2097)AAGdel     | p.K703del     |
| Pat_26 | Pre-Treatment | RANGRF  | 29098  | 37 | 17 | 8192137   | 8192137   | Frame_Shift_Del | DEL | G        | -  | 7  | 683  | c.31delG           | c.(31-33)GGGfs          | p.G11fs       |
| Pat_26 | Pre-Treatment | MYH10   | 4628   | 37 | 17 | 8397095   | 8397097   | In_Frame_Del    | DEL | CCT      | -  | 11 | 153  | c.4070_4072delAG   | c.(4069-4074)GAGGCC>GC  | p.E1357del    |
| Pat_26 | Pre-Treatment | SMCR7   | 125170 | 37 | 17 | 18167778  | 18167780  | In_Frame_Del    | DEL | GCT      | -  | 8  | 236  | c.1065_1067delIGC  | c.(1063-1068)CGGCTG>CG  | p.L360del     |
| Pat_26 | Pre-Treatment | MAP2K3  | 5606   | 37 | 17 | 21208366  | 21208367  | Frame_Shift_Del | DEL | GA       | -  | 8  | 1244 | c.700_701delGA     | c.(700-702)GAGfs        | p.E234fs      |
| Pat_26 | Pre-Treatment | CCT6B   | 10693  | 37 | 17 | 33255998  | 33255998  | Frame_Shift_Del | DEL | T        | -  | 7  | 216  | c.1506delA         | c.(1504-1506)AAAfs      | p.K502fs      |
| Pat_26 | Pre-Treatment | RARA    | 5914   | 37 | 17 | 38508619  | 38508619  | Frame_Shift_Del | DEL | G        | -  | 8  | 897  | c.667delG          | c.(667-669)GACfs        | p.D223fs      |

|        |               |             |        |    |    |           |           |                 |     |        |      |    |      |                   |                       |               |
|--------|---------------|-------------|--------|----|----|-----------|-----------|-----------------|-----|--------|------|----|------|-------------------|-----------------------|---------------|
| Pat_26 | Pre-Treatment | STAT5B      | 6777   | 37 | 17 | 40370236  | 40370236  | Frame_Shift_Del | DEL | G      | -    | 8  | 272  | c.1102delC        | c.(1102-1104)CAGfs    | p.Q368fs      |
| Pat_26 | Pre-Treatment | MAP3K14     | 9020   | 37 | 17 | 43348580  | 43348581  | Frame_Shift_Del | DEL | TG     | -    | 8  | 407  | c.1665_1666delCA  | c.(1663-1668)TACATCfs | p.Y555fs      |
| Pat_26 | Pre-Treatment | HOXB6       | 3216   | 37 | 17 | 46673842  | 46673842  | Frame_Shift_Del | DEL | T      | -    | 10 | 1019 | c.608delA         | c.(607-609)AAGfs      | p.K203fs      |
| Pat_26 | Pre-Treatment | KIAA0195    | 9772   | 37 | 17 | 73491063  | 73491063  | Frame_Shift_Del | DEL | C      | -    | 7  | 747  | c.2676delC        | c.(2674-2676)ATCfs    | p.L892fs      |
| Pat_26 | Pre-Treatment | ACOX1       | 51     | 37 | 17 | 73944473  | 73944473  | Frame_Shift_Del | DEL | C      | -    | 7  | 814  | c.1794delG        | c.(1792-1794)CTGfs    | p.L598fs      |
| Pat_26 | Pre-Treatment | PTPRM       | 5797   | 37 | 18 | 8379261   | 8379261   | Frame_Shift_Del | DEL | C      | -    | 7  | 751  | c.3670delC        | c.(3670-3672)CCCfs    | p.P1224fs     |
| Pat_26 | Pre-Treatment | LMAN1       | 3998   | 37 | 18 | 57013285  | 57013285  | Splice_Site     | DEL | T      | -    | 7  | 194  | c.823_splice      | c.e8-1                | p.P275_splice |
| Pat_26 | Pre-Treatment | ADNP2       | 22850  | 37 | 18 | 77894260  | 77894261  | Frame_Shift_Ins | INS | -      | C    | 11 | 411  | c.964_965insC     | c.(964-966)TCCfs      | p.S322fs      |
| Pat_26 | Pre-Treatment | HMHA1       | 23526  | 37 | 19 | 1080256   | 1080256   | Frame_Shift_Del | DEL | C      | -    | 7  | 1769 | c.1706delC        | c.(1705-1707)TCCfs    | p.S569fs      |
| Pat_26 | Pre-Treatment | SMARCA4     | 6597   | 37 | 19 | 11101874  | 11101875  | Frame_Shift_Ins | INS | -      | CAGC | 35 | 159  | 1294_1295insCAC   | c.(1294-1296)ACAfs    | p.T432fs      |
| Pat_26 | Pre-Treatment | CACNA1A     | 773    | 37 | 19 | 13445279  | 13445280  | Frame_Shift_Del | DEL | CC     | -    | 8  | 366  | c.1110_1111delGG  | c.(1108-1113)GTGGAGfs | p.V370fs      |
| Pat_26 | Pre-Treatment | KIAA0892    | 23383  | 37 | 19 | 19454650  | 19454651  | Frame_Shift_Del | DEL | GG     | -    | 9  | 1366 | c.978_979delGG    | c.(976-981)CTGGACfs   | p.L326fs      |
| Pat_26 | Pre-Treatment | GATAD2A     | 54815  | 37 | 19 | 19613207  | 19613208  | Frame_Shift_Del | DEL | CA     | -    | 8  | 962  | c.1643_1644delCA  | c.(1642-1644)TCAfs    | p.S548fs      |
| Pat_26 | Pre-Treatment | ATP4A       | 495    | 37 | 19 | 36054349  | 36054351  | In_Frame_Del    | DEL | CTT    | -    | 9  | 1659 | c.91_93delAAG     | c.(91-93)AAGdel       | p.K31del      |
| Pat_26 | Pre-Treatment | CEACAM5     | 1048   | 37 | 19 | 42224866  | 42224866  | Frame_Shift_Del | DEL | C      | -    | 13 | 1034 | c.1796delC        | c.(1795-1797)TCCfs    | p.S599fs      |
| Pat_26 | Pre-Treatment | DMWD        | 1762   | 37 | 19 | 46289148  | 46289148  | Frame_Shift_Del | DEL | C      | -    | 7  | 1070 | c.1606delG        | c.(1606-1608)GCAfs    | p.A536fs      |
| Pat_26 | Pre-Treatment | PPP1R15A    | 23645  | 37 | 19 | 49376824  | 49376826  | In_Frame_Del    | DEL | GAT    | -    | 8  | 767  | c.334_336delGAT   | c.(334-336)GATdel     | p.D115del     |
| Pat_26 | Pre-Treatment | PTH2        | 113091 | 37 | 19 | 49926531  | 49926533  | In_Frame_Del    | DEL | CAG    | -    | 9  | 190  | c.64_66delCTG     | c.(64-66)CTGdel       | p.L22del      |
| Pat_26 | Pre-Treatment | SLC27A5     | 10998  | 37 | 19 | 59009902  | 59009903  | Frame_Shift_Del | DEL | CA     | -    | 7  | 196  | c.2052_2053delTC  | c.(2050-2055)TGTGAGfs | p.C684fs      |
| Pat_26 | Pre-Treatment | LPIN1       | 23175  | 37 | 2  | 11919735  | 11919736  | Frame_Shift_Ins | INS | -      | CT   | 10 | 263  | c.813_814insCT    | c.(811-816)ATGCTTfs   | p.M271fs      |
| Pat_26 | Pre-Treatment | AGBL5       | 60509  | 37 | 2  | 27278901  | 27278901  | Frame_Shift_Del | DEL | C      | -    | 12 | 1512 | c.1260delC        | c.(1258-1260)ATCfs    | p.I420fs      |
| Pat_26 | Pre-Treatment | LTBP1       | 4052   | 37 | 2  | 33413655  | 33413655  | Frame_Shift_Del | DEL | C      | -    | 7  | 415  | c.1438delC        | c.(1438-1440)CCTfs    | p.P480fs      |
| Pat_26 | Pre-Treatment | VRK2        | 7444   | 37 | 2  | 58313511  | 58313511  | Frame_Shift_Del | DEL | A      | -    | 7  | 573  | c.294delA         | c.(292-294)TTAfs      | p.L98fs       |
| Pat_26 | Pre-Treatment | TIA1        | 7072   | 37 | 2  | 70451722  | 70451723  | Frame_Shift_Del | DEL | AG     | -    | 8  | 404  | c.437_438delCT    | c.(436-438)TCTfs      | p.S146fs      |
| Pat_26 | Pre-Treatment | DYSF        | 8291   | 37 | 2  | 71909688  | 71909688  | Frame_Shift_Del | DEL | A      | -    | 7  | 637  | c.6085delA        | c.(6085-6087)ACCfs    | p.T2029fs     |
| Pat_26 | Pre-Treatment | ALMS1       | 7840   | 37 | 2  | 73613032  | 73613037  | In_Frame_Del    | DEL | GGAGGA | -    | 8  | 47   | .36_41delGGAGG    | c.(34-42)CTGGAGGAG>CT | p.EE27del     |
| Pat_26 | Pre-Treatment | SEMA4C      | 54910  | 37 | 2  | 97533514  | 97533514  | Splice_Site     | DEL | C      | -    | 7  | 2093 | c.109_splice      | c.e2+1                | p.E37_splice  |
| Pat_26 | Pre-Treatment | EIF5B       | 9669   | 37 | 2  | 100013270 | 100013271 | Frame_Shift_Del | DEL | TT     | -    | 7  | 530  | c.3302_3303delITT | c.(3301-3303)ATTfs    | p.I1101fs     |
| Pat_26 | Pre-Treatment | TMEM182     | 130827 | 37 | 2  | 103378742 | 103378742 | Frame_Shift_Del | DEL | G      | -    | 9  | 268  | c.66delG          | c.(64-66)TTGfs        | p.L22fs       |
| Pat_26 | Pre-Treatment | IWS1        | 55677  | 37 | 2  | 128262634 | 128262634 | Frame_Shift_Del | DEL | G      | -    | 8  | 581  | c.845delC         | c.(844-846)CCAfs      | p.P282fs      |
| Pat_26 | Pre-Treatment | ACVR2A      | 92     | 37 | 2  | 148683686 | 148683686 | Frame_Shift_Del | DEL | A      | -    | 8  | 230  | c.1303delA        | c.(1303-1305)AAAfs    | p.K435fs      |
| Pat_26 | Pre-Treatment | COBL1       | 22837  | 37 | 2  | 165552062 | 165552062 | Frame_Shift_Del | DEL | C      | -    | 7  | 860  | c.2155delG        | c.(2155-2157)GATfs    | p.D719fs      |
| Pat_26 | Pre-Treatment | TMBIM1      | 64114  | 37 | 2  | 219144792 | 219144792 | Frame_Shift_Del | DEL | C      | -    | 10 | 929  | c.260delG         | c.(259-261)GGAfs      | p.G87fs       |
| Pat_26 | Pre-Treatment | RQCD1       | 9125   | 37 | 2  | 219449364 | 219449364 | Frame_Shift_Del | DEL | T      | -    | 13 | 1031 | c.350delT         | c.(349-351)CTTfs      | p.L117fs      |
| Pat_26 | Pre-Treatment | FARSB       | 10056  | 37 | 2  | 223464670 | 223464670 | Frame_Shift_Del | DEL | C      | -    | 7  | 1141 | c.1595delG        | c.(1594-1596)GGAfs    | p.G532fs      |
| Pat_26 | Pre-Treatment | PSMD1       | 5707   | 37 | 2  | 232026183 | 232026183 | Frame_Shift_Del | DEL | A      | -    | 8  | 1308 | c.2348delA        | c.(2347-2349)TATfs    | p.Y783fs      |
| Pat_26 | Pre-Treatment | DGKD        | 8527   | 37 | 2  | 234371306 | 234371306 | Frame_Shift_Del | DEL | C      | -    | 8  | 1277 | c.3111delC        | c.(3109-3111)TTCfs    | p.F1037fs     |
| Pat_26 | Pre-Treatment | C20orf96    | 140680 | 37 | 20 | 257983    | 257984    | Frame_Shift_Del | DEL | TC     | -    | 8  | 1116 | c.606_607delGA    | c.(604-609)GAGAAGfs   | p.E202fs      |
| Pat_26 | Pre-Treatment | ATRN        | 8455   | 37 | 20 | 3540068   | 3540068   | Frame_Shift_Del | DEL | C      | -    | 7  | 585  | c.1141delC        | c.(1141-1143)CCAfs    | p.P381fs      |
| Pat_26 | Pre-Treatment | BTBD3       | 22903  | 37 | 20 | 11899028  | 11899030  | In_Frame_Del    | DEL | CAG    | -    | 7  | 592  | c.105_107delCAGc. | c.(103-108)ACCAGC>ACC | p.S40del      |
| Pat_26 | Pre-Treatment | ISM1        | 140862 | 37 | 20 | 13202444  | 13202446  | In_Frame_Del    | DEL | GCT    | -    | 4  | 9    | c.21_23delGCT     | c.(19-24)GAGCTG>GAG   | p.L12del      |
| Pat_26 | Pre-Treatment | BCL2L1      | 598    | 37 | 20 | 30309941  | 30309942  | Frame_Shift_Del | DEL | AA     | -    | 8  | 574  | c.80_81delTT      | c.(79-81)TTTfs        | p.F27fs       |
| Pat_26 | Pre-Treatment | TM9SF4      | 9777   | 37 | 20 | 30729643  | 30729643  | Frame_Shift_Del | DEL | A      | -    | 8  | 1001 | c.473delA         | c.(472-474)GAAfs      | p.E158fs      |
| Pat_26 | Pre-Treatment | CHMP4B      | 128866 | 37 | 20 | 32439998  | 32439999  | Frame_Shift_Ins | INS | -      | A    | 8  | 977  | c.599_600insA     | c.(598-600)CCAfs      | p.P200fs      |
| Pat_26 | Pre-Treatment | RALGAPB     | 57148  | 37 | 20 | 37146233  | 37146233  | Frame_Shift_Del | DEL | C      | -    | 8  | 735  | c.1136delC        | c.(1135-1137)ACCfs    | p.T379fs      |
| Pat_26 | Pre-Treatment | SYS1-DBNDD2 | 767557 | 37 | 20 | 44038638  | 44038640  | In_Frame_Del    | DEL | CCT    | -    | 8  | 30   | c.344_346delCCTc. | c.(343-348)ACCTCC>ACC | p.S121del     |
| Pat_26 | Pre-Treatment | LSM14B      | 149986 | 37 | 20 | 60706554  | 60706554  | Frame_Shift_Del | DEL | C      | -    | 8  | 260  | c.978delC         | c.(976-978)CTCfs      | p.L326fs      |



|        |               |          |        |    |    |           |           |                 |     |          |     |    |      |                     |                        |                |
|--------|---------------|----------|--------|----|----|-----------|-----------|-----------------|-----|----------|-----|----|------|---------------------|------------------------|----------------|
| Pat_26 | Pre-Treatment | SH3BGR   | 6450   | 37 | 21 | 40823995  | 40823995  | Frame_Shift_Del | DEL | G        | -   | 7  | 1071 | c.162delG           | c.(160-162)TTGfs       | p.L54fs        |
| Pat_26 | Pre-Treatment | PCNT     | 5116   | 37 | 21 | 47851962  | 47851963  | Frame_Shift_Del | DEL | GA       | -   | 9  | 288  | c.8584_8585delGA    | c.(8584-8586)GAGfs     | p.E2862fs      |
| Pat_26 | Pre-Treatment | UFD1L    | 7353   | 37 | 22 | 19443251  | 19443253  | In_Frame_Del    | DEL | TTC      | -   | 8  | 1148 | c.717_719delGAAc.   | c.(715-720)AAGAAA>AAA> | p.239_240KK>I  |
| Pat_26 | Pre-Treatment | MED15    | 51586  | 37 | 22 | 20918817  | 20918819  | In_Frame_Del    | DEL | CAG      | -   | 8  | 104  | c.532_534delCAG     | c.(532-534)CAGdel      | p.Q188del      |
| Pat_26 | Pre-Treatment | C22orf45 | 646023 | 37 | 22 | 24827042  | 24827042  | Frame_Shift_Del | DEL | C        | -   | 5  | 4    | c.479delG           | c.(478-480)TGAfs       | p.*160fs       |
| Pat_26 | Pre-Treatment | TRIOBP   | 11078  | 37 | 22 | 38121934  | 38121934  | Frame_Shift_Del | DEL | C        | -   | 7  | 846  | c.3371delC          | c.(3370-3372)TCCfs     | p.S1124fs      |
| Pat_26 | Pre-Treatment | FAM109B  | 150368 | 37 | 22 | 42473377  | 42473377  | Frame_Shift_Del | DEL | G        | -   | 13 | 481  | c.80delG            | c.(79-81)TGGfs         | p.W27fs        |
| Pat_26 | Pre-Treatment | C22orf32 | 91689  | 37 | 22 | 42478046  | 42478048  | In_Frame_Del    | DEL | GAT      | -   | 9  | 600  | c.304_306delGAT     | c.(304-306)GATdel      | p.D107del      |
| Pat_26 | Pre-Treatment | TCF20    | 6942   | 37 | 22 | 42605990  | 42605992  | In_Frame_Del    | DEL | CTG      | -   | 10 | 311  | c.5320_5322delCA    | c.(5320-5322)CAGdel    | p.Q1774del     |
| Pat_26 | Pre-Treatment | CNTN4    | 152330 | 37 | 3  | 3078967   | 3078967   | Frame_Shift_Del | DEL | G        | -   | 7  | 1499 | c.2047delG          | c.(2047-2049)GGGfs     | p.G683fs       |
| Pat_26 | Pre-Treatment | CIDEC    | 63924  | 37 | 3  | 9908869   | 9908869   | Frame_Shift_Del | DEL | G        | -   | 11 | 832  | c.666delC           | c.(664-666)CCCfs       | p.P222fs       |
| Pat_26 | Pre-Treatment | FANCD2   | 2177   | 37 | 3  | 10136049  | 10136049  | Splice_Site     | DEL | T        | -   | 7  | 441  | c.3963_splice       | c.e40+2                | p.R1321_splice |
| Pat_26 | Pre-Treatment | SH3BP5   | 9467   | 37 | 3  | 15373833  | 15373835  | In_Frame_Del    | DEL | TCC      | -   | 7  | 57   | c.81_83delGGA       | c.(79-84)GAGGAA>GAA    | p.27_28EE>E    |
| Pat_26 | Pre-Treatment | NCKIPSD  | 51517  | 37 | 3  | 48717021  | 48717023  | In_Frame_Del    | DEL | CTG      | -   | 11 | 897  | c.1474_1476delCA    | c.(1474-1476)CAGdel    | p.Q492del      |
| Pat_26 | Pre-Treatment | IMPDH2   | 3615   | 37 | 3  | 49062664  | 49062665  | Frame_Shift_Del | DEL | TG       | -   | 7  | 1220 | c.1044_1045delCA    | c.(1042-1047)TACAAGfs  | p.Y348fs       |
| Pat_26 | Pre-Treatment | QARS     | 5859   | 37 | 3  | 49140808  | 49140808  | Frame_Shift_Del | DEL | G        | -   | 8  | 1061 | c.486delC           | c.(484-486)GGCfs       | p.G162fs       |
| Pat_26 | Pre-Treatment | PRKCD    | 5580   | 37 | 3  | 53220653  | 53220653  | Frame_Shift_Del | DEL | G        | -   | 13 | 1972 | c.1294delG          | c.(1294-1296)GGGfs     | p.G432fs       |
| Pat_26 | Pre-Treatment | C3orf63  | 23272  | 37 | 3  | 56667404  | 56667404  | Frame_Shift_Del | DEL | T        | -   | 8  | 477  | c.3232delA          | c.(3232-3234)AGTfs     | p.S1078fs      |
| Pat_26 | Pre-Treatment | GPR128   | 84873  | 37 | 3  | 100362146 | 100362146 | Frame_Shift_Del | DEL | G        | -   | 7  | 1273 | c.735delG           | c.(733-735)TTGfs       | p.L245fs       |
| Pat_26 | Pre-Treatment | STAG1    | 10274  | 37 | 3  | 136096582 | 136096582 | Frame_Shift_Del | DEL | C        | -   | 8  | 363  | c.2290delG          | c.(2290-2292)GTAfs     | p.V764fs       |
| Pat_26 | Pre-Treatment | FAM194A  | 131831 | 37 | 3  | 150421591 | 150421593 | In_Frame_Del    | DEL | TCC      | -   | 9  | 94   | c.93_95delGGA       | c.(91-96)GAGGAA>GAA    | p.31_32EE>E    |
| Pat_26 | Pre-Treatment | MBNL1    | 4154   | 37 | 3  | 152165430 | 152165430 | Frame_Shift_Del | DEL | C        | -   | 7  | 465  | c.883delC           | c.(883-885)CCCfs       | p.P295fs       |
| Pat_26 | Pre-Treatment | IQCJ     | 654502 | 37 | 3  | 158983047 | 158983048 | Frame_Shift_Del | DEL | GG       | -   | 8  | 488  | c.335_336delGG      | c.(334-336)TGGfs       | p.W112fs       |
| Pat_26 | Pre-Treatment | SI       | 6476   | 37 | 3  | 164741382 | 164741384 | In_Frame_Del    | DEL | GTG      | -   | 8  | 312  | c.3073_3075delCA    | c.(3073-3075)CACdel    | p.H1025del     |
| Pat_26 | Pre-Treatment | FAM157A  | 728262 | 37 | 3  | 197880131 | 197880133 | In_Frame_Del    | DEL | GCA      | -   | 7  | 55   | c.210_212delGCA     | c.(208-213)TGGCAG>TGC  | p.Q84del       |
| Pat_26 | Pre-Treatment | CRIPAK   | 285464 | 37 | 4  | 1389360   | 1389361   | Frame_Shift_Ins | INS | -        | CA  | 7  | 1947 | c.1061_1062insCA    | c.(1060-1062)CTCfs     | p.L354fs       |
| Pat_26 | Pre-Treatment | POLN     | 353497 | 37 | 4  | 2073875   | 2073875   | Frame_Shift_Del | DEL | G        | -   | 8  | 685  | c.2669delC          | c.(2668-2670)CCAfs     | p.P890fs       |
| Pat_26 | Pre-Treatment | ADD1     | 118    | 37 | 4  | 2909553   | 2909554   | Frame_Shift_Del | DEL | CC       | -   | 7  | 679  | c.1497_1498delCC    | c.(1495-1500)GTCCAGfs  | p.V499fs       |
| Pat_26 | Pre-Treatment | WFS1     | 7466   | 37 | 4  | 6303433   | 6303433   | Frame_Shift_Del | DEL | G        | -   | 8  | 1645 | c.1911delG          | c.(1909-1911)CTGfs     | p.L637fs       |
| Pat_26 | Pre-Treatment | SHISA3   | 152573 | 37 | 4  | 42403363  | 42403363  | Frame_Shift_Del | DEL | G        | -   | 7  | 312  | c.612delG           | c.(610-612)CTGfs       | p.L204fs       |
| Pat_26 | Pre-Treatment | REST     | 5978   | 37 | 4  | 57797637  | 57797638  | Frame_Shift_Del | DEL | TT       | -   | 8  | 543  | c.2613_2614delTT    | c.(2611-2616)AATTTAfs  | p.N871fs       |
| Pat_26 | Pre-Treatment | MUC7     | 4589   | 37 | 4  | 71347351  | 71347351  | Frame_Shift_Del | DEL | C        | -   | 7  | 1380 | c.890delC           | c.(889-891)TCCfs       | p.S297fs       |
| Pat_26 | Pre-Treatment | UTP3     | 57050  | 37 | 4  | 71555274  | 71555274  | Frame_Shift_Del | DEL | G        | -   | 8  | 1051 | c.880delG           | c.(880-882)GGAfs       | p.G294fs       |
| Pat_26 | Pre-Treatment | RAB33B   | 83452  | 37 | 4  | 140375515 | 140375515 | Frame_Shift_Del | DEL | G        | -   | 7  | 273  | c.166delG           | c.(166-168)GGCfs       | p.G56fs        |
| Pat_26 | Pre-Treatment | POU4F2   | 5458   | 37 | 4  | 147560457 | 147560458 | In_Frame_Ins    | INS | -        | GGC | 10 | 32   | c.165_166insGGC     | c.(163-168)insGGC      | p.68_69insG    |
| Pat_26 | Pre-Treatment | FBXW7    | 55294  | 37 | 4  | 153244156 | 153244156 | Frame_Shift_Del | DEL | C        | -   | 8  | 1107 | c.2001delG          | c.(1999-2001)GGGfs     | p.G667fs       |
| Pat_26 | Pre-Treatment | ADAMTS12 | 81792  | 37 | 5  | 33549462  | 33549462  | Frame_Shift_Del | DEL | G        | -   | 8  | 786  | c.4152delC          | c.(4150-4152)TTCfs     | p.F1384fs      |
| Pat_26 | Pre-Treatment | ADAMTS12 | 81792  | 37 | 5  | 33616067  | 33616067  | Frame_Shift_Del | DEL | A        | -   | 8  | 320  | c.2254delT          | c.(2254-2256)TACfs     | p.Y752fs       |
| Pat_26 | Pre-Treatment | PPAP2A   | 8611   | 37 | 5  | 54721111  | 54721128  | In_Frame_Del    | DEL | TCTTTAAA | -   | 17 | 77   | c.101delCTTCTTTTAAA | c.(ACTTCTTTTAAAGAAAG>T | p.TSFKER254d   |
| Pat_26 | Pre-Treatment | SFRS12   | 140890 | 37 | 5  | 65457960  | 65457960  | Frame_Shift_Del | DEL | G        | -   | 8  | 463  | c.87delG            | c.(85-87)TTGfs         | p.L29fs        |
| Pat_26 | Pre-Treatment | BDP1     | 55814  | 37 | 5  | 70766233  | 70766233  | Frame_Shift_Del | DEL | T        | -   | 8  | 160  | c.931delT           | c.(931-933)TTTfs       | p.F311fs       |
| Pat_26 | Pre-Treatment | AP3S1    | 1176   | 37 | 5  | 115202418 | 115202421 | Frame_Shift_Del | DEL | AAGA     | -   | 10 | 105  | c.121_124delAAG     | c.(121-126)AAGAGAFs    | p.K41fs        |
| Pat_26 | Pre-Treatment | PPARGC1B | 133522 | 37 | 5  | 149216510 | 149216510 | Frame_Shift_Del | DEL | G        | -   | 8  | 379  | c.2492delG          | c.(2491-2493)TGCfs     | p.C831fs       |
| Pat_26 | Pre-Treatment | GPX3     | 2878   | 37 | 5  | 150406548 | 150406549 | Frame_Shift_Del | DEL | GA       | -   | 7  | 541  | c.329_330delGA      | c.(328-330)GGAfs       | p.G110fs       |
| Pat_26 | Pre-Treatment | ADRA1B   | 147    | 37 | 5  | 159344829 | 159344832 | Frame_Shift_Del | DEL | GCTG     | -   | 14 | 851  | c.917_920delGCTC    | c.(916-921)TGCTGGfs    | p.C306fs       |
| Pat_26 | Pre-Treatment | SLU7     | 10569  | 37 | 5  | 159841420 | 159841421 | Frame_Shift_Del | DEL | GA       | -   | 8  | 584  | c.229_230delTC      | c.(229-231)TCAFs       | p.S77fs        |
| Pat_26 | Pre-Treatment | NOP16    | 51491  | 37 | 5  | 175815281 | 175815281 | Frame_Shift_Del | DEL | C        | -   | 8  | 639  | c.171delG           | c.(169-171)GGGfs       | p.G57fs        |

|        |                 |         |        |    |   |           |           |                 |     |     |     |     |      |                  |                       |               |
|--------|-----------------|---------|--------|----|---|-----------|-----------|-----------------|-----|-----|-----|-----|------|------------------|-----------------------|---------------|
| Pat_26 | Pre-Treatment   | UIMC1   | 51720  | 37 | 5 | 176395609 | 176395609 | Frame_Shift_Del | DEL | T   | -   | 108 | 148  | c.1147delA       | c.(1147-1149)AGCfs    | p.S383fs      |
| Pat_26 | Pre-Treatment   | NSD1    | 64324  | 37 | 5 | 176721165 | 176721165 | Frame_Shift_Del | DEL | A   | -   | 8   | 588  | c.6796delA       | c.(6796-6798)AAAs     | p.K2266fs     |
| Pat_26 | Pre-Treatment   | FOXC1   | 2296   | 37 | 6 | 1611802   | 1611803   | In_Frame_Ins    | INS | -   | GGC | 7   | 18   | .1122_1123insGG  | c.(1120-1125)insGGC   | p.380_381insC |
| Pat_26 | Pre-Treatment   | ZNF192  | 7745   | 37 | 6 | 28121376  | 28121376  | Frame_Shift_Del | DEL | G   | -   | 7   | 351  | c.1318delG       | c.(1318-1320)GGGfs    | p.G440fs      |
| Pat_26 | Pre-Treatment   | TRIM10  | 10107  | 37 | 6 | 30126250  | 30126250  | Frame_Shift_Del | DEL | C   | -   | 8   | 1368 | c.682delG        | c.(682-684)GAGfs      | p.E228fs      |
| Pat_26 | Pre-Treatment   | DDR1    | 780    | 37 | 6 | 30863251  | 30863251  | Frame_Shift_Del | DEL | C   | -   | 8   | 1179 | c.1584delC       | c.(1582-1584)GGCfs    | p.G528fs      |
| Pat_26 | Pre-Treatment   | EHMT2   | 10919  | 37 | 6 | 31857330  | 31857332  | In_Frame_Del    | DEL | TCC | -   | 7   | 417  | c.912_914delGGA  | c.(910-915)GAGGAA>GAA | .304_305EE>I  |
| Pat_26 | Pre-Treatment   | PHF1    | 5252   | 37 | 6 | 33380050  | 33380050  | Frame_Shift_Del | DEL | C   | -   | 7   | 332  | c.10delC         | c.(10-12)CCCfs        | p.P4fs        |
| Pat_26 | Pre-Treatment   | ZBTB9   | 221504 | 37 | 6 | 33423088  | 33423088  | Frame_Shift_Del | DEL | C   | -   | 7   | 1723 | c.211delC        | c.(211-213)CCTfs      | p.P71fs       |
| Pat_26 | Pre-Treatment   | FOXP4   | 116113 | 37 | 6 | 41555186  | 41555186  | Frame_Shift_Del | DEL | C   | -   | 7   | 1022 | c.808delC        | c.(808-810)CCCfs      | p.P270fs      |
| Pat_26 | Pre-Treatment   | DST     | 667    | 37 | 6 | 56382036  | 56382037  | Frame_Shift_Ins | INS | -   | T   | 8   | 959  | .11959_11960insA | c.(11959-11961)ATCfs  | p.I3987fs     |
| Pat_26 | Pre-Treatment   | FBXL4   | 26235  | 37 | 6 | 99322265  | 99322266  | Frame_Shift_Del | DEL | TT  | -   | 7   | 341  | c.1754_1755delAA | c.(1753-1755)AAAs     | p.K585fs      |
| Pat_26 | Pre-Treatment   | ARID1B  | 57492  | 37 | 6 | 157100024 | 157100026 | In_Frame_Del    | DEL | GGA | -   | 9   | 80   | c.787_789delGGA  | c.(787-789)GGAdel     | p.G270del     |
| Pat_26 | Pre-Treatment   | DAGLB   | 221955 | 37 | 7 | 6474591   | 6474591   | Frame_Shift_Del | DEL | C   | -   | 7   | 229  | c.480delG        | c.(478-480)GGGfs      | p.G160fs      |
| Pat_26 | Pre-Treatment   | THSD7A  | 221981 | 37 | 7 | 11468637  | 11468637  | Frame_Shift_Del | DEL | T   | -   | 8   | 1379 | c.3180delA       | c.(3178-3180)AAAs     | p.K1060fs     |
| Pat_26 | Pre-Treatment   | MACC1   | 346389 | 37 | 7 | 20199520  | 20199520  | Frame_Shift_Del | DEL | T   | -   | 8   | 335  | c.464delA        | c.(463-465)CAGfs      | p.Q155fs      |
| Pat_26 | Pre-Treatment   | AUTS2   | 26053  | 37 | 7 | 70229781  | 70229782  | Frame_Shift_Ins | INS | -   | A   | 9   | 29   | c.1258_1259insA  | c.(1258-1260)CCTfs    | p.P420fs      |
| Pat_26 | Pre-Treatment   | DTX2    | 113878 | 37 | 7 | 76112242  | 76112243  | Frame_Shift_Ins | INS | -   | C   | 7   | 2349 | c.686_687insC    | c.(685-687)CACfs      | p.H229fs      |
| Pat_26 | Pre-Treatment   | FGL2    | 10875  | 37 | 7 | 76826170  | 76826170  | Frame_Shift_Del | DEL | C   | -   | 8   | 478  | c.746delG        | c.(745-747)GGAfs      | p.G249fs      |
| Pat_26 | Pre-Treatment   | ZNF277  | 11179  | 37 | 7 | 111980965 | 111980965 | Frame_Shift_Del | DEL | A   | -   | 7   | 663  | c.1048delA       | c.(1048-1050)ATTfs    | p.I350fs      |
| Pat_26 | Pre-Treatment   | LUC7L2  | 51631  | 37 | 7 | 139094365 | 139094366 | Frame_Shift_Del | DEL | AG  | -   | 8   | 75   | c.744_745delAG   | c.(742-747)GAAGAGfs   | p.E248fs      |
| Pat_26 | Pre-Treatment   | PSD3    | 23362  | 37 | 8 | 18490121  | 18490121  | Splice_Site     | DEL | A   | -   | 7   | 240  | c.2410_splice    | c.e11+1               | p.T804_splice |
| Pat_26 | Pre-Treatment   | HNF4G   | 3174   | 37 | 8 | 76463653  | 76463653  | Frame_Shift_Del | DEL | C   | -   | 8   | 335  | c.272delC        | c.(271-273)ACCfs      | p.T91fs       |
| Pat_26 | Pre-Treatment   | CCNE2   | 9134   | 37 | 8 | 95902737  | 95902737  | Frame_Shift_Del | DEL | T   | -   | 8   | 1066 | c.359delA        | c.(358-360)AAGfs      | p.K120fs      |
| Pat_26 | Pre-Treatment   | RNF19A  | 25897  | 37 | 8 | 101276956 | 101276957 | Frame_Shift_Del | DEL | CT  | -   | 23  | 1219 | .1248_1249delAC  | c.(1246-1251)ATAGCAfs | p.I416fs      |
| Pat_26 | Pre-Treatment   | LRP12   | 29967  | 37 | 8 | 105503672 | 105503672 | Frame_Shift_Del | DEL | C   | -   | 9   | 297  | c.1809delG       | c.(1807-1809)TGGfs    | p.W603fs      |
| Pat_26 | Pre-Treatment   | ZFPM2   | 23414  | 37 | 8 | 106813426 | 106813426 | Frame_Shift_Del | DEL | C   | -   | 8   | 794  | c.1116delC       | c.(1114-1116)TTCfs    | p.F372fs      |
| Pat_26 | Pre-Treatment   | EIF2C2  | 27161  | 37 | 8 | 141554345 | 141554345 | Frame_Shift_Del | DEL | G   | -   | 7   | 1062 | c.1806delC       | c.(1804-1806)CCCfs    | p.P602fs      |
| Pat_26 | Pre-Treatment   | FAM83H  | 286077 | 37 | 8 | 144811169 | 144811170 | Frame_Shift_Ins | INS | -   | GT  | 7   | 833  | c.704_705insAC   | c.(703-705)GTGfs      | p.V235fs      |
| Pat_26 | Pre-Treatment   | LRRC24  | 441381 | 37 | 8 | 145749495 | 145749496 | Frame_Shift_Del | DEL | TG  | -   | 8   | 1415 | c.605_606delCA   | c.(604-606)ACAfs      | p.T202fs      |
| Pat_26 | Pre-Treatment   | KCNV2   | 169522 | 37 | 9 | 2718093   | 2718094   | Frame_Shift_Del | DEL | CC  | -   | 4   | 3    | c.354_355delCC   | c.(352-357)TTCCCCfs   | p.F118fs      |
| Pat_26 | Pre-Treatment   | NPR2    | 4882   | 37 | 9 | 35805643  | 35805643  | Frame_Shift_Del | DEL | G   | -   | 8   | 639  | c.2023delG       | c.(2023-2025)GATfs    | p.D675fs      |
| Pat_26 | Pre-Treatment   | PRRG1   | 5638   | 37 | X | 37312611  | 37312611  | Frame_Shift_Del | DEL | C   | -   | 8   | 407  | c.394delC        | c.(394-396)CCCfs      | p.P132fs      |
| Pat_26 | Pre-Treatment   | SHROOM4 | 57477  | 37 | X | 50556964  | 50556964  | Frame_Shift_Del | DEL | C   | -   | 43  | 19   | c.55delG         | c.(55-57)GCAfs        | p.A19fs       |
| Pat_26 | Pre-Treatment   | TRMT2B  | 79979  | 37 | X | 100278466 | 100278467 | Frame_Shift_Del | DEL | AA  | -   | 8   | 356  | c.748_749delTT   | c.(748-750)TTAfs      | p.L250fs      |
| Pat_26 | Pre-Treatment   | MAMLD1  | 10046  | 37 | X | 149639325 | 149639327 | In_Frame_Del    | DEL | CAG | -   | 8   | 156  | .1480_1482delCA  | c.(1480-1482)CAGdel   | p.Q502del     |
| Pat_26 | Post-Resistance | DFFA    | 1676   | 37 | 1 | 10532411  | 10532411  | Frame_Shift_Del | DEL | G   | -   | 9   | 541  | c.105delC        | c.(103-105)GCCfs      | p.A35fs       |
| Pat_26 | Post-Resistance | ZBTB40  | 9923   | 37 | 1 | 22838561  | 22838563  | In_Frame_Del    | DEL | AAG | -   | 10  | 162  | .2395_2397delAA  | c.(2395-2397)AAGdel   | p.K803del     |
| Pat_26 | Post-Resistance | EXTL1   | 2134   | 37 | 1 | 26349533  | 26349535  | In_Frame_Del    | DEL | CCT | -   | 8   | 187  | c.396_398delCCT  | c.(394-399)TGCTC>TGC  | p.L137del     |
| Pat_26 | Post-Resistance | PDE4DIP | 9659   | 37 | 1 | 144873913 | 144873913 | Frame_Shift_Del | DEL | G   | -   | 11  | 1806 | c.5044delC       | c.(5044-5046)CAGfs    | p.Q1682fs     |
| Pat_26 | Post-Resistance | ECM1    | 1893   | 37 | 1 | 150483467 | 150483467 | Frame_Shift_Del | DEL | C   | -   | 9   | 1129 | c.501delC        | c.(499-501)TTCfs      | p.F167fs      |
| Pat_26 | Post-Resistance | ARNT    | 405    | 37 | 1 | 150789283 | 150789283 | Frame_Shift_Del | DEL | G   | -   | 7   | 433  | c.1783delC       | c.(1783-1785)CGGfs    | p.R595fs      |
| Pat_26 | Post-Resistance | RFX5    | 5993   | 37 | 1 | 151315123 | 151315123 | Frame_Shift_Del | DEL | T   | -   | 7   | 2538 | c.1390delA       | c.(1390-1392)AGGfs    | p.R464fs      |
| Pat_26 | Post-Resistance | GPATCH4 | 54865  | 37 | 1 | 156568057 | 156568058 | Frame_Shift_Del | DEL | TG  | -   | 8   | 1878 | c.222_223delCA   | c.(220-225)TTCAACfs   | p.F74fs       |
| Pat_26 | Post-Resistance | PVRL4   | 81607  | 37 | 1 | 161044057 | 161044059 | In_Frame_Del    | DEL | CAC | -   | 8   | 628  | .1105_1107delGT  | c.(1105-1107)GTGdel   | p.V369del     |
| Pat_26 | Post-Resistance | PAPPA2  | 60676  | 37 | 1 | 176762724 | 176762724 | Frame_Shift_Del | DEL | C   | -   | 12  | 508  | c.5049delC       | c.(5047-5049)ATCfs    | p.I1683fs     |
| Pat_26 | Post-Resistance | MTR     | 4548   | 37 | 1 | 237024474 | 237024474 | Frame_Shift_Del | DEL | A   | -   | 7   | 83   | c.2093delA       | c.(2092-2094)CAAs     | p.Q698fs      |

|        |                 |           |        |    |    |           |           |                 |     |     |   |    |      |                   |                        |               |
|--------|-----------------|-----------|--------|----|----|-----------|-----------|-----------------|-----|-----|---|----|------|-------------------|------------------------|---------------|
| Pat_26 | Post-Resistance | ABI1      | 10006  | 37 | 10 | 27040624  | 27040626  | In_Frame_Del    | DEL | TGG | - | 8  | 367  | .1252_1254delCC   | c.(1252-1254)CCAdel    | p.P418del     |
| Pat_26 | Post-Resistance | PARD3     | 56288  | 37 | 10 | 34671501  | 34671501  | Frame_Shift_Del | DEL | T   | - | 7  | 422  | c.1366delA        | c.(1366-1368)ATAfs     | p.I456fs      |
| Pat_26 | Post-Resistance | PCDH15    | 65217  | 37 | 10 | 56077158  | 56077160  | In_Frame_Del    | DEL | GTG | - | 7  | 607  | c.747_749delCAC   | c.(745-750)ACCACT>ACT> | p.249_250TT>  |
| Pat_26 | Post-Resistance | STAMBPL1  | 57559  | 37 | 10 | 90682146  | 90682146  | Frame_Shift_Del | DEL | A   | - | 11 | 230  | c.1207delA        | c.(1207-1209)AAAfs     | p.K403fs      |
| Pat_26 | Post-Resistance | C10orf76  | 79591  | 37 | 10 | 103769184 | 103769184 | Frame_Shift_Del | DEL | C   | - | 8  | 1092 | c.901delG         | c.(901-903)GCAfs       | p.A301fs      |
| Pat_26 | Post-Resistance | C10orf118 | 55088  | 37 | 10 | 115891080 | 115891081 | Frame_Shift_Del | DEL | TC  | - | 8  | 710  | c.1926_1927delGA  | c.(1924-1929)TTGAAAsfs | p.L642fs      |
| Pat_26 | Post-Resistance | SBF2      | 81846  | 37 | 11 | 9864178   | 9864180   | In_Frame_Del    | DEL | CAT | - | 17 | 347  | c.3248_3250delATC | c.(3247-3252)GATGTA>GT | p.D1083del    |
| Pat_26 | Post-Resistance | AHNAK     | 79026  | 37 | 11 | 62294917  | 62294917  | Frame_Shift_Del | DEL | G   | - | 7  | 708  | c.6972delC        | c.(6970-6972)CCCfs     | p.P2324fs     |
| Pat_26 | Post-Resistance | KAT5      | 10524  | 37 | 11 | 65480517  | 65480518  | Frame_Shift_Del | DEL | AG  | - | 8  | 494  | c.273_274delAG    | c.(271-276)CCAGAGfs    | p.P91fs       |
| Pat_26 | Post-Resistance | NDUFV1    | 4723   | 37 | 11 | 67379630  | 67379630  | Frame_Shift_Del | DEL | G   | - | 8  | 1354 | c.1202delG        | c.(1201-1203)AGGfs     | p.R401fs      |
| Pat_26 | Post-Resistance | PVRL1     | 5818   | 37 | 11 | 119535678 | 119535680 | In_Frame_Del    | DEL | CCT | - | 12 | 74   | c.1331_1333delAG  | c.(1330-1335)GAGGGC>GC | p.E444del     |
| Pat_26 | Post-Resistance | CDON      | 50937  | 37 | 11 | 125889533 | 125889533 | Frame_Shift_Del | DEL | T   | - | 8  | 1082 | c.477delA         | c.(475-477)AAAfs       | p.K159fs      |
| Pat_26 | Post-Resistance | PRB2      | 653247 | 37 | 12 | 11546605  | 11546607  | In_Frame_Del    | DEL | GGA | - | 7  | 849  | c.405_407delTCC   | c.(403-408)CCTCCA>CCA  | p.135_136PP>I |
| Pat_26 | Post-Resistance | C12orf35  | 55196  | 37 | 12 | 32134718  | 32134720  | In_Frame_Del    | DEL | CCT | - | 7  | 554  | c.829_831delCCT   | c.(829-831)CCTdel      | p.P281del     |
| Pat_26 | Post-Resistance | TENC1     | 23371  | 37 | 12 | 53452903  | 53452903  | Frame_Shift_Del | DEL | C   | - | 8  | 541  | c.1478delC        | c.(1477-1479)ACCfs     | p.T493fs      |
| Pat_26 | Post-Resistance | ESPL1     | 9700   | 37 | 12 | 53683876  | 53683877  | Frame_Shift_Del | DEL | TG  | - | 7  | 383  | c.5121_5122delITC | c.(5119-5124)ACTGTGfs  | p.T1707fs     |
| Pat_26 | Post-Resistance | OR6C75    | 390323 | 37 | 12 | 55759486  | 55759486  | Frame_Shift_Del | DEL | T   | - | 7  | 174  | c.592delT         | c.(592-594)TTTfs       | p.F198fs      |
| Pat_26 | Post-Resistance | SMARCC2   | 6601   | 37 | 12 | 56558379  | 56558381  | In_Frame_Del    | DEL | AGG | - | 9  | 146  | c.3274_3276delCC  | c.(3274-3276)CCTdel    | p.P1092del    |
| Pat_26 | Post-Resistance | TMEM194A  | 23306  | 37 | 12 | 57456936  | 57456936  | Frame_Shift_Del | DEL | C   | - | 8  | 2456 | c.946delG         | c.(946-948)GAAfs       | p.E316fs      |
| Pat_26 | Post-Resistance | APEX1     | 328    | 37 | 14 | 20923820  | 20923820  | Frame_Shift_Del | DEL | A   | - | 7  | 772  | c.16delA          | c.(16-18)AAAfs         | p.K6fs        |
| Pat_26 | Post-Resistance | PSMA6     | 5687   | 37 | 14 | 35782216  | 35782216  | Frame_Shift_Del | DEL | A   | - | 13 | 707  | c.539delA         | c.(538-540)GAAfs       | p.E180fs      |
| Pat_26 | Post-Resistance | ZFP36L1   | 677    | 37 | 14 | 69256523  | 69256524  | Frame_Shift_Ins | INS | -   | T | 10 | 1241 | c.743_744insA     | c.(742-744)AATfs       | p.N248fs      |
| Pat_26 | Post-Resistance | CCNK      | 8812   | 37 | 14 | 99969244  | 99969246  | In_Frame_Del    | DEL | CAG | - | 9  | 638  | c.934_936delCAG   | c.(934-936)CAGdel      | p.Q315del     |
| Pat_26 | Post-Resistance | SPINT1    | 6692   | 37 | 15 | 41149075  | 41149077  | In_Frame_Del    | DEL | CAC | - | 10 | 1368 | c.1492_1494delCA  | c.(1492-1494)CACdel    | p.H501del     |
| Pat_26 | Post-Resistance | C15orf58  | 390637 | 37 | 15 | 90784232  | 90784232  | Frame_Shift_Del | DEL | A   | - | 9  | 1739 | c.92delA          | c.(91-93)TATfs         | p.Y31fs       |
| Pat_26 | Post-Resistance | SLC5A11   | 115584 | 37 | 16 | 24921737  | 24921739  | In_Frame_Del    | DEL | CAG | - | 7  | 244  | c.1761_1763delCA  | c.(1759-1764)GCCAGC>GC | p.S592del     |
| Pat_26 | Post-Resistance | KIAA0556  | 23247  | 37 | 16 | 27692779  | 27692779  | Frame_Shift_Del | DEL | C   | - | 9  | 843  | c.868delC         | c.(868-870)CCCfs       | p.P290fs      |
| Pat_26 | Post-Resistance | SRCAP     | 10847  | 37 | 16 | 30736314  | 30736314  | Frame_Shift_Del | DEL | C   | - | 7  | 1305 | c.5569delC        | c.(5569-5571)CCCfs     | p.P1857fs     |
| Pat_26 | Post-Resistance | CHRNB1    | 1140   | 37 | 17 | 7357666   | 7357668   | In_Frame_Del    | DEL | CTG | - | 10 | 944  | c.871_873delCTG   | c.(871-873)CTGdel      | p.L294del     |
| Pat_26 | Post-Resistance | CHD3      | 1107   | 37 | 17 | 7788212   | 7788214   | In_Frame_Del    | DEL | GAG | - | 14 | 117  | c.88_90delGAG     | c.(88-90)GAGdel        | p.E35del      |
| Pat_26 | Post-Resistance | CNTROB    | 116840 | 37 | 17 | 7843518   | 7843519   | Frame_Shift_Del | DEL | GA  | - | 9  | 472  | c.1269_1270delGA  | c.(1267-1272)CGGAGAsfs | p.R423fs      |
| Pat_26 | Post-Resistance | NEK8      | 284086 | 37 | 17 | 27068996  | 27068996  | Frame_Shift_Del | DEL | C   | - | 7  | 1151 | c.2070delC        | c.(2068-2070)GTCfs     | p.V690fs      |
| Pat_26 | Post-Resistance | CASC3     | 22794  | 37 | 17 | 38324506  | 38324506  | Frame_Shift_Del | DEL | C   | - | 7  | 851  | c.1801delC        | c.(1801-1803)CCCfs     | p.P601fs      |
| Pat_26 | Post-Resistance | STAT5B    | 6777   | 37 | 17 | 40370236  | 40370236  | Frame_Shift_Del | DEL | G   | - | 8  | 234  | c.1102delC        | c.(1102-1104)CAGfs     | p.Q368fs      |
| Pat_26 | Post-Resistance | UBTF      | 7343   | 37 | 17 | 42290240  | 42290240  | Frame_Shift_Del | DEL | G   | - | 7  | 1510 | c.607delC         | c.(607-609)CAGfs       | p.Q203fs      |
| Pat_26 | Post-Resistance | UBTF      | 7343   | 37 | 17 | 42294029  | 42294029  | Frame_Shift_Del | DEL | C   | - | 7  | 1063 | c.102delG         | c.(100-102)ATGfs       | p.M34fs       |
| Pat_26 | Post-Resistance | PLCD3     | 113026 | 37 | 17 | 43192760  | 43192762  | In_Frame_Del    | DEL | TCC | - | 7  | 153  | c.1509_1511delGG  | c.(1507-1512)GAGGAT>GA | p.E503del     |
| Pat_26 | Post-Resistance | CTDP1     | 9150   | 37 | 18 | 77477959  | 77477959  | Frame_Shift_Del | DEL | G   | - | 7  | 182  | c.2360delG        | c.(2359-2361)CGGfs     | p.R787fs      |
| Pat_26 | Post-Resistance | ACSBG2    | 81616  | 37 | 19 | 6147614   | 6147614   | Frame_Shift_Del | DEL | C   | - | 7  | 1117 | c.225delC         | c.(223-225)GGCfs       | p.G75fs       |
| Pat_26 | Post-Resistance | LGI4      | 163175 | 37 | 19 | 35625552  | 35625554  | In_Frame_Del    | DEL | CAG | - | 7  | 105  | c.31_33delCTG     | c.(31-33)CTGdel        | p.L11del      |
| Pat_26 | Post-Resistance | RYR1      | 6261   | 37 | 19 | 38964047  | 38964047  | Frame_Shift_Del | DEL | C   | - | 7  | 348  | c.3796delC        | c.(3796-3798)CCCfs     | p.P1266fs     |
| Pat_26 | Post-Resistance | LENG8     | 114823 | 37 | 19 | 54963859  | 54963861  | In_Frame_Del    | DEL | GCA | - | 7  | 772  | c.243_245delGCAC  | c.(241-246)TTGCAG>TTG  | p.Q85del      |
| Pat_26 | Post-Resistance | ZEB2      | 9839   | 37 | 2  | 145274887 | 145274887 | Frame_Shift_Del | DEL | G   | - | 9  | 888  | c.31delC          | c.(31-33)CGGfs         | p.R11fs       |
| Pat_26 | Post-Resistance | ANKRD44   | 91526  | 37 | 2  | 197943383 | 197943384 | Frame_Shift_Del | DEL | TG  | - | 7  | 16   | c.1693_1694delCA  | c.(1693-1695)CATfs     | p.H565fs      |
| Pat_26 | Post-Resistance | CYP20A1   | 57404  | 37 | 2  | 204150380 | 204150380 | Frame_Shift_Del | DEL | A   | - | 8  | 204  | c.896delA         | c.(895-897)CAAsfs      | p.Q299fs      |
| Pat_26 | Post-Resistance | CTLA4     | 1493   | 37 | 2  | 204736166 | 204736166 | Frame_Shift_Del | DEL | T   | - | 7  | 748  | c.523delT         | c.(523-525)TTTfs       | p.F175fs      |
| Pat_26 | Post-Resistance | TNS1      | 7145   | 37 | 2  | 218712887 | 218712889 | In_Frame_Del    | DEL | GCT | - | 8  | 47   | c.1976_1978delAG  | c.(1975-1980)CAGCCT>CC | p.Q659del     |

|        |                 |          |        |    |    |           |           |                 |     |           |     |    |      |                  |                                   |               |
|--------|-----------------|----------|--------|----|----|-----------|-----------|-----------------|-----|-----------|-----|----|------|------------------|-----------------------------------|---------------|
| Pat_26 | Post-Resistance | INPP5D   | 3635   | 37 | 2  | 234072358 | 234072359 | Frame_Shift_Ins | INS | -         | C   | 7  | 653  | c.1246_1247insC  | c.(1246-1248)GCCfs                | p.A416fs      |
| Pat_26 | Post-Resistance | DSN1     | 79980  | 37 | 20 | 35399448  | 35399448  | Frame_Shift_Del | DEL | T         | -   | 9  | 539  | c.183delA        | c.(181-183)AAafs                  | p.K61fs       |
| Pat_26 | Post-Resistance | PSMA7    | 5688   | 37 | 20 | 60714134  | 60714134  | Frame_Shift_Del | DEL | C         | -   | 7  | 883  | c.468delG        | c.(466-468)TGGfs                  | p.W156fs      |
| Pat_26 | Post-Resistance | TCFL5    | 10732  | 37 | 20 | 61490718  | 61490719  | Frame_Shift_Del | DEL | CC        | -   | 8  | 1696 | c.991_992delGG   | c.(991-993)GGAfs                  | p.G331fs      |
| Pat_26 | Post-Resistance | SLC5A4   | 6527   | 37 | 22 | 32614619  | 32614621  | In_Frame_Del    | DEL | TCC       | -   | 17 | 285  | .1860_1862delGG  | (1858-1863)GAGGAA>GA              | p.620_621EE>I |
| Pat_26 | Post-Resistance | C22orf32 | 91689  | 37 | 22 | 42478046  | 42478048  | In_Frame_Del    | DEL | GAT       | -   | 14 | 953  | c.304_306delGAT  | c.(304-306)GATdel                 | p.D107del     |
| Pat_26 | Post-Resistance | C22orf9  | 23313  | 37 | 22 | 45598978  | 45598978  | Frame_Shift_Del | DEL | G         | -   | 7  | 952  | c.745delC        | c.(745-747)CAGfs                  | p.Q249fs      |
| Pat_26 | Post-Resistance | SRGAP3   | 9901   | 37 | 3  | 9034600   | 9034600   | Frame_Shift_Del | DEL | C         | -   | 7  | 671  | c.2548delG       | c.(2548-2550)GTGfs                | p.V850fs      |
| Pat_26 | Post-Resistance | RAD54L2  | 23132  | 37 | 3  | 51624506  | 51624508  | In_Frame_Del    | DEL | GAG       | -   | 7  | 68   | c.70_72delGAG    | c.(70-72)GAGdel                   | p.E30del      |
| Pat_26 | Post-Resistance | PRKCD    | 5580   | 37 | 3  | 53220653  | 53220653  | Frame_Shift_Del | DEL | G         | -   | 7  | 2146 | c.1294delG       | c.(1294-1296)GGGfs                | p.G432fs      |
| Pat_26 | Post-Resistance | ZNF721   | 170960 | 37 | 4  | 436417    | 436417    | Frame_Shift_Del | DEL | G         | -   | 8  | 843  | c.1839delC       | c.(1837-1839)TACfs                | p.Y613fs      |
| Pat_26 | Post-Resistance | CRIPAK   | 285464 | 37 | 4  | 1389360   | 1389361   | Frame_Shift_Ins | INS | -         | CA  | 8  | 1627 | c.1061_1062insCA | c.(1060-1062)CTCfs                | p.L354fs      |
| Pat_26 | Post-Resistance | NUDT9    | 53343  | 37 | 4  | 88344097  | 88344098  | Frame_Shift_Del | DEL | TC        | -   | 7  | 241  | c.40_41delTC     | c.(40-42)TCTfs                    | p.S14fs       |
| Pat_26 | Post-Resistance | KIAA0922 | 23240  | 37 | 4  | 154523492 | 154523492 | Splice_Site     | DEL | T         | -   | 7  | 1008 | c.2450_splice    | c.e22+2                           | p.V817_splice |
| Pat_26 | Post-Resistance | SH3RF1   | 57630  | 37 | 4  | 170043324 | 170043326 | In_Frame_Del    | DEL | CAG       | -   | 12 | 169  | .1271_1273delCT  | (1270-1275)GCTGGA>GC              | p.A424del     |
| Pat_26 | Post-Resistance | PPAP2A   | 8611   | 37 | 5  | 54721111  | 54721128  | In_Frame_Del    | DEL | TCTTTAAAG | -   | 8  | 181  | delCTTCTTTTAAAG  | ACTTCTTTTAAAGAAAG/                | p.TSFKER254d  |
| Pat_26 | Post-Resistance | CENPH    | 64946  | 37 | 5  | 68492902  | 68492902  | Frame_Shift_Del | DEL | A         | -   | 7  | 204  | c.337delA        | c.(337-339)AAafs                  | p.K113fs      |
| Pat_26 | Post-Resistance | NUDT12   | 83594  | 37 | 5  | 102894977 | 102894978 | Frame_Shift_Del | DEL | TC        | -   | 13 | 216  | c.398_399delGA   | c.(397-399)AGAfs                  | p.R133fs      |
| Pat_26 | Post-Resistance | APC      | 324    | 37 | 5  | 112173349 | 112173350 | Frame_Shift_Del | DEL | TC        | -   | 28 | 211  | c.2058_2059delTC | c.(2056-2061)AATCTCfs             | p.N686fs      |
| Pat_26 | Post-Resistance | AP3S1    | 1176   | 37 | 5  | 115202418 | 115202421 | Frame_Shift_Del | DEL | AAGA      | -   | 20 | 328  | :.121_124delAAG/ | c.(121-126)AAGAGAfs               | p.K41fs       |
| Pat_26 | Post-Resistance | PPIC     | 5480   | 37 | 5  | 122365013 | 122365014 | Frame_Shift_Del | DEL | AG        | -   | 8  | 303  | c.217_218delCT   | c.(217-219)CTAfs                  | p.L73fs       |
| Pat_26 | Post-Resistance | TCF7     | 6932   | 37 | 5  | 133473765 | 133473765 | Frame_Shift_Del | DEL | C         | -   | 7  | 1136 | c.457delC        | c.(457-459)CCCfs                  | p.P153fs      |
| Pat_26 | Post-Resistance | FAT2     | 2196   | 37 | 5  | 150886794 | 150886794 | Frame_Shift_Del | DEL | G         | -   | 8  | 484  | c.12438delC      | c.(12436-12438)CCCfs              | p.P4146fs     |
| Pat_26 | Post-Resistance | HAVCR2   | 84868  | 37 | 5  | 156535948 | 156535950 | In_Frame_Del    | DEL | AGC       | -   | 14 | 561  | c.45_47delGCT    | c.(43-48)CTGCTA>CTA               | p.15_16LL>L   |
| Pat_26 | Post-Resistance | UIMC1    | 51720  | 37 | 5  | 176395609 | 176395609 | Frame_Shift_Del | DEL | T         | -   | 29 | 201  | c.1147delA       | c.(1147-1149)AGCfs                | p.S383fs      |
| Pat_26 | Post-Resistance | NOL7     | 51406  | 37 | 6  | 13615667  | 13615668  | In_Frame_Ins    | INS | -         | GGA | 4  | 7    | c.77_78insGGA    | c.(76-78)TCG>TCGGAG               | p.30_31insE   |
| Pat_26 | Post-Resistance | SYNGAP1  | 8831   | 37 | 6  | 33411201  | 33411203  | In_Frame_Del    | DEL | CAC       | -   | 9  | 270  | .2872_2874delCA  | c.(2872-2874)CACdel               | p.H966del     |
| Pat_26 | Post-Resistance | FAM162B  | 221303 | 37 | 6  | 117073772 | 117073772 | Frame_Shift_Del | DEL | A         | -   | 7  | 669  | c.477delT        | c.(475-477)GCTfs                  | p.A159fs      |
| Pat_26 | Post-Resistance | ARID1B   | 57492  | 37 | 6  | 157100024 | 157100026 | In_Frame_Del    | DEL | GGA       | -   | 10 | 56   | c.787_789delGGA  | c.(787-789)GGAdel                 | p.G270del     |
| Pat_26 | Post-Resistance | EIF3B    | 8662   | 37 | 7  | 2405996   | 2405997   | Frame_Shift_Del | DEL | CT        | -   | 8  | 289  | c.1202_1203delCT | c.(1201-1203)CCTfs                | p.P401fs      |
| Pat_26 | Post-Resistance | TWISTNB  | 221830 | 37 | 7  | 19738111  | 19738113  | In_Frame_Del    | DEL | TTC       | -   | 8  | 931  | c.843_845delGAAc | (841-846)AAGAAA>AAA               | p.281_282KK>I |
| Pat_26 | Post-Resistance | GARS     | 2617   | 37 | 7  | 30634583  | 30634585  | In_Frame_Del    | DEL | CTG       | -   | 13 | 185  | c.46_48delCTG    | c.(46-48)CTGdel                   | p.L20del      |
| Pat_26 | Post-Resistance | INHBA    | 3624   | 37 | 7  | 41739928  | 41739928  | Frame_Shift_Del | DEL | C         | -   | 7  | 750  | c.45delG         | c.(43-45)TGGfs                    | p.W15fs       |
| Pat_26 | Post-Resistance | TRRAP    | 8295   | 37 | 7  | 98569547  | 98569548  | Frame_Shift_Del | DEL | GG        | -   | 7  | 446  | :.7797_7798delGC | c.(7795-7800)CTGGACfs             | p.L2599fs     |
| Pat_26 | Post-Resistance | C8orf44  | 56260  | 37 | 8  | 67589968  | 67589968  | Frame_Shift_Del | DEL | A         | -   | 8  | 487  | c.25delA         | c.(25-27)AACfs                    | p.N9fs        |
| Pat_26 | Post-Resistance | ATAD2    | 29028  | 37 | 8  | 124368685 | 124368685 | Frame_Shift_Del | DEL | A         | -   | 11 | 208  | c.1590delT       | c.(1588-1590)TTTfs                | p.F530fs      |
| Pat_26 | Post-Resistance | BAG1     | 573    | 37 | 9  | 33255870  | 33255870  | Frame_Shift_Del | DEL | T         | -   | 8  | 405  | c.941delA        | c.(940-942)AAGfs                  | p.K314fs      |
| Pat_26 | Post-Resistance | CIZ1     | 25792  | 37 | 9  | 130950208 | 130950209 | Frame_Shift_Del | DEL | CC        | -   | 8  | 792  | c.291_292delGG   | c.(289-294)CTGGACfs               | p.L97fs       |
| Pat_26 | Post-Resistance | PRRG1    | 5638   | 37 | X  | 37312611  | 37312611  | Frame_Shift_Del | DEL | C         | -   | 9  | 431  | c.394delC        | c.(394-396)CCCfs                  | p.P132fs      |
| Pat_26 | Post-Resistance | LAS1L    | 81887  | 37 | X  | 64732694  | 64732694  | Frame_Shift_Del | DEL | C         | -   | 4  | 2    | c.2166delG       | c.(2164-2166)GGGfs                | p.G722fs      |
| Pat_26 | Post-Resistance | NKAP     | 79576  | 37 | X  | 119072752 | 119072753 | Frame_Shift_Del | DEL | TC        | -   | 7  | 234  | c.407_408delGA   | c.(406-408)AGAfs                  | p.R136fs      |
| Pat_29 | Pre-Treatment   | MST1P9   | 11223  | 37 | 1  | 17086085  | 17086086  | Frame_Shift_Ins | INS | -         | C   | 7  | 92   | c.811_812insG    | c.(811-813)GCGfs                  | p.A271fs      |
| Pat_29 | Pre-Treatment   | RBMXL1   | 494115 | 37 | 1  | 89448604  | 89448605  | Frame_Shift_Ins | INS | -         | GG  | 7  | 425  | c.905_906insCC   | c.(904-906)CCafs                  | p.P302fs      |
| Pat_29 | Pre-Treatment   | RPTN     | 126638 | 37 | 1  | 152127881 | 152127884 | Frame_Shift_Del | DEL | TGTC      | -   | 10 | 1524 | 1691_1694delGAC  | c.(1690-1695)AGACAAfs             | p.R564fs      |
| Pat_29 | Pre-Treatment   | LOR      | 4014   | 37 | 1  | 153233508 | 153233510 | In_Frame_Del    | DEL | GCA       | -   | 4  | 5    | c.83_85delGCA    | c.(82-87)GGCAGC>GGC               | p.S29del      |
| Pat_29 | Pre-Treatment   | ANK3     | 288    | 37 | 10 | 61828745  | 61828747  | In_Frame_Del    | DEL | GTG       | -   | 7  | 110  | 11892_11894delC/ | 11890-11895)ACCACT>A(3964_3965TT> |               |
| Pat_29 | Pre-Treatment   | CPXM2    | 119587 | 37 | 10 | 125528165 | 125528167 | In_Frame_Del    | DEL | CAG       | -   | 7  | 282  | .1174_1176delCTC | c.(1174-1176)CTGdel               | p.L392del     |

|        |                 |          |        |    |    |           |           |                 |     |          |         |    |     |                  |                              |               |
|--------|-----------------|----------|--------|----|----|-----------|-----------|-----------------|-----|----------|---------|----|-----|------------------|------------------------------|---------------|
| Pat_29 | Pre-Treatment   | NFRKB    | 4798   | 37 | 11 | 129752495 | 129752496 | Frame_Shift_Ins | INS | -        | T       | 7  | 95  | c.932_933insA    | c.(931-933)AAGfs             | p.K311fs      |
| Pat_29 | Pre-Treatment   | PABPC3   | 5042   | 37 | 13 | 25671273  | 25671273  | Frame_Shift_Del | DEL | G        | -       | 28 | 478 | c.937delG        | c.(937-939)GCGfs             | p.A313fs      |
| Pat_29 | Pre-Treatment   | ZNF609   | 23060  | 37 | 15 | 64972995  | 64972997  | In_Frame_Del    | DEL | CAC      | -       | 8  | 290 | .4096_4098delCA  | c.(4096-4098)CACdel          | p.H1371del    |
| Pat_29 | Pre-Treatment   | KDM6B    | 23135  | 37 | 17 | 7751859   | 7751861   | In_Frame_Del    | DEL | CAC      | -       | 7  | 72  | .2253_2255delCA  | c.(2251-2256)GTCACC>GT       | p.T762del     |
| Pat_29 | Pre-Treatment   | HAMP     | 57817  | 37 | 19 | 35773520  | 35773522  | In_Frame_Del    | DEL | CTC      | -       | 10 | 243 | c.40_42delCTC    | c.(40-42)CTCdel              | p.L18del      |
| Pat_29 | Pre-Treatment   | ATP6V1C2 | 245973 | 37 | 2  | 10917819  | 10917820  | Frame_Shift_Del | DEL | AG       | -       | 12 | 112 | c.934_935delAG   | c.(934-936)AGAfs             | p.R312fs      |
| Pat_29 | Pre-Treatment   | FRG1B    | 284802 | 37 | 20 | 29628229  | 29628230  | Frame_Shift_Ins | INS | -        | A       | 9  | 277 | c.141_142insA    | c.(139-144)GGGAAfs           | p.G47fs       |
| Pat_29 | Pre-Treatment   | MED15    | 51586  | 37 | 22 | 20918916  | 20918918  | In_Frame_Del    | DEL | CAG      | -       | 8  | 26  | c.631_633delCAG  | c.(631-633)CAGdel            | p.Q218del     |
| Pat_29 | Pre-Treatment   | TFIP11   | 24144  | 37 | 22 | 26906183  | 26906185  | In_Frame_Del    | DEL | TCA      | -       | 7  | 182 | c.54_56delTGA    | c.(52-57)GATGAC>GAC          | p.18_19DD>D   |
| Pat_29 | Pre-Treatment   | EDEM1    | 9695   | 37 | 3  | 5248941   | 5248941   | Frame_Shift_Del | DEL | T        | -       | 8  | 95  | c.1321delT       | c.(1321-1323)TTTfs           | p.F441fs      |
| Pat_29 | Pre-Treatment   | FIP1L1   | 81608  | 37 | 4  | 54319248  | 54319249  | Frame_Shift_Del | DEL | AG       | -       | 15 | 90  | c.1447_1448delAC | c.(1447-1449)AGAfs           | p.R483fs      |
| Pat_29 | Pre-Treatment   | SASH1    | 23328  | 37 | 6  | 148664242 | 148664243 | In_Frame_Ins    | INS | -        | GAGCCC  | 4  | 6   | .39_40insGAGCC   | c.(37-42)insGAGCCC           | p.23_24insEP  |
| Pat_29 | Pre-Treatment   | STAU2    | 27067  | 37 | 8  | 74507471  | 74507471  | Frame_Shift_Del | DEL | T        | -       | 8  | 97  | c.1091delA       | c.(1090-1092)AATfs           | p.N364fs      |
| Pat_29 | Pre-Treatment   | VCP      | 7415   | 37 | 9  | 35059647  | 35059647  | Frame_Shift_Del | DEL | T        | -       | 10 | 145 | c.1847delA       | c.(1846-1848)AATfs           | p.N616fs      |
| Pat_29 | Pre-Treatment   | PHF8     | 23133  | 37 | X  | 54011405  | 54011407  | In_Frame_Del    | DEL | CTC      | -       | 7  | 182 | .2491_2493delGA  | c.(2491-2493)GAGdel          | p.E831del     |
| Pat_29 | Pre-Treatment   | IRS4     | 8471   | 37 | X  | 107977802 | 107977803 | Frame_Shift_Ins | INS | -        | C       | 13 | 361 | c.1772_1773insG  | c.(1771-1773)GGCfs           | p.G591fs      |
| Pat_29 | Pre-Treatment   | CD99L2   | 83692  | 37 | X  | 149984524 | 149984526 | In_Frame_Del    | DEL | GTG      | -       | 8  | 261 | c.156_158delCAC  | c.(154-159)ACCACA>ACA        | p.52_53TT>T   |
| Pat_29 | Post-Resistance | ARID1A   | 8289   | 37 | 1  | 27100182  | 27100184  | In_Frame_Del    | DEL | GCA      | -       | 8  | 110 | .3978_3980delGC  | c.(3976-3981)CCGCAG>CC       | p.Q1334del    |
| Pat_29 | Post-Resistance | CPXM2    | 119587 | 37 | 10 | 125528165 | 125528167 | In_Frame_Del    | DEL | CAG      | -       | 12 | 372 | .1174_1176delCT  | c.(1174-1176)CTGdel          | p.L392del     |
| Pat_29 | Post-Resistance | KRTAP5-8 | 57830  | 37 | 11 | 71249125  | 71249126  | In_Frame_Ins    | INS | -        | GCTCCGG | 12 | 184 | .3CTGTGGCTCC     | c.GGCTGTGGCTCCGGC_23insGCGSC |               |
| Pat_29 | Post-Resistance | PABPC3   | 5042   | 37 | 13 | 25671273  | 25671273  | Frame_Shift_Del | DEL | G        | -       | 13 | 535 | c.937delG        | c.(937-939)GCGfs             | p.A313fs      |
| Pat_29 | Post-Resistance | SLC24A1  | 9187   | 37 | 15 | 65918177  | 65918179  | In_Frame_Del    | DEL | CTG      | -       | 8  | 114 | .1759_1761delCT  | c.(1759-1761)CTGdel          | p.L591del     |
| Pat_29 | Post-Resistance | SRCAP    | 10847  | 37 | 16 | 30736370  | 30736371  | Frame_Shift_Ins | INS | -        | C       | 10 | 211 | c.5625_5626insC  | c.(5623-5628)CAGCCfs         | p.Q1875fs     |
| Pat_29 | Post-Resistance | FXR2     | 9513   | 37 | 17 | 7495872   | 7495874   | In_Frame_Del    | DEL | CGG      | -       | 11 | 456 | .1773_1775delCC  | c.(1771-1776)CGCCGT>CG       | p.591_592RR>I |
| Pat_29 | Post-Resistance | PFAS     | 5198   | 37 | 17 | 8167575   | 8167576   | Frame_Shift_Ins | INS | -        | A       | 9  | 88  | c.1837_1838insA  | c.(1837-1839)CAGfs           | p.Q613fs      |
| Pat_29 | Post-Resistance | HAMP     | 57817  | 37 | 19 | 35773520  | 35773522  | In_Frame_Del    | DEL | CTC      | -       | 11 | 296 | c.40_42delCTC    | c.(40-42)CTCdel              | p.L18del      |
| Pat_29 | Post-Resistance | CNOT3    | 4849   | 37 | 19 | 54649671  | 54649671  | Frame_Shift_Del | DEL | T        | -       | 7  | 189 | c.729delT        | c.(727-729)CCCfs             | p.P243fs      |
| Pat_29 | Post-Resistance | ATP6V1C2 | 245973 | 37 | 2  | 10917819  | 10917820  | Frame_Shift_Del | DEL | AG       | -       | 11 | 124 | c.934_935delAG   | c.(934-936)AGAfs             | p.R312fs      |
| Pat_29 | Post-Resistance | FRG1B    | 284802 | 37 | 20 | 29628226  | 29628226  | Splice_Site     | DEL | G        | -       | 11 | 209 | c.139_splice     | c.e3-1                       | p.G47_splice  |
| Pat_29 | Post-Resistance | FRG1B    | 284802 | 37 | 20 | 29628229  | 29628230  | Frame_Shift_Ins | INS | -        | A       | 14 | 206 | c.141_142insA    | c.(139-144)GGGAAfs           | p.G47fs       |
| Pat_29 | Post-Resistance | MED12L   | 116931 | 37 | 3  | 151148114 | 151148116 | In_Frame_Del    | DEL | CAG      | -       | 8  | 123 | .6331_6333delCA  | c.(6331-6333)CAGdel          | p.Q2115del    |
| Pat_29 | Post-Resistance | CRIPAK   | 285464 | 37 | 4  | 1389462   | 1389463   | Frame_Shift_Del | DEL | CG       | -       | 8  | 557 | c.1163_1164delCC | c.(1162-1164)ACGfs           | p.T388fs      |
| Pat_29 | Post-Resistance | FIP1L1   | 81608  | 37 | 4  | 54319248  | 54319249  | Frame_Shift_Del | DEL | AG       | -       | 13 | 86  | c.1447_1448delAC | c.(1447-1449)AGAfs           | p.R483fs      |
| Pat_29 | Post-Resistance | THBS4    | 7060   | 37 | 5  | 79372774  | 79372776  | In_Frame_Del    | DEL | TGA      | -       | 8  | 504 | .1989_1991delTG  | c.(1987-1992)TGTGAT>TG       | p.D668del     |
| Pat_29 | Post-Resistance | PCDHB3   | 56132  | 37 | 5  | 140481964 | 140481976 | Frame_Shift_Del | DEL | .GGCGGCT | -       | 12 | 77  | .743delCCGGGCG   | c.(1743)CCCGGGCGGCT          | p.P577fs      |
| Pat_29 | Post-Resistance | TREML2   | 79865  | 37 | 6  | 41168714  | 41168716  | In_Frame_Del    | DEL | CAG      | -       | 8  | 69  | c.31_33delCTG    | c.(31-33)CTGdel              | p.L11del      |
| Pat_29 | Post-Resistance | PHF8     | 23133  | 37 | X  | 54011405  | 54011407  | In_Frame_Del    | DEL | CTC      | -       | 13 | 208 | .2491_2493delGA  | c.(2491-2493)GAGdel          | p.E831del     |
| Pat_34 | Pre-Treatment   | PHACTR4  | 65979  | 37 | 1  | 28785729  | 28785730  | Frame_Shift_Ins | INS | -        | A       | 8  | 104 | c.150_151insA    | c.(148-153)AGGAAfs           | p.R50fs       |
| Pat_34 | Pre-Treatment   | LRRIQ3   | 127255 | 37 | 1  | 74575212  | 74575213  | Frame_Shift_Ins | INS | -        | T       | 8  | 164 | c.732_733insA    | c.(730-735)AAACAGfs          | p.K244fs      |
| Pat_34 | Pre-Treatment   | FNDC7    | 163479 | 37 | 1  | 109276138 | 109276138 | Frame_Shift_Del | DEL | A        | -       | 7  | 149 | c.2124delA       | c.(2122-2124)CCAfs           | p.P708fs      |
| Pat_34 | Pre-Treatment   | MCL1     | 4170   | 37 | 1  | 150551492 | 150551494 | In_Frame_Del    | DEL | TCC      | -       | 10 | 308 | c.513_515delGGA  | c.(511-516)GAGGAC>GAC        | p.E171del     |
| Pat_34 | Pre-Treatment   | TM9SF3   | 56889  | 37 | 10 | 98336475  | 98336475  | Frame_Shift_Del | DEL | T        | -       | 7  | 380 | c.214delA        | c.(214-216)AGTfs             | p.S72fs       |
| Pat_34 | Pre-Treatment   | FNBP4    | 23360  | 37 | 11 | 47744589  | 47744591  | In_Frame_Del    | DEL | GGA      | -       | 4  | 7   | .2742_2744delTC  | c.(2740-2745)CCTCCA>CC       | p.914_915PP>I |
| Pat_34 | Pre-Treatment   | CASP5    | 838    | 37 | 11 | 104879687 | 104879687 | Frame_Shift_Del | DEL | T        | -       | 15 | 148 | c.28delA         | c.(28-30)AGGfs               | p.R10fs       |
| Pat_34 | Pre-Treatment   | DDX6     | 1656   | 37 | 11 | 118629613 | 118629614 | Splice_Site     | INS | -        | G       | 7  | 420 | c.865_splice     | c.e9-1                       | p.N289_splice |
| Pat_34 | Pre-Treatment   | PRB2     | 653247 | 37 | 12 | 11546732  | 11546733  | In_Frame_Ins    | INS | -        | AGA     | 8  | 252 | c.279_280insTCT  | c.(277-282)insTCT            | p.93_94insS   |
| Pat_34 | Pre-Treatment   | HOXC13   | 3229   | 37 | 12 | 54332774  | 54332776  | In_Frame_Del    | DEL | CGG      | -       | 3  | 4   | c.84_86delCGG    | c.(82-87)ATCGGC>ATC          | p.G38del      |



|        |               |          |        |    |    |           |           |                 |     |          |    |    |     |                   |                        |               |
|--------|---------------|----------|--------|----|----|-----------|-----------|-----------------|-----|----------|----|----|-----|-------------------|------------------------|---------------|
| Pat_34 | Pre-Treatment | OR6C75   | 390323 | 37 | 12 | 55759486  | 55759486  | Frame_Shift_Del | DEL | T        | -  | 8  | 215 | c.592delT         | c.(592-594)TTTfs       | p.F198fs      |
| Pat_34 | Pre-Treatment | TPCN1    | 53373  | 37 | 12 | 113704096 | 113704098 | In_Frame_Del    | DEL | CTG      | -  | 14 | 720 | c.349_351delCTG   | c.(349-351)CTGdel      | p.L122del     |
| Pat_34 | Pre-Treatment | SBNO1    | 55206  | 37 | 12 | 123794283 | 123794283 | Frame_Shift_Del | DEL | T        | -  | 9  | 224 | c.3416delA        | c.(3415-3417)AATfs     | p.N1139fs     |
| Pat_34 | Pre-Treatment | HECTD1   | 25831  | 37 | 14 | 31597933  | 31597933  | Frame_Shift_Del | DEL | A        | -  | 17 | 49  | c.4644delT        | c.(4642-4644)TTTTfs    | p.F1548fs     |
| Pat_34 | Pre-Treatment | NIPA1    | 123606 | 37 | 15 | 23086365  | 23086367  | In_Frame_Del    | DEL | GCC      | -  | 2  | 4   | c.45_47delGGC     | c.(43-48)GCGGCC>GCC    | p.15_16AA>A   |
| Pat_34 | Pre-Treatment | SLTM     | 79811  | 37 | 15 | 59182525  | 59182526  | Frame_Shift_Del | DEL | TC       | -  | 12 | 475 | c.2033_2034delGA  | c.(2032-2034)AGAFs     | p.R678fs      |
| Pat_34 | Pre-Treatment | EIF3CL   | 728689 | 37 | 16 | 28734579  | 28734581  | In_Frame_Del    | DEL | GAG      | -  | 8  | 906 | c.871_873delGAG   | c.(871-873)GAGdel      | p.E295del     |
| Pat_34 | Pre-Treatment | RABEP2   | 79874  | 37 | 16 | 28931200  | 28931202  | In_Frame_Del    | DEL | CTG      | -  | 8  | 64  | c.337_339delCAG   | c.(337-339)CAGdel      | p.Q113del     |
| Pat_34 | Pre-Treatment | COQ9     | 57017  | 37 | 16 | 57486732  | 57486734  | In_Frame_Del    | DEL | GAG      | -  | 8  | 318 | c.262_264delGAG   | c.(262-264)GAGdel      | p.E91del      |
| Pat_34 | Pre-Treatment | SLC9A5   | 6553   | 37 | 16 | 67300017  | 67300019  | In_Frame_Del    | DEL | GAG      | -  | 8  | 134 | c.2107_2109delGAI | c.(2107-2109)GAGdel    | p.E708del     |
| Pat_34 | Pre-Treatment | NFAT5    | 10725  | 37 | 16 | 69726420  | 69726422  | In_Frame_Del    | DEL | CAG      | -  | 7  | 102 | c.2638_2640delCAI | c.(2638-2640)CAGdel    | p.Q888del     |
| Pat_34 | Pre-Treatment | KIAA0182 | 23199  | 37 | 16 | 85682290  | 85682290  | Frame_Shift_Del | DEL | C        | -  | 7  | 110 | c.359delC         | c.(358-360)ACCfs       | p.T120fs      |
| Pat_34 | Pre-Treatment | CCDC144B | 284047 | 37 | 17 | 18498059  | 18498060  | Splice_Site     | INS | -        | A  | 2  | 4   | c.1867_splice     | c.e9-1                 | p.E623_splice |
| Pat_34 | Pre-Treatment | SLC8A2   | 6543   | 37 | 19 | 47935681  | 47935683  | In_Frame_Del    | DEL | TCC      | -  | 14 | 264 | c.2130_2132delGG  | c.(2128-2133)GAGGAC>GA | p.E710del     |
| Pat_34 | Pre-Treatment | LRIG1    | 26018  | 37 | 3  | 66436625  | 66436627  | In_Frame_Del    | DEL | GCT      | -  | 7  | 522 | c.1567_1569delAGI | c.(1567-1569)AGCdel    | p.S524del     |
| Pat_34 | Pre-Treatment | PDZD2    | 23037  | 37 | 5  | 32090174  | 32090175  | Frame_Shift_Ins | INS | -        | GG | 94 | 163 | c.6620_6621insGC  | c.(6619-6621)TCGfs     | p.S2207fs     |
| Pat_34 | Pre-Treatment | OSMR     | 9180   | 37 | 5  | 38886195  | 38886195  | Frame_Shift_Del | DEL | A        | -  | 36 | 39  | c.894delA         | c.(892-894)ATAfs       | p.I298fs      |
| Pat_34 | Pre-Treatment | APC      | 324    | 37 | 5  | 112173823 | 112173823 | Frame_Shift_Del | DEL | T        | -  | 10 | 28  | c.2532delT        | c.(2530-2532)TCTfs     | p.S844fs      |
| Pat_34 | Pre-Treatment | TIMD4    | 91937  | 37 | 5  | 156378745 | 156378747 | In_Frame_Del    | DEL | TTG      | -  | 7  | 329 | c.455_457delCAA   | c.(454-459)ACAAGC>AGC  | p.T152del     |
| Pat_34 | Pre-Treatment | SLC17A2  | 10246  | 37 | 6  | 25921520  | 25921520  | Frame_Shift_Del | DEL | T        | -  | 7  | 258 | c.361delA         | c.(361-363)ATGfs       | p.M121fs      |
| Pat_34 | Pre-Treatment | MAS1L    | 116511 | 37 | 6  | 29455156  | 29455157  | Frame_Shift_Del | DEL | AC       | -  | 7  | 199 | c.523_524delGT    | c.(523-525)GTCfs       | p.V175fs      |
| Pat_34 | Pre-Treatment | HLA-F    | 3134   | 37 | 6  | 29694802  | 29694803  | Frame_Shift_Ins | INS | -        | T  | 10 | 671 | c.1179_1180insT   | c.(1177-1182)TTGTTTfs  | p.L393fs      |
| Pat_34 | Pre-Treatment | TREML2   | 79865  | 37 | 6  | 41168714  | 41168716  | In_Frame_Del    | DEL | CAG      | -  | 7  | 97  | c.31_33delCTG     | c.(31-33)CTGdel        | p.L11del      |
| Pat_34 | Pre-Treatment | MTHFD1L  | 25902  | 37 | 6  | 151358163 | 151358164 | Frame_Shift_Ins | INS | -        | A  | 7  | 133 | c.2757_2758insA   | c.(2755-2760)GACAAAs   | p.D919fs      |
| Pat_34 | Pre-Treatment | PHF14    | 9678   | 37 | 7  | 11075380  | 11075381  | Frame_Shift_Del | DEL | AG       | -  | 7  | 644 | c.1569_1570delIAC | c.(1567-1572)CAAGAGfs  | p.Q523fs      |
| Pat_34 | Pre-Treatment | OGDH     | 4967   | 37 | 7  | 44684936  | 44684936  | Frame_Shift_Del | DEL | T        | -  | 8  | 399 | c.233delT         | c.(232-234)ATTfs       | p.I78fs       |
| Pat_34 | Pre-Treatment | PEX1     | 5189   | 37 | 7  | 92146721  | 92146721  | Frame_Shift_Del | DEL | T        | -  | 8  | 171 | c.1108delA        | c.(1108-1110)ATTfs     | p.I370fs      |
| Pat_34 | Pre-Treatment | FOXP2    | 93986  | 37 | 7  | 114270016 | 114270018 | In_Frame_Del    | DEL | CAG      | -  | 7  | 188 | c.553_555delCAG   | c.(553-555)CAGdel      | p.Q191del     |
| Pat_34 | Pre-Treatment | ZNF395   | 55893  | 37 | 8  | 28209226  | 28209228  | In_Frame_Del    | DEL | GCA      | -  | 8  | 159 | c.1017_1019delITG | c.(1015-1020)GCTGCC>GC | p.339_340AA>A |
| Pat_34 | Pre-Treatment | ZFHX4    | 79776  | 37 | 8  | 77765299  | 77765301  | In_Frame_Del    | DEL | CCT      | -  | 9  | 7   | c.6007_6009delICC | c.(6007-6009)CCTdel    | p.P2016del    |
| Pat_34 | Pre-Treatment | KCNQ3    | 3786   | 37 | 8  | 133150233 | 133150233 | Frame_Shift_Del | DEL | T        | -  | 8  | 200 | c.1599delA        | c.(1597-1599)AAAfs     | p.K533fs      |
| Pat_34 | Pre-Treatment | PRRG1    | 5638   | 37 | X  | 37312611  | 37312611  | Frame_Shift_Del | DEL | C        | -  | 8  | 226 | c.394delC         | c.(394-396)CCCfs       | p.P132fs      |
| Pat_34 | Pre-Treatment | MAGEC1   | 9947   | 37 | X  | 140994844 | 140994846 | In_Frame_Del    | DEL | CCT      | -  | 7  | 153 | c.1654_1656delCC  | c.(1654-1656)CCTdel    | p.P553del     |
| Pat_46 | Pre-Treatment | SPRR3    | 6707   | 37 | 1  | 152975806 | 152975829 | In_Frame_Del    | DEL | CACCAAGG | -  | 13 | 93  | c.1654_1656delCC  | c.(1654-1656)CCTdel    | p.P553del     |
| Pat_46 | Pre-Treatment | TCF7L2   | 6934   | 37 | 10 | 114925316 | 114925317 | Frame_Shift_Ins | INS | -        | A  | 7  | 97  | c.1394_1395insA   | c.(1393-1395)AGAFs     | p.R465fs      |
| Pat_46 | Pre-Treatment | GPR19    | 2842   | 37 | 12 | 12814274  | 12814274  | Frame_Shift_Del | DEL | T        | -  | 7  | 169 | c.1109delA        | c.(1108-1110)AACfs     | p.N370fs      |
| Pat_46 | Pre-Treatment | ANXA2    | 302    | 37 | 15 | 60646357  | 60646358  | Frame_Shift_Ins | INS | -        | C  | 20 | 60  | c.583_584insG     | c.(583-585)GCTfs       | p.A195fs      |
| Pat_46 | Pre-Treatment | NPIP     | 9284   | 37 | 16 | 15045758  | 15045759  | Frame_Shift_Ins | INS | -        | GT | 8  | 183 | c.929_930insGT    | c.(928-930)GAGfs       | p.E310fs      |
| Pat_46 | Pre-Treatment | SRCAP    | 10847  | 37 | 16 | 30736370  | 30736371  | Frame_Shift_Ins | INS | -        | C  | 9  | 184 | c.5625_5626insC   | c.(5623-5628)CAGCCfs   | p.Q1875fs     |
| Pat_46 | Pre-Treatment | FAM83G   | 644815 | 37 | 17 | 18891619  | 18891620  | Frame_Shift_Ins | INS | -        | AC | 22 | 57  | c.630_631insGT    | c.(628-633)AGTAACfs    | p.S210fs      |
| Pat_46 | Pre-Treatment | PLCD3    | 113026 | 37 | 17 | 43192760  | 43192762  | In_Frame_Del    | DEL | TCC      | -  | 7  | 64  | c.1509_1511delIGG | c.(1507-1512)GAGGAT>GA | p.E503del     |
| Pat_46 | Pre-Treatment | UNC13A   | 23025  | 37 | 19 | 17766924  | 17766926  | In_Frame_Del    | DEL | CCT      | -  | 2  | 4   | c.1313_1315delAGI | c.(1312-1317)GAGGTG>GT | p.E438del     |
| Pat_46 | Pre-Treatment | LILRB1   | 10859  | 37 | 19 | 55143029  | 55143030  | Frame_Shift_Ins | INS | -        | G  | 15 | 53  | c.149_150insG     | c.(148-150)CAGfs       | p.Q50fs       |
| Pat_46 | Pre-Treatment | SLC9A4   | 389015 | 37 | 2  | 103149137 | 103149137 | Frame_Shift_Del | DEL | A        | -  | 10 | 67  | c.2387delA        | c.(2386-2388)CAAs      | p.Q796fs      |
| Pat_46 | Pre-Treatment | TP53TG5  | 27296  | 37 | 20 | 44004170  | 44004170  | Frame_Shift_Del | DEL | T        | -  | 12 | 54  | c.277delA         | c.(277-279)ACAs        | p.T93fs       |
| Pat_46 | Pre-Treatment | ARFGAP3  | 26286  | 37 | 22 | 43213780  | 43213780  | Frame_Shift_Del | DEL | T        | -  | 9  | 234 | c.896delA         | c.(895-897)AATfs       | p.N299fs      |
| Pat_46 | Pre-Treatment | SLAIN2   | 57606  | 37 | 4  | 48344125  | 48344127  | In_Frame_Del    | DEL | GGA      | -  | 2  | 4   | c.369_371delGGA   | c.(367-372)TGGAG>TGC   | p.E128del     |

|        |                 |           |        |    |    |           |           |                 |     |          |      |    |     |                   |                                     |             |
|--------|-----------------|-----------|--------|----|----|-----------|-----------|-----------------|-----|----------|------|----|-----|-------------------|-------------------------------------|-------------|
| Pat_46 | Pre-Treatment   | EYA4      | 2070   | 37 | 6  | 133802671 | 133802671 | Frame_Shift_Del | DEL | T        | -    | 55 | 84  | c.1041delT        | c.(1039-1041)TCTfs                  | p.S347fs    |
| Pat_46 | Pre-Treatment   | BMP1      | 649    | 37 | 8  | 22054260  | 22054260  | Frame_Shift_Del | DEL | C        | -    | 8  | 41  | c.1833delC        | c.(1831-1833)TACfs                  | p.Y611fs    |
| Pat_46 | Pre-Treatment   | CDKN2A    | 1029   | 37 | 9  | 21970915  | 21970915  | Frame_Shift_Del | DEL | G        | -    | 50 | 30  | c.443delC         | c.(442-444)GCGfs                    | p.A148fs    |
| Pat_46 | Pre-Treatment   | PHF2      | 5253   | 37 | 9  | 96422612  | 96422612  | Frame_Shift_Del | DEL | A        | -    | 4  | 4   | c.1468delA        | c.(1468-1470)AAAFs                  | p.K490fs    |
| Pat_46 | Pre-Treatment   | MXRA5     | 25878  | 37 | X  | 3228759   | 3228759   | Frame_Shift_Del | DEL | G        | -    | 2  | 4   | c.7485delC        | c.(7483-7485)ATCfs                  | p.I2495fs   |
| Pat_46 | Pre-Treatment   | CXorf23   | 256643 | 37 | X  | 19983706  | 19983706  | Frame_Shift_Del | DEL | G        | -    | 24 | 45  | c.730delC         | c.(730-732)CTCfs                    | p.L244fs    |
| Pat_46 | Post-Resistance | PTPN6     | 5777   | 37 | 12 | 7070069   | 7070070   | Frame_Shift_Del | DEL | CT       | -    | 2  | 4   | c.1774_1775delCT  | c.(1774-1776)CTCfs                  | p.L592fs    |
| Pat_46 | Post-Resistance | CKB       | 1152   | 37 | 14 | 103988211 | 103988211 | Frame_Shift_Del | DEL | A        | -    | 2  | 4   | c.425delT         | c.(424-426)CTCfs                    | p.L142fs    |
| Pat_46 | Post-Resistance | SECTM1    | 6398   | 37 | 17 | 80285091  | 80285091  | Frame_Shift_Del | DEL | G        | -    | 2  | 4   | c.26delC          | c.(25-27)CCTfs                      | p.P9fs      |
| Pat_46 | Post-Resistance | KIAA0240  | 23506  | 37 | 6  | 42823616  | 42823616  | Frame_Shift_Del | DEL | A        | -    | 7  | 178 | c.2069delA        | c.(2068-2070)CAAfs                  | p.Q690fs    |
| Pat_46 | Post-Resistance | EYA4      | 2070   | 37 | 6  | 133802671 | 133802671 | Frame_Shift_Del | DEL | T        | -    | 17 | 128 | c.1041delT        | c.(1039-1041)TCTfs                  | p.S347fs    |
| Pat_46 | Post-Resistance | MLLT4     | 4301   | 37 | 6  | 168366692 | 168366694 | In_Frame_Del    | DEL | GAG      | -    | 2  | 4   | c.5233_5235delGAG | c.(5233-5235)GAGgdel                | p.E1750del  |
| Pat_46 | Post-Resistance | CXorf23   | 256643 | 37 | X  | 19983706  | 19983706  | Frame_Shift_Del | DEL | G        | -    | 9  | 44  | c.730delC         | c.(730-732)CTCfs                    | p.L244fs    |
| Pat_48 | Pre-Treatment   | PTEN      | 5728   | 37 | 10 | 89685308  | 89685309  | Frame_Shift_Ins | INS | -        | CAAT | 13 | 5   | c.203_204insCAAT  | c.(202-204)TACfs                    | p.Y68fs     |
| Pat_48 | Pre-Treatment   | ADCY4     | 196883 | 37 | 14 | 24803757  | 24803759  | In_Frame_Del    | DEL | CAG      | -    | 3  | 5   | c.100_102delCTG   | c.(100-102)CTGdel                   | p.L34del    |
| Pat_48 | Pre-Treatment   | EIF2AK4   | 440275 | 37 | 15 | 40282508  | 40282508  | Frame_Shift_Del | DEL | T        | -    | 8  | 242 | c.2561delT        | c.(2560-2562)ATTfs                  | p.I854fs    |
| Pat_48 | Pre-Treatment   | LOC342346 | 342346 | 37 | 16 | 4650184   | 4650186   | In_Frame_Del    | DEL | CTG      | -    | 2  | 4   | c.3292_3294delCTG | c.(3292-3294)CTGdel                 | p.L1101del  |
| Pat_48 | Pre-Treatment   | USP43     | 124739 | 37 | 17 | 9631801   | 9631801   | Frame_Shift_Del | DEL | A        | -    | 2  | 4   | c.2866delA        | c.(2866-2868)AAGfs                  | p.K956fs    |
| Pat_48 | Pre-Treatment   | C18orf34  | 374864 | 37 | 18 | 30913143  | 30913143  | Frame_Shift_Del | DEL | T        | -    | 3  | 4   | c.874delA         | c.(874-876)ATGfs                    | p.M292fs    |
| Pat_48 | Pre-Treatment   | TTN       | 7273   | 37 | 2  | 179502131 | 179502131 | Frame_Shift_Del | DEL | T        | -    | 2  | 4   | c.33188delA       | c.(33187-33189)AAGfs                | p.K11063fs  |
| Pat_48 | Pre-Treatment   | CLASP2    | 23122  | 37 | 3  | 33602361  | 33602361  | Frame_Shift_Del | DEL | T        | -    | 7  | 187 | c.2869delA        | c.(2869-2871)ATGfs                  | p.M957fs    |
| Pat_48 | Pre-Treatment   | CCDC96    | 257236 | 37 | 4  | 7044507   | 7044509   | In_Frame_Del    | DEL | CTC      | -    | 4  | 7   | c.157_159delGAG   | c.(157-159)GAGdel                   | p.E53del    |
| Pat_48 | Pre-Treatment   | LIAS      | 11019  | 37 | 4  | 39478697  | 39478697  | Frame_Shift_Del | DEL | A        | -    | 2  | 4   | c.1081delA        | c.(1081-1083)AAAFs                  | p.K361fs    |
| Pat_48 | Pre-Treatment   | RGNEF     | 64283  | 37 | 5  | 73183484  | 73183484  | Frame_Shift_Del | DEL | A        | -    | 2  | 4   | c.3367delA        | c.(3367-3369)AAAFs                  | p.K1123fs   |
| Pat_48 | Pre-Treatment   | GARS      | 2617   | 37 | 7  | 30634583  | 30634585  | In_Frame_Del    | DEL | CTG      | -    | 14 | 106 | c.46_48delCTG     | c.(46-48)CTGdel                     | p.L20del    |
| Pat_48 | Pre-Treatment   | TP53INP1  | 94241  | 37 | 8  | 95952409  | 95952411  | In_Frame_Del    | DEL | TCT      | -    | 8  | 86  | c.150_152delAGA   | c.(148-153)GAAGAG>GAC p.50_51EE>E   |             |
| Pat_48 | Post-Resistance | ACBD3     | 64746  | 37 | 1  | 226352490 | 226352491 | Frame_Shift_Ins | INS | -        | T    | 7  | 111 | c.568_569insA     | c.(568-570)AGGfs                    | p.R190fs    |
| Pat_48 | Post-Resistance | PTEN      | 5728   | 37 | 10 | 89685308  | 89685309  | Frame_Shift_Ins | INS | -        | CAAT | 8  | 28  | c.203_204insCAAT  | c.(202-204)TACfs                    | p.Y68fs     |
| Pat_48 | Post-Resistance | ZIC2      | 7546   | 37 | 13 | 100634833 | 100634834 | Frame_Shift_Del | DEL | AG       | -    | 2  | 4   | c.515_516delAG    | c.(514-516)CAGfs                    | p.Q172fs    |
| Pat_48 | Post-Resistance | BEGAIN    | 57596  | 37 | 14 | 101005271 | 101005273 | In_Frame_Del    | DEL | CCT      | -    | 3  | 6   | c.815_817delAGG   | c.(814-819)GAGGCC>GCC               | p.E272del   |
| Pat_48 | Post-Resistance | NME3      | 4832   | 37 | 16 | 1820705   | 1820705   | Frame_Shift_Del | DEL | C        | -    | 2  | 4   | c.455delG         | c.(454-456)CGCfs                    | p.R152fs    |
| Pat_48 | Post-Resistance | PABPN1L   | 390748 | 37 | 16 | 88931435  | 88931436  | Frame_Shift_Del | DEL | GG       | -    | 2  | 4   | c.560_561delCC    | c.(559-561)CCCfs                    | p.P187fs    |
| Pat_48 | Post-Resistance | C19orf20  | 91978  | 37 | 19 | 519175    | 519177    | In_Frame_Del    | DEL | GCC      | -    | 2  | 4   | c.625_627delGCC   | c.(625-627)GCCdel                   | p.A211del   |
| Pat_48 | Post-Resistance | HIST1H1A  | 3024   | 37 | 6  | 26017448  | 26017448  | Frame_Shift_Del | DEL | T        | -    | 7  | 230 | c.513delA         | c.(511-513)AAAFs                    | p.K171fs    |
| Pat_48 | Post-Resistance | HOXA11    | 3207   | 37 | 7  | 27222462  | 27222462  | Frame_Shift_Del | DEL | T        | -    | 7  | 261 | c.895delA         | c.(895-897)ATTfs                    | p.I299fs    |
| Pat_48 | Post-Resistance | TP53INP1  | 94241  | 37 | 8  | 95952409  | 95952411  | In_Frame_Del    | DEL | TCT      | -    | 9  | 221 | c.150_152delAGA   | c.(148-153)GAAGAG>GAC p.50_51EE>E   |             |
| Pat_48 | Post-Resistance | FAM83H    | 286077 | 37 | 8  | 144807177 | 144807179 | Splice_Site     | DEL | CCT      | -    | 3  | 6   | c.4444_splice     | c.e7-1                              |             |
| Pat_49 | Post-Resistance | COL8A2    | 1296   | 37 | 1  | 36564899  | 36564900  | Frame_Shift_Del | DEL | GG       | -    | 3  | 6   | c.382_383delCC    | c.(382-384)CCAFs                    | p.P128fs    |
| Pat_49 | Post-Resistance | APBB1     | 322    | 37 | 11 | 6432078   | 6432080   | In_Frame_Del    | DEL | TCA      | -    | 3  | 3   | c.498_500delTGA   | c.(496-501)GATGAA>GAA               | p.D166del   |
| Pat_49 | Post-Resistance | ZDHHC13   | 54503  | 37 | 11 | 19174128  | 19174129  | Frame_Shift_Del | DEL | CT       | -    | 3  | 4   | c.770_771delCT    | c.(769-771)GCTfs                    | p.A257fs    |
| Pat_49 | Post-Resistance | ARHGAP1   | 392    | 37 | 11 | 46702224  | 46702224  | Frame_Shift_Del | DEL | G        | -    | 7  | 141 | c.709delC         | c.(709-711)CTGfs                    | p.L237fs    |
| Pat_49 | Post-Resistance | C11orf95  | 65998  | 37 | 11 | 63533335  | 63533337  | In_Frame_Del    | DEL | TCC      | -    | 6  | 11  | c.579_581delGGA   | c.(577-582)GAGGAA>GAA p.193_194EE>I |             |
| Pat_49 | Post-Resistance | C14orf45  | 80127  | 37 | 14 | 74489766  | 74489766  | Frame_Shift_Del | DEL | G        | -    | 2  | 4   | c.204delG         | c.(202-204)AAGfs                    | p.K68fs     |
| Pat_49 | Post-Resistance | PALM      | 5064   | 37 | 19 | 727620    | 727620    | Frame_Shift_Del | DEL | G        | -    | 2  | 4   | c.195delG         | c.(193-195)GAGfs                    | p.E65fs     |
| Pat_49 | Post-Resistance | COL5A3    | 50509  | 37 | 19 | 10079363  | 10079364  | Frame_Shift_Del | DEL | GG       | -    | 2  | 4   | c.4193_4194delCC  | c.(4192-4194)CCCfs                  | p.P1398fs   |
| Pat_49 | Post-Resistance | TRIOBP    | 11078  | 37 | 22 | 38120245  | 38120253  | In_Frame_Del    | DEL | CTCCAGA/ | -    | 9  | 172 | c.1690delCCTCC    | c.(1692)GCCTCCAGAACC                | p.SRT562del |
| Pat_49 | Post-Resistance | C22orf26  | 55267  | 37 | 22 | 46449890  | 46449890  | Frame_Shift_Del | DEL | G        | -    | 2  | 4   | c.84delC          | c.(82-84)CCCfs                      | p.P28fs     |

|        |                 |              |           |    |    |           |           |                 |     |           |     |    |      |                    |                                    |               |
|--------|-----------------|--------------|-----------|----|----|-----------|-----------|-----------------|-----|-----------|-----|----|------|--------------------|------------------------------------|---------------|
| Pat_49 | Post-Resistance | RPL9         | 6133      | 37 | 4  | 39459817  | 39459818  | Frame_Shift_Ins | INS | -         | T   | 2  | 4    | c.158_159insA      | c.(157-159)AAGfs                   | p.K53fs       |
| Pat_49 | Post-Resistance | NOL7         | 51406     | 37 | 6  | 13615698  | 13615698  | Frame_Shift_Del | DEL | G         | -   | 2  | 4    | c.108delG          | c.(106-108)TTGfs                   | p.L36fs       |
| Pat_49 | Post-Resistance | SLC17A2      | 10246     | 37 | 6  | 25921520  | 25921520  | Frame_Shift_Del | DEL | T         | -   | 8  | 63   | c.361delA          | c.(361-363)ATGfs                   | p.M121fs      |
| Pat_49 | Post-Resistance | BTN2A2       | 10385     | 37 | 6  | 26384091  | 26384093  | In_Frame_Del    | DEL | CCT       | -   | 7  | 117  | c.42_44delCCT      | c.(40-45)TCCCTC>TCC                | p.L24del      |
| Pat_49 | Post-Resistance | RBM33        | 155435    | 37 | 7  | 155531073 | 155531074 | Frame_Shift_Del | DEL | CA        | -   | 7  | 129  | c.1713_1714delCA   | c.(1711-1716)CCCACAFs              | p.P571fs      |
| Pat_49 | Post-Resistance | FAM83H       | 286077    | 37 | 8  | 144807177 | 144807179 | Splice_Site     | DEL | CCT       | -   | 4  | 9    | c.4444_splice      | c.e7-1                             |               |
| Pat_49 | Post-Resistance | FAM83H       | 286077    | 37 | 8  | 144811169 | 144811170 | Frame_Shift_Ins | INS | -         | GT  | 7  | 367  | c.704_705insAC     | c.(703-705)GTGfs                   | p.V235fs      |
| Pat_50 | Pre-Treatment   | PVRL4        | 81607     | 37 | 1  | 161044057 | 161044059 | In_Frame_Del    | DEL | CAC       | -   | 7  | 439  | .1105_1107delIGT   | c.(1105-1107)GTGdel                | p.V369del     |
| Pat_50 | Pre-Treatment   | KCNMA1       | 3778      | 37 | 10 | 79397371  | 79397373  | In_Frame_Del    | DEL | GCC       | -   | 2  | 4    | c.28_30delGGC      | c.(28-30)GGCdel                    | p.G10del      |
| Pat_50 | Pre-Treatment   | KIF21A       | 55605     | 37 | 12 | 39735366  | 39735368  | In_Frame_Del    | DEL | TCC       | -   | 8  | 118  | .1860_1862delGG    | (1858-1863)GAGGAA>GA>.620_621EE>I  |               |
| Pat_50 | Pre-Treatment   | LRP1         | 4035      | 37 | 12 | 57605740  | 57605742  | In_Frame_Del    | DEL | TGC       | -   | 8  | 255  | l3289_13291delIT   | (13288-13293)TTGCTG>T 4430_4431LL> |               |
| Pat_50 | Pre-Treatment   | CEP290       | 80184     | 37 | 12 | 88443088  | 88443090  | In_Frame_Del    | DEL | TTC       | -   | 9  | 44   | .7311_7313delGA    | .(7309-7314)AAGAAT>AA              | p.K2437del    |
| Pat_50 | Pre-Treatment   | LOC100132247 | 100132247 | 37 | 16 | 22545744  | 22545755  | In_Frame_Del    | DEL | CACCCCTCA | -   | 8  | 48   | 1451delTCCACCC1452 | CTTCCACCCCTCAG(p.PPSA485del        |               |
| Pat_50 | Pre-Treatment   | ZNF207       | 7756      | 37 | 17 | 30685576  | 30685577  | Frame_Shift_Del | DEL | AT        | -   | 54 | 89   | c.223_224delIAT    | c.(223-225)ATAfs                   | p.I75fs       |
| Pat_50 | Pre-Treatment   | CYP4F3       | 4051      | 37 | 19 | 15769322  | 15769322  | Frame_Shift_Del | DEL | T         | -   | 7  | 579  | c.1271delIT        | c.(1270-1272)GTTfs                 | p.V424fs      |
| Pat_50 | Pre-Treatment   | ZNF471       | 57573     | 37 | 19 | 57022958  | 57022959  | Frame_Shift_Del | DEL | AA        | -   | 54 | 76   | c.18_19delAA       | c.(16-21)GTAAAAfs                  | p.V6fs        |
| Pat_50 | Pre-Treatment   | PWP2         | 5822      | 37 | 21 | 45535692  | 45535694  | In_Frame_Del    | DEL | GAG       | -   | 7  | 90   | c.727_729delGAG    | c.(727-729)GAGdel                  | p.E247del     |
| Pat_50 | Pre-Treatment   | ARFGAP3      | 26286     | 37 | 22 | 43213780  | 43213780  | Frame_Shift_Del | DEL | T         | -   | 8  | 375  | c.896delA          | c.(895-897)AATfs                   | p.N299fs      |
| Pat_50 | Pre-Treatment   | PKD2         | 5311      | 37 | 4  | 88929174  | 88929176  | In_Frame_Del    | DEL | GAG       | -   | 5  | 11   | c.289_291delGAG    | c.(289-291)GAGdel                  | p.E102del     |
| Pat_50 | Pre-Treatment   | HMGCR        | 3156      | 37 | 5  | 74646970  | 74646973  | Frame_Shift_Del | DEL | AACA      | -   | 41 | 69   | 1019_1022delAAC    | c.(1018-1023)GAACAAs               | p.E340fs      |
| Pat_50 | Pre-Treatment   | CSNK1A1      | 1452      | 37 | 5  | 148891411 | 148891413 | In_Frame_Del    | DEL | TAA       | -   | 65 | 51   | c.619_621delTTA    | c.(619-621)TTAdel                  | p.L207del     |
| Pat_50 | Pre-Treatment   | BHLHE22      | 27319     | 37 | 8  | 65494020  | 65494021  | In_Frame_Ins    | INS | -         | GCA | 9  | 8    | c.673_674insGCA    | .(673-675)GGC>GGCAG(p.234_235insS  |               |
| Pat_54 | Pre-Treatment   | PHF13        | 148479    | 37 | 1  | 6680069   | 6680071   | In_Frame_Del    | DEL | GAA       | -   | 8  | 109  | c.348_350delGAA    | c.(346-351)CTGAAG>CTG              | p.K121del     |
| Pat_54 | Pre-Treatment   | NBPF1        | 55672     | 37 | 1  | 16892196  | 16892196  | Frame_Shift_Del | DEL | C         | -   | 7  | 3466 | c.3221delG         | c.(3220-3222)TGCfs                 | p.C1074fs     |
| Pat_54 | Pre-Treatment   | TMCO2        | 127391    | 37 | 1  | 40713708  | 40713709  | Frame_Shift_Del | DEL | TC        | -   | 11 | 461  | c.43_44delTC       | c.(43-45)TCTfs                     | p.S15fs       |
| Pat_54 | Pre-Treatment   | NRD1         | 4898      | 37 | 1  | 52305911  | 52305912  | Frame_Shift_Ins | INS | -         | T   | 7  | 272  | c.616_617insA      | c.(616-618)ACTfs                   | p.T206fs      |
| Pat_54 | Pre-Treatment   | TTC22        | 55001     | 37 | 1  | 55252709  | 55252709  | Frame_Shift_Del | DEL | T         | -   | 2  | 4    | c.779delA          | c.(778-780)AAGfs                   | p.K260fs      |
| Pat_54 | Pre-Treatment   | CTH          | 1491      | 37 | 1  | 70877106  | 70877106  | Frame_Shift_Del | DEL | A         | -   | 7  | 632  | c.8delA            | c.(7-9)GAAfs                       | p.E3fs        |
| Pat_54 | Pre-Treatment   | FNDC7        | 163479    | 37 | 1  | 109276138 | 109276138 | Frame_Shift_Del | DEL | A         | -   | 7  | 193  | c.2124delA         | c.(2122-2124)CCAfs                 | p.P708fs      |
| Pat_54 | Pre-Treatment   | DARC         | 2532      | 37 | 1  | 159176226 | 159176227 | Frame_Shift_Del | DEL | GG        | -   | 8  | 557  | c.997_998delGG     | c.(997-999)GGAfs                   | p.G333fs      |
| Pat_54 | Pre-Treatment   | SDHC         | 6391      | 37 | 1  | 161310394 | 161310395 | Frame_Shift_Del | DEL | CC        | -   | 9  | 791  | c.190_191delCC     | c.(190-192)CCCfs                   | p.P64fs       |
| Pat_54 | Pre-Treatment   | CACNA1E      | 777       | 37 | 1  | 181680102 | 181680103 | Frame_Shift_Del | DEL | AG        | -   | 19 | 144  | c.1068_1069delAC   | c.(1066-1071)AAAGAGfs              | p.K356fs      |
| Pat_54 | Pre-Treatment   | APOBEC4      | 403314    | 37 | 1  | 183616826 | 183616828 | In_Frame_Del    | DEL | TTC       | -   | 7  | 511  | .1089_1091delGA    | .(1087-1092)AAGAAA>AA.363_364KK>I  |               |
| Pat_54 | Pre-Treatment   | PRG4         | 10216     | 37 | 1  | 186276127 | 186276128 | In_Frame_Ins    | INS | -         | AGG | 7  | 337  | .1276_1277insAG    | (1276-1278)AAG>AAGGAp.426_427insE  |               |
| Pat_54 | Pre-Treatment   | PLA2G4A      | 5321      | 37 | 1  | 186916018 | 186916018 | Frame_Shift_Del | DEL | T         | -   | 7  | 412  | c.1189delT         | c.(1189-1191)TTTfs                 | p.F397fs      |
| Pat_54 | Pre-Treatment   | DNAJC1       | 64215     | 37 | 10 | 22208818  | 22208818  | Frame_Shift_Del | DEL | T         | -   | 8  | 675  | c.578delA          | c.(577-579)AAGfs                   | p.K193fs      |
| Pat_54 | Pre-Treatment   | ZEB1         | 6935      | 37 | 10 | 31810582  | 31810582  | Frame_Shift_Del | DEL | A         | -   | 7  | 214  | c.2319delA         | c.(2317-2319)GCAfs                 | p.A773fs      |
| Pat_54 | Pre-Treatment   | RUFY2        | 55680     | 37 | 10 | 70156583  | 70156583  | Frame_Shift_Del | DEL | T         | -   | 10 | 100  | c.457delA          | c.(457-459)ATGfs                   | p.M153fs      |
| Pat_54 | Pre-Treatment   | ZMIZ1        | 57178     | 37 | 10 | 81072446  | 81072446  | Frame_Shift_Del | DEL | C         | -   | 7  | 420  | c.3144delC         | c.(3142-3144)GACfs                 | p.D1048fs     |
| Pat_54 | Pre-Treatment   | POLL         | 27343     | 37 | 10 | 103345131 | 103345133 | In_Frame_Del    | DEL | GGA       | -   | 9  | 88   | c.513_515delTCC    | c.(511-516)CCTCCC>CCC.171_172PP>I  |               |
| Pat_54 | Pre-Treatment   | OR52N5       | 390075    | 37 | 11 | 5799652   | 5799652   | Frame_Shift_Del | DEL | A         | -   | 18 | 71   | c.213delT          | c.(211-213)TTTfs                   | p.F71fs       |
| Pat_54 | Pre-Treatment   | OR8I2        | 120586    | 37 | 11 | 55861308  | 55861308  | Frame_Shift_Del | DEL | T         | -   | 9  | 448  | c.525delT          | c.(523-525)CATfs                   | p.H175fs      |
| Pat_54 | Pre-Treatment   | NOX4         | 50507     | 37 | 11 | 89106662  | 89106663  | Splice_Site     | INS | -         | A   | 12 | 486  | c.1075_splice      | c.e12-1                            | p.C359_splice |
| Pat_54 | Pre-Treatment   | PVRL1        | 5818      | 37 | 11 | 119535678 | 119535680 | In_Frame_Del    | DEL | CCT       | -   | 7  | 25   | .1331_1333delAG    | (1330-1335)GAGGGC>GC               | p.E444del     |
| Pat_54 | Pre-Treatment   | NFRKB        | 4798      | 37 | 11 | 129752495 | 129752496 | Frame_Shift_Ins | INS | -         | T   | 8  | 212  | c.932_933insA      | c.(931-933)AAGfs                   | p.K311fs      |
| Pat_54 | Pre-Treatment   | PRB2         | 653247    | 37 | 12 | 11546788  | 11546790  | In_Frame_Del    | DEL | GGA       | -   | 8  | 271  | c.222_224delTCC    | c.(220-225)CCTCCA>CCA.p.74_75PP>P  |               |
| Pat_54 | Pre-Treatment   | FAR2         | 55711     | 37 | 12 | 29450110  | 29450110  | Frame_Shift_Del | DEL | A         | -   | 11 | 422  | c.522delA          | c.(520-522)CCAfs                   | p.P174fs      |

|        |               |          |        |    |    |           |           |                 |     |     |         |     |      |                                                  |
|--------|---------------|----------|--------|----|----|-----------|-----------|-----------------|-----|-----|---------|-----|------|--------------------------------------------------|
| Pat_54 | Pre-Treatment | SFRS2IP  | 9169   | 37 | 12 | 46318575  | 46318577  | In_Frame_Del    | DEL | GGT | -       | 9   | 321  | .3840_3842delAC(3838-3843)CCACCC>CC1280_1281PP:  |
| Pat_54 | Pre-Treatment | LIMA1    | 51474  | 37 | 12 | 50594574  | 50594574  | Frame_Shift_Del | DEL | G   | -       | 8   | 1343 | c.958delC c.(958-960)CAGfs p.Q320fs              |
| Pat_54 | Pre-Treatment | SMARCC2  | 6601   | 37 | 12 | 56559113  | 56559113  | Frame_Shift_Del | DEL | G   | -       | 8   | 262  | c.3128delC c.(3127-3129)CCTfs p.P1043fs          |
| Pat_54 | Pre-Treatment | FBXO21   | 23014  | 37 | 12 | 117624320 | 117624320 | Frame_Shift_Del | DEL | A   | -       | 7   | 227  | c.432delT c.(430-432)TTTfs p.F144fs              |
| Pat_54 | Pre-Treatment | EP400    | 57634  | 37 | 12 | 132466907 | 132466907 | Frame_Shift_Del | DEL | G   | -       | 7   | 294  | c.1813delG c.(1813-1815)GCAfs p.A605fs           |
| Pat_54 | Pre-Treatment | XPO4     | 64328  | 37 | 13 | 21436858  | 21436858  | Frame_Shift_Del | DEL | G   | -       | 7   | 473  | c.315delC c.(313-315)CCCfs p.P105fs              |
| Pat_54 | Pre-Treatment | SACS     | 26278  | 37 | 13 | 23914687  | 23914687  | Frame_Shift_Del | DEL | T   | -       | 22  | 961  | c.3328delA c.(3328-3330)ATTfs p.I1110fs          |
| Pat_54 | Pre-Treatment | TSC22D1  | 8848   | 37 | 13 | 45148706  | 45148708  | In_Frame_Del    | DEL | TGC | -       | 10  | 149  | .1503_1505delGC.(1501-1506)CAGCAA>CA.501_502QQ>  |
| Pat_54 | Pre-Treatment | LMO7     | 4008   | 37 | 13 | 76415307  | 76415308  | Frame_Shift_Del | DEL | AG  | -       | 11  | 283  | .2946_2947delAC c.(2944-2949)GCAGAGfs p.A982fs   |
| Pat_54 | Pre-Treatment | MBNL2    | 10150  | 37 | 13 | 97928604  | 97928604  | Frame_Shift_Del | DEL | C   | -       | 8   | 788  | c.115delC c.(115-117)CCCfs p.P39fs               |
| Pat_54 | Pre-Treatment | FERMT2   | 10979  | 37 | 14 | 53339633  | 53339633  | Frame_Shift_Del | DEL | T   | -       | 9   | 309  | c.1157delA c.(1156-1158)AAGfs p.K386fs           |
| Pat_54 | Pre-Treatment | SIPA1L1  | 26037  | 37 | 14 | 72190482  | 72190484  | In_Frame_Del    | DEL | TCC | -       | 8   | 226  | .4390_4392delTC c.(4390-4392)TCCdel p.S1468del   |
| Pat_54 | Pre-Treatment | RBM25    | 58517  | 37 | 14 | 73572607  | 73572608  | Frame_Shift_Del | DEL | AG  | -       | 10  | 91   | c.1195_1196delAG c.(1195-1197)AGAfs p.R399fs     |
| Pat_54 | Pre-Treatment | DDX24    | 57062  | 37 | 14 | 94545821  | 94545823  | In_Frame_Del    | DEL | CCT | -       | 8   | 247  | c.266_268delAGG:(265-270)GAGGGA>GG/ p.E89del     |
| Pat_54 | Pre-Treatment | C14orf49 | 161176 | 37 | 14 | 95916348  | 95916348  | Frame_Shift_Del | DEL | C   | -       | 2   | 4    | c.1369delG c.(1369-1371)GCCfs p.A457fs           |
| Pat_54 | Pre-Treatment | KIF26A   | 26153  | 37 | 14 | 104642401 | 104642401 | Frame_Shift_Del | DEL | G   | -       | 2   | 4    | c.3276delG c.(3274-3276)GAGfs p.E1092fs          |
| Pat_54 | Pre-Treatment | THBS1    | 7057   | 37 | 15 | 39885641  | 39885641  | Frame_Shift_Del | DEL | C   | -       | 8   | 493  | c.3039delC c.(3037-3039)TTCfs p.F1013fs          |
| Pat_54 | Pre-Treatment | CASC4    | 113201 | 37 | 15 | 44624241  | 44624241  | Frame_Shift_Del | DEL | A   | -       | 125 | 186  | c.541delA c.(541-543)AAAfs p.K181fs              |
| Pat_54 | Pre-Treatment | SPG11    | 80208  | 37 | 15 | 44905698  | 44905698  | Frame_Shift_Del | DEL | T   | -       | 8   | 267  | c.3075delA c.(3073-3075)AAAfs p.K1025fs          |
| Pat_54 | Pre-Treatment | ARID3B   | 10620  | 37 | 15 | 74836290  | 74836292  | In_Frame_Del    | DEL | CAG | -       | 9   | 57   | c.13_15delCAG c.(13-15)CAGdel p.Q15del           |
| Pat_54 | Pre-Treatment | CHD2     | 1106   | 37 | 15 | 93540315  | 93540316  | Frame_Shift_Ins | INS | -   | A       | 10  | 181  | c.3724_3725insA c.(3724-3726)GAAfs p.E1242fs     |
| Pat_54 | Pre-Treatment | C16orf88 | 400506 | 37 | 16 | 19725706  | 19725706  | Frame_Shift_Del | DEL | T   | -       | 15  | 129  | c.652delA c.(652-654)ATCfs p.I218fs              |
| Pat_54 | Pre-Treatment | RABEP2   | 79874  | 37 | 16 | 28931200  | 28931202  | In_Frame_Del    | DEL | CTG | -       | 8   | 77   | c.337_339delCAG c.(337-339)CAGdel p.Q113del      |
| Pat_54 | Pre-Treatment | MYLPF    | 29895  | 37 | 16 | 30389140  | 30389140  | Frame_Shift_Del | DEL | C   | -       | 10  | 136  | c.429delC c.(427-429)TTCfs p.F143fs              |
| Pat_54 | Pre-Treatment | COQ9     | 57017  | 37 | 16 | 57486732  | 57486734  | In_Frame_Del    | DEL | GAG | -       | 10  | 236  | c.262_264delGAG c.(262-264)GAGdel p.E91del       |
| Pat_54 | Pre-Treatment | ZFP90    | 146198 | 37 | 16 | 68598462  | 68598463  | Frame_Shift_Ins | INS | -   | A       | 15  | 502  | c.1772_1773insA c.(1771-1773)CGAfs p.R591fs      |
| Pat_54 | Pre-Treatment | CTNS     | 1497   | 37 | 17 | 3543532   | 3543532   | Frame_Shift_Del | DEL | T   | -       | 7   | 672  | c.32delT c.(31-33)CTTfs p.L11fs                  |
| Pat_54 | Pre-Treatment | C17orf85 | 55421  | 37 | 17 | 3721809   | 3721811   | In_Frame_Del    | DEL | TCC | -       | 7   | 228  | .1056_1058delGG(1054-1059)GAGGAA>GA(.352_353EE>  |
| Pat_54 | Pre-Treatment | PHF23    | 79142  | 37 | 17 | 7139558   | 7139558   | Frame_Shift_Del | DEL | C   | -       | 8   | 715  | c.688delG c.(688-690)GATfs p.D230fs              |
| Pat_54 | Pre-Treatment | MYO15A   | 51168  | 37 | 17 | 18025395  | 18025396  | Frame_Shift_Ins | INS | -   | AGGGCC( | 8   | 35   | _1_3282insCAGGC c.(3280-3282)ATCfs p.I1094fs     |
| Pat_54 | Pre-Treatment | MBTD1    | 54799  | 37 | 17 | 49281228  | 49281228  | Frame_Shift_Del | DEL | C   | -       | 7   | 712  | c.663delG c.(661-663)TGGfs p.W221fs              |
| Pat_54 | Pre-Treatment | FTSJ3    | 117246 | 37 | 17 | 61901516  | 61901518  | In_Frame_Del    | DEL | TCC | -       | 7   | 343  | .1080_1082delGG(1078-1083)GAGGAA>GA(.360_361EE>  |
| Pat_54 | Pre-Treatment | RBBP8    | 5932   | 37 | 18 | 20572852  | 20572853  | Frame_Shift_Ins | INS | -   | A       | 12  | 235  | c.1062_1063insA c.(1060-1065)GGGAAfs p.G354fs    |
| Pat_54 | Pre-Treatment | CNDP1    | 84735  | 37 | 18 | 72245406  | 72245407  | Frame_Shift_Del | DEL | TC  | -       | 7   | 112  | c.1011_1012delTC c.(1009-1014)ATTCTAfs p.I337fs  |
| Pat_54 | Pre-Treatment | TCF3     | 6929   | 37 | 19 | 1620979   | 1620979   | Frame_Shift_Del | DEL | G   | -       | 2   | 4    | c.1081delC c.(1081-1083)CAGfs p.Q361fs           |
| Pat_54 | Pre-Treatment | GATAD2A  | 54815  | 37 | 19 | 19616235  | 19616235  | Frame_Shift_Del | DEL | G   | -       | 8   | 248  | c.1854delG c.(1852-1854)CTGfs p.L618fs           |
| Pat_54 | Pre-Treatment | ASXL2    | 55252  | 37 | 2  | 26022304  | 26022306  | In_Frame_Del    | DEL | CTG | -       | 10  | 448  | c.351_353delCAGc.(349-354)AGCAGT>AGT(.117_118SS> |
| Pat_54 | Pre-Treatment | SOS1     | 6654   | 37 | 2  | 39224072  | 39224073  | Frame_Shift_Del | DEL | GA  | -       | 8   | 603  | c.3071_3072delTC c.(3070-3072)CTCfs p.L1024fs    |
| Pat_54 | Pre-Treatment | EHBP1    | 23301  | 37 | 2  | 63206352  | 63206353  | Frame_Shift_Del | DEL | GA  | -       | 7   | 398  | .2595_2596delGA c.(2593-2598)CTGAGAfs p.L865fs   |
| Pat_54 | Pre-Treatment | TGOLN2   | 10618  | 37 | 2  | 85554537  | 85554537  | Frame_Shift_Del | DEL | T   | -       | 7   | 2502 | c.318delA c.(316-318)AAAfs p.K106fs              |
| Pat_54 | Pre-Treatment | GPR148   | 344561 | 37 | 2  | 131487754 | 131487755 | Frame_Shift_Del | DEL | TT  | -       | 4   | 9    | c.1030_1031delTT c.(1030-1032)TTTfs p.F344fs     |
| Pat_54 | Pre-Treatment | NEB      | 4703   | 37 | 2  | 152550852 | 152550853 | Frame_Shift_Del | DEL | GG  | -       | 7   | 522  | .1880_1881delCC c.(1879-1881)GCCfs p.A627fs      |
| Pat_54 | Pre-Treatment | 7-Mar    | 64844  | 37 | 2  | 160605268 | 160605268 | Frame_Shift_Del | DEL | T   | -       | 9   | 1163 | c.1467delT c.(1465-1467)CCTfs p.P489fs           |
| Pat_54 | Pre-Treatment | PLA2R1   | 22925  | 37 | 2  | 160918876 | 160918878 | In_Frame_Del    | DEL | CAG | -       | 4   | 6    | c.37_39delCTG c.(37-39)CTGdel p.L13del           |
| Pat_54 | Pre-Treatment | TTN      | 7273   | 37 | 2  | 179613763 | 179613763 | Frame_Shift_Del | DEL | T   | -       | 8   | 124  | c.13364delA c.(13363-13365)AAGfs p.K4455fs       |
| Pat_54 | Pre-Treatment | GIGYF2   | 26058  | 37 | 2  | 233620985 | 233620987 | In_Frame_Del    | DEL | GAG | -       | 8   | 195  | c.320_322delGAG:(319-324)CGAGGA>CG/ p.G111del    |
| Pat_54 | Pre-Treatment | MTERFD2  | 130916 | 37 | 2  | 242038902 | 242038903 | Frame_Shift_Del | DEL | CA  | -       | 8   | 471  | c.515_516delTG c.(514-516)GTGfs p.V172fs         |

|        |               |                |           |    |    |           |           |                 |     |         |    |    |      |                   |                         |               |
|--------|---------------|----------------|-----------|----|----|-----------|-----------|-----------------|-----|---------|----|----|------|-------------------|-------------------------|---------------|
| Pat_54 | Pre-Treatment | PANK2          | 80025     | 37 | 20 | 3893120   | 3893120   | Frame_Shift_Del | DEL | T       | -  | 10 | 648  | c.1251delT        | c.(1249-1251)ACTfs      | p.T417fs      |
| Pat_54 | Pre-Treatment | MCM8           | 84515     | 37 | 20 | 5935274   | 5935277   | Frame_Shift_Del | DEL | TTGA    | -  | 77 | 154  | c.274_277delTTG#  | c.(274-279)TTGATfs      | p.L92fs       |
| Pat_54 | Pre-Treatment | C20orf7        | 79133     | 37 | 20 | 13797838  | 13797838  | Frame_Shift_Del | DEL | G       | -  | 9  | 800  | c.1020delG        | c.(1018-1020)CCGfs      | p.P340fs      |
| Pat_54 | Pre-Treatment | FRG1B          | 284802    | 37 | 20 | 29625899  | 29625900  | Frame_Shift_Ins | INS | -       | AT | 11 | 314  | c.53_54insAT      | c.(52-54)AAfs           | p.K18fs       |
| Pat_54 | Pre-Treatment | SNX21          | 90203     | 37 | 20 | 44469908  | 44469908  | Frame_Shift_Del | DEL | C       | -  | 8  | 534  | c.1078delC        | c.(1078-1080)CCCfs      | p.P360fs      |
| Pat_54 | Pre-Treatment | STAU1          | 6780      | 37 | 20 | 47740939  | 47740939  | Frame_Shift_Del | DEL | G       | -  | 10 | 999  | c.795delC         | c.(793-795)ATCfs        | p.I265fs      |
| Pat_54 | Pre-Treatment | ZNF295         | 49854     | 37 | 21 | 43412088  | 43412088  | Frame_Shift_Del | DEL | G       | -  | 7  | 775  | c.2117delC        | c.(2116-2118)CCAfs      | p.P706fs      |
| Pat_54 | Pre-Treatment | MN1            | 4330      | 37 | 22 | 28193063  | 28193064  | Frame_Shift_Del | DEL | GA      | -  | 4  | 6    | c.3468_3469delITC | c.(3466-3471)CTTCAGfs   | p.L1156fs     |
| Pat_54 | Pre-Treatment | EDEM1          | 9695      | 37 | 3  | 5244752   | 5244752   | Frame_Shift_Del | DEL | G       | -  | 7  | 582  | c.960delG         | c.(958-960)CTGfs        | p.L320fs      |
| Pat_54 | Pre-Treatment | TRAK1          | 22906     | 37 | 3  | 42235351  | 42235351  | Frame_Shift_Del | DEL | G       | -  | 7  | 472  | c.936delG         | c.(934-936)CTGfs        | p.L312fs      |
| Pat_54 | Pre-Treatment | DNAH12         | 201625    | 37 | 3  | 57509312  | 57509313  | Frame_Shift_Ins | INS | -       | T  | 7  | 220  | c.276_277insA     | c.(274-279)AAAGGfs      | p.K92fs       |
| Pat_54 | Pre-Treatment | FGFBP1         | 9982      | 37 | 4  | 15938177  | 15938178  | Frame_Shift_Ins | INS | -       | T  | 7  | 317  | c.78_79insA       | c.(76-81)AAAGTGfs       | p.K26fs       |
| Pat_54 | Pre-Treatment | TLR1           | 7096      | 37 | 4  | 38798502  | 38798503  | Frame_Shift_Del | DEL | CC      | -  | 7  | 307  | c.1950_1951delGC  | c.(1948-1953)TGGGTGfs   | p.W650fs      |
| Pat_54 | Pre-Treatment | CDKL2          | 8999      | 37 | 4  | 76539579  | 76539580  | Frame_Shift_Ins | INS | -       | T  | 10 | 200  | c.222_223insA     | c.(220-225)AAACGfs      | p.K74fs       |
| Pat_54 | Pre-Treatment | CDS1           | 1040      | 37 | 4  | 85556475  | 85556475  | Frame_Shift_Del | DEL | T       | -  | 13 | 219  | c.781delT         | c.(781-783)TTTfs        | p.F261fs      |
| Pat_54 | Pre-Treatment | MMRN1          | 22915     | 37 | 4  | 90844391  | 90844393  | In_Frame_Del    | DEL | AGC     | -  | 11 | 924  | c.923_925delAGC   | c.(922-927)GAGCAG>GAC   | p.Q313del     |
| Pat_54 | Pre-Treatment | EMCN           | 51705     | 37 | 4  | 101338299 | 101338300 | Splice_Site     | DEL | CT      | -  | 8  | 420  | c.665_splice      | c.e9-1                  | p.G222_splice |
| Pat_54 | Pre-Treatment | ZNF330         | 27309     | 37 | 4  | 142143532 | 142143532 | Frame_Shift_Del | DEL | A       | -  | 7  | 142  | c.7delA           | c.(7-9)AAfs             | p.K3fs        |
| Pat_54 | Pre-Treatment | OTUD4          | 54726     | 37 | 4  | 146059009 | 146059010 | Frame_Shift_Del | DEL | TC      | -  | 9  | 488  | c.2722_2723delGA  | c.(2722-2724)GAAfs      | p.E908fs      |
| Pat_54 | Pre-Treatment | LRBA           | 987       | 37 | 4  | 151829814 | 151829814 | Frame_Shift_Del | DEL | G       | -  | 7  | 240  | c.1357delC        | c.(1357-1359)CAGfs      | p.Q453fs      |
| Pat_54 | Pre-Treatment | CDH10          | 1008      | 37 | 5  | 24492973  | 24492973  | Frame_Shift_Del | DEL | A       | -  | 8  | 486  | c.1577delT        | c.(1576-1578)TTCfs      | p.F526fs      |
| Pat_54 | Pre-Treatment | MSH3           | 4437      | 37 | 5  | 79970915  | 79970915  | Frame_Shift_Del | DEL | A       | -  | 7  | 501  | c.1141delA        | c.(1141-1143)AAfs       | p.K381fs      |
| Pat_54 | Pre-Treatment | ANKHD1-EIF4EBP | 404734    | 37 | 5  | 139905676 | 139905676 | Frame_Shift_Del | DEL | A       | -  | 9  | 358  | c.4588delA        | c.(4588-4590)AAfs       | p.K1530fs     |
| Pat_54 | Pre-Treatment | C5orf25        | 375484    | 37 | 5  | 175717107 | 175717109 | In_Frame_Del    | DEL | AGC     | -  | 4  | 5    | c.523_525delAGC   | c.(523-525)AGCdel       | p.S180del     |
| Pat_54 | Pre-Treatment | PHACTR1        | 221692    | 37 | 6  | 13228080  | 13228080  | Frame_Shift_Del | DEL | A       | -  | 7  | 337  | c.1019delA        | c.(1018-1020)TACfs      | p.Y340fs      |
| Pat_54 | Pre-Treatment | DEK            | 7913      | 37 | 6  | 18237737  | 18237737  | Frame_Shift_Del | DEL | T       | -  | 7  | 234  | c.773delA         | c.(772-774)AAGfs        | p.K258fs      |
| Pat_54 | Pre-Treatment | GABBR1         | 2550      | 37 | 6  | 29577144  | 29577144  | Frame_Shift_Del | DEL | G       | -  | 8  | 125  | c.1721delC        | c.(1720-1722)CCAfs      | p.P574fs      |
| Pat_54 | Pre-Treatment | ARHGAP18       | 93663     | 37 | 6  | 129959602 | 129959603 | Frame_Shift_Ins | INS | -       | T  | 7  | 437  | c.488_489insA     | c.(487-489)AACfs        | p.N163fs      |
| Pat_54 | Pre-Treatment | HGC6.3         | 100128124 | 37 | 6  | 168376971 | 168376972 | Frame_Shift_Ins | INS | -       | A  | 2  | 4    | c.361_362insT     | c.(361-363)TCCfs        | p.S121fs      |
| Pat_54 | Pre-Treatment | GLCC1          | 113263    | 37 | 7  | 8126097   | 8126099   | In_Frame_Del    | DEL | CAG     | -  | 7  | 526  | c.1573_1575delCA  | c.(1573-1575)CAGdel     | p.Q528del     |
| Pat_54 | Pre-Treatment | POU6F2         | 11281     | 37 | 7  | 39503812  | 39503812  | Frame_Shift_Del | DEL | C       | -  | 7  | 506  | c.1603delC        | c.(1603-1605)CCAfs      | p.P535fs      |
| Pat_54 | Pre-Treatment | OGDH           | 4967      | 37 | 7  | 44684936  | 44684936  | Frame_Shift_Del | DEL | T       | -  | 12 | 509  | c.233delT         | c.(232-234)ATTfs        | p.I78fs       |
| Pat_54 | Pre-Treatment | CYP51A1        | 1595      | 37 | 7  | 91752493  | 91752494  | Frame_Shift_Ins | INS | -       | T  | 9  | 413  | c.1026_1027insA   | c.(1024-1029)AAATGfs    | p.K342fs      |
| Pat_54 | Pre-Treatment | DYNC111        | 1780      | 37 | 7  | 95614249  | 95614249  | Frame_Shift_Del | DEL | T       | -  | 9  | 492  | c.754delT         | c.(754-756)TTTfs        | p.F252fs      |
| Pat_54 | Pre-Treatment | CNOT4          | 4850      | 37 | 7  | 135098272 | 135098272 | Frame_Shift_Del | DEL | C       | -  | 7  | 457  | c.652delG         | c.(652-654)GATfs        | p.D218fs      |
| Pat_54 | Pre-Treatment | PTPRN2         | 5799      | 37 | 7  | 158380330 | 158380332 | In_Frame_Del    | DEL | AGC     | -  | 2  | 4    | c.30_32delGCT     | c.(28-33)CTGCTA>CTA     | p.10_11LL>L   |
| Pat_54 | Pre-Treatment | RP1L1          | 94137     | 37 | 8  | 10465264  | 10465270  | Frame_Shift_Del | DEL | CCTTCTG | -  | 8  | 465  | c.38_634delCAGA   | c.(6337-6345)GCAGAAAGGT | p.A2113fs     |
| Pat_54 | Pre-Treatment | CCDC25         | 55246     | 37 | 8  | 27606054  | 27606055  | Frame_Shift_Del | DEL | AG      | -  | 8  | 617  | c.305_306delCT    | c.(304-306)GCTfs        | p.A102fs      |
| Pat_54 | Pre-Treatment | SULF1          | 23213     | 37 | 8  | 70514026  | 70514026  | Frame_Shift_Del | DEL | T       | -  | 8  | 1084 | c.1023delT        | c.(1021-1023)CCTfs      | p.P341fs      |
| Pat_54 | Pre-Treatment | KCNB2          | 9312      | 37 | 8  | 73848175  | 73848175  | Frame_Shift_Del | DEL | G       | -  | 7  | 1240 | c.585delG         | c.(583-585)CTGfs        | p.L195fs      |
| Pat_54 | Pre-Treatment | LRRCC1         | 85444     | 37 | 8  | 86038947  | 86038948  | Frame_Shift_Del | DEL | AG      | -  | 10 | 462  | c.1296_1297delAC  | c.(1294-1299)CAAGAGfs   | p.Q432fs      |
| Pat_54 | Pre-Treatment | SLC26A7        | 115111    | 37 | 8  | 92406218  | 92406218  | Frame_Shift_Del | DEL | T       | -  | 12 | 431  | c.1886delT        | c.(1885-1887)ATTfs      | p.I629fs      |
| Pat_54 | Pre-Treatment | TP53INP1       | 94241     | 37 | 8  | 95952409  | 95952411  | In_Frame_Del    | DEL | TCT     | -  | 13 | 209  | c.150_152delAGA   | c.(148-153)GAAGAG>GAC   | p.50_51EE>E   |
| Pat_54 | Pre-Treatment | RGS22          | 26166     | 37 | 8  | 101076229 | 101076229 | Frame_Shift_Del | DEL | T       | -  | 7  | 1438 | c.767delA         | c.(766-768)AAGfs        | p.K256fs      |
| Pat_54 | Pre-Treatment | ENY2           | 56943     | 37 | 8  | 110351560 | 110351562 | In_Frame_Del    | DEL | TGC     | -  | 8  | 659  | c.95_97delTGC     | c.(94-99)TTGCTG>TTG     | p.32_33LL>L   |
| Pat_54 | Pre-Treatment | TRPS1          | 7227      | 37 | 8  | 116632272 | 116632272 | Frame_Shift_Del | DEL | T       | -  | 8  | 266  | c.14delA          | c.(13-15)AAGfs          | p.K5fs        |
| Pat_54 | Pre-Treatment | ANXA13         | 312       | 37 | 8  | 124707762 | 124707762 | Frame_Shift_Del | DEL | T       | -  | 12 | 1413 | c.451delA         | c.(451-453)ATCfs        | p.I151fs      |



|        |               |           |        |    |    |           |           |                 |     |     |     |    |      |                  |                                    |               |
|--------|---------------|-----------|--------|----|----|-----------|-----------|-----------------|-----|-----|-----|----|------|------------------|------------------------------------|---------------|
| Pat_54 | Pre-Treatment | GLIS3     | 169792 | 37 | 9  | 4118450   | 4118450   | Frame_Shift_Del | DEL | G   | -   | 2  | 4    | c.563delC        | c.(562-564)CCGfs                   | p.P188fs      |
| Pat_54 | Pre-Treatment | TLN1      | 7094   | 37 | 9  | 35716473  | 35716473  | Frame_Shift_Del | DEL | C   | -   | 8  | 491  | c.2539delG       | c.(2539-2541)GAAfs                 | p.E847fs      |
| Pat_54 | Pre-Treatment | TXLNG     | 55787  | 37 | X  | 16850849  | 16850850  | Frame_Shift_Del | DEL | AG  | -   | 13 | 149  | c.968_969delAG   | c.(967-969)CAGfs                   | p.Q323fs      |
| Pat_54 | Pre-Treatment | MAP7D2    | 256714 | 37 | X  | 20031209  | 20031210  | Frame_Shift_Del | DEL | CA  | -   | 11 | 1122 | c.1724_1725delTC | c.(1723-1725)GTGfs                 | p.V575fs      |
| Pat_54 | Pre-Treatment | SHROOM4   | 57477  | 37 | X  | 50345634  | 50345634  | Frame_Shift_Del | DEL | T   | -   | 7  | 398  | c.3941delA       | c.(3940-3942)AAGfs                 | p.K1314fs     |
| Pat_54 | Pre-Treatment | MAGT1     | 84061  | 37 | X  | 77131002  | 77131003  | Frame_Shift_Del | DEL | CA  | -   | 8  | 653  | c.290_291delTG   | c.(289-291)GTGfs                   | p.V97fs       |
| Pat_54 | Pre-Treatment | RBM41     | 55285  | 37 | X  | 106312552 | 106312552 | Frame_Shift_Del | DEL | T   | -   | 8  | 492  | c.1008delA       | c.(1006-1008)AAAfs                 | p.K336fs      |
| Pat_54 | Pre-Treatment | GDI1      | 2664   | 37 | X  | 153667141 | 153667141 | Frame_Shift_Del | DEL | C   | -   | 10 | 861  | c.184delC        | c.(184-186)CCCfs                   | p.P62fs       |
| Pat_55 | Pre-Treatment | PLEKHG5   | 57449  | 37 | 1  | 6536011   | 6536013   | In_Frame_Del    | DEL | CTC | -   | 13 | 232  | c.295_297delGAG  | c.(295-297)GAGdel                  | p.E99del      |
| Pat_55 | Pre-Treatment | ISG20L2   | 81875  | 37 | 1  | 156694023 | 156694023 | Frame_Shift_Del | DEL | G   | -   | 12 | 173  | c.865delC        | c.(865-867)CTCfs                   | p.L289fs      |
| Pat_55 | Pre-Treatment | CORO1B    | 57175  | 37 | 11 | 67208955  | 67208955  | Frame_Shift_Del | DEL | A   | -   | 16 | 15   | c.485delT        | c.(484-486)GTGfs                   | p.V162fs      |
| Pat_55 | Pre-Treatment | GSPT1     | 2935   | 37 | 16 | 12009530  | 12009531  | In_Frame_Ins    | INS | -   | CCG | 5  | 10   | c.47_48insCGG    | c.(46-48)GGG>GGCGGG                | p.16_16G>GG   |
| Pat_55 | Pre-Treatment | NCOA6     | 23054  | 37 | 20 | 33330968  | 33330970  | In_Frame_Del    | DEL | TGC | -   | 9  | 127  | .3090_3092delGC  | c.(3088-3093)CAGCAA>CAI030_1031QQ: |               |
| Pat_55 | Pre-Treatment | YTHDF1    | 54915  | 37 | 20 | 61833650  | 61833652  | In_Frame_Del    | DEL | CCT | -   | 9  | 193  | .1640_1642delAG  | c.(1639-1644)GAGGTG>GT             | p.E547del     |
| Pat_55 | Pre-Treatment | TFIP11    | 24144  | 37 | 22 | 26906183  | 26906185  | In_Frame_Del    | DEL | TCA | -   | 7  | 153  | c.54_56delTGA    | c.(52-57)GATGAC>GAC                | p.18_19DD>D   |
| Pat_55 | Pre-Treatment | TPRXL     | 348825 | 37 | 3  | 14105964  | 14105965  | In_Frame_Ins    | INS | -   | AGC | 4  | 4    | c.288_289insAGC  | c.(286-291)insAGC                  | p.102_103insS |
| Pat_55 | Pre-Treatment | PAPD7     | 11044  | 37 | 5  | 6755013   | 6755014   | Frame_Shift_Del | DEL | AC  | -   | 7  | 100  | c.1584_1585delAC | c.(1582-1587)AAACACfs              | p.K528fs      |
| Pat_55 | Pre-Treatment | KCNN2     | 3781   | 37 | 5  | 113698631 | 113698632 | In_Frame_Ins    | INS | -   | GCC | 6  | 1    | c.159_160insGCC  | c.(157-162)insGCC                  | p.58_59insA   |
| Pat_60 | Pre-Treatment | TNFRSF25  | 8718   | 37 | 1  | 6522977   | 6522978   | Frame_Shift_Del | DEL | CC  | -   | 4  | 2    | c.651_652delGG   | c.(649-654)GGGGCCfs                | p.G217fs      |
| Pat_60 | Pre-Treatment | FDPS      | 2224   | 37 | 1  | 155279648 | 155279648 | Frame_Shift_Del | DEL | G   | -   | 4  | 8    | c.68delG         | c.(67-69)CGGfs                     | p.R23fs       |
| Pat_60 | Pre-Treatment | 8-Mar     | 220972 | 37 | 10 | 45953876  | 45953878  | In_Frame_Del    | DEL | GAG | -   | 22 | 163  | c.685_687delCTC  | c.(685-687)CTCdel                  | p.L229del     |
| Pat_60 | Pre-Treatment | C10orf58  | 84293  | 37 | 10 | 82182206  | 82182206  | Frame_Shift_Del | DEL | A   | -   | 7  | 159  | c.212delA        | c.(211-213)GAAfs                   | p.E71fs       |
| Pat_60 | Pre-Treatment | OR51M1    | 390059 | 37 | 11 | 5410982   | 5410982   | Frame_Shift_Del | DEL | T   | -   | 9  | 300  | c.354delT        | c.(352-354)TCTfs                   | p.S118fs      |
| Pat_60 | Pre-Treatment | PAMR1     | 25891  | 37 | 11 | 35513670  | 35513670  | Frame_Shift_Del | DEL | C   | -   | 7  | 467  | c.302delG        | c.(301-303)GGTfs                   | p.G101fs      |
| Pat_60 | Pre-Treatment | CBX5      | 23468  | 37 | 12 | 54645832  | 54645832  | Frame_Shift_Del | DEL | T   | -   | 7  | 317  | c.317delA        | c.(316-318)AAGfs                   | p.K106fs      |
| Pat_60 | Pre-Treatment | KIAA1704  | 55425  | 37 | 13 | 45580365  | 45580367  | In_Frame_Del    | DEL | GAT | -   | 8  | 441  | c.250_252delGAT  | c.(250-252)GATdel                  | p.D88del      |
| Pat_60 | Pre-Treatment | C14orf106 | 55320  | 37 | 14 | 45693722  | 45693722  | Frame_Shift_Del | DEL | T   | -   | 9  | 161  | c.2068delA       | c.(2068-2070)AGTfs                 | p.S690fs      |
| Pat_60 | Pre-Treatment | ZBTB1     | 22890  | 37 | 14 | 64989787  | 64989787  | Frame_Shift_Del | DEL | A   | -   | 8  | 474  | c.1565delA       | c.(1564-1566)CAAfs                 | p.Q522fs      |
| Pat_60 | Pre-Treatment | NPIP      | 9284   | 37 | 16 | 15045758  | 15045759  | Frame_Shift_Ins | INS | -   | GT  | 14 | 101  | c.929_930insGT   | c.(928-930)GAGfs                   | p.E310fs      |
| Pat_60 | Pre-Treatment | TAOK2     | 9344   | 37 | 16 | 29994531  | 29994533  | In_Frame_Del    | DEL | GAG | -   | 10 | 51   | .1138_1140delGAG | c.(1138-1140)GAGdel                | p.E392del     |
| Pat_60 | Pre-Treatment | TERF2     | 7014   | 37 | 16 | 69419367  | 69419367  | Frame_Shift_Del | DEL | C   | -   | 8  | 286  | c.276delG        | c.(274-276)GGGfs                   | p.G92fs       |
| Pat_60 | Pre-Treatment | STRN      | 6801   | 37 | 2  | 37113870  | 37113870  | Frame_Shift_Del | DEL | T   | -   | 10 | 368  | c.1031delA       | c.(1030-1032)AAGfs                 | p.K344fs      |
| Pat_60 | Pre-Treatment | SPEG      | 10290  | 37 | 2  | 220327081 | 220327082 | Frame_Shift_Ins | INS | -   | G   | 2  | 4    | c.2678_2679insG  | c.(2677-2679)CAGfs                 | p.Q893fs      |
| Pat_60 | Pre-Treatment | DSTN      | 11034  | 37 | 20 | 17581488  | 17581489  | Frame_Shift_Ins | INS | -   | T   | 13 | 175  | c.109_110insT    | c.(109-111)ATTfs                   | p.I37fs       |
| Pat_60 | Pre-Treatment | GGT7      | 2686   | 37 | 20 | 33447805  | 33447805  | Frame_Shift_Del | DEL | C   | -   | 4  | 7    | c.784delG        | c.(784-786)GCCfs                   | p.A262fs      |
| Pat_60 | Pre-Treatment | KRTAP19-1 | 337882 | 37 | 21 | 31852433  | 31852433  | Frame_Shift_Del | DEL | A   | -   | 9  | 1443 | c.204delT        | c.(202-204)TTTfs                   | p.F68fs       |
| Pat_60 | Pre-Treatment | GABRG1    | 2565   | 37 | 4  | 46060358  | 46060358  | Frame_Shift_Del | DEL | A   | -   | 7  | 128  | c.792delT        | c.(790-792)TTTfs                   | p.F264fs      |
| Pat_60 | Pre-Treatment | SEC31A    | 22872  | 37 | 4  | 83745800  | 83745800  | Frame_Shift_Del | DEL | T   | -   | 8  | 118  | c.3319delA       | c.(3319-3321)ATTfs                 | p.I1107fs     |
| Pat_60 | Pre-Treatment | MAST4     | 375449 | 37 | 5  | 66459466  | 66459466  | Frame_Shift_Del | DEL | C   | -   | 5  | 3    | c.3892delC       | c.(3892-3894)CAGfs                 | p.Q1298fs     |
| Pat_60 | Pre-Treatment | RHOBTB3   | 22836  | 37 | 5  | 95124535  | 95124535  | Frame_Shift_Del | DEL | C   | -   | 7  | 151  | c.1693delC       | c.(1693-1695)CAAfs                 | p.Q565fs      |
| Pat_60 | Pre-Treatment | RIOK2     | 55781  | 37 | 5  | 96503489  | 96503490  | Frame_Shift_Del | DEL | TC  | -   | 7  | 354  | .1078_1079delGA  | c.(1078-1080)GAAfs                 | p.E360fs      |
| Pat_60 | Pre-Treatment | RAPGEF6   | 51735  | 37 | 5  | 130815369 | 130815369 | Frame_Shift_Del | DEL | T   | -   | 12 | 245  | c.1918delA       | c.(1918-1920)AGTfs                 | p.S640fs      |
| Pat_60 | Pre-Treatment | CYP51A1   | 1595   | 37 | 7  | 91752494  | 91752494  | Frame_Shift_Del | DEL | T   | -   | 10 | 522  | c.1026delA       | c.(1024-1026)AAAfs                 | p.K342fs      |
| Pat_60 | Pre-Treatment | TTC16     | 158248 | 37 | 9  | 130493470 | 130493471 | Frame_Shift_Del | DEL | CC  | -   | 4  | 6    | .2408_2409delCC  | c.(2407-2409)ACCfs                 | p.T803fs      |
| Pat_60 | Pre-Treatment | CACNA1B   | 774    | 37 | 9  | 140865845 | 140865846 | Frame_Shift_Del | DEL | CG  | -   | 4  | 2    | .1344_1345delCC  | c.(1342-1347)TTCGCCfs              | p.F448fs      |
| Pat_60 | Pre-Treatment | MED12     | 9968   | 37 | X  | 70360680  | 70360682  | In_Frame_Del    | DEL | GCA | -   | 5  | 7    | .6240_6242delGC  | c.(6238-6243)CGGCAG>CG             | p.Q2086del    |
| Pat_60 | Pre-Treatment | ABCD1     | 215    | 37 | X  | 152991116 | 152991116 | Frame_Shift_Del | DEL | G   | -   | 2  | 4    | c.395delG        | c.(394-396)TGGfs                   | p.W132fs      |

|        |                 |           |        |    |    |           |           |                 |     |           |     |    |      |                                     |                                  |             |
|--------|-----------------|-----------|--------|----|----|-----------|-----------|-----------------|-----|-----------|-----|----|------|-------------------------------------|----------------------------------|-------------|
| Pat_60 | Post-Resistance | RPL22     | 6146   | 37 | 1  | 6257785   | 6257785   | Frame_Shift_Del | DEL | T         | -   | 8  | 151  | c.44delA                            | c.(43-45)AAGfs                   | p.K15fs     |
| Pat_60 | Post-Resistance | ARID1A    | 8289   | 37 | 1  | 27105931  | 27105931  | Frame_Shift_Del | DEL | G         | -   | 7  | 275  | c.5542delG                          | c.(5542-5544)GGGfs               | p.G1848fs   |
| Pat_60 | Post-Resistance | PHACTR4   | 65979  | 37 | 1  | 28800272  | 28800273  | Frame_Shift_Ins | INS | -         | C   | 7  | 481  | c.1030_1031insC                     | c.(1030-1032)TCCfs               | p.S344fs    |
| Pat_60 | Post-Resistance | GBP7      | 388646 | 37 | 1  | 89613322  | 89613322  | Frame_Shift_Del | DEL | C         | -   | 9  | 365  | c.1293delG                          | c.(1291-1293)GGGfs               | p.G431fs    |
| Pat_60 | Post-Resistance | SLC16A4   | 9122   | 37 | 1  | 110906426 | 110906427 | Frame_Shift_Ins | INS | -         | A   | 8  | 225  | c.1425_1426insT                     | c.(1423-1428)TTTGTfs             | p.F475fs    |
| Pat_60 | Post-Resistance | APOBEC4   | 403314 | 37 | 1  | 183616826 | 183616828 | In_Frame_Del    | DEL | TTC       | -   | 9  | 562  | .1089_1091delGA.                    | (1087-1092)AAGAAA>AA.363_364KK>I |             |
| Pat_60 | Post-Resistance | IPO9      | 55705  | 37 | 1  | 201843998 | 201844000 | In_Frame_Del    | DEL | GAG       | -   | 7  | 225  | .2872_2874delGA                     | c.(2872-2874)GAGdel              | p.E962del   |
| Pat_60 | Post-Resistance | ZNF33A    | 7581   | 37 | 10 | 38345019  | 38345020  | Frame_Shift_Del | DEL | AG        | -   | 7  | 303  | .1964_1965delAC                     | c.(1963-1965)CAGfs               | p.Q655fs    |
| Pat_60 | Post-Resistance | 8-Mar     | 220972 | 37 | 10 | 45953876  | 45953878  | In_Frame_Del    | DEL | GAG       | -   | 98 | 293  | c.685_687delCTC                     | c.(685-687)CTCdel                | p.L229del   |
| Pat_60 | Post-Resistance | TACC2     | 10579  | 37 | 10 | 123970380 | 123970380 | Frame_Shift_Del | DEL | C         | -   | 10 | 673  | c.6440delC                          | c.(6439-6441)ACCfs               | p.T2147fs   |
| Pat_60 | Post-Resistance | OR8D4     | 338662 | 37 | 11 | 123777441 | 123777442 | Frame_Shift_Ins | INS | -         | T   | 13 | 760  | c.303_304insT                       | c.(301-306)CTGTTTfs              | p.L101fs    |
| Pat_60 | Post-Resistance | GLB1L3    | 112937 | 37 | 11 | 134181005 | 134181005 | Frame_Shift_Del | DEL | C         | -   | 8  | 942  | c.1228delC                          | c.(1228-1230)CCCfs               | p.P410fs    |
| Pat_60 | Post-Resistance | PRB2      | 653247 | 37 | 12 | 11546732  | 11546733  | In_Frame_Ins    | INS | -         | AGA | 7  | 785  | c.279_280insTCT                     | c.(277-282)jinsTCT               | p.93_94insS |
| Pat_60 | Post-Resistance | PRB2      | 653247 | 37 | 12 | 11546856  | 11546858  | In_Frame_Del    | DEL | AGA       | -   | 8  | 503  | c.154_156delTCT                     | c.(154-156)TCTdel                | p.S52del    |
| Pat_60 | Post-Resistance | FAR2      | 55711  | 37 | 12 | 29450110  | 29450110  | Frame_Shift_Del | DEL | A         | -   | 9  | 364  | c.522delA                           | c.(520-522)CCAfs                 | p.P174fs    |
| Pat_60 | Post-Resistance | KRT1      | 3848   | 37 | 12 | 53069236  | 53069256  | In_Frame_Del    | DEL | TACTCTCCC | -   | 4  | 7    | ITGGCTCCGAGATGGCTCCGGAGGTAGC_559YGS | GGGS                             |             |
| Pat_60 | Post-Resistance | CBX5      | 23468  | 37 | 12 | 54645832  | 54645832  | Frame_Shift_Del | DEL | T         | -   | 14 | 600  | c.317delA                           | c.(316-318)AAGfs                 | p.K106fs    |
| Pat_60 | Post-Resistance | OR10A7    | 121364 | 37 | 12 | 55615114  | 55615116  | In_Frame_Del    | DEL | CTT       | -   | 11 | 542  | c.306_308delCTT                     | c.(304-309)TACTTC>TAC            | p.F107del   |
| Pat_60 | Post-Resistance | MARS      | 4141   | 37 | 12 | 57883053  | 57883053  | Frame_Shift_Del | DEL | T         | -   | 12 | 136  | c.204delT                           | c.(202-204)TATfs                 | p.Y68fs     |
| Pat_60 | Post-Resistance | IRAK3     | 11213  | 37 | 12 | 66610954  | 66610954  | Frame_Shift_Del | DEL | A         | -   | 9  | 1711 | c.592delA                           | c.(592-594)AAAfs                 | p.K198fs    |
| Pat_60 | Post-Resistance | TMTC3     | 160418 | 37 | 12 | 88566417  | 88566417  | Frame_Shift_Del | DEL | T         | -   | 10 | 512  | c.1094delT                          | c.(1093-1095)CTTfs               | p.L365fs    |
| Pat_60 | Post-Resistance | PWP1      | 11137  | 37 | 12 | 108105958 | 108105958 | Frame_Shift_Del | DEL | T         | -   | 7  | 473  | c.1467delT                          | c.(1465-1467)CCTfs               | p.P489fs    |
| Pat_60 | Post-Resistance | TPTE2     | 93492  | 37 | 13 | 20041394  | 20041394  | Frame_Shift_Del | DEL | A         | -   | 9  | 203  | c.483delT                           | c.(481-483)TTTfs                 | p.F161fs    |
| Pat_60 | Post-Resistance | SACS      | 26278  | 37 | 13 | 23914687  | 23914687  | Frame_Shift_Del | DEL | T         | -   | 20 | 889  | c.3328delA                          | c.(3328-3330)ATTfs               | p.I1110fs   |
| Pat_60 | Post-Resistance | SPG20     | 23111  | 37 | 13 | 36903501  | 36903501  | Frame_Shift_Del | DEL | T         | -   | 8  | 688  | c.1162delA                          | c.(1162-1164)AGGfs               | p.R388fs    |
| Pat_60 | Post-Resistance | KIAA1704  | 55425  | 37 | 13 | 45580365  | 45580367  | In_Frame_Del    | DEL | GAT       | -   | 7  | 660  | c.250_252delGAT                     | c.(250-252)GATdel                | p.D88del    |
| Pat_60 | Post-Resistance | DIAPH3    | 81624  | 37 | 13 | 60582733  | 60582734  | Frame_Shift_Ins | INS | -         | T   | 13 | 453  | c.958_959insA                       | c.(958-960)ATTfs                 | p.I320fs    |
| Pat_60 | Post-Resistance | TOX4      | 9878   | 37 | 14 | 21961060  | 21961062  | In_Frame_Del    | DEL | GCT       | -   | 10 | 327  | .1285_1287delGC                     | c.(1285-1287)GCTdel              | p.A434del   |
| Pat_60 | Post-Resistance | C14orf106 | 55320  | 37 | 14 | 45693722  | 45693722  | Frame_Shift_Del | DEL | T         | -   | 16 | 311  | c.2068delA                          | c.(2068-2070)AGTfs               | p.S690fs    |
| Pat_60 | Post-Resistance | MLH3      | 27030  | 37 | 14 | 75514603  | 75514604  | Frame_Shift_Ins | INS | -         | T   | 8  | 287  | c.1755_1756insA                     | c.(1753-1758)AAAGAAfs            | p.K585fs    |
| Pat_60 | Post-Resistance | FOXN3     | 1112   | 37 | 14 | 89629149  | 89629151  | In_Frame_Del    | DEL | GAG       | -   | 7  | 40   | .1080_1082delCT.                    | (1078-1083)TCCTCA>TC.360_361SS>I |             |
| Pat_60 | Post-Resistance | DDX24     | 57062  | 37 | 14 | 94545821  | 94545823  | In_Frame_Del    | DEL | CCT       | -   | 7  | 250  | c.266_268delAGG.                    | (265-270)GAGGGA>GG/              | p.E89del    |
| Pat_60 | Post-Resistance | RAGE      | 5891   | 37 | 14 | 102718302 | 102718303 | Frame_Shift_Ins | INS | -         | T   | 8  | 252  | c.313_314insA                       | c.(313-315)ATTfs                 | p.I105fs    |
| Pat_60 | Post-Resistance | GABRG3    | 2567   | 37 | 15 | 27765237  | 27765237  | Frame_Shift_Del | DEL | A         | -   | 8  | 88   | c.832delA                           | c.(832-834)AAAfs                 | p.K278fs    |
| Pat_60 | Post-Resistance | DMXL2     | 23312  | 37 | 15 | 51828841  | 51828857  | Frame_Shift_Del | DEL | TACTGTG   | -   | 32 | 388  | 6delCTCCACAG1836)GCTCCACAGTAA1      |                                  | p.A607fs    |
| Pat_60 | Post-Resistance | SLC24A1   | 9187   | 37 | 15 | 65943128  | 65943130  | In_Frame_Del    | DEL | GAG       | -   | 10 | 51   | .2641_2643delGA                     | c.(2641-2643)GAGdel              | p.E890del   |
| Pat_60 | Post-Resistance | BLM       | 641    | 37 | 15 | 91310208  | 91310208  | Frame_Shift_Del | DEL | A         | -   | 8  | 518  | c.2262delA                          | c.(2260-2262)TCAfs               | p.S754fs    |
| Pat_60 | Post-Resistance | CHD2      | 1106   | 37 | 15 | 93545433  | 93545434  | Frame_Shift_Ins | INS | -         | A   | 11 | 264  | c.4164_4165insA                     | c.(4162-4167)ATGAAfs             | p.M1388fs   |
| Pat_60 | Post-Resistance | ITGAL     | 3683   | 37 | 16 | 30531249  | 30531251  | In_Frame_Del    | DEL | GCT       | -   | 7  | 322  | .3300_3302delGC                     | (3298-3303)GGGCTG>GG             | p.L1106del  |
| Pat_60 | Post-Resistance | CCL17     | 6361   | 37 | 16 | 57447886  | 57447886  | Frame_Shift_Del | DEL | G         | -   | 4  | 9    | c.42delG                            | c.(40-42)CTGfs                   | p.L14fs     |
| Pat_60 | Post-Resistance | MED9      | 55090  | 37 | 17 | 17394705  | 17394707  | In_Frame_Del    | DEL | CAG       | -   | 12 | 278  | c.337_339delCAG                     | c.(337-339)CAGdel                | p.Q117del   |
| Pat_60 | Post-Resistance | CDC42EP4  | 23580  | 37 | 17 | 71281585  | 71281587  | In_Frame_Del    | DEL | TCC       | -   | 7  | 172  | .1053_1055delIGG.                   | (1051-1056)GAGGAT>GA             | p.E351del   |
| Pat_60 | Post-Resistance | SIRT6     | 51548  | 37 | 19 | 4180893   | 4180893   | Frame_Shift_Del | DEL | G         | -   | 7  | 82   | c.80delC                            | c.(79-81)CCGfs                   | p.P27fs     |
| Pat_60 | Post-Resistance | CD3EAP    | 10849  | 37 | 19 | 45911859  | 45911861  | In_Frame_Del    | DEL | GAA       | -   | 7  | 311  | c.633_635delGAA.                    | (631-636)CGGAAG>CGC              | p.K217del   |
| Pat_60 | Post-Resistance | ODC1      | 4953   | 37 | 2  | 10583625  | 10583625  | Frame_Shift_Del | DEL | A         | -   | 8  | 701  | c.657delT                           | c.(655-657)TTTfs                 | p.F219fs    |
| Pat_60 | Post-Resistance | BRE       | 9577   | 37 | 2  | 28521301  | 28521301  | Frame_Shift_Del | DEL | A         | -   | 8  | 564  | c.1031delA                          | c.(1030-1032)CAAFs               | p.Q344fs    |
| Pat_60 | Post-Resistance | FAM98A    | 25940  | 37 | 2  | 33813402  | 33813402  | Frame_Shift_Del | DEL | T         | -   | 11 | 585  | c.522delA                           | c.(520-522)AAAfs                 | p.K174fs    |

|        |                 |          |        |    |    |           |           |                 |     |     |   |    |      |                   |                                  |               |
|--------|-----------------|----------|--------|----|----|-----------|-----------|-----------------|-----|-----|---|----|------|-------------------|----------------------------------|---------------|
| Pat_60 | Post-Resistance | EPAS1    | 2034   | 37 | 2  | 46607704  | 46607704  | Frame_Shift_Del | DEL | G   | - | 7  | 226  | c.1893delG        | c.(1891-1893)ATGfs               | p.M631fs      |
| Pat_60 | Post-Resistance | AFTPH    | 54812  | 37 | 2  | 64778672  | 64778674  | In_Frame_Del    | DEL | GAT | - | 14 | 415  | c.64_66delGAT     | c.(64-66)GATdel                  | p.D26del      |
| Pat_60 | Post-Resistance | RGPD1    | 400966 | 37 | 2  | 87211874  | 87211875  | Splice_Site     | INS | -   | C | 12 | 201  | c.2582_splice     | c.e19-2                          | p.V861_splice |
| Pat_60 | Post-Resistance | REV1     | 51455  | 37 | 2  | 100055102 | 100055102 | Frame_Shift_Del | DEL | T   | - | 15 | 429  | c.1174delA        | c.(1174-1176)ATGfs               | p.M392fs      |
| Pat_60 | Post-Resistance | AAMP     | 14     | 37 | 2  | 219134766 | 219134766 | Frame_Shift_Del | DEL | G   | - | 9  | 1020 | c.44delC          | c.(43-45)CCAFs                   | p.P15fs       |
| Pat_60 | Post-Resistance | RQCD1    | 9125   | 37 | 2  | 219449364 | 219449364 | Frame_Shift_Del | DEL | T   | - | 9  | 1065 | c.350delT         | c.(349-351)CTTfs                 | p.L117fs      |
| Pat_60 | Post-Resistance | USP40    | 55230  | 37 | 2  | 234394236 | 234394237 | Frame_Shift_Ins | INS | -   | T | 7  | 130  | c.3477_3478insA   | c.(3475-3480)AAACAAs             | p.K1159fs     |
| Pat_60 | Post-Resistance | PANK2    | 80025  | 37 | 20 | 3893120   | 3893120   | Frame_Shift_Del | DEL | T   | - | 10 | 728  | c.1251delT        | c.(1249-1251)ACTfs               | p.T417fs      |
| Pat_60 | Post-Resistance | ZMYND8   | 23613  | 37 | 20 | 45875071  | 45875072  | Frame_Shift_Ins | INS | -   | T | 8  | 422  | c.1904_1905insA   | c.(1903-1905)AAGfs               | p.K635fs      |
| Pat_60 | Post-Resistance | SYCP2    | 10388  | 37 | 20 | 58467047  | 58467047  | Frame_Shift_Del | DEL | T   | - | 14 | 207  | c.2362delA        | c.(2362-2364)ATGfs               | p.M788fs      |
| Pat_60 | Post-Resistance | C22orf43 | 51233  | 37 | 22 | 23959767  | 23959769  | In_Frame_Del    | DEL | CAT | - | 8  | 282  | c.512_514delATGc. | c.(511-516)GATGCC>GCC            | p.D171del     |
| Pat_60 | Post-Resistance | SH3BP1   | 23616  | 37 | 22 | 38039752  | 38039754  | In_Frame_Del    | DEL | AGG | - | 7  | 173  | c.575_577delAGGc. | c.(574-579)AAGGAG>AAC            | p.E197del     |
| Pat_60 | Post-Resistance | TNRC6B   | 23112  | 37 | 22 | 40681767  | 40681767  | Frame_Shift_Del | DEL | C   | - | 7  | 1077 | c.3701delC        | c.(3700-3702)TCCfs               | p.S1234fs     |
| Pat_60 | Post-Resistance | FILIP1L  | 11259  | 37 | 3  | 99568272  | 99568273  | Frame_Shift_Ins | INS | -   | T | 8  | 354  | c.2247_2248insA   | c.(2245-2250)AAACTAfs            | p.K749fs      |
| Pat_60 | Post-Resistance | PCOLCE2  | 26577  | 37 | 3  | 142548586 | 142548586 | Frame_Shift_Del | DEL | T   | - | 7  | 610  | c.813delA         | c.(811-813)AAAFs                 | p.K271fs      |
| Pat_60 | Post-Resistance | RNF168   | 165918 | 37 | 3  | 196214338 | 196214338 | Frame_Shift_Del | DEL | T   | - | 8  | 1046 | c.490delA         | c.(490-492)AGGfs                 | p.R164fs      |
| Pat_60 | Post-Resistance | GRK4     | 2868   | 37 | 4  | 3015470   | 3015470   | Frame_Shift_Del | DEL | A   | - | 8  | 327  | c.656delA         | c.(655-657)CAAFs                 | p.Q219fs      |
| Pat_60 | Post-Resistance | RFC1     | 5981   | 37 | 4  | 39290395  | 39290395  | Frame_Shift_Del | DEL | T   | - | 7  | 241  | c.3433delA        | c.(3433-3435)AGTfs               | p.S1145fs     |
| Pat_60 | Post-Resistance | SEC24B   | 10427  | 37 | 4  | 110402913 | 110402915 | In_Frame_Del    | DEL | GAG | - | 8  | 464  | .1141_1143delGAC  | c.(1141-1143)GAGdel              | p.E384del     |
| Pat_60 | Post-Resistance | OTUD4    | 54726  | 37 | 4  | 146077123 | 146077125 | In_Frame_Del    | DEL | CAG | - | 10 | 355  | c.458_460delCTGc. | c.(457-462)GCTGAT>GAT            | p.A153del     |
| Pat_60 | Post-Resistance | TMEM192  | 201931 | 37 | 4  | 166033911 | 166033912 | Frame_Shift_Ins | INS | -   | C | 8  | 108  | c.14_15insG       | c.(13-15)GGCfs                   | p.G5fs        |
| Pat_60 | Post-Resistance | ZFR      | 51663  | 37 | 5  | 32404161  | 32404161  | Frame_Shift_Del | DEL | T   | - | 11 | 379  | c.1074delA        | c.(1072-1074)AAAFs               | p.K358fs      |
| Pat_60 | Post-Resistance | LMNB1    | 4001   | 37 | 5  | 126168434 | 126168436 | In_Frame_Del    | DEL | GAG | - | 7  | 382  | .1660_1662delGAI  | c.(1660-1662)GAGdel              | p.E559del     |
| Pat_60 | Post-Resistance | SLC22A4  | 6583   | 37 | 5  | 131676327 | 131676327 | Frame_Shift_Del | DEL | T   | - | 9  | 333  | c.1514delT        | c.(1513-1515)CTTfs               | p.L505fs      |
| Pat_60 | Post-Resistance | NRG2     | 9542   | 37 | 5  | 139422532 | 139422534 | In_Frame_Del    | DEL | GCT | - | 2  | 4    | c.121_123delAGC   | c.(121-123)AGCdel                | p.S41del      |
| Pat_60 | Post-Resistance | RBM27    | 54439  | 37 | 5  | 145647319 | 145647320 | Frame_Shift_Ins | INS | -   | A | 8  | 179  | c.2439_2440insA   | c.(2437-2442)CTTAAAs             | p.L813fs      |
| Pat_60 | Post-Resistance | KIAA1949 | 170954 | 37 | 6  | 30653494  | 30653496  | In_Frame_Del    | DEL | TGC | - | 8  | 109  | c.300_302delGCAc. | c.(298-303)CAGCAA>CAA.100_101QQ> |               |
| Pat_60 | Post-Resistance | TREML2   | 79865  | 37 | 6  | 41168714  | 41168716  | In_Frame_Del    | DEL | CAG | - | 7  | 65   | c.31_33delCTG     | c.(31-33)CTGdel                  | p.L11del      |
| Pat_60 | Post-Resistance | FOXP4    | 116113 | 37 | 6  | 41555186  | 41555186  | Frame_Shift_Del | DEL | C   | - | 7  | 196  | c.808delC         | c.(808-810)CCCfs                 | p.P270fs      |
| Pat_60 | Post-Resistance | GRIK2    | 2898   | 37 | 6  | 102503432 | 102503432 | Frame_Shift_Del | DEL | A   | - | 12 | 472  | c.2539delA        | c.(2539-2541)AAAFs               | p.K847fs      |
| Pat_60 | Post-Resistance | FYN      | 2534   | 37 | 6  | 111983042 | 111983042 | Frame_Shift_Del | DEL | T   | - | 7  | 527  | c.1514delA        | c.(1513-1515)AAGfs               | p.K505fs      |
| Pat_60 | Post-Resistance | WISP3    | 8838   | 37 | 6  | 112389434 | 112389434 | Frame_Shift_Del | DEL | A   | - | 12 | 142  | c.616delA         | c.(616-618)AAAFs                 | p.K206fs      |
| Pat_60 | Post-Resistance | C6orf174 | 387104 | 37 | 6  | 127804080 | 127804080 | Frame_Shift_Del | DEL | T   | - | 8  | 616  | c.1535delA        | c.(1534-1536)AAGfs               | p.K512fs      |
| Pat_60 | Post-Resistance | IFNGR1   | 3459   | 37 | 6  | 137519505 | 137519506 | Frame_Shift_Del | DEL | CT  | - | 8  | 453  | c.1132_1133delAG  | c.(1132-1134)AGTfs               | p.S378fs      |
| Pat_60 | Post-Resistance | MTHFD1L  | 25902  | 37 | 6  | 151358163 | 151358164 | Frame_Shift_Ins | INS | -   | A | 7  | 276  | c.2757_2758insA   | c.(2755-2760)GACAAAs             | p.D919fs      |
| Pat_60 | Post-Resistance | ZDHC4    | 55146  | 37 | 7  | 6621848   | 6621849   | Frame_Shift_Ins | INS | -   | T | 9  | 777  | c.336_337insT     | c.(334-339)CTGTTTfs              | p.L112fs      |
| Pat_60 | Post-Resistance | RSPH10B2 | 728194 | 37 | 7  | 6797480   | 6797480   | Frame_Shift_Del | DEL | A   | - | 7  | 554  | c.172delA         | c.(172-174)AAAFs                 | p.K58fs       |
| Pat_60 | Post-Resistance | OSBPL3   | 26031  | 37 | 7  | 24910452  | 24910453  | Frame_Shift_Del | DEL | TC  | - | 7  | 192  | c.279_280delGA    | c.(277-282)GAGAAGfs              | p.E93fs       |
| Pat_60 | Post-Resistance | AEBP1    | 165    | 37 | 7  | 44153765  | 44153767  | In_Frame_Del    | DEL | GAG | - | 7  | 159  | .3382_3384delGAI  | c.(3382-3384)GAGdel              | p.E1132del    |
| Pat_60 | Post-Resistance | TMEM60   | 85025  | 37 | 7  | 77423460  | 77423460  | Frame_Shift_Del | DEL | T   | - | 19 | 568  | c.231delA         | c.(229-231)AAAFs                 | p.K77fs       |
| Pat_60 | Post-Resistance | ABCB4    | 5244   | 37 | 7  | 87032544  | 87032544  | Frame_Shift_Del | DEL | T   | - | 7  | 831  | c.3561delA        | c.(3559-3561)AAAFs               | p.K1187fs     |
| Pat_60 | Post-Resistance | ABCB4    | 5244   | 37 | 7  | 87074281  | 87074282  | Frame_Shift_Ins | INS | -   | A | 9  | 134  | c.1015_1016insT   | c.(1015-1017)TCAFs               | p.S339fs      |
| Pat_60 | Post-Resistance | CYP51A1  | 1595   | 37 | 7  | 91752494  | 91752494  | Frame_Shift_Del | DEL | T   | - | 12 | 737  | c.1026delA        | c.(1024-1026)AAAFs               | p.K342fs      |
| Pat_60 | Post-Resistance | CCDC132  | 55610  | 37 | 7  | 92923947  | 92923948  | Frame_Shift_Ins | INS | -   | G | 10 | 630  | c.1166_1167insG   | c.(1165-1167)CAGfs               | p.Q389fs      |
| Pat_60 | Post-Resistance | LMTK2    | 22853  | 37 | 7  | 97820131  | 97820132  | Frame_Shift_Del | DEL | AG  | - | 9  | 1324 | .1090_1091delAC   | c.(1090-1092)AGAFs               | p.R364fs      |
| Pat_60 | Post-Resistance | STAG3    | 10734  | 37 | 7  | 99802723  | 99802723  | Frame_Shift_Del | DEL | C   | - | 10 | 907  | c.3047delC        | c.(3046-3048)TCCfs               | p.S1016fs     |
| Pat_60 | Post-Resistance | OR9A4    | 130075 | 37 | 7  | 141619203 | 141619203 | Frame_Shift_Del | DEL | T   | - | 12 | 635  | c.528delT         | c.(526-528)AATfs                 | p.N176fs      |

|        |                 |           |        |    |    |           |           |                 |     |        |      |    |      |                   |                         |               |
|--------|-----------------|-----------|--------|----|----|-----------|-----------|-----------------|-----|--------|------|----|------|-------------------|-------------------------|---------------|
| Pat_60 | Post-Resistance | XRCC2     | 7516   | 37 | 7  | 152346220 | 152346220 | Frame_Shift_Del | DEL | A      | -    | 9  | 377  | c.350delT         | c.(349-351)TTGfs        | p.L117fs      |
| Pat_60 | Post-Resistance | RBM33     | 155435 | 37 | 7  | 155531073 | 155531074 | Frame_Shift_Del | DEL | CA     | -    | 14 | 347  | c.1713_1714delCA  | c.(1711-1716)CCCACAFs   | p.P571fs      |
| Pat_60 | Post-Resistance | C8orf80   | 389643 | 37 | 8  | 27888776  | 27888776  | Frame_Shift_Del | DEL | T      | -    | 8  | 428  | c.1892delA        | c.(1891-1893)AATfs      | p.N631fs      |
| Pat_60 | Post-Resistance | MYST3     | 7994   | 37 | 8  | 41836184  | 41836184  | Frame_Shift_Del | DEL | T      | -    | 9  | 1560 | c.1019delA        | c.(1018-1020)AACfs      | p.N340fs      |
| Pat_60 | Post-Resistance | PCMTD1    | 115294 | 37 | 8  | 52733063  | 52733063  | Frame_Shift_Del | DEL | T      | -    | 14 | 191  | c.922delA         | c.(922-924)ATGfs        | p.M308fs      |
| Pat_60 | Post-Resistance | PTPLAD2   | 401494 | 37 | 9  | 21007045  | 21007046  | Frame_Shift_Ins | INS | -      | T    | 9  | 235  | c.689_690insA     | c.(688-690)AAGfs        | p.K230fs      |
| Pat_60 | Post-Resistance | NDOR1     | 27158  | 37 | 9  | 140100743 | 140100743 | Frame_Shift_Del | DEL | C      | -    | 7  | 807  | c.195delC         | c.(193-195)GACfs        | p.D65fs       |
| Pat_60 | Post-Resistance | PASD1     | 139135 | 37 | X  | 150817142 | 150817144 | In_Frame_Del    | DEL | GCT    | -    | 7  | 273  | c.685_687delGCT   | c.(685-687)GCTdel       | p.A236del     |
| Pat_60 | Post-Resistance | F8        | 2157   | 37 | X  | 154157686 | 154157686 | Frame_Shift_Del | DEL | T      | -    | 9  | 170  | c.4379delA        | c.(4378-4380)AATfs      | p.N1460fs     |
| Pat_65 | Pre-Treatment   | ESPNP     | 284729 | 37 | 1  | 17034125  | 17034126  | Frame_Shift_Ins | INS | -      | AGCT | 11 | 54   | c.364_365insAGC1  | c.(364-366)TGGfs        | p.W122fs      |
| Pat_65 | Pre-Treatment   | FAM43B    | 163933 | 37 | 1  | 20880268  | 20880270  | In_Frame_Del    | DEL | GAG    | -    | 11 | 63   | c.802_804delGAG   | c.(802-804)GAGdel       | p.E272del     |
| Pat_65 | Pre-Treatment   | DLGAP3    | 58512  | 37 | 1  | 35370281  | 35370283  | In_Frame_Del    | DEL | TGG    | -    | 9  | 518  | c.702_704delCCA   | c.(700-705)CACCAG>CAC   | p.H234del     |
| Pat_65 | Pre-Treatment   | TRIM33    | 51592  | 37 | 1  | 114968116 | 114968118 | In_Frame_Del    | DEL | TGT    | -    | 10 | 1315 | c.1648_1650delAC  | c.(1648-1650)ACAdel     | p.T550del     |
| Pat_65 | Pre-Treatment   | PIAS3     | 10401  | 37 | 1  | 145579285 | 145579285 | Frame_Shift_Del | DEL | C      | -    | 7  | 1032 | c.622delC         | c.(622-624)CCCfs        | p.P208fs      |
| Pat_65 | Pre-Treatment   | LOC200030 | 200030 | 37 | 1  | 148016436 | 148016436 | Frame_Shift_Del | DEL | T      | -    | 8  | 1057 | c.1826delA        | c.(1825-1827)AAGfs      | p.K609fs      |
| Pat_65 | Pre-Treatment   | LCE4A     | 199834 | 37 | 1  | 152681693 | 152681698 | In_Frame_Del    | DEL | TGTGGT | -    | 7  | 244  | c.142_147delTGTGC | c.(142-147)TGTGGTdel    | p.CG48del     |
| Pat_65 | Pre-Treatment   | PBXIP1    | 57326  | 37 | 1  | 154917508 | 154917510 | In_Frame_Del    | DEL | GGT    | -    | 10 | 354  | c.2186_2188delAC  | c.(2185-2190)CACCAG>CG  | p.H729del     |
| Pat_65 | Pre-Treatment   | LMX1A     | 4009   | 37 | 1  | 165177332 | 165177334 | In_Frame_Del    | DEL | TGC    | -    | 7  | 113  | c.783_785delGCAc  | c.(781-786)CAGCAA>CAA   | p.261_262QQ>I |
| Pat_65 | Pre-Treatment   | BAT2L2    | 23215  | 37 | 1  | 171511149 | 171511149 | Frame_Shift_Del | DEL | A      | -    | 8  | 159  | c.4538delA        | c.(4537-4539)GAAfs      | p.E1513fs     |
| Pat_65 | Pre-Treatment   | PRG4      | 10216  | 37 | 1  | 186276256 | 186276257 | In_Frame_Ins    | INS | -      | CCA  | 7  | 274  | c.1405_1406insCC  | c.(1405-1407)CCC>CCCACp | p.471_472insT |
| Pat_65 | Pre-Treatment   | PRG4      | 10216  | 37 | 1  | 186276374 | 186276376 | In_Frame_Del    | DEL | CCA    | -    | 15 | 492  | c.1523_1525delCC  | c.(1522-1527)CCCACC>CC  | p.T511del     |
| Pat_65 | Pre-Treatment   | GPATCH2   | 55105  | 37 | 1  | 217793189 | 217793189 | Frame_Shift_Del | DEL | G      | -    | 7  | 251  | c.709delC         | c.(709-711)CAGfs        | p.Q237fs      |
| Pat_65 | Pre-Treatment   | OBSCN     | 84033  | 37 | 1  | 228475979 | 228475980 | Frame_Shift_Del | DEL | GT     | -    | 9  | 358  | c.10029_10030delG | c.(10027-10032)TCGTGTfs | p.S3343fs     |
| Pat_65 | Pre-Treatment   | SFMBT2    | 57713  | 37 | 10 | 7212995   | 7212997   | In_Frame_Del    | DEL | CTC    | -    | 8  | 830  | c.2437_2439delGA  | c.(2437-2439)GAGdel     | p.E813del     |
| Pat_65 | Pre-Treatment   | PCDH15    | 65217  | 37 | 10 | 55698620  | 55698620  | Frame_Shift_Del | DEL | C      | -    | 7  | 365  | c.3328delG        | c.(3328-3330)GATfs      | p.D1110fs     |
| Pat_65 | Pre-Treatment   | ZMIZ1     | 57178  | 37 | 10 | 81072446  | 81072446  | Frame_Shift_Del | DEL | C      | -    | 7  | 1007 | c.3144delC        | c.(3142-3144)GACfs      | p.D1048fs     |
| Pat_65 | Pre-Treatment   | C10orf26  | 54838  | 37 | 10 | 104569669 | 104569671 | In_Frame_Del    | DEL | CAT    | -    | 8  | 675  | c.150_152delCAT   | c.(148-153)ACCATC>ACC   | p.I54del      |
| Pat_65 | Pre-Treatment   | MUC6      | 4588   | 37 | 11 | 1031058   | 1031059   | Splice_Site     | INS | -      | G    | 6  | 12   | c.575_splice      | c.e6-1                  | p.G192_splice |
| Pat_65 | Pre-Treatment   | DNHD1     | 144132 | 37 | 11 | 6578614   | 6578616   | In_Frame_Del    | DEL | GAG    | -    | 7  | 52   | c.8089_8091delGA  | c.(8089-8091)GAGdel     | p.E2703del    |
| Pat_65 | Pre-Treatment   | PRMT3     | 10196  | 37 | 11 | 20424503  | 20424503  | Frame_Shift_Del | DEL | C      | -    | 7  | 591  | c.744delC         | c.(742-744)TACfs        | p.Y248fs      |
| Pat_65 | Pre-Treatment   | MYBPC3    | 4607   | 37 | 11 | 47359101  | 47359103  | In_Frame_Del    | DEL | TCT    | -    | 8  | 230  | c.2441_2443delAG  | c.(2440-2445)AAGAGC>AG  | p.K814del     |
| Pat_65 | Pre-Treatment   | FADS2     | 9415   | 37 | 11 | 61615748  | 61615748  | Frame_Shift_Del | DEL | C      | -    | 11 | 1343 | c.736delC         | c.(736-738)CCCfs        | p.P246fs      |
| Pat_65 | Pre-Treatment   | C11orf95  | 65998  | 37 | 11 | 63531514  | 63531516  | In_Frame_Del    | DEL | CTC    | -    | 9  | 86   | c.1579_1581delGA  | c.(1579-1581)GAGdel     | p.E527del     |
| Pat_65 | Pre-Treatment   | C11orf95  | 65998  | 37 | 11 | 63533335  | 63533337  | In_Frame_Del    | DEL | TCC    | -    | 11 | 66   | c.579_581delGGA   | c.(577-582)GAGGAA>GAA   | p.193_194EE>I |
| Pat_65 | Pre-Treatment   | AIP       | 9049   | 37 | 11 | 67250670  | 67250670  | Frame_Shift_Del | DEL | A      | -    | 8  | 617  | c.41delA          | c.(40-42)CAAfs          | p.Q14fs       |
| Pat_65 | Pre-Treatment   | CD3G      | 917    | 37 | 11 | 118220583 | 118220583 | Frame_Shift_Del | DEL | A      | -    | 7  | 144  | c.205delA         | c.(205-207)AAAfs        | p.K69fs       |
| Pat_65 | Pre-Treatment   | CBL       | 867    | 37 | 11 | 119149356 | 119149358 | In_Frame_Del    | DEL | ATG    | -    | 7  | 292  | c.1364_1366delATC | c.(1363-1368)TATGAT>TAI | p.D460del     |
| Pat_65 | Pre-Treatment   | IFFO1     | 25900  | 37 | 12 | 6649704   | 6649706   | In_Frame_Del    | DEL | GGC    | -    | 8  | 376  | c.1623_1625delGC  | c.(1621-1626)CCGCCA>CC  | p.541_542PP>I |
| Pat_65 | Pre-Treatment   | C1R       | 715    | 37 | 12 | 7187850   | 7187851   | Frame_Shift_Ins | INS | -      | T    | 7  | 469  | c.2103_2104insA   | c.(2101-2106)ATGGAGfs   | p.M701fs      |
| Pat_65 | Pre-Treatment   | PRB1      | 5542   | 37 | 12 | 11506632  | 11506633  | In_Frame_Ins    | INS | -      | GGA  | 29 | 1425 | c.404_405insTCC   | c.(403-405)CCA>CCTCCA   | p.135_135P>PI |
| Pat_65 | Pre-Treatment   | PRB2      | 653247 | 37 | 12 | 11546233  | 11546235  | In_Frame_Del    | DEL | GGA    | -    | 7  | 444  | c.777_779delTCC   | c.(775-780)CCTCCA>CCA   | p.259_260PP>I |
| Pat_65 | Pre-Treatment   | PRB2      | 653247 | 37 | 12 | 11546544  | 11546545  | In_Frame_Ins    | INS | -      | GGA  | 8  | 1129 | c.467_468insTCC   | c.(466-468)CCA>CCTCCA   | p.156_156P>PI |
| Pat_65 | Pre-Treatment   | PRB2      | 653247 | 37 | 12 | 11546727  | 11546728  | In_Frame_Ins    | INS | -      | GGA  | 26 | 1664 | c.284_285insTCC   | c.(283-285)CCA>CCTCCA   | p.95_95P>PP   |
| Pat_65 | Pre-Treatment   | PRB2      | 653247 | 37 | 12 | 11546732  | 11546733  | In_Frame_Ins    | INS | -      | AGA  | 24 | 1527 | c.279_280insTCT   | c.(277-282)insTCT       | p.93_94insS   |
| Pat_65 | Pre-Treatment   | PRB2      | 653247 | 37 | 12 | 11546788  | 11546790  | In_Frame_Del    | DEL | GGA    | -    | 28 | 577  | c.222_224delTCC   | c.(220-225)CCTCCA>CCA   | p.74_75PP>P   |
| Pat_65 | Pre-Treatment   | IFLTD1    | 160492 | 37 | 12 | 25679737  | 25679738  | Frame_Shift_Del | DEL | GG     | -    | 7  | 1096 | c.580_581delCC    | c.(580-582)CCAFs        | p.P194fs      |
| Pat_65 | Pre-Treatment   | FAR2      | 55711  | 37 | 12 | 29450110  | 29450110  | Frame_Shift_Del | DEL | A      | -    | 7  | 618  | c.522delA         | c.(520-522)CCAFs        | p.P174fs      |

|        |               |          |        |    |    |           |           |                 |     |      |     |    |      |                  |                                   |               |
|--------|---------------|----------|--------|----|----|-----------|-----------|-----------------|-----|------|-----|----|------|------------------|-----------------------------------|---------------|
| Pat_65 | Pre-Treatment | CACNB3   | 784    | 37 | 12 | 49220567  | 49220567  | Frame_Shift_Del | DEL | G    | -   | 8  | 2265 | c.920delG        | c.(919-921)CGGfs                  | p.R307fs      |
| Pat_65 | Pre-Treatment | WNT1     | 7471   | 37 | 12 | 49373295  | 49373295  | Frame_Shift_Del | DEL | C    | -   | 9  | 437  | c.149delC        | c.(148-150)TCCfs                  | p.S50fs       |
| Pat_65 | Pre-Treatment | PRPF40B  | 25766  | 37 | 12 | 50025258  | 50025258  | Frame_Shift_Del | DEL | C    | -   | 12 | 704  | c.93delC         | c.(91-93)ATCfs                    | p.I31fs       |
| Pat_65 | Pre-Treatment | LRP1     | 4035   | 37 | 12 | 57572242  | 57572242  | Frame_Shift_Del | DEL | G    | -   | 8  | 610  | c.4462delG       | c.(4462-4464)GGGfs                | p.G1488fs     |
| Pat_65 | Pre-Treatment | NAP1L1   | 4673   | 37 | 12 | 76454023  | 76454024  | Frame_Shift_Del | DEL | GA   | -   | 8  | 674  | c.242_243delTC   | c.(241-243)CTCfs                  | p.L81fs       |
| Pat_65 | Pre-Treatment | C12orf42 | 374470 | 37 | 12 | 103695960 | 103695960 | Frame_Shift_Del | DEL | G    | -   | 11 | 647  | c.1009delC       | c.(1009-1011)CGCfs                | p.R337fs      |
| Pat_65 | Pre-Treatment | NT5DC3   | 51559  | 37 | 12 | 104187016 | 104187016 | Frame_Shift_Del | DEL | C    | -   | 7  | 1453 | c.945delG        | c.(943-945)GGGfs                  | p.G315fs      |
| Pat_65 | Pre-Treatment | KNTC1    | 9735   | 37 | 12 | 123068869 | 123068870 | Frame_Shift_Del | DEL | TA   | -   | 18 | 900  | c.3308_3309delTA | c.(3307-3309)CTAfs                | p.L1103fs     |
| Pat_65 | Pre-Treatment | SBNO1    | 55206  | 37 | 12 | 123794283 | 123794283 | Frame_Shift_Del | DEL | T    | -   | 12 | 464  | c.3416delA       | c.(3415-3417)AATfs                | p.N1139fs     |
| Pat_65 | Pre-Treatment | PABPC3   | 5042   | 37 | 13 | 25671273  | 25671273  | Frame_Shift_Del | DEL | G    | -   | 20 | 1616 | c.937delG        | c.(937-939)GCGfs                  | p.A313fs      |
| Pat_65 | Pre-Treatment | PABPC3   | 5042   | 37 | 13 | 25671333  | 25671333  | Frame_Shift_Del | DEL | A    | -   | 8  | 777  | c.997delA        | c.(997-999)AAAfs                  | p.K333fs      |
| Pat_65 | Pre-Treatment | RNF6     | 6049   | 37 | 13 | 26788241  | 26788241  | Frame_Shift_Del | DEL | A    | -   | 10 | 602  | c.1778delT       | c.(1777-1779)TTAfs                | p.L593fs      |
| Pat_65 | Pre-Treatment | WASF3    | 10810  | 37 | 13 | 27255386  | 27255387  | Frame_Shift_Ins | INS | -    | C   | 7  | 245  | c.912_913insC    | c.(910-915)CCGCCfs                | p.P304fs      |
| Pat_65 | Pre-Treatment | LRCH1    | 23143  | 37 | 13 | 47243183  | 47243186  | Frame_Shift_Del | DEL | CCTG | -   | 8  | 1210 | :.471_474delCCTC | c.(469-474)GCCCTGfs               | p.A157fs      |
| Pat_65 | Pre-Treatment | LMO7     | 4008   | 37 | 13 | 76415307  | 76415308  | Frame_Shift_Del | DEL | AG   | -   | 7  | 370  | :.2946_2947delAC | c.(2944-2949)GCAGAGfs             | p.A982fs      |
| Pat_65 | Pre-Treatment | TRPM1    | 4308   | 37 | 15 | 31362391  | 31362391  | Frame_Shift_Del | DEL | G    | -   | 8  | 1453 | c.56delC         | c.(55-57)CCTfs                    | p.P19fs       |
| Pat_65 | Pre-Treatment | NOX5     | 79400  | 37 | 15 | 69328208  | 69328210  | In_Frame_Del    | DEL | CTG  | -   | 8  | 1108 | .1120_1122delICT | c.(1120-1122)CTGdel               | p.L380del     |
| Pat_65 | Pre-Treatment | POLG     | 5428   | 37 | 15 | 89876828  | 89876830  | In_Frame_Del    | DEL | TGC  | -   | 10 | 116  | c.156_158delGCAc | c.(154-159)CAGCAA>CAAp.52_53QQ>Q  |               |
| Pat_65 | Pre-Treatment | CD2BP2   | 10421  | 37 | 16 | 30365550  | 30365552  | In_Frame_Del    | DEL | CAT  | -   | 9  | 1732 | c.170_172delATG: | c.(169-174)GATGGG>GGC             | p.D57del      |
| Pat_65 | Pre-Treatment | SALL1    | 6299   | 37 | 16 | 51175655  | 51175656  | In_Frame_Ins    | INS | -    | GCT | 18 | 45   | c.477_478insAGC  | c.(475-480)insAGC                 | p.159_160insS |
| Pat_65 | Pre-Treatment | PLD2     | 5338   | 37 | 17 | 4713029   | 4713029   | Frame_Shift_Del | DEL | G    | -   | 8  | 906  | c.658delG        | c.(658-660)GGCfs                  | p.G220fs      |
| Pat_65 | Pre-Treatment | DHX33    | 56919  | 37 | 17 | 5372037   | 5372039   | In_Frame_Del    | DEL | CCT  | -   | 8  | 123  | c.141_143delAGG: | c.(139-144)GGAGGC>GGC(p.47_48GG>G |               |
| Pat_65 | Pre-Treatment | CHRNB1   | 1140   | 37 | 17 | 7357666   | 7357668   | In_Frame_Del    | DEL | CTG  | -   | 9  | 905  | c.871_873delICTG | c.(871-873)CTGdel                 | p.L294del     |
| Pat_65 | Pre-Treatment | CHD3     | 1107   | 37 | 17 | 7788212   | 7788214   | In_Frame_Del    | DEL | GAG  | -   | 16 | 124  | c.88_90delGAG    | c.(88-90)GAGdel                   | p.E35del      |
| Pat_65 | Pre-Treatment | CHD3     | 1107   | 37 | 17 | 7801857   | 7801859   | In_Frame_Del    | DEL | AAG  | -   | 9  | 225  | .2095_2097delAA  | c.(2095-2097)AAGdel               | p.K703del     |
| Pat_65 | Pre-Treatment | SMCR7    | 125170 | 37 | 17 | 18167778  | 18167780  | In_Frame_Del    | DEL | GCT  | -   | 12 | 187  | .1065_1067delGC  | c.(1063-1068)CGGCTG>CG            | p.L360del     |
| Pat_65 | Pre-Treatment | WSB1     | 26118  | 37 | 17 | 25636240  | 25636241  | Frame_Shift_Del | DEL | TA   | -   | 7  | 1062 | c.826_827delITA  | c.(826-828)TATfs                  | p.Y276fs      |
| Pat_65 | Pre-Treatment | SUPT6H   | 6830   | 37 | 17 | 27001303  | 27001305  | In_Frame_Del    | DEL | GAG  | -   | 9  | 248  | c.112_114delGAG  | c.(112-114)GAGdel                 | p.E43del      |
| Pat_65 | Pre-Treatment | ZNF207   | 7756   | 37 | 17 | 30677314  | 30677316  | In_Frame_Del    | DEL | AAG  | -   | 14 | 1112 | c.10_12delAAG    | c.(10-12)AAGdel                   | p.K7del       |
| Pat_65 | Pre-Treatment | CDC6     | 990    | 37 | 17 | 38457159  | 38457159  | Frame_Shift_Del | DEL | T    | -   | 9  | 861  | c.1329delIT      | c.(1327-1329)GGTfs                | p.G443fs      |
| Pat_65 | Pre-Treatment | KRT10    | 3858   | 37 | 17 | 38978766  | 38978768  | In_Frame_Del    | DEL | TCC  | -   | 23 | 162  | c.70_72delGGA    | c.(70-72)GGAdel                   | p.G24del      |
| Pat_65 | Pre-Treatment | KCNH4    | 23415  | 37 | 17 | 40328258  | 40328259  | Frame_Shift_Ins | INS | -    | C   | 8  | 560  | c.642_643insG    | c.(640-645)GGGTCTfs               | p.G214fs      |
| Pat_65 | Pre-Treatment | XYLT2    | 64132  | 37 | 17 | 48433967  | 48433967  | Frame_Shift_Del | DEL | C    | -   | 8  | 357  | c.1578delC       | c.(1576-1578)TACfs                | p.Y526fs      |
| Pat_65 | Pre-Treatment | BPTF     | 2186   | 37 | 17 | 65822267  | 65822269  | In_Frame_Del    | DEL | GAG  | -   | 11 | 65   | c.427_429delGAG  | c.(427-429)GAGdel                 | p.E148del     |
| Pat_65 | Pre-Treatment | ITGB4    | 3691   | 37 | 17 | 73732157  | 73732158  | Frame_Shift_Del | DEL | GT   | -   | 9  | 1282 | :.1683_1684delGT | c.(1681-1686)CAGTGTfs             | p.Q561fs      |
| Pat_65 | Pre-Treatment | SS18     | 6760   | 37 | 18 | 23619289  | 23619289  | Frame_Shift_Del | DEL | G    | -   | 7  | 1142 | c.739delC        | c.(739-741)CAGfs                  | p.Q247fs      |
| Pat_65 | Pre-Treatment | WDR7     | 23335  | 37 | 18 | 54358513  | 54358513  | Frame_Shift_Del | DEL | G    | -   | 7  | 429  | c.784delG        | c.(784-786)GGGfs                  | p.G262fs      |
| Pat_65 | Pre-Treatment | ALPK2    | 115701 | 37 | 18 | 56246440  | 56246440  | Frame_Shift_Del | DEL | T    | -   | 8  | 1390 | c.1568delA       | c.(1567-1569)AAGfs                | p.K523fs      |
| Pat_65 | Pre-Treatment | CCDC159  | 126075 | 37 | 19 | 11459665  | 11459666  | Frame_Shift_Ins | INS | -    | A   | 12 | 7    | c.64_65insA      | c.(64-66)GAGfs                    | p.E22fs       |
| Pat_65 | Pre-Treatment | ECSIT    | 51295  | 37 | 19 | 11618820  | 11618821  | Frame_Shift_Ins | INS | -    | G   | 7  | 787  | c.781_782insC    | c.(781-783)CAGfs                  | p.Q261fs      |
| Pat_65 | Pre-Treatment | KIAA1683 | 80726  | 37 | 19 | 18378236  | 18378236  | Frame_Shift_Del | DEL | G    | -   | 7  | 746  | c.114delC        | c.(112-114)CCCfs                  | p.P38fs       |
| Pat_65 | Pre-Treatment | SBSN     | 374897 | 37 | 19 | 36019046  | 36019047  | Frame_Shift_Del | DEL | CT   | -   | 7  | 983  | c.137_138delAG   | c.(136-138)GAGfs                  | p.E46fs       |
| Pat_65 | Pre-Treatment | ZFP36    | 7538   | 37 | 19 | 39898948  | 39898950  | In_Frame_Del    | DEL | CAC  | -   | 9  | 1036 | c.590_592delCACc | c.(589-594)TCACCA>TCA             | p.P201del     |
| Pat_65 | Pre-Treatment | SFRS16   | 11129  | 37 | 19 | 45567607  | 45567609  | In_Frame_Del    | DEL | CTC  | -   | 7  | 73   | :.1128_1130delCT | c.(1126-1131)CGCTCC>CG            | p.S385del     |
| Pat_65 | Pre-Treatment | KLC3     | 147700 | 37 | 19 | 45850756  | 45850758  | In_Frame_Del    | DEL | GAG  | -   | 12 | 460  | c.541_543delGAG  | c.(541-543)GAGdel                 | p.E184del     |
| Pat_65 | Pre-Treatment | GLTSCR1  | 29998  | 37 | 19 | 48197891  | 48197891  | Frame_Shift_Del | DEL | C    | -   | 7  | 202  | c.2803delC       | c.(2803-2805)CCCfs                | p.P935fs      |
| Pat_65 | Pre-Treatment | ZNF175   | 7728   | 37 | 19 | 52091415  | 52091416  | Frame_Shift_Del | DEL | AG   | -   | 7  | 697  | :.1831_1832delAC | c.(1831-1833)AGAfs                | p.R611fs      |



|        |               |           |        |    |    |           |           |                 |     |         |   |     |      |                  |                                    |              |
|--------|---------------|-----------|--------|----|----|-----------|-----------|-----------------|-----|---------|---|-----|------|------------------|------------------------------------|--------------|
| Pat_65 | Pre-Treatment | CNOT3     | 4849   | 37 | 19 | 54656613  | 54656613  | Frame_Shift_Del | DEL | C       | - | 7   | 891  | c.1914delC       | c.(1912-1914)CTCfs                 | p.L638fs     |
| Pat_65 | Pre-Treatment | NTSR2     | 23620  | 37 | 2  | 11810004  | 11810006  | In_Frame_Del    | DEL | CAG     | - | 10  | 111  | c.250_252delCTG  | c.(250-252)CTGdel                  | p.L84del     |
| Pat_65 | Pre-Treatment | KIF3C     | 3797   | 37 | 2  | 26203464  | 26203466  | In_Frame_Del    | DEL | GTT     | - | 12  | 609  | .1321_1323delAAI | c.(1321-1323)AACdel                | p.N441del    |
| Pat_65 | Pre-Treatment | FAM98A    | 25940  | 37 | 2  | 33813402  | 33813402  | Frame_Shift_Del | DEL | T       | - | 7   | 499  | c.522delA        | c.(520-522)AAAfs                   | p.K174fs     |
| Pat_65 | Pre-Treatment | RIF1      | 55183  | 37 | 2  | 152293790 | 152293790 | Frame_Shift_Del | DEL | T       | - | 9   | 673  | c.1408delT       | c.(1408-1410)TTTfs                 | p.F470fs     |
| Pat_65 | Pre-Treatment | FN1       | 2335   | 37 | 2  | 216285432 | 216285433 | Frame_Shift_Del | DEL | CG      | - | 8   | 684  | .1638_1639delCC  | c.(1636-1641)TTCGGTfs              | p.F546fs     |
| Pat_65 | Pre-Treatment | SLC11A1   | 6556   | 37 | 2  | 219252307 | 219252307 | Frame_Shift_Del | DEL | T       | - | 10  | 1106 | c.591delT        | c.(589-591)GCTfs                   | p.A197fs     |
| Pat_65 | Pre-Treatment | CCDC108   | 255101 | 37 | 2  | 219868691 | 219868692 | Frame_Shift_Ins | INS | -       | T | 7   | 1402 | c.5537_5538insA  | c.(5536-5538)GAGfs                 | p.E1846fs    |
| Pat_65 | Pre-Treatment | TMEM90B   | 79953  | 37 | 20 | 24524183  | 24524185  | In_Frame_Del    | DEL | GGA     | - | 10  | 798  | c.450_452delGGA  | c.(448-453)GTGGAG>GTC              | p.E155del    |
| Pat_65 | Pre-Treatment | EMILIN3   | 90187  | 37 | 20 | 39990829  | 39990829  | Frame_Shift_Del | DEL | C       | - | 9   | 694  | c.1380delG       | c.(1378-1380)GGGfs                 | p.G460fs     |
| Pat_65 | Pre-Treatment | WFDC3     | 140686 | 37 | 20 | 44417572  | 44417572  | Frame_Shift_Del | DEL | T       | - | 7   | 1524 | c.209delA        | c.(208-210)AAGfs                   | p.K70fs      |
| Pat_65 | Pre-Treatment | SALL4     | 57167  | 37 | 20 | 50408526  | 50408526  | Frame_Shift_Del | DEL | G       | - | 8   | 1030 | c.496delC        | c.(496-498)CAGfs                   | p.Q166fs     |
| Pat_65 | Pre-Treatment | KRTAP21-1 | 337977 | 37 | 21 | 32127578  | 32127578  | Frame_Shift_Del | DEL | C       | - | 15  | 1971 | c.119delG        | c.(118-120)TGTfs                   | p.C40fs      |
| Pat_65 | Pre-Treatment | TXN2      | 25828  | 37 | 22 | 36872888  | 36872888  | Frame_Shift_Del | DEL | G       | - | 133 | 360  | c.279delC        | c.(277-279)TGCfs                   | p.C93fs      |
| Pat_65 | Pre-Treatment | TRIOBP    | 11078  | 37 | 22 | 38120392  | 38120400  | In_Frame_Del    | DEL | CTCCAGA | - | 9   | 1028 | .1837delCC       | c.(1839-1839)GCCTCCAGAACC          | p.SRT611del  |
| Pat_65 | Pre-Treatment | POLR2F    | 5435   | 37 | 22 | 38363691  | 38363691  | Frame_Shift_Del | DEL | G       | - | 8   | 824  | c.353delG        | c.(352-354)TGGfs                   | p.W118fs     |
| Pat_65 | Pre-Treatment | DDX17     | 10521  | 37 | 22 | 38881965  | 38881967  | In_Frame_Del    | DEL | GGA     | - | 8   | 474  | .2169_2171delTC  | c.(2167-2172)CCTCCC>CC.723_724PP>I |              |
| Pat_65 | Pre-Treatment | MGAT3     | 4248   | 37 | 22 | 39884335  | 39884335  | Frame_Shift_Del | DEL | T       | - | 8   | 567  | c.983delT        | c.(982-984)CTTfs                   | p.L328fs     |
| Pat_65 | Pre-Treatment | MAPK8IP2  | 23542  | 37 | 22 | 51041769  | 51041771  | In_Frame_Del    | DEL | GAG     | - | 10  | 65   | c.289_291delGAG  | c.(289-291)GAGdel                  | p.E103del    |
| Pat_65 | Pre-Treatment | XPC       | 7508   | 37 | 3  | 14219966  | 14219968  | In_Frame_Del    | DEL | CCT     | - | 7   | 216  | c.101_103delAGG  | c.(100-105)GAGAGT>GAT              | p.E34del     |
| Pat_65 | Pre-Treatment | CLASP2    | 23122  | 37 | 3  | 33602361  | 33602361  | Frame_Shift_Del | DEL | T       | - | 9   | 658  | c.2869delA       | c.(2869-2871)ATGfs                 | p.M957fs     |
| Pat_65 | Pre-Treatment | CDCP1     | 64866  | 37 | 3  | 45127479  | 45127479  | Frame_Shift_Del | DEL | T       | - | 9   | 1588 | c.2162delA       | c.(2161-2163)AAGfs                 | p.K721fs     |
| Pat_65 | Pre-Treatment | MAP4      | 4134   | 37 | 3  | 47913510  | 47913510  | Frame_Shift_Del | DEL | G       | - | 10  | 832  | c.2403delC       | c.(2401-2403)TCCfs                 | p.S801fs     |
| Pat_65 | Pre-Treatment | USP4      | 7375   | 37 | 3  | 49321969  | 49321971  | In_Frame_Del    | DEL | TCT     | - | 7   | 403  | .2318_2320delAG  | c.(2317-2322)AAGACC>AC             | p.K773del    |
| Pat_65 | Pre-Treatment | RAD54L2   | 23132  | 37 | 3  | 51624506  | 51624508  | In_Frame_Del    | DEL | GAG     | - | 7   | 85   | c.70_72delGAG    | c.(70-72)GAGdel                    | p.E30del     |
| Pat_65 | Pre-Treatment | ITIH4     | 3700   | 37 | 3  | 52847474  | 52847474  | Frame_Shift_Del | DEL | G       | - | 7   | 664  | c.2756delC       | c.(2755-2757)CCGfs                 | p.P919fs     |
| Pat_65 | Pre-Treatment | VGLL3     | 389136 | 37 | 3  | 87027857  | 87027859  | In_Frame_Del    | DEL | CTC     | - | 16  | 203  | c.220_222delGAG  | c.(220-222)GAGdel                  | p.E74del     |
| Pat_65 | Pre-Treatment | OR5H14    | 403273 | 37 | 3  | 97868506  | 97868507  | Frame_Shift_Del | DEL | TC      | - | 8   | 1163 | c.277_278delTC   | c.(277-279)TCTfs                   | p.S93fs      |
| Pat_65 | Pre-Treatment | ALCAM     | 214    | 37 | 3  | 105258856 | 105258856 | Frame_Shift_Del | DEL | A       | - | 8   | 368  | c.768delA        | c.(766-768)CCAfs                   | p.P256fs     |
| Pat_65 | Pre-Treatment | EAF2      | 55840  | 37 | 3  | 121573658 | 121573659 | Frame_Shift_Ins | INS | -       | A | 8   | 502  | c.326_327insA    | c.(325-327)GTAfs                   | p.V109fs     |
| Pat_65 | Pre-Treatment | P2RY1     | 5028   | 37 | 3  | 152554176 | 152554176 | Frame_Shift_Del | DEL | G       | - | 12  | 804  | c.605delG        | c.(604-606)TGTfs                   | p.C202fs     |
| Pat_65 | Pre-Treatment | UGDH      | 7358   | 37 | 4  | 39515752  | 39515753  | Frame_Shift_Ins | INS | -       | A | 7   | 205  | c.214_215insT    | c.(214-216)TCTfs                   | p.S72fs      |
| Pat_65 | Pre-Treatment | OCIAD2    | 132299 | 37 | 4  | 48894833  | 48894833  | Frame_Shift_Del | DEL | A       | - | 8   | 1459 | c.339delT        | c.(337-339)TTTfs                   | p.F113fs     |
| Pat_65 | Pre-Treatment | RRH       | 10692  | 37 | 4  | 110756541 | 110756541 | Frame_Shift_Del | DEL | T       | - | 9   | 366  | c.317delT        | c.(316-318)ATTfs                   | p.I106fs     |
| Pat_65 | Pre-Treatment | SCLT1     | 132320 | 37 | 4  | 129864163 | 129864163 | Frame_Shift_Del | DEL | T       | - | 9   | 293  | c.1620delA       | c.(1618-1620)AAAfs                 | p.K540fs     |
| Pat_65 | Pre-Treatment | OTUD4     | 54726  | 37 | 4  | 146077123 | 146077125 | In_Frame_Del    | DEL | CAG     | - | 13  | 418  | c.458_460delCTG  | c.(457-462)GCTGAT>GAT              | p.A153del    |
| Pat_65 | Pre-Treatment | C4orf41   | 60684  | 37 | 4  | 184614176 | 184614178 | In_Frame_Del    | DEL | GGA     | - | 7   | 479  | .2113_2115delGG  | c.(2113-2115)GGAdel                | p.G708del    |
| Pat_65 | Pre-Treatment | PDZD2     | 23037  | 37 | 5  | 32090059  | 32090061  | In_Frame_Del    | DEL | TCC     | - | 8   | 662  | .6505_6507delTC  | c.(6505-6507)TCCdel                | p.S2173del   |
| Pat_65 | Pre-Treatment | MSH3      | 4437   | 37 | 5  | 79970915  | 79970915  | Frame_Shift_Del | DEL | A       | - | 21  | 965  | c.1141delA       | c.(1141-1143)AAAfs                 | p.K381fs     |
| Pat_65 | Pre-Treatment | AP3S1     | 1176   | 37 | 5  | 115202418 | 115202421 | Frame_Shift_Del | DEL | AAGA    | - | 7   | 346  | .121_124delAAG   | c.(121-126)AAGAGAFs                | p.K41fs      |
| Pat_65 | Pre-Treatment | FBXL21    | 26223  | 37 | 5  | 135273191 | 135273191 | Frame_Shift_Del | DEL | G       | - | 7   | 495  | c.444delG        | c.(442-444)TTGfs                   | p.L148fs     |
| Pat_65 | Pre-Treatment | BRD8      | 10902  | 37 | 5  | 137495246 | 137495247 | Frame_Shift_Del | DEL | AG      | - | 9   | 435  | .2574_2575delCT  | c.(2572-2577)CTCTTTfs              | p.L858fs     |
| Pat_65 | Pre-Treatment | NUDCD2    | 134492 | 37 | 5  | 162884088 | 162884089 | Splice_Site     | INS | -       | A | 9   | 72   | c.239_splice     | c.e3-1                             | p.E80_splice |
| Pat_65 | Pre-Treatment | CPLX2     | 10814  | 37 | 5  | 175306965 | 175306967 | In_Frame_Del    | DEL | GAG     | - | 8   | 166  | c.322_324delGAG  | c.(322-324)GAGdel                  | p.E114del    |
| Pat_65 | Pre-Treatment | C5orf25   | 375484 | 37 | 5  | 175740719 | 175740719 | Frame_Shift_Del | DEL | T       | - | 8   | 1497 | c.1703delT       | c.(1702-1704)CTTfs                 | p.L568fs     |
| Pat_65 | Pre-Treatment | EXOC2     | 55770  | 37 | 6  | 637794    | 637794    | Frame_Shift_Del | DEL | G       | - | 9   | 1175 | c.25delC         | c.(25-27)CTTfs                     | p.L9fs       |
| Pat_65 | Pre-Treatment | NKAPL     | 222698 | 37 | 6  | 28227519  | 28227520  | Frame_Shift_Del | DEL | GA      | - | 9   | 865  | c.370_371delGA   | c.(370-372)GAGfs                   | p.E124fs     |

|        |               |           |        |    |   |           |           |                 |     |     |     |    |      |                  |                        |                |
|--------|---------------|-----------|--------|----|---|-----------|-----------|-----------------|-----|-----|-----|----|------|------------------|------------------------|----------------|
| Pat_65 | Pre-Treatment | PGBD1     | 84547  | 37 | 6 | 28254890  | 28254890  | Frame_Shift_Del | DEL | A   | -   | 7  | 580  | c.587delA        | c.(586-588)GAAfs       | p.E196fs       |
| Pat_65 | Pre-Treatment | ZFP57     | 346171 | 37 | 6 | 29643729  | 29643730  | Frame_Shift_Del | DEL | AA  | -   | 7  | 1124 | c.230_231delTT   | c.(229-231)TTTfs       | p.F77fs        |
| Pat_65 | Pre-Treatment | HLA-G     | 3135   | 37 | 6 | 29797196  | 29797196  | Frame_Shift_Del | DEL | C   | -   | 8  | 1459 | c.621delC        | c.(619-621)GACfs       | p.D207fs       |
| Pat_65 | Pre-Treatment | DAXX      | 1616   | 37 | 6 | 33287898  | 33287900  | In_Frame_Del    | DEL | TCC | -   | 14 | 195  | .1353_1355delIGG | c.(1351-1356)GAGGAA>GA | p.451_452EE>I  |
| Pat_65 | Pre-Treatment | CNPY3     | 10695  | 37 | 6 | 42897358  | 42897360  | In_Frame_Del    | DEL | TGC | -   | 7  | 101  | c.50_52delITGC   | c.(49-54)TTGCTG>TTG    | p.17_18LL>L    |
| Pat_65 | Pre-Treatment | ICK       | 22858  | 37 | 6 | 52883129  | 52883129  | Frame_Shift_Del | DEL | T   | -   | 10 | 1284 | c.662delA        | c.(661-663)AAGfs       | p.K221fs       |
| Pat_65 | Pre-Treatment | DDX43     | 55510  | 37 | 6 | 74117732  | 74117732  | Frame_Shift_Del | DEL | A   | -   | 9  | 238  | c.1087delA       | c.(1087-1089)AAAfs     | p.K363fs       |
| Pat_65 | Pre-Treatment | SLC17A5   | 26503  | 37 | 6 | 74351590  | 74351590  | Frame_Shift_Del | DEL | A   | -   | 7  | 671  | c.349delT        | c.(349-351)TATfs       | p.Y117fs       |
| Pat_65 | Pre-Treatment | TTK       | 7272   | 37 | 6 | 80751896  | 80751897  | Frame_Shift_Ins | INS | -   | A   | 10 | 300  | c.2551_2552insA  | c.(2551-2553)GAAfs     | p.E851fs       |
| Pat_65 | Pre-Treatment | C6orf165  | 154313 | 37 | 6 | 88144700  | 88144700  | Frame_Shift_Del | DEL | A   | -   | 8  | 271  | c.1423delA       | c.(1423-1425)AAAfs     | p.K475fs       |
| Pat_65 | Pre-Treatment | MAP3K7    | 6885   | 37 | 6 | 91296568  | 91296570  | In_Frame_Del    | DEL | GAG | -   | 14 | 199  | c.33_35delCTC    | c.(31-36)TCCTCG>TCG    | p.11_12SS>S    |
| Pat_65 | Pre-Treatment | IFNGR1    | 3459   | 37 | 6 | 137519505 | 137519506 | Frame_Shift_Del | DEL | CT  | -   | 8  | 620  | c.1132_1133delAG | c.(1132-1134)AGTfs     | p.S378fs       |
| Pat_65 | Pre-Treatment | OLIG3     | 167826 | 37 | 6 | 137815223 | 137815225 | In_Frame_Del    | DEL | GGC | -   | 8  | 356  | c.83_85delGCC    | c.(82-87)CGCCAC>CAC    | p.R28del       |
| Pat_65 | Pre-Treatment | CCDC28A   | 25901  | 37 | 6 | 139097330 | 139097330 | Frame_Shift_Del | DEL | A   | -   | 8  | 430  | c.343delA        | c.(343-345)AAAfs       | p.K115fs       |
| Pat_65 | Pre-Treatment | GRM1      | 2911   | 37 | 6 | 146755630 | 146755632 | In_Frame_Del    | DEL | GAC | -   | 8  | 484  | .3283_3285delGA  | c.(3283-3285)GACdel    | p.D1099del     |
| Pat_65 | Pre-Treatment | MTHFD1L   | 25902  | 37 | 6 | 151358163 | 151358164 | Frame_Shift_Ins | INS | -   | A   | 13 | 244  | c.2757_2758insA  | c.(2755-2760)GACAAAfs  | p.D919fs       |
| Pat_65 | Pre-Treatment | ZDHC4     | 55146  | 37 | 7 | 6621848   | 6621849   | Frame_Shift_Ins | INS | -   | T   | 9  | 877  | c.336_337insT    | c.(334-339)CTGTTTfs    | p.L112fs       |
| Pat_65 | Pre-Treatment | ZNF716    | 441234 | 37 | 7 | 57529089  | 57529091  | In_Frame_Del    | DEL | TCT | -   | 8  | 488  | c.922_924delTCT  | c.(922-924)TCTdel      | p.S309del      |
| Pat_65 | Pre-Treatment | GPC2      | 221914 | 37 | 7 | 99771554  | 99771554  | Frame_Shift_Del | DEL | C   | -   | 7  | 667  | c.796delG        | c.(796-798)GTCfs       | p.V266fs       |
| Pat_65 | Pre-Treatment | GIGYF1    | 64599  | 37 | 7 | 100283635 | 100283637 | In_Frame_Del    | DEL | TCC | -   | 11 | 221  | .1014_1016delIGG | c.(1012-1017)GAGGAA>GA | p.338_339EE>I  |
| Pat_65 | Pre-Treatment | FOXP2     | 93986  | 37 | 7 | 114270016 | 114270018 | In_Frame_Del    | DEL | CAG | -   | 12 | 333  | c.553_555delCAG  | c.(553-555)CAGdel      | p.Q191del      |
| Pat_65 | Pre-Treatment | PAXIP1    | 22976  | 37 | 7 | 154760267 | 154760269 | In_Frame_Del    | DEL | CTG | -   | 8  | 47   | .1642_1644delCA  | c.(1642-1644)CAGdel    | p.Q548del      |
| Pat_65 | Pre-Treatment | RBM33     | 155435 | 37 | 7 | 155531073 | 155531074 | Frame_Shift_Del | DEL | CA  | -   | 16 | 492  | c.1713_1714delCA | c.(1711-1716)CCCACAfs  | p.P571fs       |
| Pat_65 | Pre-Treatment | MCPH1     | 79648  | 37 | 8 | 6289099   | 6289099   | Frame_Shift_Del | DEL | A   | -   | 9  | 289  | c.313delA        | c.(313-315)AAAfs       | p.K105fs       |
| Pat_65 | Pre-Treatment | RP1L1     | 94137  | 37 | 8 | 10467706  | 10467707  | In_Frame_Ins    | INS | -   | CCC | 14 | 654  | .3901_3902insGG  | c.(3901-3903)GTG>GGGGT | p.1300_1301ins |
| Pat_65 | Pre-Treatment | SGCZ      | 137868 | 37 | 8 | 13959894  | 13959895  | Frame_Shift_Del | DEL | TG  | -   | 7  | 534  | c.734_735delCA   | c.(733-735)ACAfs       | p.T245fs       |
| Pat_65 | Pre-Treatment | ERLIN2    | 11160  | 37 | 8 | 37597949  | 37597950  | Frame_Shift_Del | DEL | AT  | -   | 8  | 1220 | c.174_175delAT   | c.(172-177)TCATATfs    | p.S58fs        |
| Pat_65 | Pre-Treatment | RAB11FIP1 | 80223  | 37 | 8 | 37728933  | 37728933  | Frame_Shift_Del | DEL | T   | -   | 8  | 538  | c.3387delA       | c.(3385-3387)AAAfs     | p.K1129fs      |
| Pat_65 | Pre-Treatment | MYST3     | 7994   | 37 | 8 | 41792323  | 41792323  | Frame_Shift_Del | DEL | C   | -   | 7  | 1714 | c.3415delG       | c.(3415-3417)GAGfs     | p.E1139fs      |
| Pat_65 | Pre-Treatment | ARFGEF1   | 10565  | 37 | 8 | 68152482  | 68152483  | Frame_Shift_Del | DEL | TG  | -   | 9  | 721  | c.2893_2894delCA | c.(2893-2895)CAAfs     | p.Q965fs       |
| Pat_65 | Pre-Treatment | SLC26A7   | 115111 | 37 | 8 | 92401631  | 92401631  | Frame_Shift_Del | DEL | T   | -   | 9  | 1265 | c.1741delT       | c.(1741-1743)TTTfs     | p.F581fs       |
| Pat_65 | Pre-Treatment | TM7SF4    | 81501  | 37 | 8 | 105361700 | 105361700 | Frame_Shift_Del | DEL | G   | -   | 7  | 1606 | c.920delG        | c.(919-921)TGGfs       | p.W307fs       |
| Pat_65 | Pre-Treatment | ATAD2     | 29028  | 37 | 8 | 124368685 | 124368685 | Frame_Shift_Del | DEL | A   | -   | 9  | 266  | c.1590delT       | c.(1588-1590)TTTfs     | p.F530fs       |
| Pat_65 | Pre-Treatment | FER1L6    | 654463 | 37 | 8 | 125080031 | 125080031 | Frame_Shift_Del | DEL | A   | -   | 7  | 256  | c.3702delA       | c.(3700-3702)GGAfs     | p.G1234fs      |
| Pat_65 | Pre-Treatment | COL22A1   | 169044 | 37 | 8 | 139809072 | 139809072 | Frame_Shift_Del | DEL | T   | -   | 7  | 1586 | c.1586delA       | c.(1585-1587)AAGfs     | p.K529fs       |
| Pat_65 | Pre-Treatment | PLEC      | 5339   | 37 | 8 | 145000951 | 145000953 | Splice_Site     | DEL | CCT | -   | 25 | 1223 | c.4455_splice    | c.e30+1                | p.E1485_splice |
| Pat_65 | Pre-Treatment | GRINA     | 2907   | 37 | 8 | 145065717 | 145065718 | Frame_Shift_Ins | INS | -   | C   | 7  | 222  | c.326_327insC    | c.(325-327)TTCfs       | p.F109fs       |
| Pat_65 | Pre-Treatment | ADAMTSL1  | 92949  | 37 | 9 | 18680349  | 18680350  | Frame_Shift_Ins | INS | -   | G   | 11 | 187  | c.1176_1177insG  | c.(1174-1179)TGTGGGfs  | p.C392fs       |
| Pat_65 | Pre-Treatment | VCP       | 7415   | 37 | 9 | 35062983  | 35062985  | In_Frame_Del    | DEL | AAG | -   | 9  | 470  | c.801_803delCTT  | c.(799-804)TTC TTG>TTG | p.F267del      |
| Pat_65 | Pre-Treatment | RALGDS    | 5900   | 37 | 9 | 135975698 | 135975700 | In_Frame_Del    | DEL | CTC | -   | 7  | 1627 | .2524_2526delIGA | c.(2524-2526)GAGdel    | p.E842del      |
| Pat_65 | Pre-Treatment | GRIN1     | 2902   | 37 | 9 | 140056884 | 140056886 | In_Frame_Del    | DEL | GAG | -   | 23 | 265  | .1780_1782delIGA | c.(1780-1782)GAGdel    | p.E598del      |
| Pat_65 | Pre-Treatment | ZMYND19   | 116225 | 37 | 9 | 140481541 | 140481542 | Frame_Shift_Ins | INS | -   | C   | 8  | 572  | c.236_237insG    | c.(235-237)GGCfs       | p.G79fs        |
| Pat_65 | Pre-Treatment | PPP2R3B   | 28227  | 37 | X | 302052    | 302052    | Frame_Shift_Del | DEL | T   | -   | 7  | 652  | c.1165delA       | c.(1165-1167)ACAfs     | p.T389fs       |
| Pat_65 | Pre-Treatment | NAP1L2    | 4674   | 37 | X | 72434104  | 72434104  | Frame_Shift_Del | DEL | T   | -   | 7  | 541  | c.225delA        | c.(223-225)AAAfs       | p.K75fs        |
| Pat_65 | Pre-Treatment | IRS4      | 8471   | 37 | X | 107977802 | 107977803 | Frame_Shift_Ins | INS | -   | C   | 22 | 1427 | c.1772_1773insG  | c.(1771-1773)GGCfs     | p.G591fs       |
| Pat_65 | Pre-Treatment | ATP2B3    | 492    | 37 | X | 152845611 | 152845611 | Frame_Shift_Del | DEL | C   | -   | 11 | 534  | c.3518delC       | c.(3517-3519)GCCfs     | p.A1173fs      |
| Pat_66 | Pre-Treatment | LRRIQ3    | 127255 | 37 | 1 | 74575212  | 74575213  | Frame_Shift_Ins | INS | -   | T   | 19 | 138  | c.732_733insA    | c.(730-735)AAACAGfs    | p.K244fs       |

|        |               |            |        |    |    |           |           |                 |     |           |     |     |      |                                          |                      |             |
|--------|---------------|------------|--------|----|----|-----------|-----------|-----------------|-----|-----------|-----|-----|------|------------------------------------------|----------------------|-------------|
| Pat_66 | Pre-Treatment | ST6GALNAC5 | 81849  | 37 | 1  | 77334277  | 77334279  | In_Frame_Del    | DEL | GCA       | -   | 9   | 59   | c.111_113delGCA:(109-114)CCGCAG>CCC      | p.Q49del             |             |
| Pat_66 | Pre-Treatment | ABCA4      | 24     | 37 | 1  | 94548992  | 94548992  | Frame_Shift_Del | DEL | G         | -   | 7   | 362  | c.774delC                                | c.(772-774)CCCfs     | p.P258fs    |
| Pat_66 | Pre-Treatment | PIAS3      | 10401  | 37 | 1  | 145579285 | 145579285 | Frame_Shift_Del | DEL | C         | -   | 9   | 879  | c.622delC                                | c.(622-624)CCCfs     | p.P208fs    |
| Pat_66 | Pre-Treatment | LOC200030  | 200030 | 37 | 1  | 148016436 | 148016436 | Frame_Shift_Del | DEL | T         | -   | 7   | 753  | c.1826delA                               | c.(1825-1827)AAGfs   | p.K609fs    |
| Pat_66 | Pre-Treatment | TCHH       | 7062   | 37 | 1  | 152082301 | 152082303 | In_Frame_Del    | DEL | CTC       | -   | 7   | 499  | .3390_3392delGA:(3388-3393)AAGAGA>AA     | p.R1133del           |             |
| Pat_66 | Pre-Treatment | LMNA       | 4000   | 37 | 1  | 156106980 | 156106981 | Frame_Shift_Del | DEL | GC        | -   | 18  | 15   | .1565_1566delGC                          | c.(1564-1566)TGCfs   | p.C522fs    |
| Pat_66 | Pre-Treatment | PVRL4      | 81607  | 37 | 1  | 161059028 | 161059030 | In_Frame_Del    | DEL | AGC       | -   | 8   | 577  | c.57_59delGCT                            | c.(55-60)CTGCTA>CTA  | p.19_20LL>L |
| Pat_66 | Pre-Treatment | PRG4       | 10216  | 37 | 1  | 186276010 | 186276011 | In_Frame_Ins    | INS | -         | AGG | 7   | 721  | .1159_1160insAG:(1159-1161)AAG>AAGGA     | p.387_388insE        |             |
| Pat_66 | Pre-Treatment | PARP1      | 142    | 37 | 1  | 226570820 | 226570820 | Frame_Shift_Del | DEL | G         | -   | 7   | 923  | c.1076delC                               | c.(1075-1077)CCAfs   | p.P359fs    |
| Pat_66 | Pre-Treatment | OR2W5      | 441932 | 37 | 1  | 247654684 | 247654684 | Frame_Shift_Del | DEL | G         | -   | 7   | 270  | c.255delG                                | c.(253-255)CTGfs     | p.L85fs     |
| Pat_66 | Pre-Treatment | PGR        | 5241   | 37 | 11 | 100998255 | 100998255 | Frame_Shift_Del | DEL | C         | -   | 4   | 9    | c.1547delG                               | c.(1546-1548)GGCfs   | p.G516fs    |
| Pat_66 | Pre-Treatment | KDM5A      | 5927   | 37 | 12 | 416953    | 416953    | Frame_Shift_Del | DEL | T         | -   | 8   | 184  | c.3597delA                               | c.(3595-3597)AAAs    | p.K1199fs   |
| Pat_66 | Pre-Treatment | PRB2       | 653247 | 37 | 12 | 11546506  | 11546508  | In_Frame_Del    | DEL | TTG       | -   | 18  | 828  | c.504_506delCA:(502-507)AACAA>AAG        | p.N168del            |             |
| Pat_66 | Pre-Treatment | GPR19      | 2842   | 37 | 12 | 12814274  | 12814274  | Frame_Shift_Del | DEL | T         | -   | 13  | 417  | c.1109delA                               | c.(1108-1110)AACfs   | p.N370fs    |
| Pat_66 | Pre-Treatment | ARNTL2     | 56938  | 37 | 12 | 27543043  | 27543044  | Frame_Shift_Del | DEL | CA        | -   | 7   | 689  | c.790_791delCA                           | c.(790-792)CACfs     | p.H264fs    |
| Pat_66 | Pre-Treatment | INTS6      | 26512  | 37 | 13 | 51948408  | 51948408  | Frame_Shift_Del | DEL | T         | -   | 7   | 663  | c.2040delA                               | c.(2038-2040)AAAs    | p.K680fs    |
| Pat_66 | Pre-Treatment | LAMP1      | 3916   | 37 | 13 | 113964033 | 113964034 | Frame_Shift_Ins | INS | -         | A   | 9   | 245  | c.259_260insA                            | c.(259-261)GACfs     | p.D87fs     |
| Pat_66 | Pre-Treatment | ZNF828     | 283489 | 37 | 13 | 115090966 | 115090966 | Frame_Shift_Del | DEL | T         | -   | 7   | 1340 | c.1649delT                               | c.(1648-1650)CTTfs   | p.L550fs    |
| Pat_66 | Pre-Treatment | EIF3CL     | 728689 | 37 | 16 | 28734579  | 28734581  | In_Frame_Del    | DEL | GAG       | -   | 13  | 1750 | c.871_873delGAG                          | c.(871-873)GAGdel    | p.E295del   |
| Pat_66 | Pre-Treatment | PRRT2      | 112476 | 37 | 16 | 29825016  | 29825016  | Frame_Shift_Del | DEL | C         | -   | 7   | 28   | c.641delC                                | c.(640-642)GCCfs     | p.A214fs    |
| Pat_66 | Pre-Treatment | TBC1D3B    | 414059 | 37 | 17 | 34493617  | 34493617  | Frame_Shift_Del | DEL | G         | -   | 2   | 4    | c.1408delC                               | c.(1408-1410)CGCfs   | p.R470fs    |
| Pat_66 | Pre-Treatment | FBXO17     | 115290 | 37 | 19 | 39440619  | 39440619  | Frame_Shift_Del | DEL | C         | -   | 2   | 4    | c.341delG                                | c.(340-342)TGCfs     | p.C114fs    |
| Pat_66 | Pre-Treatment | HS1BP3     | 64342  | 37 | 2  | 20840864  | 20840864  | Frame_Shift_Del | DEL | G         | -   | 8   | 719  | c.275delC                                | c.(274-276)CCAfs     | p.P92fs     |
| Pat_66 | Pre-Treatment | DYSF       | 8291   | 37 | 2  | 71801420  | 71801422  | In_Frame_Del    | DEL | CCG       | -   | 7   | 339  | .3267_3269delCC:(3265-3270)TTCCGC>TT     | p.R1093del           |             |
| Pat_66 | Pre-Treatment | FAM117B    | 150864 | 37 | 2  | 203621969 | 203621969 | Frame_Shift_Del | DEL | C         | -   | 8   | 118  | c.1138delC                               | c.(1138-1140)CCCfs   | p.P380fs    |
| Pat_66 | Pre-Treatment | ALPP       | 250    | 37 | 2  | 233243529 | 233243531 | In_Frame_Del    | DEL | TGC       | -   | 8   | 98   | c.17_19delTGC                            | c.(16-21)ATGCTG>ATG  | p.L13del    |
| Pat_66 | Pre-Treatment | ATRN       | 8455   | 37 | 20 | 3451934   | 3451936   | In_Frame_Del    | DEL | GCT       | -   | 2   | 4    | c.180_182delGCT:(178-183)CGGCTG>CGC      | p.L68del             |             |
| Pat_66 | Pre-Treatment | SYCP2      | 10388  | 37 | 20 | 58452518  | 58452519  | Frame_Shift_Ins | INS | -         | T   | 7   | 122  | c.3071_3072insA                          | c.(3070-3072)AACfs   | p.N1024fs   |
| Pat_66 | Pre-Treatment | GART       | 2618   | 37 | 21 | 34904722  | 34904739  | In_Frame_Del    | DEL | .CCACTGGC | -   | 109 | 479  | eITGAAGGCCAG³TGAAGGCCAGTGGTCT.VKASGL147d |                      |             |
| Pat_66 | Pre-Treatment | PFKL       | 5211   | 37 | 21 | 45736153  | 45736155  | In_Frame_Del    | DEL | CAT       | -   | 7   | 275  | c.774_776delCAT:(772-777)AACATC>AAC      | p.I262del            |             |
| Pat_66 | Pre-Treatment | PTTG1IP    | 754    | 37 | 21 | 46276194  | 46276196  | In_Frame_Del    | DEL | GCA       | -   | 13  | 144  | c.361_363delTGC                          | c.(361-363)TGCdel    | p.C121del   |
| Pat_66 | Pre-Treatment | TOP3B      | 8940   | 37 | 22 | 22314097  | 22314097  | Frame_Shift_Del | DEL | C         | -   | 7   | 568  | c.1666delG                               | c.(1666-1668)GTGfs   | p.V556fs    |
| Pat_66 | Pre-Treatment | DDX17      | 10521  | 37 | 22 | 38895455  | 38895455  | Frame_Shift_Del | DEL | C         | -   | 8   | 513  | c.488delG                                | c.(487-489)GGAfs     | p.G163fs    |
| Pat_66 | Pre-Treatment | TAB1       | 10454  | 37 | 22 | 39772049  | 39772049  | Frame_Shift_Del | DEL | C         | -   | 9   | 605  | c.108delC                                | c.(106-108)GACfs     | p.D36fs     |
| Pat_66 | Pre-Treatment | LNP1       | 348801 | 37 | 3  | 100148586 | 100148588 | In_Frame_Del    | DEL | GAT       | -   | 8   | 610  | c.13_15delGAT                            | c.(13-15)GATdel      | p.D10del    |
| Pat_66 | Pre-Treatment | EIF4G1     | 1981   | 37 | 3  | 184039744 | 184039746 | In_Frame_Del    | DEL | GAA       | -   | 8   | 82   | .1372_1374delGA                          | c.(1372-1374)GAAdel  | p.E465del   |
| Pat_66 | Pre-Treatment | GP5        | 2814   | 37 | 3  | 194117710 | 194117710 | Frame_Shift_Del | DEL | C         | -   | 4   | 3    | c.1302delG                               | c.(1300-1302)GGGfs   | p.G434fs    |
| Pat_66 | Pre-Treatment | TMEM175    | 84286  | 37 | 4  | 946206    | 946207    | Frame_Shift_Del | DEL | TG        | -   | 7   | 487  | c.430_431delTG                           | c.(430-432)TGTfs     | p.C144fs    |
| Pat_66 | Pre-Treatment | CRIPAK     | 285464 | 37 | 4  | 1388441   | 1388442   | Frame_Shift_Ins | INS | -         | CG  | 8   | 2214 | c.142_143insCG                           | c.(142-144)ATGfs     | p.M48fs     |
| Pat_66 | Pre-Treatment | CRIPAK     | 285464 | 37 | 4  | 1388900   | 1388901   | Frame_Shift_Del | DEL | CA        | -   | 14  | 808  | c.601_602delCA                           | c.(601-603)CACfs     | p.H201fs    |
| Pat_66 | Pre-Treatment | NOP14      | 8602   | 37 | 4  | 2951689   | 2951689   | Frame_Shift_Del | DEL | G         | -   | 7   | 558  | c.1254delC                               | c.(1252-1254)ACCFs   | p.T418fs    |
| Pat_66 | Pre-Treatment | RGS12      | 6002   | 37 | 4  | 3430398   | 3430399   | Frame_Shift_Ins | INS | -         | A   | 7   | 153  | c.3525_3526insA                          | c.(3523-3528)GGGAAfs | p.G1175fs   |
| Pat_66 | Pre-Treatment | PROL1      | 58503  | 37 | 4  | 71275209  | 71275210  | Frame_Shift_Del | DEL | CA        | -   | 7   | 487  | c.164_165delCA                           | c.(163-165)TCAfs     | p.S55fs     |
| Pat_66 | Pre-Treatment | SEC31A     | 22872  | 37 | 4  | 83785675  | 83785677  | In_Frame_Del    | DEL | TGC       | -   | 7   | 216  | .1272_1274delGC:(1270-1275)CAGCAC>CA     | p.Q424del            |             |
| Pat_66 | Pre-Treatment | DMXL1      | 1657   | 37 | 5  | 118525523 | 118525524 | Frame_Shift_Ins | INS | -         | G   | 7   | 256  | c.7256_7257insG                          | c.(7255-7257)GCGfs   | p.A2419fs   |
| Pat_66 | Pre-Treatment | FOXC1      | 2296   | 37 | 6  | 1612018   | 1612020   | In_Frame_Del    | DEL | CGG       | -   | 5   | 10   | .1338_1340delCG:(1336-1341)CACGGC>CA     | p.G456del            |             |
| Pat_66 | Pre-Treatment | TUBB2A     | 7280   | 37 | 6  | 3154114   | 3154116   | In_Frame_Del    | DEL | CCT       | -   | 7   | 438  | .1319_1321delAG:(1318-1323)GAGGGC>GC     | p.E440del            |             |

|        |               |           |        |    |   |           |           |                   |     |       |    |     |      |                                                     |           |
|--------|---------------|-----------|--------|----|---|-----------|-----------|-------------------|-----|-------|----|-----|------|-----------------------------------------------------|-----------|
| Pat_66 | Pre-Treatment | TUBB2B    | 347733 | 37 | 6 | 3225002   | 3225004   | In_Frame_Del      | DEL | CCT   | -  | 9   | 351  | .1319_1321delAG(1318-1323)GAGGGC>GC                 | p.E440del |
| Pat_66 | Pre-Treatment | HLA-J     | 3137   | 37 | 6 | 29977389  | 29977393  | Frame_Shift_Del   | DEL | CTTCT | -  | 17  | 109  | .408_412delCTTCc.(406-414)GACTTCTCTfs               | p.D136fs  |
| Pat_66 | Pre-Treatment | GSTA2     | 2939   | 37 | 6 | 52617657  | 52617657  | Frame_Shift_Del   | DEL | C     | -  | 12  | 2573 | c.409delG c.(409-411)GAAfs                          | p.E137fs  |
| Pat_66 | Pre-Treatment | GSTA1     | 2938   | 37 | 6 | 52658948  | 52658948  | Frame_Shift_Del   | DEL | T     | -  | 8   | 1987 | c.389delA c.(388-390)AATfs                          | p.N130fs  |
| Pat_66 | Pre-Treatment | ICK       | 22858  | 37 | 6 | 52883129  | 52883129  | Frame_Shift_Del   | DEL | T     | -  | 8   | 983  | c.662delA c.(661-663)AAGfs                          | p.K221fs  |
| Pat_66 | Pre-Treatment | PRDM1     | 639    | 37 | 6 | 106552831 | 106552832 | Frame_Shift_Del   | DEL | CT    | -  | 8   | 954  | c.796_797delICT c.(796-798)CTCfs                    | p.L266fs  |
| Pat_66 | Pre-Treatment | MTHFD1L   | 25902  | 37 | 6 | 151358163 | 151358164 | Frame_Shift_Ins   | INS | -     | A  | 10  | 225  | c.2757_2758insA c.(2755-2760)GACAAAs                | p.D919fs  |
| Pat_66 | Pre-Treatment | ZDHHC4    | 55146  | 37 | 7 | 6621849   | 6621849   | Frame_Shift_Del   | DEL | T     | -  | 7   | 520  | c.337delT c.(337-339)TTTfs                          | p.F113fs  |
| Pat_66 | Pre-Treatment | SULF1     | 23213  | 37 | 8 | 70514026  | 70514026  | Frame_Shift_Del   | DEL | T     | -  | 9   | 568  | c.1023delT c.(1021-1023)CCTfs                       | p.P341fs  |
| Pat_66 | Pre-Treatment | INTS8     | 55656  | 37 | 8 | 95877882  | 95877882  | Frame_Shift_Del   | DEL | T     | -  | 9   | 592  | c.2225delT c.(2224-2226)ATAfs                       | p.I742fs  |
| Pat_66 | Pre-Treatment | ZC3H3     | 23144  | 37 | 8 | 144522387 | 144522389 | In_Frame_Del      | DEL | GAG   | -  | 8   | 36   | .2637_2639delICT(.2635-2640)TCCTCA>TC.).879_880SS>! |           |
| Pat_66 | Pre-Treatment | OFD1      | 8481   | 37 | X | 13764946  | 13764946  | Frame_Shift_Del   | DEL | A     | -  | 7   | 60   | c.702delA c.(700-702)GCAfs                          | p.A234fs  |
| Pat_66 | Pre-Treatment | CNKSR2    | 22866  | 37 | X | 21627678  | 21627680  | In_Frame_Del      | DEL | GAG   | -  | 7   | 83   | .2635_2637delGAI c.(2635-2637)GAGdel                | p.E886del |
| Pat_66 | Pre-Treatment | F8        | 2157   | 37 | X | 154157686 | 154157686 | Frame_Shift_Del   | DEL | T     | -  | 11  | 139  | c.4379delA c.(4378-4380)AATfs                       | p.N1460fs |
| Pat_01 | Pre-Treatment | PUSL1     | 126789 | 37 | 1 | 1245090   | 1245090   | Missense_Mutation | SNP | C     | T  | 26  | 40   | c.503C>T c.(502-504)GCC>GTC                         | p.A168V   |
| Pat_01 | Pre-Treatment | RER1      | 11079  | 37 | 1 | 2328642   | 2328642   | Nonsense_Mutation | SNP | C     | T  | 186 | 268  | c.169C>T c.(169-171)CGA>TGA                         | p.R57*    |
| Pat_01 | Pre-Treatment | MTOR      | 2475   | 37 | 1 | 11181367  | 11181367  | Missense_Mutation | SNP | G     | A  | 4   | 241  | c.6869C>T c.(6868-6870)GCC>GTC                      | p.A2290V  |
| Pat_01 | Pre-Treatment | PTCHD2    | 57540  | 37 | 1 | 11584007  | 11584007  | Nonsense_Mutation | SNP | C     | T  | 57  | 78   | c.2371C>T c.(2371-2373)CAG>TAG                      | p.Q791*   |
| Pat_01 | Pre-Treatment | FBXO44    | 93611  | 37 | 1 | 11718444  | 11718444  | Missense_Mutation | SNP | C     | T  | 139 | 191  | c.386C>T c.(385-387)TCA>TTA                         | p.S129L   |
| Pat_01 | Pre-Treatment | AADACL3   | 126767 | 37 | 1 | 12785574  | 12785574  | Missense_Mutation | SNP | G     | A  | 116 | 122  | c.664G>A c.(664-666)GAA>AAA                         | p.E222K   |
| Pat_01 | Pre-Treatment | LOC649330 | 649330 | 37 | 1 | 12907868  | 12907868  | Missense_Mutation | SNP | C     | T  | 62  | 323  | c.275G>A c.(274-276)CGA>CAA                         | p.R92Q    |
| Pat_01 | Pre-Treatment | LOC440563 | 440563 | 37 | 1 | 13183695  | 13183695  | Missense_Mutation | SNP | C     | T  | 64  | 94   | c.178G>A c.(178-180)GAG>AAG                         | p.E60K    |
| Pat_01 | Pre-Treatment | NBPF1     | 55672  | 37 | 1 | 16914254  | 16914254  | Missense_Mutation | SNP | C     | T  | 60  | 466  | c.532G>A c.(532-534)GAG>AAG                         | p.E178K   |
| Pat_01 | Pre-Treatment | MRTO4     | 51154  | 37 | 1 | 19584386  | 19584386  | Missense_Mutation | SNP | C     | T  | 141 | 160  | c.401C>T c.(400-402)ACT>ATT                         | p.T134I   |
| Pat_01 | Pre-Treatment | RAP1GAP   | 5909   | 37 | 1 | 21940528  | 21940529  | Missense_Mutation | DNP | GT    | AA | 31  | 62   | c.345_346AC>TT(343-348)TCACTC>TCTTT                 | p.L116F   |
| Pat_01 | Pre-Treatment | NIPAL3    | 57185  | 37 | 1 | 24790583  | 24790583  | Missense_Mutation | SNP | C     | T  | 23  | 65   | c.994C>T c.(994-996)CCC>TCC                         | p.P332S   |
| Pat_01 | Pre-Treatment | PAFAH2    | 5051   | 37 | 1 | 26301009  | 26301009  | Missense_Mutation | SNP | T     | C  | 3   | 203  | c.891A>G c.(889-891)ATA>ATG                         | p.I297M   |
| Pat_01 | Pre-Treatment | ZNF683    | 257101 | 37 | 1 | 26691195  | 26691195  | Missense_Mutation | SNP | G     | A  | 62  | 78   | c.842C>T c.(841-843)ACC>ATC                         | p.T281I   |
| Pat_01 | Pre-Treatment | KPNA6     | 23633  | 37 | 1 | 32627987  | 32627987  | Missense_Mutation | SNP | C     | T  | 319 | 366  | c.773C>T c.(772-774)TCT>TTT                         | p.S258F   |
| Pat_01 | Pre-Treatment | GJA4      | 2701   | 37 | 1 | 35260770  | 35260770  | Missense_Mutation | SNP | C     | T  | 65  | 100  | c.956C>T c.(955-957)CCC>CTC                         | p.P319L   |
| Pat_01 | Pre-Treatment | CSF3R     | 1441   | 37 | 1 | 36941122  | 36941122  | Missense_Mutation | SNP | C     | T  | 48  | 80   | c.217G>A c.(217-219)GGC>AGC                         | p.G73S    |
| Pat_01 | Pre-Treatment | KIAA0467  | 23334  | 37 | 1 | 43893276  | 43893276  | Missense_Mutation | SNP | C     | T  | 155 | 201  | c.977C>T c.(976-978)TCC>TTC                         | p.S326F   |
| Pat_01 | Pre-Treatment | FAAH      | 2166   | 37 | 1 | 46872027  | 46872027  | Missense_Mutation | SNP | C     | T  | 69  | 104  | c.938C>T c.(937-939)CCC>CTC                         | p.P313L   |
| Pat_01 | Pre-Treatment | TMEM61    | 199964 | 37 | 1 | 55457633  | 55457633  | Missense_Mutation | SNP | G     | A  | 4   | 142  | c.490G>A c.(490-492)GCC>ACC                         | p.A164T   |
| Pat_01 | Pre-Treatment | C8A       | 731    | 37 | 1 | 57383305  | 57383305  | Missense_Mutation | SNP | A     | C  | 65  | 16   | c.1671A>C c.(1669-1671)GAA>GAC                      | p.E557D   |
| Pat_01 | Pre-Treatment | COL11A1   | 1301   | 37 | 1 | 103404641 | 103404641 | Missense_Mutation | SNP | C     | T  | 218 | 51   | c.3388G>A c.(3388-3390)GAA>AAA                      | p.E1130K  |
| Pat_01 | Pre-Treatment | CSF1      | 1435   | 37 | 1 | 110467429 | 110467429 | Missense_Mutation | SNP | C     | T  | 21  | 26   | c.1601C>T c.(1600-1602)CCC>CTC                      | p.P534L   |
| Pat_01 | Pre-Treatment | OVGP1     | 5016   | 37 | 1 | 111957310 | 111957310 | Missense_Mutation | SNP | G     | A  | 128 | 159  | c.1813C>T c.(1813-1815)CCC>TCC                      | p.P605S   |
| Pat_01 | Pre-Treatment | MAGI3     | 260425 | 37 | 1 | 114157228 | 114157228 | Missense_Mutation | SNP | C     | T  | 110 | 147  | c.1024C>T c.(1024-1026)CCT>TCT                      | p.P342S   |
| Pat_01 | Pre-Treatment | SYT6      | 148281 | 37 | 1 | 114640492 | 114640492 | Missense_Mutation | SNP | G     | A  | 4   | 321  | c.1117C>T c.(1117-1119)CAC>TAC                      | p.H373Y   |
| Pat_01 | Pre-Treatment | SYCP1     | 6847   | 37 | 1 | 115419372 | 115419372 | Missense_Mutation | SNP | G     | A  | 11  | 15   | c.742G>A c.(742-744)GAA>AAA                         | p.E248K   |
| Pat_01 | Pre-Treatment | SPAG17    | 200162 | 37 | 1 | 118558629 | 118558629 | Missense_Mutation | SNP | G     | A  | 97  | 127  | c.4246C>T c.(4246-4248)CCA>TCA                      | p.P1416S  |
| Pat_01 | Pre-Treatment | NOTCH2    | 4853   | 37 | 1 | 120465049 | 120465049 | Missense_Mutation | SNP | G     | A  | 3   | 42   | c.5023C>T c.(5023-5025)CGC>TGC                      | p.R1675C  |
| Pat_01 | Pre-Treatment | NBPF9     | 400818 | 37 | 1 | 144828599 | 144828599 | Missense_Mutation | SNP | G     | A  | 6   | 370  | c.2644G>A c.(2644-2646)GGA>AGA                      | p.G882R   |
| Pat_01 | Pre-Treatment | C1orf56   | 54964  | 37 | 1 | 151020540 | 151020540 | Missense_Mutation | SNP | G     | A  | 4   | 108  | c.217G>A c.(217-219)GAC>AAC                         | p.D73N    |
| Pat_01 | Pre-Treatment | POGZ      | 23126  | 37 | 1 | 151380907 | 151380907 | Missense_Mutation | SNP | G     | C  | 4   | 179  | c.2212C>G c.(2212-2214)CAG>GAG                      | p.Q738E   |
| Pat_01 | Pre-Treatment | RORC      | 6097   | 37 | 1 | 151785723 | 151785723 | Missense_Mutation | SNP | C     | T  | 380 | 424  | c.1166G>A c.(1165-1167)CGA>CAA                      | p.R389Q   |

|        |               |              |           |    |    |           |           |                   |     |    |    |     |     |                                     |                      |          |
|--------|---------------|--------------|-----------|----|----|-----------|-----------|-------------------|-----|----|----|-----|-----|-------------------------------------|----------------------|----------|
| Pat_01 | Pre-Treatment | TCHH         | 7062      | 37 | 1  | 152082320 | 152082320 | Missense_Mutation | SNP | T  | C  | 6   | 355 | c.3373A>G                           | c.(3373-3375)AGA>GGA | p.R1125G |
| Pat_01 | Pre-Treatment | RPTN         | 126638    | 37 | 1  | 152128886 | 152128886 | Missense_Mutation | SNP | C  | T  | 273 | 435 | c.689G>A                            | c.(688-690)CGG>CAG   | p.R230Q  |
| Pat_01 | Pre-Treatment | FLG          | 2312      | 37 | 1  | 152277449 | 152277449 | Missense_Mutation | SNP | G  | T  | 7   | 898 | c.9913C>A                           | c.(9913-9915)CGC>AGC | p.R3305S |
| Pat_01 | Pre-Treatment | FLG2         | 388698    | 37 | 1  | 152329769 | 152329769 | Nonsense_Mutation | SNP | G  | A  | 267 | 335 | c.493C>T                            | c.(493-495)CAA>TAA   | p.Q165*  |
| Pat_01 | Pre-Treatment | LCE1F        | 353137    | 37 | 1  | 152748887 | 152748887 | Missense_Mutation | SNP | C  | T  | 132 | 156 | c.40C>T                             | c.(40-42)CCC>TCC     | p.P14S   |
| Pat_01 | Pre-Treatment | PEAR1        | 375033    | 37 | 1  | 156874590 | 156874590 | Missense_Mutation | SNP | C  | T  | 163 | 173 | c.152C>T                            | c.(151-153)CCC>CTC   | p.P51L   |
| Pat_01 | Pre-Treatment | CD1C         | 911       | 37 | 1  | 158261934 | 158261934 | Missense_Mutation | SNP | G  | C  | 118 | 156 | c.389G>C                            | c.(388-390)GGC>GCC   | p.G130A  |
| Pat_01 | Pre-Treatment | OR10K2       | 391107    | 37 | 1  | 158389793 | 158389793 | Missense_Mutation | SNP | C  | T  | 88  | 127 | c.864G>A                            | c.(862-864)ATG>ATA   | p.M288I  |
| Pat_01 | Pre-Treatment | OR10J3       | 441911    | 37 | 1  | 159283990 | 159283990 | Missense_Mutation | SNP | G  | A  | 67  | 108 | c.460C>T                            | c.(460-462)CTT>TTT   | p.L154F  |
| Pat_01 | Pre-Treatment | PAPPA2       | 60676     | 37 | 1  | 176734857 | 176734857 | Missense_Mutation | SNP | C  | T  | 265 | 400 | c.4207C>T                           | c.(4207-4209)CAT>TAT | p.H1403Y |
| Pat_01 | Pre-Treatment | ASTN1        | 460       | 37 | 1  | 177001897 | 177001897 | Missense_Mutation | SNP | G  | A  | 78  | 116 | c.560C>T                            | c.(559-561)CCG>CTG   | p.P187L  |
| Pat_01 | Pre-Treatment | CEP350       | 9857      | 37 | 1  | 180062348 | 180062348 | Missense_Mutation | SNP | C  | T  | 5   | 19  | c.7108C>T                           | c.(7108-7110)CCT>TCT | p.P2370S |
| Pat_01 | Pre-Treatment | LAMC1        | 3915      | 37 | 1  | 182993000 | 182993000 | Missense_Mutation | SNP | G  | A  | 5   | 142 | c.149G>A                            | c.(148-150)TGC>TAC   | p.C50Y   |
| Pat_01 | Pre-Treatment | LAMC2        | 3918      | 37 | 1  | 183209476 | 183209476 | Missense_Mutation | SNP | T  | C  | 117 | 131 | c.3278T>C                           | c.(3277-3279)GTT>GCT | p.V1093A |
| Pat_01 | Pre-Treatment | NAV1         | 89796     | 37 | 1  | 201757704 | 201757704 | Missense_Mutation | SNP | C  | T  | 183 | 205 | c.3104C>T                           | c.(3103-3105)TCC>TTC | p.S1035F |
| Pat_01 | Pre-Treatment | LAX1         | 54900     | 37 | 1  | 203743384 | 203743385 | Nonsense_Mutation | DNP | GG | TA | 23  | 38  | c.772_773GG>TA                      | c.(772-774)GGA>TAA   | p.G258*  |
| Pat_01 | Pre-Treatment | NUAK2        | 81788     | 37 | 1  | 205273092 | 205273092 | Missense_Mutation | SNP | C  | T  | 36  | 32  | c.1373G>A                           | c.(1372-1374)GGC>GAC | p.G458D  |
| Pat_01 | Pre-Treatment | LGTN         | 1939      | 37 | 1  | 206765163 | 206765163 | Missense_Mutation | SNP | G  | A  | 190 | 227 | c.1699C>T                           | c.(1699-1701)CCT>TCT | p.P567S  |
| Pat_01 | Pre-Treatment | ATF3         | 467       | 37 | 1  | 212791476 | 212791476 | Missense_Mutation | SNP | C  | T  | 24  | 45  | c.248C>T                            | c.(247-249)CCT>CTT   | p.P83L   |
| Pat_01 | Pre-Treatment | CAPN9        | 10753     | 37 | 1  | 230916452 | 230916453 | Missense_Mutation | DNP | CC | TT | 101 | 118 | c.1479_1480CC>T477-1482)ACCCGG>ACTT |                      | p.R494W  |
| Pat_01 | Pre-Treatment | IRF2BP2      | 359948    | 37 | 1  | 234745204 | 234745204 | Missense_Mutation | SNP | G  | A  | 4   | 29  | c.37C>T                             | c.(37-39)CGG>TGG     | p.R13W   |
| Pat_01 | Pre-Treatment | FMN2         | 56776     | 37 | 1  | 240371107 | 240371107 | Missense_Mutation | SNP | C  | T  | 100 | 446 | c.2995C>T                           | c.(2995-2997)CCT>TCT | p.P999S  |
| Pat_01 | Pre-Treatment | FMN2         | 56776     | 37 | 1  | 240371239 | 240371239 | Missense_Mutation | SNP | C  | T  | 14  | 266 | c.3127C>T                           | c.(3127-3129)CCT>TCT | p.P1043S |
| Pat_01 | Pre-Treatment | PLD5         | 200150    | 37 | 1  | 242277217 | 242277217 | Missense_Mutation | SNP | G  | C  | 4   | 251 | c.1045C>G                           | c.(1045-1047)CCT>GCT | p.P349A  |
| Pat_01 | Pre-Treatment | OR14I1       | 401994    | 37 | 1  | 248845214 | 248845214 | Missense_Mutation | SNP | C  | T  | 75  | 99  | c.392G>A                            | c.(391-393)AGA>AAA   | p.R131K  |
| Pat_01 | Pre-Treatment | PFKP         | 5214      | 37 | 10 | 3155375   | 3155375   | Missense_Mutation | SNP | C  | T  | 23  | 23  | c.1219C>T                           | c.(1219-1221)CCA>TCA | p.P407S  |
| Pat_01 | Pre-Treatment | FBXO18       | 84893     | 37 | 10 | 5948525   | 5948525   | Missense_Mutation | SNP | C  | T  | 148 | 160 | c.683C>T                            | c.(682-684)CCG>CTG   | p.P228L  |
| Pat_01 | Pre-Treatment | MCM10        | 55388     | 37 | 10 | 13213185  | 13213186  | Missense_Mutation | DNP | CC | TT | 33  | 50  | c.271_272CC>TT                      | c.(271-273)CCC>TTC   | p.P91F   |
| Pat_01 | Pre-Treatment | NEBL         | 10529     | 37 | 10 | 21102879  | 21102879  | Missense_Mutation | SNP | G  | A  | 98  | 133 | c.2335C>T                           | c.(2335-2337)CAT>TAT | p.H779Y  |
| Pat_01 | Pre-Treatment | PTCHD3       | 374308    | 37 | 10 | 27703073  | 27703073  | Missense_Mutation | SNP | G  | A  | 292 | 379 | c.107C>T                            | c.(106-108)TCG>TTG   | p.S36L   |
| Pat_01 | Pre-Treatment | KIAA1462     | 57608     | 37 | 10 | 30317681  | 30317681  | Missense_Mutation | SNP | C  | T  | 191 | 225 | c.1396G>A                           | c.(1396-1398)GGA>AGA | p.G466R  |
| Pat_01 | Pre-Treatment | LOC100129055 | 100129055 | 37 | 10 | 38466905  | 38466905  | Splice_Site       | SNP | T  | G  | 33  | 38  | c.365_splice                        | c.e2+2               |          |
| Pat_01 | Pre-Treatment | ZNF33B       | 7582      | 37 | 10 | 43088920  | 43088920  | Missense_Mutation | SNP | C  | A  | 110 | 145 | c.1478G>T                           | c.(1477-1479)GGA>GTA | p.G493V  |
| Pat_01 | Pre-Treatment | RASSF4       | 83937     | 37 | 10 | 45486500  | 45486500  | Missense_Mutation | SNP | G  | A  | 132 | 78  | c.790G>A                            | c.(790-792)GTG>ATG   | p.V264M  |
| Pat_01 | Pre-Treatment | GPRIN2       | 9721      | 37 | 10 | 46999934  | 46999934  | Missense_Mutation | SNP | C  | T  | 65  | 219 | c.1054C>T                           | c.(1054-1056)CCG>TCG | p.P352S  |
| Pat_01 | Pre-Treatment | CHAT         | 1103      | 37 | 10 | 50863218  | 50863218  | Missense_Mutation | SNP | G  | A  | 475 | 156 | c.1712G>A                           | c.(1711-1713)AGA>AAA | p.R571K  |
| Pat_01 | Pre-Treatment | CTNNA3       | 29119     | 37 | 10 | 68381509  | 68381509  | Missense_Mutation | SNP | C  | T  | 70  | 17  | c.1315G>A                           | c.(1315-1317)GAA>AAA | p.E439K  |
| Pat_01 | Pre-Treatment | CDH23        | 64072     | 37 | 10 | 73537639  | 73537639  | Missense_Mutation | SNP | T  | C  | 3   | 101 | c.5048T>C                           | c.(5047-5049)TTC>TCC | p.F1683S |
| Pat_01 | Pre-Treatment | KCNMA1       | 3778      | 37 | 10 | 78708959  | 78708959  | Missense_Mutation | SNP | C  | T  | 192 | 45  | c.2650G>A                           | c.(2650-2652)GAG>AAG | p.E884K  |
| Pat_01 | Pre-Treatment | PTEN         | 5728      | 37 | 10 | 89692793  | 89692793  | Missense_Mutation | SNP | C  | G  | 106 | 26  | c.277C>G                            | c.(277-279)CAT>GAT   | p.H93D   |
| Pat_01 | Pre-Treatment | NOC3L        | 64318     | 37 | 10 | 96099543  | 96099543  | Missense_Mutation | SNP | G  | A  | 59  | 7   | c.1915C>T                           | c.(1915-1917)CCA>TCA | p.P639S  |
| Pat_01 | Pre-Treatment | NOC3L        | 64318     | 37 | 10 | 96110005  | 96110006  | Missense_Mutation | DNP | GG | AA | 169 | 39  | c.992_993CC>TT                      | c.(991-993)TCC>TTT   | p.S331F  |
| Pat_01 | Pre-Treatment | CYP2C8       | 1558      | 37 | 10 | 96829152  | 96829152  | Missense_Mutation | SNP | G  | A  | 73  | 12  | c.8C>T                              | c.(7-9)CCT>CTT       | p.P3L    |
| Pat_01 | Pre-Treatment | DNMBP        | 23268     | 37 | 10 | 101715970 | 101715970 | Missense_Mutation | SNP | G  | A  | 174 | 32  | c.1261C>T                           | c.(1261-1263)CAT>TAT | p.H421Y  |
| Pat_01 | Pre-Treatment | CPN1         | 1369      | 37 | 10 | 101835766 | 101835766 | Missense_Mutation | SNP | G  | A  | 144 | 13  | c.322C>T                            | c.(322-324)CGG>TGG   | p.R108W  |
| Pat_01 | Pre-Treatment | CYP17A1      | 1586      | 37 | 10 | 104593858 | 104593858 | Missense_Mutation | SNP | C  | T  | 21  | 7   | c.688G>A                            | c.(688-690)GAA>AAA   | p.E230K  |
| Pat_01 | Pre-Treatment | SORCS3       | 22986     | 37 | 10 | 106970954 | 106970954 | Missense_Mutation | SNP | C  | T  | 83  | 16  | c.2321C>T                           | c.(2320-2322)CCA>CTA | p.P774L  |



|        |               |          |        |    |    |           |           |                   |     |   |   |     |     |              |                      |              |
|--------|---------------|----------|--------|----|----|-----------|-----------|-------------------|-----|---|---|-----|-----|--------------|----------------------|--------------|
| Pat_01 | Pre-Treatment | RPL13AP6 | 644511 | 37 | 10 | 112696573 | 112696573 | Missense_Mutation | SNP | T | C | 4   | 26  | c.419A>G     | c.(418-420)CAC>CGC   | p.H140R      |
| Pat_01 | Pre-Treatment | HABP2    | 3026   | 37 | 10 | 115335703 | 115335703 | Missense_Mutation | SNP | C | T | 254 | 50  | c.271C>T     | c.(271-273)CAT>TAT   | p.H91Y       |
| Pat_01 | Pre-Treatment | DMBT1    | 1755   | 37 | 10 | 124358346 | 124358346 | Nonsense_Mutation | SNP | C | T | 505 | 107 | c.3013C>T    | c.(3013-3015)CGA>TGA | p.R1005*     |
| Pat_01 | Pre-Treatment | LRDD     | 55367  | 37 | 11 | 801458    | 801458    | Missense_Mutation | SNP | C | T | 16  | 19  | c.1469G>A    | c.(1468-1470)CGA>CAA | p.R490Q      |
| Pat_01 | Pre-Treatment | TH       | 7054   | 37 | 11 | 2186514   | 2186514   | Nonsense_Mutation | SNP | G | A | 181 | 235 | c.1375C>T    | c.(1375-1377)CAG>TAG | p.Q459*      |
| Pat_01 | Pre-Treatment | OR52E2   | 119678 | 37 | 11 | 5080830   | 5080830   | Missense_Mutation | SNP | G | A | 112 | 161 | c.28C>T      | c.(28-30)CAC>TAC     | p.H10Y       |
| Pat_01 | Pre-Treatment | MRV11    | 10335  | 37 | 11 | 10647848  | 10647848  | Missense_Mutation | SNP | G | A | 29  | 33  | c.1033C>T    | c.(1033-1035)CCG>TCG | p.P345S      |
| Pat_01 | Pre-Treatment | CYP2R1   | 120227 | 37 | 11 | 14901879  | 14901879  | Missense_Mutation | SNP | C | T | 48  | 83  | c.803G>A     | c.(802-804)AGA>AAA   | p.R268K      |
| Pat_01 | Pre-Treatment | NAV2     | 89797  | 37 | 11 | 20065564  | 20065564  | Missense_Mutation | SNP | C | T | 135 | 164 | c.3014C>T    | c.(3013-3015)TCC>TTC | p.S1005F     |
| Pat_01 | Pre-Treatment | KCNA4    | 3739   | 37 | 11 | 30033313  | 30033313  | Missense_Mutation | SNP | G | A | 108 | 155 | c.913C>T     | c.(913-915)CCT>TCT   | p.P305S      |
| Pat_01 | Pre-Treatment | DGKZ     | 8525   | 37 | 11 | 46397063  | 46397063  | Missense_Mutation | SNP | G | A | 20  | 18  | c.2356G>A    | c.(2356-2358)GTG>ATG | p.V786M      |
| Pat_01 | Pre-Treatment | OR4A15   | 81328  | 37 | 11 | 55135721  | 55135721  | Missense_Mutation | SNP | C | T | 224 | 43  | c.362C>T     | c.(361-363)TCC>TTC   | p.S121F      |
| Pat_01 | Pre-Treatment | OR5D13   | 390142 | 37 | 11 | 55541751  | 55541751  | Missense_Mutation | SNP | T | C | 63  | 78  | c.838T>C     | c.(838-840)TAC>CAC   | p.Y280H      |
| Pat_01 | Pre-Treatment | OR8K5    | 219453 | 37 | 11 | 55927516  | 55927516  | Missense_Mutation | SNP | G | A | 189 | 257 | c.278C>T     | c.(277-279)TCC>TTC   | p.S93F       |
| Pat_01 | Pre-Treatment | MS4A2    | 2206   | 37 | 11 | 59863103  | 59863103  | Missense_Mutation | SNP | G | A | 98  | 17  | c.709G>A     | c.(709-711)GAA>AAA   | p.E237K      |
| Pat_01 | Pre-Treatment | MS4A12   | 54860  | 37 | 11 | 60271189  | 60271189  | Missense_Mutation | SNP | G | A | 108 | 26  | c.487G>A     | c.(487-489)GGA>AGA   | p.G163R      |
| Pat_01 | Pre-Treatment | INTS5    | 80789  | 37 | 11 | 62415054  | 62415054  | Missense_Mutation | SNP | G | A | 192 | 44  | c.2498C>T    | c.(2497-2499)CCC>CTC | p.P833L      |
| Pat_01 | Pre-Treatment | TSGA10IP | 254187 | 37 | 11 | 65715236  | 65715236  | Missense_Mutation | SNP | G | A | 5   | 15  | c.940G>A     | c.(940-942)GAG>AAG   | p.E314K      |
| Pat_01 | Pre-Treatment | MYEOV    | 26579  | 37 | 11 | 69063224  | 69063224  | Missense_Mutation | SNP | G | A | 128 | 173 | c.307G>A     | c.(307-309)GCT>ACT   | p.A103T      |
| Pat_01 | Pre-Treatment | NEU3     | 10825  | 37 | 11 | 74717320  | 74717320  | Missense_Mutation | SNP | G | T | 201 | 412 | c.1169G>T    | c.(1168-1170)TGG>TTG | p.W390L      |
| Pat_01 | Pre-Treatment | DGAT2    | 84649  | 37 | 11 | 75501768  | 75501768  | Missense_Mutation | SNP | C | T | 156 | 475 | c.421C>T     | c.(421-423)CCC>TCC   | p.P141S      |
| Pat_01 | Pre-Treatment | MYO7A    | 4647   | 37 | 11 | 76905558  | 76905558  | Missense_Mutation | SNP | G | A | 16  | 36  | c.4312G>A    | c.(4312-4314)GCC>ACC | p.A1438T     |
| Pat_01 | Pre-Treatment | MYO7A    | 4647   | 37 | 11 | 76924018  | 76924018  | Missense_Mutation | SNP | C | T | 9   | 58  | c.6376C>T    | c.(6376-6378)CCT>TCT | p.P2126S     |
| Pat_01 | Pre-Treatment | HEPHL1   | 341208 | 37 | 11 | 93779011  | 93779011  | Missense_Mutation | SNP | C | T | 41  | 17  | c.343C>T     | c.(343-345)CAT>TAT   | p.H115Y      |
| Pat_01 | Pre-Treatment | C11orf65 | 160140 | 37 | 11 | 108277567 | 108277567 | Missense_Mutation | SNP | C | T | 78  | 17  | c.352G>A     | c.(352-354)GAT>AAT   | p.D118N      |
| Pat_01 | Pre-Treatment | LAYN     | 143903 | 37 | 11 | 111430932 | 111430932 | Missense_Mutation | SNP | G | A | 90  | 18  | c.898G>A     | c.(898-900)GAA>AAA   | p.E300K      |
| Pat_01 | Pre-Treatment | FAM55D   | 54827  | 37 | 11 | 114451040 | 114451040 | Missense_Mutation | SNP | C | G | 126 | 20  | c.913G>C     | c.(913-915)GAG>CAG   | p.E305Q      |
| Pat_01 | Pre-Treatment | PRMT8    | 56341  | 37 | 12 | 3649787   | 3649787   | Missense_Mutation | SNP | T | C | 20  | 260 | c.91T>C      | c.(91-93)TCC>CCC     | p.S31P       |
| Pat_01 | Pre-Treatment | EFCAB4B  | 84766  | 37 | 12 | 3789410   | 3789410   | Missense_Mutation | SNP | C | T | 85  | 121 | c.334G>A     | c.(334-336)GGA>AGA   | p.G112R      |
| Pat_01 | Pre-Treatment | LAG3     | 3902   | 37 | 12 | 6887073   | 6887073   | Missense_Mutation | SNP | C | T | 92  | 111 | c.1417C>T    | c.(1417-1419)CTT>TTT | p.L473F      |
| Pat_01 | Pre-Treatment | A2M      | 2      | 37 | 12 | 9231867   | 9231867   | Missense_Mutation | SNP | C | T | 115 | 125 | c.3092G>A    | c.(3091-3093)CGA>CAA | p.R1031Q     |
| Pat_01 | Pre-Treatment | TAS2R14  | 50840  | 37 | 12 | 11091472  | 11091472  | Missense_Mutation | SNP | G | A | 48  | 63  | c.335C>T     | c.(334-336)GCC>GTC   | p.A112V      |
| Pat_01 | Pre-Treatment | KIAA1467 | 57613  | 37 | 12 | 13219625  | 13219625  | Nonsense_Mutation | SNP | C | T | 170 | 204 | c.904C>T     | c.(904-906)CGA>TGA   | p.R302*      |
| Pat_01 | Pre-Treatment | C12orf36 | 283422 | 37 | 12 | 13526349  | 13526349  | Missense_Mutation | SNP | G | A | 44  | 82  | c.206C>T     | c.(205-207)TCG>TTG   | p.S69L       |
| Pat_01 | Pre-Treatment | PIK3C2G  | 5288   | 37 | 12 | 18650562  | 18650562  | Missense_Mutation | SNP | G | A | 64  | 78  | c.2773G>A    | c.(2773-2775)GAT>AAT | p.D925N      |
| Pat_01 | Pre-Treatment | PIK3C2G  | 5288   | 37 | 12 | 18650568  | 18650568  | Missense_Mutation | SNP | C | T | 66  | 80  | c.2779C>T    | c.(2779-2781)CGT>TGT | p.R927C      |
| Pat_01 | Pre-Treatment | CAPZA3   | 93661  | 37 | 12 | 18891723  | 18891723  | Nonsense_Mutation | SNP | G | A | 114 | 143 | c.521G>A     | c.(520-522)TGG>TAG   | p.W174*      |
| Pat_01 | Pre-Treatment | GYS2     | 2998   | 37 | 12 | 21693487  | 21693487  | Missense_Mutation | SNP | G | A | 4   | 249 | c.1666C>T    | c.(1666-1668)CGG>TGG | p.R556W      |
| Pat_01 | Pre-Treatment | DDX11    | 1663   | 37 | 12 | 31237922  | 31237922  | Missense_Mutation | SNP | G | C | 5   | 76  | c.500G>C     | c.(499-501)AGA>ACA   | p.R167T      |
| Pat_01 | Pre-Treatment | YARS2    | 51067  | 37 | 12 | 32908550  | 32908550  | Missense_Mutation | SNP | G | A | 112 | 137 | c.259C>T     | c.(259-261)CTT>TTT   | p.L87F       |
| Pat_01 | Pre-Treatment | CNTN1    | 1272   | 37 | 12 | 41330675  | 41330675  | Missense_Mutation | SNP | C | T | 262 | 380 | c.1078C>T    | c.(1078-1080)CCT>TCT | p.P360S      |
| Pat_01 | Pre-Treatment | GALNT6   | 11226  | 37 | 12 | 51773172  | 51773172  | Missense_Mutation | SNP | C | T | 80  | 104 | c.394G>A     | c.(394-396)GAA>AAA   | p.E132K      |
| Pat_01 | Pre-Treatment | KRT86    | 3892   | 37 | 12 | 52699481  | 52699481  | Missense_Mutation | SNP | G | A | 94  | 131 | c.935G>A     | c.(934-936)GGG>GAG   | p.G312E      |
| Pat_01 | Pre-Treatment | KRT72    | 140807 | 37 | 12 | 52992823  | 52992823  | Missense_Mutation | SNP | T | C | 112 | 187 | c.500A>G     | c.(499-501)AAC>AGC   | p.N167S      |
| Pat_01 | Pre-Treatment | NCKAP1L  | 3071   | 37 | 12 | 54914488  | 54914488  | Missense_Mutation | SNP | C | T | 352 | 403 | c.1636C>T    | c.(1636-1638)CGT>TGT | p.R546C      |
| Pat_01 | Pre-Treatment | LRP1     | 4035   | 37 | 12 | 57569758  | 57569758  | Missense_Mutation | SNP | G | A | 149 | 145 | c.3860G>A    | c.(3859-3861)GGA>GAA | p.G1287E     |
| Pat_01 | Pre-Treatment | DCTN2    | 10540  | 37 | 12 | 57929629  | 57929629  | Splice_Site       | SNP | C | T | 27  | 46  | c.106_splice | c.e3-1               | p.E36_splice |

|        |               |           |        |    |    |           |           |                   |     |    |    |     |     |                 |                        |               |
|--------|---------------|-----------|--------|----|----|-----------|-----------|-------------------|-----|----|----|-----|-----|-----------------|------------------------|---------------|
| Pat_01 | Pre-Treatment | B4GALNT1  | 2583   | 37 | 12 | 58024260  | 58024260  | Splice_Site       | SNP | C  | G  | 3   | 156 | c.531_splice    | c.e5+1                 | p.Q177_splice |
| Pat_01 | Pre-Treatment | MGAT4C    | 25834  | 37 | 12 | 86373354  | 86373354  | Missense_Mutation | SNP | C  | T  | 9   | 18  | c.1150G>A       | c.(1150-1152)GAA>AAA   | p.E384K       |
| Pat_01 | Pre-Treatment | SLC5A8    | 160728 | 37 | 12 | 101584309 | 101584309 | Missense_Mutation | SNP | T  | C  | 36  | 328 | c.770A>G        | c.(769-771)TAC>TGC     | p.Y257C       |
| Pat_01 | Pre-Treatment | MYBPC1    | 4604   | 37 | 12 | 102071915 | 102071915 | Missense_Mutation | SNP | G  | C  | 115 | 155 | c.3124G>C       | c.(3124-3126)GAT>CAT   | p.D1042H      |
| Pat_01 | Pre-Treatment | STAB2     | 55576  | 37 | 12 | 103988190 | 103988190 | Missense_Mutation | SNP | G  | A  | 281 | 370 | c.233G>A        | c.(232-234)AGA>AAA     | p.R78K        |
| Pat_01 | Pre-Treatment | MYO1H     | 283446 | 37 | 12 | 109835549 | 109835549 | Missense_Mutation | SNP | G  | A  | 4   | 101 | c.454G>A        | c.(454-456)GCC>ACC     | p.A152T       |
| Pat_01 | Pre-Treatment | IQCD      | 115811 | 37 | 12 | 113645584 | 113645584 | Missense_Mutation | SNP | G  | A  | 105 | 127 | c.388C>T        | c.(388-390)CGC>TGC     | p.R130C       |
| Pat_01 | Pre-Treatment | RBM19     | 9904   | 37 | 12 | 114377919 | 114377919 | Missense_Mutation | SNP | G  | T  | 5   | 568 | c.1784C>A       | c.(1783-1785)CCG>CAG   | p.P595Q       |
| Pat_01 | Pre-Treatment | RNF10     | 9921   | 37 | 12 | 121004694 | 121004694 | Missense_Mutation | SNP | C  | T  | 105 | 188 | c.1952C>T       | c.(1951-1953)TCC>TTC   | p.S651F       |
| Pat_01 | Pre-Treatment | SETD8     | 387893 | 37 | 12 | 123868746 | 123868746 | Missense_Mutation | SNP | A  | G  | 43  | 47  | c.1A>G          | c.(1-3)ATG>GTG         | p.M1V         |
| Pat_01 | Pre-Treatment | TMEM132D  | 121256 | 37 | 12 | 129559240 | 129559240 | Missense_Mutation | SNP | G  | A  | 120 | 154 | c.2480C>T       | c.(2479-2481)CCC>CTC   | p.P827L       |
| Pat_01 | Pre-Treatment | LATS2     | 26524  | 37 | 13 | 21562822  | 21562822  | Missense_Mutation | SNP | G  | A  | 98  | 95  | c.1097C>T       | c.(1096-1098)TCC>TTC   | p.S366F       |
| Pat_01 | Pre-Treatment | FLT3      | 2322   | 37 | 13 | 28636067  | 28636067  | Missense_Mutation | SNP | G  | A  | 80  | 120 | c.305C>T        | c.(304-306)TCC>TTC     | p.S102F       |
| Pat_01 | Pre-Treatment | BRCA2     | 675    | 37 | 13 | 32905117  | 32905117  | Missense_Mutation | SNP | C  | T  | 46  | 66  | c.743C>T        | c.(742-744)GCT>GTT     | p.A248V       |
| Pat_01 | Pre-Treatment | SPERT     | 220082 | 37 | 13 | 46287918  | 46287918  | Missense_Mutation | SNP | A  | T  | 15  | 19  | c.758A>T        | c.(757-759)GAG>GTG     | p.E253V       |
| Pat_01 | Pre-Treatment | NEK3      | 4752   | 37 | 13 | 52718870  | 52718870  | Nonsense_Mutation | SNP | G  | A  | 47  | 58  | c.760C>T        | c.(760-762)CGA>TGA     | p.R254*       |
| Pat_01 | Pre-Treatment | THSD1     | 55901  | 37 | 13 | 52972272  | 52972272  | Missense_Mutation | SNP | T  | C  | 222 | 257 | c.116A>G        | c.(115-117)AAC>AGC     | p.N39S        |
| Pat_01 | Pre-Treatment | C13orf34  | 79866  | 37 | 13 | 73303124  | 73303124  | Missense_Mutation | SNP | C  | T  | 161 | 176 | c.46C>T         | c.(46-48)CCA>TCA       | p.P16S        |
| Pat_01 | Pre-Treatment | ERCC5     | 2073   | 37 | 13 | 103528102 | 103528103 | Missense_Mutation | DNP | CC | TT | 51  | 82  | ..3410_3411CC>T | c.(3409-3411)CCC>CTT   | p.P1137L      |
| Pat_01 | Pre-Treatment | COL4A1    | 1282   | 37 | 13 | 110813633 | 110813633 | Nonsense_Mutation | SNP | G  | A  | 4   | 179 | c.4546C>T       | c.(4546-4548)CGA>TGA   | p.R1516*      |
| Pat_01 | Pre-Treatment | ING1      | 3621   | 37 | 13 | 111371747 | 111371747 | Missense_Mutation | SNP | C  | T  | 4   | 228 | c.737C>T        | c.(736-738)ACG>ATG     | p.T246M       |
| Pat_01 | Pre-Treatment | POTEG     | 404785 | 37 | 14 | 19574211  | 19574211  | Missense_Mutation | SNP | G  | A  | 22  | 174 | c.1268G>A       | c.(1267-1269)GGA>GAA   | p.G423E       |
| Pat_01 | Pre-Treatment | OR4N2     | 390429 | 37 | 14 | 20295951  | 20295951  | Missense_Mutation | SNP | T  | G  | 198 | 580 | c.344T>G        | c.(343-345)CTT>CGT     | p.L115R       |
| Pat_01 | Pre-Treatment | EDDM3B    | 64184  | 37 | 14 | 21238594  | 21238594  | Nonsense_Mutation | SNP | G  | A  | 111 | 172 | c.285G>A        | c.(283-285)TGG>TGA     | p.W95*        |
| Pat_01 | Pre-Treatment | SUPT16H   | 11198  | 37 | 14 | 21820896  | 21820896  | Missense_Mutation | SNP | G  | A  | 145 | 177 | c.3080C>T       | c.(3079-3081)TCG>TTG   | p.S1027L      |
| Pat_01 | Pre-Treatment | NYNRIN    | 57523  | 37 | 14 | 24886179  | 24886179  | Missense_Mutation | SNP | C  | T  | 34  | 34  | c.5224C>T       | c.(5224-5226)CCT>TCT   | p.P1742S      |
| Pat_01 | Pre-Treatment | NOVA1     | 4857   | 37 | 14 | 26949277  | 26949277  | Missense_Mutation | SNP | T  | C  | 173 | 189 | c.353A>G        | c.(352-354)GAA>GGA     | p.E118G       |
| Pat_01 | Pre-Treatment | ARHGAP5   | 394    | 37 | 14 | 32560909  | 32560909  | Missense_Mutation | SNP | C  | T  | 74  | 108 | c.1034C>T       | c.(1033-1035)GCT>GTT   | p.A345V       |
| Pat_01 | Pre-Treatment | MIA2      | 117153 | 37 | 14 | 39716382  | 39716382  | Missense_Mutation | SNP | G  | A  | 122 | 137 | c.604G>A        | c.(604-606)GAA>AAA     | p.E202K       |
| Pat_01 | Pre-Treatment | SYT16     | 83851  | 37 | 14 | 62463164  | 62463164  | Missense_Mutation | SNP | G  | A  | 167 | 223 | c.427G>A        | c.(427-429)GAA>AAA     | p.E143K       |
| Pat_01 | Pre-Treatment | ZFYVE26   | 23503  | 37 | 14 | 68233053  | 68233053  | Missense_Mutation | SNP | G  | A  | 152 | 246 | c.5902C>T       | c.(5902-5904)CCA>TCA   | p.P1968S      |
| Pat_01 | Pre-Treatment | SIPA1L1   | 26037  | 37 | 14 | 72176267  | 72176267  | Missense_Mutation | SNP | G  | A  | 4   | 132 | c.4157G>A       | c.(4156-4158)CGG>CAG   | p.R1386Q      |
| Pat_01 | Pre-Treatment | SIPA1L1   | 26037  | 37 | 14 | 72176309  | 72176309  | Missense_Mutation | SNP | G  | A  | 50  | 115 | c.4199G>A       | c.(4198-4200)AGC>AAC   | p.S1400N      |
| Pat_01 | Pre-Treatment | NUMB      | 8650   | 37 | 14 | 73750939  | 73750939  | Missense_Mutation | SNP | G  | A  | 127 | 190 | c.799C>T        | c.(799-801)CCA>TCA     | p.P267S       |
| Pat_01 | Pre-Treatment | STON2     | 85439  | 37 | 14 | 81744649  | 81744649  | Nonsense_Mutation | SNP | C  | A  | 5   | 297 | c.1006G>T       | c.(1006-1008)GAG>TAG   | p.E336*       |
| Pat_01 | Pre-Treatment | KCNK10    | 54207  | 37 | 14 | 88693861  | 88693861  | Missense_Mutation | SNP | G  | A  | 149 | 223 | c.524C>T        | c.(523-525)CCG>CTG     | p.P175L       |
| Pat_01 | Pre-Treatment | TTC7B     | 145567 | 37 | 14 | 91247111  | 91247111  | Missense_Mutation | SNP | C  | A  | 4   | 267 | c.416G>T        | c.(415-417)CGG>CTG     | p.R139L       |
| Pat_01 | Pre-Treatment | FBLN5     | 10516  | 37 | 14 | 92353657  | 92353657  | Splice_Site       | SNP | C  | T  | 189 | 257 | c.620_splice    | c.e7-1                 | p.D207_splice |
| Pat_01 | Pre-Treatment | TCL1B     | 9623   | 37 | 14 | 96152937  | 96152937  | Missense_Mutation | SNP | G  | A  | 39  | 34  | c.133G>A        | c.(133-135)GAA>AAA     | p.E45K        |
| Pat_01 | Pre-Treatment | TCL1A     | 8115   | 37 | 14 | 96178108  | 96178108  | Missense_Mutation | SNP | A  | C  | 40  | 73  | c.329T>G        | c.(328-330)CTG>CGG     | p.L110R       |
| Pat_01 | Pre-Treatment | TECPR2    | 9895   | 37 | 14 | 102916167 | 102916167 | Missense_Mutation | SNP | G  | T  | 4   | 213 | c.3277G>T       | c.(3277-3279)GGC>TGC   | p.G1093C      |
| Pat_01 | Pre-Treatment | C14orf180 | 400258 | 37 | 14 | 105054646 | 105054646 | Missense_Mutation | SNP | G  | A  | 180 | 312 | c.277G>A        | c.(277-279)GTG>ATG     | p.V93M        |
| Pat_01 | Pre-Treatment | AHNAK2    | 113146 | 37 | 14 | 105407164 | 105407164 | Missense_Mutation | SNP | G  | A  | 4   | 105 | c.14624C>T      | c.(14623-14625)CCC>CTC | p.P4875L      |
| Pat_01 | Pre-Treatment | NUDT14    | 256281 | 37 | 14 | 105642910 | 105642910 | Missense_Mutation | SNP | T  | A  | 112 | 140 | c.389A>T        | c.(388-390)CAC>CTC     | p.H130L       |
| Pat_01 | Pre-Treatment | C15orf2   | 23742  | 37 | 15 | 24923518  | 24923518  | Missense_Mutation | SNP | T  | C  | 130 | 233 | c.2504T>C       | c.(2503-2505)ATC>ACC   | p.I835T       |
| Pat_01 | Pre-Treatment | ARHGAP11A | 9824   | 37 | 15 | 32917400  | 32917400  | Missense_Mutation | SNP | A  | G  | 4   | 189 | c.671A>G        | c.(670-672)CAG>CGG     | p.Q224R       |
| Pat_01 | Pre-Treatment | RYR3      | 6263   | 37 | 15 | 33954496  | 33954496  | Missense_Mutation | SNP | C  | T  | 21  | 36  | c.4765C>T       | c.(4765-4767)CTC>TTC   | p.L1589F      |

|        |               |          |        |    |    |          |          |                   |     |    |    |     |     |                 |                        |          |
|--------|---------------|----------|--------|----|----|----------|----------|-------------------|-----|----|----|-----|-----|-----------------|------------------------|----------|
| Pat_01 | Pre-Treatment | EIF2AK4  | 440275 | 37 | 15 | 40241377 | 40241377 | Missense_Mutation | SNP | C  | T  | 206 | 505 | c.421C>T        | c.(421-423)CCT>TCT     | p.P141S  |
| Pat_01 | Pre-Treatment | PLA2G4F  | 255189 | 37 | 15 | 42442639 | 42442639 | Missense_Mutation | SNP | C  | T  | 56  | 113 | c.817G>A        | c.(817-819)GAG>AAG     | p.E273K  |
| Pat_01 | Pre-Treatment | CGNL1    | 84952  | 37 | 15 | 57730330 | 57730330 | Missense_Mutation | SNP | C  | T  | 105 | 259 | c.133C>T        | c.(133-135)CGG>TGG     | p.R45W   |
| Pat_01 | Pre-Treatment | CGNL1    | 84952  | 37 | 15 | 57731143 | 57731143 | Missense_Mutation | SNP | G  | A  | 76  | 163 | c.946G>A        | c.(946-948)GAT>AAT     | p.D316N  |
| Pat_01 | Pre-Treatment | NARG2    | 79664  | 37 | 15 | 60741638 | 60741638 | Missense_Mutation | SNP | T  | C  | 126 | 312 | c.1528A>G       | c.(1528-1530)ACA>GCA   | p.T510A  |
| Pat_01 | Pre-Treatment | IQCH     | 64799  | 37 | 15 | 67681327 | 67681327 | Missense_Mutation | SNP | G  | A  | 144 | 296 | c.1615G>A       | c.(1615-1617)GCT>ACT   | p.A539T  |
| Pat_01 | Pre-Treatment | C15orf17 | 57184  | 37 | 15 | 75198620 | 75198620 | Missense_Mutation | SNP | T  | C  | 3   | 92  | c.301A>G        | c.(301-303)AGG>GGG     | p.R101G  |
| Pat_01 | Pre-Treatment | IL16     | 3603   | 37 | 15 | 81552144 | 81552144 | Missense_Mutation | SNP | C  | T  | 158 | 107 | c.344C>T        | c.(343-345)CCT>CTT     | p.P115L  |
| Pat_01 | Pre-Treatment | RCCD1    | 91433  | 37 | 15 | 91504926 | 91504926 | Missense_Mutation | SNP | A  | G  | 281 | 218 | c.1058A>G       | c.(1057-1059)CAA>CGA   | p.Q353R  |
| Pat_01 | Pre-Treatment | MCTP2    | 55784  | 37 | 15 | 94913329 | 94913329 | Missense_Mutation | SNP | C  | T  | 74  | 120 | c.1502C>T       | c.(1501-1503)TCC>TTC   | p.S501F  |
| Pat_01 | Pre-Treatment | SOLH     | 6650   | 37 | 16 | 603470   | 603470   | Missense_Mutation | SNP | C  | A  | 5   | 217 | c.3215C>A       | c.(3214-3216)CCA>CAA   | p.P1072Q |
| Pat_01 | Pre-Treatment | CCDC78   | 124093 | 37 | 16 | 775481   | 775481   | Missense_Mutation | SNP | G  | A  | 4   | 234 | c.367C>T        | c.(367-369)CGG>TGG     | p.R123W  |
| Pat_01 | Pre-Treatment | CACNA1H  | 8912   | 37 | 16 | 1270224  | 1270224  | Missense_Mutation | SNP | G  | A  | 38  | 82  | c.6292G>A       | c.(6292-6294)GAC>AAC   | p.D2098N |
| Pat_01 | Pre-Treatment | TELO2    | 9894   | 37 | 16 | 1556291  | 1556292  | Missense_Mutation | DNP | CC | TT | 240 | 510 | .:2087_2088CC>T | c.(2086-2088)GCC>GTT   | p.A696V  |
| Pat_01 | Pre-Treatment | C16orf90 | 646174 | 37 | 16 | 3544626  | 3544626  | Missense_Mutation | SNP | C  | T  | 58  | 94  | c.298G>A        | c.(298-300)GCC>ACC     | p.A100T  |
| Pat_01 | Pre-Treatment | GRIN2A   | 2903   | 37 | 16 | 9916133  | 9916133  | Missense_Mutation | SNP | C  | T  | 92  | 379 | c.2156G>A       | c.(2155-2157)AGC>AAC   | p.S719N  |
| Pat_01 | Pre-Treatment | SRCAP    | 10847  | 37 | 16 | 30734010 | 30734010 | Missense_Mutation | SNP | C  | T  | 504 | 75  | c.3833C>T       | c.(3832-3834)TCG>TTG   | p.S1278L |
| Pat_01 | Pre-Treatment | PHKB     | 5257   | 37 | 16 | 47683017 | 47683017 | Missense_Mutation | SNP | C  | T  | 126 | 44  | c.1699C>T       | c.(1699-1701)CGC>TGC   | p.R567C  |
| Pat_01 | Pre-Treatment | CES3     | 23491  | 37 | 16 | 66997147 | 66997147 | Missense_Mutation | SNP | G  | A  | 6   | 461 | c.148G>A        | c.(148-150)GTG>ATG     | p.V50M   |
| Pat_01 | Pre-Treatment | HSD17B2  | 3294   | 37 | 16 | 82069273 | 82069273 | Nonsense_Mutation | SNP | C  | T  | 225 | 321 | c.244C>T        | c.(244-246)CAG>TAG     | p.Q82*   |
| Pat_01 | Pre-Treatment | GGT6     | 124975 | 37 | 17 | 4462049  | 4462049  | Missense_Mutation | SNP | C  | T  | 6   | 8   | c.743G>A        | c.(742-744)CGA>CAA     | p.R248Q  |
| Pat_01 | Pre-Treatment | SHBG     | 6462   | 37 | 17 | 7536230  | 7536230  | Missense_Mutation | SNP | A  | T  | 37  | 49  | c.1013A>T       | c.(1012-1014)AAC>ATC   | p.N338I  |
| Pat_01 | Pre-Treatment | DNAH2    | 146754 | 37 | 17 | 7727448  | 7727448  | Missense_Mutation | SNP | G  | A  | 136 | 210 | c.11488G>A      | c.(11488-11490)GAT>AAT | p.D3830N |
| Pat_01 | Pre-Treatment | MYH4     | 4622   | 37 | 17 | 10357171 | 10357171 | Missense_Mutation | SNP | C  | T  | 199 | 315 | c.2723G>A       | c.(2722-2724)AGA>AAA   | p.R908K  |
| Pat_01 | Pre-Treatment | MYH4     | 4622   | 37 | 17 | 10359819 | 10359819 | Missense_Mutation | SNP | C  | A  | 4   | 202 | c.1951G>T       | c.(1951-1953)GTG>TTG   | p.V651L  |
| Pat_01 | Pre-Treatment | MYH4     | 4622   | 37 | 17 | 10363572 | 10363572 | Missense_Mutation | SNP | G  | A  | 210 | 235 | c.1214C>T       | c.(1213-1215)CCC>CTC   | p.P405L  |
| Pat_01 | Pre-Treatment | KCNJ12   | 3768   | 37 | 17 | 21319835 | 21319835 | Missense_Mutation | SNP | G  | A  | 28  | 192 | c.1181G>A       | c.(1180-1182)GGA>GAA   | p.G394E  |
| Pat_01 | Pre-Treatment | MYO18A   | 399687 | 37 | 17 | 27493378 | 27493378 | Missense_Mutation | SNP | G  | A  | 133 | 174 | c.581C>T        | c.(580-582)CCT>CTT     | p.P194L  |
| Pat_01 | Pre-Treatment | SLFN11   | 91607  | 37 | 17 | 33679659 | 33679659 | Missense_Mutation | SNP | C  | T  | 36  | 56  | c.2422G>A       | c.(2422-2424)GAT>AAT   | p.D808N  |
| Pat_01 | Pre-Treatment | PEX12    | 5193   | 37 | 17 | 33904992 | 33904992 | Nonsense_Mutation | SNP | G  | A  | 5   | 316 | c.49C>T         | c.(49-51)CAG>TAG       | p.Q17*   |
| Pat_01 | Pre-Treatment | KRT20    | 54474  | 37 | 17 | 39036935 | 39036935 | Missense_Mutation | SNP | T  | A  | 145 | 160 | c.561A>T        | c.(559-561)AAA>AAT     | p.K187N  |
| Pat_01 | Pre-Treatment | TTC25    | 83538  | 37 | 17 | 40101446 | 40101446 | Missense_Mutation | SNP | G  | A  | 30  | 53  | c.1115G>A       | c.(1114-1116)AGA>AAA   | p.R372K  |
| Pat_01 | Pre-Treatment | ATP6V0A1 | 535    | 37 | 17 | 40642652 | 40642652 | Missense_Mutation | SNP | C  | T  | 61  | 100 | c.1171C>T       | c.(1171-1173)CCA>TCA   | p.P391S  |
| Pat_01 | Pre-Treatment | RAMP2    | 10266  | 37 | 17 | 40914839 | 40914839 | Nonsense_Mutation | SNP | G  | A  | 114 | 138 | c.497G>A        | c.(496-498)TGG>TAG     | p.W166*  |
| Pat_01 | Pre-Treatment | NSF      | 4905   | 37 | 17 | 44788422 | 44788422 | Missense_Mutation | SNP | G  | A  | 4   | 240 | c.1564G>A       | c.(1564-1566)GAG>AAG   | p.E522K  |
| Pat_01 | Pre-Treatment | TTL6     | 284076 | 37 | 17 | 46862461 | 46862461 | Missense_Mutation | SNP | G  | A  | 119 | 148 | c.1864C>T       | c.(1864-1866)CCC>TCC   | p.P622S  |
| Pat_01 | Pre-Treatment | UBE2Z    | 65264  | 37 | 17 | 46993463 | 46993463 | Missense_Mutation | SNP | C  | T  | 43  | 75  | c.604C>T        | c.(604-606)CCA>TCA     | p.P202S  |
| Pat_01 | Pre-Treatment | WFIKKN2  | 124857 | 37 | 17 | 48918261 | 48918261 | Missense_Mutation | SNP | G  | A  | 68  | 100 | c.1612G>A       | c.(1612-1614)GCC>ACC   | p.A538T  |
| Pat_01 | Pre-Treatment | PPM1E    | 22843  | 37 | 17 | 57046948 | 57046948 | Missense_Mutation | SNP | G  | A  | 141 | 200 | c.832G>A        | c.(832-834)GTA>ATA     | p.V278I  |
| Pat_01 | Pre-Treatment | MRC2     | 9902   | 37 | 17 | 60766309 | 60766309 | Nonsense_Mutation | SNP | C  | T  | 43  | 56  | c.3322C>T       | c.(3322-3324)CAG>TAG   | p.Q1108* |
| Pat_01 | Pre-Treatment | CD300E   | 342510 | 37 | 17 | 72613523 | 72613523 | Missense_Mutation | SNP | A  | G  | 70  | 110 | c.122T>C        | c.(121-123)ATG>ACG     | p.M41T   |
| Pat_01 | Pre-Treatment | DSC1     | 1823   | 37 | 18 | 28711805 | 28711805 | Missense_Mutation | SNP | C  | T  | 52  | 78  | c.2239G>A       | c.(2239-2241)GAA>AAA   | p.E747K  |
| Pat_01 | Pre-Treatment | DSG2     | 1829   | 37 | 18 | 29104411 | 29104411 | Missense_Mutation | SNP | G  | A  | 122 | 142 | c.691G>A        | c.(691-693)GAA>AAA     | p.E231K  |
| Pat_01 | Pre-Treatment | TCEB3B   | 51224  | 37 | 18 | 44560359 | 44560359 | Missense_Mutation | SNP | G  | A  | 79  | 98  | c.1277C>T       | c.(1276-1278)TCG>TTG   | p.S426L  |
| Pat_01 | Pre-Treatment | DCC      | 1630   | 37 | 18 | 50432696 | 50432696 | Missense_Mutation | SNP | C  | T  | 100 | 157 | c.695C>T        | c.(694-696)TCA>TTA     | p.S232L  |
| Pat_01 | Pre-Treatment | ALPK2    | 115701 | 37 | 18 | 56246968 | 56246968 | Missense_Mutation | SNP | T  | C  | 140 | 233 | c.1040A>G       | c.(1039-1041)AAC>AGC   | p.N347S  |
| Pat_01 | Pre-Treatment | ZNF407   | 55628  | 37 | 18 | 72589239 | 72589239 | Missense_Mutation | SNP | C  | T  | 126 | 132 | c.4964C>T       | c.(4963-4965)CCG>CTG   | p.P1655L |

|        |               |          |        |    |    |          |          |                   |     |    |    |     |     |                 |                          |           |
|--------|---------------|----------|--------|----|----|----------|----------|-------------------|-----|----|----|-----|-----|-----------------|--------------------------|-----------|
| Pat_01 | Pre-Treatment | MED16    | 10025  | 37 | 19 | 875420   | 875420   | Missense_Mutation | SNP | G  | A  | 34  | 52  | c.1595C>T       | c.(1594-1596)TCG>TTG     | p.S532L   |
| Pat_01 | Pre-Treatment | WDR18    | 57418  | 37 | 19 | 984364   | 984365   | Missense_Mutation | DNP | CC | TT | 28  | 29  | c.11_12CC>TT    | c.(10-12)CCC>CTT         | p.P4L     |
| Pat_01 | Pre-Treatment | ZNF556   | 80032  | 37 | 19 | 2878101  | 2878101  | Missense_Mutation | SNP | C  | T  | 65  | 89  | c.1145C>T       | c.(1144-1146)TCC>TTC     | p.S382F   |
| Pat_01 | Pre-Treatment | ZNF57    | 126295 | 37 | 19 | 2917857  | 2917857  | Missense_Mutation | SNP | C  | T  | 10  | 224 | c.1238C>T       | c.(1237-1239)ACG>ATG     | p.T413M   |
| Pat_01 | Pre-Treatment | PTPRS    | 5802   | 37 | 19 | 5212427  | 5212427  | Missense_Mutation | SNP | G  | A  | 26  | 28  | c.4690C>T       | c.(4690-4692)CCA>TCA     | p.P1564S  |
| Pat_01 | Pre-Treatment | RFX2     | 5990   | 37 | 19 | 6002814  | 6002814  | Missense_Mutation | SNP | G  | A  | 4   | 69  | c.1568C>T       | c.(1567-1569)GCG>GTG     | p.A523V   |
| Pat_01 | Pre-Treatment | EMR1     | 2015   | 37 | 19 | 6908704  | 6908704  | Missense_Mutation | SNP | C  | T  | 26  | 53  | c.1043C>T       | c.(1042-1044)TCC>TTC     | p.S348F   |
| Pat_01 | Pre-Treatment | FBN3     | 84467  | 37 | 19 | 8145902  | 8145902  | Missense_Mutation | SNP | G  | A  | 63  | 73  | c.7438C>T       | c.(7438-7440)CAC>TAC     | p.H2480Y  |
| Pat_01 | Pre-Treatment | MUC16    | 94025  | 37 | 19 | 8959682  | 8959682  | Missense_Mutation | SNP | C  | T  | 48  | 58  | c.43450G>A      | c.(43450-43452)GAA>AAA   | p.E14484K |
| Pat_01 | Pre-Treatment | MUC16    | 94025  | 37 | 19 | 9013868  | 9013868  | Missense_Mutation | SNP | G  | A  | 38  | 71  | c.38522C>T      | c.(38521-38523)CCA>CTA   | p.P12841L |
| Pat_01 | Pre-Treatment | MUC16    | 94025  | 37 | 19 | 9016716  | 9016716  | Missense_Mutation | SNP | C  | T  | 50  | 52  | c.38021G>A      | c.(38020-38022)GGG>GAC   | p.G12674E |
| Pat_01 | Pre-Treatment | ZNF561   | 93134  | 37 | 19 | 9724705  | 9724705  | Missense_Mutation | SNP | T  | A  | 130 | 171 | c.316A>T        | c.(316-318)ATA>TTA       | p.I106L   |
| Pat_01 | Pre-Treatment | ZNF844   | 284391 | 37 | 19 | 12187307 | 12187307 | Missense_Mutation | SNP | G  | C  | 7   | 249 | c.1372G>C       | c.(1372-1374)GAT>CAT     | p.D458H   |
| Pat_01 | Pre-Treatment | ZNF844   | 284391 | 37 | 19 | 12187502 | 12187502 | Missense_Mutation | SNP | A  | G  | 8   | 90  | c.1567A>G       | c.(1567-1569)AAA>GAA     | p.K523E   |
| Pat_01 | Pre-Treatment | IL27RA   | 9466   | 37 | 19 | 14157377 | 14157377 | Missense_Mutation | SNP | A  | G  | 157 | 214 | c.1088A>G       | c.(1087-1089)GAG>GGG     | p.E363G   |
| Pat_01 | Pre-Treatment | NWD1     | 284434 | 37 | 19 | 16908555 | 16908555 | Missense_Mutation | SNP | C  | T  | 139 | 368 | c.3317C>T       | c.(3316-3318)TCG>TTG     | p.S1106L  |
| Pat_01 | Pre-Treatment | UNC13A   | 23025  | 37 | 19 | 17743703 | 17743703 | Missense_Mutation | SNP | G  | A  | 63  | 157 | c.3580C>T       | c.(3580-3582)CGT>TGT     | p.R1194C  |
| Pat_01 | Pre-Treatment | UNC13A   | 23025  | 37 | 19 | 17750670 | 17750671 | Missense_Mutation | DNP | CC | TT | 79  | 268 | c.3098_3099GG>A | c.(3097-3099)CGG>CAA     | p.R1033Q  |
| Pat_01 | Pre-Treatment | UPF1     | 5976   | 37 | 19 | 18961603 | 18961603 | Missense_Mutation | SNP | C  | T  | 21  | 60  | c.736C>T        | c.(736-738)CCC>TCC       | p.P246S   |
| Pat_01 | Pre-Treatment | ZNF99    | 7652   | 37 | 19 | 22939472 | 22939472 | Missense_Mutation | SNP | A  | G  | 5   | 93  | c.2699T>C       | c.(2698-2700)TTC>TCC     | p.F900S   |
| Pat_01 | Pre-Treatment | ZNF99    | 7652   | 37 | 19 | 22939868 | 22939868 | Missense_Mutation | SNP | C  | G  | 69  | 86  | c.2463G>C       | c.(2461-2463)AAG>AAC     | p.K821N   |
| Pat_01 | Pre-Treatment | UQCRFS1  | 7386   | 37 | 19 | 29698570 | 29698570 | Missense_Mutation | SNP | G  | A  | 74  | 129 | c.710C>T        | c.(709-711)CCT>CTT       | p.P237L   |
| Pat_01 | Pre-Treatment | SLC7A9   | 11136  | 37 | 19 | 33355618 | 33355618 | Missense_Mutation | SNP | G  | A  | 148 | 255 | c.152C>T        | c.(151-153)TCC>TTC       | p.S51F    |
| Pat_01 | Pre-Treatment | HPN      | 3249   | 37 | 19 | 35551596 | 35551596 | Missense_Mutation | SNP | G  | A  | 153 | 179 | c.686G>A        | c.(685-687)GGT>GAT       | p.G229D   |
| Pat_01 | Pre-Treatment | NPHS1    | 4868   | 37 | 19 | 36322215 | 36322215 | Missense_Mutation | SNP | C  | T  | 108 | 158 | c.3370G>A       | c.(3370-3372)GAC>AAC     | p.D1124N  |
| Pat_01 | Pre-Treatment | NPHS1    | 4868   | 37 | 19 | 36333452 | 36333452 | Missense_Mutation | SNP | C  | T  | 73  | 99  | c.2335G>A       | c.(2335-2337)GGA>AGA     | p.G779R   |
| Pat_01 | Pre-Treatment | ZNF585B  | 92285  | 37 | 19 | 37677499 | 37677499 | Nonsense_Mutation | SNP | G  | A  | 202 | 308 | c.940C>T        | c.(940-942)CAG>TAG       | p.Q314*   |
| Pat_01 | Pre-Treatment | CATSPERG | 57828  | 37 | 19 | 38850110 | 38850110 | Missense_Mutation | SNP | C  | A  | 4   | 217 | c.1497C>A       | c.(1495-1497)AGC>AGA     | p.S499R   |
| Pat_01 | Pre-Treatment | ZNF283   | 284349 | 37 | 19 | 44351759 | 44351759 | Missense_Mutation | SNP | A  | C  | 4   | 111 | c.1006A>C       | c.(1006-1008)AAA>CAA     | p.K336Q   |
| Pat_01 | Pre-Treatment | ZNF229   | 7772   | 37 | 19 | 44933887 | 44933888 | Missense_Mutation | DNP | CC | TT | 141 | 239 | c.1068_1069GG>A | c.(1066-1071)AAGGGG>AAAA | p.G357R   |
| Pat_01 | Pre-Treatment | KLC3     | 147700 | 37 | 19 | 45852115 | 45852115 | Missense_Mutation | SNP | G  | A  | 6   | 20  | c.905G>A        | c.(904-906)GGG>GAG       | p.G302E   |
| Pat_01 | Pre-Treatment | IRF2BP1  | 26145  | 37 | 19 | 46388908 | 46388908 | Missense_Mutation | SNP | G  | T  | 3   | 47  | c.125C>A        | c.(124-126)GCG>GAG       | p.A42E    |
| Pat_01 | Pre-Treatment | FAM83E   | 54854  | 37 | 19 | 49104526 | 49104526 | Missense_Mutation | SNP | G  | A  | 17  | 32  | c.1277C>T       | c.(1276-1278)CCG>CTG     | p.P426L   |
| Pat_01 | Pre-Treatment | GYS1     | 2997   | 37 | 19 | 49472621 | 49472621 | Missense_Mutation | SNP | G  | A  | 3   | 33  | c.2138C>T       | c.(2137-2139)ACG>ATG     | p.T713M   |
| Pat_01 | Pre-Treatment | MED25    | 81857  | 37 | 19 | 50335400 | 50335400 | Missense_Mutation | SNP | C  | T  | 54  | 79  | c.1360C>T       | c.(1360-1362)CCC>TCC     | p.P454S   |
| Pat_01 | Pre-Treatment | SPIB     | 6689   | 37 | 19 | 50926223 | 50926223 | Missense_Mutation | SNP | G  | A  | 171 | 187 | c.268G>A        | c.(268-270)GAA>AAA       | p.E90K    |
| Pat_01 | Pre-Treatment | SHANK1   | 50944  | 37 | 19 | 51191261 | 51191261 | Missense_Mutation | SNP | G  | A  | 143 | 178 | c.2227C>T       | c.(2227-2229)CGC>TGC     | p.R743C   |
| Pat_01 | Pre-Treatment | GPR32    | 2854   | 37 | 19 | 51274491 | 51274491 | Missense_Mutation | SNP | G  | A  | 52  | 92  | c.634G>A        | c.(634-636)GGA>AGA       | p.G212R   |
| Pat_01 | Pre-Treatment | KLK5     | 25818  | 37 | 19 | 51451976 | 51451976 | Missense_Mutation | SNP | T  | C  | 4   | 212 | c.646A>G        | c.(646-648)AGG>GGG       | p.R216G   |
| Pat_01 | Pre-Treatment | ZNF845   | 91664  | 37 | 19 | 53856702 | 53856702 | Missense_Mutation | SNP | G  | A  | 4   | 83  | c.2774G>A       | c.(2773-2775)CGT>CAT     | p.R925H   |
| Pat_01 | Pre-Treatment | LILRB5   | 10990  | 37 | 19 | 54759200 | 54759200 | Missense_Mutation | SNP | G  | A  | 83  | 146 | c.901C>T        | c.(901-903)CTC>TTC       | p.L301F   |
| Pat_01 | Pre-Treatment | NLRP2    | 55655  | 37 | 19 | 55494049 | 55494049 | Missense_Mutation | SNP | C  | T  | 42  | 38  | c.983C>T        | c.(982-984)CCC>CTC       | p.P328L   |
| Pat_01 | Pre-Treatment | USP29    | 57663  | 37 | 19 | 57642039 | 57642039 | Missense_Mutation | SNP | G  | A  | 43  | 66  | c.1996G>A       | c.(1996-1998)GGA>AGA     | p.G666R   |
| Pat_01 | Pre-Treatment | C2orf39  | 92749  | 37 | 2  | 26663249 | 26663249 | Missense_Mutation | SNP | C  | T  | 29  | 62  | c.892C>T        | c.(892-894)CTT>TTT       | p.L298F   |
| Pat_01 | Pre-Treatment | SRD5A2   | 6716   | 37 | 2  | 31756517 | 31756517 | Missense_Mutation | SNP | C  | T  | 10  | 13  | c.471G>A        | c.(469-471)ATG>ATA       | p.M157I   |
| Pat_01 | Pre-Treatment | SOS1     | 6654   | 37 | 2  | 39213333 | 39213333 | Missense_Mutation | SNP | G  | A  | 199 | 370 | c.3634C>T       | c.(3634-3636)CCC>TCC     | p.P1212S  |
| Pat_01 | Pre-Treatment | EFEMP1   | 2202   | 37 | 2  | 56108861 | 56108861 | Missense_Mutation | SNP | C  | T  | 252 | 343 | c.526G>A        | c.(526-528)GAG>AAG       | p.E176K   |

|        |               |           |        |    |    |           |           |                   |     |    |    |     |     |                 |                        |               |
|--------|---------------|-----------|--------|----|----|-----------|-----------|-------------------|-----|----|----|-----|-----|-----------------|------------------------|---------------|
| Pat_01 | Pre-Treatment | FAM161A   | 84140  | 37 | 2  | 62081080  | 62081080  | Missense_Mutation | SNP | C  | T  | 63  | 75  | c.97G>A         | c.(97-99)GAA>AAA       | p.E33K        |
| Pat_01 | Pre-Treatment | REV1      | 51455  | 37 | 2  | 100020202 | 100020203 | Missense_Mutation | DNP | CT | TC | 167 | 258 | .3121_3122AG>G  | c.(3121-3123)AGG>GAG   | p.R1041E      |
| Pat_01 | Pre-Treatment | DBI       | 1622   | 37 | 2  | 120128380 | 120128380 | Splice_Site       | SNP | T  | C  | 3   | 118 | c.190_splice    | c.e3+2                 | p.G64_splice  |
| Pat_01 | Pre-Treatment | ARHGAP15  | 55843  | 37 | 2  | 144276883 | 144276883 | Missense_Mutation | SNP | C  | T  | 155 | 231 | c.875C>T        | c.(874-876)TCC>TTC     | p.S292F       |
| Pat_01 | Pre-Treatment | NEB       | 4703   | 37 | 2  | 152518729 | 152518729 | Missense_Mutation | SNP | G  | A  | 82  | 86  | c.5890C>T       | c.(5890-5892)CCA>TCA   | p.P1964S      |
| Pat_01 | Pre-Treatment | CACNB4    | 785    | 37 | 2  | 152727103 | 152727103 | Missense_Mutation | SNP | T  | G  | 42  | 69  | c.641A>C        | c.(640-642)GAT>GCT     | p.D214A       |
| Pat_01 | Pre-Treatment | TANC1     | 85461  | 37 | 2  | 160087464 | 160087464 | Missense_Mutation | SNP | C  | A  | 4   | 194 | c.5527C>A       | c.(5527-5529)CAC>AAC   | p.H1843N      |
| Pat_01 | Pre-Treatment | BAZ2B     | 29994  | 37 | 2  | 160242971 | 160242971 | Nonsense_Mutation | SNP | G  | A  | 242 | 302 | c.3364C>T       | c.(3364-3366)CAA>TAA   | p.Q1122*      |
| Pat_01 | Pre-Treatment | KCNH7     | 90134  | 37 | 2  | 163693083 | 163693083 | Missense_Mutation | SNP | C  | T  | 71  | 122 | c.271G>A        | c.(271-273)GAG>AAG     | p.E91K        |
| Pat_01 | Pre-Treatment | SCN3A     | 6328   | 37 | 2  | 165946757 | 165946757 | Missense_Mutation | SNP | G  | A  | 16  | 29  | c.5906C>T       | c.(5905-5907)TCC>TTC   | p.S1969F      |
| Pat_01 | Pre-Treatment | LRP2      | 4036   | 37 | 2  | 170042104 | 170042104 | Missense_Mutation | SNP | C  | G  | 23  | 375 | c.9754G>C       | c.(9754-9756)GAG>CAG   | p.E3252Q      |
| Pat_01 | Pre-Treatment | PPIG      | 9360   | 37 | 2  | 170463619 | 170463619 | Missense_Mutation | SNP | G  | A  | 214 | 364 | c.250G>A        | c.(250-252)GGA>AGA     | p.G84R        |
| Pat_01 | Pre-Treatment | OSBPL6    | 114880 | 37 | 2  | 179213981 | 179213981 | Missense_Mutation | SNP | C  | T  | 359 | 441 | c.1018C>T       | c.(1018-1020)CGC>TGC   | p.R340C       |
| Pat_01 | Pre-Treatment | TTN       | 7273   | 37 | 2  | 179426716 | 179426716 | Missense_Mutation | SNP | A  | T  | 29  | 43  | c.76439T>A      | c.(76438-76440)ATT>AAT | p.I25480N     |
| Pat_01 | Pre-Treatment | TTN       | 7273   | 37 | 2  | 179612027 | 179612027 | Missense_Mutation | SNP | C  | T  | 91  | 136 | c.15100G>A      | c.(15100-15102)GAA>AAA | p.E5034K      |
| Pat_01 | Pre-Treatment | TTN       | 7273   | 37 | 2  | 179613066 | 179613066 | Missense_Mutation | SNP | C  | T  | 111 | 166 | c.14061G>A      | c.(14059-14061)ATG>ATA | p.M4687I      |
| Pat_01 | Pre-Treatment | WDR12     | 55759  | 37 | 2  | 203757384 | 203757384 | Nonsense_Mutation | SNP | G  | A  | 99  | 147 | c.697C>T        | c.(697-699)CGA>TGA     | p.R233*       |
| Pat_01 | Pre-Treatment | WDR12     | 55759  | 37 | 2  | 203760919 | 203760919 | Missense_Mutation | SNP | T  | C  | 46  | 62  | c.478A>G        | c.(478-480)AGT>GGT     | p.S160G       |
| Pat_01 | Pre-Treatment | ABCA12    | 26154  | 37 | 2  | 215866284 | 215866284 | Missense_Mutation | SNP | C  | T  | 191 | 252 | c.2861G>A       | c.(2860-2862)GGA>GAA   | p.G954E       |
| Pat_01 | Pre-Treatment | ALPI      | 248    | 37 | 2  | 233323569 | 233323569 | Splice_Site       | SNP | G  | A  | 23  | 18  | c.1301_splice   | c.e11-1                | p.G434_splice |
| Pat_01 | Pre-Treatment | DNAJB3    | 414061 | 37 | 2  | 234652346 | 234652346 | Missense_Mutation | SNP | C  | T  | 201 | 208 | c.217G>A        | c.(217-219)GCG>ACG     | p.A73T        |
| Pat_01 | Pre-Treatment | COL6A3    | 1293   | 37 | 2  | 238267865 | 238267865 | Missense_Mutation | SNP | C  | T  | 143 | 255 | c.6338G>A       | c.(6337-6339)GGT>GAT   | p.G2113D      |
| Pat_01 | Pre-Treatment | DEFB125   | 245938 | 37 | 20 | 76798     | 76798     | Missense_Mutation | SNP | C  | T  | 292 | 385 | c.211C>T        | c.(211-213)CCT>TCT     | p.P71S        |
| Pat_01 | Pre-Treatment | PLCB4     | 5332   | 37 | 20 | 9404512   | 9404512   | Missense_Mutation | SNP | C  | T  | 115 | 92  | c.2401C>T       | c.(2401-2403)CTT>TTT   | p.L801F       |
| Pat_01 | Pre-Treatment | PAK7      | 57144  | 37 | 20 | 9561331   | 9561331   | Missense_Mutation | SNP | G  | A  | 288 | 379 | c.451C>T        | c.(451-453)CTC>TTC     | p.L151F       |
| Pat_01 | Pre-Treatment | CBFA2T2   | 9139   | 37 | 20 | 32194875  | 32194875  | Missense_Mutation | SNP | C  | T  | 124 | 148 | c.175C>T        | c.(175-177)CCG>TCG     | p.P59S        |
| Pat_01 | Pre-Treatment | C20orf111 | 51526  | 37 | 20 | 42825898  | 42825898  | Missense_Mutation | SNP | G  | A  | 85  | 116 | c.673C>T        | c.(673-675)CCC>TCC     | p.P225S       |
| Pat_01 | Pre-Treatment | TSHZ2     | 128553 | 37 | 20 | 51872939  | 51872939  | Missense_Mutation | SNP | C  | T  | 59  | 98  | c.2942C>T       | c.(2941-2943)CCA>CTA   | p.P981L       |
| Pat_01 | Pre-Treatment | KCNQ2     | 3785   | 37 | 20 | 62039819  | 62039819  | Missense_Mutation | SNP | C  | T  | 22  | 30  | c.1834G>A       | c.(1834-1836)GAG>AAG   | p.E612K       |
| Pat_01 | Pre-Treatment | TPTE      | 7179   | 37 | 21 | 10942755  | 10942755  | Missense_Mutation | SNP | C  | T  | 197 | 614 | c.686G>A        | c.(685-687)CGA>CAA     | p.R229Q       |
| Pat_01 | Pre-Treatment | KRTAP10-8 | 386681 | 37 | 21 | 46032171  | 46032171  | Missense_Mutation | SNP | G  | A  | 122 | 279 | c.154G>A        | c.(154-156)GAG>AAG     | p.E52K        |
| Pat_01 | Pre-Treatment | PCNT      | 5116   | 37 | 21 | 47836365  | 47836365  | Missense_Mutation | SNP | C  | T  | 187 | 417 | c.6533C>T       | c.(6532-6534)CCC>CTC   | p.P2178L      |
| Pat_01 | Pre-Treatment | POTEH     | 23784  | 37 | 22 | 16267070  | 16267070  | Missense_Mutation | SNP | C  | T  | 76  | 669 | c.1379G>A       | c.(1378-1380)GGA>GAA   | p.G460E       |
| Pat_01 | Pre-Treatment | CCT8L2    | 150160 | 37 | 22 | 17072146  | 17072147  | Missense_Mutation | DNP | CC | TT | 41  | 89  | .1294_1295GG>A  | c.(1294-1296)GGG>AAG   | p.G432K       |
| Pat_01 | Pre-Treatment | RTN4R     | 65078  | 37 | 22 | 20229672  | 20229672  | Missense_Mutation | SNP | C  | G  | 33  | 42  | c.984G>C        | c.(982-984)GAG>GAC     | p.E328D       |
| Pat_01 | Pre-Treatment | EMID1     | 129080 | 37 | 22 | 29630293  | 29630293  | Splice_Site       | SNP | G  | A  | 47  | 63  | c.1024_splice   | c.e12-1                | p.G342_splice |
| Pat_01 | Pre-Treatment | MTMR3     | 8897   | 37 | 22 | 30415933  | 30415933  | Missense_Mutation | SNP | C  | T  | 183 | 195 | c.2285C>T       | c.(2284-2286)TCA>TTA   | p.S762L       |
| Pat_01 | Pre-Treatment | DEPDC5    | 9681   | 37 | 22 | 32200858  | 32200858  | Missense_Mutation | SNP | C  | T  | 309 | 347 | c.1174C>T       | c.(1174-1176)CGT>TGT   | p.R392C       |
| Pat_01 | Pre-Treatment | RASD2     | 23551  | 37 | 22 | 35947904  | 35947904  | Missense_Mutation | SNP | G  | A  | 81  | 89  | c.626G>A        | c.(625-627)GGT>GAT     | p.G209D       |
| Pat_01 | Pre-Treatment | TUBGCP6   | 85378  | 37 | 22 | 50659166  | 50659166  | Missense_Mutation | SNP | T  | C  | 5   | 286 | c.3622A>G       | c.(3622-3624)ACC>GCC   | p.T1208A      |
| Pat_01 | Pre-Treatment | ITPR1     | 3708   | 37 | 3  | 4725218   | 4725218   | Missense_Mutation | SNP | C  | T  | 91  | 87  | c.3283C>T       | c.(3283-3285)CTC>TTC   | p.L1095F      |
| Pat_01 | Pre-Treatment | IL17RC    | 84818  | 37 | 3  | 9970171   | 9970171   | Splice_Site       | SNP | G  | A  | 5   | 424 | c.1272_splice   | c.e11+1                | p.D424_splice |
| Pat_01 | Pre-Treatment | FGD5      | 152273 | 37 | 3  | 14974174  | 14974174  | Missense_Mutation | SNP | C  | T  | 131 | 209 | c.4288C>T       | c.(4288-4290)CAC>TAC   | p.H1430Y      |
| Pat_01 | Pre-Treatment | ZNF385D   | 79750  | 37 | 3  | 21478603  | 21478603  | Missense_Mutation | SNP | C  | T  | 114 | 163 | c.532G>A        | c.(532-534)GAA>AAA     | p.E178K       |
| Pat_01 | Pre-Treatment | TRANK1    | 9881   | 37 | 3  | 36893807  | 36893807  | Missense_Mutation | SNP | C  | T  | 13  | 15  | c.2797G>A       | c.(2797-2799)GAT>AAT   | p.D933N       |
| Pat_01 | Pre-Treatment | VILL      | 50853  | 37 | 3  | 38043308  | 38043308  | Missense_Mutation | SNP | C  | A  | 74  | 136 | c.1436C>A       | c.(1435-1437)CCC>CAC   | p.P479H       |
| Pat_01 | Pre-Treatment | DLEC1     | 9940   | 37 | 3  | 38134291  | 38134292  | Missense_Mutation | DNP | CC | TT | 94  | 190 | :.1676_1677CC>T | c.(1675-1677)TCC>TTT   | p.S559F       |



|        |               |          |        |    |   |           |           |                   |     |    |    |     |     |                  |                      |          |
|--------|---------------|----------|--------|----|---|-----------|-----------|-------------------|-----|----|----|-----|-----|------------------|----------------------|----------|
| Pat_01 | Pre-Treatment | SCN10A   | 6336   | 37 | 3 | 38740026  | 38740026  | Missense_Mutation | SNP | G  | A  | 100 | 135 | c.4685C>T        | c.(4684-4686)TCA>TTA | p.S1562L |
| Pat_01 | Pre-Treatment | MYRIP    | 25924  | 37 | 3 | 40251444  | 40251444  | Missense_Mutation | SNP | G  | A  | 85  | 105 | c.1765G>A        | c.(1765-1767)GAG>AAG | p.E589K  |
| Pat_01 | Pre-Treatment | TRAK1    | 22906  | 37 | 3 | 42243999  | 42243999  | Missense_Mutation | SNP | G  | A  | 52  | 49  | c.1499G>A        | c.(1498-1500)AGG>AAG | p.R500K  |
| Pat_01 | Pre-Treatment | CCR1     | 1230   | 37 | 3 | 46244880  | 46244880  | Missense_Mutation | SNP | G  | A  | 80  | 87  | c.925C>T         | c.(925-927)CGG>TGG   | p.R309W  |
| Pat_01 | Pre-Treatment | KLHL18   | 23276  | 37 | 3 | 47324519  | 47324519  | Missense_Mutation | SNP | A  | T  | 32  | 33  | c.64A>T          | c.(64-66)AGT>TGT     | p.S22C   |
| Pat_01 | Pre-Treatment | BSN      | 8927   | 37 | 3 | 49689975  | 49689975  | Missense_Mutation | SNP | C  | T  | 47  | 87  | c.2986C>T        | c.(2986-2988)CCC>TCC | p.P996S  |
| Pat_01 | Pre-Treatment | OR5H15   | 403274 | 37 | 3 | 97887907  | 97887907  | Missense_Mutation | SNP | C  | T  | 227 | 300 | c.364C>T         | c.(364-366)CGC>TGC   | p.R122C  |
| Pat_01 | Pre-Treatment | COL8A1   | 1295   | 37 | 3 | 99514930  | 99514930  | Missense_Mutation | SNP | G  | A  | 86  | 95  | c.2185G>A        | c.(2185-2187)GGG>AGG | p.G729R  |
| Pat_01 | Pre-Treatment | HHLA2    | 11148  | 37 | 3 | 108072466 | 108072466 | Missense_Mutation | SNP | C  | T  | 88  | 125 | c.257C>T         | c.(256-258)CCC>CTC   | p.P86L   |
| Pat_01 | Pre-Treatment | C3orf30  | 152405 | 37 | 3 | 118865259 | 118865259 | Missense_Mutation | SNP | G  | A  | 83  | 114 | c.223G>A         | c.(223-225)GTA>ATA   | p.V75I   |
| Pat_01 | Pre-Treatment | PARP9    | 83666  | 37 | 3 | 122278457 | 122278457 | Missense_Mutation | SNP | G  | A  | 185 | 311 | c.11C>T          | c.(10-12)TCC>TTC     | p.S4F    |
| Pat_01 | Pre-Treatment | FAIM     | 55179  | 37 | 3 | 138340328 | 138340328 | Missense_Mutation | SNP | G  | A  | 118 | 132 | c.58G>A          | c.(58-60)GAA>AAA     | p.E20K   |
| Pat_01 | Pre-Treatment | PLSCR4   | 57088  | 37 | 3 | 145912973 | 145912973 | Missense_Mutation | SNP | G  | A  | 157 | 148 | c.883C>T         | c.(883-885)CAC>TAC   | p.H295Y  |
| Pat_01 | Pre-Treatment | SLC2A2   | 6514   | 37 | 3 | 170716922 | 170716922 | Missense_Mutation | SNP | G  | A  | 132 | 161 | c.1102C>T        | c.(1102-1104)CTC>TTC | p.L368F  |
| Pat_01 | Pre-Treatment | TNFSF10  | 8743   | 37 | 3 | 172227075 | 172227075 | Missense_Mutation | SNP | C  | T  | 77  | 108 | c.350G>A         | c.(349-351)AGA>AAA   | p.R117K  |
| Pat_01 | Pre-Treatment | KCNMB2   | 10242  | 37 | 3 | 178545976 | 178545976 | Missense_Mutation | SNP | G  | A  | 177 | 220 | c.238G>A         | c.(238-240)GAA>AAA   | p.E80K   |
| Pat_01 | Pre-Treatment | EPHB3    | 2049   | 37 | 3 | 184290328 | 184290328 | Missense_Mutation | SNP | C  | T  | 105 | 149 | c.220C>T         | c.(220-222)CCC>TCC   | p.P74S   |
| Pat_01 | Pre-Treatment | TP63     | 8626   | 37 | 3 | 189586470 | 189586470 | Missense_Mutation | SNP | C  | T  | 156 | 212 | c.1094C>T        | c.(1093-1095)TCG>TTG | p.S365L  |
| Pat_01 | Pre-Treatment | PPARGC1A | 10891  | 37 | 4 | 23815370  | 23815370  | Missense_Mutation | SNP | G  | A  | 69  | 101 | c.1736C>T        | c.(1735-1737)TCC>TTC | p.S579F  |
| Pat_01 | Pre-Treatment | CCKAR    | 886    | 37 | 4 | 26483678  | 26483678  | Missense_Mutation | SNP | C  | T  | 127 | 199 | c.869G>A         | c.(868-870)AGC>AAC   | p.S290N  |
| Pat_01 | Pre-Treatment | TLR10    | 81793  | 37 | 4 | 38777051  | 38777051  | Missense_Mutation | SNP | T  | G  | 79  | 111 | c.161A>C         | c.(160-162)GAT>GCT   | p.D54A   |
| Pat_01 | Pre-Treatment | SHISA3   | 152573 | 37 | 4 | 42403461  | 42403461  | Missense_Mutation | SNP | C  | T  | 136 | 141 | c.710C>T         | c.(709-711)TCC>TTC   | p.S237F  |
| Pat_01 | Pre-Treatment | GABRA2   | 2555   | 37 | 4 | 46307695  | 46307695  | Nonsense_Mutation | SNP | C  | T  | 67  | 82  | c.593G>A         | c.(592-594)TGG>TAG   | p.W198*  |
| Pat_01 | Pre-Treatment | CORIN    | 10699  | 37 | 4 | 47647188  | 47647188  | Missense_Mutation | SNP | C  | T  | 135 | 248 | c.1867G>A        | c.(1867-1869)GAA>AAA | p.E623K  |
| Pat_01 | Pre-Treatment | OCIAD2   | 132299 | 37 | 4 | 48901867  | 48901867  | Missense_Mutation | SNP | C  | T  | 102 | 176 | c.142G>A         | c.(142-144)GAA>AAA   | p.E48K   |
| Pat_01 | Pre-Treatment | LNX1     | 84708  | 37 | 4 | 54364972  | 54364972  | Missense_Mutation | SNP | T  | A  | 102 | 161 | c.814A>T         | c.(814-816)ATT>TTT   | p.I272F  |
| Pat_01 | Pre-Treatment | LPHN3    | 23284  | 37 | 4 | 62903453  | 62903453  | Missense_Mutation | SNP | G  | A  | 120 | 180 | c.3392G>A        | c.(3391-3393)CGA>CAA | p.R1131Q |
| Pat_01 | Pre-Treatment | UGT2B10  | 7365   | 37 | 4 | 69693259  | 69693259  | Missense_Mutation | SNP | G  | A  | 201 | 331 | c.1300G>A        | c.(1300-1302)GAT>AAT | p.D434N  |
| Pat_01 | Pre-Treatment | UGT2B7   | 7364   | 37 | 4 | 69962580  | 69962580  | Missense_Mutation | SNP | A  | T  | 34  | 29  | c.342A>T         | c.(340-342)GAA>GAT   | p.E114D  |
| Pat_01 | Pre-Treatment | ANKRD17  | 26057  | 37 | 4 | 73984530  | 73984530  | Missense_Mutation | SNP | T  | C  | 246 | 361 | c.4063A>G        | c.(4063-4065)ACT>GCT | p.T1355A |
| Pat_01 | Pre-Treatment | GK2      | 2712   | 37 | 4 | 80327902  | 80327902  | Missense_Mutation | SNP | C  | T  | 156 | 214 | c.1453G>A        | c.(1453-1455)GAA>AAA | p.E485K  |
| Pat_01 | Pre-Treatment | HERC5    | 51191  | 37 | 4 | 89425504  | 89425504  | Missense_Mutation | SNP | C  | T  | 71  | 146 | c.2704C>T        | c.(2704-2706)CCC>TCC | p.P902S  |
| Pat_01 | Pre-Treatment | UNC5C    | 8633   | 37 | 4 | 96104089  | 96104089  | Missense_Mutation | SNP | C  | T  | 168 | 234 | c.2410G>A        | c.(2410-2412)GGA>AGA | p.G804R  |
| Pat_01 | Pre-Treatment | EGF      | 1950   | 37 | 4 | 110921002 | 110921002 | Missense_Mutation | SNP | G  | A  | 196 | 237 | c.3173G>A        | c.(3172-3174)AGG>AAG | p.R1058K |
| Pat_01 | Pre-Treatment | PITX2    | 5308   | 37 | 4 | 111542415 | 111542415 | Missense_Mutation | SNP | C  | T  | 64  | 99  | c.295G>A         | c.(295-297)GAG>AAG   | p.E99K   |
| Pat_01 | Pre-Treatment | DCHS2    | 54798  | 37 | 4 | 155157358 | 155157358 | Missense_Mutation | SNP | G  | A  | 212 | 287 | c.7081C>T        | c.(7081-7083)CAT>TAT | p.H2361Y |
| Pat_01 | Pre-Treatment | DCHS2    | 54798  | 37 | 4 | 155298407 | 155298407 | Missense_Mutation | SNP | C  | T  | 102 | 173 | c.424G>A         | c.(424-426)GGG>AGG   | p.G142R  |
| Pat_01 | Pre-Treatment | CLCN3    | 1182   | 37 | 4 | 170613292 | 170613292 | Missense_Mutation | SNP | A  | T  | 144 | 186 | c.757A>T         | c.(757-759)ATC>TTC   | p.I253F  |
| Pat_01 | Pre-Treatment | ASB5     | 140458 | 37 | 4 | 177190238 | 177190238 | Missense_Mutation | SNP | G  | A  | 93  | 162 | c.22C>T          | c.(22-24)CGG>TGG     | p.R8W    |
| Pat_01 | Pre-Treatment | ODZ3     | 55714  | 37 | 4 | 183652119 | 183652119 | Missense_Mutation | SNP | C  | T  | 64  | 116 | c.2794C>T        | c.(2794-2796)CCA>TCA | p.P932S  |
| Pat_01 | Pre-Treatment | CAPSL    | 133690 | 37 | 5 | 35904702  | 35904702  | Missense_Mutation | SNP | G  | A  | 179 | 261 | c.572C>T         | c.(571-573)TCC>TTC   | p.S191F  |
| Pat_01 | Pre-Treatment | HEATR7B2 | 133558 | 37 | 5 | 41042300  | 41042300  | Nonsense_Mutation | SNP | C  | T  | 5   | 15  | c.1847G>A        | c.(1846-1848)TGG>TAG | p.W616*  |
| Pat_01 | Pre-Treatment | C5orf34  | 375444 | 37 | 5 | 43509374  | 43509374  | Missense_Mutation | SNP | G  | A  | 105 | 145 | c.68C>T          | c.(67-69)TCC>TTC     | p.S23F   |
| Pat_01 | Pre-Treatment | NNT      | 23530  | 37 | 5 | 43704409  | 43704409  | Missense_Mutation | SNP | C  | A  | 6   | 535 | c.3164C>A        | c.(3163-3165)CCA>CAA | p.P1055Q |
| Pat_01 | Pre-Treatment | SKIV2L2  | 23517  | 37 | 5 | 54662656  | 54662656  | Missense_Mutation | SNP | C  | T  | 212 | 282 | c.1763C>T        | c.(1762-1764)TCC>TTC | p.S588F  |
| Pat_01 | Pre-Treatment | MAST4    | 375449 | 37 | 5 | 66460811  | 66460812  | Missense_Mutation | DNP | CC | AT | 20  | 29  | ..5237_5238CC>A' | c.(5236-5238)CCC>CAT | p.P1746H |
| Pat_01 | Pre-Treatment | SPZ1     | 84654  | 37 | 5 | 79616461  | 79616461  | Missense_Mutation | SNP | G  | C  | 6   | 263 | c.427G>C         | c.(427-429)GAG>CAG   | p.E143Q  |

|        |               |          |        |    |   |           |           |                   |     |    |    |     |     |                                    |                      |          |
|--------|---------------|----------|--------|----|---|-----------|-----------|-------------------|-----|----|----|-----|-----|------------------------------------|----------------------|----------|
| Pat_01 | Pre-Treatment | C5orf13  | 9315   | 37 | 5 | 111066622 | 111066622 | Missense_Mutation | SNP | A  | G  | 197 | 260 | c.203T>C                           | c.(202-204)TTT>TCT   | p.F68S   |
| Pat_01 | Pre-Treatment | SLC27A6  | 28965  | 37 | 5 | 128364084 | 128364084 | Missense_Mutation | SNP | G  | A  | 118 | 130 | c.1501G>A                          | c.(1501-1503)GGA>AGA | p.G501R  |
| Pat_01 | Pre-Treatment | ACSL6    | 23305  | 37 | 5 | 131308419 | 131308419 | Nonsense_Mutation | SNP | G  | A  | 116 | 218 | c.1261C>T                          | c.(1261-1263)CAG>TAG | p.Q421*  |
| Pat_01 | Pre-Treatment | PCDHB10  | 56126  | 37 | 5 | 140574481 | 140574481 | Missense_Mutation | SNP | G  | A  | 54  | 88  | c.2356G>A                          | c.(2356-2358)GAA>AAA | p.E786K  |
| Pat_01 | Pre-Treatment | PCDHGA2  | 56113  | 37 | 5 | 140718983 | 140718983 | Missense_Mutation | SNP | G  | A  | 160 | 184 | c.445G>A                           | c.(445-447)GGA>AGA   | p.G149R  |
| Pat_01 | Pre-Treatment | PCDHGA2  | 56113  | 37 | 5 | 140720289 | 140720289 | Missense_Mutation | SNP | C  | T  | 238 | 298 | c.1751C>T                          | c.(1750-1752)CCC>CTC | p.P584L  |
| Pat_01 | Pre-Treatment | PCDHGA8  | 9708   | 37 | 5 | 140772898 | 140772898 | Missense_Mutation | SNP | G  | A  | 138 | 167 | c.518G>A                           | c.(517-519)AGC>AAC   | p.S173N  |
| Pat_01 | Pre-Treatment | GRIA1    | 2890   | 37 | 5 | 153144170 | 153144170 | Missense_Mutation | SNP | G  | A  | 45  | 66  | c.2000G>A                          | c.(1999-2001)GGA>GAA | p.G667E  |
| Pat_01 | Pre-Treatment | HAVCR2   | 84868  | 37 | 5 | 156514235 | 156514235 | Missense_Mutation | SNP | C  | T  | 72  | 120 | c.784G>A                           | c.(784-786)GAA>AAA   | p.E262K  |
| Pat_01 | Pre-Treatment | LSM11    | 134353 | 37 | 5 | 157182040 | 157182040 | Missense_Mutation | SNP | C  | T  | 92  | 101 | c.851C>T                           | c.(850-852)TCC>TTC   | p.S284F  |
| Pat_01 | Pre-Treatment | GABRP    | 2568   | 37 | 5 | 170239094 | 170239094 | Missense_Mutation | SNP | G  | A  | 168 | 153 | c.1155G>A                          | c.(1153-1155)ATG>ATA | p.M385I  |
| Pat_01 | Pre-Treatment | COL23A1  | 91522  | 37 | 5 | 177689243 | 177689244 | Missense_Mutation | DNP | CC | TT | 11  | 16  | c.649_650GG>AA                     | c.(649-651)GGA>AAA   | p.G217K  |
| Pat_01 | Pre-Treatment | PECI     | 10455  | 37 | 6 | 4133937   | 4133937   | Missense_Mutation | SNP | T  | C  | 4   | 312 | c.59A>G                            | c.(58-60)CAG>CGG     | p.Q20R   |
| Pat_01 | Pre-Treatment | ATXN1    | 6310   | 37 | 6 | 16327485  | 16327485  | Missense_Mutation | SNP | G  | A  | 138 | 304 | c.1057C>T                          | c.(1057-1059)CCT>TCT | p.P353S  |
| Pat_01 | Pre-Treatment | ZNF184   | 7738   | 37 | 6 | 27419417  | 27419417  | Missense_Mutation | SNP | G  | A  | 108 | 195 | c.1921C>T                          | c.(1921-1923)CCC>TCC | p.P641S  |
| Pat_01 | Pre-Treatment | MDC1     | 9656   | 37 | 6 | 30672158  | 30672158  | Missense_Mutation | SNP | G  | A  | 464 | 297 | c.4802C>T                          | c.(4801-4803)ACA>ATA | p.T1601I |
| Pat_01 | Pre-Treatment | BAT2     | 7916   | 37 | 6 | 31595857  | 31595857  | Missense_Mutation | SNP | C  | T  | 219 | 396 | c.1606C>T                          | c.(1606-1608)CCA>TCA | p.P536S  |
| Pat_01 | Pre-Treatment | BAT3     | 7917   | 37 | 6 | 31612903  | 31612903  | Missense_Mutation | SNP | G  | A  | 182 | 428 | c.1207C>T                          | c.(1207-1209)CCT>TCT | p.P403S  |
| Pat_01 | Pre-Treatment | LY6G6F   | 259215 | 37 | 6 | 31685384  | 31685384  | Missense_Mutation | SNP | C  | T  | 240 | 603 | c.952C>T                           | c.(952-954)CCA>TCA   | p.P318S  |
| Pat_01 | Pre-Treatment | C2       | 717    | 37 | 6 | 31903781  | 31903781  | Missense_Mutation | SNP | G  | A  | 100 | 239 | c.931G>A                           | c.(931-933)GAC>AAC   | p.D311N  |
| Pat_01 | Pre-Treatment | TNXB     | 7148   | 37 | 6 | 32029318  | 32029318  | Missense_Mutation | SNP | C  | T  | 89  | 209 | c.7348G>A                          | c.(7348-7350)GGG>AGG | p.G2450R |
| Pat_01 | Pre-Treatment | TNXB     | 7148   | 37 | 6 | 32038093  | 32038093  | Missense_Mutation | SNP | G  | A  | 23  | 64  | c.5089C>T                          | c.(5089-5091)CCT>TCT | p.P1697S |
| Pat_01 | Pre-Treatment | HLA-DMB  | 3109   | 37 | 6 | 32903140  | 32903140  | Missense_Mutation | SNP | G  | A  | 335 | 269 | c.754C>T                           | c.(754-756)CCT>TCT   | p.P252S  |
| Pat_01 | Pre-Treatment | FKBP5    | 2289   | 37 | 6 | 35545009  | 35545009  | Missense_Mutation | SNP | G  | T  | 6   | 616 | c.1028C>A                          | c.(1027-1029)GCC>GAC | p.A343D  |
| Pat_01 | Pre-Treatment | FGD2     | 221472 | 37 | 6 | 36988331  | 36988331  | Missense_Mutation | SNP | G  | A  | 16  | 70  | c.1137G>A                          | c.(1135-1137)ATG>ATA | p.M379I  |
| Pat_01 | Pre-Treatment | AARS2    | 57505  | 37 | 6 | 44275040  | 44275040  | Missense_Mutation | SNP | C  | T  | 4   | 151 | c.986G>A                           | c.(985-987)CGC>CAC   | p.R329H  |
| Pat_01 | Pre-Treatment | PGK2     | 5232   | 37 | 6 | 49753750  | 49753750  | Missense_Mutation | SNP | T  | A  | 7   | 603 | c.1151A>T                          | c.(1150-1152)AAC>ATC | p.N384I  |
| Pat_01 | Pre-Treatment | IL17F    | 112744 | 37 | 6 | 52103546  | 52103546  | Missense_Mutation | SNP | G  | A  | 69  | 68  | c.236C>T                           | c.(235-237)ACC>ATC   | p.T79I   |
| Pat_01 | Pre-Treatment | FAM83B   | 222584 | 37 | 6 | 54804808  | 54804808  | Missense_Mutation | SNP | G  | A  | 68  | 126 | c.1039G>A                          | c.(1039-1041)GAA>AAA | p.E347K  |
| Pat_01 | Pre-Treatment | COL21A1  | 81578  | 37 | 6 | 55935569  | 55935569  | Missense_Mutation | SNP | C  | T  | 29  | 42  | c.1993G>A                          | c.(1993-1995)GGG>AGG | p.G665R  |
| Pat_01 | Pre-Treatment | SMAP1    | 60682  | 37 | 6 | 71570002  | 71570002  | Missense_Mutation | SNP | T  | G  | 195 | 171 | c.1369T>G                          | c.(1369-1371)TCA>GCA | p.S457A  |
| Pat_01 | Pre-Treatment | FILIP1   | 27145  | 37 | 6 | 76063340  | 76063340  | Missense_Mutation | SNP | C  | T  | 174 | 208 | c.544G>A                           | c.(544-546)GAG>AAG   | p.E182K  |
| Pat_01 | Pre-Treatment | CASP8AP2 | 9994   | 37 | 6 | 90577172  | 90577172  | Missense_Mutation | SNP | C  | T  | 86  | 16  | c.4163C>T                          | c.(4162-4164)CCA>CTA | p.P1388L |
| Pat_01 | Pre-Treatment | GJA10    | 84694  | 37 | 6 | 90604719  | 90604719  | Missense_Mutation | SNP | C  | T  | 256 | 42  | c.532C>T                           | c.(532-534)CTC>TTC   | p.L178F  |
| Pat_01 | Pre-Treatment | AIM1     | 202    | 37 | 6 | 107016361 | 107016361 | Missense_Mutation | SNP | G  | A  | 161 | 39  | c.5092G>A                          | c.(5092-5094)GAT>AAT | p.D1698N |
| Pat_01 | Pre-Treatment | RFX6     | 222546 | 37 | 6 | 117248438 | 117248438 | Missense_Mutation | SNP | C  | T  | 147 | 31  | c.2134C>T                          | c.(2134-2136)CAC>TAC | p.H712Y  |
| Pat_01 | Pre-Treatment | ROS1     | 6098   | 37 | 6 | 117730754 | 117730754 | Missense_Mutation | SNP | C  | T  | 65  | 23  | c.280G>A                           | c.(280-282)GAA>AAA   | p.E94K   |
| Pat_01 | Pre-Treatment | CLDN20   | 49861  | 37 | 6 | 155596924 | 155596924 | Missense_Mutation | SNP | C  | A  | 4   | 236 | c.71C>A                            | c.(70-72)GCC>GAC     | p.A24D   |
| Pat_01 | Pre-Treatment | RADIL    | 55698  | 37 | 7 | 4841376   | 4841376   | Missense_Mutation | SNP | G  | A  | 24  | 35  | c.2750C>T                          | c.(2749-2751)CCC>CTC | p.P917L  |
| Pat_01 | Pre-Treatment | PRPS1L1  | 221823 | 37 | 7 | 18066867  | 18066867  | Missense_Mutation | SNP | G  | A  | 106 | 142 | c.539C>T                           | c.(538-540)TCC>TTC   | p.S180F  |
| Pat_01 | Pre-Treatment | CREB5    | 9586   | 37 | 7 | 28547317  | 28547317  | Missense_Mutation | SNP | G  | A  | 167 | 243 | c.253G>A                           | c.(253-255)GAG>AAG   | p.E85K   |
| Pat_01 | Pre-Treatment | C7orf10  | 79783  | 37 | 7 | 40900016  | 40900016  | Missense_Mutation | SNP | G  | A  | 192 | 191 | c.1255G>A                          | c.(1255-1257)GAT>AAT | p.D419N  |
| Pat_01 | Pre-Treatment | HECW1    | 23072  | 37 | 7 | 43400569  | 43400569  | Missense_Mutation | SNP | C  | T  | 84  | 132 | c.545C>T                           | c.(544-546)TCG>TTG   | p.S182L  |
| Pat_01 | Pre-Treatment | TBRG4    | 9238   | 37 | 7 | 45144223  | 45144223  | Missense_Mutation | SNP | G  | A  | 51  | 76  | c.821C>T                           | c.(820-822)CCC>CTC   | p.P274L  |
| Pat_01 | Pre-Treatment | TNS3     | 64759  | 37 | 7 | 47451336  | 47451337  | Missense_Mutation | DNP | CC | TT | 28  | 37  | c.711_712GG>AA709-714)AAGGGA>AAAA( |                      | p.G238R  |
| Pat_01 | Pre-Treatment | EGFR     | 1956   | 37 | 7 | 55266497  | 55266497  | Missense_Mutation | SNP | G  | A  | 119 | 147 | c.2789G>A                          | c.(2788-2790)GGA>GAA | p.G930E  |
| Pat_01 | Pre-Treatment | ABCB4    | 5244   | 37 | 7 | 87060829  | 87060829  | Missense_Mutation | SNP | C  | T  | 241 | 295 | c.1784G>A                          | c.(1783-1785)CGA>CAA | p.R595Q  |

|        |               |          |        |    |   |           |           |                   |     |    |    |     |     |                |                        |               |
|--------|---------------|----------|--------|----|---|-----------|-----------|-------------------|-----|----|----|-----|-----|----------------|------------------------|---------------|
| Pat_01 | Pre-Treatment | SAMD9    | 54809  | 37 | 7 | 92735311  | 92735311  | Missense_Mutation | SNP | C  | T  | 139 | 200 | c.100G>A       | c.(100-102)GAA>AAA     | p.E34K        |
| Pat_01 | Pre-Treatment | TRRAP    | 8295   | 37 | 7 | 98509757  | 98509757  | Missense_Mutation | SNP | C  | T  | 159 | 231 | c.2120C>T      | c.(2119-2121)TCC>TTC   | p.S707F       |
| Pat_01 | Pre-Treatment | OR2AE1   | 81392  | 37 | 7 | 99473956  | 99473956  | Missense_Mutation | SNP | C  | T  | 64  | 75  | c.701G>A       | c.(700-702)AGA>AAA     | p.R234K       |
| Pat_01 | Pre-Treatment | ZAN      | 7455   | 37 | 7 | 100371434 | 100371434 | Missense_Mutation | SNP | A  | G  | 25  | 27  | c.5725A>G      | c.(5725-5727)AAA>GAA   | p.K1909E      |
| Pat_01 | Pre-Treatment | MUC17    | 140453 | 37 | 7 | 100686354 | 100686354 | Missense_Mutation | SNP | C  | T  | 191 | 271 | c.11657C>T     | c.(11656-11658)CCA>CTA | p.P3886L      |
| Pat_01 | Pre-Treatment | MOGAT3   | 346606 | 37 | 7 | 100839568 | 100839568 | Missense_Mutation | SNP | C  | A  | 19  | 20  | c.771G>T       | c.(769-771)AAG>AAT     | p.K257N       |
| Pat_01 | Pre-Treatment | RELN     | 5649   | 37 | 7 | 103137012 | 103137012 | Missense_Mutation | SNP | C  | T  | 167 | 222 | c.9154G>A      | c.(9154-9156)GAA>AAA   | p.E3052K      |
| Pat_01 | Pre-Treatment | PIK3CG   | 5294   | 37 | 7 | 106519963 | 106519963 | Splice_Site       | SNP | G  | A  | 98  | 156 | c.2392_splice  | c.e6-1                 | p.I798_splice |
| Pat_01 | Pre-Treatment | SLC26A3  | 1811   | 37 | 7 | 107418680 | 107418680 | Missense_Mutation | SNP | C  | T  | 68  | 107 | c.1454G>A      | c.(1453-1455)GGG>GAG   | p.G485E       |
| Pat_01 | Pre-Treatment | PTPRZ1   | 5803   | 37 | 7 | 121608040 | 121608040 | Missense_Mutation | SNP | C  | T  | 108 | 131 | c.160C>T       | c.(160-162)CCA>TCA     | p.P54S        |
| Pat_01 | Pre-Treatment | SLC13A4  | 26266  | 37 | 7 | 135392875 | 135392875 | Missense_Mutation | SNP | C  | T  | 217 | 252 | c.352G>A       | c.(352-354)GCC>ACC     | p.A118T       |
| Pat_01 | Pre-Treatment | KIAA1549 | 57670  | 37 | 7 | 138522701 | 138522701 | Missense_Mutation | SNP | G  | A  | 57  | 105 | c.5803C>T      | c.(5803-5805)CTC>TTC   | p.L1935F      |
| Pat_01 | Pre-Treatment | BRAF     | 673    | 37 | 7 | 140453136 | 140453136 | Missense_Mutation | SNP | A  | T  | 225 | 175 | c.1799T>A      | c.(1798-1800)GTG>GAG   | p.V600E       |
| Pat_01 | Pre-Treatment | KIAA1147 | 57189  | 37 | 7 | 141364740 | 141364740 | Missense_Mutation | SNP | G  | A  | 4   | 96  | c.1067C>T      | c.(1066-1068)GCT>GTT   | p.A356V       |
| Pat_01 | Pre-Treatment | C7orf34  | 135927 | 37 | 7 | 142637618 | 142637618 | Missense_Mutation | SNP | G  | A  | 212 | 426 | c.388G>A       | c.(388-390)GGG>AGG     | p.G130R       |
| Pat_01 | Pre-Treatment | CLCN1    | 1180   | 37 | 7 | 143036696 | 143036696 | Missense_Mutation | SNP | G  | T  | 84  | 232 | c.1564G>T      | c.(1564-1566)GGG>TGG   | p.G522W       |
| Pat_01 | Pre-Treatment | SLC39A14 | 23516  | 37 | 8 | 22265980  | 22265980  | Missense_Mutation | SNP | C  | A  | 3   | 60  | c.428C>A       | c.(427-429)ACG>AAG     | p.T143K       |
| Pat_01 | Pre-Treatment | DOCK5    | 80005  | 37 | 8 | 25253110  | 25253110  | Nonsense_Mutation | SNP | G  | T  | 157 | 30  | c.4579G>T      | c.(4579-4581)GAG>TAG   | p.E1527*      |
| Pat_01 | Pre-Treatment | RP1      | 6101   | 37 | 8 | 55538849  | 55538849  | Missense_Mutation | SNP | C  | T  | 45  | 59  | c.2407C>T      | c.(2407-2409)CCT>TCT   | p.P803S       |
| Pat_01 | Pre-Treatment | PREX2    | 80243  | 37 | 8 | 69000012  | 69000012  | Missense_Mutation | SNP | T  | C  | 276 | 405 | c.2081T>C      | c.(2080-2082)TTT>TCT   | p.F694S       |
| Pat_01 | Pre-Treatment | ZFHX4    | 79776  | 37 | 8 | 77763772  | 77763772  | Missense_Mutation | SNP | C  | T  | 46  | 54  | c.4480C>T      | c.(4480-4482)CGT>TGT   | p.R1494C      |
| Pat_01 | Pre-Treatment | SLC7A13  | 157724 | 37 | 8 | 87229869  | 87229869  | Missense_Mutation | SNP | A  | G  | 185 | 221 | c.1009T>C      | c.(1009-1011)TTT>CTT   | p.F337L       |
| Pat_01 | Pre-Treatment | RGS22    | 26166  | 37 | 8 | 101020740 | 101020740 | Missense_Mutation | SNP | C  | T  | 42  | 51  | c.2224G>A      | c.(2224-2226)GAA>AAA   | p.E742K       |
| Pat_01 | Pre-Treatment | TMEM74   | 157753 | 37 | 8 | 109796543 | 109796543 | Missense_Mutation | SNP | C  | T  | 96  | 125 | c.785G>A       | c.(784-786)CGA>CAA     | p.R262Q       |
| Pat_01 | Pre-Treatment | FER1L6   | 654463 | 37 | 8 | 124998329 | 124998329 | Missense_Mutation | SNP | G  | A  | 55  | 115 | c.1432G>A      | c.(1432-1434)GAA>AAA   | p.E478K       |
| Pat_01 | Pre-Treatment | FAM135B  | 51059  | 37 | 8 | 139255192 | 139255192 | Missense_Mutation | SNP | G  | A  | 102 | 140 | c.662C>T       | c.(661-663)TCC>TTC     | p.S221F       |
| Pat_01 | Pre-Treatment | PYCR1    | 65263  | 37 | 8 | 144689142 | 144689142 | Missense_Mutation | SNP | G  | A  | 112 | 161 | c.353C>T       | c.(352-354)TCT>TTT     | p.S118F       |
| Pat_01 | Pre-Treatment | ZNF707   | 286075 | 37 | 8 | 144776319 | 144776320 | Missense_Mutation | DNP | CC | TT | 10  | 12  | c.735_736CC>TT | 733-738)GACCGC>GATT(   | p.R246C       |
| Pat_01 | Pre-Treatment | IL33     | 90865  | 37 | 9 | 6251250   | 6251250   | Missense_Mutation | SNP | G  | A  | 230 | 38  | c.328G>A       | c.(328-330)GAT>AAT     | p.D110N       |
| Pat_01 | Pre-Treatment | TAF1L    | 138474 | 37 | 9 | 32630610  | 32630610  | Missense_Mutation | SNP | C  | T  | 235 | 36  | c.4968G>A      | c.(4966-4968)ATG>ATA   | p.M1656I      |
| Pat_01 | Pre-Treatment | GBA2     | 57704  | 37 | 9 | 35748472  | 35748472  | Missense_Mutation | SNP | A  | G  | 181 | 27  | c.230T>C       | c.(229-231)ATG>ACG     | p.M77T        |
| Pat_01 | Pre-Treatment | PRUNE2   | 158471 | 37 | 9 | 79326061  | 79326061  | Missense_Mutation | SNP | G  | A  | 28  | 52  | c.1129C>T      | c.(1129-1131)CCC>TCC   | p.P377S       |
| Pat_01 | Pre-Treatment | PHF2     | 5253   | 37 | 9 | 96422487  | 96422487  | Missense_Mutation | SNP | C  | T  | 32  | 36  | c.1343C>T      | c.(1342-1344)GCC>GTC   | p.A448V       |
| Pat_01 | Pre-Treatment | HIATL1   | 84641  | 37 | 9 | 97207294  | 97207294  | Missense_Mutation | SNP | G  | A  | 222 | 347 | c.559G>A       | c.(559-561)GCA>ACA     | p.A187T       |
| Pat_01 | Pre-Treatment | BAAT     | 570    | 37 | 9 | 104124894 | 104124894 | Missense_Mutation | SNP | G  | A  | 96  | 91  | c.1073C>T      | c.(1072-1074)CCT>CTT   | p.P358L       |
| Pat_01 | Pre-Treatment | OR13C4   | 138804 | 37 | 9 | 107288802 | 107288802 | Nonsense_Mutation | SNP | G  | T  | 11  | 595 | c.689C>A       | c.(688-690)TCG>TAG     | p.S230*       |
| Pat_01 | Pre-Treatment | COL27A1  | 85301  | 37 | 9 | 117068933 | 117068934 | Missense_Mutation | DNP | GG | AA | 45  | 108 | .5072_5073GG>A | c.(5071-5073)AGG>AAA   | p.R1691K      |
| Pat_01 | Pre-Treatment | TLR4     | 7099   | 37 | 9 | 120475271 | 120475271 | Nonsense_Mutation | SNP | C  | T  | 91  | 194 | c.865C>T       | c.(865-867)CGA>TGA     | p.R289*       |
| Pat_01 | Pre-Treatment | OR1J2    | 26740  | 37 | 9 | 125273462 | 125273462 | Missense_Mutation | SNP | C  | T  | 96  | 117 | c.382C>T       | c.(382-384)CAC>TAC     | p.H128Y       |
| Pat_01 | Pre-Treatment | OR1N2    | 138882 | 37 | 9 | 125316037 | 125316037 | Missense_Mutation | SNP | G  | A  | 230 | 299 | c.589G>A       | c.(589-591)GAT>AAT     | p.D197N       |
| Pat_01 | Pre-Treatment | ABL1     | 25     | 37 | 9 | 133760646 | 133760646 | Missense_Mutation | SNP | C  | T  | 185 | 191 | c.2969C>T      | c.(2968-2970)TCG>TTG   | p.S990L       |
| Pat_01 | Pre-Treatment | LAMC3    | 10319  | 37 | 9 | 133946908 | 133946908 | Missense_Mutation | SNP | G  | A  | 43  | 175 | c.3107G>A      | c.(3106-3108)GGG>GAG   | p.G1036E      |
| Pat_01 | Pre-Treatment | ARHGAP6  | 395    | 37 | X | 11196354  | 11196354  | Nonsense_Mutation | SNP | C  | A  | 25  | 1   | c.1495G>T      | c.(1495-1497)GAA>TAA   | p.E499*       |
| Pat_01 | Pre-Treatment | GSPT2    | 23708  | 37 | X | 51488398  | 51488398  | Missense_Mutation | SNP | C  | T  | 156 | 10  | c.1676C>T      | c.(1675-1677)TCC>TTC   | p.S559F       |
| Pat_01 | Pre-Treatment | TCEAL6   | 158931 | 37 | X | 101395871 | 101395871 | Missense_Mutation | SNP | C  | T  | 142 | 11  | c.433G>A       | c.(433-435)GAT>AAT     | p.D145N       |
| Pat_01 | Pre-Treatment | MUM1L1   | 139221 | 37 | X | 105450125 | 105450125 | Missense_Mutation | SNP | G  | A  | 50  | 3   | c.700G>A       | c.(700-702)GAA>AAA     | p.E234K       |
| Pat_01 | Pre-Treatment | CAPN6    | 827    | 37 | X | 110491174 | 110491174 | Missense_Mutation | SNP | G  | A  | 430 | 47  | c.1531C>T      | c.(1531-1533)CGT>TGT   | p.R511C       |

|        |                 |           |        |    |   |           |           |                   |     |    |    |     |     |                |                        |          |
|--------|-----------------|-----------|--------|----|---|-----------|-----------|-------------------|-----|----|----|-----|-----|----------------|------------------------|----------|
| Pat_01 | Pre-Treatment   | GRIA3     | 2892   | 37 | X | 122459990 | 122459990 | Missense_Mutation | SNP | G  | A  | 209 | 16  | c.622G>A       | c.(622-624)GAA>AAA     | p.E208K  |
| Pat_01 | Pre-Treatment   | CXorf66   | 347487 | 37 | X | 139038701 | 139038701 | Missense_Mutation | SNP | G  | A  | 332 | 41  | c.440C>T       | c.(439-441)TCC>TTC     | p.S147F  |
| Pat_01 | Post-Resistance | PUSL1     | 126789 | 37 | 1 | 1245090   | 1245090   | Missense_Mutation | SNP | C  | T  | 4   | 19  | c.503C>T       | c.(502-504)GCC>GTC     | p.A168V  |
| Pat_01 | Post-Resistance | RER1      | 11079  | 37 | 1 | 2328642   | 2328642   | Nonsense_Mutation | SNP | C  | T  | 102 | 269 | c.169C>T       | c.(169-171)CGA>TGA     | p.R57*   |
| Pat_01 | Post-Resistance | EXOSC10   | 5394   | 37 | 1 | 11129748  | 11129748  | Missense_Mutation | SNP | C  | T  | 7   | 757 | c.2356G>A      | c.(2356-2358)GAC>AAC   | p.D786N  |
| Pat_01 | Post-Resistance | MTOR      | 2475   | 37 | 1 | 11259457  | 11259457  | Missense_Mutation | SNP | G  | A  | 4   | 248 | c.4111C>T      | c.(4111-4113)CCC>TCC   | p.P1371S |
| Pat_01 | Post-Resistance | PTCHD2    | 57540  | 37 | 1 | 11584007  | 11584007  | Nonsense_Mutation | SNP | C  | T  | 25  | 50  | c.2371C>T      | c.(2371-2373)CAG>TAG   | p.Q791*  |
| Pat_01 | Post-Resistance | FBXO44    | 93611  | 37 | 1 | 11718444  | 11718444  | Missense_Mutation | SNP | C  | T  | 59  | 201 | c.386C>T       | c.(385-387)TCA>TTA     | p.S129L  |
| Pat_01 | Post-Resistance | AADACL3   | 126767 | 37 | 1 | 12785574  | 12785574  | Missense_Mutation | SNP | G  | A  | 39  | 121 | c.664G>A       | c.(664-666)GAA>AAA     | p.E222K  |
| Pat_01 | Post-Resistance | LOC649330 | 649330 | 37 | 1 | 12907868  | 12907868  | Missense_Mutation | SNP | C  | T  | 47  | 325 | c.275G>A       | c.(274-276)CGA>CAA     | p.R92Q   |
| Pat_01 | Post-Resistance | LOC440563 | 440563 | 37 | 1 | 13183695  | 13183695  | Missense_Mutation | SNP | C  | T  | 33  | 86  | c.178G>A       | c.(178-180)GAG>AAG     | p.E60K   |
| Pat_01 | Post-Resistance | NBPF1     | 55672  | 37 | 1 | 16914254  | 16914254  | Missense_Mutation | SNP | C  | T  | 36  | 464 | c.532G>A       | c.(532-534)GAG>AAG     | p.E178K  |
| Pat_01 | Post-Resistance | PADI3     | 51702  | 37 | 1 | 17593271  | 17593271  | Missense_Mutation | SNP | C  | T  | 5   | 338 | c.466C>T       | c.(466-468)CGT>TGT     | p.R156C  |
| Pat_01 | Post-Resistance | PADI3     | 51702  | 37 | 1 | 17607200  | 17607200  | Missense_Mutation | SNP | G  | A  | 4   | 309 | c.1670G>A      | c.(1669-1671)CGG>CAG   | p.R557Q  |
| Pat_01 | Post-Resistance | UBR4      | 23352  | 37 | 1 | 19449373  | 19449373  | Missense_Mutation | SNP | G  | A  | 5   | 398 | c.9770C>T      | c.(9769-9771)ACA>ATA   | p.T3257I |
| Pat_01 | Post-Resistance | MRTO4     | 51154  | 37 | 1 | 19584386  | 19584386  | Missense_Mutation | SNP | C  | T  | 87  | 250 | c.401C>T       | c.(400-402)ACT>ATT     | p.T134I  |
| Pat_01 | Post-Resistance | NBPF3     | 84224  | 37 | 1 | 21798107  | 21798107  | Missense_Mutation | SNP | G  | C  | 7   | 659 | c.492G>C       | c.(490-492)CAG>CAC     | p.Q164H  |
| Pat_01 | Post-Resistance | RAP1GAP   | 5909   | 37 | 1 | 21940528  | 21940529  | Missense_Mutation | DNP | GT | AA | 13  | 61  | c.345_346AC>TT | (343-348)TCACTC>TCTTTI | p.L116F  |
| Pat_01 | Post-Resistance | NIPAL3    | 57185  | 37 | 1 | 24790583  | 24790583  | Missense_Mutation | SNP | C  | T  | 12  | 93  | c.994C>T       | c.(994-996)CCC>TCC     | p.P332S  |
| Pat_01 | Post-Resistance | ZNF683    | 257101 | 37 | 1 | 26691195  | 26691195  | Missense_Mutation | SNP | G  | A  | 36  | 62  | c.842C>T       | c.(841-843)ACC>ATC     | p.T281I  |
| Pat_01 | Post-Resistance | KPNA6     | 23633  | 37 | 1 | 32627987  | 32627987  | Missense_Mutation | SNP | C  | T  | 166 | 506 | c.773C>T       | c.(772-774)TCT>TTT     | p.S258F  |
| Pat_01 | Post-Resistance | TRIM62    | 55223  | 37 | 1 | 33625433  | 33625433  | Missense_Mutation | SNP | C  | T  | 6   | 417 | c.617G>A       | c.(616-618)CGC>CAC     | p.R206H  |
| Pat_01 | Post-Resistance | GJA4      | 2701   | 37 | 1 | 35260770  | 35260770  | Missense_Mutation | SNP | C  | T  | 21  | 80  | c.956C>T       | c.(955-957)CCC>CTC     | p.P319L  |
| Pat_01 | Post-Resistance | CSF3R     | 1441   | 37 | 1 | 36941122  | 36941122  | Missense_Mutation | SNP | C  | T  | 20  | 72  | c.217G>A       | c.(217-219)GGC>AGC     | p.G73S   |
| Pat_01 | Post-Resistance | GRIK3     | 2899   | 37 | 1 | 37356679  | 37356679  | Missense_Mutation | SNP | G  | A  | 7   | 616 | c.134C>T       | c.(133-135)GCG>GTG     | p.A45V   |
| Pat_01 | Post-Resistance | RSP01     | 284654 | 37 | 1 | 38095330  | 38095330  | Missense_Mutation | SNP | G  | A  | 4   | 92  | c.4C>T         | c.(4-6)CGG>TGG         | p.R2W    |
| Pat_01 | Post-Resistance | EPHA10    | 284656 | 37 | 1 | 38186225  | 38186225  | Missense_Mutation | SNP | C  | T  | 3   | 31  | c.2210G>A      | c.(2209-2211)CGG>CAG   | p.R737Q  |
| Pat_01 | Post-Resistance | KIAA0754  | 643314 | 37 | 1 | 39879016  | 39879016  | Missense_Mutation | SNP | A  | G  | 4   | 43  | c.3079A>G      | c.(3079-3081)ACC>GCC   | p.T1027A |
| Pat_01 | Post-Resistance | CLDN19    | 149461 | 37 | 1 | 43203975  | 43203975  | Missense_Mutation | SNP | G  | A  | 4   | 137 | c.398C>T       | c.(397-399)ACT>ATT     | p.T133I  |
| Pat_01 | Post-Resistance | MPL       | 4352   | 37 | 1 | 43804223  | 43804223  | Missense_Mutation | SNP | C  | T  | 4   | 251 | c.223C>T       | c.(223-225)CGT>TGT     | p.R75C   |
| Pat_01 | Post-Resistance | KIAA0467  | 23334  | 37 | 1 | 43893276  | 43893276  | Missense_Mutation | SNP | C  | T  | 66  | 189 | c.977C>T       | c.(976-978)TCC>TTC     | p.S326F  |
| Pat_01 | Post-Resistance | MAST2     | 23139  | 37 | 1 | 46463409  | 46463409  | Missense_Mutation | SNP | G  | T  | 9   | 616 | c.606G>T       | c.(604-606)TTG>TTT     | p.L202F  |
| Pat_01 | Post-Resistance | FAAH      | 2166   | 37 | 1 | 46872027  | 46872027  | Missense_Mutation | SNP | C  | T  | 24  | 103 | c.938C>T       | c.(937-939)CCC>CTC     | p.P313L  |
| Pat_01 | Post-Resistance | FAAH      | 2166   | 37 | 1 | 46876526  | 46876526  | Missense_Mutation | SNP | G  | A  | 4   | 196 | c.1316G>A      | c.(1315-1317)CGT>CAT   | p.R439H  |
| Pat_01 | Post-Resistance | C8A       | 731    | 37 | 1 | 57383305  | 57383305  | Missense_Mutation | SNP | A  | C  | 35  | 98  | c.1671A>C      | c.(1669-1671)GAA>GAC   | p.E557D  |
| Pat_01 | Post-Resistance | DAB1      | 1600   | 37 | 1 | 57480703  | 57480703  | Nonsense_Mutation | SNP | G  | A  | 4   | 208 | c.1297C>T      | c.(1297-1299)CAG>TAG   | p.Q433*  |
| Pat_01 | Post-Resistance | MIER1     | 57708  | 37 | 1 | 67436559  | 67436559  | Missense_Mutation | SNP | C  | T  | 89  | 222 | c.841C>T       | c.(841-843)CTT>TTT     | p.L281F  |
| Pat_01 | Post-Resistance | PALMD     | 54873  | 37 | 1 | 100152323 | 100152323 | Missense_Mutation | SNP | C  | T  | 5   | 380 | c.343C>T       | c.(343-345)CGG>TGG     | p.R115W  |
| Pat_01 | Post-Resistance | COL11A1   | 1301   | 37 | 1 | 103404641 | 103404641 | Missense_Mutation | SNP | C  | T  | 148 | 455 | c.3388G>A      | c.(3388-3390)GAA>AAA   | p.E1130K |
| Pat_01 | Post-Resistance | SLC25A24  | 29957  | 37 | 1 | 108697685 | 108697685 | Missense_Mutation | SNP | G  | A  | 5   | 381 | c.742C>T       | c.(742-744)CGC>TGC     | p.R248C  |
| Pat_01 | Post-Resistance | CSF1      | 1435   | 37 | 1 | 110467429 | 110467429 | Missense_Mutation | SNP | C  | T  | 11  | 20  | c.1601C>T      | c.(1600-1602)CCC>CTC   | p.P534L  |
| Pat_01 | Post-Resistance | OVGP1     | 5016   | 37 | 1 | 111957310 | 111957310 | Missense_Mutation | SNP | G  | A  | 65  | 128 | c.1813C>T      | c.(1813-1815)CCC>TCC   | p.P605S  |
| Pat_01 | Post-Resistance | KCND3     | 3752   | 37 | 1 | 112525240 | 112525240 | Missense_Mutation | SNP | G  | A  | 4   | 175 | c.109C>T       | c.(109-111)CGG>TGG     | p.R37W   |
| Pat_01 | Post-Resistance | MAGI3     | 260425 | 37 | 1 | 114157228 | 114157228 | Missense_Mutation | SNP | C  | T  | 86  | 241 | c.1024C>T      | c.(1024-1026)CCT>TCT   | p.P342S  |
| Pat_01 | Post-Resistance | AMPD1     | 270    | 37 | 1 | 115217374 | 115217374 | Missense_Mutation | SNP | T  | C  | 4   | 215 | c.1799A>G      | c.(1798-1800)AAG>AGG   | p.K600R  |
| Pat_01 | Post-Resistance | SYCP1     | 6847   | 37 | 1 | 115419372 | 115419372 | Missense_Mutation | SNP | G  | A  | 3   | 14  | c.742G>A       | c.(742-744)GAA>AAA     | p.E248K  |
| Pat_01 | Post-Resistance | SPAG17    | 200162 | 37 | 1 | 118558629 | 118558629 | Missense_Mutation | SNP | G  | A  | 70  | 192 | c.4246C>T      | c.(4246-4248)CCA>TCA   | p.P1416S |

|        |                 |              |           |    |    |           |           |                   |     |    |    |     |     |                |                      |               |
|--------|-----------------|--------------|-----------|----|----|-----------|-----------|-------------------|-----|----|----|-----|-----|----------------|----------------------|---------------|
| Pat_01 | Post-Resistance | TXNIP        | 10628     | 37 | 1  | 145439827 | 145439827 | Missense_Mutation | SNP | G  | T  | 43  | 405 | c.373G>T       | c.(373-375)GTG>TTG   | p.V125L       |
| Pat_01 | Post-Resistance | RORC         | 6097      | 37 | 1  | 151785723 | 151785723 | Missense_Mutation | SNP | C  | T  | 166 | 655 | c.1166G>A      | c.(1165-1167)CGA>CAA | p.R389Q       |
| Pat_01 | Post-Resistance | RPTN         | 126638    | 37 | 1  | 152128886 | 152128886 | Missense_Mutation | SNP | C  | T  | 285 | 425 | c.689G>A       | c.(688-690)CGG>CAG   | p.R230Q       |
| Pat_01 | Post-Resistance | FLG2         | 388698    | 37 | 1  | 152329769 | 152329769 | Nonsense_Mutation | SNP | G  | A  | 120 | 467 | c.493C>T       | c.(493-495)CAA>TAA   | p.Q165*       |
| Pat_01 | Post-Resistance | LCE1F        | 353137    | 37 | 1  | 152748887 | 152748887 | Missense_Mutation | SNP | C  | T  | 79  | 229 | c.40C>T        | c.(40-42)CCC>TCC     | p.P14S        |
| Pat_01 | Post-Resistance | GATAD2B      | 57459     | 37 | 1  | 153788749 | 153788749 | Missense_Mutation | SNP | C  | A  | 5   | 374 | c.1216G>T      | c.(1216-1218)GGC>TGC | p.G406C       |
| Pat_01 | Post-Resistance | SLC39A1      | 27173     | 37 | 1  | 153935074 | 153935074 | Missense_Mutation | SNP | G  | A  | 4   | 119 | c.118C>T       | c.(118-120)CTC>TTC   | p.L40F        |
| Pat_01 | Post-Resistance | RUSC1        | 23623     | 37 | 1  | 155292114 | 155292114 | Missense_Mutation | SNP | G  | A  | 4   | 275 | c.550G>A       | c.(550-552)GCC>ACC   | p.A184T       |
| Pat_01 | Post-Resistance | PEAR1        | 375033    | 37 | 1  | 156874590 | 156874590 | Missense_Mutation | SNP | C  | T  | 47  | 242 | c.152C>T       | c.(151-153)CCC>CTC   | p.P51L        |
| Pat_01 | Post-Resistance | PEAR1        | 375033    | 37 | 1  | 156880536 | 156880536 | Splice_Site       | SNP | G  | A  | 5   | 260 | c.1951_splice  | c.e15+1              | p.P651_splice |
| Pat_01 | Post-Resistance | CD1C         | 911       | 37 | 1  | 158261934 | 158261934 | Missense_Mutation | SNP | G  | C  | 127 | 211 | c.389G>C       | c.(388-390)GGC>GCC   | p.G130A       |
| Pat_01 | Post-Resistance | OR10K2       | 391107    | 37 | 1  | 158389793 | 158389793 | Missense_Mutation | SNP | C  | T  | 44  | 234 | c.864G>A       | c.(862-864)ATG>ATA   | p.M288I       |
| Pat_01 | Post-Resistance | OR6K6        | 128371    | 37 | 1  | 158725536 | 158725536 | Missense_Mutation | SNP | T  | C  | 5   | 437 | c.931T>C       | c.(931-933)TTT>CTT   | p.F311L       |
| Pat_01 | Post-Resistance | OR10J3       | 441911    | 37 | 1  | 159283990 | 159283990 | Missense_Mutation | SNP | G  | A  | 85  | 99  | c.460C>T       | c.(460-462)CTT>TTT   | p.L154F       |
| Pat_01 | Post-Resistance | COPA         | 1314      | 37 | 1  | 160302304 | 160302304 | Missense_Mutation | SNP | G  | A  | 7   | 587 | c.430C>T       | c.(430-432)CAC>TAC   | p.H144Y       |
| Pat_01 | Post-Resistance | PAPPA2       | 60676     | 37 | 1  | 176734857 | 176734857 | Missense_Mutation | SNP | C  | T  | 119 | 535 | c.4207C>T      | c.(4207-4209)CAT>TAT | p.H1403Y      |
| Pat_01 | Post-Resistance | ASTN1        | 460       | 37 | 1  | 177001897 | 177001897 | Missense_Mutation | SNP | G  | A  | 85  | 127 | c.560C>T       | c.(559-561)CCG>CTG   | p.P187L       |
| Pat_01 | Post-Resistance | CEP350       | 9857      | 37 | 1  | 180062348 | 180062348 | Missense_Mutation | SNP | C  | T  | 6   | 23  | c.7108C>T      | c.(7108-7110)CCT>TCT | p.P2370S      |
| Pat_01 | Post-Resistance | KIAA1614     | 57710     | 37 | 1  | 180886095 | 180886095 | Missense_Mutation | SNP | G  | A  | 5   | 282 | c.856G>A       | c.(856-858)GCT>ACT   | p.A286T       |
| Pat_01 | Post-Resistance | KIAA1614     | 57710     | 37 | 1  | 180904393 | 180904393 | Missense_Mutation | SNP | G  | A  | 3   | 36  | c.1348G>A      | c.(1348-1350)GTG>ATG | p.V450M       |
| Pat_01 | Post-Resistance | LAMC2        | 3918      | 37 | 1  | 183209476 | 183209476 | Missense_Mutation | SNP | T  | C  | 68  | 273 | c.3278T>C      | c.(3277-3279)GTT>GCT | p.V1093A      |
| Pat_01 | Post-Resistance | KIF14        | 9928      | 37 | 1  | 200574423 | 200574423 | Missense_Mutation | SNP | C  | G  | 7   | 344 | c.1734G>C      | c.(1732-1734)ATG>ATC | p.M578I       |
| Pat_01 | Post-Resistance | NAV1         | 89796     | 37 | 1  | 201757704 | 201757704 | Missense_Mutation | SNP | C  | T  | 166 | 256 | c.3104C>T      | c.(3103-3105)TCC>TTC | p.S1035F      |
| Pat_01 | Post-Resistance | ATP2B4       | 493       | 37 | 1  | 203668653 | 203668653 | Missense_Mutation | SNP | G  | A  | 6   | 382 | c.457G>A       | c.(457-459)GCA>ACA   | p.A153T       |
| Pat_01 | Post-Resistance | LAX1         | 54900     | 37 | 1  | 203743384 | 203743385 | Nonsense_Mutation | DNP | GG | TA | 55  | 71  | c.772_773GG>TA | c.(772-774)GGA>TAA   | p.G258*       |
| Pat_01 | Post-Resistance | ZC3H11A      | 9877      | 37 | 1  | 203821508 | 203821508 | Nonsense_Mutation | SNP | C  | G  | 6   | 266 | c.2414C>G      | c.(2413-2415)TCA>TGA | p.S805*       |
| Pat_01 | Post-Resistance | NUAK2        | 81788     | 37 | 1  | 205273092 | 205273092 | Missense_Mutation | SNP | C  | T  | 24  | 40  | c.1373G>A      | c.(1372-1374)GGC>GAC | p.G458D       |
| Pat_01 | Post-Resistance | CTSE         | 1510      | 37 | 1  | 206318358 | 206318358 | Missense_Mutation | SNP | G  | A  | 4   | 180 | c.116G>A       | c.(115-117)CGG>CAG   | p.R39Q        |
| Pat_01 | Post-Resistance | LGTN         | 1939      | 37 | 1  | 206765163 | 206765163 | Missense_Mutation | SNP | G  | A  | 219 | 325 | c.1699C>T      | c.(1699-1701)CCT>TCT | p.P567S       |
| Pat_01 | Post-Resistance | ATF3         | 467       | 37 | 1  | 212791476 | 212791476 | Missense_Mutation | SNP | C  | T  | 29  | 46  | c.248C>T       | c.(247-249)CCT>CTT   | p.P83L        |
| Pat_01 | Post-Resistance | FAM71A       | 149647    | 37 | 1  | 212799737 | 212799737 | Missense_Mutation | SNP | C  | A  | 4   | 308 | c.1518C>A      | c.(1516-1518)CAC>CAA | p.H506Q       |
| Pat_01 | Post-Resistance | OBSCN        | 84033     | 37 | 1  | 228456389 | 228456389 | Missense_Mutation | SNP | G  | A  | 4   | 206 | c.5020G>A      | c.(5020-5022)GTG>ATG | p.V1674M      |
| Pat_01 | Post-Resistance | FMN2         | 56776     | 37 | 1  | 240371107 | 240371107 | Missense_Mutation | SNP | C  | T  | 76  | 470 | c.2995C>T      | c.(2995-2997)CCT>TCT | p.P999S       |
| Pat_01 | Post-Resistance | FMN2         | 56776     | 37 | 1  | 240371239 | 240371239 | Missense_Mutation | SNP | C  | T  | 9   | 307 | c.3127C>T      | c.(3127-3129)CCT>TCT | p.P1043S      |
| Pat_01 | Post-Resistance | ZNF695       | 57116     | 37 | 1  | 247150500 | 247150500 | Missense_Mutation | SNP | A  | T  | 4   | 112 | c.1317T>A      | c.(1315-1317)GAT>GAA | p.D439E       |
| Pat_01 | Post-Resistance | OR2T4        | 127074    | 37 | 1  | 248524908 | 248524908 | Missense_Mutation | SNP | G  | A  | 9   | 355 | c.26G>A        | c.(25-27)AGC>AAC     | p.S9N         |
| Pat_01 | Post-Resistance | OR1411       | 401994    | 37 | 1  | 248845214 | 248845214 | Missense_Mutation | SNP | C  | T  | 62  | 225 | c.392G>A       | c.(391-393)AGA>AAA   | p.R131K       |
| Pat_01 | Post-Resistance | FBXO18       | 84893     | 37 | 10 | 5948525   | 5948525   | Missense_Mutation | SNP | C  | T  | 86  | 130 | c.683C>T       | c.(682-684)CCG>CTG   | p.P228L       |
| Pat_01 | Post-Resistance | PFKFB3       | 5209      | 37 | 10 | 6257204   | 6257204   | Missense_Mutation | SNP | C  | A  | 4   | 165 | c.223C>A       | c.(223-225)CGC>AGC   | p.R75S        |
| Pat_01 | Post-Resistance | SEPHS1       | 22929     | 37 | 10 | 13361156  | 13361156  | Missense_Mutation | SNP | C  | T  | 5   | 211 | c.1165G>A      | c.(1165-1167)GGG>AGG | p.G389R       |
| Pat_01 | Post-Resistance | ACBD5        | 91452     | 37 | 10 | 27499796  | 27499796  | Missense_Mutation | SNP | C  | A  | 5   | 398 | c.1151G>T      | c.(1150-1152)CGG>CTG | p.R384L       |
| Pat_01 | Post-Resistance | KIAA1462     | 57608     | 37 | 10 | 30317681  | 30317681  | Missense_Mutation | SNP | C  | T  | 66  | 168 | c.1396G>A      | c.(1396-1398)GGA>AGA | p.G466R       |
| Pat_01 | Post-Resistance | NRP1         | 8829      | 37 | 10 | 33515181  | 33515181  | Missense_Mutation | SNP | C  | T  | 4   | 152 | c.1018G>A      | c.(1018-1020)GGG>AGG | p.G340R       |
| Pat_01 | Post-Resistance | ANKRD30A     | 91074     | 37 | 10 | 37430688  | 37430688  | Missense_Mutation | SNP | C  | T  | 6   | 179 | c.695C>T       | c.(694-696)GCG>GTG   | p.A232V       |
| Pat_01 | Post-Resistance | LOC100129055 | 100129055 | 37 | 10 | 38466905  | 38466905  | Splice_Site       | SNP | T  | G  | 24  | 36  | c.365_splice   | c.e2+2               |               |
| Pat_01 | Post-Resistance | CTNNA3       | 29119     | 37 | 10 | 68381509  | 68381509  | Missense_Mutation | SNP | C  | T  | 60  | 113 | c.1315G>A      | c.(1315-1317)GAA>AAA | p.E439K       |
| Pat_01 | Post-Resistance | SGPL1        | 8879      | 37 | 10 | 72637040  | 72637040  | Missense_Mutation | SNP | C  | T  | 4   | 232 | c.1655C>T      | c.(1654-1656)ACC>ATC | p.T552I       |



|        |                 |          |        |    |    |           |           |                   |     |    |    |     |     |                |                      |          |
|--------|-----------------|----------|--------|----|----|-----------|-----------|-------------------|-----|----|----|-----|-----|----------------|----------------------|----------|
| Pat_01 | Post-Resistance | DNAJB12  | 54788  | 37 | 10 | 74103148  | 74103148  | Missense_Mutation | SNP | G  | T  | 3   | 31  | c.535C>A       | c.(535-537)CCT>ACT   | p.P179T  |
| Pat_01 | Post-Resistance | KCNMA1   | 3778   | 37 | 10 | 78708959  | 78708959  | Missense_Mutation | SNP | C  | T  | 119 | 204 | c.2650G>A      | c.(2650-2652)GAG>AAG | p.E884K  |
| Pat_01 | Post-Resistance | ZMIZ1    | 57178  | 37 | 10 | 81065994  | 81065994  | Missense_Mutation | SNP | T  | C  | 3   | 112 | c.2561T>C      | c.(2560-2562)ATC>ACC | p.I854T  |
| Pat_01 | Post-Resistance | NOC3L    | 64318  | 37 | 10 | 96099543  | 96099543  | Missense_Mutation | SNP | G  | A  | 68  | 117 | c.1915C>T      | c.(1915-1917)CCA>TCA | p.P639S  |
| Pat_01 | Post-Resistance | NOC3L    | 64318  | 37 | 10 | 96110005  | 96110006  | Missense_Mutation | DNP | GG | AA | 118 | 289 | c.992_993CC>TT | c.(991-993)TCC>TTT   | p.S331F  |
| Pat_01 | Post-Resistance | CYP2C8   | 1558   | 37 | 10 | 96829152  | 96829152  | Missense_Mutation | SNP | G  | A  | 57  | 83  | c.8C>T         | c.(7-9)CCT>CTT       | p.P3L    |
| Pat_01 | Post-Resistance | DNMBP    | 23268  | 37 | 10 | 101715970 | 101715970 | Missense_Mutation | SNP | G  | A  | 95  | 196 | c.1261C>T      | c.(1261-1263)CAT>TAT | p.H421Y  |
| Pat_01 | Post-Resistance | CPN1     | 1369   | 37 | 10 | 101835766 | 101835766 | Missense_Mutation | SNP | G  | A  | 98  | 129 | c.322C>T       | c.(322-324)CGG>TGG   | p.R108W  |
| Pat_01 | Post-Resistance | CYP17A1  | 1586   | 37 | 10 | 104593858 | 104593858 | Missense_Mutation | SNP | C  | T  | 16  | 32  | c.688G>A       | c.(688-690)GAA>AAA   | p.E230K  |
| Pat_01 | Post-Resistance | SORCS3   | 22986  | 37 | 10 | 106970954 | 106970954 | Missense_Mutation | SNP | C  | T  | 92  | 120 | c.2321C>T      | c.(2320-2322)CCA>CTA | p.P774L  |
| Pat_01 | Post-Resistance | HABP2    | 3026   | 37 | 10 | 115335703 | 115335703 | Missense_Mutation | SNP | C  | T  | 128 | 294 | c.271C>T       | c.(271-273)CAT>TAT   | p.H91Y   |
| Pat_01 | Post-Resistance | WDR11    | 55717  | 37 | 10 | 122649430 | 122649430 | Missense_Mutation | SNP | G  | T  | 4   | 154 | c.2252G>T      | c.(2251-2253)TGG>TTG | p.W751L  |
| Pat_01 | Post-Resistance | DMBT1    | 1755   | 37 | 10 | 124358346 | 124358346 | Nonsense_Mutation | SNP | C  | T  | 219 | 410 | c.3013C>T      | c.(3013-3015)CGA>TGA | p.R1005* |
| Pat_01 | Post-Resistance | C11orf35 | 256329 | 37 | 11 | 558623    | 558623    | Missense_Mutation | SNP | G  | A  | 3   | 30  | c.302C>T       | c.(301-303)CCG>CTG   | p.P101L  |
| Pat_01 | Post-Resistance | PHRF1    | 57661  | 37 | 11 | 607432    | 607432    | Missense_Mutation | SNP | G  | C  | 4   | 219 | c.1976G>C      | c.(1975-1977)CGC>CCC | p.R659P  |
| Pat_01 | Post-Resistance | LRDD     | 55367  | 37 | 11 | 801458    | 801458    | Missense_Mutation | SNP | C  | T  | 3   | 25  | c.1469G>A      | c.(1468-1470)CGA>CAA | p.R490Q  |
| Pat_01 | Post-Resistance | DUSP8    | 1850   | 37 | 11 | 1580220   | 1580220   | Missense_Mutation | SNP | G  | A  | 3   | 43  | c.436C>T       | c.(436-438)CCC>TCC   | p.P146S  |
| Pat_01 | Post-Resistance | TH       | 7054   | 37 | 11 | 2186514   | 2186514   | Nonsense_Mutation | SNP | G  | A  | 57  | 183 | c.1375C>T      | c.(1375-1377)CAG>TAG | p.Q459*  |
| Pat_01 | Post-Resistance | TRPM5    | 29850  | 37 | 11 | 2428999   | 2428999   | Missense_Mutation | SNP | C  | T  | 4   | 236 | c.2926G>A      | c.(2926-2928)GCC>ACC | p.A976T  |
| Pat_01 | Post-Resistance | OR51G2   | 81282  | 37 | 11 | 4936318   | 4936318   | Missense_Mutation | SNP | C  | A  | 22  | 142 | c.576G>T       | c.(574-576)TTG>TTT   | p.L192F  |
| Pat_01 | Post-Resistance | OR52E2   | 119678 | 37 | 11 | 5080830   | 5080830   | Missense_Mutation | SNP | G  | A  | 83  | 281 | c.28C>T        | c.(28-30)CAC>TAC     | p.H10Y   |
| Pat_01 | Post-Resistance | TRIM3    | 10612  | 37 | 11 | 6472620   | 6472620   | Missense_Mutation | SNP | G  | A  | 5   | 326 | c.1582C>T      | c.(1582-1584)CGC>TGC | p.R528C  |
| Pat_01 | Post-Resistance | MRV11    | 10335  | 37 | 11 | 10647848  | 10647848  | Missense_Mutation | SNP | G  | A  | 21  | 24  | c.1033C>T      | c.(1033-1035)CCG>TCG | p.P345S  |
| Pat_01 | Post-Resistance | CYP2R1   | 120227 | 37 | 11 | 14901879  | 14901879  | Missense_Mutation | SNP | C  | T  | 46  | 109 | c.803G>A       | c.(802-804)AGA>AAA   | p.R268K  |
| Pat_01 | Post-Resistance | ABCC8    | 6833   | 37 | 11 | 17419957  | 17419957  | Missense_Mutation | SNP | C  | T  | 4   | 180 | c.3682G>A      | c.(3682-3684)GAA>AAA | p.E1228K |
| Pat_01 | Post-Resistance | TSG101   | 7251   | 37 | 11 | 18524059  | 18524059  | Missense_Mutation | SNP | G  | T  | 4   | 169 | c.614C>A       | c.(613-615)CCT>CAT   | p.P205H  |
| Pat_01 | Post-Resistance | NAV2     | 89797  | 37 | 11 | 20065564  | 20065564  | Missense_Mutation | SNP | C  | T  | 85  | 239 | c.3014C>T      | c.(3013-3015)TCC>TTC | p.S1005F |
| Pat_01 | Post-Resistance | KCNA4    | 3739   | 37 | 11 | 30033313  | 30033313  | Missense_Mutation | SNP | G  | A  | 49  | 177 | c.913C>T       | c.(913-915)CCT>TCT   | p.P305S  |
| Pat_01 | Post-Resistance | LMO2     | 4005   | 37 | 11 | 33881054  | 33881054  | Missense_Mutation | SNP | G  | A  | 5   | 303 | c.325C>T       | c.(325-327)CGG>TGG   | p.R109W  |
| Pat_01 | Post-Resistance | MAPK8IP1 | 9479   | 37 | 11 | 45925551  | 45925551  | Missense_Mutation | SNP | G  | A  | 4   | 259 | c.1505G>A      | c.(1504-1506)CGA>CAA | p.R502Q  |
| Pat_01 | Post-Resistance | OR4A15   | 81328  | 37 | 11 | 55135721  | 55135721  | Missense_Mutation | SNP | C  | T  | 111 | 237 | c.362C>T       | c.(361-363)TCC>TTC   | p.S121F  |
| Pat_01 | Post-Resistance | OR5D13   | 390142 | 37 | 11 | 55541751  | 55541751  | Missense_Mutation | SNP | T  | C  | 35  | 97  | c.838T>C       | c.(838-840)TAC>CAC   | p.Y280H  |
| Pat_01 | Post-Resistance | OR8K5    | 219453 | 37 | 11 | 55927516  | 55927516  | Missense_Mutation | SNP | G  | A  | 140 | 422 | c.278C>T       | c.(277-279)TCC>TTC   | p.S93F   |
| Pat_01 | Post-Resistance | OR8J1    | 219477 | 37 | 11 | 56128479  | 56128479  | Missense_Mutation | SNP | G  | T  | 7   | 511 | c.757G>T       | c.(757-759)GGG>TGG   | p.G253W  |
| Pat_01 | Post-Resistance | MS4A2    | 2206   | 37 | 11 | 59863103  | 59863103  | Missense_Mutation | SNP | G  | A  | 70  | 121 | c.709G>A       | c.(709-711)GAA>AAA   | p.E237K  |
| Pat_01 | Post-Resistance | MS4A12   | 54860  | 37 | 11 | 60271189  | 60271189  | Missense_Mutation | SNP | G  | A  | 65  | 161 | c.487G>A       | c.(487-489)GGA>AGA   | p.G163R  |
| Pat_01 | Post-Resistance | FADS2    | 9415   | 37 | 11 | 61615706  | 61615706  | Missense_Mutation | SNP | G  | T  | 5   | 359 | c.694G>T       | c.(694-696)GAT>TAT   | p.D232Y  |
| Pat_01 | Post-Resistance | INTS5    | 80789  | 37 | 11 | 62415054  | 62415054  | Missense_Mutation | SNP | G  | A  | 119 | 187 | c.2498C>T      | c.(2497-2499)CCC>CTC | p.P833L  |
| Pat_01 | Post-Resistance | SART1    | 9092   | 37 | 11 | 65731545  | 65731545  | Missense_Mutation | SNP | C  | T  | 4   | 186 | c.314C>T       | c.(313-315)GCT>GTT   | p.A105V  |
| Pat_01 | Post-Resistance | MYEOV    | 26579  | 37 | 11 | 69063224  | 69063224  | Missense_Mutation | SNP | G  | A  | 71  | 202 | c.307G>A       | c.(307-309)GCT>ACT   | p.A103T  |
| Pat_01 | Post-Resistance | NEU3     | 10825  | 37 | 11 | 74717320  | 74717320  | Missense_Mutation | SNP | G  | T  | 79  | 338 | c.1169G>T      | c.(1168-1170)TGG>TTG | p.W390L  |
| Pat_01 | Post-Resistance | MAP6     | 4135   | 37 | 11 | 75298246  | 75298246  | Missense_Mutation | SNP | G  | T  | 6   | 275 | c.2300C>A      | c.(2299-2301)CCA>CAA | p.P767Q  |
| Pat_01 | Post-Resistance | DGAT2    | 84649  | 37 | 11 | 75501768  | 75501768  | Missense_Mutation | SNP | C  | T  | 79  | 335 | c.421C>T       | c.(421-423)CCC>TCC   | p.P141S  |
| Pat_01 | Post-Resistance | MYO7A    | 4647   | 37 | 11 | 76924018  | 76924018  | Missense_Mutation | SNP | C  | T  | 7   | 29  | c.6376C>T      | c.(6376-6378)CCT>TCT | p.P2126S |
| Pat_01 | Post-Resistance | ODZ4     | 26011  | 37 | 11 | 78380693  | 78380693  | Missense_Mutation | SNP | G  | A  | 6   | 472 | c.6697C>T      | c.(6697-6699)CGG>TGG | p.R2233W |
| Pat_01 | Post-Resistance | PRSS23   | 11098  | 37 | 11 | 86518819  | 86518819  | Missense_Mutation | SNP | C  | T  | 5   | 298 | c.134C>T       | c.(133-135)ACC>ATC   | p.T45I   |
| Pat_01 | Post-Resistance | TYR      | 7299   | 37 | 11 | 88924446  | 88924446  | Missense_Mutation | SNP | G  | A  | 5   | 338 | c.896G>A       | c.(895-897)CGT>CAT   | p.R299H  |

|        |                 |          |        |    |    |           |           |                   |     |   |   |     |     |              |                      |              |
|--------|-----------------|----------|--------|----|----|-----------|-----------|-------------------|-----|---|---|-----|-----|--------------|----------------------|--------------|
| Pat_01 | Post-Resistance | HEPHL1   | 341208 | 37 | 11 | 93779011  | 93779011  | Missense_Mutation | SNP | C | T | 40  | 65  | c.343C>T     | c.(343-345)CAT>TAT   | p.H115Y      |
| Pat_01 | Post-Resistance | C11orf65 | 160140 | 37 | 11 | 108277567 | 108277567 | Missense_Mutation | SNP | C | T | 81  | 116 | c.352G>A     | c.(352-354)GAT>AAT   | p.D118N      |
| Pat_01 | Post-Resistance | C11orf53 | 341032 | 37 | 11 | 111156543 | 111156543 | Missense_Mutation | SNP | G | A | 4   | 237 | c.475G>A     | c.(475-477)GCT>ACT   | p.A159T      |
| Pat_01 | Post-Resistance | LAYN     | 143903 | 37 | 11 | 111430932 | 111430932 | Missense_Mutation | SNP | G | A | 62  | 92  | c.898G>A     | c.(898-900)GAA>AAA   | p.E300K      |
| Pat_01 | Post-Resistance | FAM55D   | 54827  | 37 | 11 | 114451040 | 114451040 | Missense_Mutation | SNP | C | G | 70  | 137 | c.913G>C     | c.(913-915)GAG>CAG   | p.E305Q      |
| Pat_01 | Post-Resistance | OR10S1   | 219873 | 37 | 11 | 123847813 | 123847813 | Missense_Mutation | SNP | G | A | 4   | 190 | c.586C>T     | c.(586-588)CCC>TCC   | p.P196S      |
| Pat_01 | Post-Resistance | LAG3     | 3902   | 37 | 12 | 6887073   | 6887073   | Missense_Mutation | SNP | C | T | 50  | 183 | c.1417C>T    | c.(1417-1419)CTT>TTT | p.L473F      |
| Pat_01 | Post-Resistance | A2M      | 2      | 37 | 12 | 9231867   | 9231867   | Missense_Mutation | SNP | C | T | 70  | 239 | c.3092G>A    | c.(3091-3093)CGA>CAA | p.R1031Q     |
| Pat_01 | Post-Resistance | TAS2R14  | 50840  | 37 | 12 | 11091472  | 11091472  | Missense_Mutation | SNP | G | A | 25  | 93  | c.335C>T     | c.(334-336)GCC>GTC   | p.A112V      |
| Pat_01 | Post-Resistance | KIAA1467 | 57613  | 37 | 12 | 13219625  | 13219625  | Nonsense_Mutation | SNP | C | T | 94  | 293 | c.904C>T     | c.(904-906)CGA>TGA   | p.R302*      |
| Pat_01 | Post-Resistance | C12orf36 | 283422 | 37 | 12 | 13526349  | 13526349  | Missense_Mutation | SNP | G | A | 15  | 77  | c.206C>T     | c.(205-207)TCG>TTG   | p.S69L       |
| Pat_01 | Post-Resistance | PIK3C2G  | 5288   | 37 | 12 | 18650562  | 18650562  | Missense_Mutation | SNP | G | A | 46  | 152 | c.2773G>A    | c.(2773-2775)GAT>AAT | p.D925N      |
| Pat_01 | Post-Resistance | PIK3C2G  | 5288   | 37 | 12 | 18650568  | 18650568  | Missense_Mutation | SNP | C | T | 49  | 154 | c.2779C>T    | c.(2779-2781)CGT>TGT | p.R927C      |
| Pat_01 | Post-Resistance | CAPZA3   | 93661  | 37 | 12 | 18891723  | 18891723  | Nonsense_Mutation | SNP | G | A | 66  | 200 | c.521G>A     | c.(520-522)TGG>TAG   | p.W174*      |
| Pat_01 | Post-Resistance | YARS2    | 51067  | 37 | 12 | 32908550  | 32908550  | Missense_Mutation | SNP | G | A | 52  | 170 | c.259C>T     | c.(259-261)CTT>TTT   | p.L87F       |
| Pat_01 | Post-Resistance | CNTN1    | 1272   | 37 | 12 | 41330675  | 41330675  | Missense_Mutation | SNP | C | T | 163 | 481 | c.1078C>T    | c.(1078-1080)CCT>TCT | p.P360S      |
| Pat_01 | Post-Resistance | C1QL4    | 338761 | 37 | 12 | 49726992  | 49726992  | Missense_Mutation | SNP | C | T | 25  | 88  | c.562G>A     | c.(562-564)GAC>AAC   | p.D188N      |
| Pat_01 | Post-Resistance | KCNH3    | 23416  | 37 | 12 | 49951176  | 49951176  | Missense_Mutation | SNP | G | A | 3   | 66  | c.2692G>A    | c.(2692-2694)GGA>AGA | p.G898R      |
| Pat_01 | Post-Resistance | DIP2B    | 57609  | 37 | 12 | 51133321  | 51133321  | Missense_Mutation | SNP | G | A | 5   | 142 | c.4306G>A    | c.(4306-4308)GGA>AGA | p.G1436R     |
| Pat_01 | Post-Resistance | SLC11A2  | 4891   | 37 | 12 | 51384723  | 51384723  | Missense_Mutation | SNP | C | T | 4   | 416 | c.1430G>A    | c.(1429-1431)CGG>CAG | p.R477Q      |
| Pat_01 | Post-Resistance | GALNT6   | 11226  | 37 | 12 | 51752996  | 51752996  | Missense_Mutation | SNP | G | A | 6   | 719 | c.1288C>T    | c.(1288-1290)CGC>TGC | p.R430C      |
| Pat_01 | Post-Resistance | GALNT6   | 11226  | 37 | 12 | 51773172  | 51773172  | Missense_Mutation | SNP | C | T | 45  | 123 | c.394G>A     | c.(394-396)GAA>AAA   | p.E132K      |
| Pat_01 | Post-Resistance | KRT86    | 3892   | 37 | 12 | 52699481  | 52699481  | Missense_Mutation | SNP | G | A | 43  | 111 | c.935G>A     | c.(934-936)GGG>GAG   | p.G312E      |
| Pat_01 | Post-Resistance | KRT72    | 140807 | 37 | 12 | 52992823  | 52992823  | Missense_Mutation | SNP | T | C | 47  | 159 | c.500A>G     | c.(499-501)AAC>AGC   | p.N167S      |
| Pat_01 | Post-Resistance | NCKAP1L  | 3071   | 37 | 12 | 54914488  | 54914488  | Missense_Mutation | SNP | C | T | 165 | 537 | c.1636C>T    | c.(1636-1638)CGT>TGT | p.R546C      |
| Pat_01 | Post-Resistance | ERBB3    | 2065   | 37 | 12 | 56477573  | 56477573  | Missense_Mutation | SNP | G | A | 6   | 750 | c.121G>A     | c.(121-123)GAT>AAT   | p.D41N       |
| Pat_01 | Post-Resistance | ZC3H10   | 84872  | 37 | 12 | 56514428  | 56514428  | Missense_Mutation | SNP | G | A | 3   | 61  | c.82G>A      | c.(82-84)GGG>AGG     | p.G28R       |
| Pat_01 | Post-Resistance | LRP1     | 4035   | 37 | 12 | 57569758  | 57569758  | Missense_Mutation | SNP | G | A | 47  | 125 | c.3860G>A    | c.(3859-3861)GGA>GAA | p.G1287E     |
| Pat_01 | Post-Resistance | DCTN2    | 10540  | 37 | 12 | 57929629  | 57929629  | Splice_Site       | SNP | C | T | 11  | 34  | c.106_splice | c.e3-1               | p.E36_splice |
| Pat_01 | Post-Resistance | TMTC2    | 160335 | 37 | 12 | 83290051  | 83290051  | Missense_Mutation | SNP | C | A | 5   | 477 | c.1109C>A    | c.(1108-1110)GCA>GAA | p.A370E      |
| Pat_01 | Post-Resistance | MGAT4C   | 25834  | 37 | 12 | 86373354  | 86373354  | Missense_Mutation | SNP | C | T | 9   | 13  | c.1150G>A    | c.(1150-1152)GAA>AAA | p.E384K      |
| Pat_01 | Post-Resistance | SLC5A8   | 160728 | 37 | 12 | 101584307 | 101584307 | Missense_Mutation | SNP | C | T | 6   | 456 | c.772G>A     | c.(772-774)GGT>AGT   | p.G258S      |
| Pat_01 | Post-Resistance | MYBPC1   | 4604   | 37 | 12 | 102071915 | 102071915 | Missense_Mutation | SNP | G | C | 95  | 245 | c.3124G>C    | c.(3124-3126)GAT>CAT | p.D1042H     |
| Pat_01 | Post-Resistance | PAH      | 5053   | 37 | 12 | 103234285 | 103234285 | Missense_Mutation | SNP | G | A | 5   | 369 | c.1208C>T    | c.(1207-1209)GCT>GTT | p.A403V      |
| Pat_01 | Post-Resistance | STAB2    | 55576  | 37 | 12 | 103988190 | 103988190 | Missense_Mutation | SNP | G | A | 195 | 505 | c.233G>A     | c.(232-234)AGA>AAA   | p.R78K       |
| Pat_01 | Post-Resistance | IQCD     | 115811 | 37 | 12 | 113645584 | 113645584 | Missense_Mutation | SNP | G | A | 62  | 205 | c.388C>T     | c.(388-390)CGC>TGC   | p.R130C      |
| Pat_01 | Post-Resistance | RNF10    | 9921   | 37 | 12 | 121004694 | 121004694 | Missense_Mutation | SNP | C | T | 85  | 215 | c.1952C>T    | c.(1951-1953)TCC>TTC | p.S651F      |
| Pat_01 | Post-Resistance | P2RX7    | 5027   | 37 | 12 | 121622268 | 121622268 | Missense_Mutation | SNP | C | A | 4   | 81  | c.1451C>A    | c.(1450-1452)CCA>CAA | p.P484Q      |
| Pat_01 | Post-Resistance | SETD8    | 387893 | 37 | 12 | 123868746 | 123868746 | Missense_Mutation | SNP | A | G | 25  | 79  | c.1A>G       | c.(1-3)ATG>GTG       | p.M1V        |
| Pat_01 | Post-Resistance | TMEM132D | 121256 | 37 | 12 | 129559240 | 129559240 | Missense_Mutation | SNP | G | A | 76  | 177 | c.2480C>T    | c.(2479-2481)CCC>CTC | p.P827L      |
| Pat_01 | Post-Resistance | EP400    | 57634  | 37 | 12 | 132514687 | 132514687 | Missense_Mutation | SNP | G | A | 5   | 407 | c.5738G>A    | c.(5737-5739)AGC>AAC | p.S1913N     |
| Pat_01 | Post-Resistance | LATS2    | 26524  | 37 | 13 | 21562822  | 21562822  | Missense_Mutation | SNP | G | A | 34  | 121 | c.1097C>T    | c.(1096-1098)TCC>TTC | p.S366F      |
| Pat_01 | Post-Resistance | FLT3     | 2322   | 37 | 13 | 28636067  | 28636067  | Missense_Mutation | SNP | G | A | 42  | 171 | c.305C>T     | c.(304-306)TCC>TTC   | p.S102F      |
| Pat_01 | Post-Resistance | FRY      | 10129  | 37 | 13 | 32810251  | 32810251  | Missense_Mutation | SNP | G | A | 6   | 321 | c.5752G>A    | c.(5752-5754)GCT>ACT | p.A1918T     |
| Pat_01 | Post-Resistance | BRCA2    | 675    | 37 | 13 | 32905117  | 32905117  | Missense_Mutation | SNP | C | T | 36  | 97  | c.743C>T     | c.(742-744)GCT>GTT   | p.A248V      |
| Pat_01 | Post-Resistance | ELF1     | 1997   | 37 | 13 | 41508063  | 41508063  | Missense_Mutation | SNP | G | C | 9   | 764 | c.1358C>G    | c.(1357-1359)GCC>GGC | p.A453G      |
| Pat_01 | Post-Resistance | SPERT    | 220082 | 37 | 13 | 46287918  | 46287918  | Missense_Mutation | SNP | A | T | 8   | 10  | c.758A>T     | c.(757-759)GAG>GTG   | p.E253V      |

|        |                 |          |        |    |    |           |           |                   |     |    |    |     |     |                 |                      |               |
|--------|-----------------|----------|--------|----|----|-----------|-----------|-------------------|-----|----|----|-----|-----|-----------------|----------------------|---------------|
| Pat_01 | Post-Resistance | NEK3     | 4752   | 37 | 13 | 52718870  | 52718870  | Nonsense_Mutation | SNP | G  | A  | 39  | 138 | c.760C>T        | c.(760-762)CGA>TGA   | p.R254*       |
| Pat_01 | Post-Resistance | THSD1    | 55901  | 37 | 13 | 52972272  | 52972272  | Missense_Mutation | SNP | T  | C  | 116 | 347 | c.116A>G        | c.(115-117)AAC>AGC   | p.N39S        |
| Pat_01 | Post-Resistance | C13orf34 | 79866  | 37 | 13 | 73303124  | 73303124  | Missense_Mutation | SNP | C  | T  | 111 | 305 | c.46C>T         | c.(46-48)CCA>TCA     | p.P16S        |
| Pat_01 | Post-Resistance | TMTC4    | 84899  | 37 | 13 | 101315255 | 101315255 | Missense_Mutation | SNP | G  | A  | 5   | 327 | c.458C>T        | c.(457-459)GCG>GTG   | p.A153V       |
| Pat_01 | Post-Resistance | ERCC5    | 2073   | 37 | 13 | 103528102 | 103528103 | Missense_Mutation | DNP | CC | TT | 28  | 75  | ..3410_3411CC>T | c.(3409-3411)CCC>CTT | p.P1137L      |
| Pat_01 | Post-Resistance | GAS6     | 2621   | 37 | 13 | 114537621 | 114537621 | Missense_Mutation | SNP | C  | T  | 4   | 130 | c.737G>A        | c.(736-738)CGC>CAC   | p.R246H       |
| Pat_01 | Post-Resistance | POTEG    | 404785 | 37 | 14 | 19574211  | 19574211  | Missense_Mutation | SNP | G  | A  | 14  | 154 | c.1268G>A       | c.(1267-1269)GGA>GAA | p.G423E       |
| Pat_01 | Post-Resistance | OR4N2    | 390429 | 37 | 14 | 20295951  | 20295951  | Missense_Mutation | SNP | T  | G  | 98  | 605 | c.344T>G        | c.(343-345)CTT>CGT   | p.L115R       |
| Pat_01 | Post-Resistance | EDDM3B   | 64184  | 37 | 14 | 21238594  | 21238594  | Nonsense_Mutation | SNP | G  | A  | 73  | 214 | c.285G>A        | c.(283-285)TGG>TGA   | p.W95*        |
| Pat_01 | Post-Resistance | SUPT16H  | 11198  | 37 | 14 | 21820896  | 21820896  | Missense_Mutation | SNP | G  | A  | 99  | 284 | c.3080C>T       | c.(3079-3081)TCG>TTG | p.S1027L      |
| Pat_01 | Post-Resistance | MYH7     | 4625   | 37 | 14 | 23885002  | 23885002  | Missense_Mutation | SNP | C  | T  | 4   | 181 | c.4993G>A       | c.(4993-4995)GAC>AAC | p.D1665N      |
| Pat_01 | Post-Resistance | TGM1     | 7051   | 37 | 14 | 24727800  | 24727800  | Missense_Mutation | SNP | C  | A  | 4   | 166 | c.1239G>T       | c.(1237-1239)ATG>ATT | p.M413I       |
| Pat_01 | Post-Resistance | NYNRIN   | 57523  | 37 | 14 | 24886179  | 24886179  | Missense_Mutation | SNP | C  | T  | 15  | 36  | c.5224C>T       | c.(5224-5226)CCT>TCT | p.P1742S      |
| Pat_01 | Post-Resistance | NOVA1    | 4857   | 37 | 14 | 26949277  | 26949277  | Missense_Mutation | SNP | T  | C  | 149 | 334 | c.353A>G        | c.(352-354)GAA>GGA   | p.E118G       |
| Pat_01 | Post-Resistance | ARHGAP5  | 394    | 37 | 14 | 32560909  | 32560909  | Missense_Mutation | SNP | C  | T  | 61  | 170 | c.1034C>T       | c.(1033-1035)GCT>GTT | p.A345V       |
| Pat_01 | Post-Resistance | MIA2     | 117153 | 37 | 14 | 39716382  | 39716382  | Missense_Mutation | SNP | G  | A  | 77  | 270 | c.604G>A        | c.(604-606)GAA>AAA   | p.E202K       |
| Pat_01 | Post-Resistance | SYT16    | 83851  | 37 | 14 | 62463164  | 62463164  | Missense_Mutation | SNP | G  | A  | 88  | 258 | c.427G>A        | c.(427-429)GAA>AAA   | p.E143K       |
| Pat_01 | Post-Resistance | ZFYVE26  | 23503  | 37 | 14 | 68233053  | 68233053  | Missense_Mutation | SNP | G  | A  | 77  | 259 | c.5902C>T       | c.(5902-5904)CCA>TCA | p.P1968S      |
| Pat_01 | Post-Resistance | SIPA1L1  | 26037  | 37 | 14 | 72176309  | 72176309  | Missense_Mutation | SNP | G  | A  | 39  | 155 | c.4199G>A       | c.(4198-4200)AGC>AAC | p.S1400N      |
| Pat_01 | Post-Resistance | DCAF4    | 26094  | 37 | 14 | 73404717  | 73404717  | Nonsense_Mutation | SNP | C  | T  | 5   | 196 | c.31C>T         | c.(31-33)CGA>TGA     | p.R11*        |
| Pat_01 | Post-Resistance | NUMB     | 8650   | 37 | 14 | 73750939  | 73750939  | Missense_Mutation | SNP | G  | A  | 97  | 218 | c.799C>T        | c.(799-801)CCA>TCA   | p.P267S       |
| Pat_01 | Post-Resistance | KCNK10   | 54207  | 37 | 14 | 88693861  | 88693861  | Missense_Mutation | SNP | G  | A  | 212 | 163 | c.524C>T        | c.(523-525)CCG>CTG   | p.P175L       |
| Pat_01 | Post-Resistance | ZC3H14   | 79882  | 37 | 14 | 89078090  | 89078090  | Missense_Mutation | SNP | G  | A  | 5   | 465 | c.2206G>A       | c.(2206-2208)GAA>AAA | p.E736K       |
| Pat_01 | Post-Resistance | CCDC88C  | 440193 | 37 | 14 | 91744472  | 91744472  | Missense_Mutation | SNP | G  | A  | 4   | 50  | c.4852C>T       | c.(4852-4854)CGG>TGG | p.R1618W      |
| Pat_01 | Post-Resistance | FBLN5    | 10516  | 37 | 14 | 92353657  | 92353657  | Splice_Site       | SNP | C  | T  | 212 | 193 | c.620_splice    | c.e7-1               | p.D207_splice |
| Pat_01 | Post-Resistance | C15orf2  | 23742  | 37 | 15 | 24923518  | 24923518  | Missense_Mutation | SNP | T  | C  | 95  | 195 | c.2504T>C       | c.(2503-2505)ATC>ACC | p.I835T       |
| Pat_01 | Post-Resistance | RYR3     | 6263   | 37 | 15 | 33954496  | 33954496  | Missense_Mutation | SNP | C  | T  | 12  | 36  | c.4765C>T       | c.(4765-4767)CTC>TTC | p.L1589F      |
| Pat_01 | Post-Resistance | EIF2AK4  | 440275 | 37 | 15 | 40241377  | 40241377  | Missense_Mutation | SNP | C  | T  | 179 | 577 | c.421C>T        | c.(421-423)CCT>TCT   | p.P141S       |
| Pat_01 | Post-Resistance | PLA2G4F  | 255189 | 37 | 15 | 42442639  | 42442639  | Missense_Mutation | SNP | C  | T  | 21  | 113 | c.817G>A        | c.(817-819)GAG>AAG   | p.E273K       |
| Pat_01 | Post-Resistance | CGNL1    | 84952  | 37 | 15 | 57730330  | 57730330  | Missense_Mutation | SNP | C  | T  | 75  | 245 | c.133C>T        | c.(133-135)CGG>TGG   | p.R45W        |
| Pat_01 | Post-Resistance | CGNL1    | 84952  | 37 | 15 | 57731143  | 57731143  | Missense_Mutation | SNP | G  | A  | 63  | 219 | c.946G>A        | c.(946-948)GAT>AAT   | p.D316N       |
| Pat_01 | Post-Resistance | RNF111   | 54778  | 37 | 15 | 59376341  | 59376341  | Missense_Mutation | SNP | C  | T  | 5   | 268 | c.2311C>T       | c.(2311-2313)CGC>TGC | p.R771C       |
| Pat_01 | Post-Resistance | ZNF609   | 23060  | 37 | 15 | 64966162  | 64966162  | Missense_Mutation | SNP | G  | A  | 6   | 464 | c.1109G>A       | c.(1108-1110)GGT>GAT | p.G370D       |
| Pat_01 | Post-Resistance | IQCH     | 64799  | 37 | 15 | 67681327  | 67681327  | Missense_Mutation | SNP | G  | A  | 87  | 370 | c.1615G>A       | c.(1615-1617)GCT>ACT | p.A539T       |
| Pat_01 | Post-Resistance | TLE3     | 7090   | 37 | 15 | 70347482  | 70347482  | Missense_Mutation | SNP | G  | A  | 4   | 263 | c.1493C>T       | c.(1492-1494)ACG>ATG | p.T498M       |
| Pat_01 | Post-Resistance | IL16     | 3603   | 37 | 15 | 81552144  | 81552144  | Missense_Mutation | SNP | C  | T  | 108 | 198 | c.344C>T        | c.(343-345)CCT>CTT   | p.P115L       |
| Pat_01 | Post-Resistance | IL16     | 3603   | 37 | 15 | 81584930  | 81584930  | Missense_Mutation | SNP | G  | A  | 4   | 210 | c.1454G>A       | c.(1453-1455)CGG>CAG | p.R485Q       |
| Pat_01 | Post-Resistance | AP3B2    | 8120   | 37 | 15 | 83334325  | 83334325  | Missense_Mutation | SNP | G  | A  | 4   | 258 | c.1855C>T       | c.(1855-1857)CGG>TGG | p.R619W       |
| Pat_01 | Post-Resistance | BNC1     | 646    | 37 | 15 | 83932525  | 83932525  | Missense_Mutation | SNP | C  | T  | 4   | 219 | c.1478G>A       | c.(1477-1479)CGC>CAC | p.R493H       |
| Pat_01 | Post-Resistance | BLM      | 641    | 37 | 15 | 91312750  | 91312750  | Missense_Mutation | SNP | C  | T  | 5   | 193 | c.2489C>T       | c.(2488-2490)ACG>ATG | p.T830M       |
| Pat_01 | Post-Resistance | MAN2A2   | 4122   | 37 | 15 | 91450665  | 91450665  | Missense_Mutation | SNP | G  | A  | 5   | 281 | c.1136G>A       | c.(1135-1137)CGC>CAC | p.R379H       |
| Pat_01 | Post-Resistance | RCCD1    | 91433  | 37 | 15 | 91504926  | 91504926  | Missense_Mutation | SNP | A  | G  | 142 | 264 | c.1058A>G       | c.(1057-1059)CAA>CGA | p.Q353R       |
| Pat_01 | Post-Resistance | MCTP2    | 55784  | 37 | 15 | 94913329  | 94913329  | Missense_Mutation | SNP | C  | T  | 77  | 200 | c.1502C>T       | c.(1501-1503)TCC>TTC | p.S501F       |
| Pat_01 | Post-Resistance | CACNA1H  | 8912   | 37 | 16 | 1270224   | 1270224   | Missense_Mutation | SNP | G  | A  | 10  | 42  | c.6292G>A       | c.(6292-6294)GAC>AAC | p.D2098N      |
| Pat_01 | Post-Resistance | TELO2    | 9894   | 37 | 16 | 1556291   | 1556292   | Missense_Mutation | DNP | CC | TT | 99  | 337 | ..2087_2088CC>T | c.(2086-2088)GCC>GTT | p.A696V       |
| Pat_01 | Post-Resistance | C16orf90 | 646174 | 37 | 16 | 3544626   | 3544626   | Missense_Mutation | SNP | C  | T  | 14  | 70  | c.298G>A        | c.(298-300)GCC>ACC   | p.A100T       |
| Pat_01 | Post-Resistance | ABAT     | 18     | 37 | 16 | 8870303   | 8870303   | Missense_Mutation | SNP | G  | A  | 4   | 167 | c.1225G>A       | c.(1225-1227)GCC>ACC | p.A409T       |

|        |                 |          |        |    |    |          |          |                   |     |    |    |     |     |              |                        |          |
|--------|-----------------|----------|--------|----|----|----------|----------|-------------------|-----|----|----|-----|-----|--------------|------------------------|----------|
| Pat_01 | Post-Resistance | GRIN2A   | 2903   | 37 | 16 | 9916133  | 9916133  | Missense_Mutation | SNP | C  | T  | 49  | 381 | c.2156G>A    | c.(2155-2157)AGC>AAC   | p.S719N  |
| Pat_01 | Post-Resistance | NUBP1    | 4682   | 37 | 16 | 10855287 | 10855287 | Missense_Mutation | SNP | G  | A  | 5   | 431 | c.673G>A     | c.(673-675)GGG>AGG     | p.G225R  |
| Pat_01 | Post-Resistance | ERN2     | 10595  | 37 | 16 | 23703591 | 23703591 | Missense_Mutation | SNP | C  | T  | 4   | 118 | c.2306G>A    | c.(2305-2307)AGC>AAC   | p.S769N  |
| Pat_01 | Post-Resistance | SRCAP    | 10847  | 37 | 16 | 30734010 | 30734010 | Missense_Mutation | SNP | C  | T  | 244 | 407 | c.3833C>T    | c.(3832-3834)TCG>TTG   | p.S1278L |
| Pat_01 | Post-Resistance | PHKB     | 5257   | 37 | 16 | 47683017 | 47683017 | Missense_Mutation | SNP | C  | T  | 87  | 163 | c.1699C>T    | c.(1699-1701)CGC>TGC   | p.R567C  |
| Pat_01 | Post-Resistance | CES2     | 8824   | 37 | 16 | 66974428 | 66974428 | Nonsense_Mutation | SNP | G  | T  | 6   | 360 | c.838G>T     | c.(838-840)GGA>TGA     | p.G280*  |
| Pat_01 | Post-Resistance | ACD      | 65057  | 37 | 16 | 67694117 | 67694117 | Missense_Mutation | SNP | C  | T  | 5   | 184 | c.265G>A     | c.(265-267)GGT>AGT     | p.G89S   |
| Pat_01 | Post-Resistance | HSD17B2  | 3294   | 37 | 16 | 82069273 | 82069273 | Nonsense_Mutation | SNP | C  | T  | 134 | 444 | c.244C>T     | c.(244-246)CAG>TAG     | p.Q82*   |
| Pat_01 | Post-Resistance | SPG7     | 6687   | 37 | 16 | 89592858 | 89592858 | Missense_Mutation | SNP | G  | A  | 5   | 408 | c.740G>A     | c.(739-741)CGA>CAA     | p.R247Q  |
| Pat_01 | Post-Resistance | PAFAH1B1 | 5048   | 37 | 17 | 2583545  | 2583545  | Missense_Mutation | SNP | G  | A  | 6   | 659 | c.1090G>A    | c.(1090-1092)GTA>ATA   | p.V364I  |
| Pat_01 | Post-Resistance | SHBG     | 6462   | 37 | 17 | 7536230  | 7536230  | Missense_Mutation | SNP | A  | T  | 17  | 48  | c.1013A>T    | c.(1012-1014)AAC>ATC   | p.N338I  |
| Pat_01 | Post-Resistance | DNAH2    | 146754 | 37 | 17 | 7727448  | 7727448  | Missense_Mutation | SNP | G  | A  | 87  | 241 | c.11488G>A   | c.(11488-11490)GAT>AAT | p.D3830N |
| Pat_01 | Post-Resistance | DNAH2    | 146754 | 37 | 17 | 7735904  | 7735904  | Missense_Mutation | SNP | C  | A  | 7   | 680 | c.12734C>A   | c.(12733-12735)CCC>CAC | p.P4245H |
| Pat_01 | Post-Resistance | MYH4     | 4622   | 37 | 17 | 10357171 | 10357171 | Missense_Mutation | SNP | C  | T  | 114 | 349 | c.2723G>A    | c.(2722-2724)AGA>AAA   | p.R908K  |
| Pat_01 | Post-Resistance | MYH4     | 4622   | 37 | 17 | 10363572 | 10363572 | Missense_Mutation | SNP | G  | A  | 120 | 339 | c.1214C>T    | c.(1213-1215)CCC>CTC   | p.P405L  |
| Pat_01 | Post-Resistance | MAP2K4   | 6416   | 37 | 17 | 11998959 | 11998959 | Missense_Mutation | SNP | G  | T  | 6   | 711 | c.461G>T     | c.(460-462)CGG>CTG     | p.R154L  |
| Pat_01 | Post-Resistance | NCOR1    | 9611   | 37 | 17 | 15973659 | 15973659 | Missense_Mutation | SNP | G  | A  | 5   | 291 | c.4333C>T    | c.(4333-4335)CGT>TGT   | p.R1445C |
| Pat_01 | Post-Resistance | FLII     | 2314   | 37 | 17 | 18151015 | 18151015 | Missense_Mutation | SNP | G  | A  | 3   | 42  | c.2443C>T    | c.(2443-2445)CGC>TGC   | p.R815C  |
| Pat_01 | Post-Resistance | KCNJ12   | 3768   | 37 | 17 | 21319835 | 21319835 | Missense_Mutation | SNP | G  | A  | 13  | 119 | c.1181G>A    | c.(1180-1182)GGA>GAA   | p.G394E  |
| Pat_01 | Post-Resistance | MYO18A   | 399687 | 37 | 17 | 27493378 | 27493378 | Missense_Mutation | SNP | G  | A  | 73  | 205 | c.581C>T     | c.(580-582)CCT>CTT     | p.P194L  |
| Pat_01 | Post-Resistance | EVI2B    | 2124   | 37 | 17 | 29632188 | 29632188 | Missense_Mutation | SNP | G  | A  | 7   | 861 | c.440C>T     | c.(439-441)ACT>ATT     | p.T147I  |
| Pat_01 | Post-Resistance | SLFN11   | 91607  | 37 | 17 | 33679659 | 33679659 | Missense_Mutation | SNP | C  | T  | 25  | 55  | c.2422G>A    | c.(2422-2424)GAT>AAT   | p.D808N  |
| Pat_01 | Post-Resistance | KRT20    | 54474  | 37 | 17 | 39036935 | 39036935 | Missense_Mutation | SNP | T  | A  | 67  | 176 | c.561A>T     | c.(559-561)AAA>AAT     | p.K187N  |
| Pat_01 | Post-Resistance | TTC25    | 83538  | 37 | 17 | 40101446 | 40101446 | Missense_Mutation | SNP | G  | A  | 26  | 58  | c.1115G>A    | c.(1114-1116)AGA>AAA   | p.R372K  |
| Pat_01 | Post-Resistance | NKIRAS2  | 28511  | 37 | 17 | 40175718 | 40175718 | Missense_Mutation | SNP | G  | A  | 4   | 270 | c.383G>A     | c.(382-384)CGG>CAG     | p.R128Q  |
| Pat_01 | Post-Resistance | ATP6V0A1 | 535    | 37 | 17 | 40642652 | 40642652 | Missense_Mutation | SNP | C  | T  | 37  | 122 | c.1171C>T    | c.(1171-1173)CCA>TCA   | p.P391S  |
| Pat_01 | Post-Resistance | RAMP2    | 10266  | 37 | 17 | 40914839 | 40914839 | Nonsense_Mutation | SNP | G  | A  | 54  | 168 | c.497G>A     | c.(496-498)TGG>TAG     | p.W166*  |
| Pat_01 | Post-Resistance | MPP2     | 4355   | 37 | 17 | 41960323 | 41960323 | Missense_Mutation | SNP | G  | A  | 5   | 359 | c.536C>T     | c.(535-537)CCT>CTT     | p.P179L  |
| Pat_01 | Post-Resistance | TLL6     | 284076 | 37 | 17 | 46862461 | 46862461 | Missense_Mutation | SNP | G  | A  | 49  | 146 | c.1864C>T    | c.(1864-1866)CCC>TCC   | p.P622S  |
| Pat_01 | Post-Resistance | WFIKKN2  | 124857 | 37 | 17 | 48918261 | 48918261 | Missense_Mutation | SNP | G  | A  | 54  | 89  | c.1612G>A    | c.(1612-1614)GCC>ACC   | p.A538T  |
| Pat_01 | Post-Resistance | UTP18    | 51096  | 37 | 17 | 49337947 | 49337947 | Missense_Mutation | SNP | T  | C  | 3   | 56  | c.2T>C       | c.(1-3)ATG>ACG         | p.M1T    |
| Pat_01 | Post-Resistance | TMEM100  | 55273  | 37 | 17 | 53798217 | 53798217 | Missense_Mutation | SNP | G  | A  | 5   | 204 | c.215C>T     | c.(214-216)ACC>ATC     | p.T72I   |
| Pat_01 | Post-Resistance | PPM1E    | 22843  | 37 | 17 | 57046948 | 57046948 | Missense_Mutation | SNP | G  | A  | 122 | 288 | c.832G>A     | c.(832-834)GTA>ATA     | p.V278I  |
| Pat_01 | Post-Resistance | MRC2     | 9902   | 37 | 17 | 60766309 | 60766309 | Nonsense_Mutation | SNP | C  | T  | 21  | 53  | c.3322C>T    | c.(3322-3324)CAG>TAG   | p.Q1108* |
| Pat_01 | Post-Resistance | ABCA9    | 10350  | 37 | 17 | 67045529 | 67045529 | Missense_Mutation | SNP | G  | A  | 5   | 421 | c.199C>T     | c.(199-201)CGT>TGT     | p.R67C   |
| Pat_01 | Post-Resistance | CD300E   | 342510 | 37 | 17 | 72613523 | 72613523 | Missense_Mutation | SNP | A  | G  | 26  | 99  | c.122T>C     | c.(121-123)ATG>ACG     | p.M41T   |
| Pat_01 | Post-Resistance | ACOX1    | 51     | 37 | 17 | 73953636 | 73953636 | Nonsense_Mutation | SNP | G  | A  | 4   | 186 | c.442C>T     | c.(442-444)CGA>TGA     | p.R148*  |
| Pat_01 | Post-Resistance | BAHCC1   | 57597  | 37 | 17 | 79425454 | 79425454 | Missense_Mutation | SNP | G  | A  | 3   | 31  | c.5305G>A    | c.(5305-5307)GCC>ACC   | p.A1769T |
| Pat_01 | Post-Resistance | PYCR1    | 5831   | 37 | 17 | 79892944 | 79892944 | Missense_Mutation | SNP | G  | A  | 4   | 81  | c.398C>T     | c.(397-399)ACC>ATC     | p.T133I  |
| Pat_01 | Post-Resistance | UTS2R    | 2837   | 37 | 17 | 80332543 | 80332543 | Missense_Mutation | SNP | G  | C  | 3   | 92  | c.343G>C     | c.(343-345)GAG>CAG     | p.E115Q  |
| Pat_01 | Post-Resistance | DSG2     | 1829   | 37 | 18 | 29104411 | 29104411 | Missense_Mutation | SNP | G  | A  | 76  | 288 | c.691G>A     | c.(691-693)GAA>AAA     | p.E231K  |
| Pat_01 | Post-Resistance | TCEB3B   | 51224  | 37 | 18 | 44560359 | 44560359 | Missense_Mutation | SNP | G  | A  | 40  | 98  | c.1277C>T    | c.(1276-1278)TCG>TTG   | p.S426L  |
| Pat_01 | Post-Resistance | DCC      | 1630   | 37 | 18 | 50432696 | 50432696 | Missense_Mutation | SNP | C  | T  | 75  | 257 | c.695C>T     | c.(694-696)TCA>TTA     | p.S232L  |
| Pat_01 | Post-Resistance | ALPK2    | 115701 | 37 | 18 | 56246968 | 56246968 | Missense_Mutation | SNP | T  | C  | 104 | 322 | c.1040A>G    | c.(1039-1041)AAC>AGC   | p.N347S  |
| Pat_01 | Post-Resistance | ZNF407   | 55628  | 37 | 18 | 72589239 | 72589239 | Missense_Mutation | SNP | C  | T  | 56  | 174 | c.4964C>T    | c.(4963-4965)CCG>CTG   | p.P1655L |
| Pat_01 | Post-Resistance | SALL3    | 27164  | 37 | 18 | 76757027 | 76757027 | Missense_Mutation | SNP | G  | A  | 4   | 231 | c.3608G>A    | c.(3607-3609)CGG>CAG   | p.R1203Q |
| Pat_01 | Post-Resistance | WDR18    | 57418  | 37 | 19 | 984364   | 984365   | Missense_Mutation | DNP | CC | TT | 16  | 19  | c.11_12CC>TT | c.(10-12)CCC>CTT       | p.P4L    |

|        |                 |          |           |    |    |          |          |                   |     |    |    |     |     |                |                        |           |
|--------|-----------------|----------|-----------|----|----|----------|----------|-------------------|-----|----|----|-----|-----|----------------|------------------------|-----------|
| Pat_01 | Post-Resistance | GPX4     | 2879      | 37 | 19 | 1105450  | 1105450  | Nonsense_Mutation | SNP | C  | T  | 4   | 219 | c.265C>T       | c.(265-267)CGA>TGA     | p.R89*    |
| Pat_01 | Post-Resistance | ZNF556   | 80032     | 37 | 19 | 2878101  | 2878101  | Missense_Mutation | SNP | C  | T  | 37  | 56  | c.1145C>T      | c.(1144-1146)TCC>TTC   | p.S382F   |
| Pat_01 | Post-Resistance | ADAMTS10 | 81794     | 37 | 19 | 8670136  | 8670136  | Missense_Mutation | SNP | G  | A  | 3   | 29  | c.196C>T       | c.(196-198)CGC>TGC     | p.R66C    |
| Pat_01 | Post-Resistance | MUC16    | 94025     | 37 | 19 | 8959682  | 8959682  | Missense_Mutation | SNP | C  | T  | 22  | 38  | c.43450G>A     | c.(43450-43452)GAA>AAA | p.E14484K |
| Pat_01 | Post-Resistance | MUC16    | 94025     | 37 | 19 | 9016716  | 9016716  | Missense_Mutation | SNP | C  | T  | 22  | 52  | c.38021G>A     | c.(38020-38022)GGG>GAC | p.G12674E |
| Pat_01 | Post-Resistance | MUC16    | 94025     | 37 | 19 | 9066120  | 9066120  | Missense_Mutation | SNP | G  | A  | 3   | 92  | c.21326C>T     | c.(21325-21327)CCT>CTT | p.P7109L  |
| Pat_01 | Post-Resistance | MUC16    | 94025     | 37 | 19 | 9068104  | 9068104  | Missense_Mutation | SNP | G  | T  | 5   | 342 | c.19342C>A     | c.(19342-19344)CAA>AAA | p.Q6448K  |
| Pat_01 | Post-Resistance | ZNF559   | 84527     | 37 | 19 | 9452752  | 9452752  | Missense_Mutation | SNP | G  | A  | 4   | 185 | c.625G>A       | c.(625-627)GGA>AGA     | p.G209R   |
| Pat_01 | Post-Resistance | ECSIT    | 51295     | 37 | 19 | 11624916 | 11624916 | Nonsense_Mutation | SNP | C  | A  | 4   | 58  | c.217G>T       | c.(217-219)GAG>TAG     | p.E73*    |
| Pat_01 | Post-Resistance | KLF1     | 10661     | 37 | 19 | 12997929 | 12997929 | Missense_Mutation | SNP | G  | A  | 5   | 329 | c.26C>T        | c.(25-27)CCC>CTC       | p.P9L     |
| Pat_01 | Post-Resistance | RAD23A   | 5886      | 37 | 19 | 13059604 | 13059604 | Nonsense_Mutation | SNP | C  | T  | 5   | 383 | c.577C>T       | c.(577-579)CGA>TGA     | p.R193*   |
| Pat_01 | Post-Resistance | TPM4     | 7171      | 37 | 19 | 16178496 | 16178496 | Missense_Mutation | SNP | G  | A  | 9   | 224 | c.62G>A        | c.(61-63)CGC>CAC       | p.R21H    |
| Pat_01 | Post-Resistance | UNC13A   | 23025     | 37 | 19 | 17743703 | 17743703 | Missense_Mutation | SNP | G  | A  | 35  | 87  | c.3580C>T      | c.(3580-3582)CGT>TGT   | p.R1194C  |
| Pat_01 | Post-Resistance | UNC13A   | 23025     | 37 | 19 | 17750670 | 17750671 | Missense_Mutation | DNP | CC | TT | 33  | 160 | .3098_3099GG>A | c.(3097-3099)CGG>CAA   | p.R1033Q  |
| Pat_01 | Post-Resistance | ZNF737   | 100129842 | 37 | 19 | 20728113 | 20728113 | Missense_Mutation | SNP | A  | T  | 4   | 54  | c.896T>A       | c.(895-897)ATC>AAC     | p.I299N   |
| Pat_01 | Post-Resistance | ZNF737   | 100129842 | 37 | 19 | 20728170 | 20728170 | Missense_Mutation | SNP | G  | C  | 3   | 63  | c.839C>G       | c.(838-840)ACT>AGT     | p.T280S   |
| Pat_01 | Post-Resistance | ZNF430   | 80264     | 37 | 19 | 21240468 | 21240468 | Missense_Mutation | SNP | A  | T  | 4   | 108 | c.1354A>T      | c.(1354-1356)ACT>TCT   | p.T452S   |
| Pat_01 | Post-Resistance | ZNF492   | 57615     | 37 | 19 | 22846958 | 22846958 | Missense_Mutation | SNP | C  | T  | 5   | 16  | c.487C>T       | c.(487-489)CAT>TAT     | p.H163Y   |
| Pat_01 | Post-Resistance | ZNF99    | 7652      | 37 | 19 | 22939868 | 22939868 | Missense_Mutation | SNP | C  | G  | 57  | 93  | c.2463G>C      | c.(2461-2463)AAG>AAC   | p.K821N   |
| Pat_01 | Post-Resistance | UQCRFS1  | 7386      | 37 | 19 | 29698570 | 29698570 | Missense_Mutation | SNP | G  | A  | 49  | 165 | c.710C>T       | c.(709-711)CCT>CTT     | p.P237L   |
| Pat_01 | Post-Resistance | SLC7A9   | 11136     | 37 | 19 | 33355618 | 33355618 | Missense_Mutation | SNP | G  | A  | 70  | 240 | c.152C>T       | c.(151-153)TCC>TTC     | p.S51F    |
| Pat_01 | Post-Resistance | HPN      | 3249      | 37 | 19 | 35551379 | 35551379 | Missense_Mutation | SNP | G  | C  | 4   | 348 | c.583G>C       | c.(583-585)GGG>CGG     | p.G195R   |
| Pat_01 | Post-Resistance | HPN      | 3249      | 37 | 19 | 35551596 | 35551596 | Missense_Mutation | SNP | G  | A  | 65  | 173 | c.686G>A       | c.(685-687)GGT>GAT     | p.G229D   |
| Pat_01 | Post-Resistance | USF2     | 7392      | 37 | 19 | 35769642 | 35769642 | Missense_Mutation | SNP | C  | A  | 7   | 600 | c.769C>A       | c.(769-771)CAG>AAG     | p.Q257K   |
| Pat_01 | Post-Resistance | RBM42    | 79171     | 37 | 19 | 36122254 | 36122254 | Missense_Mutation | SNP | G  | A  | 4   | 346 | c.389G>A       | c.(388-390)CGG>CAG     | p.R130Q   |
| Pat_01 | Post-Resistance | RBM42    | 79171     | 37 | 19 | 36125267 | 36125267 | Nonsense_Mutation | SNP | G  | A  | 3   | 51  | c.1127G>A      | c.(1126-1128)TGG>TAG   | p.W376*   |
| Pat_01 | Post-Resistance | NPHS1    | 4868      | 37 | 19 | 36322215 | 36322215 | Missense_Mutation | SNP | C  | T  | 42  | 163 | c.3370G>A      | c.(3370-3372)GAC>AAC   | p.D1124N  |
| Pat_01 | Post-Resistance | NPHS1    | 4868      | 37 | 19 | 36333452 | 36333452 | Missense_Mutation | SNP | C  | T  | 30  | 99  | c.2335G>A      | c.(2335-2337)GGA>AGA   | p.G779R   |
| Pat_01 | Post-Resistance | ZNF585B  | 92285     | 37 | 19 | 37677499 | 37677499 | Nonsense_Mutation | SNP | G  | A  | 100 | 371 | c.940C>T       | c.(940-942)CAG>TAG     | p.Q314*   |
| Pat_01 | Post-Resistance | ZNF283   | 284349    | 37 | 19 | 44351864 | 44351864 | Missense_Mutation | SNP | G  | T  | 5   | 272 | c.1111G>T      | c.(1111-1113)GGT>TGT   | p.G371C   |
| Pat_01 | Post-Resistance | ZNF229   | 7772      | 37 | 19 | 44933887 | 44933888 | Missense_Mutation | DNP | CC | TT | 57  | 190 | .1068_1069GG>A | J366-1071)AAGGGG>AAA/  | p.G357R   |
| Pat_01 | Post-Resistance | KLC3     | 147700    | 37 | 19 | 45852115 | 45852115 | Missense_Mutation | SNP | G  | A  | 5   | 11  | c.905G>A       | c.(904-906)GGG>GAG     | p.G302E   |
| Pat_01 | Post-Resistance | SYMPK    | 8189      | 37 | 19 | 46326698 | 46326698 | Missense_Mutation | SNP | G  | A  | 4   | 198 | c.2632C>T      | c.(2632-2634)CGG>TGG   | p.R878W   |
| Pat_01 | Post-Resistance | EHD2     | 30846     | 37 | 19 | 48220167 | 48220167 | Missense_Mutation | SNP | G  | A  | 4   | 142 | c.298G>A       | c.(298-300)GTC>ATC     | p.V100I   |
| Pat_01 | Post-Resistance | FAM83E   | 54854     | 37 | 19 | 49104526 | 49104526 | Missense_Mutation | SNP | G  | A  | 8   | 22  | c.1277C>T      | c.(1276-1278)CCG>CTG   | p.P426L   |
| Pat_01 | Post-Resistance | PTH2     | 113091    | 37 | 19 | 49926533 | 49926533 | Missense_Mutation | SNP | G  | C  | 3   | 82  | c.64C>G        | c.(64-66)CTG>GTG       | p.L22V    |
| Pat_01 | Post-Resistance | MED25    | 81857     | 37 | 19 | 50335400 | 50335400 | Missense_Mutation | SNP | C  | T  | 22  | 51  | c.1360C>T      | c.(1360-1362)CCC>TCC   | p.P454S   |
| Pat_01 | Post-Resistance | SPIB     | 6689      | 37 | 19 | 50926223 | 50926223 | Missense_Mutation | SNP | G  | A  | 83  | 231 | c.268G>A       | c.(268-270)GAA>AAA     | p.E90K    |
| Pat_01 | Post-Resistance | MYBPC2   | 4606      | 37 | 19 | 50939283 | 50939283 | Missense_Mutation | SNP | G  | A  | 3   | 23  | c.211G>A       | c.(211-213)GTC>ATC     | p.V71I    |
| Pat_01 | Post-Resistance | SHANK1   | 50944     | 37 | 19 | 51191261 | 51191261 | Missense_Mutation | SNP | G  | A  | 60  | 189 | c.2227C>T      | c.(2227-2229)CGC>TGC   | p.R743C   |
| Pat_01 | Post-Resistance | GPR32    | 2854      | 37 | 19 | 51274491 | 51274491 | Missense_Mutation | SNP | G  | A  | 21  | 91  | c.634G>A       | c.(634-636)GGA>AGA     | p.G212R   |
| Pat_01 | Post-Resistance | ZNF614   | 80110     | 37 | 19 | 52519785 | 52519785 | Missense_Mutation | SNP | G  | A  | 5   | 333 | c.1066C>T      | c.(1066-1068)CGC>TGC   | p.R356C   |
| Pat_01 | Post-Resistance | ZNF578   | 147660    | 37 | 19 | 53014565 | 53014565 | Missense_Mutation | SNP | G  | A  | 5   | 252 | c.931G>A       | c.(931-933)GGT>AGT     | p.G311S   |
| Pat_01 | Post-Resistance | ZNF845   | 91664     | 37 | 19 | 53856702 | 53856702 | Missense_Mutation | SNP | G  | A  | 12  | 96  | c.2774G>A      | c.(2773-2775)CGT>CAT   | p.R925H   |
| Pat_01 | Post-Resistance | LILRB5   | 10990     | 37 | 19 | 54759200 | 54759200 | Missense_Mutation | SNP | G  | A  | 41  | 143 | c.901C>T       | c.(901-903)CTC>TTC     | p.L301F   |
| Pat_01 | Post-Resistance | NLRP2    | 55655     | 37 | 19 | 55494049 | 55494049 | Missense_Mutation | SNP | C  | T  | 6   | 36  | c.983C>T       | c.(982-984)CCC>CTC     | p.P328L   |
| Pat_01 | Post-Resistance | SUV420H2 | 84787     | 37 | 19 | 55854192 | 55854192 | Missense_Mutation | SNP | G  | A  | 4   | 296 | c.359G>A       | c.(358-360)GGG>GAG     | p.G120E   |



|        |                 |          |        |    |    |           |           |                   |     |    |    |     |     |                |                        |               |
|--------|-----------------|----------|--------|----|----|-----------|-----------|-------------------|-----|----|----|-----|-----|----------------|------------------------|---------------|
| Pat_01 | Post-Resistance | ZNF581   | 51545  | 37 | 19 | 56156401  | 56156401  | Missense_Mutation | SNP | G  | A  | 4   | 413 | c.464G>A       | c.(463-465)CGG>CAG     | p.R155Q       |
| Pat_01 | Post-Resistance | USP29    | 57663  | 37 | 19 | 57642039  | 57642039  | Missense_Mutation | SNP | G  | A  | 27  | 60  | c.1996G>A      | c.(1996-1998)GGA>AGA   | p.G666R       |
| Pat_01 | Post-Resistance | RSAD2    | 91543  | 37 | 2  | 7030435   | 7030435   | Missense_Mutation | SNP | G  | T  | 5   | 232 | c.867G>T       | c.(865-867)TTG>TTT     | p.L289F       |
| Pat_01 | Post-Resistance | NBAS     | 51594  | 37 | 2  | 15601422  | 15601422  | Missense_Mutation | SNP | G  | T  | 5   | 392 | c.2242C>A      | c.(2242-2244)CAT>AAT   | p.H748N       |
| Pat_01 | Post-Resistance | FAM179A  | 165186 | 37 | 2  | 29222211  | 29222211  | Nonsense_Mutation | SNP | C  | T  | 3   | 42  | c.304C>T       | c.(304-306)CAG>TAG     | p.Q102*       |
| Pat_01 | Post-Resistance | SRD5A2   | 6716   | 37 | 2  | 31756517  | 31756517  | Missense_Mutation | SNP | C  | T  | 6   | 12  | c.471G>A       | c.(469-471)ATG>ATA     | p.M157I       |
| Pat_01 | Post-Resistance | SOS1     | 6654   | 37 | 2  | 39213333  | 39213333  | Missense_Mutation | SNP | G  | A  | 140 | 521 | c.3634C>T      | c.(3634-3636)CCC>TCC   | p.P1212S      |
| Pat_01 | Post-Resistance | EFEMP1   | 2202   | 37 | 2  | 56108861  | 56108861  | Missense_Mutation | SNP | C  | T  | 200 | 492 | c.526G>A       | c.(526-528)GAG>AAG     | p.E176K       |
| Pat_01 | Post-Resistance | FAM161A  | 84140  | 37 | 2  | 62081080  | 62081080  | Missense_Mutation | SNP | C  | T  | 44  | 123 | c.97G>A        | c.(97-99)GAA>AAA       | p.E33K        |
| Pat_01 | Post-Resistance | SEMA4F   | 10505  | 37 | 2  | 74906728  | 74906728  | Missense_Mutation | SNP | C  | T  | 6   | 817 | c.1705C>T      | c.(1705-1707)CGT>TGT   | p.R569C       |
| Pat_01 | Post-Resistance | C2orf3   | 6936   | 37 | 2  | 75916281  | 75916281  | Missense_Mutation | SNP | A  | C  | 90  | 232 | c.1410T>G      | c.(1408-1410)ATT>ATG   | p.I470M       |
| Pat_01 | Post-Resistance | REV1     | 51455  | 37 | 2  | 100020202 | 100020203 | Missense_Mutation | DNP | CT | TC | 114 | 397 | .3121_3122AG>G | c.(3121-3123)AGG>GAG   | p.R1041E      |
| Pat_01 | Post-Resistance | PSD4     | 23550  | 37 | 2  | 113940340 | 113940340 | Missense_Mutation | SNP | G  | A  | 5   | 76  | c.307G>A       | c.(307-309)GAT>AAT     | p.D103N       |
| Pat_01 | Post-Resistance | PSD4     | 23550  | 37 | 2  | 113940344 | 113940344 | Missense_Mutation | SNP | C  | T  | 5   | 73  | c.311C>T       | c.(310-312)GCT>GTT     | p.A104V       |
| Pat_01 | Post-Resistance | ARHGAP15 | 55843  | 37 | 2  | 144276883 | 144276883 | Missense_Mutation | SNP | C  | T  | 137 | 455 | c.875C>T       | c.(874-876)TCC>TTC     | p.S292F       |
| Pat_01 | Post-Resistance | NEB      | 4703   | 37 | 2  | 152518729 | 152518729 | Missense_Mutation | SNP | G  | A  | 54  | 123 | c.5890C>T      | c.(5890-5892)CCA>TCA   | p.P1964S      |
| Pat_01 | Post-Resistance | CACNB4   | 785    | 37 | 2  | 152727103 | 152727103 | Missense_Mutation | SNP | T  | G  | 36  | 131 | c.641A>C       | c.(640-642)GAT>GCT     | p.D214A       |
| Pat_01 | Post-Resistance | BAZ2B    | 29994  | 37 | 2  | 160242971 | 160242971 | Nonsense_Mutation | SNP | G  | A  | 146 | 501 | c.3364C>T      | c.(3364-3366)CAA>TAA   | p.Q1122*      |
| Pat_01 | Post-Resistance | KCNH7    | 90134  | 37 | 2  | 163693083 | 163693083 | Missense_Mutation | SNP | C  | T  | 40  | 132 | c.271G>A       | c.(271-273)GAG>AAG     | p.E91K        |
| Pat_01 | Post-Resistance | SCN3A    | 6328   | 37 | 2  | 165946757 | 165946757 | Missense_Mutation | SNP | G  | A  | 10  | 37  | c.5906C>T      | c.(5905-5907)TCC>TTC   | p.S1969F      |
| Pat_01 | Post-Resistance | LRP2     | 4036   | 37 | 2  | 170044739 | 170044739 | Missense_Mutation | SNP | G  | T  | 5   | 421 | c.9069C>A      | c.(9067-9069)GAC>GAA   | p.D3023E      |
| Pat_01 | Post-Resistance | PPIG     | 9360   | 37 | 2  | 170463619 | 170463619 | Missense_Mutation | SNP | G  | A  | 158 | 507 | c.250G>A       | c.(250-252)GGA>AGA     | p.G84R        |
| Pat_01 | Post-Resistance | DCAF17   | 80067  | 37 | 2  | 172306454 | 172306454 | Missense_Mutation | SNP | C  | A  | 5   | 313 | c.524C>A       | c.(523-525)GCA>GAA     | p.A175E       |
| Pat_01 | Post-Resistance | OSBPL6   | 114880 | 37 | 2  | 179213981 | 179213981 | Missense_Mutation | SNP | C  | T  | 239 | 568 | c.1018C>T      | c.(1018-1020)CGC>TGC   | p.R340C       |
| Pat_01 | Post-Resistance | TTN      | 7273   | 37 | 2  | 179400097 | 179400097 | Missense_Mutation | SNP | C  | T  | 96  | 240 | c.93541G>A     | c.(93541-93543)GTG>ATC | p.V31181M     |
| Pat_01 | Post-Resistance | TTN      | 7273   | 37 | 2  | 179413669 | 179413669 | Missense_Mutation | SNP | C  | T  | 5   | 336 | c.84980G>A     | c.(84979-84981)CGA>CAA | p.R28327Q     |
| Pat_01 | Post-Resistance | TTN      | 7273   | 37 | 2  | 179426716 | 179426716 | Missense_Mutation | SNP | A  | T  | 26  | 69  | c.76439T>A     | c.(76438-76440)ATT>AAT | p.I25480N     |
| Pat_01 | Post-Resistance | TTN      | 7273   | 37 | 2  | 179612027 | 179612027 | Missense_Mutation | SNP | C  | T  | 46  | 152 | c.15100G>A     | c.(15100-15102)GAA>AAA | p.E5034K      |
| Pat_01 | Post-Resistance | TTN      | 7273   | 37 | 2  | 179613066 | 179613066 | Missense_Mutation | SNP | C  | T  | 79  | 216 | c.14061G>A     | c.(14059-14061)ATG>ATA | p.M4687I      |
| Pat_01 | Post-Resistance | CCDC141  | 285025 | 37 | 2  | 179736940 | 179736940 | Missense_Mutation | SNP | G  | A  | 4   | 212 | c.274C>T       | c.(274-276)CGG>TGG     | p.R92W        |
| Pat_01 | Post-Resistance | WDR12    | 55759  | 37 | 2  | 203757384 | 203757384 | Nonsense_Mutation | SNP | G  | A  | 105 | 285 | c.697C>T       | c.(697-699)CGA>TGA     | p.R233*       |
| Pat_01 | Post-Resistance | ABI2     | 10152  | 37 | 2  | 204260420 | 204260420 | Missense_Mutation | SNP | G  | A  | 5   | 425 | c.767G>A       | c.(766-768)AGC>AAC     | p.S256N       |
| Pat_01 | Post-Resistance | ABCA12   | 26154  | 37 | 2  | 215866284 | 215866284 | Missense_Mutation | SNP | C  | T  | 139 | 425 | c.2861G>A      | c.(2860-2862)GGA>GAA   | p.G954E       |
| Pat_01 | Post-Resistance | GLB1L    | 79411  | 37 | 2  | 220101964 | 220101964 | Missense_Mutation | SNP | G  | A  | 4   | 283 | c.1795C>T      | c.(1795-1797)CTC>TTC   | p.L599F       |
| Pat_01 | Post-Resistance | GLB1L    | 79411  | 37 | 2  | 220104504 | 220104504 | Missense_Mutation | SNP | C  | A  | 4   | 238 | c.773G>T       | c.(772-774)GGG>GTG     | p.G258V       |
| Pat_01 | Post-Resistance | PTPRN    | 5798   | 37 | 2  | 220162747 | 220162747 | Missense_Mutation | SNP | C  | A  | 4   | 259 | c.1747G>T      | c.(1747-1749)GCC>TCC   | p.A583S       |
| Pat_01 | Post-Resistance | ALPI     | 248    | 37 | 2  | 233323569 | 233323569 | Splice_Site       | SNP | G  | A  | 11  | 24  | c.1301_splice  | c.e11-1                | p.G434_splice |
| Pat_01 | Post-Resistance | DNAJB3   | 414061 | 37 | 2  | 234652346 | 234652346 | Missense_Mutation | SNP | C  | T  | 72  | 243 | c.217G>A       | c.(217-219)GCG>ACG     | p.A73T        |
| Pat_01 | Post-Resistance | COL6A3   | 1293   | 37 | 2  | 238267865 | 238267865 | Missense_Mutation | SNP | C  | T  | 75  | 279 | c.6338G>A      | c.(6337-6339)GGT>GAT   | p.G2113D      |
| Pat_01 | Post-Resistance | RAMP1    | 10267  | 37 | 2  | 238785940 | 238785940 | Missense_Mutation | SNP | C  | A  | 5   | 330 | c.127C>A       | c.(127-129)CAG>AAG     | p.Q43K        |
| Pat_01 | Post-Resistance | RNPEPL1  | 57140  | 37 | 2  | 241515022 | 241515022 | Missense_Mutation | SNP | G  | A  | 4   | 112 | c.812G>A       | c.(811-813)CGG>CAG     | p.R271Q       |
| Pat_01 | Post-Resistance | BOK      | 666    | 37 | 2  | 242501783 | 242501783 | Missense_Mutation | SNP | C  | T  | 4   | 179 | c.241C>T       | c.(241-243)CGG>TGG     | p.R81W        |
| Pat_01 | Post-Resistance | DEFB125  | 245938 | 37 | 20 | 76798     | 76798     | Missense_Mutation | SNP | C  | T  | 190 | 466 | c.211C>T       | c.(211-213)CCT>TCT     | p.P71S        |
| Pat_01 | Post-Resistance | TGM3     | 7053   | 37 | 20 | 2291716   | 2291716   | Missense_Mutation | SNP | G  | A  | 5   | 411 | c.481G>A       | c.(481-483)GGC>AGC     | p.G161S       |
| Pat_01 | Post-Resistance | FASTKD5  | 60493  | 37 | 20 | 3128950   | 3128950   | Missense_Mutation | SNP | C  | T  | 14  | 34  | c.767G>A       | c.(766-768)CGC>CAC     | p.R256H       |
| Pat_01 | Post-Resistance | ATRN     | 8455   | 37 | 20 | 3543099   | 3543099   | Missense_Mutation | SNP | C  | A  | 5   | 326 | c.1624C>A      | c.(1624-1626)CAG>AAG   | p.Q542K       |
| Pat_01 | Post-Resistance | PLCB4    | 5332   | 37 | 20 | 9404512   | 9404512   | Missense_Mutation | SNP | C  | T  | 48  | 127 | c.2401C>T      | c.(2401-2403)CTT>TTT   | p.L801F       |

|        |                 |           |        |    |    |          |          |                   |     |    |    |     |     |                |                      |               |
|--------|-----------------|-----------|--------|----|----|----------|----------|-------------------|-----|----|----|-----|-----|----------------|----------------------|---------------|
| Pat_01 | Post-Resistance | PAK7      | 57144  | 37 | 20 | 9561331  | 9561331  | Missense_Mutation | SNP | G  | A  | 164 | 504 | c.451C>T       | c.(451-453)CTC>TTC   | p.L151F       |
| Pat_01 | Post-Resistance | PYGB      | 5834   | 37 | 20 | 25255312 | 25255312 | Missense_Mutation | SNP | G  | A  | 5   | 518 | c.613G>A       | c.(613-615)GGA>AGA   | p.G205R       |
| Pat_01 | Post-Resistance | FRG1B     | 284802 | 37 | 20 | 29625885 | 29625885 | Missense_Mutation | SNP | A  | T  | 5   | 249 | c.39A>T        | c.(37-39)AAA>AAT     | p.K13N        |
| Pat_01 | Post-Resistance | ASXL1     | 171023 | 37 | 20 | 31023766 | 31023766 | Missense_Mutation | SNP | G  | A  | 4   | 208 | c.3251G>A      | c.(3250-3252)AGT>AAT | p.S1084N      |
| Pat_01 | Post-Resistance | DNMT3B    | 1789   | 37 | 20 | 31385087 | 31385087 | Missense_Mutation | SNP | G  | A  | 6   | 230 | c.1472G>A      | c.(1471-1473)AGC>AAC | p.S491N       |
| Pat_01 | Post-Resistance | CBFA2T2   | 9139   | 37 | 20 | 32194875 | 32194875 | Missense_Mutation | SNP | C  | T  | 77  | 226 | c.175C>T       | c.(175-177)CCG>TCG   | p.P59S        |
| Pat_01 | Post-Resistance | PLCG1     | 5335   | 37 | 20 | 39793679 | 39793679 | Missense_Mutation | SNP | G  | A  | 4   | 103 | c.1324G>A      | c.(1324-1326)GTG>ATG | p.V442M       |
| Pat_01 | Post-Resistance | PTPRT     | 11122  | 37 | 20 | 40735458 | 40735458 | Missense_Mutation | SNP | G  | A  | 5   | 307 | c.3358C>T      | c.(3358-3360)CGG>TGG | p.R1120W      |
| Pat_01 | Post-Resistance | C20orf111 | 51526  | 37 | 20 | 42825898 | 42825898 | Missense_Mutation | SNP | G  | A  | 46  | 147 | c.673C>T       | c.(673-675)CCC>TCC   | p.P225S       |
| Pat_01 | Post-Resistance | ZMYND8    | 23613  | 37 | 20 | 45905157 | 45905157 | Missense_Mutation | SNP | G  | A  | 4   | 171 | c.1321C>T      | c.(1321-1323)CAC>TAC | p.H441Y       |
| Pat_01 | Post-Resistance | TSHZ2     | 128553 | 37 | 20 | 51872939 | 51872939 | Missense_Mutation | SNP | C  | T  | 24  | 66  | c.2942C>T      | c.(2941-2943)CCA>CTA | p.P981L       |
| Pat_01 | Post-Resistance | RAE1      | 8480   | 37 | 20 | 55948597 | 55948597 | Missense_Mutation | SNP | G  | A  | 6   | 305 | c.709G>A       | c.(709-711)GAG>AAG   | p.E237K       |
| Pat_01 | Post-Resistance | CDH26     | 60437  | 37 | 20 | 58567473 | 58567473 | Missense_Mutation | SNP | G  | A  | 4   | 163 | c.1324G>A      | c.(1324-1326)GAC>AAC | p.D442N       |
| Pat_01 | Post-Resistance | TPTE      | 7179   | 37 | 21 | 10942755 | 10942755 | Missense_Mutation | SNP | C  | T  | 97  | 694 | c.686G>A       | c.(685-687)CGA>CAA   | p.R229Q       |
| Pat_01 | Post-Resistance | DSCAM     | 1826   | 37 | 21 | 42080568 | 42080568 | Missense_Mutation | SNP | C  | A  | 111 | 490 | c.173G>T       | c.(172-174)TGG>TTG   | p.W58L        |
| Pat_01 | Post-Resistance | PWP2      | 5822   | 37 | 21 | 45545973 | 45545973 | Missense_Mutation | SNP | G  | A  | 4   | 208 | c.2047G>A      | c.(2047-2049)GCG>ACG | p.A683T       |
| Pat_01 | Post-Resistance | KRTAP10-8 | 386681 | 37 | 21 | 46032171 | 46032171 | Missense_Mutation | SNP | G  | A  | 44  | 150 | c.154G>A       | c.(154-156)GAG>AAG   | p.E52K        |
| Pat_01 | Post-Resistance | PCNT      | 5116   | 37 | 21 | 47836365 | 47836365 | Missense_Mutation | SNP | C  | T  | 66  | 312 | c.6533C>T      | c.(6532-6534)CCC>CTC | p.P2178L      |
| Pat_01 | Post-Resistance | POTEH     | 23784  | 37 | 22 | 16267070 | 16267070 | Missense_Mutation | SNP | C  | T  | 44  | 716 | c.1379G>A      | c.(1378-1380)GGA>GAA | p.G460E       |
| Pat_01 | Post-Resistance | CCT8L2    | 150160 | 37 | 22 | 17072146 | 17072147 | Missense_Mutation | DNP | CC | TT | 20  | 67  | .1294_1295GG>A | c.(1294-1296)GGG>AAG | p.G432K       |
| Pat_01 | Post-Resistance | EMID1     | 129080 | 37 | 22 | 29630293 | 29630293 | Splice_Site       | SNP | G  | A  | 24  | 66  | c.1024_splice  | c.e12-1              | p.G342_splice |
| Pat_01 | Post-Resistance | MTMR3     | 8897   | 37 | 22 | 30415933 | 30415933 | Missense_Mutation | SNP | C  | T  | 95  | 174 | c.2285C>T      | c.(2284-2286)TCA>TTA | p.S762L       |
| Pat_01 | Post-Resistance | CCDC157   | 550631 | 37 | 22 | 30772519 | 30772519 | Missense_Mutation | SNP | C  | T  | 9   | 651 | c.2044C>T      | c.(2044-2046)CCT>TCT | p.P682S       |
| Pat_01 | Post-Resistance | DEPDC5    | 9681   | 37 | 22 | 32200858 | 32200858 | Missense_Mutation | SNP | C  | T  | 222 | 471 | c.1174C>T      | c.(1174-1176)CGT>TGT | p.R392C       |
| Pat_01 | Post-Resistance | TOM1      | 10043  | 37 | 22 | 35719804 | 35719804 | Missense_Mutation | SNP | G  | A  | 6   | 335 | c.545G>A       | c.(544-546)GGC>GAC   | p.G182D       |
| Pat_01 | Post-Resistance | RASD2     | 23551  | 37 | 22 | 35947904 | 35947904 | Missense_Mutation | SNP | G  | A  | 35  | 102 | c.626G>A       | c.(625-627)GGT>GAT   | p.G209D       |
| Pat_01 | Post-Resistance | MYH9      | 4627   | 37 | 22 | 36680543 | 36680543 | Missense_Mutation | SNP | G  | A  | 4   | 171 | c.5498C>T      | c.(5497-5499)GCC>GTC | p.A1833V      |
| Pat_01 | Post-Resistance | TRIOBP    | 11078  | 37 | 22 | 38119860 | 38119860 | Missense_Mutation | SNP | G  | A  | 4   | 236 | c.1297G>A      | c.(1297-1299)GCC>ACC | p.A433T       |
| Pat_01 | Post-Resistance | ADSL      | 158    | 37 | 22 | 40757531 | 40757531 | Nonsense_Mutation | SNP | C  | A  | 6   | 516 | c.902C>A       | c.(901-903)TCA>TAA   | p.S301*       |
| Pat_01 | Post-Resistance | XRCC6     | 2547   | 37 | 22 | 42032630 | 42032630 | Missense_Mutation | SNP | G  | A  | 5   | 355 | c.445G>A       | c.(445-447)GTC>ATC   | p.V149I       |
| Pat_01 | Post-Resistance | SERHL2    | 253190 | 37 | 22 | 42956229 | 42956229 | Missense_Mutation | SNP | G  | A  | 4   | 260 | c.571G>A       | c.(571-573)GGG>AGG   | p.G191R       |
| Pat_01 | Post-Resistance | SETMAR    | 6419   | 37 | 3  | 4354792  | 4354792  | Nonsense_Mutation | SNP | C  | T  | 4   | 138 | c.367C>T       | c.(367-369)CGA>TGA   | p.R123*       |
| Pat_01 | Post-Resistance | ITPR1     | 3708   | 37 | 3  | 4725218  | 4725218  | Missense_Mutation | SNP | C  | T  | 47  | 100 | c.3283C>T      | c.(3283-3285)CTC>TTC | p.L1095F      |
| Pat_01 | Post-Resistance | OXTR      | 5021   | 37 | 3  | 8809536  | 8809536  | Missense_Mutation | SNP | C  | T  | 4   | 116 | c.338G>A       | c.(337-339)CGC>CAC   | p.R113H       |
| Pat_01 | Post-Resistance | ATG7      | 10533  | 37 | 3  | 11399971 | 11399971 | Missense_Mutation | SNP | G  | A  | 5   | 350 | c.1364G>A      | c.(1363-1365)CGC>CAC | p.R455H       |
| Pat_01 | Post-Resistance | CAND2     | 23066  | 37 | 3  | 12869077 | 12869077 | Missense_Mutation | SNP | G  | A  | 5   | 361 | c.3349G>A      | c.(3349-3351)GGG>AGG | p.G1117R      |
| Pat_01 | Post-Resistance | FGD5      | 152273 | 37 | 3  | 14974174 | 14974174 | Missense_Mutation | SNP | C  | T  | 60  | 270 | c.4288C>T      | c.(4288-4290)CAC>TAC | p.H1430Y      |
| Pat_01 | Post-Resistance | KAT2B     | 8850   | 37 | 3  | 20167436 | 20167436 | Missense_Mutation | SNP | G  | A  | 6   | 635 | c.1453G>A      | c.(1453-1455)GCA>ACA | p.A485T       |
| Pat_01 | Post-Resistance | FBXL2     | 25827  | 37 | 3  | 33427035 | 33427035 | Missense_Mutation | SNP | G  | A  | 6   | 701 | c.1207G>A      | c.(1207-1209)GTC>ATC | p.V403I       |
| Pat_01 | Post-Resistance | CLASP2    | 23122  | 37 | 3  | 33704961 | 33704961 | Missense_Mutation | SNP | C  | T  | 4   | 350 | c.691G>A       | c.(691-693)GGT>AGT   | p.G231S       |
| Pat_01 | Post-Resistance | TRANK1    | 9881   | 37 | 3  | 36873315 | 36873315 | Missense_Mutation | SNP | G  | A  | 4   | 257 | c.5977C>T      | c.(5977-5979)CGC>TGC | p.R1993C      |
| Pat_01 | Post-Resistance | TRANK1    | 9881   | 37 | 3  | 36893807 | 36893807 | Missense_Mutation | SNP | C  | T  | 6   | 29  | c.2797G>A      | c.(2797-2799)GAT>AAT | p.D933N       |
| Pat_01 | Post-Resistance | VILL      | 50853  | 37 | 3  | 38043308 | 38043308 | Missense_Mutation | SNP | C  | A  | 58  | 208 | c.1436C>A      | c.(1435-1437)CCC>CAC | p.P479H       |
| Pat_01 | Post-Resistance | DLEC1     | 9940   | 37 | 3  | 38134291 | 38134292 | Missense_Mutation | DNP | CC | TT | 43  | 232 | .1676_1677CC>T | c.(1675-1677)TCC>TTT | p.S559F       |
| Pat_01 | Post-Resistance | SCN10A    | 6336   | 37 | 3  | 38740026 | 38740026 | Missense_Mutation | SNP | G  | A  | 45  | 148 | c.4685C>T      | c.(4684-4686)TCA>TTA | p.S1562L      |
| Pat_01 | Post-Resistance | MYRIP     | 25924  | 37 | 3  | 40251444 | 40251444 | Missense_Mutation | SNP | G  | A  | 53  | 149 | c.1765G>A      | c.(1765-1767)GAG>AAG | p.E589K       |
| Pat_01 | Post-Resistance | TRAK1     | 22906  | 37 | 3  | 42243999 | 42243999 | Missense_Mutation | SNP | G  | A  | 22  | 57  | c.1499G>A      | c.(1498-1500)AGG>AAG | p.R500K       |

|        |                 |          |        |    |   |           |           |                   |     |   |   |     |     |            |                        |          |
|--------|-----------------|----------|--------|----|---|-----------|-----------|-------------------|-----|---|---|-----|-----|------------|------------------------|----------|
| Pat_01 | Post-Resistance | ANO10    | 55129  | 37 | 3 | 43642014  | 43642014  | Nonsense_Mutation | SNP | G | A | 6   | 262 | c.199C>T   | c.(199-201)CAG>TAG     | p.Q67*   |
| Pat_01 | Post-Resistance | CCR1     | 1230   | 37 | 3 | 46244880  | 46244880  | Missense_Mutation | SNP | G | A | 37  | 119 | c.925C>T   | c.(925-927)CGG>TGG     | p.R309W  |
| Pat_01 | Post-Resistance | KLHL18   | 23276  | 37 | 3 | 47324519  | 47324519  | Missense_Mutation | SNP | A | T | 27  | 32  | c.64A>T    | c.(64-66)AGT>TGT       | p.S22C   |
| Pat_01 | Post-Resistance | COL7A1   | 1294   | 37 | 3 | 48606836  | 48606836  | Missense_Mutation | SNP | C | A | 5   | 383 | c.7658G>T  | c.(7657-7659)CGG>CTG   | p.R2553L |
| Pat_01 | Post-Resistance | BSN      | 8927   | 37 | 3 | 49689975  | 49689975  | Missense_Mutation | SNP | C | T | 20  | 69  | c.2986C>T  | c.(2986-2988)CCC>TCC   | p.P996S  |
| Pat_01 | Post-Resistance | DNAH1    | 25981  | 37 | 3 | 52387600  | 52387600  | Missense_Mutation | SNP | G | A | 3   | 37  | c.3431G>A  | c.(3430-3432)AGC>AAC   | p.S1144N |
| Pat_01 | Post-Resistance | DNAH1    | 25981  | 37 | 3 | 52428596  | 52428596  | Missense_Mutation | SNP | C | T | 4   | 161 | c.10742C>T | c.(10741-10743)CCA>CTA | p.P3581L |
| Pat_01 | Post-Resistance | PHF7     | 51533  | 37 | 3 | 52456871  | 52456871  | Missense_Mutation | SNP | A | G | 4   | 460 | c.893A>G   | c.(892-894)GAG>GGG     | p.E298G  |
| Pat_01 | Post-Resistance | ROBO1    | 6091   | 37 | 3 | 78696802  | 78696802  | Missense_Mutation | SNP | G | A | 6   | 776 | c.2816C>T  | c.(2815-2817)CCG>CTG   | p.P939L  |
| Pat_01 | Post-Resistance | OR5H15   | 403274 | 37 | 3 | 97887907  | 97887907  | Missense_Mutation | SNP | C | T | 123 | 398 | c.364C>T   | c.(364-366)CGC>TGC     | p.R122C  |
| Pat_01 | Post-Resistance | COL8A1   | 1295   | 37 | 3 | 99514930  | 99514930  | Missense_Mutation | SNP | G | A | 47  | 131 | c.2185G>A  | c.(2185-2187)GGG>AGG   | p.G729R  |
| Pat_01 | Post-Resistance | HHLA2    | 11148  | 37 | 3 | 108072466 | 108072466 | Missense_Mutation | SNP | C | T | 37  | 155 | c.257C>T   | c.(256-258)CCC>CTC     | p.P86L   |
| Pat_01 | Post-Resistance | C3orf30  | 152405 | 37 | 3 | 118865259 | 118865259 | Missense_Mutation | SNP | G | A | 49  | 127 | c.223G>A   | c.(223-225)GTA>ATA     | p.V75I   |
| Pat_01 | Post-Resistance | PARP9    | 83666  | 37 | 3 | 122278457 | 122278457 | Missense_Mutation | SNP | G | A | 120 | 469 | c.11C>T    | c.(10-12)TCC>TTC       | p.S4F    |
| Pat_01 | Post-Resistance | PLXND1   | 23129  | 37 | 3 | 129280710 | 129280710 | Missense_Mutation | SNP | C | T | 4   | 399 | c.4862G>A  | c.(4861-4863)CGG>CAG   | p.R1621Q |
| Pat_01 | Post-Resistance | FAIM     | 55179  | 37 | 3 | 138340328 | 138340328 | Missense_Mutation | SNP | G | A | 105 | 219 | c.58G>A    | c.(58-60)GAA>AAA       | p.E20K   |
| Pat_01 | Post-Resistance | SLC9A9   | 285195 | 37 | 3 | 143292992 | 143292992 | Missense_Mutation | SNP | G | A | 4   | 241 | c.938C>T   | c.(937-939)ACC>ATC     | p.T313I  |
| Pat_01 | Post-Resistance | PLSCR4   | 57088  | 37 | 3 | 145912973 | 145912973 | Missense_Mutation | SNP | G | A | 98  | 300 | c.883C>T   | c.(883-885)CAC>TAC     | p.H295Y  |
| Pat_01 | Post-Resistance | MED12L   | 116931 | 37 | 3 | 151129198 | 151129198 | Missense_Mutation | SNP | G | A | 5   | 468 | c.5938G>A  | c.(5938-5940)GTG>ATG   | p.V1980M |
| Pat_01 | Post-Resistance | IGSF10   | 285313 | 37 | 3 | 151165431 | 151165431 | Missense_Mutation | SNP | G | A | 5   | 215 | c.2338C>T  | c.(2338-2340)CCC>TCC   | p.P780S  |
| Pat_01 | Post-Resistance | SLC2A2   | 6514   | 37 | 3 | 170716922 | 170716922 | Missense_Mutation | SNP | G | A | 113 | 264 | c.1102C>T  | c.(1102-1104)JCT>TTC   | p.L368F  |
| Pat_01 | Post-Resistance | TNFSF10  | 8743   | 37 | 3 | 172227075 | 172227075 | Missense_Mutation | SNP | C | T | 51  | 214 | c.350G>A   | c.(349-351)AGA>AAA     | p.R117K  |
| Pat_01 | Post-Resistance | NCEH1    | 57552  | 37 | 3 | 172351338 | 172351338 | Missense_Mutation | SNP | C | G | 4   | 331 | c.1274G>C  | c.(1273-1275)AGC>ACC   | p.S425T  |
| Pat_01 | Post-Resistance | KCNMB2   | 10242  | 37 | 3 | 178545976 | 178545976 | Missense_Mutation | SNP | G | A | 129 | 355 | c.238G>A   | c.(238-240)GAA>AAA     | p.E80K   |
| Pat_01 | Post-Resistance | FAM131A  | 131408 | 37 | 3 | 184060025 | 184060025 | Missense_Mutation | SNP | G | T | 4   | 229 | c.404G>T   | c.(403-405)CGC>CTC     | p.R135L  |
| Pat_01 | Post-Resistance | EPHB3    | 2049   | 37 | 3 | 184290328 | 184290328 | Missense_Mutation | SNP | C | T | 50  | 135 | c.220C>T   | c.(220-222)CCC>TCC     | p.P74S   |
| Pat_01 | Post-Resistance | TP63     | 8626   | 37 | 3 | 189586470 | 189586470 | Missense_Mutation | SNP | C | T | 127 | 340 | c.1094C>T  | c.(1093-1095)TCG>TTG   | p.S365L  |
| Pat_01 | Post-Resistance | IL1RAP   | 3556   | 37 | 3 | 190338217 | 190338217 | Missense_Mutation | SNP | G | A | 6   | 662 | c.691G>A   | c.(691-693)GTA>ATA     | p.V231I  |
| Pat_01 | Post-Resistance | MUC4     | 4585   | 37 | 3 | 195479245 | 195479245 | Missense_Mutation | SNP | G | A | 5   | 174 | c.15197C>T | c.(15196-15198)TCG>TTC | p.S5066L |
| Pat_01 | Post-Resistance | ZNF721   | 170960 | 37 | 4 | 436628    | 436628    | Missense_Mutation | SNP | A | T | 5   | 345 | c.1628T>A  | c.(1627-1629)ATC>AAC   | p.I543N  |
| Pat_01 | Post-Resistance | ZNF721   | 170960 | 37 | 4 | 436647    | 436647    | Missense_Mutation | SNP | C | T | 9   | 347 | c.1609G>A  | c.(1609-1611)GCC>ACC   | p.A537T  |
| Pat_01 | Post-Resistance | PIGG     | 54872  | 37 | 4 | 509834    | 509834    | Missense_Mutation | SNP | C | T | 4   | 345 | c.974C>T   | c.(973-975)CCG>CTG     | p.P325L  |
| Pat_01 | Post-Resistance | DGKQ     | 1609   | 37 | 4 | 962665    | 962665    | Missense_Mutation | SNP | G | A | 3   | 46  | c.385C>T   | c.(385-387)CTC>TTC     | p.L129F  |
| Pat_01 | Post-Resistance | ZFYVE28  | 57732  | 37 | 4 | 2341259   | 2341259   | Missense_Mutation | SNP | G | A | 3   | 45  | c.442C>T   | c.(442-444)CGG>TGG     | p.R148W  |
| Pat_01 | Post-Resistance | PPARGC1A | 10891  | 37 | 4 | 23815370  | 23815370  | Missense_Mutation | SNP | G | A | 54  | 145 | c.1736C>T  | c.(1735-1737)TCC>TTC   | p.S579F  |
| Pat_01 | Post-Resistance | TLR10    | 81793  | 37 | 4 | 38777051  | 38777051  | Missense_Mutation | SNP | T | G | 47  | 175 | c.161A>C   | c.(160-162)GAT>GCT     | p.D54A   |
| Pat_01 | Post-Resistance | SHISA3   | 152573 | 37 | 4 | 42403461  | 42403461  | Missense_Mutation | SNP | C | T | 62  | 193 | c.710C>T   | c.(709-711)TCC>TTC     | p.S237F  |
| Pat_01 | Post-Resistance | GABRA2   | 2555   | 37 | 4 | 46307695  | 46307695  | Nonsense_Mutation | SNP | C | T | 37  | 116 | c.593G>A   | c.(592-594)TGG>TAG     | p.W198*  |
| Pat_01 | Post-Resistance | CORIN    | 10699  | 37 | 4 | 47647188  | 47647188  | Missense_Mutation | SNP | C | T | 97  | 297 | c.1867G>A  | c.(1867-1869)GAA>AAA   | p.E623K  |
| Pat_01 | Post-Resistance | OCIAD2   | 132299 | 37 | 4 | 48901867  | 48901867  | Missense_Mutation | SNP | C | T | 97  | 293 | c.142G>A   | c.(142-144)GAA>AAA     | p.E48K   |
| Pat_01 | Post-Resistance | LNX1     | 84708  | 37 | 4 | 54364972  | 54364972  | Missense_Mutation | SNP | T | A | 75  | 178 | c.814A>T   | c.(814-816)ATT>TTT     | p.I272F  |
| Pat_01 | Post-Resistance | LPHN3    | 23284  | 37 | 4 | 62903453  | 62903453  | Missense_Mutation | SNP | G | A | 107 | 328 | c.3392G>A  | c.(3391-3393)CGA>CAA   | p.R1131Q |
| Pat_01 | Post-Resistance | UGT2B10  | 7365   | 37 | 4 | 69693259  | 69693259  | Missense_Mutation | SNP | G | A | 103 | 383 | c.1300G>A  | c.(1300-1302)GAT>AAT   | p.D434N  |
| Pat_01 | Post-Resistance | UGT2B7   | 7364   | 37 | 4 | 69962580  | 69962580  | Missense_Mutation | SNP | A | T | 19  | 48  | c.342A>T   | c.(340-342)GAA>GAT     | p.E114D  |
| Pat_01 | Post-Resistance | MUC7     | 4589   | 37 | 4 | 71347138  | 71347138  | Missense_Mutation | SNP | C | T | 14  | 677 | c.677C>T   | c.(676-678)CCA>CTA     | p.P226L  |
| Pat_01 | Post-Resistance | GC       | 2638   | 37 | 4 | 72631267  | 72631267  | Nonsense_Mutation | SNP | G | A | 6   | 394 | c.355C>T   | c.(355-357)CGA>TGA     | p.R119*  |
| Pat_01 | Post-Resistance | ANKRD17  | 26057  | 37 | 4 | 73984530  | 73984530  | Missense_Mutation | SNP | T | C | 179 | 518 | c.4063A>G  | c.(4063-4065)ACT>GCT   | p.T1355A |

|        |                 |          |        |    |   |           |           |                   |     |    |    |     |     |                 |                      |               |
|--------|-----------------|----------|--------|----|---|-----------|-----------|-------------------|-----|----|----|-----|-----|-----------------|----------------------|---------------|
| Pat_01 | Post-Resistance | PPEF2    | 5470   | 37 | 4 | 76787390  | 76787390  | Missense_Mutation | SNP | C  | A  | 5   | 478 | c.1872G>T       | c.(1870-1872)GAG>GAT | p.E624D       |
| Pat_01 | Post-Resistance | GK2      | 2712   | 37 | 4 | 80327902  | 80327902  | Missense_Mutation | SNP | C  | T  | 103 | 261 | c.1453G>A       | c.(1453-1455)GAA>AAA | p.E485K       |
| Pat_01 | Post-Resistance | HERC5    | 51191  | 37 | 4 | 89425504  | 89425504  | Missense_Mutation | SNP | C  | T  | 50  | 224 | c.2704C>T       | c.(2704-2706)CCC>TCC | p.P902S       |
| Pat_01 | Post-Resistance | UNC5C    | 8633   | 37 | 4 | 96104089  | 96104089  | Missense_Mutation | SNP | C  | T  | 122 | 260 | c.2410G>A       | c.(2410-2412)GGA>AGA | p.G804R       |
| Pat_01 | Post-Resistance | EGF      | 1950   | 37 | 4 | 110921002 | 110921002 | Missense_Mutation | SNP | G  | A  | 110 | 292 | c.3173G>A       | c.(3172-3174)AGG>AAG | p.R1058K      |
| Pat_01 | Post-Resistance | ENPEP    | 2028   | 37 | 4 | 111441369 | 111441369 | Splice_Site       | SNP | A  | T  | 4   | 229 | c.1576_splice   | c.e10-2              | p.A526_splice |
| Pat_01 | Post-Resistance | PITX2    | 5308   | 37 | 4 | 111542415 | 111542415 | Missense_Mutation | SNP | C  | T  | 42  | 123 | c.295G>A        | c.(295-297)GAG>AAG   | p.E99K        |
| Pat_01 | Post-Resistance | FAT4     | 79633  | 37 | 4 | 126370224 | 126370224 | Nonsense_Mutation | SNP | C  | T  | 8   | 685 | c.8053C>T       | c.(8053-8055)CGA>TGA | p.R2685*      |
| Pat_01 | Post-Resistance | ELMOD2   | 255520 | 37 | 4 | 141461344 | 141461344 | Missense_Mutation | SNP | C  | T  | 4   | 136 | c.422C>T        | c.(421-423)ACG>ATG   | p.T141M       |
| Pat_01 | Post-Resistance | DCHS2    | 54798  | 37 | 4 | 155157358 | 155157358 | Missense_Mutation | SNP | G  | A  | 128 | 337 | c.7081C>T       | c.(7081-7083)CAT>TAT | p.H2361Y      |
| Pat_01 | Post-Resistance | DCHS2    | 54798  | 37 | 4 | 155298407 | 155298407 | Missense_Mutation | SNP | C  | T  | 73  | 245 | c.424G>A        | c.(424-426)GGG>AGG   | p.G142R       |
| Pat_01 | Post-Resistance | CLCN3    | 1182   | 37 | 4 | 170613292 | 170613292 | Missense_Mutation | SNP | A  | T  | 67  | 310 | c.757A>T        | c.(757-759)ATC>TTC   | p.I253F       |
| Pat_01 | Post-Resistance | ASB5     | 140458 | 37 | 4 | 177138062 | 177138062 | Missense_Mutation | SNP | C  | T  | 5   | 451 | c.769G>A        | c.(769-771)GCA>ACA   | p.A257T       |
| Pat_01 | Post-Resistance | ASB5     | 140458 | 37 | 4 | 177190238 | 177190238 | Missense_Mutation | SNP | G  | A  | 91  | 272 | c.22C>T         | c.(22-24)CGG>TGG     | p.R8W         |
| Pat_01 | Post-Resistance | ODZ3     | 55714  | 37 | 4 | 183652119 | 183652119 | Missense_Mutation | SNP | C  | T  | 56  | 130 | c.2794C>T       | c.(2794-2796)CCA>TCA | p.P932S       |
| Pat_01 | Post-Resistance | STOX2    | 56977  | 37 | 4 | 184930961 | 184930961 | Missense_Mutation | SNP | G  | A  | 3   | 36  | c.970G>A        | c.(970-972)GTG>ATG   | p.V324M       |
| Pat_01 | Post-Resistance | FAM149A  | 25854  | 37 | 4 | 187086560 | 187086560 | Missense_Mutation | SNP | C  | T  | 6   | 246 | c.1106C>T       | c.(1105-1107)CCG>CTG | p.P369L       |
| Pat_01 | Post-Resistance | C5orf23  | 79614  | 37 | 5 | 32789844  | 32789844  | Missense_Mutation | SNP | G  | A  | 5   | 364 | c.337G>A        | c.(337-339)GTC>ATC   | p.V113I       |
| Pat_01 | Post-Resistance | CAPSL    | 133690 | 37 | 5 | 35904702  | 35904702  | Missense_Mutation | SNP | G  | A  | 149 | 412 | c.572C>T        | c.(571-573)TCC>TTC   | p.S191F       |
| Pat_01 | Post-Resistance | EGFLAM   | 133584 | 37 | 5 | 38431379  | 38431379  | Missense_Mutation | SNP | G  | A  | 4   | 219 | c.2155G>A       | c.(2155-2157)GGA>AGA | p.G719R       |
| Pat_01 | Post-Resistance | HEATR7B2 | 133558 | 37 | 5 | 41042300  | 41042300  | Nonsense_Mutation | SNP | C  | T  | 10  | 11  | c.1847G>A       | c.(1846-1848)TGG>TAG | p.W616*       |
| Pat_01 | Post-Resistance | C5orf34  | 375444 | 37 | 5 | 43509374  | 43509374  | Missense_Mutation | SNP | G  | A  | 82  | 195 | c.68C>T         | c.(67-69)TCC>TTC     | p.S23F        |
| Pat_01 | Post-Resistance | SKIV2L2  | 23517  | 37 | 5 | 54662656  | 54662656  | Missense_Mutation | SNP | C  | T  | 103 | 393 | c.1763C>T       | c.(1762-1764)TCC>TTC | p.S588F       |
| Pat_01 | Post-Resistance | MAST4    | 375449 | 37 | 5 | 66460811  | 66460812  | Missense_Mutation | DNP | CC | AT | 12  | 46  | .:5237_5238CC>A | c.(5236-5238)CCC>CAT | p.P1746H      |
| Pat_01 | Post-Resistance | ZFYVE16  | 9765   | 37 | 5 | 79770564  | 79770564  | Missense_Mutation | SNP | G  | A  | 4   | 206 | c.4376G>A       | c.(4375-4377)AGT>AAT | p.S1459N      |
| Pat_01 | Post-Resistance | RASA1    | 5921   | 37 | 5 | 86685291  | 86685291  | Missense_Mutation | SNP | G  | A  | 9   | 653 | c.3007G>A       | c.(3007-3009)GTG>ATG | p.V1003M      |
| Pat_01 | Post-Resistance | TTC37    | 9652   | 37 | 5 | 94833154  | 94833154  | Missense_Mutation | SNP | C  | T  | 4   | 207 | c.3602G>A       | c.(3601-3603)CGA>CAA | p.R1201Q      |
| Pat_01 | Post-Resistance | CAST     | 831    | 37 | 5 | 96086361  | 96086361  | Nonsense_Mutation | SNP | C  | A  | 6   | 254 | c.1250C>A       | c.(1249-1251)TCA>TAA | p.S417*       |
| Pat_01 | Post-Resistance | C5orf13  | 9315   | 37 | 5 | 111066622 | 111066622 | Missense_Mutation | SNP | A  | G  | 121 | 331 | c.203T>C        | c.(202-204)TTT>TCT   | p.F68S        |
| Pat_01 | Post-Resistance | LOX      | 4015   | 37 | 5 | 121412595 | 121412595 | Missense_Mutation | SNP | G  | T  | 6   | 313 | c.733C>A        | c.(733-735)CTG>ATG   | p.L245M       |
| Pat_01 | Post-Resistance | SLC27A6  | 28965  | 37 | 5 | 128364084 | 128364084 | Missense_Mutation | SNP | G  | A  | 76  | 256 | c.1501G>A       | c.(1501-1503)GGA>AGA | p.G501R       |
| Pat_01 | Post-Resistance | CHSY3    | 337876 | 37 | 5 | 129520415 | 129520415 | Missense_Mutation | SNP | G  | A  | 4   | 244 | c.1580G>A       | c.(1579-1581)CGC>CAC | p.R527H       |
| Pat_01 | Post-Resistance | ACSL6    | 23305  | 37 | 5 | 131308419 | 131308419 | Nonsense_Mutation | SNP | G  | A  | 65  | 237 | c.1261C>T       | c.(1261-1263)CAG>TAG | p.Q421*       |
| Pat_01 | Post-Resistance | HSPA9    | 3313   | 37 | 5 | 137892158 | 137892158 | Missense_Mutation | SNP | C  | T  | 6   | 760 | c.1945G>A       | c.(1945-1947)GAA>AAA | p.E649K       |
| Pat_01 | Post-Resistance | PCDHB10  | 56126  | 37 | 5 | 140574481 | 140574481 | Missense_Mutation | SNP | G  | A  | 40  | 89  | c.2356G>A       | c.(2356-2358)GAA>AAA | p.E786K       |
| Pat_01 | Post-Resistance | PCDHGA2  | 56113  | 37 | 5 | 140718983 | 140718983 | Missense_Mutation | SNP | G  | A  | 60  | 191 | c.445G>A        | c.(445-447)GGA>AGA   | p.G149R       |
| Pat_01 | Post-Resistance | PCDHGA2  | 56113  | 37 | 5 | 140720289 | 140720289 | Missense_Mutation | SNP | C  | T  | 148 | 314 | c.1751C>T       | c.(1750-1752)CCC>CTC | p.P584L       |
| Pat_01 | Post-Resistance | PCDHGA8  | 9708   | 37 | 5 | 140772898 | 140772898 | Missense_Mutation | SNP | G  | A  | 56  | 160 | c.518G>A        | c.(517-519)AGC>AAC   | p.S173N       |
| Pat_01 | Post-Resistance | PCDH12   | 51294  | 37 | 5 | 141335609 | 141335609 | Missense_Mutation | SNP | G  | A  | 5   | 210 | c.1808C>T       | c.(1807-1809)ACT>ATT | p.T603I       |
| Pat_01 | Post-Resistance | GM2A     | 2760   | 37 | 5 | 150646936 | 150646936 | Missense_Mutation | SNP | G  | A  | 4   | 182 | c.506G>A        | c.(505-507)CGC>CAC   | p.R169H       |
| Pat_01 | Post-Resistance | GRIA1    | 2890   | 37 | 5 | 153144170 | 153144170 | Missense_Mutation | SNP | G  | A  | 36  | 101 | c.2000G>A       | c.(1999-2001)GGA>GAA | p.G667E       |
| Pat_01 | Post-Resistance | HAVCR2   | 84868  | 37 | 5 | 156514235 | 156514235 | Missense_Mutation | SNP | C  | T  | 37  | 163 | c.784G>A        | c.(784-786)GAA>AAA   | p.E262K       |
| Pat_01 | Post-Resistance | LSM11    | 134353 | 37 | 5 | 157182040 | 157182040 | Missense_Mutation | SNP | C  | T  | 64  | 122 | c.851C>T        | c.(850-852)TCC>TTC   | p.S284F       |
| Pat_01 | Post-Resistance | GABRP    | 2568   | 37 | 5 | 170239094 | 170239094 | Missense_Mutation | SNP | G  | A  | 80  | 265 | c.1155G>A       | c.(1153-1155)ATG>ATA | p.M385I       |
| Pat_01 | Post-Resistance | STC2     | 8614   | 37 | 5 | 172755184 | 172755184 | Missense_Mutation | SNP | G  | A  | 5   | 332 | c.13C>T         | c.(13-15)CGG>TGG     | p.R5W         |
| Pat_01 | Post-Resistance | GFPT2    | 9945   | 37 | 5 | 179762866 | 179762866 | Missense_Mutation | SNP | G  | A  | 4   | 175 | c.302C>T        | c.(301-303)GCT>GTT   | p.A101V       |
| Pat_01 | Post-Resistance | GNB2L1   | 10399  | 37 | 5 | 180665127 | 180665127 | Missense_Mutation | SNP | G  | A  | 5   | 432 | c.749C>T        | c.(748-750)GCT>GTT   | p.A250V       |

|        |                 |          |        |    |   |           |           |                   |     |    |    |     |     |                                    |                      |          |
|--------|-----------------|----------|--------|----|---|-----------|-----------|-------------------|-----|----|----|-----|-----|------------------------------------|----------------------|----------|
| Pat_01 | Post-Resistance | ATXN1    | 6310   | 37 | 6 | 16327485  | 16327485  | Missense_Mutation | SNP | G  | A  | 78  | 245 | c.1057C>T                          | c.(1057-1059)CCT>TCT | p.P353S  |
| Pat_01 | Post-Resistance | KDM1B    | 221656 | 37 | 6 | 18207708  | 18207708  | Missense_Mutation | SNP | C  | T  | 5   | 410 | c.1130C>T                          | c.(1129-1131)TCG>TTG | p.S377L  |
| Pat_01 | Post-Resistance | ZNF184   | 7738   | 37 | 6 | 27419417  | 27419417  | Missense_Mutation | SNP | G  | A  | 46  | 232 | c.1921C>T                          | c.(1921-1923)CCC>TCC | p.P641S  |
| Pat_01 | Post-Resistance | HLA-A    | 3105   | 37 | 6 | 29912859  | 29912859  | Missense_Mutation | SNP | C  | A  | 6   | 291 | c.1036C>A                          | c.(1036-1038)CAG>AAG | p.Q346K  |
| Pat_01 | Post-Resistance | MDC1     | 9656   | 37 | 6 | 30672158  | 30672158  | Missense_Mutation | SNP | G  | A  | 299 | 391 | c.4802C>T                          | c.(4801-4803)ACA>ATA | p.T1601I |
| Pat_01 | Post-Resistance | MICB     | 4277   | 37 | 6 | 31473433  | 31473433  | Missense_Mutation | SNP | A  | G  | 5   | 425 | c.110A>G                           | c.(109-111)CAG>CGG   | p.Q37R   |
| Pat_01 | Post-Resistance | BAT2     | 7916   | 37 | 6 | 31595857  | 31595857  | Missense_Mutation | SNP | C  | T  | 87  | 343 | c.1606C>T                          | c.(1606-1608)CCA>TCA | p.P536S  |
| Pat_01 | Post-Resistance | BAT3     | 7917   | 37 | 6 | 31612903  | 31612903  | Missense_Mutation | SNP | G  | A  | 93  | 343 | c.1207C>T                          | c.(1207-1209)CCT>TCT | p.P403S  |
| Pat_01 | Post-Resistance | LY6G6F   | 259215 | 37 | 6 | 31685384  | 31685384  | Missense_Mutation | SNP | C  | T  | 134 | 632 | c.952C>T                           | c.(952-954)CCA>TCA   | p.P318S  |
| Pat_01 | Post-Resistance | C2       | 717    | 37 | 6 | 31903781  | 31903781  | Missense_Mutation | SNP | G  | A  | 50  | 187 | c.931G>A                           | c.(931-933)GAC>AAC   | p.D311N  |
| Pat_01 | Post-Resistance | TNXB     | 7148   | 37 | 6 | 32029318  | 32029318  | Missense_Mutation | SNP | C  | T  | 51  | 177 | c.7348G>A                          | c.(7348-7350)GGG>AGG | p.G2450R |
| Pat_01 | Post-Resistance | TNXB     | 7148   | 37 | 6 | 32038093  | 32038093  | Missense_Mutation | SNP | G  | A  | 19  | 30  | c.5089C>T                          | c.(5089-5091)CCT>TCT | p.P1697S |
| Pat_01 | Post-Resistance | HLA-DMB  | 3109   | 37 | 6 | 32903140  | 32903140  | Missense_Mutation | SNP | G  | A  | 213 | 362 | c.754C>T                           | c.(754-756)CCT>TCT   | p.P252S  |
| Pat_01 | Post-Resistance | FGD2     | 221472 | 37 | 6 | 36988331  | 36988331  | Missense_Mutation | SNP | G  | A  | 9   | 64  | c.1137G>A                          | c.(1135-1137)ATG>ATA | p.M379I  |
| Pat_01 | Post-Resistance | TMEM63B  | 55362  | 37 | 6 | 44104121  | 44104121  | Missense_Mutation | SNP | G  | A  | 5   | 324 | c.314G>A                           | c.(313-315)CGG>CAG   | p.R105Q  |
| Pat_01 | Post-Resistance | CAPN11   | 11131  | 37 | 6 | 44144382  | 44144382  | Missense_Mutation | SNP | G  | A  | 5   | 325 | c.1066G>A                          | c.(1066-1068)GGG>AGG | p.G356R  |
| Pat_01 | Post-Resistance | MEP1A    | 4224   | 37 | 6 | 46801249  | 46801249  | Missense_Mutation | SNP | C  | T  | 5   | 455 | c.1583C>T                          | c.(1582-1584)ACT>ATT | p.T528I  |
| Pat_01 | Post-Resistance | IL17F    | 112744 | 37 | 6 | 52103546  | 52103546  | Missense_Mutation | SNP | G  | A  | 46  | 131 | c.236C>T                           | c.(235-237)ACC>ATC   | p.T79I   |
| Pat_01 | Post-Resistance | MCM3     | 4172   | 37 | 6 | 52148092  | 52148092  | Missense_Mutation | SNP | C  | T  | 5   | 424 | c.191G>A                           | c.(190-192)CGG>CAG   | p.R64Q   |
| Pat_01 | Post-Resistance | KLHL31   | 401265 | 37 | 6 | 53519577  | 53519577  | Missense_Mutation | SNP | C  | T  | 4   | 318 | c.494G>A                           | c.(493-495)CGG>CAG   | p.R165Q  |
| Pat_01 | Post-Resistance | FAM83B   | 222584 | 37 | 6 | 54804808  | 54804808  | Missense_Mutation | SNP | G  | A  | 59  | 137 | c.1039G>A                          | c.(1039-1041)GAA>AAA | p.E347K  |
| Pat_01 | Post-Resistance | COL21A1  | 81578  | 37 | 6 | 55935569  | 55935569  | Missense_Mutation | SNP | C  | T  | 20  | 91  | c.1993G>A                          | c.(1993-1995)GGG>AGG | p.G665R  |
| Pat_01 | Post-Resistance | SMAP1    | 60682  | 37 | 6 | 71570002  | 71570002  | Missense_Mutation | SNP | T  | G  | 160 | 342 | c.1369T>G                          | c.(1369-1371)TCA>GCA | p.S457A  |
| Pat_01 | Post-Resistance | FILIP1   | 27145  | 37 | 6 | 76063340  | 76063340  | Missense_Mutation | SNP | C  | T  | 106 | 307 | c.544G>A                           | c.(544-546)GAG>AAG   | p.E182K  |
| Pat_01 | Post-Resistance | CASP8AP2 | 9994   | 37 | 6 | 90577172  | 90577172  | Missense_Mutation | SNP | C  | T  | 48  | 110 | c.4163C>T                          | c.(4162-4164)CCA>CTA | p.P1388L |
| Pat_01 | Post-Resistance | GJA10    | 84694  | 37 | 6 | 90604719  | 90604719  | Missense_Mutation | SNP | C  | T  | 115 | 255 | c.532C>T                           | c.(532-534)CTC>TTC   | p.L178F  |
| Pat_01 | Post-Resistance | AIM1     | 202    | 37 | 6 | 107016361 | 107016361 | Missense_Mutation | SNP | G  | A  | 127 | 262 | c.5092G>A                          | c.(5092-5094)GAT>AAT | p.D1698N |
| Pat_01 | Post-Resistance | FOXO3    | 2309   | 37 | 6 | 108985003 | 108985003 | Missense_Mutation | SNP | C  | T  | 4   | 107 | c.967C>T                           | c.(967-969)CGC>TGC   | p.R323C  |
| Pat_01 | Post-Resistance | LAMA4    | 3910   | 37 | 6 | 112437179 | 112437179 | Nonsense_Mutation | SNP | C  | A  | 5   | 255 | c.4999G>T                          | c.(4999-5001)GGA>TGA | p.G1667* |
| Pat_01 | Post-Resistance | RFX6     | 222546 | 37 | 6 | 117248438 | 117248438 | Missense_Mutation | SNP | C  | T  | 116 | 179 | c.2134C>T                          | c.(2134-2136)CAC>TAC | p.H712Y  |
| Pat_01 | Post-Resistance | ROS1     | 6098   | 37 | 6 | 117730754 | 117730754 | Missense_Mutation | SNP | C  | T  | 50  | 129 | c.280G>A                           | c.(280-282)GAA>AAA   | p.E94K   |
| Pat_01 | Post-Resistance | GJA1     | 2697   | 37 | 6 | 121768295 | 121768295 | Missense_Mutation | SNP | G  | A  | 4   | 136 | c.302G>A                           | c.(301-303)CGA>CAA   | p.R101Q  |
| Pat_01 | Post-Resistance | SYNJ2    | 8871   | 37 | 6 | 158487565 | 158487565 | Missense_Mutation | SNP | G  | A  | 4   | 194 | c.1615G>A                          | c.(1615-1617)GTG>ATG | p.V539M  |
| Pat_01 | Post-Resistance | KIF25    | 3834   | 37 | 6 | 168430266 | 168430266 | Missense_Mutation | SNP | A  | C  | 4   | 278 | c.1A>C                             | c.(1-3)ATG>CTG       | p.M1L    |
| Pat_01 | Post-Resistance | GPR146   | 115330 | 37 | 7 | 1097176   | 1097176   | Missense_Mutation | SNP | G  | A  | 4   | 62  | c.25G>A                            | c.(25-27)GGC>AGC     | p.G9S    |
| Pat_01 | Post-Resistance | RADIL    | 55698  | 37 | 7 | 4841376   | 4841376   | Missense_Mutation | SNP | G  | A  | 7   | 29  | c.2750C>T                          | c.(2749-2751)CCC>CTC | p.P917L  |
| Pat_01 | Post-Resistance | WIPI2    | 26100  | 37 | 7 | 5232787   | 5232787   | Missense_Mutation | SNP | G  | A  | 6   | 481 | c.113G>A                           | c.(112-114)CGT>CAT   | p.R38H   |
| Pat_01 | Post-Resistance | PRPS1L1  | 221823 | 37 | 7 | 18066867  | 18066867  | Missense_Mutation | SNP | G  | A  | 69  | 188 | c.539C>T                           | c.(538-540)TCC>TTC   | p.S180F  |
| Pat_01 | Post-Resistance | CREB5    | 9586   | 37 | 7 | 28547317  | 28547317  | Missense_Mutation | SNP | G  | A  | 116 | 359 | c.253G>A                           | c.(253-255)GAG>AAG   | p.E85K   |
| Pat_01 | Post-Resistance | C7orf10  | 79783  | 37 | 7 | 40900016  | 40900016  | Missense_Mutation | SNP | G  | A  | 76  | 211 | c.1255G>A                          | c.(1255-1257)GAT>AAT | p.D419N  |
| Pat_01 | Post-Resistance | HECW1    | 23072  | 37 | 7 | 43400569  | 43400569  | Missense_Mutation | SNP | C  | T  | 60  | 176 | c.545C>T                           | c.(544-546)TCG>TTG   | p.S182L  |
| Pat_01 | Post-Resistance | TBRG4    | 9238   | 37 | 7 | 45144223  | 45144223  | Missense_Mutation | SNP | G  | A  | 16  | 87  | c.821C>T                           | c.(820-822)CCC>CTC   | p.P274L  |
| Pat_01 | Post-Resistance | TNS3     | 64759  | 37 | 7 | 47451336  | 47451337  | Missense_Mutation | DNP | CC | TT | 22  | 51  | c.711_712GG>AA709-714)AAGGGA>AAAA( |                      | p.G238R  |
| Pat_01 | Post-Resistance | EGFR     | 1956   | 37 | 7 | 55266497  | 55266497  | Missense_Mutation | SNP | G  | A  | 76  | 198 | c.2789G>A                          | c.(2788-2790)GGA>GAA | p.G930E  |
| Pat_01 | Post-Resistance | CLDN4    | 1364   | 37 | 7 | 73246133  | 73246133  | Missense_Mutation | SNP | G  | A  | 6   | 426 | c.602G>A                           | c.(601-603)CGC>CAC   | p.R201H  |
| Pat_01 | Post-Resistance | MAGI2    | 9863   | 37 | 7 | 77885454  | 77885454  | Missense_Mutation | SNP | G  | T  | 10  | 94  | c.1853C>A                          | c.(1852-1854)ACT>AAT | p.T618N  |
| Pat_01 | Post-Resistance | ABCB4    | 5244   | 37 | 7 | 87060829  | 87060829  | Missense_Mutation | SNP | C  | T  | 173 | 449 | c.1784G>A                          | c.(1783-1785)CGA>CAA | p.R595Q  |



|        |                 |          |        |    |   |           |           |                   |     |    |    |     |     |                |                        |               |
|--------|-----------------|----------|--------|----|---|-----------|-----------|-------------------|-----|----|----|-----|-----|----------------|------------------------|---------------|
| Pat_01 | Post-Resistance | SAMD9    | 54809  | 37 | 7 | 92735311  | 92735311  | Missense_Mutation | SNP | C  | T  | 95  | 313 | c.100G>A       | c.(100-102)GAA>AAA     | p.E34K        |
| Pat_01 | Post-Resistance | TRRAP    | 8295   | 37 | 7 | 98509757  | 98509757  | Missense_Mutation | SNP | C  | T  | 88  | 288 | c.2120C>T      | c.(2119-2121)TCC>TTC   | p.S707F       |
| Pat_01 | Post-Resistance | OR2AE1   | 81392  | 37 | 7 | 99473956  | 99473956  | Missense_Mutation | SNP | C  | T  | 32  | 78  | c.701G>A       | c.(700-702)AGA>AAA     | p.R234K       |
| Pat_01 | Post-Resistance | ZAN      | 7455   | 37 | 7 | 100349941 | 100349941 | Missense_Mutation | SNP | C  | T  | 7   | 106 | c.2213C>T      | c.(2212-2214)CCC>CTC   | p.P738L       |
| Pat_01 | Post-Resistance | ZAN      | 7455   | 37 | 7 | 100350361 | 100350361 | Missense_Mutation | SNP | T  | C  | 4   | 82  | c.2633T>C      | c.(2632-2634)CTC>CCC   | p.L878P       |
| Pat_01 | Post-Resistance | ZAN      | 7455   | 37 | 7 | 100371434 | 100371434 | Missense_Mutation | SNP | A  | G  | 6   | 29  | c.5725A>G      | c.(5725-5727)AAA>GAA   | p.K1909E      |
| Pat_01 | Post-Resistance | SLC12A9  | 56996  | 37 | 7 | 100453367 | 100453367 | Missense_Mutation | SNP | G  | A  | 5   | 457 | c.356G>A       | c.(355-357)AGC>AAC     | p.S119N       |
| Pat_01 | Post-Resistance | MUC17    | 140453 | 37 | 7 | 100686354 | 100686354 | Missense_Mutation | SNP | C  | T  | 73  | 274 | c.11657C>T     | c.(11656-11658)CCA>CTA | p.P3886L      |
| Pat_01 | Post-Resistance | MOGAT3   | 346606 | 37 | 7 | 100839568 | 100839568 | Missense_Mutation | SNP | C  | A  | 10  | 19  | c.771G>T       | c.(769-771)AAG>AAT     | p.K257N       |
| Pat_01 | Post-Resistance | RELN     | 5649   | 37 | 7 | 103137012 | 103137012 | Missense_Mutation | SNP | C  | T  | 114 | 328 | c.9154G>A      | c.(9154-9156)GAA>AAA   | p.E3052K      |
| Pat_01 | Post-Resistance | PIK3CG   | 5294   | 37 | 7 | 106519963 | 106519963 | Splice_Site       | SNP | G  | A  | 66  | 247 | c.2392_splice  | c.e6-1                 | p.I798_splice |
| Pat_01 | Post-Resistance | SLC26A3  | 1811   | 37 | 7 | 107418680 | 107418680 | Missense_Mutation | SNP | C  | T  | 43  | 165 | c.1454G>A      | c.(1453-1455)GGG>GAG   | p.G485E       |
| Pat_01 | Post-Resistance | SLC26A3  | 1811   | 37 | 7 | 107420160 | 107420160 | Missense_Mutation | SNP | G  | T  | 5   | 417 | c.1360C>A      | c.(1360-1362)CAG>AAG   | p.Q454K       |
| Pat_01 | Post-Resistance | PTPRZ1   | 5803   | 37 | 7 | 121608040 | 121608040 | Missense_Mutation | SNP | C  | T  | 51  | 198 | c.160C>T       | c.(160-162)CCA>TCA     | p.P54S        |
| Pat_01 | Post-Resistance | SLC13A4  | 26266  | 37 | 7 | 135392875 | 135392875 | Missense_Mutation | SNP | C  | T  | 110 | 302 | c.352G>A       | c.(352-354)GCC>ACC     | p.A118T       |
| Pat_01 | Post-Resistance | KIAA1549 | 57670  | 37 | 7 | 138522701 | 138522701 | Missense_Mutation | SNP | G  | A  | 35  | 126 | c.5803C>T      | c.(5803-5805)CTC>TTC   | p.L1935F      |
| Pat_01 | Post-Resistance | BRAF     | 673    | 37 | 7 | 140453136 | 140453136 | Missense_Mutation | SNP | A  | T  | 185 | 285 | c.1799T>A      | c.(1798-1800)GTG>GAG   | p.V600E       |
| Pat_01 | Post-Resistance | C7orf34  | 135927 | 37 | 7 | 142637618 | 142637618 | Missense_Mutation | SNP | G  | A  | 135 | 393 | c.388G>A       | c.(388-390)GGG>AGG     | p.G130R       |
| Pat_01 | Post-Resistance | OR6V1    | 346517 | 37 | 7 | 142749903 | 142749903 | Missense_Mutation | SNP | C  | T  | 5   | 391 | c.466C>T       | c.(466-468)CCC>TCC     | p.P156S       |
| Pat_01 | Post-Resistance | CLCN1    | 1180   | 37 | 7 | 143029958 | 143029958 | Missense_Mutation | SNP | G  | A  | 6   | 625 | c.1393G>A      | c.(1393-1395)GTC>ATC   | p.V465I       |
| Pat_01 | Post-Resistance | CLCN1    | 1180   | 37 | 7 | 143036696 | 143036696 | Missense_Mutation | SNP | G  | T  | 85  | 296 | c.1564G>T      | c.(1564-1566)GGG>TGG   | p.G522W       |
| Pat_01 | Post-Resistance | KCNH2    | 3757   | 37 | 7 | 150654507 | 150654507 | Missense_Mutation | SNP | G  | A  | 4   | 167 | c.1000C>T      | c.(1000-1002)CCC>TCC   | p.P334S       |
| Pat_01 | Post-Resistance | ENTPD4   | 9583   | 37 | 8 | 23305381  | 23305381  | Missense_Mutation | SNP | G  | A  | 6   | 361 | c.224C>T       | c.(223-225)ACC>ATC     | p.T75I        |
| Pat_01 | Post-Resistance | DOCK5    | 80005  | 37 | 8 | 25253110  | 25253110  | Nonsense_Mutation | SNP | G  | T  | 88  | 180 | c.4579G>T      | c.(4579-4581)GAG>TAG   | p.E1527*      |
| Pat_01 | Post-Resistance | WHSC1L1  | 54904  | 37 | 8 | 38173456  | 38173456  | Missense_Mutation | SNP | C  | T  | 5   | 507 | c.1960G>A      | c.(1960-1962)GAT>AAT   | p.D654N       |
| Pat_01 | Post-Resistance | ADAM2    | 2515   | 37 | 8 | 39606935  | 39606935  | Missense_Mutation | SNP | G  | T  | 157 | 517 | c.1910C>A      | c.(1909-1911)GCT>GAT   | p.A637D       |
| Pat_01 | Post-Resistance | RP1      | 6101   | 37 | 8 | 55538849  | 55538849  | Missense_Mutation | SNP | C  | T  | 21  | 94  | c.2407C>T      | c.(2407-2409)CCT>TCT   | p.P803S       |
| Pat_01 | Post-Resistance | PREX2    | 80243  | 37 | 8 | 69000012  | 69000012  | Missense_Mutation | SNP | T  | C  | 161 | 551 | c.2081T>C      | c.(2080-2082)TTT>TCT   | p.F694S       |
| Pat_01 | Post-Resistance | ZFHX4    | 79776  | 37 | 8 | 77763772  | 77763772  | Missense_Mutation | SNP | C  | T  | 37  | 75  | c.4480C>T      | c.(4480-4482)CGT>TGT   | p.R1494C      |
| Pat_01 | Post-Resistance | SLC7A13  | 157724 | 37 | 8 | 87229869  | 87229869  | Missense_Mutation | SNP | A  | G  | 138 | 354 | c.1009T>C      | c.(1009-1011)TTT>CTT   | p.F337L       |
| Pat_01 | Post-Resistance | RGS22    | 26166  | 37 | 8 | 101020740 | 101020740 | Missense_Mutation | SNP | C  | T  | 21  | 91  | c.2224G>A      | c.(2224-2226)GAA>AAA   | p.E742K       |
| Pat_01 | Post-Resistance | TMEM74   | 157753 | 37 | 8 | 109796543 | 109796543 | Missense_Mutation | SNP | C  | T  | 54  | 126 | c.785G>A       | c.(784-786)CGA>CAA     | p.R262Q       |
| Pat_01 | Post-Resistance | FAM135B  | 51059  | 37 | 8 | 139255192 | 139255192 | Missense_Mutation | SNP | G  | A  | 68  | 176 | c.662C>T       | c.(661-663)TCC>TTC     | p.S221F       |
| Pat_01 | Post-Resistance | SLC45A4  | 57210  | 37 | 8 | 142228976 | 142228976 | Missense_Mutation | SNP | C  | T  | 4   | 154 | c.610G>A       | c.(610-612)GAG>AAG     | p.E204K       |
| Pat_01 | Post-Resistance | PYCR1    | 65263  | 37 | 8 | 144689142 | 144689142 | Missense_Mutation | SNP | G  | A  | 45  | 162 | c.353C>T       | c.(352-354)TCT>TTT     | p.S118F       |
| Pat_01 | Post-Resistance | ZNF707   | 286075 | 37 | 8 | 144776319 | 144776320 | Missense_Mutation | DNP | CC | TT | 9   | 11  | c.735_736CC>TT | 733-738)GACCGC>GATT(   | p.R246C       |
| Pat_01 | Post-Resistance | SCRIB    | 23513  | 37 | 8 | 144886826 | 144886826 | Missense_Mutation | SNP | A  | T  | 5   | 68  | c.2921T>A      | c.(2920-2922)ATA>AAA   | p.I974K       |
| Pat_01 | Post-Resistance | NRBP2    | 340371 | 37 | 8 | 144918164 | 144918164 | Missense_Mutation | SNP | G  | A  | 3   | 60  | c.1354C>T      | c.(1354-1356)CGG>TGG   | p.R452W       |
| Pat_01 | Post-Resistance | IL33     | 90865  | 37 | 9 | 6251250   | 6251250   | Missense_Mutation | SNP | G  | A  | 166 | 222 | c.328G>A       | c.(328-330)GAT>AAT     | p.D110N       |
| Pat_01 | Post-Resistance | ADAMTSL1 | 92949  | 37 | 9 | 18657704  | 18657704  | Nonsense_Mutation | SNP | G  | A  | 4   | 301 | c.902G>A       | c.(901-903)TGG>TAG     | p.W301*       |
| Pat_01 | Post-Resistance | TAF1L    | 138474 | 37 | 9 | 32630610  | 32630610  | Missense_Mutation | SNP | C  | T  | 121 | 197 | c.4968G>A      | c.(4966-4968)ATG>ATA   | p.M1656I      |
| Pat_01 | Post-Resistance | GBA2     | 57704  | 37 | 9 | 35748472  | 35748472  | Missense_Mutation | SNP | A  | G  | 91  | 127 | c.230T>C       | c.(229-231)ATG>ACG     | p.M77T        |
| Pat_01 | Post-Resistance | PRUNE2   | 158471 | 37 | 9 | 79326061  | 79326061  | Missense_Mutation | SNP | G  | A  | 20  | 49  | c.1129C>T      | c.(1129-1131)CCC>TCC   | p.P377S       |
| Pat_01 | Post-Resistance | PHF2     | 5253   | 37 | 9 | 96422487  | 96422487  | Missense_Mutation | SNP | C  | T  | 7   | 26  | c.1343C>T      | c.(1342-1344)GCC>GTC   | p.A448V       |
| Pat_01 | Post-Resistance | HIATL1   | 84641  | 37 | 9 | 97207294  | 97207294  | Missense_Mutation | SNP | G  | A  | 175 | 528 | c.559G>A       | c.(559-561)GCA>ACA     | p.A187T       |
| Pat_01 | Post-Resistance | BAAT     | 570    | 37 | 9 | 104124894 | 104124894 | Missense_Mutation | SNP | G  | A  | 36  | 146 | c.1073C>T      | c.(1072-1074)CCT>CTT   | p.P358L       |
| Pat_01 | Post-Resistance | RNF20    | 56254  | 37 | 9 | 104302911 | 104302911 | Missense_Mutation | SNP | G  | A  | 7   | 320 | c.437G>A       | c.(436-438)CGA>CAA     | p.R146Q       |

|        |                 |          |        |    |   |           |           |                   |     |    |    |     |     |                |                      |               |
|--------|-----------------|----------|--------|----|---|-----------|-----------|-------------------|-----|----|----|-----|-----|----------------|----------------------|---------------|
| Pat_01 | Post-Resistance | ACTL7B   | 10880  | 37 | 9 | 111617721 | 111617721 | Missense_Mutation | SNP | C  | T  | 4   | 125 | c.490G>A       | c.(490-492)GCG>ACG   | p.A164T       |
| Pat_01 | Post-Resistance | C9orf152 | 401546 | 37 | 9 | 112963727 | 112963727 | Missense_Mutation | SNP | G  | A  | 4   | 158 | c.221C>T       | c.(220-222)TCG>TTG   | p.S74L        |
| Pat_01 | Post-Resistance | FKBP15   | 23307  | 37 | 9 | 115959229 | 115959229 | Missense_Mutation | SNP | C  | T  | 4   | 211 | c.847G>A       | c.(847-849)GAG>AAG   | p.E283K       |
| Pat_01 | Post-Resistance | COL27A1  | 85301  | 37 | 9 | 117068933 | 117068934 | Missense_Mutation | DNP | GG | AA | 37  | 77  | .5072_5073GG>A | c.(5071-5073)AGG>AAA | p.R1691K      |
| Pat_01 | Post-Resistance | TLR4     | 7099   | 37 | 9 | 120475271 | 120475271 | Nonsense_Mutation | SNP | C  | T  | 63  | 267 | c.865C>T       | c.(865-867)CGA>TGA   | p.R289*       |
| Pat_01 | Post-Resistance | OR1J2    | 26740  | 37 | 9 | 125273462 | 125273462 | Missense_Mutation | SNP | C  | T  | 42  | 150 | c.382C>T       | c.(382-384)CAC>TAC   | p.H128Y       |
| Pat_01 | Post-Resistance | OR1N2    | 138882 | 37 | 9 | 125316037 | 125316037 | Missense_Mutation | SNP | G  | A  | 125 | 353 | c.589G>A       | c.(589-591)GAT>AAT   | p.D197N       |
| Pat_01 | Post-Resistance | FAM125B  | 89853  | 37 | 9 | 129184183 | 129184183 | Missense_Mutation | SNP | G  | A  | 5   | 501 | c.713G>A       | c.(712-714)CGG>CAG   | p.R238Q       |
| Pat_01 | Post-Resistance | ABL1     | 25     | 37 | 9 | 133760646 | 133760646 | Missense_Mutation | SNP | C  | T  | 62  | 196 | c.2969C>T      | c.(2968-2970)TCG>TTG | p.S990L       |
| Pat_01 | Post-Resistance | LAMC3    | 10319  | 37 | 9 | 133946908 | 133946908 | Missense_Mutation | SNP | G  | A  | 11  | 163 | c.3107G>A      | c.(3106-3108)GGG>GAG | p.G1036E      |
| Pat_01 | Post-Resistance | RXRA     | 6256   | 37 | 9 | 137321028 | 137321028 | Missense_Mutation | SNP | G  | A  | 5   | 245 | c.985G>A       | c.(985-987)GGG>AGG   | p.G329R       |
| Pat_01 | Post-Resistance | SLC34A3  | 142680 | 37 | 9 | 140126529 | 140126529 | Missense_Mutation | SNP | T  | C  | 4   | 409 | c.91T>C        | c.(91-93)TCC>CCC     | p.S31P        |
| Pat_01 | Post-Resistance | SCML2    | 10389  | 37 | X | 18342090  | 18342090  | Nonsense_Mutation | SNP | G  | A  | 6   | 188 | c.286C>T       | c.(286-288)CGA>TGA   | p.R96*        |
| Pat_01 | Post-Resistance | CNKSR2   | 22866  | 37 | X | 21550159  | 21550159  | Missense_Mutation | SNP | G  | A  | 4   | 115 | c.1277G>A      | c.(1276-1278)GGA>GAA | p.G426E       |
| Pat_01 | Post-Resistance | GSPT2    | 23708  | 37 | X | 51488398  | 51488398  | Missense_Mutation | SNP | C  | T  | 89  | 67  | c.1676C>T      | c.(1675-1677)TCC>TTC | p.S559F       |
| Pat_01 | Post-Resistance | FAM123B  | 139285 | 37 | X | 63413019  | 63413019  | Missense_Mutation | SNP | C  | T  | 4   | 188 | c.148G>A       | c.(148-150)GGT>AGT   | p.G50S        |
| Pat_01 | Post-Resistance | TAF1     | 6872   | 37 | X | 70680617  | 70680617  | Missense_Mutation | SNP | G  | A  | 9   | 10  | c.5360G>A      | c.(5359-5361)GGG>GAG | p.G1787E      |
| Pat_01 | Post-Resistance | FAM46D   | 169966 | 37 | X | 79698739  | 79698739  | Missense_Mutation | SNP | G  | A  | 4   | 81  | c.701G>A       | c.(700-702)GGT>GAT   | p.G234D       |
| Pat_01 | Post-Resistance | TCEAL6   | 158931 | 37 | X | 101395871 | 101395871 | Missense_Mutation | SNP | C  | T  | 54  | 69  | c.433G>A       | c.(433-435)GAT>AAT   | p.D145N       |
| Pat_01 | Post-Resistance | MUM1L1   | 139221 | 37 | X | 105450125 | 105450125 | Missense_Mutation | SNP | G  | A  | 18  | 25  | c.700G>A       | c.(700-702)GAA>AAA   | p.E234K       |
| Pat_01 | Post-Resistance | CAPN6    | 827    | 37 | X | 110491174 | 110491174 | Missense_Mutation | SNP | G  | A  | 252 | 241 | c.1531C>T      | c.(1531-1533)CGT>TGT | p.R511C       |
| Pat_01 | Post-Resistance | GRIA3    | 2892   | 37 | X | 122459990 | 122459990 | Missense_Mutation | SNP | G  | A  | 166 | 128 | c.622G>A       | c.(622-624)GAA>AAA   | p.E208K       |
| Pat_01 | Post-Resistance | CXorf66  | 347487 | 37 | X | 139038701 | 139038701 | Missense_Mutation | SNP | G  | A  | 288 | 203 | c.440C>T       | c.(439-441)TCC>TTC   | p.S147F       |
| Pat_01 | Post-Resistance | PLXNA3   | 55558  | 37 | X | 153700967 | 153700967 | Missense_Mutation | SNP | G  | A  | 4   | 259 | c.5555G>A      | c.(5554-5556)CGG>CAG | p.R1852Q      |
| Pat_02 | Post-Resistance | PANK4    | 55229  | 37 | 1 | 2447075   | 2447075   | Missense_Mutation | SNP | C  | T  | 4   | 104 | c.1300G>A      | c.(1300-1302)GAC>AAC | p.D434N       |
| Pat_02 | Post-Resistance | H6PD     | 9563   | 37 | 1 | 9323666   | 9323666   | Missense_Mutation | SNP | T  | G  | 46  | 68  | c.1114T>G      | c.(1114-1116)TTG>GTG | p.L372V       |
| Pat_02 | Post-Resistance | UBE4B    | 10277  | 37 | 1 | 10166338  | 10166338  | Missense_Mutation | SNP | G  | A  | 7   | 153 | c.893G>A       | c.(892-894)CGT>CAT   | p.R298H       |
| Pat_02 | Post-Resistance | MIIP     | 60672  | 37 | 1 | 12091778  | 12091778  | Splice_Site       | SNP | G  | A  | 4   | 207 | c.1081_splice  | c.e10-1              | p.A361_splice |
| Pat_02 | Post-Resistance | IGSF21   | 84966  | 37 | 1 | 18691963  | 18691963  | Missense_Mutation | SNP | G  | A  | 163 | 50  | c.787G>A       | c.(787-789)GAG>AAG   | p.E263K       |
| Pat_02 | Post-Resistance | ARID1A   | 8289   | 37 | 1 | 27101115  | 27101115  | Missense_Mutation | SNP | C  | T  | 5   | 125 | c.4397C>T      | c.(4396-4398)GCA>GTA | p.A1466V      |
| Pat_02 | Post-Resistance | SDC3     | 9672   | 37 | 1 | 31349506  | 31349506  | Missense_Mutation | SNP | G  | A  | 3   | 44  | c.763C>T       | c.(763-765)CGG>TGG   | p.R255W       |
| Pat_02 | Post-Resistance | GJB5     | 2709   | 37 | 1 | 35222956  | 35222956  | Missense_Mutation | SNP | C  | T  | 4   | 79  | c.25C>T        | c.(25-27)CTC>TTC     | p.L9F         |
| Pat_02 | Post-Resistance | TFAP2E   | 339488 | 37 | 1 | 36054150  | 36054150  | Missense_Mutation | SNP | G  | A  | 6   | 71  | c.782G>A       | c.(781-783)CGC>CAC   | p.R261H       |
| Pat_02 | Post-Resistance | SLC6A9   | 6536   | 37 | 1 | 44463225  | 44463225  | Missense_Mutation | SNP | G  | A  | 4   | 144 | c.2113C>T      | c.(2113-2115)CGG>TGG | p.R705W       |
| Pat_02 | Post-Resistance | DHCR24   | 1718   | 37 | 1 | 55319179  | 55319179  | Missense_Mutation | SNP | T  | C  | 3   | 57  | c.1325A>G      | c.(1324-1326)GAG>GGG | p.E442G       |
| Pat_02 | Post-Resistance | JUN      | 3725   | 37 | 1 | 59248082  | 59248082  | Missense_Mutation | SNP | G  | A  | 4   | 101 | c.661C>T       | c.(661-663)CGG>TGG   | p.R221W       |
| Pat_02 | Post-Resistance | LPAR3    | 23566  | 37 | 1 | 85331140  | 85331140  | Missense_Mutation | SNP | G  | T  | 24  | 42  | c.664C>A       | c.(664-666)CCG>ACG   | p.P222T       |
| Pat_02 | Post-Resistance | GBP3     | 2635   | 37 | 1 | 89477642  | 89477642  | Missense_Mutation | SNP | C  | T  | 4   | 103 | c.937G>A       | c.(937-939)GCA>ACA   | p.A313T       |
| Pat_02 | Post-Resistance | LRRRC8D  | 55144  | 37 | 1 | 90398877  | 90398877  | Missense_Mutation | SNP | G  | A  | 4   | 61  | c.250G>A       | c.(250-252)GCA>ACA   | p.A84T        |
| Pat_02 | Post-Resistance | ALX3     | 257    | 37 | 1 | 110607256 | 110607257 | Missense_Mutation | DNP | GG | AA | 49  | 29  | c.546_547CC>TT | 544-549)GCCCG>GCTT   | p.R183W       |
| Pat_02 | Post-Resistance | NBPF16   | 728936 | 37 | 1 | 148753314 | 148753314 | Missense_Mutation | SNP | A  | G  | 10  | 69  | c.1331A>G      | c.(1330-1332)TAT>TGT | p.Y444C       |
| Pat_02 | Post-Resistance | SCNM1    | 79005  | 37 | 1 | 151141482 | 151141482 | Missense_Mutation | SNP | G  | A  | 113 | 30  | c.614G>A       | c.(613-615)GGA>GAA   | p.G205E       |
| Pat_02 | Post-Resistance | RPTN     | 126638 | 37 | 1 | 152128617 | 152128617 | Missense_Mutation | SNP | T  | C  | 9   | 876 | c.958A>G       | c.(958-960)AGT>GGT   | p.S320G       |
| Pat_02 | Post-Resistance | FLG      | 2312   | 37 | 1 | 152280647 | 152280647 | Missense_Mutation | SNP | G  | A  | 215 | 64  | c.6715C>T      | c.(6715-6717)CGG>TGG | p.R2239W      |
| Pat_02 | Post-Resistance | FLG      | 2312   | 37 | 1 | 152282909 | 152282909 | Missense_Mutation | SNP | C  | T  | 7   | 584 | c.4453G>A      | c.(4453-4455)GGT>AGT | p.G1485S      |
| Pat_02 | Post-Resistance | ADAR     | 103    | 37 | 1 | 154569345 | 154569345 | Missense_Mutation | SNP | G  | A  | 4   | 138 | c.2206C>T      | c.(2206-2208)CGC>TGC | p.R736C       |
| Pat_02 | Post-Resistance | ADAR     | 103    | 37 | 1 | 154574475 | 154574475 | Missense_Mutation | SNP | C  | T  | 5   | 119 | c.643G>A       | c.(643-645)GGT>AGT   | p.G215S       |

|        |                 |           |        |    |    |           |           |                   |     |   |   |     |     |            |                        |          |
|--------|-----------------|-----------|--------|----|----|-----------|-----------|-------------------|-----|---|---|-----|-----|------------|------------------------|----------|
| Pat_02 | Post-Resistance | HCN3      | 57657  | 37 | 1  | 155254346 | 155254346 | Missense_Mutation | SNP | G | A | 4   | 86  | c.887G>A   | c.(886-888)CGC>CAC     | p.R296H  |
| Pat_02 | Post-Resistance | MEX3A     | 92312  | 37 | 1  | 156047240 | 156047240 | Missense_Mutation | SNP | C | T | 4   | 33  | c.688G>A   | c.(688-690)GTG>ATG     | p.V230M  |
| Pat_02 | Post-Resistance | IQGAP3    | 128239 | 37 | 1  | 156535853 | 156535853 | Missense_Mutation | SNP | C | A | 6   | 262 | c.326G>T   | c.(325-327)TGG>TTG     | p.W109L  |
| Pat_02 | Post-Resistance | FCRL5     | 83416  | 37 | 1  | 157516746 | 157516746 | Missense_Mutation | SNP | C | A | 4   | 134 | c.294G>T   | c.(292-294)TTG>TTT     | p.L98F   |
| Pat_02 | Post-Resistance | FCGR2C    | 9103   | 37 | 1  | 161565349 | 161565349 | Missense_Mutation | SNP | C | G | 4   | 300 | c.767C>G   | c.(766-768)TCC>TGC     | p.S256C  |
| Pat_02 | Post-Resistance | F5        | 2153   | 37 | 1  | 169510354 | 169510354 | Missense_Mutation | SNP | A | G | 8   | 760 | c.3974T>C  | c.(3973-3975)CTC>CCC   | p.L1325P |
| Pat_02 | Post-Resistance | C1orf105  | 92346  | 37 | 1  | 172434464 | 172434464 | Nonsense_Mutation | SNP | C | T | 64  | 32  | c.367C>T   | c.(367-369)CAG>TAG     | p.Q123*  |
| Pat_02 | Post-Resistance | TNR       | 7143   | 37 | 1  | 175372465 | 175372465 | Missense_Mutation | SNP | C | T | 70  | 11  | c.787G>A   | c.(787-789)GAA>AAA     | p.E263K  |
| Pat_02 | Post-Resistance | PAPPA2    | 60676  | 37 | 1  | 176564299 | 176564299 | Missense_Mutation | SNP | G | T | 21  | 37  | c.1559G>T  | c.(1558-1560)CGG>CTG   | p.R520L  |
| Pat_02 | Post-Resistance | LAMC1     | 3915   | 37 | 1  | 183072636 | 183072636 | Missense_Mutation | SNP | G | A | 7   | 81  | c.592G>A   | c.(592-594)GGG>AGG     | p.G198R  |
| Pat_02 | Post-Resistance | DSTYK     | 25778  | 37 | 1  | 205138570 | 205138570 | Nonsense_Mutation | SNP | G | A | 6   | 185 | c.1045C>T  | c.(1045-1047)CAG>TAG   | p.Q349*  |
| Pat_02 | Post-Resistance | SMYD2     | 56950  | 37 | 1  | 214498026 | 214498026 | Missense_Mutation | SNP | C | T | 72  | 43  | c.577C>T   | c.(577-579)CAT>TAT     | p.H193Y  |
| Pat_02 | Post-Resistance | ZNF669    | 79862  | 37 | 1  | 247263846 | 247263846 | Missense_Mutation | SNP | C | T | 4   | 207 | c.1225G>A  | c.(1225-1227)GAA>AAA   | p.E409K  |
| Pat_02 | Post-Resistance | DIP2C     | 22982  | 37 | 10 | 410435    | 410435    | Missense_Mutation | SNP | G | A | 4   | 187 | c.2356C>T  | c.(2356-2358)CTC>TTC   | p.L786F  |
| Pat_02 | Post-Resistance | ADARB2    | 105    | 37 | 10 | 1279761   | 1279761   | Missense_Mutation | SNP | G | A | 77  | 44  | c.1388C>T  | c.(1387-1389)TCG>TTG   | p.S463L  |
| Pat_02 | Post-Resistance | SFMBT2    | 57713  | 37 | 10 | 7262417   | 7262417   | Missense_Mutation | SNP | G | A | 234 | 223 | c.1286C>T  | c.(1285-1287)TCC>TTC   | p.S429F  |
| Pat_02 | Post-Resistance | C10orf140 | 387640 | 37 | 10 | 21804291  | 21804291  | Missense_Mutation | SNP | C | A | 44  | 156 | c.2461G>T  | c.(2461-2463)GAT>TAT   | p.D821Y  |
| Pat_02 | Post-Resistance | EPC1      | 80314  | 37 | 10 | 32560521  | 32560521  | Missense_Mutation | SNP | G | A | 98  | 261 | c.2399C>T  | c.(2398-2400)TCC>TTC   | p.S800F  |
| Pat_02 | Post-Resistance | ANKRD30A  | 91074  | 37 | 10 | 37508119  | 37508119  | Missense_Mutation | SNP | G | A | 163 | 220 | c.3311G>A  | c.(3310-3312)AGG>AAG   | p.R1104K |
| Pat_02 | Post-Resistance | HNRNPF    | 3185   | 37 | 10 | 43882221  | 43882221  | Missense_Mutation | SNP | G | A | 4   | 178 | c.1112C>T  | c.(1111-1113)GCG>GTG   | p.A371V  |
| Pat_02 | Post-Resistance | ANK3      | 288    | 37 | 10 | 61829763  | 61829763  | Missense_Mutation | SNP | C | T | 27  | 82  | c.10876G>A | c.(10876-10878)GAA>AAA | p.E3626K |
| Pat_02 | Post-Resistance | LDB3      | 11155  | 37 | 10 | 88476299  | 88476299  | Missense_Mutation | SNP | G | A | 231 | 158 | c.1447G>A  | c.(1447-1449)GAG>AAG   | p.E483K  |
| Pat_02 | Post-Resistance | MMRN2     | 79812  | 37 | 10 | 88702692  | 88702692  | Missense_Mutation | SNP | C | T | 25  | 18  | c.1849G>A  | c.(1849-1851)GAG>AAG   | p.E617K  |
| Pat_02 | Post-Resistance | LIPJ      | 142910 | 37 | 10 | 90362398  | 90362398  | Nonsense_Mutation | SNP | G | A | 33  | 73  | c.789G>A   | c.(787-789)TGG>TGA     | p.W263*  |
| Pat_02 | Post-Resistance | PIPSL     | 266971 | 37 | 10 | 95719963  | 95719963  | Missense_Mutation | SNP | A | T | 47  | 96  | c.1191T>A  | c.(1189-1191)TTT>TTA   | p.F397L  |
| Pat_02 | Post-Resistance | DNTT      | 1791   | 37 | 10 | 98080472  | 98080472  | Missense_Mutation | SNP | C | A | 6   | 219 | c.605C>A   | c.(604-606)CCA>CAA     | p.P202Q  |
| Pat_02 | Post-Resistance | CYP17A1   | 1586   | 37 | 10 | 104592293 | 104592293 | Missense_Mutation | SNP | G | A | 4   | 156 | c.1114C>T  | c.(1114-1116)CCC>TCC   | p.P372S  |
| Pat_02 | Post-Resistance | SORCS3    | 22986  | 37 | 10 | 106924131 | 106924131 | Nonsense_Mutation | SNP | G | A | 28  | 57  | c.1803G>A  | c.(1801-1803)TGG>TGA   | p.W601*  |
| Pat_02 | Post-Resistance | GRK5      | 2869   | 37 | 10 | 121203251 | 121203251 | Missense_Mutation | SNP | C | T | 10  | 16  | c.1253C>T  | c.(1252-1254)TCC>TTC   | p.S418F  |
| Pat_02 | Post-Resistance | WDR11     | 55717  | 37 | 10 | 122626197 | 122626197 | Missense_Mutation | SNP | G | A | 5   | 228 | c.1111G>A  | c.(1111-1113)GCC>ACC   | p.A371T  |
| Pat_02 | Post-Resistance | TACC2     | 10579  | 37 | 10 | 123844357 | 123844357 | Missense_Mutation | SNP | C | T | 33  | 70  | c.2342C>T  | c.(2341-2343)CCC>CTC   | p.P781L  |
| Pat_02 | Post-Resistance | DMBT1     | 1755   | 37 | 10 | 124361487 | 124361487 | Missense_Mutation | SNP | G | A | 135 | 46  | c.3518G>A  | c.(3517-3519)GGA>GAA   | p.G1173E |
| Pat_02 | Post-Resistance | KRTAP5-3  | 387266 | 37 | 11 | 1629039   | 1629039   | Missense_Mutation | SNP | A | T | 6   | 304 | c.577T>A   | c.(577-579)TGC>AGC     | p.C193S  |
| Pat_02 | Post-Resistance | OR51D1    | 390038 | 37 | 11 | 4661948   | 4661948   | Missense_Mutation | SNP | G | A | 37  | 62  | c.928G>A   | c.(928-930)GAG>AAG     | p.E310K  |
| Pat_02 | Post-Resistance | OR52H1    | 390067 | 37 | 11 | 5565961   | 5565961   | Missense_Mutation | SNP | A | T | 58  | 113 | c.793T>A   | c.(793-795)TTC>ATC     | p.F265I  |
| Pat_02 | Post-Resistance | APBB1     | 322    | 37 | 11 | 6425007   | 6425007   | Missense_Mutation | SNP | G | A | 4   | 131 | c.767C>T   | c.(766-768)CCG>CTG     | p.P256L  |
| Pat_02 | Post-Resistance | PPFIBP2   | 8495   | 37 | 11 | 7672156   | 7672156   | Missense_Mutation | SNP | C | T | 4   | 152 | c.2207C>T  | c.(2206-2208)GCA>GTA   | p.A736V  |
| Pat_02 | Post-Resistance | ST5       | 6764   | 37 | 11 | 8720827   | 8720827   | Missense_Mutation | SNP | G | A | 4   | 185 | c.2831C>T  | c.(2830-2832)CCC>CTC   | p.P944L  |
| Pat_02 | Post-Resistance | DENND5A   | 23258  | 37 | 11 | 9165725   | 9165725   | Missense_Mutation | SNP | T | C | 4   | 145 | c.3223A>G  | c.(3223-3225)AGG>GGG   | p.R1075G |
| Pat_02 | Post-Resistance | CTR9      | 9646   | 37 | 11 | 10795560  | 10795560  | Missense_Mutation | SNP | G | A | 4   | 129 | c.2729G>A  | c.(2728-2730)CGT>CAT   | p.R910H  |
| Pat_02 | Post-Resistance | ABCC8     | 6833   | 37 | 11 | 17452420  | 17452420  | Missense_Mutation | SNP | C | A | 7   | 258 | c.1758G>T  | c.(1756-1758)TTG>TTT   | p.L586F  |
| Pat_02 | Post-Resistance | DEPDC7    | 91614  | 37 | 11 | 33052941  | 33052941  | Missense_Mutation | SNP | C | T | 4   | 92  | c.800C>T   | c.(799-801)TCG>TTG     | p.S267L  |
| Pat_02 | Post-Resistance | CAT       | 847    | 37 | 11 | 34478338  | 34478338  | Missense_Mutation | SNP | G | A | 47  | 53  | c.1030G>A  | c.(1030-1032)GAG>AAG   | p.E344K  |
| Pat_02 | Post-Resistance | DGKZ      | 8525   | 37 | 11 | 46388933  | 46388933  | Missense_Mutation | SNP | G | A | 4   | 73  | c.821G>A   | c.(820-822)AGT>AAT     | p.S274N  |
| Pat_02 | Post-Resistance | MTCH2     | 23788  | 37 | 11 | 47644265  | 47644265  | Missense_Mutation | SNP | C | A | 4   | 72  | c.813G>T   | c.(811-813)ATG>ATT     | p.M271I  |
| Pat_02 | Post-Resistance | OR8H2     | 390151 | 37 | 11 | 55872537  | 55872537  | Missense_Mutation | SNP | A | G | 5   | 363 | c.19A>G    | c.(19-21)AAC>GAC       | p.N7D    |
| Pat_02 | Post-Resistance | SSRP1     | 6749   | 37 | 11 | 57094314  | 57094314  | Missense_Mutation | SNP | A | T | 7   | 27  | c.1921T>A  | c.(1921-1923)TCC>ACC   | p.S641T  |

|        |                 |           |        |    |    |           |           |                   |     |   |   |     |     |               |                      |                |
|--------|-----------------|-----------|--------|----|----|-----------|-----------|-------------------|-----|---|---|-----|-----|---------------|----------------------|----------------|
| Pat_02 | Post-Resistance | FADS1     | 3992   | 37 | 11 | 61579965  | 61579965  | Missense_Mutation | SNP | G | A | 4   | 127 | c.662C>T      | c.(661-663)GCG>GTG   | p.A221V        |
| Pat_02 | Post-Resistance | PYGM      | 5837   | 37 | 11 | 64522942  | 64522942  | Missense_Mutation | SNP | G | A | 4   | 137 | c.749C>T      | c.(748-750)CCC>CTC   | p.P250L        |
| Pat_02 | Post-Resistance | CDC42BPG  | 55561  | 37 | 11 | 64601265  | 64601265  | Missense_Mutation | SNP | C | T | 47  | 37  | c.2510G>A     | c.(2509-2511)AGG>AAG | p.R837K        |
| Pat_02 | Post-Resistance | ATG2A     | 23130  | 37 | 11 | 64684568  | 64684568  | Nonsense_Mutation | SNP | C | A | 6   | 242 | c.40G>T       | c.(40-42)GAG>TAG     | p.E14*         |
| Pat_02 | Post-Resistance | EHBP1L1   | 254102 | 37 | 11 | 65349588  | 65349588  | Missense_Mutation | SNP | C | T | 9   | 31  | c.1445C>T     | c.(1444-1446)CCA>CTA | p.P482L        |
| Pat_02 | Post-Resistance | BBS1      | 582    | 37 | 11 | 66293622  | 66293622  | Missense_Mutation | SNP | G | A | 4   | 165 | c.1139G>A     | c.(1138-1140)CGG>CAG | p.R380Q        |
| Pat_02 | Post-Resistance | SSH3      | 54961  | 37 | 11 | 67075057  | 67075057  | Missense_Mutation | SNP | G | A | 4   | 168 | c.640G>A      | c.(640-642)GCT>ACT   | p.A214T        |
| Pat_02 | Post-Resistance | PITPNM1   | 9600   | 37 | 11 | 67265710  | 67265710  | Missense_Mutation | SNP | G | A | 4   | 88  | c.1568C>T     | c.(1567-1569)ACC>ATC | p.T523I        |
| Pat_02 | Post-Resistance | KRTAP5-10 | 387273 | 37 | 11 | 71276959  | 71276959  | Missense_Mutation | SNP | G | A | 5   | 202 | c.326G>A      | c.(325-327)GGC>GAC   | p.G109D        |
| Pat_02 | Post-Resistance | OR2AT4    | 341152 | 37 | 11 | 74799858  | 74799858  | Missense_Mutation | SNP | C | T | 103 | 121 | c.901G>A      | c.(901-903)GAT>AAT   | p.D301N        |
| Pat_02 | Post-Resistance | TSKU      | 25987  | 37 | 11 | 76507090  | 76507090  | Missense_Mutation | SNP | C | T | 4   | 168 | c.430C>T      | c.(430-432)CGG>TGG   | p.R144W        |
| Pat_02 | Post-Resistance | SYTL2     | 54843  | 37 | 11 | 85445603  | 85445603  | Missense_Mutation | SNP | G | A | 53  | 138 | c.766C>T      | c.(766-768)CCT>TCT   | p.P256S        |
| Pat_02 | Post-Resistance | FAT3      | 120114 | 37 | 11 | 92085960  | 92085960  | Missense_Mutation | SNP | G | C | 35  | 253 | c.682G>C      | c.(682-684)GAT>CAT   | p.D228H        |
| Pat_02 | Post-Resistance | CASP5     | 838    | 37 | 11 | 104871092 | 104871092 | Missense_Mutation | SNP | G | A | 6   | 285 | c.848C>T      | c.(847-849)CCG>CTG   | p.P283L        |
| Pat_02 | Post-Resistance | GLB1L2    | 89944  | 37 | 11 | 134244085 | 134244085 | Missense_Mutation | SNP | C | T | 4   | 109 | c.1642C>T     | c.(1642-1644)CCT>TCT | p.P548S        |
| Pat_02 | Post-Resistance | ANO2      | 57101  | 37 | 12 | 5915230   | 5915230   | Missense_Mutation | SNP | C | T | 31  | 34  | c.966G>A      | c.(964-966)ATG>ATA   | p.M322I        |
| Pat_02 | Post-Resistance | COPS7A    | 50813  | 37 | 12 | 6838528   | 6838528   | Missense_Mutation | SNP | G | A | 4   | 166 | c.443G>A      | c.(442-444)CGC>CAC   | p.R148H        |
| Pat_02 | Post-Resistance | ACSM4     | 341392 | 37 | 12 | 7457031   | 7457031   | Missense_Mutation | SNP | T | C | 90  | 107 | c.104T>C      | c.(103-105)CTT>CCT   | p.L35P         |
| Pat_02 | Post-Resistance | PRB2      | 653247 | 37 | 12 | 11546771  | 11546771  | Missense_Mutation | SNP | G | C | 6   | 322 | c.241C>G      | c.(241-243)CCA>GCA   | p.P81A         |
| Pat_02 | Post-Resistance | CAPZA3    | 93661  | 37 | 12 | 18891609  | 18891609  | Missense_Mutation | SNP | G | A | 37  | 69  | c.407G>A      | c.(406-408)GGA>GAA   | p.G136E        |
| Pat_02 | Post-Resistance | COL2A1    | 1280   | 37 | 12 | 48376705  | 48376705  | Missense_Mutation | SNP | G | A | 4   | 142 | c.2119C>T     | c.(2119-2121)CGT>TGT | p.R707C        |
| Pat_02 | Post-Resistance | CCNT1     | 904    | 37 | 12 | 49087949  | 49087949  | Missense_Mutation | SNP | G | A | 36  | 71  | c.1048C>T     | c.(1048-1050)CGG>TGG | p.R350W        |
| Pat_02 | Post-Resistance | TROAP     | 10024  | 37 | 12 | 49724304  | 49724304  | Missense_Mutation | SNP | G | A | 4   | 89  | c.1676G>A     | c.(1675-1677)TGC>TAC | p.C559Y        |
| Pat_02 | Post-Resistance | BIN2      | 51411  | 37 | 12 | 51685575  | 51685575  | Missense_Mutation | SNP | C | T | 17  | 50  | c.1315G>A     | c.(1315-1317)GCC>ACC | p.A439T        |
| Pat_02 | Post-Resistance | ESPL1     | 9700   | 37 | 12 | 53684700  | 53684700  | Missense_Mutation | SNP | G | A | 3   | 10  | c.5440G>A     | c.(5440-5442)GGC>AGC | p.G1814S       |
| Pat_02 | Post-Resistance | SMARCC2   | 6601   | 37 | 12 | 56583164  | 56583164  | Missense_Mutation | SNP | G | A | 4   | 139 | c.82C>T       | c.(82-84)CGG>TGG     | p.R28W         |
| Pat_02 | Post-Resistance | SLC39A5   | 283375 | 37 | 12 | 56631072  | 56631072  | Nonsense_Mutation | SNP | G | A | 4   | 75  | c.1427G>A     | c.(1426-1428)TGG>TAG | p.W476*        |
| Pat_02 | Post-Resistance | B4GALNT1  | 2583   | 37 | 12 | 58021527  | 58021527  | Missense_Mutation | SNP | G | A | 11  | 20  | c.1258C>T     | c.(1258-1260)CAC>TAC | p.H420Y        |
| Pat_02 | Post-Resistance | OS9       | 10956  | 37 | 12 | 58109684  | 58109684  | Missense_Mutation | SNP | C | T | 6   | 360 | c.721C>T      | c.(721-723)CCG>TCG   | p.P241S        |
| Pat_02 | Post-Resistance | APAF1     | 317    | 37 | 12 | 99061402  | 99061402  | Missense_Mutation | SNP | G | A | 4   | 145 | c.1474G>A     | c.(1474-1476)GCC>ACC | p.A492T        |
| Pat_02 | Post-Resistance | GAS2L3    | 283431 | 37 | 12 | 101012343 | 101012343 | Missense_Mutation | SNP | G | A | 4   | 132 | c.626G>A      | c.(625-627)CGG>CAG   | p.R209Q        |
| Pat_02 | Post-Resistance | CRY1      | 1407   | 37 | 12 | 107391819 | 107391819 | Missense_Mutation | SNP | G | C | 4   | 188 | c.1163C>G     | c.(1162-1164)GCA>GGA | p.A388G        |
| Pat_02 | Post-Resistance | TCHP      | 84260  | 37 | 12 | 110346484 | 110346484 | Missense_Mutation | SNP | C | T | 4   | 12  | c.793C>T      | c.(793-795)CGG>TGG   | p.R265W        |
| Pat_02 | Post-Resistance | ACAD10    | 80724  | 37 | 12 | 112194136 | 112194136 | Splice_Site       | SNP | G | A | 13  | 18  | c.3040_splice | c.e21-1              | p.A1014_splice |
| Pat_02 | Post-Resistance | KSR2      | 283455 | 37 | 12 | 117977577 | 117977577 | Missense_Mutation | SNP | G | T | 4   | 105 | c.1547C>A     | c.(1546-1548)CCC>CAC | p.P516H        |
| Pat_02 | Post-Resistance | NOC4L     | 79050  | 37 | 12 | 132631868 | 132631868 | Missense_Mutation | SNP | G | A | 4   | 14  | c.388G>A      | c.(388-390)GGA>AGA   | p.G130R        |
| Pat_02 | Post-Resistance | POLE      | 5426   | 37 | 12 | 133237686 | 133237686 | Missense_Mutation | SNP | C | A | 5   | 288 | c.2929G>T     | c.(2929-2931)GGG>TGG | p.G977W        |
| Pat_02 | Post-Resistance | GJA3      | 2700   | 37 | 13 | 20716802  | 20716802  | Missense_Mutation | SNP | G | A | 4   | 80  | c.626C>T      | c.(625-627)GCG>GTG   | p.A209V        |
| Pat_02 | Post-Resistance | FLT1      | 2321   | 37 | 13 | 28913433  | 28913433  | Missense_Mutation | SNP | G | A | 22  | 26  | c.2360C>T     | c.(2359-2361)TCT>TTT | p.S787F        |
| Pat_02 | Post-Resistance | NBEA      | 26960  | 37 | 13 | 35756497  | 35756497  | Missense_Mutation | SNP | G | A | 47  | 70  | c.4663G>A     | c.(4663-4665)GAT>AAT | p.D1555N       |
| Pat_02 | Post-Resistance | COG3      | 83548  | 37 | 13 | 46039319  | 46039319  | Missense_Mutation | SNP | G | A | 4   | 147 | c.148G>A      | c.(148-150)GCA>ACA   | p.A50T         |
| Pat_02 | Post-Resistance | LOC220429 | 220429 | 37 | 13 | 50466381  | 50466381  | Missense_Mutation | SNP | G | A | 47  | 46  | c.1655G>A     | c.(1654-1656)GGG>GAG | p.G552E        |
| Pat_02 | Post-Resistance | C13orf1   | 57213  | 37 | 13 | 50495655  | 50495655  | Missense_Mutation | SNP | G | A | 4   | 215 | c.452C>T      | c.(451-453)CCA>CTA   | p.P151L        |
| Pat_02 | Post-Resistance | TDRD3     | 81550  | 37 | 13 | 61102941  | 61102941  | Missense_Mutation | SNP | T | C | 29  | 36  | c.1303T>C     | c.(1303-1305)TAT>CAT | p.Y435H        |
| Pat_02 | Post-Resistance | DACH1     | 1602   | 37 | 13 | 72131228  | 72131228  | Missense_Mutation | SNP | G | A | 50  | 176 | c.1498C>T     | c.(1498-1500)CCT>TCT | p.P500S        |
| Pat_02 | Post-Resistance | C13orf39  | 196541 | 37 | 13 | 103346827 | 103346827 | Missense_Mutation | SNP | C | T | 8   | 22  | c.22G>A       | c.(22-24)GCG>ACG     | p.A8T          |
| Pat_02 | Post-Resistance | METTL3    | 56339  | 37 | 14 | 21966454  | 21966454  | Missense_Mutation | SNP | C | T | 4   | 132 | c.1691G>A     | c.(1690-1692)CGG>CAG | p.R564Q        |

|        |                 |           |        |    |    |           |           |                   |     |    |    |     |     |                |                        |               |
|--------|-----------------|-----------|--------|----|----|-----------|-----------|-------------------|-----|----|----|-----|-----|----------------|------------------------|---------------|
| Pat_02 | Post-Resistance | THTPA     | 79178  | 37 | 14 | 24026349  | 24026349  | Nonsense_Mutation | SNP | G  | A  | 4   | 86  | c.383G>A       | c.(382-384)TGG>TAG     | p.W128*       |
| Pat_02 | Post-Resistance | PYGL      | 5836   | 37 | 14 | 51382590  | 51382591  | Missense_Mutation | DNP | GG | AA | 32  | 54  | :1191_1192CC>T | 1189-1194)CTCCCT>CTTT  | p.P398S       |
| Pat_02 | Post-Resistance | KCNH5     | 27133  | 37 | 14 | 63417027  | 63417027  | Missense_Mutation | SNP | G  | A  | 4   | 164 | c.1193C>T      | c.(1192-1194)ACT>ATT   | p.T398I       |
| Pat_02 | Post-Resistance | FNTB      | 2342   | 37 | 14 | 65390803  | 65390803  | Missense_Mutation | SNP | C  | T  | 43  | 81  | c.134C>T       | c.(133-135)TCC>TTC     | p.S45F        |
| Pat_02 | Post-Resistance | PLEKHH1   | 57475  | 37 | 14 | 68043130  | 68043130  | Missense_Mutation | SNP | C  | T  | 4   | 97  | c.2371C>T      | c.(2371-2373)CTC>TTC   | p.L791F       |
| Pat_02 | Post-Resistance | PCNX      | 22990  | 37 | 14 | 71575507  | 71575507  | Missense_Mutation | SNP | C  | T  | 33  | 58  | c.6488C>T      | c.(6487-6489)TCA>TTA   | p.S2163L      |
| Pat_02 | Post-Resistance | SIPA1L1   | 26037  | 37 | 14 | 72176188  | 72176188  | Missense_Mutation | SNP | G  | A  | 4   | 87  | c.4078G>A      | c.(4078-4080)GCA>ACA   | p.A1360T      |
| Pat_02 | Post-Resistance | ACOT6     | 641372 | 37 | 14 | 74086109  | 74086109  | Missense_Mutation | SNP | G  | A  | 36  | 50  | c.190G>A       | c.(190-192)GAT>AAT     | p.D64N        |
| Pat_02 | Post-Resistance | AHSA1     | 10598  | 37 | 14 | 77926131  | 77926131  | Missense_Mutation | SNP | G  | A  | 4   | 212 | c.253G>A       | c.(253-255)GTC>ATC     | p.V85I        |
| Pat_02 | Post-Resistance | C14orf145 | 145508 | 37 | 14 | 81251316  | 81251316  | Missense_Mutation | SNP | C  | T  | 6   | 145 | c.2134G>A      | c.(2134-2136)GAA>AAA   | p.E712K       |
| Pat_02 | Post-Resistance | BTBD7     | 55727  | 37 | 14 | 93730273  | 93730273  | Missense_Mutation | SNP | G  | A  | 51  | 92  | c.1229C>T      | c.(1228-1230)TCT>TTT   | p.S410F       |
| Pat_02 | Post-Resistance | KIAA1409  | 57578  | 37 | 14 | 94071278  | 94071278  | Missense_Mutation | SNP | C  | T  | 9   | 21  | c.3260C>T      | c.(3259-3261)GCT>GTT   | p.A1087V      |
| Pat_02 | Post-Resistance | PACS2     | 23241  | 37 | 14 | 105859672 | 105859672 | Missense_Mutation | SNP | G  | A  | 19  | 29  | c.2551G>A      | c.(2551-2553)GTC>ATC   | p.V851I       |
| Pat_02 | Post-Resistance | OCA2      | 4948   | 37 | 15 | 28202788  | 28202788  | Missense_Mutation | SNP | C  | A  | 28  | 25  | c.1730G>T      | c.(1729-1731)GGG>GTG   | p.G577V       |
| Pat_02 | Post-Resistance | PLCB2     | 5330   | 37 | 15 | 40582260  | 40582260  | Missense_Mutation | SNP | G  | A  | 58  | 44  | c.3233C>T      | c.(3232-3234)TCC>TTC   | p.S1078F      |
| Pat_02 | Post-Resistance | MAP1A     | 4130   | 37 | 15 | 43813975  | 43813975  | Missense_Mutation | SNP | C  | G  | 4   | 89  | c.304C>G       | c.(304-306)CTG>GTG     | p.L102V       |
| Pat_02 | Post-Resistance | HERC1     | 8925   | 37 | 15 | 63916019  | 63916019  | Missense_Mutation | SNP | G  | A  | 6   | 284 | c.13516C>T     | :.(13516-13518)CGC>TGC | p.R4506C      |
| Pat_02 | Post-Resistance | HCN4      | 10021  | 37 | 15 | 73615699  | 73615699  | Missense_Mutation | SNP | T  | A  | 4   | 4   | c.2735A>T      | c.(2734-2736)AAG>ATG   | p.K912M       |
| Pat_02 | Post-Resistance | BCL2A1    | 597    | 37 | 15 | 80263245  | 80263245  | Missense_Mutation | SNP | G  | T  | 371 | 251 | c.217C>A       | c.(217-219)CAA>AAA     | p.Q73K        |
| Pat_02 | Post-Resistance | MEX3B     | 84206  | 37 | 15 | 82336750  | 82336750  | Missense_Mutation | SNP | G  | A  | 4   | 123 | c.461C>T       | c.(460-462)CCG>CTG     | p.P154L       |
| Pat_02 | Post-Resistance | AGBL1     | 123624 | 37 | 15 | 86791075  | 86791075  | Missense_Mutation | SNP | G  | A  | 5   | 270 | c.562G>A       | c.(562-564)GCA>ACA     | p.A188T       |
| Pat_02 | Post-Resistance | FANCI     | 55215  | 37 | 15 | 89804943  | 89804943  | Missense_Mutation | SNP | C  | T  | 7   | 385 | c.416C>T       | c.(415-417)ACG>ATG     | p.T139M       |
| Pat_02 | Post-Resistance | MESP2     | 145873 | 37 | 15 | 90321375  | 90321375  | Missense_Mutation | SNP | A  | T  | 52  | 41  | c.1004A>T      | c.(1003-1005)CAG>CTG   | p.Q335L       |
| Pat_02 | Post-Resistance | HS3ST6    | 64711  | 37 | 16 | 1961974   | 1961974   | Missense_Mutation | SNP | C  | T  | 4   | 38  | c.553G>A       | c.(553-555)GTG>ATG     | p.V185M       |
| Pat_02 | Post-Resistance | CASKIN1   | 57524  | 37 | 16 | 2236767   | 2236767   | Missense_Mutation | SNP | C  | T  | 4   | 129 | c.989G>A       | c.(988-990)GGC>GAC     | p.G330D       |
| Pat_02 | Post-Resistance | PRSS22    | 64063  | 37 | 16 | 2905646   | 2905646   | Missense_Mutation | SNP | G  | A  | 64  | 165 | c.488C>T       | c.(487-489)CCT>CTT     | p.P163L       |
| Pat_02 | Post-Resistance | PKMYT1    | 9088   | 37 | 16 | 3024313   | 3024313   | Missense_Mutation | SNP | G  | A  | 3   | 25  | c.1085C>T      | c.(1084-1086)CCG>CTG   | p.P362L       |
| Pat_02 | Post-Resistance | IL32      | 9235   | 37 | 16 | 3117607   | 3117607   | Missense_Mutation | SNP | G  | T  | 59  | 178 | c.245G>T       | c.(244-246)CGT>CTT     | p.R82L        |
| Pat_02 | Post-Resistance | C16orf71  | 146562 | 37 | 16 | 4790598   | 4790598   | Missense_Mutation | SNP | G  | A  | 4   | 104 | c.721G>A       | c.(721-723)GCT>ACT     | p.A241T       |
| Pat_02 | Post-Resistance | CIITA     | 4261   | 37 | 16 | 11000747  | 11000747  | Missense_Mutation | SNP | G  | T  | 5   | 171 | c.1398G>T      | c.(1396-1398)CAG>CAT   | p.Q466H       |
| Pat_02 | Post-Resistance | TXNDC11   | 51061  | 37 | 16 | 11778031  | 11778031  | Missense_Mutation | SNP | G  | A  | 41  | 55  | c.2305C>T      | c.(2305-2307)CCC>TCC   | p.P769S       |
| Pat_02 | Post-Resistance | GSPT1     | 2935   | 37 | 16 | 11971296  | 11971296  | Missense_Mutation | SNP | G  | C  | 17  | 37  | c.1156C>G      | c.(1156-1158)CTT>GTT   | p.L386V       |
| Pat_02 | Post-Resistance | ABCC1     | 4363   | 37 | 16 | 16138351  | 16138351  | Missense_Mutation | SNP | C  | T  | 17  | 57  | c.854C>T       | c.(853-855)CCG>CTG     | p.P285L       |
| Pat_02 | Post-Resistance | SYT17     | 51760  | 37 | 16 | 19236121  | 19236121  | Missense_Mutation | SNP | C  | T  | 77  | 89  | c.1189C>T      | c.(1189-1191)CCC>TCC   | p.P397S       |
| Pat_02 | Post-Resistance | GPR139    | 124274 | 37 | 16 | 20043605  | 20043605  | Missense_Mutation | SNP | C  | T  | 79  | 71  | c.514G>A       | c.(514-516)GAA>AAA     | p.E172K       |
| Pat_02 | Post-Resistance | ARHGAP17  | 55114  | 37 | 16 | 24942614  | 24942614  | Missense_Mutation | SNP | T  | C  | 4   | 301 | c.2006A>G      | c.(2005-2007)AAG>AGG   | p.K669R       |
| Pat_02 | Post-Resistance | IL21R     | 50615  | 37 | 16 | 27457411  | 27457411  | Splice_Site       | SNP | T  | A  | 3   | 33  | c.867_splice   | c.e8+2                 | p.K289_splice |
| Pat_02 | Post-Resistance | GTF3C1    | 2975   | 37 | 16 | 27506194  | 27506194  | Missense_Mutation | SNP | G  | A  | 5   | 129 | c.2668C>T      | c.(2668-2670)CCC>TCC   | p.P890S       |
| Pat_02 | Post-Resistance | SULT1A2   | 6799   | 37 | 16 | 28606997  | 28606997  | Splice_Site       | SNP | C  | T  | 4   | 192 | c.149_splice   | c.e3-1                 | p.G50_splice  |
| Pat_02 | Post-Resistance | TBC1D10B  | 26000  | 37 | 16 | 30370102  | 30370102  | Missense_Mutation | SNP | A  | G  | 3   | 60  | c.1679T>C      | c.(1678-1680)CTG>CCG   | p.L560P       |
| Pat_02 | Post-Resistance | PRSS36    | 146547 | 37 | 16 | 31152904  | 31152904  | Missense_Mutation | SNP | G  | A  | 37  | 101 | c.1787C>T      | c.(1786-1788)CCA>CTA   | p.P596L       |
| Pat_02 | Post-Resistance | N4BP1     | 9683   | 37 | 16 | 48580158  | 48580158  | Missense_Mutation | SNP | G  | C  | 39  | 149 | c.2233C>G      | c.(2233-2235)CAG>GAG   | p.Q745E       |
| Pat_02 | Post-Resistance | BRD7      | 29117  | 37 | 16 | 50373952  | 50373952  | Missense_Mutation | SNP | G  | A  | 48  | 191 | c.637C>T       | c.(637-639)CCA>TCA     | p.P213S       |
| Pat_02 | Post-Resistance | TOX3      | 27324  | 37 | 16 | 52473606  | 52473606  | Missense_Mutation | SNP | G  | A  | 4   | 161 | c.1262C>T      | c.(1261-1263)ACG>ATG   | p.T421M       |
| Pat_02 | Post-Resistance | CDH8      | 1006   | 37 | 16 | 62055094  | 62055094  | Missense_Mutation | SNP | C  | T  | 28  | 81  | c.214G>A       | c.(214-216)GAA>AAA     | p.E72K        |
| Pat_02 | Post-Resistance | B3GNT9    | 84752  | 37 | 16 | 67183209  | 67183209  | Missense_Mutation | SNP | C  | T  | 3   | 30  | c.1180G>A      | c.(1180-1182)GCT>ACT   | p.A394T       |
| Pat_02 | Post-Resistance | ADAMTS18  | 170692 | 37 | 16 | 77329007  | 77329007  | Missense_Mutation | SNP | C  | A  | 41  | 102 | c.2819G>T      | c.(2818-2820)TGG>TTG   | p.W940L       |



|        |                 |           |        |    |    |          |          |                   |     |    |    |     |     |                                   |                      |          |
|--------|-----------------|-----------|--------|----|----|----------|----------|-------------------|-----|----|----|-----|-----|-----------------------------------|----------------------|----------|
| Pat_02 | Post-Resistance | LRRRC50   | 123872 | 37 | 16 | 84203797 | 84203797 | Missense_Mutation | SNP | G  | A  | 4   | 163 | c.1363G>A                         | c.(1363-1365)GTT>ATT | p.V455I  |
| Pat_02 | Post-Resistance | TRPV3     | 162514 | 37 | 17 | 3419802  | 3419802  | Missense_Mutation | SNP | C  | T  | 4   | 193 | c.2147G>A                         | c.(2146-2148)CGG>CAG | p.R716Q  |
| Pat_02 | Post-Resistance | TRPV3     | 162514 | 37 | 17 | 3436091  | 3436092  | Missense_Mutation | DNP | CC | TT | 19  | 66  | c.924_925GG>AA922-927)GAGGAC>GAAA |                      | p.D309N  |
| Pat_02 | Post-Resistance | GSG2      | 83903  | 37 | 17 | 3629315  | 3629315  | Missense_Mutation | SNP | G  | A  | 86  | 138 | c.2086G>A                         | c.(2086-2088)GAT>AAT | p.D696N  |
| Pat_02 | Post-Resistance | ZNF594    | 84622  | 37 | 17 | 5086549  | 5086549  | Missense_Mutation | SNP | G  | A  | 6   | 200 | c.1003C>T                         | c.(1003-1005)CGC>TGC | p.R335C  |
| Pat_02 | Post-Resistance | FBXO39    | 162517 | 37 | 17 | 6683191  | 6683191  | Missense_Mutation | SNP | G  | A  | 37  | 52  | c.4G>A                            | c.(4-6)GAC>AAC       | p.D2N    |
| Pat_02 | Post-Resistance | HES7      | 84667  | 37 | 17 | 8025134  | 8025134  | Missense_Mutation | SNP | G  | A  | 15  | 23  | c.433C>T                          | c.(433-435)CCA>TCA   | p.P145S  |
| Pat_02 | Post-Resistance | C17orf63  | 55731  | 37 | 17 | 27086148 | 27086148 | Missense_Mutation | SNP | G  | T  | 4   | 54  | c.829C>A                          | c.(829-831)CAG>AAG   | p.Q277K  |
| Pat_02 | Post-Resistance | RHOT1     | 55288  | 37 | 17 | 30528069 | 30528069 | Missense_Mutation | SNP | G  | A  | 4   | 100 | c.1195G>A                         | c.(1195-1197)GTT>ATT | p.V399I  |
| Pat_02 | Post-Resistance | RHBDL3    | 162494 | 37 | 17 | 30625211 | 30625211 | Missense_Mutation | SNP | G  | A  | 5   | 98  | c.769G>A                          | c.(769-771)GGT>AGT   | p.G257S  |
| Pat_02 | Post-Resistance | DDX52     | 11056  | 37 | 17 | 36002256 | 36002256 | Missense_Mutation | SNP | C  | A  | 4   | 36  | c.169G>T                          | c.(169-171)GGT>TGT   | p.G57C   |
| Pat_02 | Post-Resistance | ZPBP2     | 124626 | 37 | 17 | 38031517 | 38031517 | Missense_Mutation | SNP | G  | A  | 12  | 33  | c.719G>A                          | c.(718-720)CGA>CAA   | p.R240Q  |
| Pat_02 | Post-Resistance | MED24     | 9862   | 37 | 17 | 38185157 | 38185157 | Missense_Mutation | SNP | G  | A  | 56  | 101 | c.1331C>T                         | c.(1330-1332)TCC>TTC | p.S444F  |
| Pat_02 | Post-Resistance | KRT25     | 147183 | 37 | 17 | 38905539 | 38905539 | Missense_Mutation | SNP | C  | T  | 43  | 115 | c.1214G>A                         | c.(1213-1215)GGA>GAA | p.G405E  |
| Pat_02 | Post-Resistance | KRT33A    | 3883   | 37 | 17 | 39506953 | 39506953 | Missense_Mutation | SNP | G  | A  | 4   | 83  | c.67C>T                           | c.(67-69)CCC>TCC     | p.P23S   |
| Pat_02 | Post-Resistance | WNK4      | 65266  | 37 | 17 | 40947840 | 40947840 | Missense_Mutation | SNP | G  | A  | 4   | 79  | c.3220G>A                         | c.(3220-3222)GAC>AAC | p.D1074N |
| Pat_02 | Post-Resistance | HDAC5     | 10014  | 37 | 17 | 42165927 | 42165927 | Missense_Mutation | SNP | C  | T  | 4   | 87  | c.1427G>A                         | c.(1426-1428)CGT>CAT | p.R476H  |
| Pat_02 | Post-Resistance | ITGA2B    | 3674   | 37 | 17 | 42452064 | 42452064 | Missense_Mutation | SNP | G  | A  | 4   | 115 | c.2906C>T                         | c.(2905-2907)GCG>GTG | p.A969V  |
| Pat_02 | Post-Resistance | FZD2      | 2535   | 37 | 17 | 42635928 | 42635928 | Missense_Mutation | SNP | C  | T  | 6   | 57  | c.872C>T                          | c.(871-873)TCG>TTG   | p.S291L  |
| Pat_02 | Post-Resistance | EFTUD2    | 9343   | 37 | 17 | 42942324 | 42942324 | Missense_Mutation | SNP | C  | G  | 4   | 275 | c.1259G>C                         | c.(1258-1260)TGC>TCC | p.C420S  |
| Pat_02 | Post-Resistance | ABCC3     | 8714   | 37 | 17 | 48741383 | 48741383 | Missense_Mutation | SNP | G  | C  | 4   | 131 | c.1249G>C                         | c.(1249-1251)GCC>CCC | p.A417P  |
| Pat_02 | Post-Resistance | NME1-NME2 | 654364 | 37 | 17 | 49233058 | 49233058 | Missense_Mutation | SNP | G  | A  | 4   | 153 | c.118G>A                          | c.(118-120)GGG>AGG   | p.G40R   |
| Pat_02 | Post-Resistance | ANKFN1    | 162282 | 37 | 17 | 54428221 | 54428221 | Missense_Mutation | SNP | C  | T  | 81  | 52  | c.292C>T                          | c.(292-294)CGC>TGC   | p.R98C   |
| Pat_02 | Post-Resistance | EPX       | 8288   | 37 | 17 | 56280605 | 56280605 | Missense_Mutation | SNP | G  | T  | 5   | 126 | c.1872G>T                         | c.(1870-1872)TTG>TTT | p.L624F  |
| Pat_02 | Post-Resistance | SCN4A     | 6329   | 37 | 17 | 62049821 | 62049821 | Missense_Mutation | SNP | C  | T  | 4   | 78  | c.283G>A                          | c.(283-285)GTA>ATA   | p.V95I   |
| Pat_02 | Post-Resistance | RGS9      | 8787   | 37 | 17 | 63173858 | 63173858 | Missense_Mutation | SNP | G  | A  | 62  | 215 | c.591G>A                          | c.(589-591)ATG>ATA   | p.M197I  |
| Pat_02 | Post-Resistance | SLC9A3R1  | 9368   | 37 | 17 | 72758269 | 72758269 | Missense_Mutation | SNP | C  | G  | 4   | 183 | c.560C>G                          | c.(559-561)CCG>CGG   | p.P187R  |
| Pat_02 | Post-Resistance | RECQL5    | 9400   | 37 | 17 | 73623540 | 73623540 | Missense_Mutation | SNP | C  | T  | 70  | 189 | c.2938G>A                         | c.(2938-2940)GAA>AAA | p.E980K  |
| Pat_02 | Post-Resistance | UBE2O     | 63893  | 37 | 17 | 74387583 | 74387583 | Missense_Mutation | SNP | C  | T  | 5   | 277 | c.3320G>A                         | c.(3319-3321)CGC>CAC | p.R1107H |
| Pat_02 | Post-Resistance | USP36     | 57602  | 37 | 17 | 76799510 | 76799510 | Missense_Mutation | SNP | G  | A  | 87  | 94  | c.2767C>T                         | c.(2767-2769)CTT>TTT | p.L923F  |
| Pat_02 | Post-Resistance | CANT1     | 124583 | 37 | 17 | 76993313 | 76993313 | Missense_Mutation | SNP | T  | C  | 6   | 595 | c.392A>G                          | c.(391-393)AAG>AGG   | p.K131R  |
| Pat_02 | Post-Resistance | TBCD      | 6904   | 37 | 17 | 80882868 | 80882868 | Missense_Mutation | SNP | C  | T  | 4   | 11  | c.2314C>T                         | c.(2314-2316)CGC>TGC | p.R772C  |
| Pat_02 | Post-Resistance | PPP4R1    | 9989   | 37 | 18 | 9583215  | 9583215  | Missense_Mutation | SNP | G  | A  | 4   | 111 | c.818C>T                          | c.(817-819)GCT>GTT   | p.A273V  |
| Pat_02 | Post-Resistance | TXNDC2    | 84203  | 37 | 18 | 9886894  | 9886894  | Missense_Mutation | SNP | A  | G  | 4   | 279 | c.418A>G                          | c.(418-420)AAA>GAA   | p.K140E  |
| Pat_02 | Post-Resistance | ASXL3     | 80816  | 37 | 18 | 31323203 | 31323203 | Missense_Mutation | SNP | C  | T  | 25  | 11  | c.3391C>T                         | c.(3391-3393)CCT>TCT | p.P1131S |
| Pat_02 | Post-Resistance | ASXL3     | 80816  | 37 | 18 | 31325379 | 31325379 | Missense_Mutation | SNP | G  | A  | 165 | 459 | c.5567G>A                         | c.(5566-5568)GGG>GAG | p.G1856E |
| Pat_02 | Post-Resistance | TCF4      | 6925   | 37 | 18 | 52901848 | 52901848 | Missense_Mutation | SNP | G  | A  | 151 | 126 | c.1417C>T                         | c.(1417-1419)CCG>TCG | p.P473S  |
| Pat_02 | Post-Resistance | SERPINB4  | 6318   | 37 | 18 | 61328342 | 61328342 | Missense_Mutation | SNP | C  | T  | 167 | 134 | c.109G>A                          | c.(109-111)GCA>ACA   | p.A37T   |
| Pat_02 | Post-Resistance | SERPINB2  | 5055   | 37 | 18 | 61570220 | 61570220 | Missense_Mutation | SNP | C  | T  | 4   | 185 | c.929C>T                          | c.(928-930)CCC>CTC   | p.P310L  |
| Pat_02 | Post-Resistance | SALL3     | 27164  | 37 | 18 | 76754432 | 76754432 | Missense_Mutation | SNP | C  | T  | 6   | 56  | c.2441C>T                         | c.(2440-2442)GCG>GTG | p.A814V  |
| Pat_02 | Post-Resistance | TPRSS9    | 360200 | 37 | 19 | 2415763  | 2415763  | Missense_Mutation | SNP | G  | A  | 63  | 60  | c.1567G>A                         | c.(1567-1569)GAA>AAA | p.E523K  |
| Pat_02 | Post-Resistance | ZNF57     | 126295 | 37 | 19 | 2917842  | 2917842  | Missense_Mutation | SNP | G  | A  | 9   | 143 | c.1223G>A                         | c.(1222-1224)CGA>CAA | p.R408Q  |
| Pat_02 | Post-Resistance | C19orf28  | 126321 | 37 | 19 | 3548013  | 3548013  | Missense_Mutation | SNP | C  | A  | 35  | 76  | c.670G>T                          | c.(670-672)GTG>TTG   | p.V224L  |
| Pat_02 | Post-Resistance | MAP2K2    | 5605   | 37 | 19 | 4117584  | 4117584  | Missense_Mutation | SNP | G  | A  | 42  | 122 | c.136C>T                          | c.(136-138)CTT>TTT   | p.L46F   |
| Pat_02 | Post-Resistance | SHD       | 56961  | 37 | 19 | 4290446  | 4290446  | Missense_Mutation | SNP | G  | A  | 4   | 172 | c.839G>A                          | c.(838-840)AGC>AAC   | p.S280N  |
| Pat_02 | Post-Resistance | ARRDC5    | 645432 | 37 | 19 | 4902842  | 4902842  | Missense_Mutation | SNP | G  | A  | 67  | 84  | c.38C>T                           | c.(37-39)CCC>CTC     | p.P13L   |
| Pat_02 | Post-Resistance | PTPRS     | 5802   | 37 | 19 | 5244224  | 5244224  | Missense_Mutation | SNP | G  | A  | 4   | 97  | c.1258C>T                         | c.(1258-1260)CGC>TGC | p.R420C  |

|        |                 |          |        |    |    |           |           |                   |     |    |    |     |     |                |                        |               |
|--------|-----------------|----------|--------|----|----|-----------|-----------|-------------------|-----|----|----|-----|-----|----------------|------------------------|---------------|
| Pat_02 | Post-Resistance | MCOLN1   | 57192  | 37 | 19 | 7589984   | 7589984   | Nonsense_Mutation | SNP | C  | T  | 23  | 89  | c.169C>T       | c.(169-171)CGA>TGA     | p.R57*        |
| Pat_02 | Post-Resistance | MUC16    | 94025  | 37 | 19 | 9069874   | 9069874   | Missense_Mutation | SNP | C  | T  | 117 | 98  | c.17572G>A     | c.(17572-17574)GAA>AAA | p.E5858K      |
| Pat_02 | Post-Resistance | OR7E24   | 26648  | 37 | 19 | 9361936   | 9361936   | Missense_Mutation | SNP | C  | T  | 4   | 208 | c.217C>T       | c.(217-219)CTC>TTC     | p.L73F        |
| Pat_02 | Post-Resistance | ZNF700   | 90592  | 37 | 19 | 12060061  | 12060061  | Missense_Mutation | SNP | C  | T  | 29  | 76  | c.1222C>T      | c.(1222-1224)CAT>TAT   | p.H408Y       |
| Pat_02 | Post-Resistance | ZNF878   | 729747 | 37 | 19 | 12155673  | 12155673  | Missense_Mutation | SNP | A  | C  | 7   | 400 | c.684T>G       | c.(682-684)AGT>AGG     | p.S228R       |
| Pat_02 | Post-Resistance | ZNF844   | 284391 | 37 | 19 | 12187307  | 12187307  | Missense_Mutation | SNP | G  | C  | 4   | 151 | c.1372G>C      | c.(1372-1374)GAT>CAT   | p.D458H       |
| Pat_02 | Post-Resistance | ZNF564   | 163050 | 37 | 19 | 12637555  | 12637555  | Missense_Mutation | SNP | T  | C  | 6   | 260 | c.1367A>G      | c.(1366-1368)AAA>AGA   | p.K456R       |
| Pat_02 | Post-Resistance | TRMT1    | 55621  | 37 | 19 | 13223529  | 13223529  | Missense_Mutation | SNP | C  | T  | 5   | 226 | c.860G>A       | c.(859-861)TGC>TAC     | p.C287Y       |
| Pat_02 | Post-Resistance | CACNA1A  | 773    | 37 | 19 | 13443692  | 13443692  | Missense_Mutation | SNP | G  | A  | 20  | 74  | c.1246C>T      | c.(1246-1248)CCC>TCC   | p.P416S       |
| Pat_02 | Post-Resistance | USHBP1   | 83878  | 37 | 19 | 17366283  | 17366283  | Missense_Mutation | SNP | G  | A  | 5   | 228 | c.1603C>T      | c.(1603-1605)CGG>TGG   | p.R535W       |
| Pat_02 | Post-Resistance | ANO8     | 57719  | 37 | 19 | 17435723  | 17435723  | Missense_Mutation | SNP | G  | A  | 5   | 297 | c.3134C>T      | c.(3133-3135)CCG>CTG   | p.P1045L      |
| Pat_02 | Post-Resistance | COMP     | 1311   | 37 | 19 | 18898299  | 18898299  | Splice_Site       | SNP | C  | T  | 4   | 166 | c.1135_splice  | c.e10+1                | p.R379_splice |
| Pat_02 | Post-Resistance | TSSK6    | 83983  | 37 | 19 | 19626088  | 19626088  | Missense_Mutation | DNP | GG | AA | 47  | 41  | c.148_149CC>TT | c.(148-150)CCG>TTG     | p.P50L        |
| Pat_02 | Post-Resistance | ZNF626   | 199777 | 37 | 19 | 20808006  | 20808006  | Missense_Mutation | SNP | T  | C  | 4   | 143 | c.677A>G       | c.(676-678)GAG>GGG     | p.E226G       |
| Pat_02 | Post-Resistance | ATP4A    | 495    | 37 | 19 | 36044045  | 36044045  | Missense_Mutation | SNP | G  | A  | 5   | 239 | c.2645C>T      | c.(2644-2646)ACG>ATG   | p.T882M       |
| Pat_02 | Post-Resistance | THAP8    | 199745 | 37 | 19 | 36530878  | 36530878  | Missense_Mutation | SNP | G  | A  | 5   | 133 | c.244C>T       | c.(244-246)CCC>TCC     | p.P82S        |
| Pat_02 | Post-Resistance | ZNF585B  | 92285  | 37 | 19 | 37676149  | 37676149  | Missense_Mutation | SNP | G  | A  | 74  | 206 | c.2290C>T      | c.(2290-2292)CAT>TAT   | p.H764Y       |
| Pat_02 | Post-Resistance | SIPA1L3  | 23094  | 37 | 19 | 38600987  | 38600987  | Nonsense_Mutation | SNP | C  | T  | 20  | 71  | c.2254C>T      | c.(2254-2256)CGA>TGA   | p.R752*       |
| Pat_02 | Post-Resistance | SYCN     | 342898 | 37 | 19 | 39694677  | 39694677  | Missense_Mutation | SNP | C  | A  | 6   | 22  | c.218G>T       | c.(217-219)TGG>TTG     | p.W73L        |
| Pat_02 | Post-Resistance | MED29    | 55588  | 37 | 19 | 39888248  | 39888248  | Missense_Mutation | SNP | C  | T  | 4   | 145 | c.575C>T       | c.(574-576)GCC>GTC     | p.A192V       |
| Pat_02 | Post-Resistance | ZNF780A  | 284323 | 37 | 19 | 40580552  | 40580552  | Missense_Mutation | SNP | T  | G  | 5   | 289 | c.1797A>C      | c.(1795-1797)CAA>CAC   | p.Q599H       |
| Pat_02 | Post-Resistance | SPTBN4   | 57731  | 37 | 19 | 41066113  | 41066113  | Missense_Mutation | SNP | G  | A  | 4   | 109 | c.5719G>A      | c.(5719-5721)GGT>AGT   | p.G1907S      |
| Pat_02 | Post-Resistance | CYP2B6   | 1555   | 37 | 19 | 41518343  | 41518343  | Missense_Mutation | SNP | C  | T  | 5   | 132 | c.1105C>T      | c.(1105-1107)CAC>TAC   | p.H369Y       |
| Pat_02 | Post-Resistance | CYP2S1   | 29785  | 37 | 19 | 41709378  | 41709378  | Missense_Mutation | SNP | C  | T  | 17  | 26  | c.1000C>T      | c.(1000-1002)CGG>TGG   | p.R334W       |
| Pat_02 | Post-Resistance | CEACAM6  | 4680   | 37 | 19 | 42265903  | 42265903  | Missense_Mutation | SNP | C  | T  | 28  | 106 | c.730C>T       | c.(730-732)CCC>TCC     | p.P244S       |
| Pat_02 | Post-Resistance | ZC3H4    | 23211  | 37 | 19 | 47575940  | 47575940  | Missense_Mutation | SNP | C  | T  | 15  | 54  | c.1471G>A      | c.(1471-1473)GAG>AAG   | p.E491K       |
| Pat_02 | Post-Resistance | LIG1     | 3978   | 37 | 19 | 48636318  | 48636318  | Missense_Mutation | SNP | C  | A  | 7   | 487 | c.1646G>T      | c.(1645-1647)CGG>CTG   | p.R549L       |
| Pat_02 | Post-Resistance | FAM83E   | 54854  | 37 | 19 | 49113164  | 49113164  | Missense_Mutation | SNP | C  | G  | 3   | 138 | c.727G>C       | c.(727-729)GAC>CAC     | p.D243H       |
| Pat_02 | Post-Resistance | FUZ      | 80199  | 37 | 19 | 50310433  | 50310433  | Missense_Mutation | SNP | A  | G  | 5   | 191 | c.1232T>C      | c.(1231-1233)CTG>CCG   | p.L411P       |
| Pat_02 | Post-Resistance | ZNF845   | 91664  | 37 | 19 | 53855196  | 53855196  | Missense_Mutation | SNP | T  | C  | 4   | 242 | c.1268T>C      | c.(1267-1269)ATG>ACG   | p.M423T       |
| Pat_02 | Post-Resistance | LILRB1   | 10859  | 37 | 19 | 55144109  | 55144109  | Missense_Mutation | SNP | C  | T  | 4   | 139 | c.856C>T       | c.(856-858)CCT>TCT     | p.P286S       |
| Pat_02 | Post-Resistance | LILRB4   | 11006  | 37 | 19 | 55175463  | 55175463  | Missense_Mutation | SNP | C  | G  | 5   | 177 | c.322C>G       | c.(322-324)CAG>GAG     | p.Q108E       |
| Pat_02 | Post-Resistance | PPP1R12C | 54776  | 37 | 19 | 55607264  | 55607264  | Missense_Mutation | SNP | G  | A  | 128 | 79  | c.1198C>T      | c.(1198-1200)CCG>TCG   | p.P400S       |
| Pat_02 | Post-Resistance | ZNF583   | 147949 | 37 | 19 | 56934293  | 56934293  | Missense_Mutation | SNP | C  | T  | 15  | 123 | c.266C>T       | c.(265-267)TCA>TTA     | p.S89L        |
| Pat_02 | Post-Resistance | ZNF274   | 10782  | 37 | 19 | 58721354  | 58721354  | Missense_Mutation | SNP | G  | A  | 4   | 163 | c.767G>A       | c.(766-768)GGC>GAC     | p.G256D       |
| Pat_02 | Post-Resistance | ROCK2    | 9475   | 37 | 2  | 11337309  | 11337309  | Missense_Mutation | SNP | G  | A  | 97  | 114 | c.3445C>T      | c.(3445-3447)CCA>TCA   | p.P1149S      |
| Pat_02 | Post-Resistance | KRTCAP3  | 200634 | 37 | 2  | 27666038  | 27666038  | Missense_Mutation | SNP | G  | A  | 62  | 215 | c.371G>A       | c.(370-372)GGT>GAT     | p.G124D       |
| Pat_02 | Post-Resistance | SIX3     | 6496   | 37 | 2  | 45169790  | 45169790  | Missense_Mutation | SNP | C  | T  | 3   | 24  | c.547C>T       | c.(547-549)CGC>TGC     | p.R183C       |
| Pat_02 | Post-Resistance | EPAS1    | 2034   | 37 | 2  | 46597051  | 46597051  | Missense_Mutation | SNP | A  | G  | 3   | 71  | c.865A>G       | c.(865-867)ATG>GTG     | p.M289V       |
| Pat_02 | Post-Resistance | WDR54    | 84058  | 37 | 2  | 74650623  | 74650623  | Missense_Mutation | SNP | G  | A  | 4   | 257 | c.371G>A       | c.(370-372)CGG>CAG     | p.R124Q       |
| Pat_02 | Post-Resistance | PROM2    | 150696 | 37 | 2  | 95952320  | 95952320  | Splice_Site       | SNP | G  | C  | 7   | 44  | c.2040_splice  | c.e17+1                | p.V680_splice |
| Pat_02 | Post-Resistance | IL18RAP  | 8807   | 37 | 2  | 103040432 | 103040432 | Missense_Mutation | SNP | G  | A  | 42  | 51  | c.232G>A       | c.(232-234)GAC>AAC     | p.D78N        |
| Pat_02 | Post-Resistance | UXS1     | 80146  | 37 | 2  | 106729173 | 106729173 | Missense_Mutation | SNP | G  | A  | 4   | 97  | c.793C>T       | c.(793-795)CGC>TGC     | p.R265C       |
| Pat_02 | Post-Resistance | INSIG2   | 51141  | 37 | 2  | 118860893 | 118860893 | Missense_Mutation | SNP | G  | A  | 5   | 233 | c.365G>A       | c.(364-366)AGT>AAT     | p.S122N       |
| Pat_02 | Post-Resistance | EPB41L5  | 57669  | 37 | 2  | 120918494 | 120918494 | Nonsense_Mutation | SNP | G  | T  | 5   | 321 | c.1831G>T      | c.(1831-1833)GAG>TAG   | p.E611*       |
| Pat_02 | Post-Resistance | GLI2     | 2736   | 37 | 2  | 121747862 | 121747862 | Nonsense_Mutation | SNP | G  | T  | 5   | 173 | c.4372G>T      | c.(4372-4374)GGA>TGA   | p.G1458*      |
| Pat_02 | Post-Resistance | SCN9A    | 6335   | 37 | 2  | 167151136 | 167151136 | Missense_Mutation | SNP | A  | T  | 16  | 37  | c.938T>A       | c.(937-939)CTC>CAC     | p.L313H       |

|        |                 |            |        |    |    |           |           |                   |     |   |   |     |     |            |                        |          |
|--------|-----------------|------------|--------|----|----|-----------|-----------|-------------------|-----|---|---|-----|-----|------------|------------------------|----------|
| Pat_02 | Post-Resistance | PDK1       | 5163   | 37 | 2  | 173435524 | 173435524 | Missense_Mutation | SNP | C | T | 4   | 143 | c.917C>T   | c.(916-918)ACG>ATG     | p.T306M  |
| Pat_02 | Post-Resistance | HOXD10     | 3236   | 37 | 2  | 176983724 | 176983724 | Missense_Mutation | SNP | C | A | 4   | 138 | c.788C>A   | c.(787-789)GCA>GAA     | p.A263E  |
| Pat_02 | Post-Resistance | TTN        | 7273   | 37 | 2  | 179584164 | 179584164 | Missense_Mutation | SNP | G | A | 26  | 100 | c.20221C>T | c.(20221-20223)CCT>TCT | p.P6741S |
| Pat_02 | Post-Resistance | TTN        | 7273   | 37 | 2  | 179605802 | 179605802 | Missense_Mutation | SNP | G | A | 79  | 305 | c.11645C>T | c.(11644-11646)CCA>CTA | p.P3882L |
| Pat_02 | Post-Resistance | TTN        | 7273   | 37 | 2  | 179632760 | 179632760 | Missense_Mutation | SNP | C | T | 41  | 151 | c.9286G>A  | c.(9286-9288)GAA>AAA   | p.E3096K |
| Pat_02 | Post-Resistance | CALCRL     | 10203  | 37 | 2  | 188216932 | 188216932 | Missense_Mutation | SNP | C | T | 21  | 99  | c.1037G>A  | c.(1036-1038)GGC>GAC   | p.G346D  |
| Pat_02 | Post-Resistance | MYO1B      | 4430   | 37 | 2  | 192225446 | 192225446 | Missense_Mutation | SNP | G | A | 94  | 226 | c.652G>A   | c.(652-654)GAG>AAG     | p.E218K  |
| Pat_02 | Post-Resistance | DNAH7      | 56171  | 37 | 2  | 196825573 | 196825573 | Missense_Mutation | SNP | G | A | 96  | 93  | c.2302C>T  | c.(2302-2304)CGT>TGT   | p.R768C  |
| Pat_02 | Post-Resistance | CPS1       | 1373   | 37 | 2  | 211518789 | 211518789 | Missense_Mutation | SNP | G | A | 101 | 94  | c.3521G>A  | c.(3520-3522)CGA>CAA   | p.R1174Q |
| Pat_02 | Post-Resistance | VIL1       | 7429   | 37 | 2  | 219297613 | 219297613 | Missense_Mutation | SNP | C | T | 4   | 111 | c.1439C>T  | c.(1438-1440)CCA>CTA   | p.P480L  |
| Pat_02 | Post-Resistance | AGAP1      | 116987 | 37 | 2  | 236659084 | 236659084 | Missense_Mutation | SNP | G | A | 87  | 258 | c.625G>A   | c.(625-627)GAG>AAG     | p.E209K  |
| Pat_02 | Post-Resistance | IQCA1      | 79781  | 37 | 2  | 237300651 | 237300651 | Missense_Mutation | SNP | G | A | 5   | 204 | c.1381C>T  | c.(1381-1383)CGC>TGC   | p.R461C  |
| Pat_02 | Post-Resistance | HDAC4      | 9759   | 37 | 2  | 240056075 | 240056075 | Missense_Mutation | SNP | A | G | 3   | 50  | c.1160T>C  | c.(1159-1161)CTT>CCT   | p.L387P  |
| Pat_02 | Post-Resistance | ANO7       | 50636  | 37 | 2  | 242154310 | 242154310 | Missense_Mutation | SNP | C | T | 4   | 101 | c.1981C>T  | c.(1981-1983)CTC>TTC   | p.L661F  |
| Pat_02 | Post-Resistance | GPCPD1     | 56261  | 37 | 20 | 5564948   | 5564948   | Missense_Mutation | SNP | C | T | 4   | 195 | c.328G>A   | c.(328-330)GAT>AAT     | p.D110N  |
| Pat_02 | Post-Resistance | CSRP2BP    | 57325  | 37 | 20 | 18139799  | 18139799  | Nonsense_Mutation | SNP | C | A | 13  | 126 | c.572C>A   | c.(571-573)TCA>TAA     | p.S191*  |
| Pat_02 | Post-Resistance | CST4       | 1472   | 37 | 20 | 23669492  | 23669492  | Missense_Mutation | SNP | G | A | 4   | 158 | c.115C>T   | c.(115-117)CTC>TTC     | p.L39F   |
| Pat_02 | Post-Resistance | ITCH       | 83737  | 37 | 20 | 33049960  | 33049960  | Missense_Mutation | SNP | C | T | 61  | 80  | c.1481C>T  | c.(1480-1482)CCA>CTA   | p.P494L  |
| Pat_02 | Post-Resistance | CEP250     | 11190  | 37 | 20 | 34097836  | 34097836  | Missense_Mutation | SNP | G | A | 4   | 169 | c.7018G>A  | c.(7018-7020)GGA>AGA   | p.G2340R |
| Pat_02 | Post-Resistance | PLCG1      | 5335   | 37 | 20 | 39795117  | 39795117  | Missense_Mutation | SNP | T | G | 3   | 97  | c.2002T>G  | c.(2002-2004)TGG>GGG   | p.W668G  |
| Pat_02 | Post-Resistance | PTPRT      | 11122  | 37 | 20 | 41306578  | 41306578  | Missense_Mutation | SNP | G | A | 4   | 240 | c.1081C>T  | c.(1081-1083)CTC>TTC   | p.L361F  |
| Pat_02 | Post-Resistance | WFDC10A    | 140832 | 37 | 20 | 44258532  | 44258532  | Missense_Mutation | SNP | A | T | 4   | 164 | c.80A>T    | c.(79-81)AAG>ATG       | p.K27M   |
| Pat_02 | Post-Resistance | KCNB1      | 3745   | 37 | 20 | 47989852  | 47989852  | Nonsense_Mutation | SNP | C | A | 5   | 225 | c.2245G>T  | c.(2245-2247)GAG>TAG   | p.E749*  |
| Pat_02 | Post-Resistance | ZGPAT      | 84619  | 37 | 20 | 62365029  | 62365029  | Missense_Mutation | SNP | G | A | 5   | 306 | c.809G>A   | c.(808-810)CGC>CAC     | p.R270H  |
| Pat_02 | Post-Resistance | TPTE       | 7179   | 37 | 21 | 10921987  | 10921987  | Missense_Mutation | SNP | C | T | 22  | 119 | c.1036G>A  | c.(1036-1038)GGA>AGA   | p.G346R  |
| Pat_02 | Post-Resistance | KRTAP24-1  | 643803 | 37 | 21 | 31655039  | 31655039  | Missense_Mutation | SNP | C | A | 105 | 90  | c.212G>T   | c.(211-213)TGC>TTC     | p.C71F   |
| Pat_02 | Post-Resistance | GART       | 2618   | 37 | 21 | 34889834  | 34889834  | Missense_Mutation | SNP | C | A | 6   | 485 | c.1784G>T  | c.(1783-1785)CGA>CTA   | p.R595L  |
| Pat_02 | Post-Resistance | DOPEY2     | 9980   | 37 | 21 | 37572684  | 37572684  | Missense_Mutation | SNP | C | T | 4   | 229 | c.376C>T   | c.(376-378)CTC>TTC     | p.L126F  |
| Pat_02 | Post-Resistance | C21orf33   | 8209   | 37 | 21 | 45563173  | 45563173  | Missense_Mutation | SNP | A | G | 51  | 50  | c.608A>G   | c.(607-609)AAG>AGG     | p.K203R  |
| Pat_02 | Post-Resistance | KRTAP10-11 | 386678 | 37 | 21 | 46066487  | 46066487  | Missense_Mutation | SNP | G | A | 51  | 134 | c.112G>A   | c.(112-114)GCC>ACC     | p.A38T   |
| Pat_02 | Post-Resistance | KRTAP12-3  | 386683 | 37 | 21 | 46078068  | 46078068  | Missense_Mutation | SNP | G | A | 6   | 376 | c.172G>A   | c.(172-174)GTG>ATG     | p.V58M   |
| Pat_02 | Post-Resistance | FTCD       | 10841  | 37 | 21 | 47571497  | 47571497  | Missense_Mutation | SNP | C | A | 4   | 138 | c.611G>T   | c.(610-612)CGG>CTG     | p.R204L  |
| Pat_02 | Post-Resistance | PCNT       | 5116   | 37 | 21 | 47817317  | 47817317  | Missense_Mutation | SNP | G | A | 5   | 170 | c.4355G>A  | c.(4354-4356)GGG>GAG   | p.G1452E |
| Pat_02 | Post-Resistance | VPREB3     | 29802  | 37 | 22 | 24095185  | 24095185  | Missense_Mutation | SNP | G | A | 4   | 134 | c.250C>T   | c.(250-252)CCC>TCC     | p.P84S   |
| Pat_02 | Post-Resistance | SUSD2      | 56241  | 37 | 22 | 24584196  | 24584196  | Missense_Mutation | SNP | G | A | 4   | 138 | c.2345G>A  | c.(2344-2346)CGC>CAC   | p.R782H  |
| Pat_02 | Post-Resistance | RNF185     | 91445  | 37 | 22 | 31600480  | 31600480  | Missense_Mutation | SNP | C | T | 110 | 95  | c.487C>T   | c.(487-489)CCT>TCT     | p.P163S  |
| Pat_02 | Post-Resistance | MGAT3      | 4248   | 37 | 22 | 39884185  | 39884185  | Missense_Mutation | SNP | C | T | 4   | 233 | c.833C>T   | c.(832-834)CCG>CTG     | p.P278L  |
| Pat_02 | Post-Resistance | SGSM3      | 27352  | 37 | 22 | 40804428  | 40804428  | Missense_Mutation | SNP | G | A | 4   | 114 | c.1777G>A  | c.(1777-1779)GAG>AAG   | p.E593K  |
| Pat_02 | Post-Resistance | EP300      | 2033   | 37 | 22 | 41564581  | 41564581  | Missense_Mutation | SNP | G | A | 4   | 178 | c.4003G>A  | c.(4003-4005)GTA>ATA   | p.V1335I |
| Pat_02 | Post-Resistance | TCF20      | 6942   | 37 | 22 | 42610675  | 42610675  | Missense_Mutation | SNP | G | A | 5   | 185 | c.637C>T   | c.(637-639)CGG>TGG     | p.R213W  |
| Pat_02 | Post-Resistance | TUBGCP6    | 85378  | 37 | 22 | 50659166  | 50659166  | Missense_Mutation | SNP | T | C | 5   | 177 | c.3622A>G  | c.(3622-3624)ACC>GCC   | p.T1208A |
| Pat_02 | Post-Resistance | PLXNB2     | 23654  | 37 | 22 | 50718981  | 50718981  | Missense_Mutation | SNP | G | A | 6   | 190 | c.4112C>T  | c.(4111-4113)ACG>ATG   | p.T1371M |
| Pat_02 | Post-Resistance | NCAPH2     | 29781  | 37 | 22 | 50960618  | 50960618  | Missense_Mutation | SNP | G | A | 4   | 156 | c.1171G>A  | c.(1171-1173)GTC>ATC   | p.V391I  |
| Pat_02 | Post-Resistance | SRGAP3     | 9901   | 37 | 3  | 9034696   | 9034696   | Missense_Mutation | SNP | C | T | 68  | 13  | c.2452G>A  | c.(2452-2454)GAG>AAG   | p.E818K  |
| Pat_02 | Post-Resistance | SLC4A7     | 9497   | 37 | 3  | 27439823  | 27439823  | Missense_Mutation | SNP | C | A | 4   | 166 | c.2422G>T  | c.(2422-2424)GTA>TTA   | p.V808L  |
| Pat_02 | Post-Resistance | CTNNB1     | 1499   | 37 | 3  | 41266136  | 41266136  | Missense_Mutation | SNP | T | C | 41  | 93  | c.133T>C   | c.(133-135)TCT>CCT     | p.S45P   |
| Pat_02 | Post-Resistance | CCBP2      | 1238   | 37 | 3  | 42906595  | 42906595  | Missense_Mutation | SNP | G | A | 4   | 160 | c.601G>A   | c.(601-603)GGG>AGG     | p.G201R  |

|        |                 |           |        |    |   |           |           |                   |     |   |   |     |     |               |                        |                |
|--------|-----------------|-----------|--------|----|---|-----------|-----------|-------------------|-----|---|---|-----|-----|---------------|------------------------|----------------|
| Pat_02 | Post-Resistance | CDCP1     | 64866  | 37 | 3 | 45153928  | 45153928  | Missense_Mutation | SNP | G | A | 469 | 116 | c.302C>T      | c.(301-303)TCA>TTA     | p.S101L        |
| Pat_02 | Post-Resistance | KIF9      | 64147  | 37 | 3 | 47277934  | 47277934  | Missense_Mutation | SNP | C | T | 4   | 102 | c.2100G>A     | c.(2098-2100)ATG>ATA   | p.M700I        |
| Pat_02 | Post-Resistance | GPX1      | 2876   | 37 | 3 | 49395482  | 49395482  | Missense_Mutation | SNP | G | C | 4   | 43  | c.230C>G      | c.(229-231)CCG>CGG     | p.P77R         |
| Pat_02 | Post-Resistance | BSN       | 8927   | 37 | 3 | 49699728  | 49699728  | Missense_Mutation | SNP | T | C | 3   | 45  | c.10450T>C    | c.(10450-10452)TCA>CCA | p.S3484P       |
| Pat_02 | Post-Resistance | CDHR4     | 389118 | 37 | 3 | 49836771  | 49836771  | Missense_Mutation | SNP | G | A | 4   | 45  | c.149C>T      | c.(148-150)ACA>ATA     | p.T50I         |
| Pat_02 | Post-Resistance | DOCK3     | 1795   | 37 | 3 | 51263088  | 51263088  | Missense_Mutation | SNP | C | T | 143 | 66  | c.1261C>T     | c.(1261-1263)CGC>TGC   | p.R421C        |
| Pat_02 | Post-Resistance | RBM15B    | 29890  | 37 | 3 | 51431274  | 51431274  | Missense_Mutation | SNP | G | A | 4   | 36  | c.2444G>A     | c.(2443-2445)GGT>GAT   | p.G815D        |
| Pat_02 | Post-Resistance | NISCH     | 11188  | 37 | 3 | 52522296  | 52522296  | Missense_Mutation | SNP | C | T | 4   | 161 | c.2788C>T     | c.(2788-2790)CGT>TGT   | p.R930C        |
| Pat_02 | Post-Resistance | ERC2      | 26059  | 37 | 3 | 55922487  | 55922487  | Missense_Mutation | SNP | C | T | 177 | 50  | c.2494G>A     | c.(2494-2496)GAA>AAA   | p.E832K        |
| Pat_02 | Post-Resistance | NSUN3     | 63899  | 37 | 3 | 93845251  | 93845251  | Missense_Mutation | SNP | T | G | 3   | 87  | c.940T>G      | c.(940-942)TTA>GTA     | p.L314V        |
| Pat_02 | Post-Resistance | ZPLD1     | 131368 | 37 | 3 | 102171787 | 102171787 | Missense_Mutation | SNP | G | T | 4   | 100 | c.131G>T      | c.(130-132)TGT>TTT     | p.C44F         |
| Pat_02 | Post-Resistance | CD200R1   | 131450 | 37 | 3 | 112642585 | 112642585 | Missense_Mutation | SNP | T | C | 62  | 25  | c.917A>G      | c.(916-918)AAC>AGC     | p.N306S        |
| Pat_02 | Post-Resistance | ADPRH     | 141    | 37 | 3 | 119301188 | 119301188 | Missense_Mutation | SNP | G | A | 4   | 124 | c.172G>A      | c.(172-174)GTG>ATG     | p.V58M         |
| Pat_02 | Post-Resistance | MYLK      | 4638   | 37 | 3 | 123356964 | 123356964 | Missense_Mutation | SNP | C | T | 4   | 97  | c.4915G>A     | c.(4915-4917)GGC>AGC   | p.G1639S       |
| Pat_02 | Post-Resistance | CCDC48    | 79825  | 37 | 3 | 128755927 | 128755927 | Missense_Mutation | SNP | C | A | 3   | 18  | c.1557C>A     | c.(1555-1557)GAC>GAA   | p.D519E        |
| Pat_02 | Post-Resistance | NUDT16    | 131870 | 37 | 3 | 131101010 | 131101010 | Missense_Mutation | SNP | G | A | 5   | 72  | c.160G>A      | c.(160-162)GCT>ACT     | p.A54T         |
| Pat_02 | Post-Resistance | LRRC31    | 79782  | 37 | 3 | 169569529 | 169569529 | Missense_Mutation | SNP | G | A | 43  | 34  | c.1037C>T     | c.(1036-1038)TCA>TTA   | p.S346L        |
| Pat_02 | Post-Resistance | NAALADL2  | 254827 | 37 | 3 | 175184905 | 175184905 | Missense_Mutation | SNP | G | A | 4   | 104 | c.1466G>A     | c.(1465-1467)CGA>CAA   | p.R489Q        |
| Pat_02 | Post-Resistance | FXR1      | 8087   | 37 | 3 | 180685998 | 180685998 | Missense_Mutation | SNP | G | A | 4   | 147 | c.1358G>A     | c.(1357-1359)CGA>CAA   | p.R453Q        |
| Pat_02 | Post-Resistance | EIF2B5    | 8893   | 37 | 3 | 183855532 | 183855532 | Missense_Mutation | SNP | C | T | 89  | 31  | c.445C>T      | c.(445-447)CTT>TTT     | p.L149F        |
| Pat_02 | Post-Resistance | ZNF721    | 170960 | 37 | 4 | 435639    | 435639    | Missense_Mutation | SNP | T | C | 3   | 84  | c.2617A>G     | c.(2617-2619)ACC>GCC   | p.T873A        |
| Pat_02 | Post-Resistance | TACC3     | 10460  | 37 | 4 | 1730378   | 1730378   | Missense_Mutation | SNP | C | T | 115 | 70  | c.1249C>T     | c.(1249-1251)CCG>TCG   | p.P417S        |
| Pat_02 | Post-Resistance | GPR78     | 27201  | 37 | 4 | 8584263   | 8584263   | Missense_Mutation | SNP | G | A | 4   | 69  | c.674G>A      | c.(673-675)CCG>CAG     | p.R225Q        |
| Pat_02 | Post-Resistance | BOD1L     | 259282 | 37 | 4 | 13603683  | 13603683  | Missense_Mutation | SNP | T | C | 3   | 118 | c.4841A>G     | c.(4840-4842)GAA>GGA   | p.E1614G       |
| Pat_02 | Post-Resistance | LOC344967 | 344967 | 37 | 4 | 40045496  | 40045496  | Missense_Mutation | SNP | A | T | 4   | 52  | c.160T>A      | c.(160-162)TCC>ACC     | p.S54T         |
| Pat_02 | Post-Resistance | UGT2A1    | 10941  | 37 | 4 | 70455304  | 70455304  | Missense_Mutation | SNP | C | T | 166 | 71  | c.1370G>A     | c.(1369-1371)CGA>CAA   | p.R457Q        |
| Pat_02 | Post-Resistance | PRSS12    | 8492   | 37 | 4 | 119204150 | 119204150 | Missense_Mutation | SNP | C | T | 5   | 293 | c.2156G>A     | c.(2155-2157)CGA>CAA   | p.R719Q        |
| Pat_02 | Post-Resistance | FAT4      | 79633  | 37 | 4 | 126336563 | 126336563 | Missense_Mutation | SNP | G | A | 71  | 217 | c.6445G>A     | c.(6445-6447)GAT>AAT   | p.D2149N       |
| Pat_02 | Post-Resistance | PLK4      | 10733  | 37 | 4 | 128814897 | 128814897 | Missense_Mutation | SNP | G | A | 80  | 462 | c.2423G>A     | c.(2422-2424)GGT>GAT   | p.G808D        |
| Pat_02 | Post-Resistance | TBC1D9    | 23158  | 37 | 4 | 141583078 | 141583078 | Missense_Mutation | SNP | G | A | 5   | 66  | c.1772C>T     | c.(1771-1773)GCT>GTT   | p.A591V        |
| Pat_02 | Post-Resistance | USP38     | 84640  | 37 | 4 | 144124642 | 144124642 | Missense_Mutation | SNP | A | C | 134 | 86  | c.1132A>C     | c.(1132-1134)ACA>CCA   | p.T378P        |
| Pat_02 | Post-Resistance | DCHS2     | 54798  | 37 | 4 | 155157832 | 155157832 | Missense_Mutation | SNP | C | A | 4   | 245 | c.6607G>T     | c.(6607-6609)GTC>TTC   | p.V2203F       |
| Pat_02 | Post-Resistance | FNIP2     | 57600  | 37 | 4 | 159790387 | 159790387 | Missense_Mutation | SNP | G | A | 4   | 165 | c.2599G>A     | c.(2599-2601)GGT>AGT   | p.G867S        |
| Pat_02 | Post-Resistance | ODZ3      | 55714  | 37 | 4 | 183710474 | 183710474 | Missense_Mutation | SNP | G | A | 37  | 85  | c.5533G>A     | c.(5533-5535)GGA>AGA   | p.G1845R       |
| Pat_02 | Post-Resistance | FAT1      | 2195   | 37 | 4 | 187557367 | 187557367 | Missense_Mutation | SNP | C | T | 5   | 173 | c.3995G>A     | c.(3994-3996)CGC>CAC   | p.R1332H       |
| Pat_02 | Post-Resistance | ZFP42     | 132625 | 37 | 4 | 188924340 | 188924340 | Missense_Mutation | SNP | G | A | 37  | 194 | c.379G>A      | c.(379-381)GTA>ATA     | p.V127I        |
| Pat_02 | Post-Resistance | DAB2      | 1601   | 37 | 5 | 39381588  | 39381588  | Missense_Mutation | SNP | G | A | 4   | 237 | c.1472C>T     | c.(1471-1473)GCT>GTT   | p.A491V        |
| Pat_02 | Post-Resistance | CCL28     | 56477  | 37 | 5 | 43382119  | 43382119  | Missense_Mutation | SNP | G | A | 4   | 111 | c.227C>T      | c.(226-228)CCG>CTG     | p.P76L         |
| Pat_02 | Post-Resistance | MAP3K1    | 4214   | 37 | 5 | 56161183  | 56161183  | Missense_Mutation | SNP | G | A | 28  | 74  | c.1052G>A     | c.(1051-1053)CGT>CAT   | p.R351H        |
| Pat_02 | Post-Resistance | JMY       | 133746 | 37 | 5 | 78611961  | 78611961  | Missense_Mutation | SNP | T | A | 5   | 75  | c.2798T>A     | c.(2797-2799)GTA>GAA   | p.V933E        |
| Pat_02 | Post-Resistance | CMYA5     | 202333 | 37 | 5 | 79027271  | 79027271  | Missense_Mutation | SNP | C | T | 63  | 17  | c.2683C>T     | c.(2683-2685)CCC>TCC   | p.P895S        |
| Pat_02 | Post-Resistance | GPR98     | 84059  | 37 | 5 | 89986740  | 89986740  | Missense_Mutation | SNP | G | A | 18  | 35  | c.6833G>A     | c.(6832-6834)GGA>GAA   | p.G2278E       |
| Pat_02 | Post-Resistance | ERAP2     | 64167  | 37 | 5 | 96224902  | 96224902  | Missense_Mutation | SNP | C | T | 4   | 114 | c.863C>T      | c.(862-864)GCA>GTA     | p.A288V        |
| Pat_02 | Post-Resistance | DMXL1     | 1657   | 37 | 5 | 118469331 | 118469331 | Missense_Mutation | SNP | G | A | 4   | 113 | c.1712G>A     | c.(1711-1713)CGT>CAT   | p.R571H        |
| Pat_02 | Post-Resistance | FBN2      | 2201   | 37 | 5 | 127645674 | 127645674 | Splice_Site       | SNP | C | T | 4   | 206 | c.5200_splice | c.e40+1                | p.D1734_splice |
| Pat_02 | Post-Resistance | KIF20A    | 10112  | 37 | 5 | 137519758 | 137519758 | Missense_Mutation | SNP | G | A | 4   | 135 | c.1316G>A     | c.(1315-1317)CGC>CAC   | p.R439H        |
| Pat_02 | Post-Resistance | PCDHA6    | 56142  | 37 | 5 | 140208464 | 140208464 | Missense_Mutation | SNP | G | A | 31  | 76  | c.788G>A      | c.(787-789)AGA>AAA     | p.R263K        |

|        |                 |          |        |    |   |           |           |                   |     |   |   |     |     |           |                      |          |
|--------|-----------------|----------|--------|----|---|-----------|-----------|-------------------|-----|---|---|-----|-----|-----------|----------------------|----------|
| Pat_02 | Post-Resistance | PCDHA8   | 56140  | 37 | 5 | 140221712 | 140221712 | Missense_Mutation | SNP | C | G | 9   | 85  | c.806C>G  | c.(805-807)CCG>CGG   | p.P269R  |
| Pat_02 | Post-Resistance | PCDHA12  | 56137  | 37 | 5 | 140255196 | 140255196 | Missense_Mutation | SNP | C | T | 104 | 26  | c.139C>T  | c.(139-141)CGC>TGC   | p.R47C   |
| Pat_02 | Post-Resistance | PCDHGA11 | 56105  | 37 | 5 | 140802136 | 140802136 | Missense_Mutation | SNP | G | A | 5   | 263 | c.1342G>A | c.(1342-1344)GAT>AAT | p.D448N  |
| Pat_02 | Post-Resistance | PDGFRB   | 5159   | 37 | 5 | 149497218 | 149497218 | Missense_Mutation | SNP | C | A | 5   | 144 | c.3100G>T | c.(3100-3102)GAC>TAC | p.D1034Y |
| Pat_02 | Post-Resistance | TNIP1    | 10318  | 37 | 5 | 150413198 | 150413198 | Missense_Mutation | SNP | G | A | 4   | 113 | c.1750C>T | c.(1750-1752)CCA>TCA | p.P584S  |
| Pat_02 | Post-Resistance | GABRA6   | 2559   | 37 | 5 | 161113333 | 161113333 | Missense_Mutation | SNP | C | T | 67  | 118 | c.136C>T  | c.(136-138)CGG>TGG   | p.R46W   |
| Pat_02 | Post-Resistance | ODZ2     | 57451  | 37 | 5 | 167689471 | 167689471 | Missense_Mutation | SNP | A | G | 2   | 5   | c.7954A>G | c.(7954-7956)AGG>GGG | p.R2652G |
| Pat_02 | Post-Resistance | STK10    | 6793   | 37 | 5 | 171471996 | 171471996 | Missense_Mutation | SNP | G | A | 4   | 131 | c.2797C>T | c.(2797-2799)CGG>TGG | p.R933W  |
| Pat_02 | Post-Resistance | PDLIM7   | 9260   | 37 | 5 | 176911119 | 176911119 | Missense_Mutation | SNP | G | A | 4   | 144 | c.1123C>T | c.(1123-1125)CGG>TGG | p.R375W  |
| Pat_02 | Post-Resistance | DOK3     | 79930  | 37 | 5 | 176936820 | 176936820 | Missense_Mutation | SNP | G | A | 5   | 99  | c.34C>T   | c.(34-36)CGT>TGT     | p.R12C   |
| Pat_02 | Post-Resistance | RASGEF1C | 255426 | 37 | 5 | 179554673 | 179554673 | Missense_Mutation | SNP | C | A | 37  | 12  | c.650G>T  | c.(649-651)CGG>CTG   | p.R217L  |
| Pat_02 | Post-Resistance | PRSS16   | 10279  | 37 | 6 | 27215684  | 27215684  | Nonsense_Mutation | SNP | G | T | 42  | 91  | c.94G>T   | c.(94-96)GAG>TAG     | p.E32*   |
| Pat_02 | Post-Resistance | ZNF323   | 64288  | 37 | 6 | 28294491  | 28294491  | Missense_Mutation | SNP | T | C | 93  | 154 | c.673A>G  | c.(673-675)AAG>GAG   | p.K225E  |
| Pat_02 | Post-Resistance | GPX6     | 257202 | 37 | 6 | 28472193  | 28472193  | Nonsense_Mutation | SNP | C | T | 67  | 74  | c.542G>A  | c.(541-543)TGG>TAG   | p.W181*  |
| Pat_02 | Post-Resistance | TREM1    | 54210  | 37 | 6 | 41250190  | 41250190  | Nonsense_Mutation | SNP | G | A | 40  | 56  | c.349C>T  | c.(349-351)CAG>TAG   | p.Q117*  |
| Pat_02 | Post-Resistance | TRERF1   | 55809  | 37 | 6 | 42236589  | 42236589  | Missense_Mutation | SNP | C | T | 80  | 123 | c.740G>A  | c.(739-741)GGA>GAA   | p.G247E  |
| Pat_02 | Post-Resistance | TTBK1    | 84630  | 37 | 6 | 43226814  | 43226814  | Missense_Mutation | SNP | G | A | 4   | 99  | c.1055G>A | c.(1054-1056)CGG>CAG | p.R352Q  |
| Pat_02 | Post-Resistance | SLC22A7  | 10864  | 37 | 6 | 43271969  | 43271969  | Missense_Mutation | SNP | G | A | 4   | 140 | c.1579G>A | c.(1579-1581)GTG>ATG | p.V527M  |
| Pat_02 | Post-Resistance | XPO5     | 57510  | 37 | 6 | 43535029  | 43535029  | Nonsense_Mutation | SNP | C | T | 41  | 45  | c.711G>A  | c.(709-711)TGG>TGA   | p.W237*  |
| Pat_02 | Post-Resistance | RIMS1    | 22999  | 37 | 6 | 73000460  | 73000460  | Missense_Mutation | SNP | T | A | 65  | 156 | c.3633T>A | c.(3631-3633)CAT>CAA | p.H1211Q |
| Pat_02 | Post-Resistance | COL12A1  | 1303   | 37 | 6 | 75843624  | 75843624  | Missense_Mutation | SNP | G | A | 59  | 267 | c.5614C>T | c.(5614-5616)CGT>TGT | p.R1872C |
| Pat_02 | Post-Resistance | PPIL6    | 285755 | 37 | 6 | 109748299 | 109748299 | Missense_Mutation | SNP | C | T | 16  | 20  | c.481G>A  | c.(481-483)GAG>AAG   | p.E161K  |
| Pat_02 | Post-Resistance | MAD1L1   | 8379   | 37 | 7 | 2188797   | 2188797   | Missense_Mutation | SNP | C | T | 4   | 90  | c.1063G>A | c.(1063-1065)GTC>ATC | p.V355I  |
| Pat_02 | Post-Resistance | CARD11   | 84433  | 37 | 7 | 2977639   | 2977639   | Missense_Mutation | SNP | G | A | 5   | 306 | c.1045C>T | c.(1045-1047)CTC>TTC | p.L349F  |
| Pat_02 | Post-Resistance | MEOX2    | 4223   | 37 | 7 | 15652223  | 15652223  | Missense_Mutation | SNP | A | C | 84  | 99  | c.704T>G  | c.(703-705)TTC>TGC   | p.F235C  |
| Pat_02 | Post-Resistance | INMT     | 11185  | 37 | 7 | 30795310  | 30795310  | Missense_Mutation | SNP | C | T | 64  | 92  | c.635C>T  | c.(634-636)TCC>TTC   | p.S212F  |
| Pat_02 | Post-Resistance | BBS9     | 27241  | 37 | 7 | 33312736  | 33312736  | Missense_Mutation | SNP | A | G | 119 | 163 | c.815A>G  | c.(814-816)AAG>AGG   | p.K272R  |
| Pat_02 | Post-Resistance | BMPER    | 168667 | 37 | 7 | 34192733  | 34192733  | Missense_Mutation | SNP | G | A | 192 | 281 | c.1906G>A | c.(1906-1908)GAT>AAT | p.D636N  |
| Pat_02 | Post-Resistance | SAMD9L   | 219285 | 37 | 7 | 92762896  | 92762896  | Missense_Mutation | SNP | G | A | 103 | 214 | c.2389C>T | c.(2389-2391)CCT>TCT | p.P797S  |
| Pat_02 | Post-Resistance | CCDC132  | 55610  | 37 | 7 | 92938190  | 92938190  | Missense_Mutation | SNP | G | T | 5   | 264 | c.1684G>T | c.(1684-1686)GAT>TAT | p.D562Y  |
| Pat_02 | Post-Resistance | TRRAP    | 8295   | 37 | 7 | 98581022  | 98581022  | Missense_Mutation | SNP | G | A | 5   | 300 | c.8941G>A | c.(8941-8943)GTG>ATG | p.V2981M |
| Pat_02 | Post-Resistance | CYP3A7   | 1551   | 37 | 7 | 99306869  | 99306869  | Missense_Mutation | SNP | C | T | 68  | 50  | c.1042G>A | c.(1042-1044)GAT>AAT | p.D348N  |
| Pat_02 | Post-Resistance | MUC17    | 140453 | 37 | 7 | 100678524 | 100678524 | Missense_Mutation | SNP | G | A | 259 | 527 | c.3827G>A | c.(3826-3828)GGA>GAA | p.G1276E |
| Pat_02 | Post-Resistance | PLOD3    | 8985   | 37 | 7 | 100854914 | 100854914 | Missense_Mutation | SNP | G | A | 7   | 51  | c.1316C>T | c.(1315-1317)GCC>GTC | p.A439V  |
| Pat_02 | Post-Resistance | LRWD1    | 222229 | 37 | 7 | 102113015 | 102113015 | Missense_Mutation | SNP | C | T | 4   | 55  | c.1649C>T | c.(1648-1650)TCG>TTG | p.S550L  |
| Pat_02 | Post-Resistance | RELN     | 5649   | 37 | 7 | 103293071 | 103293071 | Missense_Mutation | SNP | G | A | 152 | 139 | c.1690C>T | c.(1690-1692)CTC>TTC | p.L564F  |
| Pat_02 | Post-Resistance | PIK3CG   | 5294   | 37 | 7 | 106509799 | 106509799 | Nonsense_Mutation | SNP | G | A | 105 | 280 | c.1793G>A | c.(1792-1794)TGG>TAG | p.W598*  |
| Pat_02 | Post-Resistance | MET      | 4233   | 37 | 7 | 116409720 | 116409720 | Missense_Mutation | SNP | G | A | 4   | 163 | c.2605G>A | c.(2605-2607)GCA>ACA | p.A869T  |
| Pat_02 | Post-Resistance | WNT2     | 7472   | 37 | 7 | 116955208 | 116955208 | Missense_Mutation | SNP | G | A | 6   | 306 | c.505C>T  | c.(505-507)CGC>TGC   | p.R169C  |
| Pat_02 | Post-Resistance | CADPS2   | 93664  | 37 | 7 | 122001057 | 122001057 | Missense_Mutation | SNP | A | C | 29  | 83  | c.3398T>G | c.(3397-3399)GTG>GGG | p.V1133G |
| Pat_02 | Post-Resistance | DENND2A  | 27147  | 37 | 7 | 140221853 | 140221853 | Missense_Mutation | SNP | G | A | 5   | 215 | c.2713C>T | c.(2713-2715)CGC>TGC | p.R905C  |
| Pat_02 | Post-Resistance | BRAF     | 673    | 37 | 7 | 140453136 | 140453136 | Missense_Mutation | SNP | A | T | 673 | 123 | c.1799T>A | c.(1798-1800)GTG>GAG | p.V600E  |
| Pat_02 | Post-Resistance | TRY6     | 154754 | 37 | 7 | 142482242 | 142482242 | Missense_Mutation | SNP | G | A | 10  | 122 | c.622G>A  | c.(622-624)GGA>AGA   | p.G208R  |
| Pat_02 | Post-Resistance | ABP1     | 26     | 37 | 7 | 150554789 | 150554789 | Missense_Mutation | SNP | C | T | 101 | 108 | c.1231C>T | c.(1231-1233)CAT>TAT | p.H411Y  |
| Pat_02 | Post-Resistance | RP1L1    | 94137  | 37 | 8 | 10466247  | 10466247  | Missense_Mutation | SNP | C | A | 87  | 137 | c.5361G>T | c.(5359-5361)TTG>TTT | p.L1787F |
| Pat_02 | Post-Resistance | FAM86B1  | 85002  | 37 | 8 | 12042891  | 12042891  | Missense_Mutation | SNP | C | T | 6   | 131 | c.784G>A  | c.(784-786)GAG>AAG   | p.E262K  |
| Pat_02 | Post-Resistance | ADAM28   | 10863  | 37 | 8 | 24187552  | 24187552  | Missense_Mutation | SNP | C | A | 6   | 141 | c.1027C>A | c.(1027-1029)CAC>AAC | p.H343N  |



|        |                 |            |        |    |   |           |           |                   |     |    |    |     |     |                |                        |          |
|--------|-----------------|------------|--------|----|---|-----------|-----------|-------------------|-----|----|----|-----|-----|----------------|------------------------|----------|
| Pat_02 | Post-Resistance | TRIM35     | 23087  | 37 | 8 | 27145096  | 27145096  | Missense_Mutation | SNP | T  | G  | 7   | 7   | c.1453A>C      | c.(1453-1455)ATC>CTC   | p.I485L  |
| Pat_02 | Post-Resistance | RP1        | 6101   | 37 | 8 | 55540842  | 55540842  | Missense_Mutation | SNP | C  | T  | 33  | 71  | c.4400C>T      | c.(4399-4401)TCT>TTT   | p.S1467F |
| Pat_02 | Post-Resistance | UBXN2B     | 137886 | 37 | 8 | 59345791  | 59345791  | Missense_Mutation | SNP | C  | A  | 6   | 401 | c.412C>A       | c.(412-414)CAG>AAG     | p.Q138K  |
| Pat_02 | Post-Resistance | HNF4G      | 3174   | 37 | 8 | 76476288  | 76476288  | Missense_Mutation | SNP | C  | T  | 135 | 193 | c.1184C>T      | c.(1183-1185)TCA>TTA   | p.S395L  |
| Pat_02 | Post-Resistance | ZFHX4      | 79776  | 37 | 8 | 77767909  | 77767909  | Missense_Mutation | SNP | C  | T  | 24  | 48  | c.8617C>T      | c.(8617-8619)CCC>TCC   | p.P2873S |
| Pat_02 | Post-Resistance | RIMS2      | 9699   | 37 | 8 | 105001576 | 105001576 | Missense_Mutation | SNP | G  | A  | 6   | 457 | c.2305G>A      | c.(2305-2307)GGA>AGA   | p.G769R  |
| Pat_02 | Post-Resistance | ZFPM2      | 23414  | 37 | 8 | 106813502 | 106813502 | Missense_Mutation | SNP | G  | A  | 115 | 175 | c.1192G>A      | c.(1192-1194)GAA>AAA   | p.E398K  |
| Pat_02 | Post-Resistance | KLHL38     | 340359 | 37 | 8 | 124664485 | 124664485 | Missense_Mutation | SNP | G  | A  | 5   | 302 | c.682C>T       | c.(682-684)CAC>TAC     | p.H228Y  |
| Pat_02 | Post-Resistance | KCNQ3      | 3786   | 37 | 8 | 133492560 | 133492560 | Missense_Mutation | SNP | G  | A  | 3   | 27  | c.220C>T       | c.(220-222)CGC>TGC     | p.R74C   |
| Pat_02 | Post-Resistance | FAM135B    | 51059  | 37 | 8 | 139164008 | 139164008 | Missense_Mutation | SNP | G  | A  | 4   | 246 | c.2710C>T      | c.(2710-2712)CCA>TCA   | p.P904S  |
| Pat_02 | Post-Resistance | EPPK1      | 83481  | 37 | 8 | 144943163 | 144943163 | Missense_Mutation | SNP | C  | T  | 4   | 132 | c.4259G>A      | c.(4258-4260)CGC>CAC   | p.R1420H |
| Pat_02 | Post-Resistance | OPLAH      | 26873  | 37 | 8 | 145112821 | 145112821 | Missense_Mutation | SNP | C  | G  | 3   | 50  | c.1094G>C      | c.(1093-1095)GGC>GCC   | p.G365A  |
| Pat_02 | Post-Resistance | NFKBIL2    | 4796   | 37 | 8 | 145659473 | 145659473 | Missense_Mutation | SNP | G  | A  | 4   | 73  | c.3275C>T      | c.(3274-3276)GCT>GTT   | p.A1092V |
| Pat_02 | Post-Resistance | GPT        | 2875   | 37 | 8 | 145729775 | 145729775 | Missense_Mutation | SNP | G  | A  | 4   | 106 | c.88G>A        | c.(88-90)GTG>ATG       | p.V30M   |
| Pat_02 | Post-Resistance | PTPRD      | 5789   | 37 | 9 | 8518175   | 8518175   | Missense_Mutation | SNP | C  | T  | 331 | 54  | c.1216G>A      | c.(1216-1218)GAA>AAA   | p.E406K  |
| Pat_02 | Post-Resistance | KIAA1797   | 54914  | 37 | 9 | 20881874  | 20881874  | Missense_Mutation | SNP | G  | T  | 4   | 200 | c.2322G>T      | c.(2320-2322)TTG>TTT   | p.L774F  |
| Pat_02 | Post-Resistance | PTENP1     | 11191  | 37 | 9 | 33676158  | 33676158  | Missense_Mutation | SNP | C  | A  | 38  | 36  | c.390G>T       | c.(388-390)AAG>AAT     | p.K130N  |
| Pat_02 | Post-Resistance | SEMA4D     | 10507  | 37 | 9 | 92002306  | 92002306  | Missense_Mutation | SNP | C  | T  | 4   | 146 | c.1325G>A      | c.(1324-1326)AGC>AAC   | p.S442N  |
| Pat_02 | Post-Resistance | TEX10      | 54881  | 37 | 9 | 103066078 | 103066078 | Nonsense_Mutation | SNP | G  | A  | 4   | 230 | c.2512C>T      | c.(2512-2514)CGA>TGA   | p.R838*  |
| Pat_02 | Post-Resistance | ST6GALNAC4 | 27090  | 37 | 9 | 130677018 | 130677018 | Missense_Mutation | SNP | C  | T  | 54  | 6   | c.115G>A       | c.(115-117)GAC>AAC     | p.D39N   |
| Pat_02 | Post-Resistance | LAMC3      | 10319  | 37 | 9 | 133911584 | 133911584 | Missense_Mutation | SNP | G  | A  | 4   | 165 | c.841G>A       | c.(841-843)GGC>AGC     | p.G281S  |
| Pat_02 | Post-Resistance | COL5A1     | 1289   | 37 | 9 | 137688743 | 137688744 | Missense_Mutation | DNP | CC | GT | 38  | 16  | .2894_2895CC>G | c.(2893-2895)CCC>CGT   | p.P965R  |
| Pat_02 | Post-Resistance | CACNA1B    | 774    | 37 | 9 | 140851279 | 140851279 | Missense_Mutation | SNP | G  | A  | 4   | 119 | c.1243G>A      | c.(1243-1245)GTG>ATG   | p.V415M  |
| Pat_02 | Post-Resistance | CACNA1B    | 774    | 37 | 9 | 141014668 | 141014668 | Missense_Mutation | SNP | C  | T  | 3   | 13  | c.6082C>T      | c.(6082-6084)CGG>TGG   | p.R2028W |
| Pat_02 | Post-Resistance | FRMPD4     | 9758   | 37 | X | 12693004  | 12693004  | Missense_Mutation | SNP | C  | T  | 4   | 174 | c.445C>T       | c.(445-447)CTC>TTC     | p.L149F  |
| Pat_02 | Post-Resistance | MAGEB4     | 4115   | 37 | X | 30261045  | 30261045  | Missense_Mutation | SNP | C  | T  | 67  | 13  | c.793C>T       | c.(793-795)CCC>TCC     | p.P265S  |
| Pat_02 | Post-Resistance | CXorf22    | 170063 | 37 | X | 35993821  | 35993821  | Missense_Mutation | SNP | G  | A  | 113 | 23  | c.2504G>A      | c.(2503-2505)AGT>AAT   | p.S835N  |
| Pat_02 | Post-Resistance | CXorf36    | 79742  | 37 | X | 45051207  | 45051207  | Missense_Mutation | SNP | G  | A  | 37  | 5   | c.287C>T       | c.(286-288)TCT>TTT     | p.S96F   |
| Pat_02 | Post-Resistance | SUV39H1    | 6839   | 37 | X | 48558860  | 48558860  | Nonsense_Mutation | SNP | G  | T  | 4   | 117 | c.544G>T       | c.(544-546)GAG>TAG     | p.E182*  |
| Pat_02 | Post-Resistance | PQBP1      | 10084  | 37 | X | 48760219  | 48760219  | Missense_Mutation | SNP | C  | T  | 3   | 21  | c.656C>T       | c.(655-657)ACA>ATA     | p.T219I  |
| Pat_02 | Post-Resistance | CCNB3      | 85417  | 37 | X | 50089666  | 50089666  | Missense_Mutation | SNP | C  | T  | 136 | 21  | c.3670C>T      | c.(3670-3672)CGT>TGT   | p.R1224C |
| Pat_02 | Post-Resistance | HUWE1      | 10075  | 37 | X | 53571556  | 53571556  | Missense_Mutation | SNP | C  | T  | 3   | 44  | c.11216G>A     | c.(11215-11217)CGG>CAC | p.R3739Q |
| Pat_02 | Post-Resistance | EDA2R      | 60401  | 37 | X | 65835823  | 65835823  | Missense_Mutation | SNP | G  | A  | 39  | 34  | c.40C>T        | c.(40-42)CGG>TGG       | p.R14W   |
| Pat_02 | Post-Resistance | ERCC6L     | 54821  | 37 | X | 71427913  | 71427913  | Missense_Mutation | SNP | G  | A  | 4   | 113 | c.704C>T       | c.(703-705)ACC>ATC     | p.T235I  |
| Pat_02 | Post-Resistance | MCART6     | 401612 | 37 | X | 103349781 | 103349781 | Missense_Mutation | SNP | G  | A  | 4   | 96  | c.160C>T       | c.(160-162)CGG>TGG     | p.R54W   |
| Pat_02 | Post-Resistance | AKAP14     | 158798 | 37 | X | 119048672 | 119048672 | Missense_Mutation | SNP | C  | T  | 4   | 56  | c.272C>T       | c.(271-273)TCT>TTT     | p.S91F   |
| Pat_02 | Post-Resistance | DCAF12L2   | 340578 | 37 | X | 125299771 | 125299771 | Missense_Mutation | SNP | G  | A  | 4   | 32  | c.137C>T       | c.(136-138)GCG>GTG     | p.A46V   |
| Pat_02 | Post-Resistance | PASD1      | 139135 | 37 | X | 150844497 | 150844497 | Missense_Mutation | SNP | G  | A  | 133 | 34  | c.2204G>A      | c.(2203-2205)GGA>GAA   | p.G735E  |
| Pat_02 | Post-Resistance | ATP2B3     | 492    | 37 | X | 152845623 | 152845623 | Missense_Mutation | SNP | C  | T  | 151 | 19  | c.3530C>T      | c.(3529-3531)CCG>CTG   | p.P1177L |
| Pat_02 | Post-Resistance | TAZ        | 6901   | 37 | X | 153649015 | 153649015 | Missense_Mutation | SNP | G  | A  | 4   | 170 | c.718G>A       | c.(718-720)GGG>AGG     | p.G240R  |
| Pat_02 | Post-Resistance | PLXNA3     | 55558  | 37 | X | 153690600 | 153690600 | Missense_Mutation | SNP | C  | A  | 5   | 121 | c.1267C>A      | c.(1267-1269)CGC>AGC   | p.R423S  |
| Pat_05 | Pre-Treatment   | SCNN1D     | 6339   | 37 | 1 | 1226943   | 1226943   | Missense_Mutation | SNP | G  | A  | 9   | 11  | c.1870G>A      | c.(1870-1872)GAA>AAA   | p.E624K  |
| Pat_05 | Pre-Treatment   | LRRRC47    | 57470  | 37 | 1 | 3703694   | 3703694   | Missense_Mutation | SNP | C  | T  | 4   | 157 | c.796G>A       | c.(796-798)GGG>AGG     | p.G266R  |
| Pat_05 | Pre-Treatment   | DFFB       | 1677   | 37 | 1 | 3786321   | 3786321   | Missense_Mutation | SNP | A  | C  | 10  | 37  | c.663A>C       | c.(661-663)GAA>GAC     | p.E221D  |
| Pat_05 | Pre-Treatment   | PIK3CD     | 5293   | 37 | 1 | 9783205   | 9783205   | Missense_Mutation | SNP | C  | T  | 277 | 330 | c.2449C>T      | c.(2449-2451)CCC>TCC   | p.P817S  |
| Pat_05 | Pre-Treatment   | LOC649330  | 649330 | 37 | 1 | 12907865  | 12907865  | Missense_Mutation | SNP | C  | T  | 42  | 256 | c.278G>A       | c.(277-279)GGA>GAA     | p.G93E   |
| Pat_05 | Pre-Treatment   | CLCNKA     | 1187   | 37 | 1 | 16351384  | 16351384  | Missense_Mutation | SNP | G  | A  | 66  | 55  | c.356G>A       | c.(355-357)GGA>GAA     | p.G119E  |

|        |               |          |        |    |   |           |           |                   |     |    |    |     |     |                |                      |               |
|--------|---------------|----------|--------|----|---|-----------|-----------|-------------------|-----|----|----|-----|-----|----------------|----------------------|---------------|
| Pat_05 | Pre-Treatment | EIF4G3   | 8672   | 37 | 1 | 21299593  | 21299593  | Splice_Site       | SNP | C  | T  | 36  | 149 | c.326_splice   | c.e6-1               | p.G109_splice |
| Pat_05 | Pre-Treatment | NBPF3    | 84224  | 37 | 1 | 21798156  | 21798156  | Missense_Mutation | SNP | C  | G  | 4   | 287 | c.541C>G       | c.(541-543)CAG>GAG   | p.Q181E       |
| Pat_05 | Pre-Treatment | HSPG2    | 3339   | 37 | 1 | 22172603  | 22172603  | Missense_Mutation | SNP | G  | A  | 5   | 205 | c.8462C>T      | c.(8461-8463)CCC>CTC | p.P2821L      |
| Pat_05 | Pre-Treatment | PDIK1L   | 149420 | 37 | 1 | 26448998  | 26448998  | Missense_Mutation | SNP | G  | A  | 6   | 245 | c.956G>A       | c.(955-957)CGT>CAT   | p.R319H       |
| Pat_05 | Pre-Treatment | SFN      | 2810   | 37 | 1 | 27189752  | 27189752  | Missense_Mutation | SNP | G  | A  | 5   | 168 | c.49G>A        | c.(49-51)GAA>AAA     | p.E17K        |
| Pat_05 | Pre-Treatment | FAM46B   | 115572 | 37 | 1 | 27333219  | 27333219  | Missense_Mutation | SNP | G  | A  | 6   | 560 | c.494C>T       | c.(493-495)ACG>ATG   | p.T165M       |
| Pat_05 | Pre-Treatment | ZBTB8A   | 653121 | 37 | 1 | 33058747  | 33058747  | Missense_Mutation | SNP | C  | T  | 71  | 229 | c.215C>T       | c.(214-216)TCC>TTC   | p.S72F        |
| Pat_05 | Pre-Treatment | EIF2C4   | 192670 | 37 | 1 | 36288575  | 36288575  | Missense_Mutation | SNP | C  | T  | 5   | 337 | c.298C>T       | c.(298-300)CGG>TGG   | p.R100W       |
| Pat_05 | Pre-Treatment | EPHA10   | 284656 | 37 | 1 | 38227610  | 38227611  | Missense_Mutation | DNP | TG | CT | 119 | 143 | c.316_317CA>AG | c.(316-318)CAG>AGG   | p.Q106R       |
| Pat_05 | Pre-Treatment | MACF1    | 23499  | 37 | 1 | 39765970  | 39765970  | Missense_Mutation | SNP | G  | A  | 5   | 274 | c.2585G>A      | c.(2584-2586)AGT>AAT | p.S862N       |
| Pat_05 | Pre-Treatment | TMCO2    | 127391 | 37 | 1 | 40713883  | 40713883  | Missense_Mutation | SNP | G  | A  | 79  | 87  | c.218G>A       | c.(217-219)CGA>CAA   | p.R73Q        |
| Pat_05 | Pre-Treatment | EBNA1BP2 | 10969  | 37 | 1 | 43630421  | 43630421  | Nonsense_Mutation | SNP | T  | A  | 82  | 74  | c.763A>T       | c.(763-765)AAA>TAA   | p.K255*       |
| Pat_05 | Pre-Treatment | PTPRF    | 5792   | 37 | 1 | 44069738  | 44069738  | Missense_Mutation | SNP | G  | A  | 4   | 123 | c.2915G>A      | c.(2914-2916)CGC>CAC | p.R972H       |
| Pat_05 | Pre-Treatment | CYP4Z1   | 199974 | 37 | 1 | 47571867  | 47571867  | Missense_Mutation | SNP | G  | A  | 116 | 109 | c.1135G>A      | c.(1135-1137)GTA>ATA | p.V379I       |
| Pat_05 | Pre-Treatment | TAL1     | 6886   | 37 | 1 | 47689711  | 47689711  | Missense_Mutation | SNP | C  | T  | 4   | 299 | c.506G>A       | c.(505-507)AGG>AAG   | p.R169K       |
| Pat_05 | Pre-Treatment | INADL    | 10207  | 37 | 1 | 62614022  | 62614022  | Missense_Mutation | SNP | C  | T  | 150 | 194 | c.5338C>T      | c.(5338-5340)CTT>TTT | p.L1780F      |
| Pat_05 | Pre-Treatment | ROR1     | 4919   | 37 | 1 | 64608246  | 64608246  | Missense_Mutation | SNP | C  | T  | 4   | 236 | c.1087C>T      | c.(1087-1089)CGC>TGC | p.R363C       |
| Pat_05 | Pre-Treatment | RPE65    | 6121   | 37 | 1 | 68912507  | 68912507  | Missense_Mutation | SNP | C  | T  | 31  | 191 | c.131G>A       | c.(130-132)CGA>CAA   | p.R44Q        |
| Pat_05 | Pre-Treatment | SLC44A5  | 204962 | 37 | 1 | 75708697  | 75708697  | Splice_Site       | SNP | C  | T  | 57  | 67  | c.346_splice   | c.e8-1               | p.I116_splice |
| Pat_05 | Pre-Treatment | AMPD2    | 271    | 37 | 1 | 110172946 | 110172946 | Missense_Mutation | SNP | G  | A  | 6   | 571 | c.2237G>A      | c.(2236-2238)CGG>CAG | p.R746Q       |
| Pat_05 | Pre-Treatment | KCND3    | 3752   | 37 | 1 | 112525062 | 112525062 | Missense_Mutation | SNP | T  | C  | 47  | 57  | c.287A>G       | c.(286-288)AAC>AGC   | p.N96S        |
| Pat_05 | Pre-Treatment | SYT6     | 148281 | 37 | 1 | 114680572 | 114680572 | Missense_Mutation | SNP | G  | A  | 4   | 136 | c.361C>T       | c.(361-363)CGC>TGC   | p.R121C       |
| Pat_05 | Pre-Treatment | CD2      | 914    | 37 | 1 | 117297532 | 117297532 | Missense_Mutation | SNP | G  | A  | 22  | 66  | c.341G>A       | c.(340-342)GGA>GAA   | p.G114E       |
| Pat_05 | Pre-Treatment | HMGCS2   | 3158   | 37 | 1 | 120302578 | 120302579 | Missense_Mutation | DNP | GG | AA | 25  | 45  | c.593_594CC>TT | c.(592-594)GCC>GTT   | p.A198V       |
| Pat_05 | Pre-Treatment | NOTCH2   | 4853   | 37 | 1 | 120458306 | 120458306 | Missense_Mutation | SNP | G  | A  | 6   | 420 | c.7039C>T      | c.(7039-7041)CGT>TGT | p.R2347C      |
| Pat_05 | Pre-Treatment | NOTCH2   | 4853   | 37 | 1 | 120461053 | 120461053 | Missense_Mutation | SNP | C  | T  | 74  | 273 | c.5905G>A      | c.(5905-5907)GAT>AAT | p.D1969N      |
| Pat_05 | Pre-Treatment | CA14     | 23632  | 37 | 1 | 150236277 | 150236277 | Missense_Mutation | SNP | G  | A  | 5   | 411 | c.947G>A       | c.(946-948)CGG>CAG   | p.R316Q       |
| Pat_05 | Pre-Treatment | ECM1     | 1893   | 37 | 1 | 150482217 | 150482217 | Missense_Mutation | SNP | C  | T  | 143 | 272 | c.202C>T       | c.(202-204)CCC>TCC   | p.P68S        |
| Pat_05 | Pre-Treatment | TCHHL1   | 126637 | 37 | 1 | 152058383 | 152058383 | Missense_Mutation | SNP | G  | T  | 47  | 342 | c.1775C>A      | c.(1774-1776)CCA>CAA | p.P592Q       |
| Pat_05 | Pre-Treatment | RPTN     | 126638 | 37 | 1 | 152129112 | 152129112 | Missense_Mutation | SNP | C  | T  | 353 | 480 | c.463G>A       | c.(463-465)GAT>AAT   | p.D155N       |
| Pat_05 | Pre-Treatment | NES      | 10763  | 37 | 1 | 156642586 | 156642586 | Missense_Mutation | SNP | G  | A  | 110 | 199 | c.1394C>T      | c.(1393-1395)TCC>TTC | p.S465F       |
| Pat_05 | Pre-Treatment | ARHGEF11 | 9826   | 37 | 1 | 156909613 | 156909613 | Missense_Mutation | SNP | T  | C  | 34  | 80  | c.3703A>G      | c.(3703-3705)ACA>GCA | p.T1235A      |
| Pat_05 | Pre-Treatment | FCRL5    | 83416  | 37 | 1 | 157508968 | 157508968 | Missense_Mutation | SNP | G  | A  | 32  | 55  | c.1310C>T      | c.(1309-1311)TCT>TTT | p.S437F       |
| Pat_05 | Pre-Treatment | FCRL4    | 83417  | 37 | 1 | 157559113 | 157559113 | Missense_Mutation | SNP | C  | A  | 5   | 169 | c.188G>T       | c.(187-189)TGG>TTG   | p.W63L        |
| Pat_05 | Pre-Treatment | FCRL1    | 115350 | 37 | 1 | 157771292 | 157771292 | Missense_Mutation | SNP | G  | A  | 4   | 167 | c.962C>T       | c.(961-963)ACC>ATC   | p.T321I       |
| Pat_05 | Pre-Treatment | CD1C     | 911    | 37 | 1 | 158261967 | 158261967 | Nonsense_Mutation | SNP | T  | A  | 170 | 180 | c.422T>A       | c.(421-423)TTA>TAA   | p.L141*       |
| Pat_05 | Pre-Treatment | FCRL6    | 343413 | 37 | 1 | 159779435 | 159779435 | Missense_Mutation | SNP | C  | T  | 73  | 105 | c.848C>T       | c.(847-849)TCC>TTC   | p.S283F       |
| Pat_05 | Pre-Treatment | IGSF8    | 93185  | 37 | 1 | 160062228 | 160062228 | Missense_Mutation | SNP | G  | A  | 4   | 129 | c.1570C>T      | c.(1570-1572)CCC>TCC | p.P524S       |
| Pat_05 | Pre-Treatment | NR1I3    | 9970   | 37 | 1 | 161200970 | 161200970 | Nonsense_Mutation | SNP | G  | A  | 27  | 64  | c.760C>T       | c.(760-762)CGA>TGA   | p.R254*       |
| Pat_05 | Pre-Treatment | DUSP12   | 11266  | 37 | 1 | 161722242 | 161722242 | Missense_Mutation | SNP | G  | A  | 271 | 363 | c.662G>A       | c.(661-663)TGT>TAT   | p.C221Y       |
| Pat_05 | Pre-Treatment | TNR      | 7143   | 37 | 1 | 175331865 | 175331865 | Missense_Mutation | SNP | C  | T  | 87  | 208 | c.2788G>A      | c.(2788-2790)GAA>AAA | p.E930K       |
| Pat_05 | Pre-Treatment | TNR      | 7143   | 37 | 1 | 175334197 | 175334197 | Missense_Mutation | SNP | C  | A  | 4   | 163 | c.2536G>T      | c.(2536-2538)GCT>TCT | p.A846S       |
| Pat_05 | Pre-Treatment | IVNS1ABP | 10625  | 37 | 1 | 185274667 | 185274667 | Splice_Site       | SNP | C  | T  | 6   | 465 | c.765_splice   | c.e8+1               | p.Q255_splice |
| Pat_05 | Pre-Treatment | PRG4     | 10216  | 37 | 1 | 186275983 | 186275983 | Missense_Mutation | SNP | C  | A  | 7   | 291 | c.1132C>A      | c.(1132-1134)CCC>ACC | p.P378T       |
| Pat_05 | Pre-Treatment | PRG4     | 10216  | 37 | 1 | 186276169 | 186276169 | Missense_Mutation | SNP | C  | A  | 7   | 154 | c.1318C>A      | c.(1318-1320)CCC>ACC | p.P440T       |
| Pat_05 | Pre-Treatment | CR1      | 1378   | 37 | 1 | 207741267 | 207741267 | Missense_Mutation | SNP | G  | A  | 6   | 654 | c.2701G>A      | c.(2701-2703)GAC>AAC | p.D901N       |
| Pat_05 | Pre-Treatment | GPATCH2  | 55105  | 37 | 1 | 217622647 | 217622647 | Missense_Mutation | SNP | G  | A  | 6   | 425 | c.1310C>T      | c.(1309-1311)ACG>ATG | p.T437M       |

|        |               |          |        |    |    |           |           |                   |     |    |    |     |     |                |                        |               |
|--------|---------------|----------|--------|----|----|-----------|-----------|-------------------|-----|----|----|-----|-----|----------------|------------------------|---------------|
| Pat_05 | Pre-Treatment | DISP1    | 84976  | 37 | 1  | 223178708 | 223178709 | Missense_Mutation | DNP | GG | AA | 68  | 168 | .3969_3970GG>A | 367-3972)GAGGGC>GAA/   | p.G1324S      |
| Pat_05 | Pre-Treatment | OBSCN    | 84033  | 37 | 1  | 228557681 | 228557681 | Missense_Mutation | SNP | G  | A  | 5   | 304 | c.20006G>A     | c.(20005-20007)CGT>CAT | p.R6669H      |
| Pat_05 | Pre-Treatment | MTR      | 4548   | 37 | 1  | 236979830 | 236979831 | Missense_Mutation | DNP | GG | AA | 167 | 212 | c.751_752GG>AA | c.(751-753)GGA>AAA     | p.G251K       |
| Pat_05 | Pre-Treatment | MTR      | 4548   | 37 | 1  | 237044081 | 237044081 | Missense_Mutation | SNP | C  | T  | 4   | 305 | c.2621C>T      | c.(2620-2622)CCG>CTG   | p.P874L       |
| Pat_05 | Pre-Treatment | TRIM58   | 25893  | 37 | 1  | 248039457 | 248039457 | Missense_Mutation | SNP | C  | T  | 84  | 184 | c.1127C>T      | c.(1126-1128)TCT>TTT   | p.S376F       |
| Pat_05 | Pre-Treatment | PTER     | 9317   | 37 | 10 | 16553071  | 16553071  | Missense_Mutation | SNP | G  | A  | 3   | 41  | c.866G>A       | c.(865-867)TGT>TAT     | p.C289Y       |
| Pat_05 | Pre-Treatment | PTCHD3   | 374308 | 37 | 10 | 27688070  | 27688070  | Missense_Mutation | SNP | G  | A  | 4   | 200 | c.1457C>T      | c.(1456-1458)GCG>GTG   | p.A486V       |
| Pat_05 | Pre-Treatment | ZNF438   | 220929 | 37 | 10 | 31139194  | 31139194  | Missense_Mutation | SNP | G  | A  | 4   | 293 | c.140C>T       | c.(139-141)ACG>ATG     | p.T47M        |
| Pat_05 | Pre-Treatment | ITGB1    | 3688   | 37 | 10 | 33200994  | 33200994  | Missense_Mutation | SNP | C  | T  | 4   | 186 | c.1528G>A      | c.(1528-1530)GAA>AAA   | p.E510K       |
| Pat_05 | Pre-Treatment | ANKRD30A | 91074  | 37 | 10 | 37430948  | 37430948  | Missense_Mutation | SNP | C  | G  | 5   | 116 | c.955C>G       | c.(955-957)CCA>GCA     | p.P319A       |
| Pat_05 | Pre-Treatment | RASSF4   | 83937  | 37 | 10 | 45465703  | 45465703  | Missense_Mutation | SNP | C  | T  | 157 | 114 | c.53C>T        | c.(52-54)TCC>TTC       | p.S18F        |
| Pat_05 | Pre-Treatment | GPRIN2   | 9721   | 37 | 10 | 46999128  | 46999128  | Missense_Mutation | SNP | G  | A  | 4   | 29  | c.248G>A       | c.(247-249)CGA>CAA     | p.R83Q        |
| Pat_05 | Pre-Treatment | HNRNPH3  | 3189   | 37 | 10 | 70098394  | 70098394  | Missense_Mutation | SNP | G  | A  | 5   | 479 | c.386G>A       | c.(385-387)CGT>CAT     | p.R129H       |
| Pat_05 | Pre-Treatment | CCAR1    | 55749  | 37 | 10 | 70551009  | 70551009  | Missense_Mutation | SNP | G  | T  | 4   | 205 | c.3439G>T      | c.(3439-3441)GGT>TGT   | p.G1147C      |
| Pat_05 | Pre-Treatment | HK1      | 3098   | 37 | 10 | 71129293  | 71129293  | Missense_Mutation | SNP | C  | T  | 98  | 34  | c.788C>T       | c.(787-789)GCC>GTC     | p.A263V       |
| Pat_05 | Pre-Treatment | NPFFR1   | 64106  | 37 | 10 | 72020400  | 72020400  | Missense_Mutation | SNP | C  | T  | 13  | 9   | c.412G>A       | c.(412-414)GAA>AAA     | p.E138K       |
| Pat_05 | Pre-Treatment | UNC5B    | 219699 | 37 | 10 | 73050752  | 73050752  | Missense_Mutation | SNP | G  | A  | 6   | 384 | c.1180G>A      | c.(1180-1182)GTG>ATG   | p.V394M       |
| Pat_05 | Pre-Treatment | CDH23    | 64072  | 37 | 10 | 73537617  | 73537617  | Missense_Mutation | SNP | G  | A  | 4   | 80  | c.5026G>A      | c.(5026-5028)GCA>ACA   | p.A1676T      |
| Pat_05 | Pre-Treatment | SH2D4B   | 387694 | 37 | 10 | 82363523  | 82363523  | Missense_Mutation | SNP | C  | G  | 4   | 33  | c.832C>G       | c.(832-834)CTG>GTG     | p.L278V       |
| Pat_05 | Pre-Treatment | GPAM     | 57678  | 37 | 10 | 113926167 | 113926167 | Missense_Mutation | SNP | G  | A  | 79  | 61  | c.1214C>T      | c.(1213-1215)TCC>TTC   | p.S405F       |
| Pat_05 | Pre-Treatment | TCF7L2   | 6934   | 37 | 10 | 114901057 | 114901057 | Missense_Mutation | SNP | G  | A  | 32  | 96  | c.667G>A       | c.(667-669)GAC>AAC     | p.D223N       |
| Pat_05 | Pre-Treatment | PNLIPRP1 | 5407   | 37 | 10 | 118352022 | 118352022 | Missense_Mutation | SNP | G  | A  | 78  | 44  | c.299G>A       | c.(298-300)GGA>GAA     | p.G100E       |
| Pat_05 | Pre-Treatment | C10orf84 | 63877  | 37 | 10 | 120070744 | 120070744 | Nonsense_Mutation | SNP | G  | A  | 4   | 144 | c.625C>T       | c.(625-627)CGA>TGA     | p.R209*       |
| Pat_05 | Pre-Treatment | EIF3A    | 8661   | 37 | 10 | 120801755 | 120801755 | Missense_Mutation | SNP | T  | A  | 7   | 465 | c.3277A>T      | c.(3277-3279)ATG>TTG   | p.M1093L      |
| Pat_05 | Pre-Treatment | TACC2    | 10579  | 37 | 10 | 123842215 | 123842215 | Missense_Mutation | SNP | G  | C  | 3   | 77  | c.200G>C       | c.(199-201)AGC>ACC     | p.S67T        |
| Pat_05 | Pre-Treatment | CPXM2    | 119587 | 37 | 10 | 125516869 | 125516869 | Splice_Site       | SNP | C  | T  | 5   | 263 | c.1778_splice  | c.e12-1                | p.S593_splice |
| Pat_05 | Pre-Treatment | RIC8A    | 60626  | 37 | 11 | 212899    | 212899    | Missense_Mutation | SNP | C  | T  | 4   | 76  | c.1273C>T      | c.(1273-1275)CTC>TTC   | p.L425F       |
| Pat_05 | Pre-Treatment | ATHL1    | 80162  | 37 | 11 | 293177    | 293177    | Missense_Mutation | SNP | G  | A  | 5   | 475 | c.1285G>A      | c.(1285-1287)GAC>AAC   | p.D429N       |
| Pat_05 | Pre-Treatment | KRTAP5-4 | 387267 | 37 | 11 | 1642992   | 1642992   | Missense_Mutation | SNP | C  | T  | 4   | 130 | c.470G>A       | c.(469-471)TGT>TAT     | p.C157Y       |
| Pat_05 | Pre-Treatment | HBBP1    | 3044   | 37 | 11 | 5264439   | 5264439   | Missense_Mutation | SNP | G  | A  | 33  | 10  | c.47C>T        | c.(46-48)TCC>TTC       | p.S16F        |
| Pat_05 | Pre-Treatment | CNGA4    | 1262   | 37 | 11 | 6261640   | 6261640   | Missense_Mutation | SNP | C  | T  | 5   | 149 | c.616C>T       | c.(616-618)CCC>TCC     | p.P206S       |
| Pat_05 | Pre-Treatment | SPON1    | 10418  | 37 | 11 | 14287201  | 14287201  | Missense_Mutation | SNP | G  | A  | 25  | 10  | c.2392G>A      | c.(2392-2394)GAG>AAG   | p.E798K       |
| Pat_05 | Pre-Treatment | TRAF6    | 7189   | 37 | 11 | 36518686  | 36518686  | Missense_Mutation | SNP | G  | A  | 5   | 189 | c.578C>T       | c.(577-579)GCT>GTT     | p.A193V       |
| Pat_05 | Pre-Treatment | OR4C13   | 283092 | 37 | 11 | 49974799  | 49974799  | Missense_Mutation | SNP | G  | A  | 97  | 64  | c.825G>A       | c.(823-825)ATG>ATA     | p.M275I       |
| Pat_05 | Pre-Treatment | DDB1     | 1642   | 37 | 11 | 61068382  | 61068382  | Missense_Mutation | SNP | G  | A  | 4   | 152 | c.3238C>T      | c.(3238-3240)CGG>TGG   | p.R1080W      |
| Pat_05 | Pre-Treatment | DAK      | 26007  | 37 | 11 | 61106607  | 61106607  | Missense_Mutation | SNP | G  | A  | 5   | 110 | c.263G>A       | c.(262-264)AGC>AAC     | p.S88N        |
| Pat_05 | Pre-Treatment | FADS3    | 3995   | 37 | 11 | 61646018  | 61646018  | Missense_Mutation | SNP | G  | A  | 4   | 137 | c.713C>T       | c.(712-714)GCC>GTG     | p.A238V       |
| Pat_05 | Pre-Treatment | CDC42BPG | 55561  | 37 | 11 | 64599058  | 64599058  | Missense_Mutation | SNP | G  | A  | 4   | 75  | c.3223C>T      | c.(3223-3225)CCC>TCC   | p.P1075S      |
| Pat_05 | Pre-Treatment | MUS81    | 80198  | 37 | 11 | 65632028  | 65632028  | Missense_Mutation | SNP | G  | A  | 4   | 166 | c.1120G>A      | c.(1120-1122)GTC>ATC   | p.V374I       |
| Pat_05 | Pre-Treatment | SPTBN2   | 6712   | 37 | 11 | 66468356  | 66468356  | Missense_Mutation | SNP | G  | A  | 3   | 41  | c.3214C>T      | c.(3214-3216)CGC>TGC   | p.R1072C      |
| Pat_05 | Pre-Treatment | PITPNM1  | 9600   | 37 | 11 | 67262337  | 67262337  | Missense_Mutation | SNP | G  | A  | 6   | 382 | c.2722C>T      | c.(2722-2724)CGC>TGC   | p.R908C       |
| Pat_05 | Pre-Treatment | LRP5     | 4041   | 37 | 11 | 68191091  | 68191091  | Missense_Mutation | SNP | C  | G  | 4   | 155 | c.3162C>G      | c.(3160-3162)AGC>AGG   | p.S1054R      |
| Pat_05 | Pre-Treatment | LRP5     | 4041   | 37 | 11 | 68205968  | 68205968  | Missense_Mutation | SNP | C  | T  | 72  | 39  | c.4166C>T      | c.(4165-4167)CCC>CTC   | p.P1389L      |
| Pat_05 | Pre-Treatment | CPT1A    | 1374   | 37 | 11 | 68562334  | 68562334  | Missense_Mutation | SNP | C  | T  | 4   | 228 | c.817G>A       | c.(817-819)GGC>AGC     | p.G273S       |
| Pat_05 | Pre-Treatment | SHANK2   | 22941  | 37 | 11 | 70331942  | 70331942  | Missense_Mutation | SNP | C  | T  | 3   | 39  | c.4456G>A      | c.(4456-4458)GTC>ATC   | p.V1486I      |
| Pat_05 | Pre-Treatment | PDE2A    | 5138   | 37 | 11 | 72299879  | 72299879  | Missense_Mutation | SNP | G  | A  | 5   | 116 | c.1019C>T      | c.(1018-1020)ACT>ATT   | p.T340I       |
| Pat_05 | Pre-Treatment | ARAP1    | 116985 | 37 | 11 | 72397100  | 72397100  | Missense_Mutation | SNP | G  | A  | 4   | 118 | c.4322C>T      | c.(4321-4323)GCG>GTG   | p.A1441V      |

|        |               |           |        |    |    |           |           |                   |     |   |   |     |     |               |                        |                |
|--------|---------------|-----------|--------|----|----|-----------|-----------|-------------------|-----|---|---|-----|-----|---------------|------------------------|----------------|
| Pat_05 | Pre-Treatment | RSF1      | 51773  | 37 | 11 | 77378399  | 77378399  | Missense_Mutation | SNP | G | A | 4   | 177 | c.3889C>T     | c.(3889-3891)CGC>TGC   | p.R1297C       |
| Pat_05 | Pre-Treatment | GAB2      | 9846   | 37 | 11 | 77937876  | 77937876  | Missense_Mutation | SNP | C | T | 4   | 180 | c.842G>A      | c.(841-843)AGC>AAC     | p.S281N        |
| Pat_05 | Pre-Treatment | HEPHL1    | 341208 | 37 | 11 | 93826703  | 93826703  | Nonsense_Mutation | SNP | G | A | 167 | 119 | c.2331G>A     | c.(2329-2331)TGG>TGA   | p.W777*        |
| Pat_05 | Pre-Treatment | CNTN5     | 53942  | 37 | 11 | 100061987 | 100061987 | Splice_Site       | SNP | T | C | 32  | 23  | c.1708_splice | c.e14+2                | p.E570_splice  |
| Pat_05 | Pre-Treatment | YAP1      | 10413  | 37 | 11 | 102033218 | 102033218 | Missense_Mutation | SNP | C | T | 304 | 208 | c.604C>T      | c.(604-606)CCC>TCC     | p.P202S        |
| Pat_05 | Pre-Treatment | SIK2      | 23235  | 37 | 11 | 111574103 | 111574103 | Nonsense_Mutation | SNP | C | T | 4   | 221 | c.904C>T      | c.(904-906)CGA>TGA     | p.R302*        |
| Pat_05 | Pre-Treatment | ALG9      | 79796  | 37 | 11 | 111728344 | 111728344 | Missense_Mutation | SNP | G | A | 4   | 174 | c.682C>T      | c.(682-684)CCA>TCA     | p.P228S        |
| Pat_05 | Pre-Treatment | REXO2     | 25996  | 37 | 11 | 114314636 | 114314636 | Missense_Mutation | SNP | G | A | 4   | 59  | c.290G>A      | c.(289-291)TGT>TAT     | p.C97Y         |
| Pat_05 | Pre-Treatment | FAM55D    | 54827  | 37 | 11 | 114451024 | 114451024 | Missense_Mutation | SNP | C | A | 4   | 176 | c.929G>T      | c.(928-930)GGA>GTA     | p.G310V        |
| Pat_05 | Pre-Treatment | UBE4A     | 9354   | 37 | 11 | 118244386 | 118244386 | Missense_Mutation | SNP | G | A | 4   | 89  | c.1102G>A     | c.(1102-1104)GCC>ACC   | p.A368T        |
| Pat_05 | Pre-Treatment | GRIK4     | 2900   | 37 | 11 | 120732828 | 120732828 | Missense_Mutation | SNP | C | T | 4   | 173 | c.905C>T      | c.(904-906)GCG>GTG     | p.A302V        |
| Pat_05 | Pre-Treatment | NCAPD3    | 23310  | 37 | 11 | 134038828 | 134038828 | Missense_Mutation | SNP | A | G | 45  | 63  | c.3223T>C     | c.(3223-3225)TTC>CTC   | p.F1075L       |
| Pat_05 | Pre-Treatment | WNK1      | 65125  | 37 | 12 | 988911    | 988911    | Missense_Mutation | SNP | C | T | 6   | 595 | c.2546C>T     | c.(2545-2547)CCT>CTT   | p.P849L        |
| Pat_05 | Pre-Treatment | MLF2      | 8079   | 37 | 12 | 6861201   | 6861201   | Missense_Mutation | SNP | G | A | 4   | 237 | c.70C>T       | c.(70-72)CGT>TGT       | p.R24C         |
| Pat_05 | Pre-Treatment | GDF3      | 9573   | 37 | 12 | 7842689   | 7842689   | Missense_Mutation | SNP | G | A | 42  | 93  | c.880C>T      | c.(880-882)CAT>TAT     | p.H294Y        |
| Pat_05 | Pre-Treatment | A2M       | 2      | 37 | 12 | 9254150   | 9254150   | Missense_Mutation | SNP | G | A | 4   | 145 | c.1387C>T     | c.(1387-1389)CCC>TCC   | p.P463S        |
| Pat_05 | Pre-Treatment | BCL2L14   | 79370  | 37 | 12 | 12232613  | 12232613  | Missense_Mutation | SNP | C | T | 5   | 331 | c.374C>T      | c.(373-375)TCG>TTG     | p.S125L        |
| Pat_05 | Pre-Treatment | RPL13AP20 | 387841 | 37 | 12 | 13028826  | 13028826  | Missense_Mutation | SNP | G | A | 5   | 32  | c.394G>A      | c.(394-396)GCA>ACA     | p.A132T        |
| Pat_05 | Pre-Treatment | KIAA1467  | 57613  | 37 | 12 | 13215874  | 13215874  | Nonsense_Mutation | SNP | C | T | 134 | 552 | c.817C>T      | c.(817-819)CGA>TGA     | p.R273*        |
| Pat_05 | Pre-Treatment | ARHGDI3   | 397    | 37 | 12 | 15095590  | 15095590  | Missense_Mutation | SNP | G | A | 83  | 120 | c.472C>T      | c.(472-474)CCA>TCA     | p.P158S        |
| Pat_05 | Pre-Treatment | KIAA0528  | 9847   | 37 | 12 | 22627777  | 22627777  | Missense_Mutation | SNP | G | A | 5   | 275 | c.1951C>T     | c.(1951-1953)CGC>TGC   | p.R651C        |
| Pat_05 | Pre-Treatment | C12orf71  | 728858 | 37 | 12 | 27234382  | 27234382  | Missense_Mutation | SNP | C | T | 5   | 235 | c.535G>A      | c.(535-537)GCC>ACC     | p.A179T        |
| Pat_05 | Pre-Treatment | COL2A1    | 1280   | 37 | 12 | 48367925  | 48367925  | Missense_Mutation | SNP | G | A | 4   | 159 | c.4264C>T     | c.(4264-4266)CGG>TGG   | p.R1422W       |
| Pat_05 | Pre-Treatment | ANP32D    | 23519  | 37 | 12 | 48866508  | 48866508  | Missense_Mutation | SNP | G | A | 42  | 235 | c.61G>A       | c.(61-63)GAA>AAA       | p.E21K         |
| Pat_05 | Pre-Treatment | METTL7A   | 25840  | 37 | 12 | 51319096  | 51319096  | Missense_Mutation | SNP | G | A | 4   | 83  | c.275G>A      | c.(274-276)TGC>TAC     | p.C92Y         |
| Pat_05 | Pre-Treatment | ITGA5     | 3678   | 37 | 12 | 54798495  | 54798495  | Missense_Mutation | SNP | C | T | 29  | 133 | c.1409G>A     | c.(1408-1410)GGA>GAA   | p.G470E        |
| Pat_05 | Pre-Treatment | PDE1B     | 5153   | 37 | 12 | 54943765  | 54943765  | Missense_Mutation | SNP | T | G | 9   | 38  | c.109T>G      | c.(109-111)TCT>GCT     | p.S37A         |
| Pat_05 | Pre-Treatment | OR6C2     | 341416 | 37 | 12 | 55846399  | 55846399  | Missense_Mutation | SNP | G | A | 91  | 120 | c.402G>A      | c.(400-402)ATG>ATA     | p.M134I        |
| Pat_05 | Pre-Treatment | SPRYD4    | 283377 | 37 | 12 | 56863096  | 56863096  | Missense_Mutation | SNP | G | A | 6   | 589 | c.359G>A      | c.(358-360)CGT>CAT     | p.R120H        |
| Pat_05 | Pre-Treatment | NXPH4     | 11247  | 37 | 12 | 57619184  | 57619184  | Missense_Mutation | SNP | G | A | 20  | 68  | c.581G>A      | c.(580-582)GGG>GAG     | p.G194E        |
| Pat_05 | Pre-Treatment | OS9       | 10956  | 37 | 12 | 58089596  | 58089596  | Missense_Mutation | SNP | G | A | 163 | 202 | c.373G>A      | c.(373-375)GGA>AGA     | p.G125R        |
| Pat_05 | Pre-Treatment | FAM19A2   | 338811 | 37 | 12 | 62147474  | 62147474  | Missense_Mutation | SNP | C | T | 48  | 202 | c.313G>A      | c.(313-315)GAA>AAA     | p.E105K        |
| Pat_05 | Pre-Treatment | TRHDE     | 29953  | 37 | 12 | 72866886  | 72866886  | Missense_Mutation | SNP | G | A | 6   | 601 | c.1375G>A     | c.(1375-1377)GTG>ATG   | p.V459M        |
| Pat_05 | Pre-Treatment | SYT1      | 6857   | 37 | 12 | 79842697  | 79842697  | Splice_Site       | SNP | G | A | 88  | 127 | c.1063_splice | c.e12-1                | p.K355_splice  |
| Pat_05 | Pre-Treatment | CEP290    | 80184  | 37 | 12 | 88452799  | 88452799  | Splice_Site       | SNP | T | C | 3   | 53  | c.6646_splice | c.e49-1                | p.E2216_splice |
| Pat_05 | Pre-Treatment | C12orf12  | 196477 | 37 | 12 | 91347894  | 91347894  | Missense_Mutation | SNP | C | T | 4   | 140 | c.626G>A      | c.(625-627)CGT>CAT     | p.R209H        |
| Pat_05 | Pre-Treatment | UTP20     | 27340  | 37 | 12 | 101736806 | 101736806 | Missense_Mutation | SNP | G | A | 80  | 112 | c.4384G>A     | c.(4384-4386)GAA>AAA   | p.E1462K       |
| Pat_05 | Pre-Treatment | C12orf51  | 283450 | 37 | 12 | 112654950 | 112654950 | Missense_Mutation | SNP | G | A | 3   | 52  | c.5858C>T     | c.(5857-5859)GCC>GTC   | p.A1953V       |
| Pat_05 | Pre-Treatment | C12orf51  | 283450 | 37 | 12 | 112696965 | 112696965 | Missense_Mutation | SNP | G | A | 5   | 344 | c.1682C>T     | c.(1681-1683)GCG>GTG   | p.A561V        |
| Pat_05 | Pre-Treatment | RNFT2     | 84900  | 37 | 12 | 117188100 | 117188100 | Nonsense_Mutation | SNP | C | T | 27  | 18  | c.538C>T      | c.(538-540)CAG>TAG     | p.Q180*        |
| Pat_05 | Pre-Treatment | CDC60     | 160777 | 37 | 12 | 119866487 | 119866487 | Splice_Site       | SNP | G | A | 6   | 14  | c.91_splice   | c.e2-1                 | p.V31_splice   |
| Pat_05 | Pre-Treatment | COX6A1    | 1337   | 37 | 12 | 120875979 | 120875979 | Missense_Mutation | SNP | G | A | 4   | 89  | c.50G>A       | c.(49-51)CGC>CAC       | p.R17H         |
| Pat_05 | Pre-Treatment | ACADS     | 35     | 37 | 12 | 121176677 | 121176677 | Missense_Mutation | SNP | C | T | 4   | 198 | c.988C>T      | c.(988-990)CGC>TGC     | p.R330C        |
| Pat_05 | Pre-Treatment | PITPNM2   | 57605  | 37 | 12 | 123482049 | 123482049 | Missense_Mutation | SNP | C | T | 4   | 154 | c.1295G>A     | c.(1294-1296)GGC>GAC   | p.G432D        |
| Pat_05 | Pre-Treatment | DNAH10    | 196385 | 37 | 12 | 124408932 | 124408932 | Missense_Mutation | SNP | G | A | 16  | 38  | c.11365G>A    | c.(11365-11367)GGG>AGC | p.G3789R       |
| Pat_05 | Pre-Treatment | SFRS8     | 6433   | 37 | 12 | 132195896 | 132195896 | Missense_Mutation | SNP | C | T | 5   | 203 | c.122C>T      | c.(121-123)GCC>GTC     | p.A41V         |
| Pat_05 | Pre-Treatment | POLE      | 5426   | 37 | 12 | 133210876 | 133210876 | Missense_Mutation | SNP | G | A | 4   | 55  | c.5900C>T     | c.(5899-5901)GCG>GTG   | p.A1967V       |

|        |               |          |        |    |    |           |           |                   |     |    |    |     |     |                                   |                      |          |
|--------|---------------|----------|--------|----|----|-----------|-----------|-------------------|-----|----|----|-----|-----|-----------------------------------|----------------------|----------|
| Pat_05 | Pre-Treatment | SPATA13  | 221178 | 37 | 13 | 24863146  | 24863146  | Nonsense_Mutation | SNP | C  | T  | 4   | 162 | c.802C>T                          | c.(802-804)CGA>TGA   | p.R268*  |
| Pat_05 | Pre-Treatment | TRPC4    | 7223   | 37 | 13 | 38211066  | 38211066  | Missense_Mutation | SNP | C  | T  | 80  | 86  | c.2908G>A                         | c.(2908-2910)GAA>AAA | p.E970K  |
| Pat_05 | Pre-Treatment | LHFP     | 10186  | 37 | 13 | 40175295  | 40175295  | Missense_Mutation | SNP | G  | A  | 4   | 107 | c.59C>T                           | c.(58-60)GCT>GTT     | p.A20V   |
| Pat_05 | Pre-Treatment | ELF1     | 1997   | 37 | 13 | 41515372  | 41515372  | Missense_Mutation | SNP | G  | A  | 6   | 392 | c.941C>T                          | c.(940-942)TCG>TTG   | p.S314L  |
| Pat_05 | Pre-Treatment | KIAA0564 | 23078  | 37 | 13 | 42164868  | 42164868  | Missense_Mutation | SNP | G  | C  | 4   | 288 | c.5020C>G                         | c.(5020-5022)CAA>GAA | p.Q1674E |
| Pat_05 | Pre-Treatment | COG3     | 83548  | 37 | 13 | 46070347  | 46070347  | Missense_Mutation | SNP | G  | A  | 4   | 272 | c.1388G>A                         | c.(1387-1389)CGG>CAG | p.R463Q  |
| Pat_05 | Pre-Treatment | ATP7B    | 540    | 37 | 13 | 52518298  | 52518298  | Missense_Mutation | SNP | C  | T  | 49  | 40  | c.3190G>A                         | c.(3190-3192)GAG>AAG | p.E1064K |
| Pat_05 | Pre-Treatment | SCEL     | 8796   | 37 | 13 | 78173856  | 78173856  | Missense_Mutation | SNP | G  | A  | 3   | 69  | c.890G>A                          | c.(889-891)AGT>AAT   | p.S297N  |
| Pat_05 | Pre-Treatment | POTEG    | 404785 | 37 | 14 | 19566058  | 19566058  | Missense_Mutation | SNP | G  | A  | 4   | 234 | c.1102G>A                         | c.(1102-1104)GTC>ATC | p.V368I  |
| Pat_05 | Pre-Treatment | MYH6     | 4624   | 37 | 14 | 23873585  | 23873586  | Missense_Mutation | DNP | CC | TT | 65  | 47  | c.654_655GG>AA652-657)GAGGAC>GAAA |                      | p.D219N  |
| Pat_05 | Pre-Treatment | FAM158A  | 51016  | 37 | 14 | 24608377  | 24608377  | Missense_Mutation | SNP | G  | A  | 6   | 541 | c.469C>T                          | c.(469-471)CGG>TGG   | p.R157W  |
| Pat_05 | Pre-Treatment | RIPK3    | 11035  | 37 | 14 | 24807650  | 24807650  | Missense_Mutation | SNP | A  | G  | 39  | 172 | c.595T>C                          | c.(595-597)TCC>CCC   | p.S199P  |
| Pat_05 | Pre-Treatment | NFATC4   | 4776   | 37 | 14 | 24843005  | 24843005  | Missense_Mutation | SNP | G  | A  | 5   | 96  | c.1664G>A                         | c.(1663-1665)CGG>CAG | p.R555Q  |
| Pat_05 | Pre-Treatment | RALGAPA1 | 253959 | 37 | 14 | 36211615  | 36211615  | Missense_Mutation | SNP | C  | T  | 7   | 7   | c.1408G>A                         | c.(1408-1410)GAC>AAC | p.D470N  |
| Pat_05 | Pre-Treatment | MIA2     | 117153 | 37 | 14 | 39717268  | 39717268  | Missense_Mutation | SNP | C  | T  | 96  | 73  | c.1490C>T                         | c.(1489-1491)ACT>ATT | p.T497I  |
| Pat_05 | Pre-Treatment | MIA2     | 117153 | 37 | 14 | 39722048  | 39722048  | Nonsense_Mutation | SNP | C  | G  | 55  | 112 | c.1664C>G                         | c.(1663-1665)TCA>TGA | p.S555*  |
| Pat_05 | Pre-Treatment | SDCCAG1  | 9147   | 37 | 14 | 50269427  | 50269427  | Missense_Mutation | SNP | G  | A  | 25  | 54  | c.1934C>T                         | c.(1933-1935)CCT>CTT | p.P645L  |
| Pat_05 | Pre-Treatment | SIX1     | 6495   | 37 | 14 | 61113294  | 61113294  | Missense_Mutation | SNP | C  | T  | 45  | 22  | c.562G>A                          | c.(562-564)GAG>AAG   | p.E188K  |
| Pat_05 | Pre-Treatment | SPTB     | 6710   | 37 | 14 | 65220427  | 65220427  | Missense_Mutation | SNP | C  | T  | 4   | 141 | c.6430G>A                         | c.(6430-6432)GAT>AAT | p.D2144N |
| Pat_05 | Pre-Treatment | ZFYVE26  | 23503  | 37 | 14 | 68260920  | 68260920  | Missense_Mutation | SNP | C  | T  | 320 | 175 | c.2369G>A                         | c.(2368-2370)AGT>AAT | p.S790N  |
| Pat_05 | Pre-Treatment | PCNX     | 22990  | 37 | 14 | 71462618  | 71462618  | Missense_Mutation | SNP | G  | A  | 4   | 245 | c.2605G>A                         | c.(2605-2607)GGT>AGT | p.G869S  |
| Pat_05 | Pre-Treatment | CRIP1    | 1396   | 37 | 14 | 105954671 | 105954671 | Missense_Mutation | SNP | G  | A  | 4   | 155 | c.139G>A                          | c.(139-141)GAA>AAA   | p.E47K   |
| Pat_05 | Pre-Treatment | THBS1    | 7057   | 37 | 15 | 39885837  | 39885837  | Missense_Mutation | SNP | G  | A  | 6   | 230 | c.3235G>A                         | c.(3235-3237)GCC>ACC | p.A1079T |
| Pat_05 | Pre-Treatment | EIF2AK4  | 440275 | 37 | 15 | 40284403  | 40284403  | Missense_Mutation | SNP | G  | A  | 45  | 150 | c.2659G>A                         | c.(2659-2661)GGA>AGA | p.G887R  |
| Pat_05 | Pre-Treatment | CDAN1    | 146059 | 37 | 15 | 43026214  | 43026214  | Missense_Mutation | SNP | G  | A  | 36  | 130 | c.1289C>T                         | c.(1288-1290)GCT>GTT | p.A430V  |
| Pat_05 | Pre-Treatment | TP53BP1  | 7158   | 37 | 15 | 43714147  | 43714147  | Missense_Mutation | SNP | C  | T  | 74  | 97  | c.3991G>A                         | c.(3991-3993)GGG>AGG | p.G1331R |
| Pat_05 | Pre-Treatment | SLC12A1  | 6557   | 37 | 15 | 48521475  | 48521475  | Missense_Mutation | SNP | G  | A  | 3   | 29  | c.814G>A                          | c.(814-816)GTT>ATT   | p.V272I  |
| Pat_05 | Pre-Treatment | FBN1     | 2200   | 37 | 15 | 48766757  | 48766757  | Missense_Mutation | SNP | G  | A  | 5   | 349 | c.4055C>T                         | c.(4054-4056)CCC>CTC | p.P1352L |
| Pat_05 | Pre-Treatment | MAP2K1   | 5604   | 37 | 15 | 66777460  | 66777460  | Missense_Mutation | SNP | G  | T  | 4   | 108 | c.826G>T                          | c.(826-828)GGG>TGG   | p.G276W  |
| Pat_05 | Pre-Treatment | TLE3     | 7090   | 37 | 15 | 70344778  | 70344778  | Missense_Mutation | SNP | T  | C  | 3   | 116 | c.2069A>G                         | c.(2068-2070)AAG>AGG | p.K690R  |
| Pat_05 | Pre-Treatment | MYO9A    | 4649   | 37 | 15 | 72338507  | 72338507  | Missense_Mutation | SNP | C  | T  | 4   | 318 | c.398G>A                          | c.(397-399)AGG>AAG   | p.R133K  |
| Pat_05 | Pre-Treatment | TMEM202  | 338949 | 37 | 15 | 72700185  | 72700185  | Missense_Mutation | SNP | C  | T  | 81  | 46  | c.773C>T                          | c.(772-774)TCT>TTT   | p.S258F  |
| Pat_05 | Pre-Treatment | CYP1A2   | 1544   | 37 | 15 | 75042776  | 75042776  | Missense_Mutation | SNP | G  | A  | 4   | 252 | c.697G>A                          | c.(697-699)GGG>AGG   | p.G233R  |
| Pat_05 | Pre-Treatment | PSTPIP1  | 9051   | 37 | 15 | 77329473  | 77329473  | Missense_Mutation | SNP | G  | A  | 3   | 56  | c.1207G>A                         | c.(1207-1209)GGG>AGG | p.G403R  |
| Pat_05 | Pre-Treatment | AKAP13   | 11214  | 37 | 15 | 86124402  | 86124402  | Missense_Mutation | SNP | G  | A  | 4   | 170 | c.3103G>A                         | c.(3103-3105)GCA>ACA | p.A1035T |
| Pat_05 | Pre-Treatment | ZNF710   | 374655 | 37 | 15 | 90622960  | 90622960  | Nonsense_Mutation | SNP | G  | T  | 34  | 211 | c.1894G>T                         | c.(1894-1896)GAG>TAG | p.E632*  |
| Pat_05 | Pre-Treatment | LRRK1    | 79705  | 37 | 15 | 101523854 | 101523854 | Missense_Mutation | SNP | C  | T  | 4   | 154 | c.383C>T                          | c.(382-384)GCG>GTG   | p.A128V  |
| Pat_05 | Pre-Treatment | LRRK1    | 79705  | 37 | 15 | 101586289 | 101586289 | Missense_Mutation | SNP | G  | A  | 4   | 159 | c.3067G>A                         | c.(3067-3069)GTT>ATT | p.V1023I |
| Pat_05 | Pre-Treatment | TELO2    | 9894   | 37 | 16 | 1555588   | 1555588   | Missense_Mutation | SNP | C  | A  | 4   | 54  | c.2020C>A                         | c.(2020-2022)CAG>AAG | p.Q674K  |
| Pat_05 | Pre-Treatment | MAPK8IP3 | 23162  | 37 | 16 | 1810460   | 1810460   | Missense_Mutation | SNP | G  | A  | 4   | 202 | c.1381G>A                         | c.(1381-1383)GAG>AAG | p.E461K  |
| Pat_05 | Pre-Treatment | SPSB3    | 90864  | 37 | 16 | 1828154   | 1828154   | Missense_Mutation | SNP | G  | A  | 16  | 60  | c.473C>T                          | c.(472-474)CCC>CTC   | p.P158L  |
| Pat_05 | Pre-Treatment | RPL3L    | 6123   | 37 | 16 | 2002897   | 2002897   | Missense_Mutation | SNP | G  | A  | 4   | 259 | c.343C>T                          | c.(343-345)CGG>TGG   | p.R115W  |
| Pat_05 | Pre-Treatment | CASKIN1  | 57524  | 37 | 16 | 2237368   | 2237368   | Missense_Mutation | SNP | G  | A  | 4   | 159 | c.712C>T                          | c.(712-714)CGG>TGG   | p.R238W  |
| Pat_05 | Pre-Treatment | PRSS22   | 64063  | 37 | 16 | 2903228   | 2903228   | Missense_Mutation | SNP | C  | T  | 4   | 92  | c.820G>A                          | c.(820-822)GTC>ATC   | p.V274I  |
| Pat_05 | Pre-Treatment | PRSS22   | 64063  | 37 | 16 | 2903246   | 2903246   | Missense_Mutation | SNP | C  | T  | 26  | 46  | c.802G>A                          | c.(802-804)GAG>AAG   | p.E268K  |
| Pat_05 | Pre-Treatment | MMP25    | 64386  | 37 | 16 | 3107383   | 3107383   | Missense_Mutation | SNP | C  | T  | 5   | 178 | c.911C>T                          | c.(910-912)TCG>TTG   | p.S304L  |
| Pat_05 | Pre-Treatment | TIGD7    | 91151  | 37 | 16 | 3350332   | 3350332   | Missense_Mutation | SNP | C  | T  | 5   | 239 | c.283G>A                          | c.(283-285)GGT>AGT   | p.G95S   |



|        |               |          |        |    |    |          |          |                   |     |    |    |     |     |                 |                      |               |
|--------|---------------|----------|--------|----|----|----------|----------|-------------------|-----|----|----|-----|-----|-----------------|----------------------|---------------|
| Pat_05 | Pre-Treatment | CREBBP   | 1387   | 37 | 16 | 3819211  | 3819212  | Missense_Mutation | DNP | GG | AA | 88  | 99  | .:3023_3024CC>T | c.(3022-3024)CCC>CTT | p.P1008L      |
| Pat_05 | Pre-Treatment | GRIN2A   | 2903   | 37 | 16 | 9857613  | 9857613  | Missense_Mutation | SNP | C  | T  | 17  | 23  | c.3788G>A       | c.(3787-3789)GGG>GAG | p.G1263E      |
| Pat_05 | Pre-Treatment | GRIN2A   | 2903   | 37 | 16 | 9934962  | 9934962  | Splice_Site       | SNP | C  | A  | 21  | 99  | c.1329_splice   | c.e6-1               | p.N443_splice |
| Pat_05 | Pre-Treatment | ATF7IP2  | 80063  | 37 | 16 | 10524659 | 10524659 | Missense_Mutation | SNP | C  | T  | 4   | 127 | c.182C>T        | c.(181-183)ACG>ATG   | p.T61M        |
| Pat_05 | Pre-Treatment | KIAA0430 | 9665   | 37 | 16 | 15716945 | 15716945 | Missense_Mutation | SNP | G  | A  | 4   | 281 | c.2306C>T       | c.(2305-2307)CCG>CTG | p.P769L       |
| Pat_05 | Pre-Treatment | TMC7     | 79905  | 37 | 16 | 19027793 | 19027793 | Missense_Mutation | SNP | G  | A  | 5   | 155 | c.333G>A        | c.(331-333)ATG>ATA   | p.M111I       |
| Pat_05 | Pre-Treatment | TMC5     | 79838  | 37 | 16 | 19451823 | 19451823 | Missense_Mutation | SNP | C  | T  | 89  | 135 | c.463C>T        | c.(463-465)CAT>TAT   | p.H155Y       |
| Pat_05 | Pre-Treatment | DCUN1D3  | 123879 | 37 | 16 | 20871519 | 20871519 | Missense_Mutation | SNP | G  | A  | 6   | 497 | c.604C>T        | c.(604-606)CGG>TGG   | p.R202W       |
| Pat_05 | Pre-Treatment | POLR3E   | 55718  | 37 | 16 | 22320292 | 22320292 | Missense_Mutation | SNP | G  | A  | 4   | 202 | c.212G>A        | c.(211-213)CGC>CAC   | p.R71H        |
| Pat_05 | Pre-Treatment | PRKCB    | 5579   | 37 | 16 | 24104192 | 24104192 | Missense_Mutation | SNP | C  | T  | 44  | 168 | c.610C>T        | c.(610-612)CCC>TCC   | p.P204S       |
| Pat_05 | Pre-Treatment | SRCAP    | 10847  | 37 | 16 | 30748905 | 30748905 | Missense_Mutation | SNP | C  | T  | 4   | 309 | c.7544C>T       | c.(7543-7545)CCA>CTA | p.P2515L      |
| Pat_05 | Pre-Treatment | ZNF646   | 9726   | 37 | 16 | 31088970 | 31088970 | Missense_Mutation | SNP | C  | T  | 28  | 29  | c.1325C>T       | c.(1324-1326)CCC>CTC | p.P442L       |
| Pat_05 | Pre-Treatment | CHD9     | 80205  | 37 | 16 | 53348813 | 53348813 | Missense_Mutation | SNP | C  | T  | 140 | 143 | c.7441C>T       | c.(7441-7443)CCT>TCT | p.P2481S      |
| Pat_05 | Pre-Treatment | RBL2     | 5934   | 37 | 16 | 53513130 | 53513130 | Missense_Mutation | SNP | G  | A  | 4   | 192 | c.2768G>A       | c.(2767-2769)CGG>CAG | p.R923Q       |
| Pat_05 | Pre-Treatment | RFWD3    | 55159  | 37 | 16 | 74683038 | 74683038 | Missense_Mutation | SNP | G  | A  | 163 | 164 | c.784C>T        | c.(784-786)CCC>TCC   | p.P262S       |
| Pat_05 | Pre-Treatment | PKD1L2   | 114780 | 37 | 16 | 81167302 | 81167302 | Missense_Mutation | SNP | G  | A  | 21  | 32  | c.5723C>T       | c.(5722-5724)CCC>CTC | p.P1908L      |
| Pat_05 | Pre-Treatment | PLCG2    | 5336   | 37 | 16 | 81888165 | 81888165 | Missense_Mutation | SNP | T  | A  | 65  | 288 | c.310T>A        | c.(310-312)TTC>ATC   | p.F104I       |
| Pat_05 | Pre-Treatment | ZCCHC14  | 23174  | 37 | 16 | 87445340 | 87445340 | Missense_Mutation | SNP | G  | A  | 3   | 49  | c.2576C>T       | c.(2575-2577)ACC>ATC | p.T859I       |
| Pat_05 | Pre-Treatment | CAMKK1   | 84254  | 37 | 17 | 3773120  | 3773120  | Missense_Mutation | SNP | G  | A  | 48  | 170 | c.1187C>T       | c.(1186-1188)ACG>ATG | p.T396M       |
| Pat_05 | Pre-Treatment | MYBBP1A  | 10514  | 37 | 17 | 4452718  | 4452718  | Missense_Mutation | SNP | G  | A  | 4   | 156 | c.1339C>T       | c.(1339-1341)CGG>TGG | p.R447W       |
| Pat_05 | Pre-Treatment | CAMTA2   | 23125  | 37 | 17 | 4883851  | 4883851  | Missense_Mutation | SNP | G  | A  | 6   | 410 | c.766C>T        | c.(766-768)CCC>TCC   | p.P256S       |
| Pat_05 | Pre-Treatment | FBXO39   | 162517 | 37 | 17 | 6684059  | 6684059  | Missense_Mutation | SNP | G  | A  | 19  | 19  | c.872G>A        | c.(871-873)CGG>CAG   | p.R291Q       |
| Pat_05 | Pre-Treatment | ACAP1    | 9744   | 37 | 17 | 7246739  | 7246739  | Missense_Mutation | SNP | G  | A  | 4   | 169 | c.386G>A        | c.(385-387)CGG>CAG   | p.R129Q       |
| Pat_05 | Pre-Treatment | SUPT6H   | 6830   | 37 | 17 | 27023987 | 27023987 | Missense_Mutation | SNP | C  | T  | 177 | 291 | c.4096C>T       | c.(4096-4098)CAC>TAC | p.H1366Y      |
| Pat_05 | Pre-Treatment | LRRC37B  | 114659 | 37 | 17 | 30349585 | 30349585 | Missense_Mutation | SNP | C  | T  | 70  | 129 | c.1420C>T       | c.(1420-1422)CAT>TAT | p.H474Y       |
| Pat_05 | Pre-Treatment | LRRC37B  | 114659 | 37 | 17 | 30361940 | 30361940 | Missense_Mutation | SNP | G  | A  | 4   | 161 | c.1988G>A       | c.(1987-1989)CGC>CAC | p.R663H       |
| Pat_05 | Pre-Treatment | SRCIN1   | 80725  | 37 | 17 | 36717729 | 36717729 | Missense_Mutation | SNP | G  | A  | 4   | 80  | c.1670C>T       | c.(1669-1671)CCG>CTG | p.P557L       |
| Pat_05 | Pre-Treatment | KRT27    | 342574 | 37 | 17 | 38933948 | 38933948 | Missense_Mutation | SNP | T  | G  | 207 | 382 | c.1009A>C       | c.(1009-1011)AGT>CGT | p.S337R       |
| Pat_05 | Pre-Treatment | STAT5B   | 6777   | 37 | 17 | 40376882 | 40376882 | Missense_Mutation | SNP | G  | A  | 4   | 188 | c.290C>T        | c.(289-291)ACG>ATG   | p.T97M        |
| Pat_05 | Pre-Treatment | BRCA1    | 672    | 37 | 17 | 41244316 | 41244316 | Missense_Mutation | SNP | G  | A  | 144 | 270 | c.3232C>T       | c.(3232-3234)CCA>TCA | p.P1078S      |
| Pat_05 | Pre-Treatment | RUNDC3A  | 10900  | 37 | 17 | 42390577 | 42390577 | Missense_Mutation | SNP | G  | A  | 4   | 169 | c.329G>A        | c.(328-330)AGC>AAC   | p.S110N       |
| Pat_05 | Pre-Treatment | FMNL1    | 752    | 37 | 17 | 43320500 | 43320500 | Missense_Mutation | SNP | G  | A  | 117 | 219 | c.2026G>A       | c.(2026-2028)GAT>AAT | p.D676N       |
| Pat_05 | Pre-Treatment | WNT9B    | 7484   | 37 | 17 | 44953705 | 44953705 | Missense_Mutation | SNP | G  | A  | 4   | 95  | c.695G>A        | c.(694-696)CGT>CAT   | p.R232H       |
| Pat_05 | Pre-Treatment | ITGB3    | 3690   | 37 | 17 | 45376743 | 45376743 | Missense_Mutation | SNP | C  | T  | 6   | 656 | c.1760C>T       | c.(1759-1761)ACC>ATC | p.T587I       |
| Pat_05 | Pre-Treatment | TBX21    | 30009  | 37 | 17 | 45822470 | 45822470 | Missense_Mutation | SNP | G  | A  | 3   | 51  | c.1346G>A       | c.(1345-1347)CGC>CAC | p.R449H       |
| Pat_05 | Pre-Treatment | OSBPL7   | 114881 | 37 | 17 | 45895918 | 45895918 | Missense_Mutation | SNP | C  | T  | 4   | 180 | c.434G>A        | c.(433-435)CGC>CAC   | p.R145H       |
| Pat_05 | Pre-Treatment | CACNA1G  | 8913   | 37 | 17 | 48650037 | 48650037 | Missense_Mutation | SNP | G  | A  | 8   | 13  | c.869G>A        | c.(868-870)GGG>GAG   | p.G290E       |
| Pat_05 | Pre-Treatment | SPAG9    | 9043   | 37 | 17 | 49079164 | 49079164 | Missense_Mutation | SNP | C  | T  | 167 | 263 | c.1519G>A       | c.(1519-1521)GAA>AAA | p.E507K       |
| Pat_05 | Pre-Treatment | OR4D1    | 26689  | 37 | 17 | 56232773 | 56232773 | Missense_Mutation | SNP | C  | T  | 69  | 142 | c.259C>T        | c.(259-261)CAT>TAT   | p.H87Y        |
| Pat_05 | Pre-Treatment | TEX14    | 56155  | 37 | 17 | 56663170 | 56663170 | Missense_Mutation | SNP | C  | T  | 6   | 484 | c.3080G>A       | c.(3079-3081)AGC>AAC | p.S1027N      |
| Pat_05 | Pre-Treatment | TBC1D3P2 | 440452 | 37 | 17 | 60351236 | 60351236 | Nonsense_Mutation | SNP | G  | A  | 72  | 229 | c.79C>T         | c.(79-81)CGA>TGA     | p.R27*        |
| Pat_05 | Pre-Treatment | ERN1     | 2081   | 37 | 17 | 62131707 | 62131707 | Missense_Mutation | SNP | G  | A  | 4   | 68  | c.1856C>T       | c.(1855-1857)TCG>TTG | p.S619L       |
| Pat_05 | Pre-Treatment | TEX2     | 55852  | 37 | 17 | 62291312 | 62291312 | Missense_Mutation | SNP | G  | A  | 8   | 754 | c.266C>T        | c.(265-267)GCT>GTT   | p.A89V        |
| Pat_05 | Pre-Treatment | MRPL38   | 64978  | 37 | 17 | 73897876 | 73897877 | Nonsense_Mutation | DNP | GG | AA | 61  | 145 | c.507_508CC>TT  | 505-510)CCCCGA>CCTT( | p.R170*       |
| Pat_05 | Pre-Treatment | QRICH2   | 84074  | 37 | 17 | 74288788 | 74288788 | Missense_Mutation | SNP | C  | A  | 6   | 216 | c.1522G>T       | c.(1522-1524)GGC>TGC | p.G508C       |
| Pat_05 | Pre-Treatment | SYNGR2   | 9144   | 37 | 17 | 76166913 | 76166913 | Missense_Mutation | SNP | G  | A  | 6   | 605 | c.115G>A        | c.(115-117)GTG>ATG   | p.V39M        |
| Pat_05 | Pre-Treatment | PGS1     | 9489   | 37 | 17 | 76399780 | 76399780 | Missense_Mutation | SNP | G  | A  | 4   | 235 | c.1012G>A       | c.(1012-1014)GCA>ACA | p.A338T       |

|        |               |          |        |    |    |          |          |                   |     |   |   |     |     |              |                        |               |
|--------|---------------|----------|--------|----|----|----------|----------|-------------------|-----|---|---|-----|-----|--------------|------------------------|---------------|
| Pat_05 | Pre-Treatment | BAHCC1   | 57597  | 37 | 17 | 79430706 | 79430706 | Missense_Mutation | SNP | G | A | 5   | 163 | c.7690G>A    | c.(7690-7692)GTG>ATG   | p.V2564M      |
| Pat_05 | Pre-Treatment | KIAA0802 | 23255  | 37 | 18 | 8783903  | 8783903  | Missense_Mutation | SNP | G | A | 4   | 213 | c.793G>A     | c.(793-795)GGT>AGT     | p.G265S       |
| Pat_05 | Pre-Treatment | MC5R     | 4161   | 37 | 18 | 13826417 | 13826417 | Missense_Mutation | SNP | G | A | 4   | 287 | c.653G>A     | c.(652-654)CGG>CAG     | p.R218Q       |
| Pat_05 | Pre-Treatment | HAUS1    | 115106 | 37 | 18 | 43704860 | 43704860 | Splice_Site       | SNP | G | A | 4   | 149 | c.738_splice | c.e7+1                 | p.P246_splice |
| Pat_05 | Pre-Treatment | C18orf25 | 147339 | 37 | 18 | 43796277 | 43796277 | Missense_Mutation | SNP | G | A | 4   | 141 | c.431G>A     | c.(430-432)CGA>CAA     | p.R144Q       |
| Pat_05 | Pre-Treatment | ME2      | 4200   | 37 | 18 | 48442612 | 48442612 | Missense_Mutation | SNP | A | C | 84  | 169 | c.467A>C     | c.(466-468)AAG>ACG     | p.K156T       |
| Pat_05 | Pre-Treatment | MBD2     | 8932   | 37 | 18 | 51731459 | 51731459 | Missense_Mutation | SNP | C | T | 38  | 130 | c.611G>A     | c.(610-612)AGC>AAC     | p.S204N       |
| Pat_05 | Pre-Treatment | KIAA1468 | 57614  | 37 | 18 | 59949653 | 59949653 | Missense_Mutation | SNP | G | A | 6   | 422 | c.3229G>A    | c.(3229-3231)GCA>ACA   | p.A1077T      |
| Pat_05 | Pre-Treatment | NETO1    | 81832  | 37 | 18 | 70423314 | 70423314 | Missense_Mutation | SNP | C | T | 111 | 104 | c.937G>A     | c.(937-939)GGA>AGA     | p.G313R       |
| Pat_05 | Pre-Treatment | DAPK3    | 1613   | 37 | 19 | 3960100  | 3960100  | Missense_Mutation | SNP | C | T | 8   | 531 | c.785G>A     | c.(784-786)CGG>CAG     | p.R262Q       |
| Pat_05 | Pre-Treatment | FSD1     | 79187  | 37 | 19 | 4306225  | 4306225  | Missense_Mutation | SNP | G | A | 5   | 238 | c.142G>A     | c.(142-144)GAA>AAA     | p.E48K        |
| Pat_05 | Pre-Treatment | PLIN4    | 729359 | 37 | 19 | 4513325  | 4513325  | Missense_Mutation | SNP | G | T | 59  | 223 | c.605C>A     | c.(604-606)GCC>GAC     | p.A202D       |
| Pat_05 | Pre-Treatment | PNPLA6   | 10908  | 37 | 19 | 7605827  | 7605827  | Missense_Mutation | SNP | C | T | 4   | 81  | c.841C>T     | c.(841-843)CGG>TGG     | p.R281W       |
| Pat_05 | Pre-Treatment | XAB2     | 56949  | 37 | 19 | 7684735  | 7684735  | Missense_Mutation | SNP | C | T | 4   | 166 | c.2404G>A    | c.(2404-2406)GCC>ACC   | p.A802T       |
| Pat_05 | Pre-Treatment | CLEC4M   | 10332  | 37 | 19 | 7833780  | 7833780  | Missense_Mutation | SNP | C | T | 36  | 187 | c.1037C>T    | c.(1036-1038)GCG>GTG   | p.A346V       |
| Pat_05 | Pre-Treatment | ADAMTS10 | 81794  | 37 | 19 | 8670190  | 8670190  | Missense_Mutation | SNP | C | T | 6   | 9   | c.142G>A     | c.(142-144)GAC>AAC     | p.D48N        |
| Pat_05 | Pre-Treatment | MUC16    | 94025  | 37 | 19 | 9061896  | 9061896  | Missense_Mutation | SNP | G | C | 58  | 59  | c.25550C>G   | c.(25549-25551)ACA>AGA | p.T8517R      |
| Pat_05 | Pre-Treatment | CARM1    | 10498  | 37 | 19 | 11018769 | 11018769 | Missense_Mutation | SNP | G | A | 6   | 353 | c.401G>A     | c.(400-402)CGG>CAG     | p.R134Q       |
| Pat_05 | Pre-Treatment | ZNF844   | 284391 | 37 | 19 | 12187307 | 12187307 | Missense_Mutation | SNP | G | C | 4   | 145 | c.1372G>C    | c.(1372-1374)GAT>CAT   | p.D458H       |
| Pat_05 | Pre-Treatment | ZNF443   | 10224  | 37 | 19 | 12542199 | 12542199 | Missense_Mutation | SNP | G | A | 14  | 354 | c.787C>T     | c.(787-789)CCT>TCT     | p.P263S       |
| Pat_05 | Pre-Treatment | ZNF709   | 163051 | 37 | 19 | 12577561 | 12577561 | Missense_Mutation | SNP | G | A | 53  | 62  | c.107C>T     | c.(106-108)ACC>ATC     | p.T36I        |
| Pat_05 | Pre-Treatment | ZNF490   | 57474  | 37 | 19 | 12692177 | 12692177 | Nonsense_Mutation | SNP | G | A | 17  | 73  | c.712C>T     | c.(712-714)CGA>TGA     | p.R238*       |
| Pat_05 | Pre-Treatment | SYDE1    | 85360  | 37 | 19 | 15221541 | 15221541 | Missense_Mutation | SNP | C | G | 2   | 9   | c.1285C>G    | c.(1285-1287)CTG>GTG   | p.L429V       |
| Pat_05 | Pre-Treatment | TMEM38A  | 79041  | 37 | 19 | 16799109 | 16799109 | Missense_Mutation | SNP | C | T | 4   | 73  | c.827C>T     | c.(826-828)TCG>TTG     | p.S276L       |
| Pat_05 | Pre-Treatment | NWD1     | 284434 | 37 | 19 | 16875863 | 16875863 | Missense_Mutation | SNP | C | T | 29  | 104 | c.2270C>T    | c.(2269-2271)TCC>TTC   | p.S757F       |
| Pat_05 | Pre-Treatment | ARRDC2   | 27106  | 37 | 19 | 18120628 | 18120628 | Missense_Mutation | SNP | G | A | 4   | 277 | c.629G>A     | c.(628-630)GGC>GAC     | p.G210D       |
| Pat_05 | Pre-Treatment | ZNF431   | 170959 | 37 | 19 | 21366278 | 21366278 | Missense_Mutation | SNP | A | C | 26  | 19  | c.1172A>C    | c.(1171-1173)AAA>ACA   | p.K391T       |
| Pat_05 | Pre-Treatment | ZNF676   | 163223 | 37 | 19 | 22362924 | 22362924 | Missense_Mutation | SNP | G | C | 3   | 122 | c.1595C>G    | c.(1594-1596)CCC>CGC   | p.P532R       |
| Pat_05 | Pre-Treatment | ZNF99    | 7652   | 37 | 19 | 22939472 | 22939472 | Missense_Mutation | SNP | A | G | 3   | 61  | c.2699T>C    | c.(2698-2700)TTC>TCC   | p.F900S       |
| Pat_05 | Pre-Treatment | LGI4     | 163175 | 37 | 19 | 35625512 | 35625512 | Missense_Mutation | SNP | C | T | 11  | 21  | c.73G>A      | c.(73-75)GGA>AGA       | p.G25R        |
| Pat_05 | Pre-Treatment | ARHGAP33 | 115703 | 37 | 19 | 36268739 | 36268739 | Nonsense_Mutation | SNP | C | T | 4   | 226 | c.118C>T     | c.(118-120)CGA>TGA     | p.R40*        |
| Pat_05 | Pre-Treatment | LRFN3    | 79414  | 37 | 19 | 36431189 | 36431189 | Missense_Mutation | SNP | G | A | 3   | 27  | c.862G>A     | c.(862-864)GAG>AAG     | p.E288K       |
| Pat_05 | Pre-Treatment | COX7A1   | 1346   | 37 | 19 | 36642432 | 36642432 | Missense_Mutation | SNP | G | A | 4   | 264 | c.119C>T     | c.(118-120)CCG>CTG     | p.P40L        |
| Pat_05 | Pre-Treatment | ZNF569   | 148266 | 37 | 19 | 37903561 | 37903561 | Missense_Mutation | SNP | A | G | 47  | 219 | c.1999T>C    | c.(1999-2001)TGT>CGT   | p.C667R       |
| Pat_05 | Pre-Treatment | ZNF793   | 390927 | 37 | 19 | 38023312 | 38023312 | Missense_Mutation | SNP | C | T | 4   | 55  | c.70C>T      | c.(70-72)CGG>TGG       | p.R24W        |
| Pat_05 | Pre-Treatment | ZNF571   | 51276  | 37 | 19 | 38055543 | 38055543 | Missense_Mutation | SNP | C | G | 20  | 22  | c.1787G>C    | c.(1786-1788)AGA>ACA   | p.R596T       |
| Pat_05 | Pre-Treatment | RYR1     | 6261   | 37 | 19 | 38993310 | 38993310 | Missense_Mutation | SNP | G | A | 5   | 151 | c.7778G>A    | c.(7777-7779)CGT>CAT   | p.R2593H      |
| Pat_05 | Pre-Treatment | ATP1A3   | 478    | 37 | 19 | 42474393 | 42474393 | Missense_Mutation | SNP | G | A | 4   | 104 | c.2486C>T    | c.(2485-2487)CCG>CTG   | p.P829L       |
| Pat_05 | Pre-Treatment | ATP1A3   | 478    | 37 | 19 | 42482889 | 42482889 | Missense_Mutation | SNP | G | A | 4   | 190 | c.1499C>T    | c.(1498-1500)GCC>GTC   | p.A500V       |
| Pat_05 | Pre-Treatment | ATP1A3   | 478    | 37 | 19 | 42486240 | 42486240 | Missense_Mutation | SNP | C | T | 4   | 117 | c.1012G>A    | c.(1012-1014)GCC>ACC   | p.A338T       |
| Pat_05 | Pre-Treatment | XRCC1    | 7515   | 37 | 19 | 44048333 | 44048333 | Missense_Mutation | SNP | G | A | 3   | 41  | c.1675C>T    | c.(1675-1677)CGG>TGG   | p.R559W       |
| Pat_05 | Pre-Treatment | IRGC     | 56269  | 37 | 19 | 44223896 | 44223896 | Missense_Mutation | SNP | G | A | 3   | 35  | c.1186G>A    | c.(1186-1188)GCC>ACC   | p.A396T       |
| Pat_05 | Pre-Treatment | ZNF45    | 7596   | 37 | 19 | 44418575 | 44418575 | Missense_Mutation | SNP | C | T | 4   | 83  | c.1013G>A    | c.(1012-1014)GGC>GAC   | p.G338D       |
| Pat_05 | Pre-Treatment | EXOC3L2  | 90332  | 37 | 19 | 45731020 | 45731020 | Missense_Mutation | SNP | G | A | 3   | 43  | c.304C>T     | c.(304-306)CGT>TGT     | p.R102C       |
| Pat_05 | Pre-Treatment | SLC8A2   | 6543   | 37 | 19 | 47944435 | 47944435 | Missense_Mutation | SNP | G | A | 4   | 246 | c.1876C>T    | c.(1876-1878)CTC>TTC   | p.L626F       |
| Pat_05 | Pre-Treatment | EHD2     | 30846  | 37 | 19 | 48229081 | 48229081 | Missense_Mutation | SNP | C | T | 4   | 172 | c.515C>T     | c.(514-516)CCG>CTG     | p.P172L       |
| Pat_05 | Pre-Treatment | TRPM4    | 54795  | 37 | 19 | 49669383 | 49669383 | Missense_Mutation | SNP | G | A | 3   | 25  | c.178G>A     | c.(178-180)GTG>ATG     | p.V60M        |

|        |               |         |        |    |    |           |           |                        |     |    |    |     |     |                 |                        |               |
|--------|---------------|---------|--------|----|----|-----------|-----------|------------------------|-----|----|----|-----|-----|-----------------|------------------------|---------------|
| Pat_05 | Pre-Treatment | TSKS    | 60385  | 37 | 19 | 50265367  | 50265367  | Missense_Mutation      | SNP | G  | C  | 4   | 214 | c.293C>G        | c.(292-294)ACA>AGA     | p.T98R        |
| Pat_05 | Pre-Treatment | MED25   | 81857  | 37 | 19 | 50333404  | 50333404  | Missense_Mutation      | SNP | G  | A  | 4   | 135 | c.748G>A        | c.(748-750)GCC>ACC     | p.A250T       |
| Pat_05 | Pre-Treatment | ZNF766  | 90321  | 37 | 19 | 52793753  | 52793753  | Missense_Mutation      | SNP | C  | T  | 5   | 67  | c.709C>T        | c.(709-711)CGT>TGT     | p.R237C       |
| Pat_05 | Pre-Treatment | NLRP12  | 91662  | 37 | 19 | 54313859  | 54313859  | Missense_Mutation      | SNP | G  | A  | 4   | 143 | c.1054C>T       | c.(1054-1056)CGT>TGT   | p.R352C       |
| Pat_05 | Pre-Treatment | LILRA1  | 11024  | 37 | 19 | 55106787  | 55106787  | Missense_Mutation      | SNP | C  | T  | 82  | 118 | c.581C>T        | c.(580-582)TCG>TTG     | p.S194L       |
| Pat_05 | Pre-Treatment | FCAR    | 2204   | 37 | 19 | 55396680  | 55396680  | Missense_Mutation      | SNP | C  | T  | 21  | 20  | c.104C>T        | c.(103-105)TCG>TTG     | p.S35L        |
| Pat_05 | Pre-Treatment | NLRP2   | 55655  | 37 | 19 | 55493593  | 55493593  | Missense_Mutation      | SNP | C  | T  | 108 | 130 | c.527C>T        | c.(526-528)CCT>CTT     | p.P176L       |
| Pat_05 | Pre-Treatment | BRSK1   | 84446  | 37 | 19 | 55817693  | 55817694  | Missense_Mutation      | DNP | CC | TT | 45  | 60  | c.1964_1965CC>T | c.(1963-1965)TCC>TTT   | p.S655F       |
| Pat_05 | Pre-Treatment | ZNF579  | 163033 | 37 | 19 | 56090054  | 56090054  | Missense_Mutation      | SNP | G  | A  | 4   | 103 | c.952C>T        | c.(952-954)CGC>TGC     | p.R318C       |
| Pat_05 | Pre-Treatment | NLRP8   | 126205 | 37 | 19 | 56499245  | 56499245  | Missense_Mutation      | SNP | G  | A  | 75  | 88  | c.3113G>A       | c.(3112-3114)GGA>GAA   | p.G1038E      |
| Pat_05 | Pre-Treatment | ZNF749  | 388567 | 37 | 19 | 57956264  | 57956264  | Missense_Mutation      | SNP | G  | A  | 4   | 86  | c.1748G>A       | c.(1747-1749)CGT>CAT   | p.R583H       |
| Pat_05 | Pre-Treatment | ZNF211  | 10520  | 37 | 19 | 58153436  | 58153436  | Missense_Mutation      | SNP | C  | T  | 4   | 228 | c.1582C>T       | c.(1582-1584)CGC>TGC   | p.R528C       |
| Pat_05 | Pre-Treatment | ZNF776  | 284309 | 37 | 19 | 58265885  | 58265885  | Missense_Mutation      | SNP | G  | A  | 5   | 212 | c.1387G>A       | c.(1387-1389)GGA>AGA   | p.G463R       |
| Pat_05 | Pre-Treatment | ZNF274  | 10782  | 37 | 19 | 58722998  | 58722998  | Missense_Mutation      | SNP | A  | G  | 3   | 147 | c.925A>G        | c.(925-927)AGG>GGG     | p.R309G       |
| Pat_05 | Pre-Treatment | ZNF446  | 55663  | 37 | 19 | 58988812  | 58988812  | Missense_Mutation      | SNP | G  | C  | 3   | 150 | c.227G>C        | c.(226-228)GGC>GCC     | p.G76A        |
| Pat_05 | Pre-Treatment | CGREF1  | 10669  | 37 | 2  | 27327236  | 27327236  | Translation_Start_Site | SNP | C  | A  | 4   | 76  | c.-1G>T         | c.(-3-1)AAGGA>AATGA    |               |
| Pat_05 | Pre-Treatment | TRIM54  | 57159  | 37 | 2  | 27529154  | 27529154  | Missense_Mutation      | SNP | G  | A  | 4   | 120 | c.940G>A        | c.(940-942)GTA>ATA     | p.V314I       |
| Pat_05 | Pre-Treatment | GCKR    | 2646   | 37 | 2  | 27729725  | 27729725  | Missense_Mutation      | SNP | G  | A  | 5   | 266 | c.1039G>A       | c.(1039-1041)GTA>ATA   | p.V347I       |
| Pat_05 | Pre-Treatment | DPY30   | 84661  | 37 | 2  | 32254736  | 32254736  | Missense_Mutation      | SNP | G  | A  | 5   | 180 | c.154C>T        | c.(154-156)CCA>TCA     | p.P52S        |
| Pat_05 | Pre-Treatment | LTBP1   | 4052   | 37 | 2  | 33173962  | 33173962  | Missense_Mutation      | SNP | G  | A  | 4   | 202 | c.515G>A        | c.(514-516)CGG>CAG     | p.R172Q       |
| Pat_05 | Pre-Treatment | ANTXR1  | 84168  | 37 | 2  | 69472492  | 69472492  | Missense_Mutation      | SNP | C  | T  | 6   | 0   | c.1570C>T       | c.(1570-1572)CCG>TCG   | p.P524S       |
| Pat_05 | Pre-Treatment | ZNF638  | 27332  | 37 | 2  | 71595579  | 71595579  | Missense_Mutation      | SNP | G  | A  | 5   | 317 | c.2063G>A       | c.(2062-2064)TGT>TAT   | p.C688Y       |
| Pat_05 | Pre-Treatment | DUSP11  | 8446   | 37 | 2  | 73989939  | 73989939  | Missense_Mutation      | SNP | G  | A  | 4   | 231 | c.983C>T        | c.(982-984)CCT>CTT     | p.P328L       |
| Pat_05 | Pre-Treatment | CNNM4   | 26504  | 37 | 2  | 97464940  | 97464940  | Missense_Mutation      | SNP | G  | A  | 4   | 173 | c.1828G>A       | c.(1828-1830)GAC>AAC   | p.D610N       |
| Pat_05 | Pre-Treatment | ST6GAL2 | 84620  | 37 | 2  | 107423220 | 107423220 | Missense_Mutation      | SNP | C  | T  | 38  | 110 | c.1504G>A       | c.(1504-1506)GAT>AAT   | p.D502N       |
| Pat_05 | Pre-Treatment | PSD4    | 23550  | 37 | 2  | 113958879 | 113958879 | Missense_Mutation      | SNP | A  | T  | 51  | 80  | c.3058A>T       | c.(3058-3060)AGC>TGC   | p.S1020C      |
| Pat_05 | Pre-Treatment | PCDP1   | 200373 | 37 | 2  | 120383201 | 120383201 | Missense_Mutation      | SNP | C  | T  | 4   | 217 | c.595C>T        | c.(595-597)CGT>TGT     | p.R199C       |
| Pat_05 | Pre-Treatment | CNTNAP5 | 129684 | 37 | 2  | 124999956 | 124999956 | Missense_Mutation      | SNP | G  | A  | 12  | 29  | c.367G>A        | c.(367-369)GAA>AAA     | p.E123K       |
| Pat_05 | Pre-Treatment | POTEF   | 728378 | 37 | 2  | 130832668 | 130832668 | Missense_Mutation      | SNP | C  | T  | 62  | 78  | c.2377G>A       | c.(2377-2379)GAG>AAG   | p.E793K       |
| Pat_05 | Pre-Treatment | THSD7B  | 80731  | 37 | 2  | 138030231 | 138030231 | Missense_Mutation      | SNP | C  | T  | 21  | 29  | c.2302C>T       | c.(2302-2304)CGG>TGG   | p.R768W       |
| Pat_05 | Pre-Treatment | MBD5    | 55777  | 37 | 2  | 149247322 | 149247322 | Missense_Mutation      | SNP | G  | A  | 4   | 198 | c.3422G>A       | c.(3421-3423)AGT>AAT   | p.S1141N      |
| Pat_05 | Pre-Treatment | MMADHC  | 27249  | 37 | 2  | 150427616 | 150427616 | Missense_Mutation      | SNP | G  | T  | 6   | 557 | c.679C>A        | c.(679-681)CCA>ACA     | p.P227T       |
| Pat_05 | Pre-Treatment | NEB     | 4703   | 37 | 2  | 152506691 | 152506691 | Missense_Mutation      | SNP | T  | G  | 35  | 56  | c.7430A>C       | c.(7429-7431)GAT>GCT   | p.D2477A      |
| Pat_05 | Pre-Treatment | LRP2    | 4036   | 37 | 2  | 170175284 | 170175284 | Missense_Mutation      | SNP | G  | A  | 5   | 410 | c.298C>T        | c.(298-300)CGT>TGT     | p.R100C       |
| Pat_05 | Pre-Treatment | DYNC1I2 | 1781   | 37 | 2  | 172583344 | 172583344 | Missense_Mutation      | SNP | C  | T  | 63  | 80  | c.914C>T        | c.(913-915)GCC>GTC     | p.A305V       |
| Pat_05 | Pre-Treatment | DYNC1I2 | 1781   | 37 | 2  | 172583346 | 172583346 | Missense_Mutation      | SNP | C  | T  | 62  | 81  | c.916C>T        | c.(916-918)CCT>TCT     | p.P306S       |
| Pat_05 | Pre-Treatment | CIR1    | 9541   | 37 | 2  | 175213415 | 175213415 | Missense_Mutation      | SNP | C  | T  | 4   | 241 | c.1163G>A       | c.(1162-1164)CGG>CAG   | p.R388Q       |
| Pat_05 | Pre-Treatment | DFNB59  | 494513 | 37 | 2  | 179320879 | 179320879 | Splice_Site            | SNP | G  | A  | 6   | 124 | c.549_splice    | c.e4+1                 | p.R183_splice |
| Pat_05 | Pre-Treatment | TTN     | 7273   | 37 | 2  | 179404396 | 179404396 | Missense_Mutation      | SNP | G  | A  | 85  | 115 | c.90692C>T      | c.(90691-90693)CCA>CTA | p.P30231L     |
| Pat_05 | Pre-Treatment | TTN     | 7273   | 37 | 2  | 179629358 | 179629358 | Missense_Mutation      | SNP | G  | A  | 54  | 158 | c.9884C>T       | c.(9883-9885)ACG>ATG   | p.T3295M      |
| Pat_05 | Pre-Treatment | TTN     | 7273   | 37 | 2  | 179664293 | 179664293 | Missense_Mutation      | SNP | G  | A  | 43  | 139 | c.835C>T        | c.(835-837)CGG>TGG     | p.R279W       |
| Pat_05 | Pre-Treatment | DNAH7   | 56171  | 37 | 2  | 196620918 | 196620918 | Missense_Mutation      | SNP | G  | A  | 81  | 92  | c.11525C>T      | c.(11524-11526)CCA>CTA | p.P3842L      |
| Pat_05 | Pre-Treatment | DNAH7   | 56171  | 37 | 2  | 196749415 | 196749415 | Missense_Mutation      | SNP | C  | T  | 27  | 165 | c.5657G>A       | c.(5656-5658)CGA>CAA   | p.R1886Q      |
| Pat_05 | Pre-Treatment | AOX1    | 316    | 37 | 2  | 201477335 | 201477335 | Missense_Mutation      | SNP | G  | A  | 61  | 246 | c.1267G>A       | c.(1267-1269)GAA>AAA   | p.E423K       |
| Pat_05 | Pre-Treatment | NBEAL1  | 65065  | 37 | 2  | 204009383 | 204009383 | Nonsense_Mutation      | SNP | C  | T  | 61  | 255 | c.4822C>T       | c.(4822-4824)CAG>TAG   | p.Q1608*      |
| Pat_05 | Pre-Treatment | CRYGD   | 1421   | 37 | 2  | 208986579 | 208986579 | Missense_Mutation      | SNP | G  | A  | 4   | 254 | c.343C>T        | c.(343-345)CGC>TGC     | p.R115C       |
| Pat_05 | Pre-Treatment | IKZF2   | 22807  | 37 | 2  | 213872562 | 213872562 | Missense_Mutation      | SNP | A  | T  | 18  | 28  | c.1103T>A       | c.(1102-1104)ATT>AAT   | p.I368N       |

|        |               |           |        |    |    |           |           |                   |     |    |    |     |     |                  |                         |              |
|--------|---------------|-----------|--------|----|----|-----------|-----------|-------------------|-----|----|----|-----|-----|------------------|-------------------------|--------------|
| Pat_05 | Pre-Treatment | COL4A4    | 1286   | 37 | 2  | 227876983 | 227876983 | Missense_Mutation | SNP | C  | T  | 4   | 97  | c.4247G>A        | c.(4246-4248)AGG>AAG    | p.R1416K     |
| Pat_05 | Pre-Treatment | C2orf57   | 165100 | 37 | 2  | 232458669 | 232458669 | Missense_Mutation | SNP | G  | A  | 60  | 82  | c.1007G>A        | c.(1006-1008)GGA>GAA    | p.G336E      |
| Pat_05 | Pre-Treatment | COL6A3    | 1293   | 37 | 2  | 238280543 | 238280543 | Missense_Mutation | SNP | C  | T  | 31  | 62  | c.4117G>A        | c.(4117-4119)GCA>ACA    | p.A1373T     |
| Pat_05 | Pre-Treatment | SNRPB     | 6628   | 37 | 20 | 2443314   | 2443314   | Missense_Mutation | SNP | G  | A  | 4   | 265 | c.653C>T         | c.(652-654)CCG>CTG      | p.P218L      |
| Pat_05 | Pre-Treatment | TMC2      | 117532 | 37 | 20 | 2573005   | 2573005   | Missense_Mutation | SNP | G  | A  | 5   | 413 | c.884G>A         | c.(883-885)CGG>CAG      | p.R295Q      |
| Pat_05 | Pre-Treatment | BTBD3     | 22903  | 37 | 20 | 11903598  | 11903598  | Missense_Mutation | SNP | G  | T  | 51  | 125 | c.853G>T         | c.(853-855)GTT>TTT      | p.V285F      |
| Pat_05 | Pre-Treatment | MACROD2   | 140733 | 37 | 20 | 15913932  | 15913932  | Missense_Mutation | SNP | C  | T  | 40  | 53  | c.787C>T         | c.(787-789)CCA>TCA      | p.P263S      |
| Pat_05 | Pre-Treatment | ZNF133    | 7692   | 37 | 20 | 18297438  | 18297438  | Missense_Mutation | SNP | C  | T  | 4   | 155 | c.1943C>T        | c.(1942-1944)TCG>TTG    | p.S648L      |
| Pat_05 | Pre-Treatment | CST2      | 1470   | 37 | 20 | 23807156  | 23807156  | Missense_Mutation | SNP | G  | A  | 23  | 59  | c.142C>T         | c.(142-144)CTT>TTT      | p.L48F       |
| Pat_05 | Pre-Treatment | ZNF341    | 84905  | 37 | 20 | 32341156  | 32341156  | Missense_Mutation | SNP | C  | T  | 3   | 25  | c.668C>T         | c.(667-669)GCT>GTT      | p.A223V      |
| Pat_05 | Pre-Treatment | ITCH      | 83737  | 37 | 20 | 33045246  | 33045246  | Missense_Mutation | SNP | G  | A  | 4   | 226 | c.1385G>A        | c.(1384-1386)CGA>CAA    | p.R462Q      |
| Pat_05 | Pre-Treatment | CTNBL1    | 56259  | 37 | 20 | 36361375  | 36361375  | Missense_Mutation | SNP | G  | T  | 4   | 119 | c.125G>T         | c.(124-126)CGG>CTG      | p.R42L       |
| Pat_05 | Pre-Treatment | PLCG1     | 5335   | 37 | 20 | 39795470  | 39795470  | Missense_Mutation | SNP | G  | A  | 5   | 376 | c.2272G>A        | c.(2272-2274)GAG>AAG    | p.E758K      |
| Pat_05 | Pre-Treatment | PTPRT     | 11122  | 37 | 20 | 41514545  | 41514545  | Missense_Mutation | SNP | C  | T  | 4   | 193 | c.116G>A         | c.(115-117)AGC>AAC      | p.S39N       |
| Pat_05 | Pre-Treatment | GDAP1L1   | 78997  | 37 | 20 | 42887229  | 42887229  | Missense_Mutation | SNP | G  | A  | 3   | 27  | c.529G>A         | c.(529-531)GCC>ACC      | p.A177T      |
| Pat_05 | Pre-Treatment | FITM2     | 128486 | 37 | 20 | 42935818  | 42935818  | Missense_Mutation | SNP | G  | A  | 71  | 50  | c.236C>T         | c.(235-237)ACC>ATC      | p.T79I       |
| Pat_05 | Pre-Treatment | SEMG1     | 6406   | 37 | 20 | 43836440  | 43836440  | Missense_Mutation | SNP | G  | A  | 4   | 229 | c.502G>A         | c.(502-504)GTT>ATT      | p.V168I      |
| Pat_05 | Pre-Treatment | ARFGEF2   | 10564  | 37 | 20 | 47614885  | 47614885  | Missense_Mutation | SNP | G  | A  | 5   | 501 | c.3275G>A        | c.(3274-3276)CGC>CAC    | p.R1092H     |
| Pat_05 | Pre-Treatment | CSTF1     | 1477   | 37 | 20 | 54974209  | 54974209  | Missense_Mutation | SNP | G  | A  | 8   | 657 | c.832G>A         | c.(832-834)GTA>ATA      | p.V278I      |
| Pat_05 | Pre-Treatment | TPRSS15   | 5651   | 37 | 21 | 19737500  | 19737500  | Missense_Mutation | SNP | G  | A  | 79  | 291 | c.730C>T         | c.(730-732)CCA>TCA      | p.P244S      |
| Pat_05 | Pre-Treatment | BACH1     | 571    | 37 | 21 | 30698389  | 30698389  | Missense_Mutation | SNP | A  | C  | 81  | 70  | c.244A>C         | c.(244-246)AAA>CAA      | p.K82Q       |
| Pat_05 | Pre-Treatment | KRTAP24-1 | 643803 | 37 | 21 | 31654667  | 31654667  | Missense_Mutation | SNP | G  | A  | 38  | 162 | c.584C>T         | c.(583-585)TCC>TTC      | p.S195F      |
| Pat_05 | Pre-Treatment | DSCAM     | 1826   | 37 | 21 | 41465753  | 41465753  | Missense_Mutation | SNP | G  | A  | 19  | 71  | c.3745C>T        | c.(3745-3747)CCC>TCC    | p.P1249S     |
| Pat_05 | Pre-Treatment | C2CD2     | 25966  | 37 | 21 | 43319356  | 43319356  | Missense_Mutation | SNP | G  | A  | 3   | 47  | c.1676C>T        | c.(1675-1677)CCG>CTG    | p.P559L      |
| Pat_05 | Pre-Treatment | PWP2      | 5822   | 37 | 21 | 45550523  | 45550523  | Missense_Mutation | SNP | C  | T  | 34  | 57  | c.2630C>T        | c.(2629-2631)TCC>TTC    | p.S877F      |
| Pat_05 | Pre-Treatment | ICOSLG    | 23308  | 37 | 21 | 45655347  | 45655347  | Missense_Mutation | SNP | C  | T  | 4   | 113 | c.505G>A         | c.(505-507)GTG>ATG      | p.V169M      |
| Pat_05 | Pre-Treatment | TRPM2     | 7226   | 37 | 21 | 45819208  | 45819208  | Missense_Mutation | SNP | G  | A  | 57  | 46  | c.2092G>A        | c.(2092-2094)GAA>AAA    | p.E698K      |
| Pat_05 | Pre-Treatment | PRMT2     | 3275   | 37 | 21 | 48064360  | 48064360  | Missense_Mutation | SNP | C  | T  | 6   | 466 | c.287C>T         | c.(286-288)ACG>ATG      | p.T96M       |
| Pat_05 | Pre-Treatment | CCT8L2    | 150160 | 37 | 22 | 17072668  | 17072668  | Missense_Mutation | SNP | G  | A  | 4   | 170 | c.773C>T         | c.(772-774)ACG>ATG      | p.T258M      |
| Pat_05 | Pre-Treatment | GAB4      | 128954 | 37 | 22 | 17447197  | 17447197  | Missense_Mutation | SNP | G  | A  | 3   | 44  | c.1081C>T        | c.(1081-1083)CCC>TCC    | p.P361S      |
| Pat_05 | Pre-Treatment | C22orf29  | 79680  | 37 | 22 | 19839682  | 19839682  | Missense_Mutation | SNP | G  | A  | 94  | 195 | c.103C>T         | c.(103-105)CCT>TCT      | p.P35S       |
| Pat_05 | Pre-Treatment | DGCR8     | 54487  | 37 | 22 | 20073637  | 20073637  | Missense_Mutation | SNP | G  | A  | 4   | 194 | c.151G>A         | c.(151-153)GTT>ATT      | p.V51I       |
| Pat_05 | Pre-Treatment | GNAZ      | 2781   | 37 | 22 | 23438492  | 23438492  | Missense_Mutation | SNP | G  | A  | 4   | 201 | c.610G>A         | c.(610-612)GGG>AGG      | p.G204R      |
| Pat_05 | Pre-Treatment | SLC2A11   | 66035  | 37 | 22 | 24224998  | 24224998  | Missense_Mutation | SNP | A  | G  | 3   | 69  | c.926A>G         | c.(925-927)AAG>AGG      | p.K309R      |
| Pat_05 | Pre-Treatment | CYSA      | 23384  | 37 | 22 | 24730421  | 24730421  | Missense_Mutation | SNP | G  | A  | 5   | 388 | c.2440G>A        | c.(2440-2442)GTT>ATT    | p.V814I      |
| Pat_05 | Pre-Treatment | TFIP11    | 24144  | 37 | 22 | 26890130  | 26890130  | Missense_Mutation | SNP | C  | T  | 101 | 188 | c.2133G>A        | c.(2131-2133)ATG>ATA    | p.M711I      |
| Pat_05 | Pre-Treatment | CHEK2     | 11200  | 37 | 22 | 29091840  | 29091841  | Missense_Mutation | DNP | TG | CA | 6   | 173 | c.1116_1117CA>TC | c.(114-1119)TCCAAG>TCTG | p.K373E      |
| Pat_05 | Pre-Treatment | SMTN      | 6525   | 37 | 22 | 31492782  | 31492782  | Missense_Mutation | SNP | G  | A  | 4   | 182 | c.1925G>A        | c.(1924-1926)CGC>CAC    | p.R642H      |
| Pat_05 | Pre-Treatment | PLA2G3    | 50487  | 37 | 22 | 31533809  | 31533809  | Missense_Mutation | SNP | G  | A  | 85  | 148 | c.953C>T         | c.(952-954)TCC>TTC      | p.S318F      |
| Pat_05 | Pre-Treatment | BPIL2     | 254240 | 37 | 22 | 32831798  | 32831798  | Missense_Mutation | SNP | G  | A  | 4   | 194 | c.817C>T         | c.(817-819)CGC>TGC      | p.R273C      |
| Pat_05 | Pre-Treatment | FAM83F    | 113828 | 37 | 22 | 40417674  | 40417674  | Missense_Mutation | SNP | C  | T  | 28  | 67  | c.1160C>T        | c.(1159-1161)CCC>CTC    | p.P387L      |
| Pat_05 | Pre-Treatment | ZC3H7B    | 23264  | 37 | 22 | 41716718  | 41716718  | Splice_Site       | SNP | G  | A  | 5   | 283 | c.53_splice      | c.e2+1                  | p.Q18_splice |
| Pat_05 | Pre-Treatment | PLXNB2    | 23654  | 37 | 22 | 50716039  | 50716039  | Missense_Mutation | SNP | G  | A  | 4   | 189 | c.5177C>T        | c.(5176-5178)ACG>ATG    | p.T1726M     |
| Pat_05 | Pre-Treatment | SHANK3    | 85358  | 37 | 22 | 51160550  | 51160550  | Missense_Mutation | SNP | G  | A  | 10  | 10  | c.4337G>A        | c.(4336-4338)AGG>AAG    | p.R1446K     |
| Pat_05 | Pre-Treatment | CNTN4     | 152330 | 37 | 3  | 3067852   | 3067852   | Missense_Mutation | SNP | C  | T  | 6   | 171 | c.1553C>T        | c.(1552-1554)CCG>CTG    | p.P518L      |
| Pat_05 | Pre-Treatment | LHFPL4    | 375323 | 37 | 3  | 9594264   | 9594264   | Missense_Mutation | SNP | C  | T  | 4   | 74  | c.100G>A         | c.(100-102)GCC>ACC      | p.A34T       |
| Pat_05 | Pre-Treatment | BTD       | 686    | 37 | 3  | 15685958  | 15685958  | Missense_Mutation | SNP | G  | A  | 6   | 538 | c.595G>A         | c.(595-597)GTG>ATG      | p.V199M      |

|        |               |         |        |    |   |           |           |                   |     |    |    |     |     |                                               |                        |               |
|--------|---------------|---------|--------|----|---|-----------|-----------|-------------------|-----|----|----|-----|-----|-----------------------------------------------|------------------------|---------------|
| Pat_05 | Pre-Treatment | SATB1   | 6304   | 37 | 3 | 18391108  | 18391108  | Nonsense_Mutation | SNP | G  | A  | 4   | 61  | c.1846C>T                                     | c.(1846-1848)CAG>TAG   | p.Q616*       |
| Pat_05 | Pre-Treatment | STT3B   | 201595 | 37 | 3 | 31667620  | 31667620  | Splice_Site       | SNP | G  | A  | 4   | 194 | c.2073_splice                                 | c.e13+1                | p.R691_splice |
| Pat_05 | Pre-Treatment | ZNF860  | 344787 | 37 | 3 | 32032046  | 32032046  | Missense_Mutation | SNP | G  | A  | 12  | 198 | c.1475G>A                                     | c.(1474-1476)CGT>CAT   | p.R492H       |
| Pat_05 | Pre-Treatment | CNOT10  | 25904  | 37 | 3 | 32774919  | 32774919  | Missense_Mutation | SNP | C  | T  | 61  | 46  | c.1220C>T                                     | c.(1219-1221)TCT>TTT   | p.S407F       |
| Pat_05 | Pre-Treatment | CCR9    | 10803  | 37 | 3 | 45942970  | 45942970  | Missense_Mutation | SNP | G  | A  | 52  | 37  | c.690G>A                                      | c.(688-690)ATG>ATA     | p.M230I       |
| Pat_05 | Pre-Treatment | ATRIP   | 84126  | 37 | 3 | 48506434  | 48506434  | Missense_Mutation | SNP | G  | A  | 4   | 218 | c.2260G>A                                     | c.(2260-2262)GGG>AGG   | p.G754R       |
| Pat_05 | Pre-Treatment | PFKFB4  | 5210   | 37 | 3 | 48573700  | 48573700  | Missense_Mutation | SNP | G  | A  | 5   | 203 | c.829C>T                                      | c.(829-831)CGG>TGG     | p.R277W       |
| Pat_05 | Pre-Treatment | USP19   | 10869  | 37 | 3 | 49151487  | 49151487  | Missense_Mutation | SNP | C  | T  | 6   | 168 | c.2134G>A                                     | c.(2134-2136)GAA>AAA   | p.E712K       |
| Pat_05 | Pre-Treatment | AMT     | 275    | 37 | 3 | 49455331  | 49455331  | Missense_Mutation | SNP | C  | T  | 4   | 86  | c.953G>A                                      | c.(952-954)CGG>CAG     | p.R318Q       |
| Pat_05 | Pre-Treatment | BSN     | 8927   | 37 | 3 | 49699702  | 49699702  | Missense_Mutation | SNP | G  | A  | 3   | 40  | c.10424G>A                                    | c.(10423-10425)CGA>CAA | p.R3475Q      |
| Pat_05 | Pre-Treatment | UBA7    | 7318   | 37 | 3 | 49847481  | 49847481  | Missense_Mutation | SNP | G  | A  | 4   | 138 | c.1769C>T                                     | c.(1768-1770)GCT>GTT   | p.A590V       |
| Pat_05 | Pre-Treatment | DOCK3   | 1795   | 37 | 3 | 51418535  | 51418535  | Missense_Mutation | SNP | G  | A  | 4   | 225 | c.5638G>A                                     | c.(5638-5640)GGC>AGC   | p.G1880S      |
| Pat_05 | Pre-Treatment | IQCF2   | 389123 | 37 | 3 | 51897231  | 51897231  | Missense_Mutation | SNP | C  | T  | 28  | 88  | c.340C>T                                      | c.(340-342)CGT>TGT     | p.R114C       |
| Pat_05 | Pre-Treatment | PCBP4   | 57060  | 37 | 3 | 51992100  | 51992100  | Missense_Mutation | SNP | G  | A  | 5   | 276 | c.1189C>T                                     | c.(1189-1191)CGG>TGG   | p.R397W       |
| Pat_05 | Pre-Treatment | PBRM1   | 55193  | 37 | 3 | 52643768  | 52643768  | Nonsense_Mutation | SNP | G  | A  | 128 | 72  | c.2128C>T                                     | c.(2128-2130)CGA>TGA   | p.R710*       |
| Pat_05 | Pre-Treatment | PRKCD   | 5580   | 37 | 3 | 53212443  | 53212443  | Missense_Mutation | SNP | C  | T  | 58  | 18  | c.5C>T                                        | c.(4-6)GCG>GTG         | p.A2V         |
| Pat_05 | Pre-Treatment | C3orf67 | 200844 | 37 | 3 | 58849358  | 58849358  | Missense_Mutation | SNP | T  | C  | 68  | 94  | c.1144A>G                                     | c.(1144-1146)AAA>GAA   | p.K382E       |
| Pat_05 | Pre-Treatment | ROBO2   | 6092   | 37 | 3 | 77542449  | 77542449  | Missense_Mutation | SNP | C  | T  | 95  | 176 | c.722C>T                                      | c.(721-723)GCT>GTT     | p.A241V       |
| Pat_05 | Pre-Treatment | VGLL3   | 389136 | 37 | 3 | 87017908  | 87017908  | Missense_Mutation | SNP | G  | A  | 17  | 54  | c.769C>T                                      | c.(769-771)CCA>TCA     | p.P257S       |
| Pat_05 | Pre-Treatment | RPL24   | 6152   | 37 | 3 | 101400004 | 101400004 | Missense_Mutation | SNP | G  | A  | 282 | 416 | c.449C>T                                      | c.(448-450)GCT>GTT     | p.A150V       |
| Pat_05 | Pre-Treatment | IFT57   | 55081  | 37 | 3 | 107910402 | 107910402 | Missense_Mutation | SNP | G  | A  | 4   | 279 | c.743C>T                                      | c.(742-744)CCG>CTG     | p.P248L       |
| Pat_05 | Pre-Treatment | PHLDB2  | 90102  | 37 | 3 | 111693337 | 111693337 | Missense_Mutation | SNP | C  | T  | 218 | 316 | c.3689C>T                                     | c.(3688-3690)TCG>TTG   | p.S1230L      |
| Pat_05 | Pre-Treatment | ZBTB20  | 26137  | 37 | 3 | 114069979 | 114069979 | Missense_Mutation | SNP | G  | A  | 7   | 537 | c.946C>T                                      | c.(946-948)CGG>TGG     | p.R316W       |
| Pat_05 | Pre-Treatment | CASR    | 846    | 37 | 3 | 122003250 | 122003250 | Missense_Mutation | SNP | G  | A  | 4   | 182 | c.2449G>A                                     | c.(2449-2451)GTC>ATC   | p.V817I       |
| Pat_05 | Pre-Treatment | KALRN   | 8997   | 37 | 3 | 124438217 | 124438217 | Missense_Mutation | SNP | G  | A  | 4   | 240 | c.8861G>A                                     | c.(8860-8862)CGC>CAC   | p.R2954H      |
| Pat_05 | Pre-Treatment | ROPN1B  | 152015 | 37 | 3 | 125691013 | 125691013 | Missense_Mutation | SNP | A  | G  | 4   | 123 | c.116A>G                                      | c.(115-117)GAT>GGT     | p.D39G        |
| Pat_05 | Pre-Treatment | PLXNA1  | 5361   | 37 | 3 | 126749143 | 126749143 | Missense_Mutation | SNP | C  | T  | 5   | 264 | c.5050C>T                                     | c.(5050-5052)CGG>TGG   | p.R1684W      |
| Pat_05 | Pre-Treatment | TF      | 7018   | 37 | 3 | 133478099 | 133478099 | Missense_Mutation | SNP | T  | C  | 114 | 197 | c.1129T>C                                     | c.(1129-1131)TGG>CGG   | p.W377R       |
| Pat_05 | Pre-Treatment | SLCO2A1 | 6578   | 37 | 3 | 133654663 | 133654663 | Missense_Mutation | SNP | C  | T  | 16  | 31  | c.1769G>A                                     | c.(1768-1770)AGG>AAG   | p.R590K       |
| Pat_05 | Pre-Treatment | TSC22D2 | 9819   | 37 | 3 | 150127751 | 150127751 | Missense_Mutation | SNP | G  | A  | 7   | 607 | c.614G>A                                      | c.(613-615)AGC>AAC     | p.S205N       |
| Pat_05 | Pre-Treatment | IGSF10  | 285313 | 37 | 3 | 151165878 | 151165878 | Missense_Mutation | SNP | T  | C  | 101 | 181 | c.1891A>G                                     | c.(1891-1893)AGA>GGA   | p.R631G       |
| Pat_05 | Pre-Treatment | DHX36   | 170506 | 37 | 3 | 154006677 | 154006677 | Missense_Mutation | SNP | G  | A  | 86  | 145 | c.2009C>T                                     | c.(2008-2010)TCC>TTC   | p.S670F       |
| Pat_05 | Pre-Treatment | PLCH1   | 23007  | 37 | 3 | 155286035 | 155286035 | Missense_Mutation | SNP | C  | G  | 15  | 47  | c.814G>C                                      | c.(814-816)GTT>CTT     | p.V272L       |
| Pat_05 | Pre-Treatment | WDR49   | 151790 | 37 | 3 | 167217991 | 167217991 | Missense_Mutation | SNP | T  | G  | 82  | 301 | c.1925A>C                                     | c.(1924-1926)GAA>GCA   | p.E642A       |
| Pat_05 | Pre-Treatment | SLC7A14 | 57709  | 37 | 3 | 170216467 | 170216467 | Missense_Mutation | SNP | C  | T  | 4   | 206 | c.748G>A                                      | c.(748-750)GGC>AGC     | p.G250S       |
| Pat_05 | Pre-Treatment | CCDC39  | 339829 | 37 | 3 | 180372597 | 180372597 | Missense_Mutation | SNP | T  | C  | 52  | 102 | c.883A>G                                      | c.(883-885)ACG>GCG     | p.T295A       |
| Pat_05 | Pre-Treatment | MAP3K13 | 9175   | 37 | 3 | 185155242 | 185155243 | Nonsense_Mutation | DNP | GG | AA | 81  | 221 | c.483_484GG>AA481-486)TGGGAA>TGAA.161_162WE>* |                        |               |
| Pat_05 | Pre-Treatment | ATP13A4 | 84239  | 37 | 3 | 193156375 | 193156375 | Splice_Site       | SNP | T  | C  | 3   | 95  | c.2563_splice                                 | c.e23-1                | p.A855_splice |
| Pat_05 | Pre-Treatment | FAM193A | 8603   | 37 | 4 | 2733531   | 2733531   | Missense_Mutation | SNP | G  | A  | 4   | 219 | c.3734G>A                                     | c.(3733-3735)CGA>CAA   | p.R1245Q      |
| Pat_05 | Pre-Treatment | BOD1L   | 259282 | 37 | 4 | 13603609  | 13603609  | Missense_Mutation | SNP | C  | T  | 6   | 464 | c.4915G>A                                     | c.(4915-4917)GAA>AAA   | p.E1639K      |
| Pat_05 | Pre-Treatment | FGFBP1  | 9982   | 37 | 4 | 15938093  | 15938093  | Missense_Mutation | SNP | C  | A  | 5   | 242 | c.163G>T                                      | c.(163-165)GGG>TGG     | p.G55W        |
| Pat_05 | Pre-Treatment | PI4K2B  | 55300  | 37 | 4 | 25278666  | 25278666  | Missense_Mutation | SNP | G  | A  | 4   | 206 | c.1303G>A                                     | c.(1303-1305)GGG>AGG   | p.G435R       |
| Pat_05 | Pre-Treatment | ZCCHC4  | 29063  | 37 | 4 | 25353242  | 25353242  | Nonsense_Mutation | SNP | G  | A  | 130 | 139 | c.942G>A                                      | c.(940-942)TGG>TGA     | p.W314*       |
| Pat_05 | Pre-Treatment | KLHL5   | 51088  | 37 | 4 | 39088270  | 39088270  | Missense_Mutation | SNP | C  | T  | 5   | 224 | c.1174C>T                                     | c.(1174-1176)CGT>TGT   | p.R392C       |
| Pat_05 | Pre-Treatment | ATP8A1  | 10396  | 37 | 4 | 42448649  | 42448649  | Missense_Mutation | SNP | C  | T  | 35  | 97  | c.2909G>A                                     | c.(2908-2910)GGA>GAA   | p.G970E       |
| Pat_05 | Pre-Treatment | GRXCR1  | 389207 | 37 | 4 | 43032429  | 43032429  | Missense_Mutation | SNP | C  | T  | 57  | 206 | c.745C>T                                      | c.(745-747)CCA>TCA     | p.P249S       |
| Pat_05 | Pre-Treatment | USP46   | 64854  | 37 | 4 | 53464829  | 53464829  | Missense_Mutation | SNP | C  | T  | 28  | 24  | c.964G>A                                      | c.(964-966)GGC>AGC     | p.G322S       |



|        |               |          |        |    |   |           |           |                   |     |   |   |     |     |               |                      |                |
|--------|---------------|----------|--------|----|---|-----------|-----------|-------------------|-----|---|---|-----|-----|---------------|----------------------|----------------|
| Pat_05 | Pre-Treatment | LNx1     | 84708  | 37 | 4 | 54374296  | 54374296  | Missense_Mutation | SNP | G | A | 15  | 35  | c.479C>T      | c.(478-480)CCC>CTC   | p.P160L        |
| Pat_05 | Pre-Treatment | SRP72    | 6731   | 37 | 4 | 57333815  | 57333815  | Missense_Mutation | SNP | G | A | 5   | 101 | c.14G>A       | c.(13-15)GGC>GAC     | p.G5D          |
| Pat_05 | Pre-Treatment | EPHA5    | 2044   | 37 | 4 | 66217147  | 66217147  | Missense_Mutation | SNP | C | T | 5   | 255 | c.2468G>A     | c.(2467-2469)CGG>CAG | p.R823Q        |
| Pat_05 | Pre-Treatment | UGT2A3   | 79799  | 37 | 4 | 69817162  | 69817162  | Missense_Mutation | SNP | G | A | 28  | 41  | c.317C>T      | c.(316-318)TCA>TTA   | p.S106L        |
| Pat_05 | Pre-Treatment | UGT2B4   | 7363   | 37 | 4 | 70359495  | 70359495  | Nonsense_Mutation | SNP | C | T | 50  | 182 | c.786G>A      | c.(784-786)TGG>TGA   | p.W262*        |
| Pat_05 | Pre-Treatment | GC       | 2638   | 37 | 4 | 72631312  | 72631312  | Missense_Mutation | SNP | C | T | 4   | 252 | c.310G>A      | c.(310-312)GTT>ATT   | p.V104I        |
| Pat_05 | Pre-Treatment | ANKRD17  | 26057  | 37 | 4 | 73962892  | 73962892  | Missense_Mutation | SNP | C | T | 163 | 582 | c.5119G>A     | c.(5119-5121)GTA>ATA | p.V1707I       |
| Pat_05 | Pre-Treatment | PARM1    | 25849  | 37 | 4 | 75937682  | 75937682  | Missense_Mutation | SNP | C | T | 22  | 79  | c.91C>T       | c.(91-93)CTT>TTT     | p.L31F         |
| Pat_05 | Pre-Treatment | RASGEF1B | 153020 | 37 | 4 | 82362046  | 82362046  | Missense_Mutation | SNP | C | T | 5   | 471 | c.1046G>A     | c.(1045-1047)CGA>CAA | p.R349Q        |
| Pat_05 | Pre-Treatment | MTTP     | 4547   | 37 | 4 | 100530020 | 100530020 | Missense_Mutation | SNP | C | T | 81  | 234 | c.1655C>T     | c.(1654-1656)CCA>CTA | p.P552L        |
| Pat_05 | Pre-Treatment | UCP1     | 7350   | 37 | 4 | 141488965 | 141488965 | Missense_Mutation | SNP | G | A | 4   | 141 | c.293C>T      | c.(292-294)ACG>ATG   | p.T98M         |
| Pat_05 | Pre-Treatment | IL15     | 3600   | 37 | 4 | 142651081 | 142651081 | Missense_Mutation | SNP | C | T | 64  | 234 | c.322C>T      | c.(322-324)CAT>TAT   | p.H108Y        |
| Pat_05 | Pre-Treatment | TRIM2    | 23321  | 37 | 4 | 154217177 | 154217177 | Missense_Mutation | SNP | T | G | 40  | 108 | c.1418T>G     | c.(1417-1419)ATC>AGC | p.I473S        |
| Pat_05 | Pre-Treatment | NAF1     | 92345  | 37 | 4 | 164050291 | 164050291 | Missense_Mutation | SNP | T | C | 15  | 49  | c.1243A>G     | c.(1243-1245)AAT>GAT | p.N415D        |
| Pat_05 | Pre-Treatment | DDX60L   | 91351  | 37 | 4 | 169377245 | 169377245 | Missense_Mutation | SNP | C | T | 4   | 115 | c.782G>A      | c.(781-783)CGT>CAT   | p.R261H        |
| Pat_05 | Pre-Treatment | ADAM29   | 11086  | 37 | 4 | 175897365 | 175897365 | Missense_Mutation | SNP | A | C | 59  | 151 | c.689A>C      | c.(688-690)AAT>ACT   | p.N230T        |
| Pat_05 | Pre-Treatment | TRIML2   | 205860 | 37 | 4 | 189012598 | 189012598 | Missense_Mutation | SNP | C | T | 99  | 112 | c.1093G>A     | c.(1093-1095)GGA>AGA | p.G365R        |
| Pat_05 | Pre-Treatment | TRIO     | 7204   | 37 | 5 | 14280541  | 14280541  | Missense_Mutation | SNP | C | T | 60  | 62  | c.343C>T      | c.(343-345)CCC>TCC   | p.P115S        |
| Pat_05 | Pre-Treatment | CDH6     | 1004   | 37 | 5 | 31267705  | 31267705  | Missense_Mutation | SNP | G | A | 30  | 99  | c.125G>A      | c.(124-126)GGA>GAA   | p.G42E         |
| Pat_05 | Pre-Treatment | PDZD2    | 23037  | 37 | 5 | 32088467  | 32088467  | Missense_Mutation | SNP | C | T | 5   | 246 | c.4913C>T     | c.(4912-4914)CCG>CTG | p.P1638L       |
| Pat_05 | Pre-Treatment | SKP2     | 6502   | 37 | 5 | 36184070  | 36184070  | Missense_Mutation | SNP | T | G | 14  | 105 | c.1190T>G     | c.(1189-1191)TTT>TGT | p.F397C        |
| Pat_05 | Pre-Treatment | NIPBL    | 25836  | 37 | 5 | 37027515  | 37027515  | Splice_Site       | SNP | G | A | 6   | 470 | c.5862_splice | c.e32+1              | p.N1954_splice |
| Pat_05 | Pre-Treatment | EMB      | 133418 | 37 | 5 | 49707083  | 49707083  | Missense_Mutation | SNP | C | T | 74  | 162 | c.331G>A      | c.(331-333)GAG>AAG   | p.E111K        |
| Pat_05 | Pre-Treatment | BDP1     | 55814  | 37 | 5 | 70806049  | 70806049  | Missense_Mutation | SNP | G | A | 7   | 141 | c.3130G>A     | c.(3130-3132)GTA>ATA | p.V1044I       |
| Pat_05 | Pre-Treatment | FAM169A  | 26049  | 37 | 5 | 74137411  | 74137411  | Missense_Mutation | SNP | C | A | 50  | 167 | c.91G>T       | c.(91-93)GAC>TAC     | p.D31Y         |
| Pat_05 | Pre-Treatment | POC5     | 134359 | 37 | 5 | 74981222  | 74981222  | Missense_Mutation | SNP | G | A | 4   | 278 | c.1217C>T     | c.(1216-1218)CCT>CTT | p.P406L        |
| Pat_05 | Pre-Treatment | VCAN     | 1462   | 37 | 5 | 82786240  | 82786240  | Missense_Mutation | SNP | G | A | 5   | 457 | c.394G>A      | c.(394-396)GTC>ATC   | p.V132I        |
| Pat_05 | Pre-Treatment | C5orf36  | 285600 | 37 | 5 | 93872768  | 93872768  | Missense_Mutation | SNP | G | A | 26  | 96  | c.64C>T       | c.(64-66)CCT>TCT     | p.P22S         |
| Pat_05 | Pre-Treatment | ANKRD32  | 84250  | 37 | 5 | 94027853  | 94027853  | Missense_Mutation | SNP | C | T | 5   | 294 | c.2587C>T     | c.(2587-2589)CGT>TGT | p.R863C        |
| Pat_05 | Pre-Treatment | FAM81B   | 153643 | 37 | 5 | 94749692  | 94749692  | Missense_Mutation | SNP | G | A | 54  | 174 | c.335G>A      | c.(334-336)GGT>GAT   | p.G112D        |
| Pat_05 | Pre-Treatment | EPB41L4A | 64097  | 37 | 5 | 111540171 | 111540171 | Missense_Mutation | SNP | G | A | 5   | 252 | c.1277C>T     | c.(1276-1278)TCT>TTT | p.S426F        |
| Pat_05 | Pre-Treatment | SEMA6A   | 57556  | 37 | 5 | 115783196 | 115783196 | Missense_Mutation | SNP | C | T | 7   | 712 | c.2206G>A     | c.(2206-2208)GGC>AGC | p.G736S        |
| Pat_05 | Pre-Treatment | FBN2     | 2201   | 37 | 5 | 127624885 | 127624885 | Missense_Mutation | SNP | C | T | 61  | 211 | c.6571G>A     | c.(6571-6573)GAC>AAC | p.D2191N       |
| Pat_05 | Pre-Treatment | SLC27A6  | 28965  | 37 | 5 | 128363006 | 128363006 | Missense_Mutation | SNP | G | A | 5   | 292 | c.1436G>A     | c.(1435-1437)CGT>CAT | p.R479H        |
| Pat_05 | Pre-Treatment | WNT8A    | 7478   | 37 | 5 | 137426715 | 137426715 | Missense_Mutation | SNP | G | A | 4   | 200 | c.1009G>A     | c.(1009-1011)GCA>ACA | p.A337T        |
| Pat_05 | Pre-Treatment | KIF20A   | 10112  | 37 | 5 | 137520005 | 137520005 | Missense_Mutation | SNP | G | A | 6   | 505 | c.1430G>A     | c.(1429-1431)CGT>CAT | p.R477H        |
| Pat_05 | Pre-Treatment | PCDHA13  | 56136  | 37 | 5 | 140263298 | 140263298 | Missense_Mutation | SNP | C | T | 35  | 139 | c.1445C>T     | c.(1444-1446)GCG>GTG | p.A482V        |
| Pat_05 | Pre-Treatment | PCDHB7   | 56129  | 37 | 5 | 140554401 | 140554401 | Missense_Mutation | SNP | T | A | 30  | 80  | c.1985T>A     | c.(1984-1986)CTG>CAG | p.L662Q        |
| Pat_05 | Pre-Treatment | PCDHGA12 | 26025  | 37 | 5 | 140810870 | 140810870 | Missense_Mutation | SNP | G | A | 5   | 302 | c.544G>A      | c.(544-546)GTG>ATG   | p.V182M        |
| Pat_05 | Pre-Treatment | RELL2    | 285613 | 37 | 5 | 141019543 | 141019543 | Missense_Mutation | SNP | C | T | 55  | 194 | c.560C>T      | c.(559-561)TCC>TTC   | p.S187F        |
| Pat_05 | Pre-Treatment | SH3TC2   | 79628  | 37 | 5 | 148406153 | 148406153 | Missense_Mutation | SNP | C | T | 5   | 242 | c.3035G>A     | c.(3034-3036)CGG>CAG | p.R1012Q       |
| Pat_05 | Pre-Treatment | GRPEL2   | 134266 | 37 | 5 | 148730807 | 148730807 | Nonsense_Mutation | SNP | C | T | 4   | 196 | c.640C>T      | c.(640-642)CGA>TGA   | p.R214*        |
| Pat_05 | Pre-Treatment | PPARGC1B | 133522 | 37 | 5 | 149212436 | 149212436 | Missense_Mutation | SNP | C | T | 64  | 83  | c.800C>T      | c.(799-801)TCC>TTC   | p.S267F        |
| Pat_05 | Pre-Treatment | PDE6A    | 5145   | 37 | 5 | 149242693 | 149242693 | Missense_Mutation | SNP | G | A | 7   | 676 | c.2495C>T     | c.(2494-2496)TCG>TTG | p.S832L        |
| Pat_05 | Pre-Treatment | CSF1R    | 1436   | 37 | 5 | 149433887 | 149433887 | Missense_Mutation | SNP | G | A | 4   | 239 | c.2761C>T     | c.(2761-2763)CGG>TGG | p.R921W        |
| Pat_05 | Pre-Treatment | GALNT10  | 55568  | 37 | 5 | 153755941 | 153755941 | Missense_Mutation | SNP | G | A | 4   | 85  | c.673G>A      | c.(673-675)GCC>ACC   | p.A225T        |
| Pat_05 | Pre-Treatment | HAVCR2   | 84868  | 37 | 5 | 156525886 | 156525886 | Missense_Mutation | SNP | G | A | 14  | 95  | c.505C>T      | c.(505-507)CCT>TCT   | p.P169S        |

|        |               |          |        |    |   |           |           |                   |     |    |    |     |     |                                     |                      |               |
|--------|---------------|----------|--------|----|---|-----------|-----------|-------------------|-----|----|----|-----|-----|-------------------------------------|----------------------|---------------|
| Pat_05 | Pre-Treatment | GABRA1   | 2554   | 37 | 5 | 161302610 | 161302610 | Missense_Mutation | SNP | C  | T  | 82  | 306 | c.521C>T                            | c.(520-522)CCT>CTT   | p.P174L       |
| Pat_05 | Pre-Treatment | SLIT3    | 6586   | 37 | 5 | 168093534 | 168093534 | Missense_Mutation | SNP | G  | T  | 13  | 30  | c.4497C>A                           | c.(4495-4497)TTC>TTA | p.F1499L      |
| Pat_05 | Pre-Treatment | UNC5A    | 90249  | 37 | 5 | 176305636 | 176305637 | Missense_Mutation | DNP | CC | TT | 17  | 73  | ..2180_2181CC>T                     | c.(2179-2181)ACC>ATT | p.T727I       |
| Pat_05 | Pre-Treatment | DDX41    | 51428  | 37 | 5 | 176939374 | 176939374 | Missense_Mutation | SNP | C  | T  | 5   | 212 | c.1570G>A                           | c.(1570-1572)GGG>AGG | p.G524R       |
| Pat_05 | Pre-Treatment | RNF130   | 55819  | 37 | 5 | 179440179 | 179440179 | Missense_Mutation | SNP | C  | T  | 6   | 366 | c.575G>A                            | c.(574-576)CGT>CAT   | p.R192H       |
| Pat_05 | Pre-Treatment | GCM2     | 9247   | 37 | 6 | 10875166  | 10875166  | Missense_Mutation | SNP | C  | T  | 39  | 101 | c.583G>A                            | c.(583-585)GCA>ACA   | p.A195T       |
| Pat_05 | Pre-Treatment | SLC17A4  | 10050  | 37 | 6 | 25769267  | 25769267  | Missense_Mutation | SNP | C  | T  | 52  | 132 | c.146C>T                            | c.(145-147)TCA>TTA   | p.S49L        |
| Pat_05 | Pre-Treatment | BTN1A1   | 696    | 37 | 6 | 26501521  | 26501521  | Missense_Mutation | SNP | G  | A  | 4   | 227 | c.7G>A                              | c.(7-9)GTT>ATT       | p.V3I         |
| Pat_05 | Pre-Treatment | ABCF1    | 23     | 37 | 6 | 30553992  | 30553992  | Missense_Mutation | SNP | C  | T  | 56  | 109 | c.1795C>T                           | c.(1795-1797)CCT>TCT | p.P599S       |
| Pat_05 | Pre-Treatment | LY6G5B   | 58496  | 37 | 6 | 31639713  | 31639713  | Missense_Mutation | SNP | C  | T  | 145 | 332 | c.260C>T                            | c.(259-261)ACC>ATC   | p.T87I        |
| Pat_05 | Pre-Treatment | C6orf27  | 80737  | 37 | 6 | 31741166  | 31741166  | Missense_Mutation | SNP | G  | A  | 3   | 58  | c.770C>T                            | c.(769-771)CCG>CTG   | p.P257L       |
| Pat_05 | Pre-Treatment | C2       | 717    | 37 | 6 | 31903727  | 31903727  | Missense_Mutation | SNP | G  | A  | 4   | 311 | c.877G>A                            | c.(877-879)GTT>ATT   | p.V293I       |
| Pat_05 | Pre-Treatment | FKBPL    | 63943  | 37 | 6 | 32096828  | 32096828  | Missense_Mutation | SNP | G  | A  | 5   | 240 | c.730C>T                            | c.(730-732)CCC>TCC   | p.P244S       |
| Pat_05 | Pre-Treatment | EGFL8    | 80864  | 37 | 6 | 32135197  | 32135198  | Missense_Mutation | DNP | GC | TG | 84  | 99  | c.672_673GC>TG370-675)CGGCTG>CGTGC  |                      | p.L225V       |
| Pat_05 | Pre-Treatment | PFDN6    | 10471  | 37 | 6 | 33258515  | 33258515  | Missense_Mutation | SNP | C  | T  | 4   | 233 | c.283C>T                            | c.(283-285)CGG>TGG   | p.R95W        |
| Pat_05 | Pre-Treatment | ITPR3    | 3710   | 37 | 6 | 33663491  | 33663491  | Missense_Mutation | SNP | G  | A  | 127 | 224 | c.7950G>A                           | c.(7948-7950)ATG>ATA | p.M2650I      |
| Pat_05 | Pre-Treatment | FGD2     | 221472 | 37 | 6 | 36982714  | 36982714  | Missense_Mutation | SNP | A  | G  | 36  | 77  | c.929A>G                            | c.(928-930)GAG>GGG   | p.E310G       |
| Pat_05 | Pre-Treatment | FRS3     | 10817  | 37 | 6 | 41740560  | 41740561  | Missense_Mutation | DNP | GG | AT | 49  | 160 | c.390_391CC>AT(388-393)CTCCCT>CTATC |                      | p.P131S       |
| Pat_05 | Pre-Treatment | TAF8     | 129685 | 37 | 6 | 42044898  | 42044898  | Missense_Mutation | SNP | G  | A  | 4   | 168 | c.841G>A                            | c.(841-843)GGT>AGT   | p.G281S       |
| Pat_05 | Pre-Treatment | DLK2     | 65989  | 37 | 6 | 43418776  | 43418776  | Missense_Mutation | SNP | C  | T  | 4   | 178 | c.653G>A                            | c.(652-654)AGC>AAC   | p.S218N       |
| Pat_05 | Pre-Treatment | RSPH9    | 221421 | 37 | 6 | 43618212  | 43618212  | Missense_Mutation | SNP | G  | A  | 76  | 147 | c.328G>A                            | c.(328-330)GAA>AAA   | p.E110K       |
| Pat_05 | Pre-Treatment | BMP5     | 653    | 37 | 6 | 55620369  | 55620369  | Missense_Mutation | SNP | A  | T  | 17  | 127 | c.1327T>A                           | c.(1327-1329)TAT>AAT | p.Y443N       |
| Pat_05 | Pre-Treatment | BCKDHB   | 594    | 37 | 6 | 80878662  | 80878662  | Missense_Mutation | SNP | G  | A  | 4   | 131 | c.548G>A                            | c.(547-549)CGG>CAG   | p.R183Q       |
| Pat_05 | Pre-Treatment | GPR63    | 81491  | 37 | 6 | 97247429  | 97247429  | Missense_Mutation | SNP | G  | A  | 57  | 41  | c.179C>T                            | c.(178-180)ACC>ATC   | p.T60I        |
| Pat_05 | Pre-Treatment | PRDM13   | 59336  | 37 | 6 | 100056673 | 100056673 | Nonsense_Mutation | SNP | G  | A  | 35  | 22  | c.201G>A                            | c.(199-201)TGG>TGA   | p.W67*        |
| Pat_05 | Pre-Treatment | LAMA4    | 3910   | 37 | 6 | 112537649 | 112537649 | Missense_Mutation | SNP | G  | A  | 5   | 220 | c.217C>T                            | c.(217-219)CAC>TAC   | p.H73Y        |
| Pat_05 | Pre-Treatment | FAM26D   | 221301 | 37 | 6 | 116879223 | 116879223 | Missense_Mutation | SNP | G  | A  | 5   | 376 | c.365G>A                            | c.(364-366)CGC>CAC   | p.R122H       |
| Pat_05 | Pre-Treatment | KPNA5    | 3841   | 37 | 6 | 117043355 | 117043355 | Missense_Mutation | SNP | G  | A  | 5   | 283 | c.823G>A                            | c.(823-825)GTG>ATG   | p.V275M       |
| Pat_05 | Pre-Treatment | TAAR9    | 134860 | 37 | 6 | 132859898 | 132859898 | Missense_Mutation | SNP | G  | T  | 4   | 201 | c.470G>T                            | c.(469-471)TGG>TTG   | p.W157L       |
| Pat_05 | Pre-Treatment | KIAA1244 | 57221  | 37 | 6 | 138584535 | 138584535 | Missense_Mutation | SNP | G  | A  | 4   | 155 | c.1915G>A                           | c.(1915-1917)GAT>AAT | p.D639N       |
| Pat_05 | Pre-Treatment | TAB2     | 23118  | 37 | 6 | 149700178 | 149700178 | Missense_Mutation | SNP | C  | T  | 4   | 161 | c.1127C>T                           | c.(1126-1128)ACG>ATG | p.T376M       |
| Pat_05 | Pre-Treatment | SERAC1   | 84947  | 37 | 6 | 158567889 | 158567889 | Missense_Mutation | SNP | G  | A  | 5   | 367 | c.412C>T                            | c.(412-414)CGG>TGG   | p.R138W       |
| Pat_05 | Pre-Treatment | SLC22A1  | 6580   | 37 | 6 | 160557636 | 160557636 | Missense_Mutation | SNP | C  | T  | 4   | 258 | c.1015C>T                           | c.(1015-1017)CGC>TGC | p.R339C       |
| Pat_05 | Pre-Treatment | HEATR2   | 54919  | 37 | 7 | 803533    | 803533    | Missense_Mutation | SNP | C  | T  | 6   | 566 | c.1705C>T                           | c.(1705-1707)CGG>TGG | p.R569W       |
| Pat_05 | Pre-Treatment | GPER     | 2852   | 37 | 7 | 1132266   | 1132266   | Missense_Mutation | SNP | C  | T  | 6   | 244 | c.902C>T                            | c.(901-903)GCC>GTC   | p.A301V       |
| Pat_05 | Pre-Treatment | C7orf27  | 221927 | 37 | 7 | 2581453   | 2581453   | Missense_Mutation | SNP | C  | T  | 4   | 112 | c.1033G>A                           | c.(1033-1035)GCA>ACA | p.A345T       |
| Pat_05 | Pre-Treatment | CARD11   | 84433  | 37 | 7 | 2946323   | 2946323   | Missense_Mutation | SNP | C  | G  | 4   | 219 | c.3414G>C                           | c.(3412-3414)AAG>AAC | p.K1138N      |
| Pat_05 | Pre-Treatment | PAPOLB   | 56903  | 37 | 7 | 4899659   | 4899659   | Missense_Mutation | SNP | G  | A  | 51  | 54  | c.1783C>T                           | c.(1783-1785)CCT>TCT | p.P595S       |
| Pat_05 | Pre-Treatment | FBXL18   | 80028  | 37 | 7 | 5545111   | 5545111   | Missense_Mutation | SNP | G  | A  | 5   | 255 | c.169C>T                            | c.(169-171)CGG>TGG   | p.R57W        |
| Pat_05 | Pre-Treatment | GLCC11   | 113263 | 37 | 7 | 8110650   | 8110650   | Missense_Mutation | SNP | C  | T  | 7   | 430 | c.1066C>T                           | c.(1066-1068)CGC>TGC | p.R356C       |
| Pat_05 | Pre-Treatment | THSD7A   | 221981 | 37 | 7 | 11450924  | 11450924  | Missense_Mutation | SNP | C  | A  | 106 | 119 | c.3708G>T                           | c.(3706-3708)GAG>GAT | p.E1236D      |
| Pat_05 | Pre-Treatment | ABCB5    | 340273 | 37 | 7 | 20766661  | 20766661  | Splice_Site       | SNP | A  | G  | 115 | 112 | c.1291_splice                       | c.e13-2              | p.I431_splice |
| Pat_05 | Pre-Treatment | HOXA13   | 3209   | 37 | 7 | 27237911  | 27237911  | Missense_Mutation | SNP | G  | A  | 7   | 751 | c.1073C>T                           | c.(1072-1074)ACG>ATG | p.T358M       |
| Pat_05 | Pre-Treatment | TXNDC3   | 51314  | 37 | 7 | 37907463  | 37907463  | Missense_Mutation | SNP | C  | A  | 21  | 105 | c.781C>A                            | c.(781-783)CAG>AAG   | p.Q261K       |
| Pat_05 | Pre-Treatment | MRPS24   | 64951  | 37 | 7 | 43906339  | 43906339  | Missense_Mutation | SNP | G  | A  | 5   | 430 | c.463C>T                            | c.(463-465)CTC>TTC   | p.L155F       |
| Pat_05 | Pre-Treatment | POLM     | 27434  | 37 | 7 | 44116204  | 44116204  | Missense_Mutation | SNP | C  | T  | 5   | 394 | c.739G>A                            | c.(739-741)GGT>AGT   | p.G247S       |
| Pat_05 | Pre-Treatment | MYO1G    | 64005  | 37 | 7 | 45005386  | 45005386  | Missense_Mutation | SNP | C  | T  | 74  | 123 | c.2231G>A                           | c.(2230-2232)CGG>CAG | p.R744Q       |

|        |               |           |        |    |   |           |           |                   |     |    |    |     |     |                 |                        |               |
|--------|---------------|-----------|--------|----|---|-----------|-----------|-------------------|-----|----|----|-----|-----|-----------------|------------------------|---------------|
| Pat_05 | Pre-Treatment | MYO1G     | 64005  | 37 | 7 | 45010555  | 45010555  | Missense_Mutation | SNP | G  | A  | 4   | 74  | c.950C>T        | c.(949-951)ACA>ATA     | p.T317I       |
| Pat_05 | Pre-Treatment | ADCY1     | 107    | 37 | 7 | 45719384  | 45719384  | Missense_Mutation | SNP | C  | T  | 4   | 304 | c.1975C>T       | c.(1975-1977)CGG>TGG   | p.R659W       |
| Pat_05 | Pre-Treatment | COBL      | 23242  | 37 | 7 | 51111341  | 51111342  | Missense_Mutation | DNP | GG | AA | 68  | 78  | :.1144_1145CC>T | c.(1144-1146)CCG>TTG   | p.P382L       |
| Pat_05 | Pre-Treatment | FZD9      | 8326   | 37 | 7 | 72849988  | 72849988  | Missense_Mutation | SNP | C  | T  | 50  | 109 | c.1651C>T       | c.(1651-1653)CGG>TGG   | p.R551W       |
| Pat_05 | Pre-Treatment | ELN       | 2006   | 37 | 7 | 73470634  | 73470634  | Missense_Mutation | SNP | C  | T  | 160 | 186 | c.1184C>T       | c.(1183-1185)CCT>CTT   | p.P395L       |
| Pat_05 | Pre-Treatment | SPDYE5    | 442590 | 37 | 7 | 75130868  | 75130868  | Splice_Site       | SNP | G  | A  | 7   | 533 | c.744_splice    | c.e6-1                 | p.W248_splice |
| Pat_05 | Pre-Treatment | HIP1      | 3092   | 37 | 7 | 75211413  | 75211413  | Missense_Mutation | SNP | C  | T  | 3   | 75  | c.520G>A        | c.(520-522)GGA>AGA     | p.G174R       |
| Pat_05 | Pre-Treatment | GRM3      | 2913   | 37 | 7 | 86394825  | 86394825  | Missense_Mutation | SNP | G  | A  | 6   | 517 | c.364G>A        | c.(364-366)GAA>AAA     | p.E122K       |
| Pat_05 | Pre-Treatment | ABCB4     | 5244   | 37 | 7 | 87060845  | 87060845  | Nonsense_Mutation | SNP | G  | A  | 8   | 604 | c.1768C>T       | c.(1768-1770)CGA>TGA   | p.R590*       |
| Pat_05 | Pre-Treatment | ANKIB1    | 54467  | 37 | 7 | 91948770  | 91948770  | Missense_Mutation | SNP | C  | T  | 6   | 400 | c.613C>T        | c.(613-615)CGG>TGG     | p.R205W       |
| Pat_05 | Pre-Treatment | COL1A2    | 1278   | 37 | 7 | 94038912  | 94038912  | Missense_Mutation | SNP | G  | A  | 117 | 272 | c.928G>A        | c.(928-930)GGT>AGT     | p.G310S       |
| Pat_05 | Pre-Treatment | SLC25A13  | 10165  | 37 | 7 | 95820559  | 95820559  | Missense_Mutation | SNP | C  | A  | 26  | 153 | c.616G>T        | c.(616-618)GCT>TCT     | p.A206S       |
| Pat_05 | Pre-Treatment | ZNF3      | 7551   | 37 | 7 | 99669283  | 99669283  | Missense_Mutation | SNP | C  | T  | 5   | 279 | c.824G>A        | c.(823-825)CGG>CAG     | p.R275Q       |
| Pat_05 | Pre-Treatment | PVRIG     | 79037  | 37 | 7 | 99817740  | 99817740  | Missense_Mutation | SNP | C  | T  | 3   | 28  | c.122C>T        | c.(121-123)ACC>ATC     | p.T41I        |
| Pat_05 | Pre-Treatment | ZAN       | 7455   | 37 | 7 | 100355916 | 100355916 | Missense_Mutation | SNP | C  | T  | 4   | 145 | c.3401C>T       | c.(3400-3402)ACA>ATA   | p.T1134I      |
| Pat_05 | Pre-Treatment | MUC17     | 140453 | 37 | 7 | 100679376 | 100679376 | Missense_Mutation | SNP | G  | A  | 7   | 709 | c.4679G>A       | c.(4678-4680)GGT>GAT   | p.G1560D      |
| Pat_05 | Pre-Treatment | MUC17     | 140453 | 37 | 7 | 100687017 | 100687017 | Missense_Mutation | SNP | C  | T  | 77  | 160 | c.12320C>T      | c.(12319-12321)ACG>ATC | p.T4107M      |
| Pat_05 | Pre-Treatment | FBXL13    | 222235 | 37 | 7 | 102566739 | 102566739 | Missense_Mutation | SNP | G  | A  | 4   | 190 | c.860C>T        | c.(859-861)ACG>ATG     | p.T287M       |
| Pat_05 | Pre-Treatment | RELN      | 5649   | 37 | 7 | 103138275 | 103138275 | Missense_Mutation | SNP | G  | A  | 5   | 279 | c.8942C>T       | c.(8941-8943)ACC>ATC   | p.T2981I      |
| Pat_05 | Pre-Treatment | DOCK4     | 9732   | 37 | 7 | 111368532 | 111368532 | Missense_Mutation | SNP | G  | A  | 4   | 153 | c.5699C>T       | c.(5698-5700)CCG>CTG   | p.P1900L      |
| Pat_05 | Pre-Treatment | PPP1R3A   | 5506   | 37 | 7 | 113558921 | 113558921 | Missense_Mutation | SNP | C  | T  | 174 | 183 | c.131G>A        | c.(130-132)CGA>CAA     | p.R44Q        |
| Pat_05 | Pre-Treatment | CFTR      | 1080   | 37 | 7 | 117175335 | 117175335 | Missense_Mutation | SNP | C  | T  | 316 | 339 | c.613C>T        | c.(613-615)CCT>TCT     | p.P205S       |
| Pat_05 | Pre-Treatment | GPR37     | 2861   | 37 | 7 | 124386989 | 124386989 | Nonsense_Mutation | SNP | G  | A  | 5   | 455 | c.1432C>T       | c.(1432-1434)CGA>TGA   | p.R478*       |
| Pat_05 | Pre-Treatment | RBM28     | 55131  | 37 | 7 | 127965930 | 127965930 | Nonsense_Mutation | SNP | G  | A  | 5   | 288 | c.1144C>T       | c.(1144-1146)CAG>TAG   | p.Q382*       |
| Pat_05 | Pre-Treatment | PLXNA4    | 91584  | 37 | 7 | 131817905 | 131817905 | Missense_Mutation | SNP | G  | T  | 125 | 175 | c.5492C>A       | c.(5491-5493)GCA>GAA   | p.A1831E      |
| Pat_05 | Pre-Treatment | PLXNA4    | 91584  | 37 | 7 | 131872367 | 131872367 | Splice_Site       | SNP | C  | T  | 96  | 250 | c.2857_splice   | c.e15-1                | p.T953_splice |
| Pat_05 | Pre-Treatment | BRAF      | 673    | 37 | 7 | 140453136 | 140453136 | Missense_Mutation | SNP | A  | T  | 170 | 228 | c.1799T>A       | c.(1798-1800)GTG>GAG   | p.V600E       |
| Pat_05 | Pre-Treatment | TRYX3     | 136541 | 37 | 7 | 141954881 | 141954881 | Missense_Mutation | SNP | C  | T  | 279 | 376 | c.430G>A        | c.(430-432)GAT>AAT     | p.D144N       |
| Pat_05 | Pre-Treatment | CLCN1     | 1180   | 37 | 7 | 143049018 | 143049018 | Missense_Mutation | SNP | G  | A  | 121 | 162 | c.2927G>A       | c.(2926-2928)CGA>CAA   | p.R976Q       |
| Pat_05 | Pre-Treatment | OR2F2     | 135948 | 37 | 7 | 143633121 | 143633121 | Missense_Mutation | SNP | C  | G  | 103 | 234 | c.796C>G        | c.(796-798)CCC>GCC     | p.P266A       |
| Pat_05 | Pre-Treatment | ABCB8     | 11194  | 37 | 7 | 150737671 | 150737672 | Missense_Mutation | DNP | CC | TT | 89  | 282 | :.1389_1390CC>T | 387-1392)GTCCC>GTTI    | p.P464S       |
| Pat_05 | Pre-Treatment | ARHGEF10  | 9639   | 37 | 8 | 1851525   | 1851525   | Missense_Mutation | SNP | G  | A  | 4   | 141 | c.1729G>A       | c.(1729-1731)GCA>ACA   | p.A577T       |
| Pat_05 | Pre-Treatment | ZDHHC2    | 51201  | 37 | 8 | 17067922  | 17067922  | Missense_Mutation | SNP | A  | G  | 58  | 50  | c.883A>G        | c.(883-885)ACT>GCT     | p.T295A       |
| Pat_05 | Pre-Treatment | HR        | 55806  | 37 | 8 | 21984772  | 21984772  | Missense_Mutation | SNP | G  | A  | 5   | 265 | c.1183C>T       | c.(1183-1185)CGC>TGC   | p.R395C       |
| Pat_05 | Pre-Treatment | BIN3      | 55909  | 37 | 8 | 22481830  | 22481830  | Missense_Mutation | SNP | C  | T  | 4   | 85  | c.385G>A        | c.(385-387)GAA>AAA     | p.E129K       |
| Pat_05 | Pre-Treatment | TNFRSF10A | 8797   | 37 | 8 | 23054654  | 23054654  | Missense_Mutation | SNP | G  | A  | 101 | 111 | c.1078C>T       | c.(1078-1080)CCC>TCC   | p.P360S       |
| Pat_05 | Pre-Treatment | ADRA1A    | 148    | 37 | 8 | 26722089  | 26722089  | Missense_Mutation | SNP | C  | A  | 3   | 69  | c.398G>T        | c.(397-399)CGC>CTC     | p.R133L       |
| Pat_05 | Pre-Treatment | HMBOX1    | 79618  | 37 | 8 | 28827691  | 28827691  | Missense_Mutation | SNP | G  | A  | 4   | 261 | c.155G>A        | c.(154-156)CGT>CAT     | p.R52H        |
| Pat_05 | Pre-Treatment | RAB11FIP1 | 80223  | 37 | 8 | 37720621  | 37720621  | Missense_Mutation | SNP | G  | A  | 70  | 49  | c.3644C>T       | c.(3643-3645)CCC>CTC   | p.P1215L      |
| Pat_05 | Pre-Treatment | ASH2L     | 9070   | 37 | 8 | 37963921  | 37963921  | Missense_Mutation | SNP | G  | A  | 4   | 231 | c.214G>A        | c.(214-216)GGT>AGT     | p.G72S        |
| Pat_05 | Pre-Treatment | RB1CC1    | 9821   | 37 | 8 | 53586653  | 53586653  | Missense_Mutation | SNP | C  | T  | 7   | 819 | c.754G>A        | c.(754-756)GAA>AAA     | p.E252K       |
| Pat_05 | Pre-Treatment | RP1       | 6101   | 37 | 8 | 55533983  | 55533983  | Missense_Mutation | SNP | C  | T  | 257 | 67  | c.457C>T        | c.(457-459)CCA>TCA     | p.P153S       |
| Pat_05 | Pre-Treatment | CPA6      | 57094  | 37 | 8 | 68334828  | 68334828  | Missense_Mutation | SNP | G  | A  | 7   | 512 | c.1225C>T       | c.(1225-1227)CTC>TTC   | p.L409F       |
| Pat_05 | Pre-Treatment | PREX2     | 80243  | 37 | 8 | 69136830  | 69136830  | Missense_Mutation | SNP | G  | A  | 5   | 250 | c.4744G>A       | c.(4744-4746)GTC>ATC   | p.V1582I      |
| Pat_05 | Pre-Treatment | CALB1     | 793    | 37 | 8 | 91090621  | 91090621  | Missense_Mutation | SNP | C  | T  | 52  | 553 | c.211G>A        | c.(211-213)GGA>AGA     | p.G71R        |
| Pat_05 | Pre-Treatment | VPS13B    | 157680 | 37 | 8 | 100861005 | 100861005 | Missense_Mutation | SNP | T  | C  | 591 | 139 | c.10019T>C      | c.(10018-10020)GTT>GCT | p.V3340A      |
| Pat_05 | Pre-Treatment | OXR1      | 55074  | 37 | 8 | 107763045 | 107763045 | Missense_Mutation | SNP | C  | T  | 4   | 252 | c.2501C>T       | c.(2500-2502)GCG>GTG   | p.A834V       |

|        |                 |          |        |    |   |           |           |                   |     |   |   |     |     |           |                      |          |
|--------|-----------------|----------|--------|----|---|-----------|-----------|-------------------|-----|---|---|-----|-----|-----------|----------------------|----------|
| Pat_05 | Pre-Treatment   | ABRA     | 137735 | 37 | 8 | 107773354 | 107773354 | Missense_Mutation | SNP | G | A | 7   | 671 | c.1057C>T | c.(1057-1059)CGT>TGT | p.R353C  |
| Pat_05 | Pre-Treatment   | FAM83A   | 84985  | 37 | 8 | 124219632 | 124219632 | Missense_Mutation | SNP | G | A | 3   | 66  | c.1009G>A | c.(1009-1011)GGC>AGC | p.G337S  |
| Pat_05 | Pre-Treatment   | FER1L6   | 654463 | 37 | 8 | 124988301 | 124988301 | Missense_Mutation | SNP | G | A | 210 | 64  | c.847G>A  | c.(847-849)GAG>AAG   | p.E283K  |
| Pat_05 | Pre-Treatment   | SPATC1   | 375686 | 37 | 8 | 145095874 | 145095874 | Missense_Mutation | SNP | G | A | 5   | 335 | c.1172G>A | c.(1171-1173)CGT>CAT | p.R391H  |
| Pat_05 | Pre-Treatment   | ADCK5    | 203054 | 37 | 8 | 145603079 | 145603079 | Nonsense_Mutation | SNP | C | T | 4   | 55  | c.16C>T   | c.(16-18)CAG>TAG     | p.Q6*    |
| Pat_05 | Pre-Treatment   | C9orf82  | 79886  | 37 | 9 | 26887429  | 26887429  | Missense_Mutation | SNP | A | G | 3   | 89  | c.386T>C  | c.(385-387)CTG>CCG   | p.L129P  |
| Pat_05 | Pre-Treatment   | TAF1L    | 138474 | 37 | 9 | 32632706  | 32632706  | Missense_Mutation | SNP | T | C | 37  | 162 | c.2872A>G | c.(2872-2874)ATT>GTT | p.I958V  |
| Pat_05 | Pre-Treatment   | CNTNAP3  | 79937  | 37 | 9 | 39177472  | 39177472  | Missense_Mutation | SNP | G | A | 4   | 119 | c.770C>T  | c.(769-771)GCT>GTT   | p.A257V  |
| Pat_05 | Pre-Treatment   | TMC1     | 117531 | 37 | 9 | 75387387  | 75387387  | Missense_Mutation | SNP | G | A | 111 | 416 | c.800G>A  | c.(799-801)GGA>GAA   | p.G267E  |
| Pat_05 | Pre-Treatment   | PRUNE2   | 158471 | 37 | 9 | 79324445  | 79324445  | Missense_Mutation | SNP | C | A | 56  | 214 | c.2745G>T | c.(2743-2745)AAG>AAT | p.K915N  |
| Pat_05 | Pre-Treatment   | SHC3     | 53358  | 37 | 9 | 91793326  | 91793326  | Missense_Mutation | SNP | G | A | 4   | 150 | c.50C>T   | c.(49-51)TCG>TTG     | p.S17L   |
| Pat_05 | Pre-Treatment   | WNK2     | 65268  | 37 | 9 | 96009925  | 96009925  | Missense_Mutation | SNP | C | T | 13  | 6   | c.1643C>T | c.(1642-1644)CCC>CTC | p.P548L  |
| Pat_05 | Pre-Treatment   | TMOD1    | 7111   | 37 | 9 | 100286484 | 100286484 | Missense_Mutation | SNP | G | A | 4   | 225 | c.14G>A   | c.(13-15)CGA>CAA     | p.R5Q    |
| Pat_05 | Pre-Treatment   | KIAA0368 | 23392  | 37 | 9 | 114190363 | 114190363 | Missense_Mutation | SNP | G | A | 108 | 90  | c.1543C>T | c.(1543-1545)CGC>TGC | p.R515C  |
| Pat_05 | Pre-Treatment   | TNFSF15  | 9966   | 37 | 9 | 117554687 | 117554687 | Missense_Mutation | SNP | C | T | 34  | 96  | c.301G>A  | c.(301-303)GTT>ATT   | p.V101I  |
| Pat_05 | Pre-Treatment   | SPTAN1   | 6709   | 37 | 9 | 131394948 | 131394948 | Missense_Mutation | SNP | G | A | 4   | 165 | c.7096G>A | c.(7096-7098)GAA>AAA | p.E2366K |
| Pat_05 | Pre-Treatment   | FAM73B   | 84895  | 37 | 9 | 131825860 | 131825860 | Missense_Mutation | SNP | G | A | 4   | 190 | c.1120G>A | c.(1120-1122)GGG>AGG | p.G374R  |
| Pat_05 | Pre-Treatment   | LAMC3    | 10319  | 37 | 9 | 133914341 | 133914341 | Missense_Mutation | SNP | G | A | 4   | 73  | c.1067G>A | c.(1066-1068)CGT>CAT | p.R356H  |
| Pat_05 | Pre-Treatment   | POMT1    | 10585  | 37 | 9 | 134396829 | 134396829 | Missense_Mutation | SNP | C | T | 4   | 167 | c.1861C>T | c.(1861-1863)CGG>TGG | p.R621W  |
| Pat_05 | Pre-Treatment   | ENTPD2   | 954    | 37 | 9 | 139945566 | 139945566 | Missense_Mutation | SNP | G | A | 4   | 169 | c.562C>T  | c.(562-564)CGG>TGG   | p.R188W  |
| Pat_05 | Pre-Treatment   | UAP1L1   | 91373  | 37 | 9 | 139974488 | 139974488 | Missense_Mutation | SNP | G | A | 5   | 185 | c.1072G>A | c.(1072-1074)GTG>ATG | p.V358M  |
| Pat_05 | Pre-Treatment   | ASMTL    | 8623   | 37 | X | 1546781   | 1546781   | Missense_Mutation | SNP | G | A | 42  | 114 | c.743C>T  | c.(742-744)CCC>CTC   | p.P248L  |
| Pat_05 | Pre-Treatment   | ZBED1    | 9189   | 37 | X | 2406806   | 2406806   | Missense_Mutation | SNP | C | T | 4   | 266 | c.1955G>A | c.(1954-1956)CGG>CAG | p.R652Q  |
| Pat_05 | Pre-Treatment   | CLCN4    | 1183   | 37 | X | 10188809  | 10188809  | Missense_Mutation | SNP | G | A | 5   | 268 | c.2084G>A | c.(2083-2085)CGC>CAC | p.R695H  |
| Pat_05 | Pre-Treatment   | TLR7     | 51284  | 37 | X | 12904646  | 12904646  | Missense_Mutation | SNP | C | T | 4   | 90  | c.1019C>T | c.(1018-1020)CCC>CTC | p.P340L  |
| Pat_05 | Pre-Treatment   | PIGA     | 5277   | 37 | X | 15339849  | 15339849  | Nonsense_Mutation | SNP | G | A | 6   | 498 | c.1234C>T | c.(1234-1236)CGA>TGA | p.R412*  |
| Pat_05 | Pre-Treatment   | MAP3K15  | 389840 | 37 | X | 19379645  | 19379645  | Missense_Mutation | SNP | C | T | 5   | 273 | c.2171G>A | c.(2170-2172)CGG>CAG | p.R724Q  |
| Pat_05 | Pre-Treatment   | MAGEB4   | 4115   | 37 | X | 30260287  | 30260287  | Missense_Mutation | SNP | G | A | 4   | 71  | c.35G>A   | c.(34-36)CGT>CAT     | p.R12H   |
| Pat_05 | Pre-Treatment   | SRPX     | 8406   | 37 | X | 38024076  | 38024076  | Missense_Mutation | SNP | C | T | 3   | 89  | c.599G>A  | c.(598-600)CGG>CAG   | p.R200Q  |
| Pat_05 | Pre-Treatment   | MED14    | 9282   | 37 | X | 40556385  | 40556385  | Missense_Mutation | SNP | G | A | 5   | 178 | c.1541C>T | c.(1540-1542)ACG>ATG | p.T514M  |
| Pat_05 | Pre-Treatment   | DDX3X    | 1654   | 37 | X | 41205843  | 41205843  | Missense_Mutation | SNP | G | A | 6   | 423 | c.1583G>A | c.(1582-1584)CGT>CAT | p.R528H  |
| Pat_05 | Pre-Treatment   | SSX3     | 10214  | 37 | X | 48213515  | 48213515  | Missense_Mutation | SNP | G | A | 4   | 139 | c.199C>T  | c.(199-201)CTC>TTC   | p.L67F   |
| Pat_05 | Pre-Treatment   | MAGIX    | 79917  | 37 | X | 49021378  | 49021378  | Missense_Mutation | SNP | G | A | 4   | 128 | c.457G>A  | c.(457-459)GTG>ATG   | p.V153M  |
| Pat_05 | Pre-Treatment   | CACNA1F  | 778    | 37 | X | 49065778  | 49065778  | Missense_Mutation | SNP | C | T | 3   | 20  | c.4930G>A | c.(4930-4932)GAA>AAA | p.E1644K |
| Pat_05 | Pre-Treatment   | CACNA1F  | 778    | 37 | X | 49071632  | 49071632  | Missense_Mutation | SNP | G | A | 52  | 19  | c.3544C>T | c.(3544-3546)CGT>TGT | p.R1182C |
| Pat_05 | Pre-Treatment   | DGAT2L6  | 347516 | 37 | X | 69397467  | 69397467  | Missense_Mutation | SNP | G | A | 128 | 32  | c.35G>A   | c.(34-36)GGC>GAC     | p.G12D   |
| Pat_05 | Pre-Treatment   | RGAG4    | 340526 | 37 | X | 71349790  | 71349790  | Missense_Mutation | SNP | C | T | 3   | 59  | c.1601G>A | c.(1600-1602)CGC>CAC | p.R534H  |
| Pat_05 | Pre-Treatment   | ODZ1     | 10178  | 37 | X | 123517994 | 123517994 | Missense_Mutation | SNP | G | A | 5   | 242 | c.6766C>T | c.(6766-6768)CGT>TGT | p.R2256C |
| Pat_05 | Pre-Treatment   | MST4     | 51765  | 37 | X | 131202261 | 131202261 | Missense_Mutation | SNP | G | A | 93  | 36  | c.349G>A  | c.(349-351)GAT>AAT   | p.D117N  |
| Pat_05 | Pre-Treatment   | SLITRK2  | 84631  | 37 | X | 144905883 | 144905883 | Missense_Mutation | SNP | G | A | 4   | 208 | c.1940G>A | c.(1939-1941)CGA>CAA | p.R647Q  |
| Pat_05 | Pre-Treatment   | MAGEA8   | 4107   | 37 | X | 149013954 | 149013954 | Missense_Mutation | SNP | C | T | 132 | 36  | c.908C>T  | c.(907-909)TCC>TTC   | p.S303F  |
| Pat_05 | Pre-Treatment   | ZNF185   | 7739   | 37 | X | 152083292 | 152083292 | Missense_Mutation | SNP | G | T | 4   | 7   | c.73G>T   | c.(73-75)GTT>TTT     | p.V25F   |
| Pat_05 | Pre-Treatment   | PDZD4    | 57595  | 37 | X | 153069188 | 153069188 | Missense_Mutation | SNP | G | A | 4   | 122 | c.1930C>T | c.(1930-1932)CGG>TGG | p.R644W  |
| Pat_05 | Pre-Treatment   | PLXNA3   | 55558  | 37 | X | 153694180 | 153694180 | Missense_Mutation | SNP | G | A | 5   | 31  | c.2522G>A | c.(2521-2523)CGC>CAC | p.R841H  |
| Pat_05 | Pre-Treatment   | PLXNA3   | 55558  | 37 | X | 153696502 | 153696502 | Missense_Mutation | SNP | C | T | 4   | 133 | c.3898C>T | c.(3898-3900)CGG>TGG | p.R1300W |
| Pat_05 | Post-Resistance | SCNN1D   | 6339   | 37 | 1 | 1226943   | 1226943   | Missense_Mutation | SNP | G | A | 35  | 31  | c.1870G>A | c.(1870-1872)GAA>AAA | p.E624K  |
| Pat_05 | Post-Resistance | DFFB     | 1677   | 37 | 1 | 3786321   | 3786321   | Missense_Mutation | SNP | A | C | 17  | 37  | c.663A>C  | c.(661-663)GAA>GAC   | p.E221D  |

|        |                 |           |        |    |    |           |           |                   |     |    |    |     |     |                                    |                      |                |
|--------|-----------------|-----------|--------|----|----|-----------|-----------|-------------------|-----|----|----|-----|-----|------------------------------------|----------------------|----------------|
| Pat_05 | Post-Resistance | PIK3CD    | 5293   | 37 | 1  | 9783205   | 9783205   | Missense_Mutation | SNP | C  | T  | 334 | 360 | c.2449C>T                          | c.(2449-2451)CCC>TCC | p.P817S        |
| Pat_05 | Post-Resistance | C1orf127  | 148345 | 37 | 1  | 11015213  | 11015213  | Missense_Mutation | SNP | A  | G  | 47  | 170 | c.362T>C                           | c.(361-363)GTT>GCT   | p.V121A        |
| Pat_05 | Post-Resistance | LOC649330 | 649330 | 37 | 1  | 12907865  | 12907865  | Missense_Mutation | SNP | C  | T  | 72  | 360 | c.278G>A                           | c.(277-279)GGA>GAA   | p.G93E         |
| Pat_05 | Post-Resistance | CLCNKA    | 1187   | 37 | 1  | 16351384  | 16351384  | Missense_Mutation | SNP | G  | A  | 89  | 69  | c.356G>A                           | c.(355-357)GGA>GAA   | p.G119E        |
| Pat_05 | Post-Resistance | PAX7      | 5081   | 37 | 1  | 19029699  | 19029699  | Missense_Mutation | SNP | G  | A  | 31  | 60  | c.1064G>A                          | c.(1063-1065)CGC>CAC | p.R355H        |
| Pat_05 | Post-Resistance | EIF4G3    | 8672   | 37 | 1  | 21299593  | 21299593  | Splice_Site       | SNP | C  | T  | 40  | 102 | c.326_splice                       | c.e6-1               | p.G109_splice  |
| Pat_05 | Post-Resistance | SFN       | 2810   | 37 | 1  | 27190112  | 27190112  | Missense_Mutation | SNP | G  | A  | 4   | 153 | c.409G>A                           | c.(409-411)GGT>AGT   | p.G137S        |
| Pat_05 | Post-Resistance | ZBTB8A    | 653121 | 37 | 1  | 33058747  | 33058747  | Missense_Mutation | SNP | C  | T  | 67  | 193 | c.215C>T                           | c.(214-216)TCC>TTC   | p.S72F         |
| Pat_05 | Post-Resistance | EPHA10    | 284656 | 37 | 1  | 38227610  | 38227611  | Missense_Mutation | DNP | TG | CT | 308 | 237 | c.316_317CA>AG                     | c.(316-318)CAG>AGG   | p.Q106R        |
| Pat_05 | Post-Resistance | TMCO2     | 127391 | 37 | 1  | 40713883  | 40713883  | Missense_Mutation | SNP | G  | A  | 67  | 71  | c.218G>A                           | c.(217-219)CGA>CAA   | p.R73Q         |
| Pat_05 | Post-Resistance | EBNA1BP2  | 10969  | 37 | 1  | 43630421  | 43630421  | Nonsense_Mutation | SNP | T  | A  | 74  | 58  | c.763A>T                           | c.(763-765)AAA>TAA   | p.K255*        |
| Pat_05 | Post-Resistance | CDC20     | 991    | 37 | 1  | 43824974  | 43824974  | Missense_Mutation | SNP | C  | A  | 4   | 191 | c.88C>A                            | c.(88-90)CGC>AGC     | p.R30S         |
| Pat_05 | Post-Resistance | CYP4Z1    | 199974 | 37 | 1  | 47571867  | 47571867  | Missense_Mutation | SNP | G  | A  | 182 | 97  | c.1135G>A                          | c.(1135-1137)GTA>ATA | p.V379I        |
| Pat_05 | Post-Resistance | USP24     | 23358  | 37 | 1  | 55599790  | 55599790  | Missense_Mutation | SNP | G  | A  | 33  | 61  | c.2854C>T                          | c.(2854-2856)CCA>TCA | p.P952S        |
| Pat_05 | Post-Resistance | INADL     | 10207  | 37 | 1  | 62614022  | 62614022  | Missense_Mutation | SNP | C  | T  | 180 | 169 | c.5338C>T                          | c.(5338-5340)CTT>TTT | p.L1780F       |
| Pat_05 | Post-Resistance | EFCAB7    | 84455  | 37 | 1  | 63999792  | 63999792  | Missense_Mutation | SNP | G  | A  | 4   | 305 | c.709G>A                           | c.(709-711)GCA>ACA   | p.A237T        |
| Pat_05 | Post-Resistance | RPE65     | 6121   | 37 | 1  | 68912507  | 68912507  | Missense_Mutation | SNP | C  | T  | 51  | 184 | c.131G>A                           | c.(130-132)CGA>CAA   | p.R44Q         |
| Pat_05 | Post-Resistance | SLC44A5   | 204962 | 37 | 1  | 75708697  | 75708697  | Splice_Site       | SNP | C  | T  | 53  | 47  | c.346_splice                       | c.e8-1               | p.I1116_splice |
| Pat_05 | Post-Resistance | KCND3     | 3752   | 37 | 1  | 112525062 | 112525062 | Missense_Mutation | SNP | T  | C  | 97  | 102 | c.287A>G                           | c.(286-288)AAC>AGC   | p.N96S         |
| Pat_05 | Post-Resistance | NRAS      | 4893   | 37 | 1  | 115256530 | 115256530 | Missense_Mutation | SNP | G  | T  | 92  | 415 | c.181C>A                           | c.(181-183)CAA>AAA   | p.Q61K         |
| Pat_05 | Post-Resistance | CD2       | 914    | 37 | 1  | 117297532 | 117297532 | Missense_Mutation | SNP | G  | A  | 29  | 27  | c.341G>A                           | c.(340-342)GGA>GAA   | p.G114E        |
| Pat_05 | Post-Resistance | HMGCS2    | 3158   | 37 | 1  | 120302578 | 120302579 | Missense_Mutation | DNP | GG | AA | 62  | 60  | c.593_594CC>TT                     | c.(592-594)GCC>GTT   | p.A198V        |
| Pat_05 | Post-Resistance | NOTCH2    | 4853   | 37 | 1  | 120461053 | 120461053 | Missense_Mutation | SNP | C  | T  | 130 | 334 | c.5905G>A                          | c.(5905-5907)GAT>AAT | p.D1969N       |
| Pat_05 | Post-Resistance | LOC728989 | 728989 | 37 | 1  | 146493327 | 146493327 | Missense_Mutation | SNP | G  | A  | 35  | 113 | c.586C>T                           | c.(586-588)CAT>TAT   | p.H196Y        |
| Pat_05 | Post-Resistance | ECM1      | 1893   | 37 | 1  | 150482217 | 150482217 | Missense_Mutation | SNP | C  | T  | 158 | 300 | c.202C>T                           | c.(202-204)CCC>TCC   | p.P68S         |
| Pat_05 | Post-Resistance | TCHH      | 7062   | 37 | 1  | 152082220 | 152082220 | Missense_Mutation | SNP | G  | T  | 4   | 183 | c.3473C>A                          | c.(3472-3474)CCG>CAG | p.P1158Q       |
| Pat_05 | Post-Resistance | RPTN      | 126638 | 37 | 1  | 152129112 | 152129112 | Missense_Mutation | SNP | C  | T  | 441 | 464 | c.463G>A                           | c.(463-465)GAT>AAT   | p.D155N        |
| Pat_05 | Post-Resistance | NES       | 10763  | 37 | 1  | 156642586 | 156642586 | Missense_Mutation | SNP | G  | A  | 100 | 189 | c.1394C>T                          | c.(1393-1395)TCC>TTC | p.S465F        |
| Pat_05 | Post-Resistance | NTRK1     | 4914   | 37 | 1  | 156845875 | 156845875 | Missense_Mutation | SNP | T  | C  | 14  | 522 | c.1505T>C                          | c.(1504-1506)GTT>GCT | p.V502A        |
| Pat_05 | Post-Resistance | ARHGEF11  | 9826   | 37 | 1  | 156909613 | 156909613 | Missense_Mutation | SNP | T  | C  | 46  | 122 | c.3703A>G                          | c.(3703-3705)ACA>GCA | p.T1235A       |
| Pat_05 | Post-Resistance | FCRL5     | 83416  | 37 | 1  | 157508968 | 157508968 | Missense_Mutation | SNP | G  | A  | 60  | 81  | c.1310C>T                          | c.(1309-1311)TCT>TTT | p.S437F        |
| Pat_05 | Post-Resistance | CD1C      | 911    | 37 | 1  | 158261967 | 158261967 | Nonsense_Mutation | SNP | T  | A  | 188 | 190 | c.422T>A                           | c.(421-423)TTA>TAA   | p.L141*        |
| Pat_05 | Post-Resistance | CD1E      | 913    | 37 | 1  | 158326534 | 158326534 | Missense_Mutation | SNP | C  | T  | 44  | 330 | c.1015C>T                          | c.(1015-1017)CTT>TTT | p.L339F        |
| Pat_05 | Post-Resistance | FCRL6     | 343413 | 37 | 1  | 159779435 | 159779435 | Missense_Mutation | SNP | C  | T  | 124 | 118 | c.848C>T                           | c.(847-849)TCC>TTC   | p.S283F        |
| Pat_05 | Post-Resistance | NR1I3     | 9970   | 37 | 1  | 161200970 | 161200970 | Nonsense_Mutation | SNP | G  | A  | 19  | 51  | c.760C>T                           | c.(760-762)CGA>TGA   | p.R254*        |
| Pat_05 | Post-Resistance | DUSP12    | 11266  | 37 | 1  | 161722242 | 161722242 | Missense_Mutation | SNP | G  | A  | 222 | 226 | c.662G>A                           | c.(661-663)TGT>TAT   | p.C221Y        |
| Pat_05 | Post-Resistance | TNR       | 7143   | 37 | 1  | 175331865 | 175331865 | Missense_Mutation | SNP | C  | T  | 154 | 292 | c.2788G>A                          | c.(2788-2790)GAA>AAA | p.E930K        |
| Pat_05 | Post-Resistance | PRG4      | 10216  | 37 | 1  | 186276544 | 186276544 | Missense_Mutation | SNP | C  | A  | 4   | 168 | c.1693C>A                          | c.(1693-1695)CCC>ACC | p.P565T        |
| Pat_05 | Post-Resistance | DISP1     | 84976  | 37 | 1  | 223178708 | 223178709 | Missense_Mutation | DNP | GG | AA | 111 | 242 | .3969_3970GG>A367-3972)GAGGGC>GAA/ |                      | p.G1324S       |
| Pat_05 | Post-Resistance | DISC1     | 27185  | 37 | 1  | 231829992 | 231829992 | Missense_Mutation | SNP | C  | G  | 40  | 180 | c.488C>G                           | c.(487-489)GCC>GGC   | p.A163G        |
| Pat_05 | Post-Resistance | MTR       | 4548   | 37 | 1  | 236979830 | 236979831 | Missense_Mutation | DNP | GG | AA | 158 | 206 | c.751_752GG>AA                     | c.(751-753)GGA>AAA   | p.G251K        |
| Pat_05 | Post-Resistance | TRIM58    | 25893  | 37 | 1  | 248039457 | 248039457 | Missense_Mutation | SNP | C  | T  | 104 | 254 | c.1127C>T                          | c.(1126-1128)TCT>TTT | p.S376F        |
| Pat_05 | Post-Resistance | OR2L13    | 284521 | 37 | 1  | 248262696 | 248262696 | Missense_Mutation | SNP | A  | G  | 51  | 352 | c.19A>G                            | c.(19-21)ACT>GCT     | p.T7A          |
| Pat_05 | Post-Resistance | ANKRD30A  | 91074  | 37 | 10 | 37430948  | 37430948  | Missense_Mutation | SNP | C  | G  | 3   | 69  | c.955C>G                           | c.(955-957)CCA>GCA   | p.P319A        |
| Pat_05 | Post-Resistance | RASSF4    | 83937  | 37 | 10 | 45465703  | 45465703  | Missense_Mutation | SNP | C  | T  | 145 | 78  | c.53C>T                            | c.(52-54)TCC>TTC     | p.S18F         |
| Pat_05 | Post-Resistance | GPRIN2    | 9721   | 37 | 10 | 46999128  | 46999128  | Missense_Mutation | SNP | G  | A  | 19  | 53  | c.248G>A                           | c.(247-249)CGA>CAA   | p.R83Q         |
| Pat_05 | Post-Resistance | HK1       | 3098   | 37 | 10 | 71129293  | 71129293  | Missense_Mutation | SNP | C  | T  | 122 | 41  | c.788C>T                           | c.(787-789)GCC>GTC   | p.A263V        |



|        |                 |          |        |    |    |           |           |                   |     |    |    |     |     |                                   |                        |               |
|--------|-----------------|----------|--------|----|----|-----------|-----------|-------------------|-----|----|----|-----|-----|-----------------------------------|------------------------|---------------|
| Pat_05 | Post-Resistance | NPFFR1   | 64106  | 37 | 10 | 72020400  | 72020400  | Missense_Mutation | SNP | C  | T  | 9   | 7   | c.412G>A                          | c.(412-414)GAA>AAA     | p.E138K       |
| Pat_05 | Post-Resistance | GPAM     | 57678  | 37 | 10 | 113926167 | 113926167 | Missense_Mutation | SNP | G  | A  | 58  | 34  | c.1214C>T                         | c.(1213-1215)TCC>TTC   | p.S405F       |
| Pat_05 | Post-Resistance | PNLIPRP1 | 5407   | 37 | 10 | 118352022 | 118352022 | Missense_Mutation | SNP | G  | A  | 88  | 21  | c.299G>A                          | c.(298-300)GGA>GAA     | p.G100E       |
| Pat_05 | Post-Resistance | KRTAP5-5 | 439915 | 37 | 11 | 1651459   | 1651459   | Missense_Mutation | SNP | G  | T  | 4   | 60  | c.389G>T                          | c.(388-390)GGC>GTC     | p.G130V       |
| Pat_05 | Post-Resistance | HBBP1    | 3044   | 37 | 11 | 5264439   | 5264439   | Missense_Mutation | SNP | G  | A  | 44  | 9   | c.47C>T                           | c.(46-48)TCC>TTC       | p.S16F        |
| Pat_05 | Post-Resistance | OLFML1   | 283298 | 37 | 11 | 7509550   | 7509550   | Missense_Mutation | SNP | G  | A  | 4   | 149 | c.322G>A                          | c.(322-324)GCT>ACT     | p.A108T       |
| Pat_05 | Post-Resistance | SPON1    | 10418  | 37 | 11 | 14287201  | 14287201  | Missense_Mutation | SNP | G  | A  | 24  | 9   | c.2392G>A                         | c.(2392-2394)GAG>AAG   | p.E798K       |
| Pat_05 | Post-Resistance | CRY2     | 1408   | 37 | 11 | 45892471  | 45892471  | Missense_Mutation | SNP | G  | A  | 3   | 56  | c.1691G>A                         | c.(1690-1692)AGC>AAC   | p.S564N       |
| Pat_05 | Post-Resistance | OR4C13   | 283092 | 37 | 11 | 49974799  | 49974799  | Missense_Mutation | SNP | G  | A  | 96  | 33  | c.825G>A                          | c.(823-825)ATG>ATA     | p.M275I       |
| Pat_05 | Post-Resistance | OR4A5    | 81318  | 37 | 11 | 51412302  | 51412302  | Missense_Mutation | SNP | T  | C  | 27  | 49  | c.94A>G                           | c.(94-96)ACA>GCA       | p.T32A        |
| Pat_05 | Post-Resistance | FEN1     | 2237   | 37 | 11 | 61563828  | 61563828  | Missense_Mutation | SNP | G  | A  | 3   | 50  | c.995G>A                          | c.(994-996)CGC>CAC     | p.R332H       |
| Pat_05 | Post-Resistance | LRP5     | 4041   | 37 | 11 | 68205968  | 68205968  | Missense_Mutation | SNP | C  | T  | 108 | 49  | c.4166C>T                         | c.(4165-4167)CCC>CTC   | p.P1389L      |
| Pat_05 | Post-Resistance | HEPHL1   | 341208 | 37 | 11 | 93826703  | 93826703  | Nonsense_Mutation | SNP | G  | A  | 227 | 101 | c.2331G>A                         | c.(2329-2331)TGG>TGA   | p.W777*       |
| Pat_05 | Post-Resistance | CNTN5    | 53942  | 37 | 11 | 100061987 | 100061987 | Splice_Site       | SNP | T  | C  | 25  | 8   | c.1708_splice                     | c.e14+2                | p.E570_splice |
| Pat_05 | Post-Resistance | YAP1     | 10413  | 37 | 11 | 102033218 | 102033218 | Missense_Mutation | SNP | C  | T  | 238 | 128 | c.604C>T                          | c.(604-606)CCC>TCC     | p.P202S       |
| Pat_05 | Post-Resistance | NCAPD3   | 23310  | 37 | 11 | 134038828 | 134038828 | Missense_Mutation | SNP | A  | G  | 104 | 42  | c.3223T>C                         | c.(3223-3225)TTC>CTC   | p.F1075L      |
| Pat_05 | Post-Resistance | GDF3     | 9573   | 37 | 12 | 7842689   | 7842689   | Missense_Mutation | SNP | G  | A  | 129 | 113 | c.880C>T                          | c.(880-882)CAT>TAT     | p.H294Y       |
| Pat_05 | Post-Resistance | KIAA1467 | 57613  | 37 | 12 | 13215874  | 13215874  | Nonsense_Mutation | SNP | C  | T  | 178 | 519 | c.817C>T                          | c.(817-819)CGA>TGA     | p.R273*       |
| Pat_05 | Post-Resistance | ARHGDI3  | 397    | 37 | 12 | 15095590  | 15095590  | Missense_Mutation | SNP | G  | A  | 101 | 109 | c.472C>T                          | c.(472-474)CCA>TCA     | p.P158S       |
| Pat_05 | Post-Resistance | ANP32D   | 23519  | 37 | 12 | 48866508  | 48866508  | Missense_Mutation | SNP | G  | A  | 76  | 244 | c.61G>A                           | c.(61-63)GAA>AAA       | p.E21K        |
| Pat_05 | Post-Resistance | KRT8     | 3856   | 37 | 12 | 53298675  | 53298675  | Missense_Mutation | SNP | A  | C  | 3   | 38  | c.91T>G                           | c.(91-93)TCC>GCC       | p.S31A        |
| Pat_05 | Post-Resistance | ITGA5    | 3678   | 37 | 12 | 54798495  | 54798495  | Missense_Mutation | SNP | C  | T  | 38  | 120 | c.1409G>A                         | c.(1408-1410)GGA>GAA   | p.G470E       |
| Pat_05 | Post-Resistance | PDE1B    | 5153   | 37 | 12 | 54943765  | 54943765  | Missense_Mutation | SNP | T  | G  | 17  | 61  | c.109T>G                          | c.(109-111)TCT>GCT     | p.S37A        |
| Pat_05 | Post-Resistance | OR6C2    | 341416 | 37 | 12 | 55846399  | 55846399  | Missense_Mutation | SNP | G  | A  | 92  | 91  | c.402G>A                          | c.(400-402)ATG>ATA     | p.M134I       |
| Pat_05 | Post-Resistance | NXPH4    | 11247  | 37 | 12 | 57619184  | 57619184  | Missense_Mutation | SNP | G  | A  | 39  | 78  | c.581G>A                          | c.(580-582)GGG>GAG     | p.G194E       |
| Pat_05 | Post-Resistance | OS9      | 10956  | 37 | 12 | 58089596  | 58089596  | Missense_Mutation | SNP | G  | A  | 139 | 130 | c.373G>A                          | c.(373-375)GGA>AGA     | p.G125R       |
| Pat_05 | Post-Resistance | FAM19A2  | 338811 | 37 | 12 | 62147474  | 62147474  | Missense_Mutation | SNP | C  | T  | 55  | 177 | c.313G>A                          | c.(313-315)GAA>AAA     | p.E105K       |
| Pat_05 | Post-Resistance | SYT1     | 6857   | 37 | 12 | 79842697  | 79842697  | Splice_Site       | SNP | G  | A  | 101 | 91  | c.1063_splice                     | c.e12-1                | p.K355_splice |
| Pat_05 | Post-Resistance | UTP20    | 27340  | 37 | 12 | 101736806 | 101736806 | Missense_Mutation | SNP | G  | A  | 56  | 61  | c.4384G>A                         | c.(4384-4386)GAA>AAA   | p.E1462K      |
| Pat_05 | Post-Resistance | TRPV4    | 59341  | 37 | 12 | 110232243 | 110232243 | Missense_Mutation | SNP | T  | C  | 55  | 293 | c.1382A>G                         | c.(1381-1383)GAC>GGC   | p.D461G       |
| Pat_05 | Post-Resistance | RNFT2    | 84900  | 37 | 12 | 117188100 | 117188100 | Nonsense_Mutation | SNP | C  | T  | 27  | 36  | c.538C>T                          | c.(538-540)CAG>TAG     | p.Q180*       |
| Pat_05 | Post-Resistance | CCDC60   | 160777 | 37 | 12 | 119866487 | 119866487 | Splice_Site       | SNP | G  | A  | 11  | 22  | c.91_splice                       | c.e2-1                 | p.V31_splice  |
| Pat_05 | Post-Resistance | OGFOD2   | 79676  | 37 | 12 | 123463861 | 123463861 | Missense_Mutation | SNP | C  | A  | 4   | 142 | c.1021C>A                         | c.(1021-1023)CCC>ACC   | p.P341T       |
| Pat_05 | Post-Resistance | DNAH10   | 196385 | 37 | 12 | 124408932 | 124408932 | Missense_Mutation | SNP | G  | A  | 28  | 29  | c.11365G>A                        | c.(11365-11367)GGG>AGC | p.G3789R      |
| Pat_05 | Post-Resistance | WASF3    | 10810  | 37 | 13 | 27250713  | 27250713  | Missense_Mutation | SNP | C  | T  | 7   | 109 | c.568C>T                          | c.(568-570)CGT>TGT     | p.R190C       |
| Pat_05 | Post-Resistance | TRPC4    | 7223   | 37 | 13 | 38211066  | 38211066  | Missense_Mutation | SNP | C  | T  | 82  | 93  | c.2908G>A                         | c.(2908-2910)GAA>AAA   | p.E970K       |
| Pat_05 | Post-Resistance | ATP7B    | 540    | 37 | 13 | 52518298  | 52518298  | Missense_Mutation | SNP | C  | T  | 89  | 106 | c.3190G>A                         | c.(3190-3192)GAG>AAG   | p.E1064K      |
| Pat_05 | Post-Resistance | OR4K13   | 390433 | 37 | 14 | 20502121  | 20502121  | Missense_Mutation | SNP | G  | A  | 19  | 34  | c.797C>T                          | c.(796-798)TCG>TTG     | p.S266L       |
| Pat_05 | Post-Resistance | MYH6     | 4624   | 37 | 14 | 23873585  | 23873585  | Missense_Mutation | DNP | CC | TT | 142 | 64  | c.654_655GG>AA652-657)GAGGAC>GAAA |                        | p.D219N       |
| Pat_05 | Post-Resistance | RALGAPA1 | 253959 | 37 | 14 | 36211615  | 36211615  | Missense_Mutation | SNP | C  | T  | 3   | 0   | c.1408G>A                         | c.(1408-1410)GAC>AAC   | p.D470N       |
| Pat_05 | Post-Resistance | MIA2     | 117153 | 37 | 14 | 39717268  | 39717268  | Missense_Mutation | SNP | C  | T  | 101 | 29  | c.1490C>T                         | c.(1489-1491)ACT>ATT   | p.T497I       |
| Pat_05 | Post-Resistance | MUDENG   | 55745  | 37 | 14 | 57748805  | 57748805  | Splice_Site       | SNP | A  | G  | 15  | 21  | c.949_splice                      | c.e4-2                 | p.V317_splice |
| Pat_05 | Post-Resistance | SIX1     | 6495   | 37 | 14 | 61113294  | 61113294  | Missense_Mutation | SNP | C  | T  | 53  | 9   | c.562G>A                          | c.(562-564)GAG>AAG     | p.E188K       |
| Pat_05 | Post-Resistance | ZFYVE26  | 23503  | 37 | 14 | 68260920  | 68260920  | Missense_Mutation | SNP | C  | T  | 349 | 163 | c.2369G>A                         | c.(2368-2370)AGT>AAT   | p.S790N       |
| Pat_05 | Post-Resistance | TMEM63C  | 57156  | 37 | 14 | 77686405  | 77686405  | Missense_Mutation | SNP | C  | T  | 8   | 3   | c.287C>T                          | c.(286-288)TCC>TTC     | p.S96F        |
| Pat_05 | Post-Resistance | HERC2    | 8924   | 37 | 15 | 28358816  | 28358816  | Missense_Mutation | SNP | T  | C  | 6   | 92  | c.13922A>G                        | c.(13921-13923)GAA>GG# | p.E4641G      |
| Pat_05 | Post-Resistance | EIF2AK4  | 440275 | 37 | 15 | 40284403  | 40284403  | Missense_Mutation | SNP | G  | A  | 33  | 120 | c.2659G>A                         | c.(2659-2661)GGA>AGA   | p.G887R       |

|        |                 |           |        |    |    |           |           |                   |     |    |    |     |     |                 |                        |          |
|--------|-----------------|-----------|--------|----|----|-----------|-----------|-------------------|-----|----|----|-----|-----|-----------------|------------------------|----------|
| Pat_05 | Post-Resistance | CDAN1     | 146059 | 37 | 15 | 43026214  | 43026214  | Missense_Mutation | SNP | G  | A  | 40  | 106 | c.1289C>T       | c.(1288-1290)GCT>GTT   | p.A430V  |
| Pat_05 | Post-Resistance | TP53BP1   | 7158   | 37 | 15 | 43714147  | 43714147  | Missense_Mutation | SNP | C  | T  | 90  | 84  | c.3991G>A       | c.(3991-3993)GGG>AGG   | p.G1331R |
| Pat_05 | Post-Resistance | TMEM202   | 338949 | 37 | 15 | 72700185  | 72700185  | Missense_Mutation | SNP | C  | T  | 56  | 55  | c.773C>T        | c.(772-774)TCT>TTT     | p.S258F  |
| Pat_05 | Post-Resistance | NEO1      | 4756   | 37 | 15 | 73541473  | 73541473  | Missense_Mutation | SNP | A  | G  | 22  | 284 | c.1679A>G       | c.(1678-1680)GAA>GGA   | p.E560G  |
| Pat_05 | Post-Resistance | LOC645752 | 645752 | 37 | 15 | 78207888  | 78207888  | Missense_Mutation | SNP | A  | C  | 3   | 75  | c.1110T>G       | c.(1108-1110)AAT>AAG   | p.N370K  |
| Pat_05 | Post-Resistance | ZNF710    | 374655 | 37 | 15 | 90622960  | 90622960  | Nonsense_Mutation | SNP | G  | T  | 58  | 187 | c.1894G>T       | c.(1894-1896)GAG>TAG   | p.E632*  |
| Pat_05 | Post-Resistance | WASH3P    | 374666 | 37 | 15 | 102515344 | 102515344 | Missense_Mutation | SNP | A  | C  | 4   | 56  | c.568A>C        | c.(568-570)AAG>CAG     | p.K190Q  |
| Pat_05 | Post-Resistance | SPSB3     | 90864  | 37 | 16 | 1828154   | 1828154   | Missense_Mutation | SNP | G  | A  | 37  | 33  | c.473C>T        | c.(472-474)CCC>CTC     | p.P158L  |
| Pat_05 | Post-Resistance | PRSS22    | 64063  | 37 | 16 | 2903246   | 2903246   | Missense_Mutation | SNP | C  | T  | 47  | 103 | c.802G>A        | c.(802-804)GAG>AAG     | p.E268K  |
| Pat_05 | Post-Resistance | CREBBP    | 1387   | 37 | 16 | 3819211   | 3819212   | Missense_Mutation | DNP | GG | AA | 68  | 154 | c.3023_3024CC>T | c.(3022-3024)CCC>CTT   | p.P1008L |
| Pat_05 | Post-Resistance | GRIN2A    | 2903   | 37 | 16 | 9857613   | 9857613   | Missense_Mutation | SNP | C  | T  | 16  | 81  | c.3788G>A       | c.(3787-3789)GGG>GAG   | p.G1263E |
| Pat_05 | Post-Resistance | TMC5      | 79838  | 37 | 16 | 19451823  | 19451823  | Missense_Mutation | SNP | C  | T  | 103 | 299 | c.463C>T        | c.(463-465)CAT>TAT     | p.H155Y  |
| Pat_05 | Post-Resistance | PRKCB     | 5579   | 37 | 16 | 24104192  | 24104192  | Missense_Mutation | SNP | C  | T  | 127 | 104 | c.610C>T        | c.(610-612)CCC>TCC     | p.P204S  |
| Pat_05 | Post-Resistance | ZNF646    | 9726   | 37 | 16 | 31088970  | 31088970  | Missense_Mutation | SNP | C  | T  | 13  | 58  | c.1325C>T       | c.(1324-1326)CCC>CTC   | p.P442L  |
| Pat_05 | Post-Resistance | CHD9      | 80205  | 37 | 16 | 53348813  | 53348813  | Missense_Mutation | SNP | C  | T  | 42  | 168 | c.7441C>T       | c.(7441-7443)CCT>TCT   | p.P2481S |
| Pat_05 | Post-Resistance | CDH16     | 1014   | 37 | 16 | 66945995  | 66945995  | Nonsense_Mutation | SNP | G  | A  | 4   | 118 | c.1597C>T       | c.(1597-1599)CAG>TAG   | p.Q533*  |
| Pat_05 | Post-Resistance | PLEKHG4   | 25894  | 37 | 16 | 67314032  | 67314032  | Missense_Mutation | SNP | A  | G  | 4   | 171 | c.85A>G         | c.(85-87)AGG>GGG       | p.R29G   |
| Pat_05 | Post-Resistance | RFWD3     | 55159  | 37 | 16 | 74683038  | 74683038  | Missense_Mutation | SNP | G  | A  | 73  | 171 | c.784C>T        | c.(784-786)CCC>TCC     | p.P262S  |
| Pat_05 | Post-Resistance | PKD1L2    | 114780 | 37 | 16 | 81167302  | 81167302  | Missense_Mutation | SNP | G  | A  | 29  | 46  | c.5723C>T       | c.(5722-5724)CCC>CTC   | p.P1908L |
| Pat_05 | Post-Resistance | PLCG2     | 5336   | 37 | 16 | 81888165  | 81888165  | Missense_Mutation | SNP | T  | A  | 220 | 202 | c.310T>A        | c.(310-312)TTC>ATC     | p.F104I  |
| Pat_05 | Post-Resistance | CAMKK1    | 84254  | 37 | 17 | 3773120   | 3773120   | Missense_Mutation | SNP | G  | A  | 74  | 269 | c.1187C>T       | c.(1186-1188)ACG>ATG   | p.T396M  |
| Pat_05 | Post-Resistance | FBXO39    | 162517 | 37 | 17 | 6684059   | 6684059   | Missense_Mutation | SNP | G  | A  | 53  | 23  | c.872G>A        | c.(871-873)CGG>CAG     | p.R291Q  |
| Pat_05 | Post-Resistance | TEKT3     | 64518  | 37 | 17 | 15234473  | 15234473  | Nonsense_Mutation | SNP | G  | A  | 42  | 103 | c.430C>T        | c.(430-432)CAA>TAA     | p.Q144*  |
| Pat_05 | Post-Resistance | MAP2K3    | 5606   | 37 | 17 | 21205486  | 21205486  | Missense_Mutation | SNP | A  | G  | 16  | 220 | c.431A>G        | c.(430-432)GAC>GGC     | p.D144G  |
| Pat_05 | Post-Resistance | SUPT6H    | 6830   | 37 | 17 | 27023987  | 27023987  | Missense_Mutation | SNP | C  | T  | 184 | 289 | c.4096C>T       | c.(4096-4098)CAC>TAC   | p.H1366Y |
| Pat_05 | Post-Resistance | LRRC37B   | 114659 | 37 | 17 | 30349585  | 30349585  | Missense_Mutation | SNP | C  | T  | 101 | 136 | c.1420C>T       | c.(1420-1422)CAT>TAT   | p.H474Y  |
| Pat_05 | Post-Resistance | STARD3    | 10948  | 37 | 17 | 37817338  | 37817338  | Missense_Mutation | SNP | G  | A  | 4   | 154 | c.1139G>A       | c.(1138-1140)CGG>CAG   | p.R380Q  |
| Pat_05 | Post-Resistance | KRT27     | 342574 | 37 | 17 | 38933948  | 38933948  | Missense_Mutation | SNP | T  | G  | 206 | 344 | c.1009A>C       | c.(1009-1011)AGT>CGT   | p.S337R  |
| Pat_05 | Post-Resistance | BRCA1     | 672    | 37 | 17 | 41244316  | 41244316  | Missense_Mutation | SNP | G  | A  | 81  | 153 | c.3232C>T       | c.(3232-3234)CCA>TCA   | p.P1078S |
| Pat_05 | Post-Resistance | DHX8      | 1659   | 37 | 17 | 41598239  | 41598239  | Missense_Mutation | SNP | A  | G  | 3   | 313 | c.3058A>G       | c.(3058-3060)AGG>GGG   | p.R1020G |
| Pat_05 | Post-Resistance | FMNL1     | 752    | 37 | 17 | 43320500  | 43320500  | Missense_Mutation | SNP | G  | A  | 121 | 234 | c.2026G>A       | c.(2026-2028)GAT>AAT   | p.D676N  |
| Pat_05 | Post-Resistance | CACNA1G   | 8913   | 37 | 17 | 48650037  | 48650037  | Missense_Mutation | SNP | G  | A  | 14  | 16  | c.869G>A        | c.(868-870)GGG>GAG     | p.G290E  |
| Pat_05 | Post-Resistance | SPAG9     | 9043   | 37 | 17 | 49079164  | 49079164  | Missense_Mutation | SNP | C  | T  | 63  | 155 | c.1519G>A       | c.(1519-1521)GAA>AAA   | p.E507K  |
| Pat_05 | Post-Resistance | SPAG9     | 9043   | 37 | 17 | 49157025  | 49157025  | Missense_Mutation | SNP | T  | C  | 3   | 123 | c.344A>G        | c.(343-345)AAG>AGG     | p.K115R  |
| Pat_05 | Post-Resistance | OR4D1     | 26689  | 37 | 17 | 56232773  | 56232773  | Missense_Mutation | SNP | C  | T  | 137 | 204 | c.259C>T        | c.(259-261)CAT>TAT     | p.H87Y   |
| Pat_05 | Post-Resistance | MRPL38    | 64978  | 37 | 17 | 73897876  | 73897877  | Nonsense_Mutation | DNP | GG | AA | 79  | 125 | c.507_508CC>TT  | c.(505-510)CCCCGA>CCTT | p.R170*  |
| Pat_05 | Post-Resistance | TMC8      | 147138 | 37 | 17 | 76128447  | 76128447  | Missense_Mutation | SNP | C  | A  | 14  | 97  | c.306C>A        | c.(304-306)TTC>TTA     | p.F102L  |
| Pat_05 | Post-Resistance | CDH2      | 1000   | 37 | 18 | 25572789  | 25572789  | Missense_Mutation | SNP | G  | A  | 53  | 106 | c.1174C>T       | c.(1174-1176)CCT>TCT   | p.P392S  |
| Pat_05 | Post-Resistance | CDC68     | 80323  | 37 | 18 | 52605289  | 52605289  | Missense_Mutation | SNP | C  | T  | 35  | 46  | c.244G>A        | c.(244-246)GAT>AAT     | p.D82N   |
| Pat_05 | Post-Resistance | NETO1     | 81832  | 37 | 18 | 70423314  | 70423314  | Missense_Mutation | SNP | C  | T  | 53  | 104 | c.937G>A        | c.(937-939)GGA>AGA     | p.G313R  |
| Pat_05 | Post-Resistance | SLC25A41  | 284427 | 37 | 19 | 6433587   | 6433587   | Missense_Mutation | SNP | G  | C  | 80  | 191 | c.118C>G        | c.(118-120)CCA>GCA     | p.P40A   |
| Pat_05 | Post-Resistance | CLEC4M    | 10332  | 37 | 19 | 7833780   | 7833780   | Missense_Mutation | SNP | C  | T  | 67  | 249 | c.1037C>T       | c.(1036-1038)GCG>GTG   | p.A346V  |
| Pat_05 | Post-Resistance | ADAMTS10  | 81794  | 37 | 19 | 8670190   | 8670190   | Missense_Mutation | SNP | C  | T  | 14  | 40  | c.142G>A        | c.(142-144)GAC>AAC     | p.D48N   |
| Pat_05 | Post-Resistance | MUC16     | 94025  | 37 | 19 | 9061896   | 9061896   | Missense_Mutation | SNP | G  | C  | 61  | 193 | c.25550C>G      | c.(25549-25551)ACA>AGA | p.T8517R |
| Pat_05 | Post-Resistance | DNMT1     | 1786   | 37 | 19 | 10260302  | 10260302  | Missense_Mutation | SNP | C  | A  | 6   | 572 | c.2365G>T       | c.(2365-2367)GGG>TGG   | p.G789W  |
| Pat_05 | Post-Resistance | ZNF844    | 284391 | 37 | 19 | 12187307  | 12187307  | Missense_Mutation | SNP | G  | C  | 6   | 175 | c.1372G>C       | c.(1372-1374)GAT>CAT   | p.D458H  |
| Pat_05 | Post-Resistance | ZNF844    | 284391 | 37 | 19 | 12187394  | 12187394  | Missense_Mutation | SNP | T  | C  | 3   | 62  | c.1459T>C       | c.(1459-1461)TTT>CTT   | p.F487L  |

|        |                 |         |        |    |    |           |           |                   |     |    |    |     |     |                 |                        |           |
|--------|-----------------|---------|--------|----|----|-----------|-----------|-------------------|-----|----|----|-----|-----|-----------------|------------------------|-----------|
| Pat_05 | Post-Resistance | ZNF709  | 163051 | 37 | 19 | 12577561  | 12577561  | Missense_Mutation | SNP | G  | A  | 35  | 122 | c.107C>T        | c.(106-108)ACC>ATC     | p.T36I    |
| Pat_05 | Post-Resistance | ZNF490  | 57474  | 37 | 19 | 12692177  | 12692177  | Nonsense_Mutation | SNP | G  | A  | 30  | 50  | c.712C>T        | c.(712-714)CGA>TGA     | p.R238*   |
| Pat_05 | Post-Resistance | NOTCH3  | 4854   | 37 | 19 | 15290970  | 15290970  | Missense_Mutation | SNP | G  | C  | 19  | 334 | c.3240C>G       | c.(3238-3240)CAC>CAG   | p.H1080Q  |
| Pat_05 | Post-Resistance | NWD1    | 284434 | 37 | 19 | 16875863  | 16875863  | Missense_Mutation | SNP | C  | T  | 113 | 121 | c.2270C>T       | c.(2269-2271)TCC>TTC   | p.S757F   |
| Pat_05 | Post-Resistance | ZNF431  | 170959 | 37 | 19 | 21366278  | 21366278  | Missense_Mutation | SNP | A  | C  | 11  | 34  | c.1172A>C       | c.(1171-1173)AAA>ACA   | p.K391T   |
| Pat_05 | Post-Resistance | LGI4    | 163175 | 37 | 19 | 35625512  | 35625512  | Missense_Mutation | SNP | C  | T  | 12  | 22  | c.73G>A         | c.(73-75)GGA>AGA       | p.G25R    |
| Pat_05 | Post-Resistance | ZNF569  | 148266 | 37 | 19 | 37903561  | 37903561  | Missense_Mutation | SNP | A  | G  | 112 | 108 | c.1999T>C       | c.(1999-2001)TGT>CGT   | p.C667R   |
| Pat_05 | Post-Resistance | ZNF571  | 51276  | 37 | 19 | 38055543  | 38055543  | Missense_Mutation | SNP | C  | G  | 16  | 36  | c.1787G>C       | c.(1786-1788)AGA>ACA   | p.R596T   |
| Pat_05 | Post-Resistance | SHKBP1  | 92799  | 37 | 19 | 41094587  | 41094587  | Missense_Mutation | SNP | T  | C  | 19  | 426 | c.1394T>C       | c.(1393-1395)ATT>ACT   | p.I465T   |
| Pat_05 | Post-Resistance | CARD8   | 22900  | 37 | 19 | 48724999  | 48724999  | Missense_Mutation | SNP | T  | A  | 5   | 130 | c.831A>T        | c.(829-831)AAA>AAT     | p.K277N   |
| Pat_05 | Post-Resistance | PTH2    | 113091 | 37 | 19 | 49926533  | 49926533  | Missense_Mutation | SNP | G  | C  | 5   | 55  | c.64C>G         | c.(64-66)CTG>GTG       | p.L22V    |
| Pat_05 | Post-Resistance | ZNF578  | 147660 | 37 | 19 | 53014551  | 53014551  | Missense_Mutation | SNP | G  | A  | 6   | 207 | c.917G>A        | c.(916-918)CGT>CAT     | p.R306H   |
| Pat_05 | Post-Resistance | ZNF845  | 91664  | 37 | 19 | 53855197  | 53855197  | Missense_Mutation | SNP | G  | A  | 9   | 265 | c.1269G>A       | c.(1267-1269)ATG>ATA   | p.M423I   |
| Pat_05 | Post-Resistance | LILRA1  | 11024  | 37 | 19 | 55106787  | 55106787  | Missense_Mutation | SNP | C  | T  | 96  | 322 | c.581C>T        | c.(580-582)TCG>TTG     | p.S194L   |
| Pat_05 | Post-Resistance | LILRB1  | 10859  | 37 | 19 | 55146098  | 55146098  | Missense_Mutation | SNP | G  | A  | 7   | 13  | c.1367G>A       | c.(1366-1368)GGA>GAA   | p.G456E   |
| Pat_05 | Post-Resistance | FCAR    | 2204   | 37 | 19 | 55396680  | 55396680  | Missense_Mutation | SNP | C  | T  | 16  | 57  | c.104C>T        | c.(103-105)TCG>TTG     | p.S35L    |
| Pat_05 | Post-Resistance | NLRP2   | 55655  | 37 | 19 | 55493593  | 55493593  | Missense_Mutation | SNP | C  | T  | 113 | 321 | c.527C>T        | c.(526-528)CCT>CTT     | p.P176L   |
| Pat_05 | Post-Resistance | BRSK1   | 84446  | 37 | 19 | 55817693  | 55817694  | Missense_Mutation | DNP | CC | TT | 41  | 118 | c.1964_1965CC>T | c.(1963-1965)TCC>TTT   | p.S655F   |
| Pat_05 | Post-Resistance | NLRP8   | 126205 | 37 | 19 | 56499245  | 56499245  | Missense_Mutation | SNP | G  | A  | 65  | 198 | c.3113G>A       | c.(3112-3114)GGA>GAA   | p.G1038E  |
| Pat_05 | Post-Resistance | CRIM1   | 51232  | 37 | 2  | 36726470  | 36726470  | Missense_Mutation | SNP | G  | A  | 4   | 313 | c.1481G>A       | c.(1480-1482)CGG>CAG   | p.R494Q   |
| Pat_05 | Post-Resistance | LRPPRC  | 10128  | 37 | 2  | 44132911  | 44132911  | Missense_Mutation | SNP | G  | T  | 37  | 70  | c.3284C>A       | c.(3283-3285)ACC>AAC   | p.T1095N  |
| Pat_05 | Post-Resistance | ANTXR1  | 84168  | 37 | 2  | 69472492  | 69472492  | Missense_Mutation | SNP | C  | T  | 15  | 5   | c.1570C>T       | c.(1570-1572)CCG>TCG   | p.P524S   |
| Pat_05 | Post-Resistance | ARID5A  | 10865  | 37 | 2  | 97217971  | 97217971  | Missense_Mutation | SNP | C  | A  | 4   | 312 | c.1706C>A       | c.(1705-1707)CCG>CAG   | p.P569Q   |
| Pat_05 | Post-Resistance | ST6GAL2 | 84620  | 37 | 2  | 107423220 | 107423220 | Missense_Mutation | SNP | C  | T  | 35  | 155 | c.1504G>A       | c.(1504-1506)GAT>AAT   | p.D502N   |
| Pat_05 | Post-Resistance | FBLN7   | 129804 | 37 | 2  | 112922604 | 112922604 | Missense_Mutation | SNP | G  | A  | 4   | 145 | c.262G>A        | c.(262-264)GCA>ACA     | p.A88T    |
| Pat_05 | Post-Resistance | PSD4    | 23550  | 37 | 2  | 113958879 | 113958879 | Missense_Mutation | SNP | A  | T  | 71  | 91  | c.3058A>T       | c.(3058-3060)AGC>TGC   | p.S1020C  |
| Pat_05 | Post-Resistance | CNTNAP5 | 129684 | 37 | 2  | 124999956 | 124999956 | Missense_Mutation | SNP | G  | A  | 14  | 23  | c.367G>A        | c.(367-369)GAA>AAA     | p.E123K   |
| Pat_05 | Post-Resistance | POTEF   | 728378 | 37 | 2  | 130832668 | 130832668 | Missense_Mutation | SNP | C  | T  | 173 | 106 | c.2377G>A       | c.(2377-2379)GAG>AAG   | p.E793K   |
| Pat_05 | Post-Resistance | THSD7B  | 80731  | 37 | 2  | 138030231 | 138030231 | Missense_Mutation | SNP | C  | T  | 24  | 31  | c.2302C>T       | c.(2302-2304)CGG>TGG   | p.R768W   |
| Pat_05 | Post-Resistance | NMI     | 9111   | 37 | 2  | 152127343 | 152127343 | Missense_Mutation | SNP | T  | G  | 16  | 87  | c.788A>C        | c.(787-789)GAA>GCA     | p.E263A   |
| Pat_05 | Post-Resistance | NEB     | 4703   | 37 | 2  | 152506691 | 152506691 | Missense_Mutation | SNP | T  | G  | 48  | 43  | c.7430A>C       | c.(7429-7431)GAT>GCT   | p.D2477A  |
| Pat_05 | Post-Resistance | DYNC1I2 | 1781   | 37 | 2  | 172583344 | 172583344 | Missense_Mutation | SNP | C  | T  | 62  | 38  | c.914C>T        | c.(913-915)GCC>GTC     | p.A305V   |
| Pat_05 | Post-Resistance | DYNC1I2 | 1781   | 37 | 2  | 172583346 | 172583346 | Missense_Mutation | SNP | C  | T  | 62  | 37  | c.916C>T        | c.(916-918)CCT>TCT     | p.P306S   |
| Pat_05 | Post-Resistance | TTN     | 7273   | 37 | 2  | 179404396 | 179404396 | Missense_Mutation | SNP | G  | A  | 133 | 111 | c.90692C>T      | c.(90691-90693)CCA>CTA | p.P30231L |
| Pat_05 | Post-Resistance | TTN     | 7273   | 37 | 2  | 179629358 | 179629358 | Missense_Mutation | SNP | G  | A  | 66  | 146 | c.9884C>T       | c.(9883-9885)ACG>ATG   | p.T3295M  |
| Pat_05 | Post-Resistance | TTN     | 7273   | 37 | 2  | 179664293 | 179664293 | Missense_Mutation | SNP | G  | A  | 39  | 129 | c.835C>T        | c.(835-837)CGG>TGG     | p.R279W   |
| Pat_05 | Post-Resistance | DNAH7   | 56171  | 37 | 2  | 196620918 | 196620918 | Missense_Mutation | SNP | G  | A  | 96  | 72  | c.11525C>T      | c.(11524-11526)CCA>CTA | p.P3842L  |
| Pat_05 | Post-Resistance | DNAH7   | 56171  | 37 | 2  | 196749415 | 196749415 | Missense_Mutation | SNP | C  | T  | 42  | 147 | c.5657G>A       | c.(5656-5658)CGA>CAA   | p.R1886Q  |
| Pat_05 | Post-Resistance | AOX1    | 316    | 37 | 2  | 201477335 | 201477335 | Missense_Mutation | SNP | G  | A  | 73  | 226 | c.1267G>A       | c.(1267-1269)GAA>AAA   | p.E423K   |
| Pat_05 | Post-Resistance | NBEAL1  | 65065  | 37 | 2  | 204009383 | 204009383 | Nonsense_Mutation | SNP | C  | T  | 48  | 216 | c.4822C>T       | c.(4822-4824)CAG>TAG   | p.Q1608*  |
| Pat_05 | Post-Resistance | NBEAL1  | 65065  | 37 | 2  | 204082051 | 204082051 | Missense_Mutation | SNP | G  | A  | 17  | 55  | c.8059G>A       | c.(8059-8061)GAA>AAA   | p.E2687K  |
| Pat_05 | Post-Resistance | IKZF2   | 22807  | 37 | 2  | 213872562 | 213872562 | Missense_Mutation | SNP | A  | T  | 34  | 22  | c.1103T>A       | c.(1102-1104)ATT>AAT   | p.I368N   |
| Pat_05 | Post-Resistance | CHPF    | 79586  | 37 | 2  | 220405190 | 220405190 | Missense_Mutation | SNP | G  | A  | 4   | 148 | c.1243C>T       | c.(1243-1245)CGT>TGT   | p.R415C   |
| Pat_05 | Post-Resistance | C2orf57 | 165100 | 37 | 2  | 232458669 | 232458669 | Missense_Mutation | SNP | G  | A  | 113 | 82  | c.1007G>A       | c.(1006-1008)GGA>GAA   | p.G336E   |
| Pat_05 | Post-Resistance | COL6A3  | 1293   | 37 | 2  | 238280543 | 238280543 | Missense_Mutation | SNP | C  | T  | 38  | 109 | c.4117G>A       | c.(4117-4119)GCA>ACA   | p.A1373T  |
| Pat_05 | Post-Resistance | SIRPB2  | 284759 | 37 | 20 | 1471971   | 1471971   | Missense_Mutation | SNP | G  | A  | 13  | 53  | c.35C>T         | c.(34-36)GCC>GTC       | p.A12V    |
| Pat_05 | Post-Resistance | MACROD2 | 140733 | 37 | 20 | 15913932  | 15913932  | Missense_Mutation | SNP | C  | T  | 44  | 31  | c.787C>T        | c.(787-789)CCA>TCA     | p.P263S   |

|        |                 |           |        |    |    |           |           |                   |     |    |    |     |     |                  |                                    |          |
|--------|-----------------|-----------|--------|----|----|-----------|-----------|-------------------|-----|----|----|-----|-----|------------------|------------------------------------|----------|
| Pat_05 | Post-Resistance | CST2      | 1470   | 37 | 20 | 23807156  | 23807156  | Missense_Mutation | SNP | G  | A  | 36  | 84  | c.142C>T         | c.(142-144)CTT>TTT                 | p.L48F   |
| Pat_05 | Post-Resistance | FITM2     | 128486 | 37 | 20 | 42935818  | 42935818  | Missense_Mutation | SNP | G  | A  | 121 | 69  | c.236C>T         | c.(235-237)ACC>ATC                 | p.T79I   |
| Pat_05 | Post-Resistance | TMPRSS15  | 5651   | 37 | 21 | 19737500  | 19737500  | Missense_Mutation | SNP | G  | A  | 64  | 190 | c.730C>T         | c.(730-732)CCA>TCA                 | p.P244S  |
| Pat_05 | Post-Resistance | BACH1     | 571    | 37 | 21 | 30698389  | 30698389  | Missense_Mutation | SNP | A  | C  | 17  | 51  | c.244A>C         | c.(244-246)AAA>CAA                 | p.K82Q   |
| Pat_05 | Post-Resistance | KRTAP24-1 | 643803 | 37 | 21 | 31654667  | 31654667  | Missense_Mutation | SNP | G  | A  | 44  | 78  | c.584C>T         | c.(583-585)TCC>TTC                 | p.S195F  |
| Pat_05 | Post-Resistance | DSCAM     | 1826   | 37 | 21 | 41465753  | 41465753  | Missense_Mutation | SNP | G  | A  | 38  | 56  | c.3745C>T        | c.(3745-3747)CCC>TCC               | p.P1249S |
| Pat_05 | Post-Resistance | PWP2      | 5822   | 37 | 21 | 45550523  | 45550523  | Missense_Mutation | SNP | C  | T  | 33  | 69  | c.2630C>T        | c.(2629-2631)TCC>TTC               | p.S877F  |
| Pat_05 | Post-Resistance | TRPM2     | 7226   | 37 | 21 | 45819208  | 45819208  | Missense_Mutation | SNP | G  | A  | 44  | 99  | c.2092G>A        | c.(2092-2094)GAA>AAA               | p.E698K  |
| Pat_05 | Post-Resistance | SLC25A18  | 83733  | 37 | 22 | 18070764  | 18070764  | Missense_Mutation | SNP | G  | A  | 4   | 309 | c.649G>A         | c.(649-651)GGT>AGT                 | p.G217S  |
| Pat_05 | Post-Resistance | C22orf29  | 79680  | 37 | 22 | 19839682  | 19839682  | Missense_Mutation | SNP | G  | A  | 147 | 214 | c.103C>T         | c.(103-105)CCT>TCT                 | p.P35S   |
| Pat_05 | Post-Resistance | ZNF280B   | 140883 | 37 | 22 | 22843674  | 22843674  | Missense_Mutation | SNP | A  | G  | 4   | 158 | c.50T>C          | c.(49-51)ATA>ACA                   | p.I17T   |
| Pat_05 | Post-Resistance | TFIP11    | 24144  | 37 | 22 | 26890130  | 26890130  | Missense_Mutation | SNP | C  | T  | 83  | 131 | c.2133G>A        | c.(2131-2133)ATG>ATA               | p.M711I  |
| Pat_05 | Post-Resistance | CHEK2     | 11200  | 37 | 22 | 29091840  | 29091841  | Missense_Mutation | DNP | TG | CA | 6   | 155 | :.1116_1117CA>TC | c.(114-1119)TCCAAG>TCTG            | p.K373E  |
| Pat_05 | Post-Resistance | PLA2G3    | 50487  | 37 | 22 | 31533809  | 31533809  | Missense_Mutation | SNP | G  | A  | 190 | 263 | c.953C>T         | c.(952-954)TCC>TTC                 | p.S318F  |
| Pat_05 | Post-Resistance | PLA2G6    | 8398   | 37 | 22 | 38522451  | 38522451  | Nonsense_Mutation | SNP | G  | A  | 43  | 194 | c.1354C>T        | c.(1354-1356)CAG>TAG               | p.Q452*  |
| Pat_05 | Post-Resistance | FAM83F    | 113828 | 37 | 22 | 40417674  | 40417674  | Missense_Mutation | SNP | C  | T  | 50  | 78  | c.1160C>T        | c.(1159-1161)CCC>CTC               | p.P387L  |
| Pat_05 | Post-Resistance | ITPR1     | 3708   | 37 | 3  | 4776973   | 4776973   | Nonsense_Mutation | SNP | C  | T  | 4   | 224 | c.5335C>T        | c.(5335-5337)CGA>TGA               | p.R1779* |
| Pat_05 | Post-Resistance | CNOT10    | 25904  | 37 | 3  | 32774919  | 32774919  | Missense_Mutation | SNP | C  | T  | 55  | 15  | c.1220C>T        | c.(1219-1221)TCT>TTT               | p.S407F  |
| Pat_05 | Post-Resistance | CCR9      | 10803  | 37 | 3  | 45942970  | 45942970  | Missense_Mutation | SNP | G  | A  | 157 | 32  | c.690G>A         | c.(688-690)ATG>ATA                 | p.M230I  |
| Pat_05 | Post-Resistance | CDC25A    | 993    | 37 | 3  | 48200932  | 48200932  | Nonsense_Mutation | SNP | T  | A  | 5   | 185 | c.1336A>T        | c.(1336-1338)AGA>TGA               | p.R446*  |
| Pat_05 | Post-Resistance | PBRM1     | 55193  | 37 | 3  | 52643768  | 52643768  | Nonsense_Mutation | SNP | G  | A  | 130 | 32  | c.2128C>T        | c.(2128-2130)CGA>TGA               | p.R710*  |
| Pat_05 | Post-Resistance | PRKCD     | 5580   | 37 | 3  | 53212443  | 53212443  | Missense_Mutation | SNP | C  | T  | 103 | 18  | c.5C>T           | c.(4-6)GCG>GTG                     | p.A2V    |
| Pat_05 | Post-Resistance | ACTR8     | 93973  | 37 | 3  | 53910077  | 53910077  | Missense_Mutation | SNP | G  | A  | 37  | 96  | c.809C>T         | c.(808-810)GCC>GTC                 | p.A270V  |
| Pat_05 | Post-Resistance | C3orf63   | 23272  | 37 | 3  | 56657550  | 56657550  | Missense_Mutation | SNP | C  | T  | 7   | 203 | c.4345G>A        | c.(4345-4347)GAT>AAT               | p.D1449N |
| Pat_05 | Post-Resistance | C3orf67   | 200844 | 37 | 3  | 58849358  | 58849358  | Missense_Mutation | SNP | T  | C  | 60  | 125 | c.1144A>G        | c.(1144-1146)AAA>GAA               | p.K382E  |
| Pat_05 | Post-Resistance | ROBO2     | 6092   | 37 | 3  | 77542449  | 77542449  | Missense_Mutation | SNP | C  | T  | 144 | 140 | c.722C>T         | c.(721-723)GCT>GTT                 | p.A241V  |
| Pat_05 | Post-Resistance | VGLL3     | 389136 | 37 | 3  | 87017908  | 87017908  | Missense_Mutation | SNP | G  | A  | 39  | 48  | c.769C>T         | c.(769-771)CCA>TCA                 | p.P257S  |
| Pat_05 | Post-Resistance | RPL24     | 6152   | 37 | 3  | 101400004 | 101400004 | Missense_Mutation | SNP | G  | A  | 157 | 212 | c.449C>T         | c.(448-450)GCT>GTT                 | p.A150V  |
| Pat_05 | Post-Resistance | PHLDB2    | 90102  | 37 | 3  | 111664169 | 111664169 | Nonsense_Mutation | SNP | A  | T  | 4   | 136 | c.2452A>T        | c.(2452-2454)AAA>TAA               | p.K818*  |
| Pat_05 | Post-Resistance | PHLDB2    | 90102  | 37 | 3  | 111693337 | 111693337 | Missense_Mutation | SNP | C  | T  | 169 | 215 | c.3689C>T        | c.(3688-3690)TCG>TTG               | p.S1230L |
| Pat_05 | Post-Resistance | BOC       | 91653  | 37 | 3  | 112998766 | 112998766 | Missense_Mutation | SNP | G  | A  | 69  | 218 | c.2116G>A        | c.(2116-2118)GGT>AGT               | p.G706S  |
| Pat_05 | Post-Resistance | TF        | 7018   | 37 | 3  | 133478099 | 133478099 | Missense_Mutation | SNP | T  | C  | 49  | 179 | c.1129T>C        | c.(1129-1131)TGG>CGG               | p.W377R  |
| Pat_05 | Post-Resistance | SLCO2A1   | 6578   | 37 | 3  | 133654663 | 133654663 | Missense_Mutation | SNP | C  | T  | 31  | 31  | c.1769G>A        | c.(1768-1770)AGG>AAG               | p.R590K  |
| Pat_05 | Post-Resistance | IGSF10    | 285313 | 37 | 3  | 151165878 | 151165878 | Missense_Mutation | SNP | T  | C  | 56  | 144 | c.1891A>G        | c.(1891-1893)AGA>GGA               | p.R631G  |
| Pat_05 | Post-Resistance | DHX36     | 170506 | 37 | 3  | 154006677 | 154006677 | Missense_Mutation | SNP | G  | A  | 19  | 82  | c.2009C>T        | c.(2008-2010)TCC>TTC               | p.S670F  |
| Pat_05 | Post-Resistance | PLCH1     | 23007  | 37 | 3  | 155286035 | 155286035 | Missense_Mutation | SNP | C  | G  | 19  | 28  | c.814G>C         | c.(814-816)GTT>CTT                 | p.V272L  |
| Pat_05 | Post-Resistance | WDR49     | 151790 | 37 | 3  | 167217991 | 167217991 | Missense_Mutation | SNP | T  | G  | 30  | 202 | c.1925A>C        | c.(1924-1926)GAA>GCA               | p.E642A  |
| Pat_05 | Post-Resistance | CCDC39    | 339829 | 37 | 3  | 180372597 | 180372597 | Missense_Mutation | SNP | T  | C  | 36  | 38  | c.883A>G         | c.(883-885)ACG>GCG                 | p.T295A  |
| Pat_05 | Post-Resistance | MAP3K13   | 9175   | 37 | 3  | 185155242 | 185155243 | Nonsense_Mutation | DNP | GG | AA | 112 | 113 | c.483_484GG>AA   | c.(481-486)TGGGAA>TGAA.161_162WE>* |          |
| Pat_05 | Post-Resistance | ZCCHC4    | 29063  | 37 | 4  | 25353242  | 25353242  | Nonsense_Mutation | SNP | G  | A  | 84  | 89  | c.942G>A         | c.(940-942)TGG>TGA                 | p.W314*  |
| Pat_05 | Post-Resistance | ATP8A1    | 10396  | 37 | 4  | 42448649  | 42448649  | Missense_Mutation | SNP | C  | T  | 22  | 105 | c.2909G>A        | c.(2908-2910)GGA>GAA               | p.G970E  |
| Pat_05 | Post-Resistance | GRXCR1    | 389207 | 37 | 4  | 43032429  | 43032429  | Missense_Mutation | SNP | C  | T  | 59  | 185 | c.745C>T         | c.(745-747)CCA>TCA                 | p.P249S  |
| Pat_05 | Post-Resistance | USP46     | 64854  | 37 | 4  | 53464829  | 53464829  | Missense_Mutation | SNP | C  | T  | 21  | 13  | c.964G>A         | c.(964-966)GGC>AGC                 | p.G322S  |
| Pat_05 | Post-Resistance | LNX1      | 84708  | 37 | 4  | 54374296  | 54374296  | Missense_Mutation | SNP | G  | A  | 13  | 48  | c.479C>T         | c.(478-480)CCC>CTC                 | p.P160L  |
| Pat_05 | Post-Resistance | UGT2A3    | 79799  | 37 | 4  | 69817162  | 69817162  | Missense_Mutation | SNP | G  | A  | 37  | 24  | c.317C>T         | c.(316-318)TCA>TTA                 | p.S106L  |
| Pat_05 | Post-Resistance | UGT2B4    | 7363   | 37 | 4  | 70359495  | 70359495  | Nonsense_Mutation | SNP | C  | T  | 60  | 196 | c.786G>A         | c.(784-786)TGG>TGA                 | p.W262*  |
| Pat_05 | Post-Resistance | PARM1     | 25849  | 37 | 4  | 75937682  | 75937682  | Missense_Mutation | SNP | C  | T  | 30  | 103 | c.91C>T          | c.(91-93)CTT>TTT                   | p.L31F   |

|        |                 |          |        |    |   |           |           |                   |     |    |    |     |     |                 |                         |               |
|--------|-----------------|----------|--------|----|---|-----------|-----------|-------------------|-----|----|----|-----|-----|-----------------|-------------------------|---------------|
| Pat_05 | Post-Resistance | MTTP     | 4547   | 37 | 4 | 100530020 | 100530020 | Missense_Mutation | SNP | C  | T  | 63  | 185 | c.1655C>T       | c.(1654-1656)CCA>CTA    | p.P552L       |
| Pat_05 | Post-Resistance | PCDH10   | 57575  | 37 | 4 | 134073761 | 134073761 | Missense_Mutation | SNP | G  | T  | 5   | 165 | c.2466G>T       | c.(2464-2466)CAG>CAT    | p.Q822H       |
| Pat_05 | Post-Resistance | IL15     | 3600   | 37 | 4 | 142651081 | 142651081 | Missense_Mutation | SNP | C  | T  | 61  | 197 | c.322C>T        | c.(322-324)CAT>TAT      | p.H108Y       |
| Pat_05 | Post-Resistance | EDNRA    | 1909   | 37 | 4 | 148407174 | 148407174 | Missense_Mutation | SNP | G  | A  | 66  | 358 | c.341G>A        | c.(340-342)GGC>GAC      | p.G114D       |
| Pat_05 | Post-Resistance | TRIM2    | 23321  | 37 | 4 | 154217177 | 154217177 | Missense_Mutation | SNP | T  | G  | 22  | 97  | c.1418T>G       | c.(1417-1419)ATC>AGC    | p.I473S       |
| Pat_05 | Post-Resistance | ADAM29   | 11086  | 37 | 4 | 175897365 | 175897365 | Missense_Mutation | SNP | A  | C  | 39  | 120 | c.689A>C        | c.(688-690)AAT>ACT      | p.N230T       |
| Pat_05 | Post-Resistance | TRIML2   | 205860 | 37 | 4 | 189012598 | 189012598 | Missense_Mutation | SNP | C  | T  | 113 | 128 | c.1093G>A       | c.(1093-1095)GGA>AGA    | p.G365R       |
| Pat_05 | Post-Resistance | AHRR     | 57491  | 37 | 5 | 376820    | 376820    | Missense_Mutation | SNP | C  | A  | 3   | 44  | c.352C>A        | c.(352-354)CTG>ATG      | p.L118M       |
| Pat_05 | Post-Resistance | TRIO     | 7204   | 37 | 5 | 14280541  | 14280541  | Missense_Mutation | SNP | C  | T  | 68  | 66  | c.343C>T        | c.(343-345)CCC>TCC      | p.P115S       |
| Pat_05 | Post-Resistance | CDH6     | 1004   | 37 | 5 | 31267705  | 31267705  | Missense_Mutation | SNP | G  | A  | 30  | 109 | c.125G>A        | c.(124-126)GGA>GAA      | p.G42E        |
| Pat_05 | Post-Resistance | SKP2     | 6502   | 37 | 5 | 36184070  | 36184070  | Missense_Mutation | SNP | T  | G  | 15  | 74  | c.1190T>G       | c.(1189-1191)TTT>TGT    | p.F397C       |
| Pat_05 | Post-Resistance | C6       | 729    | 37 | 5 | 41161914  | 41161914  | Nonsense_Mutation | SNP | C  | A  | 5   | 175 | c.1339G>T       | c.(1339-1341)GGA>TGA    | p.G447*       |
| Pat_05 | Post-Resistance | EMB      | 133418 | 37 | 5 | 49707083  | 49707083  | Missense_Mutation | SNP | C  | T  | 78  | 96  | c.331G>A        | c.(331-333)GAG>AAG      | p.E111K       |
| Pat_05 | Post-Resistance | BDP1     | 55814  | 37 | 5 | 70806049  | 70806049  | Missense_Mutation | SNP | G  | A  | 6   | 120 | c.3130G>A       | c.(3130-3132)GTA>ATA    | p.V1044I      |
| Pat_05 | Post-Resistance | C5orf36  | 285600 | 37 | 5 | 93872768  | 93872768  | Missense_Mutation | SNP | G  | A  | 32  | 85  | c.64C>T         | c.(64-66)CCT>TCT        | p.P22S        |
| Pat_05 | Post-Resistance | FAM81B   | 153643 | 37 | 5 | 94749692  | 94749692  | Missense_Mutation | SNP | G  | A  | 39  | 107 | c.335G>A        | c.(334-336)GGT>GAT      | p.G112D       |
| Pat_05 | Post-Resistance | PHF15    | 23338  | 37 | 5 | 133914985 | 133914985 | Missense_Mutation | SNP | G  | A  | 4   | 94  | c.2351G>A       | c.(2350-2352)CGC>CAC    | p.R784H       |
| Pat_05 | Post-Resistance | PCDHA13  | 56136  | 37 | 5 | 140263298 | 140263298 | Missense_Mutation | SNP | C  | T  | 103 | 218 | c.1445C>T       | c.(1444-1446)GCG>GTG    | p.A482V       |
| Pat_05 | Post-Resistance | RELL2    | 285613 | 37 | 5 | 141019543 | 141019543 | Missense_Mutation | SNP | C  | T  | 84  | 229 | c.560C>T        | c.(559-561)TCC>TTC      | p.S187F       |
| Pat_05 | Post-Resistance | PPARGC1B | 133522 | 37 | 5 | 149212436 | 149212436 | Missense_Mutation | SNP | C  | T  | 111 | 110 | c.800C>T        | c.(799-801)TCC>TTC      | p.S267F       |
| Pat_05 | Post-Resistance | HAVCR2   | 84868  | 37 | 5 | 156525886 | 156525886 | Missense_Mutation | SNP | G  | A  | 21  | 66  | c.505C>T        | c.(505-507)CCT>TCT      | p.P169S       |
| Pat_05 | Post-Resistance | GABRA1   | 2554   | 37 | 5 | 161302610 | 161302610 | Missense_Mutation | SNP | C  | T  | 77  | 249 | c.521C>T        | c.(520-522)CCT>CTT      | p.P174L       |
| Pat_05 | Post-Resistance | UNC5A    | 90249  | 37 | 5 | 176305636 | 176305637 | Missense_Mutation | DNP | CC | TT | 40  | 173 | c.2180_2181CC>T | c.(2179-2181)ACC>ATT    | p.T727I       |
| Pat_05 | Post-Resistance | HK3      | 3101   | 37 | 5 | 176314556 | 176314556 | Missense_Mutation | SNP | G  | A  | 9   | 120 | c.1496C>T       | c.(1495-1497)GCG>GTG    | p.A499V       |
| Pat_05 | Post-Resistance | TMED9    | 54732  | 37 | 5 | 177019253 | 177019253 | Missense_Mutation | SNP | G  | A  | 6   | 59  | c.38G>A         | c.(37-39)CGG>CAG        | p.R13Q        |
| Pat_05 | Post-Resistance | F13A1    | 2162   | 37 | 6 | 6197494   | 6197494   | Nonsense_Mutation | SNP | C  | T  | 33  | 289 | c.1178G>A       | c.(1177-1179)TGG>TAG    | p.W393*       |
| Pat_05 | Post-Resistance | GCM2     | 9247   | 37 | 6 | 10875166  | 10875166  | Missense_Mutation | SNP | C  | T  | 72  | 132 | c.583G>A        | c.(583-585)GCA>ACA      | p.A195T       |
| Pat_05 | Post-Resistance | SLC17A4  | 10050  | 37 | 6 | 25769267  | 25769267  | Missense_Mutation | SNP | C  | T  | 121 | 113 | c.146C>T        | c.(145-147)TCA>TTA      | p.S49L        |
| Pat_05 | Post-Resistance | ABCF1    | 23     | 37 | 6 | 30553992  | 30553992  | Missense_Mutation | SNP | C  | T  | 52  | 122 | c.1795C>T       | c.(1795-1797)CCT>TCT    | p.P599S       |
| Pat_05 | Post-Resistance | VARS2    | 57176  | 37 | 6 | 30892318  | 30892318  | Missense_Mutation | SNP | A  | G  | 29  | 92  | c.2654A>G       | c.(2653-2655)TAC>TGC    | p.Y885C       |
| Pat_05 | Post-Resistance | LY6G5B   | 58496  | 37 | 6 | 31639713  | 31639713  | Missense_Mutation | SNP | C  | T  | 185 | 353 | c.260C>T        | c.(259-261)ACC>ATC      | p.T87I        |
| Pat_05 | Post-Resistance | EGFL8    | 80864  | 37 | 6 | 32135197  | 32135198  | Missense_Mutation | DNP | GC | TG | 118 | 107 | c.672_673GC>TG  | c.670-675)CGGCTG>CGTG   | p.L225V       |
| Pat_05 | Post-Resistance | LYPLA2P1 | 653639 | 37 | 6 | 33333333  | 33333333  | Missense_Mutation | SNP | G  | A  | 8   | 72  | c.673C>T        | c.(673-675)CCT>TCT      | p.P225S       |
| Pat_05 | Post-Resistance | ITPR3    | 3710   | 37 | 6 | 33663491  | 33663491  | Missense_Mutation | SNP | G  | A  | 221 | 228 | c.7950G>A       | c.(7948-7950)ATG>ATA    | p.M2650I      |
| Pat_05 | Post-Resistance | FGD2     | 221472 | 37 | 6 | 36982714  | 36982714  | Missense_Mutation | SNP | A  | G  | 89  | 110 | c.929A>G        | c.(928-930)GAG>GGG      | p.E310G       |
| Pat_05 | Post-Resistance | FRS3     | 10817  | 37 | 6 | 41740560  | 41740561  | Missense_Mutation | DNP | GG | AT | 182 | 169 | c.390_391CC>AT  | c.(388-393)CTCCCT>CTATC | p.P131S       |
| Pat_05 | Post-Resistance | RSPH9    | 221421 | 37 | 6 | 43618212  | 43618212  | Missense_Mutation | SNP | G  | A  | 68  | 167 | c.328G>A        | c.(328-330)GAA>AAA      | p.E110K       |
| Pat_05 | Post-Resistance | PGK2     | 5232   | 37 | 6 | 49754405  | 49754405  | Missense_Mutation | SNP | A  | G  | 22  | 175 | c.496T>C        | c.(496-498)TTT>CTT      | p.F166L       |
| Pat_05 | Post-Resistance | MDN1     | 23195  | 37 | 6 | 90504465  | 90504465  | Nonsense_Mutation | SNP | C  | A  | 4   | 120 | c.385G>T        | c.(385-387)GAG>TAG      | p.E129*       |
| Pat_05 | Post-Resistance | GPR63    | 81491  | 37 | 6 | 97247429  | 97247429  | Missense_Mutation | SNP | G  | A  | 81  | 34  | c.179C>T        | c.(178-180)ACC>ATC      | p.T60I        |
| Pat_05 | Post-Resistance | PRDM13   | 59336  | 37 | 6 | 100056673 | 100056673 | Nonsense_Mutation | SNP | G  | A  | 57  | 22  | c.201G>A        | c.(199-201)TGG>TGA      | p.W67*        |
| Pat_05 | Post-Resistance | KIF25    | 3834   | 37 | 6 | 168430272 | 168430272 | Missense_Mutation | SNP | T  | A  | 8   | 161 | c.7T>A          | c.(7-9)TGG>AGG          | p.W3R         |
| Pat_05 | Post-Resistance | PAPOLB   | 56903  | 37 | 7 | 4899659   | 4899659   | Missense_Mutation | SNP | G  | A  | 70  | 63  | c.1783C>T       | c.(1783-1785)CCT>TCT    | p.P595S       |
| Pat_05 | Post-Resistance | THSD7A   | 221981 | 37 | 7 | 11450924  | 11450924  | Missense_Mutation | SNP | C  | A  | 87  | 75  | c.3708G>T       | c.(3706-3708)GAG>GAT    | p.E1236D      |
| Pat_05 | Post-Resistance | ABCB5    | 340273 | 37 | 7 | 20766661  | 20766661  | Splice_Site       | SNP | A  | G  | 70  | 83  | c.1291_splice   | c.e13-2                 | p.I431_splice |
| Pat_05 | Post-Resistance | TRIL     | 9865   | 37 | 7 | 28996219  | 28996219  | Missense_Mutation | SNP | G  | C  | 7   | 51  | c.1444C>G       | c.(1444-1446)CTA>GTA    | p.L482V       |
| Pat_05 | Post-Resistance | MYO1G    | 64005  | 37 | 7 | 45005386  | 45005386  | Missense_Mutation | SNP | C  | T  | 151 | 142 | c.2231G>A       | c.(2230-2232)CGG>CAG    | p.R744Q       |



|        |                 |           |        |    |   |           |           |                   |     |    |    |     |     |                |                        |               |
|--------|-----------------|-----------|--------|----|---|-----------|-----------|-------------------|-----|----|----|-----|-----|----------------|------------------------|---------------|
| Pat_05 | Post-Resistance | COBL      | 23242  | 37 | 7 | 51111341  | 51111342  | Missense_Mutation | DNP | GG | AA | 115 | 97  | :1144_1145CC>T | c.(1144-1146)CCG>TTG   | p.P382L       |
| Pat_05 | Post-Resistance | PHKG1     | 5260   | 37 | 7 | 56151072  | 56151072  | Missense_Mutation | SNP | C  | T  | 4   | 290 | c.446G>A       | c.(445-447)CGG>CAG     | p.R149Q       |
| Pat_05 | Post-Resistance | FZD9      | 8326   | 37 | 7 | 72849988  | 72849988  | Missense_Mutation | SNP | C  | T  | 56  | 131 | c.1651C>T      | c.(1651-1653)CGG>TGG   | p.R551W       |
| Pat_05 | Post-Resistance | ELN       | 2006   | 37 | 7 | 73470634  | 73470634  | Missense_Mutation | SNP | C  | T  | 295 | 312 | c.1184C>T      | c.(1183-1185)CCT>CTT   | p.P395L       |
| Pat_05 | Post-Resistance | MTERF     | 7978   | 37 | 7 | 91503306  | 91503306  | Missense_Mutation | SNP | C  | T  | 4   | 147 | c.802G>A       | c.(802-804)GAG>AAG     | p.E268K       |
| Pat_05 | Post-Resistance | COL1A2    | 1278   | 37 | 7 | 94038912  | 94038912  | Missense_Mutation | SNP | G  | A  | 117 | 219 | c.928G>A       | c.(928-930)GGT>AGT     | p.G310S       |
| Pat_05 | Post-Resistance | LRCH4     | 4034   | 37 | 7 | 100173514 | 100173515 | Missense_Mutation | DNP | GG | AT | 10  | 19  | :1755_1756CC>A | 1753-1758)ATCCAT>ATAT  | p.H586Y       |
| Pat_05 | Post-Resistance | FBXL13    | 222235 | 37 | 7 | 102473358 | 102473358 | Missense_Mutation | SNP | C  | G  | 18  | 416 | c.1783G>C      | c.(1783-1785)GAT>CAT   | p.D595H       |
| Pat_05 | Post-Resistance | PPP1R3A   | 5506   | 37 | 7 | 113558921 | 113558921 | Missense_Mutation | SNP | C  | T  | 120 | 129 | c.131G>A       | c.(130-132)CGA>CAA     | p.R44Q        |
| Pat_05 | Post-Resistance | CFTR      | 1080   | 37 | 7 | 117175335 | 117175335 | Missense_Mutation | SNP | C  | T  | 285 | 341 | c.613C>T       | c.(613-615)CCT>TCT     | p.P205S       |
| Pat_05 | Post-Resistance | PLXNA4    | 91584  | 37 | 7 | 131817905 | 131817905 | Missense_Mutation | SNP | G  | T  | 313 | 299 | c.5492C>A      | c.(5491-5493)GCA>GAA   | p.A1831E      |
| Pat_05 | Post-Resistance | PLXNA4    | 91584  | 37 | 7 | 131872367 | 131872367 | Splice_Site       | SNP | C  | T  | 217 | 437 | c.2857_splice  | c.e15-1                | p.T953_splice |
| Pat_05 | Post-Resistance | BRAF      | 673    | 37 | 7 | 140453136 | 140453136 | Missense_Mutation | SNP | A  | T  | 144 | 174 | c.1799T>A      | c.(1798-1800)GTG>GAG   | p.V600E       |
| Pat_05 | Post-Resistance | TRYX3     | 136541 | 37 | 7 | 141954881 | 141954881 | Missense_Mutation | SNP | C  | T  | 335 | 362 | c.430G>A       | c.(430-432)GAT>AAT     | p.D144N       |
| Pat_05 | Post-Resistance | CLCN1     | 1180   | 37 | 7 | 143049018 | 143049018 | Missense_Mutation | SNP | G  | A  | 251 | 283 | c.2927G>A      | c.(2926-2928)CGA>CAA   | p.R976Q       |
| Pat_05 | Post-Resistance | OR2F2     | 135948 | 37 | 7 | 143633121 | 143633121 | Missense_Mutation | SNP | C  | G  | 116 | 242 | c.796C>G       | c.(796-798)CCC>GCC     | p.P266A       |
| Pat_05 | Post-Resistance | ABCB8     | 11194  | 37 | 7 | 150737671 | 150737672 | Missense_Mutation | DNP | CC | TT | 113 | 317 | :1389_1390CC>T | 387-1392)GTCCC>GTTT    | p.P464S       |
| Pat_05 | Post-Resistance | ZDHHC2    | 51201  | 37 | 8 | 17067922  | 17067922  | Missense_Mutation | SNP | A  | G  | 37  | 17  | c.883A>G       | c.(883-885)ACT>GCT     | p.T295A       |
| Pat_05 | Post-Resistance | FAM160B2  | 64760  | 37 | 8 | 21955042  | 21955042  | Missense_Mutation | SNP | C  | T  | 3   | 31  | c.313C>T       | c.(313-315)CGG>TGG     | p.R105W       |
| Pat_05 | Post-Resistance | TNFRSF10A | 8797   | 37 | 8 | 23054654  | 23054654  | Missense_Mutation | SNP | G  | A  | 134 | 78  | c.1078C>T      | c.(1078-1080)CCC>TCC   | p.P360S       |
| Pat_05 | Post-Resistance | RAB11FIP1 | 80223  | 37 | 8 | 37720621  | 37720621  | Missense_Mutation | SNP | G  | A  | 115 | 29  | c.3644C>T      | c.(3643-3645)CCC>CTC   | p.P1215L      |
| Pat_05 | Post-Resistance | ADAM18    | 8749   | 37 | 8 | 39505896  | 39505896  | Nonsense_Mutation | SNP | C  | A  | 3   | 48  | c.1080C>A      | c.(1078-1080)TGC>TGA   | p.C360*       |
| Pat_05 | Post-Resistance | RP1       | 6101   | 37 | 8 | 55533983  | 55533983  | Missense_Mutation | SNP | C  | T  | 410 | 41  | c.457C>T       | c.(457-459)CCA>TCA     | p.P153S       |
| Pat_05 | Post-Resistance | VPS13B    | 157680 | 37 | 8 | 100861005 | 100861005 | Missense_Mutation | SNP | T  | C  | 667 | 88  | c.10019T>C     | c.(10018-10020)GTT>GCT | p.V3340A      |
| Pat_05 | Post-Resistance | EXT1      | 2131   | 37 | 8 | 118831989 | 118831989 | Missense_Mutation | SNP | T  | C  | 18  | 478 | c.1462A>G      | c.(1462-1464)ACC>GCC   | p.T488A       |
| Pat_05 | Post-Resistance | FER1L6    | 654463 | 37 | 8 | 124988301 | 124988301 | Missense_Mutation | SNP | G  | A  | 379 | 37  | c.847G>A       | c.(847-849)GAG>AAG     | p.E283K       |
| Pat_05 | Post-Resistance | TAF1L     | 138474 | 37 | 9 | 32632706  | 32632706  | Missense_Mutation | SNP | T  | C  | 57  | 237 | c.2872A>G      | c.(2872-2874)ATT>GTT   | p.I958V       |
| Pat_05 | Post-Resistance | TMC1      | 117531 | 37 | 9 | 75387387  | 75387387  | Missense_Mutation | SNP | G  | A  | 145 | 371 | c.800G>A       | c.(799-801)GGA>GAA     | p.G267E       |
| Pat_05 | Post-Resistance | PRUNE2    | 158471 | 37 | 9 | 79324445  | 79324445  | Missense_Mutation | SNP | C  | A  | 65  | 227 | c.2745G>T      | c.(2743-2745)AAG>AAT   | p.K915N       |
| Pat_05 | Post-Resistance | WNK2      | 65268  | 37 | 9 | 96009925  | 96009925  | Missense_Mutation | SNP | C  | T  | 13  | 8   | c.1643C>T      | c.(1642-1644)CCC>CTC   | p.P548L       |
| Pat_05 | Post-Resistance | SMC2      | 10592  | 37 | 9 | 106894344 | 106894344 | Missense_Mutation | SNP | C  | G  | 7   | 37  | c.3046C>G      | c.(3046-3048)CTT>GTT   | p.L1016V      |
| Pat_05 | Post-Resistance | ABCA1     | 19     | 37 | 9 | 107593369 | 107593369 | Missense_Mutation | SNP | C  | A  | 4   | 85  | c.1729G>T      | c.(1729-1731)GGT>TGT   | p.G577C       |
| Pat_05 | Post-Resistance | C9orf4    | 23732  | 37 | 9 | 111909331 | 111909331 | Missense_Mutation | SNP | C  | T  | 6   | 345 | c.615G>A       | c.(613-615)ATG>ATA     | p.M205I       |
| Pat_05 | Post-Resistance | KIAA0368  | 23392  | 37 | 9 | 114190363 | 114190363 | Missense_Mutation | SNP | G  | A  | 71  | 66  | c.1543C>T      | c.(1543-1545)CGC>TGC   | p.R515C       |
| Pat_05 | Post-Resistance | SNAPC4    | 6621   | 37 | 9 | 139286993 | 139286993 | Missense_Mutation | SNP | T  | C  | 130 | 455 | c.791A>G       | c.(790-792)GAG>GGG     | p.E264G       |
| Pat_05 | Post-Resistance | TUBB2C    | 10383  | 37 | 9 | 140136962 | 140136962 | Missense_Mutation | SNP | G  | T  | 4   | 158 | c.292G>T       | c.(292-294)GGG>TGG     | p.G98W        |
| Pat_05 | Post-Resistance | ASMTL     | 8623   | 37 | X | 1546781   | 1546781   | Missense_Mutation | SNP | G  | A  | 105 | 158 | c.743C>T       | c.(742-744)CCC>CTC     | p.P248L       |
| Pat_05 | Post-Resistance | CXorf59   | 286464 | 37 | X | 36091411  | 36091411  | Missense_Mutation | SNP | C  | A  | 63  | 122 | c.346C>A       | c.(346-348)CAG>AAG     | p.Q116K       |
| Pat_05 | Post-Resistance | CACNA1F   | 778    | 37 | X | 49071632  | 49071632  | Missense_Mutation | SNP | G  | A  | 93  | 14  | c.3544C>T      | c.(3544-3546)CGT>TGT   | p.R1182C      |
| Pat_05 | Post-Resistance | DGAT2L6   | 347516 | 37 | X | 69397467  | 69397467  | Missense_Mutation | SNP | G  | A  | 107 | 12  | c.35G>A        | c.(34-36)GGC>GAC       | p.G12D        |
| Pat_05 | Post-Resistance | BEX5      | 340542 | 37 | X | 101409030 | 101409030 | Missense_Mutation | SNP | G  | A  | 4   | 95  | c.208C>T       | c.(208-210)CGG>TGG     | p.R70W        |
| Pat_05 | Post-Resistance | MST4      | 51765  | 37 | X | 131202261 | 131202261 | Missense_Mutation | SNP | G  | A  | 80  | 16  | c.349G>A       | c.(349-351)GAT>AAT     | p.D117N       |
| Pat_05 | Post-Resistance | MAGEA8    | 4107   | 37 | X | 149013954 | 149013954 | Missense_Mutation | SNP | C  | T  | 225 | 31  | c.908C>T       | c.(907-909)TCC>TTC     | p.S303F       |
| Pat_05 | Post-Resistance | L1CAM     | 3897   | 37 | X | 153136388 | 153136388 | Missense_Mutation | SNP | C  | A  | 4   | 312 | c.551G>T       | c.(550-552)CGG>CTG     | p.R184L       |
| Pat_06 | Pre-Treatment   | AGRN      | 375790 | 37 | 1 | 979032    | 979032    | Missense_Mutation | SNP | C  | T  | 5   | 489 | c.1718C>T      | c.(1717-1719)ACG>ATG   | p.T573M       |
| Pat_06 | Pre-Treatment   | GLTPD1    | 80772  | 37 | 1 | 1262682   | 1262682   | Missense_Mutation | SNP | C  | T  | 4   | 197 | c.184C>T       | c.(184-186)CGG>TGG     | p.R62W        |
| Pat_06 | Pre-Treatment   | SSU72     | 29101  | 37 | 1 | 1509919   | 1509919   | Missense_Mutation | SNP | G  | C  | 3   | 139 | c.19C>G        | c.(19-21)CGG>GGG       | p.R7G         |

|        |               |           |           |    |   |           |           |                   |     |   |   |    |     |               |                        |                |
|--------|---------------|-----------|-----------|----|---|-----------|-----------|-------------------|-----|---|---|----|-----|---------------|------------------------|----------------|
| Pat_06 | Pre-Treatment | CDK11B    | 984       | 37 | 1 | 1571740   | 1571740   | Missense_Mutation | SNP | C | T | 3  | 39  | c.2021G>A     | c.(2020-2022)CGC>CAC   | p.R674H        |
| Pat_06 | Pre-Treatment | RER1      | 11079     | 37 | 1 | 2332341   | 2332341   | Missense_Mutation | SNP | C | A | 6  | 565 | c.332C>A      | c.(331-333)CCC>CAC     | p.P111H        |
| Pat_06 | Pre-Treatment | PANK4     | 55229     | 37 | 1 | 2445896   | 2445896   | Missense_Mutation | SNP | G | A | 5  | 268 | c.1384C>T     | c.(1384-1386)CGC>TGC   | p.R462C        |
| Pat_06 | Pre-Treatment | ENO1      | 2023      | 37 | 1 | 8931965   | 8931965   | Missense_Mutation | SNP | G | A | 6  | 758 | c.166C>T      | c.(166-168)CGC>TGC     | p.R56C         |
| Pat_06 | Pre-Treatment | PTCHD2    | 57540     | 37 | 1 | 11562754  | 11562754  | Missense_Mutation | SNP | G | C | 3  | 157 | c.1116G>C     | c.(1114-1116)ATG>ATC   | p.M372I        |
| Pat_06 | Pre-Treatment | MFN2      | 9927      | 37 | 1 | 12057406  | 12057406  | Missense_Mutation | SNP | G | A | 5  | 430 | c.527G>A      | c.(526-528)GGC>GAC     | p.G176D        |
| Pat_06 | Pre-Treatment | MIIP      | 60672     | 37 | 1 | 12081868  | 12081868  | Missense_Mutation | SNP | C | G | 3  | 210 | c.85C>G       | c.(85-87)CGG>GGG       | p.R29G         |
| Pat_06 | Pre-Treatment | VPS13D    | 55187     | 37 | 1 | 12364562  | 12364562  | Splice_Site       | SNP | G | C | 3  | 70  | c.6217_splice | c.e26-1                | p.E2073_splice |
| Pat_06 | Pre-Treatment | PLEKHM2   | 23207     | 37 | 1 | 16054618  | 16054618  | Missense_Mutation | SNP | G | A | 3  | 75  | c.1805G>A     | c.(1804-1806)CGA>CAA   | p.R602Q        |
| Pat_06 | Pre-Treatment | SPEN      | 23013     | 37 | 1 | 16263839  | 16263839  | Missense_Mutation | SNP | G | A | 6  | 173 | c.10208G>A    | c.(10207-10209)CGC>CAC | p.R3403H       |
| Pat_06 | Pre-Treatment | ZBTB17    | 7709      | 37 | 1 | 16271225  | 16271225  | Missense_Mutation | SNP | G | A | 4  | 277 | c.1037C>T     | c.(1036-1038)CCG>CTG   | p.P346L        |
| Pat_06 | Pre-Treatment | ARHGEF10L | 55160     | 37 | 1 | 17934459  | 17934459  | Missense_Mutation | SNP | C | G | 3  | 38  | c.596C>G      | c.(595-597)TCC>TGC     | p.S199C        |
| Pat_06 | Pre-Treatment | TAS1R2    | 80834     | 37 | 1 | 19181045  | 19181045  | Missense_Mutation | SNP | C | T | 5  | 204 | c.919G>A      | c.(919-921)GAC>AAC     | p.D307N        |
| Pat_06 | Pre-Treatment | CAMK2N1   | 55450     | 37 | 1 | 20811727  | 20811727  | Missense_Mutation | SNP | T | C | 3  | 55  | c.146A>G      | c.(145-147)CAG>CGG     | p.Q49R         |
| Pat_06 | Pre-Treatment | SRRM1     | 10250     | 37 | 1 | 24979023  | 24979023  | Missense_Mutation | SNP | G | C | 3  | 139 | c.824G>C      | c.(823-825)CGA>CCA     | p.R275P        |
| Pat_06 | Pre-Treatment | RHCE      | 6006      | 37 | 1 | 25735272  | 25735272  | Missense_Mutation | SNP | G | C | 3  | 108 | c.237C>G      | c.(235-237)TTC>TTG     | p.F79L         |
| Pat_06 | Pre-Treatment | SNRNP40   | 9410      | 37 | 1 | 31766192  | 31766192  | Missense_Mutation | SNP | G | A | 4  | 169 | c.145C>T      | c.(145-147)CCT>TCT     | p.P49S         |
| Pat_06 | Pre-Treatment | S100PBP   | 64766     | 37 | 1 | 33318727  | 33318727  | Missense_Mutation | SNP | C | A | 6  | 669 | c.1072C>A     | c.(1072-1074)CAG>AAG   | p.Q358K        |
| Pat_06 | Pre-Treatment | DLGAP3    | 58512     | 37 | 1 | 35351777  | 35351777  | Missense_Mutation | SNP | C | T | 3  | 67  | c.1496G>A     | c.(1495-1497)CGG>CAG   | p.R499Q        |
| Pat_06 | Pre-Treatment | SFPQ      | 6421      | 37 | 1 | 35653674  | 35653674  | Missense_Mutation | SNP | C | T | 6  | 746 | c.1715G>A     | c.(1714-1716)CGT>CAT   | p.R572H        |
| Pat_06 | Pre-Treatment | EIF2C1    | 26523     | 37 | 1 | 36367850  | 36367850  | Missense_Mutation | SNP | G | A | 5  | 530 | c.1309G>A     | c.(1309-1311)GGG>AGG   | p.G437R        |
| Pat_06 | Pre-Treatment | COL8A2    | 1296      | 37 | 1 | 36563511  | 36563511  | Missense_Mutation | SNP | G | A | 3  | 71  | c.1771C>T     | c.(1771-1773)CCC>TCC   | p.P591S        |
| Pat_06 | Pre-Treatment | EPHA10    | 284656    | 37 | 1 | 38185243  | 38185243  | Missense_Mutation | SNP | G | A | 5  | 365 | c.2599C>T     | c.(2599-2601)CCC>TCC   | p.P867S        |
| Pat_06 | Pre-Treatment | ZMYND12   | 84217     | 37 | 1 | 42921593  | 42921593  | Missense_Mutation | SNP | G | A | 5  | 287 | c.76C>T       | c.(76-78)CGG>TGG       | p.R26W         |
| Pat_06 | Pre-Treatment | DMAP1     | 55929     | 37 | 1 | 44684119  | 44684119  | Missense_Mutation | SNP | G | A | 6  | 703 | c.530G>A      | c.(529-531)CGG>CAG     | p.R177Q        |
| Pat_06 | Pre-Treatment | PTCH2     | 8643      | 37 | 1 | 45293555  | 45293555  | Missense_Mutation | SNP | C | T | 5  | 460 | c.2018G>A     | c.(2017-2019)CGC>CAC   | p.R673H        |
| Pat_06 | Pre-Treatment | PTCH2     | 8643      | 37 | 1 | 45298004  | 45298004  | Missense_Mutation | SNP | C | A | 6  | 596 | c.275G>T      | c.(274-276)CGG>CTG     | p.R92L         |
| Pat_06 | Pre-Treatment | HECTD3    | 79654     | 37 | 1 | 45471752  | 45471752  | Missense_Mutation | SNP | G | A | 6  | 579 | c.1762C>T     | c.(1762-1764)CCC>TCC   | p.P588S        |
| Pat_06 | Pre-Treatment | FAAH      | 2166      | 37 | 1 | 46871294  | 46871294  | Missense_Mutation | SNP | G | A | 6  | 690 | c.613G>A      | c.(613-615)GTG>ATG     | p.V205M        |
| Pat_06 | Pre-Treatment | ZYG11B    | 79699     | 37 | 1 | 53236827  | 53236827  | Missense_Mutation | SNP | A | G | 4  | 523 | c.332A>G      | c.(331-333)GAT>GGT     | p.D111G        |
| Pat_06 | Pre-Treatment | MAGOH     | 4116      | 37 | 1 | 53692748  | 53692748  | Missense_Mutation | SNP | A | G | 5  | 223 | c.410T>C      | c.(409-411)ATT>ACT     | p.I137T        |
| Pat_06 | Pre-Treatment | PRKAA2    | 5563      | 37 | 1 | 57170116  | 57170116  | Nonsense_Mutation | SNP | C | T | 6  | 730 | c.1261C>T     | c.(1261-1263)CGA>TGA   | p.R421*        |
| Pat_06 | Pre-Treatment | CLCA1     | 1179      | 37 | 1 | 86960032  | 86960032  | Missense_Mutation | SNP | C | T | 78 | 104 | c.1843C>T     | c.(1843-1845)CGC>TGC   | p.R615C        |
| Pat_06 | Pre-Treatment | CCDC18    | 343099    | 37 | 1 | 93646136  | 93646136  | Missense_Mutation | SNP | A | G | 4  | 276 | c.49A>G       | c.(49-51)AGT>GGT       | p.S17G         |
| Pat_06 | Pre-Treatment | EXTL2     | 2135      | 37 | 1 | 101339811 | 101339811 | Missense_Mutation | SNP | T | C | 3  | 151 | c.680A>G      | c.(679-681)CAG>CGG     | p.Q227R        |
| Pat_06 | Pre-Treatment | COL11A1   | 1301      | 37 | 1 | 103491773 | 103491773 | Missense_Mutation | SNP | T | C | 6  | 688 | c.896A>G      | c.(895-897)GAG>GGG     | p.E299G        |
| Pat_06 | Pre-Treatment | SLC6A17   | 388662    | 37 | 1 | 110740738 | 110740738 | Missense_Mutation | SNP | C | A | 5  | 138 | c.1856C>A     | c.(1855-1857)GCA>GAA   | p.A619E        |
| Pat_06 | Pre-Treatment | RBM15     | 64783     | 37 | 1 | 110884345 | 110884345 | Missense_Mutation | SNP | G | A | 6  | 558 | c.2318G>A     | c.(2317-2319)GGG>GAG   | p.G773E        |
| Pat_06 | Pre-Treatment | KCNA2     | 3737      | 37 | 1 | 111146215 | 111146215 | Missense_Mutation | SNP | G | T | 5  | 396 | c.1190C>A     | c.(1189-1191)GCA>GAA   | p.A397E        |
| Pat_06 | Pre-Treatment | ADAM30    | 11085     | 37 | 1 | 120438642 | 120438642 | Missense_Mutation | SNP | T | C | 3  | 274 | c.318A>G      | c.(316-318)ATA>ATG     | p.I106M        |
| Pat_06 | Pre-Treatment | NBPF10    | 100132406 | 37 | 1 | 145325971 | 145325971 | Missense_Mutation | SNP | G | C | 12 | 375 | c.4069G>C     | c.(4069-4071)GAT>CAT   | p.D1357H       |
| Pat_06 | Pre-Treatment | SV2A      | 9900      | 37 | 1 | 149883534 | 149883534 | Splice_Site       | SNP | T | C | 3  | 98  | c.623_splice  | c.e3-1                 | p.G208_splice  |
| Pat_06 | Pre-Treatment | OTUD7B    | 56957     | 37 | 1 | 149949378 | 149949378 | Missense_Mutation | SNP | G | A | 6  | 751 | c.68C>T       | c.(67-69)GCG>GTG       | p.A23V         |
| Pat_06 | Pre-Treatment | CTSK      | 1513      | 37 | 1 | 150779272 | 150779272 | Missense_Mutation | SNP | G | A | 4  | 394 | c.10C>T       | c.(10-12)CTC>TTC       | p.L4F          |
| Pat_06 | Pre-Treatment | CGN       | 57530     | 37 | 1 | 151491709 | 151491709 | Missense_Mutation | SNP | C | A | 5  | 574 | c.714C>A      | c.(712-714)AGC>AGA     | p.S238R        |
| Pat_06 | Pre-Treatment | CRNN      | 49860     | 37 | 1 | 152382571 | 152382571 | Missense_Mutation | SNP | C | A | 6  | 878 | c.987G>T      | c.(985-987)GAG>GAT     | p.E329D        |
| Pat_06 | Pre-Treatment | SNAPIN    | 23557     | 37 | 1 | 153631271 | 153631271 | Missense_Mutation | SNP | G | A | 4  | 86  | c.52G>A       | c.(52-54)GGG>AGG       | p.G18R         |

|        |               |          |        |    |    |           |           |                        |     |   |   |   |     |               |                        |               |
|--------|---------------|----------|--------|----|----|-----------|-----------|------------------------|-----|---|---|---|-----|---------------|------------------------|---------------|
| Pat_06 | Pre-Treatment | ADAM15   | 8751   | 37 | 1  | 155028269 | 155028269 | Missense_Mutation      | SNP | C | T | 8 | 664 | c.616C>T      | c.(616-618)CGG>TGG     | p.R206W       |
| Pat_06 | Pre-Treatment | SYT11    | 23208  | 37 | 1  | 155838499 | 155838499 | Missense_Mutation      | SNP | G | A | 5 | 326 | c.778G>A      | c.(778-780)GAG>AAG     | p.E260K       |
| Pat_06 | Pre-Treatment | CD1C     | 911    | 37 | 1  | 158259891 | 158259891 | Missense_Mutation      | SNP | C | T | 5 | 703 | c.37C>T       | c.(37-39)CTC>TTC       | p.L13F        |
| Pat_06 | Pre-Treatment | OR6K6    | 128371 | 37 | 1  | 158724691 | 158724691 | Missense_Mutation      | SNP | C | T | 7 | 572 | c.86C>T       | c.(85-87)ACG>ATG       | p.T29M        |
| Pat_06 | Pre-Treatment | KCNJ10   | 3766   | 37 | 1  | 160012006 | 160012006 | Missense_Mutation      | SNP | G | A | 5 | 461 | c.317C>T      | c.(316-318)ACC>ATC     | p.T106I       |
| Pat_06 | Pre-Treatment | IGSF8    | 93185  | 37 | 1  | 160064979 | 160064979 | Missense_Mutation      | SNP | G | A | 4 | 227 | c.122C>T      | c.(121-123)GCT>GTT     | p.A41V        |
| Pat_06 | Pre-Treatment | ATP1A2   | 477    | 37 | 1  | 160098563 | 160098563 | Missense_Mutation      | SNP | C | T | 6 | 520 | c.1139C>T     | c.(1138-1140)ACC>ATC   | p.T380I       |
| Pat_06 | Pre-Treatment | CD84     | 8832   | 37 | 1  | 160523255 | 160523255 | Missense_Mutation      | SNP | C | A | 5 | 654 | c.673G>T      | c.(673-675)GGG>TGG     | p.G225W       |
| Pat_06 | Pre-Treatment | USF1     | 7391   | 37 | 1  | 161012372 | 161012372 | Nonsense_Mutation      | SNP | G | T | 4 | 352 | c.147C>A      | c.(145-147)TAC>TAA     | p.Y49*        |
| Pat_06 | Pre-Treatment | PVRL4    | 81607  | 37 | 1  | 161042507 | 161042507 | Missense_Mutation      | SNP | G | A | 5 | 575 | c.1477C>T     | c.(1477-1479)CGG>TGG   | p.R493W       |
| Pat_06 | Pre-Treatment | PVRL4    | 81607  | 37 | 1  | 161042585 | 161042585 | Missense_Mutation      | SNP | G | A | 4 | 323 | c.1399C>T     | c.(1399-1401)CGG>TGG   | p.R467W       |
| Pat_06 | Pre-Treatment | FCRLB    | 127943 | 37 | 1  | 161693372 | 161693372 | Missense_Mutation      | SNP | G | A | 4 | 346 | c.268G>A      | c.(268-270)GCA>ACA     | p.A90T        |
| Pat_06 | Pre-Treatment | ATF6     | 22926  | 37 | 1  | 161771859 | 161771859 | Missense_Mutation      | SNP | T | C | 4 | 714 | c.706T>C      | c.(706-708)TCT>CCT     | p.S236P       |
| Pat_06 | Pre-Treatment | NOS1AP   | 9722   | 37 | 1  | 162325042 | 162325042 | Missense_Mutation      | SNP | G | A | 6 | 493 | c.661G>A      | c.(661-663)GTG>ATG     | p.V221M       |
| Pat_06 | Pre-Treatment | GPA33    | 10223  | 37 | 1  | 167023600 | 167023600 | Missense_Mutation      | SNP | G | A | 6 | 614 | c.931C>T      | c.(931-933)CGT>TGT     | p.R311C       |
| Pat_06 | Pre-Treatment | SELE     | 6401   | 37 | 1  | 169699756 | 169699756 | Missense_Mutation      | SNP | C | G | 5 | 204 | c.532G>C      | c.(532-534)GTG>CTG     | p.V178L       |
| Pat_06 | Pre-Treatment | C1orf129 | 80133  | 37 | 1  | 170961471 | 170961471 | Splice_Site            | SNP | G | A | 5 | 485 | c.1194_splice | c.e12+1                | p.A398_splice |
| Pat_06 | Pre-Treatment | METTL13  | 51603  | 37 | 1  | 171753525 | 171753525 | Missense_Mutation      | SNP | A | G | 3 | 188 | c.799A>G      | c.(799-801)AGT>GGT     | p.S267G       |
| Pat_06 | Pre-Treatment | TNR      | 7143   | 37 | 1  | 175299353 | 175299353 | Missense_Mutation      | SNP | C | T | 4 | 306 | c.3650G>A     | c.(3649-3651)AGG>AAG   | p.R1217K      |
| Pat_06 | Pre-Treatment | TOR3A    | 64222  | 37 | 1  | 179054988 | 179054988 | Missense_Mutation      | SNP | C | T | 6 | 334 | c.599C>T      | c.(598-600)ACG>ATG     | p.T200M       |
| Pat_06 | Pre-Treatment | TOR1AIP1 | 26092  | 37 | 1  | 179886632 | 179886632 | Missense_Mutation      | SNP | G | A | 5 | 833 | c.1010G>A     | c.(1009-1011)CGG>CAG   | p.R337Q       |
| Pat_06 | Pre-Treatment | ACBD6    | 84320  | 37 | 1  | 180366741 | 180366741 | Splice_Site            | SNP | C | A | 5 | 538 | c.574_splice  | c.e6-1                 | p.G192_splice |
| Pat_06 | Pre-Treatment | XPR1     | 9213   | 37 | 1  | 180805753 | 180805753 | Nonsense_Mutation      | SNP | C | T | 6 | 672 | c.1402C>T     | c.(1402-1404)CGA>TGA   | p.R468*       |
| Pat_06 | Pre-Treatment | ASPM     | 259266 | 37 | 1  | 197115590 | 197115590 | Translation_Start_Site | SNP | G | C | 3 | 113 | c.-22C>G      | c.(-24--20)ATCCA>ATGCA |               |
| Pat_06 | Pre-Treatment | IPO9     | 55705  | 37 | 1  | 201832695 | 201832695 | Missense_Mutation      | SNP | C | T | 5 | 587 | c.1588C>T     | c.(1588-1590)CCC>TCC   | p.P530S       |
| Pat_06 | Pre-Treatment | PLXNA2   | 5362   | 37 | 1  | 208266148 | 208266148 | Missense_Mutation      | SNP | G | A | 5 | 297 | c.2080C>T     | c.(2080-2082)CGG>TGG   | p.R694W       |
| Pat_06 | Pre-Treatment | KCNH1    | 3756   | 37 | 1  | 210977413 | 210977413 | Missense_Mutation      | SNP | G | A | 6 | 290 | c.1558C>T     | c.(1558-1560)CGG>TGG   | p.R520W       |
| Pat_06 | Pre-Treatment | PROX1    | 5629   | 37 | 1  | 214170314 | 214170314 | Missense_Mutation      | SNP | A | G | 4 | 702 | c.436A>G      | c.(436-438)AGG>GGG     | p.R146G       |
| Pat_06 | Pre-Treatment | KCTD3    | 51133  | 37 | 1  | 215749250 | 215749250 | Missense_Mutation      | SNP | A | T | 4 | 156 | c.190A>T      | c.(190-192)ATT>TTT     | p.I64F        |
| Pat_06 | Pre-Treatment | DUSP10   | 11221  | 37 | 1  | 221879470 | 221879470 | Missense_Mutation      | SNP | G | A | 6 | 807 | c.1150C>T     | c.(1150-1152)CGG>TGG   | p.R384W       |
| Pat_06 | Pre-Treatment | ITPKB    | 3707   | 37 | 1  | 226924741 | 226924741 | Missense_Mutation      | SNP | T | C | 4 | 587 | c.419A>G      | c.(418-420)AAC>AGC     | p.N140S       |
| Pat_06 | Pre-Treatment | C1orf69  | 200205 | 37 | 1  | 228362629 | 228362629 | Missense_Mutation      | SNP | G | A | 4 | 185 | c.578G>A      | c.(577-579)CGC>CAC     | p.R193H       |
| Pat_06 | Pre-Treatment | TBCE     | 6905   | 37 | 1  | 235597525 | 235597525 | Missense_Mutation      | SNP | C | T | 6 | 769 | c.667C>T      | c.(667-669)CGG>TGG     | p.R223W       |
| Pat_06 | Pre-Treatment | ZNF238   | 10472  | 37 | 1  | 244218521 | 244218521 | Missense_Mutation      | SNP | G | A | 5 | 392 | c.1418G>A     | c.(1417-1419)CGC>CAC   | p.R473H       |
| Pat_06 | Pre-Treatment | CNST     | 163882 | 37 | 1  | 246754935 | 246754935 | Missense_Mutation      | SNP | G | A | 5 | 741 | c.71G>A       | c.(70-72)AGC>AAC       | p.S24N        |
| Pat_06 | Pre-Treatment | CNST     | 163882 | 37 | 1  | 246805294 | 246805294 | Missense_Mutation      | SNP | G | C | 3 | 162 | c.892G>C      | c.(892-894)GTG>CTG     | p.V298L       |
| Pat_06 | Pre-Treatment | OR2W5    | 441932 | 37 | 1  | 247654941 | 247654941 | Missense_Mutation      | SNP | G | A | 8 | 488 | c.512G>A      | c.(511-513)CGT>CAT     | p.R171H       |
| Pat_06 | Pre-Treatment | ASB13    | 79754  | 37 | 10 | 5693320   | 5693320   | Missense_Mutation      | SNP | C | T | 3 | 38  | c.238G>A      | c.(238-240)GCT>ACT     | p.A80T        |
| Pat_06 | Pre-Treatment | CAMK1D   | 57118  | 37 | 10 | 12867639  | 12867639  | Missense_Mutation      | SNP | G | A | 6 | 725 | c.989G>A      | c.(988-990)AGT>AAT     | p.S330N       |
| Pat_06 | Pre-Treatment | SUV39H2  | 79723  | 37 | 10 | 14939434  | 14939434  | Missense_Mutation      | SNP | G | A | 9 | 790 | c.587G>A      | c.(586-588)CGA>CAA     | p.R196Q       |
| Pat_06 | Pre-Treatment | PLXDC2   | 84898  | 37 | 10 | 20465997  | 20465997  | Missense_Mutation      | SNP | C | T | 5 | 733 | c.953C>T      | c.(952-954)TCG>TTG     | p.S318L       |
| Pat_06 | Pre-Treatment | ARMC3    | 219681 | 37 | 10 | 23290947  | 23290947  | Missense_Mutation      | SNP | G | A | 4 | 342 | c.1525G>A     | c.(1525-1527)GGT>AGT   | p.G509S       |
| Pat_06 | Pre-Treatment | ABI1     | 10006  | 37 | 10 | 27066118  | 27066118  | Missense_Mutation      | SNP | G | C | 3 | 212 | c.338C>G      | c.(337-339)ACA>AGA     | p.T113R       |
| Pat_06 | Pre-Treatment | ZNF438   | 220929 | 37 | 10 | 31137631  | 31137631  | Missense_Mutation      | SNP | C | T | 6 | 541 | c.1703G>A     | c.(1702-1704)TGT>TAT   | p.C568Y       |
| Pat_06 | Pre-Treatment | ANKRD30A | 91074  | 37 | 10 | 37430688  | 37430688  | Missense_Mutation      | SNP | C | T | 8 | 269 | c.695C>T      | c.(694-696)GCG>GTG     | p.A232V       |
| Pat_06 | Pre-Treatment | ANKRD30A | 91074  | 37 | 10 | 37431012  | 37431012  | Missense_Mutation      | SNP | T | C | 7 | 448 | c.1019T>C     | c.(1018-1020)ATG>ACG   | p.M340T       |
| Pat_06 | Pre-Treatment | ZNF33A   | 7581   | 37 | 10 | 38299713  | 38299713  | Splice_Site            | SNP | T | C | 4 | 300 | c.-44_splice  | c.e1+2                 |               |

|        |               |           |           |    |    |           |           |                   |     |   |   |   |     |              |                      |               |
|--------|---------------|-----------|-----------|----|----|-----------|-----------|-------------------|-----|---|---|---|-----|--------------|----------------------|---------------|
| Pat_06 | Pre-Treatment | HSD17B7P2 | 158160    | 37 | 10 | 38654432  | 38654432  | Missense_Mutation | SNP | A | G | 9 | 380 | c.524A>G     | c.(523-525)AAT>AGT   | p.N175S       |
| Pat_06 | Pre-Treatment | HNRNPF    | 3185      | 37 | 10 | 43882717  | 43882717  | Missense_Mutation | SNP | G | A | 7 | 469 | c.616C>T     | c.(616-618)CGG>TGG   | p.R206W       |
| Pat_06 | Pre-Treatment | TMEM72    | 643236    | 37 | 10 | 45427508  | 45427508  | Missense_Mutation | SNP | T | C | 3 | 85  | c.200T>C     | c.(199-201)ATC>ACC   | p.I67T        |
| Pat_06 | Pre-Treatment | SYT15     | 83849     | 37 | 10 | 46967629  | 46967629  | Missense_Mutation | SNP | G | A | 9 | 696 | c.448C>T     | c.(448-450)CGG>TGG   | p.R150W       |
| Pat_06 | Pre-Treatment | RBP3      | 5949      | 37 | 10 | 48389098  | 48389098  | Missense_Mutation | SNP | G | A | 5 | 562 | c.1780C>T    | c.(1780-1782)CCG>TCG | p.P594S       |
| Pat_06 | Pre-Treatment | ERCC6     | 2074      | 37 | 10 | 50678344  | 50678344  | Missense_Mutation | SNP | C | T | 7 | 890 | c.3662G>A    | c.(3661-3663)CGA>CAA | p.R1221Q      |
| Pat_06 | Pre-Treatment | ERCC6     | 2074      | 37 | 10 | 50740610  | 50740610  | Missense_Mutation | SNP | C | T | 4 | 439 | c.401G>A     | c.(400-402)CGG>CAG   | p.R134Q       |
| Pat_06 | Pre-Treatment | TMEM26    | 219623    | 37 | 10 | 63212688  | 63212688  | Missense_Mutation | SNP | G | A | 5 | 655 | c.152C>T     | c.(151-153)GCG>GTG   | p.A51V        |
| Pat_06 | Pre-Treatment | HERC4     | 26091     | 37 | 10 | 69785304  | 69785304  | Missense_Mutation | SNP | G | A | 5 | 795 | c.907C>T     | c.(907-909)CGG>TGG   | p.R303W       |
| Pat_06 | Pre-Treatment | USP54     | 159195    | 37 | 10 | 75258736  | 75258736  | Missense_Mutation | SNP | G | A | 6 | 821 | c.4706C>T    | c.(4705-4707)ACT>ATT | p.T1569I      |
| Pat_06 | Pre-Treatment | SEC24C    | 9632      | 37 | 10 | 75530531  | 75530531  | Missense_Mutation | SNP | G | A | 5 | 576 | c.3119G>A    | c.(3118-3120)CGG>CAG | p.R1040Q      |
| Pat_06 | Pre-Treatment | PLCE1     | 51196     | 37 | 10 | 95995712  | 95995712  | Missense_Mutation | SNP | G | T | 6 | 515 | c.2255G>T    | c.(2254-2256)CGA>CTA | p.R752L       |
| Pat_06 | Pre-Treatment | CYP2C19   | 1557      | 37 | 10 | 96580323  | 96580323  | Missense_Mutation | SNP | C | T | 5 | 793 | c.890C>T     | c.(889-891)GCT>GTT   | p.A297V       |
| Pat_06 | Pre-Treatment | ABCC2     | 1244      | 37 | 10 | 101591759 | 101591759 | Missense_Mutation | SNP | C | G | 4 | 756 | c.3129C>G    | c.(3127-3129)TTC>TTG | p.F1043L      |
| Pat_06 | Pre-Treatment | DNMBP     | 23268     | 37 | 10 | 101657981 | 101657981 | Missense_Mutation | SNP | G | A | 8 | 513 | c.2782C>T    | c.(2782-2784)CGT>TGT | p.R928C       |
| Pat_06 | Pre-Treatment | CHUK      | 1147      | 37 | 10 | 101969453 | 101969453 | Missense_Mutation | SNP | G | A | 5 | 236 | c.1027C>T    | c.(1027-1029)CGT>TGT | p.R343C       |
| Pat_06 | Pre-Treatment | PKD2L1    | 9033      | 37 | 10 | 102057356 | 102057356 | Missense_Mutation | SNP | A | G | 3 | 186 | c.739T>C     | c.(739-741)TAC>CAC   | p.Y247H       |
| Pat_06 | Pre-Treatment | TLX1NB    | 100038246 | 37 | 10 | 102849583 | 102849583 | Missense_Mutation | SNP | G | C | 4 | 77  | c.80C>G      | c.(79-81)GCC>GGC     | p.A27G        |
| Pat_06 | Pre-Treatment | NOLC1     | 9221      | 37 | 10 | 103920824 | 103920824 | Missense_Mutation | SNP | A | G | 4 | 211 | c.1715A>G    | c.(1714-1716)AAG>AGG | p.K572R       |
| Pat_06 | Pre-Treatment | PSD       | 5662      | 37 | 10 | 104162968 | 104162968 | Missense_Mutation | SNP | G | A | 3 | 60  | c.3064C>T    | c.(3064-3066)CGG>TGG | p.R1022W      |
| Pat_06 | Pre-Treatment | ACTR1A    | 10121     | 37 | 10 | 104244119 | 104244119 | Missense_Mutation | SNP | C | G | 3 | 165 | c.455G>C     | c.(454-456)AGG>ACG   | p.R152T       |
| Pat_06 | Pre-Treatment | C10orf26  | 54838     | 37 | 10 | 104569725 | 104569725 | Missense_Mutation | SNP | G | A | 6 | 653 | c.206G>A     | c.(205-207)CGC>CAC   | p.R69H        |
| Pat_06 | Pre-Treatment | C10orf79  | 80217     | 37 | 10 | 105944874 | 105944874 | Missense_Mutation | SNP | G | T | 5 | 602 | c.2041C>A    | c.(2041-2043)CAC>AAC | p.H681N       |
| Pat_06 | Pre-Treatment | MXI1      | 4601      | 37 | 10 | 112044696 | 112044696 | Missense_Mutation | SNP | G | A | 6 | 597 | c.638G>A     | c.(637-639)AGT>AAT   | p.S213N       |
| Pat_06 | Pre-Treatment | TCF7L2    | 6934      | 37 | 10 | 114905837 | 114905837 | Missense_Mutation | SNP | G | A | 5 | 642 | c.856G>A     | c.(856-858)GTC>ATC   | p.V286I       |
| Pat_06 | Pre-Treatment | NHLRC2    | 374354    | 37 | 10 | 115636654 | 115636654 | Missense_Mutation | SNP | G | T | 6 | 745 | c.706G>T     | c.(706-708)GAT>TAT   | p.D236Y       |
| Pat_06 | Pre-Treatment | BAG3      | 9531      | 37 | 10 | 121429423 | 121429423 | Missense_Mutation | SNP | G | A | 5 | 650 | c.241G>A     | c.(241-243)GAA>AAA   | p.E81K        |
| Pat_06 | Pre-Treatment | TACC2     | 10579     | 37 | 10 | 123842617 | 123842617 | Nonsense_Mutation | SNP | C | A | 4 | 174 | c.602C>A     | c.(601-603)TCG>TAG   | p.S201*       |
| Pat_06 | Pre-Treatment | TACC2     | 10579     | 37 | 10 | 123847176 | 123847176 | Missense_Mutation | SNP | T | C | 3 | 109 | c.5161T>C    | c.(5161-5163)TCC>CCC | p.S1721P      |
| Pat_06 | Pre-Treatment | BCCIP     | 56647     | 37 | 10 | 127541703 | 127541703 | Missense_Mutation | SNP | G | A | 6 | 726 | c.860G>A     | c.(859-861)CGG>CAG   | p.R287Q       |
| Pat_06 | Pre-Treatment | ECHS1     | 1892      | 37 | 10 | 135180462 | 135180462 | Missense_Mutation | SNP | C | A | 6 | 268 | c.550G>T     | c.(550-552)GGG>TGG   | p.G184W       |
| Pat_06 | Pre-Treatment | SYCE1     | 93426     | 37 | 10 | 135372449 | 135372449 | Missense_Mutation | SNP | T | C | 3 | 154 | c.203A>G     | c.(202-204)AAG>AGG   | p.K68R        |
| Pat_06 | Pre-Treatment | PHRF1     | 57661     | 37 | 11 | 597017    | 597017    | Missense_Mutation | SNP | G | A | 5 | 226 | c.715G>A     | c.(715-717)GCT>ACT   | p.A239T       |
| Pat_06 | Pre-Treatment | CDHR5     | 53841     | 37 | 11 | 618647    | 618647    | Missense_Mutation | SNP | G | C | 4 | 611 | c.1912C>G    | c.(1912-1914)CCA>GCA | p.P638A       |
| Pat_06 | Pre-Treatment | CDHR5     | 53841     | 37 | 11 | 618767    | 618767    | Missense_Mutation | SNP | C | T | 8 | 735 | c.1792G>A    | c.(1792-1794)GGT>AGT | p.G598S       |
| Pat_06 | Pre-Treatment | AP2A2     | 161       | 37 | 11 | 993914    | 993914    | Missense_Mutation | SNP | G | A | 5 | 66  | c.1711G>A    | c.(1711-1713)GCA>ACA | p.A571T       |
| Pat_06 | Pre-Treatment | MUC6      | 4588      | 37 | 11 | 1016037   | 1016037   | Missense_Mutation | SNP | G | A | 5 | 795 | c.6764C>T    | c.(6763-6765)ACG>ATG | p.T2255M      |
| Pat_06 | Pre-Treatment | CTSD      | 1509      | 37 | 11 | 1782667   | 1782667   | Missense_Mutation | SNP | G | A | 4 | 307 | c.100C>T     | c.(100-102)CGG>TGG   | p.R34W        |
| Pat_06 | Pre-Treatment | OR52B6    | 340980    | 37 | 11 | 5602528   | 5602528   | Missense_Mutation | SNP | G | A | 6 | 706 | c.422G>A     | c.(421-423)CGC>CAC   | p.R141H       |
| Pat_06 | Pre-Treatment | OR52E8    | 390079    | 37 | 11 | 5878182   | 5878182   | Missense_Mutation | SNP | C | A | 5 | 409 | c.751G>T     | c.(751-753)GGT>TGT   | p.G251C       |
| Pat_06 | Pre-Treatment | OR56A5    | 390084    | 37 | 11 | 5988961   | 5988961   | Missense_Mutation | SNP | G | C | 3 | 118 | c.764C>G     | c.(763-765)ACC>AGC   | p.T255S       |
| Pat_06 | Pre-Treatment | ZNF143    | 7702      | 37 | 11 | 9546919   | 9546919   | Missense_Mutation | SNP | C | A | 6 | 643 | c.1819C>A    | c.(1819-1821)CAG>AAG | p.Q607K       |
| Pat_06 | Pre-Treatment | COPB1     | 1315      | 37 | 11 | 14508051  | 14508051  | Splice_Site       | SNP | C | A | 5 | 681 | c.700_splice | c.e7-1               | p.V234_splice |
| Pat_06 | Pre-Treatment | SOX6      | 55553     | 37 | 11 | 16007783  | 16007783  | Missense_Mutation | SNP | C | T | 6 | 820 | c.2189G>A    | c.(2188-2190)CGG>CAG | p.R730Q       |
| Pat_06 | Pre-Treatment | NAV2      | 89797     | 37 | 11 | 20122603  | 20122603  | Missense_Mutation | SNP | G | A | 7 | 688 | c.6311G>A    | c.(6310-6312)GGC>GAC | p.G2104D      |
| Pat_06 | Pre-Treatment | FANCF     | 2188      | 37 | 11 | 22647140  | 22647140  | Missense_Mutation | SNP | C | A | 6 | 215 | c.217G>T     | c.(217-219)GGG>TGG   | p.G73W        |
| Pat_06 | Pre-Treatment | MUC15     | 143662    | 37 | 11 | 26582619  | 26582619  | Missense_Mutation | SNP | G | A | 5 | 708 | c.998C>T     | c.(997-999)TCT>TTT   | p.S333F       |

|        |               |          |        |    |    |           |           |                        |     |   |   |   |     |              |                        |              |
|--------|---------------|----------|--------|----|----|-----------|-----------|------------------------|-----|---|---|---|-----|--------------|------------------------|--------------|
| Pat_06 | Pre-Treatment | BDNF     | 627    | 37 | 11 | 27679711  | 27679711  | Missense_Mutation      | SNP | C | T | 5 | 557 | c.401G>A     | c.(400-402)CGC>CAC     | p.R134H      |
| Pat_06 | Pre-Treatment | DGKZ     | 8525   | 37 | 11 | 46388099  | 46388099  | Missense_Mutation      | SNP | C | T | 3 | 59  | c.293C>T     | c.(292-294)ACC>ATC     | p.T98I       |
| Pat_06 | Pre-Treatment | F2       | 2147   | 37 | 11 | 46741256  | 46741256  | Missense_Mutation      | SNP | C | A | 3 | 60  | c.84C>A      | c.(82-84)TTC>TTA       | p.F28L       |
| Pat_06 | Pre-Treatment | DDB2     | 1643   | 37 | 11 | 47256216  | 47256216  | Missense_Mutation      | SNP | G | A | 5 | 396 | c.695G>A     | c.(694-696)GGC>GAC     | p.G232D      |
| Pat_06 | Pre-Treatment | OR5D16   | 390144 | 37 | 11 | 55607088  | 55607088  | Missense_Mutation      | SNP | G | T | 7 | 448 | c.861G>T     | c.(859-861)TTG>TTT     | p.L287F      |
| Pat_06 | Pre-Treatment | OR5T2    | 219464 | 37 | 11 | 56000379  | 56000379  | Missense_Mutation      | SNP | G | A | 4 | 347 | c.283C>T     | c.(283-285)CAC>TAC     | p.H95Y       |
| Pat_06 | Pre-Treatment | GIF      | 2694   | 37 | 11 | 59608632  | 59608632  | Missense_Mutation      | SNP | G | A | 5 | 755 | c.677C>T     | c.(676-678)ACT>ATT     | p.T226I      |
| Pat_06 | Pre-Treatment | PRPF19   | 27339  | 37 | 11 | 60670218  | 60670218  | Nonsense_Mutation      | SNP | G | A | 6 | 235 | c.382C>T     | c.(382-384)CGA>TGA     | p.R128*      |
| Pat_06 | Pre-Treatment | C11orf84 | 144097 | 37 | 11 | 63585579  | 63585579  | Missense_Mutation      | SNP | G | A | 4 | 300 | c.430G>A     | c.(430-432)GCT>ACT     | p.A144T      |
| Pat_06 | Pre-Treatment | KCNK4    | 50801  | 37 | 11 | 64065695  | 64065695  | Missense_Mutation      | SNP | G | A | 4 | 282 | c.775G>A     | c.(775-777)GTA>ATA     | p.V259I      |
| Pat_06 | Pre-Treatment | SAC3D1   | 29901  | 37 | 11 | 64812129  | 64812129  | Missense_Mutation      | SNP | G | A | 5 | 296 | c.1007G>A    | c.(1006-1008)CGT>CAT   | p.R336H      |
| Pat_06 | Pre-Treatment | POLA2    | 23649  | 37 | 11 | 65063399  | 65063399  | Missense_Mutation      | SNP | G | A | 8 | 800 | c.1585G>A    | c.(1585-1587)GCA>ACA   | p.A529T      |
| Pat_06 | Pre-Treatment | SART1    | 9092   | 37 | 11 | 65733209  | 65733209  | Missense_Mutation      | SNP | G | T | 6 | 286 | c.697G>T     | c.(697-699)GTC>TTC     | p.V233F      |
| Pat_06 | Pre-Treatment | RIN1     | 9610   | 37 | 11 | 66103348  | 66103348  | Splice_Site            | SNP | C | G | 3 | 75  | c.268_splice | c.e3-1                 | p.T90_splice |
| Pat_06 | Pre-Treatment | ACTN3    | 89     | 37 | 11 | 66325185  | 66325185  | Missense_Mutation      | SNP | C | T | 3 | 69  | c.913C>T     | c.(913-915)CGC>TGC     | p.R305C      |
| Pat_06 | Pre-Treatment | SPTBN2   | 6712   | 37 | 11 | 66467033  | 66467033  | Missense_Mutation      | SNP | G | A | 6 | 662 | c.3620C>T    | c.(3619-3621)GCT>GTT   | p.A1207V     |
| Pat_06 | Pre-Treatment | TBC1D10C | 374403 | 37 | 11 | 67174358  | 67174358  | Missense_Mutation      | SNP | G | A | 6 | 596 | c.709G>A     | c.(709-711)GTG>ATG     | p.V237M      |
| Pat_06 | Pre-Treatment | CARNS1   | 57571  | 37 | 11 | 67187096  | 67187096  | Missense_Mutation      | SNP | G | A | 3 | 48  | c.622G>A     | c.(622-624)GAG>AAG     | p.E208K      |
| Pat_06 | Pre-Treatment | NDUFS8   | 4728   | 37 | 11 | 67800450  | 67800450  | Missense_Mutation      | SNP | G | A | 5 | 587 | c.170G>A     | c.(169-171)CGC>CAC     | p.R57H       |
| Pat_06 | Pre-Treatment | SUV420H1 | 51111  | 37 | 11 | 67925651  | 67925651  | Missense_Mutation      | SNP | C | T | 6 | 858 | c.2162G>A    | c.(2161-2163)CGT>CAT   | p.R721H      |
| Pat_06 | Pre-Treatment | CPT1A    | 1374   | 37 | 11 | 68560797  | 68560797  | Missense_Mutation      | SNP | G | C | 3 | 97  | c.953C>G     | c.(952-954)CCA>CGA     | p.P318R      |
| Pat_06 | Pre-Treatment | MRGPRF   | 116535 | 37 | 11 | 68772894  | 68772894  | Missense_Mutation      | SNP | C | A | 3 | 32  | c.884G>T     | c.(883-885)GGG>GTG     | p.G295V      |
| Pat_06 | Pre-Treatment | C11orf30 | 56946  | 37 | 11 | 76248884  | 76248884  | Missense_Mutation      | SNP | T | C | 4 | 487 | c.2405T>C    | c.(2404-2406)CTG>CCG   | p.L802P      |
| Pat_06 | Pre-Treatment | MYO7A    | 4647   | 37 | 11 | 76922326  | 76922326  | Missense_Mutation      | SNP | C | T | 3 | 43  | c.6181C>T    | c.(6181-6183)CGG>TGG   | p.R2061W     |
| Pat_06 | Pre-Treatment | FOLH1B   | 219595 | 37 | 11 | 89395322  | 89395322  | Translation_Start_Site | SNP | C | T | 6 | 237 | c.-93C>T     | c.(-95--91)TACGC>TATGC |              |
| Pat_06 | Pre-Treatment | FOLH1B   | 219595 | 37 | 11 | 89405075  | 89405075  | Missense_Mutation      | SNP | G | A | 5 | 461 | c.202G>A     | c.(202-204)GGT>AGT     | p.G68S       |
| Pat_06 | Pre-Treatment | NAALAD2  | 10003  | 37 | 11 | 89882229  | 89882229  | Missense_Mutation      | SNP | A | G | 8 | 641 | c.437A>G     | c.(436-438)AAT>AGT     | p.N146S      |
| Pat_06 | Pre-Treatment | FAT3     | 120114 | 37 | 11 | 92577545  | 92577545  | Missense_Mutation      | SNP | G | A | 4 | 170 | c.11012G>A   | c.(11011-11013)CGC>CAC | p.R3671H     |
| Pat_06 | Pre-Treatment | AMOTL1   | 154810 | 37 | 11 | 94599195  | 94599195  | Missense_Mutation      | SNP | G | C | 3 | 212 | c.2350G>C    | c.(2350-2352)GAC>CAC   | p.D784H      |
| Pat_06 | Pre-Treatment | AMOTL1   | 154810 | 37 | 11 | 94602501  | 94602501  | Missense_Mutation      | SNP | G | A | 4 | 121 | c.2627G>A    | c.(2626-2628)AGC>AAC   | p.S876N      |
| Pat_06 | Pre-Treatment | CNTN5    | 53942  | 37 | 11 | 99872777  | 99872777  | Missense_Mutation      | SNP | G | A | 3 | 120 | c.889G>A     | c.(889-891)GAA>AAA     | p.E297K      |
| Pat_06 | Pre-Treatment | YAP1     | 10413  | 37 | 11 | 101984971 | 101984971 | Missense_Mutation      | SNP | G | T | 7 | 581 | c.418G>T     | c.(418-420)GGG>TGG     | p.G140W      |
| Pat_06 | Pre-Treatment | MMP7     | 4316   | 37 | 11 | 102401409 | 102401409 | Missense_Mutation      | SNP | G | A | 5 | 529 | c.23C>T      | c.(22-24)GCT>GTT       | p.A8V        |
| Pat_06 | Pre-Treatment | ARHGAP20 | 57569  | 37 | 11 | 110450900 | 110450900 | Missense_Mutation      | SNP | G | A | 5 | 823 | c.2770C>T    | c.(2770-2772)CCC>TCC   | p.P924S      |
| Pat_06 | Pre-Treatment | BTG4     | 54766  | 37 | 11 | 111365906 | 111365906 | Missense_Mutation      | SNP | G | C | 5 | 531 | c.644C>G     | c.(643-645)GCT>GGT     | p.A215G      |
| Pat_06 | Pre-Treatment | HTR3B    | 9177   | 37 | 11 | 113816851 | 113816851 | Missense_Mutation      | SNP | G | A | 4 | 343 | c.1318G>A    | c.(1318-1320)GGC>AGC   | p.G440S      |
| Pat_06 | Pre-Treatment | PAFAH1B2 | 5049   | 37 | 11 | 117023192 | 117023192 | Missense_Mutation      | SNP | C | T | 5 | 338 | c.29C>T      | c.(28-30)GCT>GTT       | p.A10V       |
| Pat_06 | Pre-Treatment | SIDT2    | 51092  | 37 | 11 | 117053466 | 117053466 | Missense_Mutation      | SNP | G | A | 4 | 139 | c.646G>A     | c.(646-648)GTA>ATA     | p.V216I      |
| Pat_06 | Pre-Treatment | PCSK7    | 9159   | 37 | 11 | 117094004 | 117094004 | Missense_Mutation      | SNP | G | A | 4 | 306 | c.1075C>T    | c.(1075-1077)CGC>TGC   | p.R359C      |
| Pat_06 | Pre-Treatment | DSCAML1  | 57453  | 37 | 11 | 117352718 | 117352718 | Missense_Mutation      | SNP | G | C | 4 | 237 | c.2699C>G    | c.(2698-2700)GCC>GGC   | p.A900G      |
| Pat_06 | Pre-Treatment | TRIM29   | 23650  | 37 | 11 | 119988981 | 119988981 | Missense_Mutation      | SNP | G | T | 5 | 170 | c.1577C>A    | c.(1576-1578)TCT>TAT   | p.S526Y      |
| Pat_06 | Pre-Treatment | GRIK4    | 2900   | 37 | 11 | 120776054 | 120776054 | Missense_Mutation      | SNP | G | A | 6 | 652 | c.1328G>A    | c.(1327-1329)CGC>CAC   | p.R443H      |
| Pat_06 | Pre-Treatment | HSPA8    | 3312   | 37 | 11 | 122928494 | 122928494 | Missense_Mutation      | SNP | G | A | 5 | 459 | c.1889C>T    | c.(1888-1890)GCT>GTT   | p.A630V      |
| Pat_06 | Pre-Treatment | VWA5A    | 4013   | 37 | 11 | 123989321 | 123989321 | Missense_Mutation      | SNP | C | G | 3 | 206 | c.551C>G     | c.(550-552)GCC>GGC     | p.A184G      |
| Pat_06 | Pre-Treatment | SPA17    | 53340  | 37 | 11 | 124545192 | 124545192 | Missense_Mutation      | SNP | G | A | 5 | 548 | c.32G>A      | c.(31-33)CGA>CAA       | p.R11Q       |
| Pat_06 | Pre-Treatment | ROBO3    | 64221  | 37 | 11 | 124742845 | 124742845 | Missense_Mutation      | SNP | T | C | 3 | 119 | c.1396T>C    | c.(1396-1398)TCC>CCC   | p.S466P      |
| Pat_06 | Pre-Treatment | HEPN1    | 641654 | 37 | 11 | 124789836 | 124789836 | Missense_Mutation      | SNP | G | A | 5 | 291 | c.190G>A     | c.(190-192)GAA>AAA     | p.E64K       |



|        |               |              |           |    |    |           |           |                   |     |   |   |     |     |                |                        |                |
|--------|---------------|--------------|-----------|----|----|-----------|-----------|-------------------|-----|---|---|-----|-----|----------------|------------------------|----------------|
| Pat_06 | Pre-Treatment | PKNOX2       | 63876     | 37 | 11 | 125221241 | 125221241 | Missense_Mutation | SNP | A | G | 3   | 73  | c.40A>G        | c.(40-42)ATG>GTG       | p.M14V         |
| Pat_06 | Pre-Treatment | ACRV1        | 56        | 37 | 11 | 125548001 | 125548001 | Missense_Mutation | SNP | C | T | 4   | 243 | c.244G>A       | c.(244-246)GAG>AAG     | p.E82K         |
| Pat_06 | Pre-Treatment | KIRREL3      | 84623     | 37 | 11 | 126343313 | 126343313 | Missense_Mutation | SNP | C | T | 3   | 47  | c.482G>A       | c.(481-483)CGT>CAT     | p.R161H        |
| Pat_06 | Pre-Treatment | LOC100288778 | 100288778 | 37 | 12 | 90615     | 90615     | Missense_Mutation | SNP | G | T | 3   | 45  | c.621G>T       | c.(619-621)TTG>TTT     | p.L207F        |
| Pat_06 | Pre-Treatment | CACNA2D4     | 93589     | 37 | 12 | 1969324   | 1969324   | Missense_Mutation | SNP | C | G | 3   | 176 | c.1927G>C      | c.(1927-1929)GAC>CAC   | p.D643H        |
| Pat_06 | Pre-Treatment | KCNA6        | 3742      | 37 | 12 | 4919422   | 4919422   | Missense_Mutation | SNP | G | A | 5   | 458 | c.215G>A       | c.(214-216)CGG>CAG     | p.R72Q         |
| Pat_06 | Pre-Treatment | CD9          | 928       | 37 | 12 | 6309672   | 6309672   | Missense_Mutation | SNP | G | A | 5   | 326 | c.7G>A         | c.(7-9)GTC>ATC         | p.V3I          |
| Pat_06 | Pre-Treatment | PLEKHG6      | 55200     | 37 | 12 | 6428010   | 6428010   | Missense_Mutation | SNP | G | C | 3   | 284 | c.1375G>C      | c.(1375-1377)GAG>CAG   | p.E459Q        |
| Pat_06 | Pre-Treatment | ZNF384       | 171017    | 37 | 12 | 6776926   | 6776926   | Missense_Mutation | SNP | G | A | 7   | 850 | c.1688C>T      | c.(1687-1689)ACT>ATT   | p.T563I        |
| Pat_06 | Pre-Treatment | C12orf53     | 196500    | 37 | 12 | 6806933   | 6806933   | Missense_Mutation | SNP | G | A | 3   | 71  | c.43C>T        | c.(43-45)CTC>TTC       | p.L15F         |
| Pat_06 | Pre-Treatment | CD163L1      | 283316    | 37 | 12 | 7527092   | 7527092   | Missense_Mutation | SNP | C | T | 5   | 451 | c.3355G>A      | c.(3355-3357)GGC>AGC   | p.G1119S       |
| Pat_06 | Pre-Treatment | GPR19        | 2842      | 37 | 12 | 12815291  | 12815291  | Missense_Mutation | SNP | G | A | 8   | 782 | c.92C>T        | c.(91-93)ACA>ATA       | p.T31I         |
| Pat_06 | Pre-Treatment | C12orf36     | 283422    | 37 | 12 | 13526349  | 13526349  | Missense_Mutation | SNP | G | A | 4   | 234 | c.206C>T       | c.(205-207)TCG>TTG     | p.S69L         |
| Pat_06 | Pre-Treatment | C12orf72     | 254013    | 37 | 12 | 31815090  | 31815090  | Missense_Mutation | SNP | A | G | 4   | 510 | c.203A>G       | c.(202-204)CAG>CGG     | p.Q68R         |
| Pat_06 | Pre-Treatment | FGD4         | 121512    | 37 | 12 | 32735075  | 32735075  | Missense_Mutation | SNP | G | A | 8   | 566 | c.274G>A       | c.(274-276)GGT>AGT     | p.G92S         |
| Pat_06 | Pre-Treatment | DDX23        | 9416      | 37 | 12 | 49227133  | 49227133  | Missense_Mutation | SNP | G | A | 259 | 420 | c.1730C>T      | c.(1729-1731)CCA>CTA   | p.P577L        |
| Pat_06 | Pre-Treatment | LMBR1L       | 55716     | 37 | 12 | 49495258  | 49495258  | Missense_Mutation | SNP | C | T | 4   | 141 | c.1005G>A      | c.(1003-1005)ATG>ATA   | p.M335I        |
| Pat_06 | Pre-Treatment | FMNL3        | 91010     | 37 | 12 | 50043288  | 50043288  | Missense_Mutation | SNP | C | T | 5   | 455 | c.2269G>A      | c.(2269-2271)GTC>ATC   | p.V757I        |
| Pat_06 | Pre-Treatment | SLC4A8       | 9498      | 37 | 12 | 51888762  | 51888762  | Missense_Mutation | SNP | G | A | 7   | 465 | c.2803G>A      | c.(2803-2805)GCA>ACA   | p.A935T        |
| Pat_06 | Pre-Treatment | KRT86        | 3892      | 37 | 12 | 52702316  | 52702316  | Missense_Mutation | SNP | T | C | 3   | 176 | c.1408T>C      | c.(1408-1410)TGC>CGC   | p.C470R        |
| Pat_06 | Pre-Treatment | KRT75        | 9119      | 37 | 12 | 52818456  | 52818456  | Missense_Mutation | SNP | C | T | 4   | 433 | c.1501G>A      | c.(1501-1503)GGC>AGC   | p.G501S        |
| Pat_06 | Pre-Treatment | KRT8         | 3856      | 37 | 12 | 53292500  | 53292500  | Missense_Mutation | SNP | C | T | 6   | 627 | c.1165G>A      | c.(1165-1167)GCC>ACC   | p.A389T        |
| Pat_06 | Pre-Treatment | AAAS         | 8086      | 37 | 12 | 53702942  | 53702942  | Nonsense_Mutation | SNP | G | A | 6   | 794 | c.934C>T       | c.(934-936)CGA>TGA     | p.R312*        |
| Pat_06 | Pre-Treatment | AMHR2        | 269       | 37 | 12 | 53825045  | 53825045  | Missense_Mutation | SNP | C | T | 5   | 459 | c.1510C>T      | c.(1510-1512)CGC>TGC   | p.R504C        |
| Pat_06 | Pre-Treatment | MMP19        | 4327      | 37 | 12 | 56231419  | 56231419  | Missense_Mutation | SNP | G | A | 5   | 331 | c.1108C>T      | c.(1108-1110)CCC>TCC   | p.P370S        |
| Pat_06 | Pre-Treatment | DGKA         | 1606      | 37 | 12 | 56334462  | 56334462  | Missense_Mutation | SNP | C | T | 5   | 636 | c.973C>T       | c.(973-975)CGG>TGG     | p.R325W        |
| Pat_06 | Pre-Treatment | CS           | 1431      | 37 | 12 | 56667537  | 56667537  | Missense_Mutation | SNP | G | A | 5   | 654 | c.1064C>T      | c.(1063-1065)CCG>CTG   | p.P355L        |
| Pat_06 | Pre-Treatment | TIMELESS     | 8914      | 37 | 12 | 56817194  | 56817194  | Missense_Mutation | SNP | G | A | 6   | 511 | c.2156C>T      | c.(2155-2157)GCC>GTC   | p.A719V        |
| Pat_06 | Pre-Treatment | TAC3         | 6866      | 37 | 12 | 57406612  | 57406612  | Nonsense_Mutation | SNP | G | A | 4   | 528 | c.286C>T       | c.(286-288)CAG>TAG     | p.Q96*         |
| Pat_06 | Pre-Treatment | LRP1         | 4035      | 37 | 12 | 57603830  | 57603830  | Missense_Mutation | SNP | G | A | 5   | 464 | c.12458G>A     | c.(12457-12459)CGC>CAC | p.R4153H       |
| Pat_06 | Pre-Treatment | IFNG         | 3458      | 37 | 12 | 68549234  | 68549234  | Missense_Mutation | SNP | G | T | 6   | 579 | c.400C>A       | c.(400-402)CAT>AAT     | p.H134N        |
| Pat_06 | Pre-Treatment | CPSF6        | 11052     | 37 | 12 | 69656305  | 69656305  | Missense_Mutation | SNP | A | G | 3   | 170 | c.1622A>G      | c.(1621-1623)GAG>GGG   | p.E541G        |
| Pat_06 | Pre-Treatment | TMTC2        | 160335    | 37 | 12 | 83251250  | 83251250  | Missense_Mutation | SNP | G | A | 4   | 396 | c.545G>A       | c.(544-546)AGC>AAC     | p.S182N        |
| Pat_06 | Pre-Treatment | C12orf12     | 196477    | 37 | 12 | 91347305  | 91347305  | Missense_Mutation | SNP | G | C | 4   | 212 | c.1215C>G      | c.(1213-1215)AAC>AAG   | p.N405K        |
| Pat_06 | Pre-Treatment | SART3        | 9733      | 37 | 12 | 108930528 | 108930528 | Missense_Mutation | SNP | G | C | 3   | 221 | c.1343C>G      | c.(1342-1344)GCC>GGC   | p.A448G        |
| Pat_06 | Pre-Treatment | ACACB        | 32        | 37 | 12 | 109704069 | 109704069 | Missense_Mutation | SNP | G | A | 4   | 293 | c.7279G>A      | c.(7279-7281)GTG>ATG   | p.V2427M       |
| Pat_06 | Pre-Treatment | C12orf51     | 283450    | 37 | 12 | 112600845 | 112600845 | Splice_Site       | SNP | C | T | 5   | 566 | c.11854_splice | c.e68+1                | p.G3952_splice |
| Pat_06 | Pre-Treatment | C12orf51     | 283450    | 37 | 12 | 112674828 | 112674828 | Missense_Mutation | SNP | C | G | 3   | 103 | c.4099G>C      | c.(4099-4101)GCC>CCC   | p.A1367P       |
| Pat_06 | Pre-Treatment | SLC24A6      | 80024     | 37 | 12 | 113753209 | 113753209 | Missense_Mutation | SNP | G | A | 3   | 46  | c.1066C>T      | c.(1066-1068)CGG>TGG   | p.R356W        |
| Pat_06 | Pre-Treatment | MED13L       | 23389     | 37 | 12 | 116452921 | 116452921 | Missense_Mutation | SNP | G | T | 6   | 658 | c.1168C>A      | c.(1168-1170)CAG>AAG   | p.Q390K        |
| Pat_06 | Pre-Treatment | MED13L       | 23389     | 37 | 12 | 116457208 | 116457208 | Missense_Mutation | SNP | C | T | 4   | 458 | c.830G>A       | c.(829-831)CGG>CAG     | p.R277Q        |
| Pat_06 | Pre-Treatment | VSIG10       | 54621     | 37 | 12 | 118517169 | 118517169 | Missense_Mutation | SNP | T | C | 3   | 219 | c.907A>G       | c.(907-909)AGC>GGC     | p.S303G        |
| Pat_06 | Pre-Treatment | CIT          | 11113     | 37 | 12 | 120135563 | 120135563 | Missense_Mutation | SNP | G | A | 7   | 502 | c.5657C>T      | c.(5656-5658)GCG>GTG   | p.A1886V       |
| Pat_06 | Pre-Treatment | RPLP0        | 6175      | 37 | 12 | 120636757 | 120636757 | Missense_Mutation | SNP | G | C | 3   | 150 | c.365C>G       | c.(364-366)ACT>AGT     | p.T122S        |
| Pat_06 | Pre-Treatment | CABP1        | 9478      | 37 | 12 | 121098115 | 121098115 | Missense_Mutation | SNP | G | A | 4   | 161 | c.802G>A       | c.(802-804)GAA>AAA     | p.E268K        |
| Pat_06 | Pre-Treatment | CLIP1        | 6249      | 37 | 12 | 122862048 | 122862048 | Missense_Mutation | SNP | G | A | 5   | 726 | c.545C>T       | c.(544-546)ACG>ATG     | p.T182M        |
| Pat_06 | Pre-Treatment | MPHOSPH9     | 10198     | 37 | 12 | 123705991 | 123705991 | Missense_Mutation | SNP | G | A | 52  | 147 | c.344C>T       | c.(343-345)TCT>TTT     | p.S115F        |

|        |               |           |        |    |    |           |           |                   |     |   |   |   |     |           |                      |          |
|--------|---------------|-----------|--------|----|----|-----------|-----------|-------------------|-----|---|---|---|-----|-----------|----------------------|----------|
| Pat_06 | Pre-Treatment | ATP6V0A2  | 23545  | 37 | 12 | 124242547 | 124242547 | Missense_Mutation | SNP | T | C | 4 | 323 | c.2539T>C | c.(2539-2541)TCA>CCA | p.S847P  |
| Pat_06 | Pre-Treatment | TMEM132D  | 121256 | 37 | 12 | 130015713 | 130015713 | Nonsense_Mutation | SNP | G | A | 5 | 406 | c.1006C>T | c.(1006-1008)CGA>TGA | p.R336*  |
| Pat_06 | Pre-Treatment | PUS1      | 80324  | 37 | 12 | 132416789 | 132416789 | Missense_Mutation | SNP | T | C | 3 | 262 | c.373T>C  | c.(373-375)TGT>CGT   | p.C125R  |
| Pat_06 | Pre-Treatment | PUS1      | 80324  | 37 | 12 | 132426187 | 132426187 | Missense_Mutation | SNP | G | A | 5 | 724 | c.895G>A  | c.(895-897)GGC>AGC   | p.G299S  |
| Pat_06 | Pre-Treatment | POLE      | 5426   | 37 | 12 | 133218233 | 133218233 | Missense_Mutation | SNP | C | T | 4 | 188 | c.5378G>A | c.(5377-5379)AGG>AAG | p.R1793K |
| Pat_06 | Pre-Treatment | ZNF10     | 7556   | 37 | 12 | 133732999 | 133732999 | Missense_Mutation | SNP | C | A | 6 | 821 | c.1167C>A | c.(1165-1167)AGC>AGA | p.S389R  |
| Pat_06 | Pre-Treatment | GJB2      | 2706   | 37 | 13 | 20763513  | 20763513  | Missense_Mutation | SNP | G | A | 4 | 354 | c.208C>T  | c.(208-210)CCC>TCC   | p.P70S   |
| Pat_06 | Pre-Treatment | IFT88     | 8100   | 37 | 13 | 21205209  | 21205209  | Missense_Mutation | SNP | G | A | 5 | 468 | c.1381G>A | c.(1381-1383)GCT>ACT | p.A461T  |
| Pat_06 | Pre-Treatment | SACS      | 26278  | 37 | 13 | 23914963  | 23914963  | Missense_Mutation | SNP | C | G | 4 | 746 | c.3052G>C | c.(3052-3054)GAG>CAG | p.E1018Q |
| Pat_06 | Pre-Treatment | FREM2     | 341640 | 37 | 13 | 39265331  | 39265331  | Missense_Mutation | SNP | G | T | 6 | 822 | c.3850G>T | c.(3850-3852)GGG>TGG | p.G1284W |
| Pat_06 | Pre-Treatment | STOML3    | 161003 | 37 | 13 | 39550707  | 39550707  | Missense_Mutation | SNP | G | A | 5 | 277 | c.199C>T  | c.(199-201)CGC>TGC   | p.R67C   |
| Pat_06 | Pre-Treatment | SIAH3     | 283514 | 37 | 13 | 46425647  | 46425647  | Missense_Mutation | SNP | G | A | 4 | 497 | c.118C>T  | c.(118-120)CCC>TCC   | p.P40S   |
| Pat_06 | Pre-Treatment | C13orf18  | 80183  | 37 | 13 | 46919644  | 46919644  | Missense_Mutation | SNP | G | T | 3 | 53  | c.1723C>A | c.(1723-1725)CTG>ATG | p.L575M  |
| Pat_06 | Pre-Treatment | C13orf18  | 80183  | 37 | 13 | 46924411  | 46924411  | Missense_Mutation | SNP | G | A | 3 | 53  | c.1406C>T | c.(1405-1407)TCG>TTG | p.S469L  |
| Pat_06 | Pre-Treatment | RNF113B   | 140432 | 37 | 13 | 98829159  | 98829159  | Missense_Mutation | SNP | G | A | 4 | 260 | c.332C>T  | c.(331-333)ACC>ATC   | p.T111I  |
| Pat_06 | Pre-Treatment | COL4A2    | 1284   | 37 | 13 | 111114691 | 111114691 | Missense_Mutation | SNP | G | A | 5 | 442 | c.1736G>A | c.(1735-1737)CGC>CAC | p.R579H  |
| Pat_06 | Pre-Treatment | COL4A2    | 1284   | 37 | 13 | 111125465 | 111125465 | Missense_Mutation | SNP | T | A | 3 | 39  | c.2393T>A | c.(2392-2394)CTT>CAT | p.L798H  |
| Pat_06 | Pre-Treatment | ING1      | 3621   | 37 | 13 | 111371695 | 111371695 | Missense_Mutation | SNP | G | A | 5 | 491 | c.685G>A  | c.(685-687)GAC>AAC   | p.D229N  |
| Pat_06 | Pre-Treatment | ATP11A    | 23250  | 37 | 13 | 113508817 | 113508817 | Missense_Mutation | SNP | G | A | 5 | 464 | c.2216G>A | c.(2215-2217)GGG>GAG | p.G739E  |
| Pat_06 | Pre-Treatment | PROZ      | 8858   | 37 | 13 | 113813020 | 113813020 | Missense_Mutation | SNP | G | C | 3 | 80  | c.46G>C   | c.(46-48)GCC>CCC     | p.A16P   |
| Pat_06 | Pre-Treatment | PROZ      | 8858   | 37 | 13 | 113817386 | 113817386 | Missense_Mutation | SNP | G | A | 3 | 34  | c.323G>A  | c.(322-324)GGC>GAC   | p.G108D  |
| Pat_06 | Pre-Treatment | CUL4A     | 8451   | 37 | 13 | 113889431 | 113889431 | Missense_Mutation | SNP | G | A | 7 | 445 | c.820G>A  | c.(820-822)GTA>ATA   | p.V274I  |
| Pat_06 | Pre-Treatment | TTC5      | 91875  | 37 | 14 | 20763525  | 20763525  | Missense_Mutation | SNP | G | A | 5 | 460 | c.1004C>T | c.(1003-1005)GCC>GTC | p.A335V  |
| Pat_06 | Pre-Treatment | RNASE2    | 6036   | 37 | 14 | 21424318  | 21424318  | Missense_Mutation | SNP | G | A | 5 | 617 | c.388G>A  | c.(388-390)GCA>ACA   | p.A130T  |
| Pat_06 | Pre-Treatment | FLJ10357  | 55701  | 37 | 14 | 21552174  | 21552174  | Missense_Mutation | SNP | G | A | 4 | 80  | c.3754G>A | c.(3754-3756)GAC>AAC | p.D1252N |
| Pat_06 | Pre-Treatment | RPGRIP1   | 57096  | 37 | 14 | 21770737  | 21770737  | Missense_Mutation | SNP | G | A | 3 | 52  | c.581G>A  | c.(580-582)AGT>AAT   | p.S194N  |
| Pat_06 | Pre-Treatment | DAD1      | 1603   | 37 | 14 | 23044076  | 23044076  | Missense_Mutation | SNP | G | T | 6 | 506 | c.269C>A  | c.(268-270)CCA>CAA   | p.P90Q   |
| Pat_06 | Pre-Treatment | RBM23     | 55147  | 37 | 14 | 23371498  | 23371498  | Nonsense_Mutation | SNP | G | A | 6 | 423 | c.1024C>T | c.(1024-1026)CGA>TGA | p.R342*  |
| Pat_06 | Pre-Treatment | DHRS2     | 10202  | 37 | 14 | 24108425  | 24108425  | Missense_Mutation | SNP | G | A | 5 | 672 | c.178G>A  | c.(178-180)GGG>AGG   | p.G60R   |
| Pat_06 | Pre-Treatment | DCAF11    | 80344  | 37 | 14 | 24589061  | 24589061  | Missense_Mutation | SNP | G | A | 4 | 190 | c.1048G>A | c.(1048-1050)GCA>ACA | p.A350T  |
| Pat_06 | Pre-Treatment | IRF9      | 10379  | 37 | 14 | 24631376  | 24631376  | Missense_Mutation | SNP | G | A | 6 | 769 | c.23G>A   | c.(22-24)TGC>TAC     | p.C8Y    |
| Pat_06 | Pre-Treatment | RIPK3     | 11035  | 37 | 14 | 24808715  | 24808715  | Missense_Mutation | SNP | G | A | 6 | 796 | c.109C>T  | c.(109-111)CGG>TGG   | p.R37W   |
| Pat_06 | Pre-Treatment | AKAP6     | 9472   | 37 | 14 | 33147587  | 33147587  | Missense_Mutation | SNP | G | A | 5 | 556 | c.2801G>A | c.(2800-2802)AGC>AAC | p.S934N  |
| Pat_06 | Pre-Treatment | FBXO33    | 254170 | 37 | 14 | 39868790  | 39868790  | Nonsense_Mutation | SNP | G | T | 5 | 165 | c.1598C>A | c.(1597-1599)TCA>TAA | p.S533*  |
| Pat_06 | Pre-Treatment | C14orf104 | 55172  | 37 | 14 | 50101657  | 50101657  | Missense_Mutation | SNP | G | A | 3 | 9   | c.211C>T  | c.(211-213)CAC>TAC   | p.H71Y   |
| Pat_06 | Pre-Treatment | PSMC6     | 5706   | 37 | 14 | 53184828  | 53184828  | Missense_Mutation | SNP | G | A | 6 | 673 | c.601G>A  | c.(601-603)GTT>ATT   | p.V201I  |
| Pat_06 | Pre-Treatment | C14orf39  | 317761 | 37 | 14 | 60908831  | 60908831  | Missense_Mutation | SNP | C | A | 6 | 511 | c.1522G>T | c.(1522-1524)GCA>TCA | p.A508S  |
| Pat_06 | Pre-Treatment | SPTB      | 6710   | 37 | 14 | 65239449  | 65239449  | Missense_Mutation | SNP | C | T | 4 | 343 | c.5402G>A | c.(5401-5403)CGC>CAC | p.R1801H |
| Pat_06 | Pre-Treatment | FUT8      | 2530   | 37 | 14 | 66096305  | 66096305  | Missense_Mutation | SNP | G | A | 6 | 534 | c.578G>A  | c.(577-579)CGG>CAG   | p.R193Q  |
| Pat_06 | Pre-Treatment | KIAA0247  | 9766   | 37 | 14 | 70125355  | 70125355  | Missense_Mutation | SNP | G | A | 5 | 588 | c.46G>A   | c.(46-48)GTG>ATG     | p.V16M   |
| Pat_06 | Pre-Treatment | ZFYVE1    | 53349  | 37 | 14 | 73444864  | 73444864  | Missense_Mutation | SNP | C | T | 6 | 652 | c.1498G>A | c.(1498-1500)GCA>ACA | p.A500T  |
| Pat_06 | Pre-Treatment | RBM25     | 58517  | 37 | 14 | 73544119  | 73544119  | Missense_Mutation | SNP | G | A | 5 | 388 | c.199G>A  | c.(199-201)GCA>ACA   | p.A67T   |
| Pat_06 | Pre-Treatment | COQ6      | 51004  | 37 | 14 | 74425701  | 74425701  | Missense_Mutation | SNP | G | A | 4 | 328 | c.640G>A  | c.(640-642)GTA>ATA   | p.V214I  |
| Pat_06 | Pre-Treatment | YLFM1     | 56252  | 37 | 14 | 75230568  | 75230568  | Missense_Mutation | SNP | C | A | 5 | 635 | c.376C>A  | c.(376-378)CAG>AAG   | p.Q126K  |
| Pat_06 | Pre-Treatment | PROX2     | 283571 | 37 | 14 | 75329681  | 75329681  | Missense_Mutation | SNP | G | A | 4 | 375 | c.857C>T  | c.(856-858)GCT>GTT   | p.A286V  |
| Pat_06 | Pre-Treatment | MLH3      | 27030  | 37 | 14 | 75513336  | 75513336  | Missense_Mutation | SNP | G | A | 6 | 737 | c.3023C>T | c.(3022-3024)CCG>CTG | p.P1008L |
| Pat_06 | Pre-Treatment | KIAA1737  | 85457  | 37 | 14 | 77579861  | 77579861  | Missense_Mutation | SNP | G | T | 5 | 602 | c.400G>T  | c.(400-402)GTA>TTA   | p.V134L  |

|        |               |               |        |    |    |           |           |                   |     |   |   |   |     |              |                      |              |
|--------|---------------|---------------|--------|----|----|-----------|-----------|-------------------|-----|---|---|---|-----|--------------|----------------------|--------------|
| Pat_06 | Pre-Treatment | KIAA1737      | 85457  | 37 | 14 | 77580273  | 77580273  | Missense_Mutation | SNP | G | A | 5 | 512 | c.812G>A     | c.(811-813)AGC>AAC   | p.S271N      |
| Pat_06 | Pre-Treatment | DIO2          | 1734   | 37 | 14 | 80669258  | 80669258  | Missense_Mutation | SNP | A | G | 4 | 417 | c.596T>C     | c.(595-597)CTG>CCG   | p.L199P      |
| Pat_06 | Pre-Treatment | C14orf102     | 55051  | 37 | 14 | 90767615  | 90767615  | Missense_Mutation | SNP | C | T | 6 | 541 | c.1513G>A    | c.(1513-1515)GAC>AAC | p.D505N      |
| Pat_06 | Pre-Treatment | CALM1         | 801    | 37 | 14 | 90870735  | 90870735  | Missense_Mutation | SNP | T | C | 4 | 694 | c.298T>C     | c.(298-300)TAT>CAT   | p.Y100H      |
| Pat_06 | Pre-Treatment | RIN3          | 79890  | 37 | 14 | 93119143  | 93119143  | Missense_Mutation | SNP | C | A | 5 | 490 | c.1749C>A    | c.(1747-1749)AGC>AGA | p.S583R      |
| Pat_06 | Pre-Treatment | BEGAIN        | 57596  | 37 | 14 | 101005646 | 101005646 | Missense_Mutation | SNP | A | G | 3 | 212 | c.442T>C     | c.(442-444)TCG>CCG   | p.S148P      |
| Pat_06 | Pre-Treatment | KIF26A        | 26153  | 37 | 14 | 104639782 | 104639782 | Missense_Mutation | SNP | G | A | 3 | 38  | c.1799G>A    | c.(1798-1800)CGC>CAC | p.R600H      |
| Pat_06 | Pre-Treatment | CRIP1         | 1396   | 37 | 14 | 105954667 | 105954667 | Splice_Site       | SNP | G | A | 5 | 431 | c.136_splice | c.e4-1               | p.H46_splice |
| Pat_06 | Pre-Treatment | HERC2P2       | 400322 | 37 | 15 | 23312230  | 23312230  | Missense_Mutation | SNP | T | C | 3 | 136 | c.2692A>G    | c.(2692-2694)ATG>GTG | p.M898V      |
| Pat_06 | Pre-Treatment | C15orf53      | 400359 | 37 | 15 | 38990504  | 38990504  | Missense_Mutation | SNP | G | A | 6 | 303 | c.298G>A     | c.(298-300)GTC>ATC   | p.V100I      |
| Pat_06 | Pre-Treatment | BAHD1         | 22893  | 37 | 15 | 40754275  | 40754275  | Missense_Mutation | SNP | C | T | 4 | 214 | c.1597C>T    | c.(1597-1599)CGT>TGT | p.R533C      |
| Pat_06 | Pre-Treatment | RAD51         | 5888   | 37 | 15 | 41022087  | 41022087  | Missense_Mutation | SNP | G | A | 5 | 376 | c.811G>A     | c.(811-813)GCT>ACT   | p.A271T      |
| Pat_06 | Pre-Treatment | INO80         | 54617  | 37 | 15 | 41346195  | 41346195  | Missense_Mutation | SNP | G | A | 4 | 210 | c.2206C>T    | c.(2206-2208)CAC>TAC | p.H736Y      |
| Pat_06 | Pre-Treatment | JMJD7-PLA2G4B | 8681   | 37 | 15 | 42137219  | 42137219  | Missense_Mutation | SNP | G | A | 3 | 38  | c.1190G>A    | c.(1189-1191)TGC>TAC | p.C397Y      |
| Pat_06 | Pre-Treatment | JMJD7-PLA2G4B | 8681   | 37 | 15 | 42138219  | 42138219  | Missense_Mutation | SNP | G | A | 4 | 215 | c.1574G>A    | c.(1573-1575)CGC>CAC | p.R525H      |
| Pat_06 | Pre-Treatment | TUBGCP4       | 27229  | 37 | 15 | 43678142  | 43678142  | Missense_Mutation | SNP | C | A | 4 | 128 | c.877C>A     | c.(877-879)CTG>ATG   | p.L293M      |
| Pat_06 | Pre-Treatment | DUOX1         | 53905  | 37 | 15 | 45428774  | 45428774  | Missense_Mutation | SNP | G | A | 6 | 600 | c.973G>A     | c.(973-975)GCC>ACC   | p.A325T      |
| Pat_06 | Pre-Treatment | FBN1          | 2200   | 37 | 15 | 48725143  | 48725143  | Missense_Mutation | SNP | C | T | 6 | 641 | c.6659G>A    | c.(6658-6660)CGA>CAA | p.R2220Q     |
| Pat_06 | Pre-Treatment | C15orf33      | 196951 | 37 | 15 | 49833994  | 49833994  | Missense_Mutation | SNP | C | A | 6 | 723 | c.757G>T     | c.(757-759)GAT>TAT   | p.D253Y      |
| Pat_06 | Pre-Treatment | ATP8B4        | 79895  | 37 | 15 | 50264941  | 50264941  | Missense_Mutation | SNP | G | A | 6 | 219 | c.1081C>T    | c.(1081-1083)CGG>TGG | p.R361W      |
| Pat_06 | Pre-Treatment | AQP9          | 366    | 37 | 15 | 58471493  | 58471493  | Missense_Mutation | SNP | T | C | 3 | 117 | c.662T>C     | c.(661-663)CTG>CCG   | p.L221P      |
| Pat_06 | Pre-Treatment | LIPC          | 3990   | 37 | 15 | 58830669  | 58830669  | Missense_Mutation | SNP | G | A | 6 | 822 | c.226G>A     | c.(226-228)GGC>AGC   | p.G76S       |
| Pat_06 | Pre-Treatment | LACTB         | 114294 | 37 | 15 | 63433955  | 63433955  | Missense_Mutation | SNP | G | A | 4 | 495 | c.1595G>A    | c.(1594-1596)AGC>AAC | p.S532N      |
| Pat_06 | Pre-Treatment | RAB8B         | 51762  | 37 | 15 | 63555808  | 63555808  | Missense_Mutation | SNP | C | T | 4 | 185 | c.614C>T     | c.(613-615)TCG>TTG   | p.S205L      |
| Pat_06 | Pre-Treatment | FAM96A        | 84191  | 37 | 15 | 64365201  | 64365201  | Nonsense_Mutation | SNP | G | A | 7 | 697 | c.412C>T     | c.(412-414)CGA>TGA   | p.R138*      |
| Pat_06 | Pre-Treatment | NOX5          | 79400  | 37 | 15 | 69223047  | 69223047  | Missense_Mutation | SNP | G | A | 5 | 537 | c.20G>A      | c.(19-21)GGC>GAC     | p.G7D        |
| Pat_06 | Pre-Treatment | TLE3          | 7090   | 37 | 15 | 70344856  | 70344856  | Missense_Mutation | SNP | G | A | 6 | 157 | c.1991C>T    | c.(1990-1992)TCG>TTG | p.S664L      |
| Pat_06 | Pre-Treatment | TLE3          | 7090   | 37 | 15 | 70346798  | 70346798  | Missense_Mutation | SNP | A | G | 4 | 373 | c.1814T>C    | c.(1813-1815)CTG>CCG | p.L605P      |
| Pat_06 | Pre-Treatment | STOML1        | 9399   | 37 | 15 | 74276372  | 74276372  | Missense_Mutation | SNP | C | T | 5 | 209 | c.1103G>A    | c.(1102-1104)CGG>CAG | p.R368Q      |
| Pat_06 | Pre-Treatment | LINGO1        | 84894  | 37 | 15 | 77907197  | 77907197  | Missense_Mutation | SNP | T | C | 3 | 137 | c.1052A>G    | c.(1051-1053)GAG>GGG | p.E351G      |
| Pat_06 | Pre-Treatment | ADAMTS7       | 11173  | 37 | 15 | 79059759  | 79059759  | Missense_Mutation | SNP | G | A | 4 | 273 | c.2821C>T    | c.(2821-2823)CCC>TCC | p.P941S      |
| Pat_06 | Pre-Treatment | KIAA1024      | 23251  | 37 | 15 | 79748562  | 79748562  | Missense_Mutation | SNP | G | A | 6 | 490 | c.73G>A      | c.(73-75)GTT>ATT     | p.V25I       |
| Pat_06 | Pre-Treatment | FAH           | 2184   | 37 | 15 | 80460423  | 80460423  | Missense_Mutation | SNP | G | A | 5 | 287 | c.485G>A     | c.(484-486)CGT>CAT   | p.R162H      |
| Pat_06 | Pre-Treatment | BNC1          | 646    | 37 | 15 | 83932358  | 83932358  | Missense_Mutation | SNP | C | T | 5 | 416 | c.1645G>A    | c.(1645-1647)GAA>AAA | p.E549K      |
| Pat_06 | Pre-Treatment | WDR73         | 84942  | 37 | 15 | 85188797  | 85188797  | Missense_Mutation | SNP | C | A | 3 | 66  | c.788G>T     | c.(787-789)AGC>ATC   | p.S263I      |
| Pat_06 | Pre-Treatment | AKAP13        | 11214  | 37 | 15 | 86124402  | 86124402  | Missense_Mutation | SNP | G | A | 5 | 345 | c.3103G>A    | c.(3103-3105)GCA>ACA | p.A1035T     |
| Pat_06 | Pre-Treatment | ANPEP         | 290    | 37 | 15 | 90344738  | 90344738  | Missense_Mutation | SNP | C | T | 5 | 361 | c.1670G>A    | c.(1669-1671)AGC>AAC | p.S557N      |
| Pat_06 | Pre-Treatment | TLL13         | 440307 | 37 | 15 | 90800930  | 90800930  | Missense_Mutation | SNP | G | A | 5 | 626 | c.911G>A     | c.(910-912)CGG>CAG   | p.R304Q      |
| Pat_06 | Pre-Treatment | PRC1          | 9055   | 37 | 15 | 91513716  | 91513716  | Missense_Mutation | SNP | G | A | 8 | 626 | c.1490C>T    | c.(1489-1491)ACG>ATG | p.T497M      |
| Pat_06 | Pre-Treatment | CHD2          | 1106   | 37 | 15 | 93540535  | 93540535  | Missense_Mutation | SNP | G | A | 5 | 657 | c.3787G>A    | c.(3787-3789)GTG>ATG | p.V1263M     |
| Pat_06 | Pre-Treatment | ADAMTS17      | 170691 | 37 | 15 | 100692893 | 100692893 | Missense_Mutation | SNP | G | A | 5 | 561 | c.1397C>T    | c.(1396-1398)CCG>CTG | p.P466L      |
| Pat_06 | Pre-Treatment | TM2D3         | 80213  | 37 | 15 | 102185305 | 102185305 | Missense_Mutation | SNP | G | A | 4 | 212 | c.563C>T     | c.(562-564)ACG>ATG   | p.T188M      |
| Pat_06 | Pre-Treatment | TM2D3         | 80213  | 37 | 15 | 102186954 | 102186954 | Missense_Mutation | SNP | G | A | 6 | 653 | c.476C>T     | c.(475-477)ACG>ATG   | p.T159M      |
| Pat_06 | Pre-Treatment | WASH3P        | 374666 | 37 | 15 | 102514187 | 102514187 | Missense_Mutation | SNP | C | T | 3 | 101 | c.158C>T     | c.(157-159)CCC>CTC   | p.P53L       |
| Pat_06 | Pre-Treatment | WFIKKN1       | 117166 | 37 | 16 | 683596    | 683596    | Missense_Mutation | SNP | G | A | 3 | 51  | c.1186G>A    | c.(1186-1188)GGC>AGC | p.G396S      |
| Pat_06 | Pre-Treatment | RHOT2         | 89941  | 37 | 16 | 723559    | 723559    | Missense_Mutation | SNP | G | A | 7 | 527 | c.1810G>A    | c.(1810-1812)GCA>ACA | p.A604T      |
| Pat_06 | Pre-Treatment | METRN         | 79006  | 37 | 16 | 767370    | 767370    | Missense_Mutation | SNP | G | A | 3 | 32  | c.865G>A     | c.(865-867)GAG>AAG   | p.E289K      |

|        |               |           |        |    |    |          |          |                        |     |   |   |   |     |               |                      |               |
|--------|---------------|-----------|--------|----|----|----------|----------|------------------------|-----|---|---|---|-----|---------------|----------------------|---------------|
| Pat_06 | Pre-Treatment | MSLNL     | 401827 | 37 | 16 | 825086   | 825086   | Splice_Site            | SNP | C | T | 3 | 29  | c.1487_splice | c.e7-1               | p.G496_splice |
| Pat_06 | Pre-Treatment | TSC2      | 7249   | 37 | 16 | 2124250  | 2124250  | Missense_Mutation      | SNP | G | C | 3 | 246 | c.2405G>C     | c.(2404-2406)AGC>ACC | p.S802T       |
| Pat_06 | Pre-Treatment | PKD1      | 5310   | 37 | 16 | 2160688  | 2160688  | Missense_Mutation      | SNP | G | A | 4 | 121 | c.4480C>T     | c.(4480-4482)CGC>TGC | p.R1494C      |
| Pat_06 | Pre-Treatment | CLDN9     | 9080   | 37 | 16 | 3063490  | 3063490  | Missense_Mutation      | SNP | G | A | 5 | 676 | c.127G>A      | c.(127-129)GCC>ACC   | p.A43T        |
| Pat_06 | Pre-Treatment | OR1F2P    | 26184  | 37 | 16 | 3265972  | 3265972  | Missense_Mutation      | SNP | G | A | 6 | 431 | c.263G>A      | c.(262-264)CGC>CAC   | p.R88H        |
| Pat_06 | Pre-Treatment | CREBBP    | 1387   | 37 | 16 | 3795351  | 3795351  | Missense_Mutation      | SNP | C | T | 4 | 215 | c.3841G>A     | c.(3841-3843)GTT>ATT | p.V1281I      |
| Pat_06 | Pre-Treatment | ADCY9     | 115    | 37 | 16 | 4163951  | 4163951  | Missense_Mutation      | SNP | C | T | 5 | 755 | c.1493G>A     | c.(1492-1494)GGC>GAC | p.G498D       |
| Pat_06 | Pre-Treatment | ADCY9     | 115    | 37 | 16 | 4164821  | 4164821  | Missense_Mutation      | SNP | G | A | 5 | 345 | c.623C>T      | c.(622-624)ACG>ATG   | p.T208M       |
| Pat_06 | Pre-Treatment | CORO7     | 79585  | 37 | 16 | 4410468  | 4410468  | Missense_Mutation      | SNP | G | A | 3 | 88  | c.1999C>T     | c.(1999-2001)CGG>TGG | p.R667W       |
| Pat_06 | Pre-Treatment | HMOX2     | 3163   | 37 | 16 | 4557769  | 4557769  | Missense_Mutation      | SNP | G | A | 4 | 279 | c.260G>A      | c.(259-261)CGC>CAC   | p.R87H        |
| Pat_06 | Pre-Treatment | CIITA     | 4261   | 37 | 16 | 11001044 | 11001044 | Missense_Mutation      | SNP | G | C | 3 | 116 | c.1695G>C     | c.(1693-1695)GAG>GAC | p.E565D       |
| Pat_06 | Pre-Treatment | KIAA0430  | 9665   | 37 | 16 | 15711209 | 15711209 | Missense_Mutation      | SNP | C | G | 5 | 418 | c.2904G>C     | c.(2902-2904)GAG>GAC | p.E968D       |
| Pat_06 | Pre-Treatment | MYH11     | 4629   | 37 | 16 | 15850338 | 15850338 | Missense_Mutation      | SNP | C | G | 4 | 432 | c.1609G>C     | c.(1609-1611)GAG>CAG | p.E537Q       |
| Pat_06 | Pre-Treatment | ABCC1     | 4363   | 37 | 16 | 16173267 | 16173267 | Missense_Mutation      | SNP | G | A | 5 | 381 | c.2047G>A     | c.(2047-2049)GGA>AGA | p.G683R       |
| Pat_06 | Pre-Treatment | GPRC5B    | 51704  | 37 | 16 | 19883402 | 19883402 | Missense_Mutation      | SNP | A | G | 3 | 133 | c.766T>C      | c.(766-768)TTC>CTC   | p.F256L       |
| Pat_06 | Pre-Treatment | PALB2     | 79728  | 37 | 16 | 23614890 | 23614890 | Missense_Mutation      | SNP | G | A | 5 | 462 | c.3451C>T     | c.(3451-3453)CTC>TTC | p.L1151F      |
| Pat_06 | Pre-Treatment | ERN2      | 10595  | 37 | 16 | 23724538 | 23724538 | Missense_Mutation      | SNP | G | A | 3 | 26  | c.115C>T      | c.(115-117)CCT>TCT   | p.P39S        |
| Pat_06 | Pre-Treatment | SH2B1     | 25970  | 37 | 16 | 28878028 | 28878028 | Missense_Mutation      | SNP | G | A | 4 | 321 | c.613G>A      | c.(613-615)GGG>AGG   | p.G205R       |
| Pat_06 | Pre-Treatment | KIF22     | 3835   | 37 | 16 | 29809938 | 29809938 | Missense_Mutation      | SNP | G | A | 5 | 661 | c.419G>A      | c.(418-420)AGC>AAC   | p.S140N       |
| Pat_06 | Pre-Treatment | MVP       | 9961   | 37 | 16 | 29848185 | 29848185 | Missense_Mutation      | SNP | C | G | 3 | 153 | c.815C>G      | c.(814-816)CCC>CGC   | p.P272R       |
| Pat_06 | Pre-Treatment | TAOK2     | 9344   | 37 | 16 | 29990581 | 29990581 | Missense_Mutation      | SNP | C | T | 5 | 657 | c.515C>T      | c.(514-516)TCT>TTT   | p.S172F       |
| Pat_06 | Pre-Treatment | ZNF646    | 9726   | 37 | 16 | 31090124 | 31090124 | Missense_Mutation      | SNP | G | T | 6 | 804 | c.2479G>T     | c.(2479-2481)GGG>TGG | p.G827W       |
| Pat_06 | Pre-Treatment | PRSS36    | 146547 | 37 | 16 | 31150725 | 31150725 | Missense_Mutation      | SNP | G | A | 5 | 490 | c.2302C>T     | c.(2302-2304)CCG>TCG | p.P768S       |
| Pat_06 | Pre-Treatment | C16orf58  | 64755  | 37 | 16 | 31508206 | 31508206 | Missense_Mutation      | SNP | G | C | 3 | 119 | c.666C>G      | c.(664-666)AAC>AAG   | p.N222K       |
| Pat_06 | Pre-Treatment | NETO2     | 81831  | 37 | 16 | 47163191 | 47163191 | Missense_Mutation      | SNP | G | A | 6 | 797 | c.176C>T      | c.(175-177)TCG>TTG   | p.S59L        |
| Pat_06 | Pre-Treatment | LONP2     | 83752  | 37 | 16 | 48337150 | 48337150 | Missense_Mutation      | SNP | G | A | 8 | 810 | c.1729G>A     | c.(1729-1731)GTG>ATG | p.V577M       |
| Pat_06 | Pre-Treatment | SIAH1     | 6477   | 37 | 16 | 48395912 | 48395912 | Missense_Mutation      | SNP | G | A | 4 | 228 | c.428C>T      | c.(427-429)GCT>GTT   | p.A143V       |
| Pat_06 | Pre-Treatment | CBLN1     | 869    | 37 | 16 | 49315218 | 49315218 | Missense_Mutation      | SNP | G | C | 3 | 194 | c.159C>G      | c.(157-159)ATC>ATG   | p.I53M        |
| Pat_06 | Pre-Treatment | ZNF423    | 23090  | 37 | 16 | 49672212 | 49672212 | Missense_Mutation      | SNP | G | C | 3 | 196 | c.851C>G      | c.(850-852)ACC>AGC   | p.T284S       |
| Pat_06 | Pre-Treatment | TOX3      | 27324  | 37 | 16 | 52497917 | 52497917 | Missense_Mutation      | SNP | G | A | 6 | 483 | c.337C>T      | c.(337-339)CTC>TTC   | p.L113F       |
| Pat_06 | Pre-Treatment | CAPNS2    | 84290  | 37 | 16 | 55601312 | 55601312 | Missense_Mutation      | SNP | G | A | 6 | 850 | c.644G>A      | c.(643-645)CGC>CAC   | p.R215H       |
| Pat_06 | Pre-Treatment | NLRC5     | 84166  | 37 | 16 | 57113186 | 57113186 | Missense_Mutation      | SNP | C | A | 5 | 341 | c.5219C>A     | c.(5218-5220)CCG>CAG | p.P1740Q      |
| Pat_06 | Pre-Treatment | ZNF319    | 57567  | 37 | 16 | 58031472 | 58031472 | Missense_Mutation      | SNP | G | A | 5 | 445 | c.698C>T      | c.(697-699)ACG>ATG   | p.T233M       |
| Pat_06 | Pre-Treatment | SETD6     | 79918  | 37 | 16 | 58549945 | 58549945 | Missense_Mutation      | SNP | C | T | 3 | 56  | c.278C>T      | c.(277-279)CCG>CTG   | p.P93L        |
| Pat_06 | Pre-Treatment | GOT2      | 2806   | 37 | 16 | 58768141 | 58768141 | Translation_Start_Site | SNP | G | A | 5 | 95  | c.-8C>T       | c.(-10-6)TACGG>TATGG |               |
| Pat_06 | Pre-Treatment | CES3      | 23491  | 37 | 16 | 66998260 | 66998260 | Missense_Mutation      | SNP | C | G | 3 | 235 | c.561C>G      | c.(559-561)AGC>AGG   | p.S187R       |
| Pat_06 | Pre-Treatment | KIAA0895L | 653319 | 37 | 16 | 67213728 | 67213728 | Missense_Mutation      | SNP | C | T | 5 | 442 | c.704G>A      | c.(703-705)TGC>TAC   | p.C235Y       |
| Pat_06 | Pre-Treatment | PLEKHG4   | 25894  | 37 | 16 | 67318652 | 67318652 | Missense_Mutation      | SNP | G | A | 4 | 199 | c.1729G>A     | c.(1729-1731)GCA>ACA | p.A577T       |
| Pat_06 | Pre-Treatment | ZDHHC1    | 29800  | 37 | 16 | 67432126 | 67432126 | Missense_Mutation      | SNP | G | A | 8 | 721 | c.916C>T      | c.(916-918)CGG>TGG   | p.R306W       |
| Pat_06 | Pre-Treatment | PMFBP1    | 83449  | 37 | 16 | 72170712 | 72170712 | Missense_Mutation      | SNP | T | C | 5 | 293 | c.925A>G      | c.(925-927)AAG>GAG   | p.K309E       |
| Pat_06 | Pre-Treatment | PKD1L2    | 114780 | 37 | 16 | 81199543 | 81199543 | Missense_Mutation      | SNP | C | T | 8 | 43  | c.3119G>A     | c.(3118-3120)CGA>CAA | p.R1040Q      |
| Pat_06 | Pre-Treatment | PLCG2     | 5336   | 37 | 16 | 81929460 | 81929460 | Nonsense_Mutation      | SNP | G | A | 5 | 610 | c.1121G>A     | c.(1120-1122)TGG>TAG | p.W374*       |
| Pat_06 | Pre-Treatment | PLCG2     | 5336   | 37 | 16 | 81929466 | 81929466 | Missense_Mutation      | SNP | G | A | 5 | 639 | c.1127G>A     | c.(1126-1128)CGG>CAG | p.R376Q       |
| Pat_06 | Pre-Treatment | ZDHHC7    | 55625  | 37 | 16 | 85010044 | 85010044 | Missense_Mutation      | SNP | G | A | 4 | 207 | c.832C>T      | c.(832-834)CCC>TCC   | p.P278S       |
| Pat_06 | Pre-Treatment | ANKRD11   | 29123  | 37 | 16 | 89347191 | 89347191 | Missense_Mutation      | SNP | G | A | 5 | 186 | c.5759C>T     | c.(5758-5760)ACG>ATG | p.T1920M      |
| Pat_06 | Pre-Treatment | RAP1GAP2  | 23108  | 37 | 17 | 2921464  | 2921464  | Missense_Mutation      | SNP | G | A | 3 | 40  | c.1604G>A     | c.(1603-1605)AGC>AAC | p.S535N       |
| Pat_06 | Pre-Treatment | TRPV1     | 7442   | 37 | 17 | 3489127  | 3489127  | Missense_Mutation      | SNP | G | C | 3 | 148 | c.1318C>G     | c.(1318-1320)CTG>GTG | p.L440V       |

|        |               |           |        |    |    |          |          |                   |     |   |   |     |     |              |                      |               |
|--------|---------------|-----------|--------|----|----|----------|----------|-------------------|-----|---|---|-----|-----|--------------|----------------------|---------------|
| Pat_06 | Pre-Treatment | ATP2A3    | 489    | 37 | 17 | 3839752  | 3839752  | Missense_Mutation | SNP | G | A | 5   | 341 | c.2333C>T    | c.(2332-2334)ACG>ATG | p.T778M       |
| Pat_06 | Pre-Treatment | ANKFY1    | 51479  | 37 | 17 | 4082253  | 4082253  | Nonsense_Mutation | SNP | G | A | 5   | 640 | c.2497C>T    | c.(2497-2499)CGA>TGA | p.R833*       |
| Pat_06 | Pre-Treatment | PFN1      | 5216   | 37 | 17 | 4849266  | 4849266  | Missense_Mutation | SNP | C | A | 6   | 439 | c.352G>T     | c.(352-354)GGT>TGT   | p.G118C       |
| Pat_06 | Pre-Treatment | CAMTA2    | 23125  | 37 | 17 | 4875559  | 4875559  | Missense_Mutation | SNP | C | T | 6   | 568 | c.2776G>A    | c.(2776-2778)GCT>ACT | p.A926T       |
| Pat_06 | Pre-Treatment | DERL2     | 51009  | 37 | 17 | 5384615  | 5384615  | Splice_Site       | SNP | C | T | 5   | 349 | c.327_splice | c.e4+1               | p.T109_splice |
| Pat_06 | Pre-Treatment | C17orf81  | 23587  | 37 | 17 | 7160182  | 7160182  | Missense_Mutation | SNP | G | A | 4   | 454 | c.464G>A     | c.(463-465)AGC>AAC   | p.S155N       |
| Pat_06 | Pre-Treatment | TNK1      | 8711   | 37 | 17 | 7287867  | 7287867  | Missense_Mutation | SNP | G | A | 4   | 83  | c.931G>A     | c.(931-933)GTG>ATG   | p.V311M       |
| Pat_06 | Pre-Treatment | C17orf74  | 201243 | 37 | 17 | 7329660  | 7329660  | Missense_Mutation | SNP | G | A | 5   | 532 | c.350G>A     | c.(349-351)AGT>AAT   | p.S117N       |
| Pat_06 | Pre-Treatment | ZBTB4     | 57659  | 37 | 17 | 7366712  | 7366712  | Missense_Mutation | SNP | G | A | 4   | 95  | c.1589C>T    | c.(1588-1590)GCA>GTA | p.A530V       |
| Pat_06 | Pre-Treatment | DNAH2     | 146754 | 37 | 17 | 7697644  | 7697644  | Missense_Mutation | SNP | C | T | 5   | 353 | c.7642C>T    | c.(7642-7644)CGC>TGC | p.R2548C      |
| Pat_06 | Pre-Treatment | USP43     | 124739 | 37 | 17 | 9604461  | 9604461  | Nonsense_Mutation | SNP | C | T | 3   | 27  | c.1561C>T    | c.(1561-1563)CGA>TGA | p.R521*       |
| Pat_06 | Pre-Treatment | MYH2      | 4620   | 37 | 17 | 10430055 | 10430055 | Missense_Mutation | SNP | G | A | 6   | 606 | c.4048C>T    | c.(4048-4050)CGG>TGG | p.R1350W      |
| Pat_06 | Pre-Treatment | MAP2K4    | 6416   | 37 | 17 | 12028632 | 12028632 | Missense_Mutation | SNP | G | A | 5   | 726 | c.835G>A     | c.(835-837)GCA>ACA   | p.A279T       |
| Pat_06 | Pre-Treatment | ELAC2     | 60528  | 37 | 17 | 12920211 | 12920211 | Missense_Mutation | SNP | C | T | 5   | 643 | c.335G>A     | c.(334-336)CGA>CAA   | p.R112Q       |
| Pat_06 | Pre-Treatment | TRIM16    | 10626  | 37 | 17 | 15554529 | 15554529 | Missense_Mutation | SNP | G | A | 4   | 374 | c.395C>T     | c.(394-396)CCT>CTT   | p.P132L       |
| Pat_06 | Pre-Treatment | UNC119    | 9094   | 37 | 17 | 26874365 | 26874365 | Missense_Mutation | SNP | G | A | 5   | 435 | c.673C>T     | c.(673-675)CGG>TGG   | p.R225W       |
| Pat_06 | Pre-Treatment | SUPT6H    | 6830   | 37 | 17 | 27003267 | 27003267 | Missense_Mutation | SNP | A | G | 4   | 588 | c.716A>G     | c.(715-717)GAG>GGG   | p.E239G       |
| Pat_06 | Pre-Treatment | RFFL      | 117584 | 37 | 17 | 33348494 | 33348494 | Missense_Mutation | SNP | T | C | 3   | 166 | c.487A>G     | c.(487-489)ACC>GCC   | p.T163A       |
| Pat_06 | Pre-Treatment | GAS2L2    | 246176 | 37 | 17 | 34074192 | 34074192 | Missense_Mutation | SNP | T | C | 4   | 775 | c.928A>G     | c.(928-930)ACC>GCC   | p.T310A       |
| Pat_06 | Pre-Treatment | TAF15     | 8148   | 37 | 17 | 34151144 | 34151144 | Missense_Mutation | SNP | G | A | 5   | 522 | c.547G>A     | c.(547-549)GGA>AGA   | p.G183R       |
| Pat_06 | Pre-Treatment | MLLT6     | 4302   | 37 | 17 | 36873805 | 36873805 | Missense_Mutation | SNP | T | C | 3   | 208 | c.1772T>C    | c.(1771-1773)CTC>CCC | p.L591P       |
| Pat_06 | Pre-Treatment | ERBB2     | 2064   | 37 | 17 | 37866359 | 37866359 | Missense_Mutation | SNP | G | A | 5   | 678 | c.664G>A     | c.(664-666)GGT>AGT   | p.G222S       |
| Pat_06 | Pre-Treatment | GRB7      | 2886   | 37 | 17 | 37899492 | 37899492 | Missense_Mutation | SNP | G | A | 6   | 319 | c.523G>A     | c.(523-525)GGA>AGA   | p.G175R       |
| Pat_06 | Pre-Treatment | IGFBP4    | 3487   | 37 | 17 | 38610289 | 38610289 | Missense_Mutation | SNP | G | A | 7   | 736 | c.617G>A     | c.(616-618)CGC>CAC   | p.R206H       |
| Pat_06 | Pre-Treatment | KRTAP4-11 | 653240 | 37 | 17 | 39274087 | 39274087 | Missense_Mutation | SNP | G | C | 3   | 53  | c.481C>G     | c.(481-483)CTG>GTG   | p.L161V       |
| Pat_06 | Pre-Treatment | KRTAP4-5  | 85289  | 37 | 17 | 39305839 | 39305839 | Missense_Mutation | SNP | A | T | 4   | 194 | c.181T>A     | c.(181-183)TGC>AGC   | p.C61S        |
| Pat_06 | Pre-Treatment | KRTAP4-4  | 84616  | 37 | 17 | 39316769 | 39316769 | Missense_Mutation | SNP | T | A | 7   | 582 | c.175A>T     | c.(175-177)ACC>TCC   | p.T59S        |
| Pat_06 | Pre-Treatment | KRT17     | 3872   | 37 | 17 | 39775940 | 39775940 | Missense_Mutation | SNP | G | A | 7   | 415 | c.1205C>T    | c.(1204-1206)CCG>CTG | p.P402L       |
| Pat_06 | Pre-Treatment | GRN       | 2896   | 37 | 17 | 42426831 | 42426831 | Missense_Mutation | SNP | G | T | 5   | 418 | c.176G>T     | c.(175-177)GGC>GTC   | p.G59V        |
| Pat_06 | Pre-Treatment | ITGA2B    | 3674   | 37 | 17 | 42461287 | 42461287 | Missense_Mutation | SNP | C | G | 3   | 151 | c.973G>C     | c.(973-975)GCT>CCT   | p.A325P       |
| Pat_06 | Pre-Treatment | NMT1      | 4836   | 37 | 17 | 43182301 | 43182301 | Missense_Mutation | SNP | A | G | 3   | 256 | c.1407A>G    | c.(1405-1407)ATA>ATG | p.I469M       |
| Pat_06 | Pre-Treatment | KPNB1     | 3837   | 37 | 17 | 45754426 | 45754426 | Missense_Mutation | SNP | G | A | 5   | 680 | c.2036G>A    | c.(2035-2037)CGT>CAT | p.R679H       |
| Pat_06 | Pre-Treatment | COL1A1    | 1277   | 37 | 17 | 48265326 | 48265326 | Missense_Mutation | SNP | C | A | 6   | 612 | c.3280G>T    | c.(3280-3282)GGT>TGT | p.G1094C      |
| Pat_06 | Pre-Treatment | MYCBPAP   | 84073  | 37 | 17 | 48605535 | 48605535 | Missense_Mutation | SNP | G | C | 3   | 213 | c.2440G>C    | c.(2440-2442)GTG>CTG | p.V814L       |
| Pat_06 | Pre-Treatment | CACNA1G   | 8913   | 37 | 17 | 48655687 | 48655687 | Nonsense_Mutation | SNP | C | A | 5   | 282 | c.2063C>A    | c.(2062-2064)TCA>TAA | p.S688*       |
| Pat_06 | Pre-Treatment | MPO       | 4353   | 37 | 17 | 56350963 | 56350963 | Missense_Mutation | SNP | G | A | 281 | 493 | c.1433C>T    | c.(1432-1434)ACG>ATG | p.T478M       |
| Pat_06 | Pre-Treatment | HSF5      | 124535 | 37 | 17 | 56565325 | 56565325 | Missense_Mutation | SNP | C | G | 4   | 243 | c.311G>C     | c.(310-312)GGC>GCC   | p.G104A       |
| Pat_06 | Pre-Treatment | C17orf47  | 284083 | 37 | 17 | 56620550 | 56620550 | Missense_Mutation | SNP | C | T | 4   | 259 | c.998G>A     | c.(997-999)CGC>CAC   | p.R333H       |
| Pat_06 | Pre-Treatment | HEATR6    | 63897  | 37 | 17 | 58120947 | 58120947 | Missense_Mutation | SNP | G | A | 5   | 610 | c.3523C>T    | c.(3523-3525)CTC>TTC | p.L1175F      |
| Pat_06 | Pre-Treatment | TANC2     | 26115  | 37 | 17 | 61497713 | 61497713 | Missense_Mutation | SNP | G | T | 7   | 330 | c.4370G>T    | c.(4369-4371)AGC>ATC | p.S1457I      |
| Pat_06 | Pre-Treatment | ERN1      | 2081   | 37 | 17 | 62144291 | 62144291 | Missense_Mutation | SNP | C | G | 3   | 185 | c.582G>C     | c.(580-582)AAG>AAC   | p.K194N       |
| Pat_06 | Pre-Treatment | SMURF2    | 64750  | 37 | 17 | 62543799 | 62543799 | Missense_Mutation | SNP | C | A | 7   | 617 | c.1990G>T    | c.(1990-1992)GAT>TAT | p.D664Y       |
| Pat_06 | Pre-Treatment | LRRC37A3  | 374819 | 37 | 17 | 62891134 | 62891134 | Missense_Mutation | SNP | G | T | 8   | 808 | c.2242C>A    | c.(2242-2244)CTT>ATT | p.L748I       |
| Pat_06 | Pre-Treatment | PSMD12    | 5718   | 37 | 17 | 65362605 | 65362605 | Missense_Mutation | SNP | C | A | 5   | 149 | c.31G>T      | c.(31-33)GGG>TGG     | p.G11W        |
| Pat_06 | Pre-Treatment | BPTF      | 2186   | 37 | 17 | 65955937 | 65955937 | Missense_Mutation | SNP | C | G | 3   | 252 | c.8207C>G    | c.(8206-8208)ACT>AGT | p.T2736S      |
| Pat_06 | Pre-Treatment | ARSG      | 22901  | 37 | 17 | 66339924 | 66339924 | Missense_Mutation | SNP | G | A | 39  | 124 | c.398G>A     | c.(397-399)GGG>GAG   | p.G133E       |
| Pat_06 | Pre-Treatment | ABCA10    | 10349  | 37 | 17 | 67153007 | 67153007 | Missense_Mutation | SNP | C | T | 4   | 136 | c.3421G>A    | c.(3421-3423)GGA>AGA | p.G1141R      |



|        |               |            |        |    |    |          |          |                   |     |   |   |    |     |              |                        |              |
|--------|---------------|------------|--------|----|----|----------|----------|-------------------|-----|---|---|----|-----|--------------|------------------------|--------------|
| Pat_06 | Pre-Treatment | OTOP3      | 347741 | 37 | 17 | 72943400 | 72943400 | Missense_Mutation | SNP | G | A | 3  | 58  | c.1450G>A    | c.(1450-1452)GGC>AGC   | p.G484S      |
| Pat_06 | Pre-Treatment | KIAA0195   | 9772   | 37 | 17 | 73487517 | 73487517 | Missense_Mutation | SNP | G | A | 5  | 473 | c.1367G>A    | c.(1366-1368)CGC>CAC   | p.R456H      |
| Pat_06 | Pre-Treatment | CASKIN2    | 57513  | 37 | 17 | 73500322 | 73500322 | Missense_Mutation | SNP | G | A | 4  | 77  | c.1441C>T    | c.(1441-1443)CGG>TGG   | p.R481W      |
| Pat_06 | Pre-Treatment | RNF157     | 114804 | 37 | 17 | 74163736 | 74163736 | Missense_Mutation | SNP | C | T | 8  | 514 | c.439G>A     | c.(439-441)GCC>ACC     | p.A147T      |
| Pat_06 | Pre-Treatment | UBE2O      | 63893  | 37 | 17 | 74395668 | 74395668 | Missense_Mutation | SNP | G | A | 5  | 576 | c.1490C>T    | c.(1489-1491)TCT>TTT   | p.S497F      |
| Pat_06 | Pre-Treatment | ST6GALNAC1 | 55808  | 37 | 17 | 74621927 | 74621927 | Missense_Mutation | SNP | G | A | 3  | 91  | c.1579C>T    | c.(1579-1581)CTC>TTC   | p.L527F      |
| Pat_06 | Pre-Treatment | CBX4       | 8535   | 37 | 17 | 77807880 | 77807880 | Missense_Mutation | SNP | C | T | 5  | 391 | c.1561G>A    | c.(1561-1563)GAG>AAG   | p.E521K      |
| Pat_06 | Pre-Treatment | TBC1D16    | 125058 | 37 | 17 | 77987204 | 77987204 | Missense_Mutation | SNP | G | A | 3  | 85  | c.143C>T     | c.(142-144)CCG>CTG     | p.P48L       |
| Pat_06 | Pre-Treatment | FASN       | 2194   | 37 | 17 | 80040889 | 80040889 | Missense_Mutation | SNP | C | G | 4  | 248 | c.5668G>C    | c.(5668-5670)GCT>CCT   | p.A1890P     |
| Pat_06 | Pre-Treatment | TBCD       | 6904   | 37 | 17 | 80885162 | 80885162 | Missense_Mutation | SNP | G | A | 4  | 144 | c.2572G>A    | c.(2572-2574)GAC>AAC   | p.D858N      |
| Pat_06 | Pre-Treatment | MYOM1      | 8736   | 37 | 18 | 3129428  | 3129428  | Missense_Mutation | SNP | G | A | 6  | 589 | c.2596C>T    | c.(2596-2598)CCG>TCG   | p.P866S      |
| Pat_06 | Pre-Treatment | EPB41L3    | 23136  | 37 | 18 | 5478412  | 5478412  | Missense_Mutation | SNP | G | A | 6  | 597 | c.209C>T     | c.(208-210)GCT>GTT     | p.A70V       |
| Pat_06 | Pre-Treatment | KIAA1632   | 57724  | 37 | 18 | 43456258 | 43456258 | Missense_Mutation | SNP | A | G | 4  | 690 | c.5992T>C    | c.(5992-5994)TCA>CCA   | p.S1998P     |
| Pat_06 | Pre-Treatment | KIAA1632   | 57724  | 37 | 18 | 43529482 | 43529482 | Missense_Mutation | SNP | C | A | 5  | 537 | c.1465G>T    | c.(1465-1467)GGT>TGT   | p.G489C      |
| Pat_06 | Pre-Treatment | ST8SIA5    | 29906  | 37 | 18 | 44260450 | 44260450 | Missense_Mutation | SNP | C | T | 3  | 67  | c.686G>A     | c.(685-687)CGG>CAG     | p.R229Q      |
| Pat_06 | Pre-Treatment | CCDC11     | 220136 | 37 | 18 | 47788477 | 47788477 | Missense_Mutation | SNP | C | T | 6  | 790 | c.182G>A     | c.(181-183)CGC>CAC     | p.R61H       |
| Pat_06 | Pre-Treatment | ALPK2      | 115701 | 37 | 18 | 56202703 | 56202703 | Missense_Mutation | SNP | T | C | 4  | 590 | c.4716A>G    | c.(4714-4716)ATA>ATG   | p.I1572M     |
| Pat_06 | Pre-Treatment | CDH19      | 28513  | 37 | 18 | 64235831 | 64235831 | Missense_Mutation | SNP | C | A | 6  | 634 | c.312G>T     | c.(310-312)AAG>AAT     | p.K104N      |
| Pat_06 | Pre-Treatment | DSEL       | 92126  | 37 | 18 | 65179336 | 65179336 | Missense_Mutation | SNP | T | C | 4  | 745 | c.2540A>G    | c.(2539-2541)GAG>GGG   | p.E847G      |
| Pat_06 | Pre-Treatment | FAM69C     | 125704 | 37 | 18 | 72109213 | 72109213 | Missense_Mutation | SNP | C | T | 5  | 598 | c.1015G>A    | c.(1015-1017)GCG>ACG   | p.A339T      |
| Pat_06 | Pre-Treatment | REXO1      | 57455  | 37 | 19 | 1826936  | 1826936  | Missense_Mutation | SNP | G | A | 3  | 52  | c.1852C>T    | c.(1852-1854)CGG>TGG   | p.R618W      |
| Pat_06 | Pre-Treatment | REXO1      | 57455  | 37 | 19 | 1828061  | 1828061  | Missense_Mutation | SNP | G | A | 3  | 105 | c.727C>T     | c.(727-729)CGG>TGG     | p.R243W      |
| Pat_06 | Pre-Treatment | HMG20B     | 10362  | 37 | 19 | 3576268  | 3576268  | Missense_Mutation | SNP | G | A | 4  | 395 | c.482G>A     | c.(481-483)AGC>AAC     | p.S161N      |
| Pat_06 | Pre-Treatment | DAPK3      | 1613   | 37 | 19 | 3964864  | 3964864  | Missense_Mutation | SNP | C | A | 6  | 510 | c.188G>T     | c.(187-189)CGG>CTG     | p.R63L       |
| Pat_06 | Pre-Treatment | PLIN4      | 729359 | 37 | 19 | 4512545  | 4512545  | Missense_Mutation | SNP | G | A | 8  | 667 | c.1385C>T    | c.(1384-1386)GCT>GTT   | p.A462V      |
| Pat_06 | Pre-Treatment | PTPRS      | 5802   | 37 | 19 | 5214699  | 5214699  | Missense_Mutation | SNP | C | T | 3  | 90  | c.4367G>A    | c.(4366-4368)CGG>CAG   | p.R1456Q     |
| Pat_06 | Pre-Treatment | PTPRS      | 5802   | 37 | 19 | 5245864  | 5245864  | Missense_Mutation | SNP | T | G | 3  | 136 | c.911A>C     | c.(910-912)AAG>ACG     | p.K304T      |
| Pat_06 | Pre-Treatment | RANBP3     | 8498   | 37 | 19 | 5918626  | 5918626  | Nonsense_Mutation | SNP | G | A | 6  | 689 | c.1354C>T    | c.(1354-1356)CGA>TGA   | p.R452*      |
| Pat_06 | Pre-Treatment | DENND1C    | 79958  | 37 | 19 | 6480024  | 6480024  | Missense_Mutation | SNP | G | A | 3  | 83  | c.56C>T      | c.(55-57)GCG>GTG       | p.A19V       |
| Pat_06 | Pre-Treatment | TNFSF9     | 8744   | 37 | 19 | 6532819  | 6532819  | Missense_Mutation | SNP | C | A | 6  | 635 | c.290C>A     | c.(289-291)GCC>GAC     | p.A97D       |
| Pat_06 | Pre-Treatment | C3         | 718    | 37 | 19 | 6677992  | 6677992  | Missense_Mutation | SNP | C | A | 12 | 572 | c.4893G>T    | c.(4891-4893)TGG>TGT   | p.W1631C     |
| Pat_06 | Pre-Treatment | TRIP10     | 9322   | 37 | 19 | 6750307  | 6750307  | Missense_Mutation | SNP | G | T | 5  | 593 | c.1400G>T    | c.(1399-1401)TGG>TTG   | p.W467L      |
| Pat_06 | Pre-Treatment | ZNF557     | 79230  | 37 | 19 | 7076391  | 7076391  | Splice_Site       | SNP | G | T | 6  | 585 | c.100_splice | c.e5-1                 | p.G34_splice |
| Pat_06 | Pre-Treatment | XAB2       | 56949  | 37 | 19 | 7688136  | 7688136  | Missense_Mutation | SNP | G | A | 4  | 437 | c.1159C>T    | c.(1159-1161)CCC>TCC   | p.P387S      |
| Pat_06 | Pre-Treatment | CD209      | 30835  | 37 | 19 | 7810766  | 7810766  | Missense_Mutation | SNP | C | T | 11 | 735 | c.386G>A     | c.(385-387)CGG>CAG     | p.R129Q      |
| Pat_06 | Pre-Treatment | MUC16      | 94025  | 37 | 19 | 9061705  | 9061705  | Missense_Mutation | SNP | C | T | 20 | 180 | c.25741G>A   | c.(25741-25743)GAG>AAC | p.E8581K     |
| Pat_06 | Pre-Treatment | AP1M2      | 10053  | 37 | 19 | 10685123 | 10685123 | Missense_Mutation | SNP | G | A | 3  | 29  | c.1219C>T    | c.(1219-1221)CCC>TCC   | p.P407S      |
| Pat_06 | Pre-Treatment | SLC44A2    | 57153  | 37 | 19 | 10742169 | 10742169 | Nonsense_Mutation | SNP | C | T | 4  | 317 | c.460C>T     | c.(460-462)CAA>TAA     | p.Q154*      |
| Pat_06 | Pre-Treatment | DOCK6      | 57572  | 37 | 19 | 11333418 | 11333418 | Missense_Mutation | SNP | G | A | 3  | 53  | c.3233C>T    | c.(3232-3234)ACC>ATC   | p.T1078I     |
| Pat_06 | Pre-Treatment | ZNF844     | 284391 | 37 | 19 | 12187394 | 12187394 | Missense_Mutation | SNP | T | C | 6  | 166 | c.1459T>C    | c.(1459-1461)TTT>CTT   | p.F487L      |
| Pat_06 | Pre-Treatment | MAST1      | 22983  | 37 | 19 | 12969451 | 12969451 | Missense_Mutation | SNP | G | A | 4  | 214 | c.1264G>A    | c.(1264-1266)GAG>AAG   | p.E422K      |
| Pat_06 | Pre-Treatment | CACNA1A    | 773    | 37 | 19 | 13397728 | 13397728 | Missense_Mutation | SNP | G | A | 5  | 229 | c.3145C>T    | c.(3145-3147)CGG>TGG   | p.R1049W     |
| Pat_06 | Pre-Treatment | DCAF15     | 90379  | 37 | 19 | 14071323 | 14071323 | Missense_Mutation | SNP | A | G | 3  | 47  | c.1678A>G    | c.(1678-1680)ATG>GTG   | p.M560V      |
| Pat_06 | Pre-Treatment | LPHN1      | 22859  | 37 | 19 | 14273754 | 14273754 | Missense_Mutation | SNP | C | A | 3  | 57  | c.874G>T     | c.(874-876)GTG>TTG     | p.V292L      |
| Pat_06 | Pre-Treatment | DDX39      | 10212  | 37 | 19 | 14521140 | 14521140 | Missense_Mutation | SNP | C | T | 5  | 398 | c.620G>A     | c.(619-621)CGG>CAG     | p.R207Q      |
| Pat_06 | Pre-Treatment | EMR3       | 84658  | 37 | 19 | 14748977 | 14748977 | Missense_Mutation | SNP | G | A | 5  | 673 | c.1424C>T    | c.(1423-1425)CCC>CTC   | p.P475L      |
| Pat_06 | Pre-Treatment | RASAL3     | 64926  | 37 | 19 | 15565012 | 15565012 | Missense_Mutation | SNP | G | A | 3  | 56  | c.2227C>T    | c.(2227-2229)CTT>TTT   | p.L743F      |

|        |               |          |           |    |    |          |          |                   |     |   |   |    |     |               |                        |               |
|--------|---------------|----------|-----------|----|----|----------|----------|-------------------|-----|---|---|----|-----|---------------|------------------------|---------------|
| Pat_06 | Pre-Treatment | OR10H5   | 284433    | 37 | 19 | 15904883 | 15904883 | Missense_Mutation | SNP | G | A | 6  | 816 | c.25G>A       | c.(25-27)GTG>ATG       | p.V9M         |
| Pat_06 | Pre-Treatment | KLF2     | 10365     | 37 | 19 | 16437754 | 16437754 | Missense_Mutation | SNP | C | T | 4  | 206 | c.980C>T      | c.(979-981)ACG>ATG     | p.T327M       |
| Pat_06 | Pre-Treatment | NWD1     | 284434    | 37 | 19 | 16884020 | 16884020 | Missense_Mutation | SNP | C | A | 6  | 347 | c.2494C>A     | c.(2494-2496)CAA>AAA   | p.Q832K       |
| Pat_06 | Pre-Treatment | IL12RB1  | 3594      | 37 | 19 | 18197608 | 18197608 | Missense_Mutation | SNP | A | G | 3  | 123 | c.26T>C       | c.(25-27)GTC>GCC       | p.V9A         |
| Pat_06 | Pre-Treatment | GDF1     | 2657      | 37 | 19 | 18995067 | 18995067 | Missense_Mutation | SNP | G | A | 3  | 76  | c.419C>T      | c.(418-420)CCG>CTG     | p.P140L       |
| Pat_06 | Pre-Treatment | KIAA0892 | 23383     | 37 | 19 | 19455713 | 19455713 | Missense_Mutation | SNP | C | T | 4  | 258 | c.1133C>T     | c.(1132-1134)GCA>GTA   | p.A378V       |
| Pat_06 | Pre-Treatment | ZNF737   | 100129842 | 37 | 19 | 20727870 | 20727870 | Missense_Mutation | SNP | C | G | 4  | 219 | c.1139G>C     | c.(1138-1140)TGG>TCG   | p.W380S       |
| Pat_06 | Pre-Treatment | ZNF626   | 199777    | 37 | 19 | 20808090 | 20808090 | Missense_Mutation | SNP | C | T | 6  | 172 | c.593G>A      | c.(592-594)GGG>GAG     | p.G198E       |
| Pat_06 | Pre-Treatment | ZNF493   | 284443    | 37 | 19 | 21606468 | 21606468 | Missense_Mutation | SNP | C | T | 5  | 284 | c.623C>T      | c.(622-624)CCT>CTT     | p.P208L       |
| Pat_06 | Pre-Treatment | ZNF493   | 284443    | 37 | 19 | 21606614 | 21606614 | Missense_Mutation | SNP | G | A | 6  | 209 | c.769G>A      | c.(769-771)GCC>ACC     | p.A257T       |
| Pat_06 | Pre-Treatment | ZNF208   | 7757      | 37 | 19 | 22155878 | 22155878 | Missense_Mutation | SNP | G | A | 5  | 321 | c.1658C>T     | c.(1657-1659)ACT>ATT   | p.T553I       |
| Pat_06 | Pre-Treatment | ZNF681   | 148213    | 37 | 19 | 23927372 | 23927372 | Missense_Mutation | SNP | C | G | 4  | 264 | c.980G>C      | c.(979-981)AGA>ACA     | p.R327T       |
| Pat_06 | Pre-Treatment | CCNE1    | 898       | 37 | 19 | 30308147 | 30308147 | Missense_Mutation | SNP | G | A | 4  | 330 | c.284G>A      | c.(283-285)CGG>CAG     | p.R95Q        |
| Pat_06 | Pre-Treatment | TSHZ3    | 57616     | 37 | 19 | 31767905 | 31767905 | Missense_Mutation | SNP | G | A | 6  | 256 | c.2794C>T     | c.(2794-2796)CGG>TGG   | p.R932W       |
| Pat_06 | Pre-Treatment | GPI      | 2821      | 37 | 19 | 34856194 | 34856194 | Missense_Mutation | SNP | C | T | 4  | 195 | c.23C>T       | c.(22-24)CCC>CTC       | p.P8L         |
| Pat_06 | Pre-Treatment | GPI      | 2821      | 37 | 19 | 34890476 | 34890476 | Missense_Mutation | SNP | C | T | 6  | 750 | c.1414C>T     | c.(1414-1416)CGC>TGC   | p.R472C       |
| Pat_06 | Pre-Treatment | ZNF30    | 90075     | 37 | 19 | 35434144 | 35434144 | Missense_Mutation | SNP | G | A | 10 | 16  | c.274G>A      | c.(274-276)GAT>AAT     | p.D92N        |
| Pat_06 | Pre-Treatment | ZNF420   | 147923    | 37 | 19 | 37619123 | 37619123 | Missense_Mutation | SNP | G | C | 3  | 284 | c.1230G>C     | c.(1228-1230)CAG>CAC   | p.Q410H       |
| Pat_06 | Pre-Treatment | RYR1     | 6261      | 37 | 19 | 39062761 | 39062761 | Missense_Mutation | SNP | G | A | 4  | 528 | c.13849G>A    | c.(13849-13851)GGA>AGA | p.G4617R      |
| Pat_06 | Pre-Treatment | HNRNPL   | 3191      | 37 | 19 | 39336518 | 39336518 | Missense_Mutation | SNP | A | G | 4  | 670 | c.599T>C      | c.(598-600)CTG>CCG     | p.L200P       |
| Pat_06 | Pre-Treatment | PLEKHG2  | 64857     | 37 | 19 | 39915153 | 39915153 | Missense_Mutation | SNP | C | T | 4  | 225 | c.3380C>T     | c.(3379-3381)GCC>GTC   | p.A1127V      |
| Pat_06 | Pre-Treatment | FCGBP    | 8857      | 37 | 19 | 40420050 | 40420050 | Missense_Mutation | SNP | C | T | 85 | 258 | c.2944G>A     | c.(2944-2946)GAC>AAC   | p.D982N       |
| Pat_06 | Pre-Treatment | CYP2B6   | 1555      | 37 | 19 | 41522550 | 41522550 | Splice_Site       | SNP | G | T | 4  | 262 | c.1295_splice | c.e9-1                 | p.G432_splice |
| Pat_06 | Pre-Treatment | AXL      | 558       | 37 | 19 | 41725308 | 41725308 | Missense_Mutation | SNP | G | A | 3  | 78  | c.11G>A       | c.(10-12)CGG>CAG       | p.R4Q         |
| Pat_06 | Pre-Treatment | EXOSC5   | 56915     | 37 | 19 | 41893466 | 41893466 | Missense_Mutation | SNP | G | C | 3  | 62  | c.568C>G      | c.(568-570)CGG>GGG     | p.R190G       |
| Pat_06 | Pre-Treatment | ZNF155   | 7711      | 37 | 19 | 44501058 | 44501058 | Missense_Mutation | SNP | G | A | 6  | 596 | c.1049G>A     | c.(1048-1050)GGA>GAA   | p.G350E       |
| Pat_06 | Pre-Treatment | ZNF284   | 342909    | 37 | 19 | 44590236 | 44590236 | Missense_Mutation | SNP | G | A | 5  | 292 | c.605G>A      | c.(604-606)CGC>CAC     | p.R202H       |
| Pat_06 | Pre-Treatment | MARK4    | 57787     | 37 | 19 | 45801061 | 45801061 | Missense_Mutation | SNP | G | A | 3  | 34  | c.1726G>A     | c.(1726-1728)GAC>AAC   | p.D576N       |
| Pat_06 | Pre-Treatment | PTGIR    | 5739      | 37 | 19 | 47127113 | 47127113 | Missense_Mutation | SNP | G | A | 3  | 83  | c.370C>T      | c.(370-372)CCC>TCC     | p.P124S       |
| Pat_06 | Pre-Treatment | GRLF1    | 2909      | 37 | 19 | 47425372 | 47425372 | Missense_Mutation | SNP | G | A | 5  | 292 | c.3440G>A     | c.(3439-3441)CGC>CAC   | p.R1147H      |
| Pat_06 | Pre-Treatment | NAPA     | 8775      | 37 | 19 | 47995315 | 47995315 | Missense_Mutation | SNP | T | C | 4  | 571 | c.623A>G      | c.(622-624)AAG>AGG     | p.K208R       |
| Pat_06 | Pre-Treatment | EHD2     | 30846     | 37 | 19 | 48244171 | 48244171 | Missense_Mutation | SNP | C | T | 65 | 111 | c.1114C>T     | c.(1114-1116)CAC>TAC   | p.H372Y       |
| Pat_06 | Pre-Treatment | LIG1     | 3978      | 37 | 19 | 48640915 | 48640915 | Missense_Mutation | SNP | G | T | 4  | 204 | c.1118C>A     | c.(1117-1119)GCA>GAA   | p.A373E       |
| Pat_06 | Pre-Treatment | GRIN2D   | 2906      | 37 | 19 | 48908576 | 48908576 | Nonsense_Mutation | SNP | C | T | 3  | 103 | c.1051C>T     | c.(1051-1053)CAG>TAG   | p.Q351*       |
| Pat_06 | Pre-Treatment | CA11     | 770       | 37 | 19 | 49143533 | 49143533 | Missense_Mutation | SNP | C | A | 6  | 425 | c.290G>T      | c.(289-291)CGG>CTG     | p.R97L        |
| Pat_06 | Pre-Treatment | FUT2     | 2524      | 37 | 19 | 49207114 | 49207114 | Missense_Mutation | SNP | G | A | 6  | 578 | c.901G>A      | c.(901-903)GGA>AGA     | p.G301R       |
| Pat_06 | Pre-Treatment | BCAT2    | 587       | 37 | 19 | 49309887 | 49309887 | Missense_Mutation | SNP | C | T | 5  | 700 | c.187G>A      | c.(187-189)GAC>AAC     | p.D63N        |
| Pat_06 | Pre-Treatment | PLEKHA4  | 57664     | 37 | 19 | 49341337 | 49341337 | Missense_Mutation | SNP | G | A | 5  | 495 | c.2014C>T     | c.(2014-2016)CGG>TGG   | p.R672W       |
| Pat_06 | Pre-Treatment | CCDC155  | 147872    | 37 | 19 | 49897837 | 49897837 | Missense_Mutation | SNP | G | A | 5  | 409 | c.148G>A      | c.(148-150)GGC>AGC     | p.G50S        |
| Pat_06 | Pre-Treatment | ALDH16A1 | 126133    | 37 | 19 | 49965932 | 49965932 | Missense_Mutation | SNP | G | A | 4  | 161 | c.1018G>A     | c.(1018-1020)GTG>ATG   | p.V340M       |
| Pat_06 | Pre-Treatment | MED25    | 81857     | 37 | 19 | 50339086 | 50339086 | Missense_Mutation | SNP | G | C | 3  | 71  | c.1849G>C     | c.(1849-1851)GCC>CCC   | p.A617P       |
| Pat_06 | Pre-Treatment | POLD1    | 5424      | 37 | 19 | 50909518 | 50909518 | Missense_Mutation | SNP | C | T | 6  | 538 | c.1322C>T     | c.(1321-1323)ACG>ATG   | p.T441M       |
| Pat_06 | Pre-Treatment | LRRRC4B  | 94030     | 37 | 19 | 51052058 | 51052058 | Missense_Mutation | SNP | G | A | 3  | 35  | c.38C>T       | c.(37-39)CCG>CTG       | p.P13L        |
| Pat_06 | Pre-Treatment | ZNF578   | 147660    | 37 | 19 | 53014626 | 53014626 | Missense_Mutation | SNP | C | G | 6  | 445 | c.992C>G      | c.(991-993)ACA>AGA     | p.T331R       |
| Pat_06 | Pre-Treatment | ZNF578   | 147660    | 37 | 19 | 53014710 | 53014710 | Missense_Mutation | SNP | G | C | 8  | 434 | c.1076G>C     | c.(1075-1077)AGA>ACA   | p.R359T       |
| Pat_06 | Pre-Treatment | ZNF761   | 388561    | 37 | 19 | 53957922 | 53957922 | Missense_Mutation | SNP | C | T | 6  | 453 | c.161C>T      | c.(160-162)ACG>ATG     | p.T54M        |
| Pat_06 | Pre-Treatment | TSEN34   | 79042     | 37 | 19 | 54696087 | 54696087 | Missense_Mutation | SNP | G | A | 5  | 318 | c.608G>A      | c.(607-609)CGT>CAT     | p.R203H       |

|        |               |           |        |    |    |           |           |                   |     |   |   |   |     |              |                      |               |
|--------|---------------|-----------|--------|----|----|-----------|-----------|-------------------|-----|---|---|---|-----|--------------|----------------------|---------------|
| Pat_06 | Pre-Treatment | LILRA4    | 23547  | 37 | 19 | 54849290  | 54849290  | Missense_Mutation | SNP | C | G | 3 | 218 | c.572G>C     | c.(571-573)GGT>GCT   | p.G191A       |
| Pat_06 | Pre-Treatment | SYT5      | 6861   | 37 | 19 | 55686662  | 55686662  | Missense_Mutation | SNP | A | G | 4 | 114 | c.586T>C     | c.(586-588)TAC>CAC   | p.Y196H       |
| Pat_06 | Pre-Treatment | SAPS1     | 22870  | 37 | 19 | 55743297  | 55743297  | Missense_Mutation | SNP | G | A | 3 | 72  | c.2179C>T    | c.(2179-2181)CCC>TCC | p.P727S       |
| Pat_06 | Pre-Treatment | SAPS1     | 22870  | 37 | 19 | 55756504  | 55756504  | Missense_Mutation | SNP | G | A | 4 | 150 | c.602C>T     | c.(601-603)CCG>CTG   | p.P201L       |
| Pat_06 | Pre-Treatment | U2AF2     | 11338  | 37 | 19 | 56180135  | 56180135  | Missense_Mutation | SNP | G | A | 5 | 423 | c.922G>A     | c.(922-924)GTG>ATG   | p.V308M       |
| Pat_06 | Pre-Treatment | NLRP11    | 204801 | 37 | 19 | 56320822  | 56320822  | Missense_Mutation | SNP | G | A | 6 | 618 | c.1154C>T    | c.(1153-1155)ACT>ATT | p.T385I       |
| Pat_06 | Pre-Treatment | ZNF71     | 58491  | 37 | 19 | 57133523  | 57133523  | Missense_Mutation | SNP | C | T | 5 | 428 | c.868C>T     | c.(868-870)CGC>TGC   | p.R290C       |
| Pat_06 | Pre-Treatment | SLC27A5   | 10998  | 37 | 19 | 59009938  | 59009938  | Missense_Mutation | SNP | G | A | 4 | 171 | c.2017C>T    | c.(2017-2019)CGG>TGG | p.R673W       |
| Pat_06 | Pre-Treatment | MYT1L     | 23040  | 37 | 2  | 1796174   | 1796174   | Missense_Mutation | SNP | C | G | 3 | 148 | c.3339G>C    | c.(3337-3339)CAG>CAC | p.Q1113H      |
| Pat_06 | Pre-Treatment | KCNF1     | 3754   | 37 | 2  | 11053168  | 11053168  | Missense_Mutation | SNP | G | A | 4 | 183 | c.616G>A     | c.(616-618)GAG>AAG   | p.E206K       |
| Pat_06 | Pre-Treatment | DPYSL5    | 56896  | 37 | 2  | 27165503  | 27165503  | Missense_Mutation | SNP | G | A | 4 | 303 | c.1325G>A    | c.(1324-1326)CGG>CAG | p.R442Q       |
| Pat_06 | Pre-Treatment | ZNF513    | 130557 | 37 | 2  | 27601720  | 27601720  | Missense_Mutation | SNP | G | A | 3 | 54  | c.413C>T     | c.(412-414)CCG>CTG   | p.P138L       |
| Pat_06 | Pre-Treatment | C2orf16   | 84226  | 37 | 2  | 27804774  | 27804774  | Nonsense_Mutation | SNP | G | T | 8 | 827 | c.5335G>T    | c.(5335-5337)GAG>TAG | p.E1779*      |
| Pat_06 | Pre-Treatment | FAM179A   | 165186 | 37 | 2  | 29222223  | 29222223  | Missense_Mutation | SNP | C | T | 3 | 53  | c.316C>T     | c.(316-318)CTC>TTC   | p.L106F       |
| Pat_06 | Pre-Treatment | ALK       | 238    | 37 | 2  | 29519754  | 29519754  | Missense_Mutation | SNP | C | T | 6 | 175 | c.1817G>A    | c.(1816-1818)AGG>AAG | p.R606K       |
| Pat_06 | Pre-Treatment | HEATR5B   | 54497  | 37 | 2  | 37302641  | 37302641  | Missense_Mutation | SNP | C | A | 6 | 794 | c.584G>T     | c.(583-585)TGT>TTT   | p.C195F       |
| Pat_06 | Pre-Treatment | PRKCE     | 5581   | 37 | 2  | 46234724  | 46234724  | Missense_Mutation | SNP | G | A | 4 | 234 | c.1187G>A    | c.(1186-1188)CGG>CAG | p.R396Q       |
| Pat_06 | Pre-Treatment | MSH2      | 4436   | 37 | 2  | 47739544  | 47739544  | Missense_Mutation | SNP | C | A | 3 | 68  | c.2737C>A    | c.(2737-2739)CAG>AAG | p.Q913K       |
| Pat_06 | Pre-Treatment | SPTBN1    | 6711   | 37 | 2  | 54858212  | 54858212  | Missense_Mutation | SNP | G | A | 5 | 490 | c.3028G>A    | c.(3028-3030)GCA>ACA | p.A1010T      |
| Pat_06 | Pre-Treatment | PAPOLG    | 64895  | 37 | 2  | 61014687  | 61014687  | Missense_Mutation | SNP | G | T | 6 | 363 | c.1328G>T    | c.(1327-1329)CGG>CTG | p.R443L       |
| Pat_06 | Pre-Treatment | MDH1      | 4190   | 37 | 2  | 63833082  | 63833082  | Missense_Mutation | SNP | G | C | 4 | 794 | c.799G>C     | c.(799-801)GTG>CTG   | p.V267L       |
| Pat_06 | Pre-Treatment | HSPC159   | 29094  | 37 | 2  | 64683497  | 64683497  | Missense_Mutation | SNP | C | A | 7 | 831 | c.273C>A     | c.(271-273)TTC>TTA   | p.F91L        |
| Pat_06 | Pre-Treatment | SFXN5     | 94097  | 37 | 2  | 73188358  | 73188358  | Missense_Mutation | SNP | G | A | 5 | 190 | c.847C>T     | c.(847-849)CGC>TGC   | p.R283C       |
| Pat_06 | Pre-Treatment | CCT7      | 10574  | 37 | 2  | 73477522  | 73477522  | Missense_Mutation | SNP | C | T | 5 | 545 | c.1159C>T    | c.(1159-1161)CGG>TGG | p.R387W       |
| Pat_06 | Pre-Treatment | ACTG2     | 72     | 37 | 2  | 74135861  | 74135861  | Missense_Mutation | SNP | T | C | 4 | 224 | c.317T>C     | c.(316-318)CTC>CCC   | p.L106P       |
| Pat_06 | Pre-Treatment | TTC31     | 64427  | 37 | 2  | 74710251  | 74710251  | Missense_Mutation | SNP | G | A | 5 | 639 | c.29G>A      | c.(28-30)CGG>CAG     | p.R10Q        |
| Pat_06 | Pre-Treatment | ZNF2      | 7549   | 37 | 2  | 95843243  | 95843243  | Missense_Mutation | SNP | G | A | 5 | 730 | c.49G>A      | c.(49-51)GAA>AAA     | p.E17K        |
| Pat_06 | Pre-Treatment | VWA3B     | 200403 | 37 | 2  | 98779371  | 98779371  | Missense_Mutation | SNP | G | A | 4 | 237 | c.1046G>A    | c.(1045-1047)AGC>AAC | p.S349N       |
| Pat_06 | Pre-Treatment | TBC1D8    | 11138  | 37 | 2  | 101654946 | 101654946 | Missense_Mutation | SNP | C | T | 8 | 781 | c.1207G>A    | c.(1207-1209)GAC>AAC | p.D403N       |
| Pat_06 | Pre-Treatment | IL1RL2    | 8808   | 37 | 2  | 102849561 | 102849561 | Missense_Mutation | SNP | G | A | 6 | 341 | c.1274G>A    | c.(1273-1275)GGC>GAC | p.G425D       |
| Pat_06 | Pre-Treatment | SULT1C2   | 6819   | 37 | 2  | 108910735 | 108910735 | Missense_Mutation | SNP | G | A | 6 | 710 | c.202G>A     | c.(202-204)GTG>ATG   | p.V68M        |
| Pat_06 | Pre-Treatment | BCL2L11   | 10018  | 37 | 2  | 111881718 | 111881718 | Splice_Site       | SNP | T | C | 4 | 563 | c.394_splice | c.e2+2               | p.A132_splice |
| Pat_06 | Pre-Treatment | LOC401010 | 401010 | 37 | 2  | 132200809 | 132200809 | Missense_Mutation | SNP | A | G | 3 | 112 | c.1193T>C    | c.(1192-1194)CTG>CCG | p.L398P       |
| Pat_06 | Pre-Treatment | GPR39     | 2863   | 37 | 2  | 133175192 | 133175192 | Missense_Mutation | SNP | C | T | 6 | 549 | c.577C>T     | c.(577-579)CGC>TGC   | p.R193C       |
| Pat_06 | Pre-Treatment | THSD7B    | 80731  | 37 | 2  | 138169350 | 138169350 | Missense_Mutation | SNP | G | A | 5 | 525 | c.2774G>A    | c.(2773-2775)AGC>AAC | p.S925N       |
| Pat_06 | Pre-Treatment | THSD7B    | 80731  | 37 | 2  | 138208489 | 138208489 | Missense_Mutation | SNP | T | C | 4 | 282 | c.2941T>C    | c.(2941-2943)TGC>CGC | p.C981R       |
| Pat_06 | Pre-Treatment | MBD5      | 55777  | 37 | 2  | 149247153 | 149247153 | Missense_Mutation | SNP | G | A | 7 | 598 | c.3253G>A    | c.(3253-3255)GTA>ATA | p.V1085I      |
| Pat_06 | Pre-Treatment | LYPD6     | 130574 | 37 | 2  | 150305643 | 150305643 | Missense_Mutation | SNP | G | C | 3 | 219 | c.199G>C     | c.(199-201)GAC>CAC   | p.D67H        |
| Pat_06 | Pre-Treatment | NEB       | 4703   | 37 | 2  | 152584266 | 152584266 | Missense_Mutation | SNP | G | A | 4 | 355 | c.233C>T     | c.(232-234)CCT>CTT   | p.P78L        |
| Pat_06 | Pre-Treatment | CACNB4    | 785    | 37 | 2  | 152954896 | 152954896 | Missense_Mutation | SNP | C | A | 6 | 647 | c.95G>T      | c.(94-96)AGG>ATG     | p.R32M        |
| Pat_06 | Pre-Treatment | ACVR1C    | 130399 | 37 | 2  | 158412733 | 158412733 | Missense_Mutation | SNP | C | G | 3 | 143 | c.416G>C     | c.(415-417)CGA>CCA   | p.R139P       |
| Pat_06 | Pre-Treatment | SCN2A     | 6326   | 37 | 2  | 166245255 | 166245255 | Missense_Mutation | SNP | C | T | 5 | 511 | c.4939C>T    | c.(4939-4941)CGC>TGC | p.R1647C      |
| Pat_06 | Pre-Treatment | G6PC2     | 57818  | 37 | 2  | 169764282 | 169764282 | Missense_Mutation | SNP | C | T | 5 | 356 | c.761C>T     | c.(760-762)ACG>ATG   | p.T254M       |
| Pat_06 | Pre-Treatment | MYO3B     | 140469 | 37 | 2  | 171376005 | 171376005 | Missense_Mutation | SNP | G | A | 5 | 414 | c.3530G>A    | c.(3529-3531)CGT>CAT | p.R1177H      |
| Pat_06 | Pre-Treatment | HAT1      | 8520   | 37 | 2  | 172822973 | 172822973 | Missense_Mutation | SNP | G | A | 6 | 667 | c.655G>A     | c.(655-657)GTA>ATA   | p.V219I       |
| Pat_06 | Pre-Treatment | ITGA6     | 3655   | 37 | 2  | 173332254 | 173332254 | Missense_Mutation | SNP | C | T | 5 | 503 | c.353C>T     | c.(352-354)ACC>ATC   | p.T118I       |
| Pat_06 | Pre-Treatment | CDCA7     | 83879  | 37 | 2  | 174223439 | 174223439 | Splice_Site       | SNP | G | A | 4 | 187 | c.22_splice  | c.e2-1               | p.Q8_splice   |

|        |               |           |        |    |    |           |           |                   |     |   |   |     |     |              |                        |               |
|--------|---------------|-----------|--------|----|----|-----------|-----------|-------------------|-----|---|---|-----|-----|--------------|------------------------|---------------|
| Pat_06 | Pre-Treatment | ATF2      | 1386   | 37 | 2  | 175979479 | 175979479 | Missense_Mutation | SNP | C | T | 5   | 904 | c.565G>A     | c.(565-567)GTA>ATA     | p.V189I       |
| Pat_06 | Pre-Treatment | RBM45     | 129831 | 37 | 2  | 178977533 | 178977533 | Missense_Mutation | SNP | A | G | 4   | 391 | c.260A>G     | c.(259-261)CAT>CGT     | p.H87R        |
| Pat_06 | Pre-Treatment | TTN       | 7273   | 37 | 2  | 179469616 | 179469616 | Missense_Mutation | SNP | G | A | 4   | 271 | c.46496C>T   | c.(46495-46497)TCC>TTC | p.S15499F     |
| Pat_06 | Pre-Treatment | TTN       | 7273   | 37 | 2  | 179472553 | 179472553 | Missense_Mutation | SNP | G | A | 5   | 693 | c.45257C>T   | c.(45256-45258)CCG>CTC | p.P15086L     |
| Pat_06 | Pre-Treatment | TTN       | 7273   | 37 | 2  | 179605181 | 179605181 | Missense_Mutation | SNP | G | A | 4   | 167 | c.12266C>T   | c.(12265-12267)GCG>GTC | p.A4089V      |
| Pat_06 | Pre-Treatment | TTN       | 7273   | 37 | 2  | 179610475 | 179610475 | Missense_Mutation | SNP | C | T | 195 | 417 | c.16652G>A   | c.(16651-16653)GGA>GAA | p.G5551E      |
| Pat_06 | Pre-Treatment | TTN       | 7273   | 37 | 2  | 179648873 | 179648873 | Missense_Mutation | SNP | T | C | 5   | 625 | c.2699A>G    | c.(2698-2700)AAG>AGG   | p.K900R       |
| Pat_06 | Pre-Treatment | CWC22     | 57703  | 37 | 2  | 180809888 | 180809888 | Nonsense_Mutation | SNP | G | A | 4   | 221 | c.2695C>T    | c.(2695-2697)CGA>TGA   | p.R899*       |
| Pat_06 | Pre-Treatment | SSFA2     | 6744   | 37 | 2  | 182780684 | 182780684 | Missense_Mutation | SNP | T | C | 4   | 507 | c.2317T>C    | c.(2317-2319)TAT>CAT   | p.Y773H       |
| Pat_06 | Pre-Treatment | MSTN      | 2660   | 37 | 2  | 190926979 | 190926979 | Missense_Mutation | SNP | G | A | 6   | 701 | c.344C>T     | c.(343-345)ACG>ATG     | p.T115M       |
| Pat_06 | Pre-Treatment | KCTD18    | 130535 | 37 | 2  | 201369598 | 201369598 | Missense_Mutation | SNP | T | C | 5   | 362 | c.245A>G     | c.(244-246)GAG>GGG     | p.E82G        |
| Pat_06 | Pre-Treatment | CD28      | 940    | 37 | 2  | 204594418 | 204594418 | Missense_Mutation | SNP | T | C | 6   | 808 | c.457T>C     | c.(457-459)TTT>CTT     | p.F153L       |
| Pat_06 | Pre-Treatment | PARD3B    | 117583 | 37 | 2  | 206305378 | 206305378 | Missense_Mutation | SNP | C | A | 5   | 279 | c.3026C>A    | c.(3025-3027)CCA>CAA   | p.P1009Q      |
| Pat_06 | Pre-Treatment | EEF1B2    | 1933   | 37 | 2  | 207026761 | 207026761 | Splice_Site       | SNP | G | T | 5   | 499 | c.331_splice | c.e5-1                 | p.E111_splice |
| Pat_06 | Pre-Treatment | ZDBF2     | 57683  | 37 | 2  | 207173934 | 207173934 | Missense_Mutation | SNP | G | A | 3   | 47  | c.4682G>A    | c.(4681-4683)AGC>AAC   | p.S1561N      |
| Pat_06 | Pre-Treatment | C2orf67   | 151050 | 37 | 2  | 210889861 | 210889861 | Missense_Mutation | SNP | C | A | 7   | 758 | c.2531G>T    | c.(2530-2532)TGG>TTG   | p.W844L       |
| Pat_06 | Pre-Treatment | USP37     | 57695  | 37 | 2  | 219374792 | 219374792 | Missense_Mutation | SNP | G | A | 5   | 583 | c.935C>T     | c.(934-936)TCT>TTT     | p.S312F       |
| Pat_06 | Pre-Treatment | RQCD1     | 9125   | 37 | 2  | 219457378 | 219457378 | Missense_Mutation | SNP | C | A | 6   | 729 | c.679C>A     | c.(679-681)CGT>AGT     | p.R227S       |
| Pat_06 | Pre-Treatment | ZNF142    | 7701   | 37 | 2  | 219507245 | 219507245 | Missense_Mutation | SNP | G | A | 4   | 267 | c.3994C>T    | c.(3994-3996)CGC>TGC   | p.R1332C      |
| Pat_06 | Pre-Treatment | TTL4      | 9654   | 37 | 2  | 219602485 | 219602485 | Missense_Mutation | SNP | C | T | 5   | 352 | c.86C>T      | c.(85-87)CCT>CTT       | p.P29L        |
| Pat_06 | Pre-Treatment | OBSL1     | 23363  | 37 | 2  | 220423961 | 220423961 | Missense_Mutation | SNP | G | A | 5   | 738 | c.3212C>T    | c.(3211-3213)ACT>ATT   | p.T1071I      |
| Pat_06 | Pre-Treatment | SLC4A3    | 6508   | 37 | 2  | 220494381 | 220494381 | Missense_Mutation | SNP | G | A | 4   | 128 | c.575G>A     | c.(574-576)GGC>GAC     | p.G192D       |
| Pat_06 | Pre-Treatment | COL4A4    | 1286   | 37 | 2  | 227896697 | 227896697 | Missense_Mutation | SNP | C | G | 3   | 81  | c.3781G>C    | c.(3781-3783)GGA>CGA   | p.G1261R      |
| Pat_06 | Pre-Treatment | COL4A4    | 1286   | 37 | 2  | 227924297 | 227924297 | Missense_Mutation | SNP | T | C | 5   | 492 | c.2207A>G    | c.(2206-2208)AAG>AGG   | p.K736R       |
| Pat_06 | Pre-Treatment | SPHKAP    | 80309  | 37 | 2  | 228858295 | 228858295 | Missense_Mutation | SNP | T | C | 3   | 107 | c.4676A>G    | c.(4675-4677)GAT>GGT   | p.D1559G      |
| Pat_06 | Pre-Treatment | UGT1A7    | 54577  | 37 | 2  | 234590752 | 234590752 | Missense_Mutation | SNP | G | A | 8   | 823 | c.169G>A     | c.(169-171)GTA>ATA     | p.V57I        |
| Pat_06 | Pre-Treatment | COL6A3    | 1293   | 37 | 2  | 238271946 | 238271946 | Missense_Mutation | SNP | G | A | 5   | 403 | c.6013C>T    | c.(6013-6015)CCC>TCC   | p.P2005S      |
| Pat_06 | Pre-Treatment | ANKMY1    | 51281  | 37 | 2  | 241465678 | 241465678 | Missense_Mutation | SNP | C | T | 5   | 465 | c.871G>A     | c.(871-873)GCA>ACA     | p.A291T       |
| Pat_06 | Pre-Treatment | KIF1A     | 547    | 37 | 2  | 241702471 | 241702471 | Missense_Mutation | SNP | C | T | 3   | 51  | c.1960G>A    | c.(1960-1962)GAG>AAG   | p.E654K       |
| Pat_06 | Pre-Treatment | TRIB3     | 57761  | 37 | 20 | 372045    | 372045    | Missense_Mutation | SNP | T | C | 3   | 139 | c.406T>C     | c.(406-408)TTT>CTT     | p.F136L       |
| Pat_06 | Pre-Treatment | TGM6      | 343641 | 37 | 20 | 2411570   | 2411570   | Missense_Mutation | SNP | G | A | 5   | 637 | c.1864G>A    | c.(1864-1866)GTT>ATT   | p.V622I       |
| Pat_06 | Pre-Treatment | VPS16     | 64601  | 37 | 20 | 2844692   | 2844692   | Missense_Mutation | SNP | G | A | 5   | 578 | c.1574G>A    | c.(1573-1575)CGA>CAA   | p.R525Q       |
| Pat_06 | Pre-Treatment | C20orf27  | 54976  | 37 | 20 | 3734797   | 3734797   | Missense_Mutation | SNP | G | A | 3   | 60  | c.433C>T     | c.(433-435)CAC>TAC     | p.H145Y       |
| Pat_06 | Pre-Treatment | PYGB      | 5834   | 37 | 20 | 25263863  | 25263863  | Missense_Mutation | SNP | C | T | 4   | 290 | c.1570C>T    | c.(1570-1572)CCG>TCG   | p.P524S       |
| Pat_06 | Pre-Treatment | NINL      | 22981  | 37 | 20 | 25493625  | 25493625  | Missense_Mutation | SNP | G | T | 5   | 464 | c.295C>A     | c.(295-297)CCT>ACT     | p.P99T        |
| Pat_06 | Pre-Treatment | BCL2L1    | 598    | 37 | 20 | 30309595  | 30309595  | Missense_Mutation | SNP | A | G | 7   | 844 | c.427T>C     | c.(427-429)TTT>CTT     | p.F143L       |
| Pat_06 | Pre-Treatment | ASXL1     | 171023 | 37 | 20 | 31022862  | 31022862  | Missense_Mutation | SNP | C | T | 9   | 284 | c.2347C>T    | c.(2347-2349)CCG>TCG   | p.P783S       |
| Pat_06 | Pre-Treatment | C20orf112 | 140688 | 37 | 20 | 31041111  | 31041111  | Missense_Mutation | SNP | T | C | 3   | 161 | c.761A>G     | c.(760-762)GAG>GGG     | p.E254G       |
| Pat_06 | Pre-Treatment | DLGAP4    | 22839  | 37 | 20 | 35060143  | 35060143  | Missense_Mutation | SNP | G | A | 4   | 264 | c.23G>A      | c.(22-24)CGC>CAC       | p.R8H         |
| Pat_06 | Pre-Treatment | KIAA0406  | 9675   | 37 | 20 | 36640866  | 36640866  | Missense_Mutation | SNP | C | A | 5   | 298 | c.1353G>T    | c.(1351-1353)TGG>TGT   | p.W451C       |
| Pat_06 | Pre-Treatment | DHX35     | 60625  | 37 | 20 | 37634964  | 37634964  | Missense_Mutation | SNP | G | A | 6   | 694 | c.1187G>A    | c.(1186-1188)CGT>CAT   | p.R396H       |
| Pat_06 | Pre-Treatment | CDH22     | 64405  | 37 | 20 | 44828101  | 44828101  | Missense_Mutation | SNP | C | T | 5   | 130 | c.1384G>A    | c.(1384-1386)GCC>ACC   | p.A462T       |
| Pat_06 | Pre-Treatment | ARFGEF2   | 10564  | 37 | 20 | 47630450  | 47630450  | Missense_Mutation | SNP | G | A | 6   | 531 | c.4132G>A    | c.(4132-4134)GTG>ATG   | p.V1378M      |
| Pat_06 | Pre-Treatment | SLC9A8    | 23315  | 37 | 20 | 48491287  | 48491287  | Missense_Mutation | SNP | C | T | 6   | 658 | c.1004C>T    | c.(1003-1005)ACG>ATG   | p.T335M       |
| Pat_06 | Pre-Treatment | KCNG1     | 3755   | 37 | 20 | 49620679  | 49620679  | Missense_Mutation | SNP | C | T | 4   | 241 | c.1439G>A    | c.(1438-1440)CGG>CAG   | p.R480Q       |
| Pat_06 | Pre-Treatment | PCK1      | 5105   | 37 | 20 | 56136544  | 56136544  | Missense_Mutation | SNP | C | A | 5   | 468 | c.77C>A      | c.(76-78)GCA>GAA       | p.A26E        |
| Pat_06 | Pre-Treatment | APCDD1L   | 164284 | 37 | 20 | 57042680  | 57042680  | Missense_Mutation | SNP | G | C | 3   | 127 | c.223C>G     | c.(223-225)CGC>GGC     | p.R75G        |

|        |               |          |        |    |    |          |          |                   |     |   |   |    |     |               |                      |                |
|--------|---------------|----------|--------|----|----|----------|----------|-------------------|-----|---|---|----|-----|---------------|----------------------|----------------|
| Pat_06 | Pre-Treatment | EDN3     | 1908   | 37 | 20 | 57896188 | 57896188 | Missense_Mutation | SNP | G | T | 6  | 690 | c.482G>T      | c.(481-483)TGT>TTT   | p.C161F        |
| Pat_06 | Pre-Treatment | OSBPL2   | 9885   | 37 | 20 | 60847197 | 60847197 | Missense_Mutation | SNP | C | T | 4  | 329 | c.275C>T      | c.(274-276)ACG>ATG   | p.T92M         |
| Pat_06 | Pre-Treatment | OSBPL2   | 9885   | 37 | 20 | 60866810 | 60866810 | Missense_Mutation | SNP | G | A | 7  | 611 | c.1301G>A     | c.(1300-1302)CGG>CAG | p.R434Q        |
| Pat_06 | Pre-Treatment | ADRM1    | 11047  | 37 | 20 | 60881352 | 60881352 | Missense_Mutation | SNP | G | T | 5  | 570 | c.430G>T      | c.(430-432)GGC>TGC   | p.G144C        |
| Pat_06 | Pre-Treatment | LAMA5    | 3911   | 37 | 20 | 60921230 | 60921230 | Missense_Mutation | SNP | C | A | 5  | 101 | c.1324G>T     | c.(1324-1326)GAC>TAC | p.D442Y        |
| Pat_06 | Pre-Treatment | COL20A1  | 57642  | 37 | 20 | 61959682 | 61959682 | Splice_Site       | SNP | G | A | 3  | 81  | c.3614_splice | c.e34-1              | p.S1205_splice |
| Pat_06 | Pre-Treatment | PRIC285  | 85441  | 37 | 20 | 62197362 | 62197362 | Missense_Mutation | SNP | C | T | 3  | 53  | c.2813G>A     | c.(2812-2814)CGG>CAG | p.R938Q        |
| Pat_06 | Pre-Treatment | ZNF512B  | 57473  | 37 | 20 | 62598032 | 62598032 | Nonsense_Mutation | SNP | G | A | 5  | 213 | c.496C>T      | c.(496-498)CGA>TGA   | p.R166*        |
| Pat_06 | Pre-Treatment | NCAM2    | 4685   | 37 | 21 | 22696706 | 22696706 | Missense_Mutation | SNP | C | T | 6  | 681 | c.623C>T      | c.(622-624)CCG>CTG   | p.P208L        |
| Pat_06 | Pre-Treatment | USP16    | 10600  | 37 | 21 | 30414421 | 30414421 | Missense_Mutation | SNP | G | A | 5  | 294 | c.1118G>A     | c.(1117-1119)AGA>AAA | p.R373K        |
| Pat_06 | Pre-Treatment | CHAF1B   | 8208   | 37 | 21 | 37766943 | 37766943 | Missense_Mutation | SNP | G | A | 5  | 383 | c.476G>A      | c.(475-477)AGC>AAC   | p.S159N        |
| Pat_06 | Pre-Treatment | UBE2G2   | 7327   | 37 | 21 | 46193549 | 46193549 | Missense_Mutation | SNP | G | T | 5  | 371 | c.298C>A      | c.(298-300)CCC>ACC   | p.P100T        |
| Pat_06 | Pre-Treatment | MICAL3   | 57553  | 37 | 22 | 18370161 | 18370161 | Missense_Mutation | SNP | T | C | 3  | 219 | c.1932A>G     | c.(1930-1932)ATA>ATG | p.I644M        |
| Pat_06 | Pre-Treatment | GSTT2    | 2953   | 37 | 22 | 24300614 | 24300614 | Missense_Mutation | SNP | G | A | 4  | 152 | c.383C>T      | c.(382-384)CCC>CTC   | p.P128L        |
| Pat_06 | Pre-Treatment | SUSD2    | 56241  | 37 | 22 | 24583962 | 24583962 | Nonsense_Mutation | SNP | G | T | 8  | 626 | c.2200G>T     | c.(2200-2202)GGA>TGA | p.G734*        |
| Pat_06 | Pre-Treatment | SGSM1    | 129049 | 37 | 22 | 25291235 | 25291235 | Missense_Mutation | SNP | A | G | 3  | 155 | c.2164A>G     | c.(2164-2166)AGC>GGC | p.S722G        |
| Pat_06 | Pre-Treatment | MN1      | 4330   | 37 | 22 | 28195963 | 28195963 | Missense_Mutation | SNP | C | T | 4  | 50  | c.569G>A      | c.(568-570)TGC>TAC   | p.C190Y        |
| Pat_06 | Pre-Treatment | NEFH     | 4744   | 37 | 22 | 29885739 | 29885739 | Missense_Mutation | SNP | T | A | 6  | 324 | c.2110T>A     | c.(2110-2112)TCC>ACC | p.S704T        |
| Pat_06 | Pre-Treatment | PES1     | 23481  | 37 | 22 | 30977004 | 30977004 | Missense_Mutation | SNP | C | T | 5  | 210 | c.907G>A      | c.(907-909)GAT>AAT   | p.D303N        |
| Pat_06 | Pre-Treatment | RNF185   | 91445  | 37 | 22 | 31588673 | 31588673 | Nonsense_Mutation | SNP | G | A | 5  | 602 | c.180G>A      | c.(178-180)TGG>TGA   | p.W60*         |
| Pat_06 | Pre-Treatment | MYH9     | 4627   | 37 | 22 | 36705381 | 36705381 | Missense_Mutation | SNP | C | A | 4  | 346 | c.1789G>T     | c.(1789-1791)GCC>TCC | p.A597S        |
| Pat_06 | Pre-Treatment | MAFF     | 23764  | 37 | 22 | 38610560 | 38610560 | Missense_Mutation | SNP | G | A | 4  | 46  | c.170G>A      | c.(169-171)CGC>CAC   | p.R57H         |
| Pat_06 | Pre-Treatment | DDX17    | 10521  | 37 | 22 | 38882269 | 38882269 | Missense_Mutation | SNP | T | C | 44 | 330 | c.1867A>G     | c.(1867-1869)AGT>GGT | p.S623G        |
| Pat_06 | Pre-Treatment | L3MBTL2  | 83746  | 37 | 22 | 41616870 | 41616870 | Missense_Mutation | SNP | G | A | 4  | 301 | c.851G>A      | c.(850-852)CGG>CAG   | p.R284Q        |
| Pat_06 | Pre-Treatment | ZC3H7B   | 23264  | 37 | 22 | 41752674 | 41752674 | Missense_Mutation | SNP | G | A | 5  | 508 | c.2543G>A     | c.(2542-2544)GGC>GAC | p.G848D        |
| Pat_06 | Pre-Treatment | XRCC6    | 2547   | 37 | 22 | 42049589 | 42049589 | Missense_Mutation | SNP | G | A | 5  | 675 | c.1186G>A     | c.(1186-1188)GCA>ACA | p.A396T        |
| Pat_06 | Pre-Treatment | WBP2NL   | 164684 | 37 | 22 | 42415422 | 42415422 | Missense_Mutation | SNP | G | A | 4  | 191 | c.170G>A      | c.(169-171)CGG>CAG   | p.R57Q         |
| Pat_06 | Pre-Treatment | CYP2D7P1 | 1564   | 37 | 22 | 42537318 | 42537318 | Missense_Mutation | SNP | T | C | 3  | 111 | c.747A>G      | c.(745-747)ATA>ATG   | p.I249M        |
| Pat_06 | Pre-Treatment | SCUBE1   | 80274  | 37 | 22 | 43606234 | 43606234 | Missense_Mutation | SNP | C | G | 3  | 134 | c.2396G>C     | c.(2395-2397)GGC>GCC | p.G799A        |
| Pat_06 | Pre-Treatment | SCUBE1   | 80274  | 37 | 22 | 43610116 | 43610116 | Missense_Mutation | SNP | C | T | 5  | 304 | c.2033G>A     | c.(2032-2034)CGC>CAC | p.R678H        |
| Pat_06 | Pre-Treatment | NUP50    | 10762  | 37 | 22 | 45574769 | 45574769 | Missense_Mutation | SNP | G | T | 4  | 331 | c.991G>T      | c.(991-993)GGT>TGT   | p.G331C        |
| Pat_06 | Pre-Treatment | UPK3A    | 7380   | 37 | 22 | 45691499 | 45691499 | Missense_Mutation | SNP | G | A | 7  | 353 | c.763G>A      | c.(763-765)GTT>ATT   | p.V255I        |
| Pat_06 | Pre-Treatment | FAM19A5  | 25817  | 37 | 22 | 48885418 | 48885418 | Missense_Mutation | SNP | C | T | 3  | 19  | c.14C>T       | c.(13-15)CCC>CTC     | p.P5L          |
| Pat_06 | Pre-Treatment | HDAC10   | 83933  | 37 | 22 | 50687828 | 50687828 | Nonsense_Mutation | SNP | G | A | 4  | 200 | c.619C>T      | c.(619-621)CGA>TGA   | p.R207*        |
| Pat_06 | Pre-Treatment | MAPK11   | 5600   | 37 | 22 | 50703839 | 50703839 | Missense_Mutation | SNP | C | G | 4  | 347 | c.926G>C      | c.(925-927)AGC>ACC   | p.S309T        |
| Pat_06 | Pre-Treatment | PLXNB2   | 23654  | 37 | 22 | 50719060 | 50719060 | Missense_Mutation | SNP | G | A | 4  | 187 | c.4033C>T     | c.(4033-4035)CGC>TGC | p.R1345C       |
| Pat_06 | Pre-Treatment | PLXNB2   | 23654  | 37 | 22 | 50720723 | 50720723 | Missense_Mutation | SNP | C | T | 4  | 296 | c.3007G>A     | c.(3007-3009)GTC>ATC | p.V1003I       |
| Pat_06 | Pre-Treatment | CPT1B    | 1375   | 37 | 22 | 51014749 | 51014749 | Missense_Mutation | SNP | G | A | 5  | 752 | c.577C>T      | c.(577-579)CGC>TGC   | p.R193C        |
| Pat_06 | Pre-Treatment | SHANK3   | 85358  | 37 | 22 | 51142344 | 51142344 | Missense_Mutation | SNP | G | A | 3  | 63  | c.1717G>A     | c.(1717-1719)GAC>AAC | p.D573N        |
| Pat_06 | Pre-Treatment | SHANK3   | 85358  | 37 | 22 | 51142363 | 51142363 | Missense_Mutation | SNP | G | A | 3  | 55  | c.1736G>A     | c.(1735-1737)AGC>AAC | p.S579N        |
| Pat_06 | Pre-Treatment | LRRN1    | 57633  | 37 | 3  | 3887416  | 3887416  | Missense_Mutation | SNP | G | A | 6  | 614 | c.1091G>A     | c.(1090-1092)CGT>CAT | p.R364H        |
| Pat_06 | Pre-Treatment | OXTR     | 5021   | 37 | 3  | 8809414  | 8809414  | Missense_Mutation | SNP | G | A | 3  | 39  | c.460C>T      | c.(460-462)CGC>TGC   | p.R154C        |
| Pat_06 | Pre-Treatment | SLC6A11  | 6538   | 37 | 3  | 10858143 | 10858143 | Missense_Mutation | SNP | G | A | 4  | 212 | c.193G>A      | c.(193-195)GGG>AGG   | p.G65R         |
| Pat_06 | Pre-Treatment | MKRN2    | 23609  | 37 | 3  | 12611568 | 12611568 | Splice_Site       | SNP | A | T | 5  | 592 | c.156_splice  | c.e3-2               | p.R52_splice   |
| Pat_06 | Pre-Treatment | RAF1     | 5894   | 37 | 3  | 12641301 | 12641301 | Missense_Mutation | SNP | G | A | 7  | 542 | c.997C>T      | c.(997-999)CGT>TGT   | p.R333C        |
| Pat_06 | Pre-Treatment | CAND2    | 23066  | 37 | 3  | 12856781 | 12856781 | Missense_Mutation | SNP | G | A | 5  | 369 | c.1148G>A     | c.(1147-1149)CGC>CAC | p.R383H        |
| Pat_06 | Pre-Treatment | KCNH8    | 131096 | 37 | 3  | 19575002 | 19575002 | Missense_Mutation | SNP | G | A | 5  | 567 | c.2735G>A     | c.(2734-2736)AGC>AAC | p.S912N        |



|        |               |          |        |    |   |           |           |                   |     |   |   |   |     |               |                      |                |
|--------|---------------|----------|--------|----|---|-----------|-----------|-------------------|-----|---|---|---|-----|---------------|----------------------|----------------|
| Pat_06 | Pre-Treatment | ZCWPW2   | 152098 | 37 | 3 | 28454732  | 28454732  | Nonsense_Mutation | SNP | G | A | 5 | 750 | c.173G>A      | c.(172-174)TGG>TAG   | p.W58*         |
| Pat_06 | Pre-Treatment | DCLK3    | 85443  | 37 | 3 | 36763056  | 36763056  | Missense_Mutation | SNP | G | A | 6 | 531 | c.1547C>T     | c.(1546-1548)ACC>ATC | p.T516I        |
| Pat_06 | Pre-Treatment | C3orf23  | 285343 | 37 | 3 | 44408953  | 44408953  | Nonsense_Mutation | SNP | C | T | 5 | 629 | c.325C>T      | c.(325-327)CGA>TGA   | p.R109*        |
| Pat_06 | Pre-Treatment | TMEM42   | 131616 | 37 | 3 | 44905831  | 44905831  | Missense_Mutation | SNP | G | A | 6 | 327 | c.335G>A      | c.(334-336)AGC>AAC   | p.S112N        |
| Pat_06 | Pre-Treatment | TGM4     | 7047   | 37 | 3 | 44945455  | 44945455  | Missense_Mutation | SNP | G | A | 6 | 563 | c.1051G>A     | c.(1051-1053)GCA>ACA | p.A351T        |
| Pat_06 | Pre-Treatment | PRSS45   | 377047 | 37 | 3 | 46784443  | 46784443  | Missense_Mutation | SNP | T | C | 3 | 122 | c.413A>G      | c.(412-414)GAC>GGC   | p.D138G        |
| Pat_06 | Pre-Treatment | NBEAL2   | 23218  | 37 | 3 | 47042490  | 47042490  | Splice_Site       | SNP | G | A | 4 | 103 | c.4306_splice | c.e28-1              | p.Q1436_splice |
| Pat_06 | Pre-Treatment | NBEAL2   | 23218  | 37 | 3 | 47046741  | 47046741  | Missense_Mutation | SNP | G | A | 4 | 194 | c.6490G>A     | c.(6490-6492)GCA>ACA | p.A2164T       |
| Pat_06 | Pre-Treatment | TREX1    | 11277  | 37 | 3 | 48508332  | 48508332  | Missense_Mutation | SNP | C | A | 5 | 373 | c.443C>A      | c.(442-444)GCA>GAA   | p.A148E        |
| Pat_06 | Pre-Treatment | COL7A1   | 1294   | 37 | 3 | 48624646  | 48624646  | Missense_Mutation | SNP | T | C | 3 | 192 | c.3116A>G     | c.(3115-3117)GAG>GGG | p.E1039G       |
| Pat_06 | Pre-Treatment | UQCRC1   | 7384   | 37 | 3 | 48637503  | 48637503  | Missense_Mutation | SNP | C | T | 5 | 415 | c.1295G>A     | c.(1294-1296)CGG>CAG | p.R432Q        |
| Pat_06 | Pre-Treatment | DALRD3   | 55152  | 37 | 3 | 49054762  | 49054762  | Missense_Mutation | SNP | C | A | 5 | 675 | c.826G>T      | c.(826-828)GGC>TGC   | p.G276C        |
| Pat_06 | Pre-Treatment | C3orf54  | 389119 | 37 | 3 | 49842313  | 49842313  | Missense_Mutation | SNP | C | A | 6 | 668 | c.757C>A      | c.(757-759)CCA>ACA   | p.P253T        |
| Pat_06 | Pre-Treatment | ZMYND10  | 51364  | 37 | 3 | 50382587  | 50382587  | Missense_Mutation | SNP | G | C | 3 | 249 | c.169C>G      | c.(169-171)CCC>GCC   | p.P57A         |
| Pat_06 | Pre-Treatment | CACNA2D2 | 9254   | 37 | 3 | 50416528  | 50416528  | Missense_Mutation | SNP | G | A | 4 | 262 | c.1255C>T     | c.(1255-1257)CGG>TGG | p.R419W        |
| Pat_06 | Pre-Treatment | GPR62    | 118442 | 37 | 3 | 51989751  | 51989751  | Missense_Mutation | SNP | C | G | 3 | 72  | c.83C>G       | c.(82-84)GCA>GGA     | p.A28G         |
| Pat_06 | Pre-Treatment | DNAH1    | 25981  | 37 | 3 | 52422617  | 52422617  | Missense_Mutation | SNP | G | A | 3 | 97  | c.9355G>A     | c.(9355-9357)GCT>ACT | p.A3119T       |
| Pat_06 | Pre-Treatment | STAB1    | 23166  | 37 | 3 | 52553979  | 52553979  | Missense_Mutation | SNP | T | C | 3 | 123 | c.5255T>C     | c.(5254-5256)CTG>CCG | p.L1752P       |
| Pat_06 | Pre-Treatment | STAB1    | 23166  | 37 | 3 | 52555459  | 52555459  | Nonsense_Mutation | SNP | C | A | 5 | 485 | c.5991C>A     | c.(5989-5991)TGC>TGA | p.C1997*       |
| Pat_06 | Pre-Treatment | ARHGEF3  | 50650  | 37 | 3 | 56763515  | 56763515  | Missense_Mutation | SNP | G | A | 5 | 697 | c.1364C>T     | c.(1363-1365)GCC>GTC | p.A455V        |
| Pat_06 | Pre-Treatment | PDE12    | 201626 | 37 | 3 | 57542450  | 57542450  | Missense_Mutation | SNP | C | T | 4 | 227 | c.344C>T      | c.(343-345)CCG>CTG   | p.P115L        |
| Pat_06 | Pre-Treatment | SLMAP    | 7871   | 37 | 3 | 57743413  | 57743413  | Missense_Mutation | SNP | C | T | 5 | 274 | c.35C>T       | c.(34-36)CCG>CTG     | p.P12L         |
| Pat_06 | Pre-Treatment | FLNB     | 2317   | 37 | 3 | 58134499  | 58134499  | Missense_Mutation | SNP | G | A | 5 | 362 | c.6011G>A     | c.(6010-6012)CGA>CAA | p.R2004Q       |
| Pat_06 | Pre-Treatment | FLNB     | 2317   | 37 | 3 | 58149042  | 58149042  | Missense_Mutation | SNP | G | C | 3 | 285 | c.7183G>C     | c.(7183-7185)GAA>CAA | p.E2395Q       |
| Pat_06 | Pre-Treatment | CPOX     | 1371   | 37 | 3 | 98307633  | 98307633  | Missense_Mutation | SNP | C | T | 5 | 355 | c.877G>A      | c.(877-879)GCT>ACT   | p.A293T        |
| Pat_06 | Pre-Treatment | MYH15    | 22989  | 37 | 3 | 108107854 | 108107854 | Missense_Mutation | SNP | C | T | 5 | 718 | c.5558G>A     | c.(5557-5559)CGC>CAC | p.R1853H       |
| Pat_06 | Pre-Treatment | DRD3     | 1814   | 37 | 3 | 113866361 | 113866361 | Missense_Mutation | SNP | C | T | 4 | 433 | c.427G>A      | c.(427-429)GGA>AGA   | p.G143R        |
| Pat_06 | Pre-Treatment | GSK3B    | 2932   | 37 | 3 | 119582436 | 119582436 | Missense_Mutation | SNP | G | A | 4 | 153 | c.926C>T      | c.(925-927)ACT>ATT   | p.T309I        |
| Pat_06 | Pre-Treatment | POLQ     | 10721  | 37 | 3 | 121200622 | 121200622 | Missense_Mutation | SNP | G | A | 5 | 517 | c.6008C>T     | c.(6007-6009)CCG>CTG | p.P2003L       |
| Pat_06 | Pre-Treatment | PARP15   | 165631 | 37 | 3 | 122354745 | 122354745 | Missense_Mutation | SNP | G | A | 6 | 433 | c.1835G>A     | c.(1834-1836)AGA>AAA | p.R612K        |
| Pat_06 | Pre-Treatment | KALRN    | 8997   | 37 | 3 | 124438241 | 124438241 | Missense_Mutation | SNP | G | A | 6 | 456 | c.8885G>A     | c.(8884-8886)CGC>CAC | p.R2962H       |
| Pat_06 | Pre-Treatment | ITGB5    | 3693   | 37 | 3 | 124578098 | 124578098 | Missense_Mutation | SNP | G | A | 5 | 623 | c.352C>T      | c.(352-354)CTC>TTC   | p.L118F        |
| Pat_06 | Pre-Treatment | MGLL     | 11343  | 37 | 3 | 127540645 | 127540645 | Missense_Mutation | SNP | G | A | 7 | 687 | c.17C>T       | c.(16-18)TCC>TTC     | p.S6F          |
| Pat_06 | Pre-Treatment | EEFSEC   | 60678  | 37 | 3 | 128126978 | 128126978 | Missense_Mutation | SNP | G | A | 5 | 164 | c.1667G>A     | c.(1666-1668)CGT>CAT | p.R556H        |
| Pat_06 | Pre-Treatment | COPG     | 22820  | 37 | 3 | 128984621 | 128984621 | Missense_Mutation | SNP | A | G | 3 | 132 | c.1454A>G     | c.(1453-1455)GAG>GGG | p.E485G        |
| Pat_06 | Pre-Treatment | C3orf37  | 56941  | 37 | 3 | 129020824 | 129020824 | Missense_Mutation | SNP | G | A | 4 | 453 | c.667G>A      | c.(667-669)GTT>ATT   | p.V223I        |
| Pat_06 | Pre-Treatment | RHO      | 6010   | 37 | 3 | 129251434 | 129251434 | Missense_Mutation | SNP | G | A | 4 | 232 | c.755G>A      | c.(754-756)CGC>CAC   | p.R252H        |
| Pat_06 | Pre-Treatment | TMCC1    | 23023  | 37 | 3 | 129390101 | 129390101 | Missense_Mutation | SNP | G | A | 4 | 182 | c.583C>T      | c.(583-585)CGG>TGG   | p.R195W        |
| Pat_06 | Pre-Treatment | COL6A6   | 131873 | 37 | 3 | 130381086 | 130381086 | Nonsense_Mutation | SNP | C | T | 6 | 831 | c.6436C>T     | c.(6436-6438)CGA>TGA | p.R2146*       |
| Pat_06 | Pre-Treatment | ACAD11   | 84129  | 37 | 3 | 132378514 | 132378514 | Missense_Mutation | SNP | A | G | 4 | 399 | c.82T>C       | c.(82-84)TAC>CAC     | p.Y28H         |
| Pat_06 | Pre-Treatment | TF       | 7018   | 37 | 3 | 133494370 | 133494370 | Missense_Mutation | SNP | C | T | 6 | 790 | c.1781C>T     | c.(1780-1782)GCG>GTG | p.A594V        |
| Pat_06 | Pre-Treatment | RAB6B    | 51560  | 37 | 3 | 133614290 | 133614290 | Missense_Mutation | SNP | A | C | 4 | 451 | c.21T>G       | c.(19-21)TTT>TTG     | p.F7L          |
| Pat_06 | Pre-Treatment | C3orf72  | 401089 | 37 | 3 | 138669327 | 138669327 | Missense_Mutation | SNP | G | T | 6 | 303 | c.441G>T      | c.(439-441)GAG>GAT   | p.E147D        |
| Pat_06 | Pre-Treatment | ZBTB38   | 253461 | 37 | 3 | 141163446 | 141163446 | Missense_Mutation | SNP | G | A | 5 | 664 | c.2216G>A     | c.(2215-2217)AGC>AAC | p.S739N        |
| Pat_06 | Pre-Treatment | RASA2    | 5922   | 37 | 3 | 141289848 | 141289848 | Missense_Mutation | SNP | G | A | 4 | 231 | c.958G>A      | c.(958-960)GTG>ATG   | p.V320M        |
| Pat_06 | Pre-Treatment | WWTR1    | 25937  | 37 | 3 | 149290707 | 149290707 | Missense_Mutation | SNP | G | A | 6 | 500 | c.512C>T      | c.(511-513)GCC>GTC   | p.A171V        |
| Pat_06 | Pre-Treatment | LEKR1    | 389170 | 37 | 3 | 156710912 | 156710912 | Missense_Mutation | SNP | C | A | 4 | 277 | c.43C>A       | c.(43-45)CAG>AAG     | p.Q15K         |

|        |               |          |        |    |   |           |           |                   |     |   |   |     |     |              |                      |               |
|--------|---------------|----------|--------|----|---|-----------|-----------|-------------------|-----|---|---|-----|-----|--------------|----------------------|---------------|
| Pat_06 | Pre-Treatment | RARRES1  | 5918   | 37 | 3 | 158415738 | 158415738 | Missense_Mutation | SNP | C | G | 3   | 99  | c.694G>C     | c.(694-696)GAT>CAT   | p.D232H       |
| Pat_06 | Pre-Treatment | ABCC5    | 10057  | 37 | 3 | 183732084 | 183732084 | Missense_Mutation | SNP | G | A | 5   | 545 | c.97C>T      | c.(97-99)CGT>TGT     | p.R33C        |
| Pat_06 | Pre-Treatment | PSMD2    | 5708   | 37 | 3 | 184020502 | 184020502 | Missense_Mutation | SNP | G | A | 5   | 729 | c.899G>A     | c.(898-900)CGG>CAG   | p.R300Q       |
| Pat_06 | Pre-Treatment | CHRD     | 8646   | 37 | 3 | 184101422 | 184101422 | Missense_Mutation | SNP | G | A | 4   | 269 | c.1432G>A    | c.(1432-1434)GGA>AGA | p.G478R       |
| Pat_06 | Pre-Treatment | EIF4A2   | 1974   | 37 | 3 | 186501404 | 186501404 | Missense_Mutation | SNP | C | G | 215 | 497 | c.5C>G       | c.(4-6)TCT>TGT       | p.S2C         |
| Pat_06 | Pre-Treatment | IL1RAP   | 3556   | 37 | 3 | 190338161 | 190338161 | Missense_Mutation | SNP | G | C | 5   | 605 | c.635G>C     | c.(634-636)TGT>TCT   | p.C212S       |
| Pat_06 | Pre-Treatment | CCDC50   | 152137 | 37 | 3 | 191087826 | 191087826 | Splice_Site       | SNP | G | A | 5   | 646 | c.448_splice | c.e5+1               | p.G150_splice |
| Pat_06 | Pre-Treatment | TFRC     | 7037   | 37 | 3 | 195802104 | 195802104 | Missense_Mutation | SNP | T | C | 4   | 669 | c.164A>G     | c.(163-165)AAT>AGT   | p.N55S        |
| Pat_06 | Pre-Treatment | PCYT1A   | 5130   | 37 | 3 | 195974321 | 195974321 | Missense_Mutation | SNP | C | T | 6   | 646 | c.403G>A     | c.(403-405)GCA>ACA   | p.A135T       |
| Pat_06 | Pre-Treatment | BDH1     | 622    | 37 | 3 | 197238896 | 197238896 | Missense_Mutation | SNP | G | A | 8   | 767 | c.902C>T     | c.(901-903)GCT>GTT   | p.A301V       |
| Pat_06 | Pre-Treatment | CRIPAK   | 285464 | 37 | 4 | 1388561   | 1388561   | Missense_Mutation | SNP | A | T | 6   | 896 | c.262A>T     | c.(262-264)ACA>TCA   | p.T88S        |
| Pat_06 | Pre-Treatment | CRIPAK   | 285464 | 37 | 4 | 1389002   | 1389002   | Nonsense_Mutation | SNP | C | T | 5   | 848 | c.703C>T     | c.(703-705)CGA>TGA   | p.R235*       |
| Pat_06 | Pre-Treatment | POLN     | 353497 | 37 | 4 | 2159586   | 2159586   | Missense_Mutation | SNP | T | C | 4   | 343 | c.1664A>G    | c.(1663-1665)AAG>AGG | p.K555R       |
| Pat_06 | Pre-Treatment | HTT      | 3064   | 37 | 4 | 3184132   | 3184132   | Missense_Mutation | SNP | G | A | 4   | 382 | c.4807G>A    | c.(4807-4809)GAC>AAC | p.D1603N      |
| Pat_06 | Pre-Treatment | RGS12    | 6002   | 37 | 4 | 3424654   | 3424654   | Missense_Mutation | SNP | G | A | 5   | 331 | c.3056G>A    | c.(3055-3057)AGT>AAT | p.S1019N      |
| Pat_06 | Pre-Treatment | PPP2R2C  | 5522   | 37 | 4 | 6325271   | 6325271   | Missense_Mutation | SNP | T | C | 3   | 132 | c.1102A>G    | c.(1102-1104)AAC>GAC | p.N368D       |
| Pat_06 | Pre-Treatment | CCDC96   | 257236 | 37 | 4 | 7043747   | 7043747   | Missense_Mutation | SNP | G | T | 6   | 587 | c.919C>A     | c.(919-921)CAG>AAG   | p.Q307K       |
| Pat_06 | Pre-Treatment | SH3TC1   | 54436  | 37 | 4 | 8237223   | 8237223   | Missense_Mutation | SNP | G | A | 5   | 624 | c.3346G>A    | c.(3346-3348)GCT>ACT | p.A1116T      |
| Pat_06 | Pre-Treatment | LDB2     | 9079   | 37 | 4 | 16504318  | 16504318  | Missense_Mutation | SNP | G | A | 5   | 723 | c.1070C>T    | c.(1069-1071)CCC>CTC | p.P357L       |
| Pat_06 | Pre-Treatment | LAP3     | 51056  | 37 | 4 | 17609084  | 17609084  | Missense_Mutation | SNP | G | A | 6   | 618 | c.1432G>A    | c.(1432-1434)GCA>ACA | p.A478T       |
| Pat_06 | Pre-Treatment | GPR125   | 166647 | 37 | 4 | 22444334  | 22444334  | Missense_Mutation | SNP | C | A | 4   | 450 | c.859G>T     | c.(859-861)GAT>TAT   | p.D287Y       |
| Pat_06 | Pre-Treatment | GPR125   | 166647 | 37 | 4 | 22456493  | 22456493  | Missense_Mutation | SNP | G | A | 5   | 551 | c.469C>T     | c.(469-471)CGG>TGG   | p.R157W       |
| Pat_06 | Pre-Treatment | PPARGC1A | 10891  | 37 | 4 | 23814645  | 23814645  | Missense_Mutation | SNP | T | C | 4   | 764 | c.1897A>G    | c.(1897-1899)AGG>GGG | p.R633G       |
| Pat_06 | Pre-Treatment | RBPJ     | 3516   | 37 | 4 | 26432059  | 26432059  | Missense_Mutation | SNP | G | A | 5   | 775 | c.1102G>A    | c.(1102-1104)GTA>ATA | p.V368I       |
| Pat_06 | Pre-Treatment | EPHA5    | 2044   | 37 | 4 | 66356248  | 66356248  | Missense_Mutation | SNP | G | A | 4   | 481 | c.1249C>T    | c.(1249-1251)CGG>TGG | p.R417W       |
| Pat_06 | Pre-Treatment | SLC4A4   | 8671   | 37 | 4 | 72215676  | 72215676  | Missense_Mutation | SNP | G | A | 5   | 530 | c.437G>A     | c.(436-438)AGC>AAC   | p.S146N       |
| Pat_06 | Pre-Treatment | COX18    | 285521 | 37 | 4 | 73927540  | 73927540  | Missense_Mutation | SNP | G | A | 4   | 278 | c.818C>T     | c.(817-819)ACG>ATG   | p.T273M       |
| Pat_06 | Pre-Treatment | ANKRD17  | 26057  | 37 | 4 | 73963913  | 73963913  | Missense_Mutation | SNP | C | T | 6   | 850 | c.4898G>A    | c.(4897-4899)CGT>CAT | p.R1633H      |
| Pat_06 | Pre-Treatment | KLHL8    | 57563  | 37 | 4 | 88106470  | 88106470  | Missense_Mutation | SNP | G | A | 5   | 734 | c.698C>T     | c.(697-699)GCT>GTT   | p.A233V       |
| Pat_06 | Pre-Treatment | SPP1     | 6696   | 37 | 4 | 88901581  | 88901581  | Missense_Mutation | SNP | C | G | 3   | 215 | c.211C>G     | c.(211-213)CAA>GAA   | p.Q71E        |
| Pat_06 | Pre-Treatment | HERC3    | 8916   | 37 | 4 | 89627981  | 89627981  | Missense_Mutation | SNP | G | A | 4   | 453 | c.3023G>A    | c.(3022-3024)GGG>GAG | p.G1008E      |
| Pat_06 | Pre-Treatment | ATOH1    | 474    | 37 | 4 | 94750976  | 94750976  | Missense_Mutation | SNP | G | A | 5   | 546 | c.899G>A     | c.(898-900)AGC>AAC   | p.S300N       |
| Pat_06 | Pre-Treatment | UNC5C    | 8633   | 37 | 4 | 96141281  | 96141281  | Missense_Mutation | SNP | T | C | 3   | 184 | c.1155A>G    | c.(1153-1155)ATA>ATG | p.I385M       |
| Pat_06 | Pre-Treatment | MANBA    | 4126   | 37 | 4 | 103556001 | 103556001 | Missense_Mutation | SNP | A | G | 4   | 406 | c.2359T>C    | c.(2359-2361)TAC>CAC | p.Y787H       |
| Pat_06 | Pre-Treatment | ANK2     | 287    | 37 | 4 | 114203906 | 114203906 | Missense_Mutation | SNP | G | A | 4   | 207 | c.1957G>A    | c.(1957-1959)GCA>ACA | p.A653T       |
| Pat_06 | Pre-Treatment | SPATA5   | 166378 | 37 | 4 | 123868451 | 123868451 | Missense_Mutation | SNP | G | A | 5   | 191 | c.1522G>A    | c.(1522-1524)GCT>ACT | p.A508T       |
| Pat_06 | Pre-Treatment | PCDH10   | 57575  | 37 | 4 | 134072409 | 134072409 | Missense_Mutation | SNP | G | A | 4   | 288 | c.1114G>A    | c.(1114-1116)GCG>ACG | p.A372T       |
| Pat_06 | Pre-Treatment | USP38    | 84640  | 37 | 4 | 144130737 | 144130737 | Missense_Mutation | SNP | C | G | 3   | 222 | c.1424C>G    | c.(1423-1425)TCT>TGT | p.S475C       |
| Pat_06 | Pre-Treatment | ABCE1    | 6059   | 37 | 4 | 146029186 | 146029186 | Missense_Mutation | SNP | T | C | 4   | 386 | c.209T>C     | c.(208-210)TTA>TCA   | p.L70S        |
| Pat_06 | Pre-Treatment | FHDC1    | 85462  | 37 | 4 | 153884196 | 153884196 | Missense_Mutation | SNP | G | A | 6   | 767 | c.943G>A     | c.(943-945)GTA>ATA   | p.V315I       |
| Pat_06 | Pre-Treatment | RAPGEF2  | 9693   | 37 | 4 | 160266376 | 160266376 | Missense_Mutation | SNP | C | A | 6   | 806 | c.2914C>A    | c.(2914-2916)CAA>AAA | p.Q972K       |
| Pat_06 | Pre-Treatment | GK3P     | 2713   | 37 | 4 | 166200361 | 166200361 | Missense_Mutation | SNP | C | T | 7   | 508 | c.437G>A     | c.(436-438)AGC>AAC   | p.S146N       |
| Pat_06 | Pre-Treatment | CLCN3    | 1182   | 37 | 4 | 170634391 | 170634391 | Missense_Mutation | SNP | G | A | 5   | 700 | c.2311G>A    | c.(2311-2313)GTG>ATG | p.V771I       |
| Pat_06 | Pre-Treatment | STOX2    | 56977  | 37 | 4 | 184930345 | 184930345 | Missense_Mutation | SNP | C | A | 3   | 98  | c.354C>A     | c.(352-354)CAC>CAA   | p.H118Q       |
| Pat_06 | Pre-Treatment | STOX2    | 56977  | 37 | 4 | 184932540 | 184932540 | Missense_Mutation | SNP | G | A | 5   | 495 | c.2549G>A    | c.(2548-2550)AGC>AAC | p.S850N       |
| Pat_06 | Pre-Treatment | TUBB4Q   | 56604  | 37 | 4 | 190903752 | 190903752 | Missense_Mutation | SNP | C | T | 6   | 783 | c.1228G>A    | c.(1228-1230)GAG>AAG | p.E410K       |
| Pat_06 | Pre-Treatment | RICTOR   | 253260 | 37 | 5 | 38942984  | 38942984  | Missense_Mutation | SNP | G | A | 5   | 375 | c.5003C>T    | c.(5002-5004)CCG>CTG | p.P1668L      |

|        |               |          |        |    |   |           |           |                   |     |   |   |    |     |           |                      |          |
|--------|---------------|----------|--------|----|---|-----------|-----------|-------------------|-----|---|---|----|-----|-----------|----------------------|----------|
| Pat_06 | Pre-Treatment | HEATR7B2 | 133558 | 37 | 5 | 41015484  | 41015484  | Missense_Mutation | SNP | T | C | 3  | 223 | c.2981A>G | c.(2980-2982)AAG>AGG | p.K994R  |
| Pat_06 | Pre-Treatment | ISL1     | 3670   | 37 | 5 | 50679521  | 50679521  | Missense_Mutation | SNP | G | A | 4  | 297 | c.16G>A   | c.(16-18)GAT>AAT     | p.D6N    |
| Pat_06 | Pre-Treatment | PELO     | 53918  | 37 | 5 | 52096401  | 52096401  | Missense_Mutation | SNP | G | A | 4  | 323 | c.173G>A  | c.(172-174)AGC>AAC   | p.S58N   |
| Pat_06 | Pre-Treatment | DDX4     | 54514  | 37 | 5 | 55110932  | 55110932  | Missense_Mutation | SNP | C | A | 9  | 768 | c.1919C>A | c.(1918-1920)GCA>GAA | p.A640E  |
| Pat_06 | Pre-Treatment | RGS7BP   | 401190 | 37 | 5 | 63803671  | 63803671  | Missense_Mutation | SNP | G | A | 4  | 259 | c.299G>A  | c.(298-300)CGT>CAT   | p.R100H  |
| Pat_06 | Pre-Treatment | RGS7BP   | 401190 | 37 | 5 | 63871612  | 63871612  | Missense_Mutation | SNP | G | T | 28 | 335 | c.344G>T  | c.(343-345)GGT>GTT   | p.G115V  |
| Pat_06 | Pre-Treatment | ADAMTS6  | 11174  | 37 | 5 | 64492900  | 64492900  | Missense_Mutation | SNP | C | T | 5  | 575 | c.2654G>A | c.(2653-2655)AGT>AAT | p.S885N  |
| Pat_06 | Pre-Treatment | ADAMTS6  | 11174  | 37 | 5 | 64756033  | 64756033  | Nonsense_Mutation | SNP | G | A | 5  | 741 | c.595C>T  | c.(595-597)CGA>TGA   | p.R199*  |
| Pat_06 | Pre-Treatment | BDP1     | 55814  | 37 | 5 | 70806049  | 70806049  | Missense_Mutation | SNP | G | A | 8  | 339 | c.3130G>A | c.(3130-3132)GTA>ATA | p.V1044I |
| Pat_06 | Pre-Treatment | WDR41    | 55255  | 37 | 5 | 76736818  | 76736818  | Missense_Mutation | SNP | C | A | 7  | 220 | c.702G>T  | c.(700-702)TTG>TTT   | p.L234F  |
| Pat_06 | Pre-Treatment | CMYA5    | 202333 | 37 | 5 | 79031109  | 79031109  | Missense_Mutation | SNP | G | A | 61 | 117 | c.6521G>A | c.(6520-6522)GGA>GAA | p.G2174E |
| Pat_06 | Pre-Treatment | HAPLN1   | 1404   | 37 | 5 | 82937463  | 82937463  | Missense_Mutation | SNP | G | A | 6  | 812 | c.917C>T  | c.(916-918)GCG>GTG   | p.A306V  |
| Pat_06 | Pre-Treatment | LNPEP    | 4012   | 37 | 5 | 96315312  | 96315312  | Missense_Mutation | SNP | G | A | 6  | 564 | c.490G>A  | c.(490-492)GCA>ACA   | p.A164T  |
| Pat_06 | Pre-Treatment | DTWD2    | 285605 | 37 | 5 | 118183873 | 118183873 | Missense_Mutation | SNP | C | T | 5  | 418 | c.638G>A  | c.(637-639)CGG>CAG   | p.R213Q  |
| Pat_06 | Pre-Treatment | DMXL1    | 1657   | 37 | 5 | 118513729 | 118513729 | Missense_Mutation | SNP | G | A | 5  | 537 | c.6925G>A | c.(6925-6927)GAG>AAG | p.E2309K |
| Pat_06 | Pre-Treatment | SNCAIP   | 9627   | 37 | 5 | 121767682 | 121767682 | Missense_Mutation | SNP | G | A | 6  | 365 | c.1201G>A | c.(1201-1203)GTA>ATA | p.V401I  |
| Pat_06 | Pre-Treatment | GRAMD3   | 65983  | 37 | 5 | 125816379 | 125816379 | Missense_Mutation | SNP | C | T | 5  | 655 | c.715C>T  | c.(715-717)CGC>TGC   | p.R239C  |
| Pat_06 | Pre-Treatment | BRD8     | 10902  | 37 | 5 | 137503719 | 137503719 | Missense_Mutation | SNP | C | T | 6  | 793 | c.691G>A  | c.(691-693)GGT>AGT   | p.G231S  |
| Pat_06 | Pre-Treatment | FAM53C   | 51307  | 37 | 5 | 137680844 | 137680844 | Missense_Mutation | SNP | C | T | 6  | 395 | c.467C>T  | c.(466-468)CCG>CTG   | p.P156L  |
| Pat_06 | Pre-Treatment | CTNNA1   | 1495   | 37 | 5 | 138145828 | 138145828 | Missense_Mutation | SNP | G | A | 5  | 615 | c.403G>A  | c.(403-405)GTT>ATT   | p.V135I  |
| Pat_06 | Pre-Treatment | PCDHA4   | 56144  | 37 | 5 | 140186912 | 140186912 | Missense_Mutation | SNP | G | A | 6  | 542 | c.140G>A  | c.(139-141)CGC>CAC   | p.R47H   |
| Pat_06 | Pre-Treatment | PCDHA4   | 56144  | 37 | 5 | 140188628 | 140188628 | Missense_Mutation | SNP | G | A | 7  | 667 | c.1856G>A | c.(1855-1857)CGC>CAC | p.R619H  |
| Pat_06 | Pre-Treatment | PCDHB8   | 56128  | 37 | 5 | 140558184 | 140558184 | Missense_Mutation | SNP | G | A | 4  | 135 | c.569G>A  | c.(568-570)AGG>AAG   | p.R190K  |
| Pat_06 | Pre-Treatment | PCDHGA7  | 56108  | 37 | 5 | 140764210 | 140764210 | Missense_Mutation | SNP | G | A | 6  | 793 | c.1744G>A | c.(1744-1746)GCA>ACA | p.A582T  |
| Pat_06 | Pre-Treatment | PCDHGB7  | 56099  | 37 | 5 | 140799101 | 140799101 | Missense_Mutation | SNP | G | A | 4  | 165 | c.1675G>A | c.(1675-1677)GCA>ACA | p.A559T  |
| Pat_06 | Pre-Treatment | PCDHGA12 | 26025  | 37 | 5 | 140811950 | 140811950 | Missense_Mutation | SNP | C | T | 5  | 802 | c.1624C>T | c.(1624-1626)CTC>TTC | p.L542F  |
| Pat_06 | Pre-Treatment | ARHGAP26 | 23092  | 37 | 5 | 142281595 | 142281595 | Missense_Mutation | SNP | C | A | 6  | 443 | c.693C>A  | c.(691-693)AGC>AGA   | p.S231R  |
| Pat_06 | Pre-Treatment | TCERG1   | 10915  | 37 | 5 | 145838472 | 145838472 | Missense_Mutation | SNP | G | A | 5  | 802 | c.464G>A  | c.(463-465)CGT>CAT   | p.R155H  |
| Pat_06 | Pre-Treatment | ARSI     | 340075 | 37 | 5 | 149676821 | 149676821 | Missense_Mutation | SNP | A | G | 5  | 687 | c.1666T>C | c.(1666-1668)TTT>CTT | p.F556L  |
| Pat_06 | Pre-Treatment | SPARC    | 6678   | 37 | 5 | 151043744 | 151043744 | Nonsense_Mutation | SNP | C | A | 6  | 319 | c.787G>T  | c.(787-789)GAG>TAG   | p.E263*  |
| Pat_06 | Pre-Treatment | FBLL1    | 345630 | 37 | 5 | 167957138 | 167957138 | Missense_Mutation | SNP | G | A | 3  | 61  | c.344G>A  | c.(343-345)CGC>CAC   | p.R115H  |
| Pat_06 | Pre-Treatment | SH3PXD2B | 285590 | 37 | 5 | 171766461 | 171766461 | Missense_Mutation | SNP | G | A | 6  | 377 | c.1648C>T | c.(1648-1650)CGG>TGG | p.R550W  |
| Pat_06 | Pre-Treatment | UNC5A    | 90249  | 37 | 5 | 176301022 | 176301022 | Missense_Mutation | SNP | G | A | 5  | 225 | c.940G>A  | c.(940-942)GTC>ATC   | p.V314I  |
| Pat_06 | Pre-Treatment | FGFR4    | 2264   | 37 | 5 | 176522545 | 176522545 | Missense_Mutation | SNP | G | A | 3  | 34  | c.1642G>A | c.(1642-1644)GTG>ATG | p.V548M  |
| Pat_06 | Pre-Treatment | DDX41    | 51428  | 37 | 5 | 176941759 | 176941759 | Missense_Mutation | SNP | C | T | 6  | 633 | c.878G>A  | c.(877-879)CGC>CAC   | p.R293H  |
| Pat_06 | Pre-Treatment | ADAMTS2  | 9509   | 37 | 5 | 178553062 | 178553062 | Missense_Mutation | SNP | G | A | 6  | 632 | c.2687C>T | c.(2686-2688)GCC>GTC | p.A896V  |
| Pat_06 | Pre-Treatment | MAML1    | 9794   | 37 | 5 | 179193270 | 179193270 | Missense_Mutation | SNP | C | T | 6  | 754 | c.1259C>T | c.(1258-1260)CCG>CTG | p.P420L  |
| Pat_06 | Pre-Treatment | PECI     | 10455  | 37 | 6 | 4130748   | 4130748   | Missense_Mutation | SNP | G | A | 5  | 587 | c.359C>T  | c.(358-360)CCT>CTT   | p.P120L  |
| Pat_06 | Pre-Treatment | PECI     | 10455  | 37 | 6 | 4133832   | 4133832   | Missense_Mutation | SNP | T | C | 4  | 620 | c.164A>G  | c.(163-165)AAG>AGG   | p.K55R   |
| Pat_06 | Pre-Treatment | TBC1D7   | 51256  | 37 | 6 | 13316811  | 13316811  | Missense_Mutation | SNP | G | A | 5  | 660 | c.511C>T  | c.(511-513)CCC>TCC   | p.P171S  |
| Pat_06 | Pre-Treatment | CAP2     | 10486  | 37 | 6 | 17507511  | 17507511  | Missense_Mutation | SNP | G | A | 6  | 741 | c.412G>A  | c.(412-414)GAA>AAA   | p.E138K  |
| Pat_06 | Pre-Treatment | CDKAL1   | 54901  | 37 | 6 | 20846368  | 20846368  | Missense_Mutation | SNP | C | A | 7  | 614 | c.701C>A  | c.(700-702)CCA>CAA   | p.P234Q  |
| Pat_06 | Pre-Treatment | PRL      | 5617   | 37 | 6 | 22294729  | 22294729  | Missense_Mutation | SNP | C | T | 84 | 253 | c.113G>A  | c.(112-114)CGA>CAA   | p.R38Q   |
| Pat_06 | Pre-Treatment | BTN3A1   | 11119  | 37 | 6 | 26408075  | 26408075  | Missense_Mutation | SNP | G | A | 5  | 881 | c.610G>A  | c.(610-612)GTA>ATA   | p.V204I  |
| Pat_06 | Pre-Treatment | HLA-E    | 3133   | 37 | 6 | 30459102  | 30459102  | Missense_Mutation | SNP | G | A | 5  | 555 | c.799G>A  | c.(799-801)GCT>ACT   | p.A267T  |
| Pat_06 | Pre-Treatment | GNL1     | 2794   | 37 | 6 | 30515027  | 30515027  | Missense_Mutation | SNP | C | T | 7  | 837 | c.1303G>A | c.(1303-1305)GCC>ACC | p.A435T  |
| Pat_06 | Pre-Treatment | LSM2     | 57819  | 37 | 6 | 31765619  | 31765619  | Missense_Mutation | SNP | C | T | 6  | 854 | c.203G>A  | c.(202-204)CGA>CAA   | p.R68Q   |

|        |               |          |           |    |   |           |           |                   |     |    |    |    |     |                                   |                      |               |
|--------|---------------|----------|-----------|----|---|-----------|-----------|-------------------|-----|----|----|----|-----|-----------------------------------|----------------------|---------------|
| Pat_06 | Pre-Treatment | CFB      | 629       | 37 | 6 | 31901429  | 31901429  | Missense_Mutation | SNP | G  | A  | 5  | 518 | c.299G>A                          | c.(298-300)CGG>CAG   | p.R100Q       |
| Pat_06 | Pre-Treatment | ITPR3    | 3710      | 37 | 6 | 33654231  | 33654231  | Missense_Mutation | SNP | G  | A  | 5  | 787 | c.5914G>A                         | c.(5914-5916)GCA>ACA | p.A1972T      |
| Pat_06 | Pre-Treatment | DEF6     | 50619     | 37 | 6 | 35285693  | 35285693  | Missense_Mutation | SNP | G  | A  | 4  | 213 | c.833G>A                          | c.(832-834)CGC>CAC   | p.R278H       |
| Pat_06 | Pre-Treatment | PPARD    | 5467      | 37 | 6 | 35393740  | 35393740  | Missense_Mutation | SNP | G  | A  | 6  | 367 | c.1210G>A                         | c.(1210-1212)GCT>ACT | p.A404T       |
| Pat_06 | Pre-Treatment | TULP1    | 7287      | 37 | 6 | 35477014  | 35477014  | Missense_Mutation | SNP | T  | C  | 4  | 872 | c.794A>G                          | c.(793-795)AAG>AGG   | p.K265R       |
| Pat_06 | Pre-Treatment | TRERF1   | 55809     | 37 | 6 | 42237177  | 42237177  | Missense_Mutation | SNP | G  | A  | 6  | 359 | c.152C>T                          | c.(151-153)TCG>TTG   | p.S51L        |
| Pat_06 | Pre-Treatment | C6orf223 | 221416    | 37 | 6 | 43970473  | 43970473  | Missense_Mutation | SNP | G  | A  | 3  | 48  | c.339G>A                          | c.(337-339)ATG>ATA   | p.M113I       |
| Pat_06 | Pre-Treatment | TMEM63B  | 55362     | 37 | 6 | 44119605  | 44119605  | Missense_Mutation | SNP | G  | A  | 6  | 458 | c.1696G>A                         | c.(1696-1698)GGC>AGC | p.G566S       |
| Pat_06 | Pre-Treatment | TCTE1    | 202500    | 37 | 6 | 44250134  | 44250134  | Missense_Mutation | SNP | G  | A  | 5  | 372 | c.1009C>T                         | c.(1009-1011)CGT>TGT | p.R337C       |
| Pat_06 | Pre-Treatment | ENPP4    | 22875     | 37 | 6 | 46107679  | 46107679  | Missense_Mutation | SNP | G  | T  | 7  | 715 | c.359G>T                          | c.(358-360)TGG>TTG   | p.W120L       |
| Pat_06 | Pre-Treatment | ELOVL5   | 60481     | 37 | 6 | 53139987  | 53139987  | Missense_Mutation | SNP | G  | A  | 6  | 495 | c.397C>T                          | c.(397-399)CGC>TGC   | p.R133C       |
| Pat_06 | Pre-Treatment | BAI3     | 577       | 37 | 6 | 69646414  | 69646414  | Missense_Mutation | SNP | A  | G  | 3  | 224 | c.872A>G                          | c.(871-873)GAA>GGA   | p.E291G       |
| Pat_06 | Pre-Treatment | COL9A1   | 1297      | 37 | 6 | 70993524  | 70993524  | Splice_Site       | SNP | C  | G  | 24 | 32  | c.697_splice                      | c.e6-1               | p.F233_splice |
| Pat_06 | Pre-Treatment | SMPD2    | 6610      | 37 | 6 | 109764797 | 109764797 | Missense_Mutation | SNP | C  | T  | 4  | 133 | c.961C>T                          | c.(961-963)CGC>TGC   | p.R321C       |
| Pat_06 | Pre-Treatment | C6orf186 | 728464    | 37 | 6 | 110636546 | 110636546 | Missense_Mutation | SNP | C  | A  | 6  | 477 | c.556G>T                          | c.(556-558)GGG>TGG   | p.G186W       |
| Pat_06 | Pre-Treatment | LAMA4    | 3910      | 37 | 6 | 112466034 | 112466034 | Nonsense_Mutation | SNP | G  | A  | 5  | 433 | c.2455C>T                         | c.(2455-2457)CGA>TGA | p.R819*       |
| Pat_06 | Pre-Treatment | SLC35F1  | 222553    | 37 | 6 | 118556698 | 118556698 | Nonsense_Mutation | SNP | C  | T  | 4  | 239 | c.376C>T                          | c.(376-378)CGA>TGA   | p.R126*       |
| Pat_06 | Pre-Treatment | RNF146   | 81847     | 37 | 6 | 127608243 | 127608243 | Missense_Mutation | SNP | G  | A  | 4  | 207 | c.485G>A                          | c.(484-486)CGT>CAT   | p.R162H       |
| Pat_06 | Pre-Treatment | EYA4     | 2070      | 37 | 6 | 133849911 | 133849911 | Missense_Mutation | SNP | C  | T  | 5  | 765 | c.1888C>T                         | c.(1888-1890)CTC>TTC | p.L630F       |
| Pat_06 | Pre-Treatment | IL20RA   | 53832     | 37 | 6 | 137323125 | 137323125 | Missense_Mutation | SNP | C  | G  | 3  | 163 | c.1232G>C                         | c.(1231-1233)TGT>TCT | p.C411S       |
| Pat_06 | Pre-Treatment | ADAT2    | 134637    | 37 | 6 | 143771767 | 143771767 | Missense_Mutation | SNP | G  | A  | 5  | 476 | c.29C>T                           | c.(28-30)GCT>GTT     | p.A10V        |
| Pat_06 | Pre-Treatment | SHPRH    | 257218    | 37 | 6 | 146264619 | 146264619 | Missense_Mutation | SNP | G  | A  | 5  | 616 | c.1898C>T                         | c.(1897-1899)GCT>GTT | p.A633V       |
| Pat_06 | Pre-Treatment | RBM16    | 22828     | 37 | 6 | 155116190 | 155116190 | Missense_Mutation | SNP | C  | T  | 6  | 582 | c.523C>T                          | c.(523-525)CCT>TCT   | p.P175S       |
| Pat_06 | Pre-Treatment | RSPH3    | 83861     | 37 | 6 | 159420638 | 159420638 | Missense_Mutation | SNP | G  | A  | 5  | 412 | c.371C>T                          | c.(370-372)GCG>GTG   | p.A124V       |
| Pat_06 | Pre-Treatment | MAP3K4   | 4216      | 37 | 6 | 161519315 | 161519315 | Missense_Mutation | SNP | G  | A  | 6  | 807 | c.3530G>A                         | c.(3529-3531)CGG>CAG | p.R1177Q      |
| Pat_06 | Pre-Treatment | SMOC2    | 64094     | 37 | 6 | 168910632 | 168910632 | Missense_Mutation | SNP | G  | A  | 4  | 294 | c.122G>A                          | c.(121-123)AGC>AAC   | p.S41N        |
| Pat_06 | Pre-Treatment | CYP2W1   | 54905     | 37 | 7 | 1027080   | 1027080   | Missense_Mutation | SNP | C  | A  | 3  | 47  | c.1056C>A                         | c.(1054-1056)CAC>CAA | p.H352Q       |
| Pat_06 | Pre-Treatment | TTYH3    | 80727     | 37 | 7 | 2696038   | 2696038   | Missense_Mutation | SNP | G  | A  | 6  | 372 | c.1120G>A                         | c.(1120-1122)GTG>ATG | p.V374M       |
| Pat_06 | Pre-Treatment | TTYH3    | 80727     | 37 | 7 | 2698609   | 2698609   | Missense_Mutation | SNP | A  | G  | 4  | 759 | c.1460A>G                         | c.(1459-1461)GAG>GGG | p.E487G       |
| Pat_06 | Pre-Treatment | CARD11   | 84433     | 37 | 7 | 2949714   | 2949714   | Missense_Mutation | SNP | C  | A  | 5  | 698 | c.3230G>T                         | c.(3229-3231)CGG>CTG | p.R1077L      |
| Pat_06 | Pre-Treatment | TNRC18   | 84629     | 37 | 7 | 5352438   | 5352438   | Missense_Mutation | SNP | G  | A  | 3  | 49  | c.8084C>T                         | c.(8083-8085)GCG>GTG | p.A2695V      |
| Pat_06 | Pre-Treatment | FBXL18   | 80028     | 37 | 7 | 5540665   | 5540665   | Missense_Mutation | SNP | A  | G  | 3  | 110 | c.1235T>C                         | c.(1234-1236)CTG>CCG | p.L412P       |
| Pat_06 | Pre-Treatment | USP42    | 84132     | 37 | 7 | 6178755   | 6178755   | Missense_Mutation | SNP | G  | C  | 3  | 104 | c.586G>C                          | c.(586-588)GAA>CAA   | p.E196Q       |
| Pat_06 | Pre-Treatment | C7orf70  | 84792     | 37 | 7 | 6370424   | 6370424   | Missense_Mutation | SNP | C  | A  | 4  | 314 | c.362G>T                          | c.(361-363)GGT>GTT   | p.G121V       |
| Pat_06 | Pre-Treatment | DGKB     | 1607      | 37 | 7 | 14722395  | 14722395  | Missense_Mutation | SNP | A  | G  | 3  | 64  | c.901T>C                          | c.(901-903)TCC>CCC   | p.S301P       |
| Pat_06 | Pre-Treatment | AHR      | 196       | 37 | 7 | 17373614  | 17373614  | Missense_Mutation | SNP | C  | A  | 5  | 469 | c.784C>A                          | c.(784-786)CAG>AAG   | p.Q262K       |
| Pat_06 | Pre-Treatment | FAM126A  | 84668     | 37 | 7 | 22985627  | 22985627  | Missense_Mutation | SNP | G  | A  | 5  | 759 | c.1147C>T                         | c.(1147-1149)CGG>TGG | p.R383W       |
| Pat_06 | Pre-Treatment | MPP6     | 51678     | 37 | 7 | 24720065  | 24720065  | Missense_Mutation | SNP | G  | A  | 7  | 707 | c.1372G>A                         | c.(1372-1374)GCT>ACT | p.A458T       |
| Pat_06 | Pre-Treatment | POLM     | 27434     | 37 | 7 | 44113810  | 44113810  | Missense_Mutation | SNP | C  | T  | 3  | 39  | c.991G>A                          | c.(991-993)GTG>ATG   | p.V331M       |
| Pat_06 | Pre-Treatment | CDC14C   | 168448    | 37 | 7 | 48965490  | 48965490  | Missense_Mutation | SNP | A  | G  | 3  | 70  | c.1222A>G                         | c.(1222-1224)AGA>GGA | p.R408G       |
| Pat_06 | Pre-Treatment | ZNF713   | 349075    | 37 | 7 | 56007015  | 56007015  | Missense_Mutation | SNP | C  | G  | 3  | 372 | c.609C>G                          | c.(607-609)ATC>ATG   | p.I203M       |
| Pat_06 | Pre-Treatment | GBAS     | 2631      | 37 | 7 | 56049244  | 56049245  | Missense_Mutation | DNP | CG | TA | 7  | 507 | c.357_358CG>TA355-360)GGCGAG>GGTA |                      | p.E120K       |
| Pat_06 | Pre-Treatment | ZNF716   | 441234    | 37 | 7 | 57529068  | 57529068  | Missense_Mutation | SNP | T  | C  | 5  | 148 | c.901T>C                          | c.(901-903)TGT>CGT   | p.C301R       |
| Pat_06 | Pre-Treatment | ZNF735   | 730291    | 37 | 7 | 63680424  | 63680424  | Missense_Mutation | SNP | A  | G  | 3  | 182 | c.995A>G                          | c.(994-996)AAA>AGA   | p.K332R       |
| Pat_06 | Pre-Treatment | ABHD11   | 83451     | 37 | 7 | 73151601  | 73151601  | Missense_Mutation | SNP | G  | A  | 5  | 605 | c.583C>T                          | c.(583-585)CGC>TGC   | p.R195C       |
| Pat_06 | Pre-Treatment | POM121C  | 100101267 | 37 | 7 | 75070845  | 75070845  | Missense_Mutation | SNP | G  | A  | 25 | 48  | c.656C>T                          | c.(655-657)CCG>CTG   | p.P219L       |
| Pat_06 | Pre-Treatment | POM121C  | 100101267 | 37 | 7 | 75113598  | 75113598  | Splice_Site       | SNP | T  | A  | 3  | 56  | c.1_splice                        | c.e1-1               |               |

|        |               |           |        |    |   |           |           |                   |     |   |   |     |     |               |                        |               |
|--------|---------------|-----------|--------|----|---|-----------|-----------|-------------------|-----|---|---|-----|-----|---------------|------------------------|---------------|
| Pat_06 | Pre-Treatment | FGL2      | 10875  | 37 | 7 | 76826077  | 76826077  | Missense_Mutation | SNP | C | G | 4   | 606 | c.839G>C      | c.(838-840)AGG>ACG     | p.R280T       |
| Pat_06 | Pre-Treatment | SEMA3D    | 223117 | 37 | 7 | 84628872  | 84628872  | Missense_Mutation | SNP | G | A | 5   | 666 | c.2218C>T     | c.(2218-2220)CGG>TGG   | p.R740W       |
| Pat_06 | Pre-Treatment | MTERF     | 7978   | 37 | 7 | 91503708  | 91503708  | Missense_Mutation | SNP | G | A | 6   | 775 | c.400C>T      | c.(400-402)CGT>TGT     | p.R134C       |
| Pat_06 | Pre-Treatment | AKAP9     | 10142  | 37 | 7 | 91732059  | 91732059  | Missense_Mutation | SNP | C | T | 6   | 833 | c.11249C>T    | c.(11248-11250)ACG>ATG | p.T3750M      |
| Pat_06 | Pre-Treatment | TRRAP     | 8295   | 37 | 7 | 98495427  | 98495427  | Missense_Mutation | SNP | G | T | 6   | 764 | c.571G>T      | c.(571-573)GGT>TGT     | p.G191C       |
| Pat_06 | Pre-Treatment | CNPY4     | 245812 | 37 | 7 | 99720426  | 99720426  | Missense_Mutation | SNP | C | A | 4   | 204 | c.362C>A      | c.(361-363)GCA>GAA     | p.A121E       |
| Pat_06 | Pre-Treatment | MEPCE     | 56257  | 37 | 7 | 100028081 | 100028081 | Missense_Mutation | SNP | G | A | 4   | 164 | c.440G>A      | c.(439-441)GGC>GAC     | p.G147D       |
| Pat_06 | Pre-Treatment | MEPCE     | 56257  | 37 | 7 | 100028454 | 100028454 | Missense_Mutation | SNP | G | C | 4   | 687 | c.813G>C      | c.(811-813)CAG>CAC     | p.Q271H       |
| Pat_06 | Pre-Treatment | LRCH4     | 4034   | 37 | 7 | 100175810 | 100175810 | Missense_Mutation | SNP | C | G | 3   | 213 | c.920G>C      | c.(919-921)AGT>ACT     | p.S307T       |
| Pat_06 | Pre-Treatment | ZAN       | 7455   | 37 | 7 | 100377273 | 100377273 | Missense_Mutation | SNP | G | A | 3   | 19  | c.6523G>A     | c.(6523-6525)GGT>AGT   | p.G2175S      |
| Pat_06 | Pre-Treatment | ZAN       | 7455   | 37 | 7 | 100391814 | 100391814 | Nonsense_Mutation | SNP | G | T | 6   | 383 | c.8059G>T     | c.(8059-8061)GAG>TAG   | p.E2687*      |
| Pat_06 | Pre-Treatment | ACHE      | 43     | 37 | 7 | 100490114 | 100490114 | Missense_Mutation | SNP | G | A | 5   | 228 | c.1394C>T     | c.(1393-1395)GCT>GTT   | p.A465V       |
| Pat_06 | Pre-Treatment | MUC17     | 140453 | 37 | 7 | 100681244 | 100681244 | Missense_Mutation | SNP | A | G | 7   | 877 | c.6547A>G     | c.(6547-6549)ACA>GCA   | p.T2183A      |
| Pat_06 | Pre-Treatment | MUC17     | 140453 | 37 | 7 | 100681421 | 100681421 | Missense_Mutation | SNP | G | A | 10  | 813 | c.6724G>A     | c.(6724-6726)GCA>ACA   | p.A2242T      |
| Pat_06 | Pre-Treatment | C7orf52   | 375607 | 37 | 7 | 100815749 | 100815749 | Missense_Mutation | SNP | T | C | 3   | 97  | c.721A>G      | c.(721-723)ACC>GCC     | p.T241A       |
| Pat_06 | Pre-Treatment | RNF133    | 168433 | 37 | 7 | 122337948 | 122337948 | Missense_Mutation | SNP | G | T | 6   | 710 | c.1025C>A     | c.(1024-1026)CCT>CAT   | p.P342H       |
| Pat_06 | Pre-Treatment | RBM28     | 55131  | 37 | 7 | 127964611 | 127964611 | Splice_Site       | SNP | C | T | 6   | 789 | c.1339_splice | c.e12+1                | p.L447_splice |
| Pat_06 | Pre-Treatment | CPA1      | 1357   | 37 | 7 | 130023248 | 130023248 | Missense_Mutation | SNP | G | A | 5   | 185 | c.500G>A      | c.(499-501)AGT>AAT     | p.S167N       |
| Pat_06 | Pre-Treatment | PLXNA4    | 91584  | 37 | 7 | 132192500 | 132192500 | Missense_Mutation | SNP | G | A | 6   | 335 | c.953C>T      | c.(952-954)GCG>GTG     | p.A318V       |
| Pat_06 | Pre-Treatment | AKR1B1    | 231    | 37 | 7 | 134135558 | 134135558 | Missense_Mutation | SNP | G | C | 3   | 218 | c.331C>G      | c.(331-333)CAC>GAC     | p.H111D       |
| Pat_06 | Pre-Treatment | BRAF      | 673    | 37 | 7 | 140453136 | 140453136 | Missense_Mutation | SNP | A | T | 200 | 393 | c.1799T>A     | c.(1798-1800)GTG>GAG   | p.V600E       |
| Pat_06 | Pre-Treatment | MGAM      | 8972   | 37 | 7 | 141759717 | 141759717 | Missense_Mutation | SNP | A | G | 3   | 146 | c.4010A>G     | c.(4009-4011)GAT>GGT   | p.D1337G      |
| Pat_06 | Pre-Treatment | EPHB6     | 2051   | 37 | 7 | 142566372 | 142566372 | Missense_Mutation | SNP | G | A | 3   | 68  | c.2161G>A     | c.(2161-2163)GCA>ACA   | p.A721T       |
| Pat_06 | Pre-Treatment | CASP2     | 835    | 37 | 7 | 142991775 | 142991775 | Missense_Mutation | SNP | G | A | 5   | 470 | c.656G>A      | c.(655-657)CGC>CAC     | p.R219H       |
| Pat_06 | Pre-Treatment | OR2A14    | 135941 | 37 | 7 | 143826560 | 143826560 | Missense_Mutation | SNP | T | C | 4   | 654 | c.355T>C      | c.(355-357)TAT>CAT     | p.Y119H       |
| Pat_06 | Pre-Treatment | ZNF786    | 136051 | 37 | 7 | 148768900 | 148768900 | Missense_Mutation | SNP | C | T | 3   | 81  | c.964G>A      | c.(964-966)GGG>AGG     | p.G322R       |
| Pat_06 | Pre-Treatment | KRBA1     | 84626  | 37 | 7 | 149418621 | 149418621 | Missense_Mutation | SNP | C | T | 5   | 120 | c.461C>T      | c.(460-462)CCC>CTC     | p.P154L       |
| Pat_06 | Pre-Treatment | SSPO      | 23145  | 37 | 7 | 149492356 | 149492356 | Missense_Mutation | SNP | C | T | 5   | 440 | c.6245C>T     | c.(6244-6246)TCG>TTG   | p.S2082L      |
| Pat_06 | Pre-Treatment | SSPO      | 23145  | 37 | 7 | 149500048 | 149500048 | Nonsense_Mutation | SNP | G | A | 3   | 56  | c.7674G>A     | c.(7672-7674)TGG>TGA   | p.W2558*      |
| Pat_06 | Pre-Treatment | REPIN1    | 29803  | 37 | 7 | 150068614 | 150068614 | Missense_Mutation | SNP | G | C | 3   | 148 | c.284G>C      | c.(283-285)CGC>CCC     | p.R95P        |
| Pat_06 | Pre-Treatment | ABCF2     | 10061  | 37 | 7 | 150915205 | 150915205 | Missense_Mutation | SNP | C | T | 5   | 668 | c.1300G>A     | c.(1300-1302)GCA>ACA   | p.A434T       |
| Pat_06 | Pre-Treatment | HTR5A     | 3361   | 37 | 7 | 154862859 | 154862859 | Missense_Mutation | SNP | G | A | 4   | 234 | c.250G>A      | c.(250-252)GTC>ATC     | p.V84I        |
| Pat_06 | Pre-Treatment | RBM33     | 155435 | 37 | 7 | 155473430 | 155473430 | Missense_Mutation | SNP | C | G | 3   | 136 | c.395C>G      | c.(394-396)TCT>TGT     | p.S132C       |
| Pat_06 | Pre-Treatment | RBM33     | 155435 | 37 | 7 | 155556600 | 155556600 | Missense_Mutation | SNP | C | T | 3   | 67  | c.3074C>T     | c.(3073-3075)ACG>ATG   | p.T1025M      |
| Pat_06 | Pre-Treatment | CSMD1     | 64478  | 37 | 8 | 2944633   | 2944633   | Missense_Mutation | SNP | G | A | 4   | 299 | c.7463C>T     | c.(7462-7464)ACG>ATG   | p.T2488M      |
| Pat_06 | Pre-Treatment | RP1L1     | 94137  | 37 | 8 | 10480360  | 10480360  | Missense_Mutation | SNP | G | A | 3   | 58  | c.352C>T      | c.(352-354)CGG>TGG     | p.R118W       |
| Pat_06 | Pre-Treatment | EGR3      | 1960   | 37 | 8 | 22548122  | 22548122  | Missense_Mutation | SNP | G | A | 5   | 391 | c.1028C>T     | c.(1027-1029)GCG>GTG   | p.A343V       |
| Pat_06 | Pre-Treatment | TNFRSF10C | 8794   | 37 | 8 | 22974315  | 22974315  | Missense_Mutation | SNP | A | T | 6   | 568 | c.551A>T      | c.(550-552)AAC>ATC     | p.N184I       |
| Pat_06 | Pre-Treatment | ADAM7     | 8756   | 37 | 8 | 24300000  | 24300000  | Nonsense_Mutation | SNP | G | T | 8   | 823 | c.67G>T       | c.(67-69)GGA>TGA       | p.G23*        |
| Pat_06 | Pre-Treatment | PTK2B     | 2185   | 37 | 8 | 27297910  | 27297910  | Missense_Mutation | SNP | A | G | 4   | 573 | c.1991A>G     | c.(1990-1992)TAC>TGC   | p.Y664C       |
| Pat_06 | Pre-Treatment | PLEKHA2   | 59339  | 37 | 8 | 38808387  | 38808387  | Missense_Mutation | SNP | T | C | 3   | 167 | c.365T>C      | c.(364-366)CTA>CCA     | p.L122P       |
| Pat_06 | Pre-Treatment | PLAT      | 5327   | 37 | 8 | 42048920  | 42048920  | Nonsense_Mutation | SNP | G | A | 4   | 421 | c.85C>T       | c.(85-87)CGA>TGA       | p.R29*        |
| Pat_06 | Pre-Treatment | PRKDC     | 5591   | 37 | 8 | 48690333  | 48690333  | Missense_Mutation | SNP | G | A | 8   | 684 | c.11956C>T    | c.(11956-11958)CAC>TAC | p.H3986Y      |
| Pat_06 | Pre-Treatment | SNTG1     | 54212  | 37 | 8 | 51465674  | 51465674  | Missense_Mutation | SNP | G | C | 4   | 449 | c.745G>C      | c.(745-747)GCT>CCT     | p.A249P       |
| Pat_06 | Pre-Treatment | PXDNL     | 137902 | 37 | 8 | 52321132  | 52321132  | Missense_Mutation | SNP | G | C | 3   | 98  | c.3052C>G     | c.(3052-3054)CTG>GTG   | p.L1018V      |
| Pat_06 | Pre-Treatment | TGS1      | 96764  | 37 | 8 | 56698341  | 56698341  | Missense_Mutation | SNP | G | A | 6   | 317 | c.230G>A      | c.(229-231)AGC>AAC     | p.S77N        |
| Pat_06 | Pre-Treatment | KCNB2     | 9312   | 37 | 8 | 73849007  | 73849007  | Missense_Mutation | SNP | G | A | 5   | 579 | c.1417G>A     | c.(1417-1419)GGA>AGA   | p.G473R       |



|        |               |          |        |    |   |           |           |                   |     |   |   |    |     |               |                      |                |
|--------|---------------|----------|--------|----|---|-----------|-----------|-------------------|-----|---|---|----|-----|---------------|----------------------|----------------|
| Pat_06 | Pre-Treatment | ZFHX4    | 79776  | 37 | 8 | 77766927  | 77766927  | Missense_Mutation | SNP | C | G | 3  | 124 | c.7635C>G     | c.(7633-7635)TGC>TGG | p.C2545W       |
| Pat_06 | Pre-Treatment | ZFHX4    | 79776  | 37 | 8 | 77767580  | 77767580  | Missense_Mutation | SNP | C | T | 4  | 149 | c.8288C>T     | c.(8287-8289)ACG>ATG | p.T2763M       |
| Pat_06 | Pre-Treatment | CA13     | 377677 | 37 | 8 | 86193498  | 86193498  | Missense_Mutation | SNP | G | A | 6  | 826 | c.709G>A      | c.(709-711)GAA>AAA   | p.E237K        |
| Pat_06 | Pre-Treatment | SLC26A7  | 115111 | 37 | 8 | 92364117  | 92364117  | Splice_Site       | SNP | T | C | 71 | 476 | c.1218_splice | c.e11+2              | p.M406_splice  |
| Pat_06 | Pre-Treatment | INTS8    | 55656  | 37 | 8 | 95844352  | 95844352  | Missense_Mutation | SNP | G | C | 4  | 383 | c.703G>C      | c.(703-705)GAG>CAG   | p.E235Q        |
| Pat_06 | Pre-Treatment | KCNS2    | 3788   | 37 | 8 | 99441018  | 99441018  | Missense_Mutation | SNP | T | C | 4  | 522 | c.811T>C      | c.(811-813)TTT>CTT   | p.F271L        |
| Pat_06 | Pre-Treatment | CSMD3    | 114788 | 37 | 8 | 113697695 | 113697695 | Nonsense_Mutation | SNP | G | A | 5  | 713 | c.2422C>T     | c.(2422-2424)CGA>TGA | p.R808*        |
| Pat_06 | Pre-Treatment | FAM91A1  | 157769 | 37 | 8 | 124810390 | 124810390 | Missense_Mutation | SNP | G | A | 6  | 687 | c.1472G>A     | c.(1471-1473)AGC>AAC | p.S491N        |
| Pat_06 | Pre-Treatment | RNF139   | 11236  | 37 | 8 | 125487504 | 125487504 | Missense_Mutation | SNP | G | A | 5  | 686 | c.154G>A      | c.(154-156)GTG>ATG   | p.V52M         |
| Pat_06 | Pre-Treatment | MYC      | 4609   | 37 | 8 | 128750830 | 128750830 | Missense_Mutation | SNP | G | A | 4  | 286 | c.322G>A      | c.(322-324)GGA>AGA   | p.G108R        |
| Pat_06 | Pre-Treatment | COL22A1  | 169044 | 37 | 8 | 139890167 | 139890167 | Missense_Mutation | SNP | C | T | 3  | 45  | c.484G>A      | c.(484-486)GCG>ACG   | p.A162T        |
| Pat_06 | Pre-Treatment | TRAPPC9  | 83696  | 37 | 8 | 141370260 | 141370260 | Missense_Mutation | SNP | G | A | 5  | 280 | c.1384C>T     | c.(1384-1386)CGT>TGT | p.R462C        |
| Pat_06 | Pre-Treatment | TRAPPC9  | 83696  | 37 | 8 | 141461321 | 141461321 | Missense_Mutation | SNP | C | G | 3  | 293 | c.152G>C      | c.(151-153)CGA>CCA   | p.R51P         |
| Pat_06 | Pre-Treatment | PLEC     | 5339   | 37 | 8 | 145009217 | 145009217 | Missense_Mutation | SNP | G | A | 5  | 669 | c.1198C>T     | c.(1198-1200)CCC>TCC | p.P400S        |
| Pat_06 | Pre-Treatment | GPR172A  | 79581  | 37 | 8 | 145583616 | 145583616 | Missense_Mutation | SNP | C | A | 6  | 697 | c.464C>A      | c.(463-465)GCC>GAC   | p.A155D        |
| Pat_06 | Pre-Treatment | NFKBIL2  | 4796   | 37 | 8 | 145660443 | 145660443 | Missense_Mutation | SNP | G | A | 3  | 51  | c.2963C>T     | c.(2962-2964)GCC>GTC | p.A988V        |
| Pat_06 | Pre-Treatment | ZNF34    | 80778  | 37 | 8 | 145998713 | 145998713 | Missense_Mutation | SNP | G | A | 4  | 409 | c.1621C>T     | c.(1621-1623)CGG>TGG | p.R541W        |
| Pat_06 | Pre-Treatment | ZNF16    | 7564   | 37 | 8 | 146157752 | 146157752 | Missense_Mutation | SNP | T | C | 88 | 181 | c.421A>G      | c.(421-423)ATG>GTG   | p.M141V        |
| Pat_06 | Pre-Treatment | DMRT1    | 1761   | 37 | 9 | 841892    | 841892    | Missense_Mutation | SNP | C | G | 3  | 86  | c.54C>G       | c.(52-54)CAC>CAG     | p.H18Q         |
| Pat_06 | Pre-Treatment | TMEM215  | 401498 | 37 | 9 | 32784414  | 32784414  | Missense_Mutation | SNP | G | A | 5  | 449 | c.233G>A      | c.(232-234)CGC>CAC   | p.R78H         |
| Pat_06 | Pre-Treatment | DNAI1    | 27019  | 37 | 9 | 34485483  | 34485483  | Missense_Mutation | SNP | G | A | 4  | 278 | c.229G>A      | c.(229-231)GCA>ACA   | p.A77T         |
| Pat_06 | Pre-Treatment | KIAA1045 | 23349  | 37 | 9 | 34971302  | 34971302  | Missense_Mutation | SNP | G | A | 5  | 694 | c.7G>A        | c.(7-9)GTG>ATG       | p.V3M          |
| Pat_06 | Pre-Treatment | PIGO     | 84720  | 37 | 9 | 35093420  | 35093420  | Missense_Mutation | SNP | C | G | 3  | 230 | c.937G>C      | c.(937-939)GAG>CAG   | p.E313Q        |
| Pat_06 | Pre-Treatment | UNC13B   | 10497  | 37 | 9 | 35375125  | 35375125  | Nonsense_Mutation | SNP | C | A | 6  | 810 | c.1295C>A     | c.(1294-1296)TCA>TAA | p.S432*        |
| Pat_06 | Pre-Treatment | UNC13B   | 10497  | 37 | 9 | 35381166  | 35381166  | Missense_Mutation | SNP | A | G | 4  | 300 | c.2198A>G     | c.(2197-2199)GAG>GGG | p.E733G        |
| Pat_06 | Pre-Treatment | TLN1     | 7094   | 37 | 9 | 35698170  | 35698170  | Splice_Site       | SNP | C | A | 4  | 218 | c.7372_splice | c.e56-1              | p.A2458_splice |
| Pat_06 | Pre-Treatment | GNE      | 10020  | 37 | 9 | 36246441  | 36246441  | Missense_Mutation | SNP | A | G | 4  | 519 | c.203T>C      | c.(202-204)ATT>ACT   | p.I68T         |
| Pat_06 | Pre-Treatment | RORB     | 6096   | 37 | 9 | 77257530  | 77257530  | Missense_Mutation | SNP | G | A | 5  | 347 | c.469G>A      | c.(469-471)GTC>ATC   | p.V157I        |
| Pat_06 | Pre-Treatment | TLE4     | 7091   | 37 | 9 | 82242364  | 82242364  | Splice_Site       | SNP | G | A | 5  | 527 | c.369_splice  | c.e6+1               | p.G123_splice  |
| Pat_06 | Pre-Treatment | ZCCHC6   | 79670  | 37 | 9 | 88940263  | 88940263  | Missense_Mutation | SNP | C | T | 5  | 646 | c.1775G>A     | c.(1774-1776)CGC>CAC | p.R592H        |
| Pat_06 | Pre-Treatment | ECM2     | 1842   | 37 | 9 | 95277041  | 95277041  | Missense_Mutation | SNP | G | A | 4  | 344 | c.926C>T      | c.(925-927)CCT>CTT   | p.P309L        |
| Pat_06 | Pre-Treatment | HABP4    | 22927  | 37 | 9 | 99227656  | 99227656  | Missense_Mutation | SNP | G | A | 5  | 693 | c.550G>A      | c.(550-552)GGA>AGA   | p.G184R        |
| Pat_06 | Pre-Treatment | NR4A3    | 8013   | 37 | 9 | 102590767 | 102590767 | Missense_Mutation | SNP | T | C | 5  | 433 | c.443T>C      | c.(442-444)TTC>TCC   | p.F148S        |
| Pat_06 | Pre-Treatment | ACTL7A   | 10881  | 37 | 9 | 111625278 | 111625278 | Missense_Mutation | SNP | G | T | 4  | 375 | c.676G>T      | c.(676-678)GTG>TTG   | p.V226L        |
| Pat_06 | Pre-Treatment | KIAA0368 | 23392  | 37 | 9 | 114204596 | 114204596 | Missense_Mutation | SNP | G | T | 4  | 113 | c.913C>A      | c.(913-915)CAG>AAG   | p.Q305K        |
| Pat_06 | Pre-Treatment | KIAA1958 | 158405 | 37 | 9 | 115336949 | 115336949 | Missense_Mutation | SNP | G | T | 6  | 551 | c.589G>T      | c.(589-591)GAT>TAT   | p.D197Y        |
| Pat_06 | Pre-Treatment | GSN      | 2934   | 37 | 9 | 124073053 | 124073053 | Missense_Mutation | SNP | G | A | 4  | 238 | c.596G>A      | c.(595-597)CGT>CAT   | p.R199H        |
| Pat_06 | Pre-Treatment | DENND1A  | 57706  | 37 | 9 | 126202749 | 126202749 | Missense_Mutation | SNP | C | T | 6  | 366 | c.1378G>A     | c.(1378-1380)GCC>ACC | p.A460T        |
| Pat_06 | Pre-Treatment | MAPKAP1  | 79109  | 37 | 9 | 128419995 | 128419995 | Missense_Mutation | SNP | G | A | 5  | 478 | c.433C>T      | c.(433-435)CGC>TGC   | p.R145C        |
| Pat_06 | Pre-Treatment | FAM129B  | 64855  | 37 | 9 | 130286119 | 130286119 | Missense_Mutation | SNP | G | A | 5  | 520 | c.428C>T      | c.(427-429)ACG>ATG   | p.T143M        |
| Pat_06 | Pre-Treatment | DNM1     | 1759   | 37 | 9 | 130982527 | 130982527 | Missense_Mutation | SNP | G | T | 7  | 716 | c.756G>T      | c.(754-756)TTG>TTT   | p.L252F        |
| Pat_06 | Pre-Treatment | PRDM12   | 59335  | 37 | 9 | 133540159 | 133540159 | Missense_Mutation | SNP | G | A | 3  | 49  | c.119G>A      | c.(118-120)CGC>CAC   | p.R40H         |
| Pat_06 | Pre-Treatment | LAMC3    | 10319  | 37 | 9 | 133920958 | 133920958 | Missense_Mutation | SNP | G | A | 5  | 282 | c.1430G>A     | c.(1429-1431)TGC>TAC | p.C477Y        |
| Pat_06 | Pre-Treatment | MED27    | 9442   | 37 | 9 | 134769315 | 134769315 | Missense_Mutation | SNP | A | T | 4  | 425 | c.638T>A      | c.(637-639)ATA>AAA   | p.I213K        |
| Pat_06 | Pre-Treatment | MED22    | 6837   | 37 | 9 | 136208477 | 136208477 | Missense_Mutation | SNP | C | T | 4  | 101 | c.481G>A      | c.(481-483)GAC>AAC   | p.D161N        |
| Pat_06 | Pre-Treatment | NACC2    | 138151 | 37 | 9 | 138908200 | 138908200 | Missense_Mutation | SNP | G | A | 6  | 535 | c.962C>T      | c.(961-963)CCT>CTT   | p.P321L        |
| Pat_06 | Pre-Treatment | QSOX2    | 169714 | 37 | 9 | 139115638 | 139115638 | Missense_Mutation | SNP | C | G | 3  | 176 | c.646G>C      | c.(646-648)GAA>CAA   | p.E216Q        |

|        |                 |         |        |    |   |           |           |                   |     |   |   |    |     |           |                      |          |
|--------|-----------------|---------|--------|----|---|-----------|-----------|-------------------|-----|---|---|----|-----|-----------|----------------------|----------|
| Pat_06 | Pre-Treatment   | PMPCA   | 23203  | 37 | 9 | 139313544 | 139313544 | Missense_Mutation | SNP | G | A | 5  | 512 | c.1249G>A | c.(1249-1251)GGA>AGA | p.G417R  |
| Pat_06 | Pre-Treatment   | PHPT1   | 29085  | 37 | 9 | 139745228 | 139745228 | Missense_Mutation | SNP | G | A | 5  | 337 | c.307G>A  | c.(307-309)GCC>ACC   | p.A103T  |
| Pat_06 | Pre-Treatment   | EXD3    | 54932  | 37 | 9 | 140201553 | 140201553 | Missense_Mutation | SNP | C | A | 3  | 71  | c.2480G>T | c.(2479-2481)CGG>CTG | p.R827L  |
| Pat_06 | Pre-Treatment   | EHMT1   | 79813  | 37 | 9 | 140712582 | 140712582 | Missense_Mutation | SNP | G | A | 5  | 407 | c.3532G>A | c.(3532-3534)GAC>AAC | p.D1178N |
| Pat_06 | Pre-Treatment   | CACNA1B | 774    | 37 | 9 | 140953156 | 140953156 | Missense_Mutation | SNP | G | A | 3  | 62  | c.4444G>A | c.(4444-4446)GCC>ACC | p.A1482T |
| Pat_06 | Pre-Treatment   | PPP2R3B | 28227  | 37 | X | 306382    | 306382    | Missense_Mutation | SNP | G | A | 5  | 529 | c.905C>T  | c.(904-906)GCG>GTG   | p.A302V  |
| Pat_06 | Pre-Treatment   | ARSD    | 414    | 37 | X | 2827952   | 2827952   | Missense_Mutation | SNP | G | A | 5  | 252 | c.1204C>T | c.(1204-1206)CTC>TTC | p.L402F  |
| Pat_06 | Pre-Treatment   | ARSH    | 347527 | 37 | X | 2928111   | 2928111   | Missense_Mutation | SNP | C | A | 5  | 538 | c.133C>A  | c.(133-135)CTT>ATT   | p.L45I   |
| Pat_06 | Pre-Treatment   | HDHD1A  | 8226   | 37 | X | 6995345   | 6995345   | Missense_Mutation | SNP | G | C | 3  | 133 | c.426C>G  | c.(424-426)GAC>GAG   | p.D142E  |
| Pat_06 | Pre-Treatment   | SCML1   | 6322   | 37 | X | 17768311  | 17768311  | Missense_Mutation | SNP | G | A | 6  | 682 | c.601G>A  | c.(601-603)GCA>ACA   | p.A201T  |
| Pat_06 | Pre-Treatment   | CDKL5   | 6792   | 37 | X | 18622375  | 18622375  | Missense_Mutation | SNP | G | A | 6  | 648 | c.1331G>A | c.(1330-1332)CGC>CAC | p.R444H  |
| Pat_06 | Pre-Treatment   | MAP3K15 | 389840 | 37 | X | 19413274  | 19413274  | Missense_Mutation | SNP | G | A | 6  | 710 | c.544C>T  | c.(544-546)CGC>TGC   | p.R182C  |
| Pat_06 | Pre-Treatment   | KLHL34  | 257240 | 37 | X | 21675236  | 21675236  | Missense_Mutation | SNP | C | T | 4  | 107 | c.671G>A  | c.(670-672)CGC>CAC   | p.R224H  |
| Pat_06 | Pre-Treatment   | CHST7   | 56548  | 37 | X | 46433733  | 46433733  | Nonsense_Mutation | SNP | C | T | 4  | 269 | c.367C>T  | c.(367-369)CAG>TAG   | p.Q123*  |
| Pat_06 | Pre-Treatment   | ZNF182  | 7569   | 37 | X | 47842367  | 47842367  | Missense_Mutation | SNP | G | C | 4  | 528 | c.271C>G  | c.(271-273)CCA>GCA   | p.P91A   |
| Pat_06 | Pre-Treatment   | HDAC6   | 10013  | 37 | X | 48673420  | 48673420  | Missense_Mutation | SNP | A | G | 3  | 103 | c.1111A>G | c.(1111-1113)ATG>GTG | p.M371V  |
| Pat_06 | Pre-Treatment   | ERAS    | 3266   | 37 | X | 48688086  | 48688086  | Missense_Mutation | SNP | C | T | 3  | 55  | c.553C>T  | c.(553-555)CGG>TGG   | p.R185W  |
| Pat_06 | Pre-Treatment   | TIMM17B | 10245  | 37 | X | 48751207  | 48751207  | Missense_Mutation | SNP | A | G | 3  | 154 | c.406T>C  | c.(406-408)TAC>CAC   | p.Y136H  |
| Pat_06 | Pre-Treatment   | PQBP1   | 10084  | 37 | X | 48760267  | 48760267  | Missense_Mutation | SNP | C | G | 3  | 57  | c.704C>G  | c.(703-705)GCA>GGA   | p.A235G  |
| Pat_06 | Pre-Treatment   | KCND1   | 3750   | 37 | X | 48822652  | 48822652  | Missense_Mutation | SNP | C | A | 3  | 43  | c.1528G>T | c.(1528-1530)GGC>TGC | p.G510C  |
| Pat_06 | Pre-Treatment   | GRIPAP1 | 56850  | 37 | X | 48831634  | 48831634  | Missense_Mutation | SNP | C | T | 3  | 108 | c.2366G>A | c.(2365-2367)CGG>CAG | p.R789Q  |
| Pat_06 | Pre-Treatment   | WDR45   | 11152  | 37 | X | 48935361  | 48935361  | Missense_Mutation | SNP | C | T | 3  | 62  | c.176G>A  | c.(175-177)CGC>CAC   | p.R59H   |
| Pat_06 | Pre-Treatment   | GPKOW   | 27238  | 37 | X | 48979909  | 48979909  | Missense_Mutation | SNP | C | T | 4  | 136 | c.164G>A  | c.(163-165)AGG>AAG   | p.R55K   |
| Pat_06 | Pre-Treatment   | NUDT10  | 170685 | 37 | X | 51075840  | 51075840  | Missense_Mutation | SNP | C | T | 6  | 257 | c.23C>T   | c.(22-24)ACA>ATA     | p.T8I    |
| Pat_06 | Pre-Treatment   | GNL3L   | 54552  | 37 | X | 54578727  | 54578727  | Missense_Mutation | SNP | G | A | 5  | 776 | c.1184G>A | c.(1183-1185)GGG>GAG | p.G395E  |
| Pat_06 | Pre-Treatment   | ZXDB    | 158586 | 37 | X | 57620786  | 57620786  | Nonsense_Mutation | SNP | G | T | 7  | 720 | c.2305G>T | c.(2305-2307)GGA>TGA | p.G769*  |
| Pat_06 | Pre-Treatment   | FAM123B | 139285 | 37 | X | 63412575  | 63412575  | Missense_Mutation | SNP | C | G | 3  | 129 | c.592G>C  | c.(592-594)GAG>CAG   | p.E198Q  |
| Pat_06 | Pre-Treatment   | OPHN1   | 4983   | 37 | X | 67412767  | 67412767  | Missense_Mutation | SNP | A | G | 5  | 501 | c.1270T>C | c.(1270-1272)TTT>CTT | p.F424L  |
| Pat_06 | Pre-Treatment   | MED12   | 9968   | 37 | X | 70338611  | 70338611  | Missense_Mutation | SNP | G | A | 4  | 69  | c.7G>A    | c.(7-9)GCC>ACC       | p.A3T    |
| Pat_06 | Pre-Treatment   | ACRC    | 93953  | 37 | X | 70823916  | 70823916  | Missense_Mutation | SNP | A | T | 6  | 354 | c.789A>T  | c.(787-789)GAA>GAT   | p.E263D  |
| Pat_06 | Pre-Treatment   | ACRC    | 93953  | 37 | X | 70823918  | 70823918  | Missense_Mutation | SNP | C | T | 7  | 359 | c.791C>T  | c.(790-792)GCT>GTT   | p.A264V  |
| Pat_06 | Pre-Treatment   | CXCR3   | 2833   | 37 | X | 70837057  | 70837057  | Missense_Mutation | SNP | C | G | 3  | 66  | c.265G>C  | c.(265-267)GAC>CAC   | p.D89H   |
| Pat_06 | Pre-Treatment   | SATL1   | 340562 | 37 | X | 84362573  | 84362573  | Missense_Mutation | SNP | G | T | 5  | 599 | c.1402C>A | c.(1402-1404)CAA>AAA | p.Q468K  |
| Pat_06 | Pre-Treatment   | DACH2   | 117154 | 37 | X | 85969692  | 85969692  | Missense_Mutation | SNP | C | A | 7  | 761 | c.1073C>A | c.(1072-1074)CCA>CAA | p.P358Q  |
| Pat_06 | Pre-Treatment   | GUCY2F  | 2986   | 37 | X | 108673592 | 108673592 | Nonsense_Mutation | SNP | C | A | 6  | 812 | c.1735G>T | c.(1735-1737)GGA>TGA | p.G579*  |
| Pat_06 | Pre-Treatment   | ACTRT1  | 139741 | 37 | X | 127185080 | 127185080 | Missense_Mutation | SNP | G | C | 6  | 836 | c.1106C>G | c.(1105-1107)TCT>TGT | p.S369C  |
| Pat_06 | Pre-Treatment   | ZNF280C | 55609  | 37 | X | 129362974 | 129362974 | Missense_Mutation | SNP | G | A | 6  | 855 | c.1124C>T | c.(1123-1125)ACA>ATA | p.T375I  |
| Pat_06 | Pre-Treatment   | RBMX2   | 51634  | 37 | X | 129543337 | 129543337 | Missense_Mutation | SNP | G | A | 6  | 804 | c.280G>A  | c.(280-282)GTC>ATC   | p.V94I   |
| Pat_06 | Pre-Treatment   | IGSF1   | 3547   | 37 | X | 130419204 | 130419204 | Missense_Mutation | SNP | G | A | 5  | 633 | c.616C>T  | c.(616-618)CTC>TTC   | p.L206F  |
| Pat_06 | Pre-Treatment   | SPANXN2 | 494119 | 37 | X | 142795388 | 142795388 | Missense_Mutation | SNP | T | C | 5  | 872 | c.290A>G  | c.(289-291)CAG>CGG   | p.Q97R   |
| Pat_06 | Pre-Treatment   | PDZD4   | 57595  | 37 | X | 153069787 | 153069787 | Missense_Mutation | SNP | G | A | 4  | 226 | c.1331C>T | c.(1330-1332)GCG>GTG | p.A444V  |
| Pat_06 | Pre-Treatment   | FLNA    | 2316   | 37 | X | 153588658 | 153588658 | Missense_Mutation | SNP | C | T | 80 | 127 | c.3505G>A | c.(3505-3507)GGG>AGG | p.G1169R |
| Pat_06 | Pre-Treatment   | FLNA    | 2316   | 37 | X | 153590869 | 153590869 | Missense_Mutation | SNP | G | A | 6  | 767 | c.2482C>T | c.(2482-2484)CGC>TGC | p.R828C  |
| Pat_06 | Pre-Treatment   | BRCC3   | 79184  | 37 | X | 154344379 | 154344379 | Missense_Mutation | SNP | T | A | 6  | 222 | c.671T>A  | c.(670-672)ATC>AAC   | p.I224N  |
| Pat_06 | Post-Resistance | CHD5    | 26038  | 37 | 1 | 6188230   | 6188230   | Missense_Mutation | SNP | G | A | 4  | 351 | c.3779C>T | c.(3778-3780)GCG>GTG | p.A1260V |
| Pat_06 | Post-Resistance | PER3    | 8863   | 37 | 1 | 7880659   | 7880659   | Missense_Mutation | SNP | G | A | 4  | 281 | c.1892G>A | c.(1891-1893)GGT>GAT | p.G631D  |
| Pat_06 | Post-Resistance | PER3    | 8863   | 37 | 1 | 7887738   | 7887738   | Missense_Mutation | SNP | G | A | 5  | 443 | c.2725G>A | c.(2725-2727)GCA>ACA | p.A909T  |

|        |                 |          |        |    |   |           |           |                        |     |   |   |     |     |               |                        |                |
|--------|-----------------|----------|--------|----|---|-----------|-----------|------------------------|-----|---|---|-----|-----|---------------|------------------------|----------------|
| Pat_06 | Post-Resistance | SLC25A33 | 84275  | 37 | 1 | 9642420   | 9642420   | Missense_Mutation      | SNP | G | C | 38  | 176 | c.827G>C      | c.(826-828)CGC>CCC     | p.R276P        |
| Pat_06 | Post-Resistance | RBP7     | 116362 | 37 | 1 | 10067748  | 10067748  | Missense_Mutation      | SNP | T | G | 3   | 167 | c.194T>G      | c.(193-195)TTT>TGT     | p.F65C         |
| Pat_06 | Post-Resistance | PLOD1    | 5351   | 37 | 1 | 12023666  | 12023666  | Missense_Mutation      | SNP | G | A | 3   | 50  | c.1175G>A     | c.(1174-1176)AGC>AAC   | p.S392N        |
| Pat_06 | Post-Resistance | VPS13D   | 55187  | 37 | 1 | 12331126  | 12331126  | Missense_Mutation      | SNP | A | G | 5   | 380 | c.2048A>G     | c.(2047-2049)CAG>CGG   | p.Q683R        |
| Pat_06 | Post-Resistance | MST1P9   | 11223  | 37 | 1 | 17086103  | 17086103  | Missense_Mutation      | SNP | G | C | 3   | 238 | c.794C>G      | c.(793-795)GCC>GGC     | p.A265G        |
| Pat_06 | Post-Resistance | HP1BP3   | 50809  | 37 | 1 | 21071493  | 21071493  | Nonsense_Mutation      | SNP | G | A | 4   | 254 | c.1459C>T     | c.(1459-1461)CAG>TAG   | p.Q487*        |
| Pat_06 | Post-Resistance | E2F2     | 1870   | 37 | 1 | 23836582  | 23836582  | Missense_Mutation      | SNP | C | G | 3   | 62  | c.1104G>C     | c.(1102-1104)TTG>TTC   | p.L368F        |
| Pat_06 | Post-Resistance | RHCE     | 6006   | 37 | 1 | 25747287  | 25747287  | Translation_Start_Site | SNP | G | A | 5   | 138 | c.-9C>T       | c.(-11--7)GACGG>GATGG  |                |
| Pat_06 | Post-Resistance | SEPN1    | 57190  | 37 | 1 | 26140653  | 26140653  | Missense_Mutation      | SNP | T | C | 3   | 182 | c.1586T>C     | c.(1585-1587)CTG>CCG   | p.L529P        |
| Pat_06 | Post-Resistance | PDIK1L   | 149420 | 37 | 1 | 26440781  | 26440781  | Splice_Site            | SNP | A | G | 3   | 76  | c.-16_splice  | c.e2-2                 |                |
| Pat_06 | Post-Resistance | AHDC1    | 27245  | 37 | 1 | 27877945  | 27877945  | Missense_Mutation      | SNP | C | G | 3   | 196 | c.682G>C      | c.(682-684)GAG>CAG     | p.E228Q        |
| Pat_06 | Post-Resistance | BAI2     | 576    | 37 | 1 | 32193197  | 32193197  | Missense_Mutation      | SNP | T | C | 3   | 81  | c.4582A>G     | c.(4582-4584)AGC>GGC   | p.S1528G       |
| Pat_06 | Post-Resistance | EIF2C4   | 192670 | 37 | 1 | 36297718  | 36297718  | Missense_Mutation      | SNP | G | A | 171 | 536 | c.1177G>A     | c.(1177-1179)GTC>ATC   | p.V393I        |
| Pat_06 | Post-Resistance | ADPRHL2  | 54936  | 37 | 1 | 36557679  | 36557679  | Missense_Mutation      | SNP | G | A | 5   | 396 | c.685G>A      | c.(685-687)GTC>ATC     | p.V229I        |
| Pat_06 | Post-Resistance | ZC3H12A  | 80149  | 37 | 1 | 37948734  | 37948734  | Missense_Mutation      | SNP | G | C | 3   | 119 | c.1322G>C     | c.(1321-1323)GGC>GCC   | p.G441A        |
| Pat_06 | Post-Resistance | MACF1    | 23499  | 37 | 1 | 39782885  | 39782885  | Splice_Site            | SNP | G | A | 3   | 115 | c.3604_splice | c.e30-1                | p.H1202_splice |
| Pat_06 | Post-Resistance | MACF1    | 23499  | 37 | 1 | 39934318  | 39934318  | Missense_Mutation      | SNP | G | A | 5   | 350 | c.17132G>A    | c.(17131-17133)CGT>CAT | p.R5711H       |
| Pat_06 | Post-Resistance | FOXJ3    | 22887  | 37 | 1 | 42647587  | 42647587  | Splice_Site            | SNP | C | T | 4   | 279 | c.1753_splice | c.e14+1                | p.G585_splice  |
| Pat_06 | Post-Resistance | RIMKLA   | 284716 | 37 | 1 | 42880406  | 42880406  | Missense_Mutation      | SNP | G | A | 5   | 298 | c.937G>A      | c.(937-939)GTC>ATC     | p.V313I        |
| Pat_06 | Post-Resistance | WDR65    | 149465 | 37 | 1 | 43663269  | 43663269  | Missense_Mutation      | SNP | G | A | 5   | 769 | c.1168G>A     | c.(1168-1170)GCA>ACA   | p.A390T        |
| Pat_06 | Post-Resistance | KIAA0467 | 23334  | 37 | 1 | 43893032  | 43893032  | Missense_Mutation      | SNP | G | A | 4   | 344 | c.817G>A      | c.(817-819)GCT>ACT     | p.A273T        |
| Pat_06 | Post-Resistance | KIAA0467 | 23334  | 37 | 1 | 43897463  | 43897463  | Missense_Mutation      | SNP | G | A | 7   | 720 | c.2468G>A     | c.(2467-2469)CGC>CAC   | p.R823H        |
| Pat_06 | Post-Resistance | KIF2C    | 11004  | 37 | 1 | 45225987  | 45225987  | Missense_Mutation      | SNP | C | A | 5   | 316 | c.1403C>A     | c.(1402-1404)TCC>TAC   | p.S468Y        |
| Pat_06 | Post-Resistance | CYP4X1   | 260293 | 37 | 1 | 47501500  | 47501500  | Missense_Mutation      | SNP | G | A | 4   | 414 | c.515G>A      | c.(514-516)AGC>AAC     | p.S172N        |
| Pat_06 | Post-Resistance | PRKAA2   | 5563   | 37 | 1 | 57159461  | 57159461  | Missense_Mutation      | SNP | G | T | 6   | 634 | c.499G>T      | c.(499-501)GGT>TGT     | p.G167C        |
| Pat_06 | Post-Resistance | FGGY     | 55277  | 37 | 1 | 59787270  | 59787270  | Missense_Mutation      | SNP | G | A | 4   | 244 | c.49G>A       | c.(49-51)GTT>ATT       | p.V17I         |
| Pat_06 | Post-Resistance | LRRRC40  | 55631  | 37 | 1 | 70671183  | 70671183  | Missense_Mutation      | SNP | G | C | 3   | 204 | c.41C>G       | c.(40-42)GCT>GGT       | p.A14G         |
| Pat_06 | Post-Resistance | CLCA1    | 1179   | 37 | 1 | 86960032  | 86960032  | Missense_Mutation      | SNP | C | T | 43  | 128 | c.1843C>T     | c.(1843-1845)CGC>TGC   | p.R615C        |
| Pat_06 | Post-Resistance | ZNF326   | 284695 | 37 | 1 | 90472996  | 90472996  | Missense_Mutation      | SNP | G | C | 5   | 829 | c.302G>C      | c.(301-303)AGC>ACC     | p.S101T        |
| Pat_06 | Post-Resistance | HSD3B2   | 3284   | 37 | 1 | 119985587 | 119985587 | Missense_Mutation      | SNP | G | A | 7   | 412 | c.394G>A      | c.(394-396)GTC>ATC     | p.V132I        |
| Pat_06 | Post-Resistance | HFE2     | 148738 | 37 | 1 | 145416929 | 145416929 | Missense_Mutation      | SNP | T | C | 4   | 450 | c.1274T>C     | c.(1273-1275)ATT>ACT   | p.I425T        |
| Pat_06 | Post-Resistance | ITGA10   | 8515   | 37 | 1 | 145539681 | 145539681 | Splice_Site            | SNP | A | G | 3   | 159 | c.3115_splice | c.e27-2                | p.N1039_splice |
| Pat_06 | Post-Resistance | FLG      | 2312   | 37 | 1 | 152283940 | 152283940 | Missense_Mutation      | SNP | C | G | 9   | 696 | c.3422G>C     | c.(3421-3423)AGA>ACA   | p.R1141T       |
| Pat_06 | Post-Resistance | THBS3    | 7059   | 37 | 1 | 155168388 | 155168388 | Missense_Mutation      | SNP | C | A | 7   | 527 | c.1886G>T     | c.(1885-1887)GGG>GTG   | p.G629V        |
| Pat_06 | Post-Resistance | FCRL5    | 83416  | 37 | 1 | 157516756 | 157516756 | Missense_Mutation      | SNP | G | T | 142 | 360 | c.284C>A      | c.(283-285)CCT>CAT     | p.P95H         |
| Pat_06 | Post-Resistance | CD5L     | 922    | 37 | 1 | 157805934 | 157805934 | Nonsense_Mutation      | SNP | C | A | 6   | 325 | c.67G>T       | c.(67-69)GGA>TGA       | p.G23*         |
| Pat_06 | Post-Resistance | KCNJ9    | 3765   | 37 | 1 | 160054329 | 160054329 | Missense_Mutation      | SNP | C | T | 4   | 116 | c.509C>T      | c.(508-510)ACG>ATG     | p.T170M        |
| Pat_06 | Post-Resistance | CASQ1    | 844    | 37 | 1 | 160160635 | 160160635 | Missense_Mutation      | SNP | G | A | 5   | 510 | c.94G>A       | c.(94-96)GTA>ATA       | p.V32I         |
| Pat_06 | Post-Resistance | COPA     | 1314   | 37 | 1 | 160265619 | 160265619 | Missense_Mutation      | SNP | G | A | 6   | 570 | c.2383C>T     | c.(2383-2385)CTC>TTC   | p.L795F        |
| Pat_06 | Post-Resistance | F5       | 2153   | 37 | 1 | 169529941 | 169529941 | Missense_Mutation      | SNP | C | A | 6   | 784 | c.437G>T      | c.(436-438)CGA>CTA     | p.R146L        |
| Pat_06 | Post-Resistance | BAT2L2   | 23215  | 37 | 1 | 171548518 | 171548518 | Missense_Mutation      | SNP | C | A | 5   | 270 | c.7179C>A     | c.(7177-7179)GAC>GAA   | p.D2393E       |
| Pat_06 | Post-Resistance | KLHL20   | 27252  | 37 | 1 | 173722401 | 173722401 | Missense_Mutation      | SNP | G | A | 6   | 320 | c.806G>A      | c.(805-807)GGC>GAC     | p.G269D        |
| Pat_06 | Post-Resistance | CEP350   | 9857   | 37 | 1 | 180080277 | 180080277 | Missense_Mutation      | SNP | G | A | 4   | 266 | c.9335G>A     | c.(9334-9336)GGG>GAG   | p.G3112E       |
| Pat_06 | Post-Resistance | CACNA1S  | 779    | 37 | 1 | 201058518 | 201058518 | Missense_Mutation      | SNP | G | C | 3   | 219 | c.768C>G      | c.(766-768)ATC>ATG     | p.I256M        |
| Pat_06 | Post-Resistance | MYOG     | 4656   | 37 | 1 | 203053852 | 203053852 | Missense_Mutation      | SNP | G | A | 3   | 120 | c.476C>T      | c.(475-477)CCC>CTC     | p.P159L        |
| Pat_06 | Post-Resistance | SERTAD4  | 56256  | 37 | 1 | 210415389 | 210415389 | Missense_Mutation      | SNP | A | G | 3   | 224 | c.778A>G      | c.(778-780)ATA>GTA     | p.I260V        |
| Pat_06 | Post-Resistance | TMEM206  | 55248  | 37 | 1 | 212558701 | 212558701 | Missense_Mutation      | SNP | G | A | 6   | 547 | c.410C>T      | c.(409-411)CCT>CTT     | p.P137L        |

|        |                 |           |        |    |    |           |           |                   |     |   |   |     |     |               |                      |               |
|--------|-----------------|-----------|--------|----|----|-----------|-----------|-------------------|-----|---|---|-----|-----|---------------|----------------------|---------------|
| Pat_06 | Post-Resistance | ITPKB     | 3707   | 37 | 1  | 226923287 | 226923287 | Missense_Mutation | SNP | G | A | 6   | 771 | c.1873C>T     | c.(1873-1875)CGC>TGC | p.R625C       |
| Pat_06 | Post-Resistance | ZNF678    | 339500 | 37 | 1  | 227842427 | 227842427 | Missense_Mutation | SNP | G | A | 7   | 455 | c.476G>A      | c.(475-477)GGC>GAC   | p.G159D       |
| Pat_06 | Post-Resistance | OBSCN     | 84033  | 37 | 1  | 228466587 | 228466587 | Missense_Mutation | SNP | G | A | 5   | 348 | c.7057G>A     | c.(7057-7059)GCA>ACA | p.A2353T      |
| Pat_06 | Post-Resistance | TARBP1    | 6894   | 37 | 1  | 234569236 | 234569236 | Missense_Mutation | SNP | T | C | 5   | 429 | c.2314A>G     | c.(2314-2316)AGG>GGG | p.R772G       |
| Pat_06 | Post-Resistance | TBCE      | 6905   | 37 | 1  | 235582831 | 235582831 | Missense_Mutation | SNP | G | A | 4   | 416 | c.415G>A      | c.(415-417)GTA>ATA   | p.V139I       |
| Pat_06 | Post-Resistance | KIF26B    | 55083  | 37 | 1  | 245861488 | 245861488 | Missense_Mutation | SNP | G | A | 4   | 209 | c.5905G>A     | c.(5905-5907)GTC>ATC | p.V1969I      |
| Pat_06 | Post-Resistance | OR2L8     | 391190 | 37 | 1  | 248112794 | 248112794 | Missense_Mutation | SNP | G | C | 4   | 237 | c.635G>C      | c.(634-636)GGT>GCT   | p.G212A       |
| Pat_06 | Post-Resistance | OR2G6     | 391211 | 37 | 1  | 248685330 | 248685330 | Missense_Mutation | SNP | G | A | 4   | 309 | c.383G>A      | c.(382-384)CGG>CAG   | p.R128Q       |
| Pat_06 | Post-Resistance | SEPHS1    | 22929  | 37 | 10 | 13371732  | 13371732  | Missense_Mutation | SNP | T | C | 3   | 95  | c.617A>G      | c.(616-618)CAG>CGG   | p.Q206R       |
| Pat_06 | Post-Resistance | FRMD4A    | 55691  | 37 | 10 | 13699067  | 13699067  | Missense_Mutation | SNP | A | G | 3   | 156 | c.2522T>C     | c.(2521-2523)ATC>ACC | p.I841T       |
| Pat_06 | Post-Resistance | ANKRD30A  | 91074  | 37 | 10 | 37430688  | 37430688  | Missense_Mutation | SNP | C | T | 6   | 343 | c.695C>T      | c.(694-696)GCG>GTG   | p.A232V       |
| Pat_06 | Post-Resistance | ANKRD30A  | 91074  | 37 | 10 | 37431050  | 37431050  | Missense_Mutation | SNP | G | C | 7   | 272 | c.1057G>C     | c.(1057-1059)GCA>CCA | p.A353P       |
| Pat_06 | Post-Resistance | HSD17B7P2 | 158160 | 37 | 10 | 38654432  | 38654432  | Missense_Mutation | SNP | A | G | 4   | 345 | c.524A>G      | c.(523-525)AAT>AGT   | p.N175S       |
| Pat_06 | Post-Resistance | ALOX5     | 240    | 37 | 10 | 45877943  | 45877943  | Missense_Mutation | SNP | G | A | 5   | 624 | c.163G>A      | c.(163-165)GAC>AAC   | p.D55N        |
| Pat_06 | Post-Resistance | PARG      | 8505   | 37 | 10 | 51130381  | 51130381  | Splice_Site       | SNP | C | T | 3   | 46  | c.1662_splice | c.e6+1               | p.K554_splice |
| Pat_06 | Post-Resistance | HK1       | 3098   | 37 | 10 | 71146161  | 71146161  | Missense_Mutation | SNP | T | C | 3   | 188 | c.1922T>C     | c.(1921-1923)ATA>ACA | p.I641T       |
| Pat_06 | Post-Resistance | COL13A1   | 1305   | 37 | 10 | 71678072  | 71678072  | Missense_Mutation | SNP | A | G | 4   | 322 | c.1028A>G     | c.(1027-1029)AAG>AGG | p.K343R       |
| Pat_06 | Post-Resistance | ADAMTS14  | 140766 | 37 | 10 | 72498728  | 72498728  | Missense_Mutation | SNP | G | A | 4   | 261 | c.1730G>A     | c.(1729-1731)CGG>CAG | p.R577Q       |
| Pat_06 | Post-Resistance | SEC24C    | 9632   | 37 | 10 | 75529694  | 75529694  | Missense_Mutation | SNP | G | A | 7   | 839 | c.2783G>A     | c.(2782-2784)CGT>CAT | p.R928H       |
| Pat_06 | Post-Resistance | RPS24     | 6229   | 37 | 10 | 79795129  | 79795129  | Missense_Mutation | SNP | G | A | 5   | 527 | c.23G>A       | c.(22-24)CGC>CAC     | p.R8H         |
| Pat_06 | Post-Resistance | IDE       | 3416   | 37 | 10 | 94228662  | 94228662  | Missense_Mutation | SNP | C | T | 4   | 268 | c.2294G>A     | c.(2293-2295)CGG>CAG | p.R765Q       |
| Pat_06 | Post-Resistance | EXOSC1    | 51013  | 37 | 10 | 99205520  | 99205520  | Missense_Mutation | SNP | C | T | 4   | 329 | c.116G>A      | c.(115-117)GGC>GAC   | p.G39D        |
| Pat_06 | Post-Resistance | PNLIPRP1  | 5407   | 37 | 10 | 118350691 | 118350691 | Splice_Site       | SNP | G | C | 3   | 221 | c.49_splice   | c.e2+1               | p.G17_splice  |
| Pat_06 | Post-Resistance | TACC2     | 10579  | 37 | 10 | 123844309 | 123844309 | Missense_Mutation | SNP | C | T | 6   | 571 | c.2294C>T     | c.(2293-2295)CCG>CTG | p.P765L       |
| Pat_06 | Post-Resistance | PTPRE     | 5791   | 37 | 10 | 129868640 | 129868640 | Missense_Mutation | SNP | C | A | 7   | 460 | c.1219C>A     | c.(1219-1221)CTG>ATG | p.L407M       |
| Pat_06 | Post-Resistance | ADAM8     | 101    | 37 | 10 | 135080882 | 135080882 | Missense_Mutation | SNP | C | A | 3   | 105 | c.2098G>T     | c.(2098-2100)GTC>TTC | p.V700F       |
| Pat_06 | Post-Resistance | CDHR5     | 53841  | 37 | 11 | 618767    | 618767    | Missense_Mutation | SNP | C | T | 7   | 745 | c.1792G>A     | c.(1792-1794)GGT>AGT | p.G598S       |
| Pat_06 | Post-Resistance | LRDD      | 55367  | 37 | 11 | 802256    | 802256    | Missense_Mutation | SNP | G | A | 4   | 135 | c.1115C>T     | c.(1114-1116)CCT>CTT | p.P372L       |
| Pat_06 | Post-Resistance | MUC5B     | 727897 | 37 | 11 | 1266026   | 1266026   | Missense_Mutation | SNP | C | A | 137 | 517 | c.9830C>A     | c.(9829-9831)ACA>AAA | p.T3277K      |
| Pat_06 | Post-Resistance | TRIM68    | 55128  | 37 | 11 | 4621595   | 4621595   | Missense_Mutation | SNP | G | A | 4   | 266 | c.1369C>T     | c.(1369-1371)CGC>TGC | p.R457C       |
| Pat_06 | Post-Resistance | FAM160A2  | 84067  | 37 | 11 | 6239988   | 6239988   | Missense_Mutation | SNP | A | G | 4   | 462 | c.1277T>C     | c.(1276-1278)CTT>CCT | p.L426P       |
| Pat_06 | Post-Resistance | OR6A2     | 8590   | 37 | 11 | 6816547   | 6816547   | Missense_Mutation | SNP | G | C | 3   | 207 | c.393C>G      | c.(391-393)ATC>ATG   | p.I131M       |
| Pat_06 | Post-Resistance | ASCL3     | 56676  | 37 | 11 | 8959228   | 8959228   | Nonsense_Mutation | SNP | C | A | 7   | 610 | c.481G>T      | c.(481-483)GGA>TGA   | p.G161*       |
| Pat_06 | Post-Resistance | MRV11     | 10335  | 37 | 11 | 10631309  | 10631309  | Missense_Mutation | SNP | G | A | 4   | 169 | c.1537C>T     | c.(1537-1539)CGC>TGC | p.R513C       |
| Pat_06 | Post-Resistance | MRV11     | 10335  | 37 | 11 | 10649551  | 10649551  | Missense_Mutation | SNP | G | A | 4   | 285 | c.674C>T      | c.(673-675)CCG>CTG   | p.P225L       |
| Pat_06 | Post-Resistance | CTR9      | 9646   | 37 | 11 | 10785879  | 10785879  | Missense_Mutation | SNP | G | A | 6   | 521 | c.1309G>A     | c.(1309-1311)GCA>ACA | p.A437T       |
| Pat_06 | Post-Resistance | LGR4      | 55366  | 37 | 11 | 27389521  | 27389521  | Missense_Mutation | SNP | A | G | 4   | 461 | c.2749T>C     | c.(2749-2751)TCA>CCA | p.S917P       |
| Pat_06 | Post-Resistance | NR1H3     | 10062  | 37 | 11 | 47281984  | 47281984  | Missense_Mutation | SNP | A | G | 6   | 352 | c.257A>G      | c.(256-258)AAG>AGG   | p.K86R        |
| Pat_06 | Post-Resistance | CELF1     | 10658  | 37 | 11 | 47496908  | 47496908  | Missense_Mutation | SNP | G | A | 4   | 368 | c.1169C>T     | c.(1168-1170)GCT>GTT | p.A390V       |
| Pat_06 | Post-Resistance | OR4C16    | 219428 | 37 | 11 | 55340006  | 55340006  | Missense_Mutation | SNP | A | C | 22  | 770 | c.403A>C      | c.(403-405)AGC>CGC   | p.S135R       |
| Pat_06 | Post-Resistance | APLNR     | 187    | 37 | 11 | 57004082  | 57004082  | Missense_Mutation | SNP | T | C | 3   | 62  | c.397A>G      | c.(397-399)AGG>GGG   | p.R133G       |
| Pat_06 | Post-Resistance | PRG3      | 10394  | 37 | 11 | 57145305  | 57145305  | Missense_Mutation | SNP | A | G | 3   | 149 | c.512T>C      | c.(511-513)CTG>CCG   | p.L171P       |
| Pat_06 | Post-Resistance | PRG3      | 10394  | 37 | 11 | 57147026  | 57147026  | Missense_Mutation | SNP | T | A | 6   | 481 | c.316A>T      | c.(316-318)AGG>TGG   | p.R106W       |
| Pat_06 | Post-Resistance | SF1       | 7536   | 37 | 11 | 64535238  | 64535238  | Missense_Mutation | SNP | G | A | 5   | 298 | c.1147C>T     | c.(1147-1149)CAT>TAT | p.H383Y       |
| Pat_06 | Post-Resistance | BATF2     | 116071 | 37 | 11 | 64764355  | 64764355  | Missense_Mutation | SNP | G | A | 5   | 352 | c.32C>T       | c.(31-33)ACC>ATC     | p.T11I        |
| Pat_06 | Post-Resistance | CDC42EP2  | 10435  | 37 | 11 | 65088503  | 65088503  | Missense_Mutation | SNP | G | A | 4   | 447 | c.134G>A      | c.(133-135)AGT>AAT   | p.S45N        |
| Pat_06 | Post-Resistance | OVOL1     | 5017   | 37 | 11 | 65562658  | 65562658  | Missense_Mutation | SNP | A | G | 4   | 362 | c.650A>G      | c.(649-651)GAG>GGG   | p.E217G       |

|        |                 |          |        |    |    |           |           |                        |     |   |   |     |     |               |                        |                |
|--------|-----------------|----------|--------|----|----|-----------|-----------|------------------------|-----|---|---|-----|-----|---------------|------------------------|----------------|
| Pat_06 | Post-Resistance | GAL3ST3  | 89792  | 37 | 11 | 65810814  | 65810814  | Missense_Mutation      | SNP | G | A | 3   | 61  | c.460C>T      | c.(460-462)CCG>TCG     | p.P154S        |
| Pat_06 | Post-Resistance | RBM14    | 10432  | 37 | 11 | 66394038  | 66394038  | Missense_Mutation      | SNP | C | A | 7   | 200 | c.1909C>A     | c.(1909-1911)CGC>AGC   | p.R637S        |
| Pat_06 | Post-Resistance | ANO1     | 55107  | 37 | 11 | 69950240  | 69950240  | Missense_Mutation      | SNP | C | T | 4   | 148 | c.676C>T      | c.(676-678)CGG>TGG     | p.R226W        |
| Pat_06 | Post-Resistance | CTTN     | 2017   | 37 | 11 | 70271450  | 70271450  | Missense_Mutation      | SNP | T | C | 3   | 139 | c.970T>C      | c.(970-972)TTT>CTT     | p.F324L        |
| Pat_06 | Post-Resistance | LRTOMT   | 220074 | 37 | 11 | 71806493  | 71806493  | Missense_Mutation      | SNP | G | A | 5   | 288 | c.506G>A      | c.(505-507)CGC>CAC     | p.R169H        |
| Pat_06 | Post-Resistance | ARAP1    | 116985 | 37 | 11 | 72409088  | 72409088  | Missense_Mutation      | SNP | G | A | 3   | 51  | c.2605C>T     | c.(2605-2607)CCC>TCC   | p.P869S        |
| Pat_06 | Post-Resistance | DNAJB13  | 374407 | 37 | 11 | 73670659  | 73670659  | Missense_Mutation      | SNP | A | G | 4   | 386 | c.293A>G      | c.(292-294)AAG>AGG     | p.K98R         |
| Pat_06 | Post-Resistance | C2CD3    | 26005  | 37 | 11 | 73765718  | 73765718  | Splice_Site            | SNP | T | C | 3   | 331 | c.5091_splice | c.e26-1                | p.R1697_splice |
| Pat_06 | Post-Resistance | XRRRA1   | 143570 | 37 | 11 | 74554475  | 74554475  | Missense_Mutation      | SNP | C | T | 3   | 118 | c.2149G>A     | c.(2149-2151)GAA>AAA   | p.E717K        |
| Pat_06 | Post-Resistance | SLCO2B1  | 11309  | 37 | 11 | 74904599  | 74904599  | Missense_Mutation      | SNP | C | T | 5   | 232 | c.1412C>T     | c.(1411-1413)GCG>GTG   | p.A471V        |
| Pat_06 | Post-Resistance | MYO7A    | 4647   | 37 | 11 | 76871252  | 76871252  | Missense_Mutation      | SNP | T | G | 3   | 47  | c.1124T>G     | c.(1123-1125)CTC>CGC   | p.L375R        |
| Pat_06 | Post-Resistance | AQP11    | 282679 | 37 | 11 | 77301105  | 77301105  | Nonsense_Mutation      | SNP | C | A | 5   | 163 | c.68C>A       | c.(67-69)TCG>TAG       | p.S23*         |
| Pat_06 | Post-Resistance | FOLH1B   | 219595 | 37 | 11 | 89395322  | 89395322  | Translation_Start_Site | SNP | C | T | 7   | 185 | c.-93C>T      | c.(-95--91)TACGC>TATGC |                |
| Pat_06 | Post-Resistance | RAB39    | 54734  | 37 | 11 | 107799505 | 107799505 | Missense_Mutation      | SNP | G | A | 3   | 55  | c.211G>A      | c.(211-213)GGA>AGA     | p.G71R         |
| Pat_06 | Post-Resistance | BCO2     | 83875  | 37 | 11 | 112046410 | 112046410 | Missense_Mutation      | SNP | C | A | 6   | 389 | c.86C>A       | c.(85-87)CCA>CAA       | p.P29Q         |
| Pat_06 | Post-Resistance | SIDT2    | 51092  | 37 | 11 | 117053495 | 117053495 | Missense_Mutation      | SNP | G | A | 4   | 136 | c.675G>A      | c.(673-675)ATG>ATA     | p.M225I        |
| Pat_06 | Post-Resistance | CBL      | 867    | 37 | 11 | 119169068 | 119169068 | Missense_Mutation      | SNP | G | A | 5   | 308 | c.2252G>A     | c.(2251-2253)GGT>GAT   | p.G751D        |
| Pat_06 | Post-Resistance | NFRKB    | 4798   | 37 | 11 | 129739513 | 129739513 | Missense_Mutation      | SNP | G | A | 4   | 261 | c.3407C>T     | c.(3406-3408)GCT>GTT   | p.A1136V       |
| Pat_06 | Post-Resistance | ACAD8    | 27034  | 37 | 11 | 134131232 | 134131232 | Missense_Mutation      | SNP | G | A | 5   | 523 | c.905G>A      | c.(904-906)CGG>CAG     | p.R302Q        |
| Pat_06 | Post-Resistance | LRTM2    | 654429 | 37 | 12 | 1943849   | 1943849   | Missense_Mutation      | SNP | G | A | 6   | 243 | c.1075G>A     | c.(1075-1077)GAG>AAG   | p.E359K        |
| Pat_06 | Post-Resistance | DCP1B    | 196513 | 37 | 12 | 2062260   | 2062260   | Missense_Mutation      | SNP | G | C | 3   | 237 | c.846C>G      | c.(844-846)CAC>CAG     | p.H282Q        |
| Pat_06 | Post-Resistance | CHD4     | 1108   | 37 | 12 | 6703741   | 6703741   | Missense_Mutation      | SNP | C | T | 4   | 451 | c.2197G>A     | c.(2197-2199)GGC>AGC   | p.G733S        |
| Pat_06 | Post-Resistance | PHB2     | 11331  | 37 | 12 | 7077713   | 7077713   | Missense_Mutation      | SNP | T | C | 3   | 180 | c.338A>G      | c.(337-339)AAT>AGT     | p.N113S        |
| Pat_06 | Post-Resistance | ACSM4    | 341392 | 37 | 12 | 7463210   | 7463210   | Missense_Mutation      | SNP | A | G | 3   | 157 | c.488A>G      | c.(487-489)AAG>AGG     | p.K163R        |
| Pat_06 | Post-Resistance | MANSC1   | 54682  | 37 | 12 | 12483448  | 12483448  | Missense_Mutation      | SNP | G | A | 4   | 342 | c.809C>T      | c.(808-810)CCT>CTT     | p.P270L        |
| Pat_06 | Post-Resistance | ABCC9    | 10060  | 37 | 12 | 21968788  | 21968788  | Missense_Mutation      | SNP | T | C | 6   | 759 | c.3932A>G     | c.(3931-3933)GAG>GGG   | p.E1311G       |
| Pat_06 | Post-Resistance | DDX23    | 9416   | 37 | 12 | 49227133  | 49227133  | Missense_Mutation      | SNP | G | A | 163 | 485 | c.1730C>T     | c.(1729-1731)CCA>CTA   | p.P577L        |
| Pat_06 | Post-Resistance | C12orf44 | 60673  | 37 | 12 | 52467658  | 52467658  | Missense_Mutation      | SNP | C | A | 4   | 416 | c.224C>A      | c.(223-225)GCC>GAC     | p.A75D         |
| Pat_06 | Post-Resistance | KRT74    | 121391 | 37 | 12 | 52964517  | 52964517  | Missense_Mutation      | SNP | C | T | 5   | 424 | c.944G>A      | c.(943-945)CGC>CAC     | p.R315H        |
| Pat_06 | Post-Resistance | NFE2     | 4778   | 37 | 12 | 54687147  | 54687147  | Nonsense_Mutation      | SNP | C | A | 6   | 378 | c.133G>T      | c.(133-135)GAG>TAG     | p.E45*         |
| Pat_06 | Post-Resistance | ITGA7    | 3679   | 37 | 12 | 56096948  | 56096948  | Missense_Mutation      | SNP | G | A | 4   | 198 | c.221C>T      | c.(220-222)GCT>GTT     | p.A74V         |
| Pat_06 | Post-Resistance | LRP1     | 4035   | 37 | 12 | 57579344  | 57579344  | Missense_Mutation      | SNP | G | A | 4   | 263 | c.6494G>A     | c.(6493-6495)GGG>GAG   | p.G2165E       |
| Pat_06 | Post-Resistance | INHBE    | 83729  | 37 | 12 | 57850029  | 57850029  | Missense_Mutation      | SNP | C | T | 6   | 778 | c.451C>T      | c.(451-453)CGC>TGC     | p.R151C        |
| Pat_06 | Post-Resistance | SYT1     | 6857   | 37 | 12 | 79689885  | 79689885  | Missense_Mutation      | SNP | G | A | 6   | 653 | c.511G>A      | c.(511-513)GCC>ACC     | p.A171T        |
| Pat_06 | Post-Resistance | C12orf29 | 91298  | 37 | 12 | 88429460  | 88429460  | Missense_Mutation      | SNP | C | G | 3   | 89  | c.35C>G       | c.(34-36)CCG>CGG       | p.P12R         |
| Pat_06 | Post-Resistance | CHPT1    | 56994  | 37 | 12 | 102113926 | 102113926 | Missense_Mutation      | SNP | A | G | 3   | 132 | c.674A>G      | c.(673-675)AAG>AGG     | p.K225R        |
| Pat_06 | Post-Resistance | FOXN4    | 121643 | 37 | 12 | 109719400 | 109719400 | Missense_Mutation      | SNP | G | C | 3   | 90  | c.1106C>G     | c.(1105-1107)GCA>GGA   | p.A369G        |
| Pat_06 | Post-Resistance | UBE3B    | 89910  | 37 | 12 | 109939300 | 109939300 | Missense_Mutation      | SNP | G | A | 5   | 455 | c.1243G>A     | c.(1243-1245)GCA>ACA   | p.A415T        |
| Pat_06 | Post-Resistance | C12orf76 | 400073 | 37 | 12 | 110495075 | 110495075 | Missense_Mutation      | SNP | G | C | 3   | 220 | c.218C>G      | c.(217-219)GCT>GGT     | p.A73G         |
| Pat_06 | Post-Resistance | IFT81    | 28981  | 37 | 12 | 110573141 | 110573141 | Missense_Mutation      | SNP | G | A | 4   | 302 | c.595G>A      | c.(595-597)GCT>ACT     | p.A199T        |
| Pat_06 | Post-Resistance | C12orf51 | 283450 | 37 | 12 | 112646308 | 112646308 | Missense_Mutation      | SNP | T | G | 3   | 191 | c.6728A>C     | c.(6727-6729)GAC>GCC   | p.D2243A       |
| Pat_06 | Post-Resistance | C12orf51 | 283450 | 37 | 12 | 112670855 | 112670855 | Missense_Mutation      | SNP | C | T | 3   | 91  | c.4684G>A     | c.(4684-4686)GGC>AGC   | p.G1562S       |
| Pat_06 | Post-Resistance | DTX1     | 1840   | 37 | 12 | 113532899 | 113532899 | Missense_Mutation      | SNP | G | A | 4   | 240 | c.1439G>A     | c.(1438-1440)GGT>GAT   | p.G480D        |
| Pat_06 | Post-Resistance | SIRT4    | 23409  | 37 | 12 | 120750395 | 120750395 | Missense_Mutation      | SNP | G | A | 3   | 81  | c.634G>A      | c.(634-636)GTC>ATC     | p.V212I        |
| Pat_06 | Post-Resistance | KDM2B    | 84678  | 37 | 12 | 121880585 | 121880585 | Missense_Mutation      | SNP | G | A | 3   | 63  | c.2659C>T     | c.(2659-2661)CGG>TGG   | p.R887W        |
| Pat_06 | Post-Resistance | PITPNM2  | 57605  | 37 | 12 | 123474421 | 123474421 | Missense_Mutation      | SNP | T | G | 12  | 74  | c.2644A>C     | c.(2644-2646)ACC>CCC   | p.T882P        |
| Pat_06 | Post-Resistance | MPHOSPH9 | 10198  | 37 | 12 | 123705991 | 123705991 | Missense_Mutation      | SNP | G | A | 20  | 103 | c.344C>T      | c.(343-345)TCT>TTT     | p.S115F        |



|        |                 |           |        |    |    |           |           |                   |     |   |   |     |     |           |                      |          |
|--------|-----------------|-----------|--------|----|----|-----------|-----------|-------------------|-----|---|---|-----|-----|-----------|----------------------|----------|
| Pat_06 | Post-Resistance | SCARB1    | 949    | 37 | 12 | 125298879 | 125298879 | Missense_Mutation | SNP | C | T | 5   | 404 | c.499G>A  | c.(499-501)GGC>AGC   | p.G167S  |
| Pat_06 | Post-Resistance | POLE      | 5426   | 37 | 12 | 133244194 | 133244194 | Missense_Mutation | SNP | C | A | 8   | 835 | c.2214G>T | c.(2212-2214)AAG>AAT | p.K738N  |
| Pat_06 | Post-Resistance | PXMP2     | 5827   | 37 | 12 | 133277860 | 133277860 | Missense_Mutation | SNP | G | A | 5   | 466 | c.424G>A  | c.(424-426)GCC>ACC   | p.A142T  |
| Pat_06 | Post-Resistance | EFHA1     | 221154 | 37 | 13 | 22070202  | 22070202  | Missense_Mutation | SNP | G | A | 4   | 375 | c.1031C>T | c.(1030-1032)CCT>CTT | p.P344L  |
| Pat_06 | Post-Resistance | HTR2A     | 3356   | 37 | 13 | 47470011  | 47470011  | Missense_Mutation | SNP | A | T | 5   | 416 | c.31T>A   | c.(31-33)TTG>ATG     | p.L11M   |
| Pat_06 | Post-Resistance | MLNR      | 2862   | 37 | 13 | 49794771  | 49794771  | Missense_Mutation | SNP | C | G | 3   | 140 | c.298C>G  | c.(298-300)CGC>GGC   | p.R100G  |
| Pat_06 | Post-Resistance | SETDB2    | 83852  | 37 | 13 | 50050973  | 50050973  | Missense_Mutation | SNP | C | A | 143 | 503 | c.703C>A  | c.(703-705)CCA>ACA   | p.P235T  |
| Pat_06 | Post-Resistance | UGGT2     | 55757  | 37 | 13 | 96675903  | 96675903  | Missense_Mutation | SNP | C | T | 4   | 398 | c.352G>A  | c.(352-354)GCT>ACT   | p.A118T  |
| Pat_06 | Post-Resistance | FAM155A   | 728215 | 37 | 13 | 108518718 | 108518718 | Missense_Mutation | SNP | T | C | 4   | 264 | c.227A>G  | c.(226-228)CAG>CGG   | p.Q76R   |
| Pat_06 | Post-Resistance | COL4A1    | 1282   | 37 | 13 | 110823044 | 110823044 | Missense_Mutation | SNP | C | T | 4   | 271 | c.3592G>A | c.(3592-3594)GGG>AGG | p.G1198R |
| Pat_06 | Post-Resistance | RAB20     | 55647  | 37 | 13 | 111213811 | 111213811 | Missense_Mutation | SNP | G | A | 4   | 327 | c.56C>T   | c.(55-57)ACG>ATG     | p.T19M   |
| Pat_06 | Post-Resistance | TMCO3     | 55002  | 37 | 13 | 114203816 | 114203816 | Missense_Mutation | SNP | G | A | 4   | 406 | c.1997G>A | c.(1996-1998)AGG>AAG | p.R666K  |
| Pat_06 | Post-Resistance | LRRC16B   | 90668  | 37 | 14 | 24534879  | 24534879  | Missense_Mutation | SNP | G | A | 6   | 597 | c.3445G>A | c.(3445-3447)GCA>ACA | p.A1149T |
| Pat_06 | Post-Resistance | C14orf21  | 161424 | 37 | 14 | 24771294  | 24771294  | Missense_Mutation | SNP | G | A | 5   | 415 | c.932G>A  | c.(931-933)GGT>GAT   | p.G311D  |
| Pat_06 | Post-Resistance | FANCM     | 57697  | 37 | 14 | 45642373  | 45642373  | Missense_Mutation | SNP | T | C | 4   | 647 | c.2276T>C | c.(2275-2277)ATA>ACA | p.I759T  |
| Pat_06 | Post-Resistance | RPL10L    | 140801 | 37 | 14 | 47120617  | 47120617  | Missense_Mutation | SNP | G | A | 4   | 472 | c.323C>T  | c.(322-324)GCT>GTT   | p.A108V  |
| Pat_06 | Post-Resistance | TRIM9     | 114088 | 37 | 14 | 51467475  | 51467475  | Nonsense_Mutation | SNP | G | A | 6   | 438 | c.1390C>T | c.(1390-1392)CAG>TAG | p.Q464*  |
| Pat_06 | Post-Resistance | DDHD1     | 80821  | 37 | 14 | 53540470  | 53540470  | Missense_Mutation | SNP | G | C | 11  | 393 | c.1385C>G | c.(1384-1386)ACT>AGT | p.T462S  |
| Pat_06 | Post-Resistance | PRKCH     | 5583   | 37 | 14 | 61789174  | 61789174  | Missense_Mutation | SNP | G | C | 3   | 315 | c.355G>C  | c.(355-357)GAG>CAG   | p.E119Q  |
| Pat_06 | Post-Resistance | MPP5      | 64398  | 37 | 14 | 67745960  | 67745960  | Missense_Mutation | SNP | T | C | 3   | 277 | c.73T>C   | c.(73-75)TCA>CCA     | p.S25P   |
| Pat_06 | Post-Resistance | PAPLN     | 89932  | 37 | 14 | 73731013  | 73731013  | Missense_Mutation | SNP | G | A | 6   | 440 | c.2956G>A | c.(2956-2958)GAC>AAC | p.D986N  |
| Pat_06 | Post-Resistance | FLVCR2    | 55640  | 37 | 14 | 76045862  | 76045862  | Missense_Mutation | SNP | G | A | 4   | 371 | c.547G>A  | c.(547-549)GGC>AGC   | p.G183S  |
| Pat_06 | Post-Resistance | TGFB3     | 7043   | 37 | 14 | 76438059  | 76438059  | Nonsense_Mutation | SNP | C | A | 4   | 185 | c.355G>T  | c.(355-357)GAA>TAA   | p.E119*  |
| Pat_06 | Post-Resistance | SPTLC2    | 9517   | 37 | 14 | 78043193  | 78043193  | Missense_Mutation | SNP | C | A | 6   | 802 | c.548G>T  | c.(547-549)CGG>CTG   | p.R183L  |
| Pat_06 | Post-Resistance | CCDC88C   | 440193 | 37 | 14 | 91763725  | 91763725  | Missense_Mutation | SNP | T | C | 3   | 174 | c.3890A>G | c.(3889-3891)CAG>CGG | p.Q1297R |
| Pat_06 | Post-Resistance | EVL       | 51466  | 37 | 14 | 100551122 | 100551122 | Missense_Mutation | SNP | G | A | 5   | 494 | c.104G>A  | c.(103-105)CGG>CAG   | p.R35Q   |
| Pat_06 | Post-Resistance | PPP2R5C   | 5527   | 37 | 14 | 102349868 | 102349868 | Missense_Mutation | SNP | A | G | 5   | 355 | c.598A>G  | c.(598-600)ATC>GTC   | p.I200V  |
| Pat_06 | Post-Resistance | KIF26A    | 26153  | 37 | 14 | 104641515 | 104641515 | Missense_Mutation | SNP | G | T | 6   | 92  | c.2390G>T | c.(2389-2391)GGG>GTG | p.G797V  |
| Pat_06 | Post-Resistance | TMEM179   | 388021 | 37 | 14 | 105070985 | 105070985 | Missense_Mutation | SNP | C | T | 3   | 94  | c.94G>A   | c.(94-96)GGC>AGC     | p.G32S   |
| Pat_06 | Post-Resistance | MKRN3     | 7681   | 37 | 15 | 23811035  | 23811035  | Nonsense_Mutation | SNP | G | T | 6   | 440 | c.106G>T  | c.(106-108)GAG>TAG   | p.E36*   |
| Pat_06 | Post-Resistance | SRP14     | 6727   | 37 | 15 | 40331084  | 40331084  | Missense_Mutation | SNP | C | G | 3   | 173 | c.90G>C   | c.(88-90)TTG>TTC     | p.L30F   |
| Pat_06 | Post-Resistance | MGA       | 23269  | 37 | 15 | 41961367  | 41961367  | Missense_Mutation | SNP | G | A | 4   | 432 | c.275G>A  | c.(274-276)AGC>AAC   | p.S92N   |
| Pat_06 | Post-Resistance | MGA       | 23269  | 37 | 15 | 42035149  | 42035149  | Missense_Mutation | SNP | C | T | 4   | 148 | c.4991C>T | c.(4990-4992)ACT>ATT | p.T1664I |
| Pat_06 | Post-Resistance | CDAN1     | 146059 | 37 | 15 | 43028876  | 43028876  | Missense_Mutation | SNP | G | A | 3   | 74  | c.193C>T  | c.(193-195)CTC>TTC   | p.L65F   |
| Pat_06 | Post-Resistance | DUOX2     | 50506  | 37 | 15 | 45399164  | 45399164  | Missense_Mutation | SNP | G | A | 3   | 43  | c.1697C>T | c.(1696-1698)GCA>GTA | p.A566V  |
| Pat_06 | Post-Resistance | GATM      | 2628   | 37 | 15 | 45658258  | 45658258  | Nonsense_Mutation | SNP | G | A | 5   | 566 | c.964C>T  | c.(964-966)CGA>TGA   | p.R322*  |
| Pat_06 | Post-Resistance | SLC12A1   | 6557   | 37 | 15 | 48559860  | 48559860  | Missense_Mutation | SNP | G | A | 6   | 738 | c.2257G>A | c.(2257-2259)GCA>ACA | p.A753T  |
| Pat_06 | Post-Resistance | ATP8B4    | 79895  | 37 | 15 | 50223403  | 50223403  | Missense_Mutation | SNP | T | G | 6   | 385 | c.1555A>C | c.(1555-1557)ACA>CCA | p.T519P  |
| Pat_06 | Post-Resistance | C2CD4B    | 388125 | 37 | 15 | 62457078  | 62457078  | Missense_Mutation | SNP | G | A | 3   | 48  | c.106C>T  | c.(106-108)CCG>TCG   | p.P36S   |
| Pat_06 | Post-Resistance | CCDC33    | 80125  | 37 | 15 | 74565112  | 74565112  | Missense_Mutation | SNP | G | T | 6   | 194 | c.639G>T  | c.(637-639)AAG>AAT   | p.K213N  |
| Pat_06 | Post-Resistance | C15orf39  | 56905  | 37 | 15 | 75500955  | 75500955  | Missense_Mutation | SNP | C | T | 3   | 49  | c.2566C>T | c.(2566-2568)CGG>TGG | p.R856W  |
| Pat_06 | Post-Resistance | SH2D7     | 646892 | 37 | 15 | 78390760  | 78390760  | Missense_Mutation | SNP | G | C | 4   | 387 | c.467G>C  | c.(466-468)CGG>CCG   | p.R156P  |
| Pat_06 | Post-Resistance | IDH3A     | 3419   | 37 | 15 | 78454591  | 78454591  | Missense_Mutation | SNP | G | A | 7   | 709 | c.493G>A  | c.(493-495)GTG>ATG   | p.V165M  |
| Pat_06 | Post-Resistance | HOMER2    | 9455   | 37 | 15 | 83532942  | 83532942  | Missense_Mutation | SNP | C | T | 4   | 269 | c.364G>A  | c.(364-366)GAG>AAG   | p.E122K  |
| Pat_06 | Post-Resistance | LRRC28    | 123355 | 37 | 15 | 99892580  | 99892580  | Missense_Mutation | SNP | G | T | 6   | 730 | c.599G>T  | c.(598-600)GGT>GTT   | p.G200V  |
| Pat_06 | Post-Resistance | PDIA2     | 64714  | 37 | 16 | 334792    | 334792    | Missense_Mutation | SNP | G | C | 3   | 68  | c.540G>C  | c.(538-540)CAG>CAC   | p.Q180H  |
| Pat_06 | Post-Resistance | RAB11FIP3 | 9727   | 37 | 16 | 555582    | 555582    | Missense_Mutation | SNP | A | G | 3   | 118 | c.1454A>G | c.(1453-1455)GAG>GGG | p.E485G  |

|        |                 |           |        |    |    |          |          |                   |     |   |   |   |     |           |                      |          |
|--------|-----------------|-----------|--------|----|----|----------|----------|-------------------|-----|---|---|---|-----|-----------|----------------------|----------|
| Pat_06 | Post-Resistance | LMF1      | 64788  | 37 | 16 | 904562   | 904562   | Missense_Mutation | SNP | G | T | 3 | 46  | c.1674C>A | c.(1672-1674)GAC>GAA | p.D558E  |
| Pat_06 | Post-Resistance | NUBP2     | 10101  | 37 | 16 | 1838600  | 1838600  | Missense_Mutation | SNP | G | A | 3 | 68  | c.701G>A  | c.(700-702)AGG>AAG   | p.R234K  |
| Pat_06 | Post-Resistance | CASKIN1   | 57524  | 37 | 16 | 2229990  | 2229990  | Missense_Mutation | SNP | G | A | 3 | 60  | c.3379C>T | c.(3379-3381)CGC>TGC | p.R1127C |
| Pat_06 | Post-Resistance | DNASE1L2  | 1775   | 37 | 16 | 2287814  | 2287814  | Missense_Mutation | SNP | G | T | 3 | 81  | c.638G>T  | c.(637-639)CGG>CTG   | p.R213L  |
| Pat_06 | Post-Resistance | GLIS2     | 84662  | 37 | 16 | 4385140  | 4385140  | Missense_Mutation | SNP | G | A | 5 | 453 | c.602G>A  | c.(601-603)GGG>GAG   | p.G201E  |
| Pat_06 | Post-Resistance | C16orf72  | 29035  | 37 | 16 | 9210599  | 9210599  | Missense_Mutation | SNP | T | C | 7 | 560 | c.658T>C  | c.(658-660)TCG>CCG   | p.S220P  |
| Pat_06 | Post-Resistance | ABCC6P1   | 653190 | 37 | 16 | 18586170 | 18586170 | Missense_Mutation | SNP | G | A | 3 | 21  | c.136G>A  | c.(136-138)GAA>AAA   | p.E46K   |
| Pat_06 | Post-Resistance | GP2       | 2813   | 37 | 16 | 20334257 | 20334257 | Nonsense_Mutation | SNP | C | A | 6 | 436 | c.589G>T  | c.(589-591)GAG>TAG   | p.E197*  |
| Pat_06 | Post-Resistance | DNAH3     | 55567  | 37 | 16 | 20975620 | 20975620 | Missense_Mutation | SNP | T | C | 3 | 220 | c.9586A>G | c.(9586-9588)ATC>GTC | p.I3196V |
| Pat_06 | Post-Resistance | LAT       | 27040  | 37 | 16 | 28997926 | 28997926 | Missense_Mutation | SNP | G | A | 5 | 270 | c.376G>A  | c.(376-378)GGA>AGA   | p.G126R  |
| Pat_06 | Post-Resistance | ZNF764    | 92595  | 37 | 16 | 30569473 | 30569473 | Missense_Mutation | SNP | G | A | 3 | 80  | c.31C>T   | c.(31-33)CGG>TGG     | p.R11W   |
| Pat_06 | Post-Resistance | ITGAM     | 3684   | 37 | 16 | 31289423 | 31289423 | Missense_Mutation | SNP | G | A | 3 | 53  | c.1349G>A | c.(1348-1350)GGC>GAC | p.G450D  |
| Pat_06 | Post-Resistance | ITGAD     | 3681   | 37 | 16 | 31408747 | 31408747 | Missense_Mutation | SNP | G | A | 3 | 67  | c.205G>A  | c.(205-207)GCT>ACT   | p.A69T   |
| Pat_06 | Post-Resistance | C16orf87  | 388272 | 37 | 16 | 46843668 | 46843668 | Missense_Mutation | SNP | T | C | 3 | 283 | c.193A>G  | c.(193-195)ACA>GCA   | p.T65A   |
| Pat_06 | Post-Resistance | SALL1     | 6299   | 37 | 16 | 51173912 | 51173912 | Missense_Mutation | SNP | G | A | 5 | 267 | c.2221C>T | c.(2221-2223)CGG>TGG | p.R741W  |
| Pat_06 | Post-Resistance | SALL1     | 6299   | 37 | 16 | 51175720 | 51175720 | Missense_Mutation | SNP | C | T | 4 | 137 | c.413G>A  | c.(412-414)GGC>GAC   | p.G138D  |
| Pat_06 | Post-Resistance | ZNF319    | 57567  | 37 | 16 | 58031086 | 58031086 | Missense_Mutation | SNP | G | A | 5 | 297 | c.1084C>T | c.(1084-1086)CGG>TGG | p.R362W  |
| Pat_06 | Post-Resistance | CDH5      | 1003   | 37 | 16 | 66434682 | 66434682 | Missense_Mutation | SNP | G | A | 6 | 761 | c.1600G>A | c.(1600-1602)GCC>ACC | p.A534T  |
| Pat_06 | Post-Resistance | CMTM2     | 146225 | 37 | 16 | 66613713 | 66613713 | Missense_Mutation | SNP | G | A | 7 | 275 | c.203G>A  | c.(202-204)TGT>TAT   | p.C68Y   |
| Pat_06 | Post-Resistance | ACD       | 65057  | 37 | 16 | 67694333 | 67694333 | Missense_Mutation | SNP | C | T | 4 | 113 | c.49G>A   | c.(49-51)GCA>ACA     | p.A17T   |
| Pat_06 | Post-Resistance | PLA2G15   | 23659  | 37 | 16 | 68293315 | 68293315 | Missense_Mutation | SNP | T | C | 3 | 301 | c.994T>C  | c.(994-996)TAT>CAT   | p.Y332H  |
| Pat_06 | Post-Resistance | CIRH1A    | 84916  | 37 | 16 | 69199414 | 69199414 | Missense_Mutation | SNP | C | G | 3 | 215 | c.1818C>G | c.(1816-1818)ATC>ATG | p.I606M  |
| Pat_06 | Post-Resistance | NFAT5     | 10725  | 37 | 16 | 69727269 | 69727269 | Missense_Mutation | SNP | G | A | 5 | 705 | c.3487G>A | c.(3487-3489)GCA>ACA | p.A1163T |
| Pat_06 | Post-Resistance | RFWD3     | 55159  | 37 | 16 | 74666547 | 74666547 | Missense_Mutation | SNP | G | A | 4 | 209 | c.1451C>T | c.(1450-1452)ACT>ATT | p.T484I  |
| Pat_06 | Post-Resistance | MON1B     | 22879  | 37 | 16 | 77227620 | 77227620 | Missense_Mutation | SNP | G | A | 6 | 497 | c.421G>A  | c.(421-423)GCC>ACC   | p.A141T  |
| Pat_06 | Post-Resistance | RAP1GAP2  | 23108  | 37 | 17 | 2921371  | 2921371  | Missense_Mutation | SNP | G | C | 3 | 84  | c.1511G>C | c.(1510-1512)CGC>CCC | p.R504P  |
| Pat_06 | Post-Resistance | P2RX5     | 5026   | 37 | 17 | 3582885  | 3582885  | Missense_Mutation | SNP | T | C | 3 | 164 | c.1258A>G | c.(1258-1260)AGG>GGG | p.R420G  |
| Pat_06 | Post-Resistance | C17orf85  | 55421  | 37 | 17 | 3716504  | 3716504  | Missense_Mutation | SNP | C | A | 4 | 277 | c.1697G>T | c.(1696-1698)AGG>ATG | p.R566M  |
| Pat_06 | Post-Resistance | KIAA0753  | 9851   | 37 | 17 | 6510532  | 6510532  | Missense_Mutation | SNP | C | A | 5 | 607 | c.1888G>T | c.(1888-1890)GCC>TCC | p.A630S  |
| Pat_06 | Post-Resistance | C17orf74  | 201243 | 37 | 17 | 7330508  | 7330508  | Missense_Mutation | SNP | A | G | 4 | 323 | c.1198A>G | c.(1198-1200)ACC>GCC | p.T400A  |
| Pat_06 | Post-Resistance | PER1      | 5187   | 37 | 17 | 8052785  | 8052785  | Nonsense_Mutation | SNP | G | T | 5 | 232 | c.848C>A  | c.(847-849)TCA>TAA   | p.S283*  |
| Pat_06 | Post-Resistance | NTN1      | 9423   | 37 | 17 | 8926555  | 8926555  | Missense_Mutation | SNP | G | A | 3 | 47  | c.865G>A  | c.(865-867)GGC>AGC   | p.G289S  |
| Pat_06 | Post-Resistance | MYH2      | 4620   | 37 | 17 | 10442604 | 10442604 | Missense_Mutation | SNP | C | T | 7 | 828 | c.1334G>A | c.(1333-1335)CGC>CAC | p.R445H  |
| Pat_06 | Post-Resistance | DNAH9     | 1770   | 37 | 17 | 11642312 | 11642312 | Missense_Mutation | SNP | C | T | 6 | 347 | c.5930C>T | c.(5929-5931)GCT>GTT | p.A1977V |
| Pat_06 | Post-Resistance | TBC1D26   | 353149 | 37 | 17 | 15644445 | 15644445 | Missense_Mutation | SNP | T | C | 4 | 351 | c.556T>C  | c.(556-558)TAC>CAC   | p.Y186H  |
| Pat_06 | Post-Resistance | ZNF624    | 57547  | 37 | 17 | 16526963 | 16526963 | Missense_Mutation | SNP | C | G | 3 | 239 | c.1237G>C | c.(1237-1239)GAG>CAG | p.E413Q  |
| Pat_06 | Post-Resistance | MPRIIP    | 23164  | 37 | 17 | 17062123 | 17062123 | Missense_Mutation | SNP | G | A | 5 | 401 | c.1853G>A | c.(1852-1854)CGG>CAG | p.R618Q  |
| Pat_06 | Post-Resistance | TRIM16L   | 147166 | 37 | 17 | 18638618 | 18638618 | Missense_Mutation | SNP | G | C | 3 | 290 | c.892G>C  | c.(892-894)GAT>CAT   | p.D298H  |
| Pat_06 | Post-Resistance | RNF112    | 7732   | 37 | 17 | 19316950 | 19316950 | Missense_Mutation | SNP | A | G | 3 | 217 | c.781A>G  | c.(781-783)AGG>GGG   | p.R261G  |
| Pat_06 | Post-Resistance | MYO18A    | 399687 | 37 | 17 | 27421041 | 27421041 | Missense_Mutation | SNP | C | T | 4 | 191 | c.4778G>A | c.(4777-4779)CGG>CAG | p.R1593Q |
| Pat_06 | Post-Resistance | ACACA     | 31     | 37 | 17 | 35601610 | 35601610 | Missense_Mutation | SNP | G | A | 6 | 565 | c.2525C>T | c.(2524-2526)ACG>ATG | p.T842M  |
| Pat_06 | Post-Resistance | MED24     | 9862   | 37 | 17 | 38189634 | 38189634 | Missense_Mutation | SNP | C | T | 3 | 110 | c.635G>A  | c.(634-636)CGG>CAG   | p.R212Q  |
| Pat_06 | Post-Resistance | KRTAP1-3  | 81850  | 37 | 17 | 39190656 | 39190656 | Missense_Mutation | SNP | C | G | 4 | 408 | c.418G>C  | c.(418-420)GAG>CAG   | p.E140Q  |
| Pat_06 | Post-Resistance | KRTAP4-11 | 653240 | 37 | 17 | 39274087 | 39274087 | Missense_Mutation | SNP | G | C | 4 | 97  | c.481C>G  | c.(481-483)CTG>GTG   | p.L161V  |
| Pat_06 | Post-Resistance | KRT13     | 3860   | 37 | 17 | 39661436 | 39661436 | Missense_Mutation | SNP | G | A | 8 | 737 | c.367C>T  | c.(367-369)CGC>TGC   | p.R123C  |
| Pat_06 | Post-Resistance | WNK4      | 65266  | 37 | 17 | 40933231 | 40933231 | Missense_Mutation | SNP | G | A | 6 | 368 | c.515G>A  | c.(514-516)CGA>CAA   | p.R172Q  |
| Pat_06 | Post-Resistance | TMEM101   | 84336  | 37 | 17 | 42090407 | 42090407 | Missense_Mutation | SNP | C | A | 4 | 264 | c.435G>T  | c.(433-435)CAG>CAT   | p.Q145H  |

|        |                 |          |        |    |    |          |          |                        |     |   |   |     |     |           |                      |          |
|--------|-----------------|----------|--------|----|----|----------|----------|------------------------|-----|---|---|-----|-----|-----------|----------------------|----------|
| Pat_06 | Post-Resistance | PLCD3    | 113026 | 37 | 17 | 43195495 | 43195495 | Missense_Mutation      | SNP | G | T | 6   | 273 | c.1126C>A | c.(1126-1128)CAG>AAG | p.Q376K  |
| Pat_06 | Post-Resistance | CBX1     | 10951  | 37 | 17 | 46154339 | 46154339 | Missense_Mutation      | SNP | C | G | 4   | 461 | c.28G>C   | c.(28-30)GTG>CTG     | p.V10L   |
| Pat_06 | Post-Resistance | HOXB1    | 3211   | 37 | 17 | 46606940 | 46606940 | Missense_Mutation      | SNP | G | C | 4   | 308 | c.875C>G  | c.(874-876)CCG>CGG   | p.P292R  |
| Pat_06 | Post-Resistance | MSI2     | 124540 | 37 | 17 | 55729492 | 55729492 | Missense_Mutation      | SNP | G | A | 7   | 657 | c.760G>A  | c.(760-762)GCA>ACA   | p.A254T  |
| Pat_06 | Post-Resistance | MPO      | 4353   | 37 | 17 | 56350963 | 56350963 | Missense_Mutation      | SNP | G | A | 384 | 476 | c.1433C>T | c.(1432-1434)ACG>ATG | p.T478M  |
| Pat_06 | Post-Resistance | BCAS3    | 54828  | 37 | 17 | 59067378 | 59067378 | Missense_Mutation      | SNP | G | A | 6   | 684 | c.1268G>A | c.(1267-1269)AGT>AAT | p.S423N  |
| Pat_06 | Post-Resistance | MRC2     | 9902   | 37 | 17 | 60757617 | 60757617 | Nonsense_Mutation      | SNP | G | A | 4   | 247 | c.2385G>A | c.(2383-2385)TGG>TGA | p.W795*  |
| Pat_06 | Post-Resistance | TANC2    | 26115  | 37 | 17 | 61432228 | 61432228 | Missense_Mutation      | SNP | T | C | 5   | 816 | c.1837T>C | c.(1837-1839)TAC>CAC | p.Y613H  |
| Pat_06 | Post-Resistance | TANC2    | 26115  | 37 | 17 | 61483573 | 61483573 | Missense_Mutation      | SNP | G | A | 6   | 765 | c.3302G>A | c.(3301-3303)CGC>CAC | p.R1101H |
| Pat_06 | Post-Resistance | TEX2     | 55852  | 37 | 17 | 62265647 | 62265647 | Missense_Mutation      | SNP | G | A | 6   | 614 | c.2305C>T | c.(2305-2307)CGG>TGG | p.R769W  |
| Pat_06 | Post-Resistance | BPTF     | 2186   | 37 | 17 | 65822438 | 65822438 | Missense_Mutation      | SNP | T | C | 3   | 300 | c.598T>C  | c.(598-600)TAC>CAC   | p.Y200H  |
| Pat_06 | Post-Resistance | ARSG     | 22901  | 37 | 17 | 66339924 | 66339924 | Missense_Mutation      | SNP | G | A | 31  | 191 | c.398G>A  | c.(397-399)GGG>GAG   | p.G133E  |
| Pat_06 | Post-Resistance | ABCA6    | 23460  | 37 | 17 | 67119437 | 67119437 | Missense_Mutation      | SNP | G | A | 4   | 342 | c.1379C>T | c.(1378-1380)CCC>CTC | p.P460L  |
| Pat_06 | Post-Resistance | TNRC6C   | 57690  | 37 | 17 | 76047105 | 76047105 | Missense_Mutation      | SNP | C | A | 4   | 165 | c.1962C>A | c.(1960-1962)AAC>AAA | p.N654K  |
| Pat_06 | Post-Resistance | NOTUM    | 147111 | 37 | 17 | 79913328 | 79913328 | Missense_Mutation      | SNP | G | A | 4   | 114 | c.1081C>T | c.(1081-1083)CGG>TGG | p.R361W  |
| Pat_06 | Post-Resistance | PSMG2    | 56984  | 37 | 18 | 12706720 | 12706720 | Missense_Mutation      | SNP | G | A | 4   | 284 | c.229G>A  | c.(229-231)GTG>ATG   | p.V77M   |
| Pat_06 | Post-Resistance | DSC3     | 1825   | 37 | 18 | 28576918 | 28576918 | Missense_Mutation      | SNP | T | C | 5   | 194 | c.2332A>G | c.(2332-2334)ACC>GCC | p.T778A  |
| Pat_06 | Post-Resistance | ELP2     | 55250  | 37 | 18 | 33709903 | 33709903 | Missense_Mutation      | SNP | G | A | 5   | 436 | c.7G>A    | c.(7-9)GCA>ACA       | p.A3T    |
| Pat_06 | Post-Resistance | KIAA1632 | 57724  | 37 | 18 | 43496522 | 43496522 | Missense_Mutation      | SNP | G | C | 3   | 189 | c.3265C>G | c.(3265-3267)CTA>GTA | p.L1089V |
| Pat_06 | Post-Resistance | POLI     | 11201  | 37 | 18 | 51804162 | 51804162 | Nonsense_Mutation      | SNP | C | T | 4   | 155 | c.496C>T  | c.(496-498)CAG>TAG   | p.Q166*  |
| Pat_06 | Post-Resistance | ZNF236   | 7776   | 37 | 18 | 74631810 | 74631810 | Missense_Mutation      | SNP | C | G | 4   | 455 | c.3347C>G | c.(3346-3348)ACG>AGG | p.T1116R |
| Pat_06 | Post-Resistance | MED16    | 10025  | 37 | 19 | 877161   | 877161   | Nonsense_Mutation      | SNP | G | C | 3   | 65  | c.1373C>G | c.(1372-1374)TCA>TGA | p.S458*  |
| Pat_06 | Post-Resistance | TCF3     | 6929   | 37 | 19 | 1622318  | 1622318  | Missense_Mutation      | SNP | C | T | 3   | 64  | c.646G>A  | c.(646-648)GTG>ATG   | p.V216M  |
| Pat_06 | Post-Resistance | ATP8B3   | 148229 | 37 | 19 | 1783118  | 1783118  | Missense_Mutation      | SNP | C | T | 3   | 123 | c.3812G>A | c.(3811-3813)CGG>CAG | p.R1271Q |
| Pat_06 | Post-Resistance | LINGO3   | 645191 | 37 | 19 | 2290979  | 2290979  | Missense_Mutation      | SNP | A | G | 3   | 87  | c.797T>C  | c.(796-798)CTG>CCG   | p.L266P  |
| Pat_06 | Post-Resistance | LMNB2    | 84823  | 37 | 19 | 2456715  | 2456715  | Missense_Mutation      | SNP | G | A | 3   | 74  | c.157C>T  | c.(157-159)CGG>TGG   | p.R53W   |
| Pat_06 | Post-Resistance | ZNF57    | 126295 | 37 | 19 | 2918025  | 2918025  | Missense_Mutation      | SNP | T | C | 4   | 277 | c.1406T>C | c.(1405-1407)ATG>ACG | p.M469T  |
| Pat_06 | Post-Resistance | TLE6     | 79816  | 37 | 19 | 2987064  | 2987064  | Translation_Start_Site | SNP | C | G | 3   | 184 | c.0C>G    | c.(-2-2)ATCAT>ATGAT  |          |
| Pat_06 | Post-Resistance | MPND     | 84954  | 37 | 19 | 4345742  | 4345742  | Missense_Mutation      | SNP | G | C | 3   | 125 | c.295G>C  | c.(295-297)GGG>CGG   | p.G99R   |
| Pat_06 | Post-Resistance | KDM4B    | 23030  | 37 | 19 | 5144155  | 5144155  | Missense_Mutation      | SNP | G | A | 4   | 405 | c.2728G>A | c.(2728-2730)GGT>AGT | p.G910S  |
| Pat_06 | Post-Resistance | SAFB2    | 9667   | 37 | 19 | 5592789  | 5592789  | Missense_Mutation      | SNP | G | A | 4   | 175 | c.2317C>T | c.(2317-2319)CGG>TGG | p.R773W  |
| Pat_06 | Post-Resistance | FUT3     | 2525   | 37 | 19 | 5844502  | 5844502  | Missense_Mutation      | SNP | G | T | 7   | 595 | c.349C>A  | c.(349-351)CCT>ACT   | p.P117T  |
| Pat_06 | Post-Resistance | PNPLA6   | 10908  | 37 | 19 | 7607465  | 7607465  | Missense_Mutation      | SNP | G | A | 4   | 196 | c.1298G>A | c.(1297-1299)CGC>CAC | p.R433H  |
| Pat_06 | Post-Resistance | ZNF560   | 147741 | 37 | 19 | 9578478  | 9578478  | Missense_Mutation      | SNP | C | T | 6   | 553 | c.1145G>A | c.(1144-1146)GGC>GAC | p.G382D  |
| Pat_06 | Post-Resistance | MRPL4    | 51073  | 37 | 19 | 10370467 | 10370467 | Missense_Mutation      | SNP | C | T | 4   | 260 | c.914C>T  | c.(913-915)GCG>GTG   | p.A305V  |
| Pat_06 | Post-Resistance | TYK2     | 7297   | 37 | 19 | 10476414 | 10476414 | Missense_Mutation      | SNP | C | G | 3   | 95  | c.790G>C  | c.(790-792)GAG>CAG   | p.E264Q  |
| Pat_06 | Post-Resistance | RTBDN    | 83546  | 37 | 19 | 12940673 | 12940673 | Missense_Mutation      | SNP | G | A | 4   | 238 | c.121C>T  | c.(121-123)CAC>TAC   | p.H41Y   |
| Pat_06 | Post-Resistance | PKN1     | 5585   | 37 | 19 | 14580274 | 14580274 | Missense_Mutation      | SNP | G | A | 6   | 735 | c.2098G>A | c.(2098-2100)GGT>AGT | p.G700S  |
| Pat_06 | Post-Resistance | SIN3B    | 23309  | 37 | 19 | 16986980 | 16986980 | Missense_Mutation      | SNP | A | G | 3   | 166 | c.2803A>G | c.(2803-2805)AGG>GGG | p.R935G  |
| Pat_06 | Post-Resistance | KIAA1683 | 80726  | 37 | 19 | 18376614 | 18376614 | Missense_Mutation      | SNP | T | C | 3   | 140 | c.1736A>G | c.(1735-1737)AAG>AGG | p.K579R  |
| Pat_06 | Post-Resistance | ZNF93    | 81931  | 37 | 19 | 20045200 | 20045200 | Missense_Mutation      | SNP | A | C | 6   | 199 | c.1436A>C | c.(1435-1437)AAA>ACA | p.K479T  |
| Pat_06 | Post-Resistance | ZNF93    | 81931  | 37 | 19 | 20045284 | 20045284 | Missense_Mutation      | SNP | A | C | 6   | 171 | c.1520A>C | c.(1519-1521)AAA>ACA | p.K507T  |
| Pat_06 | Post-Resistance | ZNF85    | 7639   | 37 | 19 | 21132642 | 21132642 | Missense_Mutation      | SNP | T | G | 8   | 50  | c.1322T>G | c.(1321-1323)CTT>CGT | p.L441R  |
| Pat_06 | Post-Resistance | ZNF493   | 284443 | 37 | 19 | 21606468 | 21606468 | Missense_Mutation      | SNP | C | T | 4   | 201 | c.623C>T  | c.(622-624)CCT>CTT   | p.P208L  |
| Pat_06 | Post-Resistance | ZNF208   | 7757   | 37 | 19 | 22155282 | 22155282 | Missense_Mutation      | SNP | T | C | 6   | 181 | c.2254A>G | c.(2254-2256)AAG>GAG | p.K752E  |
| Pat_06 | Post-Resistance | ZNF257   | 113835 | 37 | 19 | 22271961 | 22271961 | Missense_Mutation      | SNP | A | G | 8   | 201 | c.1409A>G | c.(1408-1410)CAG>CGG | p.Q470R  |
| Pat_06 | Post-Resistance | ZNF681   | 148213 | 37 | 19 | 23927139 | 23927139 | Missense_Mutation      | SNP | T | G | 7   | 135 | c.1213A>C | c.(1213-1215)AAG>CAG | p.K405Q  |

|        |                 |          |        |    |    |           |           |                   |     |   |   |     |     |            |                        |          |
|--------|-----------------|----------|--------|----|----|-----------|-----------|-------------------|-----|---|---|-----|-----|------------|------------------------|----------|
| Pat_06 | Post-Resistance | TSHZ3    | 57616  | 37 | 19 | 31768255  | 31768255  | Missense_Mutation | SNP | G | A | 4   | 312 | c.2444C>T  | c.(2443-2445)CCG>CTG   | p.P815L  |
| Pat_06 | Post-Resistance | ZNF507   | 22847  | 37 | 19 | 32847588  | 32847588  | Missense_Mutation | SNP | A | G | 3   | 367 | c.2194A>G  | c.(2194-2196)AAT>GAT   | p.N732D  |
| Pat_06 | Post-Resistance | ZNF30    | 90075  | 37 | 19 | 35434144  | 35434144  | Missense_Mutation | SNP | G | A | 6   | 16  | c.274G>A   | c.(274-276)GAT>AAT     | p.D92N   |
| Pat_06 | Post-Resistance | FFAR2    | 2867   | 37 | 19 | 35940879  | 35940879  | Missense_Mutation | SNP | G | C | 3   | 134 | c.263G>C   | c.(262-264)GGC>GCC     | p.G88A   |
| Pat_06 | Post-Resistance | RINL     | 126432 | 37 | 19 | 39360618  | 39360618  | Missense_Mutation | SNP | T | C | 3   | 53  | c.965A>G   | c.(964-966)GAT>GGT     | p.D322G  |
| Pat_06 | Post-Resistance | PAF1     | 54623  | 37 | 19 | 39876648  | 39876648  | Missense_Mutation | SNP | C | G | 3   | 295 | c.1579G>C  | c.(1579-1581)GAT>CAT   | p.D527H  |
| Pat_06 | Post-Resistance | PAF1     | 54623  | 37 | 19 | 39881474  | 39881474  | Missense_Mutation | SNP | G | A | 3   | 53  | c.31C>T    | c.(31-33)CGG>TGG       | p.R11W   |
| Pat_06 | Post-Resistance | FCGBP    | 8857   | 37 | 19 | 40420050  | 40420050  | Missense_Mutation | SNP | C | T | 78  | 271 | c.2944G>A  | c.(2944-2946)GAC>AAC   | p.D982N  |
| Pat_06 | Post-Resistance | HIPK4    | 147746 | 37 | 19 | 40886952  | 40886952  | Missense_Mutation | SNP | C | G | 3   | 202 | c.946G>C   | c.(946-948)GAC>CAC     | p.D316H  |
| Pat_06 | Post-Resistance | CYP2A6   | 1548   | 37 | 19 | 41352877  | 41352877  | Missense_Mutation | SNP | T | C | 4   | 367 | c.734A>G   | c.(733-735)GAG>GGG     | p.E245G  |
| Pat_06 | Post-Resistance | CYP2F1   | 1572   | 37 | 19 | 41628800  | 41628800  | Missense_Mutation | SNP | G | A | 6   | 250 | c.896G>A   | c.(895-897)GGC>GAC     | p.G299D  |
| Pat_06 | Post-Resistance | CEACAM20 | 125931 | 37 | 19 | 45026903  | 45026903  | Missense_Mutation | SNP | C | A | 3   | 69  | c.511G>T   | c.(511-513)GTT>TTT     | p.V171F  |
| Pat_06 | Post-Resistance | EHD2     | 30846  | 37 | 19 | 48244171  | 48244171  | Missense_Mutation | SNP | C | T | 45  | 96  | c.1114C>T  | c.(1114-1116)CAC>TAC   | p.H372Y  |
| Pat_06 | Post-Resistance | PRRG2    | 5639   | 37 | 19 | 50086551  | 50086551  | Missense_Mutation | SNP | G | C | 3   | 193 | c.75G>C    | c.(73-75)GAG>GAC       | p.E25D   |
| Pat_06 | Post-Resistance | AP2A1    | 160    | 37 | 19 | 50270424  | 50270424  | Missense_Mutation | SNP | G | A | 4   | 475 | c.34G>A    | c.(34-36)GGG>AGG       | p.G12R   |
| Pat_06 | Post-Resistance | MED25    | 81857  | 37 | 19 | 50339574  | 50339574  | Missense_Mutation | SNP | T | C | 3   | 108 | c.2057T>C  | c.(2056-2058)CTG>CCG   | p.L686P  |
| Pat_06 | Post-Resistance | MYH14    | 79784  | 37 | 19 | 50764812  | 50764812  | Missense_Mutation | SNP | G | T | 13  | 170 | c.2382G>T  | c.(2380-2382)CAG>CAT   | p.Q794H  |
| Pat_06 | Post-Resistance | NAPSA    | 9476   | 37 | 19 | 50865325  | 50865325  | Missense_Mutation | SNP | G | C | 3   | 102 | c.250C>G   | c.(250-252)CTG>GTG     | p.L84V   |
| Pat_06 | Post-Resistance | NR1H2    | 7376   | 37 | 19 | 50882003  | 50882003  | Missense_Mutation | SNP | G | A | 5   | 370 | c.700G>A   | c.(700-702)GCC>ACC     | p.A234T  |
| Pat_06 | Post-Resistance | ZNF649   | 65251  | 37 | 19 | 52394769  | 52394769  | Missense_Mutation | SNP | A | C | 4   | 325 | c.620T>G   | c.(619-621)GTG>GGG     | p.V207G  |
| Pat_06 | Post-Resistance | ZNF841   | 284371 | 37 | 19 | 52568410  | 52568410  | Missense_Mutation | SNP | T | C | 3   | 87  | c.2377A>G  | c.(2377-2379)AAT>GAT   | p.N793D  |
| Pat_06 | Post-Resistance | ZNF600   | 162966 | 37 | 19 | 53269487  | 53269487  | Missense_Mutation | SNP | G | T | 7   | 764 | c.1522C>A  | c.(1522-1524)CGT>AGT   | p.R508S  |
| Pat_06 | Post-Resistance | PRPF31   | 26121  | 37 | 19 | 54625963  | 54625963  | Missense_Mutation | SNP | G | A | 6   | 581 | c.410G>A   | c.(409-411)CGC>CAC     | p.R137H  |
| Pat_06 | Post-Resistance | ZNF304   | 57343  | 37 | 19 | 57869118  | 57869118  | Missense_Mutation | SNP | C | A | 5   | 412 | c.1881C>A  | c.(1879-1881)AGC>AGA   | p.S627R  |
| Pat_06 | Post-Resistance | CYS1     | 192668 | 37 | 2  | 10199005  | 10199005  | Missense_Mutation | SNP | C | T | 3   | 66  | c.452G>A   | c.(451-453)AGC>AAC     | p.S151N  |
| Pat_06 | Post-Resistance | NTSR2    | 23620  | 37 | 2  | 11802254  | 11802254  | Missense_Mutation | SNP | G | T | 7   | 816 | c.737C>A   | c.(736-738)CCG>CAG     | p.P246Q  |
| Pat_06 | Post-Resistance | MATN3    | 4148   | 37 | 2  | 20205877  | 20205877  | Missense_Mutation | SNP | A | G | 3   | 294 | c.418T>C   | c.(418-420)TAC>CAC     | p.Y140H  |
| Pat_06 | Post-Resistance | CAD      | 790    | 37 | 2  | 27449125  | 27449125  | Missense_Mutation | SNP | C | A | 7   | 569 | c.1969C>A  | c.(1969-1971)CAG>AAG   | p.Q657K  |
| Pat_06 | Post-Resistance | ZNF513   | 130557 | 37 | 2  | 27601381  | 27601381  | Missense_Mutation | SNP | G | A | 6   | 572 | c.752C>T   | c.(751-753)CCT>CTT     | p.P251L  |
| Pat_06 | Post-Resistance | ZNF512   | 84450  | 37 | 2  | 27823636  | 27823636  | Missense_Mutation | SNP | G | A | 4   | 306 | c.536G>A   | c.(535-537)AGG>AAG     | p.R179K  |
| Pat_06 | Post-Resistance | VIT      | 5212   | 37 | 2  | 36982146  | 36982146  | Missense_Mutation | SNP | G | A | 4   | 434 | c.358G>A   | c.(358-360)GGT>AGT     | p.G120S  |
| Pat_06 | Post-Resistance | TMEM178  | 130733 | 37 | 2  | 39893503  | 39893503  | Missense_Mutation | SNP | T | C | 3   | 68  | c.389T>C   | c.(388-390)CTC>CCC     | p.L130P  |
| Pat_06 | Post-Resistance | LRPPRC   | 10128  | 37 | 2  | 44132881  | 44132881  | Missense_Mutation | SNP | G | A | 5   | 506 | c.3314C>T  | c.(3313-3315)GCT>GTT   | p.A1105V |
| Pat_06 | Post-Resistance | MDH1     | 4190   | 37 | 2  | 63834072  | 63834072  | Missense_Mutation | SNP | A | C | 4   | 305 | c.956A>C   | c.(955-957)GAA>GCA     | p.E319A  |
| Pat_06 | Post-Resistance | ADRA2B   | 151    | 37 | 2  | 96781851  | 96781851  | Missense_Mutation | SNP | G | C | 3   | 105 | c.38C>G    | c.(37-39)GCG>GGG       | p.A13G   |
| Pat_06 | Post-Resistance | KIAA1310 | 55683  | 37 | 2  | 97270073  | 97270073  | Nonsense_Mutation | SNP | G | C | 3   | 266 | c.2063C>G  | c.(2062-2064)TCA>TGA   | p.S688*  |
| Pat_06 | Post-Resistance | SLC9A2   | 6549   | 37 | 2  | 103321076 | 103321076 | Missense_Mutation | SNP | G | A | 5   | 461 | c.1919G>A  | c.(1918-1920)CGG>CAG   | p.R640Q  |
| Pat_06 | Post-Resistance | FBLN7    | 129804 | 37 | 2  | 112917344 | 112917344 | Missense_Mutation | SNP | G | A | 3   | 46  | c.167G>A   | c.(166-168)CGC>CAC     | p.R56H   |
| Pat_06 | Post-Resistance | ZC3H6    | 376940 | 37 | 2  | 113067600 | 113067600 | Missense_Mutation | SNP | T | C | 3   | 138 | c.475T>C   | c.(475-477)TAC>CAC     | p.Y159H  |
| Pat_06 | Post-Resistance | UGGT1    | 56886  | 37 | 2  | 128900767 | 128900767 | Missense_Mutation | SNP | G | T | 5   | 611 | c.1819G>T  | c.(1819-1821)GGG>TGG   | p.G607W  |
| Pat_06 | Post-Resistance | NCKAP5   | 344148 | 37 | 2  | 133541535 | 133541535 | Missense_Mutation | SNP | G | C | 3   | 142 | c.2849C>G  | c.(2848-2850)GCA>GGA   | p.A950G  |
| Pat_06 | Post-Resistance | LCT      | 3938   | 37 | 2  | 136558358 | 136558358 | Missense_Mutation | SNP | G | A | 4   | 285 | c.4685C>T  | c.(4684-4686)ACT>ATT   | p.T1562I |
| Pat_06 | Post-Resistance | LCT      | 3938   | 37 | 2  | 136570402 | 136570402 | Missense_Mutation | SNP | G | C | 3   | 233 | c.1832C>G  | c.(1831-1833)CCA>CGA   | p.P611R  |
| Pat_06 | Post-Resistance | KYNU     | 8942   | 37 | 2  | 143712436 | 143712436 | Missense_Mutation | SNP | T | G | 3   | 276 | c.431T>G   | c.(430-432)CTA>CGA     | p.L144R  |
| Pat_06 | Post-Resistance | GALNT13  | 114805 | 37 | 2  | 155115620 | 155115620 | Missense_Mutation | SNP | G | T | 10  | 700 | c.944G>T   | c.(943-945)TGG>TTG     | p.W315L  |
| Pat_06 | Post-Resistance | TTC30A   | 92104  | 37 | 2  | 178482916 | 178482916 | Missense_Mutation | SNP | C | A | 6   | 779 | c.514G>T   | c.(514-516)GCT>TCT     | p.A172S  |
| Pat_06 | Post-Resistance | TTN      | 7273   | 37 | 2  | 179610475 | 179610475 | Missense_Mutation | SNP | C | T | 139 | 497 | c.16652G>A | c.(16651-16653)GGA>GAA | p.G5551E |

|        |                 |                |        |    |    |           |           |                        |     |   |   |    |     |               |                       |               |
|--------|-----------------|----------------|--------|----|----|-----------|-----------|------------------------|-----|---|---|----|-----|---------------|-----------------------|---------------|
| Pat_06 | Post-Resistance | STAT1          | 6772   | 37 | 2  | 191841571 | 191841571 | Missense_Mutation      | SNP | T | C | 4  | 447 | c.2054A>G     | c.(2053-2055)AAG>AGG  | p.K685R       |
| Pat_06 | Post-Resistance | SDPR           | 8436   | 37 | 2  | 192711366 | 192711366 | Missense_Mutation      | SNP | C | G | 3  | 294 | c.286G>C      | c.(286-288)GAC>CAC    | p.D96H        |
| Pat_06 | Post-Resistance | RAPH1          | 65059  | 37 | 2  | 204305505 | 204305505 | Missense_Mutation      | SNP | G | A | 4  | 485 | c.2408C>T     | c.(2407-2409)CCA>CTA  | p.P803L       |
| Pat_06 | Post-Resistance | PARD3B         | 117583 | 37 | 2  | 206037092 | 206037092 | Missense_Mutation      | SNP | A | G | 3  | 199 | c.1778A>G     | c.(1777-1779)GAG>GGG  | p.E593G       |
| Pat_06 | Post-Resistance | ZDBF2          | 57683  | 37 | 2  | 207176040 | 207176040 | Missense_Mutation      | SNP | A | G | 3  | 36  | c.6788A>G     | c.(6787-6789)AAG>AGG  | p.K2263R      |
| Pat_06 | Post-Resistance | TNS1           | 7145   | 37 | 2  | 218696222 | 218696222 | Missense_Mutation      | SNP | A | G | 4  | 207 | c.2954T>C     | c.(2953-2955)CTG>CCG  | p.L985P       |
| Pat_06 | Post-Resistance | DOCK10         | 55619  | 37 | 2  | 225659740 | 225659740 | Missense_Mutation      | SNP | C | A | 6  | 748 | c.5010G>T     | c.(5008-5010)CAG>CAT  | p.Q1670H      |
| Pat_06 | Post-Resistance | DOCK10         | 55619  | 37 | 2  | 225710253 | 225710253 | Missense_Mutation      | SNP | T | C | 3  | 123 | c.2342A>G     | c.(2341-2343)GAG>GGG  | p.E781G       |
| Pat_06 | Post-Resistance | ATG16L1        | 55054  | 37 | 2  | 234171821 | 234171821 | Missense_Mutation      | SNP | G | A | 4  | 301 | c.255G>A      | c.(253-255)ATG>ATA    | p.M85I        |
| Pat_06 | Post-Resistance | USP40          | 55230  | 37 | 2  | 234431912 | 234431912 | Missense_Mutation      | SNP | G | A | 6  | 838 | c.2138C>T     | c.(2137-2139)ACG>ATG  | p.T713M       |
| Pat_06 | Post-Resistance | GBX2           | 2637   | 37 | 2  | 237076365 | 237076365 | Missense_Mutation      | SNP | G | A | 3  | 112 | c.250C>T      | c.(250-252)CCC>TCC    | p.P84S        |
| Pat_06 | Post-Resistance | IQCA1          | 79781  | 37 | 2  | 237300984 | 237300984 | Missense_Mutation      | SNP | A | G | 3  | 33  | c.1220T>C     | c.(1219-1221)ATG>ACG  | p.M407T       |
| Pat_06 | Post-Resistance | PER2           | 8864   | 37 | 2  | 239171652 | 239171652 | Missense_Mutation      | SNP | G | C | 3  | 256 | c.1094C>G     | c.(1093-1095)CCA>CGA  | p.P365R       |
| Pat_06 | Post-Resistance | ASB1           | 51665  | 37 | 2  | 239342236 | 239342236 | Missense_Mutation      | SNP | C | G | 3  | 180 | c.91C>G       | c.(91-93)CAT>GAT      | p.H31D        |
| Pat_06 | Post-Resistance | GPC1           | 2817   | 37 | 2  | 241404077 | 241404077 | Missense_Mutation      | SNP | G | A | 5  | 241 | c.928G>A      | c.(928-930)GTG>ATG    | p.V310M       |
| Pat_06 | Post-Resistance | ANO7           | 50636  | 37 | 2  | 242152003 | 242152003 | Missense_Mutation      | SNP | G | A | 3  | 153 | c.1852G>A     | c.(1852-1854)GGC>AGC  | p.G618S       |
| Pat_06 | Post-Resistance | C2orf85        | 285093 | 37 | 2  | 242813889 | 242813889 | Missense_Mutation      | SNP | G | A | 3  | 88  | c.182G>A      | c.(181-183)GGG>GAG    | p.G61E        |
| Pat_06 | Post-Resistance | ATRN           | 8455   | 37 | 20 | 3528125   | 3528125   | Nonsense_Mutation      | SNP | C | A | 4  | 239 | c.932C>A      | c.(931-933)TCA>TAA    | p.S311*       |
| Pat_06 | Post-Resistance | PANK2          | 80025  | 37 | 20 | 3870051   | 3870051   | Missense_Mutation      | SNP | G | A | 3  | 27  | c.304G>A      | c.(304-306)GCG>ACG    | p.A102T       |
| Pat_06 | Post-Resistance | NKX2-4         | 644524 | 37 | 20 | 21377956  | 21377956  | Missense_Mutation      | SNP | T | C | 3  | 93  | c.82A>G       | c.(82-84)AGC>GGC      | p.S28G        |
| Pat_06 | Post-Resistance | SSTR4          | 6754   | 37 | 20 | 23016853  | 23016853  | Missense_Mutation      | SNP | G | A | 5  | 309 | c.733G>A      | c.(733-735)GCT>ACT    | p.A245T       |
| Pat_06 | Post-Resistance | SUN5           | 140732 | 37 | 20 | 31573702  | 31573702  | Missense_Mutation      | SNP | A | G | 3  | 280 | c.737T>C      | c.(736-738)GTG>GCG    | p.V246A       |
| Pat_06 | Post-Resistance | PROCR          | 10544  | 37 | 20 | 33762727  | 33762727  | Missense_Mutation      | SNP | G | A | 3  | 38  | c.293G>A      | c.(292-294)CGC>CAC    | p.R98H        |
| Pat_06 | Post-Resistance | SCAND1         | 51282  | 37 | 20 | 34542183  | 34542183  | Missense_Mutation      | SNP | C | G | 3  | 209 | c.24G>C       | c.(22-24)TTG>TTC      | p.L8F         |
| Pat_06 | Post-Resistance | SAMHD1         | 25939  | 37 | 20 | 35563541  | 35563541  | Nonsense_Mutation      | SNP | G | A | 4  | 418 | c.400C>T      | c.(400-402)CGA>TGA    | p.R134*       |
| Pat_06 | Post-Resistance | MYBL2          | 4605   | 37 | 20 | 42340156  | 42340156  | Missense_Mutation      | SNP | T | C | 3  | 139 | c.1634T>C     | c.(1633-1635)TTG>TCG  | p.L545S       |
| Pat_06 | Post-Resistance | ADA            | 100    | 37 | 20 | 43254215  | 43254215  | Missense_Mutation      | SNP | T | C | 3  | 69  | c.473A>G      | c.(472-474)CAG>CGG    | p.Q158R       |
| Pat_06 | Post-Resistance | TP53TG5        | 27296  | 37 | 20 | 44004010  | 44004010  | Missense_Mutation      | SNP | G | A | 6  | 732 | c.437C>T      | c.(436-438)GCG>GTG    | p.A146V       |
| Pat_06 | Post-Resistance | NEURL2         | 140825 | 37 | 20 | 44518913  | 44518913  | Missense_Mutation      | SNP | G | A | 5  | 290 | c.718C>T      | c.(718-720)CGC>TGC    | p.R240C       |
| Pat_06 | Post-Resistance | DDX27          | 55661  | 37 | 20 | 47853049  | 47853049  | Splice_Site            | SNP | T | C | 3  | 173 | c.1780_splice | c.e14+2               | p.D594_splice |
| Pat_06 | Post-Resistance | B4GALT5        | 9334   | 37 | 20 | 48256244  | 48256244  | Nonsense_Mutation      | SNP | C | T | 6  | 711 | c.888G>A      | c.(886-888)TGG>TGA    | p.W296*       |
| Pat_06 | Post-Resistance | SLC9A8         | 23315  | 37 | 20 | 48431630  | 48431630  | Missense_Mutation      | SNP | C | A | 7  | 471 | c.112C>A      | c.(112-114)CCT>ACT    | p.P38T        |
| Pat_06 | Post-Resistance | SPATA2         | 9825   | 37 | 20 | 48522326  | 48522326  | Missense_Mutation      | SNP | G | A | 5  | 475 | c.1393C>T     | c.(1393-1395)CGC>TGC  | p.R465C       |
| Pat_06 | Post-Resistance | TMEM189-UBE2V' | 387522 | 37 | 20 | 48746152  | 48746152  | Missense_Mutation      | SNP | C | T | 4  | 465 | c.409G>A      | c.(409-411)GGG>AGG    | p.G137R       |
| Pat_06 | Post-Resistance | CASS4          | 57091  | 37 | 20 | 55033771  | 55033771  | Missense_Mutation      | SNP | C | G | 3  | 99  | c.2329C>G     | c.(2329-2331)CAC>GAC  | p.H777D       |
| Pat_06 | Post-Resistance | ZBP1           | 81030  | 37 | 20 | 56191510  | 56191510  | Missense_Mutation      | SNP | T | C | 4  | 441 | c.49A>G       | c.(49-51)AGA>GGA      | p.R17G        |
| Pat_06 | Post-Resistance | SS18L1         | 26039  | 37 | 20 | 60747785  | 60747785  | Missense_Mutation      | SNP | G | A | 5  | 472 | c.964G>A      | c.(964-966)GCG>ACG    | p.A322T       |
| Pat_06 | Post-Resistance | COL20A1        | 57642  | 37 | 20 | 61929285  | 61929285  | Missense_Mutation      | SNP | G | A | 5  | 383 | c.106G>A      | c.(106-108)GTG>ATG    | p.V36M        |
| Pat_06 | Post-Resistance | NRIP1          | 8204   | 37 | 21 | 16339298  | 16339298  | Missense_Mutation      | SNP | C | G | 6  | 808 | c.1216G>C     | c.(1216-1218)GAG>CAG  | p.E406Q       |
| Pat_06 | Post-Resistance | SYNJ1          | 8867   | 37 | 21 | 34067386  | 34067386  | Missense_Mutation      | SNP | T | C | 12 | 800 | c.803A>G      | c.(802-804)AAT>AGT    | p.N268S       |
| Pat_06 | Post-Resistance | MX2            | 4600   | 37 | 21 | 42754364  | 42754364  | Missense_Mutation      | SNP | G | A | 4  | 229 | c.605G>A      | c.(604-606)CGG>CAG    | p.R202Q       |
| Pat_06 | Post-Resistance | ICOSLG         | 23308  | 37 | 21 | 45655431  | 45655431  | Missense_Mutation      | SNP | G | A | 6  | 693 | c.421C>T      | c.(421-423)CCC>TCC    | p.P141S       |
| Pat_06 | Post-Resistance | COL6A2         | 1292   | 37 | 21 | 47542067  | 47542067  | Missense_Mutation      | SNP | G | A | 4  | 260 | c.1567G>A     | c.(1567-1569)GCA>ACA  | p.A523T       |
| Pat_06 | Post-Resistance | GAB4           | 128954 | 37 | 22 | 17489052  | 17489052  | Translation_Start_Site | SNP | G | A | 3  | 42  | c.-47C>T      | c.(-49-45)AACGC>AATGC |               |
| Pat_06 | Post-Resistance | MICAL3         | 57553  | 37 | 22 | 18300139  | 18300139  | Missense_Mutation      | SNP | G | A | 4  | 68  | c.5288C>T     | c.(5287-5289)ACC>ATC  | p.T1763I      |
| Pat_06 | Post-Resistance | MICAL3         | 57553  | 37 | 22 | 18300679  | 18300679  | Missense_Mutation      | SNP | G | C | 4  | 244 | c.4748C>G     | c.(4747-4749)CCC>CGC  | p.P1583R      |
| Pat_06 | Post-Resistance | ZDHHC8         | 29801  | 37 | 22 | 20127660  | 20127660  | Missense_Mutation      | SNP | G | A | 7  | 693 | c.580G>A      | c.(580-582)GGC>AGC    | p.G194S       |



|        |                 |           |        |    |    |           |           |                        |     |   |   |     |     |               |                        |               |
|--------|-----------------|-----------|--------|----|----|-----------|-----------|------------------------|-----|---|---|-----|-----|---------------|------------------------|---------------|
| Pat_06 | Post-Resistance | KLHL22    | 84861  | 37 | 22 | 20800753  | 20800753  | Missense_Mutation      | SNP | C | T | 5   | 253 | c.1516G>A     | c.(1516-1518)GGA>AGA   | p.G506R       |
| Pat_06 | Post-Resistance | LOC391322 | 391322 | 37 | 22 | 24373625  | 24373625  | Missense_Mutation      | SNP | G | A | 3   | 71  | c.124G>A      | c.(124-126)GTA>ATA     | p.V42I        |
| Pat_06 | Post-Resistance | CABIN1    | 23523  | 37 | 22 | 24560506  | 24560506  | Missense_Mutation      | SNP | C | A | 5   | 301 | c.4885C>A     | c.(4885-4887)CTT>ATT   | p.L1629I      |
| Pat_06 | Post-Resistance | GGT5      | 2687   | 37 | 22 | 24628048  | 24628048  | Missense_Mutation      | SNP | T | C | 3   | 189 | c.725A>G      | c.(724-726)CAG>CGG     | p.Q242R       |
| Pat_06 | Post-Resistance | EWSR1     | 2130   | 37 | 22 | 29678453  | 29678453  | Missense_Mutation      | SNP | T | C | 3   | 268 | c.488T>C      | c.(487-489)CTA>CCA     | p.L163P       |
| Pat_06 | Post-Resistance | GAS2L1    | 10634  | 37 | 22 | 29704568  | 29704568  | Missense_Mutation      | SNP | T | C | 3   | 70  | c.473T>C      | c.(472-474)GTG>GCG     | p.V158A       |
| Pat_06 | Post-Resistance | CABP7     | 164633 | 37 | 22 | 30125524  | 30125524  | Missense_Mutation      | SNP | C | T | 6   | 443 | c.614C>T      | c.(613-615)GCG>GTG     | p.A205V       |
| Pat_06 | Post-Resistance | TOM1      | 10043  | 37 | 22 | 35730374  | 35730374  | Missense_Mutation      | SNP | C | G | 3   | 243 | c.1081C>G     | c.(1081-1083)CGA>GGA   | p.R361G       |
| Pat_06 | Post-Resistance | LGALS1    | 3956   | 37 | 22 | 38074611  | 38074611  | Missense_Mutation      | SNP | A | G | 3   | 107 | c.211A>G      | c.(211-213)ACC>GCC     | p.T71A        |
| Pat_06 | Post-Resistance | NFAM1     | 150372 | 37 | 22 | 42807425  | 42807425  | Missense_Mutation      | SNP | T | C | 3   | 80  | c.439A>G      | c.(439-441)ATC>GTC     | p.I147V       |
| Pat_06 | Post-Resistance | PANX2     | 56666  | 37 | 22 | 50609350  | 50609350  | Missense_Mutation      | SNP | T | C | 3   | 84  | c.191T>C      | c.(190-192)CTG>CCG     | p.L64P        |
| Pat_06 | Post-Resistance | CPT1B     | 1375   | 37 | 22 | 51012066  | 51012066  | Missense_Mutation      | SNP | T | C | 3   | 152 | c.1049A>G     | c.(1048-1050)GAG>GGG   | p.E350G       |
| Pat_06 | Post-Resistance | SETMAR    | 6419   | 37 | 3  | 4354858   | 4354858   | Missense_Mutation      | SNP | A | G | 4   | 240 | c.433A>G      | c.(433-435)AAG>GAG     | p.K145E       |
| Pat_06 | Post-Resistance | RAF1      | 5894   | 37 | 3  | 12626736  | 12626736  | Missense_Mutation      | SNP | C | G | 3   | 264 | c.1553G>C     | c.(1552-1554)CGA>CCA   | p.R518P       |
| Pat_06 | Post-Resistance | GPD1L     | 23171  | 37 | 3  | 32200561  | 32200561  | Missense_Mutation      | SNP | G | A | 4   | 468 | c.812G>A      | c.(811-813)CGG>CAG     | p.R271Q       |
| Pat_06 | Post-Resistance | DCLK3     | 85443  | 37 | 3  | 36763141  | 36763141  | Missense_Mutation      | SNP | T | G | 6   | 421 | c.1462A>C     | c.(1462-1464)AAT>CAT   | p.N488H       |
| Pat_06 | Post-Resistance | SETD2     | 29072  | 37 | 3  | 47162297  | 47162297  | Missense_Mutation      | SNP | T | C | 3   | 285 | c.3829A>G     | c.(3829-3831)AGC>GGC   | p.S1277G      |
| Pat_06 | Post-Resistance | TREX1     | 11277  | 37 | 3  | 48506398  | 48506398  | Translation_Start_Site | SNP | G | A | 6   | 391 | c.-1088G>A    | 1090--1086)GCGTG>GCATG |               |
| Pat_06 | Post-Resistance | BSN       | 8927   | 37 | 3  | 49690213  | 49690213  | Missense_Mutation      | SNP | G | A | 3   | 115 | c.3224G>A     | c.(3223-3225)CGG>CAG   | p.R1075Q      |
| Pat_06 | Post-Resistance | DOCK3     | 1795   | 37 | 3  | 51376408  | 51376408  | Missense_Mutation      | SNP | C | T | 3   | 102 | c.3715C>T     | c.(3715-3717)CGC>TGC   | p.R1239C      |
| Pat_06 | Post-Resistance | ATXN7     | 6314   | 37 | 3  | 63981284  | 63981284  | Missense_Mutation      | SNP | G | A | 5   | 852 | c.1786G>A     | c.(1786-1788)GCA>ACA   | p.A596T       |
| Pat_06 | Post-Resistance | ADAMTS9   | 56999  | 37 | 3  | 64673345  | 64673345  | Translation_Start_Site | SNP | C | T | 3   | 55  | c.-11G>A      | c.(-13--9)GGGTG>GGATG  |               |
| Pat_06 | Post-Resistance | IMPG2     | 50939  | 37 | 3  | 101023117 | 101023117 | Missense_Mutation      | SNP | C | A | 4   | 325 | c.374G>T      | c.(373-375)TGG>TTG     | p.W125L       |
| Pat_06 | Post-Resistance | ADPRH     | 141    | 37 | 3  | 119306540 | 119306540 | Missense_Mutation      | SNP | T | C | 4   | 338 | c.889T>C      | c.(889-891)TTT>CTT     | p.F297L       |
| Pat_06 | Post-Resistance | CASR      | 846    | 37 | 3  | 121981026 | 121981026 | Missense_Mutation      | SNP | G | A | 92  | 275 | c.1144G>A     | c.(1144-1146)GAC>AAC   | p.D382N       |
| Pat_06 | Post-Resistance | CCDC14    | 64770  | 37 | 3  | 123633735 | 123633735 | Nonsense_Mutation      | SNP | G | C | 3   | 207 | c.2753C>G     | c.(2752-2754)TCA>TGA   | p.S918*       |
| Pat_06 | Post-Resistance | PLXNA1    | 5361   | 37 | 3  | 126708286 | 126708286 | Missense_Mutation      | SNP | C | T | 7   | 851 | c.781C>T      | c.(781-783)CGG>TGG     | p.R261W       |
| Pat_06 | Post-Resistance | MCM2      | 4171   | 37 | 3  | 127335840 | 127335840 | Missense_Mutation      | SNP | C | T | 6   | 688 | c.1652C>T     | c.(1651-1653)GCG>GTG   | p.A551V       |
| Pat_06 | Post-Resistance | KY        | 339855 | 37 | 3  | 134323197 | 134323197 | Missense_Mutation      | SNP | C | T | 4   | 465 | c.1210G>A     | c.(1210-1212)GTG>ATG   | p.V404M       |
| Pat_06 | Post-Resistance | DZIP1L    | 199221 | 37 | 3  | 137822486 | 137822486 | Nonsense_Mutation      | SNP | G | A | 3   | 89  | c.328C>T      | c.(328-330)CAG>TAG     | p.Q110*       |
| Pat_06 | Post-Resistance | CLSTN2    | 64084  | 37 | 3  | 140178544 | 140178544 | Missense_Mutation      | SNP | G | A | 5   | 452 | c.1155G>A     | c.(1153-1155)ATG>ATA   | p.M385I       |
| Pat_06 | Post-Resistance | GMPS      | 8833   | 37 | 3  | 155654264 | 155654264 | Missense_Mutation      | SNP | A | G | 8   | 619 | c.1945A>G     | c.(1945-1947)ATA>GTA   | p.I649V       |
| Pat_06 | Post-Resistance | SLC7A14   | 57709  | 37 | 3  | 170218966 | 170218966 | Missense_Mutation      | SNP | A | C | 72  | 267 | c.473T>G      | c.(472-474)TTT>TGT     | p.F158C       |
| Pat_06 | Post-Resistance | EIF4A2    | 1974   | 37 | 3  | 186501404 | 186501404 | Missense_Mutation      | SNP | C | G | 176 | 491 | c.5C>G        | c.(4-6)TCT>TGT         | p.S2C         |
| Pat_06 | Post-Resistance | ZNF732    | 654254 | 37 | 4  | 265139    | 265139    | Missense_Mutation      | SNP | C | T | 4   | 52  | c.1504G>A     | c.(1504-1506)GAA>AAA   | p.E502K       |
| Pat_06 | Post-Resistance | TBC1D14   | 57533  | 37 | 4  | 7016285   | 7016285   | Splice_Site            | SNP | G | A | 4   | 166 | c.1757_splice | c.e12+1                | p.W586_splice |
| Pat_06 | Post-Resistance | SH3TC1    | 54436  | 37 | 4  | 8230002   | 8230002   | Nonsense_Mutation      | SNP | C | T | 4   | 311 | c.2581C>T     | c.(2581-2583)CAG>TAG   | p.Q861*       |
| Pat_06 | Post-Resistance | BOD1L     | 259282 | 37 | 4  | 13601655  | 13601655  | Missense_Mutation      | SNP | G | A | 3   | 79  | c.6869C>T     | c.(6868-6870)ACC>ATC   | p.T2290I      |
| Pat_06 | Post-Resistance | PCDH7     | 5099   | 37 | 4  | 30724350  | 30724350  | Missense_Mutation      | SNP | G | A | 4   | 231 | c.1306G>A     | c.(1306-1308)GTT>ATT   | p.V436I       |
| Pat_06 | Post-Resistance | LRRRC66   | 339977 | 37 | 4  | 52860732  | 52860732  | Missense_Mutation      | SNP | G | A | 4   | 285 | c.2456C>T     | c.(2455-2457)CCG>CTG   | p.P819L       |
| Pat_06 | Post-Resistance | PPBP      | 5473   | 37 | 4  | 74853048  | 74853048  | Missense_Mutation      | SNP | C | A | 5   | 648 | c.328G>T      | c.(328-330)GCT>TCT     | p.A110S       |
| Pat_06 | Post-Resistance | FRAS1     | 80144  | 37 | 4  | 79238664  | 79238664  | Splice_Site            | SNP | T | C | 3   | 132 | c.1960_splice | c.e17+2                | p.A654_splice |
| Pat_06 | Post-Resistance | FRAS1     | 80144  | 37 | 4  | 79295316  | 79295316  | Missense_Mutation      | SNP | G | A | 6   | 679 | c.3062G>A     | c.(3061-3063)TGC>TAC   | p.C1021Y      |
| Pat_06 | Post-Resistance | BBS12     | 166379 | 37 | 4  | 123664066 | 123664066 | Missense_Mutation      | SNP | T | C | 3   | 265 | c.1019T>C     | c.(1018-1020)GTA>GCA   | p.V340A       |
| Pat_06 | Post-Resistance | MAML3     | 55534  | 37 | 4  | 140811349 | 140811349 | Missense_Mutation      | SNP | G | A | 5   | 649 | c.1241C>T     | c.(1240-1242)GCT>GTT   | p.A414V       |
| Pat_06 | Post-Resistance | CMYA5     | 202333 | 37 | 5  | 79031109  | 79031109  | Missense_Mutation      | SNP | G | A | 21  | 150 | c.6521G>A     | c.(6520-6522)GGA>GAA   | p.G2174E      |
| Pat_06 | Post-Resistance | FAM170A   | 340069 | 37 | 5  | 118969733 | 118969733 | Missense_Mutation      | SNP | C | A | 6   | 417 | c.290C>A      | c.(289-291)CCC>CAC     | p.P97H        |

|        |                 |          |        |    |   |           |           |                   |     |   |   |    |     |               |                      |               |
|--------|-----------------|----------|--------|----|---|-----------|-----------|-------------------|-----|---|---|----|-----|---------------|----------------------|---------------|
| Pat_06 | Post-Resistance | ISOC1    | 51015  | 37 | 5 | 128430619 | 128430619 | Missense_Mutation | SNP | T | G | 4  | 235 | c.160T>G      | c.(160-162)TTC>GTC   | p.F54V        |
| Pat_06 | Post-Resistance | PSD2     | 84249  | 37 | 5 | 139193889 | 139193889 | Missense_Mutation | SNP | G | T | 6  | 258 | c.956G>T      | c.(955-957)CGC>CTC   | p.R319L       |
| Pat_06 | Post-Resistance | SLC4A9   | 83697  | 37 | 5 | 139747047 | 139747047 | Missense_Mutation | SNP | G | C | 3  | 141 | c.2128G>C     | c.(2128-2130)GCC>CCC | p.A710P       |
| Pat_06 | Post-Resistance | SLC35A4  | 113829 | 37 | 5 | 139947539 | 139947539 | Missense_Mutation | SNP | T | C | 3  | 306 | c.785T>C      | c.(784-786)CTA>CCA   | p.L262P       |
| Pat_06 | Post-Resistance | PCDHA2   | 56146  | 37 | 5 | 140175828 | 140175828 | Missense_Mutation | SNP | G | A | 6  | 739 | c.1279G>A     | c.(1279-1281)GCA>ACA | p.A427T       |
| Pat_06 | Post-Resistance | PCDHA13  | 56136  | 37 | 5 | 140263132 | 140263132 | Missense_Mutation | SNP | G | A | 6  | 858 | c.1279G>A     | c.(1279-1281)GCG>ACG | p.A427T       |
| Pat_06 | Post-Resistance | PCDHGC4  | 56098  | 37 | 5 | 140864841 | 140864841 | Missense_Mutation | SNP | C | T | 5  | 433 | c.101C>T      | c.(100-102)CCG>CTG   | p.P34L        |
| Pat_06 | Post-Resistance | DIAPH1   | 1729   | 37 | 5 | 140953306 | 140953306 | Missense_Mutation | SNP | G | A | 3  | 89  | c.2111C>T     | c.(2110-2112)CCT>CTT | p.P704L       |
| Pat_06 | Post-Resistance | CSNK1A1  | 1452   | 37 | 5 | 148886617 | 148886617 | Missense_Mutation | SNP | A | G | 3  | 187 | c.830T>C      | c.(829-831)CTG>CCG   | p.L277P       |
| Pat_06 | Post-Resistance | GALNT10  | 55568  | 37 | 5 | 153792462 | 153792462 | Missense_Mutation | SNP | G | A | 5  | 574 | c.1400G>A     | c.(1399-1401)GGC>GAC | p.G467D       |
| Pat_06 | Post-Resistance | SAP30L   | 79685  | 37 | 5 | 153830726 | 153830726 | Missense_Mutation | SNP | A | G | 3  | 233 | c.277A>G      | c.(277-279)AGT>GGT   | p.S93G        |
| Pat_06 | Post-Resistance | KCNMB1   | 3779   | 37 | 5 | 169805934 | 169805934 | Missense_Mutation | SNP | C | T | 4  | 382 | c.350G>A      | c.(349-351)CGG>CAG   | p.R117Q       |
| Pat_06 | Post-Resistance | GFPT2    | 9945   | 37 | 5 | 179740862 | 179740862 | Missense_Mutation | SNP | G | A | 4  | 94  | c.1376C>T     | c.(1375-1377)ACC>ATC | p.T459I       |
| Pat_06 | Post-Resistance | SLC22A23 | 63027  | 37 | 6 | 3273527   | 3273527   | Missense_Mutation | SNP | G | A | 6  | 757 | c.1823C>T     | c.(1822-1824)ACG>ATG | p.T608M       |
| Pat_06 | Post-Resistance | PRL      | 5617   | 37 | 6 | 22294729  | 22294729  | Missense_Mutation | SNP | C | T | 69 | 330 | c.113G>A      | c.(112-114)CGA>CAA   | p.R38Q        |
| Pat_06 | Post-Resistance | ZSCAN23  | 222696 | 37 | 6 | 28403718  | 28403718  | Missense_Mutation | SNP | C | A | 5  | 385 | c.326G>T      | c.(325-327)AGA>ATA   | p.R109I       |
| Pat_06 | Post-Resistance | CFB      | 629    | 37 | 6 | 31914934  | 31914934  | Missense_Mutation | SNP | G | A | 5  | 596 | c.449G>A      | c.(448-450)CGA>CAA   | p.R150Q       |
| Pat_06 | Post-Resistance | SLC39A7  | 7922   | 37 | 6 | 33171342  | 33171342  | Missense_Mutation | SNP | G | A | 4  | 371 | c.1162G>A     | c.(1162-1164)GCA>ACA | p.A388T       |
| Pat_06 | Post-Resistance | ITPR3    | 3710   | 37 | 6 | 33635663  | 33635663  | Missense_Mutation | SNP | G | A | 6  | 527 | c.1808G>A     | c.(1807-1809)CGC>CAC | p.R603H       |
| Pat_06 | Post-Resistance | LEMD2    | 221496 | 37 | 6 | 33756788  | 33756788  | Missense_Mutation | SNP | G | A | 4  | 233 | c.106C>T      | c.(106-108)CGC>TGC   | p.R36C        |
| Pat_06 | Post-Resistance | FGD2     | 221472 | 37 | 6 | 36995854  | 36995854  | Missense_Mutation | SNP | T | C | 3  | 175 | c.1883T>C     | c.(1882-1884)CTG>CCG | p.L628P       |
| Pat_06 | Post-Resistance | DAAM2    | 23500  | 37 | 6 | 39859198  | 39859198  | Missense_Mutation | SNP | G | C | 3  | 104 | c.2227G>C     | c.(2227-2229)GAC>CAC | p.D743H       |
| Pat_06 | Post-Resistance | ZNF318   | 24149  | 37 | 6 | 43322656  | 43322656  | Missense_Mutation | SNP | G | A | 4  | 263 | c.2416C>T     | c.(2416-2418)CCC>TCC | p.P806S       |
| Pat_06 | Post-Resistance | C6orf154 | 221424 | 37 | 6 | 43475355  | 43475355  | Missense_Mutation | SNP | T | C | 3  | 255 | c.719A>G      | c.(718-720)AAC>AGC   | p.N240S       |
| Pat_06 | Post-Resistance | XPO5     | 57510  | 37 | 6 | 43523648  | 43523648  | Missense_Mutation | SNP | T | G | 3  | 292 | c.1366A>C     | c.(1366-1368)AAA>CAA | p.K456Q       |
| Pat_06 | Post-Resistance | SPATS1   | 221409 | 37 | 6 | 44320517  | 44320517  | Missense_Mutation | SNP | C | G | 3  | 205 | c.194C>G      | c.(193-195)CCC>CGC   | p.P65R        |
| Pat_06 | Post-Resistance | TDRD6    | 221400 | 37 | 6 | 46657207  | 46657207  | Missense_Mutation | SNP | C | G | 3  | 255 | c.1342C>G     | c.(1342-1344)CAG>GAG | p.Q448E       |
| Pat_06 | Post-Resistance | PKHD1    | 5314   | 37 | 6 | 51875171  | 51875171  | Missense_Mutation | SNP | G | A | 6  | 480 | c.5687C>T     | c.(5686-5688)ACG>ATG | p.T1896M      |
| Pat_06 | Post-Resistance | COL9A1   | 1297   | 37 | 6 | 70993524  | 70993524  | Splice_Site       | SNP | C | G | 24 | 34  | c.697_splice  | c.e6-1               | p.F233_splice |
| Pat_06 | Post-Resistance | PHIP     | 55023  | 37 | 6 | 79695070  | 79695070  | Missense_Mutation | SNP | T | C | 5  | 792 | c.2536A>G     | c.(2536-2538)AGT>GGT | p.S846G       |
| Pat_06 | Post-Resistance | ME1      | 4199   | 37 | 6 | 84025099  | 84025099  | Missense_Mutation | SNP | G | A | 5  | 364 | c.634C>T      | c.(634-636)CGG>TGG   | p.R212W       |
| Pat_06 | Post-Resistance | ANKRD6   | 22881  | 37 | 6 | 90322066  | 90322066  | Missense_Mutation | SNP | T | C | 3  | 56  | c.493T>C      | c.(493-495)TCC>CCC   | p.S165P       |
| Pat_06 | Post-Resistance | USP45    | 85015  | 37 | 6 | 99887732  | 99887732  | Splice_Site       | SNP | C | A | 5  | 200 | c.2074_splice | c.e16-1              | p.A692_splice |
| Pat_06 | Post-Resistance | LAMA4    | 3910   | 37 | 6 | 112512904 | 112512904 | Missense_Mutation | SNP | C | T | 4  | 280 | c.652G>A      | c.(652-654)GGA>AGA   | p.G218R       |
| Pat_06 | Post-Resistance | LAMA2    | 3908   | 37 | 6 | 129775409 | 129775409 | Missense_Mutation | SNP | A | G | 3  | 199 | c.6683A>G     | c.(6682-6684)TAT>TGT | p.Y2228C      |
| Pat_06 | Post-Resistance | TMEM200A | 114801 | 37 | 6 | 130762856 | 130762856 | Missense_Mutation | SNP | A | G | 3  | 274 | c.1289A>G     | c.(1288-1290)TAT>TGT | p.Y430C       |
| Pat_06 | Post-Resistance | HECA     | 51696  | 37 | 6 | 139495612 | 139495612 | Missense_Mutation | SNP | G | A | 6  | 799 | c.1403G>A     | c.(1402-1404)GGC>GAC | p.G468D       |
| Pat_06 | Post-Resistance | TXLNB    | 167838 | 37 | 6 | 139564000 | 139564000 | Missense_Mutation | SNP | G | A | 4  | 302 | c.1718C>T     | c.(1717-1719)CCT>CTT | p.P573L       |
| Pat_06 | Post-Resistance | GPR126   | 57211  | 37 | 6 | 142688774 | 142688774 | Missense_Mutation | SNP | C | A | 4  | 191 | c.172C>A      | c.(172-174)CCT>ACT   | p.P58T        |
| Pat_06 | Post-Resistance | C6orf72  | 116254 | 37 | 6 | 149893643 | 149893643 | Missense_Mutation | SNP | G | C | 3  | 210 | c.181G>C      | c.(181-183)GTT>CTT   | p.V61L        |
| Pat_06 | Post-Resistance | KATNA1   | 11104  | 37 | 6 | 149924440 | 149924440 | Missense_Mutation | SNP | C | G | 48 | 100 | c.693G>C      | c.(691-693)ATG>ATC   | p.M231I       |
| Pat_06 | Post-Resistance | RSPH3    | 83861  | 37 | 6 | 159420638 | 159420638 | Missense_Mutation | SNP | G | A | 5  | 428 | c.371C>T      | c.(370-372)GCG>GTG   | p.A124V       |
| Pat_06 | Post-Resistance | SLC22A2  | 6582   | 37 | 6 | 160645834 | 160645834 | Missense_Mutation | SNP | C | T | 4  | 245 | c.1504G>A     | c.(1504-1506)GTG>ATG | p.V502M       |
| Pat_06 | Post-Resistance | SFT2D1   | 113402 | 37 | 6 | 166755912 | 166755912 | Missense_Mutation | SNP | C | T | 3  | 30  | c.58G>A       | c.(58-60)GCG>ACG     | p.A20T        |
| Pat_06 | Post-Resistance | INTS1    | 26173  | 37 | 7 | 1515926   | 1515926   | Missense_Mutation | SNP | C | A | 3  | 79  | c.5317G>T     | c.(5317-5319)GAT>TAT | p.D1773Y      |
| Pat_06 | Post-Resistance | SDK1     | 221935 | 37 | 7 | 4153892   | 4153892   | Missense_Mutation | SNP | G | A | 3  | 54  | c.3809G>A     | c.(3808-3810)CGG>CAG | p.R1270Q      |
| Pat_06 | Post-Resistance | FOXX1    | 221937 | 37 | 7 | 4794193   | 4794193   | Missense_Mutation | SNP | G | A | 5  | 318 | c.850G>A      | c.(850-852)GCA>ACA   | p.A284T       |

|        |                 |           |           |    |   |           |           |                   |     |   |   |     |     |              |                        |              |
|--------|-----------------|-----------|-----------|----|---|-----------|-----------|-------------------|-----|---|---|-----|-----|--------------|------------------------|--------------|
| Pat_06 | Post-Resistance | DAGLB     | 221955    | 37 | 7 | 6464417   | 6464417   | Missense_Mutation | SNP | A | G | 5   | 451 | c.1106T>C    | c.(1105-1107)GTT>GCT   | p.V369A      |
| Pat_06 | Post-Resistance | MIOS      | 54468     | 37 | 7 | 7612113   | 7612113   | Missense_Mutation | SNP | G | A | 4   | 349 | c.7G>A       | c.(7-9)GGT>AGT         | p.G3S        |
| Pat_06 | Post-Resistance | SPDYE1    | 285955    | 37 | 7 | 44047000  | 44047000  | Missense_Mutation | SNP | C | T | 7   | 828 | c.766C>T     | c.(766-768)CCG>TCG     | p.P256S      |
| Pat_06 | Post-Resistance | MYO1G     | 64005     | 37 | 7 | 45004684  | 45004684  | Missense_Mutation | SNP | G | A | 6   | 635 | c.2386C>T    | c.(2386-2388)CGG>TGG   | p.R796W      |
| Pat_06 | Post-Resistance | IKZF1     | 10320     | 37 | 7 | 50468123  | 50468123  | Missense_Mutation | SNP | G | A | 4   | 245 | c.1358G>A    | c.(1357-1359)AGC>AAC   | p.S453N      |
| Pat_06 | Post-Resistance | GRB10     | 2887      | 37 | 7 | 50672987  | 50672987  | Missense_Mutation | SNP | C | A | 5   | 312 | c.1389G>T    | c.(1387-1389)AGG>AGT   | p.R463S      |
| Pat_06 | Post-Resistance | TYW1B     | 441250    | 37 | 7 | 72209564  | 72209564  | Missense_Mutation | SNP | C | T | 5   | 386 | c.979G>A     | c.(979-981)GAG>AAG     | p.E327K      |
| Pat_06 | Post-Resistance | POM121C   | 100101267 | 37 | 7 | 75070845  | 75070845  | Missense_Mutation | SNP | G | A | 41  | 59  | c.656C>T     | c.(655-657)CCG>CTG     | p.P219L      |
| Pat_06 | Post-Resistance | TMEM120A  | 83862     | 37 | 7 | 75617790  | 75617790  | Missense_Mutation | SNP | G | A | 6   | 786 | c.422C>T     | c.(421-423)ACC>ATC     | p.T141I      |
| Pat_06 | Post-Resistance | CDK14     | 5218      | 37 | 7 | 90233532  | 90233532  | Missense_Mutation | SNP | C | A | 3   | 55  | c.92C>A      | c.(91-93)GCT>GAT       | p.A31D       |
| Pat_06 | Post-Resistance | PEG10     | 23089     | 37 | 7 | 94293611  | 94293611  | Missense_Mutation | SNP | G | C | 3   | 156 | c.971G>C     | c.(970-972)CGC>CCC     | p.R324P      |
| Pat_06 | Post-Resistance | AZGP1     | 563       | 37 | 7 | 99565784  | 99565784  | Missense_Mutation | SNP | G | A | 4   | 395 | c.607C>T     | c.(607-609)CGG>TGG     | p.R203W      |
| Pat_06 | Post-Resistance | C7orf51   | 222950    | 37 | 7 | 100084595 | 100084595 | Missense_Mutation | SNP | T | C | 3   | 98  | c.220T>C     | c.(220-222)TGC>CGC     | p.C74R       |
| Pat_06 | Post-Resistance | FBXO24    | 26261     | 37 | 7 | 100197706 | 100197706 | Missense_Mutation | SNP | T | C | 3   | 129 | c.1259T>C    | c.(1258-1260)CTG>CCG   | p.L420P      |
| Pat_06 | Post-Resistance | GIGYF1    | 64599     | 37 | 7 | 100279543 | 100279543 | Missense_Mutation | SNP | T | C | 3   | 219 | c.2999A>G    | c.(2998-3000)GAG>GGG   | p.E1000G     |
| Pat_06 | Post-Resistance | MUC17     | 140453    | 37 | 7 | 100683150 | 100683150 | Missense_Mutation | SNP | A | T | 171 | 732 | c.8453A>T    | c.(8452-8454)AAC>ATC   | p.N2818I     |
| Pat_06 | Post-Resistance | VGF       | 7425      | 37 | 7 | 100807448 | 100807448 | Missense_Mutation | SNP | G | A | 3   | 80  | c.677C>T     | c.(676-678)CCG>CTG     | p.P226L      |
| Pat_06 | Post-Resistance | C7orf52   | 375607    | 37 | 7 | 100815850 | 100815850 | Missense_Mutation | SNP | G | A | 3   | 47  | c.620C>T     | c.(619-621)ACC>ATC     | p.T207I      |
| Pat_06 | Post-Resistance | PLOD3     | 8985      | 37 | 7 | 100855148 | 100855148 | Missense_Mutation | SNP | C | G | 3   | 118 | c.1211G>C    | c.(1210-1212)CGT>CCT   | p.R404P      |
| Pat_06 | Post-Resistance | MYL10     | 93408     | 37 | 7 | 101267540 | 101267540 | Missense_Mutation | SNP | G | A | 4   | 241 | c.83C>T      | c.(82-84)CCG>CTG       | p.P28L       |
| Pat_06 | Post-Resistance | DPY19L2P2 | 349152    | 37 | 7 | 102825947 | 102825947 | Missense_Mutation | SNP | A | G | 6   | 609 | c.1048T>C    | c.(1048-1050)TGT>CGT   | p.C350R      |
| Pat_06 | Post-Resistance | COG5      | 10466     | 37 | 7 | 107204271 | 107204271 | Missense_Mutation | SNP | G | C | 3   | 405 | c.164C>G     | c.(163-165)ACA>AGA     | p.T55R       |
| Pat_06 | Post-Resistance | CFTR      | 1080      | 37 | 7 | 117232572 | 117232572 | Missense_Mutation | SNP | A | G | 3   | 243 | c.2351A>G    | c.(2350-2352)CAC>CGC   | p.H784R      |
| Pat_06 | Post-Resistance | GRM8      | 2918      | 37 | 7 | 126746570 | 126746570 | Missense_Mutation | SNP | G | A | 5   | 452 | c.707C>T     | c.(706-708)ACC>ATC     | p.T236I      |
| Pat_06 | Post-Resistance | AKR1B1    | 231       | 37 | 7 | 134136435 | 134136435 | Missense_Mutation | SNP | G | A | 6   | 530 | c.137C>T     | c.(136-138)GCC>GTC     | p.A46V       |
| Pat_06 | Post-Resistance | HIPK2     | 28996     | 37 | 7 | 139257680 | 139257680 | Missense_Mutation | SNP | T | G | 3   | 177 | c.3590A>C    | c.(3589-3591)TAC>TCC   | p.Y1197S     |
| Pat_06 | Post-Resistance | BRAF      | 673       | 37 | 7 | 140453136 | 140453136 | Missense_Mutation | SNP | A | T | 210 | 324 | c.1799T>A    | c.(1798-1800)GTG>GAG   | p.V600E      |
| Pat_06 | Post-Resistance | EZH2      | 2146      | 37 | 7 | 148511118 | 148511118 | Missense_Mutation | SNP | G | A | 8   | 796 | c.1769C>T    | c.(1768-1770)GCC>GTC   | p.A590V      |
| Pat_06 | Post-Resistance | SSPO      | 23145     | 37 | 7 | 149489010 | 149489010 | Missense_Mutation | SNP | G | A | 4   | 220 | c.5351G>A    | c.(5350-5352)CGC>CAC   | p.R1784H     |
| Pat_06 | Post-Resistance | MCPH1     | 79648     | 37 | 8 | 6296572   | 6296572   | Missense_Mutation | SNP | A | G | 3   | 123 | c.535A>G     | c.(535-537)AGA>GGA     | p.R179G      |
| Pat_06 | Post-Resistance | USP17L2   | 377630    | 37 | 8 | 11994912  | 11994912  | Missense_Mutation | SNP | C | T | 6   | 370 | c.1358G>A    | c.(1357-1359)AGA>AAA   | p.R453K      |
| Pat_06 | Post-Resistance | SLC39A14  | 23516     | 37 | 8 | 22273697  | 22273697  | Missense_Mutation | SNP | G | A | 6   | 353 | c.1051G>A    | c.(1051-1053)GAT>AAT   | p.D351N      |
| Pat_06 | Post-Resistance | PTK2B     | 2185      | 37 | 8 | 27308269  | 27308269  | Missense_Mutation | SNP | G | C | 3   | 250 | c.2344G>C    | c.(2344-2346)GAG>CAG   | p.E782Q      |
| Pat_06 | Post-Resistance | SCARA3    | 51435     | 37 | 8 | 27516933  | 27516933  | Missense_Mutation | SNP | C | T | 3   | 66  | c.1246C>T    | c.(1246-1248)CGC>TGC   | p.R416C      |
| Pat_06 | Post-Resistance | RNF5P1    | 286140    | 37 | 8 | 38458594  | 38458594  | Missense_Mutation | SNP | C | T | 5   | 337 | c.125G>A     | c.(124-126)TGT>TAT     | p.C42Y       |
| Pat_06 | Post-Resistance | FAM110B   | 90362     | 37 | 8 | 59059268  | 59059268  | Missense_Mutation | SNP | C | G | 4   | 60  | c.479C>G     | c.(478-480)GCC>GGG     | p.A160G      |
| Pat_06 | Post-Resistance | ZFHX4     | 79776     | 37 | 8 | 77616835  | 77616835  | Missense_Mutation | SNP | C | G | 3   | 241 | c.512C>G     | c.(511-513)GCA>GGA     | p.A171G      |
| Pat_06 | Post-Resistance | VPS13B    | 157680    | 37 | 8 | 100821631 | 100821631 | Missense_Mutation | SNP | G | A | 5   | 355 | c.8045G>A    | c.(8044-8046)GGC>GAC   | p.G2682D     |
| Pat_06 | Post-Resistance | VPS13B    | 157680    | 37 | 8 | 100874058 | 100874058 | Missense_Mutation | SNP | G | A | 3   | 69  | c.11174G>A   | c.(11173-11175)CGG>CAG | p.R3725Q     |
| Pat_06 | Post-Resistance | PKHD1L1   | 93035     | 37 | 8 | 110504128 | 110504128 | Nonsense_Mutation | SNP | C | T | 3   | 120 | c.10141C>T   | c.(10141-10143)CGA>TGA | p.R3381*     |
| Pat_06 | Post-Resistance | DSCC1     | 79075     | 37 | 8 | 120867980 | 120867980 | Missense_Mutation | SNP | G | A | 4   | 56  | c.56C>T      | c.(55-57)GCG>GTG       | p.A19V       |
| Pat_06 | Post-Resistance | COL14A1   | 7373      | 37 | 8 | 121292236 | 121292236 | Missense_Mutation | SNP | A | G | 4   | 360 | c.3544A>G    | c.(3544-3546)AGT>GGT   | p.S1182G     |
| Pat_06 | Post-Resistance | ZHX2      | 22882     | 37 | 8 | 123965964 | 123965964 | Nonsense_Mutation | SNP | C | A | 5   | 425 | c.2214C>A    | c.(2212-2214)TGC>TGA   | p.C738*      |
| Pat_06 | Post-Resistance | NDRG1     | 10397     | 37 | 8 | 134276788 | 134276788 | Splice_Site       | SNP | A | G | 4   | 455 | c.205_splice | c.e4+1                 | p.H69_splice |
| Pat_06 | Post-Resistance | DENND3    | 22898     | 37 | 8 | 142185524 | 142185524 | Missense_Mutation | SNP | G | T | 7   | 374 | c.2261G>T    | c.(2260-2262)GGC>GTC   | p.G754V      |
| Pat_06 | Post-Resistance | GPR20     | 2843      | 37 | 8 | 142367263 | 142367263 | Missense_Mutation | SNP | A | G | 3   | 62  | c.761T>C     | c.(760-762)TTC>TCC     | p.F254S      |
| Pat_06 | Post-Resistance | BAI1      | 575       | 37 | 8 | 143607961 | 143607961 | Missense_Mutation | SNP | C | T | 4   | 226 | c.3371C>T    | c.(3370-3372)ACG>ATG   | p.T1124M     |

|        |                 |            |        |    |   |           |           |                   |     |   |   |     |     |               |                      |               |
|--------|-----------------|------------|--------|----|---|-----------|-----------|-------------------|-----|---|---|-----|-----|---------------|----------------------|---------------|
| Pat_06 | Post-Resistance | ZNF16      | 7564   | 37 | 8 | 146157752 | 146157752 | Missense_Mutation | SNP | T | C | 63  | 199 | c.421A>G      | c.(421-423)ATG>GTG   | p.M141V       |
| Pat_06 | Post-Resistance | TYRP1      | 7306   | 37 | 9 | 12707996  | 12707996  | Splice_Site       | SNP | G | C | 3   | 91  | c.1262_splice | c.e7-1               | p.D421_splice |
| Pat_06 | Post-Resistance | KLHL9      | 55958  | 37 | 9 | 21334255  | 21334255  | Missense_Mutation | SNP | G | A | 4   | 288 | c.604C>T      | c.(604-606)CTT>TTT   | p.L202F       |
| Pat_06 | Post-Resistance | FBXO10     | 26267  | 37 | 9 | 37537229  | 37537229  | Missense_Mutation | SNP | G | A | 4   | 156 | c.1297C>T     | c.(1297-1299)CGC>TGC | p.R433C       |
| Pat_06 | Post-Resistance | TRPM3      | 80036  | 37 | 9 | 73233830  | 73233830  | Missense_Mutation | SNP | C | T | 5   | 445 | c.2275G>A     | c.(2275-2277)GAC>AAC | p.D759N       |
| Pat_06 | Post-Resistance | ZNF169     | 169841 | 37 | 9 | 97063314  | 97063314  | Missense_Mutation | SNP | G | T | 5   | 302 | c.1474G>T     | c.(1474-1476)GGG>TGG | p.G492W       |
| Pat_06 | Post-Resistance | ZNF462     | 58499  | 37 | 9 | 109691319 | 109691319 | Missense_Mutation | SNP | G | A | 6   | 459 | c.5126G>A     | c.(5125-5127)CGC>CAC | p.R1709H      |
| Pat_06 | Post-Resistance | KIAA0368   | 23392  | 37 | 9 | 114131392 | 114131392 | Missense_Mutation | SNP | T | C | 3   | 180 | c.5570A>G     | c.(5569-5571)AAG>AGG | p.K1857R      |
| Pat_06 | Post-Resistance | AKNA       | 80709  | 37 | 9 | 117099578 | 117099578 | Missense_Mutation | SNP | G | A | 5   | 401 | c.4076C>T     | c.(4075-4077)GCG>GTG | p.A1359V      |
| Pat_06 | Post-Resistance | FBXW2      | 26190  | 37 | 9 | 123550186 | 123550186 | Missense_Mutation | SNP | C | A | 130 | 439 | c.351G>T      | c.(349-351)TTG>TTT   | p.L117F       |
| Pat_06 | Post-Resistance | ST6GALNAC4 | 27090  | 37 | 9 | 130676967 | 130676967 | Missense_Mutation | SNP | A | G | 3   | 247 | c.166T>C      | c.(166-168)TTC>CTC   | p.F56L        |
| Pat_06 | Post-Resistance | ZER1       | 10444  | 37 | 9 | 131515603 | 131515603 | Missense_Mutation | SNP | G | A | 3   | 63  | c.586C>T      | c.(586-588)CGG>TGG   | p.R196W       |
| Pat_06 | Post-Resistance | USP20      | 10868  | 37 | 9 | 132637886 | 132637886 | Missense_Mutation | SNP | C | A | 5   | 424 | c.2266C>A     | c.(2266-2268)CTG>ATG | p.L756M       |
| Pat_06 | Post-Resistance | FUBP3      | 8939   | 37 | 9 | 133506164 | 133506164 | Missense_Mutation | SNP | G | C | 3   | 188 | c.1267G>C     | c.(1267-1269)GAG>CAG | p.E423Q       |
| Pat_06 | Post-Resistance | BAT2L1     | 84726  | 37 | 9 | 134334694 | 134334694 | Missense_Mutation | SNP | A | G | 3   | 117 | c.1355A>G     | c.(1354-1356)CAG>CGG | p.Q452R       |
| Pat_06 | Post-Resistance | TTF1       | 7270   | 37 | 9 | 135266041 | 135266041 | Missense_Mutation | SNP | C | A | 6   | 712 | c.2165G>T     | c.(2164-2166)TGG>TTG | p.W722L       |
| Pat_06 | Post-Resistance | ADAMTS13   | 11093  | 37 | 9 | 136310144 | 136310144 | Missense_Mutation | SNP | G | A | 3   | 101 | c.2581G>A     | c.(2581-2583)GGG>AGG | p.G861R       |
| Pat_06 | Post-Resistance | DBH        | 1621   | 37 | 9 | 136505098 | 136505098 | Missense_Mutation | SNP | A | G | 3   | 235 | c.470A>G      | c.(469-471)AAG>AGG   | p.K157R       |
| Pat_06 | Post-Resistance | FBXW5      | 54461  | 37 | 9 | 139837958 | 139837958 | Missense_Mutation | SNP | G | A | 4   | 111 | c.194C>T      | c.(193-195)GCG>GTG   | p.A65V        |
| Pat_06 | Post-Resistance | GRIN1      | 2902   | 37 | 9 | 140057746 | 140057746 | Missense_Mutation | SNP | G | A | 5   | 554 | c.2297G>A     | c.(2296-2298)AGC>AAC | p.S766N       |
| Pat_06 | Post-Resistance | COBRA1     | 25920  | 37 | 9 | 140166616 | 140166616 | Missense_Mutation | SNP | G | A | 6   | 403 | c.1429G>A     | c.(1429-1431)GCC>ACC | p.A477T       |
| Pat_06 | Post-Resistance | TUBBP5     | 643224 | 37 | 9 | 141070695 | 141070695 | Missense_Mutation | SNP | G | A | 4   | 26  | c.98G>A       | c.(97-99)CGC>CAC     | p.R33H        |
| Pat_06 | Post-Resistance | GPR64      | 10149  | 37 | X | 19031908  | 19031908  | Missense_Mutation | SNP | G | A | 6   | 811 | c.995C>T      | c.(994-996)ACC>ATC   | p.T332I       |
| Pat_06 | Post-Resistance | PHEX       | 5251   | 37 | X | 22239812  | 22239812  | Nonsense_Mutation | SNP | C | A | 6   | 560 | c.1851C>A     | c.(1849-1851)TGC>TGA | p.C617*       |
| Pat_06 | Post-Resistance | DCAF8L1    | 139425 | 37 | X | 27998773  | 27998773  | Missense_Mutation | SNP | G | A | 5   | 421 | c.679C>T      | c.(679-681)CGG>TGG   | p.R227W       |
| Pat_06 | Post-Resistance | DMD        | 1756   | 37 | X | 31366745  | 31366745  | Missense_Mutation | SNP | C | T | 5   | 199 | c.9091G>A     | c.(9091-9093)GTC>ATC | p.V3031I      |
| Pat_06 | Post-Resistance | FAM47C     | 442444 | 37 | X | 37027190  | 37027190  | Missense_Mutation | SNP | T | C | 8   | 539 | c.707T>C      | c.(706-708)CTG>CCG   | p.L236P       |
| Pat_06 | Post-Resistance | SLC9A7     | 84679  | 37 | X | 46618310  | 46618310  | Missense_Mutation | SNP | C | T | 3   | 86  | c.155G>A      | c.(154-156)AGC>AAC   | p.S52N        |
| Pat_06 | Post-Resistance | FTSJ1      | 24140  | 37 | X | 48340865  | 48340865  | Missense_Mutation | SNP | T | C | 3   | 209 | c.730T>C      | c.(730-732)TAT>CAT   | p.Y244H       |
| Pat_06 | Post-Resistance | FTSJ1      | 24140  | 37 | X | 48341160  | 48341160  | Missense_Mutation | SNP | G | C | 3   | 151 | c.935G>C      | c.(934-936)TGC>TCC   | p.C312S       |
| Pat_06 | Post-Resistance | CACNA1F    | 778    | 37 | X | 49081415  | 49081415  | Missense_Mutation | SNP | G | A | 4   | 168 | c.1718C>T     | c.(1717-1719)ACG>ATG | p.T573M       |
| Pat_06 | Post-Resistance | GNL3L      | 54552  | 37 | X | 54565532  | 54565532  | Nonsense_Mutation | SNP | C | T | 3   | 44  | c.79C>T       | c.(79-81)CAG>TAG     | p.Q27*        |
| Pat_06 | Post-Resistance | GNL3L      | 54552  | 37 | X | 54569649  | 54569649  | Missense_Mutation | SNP | T | C | 3   | 195 | c.400T>C      | c.(400-402)TAC>CAC   | p.Y134H       |
| Pat_06 | Post-Resistance | TRO        | 7216   | 37 | X | 54955605  | 54955605  | Missense_Mutation | SNP | G | T | 9   | 427 | c.2448G>T     | c.(2446-2448)ATG>ATT | p.M816I       |
| Pat_06 | Post-Resistance | RRAGB      | 10325  | 37 | X | 55757870  | 55757870  | Missense_Mutation | SNP | T | C | 3   | 215 | c.451T>C      | c.(451-453)TAT>CAT   | p.Y151H       |
| Pat_06 | Post-Resistance | SYTL4      | 94121  | 37 | X | 99942091  | 99942091  | Missense_Mutation | SNP | G | A | 5   | 565 | c.1157C>T     | c.(1156-1158)GCT>GTT | p.A386V       |
| Pat_06 | Post-Resistance | RAB40AL    | 282808 | 37 | X | 102192775 | 102192775 | Missense_Mutation | SNP | C | T | 5   | 192 | c.529C>T      | c.(529-531)CGG>TGG   | p.R177W       |
| Pat_06 | Post-Resistance | IL1RAPL2   | 26280  | 37 | X | 104478654 | 104478654 | Missense_Mutation | SNP | A | G | 4   | 379 | c.509A>G      | c.(508-510)AAG>AGG   | p.K170R       |
| Pat_06 | Post-Resistance | BCORL1     | 63035  | 37 | X | 129149296 | 129149296 | Missense_Mutation | SNP | G | A | 4   | 467 | c.2548G>A     | c.(2548-2550)GGG>AGG | p.G850R       |
| Pat_06 | Post-Resistance | AFF2       | 2334   | 37 | X | 148037917 | 148037917 | Missense_Mutation | SNP | T | C | 8   | 684 | c.2342T>C     | c.(2341-2343)ATT>ACT | p.I781T       |
| Pat_06 | Post-Resistance | PLXNB3     | 5365   | 37 | X | 153033099 | 153033099 | Missense_Mutation | SNP | C | A | 6   | 68  | c.817C>A      | c.(817-819)CTG>ATG   | p.L273M       |
| Pat_06 | Post-Resistance | PLXNB3     | 5365   | 37 | X | 153042342 | 153042342 | Missense_Mutation | SNP | G | A | 4   | 127 | c.4834G>A     | c.(4834-4836)GTC>ATC | p.V1612I      |
| Pat_06 | Post-Resistance | L1CAM      | 3897   | 37 | X | 153130579 | 153130579 | Missense_Mutation | SNP | C | T | 4   | 153 | c.2836G>A     | c.(2836-2838)GGC>AGC | p.G946S       |
| Pat_06 | Post-Resistance | GAB3       | 139716 | 37 | X | 153925486 | 153925486 | Missense_Mutation | SNP | G | A | 6   | 563 | c.1345C>T     | c.(1345-1347)CGG>TGG | p.R449W       |
| Pat_08 | Pre-Treatment   | ACAP3      | 116983 | 37 | 1 | 1230911   | 1230911   | Missense_Mutation | SNP | G | A | 16  | 36  | c.1729C>T     | c.(1729-1731)CGC>TGC | p.R577C       |
| Pat_08 | Pre-Treatment   | PANK4      | 55229  | 37 | 1 | 2452281   | 2452281   | Missense_Mutation | SNP | G | A | 28  | 39  | c.487C>T      | c.(487-489)CCC>TCC   | p.P163S       |
| Pat_08 | Pre-Treatment   | UBE4B      | 10277  | 37 | 1 | 10211599  | 10211599  | Missense_Mutation | SNP | C | T | 36  | 86  | c.2906C>T     | c.(2905-2907)TCC>TTC | p.S969F       |

|        |               |           |        |    |    |           |           |                   |     |    |    |     |     |                                     |                      |          |
|--------|---------------|-----------|--------|----|----|-----------|-----------|-------------------|-----|----|----|-----|-----|-------------------------------------|----------------------|----------|
| Pat_08 | Pre-Treatment | PRAMEF8   | 391002 | 37 | 1  | 12979691  | 12979691  | Missense_Mutation | SNP | G  | A  | 61  | 237 | c.883G>A                            | c.(883-885)GAG>AAG   | p.E295K  |
| Pat_08 | Pre-Treatment | FBLIM1    | 54751  | 37 | 1  | 16093982  | 16093982  | Missense_Mutation | SNP | C  | T  | 7   | 11  | c.362C>T                            | c.(361-363)GCT>GTT   | p.A121V  |
| Pat_08 | Pre-Treatment | KDM4A     | 9682   | 37 | 1  | 44132167  | 44132167  | Missense_Mutation | SNP | C  | T  | 79  | 120 | c.718C>T                            | c.(718-720)CAC>TAC   | p.H240Y  |
| Pat_08 | Pre-Treatment | C1orf168  | 199920 | 37 | 1  | 57216843  | 57216843  | Nonsense_Mutation | SNP | G  | A  | 15  | 28  | c.1261C>T                           | c.(1261-1263)CAG>TAG | p.Q421*  |
| Pat_08 | Pre-Treatment | C8B       | 732    | 37 | 1  | 57422471  | 57422471  | Missense_Mutation | SNP | C  | T  | 183 | 382 | c.362G>A                            | c.(361-363)CGA>CAA   | p.R121Q  |
| Pat_08 | Pre-Treatment | C1orf173  | 127254 | 37 | 1  | 75072512  | 75072512  | Missense_Mutation | SNP | C  | T  | 57  | 93  | c.1262G>A                           | c.(1261-1263)GGA>GAA | p.G421E  |
| Pat_08 | Pre-Treatment | LPHN2     | 23266  | 37 | 1  | 82409213  | 82409213  | Missense_Mutation | SNP | G  | A  | 45  | 84  | c.958G>A                            | c.(958-960)GTC>ATC   | p.V320I  |
| Pat_08 | Pre-Treatment | TGFBR3    | 7049   | 37 | 1  | 92184982  | 92184982  | Missense_Mutation | SNP | G  | A  | 73  | 146 | c.1453C>T                           | c.(1453-1455)CCT>TCT | p.P485S  |
| Pat_08 | Pre-Treatment | COL11A1   | 1301   | 37 | 1  | 103440405 | 103440405 | Missense_Mutation | SNP | G  | A  | 16  | 31  | c.2789C>T                           | c.(2788-2790)CCT>CTT | p.P930L  |
| Pat_08 | Pre-Treatment | MAGI3     | 260425 | 37 | 1  | 114225824 | 114225824 | Missense_Mutation | SNP | G  | A  | 24  | 54  | c.3634G>A                           | c.(3634-3636)GAA>AAA | p.E1212K |
| Pat_08 | Pre-Treatment | TBX15     | 6913   | 37 | 1  | 119469191 | 119469191 | Missense_Mutation | SNP | G  | A  | 26  | 54  | c.145C>T                            | c.(145-147)CCA>TCA   | p.P49S   |
| Pat_08 | Pre-Treatment | C1orf43   | 25912  | 37 | 1  | 154180066 | 154180066 | Missense_Mutation | SNP | T  | C  | 74  | 133 | c.625A>G                            | c.(625-627)ACT>GCT   | p.T209A  |
| Pat_08 | Pre-Treatment | RUSC1     | 23623  | 37 | 1  | 155295412 | 155295412 | Missense_Mutation | SNP | C  | T  | 32  | 91  | c.1763C>T                           | c.(1762-1764)CCG>CTG | p.P588L  |
| Pat_08 | Pre-Treatment | CASQ1     | 844    | 37 | 1  | 160160558 | 160160558 | Missense_Mutation | SNP | G  | A  | 21  | 47  | c.17G>A                             | c.(16-18)AGG>AAG     | p.R6K    |
| Pat_08 | Pre-Treatment | C1orf192  | 257177 | 37 | 1  | 161335356 | 161335356 | Missense_Mutation | SNP | A  | T  | 141 | 196 | c.308T>A                            | c.(307-309)CTC>CAC   | p.L103H  |
| Pat_08 | Pre-Treatment | DARS2     | 55157  | 37 | 1  | 173802529 | 173802529 | Missense_Mutation | SNP | C  | T  | 8   | 6   | c.508C>T                            | c.(508-510)CGG>TGG   | p.R170W  |
| Pat_08 | Pre-Treatment | KIAA1614  | 57710  | 37 | 1  | 180885295 | 180885295 | Missense_Mutation | SNP | C  | T  | 25  | 53  | c.56C>T                             | c.(55-57)CCC>CTC     | p.P19L   |
| Pat_08 | Pre-Treatment | CACNA1E   | 777    | 37 | 1  | 181765951 | 181765951 | Missense_Mutation | SNP | C  | T  | 11  | 14  | c.6227C>T                           | c.(6226-6228)TCC>TTC | p.S2076F |
| Pat_08 | Pre-Treatment | KIF21B    | 23046  | 37 | 1  | 200945966 | 200945966 | Missense_Mutation | SNP | C  | T  | 10  | 25  | c.4381G>A                           | c.(4381-4383)GTC>ATC | p.V1461I |
| Pat_08 | Pre-Treatment | LGR6      | 59352  | 37 | 1  | 202276021 | 202276021 | Missense_Mutation | SNP | G  | A  | 23  | 43  | c.1162G>A                           | c.(1162-1164)GAA>AAA | p.E388K  |
| Pat_08 | Pre-Treatment | PIGR      | 5284   | 37 | 1  | 207110830 | 207110830 | Missense_Mutation | SNP | G  | A  | 36  | 81  | c.655C>T                            | c.(655-657)CTC>TTC   | p.L219F  |
| Pat_08 | Pre-Treatment | GPATCH2   | 55105  | 37 | 1  | 217604543 | 217604543 | Missense_Mutation | SNP | G  | A  | 96  | 180 | c.1531C>T                           | c.(1531-1533)CCT>TCT | p.P511S  |
| Pat_08 | Pre-Treatment | TLR5      | 7100   | 37 | 1  | 223286024 | 223286024 | Missense_Mutation | SNP | C  | T  | 61  | 87  | c.350G>A                            | c.(349-351)GGA>GAA   | p.G117E  |
| Pat_08 | Pre-Treatment | TTC13     | 79573  | 37 | 1  | 231060707 | 231060707 | Missense_Mutation | SNP | G  | A  | 60  | 119 | c.1601C>T                           | c.(1600-1602)GCC>GTC | p.A534V  |
| Pat_08 | Pre-Treatment | SLC35F3   | 148641 | 37 | 1  | 234454596 | 234454596 | Missense_Mutation | SNP | C  | T  | 59  | 117 | c.847C>T                            | c.(847-849)CCT>TCT   | p.P283S  |
| Pat_08 | Pre-Treatment | NID1      | 4811   | 37 | 1  | 236187487 | 236187487 | Missense_Mutation | SNP | G  | A  | 39  | 70  | c.2011C>T                           | c.(2011-2013)CCC>TCC | p.P671S  |
| Pat_08 | Pre-Treatment | RYR2      | 6262   | 37 | 1  | 237774224 | 237774224 | Missense_Mutation | SNP | G  | A  | 17  | 36  | c.4846G>A                           | c.(4846-4848)GGC>AGC | p.G1616S |
| Pat_08 | Pre-Treatment | NLRP3     | 114548 | 37 | 1  | 247582193 | 247582193 | Missense_Mutation | SNP | C  | T  | 18  | 19  | c.97C>T                             | c.(97-99)CCT>TCT     | p.P33S   |
| Pat_08 | Pre-Treatment | OR2G3     | 81469  | 37 | 1  | 247769368 | 247769368 | Missense_Mutation | SNP | A  | G  | 54  | 81  | c.481A>G                            | c.(481-483)ACT>GCT   | p.T161A  |
| Pat_08 | Pre-Treatment | CUBN      | 8029   | 37 | 10 | 17142048  | 17142048  | Missense_Mutation | SNP | C  | T  | 179 | 69  | c.1721G>A                           | c.(1720-1722)AGA>AAA | p.R574K  |
| Pat_08 | Pre-Treatment | ASAH2     | 56624  | 37 | 10 | 52003017  | 52003017  | Missense_Mutation | SNP | C  | T  | 136 | 88  | c.455G>A                            | c.(454-456)CGA>CAA   | p.R152Q  |
| Pat_08 | Pre-Treatment | ARID5B    | 84159  | 37 | 10 | 63851366  | 63851366  | Missense_Mutation | SNP | C  | T  | 47  | 26  | c.2144C>T                           | c.(2143-2145)CCT>CTT | p.P715L  |
| Pat_08 | Pre-Treatment | LRRTM3    | 347731 | 37 | 10 | 68687605  | 68687605  | Missense_Mutation | SNP | G  | A  | 41  | 26  | c.931G>A                            | c.(931-933)GGG>AGG   | p.G311R  |
| Pat_08 | Pre-Treatment | CYP2C18   | 1562   | 37 | 10 | 96466634  | 96466634  | Missense_Mutation | SNP | G  | A  | 24  | 14  | c.736G>A                            | c.(736-738)GAG>AAG   | p.E246K  |
| Pat_08 | Pre-Treatment | C10orf137 | 26098  | 37 | 10 | 127409788 | 127409788 | Missense_Mutation | SNP | C  | T  | 83  | 39  | c.124C>T                            | c.(124-126)CTT>TTT   | p.L42F   |
| Pat_08 | Pre-Treatment | ATHL1     | 80162  | 37 | 11 | 294703    | 294703    | Missense_Mutation | SNP | C  | T  | 144 | 273 | c.2168C>T                           | c.(2167-2169)TCC>TTC | p.S723F  |
| Pat_08 | Pre-Treatment | MUC5B     | 727897 | 37 | 11 | 1262686   | 1262686   | Missense_Mutation | SNP | G  | A  | 17  | 27  | c.6655G>A                           | c.(6655-6657)GAC>AAC | p.D2219N |
| Pat_08 | Pre-Treatment | KRTAP5-5  | 439915 | 37 | 11 | 1651402   | 1651402   | Missense_Mutation | SNP | C  | T  | 31  | 66  | c.332C>T                            | c.(331-333)TCC>TTC   | p.S111F  |
| Pat_08 | Pre-Treatment | KCNQ1     | 3784   | 37 | 11 | 2606487   | 2606487   | Missense_Mutation | SNP | A  | G  | 37  | 88  | c.1078A>G                           | c.(1078-1080)AGG>GGG | p.R360G  |
| Pat_08 | Pre-Treatment | SLC22A18  | 5002   | 37 | 11 | 2924603   | 2924603   | Nonsense_Mutation | SNP | C  | T  | 38  | 85  | c.28C>T                             | c.(28-30)CAG>TAG     | p.Q10*   |
| Pat_08 | Pre-Treatment | OR51S1    | 119692 | 37 | 11 | 4869568   | 4869568   | Missense_Mutation | SNP | G  | A  | 69  | 123 | c.871C>T                            | c.(871-873)CCT>TCT   | p.P291S  |
| Pat_08 | Pre-Treatment | OR51A4    | 401666 | 37 | 11 | 4967847   | 4967848   | Missense_Mutation | DNP | GG | AA | 61  | 110 | c.483_484CC>TT(481-486)TTCCT>TTTTTC |                      | p.P162S  |
| Pat_08 | Pre-Treatment | OR5111    | 390063 | 37 | 11 | 5462416   | 5462416   | Missense_Mutation | SNP | G  | A  | 28  | 47  | c.329C>T                            | c.(328-330)TCC>TTC   | p.S110F  |
| Pat_08 | Pre-Treatment | UBQLNL    | 143630 | 37 | 11 | 5536653   | 5536653   | Missense_Mutation | SNP | G  | A  | 80  | 119 | c.1019C>T                           | c.(1018-1020)TCT>TTT | p.S340F  |
| Pat_08 | Pre-Treatment | OR52N5    | 390075 | 37 | 11 | 5799521   | 5799521   | Missense_Mutation | SNP | C  | T  | 25  | 56  | c.344G>A                            | c.(343-345)GGG>GAG   | p.G115E  |
| Pat_08 | Pre-Treatment | GTF2H1    | 2965   | 37 | 11 | 18379556  | 18379556  | Missense_Mutation | SNP | C  | T  | 23  | 62  | c.1318C>T                           | c.(1318-1320)CTT>TTT | p.L440F  |
| Pat_08 | Pre-Treatment | CCDC34    | 91057  | 37 | 11 | 27379017  | 27379017  | Missense_Mutation | SNP | G  | A  | 70  | 81  | c.431C>T                            | c.(430-432)CCA>CTA   | p.P144L  |



|        |               |          |        |    |    |           |           |                   |     |    |    |     |     |                 |                        |                |
|--------|---------------|----------|--------|----|----|-----------|-----------|-------------------|-----|----|----|-----|-----|-----------------|------------------------|----------------|
| Pat_08 | Pre-Treatment | C11orf74 | 119710 | 37 | 11 | 36631726  | 36631726  | Missense_Mutation | SNP | C  | T  | 33  | 50  | c.73C>T         | c.(73-75)CTT>TTT       | p.L25F         |
| Pat_08 | Pre-Treatment | CHST1    | 8534   | 37 | 11 | 45672110  | 45672110  | Missense_Mutation | SNP | C  | T  | 34  | 51  | c.364G>A        | c.(364-366)GAC>AAC     | p.D122N        |
| Pat_08 | Pre-Treatment | RAPSN    | 5913   | 37 | 11 | 47463243  | 47463243  | Missense_Mutation | SNP | C  | T  | 20  | 40  | c.832G>A        | c.(832-834)GAG>AAG     | p.E278K        |
| Pat_08 | Pre-Treatment | OR4D6    | 219983 | 37 | 11 | 59225019  | 59225019  | Missense_Mutation | SNP | G  | A  | 63  | 87  | c.586G>A        | c.(586-588)GAG>AAG     | p.E196K        |
| Pat_08 | Pre-Treatment | AHNAK    | 79026  | 37 | 11 | 62286730  | 62286731  | Missense_Mutation | DNP | GG | AA | 149 | 223 | 15158_15159CC>T | c.(15157-15159)GCC>GTT | p.A5053V       |
| Pat_08 | Pre-Treatment | TSGA10IP | 254187 | 37 | 11 | 65714616  | 65714616  | Missense_Mutation | SNP | C  | T  | 7   | 12  | c.320C>T        | c.(319-321)CCC>CTC     | p.P107L        |
| Pat_08 | Pre-Treatment | P4HA3    | 283208 | 37 | 11 | 74013458  | 74013458  | Missense_Mutation | SNP | G  | A  | 84  | 146 | c.523C>T        | c.(523-525)CGG>TGG     | p.R175W        |
| Pat_08 | Pre-Treatment | C11orf67 | 28971  | 37 | 11 | 77553557  | 77553557  | Missense_Mutation | SNP | A  | T  | 9   | 28  | c.15A>T         | c.(13-15)GAA>GAT       | p.E5D          |
| Pat_08 | Pre-Treatment | ODZ4     | 26011  | 37 | 11 | 78440676  | 78440676  | Missense_Mutation | SNP | C  | T  | 51  | 99  | c.3151G>A       | c.(3151-3153)GAA>AAA   | p.E1051K       |
| Pat_08 | Pre-Treatment | TRPC6    | 7225   | 37 | 11 | 101375120 | 101375120 | Missense_Mutation | SNP | T  | C  | 39  | 65  | c.580A>G        | c.(580-582)ACC>GCC     | p.T194A        |
| Pat_08 | Pre-Treatment | EXPH5    | 23086  | 37 | 11 | 108381210 | 108381210 | Missense_Mutation | SNP | A  | G  | 138 | 188 | c.5024T>C       | c.(5023-5025)ATT>ACT   | p.I1675T       |
| Pat_08 | Pre-Treatment | USP28    | 57646  | 37 | 11 | 113701595 | 113701595 | Missense_Mutation | SNP | G  | A  | 67  | 125 | c.904C>T        | c.(904-906)CGT>TGT     | p.R302C        |
| Pat_08 | Pre-Treatment | FAM55B   | 120406 | 37 | 11 | 114569092 | 114569092 | Missense_Mutation | SNP | G  | A  | 9   | 20  | c.458G>A        | c.(457-459)AGG>AAG     | p.R153K        |
| Pat_08 | Pre-Treatment | DSCAML1  | 57453  | 37 | 11 | 117389456 | 117389456 | Missense_Mutation | SNP | G  | A  | 14  | 36  | c.1415C>T       | c.(1414-1416)TCG>TTG   | p.S472L        |
| Pat_08 | Pre-Treatment | OR4D5    | 219875 | 37 | 11 | 123810973 | 123810973 | Missense_Mutation | SNP | C  | T  | 102 | 221 | c.650C>T        | c.(649-651)TCG>TTG     | p.S217L        |
| Pat_08 | Pre-Treatment | VWA5A    | 4013   | 37 | 11 | 123994449 | 123994449 | Missense_Mutation | SNP | G  | A  | 32  | 43  | c.1102G>A       | c.(1102-1104)GAA>AAA   | p.E368K        |
| Pat_08 | Pre-Treatment | OR8B8    | 26493  | 37 | 11 | 124310824 | 124310824 | Missense_Mutation | SNP | G  | A  | 34  | 58  | c.158C>T        | c.(157-159)TCT>TTT     | p.S53F         |
| Pat_08 | Pre-Treatment | NTM      | 50863  | 37 | 11 | 132016408 | 132016408 | Missense_Mutation | SNP | G  | A  | 17  | 24  | c.400G>A        | c.(400-402)GTA>ATA     | p.V134I        |
| Pat_08 | Pre-Treatment | DCP1B    | 196513 | 37 | 12 | 2061949   | 2061949   | Missense_Mutation | SNP | C  | T  | 20  | 41  | c.1157G>A       | c.(1156-1158)AGA>AAA   | p.R386K        |
| Pat_08 | Pre-Treatment | CD163L1  | 283316 | 37 | 12 | 7596704   | 7596704   | Missense_Mutation | SNP | G  | A  | 42  | 90  | c.20C>T         | c.(19-21)TCG>TTG       | p.S7L          |
| Pat_08 | Pre-Treatment | NANOG    | 79923  | 37 | 12 | 7947082   | 7947082   | Missense_Mutation | SNP | G  | A  | 7   | 15  | c.444G>A        | c.(442-444)ATG>ATA     | p.M148I        |
| Pat_08 | Pre-Treatment | KLRC3    | 3823   | 37 | 12 | 10572989  | 10572989  | Missense_Mutation | SNP | C  | T  | 60  | 161 | c.161G>A        | c.(160-162)GGG>GAG     | p.G54E         |
| Pat_08 | Pre-Treatment | ABCC9    | 10060  | 37 | 12 | 22065982  | 22065982  | Missense_Mutation | SNP | G  | A  | 37  | 56  | c.835C>T        | c.(835-837)CCA>TCA     | p.P279S        |
| Pat_08 | Pre-Treatment | SYT10    | 341359 | 37 | 12 | 33579224  | 33579224  | Missense_Mutation | SNP | C  | T  | 45  | 78  | c.358G>A        | c.(358-360)GAA>AAA     | p.E120K        |
| Pat_08 | Pre-Treatment | ADAMTS20 | 80070  | 37 | 12 | 43769952  | 43769952  | Splice_Site       | SNP | C  | T  | 4   | 6   | c.5221_splice   | c.e35-1                | p.I1741_splice |
| Pat_08 | Pre-Treatment | ADAMTS20 | 80070  | 37 | 12 | 43945643  | 43945643  | Missense_Mutation | SNP | G  | A  | 32  | 47  | c.82C>T         | c.(82-84)CCC>TCC       | p.P28S         |
| Pat_08 | Pre-Treatment | PUS7L    | 83448  | 37 | 12 | 44148157  | 44148157  | Missense_Mutation | SNP | C  | T  | 60  | 120 | c.892G>A        | c.(892-894)GGA>AGA     | p.G298R        |
| Pat_08 | Pre-Treatment | COL2A1   | 1280   | 37 | 12 | 48389088  | 48389088  | Missense_Mutation | SNP | G  | A  | 66  | 108 | c.712C>T        | c.(712-714)CCC>TCC     | p.P238S        |
| Pat_08 | Pre-Treatment | RND1     | 27289  | 37 | 12 | 49251927  | 49251927  | Missense_Mutation | SNP | G  | A  | 40  | 47  | c.551C>T        | c.(550-552)TCC>TTC     | p.S184F        |
| Pat_08 | Pre-Treatment | KRT84    | 3890   | 37 | 12 | 52774929  | 52774929  | Missense_Mutation | SNP | C  | T  | 71  | 170 | c.1138G>A       | c.(1138-1140)GAG>AAG   | p.E380K        |
| Pat_08 | Pre-Treatment | KRT6B    | 3854   | 37 | 12 | 52844377  | 52844377  | Missense_Mutation | SNP | C  | G  | 13  | 50  | c.568G>C        | c.(568-570)GTT>CTT     | p.V190L        |
| Pat_08 | Pre-Treatment | KRT6A    | 3853   | 37 | 12 | 52885322  | 52885322  | Missense_Mutation | SNP | C  | T  | 28  | 90  | c.739G>A        | c.(739-741)GAG>AAG     | p.E247K        |
| Pat_08 | Pre-Treatment | OR6C75   | 390323 | 37 | 12 | 55759372  | 55759372  | Missense_Mutation | SNP | C  | T  | 34  | 46  | c.478C>T        | c.(478-480)CTT>TTT     | p.L160F        |
| Pat_08 | Pre-Treatment | GLI1     | 2735   | 37 | 12 | 57860059  | 57860059  | Missense_Mutation | SNP | G  | A  | 164 | 258 | c.799G>A        | c.(799-801)GAG>AAG     | p.E267K        |
| Pat_08 | Pre-Treatment | MSRB3    | 253827 | 37 | 12 | 65722374  | 65722374  | Missense_Mutation | SNP | C  | T  | 45  | 64  | c.275C>T        | c.(274-276)CCA>CTA     | p.P92L         |
| Pat_08 | Pre-Treatment | PTPRB    | 5787   | 37 | 12 | 71002869  | 71002869  | Missense_Mutation | SNP | C  | T  | 36  | 160 | c.305G>A        | c.(304-306)AGA>AAA     | p.R102K        |
| Pat_08 | Pre-Treatment | C12orf12 | 196477 | 37 | 12 | 91348220  | 91348220  | Nonsense_Mutation | SNP | C  | T  | 13  | 18  | c.300G>A        | c.(298-300)TGG>TGA     | p.W100*        |
| Pat_08 | Pre-Treatment | AMDHD1   | 144193 | 37 | 12 | 96356148  | 96356148  | Missense_Mutation | SNP | G  | A  | 23  | 46  | c.829G>A        | c.(829-831)GGA>AGA     | p.G277R        |
| Pat_08 | Pre-Treatment | MMAB     | 326625 | 37 | 12 | 110006647 | 110006647 | Missense_Mutation | SNP | C  | T  | 49  | 75  | c.218G>A        | c.(217-219)GGA>GAA     | p.G73E         |
| Pat_08 | Pre-Treatment | HPD      | 3242   | 37 | 12 | 122286921 | 122286921 | Missense_Mutation | SNP | C  | T  | 70  | 129 | c.580G>A        | c.(580-582)GTG>ATG     | p.V194M        |
| Pat_08 | Pre-Treatment | ZCCHC8   | 55596  | 37 | 12 | 122958814 | 122958814 | Missense_Mutation | SNP | C  | T  | 42  | 95  | c.1354G>A       | c.(1354-1356)GTA>ATA   | p.V452I        |
| Pat_08 | Pre-Treatment | GTF2H3   | 2967   | 37 | 12 | 124144370 | 124144370 | Missense_Mutation | SNP | G  | A  | 66  | 103 | c.713G>A        | c.(712-714)AGA>AAA     | p.R238K        |
| Pat_08 | Pre-Treatment | RIMBP2   | 23504  | 37 | 12 | 130926738 | 130926738 | Missense_Mutation | SNP | A  | C  | 19  | 36  | c.1108T>G       | c.(1108-1110)TGC>GGC   | p.C370G        |
| Pat_08 | Pre-Treatment | TUBA3C   | 7278   | 37 | 13 | 19752472  | 19752472  | Missense_Mutation | SNP | C  | T  | 45  | 72  | c.289G>A        | c.(289-291)GAA>AAA     | p.E97K         |
| Pat_08 | Pre-Treatment | WASF3    | 10810  | 37 | 13 | 27259911  | 27259911  | Missense_Mutation | SNP | C  | T  | 24  | 37  | c.1438C>T       | c.(1438-1440)CGG>TGG   | p.R480W        |
| Pat_08 | Pre-Treatment | GPR12    | 2835   | 37 | 13 | 27333521  | 27333521  | Nonsense_Mutation | SNP | G  | C  | 15  | 38  | c.444C>G        | c.(442-444)TAC>TAG     | p.Y148*        |
| Pat_08 | Pre-Treatment | NBEA     | 26960  | 37 | 13 | 36124729  | 36124729  | Missense_Mutation | SNP | G  | A  | 13  | 30  | c.6701G>A       | c.(6700-6702)CGA>CAA   | p.R2234Q       |

|        |               |           |        |    |    |           |           |                   |     |    |    |     |     |                 |                      |          |
|--------|---------------|-----------|--------|----|----|-----------|-----------|-------------------|-----|----|----|-----|-----|-----------------|----------------------|----------|
| Pat_08 | Pre-Treatment | NALCN     | 259232 | 37 | 13 | 101936361 | 101936361 | Missense_Mutation | SNP | C  | T  | 20  | 40  | c.1057G>A       | c.(1057-1059)GAA>AAA | p.E353K  |
| Pat_08 | Pre-Treatment | NOVA1     | 4857   | 37 | 14 | 26917922  | 26917922  | Missense_Mutation | SNP | G  | A  | 83  | 132 | c.767C>T        | c.(766-768)GCC>GTC   | p.A256V  |
| Pat_08 | Pre-Treatment | NPAS3     | 64067  | 37 | 14 | 34204525  | 34204525  | Missense_Mutation | SNP | C  | T  | 49  | 97  | c.839C>T        | c.(838-840)TCA>TTA   | p.S280L  |
| Pat_08 | Pre-Treatment | RALGAPA1  | 253959 | 37 | 14 | 36191052  | 36191052  | Missense_Mutation | SNP | A  | G  | 40  | 71  | c.2108T>C       | c.(2107-2109)GTT>GCT | p.V703A  |
| Pat_08 | Pre-Treatment | PNN       | 5411   | 37 | 14 | 39649841  | 39649842  | Missense_Mutation | DNP | GG | AA | 8   | 9   | c.928_929GG>AA  | c.(928-930)GGT>AAT   | p.G310N  |
| Pat_08 | Pre-Treatment | CDKL1     | 8814   | 37 | 14 | 50844945  | 50844945  | Missense_Mutation | SNP | G  | A  | 21  | 25  | c.1304C>T       | c.(1303-1305)CCC>CTC | p.P435L  |
| Pat_08 | Pre-Treatment | KCNH5     | 27133  | 37 | 14 | 63174583  | 63174583  | Missense_Mutation | SNP | T  | A  | 47  | 76  | c.2610A>T       | c.(2608-2610)AAA>AAT | p.K870N  |
| Pat_08 | Pre-Treatment | ZFYVE26   | 23503  | 37 | 14 | 68274583  | 68274583  | Missense_Mutation | SNP | G  | A  | 68  | 122 | c.418C>T        | c.(418-420)CCA>TCA   | p.P140S  |
| Pat_08 | Pre-Treatment | DPF3      | 8110   | 37 | 14 | 73141047  | 73141047  | Missense_Mutation | SNP | G  | A  | 10  | 14  | c.772C>T        | c.(772-774)CCC>TCC   | p.P258S  |
| Pat_08 | Pre-Treatment | DPF3      | 8110   | 37 | 14 | 73190363  | 73190363  | Missense_Mutation | SNP | C  | T  | 115 | 213 | c.503G>A        | c.(502-504)CGA>CAA   | p.R168Q  |
| Pat_08 | Pre-Treatment | NRXN3     | 9369   | 37 | 14 | 79181364  | 79181364  | Missense_Mutation | SNP | G  | A  | 25  | 53  | c.807G>A        | c.(805-807)ATG>ATA   | p.M269I  |
| Pat_08 | Pre-Treatment | SERPINA10 | 51156  | 37 | 14 | 94754734  | 94754734  | Missense_Mutation | SNP | C  | T  | 21  | 30  | c.881G>A        | c.(880-882)GGA>GAA   | p.G294E  |
| Pat_08 | Pre-Treatment | SERPINA1  | 5265   | 37 | 14 | 94847406  | 94847406  | Missense_Mutation | SNP | A  | C  | 19  | 23  | c.719T>G        | c.(718-720)GTG>GGG   | p.V240G  |
| Pat_08 | Pre-Treatment | SERPINA9  | 327657 | 37 | 14 | 94935565  | 94935565  | Missense_Mutation | SNP | G  | A  | 38  | 32  | c.667C>T        | c.(667-669)CAC>TAC   | p.H223Y  |
| Pat_08 | Pre-Treatment | THBS1     | 7057   | 37 | 15 | 39874759  | 39874759  | Missense_Mutation | SNP | G  | A  | 20  | 45  | c.433G>A        | c.(433-435)GAA>AAA   | p.E145K  |
| Pat_08 | Pre-Treatment | DLL4      | 54567  | 37 | 15 | 41228744  | 41228744  | Missense_Mutation | SNP | C  | T  | 11  | 17  | c.1559C>T       | c.(1558-1560)CCC>CTC | p.P520L  |
| Pat_08 | Pre-Treatment | UNC13C    | 440279 | 37 | 15 | 54305875  | 54305875  | Missense_Mutation | SNP | G  | A  | 24  | 58  | c.775G>A        | c.(775-777)GAA>AAA   | p.E259K  |
| Pat_08 | Pre-Treatment | UNC13C    | 440279 | 37 | 15 | 54557657  | 54557657  | Missense_Mutation | SNP | G  | A  | 3   | 2   | c.3781G>A       | c.(3781-3783)GGA>AGA | p.G1261R |
| Pat_08 | Pre-Treatment | UNC13C    | 440279 | 37 | 15 | 54825218  | 54825218  | Missense_Mutation | SNP | G  | A  | 9   | 13  | c.5650G>A       | c.(5650-5652)GAT>AAT | p.D1884N |
| Pat_08 | Pre-Treatment | FEM1B     | 10116  | 37 | 15 | 68582681  | 68582681  | Missense_Mutation | SNP | C  | T  | 46  | 81  | c.985C>T        | c.(985-987)CTT>TTT   | p.L329F  |
| Pat_08 | Pre-Treatment | CSPG4     | 1464   | 37 | 15 | 75982510  | 75982510  | Missense_Mutation | SNP | G  | A  | 36  | 46  | c.896C>T        | c.(895-897)TCC>TTC   | p.S299F  |
| Pat_08 | Pre-Treatment | IREB2     | 3658   | 37 | 15 | 78789516  | 78789516  | Missense_Mutation | SNP | C  | T  | 53  | 133 | c.2644C>T       | c.(2644-2646)CAT>TAT | p.H882Y  |
| Pat_08 | Pre-Treatment | ITFG3     | 83986  | 37 | 16 | 314061    | 314061    | Missense_Mutation | SNP | C  | T  | 21  | 56  | c.1235C>T       | c.(1234-1236)GCC>GTC | p.A412V  |
| Pat_08 | Pre-Treatment | PTX4      | 390667 | 37 | 16 | 1537629   | 1537629   | Missense_Mutation | SNP | G  | A  | 12  | 27  | c.469C>T        | c.(469-471)CAC>TAC   | p.H157Y  |
| Pat_08 | Pre-Treatment | ABCC1     | 4363   | 37 | 16 | 16108367  | 16108367  | Missense_Mutation | SNP | T  | C  | 44  | 32  | c.371T>C        | c.(370-372)ATT>ACT   | p.I124T  |
| Pat_08 | Pre-Treatment | DNAH3     | 55567  | 37 | 16 | 21098326  | 21098326  | Nonsense_Mutation | SNP | C  | T  | 54  | 118 | c.2721G>A       | c.(2719-2721)TGG>TGA | p.W907*  |
| Pat_08 | Pre-Treatment | RBBP6     | 5930   | 37 | 16 | 24580595  | 24580595  | Missense_Mutation | SNP | C  | T  | 29  | 66  | c.2584C>T       | c.(2584-2586)CCA>TCA | p.P862S  |
| Pat_08 | Pre-Treatment | C16orf78  | 123970 | 37 | 16 | 49407878  | 49407878  | Missense_Mutation | SNP | G  | A  | 33  | 70  | c.28G>A         | c.(28-30)GAT>AAT     | p.D10N   |
| Pat_08 | Pre-Treatment | GALNS     | 2588   | 37 | 16 | 88902160  | 88902160  | Missense_Mutation | SNP | G  | A  | 22  | 52  | c.731C>T        | c.(730-732)CCC>CTC   | p.P244L  |
| Pat_08 | Pre-Treatment | GALNS     | 2588   | 37 | 16 | 88904145  | 88904145  | Missense_Mutation | SNP | G  | A  | 48  | 97  | c.451C>T        | c.(451-453)CCC>TCC   | p.P151S  |
| Pat_08 | Pre-Treatment | TRPV1     | 7442   | 37 | 17 | 3494574   | 3494574   | Missense_Mutation | SNP | C  | T  | 17  | 18  | c.358G>A        | c.(358-360)GAA>AAA   | p.E120K  |
| Pat_08 | Pre-Treatment | ZZEF1     | 23140  | 37 | 17 | 4013068   | 4013068   | Missense_Mutation | SNP | T  | C  | 20  | 48  | c.1156A>G       | c.(1156-1158)AAG>GAG | p.K386E  |
| Pat_08 | Pre-Treatment | DHX33     | 56919  | 37 | 17 | 5352203   | 5352203   | Missense_Mutation | SNP | C  | T  | 35  | 34  | c.1741G>A       | c.(1741-1743)GAG>AAG | p.E581K  |
| Pat_08 | Pre-Treatment | PLSCR3    | 57048  | 37 | 17 | 7296213   | 7296213   | Missense_Mutation | SNP | G  | A  | 206 | 407 | c.566C>T        | c.(565-567)CCC>CTC   | p.P189L  |
| Pat_08 | Pre-Treatment | GLP2R     | 9340   | 37 | 17 | 9729447   | 9729447   | Missense_Mutation | SNP | G  | A  | 9   | 6   | c.67G>A         | c.(67-69)GAG>AAG     | p.E23K   |
| Pat_08 | Pre-Treatment | FOXN1     | 8456   | 37 | 17 | 26864216  | 26864216  | Missense_Mutation | SNP | C  | T  | 28  | 96  | c.1709C>T       | c.(1708-1710)TCG>TTG | p.S570L  |
| Pat_08 | Pre-Treatment | SLC6A4    | 6532   | 37 | 17 | 28548904  | 28548904  | Missense_Mutation | SNP | C  | T  | 45  | 103 | c.73G>A         | c.(73-75)GGA>AGA     | p.G25R   |
| Pat_08 | Pre-Treatment | C17orf66  | 256957 | 37 | 17 | 34192286  | 34192286  | Missense_Mutation | SNP | C  | T  | 49  | 73  | c.253G>A        | c.(253-255)GAC>AAC   | p.D85N   |
| Pat_08 | Pre-Treatment | KRT17     | 3872   | 37 | 17 | 39775880  | 39775880  | Missense_Mutation | SNP | G  | A  | 67  | 176 | c.1265C>T       | c.(1264-1266)TCC>TTC | p.S422F  |
| Pat_08 | Pre-Treatment | MPP2      | 4355   | 37 | 17 | 41956666  | 41956666  | Missense_Mutation | SNP | C  | T  | 53  | 119 | c.1594G>A       | c.(1594-1596)GGA>AGA | p.G532R  |
| Pat_08 | Pre-Treatment | FMNL1     | 752    | 37 | 17 | 43323883  | 43323883  | Missense_Mutation | SNP | G  | A  | 49  | 82  | c.3223G>A       | c.(3223-3225)GTG>ATG | p.V1075M |
| Pat_08 | Pre-Treatment | KIAA1267  | 284058 | 37 | 17 | 44144090  | 44144090  | Missense_Mutation | SNP | G  | C  | 25  | 19  | c.1661C>G       | c.(1660-1662)CCT>CGT | p.P554R  |
| Pat_08 | Pre-Treatment | TEX14     | 56155  | 37 | 17 | 56671001  | 56671001  | Missense_Mutation | SNP | C  | T  | 46  | 74  | c.2509G>A       | c.(2509-2511)GGA>AGA | p.G837R  |
| Pat_08 | Pre-Treatment | RPTOR     | 57521  | 37 | 17 | 78919517  | 78919518  | Missense_Mutation | DNP | CC | TT | 25  | 86  | c.3076_3077CC>T | c.(3076-3078)CCC>TTC | p.P1026F |
| Pat_08 | Pre-Treatment | CHMP1B    | 57132  | 37 | 18 | 11851859  | 11851859  | Missense_Mutation | SNP | A  | C  | 178 | 225 | c.349A>C        | c.(349-351)AAA>CAA   | p.K117Q  |
| Pat_08 | Pre-Treatment | MC5R      | 4161   | 37 | 18 | 13825823  | 13825823  | Missense_Mutation | SNP | A  | G  | 32  | 75  | c.59A>G         | c.(58-60)AAC>AGC     | p.N20S   |
| Pat_08 | Pre-Treatment | MEP1B     | 4225   | 37 | 18 | 29797780  | 29797780  | Missense_Mutation | SNP | C  | T  | 23  | 40  | c.1943C>T       | c.(1942-1944)TCC>TTC | p.S648F  |

|        |               |           |        |    |    |           |           |                   |     |    |    |     |     |                 |                        |              |
|--------|---------------|-----------|--------|----|----|-----------|-----------|-------------------|-----|----|----|-----|-----|-----------------|------------------------|--------------|
| Pat_08 | Pre-Treatment | RIT2      | 6014   | 37 | 18 | 40323589  | 40323589  | Missense_Mutation | SNP | G  | A  | 36  | 45  | c.523C>T        | c.(523-525)CAT>TAT     | p.H175Y      |
| Pat_08 | Pre-Treatment | DCC       | 1630   | 37 | 18 | 50937005  | 50937005  | Missense_Mutation | SNP | G  | A  | 32  | 51  | c.3119G>A       | c.(3118-3120)AGG>AAG   | p.R1040K     |
| Pat_08 | Pre-Treatment | SERPINB4  | 6318   | 37 | 18 | 61305069  | 61305069  | Missense_Mutation | SNP | C  | T  | 38  | 59  | c.1057G>A       | c.(1057-1059)GAA>AAA   | p.E353K      |
| Pat_08 | Pre-Treatment | SERPINB7  | 8710   | 37 | 18 | 61465976  | 61465976  | Missense_Mutation | SNP | C  | T  | 50  | 115 | c.593C>T        | c.(592-594)CCC>CTC     | p.P198L      |
| Pat_08 | Pre-Treatment | NETO1     | 81832  | 37 | 18 | 70461455  | 70461455  | Missense_Mutation | SNP | G  | A  | 16  | 24  | c.536C>T        | c.(535-537)TCC>TTC     | p.S179F      |
| Pat_08 | Pre-Treatment | C19orf21  | 126353 | 37 | 19 | 757983    | 757983    | Missense_Mutation | SNP | G  | A  | 14  | 14  | c.1037G>A       | c.(1036-1038)CGC>CAC   | p.R346H      |
| Pat_08 | Pre-Treatment | FSD1      | 79187  | 37 | 19 | 4323535   | 4323535   | Nonsense_Mutation | SNP | G  | A  | 9   | 19  | c.1386G>A       | c.(1384-1386)TGG>TGA   | p.W462*      |
| Pat_08 | Pre-Treatment | SEMA6B    | 10501  | 37 | 19 | 4550261   | 4550261   | Missense_Mutation | SNP | C  | T  | 42  | 57  | c.1145G>A       | c.(1144-1146)GGG>GAG   | p.G382E      |
| Pat_08 | Pre-Treatment | KIAA0355  | 9710   | 37 | 19 | 34791443  | 34791443  | Missense_Mutation | SNP | C  | T  | 24  | 32  | c.65C>T         | c.(64-66)TCC>TTC       | p.S22F       |
| Pat_08 | Pre-Treatment | ZNF568    | 374900 | 37 | 19 | 37488299  | 37488299  | Missense_Mutation | SNP | A  | G  | 4   | 6   | c.1664A>G       | c.(1663-1665)GAA>GGA   | p.E555G      |
| Pat_08 | Pre-Treatment | ZNF585B   | 92285  | 37 | 19 | 37677976  | 37677976  | Missense_Mutation | SNP | C  | T  | 33  | 41  | c.463G>A        | c.(463-465)GAA>AAA     | p.E155K      |
| Pat_08 | Pre-Treatment | LRFN1     | 57622  | 37 | 19 | 39805289  | 39805289  | Missense_Mutation | SNP | G  | A  | 11  | 9   | c.688C>T        | c.(688-690)CTC>TTC     | p.L230F      |
| Pat_08 | Pre-Treatment | LTBP4     | 8425   | 37 | 19 | 41128389  | 41128390  | Missense_Mutation | DNP | CC | TA | 21  | 36  | c.3502_3503CC>T | c.(3502-3504)CCC>TAC   | p.P1168Y     |
| Pat_08 | Pre-Treatment | PSG4      | 5672   | 37 | 19 | 43702386  | 43702386  | Missense_Mutation | SNP | G  | A  | 171 | 272 | c.472C>T        | c.(472-474)CCC>TCC     | p.P158S      |
| Pat_08 | Pre-Treatment | GEMIN7    | 79760  | 37 | 19 | 45593532  | 45593532  | Nonsense_Mutation | SNP | C  | T  | 21  | 49  | c.160C>T        | c.(160-162)CAG>TAG     | p.Q54*       |
| Pat_08 | Pre-Treatment | GPR77     | 27202  | 37 | 19 | 47844070  | 47844070  | Missense_Mutation | SNP | C  | T  | 23  | 63  | c.14C>T         | c.(13-15)TCT>TTT       | p.S5F        |
| Pat_08 | Pre-Treatment | CCDC155   | 147872 | 37 | 19 | 49898419  | 49898419  | Missense_Mutation | SNP | C  | T  | 9   | 25  | c.205C>T        | c.(205-207)CCC>TCC     | p.P69S       |
| Pat_08 | Pre-Treatment | LILRB1    | 10859  | 37 | 19 | 55147034  | 55147034  | Missense_Mutation | SNP | G  | A  | 43  | 129 | c.1624G>A       | c.(1624-1626)GAG>AAG   | p.E542K      |
| Pat_08 | Pre-Treatment | ZNF667    | 63934  | 37 | 19 | 56953336  | 56953336  | Missense_Mutation | SNP | G  | A  | 35  | 60  | c.1028C>T       | c.(1027-1029)TCA>TTA   | p.S343L      |
| Pat_08 | Pre-Treatment | ZIM2      | 23619  | 37 | 19 | 57286247  | 57286247  | Missense_Mutation | SNP | C  | T  | 12  | 33  | c.1393G>A       | c.(1393-1395)GCC>ACC   | p.A465T      |
| Pat_08 | Pre-Treatment | C2orf48   | 348738 | 37 | 2  | 10282381  | 10282382  | Splice_Site       | DNP | GG | AA | 64  | 163 | c.73_splice     | c.e3-1                 | p.G25_splice |
| Pat_08 | Pre-Treatment | HS1BP3    | 64342  | 37 | 2  | 20838401  | 20838401  | Missense_Mutation | SNP | G  | A  | 21  | 28  | c.418C>T        | c.(418-420)CCA>TCA     | p.P140S      |
| Pat_08 | Pre-Treatment | APOB      | 338    | 37 | 2  | 21232695  | 21232695  | Missense_Mutation | SNP | C  | T  | 26  | 54  | c.7045G>A       | c.(7045-7047)GAA>AAA   | p.E2349K     |
| Pat_08 | Pre-Treatment | ATAD2B    | 54454  | 37 | 2  | 24046220  | 24046220  | Missense_Mutation | SNP | C  | T  | 16  | 33  | c.2039G>A       | c.(2038-2040)AGA>AAA   | p.R680K      |
| Pat_08 | Pre-Treatment | SLC4A1AP  | 22950  | 37 | 2  | 27886668  | 27886668  | Missense_Mutation | SNP | C  | T  | 102 | 159 | c.49C>T         | c.(49-51)CCA>TCA       | p.P17S       |
| Pat_08 | Pre-Treatment | THADA     | 63892  | 37 | 2  | 43458330  | 43458331  | Missense_Mutation | DNP | CC | TT | 17  | 32  | c.5618_5619GG>A | c.(5617-5619)AGG>AAA   | p.R1873K     |
| Pat_08 | Pre-Treatment | FSHR      | 2492   | 37 | 2  | 49190238  | 49190238  | Missense_Mutation | SNP | C  | T  | 10  | 23  | c.1722G>A       | c.(1720-1722)ATG>ATA   | p.M574I      |
| Pat_08 | Pre-Treatment | ALMS1     | 7840   | 37 | 2  | 73681006  | 73681006  | Missense_Mutation | SNP | C  | T  | 24  | 46  | c.7355C>T       | c.(7354-7356)TCA>TTA   | p.S2452L     |
| Pat_08 | Pre-Treatment | EPB41L5   | 57669  | 37 | 2  | 120848052 | 120848052 | Nonsense_Mutation | SNP | C  | T  | 92  | 119 | c.1003C>T       | c.(1003-1005)CGA>TGA   | p.R335*      |
| Pat_08 | Pre-Treatment | CNTNAP5   | 129684 | 37 | 2  | 125204485 | 125204485 | Missense_Mutation | SNP | G  | A  | 75  | 122 | c.889G>A        | c.(889-891)GAG>AAG     | p.E297K      |
| Pat_08 | Pre-Treatment | POTEF     | 728378 | 37 | 2  | 130832812 | 130832812 | Missense_Mutation | SNP | C  | T  | 19  | 58  | c.2233G>A       | c.(2233-2235)GGG>AGG   | p.G745R      |
| Pat_08 | Pre-Treatment | LOC401010 | 401010 | 37 | 2  | 132200831 | 132200831 | Missense_Mutation | SNP | C  | T  | 5   | 6   | c.1171G>A       | c.(1171-1173)GAG>AAG   | p.E391K      |
| Pat_08 | Pre-Treatment | LRP1B     | 53353  | 37 | 2  | 141116476 | 141116476 | Missense_Mutation | SNP | C  | T  | 39  | 95  | c.11171G>A      | c.(11170-11172)AGA>AAA | p.R3724K     |
| Pat_08 | Pre-Treatment | MBD5      | 55777  | 37 | 2  | 149226284 | 149226284 | Missense_Mutation | SNP | C  | T  | 41  | 80  | c.772C>T        | c.(772-774)CAT>TAT     | p.H258Y      |
| Pat_08 | Pre-Treatment | NEB       | 4703   | 37 | 2  | 152381753 | 152381753 | Missense_Mutation | SNP | C  | T  | 36  | 58  | c.17093G>A      | c.(17092-17094)GGA>GAA | p.G5698E     |
| Pat_08 | Pre-Treatment | KCNJ3     | 3760   | 37 | 2  | 155711304 | 155711304 | Missense_Mutation | SNP | C  | T  | 18  | 45  | c.985C>T        | c.(985-987)CCT>TCT     | p.P329S      |
| Pat_08 | Pre-Treatment | SCN9A     | 6335   | 37 | 2  | 167085452 | 167085452 | Missense_Mutation | SNP | G  | A  | 34  | 74  | c.3922C>T       | c.(3922-3924)CCT>TCT   | p.P1308S     |
| Pat_08 | Pre-Treatment | TTN       | 7273   | 37 | 2  | 179393620 | 179393620 | Missense_Mutation | SNP | C  | T  | 35  | 47  | c.99154G>A      | c.(99154-99156)GAA>AAA | p.E33052K    |
| Pat_08 | Pre-Treatment | TTN       | 7273   | 37 | 2  | 179410756 | 179410756 | Missense_Mutation | SNP | C  | T  | 15  | 37  | c.87503G>A      | c.(87502-87504)GGA>GAA | p.G29168E    |
| Pat_08 | Pre-Treatment | TTN       | 7273   | 37 | 2  | 179428394 | 179428394 | Missense_Mutation | SNP | T  | C  | 82  | 103 | c.74761A>G      | c.(74761-74763)ACA>GCA | p.T24921A    |
| Pat_08 | Pre-Treatment | TTN       | 7273   | 37 | 2  | 179498194 | 179498194 | Missense_Mutation | SNP | C  | T  | 32  | 40  | c.35188G>A      | c.(35188-35190)GAA>AAA | p.E11730K    |
| Pat_08 | Pre-Treatment | TTN       | 7273   | 37 | 2  | 179629430 | 179629430 | Missense_Mutation | SNP | G  | A  | 57  | 90  | c.9812C>T       | c.(9811-9813)TCC>TTC   | p.S3271F     |
| Pat_08 | Pre-Treatment | TTN       | 7273   | 37 | 2  | 179654118 | 179654118 | Missense_Mutation | SNP | C  | T  | 41  | 63  | c.2045G>A       | c.(2044-2046)AGA>AAA   | p.R682K      |
| Pat_08 | Pre-Treatment | SGOL2     | 151246 | 37 | 2  | 201437870 | 201437870 | Missense_Mutation | SNP | A  | T  | 25  | 46  | c.2801A>T       | c.(2800-2802)CAA>CTA   | p.Q934L      |
| Pat_08 | Pre-Treatment | CD28      | 940    | 37 | 2  | 204594385 | 204594385 | Missense_Mutation | SNP | C  | T  | 68  | 128 | c.424C>T        | c.(424-426)CCA>TCA     | p.P142S      |
| Pat_08 | Pre-Treatment | CRYGD     | 1421   | 37 | 2  | 208988904 | 208988904 | Missense_Mutation | SNP | C  | T  | 13  | 19  | c.184G>A        | c.(184-186)GAC>AAC     | p.D62N       |
| Pat_08 | Pre-Treatment | CPS1      | 1373   | 37 | 2  | 211460248 | 211460248 | Missense_Mutation | SNP | C  | T  | 47  | 123 | c.1301C>T       | c.(1300-1302)TCC>TTC   | p.S434F      |

|        |               |           |        |    |    |           |           |                   |     |   |   |     |     |               |                        |          |
|--------|---------------|-----------|--------|----|----|-----------|-----------|-------------------|-----|---|---|-----|-----|---------------|------------------------|----------|
| Pat_08 | Pre-Treatment | VIL1      | 7429   | 37 | 2  | 219296642 | 219296642 | Missense_Mutation | SNP | C | A | 11  | 32  | c.1165C>A     | c.(1165-1167)CAG>AAG   | p.Q389K  |
| Pat_08 | Pre-Treatment | SPHKAP    | 80309  | 37 | 2  | 228855801 | 228855801 | Missense_Mutation | SNP | C | T | 30  | 44  | c.4874G>A     | c.(4873-4875)CGA>CAA   | p.R1625Q |
| Pat_08 | Pre-Treatment | CHRND     | 1144   | 37 | 2  | 233399978 | 233399978 | Missense_Mutation | SNP | G | A | 44  | 80  | c.1510G>A     | c.(1510-1512)GGG>AGG   | p.G504R  |
| Pat_08 | Pre-Treatment | CHRNA2    | 1146   | 37 | 2  | 233408401 | 233408401 | Missense_Mutation | SNP | G | A | 16  | 33  | c.1027G>A     | c.(1027-1029)GTC>ATC   | p.V343I  |
| Pat_08 | Pre-Treatment | C2orf85   | 285093 | 37 | 2  | 242813940 | 242813940 | Missense_Mutation | SNP | G | A | 6   | 5   | c.233G>A      | c.(232-234)AGG>AAG     | p.R78K   |
| Pat_08 | Pre-Treatment | PTPRT     | 11122  | 37 | 20 | 41306649  | 41306649  | Missense_Mutation | SNP | G | A | 70  | 120 | c.1010C>T     | c.(1009-1011)ACC>ATC   | p.T337I  |
| Pat_08 | Pre-Treatment | CDH22     | 64405  | 37 | 20 | 44869692  | 44869692  | Missense_Mutation | SNP | A | G | 30  | 81  | c.460T>C      | c.(460-462)TTC>CTC     | p.F154L  |
| Pat_08 | Pre-Treatment | TPTE      | 7179   | 37 | 21 | 11012916  | 11012916  | Splice_Site       | SNP | C | A | 12  | 18  | c.1704_splice | c.e9+1                 |          |
| Pat_08 | Pre-Treatment | SH3BGR    | 6450   | 37 | 21 | 40883698  | 40883698  | Missense_Mutation | SNP | C | T | 13  | 24  | c.716C>T      | c.(715-717)TCC>TTC     | p.S239F  |
| Pat_08 | Pre-Treatment | DSCAM     | 1826   | 37 | 21 | 41452217  | 41452217  | Missense_Mutation | SNP | G | A | 40  | 55  | c.4282C>T     | c.(4282-4284)CCA>TCA   | p.P1428S |
| Pat_08 | Pre-Treatment | SLC37A1   | 54020  | 37 | 21 | 43963662  | 43963662  | Missense_Mutation | SNP | G | A | 53  | 77  | c.680G>A      | c.(679-681)GGA>GAA     | p.G227E  |
| Pat_08 | Pre-Treatment | KRTAP10-6 | 386674 | 37 | 21 | 46011918  | 46011918  | Missense_Mutation | SNP | G | A | 57  | 278 | c.448C>T      | c.(448-450)CCC>TCC     | p.P150S  |
| Pat_08 | Pre-Treatment | RTN4R     | 65078  | 37 | 22 | 20230526  | 20230526  | Missense_Mutation | SNP | G | A | 14  | 32  | c.130C>T      | c.(130-132)CCC>TCC     | p.P44S   |
| Pat_08 | Pre-Treatment | AP1B1     | 162    | 37 | 22 | 29727834  | 29727834  | Missense_Mutation | SNP | G | A | 23  | 65  | c.2381C>T     | c.(2380-2382)TCC>TTC   | p.S794F  |
| Pat_08 | Pre-Treatment | LARGE     | 9215   | 37 | 22 | 34046453  | 34046453  | Missense_Mutation | SNP | G | A | 74  | 72  | c.308C>T      | c.(307-309)TCC>TTC     | p.S103F  |
| Pat_08 | Pre-Treatment | CYP2D7P1  | 1564   | 37 | 22 | 42537597  | 42537597  | Missense_Mutation | SNP | A | G | 15  | 48  | c.662T>C      | c.(661-663)TTG>TCG     | p.L221S  |
| Pat_08 | Pre-Treatment | NUP210    | 23225  | 37 | 3  | 13370433  | 13370433  | Missense_Mutation | SNP | G | A | 11  | 27  | c.4124C>T     | c.(4123-4125)TCC>TTC   | p.S1375F |
| Pat_08 | Pre-Treatment | FGD5      | 152273 | 37 | 3  | 14862578  | 14862578  | Missense_Mutation | SNP | A | G | 17  | 46  | c.2000A>G     | c.(1999-2001)AAC>AGC   | p.N667S  |
| Pat_08 | Pre-Treatment | UBP1      | 7342   | 37 | 3  | 33453119  | 33453119  | Missense_Mutation | SNP | A | G | 97  | 180 | c.509T>C      | c.(508-510)GTT>GCT     | p.V170A  |
| Pat_08 | Pre-Treatment | TRANK1    | 9881   | 37 | 3  | 36874752  | 36874752  | Missense_Mutation | SNP | C | T | 28  | 49  | c.4540G>A     | c.(4540-4542)GAA>AAA   | p.E1514K |
| Pat_08 | Pre-Treatment | LRRFIP2   | 9209   | 37 | 3  | 37150142  | 37150142  | Missense_Mutation | SNP | A | G | 97  | 137 | c.643T>C      | c.(643-645)TAT>CAT     | p.Y215H  |
| Pat_08 | Pre-Treatment | HHATL     | 57467  | 37 | 3  | 42735116  | 42735116  | Missense_Mutation | SNP | C | T | 15  | 29  | c.1241G>A     | c.(1240-1242)CGA>CAA   | p.R414Q  |
| Pat_08 | Pre-Treatment | RHOA      | 387    | 37 | 3  | 49405936  | 49405936  | Missense_Mutation | SNP | G | A | 56  | 68  | c.202C>T      | c.(202-204)CGC>TGC     | p.R68C   |
| Pat_08 | Pre-Treatment | CACNA1D   | 776    | 37 | 3  | 53766925  | 53766925  | Missense_Mutation | SNP | A | T | 27  | 52  | c.2557A>T     | c.(2557-2559)ATG>TTG   | p.M853L  |
| Pat_08 | Pre-Treatment | C3orf26   | 84319  | 37 | 3  | 99536869  | 99536869  | Missense_Mutation | SNP | G | A | 38  | 50  | c.46G>A       | c.(46-48)GGA>AGA       | p.G16R   |
| Pat_08 | Pre-Treatment | FBXO40    | 51725  | 37 | 3  | 121345753 | 121345753 | Missense_Mutation | SNP | C | T | 20  | 22  | c.2126C>T     | c.(2125-2127)TCC>TTC   | p.S709F  |
| Pat_08 | Pre-Treatment | SLC15A2   | 6565   | 37 | 3  | 121613396 | 121613396 | Nonsense_Mutation | SNP | C | T | 154 | 276 | c.73C>T       | c.(73-75)CGA>TGA       | p.R25*   |
| Pat_08 | Pre-Treatment | MECOM     | 2122   | 37 | 3  | 168838897 | 168838897 | Missense_Mutation | SNP | G | A | 37  | 49  | c.515C>T      | c.(514-516)TCG>TTG     | p.S172L  |
| Pat_08 | Pre-Treatment | TP63      | 8626   | 37 | 3  | 189455588 | 189455588 | Missense_Mutation | SNP | C | T | 48  | 89  | c.122C>T      | c.(121-123)TCC>TTC     | p.S41F   |
| Pat_08 | Pre-Treatment | TACC3     | 10460  | 37 | 4  | 1730226   | 1730226   | Missense_Mutation | SNP | C | T | 13  | 29  | c.1097C>T     | c.(1096-1098)CCC>CTC   | p.P366L  |
| Pat_08 | Pre-Treatment | UGT2A3    | 79799  | 37 | 4  | 69817123  | 69817123  | Missense_Mutation | SNP | C | T | 18  | 17  | c.356G>A      | c.(355-357)GGA>GAA     | p.G119E  |
| Pat_08 | Pre-Treatment | PARM1     | 25849  | 37 | 4  | 75938040  | 75938040  | Missense_Mutation | SNP | C | T | 99  | 195 | c.449C>T      | c.(448-450)TCC>TTC     | p.S150F  |
| Pat_08 | Pre-Treatment | NAA11     | 84779  | 37 | 4  | 80246759  | 80246759  | Missense_Mutation | SNP | C | T | 15  | 18  | c.273G>A      | c.(271-273)ATG>ATA     | p.M91I   |
| Pat_08 | Pre-Treatment | ARHGAP24  | 83478  | 37 | 4  | 86863344  | 86863344  | Missense_Mutation | SNP | C | T | 36  | 55  | c.517C>T      | c.(517-519)CTC>TTC     | p.L173F  |
| Pat_08 | Pre-Treatment | IBSP      | 3381   | 37 | 4  | 88732988  | 88732988  | Missense_Mutation | SNP | G | A | 42  | 77  | c.880G>A      | c.(880-882)GAA>AAA     | p.E294K  |
| Pat_08 | Pre-Treatment | FAM190A   | 401145 | 37 | 4  | 91229782  | 91229782  | Missense_Mutation | SNP | C | T | 11  | 27  | c.347C>T      | c.(346-348)TCT>TTT     | p.S116F  |
| Pat_08 | Pre-Treatment | ADH1A     | 124    | 37 | 4  | 100208729 | 100208729 | Missense_Mutation | SNP | G | A | 14  | 41  | c.112C>T      | c.(112-114)CGT>TGT     | p.R38C   |
| Pat_08 | Pre-Treatment | ADH1C     | 126    | 37 | 4  | 100266089 | 100266089 | Missense_Mutation | SNP | G | A | 77  | 154 | c.497C>T      | c.(496-498)CCC>CTC     | p.P166L  |
| Pat_08 | Pre-Treatment | FAT4      | 79633  | 37 | 4  | 126372799 | 126372799 | Missense_Mutation | SNP | C | T | 48  | 96  | c.10628C>T    | c.(10627-10629)CCC>CTC | p.P3543L |
| Pat_08 | Pre-Treatment | PCDH18    | 54510  | 37 | 4  | 138451129 | 138451129 | Missense_Mutation | SNP | G | A | 63  | 127 | c.2114C>T     | c.(2113-2115)TCC>TTC   | p.S705F  |
| Pat_08 | Pre-Treatment | LRBA      | 987    | 37 | 4  | 151837674 | 151837674 | Missense_Mutation | SNP | C | T | 19  | 32  | c.773G>A      | c.(772-774)AGA>AAA     | p.R258K  |
| Pat_08 | Pre-Treatment | FSTL5     | 56884  | 37 | 4  | 162376261 | 162376261 | Missense_Mutation | SNP | C | A | 38  | 57  | c.1736G>T     | c.(1735-1737)GGG>GTG   | p.G579V  |
| Pat_08 | Pre-Treatment | 1-Mar     | 55016  | 37 | 4  | 164507014 | 164507014 | Missense_Mutation | SNP | G | A | 35  | 48  | c.310C>T      | c.(310-312)CGC>TGC     | p.R104C  |
| Pat_08 | Pre-Treatment | ANXA10    | 11199  | 37 | 4  | 169099049 | 169099049 | Nonsense_Mutation | SNP | G | A | 66  | 137 | c.543G>A      | c.(541-543)TGG>TGA     | p.W181*  |
| Pat_08 | Pre-Treatment | GALNT7    | 51809  | 37 | 4  | 174242826 | 174242826 | Missense_Mutation | SNP | A | T | 27  | 40  | c.1932A>T     | c.(1930-1932)AAA>AAT   | p.K644N  |
| Pat_08 | Pre-Treatment | SNX25     | 83891  | 37 | 4  | 186263251 | 186263251 | Missense_Mutation | SNP | T | C | 84  | 112 | c.1676T>C     | c.(1675-1677)TTA>TCA   | p.L559S  |
| Pat_08 | Pre-Treatment | SEMA5A    | 9037   | 37 | 5  | 9197374   | 9197374   | Missense_Mutation | SNP | C | T | 116 | 140 | c.974G>A      | c.(973-975)AGC>AAC     | p.S325N  |

|        |               |          |        |    |   |           |           |                   |     |    |    |    |     |                |                        |               |
|--------|---------------|----------|--------|----|---|-----------|-----------|-------------------|-----|----|----|----|-----|----------------|------------------------|---------------|
| Pat_08 | Pre-Treatment | CTNND2   | 1501   | 37 | 5 | 11732369  | 11732369  | Missense_Mutation | SNP | G  | A  | 36 | 67  | c.53C>T        | c.(52-54)CCA>CTA       | p.P18L        |
| Pat_08 | Pre-Treatment | DNAH5    | 1767   | 37 | 5 | 13754366  | 13754366  | Missense_Mutation | SNP | C  | T  | 62 | 96  | c.10501G>A     | c.(10501-10503)GAA>AAA | p.E3501K      |
| Pat_08 | Pre-Treatment | DNAH5    | 1767   | 37 | 5 | 13823476  | 13823476  | Missense_Mutation | SNP | C  | T  | 15 | 20  | c.6583G>A      | c.(6583-6585)GAT>AAT   | p.D2195N      |
| Pat_08 | Pre-Treatment | CDH18    | 1016   | 37 | 5 | 19571761  | 19571761  | Missense_Mutation | SNP | C  | T  | 65 | 90  | c.1180G>A      | c.(1180-1182)GAA>AAA   | p.E394K       |
| Pat_08 | Pre-Treatment | RAI14    | 26064  | 37 | 5 | 34814746  | 34814746  | Missense_Mutation | SNP | C  | T  | 63 | 90  | c.911C>T       | c.(910-912)TCG>TTG     | p.S304L       |
| Pat_08 | Pre-Treatment | UGT3A1   | 133688 | 37 | 5 | 35965946  | 35965946  | Missense_Mutation | SNP | C  | T  | 28 | 32  | c.385G>A       | c.(385-387)GAT>AAT     | p.D129N       |
| Pat_08 | Pre-Treatment | SLC1A3   | 6507   | 37 | 5 | 36686171  | 36686171  | Missense_Mutation | SNP | C  | T  | 21 | 56  | c.1429C>T      | c.(1429-1431)CGC>TGC   | p.R477C       |
| Pat_08 | Pre-Treatment | RAB3C    | 115827 | 37 | 5 | 57913641  | 57913641  | Missense_Mutation | SNP | G  | A  | 15 | 20  | c.196G>A       | c.(196-198)GAT>AAT     | p.D66N        |
| Pat_08 | Pre-Treatment | ADAMTS6  | 11174  | 37 | 5 | 64483859  | 64483859  | Missense_Mutation | SNP | G  | A  | 61 | 86  | c.2894C>T      | c.(2893-2895)GCT>GTT   | p.A965V       |
| Pat_08 | Pre-Treatment | GPR98    | 84059  | 37 | 5 | 89949415  | 89949415  | Missense_Mutation | SNP | C  | T  | 11 | 21  | c.4024C>T      | c.(4024-4026)CCA>TCA   | p.P1342S      |
| Pat_08 | Pre-Treatment | TSSK1B   | 83942  | 37 | 5 | 112770218 | 112770218 | Missense_Mutation | SNP | C  | T  | 21 | 24  | c.319G>A       | c.(319-321)GCC>ACC     | p.A107T       |
| Pat_08 | Pre-Treatment | ADAMTS19 | 171019 | 37 | 5 | 128863489 | 128863489 | Missense_Mutation | SNP | C  | T  | 74 | 26  | c.1117C>T      | c.(1117-1119)CGT>TGT   | p.R373C       |
| Pat_08 | Pre-Treatment | FSTL4    | 23105  | 37 | 5 | 132652260 | 132652260 | Missense_Mutation | SNP | C  | T  | 24 | 12  | c.494G>A       | c.(493-495)GGA>GAA     | p.G165E       |
| Pat_08 | Pre-Treatment | PPP2R2B  | 5521   | 37 | 5 | 146017937 | 146017937 | Missense_Mutation | SNP | C  | T  | 24 | 63  | c.667G>A       | c.(667-669)GAG>AAG     | p.E223K       |
| Pat_08 | Pre-Treatment | DPYSL3   | 1809   | 37 | 5 | 146781130 | 146781130 | Missense_Mutation | SNP | G  | A  | 13 | 25  | c.941C>T       | c.(940-942)CCG>CTG     | p.P314L       |
| Pat_08 | Pre-Treatment | GABRA6   | 2559   | 37 | 5 | 161115979 | 161115979 | Missense_Mutation | SNP | C  | T  | 80 | 37  | c.250C>T       | c.(250-252)CGC>TGC     | p.R84C        |
| Pat_08 | Pre-Treatment | ODZ2     | 57451  | 37 | 5 | 167622180 | 167622180 | Splice_Site       | SNP | G  | A  | 6  | 19  | c.2754_splice  | c.e15-1                | p.S918_splice |
| Pat_08 | Pre-Treatment | ARL10    | 285598 | 37 | 5 | 175793384 | 175793384 | Missense_Mutation | SNP | C  | T  | 8  | 18  | c.185C>T       | c.(184-186)CCC>CTC     | p.P62L        |
| Pat_08 | Pre-Treatment | RASGEF1C | 255426 | 37 | 5 | 179529070 | 179529070 | Splice_Site       | SNP | C  | T  | 14 | 18  | c.1376_splice  | c.e12+1                | p.R459_splice |
| Pat_08 | Pre-Treatment | MAK      | 4117   | 37 | 6 | 10802187  | 10802187  | Missense_Mutation | SNP | C  | T  | 45 | 215 | c.769G>A       | c.(769-771)GCT>ACT     | p.A257T       |
| Pat_08 | Pre-Treatment | SCAND3   | 114821 | 37 | 6 | 28539827  | 28539828  | Missense_Mutation | DNP | CC | TT | 26 | 91  | c.3838_3839G>A | c.(3838-3840)GGA>AAA   | p.G1280K      |
| Pat_08 | Pre-Treatment | SCAND3   | 114821 | 37 | 6 | 28540785  | 28540785  | Missense_Mutation | SNP | C  | T  | 14 | 35  | c.2881G>A      | c.(2881-2883)GAA>AAA   | p.E961K       |
| Pat_08 | Pre-Treatment | OR2J2    | 26707  | 37 | 6 | 29141910  | 29141910  | Nonsense_Mutation | SNP | G  | A  | 76 | 219 | c.498G>A       | c.(496-498)TGG>TGA     | p.W166*       |
| Pat_08 | Pre-Treatment | DDR1     | 780    | 37 | 6 | 30860230  | 30860230  | Missense_Mutation | SNP | C  | T  | 28 | 71  | c.1010C>T      | c.(1009-1011)CCC>CTC   | p.P337L       |
| Pat_08 | Pre-Treatment | TNXB     | 7148   | 37 | 6 | 32026008  | 32026008  | Missense_Mutation | SNP | G  | A  | 35 | 92  | c.7652C>T      | c.(7651-7653)TCC>TTC   | p.S2551F      |
| Pat_08 | Pre-Treatment | HLA-DRA  | 3122   | 37 | 6 | 32410472  | 32410472  | Splice_Site       | SNP | T  | C  | 79 | 201 | c.328_splice   | c.e2+2                 | p.V110_splice |
| Pat_08 | Pre-Treatment | COL11A2  | 1302   | 37 | 6 | 33136737  | 33136737  | Missense_Mutation | SNP | G  | A  | 95 | 291 | c.3847C>T      | c.(3847-3849)CCT>TCT   | p.P1283S      |
| Pat_08 | Pre-Treatment | IP6K3    | 117283 | 37 | 6 | 33690517  | 33690517  | Missense_Mutation | SNP | C  | T  | 50 | 161 | c.1213G>A      | c.(1213-1215)GAT>AAT   | p.D405N       |
| Pat_08 | Pre-Treatment | GLP1R    | 2740   | 37 | 6 | 39047471  | 39047471  | Missense_Mutation | SNP | C  | T  | 25 | 90  | c.1175C>T      | c.(1174-1176)TCC>TTC   | p.S392F       |
| Pat_08 | Pre-Treatment | TREML4   | 285852 | 37 | 6 | 41196525  | 41196525  | Missense_Mutation | SNP | G  | A  | 38 | 143 | c.137G>A       | c.(136-138)AGA>AAA     | p.R46K        |
| Pat_08 | Pre-Treatment | TDRD6    | 221400 | 37 | 6 | 46659190  | 46659190  | Nonsense_Mutation | SNP | G  | T  | 77 | 203 | c.3325G>T      | c.(3325-3327)GAA>TAA   | p.E1109*      |
| Pat_08 | Pre-Treatment | GPR115   | 221393 | 37 | 6 | 47681873  | 47681873  | Missense_Mutation | SNP | T  | G  | 36 | 39  | c.892T>G       | c.(892-894)TTG>GTG     | p.L298V       |
| Pat_08 | Pre-Treatment | FAM83B   | 222584 | 37 | 6 | 54735196  | 54735196  | Missense_Mutation | SNP | G  | A  | 62 | 159 | c.152G>A       | c.(151-153)CGA>CAA     | p.R51Q        |
| Pat_08 | Pre-Treatment | GFRAL    | 389400 | 37 | 6 | 55196641  | 55196641  | Missense_Mutation | SNP | G  | A  | 32 | 71  | c.151G>A       | c.(151-153)GAT>AAT     | p.D51N        |
| Pat_08 | Pre-Treatment | KIAA1586 | 57691  | 37 | 6 | 56919090  | 56919090  | Missense_Mutation | SNP | T  | G  | 26 | 46  | c.1793T>G      | c.(1792-1794)TTT>TGT   | p.F598C       |
| Pat_08 | Pre-Treatment | COL9A1   | 1297   | 37 | 6 | 70961981  | 70961981  | Missense_Mutation | SNP | C  | T  | 47 | 53  | c.1802G>A      | c.(1801-1803)GGA>GAA   | p.G601E       |
| Pat_08 | Pre-Treatment | COL9A1   | 1297   | 37 | 6 | 70984435  | 70984435  | Missense_Mutation | SNP | G  | A  | 30 | 39  | c.1016C>T      | c.(1015-1017)TCA>TTA   | p.S339L       |
| Pat_08 | Pre-Treatment | RIMS1    | 22999  | 37 | 6 | 73110352  | 73110352  | Missense_Mutation | SNP | T  | C  | 63 | 120 | c.5015T>C      | c.(5014-5016)CTC>CCC   | p.L1672P      |
| Pat_08 | Pre-Treatment | EEF1A1   | 1915   | 37 | 6 | 74229701  | 74229701  | Missense_Mutation | SNP | C  | T  | 46 | 53  | c.49G>A        | c.(49-51)GAT>AAT       | p.D17N        |
| Pat_08 | Pre-Treatment | CNR1     | 1268   | 37 | 6 | 88854819  | 88854819  | Nonsense_Mutation | SNP | G  | A  | 13 | 18  | c.175C>T       | c.(175-177)CAA>TAA     | p.Q59*        |
| Pat_08 | Pre-Treatment | MCHR2    | 84539  | 37 | 6 | 100382356 | 100382356 | Missense_Mutation | SNP | G  | A  | 24 | 41  | c.625C>T       | c.(625-627)CCT>TCT     | p.P209S       |
| Pat_08 | Pre-Treatment | RFX6     | 222546 | 37 | 6 | 117249966 | 117249966 | Missense_Mutation | SNP | G  | A  | 76 | 124 | c.2443G>A      | c.(2443-2445)GGA>AGA   | p.G815R       |
| Pat_08 | Pre-Treatment | C6orf204 | 387119 | 37 | 6 | 118801656 | 118801656 | Missense_Mutation | SNP | C  | T  | 34 | 52  | c.1766G>A      | c.(1765-1767)AGA>AAA   | p.R589K       |
| Pat_08 | Pre-Treatment | RSPO3    | 84870  | 37 | 6 | 127476496 | 127476496 | Missense_Mutation | SNP | C  | T  | 39 | 58  | c.547C>T       | c.(547-549)CCT>TCT     | p.P183S       |
| Pat_08 | Pre-Treatment | PTPRK    | 5796   | 37 | 6 | 128388791 | 128388791 | Missense_Mutation | SNP | C  | T  | 63 | 115 | c.2030G>A      | c.(2029-2031)GGA>GAA   | p.G677E       |
| Pat_08 | Pre-Treatment | L3MBTL3  | 84456  | 37 | 6 | 130425708 | 130425708 | Missense_Mutation | SNP | C  | T  | 58 | 91  | c.1874C>T      | c.(1873-1875)TCC>TTC   | p.S625F       |
| Pat_08 | Pre-Treatment | SAMD3    | 154075 | 37 | 6 | 130465798 | 130465798 | Missense_Mutation | SNP | C  | T  | 38 | 59  | c.1430G>A      | c.(1429-1431)AGG>AAG   | p.R477K       |



|        |               |          |        |    |   |           |           |                   |     |   |   |     |     |            |                        |          |
|--------|---------------|----------|--------|----|---|-----------|-----------|-------------------|-----|---|---|-----|-----|------------|------------------------|----------|
| Pat_08 | Pre-Treatment | ALDH8A1  | 64577  | 37 | 6 | 135239986 | 135239986 | Missense_Mutation | SNP | C | T | 84  | 123 | c.1031G>A  | c.(1030-1032)AGA>AAA   | p.R344K  |
| Pat_08 | Pre-Treatment | TIAM2    | 26230  | 37 | 6 | 155450436 | 155450436 | Missense_Mutation | SNP | C | T | 33  | 62  | c.79C>T    | c.(79-81)CCT>TCT       | p.P27S   |
| Pat_08 | Pre-Treatment | ARID1B   | 57492  | 37 | 6 | 157522541 | 157522541 | Missense_Mutation | SNP | G | A | 119 | 168 | c.4759G>A  | c.(4759-4761)GAG>AAG   | p.E1587K |
| Pat_08 | Pre-Treatment | MLLT4    | 4301   | 37 | 6 | 168370511 | 168370511 | Missense_Mutation | SNP | T | A | 16  | 15  | c.5401T>A  | c.(5401-5403)TTC>ATC   | p.F1801I |
| Pat_08 | Pre-Treatment | INTS1    | 26173  | 37 | 7 | 1513911   | 1513911   | Missense_Mutation | SNP | A | G | 17  | 79  | c.5722T>C  | c.(5722-5724)TTC>CTC   | p.F1908L |
| Pat_08 | Pre-Treatment | SDK1     | 221935 | 37 | 7 | 4107511   | 4107511   | Missense_Mutation | SNP | G | A | 12  | 34  | c.2953G>A  | c.(2953-2955)GAC>AAC   | p.D985N  |
| Pat_08 | Pre-Treatment | STK31    | 56164  | 37 | 7 | 23776524  | 23776524  | Missense_Mutation | SNP | G | A | 13  | 52  | c.844G>A   | c.(844-846)GAA>AAA     | p.E282K  |
| Pat_08 | Pre-Treatment | HOXA4    | 3201   | 37 | 7 | 27168950  | 27168950  | Missense_Mutation | SNP | G | A | 42  | 188 | c.857C>T   | c.(856-858)TCG>TTG     | p.S286L  |
| Pat_08 | Pre-Treatment | HECW1    | 23072  | 37 | 7 | 43351600  | 43351600  | Missense_Mutation | SNP | C | T | 27  | 92  | c.266C>T   | c.(265-267)TCC>TTC     | p.S89F   |
| Pat_08 | Pre-Treatment | VOPP1    | 81552  | 37 | 7 | 55540681  | 55540681  | Missense_Mutation | SNP | G | A | 11  | 44  | c.386C>T   | c.(385-387)CCT>CTT     | p.P129L  |
| Pat_08 | Pre-Treatment | ZNF679   | 168417 | 37 | 7 | 63726958  | 63726958  | Missense_Mutation | SNP | G | A | 18  | 68  | c.947G>A   | c.(946-948)AGA>AAA     | p.R316K  |
| Pat_08 | Pre-Treatment | WBCSCR17 | 64409  | 37 | 7 | 71177084  | 71177084  | Missense_Mutation | SNP | C | T | 35  | 95  | c.1750C>T  | c.(1750-1752)CGC>TGC   | p.R584C  |
| Pat_08 | Pre-Treatment | PCLO     | 27445  | 37 | 7 | 82544688  | 82544688  | Missense_Mutation | SNP | G | A | 7   | 16  | c.12614C>T | c.(12613-12615)CCT>CTT | p.P4205L |
| Pat_08 | Pre-Treatment | GRM3     | 2913   | 37 | 7 | 86394514  | 86394514  | Missense_Mutation | SNP | G | A | 52  | 137 | c.53G>A    | c.(52-54)GGA>GAA       | p.G18E   |
| Pat_08 | Pre-Treatment | STEAP4   | 79689  | 37 | 7 | 87911999  | 87911999  | Missense_Mutation | SNP | C | T | 22  | 100 | c.941G>A   | c.(940-942)CGA>CAA     | p.R314Q  |
| Pat_08 | Pre-Treatment | DYNC111  | 1780   | 37 | 7 | 95662058  | 95662058  | Missense_Mutation | SNP | G | A | 68  | 206 | c.1247G>A  | c.(1246-1248)TGT>TAT   | p.C416Y  |
| Pat_08 | Pre-Treatment | BAIAP2L1 | 55971  | 37 | 7 | 97991713  | 97991713  | Missense_Mutation | SNP | C | T | 34  | 108 | c.83G>A    | c.(82-84)CGA>CAA       | p.R28Q   |
| Pat_08 | Pre-Treatment | ACHE     | 43     | 37 | 7 | 100491517 | 100491517 | Missense_Mutation | SNP | C | T | 96  | 255 | c.337G>A   | c.(337-339)GGC>AGC     | p.G113S  |
| Pat_08 | Pre-Treatment | CFTR     | 1080   | 37 | 7 | 117175443 | 117175443 | Missense_Mutation | SNP | G | A | 27  | 76  | c.721G>A   | c.(721-723)GGG>AGG     | p.G241R  |
| Pat_08 | Pre-Treatment | KCND2    | 3751   | 37 | 7 | 119914743 | 119914743 | Nonsense_Mutation | SNP | G | A | 58  | 174 | c.57G>A    | c.(55-57)TGG>TGA       | p.W19*   |
| Pat_08 | Pre-Treatment | RNF148   | 378925 | 37 | 7 | 122342384 | 122342384 | Missense_Mutation | SNP | G | A | 357 | 365 | c.421C>T   | c.(421-423)CCC>TCC     | p.P141S  |
| Pat_08 | Pre-Treatment | TSGA14   | 95681  | 37 | 7 | 130041725 | 130041725 | Missense_Mutation | SNP | T | A | 44  | 99  | c.639A>T   | c.(637-639)GAA>GAT     | p.E213D  |
| Pat_08 | Pre-Treatment | TRIM24   | 8805   | 37 | 7 | 138266508 | 138266508 | Missense_Mutation | SNP | C | T | 32  | 97  | c.2785C>T  | c.(2785-2787)CCT>TCT   | p.P929S  |
| Pat_08 | Pre-Treatment | BRAF     | 673    | 37 | 7 | 140453136 | 140453136 | Missense_Mutation | SNP | A | T | 115 | 92  | c.1799T>A  | c.(1798-1800)GTG>GAG   | p.V600E  |
| Pat_08 | Pre-Treatment | TAS2R38  | 5726   | 37 | 7 | 141672855 | 141672855 | Missense_Mutation | SNP | G | A | 31  | 32  | c.635C>T   | c.(634-636)TCT>TTT     | p.S212F  |
| Pat_08 | Pre-Treatment | TRPV6    | 55503  | 37 | 7 | 142574981 | 142574981 | Missense_Mutation | SNP | C | T | 53  | 162 | c.401G>A   | c.(400-402)CGA>CAA     | p.R134Q  |
| Pat_08 | Pre-Treatment | TRPV5    | 56302  | 37 | 7 | 142625242 | 142625242 | Missense_Mutation | SNP | C | T | 33  | 95  | c.850G>A   | c.(850-852)GAC>AAC     | p.D284N  |
| Pat_08 | Pre-Treatment | CLCN1    | 1180   | 37 | 7 | 143018840 | 143018840 | Missense_Mutation | SNP | C | T | 53  | 107 | c.595C>T   | c.(595-597)CGT>TGT     | p.R199C  |
| Pat_08 | Pre-Treatment | OR2F1    | 26211  | 37 | 7 | 143657859 | 143657859 | Missense_Mutation | SNP | C | A | 26  | 85  | c.796C>A   | c.(796-798)CCC>ACC     | p.P266T  |
| Pat_08 | Pre-Treatment | ABP1     | 26     | 37 | 7 | 150554027 | 150554027 | Missense_Mutation | SNP | G | A | 38  | 103 | c.469G>A   | c.(469-471)GAA>AAA     | p.E157K  |
| Pat_08 | Pre-Treatment | SCARA5   | 286133 | 37 | 8 | 27779754  | 27779754  | Missense_Mutation | SNP | G | A | 7   | 13  | c.250C>T   | c.(250-252)CCG>TCG     | p.P84S   |
| Pat_08 | Pre-Treatment | GSR      | 2936   | 37 | 8 | 30553929  | 30553929  | Missense_Mutation | SNP | A | G | 66  | 129 | c.763T>C   | c.(763-765)TCT>CCT     | p.S255P  |
| Pat_08 | Pre-Treatment | IDO2     | 169355 | 37 | 8 | 39845421  | 39845421  | Missense_Mutation | SNP | G | A | 9   | 28  | c.520G>A   | c.(520-522)GGA>AGA     | p.G174R  |
| Pat_08 | Pre-Treatment | PXDNL    | 137902 | 37 | 8 | 52321700  | 52321700  | Missense_Mutation | SNP | A | T | 7   | 11  | c.2484T>A  | c.(2482-2484)GAT>GAA   | p.D828E  |
| Pat_08 | Pre-Treatment | PXDNL    | 137902 | 37 | 8 | 52412271  | 52412271  | Missense_Mutation | SNP | C | T | 78  | 140 | c.440G>A   | c.(439-441)AGA>AAA     | p.R147K  |
| Pat_08 | Pre-Treatment | RP1      | 6101   | 37 | 8 | 55537568  | 55537568  | Nonsense_Mutation | SNP | C | T | 14  | 29  | c.1126C>T  | c.(1126-1128)CGA>TGA   | p.R376*  |
| Pat_08 | Pre-Treatment | RP1      | 6101   | 37 | 8 | 55538973  | 55538973  | Missense_Mutation | SNP | C | T | 23  | 34  | c.2531C>T  | c.(2530-2532)JCT>TTT   | p.S844F  |
| Pat_08 | Pre-Treatment | TRIM55   | 84675  | 37 | 8 | 67086730  | 67086730  | Nonsense_Mutation | SNP | C | T | 49  | 75  | c.1549C>T  | c.(1549-1551)CAG>TAG   | p.Q517*  |
| Pat_08 | Pre-Treatment | CPA6     | 57094  | 37 | 8 | 68423876  | 68423876  | Missense_Mutation | SNP | T | G | 67  | 85  | c.332A>C   | c.(331-333)GAT>GCT     | p.D111A  |
| Pat_08 | Pre-Treatment | KCNB2    | 9312   | 37 | 8 | 73480001  | 73480001  | Missense_Mutation | SNP | G | A | 59  | 96  | c.32G>A    | c.(31-33)AGG>AAG       | p.R11K   |
| Pat_08 | Pre-Treatment | TRHR     | 7201   | 37 | 8 | 110100064 | 110100064 | Missense_Mutation | SNP | G | A | 44  | 155 | c.323G>A   | c.(322-324)GGA>GAA     | p.G108E  |
| Pat_08 | Pre-Treatment | PKHD1L1  | 93035  | 37 | 8 | 110468517 | 110468517 | Missense_Mutation | SNP | C | T | 25  | 50  | c.6901C>T  | c.(6901-6903)CGC>TGC   | p.R2301C |
| Pat_08 | Pre-Treatment | CSMD3    | 114788 | 37 | 8 | 113326683 | 113326683 | Missense_Mutation | SNP | T | G | 40  | 114 | c.7524A>C  | c.(7522-7524)GAA>GAC   | p.E2508D |
| Pat_08 | Pre-Treatment | CSMD3    | 114788 | 37 | 8 | 113392596 | 113392596 | Missense_Mutation | SNP | G | A | 63  | 192 | c.6121C>T  | c.(6121-6123)CAT>TAT   | p.H2041Y |
| Pat_08 | Pre-Treatment | FER1L6   | 654463 | 37 | 8 | 125061918 | 125061918 | Missense_Mutation | SNP | C | T | 39  | 86  | c.2795C>T  | c.(2794-2796)CCC>CTC   | p.P932L  |
| Pat_08 | Pre-Treatment | COL22A1  | 169044 | 37 | 8 | 139611032 | 139611032 | Missense_Mutation | SNP | C | T | 41  | 98  | c.4295G>A  | c.(4294-4296)GGA>GAA   | p.G1432E |
| Pat_08 | Pre-Treatment | PTPRD    | 5789   | 37 | 9 | 8341129   | 8341129   | Missense_Mutation | SNP | C | T | 72  | 50  | c.5087G>A  | c.(5086-5088)GGA>GAA   | p.G1696E |

|        |                 |          |        |    |   |           |           |                   |     |    |    |     |     |              |                      |          |
|--------|-----------------|----------|--------|----|---|-----------|-----------|-------------------|-----|----|----|-----|-----|--------------|----------------------|----------|
| Pat_08 | Pre-Treatment   | CDKN2A   | 1029   | 37 | 9 | 21971186  | 21971186  | Nonsense_Mutation | SNP | G  | A  | 9   | 5   | c.172C>T     | c.(172-174)CGA>TGA   | p.R58*   |
| Pat_08 | Pre-Treatment   | TAF1L    | 138474 | 37 | 9 | 32633029  | 32633029  | Missense_Mutation | SNP | T  | G  | 45  | 45  | c.2549A>C    | c.(2548-2550)AAA>ACA | p.K850T  |
| Pat_08 | Pre-Treatment   | OR2S2    | 56656  | 37 | 9 | 35957515  | 35957515  | Missense_Mutation | SNP | G  | A  | 74  | 116 | c.581C>T     | c.(580-582)TCC>TTC   | p.S194F  |
| Pat_08 | Pre-Treatment   | FRMPD1   | 22844  | 37 | 9 | 37692715  | 37692716  | Missense_Mutation | DNP | GG | AA | 36  | 67  | c.77_78GG>AA | c.(76-78)CGG>CAA     | p.R26Q   |
| Pat_08 | Pre-Treatment   | FAM75A6  | 389730 | 37 | 9 | 43626820  | 43626820  | Missense_Mutation | SNP | G  | C  | 9   | 22  | c.1867C>G    | c.(1867-1869)CGG>GGG | p.R623G  |
| Pat_08 | Pre-Treatment   | VPS13A   | 23230  | 37 | 9 | 79865130  | 79865130  | Missense_Mutation | SNP | C  | T  | 48  | 101 | c.2155C>T    | c.(2155-2157)CTT>TTT | p.L719F  |
| Pat_08 | Pre-Treatment   | ZNF510   | 22869  | 37 | 9 | 99522622  | 99522622  | Missense_Mutation | SNP | C  | A  | 31  | 71  | c.490G>T     | c.(490-492)GTA>TTA   | p.V164L  |
| Pat_08 | Pre-Treatment   | OR13C9   | 286362 | 37 | 9 | 107380278 | 107380278 | Missense_Mutation | SNP | C  | T  | 30  | 57  | c.208G>A     | c.(208-210)GAC>AAC   | p.D70N   |
| Pat_08 | Pre-Treatment   | PTGS1    | 5742   | 37 | 9 | 125133515 | 125133515 | Missense_Mutation | SNP | C  | T  | 28  | 56  | c.58C>T      | c.(58-60)CCC>TCC     | p.P20S   |
| Pat_08 | Pre-Treatment   | NUP188   | 23511  | 37 | 9 | 131755873 | 131755873 | Nonsense_Mutation | SNP | C  | T  | 62  | 134 | c.2917C>T    | c.(2917-2919)CGA>TGA | p.R973*  |
| Pat_08 | Pre-Treatment   | BAT2L1   | 84726  | 37 | 9 | 134350643 | 134350643 | Missense_Mutation | SNP | C  | T  | 9   | 28  | c.3127C>T    | c.(3127-3129)CCC>TCC | p.P1043S |
| Pat_08 | Pre-Treatment   | SURF6    | 6838   | 37 | 9 | 136200589 | 136200589 | Nonsense_Mutation | SNP | G  | A  | 31  | 44  | c.358C>T     | c.(358-360)CGA>TGA   | p.R120*  |
| Pat_08 | Pre-Treatment   | LCN10    | 414332 | 37 | 9 | 139636409 | 139636409 | Missense_Mutation | SNP | C  | T  | 13  | 19  | c.181G>A     | c.(181-183)GAC>AAC   | p.D61N   |
| Pat_08 | Pre-Treatment   | MXRA5    | 25878  | 37 | X | 3240874   | 3240874   | Missense_Mutation | SNP | G  | A  | 17  | 33  | c.2852C>T    | c.(2851-2853)TCG>TTG | p.S951L  |
| Pat_08 | Pre-Treatment   | AMELX    | 265    | 37 | X | 11312955  | 11312955  | Missense_Mutation | SNP | C  | T  | 85  | 173 | c.47C>T      | c.(46-48)GCC>GTC     | p.A16V   |
| Pat_08 | Pre-Treatment   | PIGA     | 5277   | 37 | X | 15342966  | 15342966  | Missense_Mutation | SNP | G  | A  | 17  | 56  | c.1009C>T    | c.(1009-1011)CCT>TCT | p.P337S  |
| Pat_08 | Pre-Treatment   | YY2      | 404281 | 37 | X | 21871579  | 21871579  | Missense_Mutation | SNP | C  | A  | 117 | 283 | c.628C>A     | c.(628-630)CAA>AAA   | p.Q210K  |
| Pat_08 | Pre-Treatment   | MAGEB18  | 286514 | 37 | X | 26157607  | 26157607  | Missense_Mutation | SNP | C  | T  | 9   | 14  | c.505C>T     | c.(505-507)CCC>TCC   | p.P169S  |
| Pat_08 | Pre-Treatment   | OTC      | 5009   | 37 | X | 38212012  | 38212012  | Missense_Mutation | SNP | G  | A  | 44  | 75  | c.63G>A      | c.(61-63)ATG>ATA     | p.M21I   |
| Pat_08 | Pre-Treatment   | CXorf38  | 159013 | 37 | X | 40496317  | 40496317  | Missense_Mutation | SNP | A  | T  | 48  | 85  | c.563T>A     | c.(562-564)TTT>TAT   | p.F188Y  |
| Pat_08 | Pre-Treatment   | MTMR8    | 55613  | 37 | X | 63555965  | 63555965  | Missense_Mutation | SNP | G  | A  | 38  | 66  | c.1145C>T    | c.(1144-1146)TCC>TTC | p.S382F  |
| Pat_08 | Pre-Treatment   | EDA      | 1896   | 37 | X | 69247866  | 69247866  | Missense_Mutation | SNP | C  | A  | 8   | 8   | c.686C>A     | c.(685-687)CCT>CAT   | p.P229H  |
| Pat_08 | Pre-Treatment   | KIAA2022 | 340533 | 37 | X | 73960184  | 73960184  | Missense_Mutation | SNP | C  | T  | 94  | 176 | c.4208G>A    | c.(4207-4209)GGG>GAG | p.G1403E |
| Pat_08 | Pre-Treatment   | LPAR4    | 2846   | 37 | X | 78010473  | 78010473  | Missense_Mutation | SNP | C  | T  | 119 | 222 | c.107C>T     | c.(106-108)TCC>TTC   | p.S36F   |
| Pat_08 | Pre-Treatment   | APOOL    | 139322 | 37 | X | 84310875  | 84310875  | Missense_Mutation | SNP | C  | T  | 13  | 19  | c.338C>T     | c.(337-339)CCG>CTG   | p.P113L  |
| Pat_08 | Pre-Treatment   | KLHL4    | 56062  | 37 | X | 86880629  | 86880629  | Missense_Mutation | SNP | C  | T  | 28  | 78  | c.1157C>T    | c.(1156-1158)ACC>ATC | p.T386I  |
| Pat_08 | Pre-Treatment   | CXorf57  | 55086  | 37 | X | 105912404 | 105912404 | Missense_Mutation | SNP | G  | A  | 155 | 349 | c.2281G>A    | c.(2281-2283)GAG>AAG | p.E761K  |
| Pat_08 | Pre-Treatment   | TEX13B   | 56156  | 37 | X | 107225012 | 107225012 | Missense_Mutation | SNP | C  | T  | 104 | 220 | c.346G>A     | c.(346-348)GAA>AAA   | p.E116K  |
| Pat_08 | Pre-Treatment   | KIAA1210 | 57481  | 37 | X | 118222570 | 118222570 | Missense_Mutation | SNP | G  | A  | 13  | 25  | c.2623C>T    | c.(2623-2625)CTC>TTC | p.L875F  |
| Pat_08 | Pre-Treatment   | ELF4     | 2000   | 37 | X | 129215252 | 129215252 | Missense_Mutation | SNP | C  | T  | 121 | 251 | c.53G>A      | c.(52-54)GGG>GAG     | p.G18E   |
| Pat_08 | Pre-Treatment   | IGSF1    | 3547   | 37 | X | 130419321 | 130419321 | Missense_Mutation | SNP | C  | T  | 61  | 129 | c.499G>A     | c.(499-501)GGA>AGA   | p.G167R  |
| Pat_08 | Pre-Treatment   | MAGEC1   | 9947   | 37 | X | 140994505 | 140994505 | Missense_Mutation | SNP | C  | T  | 34  | 91  | c.1315C>T    | c.(1315-1317)CCC>TCC | p.P439S  |
| Pat_08 | Pre-Treatment   | FMR1     | 2332   | 37 | X | 147026391 | 147026391 | Missense_Mutation | SNP | A  | G  | 11  | 22  | c.1474A>G    | c.(1474-1476)ACT>GCT | p.T492A  |
| Pat_08 | Pre-Treatment   | MAGEA4   | 4103   | 37 | X | 151092719 | 151092719 | Nonsense_Mutation | SNP | C  | T  | 53  | 66  | c.583C>T     | c.(583-585)CAG>TAG   | p.Q195*  |
| Pat_08 | Pre-Treatment   | MAGEA3   | 4102   | 37 | X | 151935383 | 151935383 | Missense_Mutation | SNP | G  | A  | 57  | 137 | c.784C>T     | c.(784-786)CCC>TCC   | p.P262S  |
| Pat_08 | Pre-Treatment   | PLXNA3   | 55558  | 37 | X | 153697535 | 153697535 | Missense_Mutation | SNP | C  | T  | 27  | 97  | c.4571C>T    | c.(4570-4572)CCC>CTC | p.P1524L |
| Pat_08 | Pre-Treatment   | F8       | 2157   | 37 | X | 154132258 | 154132258 | Missense_Mutation | SNP | G  | A  | 93  | 128 | c.5921C>T    | c.(5920-5922)JCT>TTT | p.S1974F |
| Pat_08 | Pre-Treatment   | TMLHE    | 55217  | 37 | X | 154736697 | 154736697 | Missense_Mutation | SNP | G  | A  | 94  | 138 | c.857C>T     | c.(856-858)CCT>CTT   | p.P286L  |
| Pat_08 | Post-Resistance | ACAP3    | 116983 | 37 | 1 | 1230911   | 1230911   | Missense_Mutation | SNP | G  | A  | 26  | 44  | c.1729C>T    | c.(1729-1731)CGC>TGC | p.R577C  |
| Pat_08 | Post-Resistance | PANK4    | 55229  | 37 | 1 | 2452281   | 2452281   | Missense_Mutation | SNP | G  | A  | 46  | 81  | c.487C>T     | c.(487-489)CCC>TCC   | p.P163S  |
| Pat_08 | Post-Resistance | PIK3CD   | 5293   | 37 | 1 | 9778878   | 9778878   | Missense_Mutation | SNP | G  | A  | 5   | 214 | c.1147G>A    | c.(1147-1149)GAC>AAC | p.D383N  |
| Pat_08 | Post-Resistance | UBE4B    | 10277  | 37 | 1 | 10211599  | 10211599  | Missense_Mutation | SNP | C  | T  | 68  | 136 | c.2906C>T    | c.(2905-2907)TCC>TTC | p.S969F  |
| Pat_08 | Post-Resistance | PRAMEF11 | 440560 | 37 | 1 | 12885059  | 12885059  | Missense_Mutation | SNP | C  | G  | 6   | 334 | c.1052G>C    | c.(1051-1053)TGC>TCC | p.C351S  |
| Pat_08 | Post-Resistance | PRAMEF8  | 391002 | 37 | 1 | 12979691  | 12979691  | Missense_Mutation | SNP | G  | A  | 132 | 489 | c.883G>A     | c.(883-885)GAG>AAG   | p.E295K  |
| Pat_08 | Post-Resistance | FBLIM1   | 54751  | 37 | 1 | 16093982  | 16093982  | Missense_Mutation | SNP | C  | T  | 14  | 26  | c.362C>T     | c.(361-363)GCT>GTT   | p.A121V  |
| Pat_08 | Post-Resistance | MST1P9   | 11223  | 37 | 1 | 17085872  | 17085872  | Missense_Mutation | SNP | A  | G  | 5   | 38  | c.949T>C     | c.(949-951)TGG>CGG   | p.W317R  |
| Pat_08 | Post-Resistance | PIGV     | 55650  | 37 | 1 | 27120713  | 27120713  | Missense_Mutation | SNP | T  | C  | 4   | 215 | c.188T>C     | c.(187-189)CTG>CCG   | p.L63P   |

|        |                 |           |        |    |    |           |           |                   |     |   |   |     |     |           |                      |          |
|--------|-----------------|-----------|--------|----|----|-----------|-----------|-------------------|-----|---|---|-----|-----|-----------|----------------------|----------|
| Pat_08 | Post-Resistance | SYTL1     | 84958  | 37 | 1  | 27675626  | 27675626  | Missense_Mutation | SNP | C | T | 4   | 134 | c.515C>T  | c.(514-516)GCG>GTG   | p.A172V  |
| Pat_08 | Post-Resistance | KIAA0754  | 643314 | 37 | 1  | 39879250  | 39879250  | Missense_Mutation | SNP | A | G | 6   | 40  | c.3313A>G | c.(3313-3315)ACC>GCC | p.T1105A |
| Pat_08 | Post-Resistance | BMP8B     | 656    | 37 | 1  | 40226129  | 40226129  | Missense_Mutation | SNP | G | T | 5   | 490 | c.1171C>A | c.(1171-1173)CAC>AAC | p.H391N  |
| Pat_08 | Post-Resistance | KDM4A     | 9682   | 37 | 1  | 44132167  | 44132167  | Missense_Mutation | SNP | C | T | 115 | 208 | c.718C>T  | c.(718-720)CAC>TAC   | p.H240Y  |
| Pat_08 | Post-Resistance | BSND      | 7809   | 37 | 1  | 55472919  | 55472919  | Missense_Mutation | SNP | A | C | 38  | 135 | c.522A>C  | c.(520-522)GAA>GAC   | p.E174D  |
| Pat_08 | Post-Resistance | C1orf168  | 199920 | 37 | 1  | 57216843  | 57216843  | Nonsense_Mutation | SNP | G | A | 31  | 52  | c.1261C>T | c.(1261-1263)CAG>TAG | p.Q421*  |
| Pat_08 | Post-Resistance | C8B       | 732    | 37 | 1  | 57422471  | 57422471  | Missense_Mutation | SNP | C | T | 304 | 554 | c.362G>A  | c.(361-363)CGA>CAA   | p.R121Q  |
| Pat_08 | Post-Resistance | C1orf173  | 127254 | 37 | 1  | 75072512  | 75072512  | Missense_Mutation | SNP | C | T | 101 | 184 | c.1262G>A | c.(1261-1263)GGA>GAA | p.G421E  |
| Pat_08 | Post-Resistance | LPHN2     | 23266  | 37 | 1  | 82409213  | 82409213  | Missense_Mutation | SNP | G | A | 109 | 181 | c.958G>A  | c.(958-960)GTC>ATC   | p.V320I  |
| Pat_08 | Post-Resistance | TGFBR3    | 7049   | 37 | 1  | 92184982  | 92184982  | Missense_Mutation | SNP | G | A | 188 | 318 | c.1453C>T | c.(1453-1455)CCT>TCT | p.P485S  |
| Pat_08 | Post-Resistance | CCDC76    | 54482  | 37 | 1  | 100605978 | 100605978 | Missense_Mutation | SNP | C | T | 29  | 243 | c.409C>T  | c.(409-411)CTT>TTT   | p.L137F  |
| Pat_08 | Post-Resistance | COL11A1   | 1301   | 37 | 1  | 103440405 | 103440405 | Missense_Mutation | SNP | G | A | 37  | 58  | c.2789C>T | c.(2788-2790)CCT>CTT | p.P930L  |
| Pat_08 | Post-Resistance | CELSR2    | 1952   | 37 | 1  | 109806965 | 109806965 | Missense_Mutation | SNP | G | A | 5   | 341 | c.5267G>A | c.(5266-5268)CGT>CAT | p.R1756H |
| Pat_08 | Post-Resistance | MAGI3     | 260425 | 37 | 1  | 114225824 | 114225824 | Missense_Mutation | SNP | G | A | 65  | 99  | c.3634G>A | c.(3634-3636)GAA>AAA | p.E1212K |
| Pat_08 | Post-Resistance | NRAS      | 4893   | 37 | 1  | 115256530 | 115256530 | Missense_Mutation | SNP | G | T | 61  | 567 | c.181C>A  | c.(181-183)CAA>AAA   | p.Q61K   |
| Pat_08 | Post-Resistance | TBX15     | 6913   | 37 | 1  | 119469191 | 119469191 | Missense_Mutation | SNP | G | A | 68  | 134 | c.145C>T  | c.(145-147)CCA>TCA   | p.P49S   |
| Pat_08 | Post-Resistance | NBPF7     | 343505 | 37 | 1  | 120381953 | 120381953 | Missense_Mutation | SNP | T | C | 7   | 646 | c.692A>G  | c.(691-693)TAT>TGT   | p.Y231C  |
| Pat_08 | Post-Resistance | HIST2H2BE | 8349   | 37 | 1  | 149858153 | 149858153 | Missense_Mutation | SNP | T | C | 4   | 212 | c.38A>G   | c.(37-39)AAG>AGG     | p.K13R   |
| Pat_08 | Post-Resistance | CRNN      | 49860  | 37 | 1  | 152382749 | 152382749 | Missense_Mutation | SNP | G | A | 6   | 644 | c.809C>T  | c.(808-810)ACC>ATC   | p.T270I  |
| Pat_08 | Post-Resistance | CRNN      | 49860  | 37 | 1  | 152382770 | 152382770 | Missense_Mutation | SNP | T | C | 6   | 730 | c.788A>G  | c.(787-789)GAC>GGC   | p.D263G  |
| Pat_08 | Post-Resistance | C1orf43   | 25912  | 37 | 1  | 154180066 | 154180066 | Missense_Mutation | SNP | T | C | 93  | 136 | c.625A>G  | c.(625-627)ACT>GCT   | p.T209A  |
| Pat_08 | Post-Resistance | CLK2      | 1196   | 37 | 1  | 155236548 | 155236548 | Missense_Mutation | SNP | C | T | 4   | 180 | c.810G>A  | c.(808-810)ATG>ATA   | p.M270I  |
| Pat_08 | Post-Resistance | RUSC1     | 23623  | 37 | 1  | 155295412 | 155295412 | Missense_Mutation | SNP | C | T | 38  | 70  | c.1763C>T | c.(1762-1764)CCG>CTG | p.P588L  |
| Pat_08 | Post-Resistance | CASQ1     | 844    | 37 | 1  | 160160558 | 160160558 | Missense_Mutation | SNP | G | A | 47  | 79  | c.17G>A   | c.(16-18)AGG>AAG     | p.R6K    |
| Pat_08 | Post-Resistance | C1orf192  | 257177 | 37 | 1  | 161335356 | 161335356 | Missense_Mutation | SNP | A | T | 156 | 291 | c.308T>A  | c.(307-309)CTC>CAC   | p.L103H  |
| Pat_08 | Post-Resistance | DUSP27    | 92235  | 37 | 1  | 167096296 | 167096296 | Missense_Mutation | SNP | T | A | 3   | 39  | c.1928T>A | c.(1927-1929)ATG>AAG | p.M643K  |
| Pat_08 | Post-Resistance | DARS2     | 55157  | 37 | 1  | 173802529 | 173802529 | Missense_Mutation | SNP | C | T | 13  | 16  | c.508C>T  | c.(508-510)CCG>TGG   | p.R170W  |
| Pat_08 | Post-Resistance | KIAA1614  | 57710  | 37 | 1  | 180885295 | 180885295 | Missense_Mutation | SNP | C | T | 32  | 66  | c.56C>T   | c.(55-57)CCC>CTC     | p.P19L   |
| Pat_08 | Post-Resistance | CACNA1E   | 777    | 37 | 1  | 181765951 | 181765951 | Missense_Mutation | SNP | C | T | 15  | 24  | c.6227C>T | c.(6226-6228)TCC>TTC | p.S2076F |
| Pat_08 | Post-Resistance | KIF21B    | 23046  | 37 | 1  | 200945966 | 200945966 | Missense_Mutation | SNP | C | T | 27  | 42  | c.4381G>A | c.(4381-4383)GTC>ATC | p.V1461I |
| Pat_08 | Post-Resistance | LGR6      | 59352  | 37 | 1  | 202276021 | 202276021 | Missense_Mutation | SNP | G | A | 48  | 108 | c.1162G>A | c.(1162-1164)GAA>AAA | p.E388K  |
| Pat_08 | Post-Resistance | PIGR      | 5284   | 37 | 1  | 207110830 | 207110830 | Missense_Mutation | SNP | G | A | 80  | 126 | c.655C>T  | c.(655-657)CTC>TTC   | p.L219F  |
| Pat_08 | Post-Resistance | GPATCH2   | 55105  | 37 | 1  | 217604543 | 217604543 | Missense_Mutation | SNP | G | A | 195 | 304 | c.1531C>T | c.(1531-1533)CCT>TCT | p.P511S  |
| Pat_08 | Post-Resistance | TLR5      | 7100   | 37 | 1  | 223286024 | 223286024 | Missense_Mutation | SNP | C | T | 110 | 195 | c.350G>A  | c.(349-351)GGA>GAA   | p.G117E  |
| Pat_08 | Post-Resistance | PARP1     | 142    | 37 | 1  | 226555964 | 226555964 | Missense_Mutation | SNP | G | A | 6   | 170 | c.2213C>T | c.(2212-2214)ACC>ATC | p.T738I  |
| Pat_08 | Post-Resistance | TTC13     | 79573  | 37 | 1  | 231060707 | 231060707 | Missense_Mutation | SNP | G | A | 209 | 326 | c.1601C>T | c.(1600-1602)GCC>GTC | p.A534V  |
| Pat_08 | Post-Resistance | SLC35F3   | 148641 | 37 | 1  | 234454596 | 234454596 | Missense_Mutation | SNP | C | T | 99  | 205 | c.847C>T  | c.(847-849)CCT>TCT   | p.P283S  |
| Pat_08 | Post-Resistance | NID1      | 4811   | 37 | 1  | 236187487 | 236187487 | Missense_Mutation | SNP | G | A | 60  | 112 | c.2011C>T | c.(2011-2013)CCC>TCC | p.P671S  |
| Pat_08 | Post-Resistance | RYR2      | 6262   | 37 | 1  | 237774224 | 237774224 | Missense_Mutation | SNP | G | A | 39  | 61  | c.4846G>A | c.(4846-4848)GGC>AGC | p.G1616S |
| Pat_08 | Post-Resistance | NLRP3     | 114548 | 37 | 1  | 247582193 | 247582193 | Missense_Mutation | SNP | C | T | 28  | 51  | c.97C>T   | c.(97-99)CCT>TCT     | p.P33S   |
| Pat_08 | Post-Resistance | OR2G3     | 81469  | 37 | 1  | 247769368 | 247769368 | Missense_Mutation | SNP | A | G | 90  | 165 | c.481A>G  | c.(481-483)ACT>GCT   | p.T161A  |
| Pat_08 | Post-Resistance | OR2T3     | 343173 | 37 | 1  | 248637439 | 248637439 | Missense_Mutation | SNP | C | T | 61  | 683 | c.788C>T  | c.(787-789)ACC>ATC   | p.T263I  |
| Pat_08 | Post-Resistance | ADARB2    | 105    | 37 | 10 | 1262945   | 1262945   | Missense_Mutation | SNP | C | T | 12  | 47  | c.1628G>A | c.(1627-1629)GGC>GAC | p.G543D  |
| Pat_08 | Post-Resistance | AKR1C1    | 1645   | 37 | 10 | 5014844   | 5014844   | Missense_Mutation | SNP | G | A | 96  | 184 | c.749G>A  | c.(748-750)CGA>CAA   | p.R250Q  |
| Pat_08 | Post-Resistance | DHTKD1    | 55526  | 37 | 10 | 12143176  | 12143176  | Missense_Mutation | SNP | T | C | 13  | 26  | c.1892T>C | c.(1891-1893)CTA>CCA | p.L631P  |
| Pat_08 | Post-Resistance | CUBN      | 8029   | 37 | 10 | 17142048  | 17142048  | Missense_Mutation | SNP | C | T | 182 | 266 | c.1721G>A | c.(1720-1722)AGA>AAA | p.R574K  |
| Pat_08 | Post-Resistance | CACNB2    | 783    | 37 | 10 | 18828535  | 18828535  | Missense_Mutation | SNP | A | G | 90  | 125 | c.1865A>G | c.(1864-1866)AAC>AGC | p.N622S  |

|        |                 |           |        |    |    |           |           |                   |     |    |    |     |     |                  |                        |          |
|--------|-----------------|-----------|--------|----|----|-----------|-----------|-------------------|-----|----|----|-----|-----|------------------|------------------------|----------|
| Pat_08 | Post-Resistance | PLXDC2    | 84898  | 37 | 10 | 20506391  | 20506391  | Missense_Mutation | SNP | G  | A  | 58  | 73  | c.1159G>A        | c.(1159-1161)GAA>AAA   | p.E387K  |
| Pat_08 | Post-Resistance | ANKRD30A  | 91074  | 37 | 10 | 37430688  | 37430688  | Missense_Mutation | SNP | C  | T  | 8   | 197 | c.695C>T         | c.(694-696)GCG>GTG     | p.A232V  |
| Pat_08 | Post-Resistance | C10orf71  | 118461 | 37 | 10 | 50531430  | 50531430  | Nonsense_Mutation | SNP | G  | A  | 22  | 9   | c.840G>A         | c.(838-840)TGG>TGA     | p.W280*  |
| Pat_08 | Post-Resistance | ASAH2     | 56624  | 37 | 10 | 52003017  | 52003017  | Missense_Mutation | SNP | C  | T  | 277 | 146 | c.455G>A         | c.(454-456)CGA>CAA     | p.R152Q  |
| Pat_08 | Post-Resistance | ARID5B    | 84159  | 37 | 10 | 63851366  | 63851366  | Missense_Mutation | SNP | C  | T  | 128 | 60  | c.2144C>T        | c.(2143-2145)CCT>CTT   | p.P715L  |
| Pat_08 | Post-Resistance | LRRTM3    | 347731 | 37 | 10 | 68687605  | 68687605  | Missense_Mutation | SNP | G  | A  | 138 | 50  | c.931G>A         | c.(931-933)GGG>AGG     | p.G311R  |
| Pat_08 | Post-Resistance | PTEN      | 5728   | 37 | 10 | 89692886  | 89692886  | Missense_Mutation | SNP | T  | C  | 201 | 228 | c.370T>C         | c.(370-372)TGT>CGT     | p.C124R  |
| Pat_08 | Post-Resistance | CYP2C18   | 1562   | 37 | 10 | 96466634  | 96466634  | Missense_Mutation | SNP | G  | A  | 61  | 29  | c.736G>A         | c.(736-738)GAG>AAG     | p.E246K  |
| Pat_08 | Post-Resistance | ADRB1     | 153    | 37 | 10 | 115805027 | 115805027 | Missense_Mutation | SNP | G  | A  | 3   | 71  | c.1136G>A        | c.(1135-1137)CGC>CAC   | p.R379H  |
| Pat_08 | Post-Resistance | C10orf137 | 26098  | 37 | 10 | 127409788 | 127409788 | Missense_Mutation | SNP | C  | T  | 87  | 58  | c.124C>T         | c.(124-126)CTT>TTT     | p.L42F   |
| Pat_08 | Post-Resistance | ATHL1     | 80162  | 37 | 11 | 294703    | 294703    | Missense_Mutation | SNP | C  | T  | 213 | 326 | c.2168C>T        | c.(2167-2169)TCC>TTC   | p.S723F  |
| Pat_08 | Post-Resistance | MUC5B     | 727897 | 37 | 11 | 1262686   | 1262686   | Missense_Mutation | SNP | G  | A  | 35  | 42  | c.6655G>A        | c.(6655-6657)GAC>AAC   | p.D2219N |
| Pat_08 | Post-Resistance | KRTAP5-3  | 387266 | 37 | 11 | 1629152   | 1629152   | Missense_Mutation | SNP | C  | A  | 9   | 829 | c.464G>T         | c.(463-465)TGC>TTC     | p.C155F  |
| Pat_08 | Post-Resistance | KRTAP5-5  | 439915 | 37 | 11 | 1651402   | 1651402   | Missense_Mutation | SNP | C  | T  | 72  | 106 | c.332C>T         | c.(331-333)TCC>TTC     | p.S111F  |
| Pat_08 | Post-Resistance | KCNQ1     | 3784   | 37 | 11 | 2606487   | 2606487   | Missense_Mutation | SNP | A  | G  | 40  | 117 | c.1078A>G        | c.(1078-1080)AGG>GGG   | p.R360G  |
| Pat_08 | Post-Resistance | SLC22A18  | 5002   | 37 | 11 | 2924603   | 2924603   | Nonsense_Mutation | SNP | C  | T  | 46  | 73  | c.28C>T          | c.(28-30)CAG>TAG       | p.Q10*   |
| Pat_08 | Post-Resistance | OR51S1    | 119692 | 37 | 11 | 4869568   | 4869568   | Missense_Mutation | SNP | G  | A  | 148 | 249 | c.871C>T         | c.(871-873)CCT>TCT     | p.P291S  |
| Pat_08 | Post-Resistance | OR51A4    | 401666 | 37 | 11 | 4967847   | 4967848   | Missense_Mutation | DNP | GG | AA | 123 | 248 | c.483_484CC>TT   | (481-486)TTCCCT>TTTTTC | p.P162S  |
| Pat_08 | Post-Resistance | OR51I1    | 390063 | 37 | 11 | 5462416   | 5462416   | Missense_Mutation | SNP | G  | A  | 73  | 141 | c.329C>T         | c.(328-330)TCC>TTC     | p.S110F  |
| Pat_08 | Post-Resistance | UBQLNL    | 143630 | 37 | 11 | 5536653   | 5536653   | Missense_Mutation | SNP | G  | A  | 93  | 191 | c.1019C>T        | c.(1018-1020)TCT>TTT   | p.S340F  |
| Pat_08 | Post-Resistance | OR52N5    | 390075 | 37 | 11 | 5799521   | 5799521   | Missense_Mutation | SNP | C  | T  | 103 | 157 | c.344G>A         | c.(343-345)GGG>GAG     | p.G115E  |
| Pat_08 | Post-Resistance | GTF2H1    | 2965   | 37 | 11 | 18379556  | 18379556  | Missense_Mutation | SNP | C  | T  | 70  | 97  | c.1318C>T        | c.(1318-1320)CTT>TTT   | p.L440F  |
| Pat_08 | Post-Resistance | CCDC34    | 91057  | 37 | 11 | 27379017  | 27379017  | Missense_Mutation | SNP | G  | A  | 88  | 116 | c.431C>T         | c.(430-432)CCA>CTA     | p.P144L  |
| Pat_08 | Post-Resistance | C11orf74  | 119710 | 37 | 11 | 36631726  | 36631726  | Missense_Mutation | SNP | C  | T  | 48  | 99  | c.73C>T          | c.(73-75)CTT>TTT       | p.L25F   |
| Pat_08 | Post-Resistance | CHST1     | 8534   | 37 | 11 | 45672110  | 45672110  | Missense_Mutation | SNP | C  | T  | 44  | 93  | c.364G>A         | c.(364-366)GAC>AAC     | p.D122N  |
| Pat_08 | Post-Resistance | DGKZ      | 8525   | 37 | 11 | 46396591  | 46396591  | Missense_Mutation | SNP | C  | T  | 3   | 19  | c.2270C>T        | c.(2269-2271)TCG>TTG   | p.S757L  |
| Pat_08 | Post-Resistance | RAPSN     | 5913   | 37 | 11 | 47463243  | 47463243  | Missense_Mutation | SNP | C  | T  | 57  | 64  | c.832G>A         | c.(832-834)GAG>AAG     | p.E278K  |
| Pat_08 | Post-Resistance | OR4C3     | 256144 | 37 | 11 | 48347478  | 48347478  | Nonsense_Mutation | SNP | G  | A  | 4   | 54  | c.986G>A         | c.(985-987)TGG>TAG     | p.W329*  |
| Pat_08 | Post-Resistance | APLNR     | 187    | 37 | 11 | 57003806  | 57003806  | Missense_Mutation | SNP | C  | T  | 4   | 220 | c.673G>A         | c.(673-675)GCC>ACC     | p.A225T  |
| Pat_08 | Post-Resistance | OR4D6     | 219983 | 37 | 11 | 59225019  | 59225019  | Missense_Mutation | SNP | G  | A  | 108 | 128 | c.586G>A         | c.(586-588)GAG>AAG     | p.E196K  |
| Pat_08 | Post-Resistance | AHNAK     | 79026  | 37 | 11 | 62286730  | 62286731  | Missense_Mutation | DNP | GG | AA | 196 | 394 | 15158_15159CC>>T | (15157-15159)GCC>GTT   | p.A5053V |
| Pat_08 | Post-Resistance | TSGA10IP  | 254187 | 37 | 11 | 65714616  | 65714616  | Missense_Mutation | SNP | C  | T  | 10  | 35  | c.320C>T         | c.(319-321)CCC>CTC     | p.P107L  |
| Pat_08 | Post-Resistance | CD248     | 57124  | 37 | 11 | 66082377  | 66082377  | Missense_Mutation | SNP | C  | T  | 24  | 35  | c.2122G>A        | c.(2122-2124)GTG>ATG   | p.V708M  |
| Pat_08 | Post-Resistance | P4HA3     | 283208 | 37 | 11 | 74013458  | 74013458  | Missense_Mutation | SNP | G  | A  | 197 | 273 | c.523C>T         | c.(523-525)CGG>TGG     | p.R175W  |
| Pat_08 | Post-Resistance | ACER3     | 55331  | 37 | 11 | 76726095  | 76726095  | Nonsense_Mutation | SNP | C  | A  | 4   | 146 | c.533C>A         | c.(532-534)TCA>TAA     | p.S178*  |
| Pat_08 | Post-Resistance | C11orf67  | 28971  | 37 | 11 | 77553557  | 77553557  | Missense_Mutation | SNP | A  | T  | 38  | 59  | c.15A>T          | c.(13-15)GAA>GAT       | p.E5D    |
| Pat_08 | Post-Resistance | INTS4     | 92105  | 37 | 11 | 77614629  | 77614629  | Missense_Mutation | SNP | A  | G  | 5   | 93  | c.2054T>C        | c.(2053-2055)TTG>TCG   | p.L685S  |
| Pat_08 | Post-Resistance | ODZ4      | 26011  | 37 | 11 | 78440676  | 78440676  | Missense_Mutation | SNP | C  | T  | 112 | 169 | c.3151G>A        | c.(3151-3153)GAA>AAA   | p.E1051K |
| Pat_08 | Post-Resistance | TRPC6     | 7225   | 37 | 11 | 101375120 | 101375120 | Missense_Mutation | SNP | T  | C  | 67  | 125 | c.580A>G         | c.(580-582)ACC>GCC     | p.T194A  |
| Pat_08 | Post-Resistance | EXPH5     | 23086  | 37 | 11 | 108381210 | 108381210 | Missense_Mutation | SNP | A  | G  | 268 | 371 | c.5024T>C        | c.(5023-5025)ATT>ACT   | p.I1675T |
| Pat_08 | Post-Resistance | USP28     | 57646  | 37 | 11 | 113701595 | 113701595 | Missense_Mutation | SNP | G  | A  | 133 | 232 | c.904C>T         | c.(904-906)CGT>TGT     | p.R302C  |
| Pat_08 | Post-Resistance | FAM55B    | 120406 | 37 | 11 | 114569092 | 114569092 | Missense_Mutation | SNP | G  | A  | 28  | 41  | c.458G>A         | c.(457-459)AGG>AAG     | p.R153K  |
| Pat_08 | Post-Resistance | DSCAML1   | 57453  | 37 | 11 | 117389456 | 117389456 | Missense_Mutation | SNP | G  | A  | 30  | 46  | c.1415C>T        | c.(1414-1416)TCG>TTG   | p.S472L  |
| Pat_08 | Post-Resistance | TMPRSS13  | 84000  | 37 | 11 | 117789462 | 117789462 | Missense_Mutation | SNP | T  | C  | 5   | 145 | c.113A>G         | c.(112-114)CAG>CGG     | p.Q38R   |
| Pat_08 | Post-Resistance | TMPRSS13  | 84000  | 37 | 11 | 117789465 | 117789465 | Missense_Mutation | SNP | G  | C  | 5   | 146 | c.110C>G         | c.(109-111)GCC>GGC     | p.A37G   |
| Pat_08 | Post-Resistance | OR4D5     | 219875 | 37 | 11 | 123810973 | 123810973 | Missense_Mutation | SNP | C  | T  | 238 | 422 | c.650C>T         | c.(649-651)TCG>TTG     | p.S217L  |
| Pat_08 | Post-Resistance | VVA5A     | 4013   | 37 | 11 | 123994449 | 123994449 | Missense_Mutation | SNP | G  | A  | 50  | 97  | c.1102G>A        | c.(1102-1104)GAA>AAA   | p.E368K  |

|        |                 |          |        |    |    |           |           |                   |     |    |    |     |     |                |                      |                |
|--------|-----------------|----------|--------|----|----|-----------|-----------|-------------------|-----|----|----|-----|-----|----------------|----------------------|----------------|
| Pat_08 | Post-Resistance | OR8B8    | 26493  | 37 | 11 | 124310824 | 124310824 | Missense_Mutation | SNP | G  | A  | 97  | 184 | c.158C>T       | c.(157-159)TCT>TTT   | p.S53F         |
| Pat_08 | Post-Resistance | NTM      | 50863  | 37 | 11 | 132016408 | 132016408 | Missense_Mutation | SNP | G  | A  | 41  | 43  | c.400G>A       | c.(400-402)GTA>ATA   | p.V134I        |
| Pat_08 | Post-Resistance | DCP1B    | 196513 | 37 | 12 | 2061949   | 2061949   | Missense_Mutation | SNP | C  | T  | 74  | 70  | c.1157G>A      | c.(1156-1158)AGA>AAA | p.R386K        |
| Pat_08 | Post-Resistance | CD163L1  | 283316 | 37 | 12 | 7596704   | 7596704   | Missense_Mutation | SNP | G  | A  | 67  | 145 | c.20C>T        | c.(19-21)TCG>TTG     | p.S7L          |
| Pat_08 | Post-Resistance | NANOG    | 79923  | 37 | 12 | 7947082   | 7947082   | Missense_Mutation | SNP | G  | A  | 27  | 49  | c.444G>A       | c.(442-444)ATG>ATA   | p.M148I        |
| Pat_08 | Post-Resistance | KLRC3    | 3823   | 37 | 12 | 10572989  | 10572989  | Missense_Mutation | SNP | C  | T  | 127 | 330 | c.161G>A       | c.(160-162)GGG>GAG   | p.G54E         |
| Pat_08 | Post-Resistance | PRB2     | 653247 | 37 | 12 | 11546417  | 11546417  | Missense_Mutation | SNP | C  | T  | 136 | 194 | c.595G>A       | c.(595-597)GGA>AGA   | p.G199R        |
| Pat_08 | Post-Resistance | ABCC9    | 10060  | 37 | 12 | 22065982  | 22065982  | Missense_Mutation | SNP | G  | A  | 68  | 118 | c.835C>T       | c.(835-837)CCA>TCA   | p.P279S        |
| Pat_08 | Post-Resistance | SYT10    | 341359 | 37 | 12 | 33579224  | 33579224  | Missense_Mutation | SNP | C  | T  | 49  | 119 | c.358G>A       | c.(358-360)GAA>AAA   | p.E120K        |
| Pat_08 | Post-Resistance | ADAMTS20 | 80070  | 37 | 12 | 43769952  | 43769952  | Splice_Site       | SNP | C  | T  | 4   | 9   | c.5221_splice  | c.e35-1              | p.I1741_splice |
| Pat_08 | Post-Resistance | ADAMTS20 | 80070  | 37 | 12 | 43945643  | 43945643  | Missense_Mutation | SNP | G  | A  | 101 | 179 | c.82C>T        | c.(82-84)CCC>TCC     | p.P28S         |
| Pat_08 | Post-Resistance | PUS7L    | 83448  | 37 | 12 | 44148157  | 44148157  | Missense_Mutation | SNP | C  | T  | 63  | 150 | c.892G>A       | c.(892-894)GGA>AGA   | p.G298R        |
| Pat_08 | Post-Resistance | COL2A1   | 1280   | 37 | 12 | 48389088  | 48389088  | Missense_Mutation | SNP | G  | A  | 90  | 100 | c.712C>T       | c.(712-714)CCC>TCC   | p.P238S        |
| Pat_08 | Post-Resistance | RND1     | 27289  | 37 | 12 | 49251927  | 49251927  | Missense_Mutation | SNP | G  | A  | 41  | 76  | c.551C>T       | c.(550-552)TCC>TTC   | p.S184F        |
| Pat_08 | Post-Resistance | KRT84    | 3890   | 37 | 12 | 52774929  | 52774929  | Missense_Mutation | SNP | C  | T  | 168 | 283 | c.1138G>A      | c.(1138-1140)GAG>AAG | p.E380K        |
| Pat_08 | Post-Resistance | KRT6B    | 3854   | 37 | 12 | 52844377  | 52844377  | Missense_Mutation | SNP | C  | G  | 79  | 199 | c.568G>C       | c.(568-570)GTT>CTT   | p.V190L        |
| Pat_08 | Post-Resistance | KRT6A    | 3853   | 37 | 12 | 52885322  | 52885322  | Missense_Mutation | SNP | C  | T  | 127 | 281 | c.739G>A       | c.(739-741)GAG>AAG   | p.E247K        |
| Pat_08 | Post-Resistance | OR6C75   | 390323 | 37 | 12 | 55759372  | 55759372  | Missense_Mutation | SNP | C  | T  | 44  | 96  | c.478C>T       | c.(478-480)CTT>TTT   | p.L160F        |
| Pat_08 | Post-Resistance | GLI1     | 2735   | 37 | 12 | 57860059  | 57860059  | Missense_Mutation | SNP | G  | A  | 214 | 359 | c.799G>A       | c.(799-801)GAG>AAG   | p.E267K        |
| Pat_08 | Post-Resistance | MSRB3    | 253827 | 37 | 12 | 65722374  | 65722374  | Missense_Mutation | SNP | C  | T  | 60  | 119 | c.275C>T       | c.(274-276)CCA>CTA   | p.P92L         |
| Pat_08 | Post-Resistance | PTPRB    | 5787   | 37 | 12 | 71002869  | 71002869  | Missense_Mutation | SNP | C  | T  | 51  | 265 | c.305G>A       | c.(304-306)AGA>AAA   | p.R102K        |
| Pat_08 | Post-Resistance | C12orf12 | 196477 | 37 | 12 | 91348220  | 91348220  | Nonsense_Mutation | SNP | C  | T  | 25  | 41  | c.300G>A       | c.(298-300)TGG>TGA   | p.W100*        |
| Pat_08 | Post-Resistance | AMDHD1   | 144193 | 37 | 12 | 96356148  | 96356148  | Missense_Mutation | SNP | G  | A  | 57  | 140 | c.829G>A       | c.(829-831)GGA>AGA   | p.G277R        |
| Pat_08 | Post-Resistance | STAB2    | 55576  | 37 | 12 | 104046397 | 104046397 | Missense_Mutation | SNP | G  | A  | 4   | 160 | c.1321G>A      | c.(1321-1323)GGT>AGT | p.G441S        |
| Pat_08 | Post-Resistance | MMAB     | 326625 | 37 | 12 | 110006647 | 110006647 | Missense_Mutation | SNP | C  | T  | 49  | 113 | c.218G>A       | c.(217-219)GGA>GAA   | p.G73E         |
| Pat_08 | Post-Resistance | ANAPC7   | 51434  | 37 | 12 | 110813898 | 110813898 | Missense_Mutation | SNP | G  | T  | 4   | 220 | c.1583C>A      | c.(1582-1584)GCA>GAA | p.A528E        |
| Pat_08 | Post-Resistance | OAS3     | 4940   | 37 | 12 | 113398950 | 113398950 | Missense_Mutation | SNP | G  | A  | 3   | 87  | c.1732G>A      | c.(1732-1734)GAG>AAG | p.E578K        |
| Pat_08 | Post-Resistance | HPD      | 3242   | 37 | 12 | 122286921 | 122286921 | Missense_Mutation | SNP | C  | T  | 100 | 170 | c.580G>A       | c.(580-582)GTG>ATG   | p.V194M        |
| Pat_08 | Post-Resistance | ZCCHC8   | 55596  | 37 | 12 | 122958814 | 122958814 | Missense_Mutation | SNP | C  | T  | 83  | 111 | c.1354G>A      | c.(1354-1356)GTA>ATA | p.V452I        |
| Pat_08 | Post-Resistance | CDK2AP1  | 8099   | 37 | 12 | 123751793 | 123751793 | Missense_Mutation | SNP | G  | A  | 4   | 334 | c.92C>T        | c.(91-93)ACG>ATG     | p.T31M         |
| Pat_08 | Post-Resistance | GTF2H3   | 2967   | 37 | 12 | 124144370 | 124144370 | Missense_Mutation | SNP | G  | A  | 83  | 137 | c.713G>A       | c.(712-714)AGA>AAA   | p.R238K        |
| Pat_08 | Post-Resistance | RIMBP2   | 23504  | 37 | 12 | 130926738 | 130926738 | Missense_Mutation | SNP | A  | C  | 44  | 79  | c.1108T>G      | c.(1108-1110)TGC>GGC | p.C370G        |
| Pat_08 | Post-Resistance | TUBA3C   | 7278   | 37 | 13 | 19752472  | 19752472  | Missense_Mutation | SNP | C  | T  | 108 | 170 | c.289G>A       | c.(289-291)GAA>AAA   | p.E97K         |
| Pat_08 | Post-Resistance | WASF3    | 10810  | 37 | 13 | 27259911  | 27259911  | Missense_Mutation | SNP | C  | T  | 55  | 61  | c.1438C>T      | c.(1438-1440)CGG>TGG | p.R480W        |
| Pat_08 | Post-Resistance | GPR12    | 2835   | 37 | 13 | 27333521  | 27333521  | Nonsense_Mutation | SNP | G  | C  | 55  | 132 | c.444C>G       | c.(442-444)TAC>TAG   | p.Y148*        |
| Pat_08 | Post-Resistance | NBEA     | 26960  | 37 | 13 | 36124729  | 36124729  | Missense_Mutation | SNP | G  | A  | 29  | 48  | c.6701G>A      | c.(6700-6702)CGA>CAA | p.R2234Q       |
| Pat_08 | Post-Resistance | EDNRB    | 1910   | 37 | 13 | 78477736  | 78477736  | Missense_Mutation | SNP | C  | A  | 4   | 252 | c.490G>T       | c.(490-492)GCA>TCA   | p.A164S        |
| Pat_08 | Post-Resistance | NALCN    | 259232 | 37 | 13 | 101936361 | 101936361 | Missense_Mutation | SNP | C  | T  | 40  | 74  | c.1057G>A      | c.(1057-1059)GAA>AAA | p.E353K        |
| Pat_08 | Post-Resistance | NOVA1    | 4857   | 37 | 14 | 26917922  | 26917922  | Missense_Mutation | SNP | G  | A  | 165 | 274 | c.767C>T       | c.(766-768)GCC>GTC   | p.A256V        |
| Pat_08 | Post-Resistance | NPAS3    | 64067  | 37 | 14 | 34204525  | 34204525  | Missense_Mutation | SNP | C  | T  | 116 | 231 | c.839C>T       | c.(838-840)TCA>TTA   | p.S280L        |
| Pat_08 | Post-Resistance | RALGAPA1 | 253959 | 37 | 14 | 36191052  | 36191052  | Missense_Mutation | SNP | A  | G  | 50  | 123 | c.2108T>C      | c.(2107-2109)GTT>GCT | p.V703A        |
| Pat_08 | Post-Resistance | PNN      | 5411   | 37 | 14 | 39649841  | 39649842  | Missense_Mutation | DNP | GG | AA | 27  | 47  | c.928_929GG>AA | c.(928-930)GGT>AAT   | p.G310N        |
| Pat_08 | Post-Resistance | CDKL1    | 8814   | 37 | 14 | 50844945  | 50844945  | Missense_Mutation | SNP | G  | A  | 32  | 46  | c.1304C>T      | c.(1303-1305)CCC>CTC | p.P435L        |
| Pat_08 | Post-Resistance | KCNH5    | 27133  | 37 | 14 | 63174583  | 63174583  | Missense_Mutation | SNP | T  | A  | 108 | 146 | c.2610A>T      | c.(2608-2610)AAA>AAT | p.K870N        |
| Pat_08 | Post-Resistance | ZFYVE26  | 23503  | 37 | 14 | 68274583  | 68274583  | Missense_Mutation | SNP | G  | A  | 134 | 212 | c.418C>T       | c.(418-420)CCA>TCA   | p.P140S        |
| Pat_08 | Post-Resistance | DPF3     | 8110   | 37 | 14 | 73141047  | 73141047  | Missense_Mutation | SNP | G  | A  | 23  | 49  | c.772C>T       | c.(772-774)CCC>TCC   | p.P258S        |
| Pat_08 | Post-Resistance | DPF3     | 8110   | 37 | 14 | 73190363  | 73190363  | Missense_Mutation | SNP | C  | T  | 174 | 322 | c.503G>A       | c.(502-504)CGA>CAA   | p.R168Q        |



|        |                 |           |        |    |    |           |           |                   |     |    |    |     |     |                 |                      |          |
|--------|-----------------|-----------|--------|----|----|-----------|-----------|-------------------|-----|----|----|-----|-----|-----------------|----------------------|----------|
| Pat_08 | Post-Resistance | NRXN3     | 9369   | 37 | 14 | 79181364  | 79181364  | Missense_Mutation | SNP | G  | A  | 95  | 135 | c.807G>A        | c.(805-807)ATG>ATA   | p.M269I  |
| Pat_08 | Post-Resistance | SERPINA10 | 51156  | 37 | 14 | 94754734  | 94754734  | Missense_Mutation | SNP | C  | T  | 40  | 69  | c.881G>A        | c.(880-882)GGA>GAA   | p.G294E  |
| Pat_08 | Post-Resistance | SERPINA1  | 5265   | 37 | 14 | 94847406  | 94847406  | Missense_Mutation | SNP | A  | C  | 20  | 42  | c.719T>G        | c.(718-720)GTG>GGG   | p.V240G  |
| Pat_08 | Post-Resistance | SERPINA9  | 327657 | 37 | 14 | 94935565  | 94935565  | Missense_Mutation | SNP | G  | A  | 84  | 93  | c.667C>T        | c.(667-669)CAC>TAC   | p.H223Y  |
| Pat_08 | Post-Resistance | BRF1      | 2972   | 37 | 14 | 105752644 | 105752644 | Missense_Mutation | SNP | G  | A  | 23  | 43  | c.254C>T        | c.(253-255)ACC>ATC   | p.T85I   |
| Pat_08 | Post-Resistance | NDN       | 4692   | 37 | 15 | 23932347  | 23932347  | Missense_Mutation | SNP | C  | A  | 8   | 47  | c.18G>T         | c.(16-18)AAG>AAT     | p.K6N    |
| Pat_08 | Post-Resistance | THBS1     | 7057   | 37 | 15 | 39874759  | 39874759  | Missense_Mutation | SNP | G  | A  | 34  | 64  | c.433G>A        | c.(433-435)GAA>AAA   | p.E145K  |
| Pat_08 | Post-Resistance | DLL4      | 54567  | 37 | 15 | 41228744  | 41228744  | Missense_Mutation | SNP | C  | T  | 13  | 21  | c.1559C>T       | c.(1558-1560)CCC>CTC | p.P520L  |
| Pat_08 | Post-Resistance | UNC13C    | 440279 | 37 | 15 | 54305875  | 54305875  | Missense_Mutation | SNP | G  | A  | 58  | 144 | c.775G>A        | c.(775-777)GAA>AAA   | p.E259K  |
| Pat_08 | Post-Resistance | UNC13C    | 440279 | 37 | 15 | 54557657  | 54557657  | Missense_Mutation | SNP | G  | A  | 6   | 7   | c.3781G>A       | c.(3781-3783)GGA>AGA | p.G1261R |
| Pat_08 | Post-Resistance | UNC13C    | 440279 | 37 | 15 | 54825218  | 54825218  | Missense_Mutation | SNP | G  | A  | 6   | 31  | c.5650G>A       | c.(5650-5652)GAT>AAT | p.D1884N |
| Pat_08 | Post-Resistance | FEM1B     | 10116  | 37 | 15 | 68582681  | 68582681  | Missense_Mutation | SNP | C  | T  | 105 | 145 | c.985C>T        | c.(985-987)CTT>TTT   | p.L329F  |
| Pat_08 | Post-Resistance | CSPG4     | 1464   | 37 | 15 | 75982510  | 75982510  | Missense_Mutation | SNP | G  | A  | 41  | 97  | c.896C>T        | c.(895-897)TCC>TTC   | p.S299F  |
| Pat_08 | Post-Resistance | IREB2     | 3658   | 37 | 15 | 78789516  | 78789516  | Missense_Mutation | SNP | C  | T  | 91  | 208 | c.2644C>T       | c.(2644-2646)CAT>TAT | p.H882Y  |
| Pat_08 | Post-Resistance | KIAA1199  | 57214  | 37 | 15 | 81225737  | 81225737  | Missense_Mutation | SNP | G  | A  | 4   | 422 | c.2945G>A       | c.(2944-2946)CGG>CAG | p.R982Q  |
| Pat_08 | Post-Resistance | ITFG3     | 83986  | 37 | 16 | 314061    | 314061    | Missense_Mutation | SNP | C  | T  | 36  | 94  | c.1235C>T       | c.(1234-1236)GCC>GTC | p.A412V  |
| Pat_08 | Post-Resistance | PTX4      | 390667 | 37 | 16 | 1537629   | 1537629   | Missense_Mutation | SNP | G  | A  | 18  | 19  | c.469C>T        | c.(469-471)CAC>TAC   | p.H157Y  |
| Pat_08 | Post-Resistance | ABCC1     | 4363   | 37 | 16 | 16108367  | 16108367  | Missense_Mutation | SNP | T  | C  | 50  | 73  | c.371T>C        | c.(370-372)ATT>ACT   | p.I124T  |
| Pat_08 | Post-Resistance | DNAH3     | 55567  | 37 | 16 | 21098326  | 21098326  | Nonsense_Mutation | SNP | C  | T  | 115 | 287 | c.2721G>A       | c.(2719-2721)TGG>TGA | p.W907*  |
| Pat_08 | Post-Resistance | RBBP6     | 5930   | 37 | 16 | 24580595  | 24580595  | Missense_Mutation | SNP | C  | T  | 71  | 123 | c.2584C>T       | c.(2584-2586)CCA>TCA | p.P862S  |
| Pat_08 | Post-Resistance | ATP2A1    | 487    | 37 | 16 | 28890099  | 28890099  | Missense_Mutation | SNP | A  | G  | 3   | 100 | c.107A>G        | c.(106-108)TAC>TGC   | p.Y36C   |
| Pat_08 | Post-Resistance | C16orf78  | 123970 | 37 | 16 | 49407878  | 49407878  | Missense_Mutation | SNP | G  | A  | 137 | 213 | c.28G>A         | c.(28-30)GAT>AAT     | p.D10N   |
| Pat_08 | Post-Resistance | IRX5      | 10265  | 37 | 16 | 54965121  | 54965121  | Missense_Mutation | SNP | C  | T  | 7   | 56  | c.11C>T         | c.(10-12)CCG>CTG     | p.P4L    |
| Pat_08 | Post-Resistance | CNOT1     | 23019  | 37 | 16 | 58621149  | 58621150  | Missense_Mutation | DNP | CC | AA | 4   | 177 | c.388_389GG>TT  | c.(388-390)GGC>TTC   | p.G130F  |
| Pat_08 | Post-Resistance | GALNS     | 2588   | 37 | 16 | 88902160  | 88902160  | Missense_Mutation | SNP | G  | A  | 53  | 81  | c.731C>T        | c.(730-732)CCC>CTC   | p.P244L  |
| Pat_08 | Post-Resistance | GALNS     | 2588   | 37 | 16 | 88904145  | 88904145  | Missense_Mutation | SNP | G  | A  | 81  | 153 | c.451C>T        | c.(451-453)CCC>TCC   | p.P151S  |
| Pat_08 | Post-Resistance | SPG7      | 6687   | 37 | 16 | 89614503  | 89614503  | Missense_Mutation | SNP | G  | A  | 5   | 246 | c.1645G>A       | c.(1645-1647)GTG>ATG | p.V549M  |
| Pat_08 | Post-Resistance | TRPV1     | 7442   | 37 | 17 | 3494574   | 3494574   | Missense_Mutation | SNP | C  | T  | 35  | 29  | c.358G>A        | c.(358-360)GAA>AAA   | p.E120K  |
| Pat_08 | Post-Resistance | ZZEF1     | 23140  | 37 | 17 | 4013068   | 4013068   | Missense_Mutation | SNP | T  | C  | 83  | 102 | c.1156A>G       | c.(1156-1158)AAG>GAG | p.K386E  |
| Pat_08 | Post-Resistance | DHX33     | 56919  | 37 | 17 | 5352203   | 5352203   | Missense_Mutation | SNP | C  | T  | 44  | 92  | c.1741G>A       | c.(1741-1743)GAG>AAG | p.E581K  |
| Pat_08 | Post-Resistance | PLSCR3    | 57048  | 37 | 17 | 7296213   | 7296213   | Missense_Mutation | SNP | G  | A  | 306 | 491 | c.566C>T        | c.(565-567)CCC>CTC   | p.P189L  |
| Pat_08 | Post-Resistance | CHD3      | 1107   | 37 | 17 | 7807808   | 7807808   | Missense_Mutation | SNP | C  | T  | 45  | 304 | c.3943C>T       | c.(3943-3945)CCT>TCT | p.P1315S |
| Pat_08 | Post-Resistance | GLP2R     | 9340   | 37 | 17 | 9729447   | 9729447   | Missense_Mutation | SNP | G  | A  | 11  | 19  | c.67G>A         | c.(67-69)GAG>AAG     | p.E23K   |
| Pat_08 | Post-Resistance | MYO15A    | 51168  | 37 | 17 | 18022962  | 18022962  | Missense_Mutation | SNP | C  | T  | 31  | 160 | c.848C>T        | c.(847-849)CCC>CTC   | p.P283L  |
| Pat_08 | Post-Resistance | FOXN1     | 8456   | 37 | 17 | 26864216  | 26864216  | Missense_Mutation | SNP | C  | T  | 116 | 179 | c.1709C>T       | c.(1708-1710)TCG>TTG | p.S570L  |
| Pat_08 | Post-Resistance | SLC6A4    | 6532   | 37 | 17 | 28548904  | 28548904  | Missense_Mutation | SNP | C  | T  | 78  | 166 | c.73G>A         | c.(73-75)GGA>AGA     | p.G25R   |
| Pat_08 | Post-Resistance | C17orf66  | 256957 | 37 | 17 | 34192286  | 34192286  | Missense_Mutation | SNP | C  | T  | 81  | 143 | c.253G>A        | c.(253-255)GAC>AAC   | p.D85N   |
| Pat_08 | Post-Resistance | WIPF2     | 147179 | 37 | 17 | 38420847  | 38420847  | Missense_Mutation | SNP | G  | A  | 244 | 394 | c.419G>A        | c.(418-420)AGC>AAC   | p.S140N  |
| Pat_08 | Post-Resistance | KRT17     | 3872   | 37 | 17 | 39775880  | 39775880  | Missense_Mutation | SNP | G  | A  | 145 | 266 | c.1265C>T       | c.(1264-1266)TCC>TTC | p.S422F  |
| Pat_08 | Post-Resistance | MPP2      | 4355   | 37 | 17 | 41956666  | 41956666  | Missense_Mutation | SNP | C  | T  | 167 | 283 | c.1594G>A       | c.(1594-1596)GGA>AGA | p.G532R  |
| Pat_08 | Post-Resistance | FMNL1     | 752    | 37 | 17 | 43323883  | 43323883  | Missense_Mutation | SNP | G  | A  | 75  | 144 | c.3223G>A       | c.(3223-3225)GTG>ATG | p.V1075M |
| Pat_08 | Post-Resistance | MAPT      | 4137   | 37 | 17 | 44061152  | 44061152  | Missense_Mutation | SNP | C  | T  | 10  | 25  | c.982C>T        | c.(982-984)CCA>TCA   | p.P328S  |
| Pat_08 | Post-Resistance | KIAA1267  | 284058 | 37 | 17 | 44144090  | 44144090  | Missense_Mutation | SNP | G  | C  | 34  | 46  | c.1661C>G       | c.(1660-1662)CCT>CGT | p.P554R  |
| Pat_08 | Post-Resistance | TEX14     | 56155  | 37 | 17 | 56671001  | 56671001  | Missense_Mutation | SNP | C  | T  | 74  | 125 | c.2509G>A       | c.(2509-2511)GGA>AGA | p.G837R  |
| Pat_08 | Post-Resistance | CANT1     | 124583 | 37 | 17 | 76993313  | 76993313  | Missense_Mutation | SNP | T  | C  | 6   | 699 | c.392A>G        | c.(391-393)AAG>AGG   | p.K131R  |
| Pat_08 | Post-Resistance | RPTOR     | 57521  | 37 | 17 | 78919517  | 78919518  | Missense_Mutation | DNP | CC | TT | 66  | 114 | .:3076_3077CC>T | c.(3076-3078)CCC>TTC | p.P1026F |
| Pat_08 | Post-Resistance | CHMP1B    | 57132  | 37 | 18 | 11851859  | 11851859  | Missense_Mutation | SNP | A  | C  | 200 | 339 | c.349A>C        | c.(349-351)AAA>CAA   | p.K117Q  |

|        |                 |           |        |    |    |           |           |                   |     |    |    |     |     |                 |                        |               |
|--------|-----------------|-----------|--------|----|----|-----------|-----------|-------------------|-----|----|----|-----|-----|-----------------|------------------------|---------------|
| Pat_08 | Post-Resistance | MC5R      | 4161   | 37 | 18 | 13825823  | 13825823  | Missense_Mutation | SNP | A  | G  | 81  | 127 | c.59A>G         | c.(58-60)AAC>AGC       | p.N20S        |
| Pat_08 | Post-Resistance | MEP1B     | 4225   | 37 | 18 | 29797780  | 29797780  | Missense_Mutation | SNP | C  | T  | 32  | 85  | c.1943C>T       | c.(1942-1944)TCC>TTC   | p.S648F       |
| Pat_08 | Post-Resistance | RIT2      | 6014   | 37 | 18 | 40323589  | 40323589  | Missense_Mutation | SNP | G  | A  | 64  | 103 | c.523C>T        | c.(523-525)CAT>TAT     | p.H175Y       |
| Pat_08 | Post-Resistance | DCC       | 1630   | 37 | 18 | 50937005  | 50937005  | Missense_Mutation | SNP | G  | A  | 66  | 105 | c.3119G>A       | c.(3118-3120)AGG>AAG   | p.R1040K      |
| Pat_08 | Post-Resistance | SERPINB4  | 6318   | 37 | 18 | 61305069  | 61305069  | Missense_Mutation | SNP | C  | T  | 96  | 130 | c.1057G>A       | c.(1057-1059)GAA>AAA   | p.E353K       |
| Pat_08 | Post-Resistance | SERPINB7  | 8710   | 37 | 18 | 61465976  | 61465976  | Missense_Mutation | SNP | C  | T  | 130 | 207 | c.593C>T        | c.(592-594)CCC>CTC     | p.P198L       |
| Pat_08 | Post-Resistance | NETO1     | 81832  | 37 | 18 | 70461455  | 70461455  | Missense_Mutation | SNP | G  | A  | 50  | 79  | c.536C>T        | c.(535-537)TCC>TTC     | p.S179F       |
| Pat_08 | Post-Resistance | ZNF57     | 126295 | 37 | 19 | 2917733   | 2917733   | Missense_Mutation | SNP | G  | A  | 7   | 238 | c.1114G>A       | c.(1114-1116)GCC>ACC   | p.A372T       |
| Pat_08 | Post-Resistance | FSD1      | 79187  | 37 | 19 | 4323535   | 4323535   | Nonsense_Mutation | SNP | G  | A  | 12  | 26  | c.1386G>A       | c.(1384-1386)TGG>TGA   | p.W462*       |
| Pat_08 | Post-Resistance | SEMA6B    | 10501  | 37 | 19 | 4550261   | 4550261   | Missense_Mutation | SNP | C  | T  | 71  | 95  | c.1145G>A       | c.(1144-1146)GGG>GAG   | p.G382E       |
| Pat_08 | Post-Resistance | ZNF844    | 284391 | 37 | 19 | 12187502  | 12187502  | Missense_Mutation | SNP | A  | G  | 10  | 263 | c.1567A>G       | c.(1567-1569)AAA>GAA   | p.K523E       |
| Pat_08 | Post-Resistance | ZNF333    | 84449  | 37 | 19 | 14815865  | 14815865  | Splice_Site       | SNP | G  | A  | 4   | 104 | c.307_splice    | c.e6-1                 | p.G103_splice |
| Pat_08 | Post-Resistance | UNC13A    | 23025  | 37 | 19 | 17766939  | 17766939  | Missense_Mutation | SNP | C  | T  | 8   | 8   | c.1300G>A       | c.(1300-1302)GAG>AAG   | p.E434K       |
| Pat_08 | Post-Resistance | ZNF431    | 170959 | 37 | 19 | 21350459  | 21350459  | Missense_Mutation | SNP | T  | A  | 5   | 437 | c.309T>A        | c.(307-309)GAT>GAA     | p.D103E       |
| Pat_08 | Post-Resistance | ZNF681    | 148213 | 37 | 19 | 23927372  | 23927372  | Missense_Mutation | SNP | C  | G  | 12  | 516 | c.980G>C        | c.(979-981)AGA>ACA     | p.R327T       |
| Pat_08 | Post-Resistance | ZNF681    | 148213 | 37 | 19 | 23938352  | 23938352  | Missense_Mutation | SNP | T  | C  | 5   | 359 | c.5A>G          | c.(4-6)GAA>GGA         | p.E2G         |
| Pat_08 | Post-Resistance | KIAA0355  | 9710   | 37 | 19 | 34791443  | 34791443  | Missense_Mutation | SNP | C  | T  | 41  | 61  | c.65C>T         | c.(64-66)TCC>TTC       | p.S22F        |
| Pat_08 | Post-Resistance | CAPNS1    | 826    | 37 | 19 | 36633203  | 36633203  | Missense_Mutation | SNP | G  | A  | 4   | 333 | c.211G>A        | c.(211-213)GAG>AAG     | p.E71K        |
| Pat_08 | Post-Resistance | ZNF585B   | 92285  | 37 | 19 | 37677976  | 37677976  | Missense_Mutation | SNP | C  | T  | 64  | 123 | c.463G>A        | c.(463-465)GAA>AAA     | p.E155K       |
| Pat_08 | Post-Resistance | LRFN1     | 57622  | 37 | 19 | 39805289  | 39805289  | Missense_Mutation | SNP | G  | A  | 19  | 21  | c.688C>T        | c.(688-690)CTC>TTC     | p.L230F       |
| Pat_08 | Post-Resistance | LTBP4     | 8425   | 37 | 19 | 41128389  | 41128390  | Missense_Mutation | DNP | CC | TA | 17  | 42  | c.3502_3503CC>T | c.(3502-3504)CCC>TAC   | p.P1168Y      |
| Pat_08 | Post-Resistance | GEMIN7    | 79760  | 37 | 19 | 45593532  | 45593532  | Nonsense_Mutation | SNP | C  | T  | 55  | 53  | c.160C>T        | c.(160-162)CAG>TAG     | p.Q54*        |
| Pat_08 | Post-Resistance | GPR77     | 27202  | 37 | 19 | 47844070  | 47844070  | Missense_Mutation | SNP | C  | T  | 78  | 143 | c.14C>T         | c.(13-15)TCT>TTT       | p.S5F         |
| Pat_08 | Post-Resistance | CCDC155   | 147872 | 37 | 19 | 49898419  | 49898419  | Missense_Mutation | SNP | C  | T  | 27  | 32  | c.205C>T        | c.(205-207)CCC>TCC     | p.P69S        |
| Pat_08 | Post-Resistance | ALDH16A1  | 126133 | 37 | 19 | 49962997  | 49962997  | Missense_Mutation | SNP | G  | A  | 4   | 192 | c.391G>A        | c.(391-393)GTT>ATT     | p.V131I       |
| Pat_08 | Post-Resistance | ATF5      | 22809  | 37 | 19 | 50435876  | 50435876  | Missense_Mutation | SNP | T  | C  | 7   | 25  | c.376T>C        | c.(376-378)TCC>CCC     | p.S126P       |
| Pat_08 | Post-Resistance | LILRA2    | 11027  | 37 | 19 | 55086932  | 55086932  | Missense_Mutation | SNP | C  | T  | 4   | 200 | c.865C>T        | c.(865-867)CAC>TAC     | p.H289Y       |
| Pat_08 | Post-Resistance | LILRB1    | 10859  | 37 | 19 | 55147034  | 55147034  | Missense_Mutation | SNP | G  | A  | 191 | 306 | c.1624G>A       | c.(1624-1626)GAG>AAG   | p.E542K       |
| Pat_08 | Post-Resistance | ZNF667    | 63934  | 37 | 19 | 56953336  | 56953336  | Missense_Mutation | SNP | G  | A  | 79  | 123 | c.1028C>T       | c.(1027-1029)TCA>TTA   | p.S343L       |
| Pat_08 | Post-Resistance | ZIM2      | 23619  | 37 | 19 | 57286247  | 57286247  | Missense_Mutation | SNP | C  | T  | 58  | 94  | c.1393G>A       | c.(1393-1395)GCC>ACC   | p.A465T       |
| Pat_08 | Post-Resistance | USP29     | 57663  | 37 | 19 | 57640433  | 57640433  | Missense_Mutation | SNP | C  | A  | 6   | 172 | c.390C>A        | c.(388-390)GAC>GAA     | p.D130E       |
| Pat_08 | Post-Resistance | ASAP2     | 8853   | 37 | 2  | 9543385   | 9543385   | Missense_Mutation | SNP | G  | T  | 4   | 130 | c.2950G>T       | c.(2950-2952)GGC>TGC   | p.G984C       |
| Pat_08 | Post-Resistance | C2orf48   | 348738 | 37 | 2  | 10282381  | 10282382  | Splice_Site       | DNP | GG | AA | 99  | 235 | c.73_splice     | c.e3-1                 | p.G25_splice  |
| Pat_08 | Post-Resistance | HS1BP3    | 64342  | 37 | 2  | 20838401  | 20838401  | Missense_Mutation | SNP | G  | A  | 38  | 62  | c.418C>T        | c.(418-420)CCA>TCA     | p.P140S       |
| Pat_08 | Post-Resistance | APOB      | 338    | 37 | 2  | 21232695  | 21232695  | Missense_Mutation | SNP | C  | T  | 62  | 103 | c.7045G>A       | c.(7045-7047)GAA>AAA   | p.E2349K      |
| Pat_08 | Post-Resistance | ATAD2B    | 54454  | 37 | 2  | 24046220  | 24046220  | Missense_Mutation | SNP | C  | T  | 39  | 72  | c.2039G>A       | c.(2038-2040)AGA>AAA   | p.R680K       |
| Pat_08 | Post-Resistance | SLC4A1AP  | 22950  | 37 | 2  | 27886668  | 27886668  | Missense_Mutation | SNP | C  | T  | 174 | 316 | c.49C>T         | c.(49-51)CCA>TCA       | p.P17S        |
| Pat_08 | Post-Resistance | CRIM1     | 51232  | 37 | 2  | 36740798  | 36740798  | Missense_Mutation | SNP | G  | A  | 4   | 189 | c.1880G>A       | c.(1879-1881)CGG>CAG   | p.R627Q       |
| Pat_08 | Post-Resistance | THADA     | 63892  | 37 | 2  | 43458330  | 43458331  | Missense_Mutation | DNP | CC | TT | 18  | 34  | c.5618_5619GG>A | c.(5617-5619)AGG>AAA   | p.R1873K      |
| Pat_08 | Post-Resistance | FSHR      | 2492   | 37 | 2  | 49190238  | 49190238  | Missense_Mutation | SNP | C  | T  | 49  | 63  | c.1722G>A       | c.(1720-1722)ATG>ATA   | p.M574I       |
| Pat_08 | Post-Resistance | ALMS1     | 7840   | 37 | 2  | 73681006  | 73681006  | Missense_Mutation | SNP | C  | T  | 55  | 120 | c.7355C>T       | c.(7354-7356)TCA>TTA   | p.S2452L      |
| Pat_08 | Post-Resistance | EPB41L5   | 57669  | 37 | 2  | 120848052 | 120848052 | Nonsense_Mutation | SNP | C  | T  | 114 | 160 | c.1003C>T       | c.(1003-1005)CGA>TGA   | p.R335*       |
| Pat_08 | Post-Resistance | CNTNAP5   | 129684 | 37 | 2  | 125204485 | 125204485 | Missense_Mutation | SNP | G  | A  | 215 | 269 | c.889G>A        | c.(889-891)GAG>AAG     | p.E297K       |
| Pat_08 | Post-Resistance | POTEF     | 728378 | 37 | 2  | 130832812 | 130832812 | Missense_Mutation | SNP | C  | T  | 53  | 111 | c.2233G>A       | c.(2233-2235)GGG>AGG   | p.G745R       |
| Pat_08 | Post-Resistance | LOC401010 | 401010 | 37 | 2  | 132200831 | 132200831 | Missense_Mutation | SNP | C  | T  | 19  | 24  | c.1171G>A       | c.(1171-1173)GAG>AAG   | p.E391K       |
| Pat_08 | Post-Resistance | LRP1B     | 53353  | 37 | 2  | 141116476 | 141116476 | Missense_Mutation | SNP | C  | T  | 143 | 210 | c.11171G>A      | c.(11170-11172)AGA>AAA | p.R3724K      |
| Pat_08 | Post-Resistance | MBD5      | 55777  | 37 | 2  | 149226284 | 149226284 | Missense_Mutation | SNP | C  | T  | 90  | 176 | c.772C>T        | c.(772-774)CAT>TAT     | p.H258Y       |

|        |                 |           |        |    |    |           |           |                   |     |   |   |     |     |            |                        |           |
|--------|-----------------|-----------|--------|----|----|-----------|-----------|-------------------|-----|---|---|-----|-----|------------|------------------------|-----------|
| Pat_08 | Post-Resistance | NEB       | 4703   | 37 | 2  | 152381753 | 152381753 | Missense_Mutation | SNP | C | T | 42  | 83  | c.17093G>A | c.(17092-17094)GGA>GAA | p.G5698E  |
| Pat_08 | Post-Resistance | KCNJ3     | 3760   | 37 | 2  | 155711304 | 155711304 | Missense_Mutation | SNP | C | T | 48  | 88  | c.985C>T   | c.(985-987)CCT>TCT     | p.P329S   |
| Pat_08 | Post-Resistance | SCN9A     | 6335   | 37 | 2  | 167085452 | 167085452 | Missense_Mutation | SNP | G | A | 104 | 191 | c.3922C>T  | c.(3922-3924)CCT>TCT   | p.P1308S  |
| Pat_08 | Post-Resistance | DLX1      | 1745   | 37 | 2  | 172950632 | 172950632 | Missense_Mutation | SNP | G | A | 5   | 401 | c.227G>A   | c.(226-228)AGC>AAC     | p.S76N    |
| Pat_08 | Post-Resistance | TTN       | 7273   | 37 | 2  | 179393620 | 179393620 | Missense_Mutation | SNP | C | T | 55  | 86  | c.99154G>A | c.(99154-99156)GAA>AAA | p.E33052K |
| Pat_08 | Post-Resistance | TTN       | 7273   | 37 | 2  | 179410756 | 179410756 | Missense_Mutation | SNP | C | T | 37  | 37  | c.87503G>A | c.(87502-87504)GGA>GAA | p.G29168E |
| Pat_08 | Post-Resistance | TTN       | 7273   | 37 | 2  | 179428394 | 179428394 | Missense_Mutation | SNP | T | C | 160 | 209 | c.74761A>G | c.(74761-74763)ACA>GCA | p.T24921A |
| Pat_08 | Post-Resistance | TTN       | 7273   | 37 | 2  | 179498194 | 179498194 | Missense_Mutation | SNP | C | T | 63  | 94  | c.35188G>A | c.(35188-35190)GAA>AAA | p.E11730K |
| Pat_08 | Post-Resistance | TTN       | 7273   | 37 | 2  | 179629430 | 179629430 | Missense_Mutation | SNP | G | A | 99  | 199 | c.9812C>T  | c.(9811-9813)TCC>TTC   | p.S3271F  |
| Pat_08 | Post-Resistance | TTN       | 7273   | 37 | 2  | 179640313 | 179640313 | Missense_Mutation | SNP | G | A | 52  | 96  | c.6278C>T  | c.(6277-6279)TCT>TTT   | p.S2093F  |
| Pat_08 | Post-Resistance | TTN       | 7273   | 37 | 2  | 179654118 | 179654118 | Missense_Mutation | SNP | C | T | 99  | 174 | c.2045G>A  | c.(2044-2046)AGA>AAA   | p.R682K   |
| Pat_08 | Post-Resistance | SGOL2     | 151246 | 37 | 2  | 201437870 | 201437870 | Missense_Mutation | SNP | A | T | 117 | 150 | c.2801A>T  | c.(2800-2802)CAA>CTA   | p.Q934L   |
| Pat_08 | Post-Resistance | CD28      | 940    | 37 | 2  | 204594385 | 204594385 | Missense_Mutation | SNP | C | T | 79  | 138 | c.424C>T   | c.(424-426)CCA>TCA     | p.P142S   |
| Pat_08 | Post-Resistance | CRYGD     | 1421   | 37 | 2  | 208988904 | 208988904 | Missense_Mutation | SNP | C | T | 37  | 64  | c.184G>A   | c.(184-186)GAC>AAC     | p.D62N    |
| Pat_08 | Post-Resistance | CPS1      | 1373   | 37 | 2  | 211460248 | 211460248 | Missense_Mutation | SNP | C | T | 131 | 199 | c.1301C>T  | c.(1300-1302)TCC>TTC   | p.S434F   |
| Pat_08 | Post-Resistance | VIL1      | 7429   | 37 | 2  | 219296642 | 219296642 | Missense_Mutation | SNP | C | A | 38  | 76  | c.1165C>A  | c.(1165-1167)CAG>AAG   | p.Q389K   |
| Pat_08 | Post-Resistance | SPHKAP    | 80309  | 37 | 2  | 228855801 | 228855801 | Missense_Mutation | SNP | C | T | 67  | 107 | c.4874G>A  | c.(4873-4875)CGA>CAA   | p.R1625Q  |
| Pat_08 | Post-Resistance | CHRND     | 1144   | 37 | 2  | 233399978 | 233399978 | Missense_Mutation | SNP | G | A | 98  | 124 | c.1510G>A  | c.(1510-1512)GGG>AGG   | p.G504R   |
| Pat_08 | Post-Resistance | CHRNA     | 1146   | 37 | 2  | 233408401 | 233408401 | Missense_Mutation | SNP | G | A | 62  | 99  | c.1027G>A  | c.(1027-1029)GTC>ATC   | p.V343I   |
| Pat_08 | Post-Resistance | GPR35     | 2859   | 37 | 2  | 241569629 | 241569629 | Missense_Mutation | SNP | C | T | 76  | 145 | c.260C>T   | c.(259-261)CCG>CTG     | p.P87L    |
| Pat_08 | Post-Resistance | GGTLC1    | 92086  | 37 | 20 | 23966333  | 23966333  | Missense_Mutation | SNP | C | T | 7   | 400 | c.502G>A   | c.(502-504)GTC>ATC     | p.V168I   |
| Pat_08 | Post-Resistance | NCOA6     | 23054  | 37 | 20 | 33337594  | 33337594  | Missense_Mutation | SNP | C | A | 4   | 314 | c.2404G>T  | c.(2404-2406)GGT>TGT   | p.G802C   |
| Pat_08 | Post-Resistance | PTPR      | 11122  | 37 | 20 | 41306649  | 41306649  | Missense_Mutation | SNP | G | A | 89  | 142 | c.1010C>T  | c.(1009-1011)ACC>ATC   | p.T337I   |
| Pat_08 | Post-Resistance | CDH22     | 64405  | 37 | 20 | 44869692  | 44869692  | Missense_Mutation | SNP | A | G | 58  | 165 | c.460T>C   | c.(460-462)TTC>CTC     | p.F154L   |
| Pat_08 | Post-Resistance | BAGE2     | 85319  | 37 | 21 | 11058168  | 11058168  | Missense_Mutation | SNP | A | T | 4   | 258 | c.272T>A   | c.(271-273)CTG>CAG     | p.L91Q    |
| Pat_08 | Post-Resistance | SH3BGR    | 6450   | 37 | 21 | 40883698  | 40883698  | Missense_Mutation | SNP | C | T | 48  | 66  | c.716C>T   | c.(715-717)TCC>TTC     | p.S239F   |
| Pat_08 | Post-Resistance | DSCAM     | 1826   | 37 | 21 | 41452217  | 41452217  | Missense_Mutation | SNP | G | A | 75  | 136 | c.4282C>T  | c.(4282-4284)CCA>TCA   | p.P1428S  |
| Pat_08 | Post-Resistance | SLC37A1   | 54020  | 37 | 21 | 43963662  | 43963662  | Missense_Mutation | SNP | G | A | 95  | 166 | c.680G>A   | c.(679-681)GGA>GAA     | p.G227E   |
| Pat_08 | Post-Resistance | KRTAP10-6 | 386674 | 37 | 21 | 46011918  | 46011918  | Missense_Mutation | SNP | G | A | 183 | 567 | c.448C>T   | c.(448-450)CCC>TCC     | p.P150S   |
| Pat_08 | Post-Resistance | RTN4R     | 65078  | 37 | 22 | 20230526  | 20230526  | Missense_Mutation | SNP | G | A | 25  | 45  | c.130C>T   | c.(130-132)CCC>TCC     | p.P44S    |
| Pat_08 | Post-Resistance | AP1B1     | 162    | 37 | 22 | 29727834  | 29727834  | Missense_Mutation | SNP | G | A | 85  | 103 | c.2381C>T  | c.(2380-2382)TCC>TTC   | p.S794F   |
| Pat_08 | Post-Resistance | LARGE     | 9215   | 37 | 22 | 34046453  | 34046453  | Missense_Mutation | SNP | G | A | 128 | 147 | c.308C>T   | c.(307-309)TCC>TTC     | p.S103F   |
| Pat_08 | Post-Resistance | SBF1      | 6305   | 37 | 22 | 50902808  | 50902808  | Missense_Mutation | SNP | G | A | 4   | 267 | c.1699C>T  | c.(1699-1701)CGC>TGC   | p.R567C   |
| Pat_08 | Post-Resistance | NUP210    | 23225  | 37 | 3  | 13370433  | 13370433  | Missense_Mutation | SNP | G | A | 31  | 68  | c.4124C>T  | c.(4123-4125)TCC>TTC   | p.S1375F  |
| Pat_08 | Post-Resistance | FGD5      | 152273 | 37 | 3  | 14862578  | 14862578  | Missense_Mutation | SNP | A | G | 66  | 93  | c.2000A>G  | c.(1999-2001)AAC>AGC   | p.N667S   |
| Pat_08 | Post-Resistance | UBP1      | 7342   | 37 | 3  | 33453119  | 33453119  | Missense_Mutation | SNP | A | G | 147 | 239 | c.509T>C   | c.(508-510)GTT>GCT     | p.V170A   |
| Pat_08 | Post-Resistance | TRANK1    | 9881   | 37 | 3  | 36874752  | 36874752  | Missense_Mutation | SNP | C | T | 42  | 83  | c.4540G>A  | c.(4540-4542)GAA>AAA   | p.E1514K  |
| Pat_08 | Post-Resistance | LRRFIP2   | 9209   | 37 | 3  | 37150142  | 37150142  | Missense_Mutation | SNP | A | G | 127 | 194 | c.643T>C   | c.(643-645)TAT>CAT     | p.Y215H   |
| Pat_08 | Post-Resistance | HHATL     | 57467  | 37 | 3  | 42735116  | 42735116  | Missense_Mutation | SNP | C | T | 22  | 49  | c.1241G>A  | c.(1240-1242)CGA>CAA   | p.R414Q   |
| Pat_08 | Post-Resistance | SETD2     | 29072  | 37 | 3  | 47125298  | 47125298  | Missense_Mutation | SNP | T | C | 4   | 405 | c.5972A>G  | c.(5971-5973)GAG>GGG   | p.E1991G  |
| Pat_08 | Post-Resistance | RHOA      | 387    | 37 | 3  | 49405936  | 49405936  | Missense_Mutation | SNP | G | A | 117 | 138 | c.202C>T   | c.(202-204)CGC>TGC     | p.R68C    |
| Pat_08 | Post-Resistance | DNAH1     | 25981  | 37 | 3  | 52392656  | 52392656  | Missense_Mutation | SNP | C | T | 18  | 87  | c.4169C>T  | c.(4168-4170)CCC>CTC   | p.P1390L  |
| Pat_08 | Post-Resistance | CACNA1D   | 776    | 37 | 3  | 53766925  | 53766925  | Missense_Mutation | SNP | A | T | 53  | 78  | c.2557A>T  | c.(2557-2559)ATG>TTG   | p.M853L   |
| Pat_08 | Post-Resistance | CNTN3     | 5067   | 37 | 3  | 74385793  | 74385793  | Missense_Mutation | SNP | C | T | 44  | 57  | c.1381G>A  | c.(1381-1383)GAT>AAT   | p.D461N   |
| Pat_08 | Post-Resistance | C3orf26   | 84319  | 37 | 3  | 99536869  | 99536869  | Missense_Mutation | SNP | G | A | 80  | 81  | c.46G>A    | c.(46-48)GGA>AGA       | p.G16R    |
| Pat_08 | Post-Resistance | FBXO40    | 51725  | 37 | 3  | 121345753 | 121345753 | Missense_Mutation | SNP | C | T | 39  | 65  | c.2126C>T  | c.(2125-2127)TCC>TTC   | p.S709F   |
| Pat_08 | Post-Resistance | SLC15A2   | 6565   | 37 | 3  | 121613396 | 121613396 | Nonsense_Mutation | SNP | C | T | 324 | 477 | c.73C>T    | c.(73-75)CGA>TGA       | p.R25*    |

|        |                 |          |        |    |   |           |           |                   |     |   |   |     |     |            |                        |          |
|--------|-----------------|----------|--------|----|---|-----------|-----------|-------------------|-----|---|---|-----|-----|------------|------------------------|----------|
| Pat_08 | Post-Resistance | OTOL1    | 131149 | 37 | 3 | 161221408 | 161221408 | Missense_Mutation | SNP | G | A | 23  | 48  | c.1112G>A  | c.(1111-1113)GGG>GAG   | p.G371E  |
| Pat_08 | Post-Resistance | MECOM    | 2122   | 37 | 3 | 168838897 | 168838897 | Missense_Mutation | SNP | G | A | 56  | 96  | c.515C>T   | c.(514-516)TCG>TTG     | p.S172L  |
| Pat_08 | Post-Resistance | TP63     | 8626   | 37 | 3 | 189455588 | 189455588 | Missense_Mutation | SNP | C | T | 84  | 130 | c.122C>T   | c.(121-123)TCC>TTC     | p.S41F   |
| Pat_08 | Post-Resistance | MUC4     | 4585   | 37 | 3 | 195508133 | 195508133 | Missense_Mutation | SNP | G | A | 3   | 22  | c.9934C>T  | c.(9934-9936)CCT>TCT   | p.P3312S |
| Pat_08 | Post-Resistance | MUC4     | 4585   | 37 | 3 | 195511925 | 195511925 | Missense_Mutation | SNP | A | G | 6   | 25  | c.6526T>C  | c.(6526-6528)TCT>CCT   | p.S2176P |
| Pat_08 | Post-Resistance | SLC26A1  | 10861  | 37 | 4 | 984951    | 984951    | Missense_Mutation | SNP | C | T | 4   | 93  | c.541G>A   | c.(541-543)GCC>ACC     | p.A181T  |
| Pat_08 | Post-Resistance | TACC3    | 10460  | 37 | 4 | 1730226   | 1730226   | Missense_Mutation | SNP | C | T | 35  | 78  | c.1097C>T  | c.(1096-1098)CCC>CTC   | p.P366L  |
| Pat_08 | Post-Resistance | DEFB131  | 644414 | 37 | 4 | 9452106   | 9452106   | Missense_Mutation | SNP | G | A | 14  | 50  | c.79G>A    | c.(79-81)GAT>AAT       | p.D27N   |
| Pat_08 | Post-Resistance | UGT2A3   | 79799  | 37 | 4 | 69817123  | 69817123  | Missense_Mutation | SNP | C | T | 29  | 55  | c.356G>A   | c.(355-357)GGA>GAA     | p.G119E  |
| Pat_08 | Post-Resistance | PARM1    | 25849  | 37 | 4 | 75938040  | 75938040  | Missense_Mutation | SNP | C | T | 304 | 419 | c.449C>T   | c.(448-450)TCC>TTC     | p.S150F  |
| Pat_08 | Post-Resistance | NAA11    | 84779  | 37 | 4 | 80246759  | 80246759  | Missense_Mutation | SNP | C | T | 44  | 51  | c.273G>A   | c.(271-273)ATG>ATA     | p.M91I   |
| Pat_08 | Post-Resistance | ARHGAP24 | 83478  | 37 | 4 | 86863344  | 86863344  | Missense_Mutation | SNP | C | T | 64  | 101 | c.517C>T   | c.(517-519)CTC>TTC     | p.L173F  |
| Pat_08 | Post-Resistance | DSPP     | 1834   | 37 | 4 | 88535148  | 88535148  | Missense_Mutation | SNP | G | A | 4   | 328 | c.1334G>A  | c.(1333-1335)AGC>AAC   | p.S445N  |
| Pat_08 | Post-Resistance | IBSP     | 3381   | 37 | 4 | 88732988  | 88732988  | Missense_Mutation | SNP | G | A | 104 | 218 | c.880G>A   | c.(880-882)GAA>AAA     | p.E294K  |
| Pat_08 | Post-Resistance | FAM190A  | 401145 | 37 | 4 | 91229782  | 91229782  | Missense_Mutation | SNP | C | T | 48  | 43  | c.347C>T   | c.(346-348)TCT>TTT     | p.S116F  |
| Pat_08 | Post-Resistance | ADH1C    | 126    | 37 | 4 | 100266089 | 100266089 | Missense_Mutation | SNP | G | A | 201 | 339 | c.497C>T   | c.(496-498)CCC>CTC     | p.P166L  |
| Pat_08 | Post-Resistance | FAT4     | 79633  | 37 | 4 | 126372799 | 126372799 | Missense_Mutation | SNP | C | T | 149 | 240 | c.10628C>T | c.(10627-10629)CCC>CTC | p.P3543L |
| Pat_08 | Post-Resistance | PCDH18   | 54510  | 37 | 4 | 138451129 | 138451129 | Missense_Mutation | SNP | G | A | 149 | 260 | c.2114C>T  | c.(2113-2115)TCC>TTC   | p.S705F  |
| Pat_08 | Post-Resistance | LRBA     | 987    | 37 | 4 | 151837674 | 151837674 | Missense_Mutation | SNP | C | T | 27  | 60  | c.773G>A   | c.(772-774)AGA>AAA     | p.R258K  |
| Pat_08 | Post-Resistance | FSTL5    | 56884  | 37 | 4 | 162376261 | 162376261 | Missense_Mutation | SNP | C | A | 78  | 113 | c.1736G>T  | c.(1735-1737)GGG>GTG   | p.G579V  |
| Pat_08 | Post-Resistance | 1-Mar    | 55016  | 37 | 4 | 164507014 | 164507014 | Missense_Mutation | SNP | G | A | 66  | 95  | c.310C>T   | c.(310-312)CGC>TGC     | p.R104C  |
| Pat_08 | Post-Resistance | ANXA10   | 11199  | 37 | 4 | 169099049 | 169099049 | Nonsense_Mutation | SNP | G | A | 133 | 271 | c.543G>A   | c.(541-543)TGG>TGA     | p.W181*  |
| Pat_08 | Post-Resistance | GALNT7   | 51809  | 37 | 4 | 174242826 | 174242826 | Missense_Mutation | SNP | A | T | 41  | 62  | c.1932A>T  | c.(1930-1932)AAA>AAT   | p.K644N  |
| Pat_08 | Post-Resistance | SNX25    | 83891  | 37 | 4 | 186263251 | 186263251 | Missense_Mutation | SNP | T | C | 155 | 211 | c.1676T>C  | c.(1675-1677)TTA>TCA   | p.L559S  |
| Pat_08 | Post-Resistance | SEMA5A   | 9037   | 37 | 5 | 9197374   | 9197374   | Missense_Mutation | SNP | C | T | 101 | 184 | c.974G>A   | c.(973-975)AGC>AAC     | p.S325N  |
| Pat_08 | Post-Resistance | CTNND2   | 1501   | 37 | 5 | 11732369  | 11732369  | Missense_Mutation | SNP | G | A | 85  | 178 | c.53C>T    | c.(52-54)CCA>CTA       | p.P18L   |
| Pat_08 | Post-Resistance | DNAH5    | 1767   | 37 | 5 | 13714578  | 13714578  | Missense_Mutation | SNP | G | C | 4   | 372 | c.13061C>G | c.(13060-13062)GCG>GGC | p.A4354G |
| Pat_08 | Post-Resistance | DNAH5    | 1767   | 37 | 5 | 13823476  | 13823476  | Missense_Mutation | SNP | C | T | 55  | 67  | c.6583G>A  | c.(6583-6585)GAT>AAT   | p.D2195N |
| Pat_08 | Post-Resistance | CDH18    | 1016   | 37 | 5 | 19571761  | 19571761  | Missense_Mutation | SNP | C | T | 114 | 152 | c.1180G>A  | c.(1180-1182)GAA>AAA   | p.E394K  |
| Pat_08 | Post-Resistance | RAI14    | 26064  | 37 | 5 | 34814746  | 34814746  | Missense_Mutation | SNP | C | T | 66  | 139 | c.911C>T   | c.(910-912)TCG>TTG     | p.S304L  |
| Pat_08 | Post-Resistance | UGT3A1   | 133688 | 37 | 5 | 35965946  | 35965946  | Missense_Mutation | SNP | C | T | 45  | 78  | c.385G>A   | c.(385-387)GAT>AAT     | p.D129N  |
| Pat_08 | Post-Resistance | SLC1A3   | 6507   | 37 | 5 | 36686171  | 36686171  | Missense_Mutation | SNP | C | T | 78  | 126 | c.1429C>T  | c.(1429-1431)CGC>TGC   | p.R477C  |
| Pat_08 | Post-Resistance | PLK2     | 10769  | 37 | 5 | 57752362  | 57752362  | Missense_Mutation | SNP | T | C | 4   | 390 | c.1211A>G  | c.(1210-1212)AAG>AGG   | p.K404R  |
| Pat_08 | Post-Resistance | RAB3C    | 115827 | 37 | 5 | 57913641  | 57913641  | Missense_Mutation | SNP | G | A | 23  | 49  | c.196G>A   | c.(196-198)GAT>AAT     | p.D66N   |
| Pat_08 | Post-Resistance | ADAMTS6  | 11174  | 37 | 5 | 64483859  | 64483859  | Missense_Mutation | SNP | G | A | 96  | 154 | c.2894C>T  | c.(2893-2895)GCT>GTT   | p.A965V  |
| Pat_08 | Post-Resistance | FAM169A  | 26049  | 37 | 5 | 74077829  | 74077829  | Missense_Mutation | SNP | G | A | 15  | 136 | c.1469C>T  | c.(1468-1470)CCA>CTA   | p.P490L  |
| Pat_08 | Post-Resistance | SPZ1     | 84654  | 37 | 5 | 79616605  | 79616605  | Missense_Mutation | SNP | C | G | 15  | 198 | c.571C>G   | c.(571-573)CAC>GAG     | p.Q191E  |
| Pat_08 | Post-Resistance | GPR98    | 84059  | 37 | 5 | 89949415  | 89949415  | Missense_Mutation | SNP | C | T | 38  | 57  | c.4024C>T  | c.(4024-4026)CCA>TCA   | p.P1342S |
| Pat_08 | Post-Resistance | TSSK1B   | 83942  | 37 | 5 | 112770218 | 112770218 | Missense_Mutation | SNP | C | T | 39  | 63  | c.319G>A   | c.(319-321)GCC>ACC     | p.A107T  |
| Pat_08 | Post-Resistance | ADAMTS19 | 171019 | 37 | 5 | 128863489 | 128863489 | Missense_Mutation | SNP | C | T | 125 | 66  | c.1117C>T  | c.(1117-1119)CGT>TGT   | p.R373C  |
| Pat_08 | Post-Resistance | FSTL4    | 23105  | 37 | 5 | 132652260 | 132652260 | Missense_Mutation | SNP | C | T | 46  | 17  | c.494G>A   | c.(493-495)GGA>GAA     | p.G165E  |
| Pat_08 | Post-Resistance | CTNNA1   | 1495   | 37 | 5 | 138265031 | 138265031 | Missense_Mutation | SNP | G | A | 3   | 87  | c.1996G>A  | c.(1996-1998)GGC>AGC   | p.G666S  |
| Pat_08 | Post-Resistance | PCDHB17  | 54661  | 37 | 5 | 140536771 | 140536771 | Missense_Mutation | SNP | G | A | 23  | 28  | c.1192G>A  | c.(1192-1194)GAA>AAA   | p.E398K  |
| Pat_08 | Post-Resistance | PPP2R2B  | 5521   | 37 | 5 | 146017937 | 146017937 | Missense_Mutation | SNP | C | T | 75  | 179 | c.667G>A   | c.(667-669)GAG>AAG     | p.E223K  |
| Pat_08 | Post-Resistance | DPYSL3   | 1809   | 37 | 5 | 146781130 | 146781130 | Missense_Mutation | SNP | G | A | 36  | 42  | c.941C>T   | c.(940-942)CCG>CTG     | p.P314L  |
| Pat_08 | Post-Resistance | PDGFRB   | 5159   | 37 | 5 | 149510138 | 149510138 | Missense_Mutation | SNP | G | A | 4   | 419 | c.1331C>T  | c.(1330-1332)CCG>CTG   | p.P444L  |
| Pat_08 | Post-Resistance | GABRA6   | 2559   | 37 | 5 | 161115979 | 161115979 | Missense_Mutation | SNP | C | T | 100 | 67  | c.250C>T   | c.(250-252)CGC>TGC     | p.R84C   |

|        |                 |          |        |    |   |           |           |                   |     |    |    |     |     |                |                      |               |
|--------|-----------------|----------|--------|----|---|-----------|-----------|-------------------|-----|----|----|-----|-----|----------------|----------------------|---------------|
| Pat_08 | Post-Resistance | ODZ2     | 57451  | 37 | 5 | 167622180 | 167622180 | Splice_Site       | SNP | G  | A  | 15  | 27  | c.2754_splice  | c.e15-1              | p.S918_splice |
| Pat_08 | Post-Resistance | ARL10    | 285598 | 37 | 5 | 175793384 | 175793384 | Missense_Mutation | SNP | C  | T  | 6   | 18  | c.185C>T       | c.(184-186)CCC>CTC   | p.P62L        |
| Pat_08 | Post-Resistance | RASGEF1C | 255426 | 37 | 5 | 179529070 | 179529070 | Splice_Site       | SNP | C  | T  | 25  | 80  | c.1376_splice  | c.e12+1              | p.R459_splice |
| Pat_08 | Post-Resistance | FOXC1    | 2296   | 37 | 6 | 1611150   | 1611150   | Missense_Mutation | SNP | A  | G  | 30  | 376 | c.470A>G       | c.(469-471)GAC>GGC   | p.D157G       |
| Pat_08 | Post-Resistance | DSP      | 1832   | 37 | 6 | 7580784   | 7580784   | Missense_Mutation | SNP | T  | G  | 110 | 445 | c.4361T>G      | c.(4360-4362)GTC>GGC | p.V1454G      |
| Pat_08 | Post-Resistance | MAK      | 4117   | 37 | 6 | 10802187  | 10802187  | Missense_Mutation | SNP | C  | T  | 68  | 292 | c.769G>A       | c.(769-771)GCT>ACT   | p.A257T       |
| Pat_08 | Post-Resistance | HIVEP1   | 3096   | 37 | 6 | 12123018  | 12123018  | Missense_Mutation | SNP | C  | T  | 140 | 587 | c.2990C>T      | c.(2989-2991)CCT>CTT | p.P997L       |
| Pat_08 | Post-Resistance | SCAND3   | 114821 | 37 | 6 | 28539827  | 28539828  | Missense_Mutation | DNP | CC | TT | 31  | 128 | .3838_3839GG>A | c.(3838-3840)GGA>AAA | p.G1280K      |
| Pat_08 | Post-Resistance | SCAND3   | 114821 | 37 | 6 | 28540785  | 28540785  | Missense_Mutation | SNP | C  | T  | 52  | 129 | c.2881G>A      | c.(2881-2883)GAA>AAA | p.E961K       |
| Pat_08 | Post-Resistance | OR2J2    | 26707  | 37 | 6 | 29141910  | 29141910  | Nonsense_Mutation | SNP | G  | A  | 200 | 499 | c.498G>A       | c.(496-498)TGG>TGA   | p.W166*       |
| Pat_08 | Post-Resistance | MDC1     | 9656   | 37 | 6 | 30672288  | 30672288  | Missense_Mutation | SNP | C  | A  | 10  | 664 | c.4672G>T      | c.(4672-4674)GGC>TGC | p.G1558C      |
| Pat_08 | Post-Resistance | DDR1     | 780    | 37 | 6 | 30860230  | 30860230  | Missense_Mutation | SNP | C  | T  | 35  | 69  | c.1010C>T      | c.(1009-1011)CCC>CTC | p.P337L       |
| Pat_08 | Post-Resistance | TNXB     | 7148   | 37 | 6 | 32026008  | 32026008  | Missense_Mutation | SNP | G  | A  | 43  | 144 | c.7652C>T      | c.(7651-7653)TCC>TTC | p.S2551F      |
| Pat_08 | Post-Resistance | HLA-DRA  | 3122   | 37 | 6 | 32410472  | 32410472  | Splice_Site       | SNP | T  | C  | 192 | 436 | c.328_splice   | c.e2+2               | p.V110_splice |
| Pat_08 | Post-Resistance | COL11A2  | 1302   | 37 | 6 | 33136737  | 33136737  | Missense_Mutation | SNP | G  | A  | 95  | 274 | c.3847C>T      | c.(3847-3849)CCT>TCT | p.P1283S      |
| Pat_08 | Post-Resistance | LYPLA2P1 | 653639 | 37 | 6 | 33333333  | 33333333  | Missense_Mutation | SNP | G  | A  | 5   | 53  | c.673C>T       | c.(673-675)CCT>TCT   | p.P225S       |
| Pat_08 | Post-Resistance | IP6K3    | 117283 | 37 | 6 | 33690517  | 33690517  | Missense_Mutation | SNP | C  | T  | 101 | 249 | c.1213G>A      | c.(1213-1215)GAT>AAT | p.D405N       |
| Pat_08 | Post-Resistance | GLP1R    | 2740   | 37 | 6 | 39047471  | 39047471  | Missense_Mutation | SNP | C  | T  | 50  | 160 | c.1175C>T      | c.(1174-1176)TCC>TTC | p.S392F       |
| Pat_08 | Post-Resistance | TREML4   | 285852 | 37 | 6 | 41196525  | 41196525  | Missense_Mutation | SNP | G  | A  | 112 | 352 | c.137G>A       | c.(136-138)AGA>AAA   | p.R46K        |
| Pat_08 | Post-Resistance | ZNF318   | 24149  | 37 | 6 | 43324886  | 43324886  | Missense_Mutation | SNP | T  | C  | 18  | 365 | c.1166A>G      | c.(1165-1167)GAC>GGC | p.D389G       |
| Pat_08 | Post-Resistance | POLH     | 5429   | 37 | 6 | 43582164  | 43582164  | Missense_Mutation | SNP | C  | T  | 46  | 742 | c.2012C>T      | c.(2011-2013)CCC>CTC | p.P671L       |
| Pat_08 | Post-Resistance | TDRD6    | 221400 | 37 | 6 | 46659190  | 46659190  | Nonsense_Mutation | SNP | G  | T  | 141 | 338 | c.3325G>T      | c.(3325-3327)GAA>TAA | p.E1109*      |
| Pat_08 | Post-Resistance | GPR115   | 221393 | 37 | 6 | 47681873  | 47681873  | Missense_Mutation | SNP | T  | G  | 128 | 101 | c.892T>G       | c.(892-894)TTG>GTG   | p.L298V       |
| Pat_08 | Post-Resistance | FAM83B   | 222584 | 37 | 6 | 54735196  | 54735196  | Missense_Mutation | SNP | G  | A  | 103 | 313 | c.152G>A       | c.(151-153)CGA>CAA   | p.R51Q        |
| Pat_08 | Post-Resistance | GFRAL    | 389400 | 37 | 6 | 55196641  | 55196641  | Missense_Mutation | SNP | G  | A  | 52  | 123 | c.151G>A       | c.(151-153)GAT>AAT   | p.D51N        |
| Pat_08 | Post-Resistance | KIAA1586 | 57691  | 37 | 6 | 56919090  | 56919090  | Missense_Mutation | SNP | T  | G  | 42  | 98  | c.1793T>G      | c.(1792-1794)TTT>TGT | p.F598C       |
| Pat_08 | Post-Resistance | COL9A1   | 1297   | 37 | 6 | 70961981  | 70961981  | Missense_Mutation | SNP | C  | T  | 71  | 137 | c.1802G>A      | c.(1801-1803)GGA>GAA | p.G601E       |
| Pat_08 | Post-Resistance | COL9A1   | 1297   | 37 | 6 | 70984435  | 70984435  | Missense_Mutation | SNP | G  | A  | 49  | 78  | c.1016C>T      | c.(1015-1017)TCA>TTA | p.S339L       |
| Pat_08 | Post-Resistance | RIMS1    | 22999  | 37 | 6 | 73110352  | 73110352  | Missense_Mutation | SNP | T  | C  | 135 | 240 | c.5015T>C      | c.(5014-5016)CTC>CCC | p.L1672P      |
| Pat_08 | Post-Resistance | EEF1A1   | 1915   | 37 | 6 | 74229701  | 74229701  | Missense_Mutation | SNP | C  | T  | 62  | 87  | c.49G>A        | c.(49-51)GAT>AAT     | p.D17N        |
| Pat_08 | Post-Resistance | CNR1     | 1268   | 37 | 6 | 88854819  | 88854819  | Nonsense_Mutation | SNP | G  | A  | 16  | 54  | c.175C>T       | c.(175-177)CAA>TAA   | p.Q59*        |
| Pat_08 | Post-Resistance | RFX6     | 222546 | 37 | 6 | 117249966 | 117249966 | Missense_Mutation | SNP | G  | A  | 195 | 344 | c.2443G>A      | c.(2443-2445)GGA>AGA | p.G815R       |
| Pat_08 | Post-Resistance | C6orf204 | 387119 | 37 | 6 | 118801656 | 118801656 | Missense_Mutation | SNP | C  | T  | 55  | 106 | c.1766G>A      | c.(1765-1767)AGA>AAA | p.R589K       |
| Pat_08 | Post-Resistance | FAM184A  | 79632  | 37 | 6 | 119345282 | 119345282 | Missense_Mutation | SNP | C  | T  | 48  | 95  | c.856G>A       | c.(856-858)GAT>AAT   | p.D286N       |
| Pat_08 | Post-Resistance | RSPO3    | 84870  | 37 | 6 | 127476496 | 127476496 | Missense_Mutation | SNP | C  | T  | 75  | 121 | c.547C>T       | c.(547-549)CCT>TCT   | p.P183S       |
| Pat_08 | Post-Resistance | PTPRK    | 5796   | 37 | 6 | 128388791 | 128388791 | Missense_Mutation | SNP | C  | T  | 119 | 228 | c.2030G>A      | c.(2029-2031)GGA>GAA | p.G677E       |
| Pat_08 | Post-Resistance | L3MBTL3  | 84456  | 37 | 6 | 130425708 | 130425708 | Missense_Mutation | SNP | C  | T  | 118 | 166 | c.1874C>T      | c.(1873-1875)TCC>TTC | p.S625F       |
| Pat_08 | Post-Resistance | SAMD3    | 154075 | 37 | 6 | 130465798 | 130465798 | Missense_Mutation | SNP | C  | T  | 92  | 147 | c.1430G>A      | c.(1429-1431)AGG>AAG | p.R477K       |
| Pat_08 | Post-Resistance | ALDH8A1  | 64577  | 37 | 6 | 135239986 | 135239986 | Missense_Mutation | SNP | C  | T  | 155 | 211 | c.1031G>A      | c.(1030-1032)AGA>AAA | p.R344K       |
| Pat_08 | Post-Resistance | FBXO30   | 84085  | 37 | 6 | 146126961 | 146126961 | Missense_Mutation | SNP | G  | A  | 54  | 432 | c.581C>T       | c.(580-582)GCT>GTT   | p.A194V       |
| Pat_08 | Post-Resistance | TIAM2    | 26230  | 37 | 6 | 155450436 | 155450436 | Missense_Mutation | SNP | C  | T  | 75  | 172 | c.79C>T        | c.(79-81)CCT>TCT     | p.P27S        |
| Pat_08 | Post-Resistance | ARID1B   | 57492  | 37 | 6 | 157522541 | 157522541 | Missense_Mutation | SNP | G  | A  | 235 | 421 | c.4759G>A      | c.(4759-4761)GAG>AAG | p.E1587K      |
| Pat_08 | Post-Resistance | MLLT4    | 4301   | 37 | 6 | 168370511 | 168370511 | Missense_Mutation | SNP | T  | A  | 32  | 34  | c.5401T>A      | c.(5401-5403)TTC>ATC | p.F1801I      |
| Pat_08 | Post-Resistance | INTS1    | 26173  | 37 | 7 | 1513911   | 1513911   | Missense_Mutation | SNP | A  | G  | 26  | 76  | c.5722T>C      | c.(5722-5724)TTC>CTC | p.F1908L      |
| Pat_08 | Post-Resistance | SDK1     | 221935 | 37 | 7 | 4107511   | 4107511   | Missense_Mutation | SNP | G  | A  | 12  | 43  | c.2953G>A      | c.(2953-2955)GAC>AAC | p.D985N       |
| Pat_08 | Post-Resistance | KIAA0415 | 9907   | 37 | 7 | 4824003   | 4824003   | Splice_Site       | SNP | G  | A  | 3   | 48  | c.790_splice   | c.e6+1               | p.D264_splice |
| Pat_08 | Post-Resistance | STK31    | 56164  | 37 | 7 | 23776524  | 23776524  | Missense_Mutation | SNP | G  | A  | 13  | 79  | c.844G>A       | c.(844-846)GAA>AAA   | p.E282K       |



|        |                 |           |        |    |   |           |           |                   |     |   |   |     |     |            |                        |          |
|--------|-----------------|-----------|--------|----|---|-----------|-----------|-------------------|-----|---|---|-----|-----|------------|------------------------|----------|
| Pat_08 | Post-Resistance | HOXA4     | 3201   | 37 | 7 | 27168950  | 27168950  | Missense_Mutation | SNP | G | A | 96  | 220 | c.857C>T   | c.(856-858)TCG>TTG     | p.S286L  |
| Pat_08 | Post-Resistance | HECW1     | 23072  | 37 | 7 | 43351600  | 43351600  | Missense_Mutation | SNP | C | T | 87  | 268 | c.266C>T   | c.(265-267)TCC>TTC     | p.S89F   |
| Pat_08 | Post-Resistance | VOPP1     | 81552  | 37 | 7 | 55540681  | 55540681  | Missense_Mutation | SNP | G | A | 41  | 90  | c.386C>T   | c.(385-387)CCT>CTT     | p.P129L  |
| Pat_08 | Post-Resistance | ZNF679    | 168417 | 37 | 7 | 63726958  | 63726958  | Missense_Mutation | SNP | G | A | 135 | 429 | c.947G>A   | c.(946-948)AGA>AAA     | p.R316K  |
| Pat_08 | Post-Resistance | WBCSR17   | 64409  | 37 | 7 | 71177084  | 71177084  | Missense_Mutation | SNP | C | T | 89  | 227 | c.1750C>T  | c.(1750-1752)CGC>TGC   | p.R584C  |
| Pat_08 | Post-Resistance | PCLO      | 27445  | 37 | 7 | 82544688  | 82544688  | Missense_Mutation | SNP | G | A | 30  | 70  | c.12614C>T | c.(12613-12615)CCT>CTT | p.P4205L |
| Pat_08 | Post-Resistance | GRM3      | 2913   | 37 | 7 | 86394514  | 86394514  | Missense_Mutation | SNP | G | A | 87  | 332 | c.53G>A    | c.(52-54)GGA>GAA       | p.G18E   |
| Pat_08 | Post-Resistance | STEAP4    | 79689  | 37 | 7 | 87911999  | 87911999  | Missense_Mutation | SNP | C | T | 64  | 190 | c.941G>A   | c.(940-942)CGA>CAA     | p.R314Q  |
| Pat_08 | Post-Resistance | DYNC111   | 1780   | 37 | 7 | 95662058  | 95662058  | Missense_Mutation | SNP | G | A | 159 | 417 | c.1247G>A  | c.(1246-1248)JTG>TAT   | p.C416Y  |
| Pat_08 | Post-Resistance | BAIAP2L1  | 55971  | 37 | 7 | 97991713  | 97991713  | Missense_Mutation | SNP | C | T | 63  | 213 | c.83G>A    | c.(82-84)CGA>CAA       | p.R28Q   |
| Pat_08 | Post-Resistance | ACHE      | 43     | 37 | 7 | 100491517 | 100491517 | Missense_Mutation | SNP | C | T | 115 | 275 | c.337G>A   | c.(337-339)GGC>AGC     | p.G113S  |
| Pat_08 | Post-Resistance | NRCAM     | 4897   | 37 | 7 | 107880409 | 107880409 | Missense_Mutation | SNP | G | A | 73  | 258 | c.100C>T   | c.(100-102)CTT>TTT     | p.L34F   |
| Pat_08 | Post-Resistance | CFTR      | 1080   | 37 | 7 | 117175443 | 117175443 | Missense_Mutation | SNP | G | A | 54  | 152 | c.721G>A   | c.(721-723)GGG>AGG     | p.G241R  |
| Pat_08 | Post-Resistance | KCND2     | 3751   | 37 | 7 | 119914743 | 119914743 | Nonsense_Mutation | SNP | G | A | 128 | 326 | c.57G>A    | c.(55-57)TGG>TGA       | p.W19*   |
| Pat_08 | Post-Resistance | RNF148    | 378925 | 37 | 7 | 122342384 | 122342384 | Missense_Mutation | SNP | G | A | 463 | 402 | c.421C>T   | c.(421-423)CCC>TCC     | p.P141S  |
| Pat_08 | Post-Resistance | TSGA14    | 95681  | 37 | 7 | 130041725 | 130041725 | Missense_Mutation | SNP | T | A | 83  | 191 | c.639A>T   | c.(637-639)GAA>GAT     | p.E213D  |
| Pat_08 | Post-Resistance | TRIM24    | 8805   | 37 | 7 | 138266508 | 138266508 | Missense_Mutation | SNP | C | T | 32  | 98  | c.2785C>T  | c.(2785-2787)CCT>TCT   | p.P929S  |
| Pat_08 | Post-Resistance | BRAF      | 673    | 37 | 7 | 140453136 | 140453136 | Missense_Mutation | SNP | A | T | 826 | 75  | c.1799T>A  | c.(1798-1800)GTG>GAG   | p.V600E  |
| Pat_08 | Post-Resistance | TAS2R38   | 5726   | 37 | 7 | 141672855 | 141672855 | Missense_Mutation | SNP | G | A | 483 | 146 | c.635C>T   | c.(634-636)TCT>TTT     | p.S212F  |
| Pat_08 | Post-Resistance | TRPV6     | 55503  | 37 | 7 | 142574981 | 142574981 | Missense_Mutation | SNP | C | T | 24  | 341 | c.401G>A   | c.(400-402)CGA>CAA     | p.R134Q  |
| Pat_08 | Post-Resistance | TRPV5     | 56302  | 37 | 7 | 142625242 | 142625242 | Missense_Mutation | SNP | C | T | 57  | 137 | c.850G>A   | c.(850-852)GAC>AAC     | p.D284N  |
| Pat_08 | Post-Resistance | OR6V1     | 346517 | 37 | 7 | 142750371 | 142750371 | Missense_Mutation | SNP | G | A | 15  | 29  | c.934G>A   | c.(934-936)GCA>ACA     | p.A312T  |
| Pat_08 | Post-Resistance | CLCN1     | 1180   | 37 | 7 | 143018840 | 143018840 | Missense_Mutation | SNP | C | T | 74  | 130 | c.595C>T   | c.(595-597)CGT>TGT     | p.R199C  |
| Pat_08 | Post-Resistance | OR2F1     | 26211  | 37 | 7 | 143657859 | 143657859 | Missense_Mutation | SNP | C | A | 36  | 245 | c.796C>A   | c.(796-798)CCC>ACC     | p.P266T  |
| Pat_08 | Post-Resistance | ABP1      | 26     | 37 | 7 | 150554027 | 150554027 | Missense_Mutation | SNP | G | A | 93  | 231 | c.469G>A   | c.(469-471)GAA>AAA     | p.E157K  |
| Pat_08 | Post-Resistance | TNFRSF10C | 8794   | 37 | 8 | 22974270  | 22974270  | Missense_Mutation | SNP | A | C | 4   | 345 | c.506A>C   | c.(505-507)AAC>ACC     | p.N169T  |
| Pat_08 | Post-Resistance | SCARA5    | 286133 | 37 | 8 | 27779754  | 27779754  | Missense_Mutation | SNP | G | A | 17  | 29  | c.250C>T   | c.(250-252)CCG>TCG     | p.P84S   |
| Pat_08 | Post-Resistance | GSR       | 2936   | 37 | 8 | 30553929  | 30553929  | Missense_Mutation | SNP | A | G | 134 | 255 | c.763T>C   | c.(763-765)TCT>CCT     | p.S255P  |
| Pat_08 | Post-Resistance | IDO2      | 169355 | 37 | 8 | 39845421  | 39845421  | Missense_Mutation | SNP | G | A | 21  | 22  | c.520G>A   | c.(520-522)GGA>AGA     | p.G174R  |
| Pat_08 | Post-Resistance | PXDNL     | 137902 | 37 | 8 | 52321700  | 52321700  | Missense_Mutation | SNP | A | T | 13  | 31  | c.2484T>A  | c.(2482-2484)GAT>GAA   | p.D828E  |
| Pat_08 | Post-Resistance | PXDNL     | 137902 | 37 | 8 | 52412271  | 52412271  | Missense_Mutation | SNP | C | T | 118 | 245 | c.440G>A   | c.(439-441)AGA>AAA     | p.R147K  |
| Pat_08 | Post-Resistance | RP1       | 6101   | 37 | 8 | 55537568  | 55537568  | Nonsense_Mutation | SNP | C | T | 48  | 81  | c.1126C>T  | c.(1126-1128)CGA>TGA   | p.R376*  |
| Pat_08 | Post-Resistance | RP1       | 6101   | 37 | 8 | 55538973  | 55538973  | Missense_Mutation | SNP | C | T | 64  | 97  | c.2531C>T  | c.(2530-2532)TCT>TTT   | p.S844F  |
| Pat_08 | Post-Resistance | TRIM55    | 84675  | 37 | 8 | 67086730  | 67086730  | Nonsense_Mutation | SNP | C | T | 131 | 197 | c.1549C>T  | c.(1549-1551)CAG>TAG   | p.Q517*  |
| Pat_08 | Post-Resistance | CPA6      | 57094  | 37 | 8 | 68423876  | 68423876  | Missense_Mutation | SNP | T | G | 118 | 189 | c.332A>C   | c.(331-333)GAT>GCT     | p.D111A  |
| Pat_08 | Post-Resistance | KCNB2     | 9312   | 37 | 8 | 73480001  | 73480001  | Missense_Mutation | SNP | G | A | 96  | 261 | c.32G>A    | c.(31-33)AGG>AAG       | p.R11K   |
| Pat_08 | Post-Resistance | UBR5      | 51366  | 37 | 8 | 103354847 | 103354847 | Missense_Mutation | SNP | G | A | 4   | 318 | c.952C>T   | c.(952-954)CGT>TGT     | p.R318C  |
| Pat_08 | Post-Resistance | TRHR      | 7201   | 37 | 8 | 110100064 | 110100064 | Missense_Mutation | SNP | G | A | 88  | 303 | c.323G>A   | c.(322-324)GGA>GAA     | p.G108E  |
| Pat_08 | Post-Resistance | PKHD1L1   | 93035  | 37 | 8 | 110468517 | 110468517 | Missense_Mutation | SNP | C | T | 34  | 109 | c.6901C>T  | c.(6901-6903)CGC>TGC   | p.R2301C |
| Pat_08 | Post-Resistance | CSMD3     | 114788 | 37 | 8 | 113326683 | 113326683 | Missense_Mutation | SNP | T | G | 77  | 254 | c.7524A>C  | c.(7522-7524)GAA>GAC   | p.E2508D |
| Pat_08 | Post-Resistance | CSMD3     | 114788 | 37 | 8 | 113392596 | 113392596 | Missense_Mutation | SNP | G | A | 127 | 391 | c.6121C>T  | c.(6121-6123)CAT>TAT   | p.H2041Y |
| Pat_08 | Post-Resistance | FER1L6    | 654463 | 37 | 8 | 125061918 | 125061918 | Missense_Mutation | SNP | C | T | 90  | 175 | c.2795C>T  | c.(2794-2796)CCC>CTC   | p.P932L  |
| Pat_08 | Post-Resistance | COL22A1   | 169044 | 37 | 8 | 139611032 | 139611032 | Missense_Mutation | SNP | C | T | 50  | 136 | c.4295G>A  | c.(4294-4296)GGA>GAA   | p.G1432E |
| Pat_08 | Post-Resistance | TRAPPC9   | 83696  | 37 | 8 | 141460925 | 141460925 | Missense_Mutation | SNP | T | C | 5   | 51  | c.548A>G   | c.(547-549)GAG>GGG     | p.E183G  |
| Pat_08 | Post-Resistance | EIF2C2    | 27161  | 37 | 8 | 141545667 | 141545667 | Missense_Mutation | SNP | A | G | 75  | 202 | c.2171T>C  | c.(2170-2172)GTT>GCT   | p.V724A  |
| Pat_08 | Post-Resistance | PTPRD     | 5789   | 37 | 9 | 8341129   | 8341129   | Missense_Mutation | SNP | C | T | 181 | 88  | c.5087G>A  | c.(5086-5088)GGA>GAA   | p.G1696E |
| Pat_08 | Post-Resistance | CNTLN     | 54875  | 37 | 9 | 17466725  | 17466725  | Missense_Mutation | SNP | G | A | 3   | 35  | c.3688G>A  | c.(3688-3690)GTA>ATA   | p.V1230I |

|        |                 |          |        |    |   |           |           |                   |     |    |    |     |     |              |                      |          |
|--------|-----------------|----------|--------|----|---|-----------|-----------|-------------------|-----|----|----|-----|-----|--------------|----------------------|----------|
| Pat_08 | Post-Resistance | CDKN2A   | 1029   | 37 | 9 | 21971186  | 21971186  | Nonsense_Mutation | SNP | G  | A  | 18  | 8   | c.172C>T     | c.(172-174)CGA>TGA   | p.R58*   |
| Pat_08 | Post-Resistance | TAF1L    | 138474 | 37 | 9 | 32633029  | 32633029  | Missense_Mutation | SNP | T  | G  | 121 | 125 | c.2549A>C    | c.(2548-2550)AAA>ACA | p.K850T  |
| Pat_08 | Post-Resistance | OR2S2    | 56656  | 37 | 9 | 35957515  | 35957515  | Missense_Mutation | SNP | G  | A  | 186 | 301 | c.581C>T     | c.(580-582)TCC>TTC   | p.S194F  |
| Pat_08 | Post-Resistance | FRMPD1   | 22844  | 37 | 9 | 37692715  | 37692716  | Missense_Mutation | DNP | GG | AA | 98  | 200 | c.77_78GG>AA | c.(76-78)CGG>CAA     | p.R26Q   |
| Pat_08 | Post-Resistance | VPS13A   | 23230  | 37 | 9 | 79865130  | 79865130  | Missense_Mutation | SNP | C  | T  | 124 | 226 | c.2155C>T    | c.(2155-2157)CTT>TTT | p.L719F  |
| Pat_08 | Post-Resistance | FAM22F   | 54754  | 37 | 9 | 97082793  | 97082793  | Missense_Mutation | SNP | C  | G  | 4   | 83  | c.1065G>C    | c.(1063-1065)AAG>AAC | p.K355N  |
| Pat_08 | Post-Resistance | ZNF510   | 22869  | 37 | 9 | 99522622  | 99522622  | Missense_Mutation | SNP | C  | A  | 83  | 124 | c.490G>T     | c.(490-492)GTA>TTA   | p.V164L  |
| Pat_08 | Post-Resistance | OR13C9   | 286362 | 37 | 9 | 107380278 | 107380278 | Missense_Mutation | SNP | C  | T  | 103 | 170 | c.208G>A     | c.(208-210)GAC>AAC   | p.D70N   |
| Pat_08 | Post-Resistance | PTGS1    | 5742   | 37 | 9 | 125133515 | 125133515 | Missense_Mutation | SNP | C  | T  | 36  | 78  | c.58C>T      | c.(58-60)CCC>TCC     | p.P20S   |
| Pat_08 | Post-Resistance | NUP188   | 23511  | 37 | 9 | 131755873 | 131755873 | Nonsense_Mutation | SNP | C  | T  | 144 | 214 | c.2917C>T    | c.(2917-2919)CGA>TGA | p.R973*  |
| Pat_08 | Post-Resistance | BAT2L1   | 84726  | 37 | 9 | 134350643 | 134350643 | Missense_Mutation | SNP | C  | T  | 26  | 51  | c.3127C>T    | c.(3127-3129)CCC>TCC | p.P1043S |
| Pat_08 | Post-Resistance | SURF6    | 6838   | 37 | 9 | 136200589 | 136200589 | Nonsense_Mutation | SNP | G  | A  | 49  | 65  | c.358C>T     | c.(358-360)CGA>TGA   | p.R120*  |
| Pat_08 | Post-Resistance | MRPS2    | 51116  | 37 | 9 | 138395713 | 138395713 | Missense_Mutation | SNP | G  | A  | 4   | 215 | c.625G>A     | c.(625-627)GTG>ATG   | p.V209M  |
| Pat_08 | Post-Resistance | LCN10    | 414332 | 37 | 9 | 139636409 | 139636409 | Missense_Mutation | SNP | C  | T  | 12  | 18  | c.181G>A     | c.(181-183)GAC>AAC   | p.D61N   |
| Pat_08 | Post-Resistance | MXRA5    | 25878  | 37 | X | 3240874   | 3240874   | Missense_Mutation | SNP | G  | A  | 61  | 90  | c.2852C>T    | c.(2851-2853)TCG>TTG | p.S951L  |
| Pat_08 | Post-Resistance | AMELX    | 265    | 37 | X | 11312955  | 11312955  | Missense_Mutation | SNP | C  | T  | 142 | 262 | c.47C>T      | c.(46-48)GCC>GTC     | p.A16V   |
| Pat_08 | Post-Resistance | PIGA     | 5277   | 37 | X | 15342966  | 15342966  | Missense_Mutation | SNP | G  | A  | 33  | 56  | c.1009C>T    | c.(1009-1011)CCT>TCT | p.P337S  |
| Pat_08 | Post-Resistance | YY2      | 404281 | 37 | X | 21871579  | 21871579  | Missense_Mutation | SNP | C  | A  | 192 | 371 | c.628C>A     | c.(628-630)CAA>AAA   | p.Q210K  |
| Pat_08 | Post-Resistance | EIF2S3   | 1968   | 37 | X | 24089743  | 24089743  | Missense_Mutation | SNP | G  | A  | 51  | 356 | c.1081G>A    | c.(1081-1083)GTC>ATC | p.V361I  |
| Pat_08 | Post-Resistance | MAGEB18  | 286514 | 37 | X | 26157607  | 26157607  | Missense_Mutation | SNP | C  | T  | 14  | 33  | c.505C>T     | c.(505-507)CCC>TCC   | p.P169S  |
| Pat_08 | Post-Resistance | FAM47C   | 442444 | 37 | X | 37028026  | 37028026  | Missense_Mutation | SNP | T  | C  | 9   | 684 | c.1543T>C    | c.(1543-1545)TCT>CCT | p.S515P  |
| Pat_08 | Post-Resistance | OTC      | 5009   | 37 | X | 38212012  | 38212012  | Missense_Mutation | SNP | G  | A  | 81  | 139 | c.63G>A      | c.(61-63)ATG>ATA     | p.M21I   |
| Pat_08 | Post-Resistance | CXorf38  | 159013 | 37 | X | 40496317  | 40496317  | Missense_Mutation | SNP | A  | T  | 78  | 102 | c.563T>A     | c.(562-564)TTT>TAT   | p.F188Y  |
| Pat_08 | Post-Resistance | RBM3     | 5935   | 37 | X | 48433978  | 48433978  | Missense_Mutation | SNP | C  | T  | 3   | 78  | c.133C>T     | c.(133-135)CGG>TGG   | p.R45W   |
| Pat_08 | Post-Resistance | MTMR8    | 55613  | 37 | X | 63555965  | 63555965  | Missense_Mutation | SNP | G  | A  | 46  | 107 | c.1145C>T    | c.(1144-1146)TCC>TTC | p.S382F  |
| Pat_08 | Post-Resistance | EDA      | 1896   | 37 | X | 69247866  | 69247866  | Missense_Mutation | SNP | C  | A  | 13  | 26  | c.686C>A     | c.(685-687)CCT>CAT   | p.P229H  |
| Pat_08 | Post-Resistance | DLG3     | 1741   | 37 | X | 69712000  | 69712000  | Missense_Mutation | SNP | A  | G  | 7   | 20  | c.1564A>G    | c.(1564-1566)AGC>GGC | p.S522G  |
| Pat_08 | Post-Resistance | KIAA2022 | 340533 | 37 | X | 73960184  | 73960184  | Missense_Mutation | SNP | C  | T  | 212 | 394 | c.4208G>A    | c.(4207-4209)GGG>GAG | p.G1403E |
| Pat_08 | Post-Resistance | LPAR4    | 2846   | 37 | X | 78010473  | 78010473  | Missense_Mutation | SNP | C  | T  | 274 | 499 | c.107C>T     | c.(106-108)TCC>TTC   | p.S36F   |
| Pat_08 | Post-Resistance | APOOL    | 139322 | 37 | X | 84310875  | 84310875  | Missense_Mutation | SNP | C  | T  | 19  | 52  | c.338C>T     | c.(337-339)CCG>CTG   | p.P113L  |
| Pat_08 | Post-Resistance | KLHL4    | 56062  | 37 | X | 86880629  | 86880629  | Missense_Mutation | SNP | C  | T  | 72  | 148 | c.1157C>T    | c.(1156-1158)ACC>ATC | p.T386I  |
| Pat_08 | Post-Resistance | CXorf57  | 55086  | 37 | X | 105912404 | 105912404 | Missense_Mutation | SNP | G  | A  | 308 | 532 | c.2281G>A    | c.(2281-2283)GAG>AAG | p.E761K  |
| Pat_08 | Post-Resistance | TEX13B   | 56156  | 37 | X | 107225012 | 107225012 | Missense_Mutation | SNP | C  | T  | 268 | 454 | c.346G>A     | c.(346-348)GAA>AAA   | p.E116K  |
| Pat_08 | Post-Resistance | KIAA1210 | 57481  | 37 | X | 118222570 | 118222570 | Missense_Mutation | SNP | G  | A  | 28  | 54  | c.2623C>T    | c.(2623-2625)CTC>TTC | p.L875F  |
| Pat_08 | Post-Resistance | ELF4     | 2000   | 37 | X | 129215252 | 129215252 | Missense_Mutation | SNP | C  | T  | 247 | 459 | c.53G>A      | c.(52-54)GGG>GAG     | p.G18E   |
| Pat_08 | Post-Resistance | IGSF1    | 3547   | 37 | X | 130419321 | 130419321 | Missense_Mutation | SNP | C  | T  | 153 | 286 | c.499G>A     | c.(499-501)GGA>AGA   | p.G167R  |
| Pat_08 | Post-Resistance | MAGEC1   | 9947   | 37 | X | 140994505 | 140994505 | Missense_Mutation | SNP | C  | T  | 137 | 307 | c.1315C>T    | c.(1315-1317)CCC>TCC | p.P439S  |
| Pat_08 | Post-Resistance | FMR1     | 2332   | 37 | X | 147026391 | 147026391 | Missense_Mutation | SNP | A  | G  | 36  | 50  | c.1474A>G    | c.(1474-1476)ACT>GCT | p.T492A  |
| Pat_08 | Post-Resistance | MAGEA4   | 4103   | 37 | X | 151092719 | 151092719 | Nonsense_Mutation | SNP | C  | T  | 130 | 242 | c.583C>T     | c.(583-585)CAG>TAG   | p.Q195*  |
| Pat_08 | Post-Resistance | MAGEA3   | 4102   | 37 | X | 151935383 | 151935383 | Missense_Mutation | SNP | G  | A  | 192 | 397 | c.784C>T     | c.(784-786)CCC>TCC   | p.P262S  |
| Pat_08 | Post-Resistance | PLXNA3   | 55558  | 37 | X | 153697535 | 153697535 | Missense_Mutation | SNP | C  | T  | 61  | 164 | c.4571C>T    | c.(4570-4572)CCC>CTC | p.P1524L |
| Pat_08 | Post-Resistance | F8       | 2157   | 37 | X | 154132258 | 154132258 | Missense_Mutation | SNP | G  | A  | 171 | 306 | c.5921C>T    | c.(5920-5922)TCT>TTT | p.S1974F |
| Pat_08 | Post-Resistance | TMLHE    | 55217  | 37 | X | 154736697 | 154736697 | Missense_Mutation | SNP | G  | A  | 229 | 280 | c.857C>T     | c.(856-858)CCT>CTT   | p.P286L  |
| Pat_11 | Pre-Treatment   | KLHL17   | 339451 | 37 | 1 | 900402    | 900402    | Missense_Mutation | SNP | G  | A  | 4   | 82  | c.1760G>A    | c.(1759-1761)GGT>GAT | p.G587D  |
| Pat_11 | Pre-Treatment   | PRDM16   | 63976  | 37 | 1 | 3319415   | 3319415   | Missense_Mutation | SNP | G  | A  | 4   | 151 | c.737G>A     | c.(736-738)CGG>CAG   | p.R246Q  |
| Pat_11 | Pre-Treatment   | SPSB1    | 80176  | 37 | 1 | 9416131   | 9416131   | Nonsense_Mutation | SNP | C  | T  | 6   | 272 | c.181C>T     | c.(181-183)CGA>TGA   | p.R61*   |
| Pat_11 | Pre-Treatment   | PEX14    | 5195   | 37 | 1 | 10689972  | 10689972  | Missense_Mutation | SNP | T  | G  | 51  | 108 | c.1062T>G    | c.(1060-1062)GAT>GAG | p.D354E  |

|        |               |           |           |    |   |           |           |                   |     |    |    |     |     |                 |                      |          |
|--------|---------------|-----------|-----------|----|---|-----------|-----------|-------------------|-----|----|----|-----|-----|-----------------|----------------------|----------|
| Pat_11 | Pre-Treatment | OTUD3     | 23252     | 37 | 1 | 20234196  | 20234196  | Missense_Mutation | SNP | C  | T  | 4   | 167 | c.1154C>T       | c.(1153-1155)ACG>ATG | p.T385M  |
| Pat_11 | Pre-Treatment | ECE1      | 1889      | 37 | 1 | 21548295  | 21548295  | Missense_Mutation | SNP | G  | A  | 6   | 601 | c.2081C>T       | c.(2080-2082)TCG>TTG | p.S694L  |
| Pat_11 | Pre-Treatment | HSPG2     | 3339      | 37 | 1 | 22174273  | 22174273  | Missense_Mutation | SNP | T  | G  | 30  | 36  | c.7934A>C       | c.(7933-7935)CAG>CCG | p.Q2645P |
| Pat_11 | Pre-Treatment | CELA3B    | 23436     | 37 | 1 | 22313162  | 22313162  | Missense_Mutation | SNP | G  | A  | 4   | 109 | c.781G>A        | c.(781-783)GAC>AAC   | p.D261N  |
| Pat_11 | Pre-Treatment | EPHA8     | 2046      | 37 | 1 | 22927440  | 22927441  | Missense_Mutation | DNP | GC | AT | 5   | 217 | ..2588_2589GC>A | c.(2587-2589)TGC>TAT | p.C863Y  |
| Pat_11 | Pre-Treatment | MAN1C1    | 57134     | 37 | 1 | 26075788  | 26075788  | Missense_Mutation | SNP | G  | A  | 4   | 82  | c.796G>A        | c.(796-798)GGG>AGG   | p.G266R  |
| Pat_11 | Pre-Treatment | AHDC1     | 27245     | 37 | 1 | 27876631  | 27876631  | Missense_Mutation | SNP | G  | A  | 4   | 164 | c.1996C>T       | c.(1996-1998)CGG>TGG | p.R666W  |
| Pat_11 | Pre-Treatment | EIF3I     | 8668      | 37 | 1 | 32691835  | 32691835  | Missense_Mutation | SNP | G  | A  | 5   | 248 | c.314G>A        | c.(313-315)GGC>GAC   | p.G105D  |
| Pat_11 | Pre-Treatment | LCK       | 3932      | 37 | 1 | 32740659  | 32740659  | Missense_Mutation | SNP | G  | A  | 35  | 159 | c.253G>A        | c.(253-255)GGG>AGG   | p.G85R   |
| Pat_11 | Pre-Treatment | KIAA0319L | 79932     | 37 | 1 | 35900511  | 35900511  | Missense_Mutation | SNP | C  | T  | 4   | 126 | c.3134G>A       | c.(3133-3135)CGG>CAG | p.R1045Q |
| Pat_11 | Pre-Treatment | NFYC      | 4802      | 37 | 1 | 41218859  | 41218859  | Nonsense_Mutation | SNP | C  | T  | 16  | 70  | c.328C>T        | c.(328-330)CAG>TAG   | p.Q110*  |
| Pat_11 | Pre-Treatment | HIVEP3    | 59269     | 37 | 1 | 42046388  | 42046388  | Missense_Mutation | SNP | G  | A  | 4   | 167 | c.4081C>T       | c.(4081-4083)CCC>TCC | p.P1361S |
| Pat_11 | Pre-Treatment | PTPRF     | 5792      | 37 | 1 | 44075097  | 44075097  | Missense_Mutation | SNP | G  | A  | 4   | 123 | c.3901G>A       | c.(3901-3903)GGA>AGA | p.G1301R |
| Pat_11 | Pre-Treatment | PRDX1     | 5052      | 37 | 1 | 45980605  | 45980605  | Missense_Mutation | SNP | G  | A  | 4   | 216 | c.323C>T        | c.(322-324)CCG>CTG   | p.P108L  |
| Pat_11 | Pre-Treatment | PCSK9     | 255738    | 37 | 1 | 55509558  | 55509558  | Missense_Mutation | SNP | G  | A  | 50  | 108 | c.250G>A        | c.(250-252)GAG>AAG   | p.E84K   |
| Pat_11 | Pre-Treatment | ROR1      | 4919      | 37 | 1 | 64515506  | 64515506  | Missense_Mutation | SNP | C  | T  | 4   | 234 | c.307C>T        | c.(307-309)CGG>TGG   | p.R103W  |
| Pat_11 | Pre-Treatment | COL24A1   | 255631    | 37 | 1 | 86557972  | 86557972  | Missense_Mutation | SNP | C  | T  | 4   | 95  | c.1631G>A       | c.(1630-1632)GGT>GAT | p.G544D  |
| Pat_11 | Pre-Treatment | HFM1      | 164045    | 37 | 1 | 91781722  | 91781723  | Missense_Mutation | DNP | GG | AA | 6   | 28  | ..2917_2918CC>T | c.(2917-2919)CCC>TTC | p.P973F  |
| Pat_11 | Pre-Treatment | TGFBR3    | 7049      | 37 | 1 | 92195405  | 92195405  | Missense_Mutation | SNP | C  | T  | 5   | 353 | c.694G>A        | c.(694-696)GTA>ATA   | p.V232I  |
| Pat_11 | Pre-Treatment | ALG14     | 199857    | 37 | 1 | 95448657  | 95448657  | Missense_Mutation | SNP | G  | A  | 4   | 230 | c.626C>T        | c.(625-627)TCG>TTG   | p.S209L  |
| Pat_11 | Pre-Treatment | DPYD      | 1806      | 37 | 1 | 98058782  | 98058782  | Missense_Mutation | SNP | G  | A  | 35  | 107 | c.1120C>T       | c.(1120-1122)CCT>TCT | p.P374S  |
| Pat_11 | Pre-Treatment | AMIGO1    | 57463     | 37 | 1 | 110050820 | 110050820 | Missense_Mutation | SNP | G  | A  | 4   | 126 | c.715C>T        | c.(715-717)CGG>TGG   | p.R239W  |
| Pat_11 | Pre-Treatment | EPS8L3    | 79574     | 37 | 1 | 110294814 | 110294814 | Missense_Mutation | SNP | G  | A  | 5   | 197 | c.1237C>T       | c.(1237-1239)CGG>TGG | p.R413W  |
| Pat_11 | Pre-Treatment | RBM15     | 64783     | 37 | 1 | 110884345 | 110884345 | Missense_Mutation | SNP | G  | A  | 5   | 257 | c.2318G>A       | c.(2317-2319)GGG>GAG | p.G773E  |
| Pat_11 | Pre-Treatment | ATP5F1    | 515       | 37 | 1 | 111996918 | 111996918 | Missense_Mutation | SNP | C  | T  | 52  | 125 | c.163C>T        | c.(163-165)CGT>TGT   | p.R55C   |
| Pat_11 | Pre-Treatment | RAP1A     | 5906      | 37 | 1 | 112247011 | 112247011 | Missense_Mutation | SNP | G  | A  | 4   | 118 | c.371G>A        | c.(370-372)CGA>CAA   | p.R124Q  |
| Pat_11 | Pre-Treatment | DCLRE1B   | 64858     | 37 | 1 | 114449702 | 114449702 | Missense_Mutation | SNP | G  | A  | 5   | 214 | c.274G>A        | c.(274-276)GTA>ATA   | p.V92I   |
| Pat_11 | Pre-Treatment | SYCP1     | 6847      | 37 | 1 | 115455721 | 115455721 | Missense_Mutation | SNP | G  | A  | 42  | 87  | c.1597G>A       | c.(1597-1599)GAA>AAA | p.E533K  |
| Pat_11 | Pre-Treatment | C1orf161  | 126868    | 37 | 1 | 116666738 | 116666738 | Missense_Mutation | SNP | G  | A  | 4   | 177 | c.241G>A        | c.(241-243)GGG>AGG   | p.G81R   |
| Pat_11 | Pre-Treatment | TTF2      | 8458      | 37 | 1 | 117635516 | 117635516 | Missense_Mutation | SNP | G  | A  | 5   | 159 | c.2969G>A       | c.(2968-2970)AGC>AAC | p.S990N  |
| Pat_11 | Pre-Treatment | SPAG17    | 200162    | 37 | 1 | 118598455 | 118598455 | Missense_Mutation | SNP | C  | T  | 8   | 20  | c.2623G>A       | c.(2623-2625)GAG>AAG | p.E875K  |
| Pat_11 | Pre-Treatment | HSD3B2    | 3284      | 37 | 1 | 119985517 | 119985517 | Missense_Mutation | SNP | C  | G  | 12  | 35  | c.324C>G        | c.(322-324)ATC>ATG   | p.I108M  |
| Pat_11 | Pre-Treatment | NBPF10    | 100132406 | 37 | 1 | 145360580 | 145360580 | Missense_Mutation | SNP | A  | G  | 7   | 91  | c.9430A>G       | c.(9430-9432)AAA>GAA | p.K3144E |
| Pat_11 | Pre-Treatment | HIST2H2BE | 8349      | 37 | 1 | 149858090 | 149858090 | Missense_Mutation | SNP | C  | T  | 5   | 350 | c.101G>A        | c.(100-102)CGC>CAC   | p.R34H   |
| Pat_11 | Pre-Treatment | RPTN      | 126638    | 37 | 1 | 152128479 | 152128479 | Missense_Mutation | SNP | G  | A  | 370 | 446 | c.1096C>T       | c.(1096-1098)CAC>TAC | p.H366Y  |
| Pat_11 | Pre-Treatment | NUP210L   | 91181     | 37 | 1 | 153991444 | 153991444 | Missense_Mutation | SNP | G  | A  | 39  | 131 | c.4618C>T       | c.(4618-4620)CAT>TAT | p.H1540Y |
| Pat_11 | Pre-Treatment | ADAR      | 103       | 37 | 1 | 154562404 | 154562404 | Missense_Mutation | SNP | G  | A  | 4   | 151 | c.2497C>T       | c.(2497-2499)CTC>TTC | p.L833F  |
| Pat_11 | Pre-Treatment | FCRL2     | 79368     | 37 | 1 | 157740438 | 157740438 | Missense_Mutation | SNP | G  | A  | 4   | 55  | c.71C>T         | c.(70-72)GCG>GTG     | p.A24V   |
| Pat_11 | Pre-Treatment | TNN       | 63923     | 37 | 1 | 175067731 | 175067731 | Missense_Mutation | SNP | G  | A  | 56  | 137 | c.2119G>A       | c.(2119-2121)GAC>AAC | p.D707N  |
| Pat_11 | Pre-Treatment | ASTN1     | 460       | 37 | 1 | 176983946 | 176983946 | Missense_Mutation | SNP | C  | T  | 215 | 435 | c.1504G>A       | c.(1504-1506)GAA>AAA | p.E502K  |
| Pat_11 | Pre-Treatment | IER5      | 51278     | 37 | 1 | 181058769 | 181058769 | Missense_Mutation | SNP | G  | A  | 4   | 59  | c.731G>A        | c.(730-732)CGG>CAG   | p.R244Q  |
| Pat_11 | Pre-Treatment | KCNT2     | 343450    | 37 | 1 | 196197409 | 196197409 | Missense_Mutation | SNP | C  | T  | 4   | 110 | c.3353G>A       | c.(3352-3354)AGA>AAA | p.R1118K |
| Pat_11 | Pre-Treatment | GPR37L1   | 9283      | 37 | 1 | 202097367 | 202097367 | Missense_Mutation | SNP | G  | A  | 6   | 419 | c.1129G>A       | c.(1129-1131)GTC>ATC | p.V377I  |
| Pat_11 | Pre-Treatment | PLXNA2    | 5362      | 37 | 1 | 208391105 | 208391105 | Missense_Mutation | SNP | C  | T  | 5   | 376 | c.163G>A        | c.(163-165)GTC>ATC   | p.V55I   |
| Pat_11 | Pre-Treatment | NEK2      | 4751      | 37 | 1 | 211843711 | 211843711 | Missense_Mutation | SNP | C  | T  | 4   | 284 | c.677G>A        | c.(676-678)GGG>GAG   | p.G226E  |
| Pat_11 | Pre-Treatment | JMJD4     | 65094     | 37 | 1 | 227921686 | 227921686 | Missense_Mutation | SNP | G  | A  | 41  | 103 | c.614C>T        | c.(613-615)TCC>TTC   | p.S205F  |
| Pat_11 | Pre-Treatment | TRIM17    | 51127     | 37 | 1 | 228596305 | 228596305 | Missense_Mutation | SNP | G  | A  | 4   | 206 | c.1031C>T       | c.(1030-1032)ACG>ATG | p.T344M  |

|        |               |          |        |    |    |           |           |                   |     |    |    |     |     |                |                        |               |
|--------|---------------|----------|--------|----|----|-----------|-----------|-------------------|-----|----|----|-----|-----|----------------|------------------------|---------------|
| Pat_11 | Pre-Treatment | TRIM67   | 440730 | 37 | 1  | 231299608 | 231299608 | Missense_Mutation | SNP | G  | A  | 3   | 26  | c.893G>A       | c.(892-894)CGC>CAC     | p.R298H       |
| Pat_11 | Pre-Treatment | LYST     | 1130   | 37 | 1  | 235872531 | 235872531 | Missense_Mutation | SNP | G  | A  | 4   | 89  | c.10003C>T     | c.(10003-10005)CGT>TGT | p.R3335C      |
| Pat_11 | Pre-Treatment | OR2M5    | 127059 | 37 | 1  | 248309108 | 248309108 | Missense_Mutation | SNP | G  | A  | 109 | 339 | c.659G>A       | c.(658-660)CGA>CAA     | p.R220Q       |
| Pat_11 | Pre-Treatment | PFKP     | 5214   | 37 | 10 | 3162234   | 3162234   | Missense_Mutation | SNP | G  | A  | 4   | 155 | c.1681G>A      | c.(1681-1683)GAC>AAC   | p.D561N       |
| Pat_11 | Pre-Treatment | FAM107B  | 83641  | 37 | 10 | 14572407  | 14572407  | Missense_Mutation | SNP | G  | T  | 4   | 97  | c.52C>A        | c.(52-54)CAG>AAG       | p.Q18K        |
| Pat_11 | Pre-Treatment | CUBN     | 8029   | 37 | 10 | 16932424  | 16932424  | Missense_Mutation | SNP | C  | T  | 4   | 111 | c.8701G>A      | c.(8701-8703)GTC>ATC   | p.V2901I      |
| Pat_11 | Pre-Treatment | PDSS1    | 23590  | 37 | 10 | 27035313  | 27035313  | Missense_Mutation | SNP | G  | A  | 4   | 114 | c.1159G>A      | c.(1159-1161)GCA>ACA   | p.A387T       |
| Pat_11 | Pre-Treatment | ARHGAP12 | 94134  | 37 | 10 | 32150388  | 32150388  | Missense_Mutation | SNP | G  | A  | 4   | 80  | c.883C>T       | c.(883-885)CCT>TCT     | p.P295S       |
| Pat_11 | Pre-Treatment | ALOX5    | 240    | 37 | 10 | 45938974  | 45938974  | Missense_Mutation | SNP | G  | A  | 3   | 39  | c.1562G>A      | c.(1561-1563)CGC>CAC   | p.R521H       |
| Pat_11 | Pre-Treatment | SIRT1    | 23411  | 37 | 10 | 69651214  | 69651214  | Missense_Mutation | SNP | C  | T  | 4   | 131 | c.844C>T       | c.(844-846)CGC>TGC     | p.R282C       |
| Pat_11 | Pre-Treatment | MYPN     | 84665  | 37 | 10 | 69970102  | 69970102  | Missense_Mutation | SNP | G  | A  | 4   | 153 | c.3853G>A      | c.(3853-3855)GGA>AGA   | p.G1285R      |
| Pat_11 | Pre-Treatment | CDHR1    | 92211  | 37 | 10 | 85974039  | 85974039  | Missense_Mutation | SNP | C  | T  | 4   | 68  | c.2242C>T      | c.(2242-2244)CCC>TCC   | p.P748S       |
| Pat_11 | Pre-Treatment | CDHR1    | 92211  | 37 | 10 | 85974293  | 85974293  | Missense_Mutation | SNP | G  | T  | 4   | 133 | c.2496G>T      | c.(2494-2496)ATG>ATT   | p.M832I       |
| Pat_11 | Pre-Treatment | BMPR1A   | 657    | 37 | 10 | 88659648  | 88659648  | Splice_Site       | SNP | G  | A  | 4   | 102 | c.430_splice   | c.e6+1                 | p.G144_splice |
| Pat_11 | Pre-Treatment | PTEN     | 5728   | 37 | 10 | 89692902  | 89692902  | Missense_Mutation | SNP | G  | A  | 94  | 112 | c.386G>A       | c.(385-387)GGA>GAA     | p.G129E       |
| Pat_11 | Pre-Treatment | BLNK     | 29760  | 37 | 10 | 97969643  | 97969643  | Missense_Mutation | SNP | C  | T  | 120 | 161 | c.697G>A       | c.(697-699)GAA>AAA     | p.E233K       |
| Pat_11 | Pre-Treatment | TM9SF3   | 56889  | 37 | 10 | 98287230  | 98287230  | Missense_Mutation | SNP | G  | A  | 4   | 76  | c.1565C>T      | c.(1564-1566)GCT>GTT   | p.A522V       |
| Pat_11 | Pre-Treatment | SLIT1    | 6585   | 37 | 10 | 98924646  | 98924647  | Missense_Mutation | DNP | CC | TT | 43  | 55  | c.198_199GG>AA | c.196-201)CTGGAA>CTAA  | p.E67K        |
| Pat_11 | Pre-Treatment | PPRC1    | 23082  | 37 | 10 | 103901161 | 103901161 | Missense_Mutation | SNP | C  | T  | 50  | 51  | c.2896C>T      | c.(2896-2898)CCT>TCT   | p.P966S       |
| Pat_11 | Pre-Treatment | SUFU     | 51684  | 37 | 10 | 104375134 | 104375134 | Missense_Mutation | SNP | G  | A  | 8   | 215 | c.1132G>A      | c.(1132-1134)GGA>AGA   | p.G378R       |
| Pat_11 | Pre-Treatment | ABLIM1   | 3983   | 37 | 10 | 116213233 | 116213233 | Missense_Mutation | SNP | G  | A  | 5   | 79  | c.1451C>T      | c.(1450-1452)CCG>CTG   | p.P484L       |
| Pat_11 | Pre-Treatment | ATRNL1   | 26033  | 37 | 10 | 117226706 | 117226706 | Missense_Mutation | SNP | C  | T  | 9   | 20  | c.3440C>T      | c.(3439-3441)TCA>TTA   | p.S1147L      |
| Pat_11 | Pre-Treatment | DMBT1    | 1755   | 37 | 10 | 124348552 | 124348552 | Missense_Mutation | SNP | G  | A  | 6   | 582 | c.1876G>A      | c.(1876-1878)GTG>ATG   | p.V626M       |
| Pat_11 | Pre-Treatment | UTF1     | 8433   | 37 | 10 | 135044752 | 135044752 | Missense_Mutation | SNP | G  | A  | 3   | 14  | c.832G>A       | c.(832-834)GCC>ACC     | p.A278T       |
| Pat_11 | Pre-Treatment | PTDSS2   | 81490  | 37 | 11 | 487014    | 487014    | Missense_Mutation | SNP | G  | A  | 4   | 215 | c.511G>A       | c.(511-513)GGG>AGG     | p.G171R       |
| Pat_11 | Pre-Treatment | OR52B4   | 143496 | 37 | 11 | 4388924   | 4388924   | Missense_Mutation | SNP | C  | A  | 13  | 34  | c.602G>T       | c.(601-603)GGG>GTG     | p.G201V       |
| Pat_11 | Pre-Treatment | OR51M1   | 390059 | 37 | 11 | 5411079   | 5411079   | Missense_Mutation | SNP | C  | A  | 6   | 414 | c.451C>A       | c.(451-453)CAG>AAG     | p.Q151K       |
| Pat_11 | Pre-Treatment | OR52N5   | 390075 | 37 | 11 | 5799538   | 5799538   | Missense_Mutation | SNP | C  | G  | 3   | 120 | c.327G>C       | c.(325-327)CAG>CAC     | p.Q109H       |
| Pat_11 | Pre-Treatment | C11orf16 | 56673  | 37 | 11 | 8942909   | 8942909   | Missense_Mutation | SNP | C  | T  | 4   | 201 | c.1358G>A      | c.(1357-1359)CGG>CAG   | p.R453Q       |
| Pat_11 | Pre-Treatment | TEAD1    | 7003   | 37 | 11 | 12951761  | 12951761  | Missense_Mutation | SNP | G  | A  | 4   | 241 | c.1010G>A      | c.(1009-1011)CGA>CAA   | p.R337Q       |
| Pat_11 | Pre-Treatment | PDE3B    | 5140   | 37 | 11 | 14666034  | 14666034  | Missense_Mutation | SNP | G  | A  | 3   | 45  | c.413G>A       | c.(412-414)CGG>CAG     | p.R138Q       |
| Pat_11 | Pre-Treatment | CCDC34   | 91057  | 37 | 11 | 27384420  | 27384420  | Missense_Mutation | SNP | C  | T  | 4   | 169 | c.322G>A       | c.(322-324)GCG>ACG     | p.A108T       |
| Pat_11 | Pre-Treatment | PAMR1    | 25891  | 37 | 11 | 35456088  | 35456088  | Missense_Mutation | SNP | C  | T  | 4   | 298 | c.1598G>A      | c.(1597-1599)CGG>CAG   | p.R533Q       |
| Pat_11 | Pre-Treatment | OR4C6    | 219432 | 37 | 11 | 55432767  | 55432767  | Missense_Mutation | SNP | T  | C  | 50  | 118 | c.125T>C       | c.(124-126)CTT>CCT     | p.L42P        |
| Pat_11 | Pre-Treatment | SSRP1    | 6749   | 37 | 11 | 57100260  | 57100260  | Missense_Mutation | SNP | G  | A  | 4   | 107 | c.607C>T       | c.(607-609)CGG>TGG     | p.R203W       |
| Pat_11 | Pre-Treatment | ZDHC5    | 25921  | 37 | 11 | 57457663  | 57457663  | Missense_Mutation | SNP | G  | A  | 4   | 211 | c.545G>A       | c.(544-546)CGC>CAC     | p.R182H       |
| Pat_11 | Pre-Treatment | MS4A5    | 64232  | 37 | 11 | 60201352  | 60201352  | Missense_Mutation | SNP | C  | A  | 5   | 210 | c.454C>A       | c.(454-456)CAA>AAA     | p.Q152K       |
| Pat_11 | Pre-Treatment | DAGLA    | 747    | 37 | 11 | 61511654  | 61511654  | Missense_Mutation | SNP | G  | A  | 4   | 155 | c.2822G>A      | c.(2821-2823)AGC>AAC   | p.S941N       |
| Pat_11 | Pre-Treatment | FERMT3   | 83706  | 37 | 11 | 63990542  | 63990542  | Missense_Mutation | SNP | G  | A  | 4   | 219 | c.1705G>A      | c.(1705-1707)GAG>AAG   | p.E569K       |
| Pat_11 | Pre-Treatment | PYGM     | 5837   | 37 | 11 | 64514214  | 64514214  | Missense_Mutation | SNP | G  | A  | 4   | 186 | c.2446C>T      | c.(2446-2448)CGC>TGC   | p.R816C       |
| Pat_11 | Pre-Treatment | SF1      | 7536   | 37 | 11 | 64535600  | 64535600  | Missense_Mutation | SNP | G  | A  | 4   | 184 | c.1046C>T      | c.(1045-1047)CCC>CTC   | p.P349L       |
| Pat_11 | Pre-Treatment | CDC42BPG | 55561  | 37 | 11 | 64599130  | 64599130  | Missense_Mutation | SNP | C  | T  | 3   | 42  | c.3151G>A      | c.(3151-3153)GAG>AAG   | p.E1051K      |
| Pat_11 | Pre-Treatment | CAPN1    | 823    | 37 | 11 | 64974021  | 64974021  | Nonsense_Mutation | SNP | C  | T  | 6   | 339 | c.1441C>T      | c.(1441-1443)CGA>TGA   | p.R481*       |
| Pat_11 | Pre-Treatment | BBS1     | 582    | 37 | 11 | 66294257  | 66294257  | Nonsense_Mutation | SNP | C  | T  | 6   | 365 | c.1318C>T      | c.(1318-1320)CGA>TGA   | p.R440*       |
| Pat_11 | Pre-Treatment | SHANK2   | 22941  | 37 | 11 | 70332923  | 70332923  | Missense_Mutation | SNP | C  | T  | 29  | 146 | c.3475G>A      | c.(3475-3477)GGT>AGT   | p.G1159S      |
| Pat_11 | Pre-Treatment | ME3      | 10873  | 37 | 11 | 86267649  | 86267649  | Missense_Mutation | SNP | G  | A  | 4   | 120 | c.413C>T       | c.(412-414)ACG>ATG     | p.T138M       |
| Pat_11 | Pre-Treatment | CNTN5    | 53942  | 37 | 11 | 100141922 | 100141922 | Missense_Mutation | SNP | G  | T  | 4   | 62  | c.2263G>T      | c.(2263-2265)GGG>TGG   | p.G755W       |

|        |               |          |        |    |    |           |           |                   |     |    |    |    |     |                                    |                      |          |
|--------|---------------|----------|--------|----|----|-----------|-----------|-------------------|-----|----|----|----|-----|------------------------------------|----------------------|----------|
| Pat_11 | Pre-Treatment | MMP12    | 4321   | 37 | 11 | 102738092 | 102738092 | Missense_Mutation | SNP | G  | A  | 8  | 24  | c.820C>T                           | c.(820-822)CCT>TCT   | p.P274S  |
| Pat_11 | Pre-Treatment | MPZL3    | 196264 | 37 | 11 | 118107921 | 118107921 | Missense_Mutation | SNP | G  | A  | 5  | 241 | c.295C>T                           | c.(295-297)CGG>TGG   | p.R99W   |
| Pat_11 | Pre-Treatment | PVRL1    | 5818   | 37 | 11 | 119547812 | 119547812 | Missense_Mutation | SNP | G  | A  | 4  | 177 | c.851C>T                           | c.(850-852)ACG>ATG   | p.T284M  |
| Pat_11 | Pre-Treatment | ARHGEF12 | 23365  | 37 | 11 | 120298811 | 120298811 | Missense_Mutation | SNP | G  | A  | 7  | 438 | c.440G>A                           | c.(439-441)CGC>CAC   | p.R147H  |
| Pat_11 | Pre-Treatment | PATE2    | 399967 | 37 | 11 | 125647312 | 125647312 | Missense_Mutation | SNP | G  | A  | 28 | 77  | c.307C>T                           | c.(307-309)CAT>TAT   | p.H103Y  |
| Pat_11 | Pre-Treatment | NFRKB    | 4798   | 37 | 11 | 129739745 | 129739745 | Missense_Mutation | SNP | G  | A  | 28 | 39  | c.3175C>T                          | c.(3175-3177)CGC>TGC | p.R1059C |
| Pat_11 | Pre-Treatment | WNK1     | 65125  | 37 | 12 | 993904    | 993904    | Missense_Mutation | SNP | C  | T  | 4  | 187 | c.3934C>T                          | c.(3934-3936)CGT>TGT | p.R1312C |
| Pat_11 | Pre-Treatment | CACNA1C  | 775    | 37 | 12 | 2659138   | 2659138   | Missense_Mutation | SNP | G  | A  | 3  | 60  | c.1420G>A                          | c.(1420-1422)GTC>ATC | p.V474I  |
| Pat_11 | Pre-Treatment | TEAD4    | 7004   | 37 | 12 | 3129886   | 3129886   | Missense_Mutation | SNP | C  | G  | 4  | 135 | c.667C>G                           | c.(667-669)CTC>GTC   | p.L223V  |
| Pat_11 | Pre-Treatment | KCNA6    | 3742   | 37 | 12 | 4919314   | 4919314   | Missense_Mutation | SNP | G  | A  | 5  | 283 | c.107G>A                           | c.(106-108)GGC>GAC   | p.G36D   |
| Pat_11 | Pre-Treatment | VWF      | 7450   | 37 | 12 | 6128346   | 6128346   | Missense_Mutation | SNP | G  | A  | 4  | 180 | c.4238C>T                          | c.(4237-4239)CCG>CTG | p.P1413L |
| Pat_11 | Pre-Treatment | A2M      | 2      | 37 | 12 | 9225445   | 9225445   | Missense_Mutation | SNP | G  | A  | 3  | 22  | c.3779C>T                          | c.(3778-3780)GCT>GTT | p.A1260V |
| Pat_11 | Pre-Treatment | GSG1     | 83445  | 37 | 12 | 13240841  | 13240841  | Missense_Mutation | SNP | C  | T  | 22 | 31  | c.634G>A                           | c.(634-636)GGT>AGT   | p.G212S  |
| Pat_11 | Pre-Treatment | PTPRO    | 5800   | 37 | 12 | 15673223  | 15673223  | Missense_Mutation | SNP | G  | A  | 4  | 232 | c.1868G>A                          | c.(1867-1869)AGC>AAC | p.S623N  |
| Pat_11 | Pre-Treatment | ADAMTS20 | 80070  | 37 | 12 | 43826148  | 43826148  | Missense_Mutation | SNP | C  | T  | 37 | 70  | c.3055G>A                          | c.(3055-3057)GAA>AAA | p.E1019K |
| Pat_11 | Pre-Treatment | ADAMTS20 | 80070  | 37 | 12 | 43944932  | 43944932  | Missense_Mutation | SNP | G  | A  | 5  | 279 | c.233C>T                           | c.(232-234)ACC>ATC   | p.T78I   |
| Pat_11 | Pre-Treatment | ANO6     | 196527 | 37 | 12 | 45795629  | 45795629  | Missense_Mutation | SNP | G  | A  | 30 | 68  | c.1438G>A                          | c.(1438-1440)GTG>ATG | p.V480M  |
| Pat_11 | Pre-Treatment | ARID2    | 196528 | 37 | 12 | 46231461  | 46231461  | Missense_Mutation | SNP | C  | A  | 4  | 179 | c.1301C>A                          | c.(1300-1302)ACA>AAA | p.T434K  |
| Pat_11 | Pre-Treatment | CACNB3   | 784    | 37 | 12 | 49220596  | 49220596  | Missense_Mutation | SNP | G  | A  | 6  | 515 | c.949G>A                           | c.(949-951)GTA>ATA   | p.V317I  |
| Pat_11 | Pre-Treatment | MLL2     | 8085   | 37 | 12 | 49435269  | 49435269  | Missense_Mutation | SNP | C  | T  | 6  | 204 | c.6284G>A                          | c.(6283-6285)CGT>CAT | p.R2095H |
| Pat_11 | Pre-Treatment | LMBR1L   | 55716  | 37 | 12 | 49498254  | 49498254  | Missense_Mutation | SNP | C  | G  | 4  | 327 | c.412G>C                           | c.(412-414)GAG>CAG   | p.E138Q  |
| Pat_11 | Pre-Treatment | ITGB7    | 3695   | 37 | 12 | 53594156  | 53594156  | Missense_Mutation | SNP | C  | A  | 28 | 90  | c.72G>T                            | c.(70-72)AAG>AAT     | p.K24N   |
| Pat_11 | Pre-Treatment | RARG     | 5916   | 37 | 12 | 53607478  | 53607478  | Missense_Mutation | SNP | G  | A  | 4  | 197 | c.820C>T                           | c.(820-822)CGT>TGT   | p.R274C  |
| Pat_11 | Pre-Treatment | ESPL1    | 9700   | 37 | 12 | 53684141  | 53684141  | Missense_Mutation | SNP | G  | A  | 4  | 169 | c.5252G>A                          | c.(5251-5253)CGT>CAT | p.R1751H |
| Pat_11 | Pre-Treatment | NEUROD4  | 58158  | 37 | 12 | 55420311  | 55420311  | Missense_Mutation | SNP | G  | A  | 16 | 77  | c.88G>A                            | c.(88-90)GAG>AAG     | p.E30K   |
| Pat_11 | Pre-Treatment | OR9K2    | 441639 | 37 | 12 | 55524145  | 55524145  | Missense_Mutation | SNP | C  | T  | 42 | 107 | c.593C>T                           | c.(592-594)GCT>GTT   | p.A198V  |
| Pat_11 | Pre-Treatment | OR6C65   | 403282 | 37 | 12 | 55794361  | 55794361  | Missense_Mutation | SNP | G  | A  | 5  | 24  | c.49G>A                            | c.(49-51)GAT>AAT     | p.D17N   |
| Pat_11 | Pre-Treatment | MMP19    | 4327   | 37 | 12 | 56233343  | 56233343  | Missense_Mutation | SNP | C  | T  | 3  | 36  | c.703G>A                           | c.(703-705)GAG>AAG   | p.E235K  |
| Pat_11 | Pre-Treatment | RAB5B    | 5869   | 37 | 12 | 56380860  | 56380860  | Missense_Mutation | SNP | G  | A  | 4  | 166 | c.116G>A                           | c.(115-117)CGT>CAT   | p.R39H   |
| Pat_11 | Pre-Treatment | SLC39A5  | 283375 | 37 | 12 | 56630374  | 56630374  | Missense_Mutation | SNP | G  | A  | 5  | 210 | c.1051G>A                          | c.(1051-1053)GCT>ACT | p.A351T  |
| Pat_11 | Pre-Treatment | PAN2     | 9924   | 37 | 12 | 56716911  | 56716911  | Missense_Mutation | SNP | G  | A  | 5  | 228 | c.2440C>T                          | c.(2440-2442)CGC>TGC | p.R814C  |
| Pat_11 | Pre-Treatment | CAPS2    | 84698  | 37 | 12 | 75676125  | 75676126  | Missense_Mutation | DNP | GG | AA | 20 | 81  | c.1574_1575CC>T                    | c.(1573-1575)GCC>GTT | p.A525V  |
| Pat_11 | Pre-Treatment | USP44    | 84101  | 37 | 12 | 95922687  | 95922687  | Missense_Mutation | SNP | C  | T  | 26 | 41  | c.1520G>A                          | c.(1519-1521)GGA>GAA | p.G507E  |
| Pat_11 | Pre-Treatment | STAB2    | 55576  | 37 | 12 | 104049352 | 104049352 | Missense_Mutation | SNP | C  | T  | 32 | 85  | c.1727C>T                          | c.(1726-1728)TCT>TTT | p.S576F  |
| Pat_11 | Pre-Treatment | POLR3B   | 55703  | 37 | 12 | 106763422 | 106763422 | Missense_Mutation | SNP | G  | A  | 4  | 133 | c.365G>A                           | c.(364-366)GGC>GAC   | p.G122D  |
| Pat_11 | Pre-Treatment | BTBD11   | 121551 | 37 | 12 | 107937863 | 107937863 | Missense_Mutation | SNP | G  | A  | 19 | 70  | c.1437G>A                          | c.(1435-1437)ATG>ATA | p.M479I  |
| Pat_11 | Pre-Treatment | BRAP     | 8315   | 37 | 12 | 112119534 | 112119534 | Missense_Mutation | SNP | G  | A  | 4  | 154 | c.350C>T                           | c.(349-351)TCT>TTT   | p.S117F  |
| Pat_11 | Pre-Treatment | SBNO1    | 55206  | 37 | 12 | 123810824 | 123810824 | Nonsense_Mutation | SNP | G  | A  | 5  | 376 | c.1750C>T                          | c.(1750-1752)CGA>TGA | p.R584*  |
| Pat_11 | Pre-Treatment | SCARB1   | 949    | 37 | 12 | 125270907 | 125270907 | Missense_Mutation | SNP | C  | T  | 6  | 427 | c.1397G>A                          | c.(1396-1398)AGC>AAC | p.S466N  |
| Pat_11 | Pre-Treatment | STAR13   | 90627  | 37 | 13 | 33692262  | 33692263  | Missense_Mutation | DNP | CC | TT | 15 | 60  | c.2220_2221GG>A218-2223)CGGGAC>CGA | p.D741N              |          |
| Pat_11 | Pre-Treatment | TRPC4    | 7223   | 37 | 13 | 38211429  | 38211429  | Missense_Mutation | SNP | G  | A  | 16 | 55  | c.2545C>T                          | c.(2545-2547)CAT>TAT | p.H849Y  |
| Pat_11 | Pre-Treatment | FREM2    | 341640 | 37 | 13 | 39338481  | 39338481  | Nonsense_Mutation | SNP | G  | A  | 20 | 62  | c.5304G>A                          | c.(5302-5304)TGG>TGA | p.W1768* |
| Pat_11 | Pre-Treatment | FNDC3A   | 22862  | 37 | 13 | 49781232  | 49781232  | Missense_Mutation | SNP | G  | A  | 4  | 196 | c.3298G>A                          | c.(3298-3300)GAC>AAC | p.D1100N |
| Pat_11 | Pre-Treatment | DACH1    | 1602   | 37 | 13 | 72440865  | 72440865  | Missense_Mutation | SNP | G  | A  | 4  | 92  | c.43C>T                            | c.(43-45)CCC>TCC     | p.P15S   |
| Pat_11 | Pre-Treatment | MYCBP2   | 23077  | 37 | 13 | 77754420  | 77754420  | Missense_Mutation | SNP | G  | A  | 4  | 295 | c.4861C>T                          | c.(4861-4863)CGT>TGT | p.R1621C |
| Pat_11 | Pre-Treatment | TGM1     | 7051   | 37 | 14 | 24724025  | 24724025  | Missense_Mutation | SNP | G  | A  | 4  | 106 | c.1933C>T                          | c.(1933-1935)CGT>TGT | p.R645C  |
| Pat_11 | Pre-Treatment | ADCY4    | 196883 | 37 | 14 | 24799486  | 24799486  | Missense_Mutation | SNP | G  | A  | 4  | 188 | c.946C>T                           | c.(946-948)CGG>TGG   | p.R316W  |



|        |               |               |        |    |    |           |           |                   |     |   |   |     |     |            |                        |          |
|--------|---------------|---------------|--------|----|----|-----------|-----------|-------------------|-----|---|---|-----|-----|------------|------------------------|----------|
| Pat_11 | Pre-Treatment | AKAP6         | 9472   | 37 | 14 | 33015522  | 33015522  | Nonsense_Mutation | SNP | G | T | 5   | 181 | c.1663G>T  | c.(1663-1665)GAG>TAG   | p.E555*  |
| Pat_11 | Pre-Treatment | C14orf182     | 283551 | 37 | 14 | 50472409  | 50472409  | Missense_Mutation | SNP | C | T | 6   | 631 | c.109G>A   | c.(109-111)GAA>AAA     | p.E37K   |
| Pat_11 | Pre-Treatment | SAV1          | 60485  | 37 | 14 | 51101951  | 51101951  | Nonsense_Mutation | SNP | G | A | 4   | 217 | c.1102C>T  | c.(1102-1104)CGA>TGA   | p.R368*  |
| Pat_11 | Pre-Treatment | FERMT2        | 10979  | 37 | 14 | 53386014  | 53386014  | Missense_Mutation | SNP | A | G | 57  | 128 | c.218T>C   | c.(217-219)CTG>CCG     | p.L73P   |
| Pat_11 | Pre-Treatment | ZFYVE1        | 53349  | 37 | 14 | 73464872  | 73464872  | Missense_Mutation | SNP | G | A | 4   | 136 | c.635C>T   | c.(634-636)CCG>CTG     | p.P212L  |
| Pat_11 | Pre-Treatment | FOS           | 2353   | 37 | 14 | 75746817  | 75746817  | Missense_Mutation | SNP | G | A | 4   | 217 | c.379G>A   | c.(379-381)GGC>AGC     | p.G127S  |
| Pat_11 | Pre-Treatment | STON2         | 85439  | 37 | 14 | 81737088  | 81737088  | Missense_Mutation | SNP | C | T | 6   | 345 | c.2539G>A  | c.(2539-2541)GTG>ATG   | p.V847M  |
| Pat_11 | Pre-Treatment | SERPINA13     | 388007 | 37 | 14 | 95108015  | 95108015  | Missense_Mutation | SNP | G | A | 23  | 72  | c.532G>A   | c.(532-534)GAT>AAT     | p.D178N  |
| Pat_11 | Pre-Treatment | TRAF3         | 7187   | 37 | 14 | 103369758 | 103369758 | Missense_Mutation | SNP | G | A | 5   | 171 | c.1127G>A  | c.(1126-1128)CGG>CAG   | p.R376Q  |
| Pat_11 | Pre-Treatment | TNFAIP2       | 7127   | 37 | 14 | 103600073 | 103600073 | Missense_Mutation | SNP | C | T | 4   | 44  | c.1756C>T  | c.(1756-1758)CGC>TGC   | p.R586C  |
| Pat_11 | Pre-Treatment | AHNAK2        | 113146 | 37 | 14 | 105416378 | 105416378 | Missense_Mutation | SNP | G | A | 7   | 574 | c.5410C>T  | c.(5410-5412)CGG>TGG   | p.R1804W |
| Pat_11 | Pre-Treatment | HERC2         | 8924   | 37 | 15 | 28361855  | 28361855  | Missense_Mutation | SNP | G | A | 6   | 490 | c.13565C>T | c.(13564-13566)CCG>CTC | p.P4522L |
| Pat_11 | Pre-Treatment | HERC2         | 8924   | 37 | 15 | 28446690  | 28446690  | Missense_Mutation | SNP | G | A | 4   | 141 | c.7628C>T  | c.(7627-7629)GCT>GTT   | p.A2543V |
| Pat_11 | Pre-Treatment | DISP2         | 85455  | 37 | 15 | 40659296  | 40659296  | Missense_Mutation | SNP | G | A | 6   | 189 | c.983G>A   | c.(982-984)CGG>CAG     | p.R328Q  |
| Pat_11 | Pre-Treatment | JMJD7-PLA2G4B | 8681   | 37 | 15 | 42140051  | 42140051  | Missense_Mutation | SNP | C | T | 14  | 43  | c.2339C>T  | c.(2338-2340)CCC>CTC   | p.P780L  |
| Pat_11 | Pre-Treatment | PYGO1         | 26108  | 37 | 15 | 55839224  | 55839224  | Missense_Mutation | SNP | G | A | 5   | 153 | c.257C>T   | c.(256-258)TCG>TTG     | p.S86L   |
| Pat_11 | Pre-Treatment | HERC1         | 8925   | 37 | 15 | 64045209  | 64045209  | Missense_Mutation | SNP | C | T | 5   | 189 | c.1850G>A  | c.(1849-1851)CGC>CAC   | p.R617H  |
| Pat_11 | Pre-Treatment | DENND4A       | 10260  | 37 | 15 | 66021549  | 66021549  | Missense_Mutation | SNP | G | A | 4   | 24  | c.1348C>T  | c.(1348-1350)CCT>TCT   | p.P450S  |
| Pat_11 | Pre-Treatment | LRRC49        | 54839  | 37 | 15 | 71305234  | 71305234  | Missense_Mutation | SNP | C | T | 46  | 88  | c.1685C>T  | c.(1684-1686)TCC>TTC   | p.S562F  |
| Pat_11 | Pre-Treatment | ISLR          | 3671   | 37 | 15 | 74467617  | 74467617  | Missense_Mutation | SNP | G | A | 65  | 161 | c.418G>A   | c.(418-420)GAC>AAC     | p.D140N  |
| Pat_11 | Pre-Treatment | ZFAND6        | 54469  | 37 | 15 | 80429857  | 80429857  | Missense_Mutation | SNP | G | A | 4   | 108 | c.514G>A   | c.(514-516)GTA>ATA     | p.V172I  |
| Pat_11 | Pre-Treatment | SH3GL3        | 6457   | 37 | 15 | 84257417  | 84257417  | Missense_Mutation | SNP | A | G | 25  | 52  | c.732A>G   | c.(730-732)ATA>ATG     | p.I244M  |
| Pat_11 | Pre-Treatment | ACAN          | 176    | 37 | 15 | 89382124  | 89382124  | Nonsense_Mutation | SNP | C | T | 113 | 302 | c.301C>T   | c.(301-303)CAG>TAG     | p.Q101*  |
| Pat_11 | Pre-Treatment | RHCG          | 51458  | 37 | 15 | 90021162  | 90021162  | Missense_Mutation | SNP | C | T | 4   | 175 | c.881G>A   | c.(880-882)GGT>GAT     | p.G294D  |
| Pat_11 | Pre-Treatment | ANPEP         | 290    | 37 | 15 | 90335729  | 90335729  | Missense_Mutation | SNP | C | T | 4   | 208 | c.2314G>A  | c.(2314-2316)GTC>ATC   | p.V772I  |
| Pat_11 | Pre-Treatment | IDH2          | 3418   | 37 | 15 | 90628327  | 90628327  | Missense_Mutation | SNP | G | A | 4   | 186 | c.1084C>T  | c.(1084-1086)CGG>TGG   | p.R362W  |
| Pat_11 | Pre-Treatment | CACNA1H       | 8912   | 37 | 16 | 1254407   | 1254407   | Missense_Mutation | SNP | G | A | 61  | 110 | c.2400G>A  | c.(2398-2400)ATG>ATA   | p.M800I  |
| Pat_11 | Pre-Treatment | CACNA1H       | 8912   | 37 | 16 | 1270521   | 1270521   | Missense_Mutation | SNP | C | T | 15  | 86  | c.6589C>T  | c.(6589-6591)CCT>TCT   | p.P2197S |
| Pat_11 | Pre-Treatment | RPS2          | 6187   | 37 | 16 | 2012789   | 2012789   | Missense_Mutation | SNP | C | T | 5   | 13  | c.497G>A   | c.(496-498)CGC>CAC     | p.R166H  |
| Pat_11 | Pre-Treatment | TBL3          | 10607  | 37 | 16 | 2024990   | 2024990   | Missense_Mutation | SNP | G | A | 5   | 288 | c.526G>A   | c.(526-528)GCC>ACC     | p.A176T  |
| Pat_11 | Pre-Treatment | PKD1          | 5310   | 37 | 16 | 2153369   | 2153369   | Missense_Mutation | SNP | C | T | 7   | 542 | c.8689G>A  | c.(8689-8691)GTT>ATT   | p.V2897I |
| Pat_11 | Pre-Treatment | PKD1          | 5310   | 37 | 16 | 2153595   | 2153595   | Missense_Mutation | SNP | G | T | 49  | 130 | c.8463C>A  | c.(8461-8463)GAC>GAA   | p.D2821E |
| Pat_11 | Pre-Treatment | E4F1          | 1877   | 37 | 16 | 2283065   | 2283065   | Missense_Mutation | SNP | G | A | 4   | 186 | c.937G>A   | c.(937-939)GAG>AAG     | p.E313K  |
| Pat_11 | Pre-Treatment | PRSS22        | 64063  | 37 | 16 | 2903258   | 2903258   | Missense_Mutation | SNP | C | T | 4   | 129 | c.790G>A   | c.(790-792)GAG>AAG     | p.E264K  |
| Pat_11 | Pre-Treatment | TRAP1         | 10131  | 37 | 16 | 3713518   | 3713518   | Missense_Mutation | SNP | G | A | 4   | 208 | c.1615C>T  | c.(1615-1617)CTT>TTT   | p.L539F  |
| Pat_11 | Pre-Treatment | CORO7         | 79585  | 37 | 16 | 4408068   | 4408068   | Missense_Mutation | SNP | C | T | 44  | 106 | c.2494G>A  | c.(2494-2496)GCT>ACT   | p.A832T  |
| Pat_11 | Pre-Treatment | SEC14L5       | 9717   | 37 | 16 | 5041869   | 5041869   | Nonsense_Mutation | SNP | G | T | 4   | 45  | c.505G>T   | c.(505-507)GAG>TAG     | p.E169*  |
| Pat_11 | Pre-Treatment | ABAT          | 18     | 37 | 16 | 8839938   | 8839938   | Missense_Mutation | SNP | C | T | 29  | 48  | c.151C>T   | c.(151-153)CCA>TCA     | p.P51S   |
| Pat_11 | Pre-Treatment | CPPED1        | 55313  | 37 | 16 | 12798586  | 12798586  | Nonsense_Mutation | SNP | G | A | 4   | 205 | c.610C>T   | c.(610-612)CAG>TAG     | p.Q204*  |
| Pat_11 | Pre-Treatment | SMG1          | 23049  | 37 | 16 | 18849753  | 18849753  | Nonsense_Mutation | SNP | G | A | 4   | 126 | c.7120C>T  | c.(7120-7122)CGA>TGA   | p.R2374* |
| Pat_11 | Pre-Treatment | UMOD          | 7369   | 37 | 16 | 20360480  | 20360480  | Missense_Mutation | SNP | G | A | 4   | 153 | c.143C>T   | c.(142-144)ACG>ATG     | p.T48M   |
| Pat_11 | Pre-Treatment | CRYM          | 1428   | 37 | 16 | 21281121  | 21281121  | Missense_Mutation | SNP | G | A | 77  | 187 | c.479C>T   | c.(478-480)TCC>TTC     | p.S160F  |
| Pat_11 | Pre-Treatment | SCNN1B        | 6338   | 37 | 16 | 23387165  | 23387165  | Missense_Mutation | SNP | T | C | 4   | 167 | c.1259T>C  | c.(1258-1260)TTC>TCC   | p.F420S  |
| Pat_11 | Pre-Treatment | TNRC6A        | 27327  | 37 | 16 | 24802545  | 24802545  | Missense_Mutation | SNP | C | T | 30  | 78  | c.2582C>T  | c.(2581-2583)TCA>TTA   | p.S861L  |
| Pat_11 | Pre-Treatment | HS3ST4        | 9951   | 37 | 16 | 26147376  | 26147376  | Missense_Mutation | SNP | G | A | 11  | 15  | c.1178G>A  | c.(1177-1179)GGG>GAG   | p.G393E  |
| Pat_11 | Pre-Treatment | SPNS1         | 83985  | 37 | 16 | 28995158  | 28995158  | Missense_Mutation | SNP | C | T | 5   | 313 | c.1372C>T  | c.(1372-1374)CGG>TGG   | p.R458W  |
| Pat_11 | Pre-Treatment | ARMC5         | 79798  | 37 | 16 | 31473898  | 31473898  | Missense_Mutation | SNP | T | C | 4   | 149 | c.1030T>C  | c.(1030-1032)TCC>CCC   | p.S344P  |

|        |               |          |        |    |    |          |          |                   |     |   |   |     |     |           |                      |          |
|--------|---------------|----------|--------|----|----|----------|----------|-------------------|-----|---|---|-----|-----|-----------|----------------------|----------|
| Pat_11 | Pre-Treatment | SLC5A2   | 6524   | 37 | 16 | 31494546 | 31494546 | Missense_Mutation | SNP | C | T | 5   | 224 | c.89C>T   | c.(88-90)GCT>GTT     | p.A30V   |
| Pat_11 | Pre-Treatment | C16orf78 | 123970 | 37 | 16 | 49430391 | 49430391 | Missense_Mutation | SNP | G | A | 4   | 174 | c.452G>A  | c.(451-453)CGT>CAT   | p.R151H  |
| Pat_11 | Pre-Treatment | RBL2     | 5934   | 37 | 16 | 53493466 | 53493466 | Missense_Mutation | SNP | G | A | 4   | 193 | c.1283G>A | c.(1282-1284)CGT>CAT | p.R428H  |
| Pat_11 | Pre-Treatment | RSPRY1   | 89970  | 37 | 16 | 57238904 | 57238904 | Missense_Mutation | SNP | C | T | 3   | 36  | c.334C>T  | c.(334-336)CGG>TGG   | p.R112W  |
| Pat_11 | Pre-Treatment | PARD6A   | 50855  | 37 | 16 | 67695840 | 67695840 | Nonsense_Mutation | SNP | C | T | 5   | 321 | c.331C>T  | c.(331-333)CAG>TAG   | p.Q111*  |
| Pat_11 | Pre-Treatment | RANBP10  | 57610  | 37 | 16 | 67762380 | 67762380 | Missense_Mutation | SNP | G | A | 4   | 253 | c.1387C>T | c.(1387-1389)CCC>TCC | p.P463S  |
| Pat_11 | Pre-Treatment | TSNAXIP1 | 55815  | 37 | 16 | 67854842 | 67854842 | Missense_Mutation | SNP | G | A | 5   | 368 | c.86G>A   | c.(85-87)CGG>CAG     | p.R29Q   |
| Pat_11 | Pre-Treatment | ZFP90    | 146198 | 37 | 16 | 68598329 | 68598329 | Missense_Mutation | SNP | C | T | 43  | 51  | c.1639C>T | c.(1639-1641)CAC>TAC | p.H547Y  |
| Pat_11 | Pre-Treatment | TERF2    | 7014   | 37 | 16 | 69390830 | 69390830 | Missense_Mutation | SNP | G | A | 4   | 262 | c.1474C>T | c.(1474-1476)CGG>TGG | p.R492W  |
| Pat_11 | Pre-Treatment | FUK      | 197258 | 37 | 16 | 70503208 | 70503208 | Missense_Mutation | SNP | G | A | 6   | 291 | c.937G>A  | c.(937-939)GAT>AAT   | p.D313N  |
| Pat_11 | Pre-Treatment | FUK      | 197258 | 37 | 16 | 70513230 | 70513230 | Missense_Mutation | SNP | G | A | 4   | 95  | c.3077G>A | c.(3076-3078)GGT>GAT | p.G1026D |
| Pat_11 | Pre-Treatment | NUDT7    | 283927 | 37 | 16 | 77769734 | 77769734 | Missense_Mutation | SNP | G | A | 96  | 277 | c.199G>A  | c.(199-201)GCC>ACC   | p.A67T   |
| Pat_11 | Pre-Treatment | KIAA1609 | 57707  | 37 | 16 | 84520585 | 84520585 | Missense_Mutation | SNP | G | A | 4   | 197 | c.610C>T  | c.(610-612)CCC>TCC   | p.P204S  |
| Pat_11 | Pre-Treatment | KLHL36   | 79786  | 37 | 16 | 84693409 | 84693409 | Missense_Mutation | SNP | C | T | 84  | 101 | c.1181C>T | c.(1180-1182)TCC>TTC | p.S394F  |
| Pat_11 | Pre-Treatment | ANKFY1   | 51479  | 37 | 17 | 4080447  | 4080447  | Missense_Mutation | SNP | C | T | 74  | 156 | c.2749G>A | c.(2749-2751)GGC>AGC | p.G917S  |
| Pat_11 | Pre-Treatment | ARRB2    | 409    | 37 | 17 | 4621942  | 4621942  | Missense_Mutation | SNP | G | A | 6   | 587 | c.742G>A  | c.(742-744)GCC>ACC   | p.A248T  |
| Pat_11 | Pre-Treatment | DNAH2    | 146754 | 37 | 17 | 7674673  | 7674673  | Missense_Mutation | SNP | G | A | 5   | 262 | c.4388G>A | c.(4387-4389)CGC>CAC | p.R1463H |
| Pat_11 | Pre-Treatment | PER1     | 5187   | 37 | 17 | 8050861  | 8050861  | Missense_Mutation | SNP | G | A | 4   | 87  | c.1424C>T | c.(1423-1425)GCC>GTC | p.A475V  |
| Pat_11 | Pre-Treatment | MYOCD    | 93649  | 37 | 17 | 12666896 | 12666896 | Missense_Mutation | SNP | G | A | 58  | 91  | c.2752G>A | c.(2752-2754)GAT>AAT | p.D918N  |
| Pat_11 | Pre-Treatment | ALDH3A2  | 224    | 37 | 17 | 19575219 | 19575219 | Missense_Mutation | SNP | G | A | 4   | 303 | c.1393G>A | c.(1393-1395)GGT>AGT | p.G465S  |
| Pat_11 | Pre-Treatment | SLC47A2  | 146802 | 37 | 17 | 19609972 | 19609972 | Missense_Mutation | SNP | C | T | 4   | 180 | c.938G>A  | c.(937-939)AGC>AAC   | p.S313N  |
| Pat_11 | Pre-Treatment | CORO6    | 84940  | 37 | 17 | 27948318 | 27948318 | Missense_Mutation | SNP | G | A | 4   | 193 | c.122C>T  | c.(121-123)GCC>GTC   | p.A41V   |
| Pat_11 | Pre-Treatment | RHBDL3   | 162494 | 37 | 17 | 30648000 | 30648000 | Missense_Mutation | SNP | G | A | 4   | 205 | c.967G>A  | c.(967-969)GTG>ATG   | p.V323M  |
| Pat_11 | Pre-Treatment | NLE1     | 54475  | 37 | 17 | 33460253 | 33460253 | Missense_Mutation | SNP | G | A | 5   | 237 | c.1382C>T | c.(1381-1383)GCT>GTT | p.A461V  |
| Pat_11 | Pre-Treatment | KRTAP4-8 | 728224 | 37 | 17 | 39253949 | 39253949 | Missense_Mutation | SNP | T | A | 3   | 23  | c.388A>T  | c.(388-390)AGC>TGC   | p.S130C  |
| Pat_11 | Pre-Treatment | DHX8     | 1659   | 37 | 17 | 41598212 | 41598212 | Missense_Mutation | SNP | A | T | 4   | 168 | c.3031A>T | c.(3031-3033)ATG>TTG | p.M1011L |
| Pat_11 | Pre-Treatment | HDAC5    | 10014  | 37 | 17 | 42157535 | 42157535 | Missense_Mutation | SNP | C | T | 4   | 219 | c.2884G>A | c.(2884-2886)GGG>AGG | p.G962R  |
| Pat_11 | Pre-Treatment | GFAP     | 2670   | 37 | 17 | 42989041 | 42989041 | Missense_Mutation | SNP | G | A | 4   | 157 | c.905C>T  | c.(904-906)ACG>ATG   | p.T302M  |
| Pat_11 | Pre-Treatment | TLL6     | 284076 | 37 | 17 | 46863599 | 46863599 | Missense_Mutation | SNP | C | T | 205 | 519 | c.1688G>A | c.(1687-1689)AGA>AAA | p.R563K  |
| Pat_11 | Pre-Treatment | LPO      | 4025   | 37 | 17 | 56320353 | 56320353 | Missense_Mutation | SNP | C | T | 6   | 343 | c.13C>T   | c.(13-15)CTC>TTC     | p.L5F    |
| Pat_11 | Pre-Treatment | LPO      | 4025   | 37 | 17 | 56329765 | 56329765 | Missense_Mutation | SNP | G | A | 31  | 55  | c.1003G>A | c.(1003-1005)GAG>AAG | p.E335K  |
| Pat_11 | Pre-Treatment | RNF43    | 54894  | 37 | 17 | 56435851 | 56435851 | Missense_Mutation | SNP | G | A | 4   | 157 | c.1286C>T | c.(1285-1287)GCT>GTT | p.A429V  |
| Pat_11 | Pre-Treatment | 4-Sep    | 5414   | 37 | 17 | 56602494 | 56602494 | Missense_Mutation | SNP | G | A | 5   | 300 | c.607C>T  | c.(607-609)CGG>TGG   | p.R203W  |
| Pat_11 | Pre-Treatment | USP32    | 84669  | 37 | 17 | 58303400 | 58303400 | Missense_Mutation | SNP | C | T | 4   | 185 | c.1432G>A | c.(1432-1434)GGC>AGC | p.G478S  |
| Pat_11 | Pre-Treatment | CYB561   | 1534   | 37 | 17 | 61513430 | 61513430 | Missense_Mutation | SNP | C | T | 5   | 289 | c.286G>A  | c.(286-288)GTC>ATC   | p.V96I   |
| Pat_11 | Pre-Treatment | GPR142   | 350383 | 37 | 17 | 72368438 | 72368438 | Missense_Mutation | SNP | C | T | 51  | 138 | c.1088C>T | c.(1087-1089)ACC>ATC | p.T363I  |
| Pat_11 | Pre-Treatment | CASKIN2  | 57513  | 37 | 17 | 73498070 | 73498070 | Missense_Mutation | SNP | C | T | 4   | 177 | c.3085G>A | c.(3085-3087)GAG>AAG | p.E1029K |
| Pat_11 | Pre-Treatment | DNAH17   | 8632   | 37 | 17 | 76423087 | 76423087 | Missense_Mutation | SNP | C | T | 4   | 34  | c.3691G>A | c.(3691-3693)GCC>ACC | p.A1231T |
| Pat_11 | Pre-Treatment | EIF4A3   | 9775   | 37 | 17 | 78115177 | 78115177 | Missense_Mutation | SNP | G | A | 4   | 137 | c.313C>T  | c.(313-315)CGT>TGT   | p.R105C  |
| Pat_11 | Pre-Treatment | AZ11     | 22994  | 37 | 17 | 79164742 | 79164742 | Missense_Mutation | SNP | G | A | 5   | 165 | c.2917C>T | c.(2917-2919)CGG>TGG | p.R973W  |
| Pat_11 | Pre-Treatment | DCXR     | 51181  | 37 | 17 | 79994441 | 79994441 | Missense_Mutation | SNP | C | T | 5   | 259 | c.427G>A  | c.(427-429)GTA>ATA   | p.V143I  |
| Pat_11 | Pre-Treatment | PTPRM    | 5797   | 37 | 18 | 8394603  | 8394603  | Missense_Mutation | SNP | C | A | 22  | 177 | c.4299C>A | c.(4297-4299)GAC>GAA | p.D1433E |
| Pat_11 | Pre-Treatment | PPP4R1   | 9989   | 37 | 18 | 9583194  | 9583194  | Missense_Mutation | SNP | G | A | 28  | 48  | c.839C>T  | c.(838-840)TCA>TTA   | p.S280L  |
| Pat_11 | Pre-Treatment | CEP192   | 55125  | 37 | 18 | 13099507 | 13099507 | Missense_Mutation | SNP | C | T | 51  | 127 | c.6590C>T | c.(6589-6591)TCC>TTC | p.S2197F |
| Pat_11 | Pre-Treatment | ESCO1    | 114799 | 37 | 18 | 19154035 | 19154035 | Missense_Mutation | SNP | G | A | 6   | 489 | c.770C>T  | c.(769-771)CCG>CTG   | p.P257L  |
| Pat_11 | Pre-Treatment | FHOD3    | 80206  | 37 | 18 | 34298520 | 34298520 | Missense_Mutation | SNP | C | T | 4   | 146 | c.2683C>T | c.(2683-2685)CGT>TGT | p.R895C  |
| Pat_11 | Pre-Treatment | KIAA0427 | 9811   | 37 | 18 | 46284699 | 46284699 | Missense_Mutation | SNP | G | A | 7   | 701 | c.994G>A  | c.(994-996)GAG>AAG   | p.E332K  |

|        |               |          |           |    |    |          |          |                   |     |   |   |     |     |            |                        |           |
|--------|---------------|----------|-----------|----|----|----------|----------|-------------------|-----|---|---|-----|-----|------------|------------------------|-----------|
| Pat_11 | Pre-Treatment | ST8SIA3  | 51046     | 37 | 18 | 55027323 | 55027323 | Missense_Mutation | SNP | G | A | 19  | 64  | c.958G>A   | c.(958-960)GGA>AGA     | p.G320R   |
| Pat_11 | Pre-Treatment | SERPINB2 | 5055      | 37 | 18 | 61569770 | 61569770 | Missense_Mutation | SNP | G | A | 57  | 138 | c.811G>A   | c.(811-813)GAA>AAA     | p.E271K   |
| Pat_11 | Pre-Treatment | CDH7     | 1005      | 37 | 18 | 63477055 | 63477055 | Missense_Mutation | SNP | G | A | 19  | 51  | c.326G>A   | c.(325-327)AGA>AAA     | p.R109K   |
| Pat_11 | Pre-Treatment | RTTN     | 25914     | 37 | 18 | 67795690 | 67795690 | Missense_Mutation | SNP | G | A | 4   | 126 | c.3047C>T  | c.(3046-3048)CCG>CTG   | p.P1016L  |
| Pat_11 | Pre-Treatment | TCF3     | 6929      | 37 | 19 | 1632048  | 1632048  | Missense_Mutation | SNP | G | A | 4   | 90  | c.287C>T   | c.(286-288)CCG>CTG     | p.P96L    |
| Pat_11 | Pre-Treatment | C19orf36 | 113177    | 37 | 19 | 2097949  | 2097949  | Missense_Mutation | SNP | G | A | 4   | 121 | c.392G>A   | c.(391-393)CGC>CAC     | p.R131H   |
| Pat_11 | Pre-Treatment | CLEC4G   | 339390    | 37 | 19 | 7794294  | 7794294  | Missense_Mutation | SNP | G | T | 5   | 141 | c.840C>A   | c.(838-840)AGC>AGA     | p.S280R   |
| Pat_11 | Pre-Treatment | LASS4    | 79603     | 37 | 19 | 8322862  | 8322862  | Missense_Mutation | SNP | C | T | 57  | 178 | c.841C>T   | c.(841-843)CCC>TCC     | p.P281S   |
| Pat_11 | Pre-Treatment | MUC16    | 94025     | 37 | 19 | 9045986  | 9045986  | Missense_Mutation | SNP | G | A | 114 | 217 | c.35645C>T | c.(35644-35646)TCT>TTT | p.S11882F |
| Pat_11 | Pre-Treatment | MUC16    | 94025     | 37 | 19 | 9065407  | 9065407  | Missense_Mutation | SNP | T | G | 3   | 70  | c.22039A>C | c.(22039-22041)ACC>CCC | p.T7347P  |
| Pat_11 | Pre-Treatment | MUC16    | 94025     | 37 | 19 | 9066660  | 9066660  | Missense_Mutation | SNP | G | A | 133 | 246 | c.20786C>T | c.(20785-20787)TCC>TTC | p.S6929F  |
| Pat_11 | Pre-Treatment | MUC16    | 94025     | 37 | 19 | 9082547  | 9082547  | Missense_Mutation | SNP | C | T | 107 | 216 | c.9268G>A  | c.(9268-9270)GAG>AAG   | p.E3090K  |
| Pat_11 | Pre-Treatment | MUC16    | 94025     | 37 | 19 | 9084835  | 9084835  | Missense_Mutation | SNP | G | A | 23  | 50  | c.6980C>T  | c.(6979-6981)TCC>TTC   | p.S2327F  |
| Pat_11 | Pre-Treatment | TYK2     | 7297      | 37 | 19 | 10465279 | 10465279 | Missense_Mutation | SNP | G | A | 4   | 164 | c.2624C>T  | c.(2623-2625)GCT>GTT   | p.A875V   |
| Pat_11 | Pre-Treatment | ZNF700   | 90592     | 37 | 19 | 12060647 | 12060647 | Missense_Mutation | SNP | G | C | 7   | 199 | c.1808G>C  | c.(1807-1809)TGT>TCT   | p.C603S   |
| Pat_11 | Pre-Treatment | SYCE2    | 256126    | 37 | 19 | 13029115 | 13029115 | Missense_Mutation | SNP | G | A | 4   | 219 | c.52C>T    | c.(52-54)CCG>TCG       | p.P18S    |
| Pat_11 | Pre-Treatment | CACNA1A  | 773       | 37 | 19 | 13563820 | 13563820 | Missense_Mutation | SNP | C | T | 31  | 90  | c.409G>A   | c.(409-411)GAA>AAA     | p.E137K   |
| Pat_11 | Pre-Treatment | ZSWIM4   | 65249     | 37 | 19 | 13939511 | 13939511 | Missense_Mutation | SNP | G | A | 6   | 422 | c.2081G>A  | c.(2080-2082)CGC>CAC   | p.R694H   |
| Pat_11 | Pre-Treatment | CASP14   | 23581     | 37 | 19 | 15164421 | 15164421 | Missense_Mutation | SNP | G | A | 37  | 101 | c.156G>A   | c.(154-156)ATG>ATA     | p.M52I    |
| Pat_11 | Pre-Treatment | OR111    | 126370    | 37 | 19 | 15197997 | 15197997 | Nonsense_Mutation | SNP | G | T | 4   | 82  | c.121G>T   | c.(121-123)GGA>TGA     | p.G41*    |
| Pat_11 | Pre-Treatment | SLC35E1  | 79939     | 37 | 19 | 16666010 | 16666010 | Missense_Mutation | SNP | C | T | 6   | 231 | c.955G>A   | c.(955-957)GTC>ATC     | p.V319I   |
| Pat_11 | Pre-Treatment | NWD1     | 284434    | 37 | 19 | 16860349 | 16860349 | Missense_Mutation | SNP | G | A | 4   | 129 | c.896G>A   | c.(895-897)CGC>CAC     | p.R299H   |
| Pat_11 | Pre-Treatment | NR2F6    | 2063      | 37 | 19 | 17351518 | 17351518 | Missense_Mutation | SNP | C | T | 7   | 526 | c.335G>A   | c.(334-336)CGT>CAT     | p.R112H   |
| Pat_11 | Pre-Treatment | NCAN     | 1463      | 37 | 19 | 19338690 | 19338690 | Missense_Mutation | SNP | C | T | 73  | 182 | c.2261C>T  | c.(2260-2262)CCG>CTG   | p.P754L   |
| Pat_11 | Pre-Treatment | ZNF93    | 81931     | 37 | 19 | 20045355 | 20045355 | Missense_Mutation | SNP | C | T | 6   | 21  | c.1591C>T  | c.(1591-1593)CAT>TAT   | p.H531Y   |
| Pat_11 | Pre-Treatment | ZNF737   | 100129842 | 37 | 19 | 20728254 | 20728254 | Missense_Mutation | SNP | C | G | 8   | 24  | c.755G>C   | c.(754-756)AGT>ACT     | p.S252T   |
| Pat_11 | Pre-Treatment | ZNF708   | 7562      | 37 | 19 | 21476519 | 21476519 | Missense_Mutation | SNP | T | C | 3   | 36  | c.1249A>G  | c.(1249-1251)AAG>GAG   | p.K417E   |
| Pat_11 | Pre-Treatment | ZNF208   | 7757      | 37 | 19 | 22156875 | 22156875 | Missense_Mutation | SNP | C | T | 33  | 68  | c.961G>A   | c.(961-963)GCC>ACC     | p.A321T   |
| Pat_11 | Pre-Treatment | ZNF492   | 57615     | 37 | 19 | 22847625 | 22847625 | Missense_Mutation | SNP | G | T | 6   | 32  | c.1154G>T  | c.(1153-1155)AGA>ATA   | p.R385I   |
| Pat_11 | Pre-Treatment | ZNF507   | 22847     | 37 | 19 | 32845727 | 32845727 | Missense_Mutation | SNP | G | A | 6   | 168 | c.1991G>A  | c.(1990-1992)CGA>CAA   | p.R664Q   |
| Pat_11 | Pre-Treatment | KCTD15   | 79047     | 37 | 19 | 34302452 | 34302452 | Missense_Mutation | SNP | G | A | 4   | 108 | c.688G>A   | c.(688-690)GTA>ATA     | p.V230I   |
| Pat_11 | Pre-Treatment | ZNF420   | 147923    | 37 | 19 | 37619781 | 37619781 | Missense_Mutation | SNP | C | T | 8   | 33  | c.1888C>T  | c.(1888-1890)CTT>TTT   | p.L630F   |
| Pat_11 | Pre-Treatment | SIPA1L3  | 23094     | 37 | 19 | 38631876 | 38631876 | Missense_Mutation | SNP | G | A | 53  | 137 | c.3196G>A  | c.(3196-3198)GAA>AAA   | p.E1066K  |
| Pat_11 | Pre-Treatment | RYR1     | 6261      | 37 | 19 | 39008205 | 39008205 | Missense_Mutation | SNP | G | A | 46  | 70  | c.9892G>A  | c.(9892-9894)GCC>ACC   | p.A3298T  |
| Pat_11 | Pre-Treatment | ZFP36    | 7538      | 37 | 19 | 39899302 | 39899302 | Missense_Mutation | SNP | G | A | 4   | 122 | c.944G>A   | c.(943-945)CGA>CAA     | p.R315Q   |
| Pat_11 | Pre-Treatment | CYP2S1   | 29785     | 37 | 19 | 41704744 | 41704744 | Missense_Mutation | SNP | C | T | 4   | 168 | c.785C>T   | c.(784-786)TCG>TTG     | p.S262L   |
| Pat_11 | Pre-Treatment | TMEM145  | 284339    | 37 | 19 | 42827873 | 42827873 | Missense_Mutation | SNP | G | A | 5   | 323 | c.1333G>A  | c.(1333-1335)GTG>ATG   | p.V445M   |
| Pat_11 | Pre-Treatment | RTN2     | 6253      | 37 | 19 | 45997954 | 45997954 | Missense_Mutation | SNP | G | A | 4   | 194 | c.389C>T   | c.(388-390)GCC>GTG     | p.A130V   |
| Pat_11 | Pre-Treatment | SYMPK    | 8189      | 37 | 19 | 46319222 | 46319222 | Missense_Mutation | SNP | G | A | 3   | 34  | c.3574C>T  | c.(3574-3576)CGG>TGG   | p.R1192W  |
| Pat_11 | Pre-Treatment | CCDC9    | 26093     | 37 | 19 | 47767873 | 47767873 | Missense_Mutation | SNP | G | T | 3   | 31  | c.476G>T   | c.(475-477)CGG>CTG     | p.R159L   |
| Pat_11 | Pre-Treatment | NLRP4    | 147945    | 37 | 19 | 56382227 | 56382227 | Missense_Mutation | SNP | G | A | 46  | 122 | c.2389G>A  | c.(2389-2391)GAA>AAA   | p.E797K   |
| Pat_11 | Pre-Treatment | ASAP2    | 8853      | 37 | 2  | 9475268  | 9475268  | Missense_Mutation | SNP | G | A | 4   | 163 | c.809G>A   | c.(808-810)CGA>CAA     | p.R270Q   |
| Pat_11 | Pre-Treatment | GREB1    | 9687      | 37 | 2  | 11777890 | 11777890 | Missense_Mutation | SNP | C | T | 77  | 197 | c.5395C>T  | c.(5395-5397)CCG>TCG   | p.P1799S  |
| Pat_11 | Pre-Treatment | KCNS3    | 3790      | 37 | 2  | 18112978 | 18112978 | Missense_Mutation | SNP | G | A | 5   | 297 | c.703G>A   | c.(703-705)GGG>AGG     | p.G235R   |
| Pat_11 | Pre-Treatment | PUM2     | 23369     | 37 | 2  | 20453619 | 20453619 | Missense_Mutation | SNP | C | A | 4   | 247 | c.3027G>T  | c.(3025-3027)ATG>ATT   | p.M1009I  |
| Pat_11 | Pre-Treatment | HS1BP3   | 64342     | 37 | 2  | 20840820 | 20840820 | Missense_Mutation | SNP | C | T | 131 | 297 | c.319G>A   | c.(319-321)GAG>AAG     | p.E107K   |
| Pat_11 | Pre-Treatment | APOB     | 338       | 37 | 2  | 21232284 | 21232284 | Missense_Mutation | SNP | C | T | 35  | 76  | c.7456G>A  | c.(7456-7458)GAC>AAC   | p.D2486N  |

|        |               |           |        |    |    |           |           |                   |     |    |    |     |     |                                    |                        |          |
|--------|---------------|-----------|--------|----|----|-----------|-----------|-------------------|-----|----|----|-----|-----|------------------------------------|------------------------|----------|
| Pat_11 | Pre-Treatment | POMC      | 5443   | 37 | 2  | 25384581  | 25384581  | Missense_Mutation | SNP | G  | A  | 3   | 33  | c.173C>T                           | c.(172-174)ACT>ATT     | p.T58I   |
| Pat_11 | Pre-Treatment | NRBP1     | 29959  | 37 | 2  | 27658073  | 27658073  | Missense_Mutation | SNP | G  | A  | 5   | 274 | c.640G>A                           | c.(640-642)GGA>AGA     | p.G214R  |
| Pat_11 | Pre-Treatment | CCDC121   | 79635  | 37 | 2  | 27850624  | 27850624  | Missense_Mutation | SNP | G  | A  | 5   | 316 | c.43C>T                            | c.(43-45)CGG>TGG       | p.R15W   |
| Pat_11 | Pre-Treatment | LBH       | 81606  | 37 | 2  | 30480434  | 30480434  | Nonsense_Mutation | SNP | G  | T  | 31  | 63  | c.265G>T                           | c.(265-267)GAG>TAG     | p.E89*   |
| Pat_11 | Pre-Treatment | NLR4      | 58484  | 37 | 2  | 32477568  | 32477568  | Missense_Mutation | SNP | T  | C  | 4   | 174 | c.182A>G                           | c.(181-183)AAG>AGG     | p.K61R   |
| Pat_11 | Pre-Treatment | LTBP1     | 4052   | 37 | 2  | 33468797  | 33468797  | Nonsense_Mutation | SNP | C  | T  | 54  | 137 | c.1945C>T                          | c.(1945-1947)CGA>TGA   | p.R649*  |
| Pat_11 | Pre-Treatment | RASGRP3   | 25780  | 37 | 2  | 33745717  | 33745717  | Missense_Mutation | SNP | G  | A  | 44  | 146 | c.334G>A                           | c.(334-336)GAA>AAA     | p.E112K  |
| Pat_11 | Pre-Treatment | SFRS7     | 6432   | 37 | 2  | 38972328  | 38972328  | Missense_Mutation | SNP | G  | A  | 4   | 180 | c.664C>T                           | c.(664-666)CGT>TGT     | p.R222C  |
| Pat_11 | Pre-Treatment | DHX57     | 90957  | 37 | 2  | 39088696  | 39088696  | Missense_Mutation | SNP | G  | A  | 14  | 72  | c.856C>T                           | c.(856-858)CGC>TGC     | p.R286C  |
| Pat_11 | Pre-Treatment | RAB11FIP5 | 26056  | 37 | 2  | 73315325  | 73315325  | Missense_Mutation | SNP | C  | T  | 4   | 259 | c.1421G>A                          | c.(1420-1422)CGG>CAG   | p.R474Q  |
| Pat_11 | Pre-Treatment | REG3G     | 130120 | 37 | 2  | 79254993  | 79254993  | Missense_Mutation | SNP | G  | T  | 5   | 188 | c.394G>T                           | c.(394-396)GCA>TCA     | p.A132S  |
| Pat_11 | Pre-Treatment | STARD7    | 56910  | 37 | 2  | 96858130  | 96858130  | Missense_Mutation | SNP | G  | A  | 4   | 273 | c.820C>T                           | c.(820-822)CGT>TGT     | p.R274C  |
| Pat_11 | Pre-Treatment | SNRNP200  | 23020  | 37 | 2  | 96948966  | 96948966  | Missense_Mutation | SNP | G  | A  | 4   | 229 | c.4888C>T                          | c.(4888-4890)CGC>TGC   | p.R1630C |
| Pat_11 | Pre-Treatment | SEMA4C    | 54910  | 37 | 2  | 97526382  | 97526382  | Missense_Mutation | SNP | G  | A  | 43  | 141 | c.2483C>T                          | c.(2482-2484)CCC>CTC   | p.P828L  |
| Pat_11 | Pre-Treatment | ZAP70     | 7535   | 37 | 2  | 98349771  | 98349771  | Missense_Mutation | SNP | C  | T  | 22  | 66  | c.802C>T                           | c.(802-804)CCC>TCC     | p.P268S  |
| Pat_11 | Pre-Treatment | CHST10    | 9486   | 37 | 2  | 101014417 | 101014417 | Missense_Mutation | SNP | G  | A  | 57  | 138 | c.380C>T                           | c.(379-381)CCC>CTC     | p.P127L  |
| Pat_11 | Pre-Treatment | CKAP2L    | 150468 | 37 | 2  | 113514118 | 113514118 | Missense_Mutation | SNP | G  | A  | 4   | 176 | c.830C>T                           | c.(829-831)ACG>ATG     | p.T277M  |
| Pat_11 | Pre-Treatment | SLC35F5   | 80255  | 37 | 2  | 114500394 | 114500394 | Missense_Mutation | SNP | G  | C  | 42  | 90  | c.625C>G                           | c.(625-627)CAT>GAT     | p.H209D  |
| Pat_11 | Pre-Treatment | GLI2      | 2736   | 37 | 2  | 121747302 | 121747302 | Missense_Mutation | SNP | G  | A  | 4   | 160 | c.3812G>A                          | c.(3811-3813)AGC>AAC   | p.S1271N |
| Pat_11 | Pre-Treatment | KIF5C     | 3800   | 37 | 2  | 149853804 | 149853804 | Missense_Mutation | SNP | G  | A  | 32  | 66  | c.2050G>A                          | c.(2050-2052)GAT>AAT   | p.D684N  |
| Pat_11 | Pre-Treatment | NEB       | 4703   | 37 | 2  | 152388337 | 152388337 | Missense_Mutation | SNP | C  | T  | 4   | 53  | c.16388G>A                         | c.(16387-16389)CGT>CAT | p.R5463H |
| Pat_11 | Pre-Treatment | GALNT13   | 114805 | 37 | 2  | 155099313 | 155099313 | Missense_Mutation | SNP | G  | A  | 15  | 59  | c.581G>A                           | c.(580-582)CGA>CAA     | p.R194Q  |
| Pat_11 | Pre-Treatment | DPP4      | 1803   | 37 | 2  | 162890087 | 162890087 | Missense_Mutation | SNP | G  | A  | 44  | 116 | c.851C>T                           | c.(850-852)TCC>TTC     | p.S284F  |
| Pat_11 | Pre-Treatment | MYO3B     | 140469 | 37 | 2  | 171070963 | 171070963 | Missense_Mutation | SNP | G  | A  | 56  | 155 | c.396G>A                           | c.(394-396)ATG>ATA     | p.M132I  |
| Pat_11 | Pre-Treatment | TLK1      | 9874   | 37 | 2  | 171974268 | 171974268 | Missense_Mutation | SNP | C  | T  | 4   | 311 | c.239G>A                           | c.(238-240)AGT>AAT     | p.S80N   |
| Pat_11 | Pre-Treatment | HOXD12    | 3238   | 37 | 2  | 176964663 | 176964663 | Missense_Mutation | SNP | C  | T  | 16  | 47  | c.134C>T                           | c.(133-135)CCG>CTG     | p.P45L   |
| Pat_11 | Pre-Treatment | ANKRD44   | 91526  | 37 | 2  | 197990134 | 197990134 | Missense_Mutation | SNP | C  | T  | 4   | 185 | c.521G>A                           | c.(520-522)CGG>CAG     | p.R174Q  |
| Pat_11 | Pre-Treatment | PLCL1     | 5334   | 37 | 2  | 198949130 | 198949130 | Missense_Mutation | SNP | C  | T  | 4   | 227 | c.889C>T                           | c.(889-891)CGC>TGC     | p.R297C  |
| Pat_11 | Pre-Treatment | GPBAR1    | 151306 | 37 | 2  | 219127739 | 219127739 | Missense_Mutation | SNP | T  | C  | 3   | 112 | c.292T>C                           | c.(292-294)TCC>CCC     | p.S98P   |
| Pat_11 | Pre-Treatment | PLCD4     | 84812  | 37 | 2  | 219499237 | 219499237 | Missense_Mutation | SNP | C  | T  | 4   | 170 | c.1780C>T                          | c.(1780-1782)CGC>TGC   | p.R594C  |
| Pat_11 | Pre-Treatment | PTPRN     | 5798   | 37 | 2  | 220161969 | 220161970 | Missense_Mutation | DNP | CC | TT | 37  | 109 | .2073_2074GG>A071-2076)ACGGGA>ACA/ |                        | p.G692R  |
| Pat_11 | Pre-Treatment | SLC4A3    | 6508   | 37 | 2  | 220502499 | 220502499 | Missense_Mutation | SNP | G  | A  | 4   | 202 | c.2732G>A                          | c.(2731-2733)CGC>CAC   | p.R911H  |
| Pat_11 | Pre-Treatment | SPHKAP    | 80309  | 37 | 2  | 228882842 | 228882842 | Missense_Mutation | SNP | G  | A  | 5   | 290 | c.2728C>T                          | c.(2728-2730)CTT>TTT   | p.L910F  |
| Pat_11 | Pre-Treatment | TRIP12    | 9320   | 37 | 2  | 230664071 | 230664071 | Nonsense_Mutation | SNP | G  | A  | 4   | 175 | c.3010C>T                          | c.(3010-3012)CGA>TGA   | p.R1004* |
| Pat_11 | Pre-Treatment | C2orf57   | 165100 | 37 | 2  | 232457897 | 232457897 | Nonsense_Mutation | SNP | C  | T  | 64  | 155 | c.235C>T                           | c.(235-237)CAG>TAG     | p.Q79*   |
| Pat_11 | Pre-Treatment | FARP2     | 9855   | 37 | 2  | 242380731 | 242380731 | Missense_Mutation | SNP | C  | T  | 56  | 154 | c.1171C>T                          | c.(1171-1173)CCC>TCC   | p.P391S  |
| Pat_11 | Pre-Treatment | TGM3      | 7053   | 37 | 20 | 2308864   | 2308864   | Missense_Mutation | SNP | G  | A  | 4   | 266 | c.1186G>A                          | c.(1186-1188)GAC>AAC   | p.D396N  |
| Pat_11 | Pre-Treatment | TGM6      | 343641 | 37 | 20 | 2381057   | 2381057   | Missense_Mutation | SNP | G  | A  | 4   | 248 | c.956G>A                           | c.(955-957)CGG>CAG     | p.R319Q  |
| Pat_11 | Pre-Treatment | VSX1      | 30813  | 37 | 20 | 25056997  | 25056997  | Missense_Mutation | SNP | C  | T  | 4   | 108 | c.998G>A                           | c.(997-999)CGG>CAG     | p.R333Q  |
| Pat_11 | Pre-Treatment | NINL      | 22981  | 37 | 20 | 25434259  | 25434259  | Missense_Mutation | SNP | G  | A  | 57  | 126 | c.3977C>T                          | c.(3976-3978)TCC>TTC   | p.S1326F |
| Pat_11 | Pre-Treatment | FRG1B     | 284802 | 37 | 20 | 29625905  | 29625905  | Missense_Mutation | SNP | T  | C  | 3   | 105 | c.59T>C                            | c.(58-60)CTT>CCT       | p.L20P   |
| Pat_11 | Pre-Treatment | FRG1B     | 284802 | 37 | 20 | 29628243  | 29628243  | Missense_Mutation | SNP | T  | C  | 10  | 291 | c.155T>C                           | c.(154-156)TTG>TCG     | p.L52S   |
| Pat_11 | Pre-Treatment | FRG1B     | 284802 | 37 | 20 | 29628245  | 29628245  | Missense_Mutation | SNP | G  | A  | 10  | 292 | c.157G>A                           | c.(157-159)GCC>ACC     | p.A53T   |
| Pat_11 | Pre-Treatment | DEFB123   | 245936 | 37 | 20 | 30028545  | 30028545  | Missense_Mutation | SNP | C  | T  | 134 | 312 | c.44C>T                            | c.(43-45)TCC>TTC       | p.S15F   |
| Pat_11 | Pre-Treatment | DNMT3B    | 1789   | 37 | 20 | 31386388  | 31386388  | Missense_Mutation | SNP | G  | A  | 4   | 95  | c.1613G>A                          | c.(1612-1614)CGC>CAC   | p.R538H  |
| Pat_11 | Pre-Treatment | EDEM2     | 55741  | 37 | 20 | 33722668  | 33722668  | Missense_Mutation | SNP | G  | A  | 4   | 177 | c.575C>T                           | c.(574-576)ACG>ATG     | p.T192M  |
| Pat_11 | Pre-Treatment | TOP1      | 7150   | 37 | 20 | 39741459  | 39741459  | Missense_Mutation | SNP | G  | A  | 4   | 115 | c.1346G>A                          | c.(1345-1347)CGG>CAG   | p.R449Q  |

|        |               |           |        |    |    |          |          |                   |     |    |    |     |     |                |                      |          |
|--------|---------------|-----------|--------|----|----|----------|----------|-------------------|-----|----|----|-----|-----|----------------|----------------------|----------|
| Pat_11 | Pre-Treatment | C20orf111 | 51526  | 37 | 20 | 42826062 | 42826062 | Missense_Mutation | SNP | G  | A  | 4   | 204 | c.509C>T       | c.(508-510)ACC>ATC   | p.T170I  |
| Pat_11 | Pre-Treatment | PABPC1L   | 80336  | 37 | 20 | 43559150 | 43559150 | Missense_Mutation | SNP | C  | T  | 215 | 423 | c.1022C>T      | c.(1021-1023)TCC>TTC | p.S341F  |
| Pat_11 | Pre-Treatment | SPATA2    | 9825   | 37 | 20 | 48524979 | 48524979 | Missense_Mutation | SNP | G  | A  | 4   | 134 | c.49C>T        | c.(49-51)CGG>TGG     | p.R17W   |
| Pat_11 | Pre-Treatment | ZFP64     | 55734  | 37 | 20 | 50769739 | 50769739 | Missense_Mutation | SNP | C  | T  | 5   | 218 | c.992G>A       | c.(991-993)CGG>CAG   | p.R331Q  |
| Pat_11 | Pre-Treatment | ZBTB46    | 140685 | 37 | 20 | 62422079 | 62422079 | Missense_Mutation | SNP | G  | A  | 4   | 120 | c.32C>T        | c.(31-33)ACG>ATG     | p.T11M   |
| Pat_11 | Pre-Treatment | LIPI      | 149998 | 37 | 21 | 15535788 | 15535788 | Missense_Mutation | SNP | G  | A  | 25  | 65  | c.1021C>T      | c.(1021-1023)CTT>TTT | p.L341F  |
| Pat_11 | Pre-Treatment | BACH1     | 571    | 37 | 21 | 30693752 | 30693752 | Missense_Mutation | SNP | G  | A  | 5   | 324 | c.151G>A       | c.(151-153)GTG>ATG   | p.V51M   |
| Pat_11 | Pre-Treatment | GRIK1     | 2897   | 37 | 21 | 30953811 | 30953811 | Missense_Mutation | SNP | C  | T  | 4   | 190 | c.1846G>A      | c.(1846-1848)GTG>ATG | p.V616M  |
| Pat_11 | Pre-Treatment | PDE9A     | 5152   | 37 | 21 | 44181005 | 44181005 | Missense_Mutation | SNP | G  | A  | 4   | 124 | c.1073G>A      | c.(1072-1074)GGC>GAC | p.G358D  |
| Pat_11 | Pre-Treatment | CBS       | 875    | 37 | 21 | 44492171 | 44492171 | Missense_Mutation | SNP | G  | A  | 4   | 193 | c.133C>T       | c.(133-135)CGG>TGG   | p.R45W   |
| Pat_11 | Pre-Treatment | C21orf56  | 84221  | 37 | 21 | 47588239 | 47588239 | Missense_Mutation | SNP | C  | T  | 4   | 104 | c.527G>A       | c.(526-528)AGG>AAG   | p.R176K  |
| Pat_11 | Pre-Treatment | POTEH     | 23784  | 37 | 22 | 16287488 | 16287488 | Missense_Mutation | SNP | C  | T  | 7   | 350 | c.398G>A       | c.(397-399)AGC>AAC   | p.S133N  |
| Pat_11 | Pre-Treatment | TSSK2     | 23617  | 37 | 22 | 19119966 | 19119966 | Nonsense_Mutation | SNP | G  | T  | 6   | 205 | c.1054G>T      | c.(1054-1056)GAG>TAG | p.E352*  |
| Pat_11 | Pre-Treatment | RTN4R     | 65078  | 37 | 22 | 20229989 | 20229989 | Missense_Mutation | SNP | G  | A  | 4   | 214 | c.667C>T       | c.(667-669)CGT>TGT   | p.R223C  |
| Pat_11 | Pre-Treatment | SLC7A4    | 6545   | 37 | 22 | 21386095 | 21386095 | Missense_Mutation | SNP | G  | A  | 4   | 116 | c.7C>T         | c.(7-9)CGG>TGG       | p.R3W    |
| Pat_11 | Pre-Treatment | NF2       | 4771   | 37 | 22 | 30074207 | 30074207 | Missense_Mutation | SNP | C  | T  | 4   | 230 | c.1469C>T      | c.(1468-1470)CCG>CTG | p.P490L  |
| Pat_11 | Pre-Treatment | OSBP2     | 23762  | 37 | 22 | 31285598 | 31285599 | Missense_Mutation | DNP | GG | AA | 61  | 179 | .1598_1599GG>A | c.(1597-1599)CGG>CAA | p.R533Q  |
| Pat_11 | Pre-Treatment | PIK3IP1   | 113791 | 37 | 22 | 31686951 | 31686951 | Missense_Mutation | SNP | C  | T  | 19  | 46  | c.307G>A       | c.(307-309)GAG>AAG   | p.E103K  |
| Pat_11 | Pre-Treatment | C22orf33  | 339669 | 37 | 22 | 37398027 | 37398027 | Nonsense_Mutation | SNP | G  | A  | 18  | 39  | c.340C>T       | c.(340-342)CAG>TAG   | p.Q114*  |
| Pat_11 | Pre-Treatment | GGA1      | 26088  | 37 | 22 | 38028092 | 38028092 | Missense_Mutation | SNP | G  | A  | 4   | 157 | c.1618G>A      | c.(1618-1620)GTG>ATG | p.V540M  |
| Pat_11 | Pre-Treatment | GTPBP1    | 9567   | 37 | 22 | 39104928 | 39104928 | Missense_Mutation | SNP | G  | A  | 4   | 247 | c.271G>A       | c.(271-273)GGA>AGA   | p.G91R   |
| Pat_11 | Pre-Treatment | CBX7      | 23492  | 37 | 22 | 39534694 | 39534694 | Nonsense_Mutation | SNP | G  | A  | 4   | 210 | c.193C>T       | c.(193-195)CGA>TGA   | p.R65*   |
| Pat_11 | Pre-Treatment | TNRC6B    | 23112  | 37 | 22 | 40708530 | 40708530 | Nonsense_Mutation | SNP | G  | A  | 18  | 61  | c.4457G>A      | c.(4456-4458)TGG>TAG | p.W1486* |
| Pat_11 | Pre-Treatment | MKL1      | 57591  | 37 | 22 | 40827438 | 40827438 | Missense_Mutation | SNP | G  | A  | 198 | 475 | c.110C>T       | c.(109-111)TCG>TTG   | p.S37L   |
| Pat_11 | Pre-Treatment | POLDIP3   | 84271  | 37 | 22 | 42999126 | 42999126 | Missense_Mutation | SNP | C  | A  | 91  | 267 | c.100G>T       | c.(100-102)GTT>TTT   | p.V34F   |
| Pat_11 | Pre-Treatment | SCUBE1    | 80274  | 37 | 22 | 43614435 | 43614435 | Nonsense_Mutation | SNP | G  | A  | 5   | 193 | c.1717C>T      | c.(1717-1719)CGA>TGA | p.R573*  |
| Pat_11 | Pre-Treatment | C22orf26  | 55267  | 37 | 22 | 46449739 | 46449739 | Missense_Mutation | SNP | G  | A  | 3   | 15  | c.235C>T       | c.(235-237)CTC>TTC   | p.L79F   |
| Pat_11 | Pre-Treatment | TLL8      | 164714 | 37 | 22 | 50469033 | 50469033 | Missense_Mutation | SNP | G  | A  | 3   | 42  | c.2029C>T      | c.(2029-2031)CTC>TTC | p.L677F  |
| Pat_11 | Pre-Treatment | IL5RA     | 3568   | 37 | 3  | 3146593  | 3146593  | Missense_Mutation | SNP | C  | T  | 20  | 84  | c.76G>A        | c.(76-78)GAA>AAA     | p.E26K   |
| Pat_11 | Pre-Treatment | SETD5     | 55209  | 37 | 3  | 9476073  | 9476073  | Missense_Mutation | SNP | G  | A  | 4   | 92  | c.233G>A       | c.(232-234)TGT>TAT   | p.C78Y   |
| Pat_11 | Pre-Treatment | ATP2B2    | 491    | 37 | 3  | 10391870 | 10391870 | Missense_Mutation | SNP | C  | T  | 66  | 135 | c.2330G>A      | c.(2329-2331)CGA>CAA | p.R777Q  |
| Pat_11 | Pre-Treatment | NUP210    | 23225  | 37 | 3  | 13364899 | 13364899 | Missense_Mutation | SNP | G  | A  | 4   | 226 | c.4678C>T      | c.(4678-4680)CGT>TGT | p.R1560C |
| Pat_11 | Pre-Treatment | XPC       | 7508   | 37 | 3  | 14190138 | 14190138 | Missense_Mutation | SNP | C  | T  | 4   | 202 | c.2344G>A      | c.(2344-2346)GTG>ATG | p.V782M  |
| Pat_11 | Pre-Treatment | FGD5      | 152273 | 37 | 3  | 14949183 | 14949183 | Missense_Mutation | SNP | G  | A  | 4   | 204 | c.3301G>A      | c.(3301-3303)GTC>ATC | p.V1101I |
| Pat_11 | Pre-Treatment | GADL1     | 339896 | 37 | 3  | 30880557 | 30880557 | Missense_Mutation | SNP | C  | T  | 59  | 116 | c.835G>A       | c.(835-837)GGA>AGA   | p.G279R  |
| Pat_11 | Pre-Treatment | MYD88     | 4615   | 37 | 3  | 38181482 | 38181483 | Missense_Mutation | DNP | CC | TT | 13  | 28  | c.495_496CC>TT | 493-498)GACCCC>GATT( | p.P166S  |
| Pat_11 | Pre-Treatment | TRAK1     | 22906  | 37 | 3  | 42242402 | 42242402 | Missense_Mutation | SNP | C  | T  | 180 | 350 | c.1283C>T      | c.(1282-1284)TCC>TTC | p.S428F  |
| Pat_11 | Pre-Treatment | CCDC13    | 152206 | 37 | 3  | 42794147 | 42794147 | Missense_Mutation | SNP | G  | A  | 5   | 150 | c.433C>T       | c.(433-435)CGG>TGG   | p.R145W  |
| Pat_11 | Pre-Treatment | XCR1      | 2829   | 37 | 3  | 46063010 | 46063010 | Missense_Mutation | SNP | G  | A  | 3   | 29  | c.430C>T       | c.(430-432)CGC>TGC   | p.R144C  |
| Pat_11 | Pre-Treatment | PTPN23    | 25930  | 37 | 3  | 47446526 | 47446526 | Missense_Mutation | SNP | C  | A  | 4   | 213 | c.319C>A       | c.(319-321)CAT>AAT   | p.H107N  |
| Pat_11 | Pre-Treatment | CSPG5     | 10675  | 37 | 3  | 47610605 | 47610605 | Missense_Mutation | SNP | G  | A  | 14  | 23  | c.1495C>T      | c.(1495-1497)CCC>TCC | p.P499S  |
| Pat_11 | Pre-Treatment | BSN       | 8927   | 37 | 3  | 49695090 | 49695090 | Missense_Mutation | SNP | G  | A  | 4   | 209 | c.8101G>A      | c.(8101-8103)GTC>ATC | p.V2701I |
| Pat_11 | Pre-Treatment | DNAH1     | 25981  | 37 | 3  | 52406387 | 52406387 | Missense_Mutation | SNP | A  | G  | 4   | 161 | c.6811A>G      | c.(6811-6813)AGC>GGC | p.S2271G |
| Pat_11 | Pre-Treatment | DNAH1     | 25981  | 37 | 3  | 52417438 | 52417438 | Missense_Mutation | SNP | G  | A  | 4   | 91  | c.7978G>A      | c.(7978-7980)GTC>ATC | p.V2660I |
| Pat_11 | Pre-Treatment | NEK4      | 6787   | 37 | 3  | 52745882 | 52745882 | Missense_Mutation | SNP | G  | A  | 4   | 142 | c.2437C>T      | c.(2437-2439)CGT>TGT | p.R813C  |
| Pat_11 | Pre-Treatment | PRKCD     | 5580   | 37 | 3  | 53213714 | 53213714 | Missense_Mutation | SNP | G  | T  | 3   | 22  | c.237G>T       | c.(235-237)GAG>GAT   | p.E79D   |
| Pat_11 | Pre-Treatment | ROBO2     | 6092   | 37 | 3  | 77089988 | 77089988 | Missense_Mutation | SNP | C  | G  | 42  | 104 | c.52C>G        | c.(52-54)CGG>GGG     | p.R18G   |



|        |               |         |        |    |   |           |           |                   |     |   |   |    |     |            |                        |          |
|--------|---------------|---------|--------|----|---|-----------|-----------|-------------------|-----|---|---|----|-----|------------|------------------------|----------|
| Pat_11 | Pre-Treatment | C3orf38 | 285237 | 37 | 3 | 88205268  | 88205268  | Missense_Mutation | SNP | C | T | 20 | 48  | c.473C>T   | c.(472-474)CCT>CTT     | p.P158L  |
| Pat_11 | Pre-Treatment | EPHA6   | 285220 | 37 | 3 | 96706810  | 96706810  | Missense_Mutation | SNP | T | G | 28 | 44  | c.1087T>G  | c.(1087-1089)TAT>GAT   | p.Y363D  |
| Pat_11 | Pre-Treatment | MORC1   | 27136  | 37 | 3 | 108813812 | 108813812 | Missense_Mutation | SNP | G | A | 9  | 11  | c.527C>T   | c.(526-528)CCA>CTA     | p.P176L  |
| Pat_11 | Pre-Treatment | BOC     | 91653  | 37 | 3 | 113002341 | 113002341 | Missense_Mutation | SNP | C | T | 5  | 189 | c.2515C>T  | c.(2515-2517)CGG>TGG   | p.R839W  |
| Pat_11 | Pre-Treatment | ZBTB20  | 26137  | 37 | 3 | 114070639 | 114070639 | Missense_Mutation | SNP | C | T | 4  | 165 | c.286G>A   | c.(286-288)GAG>AAG     | p.E96K   |
| Pat_11 | Pre-Treatment | C3orf1  | 51300  | 37 | 3 | 119222428 | 119222428 | Missense_Mutation | SNP | G | A | 4  | 68  | c.410G>A   | c.(409-411)CGC>CAC     | p.R137H  |
| Pat_11 | Pre-Treatment | ESYT3   | 83850  | 37 | 3 | 138183346 | 138183346 | Missense_Mutation | SNP | G | A | 70 | 115 | c.1075G>A  | c.(1075-1077)GAA>AAA   | p.E359K  |
| Pat_11 | Pre-Treatment | PLOD2   | 5352   | 37 | 3 | 145789204 | 145789204 | Missense_Mutation | SNP | G | A | 4  | 138 | c.1792C>T  | c.(1792-1794)CGT>TGT   | p.R598C  |
| Pat_11 | Pre-Treatment | AGTR1   | 185    | 37 | 3 | 148458956 | 148458956 | Missense_Mutation | SNP | G | A | 27 | 76  | c.134G>A   | c.(133-135)GGA>GAA     | p.G45E   |
| Pat_11 | Pre-Treatment | CP      | 1356   | 37 | 3 | 148919931 | 148919931 | Nonsense_Mutation | SNP | G | A | 4  | 96  | c.1306C>T  | c.(1306-1308)CGA>TGA   | p.R436*  |
| Pat_11 | Pre-Treatment | CP      | 1356   | 37 | 3 | 148939500 | 148939500 | Missense_Mutation | SNP | C | T | 28 | 34  | c.80G>A    | c.(79-81)GGA>GAA       | p.G27E   |
| Pat_11 | Pre-Treatment | ZBBX    | 79740  | 37 | 3 | 167000053 | 167000053 | Missense_Mutation | SNP | C | T | 5  | 19  | c.2110G>A  | c.(2110-2112)GAA>AAA   | p.E704K  |
| Pat_11 | Pre-Treatment | PHC3    | 80012  | 37 | 3 | 169820640 | 169820640 | Missense_Mutation | SNP | G | A | 4  | 88  | c.2515C>T  | c.(2515-2517)CGT>TGT   | p.R839C  |
| Pat_11 | Pre-Treatment | SLC2A2  | 6514   | 37 | 3 | 170723136 | 170723136 | Nonsense_Mutation | SNP | G | A | 5  | 210 | c.901C>T   | c.(901-903)CGA>TGA     | p.R301*  |
| Pat_11 | Pre-Treatment | EIF2B5  | 8893   | 37 | 3 | 183861316 | 183861316 | Missense_Mutation | SNP | C | T | 4  | 196 | c.1832C>T  | c.(1831-1833)CCG>CTG   | p.P611L  |
| Pat_11 | Pre-Treatment | ABCF3   | 55324  | 37 | 3 | 183906156 | 183906156 | Missense_Mutation | SNP | G | A | 5  | 488 | c.797G>A   | c.(796-798)CGG>CAG     | p.R266Q  |
| Pat_11 | Pre-Treatment | TP63    | 8626   | 37 | 3 | 189455576 | 189455576 | Missense_Mutation | SNP | G | A | 4  | 106 | c.110G>A   | c.(109-111)CGA>CAA     | p.R37Q   |
| Pat_11 | Pre-Treatment | ATP13A5 | 344905 | 37 | 3 | 193081090 | 193081090 | Missense_Mutation | SNP | C | T | 21 | 65  | c.319G>A   | c.(319-321)GAA>AAA     | p.E107K  |
| Pat_11 | Pre-Treatment | LSG1    | 55341  | 37 | 3 | 194365433 | 194365433 | Missense_Mutation | SNP | C | T | 4  | 45  | c.1666G>A  | c.(1666-1668)GTA>ATA   | p.V556I  |
| Pat_11 | Pre-Treatment | MUC4    | 4585   | 37 | 3 | 195509171 | 195509171 | Missense_Mutation | SNP | G | A | 4  | 5   | c.8896C>T  | c.(8896-8898)CTT>TTT   | p.L2966F |
| Pat_11 | Pre-Treatment | ZNF721  | 170960 | 37 | 4 | 435649    | 435649    | Missense_Mutation | SNP | T | G | 7  | 55  | c.2607A>C  | c.(2605-2607)GAA>GAC   | p.E869D  |
| Pat_11 | Pre-Treatment | ZNF721  | 170960 | 37 | 4 | 436992    | 436992    | Missense_Mutation | SNP | G | C | 28 | 53  | c.1264C>G  | c.(1264-1266)CGT>GGT   | p.R422G  |
| Pat_11 | Pre-Treatment | ZBTB49  | 166793 | 37 | 4 | 4314795   | 4314795   | Missense_Mutation | SNP | C | T | 4  | 175 | c.1330C>T  | c.(1330-1332)CGG>TGG   | p.R444W  |
| Pat_11 | Pre-Treatment | CC2D2A  | 57545  | 37 | 4 | 15552594  | 15552594  | Missense_Mutation | SNP | G | A | 4  | 155 | c.2329G>A  | c.(2329-2331)GTT>ATT   | p.V777I  |
| Pat_11 | Pre-Treatment | SLIT2   | 9353   | 37 | 4 | 20530703  | 20530703  | Missense_Mutation | SNP | C | T | 44 | 113 | c.1594C>T  | c.(1594-1596)CCC>TCC   | p.P532S  |
| Pat_11 | Pre-Treatment | GPR125  | 166647 | 37 | 4 | 22425818  | 22425818  | Missense_Mutation | SNP | G | A | 11 | 27  | c.1601C>T  | c.(1600-1602)TCA>TTA   | p.S534L  |
| Pat_11 | Pre-Treatment | NSUN7   | 79730  | 37 | 4 | 40810375  | 40810375  | Missense_Mutation | SNP | G | A | 62 | 156 | c.1576G>A  | c.(1576-1578)GCC>ACC   | p.A526T  |
| Pat_11 | Pre-Treatment | NMU     | 10874  | 37 | 4 | 56496606  | 56496606  | Missense_Mutation | SNP | C | T | 42 | 77  | c.134G>A   | c.(133-135)GGA>GAA     | p.G45E   |
| Pat_11 | Pre-Treatment | UGT2B15 | 7366   | 37 | 4 | 69513083  | 69513083  | Missense_Mutation | SNP | C | T | 22 | 65  | c.1332G>A  | c.(1330-1332)ATG>ATA   | p.M444I  |
| Pat_11 | Pre-Treatment | UGT2B10 | 7365   | 37 | 4 | 69693137  | 69693137  | Missense_Mutation | SNP | C | T | 31 | 110 | c.1178C>T  | c.(1177-1179)CCA>CTA   | p.P393L  |
| Pat_11 | Pre-Treatment | RUFY3   | 22902  | 37 | 4 | 71629283  | 71629283  | Missense_Mutation | SNP | C | T | 11 | 28  | c.367C>T   | c.(367-369)CTC>TTC     | p.L123F  |
| Pat_11 | Pre-Treatment | ALB     | 213    | 37 | 4 | 74275124  | 74275124  | Missense_Mutation | SNP | C | T | 27 | 59  | c.535C>T   | c.(535-537)CTT>TTT     | p.L179F  |
| Pat_11 | Pre-Treatment | CCDC158 | 339965 | 37 | 4 | 77278541  | 77278541  | Missense_Mutation | SNP | C | T | 14 | 26  | c.2159G>A  | c.(2158-2160)GGA>GAA   | p.G720E  |
| Pat_11 | Pre-Treatment | BMP2K   | 55589  | 37 | 4 | 79832429  | 79832429  | Missense_Mutation | SNP | C | A | 4  | 57  | c.2728C>A  | c.(2728-2730)CAA>AAA   | p.Q910K  |
| Pat_11 | Pre-Treatment | AGXT2L1 | 64850  | 37 | 4 | 109670491 | 109670491 | Missense_Mutation | SNP | C | T | 47 | 105 | c.830G>A   | c.(829-831)GGA>GAA     | p.G277E  |
| Pat_11 | Pre-Treatment | EGF     | 1950   | 37 | 4 | 110890251 | 110890251 | Missense_Mutation | SNP | G | A | 5  | 241 | c.1700G>A  | c.(1699-1701)CGT>CAT   | p.R567H  |
| Pat_11 | Pre-Treatment | NDST4   | 64579  | 37 | 4 | 115769417 | 115769417 | Missense_Mutation | SNP | C | T | 22 | 51  | c.1894G>A  | c.(1894-1896)GAA>AAA   | p.E632K  |
| Pat_11 | Pre-Treatment | FAT4    | 79633  | 37 | 4 | 126241411 | 126241411 | Missense_Mutation | SNP | C | T | 46 | 110 | c.3845C>T  | c.(3844-3846)TCC>TTC   | p.S1282F |
| Pat_11 | Pre-Treatment | FAT4    | 79633  | 37 | 4 | 126367659 | 126367659 | Missense_Mutation | SNP | C | T | 55 | 135 | c.7405C>T  | c.(7405-7407)CAC>TAC   | p.H2469Y |
| Pat_11 | Pre-Treatment | FAT4    | 79633  | 37 | 4 | 126411926 | 126411926 | Missense_Mutation | SNP | C | T | 15 | 59  | c.13949C>T | c.(13948-13950)TCA>TTA | p.S4650L |
| Pat_11 | Pre-Treatment | PET112L | 5188   | 37 | 4 | 152637172 | 152637172 | Missense_Mutation | SNP | G | A | 4  | 151 | c.752C>T   | c.(751-753)GCG>GTG     | p.A251V  |
| Pat_11 | Pre-Treatment | FHDC1   | 85462  | 37 | 4 | 153896764 | 153896764 | Missense_Mutation | SNP | C | T | 5  | 274 | c.2321C>T  | c.(2320-2322)TCG>TTG   | p.S774L  |
| Pat_11 | Pre-Treatment | CLCN3   | 1182   | 37 | 4 | 170610226 | 170610226 | Missense_Mutation | SNP | G | A | 4  | 275 | c.451G>A   | c.(451-453)GAT>AAT     | p.D151N  |
| Pat_11 | Pre-Treatment | ODZ3    | 55714  | 37 | 4 | 183609435 | 183609435 | Missense_Mutation | SNP | G | A | 4  | 119 | c.2152G>A  | c.(2152-2154)GAG>AAG   | p.E718K  |
| Pat_11 | Pre-Treatment | CYP4V2  | 285440 | 37 | 4 | 187115720 | 187115720 | Missense_Mutation | SNP | T | C | 66 | 203 | c.281T>C   | c.(280-282)GTC>GCC     | p.V94A   |
| Pat_11 | Pre-Treatment | NSUN2   | 54888  | 37 | 5 | 6616948   | 6616948   | Missense_Mutation | SNP | G | T | 4  | 206 | c.913C>A   | c.(913-915)CGC>AGC     | p.R305S  |
| Pat_11 | Pre-Treatment | FASTKD3 | 79072  | 37 | 5 | 7867769   | 7867769   | Missense_Mutation | SNP | T | C | 3  | 50  | c.428A>G   | c.(427-429)AAG>AGG     | p.K143R  |

|        |               |          |        |    |   |           |           |                   |     |    |    |     |     |                   |                      |               |
|--------|---------------|----------|--------|----|---|-----------|-----------|-------------------|-----|----|----|-----|-----|-------------------|----------------------|---------------|
| Pat_11 | Pre-Treatment | PRDM9    | 56979  | 37 | 5 | 23527220  | 23527220  | Missense_Mutation | SNP | T  | C  | 6   | 41  | c.2023T>C         | c.(2023-2025)TGG>CGG | p.W675R       |
| Pat_11 | Pre-Treatment | PRDM9    | 56979  | 37 | 5 | 23527251  | 23527251  | Missense_Mutation | SNP | C  | G  | 6   | 45  | c.2054C>G         | c.(2053-2055)ACA>AGA | p.T685R       |
| Pat_11 | Pre-Treatment | SLC1A3   | 6507   | 37 | 5 | 36608694  | 36608694  | Missense_Mutation | SNP | G  | A  | 4   | 226 | c.169G>A          | c.(169-171)GCT>ACT   | p.A57T        |
| Pat_11 | Pre-Treatment | PELO     | 53918  | 37 | 5 | 52097642  | 52097642  | Missense_Mutation | SNP | C  | A  | 4   | 66  | c.1126C>A         | c.(1126-1128)CAA>AAA | p.Q376K       |
| Pat_11 | Pre-Treatment | CMYA5    | 202333 | 37 | 5 | 79030152  | 79030152  | Missense_Mutation | SNP | C  | T  | 17  | 25  | c.5564C>T         | c.(5563-5565)TCA>TTA | p.S1855L      |
| Pat_11 | Pre-Treatment | RASGRF2  | 5924   | 37 | 5 | 80369205  | 80369205  | Missense_Mutation | SNP | G  | A  | 4   | 89  | c.821G>A          | c.(820-822)CGT>CAT   | p.R274H       |
| Pat_11 | Pre-Treatment | KIF20A   | 10112  | 37 | 5 | 137517403 | 137517403 | Missense_Mutation | SNP | T  | C  | 3   | 111 | c.361T>C          | c.(361-363)TTC>CTC   | p.F121L       |
| Pat_11 | Pre-Treatment | PCDHA4   | 56144  | 37 | 5 | 140188055 | 140188055 | Missense_Mutation | SNP | G  | A  | 194 | 169 | c.1283G>A         | c.(1282-1284)CGA>CAA | p.R428Q       |
| Pat_11 | Pre-Treatment | PCDHA13  | 56136  | 37 | 5 | 140264174 | 140264174 | Missense_Mutation | SNP | C  | T  | 32  | 30  | c.2321C>T         | c.(2320-2322)CCC>CTC | p.P774L       |
| Pat_11 | Pre-Treatment | ARHGAP26 | 23092  | 37 | 5 | 142513638 | 142513638 | Missense_Mutation | SNP | C  | T  | 4   | 215 | c.1805C>T         | c.(1804-1806)ACG>ATG | p.T602M       |
| Pat_11 | Pre-Treatment | TCOF1    | 6949   | 37 | 5 | 149749166 | 149749166 | Splice_Site       | SNP | G  | A  | 4   | 104 | c.639_splice      | c.e6+1               | p.E213_splice |
| Pat_11 | Pre-Treatment | CCDC69   | 26112  | 37 | 5 | 150581166 | 150581166 | Missense_Mutation | SNP | C  | T  | 31  | 60  | c.208G>A          | c.(208-210)GAA>AAA   | p.E70K        |
| Pat_11 | Pre-Treatment | NIPAL4   | 348938 | 37 | 5 | 156899891 | 156899891 | Missense_Mutation | SNP | G  | A  | 4   | 78  | c.1324G>A         | c.(1324-1326)GTC>ATC | p.V442I       |
| Pat_11 | Pre-Treatment | DOCK2    | 1794   | 37 | 5 | 169506124 | 169506124 | Missense_Mutation | SNP | G  | A  | 3   | 31  | c.5140G>A         | c.(5140-5142)GCA>ACA | p.A1714T      |
| Pat_11 | Pre-Treatment | RIPK1    | 8737   | 37 | 6 | 3106280   | 3106280   | Missense_Mutation | SNP | C  | A  | 4   | 144 | c.1571C>A         | c.(1570-1572)CCA>CAA | p.P524Q       |
| Pat_11 | Pre-Treatment | RREB1    | 6239   | 37 | 6 | 7231562   | 7231562   | Missense_Mutation | SNP | C  | T  | 50  | 170 | c.3230C>T         | c.(3229-3231)TCG>TTG | p.S1077L      |
| Pat_11 | Pre-Treatment | OR2J2    | 26707  | 37 | 6 | 29142121  | 29142122  | Nonsense_Mutation | DNP | AA | TG | 84  | 101 | c.709_710AA>TG    | c.(709-711)AAA>TGA   | p.K237*       |
| Pat_11 | Pre-Treatment | GTF2H4   | 2968   | 37 | 6 | 30877741  | 30877741  | Missense_Mutation | SNP | G  | A  | 5   | 317 | c.275G>A          | c.(274-276)GGC>GAC   | p.G92D        |
| Pat_11 | Pre-Treatment | BAT5     | 7920   | 37 | 6 | 31658381  | 31658381  | Splice_Site       | SNP | T  | A  | 5   | 182 | c.844_splice      | c.e10-1              | p.V282_splice |
| Pat_11 | Pre-Treatment | VARS     | 7407   | 37 | 6 | 31753059  | 31753060  | Missense_Mutation | DNP | GG | AA | 50  | 114 | .:1310_1311CC>T   | c.(1309-1311)TCC>TTT | p.S437F       |
| Pat_11 | Pre-Treatment | TNXB     | 7148   | 37 | 6 | 32029197  | 32029197  | Missense_Mutation | SNP | G  | A  | 7   | 506 | c.7469C>T         | c.(7468-7470)CCG>CTG | p.P2490L      |
| Pat_11 | Pre-Treatment | CYP39A1  | 51302  | 37 | 6 | 46609950  | 46609950  | Missense_Mutation | SNP | G  | A  | 9   | 37  | c.263C>T          | c.(262-264)TCC>TTC   | p.S88F        |
| Pat_11 | Pre-Treatment | GPR111   | 222611 | 37 | 6 | 47649202  | 47649202  | Missense_Mutation | SNP | G  | A  | 27  | 55  | c.907G>A          | c.(907-909)GGA>AGA   | p.G303R       |
| Pat_11 | Pre-Treatment | KHDRBS2  | 202559 | 37 | 6 | 62604676  | 62604676  | Missense_Mutation | SNP | C  | T  | 16  | 56  | c.674G>A          | c.(673-675)GGA>GAA   | p.G225E       |
| Pat_11 | Pre-Treatment | FAM135A  | 57579  | 37 | 6 | 71235250  | 71235250  | Missense_Mutation | SNP | T  | G  | 9   | 31  | c.2463T>G         | c.(2461-2463)AAT>AAG | p.N821K       |
| Pat_11 | Pre-Treatment | COL12A1  | 1303   | 37 | 6 | 75812336  | 75812336  | Missense_Mutation | SNP | C  | T  | 21  | 52  | c.8392G>A         | c.(8392-8394)GGA>AGA | p.G2798R      |
| Pat_11 | Pre-Treatment | DOPEY1   | 23033  | 37 | 6 | 83823141  | 83823141  | Splice_Site       | SNP | G  | A  | 4   | 100 | c.780_splice      | c.e7+1               | p.Q260_splice |
| Pat_11 | Pre-Treatment | PRDM13   | 59336  | 37 | 6 | 100054917 | 100054917 | Missense_Mutation | SNP | G  | A  | 3   | 36  | c.7G>A            | c.(7-9)GGA>AGA       | p.G3R         |
| Pat_11 | Pre-Treatment | ROS1     | 6098   | 37 | 6 | 117746814 | 117746814 | Missense_Mutation | SNP | C  | A  | 28  | 130 | c.6G>T            | c.(4-6)AAG>AAT       | p.K2N         |
| Pat_11 | Pre-Treatment | THEMIS   | 387357 | 37 | 6 | 128134491 | 128134491 | Missense_Mutation | SNP | C  | T  | 48  | 72  | c.1295G>A         | c.(1294-1296)GGA>GAA | p.G432E       |
| Pat_11 | Pre-Treatment | GPR126   | 57211  | 37 | 6 | 142718806 | 142718806 | Missense_Mutation | SNP | G  | A  | 14  | 29  | c.1481G>A         | c.(1480-1482)GGA>GAA | p.G494E       |
| Pat_11 | Pre-Treatment | ULBP1    | 80329  | 37 | 6 | 150290274 | 150290274 | Missense_Mutation | SNP | G  | A  | 4   | 232 | c.403G>A          | c.(403-405)GGC>AGC   | p.G135S       |
| Pat_11 | Pre-Treatment | OPRM1    | 4988   | 37 | 6 | 154412237 | 154412237 | Missense_Mutation | SNP | G  | A  | 4   | 179 | c.794G>A          | c.(793-795)CGC>CAC   | p.R265H       |
| Pat_11 | Pre-Treatment | TIAM2    | 26230  | 37 | 6 | 155577870 | 155577870 | Missense_Mutation | SNP | A  | G  | 4   | 238 | c.4721A>G         | c.(4720-4722)GAC>GGC | p.D1574G      |
| Pat_11 | Pre-Treatment | EZR      | 7430   | 37 | 6 | 159187971 | 159187971 | Missense_Mutation | SNP | C  | T  | 6   | 459 | c.1736G>A         | c.(1735-1737)CGC>CAC | p.R579H       |
| Pat_11 | Pre-Treatment | TCP1     | 6950   | 37 | 6 | 160202027 | 160202027 | Missense_Mutation | SNP | C  | A  | 5   | 180 | c.913G>T          | c.(913-915)GCT>TCT   | p.A305S       |
| Pat_11 | Pre-Treatment | TLL2     | 83887  | 37 | 6 | 167754638 | 167754638 | Nonsense_Mutation | SNP | T  | A  | 4   | 76  | c.1250T>A         | c.(1249-1251)TTA>TAA | p.L417*       |
| Pat_11 | Pre-Treatment | MLLT4    | 4301   | 37 | 6 | 168303044 | 168303044 | Missense_Mutation | SNP | G  | A  | 44  | 138 | c.1625G>A         | c.(1624-1626)GGG>GAG | p.G542E       |
| Pat_11 | Pre-Treatment | SUN1     | 23353  | 37 | 7 | 897553    | 897553    | Missense_Mutation | SNP | G  | A  | 6   | 508 | c.1483G>A         | c.(1483-1485)GTG>ATG | p.V495M       |
| Pat_11 | Pre-Treatment | MICALL2  | 79778  | 37 | 7 | 1482008   | 1482008   | Missense_Mutation | SNP | G  | A  | 102 | 366 | c.1531C>T         | c.(1531-1533)CCT>TCT | p.P511S       |
| Pat_11 | Pre-Treatment | FOXK1    | 221937 | 37 | 7 | 4798977   | 4798977   | Missense_Mutation | SNP | G  | A  | 4   | 142 | c.1447G>A         | c.(1447-1449)GTG>ATG | p.V483M       |
| Pat_11 | Pre-Treatment | USP42    | 84132  | 37 | 7 | 6194258   | 6194258   | Missense_Mutation | SNP | C  | T  | 4   | 84  | c.3073C>T         | c.(3073-3075)CGG>TGG | p.R1025W      |
| Pat_11 | Pre-Treatment | PDE1C    | 5137   | 37 | 7 | 31876841  | 31876841  | Missense_Mutation | SNP | G  | A  | 4   | 173 | c.1156C>T         | c.(1156-1158)CTC>TTC | p.L386F       |
| Pat_11 | Pre-Treatment | ZMIZ2    | 83637  | 37 | 7 | 44805829  | 44805829  | Missense_Mutation | SNP | C  | T  | 143 | 128 | c.2309C>T         | c.(2308-2310)ACC>ATC | p.T770I       |
| Pat_11 | Pre-Treatment | ABCA13   | 154664 | 37 | 7 | 48563857  | 48563858  | Missense_Mutation | DNP | CT | TC | 5   | 33  | 14065_14066CT>Tc. | (14065-14067)CTC>TCC | p.L4689S      |
| Pat_11 | Pre-Treatment | PHKG1    | 5260   | 37 | 7 | 56151087  | 56151087  | Missense_Mutation | SNP | A  | G  | 124 | 143 | c.431T>C          | c.(430-432)CTC>CCC   | p.L144P       |
| Pat_11 | Pre-Treatment | RHBDD2   | 57414  | 37 | 7 | 75511410  | 75511410  | Missense_Mutation | SNP | G  | C  | 4   | 165 | c.442G>C          | c.(442-444)GTC>CTC   | p.V148L       |

|        |               |         |        |    |   |           |           |                   |     |   |   |     |     |               |                        |                |
|--------|---------------|---------|--------|----|---|-----------|-----------|-------------------|-----|---|---|-----|-----|---------------|------------------------|----------------|
| Pat_11 | Pre-Treatment | PCLO    | 27445  | 37 | 7 | 82508726  | 82508726  | Missense_Mutation | SNP | A | C | 7   | 26  | c.13581T>G    | c.(13579-13581)AGT>AGC | p.S4527R       |
| Pat_11 | Pre-Treatment | PTCD1   | 26024  | 37 | 7 | 99032496  | 99032496  | Missense_Mutation | SNP | G | A | 8   | 592 | c.370C>T      | c.(370-372)CCG>TCG     | p.P124S        |
| Pat_11 | Pre-Treatment | GAL3ST4 | 79690  | 37 | 7 | 99764196  | 99764196  | Missense_Mutation | SNP | G | A | 5   | 308 | c.358C>T      | c.(358-360)CGC>TGC     | p.R120C        |
| Pat_11 | Pre-Treatment | C7orf51 | 222950 | 37 | 7 | 100086437 | 100086437 | Missense_Mutation | SNP | G | A | 57  | 65  | c.1093G>A     | c.(1093-1095)GAG>AAG   | p.E365K        |
| Pat_11 | Pre-Treatment | PRKRIP1 | 79706  | 37 | 7 | 102038134 | 102038134 | Missense_Mutation | SNP | G | A | 7   | 479 | c.194G>A      | c.(193-195)CGA>CAA     | p.R65Q         |
| Pat_11 | Pre-Treatment | SLC26A4 | 5172   | 37 | 7 | 107336394 | 107336394 | Missense_Mutation | SNP | C | T | 6   | 441 | c.1454C>T     | c.(1453-1455)ACG>ATG   | p.T485M        |
| Pat_11 | Pre-Treatment | LAMB4   | 22798  | 37 | 7 | 107671373 | 107671373 | Nonsense_Mutation | SNP | G | A | 4   | 237 | c.4870C>T     | c.(4870-4872)CGA>TGA   | p.R1624*       |
| Pat_11 | Pre-Treatment | MET     | 4233   | 37 | 7 | 116435940 | 116435940 | Splice_Site       | SNP | G | A | 49  | 77  | c.3936_splice | c.e21-1                | p.L1312_splice |
| Pat_11 | Pre-Treatment | GRM8    | 2918   | 37 | 7 | 126173209 | 126173209 | Missense_Mutation | SNP | C | T | 13  | 59  | c.2227G>A     | c.(2227-2229)GAC>AAC   | p.D743N        |
| Pat_11 | Pre-Treatment | NRF1    | 4899   | 37 | 7 | 129330250 | 129330250 | Missense_Mutation | SNP | G | A | 6   | 455 | c.470G>A      | c.(469-471)CGT>CAT     | p.R157H        |
| Pat_11 | Pre-Treatment | PLXNA4  | 91584  | 37 | 7 | 131910920 | 131910920 | Missense_Mutation | SNP | G | A | 6   | 634 | c.1982C>T     | c.(1981-1983)TCG>TTG   | p.S661L        |
| Pat_11 | Pre-Treatment | AKR1B10 | 57016  | 37 | 7 | 134216768 | 134216768 | Missense_Mutation | SNP | G | A | 65  | 407 | c.343G>A      | c.(343-345)GGA>AGA     | p.G115R        |
| Pat_11 | Pre-Treatment | CNOT4   | 4850   | 37 | 7 | 135078712 | 135078712 | Missense_Mutation | SNP | G | A | 4   | 239 | c.1585C>T     | c.(1585-1587)CCG>TCG   | p.P529S        |
| Pat_11 | Pre-Treatment | ARHGEF5 | 7984   | 37 | 7 | 144077039 | 144077039 | Missense_Mutation | SNP | C | T | 106 | 535 | c.4684C>T     | c.(4684-4686)CCT>TCT   | p.P1562S       |
| Pat_11 | Pre-Treatment | KRBA1   | 84626  | 37 | 7 | 149418501 | 149418501 | Missense_Mutation | SNP | G | A | 4   | 296 | c.341G>A      | c.(340-342)CGA>CAA     | p.R114Q        |
| Pat_11 | Pre-Treatment | SSPO    | 23145  | 37 | 7 | 149475923 | 149475923 | Missense_Mutation | SNP | G | A | 5   | 235 | c.889G>A      | c.(889-891)GTC>ATC     | p.V297I        |
| Pat_11 | Pre-Treatment | GIMAP6  | 474344 | 37 | 7 | 150325195 | 150325195 | Missense_Mutation | SNP | C | T | 276 | 229 | c.491G>A      | c.(490-492)CGG>CAG     | p.R164Q        |
| Pat_11 | Pre-Treatment | ACCN3   | 9311   | 37 | 7 | 150749528 | 150749528 | Missense_Mutation | SNP | G | A | 5   | 303 | c.1484G>A     | c.(1483-1485)CGA>CAA   | p.R495Q        |
| Pat_11 | Pre-Treatment | C8orf58 | 541565 | 37 | 8 | 22459276  | 22459276  | Missense_Mutation | SNP | C | T | 14  | 171 | c.568C>T      | c.(568-570)CGC>TGC     | p.R190C        |
| Pat_11 | Pre-Treatment | C8orf80 | 389643 | 37 | 8 | 27884505  | 27884505  | Missense_Mutation | SNP | C | T | 102 | 237 | c.2219G>A     | c.(2218-2220)GGG>GAG   | p.G740E        |
| Pat_11 | Pre-Treatment | ADAM18  | 8749   | 37 | 8 | 39468096  | 39468096  | Missense_Mutation | SNP | A | C | 3   | 33  | c.393A>C      | c.(391-393)GAA>GAC     | p.E131D        |
| Pat_11 | Pre-Treatment | RP1     | 6101   | 37 | 8 | 55540286  | 55540286  | Missense_Mutation | SNP | C | T | 66  | 140 | c.3844C>T     | c.(3844-3846)CCT>TCT   | p.P1282S       |
| Pat_11 | Pre-Treatment | CYP7A1  | 1581   | 37 | 8 | 59405037  | 59405037  | Missense_Mutation | SNP | G | A | 4   | 137 | c.1090C>T     | c.(1090-1092)CGG>TGG   | p.R364W        |
| Pat_11 | Pre-Treatment | C8orf34 | 116328 | 37 | 8 | 69358598  | 69358598  | Nonsense_Mutation | SNP | T | A | 3   | 25  | c.252T>A      | c.(250-252)TAT>TAA     | p.Y84*         |
| Pat_11 | Pre-Treatment | PTDSS1  | 9791   | 37 | 8 | 97321795  | 97321795  | Missense_Mutation | SNP | G | A | 4   | 178 | c.1018G>A     | c.(1018-1020)GCT>ACT   | p.A340T        |
| Pat_11 | Pre-Treatment | TRHR    | 7201   | 37 | 8 | 110100070 | 110100070 | Missense_Mutation | SNP | A | T | 31  | 59  | c.329A>T      | c.(328-330)AAT>ATT     | p.N110I        |
| Pat_11 | Pre-Treatment | MTBP    | 27085  | 37 | 8 | 121518998 | 121518998 | Missense_Mutation | SNP | C | T | 31  | 65  | c.1780C>T     | c.(1780-1782)CCT>TCT   | p.P594S        |
| Pat_11 | Pre-Treatment | PHF20L1 | 51105  | 37 | 8 | 133858100 | 133858100 | Missense_Mutation | SNP | C | T | 4   | 65  | c.2986C>T     | c.(2986-2988)CGC>TGC   | p.R996C        |
| Pat_11 | Pre-Treatment | GPR172A | 79581  | 37 | 8 | 145583036 | 145583036 | Missense_Mutation | SNP | A | G | 4   | 45  | c.83A>G       | c.(82-84)AAT>AGT       | p.N28S         |
| Pat_11 | Pre-Treatment | RECQL4  | 9401   | 37 | 8 | 145738862 | 145738862 | Missense_Mutation | SNP | G | A | 4   | 128 | c.2203C>T     | c.(2203-2205)CGT>TGT   | p.R735C        |
| Pat_11 | Pre-Treatment | IFNA8   | 3445   | 37 | 9 | 21409416  | 21409416  | Missense_Mutation | SNP | C | T | 57  | 62  | c.241C>T      | c.(241-243)CAT>TAT     | p.H81Y         |
| Pat_11 | Pre-Treatment | C9orf71 | 169693 | 37 | 9 | 71152338  | 71152338  | Missense_Mutation | SNP | T | C | 3   | 62  | c.350A>G      | c.(349-351)GAG>GGG     | p.E117G        |
| Pat_11 | Pre-Treatment | GNA14   | 9630   | 37 | 9 | 80043926  | 80043926  | Missense_Mutation | SNP | G | A | 5   | 309 | c.620C>T      | c.(619-621)TCG>TTG     | p.S207L        |
| Pat_11 | Pre-Treatment | PHF2    | 5253   | 37 | 9 | 96436019  | 96436019  | Missense_Mutation | SNP | G | A | 4   | 106 | c.2501G>A     | c.(2500-2502)GGG>GAG   | p.G834E        |
| Pat_11 | Pre-Treatment | TBC1D2  | 55357  | 37 | 9 | 100971098 | 100971098 | Missense_Mutation | SNP | G | A | 4   | 145 | c.2002C>T     | c.(2002-2004)CGC>TGC   | p.R668C        |
| Pat_11 | Pre-Treatment | HSDL2   | 84263  | 37 | 9 | 115216443 | 115216443 | Splice_Site       | SNP | G | A | 4   | 108 | c.1015_splice | c.e9+1                 | p.G339_splice  |
| Pat_11 | Pre-Treatment | COL27A1 | 85301  | 37 | 9 | 116930263 | 116930263 | Missense_Mutation | SNP | G | A | 4   | 101 | c.428G>A      | c.(427-429)CGC>CAC     | p.R143H        |
| Pat_11 | Pre-Treatment | C5      | 727    | 37 | 9 | 123779710 | 123779710 | Nonsense_Mutation | SNP | C | T | 3   | 55  | c.1796G>A     | c.(1795-1797)TGG>TAG   | p.W599*        |
| Pat_11 | Pre-Treatment | GOLGA2  | 2801   | 37 | 9 | 131022758 | 131022758 | Missense_Mutation | SNP | C | T | 4   | 83  | c.1663G>A     | c.(1663-1665)GGA>AGA   | p.G555R        |
| Pat_11 | Pre-Treatment | SEC16A  | 9919   | 37 | 9 | 139372043 | 139372043 | Missense_Mutation | SNP | G | A | 3   | 27  | c.25C>T       | c.(25-27)CCG>TCG       | p.P9S          |
| Pat_11 | Pre-Treatment | RNF208  | 727800 | 37 | 9 | 140115264 | 140115264 | Missense_Mutation | SNP | G | A | 3   | 29  | c.401C>T      | c.(400-402)TCG>TTG     | p.S134L        |
| Pat_11 | Pre-Treatment | ZNF645  | 158506 | 37 | X | 22291533  | 22291533  | Missense_Mutation | SNP | G | A | 29  | 13  | c.425G>A      | c.(424-426)CGA>CAA     | p.R142Q        |
| Pat_11 | Pre-Treatment | KLHL15  | 80311  | 37 | X | 24006340  | 24006340  | Missense_Mutation | SNP | C | T | 4   | 82  | c.1513G>A     | c.(1513-1515)GAA>AAA   | p.E505K        |
| Pat_11 | Pre-Treatment | MAGEB6  | 158809 | 37 | X | 26212382  | 26212382  | Missense_Mutation | SNP | A | G | 5   | 71  | c.419A>G      | c.(418-420)CAT>CGT     | p.H140R        |
| Pat_11 | Pre-Treatment | MAGEB6  | 158809 | 37 | X | 26212388  | 26212388  | Missense_Mutation | SNP | T | C | 5   | 73  | c.425T>C      | c.(424-426)GTC>GCC     | p.V142A        |
| Pat_11 | Pre-Treatment | RBM10   | 8241   | 37 | X | 47035968  | 47035968  | Missense_Mutation | SNP | G | A | 4   | 110 | c.646G>A      | c.(646-648)GAC>AAC     | p.D216N        |
| Pat_11 | Pre-Treatment | CLCN5   | 1184   | 37 | X | 49853407  | 49853407  | Missense_Mutation | SNP | G | A | 4   | 191 | c.1400G>A     | c.(1399-1401)CGA>CAA   | p.R467Q        |

|        |                 |          |           |    |    |           |           |                   |     |    |    |     |     |                 |                         |          |
|--------|-----------------|----------|-----------|----|----|-----------|-----------|-------------------|-----|----|----|-----|-----|-----------------|-------------------------|----------|
| Pat_11 | Pre-Treatment   | SMC1A    | 8243      | 37 | X  | 53409199  | 53409199  | Missense_Mutation | SNP | C  | T  | 4   | 101 | c.3391G>A       | c.(3391-3393)GGG>AGG    | p.G1131R |
| Pat_11 | Pre-Treatment   | NLGN3    | 54413     | 37 | X  | 70375180  | 70375180  | Missense_Mutation | SNP | G  | A  | 4   | 145 | c.694G>A        | c.(694-696)GTC>ATC      | p.V232I  |
| Pat_11 | Pre-Treatment   | KIAA2022 | 340533    | 37 | X  | 73960071  | 73960071  | Missense_Mutation | SNP | C  | T  | 44  | 30  | c.4321G>A       | c.(4321-4323)GGA>AGA    | p.G1441R |
| Pat_11 | Pre-Treatment   | BEX4     | 56271     | 37 | X  | 102471145 | 102471145 | Missense_Mutation | SNP | G  | A  | 3   | 26  | c.64G>A         | c.(64-66)GAA>AAA        | p.E22K   |
| Pat_11 | Pre-Treatment   | ALG13    | 79868     | 37 | X  | 110951568 | 110951568 | Nonsense_Mutation | SNP | C  | T  | 6   | 168 | c.697C>T        | c.(697-699)CGA>TGA      | p.R233*  |
| Pat_11 | Pre-Treatment   | KLHL13   | 90293     | 37 | X  | 117043419 | 117043419 | Missense_Mutation | SNP | C  | T  | 19  | 16  | c.1211G>A       | c.(1210-1212)GGA>GAA    | p.G404E  |
| Pat_11 | Pre-Treatment   | ODZ1     | 10178     | 37 | X  | 123695521 | 123695521 | Missense_Mutation | SNP | C  | T  | 4   | 145 | c.2434G>A       | c.(2434-2436)GAT>AAT    | p.D812N  |
| Pat_11 | Pre-Treatment   | OCRL     | 4952      | 37 | X  | 128691316 | 128691316 | Missense_Mutation | SNP | C  | T  | 50  | 34  | c.253C>T        | c.(253-255)CGG>TGG      | p.R85W   |
| Pat_11 | Pre-Treatment   | FMR1     | 2332      | 37 | X  | 147024735 | 147024735 | Missense_Mutation | SNP | C  | A  | 4   | 174 | c.1360C>A       | c.(1360-1362)CGT>AGT    | p.R454S  |
| Pat_11 | Pre-Treatment   | MAGEA12  | 4111      | 37 | X  | 151900637 | 151900637 | Missense_Mutation | SNP | G  | A  | 4   | 123 | c.164C>T        | c.(163-165)GCT>GTT      | p.A55V   |
| Pat_11 | Pre-Treatment   | PCDH11Y  | 83259     | 37 | Y  | 4925057   | 4925057   | Missense_Mutation | SNP | G  | A  | 19  | 19  | c.193G>A        | c.(193-195)GAA>AAA      | p.E65K   |
| Pat_11 | Pre-Treatment   | PRKY     | 5616      | 37 | Y  | 7172061   | 7172061   | Missense_Mutation | SNP | G  | A  | 4   | 114 | c.250G>A        | c.(250-252)GAC>AAC      | p.D84N   |
| Pat_11 | Post-Resistance | TNFRSF4  | 7293      | 37 | 1  | 1148443   | 1148443   | Missense_Mutation | SNP | G  | A  | 4   | 139 | c.299C>T        | c.(298-300)ACG>ATG      | p.T100M  |
| Pat_11 | Post-Resistance | PEX14    | 5195      | 37 | 1  | 10689972  | 10689972  | Missense_Mutation | SNP | T  | G  | 72  | 104 | c.1062T>G       | c.(1060-1062)GAT>GAG    | p.D354E  |
| Pat_11 | Post-Resistance | HSPG2    | 3339      | 37 | 1  | 22160328  | 22160328  | Missense_Mutation | SNP | G  | A  | 3   | 44  | c.10811C>T      | c.(10810-10812)CCT>CTT  | p.P3604L |
| Pat_11 | Post-Resistance | HSPG2    | 3339      | 37 | 1  | 22174273  | 22174273  | Missense_Mutation | SNP | T  | G  | 39  | 52  | c.7934A>C       | c.(7933-7935)CAG>CCG    | p.Q2645P |
| Pat_11 | Post-Resistance | LCK      | 3932      | 37 | 1  | 32740659  | 32740659  | Missense_Mutation | SNP | G  | A  | 96  | 225 | c.253G>A        | c.(253-255)GGG>AGG      | p.G85R   |
| Pat_11 | Post-Resistance | EPHA10   | 284656    | 37 | 1  | 38185610  | 38185610  | Missense_Mutation | SNP | G  | A  | 4   | 199 | c.2533C>T       | c.(2533-2535)CGG>TGG    | p.R845W  |
| Pat_11 | Post-Resistance | NFYC     | 4802      | 37 | 1  | 41218859  | 41218859  | Nonsense_Mutation | SNP | C  | T  | 68  | 160 | c.328C>T        | c.(328-330)CAG>TAG      | p.Q110*  |
| Pat_11 | Post-Resistance | PCSK9    | 255738    | 37 | 1  | 55509558  | 55509558  | Missense_Mutation | SNP | G  | A  | 44  | 116 | c.250G>A        | c.(250-252)GAG>AAG      | p.E84K   |
| Pat_11 | Post-Resistance | HFM1     | 164045    | 37 | 1  | 91781722  | 91781723  | Missense_Mutation | DNP | GG | AA | 47  | 131 | c.2917_2918CC>T | c.(2917-2919)CCC>TTC    | p.P973F  |
| Pat_11 | Post-Resistance | DPYD     | 1806      | 37 | 1  | 98058782  | 98058782  | Missense_Mutation | SNP | G  | A  | 119 | 238 | c.1120C>T       | c.(1120-1122)CCT>TCT    | p.P374S  |
| Pat_11 | Post-Resistance | ATP5F1   | 515       | 37 | 1  | 111996918 | 111996918 | Missense_Mutation | SNP | C  | T  | 169 | 282 | c.163C>T        | c.(163-165)CGT>TGT      | p.R55C   |
| Pat_11 | Post-Resistance | SYCP1    | 6847      | 37 | 1  | 115455721 | 115455721 | Missense_Mutation | SNP | G  | A  | 132 | 205 | c.1597G>A       | c.(1597-1599)GAA>AAA    | p.E533K  |
| Pat_11 | Post-Resistance | SPAG17   | 200162    | 37 | 1  | 118598455 | 118598455 | Missense_Mutation | SNP | C  | T  | 71  | 118 | c.2623G>A       | c.(2623-2625)GAG>AAG    | p.E875K  |
| Pat_11 | Post-Resistance | HSD3B2   | 3284      | 37 | 1  | 119985517 | 119985517 | Missense_Mutation | SNP | C  | G  | 71  | 93  | c.324C>G        | c.(322-324)ATC>ATG      | p.I108M  |
| Pat_11 | Post-Resistance | NBPF10   | 100132406 | 37 | 1  | 145360574 | 145360574 | Missense_Mutation | SNP | G  | C  | 4   | 52  | c.9424G>C       | c.(9424-9426)GAT>CAT    | p.D3142H |
| Pat_11 | Post-Resistance | NBPF10   | 100132406 | 37 | 1  | 146398425 | 146398425 | Missense_Mutation | SNP | C  | A  | 7   | 455 | c.1224C>A       | c.(1222-1224)GAC>GAA    | p.D408E  |
| Pat_11 | Post-Resistance | RPTN     | 126638    | 37 | 1  | 152128479 | 152128479 | Missense_Mutation | SNP | G  | A  | 512 | 456 | c.1096C>T       | c.(1096-1098)CAC>TAC    | p.H366Y  |
| Pat_11 | Post-Resistance | NUP210L  | 91181     | 37 | 1  | 153991444 | 153991444 | Missense_Mutation | SNP | G  | A  | 123 | 414 | c.4618C>T       | c.(4618-4620)CAT>TAT    | p.H1540Y |
| Pat_11 | Post-Resistance | TNN      | 63923     | 37 | 1  | 175067731 | 175067731 | Missense_Mutation | SNP | G  | A  | 81  | 143 | c.2119G>A       | c.(2119-2121)GAC>AAC    | p.D707N  |
| Pat_11 | Post-Resistance | ASTN1    | 460       | 37 | 1  | 176983946 | 176983946 | Missense_Mutation | SNP | C  | T  | 375 | 536 | c.1504G>A       | c.(1504-1506)GAA>AAA    | p.E502K  |
| Pat_11 | Post-Resistance | CAPN2    | 824       | 37 | 1  | 223958170 | 223958170 | Missense_Mutation | SNP | G  | A  | 4   | 223 | c.1846G>A       | c.(1846-1848)GTT>ATT    | p.V616I  |
| Pat_11 | Post-Resistance | JMJD4    | 65094     | 37 | 1  | 227921686 | 227921686 | Missense_Mutation | SNP | G  | A  | 78  | 133 | c.614C>T        | c.(613-615)TCC>TTC      | p.S205F  |
| Pat_11 | Post-Resistance | OR2G3    | 81469     | 37 | 1  | 247769014 | 247769014 | Missense_Mutation | SNP | T  | G  | 34  | 744 | c.127T>G        | c.(127-129)TTC>GTC      | p.F43V   |
| Pat_11 | Post-Resistance | OR2M5    | 127059    | 37 | 1  | 248309108 | 248309108 | Missense_Mutation | SNP | G  | A  | 294 | 549 | c.659G>A        | c.(658-660)CGA>CAA      | p.R220Q  |
| Pat_11 | Post-Resistance | ITH2     | 3698      | 37 | 10 | 7791188   | 7791188   | Missense_Mutation | SNP | G  | A  | 9   | 463 | c.2732G>A       | c.(2731-2733)GGA>GAA    | p.G911E  |
| Pat_11 | Post-Resistance | PTEN     | 5728      | 37 | 10 | 89692902  | 89692902  | Missense_Mutation | SNP | G  | A  | 275 | 149 | c.386G>A        | c.(385-387)GGA>GAA      | p.G129E  |
| Pat_11 | Post-Resistance | PIPSL    | 266971    | 37 | 10 | 95718629  | 95718629  | Missense_Mutation | SNP | C  | T  | 4   | 135 | c.2525G>A       | c.(2524-2526)GGC>GAC    | p.G842D  |
| Pat_11 | Post-Resistance | BLNK     | 29760     | 37 | 10 | 97969643  | 97969643  | Missense_Mutation | SNP | C  | T  | 298 | 164 | c.697G>A        | c.(697-699)GAA>AAA      | p.E233K  |
| Pat_11 | Post-Resistance | C10orf12 | 26148     | 37 | 10 | 98744038  | 98744038  | Missense_Mutation | SNP | G  | A  | 4   | 278 | c.2891G>A       | c.(2890-2892)AGT>AAT    | p.S964N  |
| Pat_11 | Post-Resistance | SLIT1    | 6585      | 37 | 10 | 98924646  | 98924647  | Missense_Mutation | DNP | CC | TT | 172 | 87  | c.198_199GG>AA  | c.(196-201)CTGGAA>CTAA/ | p.E67K   |
| Pat_11 | Post-Resistance | PPRC1    | 23082     | 37 | 10 | 103901161 | 103901161 | Missense_Mutation | SNP | C  | T  | 82  | 71  | c.2896C>T       | c.(2896-2898)CCT>TCT    | p.P966S  |
| Pat_11 | Post-Resistance | RPL13AP6 | 644511    | 37 | 10 | 112696673 | 112696673 | Missense_Mutation | SNP | A  | G  | 4   | 64  | c.319T>C        | c.(319-321)TGC>CGC      | p.C107R  |
| Pat_11 | Post-Resistance | ATRNL1   | 26033     | 37 | 10 | 117226706 | 117226706 | Missense_Mutation | SNP | C  | T  | 71  | 41  | c.3440C>T       | c.(3439-3441)TCA>TTA    | p.S1147L |
| Pat_11 | Post-Resistance | ANO9     | 338440    | 37 | 11 | 431763    | 431763    | Missense_Mutation | SNP | T  | C  | 4   | 159 | c.470A>G        | c.(469-471)GAG>GGG      | p.E157G  |
| Pat_11 | Post-Resistance | OR52B4   | 143496    | 37 | 11 | 4388924   | 4388924   | Missense_Mutation | SNP | C  | A  | 73  | 148 | c.602G>T        | c.(601-603)GGG>GTG      | p.G201V  |

|        |                 |               |        |    |    |           |           |                   |     |    |    |     |     |                 |                         |          |
|--------|-----------------|---------------|--------|----|----|-----------|-----------|-------------------|-----|----|----|-----|-----|-----------------|-------------------------|----------|
| Pat_11 | Post-Resistance | OR10A3        | 26496  | 37 | 11 | 7960409   | 7960409   | Missense_Mutation | SNP | C  | G  | 5   | 268 | c.659G>C        | c.(658-660)CGA>CCA      | p.R220P  |
| Pat_11 | Post-Resistance | BDNF          | 627    | 37 | 11 | 27679663  | 27679663  | Missense_Mutation | SNP | G  | A  | 276 | 380 | c.449C>T        | c.(448-450)GCG>GTG      | p.A150V  |
| Pat_11 | Post-Resistance | MADD          | 8567   | 37 | 11 | 47303960  | 47303960  | Missense_Mutation | SNP | G  | A  | 4   | 295 | c.1498G>A       | c.(1498-1500)GCC>ACC    | p.A500T  |
| Pat_11 | Post-Resistance | OR4C6         | 219432 | 37 | 11 | 55432767  | 55432767  | Missense_Mutation | SNP | T  | C  | 249 | 401 | c.125T>C        | c.(124-126)CTT>CCT      | p.L42P   |
| Pat_11 | Post-Resistance | AHNAK         | 79026  | 37 | 11 | 62296070  | 62296070  | Missense_Mutation | SNP | A  | G  | 15  | 843 | c.5819T>C       | c.(5818-5820)GTG>GCG    | p.V1940A |
| Pat_11 | Post-Resistance | TMEM179B      | 374395 | 37 | 11 | 62557149  | 62557149  | Missense_Mutation | SNP | G  | A  | 6   | 412 | c.496G>A        | c.(496-498)GAA>AAA      | p.E166K  |
| Pat_11 | Post-Resistance | SHANK2        | 22941  | 37 | 11 | 70332923  | 70332923  | Missense_Mutation | SNP | C  | T  | 82  | 207 | c.3475G>A       | c.(3475-3477)GGT>AGT    | p.G1159S |
| Pat_11 | Post-Resistance | MMP12         | 4321   | 37 | 11 | 102738092 | 102738092 | Missense_Mutation | SNP | G  | A  | 29  | 39  | c.820C>T        | c.(820-822)CCT>TCT      | p.P274S  |
| Pat_11 | Post-Resistance | DSCAML1       | 57453  | 37 | 11 | 117309688 | 117309688 | Nonsense_Mutation | SNP | G  | A  | 4   | 108 | c.4336C>T       | c.(4336-4338)CAG>TAG    | p.Q1446* |
| Pat_11 | Post-Resistance | CXCR5         | 643    | 37 | 11 | 118764833 | 118764833 | Missense_Mutation | SNP | C  | T  | 4   | 220 | c.580C>T        | c.(580-582)CAT>TAT      | p.H194Y  |
| Pat_11 | Post-Resistance | BCL9L         | 283149 | 37 | 11 | 118773151 | 118773151 | Missense_Mutation | SNP | G  | A  | 26  | 53  | c.1301C>T       | c.(1300-1302)CCC>CTC    | p.P434L  |
| Pat_11 | Post-Resistance | PATE2         | 399967 | 37 | 11 | 125647312 | 125647312 | Missense_Mutation | SNP | G  | A  | 95  | 169 | c.307C>T        | c.(307-309)CAT>TAT      | p.H103Y  |
| Pat_11 | Post-Resistance | NFRKB         | 4798   | 37 | 11 | 129739745 | 129739745 | Missense_Mutation | SNP | G  | A  | 52  | 81  | c.3175C>T       | c.(3175-3177)CGC>TGC    | p.R1059C |
| Pat_11 | Post-Resistance | CCDC77        | 84318  | 37 | 12 | 518560    | 518560    | Missense_Mutation | SNP | C  | T  | 4   | 300 | c.11C>T         | c.(10-12)ACC>ATC        | p.T4I    |
| Pat_11 | Post-Resistance | GSG1          | 83445  | 37 | 12 | 13240841  | 13240841  | Missense_Mutation | SNP | C  | T  | 48  | 79  | c.634G>A        | c.(634-636)GGT>AGT      | p.G212S  |
| Pat_11 | Post-Resistance | ADAMTS20      | 80070  | 37 | 12 | 43824179  | 43824179  | Missense_Mutation | SNP | T  | A  | 14  | 194 | c.3357A>T       | c.(3355-3357)GAA>GAT    | p.E1119D |
| Pat_11 | Post-Resistance | ADAMTS20      | 80070  | 37 | 12 | 43826148  | 43826148  | Missense_Mutation | SNP | C  | T  | 79  | 160 | c.3055G>A       | c.(3055-3057)GAA>AAA    | p.E1019K |
| Pat_11 | Post-Resistance | ANO6          | 196527 | 37 | 12 | 45795629  | 45795629  | Missense_Mutation | SNP | G  | A  | 122 | 228 | c.1438G>A       | c.(1438-1440)GTG>ATG    | p.V480M  |
| Pat_11 | Post-Resistance | ITGB7         | 3695   | 37 | 12 | 53594156  | 53594156  | Missense_Mutation | SNP | C  | A  | 93  | 136 | c.72G>T         | c.(70-72)AAG>AAT        | p.K24N   |
| Pat_11 | Post-Resistance | NEUROD4       | 58158  | 37 | 12 | 55420311  | 55420311  | Missense_Mutation | SNP | G  | A  | 63  | 108 | c.88G>A         | c.(88-90)GAG>AAG        | p.E30K   |
| Pat_11 | Post-Resistance | OR9K2         | 441639 | 37 | 12 | 55524145  | 55524145  | Missense_Mutation | SNP | C  | T  | 123 | 176 | c.593C>T        | c.(592-594)GCT>GTT      | p.A198V  |
| Pat_11 | Post-Resistance | OR6C65        | 403282 | 37 | 12 | 55794361  | 55794361  | Missense_Mutation | SNP | G  | A  | 43  | 81  | c.49G>A         | c.(49-51)GAT>AAT        | p.D17N   |
| Pat_11 | Post-Resistance | CAPS2         | 84698  | 37 | 12 | 75676125  | 75676126  | Missense_Mutation | DNP | GG | AA | 157 | 362 | c.1574_1575CC>T | c.(1573-1575)GCC>GTT    | p.A525V  |
| Pat_11 | Post-Resistance | USP44         | 84101  | 37 | 12 | 95922687  | 95922687  | Missense_Mutation | SNP | C  | T  | 61  | 91  | c.1520G>A       | c.(1519-1521)GGA>GAA    | p.G507E  |
| Pat_11 | Post-Resistance | C12orf63      | 374467 | 37 | 12 | 97057618  | 97057618  | Missense_Mutation | SNP | G  | A  | 84  | 171 | c.746G>A        | c.(745-747)CGA>CAA      | p.R249Q  |
| Pat_11 | Post-Resistance | SLC17A8       | 246213 | 37 | 12 | 100813881 | 100813881 | Nonsense_Mutation | SNP | G  | T  | 31  | 82  | c.1714G>T       | c.(1714-1716)GAG>TAG    | p.E572*  |
| Pat_11 | Post-Resistance | STAB2         | 55576  | 37 | 12 | 104049352 | 104049352 | Missense_Mutation | SNP | C  | T  | 120 | 198 | c.1727C>T       | c.(1726-1728)TCT>TTT    | p.S576F  |
| Pat_11 | Post-Resistance | BTBD11        | 121551 | 37 | 12 | 107937863 | 107937863 | Missense_Mutation | SNP | G  | A  | 58  | 142 | c.1437G>A       | c.(1435-1437)ATG>ATA    | p.M479I  |
| Pat_11 | Post-Resistance | MED13L        | 23389  | 37 | 12 | 116440889 | 116440889 | Missense_Mutation | SNP | G  | A  | 4   | 295 | c.2488C>T       | c.(2488-2490)CGC>TGC    | p.R830C  |
| Pat_11 | Post-Resistance | DNAH10        | 196385 | 37 | 12 | 124265681 | 124265681 | Missense_Mutation | SNP | G  | A  | 5   | 449 | c.493G>A        | c.(493-495)GTC>ATC      | p.V165I  |
| Pat_11 | Post-Resistance | STARD13       | 90627  | 37 | 13 | 33692262  | 33692263  | Missense_Mutation | DNP | CC | TT | 202 | 144 | c.2220_2221GG>A | c.(2218-2223)CGGGAC>CGA | p.D741N  |
| Pat_11 | Post-Resistance | TRPC4         | 7223   | 37 | 13 | 38211429  | 38211429  | Missense_Mutation | SNP | G  | A  | 160 | 133 | c.2545C>T       | c.(2545-2547)CAT>TAT    | p.H849Y  |
| Pat_11 | Post-Resistance | FREM2         | 341640 | 37 | 13 | 39338481  | 39338481  | Nonsense_Mutation | SNP | G  | A  | 72  | 257 | c.5304G>A       | c.(5302-5304)TGG>TGA    | p.W1768* |
| Pat_11 | Post-Resistance | NUFIP1        | 26747  | 37 | 13 | 45523884  | 45523884  | Missense_Mutation | SNP | G  | A  | 5   | 594 | c.1111C>T       | c.(1111-1113)CTT>TTT    | p.L371F  |
| Pat_11 | Post-Resistance | FAM155A       | 728215 | 37 | 13 | 108518718 | 108518718 | Missense_Mutation | SNP | T  | C  | 4   | 240 | c.227A>G        | c.(226-228)CAG>CGG      | p.Q76R   |
| Pat_11 | Post-Resistance | ATP11A        | 23250  | 37 | 13 | 113470511 | 113470511 | Missense_Mutation | SNP | G  | A  | 5   | 252 | c.556G>A        | c.(556-558)GAA>AAA      | p.E186K  |
| Pat_11 | Post-Resistance | C14orf126     | 112487 | 37 | 14 | 31926599  | 31926599  | Missense_Mutation | SNP | T  | C  | 6   | 21  | c.1A>G          | c.(1-3)ATG>GTG          | p.M1V    |
| Pat_11 | Post-Resistance | FERMT2        | 10979  | 37 | 14 | 53386014  | 53386014  | Missense_Mutation | SNP | A  | G  | 195 | 309 | c.218T>C        | c.(217-219)CTG>CCG      | p.L73P   |
| Pat_11 | Post-Resistance | SIPA1L1       | 26037  | 37 | 14 | 72055973  | 72055973  | Missense_Mutation | SNP | G  | A  | 4   | 256 | c.1384G>A       | c.(1384-1386)GTA>ATA    | p.V462I  |
| Pat_11 | Post-Resistance | SERPINA13     | 388007 | 37 | 14 | 95108015  | 95108015  | Missense_Mutation | SNP | G  | A  | 75  | 86  | c.532G>A        | c.(532-534)GAT>AAT      | p.D178N  |
| Pat_11 | Post-Resistance | INF2          | 64423  | 37 | 14 | 105181082 | 105181082 | Missense_Mutation | SNP | G  | A  | 14  | 25  | c.3583G>A       | c.(3583-3585)GAG>AAG    | p.E1195K |
| Pat_11 | Post-Resistance | TRPM1         | 4308   | 37 | 15 | 31354879  | 31354879  | Missense_Mutation | SNP | T  | C  | 5   | 217 | c.926A>G        | c.(925-927)CAG>CGG      | p.Q309R  |
| Pat_11 | Post-Resistance | JMJD7-PLA2G4B | 8681   | 37 | 15 | 42140051  | 42140051  | Missense_Mutation | SNP | C  | T  | 25  | 42  | c.2339C>T       | c.(2338-2340)CCC>CTC    | p.P780L  |
| Pat_11 | Post-Resistance | TTBK2         | 146057 | 37 | 15 | 43038408  | 43038408  | Missense_Mutation | SNP | A  | G  | 3   | 123 | c.3320T>C       | c.(3319-3321)CTT>CCT    | p.L1107P |
| Pat_11 | Post-Resistance | DENND4A       | 10260  | 37 | 15 | 66021549  | 66021549  | Missense_Mutation | SNP | G  | A  | 13  | 19  | c.1348C>T       | c.(1348-1350)CCT>TCT    | p.P450S  |
| Pat_11 | Post-Resistance | LRRRC49       | 54839  | 37 | 15 | 71305234  | 71305234  | Missense_Mutation | SNP | C  | T  | 144 | 284 | c.1685C>T       | c.(1684-1686)TCC>TTC    | p.S562F  |
| Pat_11 | Post-Resistance | MYO9A         | 4649   | 37 | 15 | 72193624  | 72193624  | Missense_Mutation | SNP | G  | A  | 4   | 170 | c.3058C>T       | c.(3058-3060)CTC>TTC    | p.L1020F |



|        |                 |           |        |    |    |          |          |                   |     |   |   |     |     |            |                        |           |
|--------|-----------------|-----------|--------|----|----|----------|----------|-------------------|-----|---|---|-----|-----|------------|------------------------|-----------|
| Pat_11 | Post-Resistance | ISLR      | 3671   | 37 | 15 | 74467617 | 74467617 | Missense_Mutation | SNP | G | A | 99  | 169 | c.418G>A   | c.(418-420)GAC>AAC     | p.D140N   |
| Pat_11 | Post-Resistance | SH3GL3    | 6457   | 37 | 15 | 84257417 | 84257417 | Missense_Mutation | SNP | A | G | 65  | 94  | c.732A>G   | c.(730-732)ATA>ATG     | p.I244M   |
| Pat_11 | Post-Resistance | ACAN      | 176    | 37 | 15 | 89382124 | 89382124 | Nonsense_Mutation | SNP | C | T | 234 | 337 | c.301C>T   | c.(301-303)CAG>TAG     | p.Q101*   |
| Pat_11 | Post-Resistance | CACNA1H   | 8912   | 37 | 16 | 1254407  | 1254407  | Missense_Mutation | SNP | G | A | 71  | 143 | c.2400G>A  | c.(2398-2400)ATG>ATA   | p.M800I   |
| Pat_11 | Post-Resistance | CACNA1H   | 8912   | 37 | 16 | 1270521  | 1270521  | Missense_Mutation | SNP | C | T | 24  | 72  | c.6589C>T  | c.(6589-6591)CCT>TCT   | p.P2197S  |
| Pat_11 | Post-Resistance | PKD1      | 5310   | 37 | 16 | 2153595  | 2153595  | Missense_Mutation | SNP | G | T | 76  | 169 | c.8463C>A  | c.(8461-8463)GAC>GAA   | p.D2821E  |
| Pat_11 | Post-Resistance | SRRM2     | 23524  | 37 | 16 | 2816762  | 2816762  | Missense_Mutation | SNP | G | A | 5   | 383 | c.6233G>A  | c.(6232-6234)CGT>CAT   | p.R2078H  |
| Pat_11 | Post-Resistance | CORO7     | 79585  | 37 | 16 | 4408068  | 4408068  | Missense_Mutation | SNP | C | T | 73  | 119 | c.2494G>A  | c.(2494-2496)GCT>ACT   | p.A832T   |
| Pat_11 | Post-Resistance | ABAT      | 18     | 37 | 16 | 8839938  | 8839938  | Missense_Mutation | SNP | C | T | 56  | 115 | c.151C>T   | c.(151-153)CCA>TCA     | p.P51S    |
| Pat_11 | Post-Resistance | ABAT      | 18     | 37 | 16 | 8844395  | 8844395  | Missense_Mutation | SNP | A | G | 5   | 598 | c.315A>G   | c.(313-315)ATA>ATG     | p.I105M   |
| Pat_11 | Post-Resistance | SMG1      | 23049  | 37 | 16 | 18937330 | 18937330 | Missense_Mutation | SNP | T | C | 3   | 67  | c.34A>G    | c.(34-36)AGC>GGC       | p.S12G    |
| Pat_11 | Post-Resistance | CRYM      | 1428   | 37 | 16 | 21281121 | 21281121 | Missense_Mutation | SNP | G | A | 164 | 295 | c.479C>T   | c.(478-480)TCC>TTC     | p.S160F   |
| Pat_11 | Post-Resistance | TNRC6A    | 27327  | 37 | 16 | 24802545 | 24802545 | Missense_Mutation | SNP | C | T | 82  | 127 | c.2582C>T  | c.(2581-2583)TCA>TTA   | p.S861L   |
| Pat_11 | Post-Resistance | HS3ST4    | 9951   | 37 | 16 | 26147376 | 26147376 | Missense_Mutation | SNP | G | A | 20  | 49  | c.1178G>A  | c.(1177-1179)GGG>GAG   | p.G393E   |
| Pat_11 | Post-Resistance | TUFM      | 7284   | 37 | 16 | 28854424 | 28854424 | Missense_Mutation | SNP | G | A | 4   | 283 | c.1240C>T  | c.(1240-1242)CGG>TGG   | p.R414W   |
| Pat_11 | Post-Resistance | BCL7C     | 9274   | 37 | 16 | 30905235 | 30905235 | Missense_Mutation | SNP | G | A | 5   | 249 | c.31C>T    | c.(31-33)CGG>TGG       | p.R11W    |
| Pat_11 | Post-Resistance | SLC5A2    | 6524   | 37 | 16 | 31498937 | 31498937 | Missense_Mutation | SNP | G | A | 5   | 337 | c.742G>A   | c.(742-744)GTG>ATG     | p.V248M   |
| Pat_11 | Post-Resistance | SLC9A5    | 6553   | 37 | 16 | 67293737 | 67293737 | Missense_Mutation | SNP | G | A | 6   | 288 | c.1730G>A  | c.(1729-1731)AGT>AAT   | p.S577N   |
| Pat_11 | Post-Resistance | TSNAXIP1  | 55815  | 37 | 16 | 67860079 | 67860079 | Missense_Mutation | SNP | G | A | 5   | 191 | c.1007G>A  | c.(1006-1008)CGC>CAC   | p.R336H   |
| Pat_11 | Post-Resistance | PSKH1     | 5681   | 37 | 16 | 67943268 | 67943268 | Missense_Mutation | SNP | G | A | 4   | 197 | c.616G>A   | c.(616-618)GTC>ATC     | p.V206I   |
| Pat_11 | Post-Resistance | CTRL      | 1506   | 37 | 16 | 67964841 | 67964841 | Missense_Mutation | SNP | G | A | 5   | 289 | c.218C>T   | c.(217-219)GCT>GTT     | p.A73V    |
| Pat_11 | Post-Resistance | ZFP90     | 146198 | 37 | 16 | 68598329 | 68598329 | Missense_Mutation | SNP | C | T | 131 | 132 | c.1639C>T  | c.(1639-1641)CAC>TAC   | p.H547Y   |
| Pat_11 | Post-Resistance | NUDT7     | 283927 | 37 | 16 | 77769734 | 77769734 | Missense_Mutation | SNP | G | A | 237 | 532 | c.199G>A   | c.(199-201)GCC>ACC     | p.A67T    |
| Pat_11 | Post-Resistance | KLHL36    | 79786  | 37 | 16 | 84693409 | 84693409 | Missense_Mutation | SNP | C | T | 203 | 182 | c.1181C>T  | c.(1180-1182)TCC>TTC   | p.S394F   |
| Pat_11 | Post-Resistance | ANKFY1    | 51479  | 37 | 17 | 4080447  | 4080447  | Missense_Mutation | SNP | C | T | 139 | 208 | c.2749G>A  | c.(2749-2751)GGC>AGC   | p.G917S   |
| Pat_11 | Post-Resistance | ALOX12    | 239    | 37 | 17 | 6902081  | 6902081  | Missense_Mutation | SNP | G | A | 4   | 200 | c.467G>A   | c.(466-468)CGT>CAT     | p.R156H   |
| Pat_11 | Post-Resistance | MYOCD     | 93649  | 37 | 17 | 12666896 | 12666896 | Missense_Mutation | SNP | G | A | 116 | 163 | c.2752G>A  | c.(2752-2754)GAT>AAT   | p.D918N   |
| Pat_11 | Post-Resistance | KRTAP4-8  | 728224 | 37 | 17 | 39254021 | 39254021 | Missense_Mutation | SNP | C | T | 5   | 203 | c.316G>A   | c.(316-318)GTG>ATG     | p.V106M   |
| Pat_11 | Post-Resistance | KRTAP4-11 | 653240 | 37 | 17 | 39274150 | 39274150 | Missense_Mutation | SNP | T | A | 11  | 92  | c.418A>T   | c.(418-420)AGC>TGC     | p.S140C   |
| Pat_11 | Post-Resistance | TLL6      | 284076 | 37 | 17 | 46863599 | 46863599 | Missense_Mutation | SNP | C | T | 331 | 590 | c.1688G>A  | c.(1687-1689)AGA>AAA   | p.R563K   |
| Pat_11 | Post-Resistance | LPO       | 4025   | 37 | 17 | 56329765 | 56329765 | Missense_Mutation | SNP | G | A | 59  | 87  | c.1003G>A  | c.(1003-1005)GAG>AAG   | p.E335K   |
| Pat_11 | Post-Resistance | BPTF      | 2186   | 37 | 17 | 65822287 | 65822287 | Missense_Mutation | SNP | C | G | 3   | 40  | c.447C>G   | c.(445-447)GAC>GAG     | p.D149E   |
| Pat_11 | Post-Resistance | GPR142    | 350383 | 37 | 17 | 72368438 | 72368438 | Missense_Mutation | SNP | C | T | 122 | 196 | c.1088C>T  | c.(1087-1089)ACC>ATC   | p.T363I   |
| Pat_11 | Post-Resistance | PPP4R1    | 9989   | 37 | 18 | 9583194  | 9583194  | Missense_Mutation | SNP | G | A | 102 | 153 | c.839C>T   | c.(838-840)TCA>TTA     | p.S280L   |
| Pat_11 | Post-Resistance | CEP192    | 55125  | 37 | 18 | 13099507 | 13099507 | Missense_Mutation | SNP | C | T | 142 | 331 | c.6590C>T  | c.(6589-6591)TCC>TTC   | p.S2197F  |
| Pat_11 | Post-Resistance | ST8SIA3   | 51046  | 37 | 18 | 55027323 | 55027323 | Missense_Mutation | SNP | G | A | 83  | 131 | c.958G>A   | c.(958-960)GGA>AGA     | p.G320R   |
| Pat_11 | Post-Resistance | SERPIN2   | 5055   | 37 | 18 | 61569770 | 61569770 | Missense_Mutation | SNP | G | A | 154 | 289 | c.811G>A   | c.(811-813)GAA>AAA     | p.E271K   |
| Pat_11 | Post-Resistance | CDH7      | 1005   | 37 | 18 | 63477055 | 63477055 | Missense_Mutation | SNP | G | A | 85  | 114 | c.326G>A   | c.(325-327)AGA>AAA     | p.R109K   |
| Pat_11 | Post-Resistance | RTTN      | 25914  | 37 | 18 | 67781759 | 67781759 | Missense_Mutation | SNP | G | A | 5   | 466 | c.3605C>T  | c.(3604-3606)GCT>GTT   | p.A1202V  |
| Pat_11 | Post-Resistance | PNPLA6    | 10908  | 37 | 19 | 7619494  | 7619494  | Missense_Mutation | SNP | G | A | 5   | 343 | c.2549G>A  | c.(2548-2550)CGT>CAT   | p.R850H   |
| Pat_11 | Post-Resistance | LASS4     | 79603  | 37 | 19 | 8322862  | 8322862  | Missense_Mutation | SNP | C | T | 129 | 304 | c.841C>T   | c.(841-843)CCC>TCC     | p.P281S   |
| Pat_11 | Post-Resistance | MUC16     | 94025  | 37 | 19 | 9045986  | 9045986  | Missense_Mutation | SNP | G | A | 175 | 317 | c.35645C>T | c.(35644-35646)TCT>TTT | p.S11882F |
| Pat_11 | Post-Resistance | MUC16     | 94025  | 37 | 19 | 9066660  | 9066660  | Missense_Mutation | SNP | G | A | 284 | 503 | c.20786C>T | c.(20785-20787)TCC>TTC | p.S6929F  |
| Pat_11 | Post-Resistance | MUC16     | 94025  | 37 | 19 | 9082547  | 9082547  | Missense_Mutation | SNP | C | T | 254 | 371 | c.9268G>A  | c.(9268-9270)GAG>AAG   | p.E3090K  |
| Pat_11 | Post-Resistance | MUC16     | 94025  | 37 | 19 | 9084835  | 9084835  | Missense_Mutation | SNP | G | A | 37  | 91  | c.6980C>T  | c.(6979-6981)TCC>TTC   | p.S2327F  |
| Pat_11 | Post-Resistance | COL5A3    | 50509  | 37 | 19 | 10112244 | 10112244 | Missense_Mutation | SNP | G | A | 4   | 286 | c.1066C>T  | c.(1066-1068)CGG>TGG   | p.R356W   |
| Pat_11 | Post-Resistance | CACNA1A   | 773    | 37 | 19 | 13563820 | 13563820 | Missense_Mutation | SNP | C | T | 80  | 157 | c.409G>A   | c.(409-411)GAA>AAA     | p.E137K   |

|        |                 |         |        |    |    |           |           |                   |     |    |    |     |     |                                     |                        |          |
|--------|-----------------|---------|--------|----|----|-----------|-----------|-------------------|-----|----|----|-----|-----|-------------------------------------|------------------------|----------|
| Pat_11 | Post-Resistance | CASP14  | 23581  | 37 | 19 | 15164421  | 15164421  | Missense_Mutation | SNP | G  | A  | 95  | 216 | c.156G>A                            | c.(154-156)ATG>ATA     | p.M52I   |
| Pat_11 | Post-Resistance | ILVBL   | 10994  | 37 | 19 | 15234224  | 15234224  | Missense_Mutation | SNP | G  | A  | 4   | 236 | c.299C>T                            | c.(298-300)ACG>ATG     | p.T100M  |
| Pat_11 | Post-Resistance | NCAN    | 1463   | 37 | 19 | 19338690  | 19338690  | Missense_Mutation | SNP | C  | T  | 106 | 172 | c.2261C>T                           | c.(2260-2262)CCG>CTG   | p.P754L  |
| Pat_11 | Post-Resistance | ZNF93   | 81931  | 37 | 19 | 20045355  | 20045355  | Missense_Mutation | SNP | C  | T  | 37  | 105 | c.1591C>T                           | c.(1591-1593)CAT>TAT   | p.H531Y  |
| Pat_11 | Post-Resistance | ZNF43   | 7594   | 37 | 19 | 21991505  | 21991505  | Missense_Mutation | SNP | T  | A  | 5   | 314 | c.1334A>T                           | c.(1333-1335)AAC>ATC   | p.N445I  |
| Pat_11 | Post-Resistance | ZNF208  | 7757   | 37 | 19 | 22156875  | 22156875  | Missense_Mutation | SNP | C  | T  | 132 | 182 | c.961G>A                            | c.(961-963)GCC>ACC     | p.A321T  |
| Pat_11 | Post-Resistance | ZNF420  | 147923 | 37 | 19 | 37619781  | 37619781  | Missense_Mutation | SNP | C  | T  | 57  | 99  | c.1888C>T                           | c.(1888-1890)CTT>TTT   | p.L630F  |
| Pat_11 | Post-Resistance | SIPA1L3 | 23094  | 37 | 19 | 38631876  | 38631876  | Missense_Mutation | SNP | G  | A  | 129 | 222 | c.3196G>A                           | c.(3196-3198)GAA>AAA   | p.E1066K |
| Pat_11 | Post-Resistance | RYR1    | 6261   | 37 | 19 | 39008205  | 39008205  | Missense_Mutation | SNP | G  | A  | 70  | 119 | c.9892G>A                           | c.(9892-9894)GCC>ACC   | p.A3298T |
| Pat_11 | Post-Resistance | LGALS7B | 653499 | 37 | 19 | 39281435  | 39281435  | Missense_Mutation | SNP | G  | A  | 27  | 71  | c.202G>A                            | c.(202-204)GGC>AGC     | p.G68S   |
| Pat_11 | Post-Resistance | CD3EAP  | 10849  | 37 | 19 | 45912107  | 45912107  | Missense_Mutation | SNP | A  | G  | 5   | 289 | c.881A>G                            | c.(880-882)AAG>AGG     | p.K294R  |
| Pat_11 | Post-Resistance | ZNF836  | 162962 | 37 | 19 | 52659224  | 52659224  | Missense_Mutation | SNP | A  | T  | 7   | 765 | c.1712T>A                           | c.(1711-1713)ATT>AAT   | p.I571N  |
| Pat_11 | Post-Resistance | NLRP4   | 147945 | 37 | 19 | 56382227  | 56382227  | Missense_Mutation | SNP | G  | A  | 99  | 186 | c.2389G>A                           | c.(2389-2391)GAA>AAA   | p.E797K  |
| Pat_11 | Post-Resistance | GREB1   | 9687   | 37 | 2  | 11777890  | 11777890  | Missense_Mutation | SNP | C  | T  | 124 | 212 | c.5395C>T                           | c.(5395-5397)CCG>TCG   | p.P1799S |
| Pat_11 | Post-Resistance | HS1BP3  | 64342  | 37 | 2  | 20840820  | 20840820  | Missense_Mutation | SNP | C  | T  | 249 | 482 | c.319G>A                            | c.(319-321)GAG>AAG     | p.E107K  |
| Pat_11 | Post-Resistance | APOB    | 338    | 37 | 2  | 21232284  | 21232284  | Missense_Mutation | SNP | C  | T  | 119 | 214 | c.7456G>A                           | c.(7456-7458)GAC>AAC   | p.D2486N |
| Pat_11 | Post-Resistance | LBH     | 81606  | 37 | 2  | 30480434  | 30480434  | Nonsense_Mutation | SNP | G  | T  | 59  | 106 | c.265G>T                            | c.(265-267)GAG>TAG     | p.E89*   |
| Pat_11 | Post-Resistance | LTBP1   | 4052   | 37 | 2  | 33468797  | 33468797  | Nonsense_Mutation | SNP | C  | T  | 173 | 298 | c.1945C>T                           | c.(1945-1947)CGA>TGA   | p.R649*  |
| Pat_11 | Post-Resistance | RASGRP3 | 25780  | 37 | 2  | 33745717  | 33745717  | Missense_Mutation | SNP | G  | A  | 198 | 316 | c.334G>A                            | c.(334-336)GAA>AAA     | p.E112K  |
| Pat_11 | Post-Resistance | DHX57   | 90957  | 37 | 2  | 39088696  | 39088696  | Missense_Mutation | SNP | G  | A  | 93  | 139 | c.856C>T                            | c.(856-858)CGC>TGC     | p.R286C  |
| Pat_11 | Post-Resistance | ALMS1P  | 200420 | 37 | 2  | 73900940  | 73900940  | Missense_Mutation | SNP | G  | A  | 6   | 11  | c.217G>A                            | c.(217-219)GAA>AAA     | p.E73K   |
| Pat_11 | Post-Resistance | LRRTM1  | 347730 | 37 | 2  | 80530256  | 80530256  | Missense_Mutation | SNP | G  | T  | 6   | 604 | c.689C>A                            | c.(688-690)CCG>CAG     | p.P230Q  |
| Pat_11 | Post-Resistance | SEMA4C  | 54910  | 37 | 2  | 97526382  | 97526382  | Missense_Mutation | SNP | G  | A  | 119 | 160 | c.2483C>T                           | c.(2482-2484)CCC>CTC   | p.P828L  |
| Pat_11 | Post-Resistance | ZAP70   | 7535   | 37 | 2  | 98349771  | 98349771  | Missense_Mutation | SNP | C  | T  | 27  | 70  | c.802C>T                            | c.(802-804)CCC>TCC     | p.P268S  |
| Pat_11 | Post-Resistance | CHST10  | 9486   | 37 | 2  | 101014417 | 101014417 | Missense_Mutation | SNP | G  | A  | 115 | 187 | c.380C>T                            | c.(379-381)CCC>CTC     | p.P127L  |
| Pat_11 | Post-Resistance | SLC35F5 | 80255  | 37 | 2  | 114500394 | 114500394 | Missense_Mutation | SNP | G  | C  | 110 | 199 | c.625C>G                            | c.(625-627)CAT>GAT     | p.H209D  |
| Pat_11 | Post-Resistance | LRP1B   | 53353  | 37 | 2  | 141625828 | 141625828 | Missense_Mutation | SNP | G  | A  | 9   | 116 | c.4174C>T                           | c.(4174-4176)CTT>TTT   | p.L1392F |
| Pat_11 | Post-Resistance | KIF5C   | 3800   | 37 | 2  | 149853804 | 149853804 | Missense_Mutation | SNP | G  | A  | 44  | 106 | c.2050G>A                           | c.(2050-2052)GAT>AAT   | p.D684N  |
| Pat_11 | Post-Resistance | GALNT13 | 114805 | 37 | 2  | 155099313 | 155099313 | Missense_Mutation | SNP | G  | A  | 69  | 115 | c.581G>A                            | c.(580-582)CGA>CAA     | p.R194Q  |
| Pat_11 | Post-Resistance | ERMN    | 57471  | 37 | 2  | 158181947 | 158181947 | Missense_Mutation | SNP | G  | A  | 5   | 274 | c.208C>T                            | c.(208-210)CTC>TTC     | p.L70F   |
| Pat_11 | Post-Resistance | DPP4    | 1803   | 37 | 2  | 162890087 | 162890087 | Missense_Mutation | SNP | G  | A  | 112 | 226 | c.851C>T                            | c.(850-852)TCC>TTC     | p.S284F  |
| Pat_11 | Post-Resistance | MYO3B   | 140469 | 37 | 2  | 171070963 | 171070963 | Missense_Mutation | SNP | G  | A  | 123 | 260 | c.396G>A                            | c.(394-396)ATG>ATA     | p.M132I  |
| Pat_11 | Post-Resistance | HOXD12  | 3238   | 37 | 2  | 176964663 | 176964663 | Missense_Mutation | SNP | C  | T  | 58  | 94  | c.134C>T                            | c.(133-135)CCG>CTG     | p.P45L   |
| Pat_11 | Post-Resistance | TTN     | 7273   | 37 | 2  | 179604014 | 179604014 | Missense_Mutation | SNP | T  | G  | 5   | 87  | c.13433A>C                          | c.(13432-13434)AAG>ACC | p.K4478T |
| Pat_11 | Post-Resistance | SSFA2   | 6744   | 37 | 2  | 182780118 | 182780118 | Missense_Mutation | SNP | C  | T  | 4   | 137 | c.1751C>T                           | c.(1750-1752)GCA>GTA   | p.A584V  |
| Pat_11 | Post-Resistance | ZNF804A | 91752  | 37 | 2  | 185801798 | 185801798 | Missense_Mutation | SNP | G  | A  | 27  | 72  | c.1675G>A                           | c.(1675-1677)GAA>AAA   | p.E559K  |
| Pat_11 | Post-Resistance | DNAH7   | 56171  | 37 | 2  | 196636434 | 196636434 | Missense_Mutation | SNP | A  | C  | 12  | 719 | c.11383T>G                          | c.(11383-11385)TTA>GTA | p.L3795V |
| Pat_11 | Post-Resistance | MAP2    | 4133   | 37 | 2  | 210574868 | 210574868 | Missense_Mutation | SNP | G  | A  | 4   | 155 | c.4963G>A                           | c.(4963-4965)GCG>ACG   | p.A1655T |
| Pat_11 | Post-Resistance | SLC23A3 | 151295 | 37 | 2  | 220028969 | 220028969 | Missense_Mutation | SNP | G  | T  | 4   | 64  | c.1259C>A                           | c.(1258-1260)CCA>CAA   | p.P420Q  |
| Pat_11 | Post-Resistance | PTPRN   | 5798   | 37 | 2  | 220161969 | 220161970 | Missense_Mutation | DNP | CC | TT | 57  | 143 | c.2073_2074GG>A071-2076)ACGGGA>ACA/ |                        | p.G692R  |
| Pat_11 | Post-Resistance | PTPRN   | 5798   | 37 | 2  | 220172208 | 220172208 | Missense_Mutation | SNP | G  | A  | 5   | 336 | c.238C>T                            | c.(238-240)CTC>TTC     | p.L80F   |
| Pat_11 | Post-Resistance | C2orf57 | 165100 | 37 | 2  | 232457897 | 232457897 | Nonsense_Mutation | SNP | C  | T  | 171 | 270 | c.235C>T                            | c.(235-237)CAG>TAG     | p.Q79*   |
| Pat_11 | Post-Resistance | GIGYF2  | 26058  | 37 | 2  | 233681650 | 233681650 | Missense_Mutation | SNP | G  | A  | 4   | 276 | c.2278G>A                           | c.(2278-2280)GAA>AAA   | p.E760K  |
| Pat_11 | Post-Resistance | ESPNL   | 339768 | 37 | 2  | 239016478 | 239016478 | Missense_Mutation | SNP | C  | T  | 3   | 33  | c.719C>T                            | c.(718-720)GCC>GTC     | p.A240V  |
| Pat_11 | Post-Resistance | HDLBP   | 3069   | 37 | 2  | 242182015 | 242182015 | Missense_Mutation | SNP | G  | A  | 4   | 132 | c.2029C>T                           | c.(2029-2031)CGC>TGC   | p.R677C  |
| Pat_11 | Post-Resistance | FARP2   | 9855   | 37 | 2  | 242380731 | 242380731 | Missense_Mutation | SNP | C  | T  | 139 | 238 | c.1171C>T                           | c.(1171-1173)CCC>TCC   | p.P391S  |
| Pat_11 | Post-Resistance | NINL    | 22981  | 37 | 20 | 25434259  | 25434259  | Missense_Mutation | SNP | G  | A  | 75  | 157 | c.3977C>T                           | c.(3976-3978)TCC>TTC   | p.S1326F |

|        |                 |           |        |    |    |           |           |                        |     |    |    |     |     |                |                        |          |
|--------|-----------------|-----------|--------|----|----|-----------|-----------|------------------------|-----|----|----|-----|-----|----------------|------------------------|----------|
| Pat_11 | Post-Resistance | FRG1B     | 284802 | 37 | 20 | 29625905  | 29625905  | Missense_Mutation      | SNP | T  | C  | 5   | 438 | c.59T>C        | c.(58-60)CTT>CCT       | p.L20P   |
| Pat_11 | Post-Resistance | DEFB123   | 245936 | 37 | 20 | 30028545  | 30028545  | Missense_Mutation      | SNP | C  | T  | 275 | 478 | c.44C>T        | c.(43-45)TCC>TTC       | p.S15F   |
| Pat_11 | Post-Resistance | PABPC1L   | 80336  | 37 | 20 | 43559150  | 43559150  | Missense_Mutation      | SNP | C  | T  | 273 | 502 | c.1022C>T      | c.(1021-1023)TCC>TTC   | p.S341F  |
| Pat_11 | Post-Resistance | SEMG2     | 6407   | 37 | 20 | 43851414  | 43851414  | Missense_Mutation      | SNP | C  | A  | 5   | 350 | c.1141C>A      | c.(1141-1143)CAA>AAA   | p.Q381K  |
| Pat_11 | Post-Resistance | ZNF831    | 128611 | 37 | 20 | 57767060  | 57767060  | Missense_Mutation      | SNP | C  | T  | 35  | 43  | c.986C>T       | c.(985-987)GCC>GTC     | p.A329V  |
| Pat_11 | Post-Resistance | BAGE2     | 85319  | 37 | 21 | 11098839  | 11098839  | Translation_Start_Site | SNP | C  | T  | 8   | 215 | c.-121G>A      | (-123--119)CCGTG>CCATG |          |
| Pat_11 | Post-Resistance | LIPI      | 149998 | 37 | 21 | 15535788  | 15535788  | Missense_Mutation      | SNP | G  | A  | 139 | 262 | c.1021C>T      | c.(1021-1023)CTT>TTT   | p.L341F  |
| Pat_11 | Post-Resistance | KRTAP21-2 | 337978 | 37 | 21 | 32119310  | 32119310  | Nonsense_Mutation      | SNP | G  | A  | 5   | 558 | c.211C>T       | c.(211-213)CGA>TGA     | p.R71*   |
| Pat_11 | Post-Resistance | PPIL2     | 23759  | 37 | 22 | 22049690  | 22049690  | Missense_Mutation      | SNP | G  | A  | 19  | 32  | c.1474G>A      | c.(1474-1476)GCA>ACA   | p.A492T  |
| Pat_11 | Post-Resistance | OSBP2     | 23762  | 37 | 22 | 31285598  | 31285599  | Missense_Mutation      | DNP | GG | AA | 172 | 104 | .1598_1599GG>A | c.(1597-1599)CGG>CAA   | p.R533Q  |
| Pat_11 | Post-Resistance | PIK3IP1   | 113791 | 37 | 22 | 31686951  | 31686951  | Missense_Mutation      | SNP | C  | T  | 27  | 15  | c.307G>A       | c.(307-309)GAG>AAG     | p.E103K  |
| Pat_11 | Post-Resistance | C22orf33  | 339669 | 37 | 22 | 37398027  | 37398027  | Nonsense_Mutation      | SNP | G  | A  | 28  | 61  | c.340C>T       | c.(340-342)CAG>TAG     | p.Q114*  |
| Pat_11 | Post-Resistance | TNRC6B    | 23112  | 37 | 22 | 40708530  | 40708530  | Nonsense_Mutation      | SNP | G  | A  | 105 | 249 | c.4457G>A      | c.(4456-4458)TGG>TAG   | p.W1486* |
| Pat_11 | Post-Resistance | MKL1      | 57591  | 37 | 22 | 40827438  | 40827438  | Missense_Mutation      | SNP | G  | A  | 244 | 633 | c.110C>T       | c.(109-111)TCG>TTG     | p.S37L   |
| Pat_11 | Post-Resistance | CELSR1    | 9620   | 37 | 22 | 46795724  | 46795724  | Missense_Mutation      | SNP | G  | A  | 4   | 212 | c.5302C>T      | c.(5302-5304)CGG>TGG   | p.R1768W |
| Pat_11 | Post-Resistance | IL5RA     | 3568   | 37 | 3  | 3146593   | 3146593   | Missense_Mutation      | SNP | C  | T  | 126 | 179 | c.76G>A        | c.(76-78)GAA>AAA       | p.E26K   |
| Pat_11 | Post-Resistance | ATP2B2    | 491    | 37 | 3  | 10391870  | 10391870  | Missense_Mutation      | SNP | C  | T  | 84  | 151 | c.2330G>A      | c.(2329-2331)CGA>CAA   | p.R777Q  |
| Pat_11 | Post-Resistance | GADL1     | 339896 | 37 | 3  | 30880557  | 30880557  | Missense_Mutation      | SNP | C  | T  | 102 | 194 | c.835G>A       | c.(835-837)GGA>AGA     | p.G279R  |
| Pat_11 | Post-Resistance | MYD88     | 4615   | 37 | 3  | 38181482  | 38181483  | Missense_Mutation      | DNP | CC | TT | 28  | 58  | c.495_496CC>TT | 493-498)GACCCC>GATT(   | p.P166S  |
| Pat_11 | Post-Resistance | TRAK1     | 22906  | 37 | 3  | 42242402  | 42242402  | Missense_Mutation      | SNP | C  | T  | 260 | 497 | c.1283C>T      | c.(1282-1284)TCC>TTC   | p.S428F  |
| Pat_11 | Post-Resistance | FYCO1     | 79443  | 37 | 3  | 45996861  | 45996861  | Missense_Mutation      | SNP | G  | A  | 7   | 709 | c.3824C>T      | c.(3823-3825)CCG>CTG   | p.P1275L |
| Pat_11 | Post-Resistance | CSPG5     | 10675  | 37 | 3  | 47610605  | 47610605  | Missense_Mutation      | SNP | G  | A  | 24  | 49  | c.1495C>T      | c.(1495-1497)CCC>TCC   | p.P499S  |
| Pat_11 | Post-Resistance | RYBP      | 23429  | 37 | 3  | 72428255  | 72428255  | Missense_Mutation      | SNP | C  | G  | 4   | 330 | c.340G>C       | c.(340-342)GAA>CAA     | p.E114Q  |
| Pat_11 | Post-Resistance | ROBO2     | 6092   | 37 | 3  | 77089988  | 77089988  | Missense_Mutation      | SNP | C  | G  | 144 | 354 | c.52C>G        | c.(52-54)CGG>GGG       | p.R18G   |
| Pat_11 | Post-Resistance | C3orf38   | 285237 | 37 | 3  | 88205268  | 88205268  | Missense_Mutation      | SNP | C  | T  | 73  | 87  | c.473C>T       | c.(472-474)CCT>CTT     | p.P158L  |
| Pat_11 | Post-Resistance | EPHA6     | 285220 | 37 | 3  | 96706810  | 96706810  | Missense_Mutation      | SNP | T  | G  | 63  | 92  | c.1087T>G      | c.(1087-1089)TAT>GAT   | p.Y363D  |
| Pat_11 | Post-Resistance | MORC1     | 27136  | 37 | 3  | 108813812 | 108813812 | Missense_Mutation      | SNP | G  | A  | 58  | 88  | c.527C>T       | c.(526-528)CCA>CTA     | p.P176L  |
| Pat_11 | Post-Resistance | ESYT3     | 83850  | 37 | 3  | 138183346 | 138183346 | Missense_Mutation      | SNP | G  | A  | 71  | 168 | c.1075G>A      | c.(1075-1077)GAA>AAA   | p.E359K  |
| Pat_11 | Post-Resistance | AGTR1     | 185    | 37 | 3  | 148458956 | 148458956 | Missense_Mutation      | SNP | G  | A  | 119 | 254 | c.134G>A       | c.(133-135)GGA>GAA     | p.G45E   |
| Pat_11 | Post-Resistance | CP        | 1356   | 37 | 3  | 148924061 | 148924061 | Missense_Mutation      | SNP | C  | A  | 5   | 462 | c.1102G>T      | c.(1102-1104)GGG>TGG   | p.G368W  |
| Pat_11 | Post-Resistance | CP        | 1356   | 37 | 3  | 148939500 | 148939500 | Missense_Mutation      | SNP | C  | T  | 85  | 146 | c.80G>A        | c.(79-81)GGA>GAA       | p.G27E   |
| Pat_11 | Post-Resistance | ZBBX      | 79740  | 37 | 3  | 167000053 | 167000053 | Missense_Mutation      | SNP | C  | T  | 47  | 108 | c.2110G>A      | c.(2110-2112)GAA>AAA   | p.E704K  |
| Pat_11 | Post-Resistance | ATP13A5   | 344905 | 37 | 3  | 193081090 | 193081090 | Missense_Mutation      | SNP | C  | T  | 91  | 167 | c.319G>A       | c.(319-321)GAA>AAA     | p.E107K  |
| Pat_11 | Post-Resistance | ATP13A3   | 79572  | 37 | 3  | 194175075 | 194175075 | Missense_Mutation      | SNP | C  | A  | 5   | 225 | c.677G>T       | c.(676-678)TGG>TTG     | p.W226L  |
| Pat_11 | Post-Resistance | MUC4      | 4585   | 37 | 3  | 195505772 | 195505772 | Missense_Mutation      | SNP | C  | G  | 3   | 39  | c.12295G>C     | c.(12295-12297)GTC>CTC | p.V4099L |
| Pat_11 | Post-Resistance | ZNF732    | 654254 | 37 | 4  | 265307    | 265307    | Missense_Mutation      | SNP | T  | C  | 4   | 86  | c.1336A>G      | c.(1336-1338)AAA>GAA   | p.K446E  |
| Pat_11 | Post-Resistance | ZNF721    | 170960 | 37 | 4  | 436992    | 436992    | Missense_Mutation      | SNP | G  | C  | 48  | 116 | c.1264C>G      | c.(1264-1266)CGT>GGT   | p.R422G  |
| Pat_11 | Post-Resistance | FAM193A   | 8603   | 37 | 4  | 2673929   | 2673929   | Missense_Mutation      | SNP | G  | A  | 5   | 238 | c.1288G>A      | c.(1288-1290)GGA>AGA   | p.G430R  |
| Pat_11 | Post-Resistance | SLIT2     | 9353   | 37 | 4  | 20530703  | 20530703  | Missense_Mutation      | SNP | C  | T  | 124 | 199 | c.1594C>T      | c.(1594-1596)CCC>TCC   | p.P532S  |
| Pat_11 | Post-Resistance | GPR125    | 166647 | 37 | 4  | 22425818  | 22425818  | Missense_Mutation      | SNP | G  | A  | 31  | 67  | c.1601C>T      | c.(1600-1602)TCA>TTA   | p.S534L  |
| Pat_11 | Post-Resistance | NSUN7     | 79730  | 37 | 4  | 40810375  | 40810375  | Missense_Mutation      | SNP | G  | A  | 103 | 229 | c.1576G>A      | c.(1576-1578)GCC>ACC   | p.A526T  |
| Pat_11 | Post-Resistance | NMU       | 10874  | 37 | 4  | 56496606  | 56496606  | Missense_Mutation      | SNP | C  | T  | 113 | 168 | c.134G>A       | c.(133-135)GGA>GAA     | p.G45E   |
| Pat_11 | Post-Resistance | UGT2B15   | 7366   | 37 | 4  | 69513083  | 69513083  | Missense_Mutation      | SNP | C  | T  | 110 | 238 | c.1332G>A      | c.(1330-1332)ATG>ATA   | p.M444I  |
| Pat_11 | Post-Resistance | UGT2B10   | 7365   | 37 | 4  | 69693137  | 69693137  | Missense_Mutation      | SNP | C  | T  | 222 | 404 | c.1178C>T      | c.(1177-1179)CCA>CTA   | p.P393L  |
| Pat_11 | Post-Resistance | RUFY3     | 22902  | 37 | 4  | 71629283  | 71629283  | Missense_Mutation      | SNP | C  | T  | 51  | 105 | c.367C>T       | c.(367-369)CTC>TTC     | p.L123F  |
| Pat_11 | Post-Resistance | ALB       | 213    | 37 | 4  | 74275124  | 74275124  | Missense_Mutation      | SNP | C  | T  | 107 | 194 | c.535C>T       | c.(535-537)CTT>TTT     | p.L179F  |
| Pat_11 | Post-Resistance | USO1      | 8615   | 37 | 4  | 76714871  | 76714871  | Missense_Mutation      | SNP | G  | C  | 3   | 51  | c.1269G>C      | c.(1267-1269)CAG>CAC   | p.Q423H  |

|        |                 |         |        |    |   |           |           |                   |     |    |    |     |     |                    |                        |                |
|--------|-----------------|---------|--------|----|---|-----------|-----------|-------------------|-----|----|----|-----|-----|--------------------|------------------------|----------------|
| Pat_11 | Post-Resistance | CCDC158 | 339965 | 37 | 4 | 77278541  | 77278541  | Missense_Mutation | SNP | C  | T  | 41  | 113 | c.2159G>A          | c.(2158-2160)GGA>GAA   | p.G720E        |
| Pat_11 | Post-Resistance | C4orf37 | 285555 | 37 | 4 | 99027141  | 99027141  | Missense_Mutation | SNP | C  | T  | 22  | 61  | c.575G>A           | c.(574-576)CGA>CAA     | p.R192Q        |
| Pat_11 | Post-Resistance | AGXT2L1 | 64850  | 37 | 4 | 109670491 | 109670491 | Missense_Mutation | SNP | C  | T  | 114 | 236 | c.830G>A           | c.(829-831)GGA>GAA     | p.G277E        |
| Pat_11 | Post-Resistance | NDST4   | 64579  | 37 | 4 | 115769417 | 115769417 | Missense_Mutation | SNP | C  | T  | 95  | 139 | c.1894G>A          | c.(1894-1896)GAA>AAA   | p.E632K        |
| Pat_11 | Post-Resistance | FAT4    | 79633  | 37 | 4 | 126241411 | 126241411 | Missense_Mutation | SNP | C  | T  | 137 | 266 | c.3845C>T          | c.(3844-3846)TCC>TTC   | p.S1282F       |
| Pat_11 | Post-Resistance | FAT4    | 79633  | 37 | 4 | 126367659 | 126367659 | Missense_Mutation | SNP | C  | T  | 198 | 344 | c.7405C>T          | c.(7405-7407)CAC>TAC   | p.H2469Y       |
| Pat_11 | Post-Resistance | FAT4    | 79633  | 37 | 4 | 126411926 | 126411926 | Missense_Mutation | SNP | C  | T  | 60  | 121 | c.13949C>T         | c.(13948-13950)TCA>TTA | p.S4650L       |
| Pat_11 | Post-Resistance | TLL1    | 7092   | 37 | 4 | 167012495 | 167012495 | Splice_Site       | SNP | T  | C  | 24  | 82  | c.2656_splice      | c.e19+2                | p.E886_splice  |
| Pat_11 | Post-Resistance | ODZ3    | 55714  | 37 | 4 | 183635341 | 183635341 | Missense_Mutation | SNP | G  | A  | 4   | 153 | c.2323G>A          | c.(2323-2325)GTA>ATA   | p.V775I        |
| Pat_11 | Post-Resistance | CYP4V2  | 285440 | 37 | 4 | 187115720 | 187115720 | Missense_Mutation | SNP | T  | C  | 155 | 293 | c.281T>C           | c.(280-282)GTC>GCC     | p.V94A         |
| Pat_11 | Post-Resistance | FAT1    | 2195   | 37 | 4 | 187539729 | 187539729 | Missense_Mutation | SNP | A  | T  | 69  | 97  | c.8011T>A          | c.(8011-8013)TTC>ATC   | p.F2671I       |
| Pat_11 | Post-Resistance | CMYA5   | 202333 | 37 | 5 | 79030152  | 79030152  | Missense_Mutation | SNP | C  | T  | 91  | 57  | c.5564C>T          | c.(5563-5565)TCA>TTA   | p.S1855L       |
| Pat_11 | Post-Resistance | SLC22A4 | 6583   | 37 | 5 | 131630533 | 131630533 | Missense_Mutation | SNP | G  | A  | 3   | 32  | c.224G>A           | c.(223-225)CGC>CAC     | p.R75H         |
| Pat_11 | Post-Resistance | PCDHA4  | 56144  | 37 | 5 | 140188055 | 140188055 | Missense_Mutation | SNP | G  | A  | 308 | 170 | c.1283G>A          | c.(1282-1284)CGA>CAA   | p.R428Q        |
| Pat_11 | Post-Resistance | PCDHA13 | 56136  | 37 | 5 | 140264174 | 140264174 | Missense_Mutation | SNP | C  | T  | 53  | 27  | c.2321C>T          | c.(2320-2322)CCC>CTC   | p.P774L        |
| Pat_11 | Post-Resistance | PCDHB10 | 56126  | 37 | 5 | 140573462 | 140573462 | Missense_Mutation | SNP | A  | C  | 195 | 139 | c.1337A>C          | c.(1336-1338)GAC>GCC   | p.D446A        |
| Pat_11 | Post-Resistance | ARAP3   | 64411  | 37 | 5 | 141053295 | 141053295 | Missense_Mutation | SNP | G  | A  | 4   | 274 | c.779C>T           | c.(778-780)TCG>TTG     | p.S260L        |
| Pat_11 | Post-Resistance | CCDC69  | 26112  | 37 | 5 | 150581166 | 150581166 | Missense_Mutation | SNP | C  | T  | 84  | 64  | c.208G>A           | c.(208-210)GAA>AAA     | p.E70K         |
| Pat_11 | Post-Resistance | C5orf25 | 375484 | 37 | 5 | 175740719 | 175740719 | Missense_Mutation | SNP | T  | C  | 5   | 583 | c.1703T>C          | c.(1702-1704)CTT>CCT   | p.L568P        |
| Pat_11 | Post-Resistance | RREB1   | 6239   | 37 | 6 | 7231562   | 7231562   | Missense_Mutation | SNP | C  | T  | 131 | 237 | c.3230C>T          | c.(3229-3231)TCG>TTG   | p.S1077L       |
| Pat_11 | Post-Resistance | OR2J2   | 26707  | 37 | 6 | 29142121  | 29142122  | Nonsense_Mutation | DNP | AA | TG | 174 | 249 | c.709_710AA>TG     | c.(709-711)AAA>TGA     | p.K237*        |
| Pat_11 | Post-Resistance | VARS    | 7407   | 37 | 6 | 31753059  | 31753060  | Missense_Mutation | DNP | GG | AA | 75  | 139 | c.1310_1311CC>T    | c.(1309-1311)TCC>TTT   | p.S437F        |
| Pat_11 | Post-Resistance | CYP39A1 | 51302  | 37 | 6 | 46609950  | 46609950  | Missense_Mutation | SNP | G  | A  | 70  | 118 | c.263C>T           | c.(262-264)TCC>TTC     | p.S88F         |
| Pat_11 | Post-Resistance | GPR111  | 222611 | 37 | 6 | 47649202  | 47649202  | Missense_Mutation | SNP | G  | A  | 166 | 252 | c.907G>A           | c.(907-909)GGA>AGA     | p.G303R        |
| Pat_11 | Post-Resistance | TFAP2B  | 7021   | 37 | 6 | 50796357  | 50796357  | Missense_Mutation | SNP | G  | A  | 5   | 490 | c.566G>A           | c.(565-567)GGC>GAC     | p.G189D        |
| Pat_11 | Post-Resistance | KHDRBS2 | 202559 | 37 | 6 | 62604676  | 62604676  | Missense_Mutation | SNP | C  | T  | 41  | 53  | c.674G>A           | c.(673-675)GGA>GAA     | p.G225E        |
| Pat_11 | Post-Resistance | FAM135A | 57579  | 37 | 6 | 71235250  | 71235250  | Missense_Mutation | SNP | T  | G  | 67  | 125 | c.2463T>G          | c.(2461-2463)AAT>AAG   | p.N821K        |
| Pat_11 | Post-Resistance | COL12A1 | 1303   | 37 | 6 | 75812336  | 75812336  | Missense_Mutation | SNP | C  | T  | 78  | 112 | c.8392G>A          | c.(8392-8394)GGA>AGA   | p.G2798R       |
| Pat_11 | Post-Resistance | ROS1    | 6098   | 37 | 6 | 117746814 | 117746814 | Missense_Mutation | SNP | C  | A  | 165 | 314 | c.6G>T             | c.(4-6)AAG>AAT         | p.K2N          |
| Pat_11 | Post-Resistance | THEMIS  | 387357 | 37 | 6 | 128134491 | 128134491 | Missense_Mutation | SNP | C  | T  | 107 | 191 | c.1295G>A          | c.(1294-1296)GGA>GAA   | p.G432E        |
| Pat_11 | Post-Resistance | GPR126  | 57211  | 37 | 6 | 142718806 | 142718806 | Missense_Mutation | SNP | G  | A  | 50  | 98  | c.1481G>A          | c.(1480-1482)GGA>GAA   | p.G494E        |
| Pat_11 | Post-Resistance | TIAM2   | 26230  | 37 | 6 | 155577851 | 155577851 | Missense_Mutation | SNP | C  | A  | 4   | 286 | c.4702C>A          | c.(4702-4704)CTG>ATG   | p.L1568M       |
| Pat_11 | Post-Resistance | MLLT4   | 4301   | 37 | 6 | 168303044 | 168303044 | Missense_Mutation | SNP | G  | A  | 157 | 312 | c.1625G>A          | c.(1624-1626)GGG>GAG   | p.G542E        |
| Pat_11 | Post-Resistance | MICALL2 | 79778  | 37 | 7 | 1482008   | 1482008   | Missense_Mutation | SNP | G  | A  | 160 | 510 | c.1531C>T          | c.(1531-1533)CCT>TCT   | p.P511S        |
| Pat_11 | Post-Resistance | ZMIZ2   | 83637  | 37 | 7 | 44805829  | 44805829  | Missense_Mutation | SNP | C  | T  | 202 | 157 | c.2309C>T          | c.(2308-2310)ACC>ATC   | p.T770I        |
| Pat_11 | Post-Resistance | PURB    | 5814   | 37 | 7 | 44924053  | 44924053  | Missense_Mutation | SNP | C  | T  | 7   | 759 | c.895G>A           | c.(895-897)GGC>AGC     | p.G299S        |
| Pat_11 | Post-Resistance | ABCA13  | 154664 | 37 | 7 | 48563857  | 48563858  | Missense_Mutation | DNP | CT | TC | 29  | 79  | c.14065_14066CT>TC | c.(14065-14067)CTC>TCC | p.L4689S       |
| Pat_11 | Post-Resistance | PHKG1   | 5260   | 37 | 7 | 56151087  | 56151087  | Missense_Mutation | SNP | A  | G  | 187 | 152 | c.431T>C           | c.(430-432)CTC>CCC     | p.L144P        |
| Pat_11 | Post-Resistance | CLIP2   | 7461   | 37 | 7 | 73770864  | 73770864  | Missense_Mutation | SNP | G  | A  | 4   | 312 | c.928G>A           | c.(928-930)GCA>ACA     | p.A310T        |
| Pat_11 | Post-Resistance | PCLO    | 27445  | 37 | 7 | 82508726  | 82508726  | Missense_Mutation | SNP | A  | C  | 31  | 115 | c.13581T>G         | c.(13579-13581)AGT>AGG | p.S4527R       |
| Pat_11 | Post-Resistance | CROT    | 54677  | 37 | 7 | 87005238  | 87005238  | Missense_Mutation | SNP | G  | A  | 5   | 390 | c.845G>A           | c.(844-846)AGT>AAT     | p.S282N        |
| Pat_11 | Post-Resistance | C7orf51 | 222950 | 37 | 7 | 100086437 | 100086437 | Missense_Mutation | SNP | G  | A  | 146 | 114 | c.1093G>A          | c.(1093-1095)GAG>AAG   | p.E365K        |
| Pat_11 | Post-Resistance | MUC17   | 140453 | 37 | 7 | 100681244 | 100681244 | Missense_Mutation | SNP | A  | G  | 9   | 936 | c.6547A>G          | c.(6547-6549)ACA>GCA   | p.T2183A       |
| Pat_11 | Post-Resistance | MET     | 4233   | 37 | 7 | 116435940 | 116435940 | Splice_Site       | SNP | G  | A  | 222 | 205 | c.3936_splice      | c.e21-1                | p.L1312_splice |
| Pat_11 | Post-Resistance | GRM8    | 2918   | 37 | 7 | 126173209 | 126173209 | Missense_Mutation | SNP | C  | T  | 62  | 211 | c.2227G>A          | c.(2227-2229)GAC>AAC   | p.D743N        |
| Pat_11 | Post-Resistance | AKR1B10 | 57016  | 37 | 7 | 134216768 | 134216768 | Missense_Mutation | SNP | G  | A  | 127 | 673 | c.343G>A           | c.(343-345)GGA>AGA     | p.G115R        |
| Pat_11 | Post-Resistance | ARHGEF5 | 7984   | 37 | 7 | 144077039 | 144077039 | Missense_Mutation | SNP | C  | T  | 148 | 744 | c.4684C>T          | c.(4684-4686)CCT>TCT   | p.P1562S       |

|        |                 |          |        |    |   |           |           |                   |     |   |   |     |     |           |                      |          |
|--------|-----------------|----------|--------|----|---|-----------|-----------|-------------------|-----|---|---|-----|-----|-----------|----------------------|----------|
| Pat_11 | Post-Resistance | GIMAP6   | 474344 | 37 | 7 | 150325195 | 150325195 | Missense_Mutation | SNP | C | T | 463 | 262 | c.491G>A  | c.(490-492)CGG>CAG   | p.R164Q  |
| Pat_11 | Post-Resistance | C8orf80  | 389643 | 37 | 8 | 27884505  | 27884505  | Missense_Mutation | SNP | C | T | 222 | 401 | c.2219G>A | c.(2218-2220)GGG>GAG | p.G740E  |
| Pat_11 | Post-Resistance | RP1      | 6101   | 37 | 8 | 55540286  | 55540286  | Missense_Mutation | SNP | C | T | 228 | 369 | c.3844C>T | c.(3844-3846)CCT>TCT | p.P1282S |
| Pat_11 | Post-Resistance | GRHL2    | 79977  | 37 | 8 | 102555585 | 102555585 | Missense_Mutation | SNP | C | T | 5   | 424 | c.137C>T  | c.(136-138)GCA>GTA   | p.A46V   |
| Pat_11 | Post-Resistance | ODF1     | 4956   | 37 | 8 | 103564056 | 103564056 | Missense_Mutation | SNP | G | T | 7   | 817 | c.101G>T  | c.(100-102)CGG>CTG   | p.R34L   |
| Pat_11 | Post-Resistance | TRHR     | 7201   | 37 | 8 | 110100070 | 110100070 | Missense_Mutation | SNP | A | T | 156 | 217 | c.329A>T  | c.(328-330)AAT>ATT   | p.N110I  |
| Pat_11 | Post-Resistance | MTBP     | 27085  | 37 | 8 | 121518998 | 121518998 | Missense_Mutation | SNP | C | T | 104 | 167 | c.1780C>T | c.(1780-1782)CCT>TCT | p.P594S  |
| Pat_11 | Post-Resistance | SQLE     | 6713   | 37 | 8 | 126033112 | 126033112 | Missense_Mutation | SNP | G | A | 31  | 80  | c.1531G>A | c.(1531-1533)GTA>ATA | p.V511I  |
| Pat_11 | Post-Resistance | IFNA8    | 3445   | 37 | 9 | 21409416  | 21409416  | Missense_Mutation | SNP | C | T | 146 | 104 | c.241C>T  | c.(241-243)CAT>TAT   | p.H81Y   |
| Pat_11 | Post-Resistance | GNE      | 10020  | 37 | 9 | 36229078  | 36229078  | Missense_Mutation | SNP | G | A | 4   | 313 | c.1010C>T | c.(1009-1011)GCT>GTT | p.A337V  |
| Pat_11 | Post-Resistance | ZNF645   | 158506 | 37 | X | 22291533  | 22291533  | Missense_Mutation | SNP | G | A | 96  | 28  | c.425G>A  | c.(424-426)CGA>CAA   | p.R142Q  |
| Pat_11 | Post-Resistance | KIAA2022 | 340533 | 37 | X | 73960071  | 73960071  | Missense_Mutation | SNP | C | T | 117 | 52  | c.4321G>A | c.(4321-4323)GGA>AGA | p.G1441R |
| Pat_11 | Post-Resistance | KLHL13   | 90293  | 37 | X | 117043419 | 117043419 | Missense_Mutation | SNP | C | T | 88  | 30  | c.1211G>A | c.(1210-1212)GGA>GAA | p.G404E  |
| Pat_11 | Post-Resistance | OCRL     | 4952   | 37 | X | 128691316 | 128691316 | Missense_Mutation | SNP | C | T | 87  | 38  | c.253C>T  | c.(253-255)CGG>TGG   | p.R85W   |
| Pat_11 | Post-Resistance | PCDH11Y  | 83259  | 37 | Y | 4925057   | 4925057   | Missense_Mutation | SNP | G | A | 78  | 26  | c.193G>A  | c.(193-195)GAA>AAA   | p.E65K   |
| Pat_16 | Post-Resistance | KIAA1751 | 85452  | 37 | 1 | 1920014   | 1920014   | Missense_Mutation | SNP | C | A | 37  | 87  | c.233G>T  | c.(232-234)CGG>CTG   | p.R78L   |
| Pat_16 | Post-Resistance | GPR157   | 80045  | 37 | 1 | 9164611   | 9164611   | Missense_Mutation | SNP | G | A | 13  | 31  | c.875C>T  | c.(874-876)TCT>TTT   | p.S292F  |
| Pat_16 | Post-Resistance | CLCNKA   | 1187   | 37 | 1 | 16358320  | 16358320  | Missense_Mutation | SNP | C | T | 109 | 74  | c.1738C>T | c.(1738-1740)CCC>TCC | p.P580S  |
| Pat_16 | Post-Resistance | EIF4G3   | 8672   | 37 | 1 | 21183973  | 21183973  | Missense_Mutation | SNP | C | T | 6   | 534 | c.3094G>A | c.(3094-3096)GAA>AAA | p.E1032K |
| Pat_16 | Post-Resistance | NBPF3    | 84224  | 37 | 1 | 21797199  | 21797199  | Missense_Mutation | SNP | G | A | 74  | 84  | c.418G>A  | c.(418-420)GAG>AAG   | p.E140K  |
| Pat_16 | Post-Resistance | RHD      | 6007   | 37 | 1 | 25611201  | 25611201  | Missense_Mutation | SNP | G | A | 4   | 180 | c.286G>A  | c.(286-288)GGC>AGC   | p.G96S   |
| Pat_16 | Post-Resistance | UBXN11   | 91544  | 37 | 1 | 26612001  | 26612001  | Missense_Mutation | SNP | A | T | 5   | 22  | c.806T>A  | c.(805-807)TTT>TAT   | p.F269Y  |
| Pat_16 | Post-Resistance | ARID1A   | 8289   | 37 | 1 | 27107000  | 27107000  | Missense_Mutation | SNP | C | T | 45  | 132 | c.6611C>T | c.(6610-6612)GCC>GTC | p.A2204V |
| Pat_16 | Post-Resistance | HCRTR1   | 3061   | 37 | 1 | 32090687  | 32090687  | Missense_Mutation | SNP | C | T | 3   | 33  | c.1055C>T | c.(1054-1056)GCT>GTT | p.A352V  |
| Pat_16 | Post-Resistance | ZSCAN20  | 7579   | 37 | 1 | 33945010  | 33945010  | Missense_Mutation | SNP | C | T | 51  | 37  | c.121C>T  | c.(121-123)CGT>TGT   | p.R41C   |
| Pat_16 | Post-Resistance | CSMD2    | 114784 | 37 | 1 | 33992823  | 33992823  | Missense_Mutation | SNP | G | A | 4   | 243 | c.9775C>T | c.(9775-9777)CGG>TGG | p.R3259W |
| Pat_16 | Post-Resistance | CSMD2    | 114784 | 37 | 1 | 34015872  | 34015872  | Missense_Mutation | SNP | C | T | 4   | 220 | c.8390G>A | c.(8389-8391)CGG>CAG | p.R2797Q |
| Pat_16 | Post-Resistance | CSMD2    | 114784 | 37 | 1 | 34285316  | 34285316  | Missense_Mutation | SNP | C | T | 8   | 57  | c.1202G>A | c.(1201-1203)CGA>CAA | p.R401Q  |
| Pat_16 | Post-Resistance | C1orf216 | 127703 | 37 | 1 | 36181844  | 36181844  | Missense_Mutation | SNP | G | A | 4   | 124 | c.79C>T   | c.(79-81)CTC>TTC     | p.L27F   |
| Pat_16 | Post-Resistance | PABPC4   | 8761   | 37 | 1 | 40034556  | 40034556  | Missense_Mutation | SNP | C | T | 4   | 276 | c.794G>A  | c.(793-795)CGT>CAT   | p.R265H  |
| Pat_16 | Post-Resistance | ZNF642   | 339559 | 37 | 1 | 40954845  | 40954845  | Missense_Mutation | SNP | G | A | 184 | 132 | c.305G>A  | c.(304-306)CGA>CAA   | p.R102Q  |
| Pat_16 | Post-Resistance | MUTYH    | 4595   | 37 | 1 | 45798966  | 45798966  | Missense_Mutation | SNP | C | T | 4   | 102 | c.370G>A  | c.(370-372)GCA>ACA   | p.A124T  |
| Pat_16 | Post-Resistance | TOE1     | 114034 | 37 | 1 | 45808107  | 45808107  | Nonsense_Mutation | SNP | C | T | 4   | 220 | c.544C>T  | c.(544-546)CGA>TGA   | p.R182*  |
| Pat_16 | Post-Resistance | ZFYVE9   | 9372   | 37 | 1 | 52798527  | 52798527  | Missense_Mutation | SNP | G | A | 4   | 157 | c.3526G>A | c.(3526-3528)GTA>ATA | p.V1176I |
| Pat_16 | Post-Resistance | C1orf163 | 65260  | 37 | 1 | 53153690  | 53153690  | Missense_Mutation | SNP | T | C | 4   | 301 | c.398A>G  | c.(397-399)AAG>AGG   | p.K133R  |
| Pat_16 | Post-Resistance | GLIS1    | 148979 | 37 | 1 | 54060157  | 54060157  | Missense_Mutation | SNP | C | T | 3   | 87  | c.419G>A  | c.(418-420)CGG>CAG   | p.R140Q  |
| Pat_16 | Post-Resistance | C8B      | 732    | 37 | 1 | 57422517  | 57422517  | Missense_Mutation | SNP | C | T | 212 | 161 | c.316G>A  | c.(316-318)GAA>AAA   | p.E106K  |
| Pat_16 | Post-Resistance | DNAJC6   | 9829   | 37 | 1 | 65858497  | 65858497  | Missense_Mutation | SNP | C | T | 4   | 218 | c.1681C>T | c.(1681-1683)CGC>TGC | p.R561C  |
| Pat_16 | Post-Resistance | LRRC7    | 57554  | 37 | 1 | 70493918  | 70493918  | Missense_Mutation | SNP | C | T | 82  | 78  | c.1745C>T | c.(1744-1746)TCT>TTT | p.S582F  |
| Pat_16 | Post-Resistance | C1orf173 | 127254 | 37 | 1 | 75065480  | 75065480  | Missense_Mutation | SNP | T | G | 127 | 68  | c.1625A>C | c.(1624-1626)AAA>ACA | p.K542T  |
| Pat_16 | Post-Resistance | CLCA1    | 1179   | 37 | 1 | 86951080  | 86951080  | Missense_Mutation | SNP | A | T | 47  | 79  | c.790A>T  | c.(790-792)AAT>TAT   | p.N264Y  |
| Pat_16 | Post-Resistance | SH3GLB1  | 51100  | 37 | 1 | 87208874  | 87208874  | Nonsense_Mutation | SNP | C | T | 172 | 118 | c.1054C>T | c.(1054-1056)CAG>TAG | p.Q352*  |
| Pat_16 | Post-Resistance | ARHGAP29 | 9411   | 37 | 1 | 94654489  | 94654489  | Missense_Mutation | SNP | A | T | 41  | 108 | c.1585T>A | c.(1585-1587)TTT>ATT | p.F529I  |
| Pat_16 | Post-Resistance | CD53     | 963    | 37 | 1 | 111434995 | 111434995 | Missense_Mutation | SNP | G | A | 29  | 87  | c.92G>A   | c.(91-93)GGG>GAG     | p.G31E   |
| Pat_16 | Post-Resistance | SYCP1    | 6847   | 37 | 1 | 115469144 | 115469144 | Missense_Mutation | SNP | G | A | 8   | 30  | c.1886G>A | c.(1885-1887)GGT>GAT | p.G629D  |
| Pat_16 | Post-Resistance | CASQ2    | 845    | 37 | 1 | 116244011 | 116244011 | Missense_Mutation | SNP | C | T | 112 | 98  | c.1051G>A | c.(1051-1053)GAT>AAT | p.D351N  |
| Pat_16 | Post-Resistance | PDE4DIP  | 9659   | 37 | 1 | 144881505 | 144881505 | Nonsense_Mutation | SNP | G | A | 137 | 323 | c.3691C>T | c.(3691-3693)CAG>TAG | p.Q1231* |



|        |                 |          |           |    |    |           |           |                   |     |   |   |     |     |            |                        |          |
|--------|-----------------|----------|-----------|----|----|-----------|-----------|-------------------|-----|---|---|-----|-----|------------|------------------------|----------|
| Pat_16 | Post-Resistance | PDE4DIP  | 9659      | 37 | 1  | 145015949 | 145015949 | Missense_Mutation | SNP | C | T | 53  | 629 | c.139G>A   | c.(139-141)GAA>AAA     | p.E47K   |
| Pat_16 | Post-Resistance | NBPF10   | 100132406 | 37 | 1  | 145323695 | 145323695 | Missense_Mutation | SNP | C | T | 10  | 666 | c.3757C>T  | c.(3757-3759)CCA>TCA   | p.P1253S |
| Pat_16 | Post-Resistance | NBPF10   | 100132406 | 37 | 1  | 145360560 | 145360560 | Missense_Mutation | SNP | G | A | 5   | 244 | c.9410G>A  | c.(9409-9411)AGC>AAC   | p.S3137N |
| Pat_16 | Post-Resistance | LASS2    | 29956     | 37 | 1  | 150939253 | 150939253 | Missense_Mutation | SNP | C | T | 4   | 175 | c.827G>A   | c.(826-828)CGA>CAA     | p.R276Q  |
| Pat_16 | Post-Resistance | KPRP     | 448834    | 37 | 1  | 152733052 | 152733052 | Missense_Mutation | SNP | T | A | 42  | 96  | c.988T>A   | c.(988-990)TCC>ACC     | p.S330T  |
| Pat_16 | Post-Resistance | S100A5   | 6276      | 37 | 1  | 153509861 | 153509861 | Missense_Mutation | SNP | C | T | 4   | 252 | c.244G>A   | c.(244-246)GAC>AAC     | p.D82N   |
| Pat_16 | Post-Resistance | HCN3     | 57657     | 37 | 1  | 155254477 | 155254477 | Missense_Mutation | SNP | G | A | 4   | 269 | c.1018G>A  | c.(1018-1020)GCC>ACC   | p.A340T  |
| Pat_16 | Post-Resistance | FCRL3    | 115352    | 37 | 1  | 157666963 | 157666963 | Missense_Mutation | SNP | T | G | 59  | 16  | c.811A>C   | c.(811-813)AAA>CAA     | p.K271Q  |
| Pat_16 | Post-Resistance | ATP1A4   | 480       | 37 | 1  | 160141383 | 160141383 | Missense_Mutation | SNP | T | A | 171 | 113 | c.1690T>A  | c.(1690-1692)TTC>ATC   | p.F564I  |
| Pat_16 | Post-Resistance | CD244    | 51744     | 37 | 1  | 160806026 | 160806026 | Missense_Mutation | SNP | G | A | 16  | 81  | c.868C>T   | c.(868-870)CCT>TCT     | p.P290S  |
| Pat_16 | Post-Resistance | ARHGAP30 | 257106    | 37 | 1  | 161018907 | 161018907 | Missense_Mutation | SNP | C | T | 220 | 208 | c.1904G>A  | c.(1903-1905)GGA>GAA   | p.G635E  |
| Pat_16 | Post-Resistance | NIT1     | 4817      | 37 | 1  | 161090340 | 161090340 | Missense_Mutation | SNP | G | A | 4   | 215 | c.769G>A   | c.(769-771)GCA>ACA     | p.A257T  |
| Pat_16 | Post-Resistance | C1orf110 | 339512    | 37 | 1  | 162829392 | 162829392 | Missense_Mutation | SNP | A | T | 17  | 53  | c.45T>A    | c.(43-45)GAT>GAA       | p.D15E   |
| Pat_16 | Post-Resistance | UCK2     | 7371      | 37 | 1  | 165865440 | 165865440 | Missense_Mutation | SNP | G | A | 7   | 551 | c.370G>A   | c.(370-372)GTT>ATT     | p.V124I  |
| Pat_16 | Post-Resistance | MPZL1    | 9019      | 37 | 1  | 167757123 | 167757123 | Missense_Mutation | SNP | G | A | 175 | 131 | c.775G>A   | c.(775-777)GAG>AAG     | p.E259K  |
| Pat_16 | Post-Resistance | SELL     | 6402      | 37 | 1  | 169670801 | 169670801 | Missense_Mutation | SNP | C | A | 4   | 12  | c.981G>T   | c.(979-981)AAG>AAT     | p.K327N  |
| Pat_16 | Post-Resistance | SCYL3    | 57147     | 37 | 1  | 169823860 | 169823860 | Missense_Mutation | SNP | C | T | 4   | 260 | c.1720G>A  | c.(1720-1722)GAG>AAG   | p.E574K  |
| Pat_16 | Post-Resistance | FMO1     | 2326      | 37 | 1  | 171254520 | 171254520 | Missense_Mutation | SNP | G | A | 46  | 39  | c.1436G>A  | c.(1435-1437)GGA>GAA   | p.G479E  |
| Pat_16 | Post-Resistance | SLC9A11  | 284525    | 37 | 1  | 173490472 | 173490472 | Missense_Mutation | SNP | C | T | 25  | 93  | c.2707G>A  | c.(2707-2709)GGA>AGA   | p.G903R  |
| Pat_16 | Post-Resistance | FAM5B    | 57795     | 37 | 1  | 177249565 | 177249565 | Nonsense_Mutation | SNP | G | A | 44  | 164 | c.1253G>A  | c.(1252-1254)TGG>TAG   | p.W418*  |
| Pat_16 | Post-Resistance | C1orf49  | 84066     | 37 | 1  | 178489831 | 178489831 | Missense_Mutation | SNP | A | T | 36  | 20  | c.365A>T   | c.(364-366)GAG>GTG     | p.E122V  |
| Pat_16 | Post-Resistance | C1orf125 | 126859    | 37 | 1  | 179414126 | 179414126 | Missense_Mutation | SNP | G | A | 30  | 38  | c.1585G>A  | c.(1585-1587)GAG>AAG   | p.E529K  |
| Pat_16 | Post-Resistance | RGS16    | 6004      | 37 | 1  | 182572373 | 182572373 | Missense_Mutation | SNP | C | T | 6   | 635 | c.146G>A   | c.(145-147)AGC>AAC     | p.S49N   |
| Pat_16 | Post-Resistance | HMCN1    | 83872     | 37 | 1  | 186077692 | 186077692 | Missense_Mutation | SNP | C | T | 63  | 62  | c.10952C>T | c.(10951-10953)CCT>CTT | p.P3651L |
| Pat_16 | Post-Resistance | CFH      | 3075      | 37 | 1  | 196684756 | 196684756 | Missense_Mutation | SNP | G | A | 152 | 110 | c.1553G>A  | c.(1552-1554)AGA>AAA   | p.R518K  |
| Pat_16 | Post-Resistance | CFHR2    | 3080      | 37 | 1  | 196918654 | 196918654 | Missense_Mutation | SNP | C | T | 9   | 40  | c.128C>T   | c.(127-129)TCC>TTC     | p.S43F   |
| Pat_16 | Post-Resistance | CFHR5    | 81494     | 37 | 1  | 196971612 | 196971612 | Missense_Mutation | SNP | A | G | 20  | 59  | c.1148A>G  | c.(1147-1149)GAA>GGA   | p.E383G  |
| Pat_16 | Post-Resistance | CRB1     | 23418     | 37 | 1  | 197446813 | 197446813 | Missense_Mutation | SNP | C | T | 27  | 119 | c.4025C>T  | c.(4024-4026)TCC>TTC   | p.S1342F |
| Pat_16 | Post-Resistance | PIK3C2B  | 5287      | 37 | 1  | 204400899 | 204400899 | Missense_Mutation | SNP | C | T | 7   | 613 | c.4178G>A  | c.(4177-4179)CGA>CAA   | p.R1393Q |
| Pat_16 | Post-Resistance | SLC41A1  | 254428    | 37 | 1  | 205779410 | 205779410 | Missense_Mutation | SNP | G | A | 4   | 232 | c.160C>T   | c.(160-162)CGG>TGG     | p.R54W   |
| Pat_16 | Post-Resistance | LAMB3    | 3914      | 37 | 1  | 209801395 | 209801395 | Missense_Mutation | SNP | G | A | 3   | 58  | c.1273C>T  | c.(1273-1275)CCG>TCG   | p.P425S  |
| Pat_16 | Post-Resistance | TMEM206  | 55248     | 37 | 1  | 212550929 | 212550929 | Missense_Mutation | SNP | C | T | 5   | 290 | c.758G>A   | c.(757-759)CGG>CAG     | p.R253Q  |
| Pat_16 | Post-Resistance | SPATA17  | 128153    | 37 | 1  | 217947824 | 217947824 | Missense_Mutation | SNP | C | T | 18  | 58  | c.668C>T   | c.(667-669)GCC>GTC     | p.A223V  |
| Pat_16 | Post-Resistance | NVL      | 4931      | 37 | 1  | 224495956 | 224495956 | Missense_Mutation | SNP | G | A | 28  | 86  | c.352C>T   | c.(352-354)CAC>TAC     | p.H118Y  |
| Pat_16 | Post-Resistance | ZP4      | 57829     | 37 | 1  | 238048472 | 238048472 | Missense_Mutation | SNP | C | T | 44  | 49  | c.1304G>A  | c.(1303-1305)AGG>AAG   | p.R435K  |
| Pat_16 | Post-Resistance | KIF26B   | 55083     | 37 | 1  | 245848720 | 245848720 | Missense_Mutation | SNP | C | T | 3   | 59  | c.2435C>T  | c.(2434-2436)TCG>TTG   | p.S812L  |
| Pat_16 | Post-Resistance | CNST     | 163882    | 37 | 1  | 246784866 | 246784866 | Missense_Mutation | SNP | C | T | 177 | 154 | c.515C>T   | c.(514-516)TCT>TTT     | p.S172F  |
| Pat_16 | Post-Resistance | AHCTF1   | 25909     | 37 | 1  | 247012951 | 247012951 | Missense_Mutation | SNP | A | C | 37  | 90  | c.6357T>G  | c.(6355-6357)TTT>TTG   | p.F2119L |
| Pat_16 | Post-Resistance | PFKP     | 5214      | 37 | 10 | 3162204   | 3162204   | Missense_Mutation | SNP | G | A | 4   | 290 | c.1651G>A  | c.(1651-1653)GGG>AGG   | p.G551R  |
| Pat_16 | Post-Resistance | ITIH2    | 3698      | 37 | 10 | 7773808   | 7773808   | Missense_Mutation | SNP | G | A | 4   | 257 | c.1496G>A  | c.(1495-1497)CGG>CAG   | p.R499Q  |
| Pat_16 | Post-Resistance | FAM171A1 | 221061    | 37 | 10 | 15255386  | 15255386  | Missense_Mutation | SNP | C | T | 76  | 109 | c.2201G>A  | c.(2200-2202)GGA>GAA   | p.G734E  |
| Pat_16 | Post-Resistance | CUBN     | 8029      | 37 | 10 | 16932454  | 16932454  | Missense_Mutation | SNP | C | T | 4   | 137 | c.8671G>A  | c.(8671-8673)GTT>ATT   | p.V2891I |
| Pat_16 | Post-Resistance | CUBN     | 8029      | 37 | 10 | 16967398  | 16967398  | Missense_Mutation | SNP | G | A | 4   | 90  | c.6488C>T  | c.(6487-6489)JCT>TTT   | p.S2163F |
| Pat_16 | Post-Resistance | PTCHD3   | 374308    | 37 | 10 | 27702480  | 27702480  | Missense_Mutation | SNP | C | T | 3   | 50  | c.700G>A   | c.(700-702)GGC>AGC     | p.G234S  |
| Pat_16 | Post-Resistance | ANKRD30A | 91074     | 37 | 10 | 37430661  | 37430661  | Missense_Mutation | SNP | G | A | 49  | 15  | c.668G>A   | c.(667-669)GGA>GAA     | p.G223E  |
| Pat_16 | Post-Resistance | ANKRD30A | 91074     | 37 | 10 | 37430754  | 37430754  | Missense_Mutation | SNP | T | C | 5   | 85  | c.761T>C   | c.(760-762)GTG>GCG     | p.V254A  |
| Pat_16 | Post-Resistance | PRKG1    | 5592      | 37 | 10 | 54048576  | 54048576  | Missense_Mutation | SNP | A | C | 24  | 6   | c.1755A>C  | c.(1753-1755)AAA>AAC   | p.K585N  |

|        |                 |          |        |    |    |           |           |                   |     |    |    |     |     |                        |                         |          |
|--------|-----------------|----------|--------|----|----|-----------|-----------|-------------------|-----|----|----|-----|-----|------------------------|-------------------------|----------|
| Pat_16 | Post-Resistance | BICC1    | 80114  | 37 | 10 | 60573673  | 60573673  | Missense_Mutation | SNP | T  | G  | 143 | 34  | c.2460T>G              | c.(2458-2460)AAT>AAG    | p.N820K  |
| Pat_16 | Post-Resistance | MYPN     | 84665  | 37 | 10 | 69881782  | 69881782  | Missense_Mutation | SNP | G  | A  | 41  | 12  | c.587G>A               | c.(586-588)AGC>AAC      | p.S196N  |
| Pat_16 | Post-Resistance | DDX21    | 9188   | 37 | 10 | 70728771  | 70728771  | Missense_Mutation | SNP | C  | T  | 4   | 150 | c.1130C>T              | c.(1129-1131)ACT>ATT    | p.T377I  |
| Pat_16 | Post-Resistance | CDH23    | 64072  | 37 | 10 | 73466770  | 73466770  | Missense_Mutation | SNP | G  | A  | 3   | 26  | c.3070G>A              | c.(3070-3072)GTG>ATG    | p.V1024M |
| Pat_16 | Post-Resistance | STAMBPL1 | 57559  | 37 | 10 | 90672958  | 90672958  | Missense_Mutation | SNP | C  | T  | 4   | 121 | c.521C>T               | c.(520-522)TCG>TTG      | p.S174L  |
| Pat_16 | Post-Resistance | CYP2C8   | 1558   | 37 | 10 | 96824645  | 96824645  | Missense_Mutation | SNP | T  | G  | 183 | 24  | c.554A>C               | c.(553-555)AAA>ACA      | p.K185T  |
| Pat_16 | Post-Resistance | PIK3AP1  | 118788 | 37 | 10 | 98416562  | 98416562  | Missense_Mutation | SNP | C  | T  | 4   | 323 | c.560G>A               | c.(559-561)CGC>CAC      | p.R187H  |
| Pat_16 | Post-Resistance | SLIT1    | 6585   | 37 | 10 | 98778837  | 98778837  | Missense_Mutation | SNP | T  | G  | 120 | 23  | c.2774A>C              | c.(2773-2775)AAG>ACG    | p.K925T  |
| Pat_16 | Post-Resistance | SEMA4G   | 57715  | 37 | 10 | 102743232 | 102743232 | Missense_Mutation | SNP | G  | A  | 32  | 32  | c.1876G>A              | c.(1876-1878)GAT>AAT    | p.D626N  |
| Pat_16 | Post-Resistance | POLL     | 27343  | 37 | 10 | 103342563 | 103342563 | Missense_Mutation | SNP | A  | C  | 292 | 29  | c.1151T>G              | c.(1150-1152)CTG>CGG    | p.L384R  |
| Pat_16 | Post-Resistance | PDCD11   | 22984  | 37 | 10 | 105194638 | 105194638 | Missense_Mutation | SNP | C  | T  | 17  | 29  | c.3751C>T              | c.(3751-3753)CCC>TCC    | p.P1251S |
| Pat_16 | Post-Resistance | OBFC1    | 79991  | 37 | 10 | 105659885 | 105659885 | Missense_Mutation | SNP | G  | A  | 5   | 198 | c.392C>T               | c.(391-393)ACG>ATG      | p.T131M  |
| Pat_16 | Post-Resistance | TACC2    | 10579  | 37 | 10 | 123845785 | 123845785 | Missense_Mutation | SNP | C  | T  | 178 | 20  | c.3770C>T              | c.(3769-3771)TCC>TTC    | p.S1257F |
| Pat_16 | Post-Resistance | CHST15   | 51363  | 37 | 10 | 125801958 | 125801958 | Missense_Mutation | SNP | C  | T  | 3   | 64  | c.892G>A               | c.(892-894)GTC>ATC      | p.V298I  |
| Pat_16 | Post-Resistance | LRRC56   | 115399 | 37 | 11 | 554058    | 554058    | Missense_Mutation | SNP | G  | A  | 154 | 20  | c.1411G>A              | c.(1411-1413)GAC>AAC    | p.D471N  |
| Pat_16 | Post-Resistance | EPS8L2   | 64787  | 37 | 11 | 726677    | 726677    | Missense_Mutation | SNP | G  | A  | 4   | 5   | c.1993G>A              | c.(1993-1995)GAG>AAG    | p.E665K  |
| Pat_16 | Post-Resistance | MUC2     | 4583   | 37 | 11 | 1101129   | 1101129   | Missense_Mutation | SNP | G  | A  | 114 | 115 | c.14614G>A             | c.(14614-14616)GAG>AAC  | p.E4872K |
| Pat_16 | Post-Resistance | MUC5B    | 727897 | 37 | 11 | 1256566   | 1256566   | Missense_Mutation | SNP | T  | G  | 52  | 53  | c.4780T>G              | c.(4780-4782)TTC>GTC    | p.F1594V |
| Pat_16 | Post-Resistance | SLC22A18 | 5002   | 37 | 11 | 2929526   | 2929526   | Missense_Mutation | SNP | G  | A  | 4   | 114 | c.208G>A               | c.(208-210)GTG>ATG      | p.V70M   |
| Pat_16 | Post-Resistance | OR51B2   | 79345  | 37 | 11 | 5345040   | 5345040   | Missense_Mutation | SNP | G  | A  | 47  | 4   | c.488C>T               | c.(487-489)TCA>TTA      | p.S163L  |
| Pat_16 | Post-Resistance | OR5P2    | 120065 | 37 | 11 | 7817971   | 7817971   | Missense_Mutation | SNP | A  | C  | 54  | 38  | c.519T>G               | c.(517-519)TTT>TTG      | p.F173L  |
| Pat_16 | Post-Resistance | PARVA    | 55742  | 37 | 11 | 12525959  | 12525959  | Nonsense_Mutation | SNP | C  | T  | 39  | 61  | c.640C>T               | c.(640-642)CAA>TAA      | p.Q214*  |
| Pat_16 | Post-Resistance | PTPN5    | 84867  | 37 | 11 | 18764019  | 18764019  | Missense_Mutation | SNP | G  | A  | 4   | 98  | c.515C>T               | c.(514-516)CCA>CTA      | p.P172L  |
| Pat_16 | Post-Resistance | KIF18A   | 81930  | 37 | 11 | 28045369  | 28045369  | Missense_Mutation | SNP | C  | G  | 3   | 122 | c.2533G>C              | c.(2533-2535)GAC>CAC    | p.D845H  |
| Pat_16 | Post-Resistance | EXT2     | 2132   | 37 | 11 | 44228348  | 44228348  | Missense_Mutation | SNP | C  | T  | 41  | 5   | c.1501C>T              | c.(1501-1503)CTC>TTC    | p.L501F  |
| Pat_16 | Post-Resistance | AMBRA1   | 55626  | 37 | 11 | 46567211  | 46567211  | Nonsense_Mutation | SNP | C  | T  | 231 | 37  | c.494G>A               | c.(493-495)TGG>TAG      | p.W165*  |
| Pat_16 | Post-Resistance | ARHGAP1  | 392    | 37 | 11 | 46702064  | 46702065  | Nonsense_Mutation | DNP | CC | AA | 92  | 5   | c.792_793GG>TT790-795  | AGGGAG>AGTT,264_265RE>S |          |
| Pat_16 | Post-Resistance | F2       | 2147   | 37 | 11 | 46747480  | 46747480  | Missense_Mutation | SNP | G  | A  | 131 | 114 | c.631G>A               | c.(631-633)GAG>AAG      | p.E211K  |
| Pat_16 | Post-Resistance | LRP4     | 4038   | 37 | 11 | 46894655  | 46894655  | Missense_Mutation | SNP | G  | A  | 4   | 258 | c.4579C>T              | c.(4579-4581)CGC>TGC    | p.R1527C |
| Pat_16 | Post-Resistance | DDB2     | 1643   | 37 | 11 | 47256351  | 47256351  | Missense_Mutation | SNP | C  | T  | 67  | 19  | c.746C>T               | c.(745-747)GCC>GTC      | p.A249V  |
| Pat_16 | Post-Resistance | OR5M9    | 390162 | 37 | 11 | 56230826  | 56230826  | Missense_Mutation | SNP | G  | A  | 28  | 6   | c.52C>T                | c.(52-54)CGT>TGT        | p.R18C   |
| Pat_16 | Post-Resistance | OR5B17   | 219965 | 37 | 11 | 58126355  | 58126355  | Missense_Mutation | SNP | T  | C  | 69  | 7   | c.188A>G               | c.(187-189)AAC>AGC      | p.N63S   |
| Pat_16 | Post-Resistance | ZFP91    | 80829  | 37 | 11 | 58380251  | 58380251  | Nonsense_Mutation | SNP | C  | T  | 85  | 21  | c.925C>T               | c.(925-927)CAG>TAG      | p.Q309*  |
| Pat_16 | Post-Resistance | TCN1     | 6947   | 37 | 11 | 59620691  | 59620691  | Missense_Mutation | SNP | C  | T  | 5   | 509 | c.1225G>A              | c.(1225-1227)GAA>AAA    | p.E409K  |
| Pat_16 | Post-Resistance | OTUB1    | 55611  | 37 | 11 | 63764691  | 63764691  | Missense_Mutation | SNP | G  | A  | 4   | 275 | c.593G>A               | c.(592-594)CGG>CAG      | p.R198Q  |
| Pat_16 | Post-Resistance | PLCB3    | 5331   | 37 | 11 | 64023930  | 64023930  | Missense_Mutation | SNP | G  | A  | 5   | 434 | c.781G>A               | c.(781-783)GAA>AAA      | p.E261K  |
| Pat_16 | Post-Resistance | SPTBN2   | 6712   | 37 | 11 | 66466905  | 66466905  | Missense_Mutation | SNP | G  | A  | 53  | 73  | c.3748C>T              | c.(3748-3750)CGG>TGG    | p.R1250W |
| Pat_16 | Post-Resistance | LRP5     | 4041   | 37 | 11 | 68171099  | 68171099  | Missense_Mutation | SNP | G  | A  | 4   | 191 | c.1733G>A              | c.(1732-1734)CGG>CAG    | p.R578Q  |
| Pat_16 | Post-Resistance | ARHGEF17 | 9828   | 37 | 11 | 73073492  | 73073492  | Missense_Mutation | SNP | C  | T  | 17  | 4   | c.4709C>T              | c.(4708-4710)TCG>TTG    | p.S1570L |
| Pat_16 | Post-Resistance | DNAJB13  | 374407 | 37 | 11 | 73677211  | 73677211  | Missense_Mutation | SNP | C  | T  | 52  | 4   | c.521C>T               | c.(520-522)ACC>ATC      | p.T174I  |
| Pat_16 | Post-Resistance | DLG2     | 1740   | 37 | 11 | 83252744  | 83252744  | Missense_Mutation | SNP | C  | T  | 4   | 175 | c.1783G>A              | c.(1783-1785)GTC>ATC    | p.V595I  |
| Pat_16 | Post-Resistance | HEPHL1   | 341208 | 37 | 11 | 93754593  | 93754593  | Missense_Mutation | SNP | G  | A  | 79  | 129 | c.59G>A                | c.(58-60)GGG>GAG        | p.G20E   |
| Pat_16 | Post-Resistance | GRIA4    | 2893   | 37 | 11 | 105850461 | 105850461 | Missense_Mutation | SNP | C  | T  | 34  | 6   | c.2704C>T              | c.(2704-2706)CCA>TCA    | p.P902S  |
| Pat_16 | Post-Resistance | DSCAML1  | 57453  | 37 | 11 | 117352818 | 117352819 | Missense_Mutation | DNP | CC | TT | 57  | 9   | .2598_2599GG>A596-2601 | AAGGAG>AAA/             | p.E867K  |
| Pat_16 | Post-Resistance | FOXRED1  | 55572  | 37 | 11 | 126142921 | 126142921 | Missense_Mutation | SNP | C  | T  | 4   | 212 | c.364C>T               | c.(364-366)CCT>TCT      | p.P122S  |
| Pat_16 | Post-Resistance | FOXRED1  | 55572  | 37 | 11 | 126145996 | 126145996 | Missense_Mutation | SNP | G  | A  | 4   | 102 | c.853G>A               | c.(853-855)GCC>ACC      | p.A285T  |
| Pat_16 | Post-Resistance | LTBR     | 4055   | 37 | 12 | 6495261   | 6495261   | Missense_Mutation | SNP | G  | A  | 6   | 629 | c.502G>A               | c.(502-504)GTC>ATC      | p.V168I  |

|        |                 |          |        |    |    |           |           |                   |     |    |    |     |     |                  |                       |               |
|--------|-----------------|----------|--------|----|----|-----------|-----------|-------------------|-----|----|----|-----|-----|------------------|-----------------------|---------------|
| Pat_16 | Post-Resistance | AICDA    | 57379  | 37 | 12 | 8759595   | 8759595   | Missense_Mutation | SNP | G  | A  | 3   | 49  | c.22C>T          | c.(22-24)CGG>TGG      | p.R8W         |
| Pat_16 | Post-Resistance | A2ML1    | 144568 | 37 | 12 | 8975263   | 8975263   | Missense_Mutation | SNP | C  | T  | 67  | 134 | c.16C>T          | c.(16-18)CTT>TTT      | p.L6F         |
| Pat_16 | Post-Resistance | PRB3     | 5544   | 37 | 12 | 11420711  | 11420711  | Missense_Mutation | SNP | G  | A  | 5   | 164 | c.472C>T         | c.(472-474)CGT>TGT    | p.R158C       |
| Pat_16 | Post-Resistance | GRIN2B   | 2904   | 37 | 12 | 13716732  | 13716732  | Missense_Mutation | SNP | T  | A  | 31  | 32  | c.3440A>T        | c.(3439-3441)GAG>GTG  | p.E1147V      |
| Pat_16 | Post-Resistance | LRMP     | 4033   | 37 | 12 | 25260897  | 25260898  | Missense_Mutation | DNP | AT | TA | 45  | 145 | :.1403_1404AT>T/ | c.(1402-1404)GAT>GTA  | p.D468V       |
| Pat_16 | Post-Resistance | PRKAG1   | 5571   | 37 | 12 | 49396783  | 49396784  | Nonsense_Mutation | DNP | GG | AA | 50  | 132 | c.894_895CC>TT   | 892-897)CACCGA>CATT(C | p.R299*       |
| Pat_16 | Post-Resistance | KRT4     | 3851   | 37 | 12 | 53202523  | 53202523  | Missense_Mutation | SNP | C  | T  | 77  | 239 | c.1168G>A        | c.(1168-1170)GAG>AAG  | p.E390K       |
| Pat_16 | Post-Resistance | KRT18    | 3875   | 37 | 12 | 53345602  | 53345602  | Nonsense_Mutation | SNP | C  | T  | 33  | 78  | c.910C>T         | c.(910-912)CAG>TAG    | p.Q304*       |
| Pat_16 | Post-Resistance | TENC1    | 23371  | 37 | 12 | 53454201  | 53454201  | Missense_Mutation | SNP | C  | T  | 4   | 100 | c.2630C>T        | c.(2629-2631)CCG>CTG  | p.P877L       |
| Pat_16 | Post-Resistance | AMHR2    | 269    | 37 | 12 | 53823344  | 53823344  | Missense_Mutation | SNP | C  | T  | 85  | 56  | c.1075C>T        | c.(1075-1077)CCT>TCT  | p.P359S       |
| Pat_16 | Post-Resistance | GPR84    | 53831  | 37 | 12 | 54756926  | 54756926  | Missense_Mutation | SNP | C  | T  | 5   | 646 | c.710G>A         | c.(709-711)CGT>CAT    | p.R237H       |
| Pat_16 | Post-Resistance | KIAA0748 | 9840   | 37 | 12 | 55368225  | 55368225  | Missense_Mutation | SNP | G  | T  | 10  | 8   | c.122C>A         | c.(121-123)CCA>CAA    | p.P41Q        |
| Pat_16 | Post-Resistance | OR6C3    | 254786 | 37 | 12 | 55726023  | 55726023  | Missense_Mutation | SNP | C  | T  | 125 | 435 | c.539C>T         | c.(538-540)CCC>CTC    | p.P180L       |
| Pat_16 | Post-Resistance | IKZF4    | 64375  | 37 | 12 | 56427051  | 56427051  | Missense_Mutation | SNP | C  | T  | 109 | 240 | c.943C>T         | c.(943-945)CGT>TGT    | p.R315C       |
| Pat_16 | Post-Resistance | ZC3H10   | 84872  | 37 | 12 | 56514623  | 56514623  | Missense_Mutation | SNP | C  | T  | 4   | 309 | c.277C>T         | c.(277-279)CGT>TGT    | p.R93C        |
| Pat_16 | Post-Resistance | PAN2     | 9924   | 37 | 12 | 56720105  | 56720105  | Missense_Mutation | SNP | G  | A  | 3   | 52  | c.1351C>T        | c.(1351-1353)CGC>TGC  | p.R451C       |
| Pat_16 | Post-Resistance | HSD17B6  | 8630   | 37 | 12 | 57167787  | 57167787  | Missense_Mutation | SNP | G  | A  | 4   | 110 | c.151G>A         | c.(151-153)GCA>ACA    | p.A51T        |
| Pat_16 | Post-Resistance | SLC16A7  | 9194   | 37 | 12 | 60173255  | 60173256  | Missense_Mutation | DNP | GG | AA | 27  | 97  | .1232_1233GG>A   | c.(1231-1233)GGG>GAA  | p.G411E       |
| Pat_16 | Post-Resistance | C12orf56 | 115749 | 37 | 12 | 64746799  | 64746799  | Missense_Mutation | SNP | C  | T  | 109 | 82  | c.290G>A         | c.(289-291)AGA>AAA    | p.R97K        |
| Pat_16 | Post-Resistance | SLC6A15  | 55117  | 37 | 12 | 85255686  | 85255686  | Missense_Mutation | SNP | G  | A  | 5   | 203 | c.1918C>T        | c.(1918-1920)CGT>TGT  | p.R640C       |
| Pat_16 | Post-Resistance | RASSF9   | 9182   | 37 | 12 | 86198724  | 86198724  | Missense_Mutation | SNP | T  | A  | 187 | 110 | c.1064A>T        | c.(1063-1065)AAA>ATA  | p.K355I       |
| Pat_16 | Post-Resistance | LUM      | 4060   | 37 | 12 | 91497952  | 91497952  | Missense_Mutation | SNP | G  | A  | 33  | 127 | c.1007C>T        | c.(1006-1008)ACT>ATT  | p.T336I       |
| Pat_16 | Post-Resistance | HAL      | 3034   | 37 | 12 | 96370437  | 96370437  | Missense_Mutation | SNP | G  | A  | 4   | 149 | c.1702C>T        | c.(1702-1704)CGT>TGT  | p.R568C       |
| Pat_16 | Post-Resistance | UTP20    | 27340  | 37 | 12 | 101760395 | 101760395 | Missense_Mutation | SNP | C  | T  | 6   | 434 | c.6185C>T        | c.(6184-6186)CCC>CTC  | p.P2062L      |
| Pat_16 | Post-Resistance | TDG      | 6996   | 37 | 12 | 104378525 | 104378525 | Splice_Site       | SNP | A  | C  | 3   | 65  | c.793_splice     | c.e8-2                | p.L265_splice |
| Pat_16 | Post-Resistance | FICD     | 11153  | 37 | 12 | 108912995 | 108912995 | Missense_Mutation | SNP | C  | T  | 4   | 224 | c.1120C>T        | c.(1120-1122)CGT>TGT  | p.R374C       |
| Pat_16 | Post-Resistance | MYO1H    | 283446 | 37 | 12 | 109883364 | 109883364 | Missense_Mutation | SNP | G  | A  | 72  | 48  | c.565G>A         | c.(565-567)GAC>AAC    | p.D189N       |
| Pat_16 | Post-Resistance | GPN3     | 51184  | 37 | 12 | 110902973 | 110902973 | Missense_Mutation | SNP | C  | T  | 5   | 414 | c.95G>A          | c.(94-96)CGG>CAG      | p.R32Q        |
| Pat_16 | Post-Resistance | TCTN1    | 79600  | 37 | 12 | 111085668 | 111085668 | Missense_Mutation | SNP | C  | T  | 23  | 66  | c.1735C>T        | c.(1735-1737)CCC>TCC  | p.P579S       |
| Pat_16 | Post-Resistance | SH2B3    | 10019  | 37 | 12 | 111886044 | 111886044 | Missense_Mutation | SNP | G  | A  | 95  | 60  | c.1666G>A        | c.(1666-1668)GAA>AAA  | p.E556K       |
| Pat_16 | Post-Resistance | RASAL1   | 8437   | 37 | 12 | 113543644 | 113543644 | Nonsense_Mutation | SNP | G  | A  | 47  | 126 | c.1702C>T        | c.(1702-1704)CGA>TGA  | p.R568*       |
| Pat_16 | Post-Resistance | MED13L   | 23389  | 37 | 12 | 116429319 | 116429319 | Missense_Mutation | SNP | A  | T  | 136 | 72  | c.3440T>A        | c.(3439-3441)CTT>CAT  | p.L1147H      |
| Pat_16 | Post-Resistance | OASL     | 8638   | 37 | 12 | 121458536 | 121458536 | Missense_Mutation | SNP | C  | T  | 4   | 143 | c.1373G>A        | c.(1372-1374)GGT>GAT  | p.G458D       |
| Pat_16 | Post-Resistance | CAMKK2   | 10645  | 37 | 12 | 121712291 | 121712292 | Missense_Mutation | DNP | CC | TT | 9   | 34  | c.38_39GG>AA     | c.(37-39)CGG>CAA      | p.R13Q        |
| Pat_16 | Post-Resistance | WDR66    | 144406 | 37 | 12 | 122405976 | 122405976 | Missense_Mutation | SNP | C  | T  | 4   | 190 | c.2672C>T        | c.(2671-2673)CCG>CTG  | p.P891L       |
| Pat_16 | Post-Resistance | ABCB9    | 23457  | 37 | 12 | 123444668 | 123444668 | Missense_Mutation | SNP | G  | A  | 5   | 361 | c.115C>T         | c.(115-117)CGC>TGC    | p.R39C        |
| Pat_16 | Post-Resistance | SNRNP35  | 11066  | 37 | 12 | 123950368 | 123950368 | Missense_Mutation | SNP | A  | G  | 32  | 92  | c.281A>G         | c.(280-282)TAC>TGC    | p.Y94C        |
| Pat_16 | Post-Resistance | ATP6V0A2 | 23545  | 37 | 12 | 124229297 | 124229297 | Missense_Mutation | SNP | C  | A  | 4   | 247 | c.1480C>A        | c.(1480-1482)CCA>ACA  | p.P494T       |
| Pat_16 | Post-Resistance | DNAH10   | 196385 | 37 | 12 | 124297919 | 124297919 | Nonsense_Mutation | SNP | G  | A  | 67  | 215 | c.2999G>A        | c.(2998-3000)TGG>TAG  | p.W1000*      |
| Pat_16 | Post-Resistance | TMEM132C | 92293  | 37 | 12 | 128899844 | 128899844 | Missense_Mutation | SNP | T  | C  | 7   | 22  | c.317T>C         | c.(316-318)ATG>ACG    | p.M106T       |
| Pat_16 | Post-Resistance | PIWIL1   | 9271   | 37 | 12 | 130839140 | 130839140 | Missense_Mutation | SNP | G  | A  | 72  | 48  | c.1103G>A        | c.(1102-1104)AGA>AAA  | p.R368K       |
| Pat_16 | Post-Resistance | RIMBP2   | 23504  | 37 | 12 | 130883705 | 130883705 | Missense_Mutation | SNP | T  | A  | 135 | 91  | c.3134A>T        | c.(3133-3135)AAG>ATG  | p.K1045M      |
| Pat_16 | Post-Resistance | C13orf26 | 122046 | 37 | 13 | 31513882  | 31513882  | Missense_Mutation | SNP | C  | T  | 5   | 241 | c.113C>T         | c.(112-114)ACG>ATG    | p.T38M        |
| Pat_16 | Post-Resistance | STARD13  | 90627  | 37 | 13 | 33704332  | 33704332  | Missense_Mutation | SNP | G  | A  | 4   | 203 | c.482C>T         | c.(481-483)ACG>ATG    | p.T161M       |
| Pat_16 | Post-Resistance | MAB21L1  | 4081   | 37 | 13 | 36049629  | 36049629  | Missense_Mutation | SNP | T  | A  | 53  | 211 | c.647A>T         | c.(646-648)CAC>CTC    | p.H216L       |
| Pat_16 | Post-Resistance | ALG5     | 29880  | 37 | 13 | 37539733  | 37539733  | Missense_Mutation | SNP | G  | A  | 54  | 316 | c.752C>T         | c.(751-753)TCA>TTA    | p.S251L       |
| Pat_16 | Post-Resistance | SIAH3    | 283514 | 37 | 13 | 46358171  | 46358171  | Missense_Mutation | SNP | C  | T  | 5   | 408 | c.157G>A         | c.(157-159)GTC>ATC    | p.V53I        |

|        |                 |           |        |    |    |           |           |                   |     |    |    |     |     |               |                        |          |
|--------|-----------------|-----------|--------|----|----|-----------|-----------|-------------------|-----|----|----|-----|-----|---------------|------------------------|----------|
| Pat_16 | Post-Resistance | ZC3H13    | 23091  | 37 | 13 | 46541662  | 46541662  | Missense_Mutation | SNP | G  | A  | 101 | 173 | c.4298C>T     | c.(4297-4299)TCC>TTC   | p.S1433F |
| Pat_16 | Post-Resistance | LOC220429 | 220429 | 37 | 13 | 50466930  | 50466930  | Missense_Mutation | SNP | C  | T  | 35  | 82  | c.2204C>T     | c.(2203-2205)CCA>CTA   | p.P735L  |
| Pat_16 | Post-Resistance | WDFY2     | 115825 | 37 | 13 | 52293396  | 52293396  | Missense_Mutation | SNP | G  | A  | 4   | 319 | c.397G>A      | c.(397-399)GGA>AGA     | p.G133R  |
| Pat_16 | Post-Resistance | KLHL1     | 57626  | 37 | 13 | 70413125  | 70413125  | Missense_Mutation | SNP | C  | T  | 33  | 58  | c.1397G>A     | c.(1396-1398)GGA>GAA   | p.G466E  |
| Pat_16 | Post-Resistance | DACH1     | 1602   | 37 | 13 | 72063230  | 72063230  | Missense_Mutation | SNP | A  | G  | 133 | 575 | c.1621T>C     | c.(1621-1623)TCT>CCT   | p.S541P  |
| Pat_16 | Post-Resistance | RNF219    | 79596  | 37 | 13 | 79191193  | 79191193  | Missense_Mutation | SNP | G  | A  | 5   | 208 | c.703C>T      | c.(703-705)CGC>TGC     | p.R235C  |
| Pat_16 | Post-Resistance | HS6ST3    | 266722 | 37 | 13 | 96743633  | 96743633  | Nonsense_Mutation | SNP | C  | T  | 4   | 91  | c.517C>T      | c.(517-519)CAG>TAG     | p.Q173*  |
| Pat_16 | Post-Resistance | HS6ST3    | 266722 | 37 | 13 | 97484796  | 97484796  | Missense_Mutation | SNP | G  | A  | 4   | 168 | c.760G>A      | c.(760-762)GAG>AAG     | p.E254K  |
| Pat_16 | Post-Resistance | TPP2      | 7174   | 37 | 13 | 103288670 | 103288670 | Nonsense_Mutation | SNP | C  | T  | 5   | 209 | c.1606C>T     | c.(1606-1608)CGA>TGA   | p.R536*  |
| Pat_16 | Post-Resistance | EDDM3A    | 10876  | 37 | 14 | 21216124  | 21216124  | Missense_Mutation | SNP | G  | A  | 4   | 135 | c.385G>A      | c.(385-387)GTA>ATA     | p.V129I  |
| Pat_16 | Post-Resistance | SALL2     | 6297   | 37 | 14 | 21991923  | 21991923  | Missense_Mutation | SNP | G  | A  | 4   | 154 | c.1939C>T     | c.(1939-1941)CGC>TGC   | p.R647C  |
| Pat_16 | Post-Resistance | MYH7      | 4625   | 37 | 14 | 23894617  | 23894617  | Missense_Mutation | SNP | T  | G  | 63  | 94  | c.2297A>C     | c.(2296-2298)AAG>ACG   | p.K766T  |
| Pat_16 | Post-Resistance | TGM1      | 7051   | 37 | 14 | 24724283  | 24724283  | Missense_Mutation | SNP | G  | A  | 4   | 172 | c.1822C>T     | c.(1822-1824)CGC>TGC   | p.R608C  |
| Pat_16 | Post-Resistance | TGM1      | 7051   | 37 | 14 | 24724445  | 24724445  | Missense_Mutation | SNP | G  | A  | 4   | 191 | c.1660C>T     | c.(1660-1662)CGG>TGG   | p.R554W  |
| Pat_16 | Post-Resistance | FBXO33    | 254170 | 37 | 14 | 39868720  | 39868720  | Nonstop_Mutation  | SNP | C  | G  | 12  | 2   | c.1668G>C     | c.(1666-1668)TAG>TAC   | p.*556Y  |
| Pat_16 | Post-Resistance | PRPF39    | 55015  | 37 | 14 | 45571853  | 45571853  | Missense_Mutation | SNP | C  | T  | 145 | 200 | c.691C>T      | c.(691-693)CGT>TGT     | p.R231C  |
| Pat_16 | Post-Resistance | SYNE2     | 23224  | 37 | 14 | 64683071  | 64683071  | Missense_Mutation | SNP | C  | T  | 6   | 242 | c.19439C>T    | c.(19438-19440)CCC>CTC | p.P6480L |
| Pat_16 | Post-Resistance | PLEKHG3   | 26030  | 37 | 14 | 65209027  | 65209027  | Missense_Mutation | SNP | G  | A  | 4   | 103 | c.2792G>A     | c.(2791-2793)CGC>CAC   | p.R931H  |
| Pat_16 | Post-Resistance | SLC8A3    | 6547   | 37 | 14 | 70635091  | 70635091  | Missense_Mutation | SNP | C  | T  | 72  | 21  | c.49G>A       | c.(49-51)GGG>AGG       | p.G17R   |
| Pat_16 | Post-Resistance | NUMB      | 8650   | 37 | 14 | 73753887  | 73753887  | Missense_Mutation | SNP | G  | A  | 5   | 380 | c.586C>T      | c.(586-588)CGT>TGT     | p.R196C  |
| Pat_16 | Post-Resistance | CATSPERB  | 79820  | 37 | 14 | 92088249  | 92088249  | Missense_Mutation | SNP | C  | T  | 10  | 2   | c.1963G>A     | c.(1963-1965)GAG>AAG   | p.E655K  |
| Pat_16 | Post-Resistance | SLC24A4   | 123041 | 37 | 14 | 92920299  | 92920299  | Missense_Mutation | SNP | G  | A  | 111 | 19  | c.885G>A      | c.(883-885)ATG>ATA     | p.M295I  |
| Pat_16 | Post-Resistance | HSP90AA1  | 3320   | 37 | 14 | 102605674 | 102605675 | Missense_Mutation | DNP | GG | AA | 15  | 4   | c.67_68CC>TT  | c.(67-69)CCC>TTC       | p.P23F   |
| Pat_16 | Post-Resistance | PPP1R13B  | 23368  | 37 | 14 | 104205122 | 104205122 | Missense_Mutation | SNP | C  | T  | 5   | 318 | c.2758G>A     | c.(2758-2760)GAA>AAA   | p.E920K  |
| Pat_16 | Post-Resistance | MTA1      | 9112   | 37 | 14 | 105930777 | 105930777 | Missense_Mutation | SNP | C  | T  | 86  | 138 | c.1217C>T     | c.(1216-1218)TCT>TTT   | p.S406F  |
| Pat_16 | Post-Resistance | ADAM6     | 8755   | 37 | 14 | 107087201 | 107087201 | Splice_Site       | SNP | G  | A  | 7   | 22  | c.5152_splice | c.e111+1               |          |
| Pat_16 | Post-Resistance | OCA2      | 4948   | 37 | 15 | 28235790  | 28235790  | Missense_Mutation | SNP | C  | T  | 6   | 381 | c.1048G>A     | c.(1048-1050)GTG>ATG   | p.V350M  |
| Pat_16 | Post-Resistance | APBA2     | 321    | 37 | 15 | 29398813  | 29398813  | Nonsense_Mutation | SNP | C  | T  | 4   | 95  | c.1708C>T     | c.(1708-1710)CAG>TAG   | p.Q570*  |
| Pat_16 | Post-Resistance | CDAN1     | 146059 | 37 | 15 | 43024557  | 43024557  | Missense_Mutation | SNP | G  | A  | 4   | 218 | c.1507C>T     | c.(1507-1509)CGG>TGG   | p.R503W  |
| Pat_16 | Post-Resistance | MFAP1     | 4236   | 37 | 15 | 44105192  | 44105192  | Nonsense_Mutation | SNP | G  | A  | 194 | 478 | c.880C>T      | c.(880-882)CGA>TGA     | p.R294*  |
| Pat_16 | Post-Resistance | WDR76     | 79968  | 37 | 15 | 44127266  | 44127266  | Missense_Mutation | SNP | C  | T  | 25  | 73  | c.470C>T      | c.(469-471)TCG>TTG     | p.S157L  |
| Pat_16 | Post-Resistance | HDC       | 3067   | 37 | 15 | 50540510  | 50540510  | Missense_Mutation | SNP | G  | A  | 48  | 176 | c.1072C>T     | c.(1072-1074)CGC>TGC   | p.R358C  |
| Pat_16 | Post-Resistance | TRPM7     | 54822  | 37 | 15 | 50885856  | 50885856  | Missense_Mutation | SNP | A  | G  | 18  | 66  | c.3566T>C     | c.(3565-3567)TTT>TCT   | p.F1189S |
| Pat_16 | Post-Resistance | MYO5C     | 55930  | 37 | 15 | 52553323  | 52553323  | Missense_Mutation | SNP | T  | A  | 28  | 71  | c.1049A>T     | c.(1048-1050)GAG>GTG   | p.E350V  |
| Pat_16 | Post-Resistance | CGNL1     | 84952  | 37 | 15 | 57730859  | 57730859  | Missense_Mutation | SNP | C  | T  | 107 | 288 | c.662C>T      | c.(661-663)TCC>TTC     | p.S221F  |
| Pat_16 | Post-Resistance | BNIP2     | 663    | 37 | 15 | 59963387  | 59963387  | Missense_Mutation | SNP | A  | C  | 5   | 15  | c.1065T>G     | c.(1063-1065)GAT>GAG   | p.D355E  |
| Pat_16 | Post-Resistance | NARG2     | 79664  | 37 | 15 | 60760375  | 60760375  | Missense_Mutation | SNP | G  | A  | 16  | 57  | c.293C>T      | c.(292-294)TCT>TTT     | p.S98F   |
| Pat_16 | Post-Resistance | SNX22     | 79856  | 37 | 15 | 64446651  | 64446651  | Missense_Mutation | SNP | G  | A  | 123 | 385 | c.526G>A      | c.(526-528)GAT>AAT     | p.D176N  |
| Pat_16 | Post-Resistance | CILP      | 8483   | 37 | 15 | 65502086  | 65502086  | Missense_Mutation | SNP | C  | T  | 19  | 86  | c.8G>A        | c.(7-9)GGG>GAG         | p.G3E    |
| Pat_16 | Post-Resistance | HCN4      | 10021  | 37 | 15 | 73635803  | 73635803  | Missense_Mutation | SNP | G  | A  | 4   | 188 | c.1132C>T     | c.(1132-1134)CGC>TGC   | p.R378C  |
| Pat_16 | Post-Resistance | LOXL1     | 4016   | 37 | 15 | 74235231  | 74235231  | Missense_Mutation | SNP | A  | G  | 210 | 519 | c.1139A>G     | c.(1138-1140)CAA>CGA   | p.Q380R  |
| Pat_16 | Post-Resistance | ISLR      | 3671   | 37 | 15 | 74467929  | 74467929  | Missense_Mutation | SNP | G  | A  | 45  | 86  | c.730G>A      | c.(730-732)GGT>AGT     | p.G244S  |
| Pat_16 | Post-Resistance | CDC33     | 80125  | 37 | 15 | 74536345  | 74536345  | Missense_Mutation | SNP | A  | C  | 92  | 86  | c.41A>C       | c.(40-42)GAG>GCG       | p.E14A   |
| Pat_16 | Post-Resistance | CDC33     | 80125  | 37 | 15 | 74564051  | 74564051  | Missense_Mutation | SNP | T  | A  | 101 | 65  | c.554T>A      | c.(553-555)CTC>CAC     | p.L185H  |
| Pat_16 | Post-Resistance | ARID3B    | 10620  | 37 | 15 | 74836597  | 74836597  | Missense_Mutation | SNP | T  | C  | 23  | 120 | c.320T>C      | c.(319-321)GTT>GCT     | p.V107A  |
| Pat_16 | Post-Resistance | CIB2      | 10518  | 37 | 15 | 78401682  | 78401682  | Missense_Mutation | SNP | C  | T  | 70  | 64  | c.241G>A      | c.(241-243)GAT>AAT     | p.D81N   |
| Pat_16 | Post-Resistance | ZFAND6    | 54469  | 37 | 15 | 80414108  | 80414108  | Missense_Mutation | SNP | G  | A  | 6   | 208 | c.209G>A      | c.(208-210)AGT>AAT     | p.S70N   |

|        |                 |          |        |    |    |          |          |                   |     |    |    |     |     |                 |                         |              |
|--------|-----------------|----------|--------|----|----|----------|----------|-------------------|-----|----|----|-----|-----|-----------------|-------------------------|--------------|
| Pat_16 | Post-Resistance | AGBL1    | 123624 | 37 | 15 | 86807702 | 86807702 | Missense_Mutation | SNP | C  | T  | 18  | 28  | c.1162C>T       | c.(1162-1164)CCT>TCT    | p.P388S      |
| Pat_16 | Post-Resistance | RLBP1    | 6017   | 37 | 15 | 89755082 | 89755082 | Missense_Mutation | SNP | T  | A  | 29  | 81  | c.576A>T        | c.(574-576)GAA>GAT      | p.E192D      |
| Pat_16 | Post-Resistance | SYNM     | 23336  | 37 | 15 | 99670016 | 99670016 | Missense_Mutation | SNP | C  | T  | 4   | 122 | c.1451C>T       | c.(1450-1452)TCG>TTG    | p.S484L      |
| Pat_16 | Post-Resistance | SNRNP25  | 79622  | 37 | 16 | 105550   | 105550   | Splice_Site       | SNP | G  | A  | 5   | 431 | c.160_splice    | c.e2+1                  | p.P54_splice |
| Pat_16 | Post-Resistance | BAIAP3   | 8938   | 37 | 16 | 1397918  | 1397918  | Missense_Mutation | SNP | G  | T  | 4   | 309 | c.3154G>T       | c.(3154-3156)GTG>TTG    | p.V1052L     |
| Pat_16 | Post-Resistance | UNKL     | 64718  | 37 | 16 | 1453342  | 1453342  | Missense_Mutation | SNP | A  | C  | 14  | 39  | c.291T>G        | c.(289-291)TGT>TGG      | p.C97W       |
| Pat_16 | Post-Resistance | ZSCAN10  | 84891  | 37 | 16 | 3142284  | 3142284  | Missense_Mutation | SNP | G  | A  | 76  | 235 | c.265C>T        | c.(265-267)CGT>TGT      | p.R89C       |
| Pat_16 | Post-Resistance | 12-Sep   | 124404 | 37 | 16 | 4827818  | 4827818  | Missense_Mutation | SNP | C  | T  | 9   | 15  | c.1057G>A       | c.(1057-1059)GAT>AAT    | p.D353N      |
| Pat_16 | Post-Resistance | PPL      | 5493   | 37 | 16 | 4933884  | 4933884  | Missense_Mutation | SNP | G  | A  | 5   | 347 | c.4772C>T       | c.(4771-4773)ACG>ATG    | p.T1591M     |
| Pat_16 | Post-Resistance | CIITA    | 4261   | 37 | 16 | 10996552 | 10996553 | Missense_Mutation | DNP | CC | TT | 50  | 109 | c.666_667CC>TT  | c.(664-669)CTCCCT>CTTTT | p.P223S      |
| Pat_16 | Post-Resistance | MKL2     | 57496  | 37 | 16 | 14334250 | 14334250 | Missense_Mutation | SNP | C  | A  | 181 | 234 | c.988C>A        | c.(988-990)CTC>ATC      | p.L330I      |
| Pat_16 | Post-Resistance | ABCC1    | 4363   | 37 | 16 | 16230359 | 16230359 | Missense_Mutation | SNP | C  | T  | 74  | 69  | c.4150C>T       | c.(4150-4152)CTC>TTC    | p.L1384F     |
| Pat_16 | Post-Resistance | SYT17    | 51760  | 37 | 16 | 19191808 | 19191808 | Missense_Mutation | SNP | G  | A  | 4   | 315 | c.278G>A        | c.(277-279)CGC>CAC      | p.R93H       |
| Pat_16 | Post-Resistance | DNAH3    | 55567  | 37 | 16 | 21098244 | 21098244 | Missense_Mutation | SNP | C  | T  | 131 | 479 | c.2803G>A       | c.(2803-2805)GAT>AAT    | p.D935N      |
| Pat_16 | Post-Resistance | HS3ST4   | 9951   | 37 | 16 | 26147178 | 26147178 | Missense_Mutation | SNP | C  | T  | 280 | 377 | c.980C>T        | c.(979-981)TCC>TTC      | p.S327F      |
| Pat_16 | Post-Resistance | APOB48R  | 55911  | 37 | 16 | 28507353 | 28507353 | Missense_Mutation | SNP | G  | A  | 38  | 49  | c.991G>A        | c.(991-993)GCC>ACC      | p.A331T      |
| Pat_16 | Post-Resistance | TAOK2    | 9344   | 37 | 16 | 29999080 | 29999080 | Missense_Mutation | SNP | C  | T  | 4   | 166 | c.3487C>T       | c.(3487-3489)CGG>TGG    | p.R1163W     |
| Pat_16 | Post-Resistance | CD2BP2   | 10421  | 37 | 16 | 30365585 | 30365585 | Missense_Mutation | SNP | G  | A  | 145 | 671 | c.137C>T        | c.(136-138)TCT>TTT      | p.S46F       |
| Pat_16 | Post-Resistance | ZNF629   | 23361  | 37 | 16 | 30794825 | 30794825 | Missense_Mutation | SNP | G  | A  | 4   | 272 | c.824C>T        | c.(823-825)TCG>TTG      | p.S275L      |
| Pat_16 | Post-Resistance | TRIM72   | 493829 | 37 | 16 | 31230643 | 31230643 | Missense_Mutation | SNP | G  | A  | 65  | 261 | c.520G>A        | c.(520-522)GAG>AAG      | p.E174K      |
| Pat_16 | Post-Resistance | GPT2     | 84706  | 37 | 16 | 46943833 | 46943833 | Missense_Mutation | SNP | C  | T  | 4   | 233 | c.814C>T        | c.(814-816)CCC>TCC      | p.P272S      |
| Pat_16 | Post-Resistance | PHKB     | 5257   | 37 | 16 | 47675596 | 47675596 | Missense_Mutation | SNP | T  | C  | 4   | 153 | c.1601T>C       | c.(1600-1602)CTT>CCT    | p.L534P      |
| Pat_16 | Post-Resistance | SLC12A3  | 6559   | 37 | 16 | 56899385 | 56899385 | Missense_Mutation | SNP | C  | T  | 6   | 357 | c.238C>T        | c.(238-240)CGG>TGG      | p.R80W       |
| Pat_16 | Post-Resistance | CCL22    | 6367   | 37 | 16 | 57394369 | 57394369 | Missense_Mutation | SNP | G  | A  | 37  | 158 | c.94G>A         | c.(94-96)GAA>AAA        | p.E32K       |
| Pat_16 | Post-Resistance | KIFC3    | 3801   | 37 | 16 | 57805133 | 57805133 | Missense_Mutation | SNP | G  | A  | 4   | 264 | c.742C>T        | c.(742-744)CGG>TGG      | p.R248W      |
| Pat_16 | Post-Resistance | MMP15    | 4324   | 37 | 16 | 58079166 | 58079166 | Missense_Mutation | SNP | G  | A  | 12  | 67  | c.1826G>A       | c.(1825-1827)GGG>GAG    | p.G609E      |
| Pat_16 | Post-Resistance | E2F4     | 1874   | 37 | 16 | 67228796 | 67228796 | Missense_Mutation | SNP | C  | T  | 5   | 282 | c.721C>T        | c.(721-723)CGT>TGT      | p.R241C      |
| Pat_16 | Post-Resistance | ACD      | 65057  | 37 | 16 | 67694194 | 67694194 | Missense_Mutation | SNP | G  | A  | 15  | 15  | c.188C>T        | c.(187-189)CCG>CTG      | p.P63L       |
| Pat_16 | Post-Resistance | LCAT     | 3931   | 37 | 16 | 67974220 | 67974220 | Missense_Mutation | SNP | G  | A  | 4   | 206 | c.910C>T        | c.(910-912)CGC>TGC      | p.R304C      |
| Pat_16 | Post-Resistance | HYDIN    | 54768  | 37 | 16 | 70913367 | 70913367 | Missense_Mutation | SNP | G  | A  | 80  | 95  | c.10387C>T      | c.(10387-10389)CTC>TTC  | p.L3463F     |
| Pat_16 | Post-Resistance | RFWD3    | 55159  | 37 | 16 | 74685992 | 74685992 | Nonsense_Mutation | SNP | G  | A  | 70  | 92  | c.547C>T        | c.(547-549)CAG>TAG      | p.Q183*      |
| Pat_16 | Post-Resistance | CNTNAP4  | 85445  | 37 | 16 | 76461470 | 76461470 | Missense_Mutation | SNP | G  | A  | 45  | 54  | c.512G>A        | c.(511-513)CGA>CAA      | p.R171Q      |
| Pat_16 | Post-Resistance | CNTNAP4  | 85445  | 37 | 16 | 76495952 | 76495952 | Missense_Mutation | SNP | C  | T  | 21  | 78  | c.1433C>T       | c.(1432-1434)CCT>CTT    | p.P478L      |
| Pat_16 | Post-Resistance | MBTPS1   | 8720   | 37 | 16 | 84135312 | 84135312 | Missense_Mutation | SNP | T  | C  | 188 | 173 | c.77A>G         | c.(76-78)GAA>GGA        | p.E26G       |
| Pat_16 | Post-Resistance | PAFAH1B1 | 5048   | 37 | 17 | 2577469  | 2577469  | Missense_Mutation | SNP | G  | A  | 6   | 195 | c.787G>A        | c.(787-789)GTA>ATA      | p.V263I      |
| Pat_16 | Post-Resistance | CTNS     | 1497   | 37 | 17 | 3561299  | 3561299  | Missense_Mutation | SNP | C  | T  | 5   | 300 | c.682C>T        | c.(682-684)CGC>TGC      | p.R228C      |
| Pat_16 | Post-Resistance | P2RX1    | 5023   | 37 | 17 | 3806890  | 3806890  | Missense_Mutation | SNP | A  | C  | 47  | 133 | c.560T>G        | c.(559-561)CTT>CGT      | p.L187R      |
| Pat_16 | Post-Resistance | VMO1     | 284013 | 37 | 17 | 4688833  | 4688833  | Missense_Mutation | SNP | G  | A  | 33  | 103 | c.433C>T        | c.(433-435)CGC>TGC      | p.R145C      |
| Pat_16 | Post-Resistance | DHX33    | 56919  | 37 | 17 | 5359375  | 5359375  | Missense_Mutation | SNP | G  | A  | 42  | 111 | c.977C>T        | c.(976-978)CCT>CTT      | p.P326L      |
| Pat_16 | Post-Resistance | POLR2A   | 5430   | 37 | 17 | 7399591  | 7399591  | Missense_Mutation | SNP | G  | A  | 4   | 198 | c.289G>A        | c.(289-291)GTG>ATG      | p.V97M       |
| Pat_16 | Post-Resistance | DNAH2    | 146754 | 37 | 17 | 7681635  | 7681635  | Nonsense_Mutation | SNP | C  | T  | 5   | 245 | c.5389C>T       | c.(5389-5391)CGA>TGA    | p.R1797*     |
| Pat_16 | Post-Resistance | MYH13    | 8735   | 37 | 17 | 10206529 | 10206529 | Missense_Mutation | SNP | C  | T  | 315 | 272 | c.5651G>A       | c.(5650-5652)AGG>AAG    | p.R1884K     |
| Pat_16 | Post-Resistance | DNAH9    | 1770   | 37 | 17 | 11622751 | 11622751 | Missense_Mutation | SNP | C  | T  | 86  | 97  | c.5653C>T       | c.(5653-5655)CGC>TGC    | p.R1885C     |
| Pat_16 | Post-Resistance | TRIM16   | 10626  | 37 | 17 | 15532015 | 15532015 | Missense_Mutation | SNP | A  | G  | 14  | 30  | c.1609T>C       | c.(1609-1611)TCC>CCC    | p.S537P      |
| Pat_16 | Post-Resistance | SMCR8    | 140775 | 37 | 17 | 18220451 | 18220451 | Missense_Mutation | SNP | G  | A  | 4   | 293 | c.1348G>A       | c.(1348-1350)GAC>AAC    | p.D450N      |
| Pat_16 | Post-Resistance | PRPSAP2  | 5636   | 37 | 17 | 18814494 | 18814494 | Missense_Mutation | SNP | G  | T  | 4   | 268 | c.663G>T        | c.(661-663)TTG>TTT      | p.L221F      |
| Pat_16 | Post-Resistance | SLC47A1  | 55244  | 37 | 17 | 19470150 | 19470151 | Missense_Mutation | DNP | CC | TT | 33  | 106 | .:1154_1155CC>T | c.(1153-1155)TCC>TTT    | p.S385F      |



|        |                 |           |        |    |    |          |          |                   |     |    |    |     |     |                |                      |               |
|--------|-----------------|-----------|--------|----|----|----------|----------|-------------------|-----|----|----|-----|-----|----------------|----------------------|---------------|
| Pat_16 | Post-Resistance | CYTSB     | 92521  | 37 | 17 | 20108441 | 20108441 | Missense_Mutation | SNP | G  | A  | 5   | 329 | c.1079G>A      | c.(1078-1080)AGT>AAT | p.S360N       |
| Pat_16 | Post-Resistance | KCNJ12    | 3768   | 37 | 17 | 21319253 | 21319253 | Missense_Mutation | SNP | C  | T  | 39  | 108 | c.599C>T       | c.(598-600)GCC>GTC   | p.A200V       |
| Pat_16 | Post-Resistance | UNC119    | 9094   | 37 | 17 | 26874779 | 26874779 | Missense_Mutation | SNP | C  | T  | 5   | 306 | c.526G>A       | c.(526-528)GAC>AAC   | p.D176N       |
| Pat_16 | Post-Resistance | ALDOC     | 230    | 37 | 17 | 26902152 | 26902152 | Missense_Mutation | SNP | C  | T  | 4   | 126 | c.313G>A       | c.(313-315)GTG>ATG   | p.V105M       |
| Pat_16 | Post-Resistance | SPAG5     | 10615  | 37 | 17 | 26905522 | 26905522 | Missense_Mutation | SNP | G  | A  | 31  | 146 | c.3223C>T      | c.(3223-3225)CTT>TTT | p.L1075F      |
| Pat_16 | Post-Resistance | SEZ6      | 124925 | 37 | 17 | 27309030 | 27309030 | Missense_Mutation | SNP | C  | T  | 12  | 16  | c.83G>A        | c.(82-84)GGG>GAG     | p.G28E        |
| Pat_16 | Post-Resistance | NF1       | 4763   | 37 | 17 | 29684086 | 29684086 | Missense_Mutation | SNP | A  | G  | 4   | 216 | c.7847A>G      | c.(7846-7848)CAG>CGG | p.Q2616R      |
| Pat_16 | Post-Resistance | UTP6      | 55813  | 37 | 17 | 30211497 | 30211497 | Missense_Mutation | SNP | G  | A  | 24  | 85  | c.731C>T       | c.(730-732)TCG>TTG   | p.S244L       |
| Pat_16 | Post-Resistance | MMP28     | 79148  | 37 | 17 | 34093655 | 34093655 | Missense_Mutation | SNP | G  | A  | 13  | 41  | c.1427C>T      | c.(1426-1428)TCC>TTC | p.S476F       |
| Pat_16 | Post-Resistance | CASC3     | 22794  | 37 | 17 | 38320021 | 38320021 | Missense_Mutation | SNP | C  | T  | 92  | 211 | c.1073C>T      | c.(1072-1074)TCT>TTT | p.S358F       |
| Pat_16 | Post-Resistance | KRTAP9-2  | 83899  | 37 | 17 | 39383134 | 39383135 | Nonsense_Mutation | DNP | CC | TT | 111 | 269 | c.228_229CC>TT | 226-231)TGCCAG>TGTT/ | p.Q77*        |
| Pat_16 | Post-Resistance | KRT31     | 3881   | 37 | 17 | 39552779 | 39552779 | Missense_Mutation | SNP | C  | T  | 4   | 307 | c.481G>A       | c.(481-483)GGT>AGT   | p.G161S       |
| Pat_16 | Post-Resistance | KRT38     | 8687   | 37 | 17 | 39594372 | 39594372 | Missense_Mutation | SNP | C  | T  | 4   | 288 | c.1214G>A      | c.(1213-1215)CGG>CAG | p.R405Q       |
| Pat_16 | Post-Resistance | KRT32     | 3882   | 37 | 17 | 39623524 | 39623524 | Missense_Mutation | SNP | G  | C  | 24  | 70  | c.54C>G        | c.(52-54)TGC>TGG     | p.C18W        |
| Pat_16 | Post-Resistance | LOC90586  | 90586  | 37 | 17 | 41019611 | 41019611 | Missense_Mutation | SNP | G  | A  | 24  | 13  | c.316G>A       | c.(316-318)GCT>ACT   | p.A106T       |
| Pat_16 | Post-Resistance | DHX8      | 1659   | 37 | 17 | 41567763 | 41567763 | Missense_Mutation | SNP | C  | T  | 57  | 49  | c.239C>T       | c.(238-240)TCT>TTT   | p.S80F        |
| Pat_16 | Post-Resistance | MYCBPAP   | 84073  | 37 | 17 | 48595953 | 48595953 | Missense_Mutation | SNP | G  | A  | 86  | 262 | c.649G>A       | c.(649-651)GAA>AAA   | p.E217K       |
| Pat_16 | Post-Resistance | NME1-NME2 | 654364 | 37 | 17 | 49247332 | 49247332 | Missense_Mutation | SNP | G  | A  | 5   | 276 | c.683G>A       | c.(682-684)CGA>CAA   | p.R228Q       |
| Pat_16 | Post-Resistance | ANKFN1    | 162282 | 37 | 17 | 54450018 | 54450018 | Missense_Mutation | SNP | G  | A  | 53  | 158 | c.622G>A       | c.(622-624)GAA>AAA   | p.E208K       |
| Pat_16 | Post-Resistance | EPX       | 8288   | 37 | 17 | 56277065 | 56277065 | Missense_Mutation | SNP | C  | T  | 4   | 220 | c.1447C>T      | c.(1447-1449)CGC>TGC | p.R483C       |
| Pat_16 | Post-Resistance | TRIM37    | 4591   | 37 | 17 | 57119173 | 57119173 | Splice_Site       | SNP | C  | T  | 4   | 90  | c.1753_splice  | c.e17+1              | p.G585_splice |
| Pat_16 | Post-Resistance | BCAS3     | 54828  | 37 | 17 | 58824632 | 58824632 | Missense_Mutation | SNP | C  | T  | 120 | 294 | c.395C>T       | c.(394-396)CCA>CTA   | p.P132L       |
| Pat_16 | Post-Resistance | TBC1D3P2  | 440452 | 37 | 17 | 60345595 | 60345595 | Missense_Mutation | SNP | G  | A  | 78  | 172 | c.673C>T       | c.(673-675)CAC>TAC   | p.H225Y       |
| Pat_16 | Post-Resistance | SCN4A     | 6329   | 37 | 17 | 62018424 | 62018424 | Missense_Mutation | SNP | G  | A  | 4   | 172 | c.5218C>T      | c.(5218-5220)CGG>TGG | p.R1740W      |
| Pat_16 | Post-Resistance | ABCA8     | 10351  | 37 | 17 | 66915450 | 66915450 | Missense_Mutation | SNP | C  | T  | 34  | 91  | c.1780G>A      | c.(1780-1782)GAT>AAT | p.D594N       |
| Pat_16 | Post-Resistance | ABCA10    | 10349  | 37 | 17 | 67151960 | 67151960 | Missense_Mutation | SNP | G  | A  | 235 | 148 | c.3562C>T      | c.(3562-3564)CCA>TCA | p.P1188S      |
| Pat_16 | Post-Resistance | KCNJ16    | 3773   | 37 | 17 | 68128331 | 68128331 | Nonsense_Mutation | SNP | C  | T  | 4   | 238 | c.103C>T       | c.(103-105)CGA>TGA   | p.R35*        |
| Pat_16 | Post-Resistance | RAB37     | 326624 | 37 | 17 | 72736931 | 72736931 | Missense_Mutation | SNP | G  | A  | 5   | 627 | c.118G>A       | c.(118-120)GTC>ATC   | p.V40I        |
| Pat_16 | Post-Resistance | USH1G     | 124590 | 37 | 17 | 72916120 | 72916120 | Missense_Mutation | SNP | G  | A  | 33  | 43  | c.811C>T       | c.(811-813)CCG>TCG   | p.P271S       |
| Pat_16 | Post-Resistance | PRPSAP1   | 5635   | 37 | 17 | 74324800 | 74324801 | Missense_Mutation | DNP | GG | AA | 12  | 44  | c.778_779CC>TT | c.(778-780)CCA>TTA   | p.P260L       |
| Pat_16 | Post-Resistance | ENPP7     | 339221 | 37 | 17 | 77709346 | 77709346 | Missense_Mutation | SNP | G  | A  | 14  | 53  | c.904G>A       | c.(904-906)GAC>AAC   | p.D302N       |
| Pat_16 | Post-Resistance | RNF213    | 57674  | 37 | 17 | 78320995 | 78320995 | Missense_Mutation | SNP | C  | T  | 11  | 19  | c.3079C>T      | c.(3079-3081)CGT>TGT | p.R1027C      |
| Pat_16 | Post-Resistance | RPTOR     | 57521  | 37 | 17 | 78811731 | 78811731 | Nonsense_Mutation | SNP | G  | A  | 17  | 58  | c.1146G>A      | c.(1144-1146)TGG>TGA | p.W382*       |
| Pat_16 | Post-Resistance | GPS1      | 2873   | 37 | 17 | 80014551 | 80014551 | Missense_Mutation | SNP | C  | T  | 3   | 37  | c.1175C>T      | c.(1174-1176)GCC>GTC | p.A392V       |
| Pat_16 | Post-Resistance | USP14     | 9097   | 37 | 18 | 192846   | 192846   | Missense_Mutation | SNP | G  | T  | 5   | 189 | c.409G>T       | c.(409-411)GCA>TCA   | p.A137S       |
| Pat_16 | Post-Resistance | EPB41L3   | 23136  | 37 | 18 | 5416253  | 5416253  | Missense_Mutation | SNP | G  | A  | 4   | 162 | c.1631C>T      | c.(1630-1632)CCG>CTG | p.P544L       |
| Pat_16 | Post-Resistance | L3MBTL4   | 91133  | 37 | 18 | 6215757  | 6215757  | Missense_Mutation | SNP | A  | T  | 26  | 44  | c.862T>A       | c.(862-864)TTT>ATT   | p.F288I       |
| Pat_16 | Post-Resistance | ARHGAP28  | 79822  | 37 | 18 | 6894891  | 6894891  | Splice_Site       | SNP | G  | A  | 77  | 62  | c.1374_splice  | c.e14+1              | p.M458_splice |
| Pat_16 | Post-Resistance | LAMA1     | 284217 | 37 | 18 | 6950909  | 6950909  | Missense_Mutation | SNP | G  | A  | 23  | 42  | c.8269C>T      | c.(8269-8271)CAT>TAT | p.H2757Y      |
| Pat_16 | Post-Resistance | PTPRM     | 5797   | 37 | 18 | 7888152  | 7888152  | Missense_Mutation | SNP | C  | T  | 68  | 139 | c.245C>T       | c.(244-246)GCC>GTC   | p.A82V        |
| Pat_16 | Post-Resistance | NDUFV2    | 4729   | 37 | 18 | 9122540  | 9122540  | Missense_Mutation | SNP | G  | A  | 12  | 227 | c.330G>A       | c.(328-330)ATG>ATA   | p.M110I       |
| Pat_16 | Post-Resistance | DSC3      | 1825   | 37 | 18 | 28598156 | 28598156 | Missense_Mutation | SNP | C  | T  | 31  | 39  | c.1144G>A      | c.(1144-1146)GAT>AAT | p.D382N       |
| Pat_16 | Post-Resistance | DSC2      | 1824   | 37 | 18 | 28662971 | 28662971 | Missense_Mutation | SNP | A  | T  | 37  | 29  | c.998T>A       | c.(997-999)TTT>TAT   | p.F333Y       |
| Pat_16 | Post-Resistance | DSG1      | 1828   | 37 | 18 | 28914025 | 28914025 | Missense_Mutation | SNP | G  | A  | 46  | 175 | c.865G>A       | c.(865-867)GAG>AAG   | p.E289K       |
| Pat_16 | Post-Resistance | DSG4      | 147409 | 37 | 18 | 28986205 | 28986205 | Missense_Mutation | SNP | C  | T  | 116 | 84  | c.1802C>T      | c.(1801-1803)GCG>GTG | p.A601V       |
| Pat_16 | Post-Resistance | DSG2      | 1829   | 37 | 18 | 29122574 | 29122574 | Missense_Mutation | SNP | G  | C  | 31  | 71  | c.2093G>C      | c.(2092-2094)GGA>GCA | p.G698A       |
| Pat_16 | Post-Resistance | ASXL3     | 80816  | 37 | 18 | 31318749 | 31318749 | Missense_Mutation | SNP | A  | G  | 34  | 103 | c.1381A>G      | c.(1381-1383)AGT>GGT | p.S461G       |

|        |                 |             |        |    |    |          |          |                   |     |    |    |     |     |                |                        |               |
|--------|-----------------|-------------|--------|----|----|----------|----------|-------------------|-----|----|----|-----|-----|----------------|------------------------|---------------|
| Pat_16 | Post-Resistance | ASXL3       | 80816  | 37 | 18 | 31319227 | 31319227 | Missense_Mutation | SNP | G  | A  | 9   | 27  | c.1859G>A      | c.(1858-1860)GGA>GAA   | p.G620E       |
| Pat_16 | Post-Resistance | TCEB3C      | 162699 | 37 | 18 | 44555339 | 44555339 | Missense_Mutation | SNP | G  | A  | 6   | 455 | c.875C>T       | c.(874-876)ACC>ATC     | p.T292I       |
| Pat_16 | Post-Resistance | MYO5B       | 4645   | 37 | 18 | 47398601 | 47398601 | Missense_Mutation | SNP | G  | A  | 181 | 472 | c.3539C>T      | c.(3538-3540)GCG>GTG   | p.A1180V      |
| Pat_16 | Post-Resistance | DCC         | 1630   | 37 | 18 | 50832050 | 50832050 | Missense_Mutation | SNP | G  | A  | 31  | 157 | c.2014G>A      | c.(2014-2016)GAA>AAA   | p.E672K       |
| Pat_16 | Post-Resistance | FECH        | 2235   | 37 | 18 | 55222097 | 55222097 | Nonsense_Mutation | SNP | G  | A  | 69  | 150 | c.892C>T       | c.(892-894)CGA>TGA     | p.R298*       |
| Pat_16 | Post-Resistance | DOK6        | 220164 | 37 | 18 | 67425073 | 67425073 | Missense_Mutation | SNP | C  | T  | 63  | 144 | c.820C>T       | c.(820-822)CGT>TGT     | p.R274C       |
| Pat_16 | Post-Resistance | RTTN        | 25914  | 37 | 18 | 67843991 | 67843991 | Missense_Mutation | SNP | G  | A  | 6   | 408 | c.1396C>T      | c.(1396-1398)CTT>TTT   | p.L466F       |
| Pat_16 | Post-Resistance | CDC34       | 997    | 37 | 19 | 536298   | 536298   | Missense_Mutation | SNP | G  | A  | 4   | 90  | c.320G>A       | c.(319-321)GGG>GAG     | p.G107E       |
| Pat_16 | Post-Resistance | ABCA7       | 10347  | 37 | 19 | 1046386  | 1046386  | Missense_Mutation | SNP | C  | T  | 148 | 573 | c.1603C>T      | c.(1603-1605)CCG>TCG   | p.P535S       |
| Pat_16 | Post-Resistance | DOT1L       | 84444  | 37 | 19 | 2226980  | 2226980  | Missense_Mutation | SNP | C  | T  | 25  | 91  | c.4460C>T      | c.(4459-4461)TCC>TTC   | p.S1487F      |
| Pat_16 | Post-Resistance | ZNF555      | 148254 | 37 | 19 | 2853202  | 2853202  | Missense_Mutation | SNP | C  | T  | 8   | 144 | c.1139C>T      | c.(1138-1140)CCC>CTC   | p.P380L       |
| Pat_16 | Post-Resistance | TLE2        | 7089   | 37 | 19 | 3005967  | 3005967  | Splice_Site       | SNP | C  | T  | 31  | 82  | c.1501_splice  | c.e16-1                | p.N501_splice |
| Pat_16 | Post-Resistance | PLIN4       | 729359 | 37 | 19 | 4511993  | 4511993  | Missense_Mutation | SNP | G  | A  | 143 | 183 | c.1937C>T      | c.(1936-1938)GCG>GTG   | p.A646V       |
| Pat_16 | Post-Resistance | EMR1        | 2015   | 37 | 19 | 6921798  | 6921798  | Missense_Mutation | SNP | T  | A  | 731 | 103 | c.1695T>A      | c.(1693-1695)TTT>TTA   | p.F565L       |
| Pat_16 | Post-Resistance | MUC16       | 94025  | 37 | 19 | 9009311  | 9009312  | Missense_Mutation | DNP | GG | AA | 66  | 341 | 39161_39162CC> | c.(39160-39162)TCC>TTT | p.S13054F     |
| Pat_16 | Post-Resistance | MUC16       | 94025  | 37 | 19 | 9059650  | 9059650  | Missense_Mutation | SNP | G  | A  | 107 | 140 | c.27796C>T     | c.(27796-27798)CTC>TTC | p.L9266F      |
| Pat_16 | Post-Resistance | MUC16       | 94025  | 37 | 19 | 9068622  | 9068622  | Missense_Mutation | SNP | G  | A  | 90  | 99  | c.18824C>T     | c.(18823-18825)TCA>TTA | p.S6275L      |
| Pat_16 | Post-Resistance | MUC16       | 94025  | 37 | 19 | 9072288  | 9072288  | Missense_Mutation | SNP | G  | A  | 36  | 51  | c.15158C>T     | c.(15157-15159)TCC>TTC | p.S5053F      |
| Pat_16 | Post-Resistance | ZNF560      | 147741 | 37 | 19 | 9578016  | 9578016  | Missense_Mutation | SNP | C  | T  | 41  | 124 | c.1607G>A      | c.(1606-1608)CGA>CAA   | p.R536Q       |
| Pat_16 | Post-Resistance | ZNF561      | 93134  | 37 | 19 | 9721330  | 9721330  | Missense_Mutation | SNP | G  | A  | 138 | 229 | c.1007C>T      | c.(1006-1008)CCC>CTC   | p.P336L       |
| Pat_16 | Post-Resistance | COL5A3      | 50509  | 37 | 19 | 10097252 | 10097252 | Missense_Mutation | SNP | C  | T  | 73  | 253 | c.2221G>A      | c.(2221-2223)GAT>AAT   | p.D741N       |
| Pat_16 | Post-Resistance | PPAN-P2RY11 | 692312 | 37 | 19 | 10217217 | 10217217 | Missense_Mutation | SNP | G  | A  | 3   | 5   | c.59G>A        | c.(58-60)CGC>CAC       | p.R20H        |
| Pat_16 | Post-Resistance | CDC37       | 11140  | 37 | 19 | 10514068 | 10514068 | Missense_Mutation | SNP | G  | A  | 24  | 60  | c.88C>T        | c.(88-90)CGC>TGC       | p.R30C        |
| Pat_16 | Post-Resistance | ZNF440      | 126070 | 37 | 19 | 11942554 | 11942554 | Missense_Mutation | SNP | G  | A  | 85  | 414 | c.563G>A       | c.(562-564)CGA>CAA     | p.R188Q       |
| Pat_16 | Post-Resistance | ZNF844      | 284391 | 37 | 19 | 12187443 | 12187443 | Missense_Mutation | SNP | C  | G  | 5   | 451 | c.1508C>G      | c.(1507-1509)CCT>CGT   | p.P503R       |
| Pat_16 | Post-Resistance | GCDH        | 2639   | 37 | 19 | 13007772 | 13007772 | Missense_Mutation | SNP | G  | A  | 6   | 306 | c.901G>A       | c.(901-903)GTG>ATG     | p.V301M       |
| Pat_16 | Post-Resistance | ZSWIM4      | 65249  | 37 | 19 | 13939480 | 13939480 | Missense_Mutation | SNP | G  | A  | 5   | 642 | c.2050G>A      | c.(2050-2052)GTA>ATA   | p.V684I       |
| Pat_16 | Post-Resistance | MED26       | 9441   | 37 | 19 | 16687703 | 16687703 | Missense_Mutation | SNP | G  | A  | 4   | 53  | c.938C>T       | c.(937-939)CCG>CTG     | p.P313L       |
| Pat_16 | Post-Resistance | ANKLE1      | 126549 | 37 | 19 | 17394769 | 17394769 | Missense_Mutation | SNP | C  | T  | 202 | 177 | c.1196C>T      | c.(1195-1197)CCT>CTT   | p.P399L       |
| Pat_16 | Post-Resistance | UNC13A      | 23025  | 37 | 19 | 17766699 | 17766699 | Missense_Mutation | SNP | C  | T  | 15  | 35  | c.1540G>A      | c.(1540-1542)GAG>AAG   | p.E514K       |
| Pat_16 | Post-Resistance | ARRDC2      | 27106  | 37 | 19 | 18121461 | 18121461 | Missense_Mutation | SNP | C  | T  | 66  | 102 | c.1093C>T      | c.(1093-1095)CCC>TCC   | p.P365S       |
| Pat_16 | Post-Resistance | SFRS14      | 10147  | 37 | 19 | 19115375 | 19115375 | Missense_Mutation | SNP | G  | A  | 5   | 502 | c.2531C>T      | c.(2530-2532)ACG>ATG   | p.T844M       |
| Pat_16 | Post-Resistance | SF4         | 57794  | 37 | 19 | 19407930 | 19407930 | Missense_Mutation | SNP | C  | T  | 5   | 96  | c.1111G>A      | c.(1111-1113)GGG>AGG   | p.G371R       |
| Pat_16 | Post-Resistance | ZNF253      | 56242  | 37 | 19 | 20002799 | 20002799 | Missense_Mutation | SNP | A  | T  | 12  | 512 | c.743A>T       | c.(742-744)AAA>ATA     | p.K248I       |
| Pat_16 | Post-Resistance | ZNF253      | 56242  | 37 | 19 | 20002801 | 20002801 | Missense_Mutation | SNP | A  | G  | 10  | 528 | c.745A>G       | c.(745-747)ATT>GTT     | p.I249V       |
| Pat_16 | Post-Resistance | ZNF93       | 81931  | 37 | 19 | 20044699 | 20044699 | Missense_Mutation | SNP | C  | T  | 18  | 136 | c.935C>T       | c.(934-936)CCC>CTC     | p.P312L       |
| Pat_16 | Post-Resistance | ZNF626      | 199777 | 37 | 19 | 20808006 | 20808006 | Missense_Mutation | SNP | T  | C  | 10  | 352 | c.677A>G       | c.(676-678)GAG>GGG     | p.E226G       |
| Pat_16 | Post-Resistance | ZNF85       | 7639   | 37 | 19 | 21132918 | 21132918 | Missense_Mutation | SNP | C  | T  | 6   | 292 | c.1598C>T      | c.(1597-1599)ACT>ATT   | p.T533I       |
| Pat_16 | Post-Resistance | ZNF208      | 7757   | 37 | 19 | 22155896 | 22155896 | Missense_Mutation | SNP | A  | C  | 9   | 362 | c.1640T>G      | c.(1639-1641)ATT>AGT   | p.I547S       |
| Pat_16 | Post-Resistance | ZNF208      | 7757   | 37 | 19 | 22157069 | 22157069 | Missense_Mutation | SNP | G  | A  | 63  | 96  | c.767C>T       | c.(766-768)TCC>TTC     | p.S256F       |
| Pat_16 | Post-Resistance | ZNF91       | 7644   | 37 | 19 | 23544808 | 23544808 | Missense_Mutation | SNP | C  | T  | 7   | 506 | c.973G>A       | c.(973-975)GAA>AAA     | p.E325K       |
| Pat_16 | Post-Resistance | ZNF681      | 148213 | 37 | 19 | 23927358 | 23927358 | Missense_Mutation | SNP | G  | A  | 148 | 352 | c.994C>T       | c.(994-996)CAT>TAT     | p.H332Y       |
| Pat_16 | Post-Resistance | ZNF681      | 148213 | 37 | 19 | 23937634 | 23937634 | Missense_Mutation | SNP | C  | T  | 5   | 281 | c.217G>A       | c.(217-219)GAA>AAA     | p.E73K        |
| Pat_16 | Post-Resistance | GPATCH1     | 55094  | 37 | 19 | 33617614 | 33617614 | Missense_Mutation | SNP | G  | A  | 4   | 216 | c.2740G>A      | c.(2740-2742)GTG>ATG   | p.V914M       |
| Pat_16 | Post-Resistance | PDCD2L      | 84306  | 37 | 19 | 34900181 | 34900181 | Missense_Mutation | SNP | G  | A  | 6   | 314 | c.452G>A       | c.(451-453)AGC>AAC     | p.S151N       |
| Pat_16 | Post-Resistance | LGI4        | 163175 | 37 | 19 | 35624989 | 35624989 | Missense_Mutation | SNP | C  | G  | 5   | 29  | c.190G>C       | c.(190-192)GTC>CTC     | p.V64L        |
| Pat_16 | Post-Resistance | MLL4        | 9757   | 37 | 19 | 36219960 | 36219960 | Missense_Mutation | SNP | G  | A  | 5   | 289 | c.4762G>A      | c.(4762-4764)GGG>AGG   | p.G1588R      |

|        |                 |         |        |    |    |          |          |                   |     |    |    |     |     |                 |                         |          |
|--------|-----------------|---------|--------|----|----|----------|----------|-------------------|-----|----|----|-----|-----|-----------------|-------------------------|----------|
| Pat_16 | Post-Resistance | KIRREL2 | 84063  | 37 | 19 | 36357377 | 36357377 | Missense_Mutation | SNP | C  | T  | 266 | 312 | c.2110C>T       | c.(2110-2112)CTC>TTC    | p.L704F  |
| Pat_16 | Post-Resistance | APLP1   | 333    | 37 | 19 | 36369539 | 36369539 | Missense_Mutation | SNP | G  | A  | 63  | 99  | c.1630G>A       | c.(1630-1632)GAA>AAA    | p.E544K  |
| Pat_16 | Post-Resistance | NFKBID  | 84807  | 37 | 19 | 36380815 | 36380815 | Missense_Mutation | SNP | G  | A  | 6   | 309 | c.865C>T        | c.(865-867)CGG>TGG      | p.R289W  |
| Pat_16 | Post-Resistance | RYR1    | 6261   | 37 | 19 | 38939433 | 38939433 | Missense_Mutation | SNP | C  | A  | 19  | 16  | c.1102C>A       | c.(1102-1104)CTC>ATC    | p.L368I  |
| Pat_16 | Post-Resistance | LGALS4  | 3960   | 37 | 19 | 39299478 | 39299478 | Missense_Mutation | SNP | C  | T  | 73  | 269 | c.245G>A        | c.(244-246)GGG>GAG      | p.G82E   |
| Pat_16 | Post-Resistance | SIRT2   | 22933  | 37 | 19 | 39379771 | 39379771 | Missense_Mutation | SNP | G  | A  | 5   | 352 | c.457C>T        | c.(457-459)CGC>TGC      | p.R153C  |
| Pat_16 | Post-Resistance | LGALS13 | 29124  | 37 | 19 | 40095879 | 40095879 | Missense_Mutation | SNP | T  | A  | 47  | 160 | c.154T>A        | c.(154-156)TTC>ATC      | p.F52I   |
| Pat_16 | Post-Resistance | PRX     | 57716  | 37 | 19 | 40901021 | 40901021 | Missense_Mutation | SNP | G  | A  | 63  | 68  | c.3238C>T       | c.(3238-3240)CGT>TGT    | p.R1080C |
| Pat_16 | Post-Resistance | PRX     | 57716  | 37 | 19 | 40901635 | 40901635 | Missense_Mutation | SNP | T  | G  | 15  | 75  | c.2624A>C       | c.(2623-2625)AAA>ACA    | p.K875T  |
| Pat_16 | Post-Resistance | CIC     | 23152  | 37 | 19 | 42794473 | 42794473 | Missense_Mutation | SNP | C  | T  | 4   | 145 | c.1553C>T       | c.(1552-1554)CCG>CTG    | p.P518L  |
| Pat_16 | Post-Resistance | PSG8    | 440533 | 37 | 19 | 43258652 | 43258652 | Missense_Mutation | SNP | T  | C  | 247 | 297 | c.1076A>G       | c.(1075-1077)AAC>AGC    | p.N359S  |
| Pat_16 | Post-Resistance | PSG6    | 5675   | 37 | 19 | 43529189 | 43529189 | Nonsense_Mutation | SNP | C  | T  | 133 | 431 | c.102G>A        | c.(100-102)TGG>TGA      | p.W34*   |
| Pat_16 | Post-Resistance | CADM4   | 199731 | 37 | 19 | 44131825 | 44131825 | Missense_Mutation | SNP | C  | T  | 210 | 217 | c.182G>A        | c.(181-183)CGG>CAG      | p.R61Q   |
| Pat_16 | Post-Resistance | ZNF225  | 7768   | 37 | 19 | 44635194 | 44635194 | Missense_Mutation | SNP | G  | A  | 5   | 422 | c.427G>A        | c.(427-429)GTA>ATA      | p.V143I  |
| Pat_16 | Post-Resistance | DACT3   | 147906 | 37 | 19 | 47151836 | 47151836 | Missense_Mutation | SNP | G  | A  | 176 | 237 | c.1793C>T       | c.(1792-1794)CCC>CTC    | p.P598L  |
| Pat_16 | Post-Resistance | DHX34   | 9704   | 37 | 19 | 47858488 | 47858488 | Missense_Mutation | SNP | C  | T  | 5   | 411 | c.898C>T        | c.(898-900)CCC>TCC      | p.P300S  |
| Pat_16 | Post-Resistance | EHD2    | 30846  | 37 | 19 | 48220222 | 48220222 | Missense_Mutation | SNP | C  | T  | 5   | 317 | c.353C>T        | c.(352-354)CCG>CTG      | p.P118L  |
| Pat_16 | Post-Resistance | GRWD1   | 83743  | 37 | 19 | 48953958 | 48953958 | Missense_Mutation | SNP | C  | T  | 45  | 145 | c.718C>T        | c.(718-720)CAC>TAC      | p.H240Y  |
| Pat_16 | Post-Resistance | LMTK3   | 114783 | 37 | 19 | 49004787 | 49004787 | Missense_Mutation | SNP | G  | A  | 16  | 69  | c.914C>T        | c.(913-915)TCT>TTT      | p.S305F  |
| Pat_16 | Post-Resistance | PLEKHA4 | 57664  | 37 | 19 | 49362834 | 49362834 | Missense_Mutation | SNP | G  | A  | 4   | 200 | c.584C>T        | c.(583-585)CCG>CTG      | p.P195L  |
| Pat_16 | Post-Resistance | RUVBL2  | 10856  | 37 | 19 | 49507618 | 49507618 | Missense_Mutation | SNP | G  | A  | 5   | 345 | c.208G>A        | c.(208-210)GGT>AGT      | p.G70S   |
| Pat_16 | Post-Resistance | ZNF473  | 25888  | 37 | 19 | 50549870 | 50549870 | Missense_Mutation | SNP | C  | T  | 46  | 157 | c.2170C>T       | c.(2170-2172)CAC>TAC    | p.H724Y  |
| Pat_16 | Post-Resistance | LRRC4B  | 94030  | 37 | 19 | 51021739 | 51021739 | Missense_Mutation | SNP | C  | T  | 4   | 109 | c.1231G>A       | c.(1231-1233)GTG>ATG    | p.V411M  |
| Pat_16 | Post-Resistance | SHANK1  | 50944  | 37 | 19 | 51171651 | 51171651 | Missense_Mutation | SNP | C  | A  | 14  | 23  | c.3566G>T       | c.(3565-3567)GGA>GTA    | p.G1189V |
| Pat_16 | Post-Resistance | ZNF175  | 7728   | 37 | 19 | 52089988 | 52089988 | Missense_Mutation | SNP | T  | C  | 51  | 41  | c.404T>C        | c.(403-405)TTA>TCA      | p.L135S  |
| Pat_16 | Post-Resistance | ZNF611  | 81856  | 37 | 19 | 53217390 | 53217390 | Missense_Mutation | SNP | C  | T  | 5   | 439 | c.68G>A         | c.(67-69)CGC>CAC        | p.R23H   |
| Pat_16 | Post-Resistance | ZNF677  | 342926 | 37 | 19 | 53741754 | 53741754 | Missense_Mutation | SNP | C  | T  | 5   | 41  | c.226G>A        | c.(226-228)GAA>AAA      | p.E76K   |
| Pat_16 | Post-Resistance | ZNF525  | 170958 | 37 | 19 | 53884898 | 53884898 | Missense_Mutation | SNP | G  | A  | 5   | 234 | c.958G>A        | c.(958-960)GAA>AAA      | p.E320K  |
| Pat_16 | Post-Resistance | DPRX    | 503834 | 37 | 19 | 54135382 | 54135382 | Missense_Mutation | SNP | C  | T  | 65  | 242 | c.22C>T         | c.(22-24)CGT>TGT        | p.R8C    |
| Pat_16 | Post-Resistance | NLRP7   | 199713 | 37 | 19 | 55451046 | 55451047 | Missense_Mutation | DNP | CC | TT | 40  | 93  | c.1140_1141GG>A | c.(1138-1143)GGGGAG>GGA | p.E381K  |
| Pat_16 | Post-Resistance | NLRP4   | 147945 | 37 | 19 | 56373376 | 56373376 | Missense_Mutation | SNP | T  | A  | 52  | 127 | c.2037T>A       | c.(2035-2037)TTT>TTA    | p.F679L  |
| Pat_16 | Post-Resistance | NLRP8   | 126205 | 37 | 19 | 56466396 | 56466396 | Missense_Mutation | SNP | G  | T  | 89  | 133 | c.972G>T        | c.(970-972)ATG>ATT      | p.M324I  |
| Pat_16 | Post-Resistance | PEG3    | 5178   | 37 | 19 | 57325633 | 57325633 | Missense_Mutation | SNP | C  | T  | 58  | 185 | c.4177G>A       | c.(4177-4179)GAG>AAG    | p.E1393K |
| Pat_16 | Post-Resistance | PEG3    | 5178   | 37 | 19 | 57327584 | 57327584 | Missense_Mutation | SNP | T  | A  | 151 | 134 | c.2226A>T       | c.(2224-2226)GAA>GAT    | p.E742D  |
| Pat_16 | Post-Resistance | ZNF814  | 730051 | 37 | 19 | 58384399 | 58384399 | Missense_Mutation | SNP | A  | G  | 5   | 185 | c.2359T>C       | c.(2359-2361)TTC>CTC    | p.F787L  |
| Pat_16 | Post-Resistance | ZNF606  | 80095  | 37 | 19 | 58490987 | 58490987 | Missense_Mutation | SNP | A  | C  | 27  | 46  | c.1061T>G       | c.(1060-1062)TTT>TGT    | p.F354C  |
| Pat_16 | Post-Resistance | TTC15   | 51112  | 37 | 2  | 3405575  | 3405575  | Missense_Mutation | SNP | C  | T  | 68  | 119 | c.1075C>T       | c.(1075-1077)CGC>TGC    | p.R359C  |
| Pat_16 | Post-Resistance | RNF144A | 9781   | 37 | 2  | 7170318  | 7170318  | Missense_Mutation | SNP | G  | A  | 4   | 300 | c.719G>A        | c.(718-720)CGG>CAG      | p.R240Q  |
| Pat_16 | Post-Resistance | NBAS    | 51594  | 37 | 2  | 15506800 | 15506800 | Missense_Mutation | SNP | G  | A  | 6   | 244 | c.3721C>T       | c.(3721-3723)CGG>TGG    | p.R1241W |
| Pat_16 | Post-Resistance | FAM179A | 165186 | 37 | 2  | 29225569 | 29225569 | Missense_Mutation | SNP | G  | A  | 24  | 28  | c.595G>A        | c.(595-597)GGG>AGG      | p.G199R  |
| Pat_16 | Post-Resistance | CAPN13  | 92291  | 37 | 2  | 30977178 | 30977178 | Missense_Mutation | SNP | T  | G  | 28  | 41  | c.919A>C        | c.(919-921)AAA>CAA      | p.K307Q  |
| Pat_16 | Post-Resistance | MAP4K3  | 8491   | 37 | 2  | 39487908 | 39487908 | Missense_Mutation | SNP | A  | T  | 32  | 28  | c.2147T>A       | c.(2146-2148)TTT>TAT    | p.F716Y  |
| Pat_16 | Post-Resistance | AAK1    | 22848  | 37 | 2  | 69709908 | 69709908 | Missense_Mutation | SNP | G  | A  | 4   | 138 | c.2402C>T       | c.(2401-2403)TCT>TTT    | p.S801F  |
| Pat_16 | Post-Resistance | MXD1    | 4084   | 37 | 2  | 70164473 | 70164473 | Missense_Mutation | SNP | G  | A  | 4   | 164 | c.425G>A        | c.(424-426)CGG>CAG      | p.R142Q  |
| Pat_16 | Post-Resistance | MXD1    | 4084   | 37 | 2  | 70165315 | 70165315 | Missense_Mutation | SNP | C  | T  | 5   | 283 | c.565C>T        | c.(565-567)CGG>TGG      | p.R189W  |
| Pat_16 | Post-Resistance | C2orf42 | 54980  | 37 | 2  | 70406670 | 70406670 | Missense_Mutation | SNP | C  | T  | 4   | 196 | c.928G>A        | c.(928-930)GTA>ATA      | p.V310I  |
| Pat_16 | Post-Resistance | ADD2    | 119    | 37 | 2  | 70890612 | 70890612 | Missense_Mutation | SNP | A  | T  | 73  | 43  | c.2126T>A       | c.(2125-2127)TTC>TAC    | p.F709Y  |

|        |                 |           |        |    |    |           |           |                   |     |    |    |     |     |                                   |                        |               |
|--------|-----------------|-----------|--------|----|----|-----------|-----------|-------------------|-----|----|----|-----|-----|-----------------------------------|------------------------|---------------|
| Pat_16 | Post-Resistance | ADD2      | 119    | 37 | 2  | 70933534  | 70933534  | Missense_Mutation | SNP | C  | T  | 93  | 41  | c.7G>A                            | c.(7-9)GAA>AAA         | p.E3K         |
| Pat_16 | Post-Resistance | RAB11FIP5 | 26056  | 37 | 2  | 73315365  | 73315365  | Missense_Mutation | SNP | G  | A  | 4   | 232 | c.1381C>T                         | c.(1381-1383)CGG>TGG   | p.R461W       |
| Pat_16 | Post-Resistance | REG3G     | 130120 | 37 | 2  | 79254278  | 79254278  | Missense_Mutation | SNP | G  | A  | 76  | 175 | c.314G>A                          | c.(313-315)GGG>GAG     | p.G105E       |
| Pat_16 | Post-Resistance | RETSAT    | 54884  | 37 | 2  | 85581530  | 85581530  | Missense_Mutation | SNP | G  | A  | 68  | 166 | c.101C>T                          | c.(100-102)TCC>TTC     | p.S34F        |
| Pat_16 | Post-Resistance | SMYD1     | 150572 | 37 | 2  | 88396118  | 88396118  | Missense_Mutation | SNP | G  | A  | 132 | 254 | c.703G>A                          | c.(703-705)GAG>AAG     | p.E235K       |
| Pat_16 | Post-Resistance | AFF3      | 3899   | 37 | 2  | 100209977 | 100209978 | Missense_Mutation | DNP | CC | TT | 21  | 84  | .2145_2146GG>A 43-2148)GGGGGC>GGA |                        | p.G716S       |
| Pat_16 | Post-Resistance | RGPD4     | 285190 | 37 | 2  | 108487252 | 108487252 | Missense_Mutation | SNP | G  | A  | 58  | 176 | c.2792G>A                         | c.(2791-2793)GGA>GAA   | p.G931E       |
| Pat_16 | Post-Resistance | SULT1C4   | 27233  | 37 | 2  | 108999916 | 108999916 | Missense_Mutation | SNP | G  | A  | 46  | 158 | c.565G>A                          | c.(565-567)GCC>ACC     | p.A189T       |
| Pat_16 | Post-Resistance | EDAR      | 10913  | 37 | 2  | 109513459 | 109513459 | Missense_Mutation | SNP | C  | G  | 44  | 19  | c.1251G>C                         | c.(1249-1251)CAG>CAC   | p.Q417H       |
| Pat_16 | Post-Resistance | SH3RF3    | 344558 | 37 | 2  | 110053444 | 110053444 | Missense_Mutation | SNP | G  | A  | 74  | 141 | c.1670G>A                         | c.(1669-1671)GGG>GAG   | p.G557E       |
| Pat_16 | Post-Resistance | GPR17     | 2840   | 37 | 2  | 128408607 | 128408608 | Nonsense_Mutation | DNP | GG | TA | 56  | 172 | c.382_383GG>TA                    | c.(382-384)GGG>TAG     | p.G128*       |
| Pat_16 | Post-Resistance | UGGT1     | 56886  | 37 | 2  | 128884989 | 128884989 | Missense_Mutation | SNP | G  | C  | 32  | 76  | c.1189G>C                         | c.(1189-1191)GGA>CGA   | p.G397R       |
| Pat_16 | Post-Resistance | THSD7B    | 80731  | 37 | 2  | 137852453 | 137852453 | Nonsense_Mutation | SNP | C  | T  | 53  | 169 | c.868C>T                          | c.(868-870)CAA>TAA     | p.Q290*       |
| Pat_16 | Post-Resistance | THSD7B    | 80731  | 37 | 2  | 138373853 | 138373853 | Missense_Mutation | SNP | G  | A  | 107 | 396 | c.3445G>A                         | c.(3445-3447)GAA>AAA   | p.E1149K      |
| Pat_16 | Post-Resistance | LRP1B     | 53353  | 37 | 2  | 141459861 | 141459861 | Missense_Mutation | SNP | C  | T  | 55  | 145 | c.6151G>A                         | c.(6151-6153)GAA>AAA   | p.E2051K      |
| Pat_16 | Post-Resistance | LRP1B     | 53353  | 37 | 2  | 141945989 | 141945989 | Splice_Site       | SNP | C  | T  | 12  | 51  | c.1013_splice                     | c.e7+1                 | p.G338_splice |
| Pat_16 | Post-Resistance | TANC1     | 85461  | 37 | 2  | 160027046 | 160027046 | Missense_Mutation | SNP | C  | T  | 51  | 135 | c.1081C>T                         | c.(1081-1083)CCC>TCC   | p.P361S       |
| Pat_16 | Post-Resistance | BAZ2B     | 29994  | 37 | 2  | 160193521 | 160193521 | Missense_Mutation | SNP | C  | T  | 4   | 246 | c.5728G>A                         | c.(5728-5730)GCA>ACA   | p.A1910T      |
| Pat_16 | Post-Resistance | SLC4A10   | 57282  | 37 | 2  | 162728844 | 162728844 | Missense_Mutation | SNP | G  | A  | 61  | 192 | c.808G>A                          | c.(808-810)GAA>AAA     | p.E270K       |
| Pat_16 | Post-Resistance | HOXD3     | 3232   | 37 | 2  | 177036364 | 177036364 | Missense_Mutation | SNP | C  | T  | 109 | 297 | c.661C>T                          | c.(661-663)CGG>TGG     | p.R221W       |
| Pat_16 | Post-Resistance | TTN       | 7273   | 37 | 2  | 179454201 | 179454201 | Missense_Mutation | SNP | C  | T  | 17  | 48  | c.54547G>A                        | c.(54547-54549)GAA>AAA | p.E18183K     |
| Pat_16 | Post-Resistance | TTN       | 7273   | 37 | 2  | 179469452 | 179469452 | Missense_Mutation | SNP | C  | T  | 5   | 175 | c.46660G>A                        | c.(46660-46662)GTA>ATA | p.V15554I     |
| Pat_16 | Post-Resistance | TTN       | 7273   | 37 | 2  | 179641949 | 179641949 | Missense_Mutation | SNP | C  | T  | 90  | 179 | c.4741G>A                         | c.(4741-4743)GGT>AGT   | p.G1581S      |
| Pat_16 | Post-Resistance | STAT4     | 6775   | 37 | 2  | 191937835 | 191937835 | Missense_Mutation | SNP | T  | A  | 109 | 232 | c.454A>T                          | c.(454-456)AAC>TAC     | p.N152Y       |
| Pat_16 | Post-Resistance | EEF1B2    | 1933   | 37 | 2  | 207025358 | 207025358 | Missense_Mutation | SNP | A  | G  | 21  | 359 | c.127A>G                          | c.(127-129)AGC>GGC     | p.S43G        |
| Pat_16 | Post-Resistance | ABCA12    | 26154  | 37 | 2  | 215876250 | 215876250 | Missense_Mutation | SNP | G  | A  | 37  | 110 | c.2245C>T                         | c.(2245-2247)CCA>TCA   | p.P749S       |
| Pat_16 | Post-Resistance | CXCR2     | 3579   | 37 | 2  | 219000137 | 219000137 | Missense_Mutation | SNP | G  | A  | 4   | 305 | c.613G>A                          | c.(613-615)GCA>ACA     | p.A205T       |
| Pat_16 | Post-Resistance | COL4A3    | 1285   | 37 | 2  | 228147167 | 228147167 | Missense_Mutation | SNP | G  | A  | 45  | 57  | c.2575G>A                         | c.(2575-2577)GGA>AGA   | p.G859R       |
| Pat_16 | Post-Resistance | COL4A3    | 1285   | 37 | 2  | 228168824 | 228168824 | Missense_Mutation | SNP | G  | A  | 17  | 56  | c.4117G>A                         | c.(4117-4119)GGA>AGA   | p.G1373R      |
| Pat_16 | Post-Resistance | SPHKAP    | 80309  | 37 | 2  | 228846519 | 228846519 | Missense_Mutation | SNP | G  | A  | 36  | 133 | c.5017C>T                         | c.(5017-5019)CAT>TAT   | p.H1673Y      |
| Pat_16 | Post-Resistance | SLC16A14  | 151473 | 37 | 2  | 230911393 | 230911393 | Missense_Mutation | SNP | C  | A  | 18  | 40  | c.449G>T                          | c.(448-450)GGC>GTC     | p.G150V       |
| Pat_16 | Post-Resistance | CHRND     | 1144   | 37 | 2  | 233394756 | 233394756 | Missense_Mutation | SNP | C  | T  | 4   | 282 | c.727C>T                          | c.(727-729)CGC>TGC     | p.R243C       |
| Pat_16 | Post-Resistance | USP40     | 55230  | 37 | 2  | 234442200 | 234442200 | Missense_Mutation | SNP | C  | T  | 73  | 53  | c.1429G>A                         | c.(1429-1431)GAA>AAA   | p.E477K       |
| Pat_16 | Post-Resistance | TRPM8     | 79054  | 37 | 2  | 234846100 | 234846100 | Missense_Mutation | SNP | C  | T  | 74  | 202 | c.295C>T                          | c.(295-297)CCT>TCT     | p.P99S        |
| Pat_16 | Post-Resistance | TRPM8     | 79054  | 37 | 2  | 234873271 | 234873271 | Splice_Site       | SNP | G  | A  | 4   | 28  | c.1750_splice                     | c.e14-1                | p.T584_splice |
| Pat_16 | Post-Resistance | MLPH      | 79083  | 37 | 2  | 238457876 | 238457876 | Missense_Mutation | SNP | C  | T  | 36  | 73  | c.1630C>T                         | c.(1630-1632)CCC>TCC   | p.P544S       |
| Pat_16 | Post-Resistance | TRAF3IP1  | 26146  | 37 | 2  | 239307420 | 239307420 | Missense_Mutation | SNP | T  | G  | 115 | 104 | c.1936T>G                         | c.(1936-1938)TTA>GTA   | p.L646V       |
| Pat_16 | Post-Resistance | THAP4     | 51078  | 37 | 2  | 242545816 | 242545817 | Missense_Mutation | DNP | CC | TT | 14  | 14  | .1312_1313GG>A                    | c.(1312-1314)GGA>AAA   | p.G438K       |
| Pat_16 | Post-Resistance | SIRPG     | 55423  | 37 | 20 | 1629761   | 1629761   | Nonsense_Mutation | SNP | G  | A  | 62  | 238 | c.367C>T                          | c.(367-369)CGA>TGA     | p.R123*       |
| Pat_16 | Post-Resistance | TGM6      | 343641 | 37 | 20 | 2411098   | 2411098   | Missense_Mutation | SNP | G  | A  | 89  | 111 | c.1685G>A                         | c.(1684-1686)AGA>AAA   | p.R562K       |
| Pat_16 | Post-Resistance | SNRPB     | 6628   | 37 | 20 | 2443296   | 2443296   | Missense_Mutation | SNP | G  | A  | 5   | 396 | c.671C>T                          | c.(670-672)CCC>CTC     | p.P224L       |
| Pat_16 | Post-Resistance | ATRN      | 8455   | 37 | 20 | 3541478   | 3541478   | Missense_Mutation | SNP | G  | A  | 5   | 343 | c.1373G>A                         | c.(1372-1374)CGA>CAA   | p.R458Q       |
| Pat_16 | Post-Resistance | C20orf94  | 128710 | 37 | 20 | 10582435  | 10582435  | Missense_Mutation | SNP | C  | T  | 4   | 209 | c.373C>T                          | c.(373-375)CGT>TGT     | p.R125C       |
| Pat_16 | Post-Resistance | BTBD3     | 22903  | 37 | 20 | 11899185  | 11899185  | Missense_Mutation | SNP | C  | T  | 125 | 496 | c.262C>T                          | c.(262-264)CTC>TTC     | p.L88F        |
| Pat_16 | Post-Resistance | CST9      | 128822 | 37 | 20 | 23584239  | 23584239  | Missense_Mutation | SNP | A  | T  | 42  | 170 | c.388T>A                          | c.(388-390)TTT>ATT     | p.F130I       |
| Pat_16 | Post-Resistance | ASXL1     | 171023 | 37 | 20 | 31023318  | 31023318  | Missense_Mutation | SNP | C  | T  | 29  | 96  | c.2803C>T                         | c.(2803-2805)CCC>TCC   | p.P935S       |
| Pat_16 | Post-Resistance | DNMT3B    | 1789   | 37 | 20 | 31368196  | 31368196  | Missense_Mutation | SNP | G  | A  | 4   | 126 | c.67G>A                           | c.(67-69)GTC>ATC       | p.V23I        |

|        |                 |           |        |    |    |          |          |                   |     |    |    |     |     |                  |                          |          |
|--------|-----------------|-----------|--------|----|----|----------|----------|-------------------|-----|----|----|-----|-----|------------------|--------------------------|----------|
| Pat_16 | Post-Resistance | C20orf185 | 359710 | 37 | 20 | 31657725 | 31657725 | Missense_Mutation | SNP | C  | T  | 7   | 773 | c.1181C>T        | c.(1180-1182)TCG>TTG     | p.S394L  |
| Pat_16 | Post-Resistance | CBFA2T2   | 9139   | 37 | 20 | 32217603 | 32217603 | Missense_Mutation | SNP | C  | T  | 74  | 89  | c.1138C>T        | c.(1138-1140)CGT>TGT     | p.R380C  |
| Pat_16 | Post-Resistance | RBM12     | 10137  | 37 | 20 | 34241449 | 34241449 | Missense_Mutation | SNP | C  | T  | 5   | 400 | c.1796G>A        | c.(1795-1797)CGT>CAT     | p.R599H  |
| Pat_16 | Post-Resistance | PPP1R16B  | 26051  | 37 | 20 | 37524242 | 37524242 | Missense_Mutation | SNP | T  | A  | 36  | 59  | c.356T>A         | c.(355-357)CTG>CAG       | p.L119Q  |
| Pat_16 | Post-Resistance | PLCG1     | 5335   | 37 | 20 | 39788777 | 39788777 | Missense_Mutation | SNP | C  | T  | 4   | 300 | c.496C>T         | c.(496-498)CGG>TGG       | p.R166W  |
| Pat_16 | Post-Resistance | STK4      | 6789   | 37 | 20 | 43625841 | 43625841 | Missense_Mutation | SNP | C  | T  | 69  | 270 | c.725C>T         | c.(724-726)CCC>CTC       | p.P242L  |
| Pat_16 | Post-Resistance | SEMG1     | 6406   | 37 | 20 | 43836962 | 43836962 | Nonsense_Mutation | SNP | A  | T  | 16  | 74  | c.1024A>T        | c.(1024-1026)AAG>TAG     | p.K342*  |
| Pat_16 | Post-Resistance | TP53TG5   | 27296  | 37 | 20 | 44003936 | 44003936 | Missense_Mutation | SNP | C  | T  | 95  | 140 | c.511G>A         | c.(511-513)GGA>AGA       | p.G171R  |
| Pat_16 | Post-Resistance | SLC12A5   | 57468  | 37 | 20 | 44684831 | 44684831 | Missense_Mutation | SNP | A  | G  | 36  | 139 | c.2899A>G        | c.(2899-2901)AAG>GAG     | p.K967E  |
| Pat_16 | Post-Resistance | SNAI1     | 6615   | 37 | 20 | 48600613 | 48600613 | Missense_Mutation | SNP | C  | T  | 104 | 180 | c.335C>T         | c.(334-336)TCC>TTC       | p.S112F  |
| Pat_16 | Post-Resistance | SALL4     | 57167  | 37 | 20 | 50407142 | 50407142 | Missense_Mutation | SNP | G  | A  | 47  | 131 | c.1880C>T        | c.(1879-1881)TCG>TTG     | p.S627L  |
| Pat_16 | Post-Resistance | TFAP2C    | 7022   | 37 | 20 | 55208529 | 55208529 | Missense_Mutation | SNP | C  | T  | 32  | 121 | c.707C>T         | c.(706-708)TCT>TTT       | p.S236F  |
| Pat_16 | Post-Resistance | LAMA5     | 3911   | 37 | 20 | 60885978 | 60885978 | Missense_Mutation | SNP | G  | A  | 47  | 43  | c.10261C>T       | c.(10261-10263)CGG>TGC   | p.R3421W |
| Pat_16 | Post-Resistance | DIDO1     | 11083  | 37 | 20 | 61511835 | 61511835 | Missense_Mutation | SNP | C  | T  | 57  | 87  | c.5473G>A        | c.(5473-5475)GGC>AGC     | p.G1825S |
| Pat_16 | Post-Resistance | KCNQ2     | 3785   | 37 | 20 | 62076642 | 62076642 | Missense_Mutation | SNP | G  | A  | 5   | 297 | c.463C>T         | c.(463-465)CGT>TGT       | p.R155C  |
| Pat_16 | Post-Resistance | PRIC285   | 85441  | 37 | 20 | 62195457 | 62195457 | Missense_Mutation | SNP | C  | T  | 4   | 67  | c.4718G>A        | c.(4717-4719)CGG>CAG     | p.R1573Q |
| Pat_16 | Post-Resistance | SAMD10    | 140700 | 37 | 20 | 62608735 | 62608735 | Missense_Mutation | SNP | C  | T  | 5   | 210 | c.116G>A         | c.(115-117)CGG>CAG       | p.R39Q   |
| Pat_16 | Post-Resistance | PCMTD2    | 55251  | 37 | 20 | 62891413 | 62891413 | Missense_Mutation | SNP | C  | T  | 81  | 138 | c.95C>T          | c.(94-96)GCT>GTT         | p.A32V   |
| Pat_16 | Post-Resistance | TPTE      | 7179   | 37 | 21 | 10914379 | 10914379 | Missense_Mutation | SNP | G  | A  | 11  | 77  | c.1340C>T        | c.(1339-1341)TCA>TTA     | p.S447L  |
| Pat_16 | Post-Resistance | APP       | 351    | 37 | 21 | 27254055 | 27254055 | Missense_Mutation | SNP | G  | A  | 5   | 252 | c.2239C>T        | c.(2239-2241)CGC>TGC     | p.R747C  |
| Pat_16 | Post-Resistance | KCNJ6     | 3763   | 37 | 21 | 39087165 | 39087165 | Missense_Mutation | SNP | C  | T  | 94  | 315 | c.295G>A         | c.(295-297)GTT>ATT       | p.V99I   |
| Pat_16 | Post-Resistance | PLAC4     | 191585 | 37 | 21 | 42551363 | 42551364 | Missense_Mutation | DNP | AC | GG | 3   | 91  | c.192_193GT>CC   | c.(190-195)ACGTTCC>ACCC  | p.F65L   |
| Pat_16 | Post-Resistance | C2CD2     | 25966  | 37 | 21 | 43319324 | 43319325 | Missense_Mutation | DNP | GG | AA | 7   | 28  | c.1707_1708CC>TT | c.(1705-1710)TCCCTT>TCTT | p.L570F  |
| Pat_16 | Post-Resistance | ZNF295    | 49854  | 37 | 21 | 43411624 | 43411624 | Missense_Mutation | SNP | A  | T  | 60  | 212 | c.2581T>A        | c.(2581-2583)TCC>ACC     | p.S861T  |
| Pat_16 | Post-Resistance | ABCG1     | 9619   | 37 | 21 | 43711687 | 43711687 | Missense_Mutation | SNP | T  | C  | 115 | 150 | c.1610T>C        | c.(1609-1611)TTT>TCT     | p.F537S  |
| Pat_16 | Post-Resistance | SIK1      | 150094 | 37 | 21 | 44836701 | 44836701 | Missense_Mutation | SNP | G  | A  | 12  | 48  | c.2273C>T        | c.(2272-2274)CCC>CTC     | p.P758L  |
| Pat_16 | Post-Resistance | KRTAP10-8 | 386681 | 37 | 21 | 46032217 | 46032217 | Missense_Mutation | SNP | C  | T  | 5   | 175 | c.200C>T         | c.(199-201)GCC>GTC       | p.A67V   |
| Pat_16 | Post-Resistance | PCBP3     | 54039  | 37 | 21 | 47337538 | 47337538 | Missense_Mutation | SNP | C  | T  | 87  | 261 | c.712C>T         | c.(712-714)CCG>TCG       | p.P238S  |
| Pat_16 | Post-Resistance | GNB1L     | 54584  | 37 | 22 | 19776285 | 19776285 | Missense_Mutation | SNP | C  | T  | 4   | 131 | c.931G>A         | c.(931-933)GCG>ACG       | p.A311T  |
| Pat_16 | Post-Resistance | RGL4      | 266747 | 37 | 22 | 24036576 | 24036576 | Missense_Mutation | SNP | G  | A  | 4   | 180 | c.955G>A         | c.(955-957)GTC>ATC       | p.V319I  |
| Pat_16 | Post-Resistance | GGT5      | 2687   | 37 | 22 | 24640582 | 24640582 | Missense_Mutation | SNP | G  | A  | 64  | 103 | c.112C>T         | c.(112-114)CCC>TCC       | p.P38S   |
| Pat_16 | Post-Resistance | CRYBB2    | 1415   | 37 | 22 | 25625499 | 25625499 | Missense_Mutation | SNP | C  | T  | 28  | 62  | c.403C>T         | c.(403-405)CAT>TAT       | p.H135Y  |
| Pat_16 | Post-Resistance | PES1      | 23481  | 37 | 22 | 30977009 | 30977009 | Missense_Mutation | SNP | G  | A  | 63  | 49  | c.902C>T         | c.(901-903)CCC>CTC       | p.P301L  |
| Pat_16 | Post-Resistance | BPIL2     | 254240 | 37 | 22 | 32841915 | 32841915 | Missense_Mutation | SNP | C  | T  | 71  | 58  | c.443G>A         | c.(442-444)CGA>CAA       | p.R148Q  |
| Pat_16 | Post-Resistance | RASD2     | 23551  | 37 | 22 | 35947968 | 35947968 | Missense_Mutation | SNP | G  | A  | 68  | 53  | c.690G>A         | c.(688-690)ATG>ATA       | p.M230I  |
| Pat_16 | Post-Resistance | FOXRED2   | 80020  | 37 | 22 | 36894189 | 36894189 | Missense_Mutation | SNP | G  | A  | 28  | 63  | c.1231C>T        | c.(1231-1233)CGG>TGG     | p.R411W  |
| Pat_16 | Post-Resistance | ELFN2     | 114794 | 37 | 22 | 37770901 | 37770901 | Missense_Mutation | SNP | G  | A  | 4   | 63  | c.674C>T         | c.(673-675)CCG>CTG       | p.P225L  |
| Pat_16 | Post-Resistance | TRIOBP    | 11078  | 37 | 22 | 38120316 | 38120316 | Missense_Mutation | SNP | C  | T  | 120 | 617 | c.1753C>T        | c.(1753-1755)CCC>TCC     | p.P585S  |
| Pat_16 | Post-Resistance | PDGFB     | 5155   | 37 | 22 | 39631866 | 39631866 | Missense_Mutation | SNP | G  | A  | 23  | 68  | c.77C>T          | c.(76-78)CCC>CTC         | p.P26L   |
| Pat_16 | Post-Resistance | PARVG     | 64098  | 37 | 22 | 44583758 | 44583758 | Nonsense_Mutation | SNP | C  | T  | 43  | 96  | c.247C>T         | c.(247-249)CAG>TAG       | p.Q83*   |
| Pat_16 | Post-Resistance | KLHDC7B   | 113730 | 37 | 22 | 50987478 | 50987478 | Missense_Mutation | SNP | G  | A  | 4   | 12  | c.883G>A         | c.(883-885)GGC>AGC       | p.G295S  |
| Pat_16 | Post-Resistance | BRPF1     | 7862   | 37 | 3  | 9776260  | 9776260  | Missense_Mutation | SNP | C  | T  | 46  | 65  | c.436C>T         | c.(436-438)CCC>TCC       | p.P146S  |
| Pat_16 | Post-Resistance | TMEM43    | 79188  | 37 | 3  | 14174407 | 14174407 | Missense_Mutation | SNP | G  | A  | 5   | 204 | c.484G>A         | c.(484-486)GAC>AAC       | p.D162N  |
| Pat_16 | Post-Resistance | C3orf19   | 51244  | 37 | 3  | 14703141 | 14703141 | Missense_Mutation | SNP | G  | A  | 3   | 74  | c.412G>A         | c.(412-414)GGA>AGA       | p.G138R  |
| Pat_16 | Post-Resistance | EAF1      | 85403  | 37 | 3  | 15471450 | 15471450 | Missense_Mutation | SNP | C  | T  | 54  | 45  | c.134C>T         | c.(133-135)TCC>TTC       | p.S45F   |
| Pat_16 | Post-Resistance | SATB1     | 6304   | 37 | 3  | 18393533 | 18393533 | Missense_Mutation | SNP | T  | A  | 149 | 233 | c.1730A>T        | c.(1729-1731)CAT>CTT     | p.H577L  |
| Pat_16 | Post-Resistance | KCNH8     | 131096 | 37 | 3  | 19492780 | 19492780 | Missense_Mutation | SNP | C  | T  | 37  | 43  | c.1709C>T        | c.(1708-1710)TCT>TTT     | p.S570F  |



|        |                 |          |        |    |   |           |           |                   |     |    |    |     |     |                         |                      |               |
|--------|-----------------|----------|--------|----|---|-----------|-----------|-------------------|-----|----|----|-----|-----|-------------------------|----------------------|---------------|
| Pat_16 | Post-Resistance | NEK10    | 152110 | 37 | 3 | 27213359  | 27213359  | Missense_Mutation | SNP | A  | C  | 20  | 29  | c.718T>G                | c.(718-720)TTA>GTA   | p.L240V       |
| Pat_16 | Post-Resistance | GLB1     | 2720   | 37 | 3 | 33038614  | 33038614  | Missense_Mutation | SNP | G  | A  | 51  | 60  | c.1957C>T               | c.(1957-1959)CCC>TCC | p.P653S       |
| Pat_16 | Post-Resistance | STAC     | 6769   | 37 | 3 | 36484961  | 36484961  | Missense_Mutation | SNP | G  | A  | 25  | 58  | c.217G>A                | c.(217-219)GCA>ACA   | p.A73T        |
| Pat_16 | Post-Resistance | TRANK1   | 9881   | 37 | 3 | 36873053  | 36873053  | Missense_Mutation | SNP | A  | C  | 9   | 19  | c.6239T>G               | c.(6238-6240)CTC>CGC | p.L2080R      |
| Pat_16 | Post-Resistance | ALS2CL   | 259173 | 37 | 3 | 46729657  | 46729657  | Missense_Mutation | SNP | G  | A  | 4   | 100 | c.233C>T                | c.(232-234)CCG>CTG   | p.P78L        |
| Pat_16 | Post-Resistance | PTPN23   | 25930  | 37 | 3 | 47452005  | 47452005  | Missense_Mutation | SNP | C  | T  | 4   | 117 | c.2717C>T               | c.(2716-2718)CCC>CTC | p.P906L       |
| Pat_16 | Post-Resistance | LAMB2    | 3913   | 37 | 3 | 49163299  | 49163299  | Missense_Mutation | SNP | G  | A  | 103 | 113 | c.2369C>T               | c.(2368-2370)TCA>TTA | p.S790L       |
| Pat_16 | Post-Resistance | USP4     | 7375   | 37 | 3 | 49322316  | 49322316  | Missense_Mutation | SNP | G  | A  | 24  | 53  | c.2237C>T               | c.(2236-2238)ACT>ATT | p.T746I       |
| Pat_16 | Post-Resistance | BSN      | 8927   | 37 | 3 | 49689742  | 49689742  | Missense_Mutation | SNP | C  | T  | 3   | 35  | c.2753C>T               | c.(2752-2754)ACC>ATC | p.T918I       |
| Pat_16 | Post-Resistance | SEMA3F   | 6405   | 37 | 3 | 50220182  | 50220182  | Missense_Mutation | SNP | C  | T  | 45  | 69  | c.869C>T                | c.(868-870)CCC>CTC   | p.P290L       |
| Pat_16 | Post-Resistance | SEMA3F   | 6405   | 37 | 3 | 50225363  | 50225363  | Missense_Mutation | SNP | C  | T  | 10  | 15  | c.2173C>T               | c.(2173-2175)CCT>TCT | p.P725S       |
| Pat_16 | Post-Resistance | CACNA2D2 | 9254   | 37 | 3 | 50421769  | 50421769  | Splice_Site       | SNP | C  | T  | 99  | 205 | c.511_splice            | c.e6-1               | p.D171_splice |
| Pat_16 | Post-Resistance | DNAH1    | 25981  | 37 | 3 | 52397156  | 52397156  | Missense_Mutation | SNP | C  | T  | 27  | 23  | c.5240C>T               | c.(5239-5241)TCC>TTC | p.S1747F      |
| Pat_16 | Post-Resistance | ITIH3    | 3699   | 37 | 3 | 52831902  | 52831902  | Missense_Mutation | SNP | G  | A  | 6   | 8   | c.619G>A                | c.(619-621)GAC>AAC   | p.D207N       |
| Pat_16 | Post-Resistance | SLMAP    | 7871   | 37 | 3 | 57898147  | 57898147  | Missense_Mutation | SNP | G  | A  | 4   | 194 | c.1688G>A               | c.(1687-1689)CGG>CAG | p.R563Q       |
| Pat_16 | Post-Resistance | FLNB     | 2317   | 37 | 3 | 58135678  | 58135678  | Missense_Mutation | SNP | G  | A  | 5   | 342 | c.6193G>A               | c.(6193-6195)GTG>ATG | p.V2065M      |
| Pat_16 | Post-Resistance | LRIG1    | 26018  | 37 | 3 | 66434654  | 66434654  | Missense_Mutation | SNP | C  | T  | 6   | 523 | c.1832G>A               | c.(1831-1833)CGG>CAG | p.R611Q       |
| Pat_16 | Post-Resistance | KBTD8    | 84541  | 37 | 3 | 67058763  | 67058763  | Missense_Mutation | SNP | G  | A  | 53  | 73  | c.1760G>A               | c.(1759-1761)TGT>TAT | p.C587Y       |
| Pat_16 | Post-Resistance | FRMD4B   | 23150  | 37 | 3 | 69245538  | 69245538  | Missense_Mutation | SNP | G  | A  | 15  | 42  | c.1102C>T               | c.(1102-1104)CCT>TCT | p.P368S       |
| Pat_16 | Post-Resistance | C3orf26  | 84319  | 37 | 3 | 99879299  | 99879299  | Missense_Mutation | SNP | C  | A  | 3   | 24  | c.179C>A                | c.(178-180)CCA>CAA   | p.P60Q        |
| Pat_16 | Post-Resistance | FAM55C   | 91775  | 37 | 3 | 101520553 | 101520553 | Missense_Mutation | SNP | C  | T  | 32  | 31  | c.568C>T                | c.(568-570)CCC>TCC   | p.P190S       |
| Pat_16 | Post-Resistance | MYH15    | 22989  | 37 | 3 | 108117510 | 108117510 | Missense_Mutation | SNP | C  | T  | 72  | 105 | c.5167G>A               | c.(5167-5169)GAA>AAA | p.E1723K      |
| Pat_16 | Post-Resistance | DPPA4    | 55211  | 37 | 3 | 109049541 | 109049541 | Missense_Mutation | SNP | A  | C  | 35  | 69  | c.509T>G                | c.(508-510)CTT>CGT   | p.L170R       |
| Pat_16 | Post-Resistance | KIAA2018 | 205717 | 37 | 3 | 113375371 | 113375371 | Missense_Mutation | SNP | G  | A  | 4   | 164 | c.5158C>T               | c.(5158-5160)CGT>TGT | p.R1720C      |
| Pat_16 | Post-Resistance | KIAA2018 | 205717 | 37 | 3 | 113377026 | 113377026 | Missense_Mutation | SNP | G  | A  | 20  | 32  | c.3503C>T               | c.(3502-3504)TCA>TTA | p.S1168L      |
| Pat_16 | Post-Resistance | POPDC2   | 64091  | 37 | 3 | 119378790 | 119378790 | Missense_Mutation | SNP | G  | A  | 4   | 232 | c.481C>T                | c.(481-483)CTC>TTC   | p.L161F       |
| Pat_16 | Post-Resistance | ABTB1    | 80325  | 37 | 3 | 127398861 | 127398861 | Missense_Mutation | SNP | G  | A  | 5   | 314 | c.1063G>A               | c.(1063-1065)GTC>ATC | p.V355I       |
| Pat_16 | Post-Resistance | GATA2    | 2624   | 37 | 3 | 128204758 | 128204758 | Missense_Mutation | SNP | G  | A  | 17  | 43  | c.683C>T                | c.(682-684)CCC>CTC   | p.P228L       |
| Pat_16 | Post-Resistance | ACPP     | 55     | 37 | 3 | 132047117 | 132047117 | Missense_Mutation | SNP | C  | T  | 75  | 53  | c.127C>T                | c.(127-129)CGG>TGG   | p.R43W        |
| Pat_16 | Post-Resistance | BFSP2    | 8419   | 37 | 3 | 133119121 | 133119121 | Missense_Mutation | SNP | G  | A  | 4   | 81  | c.194G>A                | c.(193-195)TGC>TAC   | p.C65Y        |
| Pat_16 | Post-Resistance | SLCO2A1  | 6578   | 37 | 3 | 133661546 | 133661547 | Missense_Mutation | DNP | GG | AA | 52  | 154 | c.1527_1528CC>T525-1530 | GTCCCC>GTTT          | p.P510S       |
| Pat_16 | Post-Resistance | EPHB1    | 2047   | 37 | 3 | 134851694 | 134851694 | Missense_Mutation | SNP | G  | A  | 29  | 83  | c.1100G>A               | c.(1099-1101)CGC>CAC | p.R367H       |
| Pat_16 | Post-Resistance | HPS3     | 84343  | 37 | 3 | 148859158 | 148859158 | Missense_Mutation | SNP | T  | C  | 159 | 301 | c.961T>C                | c.(961-963)TAC>CAC   | p.Y321H       |
| Pat_16 | Post-Resistance | CP       | 1356   | 37 | 3 | 148939527 | 148939527 | Nonsense_Mutation | SNP | C  | T  | 16  | 53  | c.53G>A                 | c.(52-54)TGG>TAG     | p.W18*        |
| Pat_16 | Post-Resistance | B3GALNT1 | 8706   | 37 | 3 | 160803907 | 160803907 | Missense_Mutation | SNP | A  | C  | 13  | 24  | c.636T>G                | c.(634-636)AAT>AAG   | p.N212K       |
| Pat_16 | Post-Resistance | ZBBX     | 79740  | 37 | 3 | 167016179 | 167016179 | Missense_Mutation | SNP | A  | T  | 38  | 75  | c.1793T>A               | c.(1792-1794)TTT>TAT | p.F598Y       |
| Pat_16 | Post-Resistance | MECOM    | 2122   | 37 | 3 | 168825731 | 168825731 | Missense_Mutation | SNP | G  | A  | 27  | 23  | c.2023C>T               | c.(2023-2025)CCT>TCT | p.P675S       |
| Pat_16 | Post-Resistance | PHC3     | 80012  | 37 | 3 | 169847185 | 169847185 | Missense_Mutation | SNP | G  | A  | 4   | 241 | c.1039C>T               | c.(1039-1041)CCC>TCC | p.P347S       |
| Pat_16 | Post-Resistance | EIF2B5   | 8893   | 37 | 3 | 183855762 | 183855762 | Missense_Mutation | SNP | C  | T  | 4   | 88  | c.583C>T                | c.(583-585)CGT>TGT   | p.R195C       |
| Pat_16 | Post-Resistance | DVL3     | 1857   | 37 | 3 | 183882369 | 183882369 | Missense_Mutation | SNP | G  | A  | 5   | 181 | c.443G>A                | c.(442-444)CGG>CAG   | p.R148Q       |
| Pat_16 | Post-Resistance | TBCCD1   | 55171  | 37 | 3 | 186276241 | 186276241 | Missense_Mutation | SNP | G  | A  | 88  | 200 | c.457C>T                | c.(457-459)CCT>TCT   | p.P153S       |
| Pat_16 | Post-Resistance | TP63     | 8626   | 37 | 3 | 189582204 | 189582204 | Missense_Mutation | SNP | G  | A  | 36  | 61  | c.763G>A                | c.(763-765)GAG>AAG   | p.E255K       |
| Pat_16 | Post-Resistance | GP5      | 2814   | 37 | 3 | 194118968 | 194118968 | Missense_Mutation | SNP | C  | T  | 3   | 54  | c.44G>A                 | c.(43-45)CGC>CAC     | p.R15H        |
| Pat_16 | Post-Resistance | LSG1     | 55341  | 37 | 3 | 194373772 | 194373772 | Missense_Mutation | SNP | G  | A  | 54  | 141 | c.859C>T                | c.(859-861)CCA>TCA   | p.P287S       |
| Pat_16 | Post-Resistance | TFRC     | 7037   | 37 | 3 | 195785162 | 195785162 | Missense_Mutation | SNP | A  | G  | 146 | 86  | c.1670T>C               | c.(1669-1671)TTT>TCT | p.F557S       |
| Pat_16 | Post-Resistance | LRRRC33  | 375387 | 37 | 3 | 196387690 | 196387690 | Missense_Mutation | SNP | C  | A  | 69  | 56  | c.1176C>A               | c.(1174-1176)CAC>CAA | p.H392Q       |
| Pat_16 | Post-Resistance | ZNF141   | 7700   | 37 | 4 | 367161    | 367161    | Missense_Mutation | SNP | A  | C  | 8   | 375 | c.935A>C                | c.(934-936)AAA>ACA   | p.K312T       |

|        |                 |           |        |    |   |           |           |                   |     |    |    |     |     |                |                        |               |
|--------|-----------------|-----------|--------|----|---|-----------|-----------|-------------------|-----|----|----|-----|-----|----------------|------------------------|---------------|
| Pat_16 | Post-Resistance | NOP14     | 8602   | 37 | 4 | 2946914   | 2946914   | Missense_Mutation | SNP | C  | T  | 3   | 39  | c.1678G>A      | c.(1678-1680)GAC>AAC   | p.D560N       |
| Pat_16 | Post-Resistance | ZNF518B   | 85460  | 37 | 4 | 10444904  | 10444904  | Missense_Mutation | SNP | G  | A  | 25  | 83  | c.3049C>T      | c.(3049-3051)CAT>TAT   | p.H1017Y      |
| Pat_16 | Post-Resistance | PPARGC1A  | 10891  | 37 | 4 | 23815598  | 23815598  | Missense_Mutation | SNP | G  | A  | 73  | 264 | c.1508C>T      | c.(1507-1509)TCA>TTA   | p.S503L       |
| Pat_16 | Post-Resistance | DHX15     | 1665   | 37 | 4 | 24578242  | 24578242  | Missense_Mutation | SNP | C  | T  | 3   | 48  | c.131G>A       | c.(130-132)CGT>CAT     | p.R44H        |
| Pat_16 | Post-Resistance | SEL1L3    | 23231  | 37 | 4 | 25789890  | 25789891  | Missense_Mutation | DNP | CC | TT | 118 | 345 | .2172_2173GG>A | 170-2175)ACGGAG>ACA/   | p.E725K       |
| Pat_16 | Post-Resistance | KLB       | 152831 | 37 | 4 | 39409123  | 39409123  | Missense_Mutation | SNP | G  | A  | 56  | 95  | c.554G>A       | c.(553-555)AGA>AAA     | p.R185K       |
| Pat_16 | Post-Resistance | NSUN7     | 79730  | 37 | 4 | 40792702  | 40792702  | Missense_Mutation | SNP | C  | T  | 5   | 223 | c.1120C>T      | c.(1120-1122)CCT>TCT   | p.P374S       |
| Pat_16 | Post-Resistance | KDR       | 3791   | 37 | 4 | 55976657  | 55976657  | Missense_Mutation | SNP | C  | T  | 61  | 33  | c.1168G>A      | c.(1168-1170)GAA>AAA   | p.E390K       |
| Pat_16 | Post-Resistance | LPHN3     | 23284  | 37 | 4 | 62363041  | 62363041  | Missense_Mutation | SNP | G  | A  | 25  | 62  | c.30G>A        | c.(28-30)ATG>ATA       | p.M10I        |
| Pat_16 | Post-Resistance | TMPRSS11B | 132724 | 37 | 4 | 69095235  | 69095235  | Splice_Site       | SNP | C  | T  | 20  | 86  | c.687_splice   | c.e8-1                 | p.K229_splice |
| Pat_16 | Post-Resistance | SHROOM3   | 57619  | 37 | 4 | 77652072  | 77652072  | Nonsense_Mutation | SNP | C  | T  | 148 | 415 | c.571C>T       | c.(571-573)CAA>TAA     | p.Q191*       |
| Pat_16 | Post-Resistance | FRAS1     | 80144  | 37 | 4 | 79351557  | 79351557  | Missense_Mutation | SNP | G  | A  | 9   | 41  | c.4955G>A      | c.(4954-4956)AGG>AAG   | p.R1652K      |
| Pat_16 | Post-Resistance | GRID2     | 2895   | 37 | 4 | 94344063  | 94344063  | Missense_Mutation | SNP | G  | A  | 33  | 89  | c.1489G>A      | c.(1489-1491)GGA>AGA   | p.G497R       |
| Pat_16 | Post-Resistance | PDHA2     | 5161   | 37 | 4 | 96761349  | 96761349  | Missense_Mutation | SNP | A  | T  | 39  | 124 | c.48A>T        | c.(46-48)AAA>AAT       | p.K16N        |
| Pat_16 | Post-Resistance | ADH1C     | 126    | 37 | 4 | 100261800 | 100261800 | Missense_Mutation | SNP | G  | A  | 319 | 245 | c.896C>T       | c.(895-897)TCC>TTC     | p.S299F       |
| Pat_16 | Post-Resistance | EGF       | 1950   | 37 | 4 | 110882040 | 110882040 | Missense_Mutation | SNP | T  | A  | 155 | 83  | c.1084T>A      | c.(1084-1086)TTT>ATT   | p.F362I       |
| Pat_16 | Post-Resistance | ANK2      | 287    | 37 | 4 | 114158761 | 114158761 | Missense_Mutation | SNP | G  | A  | 105 | 291 | c.676G>A       | c.(676-678)GTG>ATG     | p.V226M       |
| Pat_16 | Post-Resistance | PRDM5     | 11107  | 37 | 4 | 121737728 | 121737728 | Missense_Mutation | SNP | A  | G  | 32  | 84  | c.745T>C       | c.(745-747)TTT>CTT     | p.F249L       |
| Pat_16 | Post-Resistance | ADAD1     | 132612 | 37 | 4 | 123317451 | 123317451 | Missense_Mutation | SNP | G  | A  | 8   | 44  | c.643G>A       | c.(643-645)GAA>AAA     | p.E215K       |
| Pat_16 | Post-Resistance | NUDT6     | 11162  | 37 | 4 | 123843634 | 123843634 | Missense_Mutation | SNP | C  | T  | 4   | 95  | c.94G>A        | c.(94-96)GCA>ACA       | p.A32T        |
| Pat_16 | Post-Resistance | FAT4      | 79633  | 37 | 4 | 126239412 | 126239412 | Missense_Mutation | SNP | G  | A  | 4   | 276 | c.1846G>A      | c.(1846-1848)GGA>AGA   | p.G616R       |
| Pat_16 | Post-Resistance | FAT4      | 79633  | 37 | 4 | 126389676 | 126389676 | Missense_Mutation | SNP | G  | A  | 64  | 71  | c.11909G>A     | c.(11908-11910)GGA>GAA | p.G3970E      |
| Pat_16 | Post-Resistance | C4orf29   | 80167  | 37 | 4 | 128949889 | 128949889 | Missense_Mutation | SNP | G  | A  | 4   | 266 | c.959G>A       | c.(958-960)CGC>CAC     | p.R320H       |
| Pat_16 | Post-Resistance | NAA15     | 80155  | 37 | 4 | 140275246 | 140275246 | Missense_Mutation | SNP | C  | T  | 21  | 54  | c.1081C>T      | c.(1081-1083)CCC>TCC   | p.P361S       |
| Pat_16 | Post-Resistance | SLC10A7   | 84068  | 37 | 4 | 147227095 | 147227095 | Missense_Mutation | SNP | G  | A  | 24  | 29  | c.538C>T       | c.(538-540)CCT>TCT     | p.P180S       |
| Pat_16 | Post-Resistance | FHDC1     | 85462  | 37 | 4 | 153896944 | 153896944 | Missense_Mutation | SNP | C  | T  | 5   | 271 | c.2501C>T      | c.(2500-2502)GCC>GTC   | p.A834V       |
| Pat_16 | Post-Resistance | DCHS2     | 54798  | 37 | 4 | 155237118 | 155237118 | Missense_Mutation | SNP | G  | A  | 26  | 72  | c.3677C>T      | c.(3676-3678)CCT>CTT   | p.P1226L      |
| Pat_16 | Post-Resistance | DCHS2     | 54798  | 37 | 4 | 155241752 | 155241752 | Missense_Mutation | SNP | C  | T  | 5   | 287 | c.3434G>A      | c.(3433-3435)CGA>CAA   | p.R1145Q      |
| Pat_16 | Post-Resistance | FGA       | 2243   | 37 | 4 | 155507586 | 155507586 | Missense_Mutation | SNP | C  | T  | 58  | 99  | c.995G>A       | c.(994-996)GGA>GAA     | p.G332E       |
| Pat_16 | Post-Resistance | CTSO      | 1519   | 37 | 4 | 156864377 | 156864377 | Missense_Mutation | SNP | G  | A  | 53  | 127 | c.175C>T       | c.(175-177)CCC>TCC     | p.P59S        |
| Pat_16 | Post-Resistance | TRIM60    | 166655 | 37 | 4 | 165962593 | 165962593 | Missense_Mutation | SNP | G  | A  | 12  | 40  | c.1369G>A      | c.(1369-1371)GAT>AAT   | p.D457N       |
| Pat_16 | Post-Resistance | SPOCK3    | 50859  | 37 | 4 | 167656164 | 167656164 | Missense_Mutation | SNP | C  | T  | 19  | 49  | c.1219G>A      | c.(1219-1221)GAT>AAT   | p.D407N       |
| Pat_16 | Post-Resistance | DDX60     | 55601  | 37 | 4 | 169206544 | 169206544 | Missense_Mutation | SNP | C  | T  | 17  | 20  | c.1445G>A      | c.(1444-1446)AGT>AAT   | p.S482N       |
| Pat_16 | Post-Resistance | FRG1      | 2483   | 37 | 4 | 190878651 | 190878651 | Missense_Mutation | SNP | G  | A  | 6   | 232 | c.531G>A       | c.(529-531)ATG>ATA     | p.M177I       |
| Pat_16 | Post-Resistance | PRLR      | 5618   | 37 | 5 | 35065819  | 35065819  | Missense_Mutation | SNP | G  | A  | 115 | 330 | c.1241C>T      | c.(1240-1242)TCA>TTA   | p.S414L       |
| Pat_16 | Post-Resistance | IL7R      | 3575   | 37 | 5 | 35867469  | 35867469  | Missense_Mutation | SNP | G  | A  | 21  | 51  | c.283G>A       | c.(283-285)GAG>AAG     | p.E95K        |
| Pat_16 | Post-Resistance | UGT3A2    | 167127 | 37 | 5 | 36036065  | 36036065  | Missense_Mutation | SNP | G  | A  | 4   | 154 | c.1307C>T      | c.(1306-1308)GCG>GTG   | p.A436V       |
| Pat_16 | Post-Resistance | EGFLAM    | 133584 | 37 | 5 | 38370447  | 38370447  | Missense_Mutation | SNP | G  | A  | 86  | 50  | c.595G>A       | c.(595-597)GAC>AAC     | p.D199N       |
| Pat_16 | Post-Resistance | HCN1      | 348980 | 37 | 5 | 45267196  | 45267196  | Missense_Mutation | SNP | C  | T  | 106 | 76  | c.1778G>A      | c.(1777-1779)CGA>CAA   | p.R593Q       |
| Pat_16 | Post-Resistance | HSPB3     | 8988   | 37 | 5 | 53751759  | 53751759  | Missense_Mutation | SNP | A  | G  | 38  | 53  | c.140A>G       | c.(139-141)AAA>AGA     | p.K47R        |
| Pat_16 | Post-Resistance | HMGR      | 3156   | 37 | 5 | 74646107  | 74646107  | Missense_Mutation | SNP | C  | T  | 23  | 46  | c.688C>T       | c.(688-690)CGT>TGT     | p.R230C       |
| Pat_16 | Post-Resistance | CMYA5     | 202333 | 37 | 5 | 79033696  | 79033696  | Missense_Mutation | SNP | A  | T  | 14  | 37  | c.9108A>T      | c.(9106-9108)GAA>GAT   | p.E3036D      |
| Pat_16 | Post-Resistance | FAM172A   | 83989  | 37 | 5 | 93217337  | 93217337  | Missense_Mutation | SNP | G  | A  | 9   | 39  | c.625C>T       | c.(625-627)CCG>TCG     | p.P209S       |
| Pat_16 | Post-Resistance | FAM81B    | 153643 | 37 | 5 | 94756087  | 94756087  | Missense_Mutation | SNP | C  | T  | 73  | 167 | c.637C>T       | c.(637-639)CTT>TTT     | p.L213F       |
| Pat_16 | Post-Resistance | PCSK1     | 5122   | 37 | 5 | 95743978  | 95743978  | Missense_Mutation | SNP | G  | A  | 21  | 61  | c.1145C>T      | c.(1144-1146)TCG>TTG   | p.S382L       |
| Pat_16 | Post-Resistance | CAMK4     | 814    | 37 | 5 | 110560209 | 110560209 | Missense_Mutation | SNP | T  | C  | 3   | 34  | c.28T>C        | c.(28-30)TCC>CCC       | p.S10P        |
| Pat_16 | Post-Resistance | CAMK4     | 814    | 37 | 5 | 110819954 | 110819954 | Missense_Mutation | SNP | A  | T  | 41  | 23  | c.1212A>T      | c.(1210-1212)AAA>AAT   | p.K404N       |

|        |                 |         |        |    |   |           |           |                   |     |   |   |     |     |           |                      |         |
|--------|-----------------|---------|--------|----|---|-----------|-----------|-------------------|-----|---|---|-----|-----|-----------|----------------------|---------|
| Pat_16 | Post-Resistance | PRR16   | 51334  | 37 | 5 | 120021953 | 120021953 | Missense_Mutation | SNP | G | A | 4   | 138 | c.464G>A  | c.(463-465)CGA>CAA   | p.R155Q |
| Pat_16 | Post-Resistance | ALDH7A1 | 501    | 37 | 5 | 125930712 | 125930712 | Missense_Mutation | SNP | C | G | 28  | 7   | c.179G>C  | c.(178-180)GGA>GCA   | p.G60A  |
| Pat_16 | Post-Resistance | C5orf48 | 389320 | 37 | 5 | 125968322 | 125968322 | Missense_Mutation | SNP | G | A | 34  | 73  | c.171G>A  | c.(169-171)ATG>ATA   | p.M57I  |
| Pat_16 | Post-Resistance | TMEM173 | 340061 | 37 | 5 | 138857920 | 138857920 | Missense_Mutation | SNP | G | A | 4   | 221 | c.694C>T  | c.(694-696)CAT>TAT   | p.H232Y |
| Pat_16 | Post-Resistance | HARS    | 3035   | 37 | 5 | 140054286 | 140054286 | Missense_Mutation | SNP | C | T | 6   | 402 | c.1436G>A | c.(1435-1437)CGT>CAT | p.R479H |
| Pat_16 | Post-Resistance | PCDHA12 | 56137  | 37 | 5 | 140255958 | 140255958 | Missense_Mutation | SNP | G | A | 91  | 71  | c.901G>A  | c.(901-903)GAA>AAA   | p.E301K |
| Pat_16 | Post-Resistance | PCDHA12 | 56137  | 37 | 5 | 140256858 | 140256858 | Missense_Mutation | SNP | T | A | 46  | 148 | c.1801T>A | c.(1801-1803)TCC>ACC | p.S601T |
| Pat_16 | Post-Resistance | PCDHB3  | 56132  | 37 | 5 | 140480621 | 140480621 | Missense_Mutation | SNP | T | G | 48  | 148 | c.388T>G  | c.(388-390)TCT>GCT   | p.S130A |
| Pat_16 | Post-Resistance | PCDHB3  | 56132  | 37 | 5 | 140482598 | 140482598 | Missense_Mutation | SNP | T | A | 164 | 120 | c.2365T>A | c.(2365-2367)TTC>ATC | p.F789I |
| Pat_16 | Post-Resistance | PCDHB8  | 56128  | 37 | 5 | 140558076 | 140558076 | Missense_Mutation | SNP | C | T | 34  | 714 | c.461C>T  | c.(460-462)CCT>CTT   | p.P154L |
| Pat_16 | Post-Resistance | PCDHB8  | 56128  | 37 | 5 | 140559324 | 140559324 | Missense_Mutation | SNP | C | T | 25  | 226 | c.1709C>T | c.(1708-1710)TCC>TTC | p.S570F |
| Pat_16 | Post-Resistance | SLC25A2 | 83884  | 37 | 5 | 140682877 | 140682877 | Missense_Mutation | SNP | A | G | 26  | 62  | c.556T>C  | c.(556-558)TTT>CTT   | p.F186L |
| Pat_16 | Post-Resistance | PCDHGB3 | 56102  | 37 | 5 | 140751933 | 140751933 | Missense_Mutation | SNP | G | A | 4   | 161 | c.1972G>A | c.(1972-1974)GTC>ATC | p.V658I |
| Pat_16 | Post-Resistance | NDFIP1  | 80762  | 37 | 5 | 141511890 | 141511890 | Missense_Mutation | SNP | C | T | 199 | 141 | c.265C>T  | c.(265-267)CCT>TCT   | p.P89S  |
| Pat_16 | Post-Resistance | KCTD16  | 57528  | 37 | 5 | 143853540 | 143853540 | Missense_Mutation | SNP | G | A | 14  | 51  | c.1150G>A | c.(1150-1152)GCT>ACT | p.A384T |
| Pat_16 | Post-Resistance | TCERG1  | 10915  | 37 | 5 | 145850279 | 145850279 | Missense_Mutation | SNP | C | T | 14  | 38  | c.1480C>T | c.(1480-1482)CCT>TCT | p.P494S |
| Pat_16 | Post-Resistance | HTR4    | 3360   | 37 | 5 | 147929772 | 147929772 | Missense_Mutation | SNP | G | A | 81  | 251 | c.80C>T   | c.(79-81)TCG>TTG     | p.S27L  |
| Pat_16 | Post-Resistance | ABLIM3  | 22885  | 37 | 5 | 148619377 | 148619377 | Missense_Mutation | SNP | T | C | 112 | 233 | c.1130T>C | c.(1129-1131)ATA>ACA | p.I377T |
| Pat_16 | Post-Resistance | SLC6A7  | 6534   | 37 | 5 | 149574444 | 149574444 | Missense_Mutation | SNP | T | G | 69  | 149 | c.187T>G  | c.(187-189)TTC>GTC   | p.F63V  |
| Pat_16 | Post-Resistance | ZNF300  | 91975  | 37 | 5 | 150275165 | 150275165 | Missense_Mutation | SNP | C | T | 12  | 75  | c.1636G>A | c.(1636-1638)GAG>AAG | p.E546K |
| Pat_16 | Post-Resistance | SLC36A1 | 206358 | 37 | 5 | 150867748 | 150867748 | Missense_Mutation | SNP | C | T | 55  | 40  | c.1364C>T | c.(1363-1365)GCT>GTT | p.A455V |
| Pat_16 | Post-Resistance | HAVCR2  | 84868  | 37 | 5 | 156533766 | 156533766 | Missense_Mutation | SNP | C | T | 4   | 275 | c.266G>A  | c.(265-267)CGC>CAC   | p.R89H  |
| Pat_16 | Post-Resistance | CYFIP2  | 26999  | 37 | 5 | 156768085 | 156768085 | Missense_Mutation | SNP | C | T | 4   | 260 | c.2593C>T | c.(2593-2595)CGG>TGG | p.R865W |
| Pat_16 | Post-Resistance | ADRA1B  | 147    | 37 | 5 | 159344336 | 159344336 | Missense_Mutation | SNP | G | A | 42  | 111 | c.424G>A  | c.(424-426)GAT>AAT   | p.D142N |
| Pat_16 | Post-Resistance | CCNJL   | 79616  | 37 | 5 | 159680534 | 159680534 | Missense_Mutation | SNP | G | A | 5   | 217 | c.1159C>T | c.(1159-1161)CCC>TCC | p.P387S |
| Pat_16 | Post-Resistance | KCNMB1  | 3779   | 37 | 5 | 169810728 | 169810728 | Nonsense_Mutation | SNP | C | T | 50  | 207 | c.261G>A  | c.(259-261)TGG>TGA   | p.W87*  |
| Pat_16 | Post-Resistance | KCNIP1  | 30820  | 37 | 5 | 170147349 | 170147349 | Missense_Mutation | SNP | G | A | 49  | 132 | c.244G>A  | c.(244-246)GAA>AAA   | p.E82K  |
| Pat_16 | Post-Resistance | DDX41   | 51428  | 37 | 5 | 176939551 | 176939551 | Missense_Mutation | SNP | G | A | 27  | 56  | c.1495C>T | c.(1495-1497)CCT>TCT | p.P499S |
| Pat_16 | Post-Resistance | ZNF354C | 30832  | 37 | 5 | 178505930 | 178505930 | Missense_Mutation | SNP | G | A | 41  | 97  | c.497G>A  | c.(496-498)GGG>GAG   | p.G166E |
| Pat_16 | Post-Resistance | TBC1D9B | 23061  | 37 | 5 | 179297386 | 179297386 | Missense_Mutation | SNP | C | T | 4   | 250 | c.2594G>A | c.(2593-2595)CGG>CAG | p.R865Q |
| Pat_16 | Post-Resistance | MAPK9   | 5601   | 37 | 5 | 179663484 | 179663484 | Missense_Mutation | SNP | G | A | 5   | 311 | c.1175C>T | c.(1174-1176)TCG>TTG | p.S392L |
| Pat_16 | Post-Resistance | GFPT2   | 9945   | 37 | 5 | 179729481 | 179729481 | Missense_Mutation | SNP | A | G | 70  | 178 | c.1946T>C | c.(1945-1947)CTG>CCG | p.L649P |
| Pat_16 | Post-Resistance | TRIM7   | 81786  | 37 | 5 | 180622549 | 180622549 | Missense_Mutation | SNP | G | A | 38  | 84  | c.1153C>T | c.(1153-1155)CGC>TGC | p.R385C |
| Pat_16 | Post-Resistance | EXOC2   | 55770  | 37 | 6 | 633049    | 633049    | Nonsense_Mutation | SNP | G | A | 5   | 281 | c.187C>T  | c.(187-189)CGA>TGA   | p.R63*  |
| Pat_16 | Post-Resistance | F13A1   | 2162   | 37 | 6 | 6196100   | 6196100   | Missense_Mutation | SNP | G | A | 4   | 213 | c.1235C>T | c.(1234-1236)CCC>CTC | p.P412L |
| Pat_16 | Post-Resistance | HIVEP1  | 3096   | 37 | 6 | 12122090  | 12122090  | Missense_Mutation | SNP | C | T | 34  | 113 | c.2062C>T | c.(2062-2064)CCA>TCA | p.P688S |
| Pat_16 | Post-Resistance | SLC17A3 | 10786  | 37 | 6 | 25862532  | 25862532  | Missense_Mutation | SNP | C | T | 5   | 223 | c.232G>A  | c.(232-234)GAT>AAT   | p.D78N  |
| Pat_16 | Post-Resistance | ZKSCAN3 | 80317  | 37 | 6 | 28327466  | 28327466  | Missense_Mutation | SNP | C | T | 34  | 171 | c.103C>T  | c.(103-105)CCC>TCC   | p.P35S  |
| Pat_16 | Post-Resistance | OR2W1   | 26692  | 37 | 6 | 29012073  | 29012073  | Missense_Mutation | SNP | T | G | 15  | 18  | c.880A>C  | c.(880-882)AAT>CAT   | p.N294H |
| Pat_16 | Post-Resistance | MOG     | 4340   | 37 | 6 | 29635420  | 29635420  | Missense_Mutation | SNP | G | A | 56  | 103 | c.551G>A  | c.(550-552)GGA>GAA   | p.G184E |
| Pat_16 | Post-Resistance | PPP1R10 | 5514   | 37 | 6 | 30574254  | 30574254  | Missense_Mutation | SNP | G | A | 4   | 272 | c.625C>T  | c.(625-627)CGT>TGT   | p.R209C |
| Pat_16 | Post-Resistance | CFB     | 629    | 37 | 6 | 31914819  | 31914819  | Missense_Mutation | SNP | G | A | 6   | 380 | c.334G>A  | c.(334-336)GGG>AGG   | p.G112R |
| Pat_16 | Post-Resistance | ZBTB22  | 9278   | 37 | 6 | 33283015  | 33283015  | Missense_Mutation | SNP | C | T | 5   | 201 | c.1679G>A | c.(1678-1680)CGA>CAA | p.R560Q |
| Pat_16 | Post-Resistance | KIFC1   | 3833   | 37 | 6 | 33374019  | 33374019  | Missense_Mutation | SNP | G | A | 6   | 553 | c.1583G>A | c.(1582-1584)CGC>CAC | p.R528H |
| Pat_16 | Post-Resistance | SCUBE3  | 222663 | 37 | 6 | 35199628  | 35199628  | Missense_Mutation | SNP | G | A | 6   | 269 | c.461G>A  | c.(460-462)CGG>CAG   | p.R154Q |
| Pat_16 | Post-Resistance | PI16    | 221476 | 37 | 6 | 36931352  | 36931352  | Missense_Mutation | SNP | G | A | 63  | 241 | c.1234G>A | c.(1234-1236)GGT>AGT | p.G412S |
| Pat_16 | Post-Resistance | CAPN11  | 11131  | 37 | 6 | 44144382  | 44144382  | Missense_Mutation | SNP | G | A | 4   | 239 | c.1066G>A | c.(1066-1068)GGG>AGG | p.G356R |

|        |                 |           |        |    |   |           |           |                        |     |    |    |     |     |                                   |                      |               |
|--------|-----------------|-----------|--------|----|---|-----------|-----------|------------------------|-----|----|----|-----|-----|-----------------------------------|----------------------|---------------|
| Pat_16 | Post-Resistance | GPR116    | 221395 | 37 | 6 | 46849223  | 46849223  | Missense_Mutation      | SNP | C  | T  | 111 | 137 | c.783G>A                          | c.(781-783)ATG>ATA   | p.M261I       |
| Pat_16 | Post-Resistance | TNFRSF21  | 27242  | 37 | 6 | 47254246  | 47254246  | Missense_Mutation      | SNP | G  | A  | 4   | 143 | c.182C>T                          | c.(181-183)ACC>ATC   | p.T61I        |
| Pat_16 | Post-Resistance | GFRAL     | 389400 | 37 | 6 | 55196618  | 55196618  | Missense_Mutation      | SNP | G  | A  | 59  | 84  | c.128G>A                          | c.(127-129)AGA>AAA   | p.R43K        |
| Pat_16 | Post-Resistance | HMGCLL1   | 54511  | 37 | 6 | 55364050  | 55364050  | Missense_Mutation      | SNP | G  | A  | 4   | 302 | c.680C>T                          | c.(679-681)CCG>CTG   | p.P227L       |
| Pat_16 | Post-Resistance | ROS1      | 6098   | 37 | 6 | 117631320 | 117631321 | Missense_Mutation      | DNP | CC | TT | 50  | 118 | 6357_6358GG>A355-6360)GGGGAA>GGA  |                      | p.E2120K      |
| Pat_16 | Post-Resistance | VNN3      | 55350  | 37 | 6 | 133055815 | 133055815 | Missense_Mutation      | SNP | A  | T  | 34  | 4   | c.17T>A                           | c.(16-18)TTT>TAT     | p.F6Y         |
| Pat_16 | Post-Resistance | IPCEF1    | 26034  | 37 | 6 | 154489155 | 154489155 | Missense_Mutation      | SNP | G  | A  | 4   | 280 | c.1001C>T                         | c.(1000-1002)TCG>TTG | p.S334L       |
| Pat_16 | Post-Resistance | MICALL2   | 79778  | 37 | 7 | 1482031   | 1482031   | Missense_Mutation      | SNP | G  | A  | 81  | 539 | c.1508C>T                         | c.(1507-1509)TCG>TTG | p.S503L       |
| Pat_16 | Post-Resistance | CHST12    | 55501  | 37 | 7 | 2473175   | 2473175   | Missense_Mutation      | SNP | G  | A  | 4   | 171 | c.901G>A                          | c.(901-903)GCC>ACC   | p.A301T       |
| Pat_16 | Post-Resistance | CARD11    | 84433  | 37 | 7 | 2979526   | 2979526   | Missense_Mutation      | SNP | C  | T  | 125 | 293 | c.721G>A                          | c.(721-723)GAG>AAG   | p.E241K       |
| Pat_16 | Post-Resistance | KIAA0415  | 9907   | 37 | 7 | 4824677   | 4824677   | Missense_Mutation      | SNP | G  | A  | 4   | 168 | c.929G>A                          | c.(928-930)CGA>CAA   | p.R310Q       |
| Pat_16 | Post-Resistance | ETV1      | 2115   | 37 | 7 | 13935508  | 13935508  | Missense_Mutation      | SNP | C  | T  | 15  | 96  | c.1417G>A                         | c.(1417-1419)GAA>AAA | p.E473K       |
| Pat_16 | Post-Resistance | AGR2      | 10551  | 37 | 7 | 16841412  | 16841413  | Missense_Mutation      | DNP | TT | CA | 95  | 76  | c.8_9AA>TG                        | c.(7-9)AAA>ATG       | p.K3M         |
| Pat_16 | Post-Resistance | DNAH11    | 8701   | 37 | 7 | 21784183  | 21784183  | Missense_Mutation      | SNP | G  | A  | 56  | 51  | c.8303G>A                         | c.(8302-8304)AGA>AAA | p.R2768K      |
| Pat_16 | Post-Resistance | STK31     | 56164  | 37 | 7 | 23768836  | 23768836  | Missense_Mutation      | SNP | C  | T  | 25  | 35  | c.451C>T                          | c.(451-453)CCT>TCT   | p.P151S       |
| Pat_16 | Post-Resistance | SKAP2     | 8935   | 37 | 7 | 26765185  | 26765185  | Splice_Site            | SNP | C  | T  | 25  | 102 | c.659_splice                      | c.e9-1               | p.D220_splice |
| Pat_16 | Post-Resistance | LOC402644 | 402644 | 37 | 7 | 28318921  | 28318922  | Missense_Mutation      | DNP | CT | TC | 154 | 144 | c.397_398AG>GA                    | c.(397-399)AGA>GAA   | p.R133E       |
| Pat_16 | Post-Resistance | AQP1      | 358    | 37 | 7 | 30961729  | 30961729  | Missense_Mutation      | SNP | G  | A  | 5   | 355 | c.433G>A                          | c.(433-435)GGG>AGG   | p.G145R       |
| Pat_16 | Post-Resistance | DPY19L2P1 | 554236 | 37 | 7 | 35163615  | 35163615  | Missense_Mutation      | SNP | C  | T  | 38  | 58  | c.481G>A                          | c.(481-483)GAC>AAC   | p.D161N       |
| Pat_16 | Post-Resistance | PURB      | 5814   | 37 | 7 | 44924053  | 44924053  | Missense_Mutation      | SNP | C  | T  | 6   | 591 | c.895G>A                          | c.(895-897)GGC>AGC   | p.G299S       |
| Pat_16 | Post-Resistance | VSTM2A    | 222008 | 37 | 7 | 54610419  | 54610419  | Translation_Start_Site | SNP | T  | A  | 89  | 60  | c.-4T>A                           | c.(-6--2)TTTTG>TTATG |               |
| Pat_16 | Post-Resistance | ZNF716    | 441234 | 37 | 7 | 57529023  | 57529023  | Missense_Mutation      | SNP | T  | C  | 7   | 359 | c.856T>C                          | c.(856-858)TAC>CAC   | p.Y286H       |
| Pat_16 | Post-Resistance | ZNF716    | 441234 | 37 | 7 | 57529048  | 57529048  | Missense_Mutation      | SNP | A  | G  | 8   | 426 | c.881A>G                          | c.(880-882)AAA>AGA   | p.K294R       |
| Pat_16 | Post-Resistance | ZNF716    | 441234 | 37 | 7 | 57529057  | 57529057  | Missense_Mutation      | SNP | C  | A  | 8   | 438 | c.890C>A                          | c.(889-891)ACA>AAA   | p.T297K       |
| Pat_16 | Post-Resistance | ZNF735    | 730291 | 37 | 7 | 63680426  | 63680426  | Missense_Mutation      | SNP | G  | A  | 6   | 434 | c.997G>A                          | c.(997-999)GCC>ACC   | p.A333T       |
| Pat_16 | Post-Resistance | AUTS2     | 26053  | 37 | 7 | 70228066  | 70228066  | Missense_Mutation      | SNP | C  | T  | 24  | 128 | c.953C>T                          | c.(952-954)CCT>CTT   | p.P318L       |
| Pat_16 | Post-Resistance | DTX2      | 113878 | 37 | 7 | 76132828  | 76132828  | Missense_Mutation      | SNP | G  | A  | 4   | 119 | c.1475G>A                         | c.(1474-1476)CGG>CAG | p.R492Q       |
| Pat_16 | Post-Resistance | SEMA3C    | 10512  | 37 | 7 | 80435062  | 80435062  | Missense_Mutation      | SNP | A  | T  | 18  | 28  | c.551T>A                          | c.(550-552)TTC>TAC   | p.F184Y       |
| Pat_16 | Post-Resistance | HGF       | 3082   | 37 | 7 | 81372738  | 81372739  | Nonsense_Mutation      | DNP | GG | AA | 157 | 90  | c.795_796CC>TT793-798)GGCCAG>GGTT |                      | p.Q266*       |
| Pat_16 | Post-Resistance | DMTF1     | 9988   | 37 | 7 | 86813826  | 86813826  | Nonsense_Mutation      | SNP | C  | T  | 4   | 185 | c.934C>T                          | c.(934-936)CGA>TGA   | p.R312*       |
| Pat_16 | Post-Resistance | CCDC132   | 55610  | 37 | 7 | 92970884  | 92970884  | Missense_Mutation      | SNP | C  | T  | 49  | 190 | c.2204C>T                         | c.(2203-2205)TCC>TTC | p.S735F       |
| Pat_16 | Post-Resistance | SLC25A13  | 10165  | 37 | 7 | 95751046  | 95751046  | Nonsense_Mutation      | SNP | G  | A  | 6   | 466 | c.1762C>T                         | c.(1762-1764)CGA>TGA | p.R588*       |
| Pat_16 | Post-Resistance | CYP3A5    | 1577   | 37 | 7 | 99272168  | 99272168  | Missense_Mutation      | SNP | C  | T  | 111 | 115 | c.206G>A                          | c.(205-207)GGA>GAA   | p.G69E        |
| Pat_16 | Post-Resistance | ACTL6B    | 51412  | 37 | 7 | 100252698 | 100252698 | Missense_Mutation      | SNP | T  | C  | 4   | 295 | c.313A>G                          | c.(313-315)AGC>GGC   | p.S105G       |
| Pat_16 | Post-Resistance | ZAN       | 7455   | 37 | 7 | 100350024 | 100350024 | Missense_Mutation      | SNP | C  | T  | 7   | 413 | c.2296C>T                         | c.(2296-2298)CCC>TCC | p.P766S       |
| Pat_16 | Post-Resistance | ZAN       | 7455   | 37 | 7 | 100350033 | 100350033 | Missense_Mutation      | SNP | T  | C  | 7   | 424 | c.2305T>C                         | c.(2305-2307)TCC>CCC | p.S769P       |
| Pat_16 | Post-Resistance | ZAN       | 7455   | 37 | 7 | 100350052 | 100350052 | Missense_Mutation      | SNP | T  | C  | 5   | 450 | c.2324T>C                         | c.(2323-2325)ATC>ACC | p.I775T       |
| Pat_16 | Post-Resistance | EPHB4     | 2050   | 37 | 7 | 100405129 | 100405129 | Missense_Mutation      | SNP | A  | C  | 275 | 391 | c.2192T>G                         | c.(2191-2193)CTT>CGT | p.L731R       |
| Pat_16 | Post-Resistance | MUC17     | 140453 | 37 | 7 | 100678520 | 100678520 | Missense_Mutation      | SNP | G  | A  | 329 | 496 | c.3823G>A                         | c.(3823-3825)GAA>AAA | p.E1275K      |
| Pat_16 | Post-Resistance | ALKBH4    | 54784  | 37 | 7 | 102100061 | 102100061 | Missense_Mutation      | SNP | C  | T  | 6   | 493 | c.311G>A                          | c.(310-312)CGG>CAG   | p.R104Q       |
| Pat_16 | Post-Resistance | SLC26A3   | 1811   | 37 | 7 | 107408046 | 107408046 | Missense_Mutation      | SNP | C  | T  | 26  | 54  | c.2249G>A                         | c.(2248-2250)GGA>GAA | p.G750E       |
| Pat_16 | Post-Resistance | LAMB4     | 22798  | 37 | 7 | 107678038 | 107678038 | Missense_Mutation      | SNP | C  | T  | 113 | 106 | c.4474G>A                         | c.(4474-4476)GAA>AAA | p.E1492K      |
| Pat_16 | Post-Resistance | DOCK4     | 9732   | 37 | 7 | 111368526 | 111368526 | Missense_Mutation      | SNP | G  | A  | 29  | 114 | c.5705C>T                         | c.(5704-5706)CCG>CTG | p.P1902L      |
| Pat_16 | Post-Resistance | PPP1R3A   | 5506   | 37 | 7 | 113518058 | 113518058 | Missense_Mutation      | SNP | C  | T  | 147 | 331 | c.3089G>A                         | c.(3088-3090)GGA>GAA | p.G1030E      |
| Pat_16 | Post-Resistance | PPP1R3A   | 5506   | 37 | 7 | 113518735 | 113518735 | Missense_Mutation      | SNP | T  | G  | 20  | 117 | c.2412A>C                         | c.(2410-2412)GAA>GAC | p.E804D       |
| Pat_16 | Post-Resistance | PPP1R3A   | 5506   | 37 | 7 | 113518737 | 113518737 | Missense_Mutation      | SNP | C  | T  | 21  | 114 | c.2410G>A                         | c.(2410-2412)GAA>AAA | p.E804K       |
| Pat_16 | Post-Resistance | ING3      | 54556  | 37 | 7 | 120607624 | 120607624 | Missense_Mutation      | SNP | C  | T  | 22  | 115 | c.478C>T                          | c.(478-480)CAT>TAT   | p.H160Y       |

|        |                 |          |        |    |   |           |           |                   |     |    |    |     |     |                  |                      |          |
|--------|-----------------|----------|--------|----|---|-----------|-----------|-------------------|-----|----|----|-----|-----|------------------|----------------------|----------|
| Pat_16 | Post-Resistance | FLNC     | 2318   | 37 | 7 | 128494697 | 128494697 | Missense_Mutation | SNP | G  | A  | 16  | 58  | c.6958G>A        | c.(6958-6960)GGA>AGA | p.G2320R |
| Pat_16 | Post-Resistance | IRF5     | 3663   | 37 | 7 | 128588784 | 128588784 | Missense_Mutation | SNP | G  | A  | 4   | 283 | c.1427G>A        | c.(1426-1428)CGG>CAG | p.R476Q  |
| Pat_16 | Post-Resistance | FAM40B   | 57464  | 37 | 7 | 129122704 | 129122704 | Missense_Mutation | SNP | G  | A  | 205 | 220 | c.2071G>A        | c.(2071-2073)GCA>ACA | p.A691T  |
| Pat_16 | Post-Resistance | PLXNA4   | 91584  | 37 | 7 | 131859659 | 131859659 | Missense_Mutation | SNP | C  | T  | 63  | 363 | c.3895G>A        | c.(3895-3897)GAC>AAC | p.D1299N |
| Pat_16 | Post-Resistance | AKR1B10  | 57016  | 37 | 7 | 134215537 | 134215537 | Missense_Mutation | SNP | G  | A  | 5   | 519 | c.209G>A         | c.(208-210)CGG>CAG   | p.R70Q   |
| Pat_16 | Post-Resistance | UBN2     | 254048 | 37 | 7 | 138958812 | 138958812 | Missense_Mutation | SNP | G  | A  | 4   | 109 | c.1965G>A        | c.(1963-1965)ATG>ATA | p.M655I  |
| Pat_16 | Post-Resistance | JHDM1D   | 80853  | 37 | 7 | 139791679 | 139791679 | Missense_Mutation | SNP | A  | C  | 74  | 272 | c.2656T>G        | c.(2656-2658)TCC>GCC | p.S886A  |
| Pat_16 | Post-Resistance | BRAF     | 673    | 37 | 7 | 140453136 | 140453136 | Missense_Mutation | SNP | A  | T  | 120 | 128 | c.1799T>A        | c.(1798-1800)GTG>GAG | p.V600E  |
| Pat_16 | Post-Resistance | TAS2R38  | 5726   | 37 | 7 | 141673404 | 141673404 | Missense_Mutation | SNP | C  | T  | 158 | 294 | c.86G>A          | c.(85-87)GGG>GAG     | p.G29E   |
| Pat_16 | Post-Resistance | TRYX3    | 136541 | 37 | 7 | 141952429 | 141952429 | Missense_Mutation | SNP | T  | C  | 77  | 110 | c.439A>G         | c.(439-441)AAA>GAA   | p.K147E  |
| Pat_16 | Post-Resistance | TRPV5    | 56302  | 37 | 7 | 142626540 | 142626540 | Missense_Mutation | SNP | C  | T  | 5   | 326 | c.470G>A         | c.(469-471)CGC>CAC   | p.R157H  |
| Pat_16 | Post-Resistance | TAS2R60  | 338398 | 37 | 7 | 143140918 | 143140918 | Missense_Mutation | SNP | T  | A  | 392 | 274 | c.373T>A         | c.(373-375)TTC>ATC   | p.F125I  |
| Pat_16 | Post-Resistance | ACCN3    | 9311   | 37 | 7 | 150749275 | 150749275 | Missense_Mutation | SNP | G  | A  | 117 | 637 | c.1409G>A        | c.(1408-1410)GGA>GAA | p.G470E  |
| Pat_16 | Post-Resistance | CSMD1    | 64478  | 37 | 8 | 3216769   | 3216769   | Missense_Mutation | SNP | G  | A  | 137 | 79  | c.3212C>T        | c.(3211-3213)TCC>TTC | p.S1071F |
| Pat_16 | Post-Resistance | SGK223   | 157285 | 37 | 8 | 8235459   | 8235459   | Missense_Mutation | SNP | G  | A  | 4   | 291 | c.460C>T         | c.(460-462)CGC>TGC   | p.R154C  |
| Pat_16 | Post-Resistance | MTMR7    | 9108   | 37 | 8 | 17228656  | 17228656  | Missense_Mutation | SNP | C  | T  | 128 | 450 | c.200G>A         | c.(199-201)GGA>GAA   | p.G67E   |
| Pat_16 | Post-Resistance | SORBS3   | 10174  | 37 | 8 | 22428730  | 22428730  | Missense_Mutation | SNP | C  | T  | 21  | 163 | c.1739C>T        | c.(1738-1740)ACC>ATC | p.T580I  |
| Pat_16 | Post-Resistance | SLC25A37 | 51312  | 37 | 8 | 23423681  | 23423681  | Missense_Mutation | SNP | C  | T  | 63  | 34  | c.271C>T         | c.(271-273)CTC>TTC   | p.L91F   |
| Pat_16 | Post-Resistance | EIF4EBP1 | 1978   | 37 | 8 | 37914667  | 37914667  | Missense_Mutation | SNP | C  | T  | 284 | 132 | c.214C>T         | c.(214-216)CCA>TCA   | p.P72S   |
| Pat_16 | Post-Resistance | GIN54    | 84296  | 37 | 8 | 41397511  | 41397511  | Missense_Mutation | SNP | C  | T  | 4   | 236 | c.472C>T         | c.(472-474)CTC>TTC   | p.L158F  |
| Pat_16 | Post-Resistance | ANK1     | 286    | 37 | 8 | 41551520  | 41551520  | Missense_Mutation | SNP | C  | T  | 4   | 136 | c.3428G>A        | c.(3427-3429)CGC>CAC | p.R1143H |
| Pat_16 | Post-Resistance | SLC20A2  | 6575   | 37 | 8 | 42294807  | 42294807  | Missense_Mutation | SNP | G  | A  | 39  | 145 | c.1223C>T        | c.(1222-1224)TCG>TTG | p.S408L  |
| Pat_16 | Post-Resistance | PXDNL    | 137902 | 37 | 8 | 52232512  | 52232512  | Missense_Mutation | SNP | C  | T  | 76  | 37  | c.4331G>A        | c.(4330-4332)GGA>GAA | p.G1444E |
| Pat_16 | Post-Resistance | PXDNL    | 137902 | 37 | 8 | 52320945  | 52320946  | Missense_Mutation | DNP | GG | AA | 9   | 52  | ..:3238_3239CC>T | c.(3238-3240)CCG>TTG | p.P1080L |
| Pat_16 | Post-Resistance | TGS1     | 96764  | 37 | 8 | 56695312  | 56695312  | Missense_Mutation | SNP | G  | A  | 4   | 248 | c.107G>A         | c.(106-108)CGA>CAA   | p.R36Q   |
| Pat_16 | Post-Resistance | PENK     | 5179   | 37 | 8 | 57354297  | 57354297  | Missense_Mutation | SNP | T  | A  | 21  | 95  | c.338A>T         | c.(337-339)AAA>ATA   | p.K113I  |
| Pat_16 | Post-Resistance | CLVS1    | 157807 | 37 | 8 | 62212762  | 62212762  | Missense_Mutation | SNP | T  | C  | 29  | 129 | c.376T>C         | c.(376-378)TTC>CTC   | p.F126L  |
| Pat_16 | Post-Resistance | PI15     | 51050  | 37 | 8 | 75757656  | 75757656  | Missense_Mutation | SNP | C  | T  | 79  | 289 | c.565C>T         | c.(565-567)CAT>TAT   | p.H189Y  |
| Pat_16 | Post-Resistance | CA1      | 759    | 37 | 8 | 86242024  | 86242024  | Missense_Mutation | SNP | G  | A  | 19  | 21  | c.563C>T         | c.(562-564)TCA>TTA   | p.S188L  |
| Pat_16 | Post-Resistance | REXO1L1  | 254958 | 37 | 8 | 86574444  | 86574444  | Missense_Mutation | SNP | C  | T  | 5   | 62  | c.779G>A         | c.(778-780)CGC>CAC   | p.R260H  |
| Pat_16 | Post-Resistance | ANGPT1   | 284    | 37 | 8 | 108334328 | 108334328 | Missense_Mutation | SNP | C  | T  | 4   | 26  | c.604G>A         | c.(604-606)GAA>AAA   | p.E202K  |
| Pat_16 | Post-Resistance | ASAP1    | 50807  | 37 | 8 | 131088611 | 131088611 | Missense_Mutation | SNP | G  | A  | 58  | 25  | c.2684C>T        | c.(2683-2685)CCT>CTT | p.P895L  |
| Pat_16 | Post-Resistance | ADCY8    | 114    | 37 | 8 | 131880120 | 131880120 | Missense_Mutation | SNP | C  | T  | 54  | 167 | c.2182G>A        | c.(2182-2184)GCA>ACA | p.A728T  |
| Pat_16 | Post-Resistance | TG       | 7038   | 37 | 8 | 133925417 | 133925417 | Missense_Mutation | SNP | C  | T  | 43  | 175 | c.4285C>T        | c.(4285-4287)CAC>TAC | p.H1429Y |
| Pat_16 | Post-Resistance | DENND3   | 22898  | 37 | 8 | 142202543 | 142202543 | Missense_Mutation | SNP | C  | T  | 18  | 84  | c.3253C>T        | c.(3253-3255)CCT>TCT | p.P1085S |
| Pat_16 | Post-Resistance | LYPD2    | 137797 | 37 | 8 | 143832556 | 143832556 | Missense_Mutation | SNP | G  | A  | 73  | 270 | c.91C>T          | c.(91-93)CCC>TCC     | p.P31S   |
| Pat_16 | Post-Resistance | CYP11B1  | 1584   | 37 | 8 | 143958215 | 143958215 | Missense_Mutation | SNP | C  | T  | 27  | 14  | c.682G>A         | c.(682-684)GAG>AAG   | p.E228K  |
| Pat_16 | Post-Resistance | ZC3H3    | 23144  | 37 | 8 | 144550663 | 144550663 | Missense_Mutation | SNP | C  | T  | 4   | 43  | c.1994G>A        | c.(1993-1995)CGC>CAC | p.R665H  |
| Pat_16 | Post-Resistance | GPR172A  | 79581  | 37 | 8 | 145583036 | 145583036 | Missense_Mutation | SNP | A  | G  | 4   | 97  | c.83A>G          | c.(82-84)AAT>AGT     | p.N28S   |
| Pat_16 | Post-Resistance | FOXH1    | 8928   | 37 | 8 | 145699782 | 145699782 | Missense_Mutation | SNP | C  | T  | 168 | 72  | c.937G>A         | c.(937-939)GTG>ATG   | p.V313M  |
| Pat_16 | Post-Resistance | GPT      | 2875   | 37 | 8 | 145730425 | 145730425 | Missense_Mutation | SNP | G  | A  | 4   | 152 | c.406G>A         | c.(406-408)GTG>ATG   | p.V136M  |
| Pat_16 | Post-Resistance | DOCK8    | 81704  | 37 | 9 | 386341    | 386341    | Missense_Mutation | SNP | G  | A  | 4   | 159 | c.2789G>A        | c.(2788-2790)CGC>CAC | p.R930H  |
| Pat_16 | Post-Resistance | VCP      | 7415   | 37 | 9 | 35059143  | 35059143  | Missense_Mutation | SNP | C  | T  | 4   | 204 | c.2078G>A        | c.(2077-2079)CGT>CAT | p.R693H  |
| Pat_16 | Post-Resistance | FAM75A6  | 389730 | 37 | 9 | 43627096  | 43627096  | Missense_Mutation | SNP | G  | A  | 349 | 53  | c.1591C>T        | c.(1591-1593)CTC>TTC | p.L531F  |
| Pat_16 | Post-Resistance | RMI1     | 80010  | 37 | 9 | 86617211  | 86617211  | Missense_Mutation | SNP | C  | T  | 5   | 16  | c.1310C>T        | c.(1309-1311)TCC>TTC | p.S437F  |
| Pat_16 | Post-Resistance | C9orf102 | 375748 | 37 | 9 | 98691032  | 98691032  | Missense_Mutation | SNP | C  | T  | 5   | 221 | c.1670C>T        | c.(1669-1671)GCG>GTG | p.A557V  |
| Pat_16 | Post-Resistance | OR13C4   | 138804 | 37 | 9 | 107288820 | 107288820 | Missense_Mutation | SNP | G  | A  | 223 | 34  | c.671C>T         | c.(670-672)ACC>ATC   | p.T224I  |



|        |                 |          |        |    |   |           |           |                   |     |    |    |     |     |                |                      |          |
|--------|-----------------|----------|--------|----|---|-----------|-----------|-------------------|-----|----|----|-----|-----|----------------|----------------------|----------|
| Pat_16 | Post-Resistance | KIAA1958 | 158405 | 37 | 9 | 115336703 | 115336703 | Missense_Mutation | SNP | C  | T  | 4   | 165 | c.343C>T       | c.(343-345)CGG>TGG   | p.R115W  |
| Pat_16 | Post-Resistance | ASTN2    | 23245  | 37 | 9 | 119858377 | 119858377 | Missense_Mutation | SNP | C  | T  | 128 | 29  | c.1222G>A      | c.(1222-1224)GAA>AAA | p.E408K  |
| Pat_16 | Post-Resistance | CEP110   | 11064  | 37 | 9 | 123886288 | 123886288 | Missense_Mutation | SNP | G  | A  | 4   | 112 | c.1730G>A      | c.(1729-1731)CGT>CAT | p.R577H  |
| Pat_16 | Post-Resistance | STOM     | 2040   | 37 | 9 | 124111550 | 124111550 | Missense_Mutation | SNP | G  | A  | 4   | 251 | c.373C>T       | c.(373-375)CGC>TGC   | p.R125C  |
| Pat_16 | Post-Resistance | COQ4     | 51117  | 37 | 9 | 131088075 | 131088075 | Missense_Mutation | SNP | C  | T  | 108 | 23  | c.317C>T       | c.(316-318)TCG>TTG   | p.S106L  |
| Pat_16 | Post-Resistance | SPTAN1   | 6709   | 37 | 9 | 131339474 | 131339475 | Nonsense_Mutation | DNP | CC | TT | 145 | 26  | c.852_853CC>TT | 350-855)GGCCGA>GGTT  | p.R285*  |
| Pat_16 | Post-Resistance | FUBP3    | 8939   | 37 | 9 | 133506104 | 133506104 | Missense_Mutation | SNP | C  | T  | 3   | 73  | c.1207C>T      | c.(1207-1209)CGG>TGG | p.R403W  |
| Pat_16 | Post-Resistance | DPP7     | 29952  | 37 | 9 | 140006403 | 140006403 | Missense_Mutation | SNP | G  | A  | 4   | 87  | c.1129C>T      | c.(1129-1131)CTC>TTC | p.L377F  |
| Pat_16 | Post-Resistance | ANAPC2   | 29882  | 37 | 9 | 140082888 | 140082888 | Missense_Mutation | SNP | G  | A  | 4   | 43  | c.97C>T        | c.(97-99)CCG>TCG     | p.P33S   |
| Pat_16 | Post-Resistance | SLC34A3  | 142680 | 37 | 9 | 140127244 | 140127244 | Missense_Mutation | SNP | G  | A  | 61  | 20  | c.313G>A       | c.(313-315)GCC>ACC   | p.A105T  |
| Pat_16 | Post-Resistance | FAM9B    | 171483 | 37 | X | 8998366   | 8998366   | Missense_Mutation | SNP | C  | T  | 8   | 5   | c.217G>A       | c.(217-219)GAT>AAT   | p.D73N   |
| Pat_16 | Post-Resistance | FRMPD4   | 9758   | 37 | X | 12712519  | 12712519  | Missense_Mutation | SNP | T  | G  | 68  | 8   | c.879T>G       | c.(877-879)GAT>GAG   | p.D293E  |
| Pat_16 | Post-Resistance | RBBP7    | 5931   | 37 | X | 16870948  | 16870948  | Missense_Mutation | SNP | G  | A  | 6   | 582 | c.809C>T       | c.(808-810)GCG>GTG   | p.A270V  |
| Pat_16 | Post-Resistance | POLA1    | 5422   | 37 | X | 25014054  | 25014054  | Missense_Mutation | SNP | C  | T  | 71  | 18  | c.4376C>T      | c.(4375-4377)GCC>GTC | p.A1459V |
| Pat_16 | Post-Resistance | FAM47C   | 442444 | 37 | X | 37027345  | 37027345  | Nonsense_Mutation | SNP | A  | T  | 44  | 81  | c.862A>T       | c.(862-864)AAG>TAG   | p.K288*  |
| Pat_16 | Post-Resistance | USP9X    | 8239   | 37 | X | 41029282  | 41029282  | Nonsense_Mutation | SNP | C  | T  | 6   | 346 | c.2671C>T      | c.(2671-2673)CGA>TGA | p.R891*  |
| Pat_16 | Post-Resistance | CLCN5    | 1184   | 37 | X | 49837183  | 49837183  | Missense_Mutation | SNP | C  | T  | 78  | 131 | c.145C>T       | c.(145-147)CAC>TAC   | p.H49Y   |
| Pat_16 | Post-Resistance | MAGED2   | 10916  | 37 | X | 54837323  | 54837323  | Nonsense_Mutation | SNP | C  | T  | 3   | 44  | c.607C>T       | c.(607-609)CGA>TGA   | p.R203*  |
| Pat_16 | Post-Resistance | SLC7A3   | 84889  | 37 | X | 70147375  | 70147375  | Missense_Mutation | SNP | C  | T  | 3   | 59  | c.1142G>A      | c.(1141-1143)CGC>CAC | p.R381H  |
| Pat_16 | Post-Resistance | MED12    | 9968   | 37 | X | 70345264  | 70345264  | Nonsense_Mutation | SNP | C  | T  | 4   | 85  | c.2290C>T      | c.(2290-2292)CGA>TGA | p.R764*  |
| Pat_16 | Post-Resistance | MAGEE1   | 57692  | 37 | X | 75649314  | 75649314  | Missense_Mutation | SNP | T  | C  | 3   | 70  | c.991T>C       | c.(991-993)TCC>CCC   | p.S331P  |
| Pat_16 | Post-Resistance | CYLC1    | 1538   | 37 | X | 83129484  | 83129484  | Missense_Mutation | SNP | G  | A  | 18  | 4   | c.1768G>A      | c.(1768-1770)GAA>AAA | p.E590K  |
| Pat_16 | Post-Resistance | ZNF711   | 7552   | 37 | X | 84519283  | 84519283  | Missense_Mutation | SNP | G  | A  | 18  | 1   | c.625G>A       | c.(625-627)GAT>AAT   | p.D209N  |
| Pat_16 | Post-Resistance | ARMCX2   | 9823   | 37 | X | 100911659 | 100911659 | Missense_Mutation | SNP | C  | T  | 5   | 214 | c.916G>A       | c.(916-918)GAA>AAA   | p.E306K  |
| Pat_16 | Post-Resistance | H2BFWT   | 158983 | 37 | X | 103267838 | 103267838 | Missense_Mutation | SNP | G  | A  | 44  | 6   | c.395C>T       | c.(394-396)ACC>ATC   | p.T132I  |
| Pat_16 | Post-Resistance | IL1RAPL2 | 26280  | 37 | X | 105011625 | 105011625 | Missense_Mutation | SNP | G  | A  | 139 | 28  | c.2032G>A      | c.(2032-2034)GAG>AAG | p.E678K  |
| Pat_16 | Post-Resistance | GUCY2F   | 2986   | 37 | X | 108719089 | 108719089 | Missense_Mutation | SNP | C  | T  | 146 | 22  | c.77G>A        | c.(76-78)GGC>GAC     | p.G26D   |
| Pat_16 | Post-Resistance | TRPC5    | 7224   | 37 | X | 111095642 | 111095642 | Missense_Mutation | SNP | C  | T  | 180 | 38  | c.1261G>A      | c.(1261-1263)GAA>AAA | p.E421K  |
| Pat_16 | Post-Resistance | HTR2C    | 3358   | 37 | X | 114141526 | 114141526 | Missense_Mutation | SNP | G  | A  | 109 | 17  | c.925G>A       | c.(925-927)GCT>ACT   | p.A309T  |
| Pat_16 | Post-Resistance | SLC6A14  | 11254  | 37 | X | 115586574 | 115586574 | Nonsense_Mutation | SNP | G  | A  | 114 | 152 | c.1556G>A      | c.(1555-1557)TGG>TAG | p.W519*  |
| Pat_16 | Post-Resistance | ODZ1     | 10178  | 37 | X | 123654419 | 123654419 | Nonsense_Mutation | SNP | C  | T  | 195 | 36  | c.3249G>A      | c.(3247-3249)TGG>TGA | p.W1083* |
| Pat_16 | Post-Resistance | PHF6     | 84295  | 37 | X | 133551320 | 133551320 | Missense_Mutation | SNP | G  | A  | 4   | 91  | c.956G>A       | c.(955-957)CGA>CAA   | p.R319Q  |
| Pat_16 | Post-Resistance | FGF13    | 2258   | 37 | X | 137717738 | 137717738 | Missense_Mutation | SNP | G  | A  | 4   | 193 | c.481C>T       | c.(481-483)CGT>TGT   | p.R161C  |
| Pat_16 | Post-Resistance | GABRQ    | 55879  | 37 | X | 151819009 | 151819009 | Missense_Mutation | SNP | G  | A  | 552 | 85  | c.867G>A       | c.(865-867)ATG>ATA   | p.M289I  |
| Pat_16 | Post-Resistance | IRAK1    | 3654   | 37 | X | 153278016 | 153278016 | Missense_Mutation | SNP | C  | G  | 3   | 66  | c.2044G>C      | c.(2044-2046)GAC>CAC | p.D682H  |
| Pat_16 | Post-Resistance | FAM50A   | 9130   | 37 | X | 153674018 | 153674018 | Missense_Mutation | SNP | C  | T  | 131 | 17  | c.149C>T       | c.(148-150)TCT>TTT   | p.S50F   |
| Pat_16 | Post-Resistance | PLXNA3   | 55558  | 37 | X | 153688933 | 153688933 | Missense_Mutation | SNP | G  | A  | 4   | 175 | c.410G>A       | c.(409-411)CGC>CAC   | p.R137H  |
| Pat_16 | Pre-Treatment   | KIAA1751 | 85452  | 37 | 1 | 1920014   | 1920014   | Missense_Mutation | SNP | C  | A  | 36  | 97  | c.233G>T       | c.(232-234)CGG>CTG   | p.R78L   |
| Pat_16 | Pre-Treatment   | GPR157   | 80045  | 37 | 1 | 9164611   | 9164611   | Missense_Mutation | SNP | G  | A  | 18  | 28  | c.875C>T       | c.(874-876)TCT>TTT   | p.S292F  |
| Pat_16 | Pre-Treatment   | VPS13D   | 55187  | 37 | 1 | 12333084  | 12333084  | Missense_Mutation | SNP | C  | T  | 4   | 246 | c.2128C>T      | c.(2128-2130)CGG>TGG | p.R710W  |
| Pat_16 | Pre-Treatment   | CLCNKA   | 1187   | 37 | 1 | 16358320  | 16358320  | Missense_Mutation | SNP | C  | T  | 71  | 39  | c.1738C>T      | c.(1738-1740)CCC>TCC | p.P580S  |
| Pat_16 | Pre-Treatment   | NBPF3    | 84224  | 37 | 1 | 21797199  | 21797199  | Missense_Mutation | SNP | G  | A  | 32  | 36  | c.418G>A       | c.(418-420)GAG>AAG   | p.E140K  |
| Pat_16 | Pre-Treatment   | E2F2     | 1870   | 37 | 1 | 23848405  | 23848405  | Missense_Mutation | SNP | G  | A  | 4   | 148 | c.502C>T       | c.(502-504)CGC>TGC   | p.R168C  |
| Pat_16 | Pre-Treatment   | GALE     | 2582   | 37 | 1 | 24124709  | 24124709  | Missense_Mutation | SNP | C  | A  | 4   | 95  | c.249G>T       | c.(247-249)ATG>ATT   | p.M83I   |
| Pat_16 | Pre-Treatment   | SRRM1    | 10250  | 37 | 1 | 24993374  | 24993374  | Missense_Mutation | SNP | C  | A  | 6   | 171 | c.1697C>A      | c.(1696-1698)CCT>CAT | p.P566H  |
| Pat_16 | Pre-Treatment   | SRRM1    | 10250  | 37 | 1 | 24993386  | 24993386  | Missense_Mutation | SNP | G  | T  | 6   | 166 | c.1709G>T      | c.(1708-1710)CGC>CTC | p.R570L  |
| Pat_16 | Pre-Treatment   | UBXN11   | 91544  | 37 | 1 | 26612001  | 26612001  | Missense_Mutation | SNP | A  | T  | 19  | 39  | c.806T>A       | c.(805-807)TTT>TAT   | p.F269Y  |

|        |               |          |           |    |   |           |           |                   |     |   |   |     |     |               |                        |               |
|--------|---------------|----------|-----------|----|---|-----------|-----------|-------------------|-----|---|---|-----|-----|---------------|------------------------|---------------|
| Pat_16 | Pre-Treatment | ARID1A   | 8289      | 37 | 1 | 27107000  | 27107000  | Missense_Mutation | SNP | C | T | 54  | 117 | c.6611C>T     | c.(6610-6612)GCC>GTC   | p.A2204V      |
| Pat_16 | Pre-Treatment | ZSCAN20  | 7579      | 37 | 1 | 33945010  | 33945010  | Missense_Mutation | SNP | C | T | 62  | 36  | c.121C>T      | c.(121-123)CGT>TGT     | p.R41C        |
| Pat_16 | Pre-Treatment | CSMD2    | 114784    | 37 | 1 | 34285316  | 34285316  | Missense_Mutation | SNP | C | T | 3   | 20  | c.1202G>A     | c.(1201-1203)CGA>CAA   | p.R401Q       |
| Pat_16 | Pre-Treatment | ZNF642   | 339559    | 37 | 1 | 40954845  | 40954845  | Missense_Mutation | SNP | G | A | 146 | 100 | c.305G>A      | c.(304-306)CGA>CAA     | p.R102Q       |
| Pat_16 | Pre-Treatment | WDR65    | 149465    | 37 | 1 | 43672452  | 43672452  | Missense_Mutation | SNP | C | T | 4   | 231 | c.1604C>T     | c.(1603-1605)GCT>GTT   | p.A535V       |
| Pat_16 | Pre-Treatment | C1orf175 | 374977    | 37 | 1 | 55151979  | 55151979  | Missense_Mutation | SNP | C | T | 3   | 65  | c.2569C>T     | c.(2569-2571)CGT>TGT   | p.R857C       |
| Pat_16 | Pre-Treatment | C8B      | 732       | 37 | 1 | 57422517  | 57422517  | Missense_Mutation | SNP | C | T | 194 | 108 | c.316G>A      | c.(316-318)GAA>AAA     | p.E106K       |
| Pat_16 | Pre-Treatment | LRRC7    | 57554     | 37 | 1 | 70493918  | 70493918  | Missense_Mutation | SNP | C | T | 116 | 77  | c.1745C>T     | c.(1744-1746)TCT>TTT   | p.S582F       |
| Pat_16 | Pre-Treatment | C1orf173 | 127254    | 37 | 1 | 75065480  | 75065480  | Missense_Mutation | SNP | T | G | 264 | 142 | c.1625A>C     | c.(1624-1626)AAA>ACA   | p.K542T       |
| Pat_16 | Pre-Treatment | CLCA1    | 1179      | 37 | 1 | 86951080  | 86951080  | Missense_Mutation | SNP | A | T | 69  | 166 | c.790A>T      | c.(790-792)AAT>TAT     | p.N264Y       |
| Pat_16 | Pre-Treatment | SH3GLB1  | 51100     | 37 | 1 | 87208874  | 87208874  | Nonsense_Mutation | SNP | C | T | 183 | 198 | c.1054C>T     | c.(1054-1056)CAG>TAG   | p.Q352*       |
| Pat_16 | Pre-Treatment | ARHGAP29 | 9411      | 37 | 1 | 94654489  | 94654489  | Missense_Mutation | SNP | A | T | 132 | 217 | c.1585T>A     | c.(1585-1587)TTT>ATT   | p.F529I       |
| Pat_16 | Pre-Treatment | CD53     | 963       | 37 | 1 | 111434995 | 111434995 | Missense_Mutation | SNP | G | A | 33  | 85  | c.92G>A       | c.(91-93)GGG>GAG       | p.G31E        |
| Pat_16 | Pre-Treatment | NRAS     | 4893      | 37 | 1 | 115256530 | 115256530 | Missense_Mutation | SNP | G | T | 185 | 532 | c.181C>A      | c.(181-183)CAA>AAA     | p.Q61K        |
| Pat_16 | Pre-Treatment | SYCP1    | 6847      | 37 | 1 | 115469144 | 115469144 | Missense_Mutation | SNP | G | A | 29  | 29  | c.1886G>A     | c.(1885-1887)GGT>GAT   | p.G629D       |
| Pat_16 | Pre-Treatment | CASQ2    | 845       | 37 | 1 | 116244011 | 116244011 | Missense_Mutation | SNP | C | T | 92  | 64  | c.1051G>A     | c.(1051-1053)GAT>AAT   | p.D351N       |
| Pat_16 | Pre-Treatment | NOTCH2   | 4853      | 37 | 1 | 120467982 | 120467982 | Missense_Mutation | SNP | G | A | 6   | 579 | c.4457C>T     | c.(4456-4458)ACG>ATG   | p.T1486M      |
| Pat_16 | Pre-Treatment | PDE4DIP  | 9659      | 37 | 1 | 144881505 | 144881505 | Nonsense_Mutation | SNP | G | A | 167 | 369 | c.3691C>T     | c.(3691-3693)CAG>TAG   | p.Q1231*      |
| Pat_16 | Pre-Treatment | PDE4DIP  | 9659      | 37 | 1 | 145015949 | 145015949 | Missense_Mutation | SNP | C | T | 57  | 667 | c.139G>A      | c.(139-141)GAA>AAA     | p.E47K        |
| Pat_16 | Pre-Treatment | NBPF10   | 100132406 | 37 | 1 | 145311785 | 145311785 | Splice_Site       | SNP | C | G | 4   | 35  | c.1854_splice | c.e14-1                | p.R618_splice |
| Pat_16 | Pre-Treatment | VPS45    | 11311     | 37 | 1 | 150064122 | 150064122 | Missense_Mutation | SNP | G | A | 5   | 414 | c.1196G>A     | c.(1195-1197)AGC>AAC   | p.S399N       |
| Pat_16 | Pre-Treatment | PSMD4    | 5710      | 37 | 1 | 151238835 | 151238835 | Missense_Mutation | SNP | G | A | 5   | 228 | c.815G>A      | c.(814-816)CGC>CAC     | p.R272H       |
| Pat_16 | Pre-Treatment | LCE2A    | 353139    | 37 | 1 | 152671573 | 152671573 | Missense_Mutation | SNP | G | A | 4   | 135 | c.196G>A      | c.(196-198)GGC>AGC     | p.G66S        |
| Pat_16 | Pre-Treatment | KPRP     | 448834    | 37 | 1 | 152733052 | 152733052 | Missense_Mutation | SNP | T | A | 29  | 64  | c.988T>A      | c.(988-990)TCC>ACC     | p.S330T       |
| Pat_16 | Pre-Treatment | DCST1    | 149095    | 37 | 1 | 155015229 | 155015229 | Missense_Mutation | SNP | G | A | 4   | 240 | c.911G>A      | c.(910-912)CGC>CAC     | p.R304H       |
| Pat_16 | Pre-Treatment | INSRR    | 3645      | 37 | 1 | 156811946 | 156811946 | Missense_Mutation | SNP | G | A | 3   | 94  | c.3355C>T     | c.(3355-3357)CGC>TGC   | p.R1119C      |
| Pat_16 | Pre-Treatment | FCRL3    | 115352    | 37 | 1 | 157666963 | 157666963 | Missense_Mutation | SNP | T | G | 57  | 28  | c.811A>C      | c.(811-813)AAA>CAA     | p.K271Q       |
| Pat_16 | Pre-Treatment | ATP1A4   | 480       | 37 | 1 | 160141383 | 160141383 | Missense_Mutation | SNP | T | A | 245 | 106 | c.1690T>A     | c.(1690-1692)TTC>ATC   | p.F564I       |
| Pat_16 | Pre-Treatment | CD244    | 51744     | 37 | 1 | 160806026 | 160806026 | Missense_Mutation | SNP | G | A | 24  | 70  | c.868C>T      | c.(868-870)CCT>TCT     | p.P290S       |
| Pat_16 | Pre-Treatment | ARHGAP30 | 257106    | 37 | 1 | 161018907 | 161018907 | Missense_Mutation | SNP | C | T | 256 | 152 | c.1904G>A     | c.(1903-1905)GGA>GAA   | p.G635E       |
| Pat_16 | Pre-Treatment | NOS1AP   | 9722      | 37 | 1 | 162257220 | 162257220 | Missense_Mutation | SNP | G | T | 10  | 140 | c.264G>T      | c.(262-264)AAG>AAT     | p.K88N        |
| Pat_16 | Pre-Treatment | C1orf110 | 339512    | 37 | 1 | 162829392 | 162829392 | Missense_Mutation | SNP | A | T | 21  | 77  | c.45T>A       | c.(43-45)GAT>GAA       | p.D15E        |
| Pat_16 | Pre-Treatment | MPZL1    | 9019      | 37 | 1 | 167757123 | 167757123 | Missense_Mutation | SNP | G | A | 239 | 156 | c.775G>A      | c.(775-777)GAG>AAG     | p.E259K       |
| Pat_16 | Pre-Treatment | FMO1     | 2326      | 37 | 1 | 171254520 | 171254520 | Missense_Mutation | SNP | G | A | 52  | 43  | c.1436G>A     | c.(1435-1437)GGA>GAA   | p.G479E       |
| Pat_16 | Pre-Treatment | SLC9A11  | 284525    | 37 | 1 | 173490472 | 173490472 | Missense_Mutation | SNP | C | T | 72  | 212 | c.2707G>A     | c.(2707-2709)GGA>AGA   | p.G903R       |
| Pat_16 | Pre-Treatment | FAM5B    | 57795     | 37 | 1 | 177249565 | 177249565 | Nonsense_Mutation | SNP | G | A | 63  | 145 | c.1253G>A     | c.(1252-1254)TGG>TAG   | p.W418*       |
| Pat_16 | Pre-Treatment | C1orf49  | 84066     | 37 | 1 | 178489831 | 178489831 | Missense_Mutation | SNP | A | T | 15  | 22  | c.365A>T      | c.(364-366)GAG>GTG     | p.E122V       |
| Pat_16 | Pre-Treatment | FAM20B   | 9917      | 37 | 1 | 179013184 | 179013184 | Missense_Mutation | SNP | G | A | 4   | 137 | c.202G>A      | c.(202-204)GCC>ACC     | p.A68T        |
| Pat_16 | Pre-Treatment | C1orf125 | 126859    | 37 | 1 | 179414126 | 179414126 | Missense_Mutation | SNP | G | A | 89  | 64  | c.1585G>A     | c.(1585-1587)GAG>AAG   | p.E529K       |
| Pat_16 | Pre-Treatment | HMCN1    | 83872     | 37 | 1 | 186077692 | 186077692 | Missense_Mutation | SNP | C | T | 116 | 58  | c.10952C>T    | c.(10951-10953)CCT>CTT | p.P3651L      |
| Pat_16 | Pre-Treatment | CFH      | 3075      | 37 | 1 | 196684756 | 196684756 | Missense_Mutation | SNP | G | A | 215 | 155 | c.1553G>A     | c.(1552-1554)AGA>AAA   | p.R518K       |
| Pat_16 | Pre-Treatment | CFHR2    | 3080      | 37 | 1 | 196918654 | 196918654 | Missense_Mutation | SNP | C | T | 24  | 75  | c.128C>T      | c.(127-129)TCC>TTC     | p.S43F        |
| Pat_16 | Pre-Treatment | CFHR5    | 81494     | 37 | 1 | 196971612 | 196971612 | Missense_Mutation | SNP | A | G | 44  | 123 | c.1148A>G     | c.(1147-1149)GAA>GGA   | p.E383G       |
| Pat_16 | Pre-Treatment | CRB1     | 23418     | 37 | 1 | 197446813 | 197446813 | Missense_Mutation | SNP | C | T | 29  | 97  | c.4025C>T     | c.(4024-4026)TCC>TTC   | p.S1342F      |
| Pat_16 | Pre-Treatment | USH2A    | 7399      | 37 | 1 | 215956214 | 215956214 | Missense_Mutation | SNP | C | T | 4   | 123 | c.10451G>A    | c.(10450-10452)CGA>CAA | p.R3484Q      |
| Pat_16 | Pre-Treatment | SPATA17  | 128153    | 37 | 1 | 217947824 | 217947824 | Missense_Mutation | SNP | C | T | 30  | 77  | c.668C>T      | c.(667-669)GCC>GTC     | p.A223V       |
| Pat_16 | Pre-Treatment | TGFB2    | 7042      | 37 | 1 | 218609479 | 218609479 | Missense_Mutation | SNP | T | C | 5   | 342 | c.922T>C      | c.(922-924)TAT>CAT     | p.Y308H       |

|        |               |           |        |    |    |           |           |                   |     |    |    |     |     |                                               |                        |          |
|--------|---------------|-----------|--------|----|----|-----------|-----------|-------------------|-----|----|----|-----|-----|-----------------------------------------------|------------------------|----------|
| Pat_16 | Pre-Treatment | LYPLAL1   | 127018 | 37 | 1  | 219347239 | 219347239 | Missense_Mutation | SNP | G  | A  | 5   | 287 | c.7G>A                                        | c.(7-9)GCT>ACT         | p.A3T    |
| Pat_16 | Pre-Treatment | NVL       | 4931   | 37 | 1  | 224495956 | 224495956 | Missense_Mutation | SNP | G  | A  | 38  | 84  | c.352C>T                                      | c.(352-354)CAC>TAC     | p.H118Y  |
| Pat_16 | Pre-Treatment | NID1      | 4811   | 37 | 1  | 236175236 | 236175236 | Missense_Mutation | SNP | G  | A  | 4   | 313 | c.2512C>T                                     | c.(2512-2514)CGT>TGT   | p.R838C  |
| Pat_16 | Pre-Treatment | ZP4       | 57829  | 37 | 1  | 238048472 | 238048472 | Missense_Mutation | SNP | C  | T  | 103 | 47  | c.1304G>A                                     | c.(1303-1305)AGG>AAG   | p.R435K  |
| Pat_16 | Pre-Treatment | OPN3      | 23596  | 37 | 1  | 241767747 | 241767747 | Missense_Mutation | SNP | C  | T  | 4   | 171 | c.508G>A                                      | c.(508-510)GGA>AGA     | p.G170R  |
| Pat_16 | Pre-Treatment | CNST      | 163882 | 37 | 1  | 246784866 | 246784866 | Missense_Mutation | SNP | C  | T  | 270 | 200 | c.515C>T                                      | c.(514-516)TCT>TTT     | p.S172F  |
| Pat_16 | Pre-Treatment | AHCTF1    | 25909  | 37 | 1  | 247012951 | 247012951 | Missense_Mutation | SNP | A  | C  | 91  | 241 | c.6357T>G                                     | c.(6355-6357)TTT>TTG   | p.F2119L |
| Pat_16 | Pre-Treatment | OR2G6     | 391211 | 37 | 1  | 248685890 | 248685890 | Missense_Mutation | SNP | A  | G  | 3   | 48  | c.943A>G                                      | c.(943-945)AAG>GAG     | p.K315E  |
| Pat_16 | Pre-Treatment | C10orf18  | 54906  | 37 | 10 | 5791697   | 5791697   | Missense_Mutation | SNP | C  | T  | 4   | 134 | c.6313C>T                                     | c.(6313-6315)CGG>TGG   | p.R2105W |
| Pat_16 | Pre-Treatment | HSPA14    | 51182  | 37 | 10 | 14881937  | 14881937  | Missense_Mutation | SNP | G  | A  | 5   | 440 | c.91G>A                                       | c.(91-93)GGT>AGT       | p.G31S   |
| Pat_16 | Pre-Treatment | FAM171A1  | 221061 | 37 | 10 | 15255386  | 15255386  | Missense_Mutation | SNP | C  | T  | 42  | 56  | c.2201G>A                                     | c.(2200-2202)GGA>GAA   | p.G734E  |
| Pat_16 | Pre-Treatment | ANKRD30A  | 91074  | 37 | 10 | 37430661  | 37430661  | Missense_Mutation | SNP | G  | A  | 49  | 11  | c.668G>A                                      | c.(667-669)GGA>GAA     | p.G223E  |
| Pat_16 | Pre-Treatment | TMEM72    | 643236 | 37 | 10 | 45423380  | 45423380  | Missense_Mutation | SNP | G  | A  | 4   | 268 | c.82G>A                                       | c.(82-84)GTG>ATG       | p.V28M   |
| Pat_16 | Pre-Treatment | PARG      | 8505   | 37 | 10 | 51093329  | 51093329  | Missense_Mutation | SNP | C  | T  | 4   | 116 | c.1750G>A                                     | c.(1750-1752)GCA>ACA   | p.A584T  |
| Pat_16 | Pre-Treatment | PRKG1     | 5592   | 37 | 10 | 54048576  | 54048576  | Missense_Mutation | SNP | A  | C  | 71  | 1   | c.1755A>C                                     | c.(1753-1755)AAA>AAC   | p.K585N  |
| Pat_16 | Pre-Treatment | BICC1     | 80114  | 37 | 10 | 60573673  | 60573673  | Missense_Mutation | SNP | T  | G  | 206 | 9   | c.2460T>G                                     | c.(2458-2460)AAT>AAG   | p.N820K  |
| Pat_16 | Pre-Treatment | MYPN      | 84665  | 37 | 10 | 69881782  | 69881782  | Missense_Mutation | SNP | G  | A  | 67  | 4   | c.587G>A                                      | c.(586-588)AGC>AAC     | p.S196N  |
| Pat_16 | Pre-Treatment | CH25H     | 9023   | 37 | 10 | 90966538  | 90966538  | Missense_Mutation | SNP | G  | A  | 4   | 219 | c.512C>T                                      | c.(511-513)ACG>ATG     | p.T171M  |
| Pat_16 | Pre-Treatment | CYP2C8    | 1558   | 37 | 10 | 96824645  | 96824645  | Missense_Mutation | SNP | T  | G  | 196 | 2   | c.554A>C                                      | c.(553-555)AAA>ACA     | p.K185T  |
| Pat_16 | Pre-Treatment | SLIT1     | 6585   | 37 | 10 | 98778837  | 98778837  | Missense_Mutation | SNP | T  | G  | 78  | 3   | c.2774A>C                                     | c.(2773-2775)AAG>ACG   | p.K925T  |
| Pat_16 | Pre-Treatment | SEMA4G    | 57715  | 37 | 10 | 102743232 | 102743232 | Missense_Mutation | SNP | G  | A  | 41  | 34  | c.1876G>A                                     | c.(1876-1878)GAT>AAT   | p.D626N  |
| Pat_16 | Pre-Treatment | POLL      | 27343  | 37 | 10 | 103342563 | 103342563 | Missense_Mutation | SNP | A  | C  | 143 | 9   | c.1151T>G                                     | c.(1150-1152)CTG>CGG   | p.L384R  |
| Pat_16 | Pre-Treatment | NPM3      | 10360  | 37 | 10 | 103542027 | 103542027 | Missense_Mutation | SNP | G  | A  | 3   | 59  | c.406C>T                                      | c.(406-408)CGG>TGG     | p.R136W  |
| Pat_16 | Pre-Treatment | NFKB2     | 4791   | 37 | 10 | 104156558 | 104156558 | Missense_Mutation | SNP | G  | A  | 5   | 177 | c.221G>A                                      | c.(220-222)CGA>CAA     | p.R74Q   |
| Pat_16 | Pre-Treatment | PDCD11    | 22984  | 37 | 10 | 105194638 | 105194638 | Missense_Mutation | SNP | C  | T  | 37  | 33  | c.3751C>T                                     | c.(3751-3753)CCC>TCC   | p.P1251S |
| Pat_16 | Pre-Treatment | FGFR2     | 2263   | 37 | 10 | 123279680 | 123279680 | Missense_Mutation | SNP | C  | T  | 15  | 9   | c.752G>A                                      | c.(751-753)CGA>CAA     | p.R251Q  |
| Pat_16 | Pre-Treatment | TACC2     | 10579  | 37 | 10 | 123845785 | 123845785 | Missense_Mutation | SNP | C  | T  | 91  | 2   | c.3770C>T                                     | c.(3769-3771)TCC>TTC   | p.S1257F |
| Pat_16 | Pre-Treatment | HTRA1     | 5654   | 37 | 10 | 124271572 | 124271572 | Missense_Mutation | SNP | C  | A  | 4   | 94  | c.1265C>A                                     | c.(1264-1266)CCA>CAA   | p.P422Q  |
| Pat_16 | Pre-Treatment | LOC653544 | 653544 | 37 | 10 | 135491123 | 135491123 | Missense_Mutation | SNP | G  | A  | 4   | 19  | c.734G>A                                      | c.(733-735)GGC>GAC     | p.G245D  |
| Pat_16 | Pre-Treatment | LRRC56    | 115399 | 37 | 11 | 554058    | 554058    | Missense_Mutation | SNP | G  | A  | 83  | 1   | c.1411G>A                                     | c.(1411-1413)GAC>AAC   | p.D471N  |
| Pat_16 | Pre-Treatment | MUC2      | 4583   | 37 | 11 | 1101129   | 1101129   | Missense_Mutation | SNP | G  | A  | 37  | 31  | c.14614G>A                                    | c.(14614-14616)GAG>AAC | p.E4872K |
| Pat_16 | Pre-Treatment | MUC5B     | 727897 | 37 | 11 | 1256566   | 1256566   | Missense_Mutation | SNP | T  | G  | 9   | 16  | c.4780T>G                                     | c.(4780-4782)TTC>GTC   | p.F1594V |
| Pat_16 | Pre-Treatment | MUC5B     | 727897 | 37 | 11 | 1265984   | 1265984   | Missense_Mutation | SNP | G  | A  | 3   | 86  | c.9788G>A                                     | c.(9787-9789)GGG>GAG   | p.G3263E |
| Pat_16 | Pre-Treatment | OR51B2    | 79345  | 37 | 11 | 5345040   | 5345040   | Missense_Mutation | SNP | G  | A  | 108 | 1   | c.488C>T                                      | c.(487-489)TCA>TTA     | p.S163L  |
| Pat_16 | Pre-Treatment | OR51I2    | 390064 | 37 | 11 | 5475460   | 5475460   | Missense_Mutation | SNP | G  | A  | 4   | 189 | c.742G>A                                      | c.(742-744)GTA>ATA     | p.V248I  |
| Pat_16 | Pre-Treatment | OR5P2     | 120065 | 37 | 11 | 7817971   | 7817971   | Missense_Mutation | SNP | A  | C  | 64  | 51  | c.519T>G                                      | c.(517-519)TTT>TTG     | p.F173L  |
| Pat_16 | Pre-Treatment | PARVA     | 55742  | 37 | 11 | 12525959  | 12525959  | Nonsense_Mutation | SNP | C  | T  | 39  | 42  | c.640C>T                                      | c.(640-642)CAA>TAA     | p.Q214*  |
| Pat_16 | Pre-Treatment | TCP11L1   | 55346  | 37 | 11 | 33087499  | 33087499  | Missense_Mutation | SNP | G  | A  | 6   | 334 | c.1096G>A                                     | c.(1096-1098)GAC>AAC   | p.D366N  |
| Pat_16 | Pre-Treatment | EXT2      | 2132   | 37 | 11 | 44228348  | 44228348  | Missense_Mutation | SNP | C  | T  | 71  | 3   | c.1501C>T                                     | c.(1501-1503)CTC>TTC   | p.L501F  |
| Pat_16 | Pre-Treatment | AMBRA1    | 55626  | 37 | 11 | 46567211  | 46567211  | Nonsense_Mutation | SNP | C  | T  | 151 | 4   | c.494G>A                                      | c.(493-495)TGG>TAG     | p.W165*  |
| Pat_16 | Pre-Treatment | AMBRA1    | 55626  | 37 | 11 | 46568751  | 46568751  | Missense_Mutation | SNP | G  | A  | 5   | 267 | c.290C>T                                      | c.(289-291)ACT>ATT     | p.T97I   |
| Pat_16 | Pre-Treatment | ARHGAP1   | 392    | 37 | 11 | 46702064  | 46702065  | Nonsense_Mutation | DNP | CC | AA | 94  | 2   | c.792_793GG>TT790-795)AGGGAG>AGTT,264_265RE>E |                        |          |
| Pat_16 | Pre-Treatment | F2        | 2147   | 37 | 11 | 46747480  | 46747480  | Missense_Mutation | SNP | G  | A  | 73  | 39  | c.631G>A                                      | c.(631-633)GAG>AAG     | p.E211K  |
| Pat_16 | Pre-Treatment | DDB2      | 1643   | 37 | 11 | 47256351  | 47256351  | Missense_Mutation | SNP | C  | T  | 65  | 2   | c.746C>T                                      | c.(745-747)GCC>GTC     | p.A249V  |
| Pat_16 | Pre-Treatment | SPRYD5    | 84767  | 37 | 11 | 55653011  | 55653011  | Missense_Mutation | SNP | G  | A  | 3   | 51  | c.107G>A                                      | c.(106-108)CGG>CAG     | p.R36Q   |
| Pat_16 | Pre-Treatment | OR5M9     | 390162 | 37 | 11 | 56230826  | 56230826  | Missense_Mutation | SNP | G  | A  | 48  | 1   | c.52C>T                                       | c.(52-54)CGT>TGT       | p.R18C   |
| Pat_16 | Pre-Treatment | OR5B17    | 219965 | 37 | 11 | 58126355  | 58126355  | Missense_Mutation | SNP | T  | C  | 81  | 7   | c.188A>G                                      | c.(187-189)AAC>AGC     | p.N63S   |

|        |               |           |        |    |    |           |           |                   |     |    |    |     |     |                                     |                      |          |
|--------|---------------|-----------|--------|----|----|-----------|-----------|-------------------|-----|----|----|-----|-----|-------------------------------------|----------------------|----------|
| Pat_16 | Pre-Treatment | ZFP91     | 80829  | 37 | 11 | 58380251  | 58380251  | Nonsense_Mutation | SNP | C  | T  | 205 | 6   | c.925C>T                            | c.(925-927)CAG>TAG   | p.Q309*  |
| Pat_16 | Pre-Treatment | VWCE      | 220001 | 37 | 11 | 61053800  | 61053800  | Missense_Mutation | SNP | C  | T  | 4   | 278 | c.527G>A                            | c.(526-528)CGC>CAC   | p.R176H  |
| Pat_16 | Pre-Treatment | ACTN3     | 89     | 37 | 11 | 66323694  | 66323694  | Missense_Mutation | SNP | C  | T  | 4   | 157 | c.797C>T                            | c.(796-798)GCT>GTT   | p.A266V  |
| Pat_16 | Pre-Treatment | SPTBN2    | 6712   | 37 | 11 | 66466905  | 66466905  | Missense_Mutation | SNP | G  | A  | 36  | 48  | c.3748C>T                           | c.(3748-3750)CGG>TGG | p.R1250W |
| Pat_16 | Pre-Treatment | ARHGEF17  | 9828   | 37 | 11 | 73073492  | 73073492  | Missense_Mutation | SNP | C  | T  | 8   | 0   | c.4709C>T                           | c.(4708-4710)TCG>TTG | p.S1570L |
| Pat_16 | Pre-Treatment | DNAJB13   | 374407 | 37 | 11 | 73677211  | 73677211  | Missense_Mutation | SNP | C  | T  | 43  | 1   | c.521C>T                            | c.(520-522)ACC>ATC   | p.T174I  |
| Pat_16 | Pre-Treatment | HEPHL1    | 341208 | 37 | 11 | 93754593  | 93754593  | Missense_Mutation | SNP | G  | A  | 63  | 77  | c.59G>A                             | c.(58-60)GGG>GAG     | p.G20E   |
| Pat_16 | Pre-Treatment | PDGFD     | 80310  | 37 | 11 | 103797821 | 103797821 | Missense_Mutation | SNP | C  | T  | 4   | 179 | c.806G>A                            | c.(805-807)CGT>CAT   | p.R269H  |
| Pat_16 | Pre-Treatment | GRI4A     | 2893   | 37 | 11 | 105850461 | 105850461 | Missense_Mutation | SNP | C  | T  | 47  | 0   | c.2704C>T                           | c.(2704-2706)CCA>TCA | p.P902S  |
| Pat_16 | Pre-Treatment | APOC3     | 345    | 37 | 11 | 116701338 | 116701338 | Missense_Mutation | SNP | C  | T  | 3   | 45  | c.40C>T                             | c.(40-42)CTC>TTC     | p.L14F   |
| Pat_16 | Pre-Treatment | DSCAML1   | 57453  | 37 | 11 | 117352818 | 117352819 | Missense_Mutation | DNP | CC | TT | 46  | 1   | .2598_2599GG>A596-2601)AAGGAG>AAA/  |                      | p.E867K  |
| Pat_16 | Pre-Treatment | RIMKLB    | 57494  | 37 | 12 | 8904628   | 8904628   | Missense_Mutation | SNP | G  | A  | 5   | 408 | c.482G>A                            | c.(481-483)CGG>CAG   | p.R161Q  |
| Pat_16 | Pre-Treatment | A2ML1     | 144568 | 37 | 12 | 8975263   | 8975263   | Missense_Mutation | SNP | C  | T  | 53  | 132 | c.16C>T                             | c.(16-18)CTT>TTT     | p.L6F    |
| Pat_16 | Pre-Treatment | GRIN2B    | 2904   | 37 | 12 | 13716732  | 13716732  | Missense_Mutation | SNP | T  | A  | 40  | 18  | c.3440A>T                           | c.(3439-3441)GAG>GTG | p.E1147V |
| Pat_16 | Pre-Treatment | LRMP      | 4033   | 37 | 12 | 25260897  | 25260898  | Missense_Mutation | DNP | AT | TA | 56  | 171 | .:1403_1404AT>T/                    | c.(1402-1404)GAT>GTA | p.D468V  |
| Pat_16 | Pre-Treatment | PRKAG1    | 5571   | 37 | 12 | 49396783  | 49396784  | Nonsense_Mutation | DNP | GG | AA | 55  | 136 | c.894_895CC>TT 892-897)CACCGA>CATT( |                      | p.R299*  |
| Pat_16 | Pre-Treatment | KRT4      | 3851   | 37 | 12 | 53202523  | 53202523  | Missense_Mutation | SNP | C  | T  | 30  | 104 | c.1168G>A                           | c.(1168-1170)GAG>AAG | p.E390K  |
| Pat_16 | Pre-Treatment | KRT18     | 3875   | 37 | 12 | 53345602  | 53345602  | Nonsense_Mutation | SNP | C  | T  | 18  | 55  | c.910C>T                            | c.(910-912)CAG>TAG   | p.Q304*  |
| Pat_16 | Pre-Treatment | AMHR2     | 269    | 37 | 12 | 53823344  | 53823344  | Missense_Mutation | SNP | C  | T  | 88  | 48  | c.1075C>T                           | c.(1075-1077)CCT>TCT | p.P359S  |
| Pat_16 | Pre-Treatment | KIAA0748  | 9840   | 37 | 12 | 55368225  | 55368225  | Missense_Mutation | SNP | G  | T  | 14  | 15  | c.122C>A                            | c.(121-123)CCA>CAA   | p.P41Q   |
| Pat_16 | Pre-Treatment | OR6C3     | 254786 | 37 | 12 | 55726023  | 55726023  | Missense_Mutation | SNP | C  | T  | 150 | 485 | c.539C>T                            | c.(538-540)CCC>CTC   | p.P180L  |
| Pat_16 | Pre-Treatment | CDK2      | 1017   | 37 | 12 | 56365339  | 56365339  | Missense_Mutation | SNP | C  | T  | 6   | 642 | c.827C>T                            | c.(826-828)TCG>TTG   | p.S276L  |
| Pat_16 | Pre-Treatment | IKZF4     | 64375  | 37 | 12 | 56427051  | 56427051  | Missense_Mutation | SNP | C  | T  | 94  | 203 | c.943C>T                            | c.(943-945)CGT>TGT   | p.R315C  |
| Pat_16 | Pre-Treatment | TMEM194A  | 23306  | 37 | 12 | 57453807  | 57453807  | Missense_Mutation | SNP | G  | A  | 4   | 237 | c.1190C>T                           | c.(1189-1191)ACG>ATG | p.T397M  |
| Pat_16 | Pre-Treatment | STAT6     | 6778   | 37 | 12 | 57500077  | 57500077  | Missense_Mutation | SNP | C  | T  | 4   | 191 | c.577G>A                            | c.(577-579)GCC>ACC   | p.A193T  |
| Pat_16 | Pre-Treatment | SLC16A7   | 9194   | 37 | 12 | 60173255  | 60173256  | Missense_Mutation | DNP | GG | AA | 63  | 144 | .1232_1233GG>A c.(1231-1233)GGG>GAA |                      | p.G411E  |
| Pat_16 | Pre-Treatment | C12orf56  | 115749 | 37 | 12 | 64746799  | 64746799  | Missense_Mutation | SNP | C  | T  | 81  | 79  | c.290G>A                            | c.(289-291)AGA>AAA   | p.R97K   |
| Pat_16 | Pre-Treatment | CPSF6     | 11052  | 37 | 12 | 69652691  | 69652691  | Missense_Mutation | SNP | C  | T  | 5   | 592 | c.1016C>T                           | c.(1015-1017)CCT>CTT | p.P339L  |
| Pat_16 | Pre-Treatment | RASSF9    | 9182   | 37 | 12 | 86198724  | 86198724  | Missense_Mutation | SNP | T  | A  | 375 | 207 | c.1064A>T                           | c.(1063-1065)AAA>ATA | p.K355I  |
| Pat_16 | Pre-Treatment | LUM       | 4060   | 37 | 12 | 91497952  | 91497952  | Missense_Mutation | SNP | G  | A  | 83  | 185 | c.1007C>T                           | c.(1006-1008)ACT>ATT | p.T336I  |
| Pat_16 | Pre-Treatment | MYO1H     | 283446 | 37 | 12 | 109883364 | 109883364 | Missense_Mutation | SNP | G  | A  | 98  | 57  | c.565G>A                            | c.(565-567)GAC>AAC   | p.D189N  |
| Pat_16 | Pre-Treatment | TCTN1     | 79600  | 37 | 12 | 111085668 | 111085668 | Missense_Mutation | SNP | C  | T  | 26  | 83  | c.1735C>T                           | c.(1735-1737)CCC>TCC | p.P579S  |
| Pat_16 | Pre-Treatment | SH2B3     | 10019  | 37 | 12 | 111886044 | 111886044 | Missense_Mutation | SNP | G  | A  | 70  | 34  | c.1666G>A                           | c.(1666-1668)GAA>AAA | p.E556K  |
| Pat_16 | Pre-Treatment | RASAL1    | 8437   | 37 | 12 | 113543644 | 113543644 | Nonsense_Mutation | SNP | G  | A  | 40  | 79  | c.1702C>T                           | c.(1702-1704)CGA>TGA | p.R568*  |
| Pat_16 | Pre-Treatment | MED13L    | 23389  | 37 | 12 | 116429319 | 116429319 | Missense_Mutation | SNP | A  | T  | 156 | 74  | c.3440T>A                           | c.(3439-3441)CTT>CAT | p.L1147H |
| Pat_16 | Pre-Treatment | SNRNP35   | 11066  | 37 | 12 | 123950368 | 123950368 | Missense_Mutation | SNP | A  | G  | 43  | 94  | c.281A>G                            | c.(280-282)TAC>TGC   | p.Y94C   |
| Pat_16 | Pre-Treatment | DNAH10    | 196385 | 37 | 12 | 124297919 | 124297919 | Nonsense_Mutation | SNP | G  | A  | 58  | 160 | c.2999G>A                           | c.(2998-3000)TGG>TAG | p.W1000* |
| Pat_16 | Pre-Treatment | TMEM132B  | 114795 | 37 | 12 | 126139119 | 126139119 | Missense_Mutation | SNP | C  | T  | 41  | 92  | c.3100C>T                           | c.(3100-3102)CCA>TCA | p.P1034S |
| Pat_16 | Pre-Treatment | PIWIL1    | 9271   | 37 | 12 | 130839140 | 130839140 | Missense_Mutation | SNP | G  | A  | 80  | 43  | c.1103G>A                           | c.(1102-1104)AGA>AAA | p.R368K  |
| Pat_16 | Pre-Treatment | RIMBP2    | 23504  | 37 | 12 | 130883705 | 130883705 | Missense_Mutation | SNP | T  | A  | 130 | 80  | c.3134A>T                           | c.(3133-3135)AAG>ATG | p.K1045M |
| Pat_16 | Pre-Treatment | MAB21L1   | 4081   | 37 | 13 | 36049629  | 36049629  | Missense_Mutation | SNP | T  | A  | 93  | 213 | c.647A>T                            | c.(646-648)CAC>CTC   | p.H216L  |
| Pat_16 | Pre-Treatment | ALG5      | 29880  | 37 | 13 | 37539733  | 37539733  | Missense_Mutation | SNP | G  | A  | 81  | 317 | c.752C>T                            | c.(751-753)TCA>TTA   | p.S251L  |
| Pat_16 | Pre-Treatment | ZC3H13    | 23091  | 37 | 13 | 46541662  | 46541662  | Missense_Mutation | SNP | G  | A  | 240 | 245 | c.4298C>T                           | c.(4297-4299)TCC>TTC | p.S1433F |
| Pat_16 | Pre-Treatment | LOC220429 | 220429 | 37 | 13 | 50466930  | 50466930  | Missense_Mutation | SNP | C  | T  | 44  | 94  | c.2204C>T                           | c.(2203-2205)CCA>CTA | p.P735L  |
| Pat_16 | Pre-Treatment | KLHL1     | 57626  | 37 | 13 | 70413125  | 70413125  | Missense_Mutation | SNP | C  | T  | 65  | 121 | c.1397G>A                           | c.(1396-1398)GGA>GAA | p.G466E  |
| Pat_16 | Pre-Treatment | DACH1     | 1602   | 37 | 13 | 72063230  | 72063230  | Missense_Mutation | SNP | A  | G  | 174 | 650 | c.1621T>C                           | c.(1621-1623)TCT>CCT | p.S541P  |
| Pat_16 | Pre-Treatment | ACIN1     | 22985  | 37 | 14 | 23535213  | 23535213  | Missense_Mutation | SNP | G  | A  | 3   | 61  | c.2444C>T                           | c.(2443-2445)TCG>TTG | p.S815L  |

|        |               |           |        |    |    |           |           |                   |     |    |    |     |     |                |                          |              |
|--------|---------------|-----------|--------|----|----|-----------|-----------|-------------------|-----|----|----|-----|-----|----------------|--------------------------|--------------|
| Pat_16 | Pre-Treatment | MYH7      | 4625   | 37 | 14 | 23894617  | 23894617  | Missense_Mutation | SNP | T  | G  | 48  | 57  | c.2297A>C      | c.(2296-2298)AAG>ACG     | p.K766T      |
| Pat_16 | Pre-Treatment | DHRS1     | 115817 | 37 | 14 | 24768213  | 24768213  | Missense_Mutation | SNP | C  | T  | 4   | 136 | c.100G>A       | c.(100-102)GTT>ATT       | p.V34I       |
| Pat_16 | Pre-Treatment | BAZ1A     | 11177  | 37 | 14 | 35245523  | 35245523  | Missense_Mutation | SNP | C  | A  | 4   | 132 | c.2435G>T      | c.(2434-2436)AGA>ATA     | p.R812I      |
| Pat_16 | Pre-Treatment | FBXO33    | 254170 | 37 | 14 | 39868720  | 39868720  | Nonstop_Mutation  | SNP | C  | G  | 25  | 2   | c.1668G>C      | c.(1666-1668)TAG>TAC     | p.*556Y      |
| Pat_16 | Pre-Treatment | PRPF39    | 55015  | 37 | 14 | 45571853  | 45571853  | Missense_Mutation | SNP | C  | T  | 270 | 285 | c.691C>T       | c.(691-693)CGT>TGT       | p.R231C      |
| Pat_16 | Pre-Treatment | KIAA0831  | 22863  | 37 | 14 | 55844779  | 55844779  | Missense_Mutation | SNP | C  | T  | 3   | 79  | c.1009G>A      | c.(1009-1011)GAA>AAA     | p.E337K      |
| Pat_16 | Pre-Treatment | SLC8A3    | 6547   | 37 | 14 | 70635091  | 70635091  | Missense_Mutation | SNP | C  | T  | 40  | 1   | c.49G>A        | c.(49-51)GGG>AGG         | p.G17R       |
| Pat_16 | Pre-Treatment | CATSPERB  | 79820  | 37 | 14 | 92088249  | 92088249  | Missense_Mutation | SNP | C  | T  | 14  | 0   | c.1963G>A      | c.(1963-1965)GAG>AAG     | p.E655K      |
| Pat_16 | Pre-Treatment | SLC24A4   | 123041 | 37 | 14 | 92920299  | 92920299  | Missense_Mutation | SNP | G  | A  | 54  | 3   | c.885G>A       | c.(883-885)ATG>ATA       | p.M295I      |
| Pat_16 | Pre-Treatment | HSP90AA1  | 3320   | 37 | 14 | 102605674 | 102605675 | Missense_Mutation | DNP | GG | AA | 38  | 0   | c.67_68CC>TT   | c.(67-69)CCC>TTC         | p.P23F       |
| Pat_16 | Pre-Treatment | ZNF839    | 55778  | 37 | 14 | 102807738 | 102807738 | Missense_Mutation | SNP | G  | A  | 3   | 84  | c.1658G>A      | c.(1657-1659)GGG>GAG     | p.G553E      |
| Pat_16 | Pre-Treatment | CDC42BPB  | 9578   | 37 | 14 | 103406431 | 103406431 | Missense_Mutation | SNP | G  | A  | 3   | 56  | c.4543C>T      | c.(4543-4545)CTC>TTC     | p.L1515F     |
| Pat_16 | Pre-Treatment | MTA1      | 9112   | 37 | 14 | 105930777 | 105930777 | Missense_Mutation | SNP | C  | T  | 57  | 76  | c.1217C>T      | c.(1216-1218)TCT>TTT     | p.S406F      |
| Pat_16 | Pre-Treatment | ARHGAP11A | 9824   | 37 | 15 | 32908542  | 32908542  | Splice_Site       | SNP | G  | A  | 4   | 110 | c.129_splice   | c.e1+1                   | p.G43_splice |
| Pat_16 | Pre-Treatment | GPR176    | 11245  | 37 | 15 | 40094145  | 40094145  | Missense_Mutation | SNP | G  | A  | 4   | 165 | c.736C>T       | c.(736-738)CGG>TGG       | p.R246W      |
| Pat_16 | Pre-Treatment | MFAP1     | 4236   | 37 | 15 | 44105192  | 44105192  | Nonsense_Mutation | SNP | G  | A  | 232 | 537 | c.880C>T       | c.(880-882)CGA>TGA       | p.R294*      |
| Pat_16 | Pre-Treatment | WDR76     | 79968  | 37 | 15 | 44127266  | 44127266  | Missense_Mutation | SNP | C  | T  | 34  | 75  | c.470C>T       | c.(469-471)TCG>TTG       | p.S157L      |
| Pat_16 | Pre-Treatment | HDC       | 3067   | 37 | 15 | 50540510  | 50540510  | Missense_Mutation | SNP | G  | A  | 39  | 89  | c.1072C>T      | c.(1072-1074)CGC>TGC     | p.R358C      |
| Pat_16 | Pre-Treatment | TRPM7     | 54822  | 37 | 15 | 50885856  | 50885856  | Missense_Mutation | SNP | A  | G  | 58  | 113 | c.3566T>C      | c.(3565-3567)TTT>TCT     | p.F1189S     |
| Pat_16 | Pre-Treatment | MYO5C     | 55930  | 37 | 15 | 52553323  | 52553323  | Missense_Mutation | SNP | T  | A  | 29  | 57  | c.1049A>T      | c.(1048-1050)GAG>GTG     | p.E350V      |
| Pat_16 | Pre-Treatment | CGNL1     | 84952  | 37 | 15 | 57730859  | 57730859  | Missense_Mutation | SNP | C  | T  | 137 | 251 | c.662C>T       | c.(661-663)TCC>TTC       | p.S221F      |
| Pat_16 | Pre-Treatment | BNIP2     | 663    | 37 | 15 | 59963387  | 59963387  | Missense_Mutation | SNP | A  | C  | 7   | 15  | c.1065T>G      | c.(1063-1065)GAT>GAG     | p.D355E      |
| Pat_16 | Pre-Treatment | NARG2     | 79664  | 37 | 15 | 60760375  | 60760375  | Missense_Mutation | SNP | G  | A  | 47  | 91  | c.293C>T       | c.(292-294)TCT>TTT       | p.S98F       |
| Pat_16 | Pre-Treatment | SNX22     | 79856  | 37 | 15 | 64446651  | 64446651  | Missense_Mutation | SNP | G  | A  | 163 | 416 | c.526G>A       | c.(526-528)GAT>AAT       | p.D176N      |
| Pat_16 | Pre-Treatment | CILP      | 8483   | 37 | 15 | 65502086  | 65502086  | Missense_Mutation | SNP | C  | T  | 37  | 99  | c.8G>A         | c.(7-9)GGG>GAG           | p.G3E        |
| Pat_16 | Pre-Treatment | LOXL1     | 4016   | 37 | 15 | 74235231  | 74235231  | Missense_Mutation | SNP | A  | G  | 190 | 491 | c.1139A>G      | c.(1138-1140)CAA>CGA     | p.Q380R      |
| Pat_16 | Pre-Treatment | ISLR      | 3671   | 37 | 15 | 74467929  | 74467929  | Missense_Mutation | SNP | G  | A  | 37  | 95  | c.730G>A       | c.(730-732)GGT>AGT       | p.G244S      |
| Pat_16 | Pre-Treatment | CCDC33    | 80125  | 37 | 15 | 74536345  | 74536345  | Missense_Mutation | SNP | A  | C  | 54  | 73  | c.41A>C        | c.(40-42)GAG>GCG         | p.E14A       |
| Pat_16 | Pre-Treatment | CCDC33    | 80125  | 37 | 15 | 74564051  | 74564051  | Missense_Mutation | SNP | T  | A  | 59  | 34  | c.554T>A       | c.(553-555)CTC>CAC       | p.L185H      |
| Pat_16 | Pre-Treatment | ARID3B    | 10620  | 37 | 15 | 74836597  | 74836597  | Missense_Mutation | SNP | T  | C  | 45  | 161 | c.320T>C       | c.(319-321)GTT>GCT       | p.V107A      |
| Pat_16 | Pre-Treatment | CIB2      | 10518  | 37 | 15 | 78401682  | 78401682  | Missense_Mutation | SNP | C  | T  | 64  | 46  | c.241G>A       | c.(241-243)GAT>AAT       | p.D81N       |
| Pat_16 | Pre-Treatment | ZNF592    | 9640   | 37 | 15 | 85327543  | 85327543  | Missense_Mutation | SNP | A  | G  | 3   | 114 | c.1637A>G      | c.(1636-1638)AAG>AGG     | p.K546R      |
| Pat_16 | Pre-Treatment | AGBL1     | 123624 | 37 | 15 | 86807702  | 86807702  | Missense_Mutation | SNP | C  | T  | 15  | 39  | c.1162C>T      | c.(1162-1164)CCT>TCT     | p.P388S      |
| Pat_16 | Pre-Treatment | RLBP1     | 6017   | 37 | 15 | 89755082  | 89755082  | Missense_Mutation | SNP | T  | A  | 49  | 127 | c.576A>T       | c.(574-576)GAA>GAT       | p.E192D      |
| Pat_16 | Pre-Treatment | AP3S2     | 10239  | 37 | 15 | 90447182  | 90447182  | Missense_Mutation | SNP | G  | A  | 3   | 88  | c.335C>T       | c.(334-336)ACG>ATG       | p.T112M      |
| Pat_16 | Pre-Treatment | SLCO3A1   | 28232  | 37 | 15 | 92671676  | 92671676  | Missense_Mutation | SNP | G  | A  | 4   | 232 | c.1469G>A      | c.(1468-1470)GGC>GAC     | p.G490D      |
| Pat_16 | Pre-Treatment | AXIN1     | 8312   | 37 | 16 | 347134    | 347134    | Missense_Mutation | SNP | G  | A  | 6   | 483 | c.1877C>T      | c.(1876-1878)GCG>GTG     | p.A626V      |
| Pat_16 | Pre-Treatment | UNKL      | 64718  | 37 | 16 | 1453342   | 1453342   | Missense_Mutation | SNP | A  | C  | 36  | 31  | c.291T>G       | c.(289-291)TGT>TGG       | p.C97W       |
| Pat_16 | Pre-Treatment | MAPK8IP3  | 23162  | 37 | 16 | 1779539   | 1779539   | Missense_Mutation | SNP | G  | A  | 3   | 54  | c.562G>A       | c.(562-564)GGA>AGA       | p.G188R      |
| Pat_16 | Pre-Treatment | PKD1      | 5310   | 37 | 16 | 2150460   | 2150460   | Missense_Mutation | SNP | G  | A  | 4   | 84  | c.9505C>T      | c.(9505-9507)CGG>TGG     | p.R3169W     |
| Pat_16 | Pre-Treatment | C16orf79  | 283870 | 37 | 16 | 2259985   | 2259985   | Missense_Mutation | SNP | C  | A  | 3   | 52  | c.404G>T       | c.(403-405)CGG>CTG       | p.R135L      |
| Pat_16 | Pre-Treatment | ZSCAN10   | 84891  | 37 | 16 | 3142284   | 3142284   | Missense_Mutation | SNP | G  | A  | 48  | 154 | c.265C>T       | c.(265-267)CGT>TGT       | p.R89C       |
| Pat_16 | Pre-Treatment | CREBBP    | 1387   | 37 | 16 | 3819305   | 3819305   | Missense_Mutation | SNP | G  | A  | 4   | 219 | c.2930C>T      | c.(2929-2931)TCG>TTG     | p.S977L      |
| Pat_16 | Pre-Treatment | 12-Sep    | 124404 | 37 | 16 | 4827818   | 4827818   | Missense_Mutation | SNP | C  | T  | 5   | 6   | c.1057G>A      | c.(1057-1059)GAT>AAT     | p.D353N      |
| Pat_16 | Pre-Treatment | CIITA     | 4261   | 37 | 16 | 10996552  | 10996553  | Missense_Mutation | DNP | CC | TT | 74  | 79  | c.666_667CC>TT | c.(664-669)CTCCCT>CTTTCT | p.P223S      |
| Pat_16 | Pre-Treatment | MKL2      | 57496  | 37 | 16 | 14334250  | 14334250  | Missense_Mutation | SNP | C  | A  | 104 | 83  | c.988C>A       | c.(988-990)CTC>ATC       | p.L330I      |
| Pat_16 | Pre-Treatment | ABCC1     | 4363   | 37 | 16 | 16230359  | 16230359  | Missense_Mutation | SNP | C  | T  | 36  | 47  | c.4150C>T      | c.(4150-4152)CTC>TTC     | p.L1384F     |



|        |               |           |        |    |    |          |          |                   |     |    |    |     |     |                 |                         |               |
|--------|---------------|-----------|--------|----|----|----------|----------|-------------------|-----|----|----|-----|-----|-----------------|-------------------------|---------------|
| Pat_16 | Pre-Treatment | SMG1      | 23049  | 37 | 16 | 18937330 | 18937330 | Missense_Mutation | SNP | T  | C  | 3   | 30  | c.34A>G         | c.(34-36)AGC>GGC        | p.S12G        |
| Pat_16 | Pre-Treatment | DNAH3     | 55567  | 37 | 16 | 21098244 | 21098244 | Missense_Mutation | SNP | C  | T  | 117 | 383 | c.2803G>A       | c.(2803-2805)GAT>AAT    | p.D935N       |
| Pat_16 | Pre-Treatment | CACNG3    | 10368  | 37 | 16 | 24373047 | 24373047 | Missense_Mutation | SNP | C  | T  | 4   | 236 | c.811C>T        | c.(811-813)CCC>TCC      | p.P271S       |
| Pat_16 | Pre-Treatment | HS3ST4    | 9951   | 37 | 16 | 26147178 | 26147178 | Missense_Mutation | SNP | C  | T  | 224 | 268 | c.980C>T        | c.(979-981)TCC>TTC      | p.S327F       |
| Pat_16 | Pre-Treatment | APOB48R   | 55911  | 37 | 16 | 28507353 | 28507353 | Missense_Mutation | SNP | G  | A  | 32  | 33  | c.991G>A        | c.(991-993)GCC>ACC      | p.A331T       |
| Pat_16 | Pre-Treatment | CD2BP2    | 10421  | 37 | 16 | 30365585 | 30365585 | Missense_Mutation | SNP | G  | A  | 175 | 662 | c.137C>T        | c.(136-138)TCT>TTT      | p.S46F        |
| Pat_16 | Pre-Treatment | FBXL19    | 54620  | 37 | 16 | 30938732 | 30938732 | Missense_Mutation | SNP | G  | A  | 3   | 41  | c.341G>A        | c.(340-342)TGT>TAT      | p.C114Y       |
| Pat_16 | Pre-Treatment | TRIM72    | 493829 | 37 | 16 | 31230643 | 31230643 | Missense_Mutation | SNP | G  | A  | 60  | 221 | c.520G>A        | c.(520-522)GAG>AAG      | p.E174K       |
| Pat_16 | Pre-Treatment | ZNF267    | 10308  | 37 | 16 | 31927534 | 31927534 | Missense_Mutation | SNP | C  | G  | 4   | 186 | c.1964C>G       | c.(1963-1965)ACT>AGT    | p.T655S       |
| Pat_16 | Pre-Treatment | ZNF267    | 10308  | 37 | 16 | 31927690 | 31927690 | Missense_Mutation | SNP | G  | A  | 4   | 199 | c.2120G>A       | c.(2119-2121)CGG>CAG    | p.R707Q       |
| Pat_16 | Pre-Treatment | CCL22     | 6367   | 37 | 16 | 57394369 | 57394369 | Missense_Mutation | SNP | G  | A  | 22  | 120 | c.94G>A         | c.(94-96)GAA>AAA        | p.E32K        |
| Pat_16 | Pre-Treatment | CNGB1     | 1258   | 37 | 16 | 57935297 | 57935297 | Missense_Mutation | SNP | G  | A  | 4   | 269 | c.2935C>T       | c.(2935-2937)CGC>TGC    | p.R979C       |
| Pat_16 | Pre-Treatment | MMP15     | 4324   | 37 | 16 | 58079166 | 58079166 | Missense_Mutation | SNP | G  | A  | 20  | 70  | c.1826G>A       | c.(1825-1827)GGG>GAG    | p.G609E       |
| Pat_16 | Pre-Treatment | ACD       | 65057  | 37 | 16 | 67694194 | 67694194 | Missense_Mutation | SNP | G  | A  | 20  | 24  | c.188C>T        | c.(187-189)CCG>CTG      | p.P63L        |
| Pat_16 | Pre-Treatment | HYDIN     | 54768  | 37 | 16 | 70913367 | 70913367 | Missense_Mutation | SNP | G  | A  | 48  | 65  | c.10387C>T      | c.(10387-10389)CTC>TTC  | p.L3463F      |
| Pat_16 | Pre-Treatment | RFWD3     | 55159  | 37 | 16 | 74685992 | 74685992 | Nonsense_Mutation | SNP | G  | A  | 89  | 82  | c.547C>T        | c.(547-549)CAG>TAG      | p.Q183*       |
| Pat_16 | Pre-Treatment | CNTNAP4   | 85445  | 37 | 16 | 76461470 | 76461470 | Missense_Mutation | SNP | G  | A  | 58  | 50  | c.512G>A        | c.(511-513)CGA>CAA      | p.R171Q       |
| Pat_16 | Pre-Treatment | CNTNAP4   | 85445  | 37 | 16 | 76495952 | 76495952 | Missense_Mutation | SNP | C  | T  | 28  | 85  | c.1433C>T       | c.(1432-1434)CCT>CTT    | p.P478L       |
| Pat_16 | Pre-Treatment | MBTPS1    | 8720   | 37 | 16 | 84135312 | 84135312 | Missense_Mutation | SNP | T  | C  | 168 | 158 | c.77A>G         | c.(76-78)GAA>GGA        | p.E26G        |
| Pat_16 | Pre-Treatment | ATP2C2    | 9914   | 37 | 16 | 84472866 | 84472866 | Missense_Mutation | SNP | G  | A  | 4   | 138 | c.1081G>A       | c.(1081-1083)GTG>ATG    | p.V361M       |
| Pat_16 | Pre-Treatment | P2RX1     | 5023   | 37 | 17 | 3806890  | 3806890  | Missense_Mutation | SNP | A  | C  | 37  | 100 | c.560T>G        | c.(559-561)CTT>CGT      | p.L187R       |
| Pat_16 | Pre-Treatment | VMO1      | 284013 | 37 | 17 | 4688833  | 4688833  | Missense_Mutation | SNP | G  | A  | 31  | 82  | c.433C>T        | c.(433-435)CGC>TGC      | p.R145C       |
| Pat_16 | Pre-Treatment | DHX33     | 56919  | 37 | 17 | 5359375  | 5359375  | Missense_Mutation | SNP | G  | A  | 43  | 84  | c.977C>T        | c.(976-978)CCT>CTT      | p.P326L       |
| Pat_16 | Pre-Treatment | DNAH2     | 146754 | 37 | 17 | 7643737  | 7643737  | Splice_Site       | SNP | G  | A  | 4   | 312 | c.1377_splice   | c.e9-1                  | p.K459_splice |
| Pat_16 | Pre-Treatment | CHD3      | 1107   | 37 | 17 | 7797756  | 7797756  | Missense_Mutation | SNP | G  | A  | 4   | 290 | c.1099G>A       | c.(1099-1101)GGG>AGG    | p.G367R       |
| Pat_16 | Pre-Treatment | CHD3      | 1107   | 37 | 17 | 7807196  | 7807196  | Missense_Mutation | SNP | G  | A  | 4   | 196 | c.3781G>A       | c.(3781-3783)GCT>ACT    | p.A1261T      |
| Pat_16 | Pre-Treatment | MYH13     | 8735   | 37 | 17 | 10206529 | 10206529 | Missense_Mutation | SNP | C  | T  | 209 | 149 | c.5651G>A       | c.(5650-5652)AGG>AAG    | p.R1884K      |
| Pat_16 | Pre-Treatment | DNAH9     | 1770   | 37 | 17 | 11622751 | 11622751 | Missense_Mutation | SNP | C  | T  | 67  | 61  | c.5653C>T       | c.(5653-5655)CGC>TGC    | p.R1885C      |
| Pat_16 | Pre-Treatment | TRIM16    | 10626  | 37 | 17 | 15532015 | 15532015 | Missense_Mutation | SNP | A  | G  | 25  | 36  | c.1609T>C       | c.(1609-1611)TCC>CCC    | p.S537P       |
| Pat_16 | Pre-Treatment | TOM1L2    | 146691 | 37 | 17 | 17788064 | 17788064 | Nonsense_Mutation | SNP | G  | A  | 6   | 359 | c.385C>T        | c.(385-387)CGA>TGA      | p.R129*       |
| Pat_16 | Pre-Treatment | SLC47A1   | 55244  | 37 | 17 | 19470150 | 19470151 | Missense_Mutation | DNP | CC | TT | 53  | 132 | .:1154_1155CC>T | c.(1153-1155)TCC>TTT    | p.S385F       |
| Pat_16 | Pre-Treatment | KCNJ12    | 3768   | 37 | 17 | 21319012 | 21319012 | Missense_Mutation | SNP | C  | T  | 4   | 39  | c.358C>T        | c.(358-360)CGC>TGC      | p.R120C       |
| Pat_16 | Pre-Treatment | KCNJ12    | 3768   | 37 | 17 | 21319253 | 21319253 | Missense_Mutation | SNP | C  | T  | 9   | 34  | c.599C>T        | c.(598-600)GCC>GTC      | p.A200V       |
| Pat_16 | Pre-Treatment | PIGS      | 94005  | 37 | 17 | 26888548 | 26888548 | Missense_Mutation | SNP | C  | A  | 3   | 48  | c.568G>T        | c.(568-570)GCC>TCC      | p.A190S       |
| Pat_16 | Pre-Treatment | SPAG5     | 10615  | 37 | 17 | 26905522 | 26905522 | Missense_Mutation | SNP | G  | A  | 84  | 197 | c.3223C>T       | c.(3223-3225)CTT>TTT    | p.L1075F      |
| Pat_16 | Pre-Treatment | SEZ6      | 124925 | 37 | 17 | 27309030 | 27309030 | Missense_Mutation | SNP | C  | T  | 19  | 12  | c.83G>A         | c.(82-84)GGG>GAG        | p.G28E        |
| Pat_16 | Pre-Treatment | UTP6      | 55813  | 37 | 17 | 30211497 | 30211497 | Missense_Mutation | SNP | G  | A  | 38  | 46  | c.731C>T        | c.(730-732)TCG>TTG      | p.S244L       |
| Pat_16 | Pre-Treatment | MMP28     | 79148  | 37 | 17 | 34093655 | 34093655 | Missense_Mutation | SNP | G  | A  | 8   | 30  | c.1427C>T       | c.(1426-1428)TCC>TTC    | p.S476F       |
| Pat_16 | Pre-Treatment | MYO19     | 80179  | 37 | 17 | 34861158 | 34861158 | Missense_Mutation | SNP | G  | A  | 4   | 141 | c.1883C>T       | c.(1882-1884)GCG>GTG    | p.A628V       |
| Pat_16 | Pre-Treatment | CASC3     | 22794  | 37 | 17 | 38320021 | 38320021 | Missense_Mutation | SNP | C  | T  | 105 | 207 | c.1073C>T       | c.(1072-1074)TCT>TTT    | p.S358F       |
| Pat_16 | Pre-Treatment | KRTAP4-11 | 653240 | 37 | 17 | 39274214 | 39274214 | Missense_Mutation | SNP | G  | C  | 6   | 91  | c.354C>G        | c.(352-354)AGC>AGG      | p.S118R       |
| Pat_16 | Pre-Treatment | KRTAP9-2  | 83899  | 37 | 17 | 39383134 | 39383135 | Nonsense_Mutation | DNP | CC | TT | 41  | 96  | c.228_229CC>TT  | c.(226-231)TGCCAG>TGTT/ | p.Q77*        |
| Pat_16 | Pre-Treatment | KRT32     | 3882   | 37 | 17 | 39623524 | 39623524 | Missense_Mutation | SNP | G  | C  | 12  | 69  | c.54C>G         | c.(52-54)TGC>TGG        | p.C18W        |
| Pat_16 | Pre-Treatment | LOC90586  | 90586  | 37 | 17 | 41019611 | 41019611 | Missense_Mutation | SNP | G  | A  | 29  | 21  | c.316G>A        | c.(316-318)GCT>ACT      | p.A106T       |
| Pat_16 | Pre-Treatment | DHX8      | 1659   | 37 | 17 | 41567763 | 41567763 | Missense_Mutation | SNP | C  | T  | 61  | 45  | c.239C>T        | c.(238-240)TCT>TTT      | p.S80F        |
| Pat_16 | Pre-Treatment | SOST      | 50964  | 37 | 17 | 41832760 | 41832760 | Missense_Mutation | SNP | G  | A  | 3   | 61  | c.592C>T        | c.(592-594)CGC>TGC      | p.R198C       |
| Pat_16 | Pre-Treatment | MYCBPAP   | 84073  | 37 | 17 | 48595953 | 48595953 | Missense_Mutation | SNP | G  | A  | 114 | 253 | c.649G>A        | c.(649-651)GAA>AAA      | p.E217K       |

|        |               |          |        |    |    |          |          |                   |     |    |    |     |     |                                       |                        |               |
|--------|---------------|----------|--------|----|----|----------|----------|-------------------|-----|----|----|-----|-----|---------------------------------------|------------------------|---------------|
| Pat_16 | Pre-Treatment | ANKFN1   | 162282 | 37 | 17 | 54450018 | 54450018 | Missense_Mutation | SNP | G  | A  | 52  | 138 | c.622G>A                              | c.(622-624)GAA>AAA     | p.E208K       |
| Pat_16 | Pre-Treatment | TRIM25   | 7706   | 37 | 17 | 54990890 | 54990890 | Missense_Mutation | SNP | G  | A  | 4   | 147 | c.460C>T                              | c.(460-462)CGC>TGC     | p.R154C       |
| Pat_16 | Pre-Treatment | BZRAP1   | 9256   | 37 | 17 | 56387973 | 56387973 | Missense_Mutation | SNP | G  | A  | 4   | 65  | c.3599C>T                             | c.(3598-3600)CCG>CTG   | p.P1200L      |
| Pat_16 | Pre-Treatment | PPM1E    | 22843  | 37 | 17 | 57043079 | 57043079 | Missense_Mutation | SNP | G  | A  | 7   | 639 | c.608G>A                              | c.(607-609)CGT>CAT     | p.R203H       |
| Pat_16 | Pre-Treatment | BCAS3    | 54828  | 37 | 17 | 58824632 | 58824632 | Missense_Mutation | SNP | C  | T  | 167 | 517 | c.395C>T                              | c.(394-396)CCA>CTA     | p.P132L       |
| Pat_16 | Pre-Treatment | TBC1D3P2 | 440452 | 37 | 17 | 60345595 | 60345595 | Missense_Mutation | SNP | G  | A  | 42  | 119 | c.673C>T                              | c.(673-675)CAC>TAC     | p.H225Y       |
| Pat_16 | Pre-Treatment | ERN1     | 2081   | 37 | 17 | 62137857 | 62137857 | Missense_Mutation | SNP | G  | T  | 48  | 132 | c.1178C>A                             | c.(1177-1179)GCT>GAT   | p.A393D       |
| Pat_16 | Pre-Treatment | BPTF     | 2186   | 37 | 17 | 65908492 | 65908492 | Nonsense_Mutation | SNP | C  | T  | 4   | 202 | c.4492C>T                             | c.(4492-4494)CGA>TGA   | p.R1498*      |
| Pat_16 | Pre-Treatment | ABCA8    | 10351  | 37 | 17 | 66915450 | 66915450 | Missense_Mutation | SNP | C  | T  | 134 | 307 | c.1780G>A                             | c.(1780-1782)GAT>AAT   | p.D594N       |
| Pat_16 | Pre-Treatment | ABCA10   | 10349  | 37 | 17 | 67151960 | 67151960 | Missense_Mutation | SNP | G  | A  | 472 | 204 | c.3562C>T                             | c.(3562-3564)CCA>TCA   | p.P1188S      |
| Pat_16 | Pre-Treatment | USH1G    | 124590 | 37 | 17 | 72916120 | 72916120 | Missense_Mutation | SNP | G  | A  | 19  | 15  | c.811C>T                              | c.(811-813)CCG>TCG     | p.P271S       |
| Pat_16 | Pre-Treatment | PRPSAP1  | 5635   | 37 | 17 | 74324800 | 74324801 | Missense_Mutation | DNP | GG | AA | 16  | 58  | c.778_779CC>TT                        | c.(778-780)CCA>TTA     | p.P260L       |
| Pat_16 | Pre-Treatment | ENPP7    | 339221 | 37 | 17 | 77709346 | 77709346 | Missense_Mutation | SNP | G  | A  | 21  | 48  | c.904G>A                              | c.(904-906)GAC>AAC     | p.D302N       |
| Pat_16 | Pre-Treatment | RNF213   | 57674  | 37 | 17 | 78320995 | 78320995 | Missense_Mutation | SNP | C  | T  | 7   | 11  | c.3079C>T                             | c.(3079-3081)CGT>TGT   | p.R1027C      |
| Pat_16 | Pre-Treatment | RPTOR    | 57521  | 37 | 17 | 78811731 | 78811731 | Nonsense_Mutation | SNP | G  | A  | 28  | 53  | c.1146G>A                             | c.(1144-1146)TGG>TGA   | p.W382*       |
| Pat_16 | Pre-Treatment | L3MBTL4  | 91133  | 37 | 18 | 6215757  | 6215757  | Missense_Mutation | SNP | A  | T  | 34  | 60  | c.862T>A                              | c.(862-864)TTT>ATT     | p.F288I       |
| Pat_16 | Pre-Treatment | ARHGAP28 | 79822  | 37 | 18 | 6894891  | 6894891  | Splice_Site       | SNP | G  | A  | 101 | 54  | c.1374_splice                         | c.e14+1                | p.M458_splice |
| Pat_16 | Pre-Treatment | LAMA1    | 284217 | 37 | 18 | 6950909  | 6950909  | Missense_Mutation | SNP | G  | A  | 22  | 33  | c.8269C>T                             | c.(8269-8271)CAT>TAT   | p.H2757Y      |
| Pat_16 | Pre-Treatment | PTPRM    | 5797   | 37 | 18 | 7888152  | 7888152  | Missense_Mutation | SNP | C  | T  | 121 | 294 | c.245C>T                              | c.(244-246)GCC>GTC     | p.A82V        |
| Pat_16 | Pre-Treatment | DSC3     | 1825   | 37 | 18 | 28598156 | 28598156 | Missense_Mutation | SNP | C  | T  | 80  | 59  | c.1144G>A                             | c.(1144-1146)GAT>AAT   | p.D382N       |
| Pat_16 | Pre-Treatment | DSC2     | 1824   | 37 | 18 | 28662971 | 28662971 | Missense_Mutation | SNP | A  | T  | 70  | 29  | c.998T>A                              | c.(997-999)TTT>TAT     | p.F333Y       |
| Pat_16 | Pre-Treatment | DSG1     | 1828   | 37 | 18 | 28914025 | 28914025 | Missense_Mutation | SNP | G  | A  | 78  | 232 | c.865G>A                              | c.(865-867)GAG>AAG     | p.E289K       |
| Pat_16 | Pre-Treatment | DSG4     | 147409 | 37 | 18 | 28986205 | 28986205 | Missense_Mutation | SNP | C  | T  | 151 | 89  | c.1802C>T                             | c.(1801-1803)GCG>GTG   | p.A601V       |
| Pat_16 | Pre-Treatment | DSG2     | 1829   | 37 | 18 | 29122574 | 29122574 | Missense_Mutation | SNP | G  | C  | 46  | 102 | c.2093G>C                             | c.(2092-2094)GGA>GCA   | p.G698A       |
| Pat_16 | Pre-Treatment | ASXL3    | 80816  | 37 | 18 | 31318749 | 31318749 | Missense_Mutation | SNP | A  | G  | 61  | 139 | c.1381A>G                             | c.(1381-1383)AGT>GGT   | p.S461G       |
| Pat_16 | Pre-Treatment | ASXL3    | 80816  | 37 | 18 | 31319227 | 31319227 | Missense_Mutation | SNP | G  | A  | 11  | 30  | c.1859G>A                             | c.(1858-1860)GGA>GAA   | p.G620E       |
| Pat_16 | Pre-Treatment | TCEB3C   | 162699 | 37 | 18 | 44555339 | 44555339 | Missense_Mutation | SNP | G  | A  | 6   | 257 | c.875C>T                              | c.(874-876)ACC>ATC     | p.T292I       |
| Pat_16 | Pre-Treatment | MYO5B    | 4645   | 37 | 18 | 47398601 | 47398601 | Missense_Mutation | SNP | G  | A  | 174 | 403 | c.3539C>T                             | c.(3538-3540)GCG>GTG   | p.A1180V      |
| Pat_16 | Pre-Treatment | DCC      | 1630   | 37 | 18 | 50832050 | 50832050 | Missense_Mutation | SNP | G  | A  | 58  | 144 | c.2014G>A                             | c.(2014-2016)GAA>AAA   | p.E672K       |
| Pat_16 | Pre-Treatment | FECH     | 2235   | 37 | 18 | 55222097 | 55222097 | Nonsense_Mutation | SNP | G  | A  | 69  | 169 | c.892C>T                              | c.(892-894)CGA>TGA     | p.R298*       |
| Pat_16 | Pre-Treatment | PHLPP1   | 23239  | 37 | 18 | 60639769 | 60639769 | Missense_Mutation | SNP | G  | A  | 4   | 226 | c.2047G>A                             | c.(2047-2049)GTG>ATG   | p.V683M       |
| Pat_16 | Pre-Treatment | DOK6     | 220164 | 37 | 18 | 67425073 | 67425073 | Missense_Mutation | SNP | C  | T  | 62  | 167 | c.820C>T                              | c.(820-822)CGT>TGT     | p.R274C       |
| Pat_16 | Pre-Treatment | ATP9B    | 374868 | 37 | 18 | 77104307 | 77104307 | Nonsense_Mutation | SNP | C  | T  | 4   | 142 | c.2425C>T                             | c.(2425-2427)CGA>TGA   | p.R809*       |
| Pat_16 | Pre-Treatment | ABCA7    | 10347  | 37 | 19 | 1046386  | 1046386  | Missense_Mutation | SNP | C  | T  | 111 | 406 | c.1603C>T                             | c.(1603-1605)CCG>TCG   | p.P535S       |
| Pat_16 | Pre-Treatment | DOT1L    | 84444  | 37 | 19 | 2226980  | 2226980  | Missense_Mutation | SNP | C  | T  | 19  | 44  | c.4460C>T                             | c.(4459-4461)TCC>TTC   | p.S1487F      |
| Pat_16 | Pre-Treatment | JSRP1    | 126306 | 37 | 19 | 2254224  | 2254224  | Missense_Mutation | SNP | G  | A  | 6   | 349 | c.224C>T                              | c.(223-225)ACC>ATC     | p.T75I        |
| Pat_16 | Pre-Treatment | ZNF57    | 126295 | 37 | 19 | 2917733  | 2917733  | Missense_Mutation | SNP | G  | A  | 4   | 150 | c.1114G>A                             | c.(1114-1116)GCC>ACC   | p.A372T       |
| Pat_16 | Pre-Treatment | ZNF57    | 126295 | 37 | 19 | 2917793  | 2917793  | Missense_Mutation | SNP | T  | C  | 5   | 203 | c.1174T>C                             | c.(1174-1176)TAT>CAT   | p.Y392H       |
| Pat_16 | Pre-Treatment | ZNF57    | 126295 | 37 | 19 | 2917961  | 2917961  | Missense_Mutation | SNP | C  | T  | 8   | 239 | c.1342C>T                             | c.(1342-1344)CAT>TAT   | p.H448Y       |
| Pat_16 | Pre-Treatment | TLE2     | 7089   | 37 | 19 | 3005967  | 3005967  | Splice_Site       | SNP | C  | T  | 23  | 105 | c.1501_splice                         | c.e16-1                | p.N501_splice |
| Pat_16 | Pre-Treatment | PLIN4    | 729359 | 37 | 19 | 4511993  | 4511993  | Missense_Mutation | SNP | G  | A  | 66  | 95  | c.1937C>T                             | c.(1936-1938)GCG>GTG   | p.A646V       |
| Pat_16 | Pre-Treatment | C3       | 718    | 37 | 19 | 6713215  | 6713215  | Missense_Mutation | SNP | C  | T  | 3   | 77  | c.988G>A                              | c.(988-990)GTC>ATC     | p.V330I       |
| Pat_16 | Pre-Treatment | EMR1     | 2015   | 37 | 19 | 6921798  | 6921798  | Missense_Mutation | SNP | T  | A  | 54  | 109 | c.1695T>A                             | c.(1693-1695)TTT>TTA   | p.F565L       |
| Pat_16 | Pre-Treatment | MUC16    | 94025  | 37 | 19 | 9009311  | 9009312  | Missense_Mutation | DNP | GG | AA | 39  | 134 | 39161_39162CC>>c.(39160-39162)TCC>TTT | p.S13054F              |               |
| Pat_16 | Pre-Treatment | MUC16    | 94025  | 37 | 19 | 9059650  | 9059650  | Missense_Mutation | SNP | G  | A  | 60  | 62  | c.27796C>T                            | c.(27796-27798)CTC>TTC | p.L9266F      |
| Pat_16 | Pre-Treatment | MUC16    | 94025  | 37 | 19 | 9068622  | 9068622  | Missense_Mutation | SNP | G  | A  | 97  | 95  | c.18824C>T                            | c.(18823-18825)TCA>TTA | p.S6275L      |
| Pat_16 | Pre-Treatment | MUC16    | 94025  | 37 | 19 | 9072288  | 9072288  | Missense_Mutation | SNP | G  | A  | 30  | 36  | c.15158C>T                            | c.(15157-15159)TCC>TTC | p.S5053F      |

|        |               |         |        |    |    |          |          |                   |     |    |    |     |     |                 |                      |          |
|--------|---------------|---------|--------|----|----|----------|----------|-------------------|-----|----|----|-----|-----|-----------------|----------------------|----------|
| Pat_16 | Pre-Treatment | ZNF560  | 147741 | 37 | 19 | 9578016  | 9578016  | Missense_Mutation | SNP | C  | T  | 42  | 136 | c.1607G>A       | c.(1606-1608)CGA>CAA | p.R536Q  |
| Pat_16 | Pre-Treatment | ZNF561  | 93134  | 37 | 19 | 9721330  | 9721330  | Missense_Mutation | SNP | G  | A  | 146 | 161 | c.1007C>T       | c.(1006-1008)CCC>CTC | p.P336L  |
| Pat_16 | Pre-Treatment | COL5A3  | 50509  | 37 | 19 | 10097252 | 10097252 | Missense_Mutation | SNP | C  | T  | 29  | 139 | c.2221G>A       | c.(2221-2223)GAT>AAT | p.D741N  |
| Pat_16 | Pre-Treatment | CDC37   | 11140  | 37 | 19 | 10514068 | 10514068 | Missense_Mutation | SNP | G  | A  | 37  | 52  | c.88C>T         | c.(88-90)CGC>TGC     | p.R30C   |
| Pat_16 | Pre-Treatment | KEAP1   | 9817   | 37 | 19 | 10610253 | 10610253 | Missense_Mutation | SNP | G  | A  | 4   | 218 | c.457C>T        | c.(457-459)CTC>TTC   | p.L153F  |
| Pat_16 | Pre-Treatment | LPPR2   | 64748  | 37 | 19 | 11470343 | 11470343 | Nonsense_Mutation | SNP | C  | T  | 4   | 206 | c.202C>T        | c.(202-204)CGA>TGA   | p.R68*   |
| Pat_16 | Pre-Treatment | ZNF653  | 115950 | 37 | 19 | 11597637 | 11597637 | Missense_Mutation | SNP | G  | A  | 8   | 32  | c.1402C>T       | c.(1402-1404)CAC>TAC | p.H468Y  |
| Pat_16 | Pre-Treatment | ZNF440  | 126070 | 37 | 19 | 11942554 | 11942554 | Missense_Mutation | SNP | G  | A  | 82  | 233 | c.563G>A        | c.(562-564)CGA>CAA   | p.R188Q  |
| Pat_16 | Pre-Treatment | ZNF844  | 284391 | 37 | 19 | 12187307 | 12187307 | Missense_Mutation | SNP | G  | C  | 5   | 183 | c.1372G>C       | c.(1372-1374)GAT>CAT | p.D458H  |
| Pat_16 | Pre-Treatment | ZNF844  | 284391 | 37 | 19 | 12187502 | 12187502 | Missense_Mutation | SNP | A  | G  | 6   | 57  | c.1567A>G       | c.(1567-1569)AAA>GAA | p.K523E  |
| Pat_16 | Pre-Treatment | ANKLE1  | 126549 | 37 | 19 | 17394769 | 17394769 | Missense_Mutation | SNP | C  | T  | 128 | 122 | c.1196C>T       | c.(1195-1197)CCT>CTT | p.P399L  |
| Pat_16 | Pre-Treatment | UNC13A  | 23025  | 37 | 19 | 17766699 | 17766699 | Missense_Mutation | SNP | C  | T  | 18  | 9   | c.1540G>A       | c.(1540-1542)GAG>AAG | p.E514K  |
| Pat_16 | Pre-Treatment | ARRDC2  | 27106  | 37 | 19 | 18121461 | 18121461 | Missense_Mutation | SNP | C  | T  | 65  | 87  | c.1093C>T       | c.(1093-1095)CCC>TCC | p.P365S  |
| Pat_16 | Pre-Treatment | ZNF93   | 81931  | 37 | 19 | 20044699 | 20044699 | Missense_Mutation | SNP | C  | T  | 18  | 52  | c.935C>T        | c.(934-936)CCC>CTC   | p.P312L  |
| Pat_16 | Pre-Treatment | ZNF626  | 199777 | 37 | 19 | 20807184 | 20807184 | Missense_Mutation | SNP | T  | C  | 7   | 190 | c.1499A>G       | c.(1498-1500)GAG>GGG | p.E500G  |
| Pat_16 | Pre-Treatment | ZNF208  | 7757   | 37 | 19 | 22157069 | 22157069 | Missense_Mutation | SNP | G  | A  | 37  | 36  | c.767C>T        | c.(766-768)TCC>TTC   | p.S256F  |
| Pat_16 | Pre-Treatment | ZNF681  | 148213 | 37 | 19 | 23927358 | 23927358 | Missense_Mutation | SNP | G  | A  | 63  | 90  | c.994C>T        | c.(994-996)CAT>TAT   | p.H332Y  |
| Pat_16 | Pre-Treatment | DPY19L3 | 147991 | 37 | 19 | 32968480 | 32968480 | Missense_Mutation | SNP | G  | A  | 4   | 197 | c.1750G>A       | c.(1750-1752)GGA>AGA | p.G584R  |
| Pat_16 | Pre-Treatment | PDCD2L  | 84306  | 37 | 19 | 34912539 | 34912539 | Missense_Mutation | SNP | G  | A  | 5   | 469 | c.913G>A        | c.(913-915)GCA>ACA   | p.A305T  |
| Pat_16 | Pre-Treatment | LG14    | 163175 | 37 | 19 | 35624989 | 35624989 | Missense_Mutation | SNP | C  | G  | 14  | 52  | c.190G>C        | c.(190-192)GTC>CTC   | p.V64L   |
| Pat_16 | Pre-Treatment | KIRREL2 | 84063  | 37 | 19 | 36357377 | 36357377 | Missense_Mutation | SNP | C  | T  | 128 | 146 | c.2110C>T       | c.(2110-2112)CTC>TTC | p.L704F  |
| Pat_16 | Pre-Treatment | APLP1   | 333    | 37 | 19 | 36369539 | 36369539 | Missense_Mutation | SNP | G  | A  | 40  | 40  | c.1630G>A       | c.(1630-1632)GAA>AAA | p.E544K  |
| Pat_16 | Pre-Treatment | RYR1    | 6261   | 37 | 19 | 38939433 | 38939433 | Missense_Mutation | SNP | C  | A  | 11  | 22  | c.1102C>A       | c.(1102-1104)CTC>ATC | p.L368I  |
| Pat_16 | Pre-Treatment | LGALS4  | 3960   | 37 | 19 | 39299478 | 39299478 | Missense_Mutation | SNP | C  | T  | 40  | 128 | c.245G>A        | c.(244-246)GGG>GAG   | p.G82E   |
| Pat_16 | Pre-Treatment | SIRT2   | 22933  | 37 | 19 | 39379771 | 39379771 | Missense_Mutation | SNP | G  | A  | 4   | 214 | c.457C>T        | c.(457-459)CGC>TGC   | p.R153C  |
| Pat_16 | Pre-Treatment | LGALS13 | 29124  | 37 | 19 | 40095879 | 40095879 | Missense_Mutation | SNP | T  | A  | 30  | 107 | c.154T>A        | c.(154-156)TTC>ATC   | p.F52I   |
| Pat_16 | Pre-Treatment | PRX     | 57716  | 37 | 19 | 40901021 | 40901021 | Missense_Mutation | SNP | G  | A  | 42  | 42  | c.3238C>T       | c.(3238-3240)CGT>TGT | p.R1080C |
| Pat_16 | Pre-Treatment | PRX     | 57716  | 37 | 19 | 40901635 | 40901635 | Missense_Mutation | SNP | T  | G  | 9   | 57  | c.2624A>C       | c.(2623-2625)AAA>ACA | p.K875T  |
| Pat_16 | Pre-Treatment | DMRTC2  | 63946  | 37 | 19 | 42355736 | 42355736 | Missense_Mutation | SNP | G  | A  | 38  | 114 | c.1076G>A       | c.(1075-1077)CGT>CAT | p.R359H  |
| Pat_16 | Pre-Treatment | LIPE    | 3991   | 37 | 19 | 42912470 | 42912470 | Missense_Mutation | SNP | G  | A  | 4   | 199 | c.1424C>T       | c.(1423-1425)ACG>ATG | p.T475M  |
| Pat_16 | Pre-Treatment | PSG8    | 440533 | 37 | 19 | 43258652 | 43258652 | Missense_Mutation | SNP | T  | C  | 219 | 275 | c.1076A>G       | c.(1075-1077)AAC>AGC | p.N359S  |
| Pat_16 | Pre-Treatment | PSG6    | 5675   | 37 | 19 | 43529189 | 43529189 | Nonsense_Mutation | SNP | C  | T  | 71  | 253 | c.102G>A        | c.(100-102)TGG>TGA   | p.W34*   |
| Pat_16 | Pre-Treatment | PSG4    | 5672   | 37 | 19 | 43708074 | 43708074 | Nonsense_Mutation | SNP | C  | A  | 6   | 456 | c.394G>T        | c.(394-396)GGA>TGA   | p.G132*  |
| Pat_16 | Pre-Treatment | CADM4   | 199731 | 37 | 19 | 44131825 | 44131825 | Missense_Mutation | SNP | C  | T  | 196 | 222 | c.182G>A        | c.(181-183)CGG>CAG   | p.R61Q   |
| Pat_16 | Pre-Treatment | DACT3   | 147906 | 37 | 19 | 47151836 | 47151836 | Missense_Mutation | SNP | G  | A  | 269 | 259 | c.1793C>T       | c.(1792-1794)CCC>CTC | p.P598L  |
| Pat_16 | Pre-Treatment | GRWD1   | 83743  | 37 | 19 | 48953958 | 48953958 | Missense_Mutation | SNP | C  | T  | 24  | 111 | c.718C>T        | c.(718-720)CAC>TAC   | p.H240Y  |
| Pat_16 | Pre-Treatment | LMTK3   | 114783 | 37 | 19 | 49004787 | 49004787 | Missense_Mutation | SNP | G  | A  | 4   | 21  | c.914C>T        | c.(913-915)TCT>TTT   | p.S305F  |
| Pat_16 | Pre-Treatment | PTH2    | 113091 | 37 | 19 | 49926533 | 49926533 | Missense_Mutation | SNP | G  | C  | 3   | 51  | c.64C>G         | c.(64-66)CTG>GTG     | p.L22V   |
| Pat_16 | Pre-Treatment | PTOV1   | 53635  | 37 | 19 | 50361215 | 50361215 | Missense_Mutation | SNP | G  | A  | 5   | 289 | c.859G>A        | c.(859-861)GTG>ATG   | p.V287M  |
| Pat_16 | Pre-Treatment | ZNF473  | 25888  | 37 | 19 | 50549870 | 50549870 | Missense_Mutation | SNP | C  | T  | 32  | 119 | c.2170C>T       | c.(2170-2172)CAC>TAC | p.H724Y  |
| Pat_16 | Pre-Treatment | SHANK1  | 50944  | 37 | 19 | 51171651 | 51171651 | Missense_Mutation | SNP | C  | A  | 8   | 24  | c.3566G>T       | c.(3565-3567)GGA>GTA | p.G1189V |
| Pat_16 | Pre-Treatment | ZNF175  | 7728   | 37 | 19 | 52089988 | 52089988 | Missense_Mutation | SNP | T  | C  | 50  | 55  | c.404T>C        | c.(403-405)TTA>TCA   | p.L135S  |
| Pat_16 | Pre-Treatment | ZNF836  | 162962 | 37 | 19 | 52659056 | 52659056 | Missense_Mutation | SNP | T  | A  | 6   | 299 | c.1880A>T       | c.(1879-1881)AAT>ATT | p.N627I  |
| Pat_16 | Pre-Treatment | ZNF836  | 162962 | 37 | 19 | 52659075 | 52659075 | Missense_Mutation | SNP | C  | A  | 6   | 270 | c.1861G>T       | c.(1861-1863)GAC>TAC | p.D621Y  |
| Pat_16 | Pre-Treatment | ZNF28   | 7576   | 37 | 19 | 53302984 | 53302985 | Missense_Mutation | DNP | TT | GA | 6   | 426 | c.2113_2114AA>T | c.(2113-2115)AAC>TCC | p.N705S  |
| Pat_16 | Pre-Treatment | ZNF677  | 342926 | 37 | 19 | 53741754 | 53741754 | Missense_Mutation | SNP | C  | T  | 20  | 98  | c.226G>A        | c.(226-228)GAA>AAA   | p.E76K   |
| Pat_16 | Pre-Treatment | ZNF845  | 91664  | 37 | 19 | 53855364 | 53855364 | Missense_Mutation | SNP | C  | T  | 9   | 192 | c.1436C>T       | c.(1435-1437)ACA>ATA | p.T479I  |

|        |               |           |        |    |    |           |           |                   |     |    |    |     |     |                                   |                        |               |
|--------|---------------|-----------|--------|----|----|-----------|-----------|-------------------|-----|----|----|-----|-----|-----------------------------------|------------------------|---------------|
| Pat_16 | Pre-Treatment | ZNF761    | 388561 | 37 | 19 | 53959137  | 53959137  | Missense_Mutation | SNP | G  | T  | 6   | 300 | c.1376G>T                         | c.(1375-1377)CGT>CTT   | p.R459L       |
| Pat_16 | Pre-Treatment | ZNF761    | 388561 | 37 | 19 | 53959151  | 53959151  | Missense_Mutation | SNP | C  | A  | 7   | 272 | c.1390C>A                         | c.(1390-1392)CAA>AAA   | p.Q464K       |
| Pat_16 | Pre-Treatment | DPRX      | 503834 | 37 | 19 | 54135382  | 54135382  | Missense_Mutation | SNP | C  | T  | 37  | 139 | c.22C>T                           | c.(22-24)CGT>TGT       | p.R8C         |
| Pat_16 | Pre-Treatment | NLRP7     | 199713 | 37 | 19 | 55451046  | 55451046  | Missense_Mutation | SNP | C  | T  | 11  | 36  | c.1141G>A                         | c.(1141-1143)GAG>AAG   | p.E381K       |
| Pat_16 | Pre-Treatment | NLRP4     | 147945 | 37 | 19 | 56373376  | 56373376  | Missense_Mutation | SNP | T  | A  | 28  | 129 | c.2037T>A                         | c.(2035-2037)TTT>TTA   | p.F679L       |
| Pat_16 | Pre-Treatment | NLRP8     | 126205 | 37 | 19 | 56466396  | 56466396  | Missense_Mutation | SNP | G  | T  | 59  | 76  | c.972G>T                          | c.(970-972)ATG>ATT     | p.M324I       |
| Pat_16 | Pre-Treatment | PEG3      | 5178   | 37 | 19 | 57325633  | 57325633  | Missense_Mutation | SNP | C  | T  | 40  | 126 | c.4177G>A                         | c.(4177-4179)GAG>AAG   | p.E1393K      |
| Pat_16 | Pre-Treatment | PEG3      | 5178   | 37 | 19 | 57327584  | 57327584  | Missense_Mutation | SNP | T  | A  | 145 | 157 | c.2226A>T                         | c.(2224-2226)GAA>GAT   | p.E742D       |
| Pat_16 | Pre-Treatment | ZNF419    | 79744  | 37 | 19 | 58005106  | 58005106  | Missense_Mutation | SNP | C  | T  | 7   | 258 | c.1181C>T                         | c.(1180-1182)ACT>ATT   | p.T394I       |
| Pat_16 | Pre-Treatment | ZNF419    | 79744  | 37 | 19 | 58005146  | 58005146  | Missense_Mutation | SNP | C  | G  | 7   | 264 | c.1221C>G                         | c.(1219-1221)TTC>TTG   | p.F407L       |
| Pat_16 | Pre-Treatment | ZNF606    | 80095  | 37 | 19 | 58490987  | 58490987  | Missense_Mutation | SNP | A  | C  | 73  | 74  | c.1061T>G                         | c.(1060-1062)TTT>TGT   | p.F354C       |
| Pat_16 | Pre-Treatment | TTC15     | 51112  | 37 | 2  | 3405575   | 3405575   | Missense_Mutation | SNP | C  | T  | 60  | 146 | c.1075C>T                         | c.(1075-1077)CGC>TGC   | p.R359C       |
| Pat_16 | Pre-Treatment | GREB1     | 9687   | 37 | 2  | 11758794  | 11758794  | Missense_Mutation | SNP | G  | A  | 3   | 67  | c.3793G>A                         | c.(3793-3795)GTG>ATG   | p.V1265M      |
| Pat_16 | Pre-Treatment | UBXN2A    | 165324 | 37 | 2  | 24199878  | 24199878  | Missense_Mutation | SNP | G  | A  | 4   | 118 | c.220G>A                          | c.(220-222)GTC>ATC     | p.V74I        |
| Pat_16 | Pre-Treatment | AGBL5     | 60509  | 37 | 2  | 27275992  | 27275992  | Missense_Mutation | SNP | G  | A  | 6   | 495 | c.166G>A                          | c.(166-168)GTG>ATG     | p.V56M        |
| Pat_16 | Pre-Treatment | FAM179A   | 165186 | 37 | 2  | 29225569  | 29225569  | Missense_Mutation | SNP | G  | A  | 10  | 46  | c.595G>A                          | c.(595-597)GGG>AGG     | p.G199R       |
| Pat_16 | Pre-Treatment | CAPN13    | 92291  | 37 | 2  | 30977178  | 30977178  | Missense_Mutation | SNP | T  | G  | 20  | 21  | c.919A>C                          | c.(919-921)AAA>CAA     | p.K307Q       |
| Pat_16 | Pre-Treatment | MAP4K3    | 8491   | 37 | 2  | 39487908  | 39487908  | Missense_Mutation | SNP | A  | T  | 54  | 36  | c.2147T>A                         | c.(2146-2148)TTT>TAT   | p.F716Y       |
| Pat_16 | Pre-Treatment | ADD2      | 119    | 37 | 2  | 70890612  | 70890612  | Missense_Mutation | SNP | A  | T  | 119 | 68  | c.2126T>A                         | c.(2125-2127)TTC>TAC   | p.F709Y       |
| Pat_16 | Pre-Treatment | ADD2      | 119    | 37 | 2  | 70933534  | 70933534  | Missense_Mutation | SNP | C  | T  | 90  | 44  | c.7G>A                            | c.(7-9)GAA>AAA         | p.E3K         |
| Pat_16 | Pre-Treatment | RAB11FIP5 | 26056  | 37 | 2  | 73315742  | 73315742  | Missense_Mutation | SNP | G  | A  | 3   | 33  | c.1004C>T                         | c.(1003-1005)TCG>TTG   | p.S335L       |
| Pat_16 | Pre-Treatment | REG3G     | 130120 | 37 | 2  | 79254278  | 79254278  | Missense_Mutation | SNP | G  | A  | 111 | 178 | c.314G>A                          | c.(313-315)GGG>GAG     | p.G105E       |
| Pat_16 | Pre-Treatment | TGOLN2    | 10618  | 37 | 2  | 85554362  | 85554362  | Missense_Mutation | SNP | G  | T  | 8   | 829 | c.493C>A                          | c.(493-495)CCT>ACT     | p.P165T       |
| Pat_16 | Pre-Treatment | TGOLN2    | 10618  | 37 | 2  | 85554367  | 85554367  | Missense_Mutation | SNP | T  | C  | 9   | 832 | c.488A>G                          | c.(487-489)GAC>GGC     | p.D163G       |
| Pat_16 | Pre-Treatment | RETSAT    | 54884  | 37 | 2  | 85581530  | 85581530  | Missense_Mutation | SNP | G  | A  | 110 | 229 | c.101C>T                          | c.(100-102)TCC>TTC     | p.S34F        |
| Pat_16 | Pre-Treatment | PTCD3     | 55037  | 37 | 2  | 86362095  | 86362095  | Missense_Mutation | SNP | G  | A  | 5   | 296 | c.1763G>A                         | c.(1762-1764)AGA>AAA   | p.R588K       |
| Pat_16 | Pre-Treatment | SMYD1     | 150572 | 37 | 2  | 88396118  | 88396118  | Missense_Mutation | SNP | G  | A  | 116 | 280 | c.703G>A                          | c.(703-705)GAG>AAG     | p.E235K       |
| Pat_16 | Pre-Treatment | KCNIP3    | 30818  | 37 | 2  | 96040928  | 96040928  | Missense_Mutation | SNP | C  | T  | 4   | 192 | c.419C>T                          | c.(418-420)GCG>GTG     | p.A140V       |
| Pat_16 | Pre-Treatment | AFF3      | 3899   | 37 | 2  | 100209977 | 100209978 | Missense_Mutation | DNP | CC | TT | 25  | 84  | .2145_2146GG>Al43-2148)GGGGGC>GGA |                        | p.G716S       |
| Pat_16 | Pre-Treatment | RGPD4     | 285190 | 37 | 2  | 108487252 | 108487252 | Missense_Mutation | SNP | G  | A  | 117 | 199 | c.2792G>A                         | c.(2791-2793)GGA>GAA   | p.G931E       |
| Pat_16 | Pre-Treatment | SULT1C4   | 27233  | 37 | 2  | 108999916 | 108999916 | Missense_Mutation | SNP | G  | A  | 46  | 135 | c.565G>A                          | c.(565-567)GCC>ACC     | p.A189T       |
| Pat_16 | Pre-Treatment | EDAR      | 10913  | 37 | 2  | 109513459 | 109513459 | Missense_Mutation | SNP | C  | G  | 39  | 20  | c.1251G>C                         | c.(1249-1251)CAG>CAC   | p.Q417H       |
| Pat_16 | Pre-Treatment | SH3RF3    | 344558 | 37 | 2  | 110053444 | 110053444 | Missense_Mutation | SNP | G  | A  | 35  | 95  | c.1670G>A                         | c.(1669-1671)GGG>GAG   | p.G557E       |
| Pat_16 | Pre-Treatment | GPR17     | 2840   | 37 | 2  | 128408607 | 128408608 | Nonsense_Mutation | DNP | GG | TA | 38  | 94  | c.382_383GG>TA                    | c.(382-384)GGG>TAG     | p.G128*       |
| Pat_16 | Pre-Treatment | UGGT1     | 56886  | 37 | 2  | 128884989 | 128884989 | Missense_Mutation | SNP | G  | C  | 37  | 95  | c.1189G>C                         | c.(1189-1191)GGA>CGA   | p.G397R       |
| Pat_16 | Pre-Treatment | THSD7B    | 80731  | 37 | 2  | 137852453 | 137852453 | Nonsense_Mutation | SNP | C  | T  | 56  | 176 | c.868C>T                          | c.(868-870)CAA>TAA     | p.Q290*       |
| Pat_16 | Pre-Treatment | THSD7B    | 80731  | 37 | 2  | 138373853 | 138373853 | Missense_Mutation | SNP | G  | A  | 160 | 347 | c.3445G>A                         | c.(3445-3447)GAA>AAA   | p.E1149K      |
| Pat_16 | Pre-Treatment | LRP1B     | 53353  | 37 | 2  | 141459861 | 141459861 | Missense_Mutation | SNP | C  | T  | 73  | 213 | c.6151G>A                         | c.(6151-6153)GAA>AAA   | p.E2051K      |
| Pat_16 | Pre-Treatment | LRP1B     | 53353  | 37 | 2  | 141945989 | 141945989 | Splice_Site       | SNP | C  | T  | 31  | 96  | c.1013_splice                     | c.e7+1                 | p.G338_splice |
| Pat_16 | Pre-Treatment | NEB       | 4703   | 37 | 2  | 152394408 | 152394408 | Missense_Mutation | SNP | G  | T  | 6   | 118 | c.15977C>A                        | c.(15976-15978)GCA>GAA | p.A5326E      |
| Pat_16 | Pre-Treatment | TANC1     | 85461  | 37 | 2  | 160027046 | 160027046 | Missense_Mutation | SNP | C  | T  | 35  | 109 | c.1081C>T                         | c.(1081-1083)CCC>TCC   | p.P361S       |
| Pat_16 | Pre-Treatment | BAZZB     | 29994  | 37 | 2  | 160295112 | 160295112 | Missense_Mutation | SNP | G  | A  | 5   | 431 | c.995C>T                          | c.(994-996)GCG>GTG     | p.A332V       |
| Pat_16 | Pre-Treatment | SLC4A10   | 57282  | 37 | 2  | 162728844 | 162728844 | Missense_Mutation | SNP | G  | A  | 94  | 243 | c.808G>A                          | c.(808-810)GAA>AAA     | p.E270K       |
| Pat_16 | Pre-Treatment | DPP4      | 1803   | 37 | 2  | 162875301 | 162875301 | Missense_Mutation | SNP | C  | T  | 5   | 350 | c.1358G>A                         | c.(1357-1359)AGG>AAG   | p.R453K       |
| Pat_16 | Pre-Treatment | HOXD3     | 3232   | 37 | 2  | 177036364 | 177036364 | Missense_Mutation | SNP | C  | T  | 100 | 231 | c.661C>T                          | c.(661-663)CGG>TGG     | p.R221W       |
| Pat_16 | Pre-Treatment | TTN       | 7273   | 37 | 2  | 179454201 | 179454201 | Missense_Mutation | SNP | C  | T  | 26  | 68  | c.54547G>A                        | c.(54547-54549)GAA>AAA | p.E18183K     |
| Pat_16 | Pre-Treatment | TTN       | 7273   | 37 | 2  | 179641949 | 179641949 | Missense_Mutation | SNP | C  | T  | 97  | 217 | c.4741G>A                         | c.(4741-4743)GGT>AGT   | p.G1581S      |

|        |               |          |        |    |    |           |           |                   |     |    |    |     |     |                |                          |               |
|--------|---------------|----------|--------|----|----|-----------|-----------|-------------------|-----|----|----|-----|-----|----------------|--------------------------|---------------|
| Pat_16 | Pre-Treatment | DNAJC10  | 54431  | 37 | 2  | 183593668 | 183593668 | Nonsense_Mutation | SNP | C  | T  | 4   | 317 | c.580C>T       | c.(580-582)CGA>TGA       | p.R194*       |
| Pat_16 | Pre-Treatment | STAT4    | 6775   | 37 | 2  | 191937835 | 191937835 | Missense_Mutation | SNP | T  | A  | 157 | 317 | c.454A>T       | c.(454-456)AAC>TAC       | p.N152Y       |
| Pat_16 | Pre-Treatment | ABCA12   | 26154  | 37 | 2  | 215876250 | 215876250 | Missense_Mutation | SNP | G  | A  | 74  | 142 | c.2245C>T      | c.(2245-2247)CCA>TCA     | p.P749S       |
| Pat_16 | Pre-Treatment | ANKZF1   | 55139  | 37 | 2  | 220099997 | 220099997 | Missense_Mutation | SNP | C  | T  | 4   | 273 | c.1654C>T      | c.(1654-1656)CGT>TGT     | p.R552C       |
| Pat_16 | Pre-Treatment | COL4A3   | 1285   | 37 | 2  | 228147167 | 228147167 | Missense_Mutation | SNP | G  | A  | 125 | 59  | c.2575G>A      | c.(2575-2577)GGA>AGA     | p.G859R       |
| Pat_16 | Pre-Treatment | COL4A3   | 1285   | 37 | 2  | 228168824 | 228168824 | Missense_Mutation | SNP | G  | A  | 26  | 61  | c.4117G>A      | c.(4117-4119)GGA>AGA     | p.G1373R      |
| Pat_16 | Pre-Treatment | SPHKAP   | 80309  | 37 | 2  | 228846519 | 228846519 | Missense_Mutation | SNP | G  | A  | 42  | 114 | c.5017C>T      | c.(5017-5019)CAT>TAT     | p.H1673Y      |
| Pat_16 | Pre-Treatment | SLC16A14 | 151473 | 37 | 2  | 230911393 | 230911393 | Missense_Mutation | SNP | C  | A  | 13  | 37  | c.449G>T       | c.(448-450)GGC>GTC       | p.G150V       |
| Pat_16 | Pre-Treatment | USP40    | 55230  | 37 | 2  | 234442200 | 234442200 | Missense_Mutation | SNP | C  | T  | 127 | 87  | c.1429G>A      | c.(1429-1431)GAA>AAA     | p.E477K       |
| Pat_16 | Pre-Treatment | TRPM8    | 79054  | 37 | 2  | 234846100 | 234846100 | Missense_Mutation | SNP | C  | T  | 80  | 179 | c.295C>T       | c.(295-297)CCT>TCT       | p.P99S        |
| Pat_16 | Pre-Treatment | TRPM8    | 79054  | 37 | 2  | 234873271 | 234873271 | Splice_Site       | SNP | G  | A  | 23  | 57  | c.1750_splice  | c.e14-1                  | p.T584_splice |
| Pat_16 | Pre-Treatment | MLPH     | 79083  | 37 | 2  | 238457876 | 238457876 | Missense_Mutation | SNP | C  | T  | 28  | 63  | c.1630C>T      | c.(1630-1632)CCC>TCC     | p.P544S       |
| Pat_16 | Pre-Treatment | TRAF3IP1 | 26146  | 37 | 2  | 239307420 | 239307420 | Missense_Mutation | SNP | T  | G  | 138 | 53  | c.1936T>G      | c.(1936-1938)TTA>GTA     | p.L646V       |
| Pat_16 | Pre-Treatment | THAP4    | 51078  | 37 | 2  | 242545816 | 242545817 | Missense_Mutation | DNP | CC | TT | 7   | 10  | .1312_1313GG>A | c.(1312-1314)GGA>AAA     | p.G438K       |
| Pat_16 | Pre-Treatment | SIRPG    | 55423  | 37 | 20 | 1629761   | 1629761   | Nonsense_Mutation | SNP | G  | A  | 59  | 188 | c.367C>T       | c.(367-369)CGA>TGA       | p.R123*       |
| Pat_16 | Pre-Treatment | TGM6     | 343641 | 37 | 20 | 2411098   | 2411098   | Missense_Mutation | SNP | G  | A  | 56  | 94  | c.1685G>A      | c.(1684-1686)AGA>AAA     | p.R562K       |
| Pat_16 | Pre-Treatment | BTBD3    | 22903  | 37 | 20 | 11899185  | 11899185  | Missense_Mutation | SNP | C  | T  | 160 | 584 | c.262C>T       | c.(262-264)CTC>TTC       | p.L88F        |
| Pat_16 | Pre-Treatment | CST9     | 128822 | 37 | 20 | 23584239  | 23584239  | Missense_Mutation | SNP | A  | T  | 64  | 155 | c.388T>A       | c.(388-390)TTT>ATT       | p.F130I       |
| Pat_16 | Pre-Treatment | FRG1B    | 284802 | 37 | 20 | 29624093  | 29624093  | Splice_Site       | SNP | G  | T  | 4   | 40  | c.26_splice    | c.e1+1                   | p.R9_splice   |
| Pat_16 | Pre-Treatment | FRG1B    | 284802 | 37 | 20 | 29625892  | 29625892  | Missense_Mutation | SNP | T  | C  | 5   | 293 | c.46T>C        | c.(46-48)TAT>CAT         | p.Y16H        |
| Pat_16 | Pre-Treatment | ASXL1    | 171023 | 37 | 20 | 31023318  | 31023318  | Missense_Mutation | SNP | C  | T  | 44  | 137 | c.2803C>T      | c.(2803-2805)CCC>TCC     | p.P935S       |
| Pat_16 | Pre-Treatment | CBFA2T2  | 9139   | 37 | 20 | 32217603  | 32217603  | Missense_Mutation | SNP | C  | T  | 69  | 86  | c.1138C>T      | c.(1138-1140)CGT>TGT     | p.R380C       |
| Pat_16 | Pre-Treatment | NFS1     | 9054   | 37 | 20 | 34263049  | 34263049  | Missense_Mutation | SNP | C  | T  | 4   | 122 | c.866G>A       | c.(865-867)CGG>CAG       | p.R289Q       |
| Pat_16 | Pre-Treatment | PPP1R16B | 26051  | 37 | 20 | 37524242  | 37524242  | Missense_Mutation | SNP | T  | A  | 25  | 36  | c.356T>A       | c.(355-357)CTG>CAG       | p.L119Q       |
| Pat_16 | Pre-Treatment | STK4     | 6789   | 37 | 20 | 43625841  | 43625841  | Missense_Mutation | SNP | C  | T  | 70  | 301 | c.725C>T       | c.(724-726)CCC>CTC       | p.P242L       |
| Pat_16 | Pre-Treatment | SEMG1    | 6406   | 37 | 20 | 43836962  | 43836962  | Nonsense_Mutation | SNP | A  | T  | 24  | 58  | c.1024A>T      | c.(1024-1026)AAG>TAG     | p.K342*       |
| Pat_16 | Pre-Treatment | TP53TG5  | 27296  | 37 | 20 | 44003936  | 44003936  | Missense_Mutation | SNP | C  | T  | 140 | 158 | c.511G>A       | c.(511-513)GGA>AGA       | p.G171R       |
| Pat_16 | Pre-Treatment | ZSWIM3   | 140831 | 37 | 20 | 44506623  | 44506623  | Missense_Mutation | SNP | G  | A  | 5   | 211 | c.1426G>A      | c.(1426-1428)GCA>ACA     | p.A476T       |
| Pat_16 | Pre-Treatment | SLC12A5  | 57468  | 37 | 20 | 44684831  | 44684831  | Missense_Mutation | SNP | A  | G  | 21  | 67  | c.2899A>G      | c.(2899-2901)AAG>GAG     | p.K967E       |
| Pat_16 | Pre-Treatment | ARFGEF2  | 10564  | 37 | 20 | 47641991  | 47641991  | Missense_Mutation | SNP | G  | A  | 4   | 214 | c.4897G>A      | c.(4897-4899)GAG>AAG     | p.E1633K      |
| Pat_16 | Pre-Treatment | SNAI1    | 6615   | 37 | 20 | 48600613  | 48600613  | Missense_Mutation | SNP | C  | T  | 245 | 302 | c.335C>T       | c.(334-336)TCC>TTC       | p.S112F       |
| Pat_16 | Pre-Treatment | SALL4    | 57167  | 37 | 20 | 50407142  | 50407142  | Missense_Mutation | SNP | G  | A  | 38  | 133 | c.1880C>T      | c.(1879-1881)TCG>TTG     | p.S627L       |
| Pat_16 | Pre-Treatment | TFAP2C   | 7022   | 37 | 20 | 55208529  | 55208529  | Missense_Mutation | SNP | C  | T  | 86  | 301 | c.707C>T       | c.(706-708)TCT>TTT       | p.S236F       |
| Pat_16 | Pre-Treatment | LAMA5    | 3911   | 37 | 20 | 60885978  | 60885978  | Missense_Mutation | SNP | G  | A  | 20  | 36  | c.10261C>T     | c.(10261-10263)CGG>TGC   | p.R3421W      |
| Pat_16 | Pre-Treatment | DIDO1    | 11083  | 37 | 20 | 61511835  | 61511835  | Missense_Mutation | SNP | C  | T  | 73  | 72  | c.5473G>A      | c.(5473-5475)GGC>AGC     | p.G1825S      |
| Pat_16 | Pre-Treatment | PCMTD2   | 55251  | 37 | 20 | 62891325  | 62891325  | Missense_Mutation | SNP | G  | A  | 6   | 635 | c.7G>A         | c.(7-9)GGT>AGT           | p.G3S         |
| Pat_16 | Pre-Treatment | PCMTD2   | 55251  | 37 | 20 | 62891413  | 62891413  | Missense_Mutation | SNP | C  | T  | 276 | 293 | c.95C>T        | c.(94-96)GCT>GTT         | p.A32V        |
| Pat_16 | Pre-Treatment | TPTE     | 7179   | 37 | 21 | 10914379  | 10914379  | Missense_Mutation | SNP | G  | A  | 22  | 44  | c.1340C>T      | c.(1339-1341)TCA>TTA     | p.S447L       |
| Pat_16 | Pre-Treatment | C2CD2    | 25966  | 37 | 21 | 43319324  | 43319325  | Missense_Mutation | DNP | GG | AA | 7   | 32  | .1707_1708CC>T | c.(1705-1710)TCCCTT>TCTT | p.L570F       |
| Pat_16 | Pre-Treatment | ZNF295   | 49854  | 37 | 21 | 43411624  | 43411624  | Missense_Mutation | SNP | A  | T  | 68  | 145 | c.2581T>A      | c.(2581-2583)TCC>ACC     | p.S861T       |
| Pat_16 | Pre-Treatment | ABCG1    | 9619   | 37 | 21 | 43711687  | 43711687  | Missense_Mutation | SNP | T  | C  | 16  | 74  | c.1610T>C      | c.(1609-1611)TTT>TCT     | p.F537S       |
| Pat_16 | Pre-Treatment | PCBP3    | 54039  | 37 | 21 | 47337538  | 47337538  | Missense_Mutation | SNP | C  | T  | 106 | 266 | c.712C>T       | c.(712-714)CCG>TCG       | p.P238S       |
| Pat_16 | Pre-Treatment | DIP2A    | 23181  | 37 | 21 | 47974146  | 47974146  | Missense_Mutation | SNP | C  | T  | 4   | 142 | c.3095C>T      | c.(3094-3096)GCT>GTT     | p.A1032V      |
| Pat_16 | Pre-Treatment | GGT5     | 2687   | 37 | 22 | 24640582  | 24640582  | Missense_Mutation | SNP | G  | A  | 38  | 77  | c.112C>T       | c.(112-114)CCC>TCC       | p.P38S        |
| Pat_16 | Pre-Treatment | PES1     | 23481  | 37 | 22 | 30977009  | 30977009  | Missense_Mutation | SNP | G  | A  | 69  | 32  | c.902C>T       | c.(901-903)CCC>CTC       | p.P301L       |
| Pat_16 | Pre-Treatment | PISD     | 23761  | 37 | 22 | 32015741  | 32015741  | Missense_Mutation | SNP | C  | T  | 3   | 80  | c.1087G>A      | c.(1087-1089)GTC>ATC     | p.V363I       |
| Pat_16 | Pre-Treatment | BPIL2    | 254240 | 37 | 22 | 32841915  | 32841915  | Missense_Mutation | SNP | C  | T  | 47  | 39  | c.443G>A       | c.(442-444)CGA>CAA       | p.R148Q       |



|        |               |          |        |    |    |           |           |                   |     |    |    |     |     |                                    |                      |               |
|--------|---------------|----------|--------|----|----|-----------|-----------|-------------------|-----|----|----|-----|-----|------------------------------------|----------------------|---------------|
| Pat_16 | Pre-Treatment | RASD2    | 23551  | 37 | 22 | 35947968  | 35947968  | Missense_Mutation | SNP | G  | A  | 42  | 24  | c.690G>A                           | c.(688-690)ATG>ATA   | p.M230I       |
| Pat_16 | Pre-Treatment | FOXRED2  | 80020  | 37 | 22 | 36894189  | 36894189  | Missense_Mutation | SNP | G  | A  | 66  | 111 | c.1231C>T                          | c.(1231-1233)CGG>TGG | p.R411W       |
| Pat_16 | Pre-Treatment | TRIOBP   | 11078  | 37 | 22 | 38120316  | 38120316  | Missense_Mutation | SNP | C  | T  | 67  | 385 | c.1753C>T                          | c.(1753-1755)CCC>TCC | p.P585S       |
| Pat_16 | Pre-Treatment | PDGFB    | 5155   | 37 | 22 | 39631866  | 39631866  | Missense_Mutation | SNP | G  | A  | 13  | 36  | c.77C>T                            | c.(76-78)CCC>CTC     | p.P26L        |
| Pat_16 | Pre-Treatment | CACNA1I  | 8911   | 37 | 22 | 40054256  | 40054256  | Missense_Mutation | SNP | G  | A  | 4   | 94  | c.2092G>A                          | c.(2092-2094)GAC>AAC | p.D698N       |
| Pat_16 | Pre-Treatment | PARVG    | 64098  | 37 | 22 | 44583758  | 44583758  | Nonsense_Mutation | SNP | C  | T  | 29  | 44  | c.247C>T                           | c.(247-249)CAG>TAG   | p.Q83*        |
| Pat_16 | Pre-Treatment | PLXNB2   | 23654  | 37 | 22 | 50724514  | 50724514  | Missense_Mutation | SNP | C  | T  | 3   | 41  | c.1891G>A                          | c.(1891-1893)GTG>ATG | p.V631M       |
| Pat_16 | Pre-Treatment | KLHDC7B  | 113730 | 37 | 22 | 50987478  | 50987478  | Missense_Mutation | SNP | G  | A  | 17  | 8   | c.883G>A                           | c.(883-885)GGC>AGC   | p.G295S       |
| Pat_16 | Pre-Treatment | BRPF1    | 7862   | 37 | 3  | 9776260   | 9776260   | Missense_Mutation | SNP | C  | T  | 26  | 45  | c.436C>T                           | c.(436-438)CCC>TCC   | p.P146S       |
| Pat_16 | Pre-Treatment | EAF1     | 85403  | 37 | 3  | 15471450  | 15471450  | Missense_Mutation | SNP | C  | T  | 74  | 70  | c.134C>T                           | c.(133-135)TCC>TTC   | p.S45F        |
| Pat_16 | Pre-Treatment | SATB1    | 6304   | 37 | 3  | 18393533  | 18393533  | Missense_Mutation | SNP | T  | A  | 212 | 238 | c.1730A>T                          | c.(1729-1731)CAT>CTT | p.H577L       |
| Pat_16 | Pre-Treatment | KCNH8    | 131096 | 37 | 3  | 19492780  | 19492780  | Missense_Mutation | SNP | C  | T  | 83  | 95  | c.1709C>T                          | c.(1708-1710)TCT>TTT | p.S570F       |
| Pat_16 | Pre-Treatment | NEK10    | 152110 | 37 | 3  | 27213359  | 27213359  | Missense_Mutation | SNP | A  | C  | 34  | 32  | c.718T>G                           | c.(718-720)TTA>GTA   | p.L240V       |
| Pat_16 | Pre-Treatment | GLB1     | 2720   | 37 | 3  | 33038614  | 33038614  | Missense_Mutation | SNP | G  | A  | 54  | 57  | c.1957C>T                          | c.(1957-1959)CCC>TCC | p.P653S       |
| Pat_16 | Pre-Treatment | STAC     | 6769   | 37 | 3  | 36484961  | 36484961  | Missense_Mutation | SNP | G  | A  | 25  | 33  | c.217G>A                           | c.(217-219)GCA>ACA   | p.A73T        |
| Pat_16 | Pre-Treatment | TRANK1   | 9881   | 37 | 3  | 36873053  | 36873053  | Missense_Mutation | SNP | A  | C  | 10  | 16  | c.6239T>G                          | c.(6238-6240)CTC>CGC | p.L2080R      |
| Pat_16 | Pre-Treatment | TRANK1   | 9881   | 37 | 3  | 36873507  | 36873507  | Missense_Mutation | SNP | G  | A  | 4   | 134 | c.5785C>T                          | c.(5785-5787)CGG>TGG | p.R1929W      |
| Pat_16 | Pre-Treatment | LAMB2    | 3913   | 37 | 3  | 49163299  | 49163299  | Missense_Mutation | SNP | G  | A  | 71  | 71  | c.2369C>T                          | c.(2368-2370)TCA>TTA | p.S790L       |
| Pat_16 | Pre-Treatment | USP4     | 7375   | 37 | 3  | 49322316  | 49322316  | Missense_Mutation | SNP | G  | A  | 32  | 27  | c.2237C>T                          | c.(2236-2238)ACT>ATT | p.T746I       |
| Pat_16 | Pre-Treatment | SEMA3F   | 6405   | 37 | 3  | 50220182  | 50220182  | Missense_Mutation | SNP | C  | T  | 30  | 58  | c.869C>T                           | c.(868-870)CCC>CTC   | p.P290L       |
| Pat_16 | Pre-Treatment | SEMA3F   | 6405   | 37 | 3  | 50225363  | 50225363  | Missense_Mutation | SNP | C  | T  | 11  | 15  | c.2173C>T                          | c.(2173-2175)CCT>TCT | p.P725S       |
| Pat_16 | Pre-Treatment | CACNA2D2 | 9254   | 37 | 3  | 50421769  | 50421769  | Splice_Site       | SNP | C  | T  | 71  | 94  | c.511_splice                       | c.e6-1               | p.D171_splice |
| Pat_16 | Pre-Treatment | VPRBP    | 9730   | 37 | 3  | 51500894  | 51500894  | Splice_Site       | SNP | T  | C  | 3   | 106 | c.188_splice                       | c.e5-1               | p.G63_splice  |
| Pat_16 | Pre-Treatment | DNAH1    | 25981  | 37 | 3  | 52397156  | 52397156  | Missense_Mutation | SNP | C  | T  | 22  | 35  | c.5240C>T                          | c.(5239-5241)TCC>TTC | p.S1747F      |
| Pat_16 | Pre-Treatment | ITIH3    | 3699   | 37 | 3  | 52831902  | 52831902  | Missense_Mutation | SNP | G  | A  | 4   | 11  | c.619G>A                           | c.(619-621)GAC>AAC   | p.D207N       |
| Pat_16 | Pre-Treatment | SFMBT1   | 51460  | 37 | 3  | 52940181  | 52940181  | Missense_Mutation | SNP | C  | T  | 4   | 210 | c.2408G>A                          | c.(2407-2409)CGG>CAG | p.R803Q       |
| Pat_16 | Pre-Treatment | LRIG1    | 26018  | 37 | 3  | 66448590  | 66448590  | Missense_Mutation | SNP | G  | A  | 4   | 169 | c.1250C>T                          | c.(1249-1251)GCG>GTG | p.A417V       |
| Pat_16 | Pre-Treatment | KBTBD8   | 84541  | 37 | 3  | 67058763  | 67058763  | Missense_Mutation | SNP | G  | A  | 45  | 84  | c.1760G>A                          | c.(1759-1761)TGT>TAT | p.C587Y       |
| Pat_16 | Pre-Treatment | FRMD4B   | 23150  | 37 | 3  | 69245538  | 69245538  | Missense_Mutation | SNP | G  | A  | 46  | 49  | c.1102C>T                          | c.(1102-1104)CCT>TCT | p.P368S       |
| Pat_16 | Pre-Treatment | FOXP1    | 27086  | 37 | 3  | 71008430  | 71008430  | Missense_Mutation | SNP | C  | T  | 4   | 267 | c.2002G>A                          | c.(2002-2004)GAA>AAA | p.E668K       |
| Pat_16 | Pre-Treatment | FAM55C   | 91775  | 37 | 3  | 101520553 | 101520553 | Missense_Mutation | SNP | C  | T  | 58  | 69  | c.568C>T                           | c.(568-570)CCC>TCC   | p.P190S       |
| Pat_16 | Pre-Treatment | MYH15    | 22989  | 37 | 3  | 108117510 | 108117510 | Missense_Mutation | SNP | C  | T  | 94  | 120 | c.5167G>A                          | c.(5167-5169)GAA>AAA | p.E1723K      |
| Pat_16 | Pre-Treatment | DPPA4    | 55211  | 37 | 3  | 109049541 | 109049541 | Missense_Mutation | SNP | A  | C  | 44  | 63  | c.509T>G                           | c.(508-510)CTT>CGT   | p.L170R       |
| Pat_16 | Pre-Treatment | KIAA2018 | 205717 | 37 | 3  | 113377026 | 113377026 | Missense_Mutation | SNP | G  | A  | 34  | 52  | c.3503C>T                          | c.(3502-3504)TCA>TTA | p.S1168L      |
| Pat_16 | Pre-Treatment | PARP14   | 54625  | 37 | 3  | 122446777 | 122446777 | Missense_Mutation | SNP | G  | A  | 4   | 74  | c.5060G>A                          | c.(5059-5061)GGC>GAC | p.G1687D      |
| Pat_16 | Pre-Treatment | PODXL2   | 50512  | 37 | 3  | 127358286 | 127358286 | Missense_Mutation | SNP | G  | A  | 4   | 59  | c.269G>A                           | c.(268-270)CGG>CAG   | p.R90Q        |
| Pat_16 | Pre-Treatment | GATA2    | 2624   | 37 | 3  | 128204758 | 128204758 | Missense_Mutation | SNP | G  | A  | 21  | 34  | c.683C>T                           | c.(682-684)CCC>CTC   | p.P228L       |
| Pat_16 | Pre-Treatment | IFT122   | 55764  | 37 | 3  | 129225317 | 129225317 | Missense_Mutation | SNP | G  | A  | 4   | 223 | c.2716G>A                          | c.(2716-2718)GTG>ATG | p.V906M       |
| Pat_16 | Pre-Treatment | ACPP     | 55     | 37 | 3  | 132047117 | 132047117 | Missense_Mutation | SNP | C  | T  | 86  | 55  | c.127C>T                           | c.(127-129)CGG>TGG   | p.R43W        |
| Pat_16 | Pre-Treatment | SLCO2A1  | 6578   | 37 | 3  | 133661546 | 133661547 | Missense_Mutation | DNP | GG | AA | 60  | 153 | c.1527_1528CC>T525-1530)GTCCC>GTTT |                      | p.P510S       |
| Pat_16 | Pre-Treatment | EPHB1    | 2047   | 37 | 3  | 134851694 | 134851694 | Missense_Mutation | SNP | G  | A  | 21  | 60  | c.1100G>A                          | c.(1099-1101)CGC>CAC | p.R367H       |
| Pat_16 | Pre-Treatment | HPS3     | 84343  | 37 | 3  | 148859158 | 148859158 | Missense_Mutation | SNP | T  | C  | 155 | 303 | c.961T>C                           | c.(961-963)TAC>CAC   | p.Y321H       |
| Pat_16 | Pre-Treatment | CP       | 1356   | 37 | 3  | 148939527 | 148939527 | Nonsense_Mutation | SNP | C  | T  | 62  | 126 | c.53G>A                            | c.(52-54)TGG>TAG     | p.W18*        |
| Pat_16 | Pre-Treatment | B3GALNT1 | 8706   | 37 | 3  | 160803907 | 160803907 | Missense_Mutation | SNP | A  | C  | 33  | 61  | c.636T>G                           | c.(634-636)AAT>AAG   | p.N212K       |
| Pat_16 | Pre-Treatment | ZBBX     | 79740  | 37 | 3  | 167016179 | 167016179 | Missense_Mutation | SNP | A  | T  | 75  | 190 | c.1793T>A                          | c.(1792-1794)TTT>TAT | p.F598Y       |
| Pat_16 | Pre-Treatment | SERPINI1 | 5274   | 37 | 3  | 167540842 | 167540842 | Missense_Mutation | SNP | G  | A  | 55  | 148 | c.1048G>A                          | c.(1048-1050)GAA>AAA | p.E350K       |
| Pat_16 | Pre-Treatment | MECOM    | 2122   | 37 | 3  | 168825731 | 168825731 | Missense_Mutation | SNP | G  | A  | 67  | 63  | c.2023C>T                          | c.(2023-2025)CCT>TCT | p.P675S       |

|        |               |           |        |    |   |           |           |                   |     |    |    |     |     |                                    |                        |                |
|--------|---------------|-----------|--------|----|---|-----------|-----------|-------------------|-----|----|----|-----|-----|------------------------------------|------------------------|----------------|
| Pat_16 | Pre-Treatment | TBCCD1    | 55171  | 37 | 3 | 186276241 | 186276241 | Missense_Mutation | SNP | G  | A  | 144 | 327 | c.457C>T                           | c.(457-459)CCT>TCT     | p.P153S        |
| Pat_16 | Pre-Treatment | TP63      | 8626   | 37 | 3 | 189582204 | 189582204 | Missense_Mutation | SNP | G  | A  | 28  | 55  | c.763G>A                           | c.(763-765)GAG>AAG     | p.E255K        |
| Pat_16 | Pre-Treatment | LSG1      | 55341  | 37 | 3 | 194373772 | 194373772 | Missense_Mutation | SNP | G  | A  | 57  | 126 | c.859C>T                           | c.(859-861)CCA>TCA     | p.P287S        |
| Pat_16 | Pre-Treatment | TFRC      | 7037   | 37 | 3 | 195785162 | 195785162 | Missense_Mutation | SNP | A  | G  | 150 | 92  | c.1670T>C                          | c.(1669-1671)TTT>TCT   | p.F557S        |
| Pat_16 | Pre-Treatment | LRRC33    | 375387 | 37 | 3 | 196387690 | 196387690 | Missense_Mutation | SNP | C  | A  | 84  | 58  | c.1176C>A                          | c.(1174-1176)CAC>CAA   | p.H392Q        |
| Pat_16 | Pre-Treatment | GAK       | 2580   | 37 | 4 | 860167    | 860167    | Missense_Mutation | SNP | C  | T  | 3   | 47  | c.3028G>A                          | c.(3028-3030)GAC>AAC   | p.D1010N       |
| Pat_16 | Pre-Treatment | HTRA3     | 94031  | 37 | 4 | 8307709   | 8307709   | Missense_Mutation | SNP | A  | G  | 4   | 129 | c.1208A>G                          | c.(1207-1209)CAA>CGA   | p.Q403R        |
| Pat_16 | Pre-Treatment | ZNF518B   | 85460  | 37 | 4 | 10444904  | 10444904  | Missense_Mutation | SNP | G  | A  | 32  | 124 | c.3049C>T                          | c.(3049-3051)CAT>TAT   | p.H1017Y       |
| Pat_16 | Pre-Treatment | PPARGC1A  | 10891  | 37 | 4 | 23815598  | 23815598  | Missense_Mutation | SNP | G  | A  | 82  | 223 | c.1508C>T                          | c.(1507-1509)TCA>TTA   | p.S503L        |
| Pat_16 | Pre-Treatment | SEL1L3    | 23231  | 37 | 4 | 25789890  | 25789891  | Missense_Mutation | DNP | CC | TT | 113 | 200 | .2172_2173GG>A170-2175)ACGGAG>ACA/ |                        | p.E725K        |
| Pat_16 | Pre-Treatment | KLB       | 152831 | 37 | 4 | 39409123  | 39409123  | Missense_Mutation | SNP | G  | A  | 53  | 135 | c.554G>A                           | c.(553-555)AGA>AAA     | p.R185K        |
| Pat_16 | Pre-Treatment | KDR       | 3791   | 37 | 4 | 55976657  | 55976657  | Missense_Mutation | SNP | C  | T  | 88  | 43  | c.1168G>A                          | c.(1168-1170)GAA>AAA   | p.E390K        |
| Pat_16 | Pre-Treatment | LPHN3     | 23284  | 37 | 4 | 62363041  | 62363041  | Missense_Mutation | SNP | G  | A  | 27  | 92  | c.30G>A                            | c.(28-30)ATG>ATA       | p.M10I         |
| Pat_16 | Pre-Treatment | TMPRSS11B | 132724 | 37 | 4 | 69095235  | 69095235  | Splice_Site       | SNP | C  | T  | 36  | 108 | c.687_splice                       | c.e8-1                 | p.K229_splice  |
| Pat_16 | Pre-Treatment | SHROOM3   | 57619  | 37 | 4 | 77652072  | 77652072  | Nonsense_Mutation | SNP | C  | T  | 206 | 446 | c.571C>T                           | c.(571-573)CAA>TAA     | p.Q191*        |
| Pat_16 | Pre-Treatment | FRAS1     | 80144  | 37 | 4 | 79351557  | 79351557  | Missense_Mutation | SNP | G  | A  | 15  | 43  | c.4955G>A                          | c.(4954-4956)AGG>AAG   | p.R1652K       |
| Pat_16 | Pre-Treatment | GRID2     | 2895   | 37 | 4 | 94344063  | 94344063  | Missense_Mutation | SNP | G  | A  | 32  | 122 | c.1489G>A                          | c.(1489-1491)GGA>AGA   | p.G497R        |
| Pat_16 | Pre-Treatment | PDHA2     | 5161   | 37 | 4 | 96761349  | 96761349  | Missense_Mutation | SNP | A  | T  | 50  | 79  | c.48A>T                            | c.(46-48)AAA>AAT       | p.K16N         |
| Pat_16 | Pre-Treatment | ADH1C     | 126    | 37 | 4 | 100261800 | 100261800 | Missense_Mutation | SNP | G  | A  | 364 | 226 | c.896C>T                           | c.(895-897)TCC>TTC     | p.S299F        |
| Pat_16 | Pre-Treatment | GAR1      | 54433  | 37 | 4 | 110743584 | 110743584 | Missense_Mutation | SNP | G  | T  | 5   | 123 | c.511G>T                           | c.(511-513)GGT>TGT     | p.G171C        |
| Pat_16 | Pre-Treatment | EGF       | 1950   | 37 | 4 | 110882040 | 110882040 | Missense_Mutation | SNP | T  | A  | 142 | 79  | c.1084T>A                          | c.(1084-1086)TTT>ATT   | p.F362I        |
| Pat_16 | Pre-Treatment | ANK2      | 287    | 37 | 4 | 114158761 | 114158761 | Missense_Mutation | SNP | G  | A  | 113 | 324 | c.676G>A                           | c.(676-678)GTG>ATG     | p.V226M        |
| Pat_16 | Pre-Treatment | ANK2      | 287    | 37 | 4 | 114263073 | 114263073 | Splice_Site       | SNP | G  | A  | 5   | 174 | c.4122_splice                      | c.e33+1                | p.E1374_splice |
| Pat_16 | Pre-Treatment | PRDM5     | 11107  | 37 | 4 | 121737728 | 121737728 | Missense_Mutation | SNP | A  | G  | 30  | 64  | c.745T>C                           | c.(745-747)TTT>CTT     | p.F249L        |
| Pat_16 | Pre-Treatment | ADAD1     | 132612 | 37 | 4 | 123317451 | 123317451 | Missense_Mutation | SNP | G  | A  | 31  | 83  | c.643G>A                           | c.(643-645)GAA>AAA     | p.E215K        |
| Pat_16 | Pre-Treatment | FAT4      | 79633  | 37 | 4 | 126389676 | 126389676 | Missense_Mutation | SNP | G  | A  | 163 | 82  | c.11909G>A                         | c.(11908-11910)GGA>GAA | p.G3970E       |
| Pat_16 | Pre-Treatment | NAA15     | 80155  | 37 | 4 | 140275246 | 140275246 | Missense_Mutation | SNP | C  | T  | 53  | 164 | c.1081C>T                          | c.(1081-1083)CCC>TCC   | p.P361S        |
| Pat_16 | Pre-Treatment | SLC10A7   | 84068  | 37 | 4 | 147227095 | 147227095 | Missense_Mutation | SNP | G  | A  | 61  | 48  | c.538C>T                           | c.(538-540)CCT>TCT     | p.P180S        |
| Pat_16 | Pre-Treatment | DCHS2     | 54798  | 37 | 4 | 155237118 | 155237118 | Missense_Mutation | SNP | G  | A  | 67  | 136 | c.3677C>T                          | c.(3676-3678)CCT>CTT   | p.P1226L       |
| Pat_16 | Pre-Treatment | FGA       | 2243   | 37 | 4 | 155507586 | 155507586 | Missense_Mutation | SNP | C  | T  | 85  | 171 | c.995G>A                           | c.(994-996)GGA>GAA     | p.G332E        |
| Pat_16 | Pre-Treatment | CTSO      | 1519   | 37 | 4 | 156864377 | 156864377 | Missense_Mutation | SNP | G  | A  | 108 | 255 | c.175C>T                           | c.(175-177)CCC>TCC     | p.P59S         |
| Pat_16 | Pre-Treatment | TRIM60    | 166655 | 37 | 4 | 165962593 | 165962593 | Missense_Mutation | SNP | G  | A  | 33  | 64  | c.1369G>A                          | c.(1369-1371)GAT>AAT   | p.D457N        |
| Pat_16 | Pre-Treatment | SPOCK3    | 50859  | 37 | 4 | 167656164 | 167656164 | Missense_Mutation | SNP | C  | T  | 30  | 79  | c.1219G>A                          | c.(1219-1221)GAT>AAT   | p.D407N        |
| Pat_16 | Pre-Treatment | DDX60     | 55601  | 37 | 4 | 169206544 | 169206544 | Missense_Mutation | SNP | C  | T  | 30  | 25  | c.1445G>A                          | c.(1444-1446)AGT>AAT   | p.S482N        |
| Pat_16 | Pre-Treatment | C4orf41   | 60684  | 37 | 4 | 184626224 | 184626224 | Splice_Site       | SNP | G  | A  | 4   | 280 | c.3055_splice                      | c.e27+1                | p.D1019_splice |
| Pat_16 | Pre-Treatment | FRG1      | 2483   | 37 | 4 | 190878651 | 190878651 | Missense_Mutation | SNP | G  | A  | 14  | 195 | c.531G>A                           | c.(529-531)ATG>ATA     | p.M177I        |
| Pat_16 | Pre-Treatment | BRD9      | 65980  | 37 | 5 | 884073    | 884073    | Missense_Mutation | SNP | G  | A  | 39  | 98  | c.946C>T                           | c.(946-948)CGG>TGG     | p.R316W        |
| Pat_16 | Pre-Treatment | PRLR      | 5618   | 37 | 5 | 35065819  | 35065819  | Missense_Mutation | SNP | G  | A  | 159 | 403 | c.1241C>T                          | c.(1240-1242)TCA>TTA   | p.S414L        |
| Pat_16 | Pre-Treatment | IL7R      | 3575   | 37 | 5 | 35867469  | 35867469  | Missense_Mutation | SNP | G  | A  | 44  | 112 | c.283G>A                           | c.(283-285)GAG>AAG     | p.E95K         |
| Pat_16 | Pre-Treatment | EGFLAM    | 133584 | 37 | 5 | 38370447  | 38370447  | Missense_Mutation | SNP | G  | A  | 95  | 57  | c.595G>A                           | c.(595-597)GAC>AAC     | p.D199N        |
| Pat_16 | Pre-Treatment | ZNF131    | 7690   | 37 | 5 | 43161556  | 43161556  | Missense_Mutation | SNP | G  | T  | 4   | 128 | c.577G>T                           | c.(577-579)GCC>TCC     | p.A193S        |
| Pat_16 | Pre-Treatment | HCN1      | 348980 | 37 | 5 | 45267196  | 45267196  | Missense_Mutation | SNP | C  | T  | 152 | 116 | c.1778G>A                          | c.(1777-1779)CGA>CAA   | p.R593Q        |
| Pat_16 | Pre-Treatment | HSPB3     | 8988   | 37 | 5 | 53751759  | 53751759  | Missense_Mutation | SNP | A  | G  | 26  | 53  | c.140A>G                           | c.(139-141)AAA>AGA     | p.K47R         |
| Pat_16 | Pre-Treatment | PIK3R1    | 5295   | 37 | 5 | 67588966  | 67588966  | Missense_Mutation | SNP | G  | A  | 6   | 294 | c.1057G>A                          | c.(1057-1059)GGG>AGG   | p.G353R        |
| Pat_16 | Pre-Treatment | MAP1B     | 4131   | 37 | 5 | 71495673  | 71495673  | Missense_Mutation | SNP | C  | T  | 4   | 221 | c.6491C>T                          | c.(6490-6492)CCG>CTG   | p.P2164L       |
| Pat_16 | Pre-Treatment | HMGR      | 3156   | 37 | 5 | 74646107  | 74646107  | Missense_Mutation | SNP | C  | T  | 29  | 56  | c.688C>T                           | c.(688-690)CGT>TGT     | p.R230C        |
| Pat_16 | Pre-Treatment | CMYA5     | 202333 | 37 | 5 | 79033696  | 79033696  | Missense_Mutation | SNP | A  | T  | 27  | 60  | c.9108A>T                          | c.(9106-9108)GAA>GAT   | p.E3036D       |

|        |               |          |        |    |   |           |           |                   |     |    |    |     |     |                                   |                      |         |
|--------|---------------|----------|--------|----|---|-----------|-----------|-------------------|-----|----|----|-----|-----|-----------------------------------|----------------------|---------|
| Pat_16 | Pre-Treatment | SPZ1     | 84654  | 37 | 5 | 79616461  | 79616461  | Missense_Mutation | SNP | G  | C  | 6   | 242 | c.427G>C                          | c.(427-429)GAG>CAG   | p.E143Q |
| Pat_16 | Pre-Treatment | FAM172A  | 83989  | 37 | 5 | 93217337  | 93217337  | Missense_Mutation | SNP | G  | A  | 36  | 91  | c.625C>T                          | c.(625-627)CCG>TCG   | p.P209S |
| Pat_16 | Pre-Treatment | FAM81B   | 153643 | 37 | 5 | 94756087  | 94756087  | Missense_Mutation | SNP | C  | T  | 85  | 190 | c.637C>T                          | c.(637-639)CTT>TTT   | p.L213F |
| Pat_16 | Pre-Treatment | PCSK1    | 5122   | 37 | 5 | 95743978  | 95743978  | Missense_Mutation | SNP | G  | A  | 28  | 70  | c.1145C>T                         | c.(1144-1146)TCG>TTG | p.S382L |
| Pat_16 | Pre-Treatment | CAMK4    | 814    | 37 | 5 | 110819954 | 110819954 | Missense_Mutation | SNP | A  | T  | 58  | 48  | c.1212A>T                         | c.(1210-1212)AAA>AAT | p.K404N |
| Pat_16 | Pre-Treatment | ALDH7A1  | 501    | 37 | 5 | 125930712 | 125930712 | Missense_Mutation | SNP | C  | G  | 20  | 15  | c.179G>C                          | c.(178-180)GGA>GCA   | p.G60A  |
| Pat_16 | Pre-Treatment | C5orf48  | 389320 | 37 | 5 | 125968322 | 125968322 | Missense_Mutation | SNP | G  | A  | 39  | 72  | c.171G>A                          | c.(169-171)ATG>ATA   | p.M57I  |
| Pat_16 | Pre-Treatment | PCDHA12  | 56137  | 37 | 5 | 140255958 | 140255958 | Missense_Mutation | SNP | G  | A  | 101 | 74  | c.901G>A                          | c.(901-903)GAA>AAA   | p.E301K |
| Pat_16 | Pre-Treatment | PCDHA12  | 56137  | 37 | 5 | 140256858 | 140256858 | Missense_Mutation | SNP | T  | A  | 34  | 55  | c.1801T>A                         | c.(1801-1803)TCC>ACC | p.S601T |
| Pat_16 | Pre-Treatment | PCDHB3   | 56132  | 37 | 5 | 140480621 | 140480621 | Missense_Mutation | SNP | T  | G  | 49  | 111 | c.388T>G                          | c.(388-390)TCT>GCT   | p.S130A |
| Pat_16 | Pre-Treatment | PCDHB3   | 56132  | 37 | 5 | 140482598 | 140482598 | Missense_Mutation | SNP | T  | A  | 103 | 62  | c.2365T>A                         | c.(2365-2367)TTC>ATC | p.F789I |
| Pat_16 | Pre-Treatment | PCDHB8   | 56128  | 37 | 5 | 140558076 | 140558076 | Missense_Mutation | SNP | C  | T  | 32  | 666 | c.461C>T                          | c.(460-462)CCT>CTT   | p.P154L |
| Pat_16 | Pre-Treatment | PCDHB8   | 56128  | 37 | 5 | 140559324 | 140559324 | Missense_Mutation | SNP | C  | T  | 15  | 149 | c.1709C>T                         | c.(1708-1710)TCC>TTC | p.S570F |
| Pat_16 | Pre-Treatment | SLC25A2  | 83884  | 37 | 5 | 140682877 | 140682877 | Missense_Mutation | SNP | A  | G  | 36  | 50  | c.556T>C                          | c.(556-558)TTT>CTT   | p.F186L |
| Pat_16 | Pre-Treatment | PCDHGB4  | 8641   | 37 | 5 | 140768940 | 140768940 | Missense_Mutation | SNP | C  | T  | 4   | 102 | c.1489C>T                         | c.(1489-1491)CGG>TGG | p.R497W |
| Pat_16 | Pre-Treatment | NDFIP1   | 80762  | 37 | 5 | 141511890 | 141511890 | Missense_Mutation | SNP | C  | T  | 280 | 171 | c.265C>T                          | c.(265-267)CCT>TCT   | p.P89S  |
| Pat_16 | Pre-Treatment | KCTD16   | 57528  | 37 | 5 | 143853540 | 143853540 | Missense_Mutation | SNP | G  | A  | 28  | 52  | c.1150G>A                         | c.(1150-1152)GCT>ACT | p.A384T |
| Pat_16 | Pre-Treatment | TCERG1   | 10915  | 37 | 5 | 145850279 | 145850279 | Missense_Mutation | SNP | C  | T  | 28  | 68  | c.1480C>T                         | c.(1480-1482)CCT>TCT | p.P494S |
| Pat_16 | Pre-Treatment | HTR4     | 3360   | 37 | 5 | 147929772 | 147929772 | Missense_Mutation | SNP | G  | A  | 37  | 112 | c.80C>T                           | c.(79-81)TCG>TTG     | p.S27L  |
| Pat_16 | Pre-Treatment | ABLIM3   | 22885  | 37 | 5 | 148619377 | 148619377 | Missense_Mutation | SNP | T  | C  | 75  | 130 | c.1130T>C                         | c.(1129-1131)ATA>ACA | p.I377T |
| Pat_16 | Pre-Treatment | ARHGEF37 | 389337 | 37 | 5 | 148989254 | 148989254 | Missense_Mutation | SNP | G  | A  | 4   | 183 | c.454G>A                          | c.(454-456)GTG>ATG   | p.V152M |
| Pat_16 | Pre-Treatment | SLC6A7   | 6534   | 37 | 5 | 149574444 | 149574444 | Missense_Mutation | SNP | T  | G  | 55  | 111 | c.187T>G                          | c.(187-189)TTC>GTC   | p.F63V  |
| Pat_16 | Pre-Treatment | ZNF300   | 91975  | 37 | 5 | 150275165 | 150275165 | Missense_Mutation | SNP | C  | T  | 24  | 72  | c.1636G>A                         | c.(1636-1638)GAG>AAG | p.E546K |
| Pat_16 | Pre-Treatment | SLC36A1  | 206358 | 37 | 5 | 150867748 | 150867748 | Missense_Mutation | SNP | C  | T  | 63  | 37  | c.1364C>T                         | c.(1363-1365)GCT>GTT | p.A455V |
| Pat_16 | Pre-Treatment | GALNT10  | 55568  | 37 | 5 | 153789293 | 153789293 | Missense_Mutation | SNP | G  | A  | 4   | 313 | c.1357G>A                         | c.(1357-1359)GTG>ATG | p.V453M |
| Pat_16 | Pre-Treatment | ADRA1B   | 147    | 37 | 5 | 159344336 | 159344336 | Missense_Mutation | SNP | G  | A  | 40  | 66  | c.424G>A                          | c.(424-426)GAT>AAT   | p.D142N |
| Pat_16 | Pre-Treatment | KCNMB1   | 3779   | 37 | 5 | 169810728 | 169810728 | Nonsense_Mutation | SNP | C  | T  | 39  | 108 | c.261G>A                          | c.(259-261)TGG>TGA   | p.W87*  |
| Pat_16 | Pre-Treatment | KCNIP1   | 30820  | 37 | 5 | 170147349 | 170147349 | Missense_Mutation | SNP | G  | A  | 48  | 101 | c.244G>A                          | c.(244-246)GAA>AAA   | p.E82K  |
| Pat_16 | Pre-Treatment | DDX41    | 51428  | 37 | 5 | 176939551 | 176939551 | Missense_Mutation | SNP | G  | A  | 30  | 35  | c.1495C>T                         | c.(1495-1497)CCT>TCT | p.P499S |
| Pat_16 | Pre-Treatment | ZNF354C  | 30832  | 37 | 5 | 178505930 | 178505930 | Missense_Mutation | SNP | G  | A  | 39  | 126 | c.497G>A                          | c.(496-498)GGG>GAG   | p.G166E |
| Pat_16 | Pre-Treatment | GFPT2    | 9945   | 37 | 5 | 179729481 | 179729481 | Missense_Mutation | SNP | A  | G  | 32  | 76  | c.1946T>C                         | c.(1945-1947)CTG>CCG | p.L649P |
| Pat_16 | Pre-Treatment | TRIM7    | 81786  | 37 | 5 | 180622549 | 180622549 | Missense_Mutation | SNP | G  | A  | 38  | 128 | c.1153C>T                         | c.(1153-1155)CGC>TGC | p.R385C |
| Pat_16 | Pre-Treatment | WRNIP1   | 56897  | 37 | 6 | 2783738   | 2783738   | Missense_Mutation | SNP | G  | A  | 4   | 134 | c.1585G>A                         | c.(1585-1587)GGA>AGA | p.G529R |
| Pat_16 | Pre-Treatment | HIVEP1   | 3096   | 37 | 6 | 12122090  | 12122090  | Missense_Mutation | SNP | C  | T  | 23  | 102 | c.2062C>T                         | c.(2062-2064)CCA>TCA | p.P688S |
| Pat_16 | Pre-Treatment | ZKSCAN3  | 80317  | 37 | 6 | 28327466  | 28327466  | Missense_Mutation | SNP | C  | T  | 92  | 180 | c.103C>T                          | c.(103-105)CCC>TCC   | p.P35S  |
| Pat_16 | Pre-Treatment | OR2W1    | 26692  | 37 | 6 | 29012073  | 29012073  | Missense_Mutation | SNP | T  | G  | 20  | 22  | c.880A>C                          | c.(880-882)AAT>CAT   | p.N294H |
| Pat_16 | Pre-Treatment | MOG      | 4340   | 37 | 6 | 29635420  | 29635420  | Missense_Mutation | SNP | G  | A  | 61  | 98  | c.551G>A                          | c.(550-552)GGA>GAA   | p.G184E |
| Pat_16 | Pre-Treatment | TRIM10   | 10107  | 37 | 6 | 30122054  | 30122054  | Missense_Mutation | SNP | T  | C  | 3   | 49  | c.1138A>G                         | c.(1138-1140)ACC>GCC | p.T380A |
| Pat_16 | Pre-Treatment | SKIV2L   | 6499   | 37 | 6 | 31931192  | 31931192  | Missense_Mutation | SNP | G  | A  | 4   | 239 | c.1406G>A                         | c.(1405-1407)CGG>CAG | p.R469Q |
| Pat_16 | Pre-Treatment | TCP11    | 6954   | 37 | 6 | 35089915  | 35089915  | Missense_Mutation | SNP | G  | A  | 6   | 390 | c.596C>T                          | c.(595-597)ACG>ATG   | p.T199M |
| Pat_16 | Pre-Treatment | BRPF3    | 27154  | 37 | 6 | 36168892  | 36168892  | Missense_Mutation | SNP | C  | T  | 4   | 220 | c.793C>T                          | c.(793-795)CGG>TGG   | p.R265W |
| Pat_16 | Pre-Treatment | BRPF3    | 27154  | 37 | 6 | 36178156  | 36178156  | Missense_Mutation | SNP | G  | A  | 4   | 192 | c.2030G>A                         | c.(2029-2031)CGA>CAA | p.R677Q |
| Pat_16 | Pre-Treatment | PI16     | 221476 | 37 | 6 | 36931352  | 36931352  | Missense_Mutation | SNP | G  | A  | 57  | 236 | c.1234G>A                         | c.(1234-1236)GGT>AGT | p.G412S |
| Pat_16 | Pre-Treatment | GPR116   | 221395 | 37 | 6 | 46849223  | 46849223  | Missense_Mutation | SNP | C  | T  | 121 | 201 | c.783G>A                          | c.(781-783)ATG>ATA   | p.M261I |
| Pat_16 | Pre-Treatment | GPR110   | 266977 | 37 | 6 | 46977963  | 46977963  | Missense_Mutation | SNP | C  | T  | 4   | 273 | c.1208G>A                         | c.(1207-1209)CGG>CAG | p.R403Q |
| Pat_16 | Pre-Treatment | GFRAL    | 389400 | 37 | 6 | 55196618  | 55196618  | Missense_Mutation | SNP | G  | A  | 84  | 111 | c.128G>A                          | c.(127-129)AGA>AAA   | p.R43K  |
| Pat_16 | Pre-Treatment | ROS1     | 6098   | 37 | 6 | 117631320 | 117631321 | Missense_Mutation | DNP | CC | TT | 79  | 89  | .6357_6358GG>A355-6360)GGGGAA>GGA | p.E2120K             |         |

|        |               |           |        |    |   |           |           |                        |     |    |    |     |     |                |                      |               |
|--------|---------------|-----------|--------|----|---|-----------|-----------|------------------------|-----|----|----|-----|-----|----------------|----------------------|---------------|
| Pat_16 | Pre-Treatment | VNN3      | 55350  | 37 | 6 | 133055815 | 133055815 | Missense_Mutation      | SNP | A  | T  | 26  | 2   | c.17T>A        | c.(16-18)TTT>TAT     | p.F6Y         |
| Pat_16 | Pre-Treatment | PLG       | 5340   | 37 | 6 | 161152156 | 161152156 | Missense_Mutation      | SNP | G  | A  | 4   | 95  | c.1330G>A      | c.(1330-1332)GTC>ATC | p.V444I       |
| Pat_16 | Pre-Treatment | MICALL2   | 79778  | 37 | 7 | 1482031   | 1482031   | Missense_Mutation      | SNP | G  | A  | 75  | 288 | c.1508C>T      | c.(1507-1509)TCG>TTG | p.S503L       |
| Pat_16 | Pre-Treatment | CARD11    | 84433  | 37 | 7 | 2979526   | 2979526   | Missense_Mutation      | SNP | C  | T  | 64  | 148 | c.721G>A       | c.(721-723)GAG>AAG   | p.E241K       |
| Pat_16 | Pre-Treatment | ETV1      | 2115   | 37 | 7 | 13935508  | 13935508  | Missense_Mutation      | SNP | C  | T  | 21  | 130 | c.1417G>A      | c.(1417-1419)GAA>AAA | p.E473K       |
| Pat_16 | Pre-Treatment | AGR2      | 10551  | 37 | 7 | 16841412  | 16841413  | Missense_Mutation      | DNP | TT | CA | 138 | 128 | c.8_9AA>TG     | c.(7-9)AAA>ATG       | p.K3M         |
| Pat_16 | Pre-Treatment | DNAH11    | 8701   | 37 | 7 | 21784183  | 21784183  | Missense_Mutation      | SNP | G  | A  | 100 | 87  | c.8303G>A      | c.(8302-8304)AGA>AAA | p.R2768K      |
| Pat_16 | Pre-Treatment | STK31     | 56164  | 37 | 7 | 23768836  | 23768836  | Missense_Mutation      | SNP | C  | T  | 77  | 59  | c.451C>T       | c.(451-453)CCT>TCT   | p.P151S       |
| Pat_16 | Pre-Treatment | SKAP2     | 8935   | 37 | 7 | 26765185  | 26765185  | Splice_Site            | SNP | C  | T  | 65  | 164 | c.659_splice   | c.e9-1               | p.D220_splice |
| Pat_16 | Pre-Treatment | LOC402644 | 402644 | 37 | 7 | 28318921  | 28318922  | Missense_Mutation      | DNP | CT | TC | 46  | 52  | c.397_398AG>GA | c.(397-399)AGA>GAA   | p.R133E       |
| Pat_16 | Pre-Treatment | DPY19L2P1 | 554236 | 37 | 7 | 35163615  | 35163615  | Missense_Mutation      | SNP | C  | T  | 74  | 109 | c.481G>A       | c.(481-483)GAC>AAC   | p.D161N       |
| Pat_16 | Pre-Treatment | AOAH      | 313    | 37 | 7 | 36726345  | 36726345  | Missense_Mutation      | SNP | G  | A  | 6   | 355 | c.182C>T       | c.(181-183)ACG>ATG   | p.T61M        |
| Pat_16 | Pre-Treatment | HECW1     | 23072  | 37 | 7 | 43485016  | 43485016  | Missense_Mutation      | SNP | G  | A  | 4   | 243 | c.2245G>A      | c.(2245-2247)GTA>ATA | p.V749I       |
| Pat_16 | Pre-Treatment | DBNL      | 28988  | 37 | 7 | 44092491  | 44092491  | Missense_Mutation      | SNP | G  | A  | 4   | 116 | c.278G>A       | c.(277-279)CGG>CAG   | p.R93Q        |
| Pat_16 | Pre-Treatment | RAMP3     | 10268  | 37 | 7 | 45217030  | 45217030  | Missense_Mutation      | SNP | G  | A  | 4   | 242 | c.181G>A       | c.(181-183)GAG>AAG   | p.E61K        |
| Pat_16 | Pre-Treatment | VSTM2A    | 222008 | 37 | 7 | 54610419  | 54610419  | Translation_Start_Site | SNP | T  | A  | 110 | 76  | c.-4T>A        | c.(-6--2)TTTTG>TTATG |               |
| Pat_16 | Pre-Treatment | AUTS2     | 26053  | 37 | 7 | 70228066  | 70228066  | Missense_Mutation      | SNP | C  | T  | 45  | 65  | c.953C>T       | c.(952-954)CCT>CTT   | p.P318L       |
| Pat_16 | Pre-Treatment | SEMA3C    | 10512  | 37 | 7 | 80435062  | 80435062  | Missense_Mutation      | SNP | A  | T  | 66  | 97  | c.551T>A       | c.(550-552)TTC>TAC   | p.F184Y       |
| Pat_16 | Pre-Treatment | HGF       | 3082   | 37 | 7 | 81372738  | 81372739  | Nonsense_Mutation      | DNP | GG | AA | 202 | 128 | c.795_796CC>TT | 793-798)GGCCAG>GGTT, | p.Q266*       |
| Pat_16 | Pre-Treatment | CACNA2D1  | 781    | 37 | 7 | 81689806  | 81689806  | Nonsense_Mutation      | SNP | G  | A  | 5   | 621 | c.817C>T       | c.(817-819)CGA>TGA   | p.R273*       |
| Pat_16 | Pre-Treatment | CCDC132   | 55610  | 37 | 7 | 92970884  | 92970884  | Missense_Mutation      | SNP | C  | T  | 67  | 214 | c.2204C>T      | c.(2203-2205)TCC>TTC | p.S735F       |
| Pat_16 | Pre-Treatment | CYP3A5    | 1577   | 37 | 7 | 99272168  | 99272168  | Missense_Mutation      | SNP | C  | T  | 125 | 84  | c.206G>A       | c.(205-207)GGA>GAA   | p.G69E        |
| Pat_16 | Pre-Treatment | POP7      | 10248  | 37 | 7 | 100304533 | 100304533 | Missense_Mutation      | SNP | C  | T  | 4   | 201 | c.80C>T        | c.(79-81)CCC>CTC     | p.P27L        |
| Pat_16 | Pre-Treatment | EPHB4     | 2050   | 37 | 7 | 100405129 | 100405129 | Missense_Mutation      | SNP | A  | C  | 116 | 195 | c.2192T>G      | c.(2191-2193)CTT>CGT | p.L731R       |
| Pat_16 | Pre-Treatment | SLC12A9   | 56996  | 37 | 7 | 100457628 | 100457628 | Missense_Mutation      | SNP | C  | T  | 5   | 598 | c.1099C>T      | c.(1099-1101)CGC>TGC | p.R367C       |
| Pat_16 | Pre-Treatment | MUC17     | 140453 | 37 | 7 | 100678520 | 100678520 | Missense_Mutation      | SNP | G  | A  | 351 | 412 | c.3823G>A      | c.(3823-3825)GAA>AAA | p.E1275K      |
| Pat_16 | Pre-Treatment | MUC17     | 140453 | 37 | 7 | 100681244 | 100681244 | Missense_Mutation      | SNP | A  | G  | 6   | 665 | c.6547A>G      | c.(6547-6549)ACA>GCA | p.T2183A      |
| Pat_16 | Pre-Treatment | MUC17     | 140453 | 37 | 7 | 100681979 | 100681979 | Missense_Mutation      | SNP | G  | A  | 10  | 831 | c.7282G>A      | c.(7282-7284)GTC>ATC | p.V2428I      |
| Pat_16 | Pre-Treatment | MUC17     | 140453 | 37 | 7 | 100684076 | 100684076 | Missense_Mutation      | SNP | A  | G  | 6   | 801 | c.9379A>G      | c.(9379-9381)ACA>GCA | p.T3127A      |
| Pat_16 | Pre-Treatment | SLC26A3   | 1811   | 37 | 7 | 107408046 | 107408046 | Missense_Mutation      | SNP | C  | T  | 32  | 108 | c.2249G>A      | c.(2248-2250)GGA>GAA | p.G750E       |
| Pat_16 | Pre-Treatment | LAMB4     | 22798  | 37 | 7 | 107678038 | 107678038 | Missense_Mutation      | SNP | C  | T  | 187 | 128 | c.4474G>A      | c.(4474-4476)GAA>AAA | p.E1492K      |
| Pat_16 | Pre-Treatment | DOCK4     | 9732   | 37 | 7 | 111368526 | 111368526 | Missense_Mutation      | SNP | G  | A  | 22  | 166 | c.5705C>T      | c.(5704-5706)CCG>CTG | p.P1902L      |
| Pat_16 | Pre-Treatment | PPP1R3A   | 5506   | 37 | 7 | 113518058 | 113518058 | Missense_Mutation      | SNP | C  | T  | 200 | 455 | c.3089G>A      | c.(3088-3090)GGA>GAA | p.G1030E      |
| Pat_16 | Pre-Treatment | PPP1R3A   | 5506   | 37 | 7 | 113518735 | 113518735 | Missense_Mutation      | SNP | T  | G  | 35  | 149 | c.2412A>C      | c.(2410-2412)GAA>GAC | p.E804D       |
| Pat_16 | Pre-Treatment | PPP1R3A   | 5506   | 37 | 7 | 113518737 | 113518737 | Missense_Mutation      | SNP | C  | T  | 33  | 149 | c.2410G>A      | c.(2410-2412)GAA>AAA | p.E804K       |
| Pat_16 | Pre-Treatment | ING3      | 54556  | 37 | 7 | 120607624 | 120607624 | Missense_Mutation      | SNP | C  | T  | 60  | 269 | c.478C>T       | c.(478-480)CAT>TAT   | p.H160Y       |
| Pat_16 | Pre-Treatment | CADPS2    | 93664  | 37 | 7 | 122261558 | 122261558 | Missense_Mutation      | SNP | C  | T  | 5   | 622 | c.1081G>A      | c.(1081-1083)GTG>ATG | p.V361M       |
| Pat_16 | Pre-Treatment | ZNF800    | 168850 | 37 | 7 | 127013577 | 127013577 | Missense_Mutation      | SNP | C  | T  | 6   | 285 | c.1813G>A      | c.(1813-1815)GTC>ATC | p.V605I       |
| Pat_16 | Pre-Treatment | FLNC      | 2318   | 37 | 7 | 128494697 | 128494697 | Missense_Mutation      | SNP | G  | A  | 8   | 55  | c.6958G>A      | c.(6958-6960)GGA>AGA | p.G2320R      |
| Pat_16 | Pre-Treatment | FAM40B    | 57464  | 37 | 7 | 129122704 | 129122704 | Missense_Mutation      | SNP | G  | A  | 249 | 216 | c.2071G>A      | c.(2071-2073)GCA>ACA | p.A691T       |
| Pat_16 | Pre-Treatment | PLXNA4    | 91584  | 37 | 7 | 131859659 | 131859659 | Missense_Mutation      | SNP | C  | T  | 38  | 174 | c.3895G>A      | c.(3895-3897)GAC>AAC | p.D1299N      |
| Pat_16 | Pre-Treatment | JHDM1D    | 80853  | 37 | 7 | 139791679 | 139791679 | Missense_Mutation      | SNP | A  | C  | 87  | 319 | c.2656T>G      | c.(2656-2658)TCC>GCC | p.S886A       |
| Pat_16 | Pre-Treatment | BRAF      | 673    | 37 | 7 | 140453136 | 140453136 | Missense_Mutation      | SNP | A  | T  | 229 | 180 | c.1799T>A      | c.(1798-1800)GTG>GAG | p.V600E       |
| Pat_16 | Pre-Treatment | KIAA1147  | 57189  | 37 | 7 | 141364740 | 141364740 | Missense_Mutation      | SNP | G  | A  | 4   | 104 | c.1067C>T      | c.(1066-1068)GCT>GTT | p.A356V       |
| Pat_16 | Pre-Treatment | TAS2R38   | 5726   | 37 | 7 | 141673404 | 141673404 | Missense_Mutation      | SNP | C  | T  | 126 | 181 | c.86G>A        | c.(85-87)GGG>GAG     | p.G29E        |
| Pat_16 | Pre-Treatment | TRYX3     | 136541 | 37 | 7 | 141952429 | 141952429 | Missense_Mutation      | SNP | T  | C  | 104 | 163 | c.439A>G       | c.(439-441)AAA>GAA   | p.K147E       |
| Pat_16 | Pre-Treatment | CLCN1     | 1180   | 37 | 7 | 143029591 | 143029591 | Missense_Mutation      | SNP | G  | A  | 5   | 292 | c.1246G>A      | c.(1246-1248)GGA>AGA | p.G416R       |

|        |               |          |        |    |   |           |           |                   |     |    |    |     |     |                |                      |          |
|--------|---------------|----------|--------|----|---|-----------|-----------|-------------------|-----|----|----|-----|-----|----------------|----------------------|----------|
| Pat_16 | Pre-Treatment | TAS2R60  | 338398 | 37 | 7 | 143140918 | 143140918 | Missense_Mutation | SNP | T  | A  | 390 | 266 | c.373T>A       | c.(373-375)TTC>ATC   | p.F125I  |
| Pat_16 | Pre-Treatment | ZNF425   | 155054 | 37 | 7 | 148802211 | 148802211 | Missense_Mutation | SNP | C  | A  | 4   | 191 | c.752G>T       | c.(751-753)TGT>TTT   | p.C251F  |
| Pat_16 | Pre-Treatment | ACCN3    | 9311   | 37 | 7 | 150749275 | 150749275 | Missense_Mutation | SNP | G  | A  | 106 | 487 | c.1409G>A      | c.(1408-1410)GGA>GAA | p.G470E  |
| Pat_16 | Pre-Treatment | CLN8     | 2055   | 37 | 8 | 1728717   | 1728717   | Missense_Mutation | SNP | G  | A  | 4   | 208 | c.845G>A       | c.(844-846)CGG>CAG   | p.R282Q  |
| Pat_16 | Pre-Treatment | CSMD1    | 64478  | 37 | 8 | 3216769   | 3216769   | Missense_Mutation | SNP | G  | A  | 175 | 65  | c.3212C>T      | c.(3211-3213)TCC>TTC | p.S1071F |
| Pat_16 | Pre-Treatment | MTMR7    | 9108   | 37 | 8 | 17228656  | 17228656  | Missense_Mutation | SNP | C  | T  | 130 | 366 | c.200G>A       | c.(199-201)GGA>GAA   | p.G67E   |
| Pat_16 | Pre-Treatment | PIWIL2   | 55124  | 37 | 8 | 22163488  | 22163488  | Missense_Mutation | SNP | G  | A  | 4   | 250 | c.1504G>A      | c.(1504-1506)GGA>AGA | p.G502R  |
| Pat_16 | Pre-Treatment | SORBS3   | 10174  | 37 | 8 | 22428730  | 22428730  | Missense_Mutation | SNP | C  | T  | 11  | 145 | c.1739C>T      | c.(1738-1740)ACC>ATC | p.T580I  |
| Pat_16 | Pre-Treatment | SLC25A37 | 51312  | 37 | 8 | 23423681  | 23423681  | Missense_Mutation | SNP | C  | T  | 76  | 22  | c.271C>T       | c.(271-273)CTC>TTC   | p.L91F   |
| Pat_16 | Pre-Treatment | DOCK5    | 80005  | 37 | 8 | 25189850  | 25189850  | Missense_Mutation | SNP | G  | A  | 4   | 226 | c.1987G>A      | c.(1987-1989)GGA>AGA | p.G663R  |
| Pat_16 | Pre-Treatment | PTK2B    | 2185   | 37 | 8 | 27296570  | 27296570  | Missense_Mutation | SNP | C  | A  | 41  | 154 | c.1666C>A      | c.(1666-1668)CTG>ATG | p.L556M  |
| Pat_16 | Pre-Treatment | EIF4EBP1 | 1978   | 37 | 8 | 37914667  | 37914667  | Missense_Mutation | SNP | C  | T  | 366 | 144 | c.214C>T       | c.(214-216)CCA>TCA   | p.P72S   |
| Pat_16 | Pre-Treatment | SLC20A2  | 6575   | 37 | 8 | 42294807  | 42294807  | Missense_Mutation | SNP | G  | A  | 22  | 69  | c.1223C>T      | c.(1222-1224)TCG>TTG | p.S408L  |
| Pat_16 | Pre-Treatment | PXDNL    | 137902 | 37 | 8 | 52232512  | 52232512  | Missense_Mutation | SNP | C  | T  | 85  | 30  | c.4331G>A      | c.(4330-4332)GGA>GAA | p.G1444E |
| Pat_16 | Pre-Treatment | PXDNL    | 137902 | 37 | 8 | 52320945  | 52320946  | Missense_Mutation | DNP | GG | AA | 14  | 58  | :3238_3239CC>T | c.(3238-3240)CCG>TTG | p.P1080L |
| Pat_16 | Pre-Treatment | PENK     | 5179   | 37 | 8 | 57354297  | 57354297  | Missense_Mutation | SNP | T  | A  | 41  | 157 | c.338A>T       | c.(337-339)AAA>ATA   | p.K113I  |
| Pat_16 | Pre-Treatment | CLVS1    | 157807 | 37 | 8 | 62212762  | 62212762  | Missense_Mutation | SNP | T  | C  | 56  | 143 | c.376T>C       | c.(376-378)TTC>CTC   | p.F126L  |
| Pat_16 | Pre-Treatment | PI15     | 51050  | 37 | 8 | 75757656  | 75757656  | Missense_Mutation | SNP | C  | T  | 110 | 419 | c.565C>T       | c.(565-567)CAT>TAT   | p.H189Y  |
| Pat_16 | Pre-Treatment | CA1      | 759    | 37 | 8 | 86242024  | 86242024  | Missense_Mutation | SNP | G  | A  | 24  | 30  | c.563C>T       | c.(562-564)TCA>TTA   | p.S188L  |
| Pat_16 | Pre-Treatment | UBR5     | 51366  | 37 | 8 | 103327037 | 103327037 | Missense_Mutation | SNP | G  | A  | 4   | 207 | c.1829C>T      | c.(1828-1830)CCA>CTA | p.P610L  |
| Pat_16 | Pre-Treatment | ASAP1    | 50807  | 37 | 8 | 131088611 | 131088611 | Missense_Mutation | SNP | G  | A  | 88  | 45  | c.2684C>T      | c.(2683-2685)CCT>CTT | p.P895L  |
| Pat_16 | Pre-Treatment | ADCY8    | 114    | 37 | 8 | 131880120 | 131880120 | Missense_Mutation | SNP | C  | T  | 49  | 223 | c.2182G>A      | c.(2182-2184)GCA>ACA | p.A728T  |
| Pat_16 | Pre-Treatment | TG       | 7038   | 37 | 8 | 133925417 | 133925417 | Missense_Mutation | SNP | C  | T  | 46  | 177 | c.4285C>T      | c.(4285-4287)CAC>TAC | p.H1429Y |
| Pat_16 | Pre-Treatment | DENND3   | 22898  | 37 | 8 | 142202543 | 142202543 | Missense_Mutation | SNP | C  | T  | 19  | 67  | c.3253C>T      | c.(3253-3255)CCT>TCT | p.P1085S |
| Pat_16 | Pre-Treatment | LYPD2    | 137797 | 37 | 8 | 143832556 | 143832556 | Missense_Mutation | SNP | G  | A  | 38  | 156 | c.91C>T        | c.(91-93)CCC>TCC     | p.P31S   |
| Pat_16 | Pre-Treatment | CYP11B1  | 1584   | 37 | 8 | 143957679 | 143957679 | Missense_Mutation | SNP | A  | T  | 9   | 51  | c.932T>A       | c.(931-933)CTC>CAC   | p.L311H  |
| Pat_16 | Pre-Treatment | CYP11B1  | 1584   | 37 | 8 | 143958215 | 143958215 | Missense_Mutation | SNP | C  | T  | 21  | 10  | c.682G>A       | c.(682-684)GAG>AAG   | p.E228K  |
| Pat_16 | Pre-Treatment | PYCR1    | 65263  | 37 | 8 | 144688004 | 144688004 | Missense_Mutation | SNP | G  | A  | 4   | 245 | c.727C>T       | c.(727-729)CGC>TGC   | p.R243C  |
| Pat_16 | Pre-Treatment | FOXH1    | 8928   | 37 | 8 | 145699782 | 145699782 | Missense_Mutation | SNP | C  | T  | 145 | 57  | c.937G>A       | c.(937-939)GTG>ATG   | p.V313M  |
| Pat_16 | Pre-Treatment | FAM75A6  | 389730 | 37 | 9 | 43627096  | 43627096  | Missense_Mutation | SNP | G  | A  | 267 | 10  | c.1591C>T      | c.(1591-1593)CTC>TTC | p.L531F  |
| Pat_16 | Pre-Treatment | APBA1    | 320    | 37 | 9 | 72131715  | 72131715  | Missense_Mutation | SNP | C  | T  | 3   | 31  | c.412G>A       | c.(412-414)GCC>ACC   | p.A138T  |
| Pat_16 | Pre-Treatment | RMI1     | 80010  | 37 | 9 | 86617211  | 86617211  | Missense_Mutation | SNP | C  | T  | 31  | 23  | c.1310C>T      | c.(1309-1311)TCC>TTC | p.S437F  |
| Pat_16 | Pre-Treatment | C9orf89  | 84270  | 37 | 9 | 95870013  | 95870013  | Missense_Mutation | SNP | G  | A  | 3   | 53  | c.65G>A        | c.(64-66)CGC>CAC     | p.R22H   |
| Pat_16 | Pre-Treatment | OR13C4   | 138804 | 37 | 9 | 107288820 | 107288820 | Missense_Mutation | SNP | G  | A  | 245 | 1   | c.671C>T       | c.(670-672)ACC>ATC   | p.T224I  |
| Pat_16 | Pre-Treatment | ASTN2    | 23245  | 37 | 9 | 119858377 | 119858377 | Missense_Mutation | SNP | C  | T  | 124 | 10  | c.1222G>A      | c.(1222-1224)GAA>AAA | p.E408K  |
| Pat_16 | Pre-Treatment | MRRF     | 92399  | 37 | 9 | 125033270 | 125033270 | Missense_Mutation | SNP | G  | A  | 6   | 470 | c.100G>A       | c.(100-102)GTG>ATG   | p.V34M   |
| Pat_16 | Pre-Treatment | COQ4     | 51117  | 37 | 9 | 131088075 | 131088075 | Missense_Mutation | SNP | C  | T  | 85  | 1   | c.317C>T       | c.(316-318)TCG>TTG   | p.S106L  |
| Pat_16 | Pre-Treatment | SPTAN1   | 6709   | 37 | 9 | 131339474 | 131339475 | Nonsense_Mutation | DNP | CC | TT | 165 | 7   | c.852_853CC>TT | 350-855)GGCCGA>GGTT  | p.R285*  |
| Pat_16 | Pre-Treatment | SLC34A3  | 142680 | 37 | 9 | 140127244 | 140127244 | Missense_Mutation | SNP | G  | A  | 52  | 1   | c.313G>A       | c.(313-315)GCC>ACC   | p.A105T  |
| Pat_16 | Pre-Treatment | MXRA5    | 25878  | 37 | X | 3261841   | 3261841   | Missense_Mutation | SNP | C  | T  | 4   | 34  | c.34G>A        | c.(34-36)GTG>ATG     | p.V12M   |
| Pat_16 | Pre-Treatment | FAM9B    | 171483 | 37 | X | 8998366   | 8998366   | Missense_Mutation | SNP | C  | T  | 12  | 1   | c.217G>A       | c.(217-219)GAT>AAT   | p.D73N   |
| Pat_16 | Pre-Treatment | FRMPD4   | 9758   | 37 | X | 12712519  | 12712519  | Missense_Mutation | SNP | T  | G  | 112 | 4   | c.879T>G       | c.(877-879)GAT>GAG   | p.D293E  |
| Pat_16 | Pre-Treatment | CDKL5    | 6792   | 37 | X | 18602452  | 18602452  | Missense_Mutation | SNP | G  | A  | 4   | 294 | c.533G>A       | c.(532-534)CGG>CAG   | p.R178Q  |
| Pat_16 | Pre-Treatment | PPEF1    | 5475   | 37 | X | 18842202  | 18842202  | Missense_Mutation | SNP | G  | A  | 4   | 67  | c.1663G>A      | c.(1663-1665)GAG>AAG | p.E555K  |
| Pat_16 | Pre-Treatment | POLA1    | 5422   | 37 | X | 25014054  | 25014054  | Missense_Mutation | SNP | C  | T  | 82  | 5   | c.4376C>T      | c.(4375-4377)GCC>GTC | p.A1459V |
| Pat_16 | Pre-Treatment | FAM47C   | 442444 | 37 | X | 37027345  | 37027345  | Nonsense_Mutation | SNP | A  | T  | 28  | 47  | c.862A>T       | c.(862-864)AAG>TAG   | p.K288*  |
| Pat_16 | Pre-Treatment | GRIPAP1  | 56850  | 37 | X | 48846277  | 48846277  | Missense_Mutation | SNP | G  | C  | 3   | 132 | c.740C>G       | c.(739-741)ACA>AGA   | p.T247R  |



|        |                 |           |        |    |    |           |           |                   |     |    |    |     |     |                |                        |           |
|--------|-----------------|-----------|--------|----|----|-----------|-----------|-------------------|-----|----|----|-----|-----|----------------|------------------------|-----------|
| Pat_16 | Pre-Treatment   | CLCN5     | 1184   | 37 | X  | 49837183  | 49837183  | Missense_Mutation | SNP | C  | T  | 127 | 161 | c.145C>T       | c.(145-147)CAC>TAC     | p.H49Y    |
| Pat_16 | Pre-Treatment   | ABCB7     | 22     | 37 | X  | 74291389  | 74291389  | Missense_Mutation | SNP | C  | T  | 6   | 389 | c.1162G>A      | c.(1162-1164)GGT>AGT   | p.G388S   |
| Pat_16 | Pre-Treatment   | CYLC1     | 1538   | 37 | X  | 83129484  | 83129484  | Missense_Mutation | SNP | G  | A  | 44  | 0   | c.1768G>A      | c.(1768-1770)GAA>AAA   | p.E590K   |
| Pat_16 | Pre-Treatment   | ZNF711    | 7552   | 37 | X  | 84519283  | 84519283  | Missense_Mutation | SNP | G  | A  | 62  | 1   | c.625G>A       | c.(625-627)GAT>AAT     | p.D209N   |
| Pat_16 | Pre-Treatment   | H2BFWT    | 158983 | 37 | X  | 103267838 | 103267838 | Missense_Mutation | SNP | G  | A  | 44  | 1   | c.395C>T       | c.(394-396)ACC>ATC     | p.T132I   |
| Pat_16 | Pre-Treatment   | IL1RAPL2  | 26280  | 37 | X  | 105011625 | 105011625 | Missense_Mutation | SNP | G  | A  | 174 | 8   | c.2032G>A      | c.(2032-2034)GAG>AAG   | p.E678K   |
| Pat_16 | Pre-Treatment   | GUCY2F    | 2986   | 37 | X  | 108718564 | 108718564 | Missense_Mutation | SNP | G  | A  | 4   | 211 | c.602C>T       | c.(601-603)ACA>ATA     | p.T201I   |
| Pat_16 | Pre-Treatment   | GUCY2F    | 2986   | 37 | X  | 108719089 | 108719089 | Missense_Mutation | SNP | C  | T  | 141 | 9   | c.77G>A        | c.(76-78)GGC>GAC       | p.G26D    |
| Pat_16 | Pre-Treatment   | TRPC5     | 7224   | 37 | X  | 111095642 | 111095642 | Missense_Mutation | SNP | C  | T  | 188 | 5   | c.1261G>A      | c.(1261-1263)GAA>AAA   | p.E421K   |
| Pat_16 | Pre-Treatment   | HTR2C     | 3358   | 37 | X  | 114141526 | 114141526 | Missense_Mutation | SNP | G  | A  | 160 | 2   | c.925G>A       | c.(925-927)GCT>ACT     | p.A309T   |
| Pat_16 | Pre-Treatment   | SLC6A14   | 11254  | 37 | X  | 115586574 | 115586574 | Nonsense_Mutation | SNP | G  | A  | 168 | 230 | c.1556G>A      | c.(1555-1557)TGG>TAG   | p.W519*   |
| Pat_16 | Pre-Treatment   | ODZ1      | 10178  | 37 | X  | 123654419 | 123654419 | Nonsense_Mutation | SNP | C  | T  | 258 | 7   | c.3249G>A      | c.(3247-3249)TGG>TGA   | p.W1083*  |
| Pat_16 | Pre-Treatment   | MAGEC1    | 9947   | 37 | X  | 140995008 | 140995008 | Missense_Mutation | SNP | G  | A  | 9   | 565 | c.1818G>A      | c.(1816-1818)ATG>ATA   | p.M606I   |
| Pat_16 | Pre-Treatment   | SLITRK4   | 139065 | 37 | X  | 142718881 | 142718881 | Missense_Mutation | SNP | G  | A  | 4   | 118 | c.44C>T        | c.(43-45)TCG>TTG       | p.S15L    |
| Pat_16 | Pre-Treatment   | GABRQ     | 55879  | 37 | X  | 151819009 | 151819009 | Missense_Mutation | SNP | G  | A  | 405 | 15  | c.867G>A       | c.(865-867)ATG>ATA     | p.M289I   |
| Pat_16 | Pre-Treatment   | FAM50A    | 9130   | 37 | X  | 153674018 | 153674018 | Missense_Mutation | SNP | C  | T  | 123 | 4   | c.149C>T       | c.(148-150)TCT>TTT     | p.S50F    |
| Pat_21 | Post-Resistance | CA6       | 765    | 37 | 1  | 9022677   | 9022677   | Missense_Mutation | SNP | G  | A  | 41  | 14  | c.533G>A       | c.(532-534)AGC>AAC     | p.S178N   |
| Pat_21 | Post-Resistance | KIAA0754  | 643314 | 37 | 1  | 39879293  | 39879293  | Missense_Mutation | SNP | C  | T  | 3   | 32  | c.3356C>T      | c.(3355-3357)TCC>TTC   | p.S1119F  |
| Pat_21 | Post-Resistance | COL9A2    | 1298   | 37 | 1  | 40773902  | 40773902  | Missense_Mutation | SNP | G  | A  | 10  | 5   | c.862C>T       | c.(862-864)CGT>TGT     | p.R288C   |
| Pat_21 | Post-Resistance | NBPF16    | 728936 | 37 | 1  | 148754851 | 148754851 | Missense_Mutation | SNP | C  | G  | 14  | 94  | c.1507C>G      | c.(1507-1509)CTG>GTG   | p.L503V   |
| Pat_21 | Post-Resistance | FCER1A    | 2205   | 37 | 1  | 159277667 | 159277667 | Missense_Mutation | SNP | G  | T  | 10  | 4   | c.719G>T       | c.(718-720)AGG>ATG     | p.R240M   |
| Pat_21 | Post-Resistance | ALOX5     | 240    | 37 | 10 | 45878120  | 45878120  | Missense_Mutation | SNP | G  | A  | 3   | 3   | c.340G>A       | c.(340-342)GAT>AAT     | p.D114N   |
| Pat_21 | Post-Resistance | CHAT      | 1103   | 37 | 10 | 50870733  | 50870733  | Missense_Mutation | SNP | C  | T  | 55  | 17  | c.1882C>T      | c.(1882-1884)CGG>TGG   | p.R628W   |
| Pat_21 | Post-Resistance | PRKG1     | 5592   | 37 | 10 | 54050036  | 54050036  | Missense_Mutation | SNP | C  | T  | 18  | 9   | c.1903C>T      | c.(1903-1905)CCT>TCT   | p.P635S   |
| Pat_21 | Post-Resistance | TMEM26    | 219623 | 37 | 10 | 63170123  | 63170123  | Missense_Mutation | SNP | C  | T  | 14  | 5   | c.1064G>A      | c.(1063-1065)CGG>CAG   | p.R355Q   |
| Pat_21 | Post-Resistance | RAB11FIP2 | 22841  | 37 | 10 | 119768573 | 119768573 | Missense_Mutation | SNP | G  | A  | 3   | 57  | c.1475C>T      | c.(1474-1476)ACG>ATG   | p.T492M   |
| Pat_21 | Post-Resistance | PPP2R2D   | 55844  | 37 | 10 | 133754154 | 133754154 | Missense_Mutation | SNP | G  | A  | 9   | 5   | c.334G>A       | c.(334-336)GAA>AAA     | p.E112K   |
| Pat_21 | Post-Resistance | OR51Q1    | 390061 | 37 | 11 | 5444067   | 5444067   | Missense_Mutation | SNP | C  | T  | 49  | 15  | c.637C>T       | c.(637-639)CCT>TCT     | p.P213S   |
| Pat_21 | Post-Resistance | ZBTB39    | 9880   | 37 | 12 | 57397347  | 57397347  | Missense_Mutation | SNP | T  | A  | 26  | 8   | c.1355A>T      | c.(1354-1356)AAA>ATA   | p.K452I   |
| Pat_21 | Post-Resistance | KIAA1370  | 56204  | 37 | 15 | 52901546  | 52901547  | Missense_Mutation | DNP | CT | TC | 60  | 120 | .1564_1565AG>G | c.(1564-1566)AGG>GAG   | p.R522E   |
| Pat_21 | Post-Resistance | PDXDC2    | 283970 | 37 | 16 | 70016259  | 70016259  | Missense_Mutation | SNP | T  | C  | 8   | 50  | c.443A>G       | c.(442-444)AAA>AGA     | p.K148R   |
| Pat_21 | Post-Resistance | DNAH2     | 146754 | 37 | 17 | 7696425   | 7696425   | Missense_Mutation | SNP | G  | A  | 43  | 9   | c.7471G>A      | c.(7471-7473)GAC>AAC   | p.D2491N  |
| Pat_21 | Post-Resistance | CNP       | 1267   | 37 | 17 | 40120425  | 40120425  | Missense_Mutation | SNP | G  | A  | 18  | 4   | c.343G>A       | c.(343-345)GAC>AAC     | p.D115N   |
| Pat_21 | Post-Resistance | PHB       | 5245   | 37 | 17 | 47486767  | 47486767  | Missense_Mutation | SNP | A  | G  | 42  | 83  | c.319T>C       | c.(319-321)TTC>CTC     | p.F107L   |
| Pat_21 | Post-Resistance | SBNO2     | 22904  | 37 | 19 | 1122996   | 1122996   | Missense_Mutation | SNP | A  | C  | 6   | 1   | c.677T>G       | c.(676-678)CTG>CGG     | p.L226R   |
| Pat_21 | Post-Resistance | TTN       | 7273   | 37 | 2  | 179417877 | 179417877 | Missense_Mutation | SNP | C  | T  | 3   | 7   | c.82046G>A     | c.(82045-82047)GGA>GAA | p.G27349E |
| Pat_21 | Post-Resistance | KIF1A     | 547    | 37 | 2  | 241697894 | 241697894 | Missense_Mutation | SNP | C  | T  | 14  | 5   | c.2438G>A      | c.(2437-2439)CGG>CAG   | p.R813Q   |
| Pat_21 | Post-Resistance | RTEL1     | 51750  | 37 | 20 | 62305428  | 62305428  | Missense_Mutation | SNP | G  | A  | 3   | 58  | c.901G>A       | c.(901-903)GCG>ACG     | p.A301T   |
| Pat_21 | Post-Resistance | SEMA5B    | 54437  | 37 | 3  | 122630349 | 122630349 | Missense_Mutation | SNP | G  | A  | 7   | 4   | c.3080C>T      | c.(3079-3081)ACC>ATC   | p.T1027I  |
| Pat_21 | Post-Resistance | RPL39L    | 116832 | 37 | 3  | 186838943 | 186838943 | Missense_Mutation | SNP | A  | T  | 5   | 190 | c.146T>A       | c.(145-147)CTG>CAG     | p.L49Q    |
| Pat_21 | Post-Resistance | EVC2      | 132884 | 37 | 4  | 5578151   | 5578151   | Missense_Mutation | SNP | C  | T  | 5   | 1   | c.3088G>A      | c.(3088-3090)GAC>AAC   | p.D1030N  |
| Pat_21 | Post-Resistance | SYNE1     | 23345  | 37 | 6  | 152443641 | 152443641 | Missense_Mutation | SNP | G  | A  | 40  | 12  | c.26324C>T     | c.(26323-26325)GCC>GTC | p.A8775V  |
| Pat_21 | Post-Resistance | GLI3      | 2737   | 37 | 7  | 42017228  | 42017228  | Missense_Mutation | SNP | C  | T  | 16  | 18  | c.1741G>A      | c.(1741-1743)GAA>AAA   | p.E581K   |
| Pat_21 | Post-Resistance | SEMA3E    | 9723   | 37 | 7  | 83014632  | 83014632  | Missense_Mutation | SNP | C  | T  | 56  | 50  | c.1853G>A      | c.(1852-1854)GGA>GAA   | p.G618E   |
| Pat_21 | Post-Resistance | BRAF      | 673    | 37 | 7  | 140453136 | 140453136 | Missense_Mutation | SNP | A  | T  | 99  | 54  | c.1799T>A      | c.(1798-1800)GTG>GAG   | p.V600E   |
| Pat_21 | Post-Resistance | MLLT3     | 4300   | 37 | 9  | 20414286  | 20414286  | Missense_Mutation | SNP | G  | T  | 4   | 43  | c.558C>A       | c.(556-558)AGC>AGA     | p.S186R   |
| Pat_21 | Post-Resistance | TRUB2     | 26995  | 37 | 9  | 131083986 | 131083986 | Missense_Mutation | SNP | C  | T  | 3   | 6   | c.133G>A       | c.(133-135)GCT>ACT     | p.A45T    |

|        |                 |          |           |    |    |           |           |                   |     |    |    |    |     |                |                      |          |
|--------|-----------------|----------|-----------|----|----|-----------|-----------|-------------------|-----|----|----|----|-----|----------------|----------------------|----------|
| Pat_21 | Post-Resistance | TUBBP5   | 643224    | 37 | 9  | 141070950 | 141070950 | Missense_Mutation | SNP | A  | G  | 4  | 60  | c.353A>G       | c.(352-354)CAC>CGC   | p.H118R  |
| Pat_21 | Post-Resistance | FAM48B1  | 100130302 | 37 | X  | 24382420  | 24382420  | Missense_Mutation | SNP | G  | C  | 5  | 18  | c.1543G>C      | c.(1543-1545)GCT>CCT | p.A515P  |
| Pat_21 | Post-Resistance | MED12    | 9968      | 37 | X  | 70360666  | 70360666  | Nonsense_Mutation | SNP | C  | T  | 4  | 32  | c.6226C>T      | c.(6226-6228)CAG>TAG | p.Q2076* |
| Pat_21 | Post-Resistance | FLJ44635 | 392490    | 37 | X  | 71379788  | 71379788  | Missense_Mutation | SNP | G  | A  | 31 | 8   | c.109G>A       | c.(109-111)GAA>AAA   | p.E37K   |
| Pat_22 | Pre-Treatment   | KIAA0562 | 9731      | 37 | 1  | 3755640   | 3755640   | Missense_Mutation | SNP | G  | A  | 4  | 23  | c.779C>T       | c.(778-780)GCC>GTC   | p.A260V  |
| Pat_22 | Pre-Treatment   | MFN2     | 9927      | 37 | 1  | 12066704  | 12066704  | Missense_Mutation | SNP | C  | T  | 4  | 23  | c.1826C>T      | c.(1825-1827)TCC>TTC | p.S609F  |
| Pat_22 | Pre-Treatment   | PRAMEF11 | 440560    | 37 | 1  | 12887523  | 12887523  | Missense_Mutation | SNP | C  | T  | 25 | 116 | c.334G>A       | c.(334-336)GAA>AAA   | p.E112K  |
| Pat_22 | Pre-Treatment   | CD52     | 1043      | 37 | 1  | 26644522  | 26644522  | Missense_Mutation | SNP | T  | G  | 6  | 18  | c.14T>G        | c.(13-15)CTC>CGC     | p.L5R    |
| Pat_22 | Pre-Treatment   | SESN2    | 83667     | 37 | 1  | 28599237  | 28599237  | Missense_Mutation | SNP | C  | T  | 6  | 24  | c.683C>T       | c.(682-684)CCC>CTC   | p.P228L  |
| Pat_22 | Pre-Treatment   | SDC3     | 9672      | 37 | 1  | 31347149  | 31347149  | Missense_Mutation | SNP | A  | C  | 6  | 12  | c.1157T>G      | c.(1156-1158)CTC>CGC | p.L386R  |
| Pat_22 | Pre-Treatment   | SPOCD1   | 90853     | 37 | 1  | 32280048  | 32280048  | Missense_Mutation | SNP | T  | C  | 2  | 4   | c.887A>G       | c.(886-888)CAG>CGG   | p.Q296R  |
| Pat_22 | Pre-Treatment   | TMEM39B  | 55116     | 37 | 1  | 32557516  | 32557516  | Missense_Mutation | SNP | C  | G  | 16 | 14  | c.831C>G       | c.(829-831)TTC>TTG   | p.F277L  |
| Pat_22 | Pre-Treatment   | CSMD2    | 114784    | 37 | 1  | 34037305  | 34037305  | Missense_Mutation | SNP | C  | T  | 3  | 23  | c.7790G>A      | c.(7789-7791)AGT>AAT | p.S2597N |
| Pat_22 | Pre-Treatment   | CSMD2    | 114784    | 37 | 1  | 34066469  | 34066469  | Missense_Mutation | SNP | G  | T  | 8  | 24  | c.6858C>A      | c.(6856-6858)TTC>TTA | p.F2286L |
| Pat_22 | Pre-Treatment   | CSMD2    | 114784    | 37 | 1  | 34158530  | 34158530  | Missense_Mutation | SNP | C  | T  | 10 | 80  | c.3932G>A      | c.(3931-3933)GGG>GAG | p.G1311E |
| Pat_22 | Pre-Treatment   | GRIK3    | 2899      | 37 | 1  | 37319298  | 37319298  | Missense_Mutation | SNP | C  | T  | 7  | 26  | c.1130G>A      | c.(1129-1131)CGA>CAA | p.R377Q  |
| Pat_22 | Pre-Treatment   | HIVEP3   | 59269     | 37 | 1  | 42046859  | 42046859  | Missense_Mutation | SNP | G  | A  | 10 | 36  | c.3610C>T      | c.(3610-3612)CAT>TAT | p.H1204Y |
| Pat_22 | Pre-Treatment   | DEPDC1   | 55635     | 37 | 1  | 68942710  | 68942710  | Missense_Mutation | SNP | T  | C  | 3  | 15  | c.2341A>G      | c.(2341-2343)ACC>GCC | p.T781A  |
| Pat_22 | Pre-Treatment   | GBP2     | 2634      | 37 | 1  | 89587495  | 89587495  | Missense_Mutation | SNP | G  | A  | 36 | 51  | c.155C>T       | c.(154-156)TCC>TTC   | p.S52F   |
| Pat_22 | Pre-Treatment   | SLC6A17  | 388662    | 37 | 1  | 110716639 | 110716639 | Nonsense_Mutation | SNP | G  | A  | 11 | 26  | c.489G>A       | c.(487-489)TGG>TGA   | p.W163*  |
| Pat_22 | Pre-Treatment   | NBPF7    | 343505    | 37 | 1  | 120378788 | 120378788 | Missense_Mutation | SNP | G  | A  | 7  | 17  | c.958C>T       | c.(958-960)CCG>TCG   | p.P320S  |
| Pat_22 | Pre-Treatment   | CHD1L    | 9557      | 37 | 1  | 146724319 | 146724319 | Missense_Mutation | SNP | C  | T  | 10 | 33  | c.169C>T       | c.(169-171)CTC>TTC   | p.L57F   |
| Pat_22 | Pre-Treatment   | FLG      | 2312      | 37 | 1  | 152284934 | 152284934 | Missense_Mutation | SNP | T  | C  | 9  | 38  | c.2428A>G      | c.(2428-2430)ACA>GCA | p.T810A  |
| Pat_22 | Pre-Treatment   | ADAR     | 103       | 37 | 1  | 154574475 | 154574475 | Missense_Mutation | SNP | C  | T  | 4  | 24  | c.643G>A       | c.(643-645)GGT>AGT   | p.G215S  |
| Pat_22 | Pre-Treatment   | OR6N1    | 128372    | 37 | 1  | 158735982 | 158735982 | Missense_Mutation | SNP | G  | A  | 4  | 15  | c.491C>T       | c.(490-492)TCA>TTA   | p.S164L  |
| Pat_22 | Pre-Treatment   | TNN      | 63923     | 37 | 1  | 175086222 | 175086222 | Missense_Mutation | SNP | G  | A  | 7  | 37  | c.2267G>A      | c.(2266-2268)GGG>GAG | p.G756E  |
| Pat_22 | Pre-Treatment   | CRB1     | 23418     | 37 | 1  | 197313530 | 197313530 | Missense_Mutation | SNP | C  | T  | 7  | 72  | c.772C>T       | c.(772-774)CAC>TAC   | p.H258Y  |
| Pat_22 | Pre-Treatment   | PTPRC    | 5788      | 37 | 1  | 198665985 | 198665985 | Missense_Mutation | SNP | C  | T  | 7  | 65  | c.239C>T       | c.(238-240)TCC>TTC   | p.S80F   |
| Pat_22 | Pre-Treatment   | CTSE     | 1510      | 37 | 1  | 206331084 | 206331084 | Missense_Mutation | SNP | G  | A  | 8  | 48  | c.1090G>A      | c.(1090-1092)GCT>ACT | p.A364T  |
| Pat_22 | Pre-Treatment   | RASSF5   | 83593     | 37 | 1  | 206757827 | 206757827 | Missense_Mutation | SNP | G  | A  | 27 | 164 | c.799G>A       | c.(799-801)GAG>AAG   | p.E267K  |
| Pat_22 | Pre-Treatment   | CNST     | 163882    | 37 | 1  | 246810513 | 246810513 | Missense_Mutation | SNP | C  | T  | 4  | 39  | c.1010C>T      | c.(1009-1011)CCC>CTC | p.P337L  |
| Pat_22 | Pre-Treatment   | TRIM58   | 25893     | 37 | 1  | 248039444 | 248039444 | Missense_Mutation | SNP | G  | A  | 3  | 10  | c.1114G>A      | c.(1114-1116)GAA>AAA | p.E372K  |
| Pat_22 | Pre-Treatment   | OR2T6    | 254879    | 37 | 1  | 248551607 | 248551608 | Missense_Mutation | DNP | GG | AA | 4  | 40  | c.698_699GG>AA | c.(697-699)GGG>GAA   | p.G233E  |
| Pat_22 | Pre-Treatment   | OR2T11   | 127077    | 37 | 1  | 248789853 | 248789853 | Missense_Mutation | SNP | C  | T  | 4  | 30  | c.577G>A       | c.(577-579)GAA>AAA   | p.E193K  |
| Pat_22 | Pre-Treatment   | AGAP11   | 119385    | 37 | 10 | 88768583  | 88768583  | Missense_Mutation | SNP | G  | A  | 4  | 45  | c.574G>A       | c.(574-576)GCA>ACA   | p.A192T  |
| Pat_22 | Pre-Treatment   | SLC16A12 | 387700    | 37 | 10 | 91196021  | 91196021  | Missense_Mutation | SNP | G  | A  | 3  | 16  | c.994C>T       | c.(994-996)CTC>TTC   | p.L332F  |
| Pat_22 | Pre-Treatment   | ZNF518A  | 9849      | 37 | 10 | 97918694  | 97918694  | Missense_Mutation | SNP | T  | C  | 4  | 5   | c.2615T>C      | c.(2614-2616)GTG>GCG | p.V872A  |
| Pat_22 | Pre-Treatment   | LOXL4    | 84171     | 37 | 10 | 100017824 | 100017824 | Nonsense_Mutation | SNP | C  | T  | 9  | 21  | c.1019G>A      | c.(1018-1020)TGG>TAG | p.W340*  |
| Pat_22 | Pre-Treatment   | SORCS3   | 22986     | 37 | 10 | 106982904 | 106982904 | Missense_Mutation | SNP | C  | T  | 4  | 16  | c.2765C>T      | c.(2764-2766)CCA>CTA | p.P922L  |
| Pat_22 | Pre-Treatment   | PNLIP    | 5406      | 37 | 10 | 118315007 | 118315007 | Missense_Mutation | SNP | G  | A  | 4  | 33  | c.799G>A       | c.(799-801)GGA>AGA   | p.G267R  |
| Pat_22 | Pre-Treatment   | C10orf93 | 255352    | 37 | 10 | 134752184 | 134752184 | Missense_Mutation | SNP | G  | A  | 19 | 42  | c.445C>T       | c.(445-447)CGT>TGT   | p.R149C  |
| Pat_22 | Pre-Treatment   | MS4A10   | 341116    | 37 | 11 | 60561520  | 60561520  | Missense_Mutation | SNP | C  | T  | 3  | 7   | c.436C>T       | c.(436-438)CTC>TTC   | p.L146F  |
| Pat_22 | Pre-Treatment   | B3GNT1   | 11041     | 37 | 11 | 66113666  | 66113666  | Missense_Mutation | SNP | C  | G  | 3  | 21  | c.1102G>C      | c.(1102-1104)GAA>CAA | p.E368Q  |
| Pat_22 | Pre-Treatment   | RBM4     | 5936      | 37 | 11 | 66407211  | 66407211  | Missense_Mutation | SNP | C  | T  | 7  | 36  | c.29C>T        | c.(28-30)CCC>CTC     | p.P10L   |
| Pat_22 | Pre-Treatment   | CD163    | 9332      | 37 | 12 | 7639377   | 7639377   | Missense_Mutation | SNP | C  | T  | 11 | 23  | c.2176G>A      | c.(2176-2178)GGT>AGT | p.G726S  |
| Pat_22 | Pre-Treatment   | PHC1     | 1911      | 37 | 12 | 9089851   | 9089851   | Missense_Mutation | SNP | G  | A  | 2  | 2   | c.2557G>A      | c.(2557-2559)GTT>ATT | p.V853I  |
| Pat_22 | Pre-Treatment   | SYT10    | 341359    | 37 | 12 | 33560007  | 33560007  | Missense_Mutation | SNP | C  | T  | 4  | 3   | c.794G>A       | c.(793-795)GGA>GAA   | p.G265E  |

|        |               |           |        |    |    |           |           |                   |     |    |    |    |    |               |                        |                |
|--------|---------------|-----------|--------|----|----|-----------|-----------|-------------------|-----|----|----|----|----|---------------|------------------------|----------------|
| Pat_22 | Pre-Treatment | ABCD2     | 225    | 37 | 12 | 39973341  | 39973341  | Missense_Mutation | SNP | G  | A  | 6  | 71 | c.1873C>T     | c.(1873-1875)CAT>TAT   | p.H625Y        |
| Pat_22 | Pre-Treatment | ARID2     | 196528 | 37 | 12 | 46123701  | 46123701  | Missense_Mutation | SNP | C  | T  | 5  | 6  | c.82C>T       | c.(82-84)CAC>TAC       | p.H28Y         |
| Pat_22 | Pre-Treatment | MLL2      | 8085   | 37 | 12 | 49426540  | 49426540  | Missense_Mutation | SNP | G  | A  | 2  | 0  | c.11948C>T    | c.(11947-11949)ACT>ATT | p.T3983I       |
| Pat_22 | Pre-Treatment | GCN1L1    | 10985  | 37 | 12 | 120574409 | 120574409 | Missense_Mutation | SNP | G  | A  | 4  | 20 | c.6905C>T     | c.(6904-6906)TCC>TTC   | p.S2302F       |
| Pat_22 | Pre-Treatment | KDM2B     | 84678  | 37 | 12 | 121947683 | 121947683 | Missense_Mutation | SNP | G  | A  | 3  | 18 | c.1334C>T     | c.(1333-1335)TCA>TTA   | p.S445L        |
| Pat_22 | Pre-Treatment | VPS33A    | 65082  | 37 | 12 | 122717499 | 122717499 | Missense_Mutation | SNP | G  | A  | 3  | 9  | c.1457C>T     | c.(1456-1458)TCG>TTG   | p.S486L        |
| Pat_22 | Pre-Treatment | PUS1      | 80324  | 37 | 12 | 132423739 | 132423739 | Missense_Mutation | SNP | G  | A  | 2  | 2  | c.463G>A      | c.(463-465)GTG>ATG     | p.V155M        |
| Pat_22 | Pre-Treatment | TUBA3C    | 7278   | 37 | 13 | 19748188  | 19748188  | Missense_Mutation | SNP | G  | A  | 6  | 70 | c.1168C>T     | c.(1168-1170)CGC>TGC   | p.R390C        |
| Pat_22 | Pre-Treatment | GJB6      | 10804  | 37 | 13 | 20797118  | 20797118  | Missense_Mutation | SNP | T  | C  | 4  | 13 | c.502A>G      | c.(502-504)AAA>GAA     | p.K168E        |
| Pat_22 | Pre-Treatment | MAPK11P1L | 93487  | 37 | 14 | 55529396  | 55529396  | Missense_Mutation | SNP | C  | T  | 4  | 18 | c.79C>T       | c.(79-81)CCT>TCT       | p.P27S         |
| Pat_22 | Pre-Treatment | GPHN      | 10243  | 37 | 14 | 67432002  | 67432002  | Missense_Mutation | SNP | C  | T  | 6  | 30 | c.824C>T      | c.(823-825)GCT>GTT     | p.A275V        |
| Pat_22 | Pre-Treatment | PCNX      | 22990  | 37 | 14 | 71429044  | 71429044  | Missense_Mutation | SNP | A  | G  | 6  | 23 | c.464A>G      | c.(463-465)AAC>AGC     | p.N155S        |
| Pat_22 | Pre-Treatment | TLL5      | 23093  | 37 | 14 | 76173379  | 76173379  | Missense_Mutation | SNP | G  | A  | 10 | 53 | c.604G>A      | c.(604-606)GAA>AAA     | p.E202K        |
| Pat_22 | Pre-Treatment | RYR3      | 6263   | 37 | 15 | 33926814  | 33926814  | Missense_Mutation | SNP | C  | A  | 5  | 20 | c.3055C>A     | c.(3055-3057)CTG>ATG   | p.L1019M       |
| Pat_22 | Pre-Treatment | BMF       | 90427  | 37 | 15 | 40398106  | 40398106  | Missense_Mutation | SNP | C  | T  | 12 | 30 | c.182G>A      | c.(181-183)CGA>CAA     | p.R61Q         |
| Pat_22 | Pre-Treatment | PLA2G4D   | 283748 | 37 | 15 | 42363411  | 42363411  | Missense_Mutation | SNP | T  | C  | 2  | 6  | c.1786A>G     | c.(1786-1788)AGG>GGG   | p.R596G        |
| Pat_22 | Pre-Treatment | THSD4     | 79875  | 37 | 15 | 72039374  | 72039374  | Nonsense_Mutation | SNP | G  | A  | 6  | 5  | c.2234G>A     | c.(2233-2235)TGG>TAG   | p.W745*        |
| Pat_22 | Pre-Treatment | KIAA1024  | 23251  | 37 | 15 | 79750596  | 79750596  | Missense_Mutation | SNP | C  | T  | 3  | 13 | c.2107C>T     | c.(2107-2109)CTC>TTC   | p.L703F        |
| Pat_22 | Pre-Treatment | FSD2      | 123722 | 37 | 15 | 83455943  | 83455943  | Missense_Mutation | SNP | A  | G  | 3  | 20 | c.200T>C      | c.(199-201)CTT>CCT     | p.L67P         |
| Pat_22 | Pre-Treatment | RHOT2     | 89941  | 37 | 16 | 722799    | 722799    | Missense_Mutation | SNP | T  | C  | 10 | 20 | c.1501T>C     | c.(1501-1503)TTT>CTT   | p.F501L        |
| Pat_22 | Pre-Treatment | ZNF263    | 10127  | 37 | 16 | 3339681   | 3339681   | Missense_Mutation | SNP | A  | G  | 13 | 29 | c.1175A>G     | c.(1174-1176)AAC>AGC   | p.N392S        |
| Pat_22 | Pre-Treatment | GRIN2A    | 2903   | 37 | 16 | 9857436   | 9857436   | Missense_Mutation | SNP | C  | T  | 4  | 18 | c.3965G>A     | c.(3964-3966)GGA>GAA   | p.G1322E       |
| Pat_22 | Pre-Treatment | ACSM5     | 54988  | 37 | 16 | 20448432  | 20448432  | Missense_Mutation | SNP | G  | A  | 8  | 27 | c.1367G>A     | c.(1366-1368)CGA>CAA   | p.R456Q        |
| Pat_22 | Pre-Treatment | SLC5A11   | 115584 | 37 | 16 | 24921657  | 24921657  | Missense_Mutation | SNP | G  | A  | 5  | 59 | c.1681G>A     | c.(1681-1683)GAC>AAC   | p.D561N        |
| Pat_22 | Pre-Treatment | TUBB3     | 10381  | 37 | 16 | 89989858  | 89989859  | Missense_Mutation | DNP | GG | AA | 12 | 16 | c.49_50GG>AA  | c.(49-51)GGG>AAG       | p.G17K         |
| Pat_22 | Pre-Treatment | MYO15A    | 51168  | 37 | 17 | 18052101  | 18052101  | Nonsense_Mutation | SNP | G  | A  | 3  | 21 | c.6791G>A     | c.(6790-6792)TGG>TAG   | p.W2264*       |
| Pat_22 | Pre-Treatment | ZNF286B   | 729288 | 37 | 17 | 18565486  | 18565486  | Missense_Mutation | SNP | C  | T  | 7  | 19 | c.1333G>A     | c.(1333-1335)GGG>AGG   | p.G445R        |
| Pat_22 | Pre-Treatment | FNDC8     | 54752  | 37 | 17 | 33448915  | 33448915  | Missense_Mutation | SNP | A  | G  | 5  | 23 | c.203A>G      | c.(202-204)AAC>AGC     | p.N68S         |
| Pat_22 | Pre-Treatment | CCL16     | 6360   | 37 | 17 | 34304696  | 34304696  | Missense_Mutation | SNP | T  | A  | 6  | 27 | c.269A>T      | c.(268-270)GAT>GTT     | p.D90V         |
| Pat_22 | Pre-Treatment | CACNB1    | 782    | 37 | 17 | 37331531  | 37331531  | Missense_Mutation | SNP | C  | T  | 5  | 81 | c.1712G>A     | c.(1711-1713)CGC>CAC   | p.R571H        |
| Pat_22 | Pre-Treatment | KRTAP4-2  | 85291  | 37 | 17 | 39334280  | 39334280  | Missense_Mutation | SNP | C  | A  | 6  | 86 | c.137G>T      | c.(136-138)TGC>TTC     | p.C46F         |
| Pat_22 | Pre-Treatment | TMEM106A  | 113277 | 37 | 17 | 41365877  | 41365877  | Missense_Mutation | SNP | C  | T  | 3  | 16 | c.242C>T      | c.(241-243)CCC>CTC     | p.P81L         |
| Pat_22 | Pre-Treatment | ARMC7     | 79637  | 37 | 17 | 73124939  | 73124939  | Missense_Mutation | SNP | G  | A  | 3  | 6  | c.403G>A      | c.(403-405)GAG>AAG     | p.E135K        |
| Pat_22 | Pre-Treatment | MGAT5B    | 146664 | 37 | 17 | 74922812  | 74922812  | Missense_Mutation | SNP | C  | T  | 5  | 54 | c.1324C>T     | c.(1324-1326)CCT>TCT   | p.P442S        |
| Pat_22 | Pre-Treatment | MEP1B     | 4225   | 37 | 18 | 29797884  | 29797884  | Missense_Mutation | SNP | C  | T  | 5  | 31 | c.2047C>T     | c.(2047-2049)CGT>TGT   | p.R683C        |
| Pat_22 | Pre-Treatment | KIAA1632  | 57724  | 37 | 18 | 43493669  | 43493669  | Splice_Site       | SNP | A  | G  | 12 | 63 | c.3816_splice | c.e21+1                | p.K1272_splice |
| Pat_22 | Pre-Treatment | DCC       | 1630   | 37 | 18 | 50592482  | 50592482  | Missense_Mutation | SNP | G  | A  | 6  | 24 | c.1207G>A     | c.(1207-1209)GAA>AAA   | p.E403K        |
| Pat_22 | Pre-Treatment | ALPK2     | 115701 | 37 | 18 | 56204778  | 56204778  | Missense_Mutation | SNP | C  | T  | 6  | 9  | c.2641G>A     | c.(2641-2643)GAC>AAC   | p.D881N        |
| Pat_22 | Pre-Treatment | SEMA6B    | 10501  | 37 | 19 | 4550181   | 4550181   | Missense_Mutation | SNP | C  | T  | 3  | 13 | c.1225G>A     | c.(1225-1227)GTG>ATG   | p.V409M        |
| Pat_22 | Pre-Treatment | FBN3      | 84467  | 37 | 19 | 8203443   | 8203443   | Missense_Mutation | SNP | G  | A  | 2  | 1  | c.871C>T      | c.(871-873)CGG>TGG     | p.R291W        |
| Pat_22 | Pre-Treatment | MUC16     | 94025  | 37 | 19 | 9066642   | 9066642   | Missense_Mutation | SNP | G  | A  | 17 | 43 | c.20804C>T    | c.(20803-20805)TCC>TTC | p.S6935F       |
| Pat_22 | Pre-Treatment | MUC16     | 94025  | 37 | 19 | 9085696   | 9085696   | Missense_Mutation | SNP | G  | A  | 9  | 21 | c.6119C>T     | c.(6118-6120)TCC>TTC   | p.S2040F       |
| Pat_22 | Pre-Treatment | NWD1      | 284434 | 37 | 19 | 16875863  | 16875863  | Missense_Mutation | SNP | C  | T  | 6  | 31 | c.2270C>T     | c.(2269-2271)TCC>TTC   | p.S757F        |
| Pat_22 | Pre-Treatment | USHBP1    | 83878  | 37 | 19 | 17375090  | 17375090  | Missense_Mutation | SNP | G  | A  | 3  | 13 | c.19C>T       | c.(19-21)CGG>TGG       | p.R7W          |
| Pat_22 | Pre-Treatment | PDE4C     | 5143   | 37 | 19 | 18324185  | 18324185  | Missense_Mutation | SNP | C  | T  | 4  | 15 | c.1601G>A     | c.(1600-1602)CGA>CAA   | p.R534Q        |
| Pat_22 | Pre-Treatment | WDR62     | 284403 | 37 | 19 | 36583709  | 36583709  | Missense_Mutation | SNP | C  | T  | 5  | 53 | c.2329C>T     | c.(2329-2331)CCC>TCC   | p.P777S        |
| Pat_22 | Pre-Treatment | FCGBP     | 8857   | 37 | 19 | 40430526  | 40430526  | Missense_Mutation | SNP | G  | A  | 2  | 3  | c.1417C>T     | c.(1417-1419)CGC>TGC   | p.R473C        |

|        |               |          |        |    |    |           |           |                   |     |    |    |    |     |                                   |                        |              |
|--------|---------------|----------|--------|----|----|-----------|-----------|-------------------|-----|----|----|----|-----|-----------------------------------|------------------------|--------------|
| Pat_22 | Pre-Treatment | NUMBL    | 9253   | 37 | 19 | 41188694  | 41188694  | Missense_Mutation | SNP | G  | A  | 6  | 29  | c.338C>T                          | c.(337-339)TCC>TTC     | p.S113F      |
| Pat_22 | Pre-Treatment | SNRPA    | 6626   | 37 | 19 | 41257328  | 41257328  | Missense_Mutation | SNP | G  | C  | 79 | 193 | c.15G>C                           | c.(13-15)GAG>GAC       | p.E5D        |
| Pat_22 | Pre-Treatment | PSG9     | 5678   | 37 | 19 | 43763240  | 43763241  | Missense_Mutation | DNP | CC | TT | 22 | 72  | c.756_757GG>AA754-759)AGGGAG>AGAA |                        | p.E253K      |
| Pat_22 | Pre-Treatment | SIGLEC9  | 27180  | 37 | 19 | 51629019  | 51629019  | Missense_Mutation | SNP | C  | T  | 13 | 47  | c.587C>T                          | c.(586-588)TCG>TTG     | p.S196L      |
| Pat_22 | Pre-Treatment | SIGLEC12 | 89858  | 37 | 19 | 52002706  | 52002706  | Missense_Mutation | SNP | C  | T  | 7  | 18  | c.1073G>A                         | c.(1072-1074)CGA>CAA   | p.R358Q      |
| Pat_22 | Pre-Treatment | NLRP8    | 126205 | 37 | 19 | 56466752  | 56466752  | Missense_Mutation | SNP | C  | T  | 3  | 23  | c.1328C>T                         | c.(1327-1329)TCC>TTC   | p.S443F      |
| Pat_22 | Pre-Treatment | GPR113   | 165082 | 37 | 2  | 26534297  | 26534297  | Missense_Mutation | SNP | C  | T  | 12 | 31  | c.2299G>A                         | c.(2299-2301)GAA>AAA   | p.E767K      |
| Pat_22 | Pre-Treatment | SPTBN1   | 6711   | 37 | 2  | 54845325  | 54845325  | Missense_Mutation | SNP | C  | T  | 4  | 25  | c.758C>T                          | c.(757-759)CCC>CTC     | p.P253L      |
| Pat_22 | Pre-Treatment | TCF7L1   | 83439  | 37 | 2  | 85531407  | 85531407  | Missense_Mutation | SNP | C  | T  | 9  | 72  | c.791C>T                          | c.(790-792)CCC>CTC     | p.P264L      |
| Pat_22 | Pre-Treatment | ELMOD3   | 84173  | 37 | 2  | 85598626  | 85598626  | Missense_Mutation | SNP | C  | T  | 3  | 13  | c.548C>T                          | c.(547-549)ACC>ATC     | p.T183I      |
| Pat_22 | Pre-Treatment | PTCD3    | 55037  | 37 | 2  | 86335622  | 86335622  | Splice_Site       | SNP | G  | A  | 9  | 18  | c.158_splice                      | c.e3-1                 | p.G53_splice |
| Pat_22 | Pre-Treatment | ST6GAL2  | 84620  | 37 | 2  | 107460402 | 107460402 | Missense_Mutation | SNP | C  | T  | 3  | 10  | c.32G>A                           | c.(31-33)CGA>CAA       | p.R11Q       |
| Pat_22 | Pre-Treatment | IL1B     | 3553   | 37 | 2  | 113590968 | 113590968 | Missense_Mutation | SNP | G  | A  | 3  | 11  | c.284C>T                          | c.(283-285)CCC>CTC     | p.P95L       |
| Pat_22 | Pre-Treatment | BAZ2B    | 29994  | 37 | 2  | 160310283 | 160310283 | Missense_Mutation | SNP | G  | A  | 4  | 15  | c.175C>T                          | c.(175-177)CCG>TCG     | p.P59S       |
| Pat_22 | Pre-Treatment | SCN2A    | 6326   | 37 | 2  | 166245451 | 166245451 | Missense_Mutation | SNP | C  | T  | 27 | 111 | c.5135C>T                         | c.(5134-5136)ACC>ATC   | p.T1712I     |
| Pat_22 | Pre-Treatment | TTN      | 7273   | 37 | 2  | 179472716 | 179472716 | Missense_Mutation | SNP | C  | T  | 6  | 38  | c.45094G>A                        | c.(45094-45096)GAA>AAA | p.E15032K    |
| Pat_22 | Pre-Treatment | TTN      | 7273   | 37 | 2  | 179586756 | 179586756 | Missense_Mutation | SNP | C  | T  | 16 | 37  | c.18902G>A                        | c.(18901-18903)CGA>CAA | p.R6301Q     |
| Pat_22 | Pre-Treatment | SDPR     | 8436   | 37 | 2  | 192700845 | 192700845 | Missense_Mutation | SNP | G  | A  | 24 | 51  | c.1082C>T                         | c.(1081-1083)TCC>TTC   | p.S361F      |
| Pat_22 | Pre-Treatment | AOX1     | 316    | 37 | 2  | 201492113 | 201492114 | Missense_Mutation | DNP | GG | AA | 8  | 75  | .2162_2163GG>A                    | c.(2161-2163)AGG>AAA   | p.R721K      |
| Pat_22 | Pre-Treatment | AOX1     | 316    | 37 | 2  | 201515721 | 201515721 | Missense_Mutation | SNP | G  | A  | 5  | 17  | c.2872G>A                         | c.(2872-2874)GAA>AAA   | p.E958K      |
| Pat_22 | Pre-Treatment | TTL4     | 9654   | 37 | 2  | 219612363 | 219612363 | Missense_Mutation | SNP | C  | A  | 9  | 53  | c.2293C>A                         | c.(2293-2295)CTG>ATG   | p.L765M      |
| Pat_22 | Pre-Treatment | PAK7     | 57144  | 37 | 20 | 9538302   | 9538302   | Missense_Mutation | SNP | G  | A  | 5  | 35  | c.1696C>T                         | c.(1696-1698)CAC>TAC   | p.H566Y      |
| Pat_22 | Pre-Treatment | FAM83C   | 128876 | 37 | 20 | 33876617  | 33876617  | Missense_Mutation | SNP | C  | T  | 6  | 30  | c.658G>A                          | c.(658-660)GAC>AAC     | p.D220N      |
| Pat_22 | Pre-Treatment | RBM12    | 10137  | 37 | 20 | 34240655  | 34240655  | Missense_Mutation | SNP | G  | A  | 6  | 18  | c.2590C>T                         | c.(2590-2592)CCC>TCC   | p.P864S      |
| Pat_22 | Pre-Treatment | PPP1R16B | 26051  | 37 | 20 | 37546830  | 37546830  | Missense_Mutation | SNP | T  | A  | 17 | 72  | c.1225T>A                         | c.(1225-1227)TCC>ACC   | p.S409T      |
| Pat_22 | Pre-Treatment | WFDC3    | 140686 | 37 | 20 | 44405770  | 44405770  | Missense_Mutation | SNP | C  | T  | 4  | 23  | c.437G>A                          | c.(436-438)GGG>GAG     | p.G146E      |
| Pat_22 | Pre-Treatment | TATDN2   | 9797   | 37 | 3  | 10320139  | 10320139  | Missense_Mutation | SNP | C  | T  | 20 | 86  | c.2138C>T                         | c.(2137-2139)CCT>CTT   | p.P713L      |
| Pat_22 | Pre-Treatment | TATDN2   | 9797   | 37 | 3  | 10320141  | 10320141  | Missense_Mutation | SNP | C  | T  | 20 | 83  | c.2140C>T                         | c.(2140-2142)CGC>TGC   | p.R714C      |
| Pat_22 | Pre-Treatment | MOBP     | 4336   | 37 | 3  | 39544031  | 39544031  | Missense_Mutation | SNP | G  | A  | 2  | 1   | c.212G>A                          | c.(211-213)AGC>AAC     | p.S71N       |
| Pat_22 | Pre-Treatment | ACOX2    | 8309   | 37 | 3  | 58510153  | 58510153  | Missense_Mutation | SNP | C  | T  | 8  | 35  | c.1526G>A                         | c.(1525-1527)AGG>AAG   | p.R509K      |
| Pat_22 | Pre-Treatment | IGSF11   | 152404 | 37 | 3  | 118623508 | 118623508 | Missense_Mutation | SNP | G  | A  | 5  | 16  | c.841C>T                          | c.(841-843)CCT>TCT     | p.P281S      |
| Pat_22 | Pre-Treatment | GPR156   | 165829 | 37 | 3  | 119886537 | 119886537 | Missense_Mutation | SNP | G  | A  | 4  | 9   | c.1787C>T                         | c.(1786-1788)CCT>CTT   | p.P596L      |
| Pat_22 | Pre-Treatment | POLQ     | 10721  | 37 | 3  | 121207124 | 121207124 | Missense_Mutation | SNP | T  | A  | 2  | 3   | c.4654A>T                         | c.(4654-4656)AAT>TAT   | p.N1552Y     |
| Pat_22 | Pre-Treatment | LRRC31   | 79782  | 37 | 3  | 169557925 | 169557925 | Missense_Mutation | SNP | A  | G  | 7  | 30  | c.1504T>C                         | c.(1504-1506)TTT>CTT   | p.F502L      |
| Pat_22 | Pre-Treatment | MUC4     | 4585   | 37 | 3  | 195507890 | 195507890 | Missense_Mutation | SNP | G  | C  | 2  | 3   | c.10177C>G                        | c.(10177-10179)CTT>GTT | p.L3393V     |
| Pat_22 | Pre-Treatment | CORIN    | 10699  | 37 | 4  | 47746491  | 47746491  | Missense_Mutation | SNP | A  | G  | 13 | 74  | c.727T>C                          | c.(727-729)TTT>CTT     | p.F243L      |
| Pat_22 | Pre-Treatment | PTPN13   | 5783   | 37 | 4  | 87693999  | 87693999  | Missense_Mutation | SNP | C  | T  | 9  | 58  | c.5237C>T                         | c.(5236-5238)TCC>TTC   | p.S1746F     |
| Pat_22 | Pre-Treatment | NPNT     | 255743 | 37 | 4  | 106848493 | 106848493 | Missense_Mutation | SNP | C  | T  | 6  | 30  | c.173C>T                          | c.(172-174)CCT>CTT     | p.P58L       |
| Pat_22 | Pre-Treatment | BBS7     | 55212  | 37 | 4  | 122775885 | 122775885 | Missense_Mutation | SNP | T  | C  | 6  | 31  | c.692A>G                          | c.(691-693)GAA>GGA     | p.E231G      |
| Pat_22 | Pre-Treatment | INPP4B   | 8821   | 37 | 4  | 143094889 | 143094889 | Missense_Mutation | SNP | G  | C  | 22 | 34  | c.1255C>G                         | c.(1255-1257)CAA>GAA   | p.Q419E      |
| Pat_22 | Pre-Treatment | LRBA     | 987    | 37 | 4  | 151821300 | 151821300 | Missense_Mutation | SNP | G  | A  | 19 | 56  | c.1825C>T                         | c.(1825-1827)CGG>TGG   | p.R609W      |
| Pat_22 | Pre-Treatment | LRP2BP   | 55805  | 37 | 4  | 186294045 | 186294045 | Missense_Mutation | SNP | C  | T  | 3  | 23  | c.768G>A                          | c.(766-768)ATG>ATA     | p.M256I      |
| Pat_22 | Pre-Treatment | FAT1     | 2195   | 37 | 4  | 187629958 | 187629958 | Missense_Mutation | SNP | C  | T  | 5  | 17  | c.1024G>A                         | c.(1024-1026)GGA>AGA   | p.G342R      |
| Pat_22 | Pre-Treatment | CDH9     | 1007   | 37 | 5  | 26881493  | 26881493  | Missense_Mutation | SNP | C  | T  | 5  | 11  | c.2122G>A                         | c.(2122-2124)GAA>AAA   | p.E708K      |
| Pat_22 | Pre-Treatment | MARVELD2 | 153562 | 37 | 5  | 68715618  | 68715618  | Missense_Mutation | SNP | C  | T  | 4  | 26  | c.406C>T                          | c.(406-408)CCC>TCC     | p.P136S      |
| Pat_22 | Pre-Treatment | ARAP3    | 64411  | 37 | 5  | 141059845 | 141059845 | Missense_Mutation | SNP | G  | A  | 10 | 28  | c.209C>T                          | c.(208-210)TCC>TTC     | p.S70F       |
| Pat_22 | Pre-Treatment | GRXCR2   | 643226 | 37 | 5  | 145252219 | 145252219 | Missense_Mutation | SNP | C  | T  | 6  | 46  | c.313G>A                          | c.(313-315)GAT>AAT     | p.D105N      |

|        |               |          |        |    |   |           |           |                   |     |   |   |    |     |               |                      |                |
|--------|---------------|----------|--------|----|---|-----------|-----------|-------------------|-----|---|---|----|-----|---------------|----------------------|----------------|
| Pat_22 | Pre-Treatment | GRIA1    | 2890   | 37 | 5 | 153190754 | 153190754 | Missense_Mutation | SNP | C | T | 3  | 14  | c.2690C>T     | c.(2689-2691)TCA>TTA | p.S897L        |
| Pat_22 | Pre-Treatment | DOCK2    | 1794   | 37 | 5 | 169506058 | 169506058 | Missense_Mutation | SNP | G | A | 14 | 29  | c.5074G>A     | c.(5074-5076)GAG>AAG | p.E1692K       |
| Pat_22 | Pre-Treatment | SLC22A23 | 63027  | 37 | 6 | 3324095   | 3324095   | Missense_Mutation | SNP | G | A | 6  | 15  | c.1055C>T     | c.(1054-1056)CCC>CTC | p.P352L        |
| Pat_22 | Pre-Treatment | HLA-DRB5 | 3127   | 37 | 6 | 32487267  | 32487267  | Nonsense_Mutation | SNP | G | A | 13 | 40  | c.532C>T      | c.(532-534)CAG>TAG   | p.Q178*        |
| Pat_22 | Pre-Treatment | GLP1R    | 2740   | 37 | 6 | 39046097  | 39046097  | Splice_Site       | SNP | G | A | 11 | 22  | c.824_splice  | c.e8-1               | p.G275_splice  |
| Pat_22 | Pre-Treatment | MDFI     | 4188   | 37 | 6 | 41621284  | 41621284  | Missense_Mutation | SNP | G | A | 9  | 48  | c.712G>A      | c.(712-714)GAG>AAG   | p.E238K        |
| Pat_22 | Pre-Treatment | PKHD1    | 5314   | 37 | 6 | 51947245  | 51947245  | Missense_Mutation | SNP | G | A | 17 | 68  | c.226C>T      | c.(226-228)CCC>TCC   | p.P76S         |
| Pat_22 | Pre-Treatment | FAM83B   | 222584 | 37 | 6 | 54805192  | 54805192  | Missense_Mutation | SNP | C | T | 8  | 33  | c.1423C>T     | c.(1423-1425)CGC>TGC | p.R475C        |
| Pat_22 | Pre-Treatment | COL21A1  | 81578  | 37 | 6 | 56044571  | 56044571  | Missense_Mutation | SNP | C | T | 3  | 22  | c.445G>A      | c.(445-447)GAT>AAT   | p.D149N        |
| Pat_22 | Pre-Treatment | ELOVL4   | 6785   | 37 | 6 | 80629160  | 80629160  | Nonsense_Mutation | SNP | G | A | 6  | 33  | c.646C>T      | c.(646-648)CGA>TGA   | p.R216*        |
| Pat_22 | Pre-Treatment | RFX6     | 222546 | 37 | 6 | 117248471 | 117248471 | Missense_Mutation | SNP | G | A | 7  | 43  | c.2167G>A     | c.(2167-2169)GAG>AAG | p.E723K        |
| Pat_22 | Pre-Treatment | TXLNB    | 167838 | 37 | 6 | 139563907 | 139563907 | Nonsense_Mutation | SNP | C | T | 5  | 25  | c.1811G>A     | c.(1810-1812)TGG>TAG | p.W604*        |
| Pat_22 | Pre-Treatment | MTHFD1L  | 25902  | 37 | 6 | 151258056 | 151258056 | Missense_Mutation | SNP | G | A | 12 | 35  | c.1373G>A     | c.(1372-1374)GGA>GAA | p.G458E        |
| Pat_22 | Pre-Treatment | FTSJ2    | 29960  | 37 | 7 | 2274902   | 2274902   | Missense_Mutation | SNP | C | T | 4  | 16  | c.596G>A      | c.(595-597)AGT>AAT   | p.S199N        |
| Pat_22 | Pre-Treatment | ACTB     | 60     | 37 | 7 | 5567389   | 5567389   | Missense_Mutation | SNP | T | G | 60 | 504 | c.1118A>C     | c.(1117-1119)AAA>ACA | p.K373T        |
| Pat_22 | Pre-Treatment | OGDH     | 4967   | 37 | 7 | 44715620  | 44715620  | Missense_Mutation | SNP | C | T | 16 | 122 | c.1078C>T     | c.(1078-1080)CGT>TGT | p.R360C        |
| Pat_22 | Pre-Treatment | CYP51A1  | 1595   | 37 | 7 | 91746480  | 91746480  | Missense_Mutation | SNP | G | A | 3  | 20  | c.1229C>T     | c.(1228-1230)TCT>TTT | p.S410F        |
| Pat_22 | Pre-Treatment | CYP3A4   | 1576   | 37 | 7 | 99366124  | 99366124  | Missense_Mutation | SNP | C | T | 6  | 48  | c.523G>A      | c.(523-525)GTC>ATC   | p.V175I        |
| Pat_22 | Pre-Treatment | BRAF     | 673    | 37 | 7 | 140453136 | 140453136 | Missense_Mutation | SNP | A | T | 15 | 23  | c.1799T>A     | c.(1798-1800)GTG>GAG | p.V600E        |
| Pat_22 | Pre-Treatment | TAS2R60  | 338398 | 37 | 7 | 143141207 | 143141207 | Missense_Mutation | SNP | G | A | 8  | 12  | c.662G>A      | c.(661-663)GGA>GAA   | p.G221E        |
| Pat_22 | Pre-Treatment | C7orf29  | 113763 | 37 | 7 | 150027766 | 150027766 | Nonsense_Mutation | SNP | G | A | 11 | 29  | c.273G>A      | c.(271-273)TGG>TGA   | p.W91*         |
| Pat_22 | Pre-Treatment | CSMD1    | 64478  | 37 | 8 | 2965315   | 2965315   | Nonsense_Mutation | SNP | G | A | 3  | 26  | c.6763C>T     | c.(6763-6765)CAG>TAG | p.Q2255*       |
| Pat_22 | Pre-Treatment | DEFB136  | 613210 | 37 | 8 | 11831592  | 11831592  | Missense_Mutation | SNP | G | A | 12 | 68  | c.91C>T       | c.(91-93)CGC>TGC     | p.R31C         |
| Pat_22 | Pre-Treatment | RP1      | 6101   | 37 | 8 | 55533900  | 55533900  | Missense_Mutation | SNP | G | A | 13 | 34  | c.374G>A      | c.(373-375)CGG>CAG   | p.R125Q        |
| Pat_22 | Pre-Treatment | JPH1     | 56704  | 37 | 8 | 75227798  | 75227798  | Missense_Mutation | SNP | C | G | 3  | 25  | c.437G>C      | c.(436-438)AGC>ACC   | p.S146T        |
| Pat_22 | Pre-Treatment | SLC7A13  | 157724 | 37 | 8 | 87241932  | 87241932  | Missense_Mutation | SNP | C | T | 17 | 18  | c.575G>A      | c.(574-576)CGA>CAA   | p.R192Q        |
| Pat_22 | Pre-Treatment | ENPP2    | 5168   | 37 | 8 | 120613682 | 120613682 | Missense_Mutation | SNP | C | T | 16 | 98  | c.854G>A      | c.(853-855)AGA>AAA   | p.R285K        |
| Pat_22 | Pre-Treatment | KIAA0196 | 9897   | 37 | 8 | 126051070 | 126051070 | Splice_Site       | SNP | A | G | 29 | 37  | c.3084_splice | c.e25+1              | p.K1028_splice |
| Pat_22 | Pre-Treatment | LRRRC6   | 23639  | 37 | 8 | 133637582 | 133637582 | Missense_Mutation | SNP | G | A | 6  | 2   | c.772C>T      | c.(772-774)CCT>TCT   | p.P258S        |
| Pat_22 | Pre-Treatment | SHARPIN  | 81858  | 37 | 8 | 145154852 | 145154852 | Missense_Mutation | SNP | G | A | 12 | 16  | c.497C>T      | c.(496-498)CCT>CTT   | p.P166L        |
| Pat_22 | Pre-Treatment | ADCK5    | 203054 | 37 | 8 | 145615884 | 145615884 | Missense_Mutation | SNP | G | A | 3  | 10  | c.280G>A      | c.(280-282)GGC>AGC   | p.G94S         |
| Pat_22 | Pre-Treatment | PTPRD    | 5789   | 37 | 9 | 8500886   | 8500886   | Missense_Mutation | SNP | G | A | 19 | 61  | c.1996C>T     | c.(1996-1998)CCT>TCT | p.P666S        |
| Pat_22 | Pre-Treatment | IFNA21   | 3452   | 37 | 9 | 21166224  | 21166224  | Missense_Mutation | SNP | C | T | 21 | 63  | c.388G>A      | c.(388-390)GAA>AAA   | p.E130K        |
| Pat_22 | Pre-Treatment | PAX5     | 5079   | 37 | 9 | 37033987  | 37033987  | Missense_Mutation | SNP | C | G | 2  | 9   | c.42G>C       | c.(40-42)AGG>AGC     | p.R14S         |
| Pat_22 | Pre-Treatment | ALDOB    | 229    | 37 | 9 | 104190778 | 104190778 | Missense_Mutation | SNP | C | T | 3  | 22  | c.352G>A      | c.(352-354)GGA>AGA   | p.G118R        |
| Pat_22 | Pre-Treatment | PTPN3    | 5774   | 37 | 9 | 112195353 | 112195353 | Nonsense_Mutation | SNP | C | T | 4  | 16  | c.764G>A      | c.(763-765)TGG>TAG   | p.W255*        |
| Pat_22 | Pre-Treatment | PHF19    | 26147  | 37 | 9 | 123636851 | 123636851 | Missense_Mutation | SNP | G | A | 25 | 54  | c.169C>T      | c.(169-171)CTC>TTC   | p.L57F         |
| Pat_22 | Pre-Treatment | PDCL     | 5082   | 37 | 9 | 125582834 | 125582834 | Missense_Mutation | SNP | C | T | 3  | 26  | c.436G>A      | c.(436-438)GAA>AAA   | p.E146K        |
| Pat_22 | Pre-Treatment | ACE2     | 59272  | 37 | X | 15596407  | 15596407  | Missense_Mutation | SNP | C | T | 9  | 32  | c.1102G>A     | c.(1102-1104)GAC>AAC | p.D368N        |
| Pat_22 | Pre-Treatment | BEND2    | 139105 | 37 | X | 18219991  | 18219991  | Missense_Mutation | SNP | C | T | 8  | 36  | c.977G>A      | c.(976-978)GGA>GAA   | p.G326E        |
| Pat_22 | Pre-Treatment | ARAF     | 369    | 37 | X | 47429015  | 47429015  | Missense_Mutation | SNP | G | A | 3  | 9   | c.1378G>A     | c.(1378-1380)GCC>ACC | p.A460T        |
| Pat_22 | Pre-Treatment | RLIM     | 51132  | 37 | X | 73812068  | 73812068  | Missense_Mutation | SNP | C | T | 7  | 23  | c.1082G>A     | c.(1081-1083)GGA>GAA | p.G361E        |
| Pat_22 | Pre-Treatment | SERPINA7 | 6906   | 37 | X | 105278344 | 105278344 | Missense_Mutation | SNP | G | A | 5  | 9   | c.926C>T      | c.(925-927)TCC>TTC   | p.S309F        |
| Pat_22 | Pre-Treatment | TBC1D8B  | 54885  | 37 | X | 106109164 | 106109164 | Missense_Mutation | SNP | C | T | 12 | 94  | c.2563C>T     | c.(2563-2565)CAT>TAT | p.H855Y        |
| Pat_22 | Pre-Treatment | SOX3     | 6658   | 37 | X | 139586325 | 139586325 | Missense_Mutation | SNP | G | A | 2  | 1   | c.901C>T      | c.(901-903)CGC>TGC   | p.R301C        |
| Pat_22 | Pre-Treatment | MAGEC1   | 9947   | 37 | X | 140993320 | 140993320 | Missense_Mutation | SNP | A | G | 4  | 33  | c.130A>G      | c.(130-132)AGC>GGC   | p.S44G         |
| Pat_22 | Pre-Treatment | AFF2     | 2334   | 37 | X | 147743727 | 147743727 | Nonsense_Mutation | SNP | C | A | 9  | 153 | c.479C>A      | c.(478-480)TCA>TAA   | p.S160*        |



|        |                 |          |        |    |    |           |           |                   |     |    |    |     |     |                                    |                      |          |
|--------|-----------------|----------|--------|----|----|-----------|-----------|-------------------|-----|----|----|-----|-----|------------------------------------|----------------------|----------|
| Pat_22 | Pre-Treatment   | DKC1     | 1736   | 37 | X  | 153994523 | 153994523 | Missense_Mutation | SNP | A  | G  | 10  | 39  | c.296A>G                           | c.(295-297)AAC>AGC   | p.N99S   |
| Pat_22 | Post-Resistance | TAS1R3   | 83756  | 37 | 1  | 1269395   | 1269395   | Missense_Mutation | SNP | C  | T  | 21  | 38  | c.2110C>T                          | c.(2110-2112)CCG>TCG | p.P704S  |
| Pat_22 | Post-Resistance | MFN2     | 9927   | 37 | 1  | 12066704  | 12066704  | Missense_Mutation | SNP | C  | T  | 21  | 116 | c.1826C>T                          | c.(1825-1827)TCC>TTC | p.S609F  |
| Pat_22 | Post-Resistance | PRAMEF11 | 440560 | 37 | 1  | 12887523  | 12887523  | Missense_Mutation | SNP | C  | T  | 205 | 445 | c.334G>A                           | c.(334-336)GAA>AAA   | p.E112K  |
| Pat_22 | Post-Resistance | CD52     | 1043   | 37 | 1  | 26644522  | 26644522  | Missense_Mutation | SNP | T  | G  | 17  | 103 | c.14T>G                            | c.(13-15)CTC>CGC     | p.L5R    |
| Pat_22 | Post-Resistance | SESN2    | 83667  | 37 | 1  | 28599237  | 28599237  | Missense_Mutation | SNP | C  | T  | 25  | 142 | c.683C>T                           | c.(682-684)CCC>CTC   | p.P228L  |
| Pat_22 | Post-Resistance | SDC3     | 9672   | 37 | 1  | 31347149  | 31347149  | Missense_Mutation | SNP | A  | C  | 30  | 83  | c.1157T>G                          | c.(1156-1158)CTC>CGC | p.L386R  |
| Pat_22 | Post-Resistance | TMEM39B  | 55116  | 37 | 1  | 32557516  | 32557516  | Missense_Mutation | SNP | C  | G  | 32  | 91  | c.831C>G                           | c.(829-831)TTC>TTG   | p.F277L  |
| Pat_22 | Post-Resistance | CSMD2    | 114784 | 37 | 1  | 34037305  | 34037305  | Missense_Mutation | SNP | C  | T  | 31  | 178 | c.7790G>A                          | c.(7789-7791)AGT>AAT | p.S2597N |
| Pat_22 | Post-Resistance | CSMD2    | 114784 | 37 | 1  | 34066469  | 34066469  | Missense_Mutation | SNP | G  | T  | 52  | 114 | c.6858C>A                          | c.(6856-6858)TTC>TTA | p.F2286L |
| Pat_22 | Post-Resistance | CSMD2    | 114784 | 37 | 1  | 34158530  | 34158530  | Missense_Mutation | SNP | C  | T  | 69  | 315 | c.3932G>A                          | c.(3931-3933)GGG>GAG | p.G1311E |
| Pat_22 | Post-Resistance | GRIK3    | 2899   | 37 | 1  | 37282732  | 37282732  | Missense_Mutation | SNP | C  | T  | 31  | 153 | c.2020G>A                          | c.(2020-2022)GAT>AAT | p.D674N  |
| Pat_22 | Post-Resistance | GRIK3    | 2899   | 37 | 1  | 37319298  | 37319298  | Missense_Mutation | SNP | C  | T  | 19  | 178 | c.1130G>A                          | c.(1129-1131)CGA>CAA | p.R377Q  |
| Pat_22 | Post-Resistance | C1orf175 | 374977 | 37 | 1  | 55119637  | 55119637  | Missense_Mutation | SNP | C  | A  | 4   | 155 | c.1038C>A                          | c.(1036-1038)AGC>AGA | p.S346R  |
| Pat_22 | Post-Resistance | DEPDC1   | 55635  | 37 | 1  | 68942710  | 68942710  | Missense_Mutation | SNP | T  | C  | 40  | 98  | c.2341A>G                          | c.(2341-2343)ACC>GCC | p.T781A  |
| Pat_22 | Post-Resistance | GBP2     | 2634   | 37 | 1  | 89587495  | 89587495  | Missense_Mutation | SNP | G  | A  | 126 | 224 | c.155C>T                           | c.(154-156)TCC>TTC   | p.S52F   |
| Pat_22 | Post-Resistance | ABCA4    | 24     | 37 | 1  | 94471119  | 94471119  | Missense_Mutation | SNP | C  | T  | 21  | 76  | c.6025G>A                          | c.(6025-6027)GAA>AAA | p.E2009K |
| Pat_22 | Post-Resistance | SLC6A17  | 388662 | 37 | 1  | 110716639 | 110716639 | Nonsense_Mutation | SNP | G  | A  | 57  | 120 | c.489G>A                           | c.(487-489)TGG>TGA   | p.W163*  |
| Pat_22 | Post-Resistance | C1orf88  | 128344 | 37 | 1  | 111892789 | 111892789 | Nonsense_Mutation | SNP | G  | T  | 5   | 315 | c.451G>T                           | c.(451-453)GGA>TGA   | p.G151*  |
| Pat_22 | Post-Resistance | NBPF7    | 343505 | 37 | 1  | 120378788 | 120378788 | Missense_Mutation | SNP | G  | A  | 56  | 115 | c.958C>T                           | c.(958-960)CCG>TCG   | p.P320S  |
| Pat_22 | Post-Resistance | NUDT17   | 200035 | 37 | 1  | 145588959 | 145588959 | Missense_Mutation | SNP | C  | T  | 3   | 64  | c.289G>A                           | c.(289-291)GTC>ATC   | p.V97I   |
| Pat_22 | Post-Resistance | CHD1L    | 9557   | 37 | 1  | 146724319 | 146724319 | Missense_Mutation | SNP | C  | T  | 79  | 358 | c.169C>T                           | c.(169-171)CTC>TTC   | p.L57F   |
| Pat_22 | Post-Resistance | NBPF16   | 728936 | 37 | 1  | 148753279 | 148753279 | Missense_Mutation | SNP | G  | T  | 9   | 282 | c.1296G>T                          | c.(1294-1296)GAG>GAT | p.E432D  |
| Pat_22 | Post-Resistance | FLG      | 2312   | 37 | 1  | 152284934 | 152284934 | Missense_Mutation | SNP | T  | C  | 74  | 410 | c.2428A>G                          | c.(2428-2430)ACA>GCA | p.T810A  |
| Pat_22 | Post-Resistance | ARHGEF11 | 9826   | 37 | 1  | 156917684 | 156917684 | Missense_Mutation | SNP | C  | A  | 4   | 86  | c.2098G>T                          | c.(2098-2100)GAT>TAT | p.D700Y  |
| Pat_22 | Post-Resistance | TNN      | 63923  | 37 | 1  | 175086222 | 175086222 | Missense_Mutation | SNP | G  | A  | 49  | 312 | c.2267G>A                          | c.(2266-2268)GGG>GAG | p.G756E  |
| Pat_22 | Post-Resistance | TNR      | 7143   | 37 | 1  | 175372495 | 175372495 | Missense_Mutation | SNP | C  | T  | 26  | 140 | c.757G>A                           | c.(757-759)GAA>AAA   | p.E253K  |
| Pat_22 | Post-Resistance | CFH      | 3075   | 37 | 1  | 196695999 | 196695999 | Missense_Mutation | SNP | C  | T  | 75  | 277 | c.2165C>T                          | c.(2164-2166)TCA>TTA | p.S722L  |
| Pat_22 | Post-Resistance | CRB1     | 23418  | 37 | 1  | 197313530 | 197313530 | Missense_Mutation | SNP | C  | T  | 109 | 414 | c.772C>T                           | c.(772-774)CAC>TAC   | p.H258Y  |
| Pat_22 | Post-Resistance | PTPRC    | 5788   | 37 | 1  | 198665985 | 198665985 | Missense_Mutation | SNP | C  | T  | 80  | 461 | c.239C>T                           | c.(238-240)TCC>TTC   | p.S80F   |
| Pat_22 | Post-Resistance | GOLT1A   | 127845 | 37 | 1  | 204170779 | 204170779 | Missense_Mutation | SNP | C  | T  | 31  | 193 | c.278G>A                           | c.(277-279)GGA>GAA   | p.G93E   |
| Pat_22 | Post-Resistance | CTSE     | 1510   | 37 | 1  | 206331084 | 206331084 | Missense_Mutation | SNP | G  | A  | 40  | 352 | c.1090G>A                          | c.(1090-1092)GCT>ACT | p.A364T  |
| Pat_22 | Post-Resistance | RASSF5   | 83593  | 37 | 1  | 206757827 | 206757827 | Missense_Mutation | SNP | G  | A  | 57  | 626 | c.799G>A                           | c.(799-801)GAG>AAG   | p.E267K  |
| Pat_22 | Post-Resistance | C1orf74  | 148304 | 37 | 1  | 209956721 | 209956721 | Missense_Mutation | SNP | C  | T  | 18  | 73  | c.259G>A                           | c.(259-261)GAG>AAG   | p.E87K   |
| Pat_22 | Post-Resistance | MIA3     | 375056 | 37 | 1  | 222825630 | 222825630 | Missense_Mutation | SNP | C  | T  | 66  | 398 | c.4042C>T                          | c.(4042-4044)CGG>TGG | p.R1348W |
| Pat_22 | Post-Resistance | CNST     | 163882 | 37 | 1  | 246810513 | 246810513 | Missense_Mutation | SNP | C  | T  | 47  | 271 | c.1010C>T                          | c.(1009-1011)CCC>CTC | p.P337L  |
| Pat_22 | Post-Resistance | TRIM58   | 25893  | 37 | 1  | 248039444 | 248039444 | Missense_Mutation | SNP | G  | A  | 37  | 89  | c.1114G>A                          | c.(1114-1116)GAA>AAA | p.E372K  |
| Pat_22 | Post-Resistance | OR2T6    | 254879 | 37 | 1  | 248551607 | 248551608 | Missense_Mutation | DNP | GG | AA | 71  | 243 | c.698_699GG>AA                     | c.(697-699)GGG>GAA   | p.G233E  |
| Pat_22 | Post-Resistance | OR2T11   | 127077 | 37 | 1  | 248789853 | 248789853 | Missense_Mutation | SNP | C  | T  | 85  | 188 | c.577G>A                           | c.(577-579)GAA>AAA   | p.E193K  |
| Pat_22 | Post-Resistance | ZNF692   | 55657  | 37 | 1  | 249144435 | 249144436 | Missense_Mutation | DNP | CC | TT | 19  | 94  | .1533_1534GG>A531-1536)CAGGCT>CAA/ |                      | p.A512T  |
| Pat_22 | Post-Resistance | FBXO18   | 84893  | 37 | 10 | 5958276   | 5958276   | Missense_Mutation | SNP | G  | A  | 36  | 60  | c.1645G>A                          | c.(1645-1647)GGA>AGA | p.G549R  |
| Pat_22 | Post-Resistance | FRMPD2   | 143162 | 37 | 10 | 49440316  | 49440316  | Missense_Mutation | SNP | G  | A  | 7   | 18  | c.1010C>T                          | c.(1009-1011)TCC>TTC | p.S337F  |
| Pat_22 | Post-Resistance | PRF1     | 5551   | 37 | 10 | 72360448  | 72360448  | Missense_Mutation | SNP | C  | T  | 3   | 79  | c.211G>A                           | c.(211-213)GGC>AGC   | p.G71S   |
| Pat_22 | Post-Resistance | CDHR1    | 92211  | 37 | 10 | 85960421  | 85960421  | Missense_Mutation | SNP | G  | A  | 6   | 39  | c.503G>A                           | c.(502-504)GGG>GAG   | p.G168E  |
| Pat_22 | Post-Resistance | SLC16A12 | 387700 | 37 | 10 | 91196021  | 91196021  | Missense_Mutation | SNP | G  | A  | 35  | 162 | c.994C>T                           | c.(994-996)CTC>TTC   | p.L332F  |
| Pat_22 | Post-Resistance | CYP2C8   | 1558   | 37 | 10 | 96827082  | 96827082  | Missense_Mutation | SNP | C  | T  | 29  | 72  | c.364G>A                           | c.(364-366)GAG>AAG   | p.E122K  |
| Pat_22 | Post-Resistance | ZNF518A  | 9849   | 37 | 10 | 97918694  | 97918694  | Missense_Mutation | SNP | T  | C  | 43  | 55  | c.2615T>C                          | c.(2614-2616)GTG>GCG | p.V872A  |

|        |                 |           |        |    |    |           |           |                        |     |    |    |     |     |                 |                       |                |
|--------|-----------------|-----------|--------|----|----|-----------|-----------|------------------------|-----|----|----|-----|-----|-----------------|-----------------------|----------------|
| Pat_22 | Post-Resistance | LOXL4     | 84171  | 37 | 10 | 100017824 | 100017824 | Nonsense_Mutation      | SNP | C  | T  | 65  | 79  | c.1019G>A       | c.(1018-1020)TGG>TAG  | p.W340*        |
| Pat_22 | Post-Resistance | SORCS3    | 22986  | 37 | 10 | 106982904 | 106982904 | Missense_Mutation      | SNP | C  | T  | 35  | 90  | c.2765C>T       | c.(2764-2766)CCA>CTA  | p.P922L        |
| Pat_22 | Post-Resistance | PNLIP     | 5406   | 37 | 10 | 118315007 | 118315007 | Missense_Mutation      | SNP | G  | A  | 52  | 333 | c.799G>A        | c.(799-801)GGA>AGA    | p.G267R        |
| Pat_22 | Post-Resistance | GLRX3     | 10539  | 37 | 10 | 131969861 | 131969861 | Missense_Mutation      | SNP | G  | A  | 20  | 139 | c.785G>A        | c.(784-786)GGA>GAA    | p.G262E        |
| Pat_22 | Post-Resistance | C10orf93  | 255352 | 37 | 10 | 134752184 | 134752184 | Missense_Mutation      | SNP | G  | A  | 107 | 168 | c.445C>T        | c.(445-447)CGT>TGT    | p.R149C        |
| Pat_22 | Post-Resistance | LOC653544 | 653544 | 37 | 10 | 135491113 | 135491113 | Missense_Mutation      | SNP | G  | A  | 3   | 40  | c.724G>A        | c.(724-726)GCC>ACC    | p.A242T        |
| Pat_22 | Post-Resistance | LRDD      | 55367  | 37 | 11 | 800594    | 800594    | Missense_Mutation      | SNP | C  | T  | 3   | 73  | c.1990G>A       | c.(1990-1992)GAG>AAG  | p.E664K        |
| Pat_22 | Post-Resistance | MS4A10    | 341116 | 37 | 11 | 60561520  | 60561520  | Missense_Mutation      | SNP | C  | T  | 28  | 111 | c.436C>T        | c.(436-438)CTC>TTC    | p.L146F        |
| Pat_22 | Post-Resistance | CPSF7     | 79869  | 37 | 11 | 61179325  | 61179325  | Missense_Mutation      | SNP | C  | T  | 24  | 175 | c.1169G>A       | c.(1168-1170)CGT>CAT  | p.R390H        |
| Pat_22 | Post-Resistance | B3GNT1    | 11041  | 37 | 11 | 66113666  | 66113666  | Missense_Mutation      | SNP | C  | G  | 18  | 157 | c.1102G>C       | c.(1102-1104)GAA>CAA  | p.E368Q        |
| Pat_22 | Post-Resistance | RBM4      | 5936   | 37 | 11 | 66407211  | 66407211  | Missense_Mutation      | SNP | C  | T  | 59  | 318 | c.29C>T         | c.(28-30)CCC>CTC      | p.P10L         |
| Pat_22 | Post-Resistance | SPTBN2    | 6712   | 37 | 11 | 66475760  | 66475760  | Missense_Mutation      | SNP | C  | A  | 4   | 57  | c.1202G>T       | c.(1201-1203)CGG>CTG  | p.R401L        |
| Pat_22 | Post-Resistance | SHANK2    | 22941  | 37 | 11 | 70333711  | 70333711  | Missense_Mutation      | SNP | G  | A  | 17  | 17  | c.2687C>T       | c.(2686-2688)CCG>CTG  | p.P896L        |
| Pat_22 | Post-Resistance | ARHGEF17  | 9828   | 37 | 11 | 73075219  | 73075219  | Missense_Mutation      | SNP | A  | G  | 7   | 390 | c.5336A>G       | c.(5335-5337)TAT>TGT  | p.Y1779C       |
| Pat_22 | Post-Resistance | MYO7A     | 4647   | 37 | 11 | 76895747  | 76895747  | Missense_Mutation      | SNP | C  | T  | 4   | 37  | c.3490C>T       | c.(3490-3492)CGG>TGG  | p.R1164W       |
| Pat_22 | Post-Resistance | HEPHL1    | 341208 | 37 | 11 | 93815680  | 93815680  | Missense_Mutation      | SNP | C  | T  | 17  | 35  | c.1813C>T       | c.(1813-1815)CCC>TCC  | p.P605S        |
| Pat_22 | Post-Resistance | ATM       | 472    | 37 | 11 | 108160328 | 108160328 | Splice_Site            | SNP | G  | A  | 11  | 45  | c.4237_splice   | c.e29-1               | p.D1413_splice |
| Pat_22 | Post-Resistance | SIDT2     | 51092  | 37 | 11 | 117054825 | 117054825 | Missense_Mutation      | SNP | C  | A  | 4   | 158 | c.838C>A        | c.(838-840)CTG>ATG    | p.L280M        |
| Pat_22 | Post-Resistance | ST14      | 6768   | 37 | 11 | 130058088 | 130058088 | Missense_Mutation      | SNP | G  | A  | 3   | 50  | c.161G>A        | c.(160-162)CGC>CAC    | p.R54H         |
| Pat_22 | Post-Resistance | ANO2      | 57101  | 37 | 12 | 5674749   | 5674749   | Missense_Mutation      | SNP | C  | T  | 10  | 37  | c.2702G>A       | c.(2701-2703)CGT>CAT  | p.R901H        |
| Pat_22 | Post-Resistance | CD163     | 9332   | 37 | 12 | 7639377   | 7639377   | Missense_Mutation      | SNP | C  | T  | 34  | 205 | c.2176G>A       | c.(2176-2178)GGT>AGT  | p.G726S        |
| Pat_22 | Post-Resistance | PRB4      | 5545   | 37 | 12 | 11461646  | 11461646  | Missense_Mutation      | SNP | C  | G  | 8   | 457 | c.271G>C        | c.(271-273)GGT>CGT    | p.G91R         |
| Pat_22 | Post-Resistance | SYT10     | 341359 | 37 | 12 | 33560007  | 33560007  | Missense_Mutation      | SNP | C  | T  | 25  | 47  | c.794G>A        | c.(793-795)GGA>GAA    | p.G265E        |
| Pat_22 | Post-Resistance | ABCD2     | 225    | 37 | 12 | 39973341  | 39973341  | Missense_Mutation      | SNP | G  | A  | 34  | 452 | c.1873C>T       | c.(1873-1875)CAT>TAT  | p.H625Y        |
| Pat_22 | Post-Resistance | CNTN1     | 1272   | 37 | 12 | 41312557  | 41312557  | Missense_Mutation      | SNP | C  | T  | 115 | 299 | c.211C>T        | c.(211-213)CCT>TCT    | p.P71S         |
| Pat_22 | Post-Resistance | ADAMTS20  | 80070  | 37 | 12 | 43945643  | 43945643  | Missense_Mutation      | SNP | G  | A  | 63  | 118 | c.82C>T         | c.(82-84)CCC>TCC      | p.P28S         |
| Pat_22 | Post-Resistance | ARID2     | 196528 | 37 | 12 | 46123701  | 46123701  | Missense_Mutation      | SNP | C  | T  | 17  | 33  | c.82C>T         | c.(82-84)CAC>TAC      | p.H28Y         |
| Pat_22 | Post-Resistance | FAM113B   | 91523  | 37 | 12 | 47629357  | 47629357  | Missense_Mutation      | SNP | G  | A  | 14  | 97  | c.511G>A        | c.(511-513)GAA>AAA    | p.E171K        |
| Pat_22 | Post-Resistance | NCKAP1L   | 3071   | 37 | 12 | 54925961  | 54925962  | Missense_Mutation      | DNP | CC | TT | 10  | 85  | :.2789_2790CC>T | c.(2788-2790)TCC>TTT  | p.S930F        |
| Pat_22 | Post-Resistance | MYF6      | 4618   | 37 | 12 | 81101671  | 81101671  | Missense_Mutation      | SNP | G  | A  | 40  | 103 | c.173G>A        | c.(172-174)GGA>GAA    | p.G58E         |
| Pat_22 | Post-Resistance | LRRIQ1    | 84125  | 37 | 12 | 85492709  | 85492709  | Missense_Mutation      | SNP | C  | T  | 35  | 188 | c.3146C>T       | c.(3145-3147)ACT>ATT  | p.T1049I       |
| Pat_22 | Post-Resistance | C12orf23  | 90488  | 37 | 12 | 107360888 | 107360888 | Splice_Site            | SNP | G  | T  | 5   | 109 | c.-5_splice     | c.e3-1                |                |
| Pat_22 | Post-Resistance | TBX5      | 6910   | 37 | 12 | 114804084 | 114804084 | Nonsense_Mutation      | SNP | G  | A  | 24  | 141 | c.868C>T        | c.(868-870)CAA>TAA    | p.Q290*        |
| Pat_22 | Post-Resistance | GCN1L1    | 10985  | 37 | 12 | 120574409 | 120574409 | Missense_Mutation      | SNP | G  | A  | 18  | 119 | c.6905C>T       | c.(6904-6906)TCC>TTC  | p.S2302F       |
| Pat_22 | Post-Resistance | VPS33A    | 65082  | 37 | 12 | 122717499 | 122717499 | Missense_Mutation      | SNP | G  | A  | 12  | 35  | c.1457C>T       | c.(1456-1458)TCG>TTG  | p.S486L        |
| Pat_22 | Post-Resistance | GPR109B   | 8843   | 37 | 12 | 123200497 | 123200497 | Missense_Mutation      | SNP | G  | A  | 3   | 36  | c.788C>T        | c.(787-789)ACG>ATG    | p.T263M        |
| Pat_22 | Post-Resistance | TUBA3C    | 7278   | 37 | 13 | 19748188  | 19748188  | Missense_Mutation      | SNP | G  | A  | 40  | 277 | c.1168C>T       | c.(1168-1170)CGC>TGC  | p.R390C        |
| Pat_22 | Post-Resistance | GJB6      | 10804  | 37 | 13 | 20797118  | 20797118  | Missense_Mutation      | SNP | T  | C  | 39  | 69  | c.502A>G        | c.(502-504)AAA>GAA    | p.K168E        |
| Pat_22 | Post-Resistance | MAB21L1   | 4081   | 37 | 13 | 36050424  | 36050424  | Translation_Start_Site | SNP | G  | A  | 3   | 23  | c.-148C>T       | (-150-146)AACGC>AATGC |                |
| Pat_22 | Post-Resistance | SLC10A2   | 6555   | 37 | 13 | 103705031 | 103705031 | Missense_Mutation      | SNP | G  | A  | 24  | 117 | c.524C>T        | c.(523-525)CCT>CTT    | p.P175L        |
| Pat_22 | Post-Resistance | ZNF219    | 51222  | 37 | 14 | 21561080  | 21561080  | Missense_Mutation      | SNP | G  | A  | 15  | 138 | c.376C>T        | c.(376-378)CGC>TGC    | p.R126C        |
| Pat_22 | Post-Resistance | MYH7      | 4625   | 37 | 14 | 23885256  | 23885256  | Missense_Mutation      | SNP | G  | A  | 11  | 66  | c.4910C>T       | c.(4909-4911)GCC>GTC  | p.A1637V       |
| Pat_22 | Post-Resistance | MAPK11P1L | 93487  | 37 | 14 | 55529396  | 55529396  | Missense_Mutation      | SNP | C  | T  | 22  | 111 | c.79C>T         | c.(79-81)CCT>TCT      | p.P27S         |
| Pat_22 | Post-Resistance | LGALS3    | 3958   | 37 | 14 | 55604868  | 55604868  | Missense_Mutation      | SNP | C  | T  | 5   | 31  | c.124C>T        | c.(124-126)CCT>TCT    | p.P42S         |
| Pat_22 | Post-Resistance | PCNX      | 22990  | 37 | 14 | 71429044  | 71429044  | Missense_Mutation      | SNP | A  | G  | 83  | 191 | c.464A>G        | c.(463-465)AAC>AGC    | p.N155S        |
| Pat_22 | Post-Resistance | YLPM1     | 56252  | 37 | 14 | 75265094  | 75265094  | Missense_Mutation      | SNP | C  | T  | 6   | 285 | c.3094C>T       | c.(3094-3096)CGG>TGG  | p.R1032W       |
| Pat_22 | Post-Resistance | TLL5      | 23093  | 37 | 14 | 76173379  | 76173379  | Missense_Mutation      | SNP | G  | A  | 71  | 299 | c.604G>A        | c.(604-606)GAA>AAA    | p.E202K        |

|        |                 |          |        |    |    |           |           |                   |     |    |    |     |     |                                     |                        |               |
|--------|-----------------|----------|--------|----|----|-----------|-----------|-------------------|-----|----|----|-----|-----|-------------------------------------|------------------------|---------------|
| Pat_22 | Post-Resistance | KIAA1409 | 57578  | 37 | 14 | 94046595  | 94046595  | Missense_Mutation | SNP | G  | A  | 38  | 158 | c.2003G>A                           | c.(2002-2004)GGA>GAA   | p.G668E       |
| Pat_22 | Post-Resistance | BCL11B   | 64919  | 37 | 14 | 99641836  | 99641836  | Missense_Mutation | SNP | C  | T  | 4   | 127 | c.1337G>A                           | c.(1336-1338)CGG>CAG   | p.R446Q       |
| Pat_22 | Post-Resistance | DYNC1H1  | 1778   | 37 | 14 | 102515854 | 102515854 | Missense_Mutation | SNP | G  | A  | 4   | 117 | c.13450G>A                          | c.(13450-13452)GAG>AAC | p.E4484K      |
| Pat_22 | Post-Resistance | RYR3     | 6263   | 37 | 15 | 33926814  | 33926814  | Missense_Mutation | SNP | C  | A  | 27  | 118 | c.3055C>A                           | c.(3055-3057)CTG>ATG   | p.L1019M      |
| Pat_22 | Post-Resistance | BMF      | 90427  | 37 | 15 | 40398106  | 40398106  | Missense_Mutation | SNP | C  | T  | 33  | 104 | c.182G>A                            | c.(181-183)CGA>CAA     | p.R61Q        |
| Pat_22 | Post-Resistance | MGA      | 23269  | 37 | 15 | 42057138  | 42057138  | Missense_Mutation | SNP | C  | T  | 5   | 197 | c.7799C>T                           | c.(7798-7800)CCG>CTG   | p.P2600L      |
| Pat_22 | Post-Resistance | PAQR5    | 54852  | 37 | 15 | 69696009  | 69696009  | Missense_Mutation | SNP | G  | A  | 21  | 136 | c.841G>A                            | c.(841-843)GAA>AAA     | p.E281K       |
| Pat_22 | Post-Resistance | THSD4    | 79875  | 37 | 15 | 72039374  | 72039374  | Nonsense_Mutation | SNP | G  | A  | 10  | 30  | c.2234G>A                           | c.(2233-2235)TGG>TAG   | p.W745*       |
| Pat_22 | Post-Resistance | ISLR     | 3671   | 37 | 15 | 74468448  | 74468448  | Nonsense_Mutation | SNP | C  | T  | 10  | 24  | c.1249C>T                           | c.(1249-1251)CAA>TAA   | p.Q417*       |
| Pat_22 | Post-Resistance | KIAA1024 | 23251  | 37 | 15 | 79750596  | 79750596  | Missense_Mutation | SNP | C  | T  | 24  | 95  | c.2107C>T                           | c.(2107-2109)CTC>TTC   | p.L703F       |
| Pat_22 | Post-Resistance | FSD2     | 123722 | 37 | 15 | 83455943  | 83455943  | Missense_Mutation | SNP | A  | G  | 10  | 263 | c.200T>C                            | c.(199-201)CTT>CCT     | p.L67P        |
| Pat_22 | Post-Resistance | RHOT2    | 89941  | 37 | 16 | 722799    | 722799    | Missense_Mutation | SNP | T  | C  | 37  | 82  | c.1501T>C                           | c.(1501-1503)TTT>CTT   | p.F501L       |
| Pat_22 | Post-Resistance | ZNF263   | 10127  | 37 | 16 | 3339681   | 3339681   | Missense_Mutation | SNP | A  | G  | 82  | 204 | c.1175A>G                           | c.(1174-1176)AAC>AGC   | p.N392S       |
| Pat_22 | Post-Resistance | UBN1     | 29855  | 37 | 16 | 4911098   | 4911098   | Missense_Mutation | SNP | G  | A  | 3   | 44  | c.1105G>A                           | c.(1105-1107)GCT>ACT   | p.A369T       |
| Pat_22 | Post-Resistance | GRIN2A   | 2903   | 37 | 16 | 9857436   | 9857436   | Missense_Mutation | SNP | C  | T  | 21  | 155 | c.3965G>A                           | c.(3964-3966)GGA>GAA   | p.G1322E      |
| Pat_22 | Post-Resistance | ACSM5    | 54988  | 37 | 16 | 20448432  | 20448432  | Missense_Mutation | SNP | G  | A  | 44  | 239 | c.1367G>A                           | c.(1366-1368)CGA>CAA   | p.R456Q       |
| Pat_22 | Post-Resistance | ACSM2B   | 348158 | 37 | 16 | 20563586  | 20563586  | Nonsense_Mutation | SNP | C  | T  | 41  | 260 | c.774G>A                            | c.(772-774)TGG>TGA     | p.W258*       |
| Pat_22 | Post-Resistance | SLC5A11  | 115584 | 37 | 16 | 24921657  | 24921657  | Missense_Mutation | SNP | G  | A  | 48  | 251 | c.1681G>A                           | c.(1681-1683)GAC>AAC   | p.D561N       |
| Pat_22 | Post-Resistance | GTF3C1   | 2975   | 37 | 16 | 27556735  | 27556735  | Nonsense_Mutation | SNP | G  | A  | 40  | 186 | c.331C>T                            | c.(331-333)CAG>TAG     | p.Q111*       |
| Pat_22 | Post-Resistance | ESRP2    | 80004  | 37 | 16 | 68269839  | 68269839  | Missense_Mutation | SNP | G  | A  | 3   | 30  | c.110C>T                            | c.(109-111)ACG>ATG     | p.T37M        |
| Pat_22 | Post-Resistance | SMPD3    | 55512  | 37 | 16 | 68405838  | 68405838  | Missense_Mutation | SNP | G  | A  | 8   | 32  | c.247C>T                            | c.(247-249)CTC>TTC     | p.L83F        |
| Pat_22 | Post-Resistance | TERF2    | 7014   | 37 | 16 | 69390829  | 69390829  | Missense_Mutation | SNP | C  | T  | 6   | 265 | c.1475G>A                           | c.(1474-1476)CGG>CAG   | p.R492Q       |
| Pat_22 | Post-Resistance | NFAT5    | 10725  | 37 | 16 | 69727609  | 69727609  | Missense_Mutation | SNP | T  | C  | 6   | 166 | c.3827T>C                           | c.(3826-3828)ATG>ACG   | p.M1276T      |
| Pat_22 | Post-Resistance | CNTNAP4  | 85445  | 37 | 16 | 76350324  | 76350324  | Missense_Mutation | SNP | C  | T  | 15  | 90  | c.100C>T                            | c.(100-102)CCT>TCT     | p.P34S        |
| Pat_22 | Post-Resistance | FBXO31   | 79791  | 37 | 16 | 87376497  | 87376497  | Missense_Mutation | SNP | C  | T  | 3   | 50  | c.718G>A                            | c.(718-720)GGC>AGC     | p.G240S       |
| Pat_22 | Post-Resistance | MVD      | 4597   | 37 | 16 | 88723970  | 88723970  | Missense_Mutation | SNP | G  | A  | 4   | 135 | c.277C>T                            | c.(277-279)CGG>TGG     | p.R93W        |
| Pat_22 | Post-Resistance | TUBB3    | 10381  | 37 | 16 | 89989858  | 89989859  | Missense_Mutation | DNP | GG | AA | 21  | 65  | c.49_50GG>AA                        | c.(49-51)GGG>AAG       | p.G17K        |
| Pat_22 | Post-Resistance | CHD3     | 1107   | 37 | 17 | 7812606   | 7812606   | Missense_Mutation | SNP | C  | G  | 2   | 4   | c.5540C>G                           | c.(5539-5541)TCC>TGC   | p.S1847C      |
| Pat_22 | Post-Resistance | MYO15A   | 51168  | 37 | 17 | 18052101  | 18052101  | Nonsense_Mutation | SNP | G  | A  | 7   | 71  | c.6791G>A                           | c.(6790-6792)TGG>TAG   | p.W2264*      |
| Pat_22 | Post-Resistance | ZNF286B  | 729288 | 37 | 17 | 18565486  | 18565486  | Missense_Mutation | SNP | C  | T  | 150 | 157 | c.1333G>A                           | c.(1333-1335)GGG>AGG   | p.G445R       |
| Pat_22 | Post-Resistance | FNDC8    | 54752  | 37 | 17 | 33448915  | 33448915  | Missense_Mutation | SNP | A  | G  | 35  | 127 | c.203A>G                            | c.(202-204)AAC>AGC     | p.N68S        |
| Pat_22 | Post-Resistance | CCL16    | 6360   | 37 | 17 | 34304696  | 34304696  | Missense_Mutation | SNP | T  | A  | 71  | 194 | c.269A>T                            | c.(268-270)GAT>GTT     | p.D90V        |
| Pat_22 | Post-Resistance | ACACA    | 31     | 37 | 17 | 35614647  | 35614647  | Missense_Mutation | SNP | C  | T  | 47  | 169 | c.1693G>A                           | c.(1693-1695)GAA>AAA   | p.E565K       |
| Pat_22 | Post-Resistance | KRT39    | 390792 | 37 | 17 | 39122949  | 39122949  | Missense_Mutation | SNP | G  | A  | 78  | 485 | c.160C>T                            | c.(160-162)CCC>TCC     | p.P54S        |
| Pat_22 | Post-Resistance | TMEM106A | 113277 | 37 | 17 | 41365877  | 41365877  | Missense_Mutation | SNP | C  | T  | 40  | 97  | c.242C>T                            | c.(241-243)CCC>CTC     | p.P81L        |
| Pat_22 | Post-Resistance | ARL17A   | 51326  | 37 | 17 | 44594548  | 44594548  | Missense_Mutation | SNP | G  | A  | 8   | 153 | c.311C>T                            | c.(310-312)ACC>ATC     | p.T104I       |
| Pat_22 | Post-Resistance | KIF2B    | 84643  | 37 | 17 | 51902342  | 51902342  | Missense_Mutation | SNP | G  | A  | 6   | 123 | c.1948G>A                           | c.(1948-1950)GAT>AAT   | p.D650N       |
| Pat_22 | Post-Resistance | TOM1L1   | 10040  | 37 | 17 | 53016382  | 53016382  | Splice_Site       | SNP | G  | A  | 9   | 269 | c.1130_splice                       | c.e11+1                | p.P377_splice |
| Pat_22 | Post-Resistance | KCNH6    | 81033  | 37 | 17 | 61622604  | 61622605  | Missense_Mutation | DNP | GG | AA | 35  | 85  | c.2670_2671GG>A368-2673)CAGGGC>CAA/ |                        | p.G891S       |
| Pat_22 | Post-Resistance | KPNA2    | 3838   | 37 | 17 | 66039997  | 66039997  | Missense_Mutation | SNP | A  | G  | 16  | 506 | c.974A>G                            | c.(973-975)GAT>GGT     | p.D325G       |
| Pat_22 | Post-Resistance | GPR142   | 350383 | 37 | 17 | 72368641  | 72368641  | Missense_Mutation | SNP | G  | A  | 27  | 180 | c.1291G>A                           | c.(1291-1293)GAT>AAT   | p.D431N       |
| Pat_22 | Post-Resistance | ARMC7    | 79637  | 37 | 17 | 73124939  | 73124939  | Missense_Mutation | SNP | G  | A  | 23  | 68  | c.403G>A                            | c.(403-405)GAG>AAG     | p.E135K       |
| Pat_22 | Post-Resistance | CDK3     | 1018   | 37 | 17 | 73999460  | 73999460  | Missense_Mutation | SNP | A  | G  | 3   | 84  | c.773A>G                            | c.(772-774)GAG>GGG     | p.E258G       |
| Pat_22 | Post-Resistance | MGAT5B   | 146664 | 37 | 17 | 74922812  | 74922812  | Missense_Mutation | SNP | C  | T  | 43  | 258 | c.1324C>T                           | c.(1324-1326)CCT>TCT   | p.P442S       |
| Pat_22 | Post-Resistance | POTEC    | 388468 | 37 | 18 | 14513663  | 14513663  | Missense_Mutation | SNP | C  | T  | 5   | 212 | c.1531G>A                           | c.(1531-1533)GAG>AAG   | p.E511K       |
| Pat_22 | Post-Resistance | POTEC    | 388468 | 37 | 18 | 14513675  | 14513675  | Missense_Mutation | SNP | T  | C  | 5   | 264 | c.1519A>G                           | c.(1519-1521)AAA>GAA   | p.K507E       |
| Pat_22 | Post-Resistance | DSG1     | 1828   | 37 | 18 | 28934903  | 28934903  | Missense_Mutation | SNP | G  | A  | 67  | 318 | c.2744G>A                           | c.(2743-2745)AGA>AAA   | p.R915K       |

|        |                 |          |        |    |    |           |           |                   |     |    |    |     |     |                                   |                        |              |
|--------|-----------------|----------|--------|----|----|-----------|-----------|-------------------|-----|----|----|-----|-----|-----------------------------------|------------------------|--------------|
| Pat_22 | Post-Resistance | MEP1B    | 4225   | 37 | 18 | 29797884  | 29797884  | Missense_Mutation | SNP | C  | T  | 66  | 174 | c.2047C>T                         | c.(2047-2049)CGT>TGT   | p.R683C      |
| Pat_22 | Post-Resistance | NOL4     | 8715   | 37 | 18 | 31537457  | 31537457  | Missense_Mutation | SNP | C  | T  | 7   | 49  | c.1261G>A                         | c.(1261-1263)GAA>AAA   | p.E421K      |
| Pat_22 | Post-Resistance | SLC39A6  | 25800  | 37 | 18 | 33694126  | 33694126  | Missense_Mutation | SNP | C  | T  | 5   | 172 | c.1777G>A                         | c.(1777-1779)GCC>ACC   | p.A593T      |
| Pat_22 | Post-Resistance | DCC      | 1630   | 37 | 18 | 50592482  | 50592482  | Missense_Mutation | SNP | G  | A  | 75  | 130 | c.1207G>A                         | c.(1207-1209)GAA>AAA   | p.E403K      |
| Pat_22 | Post-Resistance | ALPK2    | 115701 | 37 | 18 | 56204778  | 56204778  | Missense_Mutation | SNP | C  | T  | 37  | 76  | c.2641G>A                         | c.(2641-2643)GAC>AAC   | p.D881N      |
| Pat_22 | Post-Resistance | SERPINB4 | 6318   | 37 | 18 | 61328062  | 61328062  | Missense_Mutation | SNP | T  | C  | 30  | 120 | c.194A>G                          | c.(193-195)AAC>AGC     | p.N65S       |
| Pat_22 | Post-Resistance | DSEL     | 92126  | 37 | 18 | 65181856  | 65181856  | Missense_Mutation | SNP | G  | A  | 28  | 81  | c.20C>T                           | c.(19-21)CCC>CTC       | p.P7L        |
| Pat_22 | Post-Resistance | XAB2     | 56949  | 37 | 19 | 7692314   | 7692314   | Missense_Mutation | SNP | A  | C  | 4   | 24  | c.337T>G                          | c.(337-339)TGG>GGG     | p.W113G      |
| Pat_22 | Post-Resistance | MUC16    | 94025  | 37 | 19 | 9066642   | 9066642   | Missense_Mutation | SNP | G  | A  | 108 | 365 | c.20804C>T                        | c.(20803-20805)TCC>TTC | p.S6935F     |
| Pat_22 | Post-Resistance | MUC16    | 94025  | 37 | 19 | 9085696   | 9085696   | Missense_Mutation | SNP | G  | A  | 95  | 246 | c.6119C>T                         | c.(6118-6120)TCC>TTC   | p.S2040F     |
| Pat_22 | Post-Resistance | ICAM3    | 3385   | 37 | 19 | 10449423  | 10449423  | Missense_Mutation | SNP | C  | A  | 4   | 161 | c.278G>T                          | c.(277-279)CGG>CTG     | p.R93L       |
| Pat_22 | Post-Resistance | ZNF433   | 163059 | 37 | 19 | 12126109  | 12126109  | Missense_Mutation | SNP | C  | T  | 32  | 295 | c.1573G>A                         | c.(1573-1575)GGA>AGA   | p.G525R      |
| Pat_22 | Post-Resistance | MRI1     | 84245  | 37 | 19 | 13875479  | 13875479  | Missense_Mutation | SNP | G  | A  | 3   | 61  | c.77G>A                           | c.(76-78)CGC>CAC       | p.R26H       |
| Pat_22 | Post-Resistance | NWD1     | 284434 | 37 | 19 | 16875863  | 16875863  | Missense_Mutation | SNP | C  | T  | 40  | 152 | c.2270C>T                         | c.(2269-2271)TCC>TTC   | p.S757F      |
| Pat_22 | Post-Resistance | PDE4C    | 5143   | 37 | 19 | 18324185  | 18324185  | Missense_Mutation | SNP | C  | T  | 18  | 91  | c.1601G>A                         | c.(1600-1602)CGA>CAA   | p.R534Q      |
| Pat_22 | Post-Resistance | WDR62    | 284403 | 37 | 19 | 36583709  | 36583709  | Missense_Mutation | SNP | C  | T  | 52  | 328 | c.2329C>T                         | c.(2329-2331)CCC>TCC   | p.P777S      |
| Pat_22 | Post-Resistance | NUMBL    | 9253   | 37 | 19 | 41188694  | 41188694  | Missense_Mutation | SNP | G  | A  | 22  | 174 | c.338C>T                          | c.(337-339)TCC>TTC     | p.S113F      |
| Pat_22 | Post-Resistance | SNRPA    | 6626   | 37 | 19 | 41257328  | 41257328  | Missense_Mutation | SNP | G  | C  | 202 | 563 | c.15G>C                           | c.(13-15)GAG>GAC       | p.E5D        |
| Pat_22 | Post-Resistance | PSG5     | 5673   | 37 | 19 | 43689242  | 43689242  | Missense_Mutation | SNP | A  | T  | 8   | 670 | c.122T>A                          | c.(121-123)CTG>CAG     | p.L41Q       |
| Pat_22 | Post-Resistance | PSG9     | 5678   | 37 | 19 | 43763240  | 43763241  | Missense_Mutation | DNP | CC | TT | 148 | 517 | c.756_757GG>AA754-759)AGGGAG>AGAA |                        | p.E253K      |
| Pat_22 | Post-Resistance | PNMAL2   | 57469  | 37 | 19 | 46998016  | 46998016  | Missense_Mutation | SNP | C  | T  | 8   | 44  | c.707G>A                          | c.(706-708)AGG>AAG     | p.R236K      |
| Pat_22 | Post-Resistance | SLC8A2   | 6543   | 37 | 19 | 47935442  | 47935442  | Missense_Mutation | SNP | G  | C  | 26  | 78  | c.2371C>G                         | c.(2371-2373)CTG>GTG   | p.L791V      |
| Pat_22 | Post-Resistance | ACPT     | 93650  | 37 | 19 | 51293729  | 51293729  | Missense_Mutation | SNP | C  | G  | 3   | 18  | c.58C>G                           | c.(58-60)CTG>GTG       | p.L20V       |
| Pat_22 | Post-Resistance | SIGLEC9  | 27180  | 37 | 19 | 51629019  | 51629019  | Missense_Mutation | SNP | C  | T  | 54  | 208 | c.587C>T                          | c.(586-588)TCG>TTG     | p.S196L      |
| Pat_22 | Post-Resistance | SIGLEC12 | 89858  | 37 | 19 | 52002706  | 52002706  | Missense_Mutation | SNP | C  | T  | 31  | 126 | c.1073G>A                         | c.(1072-1074)CGA>CAA   | p.R358Q      |
| Pat_22 | Post-Resistance | ZNF331   | 55422  | 37 | 19 | 54080796  | 54080796  | Missense_Mutation | SNP | G  | A  | 26  | 195 | c.982G>A                          | c.(982-984)GAA>AAA     | p.E328K      |
| Pat_22 | Post-Resistance | KIR3DL1  | 3811   | 37 | 19 | 55331370  | 55331370  | Missense_Mutation | SNP | G  | T  | 5   | 311 | c.558G>T                          | c.(556-558)ATG>ATT     | p.M186I      |
| Pat_22 | Post-Resistance | NLRP8    | 126205 | 37 | 19 | 56466752  | 56466752  | Missense_Mutation | SNP | C  | T  | 37  | 241 | c.1328C>T                         | c.(1327-1329)TCC>TTC   | p.S443F      |
| Pat_22 | Post-Resistance | GPR113   | 165082 | 37 | 2  | 26534297  | 26534297  | Missense_Mutation | SNP | C  | T  | 117 | 196 | c.2299G>A                         | c.(2299-2301)GAA>AAA   | p.E767K      |
| Pat_22 | Post-Resistance | ERLEC1   | 27248  | 37 | 2  | 54028628  | 54028628  | Missense_Mutation | SNP | G  | A  | 7   | 286 | c.620G>A                          | c.(619-621)AGA>AAA     | p.R207K      |
| Pat_22 | Post-Resistance | TPRKB    | 51002  | 37 | 2  | 73959336  | 73959336  | Missense_Mutation | SNP | C  | T  | 25  | 140 | c.218G>A                          | c.(217-219)AGA>AAA     | p.R73K       |
| Pat_22 | Post-Resistance | TCF7L1   | 83439  | 37 | 2  | 85531407  | 85531407  | Missense_Mutation | SNP | C  | T  | 49  | 295 | c.791C>T                          | c.(790-792)CCC>CTC     | p.P264L      |
| Pat_22 | Post-Resistance | PTCD3    | 55037  | 37 | 2  | 86335622  | 86335622  | Splice_Site       | SNP | G  | A  | 81  | 289 | c.158_splice                      | c.e3-1                 | p.G53_splice |
| Pat_22 | Post-Resistance | ST6GAL2  | 84620  | 37 | 2  | 107459497 | 107459497 | Missense_Mutation | SNP | C  | T  | 14  | 34  | c.937G>A                          | c.(937-939)GAA>AAA     | p.E313K      |
| Pat_22 | Post-Resistance | ST6GAL2  | 84620  | 37 | 2  | 107460402 | 107460402 | Missense_Mutation | SNP | C  | T  | 13  | 69  | c.32G>A                           | c.(31-33)CGA>CAA       | p.R11Q       |
| Pat_22 | Post-Resistance | IL1B     | 3553   | 37 | 2  | 113590968 | 113590968 | Missense_Mutation | SNP | G  | A  | 28  | 118 | c.284C>T                          | c.(283-285)CCC>CTC     | p.P95L       |
| Pat_22 | Post-Resistance | WDR33    | 55339  | 37 | 2  | 128467366 | 128467366 | Missense_Mutation | SNP | G  | A  | 39  | 305 | c.3373C>T                         | c.(3373-3375)CCT>TCT   | p.P1125S     |
| Pat_22 | Post-Resistance | BAZZB    | 29994  | 37 | 2  | 160310283 | 160310283 | Missense_Mutation | SNP | G  | A  | 17  | 108 | c.175C>T                          | c.(175-177)CCG>TCG     | p.P59S       |
| Pat_22 | Post-Resistance | SCN2A    | 6326   | 37 | 2  | 166245451 | 166245451 | Missense_Mutation | SNP | C  | T  | 70  | 602 | c.5135C>T                         | c.(5134-5136)ACC>ATC   | p.T1712I     |
| Pat_22 | Post-Resistance | FASTKD1  | 79675  | 37 | 2  | 170403111 | 170403111 | Missense_Mutation | SNP | C  | T  | 48  | 251 | c.1318G>A                         | c.(1318-1320)GAA>AAA   | p.E440K      |
| Pat_22 | Post-Resistance | EVX2     | 344191 | 37 | 2  | 176945436 | 176945436 | Missense_Mutation | SNP | G  | A  | 4   | 24  | c.830C>T                          | c.(829-831)CCC>CTC     | p.P277L      |
| Pat_22 | Post-Resistance | TTN      | 7273   | 37 | 2  | 179472716 | 179472716 | Missense_Mutation | SNP | C  | T  | 26  | 224 | c.45094G>A                        | c.(45094-45096)GAA>AAA | p.E15032K    |
| Pat_22 | Post-Resistance | TTN      | 7273   | 37 | 2  | 179586756 | 179586756 | Missense_Mutation | SNP | C  | T  | 134 | 386 | c.18902G>A                        | c.(18901-18903)CGA>CAA | p.R6301Q     |
| Pat_22 | Post-Resistance | TTN      | 7273   | 37 | 2  | 179604201 | 179604201 | Missense_Mutation | SNP | C  | T  | 15  | 107 | c.13246G>A                        | c.(13246-13248)GAG>AAC | p.E4416K     |
| Pat_22 | Post-Resistance | TTN      | 7273   | 37 | 2  | 179613212 | 179613212 | Nonsense_Mutation | SNP | C  | A  | 8   | 196 | c.13915G>T                        | c.(13915-13917)GAA>TAA | p.E4639*     |
| Pat_22 | Post-Resistance | SDPR     | 8436   | 37 | 2  | 192700845 | 192700845 | Missense_Mutation | SNP | G  | A  | 118 | 284 | c.1082C>T                         | c.(1081-1083)TCC>TTC   | p.S361F      |
| Pat_22 | Post-Resistance | AOX1     | 316    | 37 | 2  | 201492113 | 201492114 | Missense_Mutation | DNP | GG | AA | 78  | 538 | c.2162_2163GG>A                   | c.(2161-2163)AGG>AAA   | p.R721K      |

|        |                 |          |        |    |    |           |           |                   |     |   |   |     |     |            |                        |          |
|--------|-----------------|----------|--------|----|----|-----------|-----------|-------------------|-----|---|---|-----|-----|------------|------------------------|----------|
| Pat_22 | Post-Resistance | AOX1     | 316    | 37 | 2  | 201515721 | 201515721 | Missense_Mutation | SNP | G | A | 50  | 150 | c.2872G>A  | c.(2872-2874)GAA>AAA   | p.E958K  |
| Pat_22 | Post-Resistance | CASP10   | 843    | 37 | 2  | 202093684 | 202093684 | Missense_Mutation | SNP | G | A | 27  | 62  | c.1444G>A  | c.(1444-1446)GAA>AAA   | p.E482K  |
| Pat_22 | Post-Resistance | TTL4     | 9654   | 37 | 2  | 219612363 | 219612363 | Missense_Mutation | SNP | C | A | 62  | 290 | c.2293C>A  | c.(2293-2295)CTG>ATG   | p.L765M  |
| Pat_22 | Post-Resistance | CUL3     | 8452   | 37 | 2  | 225449690 | 225449690 | Missense_Mutation | SNP | C | T | 8   | 55  | c.37G>A    | c.(37-39)GAC>AAC       | p.D13N   |
| Pat_22 | Post-Resistance | MTERFD2  | 130916 | 37 | 2  | 242035499 | 242035499 | Missense_Mutation | SNP | C | G | 4   | 62  | c.1147G>C  | c.(1147-1149)GAT>CAT   | p.D383H  |
| Pat_22 | Post-Resistance | PAK7     | 57144  | 37 | 20 | 9538302   | 9538302   | Missense_Mutation | SNP | G | A | 66  | 175 | c.1696C>T  | c.(1696-1698)CAC>TAC   | p.H566Y  |
| Pat_22 | Post-Resistance | ACSS1    | 84532  | 37 | 20 | 24995839  | 24995839  | Nonsense_Mutation | SNP | C | T | 13  | 131 | c.1274G>A  | c.(1273-1275)TGG>TAG   | p.W425*  |
| Pat_22 | Post-Resistance | FRG1B    | 284802 | 37 | 20 | 29625941  | 29625941  | Missense_Mutation | SNP | A | T | 5   | 232 | c.95A>T    | c.(94-96)GAT>GTT       | p.D32V   |
| Pat_22 | Post-Resistance | FAM83C   | 128876 | 37 | 20 | 33876617  | 33876617  | Missense_Mutation | SNP | C | T | 26  | 92  | c.658G>A   | c.(658-660)GAC>AAC     | p.D220N  |
| Pat_22 | Post-Resistance | RBM12    | 10137  | 37 | 20 | 34240655  | 34240655  | Missense_Mutation | SNP | G | A | 54  | 153 | c.2590C>T  | c.(2590-2592)CCC>TCC   | p.P864S  |
| Pat_22 | Post-Resistance | PPP1R16B | 26051  | 37 | 20 | 37546830  | 37546830  | Missense_Mutation | SNP | T | A | 155 | 402 | c.1225T>A  | c.(1225-1227)TCC>ACC   | p.S409T  |
| Pat_22 | Post-Resistance | WFDC3    | 140686 | 37 | 20 | 44405770  | 44405770  | Missense_Mutation | SNP | C | T | 27  | 131 | c.437G>A   | c.(436-438)GGG>GAG     | p.G146E  |
| Pat_22 | Post-Resistance | CBLN4    | 140689 | 37 | 20 | 54573681  | 54573681  | Missense_Mutation | SNP | C | T | 25  | 185 | c.538G>A   | c.(538-540)GAG>AAG     | p.E180K  |
| Pat_22 | Post-Resistance | CLTCL1   | 8218   | 37 | 22 | 19196557  | 19196557  | Missense_Mutation | SNP | G | A | 4   | 47  | c.3317C>T  | c.(3316-3318)GCT>GTT   | p.A1106V |
| Pat_22 | Post-Resistance | TATDN2   | 9797   | 37 | 3  | 10320139  | 10320139  | Missense_Mutation | SNP | C | T | 151 | 383 | c.2138C>T  | c.(2137-2139)CCT>CTT   | p.P713L  |
| Pat_22 | Post-Resistance | TATDN2   | 9797   | 37 | 3  | 10320141  | 10320141  | Missense_Mutation | SNP | C | T | 142 | 374 | c.2140C>T  | c.(2140-2142)CGC>TGC   | p.R714C  |
| Pat_22 | Post-Resistance | SYN2     | 6854   | 37 | 3  | 12182183  | 12182183  | Missense_Mutation | SNP | G | A | 10  | 32  | c.410G>A   | c.(409-411)GGA>GAA     | p.G137E  |
| Pat_22 | Post-Resistance | SLC4A7   | 9497   | 37 | 3  | 27436107  | 27436107  | Missense_Mutation | SNP | C | T | 87  | 219 | c.2992G>A  | c.(2992-2994)GAA>AAA   | p.E998K  |
| Pat_22 | Post-Resistance | ACOX2    | 8309   | 37 | 3  | 58510153  | 58510153  | Missense_Mutation | SNP | C | T | 32  | 194 | c.1526G>A  | c.(1525-1527)AGG>AAG   | p.R509K  |
| Pat_22 | Post-Resistance | SUCLG2   | 8801   | 37 | 3  | 67451239  | 67451239  | Missense_Mutation | SNP | C | T | 4   | 162 | c.1099G>A  | c.(1099-1101)GTC>ATC   | p.V367I  |
| Pat_22 | Post-Resistance | KIAA1524 | 57650  | 37 | 3  | 108300300 | 108300300 | Missense_Mutation | SNP | G | A | 34  | 214 | c.511C>T   | c.(511-513)CGG>TGG     | p.R171W  |
| Pat_22 | Post-Resistance | IGSF11   | 152404 | 37 | 3  | 118623508 | 118623508 | Missense_Mutation | SNP | G | A | 75  | 160 | c.841C>T   | c.(841-843)CCT>TCT     | p.P281S  |
| Pat_22 | Post-Resistance | GPR156   | 165829 | 37 | 3  | 119886537 | 119886537 | Missense_Mutation | SNP | G | A | 26  | 51  | c.1787C>T  | c.(1786-1788)CCT>CTT   | p.P596L  |
| Pat_22 | Post-Resistance | POLQ     | 10721  | 37 | 3  | 121238898 | 121238898 | Missense_Mutation | SNP | C | T | 58  | 102 | c.1288G>A  | c.(1288-1290)GGA>AGA   | p.G430R  |
| Pat_22 | Post-Resistance | SLC15A2  | 6565   | 37 | 3  | 121641115 | 121641115 | Missense_Mutation | SNP | G | A | 48  | 110 | c.746G>A   | c.(745-747)GGA>GAA     | p.G249E  |
| Pat_22 | Post-Resistance | OSBPL11  | 114885 | 37 | 3  | 125249392 | 125249392 | Nonsense_Mutation | SNP | C | T | 11  | 110 | c.2211G>A  | c.(2209-2211)TGG>TGA   | p.W737*  |
| Pat_22 | Post-Resistance | DNAJB8   | 165721 | 37 | 3  | 128181773 | 128181773 | Missense_Mutation | SNP | C | T | 10  | 91  | c.316G>A   | c.(316-318)GGC>AGC     | p.G106S  |
| Pat_22 | Post-Resistance | KIAA1257 | 57501  | 37 | 3  | 128690150 | 128690150 | Missense_Mutation | SNP | G | A | 8   | 43  | c.1148C>T  | c.(1147-1149)GCC>GTC   | p.A383V  |
| Pat_22 | Post-Resistance | LRRC31   | 79782  | 37 | 3  | 169557925 | 169557925 | Missense_Mutation | SNP | A | G | 87  | 211 | c.1504T>C  | c.(1504-1506)TTT>CTT   | p.F502L  |
| Pat_22 | Post-Resistance | MUC4     | 4585   | 37 | 3  | 195505774 | 195505774 | Missense_Mutation | SNP | G | T | 4   | 21  | c.12293C>A | c.(12292-12294)CCT>CAT | p.P4098H |
| Pat_22 | Post-Resistance | PIGZ     | 80235  | 37 | 3  | 196674974 | 196674974 | Missense_Mutation | SNP | G | A | 4   | 82  | c.794C>T   | c.(793-795)GCA>GTA     | p.A265V  |
| Pat_22 | Post-Resistance | DEFB131  | 644414 | 37 | 4  | 9446290   | 9446290   | Missense_Mutation | SNP | C | T | 17  | 101 | c.31C>T    | c.(31-33)CTT>TTT       | p.L11F   |
| Pat_22 | Post-Resistance | SLIT2    | 9353   | 37 | 4  | 20591326  | 20591326  | Missense_Mutation | SNP | G | A | 16  | 93  | c.3148G>A  | c.(3148-3150)GAT>AAT   | p.D1050N |
| Pat_22 | Post-Resistance | ANAPC4   | 29945  | 37 | 4  | 25398350  | 25398350  | Missense_Mutation | SNP | T | C | 28  | 91  | c.1126T>C  | c.(1126-1128)TAT>CAT   | p.Y376H  |
| Pat_22 | Post-Resistance | CORIN    | 10699  | 37 | 4  | 47746491  | 47746491  | Missense_Mutation | SNP | A | G | 96  | 490 | c.727T>C   | c.(727-729)TTT>CTT     | p.F243L  |
| Pat_22 | Post-Resistance | CWH43    | 80157  | 37 | 4  | 49063860  | 49063860  | Missense_Mutation | SNP | G | A | 4   | 22  | c.2053G>A  | c.(2053-2055)GAA>AAA   | p.E685K  |
| Pat_22 | Post-Resistance | WDFY3    | 23001  | 37 | 4  | 85678258  | 85678258  | Missense_Mutation | SNP | C | A | 6   | 280 | c.5245G>T  | c.(5245-5247)GAT>TAT   | p.D1749Y |
| Pat_22 | Post-Resistance | PTPN13   | 5783   | 37 | 4  | 87693999  | 87693999  | Missense_Mutation | SNP | C | T | 49  | 269 | c.5237C>T  | c.(5236-5238)TCC>TTC   | p.S1746F |
| Pat_22 | Post-Resistance | NPNT     | 255743 | 37 | 4  | 106848493 | 106848493 | Missense_Mutation | SNP | C | T | 32  | 163 | c.173C>T   | c.(172-174)CCT>CTT     | p.P58L   |
| Pat_22 | Post-Resistance | SEC24D   | 9871   | 37 | 4  | 119727108 | 119727108 | Missense_Mutation | SNP | A | G | 4   | 126 | c.803T>C   | c.(802-804)ATC>ACC     | p.I268T  |
| Pat_22 | Post-Resistance | BBS7     | 55212  | 37 | 4  | 122775885 | 122775885 | Missense_Mutation | SNP | T | C | 48  | 276 | c.692A>G   | c.(691-693)GAA>GGA     | p.E231G  |
| Pat_22 | Post-Resistance | KIAA1109 | 84162  | 37 | 4  | 123122189 | 123122189 | Missense_Mutation | SNP | G | A | 5   | 269 | c.1406G>A  | c.(1405-1407)CGA>CAA   | p.R469Q  |
| Pat_22 | Post-Resistance | INPP4B   | 8821   | 37 | 4  | 143094889 | 143094889 | Missense_Mutation | SNP | G | C | 171 | 327 | c.1255C>G  | c.(1255-1257)CAA>GAA   | p.Q419E  |
| Pat_22 | Post-Resistance | LRBA     | 987    | 37 | 4  | 151821300 | 151821300 | Missense_Mutation | SNP | G | A | 42  | 217 | c.1825C>T  | c.(1825-1827)CGG>TGG   | p.R609W  |
| Pat_22 | Post-Resistance | ETFDH    | 2110   | 37 | 4  | 159627861 | 159627861 | Missense_Mutation | SNP | G | A | 41  | 822 | c.1549G>A  | c.(1549-1551)GAC>AAC   | p.D517N  |
| Pat_22 | Post-Resistance | ETFDH    | 2110   | 37 | 4  | 159627900 | 159627900 | Missense_Mutation | SNP | G | A | 23  | 787 | c.1588G>A  | c.(1588-1590)GAA>AAA   | p.E530K  |
| Pat_22 | Post-Resistance | ODZ3     | 55714  | 37 | 4  | 183601472 | 183601472 | Missense_Mutation | SNP | C | T | 10  | 66  | c.1609C>T  | c.(1609-1611)CCA>TCA   | p.P537S  |



|        |                 |          |        |    |   |           |           |                   |     |    |    |     |     |                |                        |               |
|--------|-----------------|----------|--------|----|---|-----------|-----------|-------------------|-----|----|----|-----|-----|----------------|------------------------|---------------|
| Pat_22 | Post-Resistance | LRP2BP   | 55805  | 37 | 4 | 186294045 | 186294045 | Missense_Mutation | SNP | C  | T  | 23  | 177 | c.768G>A       | c.(766-768)ATG>ATA     | p.M256I       |
| Pat_22 | Post-Resistance | FAT1     | 2195   | 37 | 4 | 187629958 | 187629958 | Missense_Mutation | SNP | C  | T  | 54  | 217 | c.1024G>A      | c.(1024-1026)GGA>AGA   | p.G342R       |
| Pat_22 | Post-Resistance | EXOC3    | 11336  | 37 | 5 | 453788    | 453788    | Missense_Mutation | SNP | A  | G  | 29  | 439 | c.668A>G       | c.(667-669)GAC>GGC     | p.D223G       |
| Pat_22 | Post-Resistance | IRX1     | 79192  | 37 | 5 | 3599780   | 3599780   | Nonsense_Mutation | SNP | C  | T  | 19  | 56  | c.718C>T       | c.(718-720)CAG>TAG     | p.Q240*       |
| Pat_22 | Post-Resistance | KIAA0947 | 23379  | 37 | 5 | 5461174   | 5461174   | Missense_Mutation | SNP | C  | T  | 36  | 316 | c.1727C>T      | c.(1726-1728)CCA>CTA   | p.P576L       |
| Pat_22 | Post-Resistance | DNAH5    | 1767   | 37 | 5 | 13721215  | 13721215  | Missense_Mutation | SNP | G  | A  | 30  | 170 | c.12173C>T     | c.(12172-12174)TCC>TTC | p.S4058F      |
| Pat_22 | Post-Resistance | DNAH5    | 1767   | 37 | 5 | 13865981  | 13865981  | Missense_Mutation | SNP | G  | A  | 4   | 147 | c.4151C>T      | c.(4150-4152)ACA>ATA   | p.T1384I      |
| Pat_22 | Post-Resistance | TRIO     | 7204   | 37 | 5 | 14401083  | 14401083  | Missense_Mutation | SNP | G  | T  | 5   | 111 | c.4626G>T      | c.(4624-4626)TTG>TTT   | p.L1542F      |
| Pat_22 | Post-Resistance | FBXL7    | 23194  | 37 | 5 | 15928355  | 15928355  | Missense_Mutation | SNP | G  | A  | 5   | 39  | c.484G>A       | c.(484-486)GAG>AAG     | p.E162K       |
| Pat_22 | Post-Resistance | PRDM9    | 56979  | 37 | 5 | 23527052  | 23527052  | Missense_Mutation | SNP | C  | T  | 5   | 287 | c.1855C>T      | c.(1855-1857)CGG>TGG   | p.R619W       |
| Pat_22 | Post-Resistance | CDH9     | 1007   | 37 | 5 | 26881493  | 26881493  | Missense_Mutation | SNP | C  | T  | 21  | 157 | c.2122G>A      | c.(2122-2124)GAA>AAA   | p.E708K       |
| Pat_22 | Post-Resistance | CDH9     | 1007   | 37 | 5 | 26902807  | 26902807  | Missense_Mutation | SNP | G  | A  | 9   | 77  | c.1031C>T      | c.(1030-1032)ACT>ATT   | p.T344I       |
| Pat_22 | Post-Resistance | CDH6     | 1004   | 37 | 5 | 31317546  | 31317546  | Missense_Mutation | SNP | C  | T  | 39  | 191 | c.1577C>T      | c.(1576-1578)TCC>TTC   | p.S526F       |
| Pat_22 | Post-Resistance | NPR3     | 4883   | 37 | 5 | 32712335  | 32712335  | Missense_Mutation | SNP | C  | G  | 4   | 110 | c.453C>G       | c.(451-453)GAC>GAG     | p.D151E       |
| Pat_22 | Post-Resistance | C9       | 735    | 37 | 5 | 39315936  | 39315936  | Missense_Mutation | SNP | G  | A  | 12  | 49  | c.811C>T       | c.(811-813)CGG>TGG     | p.R271W       |
| Pat_22 | Post-Resistance | MARVELD2 | 153562 | 37 | 5 | 68715618  | 68715618  | Missense_Mutation | SNP | C  | T  | 35  | 149 | c.406C>T       | c.(406-408)CCC>TCC     | p.P136S       |
| Pat_22 | Post-Resistance | VCAN     | 1462   | 37 | 5 | 82833609  | 82833609  | Missense_Mutation | SNP | C  | T  | 21  | 166 | c.4787C>T      | c.(4786-4788)TCA>TTA   | p.S1596L      |
| Pat_22 | Post-Resistance | CCNH     | 902    | 37 | 5 | 86697554  | 86697554  | Missense_Mutation | SNP | C  | T  | 9   | 70  | c.725G>A       | c.(724-726)AGA>AAA     | p.R242K       |
| Pat_22 | Post-Resistance | TTC37    | 9652   | 37 | 5 | 94856445  | 94856445  | Missense_Mutation | SNP | C  | T  | 21  | 168 | c.2089G>A      | c.(2089-2091)GAA>AAA   | p.E697K       |
| Pat_22 | Post-Resistance | SLCO4C1  | 353189 | 37 | 5 | 101572687 | 101572687 | Missense_Mutation | SNP | C  | T  | 26  | 92  | c.2050G>A      | c.(2050-2052)GGA>AGA   | p.G684R       |
| Pat_22 | Post-Resistance | SLC27A6  | 28965  | 37 | 5 | 128368934 | 128368934 | Missense_Mutation | SNP | G  | A  | 8   | 104 | c.1819G>A      | c.(1819-1821)GAA>AAA   | p.E607K       |
| Pat_22 | Post-Resistance | TRPC7    | 57113  | 37 | 5 | 135549236 | 135549236 | Missense_Mutation | SNP | C  | T  | 9   | 97  | c.2473G>A      | c.(2473-2475)GAA>AAA   | p.E825K       |
| Pat_22 | Post-Resistance | SPOCK1   | 6695   | 37 | 5 | 136314511 | 136314512 | Missense_Mutation | DNP | CC | TT | 17  | 71  | .1151_1152GG>A | c.(1150-1152)GGG>GAA   | p.G384E       |
| Pat_22 | Post-Resistance | GFRA3    | 2676   | 37 | 5 | 137589845 | 137589845 | Missense_Mutation | SNP | G  | A  | 4   | 137 | c.790C>T       | c.(790-792)CGC>TGC     | p.R264C       |
| Pat_22 | Post-Resistance | PCDHB1   | 29930  | 37 | 5 | 140431953 | 140431953 | Missense_Mutation | SNP | G  | A  | 17  | 56  | c.898G>A       | c.(898-900)GAA>AAA     | p.E300K       |
| Pat_22 | Post-Resistance | PCDHB13  | 56123  | 37 | 5 | 140596049 | 140596049 | Missense_Mutation | SNP | G  | A  | 34  | 123 | c.2354G>A      | c.(2353-2355)GGA>GAA   | p.G785E       |
| Pat_22 | Post-Resistance | PCDHB14  | 56122  | 37 | 5 | 140605428 | 140605428 | Missense_Mutation | SNP | G  | A  | 17  | 139 | c.2351G>A      | c.(2350-2352)GGG>GAG   | p.G784E       |
| Pat_22 | Post-Resistance | PCDHGB2  | 56103  | 37 | 5 | 140740726 | 140740726 | Missense_Mutation | SNP | G  | A  | 23  | 107 | c.1024G>A      | c.(1024-1026)GAT>AAT   | p.D342N       |
| Pat_22 | Post-Resistance | ARAP3    | 64411  | 37 | 5 | 141059845 | 141059845 | Missense_Mutation | SNP | G  | A  | 36  | 212 | c.209C>T       | c.(208-210)TCC>TTC     | p.S70F        |
| Pat_22 | Post-Resistance | GRXCR2   | 643226 | 37 | 5 | 145252219 | 145252219 | Missense_Mutation | SNP | C  | T  | 39  | 235 | c.313G>A       | c.(313-315)GAT>AAT     | p.D105N       |
| Pat_22 | Post-Resistance | JAKMIP2  | 9832   | 37 | 5 | 147030062 | 147030062 | Missense_Mutation | SNP | C  | T  | 10  | 92  | c.676G>A       | c.(676-678)GAA>AAA     | p.E226K       |
| Pat_22 | Post-Resistance | FBXO38   | 81545  | 37 | 5 | 147807451 | 147807451 | Missense_Mutation | SNP | G  | T  | 4   | 97  | c.2594G>T      | c.(2593-2595)CGG>CTG   | p.R865L       |
| Pat_22 | Post-Resistance | GRIA1    | 2890   | 37 | 5 | 153190754 | 153190754 | Missense_Mutation | SNP | C  | T  | 19  | 90  | c.2690C>T      | c.(2689-2691)TCA>TTA   | p.S897L       |
| Pat_22 | Post-Resistance | PWWP2A   | 114825 | 37 | 5 | 159520191 | 159520191 | Missense_Mutation | SNP | G  | A  | 25  | 60  | c.1466C>T      | c.(1465-1467)TCT>TTT   | p.S489F       |
| Pat_22 | Post-Resistance | DOCK2    | 1794   | 37 | 5 | 169506058 | 169506058 | Missense_Mutation | SNP | G  | A  | 36  | 202 | c.5074G>A      | c.(5074-5076)GAG>AAG   | p.E1692K      |
| Pat_22 | Post-Resistance | MGATA8   | 11282  | 37 | 5 | 179227581 | 179227581 | Missense_Mutation | SNP | G  | A  | 3   | 28  | c.622C>T       | c.(622-624)CAT>TAT     | p.H208Y       |
| Pat_22 | Post-Resistance | SLC22A23 | 63027  | 37 | 6 | 3324095   | 3324095   | Missense_Mutation | SNP | G  | A  | 28  | 59  | c.1055C>T      | c.(1054-1056)CCC>CTC   | p.P352L       |
| Pat_22 | Post-Resistance | CD83     | 9308   | 37 | 6 | 14131756  | 14131756  | Missense_Mutation | SNP | G  | T  | 4   | 132 | c.159G>T       | c.(157-159)TTG>TTT     | p.L53F        |
| Pat_22 | Post-Resistance | SLC17A1  | 6568   | 37 | 6 | 25819333  | 25819333  | Missense_Mutation | SNP | A  | C  | 7   | 51  | c.579T>G       | c.(577-579)TGT>TGG     | p.C193W       |
| Pat_22 | Post-Resistance | HLA-DRB5 | 3127   | 37 | 6 | 32487267  | 32487267  | Nonsense_Mutation | SNP | G  | A  | 91  | 223 | c.532C>T       | c.(532-534)CAG>TAG     | p.Q178*       |
| Pat_22 | Post-Resistance | GLP1R    | 2740   | 37 | 6 | 39046097  | 39046097  | Splice_Site       | SNP | G  | A  | 78  | 176 | c.824_splice   | c.e8-1                 | p.G275_splice |
| Pat_22 | Post-Resistance | MDF1     | 4188   | 37 | 6 | 41621284  | 41621284  | Missense_Mutation | SNP | G  | A  | 73  | 243 | c.712G>A       | c.(712-714)GAG>AAG     | p.E238K       |
| Pat_22 | Post-Resistance | PKHD1    | 5314   | 37 | 6 | 51947245  | 51947245  | Missense_Mutation | SNP | G  | A  | 111 | 379 | c.226C>T       | c.(226-228)CCC>TCC     | p.P76S        |
| Pat_22 | Post-Resistance | FAM83B   | 222584 | 37 | 6 | 54805192  | 54805192  | Missense_Mutation | SNP | C  | T  | 73  | 294 | c.1423C>T      | c.(1423-1425)CGC>TGC   | p.R475C       |
| Pat_22 | Post-Resistance | COL21A1  | 81578  | 37 | 6 | 56044571  | 56044571  | Missense_Mutation | SNP | C  | T  | 42  | 142 | c.445G>A       | c.(445-447)GAT>AAT     | p.D149N       |
| Pat_22 | Post-Resistance | PHIP     | 55023  | 37 | 6 | 79700616  | 79700616  | Missense_Mutation | SNP | G  | A  | 20  | 79  | c.2288C>T      | c.(2287-2289)CCA>CTA   | p.P763L       |
| Pat_22 | Post-Resistance | ELOVL4   | 6785   | 37 | 6 | 80629160  | 80629160  | Nonsense_Mutation | SNP | G  | A  | 30  | 214 | c.646C>T       | c.(646-648)CGA>TGA     | p.R216*       |

|        |                 |          |        |    |   |           |           |                   |     |    |    |     |     |                                    |                      |                |
|--------|-----------------|----------|--------|----|---|-----------|-----------|-------------------|-----|----|----|-----|-----|------------------------------------|----------------------|----------------|
| Pat_22 | Post-Resistance | ANKRD6   | 22881  | 37 | 6 | 90333759  | 90333759  | Missense_Mutation | SNP | G  | A  | 8   | 45  | c.1201G>A                          | c.(1201-1203)GAT>AAT | p.D401N        |
| Pat_22 | Post-Resistance | ASCC3    | 10973  | 37 | 6 | 101103625 | 101103625 | Missense_Mutation | SNP | G  | A  | 5   | 308 | c.2773C>T                          | c.(2773-2775)CGG>TGG | p.R925W        |
| Pat_22 | Post-Resistance | SCML4    | 256380 | 37 | 6 | 108071007 | 108071007 | Missense_Mutation | SNP | C  | T  | 4   | 100 | c.167G>A                           | c.(166-168)CGG>CAG   | p.R56Q         |
| Pat_22 | Post-Resistance | CDK19    | 23097  | 37 | 6 | 110935790 | 110935790 | Missense_Mutation | SNP | G  | A  | 16  | 143 | c.1457C>T                          | c.(1456-1458)TCG>TTG | p.S486L        |
| Pat_22 | Post-Resistance | RFX6     | 222546 | 37 | 6 | 117248471 | 117248471 | Missense_Mutation | SNP | G  | A  | 32  | 220 | c.2167G>A                          | c.(2167-2169)GAG>AAG | p.E723K        |
| Pat_22 | Post-Resistance | VGLL2    | 245806 | 37 | 6 | 117591810 | 117591810 | Missense_Mutation | SNP | C  | T  | 3   | 15  | c.496C>T                           | c.(496-498)CAC>TAC   | p.H166Y        |
| Pat_22 | Post-Resistance | MTHFD1L  | 25902  | 37 | 6 | 151258056 | 151258056 | Missense_Mutation | SNP | G  | A  | 52  | 208 | c.1373G>A                          | c.(1372-1374)GGA>GAA | p.G458E        |
| Pat_22 | Post-Resistance | FTSJ2    | 29960  | 37 | 7 | 2274902   | 2274902   | Missense_Mutation | SNP | C  | T  | 22  | 104 | c.596G>A                           | c.(595-597)AGT>AAT   | p.S199N        |
| Pat_22 | Post-Resistance | DGKB     | 1607   | 37 | 7 | 14622749  | 14622749  | Missense_Mutation | SNP | G  | A  | 3   | 126 | c.1450C>T                          | c.(1450-1452)CGT>TGT | p.R484C        |
| Pat_22 | Post-Resistance | ANKMY2   | 57037  | 37 | 7 | 16655443  | 16655443  | Missense_Mutation | SNP | C  | T  | 17  | 126 | c.457G>A                           | c.(457-459)GAG>AAG   | p.E153K        |
| Pat_22 | Post-Resistance | STK31    | 56164  | 37 | 7 | 23768756  | 23768756  | Missense_Mutation | SNP | G  | A  | 33  | 151 | c.371G>A                           | c.(370-372)CGA>CAA   | p.R124Q        |
| Pat_22 | Post-Resistance | GCK      | 2645   | 37 | 7 | 44228513  | 44228513  | Missense_Mutation | SNP | C  | T  | 6   | 71  | c.40G>A                            | c.(40-42)GAG>AAG     | p.E14K         |
| Pat_22 | Post-Resistance | IKZF1    | 10320  | 37 | 7 | 50450271  | 50450271  | Missense_Mutation | SNP | C  | T  | 4   | 93  | c.455C>T                           | c.(454-456)GCC>GTC   | p.A152V        |
| Pat_22 | Post-Resistance | TYW1     | 55253  | 37 | 7 | 66563692  | 66563692  | Missense_Mutation | SNP | C  | T  | 22  | 128 | c.1549C>T                          | c.(1549-1551)CCT>TCT | p.P517S        |
| Pat_22 | Post-Resistance | GTPBP10  | 85865  | 37 | 7 | 90014367  | 90014367  | Missense_Mutation | SNP | C  | T  | 73  | 261 | c.1063C>T                          | c.(1063-1065)CAT>TAT | p.H355Y        |
| Pat_22 | Post-Resistance | SAMD9L   | 219285 | 37 | 7 | 92762458  | 92762458  | Missense_Mutation | SNP | C  | T  | 6   | 68  | c.2827G>A                          | c.(2827-2829)GAA>AAA | p.E943K        |
| Pat_22 | Post-Resistance | COL1A2   | 1278   | 37 | 7 | 94028379  | 94028379  | Missense_Mutation | SNP | G  | A  | 23  | 232 | c.115G>A                           | c.(115-117)GGA>AGA   | p.G39R         |
| Pat_22 | Post-Resistance | CYP3A4   | 1576   | 37 | 7 | 99366124  | 99366124  | Missense_Mutation | SNP | C  | T  | 41  | 262 | c.523G>A                           | c.(523-525)GTC>ATC   | p.V175I        |
| Pat_22 | Post-Resistance | PPP1R3A  | 5506   | 37 | 7 | 113558463 | 113558463 | Missense_Mutation | SNP | G  | A  | 35  | 125 | c.589C>T                           | c.(589-591)CCT>TCT   | p.P197S        |
| Pat_22 | Post-Resistance | C7orf58  | 79974  | 37 | 7 | 120740101 | 120740101 | Missense_Mutation | SNP | A  | G  | 26  | 170 | c.871A>G                           | c.(871-873)ACG>GCG   | p.T291A        |
| Pat_22 | Post-Resistance | BRAF     | 673    | 37 | 7 | 140453136 | 140453136 | Missense_Mutation | SNP | A  | T  | 394 | 190 | c.1799T>A                          | c.(1798-1800)GTG>GAG | p.V600E        |
| Pat_22 | Post-Resistance | TAS2R60  | 338398 | 37 | 7 | 143141207 | 143141207 | Missense_Mutation | SNP | G  | A  | 120 | 181 | c.662G>A                           | c.(661-663)GGA>GAA   | p.G221E        |
| Pat_22 | Post-Resistance | ZNF786   | 136051 | 37 | 7 | 148768111 | 148768111 | Missense_Mutation | SNP | G  | A  | 4   | 118 | c.1753C>T                          | c.(1753-1755)CGC>TGC | p.R585C        |
| Pat_22 | Post-Resistance | ACTR3C   | 653857 | 37 | 7 | 149983565 | 149983566 | Missense_Mutation | DNP | TG | CA | 42  | 131 | c.361_362CA>TG                     | c.(361-363)CAG>TGG   | p.Q121W        |
| Pat_22 | Post-Resistance | C7orf29  | 113763 | 37 | 7 | 150027766 | 150027766 | Nonsense_Mutation | SNP | G  | A  | 113 | 137 | c.273G>A                           | c.(271-273)TGG>TGA   | p.W91*         |
| Pat_22 | Post-Resistance | CSMD1    | 64478  | 37 | 8 | 2965315   | 2965315   | Nonsense_Mutation | SNP | G  | A  | 31  | 140 | c.6763C>T                          | c.(6763-6765)CAG>TAG | p.Q2255*       |
| Pat_22 | Post-Resistance | SH2D4A   | 63898  | 37 | 8 | 19221663  | 19221663  | Missense_Mutation | SNP | G  | A  | 5   | 101 | c.787G>A                           | c.(787-789)GGG>AGG   | p.G263R        |
| Pat_22 | Post-Resistance | SCARA3   | 51435  | 37 | 8 | 27509049  | 27509049  | Missense_Mutation | SNP | G  | A  | 4   | 77  | c.131G>A                           | c.(130-132)CGC>CAC   | p.R44H         |
| Pat_22 | Post-Resistance | RP1      | 6101   | 37 | 8 | 55533900  | 55533900  | Missense_Mutation | SNP | G  | A  | 27  | 133 | c.374G>A                           | c.(373-375)CGG>CAG   | p.R125Q        |
| Pat_22 | Post-Resistance | JPH1     | 56704  | 37 | 8 | 75227798  | 75227798  | Missense_Mutation | SNP | C  | G  | 15  | 101 | c.437G>C                           | c.(436-438)AGC>ACC   | p.S146T        |
| Pat_22 | Post-Resistance | SLC7A13  | 157724 | 37 | 8 | 87241932  | 87241932  | Missense_Mutation | SNP | C  | T  | 215 | 161 | c.575G>A                           | c.(574-576)CGA>CAA   | p.R192Q        |
| Pat_22 | Post-Resistance | RBM12B   | 389677 | 37 | 8 | 94747846  | 94747846  | Nonsense_Mutation | SNP | G  | A  | 29  | 292 | c.793C>T                           | c.(793-795)CGA>TGA   | p.R265*        |
| Pat_22 | Post-Resistance | POP1     | 10940  | 37 | 8 | 99146777  | 99146777  | Missense_Mutation | SNP | C  | T  | 14  | 190 | c.901C>T                           | c.(901-903)CCC>TCC   | p.P301S        |
| Pat_22 | Post-Resistance | ABRA     | 137735 | 37 | 8 | 107781965 | 107781965 | Missense_Mutation | SNP | G  | A  | 55  | 559 | c.454C>T                           | c.(454-456)CAC>TAC   | p.H152Y        |
| Pat_22 | Post-Resistance | ENPP2    | 5168   | 37 | 8 | 120613682 | 120613682 | Missense_Mutation | SNP | C  | T  | 47  | 463 | c.854G>A                           | c.(853-855)AGA>AAA   | p.R285K        |
| Pat_22 | Post-Resistance | MTBP     | 27085  | 37 | 8 | 121528398 | 121528398 | Missense_Mutation | SNP | C  | T  | 4   | 97  | c.2213C>T                          | c.(2212-2214)JCT>TTT | p.S738F        |
| Pat_22 | Post-Resistance | KIAA0196 | 9897   | 37 | 8 | 126051070 | 126051070 | Splice_Site       | SNP | A  | G  | 173 | 207 | c.3084_splice                      | c.e25+1              | p.K1028_splice |
| Pat_22 | Post-Resistance | LRRC6    | 23639  | 37 | 8 | 133637582 | 133637582 | Missense_Mutation | SNP | G  | A  | 47  | 61  | c.772C>T                           | c.(772-774)CCT>TCT   | p.P258S        |
| Pat_22 | Post-Resistance | SHARPIN  | 81858  | 37 | 8 | 145154852 | 145154852 | Missense_Mutation | SNP | G  | A  | 39  | 37  | c.497C>T                           | c.(496-498)CCT>CTT   | p.P166L        |
| Pat_22 | Post-Resistance | C9orf66  | 157983 | 37 | 9 | 214556    | 214556    | Missense_Mutation | SNP | C  | T  | 40  | 149 | c.841G>A                           | c.(841-843)GAG>AAG   | p.E281K        |
| Pat_22 | Post-Resistance | CDC37L1  | 55664  | 37 | 9 | 4679813   | 4679813   | Missense_Mutation | SNP | G  | C  | 3   | 80  | c.46G>C                            | c.(46-48)GCC>CCC     | p.A16P         |
| Pat_22 | Post-Resistance | RANBP6   | 26953  | 37 | 9 | 6012811   | 6012811   | Missense_Mutation | SNP | C  | A  | 4   | 139 | c.2797G>T                          | c.(2797-2799)GCT>TCT | p.A933S        |
| Pat_22 | Post-Resistance | PTPRD    | 5789   | 37 | 9 | 8500886   | 8500886   | Missense_Mutation | SNP | G  | A  | 221 | 316 | c.1996C>T                          | c.(1996-1998)CCT>TCT | p.P666S        |
| Pat_22 | Post-Resistance | IFNA21   | 3452   | 37 | 9 | 21166224  | 21166224  | Missense_Mutation | SNP | C  | T  | 210 | 341 | c.388G>A                           | c.(388-390)GAA>AAA   | p.E130K        |
| Pat_22 | Post-Resistance | TMEM215  | 401498 | 37 | 9 | 32784875  | 32784875  | Missense_Mutation | SNP | G  | A  | 5   | 234 | c.694G>A                           | c.(694-696)GAG>AAG   | p.E232K        |
| Pat_22 | Post-Resistance | CDK20    | 23552  | 37 | 9 | 90586181  | 90586182  | Missense_Mutation | DNP | CC | TT | 20  | 86  | c.258_259GG>AA(256-261)TCGGAT>TCAA |                      | p.D87N         |
| Pat_22 | Post-Resistance | HABP4    | 22927  | 37 | 9 | 99250477  | 99250477  | Missense_Mutation | SNP | G  | A  | 5   | 205 | c.1106G>A                          | c.(1105-1107)CGT>CAT | p.R369H        |

|        |                 |           |        |    |   |           |           |                   |     |   |   |     |     |            |                        |          |
|--------|-----------------|-----------|--------|----|---|-----------|-----------|-------------------|-----|---|---|-----|-----|------------|------------------------|----------|
| Pat_22 | Post-Resistance | ALDOB     | 229    | 37 | 9 | 104190778 | 104190778 | Missense_Mutation | SNP | C | T | 39  | 283 | c.352G>A   | c.(352-354)GGA>AGA     | p.G118R  |
| Pat_22 | Post-Resistance | PHF19     | 26147  | 37 | 9 | 123636851 | 123636851 | Missense_Mutation | SNP | G | A | 75  | 194 | c.169C>T   | c.(169-171)CTC>TTC     | p.L57F   |
| Pat_22 | Post-Resistance | PDCL      | 5082   | 37 | 9 | 125582834 | 125582834 | Missense_Mutation | SNP | C | T | 36  | 173 | c.436G>A   | c.(436-438)GAA>AAA     | p.E146K  |
| Pat_22 | Post-Resistance | RPL12     | 6136   | 37 | 9 | 130211903 | 130211903 | Missense_Mutation | SNP | T | C | 3   | 128 | c.196A>G   | c.(196-198)AAC>GAC     | p.N66D   |
| Pat_22 | Post-Resistance | ACE2      | 59272  | 37 | X | 15596407  | 15596407  | Missense_Mutation | SNP | C | T | 41  | 142 | c.1102G>A  | c.(1102-1104)GAC>AAC   | p.D368N  |
| Pat_22 | Post-Resistance | BEND2     | 139105 | 37 | X | 18219991  | 18219991  | Missense_Mutation | SNP | C | T | 66  | 200 | c.977G>A   | c.(976-978)GGA>GAA     | p.G326E  |
| Pat_22 | Post-Resistance | MAP7D2    | 256714 | 37 | X | 20062607  | 20062607  | Missense_Mutation | SNP | G | A | 49  | 297 | c.631C>T   | c.(631-633)CCT>TCT     | p.P211S  |
| Pat_22 | Post-Resistance | KLHL34    | 257240 | 37 | X | 21674138  | 21674138  | Missense_Mutation | SNP | C | T | 3   | 53  | c.1769G>A  | c.(1768-1770)CGC>CAC   | p.R590H  |
| Pat_22 | Post-Resistance | FAM47C    | 442444 | 37 | X | 37029119  | 37029119  | Missense_Mutation | SNP | G | A | 46  | 195 | c.2636G>A  | c.(2635-2637)AGA>AAA   | p.R879K  |
| Pat_22 | Post-Resistance | FAM123B   | 139285 | 37 | X | 63410913  | 63410913  | Missense_Mutation | SNP | C | T | 26  | 63  | c.2254G>A  | c.(2254-2256)GAA>AAA   | p.E752K  |
| Pat_22 | Post-Resistance | RLIM      | 51132  | 37 | X | 73812068  | 73812068  | Missense_Mutation | SNP | C | T | 98  | 194 | c.1082G>A  | c.(1081-1083)GGA>GAA   | p.G361E  |
| Pat_22 | Post-Resistance | SERPINA7  | 6906   | 37 | X | 105278344 | 105278344 | Missense_Mutation | SNP | G | A | 25  | 166 | c.926C>T   | c.(925-927)TCC>TTC     | p.S309F  |
| Pat_22 | Post-Resistance | TBC1D8B   | 54885  | 37 | X | 106109164 | 106109164 | Missense_Mutation | SNP | C | T | 173 | 433 | c.2563C>T  | c.(2563-2565)CAT>TAT   | p.H855Y  |
| Pat_22 | Post-Resistance | ALG13     | 79868  | 37 | X | 111003208 | 111003208 | Missense_Mutation | SNP | A | T | 4   | 125 | c.3395A>T  | c.(3394-3396)TAT>TTT   | p.Y1132F |
| Pat_22 | Post-Resistance | DOCK11    | 139818 | 37 | X | 117752516 | 117752516 | Missense_Mutation | SNP | C | T | 69  | 199 | c.3296C>T  | c.(3295-3297)TCA>TTA   | p.S1099L |
| Pat_22 | Post-Resistance | SLC25A5   | 292    | 37 | X | 118603691 | 118603691 | Missense_Mutation | SNP | G | A | 8   | 745 | c.179G>A   | c.(178-180)CGT>CAT     | p.R60H   |
| Pat_22 | Post-Resistance | ACTRT1    | 139741 | 37 | X | 127185237 | 127185237 | Missense_Mutation | SNP | C | T | 54  | 142 | c.949G>A   | c.(949-951)GAA>AAA     | p.E317K  |
| Pat_22 | Post-Resistance | XPNPEP2   | 7512   | 37 | X | 128881600 | 128881600 | Missense_Mutation | SNP | G | A | 20  | 147 | c.508G>A   | c.(508-510)GAT>AAT     | p.D170N  |
| Pat_22 | Post-Resistance | ZNF449    | 203523 | 37 | X | 134494528 | 134494528 | Missense_Mutation | SNP | C | T | 26  | 215 | c.1084C>T  | c.(1084-1086)CGT>TGT   | p.R362C  |
| Pat_22 | Post-Resistance | ATP11C    | 286410 | 37 | X | 138856954 | 138856954 | Missense_Mutation | SNP | G | A | 43  | 294 | c.2120C>T  | c.(2119-2121)ACC>ATC   | p.T707I  |
| Pat_22 | Post-Resistance | MAGEC1    | 9947   | 37 | X | 140993455 | 140993455 | Missense_Mutation | SNP | G | A | 6   | 272 | c.265G>A   | c.(265-267)GGC>AGC     | p.G89S   |
| Pat_22 | Post-Resistance | AFF2      | 2334   | 37 | X | 147743727 | 147743727 | Nonsense_Mutation | SNP | C | A | 84  | 586 | c.479C>A   | c.(478-480)TCA>TAA     | p.S160*  |
| Pat_22 | Post-Resistance | FLNA      | 2316   | 37 | X | 153594547 | 153594547 | Missense_Mutation | SNP | C | T | 10  | 175 | c.1274G>A  | c.(1273-1275)GGA>GAA   | p.G425E  |
| Pat_22 | Post-Resistance | DKC1      | 1736   | 37 | X | 153994523 | 153994523 | Missense_Mutation | SNP | A | G | 28  | 250 | c.296A>G   | c.(295-297)AAC>AGC     | p.N99S   |
| Pat_22 | Post-Resistance | RAB39B    | 116442 | 37 | X | 154490289 | 154490289 | Missense_Mutation | SNP | C | T | 7   | 245 | c.441G>A   | c.(439-441)ATG>ATA     | p.M147I  |
| Pat_22 | Post-Resistance | RAB39B    | 116442 | 37 | X | 154493417 | 154493417 | Missense_Mutation | SNP | C | T | 24  | 387 | c.157G>A   | c.(157-159)GAG>AAG     | p.E53K   |
| Pat_24 | Pre-Treatment   | NOC2L     | 26155  | 37 | 1 | 883917    | 883917    | Missense_Mutation | SNP | C | T | 4   | 144 | c.1510G>A  | c.(1510-1512)GTG>ATG   | p.V504M  |
| Pat_24 | Pre-Treatment   | NOC2L     | 26155  | 37 | 1 | 889226    | 889226    | Missense_Mutation | SNP | C | T | 4   | 80  | c.824G>A   | c.(823-825)CGG>CAG     | p.R275Q  |
| Pat_24 | Pre-Treatment   | AGRN      | 375790 | 37 | 1 | 981567    | 981567    | Missense_Mutation | SNP | G | A | 6   | 371 | c.2833G>A  | c.(2833-2835)GGC>AGC   | p.G945S  |
| Pat_24 | Pre-Treatment   | CALML6    | 163688 | 37 | 1 | 1848504   | 1848504   | Missense_Mutation | SNP | G | A | 4   | 38  | c.490G>A   | c.(490-492)GAC>AAC     | p.D164N  |
| Pat_24 | Pre-Treatment   | KIAA1751  | 85452  | 37 | 1 | 1887145   | 1887145   | Missense_Mutation | SNP | C | T | 44  | 74  | c.2161G>A  | c.(2161-2163)GAG>AAG   | p.E721K  |
| Pat_24 | Pre-Treatment   | MEGF6     | 1953   | 37 | 1 | 3424398   | 3424398   | Missense_Mutation | SNP | G | A | 6   | 234 | c.1750C>T  | c.(1750-1752)CGC>TGC   | p.R584C  |
| Pat_24 | Pre-Treatment   | CAMTA1    | 23261  | 37 | 1 | 7723494   | 7723494   | Missense_Mutation | SNP | G | A | 6   | 479 | c.887G>A   | c.(886-888)GGG>GAG     | p.G296E  |
| Pat_24 | Pre-Treatment   | CA6       | 765    | 37 | 1 | 9009433   | 9009433   | Missense_Mutation | SNP | A | G | 3   | 76  | c.191A>G   | c.(190-192)AAG>AGG     | p.K64R   |
| Pat_24 | Pre-Treatment   | UBE4B     | 10277  | 37 | 1 | 10163069  | 10163069  | Missense_Mutation | SNP | C | T | 4   | 135 | c.499C>T   | c.(499-501)CGT>TGT     | p.R167C  |
| Pat_24 | Pre-Treatment   | KIF1B     | 23095  | 37 | 1 | 10386389  | 10386389  | Nonsense_Mutation | SNP | C | T | 4   | 103 | c.2896C>T  | c.(2896-2898)CGA>TGA   | p.R966*  |
| Pat_24 | Pre-Treatment   | MASP2     | 10747  | 37 | 1 | 11087664  | 11087664  | Missense_Mutation | SNP | C | T | 46  | 93  | c.1339G>A  | c.(1339-1341)GGA>AGA   | p.G447R  |
| Pat_24 | Pre-Treatment   | MFN2      | 9927   | 37 | 1 | 12059138  | 12059138  | Missense_Mutation | SNP | G | A | 4   | 185 | c.802G>A   | c.(802-804)GAG>AAG     | p.E268K  |
| Pat_24 | Pre-Treatment   | TNFRSF8   | 943    | 37 | 1 | 12170154  | 12170154  | Missense_Mutation | SNP | G | A | 4   | 175 | c.569G>A   | c.(568-570)AGC>AAC     | p.S190N  |
| Pat_24 | Pre-Treatment   | VPS13D    | 55187  | 37 | 1 | 12337906  | 12337906  | Missense_Mutation | SNP | C | T | 4   | 215 | c.4261C>T  | c.(4261-4263)CGT>TGT   | p.R1421C |
| Pat_24 | Pre-Treatment   | VPS13D    | 55187  | 37 | 1 | 12463904  | 12463904  | Missense_Mutation | SNP | C | T | 42  | 78  | c.11908C>T | c.(11908-11910)CAT>TAT | p.H3970Y |
| Pat_24 | Pre-Treatment   | PRAMEF12  | 390999 | 37 | 1 | 12837729  | 12837729  | Missense_Mutation | SNP | G | A | 39  | 77  | c.1439G>A  | c.(1438-1440)GGT>GAT   | p.G480D  |
| Pat_24 | Pre-Treatment   | PRAMEF1   | 65121  | 37 | 1 | 12856002  | 12856002  | Missense_Mutation | SNP | G | A | 52  | 402 | c.1282G>A  | c.(1282-1284)GAG>AAG   | p.E428K  |
| Pat_24 | Pre-Treatment   | LOC440563 | 440563 | 37 | 1 | 13183494  | 13183494  | Missense_Mutation | SNP | G | A | 16  | 111 | c.379C>T   | c.(379-381)CCA>TCA     | p.P127S  |
| Pat_24 | Pre-Treatment   | ZBTB17    | 7709   | 37 | 1 | 16269047  | 16269047  | Missense_Mutation | SNP | G | A | 4   | 243 | c.2015C>T  | c.(2014-2016)GCG>GTG   | p.A672V  |
| Pat_24 | Pre-Treatment   | ARHGEF19  | 128272 | 37 | 1 | 16535275  | 16535275  | Missense_Mutation | SNP | C | T | 23  | 24  | c.275G>A   | c.(274-276)GGG>GAG     | p.G92E   |
| Pat_24 | Pre-Treatment   | ATP13A2   | 23400  | 37 | 1 | 17318253  | 17318253  | Missense_Mutation | SNP | G | A | 5   | 215 | c.2227C>T  | c.(2227-2229)CGC>TGC   | p.R743C  |

|        |               |          |        |    |   |          |          |                   |     |    |    |     |     |                 |                      |                |
|--------|---------------|----------|--------|----|---|----------|----------|-------------------|-----|----|----|-----|-----|-----------------|----------------------|----------------|
| Pat_24 | Pre-Treatment | IGSF21   | 84966  | 37 | 1 | 18702857 | 18702857 | Missense_Mutation | SNP | G  | A  | 131 | 240 | c.1069G>A       | c.(1069-1071)GAC>AAC | p.D357N        |
| Pat_24 | Pre-Treatment | UBR4     | 23352  | 37 | 1 | 19480265 | 19480266 | Missense_Mutation | DNP | CG | TA | 4   | 157 | .:6626_6627CG>T | c.(6625-6627)GCG>GTA | p.A2209V       |
| Pat_24 | Pre-Treatment | UBR4     | 23352  | 37 | 1 | 19490771 | 19490771 | Missense_Mutation | SNP | G  | A  | 4   | 104 | c.4676C>T       | c.(4675-4677)GCT>GTT | p.A1559V       |
| Pat_24 | Pre-Treatment | PQLC2    | 54896  | 37 | 1 | 19651203 | 19651203 | Missense_Mutation | SNP | G  | A  | 4   | 63  | c.241G>A        | c.(241-243)GGA>AGA   | p.G81R         |
| Pat_24 | Pre-Treatment | TMCO4    | 255104 | 37 | 1 | 20027300 | 20027300 | Missense_Mutation | SNP | C  | T  | 6   | 268 | c.1343G>A       | c.(1342-1344)CGG>CAG | p.R448Q        |
| Pat_24 | Pre-Treatment | PLA2G2A  | 5320   | 37 | 1 | 20302261 | 20302261 | Missense_Mutation | SNP | G  | A  | 4   | 118 | c.368C>T        | c.(367-369)ACG>ATG   | p.T123M        |
| Pat_24 | Pre-Treatment | PLA2G2A  | 5320   | 37 | 1 | 20304963 | 20304963 | Missense_Mutation | SNP | G  | A  | 4   | 99  | c.95C>T         | c.(94-96)ACG>ATG     | p.T32M         |
| Pat_24 | Pre-Treatment | HSPG2    | 3339   | 37 | 1 | 22168731 | 22168731 | Splice_Site       | SNP | C  | T  | 4   | 138 | c.9052_splice   | c.e68+1              | p.R3018_splice |
| Pat_24 | Pre-Treatment | KDM1A    | 23028  | 37 | 1 | 23399805 | 23399805 | Missense_Mutation | SNP | G  | A  | 53  | 112 | c.1571G>A       | c.(1570-1572)AGA>AAA | p.R524K        |
| Pat_24 | Pre-Treatment | ASAP3    | 55616  | 37 | 1 | 23763960 | 23763960 | Missense_Mutation | SNP | G  | A  | 4   | 180 | c.1108C>T       | c.(1108-1110)CGG>TGG | p.R370W        |
| Pat_24 | Pre-Treatment | E2F2     | 1870   | 37 | 1 | 23848359 | 23848359 | Missense_Mutation | SNP | C  | T  | 4   | 183 | c.548G>A        | c.(547-549)CGC>CAC   | p.R183H        |
| Pat_24 | Pre-Treatment | GRHL3    | 57822  | 37 | 1 | 24669436 | 24669436 | Missense_Mutation | SNP | G  | A  | 5   | 357 | c.1355G>A       | c.(1354-1356)CGG>CAG | p.R452Q        |
| Pat_24 | Pre-Treatment | CNKSR1   | 10256  | 37 | 1 | 26504045 | 26504045 | Missense_Mutation | SNP | C  | T  | 38  | 75  | c.7C>T          | c.(7-9)CCG>TCG       | p.P3S          |
| Pat_24 | Pre-Treatment | WDTC1    | 23038  | 37 | 1 | 27624562 | 27624562 | Missense_Mutation | SNP | C  | T  | 4   | 201 | c.1192C>T       | c.(1192-1194)CTT>TTT | p.L398F        |
| Pat_24 | Pre-Treatment | GPR3     | 2827   | 37 | 1 | 27720960 | 27720960 | Missense_Mutation | SNP | G  | A  | 4   | 167 | c.658G>A        | c.(658-660)GTC>ATC   | p.V220I        |
| Pat_24 | Pre-Treatment | MATN1    | 4146   | 37 | 1 | 31194293 | 31194293 | Missense_Mutation | SNP | C  | T  | 6   | 397 | c.400G>A        | c.(400-402)GAT>AAT   | p.D134N        |
| Pat_24 | Pre-Treatment | NKAIN1   | 79570  | 37 | 1 | 31655401 | 31655401 | Missense_Mutation | SNP | C  | A  | 105 | 160 | c.508G>T        | c.(508-510)GTG>TTG   | p.V170L        |
| Pat_24 | Pre-Treatment | COL16A1  | 1307   | 37 | 1 | 32163665 | 32163665 | Missense_Mutation | SNP | G  | A  | 5   | 93  | c.499C>T        | c.(499-501)CGT>TGT   | p.R167C        |
| Pat_24 | Pre-Treatment | BAI2     | 576    | 37 | 1 | 32204495 | 32204495 | Missense_Mutation | SNP | G  | A  | 5   | 284 | c.2539C>T       | c.(2539-2541)CGC>TGC | p.R847C        |
| Pat_24 | Pre-Treatment | SPOCD1   | 90853  | 37 | 1 | 32262229 | 32262229 | Missense_Mutation | SNP | G  | A  | 6   | 421 | c.2233C>T       | c.(2233-2235)CGG>TGG | p.R745W        |
| Pat_24 | Pre-Treatment | TRIM62   | 55223  | 37 | 1 | 33613004 | 33613004 | Missense_Mutation | SNP | G  | A  | 4   | 174 | c.1202C>T       | c.(1201-1203)ACG>ATG | p.T401M        |
| Pat_24 | Pre-Treatment | TRIM62   | 55223  | 37 | 1 | 33625416 | 33625416 | Missense_Mutation | SNP | C  | T  | 5   | 277 | c.634G>A        | c.(634-636)GAG>AAG   | p.E212K        |
| Pat_24 | Pre-Treatment | C1orf94  | 84970  | 37 | 1 | 34663095 | 34663095 | Missense_Mutation | SNP | G  | A  | 85  | 143 | c.20G>A         | c.(19-21)AGG>AAG     | p.R7K          |
| Pat_24 | Pre-Treatment | EPHA10   | 284656 | 37 | 1 | 38227437 | 38227437 | Missense_Mutation | SNP | C  | T  | 22  | 48  | c.490G>A        | c.(490-492)GGC>AGC   | p.G164S        |
| Pat_24 | Pre-Treatment | UTP11L   | 51118  | 37 | 1 | 38488443 | 38488443 | Missense_Mutation | SNP | G  | A  | 4   | 110 | c.640G>A        | c.(640-642)GTT>ATT   | p.V214I        |
| Pat_24 | Pre-Treatment | MACF1    | 23499  | 37 | 1 | 39751063 | 39751063 | Splice_Site       | SNP | G  | A  | 4   | 186 | c.1368_splice   | c.e14+1              | p.A456_splice  |
| Pat_24 | Pre-Treatment | KIAA0754 | 643314 | 37 | 1 | 39879016 | 39879016 | Missense_Mutation | SNP | A  | G  | 3   | 61  | c.3079A>G       | c.(3079-3081)ACC>GCC | p.T1027A       |
| Pat_24 | Pre-Treatment | CCDC30   | 728621 | 37 | 1 | 43011243 | 43011243 | Missense_Mutation | SNP | G  | A  | 29  | 57  | c.418G>A        | c.(418-420)GAA>AAA   | p.E140K        |
| Pat_24 | Pre-Treatment | TIE1     | 7075   | 37 | 1 | 43782919 | 43782919 | Missense_Mutation | SNP | G  | A  | 4   | 191 | c.2459G>A       | c.(2458-2460)CGG>CAG | p.R820Q        |
| Pat_24 | Pre-Treatment | KIAA0467 | 23334  | 37 | 1 | 43893309 | 43893309 | Missense_Mutation | SNP | G  | A  | 4   | 241 | c.1010G>A       | c.(1009-1011)CGG>CAG | p.R337Q        |
| Pat_24 | Pre-Treatment | KIAA0467 | 23334  | 37 | 1 | 43909464 | 43909464 | Missense_Mutation | SNP | G  | A  | 5   | 201 | c.6125G>A       | c.(6124-6126)CGC>CAC | p.R2042H       |
| Pat_24 | Pre-Treatment | SLC6A9   | 6536   | 37 | 1 | 44474289 | 44474289 | Missense_Mutation | SNP | C  | T  | 16  | 20  | c.545G>A        | c.(544-546)GGC>GAC   | p.G182D        |
| Pat_24 | Pre-Treatment | DMAP1    | 55929  | 37 | 1 | 44680523 | 44680523 | Missense_Mutation | SNP | C  | T  | 4   | 167 | c.346C>T        | c.(346-348)CGT>TGT   | p.R116C        |
| Pat_24 | Pre-Treatment | CYP4B1   | 1580   | 37 | 1 | 47283696 | 47283696 | Missense_Mutation | SNP | C  | T  | 90  | 120 | c.1264C>T       | c.(1264-1266)CCT>TCT | p.P422S        |
| Pat_24 | Pre-Treatment | CYP4A22  | 284541 | 37 | 1 | 47607897 | 47607897 | Missense_Mutation | SNP | G  | A  | 20  | 69  | c.500G>A        | c.(499-501)CGA>CAA   | p.R167Q        |
| Pat_24 | Pre-Treatment | TAL1     | 6886   | 37 | 1 | 47685757 | 47685757 | Missense_Mutation | SNP | G  | A  | 76  | 114 | c.631C>T        | c.(631-633)CGC>TGC   | p.R211C        |
| Pat_24 | Pre-Treatment | ELAVL4   | 1996   | 37 | 1 | 50610750 | 50610750 | Missense_Mutation | SNP | G  | A  | 5   | 197 | c.131G>A        | c.(130-132)AGC>AAC   | p.S44N         |
| Pat_24 | Pre-Treatment | PODN     | 127435 | 37 | 1 | 53544158 | 53544158 | Missense_Mutation | SNP | G  | A  | 4   | 62  | c.1120G>A       | c.(1120-1122)GCG>ACG | p.A374T        |
| Pat_24 | Pre-Treatment | GLIS1    | 148979 | 37 | 1 | 53995598 | 53995598 | Missense_Mutation | SNP | G  | A  | 4   | 82  | c.823C>T        | c.(823-825)CGG>TGG   | p.R275W        |
| Pat_24 | Pre-Treatment | ACOT11   | 26027  | 37 | 1 | 55065066 | 55065066 | Missense_Mutation | SNP | G  | A  | 6   | 541 | c.862G>A        | c.(862-864)GTG>ATG   | p.V288M        |
| Pat_24 | Pre-Treatment | PARS2    | 25973  | 37 | 1 | 55224437 | 55224437 | Missense_Mutation | SNP | C  | T  | 5   | 382 | c.398G>A        | c.(397-399)CGG>CAG   | p.R133Q        |
| Pat_24 | Pre-Treatment | JAK1     | 3716   | 37 | 1 | 65335121 | 65335121 | Nonsense_Mutation | SNP | G  | A  | 4   | 123 | c.520C>T        | c.(520-522)CGA>TGA   | p.R174*        |
| Pat_24 | Pre-Treatment | C1orf173 | 127254 | 37 | 1 | 75065480 | 75065480 | Missense_Mutation | SNP | T  | C  | 50  | 127 | c.1625A>G       | c.(1624-1626)AAA>AGA | p.K542R        |
| Pat_24 | Pre-Treatment | C1orf173 | 127254 | 37 | 1 | 75072303 | 75072303 | Missense_Mutation | SNP | C  | T  | 71  | 87  | c.1471G>A       | c.(1471-1473)GAA>AAA | p.E491K        |
| Pat_24 | Pre-Treatment | BCL10    | 8915   | 37 | 1 | 85742019 | 85742019 | Missense_Mutation | SNP | G  | A  | 4   | 166 | c.17C>T         | c.(16-18)CCG>CTG     | p.P6L          |
| Pat_24 | Pre-Treatment | GBP2     | 2634   | 37 | 1 | 89578223 | 89578223 | Missense_Mutation | SNP | G  | A  | 6   | 413 | c.1294C>T       | c.(1294-1296)CGT>TGT | p.R432C        |
| Pat_24 | Pre-Treatment | ABCA4    | 24     | 37 | 1 | 94497348 | 94497348 | Missense_Mutation | SNP | C  | T  | 48  | 63  | c.4114G>A       | c.(4114-4116)GAC>AAC | p.D1372N       |

|        |               |          |        |    |   |           |           |                   |     |   |   |     |     |           |                      |          |
|--------|---------------|----------|--------|----|---|-----------|-----------|-------------------|-----|---|---|-----|-----|-----------|----------------------|----------|
| Pat_24 | Pre-Treatment | ARHGAP29 | 9411   | 37 | 1 | 94655584  | 94655584  | Missense_Mutation | SNP | C | T | 4   | 100 | c.1337G>A | c.(1336-1338)AGT>AAT | p.S446N  |
| Pat_24 | Pre-Treatment | CNN3     | 1266   | 37 | 1 | 95363578  | 95363578  | Missense_Mutation | SNP | G | A | 6   | 331 | c.710C>T  | c.(709-711)CCG>CTG   | p.P237L  |
| Pat_24 | Pre-Treatment | OLFM3    | 118427 | 37 | 1 | 102312505 | 102312505 | Missense_Mutation | SNP | C | T | 40  | 96  | c.25G>A   | c.(25-27)GGC>AGC     | p.G9S    |
| Pat_24 | Pre-Treatment | COL11A1  | 1301   | 37 | 1 | 103427784 | 103427784 | Missense_Mutation | SNP | C | T | 45  | 104 | c.3062G>A | c.(3061-3063)GGA>GAA | p.G1021E |
| Pat_24 | Pre-Treatment | KIAA1324 | 57535  | 37 | 1 | 109741247 | 109741247 | Missense_Mutation | SNP | G | A | 4   | 107 | c.2452G>A | c.(2452-2454)GTC>ATC | p.V818I  |
| Pat_24 | Pre-Treatment | CHI3L2   | 1117   | 37 | 1 | 111781480 | 111781480 | Missense_Mutation | SNP | G | A | 8   | 327 | c.844G>A  | c.(844-846)GTG>ATG   | p.V282M  |
| Pat_24 | Pre-Treatment | MAN1A2   | 10905  | 37 | 1 | 118008992 | 118008992 | Missense_Mutation | SNP | C | T | 20  | 57  | c.1111C>T | c.(1111-1113)CGT>TGT | p.R371C  |
| Pat_24 | Pre-Treatment | GDAP2    | 54834  | 37 | 1 | 118462964 | 118462964 | Missense_Mutation | SNP | G | A | 5   | 103 | c.17C>T   | c.(16-18)GCA>GTA     | p.A6V    |
| Pat_24 | Pre-Treatment | ZNF697   | 90874  | 37 | 1 | 120166548 | 120166548 | Missense_Mutation | SNP | C | T | 4   | 8   | c.418G>A  | c.(418-420)GTA>ATA   | p.V140I  |
| Pat_24 | Pre-Treatment | NBPF7    | 343505 | 37 | 1 | 120387026 | 120387026 | Missense_Mutation | SNP | G | A | 5   | 235 | c.133C>T  | c.(133-135)CGC>TGC   | p.R45C   |
| Pat_24 | Pre-Treatment | NOTCH2   | 4853   | 37 | 1 | 120506280 | 120506280 | Missense_Mutation | SNP | C | T | 7   | 418 | c.1832G>A | c.(1831-1833)TGT>TAT | p.C611Y  |
| Pat_24 | Pre-Treatment | PPIAL4G  | 644591 | 37 | 1 | 143767640 | 143767640 | Missense_Mutation | SNP | G | A | 10  | 563 | c.209C>T  | c.(208-210)CCT>CTT   | p.P70L   |
| Pat_24 | Pre-Treatment | NBPF9    | 400818 | 37 | 1 | 144815950 | 144815950 | Missense_Mutation | SNP | G | C | 5   | 352 | c.1321G>C | c.(1321-1323)GAC>CAC | p.D441H  |
| Pat_24 | Pre-Treatment | HFE2     | 148738 | 37 | 1 | 145416650 | 145416650 | Missense_Mutation | SNP | G | A | 6   | 130 | c.995G>A  | c.(994-996)CGC>CAC   | p.R332H  |
| Pat_24 | Pre-Treatment | NBPF15   | 284565 | 37 | 1 | 148591264 | 148591264 | Missense_Mutation | SNP | T | G | 9   | 213 | c.1329T>G | c.(1327-1329)TGT>TGG | p.C443W  |
| Pat_24 | Pre-Treatment | ARNT     | 405    | 37 | 1 | 150786615 | 150786615 | Missense_Mutation | SNP | G | A | 7   | 395 | c.2051C>T | c.(2050-2052)GCC>GTC | p.A684V  |
| Pat_24 | Pre-Treatment | ARNT     | 405    | 37 | 1 | 150807020 | 150807020 | Missense_Mutation | SNP | C | T | 6   | 332 | c.797G>A  | c.(796-798)CGA>CAA   | p.R266Q  |
| Pat_24 | Pre-Treatment | FLG      | 2312   | 37 | 1 | 152281475 | 152281475 | Missense_Mutation | SNP | C | T | 187 | 486 | c.5887G>A | c.(5887-5889)GAC>AAC | p.D1963N |
| Pat_24 | Pre-Treatment | SPRR3    | 6707   | 37 | 1 | 152975642 | 152975642 | Missense_Mutation | SNP | G | A | 26  | 41  | c.146G>A  | c.(145-147)GGA>GAA   | p.G49E   |
| Pat_24 | Pre-Treatment | NPR1     | 4881   | 37 | 1 | 153660175 | 153660175 | Missense_Mutation | SNP | G | A | 5   | 250 | c.2158G>A | c.(2158-2160)GGT>AGT | p.G720S  |
| Pat_24 | Pre-Treatment | GATAD2B  | 57459  | 37 | 1 | 153788964 | 153788964 | Missense_Mutation | SNP | G | A | 5   | 137 | c.1001C>T | c.(1000-1002)TCG>TTG | p.S334L  |
| Pat_24 | Pre-Treatment | FLAD1    | 80308  | 37 | 1 | 154965460 | 154965460 | Missense_Mutation | SNP | C | T | 4   | 218 | c.1711C>T | c.(1711-1713)CGT>TGT | p.R571C  |
| Pat_24 | Pre-Treatment | THBS3    | 7059   | 37 | 1 | 155172066 | 155172066 | Missense_Mutation | SNP | G | A | 5   | 272 | c.1084C>T | c.(1084-1086)CGG>TGG | p.R362W  |
| Pat_24 | Pre-Treatment | RUSC1    | 23623  | 37 | 1 | 155292183 | 155292183 | Missense_Mutation | SNP | C | T | 4   | 83  | c.619C>T  | c.(619-621)CTC>TTC   | p.L207F  |
| Pat_24 | Pre-Treatment | GON4L    | 54856  | 37 | 1 | 155734847 | 155734847 | Missense_Mutation | SNP | C | T | 5   | 97  | c.4417G>A | c.(4417-4419)GAA>AAA | p.E1473K |
| Pat_24 | Pre-Treatment | LMNA     | 4000   | 37 | 1 | 156105026 | 156105026 | Missense_Mutation | SNP | G | A | 4   | 161 | c.859G>A  | c.(859-861)GCT>ACT   | p.A287T  |
| Pat_24 | Pre-Treatment | NTRK1    | 4914   | 37 | 1 | 156849018 | 156849018 | Missense_Mutation | SNP | G | A | 28  | 26  | c.1910G>A | c.(1909-1911)GGG>GAG | p.G637E  |
| Pat_24 | Pre-Treatment | PEAR1    | 375033 | 37 | 1 | 156882753 | 156882753 | Missense_Mutation | SNP | G | A | 4   | 162 | c.2401G>A | c.(2401-2403)GGC>AGC | p.G801S  |
| Pat_24 | Pre-Treatment | FCRL5    | 83416  | 37 | 1 | 157490858 | 157490858 | Missense_Mutation | SNP | C | T | 4   | 165 | c.2464G>A | c.(2464-2466)GAC>AAC | p.D822N  |
| Pat_24 | Pre-Treatment | SPTA1    | 6708   | 37 | 1 | 158615148 | 158615148 | Missense_Mutation | SNP | C | T | 4   | 74  | c.4024G>A | c.(4024-4026)GCT>ACT | p.A1342T |
| Pat_24 | Pre-Treatment | HSPA7    | 3311   | 37 | 1 | 161577111 | 161577111 | Missense_Mutation | SNP | C | T | 5   | 107 | c.1031C>T | c.(1030-1032)TCG>TTG | p.S344L  |
| Pat_24 | Pre-Treatment | POGK     | 57645  | 37 | 1 | 166819237 | 166819237 | Missense_Mutation | SNP | G | A | 4   | 203 | c.1421G>A | c.(1420-1422)CGG>CAG | p.R474Q  |
| Pat_24 | Pre-Treatment | XCL1     | 6375   | 37 | 1 | 168549354 | 168549354 | Nonsense_Mutation | SNP | C | T | 5   | 346 | c.115C>T  | c.(115-117)CGA>TGA   | p.R39*   |
| Pat_24 | Pre-Treatment | TNN      | 63923  | 37 | 1 | 175066678 | 175066678 | Missense_Mutation | SNP | G | A | 46  | 111 | c.1714G>A | c.(1714-1716)GAG>AAG | p.E572K  |
| Pat_24 | Pre-Treatment | FAM5B    | 57795  | 37 | 1 | 177247738 | 177247738 | Missense_Mutation | SNP | G | A | 7   | 738 | c.1052G>A | c.(1051-1053)CGG>CAG | p.R351Q  |
| Pat_24 | Pre-Treatment | ANGPTL1  | 9068   | 37 | 1 | 178834455 | 178834455 | Missense_Mutation | SNP | G | T | 4   | 72  | c.457C>A  | c.(457-459)CAA>AAA   | p.Q153K  |
| Pat_24 | Pre-Treatment | PDC      | 5132   | 37 | 1 | 186418565 | 186418565 | Missense_Mutation | SNP | C | A | 5   | 220 | c.27G>T   | c.(25-27)TTG>TTT     | p.L9F    |
| Pat_24 | Pre-Treatment | CRB1     | 23418  | 37 | 1 | 197446956 | 197446956 | Nonsense_Mutation | SNP | C | T | 4   | 224 | c.4168C>T | c.(4168-4170)CGA>TGA | p.R1390* |
| Pat_24 | Pre-Treatment | KIF14    | 9928   | 37 | 1 | 200574423 | 200574423 | Missense_Mutation | SNP | C | T | 7   | 130 | c.1734G>A | c.(1732-1734)ATG>ATA | p.M578I  |
| Pat_24 | Pre-Treatment | KIF21B   | 23046  | 37 | 1 | 200960046 | 200960046 | Nonsense_Mutation | SNP | G | A | 4   | 206 | c.2686C>T | c.(2686-2688)CGA>TGA | p.R896*  |
| Pat_24 | Pre-Treatment | PPFIA4   | 8497   | 37 | 1 | 203014674 | 203014674 | Missense_Mutation | SNP | G | A | 4   | 29  | c.1286G>A | c.(1285-1287)CGG>CAG | p.R429Q  |
| Pat_24 | Pre-Treatment | PLEKHA6  | 22874  | 37 | 1 | 204210881 | 204210881 | Missense_Mutation | SNP | G | A | 107 | 72  | c.2234C>T | c.(2233-2235)CCC>CTC | p.P745L  |
| Pat_24 | Pre-Treatment | RBBP5    | 5929   | 37 | 1 | 205070737 | 205070737 | Missense_Mutation | SNP | C | T | 6   | 636 | c.623G>A  | c.(622-624)CGG>CAG   | p.R208Q  |
| Pat_24 | Pre-Treatment | TMCC2    | 9911   | 37 | 1 | 205211123 | 205211123 | Missense_Mutation | SNP | G | A | 4   | 168 | c.698G>A  | c.(697-699)GGC>GAC   | p.G233D  |
| Pat_24 | Pre-Treatment | CR1L     | 1379   | 37 | 1 | 207857221 | 207857221 | Nonsense_Mutation | SNP | C | T | 4   | 206 | c.382C>T  | c.(382-384)CGA>TGA   | p.R128*  |
| Pat_24 | Pre-Treatment | PLXNA2   | 5362   | 37 | 1 | 208204972 | 208204972 | Missense_Mutation | SNP | G | A | 96  | 152 | c.5188C>T | c.(5188-5190)CAT>TAT | p.H1730Y |
| Pat_24 | Pre-Treatment | CENPF    | 1063   | 37 | 1 | 214803896 | 214803896 | Missense_Mutation | SNP | G | A | 6   | 446 | c.1214G>A | c.(1213-1215)CGT>CAT | p.R405H  |



|        |               |          |        |    |    |           |           |                   |     |   |   |     |     |               |                        |               |
|--------|---------------|----------|--------|----|----|-----------|-----------|-------------------|-----|---|---|-----|-----|---------------|------------------------|---------------|
| Pat_24 | Pre-Treatment | USH2A    | 7399   | 37 | 1  | 215847856 | 215847856 | Missense_Mutation | SNP | G | A | 4   | 155 | c.13397C>T    | c.(13396-13398)CCT>CTT | p.P4466L      |
| Pat_24 | Pre-Treatment | SPATA17  | 128153 | 37 | 1  | 217955597 | 217955597 | Missense_Mutation | SNP | G | A | 98  | 96  | c.805G>A      | c.(805-807)GAT>AAT     | p.D269N       |
| Pat_24 | Pre-Treatment | RAB3GAP2 | 25782  | 37 | 1  | 220379276 | 220379276 | Missense_Mutation | SNP | G | A | 79  | 87  | c.685C>T      | c.(685-687)CGT>TGT     | p.R229C       |
| Pat_24 | Pre-Treatment | HLX      | 3142   | 37 | 1  | 221055560 | 221055560 | Missense_Mutation | SNP | G | A | 4   | 138 | c.827G>A      | c.(826-828)CGT>CAT     | p.R276H       |
| Pat_24 | Pre-Treatment | TP53BP2  | 7159   | 37 | 1  | 223990993 | 223990993 | Missense_Mutation | SNP | G | A | 7   | 459 | c.811C>T      | c.(811-813)CGC>TGC     | p.R271C       |
| Pat_24 | Pre-Treatment | URB2     | 9816   | 37 | 1  | 229771796 | 229771796 | Missense_Mutation | SNP | G | A | 7   | 606 | c.1436G>A     | c.(1435-1437)CGT>CAT   | p.R479H       |
| Pat_24 | Pre-Treatment | TRIM67   | 440730 | 37 | 1  | 231339738 | 231339738 | Missense_Mutation | SNP | G | A | 4   | 172 | c.1660G>A     | c.(1660-1662)GGT>AGT   | p.G554S       |
| Pat_24 | Pre-Treatment | SIPA1L2  | 57568  | 37 | 1  | 232579388 | 232579388 | Missense_Mutation | SNP | C | T | 6   | 343 | c.3397G>A     | c.(3397-3399)GGC>AGC   | p.G1133S      |
| Pat_24 | Pre-Treatment | SIPA1L2  | 57568  | 37 | 1  | 232600585 | 232600585 | Splice_Site       | SNP | C | T | 4   | 156 | c.2820_splice | c.e7+1                 | p.V940_splice |
| Pat_24 | Pre-Treatment | PCNXL2   | 80003  | 37 | 1  | 233394278 | 233394278 | Missense_Mutation | SNP | G | A | 140 | 107 | c.1330C>T     | c.(1330-1332)CCC>TCC   | p.P444S       |
| Pat_24 | Pre-Treatment | PCNXL2   | 80003  | 37 | 1  | 233394878 | 233394878 | Missense_Mutation | SNP | C | T | 4   | 227 | c.730G>A      | c.(730-732)GAG>AAG     | p.E244K       |
| Pat_24 | Pre-Treatment | TARBP1   | 6894   | 37 | 1  | 234527445 | 234527445 | Missense_Mutation | SNP | C | T | 4   | 109 | c.4744G>A     | c.(4744-4746)GTT>ATT   | p.V1582I      |
| Pat_24 | Pre-Treatment | OR2L8    | 391190 | 37 | 1  | 248113064 | 248113064 | Missense_Mutation | SNP | G | A | 34  | 99  | c.905G>A      | c.(904-906)CGA>CAA     | p.R302Q       |
| Pat_24 | Pre-Treatment | OR2AK2   | 391191 | 37 | 1  | 248128661 | 248128661 | Missense_Mutation | SNP | G | A | 33  | 40  | c.28G>A       | c.(28-30)GAT>AAT       | p.D10N        |
| Pat_24 | Pre-Treatment | OR2M5    | 127059 | 37 | 1  | 248308569 | 248308569 | Missense_Mutation | SNP | G | A | 141 | 127 | c.120G>A      | c.(118-120)ATG>ATA     | p.M40I        |
| Pat_24 | Pre-Treatment | OR2M4    | 26245  | 37 | 1  | 248402801 | 248402801 | Missense_Mutation | SNP | G | A | 199 | 121 | c.571G>A      | c.(571-573)GAA>AAA     | p.E191K       |
| Pat_24 | Pre-Treatment | OR2T12   | 127064 | 37 | 1  | 248458834 | 248458834 | Missense_Mutation | SNP | A | T | 120 | 105 | c.47T>A       | c.(46-48)TTT>TAT       | p.F16Y        |
| Pat_24 | Pre-Treatment | ZNF692   | 55657  | 37 | 1  | 249150737 | 249150737 | Missense_Mutation | SNP | C | T | 130 | 103 | c.500G>A      | c.(499-501)AGG>AAG     | p.R167K       |
| Pat_24 | Pre-Treatment | TUBB8    | 347688 | 37 | 10 | 93214     | 93214     | Missense_Mutation | SNP | G | T | 5   | 199 | c.1118C>A     | c.(1117-1119)GCC>GAC   | p.A373D       |
| Pat_24 | Pre-Treatment | DIP2C    | 22982  | 37 | 10 | 409202    | 409202    | Missense_Mutation | SNP | C | T | 4   | 232 | c.2527G>A     | c.(2527-2529)GTG>ATG   | p.V843M       |
| Pat_24 | Pre-Treatment | DIP2C    | 22982  | 37 | 10 | 518463    | 518463    | Missense_Mutation | SNP | G | A | 4   | 242 | c.184C>T      | c.(184-186)CGC>TGC     | p.R62C        |
| Pat_24 | Pre-Treatment | ASB13    | 79754  | 37 | 10 | 5693232   | 5693232   | Missense_Mutation | SNP | G | A | 4   | 142 | c.326C>T      | c.(325-327)GCC>GTC     | p.A109V       |
| Pat_24 | Pre-Treatment | IL2RA    | 3559   | 37 | 10 | 6063567   | 6063567   | Missense_Mutation | SNP | C | T | 5   | 200 | c.457G>A      | c.(457-459)GTC>ATC     | p.V153I       |
| Pat_24 | Pre-Treatment | TAF3     | 83860  | 37 | 10 | 8007211   | 8007211   | Missense_Mutation | SNP | C | T | 4   | 88  | c.1738C>T     | c.(1738-1740)CTT>TTT   | p.L580F       |
| Pat_24 | Pre-Treatment | TAF3     | 83860  | 37 | 10 | 8056640   | 8056640   | Missense_Mutation | SNP | C | G | 35  | 49  | c.2716C>G     | c.(2716-2718)CAG>GAG   | p.Q906E       |
| Pat_24 | Pre-Treatment | FAM171A1 | 221061 | 37 | 10 | 15256371  | 15256371  | Missense_Mutation | SNP | C | T | 4   | 225 | c.1216G>A     | c.(1216-1218)GGC>AGC   | p.G406S       |
| Pat_24 | Pre-Treatment | CUBN     | 8029   | 37 | 10 | 16942693  | 16942693  | Missense_Mutation | SNP | C | T | 7   | 383 | c.8341G>A     | c.(8341-8343)GTG>ATG   | p.V2781M      |
| Pat_24 | Pre-Treatment | ZEB1     | 6935   | 37 | 10 | 31799637  | 31799637  | Missense_Mutation | SNP | C | T | 37  | 56  | c.518C>T      | c.(517-519)CCA>CTA     | p.P173L       |
| Pat_24 | Pre-Treatment | ARHGAP12 | 94134  | 37 | 10 | 32097662  | 32097662  | Nonsense_Mutation | SNP | G | A | 6   | 405 | c.2281C>T     | c.(2281-2283)CGA>TGA   | p.R761*       |
| Pat_24 | Pre-Treatment | NRP1     | 8829   | 37 | 10 | 33475384  | 33475384  | Missense_Mutation | SNP | C | T | 5   | 147 | c.2095G>A     | c.(2095-2097)GAA>AAA   | p.E699K       |
| Pat_24 | Pre-Treatment | FZD8     | 8325   | 37 | 10 | 35930284  | 35930284  | Missense_Mutation | SNP | G | A | 3   | 36  | c.74C>T       | c.(73-75)GCT>GTT       | p.A25V        |
| Pat_24 | Pre-Treatment | TMEM72   | 643236 | 37 | 10 | 45430515  | 45430515  | Missense_Mutation | SNP | C | T | 5   | 161 | c.761C>T      | c.(760-762)ACA>ATA     | p.T254I       |
| Pat_24 | Pre-Treatment | ANUBL1   | 93550  | 37 | 10 | 46121809  | 46121809  | Missense_Mutation | SNP | C | T | 4   | 116 | c.1462G>A     | c.(1462-1464)GTG>ATG   | p.V488M       |
| Pat_24 | Pre-Treatment | RBP3     | 5949   | 37 | 10 | 48382146  | 48382146  | Missense_Mutation | SNP | C | T | 48  | 46  | c.3503G>A     | c.(3502-3504)GGG>GAG   | p.G1168E      |
| Pat_24 | Pre-Treatment | RBP3     | 5949   | 37 | 10 | 48382161  | 48382161  | Missense_Mutation | SNP | C | T | 4   | 112 | c.3488G>A     | c.(3487-3489)CGG>CAG   | p.R1163Q      |
| Pat_24 | Pre-Treatment | C10orf71 | 118461 | 37 | 10 | 50534997  | 50534997  | Missense_Mutation | SNP | C | T | 3   | 32  | c.2096C>T     | c.(2095-2097)ACA>ATA   | p.T699I       |
| Pat_24 | Pre-Treatment | CHAT     | 1103   | 37 | 10 | 50870734  | 50870734  | Missense_Mutation | SNP | G | A | 4   | 192 | c.1883G>A     | c.(1882-1884)CGG>CAG   | p.R628Q       |
| Pat_24 | Pre-Treatment | AGAP7    | 653268 | 37 | 10 | 51465222  | 51465222  | Missense_Mutation | SNP | C | T | 4   | 194 | c.1234G>A     | c.(1234-1236)GTC>ATC   | p.V412I       |
| Pat_24 | Pre-Treatment | ANK3     | 288    | 37 | 10 | 61829772  | 61829772  | Missense_Mutation | SNP | C | T | 25  | 51  | c.10867G>A    | c.(10867-10869)GAT>AAT | p.D3623N      |
| Pat_24 | Pre-Treatment | TMEM26   | 219623 | 37 | 10 | 63188780  | 63188780  | Missense_Mutation | SNP | G | A | 4   | 117 | c.509C>T      | c.(508-510)ACT>ATT     | p.T170I       |
| Pat_24 | Pre-Treatment | NRBF2    | 29982  | 37 | 10 | 64893246  | 64893246  | Missense_Mutation | SNP | G | A | 4   | 135 | c.16G>A       | c.(16-18)GGA>AGA       | p.G6R         |
| Pat_24 | Pre-Treatment | MYPN     | 84665  | 37 | 10 | 69933908  | 69933908  | Missense_Mutation | SNP | G | A | 134 | 159 | c.2059G>A     | c.(2059-2061)GAG>AAG   | p.E687K       |
| Pat_24 | Pre-Treatment | UNC5B    | 219699 | 37 | 10 | 73055623  | 73055623  | Missense_Mutation | SNP | C | T | 4   | 126 | c.2231C>T     | c.(2230-2232)CCG>CTG   | p.P744L       |
| Pat_24 | Pre-Treatment | ECD      | 11319  | 37 | 10 | 74894454  | 74894454  | Missense_Mutation | SNP | A | T | 4   | 91  | c.1822T>A     | c.(1822-1824)TAT>AAT   | p.Y608N       |
| Pat_24 | Pre-Treatment | USP54    | 159195 | 37 | 10 | 75301233  | 75301233  | Missense_Mutation | SNP | G | A | 5   | 216 | c.725C>T      | c.(724-726)GCT>GTT     | p.A242V       |
| Pat_24 | Pre-Treatment | USP54    | 159195 | 37 | 10 | 75301248  | 75301248  | Missense_Mutation | SNP | C | T | 4   | 225 | c.710G>A      | c.(709-711)CGT>CAT     | p.R237H       |
| Pat_24 | Pre-Treatment | POLR3A   | 11128  | 37 | 10 | 79737362  | 79737362  | Missense_Mutation | SNP | C | T | 4   | 107 | c.4047G>A     | c.(4045-4047)ATG>ATA   | p.M1349I      |

|        |               |          |        |    |    |           |           |                   |     |   |   |     |     |           |                      |          |
|--------|---------------|----------|--------|----|----|-----------|-----------|-------------------|-----|---|---|-----|-----|-----------|----------------------|----------|
| Pat_24 | Pre-Treatment | EIF5AL1  | 143244 | 37 | 10 | 81272743  | 81272743  | Missense_Mutation | SNP | G | A | 4   | 176 | c.338G>A  | c.(337-339)CGT>CAT   | p.R113H  |
| Pat_24 | Pre-Treatment | LRIT2    | 340745 | 37 | 10 | 85981954  | 85981954  | Missense_Mutation | SNP | C | T | 4   | 170 | c.1375G>A | c.(1375-1377)GCA>ACA | p.A459T  |
| Pat_24 | Pre-Treatment | IFIT1B   | 439996 | 37 | 10 | 91143396  | 91143396  | Missense_Mutation | SNP | G | A | 4   | 109 | c.326G>A  | c.(325-327)GGC>GAC   | p.G109D  |
| Pat_24 | Pre-Treatment | HELLS    | 3070   | 37 | 10 | 96348116  | 96348116  | Missense_Mutation | SNP | G | A | 4   | 175 | c.1457G>A | c.(1456-1458)CGT>CAT | p.R486H  |
| Pat_24 | Pre-Treatment | PDLIM1   | 9124   | 37 | 10 | 96997803  | 96997803  | Missense_Mutation | SNP | C | T | 4   | 76  | c.869G>A  | c.(868-870)GGC>GAC   | p.G290D  |
| Pat_24 | Pre-Treatment | DNTT     | 1791   | 37 | 10 | 98092226  | 98092226  | Missense_Mutation | SNP | G | A | 4   | 205 | c.1232G>A | c.(1231-1233)CGT>CAT | p.R411H  |
| Pat_24 | Pre-Treatment | SLIT1    | 6585   | 37 | 10 | 98816147  | 98816147  | Missense_Mutation | SNP | G | A | 99  | 192 | c.1232C>T | c.(1231-1233)TCC>TTC | p.S411F  |
| Pat_24 | Pre-Treatment | RRP12    | 23223  | 37 | 10 | 99140560  | 99140560  | Missense_Mutation | SNP | C | T | 4   | 196 | c.1529G>A | c.(1528-1530)AGG>AAG | p.R510K  |
| Pat_24 | Pre-Treatment | MMS19    | 64210  | 37 | 10 | 99225675  | 99225675  | Missense_Mutation | SNP | T | C | 129 | 216 | c.1643A>G | c.(1642-1644)CAA>CGA | p.Q548R  |
| Pat_24 | Pre-Treatment | PI4K2A   | 55361  | 37 | 10 | 99400564  | 99400564  | Missense_Mutation | SNP | C | T | 4   | 35  | c.65C>T   | c.(64-66)TCG>TTG     | p.S22L   |
| Pat_24 | Pre-Treatment | SFRP5    | 6425   | 37 | 10 | 99527416  | 99527416  | Missense_Mutation | SNP | C | T | 4   | 144 | c.809G>A  | c.(808-810)CGC>CAC   | p.R270H  |
| Pat_24 | Pre-Treatment | ABCC2    | 1244   | 37 | 10 | 101590187 | 101590187 | Missense_Mutation | SNP | G | A | 4   | 229 | c.2744G>A | c.(2743-2745)CGC>CAC | p.R915H  |
| Pat_24 | Pre-Treatment | LZTS2    | 84445  | 37 | 10 | 102763861 | 102763861 | Missense_Mutation | SNP | C | T | 4   | 202 | c.1006C>T | c.(1006-1008)CGG>TGG | p.R336W  |
| Pat_24 | Pre-Treatment | TMEM180  | 79847  | 37 | 10 | 104233583 | 104233583 | Missense_Mutation | SNP | G | A | 6   | 392 | c.1105G>A | c.(1105-1107)GTC>ATC | p.V369I  |
| Pat_24 | Pre-Treatment | SLK      | 9748   | 37 | 10 | 105785470 | 105785470 | Nonsense_Mutation | SNP | G | T | 4   | 112 | c.3700G>T | c.(3700-3702)GGA>TGA | p.G1234* |
| Pat_24 | Pre-Treatment | COL17A1  | 1308   | 37 | 10 | 105836119 | 105836119 | Missense_Mutation | SNP | G | A | 4   | 243 | c.271C>T  | c.(271-273)CCC>TCC   | p.P91S   |
| Pat_24 | Pre-Treatment | CCDC147  | 159686 | 37 | 10 | 106139938 | 106139938 | Missense_Mutation | SNP | G | A | 4   | 152 | c.1325G>A | c.(1324-1326)CGT>CAT | p.R442H  |
| Pat_24 | Pre-Treatment | XPNPEP1  | 7511   | 37 | 10 | 111651581 | 111651581 | Missense_Mutation | SNP | G | A | 4   | 124 | c.185C>T  | c.(184-186)ACA>ATA   | p.T62I   |
| Pat_24 | Pre-Treatment | ACSL5    | 51703  | 37 | 10 | 114173027 | 114173027 | Missense_Mutation | SNP | C | T | 86  | 43  | c.1045C>T | c.(1045-1047)CCC>TCC | p.P349S  |
| Pat_24 | Pre-Treatment | ABLIM1   | 3983   | 37 | 10 | 116213210 | 116213210 | Missense_Mutation | SNP | G | A | 4   | 57  | c.1474C>T | c.(1474-1476)CTC>TTC | p.L492F  |
| Pat_24 | Pre-Treatment | ABLIM1   | 3983   | 37 | 10 | 116225553 | 116225553 | Missense_Mutation | SNP | G | A | 6   | 227 | c.1345C>T | c.(1345-1347)CGG>TGG | p.R449W  |
| Pat_24 | Pre-Treatment | ATRNL1   | 26033  | 37 | 10 | 116919972 | 116919972 | Missense_Mutation | SNP | T | A | 4   | 75  | c.1001T>A | c.(1000-1002)CTA>CAA | p.L334Q  |
| Pat_24 | Pre-Treatment | ATRNL1   | 26033  | 37 | 10 | 117026430 | 117026430 | Nonsense_Mutation | SNP | G | A | 9   | 83  | c.1929G>A | c.(1927-1929)TGG>TGA | p.W643*  |
| Pat_24 | Pre-Treatment | HTRA1    | 5654   | 37 | 10 | 124268285 | 124268285 | Missense_Mutation | SNP | A | T | 28  | 14  | c.1119A>T | c.(1117-1119)AAA>AAT | p.K373N  |
| Pat_24 | Pre-Treatment | ADAM12   | 8038   | 37 | 10 | 127738226 | 127738226 | Missense_Mutation | SNP | G | A | 4   | 101 | c.1631C>T | c.(1630-1632)GCC>GTC | p.A544V  |
| Pat_24 | Pre-Treatment | DOCK1    | 1793   | 37 | 10 | 128925979 | 128925979 | Missense_Mutation | SNP | G | A | 4   | 147 | c.2735G>A | c.(2734-2736)CGG>CAG | p.R912Q  |
| Pat_24 | Pre-Treatment | CLRN3    | 119467 | 37 | 10 | 129690880 | 129690880 | Missense_Mutation | SNP | G | A | 98  | 66  | c.169C>T  | c.(169-171)CGT>TGT   | p.R57C   |
| Pat_24 | Pre-Treatment | STK32C   | 282974 | 37 | 10 | 134041533 | 134041533 | Missense_Mutation | SNP | G | A | 3   | 49  | c.418C>T  | c.(418-420)CGG>TGG   | p.R140W  |
| Pat_24 | Pre-Treatment | B4GALNT4 | 338707 | 37 | 11 | 372699    | 372699    | Missense_Mutation | SNP | G | A | 4   | 130 | c.293G>A  | c.(292-294)GGG>GAG   | p.G98E   |
| Pat_24 | Pre-Treatment | PKP3     | 11187  | 37 | 11 | 397003    | 397003    | Missense_Mutation | SNP | G | A | 30  | 28  | c.502G>A  | c.(502-504)GGT>AGT   | p.G168S  |
| Pat_24 | Pre-Treatment | DEAF1    | 10522  | 37 | 11 | 674732    | 674732    | Missense_Mutation | SNP | G | A | 4   | 195 | c.1307C>T | c.(1306-1308)GCG>GTG | p.A436V  |
| Pat_24 | Pre-Treatment | KRTAP5-5 | 439915 | 37 | 11 | 1651471   | 1651471   | Missense_Mutation | SNP | G | T | 4   | 113 | c.401G>T  | c.(400-402)GGG>GTG   | p.G134V  |
| Pat_24 | Pre-Treatment | KRTAP5-5 | 439915 | 37 | 11 | 1651483   | 1651483   | Missense_Mutation | SNP | G | C | 4   | 166 | c.413G>C  | c.(412-414)GGC>GCC   | p.G138A  |
| Pat_24 | Pre-Treatment | ZNF195   | 7748   | 37 | 11 | 3381754   | 3381754   | Missense_Mutation | SNP | C | G | 3   | 63  | c.484G>C  | c.(484-486)GGC>CGC   | p.G162R  |
| Pat_24 | Pre-Treatment | CHRNA10  | 57053  | 37 | 11 | 3690528   | 3690528   | Missense_Mutation | SNP | G | A | 4   | 108 | c.260C>T  | c.(259-261)ACA>ATA   | p.T87I   |
| Pat_24 | Pre-Treatment | OR52R1   | 119695 | 37 | 11 | 4825480   | 4825480   | Missense_Mutation | SNP | C | T | 6   | 12  | c.368G>A  | c.(367-369)GGA>GAA   | p.G123E  |
| Pat_24 | Pre-Treatment | OR51G2   | 81282  | 37 | 11 | 4936883   | 4936883   | Missense_Mutation | SNP | C | T | 22  | 27  | c.11G>A   | c.(10-12)GGA>GAA     | p.G4E    |
| Pat_24 | Pre-Treatment | OR51B2   | 79345  | 37 | 11 | 5344923   | 5344923   | Missense_Mutation | SNP | G | A | 12  | 26  | c.605C>T  | c.(604-606)TCT>TTT   | p.S202F  |
| Pat_24 | Pre-Treatment | OR51Q1   | 390061 | 37 | 11 | 5444142   | 5444142   | Missense_Mutation | SNP | C | T | 33  | 90  | c.712C>T  | c.(712-714)CGT>TGT   | p.R238C  |
| Pat_24 | Pre-Treatment | FAM160A2 | 84067  | 37 | 11 | 6245114   | 6245114   | Missense_Mutation | SNP | C | T | 4   | 160 | c.503G>A  | c.(502-504)AGT>AAT   | p.S168N  |
| Pat_24 | Pre-Treatment | ZNF215   | 7762   | 37 | 11 | 6962868   | 6962868   | Missense_Mutation | SNP | G | A | 4   | 141 | c.467G>A  | c.(466-468)CGA>CAA   | p.R156Q  |
| Pat_24 | Pre-Treatment | SYT9     | 143425 | 37 | 11 | 7324551   | 7324551   | Missense_Mutation | SNP | G | A | 36  | 48  | c.427G>A  | c.(427-429)GGG>AGG   | p.G143R  |
| Pat_24 | Pre-Treatment | OLFML1   | 283298 | 37 | 11 | 7507125   | 7507125   | Missense_Mutation | SNP | G | A | 4   | 142 | c.19G>A   | c.(19-21)GGA>AGA     | p.G7R    |
| Pat_24 | Pre-Treatment | PPFIBP2  | 8495   | 37 | 11 | 7662818   | 7662818   | Missense_Mutation | SNP | G | A | 4   | 194 | c.1484G>A | c.(1483-1485)CGG>CAG | p.R495Q  |
| Pat_24 | Pre-Treatment | OR10A3   | 26496  | 37 | 11 | 7960835   | 7960835   | Missense_Mutation | SNP | G | A | 4   | 189 | c.233C>T  | c.(232-234)ACG>ATG   | p.T78M   |
| Pat_24 | Pre-Treatment | DENND5A  | 23258  | 37 | 11 | 9163614   | 9163614   | Missense_Mutation | SNP | C | T | 6   | 193 | c.3553G>A | c.(3553-3555)GTA>ATA | p.V1185I |
| Pat_24 | Pre-Treatment | MICAL2   | 9645   | 37 | 11 | 12229575  | 12229575  | Missense_Mutation | SNP | C | T | 6   | 479 | c.478C>T  | c.(478-480)CGC>TGC   | p.R160C  |

|        |               |           |        |    |    |          |          |                   |     |   |   |     |     |           |                      |          |
|--------|---------------|-----------|--------|----|----|----------|----------|-------------------|-----|---|---|-----|-----|-----------|----------------------|----------|
| Pat_24 | Pre-Treatment | TEAD1     | 7003   | 37 | 11 | 12904563 | 12904563 | Missense_Mutation | SNP | C | T | 5   | 93  | c.545C>T  | c.(544-546)TCG>TTG   | p.S182L  |
| Pat_24 | Pre-Treatment | ARNTL     | 406    | 37 | 11 | 13402788 | 13402788 | Missense_Mutation | SNP | C | T | 51  | 146 | c.1604C>T | c.(1603-1605)CCA>CTA | p.P535L  |
| Pat_24 | Pre-Treatment | PIK3C2A   | 5286   | 37 | 11 | 17135987 | 17135987 | Missense_Mutation | SNP | C | T | 4   | 158 | c.3242G>A | c.(3241-3243)CGA>CAA | p.R1081Q |
| Pat_24 | Pre-Treatment | CSRP3     | 8048   | 37 | 11 | 19206514 | 19206514 | Missense_Mutation | SNP | C | T | 26  | 63  | c.493G>A  | c.(493-495)GAA>AAA   | p.E165K  |
| Pat_24 | Pre-Treatment | CCDC34    | 91057  | 37 | 11 | 27384734 | 27384734 | Missense_Mutation | SNP | G | A | 3   | 17  | c.8C>T    | c.(7-9)GCG>GTG       | p.A3V    |
| Pat_24 | Pre-Treatment | KIF18A    | 81930  | 37 | 11 | 28057807 | 28057807 | Missense_Mutation | SNP | C | T | 4   | 111 | c.2353G>A | c.(2353-2355)GAA>AAA | p.E785K  |
| Pat_24 | Pre-Treatment | C11orf46  | 120534 | 37 | 11 | 30354450 | 30354450 | Missense_Mutation | SNP | C | T | 4   | 83  | c.464C>T  | c.(463-465)ACG>ATG   | p.T155M  |
| Pat_24 | Pre-Treatment | C11orf41  | 25758  | 37 | 11 | 33565594 | 33565594 | Missense_Mutation | SNP | G | A | 5   | 290 | c.1594G>A | c.(1594-1596)GTG>ATG | p.V532M  |
| Pat_24 | Pre-Treatment | ELF5      | 2001   | 37 | 11 | 34527196 | 34527196 | Missense_Mutation | SNP | G | A | 137 | 167 | c.131C>T  | c.(130-132)CCT>CTT   | p.P44L   |
| Pat_24 | Pre-Treatment | MAPK8IP1  | 9479   | 37 | 11 | 45926796 | 45926796 | Missense_Mutation | SNP | G | A | 4   | 125 | c.2059G>A | c.(2059-2061)GTG>ATG | p.V687M  |
| Pat_24 | Pre-Treatment | PACSIN3   | 29763  | 37 | 11 | 47199955 | 47199955 | Missense_Mutation | SNP | T | G | 42  | 57  | c.1121A>C | c.(1120-1122)TAC>TCC | p.Y374S  |
| Pat_24 | Pre-Treatment | MADD      | 8567   | 37 | 11 | 47317128 | 47317128 | Missense_Mutation | SNP | G | A | 4   | 162 | c.3598G>A | c.(3598-3600)GTG>ATG | p.V1200M |
| Pat_24 | Pre-Treatment | KBTD4     | 55709  | 37 | 11 | 47595153 | 47595153 | Missense_Mutation | SNP | G | A | 4   | 107 | c.886C>T  | c.(886-888)CGG>TGG   | p.R296W  |
| Pat_24 | Pre-Treatment | NUP160    | 23279  | 37 | 11 | 47858456 | 47858456 | Nonsense_Mutation | SNP | G | A | 4   | 206 | c.925C>T  | c.(925-927)CGA>TGA   | p.R309*  |
| Pat_24 | Pre-Treatment | OR4X2     | 119764 | 37 | 11 | 48267541 | 48267541 | Missense_Mutation | SNP | A | T | 5   | 204 | c.886A>T  | c.(886-888)AGG>TGG   | p.R296W  |
| Pat_24 | Pre-Treatment | GLYATL1   | 92292  | 37 | 11 | 58714563 | 58714563 | Missense_Mutation | SNP | G | A | 50  | 101 | c.3G>A    | c.(1-3)ATG>ATA       | p.M1I    |
| Pat_24 | Pre-Treatment | GLYATL1   | 92292  | 37 | 11 | 58723157 | 58723157 | Missense_Mutation | SNP | G | A | 32  | 59  | c.566G>A  | c.(565-567)GGG>GAG   | p.G189E  |
| Pat_24 | Pre-Treatment | GLYATL1   | 92292  | 37 | 11 | 58723339 | 58723339 | Nonsense_Mutation | SNP | C | T | 4   | 131 | c.748C>T  | c.(748-750)CGA>TGA   | p.R250*  |
| Pat_24 | Pre-Treatment | CD6       | 923    | 37 | 11 | 60781460 | 60781460 | Missense_Mutation | SNP | C | T | 4   | 186 | c.1361C>T | c.(1360-1362)CCG>CTG | p.P454L  |
| Pat_24 | Pre-Treatment | CPSF7     | 79869  | 37 | 11 | 61183653 | 61183653 | Missense_Mutation | SNP | G | A | 4   | 136 | c.889C>T  | c.(889-891)CCC>TCC   | p.P297S  |
| Pat_24 | Pre-Treatment | EEF1G     | 1937   | 37 | 11 | 62338516 | 62338516 | Missense_Mutation | SNP | G | A | 5   | 192 | c.443C>T  | c.(442-444)ACG>ATG   | p.T148M  |
| Pat_24 | Pre-Treatment | TAF6L     | 10629  | 37 | 11 | 62543392 | 62543392 | Missense_Mutation | SNP | A | G | 3   | 78  | c.137A>G  | c.(136-138)GAG>GGG   | p.E46G   |
| Pat_24 | Pre-Treatment | SLC22A8   | 9376   | 37 | 11 | 62763580 | 62763580 | Missense_Mutation | SNP | G | A | 67  | 92  | c.806C>T  | c.(805-807)TCC>TTC   | p.S269F  |
| Pat_24 | Pre-Treatment | LGALS12   | 85329  | 37 | 11 | 63276320 | 63276320 | Missense_Mutation | SNP | C | T | 5   | 186 | c.295C>T  | c.(295-297)CGC>TGC   | p.R99C   |
| Pat_24 | Pre-Treatment | RTN3      | 10313  | 37 | 11 | 63486611 | 63486611 | Missense_Mutation | SNP | C | T | 46  | 82  | c.637C>T  | c.(637-639)CCA>TCA   | p.P213S  |
| Pat_24 | Pre-Treatment | ATG2A     | 23130  | 37 | 11 | 64662539 | 64662539 | Missense_Mutation | SNP | G | A | 4   | 227 | c.5723C>T | c.(5722-5724)ACG>ATG | p.T1908M |
| Pat_24 | Pre-Treatment | C11orf85  | 283129 | 37 | 11 | 64726840 | 64726840 | Missense_Mutation | SNP | G | A | 4   | 197 | c.38C>T   | c.(37-39)ACG>ATG     | p.T13M   |
| Pat_24 | Pre-Treatment | ZFPL1     | 7542   | 37 | 11 | 64854809 | 64854809 | Missense_Mutation | SNP | C | T | 5   | 250 | c.650C>T  | c.(649-651)ACG>ATG   | p.T217M  |
| Pat_24 | Pre-Treatment | POLA2     | 23649  | 37 | 11 | 65063436 | 65063436 | Missense_Mutation | SNP | C | T | 5   | 459 | c.1622C>T | c.(1621-1623)CCG>CTG | p.P541L  |
| Pat_24 | Pre-Treatment | PCNXL3    | 399909 | 37 | 11 | 65385807 | 65385807 | Missense_Mutation | SNP | G | A | 4   | 150 | c.974G>A  | c.(973-975)AGC>AAC   | p.S325N  |
| Pat_24 | Pre-Treatment | FIBP      | 9158   | 37 | 11 | 65651915 | 65651915 | Missense_Mutation | SNP | G | A | 4   | 181 | c.973C>T  | c.(973-975)CGG>TGG   | p.R325W  |
| Pat_24 | Pre-Treatment | FOSL1     | 8061   | 37 | 11 | 65664389 | 65664389 | Missense_Mutation | SNP | C | T | 4   | 134 | c.188G>A  | c.(187-189)AGT>AAT   | p.S63N   |
| Pat_24 | Pre-Treatment | B3GNT1    | 11041  | 37 | 11 | 66113576 | 66113576 | Missense_Mutation | SNP | G | A | 5   | 333 | c.1192C>T | c.(1192-1194)CGC>TGC | p.R398C  |
| Pat_24 | Pre-Treatment | PELI3     | 246330 | 37 | 11 | 66243271 | 66243271 | Missense_Mutation | SNP | G | A | 3   | 46  | c.1043G>A | c.(1042-1044)CGC>CAC | p.R348H  |
| Pat_24 | Pre-Treatment | CCDC87    | 55231  | 37 | 11 | 66359879 | 66359879 | Missense_Mutation | SNP | G | A | 4   | 57  | c.608C>T  | c.(607-609)ACG>ATG   | p.T203M  |
| Pat_24 | Pre-Treatment | CCS       | 9973   | 37 | 11 | 66366692 | 66366692 | Missense_Mutation | SNP | C | T | 4   | 111 | c.218C>T  | c.(217-219)GCG>GTG   | p.A73V   |
| Pat_24 | Pre-Treatment | PC        | 5091   | 37 | 11 | 66620239 | 66620239 | Missense_Mutation | SNP | C | T | 4   | 187 | c.1582G>A | c.(1582-1584)GTT>ATT | p.V528I  |
| Pat_24 | Pre-Treatment | PITPNM1   | 9600   | 37 | 11 | 67270150 | 67270150 | Missense_Mutation | SNP | C | T | 4   | 213 | c.118G>A  | c.(118-120)GTG>ATG   | p.V40M   |
| Pat_24 | Pre-Treatment | NUDT8     | 254552 | 37 | 11 | 67396467 | 67396467 | Missense_Mutation | SNP | G | A | 6   | 223 | c.250C>T  | c.(250-252)CGG>TGG   | p.R84W   |
| Pat_24 | Pre-Treatment | LOC645332 | 645332 | 37 | 11 | 67564228 | 67564228 | Missense_Mutation | SNP | C | T | 5   | 132 | c.236G>A  | c.(235-237)AGC>AAC   | p.S79N   |
| Pat_24 | Pre-Treatment | CHKA      | 1119   | 37 | 11 | 67821460 | 67821460 | Missense_Mutation | SNP | C | T | 3   | 50  | c.1369G>A | c.(1369-1371)GTG>ATG | p.V457M  |
| Pat_24 | Pre-Treatment | LRP5      | 4041   | 37 | 11 | 68154038 | 68154038 | Missense_Mutation | SNP | G | A | 4   | 173 | c.1270G>A | c.(1270-1272)GAC>AAC | p.D424N  |
| Pat_24 | Pre-Treatment | CPT1A     | 1374   | 37 | 11 | 68562289 | 68562289 | Missense_Mutation | SNP | G | A | 4   | 204 | c.862C>T  | c.(862-864)CGG>TGG   | p.R288W  |
| Pat_24 | Pre-Treatment | MYEOV     | 26579  | 37 | 11 | 69063509 | 69063509 | Nonsense_Mutation | SNP | C | T | 4   | 144 | c.592C>T  | c.(592-594)CGA>TGA   | p.R198*  |
| Pat_24 | Pre-Treatment | CTTN      | 2017   | 37 | 11 | 70263164 | 70263164 | Missense_Mutation | SNP | G | A | 7   | 463 | c.503G>A  | c.(502-504)CGA>CAA   | p.R168Q  |
| Pat_24 | Pre-Treatment | DHCR7     | 1717   | 37 | 11 | 71146522 | 71146522 | Missense_Mutation | SNP | G | A | 4   | 128 | c.1327C>T | c.(1327-1329)CGC>TGC | p.R443C  |
| Pat_24 | Pre-Treatment | PRKRIR    | 5612   | 37 | 11 | 76062369 | 76062369 | Missense_Mutation | SNP | G | A | 4   | 219 | c.1825C>T | c.(1825-1827)CCC>TCC | p.P609S  |

|        |               |           |        |    |    |           |           |                   |     |   |   |     |     |            |                        |          |
|--------|---------------|-----------|--------|----|----|-----------|-----------|-------------------|-----|---|---|-----|-----|------------|------------------------|----------|
| Pat_24 | Pre-Treatment | C11orf30  | 56946  | 37 | 11 | 76261033  | 76261033  | Missense_Mutation | SNP | C | T | 4   | 206 | c.3812C>T  | c.(3811-3813)TCC>TTC   | p.S1271F |
| Pat_24 | Pre-Treatment | GAB2      | 9846   | 37 | 11 | 77934697  | 77934697  | Missense_Mutation | SNP | G | A | 237 | 405 | c.1328C>T  | c.(1327-1329)TCG>TTG   | p.S443L  |
| Pat_24 | Pre-Treatment | FAT3      | 120114 | 37 | 11 | 92531158  | 92531158  | Missense_Mutation | SNP | C | T | 54  | 127 | c.4979C>T  | c.(4978-4980)TCC>TTC   | p.S1660F |
| Pat_24 | Pre-Treatment | FAT3      | 120114 | 37 | 11 | 92616245  | 92616245  | Missense_Mutation | SNP | C | T | 4   | 165 | c.12623C>T | c.(12622-12624)CCG>CTC | p.P4208L |
| Pat_24 | Pre-Treatment | ANGPTL5   | 253935 | 37 | 11 | 101765741 | 101765741 | Missense_Mutation | SNP | G | A | 34  | 53  | c.716C>T   | c.(715-717)ACC>ATC     | p.T239I  |
| Pat_24 | Pre-Treatment | GRIA4     | 2893   | 37 | 11 | 105781176 | 105781176 | Missense_Mutation | SNP | G | A | 43  | 57  | c.1174G>A  | c.(1174-1176)GAT>AAT   | p.D392N  |
| Pat_24 | Pre-Treatment | PPP2R1B   | 5519   | 37 | 11 | 111625721 | 111625721 | Missense_Mutation | SNP | G | A | 4   | 172 | c.941C>T   | c.(940-942)GCT>GTT     | p.A314V  |
| Pat_24 | Pre-Treatment | NCAM1     | 4684   | 37 | 11 | 113076768 | 113076768 | Missense_Mutation | SNP | G | A | 5   | 281 | c.140G>A   | c.(139-141)CGA>CAA     | p.R47Q   |
| Pat_24 | Pre-Treatment | ZBTB16    | 7704   | 37 | 11 | 113934474 | 113934474 | Missense_Mutation | SNP | G | A | 4   | 65  | c.452G>A   | c.(451-453)CGG>CAG     | p.R151Q  |
| Pat_24 | Pre-Treatment | ZBTB16    | 7704   | 37 | 11 | 113934735 | 113934735 | Missense_Mutation | SNP | T | C | 2   | 9   | c.713T>C   | c.(712-714)GTG>GCG     | p.V238A  |
| Pat_24 | Pre-Treatment | FAM55D    | 54827  | 37 | 11 | 114453681 | 114453681 | Missense_Mutation | SNP | T | A | 85  | 111 | c.159A>T   | c.(157-159)TTA>TTT     | p.L53F   |
| Pat_24 | Pre-Treatment | MLL       | 4297   | 37 | 11 | 118344458 | 118344458 | Nonsense_Mutation | SNP | C | T | 17  | 29  | c.2584C>T  | c.(2584-2586)CGA>TGA   | p.R862*  |
| Pat_24 | Pre-Treatment | HINFP     | 25988  | 37 | 11 | 119004963 | 119004963 | Missense_Mutation | SNP | G | A | 4   | 63  | c.1309G>A  | c.(1309-1311)GGA>AGA   | p.G437R  |
| Pat_24 | Pre-Treatment | ABCG4     | 64137  | 37 | 11 | 119029628 | 119029628 | Missense_Mutation | SNP | G | A | 4   | 194 | c.1426G>A  | c.(1426-1428)GTG>ATG   | p.V476M  |
| Pat_24 | Pre-Treatment | TRIM29    | 23650  | 37 | 11 | 119991365 | 119991365 | Missense_Mutation | SNP | G | A | 4   | 74  | c.1444C>T  | c.(1444-1446)CGG>TGG   | p.R482W  |
| Pat_24 | Pre-Treatment | SORL1     | 6653   | 37 | 11 | 121495971 | 121495971 | Missense_Mutation | SNP | G | A | 4   | 172 | c.6349G>A  | c.(6349-6351)GAT>AAT   | p.D2117N |
| Pat_24 | Pre-Treatment | OR10S1    | 219873 | 37 | 11 | 123848079 | 123848079 | Missense_Mutation | SNP | G | A | 16  | 35  | c.320C>T   | c.(319-321)TCC>TTC     | p.S107F  |
| Pat_24 | Pre-Treatment | ROBO3     | 64221  | 37 | 11 | 124744006 | 124744006 | Missense_Mutation | SNP | G | A | 9   | 627 | c.1825G>A  | c.(1825-1827)GTG>ATG   | p.V609M  |
| Pat_24 | Pre-Treatment | SNX19     | 399979 | 37 | 11 | 130775881 | 130775881 | Missense_Mutation | SNP | C | T | 4   | 167 | c.2410G>A  | c.(2410-2412)GTG>ATG   | p.V804M  |
| Pat_24 | Pre-Treatment | CACNA1C   | 775    | 37 | 12 | 2719791   | 2719791   | Missense_Mutation | SNP | G | A | 6   | 313 | c.3703G>A  | c.(3703-3705)GTG>ATG   | p.V1235M |
| Pat_24 | Pre-Treatment | NTF3      | 4908   | 37 | 12 | 5603829   | 5603829   | Missense_Mutation | SNP | C | T | 7   | 280 | c.449C>T   | c.(448-450)TCG>TTG     | p.S150L  |
| Pat_24 | Pre-Treatment | VWF       | 7450   | 37 | 12 | 6172182   | 6172182   | Missense_Mutation | SNP | G | A | 5   | 102 | c.1471C>T  | c.(1471-1473)CGC>TGC   | p.R491C  |
| Pat_24 | Pre-Treatment | ZNF384    | 171017 | 37 | 12 | 6781600   | 6781600   | Missense_Mutation | SNP | C | T | 4   | 206 | c.1010G>A  | c.(1009-1011)CGT>CAT   | p.R337H  |
| Pat_24 | Pre-Treatment | MLF2      | 8079   | 37 | 12 | 6860835   | 6860835   | Missense_Mutation | SNP | G | A | 4   | 228 | c.188C>T   | c.(187-189)GCT>GTT     | p.A63V   |
| Pat_24 | Pre-Treatment | PTPN6     | 5777   | 37 | 12 | 7065712   | 7065712   | Missense_Mutation | SNP | G | A | 4   | 213 | c.1055G>A  | c.(1054-1056)CGA>CAA   | p.R352Q  |
| Pat_24 | Pre-Treatment | ACSM4     | 341392 | 37 | 12 | 7479635   | 7479635   | Missense_Mutation | SNP | C | T | 12  | 38  | c.1600C>T  | c.(1600-1602)CTT>TTT   | p.L534F  |
| Pat_24 | Pre-Treatment | A2M       | 2      | 37 | 12 | 9224967   | 9224967   | Missense_Mutation | SNP | G | A | 15  | 50  | c.4091C>T  | c.(4090-4092)TCC>TTC   | p.S1364F |
| Pat_24 | Pre-Treatment | PRB3      | 5544   | 37 | 12 | 11420584  | 11420584  | Missense_Mutation | SNP | C | T | 7   | 358 | c.599G>A   | c.(598-600)CGT>CAT     | p.R200H  |
| Pat_24 | Pre-Treatment | RPL13AP20 | 387841 | 37 | 12 | 13028782  | 13028782  | Missense_Mutation | SNP | G | A | 4   | 116 | c.350G>A   | c.(349-351)CGG>CAG     | p.R117Q  |
| Pat_24 | Pre-Treatment | GRIN2B    | 2904   | 37 | 12 | 13715812  | 13715812  | Missense_Mutation | SNP | G | A | 52  | 76  | c.4360C>T  | c.(4360-4362)CCC>TCC   | p.P1454S |
| Pat_24 | Pre-Treatment | PTPRO     | 5800   | 37 | 12 | 15742411  | 15742411  | Missense_Mutation | SNP | A | G | 126 | 230 | c.3433A>G  | c.(3433-3435)ACA>GCA   | p.T1145A |
| Pat_24 | Pre-Treatment | RECQL     | 5965   | 37 | 12 | 21624004  | 21624004  | Missense_Mutation | SNP | T | G | 3   | 93  | c.1696A>C  | c.(1696-1698)ACC>CCC   | p.T566P  |
| Pat_24 | Pre-Treatment | ABCC9     | 10060  | 37 | 12 | 22068802  | 22068802  | Nonsense_Mutation | SNP | C | A | 4   | 54  | c.616G>T   | c.(616-618)GAA>TAA     | p.E206*  |
| Pat_24 | Pre-Treatment | PTHLH     | 5744   | 37 | 12 | 28116642  | 28116642  | Missense_Mutation | SNP | G | A | 7   | 390 | c.163C>T   | c.(163-165)CGG>TGG     | p.R55W   |
| Pat_24 | Pre-Treatment | ALG10     | 84920  | 37 | 12 | 34179675  | 34179675  | Missense_Mutation | SNP | G | A | 4   | 244 | c.1247G>A  | c.(1246-1248)CGT>CAT   | p.R416H  |
| Pat_24 | Pre-Treatment | KIF21A    | 55605  | 37 | 12 | 39726893  | 39726893  | Missense_Mutation | SNP | C | T | 5   | 216 | c.2504G>A  | c.(2503-2505)CGG>CAG   | p.R835Q  |
| Pat_24 | Pre-Treatment | ABCD2     | 225    | 37 | 12 | 39973341  | 39973341  | Missense_Mutation | SNP | G | A | 47  | 105 | c.1873C>T  | c.(1873-1875)CAT>TAT   | p.H625Y  |
| Pat_24 | Pre-Treatment | LRRK2     | 120892 | 37 | 12 | 40758790  | 40758790  | Missense_Mutation | SNP | G | A | 4   | 132 | c.7328G>A  | c.(7327-7329)CGA>CAA   | p.R2443Q |
| Pat_24 | Pre-Treatment | PPHLN1    | 51535  | 37 | 12 | 42836514  | 42836514  | Missense_Mutation | SNP | G | A | 7   | 480 | c.1096G>A  | c.(1096-1098)GAA>AAA   | p.E366K  |
| Pat_24 | Pre-Treatment | ARID2     | 196528 | 37 | 12 | 46246366  | 46246366  | Missense_Mutation | SNP | C | T | 80  | 117 | c.4460C>T  | c.(4459-4461)CCC>CTC   | p.P1487L |
| Pat_24 | Pre-Treatment | SLC38A4   | 55089  | 37 | 12 | 47181792  | 47181792  | Missense_Mutation | SNP | C | T | 19  | 59  | c.233G>A   | c.(232-234)GGA>GAA     | p.G78E   |
| Pat_24 | Pre-Treatment | FAM113B   | 91523  | 37 | 12 | 47629811  | 47629811  | Missense_Mutation | SNP | C | T | 4   | 236 | c.965C>T   | c.(964-966)CCT>CTT     | p.P322L  |
| Pat_24 | Pre-Treatment | RAPGEF3   | 10411  | 37 | 12 | 48144895  | 48144895  | Missense_Mutation | SNP | C | T | 3   | 17  | c.481G>A   | c.(481-483)GAA>AAA     | p.E161K  |
| Pat_24 | Pre-Treatment | ADCY6     | 112    | 37 | 12 | 49176700  | 49176700  | Missense_Mutation | SNP | G | A | 4   | 115 | c.518C>T   | c.(517-519)CCC>CTC     | p.P173L  |
| Pat_24 | Pre-Treatment | LMBR1L    | 55716  | 37 | 12 | 49500753  | 49500753  | Missense_Mutation | SNP | A | G | 102 | 210 | c.148T>C   | c.(148-150)TTC>CTC     | p.F50L   |
| Pat_24 | Pre-Treatment | FAIM2     | 23017  | 37 | 12 | 50283310  | 50283310  | Missense_Mutation | SNP | G | A | 4   | 201 | c.605C>T   | c.(604-606)ACG>ATG     | p.T202M  |
| Pat_24 | Pre-Treatment | BIN2      | 51411  | 37 | 12 | 51685932  | 51685932  | Missense_Mutation | SNP | C | T | 24  | 45  | c.958G>A   | c.(958-960)GAA>AAA     | p.E320K  |

|        |               |          |        |    |    |           |           |                   |     |   |   |     |     |              |                      |               |
|--------|---------------|----------|--------|----|----|-----------|-----------|-------------------|-----|---|---|-----|-----|--------------|----------------------|---------------|
| Pat_24 | Pre-Treatment | ACVRL1   | 94     | 37 | 12 | 52309892  | 52309892  | Missense_Mutation | SNP | G | A | 6   | 311 | c.1121G>A    | c.(1120-1122)CGG>CAG | p.R374Q       |
| Pat_24 | Pre-Treatment | KRT5     | 3852   | 37 | 12 | 52911448  | 52911448  | Missense_Mutation | SNP | C | T | 5   | 392 | c.1018G>A    | c.(1018-1020)GCT>ACT | p.A340T       |
| Pat_24 | Pre-Treatment | KRT71    | 112802 | 37 | 12 | 52942532  | 52942532  | Missense_Mutation | SNP | C | T | 126 | 182 | c.766G>A     | c.(766-768)GAA>AAA   | p.E256K       |
| Pat_24 | Pre-Treatment | SPRYD3   | 84926  | 37 | 12 | 53468516  | 53468516  | Missense_Mutation | SNP | C | T | 5   | 221 | c.424G>A     | c.(424-426)GGG>AGG   | p.G142R       |
| Pat_24 | Pre-Treatment | ESPL1    | 9700   | 37 | 12 | 53686729  | 53686729  | Missense_Mutation | SNP | G | A | 4   | 107 | c.6136G>A    | c.(6136-6138)GTG>ATG | p.V2046M      |
| Pat_24 | Pre-Treatment | HOXC12   | 3228   | 37 | 12 | 54350232  | 54350232  | Missense_Mutation | SNP | G | A | 5   | 338 | c.731G>A     | c.(730-732)CGG>CAG   | p.R244Q       |
| Pat_24 | Pre-Treatment | NCKAP1L  | 3071   | 37 | 12 | 54910702  | 54910702  | Missense_Mutation | SNP | C | T | 4   | 219 | c.1021C>T    | c.(1021-1023)CGG>TGG | p.R341W       |
| Pat_24 | Pre-Treatment | RDH16    | 8608   | 37 | 12 | 57351092  | 57351092  | Missense_Mutation | SNP | C | T | 4   | 102 | c.155G>A     | c.(154-156)CGA>CAA   | p.R52Q        |
| Pat_24 | Pre-Treatment | LRP1     | 4035   | 37 | 12 | 57579368  | 57579368  | Missense_Mutation | SNP | G | A | 3   | 77  | c.6518G>A    | c.(6517-6519)CGG>CAG | p.R2173Q      |
| Pat_24 | Pre-Treatment | USP15    | 9958   | 37 | 12 | 62785105  | 62785105  | Missense_Mutation | SNP | G | A | 4   | 204 | c.2129G>A    | c.(2128-2130)CGA>CAA | p.R710Q       |
| Pat_24 | Pre-Treatment | TMEM5    | 10329  | 37 | 12 | 64202532  | 64202532  | Missense_Mutation | SNP | C | T | 4   | 219 | c.992C>T     | c.(991-993)CCG>CTG   | p.P331L       |
| Pat_24 | Pre-Treatment | GNS      | 2799   | 37 | 12 | 65141685  | 65141685  | Missense_Mutation | SNP | G | A | 4   | 168 | c.266C>T     | c.(265-267)GCT>GTT   | p.A89V        |
| Pat_24 | Pre-Treatment | HELB     | 92797  | 37 | 12 | 66724980  | 66724980  | Missense_Mutation | SNP | G | A | 5   | 171 | c.2717G>A    | c.(2716-2718)CGC>CAC | p.R906H       |
| Pat_24 | Pre-Treatment | CNOT2    | 4848   | 37 | 12 | 70739967  | 70739967  | Missense_Mutation | SNP | C | T | 4   | 125 | c.1399C>T    | c.(1399-1401)CGT>TGT | p.R467C       |
| Pat_24 | Pre-Treatment | THAP2    | 83591  | 37 | 12 | 72070580  | 72070580  | Missense_Mutation | SNP | G | C | 3   | 103 | c.379G>C     | c.(379-381)GCC>CCC   | p.A127P       |
| Pat_24 | Pre-Treatment | NAV3     | 89795  | 37 | 12 | 78513287  | 78513287  | Missense_Mutation | SNP | G | A | 4   | 185 | c.3311G>A    | c.(3310-3312)GGG>GAG | p.G1104E      |
| Pat_24 | Pre-Treatment | SLC6A15  | 55117  | 37 | 12 | 85255559  | 85255559  | Missense_Mutation | SNP | G | A | 4   | 130 | c.2045C>T    | c.(2044-2046)CCG>CTG | p.P682L       |
| Pat_24 | Pre-Treatment | ATP2B1   | 490    | 37 | 12 | 90049560  | 90049560  | Missense_Mutation | SNP | C | T | 4   | 90  | c.104G>A     | c.(103-105)CGG>CAG   | p.R35Q        |
| Pat_24 | Pre-Treatment | C12orf12 | 196477 | 37 | 12 | 91348050  | 91348050  | Missense_Mutation | SNP | G | A | 6   | 18  | c.470C>T     | c.(469-471)TCC>TTC   | p.S157F       |
| Pat_24 | Pre-Treatment | PLXNC1   | 10154  | 37 | 12 | 94631525  | 94631525  | Missense_Mutation | SNP | G | A | 4   | 161 | c.2066G>A    | c.(2065-2067)CGG>CAG | p.R689Q       |
| Pat_24 | Pre-Treatment | UTP20    | 27340  | 37 | 12 | 101689336 | 101689336 | Missense_Mutation | SNP | G | T | 4   | 84  | c.1330G>T    | c.(1330-1332)GCC>TCC | p.A444S       |
| Pat_24 | Pre-Treatment | CHST11   | 50515  | 37 | 12 | 105150764 | 105150764 | Missense_Mutation | SNP | G | A | 4   | 144 | c.242G>A     | c.(241-243)CGG>CAG   | p.R81Q        |
| Pat_24 | Pre-Treatment | RFX4     | 5992   | 37 | 12 | 107125991 | 107125991 | Missense_Mutation | SNP | G | A | 69  | 142 | c.1435G>A    | c.(1435-1437)GAG>AAG | p.E479K       |
| Pat_24 | Pre-Treatment | CRY1     | 1407   | 37 | 12 | 107386630 | 107386630 | Missense_Mutation | SNP | G | A | 6   | 280 | c.1696C>T    | c.(1696-1698)CGT>TGT | p.R566C       |
| Pat_24 | Pre-Treatment | PWP1     | 11137  | 37 | 12 | 108082472 | 108082472 | Missense_Mutation | SNP | G | A | 4   | 94  | c.212G>A     | c.(211-213)CGC>CAC   | p.R71H        |
| Pat_24 | Pre-Treatment | FICD     | 11153  | 37 | 12 | 108912743 | 108912743 | Missense_Mutation | SNP | G | A | 4   | 120 | c.868G>A     | c.(868-870)GTG>ATG   | p.V290M       |
| Pat_24 | Pre-Treatment | TMEM119  | 338773 | 37 | 12 | 108985629 | 108985629 | Missense_Mutation | SNP | C | A | 4   | 113 | c.531G>T     | c.(529-531)TTG>TTT   | p.L177F       |
| Pat_24 | Pre-Treatment | DAO      | 1610   | 37 | 12 | 109278847 | 109278847 | Missense_Mutation | SNP | G | A | 5   | 122 | c.65G>A      | c.(64-66)CGC>CAC     | p.R22H        |
| Pat_24 | Pre-Treatment | ACACB    | 32     | 37 | 12 | 109625846 | 109625846 | Missense_Mutation | SNP | C | T | 4   | 206 | c.2023C>T    | c.(2023-2025)CGG>TGG | p.R675W       |
| Pat_24 | Pre-Treatment | ACACB    | 32     | 37 | 12 | 109660688 | 109660688 | Missense_Mutation | SNP | G | A | 3   | 51  | c.3763G>A    | c.(3763-3765)GGC>AGC | p.G1255S      |
| Pat_24 | Pre-Treatment | TCHP     | 84260  | 37 | 12 | 110348958 | 110348958 | Missense_Mutation | SNP | G | A | 3   | 26  | c.970G>A     | c.(970-972)GAT>AAT   | p.D324N       |
| Pat_24 | Pre-Treatment | ANKRD13A | 88455  | 37 | 12 | 110456188 | 110456188 | Missense_Mutation | SNP | C | T | 4   | 149 | c.439C>T     | c.(439-441)CGC>TGC   | p.R147C       |
| Pat_24 | Pre-Treatment | DDX54    | 79039  | 37 | 12 | 113601055 | 113601055 | Missense_Mutation | SNP | G | A | 4   | 182 | c.1963C>T    | c.(1963-1965)CGG>TGG | p.R655W       |
| Pat_24 | Pre-Treatment | IQCD     | 115811 | 37 | 12 | 113633648 | 113633648 | Missense_Mutation | SNP | G | A | 6   | 287 | c.776C>T     | c.(775-777)TCG>TTG   | p.S259L       |
| Pat_24 | Pre-Treatment | TAOK3    | 51347  | 37 | 12 | 118636903 | 118636903 | Missense_Mutation | SNP | C | T | 4   | 236 | c.1147G>A    | c.(1147-1149)GAT>AAT | p.D383N       |
| Pat_24 | Pre-Treatment | CCDC64   | 92558  | 37 | 12 | 120436370 | 120436370 | Nonsense_Mutation | SNP | C | T | 4   | 140 | c.475C>T     | c.(475-477)CGA>TGA   | p.R159*       |
| Pat_24 | Pre-Treatment | P2RX7    | 5027   | 37 | 12 | 121613228 | 121613228 | Missense_Mutation | SNP | C | T | 7   | 270 | c.919C>T     | c.(919-921)CGG>TGG   | p.R307W       |
| Pat_24 | Pre-Treatment | CAMKK2   | 10645  | 37 | 12 | 121706440 | 121706440 | Splice_Site       | SNP | C | T | 8   | 546 | c.625_splice | c.e5+1               | p.R209_splice |
| Pat_24 | Pre-Treatment | TMEM120B | 144404 | 37 | 12 | 122190101 | 122190101 | Missense_Mutation | SNP | G | A | 4   | 241 | c.433G>A     | c.(433-435)GTG>ATG   | p.V145M       |
| Pat_24 | Pre-Treatment | HIP1R    | 9026   | 37 | 12 | 123346041 | 123346041 | Missense_Mutation | SNP | G | C | 3   | 90  | c.3139G>C    | c.(3139-3141)GCC>CCC | p.A1047P      |
| Pat_24 | Pre-Treatment | DNAH10   | 196385 | 37 | 12 | 124270346 | 124270346 | Missense_Mutation | SNP | G | A | 59  | 86  | c.1101G>A    | c.(1099-1101)ATG>ATA | p.M367I       |
| Pat_24 | Pre-Treatment | DNAH10   | 196385 | 37 | 12 | 124293478 | 124293478 | Missense_Mutation | SNP | G | A | 6   | 528 | c.2768G>A    | c.(2767-2769)CGG>CAG | p.R923Q       |
| Pat_24 | Pre-Treatment | AACS     | 65985  | 37 | 12 | 125626671 | 125626671 | Missense_Mutation | SNP | G | A | 5   | 213 | c.1915G>A    | c.(1915-1917)GTC>ATC | p.V639I       |
| Pat_24 | Pre-Treatment | TMEM132B | 114795 | 37 | 12 | 126004121 | 126004121 | Missense_Mutation | SNP | G | A | 55  | 109 | c.1228G>A    | c.(1228-1230)GAG>AAG | p.E410K       |
| Pat_24 | Pre-Treatment | TMEM132D | 121256 | 37 | 12 | 130184920 | 130184920 | Missense_Mutation | SNP | G | A | 3   | 51  | c.403C>T     | c.(403-405)CGG>TGG   | p.R135W       |
| Pat_24 | Pre-Treatment | POLE     | 5426   | 37 | 12 | 133219832 | 133219832 | Missense_Mutation | SNP | G | A | 4   | 81  | c.4529C>T    | c.(4528-4530)GCA>GTA | p.A1510V      |
| Pat_24 | Pre-Treatment | PGAM5    | 192111 | 37 | 12 | 133291473 | 133291473 | Missense_Mutation | SNP | G | A | 4   | 236 | c.221G>A     | c.(220-222)CGG>CAG   | p.R74Q        |



|        |               |           |        |    |    |           |           |                        |     |   |   |    |     |            |                        |          |
|--------|---------------|-----------|--------|----|----|-----------|-----------|------------------------|-----|---|---|----|-----|------------|------------------------|----------|
| Pat_24 | Pre-Treatment | ZNF268    | 10795  | 37 | 12 | 133727692 | 133727692 | Translation_Start_Site | SNP | G | A | 4  | 154 | c.-972G>A  | (-974-970)TCGTG>TCATG  |          |
| Pat_24 | Pre-Treatment | ZNF10     | 7556   | 37 | 12 | 133732827 | 133732827 | Nonsense_Mutation      | SNP | G | A | 4  | 94  | c.995G>A   | c.(994-996)TGG>TAG     | p.W332*  |
| Pat_24 | Pre-Treatment | ZNF10     | 7556   | 37 | 12 | 133732959 | 133732959 | Missense_Mutation      | SNP | C | T | 70 | 161 | c.1127C>T  | c.(1126-1128)CCC>CTC   | p.P376L  |
| Pat_24 | Pre-Treatment | MPHOSPH8  | 54737  | 37 | 13 | 20240595  | 20240595  | Nonsense_Mutation      | SNP | C | T | 5  | 297 | c.2050C>T  | c.(2050-2052)CGA>TGA   | p.R684*  |
| Pat_24 | Pre-Treatment | PSPC1     | 55269  | 37 | 13 | 20356687  | 20356687  | Missense_Mutation      | SNP | G | A | 4  | 177 | c.211C>T   | c.(211-213)CTC>TTC     | p.L71F   |
| Pat_24 | Pre-Treatment | ATP12A    | 479    | 37 | 13 | 25262518  | 25262518  | Missense_Mutation      | SNP | C | T | 8  | 457 | c.290C>T   | c.(289-291)CCT>CTT     | p.P97L   |
| Pat_24 | Pre-Treatment | RNF6      | 6049   | 37 | 13 | 26789432  | 26789432  | Missense_Mutation      | SNP | C | T | 6  | 429 | c.587G>A   | c.(586-588)CGA>CAA     | p.R196Q  |
| Pat_24 | Pre-Treatment | MTUS2     | 23281  | 37 | 13 | 29600916  | 29600916  | Missense_Mutation      | SNP | A | G | 22 | 36  | c.2111A>G  | c.(2110-2112)AAC>AGC   | p.N704S  |
| Pat_24 | Pre-Treatment | STAR13    | 90627  | 37 | 13 | 33704132  | 33704132  | Missense_Mutation      | SNP | C | T | 31 | 56  | c.682G>A   | c.(682-684)GTC>ATC     | p.V228I  |
| Pat_24 | Pre-Treatment | TRPC4     | 7223   | 37 | 13 | 38266415  | 38266415  | Missense_Mutation      | SNP | G | A | 35 | 74  | c.955C>T   | c.(955-957)CCA>TCA     | p.P319S  |
| Pat_24 | Pre-Treatment | ELF1      | 1997   | 37 | 13 | 41525471  | 41525471  | Nonsense_Mutation      | SNP | G | A | 4  | 94  | c.355C>T   | c.(355-357)CGA>TGA     | p.R119*  |
| Pat_24 | Pre-Treatment | ATP7B     | 540    | 37 | 13 | 52524205  | 52524205  | Missense_Mutation      | SNP | C | T | 4  | 153 | c.2668G>A  | c.(2668-2670)GTG>ATG   | p.V890M  |
| Pat_24 | Pre-Treatment | UCHL3     | 7347   | 37 | 13 | 76141423  | 76141423  | Missense_Mutation      | SNP | G | A | 5  | 243 | c.401G>A   | c.(400-402)CGA>CAA     | p.R134Q  |
| Pat_24 | Pre-Treatment | LMO7      | 4008   | 37 | 13 | 76415291  | 76415291  | Missense_Mutation      | SNP | G | A | 38 | 61  | c.2930G>A  | c.(2929-2931)AGG>AAG   | p.R977K  |
| Pat_24 | Pre-Treatment | SPRY2     | 10253  | 37 | 13 | 80911087  | 80911087  | Nonsense_Mutation      | SNP | G | A | 5  | 227 | c.754C>T   | c.(754-756)CGA>TGA     | p.R252*  |
| Pat_24 | Pre-Treatment | DZIP1     | 22873  | 37 | 13 | 96239829  | 96239829  | Missense_Mutation      | SNP | C | T | 6  | 327 | c.2182G>A  | c.(2182-2184)GAA>AAA   | p.E728K  |
| Pat_24 | Pre-Treatment | IPO5      | 3843   | 37 | 13 | 98649834  | 98649834  | Nonsense_Mutation      | SNP | G | A | 4  | 152 | c.963G>A   | c.(961-963)TGG>TGA     | p.W321*  |
| Pat_24 | Pre-Treatment | NALCN     | 259232 | 37 | 13 | 101756664 | 101756664 | Missense_Mutation      | SNP | C | T | 48 | 55  | c.2871G>A  | c.(2869-2871)ATG>ATA   | p.M957I  |
| Pat_24 | Pre-Treatment | MYO16     | 23026  | 37 | 13 | 109661317 | 109661317 | Missense_Mutation      | SNP | G | A | 65 | 85  | c.2449G>A  | c.(2449-2451)GAA>AAA   | p.E817K  |
| Pat_24 | Pre-Treatment | COL4A1    | 1282   | 37 | 13 | 110835536 | 110835536 | Missense_Mutation      | SNP | G | A | 14 | 25  | c.1985C>T  | c.(1984-1986)CCC>CTC   | p.P662L  |
| Pat_24 | Pre-Treatment | ATP11A    | 23250  | 37 | 13 | 113527942 | 113527942 | Missense_Mutation      | SNP | C | T | 4  | 142 | c.3113C>T  | c.(3112-3114)TCG>TTG   | p.S1038L |
| Pat_24 | Pre-Treatment | PROZ      | 8858   | 37 | 13 | 113826166 | 113826166 | Missense_Mutation      | SNP | G | A | 4  | 113 | c.950G>A   | c.(949-951)CGG>CAG     | p.R317Q  |
| Pat_24 | Pre-Treatment | OR4M1     | 441670 | 37 | 14 | 20249078  | 20249078  | Missense_Mutation      | SNP | G | A | 97 | 136 | c.597G>A   | c.(595-597)ATG>ATA     | p.M199I  |
| Pat_24 | Pre-Treatment | TEP1      | 7011   | 37 | 14 | 20852268  | 20852268  | Missense_Mutation      | SNP | G | A | 4  | 178 | c.3463C>T  | c.(3463-3465)CGG>TGG   | p.R1155W |
| Pat_24 | Pre-Treatment | LRP10     | 26020  | 37 | 14 | 23345353  | 23345353  | Missense_Mutation      | SNP | G | C | 4  | 226 | c.1196G>C  | c.(1195-1197)TGC>TCC   | p.C399S  |
| Pat_24 | Pre-Treatment | ACIN1     | 22985  | 37 | 14 | 23530575  | 23530575  | Missense_Mutation      | SNP | C | T | 6  | 279 | c.3530G>A  | c.(3529-3531)CGA>CAA   | p.R1177Q |
| Pat_24 | Pre-Treatment | HOMEZ     | 57594  | 37 | 14 | 23745797  | 23745797  | Missense_Mutation      | SNP | G | A | 45 | 65  | c.640C>T   | c.(640-642)CCC>TCC     | p.P214S  |
| Pat_24 | Pre-Treatment | CMTM5     | 116173 | 37 | 14 | 23847681  | 23847681  | Missense_Mutation      | SNP | C | T | 6  | 442 | c.250C>T   | c.(250-252)CGC>TGC     | p.R84C   |
| Pat_24 | Pre-Treatment | MYH7      | 4625   | 37 | 14 | 23899059  | 23899059  | Missense_Mutation      | SNP | C | T | 4  | 132 | c.1063G>A  | c.(1063-1065)GCC>ACC   | p.A355T  |
| Pat_24 | Pre-Treatment | JPH4      | 84502  | 37 | 14 | 24045177  | 24045177  | Missense_Mutation      | SNP | G | A | 29 | 39  | c.868C>T   | c.(868-870)CGG>TGG     | p.R290W  |
| Pat_24 | Pre-Treatment | LRRC16B   | 90668  | 37 | 14 | 24535670  | 24535670  | Missense_Mutation      | SNP | G | A | 4  | 229 | c.3589G>A  | c.(3589-3591)GCA>ACA   | p.A1197T |
| Pat_24 | Pre-Treatment | NOVA1     | 4857   | 37 | 14 | 26949269  | 26949269  | Nonsense_Mutation      | SNP | G | A | 70 | 121 | c.361C>T   | c.(361-363)CGA>TGA     | p.R121*  |
| Pat_24 | Pre-Treatment | SIP1      | 8487   | 37 | 14 | 39594217  | 39594217  | Missense_Mutation      | SNP | A | T | 4  | 205 | c.541A>T   | c.(541-543)AGT>TGT     | p.S181C  |
| Pat_24 | Pre-Treatment | LRFN5     | 145581 | 37 | 14 | 42356643  | 42356643  | Missense_Mutation      | SNP | G | A | 4  | 163 | c.815G>A   | c.(814-816)CGC>CAC     | p.R272H  |
| Pat_24 | Pre-Treatment | C14orf182 | 283551 | 37 | 14 | 50472465  | 50472465  | Missense_Mutation      | SNP | C | T | 7  | 654 | c.53G>A    | c.(52-54)AGG>AAG       | p.R18K   |
| Pat_24 | Pre-Treatment | TRIM9     | 114088 | 37 | 14 | 51444041  | 51444041  | Missense_Mutation      | SNP | C | T | 4  | 178 | c.2101G>A  | c.(2101-2103)GAC>AAC   | p.D701N  |
| Pat_24 | Pre-Treatment | PELI2     | 57161  | 37 | 14 | 56763456  | 56763456  | Missense_Mutation      | SNP | G | A | 4  | 83  | c.835G>A   | c.(835-837)GCC>ACC     | p.A279T  |
| Pat_24 | Pre-Treatment | ARID4A    | 5926   | 37 | 14 | 58814397  | 58814397  | Missense_Mutation      | SNP | C | T | 4  | 106 | c.1205C>T  | c.(1204-1206)TCG>TTG   | p.S402L  |
| Pat_24 | Pre-Treatment | KCNH5     | 27133  | 37 | 14 | 63174438  | 63174438  | Missense_Mutation      | SNP | C | T | 79 | 138 | c.2755G>A  | c.(2755-2757)GAG>AAG   | p.E919K  |
| Pat_24 | Pre-Treatment | KCNH5     | 27133  | 37 | 14 | 63174770  | 63174770  | Missense_Mutation      | SNP | C | T | 48 | 72  | c.2423G>A  | c.(2422-2424)GGA>GAA   | p.G808E  |
| Pat_24 | Pre-Treatment | SYNE2     | 23224  | 37 | 14 | 64467305  | 64467305  | Missense_Mutation      | SNP | G | A | 4  | 197 | c.3506G>A  | c.(3505-3507)CGC>CAC   | p.R1169H |
| Pat_24 | Pre-Treatment | SYNE2     | 23224  | 37 | 14 | 64679658  | 64679658  | Missense_Mutation      | SNP | C | T | 5  | 191 | c.18991C>T | c.(18991-18993)CGC>TGC | p.R6331C |
| Pat_24 | Pre-Treatment | HSPA2     | 3306   | 37 | 14 | 65009062  | 65009062  | Missense_Mutation      | SNP | G | A | 4  | 163 | c.1495G>A  | c.(1495-1497)GGT>AGT   | p.G499S  |
| Pat_24 | Pre-Treatment | SPTB      | 6710   | 37 | 14 | 65240084  | 65240084  | Missense_Mutation      | SNP | C | T | 6  | 315 | c.5032G>A  | c.(5032-5034)GTG>ATG   | p.V1678M |
| Pat_24 | Pre-Treatment | DCAF5     | 8816   | 37 | 14 | 69521641  | 69521641  | Missense_Mutation      | SNP | G | A | 4  | 142 | c.1762C>T  | c.(1762-1764)CGG>TGG   | p.R588W  |
| Pat_24 | Pre-Treatment | TMEM90A   | 646658 | 37 | 14 | 74876219  | 74876219  | Missense_Mutation      | SNP | C | T | 5  | 7   | c.229G>A   | c.(229-231)GAC>AAC     | p.D77N   |
| Pat_24 | Pre-Treatment | TTL5      | 23093  | 37 | 14 | 76249729  | 76249729  | Missense_Mutation      | SNP | C | T | 4  | 112 | c.2842C>T  | c.(2842-2844)CAT>TAT   | p.H948Y  |

|        |               |           |        |    |    |           |           |                   |     |    |    |     |     |                |                      |          |
|--------|---------------|-----------|--------|----|----|-----------|-----------|-------------------|-----|----|----|-----|-----|----------------|----------------------|----------|
| Pat_24 | Pre-Treatment | ESRRB     | 2103   | 37 | 14 | 76928965  | 76928965  | Missense_Mutation | SNP | C  | T  | 5   | 229 | c.475C>T       | c.(475-477)CGC>TGC   | p.R159C  |
| Pat_24 | Pre-Treatment | ANGEL1    | 23357  | 37 | 14 | 77272947  | 77272947  | Missense_Mutation | SNP | G  | A  | 5   | 155 | c.1192C>T      | c.(1192-1194)CGC>TGC | p.R398C  |
| Pat_24 | Pre-Treatment | GSTZ1     | 2954   | 37 | 14 | 77795544  | 77795544  | Missense_Mutation | SNP | G  | A  | 4   | 97  | c.421G>A       | c.(421-423)GCC>ACC   | p.A141T  |
| Pat_24 | Pre-Treatment | C14orf145 | 145508 | 37 | 14 | 81372379  | 81372379  | Missense_Mutation | SNP | C  | T  | 4   | 117 | c.281G>A       | c.(280-282)CGT>CAT   | p.R94H   |
| Pat_24 | Pre-Treatment | ZC3H14    | 79882  | 37 | 14 | 89037468  | 89037468  | Missense_Mutation | SNP | G  | A  | 4   | 155 | c.235G>A       | c.(235-237)GAA>AAA   | p.E79K   |
| Pat_24 | Pre-Treatment | TRIP11    | 9321   | 37 | 14 | 92470806  | 92470806  | Missense_Mutation | SNP | C  | T  | 4   | 78  | c.3514G>A      | c.(3514-3516)GAA>AAA | p.E1172K |
| Pat_24 | Pre-Treatment | RIN3      | 79890  | 37 | 14 | 93118751  | 93118751  | Missense_Mutation | SNP | G  | A  | 5   | 304 | c.1357G>A      | c.(1357-1359)GCC>ACC | p.A453T  |
| Pat_24 | Pre-Treatment | DICER1    | 23405  | 37 | 14 | 95572381  | 95572381  | Missense_Mutation | SNP | G  | A  | 6   | 371 | c.2984C>T      | c.(2983-2985)TCA>TTA | p.S995L  |
| Pat_24 | Pre-Treatment | CLMN      | 79789  | 37 | 14 | 95669186  | 95669186  | Missense_Mutation | SNP | C  | T  | 4   | 192 | c.2500G>A      | c.(2500-2502)GAC>AAC | p.D834N  |
| Pat_24 | Pre-Treatment | CYP46A1   | 10858  | 37 | 14 | 100165849 | 100165849 | Missense_Mutation | SNP | G  | A  | 8   | 587 | c.329G>A       | c.(328-330)CGT>CAT   | p.R110H  |
| Pat_24 | Pre-Treatment | RAGE      | 5891   | 37 | 14 | 102732227 | 102732227 | Nonsense_Mutation | SNP | G  | A  | 5   | 184 | c.145C>T       | c.(145-147)CGA>TGA   | p.R49*   |
| Pat_24 | Pre-Treatment | TDRD9     | 122402 | 37 | 14 | 104457535 | 104457535 | Missense_Mutation | SNP | G  | A  | 4   | 166 | c.1154G>A      | c.(1153-1155)CGA>CAA | p.R385Q  |
| Pat_24 | Pre-Treatment | KIAA0284  | 283638 | 37 | 14 | 105356013 | 105356013 | Missense_Mutation | SNP | C  | T  | 24  | 57  | c.3796C>T      | c.(3796-3798)CCC>TCC | p.P1266S |
| Pat_24 | Pre-Treatment | PLD4      | 122618 | 37 | 14 | 105397256 | 105397256 | Missense_Mutation | SNP | G  | A  | 4   | 231 | c.895G>A       | c.(895-897)GTG>ATG   | p.V299M  |
| Pat_24 | Pre-Treatment | AHNAK2    | 113146 | 37 | 14 | 105418760 | 105418760 | Missense_Mutation | SNP | C  | T  | 7   | 717 | c.3028G>A      | c.(3028-3030)GTA>ATA | p.V1010I |
| Pat_24 | Pre-Treatment | NUDT14    | 256281 | 37 | 14 | 105643099 | 105643099 | Missense_Mutation | SNP | G  | A  | 4   | 220 | c.200C>T       | c.(199-201)GCG>GTG   | p.A67V   |
| Pat_24 | Pre-Treatment | BRF1      | 2972   | 37 | 14 | 105677459 | 105677459 | Missense_Mutation | SNP | C  | T  | 6   | 329 | c.1996G>A      | c.(1996-1998)GAC>AAC | p.D666N  |
| Pat_24 | Pre-Treatment | GABRB3    | 2562   | 37 | 15 | 26812790  | 26812790  | Missense_Mutation | SNP | G  | A  | 4   | 144 | c.773C>T       | c.(772-774)ACG>ATG   | p.T258M  |
| Pat_24 | Pre-Treatment | HERC2     | 8924   | 37 | 15 | 28422096  | 28422096  | Missense_Mutation | SNP | C  | T  | 4   | 115 | c.9432G>A      | c.(9430-9432)ATG>ATA | p.M3144I |
| Pat_24 | Pre-Treatment | TMCO5A    | 145942 | 37 | 15 | 38229100  | 38229100  | Missense_Mutation | SNP | G  | A  | 35  | 34  | c.193G>A       | c.(193-195)GAG>AAG   | p.E65K   |
| Pat_24 | Pre-Treatment | RASGRP1   | 10125  | 37 | 15 | 38795510  | 38795510  | Missense_Mutation | SNP | G  | T  | 4   | 90  | c.1391C>A      | c.(1390-1392)CCA>CAA | p.P464Q  |
| Pat_24 | Pre-Treatment | IVD       | 3712   | 37 | 15 | 40710365  | 40710365  | Missense_Mutation | SNP | G  | A  | 4   | 209 | c.1184G>A      | c.(1183-1185)CGC>CAC | p.R395H  |
| Pat_24 | Pre-Treatment | CASC5     | 57082  | 37 | 15 | 40933168  | 40933168  | Missense_Mutation | SNP | G  | A  | 6   | 377 | c.5819G>A      | c.(5818-5820)CGA>CAA | p.R1940Q |
| Pat_24 | Pre-Treatment | MAPKBP1   | 23005  | 37 | 15 | 42115755  | 42115755  | Missense_Mutation | SNP | C  | T  | 4   | 175 | c.3727C>T      | c.(3727-3729)CGG>TGG | p.R1243W |
| Pat_24 | Pre-Treatment | SPTBN5    | 51332  | 37 | 15 | 42160796  | 42160796  | Missense_Mutation | SNP | G  | A  | 4   | 198 | c.5752C>T      | c.(5752-5754)CGT>TGT | p.R1918C |
| Pat_24 | Pre-Treatment | PLA2G4E   | 123745 | 37 | 15 | 42298211  | 42298211  | Missense_Mutation | SNP | C  | T  | 4   | 170 | c.415G>A       | c.(415-417)GTG>ATG   | p.V139M  |
| Pat_24 | Pre-Treatment | CDAN1     | 146059 | 37 | 15 | 43020929  | 43020929  | Missense_Mutation | SNP | C  | T  | 4   | 156 | c.2725G>A      | c.(2725-2727)GGA>AGA | p.G909R  |
| Pat_24 | Pre-Treatment | TTBK2     | 146057 | 37 | 15 | 43109292  | 43109292  | Nonsense_Mutation | SNP | G  | A  | 4   | 187 | c.541C>T       | c.(541-543)CGA>TGA   | p.R181*  |
| Pat_24 | Pre-Treatment | MAP1A     | 4130   | 37 | 15 | 43815947  | 43815947  | Missense_Mutation | SNP | C  | T  | 3   | 56  | c.2276C>T      | c.(2275-2277)CCG>CTG | p.P759L  |
| Pat_24 | Pre-Treatment | MAP1A     | 4130   | 37 | 15 | 43818722  | 43818722  | Missense_Mutation | SNP | G  | A  | 12  | 49  | c.5051G>A      | c.(5050-5052)AGG>AAG | p.R1684K |
| Pat_24 | Pre-Treatment | CKMT1B    | 1159   | 37 | 15 | 43891417  | 43891418  | Missense_Mutation | DNP | GG | AA | 129 | 116 | .1200_1201GG>A | 198-1203)CTGGAG>CTA  | p.E401K  |
| Pat_24 | Pre-Treatment | DUOX2     | 50506  | 37 | 15 | 45388258  | 45388258  | Missense_Mutation | SNP | C  | T  | 63  | 54  | c.3848G>A      | c.(3847-3849)GGA>GAA | p.G1283E |
| Pat_24 | Pre-Treatment | SEMA6D    | 80031  | 37 | 15 | 48063158  | 48063158  | Missense_Mutation | SNP | G  | A  | 5   | 165 | c.2398G>A      | c.(2398-2400)GCT>ACT | p.A800T  |
| Pat_24 | Pre-Treatment | CYP19A1   | 1588   | 37 | 15 | 51507369  | 51507369  | Missense_Mutation | SNP | C  | T  | 4   | 216 | c.919G>A       | c.(919-921)GCT>ACT   | p.A307T  |
| Pat_24 | Pre-Treatment | GLDN      | 342035 | 37 | 15 | 51675633  | 51675633  | Missense_Mutation | SNP | G  | A  | 131 | 298 | c.416G>A       | c.(415-417)GGA>GAA   | p.G139E  |
| Pat_24 | Pre-Treatment | DMXL2     | 23312  | 37 | 15 | 51756911  | 51756911  | Missense_Mutation | SNP | C  | T  | 4   | 167 | c.7766G>A      | c.(7765-7767)CGA>CAA | p.R2589Q |
| Pat_24 | Pre-Treatment | MYO5C     | 55930  | 37 | 15 | 52497186  | 52497186  | Missense_Mutation | SNP | C  | T  | 6   | 112 | c.4696G>A      | c.(4696-4698)GGC>AGC | p.G1566S |
| Pat_24 | Pre-Treatment | GCNT3     | 9245   | 37 | 15 | 59910924  | 59910924  | Missense_Mutation | SNP | C  | T  | 60  | 196 | c.487C>T       | c.(487-489)CAT>TAT   | p.H163Y  |
| Pat_24 | Pre-Treatment | CILP      | 8483   | 37 | 15 | 65499120  | 65499120  | Missense_Mutation | SNP | C  | T  | 230 | 154 | c.424G>A       | c.(424-426)GGA>AGA   | p.G142R  |
| Pat_24 | Pre-Treatment | MEGF11    | 84465  | 37 | 15 | 66262997  | 66262997  | Missense_Mutation | SNP | C  | T  | 16  | 45  | c.793G>A       | c.(793-795)GGG>AGG   | p.G265R  |
| Pat_24 | Pre-Treatment | DIS3L     | 115752 | 37 | 15 | 66618578  | 66618578  | Missense_Mutation | SNP | G  | A  | 4   | 235 | c.2077G>A      | c.(2077-2079)GCC>ACC | p.A693T  |
| Pat_24 | Pre-Treatment | DIS3L     | 115752 | 37 | 15 | 66624358  | 66624358  | Missense_Mutation | SNP | G  | A  | 48  | 136 | c.2681G>A      | c.(2680-2682)AGG>AAG | p.R894K  |
| Pat_24 | Pre-Treatment | PIAS1     | 8554   | 37 | 15 | 68434663  | 68434663  | Missense_Mutation | SNP | A  | G  | 4   | 116 | c.590A>G       | c.(589-591)CAG>CGG   | p.Q197R  |
| Pat_24 | Pre-Treatment | NEO1      | 4756   | 37 | 15 | 73581579  | 73581579  | Missense_Mutation | SNP | C  | T  | 4   | 114 | c.3742C>T      | c.(3742-3744)CCT>TCT | p.P1248S |
| Pat_24 | Pre-Treatment | C15orf60  | 283677 | 37 | 15 | 73843396  | 73843396  | Missense_Mutation | SNP | G  | A  | 4   | 64  | c.451G>A       | c.(451-453)GGA>AGA   | p.G151R  |
| Pat_24 | Pre-Treatment | CSK       | 1445   | 37 | 15 | 75094194  | 75094194  | Missense_Mutation | SNP | C  | T  | 4   | 120 | c.1046C>T      | c.(1045-1047)CCA>CTA | p.P349L  |
| Pat_24 | Pre-Treatment | LMAN1L    | 79748  | 37 | 15 | 75117900  | 75117900  | Missense_Mutation | SNP | T  | C  | 4   | 241 | c.1535T>C      | c.(1534-1536)CTG>CCG | p.L512P  |

|        |               |          |        |    |    |          |          |                   |     |    |    |     |     |                                   |                        |          |
|--------|---------------|----------|--------|----|----|----------|----------|-------------------|-----|----|----|-----|-----|-----------------------------------|------------------------|----------|
| Pat_24 | Pre-Treatment | RPP25    | 54913  | 37 | 15 | 75248458 | 75248458 | Missense_Mutation | SNP | G  | A  | 21  | 38  | c.467C>T                          | c.(466-468)CCC>CTC     | p.P156L  |
| Pat_24 | Pre-Treatment | KIAA1024 | 23251  | 37 | 15 | 79749478 | 79749478 | Missense_Mutation | SNP | G  | A  | 6   | 425 | c.989G>A                          | c.(988-990)AGC>AAC     | p.S330N  |
| Pat_24 | Pre-Treatment | DET1     | 55070  | 37 | 15 | 89070830 | 89070830 | Missense_Mutation | SNP | C  | T  | 4   | 153 | c.1271G>A                         | c.(1270-1272)CGG>CAG   | p.R424Q  |
| Pat_24 | Pre-Treatment | MCTP2    | 55784  | 37 | 15 | 94841646 | 94841646 | Missense_Mutation | SNP | C  | T  | 16  | 64  | c.152C>T                          | c.(151-153)TCT>TTT     | p.S51F   |
| Pat_24 | Pre-Treatment | IGF1R    | 3480   | 37 | 15 | 99456466 | 99456466 | Missense_Mutation | SNP | C  | T  | 5   | 264 | c.1783C>T                         | c.(1783-1785)CGT>TGT   | p.R595C  |
| Pat_24 | Pre-Treatment | IGF1R    | 3480   | 37 | 15 | 99500543 | 99500543 | Missense_Mutation | SNP | G  | A  | 4   | 128 | c.3976G>A                         | c.(3976-3978)GAG>AAG   | p.E1326K |
| Pat_24 | Pre-Treatment | SYNM     | 23336  | 37 | 15 | 99670857 | 99670857 | Missense_Mutation | SNP | T  | G  | 30  | 31  | c.2292T>G                         | c.(2290-2292)TTT>TTG   | p.F764L  |
| Pat_24 | Pre-Treatment | RHBDF1   | 64285  | 37 | 16 | 111666   | 111666   | Missense_Mutation | SNP | C  | T  | 4   | 192 | c.1237G>A                         | c.(1237-1239)GTG>ATG   | p.V413M  |
| Pat_24 | Pre-Treatment | SOLH     | 6650   | 37 | 16 | 599050   | 599050   | Missense_Mutation | SNP | C  | T  | 5   | 369 | c.1507C>T                         | c.(1507-1509)CCC>TCC   | p.P503S  |
| Pat_24 | Pre-Treatment | RHBDL1   | 9028   | 37 | 16 | 727118   | 727118   | Missense_Mutation | SNP | G  | T  | 4   | 92  | c.769G>T                          | c.(769-771)GGG>TGG     | p.G257W  |
| Pat_24 | Pre-Treatment | FBXL16   | 146330 | 37 | 16 | 744675   | 744675   | Missense_Mutation | SNP | T  | G  | 14  | 23  | c.1250A>C                         | c.(1249-1251)CAC>CCC   | p.H417P  |
| Pat_24 | Pre-Treatment | PTX4     | 390667 | 37 | 16 | 1536466  | 1536466  | Missense_Mutation | SNP | C  | T  | 4   | 88  | c.896G>A                          | c.(895-897)CGC>CAC     | p.R299H  |
| Pat_24 | Pre-Treatment | TELO2    | 9894   | 37 | 16 | 1545592  | 1545592  | Missense_Mutation | SNP | G  | A  | 4   | 202 | c.581G>A                          | c.(580-582)CGG>CAG     | p.R194Q  |
| Pat_24 | Pre-Treatment | TBL3     | 10607  | 37 | 16 | 2027116  | 2027116  | Missense_Mutation | SNP | G  | A  | 5   | 178 | c.1502G>A                         | c.(1501-1503)CGC>CAC   | p.R501H  |
| Pat_24 | Pre-Treatment | TSC2     | 7249   | 37 | 16 | 2124261  | 2124261  | Missense_Mutation | SNP | G  | A  | 4   | 131 | c.2416G>A                         | c.(2416-2418)GTG>ATG   | p.V806M  |
| Pat_24 | Pre-Treatment | TSC2     | 7249   | 37 | 16 | 2125875  | 2125875  | Missense_Mutation | SNP | C  | T  | 4   | 203 | c.2621C>T                         | c.(2620-2622)CCG>CTG   | p.P874L  |
| Pat_24 | Pre-Treatment | TSC2     | 7249   | 37 | 16 | 2138495  | 2138495  | Missense_Mutation | SNP | C  | T  | 4   | 166 | c.5308C>T                         | c.(5308-5310)CCT>TCT   | p.P1770S |
| Pat_24 | Pre-Treatment | PKD1     | 5310   | 37 | 16 | 2140785  | 2140785  | Missense_Mutation | SNP | G  | A  | 4   | 163 | c.12028C>T                        | c.(12028-12030)CGC>TGC | p.R4010C |
| Pat_24 | Pre-Treatment | PKD1     | 5310   | 37 | 16 | 2152968  | 2152968  | Missense_Mutation | SNP | T  | C  | 4   | 146 | c.8795A>G                         | c.(8794-8796)CAC>CGC   | p.H2932R |
| Pat_24 | Pre-Treatment | ABCA3    | 21     | 37 | 16 | 2354118  | 2354118  | Missense_Mutation | SNP | G  | A  | 5   | 425 | c.1319C>T                         | c.(1318-1320)CCC>CTC   | p.P440L  |
| Pat_24 | Pre-Treatment | SRRM2    | 23524  | 37 | 16 | 2817405  | 2817406  | Missense_Mutation | DNP | CC | TT | 120 | 178 | c.6876_6877CC>T874-6879)GCCCA>GCT |                        | p.P2293S |
| Pat_24 | Pre-Treatment | SRRM2    | 23524  | 37 | 16 | 2818022  | 2818022  | Missense_Mutation | SNP | C  | T  | 4   | 153 | c.7493C>T                         | c.(7492-7494)GCC>GTC   | p.A2498V |
| Pat_24 | Pre-Treatment | ZNF213   | 7760   | 37 | 16 | 3187516  | 3187516  | Missense_Mutation | SNP | C  | T  | 4   | 189 | c.235C>T                          | c.(235-237)CGT>TGT     | p.R79C   |
| Pat_24 | Pre-Treatment | ZNF213   | 7760   | 37 | 16 | 3187633  | 3187633  | Missense_Mutation | SNP | G  | A  | 3   | 56  | c.352G>A                          | c.(352-354)GCC>ACC     | p.A118T  |
| Pat_24 | Pre-Treatment | ZNF263   | 10127  | 37 | 16 | 3340442  | 3340442  | Missense_Mutation | SNP | C  | T  | 4   | 200 | c.1936C>T                         | c.(1936-1938)CGG>TGG   | p.R646W  |
| Pat_24 | Pre-Treatment | NAT15    | 79903  | 37 | 16 | 3526288  | 3526288  | Missense_Mutation | SNP | G  | A  | 4   | 134 | c.61G>A                           | c.(61-63)GAT>AAT       | p.D21N   |
| Pat_24 | Pre-Treatment | MGRN1    | 23295  | 37 | 16 | 4721398  | 4721398  | Missense_Mutation | SNP | C  | T  | 4   | 181 | c.733C>T                          | c.(733-735)CGG>TGG     | p.R245W  |
| Pat_24 | Pre-Treatment | A2BP1    | 54715  | 37 | 16 | 7680638  | 7680638  | Missense_Mutation | SNP | G  | A  | 30  | 73  | c.710G>A                          | c.(709-711)GGA>GAA     | p.G237E  |
| Pat_24 | Pre-Treatment | TEKT5    | 146279 | 37 | 16 | 10788232 | 10788232 | Nonsense_Mutation | SNP | G  | A  | 136 | 254 | c.499C>T                          | c.(499-501)CAG>TAG     | p.Q167*  |
| Pat_24 | Pre-Treatment | CLEC16A  | 23274  | 37 | 16 | 11272395 | 11272395 | Missense_Mutation | SNP | G  | A  | 4   | 214 | c.3010G>A                         | c.(3010-3012)GTC>ATC   | p.V1004I |
| Pat_24 | Pre-Treatment | TXNDC11  | 51061  | 37 | 16 | 11794417 | 11794417 | Missense_Mutation | SNP | T  | C  | 57  | 88  | c.878A>G                          | c.(877-879)TAC>TGC     | p.Y293C  |
| Pat_24 | Pre-Treatment | ERCC4    | 2072   | 37 | 16 | 14022037 | 14022037 | Missense_Mutation | SNP | C  | T  | 39  | 113 | c.737C>T                          | c.(736-738)TCG>TTG     | p.S246L  |
| Pat_24 | Pre-Treatment | ABCC6    | 368    | 37 | 16 | 16276744 | 16276744 | Missense_Mutation | SNP | C  | T  | 4   | 205 | c.1987G>A                         | c.(1987-1989)GGT>AGT   | p.G663S  |
| Pat_24 | Pre-Treatment | TMC7     | 79905  | 37 | 16 | 19049260 | 19049260 | Missense_Mutation | SNP | G  | A  | 4   | 188 | c.1070G>A                         | c.(1069-1071)CGC>CAC   | p.R357H  |
| Pat_24 | Pre-Treatment | ITPRIPL2 | 162073 | 37 | 16 | 19126600 | 19126600 | Missense_Mutation | SNP | C  | T  | 6   | 349 | c.817C>T                          | c.(817-819)CGC>TGC     | p.R273C  |
| Pat_24 | Pre-Treatment | SYT17    | 51760  | 37 | 16 | 19195170 | 19195170 | Missense_Mutation | SNP | G  | A  | 6   | 358 | c.652G>A                          | c.(652-654)GAT>AAT     | p.D218N  |
| Pat_24 | Pre-Treatment | IGSF6    | 10261  | 37 | 16 | 21663853 | 21663853 | Missense_Mutation | SNP | C  | T  | 4   | 158 | c.67G>A                           | c.(67-69)GGT>AGT       | p.G23S   |
| Pat_24 | Pre-Treatment | OTOA     | 146183 | 37 | 16 | 21726384 | 21726384 | Missense_Mutation | SNP | C  | T  | 6   | 554 | c.1399C>T                         | c.(1399-1401)CGC>TGC   | p.R467C  |
| Pat_24 | Pre-Treatment | POLR3E   | 55718  | 37 | 16 | 22328500 | 22328500 | Missense_Mutation | SNP | G  | A  | 5   | 244 | c.838G>A                          | c.(838-840)GAT>AAT     | p.D280N  |
| Pat_24 | Pre-Treatment | CD19     | 930    | 37 | 16 | 28944394 | 28944394 | Missense_Mutation | SNP | G  | A  | 66  | 80  | c.518G>A                          | c.(517-519)TGT>TAT     | p.C173Y  |
| Pat_24 | Pre-Treatment | SPN      | 6693   | 37 | 16 | 29675747 | 29675747 | Missense_Mutation | SNP | C  | T  | 4   | 206 | c.698C>T                          | c.(697-699)TCT>TTT     | p.S233F  |
| Pat_24 | Pre-Treatment | SEZ6L2   | 26470  | 37 | 16 | 29900013 | 29900013 | Missense_Mutation | SNP | G  | A  | 4   | 74  | c.887C>T                          | c.(886-888)CCG>CTG     | p.P296L  |
| Pat_24 | Pre-Treatment | ZNF689   | 115509 | 37 | 16 | 30616499 | 30616499 | Missense_Mutation | SNP | G  | A  | 4   | 119 | c.589C>T                          | c.(589-591)CGG>TGG     | p.R197W  |
| Pat_24 | Pre-Treatment | SETD1A   | 9739   | 37 | 16 | 30992162 | 30992162 | Missense_Mutation | SNP | C  | A  | 4   | 71  | c.4684C>A                         | c.(4684-4686)CAG>AAG   | p.Q1562K |
| Pat_24 | Pre-Treatment | TRIM72   | 493829 | 37 | 16 | 31234180 | 31234180 | Missense_Mutation | SNP | C  | T  | 4   | 175 | c.773C>T                          | c.(772-774)CCC>CTC     | p.P258L  |
| Pat_24 | Pre-Treatment | ITGAX    | 3687   | 37 | 16 | 31393220 | 31393220 | Missense_Mutation | SNP | G  | A  | 49  | 92  | c.3484G>A                         | c.(3484-3486)GAG>AAG   | p.E1162K |
| Pat_24 | Pre-Treatment | VPS35    | 55737  | 37 | 16 | 46714661 | 46714661 | Missense_Mutation | SNP | G  | A  | 4   | 168 | c.428C>T                          | c.(427-429)CCC>CTC     | p.P143L  |

|        |               |          |        |    |    |          |          |                   |     |    |    |     |     |                 |                        |               |
|--------|---------------|----------|--------|----|----|----------|----------|-------------------|-----|----|----|-----|-----|-----------------|------------------------|---------------|
| Pat_24 | Pre-Treatment | ZNF423   | 23090  | 37 | 16 | 49670154 | 49670154 | Missense_Mutation | SNP | G  | A  | 24  | 41  | c.2909C>T       | c.(2908-2910)TCG>TTG   | p.S970L       |
| Pat_24 | Pre-Treatment | ADCY7    | 113    | 37 | 16 | 50324486 | 50324486 | Missense_Mutation | SNP | C  | T  | 41  | 73  | c.290C>T        | c.(289-291)GCG>GTG     | p.A97V        |
| Pat_24 | Pre-Treatment | CES7     | 221223 | 37 | 16 | 55880509 | 55880509 | Missense_Mutation | SNP | C  | T  | 7   | 563 | c.1582G>A       | c.(1582-1584)GGA>AGA   | p.G528R       |
| Pat_24 | Pre-Treatment | MT3      | 4504   | 37 | 16 | 56623800 | 56623800 | Missense_Mutation | SNP | C  | T  | 4   | 164 | c.50C>T         | c.(49-51)GCG>GTG       | p.A17V        |
| Pat_24 | Pre-Treatment | SLC12A3  | 6559   | 37 | 16 | 56920388 | 56920388 | Splice_Site       | SNP | G  | A  | 4   | 132 | c.2037_splice   | c.e16+1                | p.I679_splice |
| Pat_24 | Pre-Treatment | KIFC3    | 3801   | 37 | 16 | 57794802 | 57794803 | Missense_Mutation | DNP | GG | AT | 23  | 8   | ..2067_2068CC>A | 065-2070)AGCCGC>AGA    | 1689_690SR>R  |
| Pat_24 | Pre-Treatment | GOT2     | 2806   | 37 | 16 | 58752448 | 58752448 | Missense_Mutation | SNP | C  | T  | 5   | 286 | c.580G>A        | c.(580-582)GCT>ACT     | p.A194T       |
| Pat_24 | Pre-Treatment | HSF4     | 3299   | 37 | 16 | 67200260 | 67200260 | Missense_Mutation | SNP | C  | T  | 4   | 120 | c.523C>T        | c.(523-525)CGG>TGG     | p.R175W       |
| Pat_24 | Pre-Treatment | SLC9A5   | 6553   | 37 | 16 | 67304752 | 67304752 | Missense_Mutation | SNP | C  | T  | 4   | 107 | c.2330C>T       | c.(2329-2331)TCG>TTG   | p.S777L       |
| Pat_24 | Pre-Treatment | PARD6A   | 50855  | 37 | 16 | 67695433 | 67695433 | Missense_Mutation | SNP | C  | T  | 5   | 330 | c.139C>T        | c.(139-141)CGG>TGG     | p.R47W        |
| Pat_24 | Pre-Treatment | COG8     | 84342  | 37 | 16 | 69370596 | 69370596 | Missense_Mutation | SNP | C  | T  | 4   | 137 | c.397G>A        | c.(397-399)GAG>AAG     | p.E133K       |
| Pat_24 | Pre-Treatment | MTSS1L   | 92154  | 37 | 16 | 70712262 | 70712262 | Missense_Mutation | SNP | C  | T  | 5   | 128 | c.517G>A        | c.(517-519)GAC>AAC     | p.D173N       |
| Pat_24 | Pre-Treatment | HYDIN    | 54768  | 37 | 16 | 70954955 | 70954955 | Missense_Mutation | SNP | C  | T  | 5   | 174 | c.7321G>A       | c.(7321-7323)GAA>AAA   | p.E2441K      |
| Pat_24 | Pre-Treatment | KIAA0174 | 9798   | 37 | 16 | 71955271 | 71955271 | Missense_Mutation | SNP | C  | T  | 4   | 134 | c.506C>T        | c.(505-507)GCC>GTC     | p.A169V       |
| Pat_24 | Pre-Treatment | DHX38    | 9785   | 37 | 16 | 72139428 | 72139428 | Missense_Mutation | SNP | G  | A  | 4   | 188 | c.2392G>A       | c.(2392-2394)GTT>ATT   | p.V798I       |
| Pat_24 | Pre-Treatment | VAT1L    | 57687  | 37 | 16 | 77850847 | 77850847 | Missense_Mutation | SNP | G  | A  | 68  | 80  | c.263G>A        | c.(262-264)CGA>CAA     | p.R88Q        |
| Pat_24 | Pre-Treatment | SLC38A8  | 146167 | 37 | 16 | 84075678 | 84075678 | Missense_Mutation | SNP | C  | T  | 4   | 239 | c.85G>A         | c.(85-87)GCT>ACT       | p.A29T        |
| Pat_24 | Pre-Treatment | ZCCHC14  | 23174  | 37 | 16 | 87446244 | 87446244 | Missense_Mutation | SNP | C  | T  | 4   | 158 | c.1672G>A       | c.(1672-1674)GCC>ACC   | p.A558T       |
| Pat_24 | Pre-Treatment | CA5A     | 763    | 37 | 16 | 87969963 | 87969963 | Nonsense_Mutation | SNP | G  | A  | 5   | 277 | c.94C>T         | c.(94-96)CGA>TGA       | p.R32*        |
| Pat_24 | Pre-Treatment | TRAPP2L  | 51693  | 37 | 16 | 88925066 | 88925066 | Missense_Mutation | SNP | G  | A  | 6   | 461 | c.73G>A         | c.(73-75)GAG>AAG       | p.E25K        |
| Pat_24 | Pre-Treatment | SPIRE2   | 84501  | 37 | 16 | 89916844 | 89916844 | Missense_Mutation | SNP | G  | A  | 3   | 36  | c.421G>A        | c.(421-423)GGC>AGC     | p.G141S       |
| Pat_24 | Pre-Treatment | DEF8     | 54849  | 37 | 16 | 90027396 | 90027396 | Missense_Mutation | SNP | G  | A  | 5   | 363 | c.755G>A        | c.(754-756)AGC>AAC     | p.S252N       |
| Pat_24 | Pre-Treatment | PRPF8    | 10594  | 37 | 17 | 1577755  | 1577755  | Missense_Mutation | SNP | G  | A  | 6   | 222 | c.3280C>T       | c.(3280-3282)CGC>TGC   | p.R1094C      |
| Pat_24 | Pre-Treatment | SMG6     | 23293  | 37 | 17 | 2203290  | 2203290  | Missense_Mutation | SNP | G  | A  | 4   | 68  | c.757C>T        | c.(757-759)CGC>TGC     | p.R253C       |
| Pat_24 | Pre-Treatment | SHPK     | 23729  | 37 | 17 | 3514093  | 3514093  | Missense_Mutation | SNP | G  | A  | 5   | 259 | c.1198C>T       | c.(1198-1200)CGG>TGG   | p.R400W       |
| Pat_24 | Pre-Treatment | P2RX5    | 5026   | 37 | 17 | 3593916  | 3593916  | Missense_Mutation | SNP | G  | A  | 4   | 173 | c.419C>T        | c.(418-420)GCG>GTG     | p.A140V       |
| Pat_24 | Pre-Treatment | ITGAE    | 3682   | 37 | 17 | 3657141  | 3657141  | Missense_Mutation | SNP | G  | A  | 64  | 107 | c.1463C>T       | c.(1462-1464)GCC>GTC   | p.A488V       |
| Pat_24 | Pre-Treatment | GGT6     | 124975 | 37 | 17 | 4462050  | 4462050  | Nonsense_Mutation | SNP | G  | A  | 3   | 12  | c.742C>T        | c.(742-744)CGA>TGA     | p.R248*       |
| Pat_24 | Pre-Treatment | MINK1    | 50488  | 37 | 17 | 4798370  | 4798370  | Missense_Mutation | SNP | C  | T  | 4   | 128 | c.2918C>T       | c.(2917-2919)GCC>GTC   | p.A973V       |
| Pat_24 | Pre-Treatment | KIF1C    | 10749  | 37 | 17 | 4925960  | 4925960  | Missense_Mutation | SNP | C  | T  | 3   | 34  | c.2584C>T       | c.(2584-2586)CGG>TGG   | p.R862W       |
| Pat_24 | Pre-Treatment | GPR172B  | 55065  | 37 | 17 | 4937566  | 4937566  | Missense_Mutation | SNP | G  | A  | 4   | 130 | c.218C>T        | c.(217-219)CCG>CTG     | p.P73L        |
| Pat_24 | Pre-Treatment | NUP88    | 4927   | 37 | 17 | 5292182  | 5292182  | Missense_Mutation | SNP | G  | A  | 26  | 74  | c.1583C>T       | c.(1582-1584)TCC>TTC   | p.S528F       |
| Pat_24 | Pre-Treatment | BCL6B    | 255877 | 37 | 17 | 6930888  | 6930888  | Missense_Mutation | SNP | G  | A  | 5   | 228 | c.1390G>A       | c.(1390-1392)GGA>AGA   | p.G464R       |
| Pat_24 | Pre-Treatment | NEURL4   | 84461  | 37 | 17 | 7221108  | 7221108  | Nonsense_Mutation | SNP | T  | A  | 4   | 81  | c.4204A>T       | c.(4204-4206)AGA>TGA   | p.R1402*      |
| Pat_24 | Pre-Treatment | TMEM102  | 284114 | 37 | 17 | 7339756  | 7339756  | Missense_Mutation | SNP | C  | T  | 4   | 147 | c.458C>T        | c.(457-459)ACC>ATC     | p.T153I       |
| Pat_24 | Pre-Treatment | ZBTB4    | 57659  | 37 | 17 | 7366997  | 7366997  | Missense_Mutation | SNP | G  | A  | 4   | 185 | c.1304C>T       | c.(1303-1305)CCG>CTG   | p.P435L       |
| Pat_24 | Pre-Treatment | POLR2A   | 5430   | 37 | 17 | 7401081  | 7401081  | Missense_Mutation | SNP | C  | T  | 4   | 199 | c.1094C>T       | c.(1093-1095)ACT>ATT   | p.T365I       |
| Pat_24 | Pre-Treatment | POLR2A   | 5430   | 37 | 17 | 7404944  | 7404944  | Nonsense_Mutation | SNP | C  | T  | 5   | 260 | c.2245C>T       | c.(2245-2247)CGA>TGA   | p.R749*       |
| Pat_24 | Pre-Treatment | DNAH2    | 146754 | 37 | 17 | 7722299  | 7722299  | Missense_Mutation | SNP | C  | T  | 4   | 55  | c.10733C>T      | c.(10732-10734)ACC>ATC | p.T3578I      |
| Pat_24 | Pre-Treatment | KCNAB3   | 9196   | 37 | 17 | 7826851  | 7826851  | Missense_Mutation | SNP | G  | A  | 4   | 122 | c.1060C>T       | c.(1060-1062)CGC>TGC   | p.R354C       |
| Pat_24 | Pre-Treatment | CNTROB   | 116840 | 37 | 17 | 7851874  | 7851874  | Missense_Mutation | SNP | G  | A  | 4   | 146 | c.2450G>A       | c.(2449-2451)CGG>CAG   | p.R817Q       |
| Pat_24 | Pre-Treatment | PIK3R5   | 23533  | 37 | 17 | 8793371  | 8793371  | Missense_Mutation | SNP | C  | T  | 4   | 128 | c.730G>A        | c.(730-732)GGG>AGG     | p.G244R       |
| Pat_24 | Pre-Treatment | MYH8     | 4626   | 37 | 17 | 10304868 | 10304868 | Missense_Mutation | SNP | C  | T  | 176 | 287 | c.2923G>A       | c.(2923-2925)GAG>AAG   | p.E975K       |
| Pat_24 | Pre-Treatment | MYH4     | 4622   | 37 | 17 | 10353795 | 10353795 | Missense_Mutation | SNP | G  | A  | 5   | 378 | c.4156C>T       | c.(4156-4158)CGC>TGC   | p.R1386C      |
| Pat_24 | Pre-Treatment | MYH4     | 4622   | 37 | 17 | 10360853 | 10360853 | Missense_Mutation | SNP | G  | A  | 92  | 120 | c.1781C>T       | c.(1780-1782)GCC>GTC   | p.A594V       |
| Pat_24 | Pre-Treatment | MYH4     | 4622   | 37 | 17 | 10364367 | 10364367 | Missense_Mutation | SNP | G  | A  | 4   | 159 | c.1013C>T       | c.(1012-1014)GCT>GTT   | p.A338V       |
| Pat_24 | Pre-Treatment | MYH1     | 4619   | 37 | 17 | 10412834 | 10412834 | Missense_Mutation | SNP | C  | T  | 101 | 194 | c.1555G>A       | c.(1555-1557)GAC>AAC   | p.D519N       |

|        |               |           |        |    |    |          |          |                   |     |   |   |    |     |               |                        |               |
|--------|---------------|-----------|--------|----|----|----------|----------|-------------------|-----|---|---|----|-----|---------------|------------------------|---------------|
| Pat_24 | Pre-Treatment | MYH2      | 4620   | 37 | 17 | 10432937 | 10432937 | Missense_Mutation | SNP | C | T | 49 | 94  | c.3061G>A     | c.(3061-3063)GAC>AAC   | p.D1021N      |
| Pat_24 | Pre-Treatment | MYH3      | 4621   | 37 | 17 | 10541496 | 10541496 | Missense_Mutation | SNP | G | A | 5  | 155 | c.3593C>T     | c.(3592-3594)GCG>GTG   | p.A1198V      |
| Pat_24 | Pre-Treatment | MYH3      | 4621   | 37 | 17 | 10547729 | 10547729 | Missense_Mutation | SNP | G | A | 4  | 187 | c.1349C>T     | c.(1348-1350)ACG>ATG   | p.T450M       |
| Pat_24 | Pre-Treatment | DNAH9     | 1770   | 37 | 17 | 11795211 | 11795211 | Missense_Mutation | SNP | C | T | 5  | 432 | c.11230C>T    | c.(11230-11232)CGC>TGC | p.R3744C      |
| Pat_24 | Pre-Treatment | MYOCD     | 93649  | 37 | 17 | 12642601 | 12642601 | Missense_Mutation | SNP | C | A | 55 | 65  | c.673C>A      | c.(673-675)CTT>ATT     | p.L225I       |
| Pat_24 | Pre-Treatment | NCOR1     | 9611   | 37 | 17 | 15978955 | 15978955 | Missense_Mutation | SNP | G | A | 5  | 185 | c.3563C>T     | c.(3562-3564)TCG>TTG   | p.S1188L      |
| Pat_24 | Pre-Treatment | TRPV2     | 51393  | 37 | 17 | 16335108 | 16335108 | Missense_Mutation | SNP | G | A | 4  | 143 | c.1598G>A     | c.(1597-1599)CGG>CAG   | p.R533Q       |
| Pat_24 | Pre-Treatment | RAI1      | 10743  | 37 | 17 | 17697049 | 17697049 | Missense_Mutation | SNP | G | A | 4  | 137 | c.787G>A      | c.(787-789)GTC>ATC     | p.V263I       |
| Pat_24 | Pre-Treatment | SHMT1     | 6470   | 37 | 17 | 18256995 | 18256995 | Missense_Mutation | SNP | G | A | 5  | 321 | c.233C>T      | c.(232-234)CCG>CTG     | p.P78L        |
| Pat_24 | Pre-Treatment | MFAP4     | 4239   | 37 | 17 | 19288418 | 19288418 | Missense_Mutation | SNP | C | T | 7  | 390 | c.514G>A      | c.(514-516)GGG>AGG     | p.G172R       |
| Pat_24 | Pre-Treatment | RNF112    | 7732   | 37 | 17 | 19316944 | 19316944 | Missense_Mutation | SNP | G | A | 12 | 28  | c.775G>A      | c.(775-777)GAA>AAA     | p.E259K       |
| Pat_24 | Pre-Treatment | SLC47A2   | 146802 | 37 | 17 | 19618059 | 19618059 | Missense_Mutation | SNP | G | A | 8  | 611 | c.269C>T      | c.(268-270)TCG>TTG     | p.S90L        |
| Pat_24 | Pre-Treatment | ALDH3A1   | 218    | 37 | 17 | 19648378 | 19648378 | Missense_Mutation | SNP | G | A | 21 | 26  | c.65C>T       | c.(64-66)CCG>CTG       | p.P22L        |
| Pat_24 | Pre-Treatment | CYTSB     | 92521  | 37 | 17 | 20163608 | 20163608 | Splice_Site       | SNP | G | A | 4  | 74  | c.2940_splice | c.e12+1                | p.A980_splice |
| Pat_24 | Pre-Treatment | SEZ6      | 124925 | 37 | 17 | 27308551 | 27308551 | Missense_Mutation | SNP | G | A | 12 | 26  | c.562C>T      | c.(562-564)CCT>TCT     | p.P188S       |
| Pat_24 | Pre-Treatment | SEZ6      | 124925 | 37 | 17 | 27308970 | 27308970 | Missense_Mutation | SNP | G | A | 17 | 42  | c.143C>T      | c.(142-144)CCT>CTT     | p.P48L        |
| Pat_24 | Pre-Treatment | TAOK1     | 57551  | 37 | 17 | 27861169 | 27861169 | Missense_Mutation | SNP | C | A | 4  | 81  | c.2395C>A     | c.(2395-2397)CAG>AAG   | p.Q799K       |
| Pat_24 | Pre-Treatment | CPD       | 1362   | 37 | 17 | 28747972 | 28747972 | Missense_Mutation | SNP | C | T | 4  | 151 | c.1108C>T     | c.(1108-1110)CGT>TGT   | p.R370C       |
| Pat_24 | Pre-Treatment | RAB11FIP4 | 84440  | 37 | 17 | 29848344 | 29848344 | Missense_Mutation | SNP | G | A | 4  | 95  | c.724G>A      | c.(724-726)GTC>ATC     | p.V242I       |
| Pat_24 | Pre-Treatment | MYO1D     | 4642   | 37 | 17 | 30821877 | 30821877 | Missense_Mutation | SNP | C | T | 4  | 128 | c.2921G>A     | c.(2920-2922)GGG>GAG   | p.G974E       |
| Pat_24 | Pre-Treatment | CCL18     | 6362   | 37 | 17 | 34397903 | 34397903 | Missense_Mutation | SNP | C | T | 29 | 76  | c.164C>T      | c.(163-165)CCC>CTC     | p.P55L        |
| Pat_24 | Pre-Treatment | GNBP2     | 79893  | 37 | 17 | 34937778 | 34937778 | Missense_Mutation | SNP | C | T | 39 | 56  | c.1025C>T     | c.(1024-1026)ACC>ATC   | p.T342I       |
| Pat_24 | Pre-Treatment | ACACA     | 31     | 37 | 17 | 35581989 | 35581989 | Missense_Mutation | SNP | C | T | 4  | 136 | c.3287G>A     | c.(3286-3288)CGC>CAC   | p.R1096H      |
| Pat_24 | Pre-Treatment | ACACA     | 31     | 37 | 17 | 35627700 | 35627700 | Missense_Mutation | SNP | C | T | 20 | 265 | c.950G>A      | c.(949-951)GGA>GAA     | p.G317E       |
| Pat_24 | Pre-Treatment | MLLT6     | 4302   | 37 | 17 | 36872692 | 36872692 | Missense_Mutation | SNP | C | T | 30 | 35  | c.1109C>T     | c.(1108-1110)TCC>TTC   | p.S370F       |
| Pat_24 | Pre-Treatment | FBXO47    | 494188 | 37 | 17 | 37119185 | 37119185 | Missense_Mutation | SNP | C | T | 4  | 171 | c.94G>A       | c.(94-96)GGC>AGC       | p.G32S        |
| Pat_24 | Pre-Treatment | GRB7      | 2886   | 37 | 17 | 37902175 | 37902175 | Missense_Mutation | SNP | G | A | 7  | 644 | c.1280G>A     | c.(1279-1281)CGC>CAC   | p.R427H       |
| Pat_24 | Pre-Treatment | CCR7      | 1236   | 37 | 17 | 38711853 | 38711853 | Missense_Mutation | SNP | G | A | 4  | 169 | c.278C>T      | c.(277-279)ACC>ATC     | p.T93I        |
| Pat_24 | Pre-Treatment | KRT26     | 353288 | 37 | 17 | 38926062 | 38926062 | Missense_Mutation | SNP | C | T | 93 | 131 | c.913G>A      | c.(913-915)GAA>AAA     | p.E305K       |
| Pat_24 | Pre-Treatment | KRT12     | 3859   | 37 | 17 | 39019399 | 39019399 | Missense_Mutation | SNP | C | T | 4  | 205 | c.1292G>A     | c.(1291-1293)CGC>CAC   | p.R431H       |
| Pat_24 | Pre-Treatment | KRT12     | 3859   | 37 | 17 | 39023219 | 39023219 | Missense_Mutation | SNP | C | T | 4  | 205 | c.220G>A      | c.(220-222)GGA>AGA     | p.G74R        |
| Pat_24 | Pre-Treatment | KRT12     | 3859   | 37 | 17 | 39023402 | 39023402 | Missense_Mutation | SNP | G | A | 5  | 149 | c.37C>T       | c.(37-39)CGC>TGC       | p.R13C        |
| Pat_24 | Pre-Treatment | KRT37     | 8688   | 37 | 17 | 39580309 | 39580309 | Missense_Mutation | SNP | C | T | 4  | 232 | c.467G>A      | c.(466-468)CGT>CAT     | p.R156H       |
| Pat_24 | Pre-Treatment | KRT32     | 3882   | 37 | 17 | 39616393 | 39616393 | Missense_Mutation | SNP | G | A | 4  | 94  | c.1316C>T     | c.(1315-1317)CCT>CTT   | p.P439L       |
| Pat_24 | Pre-Treatment | FKBP10    | 60681  | 37 | 17 | 39973332 | 39973332 | Missense_Mutation | SNP | G | T | 4  | 181 | c.268G>T      | c.(268-270)GCC>TCC     | p.A90S        |
| Pat_24 | Pre-Treatment | GHDC      | 84514  | 37 | 17 | 40344316 | 40344316 | Missense_Mutation | SNP | C | T | 4  | 168 | c.832G>A      | c.(832-834)GGG>AGG     | p.G278R       |
| Pat_24 | Pre-Treatment | TUBG2     | 27175  | 37 | 17 | 40818688 | 40818688 | Missense_Mutation | SNP | G | A | 5  | 256 | c.1226G>A     | c.(1225-1227)CGT>CAT   | p.R409H       |
| Pat_24 | Pre-Treatment | BRCA1     | 672    | 37 | 17 | 41209095 | 41209095 | Nonsense_Mutation | SNP | G | A | 6  | 393 | c.5251C>T     | c.(5251-5253)CGA>TGA   | p.R1751*      |
| Pat_24 | Pre-Treatment | MPP3      | 4356   | 37 | 17 | 41908611 | 41908611 | Splice_Site       | SNP | C | T | 5  | 186 | c.222_splice  | c.e5+1                 | p.D74_splice  |
| Pat_24 | Pre-Treatment | NSF       | 4905   | 37 | 17 | 44788404 | 44788404 | Nonsense_Mutation | SNP | C | T | 43 | 92  | c.1546C>T     | c.(1546-1548)CGA>TGA   | p.R516*       |
| Pat_24 | Pre-Treatment | IGF2BP1   | 10642  | 37 | 17 | 47115649 | 47115649 | Missense_Mutation | SNP | G | A | 4  | 88  | c.521G>A      | c.(520-522)CGG>CAG     | p.R174Q       |
| Pat_24 | Pre-Treatment | C17orf67  | 339210 | 37 | 17 | 54892231 | 54892231 | Missense_Mutation | SNP | C | T | 6  | 718 | c.227G>A      | c.(226-228)CGG>CAG     | p.R76Q        |
| Pat_24 | Pre-Treatment | C17orf67  | 339210 | 37 | 17 | 54892253 | 54892253 | Missense_Mutation | SNP | C | T | 7  | 728 | c.205G>A      | c.(205-207)GGA>AGA     | p.G69R        |
| Pat_24 | Pre-Treatment | OR4D2     | 124538 | 37 | 17 | 56247618 | 56247618 | Missense_Mutation | SNP | C | T | 52 | 77  | c.602C>T      | c.(601-603)TCC>TTC     | p.S201F       |
| Pat_24 | Pre-Treatment | BZRAP1    | 9256   | 37 | 17 | 56389471 | 56389471 | Missense_Mutation | SNP | G | A | 4  | 117 | c.2711C>T     | c.(2710-2712)CCC>CTC   | p.P904L       |
| Pat_24 | Pre-Treatment | TRIM37    | 4591   | 37 | 17 | 57157205 | 57157205 | Missense_Mutation | SNP | C | T | 65 | 74  | c.526G>A      | c.(526-528)GAT>AAT     | p.D176N       |
| Pat_24 | Pre-Treatment | BCAS3     | 54828  | 37 | 17 | 59001793 | 59001793 | Missense_Mutation | SNP | G | A | 4  | 233 | c.1019G>A     | c.(1018-1020)AGT>AAT   | p.S340N       |



|        |               |          |        |    |    |          |          |                   |     |   |   |     |     |           |                      |          |
|--------|---------------|----------|--------|----|----|----------|----------|-------------------|-----|---|---|-----|-----|-----------|----------------------|----------|
| Pat_24 | Pre-Treatment | MED13    | 9969   | 37 | 17 | 60088302 | 60088302 | Missense_Mutation | SNP | C | T | 4   | 217 | c.1576G>A | c.(1576-1578)GAA>AAA | p.E526K  |
| Pat_24 | Pre-Treatment | MED13    | 9969   | 37 | 17 | 60106978 | 60106978 | Missense_Mutation | SNP | C | T | 4   | 169 | c.1207G>A | c.(1207-1209)GAA>AAA | p.E403K  |
| Pat_24 | Pre-Treatment | TBC1D3P2 | 440452 | 37 | 17 | 60348753 | 60348753 | Missense_Mutation | SNP | C | G | 4   | 152 | c.352G>C  | c.(352-354)GAG>CAG   | p.E118Q  |
| Pat_24 | Pre-Treatment | ACE      | 1636   | 37 | 17 | 61555323 | 61555323 | Missense_Mutation | SNP | C | T | 3   | 36  | c.281C>T  | c.(280-282)GCG>GTG   | p.A94V   |
| Pat_24 | Pre-Treatment | GH2      | 2689   | 37 | 17 | 61958766 | 61958766 | Missense_Mutation | SNP | G | A | 6   | 408 | c.124C>T  | c.(124-126)CGC>TGC   | p.R42C   |
| Pat_24 | Pre-Treatment | GPR142   | 350383 | 37 | 17 | 72368171 | 72368171 | Missense_Mutation | SNP | G | A | 4   | 101 | c.821G>A  | c.(820-822)CGG>CAG   | p.R274Q  |
| Pat_24 | Pre-Treatment | UNK      | 85451  | 37 | 17 | 73816091 | 73816091 | Missense_Mutation | SNP | C | T | 4   | 119 | c.1967C>T | c.(1966-1968)CCC>CTC | p.P656L  |
| Pat_24 | Pre-Treatment | MRPL38   | 64978  | 37 | 17 | 73895736 | 73895736 | Missense_Mutation | SNP | G | A | 3   | 53  | c.730C>T  | c.(730-732)CGG>TGG   | p.R244W  |
| Pat_24 | Pre-Treatment | RNF157   | 114804 | 37 | 17 | 74141393 | 74141393 | Missense_Mutation | SNP | G | T | 4   | 49  | c.1963C>A | c.(1963-1965)CAG>AAG | p.Q655K  |
| Pat_24 | Pre-Treatment | RNF157   | 114804 | 37 | 17 | 74157728 | 74157728 | Missense_Mutation | SNP | G | A | 4   | 83  | c.953C>T  | c.(952-954)CCC>CTC   | p.P318L  |
| Pat_24 | Pre-Treatment | QRICH2   | 84074  | 37 | 17 | 74289004 | 74289004 | Missense_Mutation | SNP | G | A | 8   | 174 | c.1306C>T | c.(1306-1308)CGG>TGG | p.R436W  |
| Pat_24 | Pre-Treatment | MXRA7    | 439921 | 37 | 17 | 74673705 | 74673705 | Missense_Mutation | SNP | C | T | 6   | 289 | c.580G>A  | c.(580-582)GAC>AAC   | p.D194N  |
| Pat_24 | Pre-Treatment | PGS1     | 9489   | 37 | 17 | 76394430 | 76394430 | Missense_Mutation | SNP | G | A | 4   | 178 | c.509G>A  | c.(508-510)CGA>CAA   | p.R170Q  |
| Pat_24 | Pre-Treatment | LGALS3BP | 3959   | 37 | 17 | 76972089 | 76972089 | Missense_Mutation | SNP | C | T | 15  | 51  | c.202G>A  | c.(202-204)GAG>AAG   | p.E68K   |
| Pat_24 | Pre-Treatment | CANT1    | 124583 | 37 | 17 | 76989694 | 76989694 | Missense_Mutation | SNP | G | A | 4   | 99  | c.1144C>T | c.(1144-1146)CGC>TGC | p.R382C  |
| Pat_24 | Pre-Treatment | RNF213   | 57674  | 37 | 17 | 78320284 | 78320284 | Missense_Mutation | SNP | G | A | 5   | 131 | c.2368G>A | c.(2368-2370)GAC>AAC | p.D790N  |
| Pat_24 | Pre-Treatment | TMEM105  | 284186 | 37 | 17 | 79287722 | 79287722 | Missense_Mutation | SNP | G | A | 6   | 257 | c.119C>T  | c.(118-120)ACA>ATA   | p.T40I   |
| Pat_24 | Pre-Treatment | P4HB     | 5034   | 37 | 17 | 79804327 | 79804327 | Missense_Mutation | SNP | C | T | 6   | 314 | c.1034G>A | c.(1033-1035)CGC>CAC | p.R345H  |
| Pat_24 | Pre-Treatment | TBCD     | 6904   | 37 | 17 | 80726375 | 80726375 | Missense_Mutation | SNP | G | A | 5   | 307 | c.515G>A  | c.(514-516)GGG>GAG   | p.G172E  |
| Pat_24 | Pre-Treatment | ENOSF1   | 55556  | 37 | 18 | 694292   | 694292   | Missense_Mutation | SNP | C | T | 4   | 194 | c.352G>A  | c.(352-354)GTC>ATC   | p.V118I  |
| Pat_24 | Pre-Treatment | MYOM1    | 8736   | 37 | 18 | 3102547  | 3102547  | Missense_Mutation | SNP | G | A | 77  | 115 | c.3500C>T | c.(3499-3501)TCC>TTC | p.S1167F |
| Pat_24 | Pre-Treatment | L3MBTL4  | 91133  | 37 | 18 | 6239762  | 6239762  | Missense_Mutation | SNP | C | T | 4   | 206 | c.662G>A  | c.(661-663)CGC>CAC   | p.R221H  |
| Pat_24 | Pre-Treatment | MPPE1    | 65258  | 37 | 18 | 11886762 | 11886762 | Missense_Mutation | SNP | G | A | 4   | 91  | c.694C>T  | c.(694-696)CGG>TGG   | p.R232W  |
| Pat_24 | Pre-Treatment | IMPA2    | 3613   | 37 | 18 | 12009956 | 12009956 | Missense_Mutation | SNP | C | T | 101 | 157 | c.305C>T  | c.(304-306)CCC>CTC   | p.P102L  |
| Pat_24 | Pre-Treatment | MEP1B    | 4225   | 37 | 18 | 29793298 | 29793298 | Missense_Mutation | SNP | C | T | 13  | 15  | c.1355C>T | c.(1354-1356)CCA>CTA | p.P452L  |
| Pat_24 | Pre-Treatment | MEP1B    | 4225   | 37 | 18 | 29797906 | 29797906 | Missense_Mutation | SNP | G | A | 4   | 162 | c.2069G>A | c.(2068-2070)CGA>CAA | p.R690Q  |
| Pat_24 | Pre-Treatment | ASXL3    | 80816  | 37 | 18 | 31325120 | 31325120 | Missense_Mutation | SNP | G | A | 17  | 25  | c.5308G>A | c.(5308-5310)GGA>AGA | p.G1770R |
| Pat_24 | Pre-Treatment | SLC14A2  | 8170   | 37 | 18 | 43212383 | 43212383 | Missense_Mutation | SNP | C | T | 5   | 246 | c.590C>T  | c.(589-591)TCG>TTG   | p.S197L  |
| Pat_24 | Pre-Treatment | SLC14A2  | 8170   | 37 | 18 | 43248375 | 43248375 | Missense_Mutation | SNP | G | A | 4   | 115 | c.1969G>A | c.(1969-1971)GTG>ATG | p.V657M  |
| Pat_24 | Pre-Treatment | PIAS2    | 9063   | 37 | 18 | 44416455 | 44416455 | Missense_Mutation | SNP | G | A | 53  | 93  | c.1067C>T | c.(1066-1068)CCA>CTA | p.P356L  |
| Pat_24 | Pre-Treatment | MYO5B    | 4645   | 37 | 18 | 47462641 | 47462641 | Missense_Mutation | SNP | C | T | 14  | 21  | c.1984G>A | c.(1984-1986)GAT>AAT | p.D662N  |
| Pat_24 | Pre-Treatment | ST8SIA3  | 51046  | 37 | 18 | 55021734 | 55021734 | Missense_Mutation | SNP | G | A | 4   | 153 | c.281G>A  | c.(280-282)CGG>CAG   | p.R94Q   |
| Pat_24 | Pre-Treatment | CCBE1    | 147372 | 37 | 18 | 57136752 | 57136752 | Missense_Mutation | SNP | C | T | 162 | 231 | c.353G>A  | c.(352-354)CGA>CAA   | p.R118Q  |
| Pat_24 | Pre-Treatment | NETO1    | 81832  | 37 | 18 | 70526196 | 70526196 | Missense_Mutation | SNP | G | A | 61  | 73  | c.334C>T  | c.(334-336)CCA>TCA   | p.P112S  |
| Pat_24 | Pre-Treatment | SALL3    | 27164  | 37 | 18 | 76754380 | 76754380 | Missense_Mutation | SNP | G | A | 4   | 68  | c.2389G>A | c.(2389-2391)GAT>AAT | p.D797N  |
| Pat_24 | Pre-Treatment | HCN2     | 610    | 37 | 19 | 613879   | 613879   | Missense_Mutation | SNP | G | A | 4   | 168 | c.1853G>A | c.(1852-1854)CGC>CAC | p.R618H  |
| Pat_24 | Pre-Treatment | MED16    | 10025  | 37 | 19 | 885943   | 885943   | Missense_Mutation | SNP | C | T | 6   | 159 | c.706G>A  | c.(706-708)GCG>ACG   | p.A236T  |
| Pat_24 | Pre-Treatment | PCSK4    | 54760  | 37 | 19 | 1488228  | 1488228  | Missense_Mutation | SNP | C | T | 4   | 80  | c.346G>A  | c.(346-348)GTG>ATG   | p.V116M  |
| Pat_24 | Pre-Treatment | MBD3     | 53615  | 37 | 19 | 1581224  | 1581224  | Missense_Mutation | SNP | C | T | 4   | 89  | c.544G>A  | c.(544-546)GCC>ACC   | p.A182T  |
| Pat_24 | Pre-Treatment | ATP8B3   | 148229 | 37 | 19 | 1791839  | 1791839  | Missense_Mutation | SNP | C | T | 4   | 129 | c.2212G>A | c.(2212-2214)GAG>AAG | p.E738K  |
| Pat_24 | Pre-Treatment | FAM108A1 | 81926  | 37 | 19 | 1877576  | 1877576  | Missense_Mutation | SNP | G | A | 4   | 149 | c.638C>T  | c.(637-639)CCG>CTG   | p.P213L  |
| Pat_24 | Pre-Treatment | AP3D1    | 8943   | 37 | 19 | 2116222  | 2116222  | Missense_Mutation | SNP | G | A | 4   | 70  | c.2057C>T | c.(2056-2058)TCG>TTG | p.S686L  |
| Pat_24 | Pre-Treatment | SLC39A3  | 29985  | 37 | 19 | 2733161  | 2733161  | Missense_Mutation | SNP | G | A | 4   | 78  | c.533C>T  | c.(532-534)TCG>TTG   | p.S178L  |
| Pat_24 | Pre-Treatment | NFIC     | 4782   | 37 | 19 | 3382196  | 3382196  | Missense_Mutation | SNP | G | A | 4   | 205 | c.517G>A  | c.(517-519)GTC>ATC   | p.V173I  |
| Pat_24 | Pre-Treatment | LONP1    | 9361   | 37 | 19 | 5696124  | 5696124  | Missense_Mutation | SNP | G | A | 4   | 156 | c.1954C>T | c.(1954-1956)CGT>TGT | p.R652C  |
| Pat_24 | Pre-Treatment | RANBP3   | 8498   | 37 | 19 | 5917637  | 5917637  | Missense_Mutation | SNP | G | A | 4   | 62  | c.1688C>T | c.(1687-1689)ACG>ATG | p.T563M  |
| Pat_24 | Pre-Treatment | KHSRP    | 8570   | 37 | 19 | 6418041  | 6418041  | Missense_Mutation | SNP | C | G | 3   | 115 | c.929G>C  | c.(928-930)GGC>GCC   | p.G310A  |

|        |               |          |        |    |    |          |          |                        |     |   |   |    |     |            |                        |           |
|--------|---------------|----------|--------|----|----|----------|----------|------------------------|-----|---|---|----|-----|------------|------------------------|-----------|
| Pat_24 | Pre-Treatment | SLC25A41 | 284427 | 37 | 19 | 6432116  | 6432116  | Missense_Mutation      | SNP | C | T | 4  | 139 | c.307G>A   | c.(307-309)GGG>AGG     | p.G103R   |
| Pat_24 | Pre-Treatment | TUBB4    | 10382  | 37 | 19 | 6495272  | 6495272  | Missense_Mutation      | SNP | C | T | 5  | 348 | c.1238G>A  | c.(1237-1239)AGC>AAC   | p.S413N   |
| Pat_24 | Pre-Treatment | SH2D3A   | 10045  | 37 | 19 | 6760844  | 6760844  | Missense_Mutation      | SNP | G | A | 4  | 81  | c.224C>T   | c.(223-225)ACA>ATA     | p.T75I    |
| Pat_24 | Pre-Treatment | ZNF557   | 79230  | 37 | 19 | 7083094  | 7083094  | Missense_Mutation      | SNP | A | G | 6  | 169 | c.611A>G   | c.(610-612)AAT>AGT     | p.N204S   |
| Pat_24 | Pre-Treatment | C19orf45 | 374877 | 37 | 19 | 7570268  | 7570268  | Missense_Mutation      | SNP | G | A | 5  | 272 | c.841G>A   | c.(841-843)GGC>AGC     | p.G281S   |
| Pat_24 | Pre-Treatment | CLEC4M   | 10332  | 37 | 19 | 7828094  | 7828094  | Translation_Start_Site | SNP | G | A | 12 | 34  | c.-58G>A   | :(-60--56)GGGTG>GGATG  |           |
| Pat_24 | Pre-Treatment | LRRc8E   | 80131  | 37 | 19 | 7965776  | 7965776  | Missense_Mutation      | SNP | G | A | 4  | 125 | c.2369G>A  | c.(2368-2370)CGG>CAG   | p.R790Q   |
| Pat_24 | Pre-Treatment | FBN3     | 84467  | 37 | 19 | 8188854  | 8188854  | Missense_Mutation      | SNP | C | T | 19 | 39  | c.2770G>A  | c.(2770-2772)GAT>AAT   | p.D924N   |
| Pat_24 | Pre-Treatment | LASS4    | 79603  | 37 | 19 | 8319406  | 8319406  | Missense_Mutation      | SNP | G | A | 4  | 109 | c.197G>A   | c.(196-198)CGG>CAG     | p.R66Q    |
| Pat_24 | Pre-Treatment | MYO1F    | 4542   | 37 | 19 | 8615464  | 8615464  | Nonsense_Mutation      | SNP | G | A | 4  | 169 | c.886C>T   | c.(886-888)CGA>TGA     | p.R296*   |
| Pat_24 | Pre-Treatment | MUC16    | 94025  | 37 | 19 | 9048291  | 9048291  | Missense_Mutation      | SNP | G | A | 4  | 115 | c.33340C>T | c.(33340-33342)CCA>TCA | p.P11114S |
| Pat_24 | Pre-Treatment | MUC16    | 94025  | 37 | 19 | 9075747  | 9075747  | Missense_Mutation      | SNP | G | C | 16 | 34  | c.11699C>G | c.(11698-11700)TCC>TGC | p.S3900C  |
| Pat_24 | Pre-Treatment | MUC16    | 94025  | 37 | 19 | 9090637  | 9090637  | Missense_Mutation      | SNP | G | A | 4  | 41  | c.1178C>T  | c.(1177-1179)CCA>CTA   | p.P393L   |
| Pat_24 | Pre-Treatment | ZNF426   | 79088  | 37 | 19 | 9639976  | 9639976  | Missense_Mutation      | SNP | C | T | 4  | 159 | c.745G>A   | c.(745-747)GAA>AAA     | p.E249K   |
| Pat_24 | Pre-Treatment | RAVER1   | 125950 | 37 | 19 | 10439703 | 10439703 | Missense_Mutation      | SNP | G | A | 3  | 26  | c.422C>T   | c.(421-423)TCG>TTG     | p.S141L   |
| Pat_24 | Pre-Treatment | TYK2     | 7297   | 37 | 19 | 10465258 | 10465258 | Missense_Mutation      | SNP | G | A | 4  | 241 | c.2645C>T  | c.(2644-2646)CCG>CTG   | p.P882L   |
| Pat_24 | Pre-Treatment | ZNF433   | 163059 | 37 | 19 | 12127138 | 12127138 | Missense_Mutation      | SNP | G | A | 4  | 164 | c.544C>T   | c.(544-546)CAT>TAT     | p.H182Y   |
| Pat_24 | Pre-Treatment | MAN2B1   | 4125   | 37 | 19 | 12772187 | 12772187 | Missense_Mutation      | SNP | G | A | 4  | 186 | c.913C>T   | c.(913-915)CGG>TGG     | p.R305W   |
| Pat_24 | Pre-Treatment | ASNA1    | 439    | 37 | 19 | 12849338 | 12849338 | Missense_Mutation      | SNP | G | A | 7  | 349 | c.175G>A   | c.(175-177)GTC>ATC     | p.V59I    |
| Pat_24 | Pre-Treatment | GCDH     | 2639   | 37 | 19 | 13007041 | 13007041 | Missense_Mutation      | SNP | G | A | 5  | 248 | c.658G>A   | c.(658-660)GAT>AAT     | p.D220N   |
| Pat_24 | Pre-Treatment | CALR     | 811    | 37 | 19 | 13054686 | 13054686 | Nonsense_Mutation      | SNP | G | T | 4  | 21  | c.1213G>T  | c.(1213-1215)GAG>TAG   | p.E405*   |
| Pat_24 | Pre-Treatment | LPHN1    | 22859  | 37 | 19 | 14281565 | 14281565 | Missense_Mutation      | SNP | G | A | 4  | 80  | c.323C>T   | c.(322-324)TCG>TTG     | p.S108L   |
| Pat_24 | Pre-Treatment | MYO9B    | 4650   | 37 | 19 | 17317980 | 17317980 | Missense_Mutation      | SNP | G | A | 4  | 52  | c.5551G>A  | c.(5551-5553)GCA>ACA   | p.A1851T  |
| Pat_24 | Pre-Treatment | MAP1S    | 55201  | 37 | 19 | 17837824 | 17837824 | Missense_Mutation      | SNP | C | T | 4  | 26  | c.1631C>T  | c.(1630-1632)GCA>GTA   | p.A544V   |
| Pat_24 | Pre-Treatment | ARRDC2   | 27106  | 37 | 19 | 18120750 | 18120750 | Missense_Mutation      | SNP | G | A | 5  | 78  | c.751G>A   | c.(751-753)GGG>AGG     | p.G251R   |
| Pat_24 | Pre-Treatment | ZNF676   | 163223 | 37 | 19 | 22363213 | 22363213 | Missense_Mutation      | SNP | G | A | 4  | 133 | c.1306C>T  | c.(1306-1308)CTT>TTT   | p.L436F   |
| Pat_24 | Pre-Treatment | ZNF492   | 57615  | 37 | 19 | 22847739 | 22847739 | Missense_Mutation      | SNP | G | A | 5  | 183 | c.1268G>A  | c.(1267-1269)TGT>TAT   | p.C423Y   |
| Pat_24 | Pre-Treatment | ZNF507   | 22847  | 37 | 19 | 32844016 | 32844016 | Nonsense_Mutation      | SNP | C | T | 4  | 148 | c.280C>T   | c.(280-282)CAG>TAG     | p.Q94*    |
| Pat_24 | Pre-Treatment | C19orf40 | 91442  | 37 | 19 | 33464993 | 33464993 | Missense_Mutation      | SNP | G | A | 4  | 128 | c.271G>A   | c.(271-273)GTT>ATT     | p.V91I    |
| Pat_24 | Pre-Treatment | MLL4     | 9757   | 37 | 19 | 36214067 | 36214067 | Nonsense_Mutation      | SNP | C | T | 4  | 154 | c.2893C>T  | c.(2893-2895)CGA>TGA   | p.R965*   |
| Pat_24 | Pre-Treatment | APLP1    | 333    | 37 | 19 | 36368683 | 36368683 | Missense_Mutation      | SNP | G | A | 4  | 113 | c.1508G>A  | c.(1507-1509)AGC>AAC   | p.S503N   |
| Pat_24 | Pre-Treatment | WDR62    | 284403 | 37 | 19 | 36579954 | 36579954 | Nonsense_Mutation      | SNP | C | T | 73 | 145 | c.1783C>T  | c.(1783-1785)CAG>TAG   | p.Q595*   |
| Pat_24 | Pre-Treatment | WDR62    | 284403 | 37 | 19 | 36594667 | 36594667 | Missense_Mutation      | SNP | G | A | 4  | 167 | c.3922G>A  | c.(3922-3924)GTG>ATG   | p.V1308M  |
| Pat_24 | Pre-Treatment | ZNF146   | 7705   | 37 | 19 | 36727658 | 36727658 | Missense_Mutation      | SNP | G | A | 6  | 145 | c.316G>A   | c.(316-318)GGG>AGG     | p.G106R   |
| Pat_24 | Pre-Treatment | ZNF829   | 374899 | 37 | 19 | 37382503 | 37382503 | Missense_Mutation      | SNP | C | T | 4  | 124 | c.1190G>A  | c.(1189-1191)CGA>CAA   | p.R397Q   |
| Pat_24 | Pre-Treatment | HKR1     | 284459 | 37 | 19 | 37853872 | 37853872 | Missense_Mutation      | SNP | G | A | 5  | 240 | c.1175G>A  | c.(1174-1176)CGT>CAT   | p.R392H   |
| Pat_24 | Pre-Treatment | ZNF527   | 84503  | 37 | 19 | 37865129 | 37865129 | Missense_Mutation      | SNP | C | T | 78 | 108 | c.29C>T    | c.(28-30)TCC>TTC       | p.S10F    |
| Pat_24 | Pre-Treatment | DPF1     | 8193   | 37 | 19 | 38708452 | 38708452 | Missense_Mutation      | SNP | G | A | 4  | 148 | c.662C>T   | c.(661-663)CCG>CTG     | p.P221L   |
| Pat_24 | Pre-Treatment | FAM98C   | 147965 | 37 | 19 | 38896008 | 38896008 | Missense_Mutation      | SNP | C | T | 4  | 125 | c.580C>T   | c.(580-582)CCC>TCC     | p.P194S   |
| Pat_24 | Pre-Treatment | RYR1     | 6261   | 37 | 19 | 39013705 | 39013705 | Missense_Mutation      | SNP | G | A | 12 | 7   | c.10297G>A | :(10297-10299)GAG>AAC  | p.E3433K  |
| Pat_24 | Pre-Treatment | SIRT2    | 22933  | 37 | 19 | 39371357 | 39371357 | Missense_Mutation      | SNP | G | A | 4  | 197 | c.844C>T   | c.(844-846)CGC>TGC     | p.R282C   |
| Pat_24 | Pre-Treatment | FBXO17   | 115290 | 37 | 19 | 39439252 | 39439252 | Missense_Mutation      | SNP | G | A | 4  | 227 | c.416C>T   | c.(415-417)CCG>CTG     | p.P139L   |
| Pat_24 | Pre-Treatment | PAPL     | 390928 | 37 | 19 | 39589605 | 39589605 | Missense_Mutation      | SNP | C | T | 4  | 99  | c.328C>T   | c.(328-330)CGC>TGC     | p.R110C   |
| Pat_24 | Pre-Treatment | TIMM50   | 92609  | 37 | 19 | 39972542 | 39972542 | Missense_Mutation      | SNP | G | A | 4  | 215 | c.437G>A   | c.(436-438)CGC>CAC     | p.R146H   |
| Pat_24 | Pre-Treatment | ZNF546   | 339327 | 37 | 19 | 40519644 | 40519644 | Missense_Mutation      | SNP | T | C | 54 | 82  | c.467T>C   | c.(466-468)TTG>TCG     | p.L156S   |
| Pat_24 | Pre-Treatment | PRX      | 57716  | 37 | 19 | 40900066 | 40900066 | Missense_Mutation      | SNP | G | A | 4  | 185 | c.4193C>T  | c.(4192-4194)GCC>GTC   | p.A1398V  |
| Pat_24 | Pre-Treatment | LTBP4    | 8425   | 37 | 19 | 41129511 | 41129511 | Missense_Mutation      | SNP | G | A | 4  | 71  | c.3760G>A  | c.(3760-3762)GTG>ATG   | p.V1254M  |

|        |               |          |        |    |    |          |          |                   |     |   |   |     |     |              |                      |               |
|--------|---------------|----------|--------|----|----|----------|----------|-------------------|-----|---|---|-----|-----|--------------|----------------------|---------------|
| Pat_24 | Pre-Treatment | CYP2B7P1 | 1556   | 37 | 19 | 41442117 | 41442117 | Missense_Mutation | SNP | C | T | 44  | 53  | c.287C>T     | c.(286-288)TCT>TTT   | p.S96F        |
| Pat_24 | Pre-Treatment | CYP2F1   | 1572   | 37 | 19 | 41630689 | 41630689 | Missense_Mutation | SNP | G | A | 4   | 39  | c.1030G>A    | c.(1030-1032)GCG>ACG | p.A344T       |
| Pat_24 | Pre-Treatment | BCKDHA   | 593    | 37 | 19 | 41920054 | 41920054 | Missense_Mutation | SNP | G | A | 4   | 124 | c.476G>A     | c.(475-477)CGG>CAG   | p.R159Q       |
| Pat_24 | Pre-Treatment | GSK3A    | 2931   | 37 | 19 | 42736815 | 42736815 | Missense_Mutation | SNP | G | A | 4   | 102 | c.1118C>T    | c.(1117-1119)CCG>CTG | p.P373L       |
| Pat_24 | Pre-Treatment | PAFAH1B3 | 5050   | 37 | 19 | 42804331 | 42804331 | Missense_Mutation | SNP | G | A | 4   | 179 | c.277C>T     | c.(277-279)CGG>TGG   | p.R93W        |
| Pat_24 | Pre-Treatment | TMEM145  | 284339 | 37 | 19 | 42827822 | 42827822 | Missense_Mutation | SNP | G | A | 4   | 189 | c.1282G>A    | c.(1282-1284)GGA>AGA | p.G428R       |
| Pat_24 | Pre-Treatment | MEGF8    | 1954   | 37 | 19 | 42847683 | 42847683 | Missense_Mutation | SNP | G | A | 4   | 101 | c.1568G>A    | c.(1567-1569)GGC>GAC | p.G523D       |
| Pat_24 | Pre-Treatment | CEACAM1  | 634    | 37 | 19 | 43025661 | 43025661 | Missense_Mutation | SNP | G | A | 6   | 450 | c.716C>T     | c.(715-717)ACC>ATC   | p.T239I       |
| Pat_24 | Pre-Treatment | PSG8     | 440533 | 37 | 19 | 43259211 | 43259211 | Missense_Mutation | SNP | C | T | 57  | 92  | c.917G>A     | c.(916-918)GGA>GAA   | p.G306E       |
| Pat_24 | Pre-Treatment | GIPR     | 2696   | 37 | 19 | 46180288 | 46180288 | Missense_Mutation | SNP | G | A | 5   | 140 | c.715G>A     | c.(715-717)GTC>ATC   | p.V239I       |
| Pat_24 | Pre-Treatment | SYMPK    | 8189   | 37 | 19 | 46332352 | 46332352 | Missense_Mutation | SNP | C | T | 4   | 113 | c.1861G>A    | c.(1861-1863)GCC>ACC | p.A621T       |
| Pat_24 | Pre-Treatment | PNMAL1   | 55228  | 37 | 19 | 46974154 | 46974154 | Missense_Mutation | SNP | G | A | 12  | 55  | c.139C>T     | c.(139-141)CTC>TTC   | p.L47F        |
| Pat_24 | Pre-Treatment | SLC1A5   | 6510   | 37 | 19 | 47280531 | 47280531 | Missense_Mutation | SNP | G | A | 4   | 189 | c.1190C>T    | c.(1189-1191)GCC>GTC | p.A397V       |
| Pat_24 | Pre-Treatment | GRLF1    | 2909   | 37 | 19 | 47424220 | 47424220 | Missense_Mutation | SNP | G | A | 4   | 155 | c.2288G>A    | c.(2287-2289)CGT>CAT | p.R763H       |
| Pat_24 | Pre-Treatment | GRLF1    | 2909   | 37 | 19 | 47440602 | 47440602 | Missense_Mutation | SNP | G | A | 4   | 117 | c.3763G>A    | c.(3763-3765)GTG>ATG | p.V1255M      |
| Pat_24 | Pre-Treatment | DHX34    | 9704   | 37 | 19 | 47882968 | 47882968 | Missense_Mutation | SNP | C | T | 130 | 243 | c.2708C>T    | c.(2707-2709)TCC>TTC | p.S903F       |
| Pat_24 | Pre-Treatment | SULT2A1  | 6822   | 37 | 19 | 48389505 | 48389505 | Missense_Mutation | SNP | C | T | 45  | 86  | c.10G>A      | c.(10-12)GAT>AAT     | p.D4N         |
| Pat_24 | Pre-Treatment | FGF21    | 26291  | 37 | 19 | 49261344 | 49261344 | Missense_Mutation | SNP | C | T | 12  | 16  | c.497C>T     | c.(496-498)CCA>CTA   | p.P166L       |
| Pat_24 | Pre-Treatment | BCAT2    | 587    | 37 | 19 | 49299854 | 49299854 | Missense_Mutation | SNP | C | T | 5   | 223 | c.1046G>A    | c.(1045-1047)CGA>CAA | p.R349Q       |
| Pat_24 | Pre-Treatment | BAX      | 581    | 37 | 19 | 49464149 | 49464149 | Nonsense_Mutation | SNP | G | A | 4   | 240 | c.452G>A     | c.(451-453)TGG>TAG   | p.W151*       |
| Pat_24 | Pre-Treatment | CGB7     | 94027  | 37 | 19 | 49557583 | 49557583 | Missense_Mutation | SNP | G | A | 10  | 112 | c.463C>T     | c.(463-465)CCG>TCG   | p.P155S       |
| Pat_24 | Pre-Treatment | CPT1C    | 126129 | 37 | 19 | 50212025 | 50212025 | Missense_Mutation | SNP | G | A | 5   | 332 | c.1495G>A    | c.(1495-1497)GGC>AGC | p.G499S       |
| Pat_24 | Pre-Treatment | SHANK1   | 50944  | 37 | 19 | 51165452 | 51165452 | Missense_Mutation | SNP | G | A | 4   | 88  | c.6256C>T    | c.(6256-6258)CCG>TCG | p.P2086S      |
| Pat_24 | Pre-Treatment | KLK15    | 55554  | 37 | 19 | 51330167 | 51330167 | Missense_Mutation | SNP | C | T | 25  | 36  | c.448G>A     | c.(448-450)GAG>AAG   | p.E150K       |
| Pat_24 | Pre-Treatment | KLK5     | 25818  | 37 | 19 | 51447041 | 51447041 | Missense_Mutation | SNP | C | T | 8   | 22  | c.728G>A     | c.(727-729)GGT>GAT   | p.G243D       |
| Pat_24 | Pre-Treatment | LIM2     | 3982   | 37 | 19 | 51885793 | 51885793 | Missense_Mutation | SNP | C | T | 54  | 117 | c.204G>A     | c.(202-204)ATG>ATA   | p.M68I        |
| Pat_24 | Pre-Treatment | ZNF578   | 147660 | 37 | 19 | 53014551 | 53014551 | Missense_Mutation | SNP | G | A | 17  | 234 | c.917G>A     | c.(916-918)CGT>CAT   | p.R306H       |
| Pat_24 | Pre-Treatment | ZNF816A  | 125893 | 37 | 19 | 53454670 | 53454670 | Missense_Mutation | SNP | C | T | 8   | 362 | c.358G>A     | c.(358-360)GTT>ATT   | p.V120I       |
| Pat_24 | Pre-Treatment | VN1R2    | 317701 | 37 | 19 | 53762332 | 53762332 | Nonsense_Mutation | SNP | G | A | 37  | 47  | c.704G>A     | c.(703-705)TGG>TAG   | p.W235*       |
| Pat_24 | Pre-Treatment | ZNF331   | 55422  | 37 | 19 | 54080095 | 54080095 | Missense_Mutation | SNP | G | A | 4   | 125 | c.281G>A     | c.(280-282)CCG>CAC   | p.R94H        |
| Pat_24 | Pre-Treatment | LAIR1    | 3903   | 37 | 19 | 54866912 | 54866912 | Missense_Mutation | SNP | C | T | 4   | 234 | c.829G>A     | c.(829-831)GAG>AAG   | p.E277K       |
| Pat_24 | Pre-Treatment | KIR2DL4  | 3805   | 37 | 19 | 55324579 | 55324579 | Splice_Site       | SNP | G | C | 3   | 60  | c.707_splice | c.e6-1               | p.G236_splice |
| Pat_24 | Pre-Treatment | NCR1     | 9437   | 37 | 19 | 55423586 | 55423586 | Missense_Mutation | SNP | G | A | 4   | 159 | c.733G>A     | c.(733-735)GAC>AAC   | p.D245N       |
| Pat_24 | Pre-Treatment | PTPRH    | 5794   | 37 | 19 | 55699497 | 55699497 | Missense_Mutation | SNP | G | T | 5   | 311 | c.2424C>A    | c.(2422-2424)CAC>CAA | p.H808Q       |
| Pat_24 | Pre-Treatment | CCDC106  | 29903  | 37 | 19 | 56163871 | 56163871 | Missense_Mutation | SNP | G | A | 4   | 142 | c.602G>A     | c.(601-603)CGG>CAG   | p.R201Q       |
| Pat_24 | Pre-Treatment | EPN1     | 29924  | 37 | 19 | 56190208 | 56190208 | Missense_Mutation | SNP | G | A | 4   | 158 | c.215G>A     | c.(214-216)CGT>CAT   | p.R72H        |
| Pat_24 | Pre-Treatment | ZNF471   | 57573  | 37 | 19 | 57035779 | 57035779 | Missense_Mutation | SNP | G | A | 4   | 110 | c.343G>A     | c.(343-345)GGA>AGA   | p.G115R       |
| Pat_24 | Pre-Treatment | PEG3     | 5178   | 37 | 19 | 57325423 | 57325423 | Missense_Mutation | SNP | C | G | 4   | 164 | c.4387G>C    | c.(4387-4389)GAA>CAA | p.E1463Q      |
| Pat_24 | Pre-Treatment | ZIM3     | 114026 | 37 | 19 | 57647082 | 57647082 | Nonsense_Mutation | SNP | C | T | 63  | 107 | c.623G>A     | c.(622-624)TGG>TAG   | p.W208*       |
| Pat_24 | Pre-Treatment | ZSCAN4   | 201516 | 37 | 19 | 58189418 | 58189418 | Missense_Mutation | SNP | C | T | 63  | 100 | c.533C>T     | c.(532-534)TCC>TTC   | p.S178F       |
| Pat_24 | Pre-Treatment | ZSCAN22  | 342945 | 37 | 19 | 58849872 | 58849872 | Missense_Mutation | SNP | G | A | 6   | 442 | c.656G>A     | c.(655-657)CGT>CAT   | p.R219H       |
| Pat_24 | Pre-Treatment | ADAM17   | 6868   | 37 | 2  | 9676829  | 9676829  | Missense_Mutation | SNP | A | G | 101 | 210 | c.359T>C     | c.(358-360)GTT>GCT   | p.V120A       |
| Pat_24 | Pre-Treatment | GEN1     | 348654 | 37 | 2  | 17946296 | 17946296 | Missense_Mutation | SNP | T | A | 69  | 125 | c.481T>A     | c.(481-483)TAT>AAT   | p.Y161N       |
| Pat_24 | Pre-Treatment | NT5C1B   | 93034  | 37 | 2  | 18736717 | 18736717 | Missense_Mutation | SNP | G | A | 7   | 537 | c.1693C>T    | c.(1693-1695)CGG>TGG | p.R565W       |
| Pat_24 | Pre-Treatment | NT5C1B   | 93034  | 37 | 2  | 18765976 | 18765976 | Missense_Mutation | SNP | G | A | 12  | 19  | c.707C>T     | c.(706-708)TCG>TTG   | p.S236L       |
| Pat_24 | Pre-Treatment | DPYSL5   | 56896  | 37 | 2  | 27157485 | 27157485 | Missense_Mutation | SNP | C | T | 5   | 351 | c.830C>T     | c.(829-831)ACG>ATG   | p.T277M       |
| Pat_24 | Pre-Treatment | IFT172   | 26160  | 37 | 2  | 27700873 | 27700873 | Missense_Mutation | SNP | G | A | 6   | 474 | c.1156C>T    | c.(1156-1158)CGG>TGG | p.R386W       |

|        |               |          |        |    |   |           |           |                   |     |   |   |     |     |            |                        |          |
|--------|---------------|----------|--------|----|---|-----------|-----------|-------------------|-----|---|---|-----|-----|------------|------------------------|----------|
| Pat_24 | Pre-Treatment | PLB1     | 151056 | 37 | 2 | 28820886  | 28820886  | Missense_Mutation | SNP | G | A | 4   | 207 | c.2336G>A  | c.(2335-2337)GGC>GAC   | p.G779D  |
| Pat_24 | Pre-Treatment | CRIM1    | 51232  | 37 | 2 | 36583665  | 36583665  | Missense_Mutation | SNP | C | T | 4   | 106 | c.230C>T   | c.(229-231)ACC>ATC     | p.T77I   |
| Pat_24 | Pre-Treatment | GEMIN6   | 79833  | 37 | 2 | 39009011  | 39009011  | Missense_Mutation | SNP | G | A | 4   | 225 | c.481G>A   | c.(481-483)GGA>AGA     | p.G161R  |
| Pat_24 | Pre-Treatment | MTA3     | 57504  | 37 | 2 | 42936069  | 42936069  | Missense_Mutation | SNP | G | A | 6   | 380 | c.1187G>A  | c.(1186-1188)CGA>CAA   | p.R396Q  |
| Pat_24 | Pre-Treatment | PLEKHH2  | 130271 | 37 | 2 | 43927635  | 43927635  | Missense_Mutation | SNP | C | T | 120 | 176 | c.1538C>T  | c.(1537-1539)TCC>TTC   | p.S513F  |
| Pat_24 | Pre-Treatment | ABCG8    | 64241  | 37 | 2 | 44078855  | 44078855  | Missense_Mutation | SNP | G | A | 6   | 184 | c.455G>A   | c.(454-456)CGC>CAC     | p.R152H  |
| Pat_24 | Pre-Treatment | TTC7A    | 57217  | 37 | 2 | 47233086  | 47233086  | Missense_Mutation | SNP | G | A | 6   | 190 | c.1091G>A  | c.(1090-1092)CGG>CAG   | p.R364Q  |
| Pat_24 | Pre-Treatment | OTX1     | 5013   | 37 | 2 | 63282733  | 63282733  | Missense_Mutation | SNP | G | A | 4   | 133 | c.347G>A   | c.(346-348)CGG>CAG     | p.R116Q  |
| Pat_24 | Pre-Treatment | SLC1A4   | 6509   | 37 | 2 | 65243783  | 65243783  | Missense_Mutation | SNP | C | T | 4   | 135 | c.1010C>T  | c.(1009-1011)GCG>GTG   | p.A337V  |
| Pat_24 | Pre-Treatment | APLF     | 200558 | 37 | 2 | 68753264  | 68753264  | Missense_Mutation | SNP | G | A | 4   | 230 | c.694G>A   | c.(694-696)GGA>AGA     | p.G232R  |
| Pat_24 | Pre-Treatment | ARHGAP25 | 9938   | 37 | 2 | 69053237  | 69053237  | Missense_Mutation | SNP | C | T | 4   | 219 | c.1849C>T  | c.(1849-1851)CGG>TGG   | p.R617W  |
| Pat_24 | Pre-Treatment | CYP26B1  | 56603  | 37 | 2 | 72362394  | 72362394  | Missense_Mutation | SNP | C | T | 4   | 103 | c.584G>A   | c.(583-585)CGG>CAG     | p.R195Q  |
| Pat_24 | Pre-Treatment | ALMS1    | 7840   | 37 | 2 | 73827919  | 73827919  | Nonsense_Mutation | SNP | G | A | 4   | 72  | c.11786G>A | c.(11785-11787)TGG>TAG | p.W3929* |
| Pat_24 | Pre-Treatment | DQX1     | 165545 | 37 | 2 | 74751136  | 74751136  | Missense_Mutation | SNP | G | A | 4   | 160 | c.730C>T   | c.(730-732)CGG>TGG     | p.R244W  |
| Pat_24 | Pre-Treatment | CTNNA2   | 1496   | 37 | 2 | 80874869  | 80874869  | Missense_Mutation | SNP | G | A | 129 | 204 | c.2734G>A  | c.(2734-2736)GAG>AAG   | p.E912K  |
| Pat_24 | Pre-Treatment | MAT2A    | 4144   | 37 | 2 | 85769710  | 85769710  | Missense_Mutation | SNP | G | A | 4   | 173 | c.791G>A   | c.(790-792)CGC>CAC     | p.R264H  |
| Pat_24 | Pre-Treatment | POLR1A   | 25885  | 37 | 2 | 86257434  | 86257434  | Missense_Mutation | SNP | G | A | 4   | 110 | c.4664C>T  | c.(4663-4665)GCG>GTG   | p.A1555V |
| Pat_24 | Pre-Treatment | MRPS5    | 64969  | 37 | 2 | 95774016  | 95774016  | Nonsense_Mutation | SNP | G | A | 5   | 167 | c.541C>T   | c.(541-543)CGA>TGA     | p.R181*  |
| Pat_24 | Pre-Treatment | GPAT2    | 150763 | 37 | 2 | 96697836  | 96697836  | Missense_Mutation | SNP | C | T | 25  | 141 | c.122G>A   | c.(121-123)GGG>GAG     | p.G41E   |
| Pat_24 | Pre-Treatment | STARD7   | 56910  | 37 | 2 | 96858130  | 96858130  | Missense_Mutation | SNP | G | A | 6   | 339 | c.820C>T   | c.(820-822)CGT>TGT     | p.R274C  |
| Pat_24 | Pre-Treatment | SNRNP200 | 23020  | 37 | 2 | 96948969  | 96948969  | Nonsense_Mutation | SNP | G | A | 7   | 218 | c.4885C>T  | c.(4885-4887)CGA>TGA   | p.R1629* |
| Pat_24 | Pre-Treatment | ACTR1B   | 10120  | 37 | 2 | 98273346  | 98273346  | Missense_Mutation | SNP | C | T | 4   | 42  | c.1106G>A  | c.(1105-1107)CGT>CAT   | p.R369H  |
| Pat_24 | Pre-Treatment | LYG1     | 129530 | 37 | 2 | 99907879  | 99907879  | Missense_Mutation | SNP | G | A | 14  | 43  | c.154C>T   | c.(154-156)CGT>TGT     | p.R52C   |
| Pat_24 | Pre-Treatment | NPAS2    | 4862   | 37 | 2 | 101584859 | 101584859 | Missense_Mutation | SNP | G | A | 4   | 240 | c.1024G>A  | c.(1024-1026)GAG>AAG   | p.E342K  |
| Pat_24 | Pre-Treatment | FHL2     | 2274   | 37 | 2 | 105979858 | 105979858 | Missense_Mutation | SNP | C | A | 5   | 57  | c.572G>T   | c.(571-573)TGC>TTC     | p.C191F  |
| Pat_24 | Pre-Treatment | PSD4     | 23550  | 37 | 2 | 113950879 | 113950879 | Missense_Mutation | SNP | G | A | 56  | 102 | c.1964G>A  | c.(1963-1965)CGG>CAG   | p.R655Q  |
| Pat_24 | Pre-Treatment | DPP10    | 57628  | 37 | 2 | 116548905 | 116548905 | Missense_Mutation | SNP | G | A | 4   | 179 | c.1673G>A  | c.(1672-1674)CGA>CAA   | p.R558Q  |
| Pat_24 | Pre-Treatment | CNTNAP5  | 129684 | 37 | 2 | 125521709 | 125521709 | Nonsense_Mutation | SNP | C | T | 61  | 103 | c.2515C>T  | c.(2515-2517)CGA>TGA   | p.R839*  |
| Pat_24 | Pre-Treatment | IWS1     | 55677  | 37 | 2 | 128250895 | 128250895 | Missense_Mutation | SNP | G | A | 4   | 133 | c.1891C>T  | c.(1891-1893)CTC>TTC   | p.L631F  |
| Pat_24 | Pre-Treatment | UGGT1    | 56886  | 37 | 2 | 128848960 | 128848960 | Missense_Mutation | SNP | C | A | 3   | 37  | c.29C>A    | c.(28-30)GCG>GAG       | p.A10E   |
| Pat_24 | Pre-Treatment | FAM123C  | 205147 | 37 | 2 | 131519893 | 131519893 | Missense_Mutation | SNP | G | A | 6   | 9   | c.248G>A   | c.(247-249)GGA>GAA     | p.G83E   |
| Pat_24 | Pre-Treatment | PLEKHB2  | 55041  | 37 | 2 | 131904261 | 131904261 | Missense_Mutation | SNP | G | A | 6   | 359 | c.584G>A   | c.(583-585)CGA>CAA     | p.R195Q  |
| Pat_24 | Pre-Treatment | NCKAP5   | 344148 | 37 | 2 | 133540573 | 133540573 | Missense_Mutation | SNP | C | T | 5   | 198 | c.3811G>A  | c.(3811-3813)GCC>ACC   | p.A1271T |
| Pat_24 | Pre-Treatment | NCKAP5   | 344148 | 37 | 2 | 133541974 | 133541974 | Missense_Mutation | SNP | G | A | 127 | 221 | c.2410C>T  | c.(2410-2412)CCT>TCT   | p.P804S  |
| Pat_24 | Pre-Treatment | MGAT5    | 4249   | 37 | 2 | 135180410 | 135180410 | Missense_Mutation | SNP | G | A | 5   | 247 | c.1714G>A  | c.(1714-1716)GGG>AGG   | p.G572R  |
| Pat_24 | Pre-Treatment | TMEM163  | 81615  | 37 | 2 | 135308187 | 135308187 | Missense_Mutation | SNP | G | A | 4   | 233 | c.412C>T   | c.(412-414)CGT>TGT     | p.R138C  |
| Pat_24 | Pre-Treatment | LRP1B    | 53353  | 37 | 2 | 141250238 | 141250238 | Missense_Mutation | SNP | G | A | 4   | 102 | c.9059C>T  | c.(9058-9060)GCT>GTT   | p.A3020V |
| Pat_24 | Pre-Treatment | LRP1B    | 53353  | 37 | 2 | 141264467 | 141264467 | Missense_Mutation | SNP | C | T | 41  | 55  | c.8419G>A  | c.(8419-8421)GAA>AAA   | p.E2807K |
| Pat_24 | Pre-Treatment | LRP1B    | 53353  | 37 | 2 | 141946086 | 141946086 | Missense_Mutation | SNP | C | T | 4   | 137 | c.917G>A   | c.(916-918)CGG>CAG     | p.R306Q  |
| Pat_24 | Pre-Treatment | ACVR1C   | 130399 | 37 | 2 | 158401119 | 158401119 | Missense_Mutation | SNP | C | T | 22  | 54  | c.781G>A   | c.(781-783)GGA>AGA     | p.G261R  |
| Pat_24 | Pre-Treatment | TANC1    | 85461  | 37 | 2 | 160080770 | 160080770 | Missense_Mutation | SNP | G | A | 4   | 127 | c.3706G>A  | c.(3706-3708)GTG>ATG   | p.V1236M |
| Pat_24 | Pre-Treatment | WDSUB1   | 151525 | 37 | 2 | 160114456 | 160114456 | Missense_Mutation | SNP | C | T | 4   | 61  | c.845G>A   | c.(844-846)AGG>AAG     | p.R282K  |
| Pat_24 | Pre-Treatment | SCN3A    | 6328   | 37 | 2 | 165950907 | 165950907 | Nonsense_Mutation | SNP | G | A | 135 | 219 | c.4513C>T  | c.(4513-4515)CAG>TAG   | p.Q1505* |
| Pat_24 | Pre-Treatment | SCN2A    | 6326   | 37 | 2 | 166170222 | 166170222 | Missense_Mutation | SNP | C | T | 49  | 82  | c.1127C>T  | c.(1126-1128)TCC>TTC   | p.S376F  |
| Pat_24 | Pre-Treatment | CSRNP3   | 80034  | 37 | 2 | 166535587 | 166535587 | Missense_Mutation | SNP | C | T | 4   | 213 | c.1082C>T  | c.(1081-1083)ACG>ATG   | p.T361M  |
| Pat_24 | Pre-Treatment | SCN1A    | 6323   | 37 | 2 | 166915126 | 166915126 | Missense_Mutation | SNP | G | A | 37  | 57  | c.337C>T   | c.(337-339)CCC>TCC     | p.P113S  |
| Pat_24 | Pre-Treatment | LRP2     | 4036   | 37 | 2 | 170002377 | 170002377 | Missense_Mutation | SNP | C | T | 19  | 38  | c.12868G>A | c.(12868-12870)GAA>AAA | p.E4290K |

|        |               |          |        |    |    |           |           |                   |     |    |    |     |     |                |                        |           |
|--------|---------------|----------|--------|----|----|-----------|-----------|-------------------|-----|----|----|-----|-----|----------------|------------------------|-----------|
| Pat_24 | Pre-Treatment | LRP2     | 4036   | 37 | 2  | 170030528 | 170030528 | Nonsense_Mutation | SNP | G  | A  | 54  | 87  | c.10915C>T     | c.(10915-10917)CAG>TAG | p.Q3639*  |
| Pat_24 | Pre-Treatment | LRP2     | 4036   | 37 | 2  | 170032996 | 170032996 | Missense_Mutation | SNP | G  | A  | 4   | 87  | c.10496C>T     | c.(10495-10497)ACC>ATC | p.T3499I  |
| Pat_24 | Pre-Treatment | LRP2     | 4036   | 37 | 2  | 170099985 | 170099985 | Nonsense_Mutation | SNP | G  | A  | 5   | 326 | c.3478C>T      | c.(3478-3480)CGA>TGA   | p.R1160*  |
| Pat_24 | Pre-Treatment | ITGA6    | 3655   | 37 | 2  | 173352006 | 173352006 | Missense_Mutation | SNP | C  | T  | 27  | 53  | c.1985C>T      | c.(1984-1986)CCA>CTA   | p.P662L   |
| Pat_24 | Pre-Treatment | TTN      | 7273   | 37 | 2  | 179395188 | 179395188 | Missense_Mutation | SNP | T  | A  | 31  | 65  | c.98450A>T     | c.(98449-98451)AAG>ATG | p.K32817M |
| Pat_24 | Pre-Treatment | TTN      | 7273   | 37 | 2  | 179410270 | 179410270 | Missense_Mutation | SNP | C  | T  | 7   | 615 | c.87863G>A     | c.(87862-87864)CGT>CAT | p.R29288H |
| Pat_24 | Pre-Treatment | TTN      | 7273   | 37 | 2  | 179458711 | 179458711 | Missense_Mutation | SNP | C  | T  | 134 | 219 | c.50705G>A     | c.(50704-50706)GGT>GAT | p.G16902D |
| Pat_24 | Pre-Treatment | CCDC141  | 285025 | 37 | 2  | 179718176 | 179718177 | Missense_Mutation | DNP | TG | CT | 80  | 168 | .1510_1511CA>A | c.(1510-1512)CAC>AGC   | p.H504S   |
| Pat_24 | Pre-Treatment | PDE1A    | 5136   | 37 | 2  | 183104982 | 183104982 | Nonsense_Mutation | SNP | G  | A  | 52  | 77  | c.253C>T       | c.(253-255)CAG>TAG     | p.Q85*    |
| Pat_24 | Pre-Treatment | ZSWIM2   | 151112 | 37 | 2  | 187692805 | 187692805 | Missense_Mutation | SNP | C  | T  | 6   | 101 | c.1808G>A      | c.(1807-1809)CGA>CAA   | p.R603Q   |
| Pat_24 | Pre-Treatment | ANKAR    | 150709 | 37 | 2  | 190608104 | 190608104 | Missense_Mutation | SNP | G  | A  | 4   | 53  | c.3701G>A      | c.(3700-3702)CGT>CAT   | p.R1234H  |
| Pat_24 | Pre-Treatment | INPP1    | 3628   | 37 | 2  | 191235652 | 191235652 | Missense_Mutation | SNP | G  | A  | 6   | 540 | c.724G>A       | c.(724-726)GGC>AGC     | p.G242S   |
| Pat_24 | Pre-Treatment | MFSD6    | 54842  | 37 | 2  | 191301809 | 191301809 | Missense_Mutation | SNP | G  | A  | 5   | 154 | c.1054G>A      | c.(1054-1056)GAA>AAA   | p.E352K   |
| Pat_24 | Pre-Treatment | MYO1B    | 4430   | 37 | 2  | 192257872 | 192257872 | Missense_Mutation | SNP | G  | A  | 4   | 174 | c.2150G>A      | c.(2149-2151)GGG>GAG   | p.G717E   |
| Pat_24 | Pre-Treatment | BMPR2    | 659    | 37 | 2  | 203420798 | 203420798 | Missense_Mutation | SNP | G  | A  | 4   | 145 | c.2410G>A      | c.(2410-2412)GTC>ATC   | p.V804I   |
| Pat_24 | Pre-Treatment | PARD3B   | 117583 | 37 | 2  | 206037007 | 206037007 | Missense_Mutation | SNP | G  | A  | 73  | 210 | c.1693G>A      | c.(1693-1695)GAA>AAA   | p.E565K   |
| Pat_24 | Pre-Treatment | NDUFS1   | 4719   | 37 | 2  | 207003231 | 207003231 | Missense_Mutation | SNP | G  | A  | 5   | 295 | c.1370C>T      | c.(1369-1371)TCG>TTG   | p.S457L   |
| Pat_24 | Pre-Treatment | LANCL1   | 10314  | 37 | 2  | 211305413 | 211305413 | Missense_Mutation | SNP | G  | A  | 4   | 150 | c.599C>T       | c.(598-600)ACG>ATG     | p.T200M   |
| Pat_24 | Pre-Treatment | ERBB4    | 2066   | 37 | 2  | 212578265 | 212578266 | Missense_Mutation | DNP | GG | TT | 4   | 99  | c.991_992CC>AA | c.(991-993)CCA>AAA     | p.P331K   |
| Pat_24 | Pre-Treatment | C2orf62  | 375307 | 37 | 2  | 219227554 | 219227554 | Missense_Mutation | SNP | C  | T  | 5   | 94  | c.559C>T       | c.(559-561)CGG>TGG     | p.R187W   |
| Pat_24 | Pre-Treatment | USP37    | 57695  | 37 | 2  | 219411766 | 219411766 | Nonsense_Mutation | SNP | G  | A  | 4   | 203 | c.478C>T       | c.(478-480)CGA>TGA     | p.R160*   |
| Pat_24 | Pre-Treatment | WNT10A   | 80326  | 37 | 2  | 219746978 | 219746978 | Missense_Mutation | SNP | G  | A  | 5   | 96  | c.209G>A       | c.(208-210)CGG>CAG     | p.R70Q    |
| Pat_24 | Pre-Treatment | CCDC108  | 255101 | 37 | 2  | 219894331 | 219894331 | Missense_Mutation | SNP | G  | A  | 5   | 287 | c.1444C>T      | c.(1444-1446)CGC>TGC   | p.R482C   |
| Pat_24 | Pre-Treatment | ANKZF1   | 55139  | 37 | 2  | 220098932 | 220098932 | Missense_Mutation | SNP | C  | T  | 11  | 21  | c.1126C>T      | c.(1126-1128)CCT>TCT   | p.P376S   |
| Pat_24 | Pre-Treatment | TUBA4A   | 7277   | 37 | 2  | 220115777 | 220115777 | Missense_Mutation | SNP | C  | T  | 5   | 433 | c.644G>A       | c.(643-645)CGC>CAC     | p.R215H   |
| Pat_24 | Pre-Treatment | KIAA1486 | 57624  | 37 | 2  | 226446729 | 226446729 | Missense_Mutation | SNP | C  | T  | 5   | 364 | c.596C>T       | c.(595-597)CCG>CTG     | p.P199L   |
| Pat_24 | Pre-Treatment | SP140L   | 93349  | 37 | 2  | 231254663 | 231254663 | Missense_Mutation | SNP | G  | A  | 57  | 92  | c.889G>A       | c.(889-891)GAT>AAT     | p.D297N   |
| Pat_24 | Pre-Treatment | ALPP     | 250    | 37 | 2  | 233243710 | 233243710 | Missense_Mutation | SNP | C  | T  | 4   | 175 | c.106C>T       | c.(106-108)CGC>TGC     | p.R36C    |
| Pat_24 | Pre-Treatment | ALPP     | 250    | 37 | 2  | 233245136 | 233245136 | Missense_Mutation | SNP | C  | T  | 4   | 198 | c.799C>T       | c.(799-801)CGG>TGG     | p.R267W   |
| Pat_24 | Pre-Treatment | GIGYF2   | 26058  | 37 | 2  | 233674449 | 233674449 | Missense_Mutation | SNP | G  | A  | 4   | 230 | c.1826G>A      | c.(1825-1827)CGA>CAA   | p.R609Q   |
| Pat_24 | Pre-Treatment | DGKD     | 8527   | 37 | 2  | 234375783 | 234375783 | Missense_Mutation | SNP | G  | A  | 5   | 427 | c.3358G>A      | c.(3358-3360)GTG>ATG   | p.V1120M  |
| Pat_24 | Pre-Treatment | UGT1A4   | 54657  | 37 | 2  | 234627614 | 234627614 | Missense_Mutation | SNP | G  | A  | 28  | 39  | c.148G>A       | c.(148-150)GAG>AAG     | p.E50K    |
| Pat_24 | Pre-Treatment | TRPM8    | 79054  | 37 | 2  | 234854527 | 234854527 | Missense_Mutation | SNP | G  | A  | 107 | 187 | c.727G>A       | c.(727-729)GAT>AAT     | p.D243N   |
| Pat_24 | Pre-Treatment | TRAF3IP1 | 26146  | 37 | 2  | 239258006 | 239258006 | Missense_Mutation | SNP | C  | T  | 37  | 87  | c.1408C>T      | c.(1408-1410)CGG>TGG   | p.R470W   |
| Pat_24 | Pre-Treatment | TRIB3    | 57761  | 37 | 20 | 368853    | 368853    | Missense_Mutation | SNP | C  | T  | 4   | 175 | c.199C>T       | c.(199-201)CGT>TGT     | p.R67C    |
| Pat_24 | Pre-Treatment | SIRPA    | 140885 | 37 | 20 | 1902259   | 1902259   | Missense_Mutation | SNP | C  | T  | 4   | 128 | c.655C>T       | c.(655-657)CGC>TGC     | p.R219C   |
| Pat_24 | Pre-Treatment | SIRPA    | 140885 | 37 | 20 | 1918051   | 1918051   | Missense_Mutation | SNP | C  | T  | 4   | 136 | c.1352C>T      | c.(1351-1353)ACG>ATG   | p.T451M   |
| Pat_24 | Pre-Treatment | TGM6     | 343641 | 37 | 20 | 2384352   | 2384352   | Missense_Mutation | SNP | G  | A  | 82  | 99  | c.1219G>A      | c.(1219-1221)GAT>AAT   | p.D407N   |
| Pat_24 | Pre-Treatment | TMC2     | 117532 | 37 | 20 | 2575609   | 2575609   | Nonsense_Mutation | SNP | C  | T  | 4   | 229 | c.1072C>T      | c.(1072-1074)CGA>TGA   | p.R358*   |
| Pat_24 | Pre-Treatment | IDH3B    | 3420   | 37 | 20 | 2640427   | 2640427   | Missense_Mutation | SNP | G  | A  | 4   | 114 | c.928C>T       | c.(928-930)CCA>TCA     | p.P310S   |
| Pat_24 | Pre-Treatment | CPXM1    | 56265  | 37 | 20 | 2776427   | 2776427   | Missense_Mutation | SNP | G  | A  | 6   | 244 | c.1538C>T      | c.(1537-1539)ACC>ATC   | p.T513I   |
| Pat_24 | Pre-Treatment | ITPA     | 3704   | 37 | 20 | 3194691   | 3194691   | Missense_Mutation | SNP | C  | T  | 46  | 80  | c.250C>T       | c.(250-252)CCC>TCC     | p.P84S    |
| Pat_24 | Pre-Treatment | CDC25B   | 994    | 37 | 20 | 3781438   | 3781438   | Nonsense_Mutation | SNP | C  | T  | 29  | 97  | c.508C>T       | c.(508-510)CAG>TAG     | p.Q170*   |
| Pat_24 | Pre-Treatment | HAO1     | 54363  | 37 | 20 | 7894856   | 7894856   | Missense_Mutation | SNP | C  | T  | 5   | 292 | c.500G>A       | c.(499-501)CGT>CAT     | p.R167H   |
| Pat_24 | Pre-Treatment | PLCB4    | 5332   | 37 | 20 | 9416225   | 9416225   | Missense_Mutation | SNP | C  | T  | 29  | 45  | c.2507C>T      | c.(2506-2508)TCA>TTA   | p.S836L   |
| Pat_24 | Pre-Treatment | BTBD3    | 22903  | 37 | 20 | 11904205  | 11904205  | Missense_Mutation | SNP | C  | T  | 5   | 161 | c.1460C>T      | c.(1459-1461)ACA>ATA   | p.T487I   |
| Pat_24 | Pre-Treatment | XRN2     | 22803  | 37 | 20 | 21327126  | 21327126  | Missense_Mutation | SNP | C  | T  | 6   | 489 | c.1603C>T      | c.(1603-1605)CGT>TGT   | p.R535C   |



|        |               |           |        |    |    |          |          |                   |     |   |   |     |     |              |                      |              |
|--------|---------------|-----------|--------|----|----|----------|----------|-------------------|-----|---|---|-----|-----|--------------|----------------------|--------------|
| Pat_24 | Pre-Treatment | GZF1      | 64412  | 37 | 20 | 23350289 | 23350289 | Missense_Mutation | SNP | C | T | 6   | 349 | c.1696C>T    | c.(1696-1698)CGC>TGC | p.R566C      |
| Pat_24 | Pre-Treatment | CST9      | 128822 | 37 | 20 | 23584214 | 23584214 | Missense_Mutation | SNP | C | T | 4   | 110 | c.413G>A     | c.(412-414)TGC>TAC   | p.C138Y      |
| Pat_24 | Pre-Treatment | ACSS1     | 84532  | 37 | 20 | 25002061 | 25002061 | Missense_Mutation | SNP | C | T | 4   | 40  | c.1072G>A    | c.(1072-1074)GTC>ATC | p.V358I      |
| Pat_24 | Pre-Treatment | MYLK2     | 85366  | 37 | 20 | 30408261 | 30408261 | Missense_Mutation | SNP | G | A | 50  | 234 | c.385G>A     | c.(385-387)GGC>AGC   | p.G129S      |
| Pat_24 | Pre-Treatment | DNMT3B    | 1789   | 37 | 20 | 31388045 | 31388045 | Missense_Mutation | SNP | G | A | 7   | 642 | c.1846G>A    | c.(1846-1848)GTG>ATG | p.V616M      |
| Pat_24 | Pre-Treatment | ZNF341    | 84905  | 37 | 20 | 32328819 | 32328819 | Splice_Site       | SNP | G | A | 4   | 194 | c.142_splice | c.e2+1               | p.D48_splice |
| Pat_24 | Pre-Treatment | CEP250    | 11190  | 37 | 20 | 34091848 | 34091848 | Missense_Mutation | SNP | C | T | 29  | 25  | c.5651C>T    | c.(5650-5652)GCC>GTC | p.A1884V     |
| Pat_24 | Pre-Treatment | EPB41L1   | 2036   | 37 | 20 | 34782211 | 34782211 | Missense_Mutation | SNP | G | A | 4   | 163 | c.1378G>A    | c.(1378-1380)GAG>AAG | p.E460K      |
| Pat_24 | Pre-Treatment | NDRG3     | 57446  | 37 | 20 | 35282084 | 35282084 | Missense_Mutation | SNP | G | A | 4   | 231 | c.967C>T     | c.(967-969)CGG>TGG   | p.R323W      |
| Pat_24 | Pre-Treatment | C20orf118 | 140711 | 37 | 20 | 35504590 | 35504590 | Missense_Mutation | SNP | C | T | 7   | 442 | c.13C>T      | c.(13-15)CGC>TGC     | p.R5C        |
| Pat_24 | Pre-Treatment | SAMHD1    | 25939  | 37 | 20 | 35563559 | 35563559 | Missense_Mutation | SNP | G | A | 4   | 205 | c.382C>T     | c.(382-384)CTC>TTC   | p.L128F      |
| Pat_24 | Pre-Treatment | DHX35     | 60625  | 37 | 20 | 37650576 | 37650576 | Missense_Mutation | SNP | G | A | 5   | 219 | c.1591G>A    | c.(1591-1593)GCA>ACA | p.A531T      |
| Pat_24 | Pre-Treatment | PLCG1     | 5335   | 37 | 20 | 39792036 | 39792036 | Missense_Mutation | SNP | C | T | 106 | 253 | c.808C>T     | c.(808-810)CGC>TGC   | p.R270C      |
| Pat_24 | Pre-Treatment | PLCG1     | 5335   | 37 | 20 | 39797771 | 39797771 | Missense_Mutation | SNP | G | A | 4   | 196 | c.2536G>A    | c.(2536-2538)GTG>ATG | p.V846M      |
| Pat_24 | Pre-Treatment | ZHX3      | 23051  | 37 | 20 | 39830922 | 39830922 | Missense_Mutation | SNP | C | T | 7   | 485 | c.2635G>A    | c.(2635-2637)GTC>ATC | p.V879I      |
| Pat_24 | Pre-Treatment | CHD6      | 84181  | 37 | 20 | 40102096 | 40102096 | Missense_Mutation | SNP | G | A | 6   | 314 | c.2530C>T    | c.(2530-2532)CGG>TGG | p.R844W      |
| Pat_24 | Pre-Treatment | PTPRT     | 11122  | 37 | 20 | 41306788 | 41306788 | Missense_Mutation | SNP | G | A | 25  | 33  | c.871C>T     | c.(871-873)CCC>TCC   | p.P291S      |
| Pat_24 | Pre-Treatment | PI3       | 5266   | 37 | 20 | 43803588 | 43803588 | Missense_Mutation | SNP | G | A | 6   | 290 | c.25G>A      | c.(25-27)GTG>ATG     | p.V9M        |
| Pat_24 | Pre-Treatment | SLC12A5   | 57468  | 37 | 20 | 44676109 | 44676109 | Missense_Mutation | SNP | G | A | 60  | 165 | c.1873G>A    | c.(1873-1875)GGC>AGC | p.G625S      |
| Pat_24 | Pre-Treatment | SLC35C2   | 51006  | 37 | 20 | 44986310 | 44986310 | Missense_Mutation | SNP | G | A | 8   | 272 | c.223C>T     | c.(223-225)CGT>TGT   | p.R75C       |
| Pat_24 | Pre-Treatment | SLC2A10   | 81031  | 37 | 20 | 45362445 | 45362445 | Missense_Mutation | SNP | G | A | 5   | 226 | c.1598G>A    | c.(1597-1599)AGC>AAC | p.S533N      |
| Pat_24 | Pre-Treatment | EYA2      | 2139   | 37 | 20 | 45801437 | 45801437 | Missense_Mutation | SNP | G | A | 5   | 323 | c.1120G>A    | c.(1120-1122)GTG>ATG | p.V374M      |
| Pat_24 | Pre-Treatment | ZMYND8    | 23613  | 37 | 20 | 45867738 | 45867738 | Missense_Mutation | SNP | G | A | 6   | 297 | c.2369C>T    | c.(2368-2370)CCG>CTG | p.P790L      |
| Pat_24 | Pre-Treatment | NCOA3     | 8202   | 37 | 20 | 46262366 | 46262366 | Missense_Mutation | SNP | G | A | 4   | 196 | c.950G>A     | c.(949-951)CGT>CAT   | p.R317H      |
| Pat_24 | Pre-Treatment | DIDO1     | 11083  | 37 | 20 | 61511433 | 61511433 | Missense_Mutation | SNP | G | A | 289 | 230 | c.5875C>T    | c.(5875-5877)CCC>TCC | p.P1959S     |
| Pat_24 | Pre-Treatment | DIDO1     | 11083  | 37 | 20 | 61522492 | 61522492 | Missense_Mutation | SNP | G | A | 4   | 155 | c.3361C>T    | c.(3361-3363)CGC>TGC | p.R1121C     |
| Pat_24 | Pre-Treatment | DIDO1     | 11083  | 37 | 20 | 61542460 | 61542460 | Missense_Mutation | SNP | G | A | 4   | 178 | c.505C>T     | c.(505-507)CGC>TGC   | p.R169C      |
| Pat_24 | Pre-Treatment | ARFGAP1   | 55738  | 37 | 20 | 61909542 | 61909542 | Missense_Mutation | SNP | G | A | 4   | 193 | c.517G>A     | c.(517-519)GGC>AGC   | p.G173S      |
| Pat_24 | Pre-Treatment | EEF1A2    | 1917   | 37 | 20 | 62122041 | 62122041 | Missense_Mutation | SNP | G | A | 4   | 138 | c.820C>T     | c.(820-822)CCG>TCG   | p.P274S      |
| Pat_24 | Pre-Treatment | PRPF6     | 24148  | 37 | 20 | 62657343 | 62657343 | Missense_Mutation | SNP | G | A | 5   | 185 | c.1960G>A    | c.(1960-1962)GAG>AAG | p.E654K      |
| Pat_24 | Pre-Treatment | USP25     | 29761  | 37 | 21 | 17183520 | 17183520 | Missense_Mutation | SNP | G | A | 4   | 238 | c.922G>A     | c.(922-924)GTA>ATA   | p.V308I      |
| Pat_24 | Pre-Treatment | NCAM2     | 4685   | 37 | 21 | 22696705 | 22696705 | Missense_Mutation | SNP | C | T | 5   | 257 | c.622C>T     | c.(622-624)CCG>TCG   | p.P208S      |
| Pat_24 | Pre-Treatment | ETS2      | 2114   | 37 | 21 | 40194704 | 40194704 | Missense_Mutation | SNP | C | T | 5   | 284 | c.1301C>T    | c.(1300-1302)TCG>TTG | p.S434L      |
| Pat_24 | Pre-Treatment | BRWD1     | 54014  | 37 | 21 | 40648100 | 40648100 | Missense_Mutation | SNP | G | A | 5   | 384 | c.1144C>T    | c.(1144-1146)CGG>TGG | p.R382W      |
| Pat_24 | Pre-Treatment | BACE2     | 25825  | 37 | 21 | 42629134 | 42629134 | Missense_Mutation | SNP | G | A | 6   | 246 | c.1184G>A    | c.(1183-1185)CGA>CAA | p.R395Q      |
| Pat_24 | Pre-Treatment | RIPK4     | 54101  | 37 | 21 | 43161465 | 43161465 | Missense_Mutation | SNP | C | T | 5   | 254 | c.1888G>A    | c.(1888-1890)GTC>ATC | p.V630I      |
| Pat_24 | Pre-Treatment | ZNF295    | 49854  | 37 | 21 | 43412883 | 43412883 | Missense_Mutation | SNP | G | A | 4   | 208 | c.1322C>T    | c.(1321-1323)TCG>TTG | p.S441L      |
| Pat_24 | Pre-Treatment | UMODL1    | 89766  | 37 | 21 | 43547286 | 43547286 | Missense_Mutation | SNP | C | T | 5   | 175 | c.3464C>T    | c.(3463-3465)ACG>ATG | p.T1155M     |
| Pat_24 | Pre-Treatment | AGPAT3    | 56894  | 37 | 21 | 45379596 | 45379596 | Missense_Mutation | SNP | G | A | 6   | 443 | c.34G>A      | c.(34-36)GTG>ATG     | p.V12M       |
| Pat_24 | Pre-Treatment | PRODH     | 5625   | 37 | 22 | 18912710 | 18912710 | Missense_Mutation | SNP | G | A | 4   | 190 | c.521C>T     | c.(520-522)ACG>ATG   | p.T174M      |
| Pat_24 | Pre-Treatment | ARVCF     | 421    | 37 | 22 | 19960727 | 19960727 | Missense_Mutation | SNP | C | T | 4   | 58  | c.2353G>A    | c.(2353-2355)GAA>AAA | p.E785K      |
| Pat_24 | Pre-Treatment | SMARCB1   | 6598   | 37 | 22 | 24167562 | 24167562 | Missense_Mutation | SNP | C | T | 4   | 147 | c.946C>T     | c.(946-948)CGG>TGG   | p.R316W      |
| Pat_24 | Pre-Treatment | GSTT1     | 2952   | 37 | 22 | 24379432 | 24379432 | Missense_Mutation | SNP | G | A | 4   | 94  | c.280C>T     | c.(280-282)CGT>TGT   | p.R94C       |
| Pat_24 | Pre-Treatment | SEZ6L     | 23544  | 37 | 22 | 26761478 | 26761478 | Missense_Mutation | SNP | C | T | 4   | 135 | c.2740C>T    | c.(2740-2742)CGC>TGC | p.R914C      |
| Pat_24 | Pre-Treatment | TBC1D10A  | 83874  | 37 | 22 | 30691727 | 30691727 | Missense_Mutation | SNP | C | T | 4   | 144 | c.523G>A     | c.(523-525)GGC>AGC   | p.G175S      |
| Pat_24 | Pre-Treatment | SF3A1     | 10291  | 37 | 22 | 30735151 | 30735151 | Missense_Mutation | SNP | C | T | 6   | 438 | c.1465G>A    | c.(1465-1467)GGT>AGT | p.G489S      |
| Pat_24 | Pre-Treatment | DUSP18    | 150290 | 37 | 22 | 31059603 | 31059603 | Missense_Mutation | SNP | C | T | 4   | 99  | c.388G>A     | c.(388-390)GCC>ACC   | p.A130T      |

|        |               |          |        |    |    |          |          |                   |     |   |   |     |     |            |                        |          |
|--------|---------------|----------|--------|----|----|----------|----------|-------------------|-----|---|---|-----|-----|------------|------------------------|----------|
| Pat_24 | Pre-Treatment | RFPL3    | 10738  | 37 | 22 | 32756800 | 32756800 | Missense_Mutation | SNP | G | A | 5   | 241 | c.935G>A   | c.(934-936)CGT>CAT     | p.R312H  |
| Pat_24 | Pre-Treatment | C22orf28 | 51493  | 37 | 22 | 32791099 | 32791099 | Missense_Mutation | SNP | C | T | 4   | 169 | c.1093G>A  | c.(1093-1095)GGA>AGA   | p.G365R  |
| Pat_24 | Pre-Treatment | MYH9     | 4627   | 37 | 22 | 36716897 | 36716897 | Missense_Mutation | SNP | G | A | 4   | 120 | c.814C>T   | c.(814-816)CGG>TGG     | p.R272W  |
| Pat_24 | Pre-Treatment | EIF3D    | 8664   | 37 | 22 | 36908588 | 36908588 | Missense_Mutation | SNP | G | A | 4   | 180 | c.1268C>T  | c.(1267-1269)ACG>ATG   | p.T423M  |
| Pat_24 | Pre-Treatment | CACNG2   | 10369  | 37 | 22 | 36962445 | 36962445 | Nonsense_Mutation | SNP | G | A | 4   | 161 | c.391C>T   | c.(391-393)CGA>TGA     | p.R131*  |
| Pat_24 | Pre-Treatment | TRIOBP   | 11078  | 37 | 22 | 38120119 | 38120119 | Missense_Mutation | SNP | A | G | 5   | 277 | c.1556A>G  | c.(1555-1557)AAT>AGT   | p.N519S  |
| Pat_24 | Pre-Treatment | TRIOBP   | 11078  | 37 | 22 | 38120359 | 38120359 | Missense_Mutation | SNP | C | G | 16  | 485 | c.1796C>G  | c.(1795-1797)ACA>AGA   | p.T599R  |
| Pat_24 | Pre-Treatment | POLR2F   | 5435   | 37 | 22 | 38352793 | 38352793 | Missense_Mutation | SNP | G | A | 4   | 192 | c.34G>A    | c.(34-36)GAC>AAC       | p.D12N   |
| Pat_24 | Pre-Treatment | KCNJ4    | 3761   | 37 | 22 | 38822895 | 38822895 | Missense_Mutation | SNP | G | A | 5   | 244 | c.1243C>T  | c.(1243-1245)CGG>TGG   | p.R415W  |
| Pat_24 | Pre-Treatment | EP300    | 2033   | 37 | 22 | 41572528 | 41572528 | Missense_Mutation | SNP | G | A | 4   | 125 | c.5057G>A  | c.(5056-5058)TGT>TAT   | p.C1686Y |
| Pat_24 | Pre-Treatment | 3-Sep    | 55964  | 37 | 22 | 42382068 | 42382068 | Missense_Mutation | SNP | C | T | 5   | 111 | c.283C>T   | c.(283-285)CGG>TGG     | p.R95W   |
| Pat_24 | Pre-Treatment | NAGA     | 4668   | 37 | 22 | 42456333 | 42456333 | Missense_Mutation | SNP | C | T | 6   | 261 | c.1186G>A  | c.(1186-1188)GTG>ATG   | p.V396M  |
| Pat_24 | Pre-Treatment | TBC1D22A | 25771  | 37 | 22 | 47189519 | 47189519 | Missense_Mutation | SNP | C | T | 5   | 169 | c.241C>T   | c.(241-243)CTC>TTC     | p.L81F   |
| Pat_24 | Pre-Treatment | TLL8     | 164714 | 37 | 22 | 50470483 | 50470483 | Missense_Mutation | SNP | G | A | 4   | 217 | c.1339C>T  | c.(1339-1341)CGC>TGC   | p.R447C  |
| Pat_24 | Pre-Treatment | PANX2    | 56666  | 37 | 22 | 50616139 | 50616139 | Missense_Mutation | SNP | G | A | 6   | 380 | c.998G>A   | c.(997-999)CGC>CAC     | p.R333H  |
| Pat_24 | Pre-Treatment | SELO     | 83642  | 37 | 22 | 50655462 | 50655462 | Missense_Mutation | SNP | G | A | 4   | 102 | c.1750G>A  | c.(1750-1752)GTG>ATG   | p.V584M  |
| Pat_24 | Pre-Treatment | MAPK12   | 6300   | 37 | 22 | 50694078 | 50694078 | Missense_Mutation | SNP | G | A | 6   | 438 | c.737C>T   | c.(736-738)CCG>CTG     | p.P246L  |
| Pat_24 | Pre-Treatment | MIOX     | 55586  | 37 | 22 | 50927667 | 50927667 | Missense_Mutation | SNP | G | A | 4   | 55  | c.529G>A   | c.(529-531)GGG>AGG     | p.G177R  |
| Pat_24 | Pre-Treatment | MTMR14   | 64419  | 37 | 3  | 9730640  | 9730640  | Missense_Mutation | SNP | G | A | 4   | 184 | c.1307G>A  | c.(1306-1308)CGT>CAT   | p.R436H  |
| Pat_24 | Pre-Treatment | TADA3    | 10474  | 37 | 3  | 9827040  | 9827040  | Missense_Mutation | SNP | C | T | 4   | 211 | c.880G>A   | c.(880-882)GGG>AGG     | p.G294R  |
| Pat_24 | Pre-Treatment | CIDEC    | 63924  | 37 | 3  | 9911632  | 9911632  | Missense_Mutation | SNP | G | A | 4   | 151 | c.488C>T   | c.(487-489)GCG>GTG     | p.A163V  |
| Pat_24 | Pre-Treatment | CAND2    | 23066  | 37 | 3  | 12857393 | 12857393 | Missense_Mutation | SNP | C | T | 4   | 134 | c.1327C>T  | c.(1327-1329)CGG>TGG   | p.R443W  |
| Pat_24 | Pre-Treatment | GRIP2    | 80852  | 37 | 3  | 14555822 | 14555822 | Missense_Mutation | SNP | C | T | 3   | 23  | c.1765G>A  | c.(1765-1767)GAG>AAG   | p.E589K  |
| Pat_24 | Pre-Treatment | C3orf19  | 51244  | 37 | 3  | 14708937 | 14708937 | Missense_Mutation | SNP | G | A | 4   | 229 | c.731G>A   | c.(730-732)CGG>CAG     | p.R244Q  |
| Pat_24 | Pre-Treatment | FGD5     | 152273 | 37 | 3  | 14939582 | 14939582 | Missense_Mutation | SNP | G | A | 6   | 428 | c.3046G>A  | c.(3046-3048)GCT>ACT   | p.A1016T |
| Pat_24 | Pre-Treatment | SH3BP5   | 9467   | 37 | 3  | 15300421 | 15300421 | Missense_Mutation | SNP | C | T | 4   | 114 | c.806G>A   | c.(805-807)CGG>CAG     | p.R269Q  |
| Pat_24 | Pre-Treatment | CMTM8    | 152189 | 37 | 3  | 32398920 | 32398920 | Missense_Mutation | SNP | C | T | 108 | 129 | c.203C>T   | c.(202-204)CCC>CTC     | p.P68L   |
| Pat_24 | Pre-Treatment | UBP1     | 7342   | 37 | 3  | 33438622 | 33438622 | Missense_Mutation | SNP | C | T | 4   | 129 | c.1186G>A  | c.(1186-1188)GAC>AAC   | p.D396N  |
| Pat_24 | Pre-Treatment | PDCD6IP  | 10015  | 37 | 3  | 33905518 | 33905518 | Missense_Mutation | SNP | C | T | 59  | 99  | c.2141C>T  | c.(2140-2142)GCC>GTC   | p.A714V  |
| Pat_24 | Pre-Treatment | STAC     | 6769   | 37 | 3  | 36545899 | 36545899 | Missense_Mutation | SNP | G | A | 47  | 70  | c.781G>A   | c.(781-783)GAA>AAA     | p.E261K  |
| Pat_24 | Pre-Treatment | TRANK1   | 9881   | 37 | 3  | 36884181 | 36884181 | Missense_Mutation | SNP | C | T | 4   | 96  | c.3430G>A  | c.(3430-3432)GTT>ATT   | p.V1144I |
| Pat_24 | Pre-Treatment | DLEC1    | 9940   | 37 | 3  | 38151621 | 38151621 | Missense_Mutation | SNP | C | T | 5   | 154 | c.3292C>T  | c.(3292-3294)CTC>TTC   | p.L1098F |
| Pat_24 | Pre-Treatment | ACVR2B   | 93     | 37 | 3  | 38522951 | 38522951 | Missense_Mutation | SNP | G | A | 4   | 147 | c.1069G>A  | c.(1069-1071)GGA>AGA   | p.G357R  |
| Pat_24 | Pre-Treatment | SCN10A   | 6336   | 37 | 3  | 38739931 | 38739931 | Missense_Mutation | SNP | G | A | 4   | 235 | c.4780C>T  | c.(4780-4782)CGC>TGC   | p.R1594C |
| Pat_24 | Pre-Treatment | CSRNP1   | 64651  | 37 | 3  | 39184553 | 39184553 | Missense_Mutation | SNP | G | A | 5   | 232 | c.1763C>T  | c.(1762-1764)CCG>CTG   | p.P588L  |
| Pat_24 | Pre-Treatment | HIGD1A   | 25994  | 37 | 3  | 42835717 | 42835717 | Missense_Mutation | SNP | G | A | 51  | 86  | c.29C>T    | c.(28-30)CCT>CTT       | p.P10L   |
| Pat_24 | Pre-Treatment | CDCP1    | 64866  | 37 | 3  | 45136959 | 45136959 | Missense_Mutation | SNP | C | T | 4   | 205 | c.1126G>A  | c.(1126-1128)GTG>ATG   | p.V376M  |
| Pat_24 | Pre-Treatment | SETD2    | 29072  | 37 | 3  | 47147534 | 47147534 | Nonsense_Mutation | SNP | G | A | 4   | 215 | c.4792C>T  | c.(4792-4794)CGA>TGA   | p.R1598* |
| Pat_24 | Pre-Treatment | SETD2    | 29072  | 37 | 3  | 47164268 | 47164268 | Nonsense_Mutation | SNP | G | A | 10  | 29  | c.1858C>T  | c.(1858-1860)CGA>TGA   | p.R620*  |
| Pat_24 | Pre-Treatment | KLHL18   | 23276  | 37 | 3  | 47384255 | 47384255 | Missense_Mutation | SNP | G | A | 4   | 122 | c.1273G>A  | c.(1273-1275)GTT>ATT   | p.V425I  |
| Pat_24 | Pre-Treatment | PTPN23   | 25930  | 37 | 3  | 47446188 | 47446188 | Missense_Mutation | SNP | G | A | 4   | 161 | c.206G>A   | c.(205-207)CGC>CAC     | p.R69H   |
| Pat_24 | Pre-Treatment | FBXW12   | 285231 | 37 | 3  | 48423472 | 48423472 | Missense_Mutation | SNP | G | A | 4   | 205 | c.1192G>A  | c.(1192-1194)GAG>AAG   | p.E398K  |
| Pat_24 | Pre-Treatment | COL7A1   | 1294   | 37 | 3  | 48608389 | 48608389 | Missense_Mutation | SNP | G | A | 3   | 38  | c.7177C>T  | c.(7177-7179)CTC>TTC   | p.L2393F |
| Pat_24 | Pre-Treatment | COL7A1   | 1294   | 37 | 3  | 48629609 | 48629609 | Missense_Mutation | SNP | G | A | 5   | 249 | c.1166C>T  | c.(1165-1167)ACG>ATG   | p.T389M  |
| Pat_24 | Pre-Treatment | CELSR3   | 1951   | 37 | 3  | 48663703 | 48663703 | Missense_Mutation | SNP | G | A | 4   | 114 | c.12371C>T | c.(12370-12372)GCT>GTT | p.A4124V |
| Pat_24 | Pre-Treatment | CELSR3   | 1951   | 37 | 3  | 48689366 | 48689366 | Missense_Mutation | SNP | G | A | 117 | 156 | c.5867C>T  | c.(5866-5868)CCA>CTA   | p.P1956L |
| Pat_24 | Pre-Treatment | C3orf62  | 375341 | 37 | 3  | 49314068 | 49314068 | Missense_Mutation | SNP | C | G | 4   | 180 | c.238G>C   | c.(238-240)GCT>CCT     | p.A80P   |

|        |               |         |        |    |   |           |           |                   |     |    |    |     |     |                                     |                      |                |
|--------|---------------|---------|--------|----|---|-----------|-----------|-------------------|-----|----|----|-----|-----|-------------------------------------|----------------------|----------------|
| Pat_24 | Pre-Treatment | GPX1    | 2876   | 37 | 3 | 49395051  | 49395052  | Missense_Mutation | DNP | AG | TA | 22  | 70  | c.381_382CT>TA_379-384)GCCTTC>GCTA' | p.F128I              |                |
| Pat_24 | Pre-Treatment | APEH    | 327    | 37 | 3 | 49720135  | 49720135  | Missense_Mutation | SNP | G  | A  | 4   | 211 | c.1849G>A                           | c.(1849-1851)GCC>ACC | p.A617T        |
| Pat_24 | Pre-Treatment | DOCK3   | 1795   | 37 | 3 | 51265501  | 51265501  | Missense_Mutation | SNP | C  | G  | 3   | 103 | c.1629C>G                           | c.(1627-1629)CAC>CAG | p.H543Q        |
| Pat_24 | Pre-Treatment | DOCK3   | 1795   | 37 | 3 | 51411966  | 51411966  | Missense_Mutation | SNP | G  | A  | 4   | 90  | c.5360G>A                           | c.(5359-5361)CGG>CAG | p.R1787Q       |
| Pat_24 | Pre-Treatment | VPRBP   | 9730   | 37 | 3 | 51458334  | 51458334  | Missense_Mutation | SNP | G  | A  | 149 | 220 | c.2090C>T                           | c.(2089-2091)TCC>TTC | p.S697F        |
| Pat_24 | Pre-Treatment | PARP3   | 10039  | 37 | 3 | 51977511  | 51977511  | Missense_Mutation | SNP | G  | A  | 4   | 71  | c.140G>A                            | c.(139-141)CGC>CAC   | p.R47H         |
| Pat_24 | Pre-Treatment | TLR9    | 54106  | 37 | 3 | 52255447  | 52255447  | Missense_Mutation | SNP | C  | T  | 3   | 28  | c.2885G>A                           | c.(2884-2886)CGC>CAC | p.R962H        |
| Pat_24 | Pre-Treatment | NT5DC2  | 64943  | 37 | 3 | 52559263  | 52559263  | Missense_Mutation | SNP | C  | T  | 4   | 177 | c.1057G>A                           | c.(1057-1059)GTG>ATG | p.V353M        |
| Pat_24 | Pre-Treatment | RFT1    | 91869  | 37 | 3 | 53125938  | 53125938  | Missense_Mutation | SNP | C  | T  | 4   | 136 | c.1607G>A                           | c.(1606-1608)CGC>CAC | p.R536H        |
| Pat_24 | Pre-Treatment | MITF    | 4286   | 37 | 3 | 69928373  | 69928373  | Missense_Mutation | SNP | C  | T  | 4   | 87  | c.193C>T                            | c.(193-195)CGT>TGT   | p.R65C         |
| Pat_24 | Pre-Treatment | CNTN3   | 5067   | 37 | 3 | 74350624  | 74350624  | Missense_Mutation | SNP | G  | A  | 72  | 147 | c.2020C>T                           | c.(2020-2022)CGG>TGG | p.R674W        |
| Pat_24 | Pre-Treatment | ROBO2   | 6092   | 37 | 3 | 77666773  | 77666773  | Nonsense_Mutation | SNP | C  | T  | 55  | 76  | c.3403C>T                           | c.(3403-3405)CGA>TGA | p.R1135*       |
| Pat_24 | Pre-Treatment | EPHA3   | 2042   | 37 | 3 | 89448601  | 89448601  | Missense_Mutation | SNP | G  | A  | 4   | 180 | c.1565G>A                           | c.(1564-1566)CGC>CAC | p.R522H        |
| Pat_24 | Pre-Treatment | PROS1   | 5627   | 37 | 3 | 93646210  | 93646210  | Missense_Mutation | SNP | G  | A  | 4   | 115 | c.118C>T                            | c.(118-120)CGT>TGT   | p.R40C         |
| Pat_24 | Pre-Treatment | IMPG2   | 50939  | 37 | 3 | 100964717 | 100964717 | Missense_Mutation | SNP | G  | A  | 5   | 227 | c.1472C>T                           | c.(1471-1473)CCG>CTG | p.P491L        |
| Pat_24 | Pre-Treatment | DRD3    | 1814   | 37 | 3 | 113866354 | 113866354 | Missense_Mutation | SNP | C  | T  | 88  | 130 | c.434G>A                            | c.(433-435)AGC>AAC   | p.S145N        |
| Pat_24 | Pre-Treatment | DRD3    | 1814   | 37 | 3 | 113890700 | 113890700 | Missense_Mutation | SNP | T  | C  | 64  | 45  | c.140A>G                            | c.(139-141)AAT>AGT   | p.N47S         |
| Pat_24 | Pre-Treatment | ZBTB20  | 26137  | 37 | 3 | 114070510 | 114070510 | Missense_Mutation | SNP | C  | T  | 4   | 139 | c.415G>A                            | c.(415-417)GAC>AAC   | p.D139N        |
| Pat_24 | Pre-Treatment | UPK1B   | 7348   | 37 | 3 | 118905613 | 118905613 | Missense_Mutation | SNP | C  | T  | 5   | 213 | c.25C>T                             | c.(25-27)CGT>TGT     | p.R9C          |
| Pat_24 | Pre-Treatment | ADPRH   | 141    | 37 | 3 | 119306475 | 119306475 | Missense_Mutation | SNP | C  | T  | 18  | 55  | c.824C>T                            | c.(823-825)CCC>CTC   | p.P275L        |
| Pat_24 | Pre-Treatment | GPR156  | 165829 | 37 | 3 | 119886477 | 119886477 | Missense_Mutation | SNP | G  | A  | 5   | 155 | c.1847C>T                           | c.(1846-1848)GCA>GTA | p.A616V        |
| Pat_24 | Pre-Treatment | STXBP5L | 9515   | 37 | 3 | 120760586 | 120760586 | Missense_Mutation | SNP | A  | T  | 6   | 140 | c.327A>T                            | c.(325-327)GAA>GAT   | p.E109D        |
| Pat_24 | Pre-Treatment | FBXO40  | 51725  | 37 | 3 | 121340508 | 121340508 | Missense_Mutation | SNP | C  | T  | 75  | 102 | c.232C>T                            | c.(232-234)CGC>TGC   | p.R78C         |
| Pat_24 | Pre-Treatment | FBXO40  | 51725  | 37 | 3 | 121340844 | 121340844 | Missense_Mutation | SNP | G  | A  | 31  | 48  | c.568G>A                            | c.(568-570)GGG>AGG   | p.G190R        |
| Pat_24 | Pre-Treatment | KALRN   | 8997   | 37 | 3 | 124132426 | 124132426 | Missense_Mutation | SNP | G  | A  | 5   | 169 | c.2450G>A                           | c.(2449-2451)CGG>CAG | p.R817Q        |
| Pat_24 | Pre-Treatment | PLXNA1  | 5361   | 37 | 3 | 126735786 | 126735786 | Splice_Site       | SNP | G  | A  | 5   | 203 | c.3114_splice                       | c.e16-1              | p.S1038_splice |
| Pat_24 | Pre-Treatment | DNAJC13 | 23317  | 37 | 3 | 132235305 | 132235305 | Missense_Mutation | SNP | C  | T  | 4   | 185 | c.5525C>T                           | c.(5524-5526)TCG>TTG | p.S1842L       |
| Pat_24 | Pre-Treatment | EPHB1   | 2047   | 37 | 3 | 134920413 | 134920413 | Missense_Mutation | SNP | G  | A  | 5   | 396 | c.2228G>A                           | c.(2227-2229)CGG>CAG | p.R743Q        |
| Pat_24 | Pre-Treatment | MRAS    | 22808  | 37 | 3 | 138091918 | 138091918 | Missense_Mutation | SNP | G  | A  | 4   | 233 | c.193G>A                            | c.(193-195)GTT>ATT   | p.V65I         |
| Pat_24 | Pre-Treatment | ATR     | 545    | 37 | 3 | 142279165 | 142279165 | Missense_Mutation | SNP | G  | A  | 4   | 220 | c.1481C>T                           | c.(1480-1482)GCT>GTT | p.A494V        |
| Pat_24 | Pre-Treatment | TRPC1   | 7220   | 37 | 3 | 142523009 | 142523009 | Nonsense_Mutation | SNP | C  | T  | 22  | 49  | c.1948C>T                           | c.(1948-1950)CAG>TAG | p.Q650*        |
| Pat_24 | Pre-Treatment | HPS3    | 84343  | 37 | 3 | 148859167 | 148859167 | Missense_Mutation | SNP | G  | A  | 5   | 248 | c.970G>A                            | c.(970-972)GGT>AGT   | p.G324S        |
| Pat_24 | Pre-Treatment | CP      | 1356   | 37 | 3 | 148924003 | 148924003 | Missense_Mutation | SNP | G  | A  | 58  | 91  | c.1160C>T                           | c.(1159-1161)CCC>CTC | p.P387L        |
| Pat_24 | Pre-Treatment | TSC22D2 | 9819   | 37 | 3 | 150128509 | 150128509 | Missense_Mutation | SNP | C  | T  | 3   | 22  | c.1372C>T                           | c.(1372-1374)CCC>TCC | p.P458S        |
| Pat_24 | Pre-Treatment | MFSD1   | 64747  | 37 | 3 | 158520073 | 158520073 | Missense_Mutation | SNP | G  | T  | 4   | 69  | c.132G>T                            | c.(130-132)TTG>TTT   | p.L44F         |
| Pat_24 | Pre-Treatment | IFT80   | 57560  | 37 | 3 | 159995430 | 159995430 | Missense_Mutation | SNP | G  | A  | 4   | 95  | c.1865C>T                           | c.(1864-1866)GCT>GTT | p.A622V        |
| Pat_24 | Pre-Treatment | SPATA16 | 83893  | 37 | 3 | 172737325 | 172737325 | Missense_Mutation | SNP | G  | A  | 131 | 236 | c.799C>T                            | c.(799-801)CGT>TGT   | p.R267C        |
| Pat_24 | Pre-Treatment | NLGN1   | 22871  | 37 | 3 | 173998272 | 173998272 | Missense_Mutation | SNP | G  | C  | 4   | 92  | c.1651G>C                           | c.(1651-1653)GAC>CAC | p.D551H        |
| Pat_24 | Pre-Treatment | FXR1    | 8087   | 37 | 3 | 180685938 | 180685938 | Missense_Mutation | SNP | G  | A  | 5   | 242 | c.1298G>A                           | c.(1297-1299)CGA>CAA | p.R433Q        |
| Pat_24 | Pre-Treatment | FXR1    | 8087   | 37 | 3 | 180688048 | 180688048 | Missense_Mutation | SNP | G  | A  | 6   | 298 | c.1505G>A                           | c.(1504-1506)CGT>CAT | p.R502H        |
| Pat_24 | Pre-Treatment | MCF2L2  | 23101  | 37 | 3 | 183017985 | 183017985 | Splice_Site       | SNP | C  | T  | 13  | 33  | c.1114_splice                       | c.e11-1              | p.E372_splice  |
| Pat_24 | Pre-Treatment | ABCC5   | 10057  | 37 | 3 | 183681340 | 183681340 | Missense_Mutation | SNP | G  | A  | 4   | 148 | c.2068C>T                           | c.(2068-2070)CGC>TGC | p.R690C        |
| Pat_24 | Pre-Treatment | ABCF3   | 55324  | 37 | 3 | 183906749 | 183906749 | Missense_Mutation | SNP | C  | T  | 7   | 207 | c.950C>T                            | c.(949-951)ACC>ATC   | p.T317I        |
| Pat_24 | Pre-Treatment | ALG3    | 10195  | 37 | 3 | 183960623 | 183960623 | Missense_Mutation | SNP | G  | A  | 4   | 165 | c.1132C>T                           | c.(1132-1134)CGC>TGC | p.R378C        |
| Pat_24 | Pre-Treatment | ECE2    | 9718   | 37 | 3 | 184005689 | 184005689 | Missense_Mutation | SNP | G  | A  | 70  | 112 | c.1682G>A                           | c.(1681-1683)GGG>GAG | p.G561E        |
| Pat_24 | Pre-Treatment | EIF4G1  | 1981   | 37 | 3 | 184045071 | 184045071 | Missense_Mutation | SNP | C  | T  | 5   | 280 | c.3496C>T                           | c.(3496-3498)CGG>TGG | p.R1166W       |
| Pat_24 | Pre-Treatment | EIF4G1  | 1981   | 37 | 3 | 184045084 | 184045084 | Missense_Mutation | SNP | G  | A  | 6   | 279 | c.3509G>A                           | c.(3508-3510)CGT>CAT | p.R1170H       |

|        |               |         |        |    |   |           |           |                   |     |   |   |     |     |              |                      |              |
|--------|---------------|---------|--------|----|---|-----------|-----------|-------------------|-----|---|---|-----|-----|--------------|----------------------|--------------|
| Pat_24 | Pre-Treatment | CLCN2   | 1181   | 37 | 3 | 184071895 | 184071895 | Missense_Mutation | SNP | C | T | 4   | 93  | c.1715G>A    | c.(1714-1716)CGC>CAC | p.R572H      |
| Pat_24 | Pre-Treatment | KNG1    | 3827   | 37 | 3 | 186435504 | 186435504 | Missense_Mutation | SNP | G | A | 4   | 193 | c.173G>A     | c.(172-174)CGC>CAC   | p.R58H       |
| Pat_24 | Pre-Treatment | LPP     | 4026   | 37 | 3 | 188477903 | 188477903 | Missense_Mutation | SNP | C | T | 4   | 64  | c.1243C>T    | c.(1243-1245)CGC>TGC | p.R415C      |
| Pat_24 | Pre-Treatment | ATP13A4 | 84239  | 37 | 3 | 193207602 | 193207602 | Missense_Mutation | SNP | T | A | 5   | 118 | c.655A>T     | c.(655-657)AGT>TGT   | p.S219C      |
| Pat_24 | Pre-Treatment | LRRC33  | 375387 | 37 | 3 | 196387194 | 196387194 | Missense_Mutation | SNP | G | A | 4   | 132 | c.680G>A     | c.(679-681)CGG>CAG   | p.R227Q      |
| Pat_24 | Pre-Treatment | LMLN    | 89782  | 37 | 3 | 197707212 | 197707212 | Missense_Mutation | SNP | C | T | 4   | 232 | c.565C>T     | c.(565-567)CGT>TGT   | p.R189C      |
| Pat_24 | Pre-Treatment | PDE6B   | 5158   | 37 | 4 | 661780    | 661780    | Missense_Mutation | SNP | G | A | 4   | 168 | c.2488G>A    | c.(2488-2490)GTG>ATG | p.V830M      |
| Pat_24 | Pre-Treatment | CRIPAK  | 285464 | 37 | 4 | 1389048   | 1389048   | Missense_Mutation | SNP | G | A | 8   | 612 | c.749G>A     | c.(748-750)CGC>CAC   | p.R250H      |
| Pat_24 | Pre-Treatment | HTT     | 3064   | 37 | 4 | 3158817   | 3158817   | Missense_Mutation | SNP | C | T | 4   | 103 | c.3650C>T    | c.(3649-3651)ACC>ATC | p.T1217I     |
| Pat_24 | Pre-Treatment | RGS12   | 6002   | 37 | 4 | 3317941   | 3317941   | Missense_Mutation | SNP | C | T | 4   | 172 | c.44C>T      | c.(43-45)CCG>CTG     | p.P15L       |
| Pat_24 | Pre-Treatment | CRMP1   | 1400   | 37 | 4 | 5851178   | 5851178   | Missense_Mutation | SNP | G | A | 25  | 52  | c.562C>T     | c.(562-564)CTT>TTT   | p.L188F      |
| Pat_24 | Pre-Treatment | ZNF518B | 85460  | 37 | 4 | 10447435  | 10447435  | Missense_Mutation | SNP | G | A | 4   | 220 | c.518C>T     | c.(517-519)ACG>ATG   | p.T173M      |
| Pat_24 | Pre-Treatment | LGI2    | 55203  | 37 | 4 | 25005381  | 25005381  | Missense_Mutation | SNP | G | A | 6   | 493 | c.1330C>T    | c.(1330-1332)CGG>TGG | p.R444W      |
| Pat_24 | Pre-Treatment | PCDH7   | 5099   | 37 | 4 | 30724909  | 30724909  | Missense_Mutation | SNP | G | A | 4   | 93  | c.1865G>A    | c.(1864-1866)AGC>AAC | p.S622N      |
| Pat_24 | Pre-Treatment | KLF3    | 51274  | 37 | 4 | 38698711  | 38698711  | Missense_Mutation | SNP | C | T | 27  | 55  | c.865C>T     | c.(865-867)CCC>TCC   | p.P289S      |
| Pat_24 | Pre-Treatment | CHRNA9  | 55584  | 37 | 4 | 40339314  | 40339314  | Missense_Mutation | SNP | G | A | 26  | 47  | c.298G>A     | c.(298-300)GAT>AAT   | p.D100N      |
| Pat_24 | Pre-Treatment | RBM47   | 54502  | 37 | 4 | 40438508  | 40438508  | Missense_Mutation | SNP | G | A | 4   | 217 | c.1280C>T    | c.(1279-1281)CCG>CTG | p.P427L      |
| Pat_24 | Pre-Treatment | UCHL1   | 7345   | 37 | 4 | 41262778  | 41262778  | Missense_Mutation | SNP | C | T | 85  | 150 | c.289C>T     | c.(289-291)CAC>TAC   | p.H97Y       |
| Pat_24 | Pre-Treatment | KDR     | 3791   | 37 | 4 | 55968610  | 55968610  | Missense_Mutation | SNP | C | T | 4   | 139 | c.2053G>A    | c.(2053-2055)GAA>AAA | p.E685K      |
| Pat_24 | Pre-Treatment | SRP72   | 6731   | 37 | 4 | 57344629  | 57344629  | Missense_Mutation | SNP | G | A | 4   | 99  | c.727G>A     | c.(727-729)GAG>AAG   | p.E243K      |
| Pat_24 | Pre-Treatment | UGT2B10 | 7365   | 37 | 4 | 69874623  | 69874623  | Missense_Mutation | SNP | G | A | 5   | 394 | c.1148C>T    | c.(1147-1149)TCG>TTG | p.S383L      |
| Pat_24 | Pre-Treatment | UGT2B4  | 7363   | 37 | 4 | 70355227  | 70355227  | Missense_Mutation | SNP | G | A | 6   | 447 | c.932C>T     | c.(931-933)TCG>TTG   | p.S311L      |
| Pat_24 | Pre-Treatment | UGT2B4  | 7363   | 37 | 4 | 70355286  | 70355286  | Missense_Mutation | SNP | T | A | 82  | 147 | c.873A>T     | c.(871-873)GAA>GAT   | p.E291D      |
| Pat_24 | Pre-Treatment | ALB     | 213    | 37 | 4 | 74280825  | 74280825  | Missense_Mutation | SNP | G | A | 65  | 124 | c.1132G>A    | c.(1132-1134)GAA>AAA | p.E378K      |
| Pat_24 | Pre-Treatment | RASSF6  | 166824 | 37 | 4 | 74459282  | 74459282  | Missense_Mutation | SNP | C | T | 67  | 98  | c.269G>A     | c.(268-270)GGA>GAA   | p.G90E       |
| Pat_24 | Pre-Treatment | CXCL9   | 4283   | 37 | 4 | 76925960  | 76925960  | Splice_Site       | SNP | A | G | 37  | 127 | c.276_splice | c.e3+1               | p.Q92_splice |
| Pat_24 | Pre-Treatment | CCDC158 | 339965 | 37 | 4 | 77234386  | 77234386  | Missense_Mutation | SNP | C | T | 9   | 25  | c.3279G>A    | c.(3277-3279)ATG>ATA | p.M1093I     |
| Pat_24 | Pre-Treatment | PRKG2   | 5593   | 37 | 4 | 82061745  | 82061745  | Nonsense_Mutation | SNP | C | A | 4   | 137 | c.1486G>T    | c.(1486-1488)GAG>TAG | p.E496*      |
| Pat_24 | Pre-Treatment | HERC3   | 8916   | 37 | 4 | 89527102  | 89527102  | Missense_Mutation | SNP | G | A | 4   | 94  | c.128G>A     | c.(127-129)GGA>GAA   | p.G43E       |
| Pat_24 | Pre-Treatment | GPRIN3  | 285513 | 37 | 4 | 90170964  | 90170964  | Missense_Mutation | SNP | G | A | 67  | 91  | c.298C>T     | c.(298-300)CCC>TCC   | p.P100S      |
| Pat_24 | Pre-Treatment | MMRN1   | 22915  | 37 | 4 | 90857395  | 90857395  | Missense_Mutation | SNP | C | T | 14  | 11  | c.2564C>T    | c.(2563-2565)TCC>TTC | p.S855F      |
| Pat_24 | Pre-Treatment | PDLIM5  | 10611  | 37 | 4 | 95561492  | 95561492  | Missense_Mutation | SNP | G | T | 4   | 161 | c.1174G>T    | c.(1174-1176)GCT>TCT | p.A392S      |
| Pat_24 | Pre-Treatment | DDIT4L  | 115265 | 37 | 4 | 101109213 | 101109213 | Nonsense_Mutation | SNP | G | T | 6   | 355 | c.203C>A     | c.(202-204)TCA>TAA   | p.S68*       |
| Pat_24 | Pre-Treatment | TET2    | 54790  | 37 | 4 | 106157378 | 106157378 | Missense_Mutation | SNP | T | A | 52  | 63  | c.2279T>A    | c.(2278-2280)TTT>TAT | p.F760Y      |
| Pat_24 | Pre-Treatment | TBCK    | 93627  | 37 | 4 | 107173160 | 107173160 | Missense_Mutation | SNP | G | A | 23  | 46  | c.460C>T     | c.(460-462)CCC>TCC   | p.P154S      |
| Pat_24 | Pre-Treatment | PAPSS1  | 9061   | 37 | 4 | 108566061 | 108566061 | Missense_Mutation | SNP | C | T | 4   | 98  | c.1403G>A    | c.(1402-1404)CGT>CAT | p.R468H      |
| Pat_24 | Pre-Treatment | HADH    | 3033   | 37 | 4 | 108940781 | 108940781 | Missense_Mutation | SNP | C | T | 183 | 257 | c.505C>T     | c.(505-507)CTC>TTC   | p.L169F      |
| Pat_24 | Pre-Treatment | PITX2   | 5308   | 37 | 4 | 111553619 | 111553619 | Missense_Mutation | SNP | C | T | 4   | 203 | c.64G>A      | c.(64-66)GTT>ATT     | p.V22I       |
| Pat_24 | Pre-Treatment | C4orf21 | 55345  | 37 | 4 | 113540414 | 113540414 | Missense_Mutation | SNP | C | T | 4   | 112 | c.784G>A     | c.(784-786)GAA>AAA   | p.E262K      |
| Pat_24 | Pre-Treatment | NDST4   | 64579  | 37 | 4 | 115767146 | 115767146 | Missense_Mutation | SNP | C | T | 35  | 48  | c.1948G>A    | c.(1948-1950)GAC>AAC | p.D650N      |
| Pat_24 | Pre-Treatment | USP53   | 54532  | 37 | 4 | 120161041 | 120161041 | Missense_Mutation | SNP | C | T | 27  | 40  | c.127C>T     | c.(127-129)CTT>TTT   | p.L43F       |
| Pat_24 | Pre-Treatment | PRDM5   | 11107  | 37 | 4 | 121616280 | 121616280 | Missense_Mutation | SNP | C | T | 4   | 195 | c.1879G>A    | c.(1879-1881)GTA>ATA | p.V627I      |
| Pat_24 | Pre-Treatment | TRPC3   | 7222   | 37 | 4 | 122800914 | 122800914 | Missense_Mutation | SNP | G | A | 22  | 65  | c.2743C>T    | c.(2743-2745)CCC>TCC | p.P915S      |
| Pat_24 | Pre-Treatment | PCDH18  | 54510  | 37 | 4 | 138452779 | 138452779 | Missense_Mutation | SNP | C | T | 4   | 63  | c.464G>A     | c.(463-465)CGC>CAC   | p.R155H      |
| Pat_24 | Pre-Treatment | RNF150  | 57484  | 37 | 4 | 141888839 | 141888839 | Missense_Mutation | SNP | C | T | 4   | 152 | c.673G>A     | c.(673-675)GCA>ACA   | p.A225T      |
| Pat_24 | Pre-Treatment | TRIM2   | 23321  | 37 | 4 | 154197202 | 154197202 | Missense_Mutation | SNP | G | A | 4   | 91  | c.292G>A     | c.(292-294)GCT>ACT   | p.A98T       |
| Pat_24 | Pre-Treatment | GLRB    | 2743   | 37 | 4 | 158091737 | 158091737 | Missense_Mutation | SNP | T | A | 57  | 69  | c.1351T>A    | c.(1351-1353)TCT>ACT | p.S451T      |

|        |               |          |        |    |   |           |           |                   |     |   |   |     |     |           |                      |          |
|--------|---------------|----------|--------|----|---|-----------|-----------|-------------------|-----|---|---|-----|-----|-----------|----------------------|----------|
| Pat_24 | Pre-Treatment | GRIA2    | 2891   | 37 | 4 | 158282254 | 158282254 | Missense_Mutation | SNP | G | A | 4   | 194 | c.2384G>A | c.(2383-2385)GGC>GAC | p.G795D  |
| Pat_24 | Pre-Treatment | TLL1     | 7092   | 37 | 4 | 166915607 | 166915607 | Missense_Mutation | SNP | C | T | 20  | 21  | c.436C>T  | c.(436-438)CCC>TCC   | p.P146S  |
| Pat_24 | Pre-Treatment | ADAM29   | 11086  | 37 | 4 | 175898987 | 175898987 | Missense_Mutation | SNP | C | T | 7   | 238 | c.2311C>T | c.(2311-2313)CGG>TGG | p.R771W  |
| Pat_24 | Pre-Treatment | SNX25    | 83891  | 37 | 4 | 186274751 | 186274751 | Missense_Mutation | SNP | G | A | 4   | 146 | c.2087G>A | c.(2086-2088)CGA>CAA | p.R696Q  |
| Pat_24 | Pre-Treatment | MTNR1A   | 4543   | 37 | 4 | 187455657 | 187455657 | Missense_Mutation | SNP | G | A | 26  | 90  | c.239C>T  | c.(238-240)CCG>CTG   | p.P80L   |
| Pat_24 | Pre-Treatment | EXOC3    | 11336  | 37 | 5 | 465848    | 465848    | Missense_Mutation | SNP | G | A | 4   | 134 | c.1954G>A | c.(1954-1956)GTG>ATG | p.V652M  |
| Pat_24 | Pre-Treatment | MRPL36   | 64979  | 37 | 5 | 1798790   | 1798790   | Missense_Mutation | SNP | C | T | 5   | 166 | c.260G>A  | c.(259-261)CCG>CAG   | p.R87Q   |
| Pat_24 | Pre-Treatment | CTNND2   | 1501   | 37 | 5 | 11022948  | 11022948  | Missense_Mutation | SNP | C | T | 5   | 97  | c.2932G>A | c.(2932-2934)GCC>ACC | p.A978T  |
| Pat_24 | Pre-Treatment | CTNND2   | 1501   | 37 | 5 | 11397234  | 11397234  | Missense_Mutation | SNP | C | A | 70  | 37  | c.521G>T  | c.(520-522)AGC>ATC   | p.S174I  |
| Pat_24 | Pre-Treatment | CTNND2   | 1501   | 37 | 5 | 11732369  | 11732369  | Missense_Mutation | SNP | G | A | 4   | 190 | c.53C>T   | c.(52-54)CCA>CTA     | p.P18L   |
| Pat_24 | Pre-Treatment | DNAH5    | 1767   | 37 | 5 | 13864603  | 13864603  | Missense_Mutation | SNP | G | A | 4   | 116 | c.4499C>T | c.(4498-4500)ACC>ATC | p.T1500I |
| Pat_24 | Pre-Treatment | TRIO     | 7204   | 37 | 5 | 14280445  | 14280445  | Missense_Mutation | SNP | C | T | 5   | 188 | c.247C>T  | c.(247-249)CGT>TGT   | p.R83C   |
| Pat_24 | Pre-Treatment | PRDM9    | 56979  | 37 | 5 | 23509657  | 23509657  | Missense_Mutation | SNP | C | T | 146 | 85  | c.148C>T  | c.(148-150)CGC>TGC   | p.R50C   |
| Pat_24 | Pre-Treatment | PRDM9    | 56979  | 37 | 5 | 23527385  | 23527385  | Missense_Mutation | SNP | A | C | 5   | 263 | c.2188A>C | c.(2188-2190)AGC>CGC | p.S730R  |
| Pat_24 | Pre-Treatment | PRDM9    | 56979  | 37 | 5 | 23527388  | 23527388  | Missense_Mutation | SNP | A | G | 7   | 280 | c.2191A>G | c.(2191-2193)AAT>GAT | p.N731D  |
| Pat_24 | Pre-Treatment | MTMR12   | 54545  | 37 | 5 | 32239127  | 32239127  | Missense_Mutation | SNP | G | A | 4   | 134 | c.1324C>T | c.(1324-1326)CGC>TGC | p.R442C  |
| Pat_24 | Pre-Treatment | SPEF2    | 79925  | 37 | 5 | 35792486  | 35792486  | Missense_Mutation | SNP | G | A | 141 | 140 | c.4492G>A | c.(4492-4494)GTG>ATG | p.V1498M |
| Pat_24 | Pre-Treatment | RICTOR   | 253260 | 37 | 5 | 38967280  | 38967280  | Missense_Mutation | SNP | G | A | 6   | 585 | c.1201C>T | c.(1201-1203)CGT>TGT | p.R401C  |
| Pat_24 | Pre-Treatment | ISL1     | 3670   | 37 | 5 | 50680467  | 50680467  | Missense_Mutation | SNP | G | A | 5   | 379 | c.121G>A  | c.(121-123)GCA>ACA   | p.A41T   |
| Pat_24 | Pre-Treatment | ITGA2    | 3673   | 37 | 5 | 52337982  | 52337982  | Nonsense_Mutation | SNP | C | T | 4   | 229 | c.226C>T  | c.(226-228)CGA>TGA   | p.R76*   |
| Pat_24 | Pre-Treatment | ANKRD55  | 79722  | 37 | 5 | 55407572  | 55407572  | Missense_Mutation | SNP | G | A | 91  | 158 | c.1003C>T | c.(1003-1005)CGG>TGG | p.R335W  |
| Pat_24 | Pre-Treatment | MAP3K1   | 4214   | 37 | 5 | 56178002  | 56178002  | Missense_Mutation | SNP | C | T | 4   | 173 | c.2975C>T | c.(2974-2976)TCT>TTT | p.S992F  |
| Pat_24 | Pre-Treatment | DIMT1L   | 27292  | 37 | 5 | 61686727  | 61686727  | Missense_Mutation | SNP | G | A | 167 | 227 | c.875C>T  | c.(874-876)TCC>TTC   | p.S292F  |
| Pat_24 | Pre-Treatment | MAST4    | 375449 | 37 | 5 | 66430465  | 66430465  | Missense_Mutation | SNP | G | T | 5   | 331 | c.1774G>T | c.(1774-1776)GTG>TTG | p.V592L  |
| Pat_24 | Pre-Treatment | MAP1B    | 4131   | 37 | 5 | 71495411  | 71495411  | Missense_Mutation | SNP | C | T | 4   | 220 | c.6229C>T | c.(6229-6231)CGT>TGT | p.R2077C |
| Pat_24 | Pre-Treatment | RGNEF    | 64283  | 37 | 5 | 73148496  | 73148496  | Missense_Mutation | SNP | C | T | 5   | 305 | c.1769C>T | c.(1768-1770)TCG>TTG | p.S590L  |
| Pat_24 | Pre-Treatment | HMGCR    | 3156   | 37 | 5 | 74652224  | 74652224  | Missense_Mutation | SNP | G | A | 4   | 226 | c.1937G>A | c.(1936-1938)CGT>CAT | p.R646H  |
| Pat_24 | Pre-Treatment | AGGF1    | 55109  | 37 | 5 | 76331512  | 76331512  | Missense_Mutation | SNP | G | A | 4   | 144 | c.460G>A  | c.(460-462)GAT>AAT   | p.D154N  |
| Pat_24 | Pre-Treatment | JMY      | 133746 | 37 | 5 | 78586025  | 78586025  | Missense_Mutation | SNP | C | T | 55  | 101 | c.1288C>T | c.(1288-1290)CAC>TAC | p.H430Y  |
| Pat_24 | Pre-Treatment | JMY      | 133746 | 37 | 5 | 78586965  | 78586965  | Missense_Mutation | SNP | G | T | 4   | 86  | c.1370G>T | c.(1369-1371)CGA>CTA | p.R457L  |
| Pat_24 | Pre-Treatment | RASA1    | 5921   | 37 | 5 | 86659278  | 86659278  | Missense_Mutation | SNP | A | G | 40  | 86  | c.1567A>G | c.(1567-1569)AGT>GGT | p.S523G  |
| Pat_24 | Pre-Treatment | MEF2C    | 4208   | 37 | 5 | 88100420  | 88100420  | Missense_Mutation | SNP | C | T | 4   | 111 | c.253G>A  | c.(253-255)GTG>ATG   | p.V85M   |
| Pat_24 | Pre-Treatment | GPR98    | 84059  | 37 | 5 | 89914946  | 89914946  | Missense_Mutation | SNP | C | T | 3   | 26  | c.401C>T  | c.(400-402)ACT>ATT   | p.T134I  |
| Pat_24 | Pre-Treatment | EPB41L4A | 64097  | 37 | 5 | 111504473 | 111504473 | Missense_Mutation | SNP | G | A | 4   | 225 | c.1895C>T | c.(1894-1896)TCG>TTG | p.S632L  |
| Pat_24 | Pre-Treatment | APC      | 324    | 37 | 5 | 112128186 | 112128186 | Missense_Mutation | SNP | G | A | 4   | 180 | c.689G>A  | c.(688-690)CGT>CAT   | p.R230H  |
| Pat_24 | Pre-Treatment | APC      | 324    | 37 | 5 | 112162892 | 112162892 | Missense_Mutation | SNP | G | A | 5   | 170 | c.1496G>A | c.(1495-1497)CGA>CAA | p.R499Q  |
| Pat_24 | Pre-Treatment | HSD17B4  | 3295   | 37 | 5 | 118829594 | 118829594 | Missense_Mutation | SNP | A | G | 62  | 51  | c.821A>G  | c.(820-822)AAG>AGG   | p.K274R  |
| Pat_24 | Pre-Treatment | CEP120   | 153241 | 37 | 5 | 122713159 | 122713159 | Missense_Mutation | SNP | C | T | 4   | 172 | c.2267G>A | c.(2266-2268)CGT>CAT | p.R756H  |
| Pat_24 | Pre-Treatment | CHSY3    | 337876 | 37 | 5 | 129520990 | 129520990 | Missense_Mutation | SNP | G | T | 4   | 198 | c.2155G>T | c.(2155-2157)GTT>TTT | p.V719F  |
| Pat_24 | Pre-Treatment | KIF3A    | 11127  | 37 | 5 | 132062130 | 132062130 | Missense_Mutation | SNP | C | T | 6   | 206 | c.341G>A  | c.(340-342)CGA>CAA   | p.R114Q  |
| Pat_24 | Pre-Treatment | KLHL3    | 26249  | 37 | 5 | 136973018 | 136973018 | Missense_Mutation | SNP | G | A | 5   | 239 | c.1286C>T | c.(1285-1287)ACG>ATG | p.T429M  |
| Pat_24 | Pre-Treatment | HSPA9    | 3313   | 37 | 5 | 137892552 | 137892552 | Nonsense_Mutation | SNP | G | A | 5   | 200 | c.1732C>T | c.(1732-1734)CGA>TGA | p.R578*  |
| Pat_24 | Pre-Treatment | CXXC5    | 51523  | 37 | 5 | 139060727 | 139060727 | Missense_Mutation | SNP | G | A | 4   | 48  | c.619G>A  | c.(619-621)GAC>AAC   | p.D207N  |
| Pat_24 | Pre-Treatment | SLC35A4  | 113829 | 37 | 5 | 139947436 | 139947436 | Missense_Mutation | SNP | G | T | 4   | 174 | c.682G>T  | c.(682-684)GGT>TGT   | p.G228C  |
| Pat_24 | Pre-Treatment | PCDHA1   | 56147  | 37 | 5 | 140167131 | 140167131 | Missense_Mutation | SNP | C | T | 6   | 444 | c.1256C>T | c.(1255-1257)TCG>TTG | p.S419L  |
| Pat_24 | Pre-Treatment | PCDHA1   | 56147  | 37 | 5 | 140167736 | 140167736 | Missense_Mutation | SNP | C | T | 108 | 218 | c.1861C>T | c.(1861-1863)CCG>TCG | p.P621S  |
| Pat_24 | Pre-Treatment | PCDHA3   | 56145  | 37 | 5 | 140182649 | 140182649 | Missense_Mutation | SNP | C | T | 80  | 114 | c.1867C>T | c.(1867-1869)CGC>TGC | p.R623C  |



|        |               |          |        |    |   |           |           |                        |     |   |   |     |     |            |                        |          |
|--------|---------------|----------|--------|----|---|-----------|-----------|------------------------|-----|---|---|-----|-----|------------|------------------------|----------|
| Pat_24 | Pre-Treatment | PCDHA8   | 56140  | 37 | 5 | 140222432 | 140222432 | Missense_Mutation      | SNP | C | T | 5   | 275 | c.1526C>T  | c.(1525-1527)TCG>TTG   | p.S509L  |
| Pat_24 | Pre-Treatment | PCDHA10  | 56139  | 37 | 5 | 140236862 | 140236862 | Missense_Mutation      | SNP | G | A | 144 | 274 | c.1229G>A  | c.(1228-1230)AGC>AAC   | p.S410N  |
| Pat_24 | Pre-Treatment | PCDHB1   | 29930  | 37 | 5 | 140431953 | 140431953 | Missense_Mutation      | SNP | G | A | 33  | 49  | c.898G>A   | c.(898-900)GAA>AAA     | p.E300K  |
| Pat_24 | Pre-Treatment | PCDHB3   | 56132  | 37 | 5 | 140481797 | 140481797 | Missense_Mutation      | SNP | G | A | 60  | 71  | c.1564G>A  | c.(1564-1566)GAG>AAG   | p.E522K  |
| Pat_24 | Pre-Treatment | PCDHB4   | 56131  | 37 | 5 | 140503558 | 140503558 | Missense_Mutation      | SNP | C | T | 4   | 120 | c.1978C>T  | c.(1978-1980)CTC>TTC   | p.L660F  |
| Pat_24 | Pre-Treatment | PCDHB6   | 56130  | 37 | 5 | 140531196 | 140531196 | Missense_Mutation      | SNP | C | T | 8   | 411 | c.1358C>T  | c.(1357-1359)TCC>TTC   | p.S453F  |
| Pat_24 | Pre-Treatment | PCDHB16  | 57717  | 37 | 5 | 140562543 | 140562543 | Missense_Mutation      | SNP | G | A | 27  | 34  | c.409G>A   | c.(409-411)GAA>AAA     | p.E137K  |
| Pat_24 | Pre-Treatment | PCDHB11  | 56125  | 37 | 5 | 140581443 | 140581443 | Missense_Mutation      | SNP | C | T | 92  | 171 | c.2096C>T  | c.(2095-2097)TCG>TTG   | p.S699L  |
| Pat_24 | Pre-Treatment | PCDH12   | 51294  | 37 | 5 | 141335676 | 141335676 | Missense_Mutation      | SNP | C | G | 4   | 93  | c.1741G>C  | c.(1741-1743)GTG>CTG   | p.V581L  |
| Pat_24 | Pre-Treatment | GRXCR2   | 643226 | 37 | 5 | 145246230 | 145246230 | Missense_Mutation      | SNP | C | T | 4   | 147 | c.398G>A   | c.(397-399)CGA>CAA     | p.R133Q  |
| Pat_24 | Pre-Treatment | SH3RF2   | 153769 | 37 | 5 | 145428766 | 145428766 | Missense_Mutation      | SNP | G | A | 4   | 166 | c.1280G>A  | c.(1279-1281)CGA>CAA   | p.R427Q  |
| Pat_24 | Pre-Treatment | SH3RF2   | 153769 | 37 | 5 | 145435672 | 145435672 | Missense_Mutation      | SNP | C | T | 94  | 145 | c.1451C>T  | c.(1450-1452)TCC>TTC   | p.S484F  |
| Pat_24 | Pre-Treatment | PDGFRB   | 5159   | 37 | 5 | 149510217 | 149510217 | Nonsense_Mutation      | SNP | G | A | 5   | 333 | c.1252C>T  | c.(1252-1254)CGA>TGA   | p.R418*  |
| Pat_24 | Pre-Treatment | RPS14    | 6208   | 37 | 5 | 149823869 | 149823869 | Missense_Mutation      | SNP | G | A | 5   | 395 | c.436C>T   | c.(436-438)CGC>TGC     | p.R146C  |
| Pat_24 | Pre-Treatment | FAT2     | 2196   | 37 | 5 | 150885392 | 150885392 | Missense_Mutation      | SNP | G | A | 5   | 274 | c.12784C>T | c.(12784-12786)CGC>TGC | p.R4262C |
| Pat_24 | Pre-Treatment | PWWP2A   | 114825 | 37 | 5 | 159520099 | 159520099 | Missense_Mutation      | SNP | G | A | 18  | 21  | c.1558C>T  | c.(1558-1560)CCT>TCT   | p.P520S  |
| Pat_24 | Pre-Treatment | C5orf54  | 63920  | 37 | 5 | 159822493 | 159822493 | Missense_Mutation      | SNP | G | A | 5   | 306 | c.5C>T     | c.(4-6)TCG>TTG         | p.S2L    |
| Pat_24 | Pre-Treatment | ODZ2     | 57451  | 37 | 5 | 167631391 | 167631391 | Missense_Mutation      | SNP | G | A | 23  | 55  | c.3562G>A  | c.(3562-3564)GGC>AGC   | p.G1188S |
| Pat_24 | Pre-Treatment | ODZ2     | 57451  | 37 | 5 | 167671635 | 167671635 | Missense_Mutation      | SNP | G | A | 4   | 174 | c.5704G>A  | c.(5704-5706)GAG>AAG   | p.E1902K |
| Pat_24 | Pre-Treatment | SLIT3    | 6586   | 37 | 5 | 168138041 | 168138041 | Missense_Mutation      | SNP | G | A | 11  | 25  | c.2578C>T  | c.(2578-2580)CAC>TAC   | p.H860Y  |
| Pat_24 | Pre-Treatment | CCDC99   | 54908  | 37 | 5 | 169028394 | 169028394 | Nonsense_Mutation      | SNP | C | T | 4   | 179 | c.1435C>T  | c.(1435-1437)CGA>TGA   | p.R479*  |
| Pat_24 | Pre-Treatment | GPRIN1   | 114787 | 37 | 5 | 176024702 | 176024702 | Missense_Mutation      | SNP | G | A | 30  | 58  | c.2134C>T  | c.(2134-2136)CCC>TCC   | p.P712S  |
| Pat_24 | Pre-Treatment | SLC34A1  | 6569   | 37 | 5 | 176821059 | 176821059 | Missense_Mutation      | SNP | C | T | 5   | 427 | c.1037C>T  | c.(1036-1038)CCG>CTG   | p.P346L  |
| Pat_24 | Pre-Treatment | F12      | 2161   | 37 | 5 | 176832982 | 176832982 | Missense_Mutation      | SNP | G | A | 5   | 328 | c.196C>T   | c.(196-198)CGG>TGG     | p.R66W   |
| Pat_24 | Pre-Treatment | GRK6     | 2870   | 37 | 5 | 176860170 | 176860170 | Missense_Mutation      | SNP | G | A | 5   | 340 | c.463G>A   | c.(463-465)GTG>ATG     | p.V155M  |
| Pat_24 | Pre-Treatment | TMED9    | 54732  | 37 | 5 | 177020678 | 177020678 | Missense_Mutation      | SNP | G | A | 5   | 361 | c.313G>A   | c.(313-315)GAG>AAG     | p.E105K  |
| Pat_24 | Pre-Treatment | EXOC2    | 55770  | 37 | 6 | 564069    | 564069    | Missense_Mutation      | SNP | G | A | 4   | 220 | c.1753C>T  | c.(1753-1755)CGT>TGT   | p.R585C  |
| Pat_24 | Pre-Treatment | DSP      | 1832   | 37 | 6 | 7580243   | 7580243   | Missense_Mutation      | SNP | G | A | 4   | 132 | c.3820G>A  | c.(3820-3822)GCC>ACC   | p.A1274T |
| Pat_24 | Pre-Treatment | TFAP2A   | 7020   | 37 | 6 | 10398877  | 10398877  | Missense_Mutation      | SNP | G | A | 8   | 620 | c.1087C>T  | c.(1087-1089)CGG>TGG   | p.R363W  |
| Pat_24 | Pre-Treatment | ATXN1    | 6310   | 37 | 6 | 16326632  | 16326632  | Missense_Mutation      | SNP | C | T | 6   | 388 | c.1910G>A  | c.(1909-1911)CGA>CAA   | p.R637Q  |
| Pat_24 | Pre-Treatment | ATXN1    | 6310   | 37 | 6 | 16328562  | 16328562  | Translation_Start_Site | SNP | C | T | 4   | 62  | c.-20G>A   | c.(-22--18)CCGTG>CCATG |          |
| Pat_24 | Pre-Treatment | BTN1A1   | 696    | 37 | 6 | 26509113  | 26509113  | Missense_Mutation      | SNP | G | A | 42  | 43  | c.1292G>A  | c.(1291-1293)GGA>GAA   | p.G431E  |
| Pat_24 | Pre-Treatment | HLA-G    | 3135   | 37 | 6 | 29797338  | 29797338  | Missense_Mutation      | SNP | G | A | 7   | 289 | c.763G>A   | c.(763-765)GTG>ATG     | p.V255M  |
| Pat_24 | Pre-Treatment | TRIM15   | 89870  | 37 | 6 | 30131474  | 30131474  | Missense_Mutation      | SNP | C | T | 34  | 81  | c.13C>T    | c.(13-15)CCG>TCG       | p.P5S    |
| Pat_24 | Pre-Treatment | LTB      | 4050   | 37 | 6 | 31550145  | 31550145  | Missense_Mutation      | SNP | C | T | 82  | 53  | c.50G>A    | c.(49-51)GGT>GAT       | p.G17D   |
| Pat_24 | Pre-Treatment | LY6G5B   | 58496  | 37 | 6 | 31639676  | 31639676  | Nonsense_Mutation      | SNP | C | T | 8   | 501 | c.223C>T   | c.(223-225)CAG>TAG     | p.Q75*   |
| Pat_24 | Pre-Treatment | BAT5     | 7920   | 37 | 6 | 31655035  | 31655035  | Missense_Mutation      | SNP | C | A | 4   | 133 | c.1631G>T  | c.(1630-1632)TGC>TTC   | p.C544F  |
| Pat_24 | Pre-Treatment | SLC44A4  | 80736  | 37 | 6 | 31846718  | 31846718  | Missense_Mutation      | SNP | C | T | 7   | 592 | c.40G>A    | c.(40-42)GGG>AGG       | p.G14R   |
| Pat_24 | Pre-Treatment | C4A      | 720    | 37 | 6 | 31997489  | 31997489  | Missense_Mutation      | SNP | C | T | 19  | 55  | c.3823C>T  | c.(3823-3825)CAC>TAC   | p.H1275Y |
| Pat_24 | Pre-Treatment | TNXB     | 7148   | 37 | 6 | 32017964  | 32017964  | Missense_Mutation      | SNP | C | T | 5   | 183 | c.9244G>A  | c.(9244-9246)GAG>AAG   | p.E3082K |
| Pat_24 | Pre-Treatment | HLA-DOB  | 3112   | 37 | 6 | 32781028  | 32781028  | Missense_Mutation      | SNP | C | T | 4   | 167 | c.787G>A   | c.(787-789)GTC>ATC     | p.V263I  |
| Pat_24 | Pre-Treatment | COL11A2  | 1302   | 37 | 6 | 33157226  | 33157226  | Missense_Mutation      | SNP | G | A | 4   | 166 | c.103C>T   | c.(103-105)CTC>TTC     | p.L35F   |
| Pat_24 | Pre-Treatment | VPS52    | 6293   | 37 | 6 | 33231874  | 33231874  | Missense_Mutation      | SNP | G | A | 6   | 399 | c.1531C>T  | c.(1531-1533)CGC>TGC   | p.R511C  |
| Pat_24 | Pre-Treatment | SYNGAP1  | 8831   | 37 | 6 | 33403335  | 33403335  | Missense_Mutation      | SNP | C | T | 7   | 697 | c.707C>T   | c.(706-708)GCG>GTG     | p.A236V  |
| Pat_24 | Pre-Treatment | C6orf125 | 84300  | 37 | 6 | 33669164  | 33669164  | Missense_Mutation      | SNP | C | T | 7   | 372 | c.172G>A   | c.(172-174)GAG>AAG     | p.E58K   |
| Pat_24 | Pre-Treatment | IP6K3    | 117283 | 37 | 6 | 33690697  | 33690697  | Missense_Mutation      | SNP | G | A | 45  | 102 | c.1033C>T  | c.(1033-1035)CCT>TCT   | p.P345S  |
| Pat_24 | Pre-Treatment | CPNE5    | 57699  | 37 | 6 | 36716016  | 36716016  | Missense_Mutation      | SNP | C | T | 253 | 221 | c.1000G>A  | c.(1000-1002)GAT>AAT   | p.D334N  |

|        |               |          |        |    |   |           |           |                        |     |    |    |     |     |                |                        |                |
|--------|---------------|----------|--------|----|---|-----------|-----------|------------------------|-----|----|----|-----|-----|----------------|------------------------|----------------|
| Pat_24 | Pre-Treatment | DNAH8    | 1769   | 37 | 6 | 38867551  | 38867551  | Splice_Site            | SNP | G  | A  | 90  | 91  | c.8413_splice  | c.e60-1                | p.l2805_splice |
| Pat_24 | Pre-Treatment | CNPY3    | 10695  | 37 | 6 | 42897414  | 42897414  | Missense_Mutation      | SNP | G  | A  | 3   | 35  | c.106G>A       | c.(106-108)GGA>AGA     | p.G36R         |
| Pat_24 | Pre-Treatment | TCTE1    | 202500 | 37 | 6 | 44250280  | 44250280  | Missense_Mutation      | SNP | C  | T  | 86  | 75  | c.863G>A       | c.(862-864)CGA>CAA     | p.R288Q        |
| Pat_24 | Pre-Treatment | AARS2    | 57505  | 37 | 6 | 44269835  | 44269835  | Missense_Mutation      | SNP | G  | A  | 4   | 166 | c.2560C>T      | c.(2560-2562)CGT>TGT   | p.R854C        |
| Pat_24 | Pre-Treatment | TINAG    | 27283  | 37 | 6 | 54254619  | 54254619  | Missense_Mutation      | SNP | G  | A  | 127 | 248 | c.1327G>A      | c.(1327-1329)GGA>AGA   | p.G443R        |
| Pat_24 | Pre-Treatment | FAM83B   | 222584 | 37 | 6 | 54804664  | 54804664  | Missense_Mutation      | SNP | G  | T  | 43  | 150 | c.895G>T       | c.(895-897)GCC>TCC     | p.A299S        |
| Pat_24 | Pre-Treatment | FAM83B   | 222584 | 37 | 6 | 54806252  | 54806252  | Missense_Mutation      | SNP | C  | T  | 18  | 53  | c.2483C>T      | c.(2482-2484)CCT>CTT   | p.P828L        |
| Pat_24 | Pre-Treatment | COL19A1  | 1310   | 37 | 6 | 70878100  | 70878100  | Missense_Mutation      | SNP | G  | A  | 4   | 138 | c.2534G>A      | c.(2533-2535)GGT>GAT   | p.G845D        |
| Pat_24 | Pre-Treatment | OGFRL1   | 79627  | 37 | 6 | 72011342  | 72011342  | Nonsense_Mutation      | SNP | C  | T  | 24  | 49  | c.946C>T       | c.(946-948)CGA>TGA     | p.R316*        |
| Pat_24 | Pre-Treatment | KCNQ5    | 56479  | 37 | 6 | 73904174  | 73904174  | Splice_Site            | SNP | G  | A  | 18  | 40  | c.1837_splice  | c.e14-1                | p.V613_splice  |
| Pat_24 | Pre-Treatment | C6orf150 | 115004 | 37 | 6 | 74135186  | 74135186  | Missense_Mutation      | SNP | C  | T  | 4   | 73  | c.1333G>A      | c.(1333-1335)GTA>ATA   | p.V445I        |
| Pat_24 | Pre-Treatment | COL12A1  | 1303   | 37 | 6 | 75853037  | 75853037  | Missense_Mutation      | SNP | C  | A  | 5   | 153 | c.4758G>T      | c.(4756-4758)TGG>TGT   | p.W1586C       |
| Pat_24 | Pre-Treatment | COL12A1  | 1303   | 37 | 6 | 75875427  | 75875427  | Missense_Mutation      | SNP | A  | C  | 89  | 130 | c.2779T>G      | c.(2779-2781)TCT>GCT   | p.S927A        |
| Pat_24 | Pre-Treatment | IMPG1    | 3617   | 37 | 6 | 76660307  | 76660307  | Missense_Mutation      | SNP | C  | T  | 18  | 28  | c.1796G>A      | c.(1795-1797)CGA>CAA   | p.R599Q        |
| Pat_24 | Pre-Treatment | SH3BGR2  | 83699  | 37 | 6 | 80383502  | 80383502  | Missense_Mutation      | SNP | G  | A  | 4   | 241 | c.217G>A       | c.(217-219)GAC>AAC     | p.D73N         |
| Pat_24 | Pre-Treatment | TTK      | 7272   | 37 | 6 | 80717681  | 80717681  | Missense_Mutation      | SNP | C  | T  | 5   | 163 | c.295C>T       | c.(295-297)CCC>TCC     | p.P99S         |
| Pat_24 | Pre-Treatment | ZNF292   | 23036  | 37 | 6 | 87965927  | 87965927  | Missense_Mutation      | SNP | C  | G  | 3   | 81  | c.2580C>G      | c.(2578-2580)AAC>AAG   | p.N860K        |
| Pat_24 | Pre-Treatment | MDN1     | 23195  | 37 | 6 | 90365626  | 90365626  | Missense_Mutation      | SNP | C  | T  | 4   | 112 | c.15347G>A     | c.(15346-15348)CGT>CAT | p.R5116H       |
| Pat_24 | Pre-Treatment | MDN1     | 23195  | 37 | 6 | 90405631  | 90405631  | Missense_Mutation      | SNP | C  | T  | 4   | 186 | c.9464G>A      | c.(9463-9465)CGG>CAG   | p.R3155Q       |
| Pat_24 | Pre-Treatment | MDN1     | 23195  | 37 | 6 | 90463861  | 90463861  | Missense_Mutation      | SNP | G  | A  | 4   | 126 | c.2905C>T      | c.(2905-2907)CGG>TGG   | p.R969W        |
| Pat_24 | Pre-Treatment | MANEA    | 79694  | 37 | 6 | 96054174  | 96054174  | Missense_Mutation      | SNP | C  | T  | 4   | 109 | c.1282C>T      | c.(1282-1284)CGT>TGT   | p.R428C        |
| Pat_24 | Pre-Treatment | KLHL32   | 114792 | 37 | 6 | 97562088  | 97562088  | Missense_Mutation      | SNP | G  | A  | 4   | 78  | c.1057G>A      | c.(1057-1059)GGG>AGG   | p.G353R        |
| Pat_24 | Pre-Treatment | PRDM1    | 639    | 37 | 6 | 106553455 | 106553455 | Missense_Mutation      | SNP | G  | A  | 4   | 160 | c.1420G>A      | c.(1420-1422)GGA>AGA   | p.G474R        |
| Pat_24 | Pre-Treatment | MICAL1   | 64780  | 37 | 6 | 109773539 | 109773539 | Missense_Mutation      | SNP | G  | A  | 5   | 425 | c.742C>T       | c.(742-744)CGC>TGC     | p.R248C        |
| Pat_24 | Pre-Treatment | LAMA4    | 3910   | 37 | 6 | 112486417 | 112486417 | Missense_Mutation      | SNP | G  | A  | 4   | 165 | c.1613C>T      | c.(1612-1614)GCG>GTG   | p.A538V        |
| Pat_24 | Pre-Treatment | HDAC2    | 3066   | 37 | 6 | 114279863 | 114279863 | Missense_Mutation      | SNP | C  | T  | 4   | 187 | c.515G>A       | c.(514-516)CGG>CAG     | p.R172Q        |
| Pat_24 | Pre-Treatment | GPRC6A   | 222545 | 37 | 6 | 117128060 | 117128060 | Nonsense_Mutation      | SNP | G  | A  | 26  | 59  | c.808C>T       | c.(808-810)CAG>TAG     | p.Q270*        |
| Pat_24 | Pre-Treatment | RFX6     | 222546 | 37 | 6 | 117240317 | 117240317 | Missense_Mutation      | SNP | G  | A  | 29  | 69  | c.1040G>A      | c.(1039-1041)AGA>AAA   | p.R347K        |
| Pat_24 | Pre-Treatment | ROS1     | 6098   | 37 | 6 | 117609788 | 117609788 | Missense_Mutation      | SNP | T  | A  | 29  | 44  | c.6911A>T      | c.(6910-6912)AAA>ATA   | p.K2304I       |
| Pat_24 | Pre-Treatment | FAM184A  | 79632  | 37 | 6 | 119345242 | 119345242 | Missense_Mutation      | SNP | C  | T  | 26  | 78  | c.896G>A       | c.(895-897)CGA>CAA     | p.R299Q        |
| Pat_24 | Pre-Treatment | RNF217   | 154214 | 37 | 6 | 125284135 | 125284135 | Translation_Start_Site | SNP | G  | A  | 4   | 32  | c.-260G>A      | (-262--258)ACGTG>ACATG |                |
| Pat_24 | Pre-Treatment | PTPRK    | 5796   | 37 | 6 | 128718792 | 128718792 | Missense_Mutation      | SNP | G  | A  | 4   | 158 | c.142C>T       | c.(142-144)CAC>TAC     | p.H48Y         |
| Pat_24 | Pre-Treatment | MED23    | 9439   | 37 | 6 | 131926379 | 131926379 | Splice_Site            | SNP | C  | T  | 4   | 71  | c.1613_splice  | c.e14+1                | p.S538_splice  |
| Pat_24 | Pre-Treatment | MAP7     | 9053   | 37 | 6 | 136681893 | 136681893 | Missense_Mutation      | SNP | C  | T  | 6   | 458 | c.1745G>A      | c.(1744-1746)CGG>CAG   | p.R582Q        |
| Pat_24 | Pre-Treatment | MAP7     | 9053   | 37 | 6 | 136698940 | 136698940 | Missense_Mutation      | SNP | G  | A  | 4   | 117 | c.704C>T       | c.(703-705)TCG>TTG     | p.S235L        |
| Pat_24 | Pre-Treatment | REPS1    | 85021  | 37 | 6 | 139266690 | 139266690 | Missense_Mutation      | SNP | T  | C  | 5   | 468 | c.422A>G       | c.(421-423)AAG>AGG     | p.K141R        |
| Pat_24 | Pre-Treatment | VTA1     | 51534  | 37 | 6 | 142487422 | 142487422 | Missense_Mutation      | SNP | G  | A  | 4   | 184 | c.170G>A       | c.(169-171)CGC>CAC     | p.R57H         |
| Pat_24 | Pre-Treatment | HIVEP2   | 3097   | 37 | 6 | 143081227 | 143081228 | Missense_Mutation      | DNP | GG | AC | 41  | 25  | .6197_6198CC>G | c.(6196-6198)CCC>CGT   | p.P2066R       |
| Pat_24 | Pre-Treatment | HIVEP2   | 3097   | 37 | 6 | 143092632 | 143092632 | Missense_Mutation      | SNP | G  | A  | 4   | 196 | c.3244C>T      | c.(3244-3246)CGG>TGG   | p.R1082W       |
| Pat_24 | Pre-Treatment | CNKSR3   | 154043 | 37 | 6 | 154735436 | 154735436 | Missense_Mutation      | SNP | G  | A  | 3   | 60  | c.1067C>T      | c.(1066-1068)CCC>CTC   | p.P356L        |
| Pat_24 | Pre-Treatment | SYNJ2    | 8871   | 37 | 6 | 158483177 | 158483177 | Missense_Mutation      | SNP | G  | A  | 141 | 233 | c.1108G>A      | c.(1108-1110)GGG>AGG   | p.G370R        |
| Pat_24 | Pre-Treatment | TULP4    | 56995  | 37 | 6 | 158902288 | 158902288 | Missense_Mutation      | SNP | G  | A  | 4   | 49  | c.1453G>A      | c.(1453-1455)GTC>ATC   | p.V485I        |
| Pat_24 | Pre-Treatment | FGFR1OP  | 11116  | 37 | 6 | 167438355 | 167438355 | Missense_Mutation      | SNP | G  | A  | 4   | 114 | c.892G>A       | c.(892-894)GGA>AGA     | p.G298R        |
| Pat_24 | Pre-Treatment | GPR31    | 2853   | 37 | 6 | 167570419 | 167570419 | Nonsense_Mutation      | SNP | G  | A  | 3   | 49  | c.901C>T       | c.(901-903)CGA>TGA     | p.R301*        |
| Pat_24 | Pre-Treatment | GPR146   | 115330 | 37 | 7 | 1097440   | 1097440   | Missense_Mutation      | SNP | G  | A  | 32  | 102 | c.289G>A       | c.(289-291)GTG>ATG     | p.V97M         |
| Pat_24 | Pre-Treatment | FBXL18   | 80028  | 37 | 7 | 5540381   | 5540381   | Missense_Mutation      | SNP | G  | A  | 5   | 77  | c.1519C>T      | c.(1519-1521)CGC>TGC   | p.R507C        |
| Pat_24 | Pre-Treatment | USP42    | 84132  | 37 | 7 | 6175496   | 6175496   | Missense_Mutation      | SNP | T  | C  | 3   | 72  | c.467T>C       | c.(466-468)ATG>ACG     | p.M156T        |

|        |               |           |        |    |   |           |           |                   |     |    |    |     |     |                  |                        |               |
|--------|---------------|-----------|--------|----|---|-----------|-----------|-------------------|-----|----|----|-----|-----|------------------|------------------------|---------------|
| Pat_24 | Pre-Treatment | ABCB5     | 340273 | 37 | 7 | 20683202  | 20683202  | Missense_Mutation | SNP | G  | A  | 4   | 140 | c.625G>A         | c.(625-627)GTG>ATG     | p.V209M       |
| Pat_24 | Pre-Treatment | ABCB5     | 340273 | 37 | 7 | 20738102  | 20738102  | Missense_Mutation | SNP | G  | A  | 42  | 31  | c.748G>A         | c.(748-750)GGG>AGG     | p.G250R       |
| Pat_24 | Pre-Treatment | STK31     | 56164  | 37 | 7 | 23794043  | 23794043  | Missense_Mutation | SNP | T  | C  | 219 | 122 | c.1243T>C        | c.(1243-1245)TGG>CGG   | p.W415R       |
| Pat_24 | Pre-Treatment | CCDC129   | 223075 | 37 | 7 | 31617639  | 31617639  | Missense_Mutation | SNP | G  | A  | 4   | 121 | c.761G>A         | c.(760-762)GGT>GAT     | p.G254D       |
| Pat_24 | Pre-Treatment | KBTBD2    | 25948  | 37 | 7 | 32909121  | 32909121  | Missense_Mutation | SNP | G  | A  | 6   | 319 | c.1708C>T        | c.(1708-1710)CGT>TGT   | p.R570C       |
| Pat_24 | Pre-Treatment | GPR141    | 353345 | 37 | 7 | 37780815  | 37780815  | Missense_Mutation | SNP | G  | A  | 5   | 239 | c.820G>A         | c.(820-822)GCA>ACA     | p.A274T       |
| Pat_24 | Pre-Treatment | UBE2D4    | 51619  | 37 | 7 | 43982601  | 43982601  | Missense_Mutation | SNP | C  | T  | 182 | 138 | c.169C>T         | c.(169-171)CCT>TCT     | p.P57S        |
| Pat_24 | Pre-Treatment | DBNL      | 28988  | 37 | 7 | 44091467  | 44091467  | Missense_Mutation | SNP | G  | A  | 4   | 154 | c.178G>A         | c.(178-180)GGG>AGG     | p.G60R        |
| Pat_24 | Pre-Treatment | AEBP1     | 165    | 37 | 7 | 44148759  | 44148759  | Missense_Mutation | SNP | G  | A  | 4   | 163 | c.1072G>A        | c.(1072-1074)GTG>ATG   | p.V358M       |
| Pat_24 | Pre-Treatment | AEBP1     | 165    | 37 | 7 | 44151573  | 44151573  | Missense_Mutation | SNP | G  | A  | 6   | 244 | c.1961G>A        | c.(1960-1962)CGC>CAC   | p.R654H       |
| Pat_24 | Pre-Treatment | CCM2      | 83605  | 37 | 7 | 45113987  | 45113987  | Missense_Mutation | SNP | G  | A  | 4   | 67  | c.1034G>A        | c.(1033-1035)AGC>AAC   | p.S345N       |
| Pat_24 | Pre-Treatment | PKD1L1    | 168507 | 37 | 7 | 47898480  | 47898480  | Missense_Mutation | SNP | C  | T  | 4   | 48  | c.4153G>A        | c.(4153-4155)GGC>AGC   | p.G1385S      |
| Pat_24 | Pre-Treatment | ABCA13    | 154664 | 37 | 7 | 48550794  | 48550794  | Missense_Mutation | SNP | G  | A  | 4   | 115 | c.13639G>A       | c.(13639-13641)GGA>AG/ | p.G4547R      |
| Pat_24 | Pre-Treatment | COBL      | 23242  | 37 | 7 | 51152943  | 51152943  | Missense_Mutation | SNP | G  | A  | 4   | 139 | c.1016C>T        | c.(1015-1017)CCT>CTT   | p.P339L       |
| Pat_24 | Pre-Treatment | 14-Sep    | 346288 | 37 | 7 | 55886880  | 55886880  | Missense_Mutation | SNP | C  | T  | 20  | 11  | c.757G>A         | c.(757-759)GAA>AAA     | p.E253K       |
| Pat_24 | Pre-Treatment | ZNF716    | 441234 | 37 | 7 | 57529035  | 57529035  | Missense_Mutation | SNP | C  | T  | 43  | 150 | c.868C>T         | c.(868-870)CAT>TAT     | p.H290Y       |
| Pat_24 | Pre-Treatment | WBSCR17   | 64409  | 37 | 7 | 71130513  | 71130513  | Missense_Mutation | SNP | C  | T  | 89  | 65  | c.1198C>T        | c.(1198-1200)CGC>TGC   | p.R400C       |
| Pat_24 | Pre-Treatment | FZD9      | 8326   | 37 | 7 | 72849278  | 72849278  | Missense_Mutation | SNP | C  | T  | 4   | 231 | c.941C>T         | c.(940-942)ACG>ATG     | p.T314M       |
| Pat_24 | Pre-Treatment | ELN       | 2006   | 37 | 7 | 73442524  | 73442524  | Missense_Mutation | SNP | G  | A  | 4   | 139 | c.7G>A           | c.(7-9)GGT>AGT         | p.G3S         |
| Pat_24 | Pre-Treatment | ELN       | 2006   | 37 | 7 | 73467491  | 73467491  | Splice_Site       | SNP | A  | G  | 4   | 111 | c.950_splice     | c.e18-2                | p.G317_splice |
| Pat_24 | Pre-Treatment | LAT2      | 7462   | 37 | 7 | 73634106  | 73634106  | Missense_Mutation | SNP | G  | A  | 7   | 537 | c.167G>A         | c.(166-168)CGG>CAG     | p.R56Q        |
| Pat_24 | Pre-Treatment | CCDC146   | 57639  | 37 | 7 | 76916860  | 76916860  | Missense_Mutation | SNP | G  | A  | 4   | 109 | c.2381G>A        | c.(2380-2382)GGC>GAC   | p.G794D       |
| Pat_24 | Pre-Treatment | PCLO      | 27445  | 37 | 7 | 82579646  | 82579646  | Nonsense_Mutation | SNP | G  | A  | 114 | 74  | c.10258C>T       | c.(10258-10260)CGA>TGA | p.R3420*      |
| Pat_24 | Pre-Treatment | SEMA3D    | 223117 | 37 | 7 | 84629153  | 84629153  | Missense_Mutation | SNP | G  | A  | 4   | 83  | c.1937C>T        | c.(1936-1938)ACG>ATG   | p.T646M       |
| Pat_24 | Pre-Treatment | ABCB4     | 5244   | 37 | 7 | 87035681  | 87035681  | Missense_Mutation | SNP | G  | A  | 6   | 467 | c.3430C>T        | c.(3430-3432)CGG>TGG   | p.R1144W      |
| Pat_24 | Pre-Treatment | ABCB1     | 5243   | 37 | 7 | 87168601  | 87168601  | Nonsense_Mutation | SNP | G  | A  | 4   | 140 | c.2380C>T        | c.(2380-2382)CGA>TGA   | p.R794*       |
| Pat_24 | Pre-Treatment | C7orf63   | 79846  | 37 | 7 | 89884782  | 89884782  | Missense_Mutation | SNP | G  | A  | 7   | 484 | c.166G>A         | c.(166-168)GAA>AAA     | p.E56K        |
| Pat_24 | Pre-Treatment | CCDC132   | 55610  | 37 | 7 | 92905528  | 92905528  | Missense_Mutation | SNP | G  | A  | 7   | 503 | c.853G>A         | c.(853-855)GTG>ATG     | p.V285M       |
| Pat_24 | Pre-Treatment | ASNS      | 440    | 37 | 7 | 97482657  | 97482657  | Missense_Mutation | SNP | G  | A  | 81  | 87  | c.1280C>T        | c.(1279-1281)TCC>TTC   | p.S427F       |
| Pat_24 | Pre-Treatment | PTCD1     | 26024  | 37 | 7 | 99032639  | 99032639  | Missense_Mutation | SNP | G  | A  | 4   | 121 | c.227C>T         | c.(226-228)ACG>ATG     | p.T76M        |
| Pat_24 | Pre-Treatment | ZKSCAN5   | 23660  | 37 | 7 | 99129144  | 99129144  | Missense_Mutation | SNP | G  | A  | 4   | 120 | c.1792G>A        | c.(1792-1794)GTC>ATC   | p.V598I       |
| Pat_24 | Pre-Treatment | SPDYE3    | 441272 | 37 | 7 | 99917310  | 99917310  | Missense_Mutation | SNP | G  | A  | 5   | 450 | c.338G>A         | c.(337-339)CGT>CAT     | p.R113H       |
| Pat_24 | Pre-Treatment | TRIM56    | 81844  | 37 | 7 | 100731159 | 100731159 | Missense_Mutation | SNP | G  | T  | 4   | 76  | c.566G>T         | c.(565-567)TGC>TTC     | p.C189F       |
| Pat_24 | Pre-Treatment | FIS1      | 51024  | 37 | 7 | 100883161 | 100883161 | Missense_Mutation | SNP | C  | T  | 3   | 44  | c.385G>A         | c.(385-387)GTG>ATG     | p.V129M       |
| Pat_24 | Pre-Treatment | RABL5     | 64792  | 37 | 7 | 100959806 | 100959806 | Missense_Mutation | SNP | G  | A  | 5   | 238 | c.224C>T         | c.(223-225)CCG>CTG     | p.P75L        |
| Pat_24 | Pre-Treatment | CUX1      | 1523   | 37 | 7 | 101892248 | 101892248 | Missense_Mutation | SNP | G  | A  | 4   | 60  | c.4444G>A        | c.(4444-4446)GCG>ACG   | p.A1482T      |
| Pat_24 | Pre-Treatment | LRWD1     | 222229 | 37 | 7 | 102107853 | 102107853 | Missense_Mutation | SNP | C  | T  | 4   | 123 | c.500C>T         | c.(499-501)GCC>GTG     | p.A167V       |
| Pat_24 | Pre-Treatment | LAMB1     | 3912   | 37 | 7 | 107605047 | 107605047 | Missense_Mutation | SNP | C  | G  | 4   | 243 | c.1648G>C        | c.(1648-1650)GCC>CCC   | p.A550P       |
| Pat_24 | Pre-Treatment | LAMB4     | 22798  | 37 | 7 | 107720104 | 107720104 | Missense_Mutation | SNP | G  | A  | 4   | 228 | c.1829C>T        | c.(1828-1830)GCT>GTT   | p.A610V       |
| Pat_24 | Pre-Treatment | PNPLA8    | 50640  | 37 | 7 | 108155059 | 108155059 | Missense_Mutation | SNP | G  | A  | 5   | 315 | c.877C>T         | c.(877-879)CGT>TGT     | p.R293C       |
| Pat_24 | Pre-Treatment | LOC407835 | 407835 | 37 | 7 | 128766867 | 128766867 | Missense_Mutation | SNP | G  | A  | 50  | 3   | c.296G>A         | c.(295-297)AGG>AAG     | p.R99K        |
| Pat_24 | Pre-Treatment | CALD1     | 800    | 37 | 7 | 134613579 | 134613579 | Missense_Mutation | SNP | G  | A  | 4   | 171 | c.146G>A         | c.(145-147)CGG>CAG     | p.R49Q        |
| Pat_24 | Pre-Treatment | BRAF      | 673    | 37 | 7 | 140453136 | 140453137 | Missense_Mutation | DNP | AC | TT | 224 | 28  | c.1798_1799GT>Av | c.(1798-1800)GTG>AAG   | p.V600K       |
| Pat_24 | Pre-Treatment | CLEC5A    | 23601  | 37 | 7 | 141629932 | 141629932 | Missense_Mutation | SNP | C  | T  | 6   | 365 | c.539G>A         | c.(538-540)CGC>CAC     | p.R180H       |
| Pat_24 | Pre-Treatment | TRY6      | 154754 | 37 | 7 | 142482242 | 142482242 | Missense_Mutation | SNP | G  | A  | 7   | 185 | c.622G>A         | c.(622-624)GGA>AGA     | p.G208R       |
| Pat_24 | Pre-Treatment | TRPV6     | 55503  | 37 | 7 | 142569711 | 142569711 | Missense_Mutation | SNP | G  | A  | 7   | 524 | c.1927C>T        | c.(1927-1929)CGG>TGG   | p.R643W       |
| Pat_24 | Pre-Treatment | OR2F1     | 26211  | 37 | 7 | 143657455 | 143657455 | Missense_Mutation | SNP | G  | A  | 4   | 213 | c.392G>A         | c.(391-393)CGA>CAA     | p.R131Q       |

|        |               |           |        |    |   |           |           |                   |     |   |   |     |     |           |                      |          |
|--------|---------------|-----------|--------|----|---|-----------|-----------|-------------------|-----|---|---|-----|-----|-----------|----------------------|----------|
| Pat_24 | Pre-Treatment | REPIN1    | 29803  | 37 | 7 | 150069039 | 150069039 | Nonsense_Mutation | SNP | C | T | 5   | 171 | c.709C>T  | c.(709-711)CAG>TAG   | p.Q237*  |
| Pat_24 | Pre-Treatment | ZNF775    | 285971 | 37 | 7 | 150095095 | 150095095 | Missense_Mutation | SNP | G | A | 3   | 35  | c.1526G>A | c.(1525-1527)CGC>CAC | p.R509H  |
| Pat_24 | Pre-Treatment | NOM1      | 64434  | 37 | 7 | 156752644 | 156752644 | Missense_Mutation | SNP | G | T | 5   | 204 | c.1408G>T | c.(1408-1410)GCC>TCC | p.A470S  |
| Pat_24 | Pre-Treatment | CSMD1     | 64478  | 37 | 8 | 2820822   | 2820822   | Missense_Mutation | SNP | C | T | 7   | 298 | c.9379G>A | c.(9379-9381)GGT>AGT | p.G3127S |
| Pat_24 | Pre-Treatment | MFHAS1    | 9258   | 37 | 8 | 8750411   | 8750411   | Missense_Mutation | SNP | G | A | 3   | 30  | c.158C>T  | c.(157-159)TCC>TTC   | p.S53F   |
| Pat_24 | Pre-Treatment | TNKS      | 8658   | 37 | 8 | 9437741   | 9437741   | Missense_Mutation | SNP | G | A | 8   | 313 | c.746G>A  | c.(745-747)GGT>GAT   | p.G249D  |
| Pat_24 | Pre-Treatment | FDFT1     | 2222   | 37 | 8 | 11689096  | 11689096  | Missense_Mutation | SNP | C | T | 4   | 175 | c.949C>T  | c.(949-951)CGG>TGG   | p.R317W  |
| Pat_24 | Pre-Treatment | DLC1      | 10395  | 37 | 8 | 12956977  | 12956977  | Missense_Mutation | SNP | C | T | 4   | 167 | c.2869G>A | c.(2869-2871)GAC>AAC | p.D957N  |
| Pat_24 | Pre-Treatment | LZTS1     | 11178  | 37 | 8 | 20112631  | 20112631  | Missense_Mutation | SNP | G | A | 4   | 144 | c.62C>T   | c.(61-63)TCG>TTG     | p.S21L   |
| Pat_24 | Pre-Treatment | LGI3      | 203190 | 37 | 8 | 22006155  | 22006155  | Missense_Mutation | SNP | G | A | 4   | 146 | c.1165C>T | c.(1165-1167)CGG>TGG | p.R389W  |
| Pat_24 | Pre-Treatment | SORBS3    | 10174  | 37 | 8 | 22414417  | 22414417  | Missense_Mutation | SNP | G | A | 4   | 109 | c.410G>A  | c.(409-411)CGA>CAA   | p.R137Q  |
| Pat_24 | Pre-Treatment | RHOBTB2   | 23221  | 37 | 8 | 22864881  | 22864881  | Missense_Mutation | SNP | G | A | 6   | 417 | c.1123G>A | c.(1123-1125)GGA>AGA | p.G375R  |
| Pat_24 | Pre-Treatment | ENTPD4    | 9583   | 37 | 8 | 23297322  | 23297322  | Missense_Mutation | SNP | C | T | 5   | 140 | c.989G>A  | c.(988-990)GGC>GAC   | p.G330D  |
| Pat_24 | Pre-Treatment | SLC25A37  | 51312  | 37 | 8 | 23429231  | 23429231  | Missense_Mutation | SNP | G | A | 5   | 116 | c.880G>A  | c.(880-882)GGC>AGC   | p.G294S  |
| Pat_24 | Pre-Treatment | ADAM28    | 10863  | 37 | 8 | 24187570  | 24187570  | Missense_Mutation | SNP | C | T | 45  | 74  | c.1045C>T | c.(1045-1047)CAT>TAT | p.H349Y  |
| Pat_24 | Pre-Treatment | NEFM      | 4741   | 37 | 8 | 24775894  | 24775894  | Missense_Mutation | SNP | G | T | 38  | 54  | c.2526G>T | c.(2524-2526)AAG>AAT | p.K842N  |
| Pat_24 | Pre-Treatment | KIF13B    | 23303  | 37 | 8 | 28928049  | 28928049  | Missense_Mutation | SNP | G | A | 7   | 17  | c.5453C>T | c.(5452-5454)CCT>CTT | p.P1818L |
| Pat_24 | Pre-Treatment | NRG1      | 3084   | 37 | 8 | 32621523  | 32621523  | Missense_Mutation | SNP | G | A | 4   | 116 | c.1526G>A | c.(1525-1527)AGT>AAT | p.S509N  |
| Pat_24 | Pre-Treatment | KCNU1     | 157855 | 37 | 8 | 36793199  | 36793199  | Missense_Mutation | SNP | G | A | 70  | 125 | c.3211G>A | c.(3211-3213)GAC>AAC | p.D1071N |
| Pat_24 | Pre-Treatment | GPR124    | 25960  | 37 | 8 | 37698701  | 37698701  | Missense_Mutation | SNP | C | T | 4   | 161 | c.2845C>T | c.(2845-2847)CGC>TGC | p.R949C  |
| Pat_24 | Pre-Treatment | LETM2     | 137994 | 37 | 8 | 38258458  | 38258458  | Missense_Mutation | SNP | C | T | 118 | 165 | c.730C>T  | c.(730-732)CGC>TGC   | p.R244C  |
| Pat_24 | Pre-Treatment | IKBKB     | 3551   | 37 | 8 | 42175254  | 42175254  | Missense_Mutation | SNP | C | T | 47  | 81  | c.1205C>T | c.(1204-1206)TCC>TTC | p.S402F  |
| Pat_24 | Pre-Treatment | CHRNA6    | 8973   | 37 | 8 | 42611837  | 42611837  | Missense_Mutation | SNP | G | A | 68  | 117 | c.505C>T  | c.(505-507)CAT>TAT   | p.H169Y  |
| Pat_24 | Pre-Treatment | KIAA0146  | 23514  | 37 | 8 | 48642011  | 48642011  | Missense_Mutation | SNP | C | T | 3   | 28  | c.2588C>T | c.(2587-2589)GCC>GTC | p.A863V  |
| Pat_24 | Pre-Treatment | YTHDF3    | 253943 | 37 | 8 | 64099378  | 64099378  | Missense_Mutation | SNP | T | A | 4   | 122 | c.809T>A  | c.(808-810)ATA>AAA   | p.I270K  |
| Pat_24 | Pre-Treatment | C8orf44   | 56260  | 37 | 8 | 67590034  | 67590034  | Missense_Mutation | SNP | G | A | 4   | 134 | c.91G>A   | c.(91-93)GAA>AAA     | p.E31K   |
| Pat_24 | Pre-Treatment | C8orf34   | 116328 | 37 | 8 | 69621281  | 69621281  | Missense_Mutation | SNP | C | T | 28  | 45  | c.1036C>T | c.(1036-1038)CAT>TAT | p.H346Y  |
| Pat_24 | Pre-Treatment | SULF1     | 23213  | 37 | 8 | 70476364  | 70476364  | Missense_Mutation | SNP | G | A | 69  | 95  | c.154G>A  | c.(154-156)GAT>AAT   | p.D52N   |
| Pat_24 | Pre-Treatment | SULF1     | 23213  | 37 | 8 | 70553057  | 70553057  | Missense_Mutation | SNP | G | A | 4   | 75  | c.2566G>A | c.(2566-2568)GGA>AGA | p.G856R  |
| Pat_24 | Pre-Treatment | RPL7      | 6129   | 37 | 8 | 74203308  | 74203308  | Missense_Mutation | SNP | T | C | 3   | 72  | c.718A>G  | c.(718-720)ATC>GTC   | p.I240V  |
| Pat_24 | Pre-Treatment | JPH1      | 56704  | 37 | 8 | 75227342  | 75227342  | Missense_Mutation | SNP | C | T | 5   | 249 | c.893G>A  | c.(892-894)CGC>CAC   | p.R298H  |
| Pat_24 | Pre-Treatment | TPD52     | 7163   | 37 | 8 | 80965533  | 80965533  | Missense_Mutation | SNP | C | T | 5   | 328 | c.388G>A  | c.(388-390)GTG>ATG   | p.V130M  |
| Pat_24 | Pre-Treatment | ZFAND1    | 79752  | 37 | 8 | 82627077  | 82627077  | Missense_Mutation | SNP | C | T | 5   | 231 | c.320G>A  | c.(319-321)CGA>CAA   | p.R107Q  |
| Pat_24 | Pre-Treatment | CA13      | 377677 | 37 | 8 | 86193501  | 86193501  | Missense_Mutation | SNP | G | A | 6   | 437 | c.712G>A  | c.(712-714)GCA>ACA   | p.A238T  |
| Pat_24 | Pre-Treatment | MMP16     | 4325   | 37 | 8 | 89180150  | 89180150  | Missense_Mutation | SNP | G | A | 4   | 117 | c.457C>T  | c.(457-459)CGC>TGC   | p.R153C  |
| Pat_24 | Pre-Treatment | CDH17     | 1015   | 37 | 8 | 95182723  | 95182723  | Missense_Mutation | SNP | G | A | 4   | 235 | c.968C>T  | c.(967-969)CCG>CTG   | p.P323L  |
| Pat_24 | Pre-Treatment | KIAA1429  | 25962  | 37 | 8 | 95501050  | 95501050  | Missense_Mutation | SNP | G | A | 4   | 117 | c.5323C>T | c.(5323-5325)CGT>TGT | p.R1775C |
| Pat_24 | Pre-Treatment | INTS8     | 55656  | 37 | 8 | 95879525  | 95879525  | Missense_Mutation | SNP | A | T | 4   | 156 | c.2374A>T | c.(2374-2376)ACA>TCA | p.T792S  |
| Pat_24 | Pre-Treatment | MATN2     | 4147   | 37 | 8 | 98991147  | 98991147  | Missense_Mutation | SNP | G | A | 4   | 130 | c.992G>A  | c.(991-993)TGT>TAT   | p.C331Y  |
| Pat_24 | Pre-Treatment | KLF10     | 7071   | 37 | 8 | 103667813 | 103667813 | Missense_Mutation | SNP | G | A | 4   | 139 | c.17C>T   | c.(16-18)GCC>GTC     | p.A6V    |
| Pat_24 | Pre-Treatment | ANGPT1    | 284    | 37 | 8 | 108296965 | 108296965 | Nonsense_Mutation | SNP | G | A | 4   | 202 | c.1150C>T | c.(1150-1152)CGA>TGA | p.R384*  |
| Pat_24 | Pre-Treatment | EIF3H     | 8667   | 37 | 8 | 117671160 | 117671160 | Missense_Mutation | SNP | C | T | 4   | 163 | c.349G>A  | c.(349-351)GTG>ATG   | p.V117M  |
| Pat_24 | Pre-Treatment | TNFRSF11B | 4982   | 37 | 8 | 119945293 | 119945293 | Missense_Mutation | SNP | C | T | 4   | 77  | c.277G>A  | c.(277-279)GTC>ATC   | p.V93I   |
| Pat_24 | Pre-Treatment | TAF2      | 6873   | 37 | 8 | 120814047 | 120814047 | Missense_Mutation | SNP | G | A | 37  | 77  | c.779C>T  | c.(778-780)CCA>CTA   | p.P260L  |
| Pat_24 | Pre-Treatment | EFR3A     | 23167  | 37 | 8 | 132968136 | 132968136 | Missense_Mutation | SNP | G | A | 4   | 90  | c.760G>A  | c.(760-762)GTT>ATT   | p.V254I  |
| Pat_24 | Pre-Treatment | KCNQ3     | 3786   | 37 | 8 | 133142113 | 133142113 | Missense_Mutation | SNP | T | G | 166 | 193 | c.2015A>C | c.(2014-2016)AAG>ACG | p.K672T  |
| Pat_24 | Pre-Treatment | TG        | 7038   | 37 | 8 | 133881993 | 133881993 | Missense_Mutation | SNP | G | A | 4   | 183 | c.196G>A  | c.(196-198)GAC>AAC   | p.D66N   |

|        |               |          |        |    |   |           |           |                   |     |   |   |     |     |              |                        |               |
|--------|---------------|----------|--------|----|---|-----------|-----------|-------------------|-----|---|---|-----|-----|--------------|------------------------|---------------|
| Pat_24 | Pre-Treatment | FAM135B  | 51059  | 37 | 8 | 139164716 | 139164716 | Missense_Mutation | SNP | C | T | 57  | 92  | c.2002G>A    | c.(2002-2004)GAA>AAA   | p.E668K       |
| Pat_24 | Pre-Treatment | FAM135B  | 51059  | 37 | 8 | 139380207 | 139380207 | Missense_Mutation | SNP | G | A | 5   | 257 | c.20C>T      | c.(19-21)ACG>ATG       | p.T7M         |
| Pat_24 | Pre-Treatment | GPR20    | 2843   | 37 | 8 | 142367548 | 142367548 | Missense_Mutation | SNP | C | T | 3   | 32  | c.476G>A     | c.(475-477)CGC>CAC     | p.R159H       |
| Pat_24 | Pre-Treatment | LY6D     | 8581   | 37 | 8 | 143867004 | 143867004 | Splice_Site       | SNP | C | T | 4   | 230 | c.151_splice | c.e2+1                 | p.V51_splice  |
| Pat_24 | Pre-Treatment | CYP11B1  | 1584   | 37 | 8 | 143956699 | 143956699 | Missense_Mutation | SNP | C | T | 38  | 51  | c.1151G>A    | c.(1150-1152)CGA>CAA   | p.R384Q       |
| Pat_24 | Pre-Treatment | TSTA3    | 7264   | 37 | 8 | 144698314 | 144698314 | Missense_Mutation | SNP | C | T | 6   | 368 | c.223G>A     | c.(223-225)GGC>AGC     | p.G75S        |
| Pat_24 | Pre-Treatment | PLEC     | 5339   | 37 | 8 | 144993059 | 144993059 | Missense_Mutation | SNP | G | A | 5   | 203 | c.11341C>T   | c.(11341-11343)CGC>TGC | p.R3781C      |
| Pat_24 | Pre-Treatment | GPR172A  | 79581  | 37 | 8 | 145583069 | 145583069 | Missense_Mutation | SNP | A | G | 9   | 104 | c.116A>G     | c.(115-117)AAA>AGA     | p.K39R        |
| Pat_24 | Pre-Treatment | KANK1    | 23189  | 37 | 9 | 712642    | 712642    | Missense_Mutation | SNP | C | T | 3   | 42  | c.1876C>T    | c.(1876-1878)CGG>TGG   | p.R626W       |
| Pat_24 | Pre-Treatment | UBAP2    | 55833  | 37 | 9 | 33922757  | 33922757  | Missense_Mutation | SNP | G | T | 41  | 14  | c.3192C>A    | c.(3190-3192)TTC>TTA   | p.F1064L      |
| Pat_24 | Pre-Treatment | RECK     | 8434   | 37 | 9 | 36110025  | 36110025  | Missense_Mutation | SNP | C | T | 4   | 143 | c.1837C>T    | c.(1837-1839)CGC>TGC   | p.R613C       |
| Pat_24 | Pre-Treatment | ZCCHC7   | 84186  | 37 | 9 | 37304227  | 37304227  | Missense_Mutation | SNP | C | T | 4   | 134 | c.697C>T     | c.(697-699)CGG>TGG     | p.R233W       |
| Pat_24 | Pre-Treatment | SMC5     | 23137  | 37 | 9 | 72893497  | 72893497  | Missense_Mutation | SNP | C | T | 86  | 31  | c.634C>T     | c.(634-636)CAC>TAC     | p.H212Y       |
| Pat_24 | Pre-Treatment | TRPM6    | 140803 | 37 | 9 | 77435255  | 77435255  | Nonsense_Mutation | SNP | G | A | 86  | 21  | c.1099C>T    | c.(1099-1101)CAA>TAA   | p.Q367*       |
| Pat_24 | Pre-Treatment | VPS13A   | 23230  | 37 | 9 | 79908310  | 79908310  | Missense_Mutation | SNP | G | T | 4   | 203 | c.3393G>T    | c.(3391-3393)ATG>ATT   | p.M1131I      |
| Pat_24 | Pre-Treatment | KIF27    | 55582  | 37 | 9 | 86518061  | 86518061  | Nonsense_Mutation | SNP | G | A | 4   | 123 | c.1372C>T    | c.(1372-1374)CGA>TGA   | p.R458*       |
| Pat_24 | Pre-Treatment | ROR2     | 4920   | 37 | 9 | 94486849  | 94486849  | Missense_Mutation | SNP | C | T | 5   | 134 | c.1927G>A    | c.(1927-1929)GCC>ACC   | p.A643T       |
| Pat_24 | Pre-Treatment | COL15A1  | 1306   | 37 | 9 | 101812157 | 101812157 | Nonsense_Mutation | SNP | C | T | 5   | 434 | c.2884C>T    | c.(2884-2886)CGA>TGA   | p.R962*       |
| Pat_24 | Pre-Treatment | BAAT     | 570    | 37 | 9 | 104133665 | 104133665 | Missense_Mutation | SNP | G | A | 101 | 29  | c.22C>T      | c.(22-24)CCT>TCT       | p.P8S         |
| Pat_24 | Pre-Treatment | C9orf125 | 84302  | 37 | 9 | 104239242 | 104239242 | Nonsense_Mutation | SNP | G | A | 4   | 203 | c.133C>T     | c.(133-135)CGA>TGA     | p.R45*        |
| Pat_24 | Pre-Treatment | ACTL7B   | 10880  | 37 | 9 | 111617367 | 111617367 | Missense_Mutation | SNP | C | T | 4   | 117 | c.844G>A     | c.(844-846)GAG>AAG     | p.E282K       |
| Pat_24 | Pre-Treatment | IKBKAP   | 8518   | 37 | 9 | 111663931 | 111663931 | Missense_Mutation | SNP | G | A | 4   | 220 | c.1885C>T    | c.(1885-1887)CGC>TGC   | p.R629C       |
| Pat_24 | Pre-Treatment | SVEP1    | 79987  | 37 | 9 | 113170069 | 113170069 | Missense_Mutation | SNP | G | A | 110 | 29  | c.7811C>T    | c.(7810-7812)TCC>TTC   | p.S2604F      |
| Pat_24 | Pre-Treatment | C9orf84  | 158401 | 37 | 9 | 114454492 | 114454492 | Nonsense_Mutation | SNP | C | T | 92  | 29  | c.3573G>A    | c.(3571-3573)TGG>TGA   | p.W1191*      |
| Pat_24 | Pre-Treatment | BSPRY    | 54836  | 37 | 9 | 116116589 | 116116589 | Missense_Mutation | SNP | G | A | 5   | 139 | c.271G>A     | c.(271-273)GTC>ATC     | p.V91I        |
| Pat_24 | Pre-Treatment | C9orf43  | 257169 | 37 | 9 | 116185655 | 116185655 | Missense_Mutation | SNP | G | A | 4   | 122 | c.533G>A     | c.(532-534)CGA>CAA     | p.R178Q       |
| Pat_24 | Pre-Treatment | RGS3     | 5998   | 37 | 9 | 116346450 | 116346450 | Missense_Mutation | SNP | G | A | 4   | 177 | c.2758G>A    | c.(2758-2760)GAG>AAG   | p.E920K       |
| Pat_24 | Pre-Treatment | COL27A1  | 85301  | 37 | 9 | 116956726 | 116956726 | Missense_Mutation | SNP | G | A | 5   | 261 | c.2059G>A    | c.(2059-2061)GAT>AAT   | p.D687N       |
| Pat_24 | Pre-Treatment | AKNA     | 80709  | 37 | 9 | 117118255 | 117118255 | Missense_Mutation | SNP | C | T | 4   | 128 | c.3008G>A    | c.(3007-3009)CGG>CAG   | p.R1003Q      |
| Pat_24 | Pre-Treatment | TNC      | 3371   | 37 | 9 | 117848578 | 117848578 | Missense_Mutation | SNP | C | T | 5   | 403 | c.1432G>A    | c.(1432-1434)GGC>AGC   | p.G478S       |
| Pat_24 | Pre-Treatment | ASTN2    | 23245  | 37 | 9 | 119249714 | 119249714 | Nonsense_Mutation | SNP | G | A | 4   | 98  | c.3421C>T    | c.(3421-3423)CGA>TGA   | p.R1141*      |
| Pat_24 | Pre-Treatment | OR1L3    | 26735  | 37 | 9 | 125438296 | 125438296 | Missense_Mutation | SNP | G | A | 60  | 18  | c.888G>A     | c.(886-888)ATG>ATA     | p.M296I       |
| Pat_24 | Pre-Treatment | PPP6C    | 5537   | 37 | 9 | 127912080 | 127912080 | Missense_Mutation | SNP | G | A | 83  | 10  | c.790C>T     | c.(790-792)CGT>TGT     | p.R264C       |
| Pat_24 | Pre-Treatment | GAPVD1   | 26130  | 37 | 9 | 128083731 | 128083731 | Missense_Mutation | SNP | C | T | 83  | 27  | c.1622C>T    | c.(1621-1623)TCG>TTG   | p.S541L       |
| Pat_24 | Pre-Treatment | URM1     | 81605  | 37 | 9 | 131150103 | 131150103 | Missense_Mutation | SNP | C | T | 5   | 375 | c.115C>T     | c.(115-117)CGG>TGG     | p.R39W        |
| Pat_24 | Pre-Treatment | FUBP3    | 8939   | 37 | 9 | 133499049 | 133499049 | Missense_Mutation | SNP | G | A | 4   | 206 | c.926G>A     | c.(925-927)CGG>CAG     | p.R309Q       |
| Pat_24 | Pre-Treatment | C9orf9   | 11092  | 37 | 9 | 135763747 | 135763747 | Missense_Mutation | SNP | C | T | 4   | 178 | c.418C>T     | c.(418-420)CTC>TTC     | p.L140F       |
| Pat_24 | Pre-Treatment | C9orf7   | 11094  | 37 | 9 | 136333048 | 136333048 | Missense_Mutation | SNP | C | T | 4   | 107 | c.326C>T     | c.(325-327)GCG>GTG     | p.A109V       |
| Pat_24 | Pre-Treatment | RXRA     | 6256   | 37 | 9 | 137300016 | 137300016 | Missense_Mutation | SNP | G | A | 4   | 205 | c.301G>A     | c.(301-303)GTC>ATC     | p.V101I       |
| Pat_24 | Pre-Treatment | QSOX2    | 169714 | 37 | 9 | 139100978 | 139100978 | Missense_Mutation | SNP | C | T | 4   | 160 | c.1693G>A    | c.(1693-1695)GAC>AAC   | p.D565N       |
| Pat_24 | Pre-Treatment | PMPCA    | 23203  | 37 | 9 | 139309021 | 139309021 | Missense_Mutation | SNP | G | T | 4   | 226 | c.454G>T     | c.(454-456)GCT>TCT     | p.A152S       |
| Pat_24 | Pre-Treatment | SEC16A   | 9919   | 37 | 9 | 139366482 | 139366482 | Missense_Mutation | SNP | C | T | 4   | 101 | c.3649G>A    | c.(3649-3651)GAG>AAG   | p.E1217K      |
| Pat_24 | Pre-Treatment | NOTCH1   | 4851   | 37 | 9 | 139413893 | 139413893 | Splice_Site       | SNP | G | T | 4   | 150 | c.865_splice | c.e5+1                 | p.G289_splice |
| Pat_24 | Pre-Treatment | TMEM203  | 94107  | 37 | 9 | 140099601 | 140099601 | Missense_Mutation | SNP | G | A | 4   | 90  | c.266C>T     | c.(265-267)ACG>ATG     | p.T89M        |
| Pat_24 | Pre-Treatment | NDOR1    | 27158  | 37 | 9 | 140110375 | 140110375 | Missense_Mutation | SNP | G | A | 4   | 219 | c.1460G>A    | c.(1459-1461)CGC>CAC   | p.R487H       |
| Pat_24 | Pre-Treatment | TUBB2C   | 10383  | 37 | 9 | 140137137 | 140137137 | Missense_Mutation | SNP | G | A | 4   | 161 | c.467G>A     | c.(466-468)CGG>CAG     | p.R156Q       |
| Pat_24 | Pre-Treatment | ZMYND19  | 116225 | 37 | 9 | 140477114 | 140477114 | Missense_Mutation | SNP | G | A | 5   | 136 | c.565C>T     | c.(565-567)CGC>TGC     | p.R189C       |



|        |                 |          |        |    |   |           |           |                        |     |    |    |     |     |                |                        |               |
|--------|-----------------|----------|--------|----|---|-----------|-----------|------------------------|-----|----|----|-----|-----|----------------|------------------------|---------------|
| Pat_24 | Pre-Treatment   | TUBBP5   | 643224 | 37 | 9 | 141071420 | 141071420 | Missense_Mutation      | SNP | G  | A  | 4   | 97  | c.823G>A       | c.(823-825)GAC>AAC     | p.D275N       |
| Pat_24 | Pre-Treatment   | ASMTL    | 8623   | 37 | X | 1522283   | 1522283   | Missense_Mutation      | SNP | C  | T  | 5   | 188 | c.1745G>A      | c.(1744-1746)GGC>GAC   | p.G582D       |
| Pat_24 | Pre-Treatment   | MXRA5    | 25878  | 37 | X | 3228314   | 3228314   | Missense_Mutation      | SNP | G  | A  | 38  | 16  | c.7930C>T      | c.(7930-7932)CAT>TAT   | p.H2644Y      |
| Pat_24 | Pre-Treatment   | TLR7     | 51284  | 37 | X | 12903670  | 12903670  | Missense_Mutation      | SNP | C  | T  | 77  | 21  | c.43C>T        | c.(43-45)CTT>TTT       | p.L15F        |
| Pat_24 | Pre-Treatment   | GLRA2    | 2742   | 37 | X | 14625262  | 14625262  | Missense_Mutation      | SNP | C  | T  | 4   | 106 | c.587C>T       | c.(586-588)ACG>ATG     | p.T196M       |
| Pat_24 | Pre-Treatment   | ASB11    | 140456 | 37 | X | 15301641  | 15301641  | Missense_Mutation      | SNP | G  | A  | 170 | 49  | c.958C>T       | c.(958-960)CTC>TTC     | p.L320F       |
| Pat_24 | Pre-Treatment   | PHEX     | 5251   | 37 | X | 22051081  | 22051081  | Translation_Start_Site | SNP | C  | T  | 4   | 158 | c.-42C>T       | c.(-44-40)CACGA>CATGA  |               |
| Pat_24 | Pre-Treatment   | FAM47C   | 442444 | 37 | X | 37028662  | 37028662  | Missense_Mutation      | SNP | T  | C  | 6   | 57  | c.2179T>C      | c.(2179-2181)TGC>CGC   | p.C727R       |
| Pat_24 | Pre-Treatment   | SSX3     | 10214  | 37 | X | 48213500  | 48213500  | Missense_Mutation      | SNP | G  | A  | 4   | 175 | c.214C>T       | c.(214-216)CGT>TGT     | p.R72C        |
| Pat_24 | Pre-Treatment   | OTUD5    | 55593  | 37 | X | 48791834  | 48791834  | Missense_Mutation      | SNP | C  | T  | 4   | 115 | c.977G>A       | c.(976-978)CGT>CAT     | p.R326H       |
| Pat_24 | Pre-Treatment   | KDM5C    | 8242   | 37 | X | 53223862  | 53223862  | Missense_Mutation      | SNP | C  | T  | 4   | 34  | c.3497G>A      | c.(3496-3498)CGC>CAC   | p.R1166H      |
| Pat_24 | Pre-Treatment   | ITIH5L   | 347365 | 37 | X | 54785245  | 54785245  | Missense_Mutation      | SNP | C  | T  | 36  | 16  | c.1262G>A      | c.(1261-1263)AGG>AAG   | p.R421K       |
| Pat_24 | Pre-Treatment   | PFKFB1   | 5207   | 37 | X | 54960268  | 54960268  | Missense_Mutation      | SNP | G  | A  | 4   | 61  | c.1342C>T      | c.(1342-1344)CGG>TGG   | p.R448W       |
| Pat_24 | Pre-Treatment   | EFNB1    | 1947   | 37 | X | 68059902  | 68059902  | Missense_Mutation      | SNP | G  | A  | 3   | 40  | c.599G>A       | c.(598-600)GGC>GAC     | p.G200D       |
| Pat_24 | Pre-Treatment   | GDPD2    | 54857  | 37 | X | 69652895  | 69652895  | Missense_Mutation      | SNP | G  | A  | 3   | 24  | c.1579G>A      | c.(1579-1581)GCA>ACA   | p.A527T       |
| Pat_24 | Pre-Treatment   | MED12    | 9968   | 37 | X | 70356309  | 70356309  | Missense_Mutation      | SNP | G  | A  | 3   | 33  | c.5204G>A      | c.(5203-5205)CGC>CAC   | p.R1735H      |
| Pat_24 | Pre-Treatment   | ACRC     | 93953  | 37 | X | 70823920  | 70823920  | Missense_Mutation      | SNP | C  | T  | 7   | 86  | c.793C>T       | c.(793-795)CCC>TCC     | p.P265S       |
| Pat_24 | Pre-Treatment   | NAP1L2   | 4674   | 37 | X | 72433673  | 72433673  | Missense_Mutation      | SNP | T  | C  | 3   | 33  | c.656A>G       | c.(655-657)GAG>GGG     | p.E219G       |
| Pat_24 | Pre-Treatment   | ATP7A    | 538    | 37 | X | 77298875  | 77298875  | Missense_Mutation      | SNP | C  | T  | 4   | 94  | c.4066C>T      | c.(4066-4068)CGG>TGG   | p.R1356W      |
| Pat_24 | Pre-Treatment   | ZMAT1    | 84460  | 37 | X | 101138559 | 101138559 | Missense_Mutation      | SNP | T  | C  | 3   | 74  | c.1327A>G      | c.(1327-1329)AGG>GGG   | p.R443G       |
| Pat_24 | Pre-Treatment   | GPRASP1  | 9737   | 37 | X | 101912419 | 101912419 | Missense_Mutation      | SNP | G  | A  | 4   | 97  | c.3578G>A      | c.(3577-3579)CGA>CAA   | p.R1193Q      |
| Pat_24 | Pre-Treatment   | CXorf57  | 55086  | 37 | X | 105912456 | 105912456 | Missense_Mutation      | SNP | G  | A  | 4   | 202 | c.2333G>A      | c.(2332-2334)CGA>CAA   | p.R778Q       |
| Pat_24 | Pre-Treatment   | COL4A6   | 1288   | 37 | X | 107430394 | 107430394 | Missense_Mutation      | SNP | G  | A  | 4   | 223 | c.1886C>T      | c.(1885-1887)CCC>CTC   | p.P629L       |
| Pat_24 | Pre-Treatment   | COL4A6   | 1288   | 37 | X | 107431220 | 107431220 | Missense_Mutation      | SNP | C  | T  | 60  | 19  | c.1628G>A      | c.(1627-1629)GGA>GAA   | p.G543E       |
| Pat_24 | Pre-Treatment   | GUCY2F   | 2986   | 37 | X | 108673582 | 108673583 | Missense_Mutation      | DNP | CC | AA | 5   | 244 | .1744_1745GG>T | c.(1744-1746)GGA>TTA   | p.G582L       |
| Pat_24 | Pre-Treatment   | GUCY2F   | 2986   | 37 | X | 108673592 | 108673592 | Nonsense_Mutation      | SNP | C  | A  | 5   | 212 | c.1735G>T      | c.(1735-1737)GGA>TGA   | p.G579*       |
| Pat_24 | Pre-Treatment   | TMEM164  | 84187  | 37 | X | 109247348 | 109247348 | Missense_Mutation      | SNP | G  | A  | 4   | 147 | c.346G>A       | c.(346-348)GTC>ATC     | p.V116I       |
| Pat_24 | Pre-Treatment   | ZCCHC16  | 340595 | 37 | X | 111697979 | 111697979 | Missense_Mutation      | SNP | C  | T  | 106 | 27  | c.23C>T        | c.(22-24)TCA>TTA       | p.S8L         |
| Pat_24 | Pre-Treatment   | CT47B1   | 643311 | 37 | X | 120009390 | 120009390 | Missense_Mutation      | SNP | C  | G  | 6   | 110 | c.135G>C       | c.(133-135)ATG>ATC     | p.M45I        |
| Pat_24 | Pre-Treatment   | CT47B1   | 643311 | 37 | X | 120009393 | 120009393 | Missense_Mutation      | SNP | G  | C  | 6   | 107 | c.132C>G       | c.(130-132)GAC>GAG     | p.D44E        |
| Pat_24 | Pre-Treatment   | OCRL     | 4952   | 37 | X | 128692706 | 128692706 | Missense_Mutation      | SNP | C  | T  | 4   | 60  | c.536C>T       | c.(535-537)CCT>CTT     | p.P179L       |
| Pat_24 | Pre-Treatment   | OCRL     | 4952   | 37 | X | 128703359 | 128703359 | Missense_Mutation      | SNP | G  | A  | 4   | 212 | c.1585G>A      | c.(1585-1587)GCC>ACC   | p.A529T       |
| Pat_24 | Pre-Treatment   | BCORL1   | 63035  | 37 | X | 129171402 | 129171402 | Missense_Mutation      | SNP | G  | A  | 4   | 139 | c.4366G>A      | c.(4366-4368)GGC>AGC   | p.G1456S      |
| Pat_24 | Pre-Treatment   | TFDP3    | 51270  | 37 | X | 132351950 | 132351950 | Missense_Mutation      | SNP | C  | T  | 4   | 136 | c.338G>A       | c.(337-339)CGT>CAT     | p.R113H       |
| Pat_24 | Pre-Treatment   | FAM122C  | 159091 | 37 | X | 133948871 | 133948871 | Missense_Mutation      | SNP | C  | T  | 5   | 253 | c.181C>T       | c.(181-183)CGC>TGC     | p.R61C        |
| Pat_24 | Pre-Treatment   | ZIC3     | 7547   | 37 | X | 136649872 | 136649872 | Missense_Mutation      | SNP | G  | A  | 4   | 174 | c.1022G>A      | c.(1021-1023)CGT>CAT   | p.R341H       |
| Pat_24 | Pre-Treatment   | FMR1     | 2332   | 37 | X | 147030296 | 147030296 | Missense_Mutation      | SNP | C  | T  | 90  | 31  | c.1831C>T      | c.(1831-1833)CGT>TGT   | p.R611C       |
| Pat_24 | Pre-Treatment   | AFF2     | 2334   | 37 | X | 148072792 | 148072792 | Missense_Mutation      | SNP | G  | A  | 5   | 198 | c.3866G>A      | c.(3865-3867)AGC>AAC   | p.S1289N      |
| Pat_24 | Pre-Treatment   | TMEM185A | 84548  | 37 | X | 148690324 | 148690324 | Missense_Mutation      | SNP | C  | T  | 4   | 212 | c.413G>A       | c.(412-414)AGG>AAG     | p.R138K       |
| Pat_24 | Pre-Treatment   | MAMLD1   | 10046  | 37 | X | 149639500 | 149639500 | Missense_Mutation      | SNP | C  | T  | 4   | 184 | c.1655C>T      | c.(1654-1656)CCG>CTG   | p.P552L       |
| Pat_24 | Pre-Treatment   | PNMA3    | 29944  | 37 | X | 152226020 | 152226020 | Missense_Mutation      | SNP | G  | A  | 4   | 96  | c.608G>A       | c.(607-609)CGG>CAG     | p.R203Q       |
| Pat_24 | Pre-Treatment   | HCFC1    | 3054   | 37 | X | 153221856 | 153221856 | Missense_Mutation      | SNP | G  | A  | 4   | 82  | c.2642C>T      | c.(2641-2643)ACG>ATG   | p.T881M       |
| Pat_24 | Post-Resistance | KIAA1751 | 85452  | 37 | 1 | 1887145   | 1887145   | Missense_Mutation      | SNP | C  | T  | 12  | 96  | c.2161G>A      | c.(2161-2163)GAG>AAG   | p.E721K       |
| Pat_24 | Post-Resistance | PLCH2    | 9651   | 37 | 1 | 2436255   | 2436255   | Missense_Mutation      | SNP | G  | A  | 11  | 34  | c.3854G>A      | c.(3853-3855)GGG>GAG   | p.G1285E      |
| Pat_24 | Post-Resistance | MASP2    | 10747  | 37 | 1 | 11087664  | 11087664  | Missense_Mutation      | SNP | C  | T  | 32  | 103 | c.1339G>A      | c.(1339-1341)GGA>AGA   | p.G447R       |
| Pat_24 | Post-Resistance | TNFRSF8  | 943    | 37 | 1 | 12195671  | 12195671  | Splice_Site            | SNP | G  | A  | 4   | 132 | c.1335_splice  | c.e13+1                | p.T445_splice |
| Pat_24 | Post-Resistance | VPS13D   | 55187  | 37 | 1 | 12418520  | 12418520  | Missense_Mutation      | SNP | C  | T  | 4   | 146 | c.10004C>T     | c.(10003-10005)ACG>ATG | p.T3335M      |

|        |                 |          |           |    |   |           |           |                   |     |    |    |    |     |                |                      |          |
|--------|-----------------|----------|-----------|----|---|-----------|-----------|-------------------|-----|----|----|----|-----|----------------|----------------------|----------|
| Pat_24 | Post-Resistance | PRAMEF12 | 390999    | 37 | 1 | 12837729  | 12837729  | Missense_Mutation | SNP | G  | A  | 23 | 70  | c.1439G>A      | c.(1438-1440)GGT>GAT | p.G480D  |
| Pat_24 | Post-Resistance | PRAMEF1  | 65121     | 37 | 1 | 12856002  | 12856002  | Missense_Mutation | SNP | G  | A  | 32 | 442 | c.1282G>A      | c.(1282-1284)GAG>AAG | p.E428K  |
| Pat_24 | Post-Resistance | TMEM82   | 388595    | 37 | 1 | 16069565  | 16069566  | Missense_Mutation | DNP | CC | TT | 13 | 51  | c.212_213CC>TT | c.(211-213)TCC>TTT   | p.S71F   |
| Pat_24 | Post-Resistance | ARHGEF19 | 128272    | 37 | 1 | 16535275  | 16535275  | Missense_Mutation | SNP | C  | T  | 10 | 30  | c.275G>A       | c.(274-276)GGG>GAG   | p.G92E   |
| Pat_24 | Post-Resistance | IGSF21   | 84966     | 37 | 1 | 18702857  | 18702857  | Missense_Mutation | SNP | G  | A  | 46 | 225 | c.1069G>A      | c.(1069-1071)GAC>AAC | p.D357N  |
| Pat_24 | Post-Resistance | CNKSR1   | 10256     | 37 | 1 | 26504045  | 26504045  | Missense_Mutation | SNP | C  | T  | 14 | 55  | c.7C>T         | c.(7-9)CCG>TCG       | p.P3S    |
| Pat_24 | Post-Resistance | FGR      | 2268      | 37 | 1 | 27939499  | 27939499  | Missense_Mutation | SNP | C  | G  | 3  | 81  | c.1516G>C      | c.(1516-1518)GAG>CAG | p.E506Q  |
| Pat_24 | Post-Resistance | NKAIN1   | 79570     | 37 | 1 | 31655401  | 31655401  | Missense_Mutation | SNP | C  | A  | 46 | 182 | c.508G>T       | c.(508-510)GTG>TTG   | p.V170L  |
| Pat_24 | Post-Resistance | ADC      | 113451    | 37 | 1 | 33559013  | 33559013  | Missense_Mutation | SNP | G  | A  | 4  | 104 | c.583G>A       | c.(583-585)GTG>ATG   | p.V195M  |
| Pat_24 | Post-Resistance | EPHA10   | 284656    | 37 | 1 | 38227437  | 38227437  | Missense_Mutation | SNP | C  | T  | 6  | 34  | c.490G>A       | c.(490-492)GGC>AGC   | p.G164S  |
| Pat_24 | Post-Resistance | ZMPSTE24 | 10269     | 37 | 1 | 40735746  | 40735746  | Missense_Mutation | SNP | G  | T  | 4  | 129 | c.574G>T       | c.(574-576)GGG>TGG   | p.G192W  |
| Pat_24 | Post-Resistance | FOXJ3    | 22887     | 37 | 1 | 42730851  | 42730851  | Nonsense_Mutation | SNP | G  | A  | 4  | 109 | c.379C>T       | c.(379-381)CGA>TGA   | p.R127*  |
| Pat_24 | Post-Resistance | CCDC30   | 728621    | 37 | 1 | 43011243  | 43011243  | Missense_Mutation | SNP | G  | A  | 5  | 26  | c.418G>A       | c.(418-420)GAA>AAA   | p.E140K  |
| Pat_24 | Post-Resistance | YBX1     | 4904      | 37 | 1 | 43166675  | 43166675  | Missense_Mutation | SNP | G  | A  | 4  | 100 | c.964G>A       | c.(964-966)GGG>AGG   | p.G322R  |
| Pat_24 | Post-Resistance | SLC6A9   | 6536      | 37 | 1 | 44474289  | 44474289  | Missense_Mutation | SNP | C  | T  | 15 | 47  | c.545G>A       | c.(544-546)GGC>GAC   | p.G182D  |
| Pat_24 | Post-Resistance | CYP4B1   | 1580      | 37 | 1 | 47283696  | 47283696  | Missense_Mutation | SNP | C  | T  | 61 | 222 | c.1264C>T      | c.(1264-1266)CCT>TCT | p.P422S  |
| Pat_24 | Post-Resistance | TAL1     | 6886      | 37 | 1 | 47685757  | 47685757  | Missense_Mutation | SNP | G  | A  | 31 | 107 | c.631C>T       | c.(631-633)CGC>TGC   | p.R211C  |
| Pat_24 | Post-Resistance | MAGOH    | 4116      | 37 | 1 | 53692748  | 53692748  | Missense_Mutation | SNP | A  | G  | 3  | 54  | c.410T>C       | c.(409-411)ATT>ACT   | p.I137T  |
| Pat_24 | Post-Resistance | GLIS1    | 148979    | 37 | 1 | 53990458  | 53990458  | Missense_Mutation | SNP | G  | A  | 4  | 190 | c.1060C>T      | c.(1060-1062)CGT>TGT | p.R354C  |
| Pat_24 | Post-Resistance | PARS2    | 25973     | 37 | 1 | 55224360  | 55224360  | Missense_Mutation | SNP | C  | T  | 5  | 384 | c.475G>A       | c.(475-477)GAG>AAG   | p.E159K  |
| Pat_24 | Post-Resistance | C1orf173 | 127254    | 37 | 1 | 75065480  | 75065480  | Missense_Mutation | SNP | T  | C  | 20 | 53  | c.1625A>G      | c.(1624-1626)AAA>AGA | p.K542R  |
| Pat_24 | Post-Resistance | C1orf173 | 127254    | 37 | 1 | 75072303  | 75072303  | Missense_Mutation | SNP | C  | T  | 7  | 50  | c.1471G>A      | c.(1471-1473)GAA>AAA | p.E491K  |
| Pat_24 | Post-Resistance | ABCA4    | 24        | 37 | 1 | 94497348  | 94497348  | Missense_Mutation | SNP | C  | T  | 16 | 89  | c.4114G>A      | c.(4114-4116)GAC>AAC | p.D1372N |
| Pat_24 | Post-Resistance | OLFM3    | 118427    | 37 | 1 | 102312505 | 102312505 | Missense_Mutation | SNP | C  | T  | 17 | 97  | c.25G>A        | c.(25-27)GGC>AGC     | p.G9S    |
| Pat_24 | Post-Resistance | COL11A1  | 1301      | 37 | 1 | 103427784 | 103427784 | Missense_Mutation | SNP | C  | T  | 16 | 82  | c.3062G>A      | c.(3061-3063)GGA>GAA | p.G1021E |
| Pat_24 | Post-Resistance | CELSR2   | 1952      | 37 | 1 | 109805585 | 109805585 | Missense_Mutation | SNP | G  | A  | 3  | 75  | c.4702G>A      | c.(4702-4704)GTG>ATG | p.V1568M |
| Pat_24 | Post-Resistance | PHTF1    | 10745     | 37 | 1 | 114254647 | 114254647 | Missense_Mutation | SNP | C  | T  | 4  | 140 | c.872G>A       | c.(871-873)CGT>CAT   | p.R291H  |
| Pat_24 | Post-Resistance | MAN1A2   | 10905     | 37 | 1 | 118008992 | 118008992 | Missense_Mutation | SNP | C  | T  | 7  | 58  | c.1111C>T      | c.(1111-1113)CGT>TGT | p.R371C  |
| Pat_24 | Post-Resistance | NBPF9    | 400818    | 37 | 1 | 144621586 | 144621586 | Missense_Mutation | SNP | C  | G  | 7  | 408 | c.918C>G       | c.(916-918)TTC>TTG   | p.F306L  |
| Pat_24 | Post-Resistance | NBPF10   | 100132406 | 37 | 1 | 145295443 | 145295443 | Missense_Mutation | SNP | C  | G  | 5  | 173 | c.196C>G       | c.(196-198)CTC>GTC   | p.L66V   |
| Pat_24 | Post-Resistance | NBPF10   | 100132406 | 37 | 1 | 145362127 | 145362127 | Missense_Mutation | SNP | G  | T  | 18 | 371 | c.9660G>T      | c.(9658-9660)GAG>GAT | p.E3220D |
| Pat_24 | Post-Resistance | BOLA1    | 51027     | 37 | 1 | 149871793 | 149871793 | Missense_Mutation | SNP | C  | T  | 4  | 113 | c.181C>T       | c.(181-183)CCG>TCG   | p.P61S   |
| Pat_24 | Post-Resistance | FLG      | 2312      | 37 | 1 | 152281475 | 152281475 | Missense_Mutation | SNP | C  | T  | 63 | 494 | c.5887G>A      | c.(5887-5889)GAC>AAC | p.D1963N |
| Pat_24 | Post-Resistance | ASH1L    | 55870     | 37 | 1 | 155448204 | 155448204 | Missense_Mutation | SNP | C  | T  | 4  | 109 | c.4457G>A      | c.(4456-4458)CGT>CAT | p.R1486H |
| Pat_24 | Post-Resistance | NTRK1    | 4914      | 37 | 1 | 156849018 | 156849018 | Missense_Mutation | SNP | G  | A  | 8  | 23  | c.1910G>A      | c.(1909-1911)GGG>GAG | p.G637E  |
| Pat_24 | Post-Resistance | USP21    | 27005     | 37 | 1 | 161134390 | 161134390 | Missense_Mutation | SNP | A  | G  | 16 | 262 | c.1372A>G      | c.(1372-1374)ATC>GTC | p.I458V  |
| Pat_24 | Post-Resistance | DDR2     | 4921      | 37 | 1 | 162731044 | 162731044 | Missense_Mutation | SNP | A  | G  | 3  | 73  | c.899A>G       | c.(898-900)AAG>AGG   | p.K300R  |
| Pat_24 | Post-Resistance | LRRC52   | 440699    | 37 | 1 | 165532978 | 165532978 | Missense_Mutation | SNP | G  | A  | 4  | 146 | c.859G>A       | c.(859-861)GAG>AAG   | p.E287K  |
| Pat_24 | Post-Resistance | TNN      | 63923     | 37 | 1 | 175066678 | 175066678 | Missense_Mutation | SNP | G  | A  | 11 | 122 | c.1714G>A      | c.(1714-1716)GAG>AAG | p.E572K  |
| Pat_24 | Post-Resistance | CACNA1E  | 777       | 37 | 1 | 181745340 | 181745340 | Nonsense_Mutation | SNP | G  | A  | 4  | 128 | c.5243G>A      | c.(5242-5244)TGG>TAG | p.W1748* |
| Pat_24 | Post-Resistance | LAMC1    | 3915      | 37 | 1 | 183095301 | 183095301 | Missense_Mutation | SNP | C  | T  | 4  | 184 | c.2848C>T      | c.(2848-2850)CGC>TGC | p.R950C  |
| Pat_24 | Post-Resistance | UBE2T    | 29089     | 37 | 1 | 202302658 | 202302658 | Nonsense_Mutation | SNP | G  | A  | 4  | 130 | c.205C>T       | c.(205-207)CGA>TGA   | p.R69*   |
| Pat_24 | Post-Resistance | PLEKHA6  | 22874     | 37 | 1 | 204210881 | 204210881 | Missense_Mutation | SNP | G  | A  | 42 | 75  | c.2234C>T      | c.(2233-2235)CCC>CTC | p.P745L  |
| Pat_24 | Post-Resistance | PLXNA2   | 5362      | 37 | 1 | 208204972 | 208204972 | Missense_Mutation | SNP | G  | A  | 64 | 218 | c.5188C>T      | c.(5188-5190)CAT>TAT | p.H1730Y |
| Pat_24 | Post-Resistance | CENPF    | 1063      | 37 | 1 | 214813956 | 214813956 | Missense_Mutation | SNP | G  | A  | 3  | 44  | c.2275G>A      | c.(2275-2277)GAA>AAA | p.E759K  |
| Pat_24 | Post-Resistance | KCTD3    | 51133     | 37 | 1 | 215775263 | 215775263 | Missense_Mutation | SNP | C  | T  | 29 | 183 | c.988C>T       | c.(988-990)CTT>TTT   | p.L330F  |
| Pat_24 | Post-Resistance | SPATA17  | 128153    | 37 | 1 | 217955597 | 217955597 | Missense_Mutation | SNP | G  | A  | 70 | 89  | c.805G>A       | c.(805-807)GAT>AAT   | p.D269N  |

|        |                 |          |        |    |    |           |           |                   |     |    |    |    |     |                                   |                      |          |
|--------|-----------------|----------|--------|----|----|-----------|-----------|-------------------|-----|----|----|----|-----|-----------------------------------|----------------------|----------|
| Pat_24 | Post-Resistance | TAF1A    | 9015   | 37 | 1  | 222750876 | 222750876 | Missense_Mutation | SNP | C  | T  | 4  | 181 | c.515G>A                          | c.(514-516)CGG>CAG   | p.R172Q  |
| Pat_24 | Post-Resistance | AGT      | 183    | 37 | 1  | 230845894 | 230845894 | Missense_Mutation | SNP | G  | A  | 5  | 158 | c.703C>T                          | c.(703-705)CTC>TTC   | p.L235F  |
| Pat_24 | Post-Resistance | PCNXL2   | 80003  | 37 | 1  | 233394278 | 233394278 | Missense_Mutation | SNP | G  | A  | 83 | 164 | c.1330C>T                         | c.(1330-1332)CCC>TCC | p.P444S  |
| Pat_24 | Post-Resistance | OR2L8    | 391190 | 37 | 1  | 248112697 | 248112697 | Missense_Mutation | SNP | G  | A  | 4  | 191 | c.538G>A                          | c.(538-540)GTC>ATC   | p.V180I  |
| Pat_24 | Post-Resistance | OR2L8    | 391190 | 37 | 1  | 248113064 | 248113064 | Missense_Mutation | SNP | G  | A  | 16 | 99  | c.905G>A                          | c.(904-906)CGA>CAA   | p.R302Q  |
| Pat_24 | Post-Resistance | OR2AK2   | 391191 | 37 | 1  | 248128661 | 248128661 | Missense_Mutation | SNP | G  | A  | 15 | 20  | c.28G>A                           | c.(28-30)GAT>AAT     | p.D10N   |
| Pat_24 | Post-Resistance | OR2M5    | 127059 | 37 | 1  | 248308569 | 248308569 | Missense_Mutation | SNP | G  | A  | 67 | 99  | c.120G>A                          | c.(118-120)ATG>ATA   | p.M40I   |
| Pat_24 | Post-Resistance | OR2M4    | 26245  | 37 | 1  | 248402801 | 248402801 | Missense_Mutation | SNP | G  | A  | 74 | 112 | c.571G>A                          | c.(571-573)GAA>AAA   | p.E191K  |
| Pat_24 | Post-Resistance | OR2T12   | 127064 | 37 | 1  | 248458834 | 248458834 | Missense_Mutation | SNP | A  | T  | 46 | 99  | c.47T>A                           | c.(46-48)TTT>TAT     | p.F16Y   |
| Pat_24 | Post-Resistance | ZNF692   | 55657  | 37 | 1  | 249150737 | 249150737 | Missense_Mutation | SNP | C  | T  | 54 | 85  | c.500G>A                          | c.(499-501)AGG>AAG   | p.R167K  |
| Pat_24 | Post-Resistance | PITRM1   | 10531  | 37 | 10 | 3202514   | 3202514   | Missense_Mutation | SNP | G  | A  | 4  | 63  | c.704C>T                          | c.(703-705)ACG>ATG   | p.T235M  |
| Pat_24 | Post-Resistance | TAF3     | 83860  | 37 | 10 | 8056640   | 8056640   | Missense_Mutation | SNP | C  | G  | 9  | 29  | c.2716C>G                         | c.(2716-2718)CAG>GAG | p.Q906E  |
| Pat_24 | Post-Resistance | KIAA1217 | 56243  | 37 | 10 | 24762578  | 24762578  | Missense_Mutation | SNP | C  | A  | 4  | 129 | c.1268C>A                         | c.(1267-1269)GCA>GAA | p.A423E  |
| Pat_24 | Post-Resistance | ZEB1     | 6935   | 37 | 10 | 31799637  | 31799637  | Missense_Mutation | SNP | C  | T  | 15 | 52  | c.518C>T                          | c.(517-519)CCA>CTA   | p.P173L  |
| Pat_24 | Post-Resistance | BICC1    | 80114  | 37 | 10 | 60573728  | 60573728  | Missense_Mutation | SNP | C  | T  | 4  | 150 | c.2515C>T                         | c.(2515-2517)CGT>TGT | p.R839C  |
| Pat_24 | Post-Resistance | MYPN     | 84665  | 37 | 10 | 69933908  | 69933908  | Missense_Mutation | SNP | G  | A  | 58 | 121 | c.2059G>A                         | c.(2059-2061)GAG>AAG | p.E687K  |
| Pat_24 | Post-Resistance | GPR120   | 338557 | 37 | 10 | 95326521  | 95326521  | Missense_Mutation | SNP | G  | A  | 3  | 20  | c.44G>A                           | c.(43-45)CGC>CAC     | p.R15H   |
| Pat_24 | Post-Resistance | SLIT1    | 6585   | 37 | 10 | 98816147  | 98816147  | Missense_Mutation | SNP | G  | A  | 37 | 177 | c.1232C>T                         | c.(1231-1233)TCC>TTC | p.S411F  |
| Pat_24 | Post-Resistance | RRP12    | 23223  | 37 | 10 | 99133588  | 99133588  | Missense_Mutation | SNP | T  | C  | 4  | 185 | c.1862A>G                         | c.(1861-1863)CAG>CGG | p.Q621R  |
| Pat_24 | Post-Resistance | MMS19    | 64210  | 37 | 10 | 99225675  | 99225675  | Missense_Mutation | SNP | T  | C  | 61 | 253 | c.1643A>G                         | c.(1642-1644)CAA>CGA | p.Q548R  |
| Pat_24 | Post-Resistance | PDZD7    | 79955  | 37 | 10 | 102783262 | 102783262 | Missense_Mutation | SNP | C  | T  | 4  | 154 | c.473G>A                          | c.(472-474)CGC>CAC   | p.R158H  |
| Pat_24 | Post-Resistance | SORCS1   | 114815 | 37 | 10 | 108536412 | 108536412 | Missense_Mutation | SNP | T  | A  | 4  | 101 | c.765A>T                          | c.(763-765)TTA>TTT   | p.L255F  |
| Pat_24 | Post-Resistance | ACSL5    | 51703  | 37 | 10 | 114173027 | 114173027 | Missense_Mutation | SNP | C  | T  | 26 | 104 | c.1045C>T                         | c.(1045-1047)CCC>TCC | p.P349S  |
| Pat_24 | Post-Resistance | EIF3A    | 8661   | 37 | 10 | 120801755 | 120801756 | Missense_Mutation | DNP | TG | AC | 6  | 376 | .3276_3277CA>G274-3279)GGCATG>GGG |                      | p.M1093L |
| Pat_24 | Post-Resistance | HTRA1    | 5654   | 37 | 10 | 124268285 | 124268285 | Missense_Mutation | SNP | A  | T  | 13 | 25  | c.1119A>T                         | c.(1117-1119)AAA>AAT | p.K373N  |
| Pat_24 | Post-Resistance | CLRN3    | 119467 | 37 | 10 | 129690880 | 129690880 | Missense_Mutation | SNP | G  | A  | 27 | 81  | c.169C>T                          | c.(169-171)CGT>TGT   | p.R57C   |
| Pat_24 | Post-Resistance | MGMT     | 4255   | 37 | 10 | 131565127 | 131565127 | Missense_Mutation | SNP | G  | A  | 4  | 49  | c.583G>A                          | c.(583-585)GTG>ATG   | p.V195M  |
| Pat_24 | Post-Resistance | STK32C   | 282974 | 37 | 10 | 134040349 | 134040349 | Nonsense_Mutation | SNP | G  | T  | 4  | 172 | c.594C>A                          | c.(592-594)TGC>TGA   | p.C198*  |
| Pat_24 | Post-Resistance | PKP3     | 11187  | 37 | 11 | 397003    | 397003    | Missense_Mutation | SNP | G  | A  | 9  | 38  | c.502G>A                          | c.(502-504)GGT>AGT   | p.G168S  |
| Pat_24 | Post-Resistance | CTSD     | 1509   | 37 | 11 | 1782670   | 1782670   | Missense_Mutation | SNP | G  | A  | 4  | 123 | c.97C>T                           | c.(97-99)CGC>TGC     | p.R33C   |
| Pat_24 | Post-Resistance | OR51E1   | 143503 | 37 | 11 | 4674675   | 4674675   | Nonsense_Mutation | SNP | C  | T  | 4  | 186 | c.919C>T                          | c.(919-921)CGA>TGA   | p.R307*  |
| Pat_24 | Post-Resistance | OR52R1   | 119695 | 37 | 11 | 4825480   | 4825480   | Missense_Mutation | SNP | C  | T  | 10 | 13  | c.368G>A                          | c.(367-369)GGA>GAA   | p.G123E  |
| Pat_24 | Post-Resistance | HBB      | 3043   | 37 | 11 | 5248225   | 5248225   | Missense_Mutation | SNP | C  | G  | 32 | 94  | c.27G>C                           | c.(25-27)AAG>AAC     | p.K9N    |
| Pat_24 | Post-Resistance | OR51Q1   | 390061 | 37 | 11 | 5444142   | 5444142   | Missense_Mutation | SNP | C  | T  | 43 | 127 | c.712C>T                          | c.(712-714)CGT>TGT   | p.R238C  |
| Pat_24 | Post-Resistance | SYT9     | 143425 | 37 | 11 | 7324551   | 7324551   | Missense_Mutation | SNP | G  | A  | 25 | 62  | c.427G>A                          | c.(427-429)GGG>AGG   | p.G143R  |
| Pat_24 | Post-Resistance | GALNTL4  | 374378 | 37 | 11 | 11470334  | 11470334  | Missense_Mutation | SNP | G  | A  | 4  | 62  | c.385C>T                          | c.(385-387)CGC>TGC   | p.R129C  |
| Pat_24 | Post-Resistance | ARNTL    | 406    | 37 | 11 | 13402788  | 13402788  | Missense_Mutation | SNP | C  | T  | 19 | 121 | c.1604C>T                         | c.(1603-1605)CCA>CTA | p.P535L  |
| Pat_24 | Post-Resistance | PTPN5    | 84867  | 37 | 11 | 18759448  | 18759448  | Missense_Mutation | SNP | G  | A  | 4  | 194 | c.979C>T                          | c.(979-981)CGG>TGG   | p.R327W  |
| Pat_24 | Post-Resistance | CSRP3    | 8048   | 37 | 11 | 19206514  | 19206514  | Missense_Mutation | SNP | C  | T  | 5  | 45  | c.493G>A                          | c.(493-495)GAA>AAA   | p.E165K  |
| Pat_24 | Post-Resistance | E2F8     | 79733  | 37 | 11 | 19247042  | 19247042  | Missense_Mutation | SNP | G  | A  | 4  | 157 | c.2147C>T                         | c.(2146-2148)CCG>CTG | p.P716L  |
| Pat_24 | Post-Resistance | E2F8     | 79733  | 37 | 11 | 19251523  | 19251523  | Missense_Mutation | SNP | C  | G  | 6  | 357 | c.1371G>C                         | c.(1369-1371)CAG>CAC | p.Q457H  |
| Pat_24 | Post-Resistance | ELF5     | 2001   | 37 | 11 | 34527196  | 34527196  | Missense_Mutation | SNP | G  | A  | 81 | 262 | c.131C>T                          | c.(130-132)CCT>CTT   | p.P44L   |
| Pat_24 | Post-Resistance | CNTF     | 1270   | 37 | 11 | 58391688  | 58391688  | Missense_Mutation | SNP | C  | T  | 4  | 40  | c.296C>T                          | c.(295-297)ACC>ATC   | p.T99I   |
| Pat_24 | Post-Resistance | GLYATL1  | 92292  | 37 | 11 | 58714563  | 58714563  | Missense_Mutation | SNP | G  | A  | 21 | 96  | c.3G>A                            | c.(1-3)ATG>ATA       | p.M1I    |
| Pat_24 | Post-Resistance | SLC22A8  | 9376   | 37 | 11 | 62763580  | 62763580  | Missense_Mutation | SNP | G  | A  | 24 | 70  | c.806C>T                          | c.(805-807)TCC>TTC   | p.S269F  |
| Pat_24 | Post-Resistance | RTN3     | 10313  | 37 | 11 | 63486611  | 63486611  | Missense_Mutation | SNP | C  | T  | 12 | 66  | c.637C>T                          | c.(637-639)CCA>TCA   | p.P213S  |
| Pat_24 | Post-Resistance | SNX15    | 29907  | 37 | 11 | 64802547  | 64802547  | Missense_Mutation | SNP | G  | A  | 6  | 240 | c.389G>A                          | c.(388-390)CGA>CAA   | p.R130Q  |

|        |                 |          |        |    |    |           |           |                        |     |   |   |     |     |            |                        |          |
|--------|-----------------|----------|--------|----|----|-----------|-----------|------------------------|-----|---|---|-----|-----|------------|------------------------|----------|
| Pat_24 | Post-Resistance | SLC25A45 | 283130 | 37 | 11 | 65143942  | 65143942  | Missense_Mutation      | SNP | C | T | 5   | 134 | c.803G>A   | c.(802-804)CGC>CAC     | p.R268H  |
| Pat_24 | Post-Resistance | RIN1     | 9610   | 37 | 11 | 66102072  | 66102072  | Missense_Mutation      | SNP | G | C | 2   | 6   | c.1198C>G  | c.(1198-1200)CAG>GAG   | p.Q400E  |
| Pat_24 | Post-Resistance | NADSYN1  | 55191  | 37 | 11 | 71191846  | 71191846  | Missense_Mutation      | SNP | C | T | 4   | 86  | c.919C>T   | c.(919-921)CTC>TTC     | p.L307F  |
| Pat_24 | Post-Resistance | ARHGEF17 | 9828   | 37 | 11 | 73071384  | 73071384  | Missense_Mutation      | SNP | G | A | 4   | 185 | c.4226G>A  | c.(4225-4227)CGG>CAG   | p.R1409Q |
| Pat_24 | Post-Resistance | GAB2     | 9846   | 37 | 11 | 77934697  | 77934697  | Missense_Mutation      | SNP | G | A | 103 | 384 | c.1328C>T  | c.(1327-1329)TCG>TTG   | p.S443L  |
| Pat_24 | Post-Resistance | NAALAD2  | 10003  | 37 | 11 | 89882229  | 89882229  | Missense_Mutation      | SNP | A | G | 5   | 356 | c.437A>G   | c.(436-438)AAT>AGT     | p.N146S  |
| Pat_24 | Post-Resistance | NAALAD2  | 10003  | 37 | 11 | 89882249  | 89882249  | Missense_Mutation      | SNP | G | T | 6   | 280 | c.457G>T   | c.(457-459)GCT>TCT     | p.A153S  |
| Pat_24 | Post-Resistance | CHORDC1  | 26973  | 37 | 11 | 89944439  | 89944439  | Missense_Mutation      | SNP | A | G | 4   | 115 | c.377T>C   | c.(376-378)CTA>CCA     | p.L126P  |
| Pat_24 | Post-Resistance | FAT3     | 120114 | 37 | 11 | 92531158  | 92531158  | Missense_Mutation      | SNP | C | T | 71  | 155 | c.4979C>T  | c.(4978-4980)TCC>TTC   | p.S1660F |
| Pat_24 | Post-Resistance | CCDC82   | 79780  | 37 | 11 | 96117471  | 96117471  | Missense_Mutation      | SNP | A | T | 4   | 138 | c.441T>A   | c.(439-441)GAT>GAA     | p.D147E  |
| Pat_24 | Post-Resistance | PGR      | 5241   | 37 | 11 | 100999627 | 100999627 | Missense_Mutation      | SNP | G | A | 3   | 55  | c.175C>T   | c.(175-177)CTC>TTC     | p.L59F   |
| Pat_24 | Post-Resistance | ANGPTL5  | 253935 | 37 | 11 | 101765741 | 101765741 | Missense_Mutation      | SNP | G | A | 10  | 28  | c.716C>T   | c.(715-717)ACC>ATC     | p.T239I  |
| Pat_24 | Post-Resistance | GRIA4    | 2893   | 37 | 11 | 105781176 | 105781176 | Missense_Mutation      | SNP | G | A | 31  | 121 | c.1174G>A  | c.(1174-1176)GAT>AAT   | p.D392N  |
| Pat_24 | Post-Resistance | FAM55D   | 54827  | 37 | 11 | 114453681 | 114453681 | Missense_Mutation      | SNP | T | A | 15  | 90  | c.159A>T   | c.(157-159)TTA>TTT     | p.L53F   |
| Pat_24 | Post-Resistance | TPRSS13  | 84000  | 37 | 11 | 117789432 | 117789432 | Missense_Mutation      | SNP | C | T | 4   | 128 | c.143G>A   | c.(142-144)GGG>GAG     | p.G48E   |
| Pat_24 | Post-Resistance | FOXR1    | 283150 | 37 | 11 | 118850336 | 118850336 | Missense_Mutation      | SNP | C | T | 4   | 169 | c.569C>T   | c.(568-570)TCC>TTC     | p.S190F  |
| Pat_24 | Post-Resistance | THYN1    | 29087  | 37 | 11 | 134120179 | 134120179 | Missense_Mutation      | SNP | C | T | 6   | 276 | c.281G>A   | c.(280-282)CGT>CAT     | p.R94H   |
| Pat_24 | Post-Resistance | GLB1L3   | 112937 | 37 | 11 | 134153651 | 134153651 | Missense_Mutation      | SNP | G | A | 12  | 41  | c.548G>A   | c.(547-549)CGG>CAG     | p.R183Q  |
| Pat_24 | Post-Resistance | KDM5A    | 5927   | 37 | 12 | 427492    | 427492    | Nonsense_Mutation      | SNP | G | A | 4   | 157 | c.2677C>T  | c.(2677-2679)CGA>TGA   | p.R893*  |
| Pat_24 | Post-Resistance | CHD4     | 1108   | 37 | 12 | 6707075   | 6707075   | Missense_Mutation      | SNP | C | T | 4   | 180 | c.1877G>A  | c.(1876-1878)CGA>CAA   | p.R626Q  |
| Pat_24 | Post-Resistance | ACSM4    | 341392 | 37 | 12 | 7479635   | 7479635   | Missense_Mutation      | SNP | C | T | 3   | 15  | c.1600C>T  | c.(1600-1602)CTT>TTT   | p.L534F  |
| Pat_24 | Post-Resistance | RIMKLB   | 57494  | 37 | 12 | 8866505   | 8866505   | Missense_Mutation      | SNP | C | T | 4   | 94  | c.43C>T    | c.(43-45)CGT>TGT       | p.R15C   |
| Pat_24 | Post-Resistance | A2M      | 2      | 37 | 12 | 9224967   | 9224967   | Missense_Mutation      | SNP | G | A | 3   | 36  | c.4091C>T  | c.(4090-4092)TCC>TTC   | p.S1364F |
| Pat_24 | Post-Resistance | ETV6     | 2120   | 37 | 12 | 12022504  | 12022504  | Missense_Mutation      | SNP | C | T | 130 | 349 | c.610C>T   | c.(610-612)CCC>TCC     | p.P204S  |
| Pat_24 | Post-Resistance | GPRC5D   | 55507  | 37 | 12 | 13102601  | 13102601  | Missense_Mutation      | SNP | G | A | 27  | 90  | c.718C>T   | c.(718-720)CCG>TCG     | p.P240S  |
| Pat_24 | Post-Resistance | GRIN2B   | 2904   | 37 | 12 | 13715812  | 13715812  | Missense_Mutation      | SNP | G | A | 17  | 72  | c.4360C>T  | c.(4360-4362)CCC>TCC   | p.P1454S |
| Pat_24 | Post-Resistance | GUCY2C   | 2984   | 37 | 12 | 14825883  | 14825883  | Missense_Mutation      | SNP | C | T | 4   | 176 | c.1094G>A  | c.(1093-1095)GGT>GAT   | p.G365D  |
| Pat_24 | Post-Resistance | PTPRO    | 5800   | 37 | 12 | 15742411  | 15742411  | Missense_Mutation      | SNP | A | G | 59  | 267 | c.3433A>G  | c.(3433-3435)ACA>GCA   | p.T1145A |
| Pat_24 | Post-Resistance | GYS2     | 2998   | 37 | 12 | 21713332  | 21713332  | Missense_Mutation      | SNP | C | T | 6   | 260 | c.1157G>A  | c.(1156-1158)CGA>CAA   | p.R386Q  |
| Pat_24 | Post-Resistance | RASSF8   | 11228  | 37 | 12 | 26208270  | 26208270  | Translation_Start_Site | SNP | G | A | 4   | 109 | c.-6G>A    | c.(8--4)CGGTG>CGATG    |          |
| Pat_24 | Post-Resistance | ABCD2    | 225    | 37 | 12 | 39973341  | 39973341  | Missense_Mutation      | SNP | G | A | 26  | 165 | c.1873C>T  | c.(1873-1875)CAT>TAT   | p.H625Y  |
| Pat_24 | Post-Resistance | LRRK2    | 120892 | 37 | 12 | 40688687  | 40688687  | Missense_Mutation      | SNP | G | A | 4   | 25  | c.2849G>A  | c.(2848-2850)AGA>AAA   | p.R950K  |
| Pat_24 | Post-Resistance | PRICKLE1 | 144165 | 37 | 12 | 42863277  | 42863277  | Missense_Mutation      | SNP | G | A | 4   | 106 | c.359C>T   | c.(358-360)GCA>GTA     | p.A120V  |
| Pat_24 | Post-Resistance | ARID2    | 196528 | 37 | 12 | 46242686  | 46242686  | Missense_Mutation      | SNP | C | T | 4   | 97  | c.1648C>T  | c.(1648-1650)CTC>TTC   | p.L550F  |
| Pat_24 | Post-Resistance | ARID2    | 196528 | 37 | 12 | 46246366  | 46246366  | Missense_Mutation      | SNP | C | T | 47  | 132 | c.4460C>T  | c.(4459-4461)CCC>CTC   | p.P1487L |
| Pat_24 | Post-Resistance | ADCY6    | 112    | 37 | 12 | 49176698  | 49176698  | Missense_Mutation      | SNP | C | T | 4   | 105 | c.520G>A   | c.(520-522)GCC>ACC     | p.A174T  |
| Pat_24 | Post-Resistance | LMBR1L   | 55716  | 37 | 12 | 49500753  | 49500753  | Missense_Mutation      | SNP | A | G | 63  | 186 | c.148T>C   | c.(148-150)TTC>CTC     | p.F50L   |
| Pat_24 | Post-Resistance | C1QL4    | 338761 | 37 | 12 | 49726938  | 49726938  | Missense_Mutation      | SNP | C | T | 4   | 96  | c.616G>A   | c.(616-618)GTG>ATG     | p.V206M  |
| Pat_24 | Post-Resistance | BIN2     | 51411  | 37 | 12 | 51685932  | 51685932  | Missense_Mutation      | SNP | C | T | 5   | 31  | c.958G>A   | c.(958-960)GAA>AAA     | p.E320K  |
| Pat_24 | Post-Resistance | SCN8A    | 6334   | 37 | 12 | 52201072  | 52201072  | Missense_Mutation      | SNP | A | T | 3   | 6   | c.5802A>T  | c.(5800-5802)AAA>AAT   | p.K1934N |
| Pat_24 | Post-Resistance | KRT84    | 3890   | 37 | 12 | 52772015  | 52772015  | Missense_Mutation      | SNP | C | T | 2   | 3   | c.1606G>A  | c.(1606-1608)GGA>AGA   | p.G536R  |
| Pat_24 | Post-Resistance | KRT71    | 112802 | 37 | 12 | 52942532  | 52942532  | Missense_Mutation      | SNP | C | T | 39  | 153 | c.766G>A   | c.(766-768)GAA>AAA     | p.E256K  |
| Pat_24 | Post-Resistance | CALCOCO1 | 57658  | 37 | 12 | 54118963  | 54118963  | Missense_Mutation      | SNP | G | A | 5   | 120 | c.64C>T    | c.(64-66)CGG>TGG       | p.R22W   |
| Pat_24 | Post-Resistance | LRP1     | 4035   | 37 | 12 | 57588432  | 57588432  | Missense_Mutation      | SNP | C | T | 4   | 156 | c.8141C>T  | c.(8140-8142)ACG>ATG   | p.T2714M |
| Pat_24 | Post-Resistance | LRP1     | 4035   | 37 | 12 | 57606018  | 57606018  | Missense_Mutation      | SNP | G | A | 3   | 43  | c.13468G>A | c.(13468-13470)GCT>ACT | p.A4490T |
| Pat_24 | Post-Resistance | TRHDE    | 29953  | 37 | 12 | 73050751  | 73050751  | Missense_Mutation      | SNP | T | C | 3   | 110 | c.2894T>C  | c.(2893-2895)GTC>GCC   | p.V965A  |
| Pat_24 | Post-Resistance | CSRP2    | 1466   | 37 | 12 | 77252758  | 77252758  | Missense_Mutation      | SNP | C | T | 4   | 89  | c.556G>A   | c.(556-558)GCA>ACA     | p.A186T  |

|        |                 |           |        |    |    |           |           |                   |     |    |    |     |     |                                    |                      |          |
|--------|-----------------|-----------|--------|----|----|-----------|-----------|-------------------|-----|----|----|-----|-----|------------------------------------|----------------------|----------|
| Pat_24 | Post-Resistance | SCYL2     | 55681  | 37 | 12 | 100732400 | 100732400 | Missense_Mutation | SNP | C  | T  | 4   | 153 | c.2240C>T                          | c.(2239-2241)ACT>ATT | p.T747I  |
| Pat_24 | Post-Resistance | RFX4      | 5992   | 37 | 12 | 107125991 | 107125991 | Missense_Mutation | SNP | G  | A  | 34  | 155 | c.1435G>A                          | c.(1435-1437)GAG>AAG | p.E479K  |
| Pat_24 | Post-Resistance | PRDM4     | 11108  | 37 | 12 | 108145294 | 108145294 | Missense_Mutation | SNP | G  | T  | 4   | 76  | c.1024C>A                          | c.(1024-1026)CAT>AAT | p.H342N  |
| Pat_24 | Post-Resistance | USP30     | 84749  | 37 | 12 | 109519817 | 109519817 | Missense_Mutation | SNP | G  | A  | 6   | 407 | c.860G>A                           | c.(859-861)TGT>TAT   | p.C287Y  |
| Pat_24 | Post-Resistance | ACACB     | 32     | 37 | 12 | 109577470 | 109577470 | Missense_Mutation | SNP | G  | A  | 3   | 80  | c.260G>A                           | c.(259-261)CGG>CAG   | p.R87Q   |
| Pat_24 | Post-Resistance | NOS1      | 4842   | 37 | 12 | 117705897 | 117705897 | Missense_Mutation | SNP | T  | C  | 3   | 80  | c.1892A>G                          | c.(1891-1893)AAG>AGG | p.K631R  |
| Pat_24 | Post-Resistance | GATC      | 283459 | 37 | 12 | 120894955 | 120894955 | Missense_Mutation | SNP | G  | A  | 4   | 109 | c.331G>A                           | c.(331-333)GTG>ATG   | p.V111M  |
| Pat_24 | Post-Resistance | ATP6V0A2  | 23545  | 37 | 12 | 124221795 | 124221795 | Missense_Mutation | SNP | C  | T  | 4   | 110 | c.1015C>T                          | c.(1015-1017)CGC>TGC | p.R339C  |
| Pat_24 | Post-Resistance | DNAH10    | 196385 | 37 | 12 | 124270346 | 124270346 | Missense_Mutation | SNP | G  | A  | 30  | 132 | c.1101G>A                          | c.(1099-1101)ATG>ATA | p.M367I  |
| Pat_24 | Post-Resistance | DHX37     | 57647  | 37 | 12 | 125441316 | 125441316 | Nonsense_Mutation | SNP | G  | A  | 6   | 269 | c.2374C>T                          | c.(2374-2376)CGA>TGA | p.R792*  |
| Pat_24 | Post-Resistance | ZNF10     | 7556   | 37 | 12 | 133732959 | 133732959 | Missense_Mutation | SNP | C  | T  | 34  | 178 | c.1127C>T                          | c.(1126-1128)CCC>CTC | p.P376L  |
| Pat_24 | Post-Resistance | MTUS2     | 23281  | 37 | 13 | 29600916  | 29600916  | Missense_Mutation | SNP | A  | G  | 9   | 41  | c.2111A>G                          | c.(2110-2112)AAC>AGC | p.N704S  |
| Pat_24 | Post-Resistance | ALOX5AP   | 241    | 37 | 13 | 31330090  | 31330090  | Missense_Mutation | SNP | C  | T  | 4   | 136 | c.251C>T                           | c.(250-252)GCG>GTG   | p.A84V   |
| Pat_24 | Post-Resistance | BRCA2     | 675    | 37 | 13 | 32912568  | 32912568  | Missense_Mutation | SNP | C  | T  | 4   | 151 | c.4076C>T                          | c.(4075-4077)ACT>ATT | p.T1359I |
| Pat_24 | Post-Resistance | STARD13   | 90627  | 37 | 13 | 33704132  | 33704132  | Missense_Mutation | SNP | C  | T  | 5   | 68  | c.682G>A                           | c.(682-684)GTC>ATC   | p.V228I  |
| Pat_24 | Post-Resistance | ATP7B     | 540    | 37 | 13 | 52548265  | 52548265  | Missense_Mutation | SNP | G  | A  | 83  | 202 | c.1091C>T                          | c.(1090-1092)GCC>GTC | p.A364V  |
| Pat_24 | Post-Resistance | LMO7      | 4008   | 37 | 13 | 76415291  | 76415291  | Missense_Mutation | SNP | G  | A  | 10  | 93  | c.2930G>A                          | c.(2929-2931)AGG>AAG | p.R977K  |
| Pat_24 | Post-Resistance | IPO5      | 3843   | 37 | 13 | 98655265  | 98655265  | Missense_Mutation | SNP | T  | C  | 11  | 273 | c.1471T>C                          | c.(1471-1473)TCC>CCC | p.S491P  |
| Pat_24 | Post-Resistance | TNFSF13B  | 10673  | 37 | 13 | 108922454 | 108922454 | Missense_Mutation | SNP | G  | A  | 4   | 183 | c.211G>A                           | c.(211-213)GCC>ACC   | p.A71T   |
| Pat_24 | Post-Resistance | MYO16     | 23026  | 37 | 13 | 109661317 | 109661317 | Missense_Mutation | SNP | G  | A  | 16  | 104 | c.2449G>A                          | c.(2449-2451)GAA>AAA | p.E817K  |
| Pat_24 | Post-Resistance | COL4A1    | 1282   | 37 | 13 | 110835536 | 110835536 | Missense_Mutation | SNP | G  | A  | 6   | 21  | c.1985C>T                          | c.(1984-1986)CCC>CTC | p.P662L  |
| Pat_24 | Post-Resistance | TEP1      | 7011   | 37 | 14 | 20863691  | 20863691  | Missense_Mutation | SNP | G  | A  | 4   | 80  | c.1846C>T                          | c.(1846-1848)CGT>TGT | p.R616C  |
| Pat_24 | Post-Resistance | OSGEP     | 55644  | 37 | 14 | 20917419  | 20917419  | Missense_Mutation | SNP | C  | G  | 4   | 143 | c.418G>C                           | c.(418-420)GCA>CCA   | p.A140P  |
| Pat_24 | Post-Resistance | HOMEZ     | 57594  | 37 | 14 | 23745797  | 23745797  | Missense_Mutation | SNP | G  | A  | 12  | 61  | c.640C>T                           | c.(640-642)CCC>TCC   | p.P214S  |
| Pat_24 | Post-Resistance | JPH4      | 84502  | 37 | 14 | 24045177  | 24045177  | Missense_Mutation | SNP | G  | A  | 18  | 46  | c.868C>T                           | c.(868-870)CGG>TGG   | p.R290W  |
| Pat_24 | Post-Resistance | NOVA1     | 4857   | 37 | 14 | 26949269  | 26949269  | Nonsense_Mutation | SNP | G  | A  | 30  | 178 | c.361C>T                           | c.(361-363)CGA>TGA   | p.R121*  |
| Pat_24 | Post-Resistance | KCNH5     | 27133  | 37 | 14 | 63174438  | 63174438  | Missense_Mutation | SNP | C  | T  | 48  | 167 | c.2755G>A                          | c.(2755-2757)GAG>AAG | p.E919K  |
| Pat_24 | Post-Resistance | KCNH5     | 27133  | 37 | 14 | 63174770  | 63174770  | Missense_Mutation | SNP | C  | T  | 5   | 42  | c.2423G>A                          | c.(2422-2424)GGA>GAA | p.G808E  |
| Pat_24 | Post-Resistance | SPTB      | 6710   | 37 | 14 | 65270369  | 65270369  | Missense_Mutation | SNP | G  | A  | 4   | 149 | c.430C>T                           | c.(430-432)CGC>TGC   | p.R144C  |
| Pat_24 | Post-Resistance | EIF2S1    | 1965   | 37 | 14 | 67831648  | 67831648  | Missense_Mutation | SNP | G  | A  | 5   | 333 | c.164G>A                           | c.(163-165)CGT>CAT   | p.R55H   |
| Pat_24 | Post-Resistance | HEATR4    | 399671 | 37 | 14 | 73978727  | 73978727  | Missense_Mutation | SNP | G  | A  | 6   | 231 | c.1541C>T                          | c.(1540-1542)ACC>ATC | p.T514I  |
| Pat_24 | Post-Resistance | LTBP2     | 4053   | 37 | 14 | 74971770  | 74971770  | Missense_Mutation | SNP | G  | A  | 4   | 124 | c.4285C>T                          | c.(4285-4287)CGG>TGG | p.R1429W |
| Pat_24 | Post-Resistance | YLPM1     | 56252  | 37 | 14 | 75230688  | 75230688  | Missense_Mutation | SNP | C  | T  | 3   | 47  | c.496C>T                           | c.(496-498)CCC>TCC   | p.P166S  |
| Pat_24 | Post-Resistance | C14orf102 | 55051  | 37 | 14 | 90759123  | 90759123  | Missense_Mutation | SNP | C  | T  | 6   | 199 | c.1760G>A                          | c.(1759-1761)CGT>CAT | p.R587H  |
| Pat_24 | Post-Resistance | KIAA0284  | 283638 | 37 | 14 | 105353332 | 105353332 | Missense_Mutation | SNP | C  | T  | 4   | 72  | c.2756C>T                          | c.(2755-2757)ACG>ATG | p.T919M  |
| Pat_24 | Post-Resistance | KIAA0284  | 283638 | 37 | 14 | 105356013 | 105356013 | Missense_Mutation | SNP | C  | T  | 12  | 46  | c.3796C>T                          | c.(3796-3798)CCC>TCC | p.P1266S |
| Pat_24 | Post-Resistance | RYR3      | 6263   | 37 | 15 | 33603253  | 33603253  | Missense_Mutation | SNP | G  | A  | 3   | 22  | c.7G>A                             | c.(7-9)GAA>AAA       | p.E3K    |
| Pat_24 | Post-Resistance | RYR3      | 6263   | 37 | 15 | 33955922  | 33955922  | Nonsense_Mutation | SNP | C  | A  | 3   | 21  | c.5603C>A                          | c.(5602-5604)TCA>TAA | p.S1868* |
| Pat_24 | Post-Resistance | C15orf55  | 256646 | 37 | 15 | 34646772  | 34646772  | Missense_Mutation | SNP | G  | T  | 4   | 79  | c.1117G>T                          | c.(1117-1119)GAC>TAC | p.D373Y  |
| Pat_24 | Post-Resistance | TMCO5A    | 145942 | 37 | 15 | 38229100  | 38229100  | Missense_Mutation | SNP | G  | A  | 12  | 13  | c.193G>A                           | c.(193-195)GAG>AAG   | p.E65K   |
| Pat_24 | Post-Resistance | CASC5     | 57082  | 37 | 15 | 40951616  | 40951616  | Missense_Mutation | SNP | G  | A  | 4   | 169 | c.6871G>A                          | c.(6871-6873)GTA>ATA | p.V2291I |
| Pat_24 | Post-Resistance | MAP1A     | 4130   | 37 | 15 | 43816316  | 43816316  | Missense_Mutation | SNP | C  | T  | 4   | 133 | c.2645C>T                          | c.(2644-2646)GCT>GTT | p.A882V  |
| Pat_24 | Post-Resistance | CKMT1B    | 1159   | 37 | 15 | 43891417  | 43891418  | Missense_Mutation | DNP | GG | AA | 59  | 108 | c.1200_1201GG>A198-1203CTGGAG>CTAA | p.E401K              |          |
| Pat_24 | Post-Resistance | DUOX2     | 50506  | 37 | 15 | 45388258  | 45388258  | Missense_Mutation | SNP | C  | T  | 15  | 25  | c.3848G>A                          | c.(3847-3849)GGA>GAA | p.G1283E |
| Pat_24 | Post-Resistance | SHF       | 90525  | 37 | 15 | 45491196  | 45491196  | Missense_Mutation | SNP | G  | A  | 4   | 14  | c.77C>T                            | c.(76-78)CCG>CTG     | p.P26L   |
| Pat_24 | Post-Resistance | CILP      | 8483   | 37 | 15 | 65499120  | 65499120  | Missense_Mutation | SNP | C  | T  | 107 | 133 | c.424G>A                           | c.(424-426)GGA>AGA   | p.G142R  |
| Pat_24 | Post-Resistance | DIS3L     | 115752 | 37 | 15 | 66624358  | 66624358  | Missense_Mutation | SNP | G  | A  | 5   | 118 | c.2681G>A                          | c.(2680-2682)AGG>AAG | p.R894K  |



|        |                 |           |        |    |    |           |           |                   |     |    |    |    |     |                                                 |                      |               |
|--------|-----------------|-----------|--------|----|----|-----------|-----------|-------------------|-----|----|----|----|-----|-------------------------------------------------|----------------------|---------------|
| Pat_24 | Post-Resistance | LOC645752 | 645752 | 37 | 15 | 78207888  | 78207888  | Missense_Mutation | SNP | A  | C  | 4  | 26  | c.1110T>G                                       | c.(1108-1110)AAT>AAG | p.N370K       |
| Pat_24 | Post-Resistance | C15orf42  | 90381  | 37 | 15 | 90129084  | 90129084  | Missense_Mutation | SNP | G  | A  | 4  | 170 | c.1322G>A                                       | c.(1321-1323)AGC>AAC | p.S441N       |
| Pat_24 | Post-Resistance | SYNM      | 23336  | 37 | 15 | 99670857  | 99670857  | Missense_Mutation | SNP | T  | G  | 19 | 13  | c.2292T>G                                       | c.(2290-2292)TTT>TTG | p.F764L       |
| Pat_24 | Post-Resistance | OR4F15    | 390649 | 37 | 15 | 102358732 | 102358732 | Missense_Mutation | SNP | C  | T  | 4  | 179 | c.343C>T                                        | c.(343-345)CTC>TTC   | p.L115F       |
| Pat_24 | Post-Resistance | PIGQ      | 9091   | 37 | 16 | 624252    | 624252    | Missense_Mutation | SNP | G  | A  | 3  | 40  | c.178G>A                                        | c.(178-180)GTG>ATG   | p.V60M        |
| Pat_24 | Post-Resistance | FBXL16    | 146330 | 37 | 16 | 744675    | 744675    | Missense_Mutation | SNP | T  | G  | 8  | 36  | c.1250A>C                                       | c.(1249-1251)CAC>CCC | p.H417P       |
| Pat_24 | Post-Resistance | PKD1      | 5310   | 37 | 16 | 2155877   | 2155877   | Missense_Mutation | SNP | C  | T  | 4  | 114 | c.7852G>A                                       | c.(7852-7854)GTG>ATG | p.V2618M      |
| Pat_24 | Post-Resistance | SRRM2     | 23524  | 37 | 16 | 2817405   | 2817406   | Missense_Mutation | DNP | CC | TT | 59 | 194 | :c.6876_6877CC>T874-6879)GCCCA>GCT              |                      | p.P2293S      |
| Pat_24 | Post-Resistance | A2BP1     | 54715  | 37 | 16 | 7680638   | 7680638   | Missense_Mutation | SNP | G  | A  | 16 | 87  | c.710G>A                                        | c.(709-711)GGA>GAA   | p.G237E       |
| Pat_24 | Post-Resistance | TEKT5     | 146279 | 37 | 16 | 10788232  | 10788232  | Nonsense_Mutation | SNP | G  | A  | 69 | 221 | c.499C>T                                        | c.(499-501)CAG>TAG   | p.Q167*       |
| Pat_24 | Post-Resistance | TXNDC11   | 51061  | 37 | 16 | 11794417  | 11794417  | Missense_Mutation | SNP | T  | C  | 23 | 87  | c.878A>G                                        | c.(877-879)TAC>TGC   | p.Y293C       |
| Pat_24 | Post-Resistance | ERCC4     | 2072   | 37 | 16 | 14022037  | 14022037  | Missense_Mutation | SNP | C  | T  | 34 | 118 | c.737C>T                                        | c.(736-738)TCG>TTG   | p.S246L       |
| Pat_24 | Post-Resistance | SMG1      | 23049  | 37 | 16 | 18853620  | 18853620  | Missense_Mutation | SNP | C  | T  | 4  | 175 | c.6376G>A                                       | c.(6376-6378)GGA>AGA | p.G2126R      |
| Pat_24 | Post-Resistance | SMG1      | 23049  | 37 | 16 | 18937330  | 18937330  | Missense_Mutation | SNP | T  | C  | 6  | 32  | c.34A>G                                         | c.(34-36)AGC>GGC     | p.S12G        |
| Pat_24 | Post-Resistance | CD19      | 930    | 37 | 16 | 28944394  | 28944394  | Missense_Mutation | SNP | G  | A  | 27 | 102 | c.518G>A                                        | c.(517-519)TGT>TAT   | p.C173Y       |
| Pat_24 | Post-Resistance | TGFB11    | 7041   | 37 | 16 | 31487375  | 31487375  | Missense_Mutation | SNP | G  | A  | 5  | 120 | c.757G>A                                        | c.(757-759)GTT>ATT   | p.V253I       |
| Pat_24 | Post-Resistance | VPS35     | 55737  | 37 | 16 | 46714661  | 46714661  | Missense_Mutation | SNP | G  | A  | 28 | 81  | c.428C>T                                        | c.(427-429)CCC>CTC   | p.P143L       |
| Pat_24 | Post-Resistance | ADCY7     | 113    | 37 | 16 | 50324486  | 50324486  | Missense_Mutation | SNP | C  | T  | 37 | 67  | c.290C>T                                        | c.(289-291)GCG>GTG   | p.A97V        |
| Pat_24 | Post-Resistance | KIFC3     | 3801   | 37 | 16 | 57794802  | 57794803  | Missense_Mutation | DNP | GG | AT | 7  | 23  | :c.2067_2068CC>A065-2070)AGCCGC>AGA1689_690SR>R |                      |               |
| Pat_24 | Post-Resistance | CES3      | 23491  | 37 | 16 | 67000685  | 67000685  | Missense_Mutation | SNP | G  | A  | 47 | 169 | c.979G>A                                        | c.(979-981)GAA>AAA   | p.E327K       |
| Pat_24 | Post-Resistance | KCTD19    | 146212 | 37 | 16 | 67325211  | 67325211  | Splice_Site       | SNP | C  | T  | 4  | 83  | c.2565_splice                                   | c.e14+1              | p.W855_splice |
| Pat_24 | Post-Resistance | THAP11    | 57215  | 37 | 16 | 67877052  | 67877052  | Missense_Mutation | SNP | G  | A  | 4  | 141 | c.595G>A                                        | c.(595-597)GCA>ACA   | p.A199T       |
| Pat_24 | Post-Resistance | NRN1L     | 123904 | 37 | 16 | 67919927  | 67919927  | Missense_Mutation | SNP | C  | T  | 4  | 66  | c.263C>T                                        | c.(262-264)CCG>CTG   | p.P88L        |
| Pat_24 | Post-Resistance | DHX38     | 9785   | 37 | 16 | 72133661  | 72133661  | Missense_Mutation | SNP | G  | A  | 4  | 124 | c.991G>A                                        | c.(991-993)GAG>AAG   | p.E331K       |
| Pat_24 | Post-Resistance | ZFHX3     | 463    | 37 | 16 | 72991473  | 72991473  | Missense_Mutation | SNP | C  | T  | 5  | 74  | c.2572G>A                                       | c.(2572-2574)GAG>AAG | p.E858K       |
| Pat_24 | Post-Resistance | ZFHX3     | 463    | 37 | 16 | 72992655  | 72992655  | Missense_Mutation | SNP | C  | T  | 3  | 63  | c.1390G>A                                       | c.(1390-1392)GAG>AAG | p.E464K       |
| Pat_24 | Post-Resistance | VAT1L     | 57687  | 37 | 16 | 77850847  | 77850847  | Missense_Mutation | SNP | G  | A  | 23 | 122 | c.263G>A                                        | c.(262-264)CGA>CAA   | p.R88Q        |
| Pat_24 | Post-Resistance | PLCG2     | 5336   | 37 | 16 | 81819769  | 81819769  | Missense_Mutation | SNP | G  | A  | 4  | 82  | c.175G>A                                        | c.(175-177)GAC>AAC   | p.D59N        |
| Pat_24 | Post-Resistance | TAF1C     | 9013   | 37 | 16 | 84217086  | 84217086  | Missense_Mutation | SNP | C  | T  | 3  | 23  | c.248G>A                                        | c.(247-249)CGG>CAG   | p.R83Q        |
| Pat_24 | Post-Resistance | USP10     | 9100   | 37 | 16 | 84778259  | 84778259  | Missense_Mutation | SNP | G  | C  | 6  | 39  | c.172G>C                                        | c.(172-174)GAG>CAG   | p.E58Q        |
| Pat_24 | Post-Resistance | C17orf97  | 400566 | 37 | 17 | 263384    | 263384    | Missense_Mutation | SNP | G  | C  | 3  | 18  | c.780G>C                                        | c.(778-780)GAG>GAC   | p.E260D       |
| Pat_24 | Post-Resistance | SLC43A2   | 124935 | 37 | 17 | 1486602   | 1486602   | Missense_Mutation | SNP | G  | A  | 4  | 165 | c.1246C>T                                       | c.(1246-1248)CGG>TGG | p.R416W       |
| Pat_24 | Post-Resistance | PRPF8     | 10594  | 37 | 17 | 1564990   | 1564990   | Nonsense_Mutation | SNP | G  | A  | 4  | 171 | c.4117C>T                                       | c.(4117-4119)CAG>TAG | p.Q1373*      |
| Pat_24 | Post-Resistance | ITGAE     | 3682   | 37 | 17 | 3657141   | 3657141   | Missense_Mutation | SNP | G  | A  | 22 | 110 | c.1463C>T                                       | c.(1462-1464)GCC>GTC | p.A488V       |
| Pat_24 | Post-Resistance | MINK1     | 50488  | 37 | 17 | 4796762   | 4796762   | Missense_Mutation | SNP | G  | A  | 4  | 70  | c.2434G>A                                       | c.(2434-2436)GAG>AAG | p.E812K       |
| Pat_24 | Post-Resistance | NUP88     | 4927   | 37 | 17 | 5292182   | 5292182   | Missense_Mutation | SNP | G  | A  | 13 | 52  | c.1583C>T                                       | c.(1582-1584)TCC>TTC | p.S528F       |
| Pat_24 | Post-Resistance | TEKT1     | 83659  | 37 | 17 | 6716271   | 6716271   | Missense_Mutation | SNP | C  | T  | 5  | 218 | c.731G>A                                        | c.(730-732)CGA>CAA   | p.R244Q       |
| Pat_24 | Post-Resistance | ALOX12    | 239    | 37 | 17 | 6902059   | 6902059   | Missense_Mutation | SNP | C  | T  | 4  | 115 | c.445C>T                                        | c.(445-447)CCC>TCC   | p.P149S       |
| Pat_24 | Post-Resistance | NEURL4    | 84461  | 37 | 17 | 7227426   | 7227426   | Splice_Site       | SNP | C  | A  | 4  | 186 | c.2062_splice                                   | c.e11+1              | p.E688_splice |
| Pat_24 | Post-Resistance | PFAS      | 5198   | 37 | 17 | 8170932   | 8170932   | Missense_Mutation | SNP | G  | A  | 4  | 190 | c.3331G>A                                       | c.(3331-3333)GTG>ATG | p.V1111M      |
| Pat_24 | Post-Resistance | PIK3R6    | 146850 | 37 | 17 | 8736226   | 8736226   | Missense_Mutation | SNP | G  | A  | 4  | 183 | c.782C>T                                        | c.(781-783)CCC>CTC   | p.P261L       |
| Pat_24 | Post-Resistance | MYH8      | 4626   | 37 | 17 | 10304868  | 10304868  | Missense_Mutation | SNP | C  | T  | 64 | 310 | c.2923G>A                                       | c.(2923-2925)GAG>AAG | p.E975K       |
| Pat_24 | Post-Resistance | MYH4      | 4622   | 37 | 17 | 10351188  | 10351188  | Missense_Mutation | SNP | G  | A  | 5  | 334 | c.4912C>T                                       | c.(4912-4914)CGC>TGC | p.R1638C      |
| Pat_24 | Post-Resistance | MYH4      | 4622   | 37 | 17 | 10360853  | 10360853  | Missense_Mutation | SNP | G  | A  | 39 | 80  | c.1781C>T                                       | c.(1780-1782)GCC>GTC | p.A594V       |
| Pat_24 | Post-Resistance | MYH1      | 4619   | 37 | 17 | 10402046  | 10402046  | Missense_Mutation | SNP | C  | T  | 5  | 279 | c.4078G>A                                       | c.(4078-4080)GAG>AAG | p.E1360K      |
| Pat_24 | Post-Resistance | MYH1      | 4619   | 37 | 17 | 10412834  | 10412834  | Missense_Mutation | SNP | C  | T  | 81 | 283 | c.1555G>A                                       | c.(1555-1557)GAC>AAC | p.D519N       |
| Pat_24 | Post-Resistance | MYH2      | 4620   | 37 | 17 | 10432937  | 10432937  | Missense_Mutation | SNP | C  | T  | 34 | 119 | c.3061G>A                                       | c.(3061-3063)GAC>AAC | p.D1021N      |

|        |                 |           |           |    |    |          |          |                   |     |   |   |    |     |           |                      |          |
|--------|-----------------|-----------|-----------|----|----|----------|----------|-------------------|-----|---|---|----|-----|-----------|----------------------|----------|
| Pat_24 | Post-Resistance | MYOCD     | 93649     | 37 | 17 | 12642601 | 12642601 | Missense_Mutation | SNP | C | A | 27 | 85  | c.673C>A  | c.(673-675)CTT>ATT   | p.L225I  |
| Pat_24 | Post-Resistance | RNF112    | 7732      | 37 | 17 | 19316944 | 19316944 | Missense_Mutation | SNP | G | A | 10 | 47  | c.775G>A  | c.(775-777)GAA>AAA   | p.E259K  |
| Pat_24 | Post-Resistance | ALDH3A1   | 218       | 37 | 17 | 19648378 | 19648378 | Missense_Mutation | SNP | G | A | 3  | 24  | c.65C>T   | c.(64-66)CCG>CTG     | p.P22L   |
| Pat_24 | Post-Resistance | WSB1      | 26118     | 37 | 17 | 25628877 | 25628877 | Missense_Mutation | SNP | G | A | 5  | 329 | c.104G>A  | c.(103-105)CGT>CAT   | p.R35H   |
| Pat_24 | Post-Resistance | SARM1     | 23098     | 37 | 17 | 26712115 | 26712115 | Missense_Mutation | SNP | G | A | 4  | 57  | c.1451G>A | c.(1450-1452)CGC>CAC | p.R484H  |
| Pat_24 | Post-Resistance | SLC46A1   | 113235    | 37 | 17 | 26727681 | 26727681 | Missense_Mutation | SNP | C | T | 3  | 33  | c.1267G>A | c.(1267-1269)GGG>AGG | p.G423R  |
| Pat_24 | Post-Resistance | SEZ6      | 124925    | 37 | 17 | 27308551 | 27308551 | Missense_Mutation | SNP | G | A | 11 | 32  | c.562C>T  | c.(562-564)CCT>TCT   | p.P188S  |
| Pat_24 | Post-Resistance | SEZ6      | 124925    | 37 | 17 | 27308970 | 27308970 | Missense_Mutation | SNP | G | A | 13 | 41  | c.143C>T  | c.(142-144)CCT>CTT   | p.P48L   |
| Pat_24 | Post-Resistance | TAOK1     | 57551     | 37 | 17 | 27829707 | 27829707 | Missense_Mutation | SNP | G | A | 7  | 258 | c.1304G>A | c.(1303-1305)CGA>CAA | p.R435Q  |
| Pat_24 | Post-Resistance | ZNF830    | 91603     | 37 | 17 | 33289450 | 33289450 | Missense_Mutation | SNP | G | A | 4  | 173 | c.865G>A  | c.(865-867)GAA>AAA   | p.E289K  |
| Pat_24 | Post-Resistance | GAS2L2    | 246176    | 37 | 17 | 34074225 | 34074225 | Nonsense_Mutation | SNP | G | A | 5  | 336 | c.895C>T  | c.(895-897)CAG>TAG   | p.Q299*  |
| Pat_24 | Post-Resistance | CCL18     | 6362      | 37 | 17 | 34397903 | 34397903 | Missense_Mutation | SNP | C | T | 19 | 102 | c.164C>T  | c.(163-165)CCC>CTC   | p.P55L   |
| Pat_24 | Post-Resistance | MLLT6     | 4302      | 37 | 17 | 36872692 | 36872692 | Missense_Mutation | SNP | C | T | 11 | 45  | c.1109C>T | c.(1108-1110)TCC>TTC | p.S370F  |
| Pat_24 | Post-Resistance | GRB7      | 2886      | 37 | 17 | 37903097 | 37903097 | Missense_Mutation | SNP | C | T | 4  | 138 | c.1546C>T | c.(1546-1548)CGC>TGC | p.R516C  |
| Pat_24 | Post-Resistance | KRT26     | 353288    | 37 | 17 | 38926062 | 38926062 | Missense_Mutation | SNP | C | T | 30 | 135 | c.913G>A  | c.(913-915)GAA>AAA   | p.E305K  |
| Pat_24 | Post-Resistance | KRTAP4-7  | 100132476 | 37 | 17 | 39240742 | 39240742 | Missense_Mutation | SNP | G | T | 6  | 179 | c.284G>T  | c.(283-285)TGC>TTC   | p.C95F   |
| Pat_24 | Post-Resistance | KRTAP4-12 | 83755     | 37 | 17 | 39279951 | 39279951 | Missense_Mutation | SNP | G | A | 5  | 213 | c.424C>T  | c.(424-426)CGC>TGC   | p.R142C  |
| Pat_24 | Post-Resistance | SLC4A1    | 6521      | 37 | 17 | 42335041 | 42335041 | Missense_Mutation | SNP | C | G | 2  | 11  | c.1417G>C | c.(1417-1419)GAA>CAA | p.E473Q  |
| Pat_24 | Post-Resistance | NSF       | 4905      | 37 | 17 | 44788404 | 44788404 | Nonsense_Mutation | SNP | C | T | 12 | 117 | c.1546C>T | c.(1546-1548)CGA>TGA | p.R516*  |
| Pat_24 | Post-Resistance | SCRN2     | 90507     | 37 | 17 | 45915916 | 45915916 | Missense_Mutation | SNP | C | T | 5  | 362 | c.919G>A  | c.(919-921)GCC>ACC   | p.A307T  |
| Pat_24 | Post-Resistance | SP2       | 6668      | 37 | 17 | 45994060 | 45994060 | Missense_Mutation | SNP | G | A | 4  | 167 | c.623G>A  | c.(622-624)GGC>GAC   | p.G208D  |
| Pat_24 | Post-Resistance | PHB       | 5245      | 37 | 17 | 47486457 | 47486457 | Missense_Mutation | SNP | C | T | 49 | 48  | c.457G>A  | c.(457-459)GAC>AAC   | p.D153N  |
| Pat_24 | Post-Resistance | MSI2      | 124540    | 37 | 17 | 55704604 | 55704604 | Missense_Mutation | SNP | G | A | 6  | 249 | c.667G>A  | c.(667-669)GTG>ATG   | p.V223M  |
| Pat_24 | Post-Resistance | OR4D2     | 124538    | 37 | 17 | 56247618 | 56247618 | Missense_Mutation | SNP | C | T | 19 | 75  | c.602C>T  | c.(601-603)TCC>TTC   | p.S201F  |
| Pat_24 | Post-Resistance | C17orf47  | 284083    | 37 | 17 | 56620916 | 56620916 | Missense_Mutation | SNP | G | A | 4  | 130 | c.632C>T  | c.(631-633)ACG>ATG   | p.T211M  |
| Pat_24 | Post-Resistance | TRIM37    | 4591      | 37 | 17 | 57157205 | 57157205 | Missense_Mutation | SNP | C | T | 27 | 73  | c.526G>A  | c.(526-528)GAT>AAT   | p.D176N  |
| Pat_24 | Post-Resistance | 10-Mar    | 162333    | 37 | 17 | 60813730 | 60813730 | Missense_Mutation | SNP | T | C | 14 | 62  | c.1499A>G | c.(1498-1500)GAC>GGC | p.D500G  |
| Pat_24 | Post-Resistance | 10-Mar    | 162333    | 37 | 17 | 60821776 | 60821776 | Nonsense_Mutation | SNP | G | A | 4  | 182 | c.496C>T  | c.(496-498)CAG>TAG   | p.Q166*  |
| Pat_24 | Post-Resistance | ABCA6     | 23460     | 37 | 17 | 67092389 | 67092389 | Missense_Mutation | SNP | A | G | 2  | 3   | c.3400T>C | c.(3400-3402)TTC>CTC | p.F1134L |
| Pat_24 | Post-Resistance | OTOP2     | 92736     | 37 | 17 | 72926856 | 72926856 | Missense_Mutation | SNP | G | A | 4  | 171 | c.1126G>A | c.(1126-1128)GCC>ACC | p.A376T  |
| Pat_24 | Post-Resistance | MFSD11    | 79157     | 37 | 17 | 74771214 | 74771214 | Missense_Mutation | SNP | C | T | 4  | 169 | c.1010C>T | c.(1009-1011)CCT>CTT | p.P337L  |
| Pat_24 | Post-Resistance | LGALS3BP  | 3959      | 37 | 17 | 76972089 | 76972089 | Missense_Mutation | SNP | C | T | 6  | 42  | c.202G>A  | c.(202-204)GAG>AAG   | p.E68K   |
| Pat_24 | Post-Resistance | RPTOR     | 57521     | 37 | 17 | 78704421 | 78704421 | Missense_Mutation | SNP | C | T | 4  | 155 | c.569C>T  | c.(568-570)TCG>TTG   | p.S190L  |
| Pat_24 | Post-Resistance | RPTOR     | 57521     | 37 | 17 | 78931496 | 78931496 | Missense_Mutation | SNP | G | A | 4  | 172 | c.3443G>A | c.(3442-3444)CGG>CAG | p.R1148Q |
| Pat_24 | Post-Resistance | BAIAP2    | 10458     | 37 | 17 | 79078422 | 79078422 | Missense_Mutation | SNP | C | T | 14 | 29  | c.1175C>T | c.(1174-1176)ACC>ATC | p.T392I  |
| Pat_24 | Post-Resistance | NPLOC4    | 55666     | 37 | 17 | 79556017 | 79556017 | Missense_Mutation | SNP | C | T | 4  | 188 | c.1234G>A | c.(1234-1236)GCC>ACC | p.A412T  |
| Pat_24 | Post-Resistance | MYOM1     | 8736      | 37 | 18 | 3102547  | 3102547  | Missense_Mutation | SNP | G | A | 17 | 89  | c.3500C>T | c.(3499-3501)TCC>TTC | p.S1167F |
| Pat_24 | Post-Resistance | IMPA2     | 3613      | 37 | 18 | 12009956 | 12009956 | Missense_Mutation | SNP | C | T | 43 | 247 | c.305C>T  | c.(304-306)CCC>CTC   | p.P102L  |
| Pat_24 | Post-Resistance | LAMA3     | 3909      | 37 | 18 | 21492684 | 21492684 | Missense_Mutation | SNP | C | T | 4  | 151 | c.7168C>T | c.(7168-7170)CCC>TCC | p.P2390S |
| Pat_24 | Post-Resistance | DSC3      | 1825      | 37 | 18 | 28576937 | 28576937 | Missense_Mutation | SNP | C | T | 6  | 26  | c.2313G>A | c.(2311-2313)ATG>ATA | p.M771I  |
| Pat_24 | Post-Resistance | MEP1B     | 4225      | 37 | 18 | 29793298 | 29793298 | Missense_Mutation | SNP | C | T | 4  | 20  | c.1355C>T | c.(1354-1356)CCA>CTA | p.P452L  |
| Pat_24 | Post-Resistance | ASXL3     | 80816     | 37 | 18 | 31325120 | 31325120 | Missense_Mutation | SNP | G | A | 8  | 24  | c.5308G>A | c.(5308-5310)GGA>AGA | p.G1770R |
| Pat_24 | Post-Resistance | CCBE1     | 147372    | 37 | 18 | 57136752 | 57136752 | Missense_Mutation | SNP | C | T | 68 | 333 | c.353G>A  | c.(352-354)CGA>CAA   | p.R118Q  |
| Pat_24 | Post-Resistance | KIAA1468  | 57614     | 37 | 18 | 59949677 | 59949677 | Missense_Mutation | SNP | T | C | 22 | 160 | c.3253T>C | c.(3253-3255)TTT>CTT | p.F1085L |
| Pat_24 | Post-Resistance | NETO1     | 81832     | 37 | 18 | 70526196 | 70526196 | Missense_Mutation | SNP | G | A | 7  | 68  | c.334C>T  | c.(334-336)CCA>TCA   | p.P112S  |
| Pat_24 | Post-Resistance | PRTN3     | 5657      | 37 | 19 | 843464   | 843464   | Missense_Mutation | SNP | C | T | 3  | 17  | c.65C>T   | c.(64-66)GCT>GTT     | p.A22V   |
| Pat_24 | Post-Resistance | ZNF555    | 148254    | 37 | 19 | 2853202  | 2853202  | Missense_Mutation | SNP | C | T | 5  | 48  | c.1139C>T | c.(1138-1140)CCC>CTC | p.P380L  |

|        |                 |          |        |    |    |          |          |                        |     |   |   |    |     |            |                         |          |
|--------|-----------------|----------|--------|----|----|----------|----------|------------------------|-----|---|---|----|-----|------------|-------------------------|----------|
| Pat_24 | Post-Resistance | NFIC     | 4782   | 37 | 19 | 3452528  | 3452528  | Missense_Mutation      | SNP | C | T | 10 | 723 | c.1133C>T  | c.(1132-1134)ACG>ATG    | p.T378M  |
| Pat_24 | Post-Resistance | CLEC4M   | 10332  | 37 | 19 | 7828094  | 7828094  | Translation_Start_Site | SNP | G | A | 4  | 21  | c.-58G>A   | :(-60--56)GGGTG>GGATG   |          |
| Pat_24 | Post-Resistance | FBN3     | 84467  | 37 | 19 | 8188854  | 8188854  | Missense_Mutation      | SNP | C | T | 17 | 65  | c.2770G>A  | c.(2770-2772)GAT>AAT    | p.D924N  |
| Pat_24 | Post-Resistance | MUC16    | 94025  | 37 | 19 | 9064995  | 9064995  | Missense_Mutation      | SNP | G | A | 4  | 168 | c.22451C>T | c.(22450-22452)ACT>ATT  | p.T7484I |
| Pat_24 | Post-Resistance | MUC16    | 94025  | 37 | 19 | 9075747  | 9075747  | Missense_Mutation      | SNP | G | C | 11 | 26  | c.11699C>G | c.(11698-11700)TCC>TGC  | p.S3900C |
| Pat_24 | Post-Resistance | COL5A3   | 50509  | 37 | 19 | 10114730 | 10114730 | Missense_Mutation      | SNP | G | A | 4  | 192 | c.686C>T   | c.(685-687)CCG>CTG      | p.P229L  |
| Pat_24 | Post-Resistance | FAM129C  | 199786 | 37 | 19 | 17648304 | 17648304 | Missense_Mutation      | SNP | C | G | 3  | 124 | c.640C>G   | c.(640-642)CAT>GAT      | p.H214D  |
| Pat_24 | Post-Resistance | PIK3R2   | 5296   | 37 | 19 | 18279920 | 18279920 | Missense_Mutation      | SNP | G | A | 33 | 160 | c.2003G>A  | c.(2002-2004)TGC>TAC    | p.C668Y  |
| Pat_24 | Post-Resistance | GMIP     | 51291  | 37 | 19 | 19741062 | 19741062 | Missense_Mutation      | SNP | C | T | 4  | 114 | c.2623G>A  | c.(2623-2625)GGC>AGC    | p.G875S  |
| Pat_24 | Post-Resistance | ZNF93    | 81931  | 37 | 19 | 20045284 | 20045284 | Missense_Mutation      | SNP | A | C | 3  | 143 | c.1520A>C  | c.(1519-1521)AAA>ACA    | p.K507T  |
| Pat_24 | Post-Resistance | ZNF208   | 7757   | 37 | 19 | 22155909 | 22155909 | Missense_Mutation      | SNP | C | A | 4  | 140 | c.1627G>T  | c.(1627-1629)GGC>TGC    | p.G543C  |
| Pat_24 | Post-Resistance | ZNF492   | 57615  | 37 | 19 | 22847739 | 22847739 | Missense_Mutation      | SNP | G | A | 5  | 145 | c.1268G>A  | c.(1267-1269)TGT>TAT    | p.C423Y  |
| Pat_24 | Post-Resistance | CHST8    | 64377  | 37 | 19 | 34263819 | 34263819 | Missense_Mutation      | SNP | C | T | 4  | 90  | c.1126C>T  | c.(1126-1128)CGG>TGG    | p.R376W  |
| Pat_24 | Post-Resistance | KIAA0355 | 9710   | 37 | 19 | 34832463 | 34832463 | Missense_Mutation      | SNP | C | T | 4  | 159 | c.1624C>T  | c.(1624-1626)CGG>TGG    | p.R542W  |
| Pat_24 | Post-Resistance | ATP4A    | 495    | 37 | 19 | 36049978 | 36049978 | Missense_Mutation      | SNP | G | A | 9  | 528 | c.1172C>T  | c.(1171-1173)ACT>ATT    | p.T391I  |
| Pat_24 | Post-Resistance | WDR62    | 284403 | 37 | 19 | 36579954 | 36579954 | Nonsense_Mutation      | SNP | C | T | 44 | 154 | c.1783C>T  | c.(1783-1785)CAG>TAG    | p.Q595*  |
| Pat_24 | Post-Resistance | ZNF527   | 84503  | 37 | 19 | 37865129 | 37865129 | Missense_Mutation      | SNP | C | T | 28 | 85  | c.29C>T    | c.(28-30)TCC>TTC        | p.S10F   |
| Pat_24 | Post-Resistance | ACTN4    | 81     | 37 | 19 | 39219688 | 39219688 | Missense_Mutation      | SNP | G | A | 23 | 284 | c.2471G>A  | c.(2470-2472)GGC>GAC    | p.G824D  |
| Pat_24 | Post-Resistance | ZNF546   | 339327 | 37 | 19 | 40519644 | 40519644 | Missense_Mutation      | SNP | T | C | 16 | 48  | c.467T>C   | c.(466-468)TTG>TCG      | p.L156S  |
| Pat_24 | Post-Resistance | CYP2B7P1 | 1556   | 37 | 19 | 41442117 | 41442117 | Missense_Mutation      | SNP | C | T | 11 | 62  | c.287C>T   | c.(286-288)TCT>TTT      | p.S96F   |
| Pat_24 | Post-Resistance | CYP2A13  | 1553   | 37 | 19 | 41600907 | 41600907 | Missense_Mutation      | SNP | C | T | 4  | 191 | c.1205C>T  | c.(1204-1206)CCC>CTC    | p.P402L  |
| Pat_24 | Post-Resistance | MEGF8    | 1954   | 37 | 19 | 42873700 | 42873700 | Missense_Mutation      | SNP | G | A | 5  | 194 | c.6458G>A  | c.(6457-6459)CGC>CAC    | p.R2153H |
| Pat_24 | Post-Resistance | PSG8     | 440533 | 37 | 19 | 43259211 | 43259211 | Missense_Mutation      | SNP | C | T | 13 | 87  | c.917G>A   | c.(916-918)GGA>GAA      | p.G306E  |
| Pat_24 | Post-Resistance | ERCC1    | 2067   | 37 | 19 | 45923622 | 45923622 | Missense_Mutation      | SNP | C | T | 4  | 106 | c.385G>A   | c.(385-387)GAC>AAC      | p.D129N  |
| Pat_24 | Post-Resistance | GIPR     | 2696   | 37 | 19 | 46181236 | 46181236 | Missense_Mutation      | SNP | C | T | 6  | 206 | c.997C>T   | c.(997-999)CGG>TGG      | p.R333W  |
| Pat_24 | Post-Resistance | PNMAL1   | 55228  | 37 | 19 | 46974154 | 46974154 | Missense_Mutation      | SNP | G | A | 12 | 27  | c.139C>T   | c.(139-141)CTC>TTC      | p.L47F   |
| Pat_24 | Post-Resistance | DHX34    | 9704   | 37 | 19 | 47882968 | 47882968 | Missense_Mutation      | SNP | C | T | 55 | 275 | c.2708C>T  | c.(2707-2709)TCC>TTC    | p.S903F  |
| Pat_24 | Post-Resistance | SULT2A1  | 6822   | 37 | 19 | 48389505 | 48389505 | Missense_Mutation      | SNP | C | T | 17 | 112 | c.10G>A    | c.(10-12)GAT>AAT        | p.D4N    |
| Pat_24 | Post-Resistance | FGF21    | 26291  | 37 | 19 | 49261344 | 49261344 | Missense_Mutation      | SNP | C | T | 3  | 14  | c.497C>T   | c.(496-498)CCA>CTA      | p.P166L  |
| Pat_24 | Post-Resistance | PLEKHA4  | 57664  | 37 | 19 | 49363613 | 49363613 | Missense_Mutation      | SNP | T | C | 3  | 160 | c.470A>G   | c.(469-471)GAC>GGC      | p.D157G  |
| Pat_24 | Post-Resistance | POLD1    | 5424   | 37 | 19 | 50912813 | 50912813 | Missense_Mutation      | SNP | C | T | 4  | 152 | c.2044C>T  | c.(2044-2046)CGG>TGG    | p.R682W  |
| Pat_24 | Post-Resistance | MYBPC2   | 4606   | 37 | 19 | 50964863 | 50964863 | Missense_Mutation      | SNP | G | A | 4  | 86  | c.2996G>A  | c.(2995-2997)GGC>GAC    | p.G999D  |
| Pat_24 | Post-Resistance | KLK15    | 55554  | 37 | 19 | 51330167 | 51330167 | Missense_Mutation      | SNP | C | T | 14 | 32  | c.448G>A   | c.(448-450)GAG>AAG      | p.E150K  |
| Pat_24 | Post-Resistance | KLK5     | 25818  | 37 | 19 | 51447041 | 51447041 | Missense_Mutation      | SNP | C | T | 6  | 24  | c.728G>A   | c.(727-729)GGT>GAT      | p.G243D  |
| Pat_24 | Post-Resistance | LIM2     | 3982   | 37 | 19 | 51885793 | 51885793 | Missense_Mutation      | SNP | C | T | 27 | 152 | c.204G>A   | c.(202-204)ATG>ATA      | p.M68I   |
| Pat_24 | Post-Resistance | ZNF836   | 162962 | 37 | 19 | 52659470 | 52659470 | Missense_Mutation      | SNP | C | T | 4  | 171 | c.1466G>A  | c.(1465-1467)CGG>CAG    | p.R489Q  |
| Pat_24 | Post-Resistance | ZNF578   | 147660 | 37 | 19 | 53014551 | 53014551 | Missense_Mutation      | SNP | G | A | 5  | 204 | c.917G>A   | c.(916-918)CGT>CAT      | p.R306H  |
| Pat_24 | Post-Resistance | VN1R2    | 317701 | 37 | 19 | 53762332 | 53762332 | Nonsense_Mutation      | SNP | G | A | 10 | 37  | c.704G>A   | c.(703-705)TGG>TAG      | p.W235*  |
| Pat_24 | Post-Resistance | ZIK1     | 284307 | 37 | 19 | 58100021 | 58100021 | Missense_Mutation      | SNP | G | T | 3  | 66  | c.187G>T   | c.(187-189)GTA>TTA      | p.V63L   |
| Pat_24 | Post-Resistance | ZSCAN4   | 201516 | 37 | 19 | 58189418 | 58189418 | Missense_Mutation      | SNP | C | T | 17 | 104 | c.533C>T   | c.(532-534)TCC>TTC      | p.S178F  |
| Pat_24 | Post-Resistance | TRIM28   | 10155  | 37 | 19 | 59056878 | 59056878 | Missense_Mutation      | SNP | G | A | 4  | 106 | c.427G>A   | c.(427-429)GCC>ACC      | p.A143T  |
| Pat_24 | Post-Resistance | ADAM17   | 6868   | 37 | 2  | 9676829  | 9676829  | Missense_Mutation      | SNP | A | G | 51 | 154 | c.359T>C   | c.(358-360)GTT>GCT      | p.V120A  |
| Pat_24 | Post-Resistance | GREB1    | 9687   | 37 | 2  | 11777891 | 11777891 | Missense_Mutation      | SNP | C | T | 4  | 176 | c.5396C>T  | c.(5395-5397)CCG>CTG    | p.P1799L |
| Pat_24 | Post-Resistance | GEN1     | 348654 | 37 | 2  | 17946296 | 17946296 | Missense_Mutation      | SNP | T | A | 51 | 166 | c.481T>A   | c.(481-483)TAT>AAT      | p.Y161N  |
| Pat_24 | Post-Resistance | PLEKHH2  | 130271 | 37 | 2  | 43927635 | 43927635 | Missense_Mutation      | SNP | C | T | 64 | 188 | c.1538C>T  | c.(1537-1539)TCC>TTC    | p.S513F  |
| Pat_24 | Post-Resistance | CCDC142  | 84865  | 37 | 2  | 74710339 | 74710339 | Translation_Start_Site | SNP | G | A | 4  | 56  | c.-374C>T  | :(-376--372)AACGT>AATGT |          |
| Pat_24 | Post-Resistance | REG3G    | 130120 | 37 | 2  | 79255367 | 79255367 | Missense_Mutation      | SNP | G | A | 4  | 148 | c.493G>A   | c.(493-495)GCA>ACA      | p.A165T  |

|        |                 |          |        |    |    |           |           |                   |     |    |    |    |     |                |                        |           |
|--------|-----------------|----------|--------|----|----|-----------|-----------|-------------------|-----|----|----|----|-----|----------------|------------------------|-----------|
| Pat_24 | Post-Resistance | CTNNA2   | 1496   | 37 | 2  | 80874869  | 80874869  | Missense_Mutation | SNP | G  | A  | 27 | 83  | c.2734G>A      | c.(2734-2736)GAG>AAG   | p.E912K   |
| Pat_24 | Post-Resistance | KDM3A    | 55818  | 37 | 2  | 86701921  | 86701921  | Missense_Mutation | SNP | G  | A  | 5  | 200 | c.1747G>A      | c.(1747-1749)GTG>ATG   | p.V583M   |
| Pat_24 | Post-Resistance | SEMA4C   | 54910  | 37 | 2  | 97533590  | 97533590  | Missense_Mutation | SNP | C  | T  | 5  | 383 | c.34G>A        | c.(34-36)GCA>ACA       | p.A12T    |
| Pat_24 | Post-Resistance | LYG1     | 129530 | 37 | 2  | 99907879  | 99907879  | Missense_Mutation | SNP | G  | A  | 12 | 40  | c.154C>T       | c.(154-156)CGT>TGT     | p.R52C    |
| Pat_24 | Post-Resistance | PSD4     | 23550  | 37 | 2  | 113950879 | 113950879 | Missense_Mutation | SNP | G  | A  | 8  | 82  | c.1964G>A      | c.(1963-1965)CGG>CAG   | p.R655Q   |
| Pat_24 | Post-Resistance | CNTNAP5  | 129684 | 37 | 2  | 125521709 | 125521709 | Nonsense_Mutation | SNP | C  | T  | 18 | 64  | c.2515C>T      | c.(2515-2517)CGA>TGA   | p.R839*   |
| Pat_24 | Post-Resistance | MYO7B    | 4648   | 37 | 2  | 128394168 | 128394168 | Nonsense_Mutation | SNP | C  | T  | 3  | 46  | c.6094C>T      | c.(6094-6096)CGA>TGA   | p.R2032*  |
| Pat_24 | Post-Resistance | NCKAP5   | 344148 | 37 | 2  | 133541974 | 133541974 | Missense_Mutation | SNP | G  | A  | 25 | 137 | c.2410C>T      | c.(2410-2412)CCT>TCT   | p.P804S   |
| Pat_24 | Post-Resistance | LRP1B    | 53353  | 37 | 2  | 141264467 | 141264467 | Missense_Mutation | SNP | C  | T  | 33 | 86  | c.8419G>A      | c.(8419-8421)GAA>AAA   | p.E2807K  |
| Pat_24 | Post-Resistance | ACVR1C   | 130399 | 37 | 2  | 158401119 | 158401119 | Missense_Mutation | SNP | C  | T  | 16 | 40  | c.781G>A       | c.(781-783)GGA>AGA     | p.G261R   |
| Pat_24 | Post-Resistance | ITGB6    | 3694   | 37 | 2  | 161029195 | 161029195 | Missense_Mutation | SNP | A  | G  | 68 | 403 | c.806T>C       | c.(805-807)GTG>GCG     | p.V269A   |
| Pat_24 | Post-Resistance | SCN2A    | 6326   | 37 | 2  | 166170222 | 166170222 | Missense_Mutation | SNP | C  | T  | 12 | 40  | c.1127C>T      | c.(1126-1128)TCC>TTC   | p.S376F   |
| Pat_24 | Post-Resistance | SCN1A    | 6323   | 37 | 2  | 166915126 | 166915126 | Missense_Mutation | SNP | G  | A  | 17 | 67  | c.337C>T       | c.(337-339)CCC>TCC     | p.P113S   |
| Pat_24 | Post-Resistance | XIRP2    | 129446 | 37 | 2  | 168106448 | 168106448 | Missense_Mutation | SNP | C  | T  | 4  | 194 | c.8546C>T      | c.(8545-8547)GCA>GTA   | p.A2849V  |
| Pat_24 | Post-Resistance | LRP2     | 4036   | 37 | 2  | 170002377 | 170002377 | Missense_Mutation | SNP | C  | T  | 10 | 11  | c.12868G>A     | c.(12868-12870)GAA>AAA | p.E4290K  |
| Pat_24 | Post-Resistance | LRP2     | 4036   | 37 | 2  | 170030528 | 170030528 | Nonsense_Mutation | SNP | G  | A  | 30 | 117 | c.10915C>T     | c.(10915-10917)CAG>TAG | p.Q3639*  |
| Pat_24 | Post-Resistance | MYO3B    | 140469 | 37 | 2  | 171243735 | 171243735 | Missense_Mutation | SNP | G  | A  | 22 | 99  | c.1494G>A      | c.(1492-1494)ATG>ATA   | p.M498I   |
| Pat_24 | Post-Resistance | OSBPL6   | 114880 | 37 | 2  | 179196280 | 179196280 | Missense_Mutation | SNP | G  | A  | 4  | 187 | c.320G>A       | c.(319-321)CGT>CAT     | p.R107H   |
| Pat_24 | Post-Resistance | TTN      | 7273   | 37 | 2  | 179395188 | 179395188 | Missense_Mutation | SNP | T  | A  | 9  | 30  | c.98450A>T     | c.(98449-98451)AAG>ATG | p.K32817M |
| Pat_24 | Post-Resistance | TTN      | 7273   | 37 | 2  | 179458711 | 179458711 | Missense_Mutation | SNP | C  | T  | 49 | 175 | c.50705G>A     | c.(50704-50706)GGT>GAT | p.G16902D |
| Pat_24 | Post-Resistance | CCDC141  | 285025 | 37 | 2  | 179718176 | 179718177 | Missense_Mutation | DNP | TG | CT | 52 | 188 | .1510_1511CA>A | c.(1510-1512)CAC>AGC   | p.H504S   |
| Pat_24 | Post-Resistance | PDE1A    | 5136   | 37 | 2  | 183104982 | 183104982 | Nonsense_Mutation | SNP | G  | A  | 12 | 80  | c.253C>T       | c.(253-255)CAG>TAG     | p.Q85*    |
| Pat_24 | Post-Resistance | PARD3B   | 117583 | 37 | 2  | 206037007 | 206037007 | Missense_Mutation | SNP | G  | A  | 32 | 119 | c.1693G>A      | c.(1693-1695)GAA>AAA   | p.E565K   |
| Pat_24 | Post-Resistance | ATIC     | 471    | 37 | 2  | 216209532 | 216209532 | Missense_Mutation | SNP | G  | A  | 4  | 153 | c.1258G>A      | c.(1258-1260)GTA>ATA   | p.V420I   |
| Pat_24 | Post-Resistance | WNT6     | 7475   | 37 | 2  | 219738322 | 219738322 | Missense_Mutation | SNP | C  | T  | 4  | 7   | c.853C>T       | c.(853-855)CTC>TTC     | p.L285F   |
| Pat_24 | Post-Resistance | SPEG     | 10290  | 37 | 2  | 220309456 | 220309456 | Missense_Mutation | SNP | C  | T  | 3  | 37  | c.470C>T       | c.(469-471)ACC>ATC     | p.T157I   |
| Pat_24 | Post-Resistance | ACSL3    | 2181   | 37 | 2  | 223791867 | 223791867 | Nonsense_Mutation | SNP | C  | A  | 4  | 147 | c.1425C>A      | c.(1423-1425)TAC>TAA   | p.Y475*   |
| Pat_24 | Post-Resistance | WDFY1    | 57590  | 37 | 2  | 224763710 | 224763710 | Missense_Mutation | SNP | G  | A  | 5  | 383 | c.563C>T       | c.(562-564)ACG>ATG     | p.T188M   |
| Pat_24 | Post-Resistance | SLC16A14 | 151473 | 37 | 2  | 230910728 | 230910728 | Missense_Mutation | SNP | C  | T  | 4  | 155 | c.1114G>A      | c.(1114-1116)GTC>ATC   | p.V372I   |
| Pat_24 | Post-Resistance | SP140L   | 93349  | 37 | 2  | 231254663 | 231254663 | Missense_Mutation | SNP | G  | A  | 19 | 46  | c.889G>A       | c.(889-891)GAT>AAT     | p.D297N   |
| Pat_24 | Post-Resistance | UGT1A4   | 54657  | 37 | 2  | 234627614 | 234627614 | Missense_Mutation | SNP | G  | A  | 5  | 36  | c.148G>A       | c.(148-150)GAG>AAG     | p.E50K    |
| Pat_24 | Post-Resistance | TRPM8    | 79054  | 37 | 2  | 234854527 | 234854527 | Missense_Mutation | SNP | G  | A  | 69 | 213 | c.727G>A       | c.(727-729)GAT>AAT     | p.D243N   |
| Pat_24 | Post-Resistance | PER2     | 8864   | 37 | 2  | 239161768 | 239161768 | Missense_Mutation | SNP | G  | A  | 4  | 102 | c.2896C>T      | c.(2896-2898)CGG>TGG   | p.R966W   |
| Pat_24 | Post-Resistance | FARP2    | 9855   | 37 | 2  | 242423676 | 242423676 | Missense_Mutation | SNP | A  | G  | 18 | 94  | c.2351A>G      | c.(2350-2352)TAC>TGC   | p.Y784C   |
| Pat_24 | Post-Resistance | ZCCHC3   | 85364  | 37 | 20 | 279147    | 279147    | Missense_Mutation | SNP | G  | A  | 4  | 177 | c.917G>A       | c.(916-918)GGG>GAG     | p.G306E   |
| Pat_24 | Post-Resistance | SIRPA    | 140885 | 37 | 20 | 1895804   | 1895804   | Missense_Mutation | SNP | G  | A  | 4  | 94  | c.139G>A       | c.(139-141)GCT>ACT     | p.A47T    |
| Pat_24 | Post-Resistance | TGM6     | 343641 | 37 | 20 | 2384352   | 2384352   | Missense_Mutation | SNP | G  | A  | 36 | 100 | c.1219G>A      | c.(1219-1221)GAT>AAT   | p.D407N   |
| Pat_24 | Post-Resistance | ITPA     | 3704   | 37 | 20 | 3194691   | 3194691   | Missense_Mutation | SNP | C  | T  | 21 | 69  | c.250C>T       | c.(250-252)CCC>TCC     | p.P84S    |
| Pat_24 | Post-Resistance | SLC23A2  | 9962   | 37 | 20 | 4854620   | 4854620   | Missense_Mutation | SNP | A  | C  | 10 | 128 | c.1064T>G      | c.(1063-1065)GTG>GGG   | p.V355G   |
| Pat_24 | Post-Resistance | PLCB4    | 5332   | 37 | 20 | 9416225   | 9416225   | Missense_Mutation | SNP | C  | T  | 4  | 17  | c.2507C>T      | c.(2506-2508)TCA>TTA   | p.S836L   |
| Pat_24 | Post-Resistance | PCSK2    | 5126   | 37 | 20 | 17434414  | 17434414  | Missense_Mutation | SNP | G  | A  | 4  | 74  | c.913G>A       | c.(913-915)GTG>ATG     | p.V305M   |
| Pat_24 | Post-Resistance | MYLK2    | 85366  | 37 | 20 | 30408261  | 30408261  | Missense_Mutation | SNP | G  | A  | 13 | 145 | c.385G>A       | c.(385-387)GGC>AGC     | p.G129S   |
| Pat_24 | Post-Resistance | NCOA6    | 23054  | 37 | 20 | 33337567  | 33337567  | Missense_Mutation | SNP | C  | T  | 4  | 190 | c.2431G>A      | c.(2431-2433)GAT>AAT   | p.D811N   |
| Pat_24 | Post-Resistance | CEP250   | 11190  | 37 | 20 | 34091848  | 34091848  | Missense_Mutation | SNP | C  | T  | 9  | 32  | c.5651C>T      | c.(5650-5652)GCC>GTC   | p.A1884V  |
| Pat_24 | Post-Resistance | PLCG1    | 5335   | 37 | 20 | 39792036  | 39792036  | Missense_Mutation | SNP | C  | T  | 49 | 149 | c.808C>T       | c.(808-810)CGC>TGC     | p.R270C   |
| Pat_24 | Post-Resistance | PTPRT    | 11122  | 37 | 20 | 41306788  | 41306788  | Missense_Mutation | SNP | G  | A  | 11 | 16  | c.871C>T       | c.(871-873)CCC>TCC     | p.P291S   |
| Pat_24 | Post-Resistance | TOX2     | 84969  | 37 | 20 | 42635328  | 42635328  | Missense_Mutation | SNP | G  | A  | 4  | 179 | c.334G>A       | c.(334-336)GGT>AGT     | p.G112S   |

|        |                 |           |        |    |    |           |           |                   |     |    |    |    |     |                                     |                      |          |
|--------|-----------------|-----------|--------|----|----|-----------|-----------|-------------------|-----|----|----|----|-----|-------------------------------------|----------------------|----------|
| Pat_24 | Post-Resistance | GDAP1L1   | 78997  | 37 | 20 | 42907720  | 42907720  | Missense_Mutation | SNP | G  | A  | 4  | 127 | c.884G>A                            | c.(883-885)CGG>CAG   | p.R295Q  |
| Pat_24 | Post-Resistance | TTPAL     | 79183  | 37 | 20 | 43109033  | 43109033  | Missense_Mutation | SNP | G  | A  | 6  | 345 | c.394G>A                            | c.(394-396)GTG>ATG   | p.V132M  |
| Pat_24 | Post-Resistance | SLC12A5   | 57468  | 37 | 20 | 44676109  | 44676109  | Missense_Mutation | SNP | G  | A  | 31 | 132 | c.1873G>A                           | c.(1873-1875)GGC>AGC | p.G625S  |
| Pat_24 | Post-Resistance | SALL4     | 57167  | 37 | 20 | 50408315  | 50408315  | Missense_Mutation | SNP | C  | T  | 4  | 145 | c.707G>A                            | c.(706-708)CGC>CAC   | p.R236H  |
| Pat_24 | Post-Resistance | RAB22A    | 57403  | 37 | 20 | 56928332  | 56928332  | Missense_Mutation | SNP | C  | T  | 4  | 155 | c.202C>T                            | c.(202-204)CGT>TGT   | p.R68C   |
| Pat_24 | Post-Resistance | DIDO1     | 11083  | 37 | 20 | 61511433  | 61511433  | Missense_Mutation | SNP | G  | A  | 74 | 208 | c.5875C>T                           | c.(5875-5877)CCC>TCC | p.P1959S |
| Pat_24 | Post-Resistance | YTHDF1    | 54915  | 37 | 20 | 61833974  | 61833974  | Missense_Mutation | SNP | C  | T  | 4  | 138 | c.1318G>A                           | c.(1318-1320)GTC>ATC | p.V440I  |
| Pat_24 | Post-Resistance | KRTAP24-1 | 643803 | 37 | 21 | 31654844  | 31654844  | Missense_Mutation | SNP | C  | T  | 4  | 181 | c.407G>A                            | c.(406-408)CGA>CAA   | p.R136Q  |
| Pat_24 | Post-Resistance | SYNJ1     | 8867   | 37 | 21 | 34012088  | 34012088  | Missense_Mutation | SNP | G  | A  | 4  | 58  | c.3707C>T                           | c.(3706-3708)ACG>ATG | p.T1236M |
| Pat_24 | Post-Resistance | CLIC6     | 54102  | 37 | 21 | 36042415  | 36042415  | Missense_Mutation | SNP | A  | G  | 4  | 11  | c.728A>G                            | c.(727-729)GAG>GGG   | p.E243G  |
| Pat_24 | Post-Resistance | PRDM15    | 63977  | 37 | 21 | 43248606  | 43248606  | Missense_Mutation | SNP | C  | T  | 9  | 651 | c.2548G>A                           | c.(2548-2550)GAC>AAC | p.D850N  |
| Pat_24 | Post-Resistance | PRODH     | 5625   | 37 | 22 | 18907019  | 18907019  | Missense_Mutation | SNP | C  | T  | 4  | 74  | c.1196G>A                           | c.(1195-1197)CGG>CAG | p.R399Q  |
| Pat_24 | Post-Resistance | TPST2     | 8459   | 37 | 22 | 26937460  | 26937460  | Missense_Mutation | SNP | C  | T  | 4  | 167 | c.137G>A                            | c.(136-138)CGG>CAG   | p.R46Q   |
| Pat_24 | Post-Resistance | CRYBB1    | 1414   | 37 | 22 | 27003893  | 27003893  | Missense_Mutation | SNP | T  | C  | 20 | 149 | c.392A>G                            | c.(391-393)TAC>TGC   | p.Y131C  |
| Pat_24 | Post-Resistance | CCDC157   | 550631 | 37 | 22 | 30768247  | 30768247  | Missense_Mutation | SNP | G  | A  | 3  | 15  | c.1307G>A                           | c.(1306-1308)CGT>CAT | p.R436H  |
| Pat_24 | Post-Resistance | PISD      | 23761  | 37 | 22 | 32044143  | 32044143  | Nonsense_Mutation | SNP | G  | A  | 4  | 90  | c.265C>T                            | c.(265-267)CGA>TGA   | p.R89*   |
| Pat_24 | Post-Resistance | MCM5      | 4174   | 37 | 22 | 35812336  | 35812336  | Missense_Mutation | SNP | G  | A  | 6  | 501 | c.1352G>A                           | c.(1351-1353)CGA>CAA | p.R451Q  |
| Pat_24 | Post-Resistance | TRIOBP    | 11078  | 37 | 22 | 38120359  | 38120359  | Missense_Mutation | SNP | C  | G  | 5  | 373 | c.1796C>G                           | c.(1795-1797)ACA>AGA | p.T599R  |
| Pat_24 | Post-Resistance | ZC3H7B    | 23264  | 37 | 22 | 41752656  | 41752656  | Missense_Mutation | SNP | A  | T  | 6  | 294 | c.2525A>T                           | c.(2524-2526)TAC>TTC | p.Y842F  |
| Pat_24 | Post-Resistance | C22orf9   | 23313  | 37 | 22 | 45599059  | 45599059  | Missense_Mutation | SNP | C  | T  | 7  | 259 | c.664G>A                            | c.(664-666)GTG>ATG   | p.V222M  |
| Pat_24 | Post-Resistance | MLC1      | 23209  | 37 | 22 | 50523291  | 50523291  | Missense_Mutation | SNP | C  | T  | 3  | 57  | c.41G>A                             | c.(40-42)CGG>CAG     | p.R14Q   |
| Pat_24 | Post-Resistance | SHANK3    | 85358  | 37 | 22 | 51121796  | 51121796  | Missense_Mutation | SNP | G  | A  | 4  | 83  | c.914G>A                            | c.(913-915)CGT>CAT   | p.R305H  |
| Pat_24 | Post-Resistance | RABL2B    | 11158  | 37 | 22 | 51208419  | 51208419  | Missense_Mutation | SNP | G  | A  | 7  | 60  | c.323C>T                            | c.(322-324)ACC>ATC   | p.T108I  |
| Pat_24 | Post-Resistance | FGD5      | 152273 | 37 | 3  | 14862356  | 14862356  | Missense_Mutation | SNP | G  | A  | 3  | 62  | c.1778G>A                           | c.(1777-1779)GGG>GAG | p.G593E  |
| Pat_24 | Post-Resistance | ANKRD28   | 23243  | 37 | 3  | 15718494  | 15718494  | Missense_Mutation | SNP | C  | T  | 4  | 149 | c.2770G>A                           | c.(2770-2772)GCA>ACA | p.A924T  |
| Pat_24 | Post-Resistance | CMTM8     | 152189 | 37 | 3  | 32398920  | 32398920  | Missense_Mutation | SNP | C  | T  | 27 | 115 | c.203C>T                            | c.(202-204)CCC>CTC   | p.P68L   |
| Pat_24 | Post-Resistance | CLASP2    | 23122  | 37 | 3  | 33623409  | 33623409  | Missense_Mutation | SNP | G  | A  | 3  | 77  | c.2251C>T                           | c.(2251-2253)CGT>TGT | p.R751C  |
| Pat_24 | Post-Resistance | PDCD6IP   | 10015  | 37 | 3  | 33905518  | 33905518  | Missense_Mutation | SNP | C  | T  | 21 | 138 | c.2141C>T                           | c.(2140-2142)GCC>GTC | p.A714V  |
| Pat_24 | Post-Resistance | HIGD1A    | 25994  | 37 | 3  | 42835717  | 42835717  | Missense_Mutation | SNP | G  | A  | 18 | 70  | c.29C>T                             | c.(28-30)CCT>CTT     | p.P10L   |
| Pat_24 | Post-Resistance | C3orf39   | 84892  | 37 | 3  | 43122095  | 43122095  | Missense_Mutation | SNP | C  | T  | 4  | 178 | c.829G>A                            | c.(829-831)GTG>ATG   | p.V277M  |
| Pat_24 | Post-Resistance | SETD2     | 29072  | 37 | 3  | 47164268  | 47164268  | Nonsense_Mutation | SNP | G  | A  | 4  | 15  | c.1858C>T                           | c.(1858-1860)CGA>TGA | p.R620*  |
| Pat_24 | Post-Resistance | KLHL18    | 23276  | 37 | 3  | 47382099  | 47382099  | Missense_Mutation | SNP | G  | A  | 7  | 397 | c.1159G>A                           | c.(1159-1161)GTC>ATC | p.V387I  |
| Pat_24 | Post-Resistance | CELSR3    | 1951   | 37 | 3  | 48689366  | 48689366  | Missense_Mutation | SNP | G  | A  | 25 | 134 | c.5867C>T                           | c.(5866-5868)CCA>CTA | p.P1956L |
| Pat_24 | Post-Resistance | GPX1      | 2876   | 37 | 3  | 49395051  | 49395052  | Missense_Mutation | DNP | AG | TA | 12 | 74  | c.381_382CT>TA`379-384)GCCTTC>GCTA` |                      | p.F128I  |
| Pat_24 | Post-Resistance | AMT       | 275    | 37 | 3  | 49455262  | 49455262  | Missense_Mutation | SNP | C  | T  | 7  | 394 | c.1022G>A                           | c.(1021-1023)GGT>GAT | p.G341D  |
| Pat_24 | Post-Resistance | DAG1      | 1605   | 37 | 3  | 49569385  | 49569385  | Missense_Mutation | SNP | C  | T  | 4  | 62  | c.1441C>T                           | c.(1441-1443)CGC>TGC | p.R481C  |
| Pat_24 | Post-Resistance | VPRBP     | 9730   | 37 | 3  | 51458334  | 51458334  | Missense_Mutation | SNP | G  | A  | 85 | 269 | c.2090C>T                           | c.(2089-2091)TCC>TTC | p.S697F  |
| Pat_24 | Post-Resistance | GLYCTK    | 132158 | 37 | 3  | 52324395  | 52324395  | Nonsense_Mutation | SNP | C  | T  | 4  | 67  | c.37C>T                             | c.(37-39)CGA>TGA     | p.R13*   |
| Pat_24 | Post-Resistance | TKT       | 7086   | 37 | 3  | 53263377  | 53263377  | Missense_Mutation | SNP | G  | A  | 4  | 53  | c.1183C>T                           | c.(1183-1185)CGG>TGG | p.R395W  |
| Pat_24 | Post-Resistance | IL17RD    | 54756  | 37 | 3  | 57136608  | 57136608  | Missense_Mutation | SNP | G  | A  | 4  | 134 | c.878C>T                            | c.(877-879)CCG>CTG   | p.P293L  |
| Pat_24 | Post-Resistance | LRIG1     | 26018  | 37 | 3  | 66512898  | 66512898  | Missense_Mutation | SNP | G  | A  | 3  | 37  | c.254C>T                            | c.(253-255)CCT>CTT   | p.P85L   |
| Pat_24 | Post-Resistance | CNTN3     | 5067   | 37 | 3  | 74350624  | 74350624  | Missense_Mutation | SNP | G  | A  | 42 | 117 | c.2020C>T                           | c.(2020-2022)CGG>TGG | p.R674W  |
| Pat_24 | Post-Resistance | ROBO2     | 6092   | 37 | 3  | 77666773  | 77666773  | Nonsense_Mutation | SNP | C  | T  | 28 | 84  | c.3403C>T                           | c.(3403-3405)CGA>TGA | p.R1135* |
| Pat_24 | Post-Resistance | NIT2      | 56954  | 37 | 3  | 100074045 | 100074045 | Missense_Mutation | SNP | G  | A  | 3  | 54  | c.764G>A                            | c.(763-765)CGC>CAC   | p.R255H  |
| Pat_24 | Post-Resistance | SLC9A10   | 285335 | 37 | 3  | 111950227 | 111950227 | Missense_Mutation | SNP | C  | T  | 3  | 48  | c.1553G>A                           | c.(1552-1554)CGT>CAT | p.R518H  |
| Pat_24 | Post-Resistance | DRD3      | 1814   | 37 | 3  | 113866354 | 113866354 | Missense_Mutation | SNP | C  | T  | 27 | 125 | c.434G>A                            | c.(433-435)AGC>AAC   | p.S145N  |
| Pat_24 | Post-Resistance | DRD3      | 1814   | 37 | 3  | 113890700 | 113890700 | Missense_Mutation | SNP | T  | C  | 25 | 111 | c.140A>G                            | c.(139-141)AAT>AGT   | p.N47S   |



|        |                 |          |        |    |   |           |           |                   |     |   |   |    |     |               |                      |               |
|--------|-----------------|----------|--------|----|---|-----------|-----------|-------------------|-----|---|---|----|-----|---------------|----------------------|---------------|
| Pat_24 | Post-Resistance | ADPRH    | 141    | 37 | 3 | 119306475 | 119306475 | Missense_Mutation | SNP | C | T | 20 | 68  | c.824C>T      | c.(823-825)CCC>CTC   | p.P275L       |
| Pat_24 | Post-Resistance | FBXO40   | 51725  | 37 | 3 | 121340508 | 121340508 | Missense_Mutation | SNP | C | T | 37 | 115 | c.232C>T      | c.(232-234)CGC>TGC   | p.R78C        |
| Pat_24 | Post-Resistance | FBXO40   | 51725  | 37 | 3 | 121340844 | 121340844 | Missense_Mutation | SNP | G | A | 8  | 57  | c.568G>A      | c.(568-570)GGG>AGG   | p.G190R       |
| Pat_24 | Post-Resistance | ADCY5    | 111    | 37 | 3 | 123036955 | 123036955 | Nonsense_Mutation | SNP | G | A | 4  | 66  | c.2266C>T     | c.(2266-2268)CAG>TAG | p.Q756*       |
| Pat_24 | Post-Resistance | ALDH1L1  | 10840  | 37 | 3 | 125831722 | 125831722 | Missense_Mutation | SNP | C | T | 9  | 29  | c.2084G>A     | c.(2083-2085)GGG>GAG | p.G695E       |
| Pat_24 | Post-Resistance | TRPC1    | 7220   | 37 | 3 | 142523009 | 142523009 | Nonsense_Mutation | SNP | C | T | 9  | 65  | c.1948C>T     | c.(1948-1950)CAG>TAG | p.Q650*       |
| Pat_24 | Post-Resistance | PLSCR4   | 57088  | 37 | 3 | 145913071 | 145913071 | Splice_Site       | SNP | T | C | 7  | 297 | c.787_splice  | c.e8-1               | p.V263_splice |
| Pat_24 | Post-Resistance | CP       | 1356   | 37 | 3 | 148924003 | 148924003 | Missense_Mutation | SNP | G | A | 21 | 91  | c.1160C>T     | c.(1159-1161)CCC>CTC | p.P387L       |
| Pat_24 | Post-Resistance | MED12L   | 116931 | 37 | 3 | 151085950 | 151085950 | Missense_Mutation | SNP | C | T | 4  | 117 | c.3356C>T     | c.(3355-3357)GCG>GTG | p.A1119V      |
| Pat_24 | Post-Resistance | GPR149   | 344758 | 37 | 3 | 154055985 | 154055985 | Missense_Mutation | SNP | T | C | 53 | 196 | c.1699A>G     | c.(1699-1701)ACC>GCC | p.T567A       |
| Pat_24 | Post-Resistance | GOLIM4   | 27333  | 37 | 3 | 167747592 | 167747592 | Missense_Mutation | SNP | C | T | 4  | 102 | c.1409G>A     | c.(1408-1410)CGG>CAG | p.R470Q       |
| Pat_24 | Post-Resistance | SAMD7    | 344658 | 37 | 3 | 169654162 | 169654162 | Missense_Mutation | SNP | G | T | 4  | 107 | c.1077G>T     | c.(1075-1077)TTG>TTT | p.L359F       |
| Pat_24 | Post-Resistance | FNDC3B   | 64778  | 37 | 3 | 172061890 | 172061890 | Missense_Mutation | SNP | G | C | 5  | 263 | c.2092G>C     | c.(2092-2094)GAA>CAA | p.E698Q       |
| Pat_24 | Post-Resistance | SPATA16  | 83893  | 37 | 3 | 172737325 | 172737325 | Missense_Mutation | SNP | G | A | 63 | 271 | c.799C>T      | c.(799-801)CGT>TGT   | p.R267C       |
| Pat_24 | Post-Resistance | NLGN1    | 22871  | 37 | 3 | 173993297 | 173993297 | Missense_Mutation | SNP | G | A | 4  | 71  | c.839G>A      | c.(838-840)CGT>CAT   | p.R280H       |
| Pat_24 | Post-Resistance | PIK3CA   | 5290   | 37 | 3 | 178936092 | 178936092 | Missense_Mutation | SNP | A | G | 4  | 64  | c.1634A>G     | c.(1633-1635)GAG>GGG | p.E545G       |
| Pat_24 | Post-Resistance | USP13    | 8975   | 37 | 3 | 179481925 | 179481925 | Missense_Mutation | SNP | G | A | 6  | 205 | c.2228G>A     | c.(2227-2229)CGA>CAA | p.R743Q       |
| Pat_24 | Post-Resistance | MCF2L2   | 23101  | 37 | 3 | 183017985 | 183017985 | Splice_Site       | SNP | C | T | 8  | 27  | c.1114_splice | c.e11-1              | p.E372_splice |
| Pat_24 | Post-Resistance | ECE2     | 9718   | 37 | 3 | 184005689 | 184005689 | Missense_Mutation | SNP | G | A | 22 | 61  | c.1682G>A     | c.(1681-1683)GGG>GAG | p.G561E       |
| Pat_24 | Post-Resistance | DGKG     | 1608   | 37 | 3 | 186006513 | 186006513 | Missense_Mutation | SNP | T | C | 3  | 163 | c.530A>G      | c.(529-531)CAG>CGG   | p.Q177R       |
| Pat_24 | Post-Resistance | MUC4     | 4585   | 37 | 3 | 195515146 | 195515146 | Missense_Mutation | SNP | G | A | 2  | 3   | c.3305C>T     | c.(3304-3306)GCC>GTC | p.A1102V      |
| Pat_24 | Post-Resistance | GAK      | 2580   | 37 | 4 | 876496    | 876496    | Missense_Mutation | SNP | C | T | 4  | 128 | c.1516G>A     | c.(1516-1518)GTG>ATG | p.V506M       |
| Pat_24 | Post-Resistance | CRMP1    | 1400   | 37 | 4 | 5851178   | 5851178   | Missense_Mutation | SNP | G | A | 3  | 30  | c.562C>T      | c.(562-564)CTT>TTT   | p.L188F       |
| Pat_24 | Post-Resistance | KLF3     | 51274  | 37 | 4 | 38698711  | 38698711  | Missense_Mutation | SNP | C | T | 16 | 43  | c.865C>T      | c.(865-867)CCC>TCC   | p.P289S       |
| Pat_24 | Post-Resistance | CHRNA9   | 55584  | 37 | 4 | 40339314  | 40339314  | Missense_Mutation | SNP | G | A | 23 | 48  | c.298G>A      | c.(298-300)GAT>AAT   | p.D100N       |
| Pat_24 | Post-Resistance | UCHL1    | 7345   | 37 | 4 | 41262778  | 41262778  | Missense_Mutation | SNP | C | T | 83 | 162 | c.289C>T      | c.(289-291)CAC>TAC   | p.H97Y        |
| Pat_24 | Post-Resistance | CORIN    | 10699  | 37 | 4 | 47644003  | 47644003  | Missense_Mutation | SNP | T | C | 15 | 159 | c.2132A>G     | c.(2131-2133)CAC>CGC | p.H711R       |
| Pat_24 | Post-Resistance | KIT      | 3815   | 37 | 4 | 55604659  | 55604659  | Missense_Mutation | SNP | G | A | 4  | 130 | c.2867G>A     | c.(2866-2868)CGG>CAG | p.R956Q       |
| Pat_24 | Post-Resistance | UGT2B4   | 7363   | 37 | 4 | 70355286  | 70355286  | Missense_Mutation | SNP | T | A | 26 | 75  | c.873A>T      | c.(871-873)GAA>GAT   | p.E291D       |
| Pat_24 | Post-Resistance | ALB      | 213    | 37 | 4 | 74280825  | 74280825  | Missense_Mutation | SNP | G | A | 47 | 160 | c.1132G>A     | c.(1132-1134)GAA>AAA | p.E378K       |
| Pat_24 | Post-Resistance | RASSF6   | 166824 | 37 | 4 | 74459282  | 74459282  | Missense_Mutation | SNP | C | T | 20 | 122 | c.269G>A      | c.(268-270)GGA>GAA   | p.G90E        |
| Pat_24 | Post-Resistance | PF4      | 5196   | 37 | 4 | 74847200  | 74847200  | Missense_Mutation | SNP | C | T | 4  | 108 | c.152G>A      | c.(151-153)CGT>CAT   | p.R51H        |
| Pat_24 | Post-Resistance | CXCL9    | 4283   | 37 | 4 | 76925960  | 76925960  | Splice_Site       | SNP | A | G | 30 | 75  | c.276_splice  | c.e3+1               | p.Q92_splice  |
| Pat_24 | Post-Resistance | GPRIN3   | 285513 | 37 | 4 | 90170964  | 90170964  | Missense_Mutation | SNP | G | A | 45 | 170 | c.298C>T      | c.(298-300)CCC>TCC   | p.P100S       |
| Pat_24 | Post-Resistance | MMRN1    | 22915  | 37 | 4 | 90857395  | 90857395  | Missense_Mutation | SNP | C | T | 4  | 5   | c.2564C>T     | c.(2563-2565)TCC>TTC | p.S855F       |
| Pat_24 | Post-Resistance | SMARCAD1 | 56916  | 37 | 4 | 95155158  | 95155158  | Missense_Mutation | SNP | G | A | 4  | 65  | c.422G>A      | c.(421-423)AGA>AAA   | p.R141K       |
| Pat_24 | Post-Resistance | TET2     | 54790  | 37 | 4 | 106157378 | 106157378 | Missense_Mutation | SNP | T | A | 16 | 48  | c.2279T>A     | c.(2278-2280)TTT>TAT | p.F760Y       |
| Pat_24 | Post-Resistance | HADH     | 3033   | 37 | 4 | 108940781 | 108940781 | Missense_Mutation | SNP | C | T | 71 | 362 | c.505C>T      | c.(505-507)CTC>TTC   | p.L169F       |
| Pat_24 | Post-Resistance | NDST4    | 64579  | 37 | 4 | 115767146 | 115767146 | Missense_Mutation | SNP | C | T | 18 | 44  | c.1948G>A     | c.(1948-1950)GAC>AAC | p.D650N       |
| Pat_24 | Post-Resistance | USP53    | 54532  | 37 | 4 | 120161041 | 120161041 | Missense_Mutation | SNP | C | T | 6  | 22  | c.127C>T      | c.(127-129)CTT>TTT   | p.L43F        |
| Pat_24 | Post-Resistance | TRPC3    | 7222   | 37 | 4 | 122800914 | 122800914 | Missense_Mutation | SNP | G | A | 30 | 111 | c.2743C>T     | c.(2743-2745)CCC>TCC | p.P915S       |
| Pat_24 | Post-Resistance | SFRP2    | 6423   | 37 | 4 | 154702662 | 154702662 | Missense_Mutation | SNP | G | T | 4  | 170 | c.829C>A      | c.(829-831)CAG>AAG   | p.Q277K       |
| Pat_24 | Post-Resistance | PLRG1    | 5356   | 37 | 4 | 155461792 | 155461792 | Missense_Mutation | SNP | G | A | 6  | 325 | c.893C>T      | c.(892-894)CCG>CTG   | p.P298L       |
| Pat_24 | Post-Resistance | GLRB     | 2743   | 37 | 4 | 158091737 | 158091737 | Missense_Mutation | SNP | T | A | 5  | 58  | c.1351T>A     | c.(1351-1353)TCT>ACT | p.S451T       |
| Pat_24 | Post-Resistance | RAPGEF2  | 9693   | 37 | 4 | 160274944 | 160274944 | Missense_Mutation | SNP | C | A | 4  | 153 | c.3914C>A     | c.(3913-3915)ACA>AAA | p.T1305K      |
| Pat_24 | Post-Resistance | TLL1     | 7092   | 37 | 4 | 166915607 | 166915607 | Missense_Mutation | SNP | C | T | 11 | 16  | c.436C>T      | c.(436-438)CCC>TCC   | p.P146S       |
| Pat_24 | Post-Resistance | ACSL1    | 2180   | 37 | 4 | 185681510 | 185681510 | Splice_Site       | SNP | C | T | 6  | 357 | c.1782_splice | c.e18+1              | p.Q594_splice |

|        |                 |          |        |    |   |           |           |                   |     |   |   |     |     |               |                      |                |
|--------|-----------------|----------|--------|----|---|-----------|-----------|-------------------|-----|---|---|-----|-----|---------------|----------------------|----------------|
| Pat_24 | Post-Resistance | MTNR1A   | 4543   | 37 | 4 | 187455657 | 187455657 | Missense_Mutation | SNP | G | A | 18  | 85  | c.239C>T      | c.(238-240)CCG>CTG   | p.P80L         |
| Pat_24 | Post-Resistance | ADAMTS16 | 170690 | 37 | 5 | 5190109   | 5190109   | Missense_Mutation | SNP | C | A | 4   | 188 | c.1073C>A     | c.(1072-1074)GCA>GAA | p.A358E        |
| Pat_24 | Post-Resistance | CTNND2   | 1501   | 37 | 5 | 10981933  | 10981933  | Missense_Mutation | SNP | C | A | 24  | 79  | c.3369G>T     | c.(3367-3369)TTG>TTT | p.L1123F       |
| Pat_24 | Post-Resistance | CTNND2   | 1501   | 37 | 5 | 11397234  | 11397234  | Missense_Mutation | SNP | C | A | 61  | 56  | c.521G>T      | c.(520-522)AGC>ATC   | p.S174I        |
| Pat_24 | Post-Resistance | CDH12    | 1010   | 37 | 5 | 21854857  | 21854857  | Missense_Mutation | SNP | G | A | 4   | 135 | c.569C>T      | c.(568-570)CCG>CTG   | p.P190L        |
| Pat_24 | Post-Resistance | PRDM9    | 56979  | 37 | 5 | 23509657  | 23509657  | Missense_Mutation | SNP | C | T | 40  | 105 | c.148C>T      | c.(148-150)CGC>TGC   | p.R50C         |
| Pat_24 | Post-Resistance | PDZD2    | 23037  | 37 | 5 | 31983706  | 31983706  | Missense_Mutation | SNP | C | T | 6   | 430 | c.922C>T      | c.(922-924)CGC>TGC   | p.R308C        |
| Pat_24 | Post-Resistance | SPEF2    | 79925  | 37 | 5 | 35792486  | 35792486  | Missense_Mutation | SNP | G | A | 77  | 139 | c.4492G>A     | c.(4492-4494)GTG>ATG | p.V1498M       |
| Pat_24 | Post-Resistance | NIPBL    | 25836  | 37 | 5 | 37022189  | 37022189  | Nonsense_Mutation | SNP | C | T | 4   | 152 | c.5365C>T     | c.(5365-5367)CGA>TGA | p.R1789*       |
| Pat_24 | Post-Resistance | NUP155   | 9631   | 37 | 5 | 37303483  | 37303483  | Nonsense_Mutation | SNP | G | A | 3   | 51  | c.3196C>T     | c.(3196-3198)CGA>TGA | p.R1066*       |
| Pat_24 | Post-Resistance | MGC42105 | 167359 | 37 | 5 | 43280506  | 43280506  | Missense_Mutation | SNP | C | A | 4   | 174 | c.986C>A      | c.(985-987)CCA>CAA   | p.P329Q        |
| Pat_24 | Post-Resistance | NNT      | 23530  | 37 | 5 | 43649294  | 43649294  | Missense_Mutation | SNP | C | T | 99  | 450 | c.1490C>T     | c.(1489-1491)GCC>GTC | p.A497V        |
| Pat_24 | Post-Resistance | ANKRD55  | 79722  | 37 | 5 | 55407572  | 55407572  | Missense_Mutation | SNP | G | A | 47  | 110 | c.1003C>T     | c.(1003-1005)CGG>TGG | p.R335W        |
| Pat_24 | Post-Resistance | DIMT1L   | 27292  | 37 | 5 | 61686727  | 61686727  | Missense_Mutation | SNP | G | A | 80  | 326 | c.875C>T      | c.(874-876)TCC>TTC   | p.S292F        |
| Pat_24 | Post-Resistance | JMY      | 133746 | 37 | 5 | 78586025  | 78586025  | Missense_Mutation | SNP | C | T | 16  | 72  | c.1288C>T     | c.(1288-1290)CAC>TAC | p.H430Y        |
| Pat_24 | Post-Resistance | EFNA5    | 1946   | 37 | 5 | 106722984 | 106722984 | Missense_Mutation | SNP | G | A | 4   | 56  | c.517C>T      | c.(517-519)CGT>TGT   | p.R173C        |
| Pat_24 | Post-Resistance | HSD17B4  | 3295   | 37 | 5 | 118829594 | 118829594 | Missense_Mutation | SNP | A | G | 30  | 59  | c.821A>G      | c.(820-822)AAG>AGG   | p.K274R        |
| Pat_24 | Post-Resistance | SLC22A5  | 6584   | 37 | 5 | 131726524 | 131726524 | Missense_Mutation | SNP | C | T | 4   | 165 | c.1195C>T     | c.(1195-1197)CGG>TGG | p.R399W        |
| Pat_24 | Post-Resistance | BRD8     | 10902  | 37 | 5 | 137500435 | 137500435 | Missense_Mutation | SNP | C | T | 4   | 167 | c.1699G>A     | c.(1699-1701)GAT>AAT | p.D567N        |
| Pat_24 | Post-Resistance | FAM53C   | 51307  | 37 | 5 | 137682559 | 137682559 | Missense_Mutation | SNP | G | A | 4   | 73  | c.1090G>A     | c.(1090-1092)GTG>ATG | p.V364M        |
| Pat_24 | Post-Resistance | PCDHA1   | 56147  | 37 | 5 | 140167736 | 140167736 | Missense_Mutation | SNP | C | T | 75  | 260 | c.1861C>T     | c.(1861-1863)CCG>TCG | p.P621S        |
| Pat_24 | Post-Resistance | PCDHA3   | 56145  | 37 | 5 | 140182649 | 140182649 | Missense_Mutation | SNP | C | T | 39  | 172 | c.1867C>T     | c.(1867-1869)CGC>TGC | p.R623C        |
| Pat_24 | Post-Resistance | PCDHA10  | 56139  | 37 | 5 | 140236862 | 140236862 | Missense_Mutation | SNP | G | A | 76  | 406 | c.1229G>A     | c.(1228-1230)AGC>AAC | p.S410N        |
| Pat_24 | Post-Resistance | PCDHB1   | 29930  | 37 | 5 | 140431953 | 140431953 | Missense_Mutation | SNP | G | A | 8   | 20  | c.898G>A      | c.(898-900)GAA>AAA   | p.E300K        |
| Pat_24 | Post-Resistance | PCDHB3   | 56132  | 37 | 5 | 140481797 | 140481797 | Missense_Mutation | SNP | G | A | 18  | 54  | c.1564G>A     | c.(1564-1566)GAG>AAG | p.E522K        |
| Pat_24 | Post-Resistance | PCDHB16  | 57717  | 37 | 5 | 140562543 | 140562543 | Missense_Mutation | SNP | G | A | 15  | 27  | c.409G>A      | c.(409-411)GAA>AAA   | p.E137K        |
| Pat_24 | Post-Resistance | PCDHB11  | 56125  | 37 | 5 | 140581443 | 140581443 | Missense_Mutation | SNP | C | T | 34  | 153 | c.2096C>T     | c.(2095-2097)TCG>TTG | p.S699L        |
| Pat_24 | Post-Resistance | PCDH12   | 51294  | 37 | 5 | 141334938 | 141334938 | Missense_Mutation | SNP | G | A | 4   | 127 | c.2479C>T     | c.(2479-2481)CGT>TGT | p.R827C        |
| Pat_24 | Post-Resistance | SH3RF2   | 153769 | 37 | 5 | 145435672 | 145435672 | Missense_Mutation | SNP | C | T | 39  | 147 | c.1451C>T     | c.(1450-1452)TCC>TTC | p.S484F        |
| Pat_24 | Post-Resistance | ODZ2     | 57451  | 37 | 5 | 167631391 | 167631391 | Missense_Mutation | SNP | G | A | 14  | 61  | c.3562G>A     | c.(3562-3564)GGC>AGC | p.G1188S       |
| Pat_24 | Post-Resistance | GPRIN1   | 114787 | 37 | 5 | 176024702 | 176024702 | Missense_Mutation | SNP | G | A | 11  | 30  | c.2134C>T     | c.(2134-2136)CCC>TCC | p.P712S        |
| Pat_24 | Post-Resistance | FAM193B  | 54540  | 37 | 5 | 176952013 | 176952013 | Missense_Mutation | SNP | A | G | 6   | 149 | c.1370T>C     | c.(1369-1371)TTC>TCC | p.F457S        |
| Pat_24 | Post-Resistance | HNRNPAB  | 3182   | 37 | 5 | 177636332 | 177636332 | Missense_Mutation | SNP | G | A | 8   | 347 | c.671G>A      | c.(670-672)TGT>TAT   | p.C224Y        |
| Pat_24 | Post-Resistance | HNRNPH1  | 3187   | 37 | 5 | 179043960 | 179043960 | Splice_Site       | SNP | C | G | 4   | 65  | c.1118_splice | c.e11-1              | p.E373_splice  |
| Pat_24 | Post-Resistance | HIVEP1   | 3096   | 37 | 6 | 12121323  | 12121323  | Missense_Mutation | SNP | G | A | 4   | 108 | c.1295G>A     | c.(1294-1296)CGA>CAA | p.R432Q        |
| Pat_24 | Post-Resistance | BTN1A1   | 696    | 37 | 6 | 26509113  | 26509113  | Missense_Mutation | SNP | G | A | 24  | 33  | c.1292G>A     | c.(1291-1293)GGA>GAA | p.G431E        |
| Pat_24 | Post-Resistance | GABBR1   | 2550   | 37 | 6 | 29589056  | 29589056  | Missense_Mutation | SNP | C | T | 4   | 128 | c.1145G>A     | c.(1144-1146)CGT>CAT | p.R382H        |
| Pat_24 | Post-Resistance | TRIM15   | 89870  | 37 | 6 | 30131474  | 30131474  | Missense_Mutation | SNP | C | T | 28  | 80  | c.13C>T       | c.(13-15)CCG>TCG     | p.P5S          |
| Pat_24 | Post-Resistance | LTB      | 4050   | 37 | 6 | 31550145  | 31550145  | Missense_Mutation | SNP | C | T | 28  | 74  | c.50G>A       | c.(49-51)GGT>GAT     | p.G17D         |
| Pat_24 | Post-Resistance | C4A      | 720    | 37 | 6 | 31997489  | 31997489  | Missense_Mutation | SNP | C | T | 4   | 52  | c.3823C>T     | c.(3823-3825)CAC>TAC | p.H1275Y       |
| Pat_24 | Post-Resistance | COL11A2  | 1302   | 37 | 6 | 33137639  | 33137639  | Missense_Mutation | SNP | G | A | 4   | 176 | c.3659C>T     | c.(3658-3660)JCT>TTT | p.S1220F       |
| Pat_24 | Post-Resistance | SLC39A7  | 7922   | 37 | 6 | 33169579  | 33169579  | Missense_Mutation | SNP | C | T | 4   | 132 | c.469C>T      | c.(469-471)CCC>TCC   | p.P157S        |
| Pat_24 | Post-Resistance | IP6K3    | 117283 | 37 | 6 | 33690697  | 33690697  | Missense_Mutation | SNP | G | A | 23  | 139 | c.1033C>T     | c.(1033-1035)CCT>TCT | p.P345S        |
| Pat_24 | Post-Resistance | CPNE5    | 57699  | 37 | 6 | 36716016  | 36716016  | Missense_Mutation | SNP | C | T | 151 | 316 | c.1000G>A     | c.(1000-1002)GAT>AAT | p.D334N        |
| Pat_24 | Post-Resistance | DNAH8    | 1769   | 37 | 6 | 38867551  | 38867551  | Splice_Site       | SNP | G | A | 25  | 56  | c.8413_splice | c.e60-1              | p.I2805_splice |
| Pat_24 | Post-Resistance | TFEB     | 7942   | 37 | 6 | 41652383  | 41652383  | Missense_Mutation | SNP | C | T | 4   | 174 | c.1385G>A     | c.(1384-1386)AGC>AAC | p.S462N        |
| Pat_24 | Post-Resistance | SLC35B2  | 347734 | 37 | 6 | 44222697  | 44222697  | Missense_Mutation | SNP | C | T | 6   | 133 | c.1045G>A     | c.(1045-1047)GCA>ACA | p.A349T        |

|        |                 |           |        |    |   |           |           |                   |     |    |    |     |     |                |                        |               |
|--------|-----------------|-----------|--------|----|---|-----------|-----------|-------------------|-----|----|----|-----|-----|----------------|------------------------|---------------|
| Pat_24 | Post-Resistance | TCTE1     | 202500 | 37 | 6 | 44250280  | 44250280  | Missense_Mutation | SNP | C  | T  | 65  | 117 | c.863G>A       | c.(862-864)CGA>CAA     | p.R288Q       |
| Pat_24 | Post-Resistance | TINAG     | 27283  | 37 | 6 | 54254619  | 54254619  | Missense_Mutation | SNP | G  | A  | 37  | 208 | c.1327G>A      | c.(1327-1329)GGA>AGA   | p.G443R       |
| Pat_24 | Post-Resistance | FAM83B    | 222584 | 37 | 6 | 54735052  | 54735052  | Missense_Mutation | SNP | C  | T  | 47  | 150 | c.8C>T         | c.(7-9)ACC>ATC         | p.T31         |
| Pat_24 | Post-Resistance | FAM83B    | 222584 | 37 | 6 | 54804664  | 54804664  | Missense_Mutation | SNP | G  | T  | 24  | 121 | c.895G>T       | c.(895-897)GCC>TCC     | p.A299S       |
| Pat_24 | Post-Resistance | FAM83B    | 222584 | 37 | 6 | 54806252  | 54806252  | Missense_Mutation | SNP | C  | T  | 6   | 33  | c.2483C>T      | c.(2482-2484)CCT>CTT   | p.P828L       |
| Pat_24 | Post-Resistance | ZNF451    | 26036  | 37 | 6 | 56999546  | 56999546  | Missense_Mutation | SNP | G  | A  | 4   | 118 | c.580G>A       | c.(580-582)GAT>AAT     | p.D194N       |
| Pat_24 | Post-Resistance | KCNQ5     | 56479  | 37 | 6 | 73904174  | 73904174  | Splice_Site       | SNP | G  | A  | 17  | 56  | c.1837_splice  | c.e14-1                | p.V613_splice |
| Pat_24 | Post-Resistance | MTO1      | 25821  | 37 | 6 | 74210376  | 74210376  | Missense_Mutation | SNP | G  | A  | 4   | 186 | c.2072G>A      | c.(2071-2073)CGA>CAA   | p.R691Q       |
| Pat_24 | Post-Resistance | COL12A1   | 1303   | 37 | 6 | 75875427  | 75875427  | Missense_Mutation | SNP | A  | C  | 80  | 170 | c.2779T>G      | c.(2779-2781)TCT>GCT   | p.S927A       |
| Pat_24 | Post-Resistance | IMPG1     | 3617   | 37 | 6 | 76660307  | 76660307  | Missense_Mutation | SNP | C  | T  | 11  | 29  | c.1796G>A      | c.(1795-1797)CGA>CAA   | p.R599Q       |
| Pat_24 | Post-Resistance | TPBG      | 7162   | 37 | 6 | 83074982  | 83074982  | Missense_Mutation | SNP | C  | A  | 4   | 76  | c.304C>A       | c.(304-306)CAG>AAG     | p.Q102K       |
| Pat_24 | Post-Resistance | PRSS35    | 167681 | 37 | 6 | 84233702  | 84233702  | Missense_Mutation | SNP | G  | A  | 5   | 105 | c.542G>A       | c.(541-543)AGT>AAT     | p.S181N       |
| Pat_24 | Post-Resistance | NT5E      | 4907   | 37 | 6 | 86159912  | 86159912  | Missense_Mutation | SNP | G  | A  | 3   | 20  | c.55G>A        | c.(55-57)GTG>ATG       | p.V19M        |
| Pat_24 | Post-Resistance | RFX6      | 222546 | 37 | 6 | 117240317 | 117240317 | Missense_Mutation | SNP | G  | A  | 4   | 38  | c.1040G>A      | c.(1039-1041)AGA>AAA   | p.R347K       |
| Pat_24 | Post-Resistance | SERINC1   | 57515  | 37 | 6 | 122768144 | 122768144 | Missense_Mutation | SNP | C  | T  | 3   | 32  | c.1001G>A      | c.(1000-1002)CGT>CAT   | p.R334H       |
| Pat_24 | Post-Resistance | TPD52L1   | 7164   | 37 | 6 | 125583992 | 125583992 | Missense_Mutation | SNP | G  | A  | 4   | 138 | c.499G>A       | c.(499-501)GGT>AGT     | p.G167S       |
| Pat_24 | Post-Resistance | SLC2A12   | 154091 | 37 | 6 | 134350082 | 134350082 | Missense_Mutation | SNP | T  | C  | 5   | 104 | c.881A>G       | c.(880-882)CAA>CGA     | p.Q294R       |
| Pat_24 | Post-Resistance | AKAP12    | 9590   | 37 | 6 | 151674214 | 151674214 | Missense_Mutation | SNP | G  | A  | 4   | 123 | c.4688G>A      | c.(4687-4689)CGT>CAT   | p.R1563H      |
| Pat_24 | Post-Resistance | SYNE1     | 23345  | 37 | 6 | 152651941 | 152651941 | Nonsense_Mutation | SNP | G  | A  | 4   | 193 | c.13879C>T     | c.(13879-13881)CAG>TAG | p.Q4627*      |
| Pat_24 | Post-Resistance | FNDC1     | 84624  | 37 | 6 | 159644568 | 159644568 | Missense_Mutation | SNP | G  | A  | 8   | 14  | c.775G>A       | c.(775-777)GAA>AAA     | p.E259K       |
| Pat_24 | Post-Resistance | LPA       | 4018   | 37 | 6 | 160961211 | 160961211 | Missense_Mutation | SNP | A  | G  | 3   | 56  | c.5599T>C      | c.(5599-5601)TCA>CCA   | p.S1867P      |
| Pat_24 | Post-Resistance | MLLT4     | 4301   | 37 | 6 | 168352709 | 168352709 | Missense_Mutation | SNP | G  | A  | 3   | 33  | c.4651G>A      | c.(4651-4653)GAG>AAG   | p.E1551K      |
| Pat_24 | Post-Resistance | WDR27     | 253769 | 37 | 6 | 170059581 | 170059581 | Missense_Mutation | SNP | G  | A  | 3   | 21  | c.1163C>T      | c.(1162-1164)TCG>TTG   | p.S388L       |
| Pat_24 | Post-Resistance | INTS1     | 26173  | 37 | 7 | 1524973   | 1524973   | Missense_Mutation | SNP | G  | A  | 6   | 268 | c.3109C>T      | c.(3109-3111)CCT>TCT   | p.P1037S      |
| Pat_24 | Post-Resistance | FSCN1     | 6624   | 37 | 7 | 5643541   | 5643541   | Missense_Mutation | SNP | G  | A  | 30  | 122 | c.1159G>A      | c.(1159-1161)GTG>ATG   | p.V387M       |
| Pat_24 | Post-Resistance | ABCB5     | 340273 | 37 | 7 | 20738102  | 20738102  | Missense_Mutation | SNP | G  | A  | 21  | 16  | c.748G>A       | c.(748-750)GGG>AGG     | p.G250R       |
| Pat_24 | Post-Resistance | DNAH11    | 8701   | 37 | 7 | 21600746  | 21600746  | Missense_Mutation | SNP | T  | C  | 6   | 23  | c.940T>C       | c.(940-942)TAT>CAT     | p.Y314H       |
| Pat_24 | Post-Resistance | STK31     | 56164  | 37 | 7 | 23794043  | 23794043  | Missense_Mutation | SNP | T  | C  | 149 | 160 | c.1243T>C      | c.(1243-1245)TGG>CGG   | p.W415R       |
| Pat_24 | Post-Resistance | GARS      | 2617   | 37 | 7 | 30651795  | 30651795  | Missense_Mutation | SNP | C  | T  | 4   | 91  | c.965C>T       | c.(964-966)GCT>GTT     | p.A322V       |
| Pat_24 | Post-Resistance | KIAA0895  | 23366  | 37 | 7 | 36396726  | 36396726  | Nonsense_Mutation | SNP | T  | A  | 17  | 84  | c.652A>T       | c.(652-654)AAG>TAG     | p.K218*       |
| Pat_24 | Post-Resistance | UBE2D4    | 51619  | 37 | 7 | 43982601  | 43982601  | Missense_Mutation | SNP | C  | T  | 82  | 114 | c.169C>T       | c.(169-171)CCT>TCT     | p.P57S        |
| Pat_24 | Post-Resistance | 14-Sep    | 346288 | 37 | 7 | 55886880  | 55886880  | Missense_Mutation | SNP | C  | T  | 4   | 14  | c.757G>A       | c.(757-759)GAA>AAA     | p.E253K       |
| Pat_24 | Post-Resistance | ZNF479    | 90827  | 37 | 7 | 57187809  | 57187809  | Missense_Mutation | SNP | T  | G  | 16  | 109 | c.1313A>C      | c.(1312-1314)AAA>ACA   | p.K438T       |
| Pat_24 | Post-Resistance | ZNF117    | 51351  | 37 | 7 | 64439050  | 64439050  | Missense_Mutation | SNP | C  | G  | 4   | 202 | c.899G>C       | c.(898-900)AGT>ACT     | p.S300T       |
| Pat_24 | Post-Resistance | WBSCR17   | 64409  | 37 | 7 | 71130513  | 71130513  | Missense_Mutation | SNP | C  | T  | 88  | 64  | c.1198C>T      | c.(1198-1200)CGC>TGC   | p.R400C       |
| Pat_24 | Post-Resistance | GTF2IRD1  | 9569   | 37 | 7 | 73933956  | 73933956  | Missense_Mutation | SNP | C  | T  | 4   | 52  | c.823C>T       | c.(823-825)CCT>TCT     | p.P275S       |
| Pat_24 | Post-Resistance | PCLO      | 27445  | 37 | 7 | 82579646  | 82579646  | Nonsense_Mutation | SNP | G  | A  | 27  | 42  | c.10258C>T     | c.(10258-10260)CGA>TGA | p.R3420*      |
| Pat_24 | Post-Resistance | PCLO      | 27445  | 37 | 7 | 82784980  | 82784980  | Missense_Mutation | SNP | G  | A  | 13  | 22  | c.977C>T       | c.(976-978)CCT>CTT     | p.P326L       |
| Pat_24 | Post-Resistance | ASNS      | 440    | 37 | 7 | 97482657  | 97482657  | Missense_Mutation | SNP | G  | A  | 29  | 72  | c.1280C>T      | c.(1279-1281)TCC>TTC   | p.S427F       |
| Pat_24 | Post-Resistance | LAMB4     | 22798  | 37 | 7 | 107706339 | 107706339 | Missense_Mutation | SNP | G  | A  | 17  | 249 | c.2704C>T      | c.(2704-2706)CCT>TCT   | p.P902S       |
| Pat_24 | Post-Resistance | CFTR      | 1080   | 37 | 7 | 117227866 | 117227866 | Missense_Mutation | SNP | G  | A  | 24  | 119 | c.1658G>A      | c.(1657-1659)CGA>CAA   | p.R553Q       |
| Pat_24 | Post-Resistance | PTPRZ1    | 5803   | 37 | 7 | 121652413 | 121652413 | Missense_Mutation | SNP | C  | T  | 12  | 61  | c.3313C>T      | c.(3313-3315)CAT>TAT   | p.H1105Y      |
| Pat_24 | Post-Resistance | ASB15     | 142685 | 37 | 7 | 123254602 | 123254602 | Missense_Mutation | SNP | G  | A  | 84  | 492 | c.46G>A        | c.(46-48)GAT>AAT       | p.D16N        |
| Pat_24 | Post-Resistance | LOC407835 | 407835 | 37 | 7 | 128766867 | 128766867 | Missense_Mutation | SNP | G  | A  | 17  | 17  | c.296G>A       | c.(295-297)AGG>AAG     | p.R99K        |
| Pat_24 | Post-Resistance | CALD1     | 800    | 37 | 7 | 134620439 | 134620439 | Missense_Mutation | SNP | G  | A  | 2   | 3   | c.1309G>A      | c.(1309-1311)GGA>AGA   | p.G437R       |
| Pat_24 | Post-Resistance | PARP12    | 64761  | 37 | 7 | 139757737 | 139757737 | Nonsense_Mutation | SNP | G  | A  | 30  | 182 | c.424C>T       | c.(424-426)CAA>TAA     | p.Q142*       |
| Pat_24 | Post-Resistance | BRAF      | 673    | 37 | 7 | 140453136 | 140453137 | Missense_Mutation | DNP | AC | TT | 51  | 75  | .1798_1799GT>A | c.(1798-1800)GTG>AAG   | p.V600K       |

|        |                 |          |        |    |   |           |           |                   |     |    |    |     |     |                |                      |          |
|--------|-----------------|----------|--------|----|---|-----------|-----------|-------------------|-----|----|----|-----|-----|----------------|----------------------|----------|
| Pat_24 | Post-Resistance | MGAM     | 8972   | 37 | 7 | 141731561 | 141731561 | Missense_Mutation | SNP | C  | T  | 19  | 220 | c.1552C>T      | c.(1552-1554)CAC>TAC | p.H518Y  |
| Pat_24 | Post-Resistance | SSPO     | 23145  | 37 | 7 | 149483200 | 149483200 | Missense_Mutation | SNP | G  | A  | 4   | 47  | c.3268G>A      | c.(3268-3270)GTG>ATG | p.V1090M |
| Pat_24 | Post-Resistance | TUSC3    | 7991   | 37 | 8 | 15519763  | 15519763  | Missense_Mutation | SNP | G  | T  | 34  | 212 | c.666G>T       | c.(664-666)TTG>TTT   | p.L222F  |
| Pat_24 | Post-Resistance | LGI3     | 203190 | 37 | 8 | 22006139  | 22006139  | Missense_Mutation | SNP | C  | T  | 4   | 124 | c.1181G>A      | c.(1180-1182)AGC>AAC | p.S394N  |
| Pat_24 | Post-Resistance | ADAM28   | 10863  | 37 | 8 | 24187570  | 24187570  | Missense_Mutation | SNP | C  | T  | 24  | 84  | c.1045C>T      | c.(1045-1047)CAT>TAT | p.H349Y  |
| Pat_24 | Post-Resistance | NEFM     | 4741   | 37 | 8 | 24775894  | 24775894  | Missense_Mutation | SNP | G  | T  | 6   | 17  | c.2526G>T      | c.(2524-2526)AAG>AAT | p.K842N  |
| Pat_24 | Post-Resistance | KCNU1    | 157855 | 37 | 8 | 36793199  | 36793199  | Missense_Mutation | SNP | G  | A  | 34  | 143 | c.3211G>A      | c.(3211-3213)GAC>AAC | p.D1071N |
| Pat_24 | Post-Resistance | LETM2    | 137994 | 37 | 8 | 38258458  | 38258458  | Missense_Mutation | SNP | C  | T  | 56  | 200 | c.730C>T       | c.(730-732)CGC>TGC   | p.R244C  |
| Pat_24 | Post-Resistance | IKBKB    | 3551   | 37 | 8 | 42175254  | 42175254  | Missense_Mutation | SNP | C  | T  | 8   | 66  | c.1205C>T      | c.(1204-1206)TCC>TTC | p.S402F  |
| Pat_24 | Post-Resistance | CHRNA6   | 8973   | 37 | 8 | 42611837  | 42611837  | Missense_Mutation | SNP | G  | A  | 8   | 70  | c.505C>T       | c.(505-507)CAT>TAT   | p.H169Y  |
| Pat_24 | Post-Resistance | NCOA2    | 10499  | 37 | 8 | 71037031  | 71037031  | Missense_Mutation | SNP | C  | T  | 4   | 173 | c.3986G>A      | c.(3985-3987)CGA>CAA | p.R1329Q |
| Pat_24 | Post-Resistance | OXR1     | 55074  | 37 | 8 | 107752610 | 107752610 | Missense_Mutation | SNP | T  | C  | 4   | 126 | c.2206T>C      | c.(2206-2208)TGG>CGG | p.W736R  |
| Pat_24 | Post-Resistance | SAMD12   | 401474 | 37 | 8 | 119391770 | 119391770 | Missense_Mutation | SNP | C  | T  | 11  | 81  | c.492G>A       | c.(490-492)ATG>ATA   | p.M164I  |
| Pat_24 | Post-Resistance | TAF2     | 6873   | 37 | 8 | 120814047 | 120814047 | Missense_Mutation | SNP | G  | A  | 19  | 99  | c.779C>T       | c.(778-780)CCA>CTA   | p.P260L  |
| Pat_24 | Post-Resistance | KCNQ3    | 3786   | 37 | 8 | 133142113 | 133142113 | Missense_Mutation | SNP | T  | G  | 100 | 213 | c.2015A>C      | c.(2014-2016)AAG>ACG | p.K672T  |
| Pat_24 | Post-Resistance | FAM135B  | 51059  | 37 | 8 | 139164716 | 139164716 | Missense_Mutation | SNP | C  | T  | 30  | 105 | c.2002G>A      | c.(2002-2004)GAA>AAA | p.E668K  |
| Pat_24 | Post-Resistance | CYP11B1  | 1584   | 37 | 8 | 143956699 | 143956699 | Missense_Mutation | SNP | C  | T  | 10  | 47  | c.1151G>A      | c.(1150-1152)CGA>CAA | p.R384Q  |
| Pat_24 | Post-Resistance | OPLAH    | 26873  | 37 | 8 | 145113718 | 145113718 | Missense_Mutation | SNP | C  | T  | 3   | 37  | c.545G>A       | c.(544-546)CGA>CAA   | p.R182Q  |
| Pat_24 | Post-Resistance | ADCK5    | 203054 | 37 | 8 | 145616368 | 145616368 | Missense_Mutation | SNP | T  | C  | 4   | 129 | c.578T>C       | c.(577-579)CTC>CCC   | p.L193P  |
| Pat_24 | Post-Resistance | APTX     | 54840  | 37 | 9 | 32989824  | 32989824  | Missense_Mutation | SNP | C  | A  | 4   | 96  | c.66G>T        | c.(64-66)TTG>TTT     | p.L22F   |
| Pat_24 | Post-Resistance | UBAP2    | 55833  | 37 | 9 | 33922757  | 33922757  | Missense_Mutation | SNP | G  | T  | 29  | 62  | c.3192C>A      | c.(3190-3192)TTC>TTA | p.F1064L |
| Pat_24 | Post-Resistance | RUSC2    | 9853   | 37 | 9 | 35561251  | 35561251  | Nonsense_Mutation | SNP | C  | T  | 4   | 100 | c.4423C>T      | c.(4423-4425)CGA>TGA | p.R1475* |
| Pat_24 | Post-Resistance | APBA1    | 320    | 37 | 9 | 72131401  | 72131402  | Missense_Mutation | DNP | GG | AA | 6   | 40  | c.725_726CC>TT | c.(724-726)TCC>TTT   | p.S242F  |
| Pat_24 | Post-Resistance | SMC5     | 23137  | 37 | 9 | 72893497  | 72893497  | Missense_Mutation | SNP | C  | T  | 24  | 21  | c.634C>T       | c.(634-636)CAC>TAC   | p.H212Y  |
| Pat_24 | Post-Resistance | TRPM6    | 140803 | 37 | 9 | 77435255  | 77435255  | Nonsense_Mutation | SNP | G  | A  | 28  | 63  | c.1099C>T      | c.(1099-1101)CAA>TAA | p.Q367*  |
| Pat_24 | Post-Resistance | HSD17B3  | 3293   | 37 | 9 | 99013756  | 99013756  | Missense_Mutation | SNP | C  | T  | 14  | 110 | c.397G>A       | c.(397-399)GGA>AGA   | p.G133R  |
| Pat_24 | Post-Resistance | NR4A3    | 8013   | 37 | 9 | 102595600 | 102595600 | Missense_Mutation | SNP | G  | A  | 4   | 82  | c.1118G>A      | c.(1117-1119)CGT>CAT | p.R373H  |
| Pat_24 | Post-Resistance | BAAT     | 570    | 37 | 9 | 104133665 | 104133665 | Missense_Mutation | SNP | G  | A  | 61  | 72  | c.22C>T        | c.(22-24)CCT>TCT     | p.P8S    |
| Pat_24 | Post-Resistance | ZNF462   | 58499  | 37 | 9 | 109686821 | 109686821 | Missense_Mutation | SNP | G  | A  | 5   | 81  | c.628G>A       | c.(628-630)GTA>ATA   | p.V210I  |
| Pat_24 | Post-Resistance | C9orf6   | 54942  | 37 | 9 | 111701857 | 111701857 | Missense_Mutation | SNP | T  | A  | 4   | 41  | c.437T>A       | c.(436-438)GTG>GAG   | p.V146E  |
| Pat_24 | Post-Resistance | C9orf6   | 54942  | 37 | 9 | 111701884 | 111701884 | Missense_Mutation | SNP | G  | A  | 4   | 51  | c.464G>A       | c.(463-465)AGC>AAC   | p.S155N  |
| Pat_24 | Post-Resistance | SVEP1    | 79987  | 37 | 9 | 113170069 | 113170069 | Missense_Mutation | SNP | G  | A  | 40  | 66  | c.7811C>T      | c.(7810-7812)TCC>TTC | p.S2604F |
| Pat_24 | Post-Resistance | KIAA0368 | 23392  | 37 | 9 | 114131428 | 114131428 | Missense_Mutation | SNP | C  | T  | 2   | 4   | c.5534G>A      | c.(5533-5535)CGG>CAG | p.R1845Q |
| Pat_24 | Post-Resistance | C9orf84  | 158401 | 37 | 9 | 114454492 | 114454492 | Nonsense_Mutation | SNP | C  | T  | 25  | 47  | c.3573G>A      | c.(3571-3573)TGG>TGA | p.W1191* |
| Pat_24 | Post-Resistance | AKNA     | 80709  | 37 | 9 | 117103936 | 117103936 | Missense_Mutation | SNP | G  | A  | 4   | 129 | c.3944C>T      | c.(3943-3945)GCG>GTG | p.A1315V |
| Pat_24 | Post-Resistance | TRIM32   | 22954  | 37 | 9 | 119461183 | 119461183 | Missense_Mutation | SNP | G  | A  | 4   | 171 | c.1162G>A      | c.(1162-1164)GCT>ACT | p.A388T  |
| Pat_24 | Post-Resistance | PTGS1    | 5742   | 37 | 9 | 125154705 | 125154705 | Missense_Mutation | SNP | C  | A  | 4   | 113 | c.1682C>A      | c.(1681-1683)GCC>GAC | p.A561D  |
| Pat_24 | Post-Resistance | OR1L3    | 26735  | 37 | 9 | 125438296 | 125438296 | Missense_Mutation | SNP | G  | A  | 28  | 25  | c.888G>A       | c.(886-888)ATG>ATA   | p.M296I  |
| Pat_24 | Post-Resistance | RC3H2    | 54542  | 37 | 9 | 125652627 | 125652627 | Missense_Mutation | SNP | C  | T  | 3   | 41  | c.547G>A       | c.(547-549)GCT>ACT   | p.A183T  |
| Pat_24 | Post-Resistance | PPP6C    | 5537   | 37 | 9 | 127912080 | 127912080 | Missense_Mutation | SNP | G  | A  | 38  | 47  | c.790C>T       | c.(790-792)CGT>TGT   | p.R264C  |
| Pat_24 | Post-Resistance | GAPVD1   | 26130  | 37 | 9 | 128083731 | 128083731 | Missense_Mutation | SNP | C  | T  | 24  | 37  | c.1622C>T      | c.(1621-1623)TCG>TTG | p.S541L  |
| Pat_24 | Post-Resistance | ABL1     | 25     | 37 | 9 | 133750433 | 133750433 | Missense_Mutation | SNP | G  | A  | 4   | 69  | c.1264G>A      | c.(1264-1266)GTC>ATC | p.V422I  |
| Pat_24 | Post-Resistance | TSC1     | 7248   | 37 | 9 | 135772721 | 135772721 | Missense_Mutation | SNP | T  | C  | 3   | 132 | c.2825A>G      | c.(2824-2826)CAG>CGG | p.Q942R  |
| Pat_24 | Post-Resistance | ZMYND19  | 116225 | 37 | 9 | 140477021 | 140477021 | Nonsense_Mutation | SNP | G  | A  | 4   | 177 | c.658C>T       | c.(658-660)CAG>TAG   | p.Q220*  |
| Pat_24 | Post-Resistance | CACNA1B  | 774    | 37 | 9 | 141010104 | 141010104 | Missense_Mutation | SNP | C  | T  | 14  | 32  | c.5750C>T      | c.(5749-5751)TCC>TTC | p.S1917F |
| Pat_24 | Post-Resistance | PLCXD1   | 55344  | 37 | X | 205453    | 205453    | Missense_Mutation | SNP | G  | A  | 7   | 371 | c.181G>A       | c.(181-183)GAG>AAG   | p.E61K   |
| Pat_24 | Post-Resistance | PLCXD1   | 55344  | 37 | X | 205496    | 205496    | Missense_Mutation | SNP | G  | A  | 8   | 216 | c.224G>A       | c.(223-225)TGC>TAC   | p.C75Y   |

|        |                 |          |        |    |    |           |           |                   |     |    |    |     |     |                |                        |          |
|--------|-----------------|----------|--------|----|----|-----------|-----------|-------------------|-----|----|----|-----|-----|----------------|------------------------|----------|
| Pat_24 | Post-Resistance | MXRA5    | 25878  | 37 | X  | 3228314   | 3228314   | Missense_Mutation | SNP | G  | A  | 30  | 38  | c.7930C>T      | c.(7930-7932)CAT>TAT   | p.H2644Y |
| Pat_24 | Post-Resistance | TLR7     | 51284  | 37 | X  | 12903670  | 12903670  | Missense_Mutation | SNP | C  | T  | 8   | 36  | c.43C>T        | c.(43-45)CTT>TTT       | p.L15F   |
| Pat_24 | Post-Resistance | ASB9     | 140462 | 37 | X  | 15268684  | 15268684  | Missense_Mutation | SNP | G  | A  | 4   | 64  | c.436C>T       | c.(436-438)CAC>TAC     | p.H146Y  |
| Pat_24 | Post-Resistance | ASB11    | 140456 | 37 | X  | 15301641  | 15301641  | Missense_Mutation | SNP | G  | A  | 136 | 159 | c.958C>T       | c.(958-960)CTC>TTC     | p.L320F  |
| Pat_24 | Post-Resistance | CDKL5    | 6792   | 37 | X  | 18593569  | 18593569  | Missense_Mutation | SNP | C  | T  | 4   | 179 | c.241C>T       | c.(241-243)CGG>TGG     | p.R81W   |
| Pat_24 | Post-Resistance | SSX6     | 280657 | 37 | X  | 47969921  | 47969921  | Missense_Mutation | SNP | T  | G  | 5   | 54  | c.124T>G       | c.(124-126)TTC>GTC     | p.F42V   |
| Pat_24 | Post-Resistance | HUWE1    | 10075  | 37 | X  | 53587269  | 53587269  | Missense_Mutation | SNP | A  | T  | 4   | 68  | c.7616T>A      | c.(7615-7617)CTC>CAC   | p.L2539H |
| Pat_24 | Post-Resistance | ITIH5L   | 347365 | 37 | X  | 54785245  | 54785245  | Missense_Mutation | SNP | C  | T  | 32  | 24  | c.1262G>A      | c.(1261-1263)AGG>AAG   | p.R421K  |
| Pat_24 | Post-Resistance | ZMYM3    | 9203   | 37 | X  | 70464284  | 70464284  | Missense_Mutation | SNP | G  | A  | 3   | 26  | c.3148C>T      | c.(3148-3150)CGG>TGG   | p.R1050W |
| Pat_24 | Post-Resistance | ACRC     | 93953  | 37 | X  | 70823578  | 70823578  | Missense_Mutation | SNP | G  | A  | 4   | 124 | c.451G>A       | c.(451-453)GAC>AAC     | p.D151N  |
| Pat_24 | Post-Resistance | ACRC     | 93953  | 37 | X  | 70823920  | 70823920  | Missense_Mutation | SNP | C  | T  | 6   | 45  | c.793C>T       | c.(793-795)CCC>TCC     | p.P265S  |
| Pat_24 | Post-Resistance | ATRX     | 546    | 37 | X  | 76813014  | 76813014  | Missense_Mutation | SNP | C  | T  | 4   | 84  | c.6607G>A      | c.(6607-6609)GAG>AAG   | p.E2203K |
| Pat_24 | Post-Resistance | NOX1     | 27035  | 37 | X  | 100117242 | 100117242 | Missense_Mutation | SNP | C  | T  | 5   | 224 | c.722G>A       | c.(721-723)CGC>CAC     | p.R241H  |
| Pat_24 | Post-Resistance | COL4A6   | 1288   | 37 | X  | 107431220 | 107431220 | Missense_Mutation | SNP | C  | T  | 9   | 17  | c.1628G>A      | c.(1627-1629)GGA>GAA   | p.G543E  |
| Pat_24 | Post-Resistance | ZCCHC16  | 340595 | 37 | X  | 111697979 | 111697979 | Missense_Mutation | SNP | C  | T  | 46  | 54  | c.23C>T        | c.(22-24)TCA>TTA       | p.S8L    |
| Pat_24 | Post-Resistance | ZCCHC12  | 170261 | 37 | X  | 117959245 | 117959245 | Missense_Mutation | SNP | G  | A  | 3   | 79  | c.38G>A        | c.(37-39)CGG>CAG       | p.R13Q   |
| Pat_24 | Post-Resistance | SAGE1    | 55511  | 37 | X  | 134991035 | 134991035 | Missense_Mutation | SNP | C  | T  | 4   | 141 | c.1454C>T      | c.(1453-1455)ACT>ATT   | p.T485I  |
| Pat_24 | Post-Resistance | FMR1     | 2332   | 37 | X  | 147030296 | 147030296 | Missense_Mutation | SNP | C  | T  | 53  | 64  | c.1831C>T      | c.(1831-1833)CGT>TGT   | p.R611C  |
| Pat_24 | Post-Resistance | PCDH11Y  | 83259  | 37 | Y  | 4968692   | 4968692   | Missense_Mutation | SNP | G  | T  | 4   | 127 | c.3073G>T      | c.(3073-3075)GAC>TAC   | p.D1025Y |
| Pat_27 | Post-Resistance | KIAA1751 | 85452  | 37 | 1  | 1896422   | 1896422   | Missense_Mutation | SNP | G  | A  | 3   | 55  | c.1480C>T      | c.(1480-1482)CGG>TGG   | p.R494W  |
| Pat_27 | Post-Resistance | CAMTA1   | 23261  | 37 | 1  | 7723778   | 7723778   | Missense_Mutation | SNP | G  | A  | 7   | 192 | c.1171G>A      | c.(1171-1173)GGG>AGG   | p.G391R  |
| Pat_27 | Post-Resistance | RAP1GAP  | 5909   | 37 | 1  | 21940167  | 21940167  | Missense_Mutation | SNP | G  | A  | 5   | 230 | c.428C>T       | c.(427-429)CCC>CTC     | p.P143L  |
| Pat_27 | Post-Resistance | SRRM1    | 10250  | 37 | 1  | 24973198  | 24973198  | Missense_Mutation | SNP | G  | T  | 5   | 173 | c.152G>T       | c.(151-153)TGG>TTG     | p.W51L   |
| Pat_27 | Post-Resistance | FGR      | 2268   | 37 | 1  | 27939558  | 27939558  | Missense_Mutation | SNP | G  | T  | 8   | 207 | c.1457C>A      | c.(1456-1458)TCC>TAC   | p.S486Y  |
| Pat_27 | Post-Resistance | XKR8     | 55113  | 37 | 1  | 28293629  | 28293629  | Missense_Mutation | SNP | C  | T  | 6   | 235 | c.1106C>T      | c.(1105-1107)CCT>CTT   | p.P369L  |
| Pat_27 | Post-Resistance | TINAGL1  | 64129  | 37 | 1  | 32051422  | 32051422  | Missense_Mutation | SNP | C  | T  | 3   | 53  | c.1162C>T      | c.(1162-1164)CTT>TTT   | p.L388F  |
| Pat_27 | Post-Resistance | MAST2    | 23139  | 37 | 1  | 46501175  | 46501175  | Missense_Mutation | SNP | C  | T  | 7   | 219 | c.4834C>T      | c.(4834-4836)CCT>TCT   | p.P1612S |
| Pat_27 | Post-Resistance | BEND5    | 79656  | 37 | 1  | 49224669  | 49224669  | Missense_Mutation | SNP | C  | G  | 7   | 325 | c.648G>C       | c.(646-648)AAG>AAC     | p.K216N  |
| Pat_27 | Post-Resistance | SERBP1   | 26135  | 37 | 1  | 67895734  | 67895735  | Missense_Mutation | DNP | GG | AA | 10  | 291 | c.249_250CC>TT | 247-252)CCCCC>CCTT     | p.P84S   |
| Pat_27 | Post-Resistance | GBP1     | 2633   | 37 | 1  | 89523902  | 89523902  | Missense_Mutation | SNP | T  | C  | 8   | 448 | c.647A>G       | c.(646-648)GAT>GGT     | p.D216G  |
| Pat_27 | Post-Resistance | PDE4DIP  | 9659   | 37 | 1  | 144882859 | 144882859 | Missense_Mutation | SNP | G  | A  | 17  | 796 | c.3160C>T      | c.(3160-3162)CTT>TTT   | p.L1054F |
| Pat_27 | Post-Resistance | ANKRD35  | 148741 | 37 | 1  | 145562242 | 145562242 | Missense_Mutation | SNP | G  | A  | 7   | 169 | c.1930G>A      | c.(1930-1932)GAG>AAG   | p.E644K  |
| Pat_27 | Post-Resistance | SNX27    | 81609  | 37 | 1  | 151665915 | 151665915 | Nonsense_Mutation | SNP | G  | T  | 5   | 273 | c.1534G>T      | c.(1534-1536)GAG>TAG   | p.E512*  |
| Pat_27 | Post-Resistance | KPRP     | 448834 | 37 | 1  | 152733059 | 152733059 | Missense_Mutation | SNP | C  | T  | 9   | 203 | c.995C>T       | c.(994-996)CCG>CTG     | p.P332L  |
| Pat_27 | Post-Resistance | PGLYRP3  | 114771 | 37 | 1  | 153276464 | 153276464 | Missense_Mutation | SNP | G  | A  | 6   | 125 | c.398C>T       | c.(397-399)GCC>GTC     | p.A133V  |
| Pat_27 | Post-Resistance | ATP8B2   | 57198  | 37 | 1  | 154316912 | 154316912 | Missense_Mutation | SNP | G  | A  | 24  | 472 | c.2176G>A      | c.(2176-2178)GAT>AAT   | p.D726N  |
| Pat_27 | Post-Resistance | SLAMF9   | 89886  | 37 | 1  | 159922198 | 159922198 | Missense_Mutation | SNP | C  | T  | 16  | 449 | c.518G>A       | c.(517-519)GGG>GAG     | p.G173E  |
| Pat_27 | Post-Resistance | ARPC5    | 10092  | 37 | 1  | 183599639 | 183599639 | Missense_Mutation | SNP | G  | A  | 10  | 172 | c.350C>T       | c.(349-351)CCG>CTG     | p.P117L  |
| Pat_27 | Post-Resistance | FAM129A  | 116496 | 37 | 1  | 184853830 | 184853830 | Missense_Mutation | SNP | C  | T  | 7   | 163 | c.538G>A       | c.(538-540)GAG>AAG     | p.E180K  |
| Pat_27 | Post-Resistance | MFSD4    | 148808 | 37 | 1  | 205555175 | 205555175 | Missense_Mutation | SNP | C  | T  | 7   | 101 | c.989C>T       | c.(988-990)GCC>GTC     | p.A330V  |
| Pat_27 | Post-Resistance | KCNK2    | 3776   | 37 | 1  | 215408276 | 215408276 | Missense_Mutation | SNP | C  | T  | 4   | 131 | c.1069C>T      | c.(1069-1071)CGG>TGG   | p.R357W  |
| Pat_27 | Post-Resistance | USH2A    | 7399   | 37 | 1  | 215955491 | 215955491 | Missense_Mutation | SNP | G  | A  | 7   | 253 | c.10633C>T     | c.(10633-10635)CGG>TGC | p.R3545W |
| Pat_27 | Post-Resistance | MIA3     | 375056 | 37 | 1  | 222828056 | 222828056 | Missense_Mutation | SNP | G  | A  | 11  | 333 | c.4528G>A      | c.(4528-4530)GAA>AAA   | p.E1510K |
| Pat_27 | Post-Resistance | OR13G1   | 441933 | 37 | 1  | 247836088 | 247836088 | Missense_Mutation | SNP | C  | T  | 5   | 103 | c.256G>A       | c.(256-258)GAA>AAA     | p.E86K   |
| Pat_27 | Post-Resistance | ITIH2    | 3698   | 37 | 10 | 7747116   | 7747116   | Nonsense_Mutation | SNP | C  | T  | 11  | 242 | c.130C>T       | c.(130-132)CAA>TAA     | p.Q44*   |
| Pat_27 | Post-Resistance | MBL2     | 4153   | 37 | 10 | 54527986  | 54527986  | Missense_Mutation | SNP | C  | T  | 22  | 858 | c.658G>A       | c.(658-660)GAA>AAA     | p.E220K  |
| Pat_27 | Post-Resistance | CPN1     | 1369   | 37 | 10 | 101835676 | 101835676 | Missense_Mutation | SNP | C  | G  | 3   | 118 | c.412G>C       | c.(412-414)GCT>CCT     | p.A138P  |



|        |                 |          |        |    |    |           |           |                   |     |    |    |    |     |                |                      |               |
|--------|-----------------|----------|--------|----|----|-----------|-----------|-------------------|-----|----|----|----|-----|----------------|----------------------|---------------|
| Pat_27 | Post-Resistance | OR52K2   | 119774 | 37 | 11 | 4470906   | 4470906   | Missense_Mutation | SNP | G  | A  | 6  | 262 | c.337G>A       | c.(337-339)GAG>AAG   | p.E113K       |
| Pat_27 | Post-Resistance | MRGPRX2  | 117194 | 37 | 11 | 19077943  | 19077943  | Missense_Mutation | SNP | G  | A  | 24 | 772 | c.7C>T         | c.(7-9)CCA>TCA       | p.P3S         |
| Pat_27 | Post-Resistance | DEPDC7   | 91614  | 37 | 11 | 33053923  | 33053923  | Missense_Mutation | SNP | C  | T  | 6  | 133 | c.1036C>T      | c.(1036-1038)CTT>TTT | p.L346F       |
| Pat_27 | Post-Resistance | SLC1A2   | 6506   | 37 | 11 | 35287201  | 35287201  | Missense_Mutation | SNP | C  | T  | 10 | 432 | c.1526G>A      | c.(1525-1527)CGA>CAA | p.R509Q       |
| Pat_27 | Post-Resistance | OR4A15   | 81328  | 37 | 11 | 55135952  | 55135952  | Missense_Mutation | SNP | G  | A  | 10 | 228 | c.593G>A       | c.(592-594)GGA>GAA   | p.G198E       |
| Pat_27 | Post-Resistance | OR5B17   | 219965 | 37 | 11 | 58125958  | 58125958  | Missense_Mutation | SNP | C  | G  | 4  | 147 | c.585G>C       | c.(583-585)TTG>TTC   | p.L195F       |
| Pat_27 | Post-Resistance | POU2F3   | 25833  | 37 | 11 | 120169067 | 120169067 | Nonsense_Mutation | SNP | C  | T  | 9  | 660 | c.226C>T       | c.(226-228)CAA>TAA   | p.Q76*        |
| Pat_27 | Post-Resistance | PRB3     | 5544   | 37 | 12 | 11420296  | 11420296  | Missense_Mutation | SNP | C  | A  | 13 | 722 | c.760G>T       | c.(760-762)GGT>TGT   | p.G254C       |
| Pat_27 | Post-Resistance | ENDOU    | 8909   | 37 | 12 | 48110749  | 48110749  | Missense_Mutation | SNP | C  | T  | 11 | 658 | c.475G>A       | c.(475-477)GAA>AAA   | p.E159K       |
| Pat_27 | Post-Resistance | KRT75    | 9119   | 37 | 12 | 52827961  | 52827961  | Missense_Mutation | SNP | C  | T  | 8  | 185 | c.128G>A       | c.(127-129)GGG>GAG   | p.G43E        |
| Pat_27 | Post-Resistance | PPP1R1A  | 5502   | 37 | 12 | 54974805  | 54974805  | Missense_Mutation | SNP | C  | T  | 7  | 323 | c.433G>A       | c.(433-435)GAG>AAG   | p.E145K       |
| Pat_27 | Post-Resistance | NEUROD4  | 58158  | 37 | 12 | 55420971  | 55420971  | Missense_Mutation | SNP | G  | A  | 7  | 213 | c.748G>A       | c.(748-750)GAG>AAG   | p.E250K       |
| Pat_27 | Post-Resistance | DTX1     | 1840   | 37 | 12 | 113515335 | 113515335 | Missense_Mutation | SNP | T  | G  | 6  | 282 | c.366T>G       | c.(364-366)GAT>GAG   | p.D122E       |
| Pat_27 | Post-Resistance | NOS1     | 4842   | 37 | 12 | 117691515 | 117691515 | Missense_Mutation | SNP | G  | A  | 9  | 184 | c.2576C>T      | c.(2575-2577)TCC>TTC | p.S859F       |
| Pat_27 | Post-Resistance | RPL21    | 6144   | 37 | 13 | 27827918  | 27827918  | Missense_Mutation | SNP | C  | T  | 5  | 205 | c.5C>T         | c.(4-6)ACG>ATG       | p.T2M         |
| Pat_27 | Post-Resistance | NDRG2    | 57447  | 37 | 14 | 21490649  | 21490649  | Missense_Mutation | SNP | G  | A  | 4  | 72  | c.125C>T       | c.(124-126)TCT>TTT   | p.S42F        |
| Pat_27 | Post-Resistance | KIAA1409 | 57578  | 37 | 14 | 94060164  | 94060164  | Nonsense_Mutation | SNP | G  | A  | 7  | 297 | c.2640G>A      | c.(2638-2640)TGG>TGA | p.W880*       |
| Pat_27 | Post-Resistance | AK7      | 122481 | 37 | 14 | 96944861  | 96944861  | Missense_Mutation | SNP | C  | T  | 5  | 309 | c.1615C>T      | c.(1615-1617)CCT>TCT | p.P539S       |
| Pat_27 | Post-Resistance | KIAA0284 | 283638 | 37 | 14 | 105349566 | 105349566 | Missense_Mutation | SNP | G  | A  | 12 | 422 | c.772G>A       | c.(772-774)GGA>AGA   | p.G258R       |
| Pat_27 | Post-Resistance | GABRB3   | 2562   | 37 | 15 | 26812865  | 26812865  | Missense_Mutation | SNP | A  | G  | 4  | 230 | c.698T>C       | c.(697-699)CTG>CCG   | p.L233P       |
| Pat_27 | Post-Resistance | CYP19A1  | 1588   | 37 | 15 | 51507941  | 51507941  | Missense_Mutation | SNP | C  | T  | 21 | 450 | c.817G>A       | c.(817-819)GAA>AAA   | p.E273K       |
| Pat_27 | Post-Resistance | SCG3     | 29106  | 37 | 15 | 51991527  | 51991527  | Missense_Mutation | SNP | G  | A  | 16 | 330 | c.997G>A       | c.(997-999)GAA>AAA   | p.E333K       |
| Pat_27 | Post-Resistance | ONECUT1  | 3175   | 37 | 15 | 53049970  | 53049970  | Missense_Mutation | SNP | C  | T  | 9  | 495 | c.1180G>A      | c.(1180-1182)GAT>AAT | p.D394N       |
| Pat_27 | Post-Resistance | CILP     | 8483   | 37 | 15 | 65489992  | 65489992  | Missense_Mutation | SNP | T  | C  | 8  | 174 | c.2632A>G      | c.(2632-2634)ATG>GTG | p.M878V       |
| Pat_27 | Post-Resistance | PTPN9    | 5780   | 37 | 15 | 75798062  | 75798062  | Missense_Mutation | SNP | C  | T  | 5  | 326 | c.922G>A       | c.(922-924)GAA>AAA   | p.E308K       |
| Pat_27 | Post-Resistance | TBC1D2B  | 23102  | 37 | 15 | 78290635  | 78290635  | Missense_Mutation | SNP | C  | T  | 5  | 50  | c.2759G>A      | c.(2758-2760)CGA>CAA | p.R920Q       |
| Pat_27 | Post-Resistance | CTSH     | 1512   | 37 | 15 | 79228060  | 79228060  | Missense_Mutation | SNP | C  | A  | 4  | 135 | c.226G>T       | c.(226-228)GCT>TCT   | p.A76S        |
| Pat_27 | Post-Resistance | NAGPA    | 51172  | 37 | 16 | 5083691   | 5083691   | Missense_Mutation | SNP | C  | T  | 3  | 36  | c.125G>A       | c.(124-126)CGC>CAC   | p.R42H        |
| Pat_27 | Post-Resistance | SLC6A2   | 6530   | 37 | 16 | 55730201  | 55730201  | Nonsense_Mutation | SNP | G  | A  | 7  | 492 | c.1212G>A      | c.(1210-1212)TGG>TGA | p.W404*       |
| Pat_27 | Post-Resistance | HYDIN    | 54768  | 37 | 16 | 71218803  | 71218803  | Missense_Mutation | SNP | C  | T  | 8  | 375 | c.226G>A       | c.(226-228)GAA>AAA   | p.E76K        |
| Pat_27 | Post-Resistance | WDR59    | 79726  | 37 | 16 | 74908231  | 74908231  | Missense_Mutation | SNP | G  | A  | 8  | 195 | c.2801C>T      | c.(2800-2802)TCG>TTG | p.S934L       |
| Pat_27 | Post-Resistance | MBTPS1   | 8720   | 37 | 16 | 84092910  | 84092910  | Missense_Mutation | SNP | G  | A  | 7  | 221 | c.2828C>T      | c.(2827-2829)CCC>CTC | p.P943L       |
| Pat_27 | Post-Resistance | KRT15    | 3866   | 37 | 17 | 39672221  | 39672221  | Missense_Mutation | SNP | C  | T  | 16 | 648 | c.942G>A       | c.(940-942)ATG>ATA   | p.M314I       |
| Pat_27 | Post-Resistance | KRT9     | 3857   | 37 | 17 | 39727668  | 39727668  | Missense_Mutation | SNP | C  | T  | 8  | 284 | c.577G>A       | c.(577-579)GGA>AGA   | p.G193R       |
| Pat_27 | Post-Resistance | BZRAP1   | 9256   | 37 | 17 | 56389844  | 56389844  | Missense_Mutation | SNP | G  | A  | 7  | 261 | c.2338C>T      | c.(2338-2340)CCA>TCA | p.P780S       |
| Pat_27 | Post-Resistance | INTS2    | 57508  | 37 | 17 | 59955305  | 59955305  | Missense_Mutation | SNP | C  | G  | 15 | 248 | c.2423G>C      | c.(2422-2424)AGA>ACA | p.R808T       |
| Pat_27 | Post-Resistance | MED13    | 9969   | 37 | 17 | 60088115  | 60088115  | Missense_Mutation | SNP | G  | C  | 5  | 153 | c.1763C>G      | c.(1762-1764)CCT>CGT | p.P588R       |
| Pat_27 | Post-Resistance | B3GNTL1  | 146712 | 37 | 17 | 80963044  | 80963044  | Missense_Mutation | SNP | C  | T  | 5  | 261 | c.451G>A       | c.(451-453)GAA>AAA   | p.E151K       |
| Pat_27 | Post-Resistance | POTEC    | 388468 | 37 | 18 | 14542773  | 14542773  | Missense_Mutation | SNP | C  | T  | 6  | 317 | c.373G>A       | c.(373-375)GAC>AAC   | p.D125N       |
| Pat_27 | Post-Resistance | DSG3     | 1830   | 37 | 18 | 29041340  | 29041340  | Missense_Mutation | SNP | C  | T  | 7  | 235 | c.964C>T       | c.(964-966)CCT>TCT   | p.P322S       |
| Pat_27 | Post-Resistance | DCC      | 1630   | 37 | 18 | 50278595  | 50278595  | Missense_Mutation | SNP | G  | A  | 8  | 211 | c.263G>A       | c.(262-264)AGG>AAG   | p.R88K        |
| Pat_27 | Post-Resistance | DCC      | 1630   | 37 | 18 | 50994312  | 50994312  | Missense_Mutation | SNP | C  | T  | 14 | 217 | c.3668C>T      | c.(3667-3669)TCG>TTG | p.S1223L      |
| Pat_27 | Post-Resistance | TCF4     | 6925   | 37 | 18 | 52942893  | 52942894  | Missense_Mutation | DNP | GG | AA | 18 | 829 | c.745_746CC>TT | c.(745-747)CCA>TTA   | p.P249L       |
| Pat_27 | Post-Resistance | CD226    | 10666  | 37 | 18 | 67563144  | 67563144  | Missense_Mutation | SNP | C  | T  | 9  | 174 | c.520G>A       | c.(520-522)GAC>AAC   | p.D174N       |
| Pat_27 | Post-Resistance | PTPRS    | 5802   | 37 | 19 | 5212059   | 5212059   | Missense_Mutation | SNP | C  | T  | 4  | 123 | c.4972G>A      | c.(4972-4974)GCA>ACA | p.A1658T      |
| Pat_27 | Post-Resistance | SAFB     | 6294   | 37 | 19 | 5667829   | 5667829   | Splice_Site       | SNP | A  | G  | 4  | 145 | c.2552_splice  | c.e20-2              | p.G851_splice |
| Pat_27 | Post-Resistance | TIMM44   | 10469  | 37 | 19 | 7999041   | 7999041   | Missense_Mutation | SNP | G  | A  | 8  | 403 | c.476C>T       | c.(475-477)TCG>TTG   | p.S159L       |

|        |                 |            |        |    |    |           |           |                   |     |   |   |    |     |            |                        |          |
|--------|-----------------|------------|--------|----|----|-----------|-----------|-------------------|-----|---|---|----|-----|------------|------------------------|----------|
| Pat_27 | Post-Resistance | MUC16      | 94025  | 37 | 19 | 9074278   | 9074278   | Nonsense_Mutation | SNP | G | A | 18 | 289 | c.13168C>T | c.(13168-13170)CAA>TAA | p.Q4390* |
| Pat_27 | Post-Resistance | ZNF559     | 84527  | 37 | 19 | 9452810   | 9452810   | Missense_Mutation | SNP | T | C | 3  | 112 | c.683T>C   | c.(682-684)CTT>CCT     | p.L228P  |
| Pat_27 | Post-Resistance | SYCE2      | 256126 | 37 | 19 | 13011390  | 13011390  | Missense_Mutation | SNP | C | T | 12 | 157 | c.379G>A   | c.(379-381)GAA>AAA     | p.E127K  |
| Pat_27 | Post-Resistance | LPNH1      | 22859  | 37 | 19 | 14294372  | 14294372  | Missense_Mutation | SNP | C | T | 3  | 36  | c.43G>A    | c.(43-45)GCC>ACC       | p.A15T   |
| Pat_27 | Post-Resistance | NOTCH3     | 4854   | 37 | 19 | 15297763  | 15297763  | Missense_Mutation | SNP | C | G | 9  | 141 | c.1877G>C  | c.(1876-1878)AGC>ACC   | p.S626T  |
| Pat_27 | Post-Resistance | OR10H5     | 284433 | 37 | 19 | 15905382  | 15905382  | Missense_Mutation | SNP | A | C | 13 | 202 | c.524A>C   | c.(523-525)CAC>CCC     | p.H175P  |
| Pat_27 | Post-Resistance | OR10H5     | 284433 | 37 | 19 | 15905384  | 15905384  | Missense_Mutation | SNP | C | T | 13 | 203 | c.526C>T   | c.(526-528)CAT>TAT     | p.H176Y  |
| Pat_27 | Post-Resistance | GATAD2A    | 54815  | 37 | 19 | 19616218  | 19616218  | Nonsense_Mutation | SNP | C | T | 30 | 531 | c.1837C>T  | c.(1837-1839)CAG>TAG   | p.Q613*  |
| Pat_27 | Post-Resistance | ZNF93      | 81931  | 37 | 19 | 20045277  | 20045277  | Missense_Mutation | SNP | G | A | 8  | 395 | c.1513G>A  | c.(1513-1515)GGA>AGA   | p.G505R  |
| Pat_27 | Post-Resistance | SUPT5H     | 6829   | 37 | 19 | 39949676  | 39949676  | Missense_Mutation | SNP | T | C | 16 | 571 | c.421T>C   | c.(421-423)TAC>CAC     | p.Y141H  |
| Pat_27 | Post-Resistance | FCGBP      | 8857   | 37 | 19 | 40364210  | 40364210  | Missense_Mutation | SNP | G | A | 12 | 95  | c.14432C>T | c.(14431-14433)CCT>CTT | p.P4811L |
| Pat_27 | Post-Resistance | CEACAM20   | 125931 | 37 | 19 | 45024526  | 45024526  | Missense_Mutation | SNP | G | A | 4  | 143 | c.1012C>T  | c.(1012-1014)CTT>TTT   | p.L338F  |
| Pat_27 | Post-Resistance | NLRP7      | 199713 | 37 | 19 | 55445975  | 55445975  | Missense_Mutation | SNP | G | T | 3  | 71  | c.2353C>A  | c.(2353-2355)CTC>ATC   | p.L785I  |
| Pat_27 | Post-Resistance | MSGN1      | 343930 | 37 | 2  | 17998003  | 17998003  | Missense_Mutation | SNP | G | A | 12 | 192 | c.218G>A   | c.(217-219)GGG>GAG     | p.G73E   |
| Pat_27 | Post-Resistance | PUM2       | 23369  | 37 | 2  | 20478445  | 20478445  | Missense_Mutation | SNP | G | A | 12 | 228 | c.1856C>T  | c.(1855-1857)CCA>CTA   | p.P619L  |
| Pat_27 | Post-Resistance | GKN1       | 56287  | 37 | 2  | 69204869  | 69204869  | Missense_Mutation | SNP | G | A | 13 | 338 | c.209G>A   | c.(208-210)GGA>GAA     | p.G70E   |
| Pat_27 | Post-Resistance | EDAR       | 10913  | 37 | 2  | 109546605 | 109546605 | Missense_Mutation | SNP | G | A | 4  | 135 | c.145C>T   | c.(145-147)CCG>TCG     | p.P49S   |
| Pat_27 | Post-Resistance | YSK4       | 80122  | 37 | 2  | 135741376 | 135741376 | Missense_Mutation | SNP | C | T | 8  | 173 | c.3092G>A  | c.(3091-3093)AGG>AAG   | p.R1031K |
| Pat_27 | Post-Resistance | PLA2R1     | 22925  | 37 | 2  | 160876756 | 160876756 | Nonsense_Mutation | SNP | C | T | 6  | 154 | c.1313G>A  | c.(1312-1314)TGG>TAG   | p.W438*  |
| Pat_27 | Post-Resistance | XIRP2      | 129446 | 37 | 2  | 168098359 | 168098359 | Missense_Mutation | SNP | C | T | 8  | 335 | c.1115C>T  | c.(1114-1116)TCT>TTT   | p.S372F  |
| Pat_27 | Post-Resistance | KLHL23     | 151230 | 37 | 2  | 170591997 | 170591997 | Missense_Mutation | SNP | C | T | 6  | 220 | c.473C>T   | c.(472-474)TCT>TTT     | p.S158F  |
| Pat_27 | Post-Resistance | TTN        | 7273   | 37 | 2  | 179610734 | 179610734 | Missense_Mutation | SNP | G | A | 30 | 603 | c.16393C>T | c.(16393-16395)CGG>TGC | p.R5465W |
| Pat_27 | Post-Resistance | ITGA4      | 3676   | 37 | 2  | 182399598 | 182399598 | Missense_Mutation | SNP | T | A | 6  | 175 | c.2939T>A  | c.(2938-2940)ATT>AAT   | p.I980N  |
| Pat_27 | Post-Resistance | COL5A2     | 1290   | 37 | 2  | 189916194 | 189916194 | Missense_Mutation | SNP | G | A | 4  | 44  | c.2783C>T  | c.(2782-2784)CCT>CTT   | p.P928L  |
| Pat_27 | Post-Resistance | MSTN       | 2660   | 37 | 2  | 190922273 | 190922273 | Missense_Mutation | SNP | C | T | 5  | 306 | c.839G>A   | c.(838-840)CGA>CAA     | p.R280Q  |
| Pat_27 | Post-Resistance | SPEG       | 10290  | 37 | 2  | 220355223 | 220355223 | Missense_Mutation | SNP | G | A | 3  | 117 | c.9014G>A  | c.(9013-9015)CGG>CAG   | p.R3005Q |
| Pat_27 | Post-Resistance | UGT1A9     | 54600  | 37 | 2  | 234580881 | 234580881 | Missense_Mutation | SNP | C | A | 17 | 293 | c.301C>A   | c.(301-303)CAA>AAA     | p.Q101K  |
| Pat_27 | Post-Resistance | WFDC8      | 90199  | 37 | 20 | 44187548  | 44187548  | Missense_Mutation | SNP | C | T | 10 | 391 | c.220G>A   | c.(220-222)GAA>AAA     | p.E74K   |
| Pat_27 | Post-Resistance | CDH4       | 1002   | 37 | 20 | 60427833  | 60427833  | Missense_Mutation | SNP | G | A | 8  | 209 | c.756G>A   | c.(754-756)ATG>ATA     | p.M252I  |
| Pat_27 | Post-Resistance | LAMA5      | 3911   | 37 | 20 | 60887335  | 60887335  | Missense_Mutation | SNP | A | G | 3  | 46  | c.9398T>C  | c.(9397-9399)CTT>CCT   | p.L3133P |
| Pat_27 | Post-Resistance | TPRSS15    | 5651   | 37 | 21 | 19701534  | 19701534  | Missense_Mutation | SNP | C | T | 11 | 143 | c.1732G>A  | c.(1732-1734)GAT>AAT   | p.D578N  |
| Pat_27 | Post-Resistance | KRTAP21-2  | 337978 | 37 | 21 | 32119361  | 32119361  | Missense_Mutation | SNP | C | T | 24 | 803 | c.160G>A   | c.(160-162)GGC>AGC     | p.G54S   |
| Pat_27 | Post-Resistance | TTC3       | 7267   | 37 | 21 | 38568217  | 38568217  | Missense_Mutation | SNP | C | T | 12 | 99  | c.5459C>T  | c.(5458-5460)CCT>CTT   | p.P1820L |
| Pat_27 | Post-Resistance | SH3BGR     | 6450   | 37 | 21 | 40883652  | 40883652  | Missense_Mutation | SNP | G | A | 6  | 186 | c.670G>A   | c.(670-672)GAG>AAG     | p.E224K  |
| Pat_27 | Post-Resistance | KRTAP10-10 | 353333 | 37 | 21 | 46058017  | 46058017  | Missense_Mutation | SNP | C | T | 27 | 477 | c.683C>T   | c.(682-684)TCC>TTC     | p.S228F  |
| Pat_27 | Post-Resistance | SGSM1      | 129049 | 37 | 22 | 25301100  | 25301100  | Missense_Mutation | SNP | T | C | 38 | 685 | c.2929T>C  | c.(2929-2931)TAT>CAT   | p.Y977H  |
| Pat_27 | Post-Resistance | TUBGCP6    | 85378  | 37 | 22 | 50678729  | 50678729  | Missense_Mutation | SNP | G | A | 4  | 99  | c.809C>T   | c.(808-810)TCC>TTC     | p.S270F  |
| Pat_27 | Post-Resistance | FGD5       | 152273 | 37 | 3  | 14862841  | 14862841  | Missense_Mutation | SNP | C | T | 12 | 843 | c.2263C>T  | c.(2263-2265)CCC>TCC   | p.P755S  |
| Pat_27 | Post-Resistance | LAMB2      | 3913   | 37 | 3  | 49163829  | 49163829  | Missense_Mutation | SNP | G | A | 9  | 231 | c.2120C>T  | c.(2119-2121)CCC>CTC   | p.P707L  |
| Pat_27 | Post-Resistance | IMPG2      | 50939  | 37 | 3  | 100949808 | 100949808 | Missense_Mutation | SNP | G | A | 14 | 167 | c.3415C>T  | c.(3415-3417)CCC>TCC   | p.P1139S |
| Pat_27 | Post-Resistance | IMPG2      | 50939  | 37 | 3  | 100949844 | 100949844 | Missense_Mutation | SNP | G | A | 24 | 354 | c.3379C>T  | c.(3379-3381)CTT>TTT   | p.L1127F |
| Pat_27 | Post-Resistance | IFT122     | 55764  | 37 | 3  | 129233345 | 129233345 | Missense_Mutation | SNP | C | T | 21 | 520 | c.3101C>T  | c.(3100-3102)TCC>TTC   | p.S1034F |
| Pat_27 | Post-Resistance | MRPL3      | 11222  | 37 | 3  | 131188584 | 131188584 | Missense_Mutation | SNP | G | A | 7  | 200 | c.772C>T   | c.(772-774)CCT>TCT     | p.P258S  |
| Pat_27 | Post-Resistance | AADACL2    | 344752 | 37 | 3  | 151475197 | 151475197 | Missense_Mutation | SNP | G | A | 11 | 387 | c.1021G>A  | c.(1021-1023)GAT>AAT   | p.D341N  |
| Pat_27 | Post-Resistance | MAP3K13    | 9175   | 37 | 3  | 185169106 | 185169106 | Missense_Mutation | SNP | C | T | 7  | 265 | c.1201C>T  | c.(1201-1203)CGG>TGG   | p.R401W  |
| Pat_27 | Post-Resistance | MUC4       | 4585   | 37 | 3  | 195480096 | 195480096 | Missense_Mutation | SNP | C | T | 8  | 279 | c.14950G>A | c.(14950-14952)GGG>AGC | p.G4984R |
| Pat_27 | Post-Resistance | LMLN       | 89782  | 37 | 3  | 197762807 | 197762807 | Nonsense_Mutation | SNP | G | A | 21 | 379 | c.1760G>A  | c.(1759-1761)TGG>TAG   | p.W587*  |

|        |                 |         |        |    |   |           |           |                   |     |   |   |    |     |            |                        |          |
|--------|-----------------|---------|--------|----|---|-----------|-----------|-------------------|-----|---|---|----|-----|------------|------------------------|----------|
| Pat_27 | Post-Resistance | RGS12   | 6002   | 37 | 4 | 3415805   | 3415805   | Missense_Mutation | SNP | C | T | 4  | 44  | c.2027C>T  | c.(2026-2028)ACG>ATG   | p.T676M  |
| Pat_27 | Post-Resistance | DRD5    | 1816   | 37 | 4 | 9784941   | 9784941   | Missense_Mutation | SNP | G | A | 9  | 219 | c.1288G>A  | c.(1288-1290)GAG>AAG   | p.E430K  |
| Pat_27 | Post-Resistance | KLHL8   | 57563  | 37 | 4 | 88106672  | 88106672  | Missense_Mutation | SNP | G | A | 20 | 431 | c.496C>T   | c.(496-498)CCC>TCC     | p.P166S  |
| Pat_27 | Post-Resistance | FAM13A  | 10144  | 37 | 4 | 89772207  | 89772207  | Missense_Mutation | SNP | G | A | 16 | 471 | c.971C>T   | c.(970-972)TCA>TTA     | p.S324L  |
| Pat_27 | Post-Resistance | ADH1A   | 124    | 37 | 4 | 100203562 | 100203562 | Missense_Mutation | SNP | C | T | 30 | 754 | c.769G>A   | c.(769-771)GAA>AAA     | p.E257K  |
| Pat_27 | Post-Resistance | CENPE   | 1062   | 37 | 4 | 104059536 | 104059536 | Missense_Mutation | SNP | C | T | 10 | 344 | c.6275G>A  | c.(6274-6276)AGC>AAC   | p.S2092N |
| Pat_27 | Post-Resistance | ANK2    | 287    | 37 | 4 | 114275112 | 114275112 | Missense_Mutation | SNP | G | A | 27 | 540 | c.5338G>A  | c.(5338-5340)GAA>AAA   | p.E1780K |
| Pat_27 | Post-Resistance | GUCY1A3 | 2982   | 37 | 4 | 156634496 | 156634496 | Missense_Mutation | SNP | G | A | 7  | 161 | c.1333G>A  | c.(1333-1335)GAG>AAG   | p.E445K  |
| Pat_27 | Post-Resistance | GRIA2   | 2891   | 37 | 4 | 158284132 | 158284132 | Missense_Mutation | SNP | C | T | 7  | 457 | c.2588C>T  | c.(2587-2589)TCA>TTA   | p.S863L  |
| Pat_27 | Post-Resistance | AGXT2   | 64902  | 37 | 5 | 35040718  | 35040718  | Missense_Mutation | SNP | T | C | 32 | 421 | c.139A>G   | c.(139-141)AGA>GGA     | p.R47G   |
| Pat_27 | Post-Resistance | NIPBL   | 25836  | 37 | 5 | 37008807  | 37008807  | Missense_Mutation | SNP | G | A | 6  | 285 | c.4403G>A  | c.(4402-4404)AGG>AAG   | p.R1468K |
| Pat_27 | Post-Resistance | HCN1    | 348980 | 37 | 5 | 45262838  | 45262838  | Missense_Mutation | SNP | C | T | 9  | 219 | c.1858G>A  | c.(1858-1860)GAA>AAA   | p.E620K  |
| Pat_27 | Post-Resistance | IL6ST   | 3572   | 37 | 5 | 55250646  | 55250646  | Missense_Mutation | SNP | T | C | 30 | 268 | c.1442A>G  | c.(1441-1443)TAT>TGT   | p.Y481C  |
| Pat_27 | Post-Resistance | NDUFAF2 | 91942  | 37 | 5 | 60369011  | 60369011  | Missense_Mutation | SNP | G | A | 7  | 247 | c.187G>A   | c.(187-189)GAA>AAA     | p.E63K   |
| Pat_27 | Post-Resistance | ZFYVE16 | 9765   | 37 | 5 | 79732983  | 79732983  | Missense_Mutation | SNP | C | T | 23 | 283 | c.479C>T   | c.(478-480)TCC>TTC     | p.S160F  |
| Pat_27 | Post-Resistance | FAM170A | 340069 | 37 | 5 | 118970375 | 118970375 | Missense_Mutation | SNP | G | A | 8  | 260 | c.932G>A   | c.(931-933)AGG>AAG     | p.R311K  |
| Pat_27 | Post-Resistance | SLC27A6 | 28965  | 37 | 5 | 128368799 | 128368799 | Missense_Mutation | SNP | G | A | 8  | 122 | c.1684G>A  | c.(1684-1686)GAA>AAA   | p.E562K  |
| Pat_27 | Post-Resistance | PCDHA11 | 56138  | 37 | 5 | 140250222 | 140250222 | Missense_Mutation | SNP | G | A | 36 | 544 | c.1534G>A  | c.(1534-1536)GAG>AAG   | p.E512K  |
| Pat_27 | Post-Resistance | PCDHAC1 | 56135  | 37 | 5 | 140308884 | 140308884 | Missense_Mutation | SNP | G | A | 24 | 610 | c.2407G>A  | c.(2407-2409)GGG>AGG   | p.G803R  |
| Pat_27 | Post-Resistance | KIF4B   | 285643 | 37 | 5 | 154394186 | 154394186 | Missense_Mutation | SNP | G | A | 8  | 238 | c.767G>A   | c.(766-768)CGT>CAT     | p.R256H  |
| Pat_27 | Post-Resistance | CYFIP2  | 26999  | 37 | 5 | 156819976 | 156819976 | Missense_Mutation | SNP | C | T | 7  | 211 | c.3730C>T  | c.(3730-3732)CC>TCC    | p.P1244S |
| Pat_27 | Post-Resistance | LTC4S   | 4056   | 37 | 5 | 179222612 | 179222612 | Missense_Mutation | SNP | C | T | 4  | 150 | c.86C>T    | c.(85-87)GCG>GTG       | p.A29V   |
| Pat_27 | Post-Resistance | CCDC90A | 63933  | 37 | 6 | 13807199  | 13807199  | Missense_Mutation | SNP | A | C | 7  | 424 | c.493T>G   | c.(493-495)TAC>GAC     | p.Y165D  |
| Pat_27 | Post-Resistance | NOTCH4  | 4855   | 37 | 6 | 32188985  | 32188985  | Missense_Mutation | SNP | G | T | 4  | 115 | c.569C>A   | c.(568-570)GCC>GAC     | p.A190D  |
| Pat_27 | Post-Resistance | COL11A2 | 1302   | 37 | 6 | 33137210  | 33137210  | Missense_Mutation | SNP | G | A | 4  | 89  | c.3748C>T  | c.(3748-3750)CCA>TCA   | p.P1250S |
| Pat_27 | Post-Resistance | RNF8    | 9025   | 37 | 6 | 37348960  | 37348960  | Missense_Mutation | SNP | C | T | 14 | 529 | c.1271C>T  | c.(1270-1272)TCC>TTC   | p.S424F  |
| Pat_27 | Post-Resistance | UBR2    | 23304  | 37 | 6 | 42620241  | 42620241  | Missense_Mutation | SNP | C | A | 32 | 713 | c.2627C>A  | c.(2626-2628)CCG>CAG   | p.P876Q  |
| Pat_27 | Post-Resistance | TINAG   | 27283  | 37 | 6 | 54212284  | 54212284  | Missense_Mutation | SNP | G | A | 7  | 240 | c.868G>A   | c.(868-870)GAT>AAT     | p.D290N  |
| Pat_27 | Post-Resistance | DSE     | 29940  | 37 | 6 | 116757093 | 116757093 | Missense_Mutation | SNP | C | T | 5  | 191 | c.1462C>T  | c.(1462-1464)CCA>TCA   | p.P488S  |
| Pat_27 | Post-Resistance | NCF1    | 653361 | 37 | 7 | 74193613  | 74193613  | Nonsense_Mutation | SNP | G | A | 6  | 160 | c.240G>A   | c.(238-240)TGG>TGA     | p.W80*   |
| Pat_27 | Post-Resistance | PCLO    | 27445  | 37 | 7 | 82430897  | 82430897  | Missense_Mutation | SNP | C | T | 12 | 136 | c.14944G>A | c.(14944-14946)GGA>AGA | p.G4982R |
| Pat_27 | Post-Resistance | TRRAP   | 8295   | 37 | 7 | 98563436  | 98563436  | Missense_Mutation | SNP | C | T | 20 | 226 | c.7073C>T  | c.(7072-7074)TCA>TTA   | p.S2358L |
| Pat_27 | Post-Resistance | RELN    | 5649   | 37 | 7 | 103294556 | 103294556 | Missense_Mutation | SNP | G | A | 10 | 285 | c.1538C>T  | c.(1537-1539)TCC>TTC   | p.S513F  |
| Pat_27 | Post-Resistance | SRPK2   | 6733   | 37 | 7 | 104809704 | 104809704 | Missense_Mutation | SNP | G | A | 7  | 131 | c.205C>T   | c.(205-207)CAT>TAT     | p.H69Y   |
| Pat_27 | Post-Resistance | CADPS2  | 93664  | 37 | 7 | 122091475 | 122091475 | Missense_Mutation | SNP | T | C | 11 | 101 | c.2241A>G  | c.(2239-2241)ATA>ATG   | p.I747M  |
| Pat_27 | Post-Resistance | SVOPL   | 136306 | 37 | 7 | 138333801 | 138333801 | Missense_Mutation | SNP | G | A | 16 | 161 | c.616C>T   | c.(616-618)CGC>TGC     | p.R206C  |
| Pat_27 | Post-Resistance | BRAF    | 673    | 37 | 7 | 140453136 | 140453136 | Missense_Mutation | SNP | A | T | 19 | 219 | c.1799T>A  | c.(1798-1800)GTG>GAG   | p.V600E  |
| Pat_27 | Post-Resistance | MGAM    | 8972   | 37 | 7 | 141799414 | 141799414 | Missense_Mutation | SNP | G | T | 19 | 403 | c.5063G>T  | c.(5062-5064)GGT>GTT   | p.G1688V |
| Pat_27 | Post-Resistance | KRBA1   | 84626  | 37 | 7 | 149420968 | 149420968 | Missense_Mutation | SNP | A | G | 3  | 85  | c.916A>G   | c.(916-918)AGG>GGG     | p.R306G  |
| Pat_27 | Post-Resistance | C8orf79 | 57604  | 37 | 8 | 12879537  | 12879537  | Missense_Mutation | SNP | A | G | 3  | 67  | c.1349A>G  | c.(1348-1350)AAG>AGG   | p.K450R  |
| Pat_27 | Post-Resistance | ADAM7   | 8756   | 37 | 8 | 24358371  | 24358371  | Missense_Mutation | SNP | C | T | 16 | 432 | c.2071C>T  | c.(2071-2073)CGT>TGT   | p.R691C  |
| Pat_27 | Post-Resistance | STAR    | 6770   | 37 | 8 | 38003511  | 38003511  | Missense_Mutation | SNP | C | T | 7  | 201 | c.566G>A   | c.(565-567)GGG>GAG     | p.G189E  |
| Pat_27 | Post-Resistance | SLC20A2 | 6575   | 37 | 8 | 42302247  | 42302247  | Missense_Mutation | SNP | G | A | 4  | 99  | c.647C>T   | c.(646-648)GCC>GTC     | p.A216V  |
| Pat_27 | Post-Resistance | RB1CC1  | 9821   | 37 | 8 | 53570221  | 53570221  | Missense_Mutation | SNP | G | A | 6  | 136 | c.2168C>T  | c.(2167-2169)TCA>TTA   | p.S723L  |
| Pat_27 | Post-Resistance | ZFHX4   | 79776  | 37 | 8 | 77690475  | 77690475  | Missense_Mutation | SNP | C | T | 8  | 444 | c.3047C>T  | c.(3046-3048)CCC>CTC   | p.P1016L |
| Pat_27 | Post-Resistance | FAM83H  | 286077 | 37 | 8 | 144811394 | 144811394 | Nonsense_Mutation | SNP | C | A | 19 | 386 | c.547G>T   | c.(547-549)GAG>TAG     | p.E183*  |
| Pat_27 | Post-Resistance | FREM1   | 158326 | 37 | 9 | 14770666  | 14770666  | Missense_Mutation | SNP | C | T | 5  | 167 | c.4996G>A  | c.(4996-4998)GAT>AAT   | p.D1666N |

|        |                 |           |        |    |   |           |           |                   |     |    |    |     |     |                                   |                      |               |
|--------|-----------------|-----------|--------|----|---|-----------|-----------|-------------------|-----|----|----|-----|-----|-----------------------------------|----------------------|---------------|
| Pat_27 | Post-Resistance | TOMM5     | 401505 | 37 | 9 | 37592527  | 37592527  | Missense_Mutation | SNP | C  | G  | 10  | 246 | c.3G>C                            | c.(1-3)ATG>ATC       | p.M1I         |
| Pat_27 | Post-Resistance | TRPM6     | 140803 | 37 | 9 | 77377950  | 77377950  | Missense_Mutation | SNP | C  | T  | 7   | 189 | c.3637G>A                         | c.(3637-3639)GAT>AAT | p.D1213N      |
| Pat_27 | Post-Resistance | IKBKAP    | 8518   | 37 | 9 | 111692162 | 111692162 | Missense_Mutation | SNP | G  | A  | 9   | 244 | c.190C>T                          | c.(190-192)CCA>TCA   | p.P64S        |
| Pat_27 | Post-Resistance | C9orf172  | 389813 | 37 | 9 | 139740328 | 139740328 | Missense_Mutation | SNP | C  | T  | 3   | 24  | c.1462C>T                         | c.(1462-1464)CGG>TGG | p.R488W       |
| Pat_27 | Post-Resistance | C9orf172  | 389813 | 37 | 9 | 139740331 | 139740331 | Missense_Mutation | SNP | C  | T  | 3   | 22  | c.1465C>T                         | c.(1465-1467)CGC>TGC | p.R489C       |
| Pat_27 | Post-Resistance | C9orf173  | 441476 | 37 | 9 | 140146901 | 140146901 | Missense_Mutation | SNP | G  | A  | 3   | 41  | c.413G>A                          | c.(412-414)CGC>CAC   | p.R138H       |
| Pat_27 | Post-Resistance | RBM10     | 8241   | 37 | X | 47030582  | 47030582  | Missense_Mutation | SNP | G  | T  | 6   | 67  | c.357G>T                          | c.(355-357)GAG>GAT   | p.E119D       |
| Pat_27 | Post-Resistance | PSMD10    | 5716   | 37 | X | 107331082 | 107331082 | Missense_Mutation | SNP | T  | C  | 14  | 200 | c.361A>G                          | c.(361-363)ATC>GTC   | p.I121V       |
| Pat_27 | Post-Resistance | GLUD2     | 2747   | 37 | X | 120183130 | 120183130 | Missense_Mutation | SNP | G  | A  | 14  | 172 | c.1592G>A                         | c.(1591-1593)GGA>GAA | p.G531E       |
| Pat_28 | Post-Resistance | TNFRSF18  | 8784   | 37 | 1 | 1139283   | 1139284   | Missense_Mutation | DNP | CC | TT | 3   | 6   | c.666_667GG>AA664-669)GAGGAA>GAAA |                      | p.E223K       |
| Pat_28 | Post-Resistance | PLCH2     | 9651   | 37 | 1 | 2418756   | 2418756   | Missense_Mutation | SNP | C  | T  | 14  | 26  | c.1055C>T                         | c.(1054-1056)TCC>TTC | p.S352F       |
| Pat_28 | Post-Resistance | TAS1R1    | 80835  | 37 | 1 | 6631144   | 6631144   | Missense_Mutation | SNP | G  | A  | 82  | 102 | c.367G>A                          | c.(367-369)GGG>AGG   | p.G123R       |
| Pat_28 | Post-Resistance | ERRFI1    | 54206  | 37 | 1 | 8073403   | 8073403   | Missense_Mutation | SNP | C  | T  | 35  | 59  | c.1256G>A                         | c.(1255-1257)GGA>GAA | p.G419E       |
| Pat_28 | Post-Resistance | RERE      | 473    | 37 | 1 | 8421339   | 8421339   | Missense_Mutation | SNP | G  | A  | 6   | 12  | c.2228C>T                         | c.(2227-2229)GCT>GTT | p.A743V       |
| Pat_28 | Post-Resistance | SLC2A7    | 155184 | 37 | 1 | 9064917   | 9064917   | Missense_Mutation | SNP | C  | T  | 10  | 7   | c.1214G>A                         | c.(1213-1215)AGG>AAG | p.R405K       |
| Pat_28 | Post-Resistance | KIF1B     | 23095  | 37 | 1 | 10356973  | 10356973  | Missense_Mutation | SNP | G  | A  | 31  | 62  | c.1880G>A                         | c.(1879-1881)GGT>GAT | p.G627D       |
| Pat_28 | Post-Resistance | MASP2     | 10747  | 37 | 1 | 11097851  | 11097851  | Missense_Mutation | SNP | G  | A  | 21  | 50  | c.907C>T                          | c.(907-909)CCG>TCG   | p.P303S       |
| Pat_28 | Post-Resistance | PRAMEF1   | 65121  | 37 | 1 | 12856047  | 12856047  | Missense_Mutation | SNP | G  | A  | 100 | 473 | c.1327G>A                         | c.(1327-1329)GAA>AAA | p.E443K       |
| Pat_28 | Post-Resistance | SPEN      | 23013  | 37 | 1 | 16199603  | 16199603  | Missense_Mutation | SNP | G  | A  | 24  | 40  | c.376G>A                          | c.(376-378)GAA>AAA   | p.E126K       |
| Pat_28 | Post-Resistance | ARHGEF19  | 128272 | 37 | 1 | 16528277  | 16528277  | Missense_Mutation | SNP | C  | T  | 9   | 22  | c.2146G>A                         | c.(2146-2148)GAT>AAT | p.D716N       |
| Pat_28 | Post-Resistance | ARHGEF19  | 128272 | 37 | 1 | 16534552  | 16534552  | Missense_Mutation | SNP | C  | T  | 12  | 24  | c.581G>A                          | c.(580-582)AGG>AAG   | p.R194K       |
| Pat_28 | Post-Resistance | NBPF1     | 55672  | 37 | 1 | 16895655  | 16895655  | Missense_Mutation | SNP | G  | A  | 17  | 369 | c.2527C>T                         | c.(2527-2529)CCT>TCT | p.P843S       |
| Pat_28 | Post-Resistance | MFAP2     | 4237   | 37 | 1 | 17304762  | 17304762  | Missense_Mutation | SNP | C  | T  | 5   | 5   | c.7G>A                            | c.(7-9)GCT>ACT       | p.A3T         |
| Pat_28 | Post-Resistance | TAS1R2    | 80834  | 37 | 1 | 19186064  | 19186064  | Missense_Mutation | SNP | C  | A  | 36  | 46  | c.91G>T                           | c.(91-93)GGG>TGG     | p.G31W        |
| Pat_28 | Post-Resistance | UBR4      | 23352  | 37 | 1 | 19412751  | 19412752  | Missense_Mutation | DNP | GG | AA | 45  | 46  | 14700_14701CC>398-14703)GGCCGG>GG |                      | p.R4901W      |
| Pat_28 | Post-Resistance | AKR7L     | 246181 | 37 | 1 | 19593864  | 19593864  | Missense_Mutation | SNP | G  | A  | 23  | 25  | c.926C>T                          | c.(925-927)CCG>CTG   | p.P309L       |
| Pat_28 | Post-Resistance | ALPL      | 249    | 37 | 1 | 21902301  | 21902301  | Missense_Mutation | SNP | C  | T  | 84  | 128 | c.1073C>T                         | c.(1072-1074)GCC>GTC | p.A358V       |
| Pat_28 | Post-Resistance | ARID1A    | 8289   | 37 | 1 | 27099036  | 27099036  | Missense_Mutation | SNP | G  | A  | 34  | 50  | c.3452G>A                         | c.(3451-3453)AGC>AAC | p.S1151N      |
| Pat_28 | Post-Resistance | WDTC1     | 23038  | 37 | 1 | 27631583  | 27631583  | Missense_Mutation | SNP | G  | A  | 35  | 35  | c.1735G>A                         | c.(1735-1737)GAT>AAT | p.D579N       |
| Pat_28 | Post-Resistance | OPRD1     | 4985   | 37 | 1 | 29185531  | 29185531  | Missense_Mutation | SNP | C  | T  | 60  | 99  | c.293C>T                          | c.(292-294)GCC>GTC   | p.A98V        |
| Pat_28 | Post-Resistance | TINAGL1   | 64129  | 37 | 1 | 32049085  | 32049085  | Missense_Mutation | SNP | C  | T  | 9   | 4   | c.491C>T                          | c.(490-492)GCC>GTC   | p.A164V       |
| Pat_28 | Post-Resistance | TXLNA     | 200081 | 37 | 1 | 32646870  | 32646870  | Missense_Mutation | SNP | G  | A  | 17  | 5   | c.197G>A                          | c.(196-198)GGG>GAG   | p.G66E        |
| Pat_28 | Post-Resistance | PHC2      | 1912   | 37 | 1 | 33799887  | 33799887  | Missense_Mutation | SNP | C  | T  | 43  | 16  | c.1562G>A                         | c.(1561-1563)GGG>GAG | p.G521E       |
| Pat_28 | Post-Resistance | CSMD2     | 114784 | 37 | 1 | 34174694  | 34174694  | Missense_Mutation | SNP | G  | A  | 51  | 24  | c.3451C>T                         | c.(3451-3453)CTC>TTC | p.L1151F      |
| Pat_28 | Post-Resistance | KIAA0319L | 79932  | 37 | 1 | 35972665  | 35972665  | Missense_Mutation | SNP | G  | A  | 56  | 19  | c.214C>T                          | c.(214-216)CAC>TAC   | p.H72Y        |
| Pat_28 | Post-Resistance | MKNK1     | 8569   | 37 | 1 | 47034147  | 47034147  | Missense_Mutation | SNP | G  | A  | 46  | 96  | c.640C>T                          | c.(640-642)CCA>TCA   | p.P214S       |
| Pat_28 | Post-Resistance | CYP4B1    | 1580   | 37 | 1 | 47279153  | 47279153  | Splice_Site       | SNP | G  | A  | 19  | 56  | c.496_splice                      | c.e5-1               | p.D166_splice |
| Pat_28 | Post-Resistance | PDE4B     | 5142   | 37 | 1 | 66838245  | 66838245  | Missense_Mutation | SNP | C  | T  | 21  | 4   | c.2095C>T                         | c.(2095-2097)CAC>TAC | p.H699Y       |
| Pat_28 | Post-Resistance | SGIP1     | 84251  | 37 | 1 | 67142777  | 67142777  | Missense_Mutation | SNP | G  | A  | 41  | 16  | c.737G>A                          | c.(736-738)GGA>GAA   | p.G246E       |
| Pat_28 | Post-Resistance | SGIP1     | 84251  | 37 | 1 | 67185024  | 67185024  | Missense_Mutation | SNP | C  | T  | 35  | 11  | c.1678C>T                         | c.(1678-1680)CTC>TTC | p.L560F       |
| Pat_28 | Post-Resistance | ANKRD13C  | 81573  | 37 | 1 | 70766452  | 70766452  | Missense_Mutation | SNP | G  | A  | 12  | 2   | c.916C>T                          | c.(916-918)CAT>TAT   | p.H306Y       |
| Pat_28 | Post-Resistance | HIAT1     | 64645  | 37 | 1 | 100547727 | 100547727 | Missense_Mutation | SNP | G  | A  | 17  | 8   | c.1435G>A                         | c.(1435-1437)GAG>AAG | p.E479K       |
| Pat_28 | Post-Resistance | KIAA1324  | 57535  | 37 | 1 | 109741221 | 109741221 | Missense_Mutation | SNP | G  | A  | 20  | 9   | c.2426G>A                         | c.(2425-2427)AGT>AAT | p.S809N       |
| Pat_28 | Post-Resistance | PROK1     | 84432  | 37 | 1 | 110998950 | 110998950 | Missense_Mutation | SNP | G  | A  | 19  | 6   | c.295G>A                          | c.(295-297)GAC>AAC   | p.D99N        |
| Pat_28 | Post-Resistance | CSDE1     | 7812   | 37 | 1 | 115261341 | 115261341 | Missense_Mutation | SNP | G  | A  | 38  | 16  | c.2242C>T                         | c.(2242-2244)CCT>TCT | p.P748S       |
| Pat_28 | Post-Resistance | CD2       | 914    | 37 | 1 | 117311211 | 117311211 | Missense_Mutation | SNP | C  | T  | 24  | 114 | c.862C>T                          | c.(862-864)CAT>TAT   | p.H288Y       |
| Pat_28 | Post-Resistance | CD2       | 914    | 37 | 1 | 117311310 | 117311310 | Missense_Mutation | SNP | C  | T  | 89  | 289 | c.961C>T                          | c.(961-963)CAC>TAC   | p.H321Y       |

|        |                 |          |        |    |   |           |           |                   |     |   |   |     |     |               |                      |                |
|--------|-----------------|----------|--------|----|---|-----------|-----------|-------------------|-----|---|---|-----|-----|---------------|----------------------|----------------|
| Pat_28 | Post-Resistance | MAN1A2   | 10905  | 37 | 1 | 118035827 | 118035827 | Nonsense_Mutation | SNP | G | A | 51  | 257 | c.1227G>A     | c.(1225-1227)TGG>TGA | p.W409*        |
| Pat_28 | Post-Resistance | SPAG17   | 200162 | 37 | 1 | 118634562 | 118634562 | Missense_Mutation | SNP | G | A | 130 | 584 | c.1237C>T     | c.(1237-1239)CCA>TCA | p.P413S        |
| Pat_28 | Post-Resistance | TBX15    | 6913   | 37 | 1 | 119427795 | 119427795 | Missense_Mutation | SNP | G | A | 38  | 257 | c.1051C>T     | c.(1051-1053)CCT>TCT | p.P351S        |
| Pat_28 | Post-Resistance | NOTCH2   | 4853   | 37 | 1 | 120463021 | 120463021 | Splice_Site       | SNP | C | T | 31  | 373 | c.5311_splice | c.e30-1              | p.A1771_splice |
| Pat_28 | Post-Resistance | PDE4DIP  | 9659   | 37 | 1 | 144855760 | 144855760 | Missense_Mutation | SNP | G | A | 9   | 146 | c.6793C>T     | c.(6793-6795)CCT>TCT | p.P2265S       |
| Pat_28 | Post-Resistance | PDE4DIP  | 9659   | 37 | 1 | 144857675 | 144857675 | Missense_Mutation | SNP | C | T | 55  | 561 | c.6379G>A     | c.(6379-6381)GTC>ATC | p.V2127I       |
| Pat_28 | Post-Resistance | PDE4DIP  | 9659   | 37 | 1 | 144864232 | 144864232 | Missense_Mutation | SNP | C | T | 30  | 550 | c.5863G>A     | c.(5863-5865)GTG>ATG | p.V1955M       |
| Pat_28 | Post-Resistance | PDE4DIP  | 9659   | 37 | 1 | 145016012 | 145016012 | Splice_Site       | SNP | C | T | 13  | 368 | c.77_splice   | c.e3-1               | p.A26_splice   |
| Pat_28 | Post-Resistance | HFE2     | 148738 | 37 | 1 | 145416623 | 145416623 | Missense_Mutation | SNP | C | T | 39  | 35  | c.968C>T      | c.(967-969)CCA>CTA   | p.P323L        |
| Pat_28 | Post-Resistance | BCL9     | 607    | 37 | 1 | 147096332 | 147096332 | Missense_Mutation | SNP | G | A | 21  | 59  | c.3853G>A     | c.(3853-3855)GGA>AGA | p.G1285R       |
| Pat_28 | Post-Resistance | ADAMTSL4 | 54507  | 37 | 1 | 150526233 | 150526233 | Nonsense_Mutation | SNP | C | T | 22  | 42  | c.766C>T      | c.(766-768)CAG>TAG   | p.Q256*        |
| Pat_28 | Post-Resistance | BNIP1    | 149428 | 37 | 1 | 151018642 | 151018642 | Splice_Site       | SNP | G | A | 18  | 46  | c.1037_splice | c.e9+1               | p.Q346_splice  |
| Pat_28 | Post-Resistance | POGZ     | 23126  | 37 | 1 | 151400368 | 151400368 | Missense_Mutation | SNP | C | T | 21  | 39  | c.1009G>A     | c.(1009-1011)GTG>ATG | p.V337M        |
| Pat_28 | Post-Resistance | LINGO4   | 339398 | 37 | 1 | 151773616 | 151773616 | Missense_Mutation | SNP | G | A | 43  | 107 | c.1565C>T     | c.(1564-1566)CCA>CTA | p.P522L        |
| Pat_28 | Post-Resistance | RPTN     | 126638 | 37 | 1 | 152128157 | 152128157 | Missense_Mutation | SNP | G | A | 232 | 606 | c.1418C>T     | c.(1417-1419)TCC>TTC | p.S473F        |
| Pat_28 | Post-Resistance | FLG      | 2312   | 37 | 1 | 152284826 | 152284826 | Missense_Mutation | SNP | C | T | 189 | 520 | c.2536G>A     | c.(2536-2538)GGG>AGG | p.G846R        |
| Pat_28 | Post-Resistance | S100A6   | 6277   | 37 | 1 | 153507231 | 153507231 | Missense_Mutation | SNP | C | T | 32  | 70  | c.214G>A      | c.(214-216)GAG>AAG   | p.E72K         |
| Pat_28 | Post-Resistance | SLC27A3  | 11000  | 37 | 1 | 153751029 | 153751029 | Missense_Mutation | SNP | G | A | 41  | 115 | c.1588G>A     | c.(1588-1590)GGT>AGT | p.G530S        |
| Pat_28 | Post-Resistance | GATAD2B  | 57459  | 37 | 1 | 153792200 | 153792200 | Missense_Mutation | SNP | C | T | 35  | 94  | c.347G>A      | c.(346-348)CGA>CAA   | p.R116Q        |
| Pat_28 | Post-Resistance | ATP8B2   | 57198  | 37 | 1 | 154315633 | 154315633 | Missense_Mutation | SNP | G | A | 27  | 89  | c.1597G>A     | c.(1597-1599)GTC>ATC | p.V533I        |
| Pat_28 | Post-Resistance | GBAP1    | 2630   | 37 | 1 | 155188242 | 155188242 | Missense_Mutation | SNP | C | T | 118 | 351 | c.56G>A       | c.(55-57)AGC>AAC     | p.S19N         |
| Pat_28 | Post-Resistance | GON4L    | 54856  | 37 | 1 | 155742957 | 155742957 | Missense_Mutation | SNP | C | T | 35  | 127 | c.2395G>A     | c.(2395-2397)GCC>ACC | p.A799T        |
| Pat_28 | Post-Resistance | C1orf85  | 112770 | 37 | 1 | 156263364 | 156263364 | Missense_Mutation | SNP | C | T | 19  | 66  | c.802G>A      | c.(802-804)GAC>AAC   | p.D268N        |
| Pat_28 | Post-Resistance | GPATCH4  | 54865  | 37 | 1 | 156567856 | 156567856 | Missense_Mutation | SNP | G | A | 43  | 177 | c.319C>T      | c.(319-321)CCC>TCC   | p.P107S        |
| Pat_28 | Post-Resistance | ARHGEF11 | 9826   | 37 | 1 | 156907216 | 156907216 | Missense_Mutation | SNP | C | T | 12  | 36  | c.4145G>A     | c.(4144-4146)AGC>AAC | p.S1382N       |
| Pat_28 | Post-Resistance | OR10J3   | 441911 | 37 | 1 | 159283647 | 159283647 | Missense_Mutation | SNP | G | A | 41  | 91  | c.803C>T      | c.(802-804)TCC>TTC   | p.S268F        |
| Pat_28 | Post-Resistance | COPA     | 1314   | 37 | 1 | 160265603 | 160265603 | Missense_Mutation | SNP | G | C | 96  | 94  | c.2399C>G     | c.(2398-2400)CCT>CGT | p.P800R        |
| Pat_28 | Post-Resistance | SLAMF7   | 57823  | 37 | 1 | 160718023 | 160718023 | Missense_Mutation | SNP | C | T | 26  | 59  | c.95C>T       | c.(94-96)TCC>TTC     | p.S32F         |
| Pat_28 | Post-Resistance | SLAMF7   | 57823  | 37 | 1 | 160722024 | 160722024 | Missense_Mutation | SNP | G | A | 22  | 43  | c.922G>A      | c.(922-924)GAA>AAA   | p.E308K        |
| Pat_28 | Post-Resistance | LY9      | 4063   | 37 | 1 | 160784219 | 160784219 | Missense_Mutation | SNP | C | T | 30  | 31  | c.740C>T      | c.(739-741)GCC>GTC   | p.A247V        |
| Pat_28 | Post-Resistance | C1orf192 | 257177 | 37 | 1 | 161334780 | 161334780 | Missense_Mutation | SNP | C | T | 29  | 82  | c.509G>A      | c.(508-510)GGT>GAT   | p.G170D        |
| Pat_28 | Post-Resistance | HSPA6    | 3310   | 37 | 1 | 161495508 | 161495508 | Missense_Mutation | SNP | G | A | 14  | 27  | c.1060G>A     | c.(1060-1062)GAC>AAC | p.D354N        |
| Pat_28 | Post-Resistance | CD247    | 919    | 37 | 1 | 167408600 | 167408600 | Missense_Mutation | SNP | C | T | 35  | 88  | c.200G>A      | c.(199-201)GGC>GAC   | p.G67D         |
| Pat_28 | Post-Resistance | FMO2     | 2327   | 37 | 1 | 171165914 | 171165914 | Missense_Mutation | SNP | C | T | 100 | 70  | c.448C>T      | c.(448-450)CAC>TAC   | p.H150Y        |
| Pat_28 | Post-Resistance | KLHL20   | 27252  | 37 | 1 | 173726202 | 173726202 | Missense_Mutation | SNP | G | A | 87  | 169 | c.1055G>A     | c.(1054-1056)AGC>AAC | p.S352N        |
| Pat_28 | Post-Resistance | DARS2    | 55157  | 37 | 1 | 173807354 | 173807354 | Missense_Mutation | SNP | G | A | 99  | 86  | c.797G>A      | c.(796-798)CGA>CAA   | p.R266Q        |
| Pat_28 | Post-Resistance | ABL2     | 27     | 37 | 1 | 179077325 | 179077325 | Missense_Mutation | SNP | G | T | 42  | 110 | c.3077C>A     | c.(3076-3078)GCT>GAT | p.A1026D       |
| Pat_28 | Post-Resistance | XPR1     | 9213   | 37 | 1 | 180775291 | 180775291 | Missense_Mutation | SNP | G | C | 64  | 149 | c.541G>C      | c.(541-543)GAG>CAG   | p.E181Q        |
| Pat_28 | Post-Resistance | DHX9     | 1660   | 37 | 1 | 182856439 | 182856439 | Missense_Mutation | SNP | G | A | 20  | 35  | c.3683G>A     | c.(3682-3684)GGC>GAC | p.G1228D       |
| Pat_28 | Post-Resistance | LAMC2    | 3918   | 37 | 1 | 183209211 | 183209211 | Missense_Mutation | SNP | G | A | 25  | 93  | c.3106G>A     | c.(3106-3108)GCA>ACA | p.A1036T       |
| Pat_28 | Post-Resistance | PRG4     | 10216  | 37 | 1 | 186277792 | 186277792 | Missense_Mutation | SNP | C | T | 76  | 195 | c.2941C>T     | c.(2941-2943)CTT>TTT | p.L981F        |
| Pat_28 | Post-Resistance | TPR      | 7175   | 37 | 1 | 186321233 | 186321233 | Missense_Mutation | SNP | C | T | 25  | 65  | c.2344G>A     | c.(2344-2346)GAA>AAA | p.E782K        |
| Pat_28 | Post-Resistance | TPR      | 7175   | 37 | 1 | 186329026 | 186329026 | Missense_Mutation | SNP | C | T | 32  | 101 | c.1294G>A     | c.(1294-1296)GCC>ACC | p.A432T        |
| Pat_28 | Post-Resistance | FAM5C    | 339479 | 37 | 1 | 190068128 | 190068128 | Missense_Mutation | SNP | A | C | 25  | 17  | c.1321T>G     | c.(1321-1323)TGC>GGC | p.C441G        |
| Pat_28 | Post-Resistance | F13B     | 2165   | 37 | 1 | 197024887 | 197024887 | Missense_Mutation | SNP | G | A | 75  | 213 | c.1312C>T     | c.(1312-1314)CGT>TGT | p.R438C        |
| Pat_28 | Post-Resistance | DENND1B  | 163486 | 37 | 1 | 197479747 | 197479747 | Missense_Mutation | SNP | G | A | 53  | 121 | c.2111C>T     | c.(2110-2112)TCG>TTG | p.S704L        |
| Pat_28 | Post-Resistance | PPFIA4   | 8497   | 37 | 1 | 203015116 | 203015116 | Splice_Site       | SNP | G | A | 100 | 192 | c.1446_splice | c.e12+1              | p.Q482_splice  |



|        |                 |          |        |    |    |           |           |                   |     |    |    |     |     |                                    |                        |                |
|--------|-----------------|----------|--------|----|----|-----------|-----------|-------------------|-----|----|----|-----|-----|------------------------------------|------------------------|----------------|
| Pat_28 | Post-Resistance | CHIT1    | 1118   | 37 | 1  | 203186259 | 203186259 | Missense_Mutation | SNP | G  | A  | 9   | 46  | c.1159C>T                          | c.(1159-1161)CTT>TTT   | p.L387F        |
| Pat_28 | Post-Resistance | LAX1     | 54900  | 37 | 1  | 203743784 | 203743784 | Missense_Mutation | SNP | G  | A  | 14  | 51  | c.1172G>A                          | c.(1171-1173)GGC>GAC   | p.G391D        |
| Pat_28 | Post-Resistance | LRRN2    | 10446  | 37 | 1  | 204587559 | 204587559 | Missense_Mutation | SNP | G  | A  | 9   | 25  | c.1562C>T                          | c.(1561-1563)CCA>CTA   | p.P521L        |
| Pat_28 | Post-Resistance | CNTN2    | 6900   | 37 | 1  | 205036253 | 205036253 | Missense_Mutation | SNP | C  | T  | 36  | 105 | c.2000C>T                          | c.(1999-2001)GCC>GTC   | p.A667V        |
| Pat_28 | Post-Resistance | TMEM81   | 388730 | 37 | 1  | 205052995 | 205052995 | Missense_Mutation | SNP | C  | T  | 31  | 79  | c.454G>A                           | c.(454-456)GAG>AAG     | p.E152K        |
| Pat_28 | Post-Resistance | C4BPA    | 722    | 37 | 1  | 207307782 | 207307782 | Missense_Mutation | SNP | G  | A  | 120 | 296 | c.1118G>A                          | c.(1117-1119)GGT>GAT   | p.G373D        |
| Pat_28 | Post-Resistance | C4BPA    | 722    | 37 | 1  | 207318040 | 207318040 | Missense_Mutation | SNP | C  | T  | 13  | 56  | c.1772C>T                          | c.(1771-1773)TCC>TTC   | p.S591F        |
| Pat_28 | Post-Resistance | CR1      | 1378   | 37 | 1  | 207737275 | 207737275 | Missense_Mutation | SNP | C  | T  | 84  | 183 | c.2303C>T                          | c.(2302-2304)CCC>CTC   | p.P768L        |
| Pat_28 | Post-Resistance | C1orf107 | 27042  | 37 | 1  | 210014251 | 210014251 | Missense_Mutation | SNP | G  | A  | 78  | 172 | c.1336G>A                          | c.(1336-1338)GAT>AAT   | p.D446N        |
| Pat_28 | Post-Resistance | RCOR3    | 55758  | 37 | 1  | 211462676 | 211462676 | Missense_Mutation | SNP | C  | T  | 36  | 88  | c.703C>T                           | c.(703-705)CCC>TCC     | p.P235S        |
| Pat_28 | Post-Resistance | RPS6KC1  | 26750  | 37 | 1  | 213415395 | 213415395 | Missense_Mutation | SNP | C  | T  | 64  | 154 | c.2576C>T                          | c.(2575-2577)ACT>ATT   | p.T859I        |
| Pat_28 | Post-Resistance | PROX1    | 5629   | 37 | 1  | 214170398 | 214170398 | Missense_Mutation | SNP | C  | T  | 44  | 113 | c.520C>T                           | c.(520-522)CGG>TGG     | p.R174W        |
| Pat_28 | Post-Resistance | USH2A    | 7399   | 37 | 1  | 215847694 | 215847694 | Missense_Mutation | SNP | C  | T  | 38  | 139 | c.13559G>A                         | c.(13558-13560)AGT>AAT | p.S4520N       |
| Pat_28 | Post-Resistance | USH2A    | 7399   | 37 | 1  | 216465706 | 216465706 | Missense_Mutation | SNP | G  | A  | 11  | 37  | c.1651C>T                          | c.(1651-1653)CGC>TGC   | p.R551C        |
| Pat_28 | Post-Resistance | ESRRG    | 2104   | 37 | 1  | 216850709 | 216850709 | Missense_Mutation | SNP | A  | G  | 66  | 44  | c.181T>C                           | c.(181-183)TCT>CCT     | p.S61P         |
| Pat_28 | Post-Resistance | MARK1    | 4139   | 37 | 1  | 220777480 | 220777480 | Splice_Site       | SNP | G  | A  | 48  | 108 | c.495_splice                       | c.e6+1                 | p.Q165_splice  |
| Pat_28 | Post-Resistance | CAPN2    | 824    | 37 | 1  | 223946979 | 223946979 | Missense_Mutation | SNP | G  | A  | 22  | 80  | c.1325G>A                          | c.(1324-1326)GGG>GAG   | p.G442E        |
| Pat_28 | Post-Resistance | CDC42BPA | 8476   | 37 | 1  | 227307504 | 227307504 | Splice_Site       | SNP | C  | T  | 6   | 35  | c.1647_splice                      | c.e12+1                | p.K549_splice  |
| Pat_28 | Post-Resistance | OBSCN    | 84033  | 37 | 1  | 228431084 | 228431084 | Missense_Mutation | SNP | G  | A  | 18  | 36  | c.3130G>A                          | c.(3130-3132)GCA>ACA   | p.A1044T       |
| Pat_28 | Post-Resistance | SIPA1L2  | 57568  | 37 | 1  | 232650854 | 232650854 | Missense_Mutation | SNP | C  | T  | 55  | 152 | c.232G>A                           | c.(232-234)GCA>ACA     | p.A78T         |
| Pat_28 | Post-Resistance | GPR137B  | 7107   | 37 | 1  | 236306136 | 236306136 | Missense_Mutation | SNP | C  | T  | 15  | 50  | c.214C>T                           | c.(214-216)CAC>TAC     | p.H72Y         |
| Pat_28 | Post-Resistance | RYR2     | 6262   | 37 | 1  | 237729896 | 237729896 | Missense_Mutation | SNP | G  | A  | 26  | 23  | c.3244G>A                          | c.(3244-3246)GGG>AGG   | p.G1082R       |
| Pat_28 | Post-Resistance | RYR2     | 6262   | 37 | 1  | 237944864 | 237944864 | Splice_Site       | SNP | G  | A  | 8   | 17  | c.11881_splice                     | c.e89-1                | p.D3961_splice |
| Pat_28 | Post-Resistance | PLD5     | 200150 | 37 | 1  | 242271047 | 242271047 | Missense_Mutation | SNP | C  | T  | 53  | 111 | c.1165G>A                          | c.(1165-1167)GAT>AAT   | p.D389N        |
| Pat_28 | Post-Resistance | ZNF695   | 57116  | 37 | 1  | 247162670 | 247162670 | Missense_Mutation | SNP | T  | A  | 32  | 133 | c.239A>T                           | c.(238-240)GAG>GTG     | p.E80V         |
| Pat_28 | Post-Resistance | OR14C36  | 127066 | 37 | 1  | 248512866 | 248512866 | Missense_Mutation | SNP | C  | T  | 44  | 146 | c.790C>T                           | c.(790-792)CCT>TCT     | p.P264S        |
| Pat_28 | Post-Resistance | SH3BP5L  | 80851  | 37 | 1  | 249108722 | 249108722 | Missense_Mutation | SNP | C  | T  | 20  | 50  | c.463G>A                           | c.(463-465)GAG>AAG     | p.E155K        |
| Pat_28 | Post-Resistance | C10orf18 | 54906  | 37 | 10 | 5777482   | 5777482   | Missense_Mutation | SNP | C  | T  | 38  | 80  | c.1420C>T                          | c.(1420-1422)CCC>TCC   | p.P474S        |
| Pat_28 | Post-Resistance | FBXO18   | 84893  | 37 | 10 | 5948575   | 5948575   | Missense_Mutation | SNP | G  | A  | 54  | 68  | c.733G>A                           | c.(733-735)GAG>AAG     | p.E245K        |
| Pat_28 | Post-Resistance | CDC123   | 8872   | 37 | 10 | 12240757  | 12240757  | Missense_Mutation | SNP | C  | T  | 40  | 56  | c.128C>T                           | c.(127-129)ACT>ATT     | p.T43I         |
| Pat_28 | Post-Resistance | FAM171A1 | 221061 | 37 | 10 | 15262990  | 15262990  | Missense_Mutation | SNP | G  | A  | 79  | 91  | c.824C>T                           | c.(823-825)GCC>GTC     | p.A275V        |
| Pat_28 | Post-Resistance | CUBN     | 8029   | 37 | 10 | 16932487  | 16932487  | Missense_Mutation | SNP | C  | T  | 66  | 90  | c.8638G>A                          | c.(8638-8640)GCC>ACC   | p.A2880T       |
| Pat_28 | Post-Resistance | DNAJC1   | 64215  | 37 | 10 | 22171369  | 22171369  | Splice_Site       | SNP | C  | T  | 9   | 10  | c.821_splice                       | c.e8-1                 | p.K274_splice  |
| Pat_28 | Post-Resistance | MYO3A    | 53904  | 37 | 10 | 26491957  | 26491957  | Missense_Mutation | SNP | C  | T  | 30  | 33  | c.4651C>T                          | c.(4651-4653)CCA>TCA   | p.P1551S       |
| Pat_28 | Post-Resistance | ARMC4    | 55130  | 37 | 10 | 28273151  | 28273151  | Missense_Mutation | SNP | C  | T  | 79  | 104 | c.644G>A                           | c.(643-645)GGA>GAA     | p.G215E        |
| Pat_28 | Post-Resistance | ZNF438   | 220929 | 37 | 10 | 31138079  | 31138079  | Missense_Mutation | SNP | G  | A  | 11  | 19  | c.1255C>T                          | c.(1255-1257)CCC>TCC   | p.P419S        |
| Pat_28 | Post-Resistance | ITGB1    | 3688   | 37 | 10 | 33199238  | 33199238  | Missense_Mutation | SNP | C  | T  | 21  | 17  | c.2077G>A                          | c.(2077-2079)GAG>AAG   | p.E693K        |
| Pat_28 | Post-Resistance | ANK3     | 288    | 37 | 10 | 61833910  | 61833910  | Missense_Mutation | SNP | C  | G  | 74  | 22  | c.6729G>C                          | c.(6727-6729)GAG>GAC   | p.E2243D       |
| Pat_28 | Post-Resistance | LRRTM3   | 347731 | 37 | 10 | 68686729  | 68686729  | Missense_Mutation | SNP | G  | A  | 36  | 15  | c.55G>A                            | c.(55-57)GCC>ACC       | p.A19T         |
| Pat_28 | Post-Resistance | CDH23    | 64072  | 37 | 10 | 73270727  | 73270727  | Missense_Mutation | SNP | C  | T  | 35  | 15  | c.305C>T                           | c.(304-306)ACC>ATC     | p.T102I        |
| Pat_28 | Post-Resistance | CDH23    | 64072  | 37 | 10 | 73550910  | 73550910  | Missense_Mutation | SNP | G  | T  | 5   | 1   | c.6071G>T                          | c.(6070-6072)GGT>GTT   | p.G2024V       |
| Pat_28 | Post-Resistance | SEC24C   | 9632   | 37 | 10 | 75526296  | 75526296  | Missense_Mutation | SNP | C  | T  | 37  | 10  | c.1796C>T                          | c.(1795-1797)ACC>ATC   | p.T599I        |
| Pat_28 | Post-Resistance | MYST4    | 23522  | 37 | 10 | 76788642  | 76788642  | Missense_Mutation | SNP | G  | A  | 9   | 4   | c.4060G>A                          | c.(4060-4062)GAA>AAA   | p.E1354K       |
| Pat_28 | Post-Resistance | SAMD8    | 142891 | 37 | 10 | 76910581  | 76910581  | Missense_Mutation | SNP | C  | T  | 41  | 23  | c.295C>T                           | c.(295-297)CCT>TCT     | p.P99S         |
| Pat_28 | Post-Resistance | PAPSS2   | 9060   | 37 | 10 | 89503399  | 89503399  | Splice_Site       | SNP | G  | A  | 40  | 16  | c.1476_splice                      | c.e10+1                | p.E492_splice  |
| Pat_28 | Post-Resistance | PANK1    | 53354  | 37 | 10 | 91353019  | 91353020  | Missense_Mutation | DNP | GG | AA | 32  | 10  | ..1545_1546CC>T343-1548)GCCCGG>GCT |                        | p.R516W        |
| Pat_28 | Post-Resistance | NOC3L    | 64318  | 37 | 10 | 96114731  | 96114731  | Missense_Mutation | SNP | G  | A  | 40  | 18  | c.685C>T                           | c.(685-687)CCA>TCA     | p.P229S        |

|        |                 |          |        |    |    |           |           |                        |     |   |   |     |     |               |                        |               |
|--------|-----------------|----------|--------|----|----|-----------|-----------|------------------------|-----|---|---|-----|-----|---------------|------------------------|---------------|
| Pat_28 | Post-Resistance | WDR11    | 55717  | 37 | 10 | 122630712 | 122630712 | Missense_Mutation      | SNP | C | T | 64  | 24  | c.1325C>T     | c.(1324-1326)CCC>CTC   | p.P442L       |
| Pat_28 | Post-Resistance | TACC2    | 10579  | 37 | 10 | 123971094 | 123971094 | Missense_Mutation      | SNP | C | T | 53  | 21  | c.7154C>T     | c.(7153-7155)TCT>TTT   | p.S2385F      |
| Pat_28 | Post-Resistance | CPXM2    | 119587 | 37 | 10 | 125514202 | 125514202 | Missense_Mutation      | SNP | C | T | 57  | 35  | c.1994G>A     | c.(1993-1995)GGC>GAC   | p.G665D       |
| Pat_28 | Post-Resistance | ECHS1    | 1892   | 37 | 10 | 135184208 | 135184208 | Missense_Mutation      | SNP | C | T | 26  | 6   | c.142G>A      | c.(142-144)GGG>AGG     | p.G48R        |
| Pat_28 | Post-Resistance | EPS8L2   | 64787  | 37 | 11 | 726925    | 726925    | Missense_Mutation      | SNP | G | A | 10  | 10  | c.2092G>A     | c.(2092-2094)GAA>AAA   | p.E698K       |
| Pat_28 | Post-Resistance | MUC5B    | 727897 | 37 | 11 | 1252167   | 1252167   | Missense_Mutation      | SNP | C | T | 4   | 3   | c.3449C>T     | c.(3448-3450)GCC>GTC   | p.A1150V      |
| Pat_28 | Post-Resistance | SYT8     | 90019  | 37 | 11 | 1858028   | 1858028   | Missense_Mutation      | SNP | C | T | 15  | 21  | c.769C>T      | c.(769-771)CCC>TCC     | p.P257S       |
| Pat_28 | Post-Resistance | ART1     | 417    | 37 | 11 | 3681107   | 3681107   | Missense_Mutation      | SNP | G | A | 16  | 11  | c.358G>A      | c.(358-360)GCC>ACC     | p.A120T       |
| Pat_28 | Post-Resistance | ART1     | 417    | 37 | 11 | 3681464   | 3681464   | Missense_Mutation      | SNP | G | A | 39  | 44  | c.715G>A      | c.(715-717)GAA>AAA     | p.E239K       |
| Pat_28 | Post-Resistance | UBQLNL   | 143630 | 37 | 11 | 5536746   | 5536746   | Missense_Mutation      | SNP | G | A | 20  | 30  | c.926C>T      | c.(925-927)TCA>TTA     | p.S309L       |
| Pat_28 | Post-Resistance | OR2AG2   | 338755 | 37 | 11 | 6789807   | 6789807   | Missense_Mutation      | SNP | G | A | 15  | 44  | c.382C>T      | c.(382-384)CAT>TAT     | p.H128Y       |
| Pat_28 | Post-Resistance | OVCH2    | 341277 | 37 | 11 | 7723023   | 7723023   | Splice_Site            | SNP | C | T | 8   | 19  | c.560_splice  | c.e6-1                 | p.G187_splice |
| Pat_28 | Post-Resistance | WEE1     | 7465   | 37 | 11 | 9603156   | 9603156   | Missense_Mutation      | SNP | C | T | 35  | 83  | c.1219C>T     | c.(1219-1221)CTT>TTT   | p.L407F       |
| Pat_28 | Post-Resistance | AMPD3    | 272    | 37 | 11 | 10500091  | 10500091  | Missense_Mutation      | SNP | G | A | 163 | 252 | c.240G>A      | c.(238-240)ATG>ATA     | p.M80I        |
| Pat_28 | Post-Resistance | CYP2R1   | 120227 | 37 | 11 | 14902114  | 14902114  | Missense_Mutation      | SNP | T | G | 53  | 69  | c.568A>C      | c.(568-570)ATA>CTA     | p.I190L       |
| Pat_28 | Post-Resistance | PLEKHA7  | 144100 | 37 | 11 | 16812638  | 16812638  | Missense_Mutation      | SNP | A | T | 21  | 46  | c.2854T>A     | c.(2854-2856)TCT>ACT   | p.S952T       |
| Pat_28 | Post-Resistance | BBOX1    | 8424   | 37 | 11 | 27077035  | 27077035  | Missense_Mutation      | SNP | C | T | 41  | 66  | c.58C>T       | c.(58-60)CTC>TTC       | p.L20F        |
| Pat_28 | Post-Resistance | KIF18A   | 81930  | 37 | 11 | 28090901  | 28090901  | Missense_Mutation      | SNP | C | T | 37  | 62  | c.1495G>A     | c.(1495-1497)GAG>AAG   | p.E499K       |
| Pat_28 | Post-Resistance | WT1      | 7490   | 37 | 11 | 32439177  | 32439177  | Missense_Mutation      | SNP | G | A | 29  | 60  | c.896C>T      | c.(895-897)TCC>TTC     | p.S299F       |
| Pat_28 | Post-Resistance | PDHX     | 8050   | 37 | 11 | 34953002  | 34953002  | Missense_Mutation      | SNP | G | A | 24  | 37  | c.212G>A      | c.(211-213)GGA>GAA     | p.G71E        |
| Pat_28 | Post-Resistance | SLC1A2   | 6506   | 37 | 11 | 35338938  | 35338938  | Missense_Mutation      | SNP | G | A | 20  | 23  | c.143C>T      | c.(142-144)ACC>ATC     | p.T48I        |
| Pat_28 | Post-Resistance | EXT2     | 2132   | 37 | 11 | 44148506  | 44148506  | Splice_Site            | SNP | G | A | 65  | 79  | c.1079_splice | c.e6+1                 | p.R360_splice |
| Pat_28 | Post-Resistance | LRP4     | 4038   | 37 | 11 | 46897070  | 46897070  | Missense_Mutation      | SNP | G | A | 36  | 51  | c.3862C>T     | c.(3862-3864)CTC>TTC   | p.L1288F      |
| Pat_28 | Post-Resistance | MADD     | 8567   | 37 | 11 | 47330241  | 47330241  | Missense_Mutation      | SNP | G | A | 12  | 14  | c.3859G>A     | c.(3859-3861)GGA>AGA   | p.G1287R      |
| Pat_28 | Post-Resistance | OR5T3    | 390154 | 37 | 11 | 56020000  | 56020000  | Missense_Mutation      | SNP | C | T | 59  | 115 | c.325C>T      | c.(325-327)CCA>TCA     | p.P109S       |
| Pat_28 | Post-Resistance | RTN4RL2  | 349667 | 37 | 11 | 57243840  | 57243840  | Missense_Mutation      | SNP | C | T | 5   | 9   | c.719C>T      | c.(718-720)GCC>GTC     | p.A240V       |
| Pat_28 | Post-Resistance | SMTNL1   | 219537 | 37 | 11 | 57310833  | 57310833  | Missense_Mutation      | SNP | G | A | 12  | 19  | c.772G>A      | c.(772-774)GAT>AAT     | p.D258N       |
| Pat_28 | Post-Resistance | FADS3    | 3995   | 37 | 11 | 61646912  | 61646912  | Missense_Mutation      | SNP | G | A | 7   | 12  | c.394C>T      | c.(394-396)CCC>TCC     | p.P132S       |
| Pat_28 | Post-Resistance | AHNAK    | 79026  | 37 | 11 | 62291855  | 62291855  | Missense_Mutation      | SNP | C | T | 17  | 30  | c.10034G>A    | c.(10033-10035)GGC>GAC | p.G3345D      |
| Pat_28 | Post-Resistance | MTA2     | 9219   | 37 | 11 | 62365541  | 62365541  | Missense_Mutation      | SNP | C | T | 137 | 195 | c.445G>A      | c.(445-447)GTT>ATT     | p.V149I       |
| Pat_28 | Post-Resistance | RARRES3  | 5920   | 37 | 11 | 63313688  | 63313688  | Missense_Mutation      | SNP | C | T | 62  | 121 | c.455C>T      | c.(454-456)TCT>TTT     | p.S152F       |
| Pat_28 | Post-Resistance | ATG2A    | 23130  | 37 | 11 | 64678361  | 64678361  | Missense_Mutation      | SNP | G | A | 9   | 7   | c.1532C>T     | c.(1531-1533)ACC>ATC   | p.T511I       |
| Pat_28 | Post-Resistance | SIPA1    | 6494   | 37 | 11 | 65417916  | 65417916  | Missense_Mutation      | SNP | C | T | 26  | 34  | c.2948C>T     | c.(2947-2949)TCC>TTC   | p.S983F       |
| Pat_28 | Post-Resistance | BRMS1    | 25855  | 37 | 11 | 66107685  | 66107685  | Splice_Site            | SNP | C | T | 9   | 15  | c.536_splice  | c.e7-1                 | p.E179_splice |
| Pat_28 | Post-Resistance | RBM4B    | 83759  | 37 | 11 | 66436559  | 66436559  | Missense_Mutation      | SNP | C | T | 33  | 54  | c.616G>A      | c.(616-618)GGG>AGG     | p.G206R       |
| Pat_28 | Post-Resistance | C2CD3    | 26005  | 37 | 11 | 73795952  | 73795952  | Missense_Mutation      | SNP | G | A | 37  | 65  | c.3974C>T     | c.(3973-3975)ACA>ATA   | p.T1325I      |
| Pat_28 | Post-Resistance | ODZ4     | 26011  | 37 | 11 | 78437183  | 78437183  | Missense_Mutation      | SNP | T | A | 73  | 286 | c.3491A>T     | c.(3490-3492)GAC>GTC   | p.D1164V      |
| Pat_28 | Post-Resistance | PCF11    | 51585  | 37 | 11 | 82880547  | 82880547  | Missense_Mutation      | SNP | G | A | 16  | 31  | c.3170G>A     | c.(3169-3171)GGT>GAT   | p.G1057D      |
| Pat_28 | Post-Resistance | PCF11    | 51585  | 37 | 11 | 82895760  | 82895760  | Missense_Mutation      | SNP | C | T | 56  | 106 | c.4492C>T     | c.(4492-4494)CCA>TCA   | p.P1498S      |
| Pat_28 | Post-Resistance | SYTL2    | 54843  | 37 | 11 | 85459318  | 85459318  | Missense_Mutation      | SNP | C | T | 70  | 106 | c.250G>A      | c.(250-252)GCA>ACA     | p.A84T        |
| Pat_28 | Post-Resistance | PANX1    | 24145  | 37 | 11 | 93911643  | 93911643  | Missense_Mutation      | SNP | G | A | 36  | 55  | c.430G>A      | c.(430-432)GAA>AAA     | p.E144K       |
| Pat_28 | Post-Resistance | CNTN5    | 53942  | 37 | 11 | 100170018 | 100170018 | Missense_Mutation      | SNP | G | A | 32  | 38  | c.2510G>A     | c.(2509-2511)CGA>CAA   | p.R837Q       |
| Pat_28 | Post-Resistance | MMP3     | 4314   | 37 | 11 | 102706936 | 102706936 | Missense_Mutation      | SNP | C | T | 49  | 70  | c.1355G>A     | c.(1354-1356)GGA>GAA   | p.G452E       |
| Pat_28 | Post-Resistance | DYNC2H1  | 79659  | 37 | 11 | 103349887 | 103349887 | Missense_Mutation      | SNP | G | A | 54  | 94  | c.12830G>A    | c.(12829-12831)AGG>AAC | p.R4277K      |
| Pat_28 | Post-Resistance | PAFAH1B2 | 5049   | 37 | 11 | 117023157 | 117023157 | Translation_Start_Site | SNP | G | A | 23  | 38  | c.-6G>A       | c.(-8--4)CAGTG>CAATG   |               |
| Pat_28 | Post-Resistance | SIDT2    | 51092  | 37 | 11 | 117063322 | 117063322 | Missense_Mutation      | SNP | C | T | 43  | 81  | c.2014C>T     | c.(2014-2016)CTC>TTC   | p.L672F       |
| Pat_28 | Post-Resistance | DSCAML1  | 57453  | 37 | 11 | 117376258 | 117376258 | Missense_Mutation      | SNP | C | T | 20  | 40  | c.2153G>A     | c.(2152-2154)AGC>AAC   | p.S718N       |

|        |                 |          |        |    |    |           |           |                   |     |    |    |     |     |                 |                      |          |
|--------|-----------------|----------|--------|----|----|-----------|-----------|-------------------|-----|----|----|-----|-----|-----------------|----------------------|----------|
| Pat_28 | Post-Resistance | CD3G     | 917    | 37 | 11 | 118221377 | 118221377 | Missense_Mutation | SNP | G  | A  | 47  | 74  | c.418G>A        | c.(418-420)GAT>AAT   | p.D140N  |
| Pat_28 | Post-Resistance | ARHGEF12 | 23365  | 37 | 11 | 120347935 | 120347935 | Missense_Mutation | SNP | G  | A  | 26  | 34  | c.3373G>A       | c.(3373-3375)GAC>AAC | p.D1125N |
| Pat_28 | Post-Resistance | TECTA    | 7007   | 37 | 11 | 121008594 | 121008594 | Missense_Mutation | SNP | G  | A  | 19  | 25  | c.3406G>A       | c.(3406-3408)GAC>AAC | p.D1136N |
| Pat_28 | Post-Resistance | C11orf63 | 79864  | 37 | 11 | 122830118 | 122830118 | Missense_Mutation | SNP | G  | A  | 47  | 51  | c.2302G>A       | c.(2302-2304)GCT>ACT | p.A768T  |
| Pat_28 | Post-Resistance | FKBP4    | 2288   | 37 | 12 | 2912344   | 2912344   | Missense_Mutation | SNP | C  | T  | 4   | 37  | c.1300C>T       | c.(1300-1302)CAT>TAT | p.H434Y  |
| Pat_28 | Post-Resistance | TULP3    | 7289   | 37 | 12 | 3039467   | 3039467   | Missense_Mutation | SNP | G  | A  | 15  | 70  | c.448G>A        | c.(448-450)GCA>ACA   | p.A150T  |
| Pat_28 | Post-Resistance | ANO2     | 57101  | 37 | 12 | 5848526   | 5848526   | Missense_Mutation | SNP | C  | T  | 13  | 7   | c.1379G>A       | c.(1378-1380)CGA>CAA | p.R460Q  |
| Pat_28 | Post-Resistance | NOP2     | 4839   | 37 | 12 | 6666256   | 6666256   | Missense_Mutation | SNP | T  | C  | 13  | 69  | c.2330A>G       | c.(2329-2331)CAG>CGG | p.Q777R  |
| Pat_28 | Post-Resistance | LEPREL2  | 10536  | 37 | 12 | 6946928   | 6946928   | Missense_Mutation | SNP | C  | T  | 8   | 26  | c.1744C>T       | c.(1744-1746)CCA>TCA | p.P582S  |
| Pat_28 | Post-Resistance | C1S      | 716    | 37 | 12 | 7170231   | 7170231   | Missense_Mutation | SNP | G  | A  | 19  | 106 | c.251G>A        | c.(250-252)GGA>GAA   | p.G84E   |
| Pat_28 | Post-Resistance | CD163    | 9332   | 37 | 12 | 7635975   | 7635975   | Missense_Mutation | SNP | C  | T  | 17  | 74  | c.3076G>A       | c.(3076-3078)GTG>ATG | p.V1026M |
| Pat_28 | Post-Resistance | CD163    | 9332   | 37 | 12 | 7636043   | 7636043   | Missense_Mutation | SNP | G  | A  | 108 | 45  | c.3008C>T       | c.(3007-3009)TCT>TTT | p.S1003F |
| Pat_28 | Post-Resistance | FAM90A1  | 55138  | 37 | 12 | 8374615   | 8374615   | Missense_Mutation | SNP | C  | T  | 5   | 36  | c.1198G>A       | c.(1198-1200)GAA>AAA | p.E400K  |
| Pat_28 | Post-Resistance | A2ML1    | 144568 | 37 | 12 | 9013531   | 9013531   | Missense_Mutation | SNP | G  | A  | 62  | 256 | c.3319G>A       | c.(3319-3321)GAG>AAG | p.E1107K |
| Pat_28 | Post-Resistance | PHC1     | 1911   | 37 | 12 | 9087072   | 9087072   | Missense_Mutation | SNP | C  | T  | 12  | 81  | c.2251C>T       | c.(2251-2253)CCG>TCG | p.P751S  |
| Pat_28 | Post-Resistance | PRB1     | 5542   | 37 | 12 | 11506808  | 11506808  | Missense_Mutation | SNP | G  | A  | 63  | 522 | c.229C>T        | c.(229-231)CCA>TCA   | p.P77S   |
| Pat_28 | Post-Resistance | LRP6     | 4040   | 37 | 12 | 12318165  | 12318165  | Missense_Mutation | SNP | C  | T  | 103 | 384 | c.1610G>A       | c.(1609-1611)GGA>GAA | p.G537E  |
| Pat_28 | Post-Resistance | MANSC1   | 54682  | 37 | 12 | 12483659  | 12483659  | Missense_Mutation | SNP | C  | T  | 17  | 56  | c.598G>A        | c.(598-600)GAA>AAA   | p.E200K  |
| Pat_28 | Post-Resistance | PLBD1    | 79887  | 37 | 12 | 14659915  | 14659915  | Missense_Mutation | SNP | C  | T  | 63  | 262 | c.1324G>A       | c.(1324-1326)GGG>AGG | p.G442R  |
| Pat_28 | Post-Resistance | GUCY2C   | 2984   | 37 | 12 | 14794136  | 14794136  | Missense_Mutation | SNP | C  | T  | 38  | 188 | c.1948G>A       | c.(1948-1950)GAG>AAG | p.E650K  |
| Pat_28 | Post-Resistance | PLEKHA5  | 54477  | 37 | 12 | 19282804  | 19282804  | Missense_Mutation | SNP | G  | A  | 9   | 47  | c.71G>A         | c.(70-72)GGC>GAC     | p.G24D   |
| Pat_28 | Post-Resistance | PLEKHA5  | 54477  | 37 | 12 | 19519010  | 19519010  | Missense_Mutation | SNP | C  | T  | 22  | 113 | c.3223C>T       | c.(3223-3225)CCT>TCT | p.P1075S |
| Pat_28 | Post-Resistance | SLCO1A2  | 6579   | 37 | 12 | 21453476  | 21453476  | Missense_Mutation | SNP | G  | A  | 22  | 72  | c.716C>T        | c.(715-717)ACT>ATT   | p.T239I  |
| Pat_28 | Post-Resistance | ETNK1    | 55500  | 37 | 12 | 22778273  | 22778273  | Missense_Mutation | SNP | G  | A  | 3   | 14  | c.176G>A        | c.(175-177)GGG>GAG   | p.G59E   |
| Pat_28 | Post-Resistance | BCAT1    | 586    | 37 | 12 | 25047302  | 25047302  | Nonsense_Mutation | SNP | C  | T  | 19  | 57  | c.186G>A        | c.(184-186)TGG>TGA   | p.W62*   |
| Pat_28 | Post-Resistance | MED21    | 9412   | 37 | 12 | 27180324  | 27180324  | Missense_Mutation | SNP | G  | A  | 89  | 354 | c.202G>A        | c.(202-204)GAC>AAC   | p.D68N   |
| Pat_28 | Post-Resistance | PPFIBP1  | 8496   | 37 | 12 | 27813843  | 27813843  | Missense_Mutation | SNP | G  | A  | 12  | 70  | c.931G>A        | c.(931-933)GCT>ACT   | p.A311T  |
| Pat_28 | Post-Resistance | PTHLH    | 5744   | 37 | 12 | 28116518  | 28116518  | Missense_Mutation | SNP | C  | T  | 58  | 274 | c.287G>A        | c.(286-288)GGG>GAG   | p.G96E   |
| Pat_28 | Post-Resistance | CAPRN2   | 65981  | 37 | 12 | 30881703  | 30881703  | Missense_Mutation | SNP | C  | T  | 89  | 344 | c.1661G>A       | c.(1660-1662)AGT>AAT | p.S554N  |
| Pat_28 | Post-Resistance | CNTN1    | 1272   | 37 | 12 | 41463763  | 41463763  | Missense_Mutation | SNP | G  | A  | 9   | 174 | c.2983G>A       | c.(2983-2985)GCA>ACA | p.A995T  |
| Pat_28 | Post-Resistance | NELL2    | 4753   | 37 | 12 | 44926412  | 44926412  | Missense_Mutation | SNP | C  | T  | 119 | 179 | c.1756G>A       | c.(1756-1758)GGC>AGC | p.G586S  |
| Pat_28 | Post-Resistance | C12orf54 | 121273 | 37 | 12 | 48888714  | 48888714  | Missense_Mutation | SNP | G  | A  | 66  | 107 | c.376G>A        | c.(376-378)GGA>AGA   | p.G126R  |
| Pat_28 | Post-Resistance | SLC4A8   | 9498   | 37 | 12 | 51879622  | 51879622  | Missense_Mutation | SNP | G  | A  | 58  | 90  | c.2224G>A       | c.(2224-2226)GTG>ATG | p.V742M  |
| Pat_28 | Post-Resistance | SCN8A    | 6334   | 37 | 12 | 52100398  | 52100399  | Missense_Mutation | DNP | CC | TT | 3   | 8   | c.1534_1535CC>T | c.(1534-1536)CCC>TTC | p.P512F  |
| Pat_28 | Post-Resistance | ACVR1B   | 91     | 37 | 12 | 52377866  | 52377866  | Missense_Mutation | SNP | G  | A  | 21  | 55  | c.895G>A        | c.(895-897)GTG>ATG   | p.V299M  |
| Pat_28 | Post-Resistance | KRT80    | 144501 | 37 | 12 | 52565292  | 52565292  | Missense_Mutation | SNP | C  | T  | 9   | 7   | c.1249G>A       | c.(1249-1251)GGC>AGC | p.G417S  |
| Pat_28 | Post-Resistance | TARBP2   | 6895   | 37 | 12 | 53895854  | 53895854  | Missense_Mutation | SNP | G  | A  | 36  | 68  | c.109G>A        | c.(109-111)GAG>AAG   | p.E37K   |
| Pat_28 | Post-Resistance | RDH16    | 8608   | 37 | 12 | 57345908  | 57345908  | Missense_Mutation | SNP | C  | T  | 27  | 34  | c.859G>A        | c.(859-861)GCC>ACC   | p.A287T  |
| Pat_28 | Post-Resistance | MYO1A    | 4640   | 37 | 12 | 57431340  | 57431340  | Missense_Mutation | SNP | G  | A  | 189 | 309 | c.2047C>T       | c.(2047-2049)CCC>TCC | p.P683S  |
| Pat_28 | Post-Resistance | LRP1     | 4035   | 37 | 12 | 57535237  | 57535237  | Missense_Mutation | SNP | C  | T  | 17  | 27  | c.271C>T        | c.(271-273)CTC>TTC   | p.L91F   |
| Pat_28 | Post-Resistance | LRIG3    | 121227 | 37 | 12 | 59274590  | 59274590  | Missense_Mutation | SNP | C  | T  | 128 | 137 | c.1574G>A       | c.(1573-1575)AGC>AAC | p.S525N  |
| Pat_28 | Post-Resistance | SRGAP1   | 57522  | 37 | 12 | 64521485  | 64521485  | Missense_Mutation | SNP | C  | T  | 22  | 28  | c.2521C>T       | c.(2521-2523)CCT>TCT | p.P841S  |
| Pat_28 | Post-Resistance | PTPRR    | 5801   | 37 | 12 | 71054727  | 71054727  | Missense_Mutation | SNP | G  | A  | 22  | 27  | c.1759C>T       | c.(1759-1761)CAC>TAC | p.H587Y  |
| Pat_28 | Post-Resistance | TRHDE    | 29953  | 37 | 12 | 73012738  | 73012738  | Missense_Mutation | SNP | C  | T  | 36  | 59  | c.2254C>T       | c.(2254-2256)CTT>TTT | p.L752F  |
| Pat_28 | Post-Resistance | ACSS3    | 79611  | 37 | 12 | 81536896  | 81536896  | Missense_Mutation | SNP | C  | T  | 24  | 39  | c.791C>T        | c.(790-792)CCT>CTT   | p.P264L  |
| Pat_28 | Post-Resistance | C12orf50 | 160419 | 37 | 12 | 88390385  | 88390385  | Missense_Mutation | SNP | C  | T  | 18  | 34  | c.328G>A        | c.(328-330)GAA>AAA   | p.E110K  |
| Pat_28 | Post-Resistance | CCDC41   | 51134  | 37 | 12 | 94725579  | 94725579  | Nonsense_Mutation | SNP | C  | T  | 52  | 96  | c.1604G>A       | c.(1603-1605)TGG>TAG | p.W535*  |

|        |                 |          |        |    |    |           |           |                   |     |   |   |     |     |              |                      |               |
|--------|-----------------|----------|--------|----|----|-----------|-----------|-------------------|-----|---|---|-----|-----|--------------|----------------------|---------------|
| Pat_28 | Post-Resistance | HAL      | 3034   | 37 | 12 | 96384204  | 96384204  | Nonsense_Mutation | SNP | C | T | 62  | 86  | c.822G>A     | c.(820-822)TGG>TGA   | p.W274*       |
| Pat_28 | Post-Resistance | BTBD11   | 121551 | 37 | 12 | 108013921 | 108013921 | Missense_Mutation | SNP | G | A | 32  | 62  | c.2611G>A    | c.(2611-2613)GAG>AAG | p.E871K       |
| Pat_28 | Post-Resistance | C12orf51 | 283450 | 37 | 12 | 112697046 | 112697046 | Missense_Mutation | SNP | G | A | 22  | 28  | c.1601C>T    | c.(1600-1602)ACT>ATT | p.T534I       |
| Pat_28 | Post-Resistance | MSI1     | 4440   | 37 | 12 | 120806035 | 120806035 | Missense_Mutation | SNP | C | T | 4   | 7   | c.142G>A     | c.(142-144)GAG>AAG   | p.E48K        |
| Pat_28 | Post-Resistance | KDM2B    | 84678  | 37 | 12 | 121880111 | 121880111 | Missense_Mutation | SNP | G | A | 13  | 17  | c.3133C>T    | c.(3133-3135)CCA>TCA | p.P1045S      |
| Pat_28 | Post-Resistance | B3GNT4   | 79369  | 37 | 12 | 122690928 | 122690928 | Missense_Mutation | SNP | G | A | 24  | 33  | c.130G>A     | c.(130-132)GGC>AGC   | p.G44S        |
| Pat_28 | Post-Resistance | SBNO1    | 55206  | 37 | 12 | 123789220 | 123789220 | Missense_Mutation | SNP | G | A | 12  | 23  | c.3677C>T    | c.(3676-3678)CCT>CTT | p.P1226L      |
| Pat_28 | Post-Resistance | GPR133   | 283383 | 37 | 12 | 131476909 | 131476909 | Missense_Mutation | SNP | C | T | 5   | 141 | c.938C>T     | c.(937-939)TCG>TTG   | p.S313L       |
| Pat_28 | Post-Resistance | EP400    | 57634  | 37 | 12 | 132546772 | 132546772 | Nonsense_Mutation | SNP | C | T | 35  | 61  | c.8002C>T    | c.(8002-8004)CGA>TGA | p.R2668*      |
| Pat_28 | Post-Resistance | DDX51    | 317781 | 37 | 12 | 132625058 | 132625058 | Missense_Mutation | SNP | C | T | 14  | 23  | c.1583G>A    | c.(1582-1584)GGG>GAG | p.G528E       |
| Pat_28 | Post-Resistance | PARP4    | 143    | 37 | 13 | 25009030  | 25009030  | Missense_Mutation | SNP | G | A | 21  | 43  | c.4249C>T    | c.(4249-4251)CCT>TCT | p.P1417S      |
| Pat_28 | Post-Resistance | MTUS2    | 23281  | 37 | 13 | 29599727  | 29599727  | Missense_Mutation | SNP | G | A | 16  | 35  | c.922G>A     | c.(922-924)GAA>AAA   | p.E308K       |
| Pat_28 | Post-Resistance | SLC7A1   | 6541   | 37 | 13 | 30091417  | 30091417  | Missense_Mutation | SNP | G | A | 22  | 10  | c.1541C>T    | c.(1540-1542)ACC>ATC | p.T514I       |
| Pat_28 | Post-Resistance | NBEA     | 26960  | 37 | 13 | 36046651  | 36046651  | Missense_Mutation | SNP | C | T | 27  | 68  | c.6563C>T    | c.(6562-6564)GCC>GTC | p.A2188V      |
| Pat_28 | Post-Resistance | FAM48A   | 55578  | 37 | 13 | 37598261  | 37598261  | Missense_Mutation | SNP | G | A | 48  | 122 | c.1502C>T    | c.(1501-1503)CCA>CTA | p.P501L       |
| Pat_28 | Post-Resistance | KIAA0564 | 23078  | 37 | 13 | 42358022  | 42358022  | Missense_Mutation | SNP | C | T | 44  | 140 | c.2186G>A    | c.(2185-2187)GGA>GAA | p.G729E       |
| Pat_28 | Post-Resistance | ENOX1    | 55068  | 37 | 13 | 43896613  | 43896613  | Nonsense_Mutation | SNP | G | A | 32  | 80  | c.1168C>T    | c.(1168-1170)CAG>TAG | p.Q390*       |
| Pat_28 | Post-Resistance | TSC22D1  | 8848   | 37 | 13 | 45148787  | 45148787  | Missense_Mutation | SNP | C | T | 79  | 203 | c.1424G>A    | c.(1423-1425)AGC>AAC | p.S475N       |
| Pat_28 | Post-Resistance | COG3     | 83548  | 37 | 13 | 46057384  | 46057384  | Missense_Mutation | SNP | C | T | 17  | 41  | c.737C>T     | c.(736-738)CCC>CTC   | p.P246L       |
| Pat_28 | Post-Resistance | CPB2     | 1361   | 37 | 13 | 46632381  | 46632381  | Missense_Mutation | SNP | G | A | 162 | 355 | c.932C>T     | c.(931-933)TCA>TTA   | p.S311L       |
| Pat_28 | Post-Resistance | CDADC1   | 81602  | 37 | 13 | 49841965  | 49841965  | Missense_Mutation | SNP | C | T | 13  | 36  | c.770C>T     | c.(769-771)ACT>ATT   | p.T257I       |
| Pat_28 | Post-Resistance | KCNRG    | 283518 | 37 | 13 | 50594432  | 50594432  | Missense_Mutation | SNP | G | A | 27  | 86  | c.661G>A     | c.(661-663)GAA>AAA   | p.E221K       |
| Pat_28 | Post-Resistance | FAM10A4  | 145165 | 37 | 13 | 50746472  | 50746472  | Missense_Mutation | SNP | G | A | 12  | 42  | c.248G>A     | c.(247-249)GGT>GAT   | p.G83D        |
| Pat_28 | Post-Resistance | DIAPH3   | 81624  | 37 | 13 | 60737836  | 60737836  | Missense_Mutation | SNP | G | A | 4   | 15  | c.65C>T      | c.(64-66)CCT>CTT     | p.P22L        |
| Pat_28 | Post-Resistance | DACH1    | 1602   | 37 | 13 | 72440816  | 72440816  | Missense_Mutation | SNP | G | A | 6   | 24  | c.92C>T      | c.(91-93)ACC>ATC     | p.T31I        |
| Pat_28 | Post-Resistance | TBC1D4   | 9882   | 37 | 13 | 76055733  | 76055733  | Nonsense_Mutation | SNP | C | T | 8   | 14  | c.171G>A     | c.(169-171)TGG>TGA   | p.W57*        |
| Pat_28 | Post-Resistance | LMO7     | 4008   | 37 | 13 | 76397878  | 76397878  | Missense_Mutation | SNP | C | T | 25  | 116 | c.2119C>T    | c.(2119-2121)CCC>TCC | p.P707S       |
| Pat_28 | Post-Resistance | MYCBP2   | 23077  | 37 | 13 | 77732175  | 77732175  | Missense_Mutation | SNP | C | T | 46  | 133 | c.6553G>A    | c.(6553-6555)GCA>ACA | p.A2185T      |
| Pat_28 | Post-Resistance | DCT      | 1638   | 37 | 13 | 95131491  | 95131491  | Missense_Mutation | SNP | C | T | 13  | 48  | c.19G>A      | c.(19-21)GGG>AGG     | p.G7R         |
| Pat_28 | Post-Resistance | TM9SF2   | 9375   | 37 | 13 | 100153939 | 100153939 | Missense_Mutation | SNP | G | A | 27  | 50  | c.79G>A      | c.(79-81)GTT>ATT     | p.V27I        |
| Pat_28 | Post-Resistance | UPF3A    | 65110  | 37 | 13 | 115051782 | 115051782 | Missense_Mutation | SNP | G | A | 35  | 69  | c.427G>A     | c.(427-429)GAA>AAA   | p.E143K       |
| Pat_28 | Post-Resistance | RNASE11  | 122651 | 37 | 14 | 21052549  | 21052549  | Missense_Mutation | SNP | C | T | 55  | 140 | c.85G>A      | c.(85-87)GAA>AAA     | p.E29K        |
| Pat_28 | Post-Resistance | RNASE2   | 6036   | 37 | 14 | 21424315  | 21424315  | Missense_Mutation | SNP | C | T | 55  | 143 | c.385C>T     | c.(385-387)CCA>TCA   | p.P129S       |
| Pat_28 | Post-Resistance | RAB2B    | 84932  | 37 | 14 | 21930517  | 21930517  | Missense_Mutation | SNP | G | A | 46  | 155 | c.535C>T     | c.(535-537)CAC>TAC   | p.H179Y       |
| Pat_28 | Post-Resistance | SALL2    | 6297   | 37 | 14 | 21992135  | 21992135  | Missense_Mutation | SNP | G | A | 26  | 37  | c.1727C>T    | c.(1726-1728)CCC>CTC | p.P576L       |
| Pat_28 | Post-Resistance | LRP10    | 26020  | 37 | 14 | 23346554  | 23346554  | Missense_Mutation | SNP | G | A | 67  | 123 | c.1960G>A    | c.(1960-1962)GTG>ATG | p.V654M       |
| Pat_28 | Post-Resistance | LRRC16B  | 90668  | 37 | 14 | 24524817  | 24524817  | Missense_Mutation | SNP | A | G | 44  | 150 | c.671A>G     | c.(670-672)GAC>GGC   | p.D224G       |
| Pat_28 | Post-Resistance | TM9SF1   | 10548  | 37 | 14 | 24662189  | 24662189  | Missense_Mutation | SNP | G | A | 11  | 33  | c.632C>T     | c.(631-633)ACT>ATT   | p.T211I       |
| Pat_28 | Post-Resistance | LTB4R2   | 56413  | 37 | 14 | 24779959  | 24779959  | Missense_Mutation | SNP | C | T | 22  | 48  | c.182C>T     | c.(181-183)GCG>GTG   | p.A61V        |
| Pat_28 | Post-Resistance | NYNRIN   | 57523  | 37 | 14 | 24868469  | 24868469  | Missense_Mutation | SNP | G | A | 16  | 37  | c.17G>A      | c.(16-18)GGC>GAC     | p.G6D         |
| Pat_28 | Post-Resistance | RALGAPA1 | 253959 | 37 | 14 | 36096557  | 36096557  | Missense_Mutation | SNP | G | A | 42  | 127 | c.5078C>T    | c.(5077-5079)CCT>CTT | p.P1693L      |
| Pat_28 | Post-Resistance | FOXA1    | 3169   | 37 | 14 | 38061750  | 38061750  | Missense_Mutation | SNP | C | T | 21  | 58  | c.239G>A     | c.(238-240)GGC>GAC   | p.G80D        |
| Pat_28 | Post-Resistance | SEC23A   | 10484  | 37 | 14 | 39514375  | 39514375  | Missense_Mutation | SNP | G | A | 54  | 148 | c.1891C>T    | c.(1891-1893)CCA>TCA | p.P631S       |
| Pat_28 | Post-Resistance | CTAGE5   | 4253   | 37 | 14 | 39772681  | 39772681  | Splice_Site       | SNP | G | A | 54  | 139 | c.917_splice | c.e11-1              | p.D306_splice |
| Pat_28 | Post-Resistance | PRPF39   | 55015  | 37 | 14 | 45577693  | 45577693  | Missense_Mutation | SNP | G | A | 43  | 108 | c.979G>A     | c.(979-981)GAA>AAA   | p.E327K       |
| Pat_28 | Post-Resistance | RPL36AL  | 6166   | 37 | 14 | 50085608  | 50085608  | Missense_Mutation | SNP | C | T | 117 | 287 | c.215G>A     | c.(214-216)TGT>TAT   | p.C72Y        |
| Pat_28 | Post-Resistance | ATP5S    | 27109  | 37 | 14 | 50788309  | 50788309  | Missense_Mutation | SNP | A | T | 55  | 36  | c.149A>T     | c.(148-150)AAT>ATT   | p.N50I        |

|        |                 |           |        |    |    |           |           |                   |     |    |    |     |     |                |                        |                |
|--------|-----------------|-----------|--------|----|----|-----------|-----------|-------------------|-----|----|----|-----|-----|----------------|------------------------|----------------|
| Pat_28 | Post-Resistance | SAV1      | 60485  | 37 | 14 | 51111627  | 51111627  | Missense_Mutation | SNP | C  | T  | 49  | 141 | c.641G>A       | c.(640-642)AGA>AAA     | p.R214K        |
| Pat_28 | Post-Resistance | NID2      | 22795  | 37 | 14 | 52508877  | 52508877  | Missense_Mutation | SNP | C  | T  | 74  | 177 | c.1771G>A      | c.(1771-1773)GGC>AGC   | p.G591S        |
| Pat_28 | Post-Resistance | NID2      | 22795  | 37 | 14 | 52534788  | 52534788  | Missense_Mutation | SNP | G  | A  | 12  | 25  | c.322C>T       | c.(322-324)CCT>TCT     | p.P108S        |
| Pat_28 | Post-Resistance | GPR137C   | 283554 | 37 | 14 | 53101727  | 53101727  | Missense_Mutation | SNP | C  | T  | 40  | 134 | c.1184C>T      | c.(1183-1185)ACT>ATT   | p.T395I        |
| Pat_28 | Post-Resistance | KIAA0586  | 9786   | 37 | 14 | 58937442  | 58937442  | Splice_Site       | SNP | G  | A  | 11  | 50  | c.2325_splice  | c.e16+1                | p.K775_splice  |
| Pat_28 | Post-Resistance | SYNE2     | 23224  | 37 | 14 | 64532207  | 64532207  | Missense_Mutation | SNP | C  | T  | 48  | 123 | c.10270C>T     | c.(10270-10272)CTT>TTT | p.L3424F       |
| Pat_28 | Post-Resistance | SYNE2     | 23224  | 37 | 14 | 64588803  | 64588803  | Missense_Mutation | SNP | C  | T  | 31  | 75  | c.13232C>T     | c.(13231-13233)CCC>CTC | p.P4411L       |
| Pat_28 | Post-Resistance | C14orf50  | 145376 | 37 | 14 | 65053913  | 65053913  | Missense_Mutation | SNP | C  | T  | 15  | 44  | c.713C>T       | c.(712-714)TCC>TTC     | p.S238F        |
| Pat_28 | Post-Resistance | PLEKHH1   | 57475  | 37 | 14 | 68028985  | 68028985  | Missense_Mutation | SNP | G  | A  | 3   | 8   | c.637G>A       | c.(637-639)GCA>ACA     | p.A213T        |
| Pat_28 | Post-Resistance | ZFYVE26   | 23503  | 37 | 14 | 68220930  | 68220930  | Splice_Site       | SNP | C  | A  | 8   | 240 | c.6987_splice  | c.e38-1                | p.R2329_splice |
| Pat_28 | Post-Resistance | ZFYVE26   | 23503  | 37 | 14 | 68265160  | 68265161  | Missense_Mutation | DNP | CC | TT | 29  | 19  | .1818_1819GG>A | 316-1821)GAGGGG>GAA    | p.G607R        |
| Pat_28 | Post-Resistance | DNAL1     | 83544  | 37 | 14 | 74125550  | 74125550  | Missense_Mutation | SNP | G  | A  | 24  | 84  | c.43G>A        | c.(43-45)GAA>AAA       | p.E15K         |
| Pat_28 | Post-Resistance | C14orf115 | 55237  | 37 | 14 | 74823727  | 74823727  | Missense_Mutation | SNP | G  | A  | 16  | 48  | c.241G>A       | c.(241-243)GGG>AGG     | p.G81R         |
| Pat_28 | Post-Resistance | C14orf1   | 11161  | 37 | 14 | 76121320  | 76121320  | Splice_Site       | SNP | C  | T  | 88  | 211 | c.134_splice   | c.e3-1                 | p.V45_splice   |
| Pat_28 | Post-Resistance | EML5      | 161436 | 37 | 14 | 89083215  | 89083215  | Missense_Mutation | SNP | C  | T  | 33  | 85  | c.5651G>A      | c.(5650-5652)GGA>GAA   | p.G1884E       |
| Pat_28 | Post-Resistance | C14orf102 | 55051  | 37 | 14 | 90769076  | 90769076  | Missense_Mutation | SNP | C  | T  | 22  | 47  | c.1399G>A      | c.(1399-1401)GAG>AAG   | p.E467K        |
| Pat_28 | Post-Resistance | TRIP11    | 9321   | 37 | 14 | 92469971  | 92469971  | Missense_Mutation | SNP | C  | T  | 41  | 116 | c.4349G>A      | c.(4348-4350)AGA>AAA   | p.R1450K       |
| Pat_28 | Post-Resistance | KIAA1409  | 57578  | 37 | 14 | 94063753  | 94063753  | Missense_Mutation | SNP | C  | T  | 68  | 187 | c.2708C>T      | c.(2707-2709)ACC>ATC   | p.T903I        |
| Pat_28 | Post-Resistance | DICER1    | 23405  | 37 | 14 | 95573996  | 95573996  | Missense_Mutation | SNP | G  | A  | 37  | 115 | c.2753C>T      | c.(2752-2754)ACA>ATA   | p.T918I        |
| Pat_28 | Post-Resistance | BDKRB1    | 623    | 37 | 14 | 96730461  | 96730461  | Nonsense_Mutation | SNP | C  | T  | 20  | 49  | c.442C>T       | c.(442-444)CAG>TAG     | p.Q148*        |
| Pat_28 | Post-Resistance | HSP90AA1  | 3320   | 37 | 14 | 102605629 | 102605629 | Missense_Mutation | SNP | G  | A  | 26  | 54  | c.113C>T       | c.(112-114)CCA>CTA     | p.P38L         |
| Pat_28 | Post-Resistance | RAGE      | 5891   | 37 | 14 | 102698043 | 102698043 | Splice_Site       | SNP | C  | T  | 131 | 334 | c.981_splice   | c.e10+1                | p.Q327_splice  |
| Pat_28 | Post-Resistance | ZNF839    | 55778  | 37 | 14 | 102793076 | 102793076 | Missense_Mutation | SNP | C  | T  | 7   | 18  | c.695C>T       | c.(694-696)TCT>TTT     | p.S232F        |
| Pat_28 | Post-Resistance | RCOR1     | 23186  | 37 | 14 | 103187413 | 103187413 | Missense_Mutation | SNP | C  | T  | 81  | 223 | c.1114C>T      | c.(1114-1116)CTT>TTT   | p.L372F        |
| Pat_28 | Post-Resistance | CDC42BPB  | 9578   | 37 | 14 | 103420938 | 103420938 | Splice_Site       | SNP | C  | T  | 11  | 36  | c.2988_splice  | c.e22+1                | p.E996_splice  |
| Pat_28 | Post-Resistance | AHNAK2    | 113146 | 37 | 14 | 105415040 | 105415040 | Missense_Mutation | SNP | C  | T  | 32  | 106 | c.6748G>A      | c.(6748-6750)GAC>AAC   | p.D2250N       |
| Pat_28 | Post-Resistance | OR4M2     | 390538 | 37 | 15 | 22368861  | 22368861  | Missense_Mutation | SNP | G  | A  | 37  | 204 | c.286G>A       | c.(286-288)GGA>AGA     | p.G96R         |
| Pat_28 | Post-Resistance | C15orf2   | 23742  | 37 | 15 | 24924252  | 24924252  | Missense_Mutation | SNP | G  | A  | 30  | 55  | c.3238G>A      | c.(3238-3240)GGA>AGA   | p.G1080R       |
| Pat_28 | Post-Resistance | RYR3      | 6263   | 37 | 15 | 33955831  | 33955831  | Nonsense_Mutation | SNP | C  | T  | 5   | 19  | c.5512C>T      | c.(5512-5514)CAG>TAG   | p.Q1838*       |
| Pat_28 | Post-Resistance | SPRED1    | 161742 | 37 | 15 | 38643504  | 38643504  | Missense_Mutation | SNP | G  | A  | 30  | 37  | c.974G>A       | c.(973-975)CGA>CAA     | p.R325Q        |
| Pat_28 | Post-Resistance | INO80     | 54617  | 37 | 15 | 41277593  | 41277593  | Missense_Mutation | SNP | C  | A  | 50  | 78  | c.3864G>T      | c.(3862-3864)CAG>CAT   | p.Q1288H       |
| Pat_28 | Post-Resistance | MAPKBP1   | 23005  | 37 | 15 | 42110227  | 42110227  | Missense_Mutation | SNP | G  | A  | 87  | 123 | c.1943G>A      | c.(1942-1944)GGA>GAA   | p.G648E        |
| Pat_28 | Post-Resistance | ZFP106    | 64397  | 37 | 15 | 42717193  | 42717193  | Missense_Mutation | SNP | G  | A  | 44  | 45  | c.4960C>T      | c.(4960-4962)CAT>TAT   | p.H1654Y       |
| Pat_28 | Post-Resistance | TUBGCP4   | 27229  | 37 | 15 | 43678070  | 43678070  | Missense_Mutation | SNP | C  | T  | 24  | 44  | c.805C>T       | c.(805-807)CCA>TCA     | p.P269S        |
| Pat_28 | Post-Resistance | CATSPER2  | 117155 | 37 | 15 | 43940142  | 43940142  | Missense_Mutation | SNP | G  | T  | 6   | 146 | c.118C>A       | c.(118-120)CCG>ACG     | p.P40T         |
| Pat_28 | Post-Resistance | SPG11     | 80208  | 37 | 15 | 44888417  | 44888417  | Missense_Mutation | SNP | C  | T  | 66  | 83  | c.4298G>A      | c.(4297-4299)GGA>GAA   | p.G1433E       |
| Pat_28 | Post-Resistance | DUOX1     | 53905  | 37 | 15 | 45444694  | 45444694  | Missense_Mutation | SNP | C  | T  | 19  | 32  | c.3404C>T      | c.(3403-3405)TCC>TTC   | p.S1135F       |
| Pat_28 | Post-Resistance | SLC27A2   | 11001  | 37 | 15 | 50521152  | 50521152  | Missense_Mutation | SNP | G  | A  | 30  | 59  | c.1468G>A      | c.(1468-1470)GAA>AAA   | p.E490K        |
| Pat_28 | Post-Resistance | GABPB1    | 2553   | 37 | 15 | 50596219  | 50596219  | Missense_Mutation | SNP | G  | A  | 69  | 97  | c.220C>T       | c.(220-222)CCA>TCA     | p.P74S         |
| Pat_28 | Post-Resistance | GLDN      | 342035 | 37 | 15 | 51669649  | 51669649  | Nonsense_Mutation | SNP | C  | T  | 35  | 39  | c.367C>T       | c.(367-369)CGA>TGA     | p.R123*        |
| Pat_28 | Post-Resistance | PRTG      | 283659 | 37 | 15 | 55916646  | 55916646  | Missense_Mutation | SNP | G  | A  | 39  | 34  | c.2987C>T      | c.(2986-2988)GCC>GTC   | p.A996V        |
| Pat_28 | Post-Resistance | ZNF280D   | 54816  | 37 | 15 | 56946646  | 56946646  | Missense_Mutation | SNP | C  | T  | 43  | 68  | c.2113G>A      | c.(2113-2115)GAT>AAT   | p.D705N        |
| Pat_28 | Post-Resistance | ZNF280D   | 54816  | 37 | 15 | 56981518  | 56981518  | Missense_Mutation | SNP | G  | A  | 48  | 93  | c.650C>T       | c.(649-651)TCC>TTC     | p.S217F        |
| Pat_28 | Post-Resistance | SLTM      | 79811  | 37 | 15 | 59179711  | 59179711  | Missense_Mutation | SNP | C  | T  | 27  | 48  | c.2404G>A      | c.(2404-2406)GGG>AGG   | p.G802R        |
| Pat_28 | Post-Resistance | HERC1     | 8925   | 37 | 15 | 63922787  | 63922787  | Missense_Mutation | SNP | G  | A  | 75  | 107 | c.12844C>T     | c.(12844-12846)CCG>TCC | p.P4282S       |
| Pat_28 | Post-Resistance | HERC1     | 8925   | 37 | 15 | 63967129  | 63967129  | Missense_Mutation | SNP | G  | A  | 61  | 88  | c.7258C>T      | c.(7258-7260)CAT>TAT   | p.H2420Y       |
| Pat_28 | Post-Resistance | MAP2K1    | 5604   | 37 | 15 | 66735639  | 66735639  | Missense_Mutation | SNP | G  | A  | 44  | 65  | c.460G>A       | c.(460-462)GTC>ATC     | p.V154I        |



|        |                 |          |        |    |    |          |          |                   |     |    |    |    |     |                |                        |               |
|--------|-----------------|----------|--------|----|----|----------|----------|-------------------|-----|----|----|----|-----|----------------|------------------------|---------------|
| Pat_28 | Post-Resistance | LCTL     | 197021 | 37 | 15 | 66845518 | 66845518 | Missense_Mutation | SNP | C  | T  | 88 | 156 | c.1001G>A      | c.(1000-1002)GGC>GAC   | p.G334D       |
| Pat_28 | Post-Resistance | PKM2     | 5315   | 37 | 15 | 72500969 | 72500969 | Missense_Mutation | SNP | C  | T  | 32 | 51  | c.829G>A       | c.(829-831)GTT>ATT     | p.V277I       |
| Pat_28 | Post-Resistance | CELF6    | 60677  | 37 | 15 | 72612113 | 72612113 | Missense_Mutation | SNP | C  | T  | 3  | 6   | c.103G>A       | c.(103-105)GGT>AGT     | p.G35S        |
| Pat_28 | Post-Resistance | NEO1     | 4756   | 37 | 15 | 73414991 | 73414991 | Missense_Mutation | SNP | C  | T  | 62 | 109 | c.574C>T       | c.(574-576)CTT>TTT     | p.L192F       |
| Pat_28 | Post-Resistance | EDC3     | 80153  | 37 | 15 | 74925035 | 74925035 | Missense_Mutation | SNP | G  | A  | 42 | 59  | c.1445C>T      | c.(1444-1446)CCC>CTC   | p.P482L       |
| Pat_28 | Post-Resistance | C15orf27 | 123591 | 37 | 15 | 76430187 | 76430187 | Missense_Mutation | SNP | G  | A  | 27 | 41  | c.178G>A       | c.(178-180)GCG>ACG     | p.A60T        |
| Pat_28 | Post-Resistance | SH2D7    | 646892 | 37 | 15 | 78393670 | 78393670 | Missense_Mutation | SNP | C  | T  | 4  | 7   | c.1075C>T      | c.(1075-1077)CTC>TTC   | p.L359F       |
| Pat_28 | Post-Resistance | RASGRF1  | 5923   | 37 | 15 | 79317768 | 79317768 | Missense_Mutation | SNP | C  | T  | 24 | 34  | c.1430G>A      | c.(1429-1431)GGG>GAG   | p.G477E       |
| Pat_28 | Post-Resistance | ADAMTSL3 | 57188  | 37 | 15 | 84651298 | 84651298 | Missense_Mutation | SNP | C  | T  | 57 | 73  | c.2918C>T      | c.(2917-2919)GCT>GTT   | p.A973V       |
| Pat_28 | Post-Resistance | ZNF592   | 9640   | 37 | 15 | 85327998 | 85327998 | Missense_Mutation | SNP | C  | T  | 39 | 57  | c.2092C>T      | c.(2092-2094)CCA>TCA   | p.P698S       |
| Pat_28 | Post-Resistance | AKAP13   | 11214  | 37 | 15 | 86129008 | 86129008 | Missense_Mutation | SNP | G  | A  | 52 | 65  | c.4115G>A      | c.(4114-4116)AGC>AAC   | p.S1372N      |
| Pat_28 | Post-Resistance | DET1     | 55070  | 37 | 15 | 89074920 | 89074920 | Missense_Mutation | SNP | G  | A  | 28 | 35  | c.17C>T        | c.(16-18)TCT>TTT       | p.S6F         |
| Pat_28 | Post-Resistance | IDH2     | 3418   | 37 | 15 | 90630349 | 90630349 | Missense_Mutation | SNP | G  | A  | 42 | 64  | c.962C>T       | c.(961-963)GCC>GTC     | p.A321V       |
| Pat_28 | Post-Resistance | IQGAP1   | 8826   | 37 | 15 | 91020018 | 91020018 | Missense_Mutation | SNP | G  | A  | 57 | 82  | c.2908G>A      | c.(2908-2910)GAA>AAA   | p.E970K       |
| Pat_28 | Post-Resistance | CLCN7    | 1186   | 37 | 16 | 1498984  | 1498984  | Missense_Mutation | SNP | C  | T  | 10 | 21  | c.1780G>A      | c.(1780-1782)GGC>AGC   | p.G594S       |
| Pat_28 | Post-Resistance | TSC2     | 7249   | 37 | 16 | 2115539  | 2115539  | Missense_Mutation | SNP | C  | T  | 69 | 103 | c.1619C>T      | c.(1618-1620)TCC>TTC   | p.S540F       |
| Pat_28 | Post-Resistance | PKD1     | 5310   | 37 | 16 | 2159518  | 2159518  | Missense_Mutation | SNP | C  | T  | 9  | 5   | c.5650G>A      | c.(5650-5652)GAG>AAG   | p.E1884K      |
| Pat_28 | Post-Resistance | SRRM2    | 23524  | 37 | 16 | 2811608  | 2811608  | Missense_Mutation | SNP | G  | A  | 88 | 123 | c.1079G>A      | c.(1078-1080)GGC>GAC   | p.G360D       |
| Pat_28 | Post-Resistance | ZNF200   | 7752   | 37 | 16 | 3283749  | 3283749  | Missense_Mutation | SNP | C  | T  | 63 | 115 | c.7G>A         | c.(7-9)GCT>ACT         | p.A3T         |
| Pat_28 | Post-Resistance | MEFV     | 4210   | 37 | 16 | 3293211  | 3293211  | Missense_Mutation | SNP | C  | T  | 20 | 46  | c.2276G>A      | c.(2275-2277)GGG>GAG   | p.G759E       |
| Pat_28 | Post-Resistance | ZNF434   | 54925  | 37 | 16 | 3434791  | 3434791  | Missense_Mutation | SNP | C  | T  | 83 | 107 | c.266G>A       | c.(265-267)CGG>CAG     | p.R89Q        |
| Pat_28 | Post-Resistance | HMOX2    | 3163   | 37 | 16 | 4557807  | 4557807  | Missense_Mutation | SNP | C  | T  | 35 | 40  | c.298C>T       | c.(298-300)CCC>TCC     | p.P100S       |
| Pat_28 | Post-Resistance | MGRN1    | 23295  | 37 | 16 | 4732846  | 4732846  | Missense_Mutation | SNP | C  | T  | 19 | 34  | c.1381C>T      | c.(1381-1383)CCC>TCC   | p.P461S       |
| Pat_28 | Post-Resistance | A2BP1    | 54715  | 37 | 16 | 7703847  | 7703847  | Missense_Mutation | SNP | C  | T  | 35 | 59  | c.788C>T       | c.(787-789)GCC>GTC     | p.A263V       |
| Pat_28 | Post-Resistance | NTAN1    | 123803 | 37 | 16 | 15141408 | 15141408 | Splice_Site       | SNP | C  | T  | 16 | 5   | c.251_splice   | c.e4-1                 | p.G84_splice  |
| Pat_28 | Post-Resistance | ACSM2B   | 348158 | 37 | 16 | 20563483 | 20563483 | Missense_Mutation | SNP | G  | A  | 78 | 26  | c.877C>T       | c.(877-879)CCA>TCA     | p.P293S       |
| Pat_28 | Post-Resistance | PRKCB    | 5579   | 37 | 16 | 24196889 | 24196889 | Splice_Site       | SNP | G  | A  | 28 | 9   | c.1722_splice  | c.e15+1                | p.G574_splice |
| Pat_28 | Post-Resistance | CORO1A   | 11151  | 37 | 16 | 30196592 | 30196592 | Missense_Mutation | SNP | C  | T  | 27 | 16  | c.62C>T        | c.(61-63)GCC>GTC       | p.A21V        |
| Pat_28 | Post-Resistance | PRR14    | 78994  | 37 | 16 | 30666261 | 30666261 | Missense_Mutation | SNP | C  | T  | 37 | 24  | c.970C>T       | c.(970-972)CCT>TCT     | p.P324S       |
| Pat_28 | Post-Resistance | PSKH1    | 5681   | 37 | 16 | 67942965 | 67942965 | Missense_Mutation | SNP | G  | A  | 23 | 13  | c.313G>A       | c.(313-315)GGC>AGC     | p.G105S       |
| Pat_28 | Post-Resistance | HYDIN    | 54768  | 37 | 16 | 70891656 | 70891656 | Missense_Mutation | SNP | G  | A  | 18 | 32  | c.12244C>T     | c.(12244-12246)CTC>TTC | p.L4082F      |
| Pat_28 | Post-Resistance | KIAA0174 | 9798   | 37 | 16 | 71950997 | 71950997 | Missense_Mutation | SNP | C  | T  | 30 | 22  | c.356C>T       | c.(355-357)GCT>GTT     | p.A119V       |
| Pat_28 | Post-Resistance | CNTNAP4  | 85445  | 37 | 16 | 76481969 | 76481970 | Missense_Mutation | DNP | CC | TT | 19 | 17  | c.599_600CC>TT | c.(598-600)TCC>TTT     | p.S200F       |
| Pat_28 | Post-Resistance | BCMO1    | 53630  | 37 | 16 | 81295889 | 81295889 | Splice_Site       | SNP | G  | A  | 15 | 10  | c.471_splice   | c.e4+1                 | p.K157_splice |
| Pat_28 | Post-Resistance | CDH13    | 1012   | 37 | 16 | 83159054 | 83159054 | Missense_Mutation | SNP | C  | T  | 16 | 4   | c.431C>T       | c.(430-432)CCC>CTC     | p.P144L       |
| Pat_28 | Post-Resistance | OSGIN1   | 29948  | 37 | 16 | 83998908 | 83998908 | Missense_Mutation | SNP | C  | T  | 7  | 8   | c.979C>T       | c.(979-981)CTC>TTC     | p.L327F       |
| Pat_28 | Post-Resistance | TCF25    | 22980  | 37 | 16 | 89965263 | 89965263 | Missense_Mutation | SNP | C  | T  | 14 | 10  | c.1204C>T      | c.(1204-1206)CTC>TTC   | p.L402F       |
| Pat_28 | Post-Resistance | SMYD4    | 114826 | 37 | 17 | 1703574  | 1703574  | Missense_Mutation | SNP | C  | T  | 68 | 109 | c.1114G>A      | c.(1114-1116)GAT>AAT   | p.D372N       |
| Pat_28 | Post-Resistance | ATP2A3   | 489    | 37 | 17 | 3854679  | 3854679  | Missense_Mutation | SNP | C  | T  | 9  | 50  | c.329G>A       | c.(328-330)CGC>CAC     | p.R110H       |
| Pat_28 | Post-Resistance | ANKFY1   | 51479  | 37 | 17 | 4083052  | 4083052  | Missense_Mutation | SNP | C  | A  | 9  | 159 | c.2361G>T      | c.(2359-2361)CAG>CAT   | p.Q787H       |
| Pat_28 | Post-Resistance | KIF1C    | 10749  | 37 | 17 | 4904580  | 4904580  | Missense_Mutation | SNP | C  | T  | 45 | 47  | c.247C>T       | c.(247-249)CTC>TTC     | p.L83F        |
| Pat_28 | Post-Resistance | ZNF232   | 7775   | 37 | 17 | 5012856  | 5012856  | Missense_Mutation | SNP | C  | T  | 30 | 69  | c.250G>A       | c.(250-252)GAG>AAG     | p.E84K        |
| Pat_28 | Post-Resistance | C17orf87 | 388325 | 37 | 17 | 5126713  | 5126713  | Nonsense_Mutation | SNP | C  | T  | 38 | 132 | c.60G>A        | c.(58-60)TGG>TGA       | p.W20*        |
| Pat_28 | Post-Resistance | NLRP1    | 22861  | 37 | 17 | 5418157  | 5418157  | Missense_Mutation | SNP | C  | T  | 16 | 31  | c.4339G>A      | c.(4339-4341)GCC>ACC   | p.A1447T      |
| Pat_28 | Post-Resistance | NEURL4   | 84461  | 37 | 17 | 7219594  | 7219594  | Missense_Mutation | SNP | C  | T  | 12 | 33  | c.4537G>A      | c.(4537-4539)GTG>ATG   | p.V1513M      |
| Pat_28 | Post-Resistance | CHRNB1   | 1140   | 37 | 17 | 7352023  | 7352023  | Missense_Mutation | SNP | C  | T  | 27 | 39  | c.736C>T       | c.(736-738)CTC>TTC     | p.L246F       |
| Pat_28 | Post-Resistance | WRAP53   | 55135  | 37 | 17 | 7606676  | 7606676  | Missense_Mutation | SNP | C  | T  | 14 | 26  | c.1519C>T      | c.(1519-1521)CAC>TAC   | p.H507Y       |

|        |                 |          |        |    |    |          |          |                   |     |   |   |     |     |               |                      |               |
|--------|-----------------|----------|--------|----|----|----------|----------|-------------------|-----|---|---|-----|-----|---------------|----------------------|---------------|
| Pat_28 | Post-Resistance | ARHGEF15 | 22899  | 37 | 17 | 8222177  | 8222177  | Missense_Mutation | SNP | C | T | 137 | 208 | c.1982C>T     | c.(1981-1983)CCT>CTT | p.P661L       |
| Pat_28 | Post-Resistance | MYH13    | 8735   | 37 | 17 | 10224989 | 10224989 | Missense_Mutation | SNP | C | T | 15  | 28  | c.2971G>A     | c.(2971-2973)GAA>AAA | p.E991K       |
| Pat_28 | Post-Resistance | DNAH9    | 1770   | 37 | 17 | 11660901 | 11660901 | Missense_Mutation | SNP | C | T | 37  | 54  | c.6887C>T     | c.(6886-6888)CCT>CTT | p.P2296L      |
| Pat_28 | Post-Resistance | TRIM16   | 10626  | 37 | 17 | 15518958 | 15518958 | Splice_Site       | SNP | C | T | 13  | 29  | c.1600_splice | c.e8+1               | p.E534_splice |
| Pat_28 | Post-Resistance | CDRT1    | 374286 | 37 | 17 | 15522757 | 15522757 | Missense_Mutation | SNP | G | A | 145 | 232 | c.70C>T       | c.(70-72)CCT>TCT     | p.P24S        |
| Pat_28 | Post-Resistance | NCOR1    | 9611   | 37 | 17 | 16089890 | 16089890 | Missense_Mutation | SNP | C | T | 30  | 46  | c.220G>A      | c.(220-222)GAA>AAA   | p.E74K        |
| Pat_28 | Post-Resistance | CENPV    | 201161 | 37 | 17 | 16256366 | 16256366 | Missense_Mutation | SNP | C | T | 6   | 14  | c.385G>A      | c.(385-387)GCC>ACC   | p.A129T       |
| Pat_28 | Post-Resistance | PEMT     | 10400  | 37 | 17 | 17415822 | 17415822 | Splice_Site       | SNP | C | T | 5   | 15  | c.355_splice  | c.e4+1               | p.G119_splice |
| Pat_28 | Post-Resistance | SLC47A1  | 55244  | 37 | 17 | 19463768 | 19463768 | Missense_Mutation | SNP | C | A | 41  | 75  | c.1068C>A     | c.(1066-1068)AGC>AGA | p.S356R       |
| Pat_28 | Post-Resistance | NOS2     | 4843   | 37 | 17 | 26085933 | 26085933 | Missense_Mutation | SNP | C | T | 6   | 11  | c.3328G>A     | c.(3328-3330)GTC>ATC | p.V1110I      |
| Pat_28 | Post-Resistance | MYO18A   | 399687 | 37 | 17 | 27438824 | 27438824 | Missense_Mutation | SNP | C | T | 10  | 16  | c.2656G>A     | c.(2656-2658)GAG>AAG | p.E886K       |
| Pat_28 | Post-Resistance | SLC6A4   | 6532   | 37 | 17 | 28545256 | 28545256 | Missense_Mutation | SNP | T | A | 18  | 17  | c.578A>T      | c.(577-579)GAC>GTC   | p.D193V       |
| Pat_28 | Post-Resistance | UNC45B   | 146862 | 37 | 17 | 33496857 | 33496857 | Missense_Mutation | SNP | G | A | 22  | 33  | c.1454G>A     | c.(1453-1455)GGA>GAA | p.G485E       |
| Pat_28 | Post-Resistance | GPR179   | 440435 | 37 | 17 | 36489193 | 36489193 | Missense_Mutation | SNP | G | A | 18  | 19  | c.1978C>T     | c.(1978-1980)CTT>TTT | p.L660F       |
| Pat_28 | Post-Resistance | KRT40    | 125115 | 37 | 17 | 39140422 | 39140422 | Missense_Mutation | SNP | G | A | 24  | 23  | c.104C>T      | c.(103-105)CCC>CTC   | p.P35L        |
| Pat_28 | Post-Resistance | KRTAP4-5 | 85289  | 37 | 17 | 39305839 | 39305839 | Missense_Mutation | SNP | A | T | 5   | 92  | c.181T>A      | c.(181-183)TGC>AGC   | p.C61S        |
| Pat_28 | Post-Resistance | STAT5A   | 6776   | 37 | 17 | 40456662 | 40456662 | Nonsense_Mutation | SNP | C | T | 62  | 80  | c.1372C>T     | c.(1372-1374)CAG>TAG | p.Q458*       |
| Pat_28 | Post-Resistance | STAT5A   | 6776   | 37 | 17 | 40458299 | 40458299 | Missense_Mutation | SNP | C | T | 48  | 48  | c.1514C>T     | c.(1513-1515)CCG>CTG | p.P505L       |
| Pat_28 | Post-Resistance | NAGLU    | 4669   | 37 | 17 | 40695604 | 40695604 | Missense_Mutation | SNP | C | T | 13  | 20  | c.1580C>T     | c.(1579-1581)ACC>ATC | p.T527I       |
| Pat_28 | Post-Resistance | WNK4     | 65266  | 37 | 17 | 40940379 | 40940379 | Missense_Mutation | SNP | G | A | 18  | 21  | c.1994G>A     | c.(1993-1995)GGG>GAG | p.G665E       |
| Pat_28 | Post-Resistance | AOC3     | 8639   | 37 | 17 | 41003494 | 41003494 | Missense_Mutation | SNP | C | T | 45  | 68  | c.134C>T      | c.(133-135)TCT>TTT   | p.S45F        |
| Pat_28 | Post-Resistance | GPATCH8  | 23131  | 37 | 17 | 42474974 | 42474974 | Missense_Mutation | SNP | C | T | 39  | 54  | c.4471G>A     | c.(4471-4473)GGT>AGT | p.G1491S      |
| Pat_28 | Post-Resistance | DBF4B    | 80174  | 37 | 17 | 42828308 | 42828308 | Missense_Mutation | SNP | C | T | 16  | 31  | c.1535C>T     | c.(1534-1536)CCC>CTC | p.P512L       |
| Pat_28 | Post-Resistance | EFTUD2   | 9343   | 37 | 17 | 42937832 | 42937832 | Missense_Mutation | SNP | C | T | 5   | 121 | c.1687G>A     | c.(1687-1689)GCA>ACA | p.A563T       |
| Pat_28 | Post-Resistance | TBX21    | 30009  | 37 | 17 | 45822662 | 45822662 | Missense_Mutation | SNP | C | T | 9   | 16  | c.1538C>T     | c.(1537-1539)TCC>TTC | p.S513F       |
| Pat_28 | Post-Resistance | NFE2L1   | 4779   | 37 | 17 | 46128833 | 46128833 | Missense_Mutation | SNP | C | T | 37  | 59  | c.353C>T      | c.(352-354)CCC>CTC   | p.P118L       |
| Pat_28 | Post-Resistance | AKAP1    | 8165   | 37 | 17 | 55193535 | 55193535 | Missense_Mutation | SNP | C | T | 33  | 50  | c.2345C>T     | c.(2344-2346)TCC>TTC | p.S782F       |
| Pat_28 | Post-Resistance | BZRAP1   | 9256   | 37 | 17 | 56393847 | 56393847 | Missense_Mutation | SNP | G | A | 25  | 34  | c.1927C>T     | c.(1927-1929)CCA>TCA | p.P643S       |
| Pat_28 | Post-Resistance | TANC2    | 26115  | 37 | 17 | 61499122 | 61499122 | Missense_Mutation | SNP | G | T | 30  | 40  | c.5779G>T     | c.(5779-5781)GCT>TCT | p.A1927S      |
| Pat_28 | Post-Resistance | HELZ     | 9931   | 37 | 17 | 65163817 | 65163817 | Missense_Mutation | SNP | C | T | 63  | 105 | c.1526G>A     | c.(1525-1527)GGT>GAT | p.G509D       |
| Pat_28 | Post-Resistance | BPTF     | 2186   | 37 | 17 | 65871125 | 65871125 | Missense_Mutation | SNP | G | T | 51  | 76  | c.1853G>T     | c.(1852-1854)GGA>GTA | p.G618V       |
| Pat_28 | Post-Resistance | PRKAR1A  | 5573   | 37 | 17 | 66522054 | 66522054 | Splice_Site       | SNP | G | A | 20  | 17  | c.708_splice  | c.e7+1               | p.M236_splice |
| Pat_28 | Post-Resistance | ABCA8    | 10351  | 37 | 17 | 66887738 | 66887738 | Splice_Site       | SNP | C | T | 25  | 33  | c.2917_splice | c.e22-1              | p.N973_splice |
| Pat_28 | Post-Resistance | DNAI2    | 64446  | 37 | 17 | 72277988 | 72277988 | Missense_Mutation | SNP | G | A | 53  | 81  | c.32G>A       | c.(31-33)CGC>CAC     | p.R11H        |
| Pat_28 | Post-Resistance | GAA      | 2548   | 37 | 17 | 78082578 | 78082578 | Missense_Mutation | SNP | C | T | 6   | 6   | c.1277C>T     | c.(1276-1278)GCC>GTC | p.A426V       |
| Pat_28 | Post-Resistance | GAA      | 2548   | 37 | 17 | 78083747 | 78083747 | Missense_Mutation | SNP | C | T | 17  | 34  | c.1330C>T     | c.(1330-1332)CCT>TCT | p.P444S       |
| Pat_28 | Post-Resistance | TBCD     | 6904   | 37 | 17 | 80887270 | 80887270 | Missense_Mutation | SNP | C | T | 9   | 19  | c.2885C>T     | c.(2884-2886)CCT>CTT | p.P962L       |
| Pat_28 | Post-Resistance | NAPG     | 8774   | 37 | 18 | 10549040 | 10549040 | Missense_Mutation | SNP | G | A | 140 | 203 | c.742G>A      | c.(742-744)GAT>AAT   | p.D248N       |
| Pat_28 | Post-Resistance | ROCK1    | 6093   | 37 | 18 | 18539864 | 18539864 | Missense_Mutation | SNP | A | T | 22  | 37  | c.3449T>A     | c.(3448-3450)ATT>AAT | p.I1150N      |
| Pat_28 | Post-Resistance | CABLES1  | 91768  | 37 | 18 | 20774434 | 20774434 | Missense_Mutation | SNP | C | T | 35  | 47  | c.940C>T      | c.(940-942)CCC>TCC   | p.P314S       |
| Pat_28 | Post-Resistance | CDH2     | 1000   | 37 | 18 | 25570271 | 25570271 | Missense_Mutation | SNP | G | A | 51  | 56  | c.1388C>T     | c.(1387-1389)GCT>GTT | p.A463V       |
| Pat_28 | Post-Resistance | DSC1     | 1823   | 37 | 18 | 28714042 | 28714042 | Missense_Mutation | SNP | G | A | 83  | 116 | c.1928C>T     | c.(1927-1929)TCT>TTT | p.S643F       |
| Pat_28 | Post-Resistance | C18orf34 | 374864 | 37 | 18 | 30913179 | 30913179 | Missense_Mutation | SNP | C | T | 27  | 52  | c.838G>A      | c.(838-840)GAA>AAA   | p.E280K       |
| Pat_28 | Post-Resistance | C18orf21 | 83608  | 37 | 18 | 33552764 | 33552764 | Missense_Mutation | SNP | C | T | 22  | 30  | c.73C>T       | c.(73-75)CTC>TTC     | p.L25F        |
| Pat_28 | Post-Resistance | TCF4     | 6925   | 37 | 18 | 52946848 | 52946848 | Missense_Mutation | SNP | C | T | 48  | 65  | c.589G>A      | c.(589-591)GAC>AAC   | p.D197N       |
| Pat_28 | Post-Resistance | PHLPP1   | 23239  | 37 | 18 | 60645567 | 60645567 | Missense_Mutation | SNP | C | T | 11  | 29  | c.2521C>T     | c.(2521-2523)CCT>TCT | p.P841S       |
| Pat_28 | Post-Resistance | SERPINB7 | 8710   | 37 | 18 | 61465975 | 61465975 | Missense_Mutation | SNP | C | T | 60  | 109 | c.592C>T      | c.(592-594)CCC>TCC   | p.P198S       |

|        |                 |          |        |    |    |          |          |                   |     |    |    |     |     |                 |                        |               |
|--------|-----------------|----------|--------|----|----|----------|----------|-------------------|-----|----|----|-----|-----|-----------------|------------------------|---------------|
| Pat_28 | Post-Resistance | FBXO15   | 201456 | 37 | 18 | 71793289 | 71793289 | Missense_Mutation | SNP | G  | A  | 57  | 87  | c.605C>T        | c.(604-606)ACC>ATC     | p.T202I       |
| Pat_28 | Post-Resistance | CNDP2    | 55748  | 37 | 18 | 72173088 | 72173088 | Missense_Mutation | SNP | C  | T  | 19  | 19  | c.209C>T        | c.(208-210)CCT>CTT     | p.P70L        |
| Pat_28 | Post-Resistance | PQLC1    | 80148  | 37 | 18 | 77710866 | 77710866 | Missense_Mutation | SNP | C  | T  | 9   | 11  | c.61G>A         | c.(61-63)GCG>ACG       | p.A21T        |
| Pat_28 | Post-Resistance | ABCA7    | 10347  | 37 | 19 | 1051561  | 1051561  | Missense_Mutation | SNP | G  | A  | 7   | 4   | c.2938G>A       | c.(2938-2940)GAG>AAG   | p.E980K       |
| Pat_28 | Post-Resistance | ADAMTSL5 | 339366 | 37 | 19 | 1510414  | 1510414  | Missense_Mutation | SNP | C  | T  | 8   | 15  | c.205G>A        | c.(205-207)GAA>AAA     | p.E69K        |
| Pat_28 | Post-Resistance | REXO1    | 57455  | 37 | 19 | 1821560  | 1821561  | Missense_Mutation | DNP | GG | AA | 33  | 56  | ..2351_2352CC>T | c.(2350-2352)ACC>ATT   | p.T784I       |
| Pat_28 | Post-Resistance | ZFR2     | 23217  | 37 | 19 | 3813925  | 3813925  | Missense_Mutation | SNP | G  | A  | 6   | 13  | c.2135C>T       | c.(2134-2136)TCC>TTC   | p.S712F       |
| Pat_28 | Post-Resistance | DUS3L    | 56931  | 37 | 19 | 5788114  | 5788114  | Missense_Mutation | SNP | C  | T  | 29  | 29  | c.1016G>A       | c.(1015-1017)TGC>TAC   | p.C339Y       |
| Pat_28 | Post-Resistance | LRRc8E   | 80131  | 37 | 19 | 7965235  | 7965235  | Missense_Mutation | SNP | C  | T  | 6   | 15  | c.1828C>T       | c.(1828-1830)CTT>TTT   | p.L610F       |
| Pat_28 | Post-Resistance | MUC16    | 94025  | 37 | 19 | 9072952  | 9072952  | Missense_Mutation | SNP | C  | T  | 25  | 56  | c.14494G>A      | c.(14494-14496)GTT>ATT | p.V4832I      |
| Pat_28 | Post-Resistance | MUC16    | 94025  | 37 | 19 | 9088864  | 9088864  | Missense_Mutation | SNP | G  | A  | 138 | 217 | c.2951C>T       | c.(2950-2952)ACT>ATT   | p.T984I       |
| Pat_28 | Post-Resistance | MUC16    | 94025  | 37 | 19 | 9089170  | 9089170  | Missense_Mutation | SNP | G  | A  | 6   | 14  | c.2645C>T       | c.(2644-2646)TCC>TTC   | p.S882F       |
| Pat_28 | Post-Resistance | ZNF426   | 79088  | 37 | 19 | 9639763  | 9639763  | Missense_Mutation | SNP | A  | G  | 6   | 148 | c.958T>C        | c.(958-960)TCC>CCC     | p.S320P       |
| Pat_28 | Post-Resistance | DNMT1    | 1786   | 37 | 19 | 10259597 | 10259597 | Missense_Mutation | SNP | G  | A  | 47  | 75  | c.2635C>T       | c.(2635-2637)CCT>TCT   | p.P879S       |
| Pat_28 | Post-Resistance | DOCK6    | 57572  | 37 | 19 | 11333782 | 11333782 | Missense_Mutation | SNP | C  | T  | 14  | 28  | c.2956G>A       | c.(2956-2958)GAT>AAT   | p.D986N       |
| Pat_28 | Post-Resistance | ZNF491   | 126069 | 37 | 19 | 11916832 | 11916832 | Missense_Mutation | SNP | C  | T  | 28  | 50  | c.64C>T         | c.(64-66)CCG>TCG       | p.P22S        |
| Pat_28 | Post-Resistance | ZNF490   | 57474  | 37 | 19 | 12691426 | 12691426 | Missense_Mutation | SNP | G  | A  | 53  | 75  | c.1463C>T       | c.(1462-1464)TCC>TTC   | p.S488F       |
| Pat_28 | Post-Resistance | SFRS14   | 10147  | 37 | 19 | 19105966 | 19105966 | Missense_Mutation | SNP | C  | T  | 8   | 14  | c.3115G>A       | c.(3115-3117)GAG>AAG   | p.E1039K      |
| Pat_28 | Post-Resistance | NCAN     | 1463   | 37 | 19 | 19329858 | 19329858 | Missense_Mutation | SNP | G  | A  | 14  | 20  | c.208G>A        | c.(208-210)GCC>ACC     | p.A70T        |
| Pat_28 | Post-Resistance | ZNF714   | 148206 | 37 | 19 | 21300311 | 21300311 | Missense_Mutation | SNP | G  | A  | 13  | 24  | c.844G>A        | c.(844-846)GAA>AAA     | p.E282K       |
| Pat_28 | Post-Resistance | ZNF493   | 284443 | 37 | 19 | 21606468 | 21606468 | Missense_Mutation | SNP | C  | T  | 5   | 61  | c.623C>T        | c.(622-624)CCT>CTT     | p.P208L       |
| Pat_28 | Post-Resistance | ZNF676   | 163223 | 37 | 19 | 22363137 | 22363137 | Missense_Mutation | SNP | G  | A  | 124 | 170 | c.1382C>T       | c.(1381-1383)TCC>TTC   | p.S461F       |
| Pat_28 | Post-Resistance | ZNF681   | 148213 | 37 | 19 | 23927342 | 23927343 | Missense_Mutation | DNP | GG | AA | 107 | 176 | ..1009_1010CC>T | c.(1009-1011)CCC>TTC   | p.P337F       |
| Pat_28 | Post-Resistance | HPN      | 3249   | 37 | 19 | 35550855 | 35550855 | Missense_Mutation | SNP | G  | A  | 6   | 2   | c.368G>A        | c.(367-369)GGG>GAG     | p.G123E       |
| Pat_28 | Post-Resistance | ZNF567   | 163081 | 37 | 19 | 37210792 | 37210792 | Missense_Mutation | SNP | G  | A  | 28  | 10  | c.1166G>A       | c.(1165-1167)GGT>GAT   | p.G389D       |
| Pat_28 | Post-Resistance | SHKBP1   | 92799  | 37 | 19 | 41089329 | 41089329 | Missense_Mutation | SNP | G  | A  | 5   | 1   | c.986G>A        | c.(985-987)AGT>AAT     | p.S329N       |
| Pat_28 | Post-Resistance | CEACAM5  | 1048   | 37 | 19 | 42231273 | 42231273 | Splice_Site       | SNP | G  | A  | 45  | 16  | c.2145_splice   | c.e9+1                 |               |
| Pat_28 | Post-Resistance | IRF2BP1  | 26145  | 37 | 19 | 46387621 | 46387621 | Missense_Mutation | SNP | C  | T  | 2   | 3   | c.1412G>A       | c.(1411-1413)CGC>CAC   | p.R471H       |
| Pat_28 | Post-Resistance | LRRc4B   | 94030  | 37 | 19 | 51021106 | 51021106 | Missense_Mutation | SNP | C  | T  | 10  | 4   | c.1864G>A       | c.(1864-1866)GAC>AAC   | p.D622N       |
| Pat_28 | Post-Resistance | KLK10    | 5655   | 37 | 19 | 51518677 | 51518677 | Missense_Mutation | SNP | C  | T  | 58  | 30  | c.674G>A        | c.(673-675)TGC>TAC     | p.C225Y       |
| Pat_28 | Post-Resistance | TTYH1    | 57348  | 37 | 19 | 54937938 | 54937938 | Missense_Mutation | SNP | G  | A  | 18  | 9   | c.727G>A        | c.(727-729)GTG>ATG     | p.V243M       |
| Pat_28 | Post-Resistance | SAPS1    | 22870  | 37 | 19 | 55743331 | 55743332 | Missense_Mutation | DNP | GG | AA | 7   | 0   | ..2144_2145CC>T | c.(2143-2145)ACC>ATT   | p.T715I       |
| Pat_28 | Post-Resistance | NLRP9    | 338321 | 37 | 19 | 56244884 | 56244884 | Missense_Mutation | SNP | C  | T  | 29  | 17  | c.313G>A        | c.(313-315)GAA>AAA     | p.E105K       |
| Pat_28 | Post-Resistance | NLRP8    | 126205 | 37 | 19 | 56467192 | 56467192 | Missense_Mutation | SNP | G  | A  | 13  | 8   | c.1768G>A       | c.(1768-1770)GTC>ATC   | p.V590I       |
| Pat_28 | Post-Resistance | NLRP5    | 126206 | 37 | 19 | 56539808 | 56539808 | Missense_Mutation | SNP | C  | T  | 85  | 30  | c.2209C>T       | c.(2209-2211)CGG>TGG   | p.R737W       |
| Pat_28 | Post-Resistance | ZNF446   | 55663  | 37 | 19 | 58991958 | 58991958 | Nonsense_Mutation | SNP | G  | A  | 16  | 5   | c.1218G>A       | c.(1216-1218)TGG>TGA   | p.W406*       |
| Pat_28 | Post-Resistance | MZF1     | 7593   | 37 | 19 | 59073780 | 59073780 | Missense_Mutation | SNP | C  | T  | 11  | 4   | c.1864G>A       | c.(1864-1866)GAA>AAA   | p.E622K       |
| Pat_28 | Post-Resistance | TTC15    | 51112  | 37 | 2  | 3392191  | 3392191  | Missense_Mutation | SNP | G  | A  | 5   | 5   | c.797G>A        | c.(796-798)CGA>CAA     | p.R266Q       |
| Pat_28 | Post-Resistance | RSAD2    | 91543  | 37 | 2  | 7018278  | 7018278  | Splice_Site       | SNP | G  | A  | 12  | 23  | c.346_splice    | c.e1+1                 | p.G116_splice |
| Pat_28 | Post-Resistance | RNF144A  | 9781   | 37 | 2  | 7164519  | 7164519  | Missense_Mutation | SNP | G  | A  | 24  | 102 | c.529G>A        | c.(529-531)GAA>AAA     | p.E177K       |
| Pat_28 | Post-Resistance | ATP6V1C2 | 245973 | 37 | 2  | 10912050 | 10912050 | Missense_Mutation | SNP | G  | A  | 61  | 90  | c.556G>A        | c.(556-558)GTC>ATC     | p.V186I       |
| Pat_28 | Post-Resistance | NBAS     | 51594  | 37 | 2  | 15514779 | 15514779 | Missense_Mutation | SNP | G  | A  | 117 | 192 | c.3656C>T       | c.(3655-3657)GCC>GTC   | p.A1219V      |
| Pat_28 | Post-Resistance | APOB     | 338    | 37 | 2  | 21249778 | 21249778 | Missense_Mutation | SNP | C  | T  | 22  | 37  | c.2126G>A       | c.(2125-2127)GGA>GAA   | p.G709E       |
| Pat_28 | Post-Resistance | ADCY3    | 109    | 37 | 2  | 25141636 | 25141636 | Missense_Mutation | SNP | C  | T  | 27  | 21  | c.221G>A        | c.(220-222)CGC>CAC     | p.R74H        |
| Pat_28 | Post-Resistance | ASXL2    | 55252  | 37 | 2  | 26029195 | 26029195 | Missense_Mutation | SNP | G  | A  | 9   | 18  | c.155C>T        | c.(154-156)CCT>CTT     | p.P52L        |
| Pat_28 | Post-Resistance | C2orf39  | 92749  | 37 | 2  | 26676329 | 26676329 | Missense_Mutation | SNP | G  | A  | 3   | 8   | c.1831G>A       | c.(1831-1833)GAG>AAG   | p.E611K       |
| Pat_28 | Post-Resistance | CAD      | 790    | 37 | 2  | 27447990 | 27447990 | Missense_Mutation | SNP | G  | A  | 29  | 32  | c.1499G>A       | c.(1498-1500)CGG>CAG   | p.R500Q       |

|        |                 |           |        |    |   |           |           |                   |     |   |   |     |     |               |                        |               |
|--------|-----------------|-----------|--------|----|---|-----------|-----------|-------------------|-----|---|---|-----|-----|---------------|------------------------|---------------|
| Pat_28 | Post-Resistance | SNX17     | 9784   | 37 | 2 | 27596970  | 27596970  | Missense_Mutation | SNP | G | A | 78  | 128 | c.451G>A      | c.(451-453)GAT>AAT     | p.D151N       |
| Pat_28 | Post-Resistance | BIRC6     | 57448  | 37 | 2 | 32704593  | 32704593  | Missense_Mutation | SNP | G | A | 12  | 5   | c.7316G>A     | c.(7315-7317)GGT>GAT   | p.G2439D      |
| Pat_28 | Post-Resistance | FAM98A    | 25940  | 37 | 2 | 33810001  | 33810001  | Missense_Mutation | SNP | G | A | 22  | 48  | c.1399C>T     | c.(1399-1401)CGT>TGT   | p.R467C       |
| Pat_28 | Post-Resistance | FEZ2      | 9637   | 37 | 2 | 36808513  | 36808513  | Missense_Mutation | SNP | G | A | 77  | 24  | c.554C>T      | c.(553-555)CCT>CTT     | p.P185L       |
| Pat_28 | Post-Resistance | MSH2      | 4436   | 37 | 2 | 47639656  | 47639656  | Missense_Mutation | SNP | G | A | 34  | 11  | c.749G>A      | c.(748-750)GGA>GAA     | p.G250E       |
| Pat_28 | Post-Resistance | MSH6      | 2956   | 37 | 2 | 48030799  | 48030799  | Missense_Mutation | SNP | G | A | 58  | 25  | c.3413G>A     | c.(3412-3414)GGG>GAG   | p.G1138E      |
| Pat_28 | Post-Resistance | SMEK2     | 57223  | 37 | 2 | 55806904  | 55806904  | Missense_Mutation | SNP | C | T | 15  | 35  | c.1379G>A     | c.(1378-1380)AGT>AAT   | p.S460N       |
| Pat_28 | Post-Resistance | ANTXR1    | 84168  | 37 | 2 | 69472535  | 69472535  | Missense_Mutation | SNP | C | T | 7   | 6   | c.1613C>T     | c.(1612-1614)TCC>TTC   | p.S538F       |
| Pat_28 | Post-Resistance | C2orf42   | 54980  | 37 | 2 | 70392231  | 70392231  | Missense_Mutation | SNP | G | A | 48  | 83  | c.1346C>T     | c.(1345-1347)ACC>ATC   | p.T449I       |
| Pat_28 | Post-Resistance | MPHOSPH10 | 10199  | 37 | 2 | 71376534  | 71376534  | Missense_Mutation | SNP | C | T | 33  | 37  | c.1847C>T     | c.(1846-1848)TCG>TTG   | p.S616L       |
| Pat_28 | Post-Resistance | ALMS1     | 7840   | 37 | 2 | 73679238  | 73679238  | Missense_Mutation | SNP | G | A | 23  | 58  | c.5587G>A     | c.(5587-5589)GAG>AAG   | p.E1863K      |
| Pat_28 | Post-Resistance | MOGS      | 7841   | 37 | 2 | 74690347  | 74690347  | Missense_Mutation | SNP | C | T | 76  | 159 | c.746G>A      | c.(745-747)AGT>AAT     | p.S249N       |
| Pat_28 | Post-Resistance | REEP1     | 65055  | 37 | 2 | 86459804  | 86459804  | Missense_Mutation | SNP | C | T | 14  | 27  | c.539G>A      | c.(538-540)GGC>GAC     | p.G180D       |
| Pat_28 | Post-Resistance | EIF2AK3   | 9451   | 37 | 2 | 88885358  | 88885358  | Splice_Site       | SNP | C | T | 20  | 38  | c.1650_splice | c.e9+1                 | p.R550_splice |
| Pat_28 | Post-Resistance | SNRNP200  | 23020  | 37 | 2 | 96949423  | 96949423  | Missense_Mutation | SNP | C | T | 88  | 123 | c.4613G>A     | c.(4612-4614)CGC>CAC   | p.R1538H      |
| Pat_28 | Post-Resistance | IL1RL2    | 8808   | 37 | 2 | 102851660 | 102851660 | Missense_Mutation | SNP | A | G | 6   | 75  | c.1601A>G     | c.(1600-1602)TAC>TGC   | p.Y534C       |
| Pat_28 | Post-Resistance | TGFBRAP1  | 9392   | 37 | 2 | 105897121 | 105897121 | Missense_Mutation | SNP | G | A | 23  | 29  | c.1181C>T     | c.(1180-1182)TCC>TTC   | p.S394F       |
| Pat_28 | Post-Resistance | BUB1      | 699    | 37 | 2 | 111425401 | 111425401 | Missense_Mutation | SNP | G | A | 133 | 214 | c.593C>T      | c.(592-594)TCT>TTT     | p.S198F       |
| Pat_28 | Post-Resistance | PSD4      | 23550  | 37 | 2 | 113943469 | 113943469 | Missense_Mutation | SNP | G | A | 8   | 7   | c.1265G>A     | c.(1264-1266)GGA>GAA   | p.G422E       |
| Pat_28 | Post-Resistance | GLI2      | 2736   | 37 | 2 | 121747032 | 121747032 | Missense_Mutation | SNP | G | C | 10  | 10  | c.3542G>C     | c.(3541-3543)GGC>GCC   | p.G1181A      |
| Pat_28 | Post-Resistance | POTEE     | 445582 | 37 | 2 | 132010515 | 132010515 | Missense_Mutation | SNP | G | A | 40  | 118 | c.1621G>A     | c.(1621-1623)GAA>AAA   | p.E541K       |
| Pat_28 | Post-Resistance | RAB3GAP1  | 22930  | 37 | 2 | 135881744 | 135881744 | Missense_Mutation | SNP | C | T | 29  | 54  | c.758C>T      | c.(757-759)GCC>GTC     | p.A253V       |
| Pat_28 | Post-Resistance | RAB3GAP1  | 22930  | 37 | 2 | 135911273 | 135911273 | Missense_Mutation | SNP | G | A | 71  | 93  | c.2116G>A     | c.(2116-2118)GAT>AAT   | p.D706N       |
| Pat_28 | Post-Resistance | LRP1B     | 53353  | 37 | 2 | 141260598 | 141260598 | Missense_Mutation | SNP | C | T | 58  | 118 | c.8596G>A     | c.(8596-8598)GAT>AAT   | p.D2866N      |
| Pat_28 | Post-Resistance | GPD2      | 2820   | 37 | 2 | 157406210 | 157406210 | Missense_Mutation | SNP | G | A | 48  | 83  | c.752G>A      | c.(751-753)AGC>AAC     | p.S251N       |
| Pat_28 | Post-Resistance | FIGN      | 55137  | 37 | 2 | 164467326 | 164467326 | Missense_Mutation | SNP | C | T | 84  | 82  | c.1016G>A     | c.(1015-1017)GGC>GAC   | p.G339D       |
| Pat_28 | Post-Resistance | CSRNP3    | 80034  | 37 | 2 | 166535998 | 166535998 | Missense_Mutation | SNP | C | T | 21  | 37  | c.1493C>T     | c.(1492-1494)CCC>CTC   | p.P498L       |
| Pat_28 | Post-Resistance | SCN1A     | 6323   | 37 | 2 | 166904178 | 166904178 | Nonsense_Mutation | SNP | G | A | 46  | 61  | c.1129C>T     | c.(1129-1131)CGA>TGA   | p.R377*       |
| Pat_28 | Post-Resistance | MYO3B     | 140469 | 37 | 2 | 171056714 | 171056714 | Missense_Mutation | SNP | C | T | 42  | 60  | c.241C>T      | c.(241-243)CAT>TAT     | p.H81Y        |
| Pat_28 | Post-Resistance | RAPGEF4   | 11069  | 37 | 2 | 173853494 | 173853494 | Missense_Mutation | SNP | C | T | 6   | 152 | c.1301C>T     | c.(1300-1302)GCC>GTC   | p.A434V       |
| Pat_28 | Post-Resistance | TTC30A    | 92104  | 37 | 2 | 178482813 | 178482813 | Missense_Mutation | SNP | G | A | 34  | 26  | c.617C>T      | c.(616-618)TCA>TTA     | p.S206L       |
| Pat_28 | Post-Resistance | TTN       | 7273   | 37 | 2 | 179432060 | 179432060 | Missense_Mutation | SNP | T | C | 65  | 127 | c.71095A>G    | :(71095-71097)AGA>GG/  | p.R23699G     |
| Pat_28 | Post-Resistance | TTN       | 7273   | 37 | 2 | 179440406 | 179440406 | Missense_Mutation | SNP | C | T | 8   | 60  | c.62749G>A    | :(62749-62751)GCC>ACC  | p.A20917T     |
| Pat_28 | Post-Resistance | TTN       | 7273   | 37 | 2 | 179456042 | 179456042 | Missense_Mutation | SNP | G | A | 246 | 354 | c.52706C>T    | c.(52705-52707)ACC>ATC | p.T17569I     |
| Pat_28 | Post-Resistance | TTN       | 7273   | 37 | 2 | 179486387 | 179486387 | Missense_Mutation | SNP | G | A | 50  | 56  | c.37460C>T    | c.(37459-37461)TCC>TTC | p.S12487F     |
| Pat_28 | Post-Resistance | TTN       | 7273   | 37 | 2 | 179592069 | 179592069 | Missense_Mutation | SNP | C | T | 6   | 9   | c.16291G>A    | :(16291-16293)GCC>ACC  | p.A5431T      |
| Pat_28 | Post-Resistance | TTN       | 7273   | 37 | 2 | 179611769 | 179611769 | Missense_Mutation | SNP | G | A | 41  | 78  | c.15358C>T    | c.(15358-15360)CCT>TCT | p.P5120S      |
| Pat_28 | Post-Resistance | TTN       | 7273   | 37 | 2 | 179614040 | 179614040 | Missense_Mutation | SNP | C | T | 54  | 96  | c.13087G>A    | :(13087-13089)GAG>AAC  | p.E4363K      |
| Pat_28 | Post-Resistance | TTN       | 7273   | 37 | 2 | 179614208 | 179614208 | Missense_Mutation | SNP | C | T | 26  | 50  | c.12919G>A    | :(12919-12921)GAC>AAC  | p.D4307N      |
| Pat_28 | Post-Resistance | ZC3H15    | 55854  | 37 | 2 | 187371549 | 187371549 | Missense_Mutation | SNP | C | T | 77  | 125 | c.1076C>T     | c.(1075-1077)ACT>ATT   | p.T359I       |
| Pat_28 | Post-Resistance | FAM171B   | 165215 | 37 | 2 | 187626412 | 187626412 | Missense_Mutation | SNP | A | T | 20  | 29  | c.1343A>T     | c.(1342-1344)GAA>GTA   | p.E448V       |
| Pat_28 | Post-Resistance | STAT4     | 6775   | 37 | 2 | 191900923 | 191900923 | Missense_Mutation | SNP | C | T | 61  | 79  | c.1537G>A     | c.(1537-1539)GAT>AAT   | p.D513N       |
| Pat_28 | Post-Resistance | SLC39A10  | 57181  | 37 | 2 | 196578188 | 196578188 | Missense_Mutation | SNP | C | T | 29  | 40  | c.1607C>T     | c.(1606-1608)ACA>ATA   | p.T536I       |
| Pat_28 | Post-Resistance | DNAH7     | 56171  | 37 | 2 | 196718162 | 196718162 | Missense_Mutation | SNP | C | T | 45  | 55  | c.8686G>A     | c.(8686-8688)GAG>AAG   | p.E2896K      |
| Pat_28 | Post-Resistance | DNAH7     | 56171  | 37 | 2 | 196746610 | 196746610 | Missense_Mutation | SNP | C | T | 62  | 93  | c.5870G>A     | c.(5869-5871)CGA>CAA   | p.R1957Q      |
| Pat_28 | Post-Resistance | AOX1      | 316    | 37 | 2 | 201499552 | 201499552 | Missense_Mutation | SNP | G | A | 21  | 39  | c.2260G>A     | c.(2260-2262)GAA>AAA   | p.E754K       |
| Pat_28 | Post-Resistance | NOP58     | 51602  | 37 | 2 | 203160427 | 203160427 | Missense_Mutation | SNP | C | T | 43  | 59  | c.938C>T      | c.(937-939)GCT>GTT     | p.A313V       |

|        |                 |                |        |    |    |           |           |                   |     |   |   |     |     |               |                      |                |
|--------|-----------------|----------------|--------|----|----|-----------|-----------|-------------------|-----|---|---|-----|-----|---------------|----------------------|----------------|
| Pat_28 | Post-Resistance | ALS2CR8        | 79800  | 37 | 2  | 203834727 | 203834727 | Missense_Mutation | SNP | C | A | 4   | 61  | c.1039C>A     | c.(1039-1041)CAG>AAG | p.Q347K        |
| Pat_28 | Post-Resistance | ALS2CR8        | 79800  | 37 | 2  | 203839124 | 203839124 | Missense_Mutation | SNP | C | T | 12  | 22  | c.1399C>T     | c.(1399-1401)CCA>TCA | p.P467S        |
| Pat_28 | Post-Resistance | ERBB4          | 2066   | 37 | 2  | 212285267 | 212285267 | Missense_Mutation | SNP | C | T | 25  | 44  | c.3034G>A     | c.(3034-3036)GAT>AAT | p.D1012N       |
| Pat_28 | Post-Resistance | FN1            | 2335   | 37 | 2  | 216251411 | 216251411 | Splice_Site       | SNP | C | T | 25  | 39  | c.4612_splice | c.e28+1              | p.V1538_splice |
| Pat_28 | Post-Resistance | TLL4           | 9654   | 37 | 2  | 219617555 | 219617555 | Missense_Mutation | SNP | G | A | 87  | 105 | c.3046G>A     | c.(3046-3048)GAG>AAG | p.E1016K       |
| Pat_28 | Post-Resistance | SPEG           | 10290  | 37 | 2  | 220342638 | 220342638 | Missense_Mutation | SNP | C | T | 43  | 82  | c.4838C>T     | c.(4837-4839)TCC>TTC | p.S1613F       |
| Pat_28 | Post-Resistance | DNER           | 92737  | 37 | 2  | 230450723 | 230450723 | Missense_Mutation | SNP | G | A | 17  | 33  | c.698C>T      | c.(697-699)ACT>ATT   | p.T233I        |
| Pat_28 | Post-Resistance | CAB39          | 51719  | 37 | 2  | 231663500 | 231663500 | Missense_Mutation | SNP | G | A | 27  | 64  | c.455G>A      | c.(454-456)AGA>AAA   | p.R152K        |
| Pat_28 | Post-Resistance | INPP5D         | 3635   | 37 | 2  | 234085987 | 234085987 | Missense_Mutation | SNP | C | T | 46  | 72  | c.2066C>T     | c.(2065-2067)TCT>TTT | p.S689F        |
| Pat_28 | Post-Resistance | HJURP          | 55355  | 37 | 2  | 234750199 | 234750199 | Nonsense_Mutation | SNP | C | T | 32  | 46  | c.1227G>A     | c.(1225-1227)TGG>TGA | p.W409*        |
| Pat_28 | Post-Resistance | AGAP1          | 116987 | 37 | 2  | 236708027 | 236708027 | Missense_Mutation | SNP | G | A | 38  | 44  | c.818G>A      | c.(817-819)GGG>GAG   | p.G273E        |
| Pat_28 | Post-Resistance | IQCA1          | 79781  | 37 | 2  | 237240009 | 237240009 | Missense_Mutation | SNP | C | T | 45  | 88  | c.2366G>A     | c.(2365-2367)AGC>AAC | p.S789N        |
| Pat_28 | Post-Resistance | SNED1          | 25992  | 37 | 2  | 242002222 | 242002222 | Missense_Mutation | SNP | C | T | 5   | 11  | c.2272C>T     | c.(2272-2274)CGG>TGG | p.R758W        |
| Pat_28 | Post-Resistance | D2HGDH         | 728294 | 37 | 2  | 242690738 | 242690738 | Missense_Mutation | SNP | G | A | 16  | 16  | c.1075G>A     | c.(1075-1077)GAG>AAG | p.E359K        |
| Pat_28 | Post-Resistance | ANGPT4         | 51378  | 37 | 20 | 855013    | 855013    | Missense_Mutation | SNP | C | T | 35  | 45  | c.1265G>A     | c.(1264-1266)AGC>AAC | p.S422N        |
| Pat_28 | Post-Resistance | IDH3B          | 3420   | 37 | 20 | 2639446   | 2639446   | Missense_Mutation | SNP | G | A | 42  | 75  | c.1109C>T     | c.(1108-1110)ACC>ATC | p.T370I        |
| Pat_28 | Post-Resistance | CHGB           | 1114   | 37 | 20 | 5903767   | 5903767   | Missense_Mutation | SNP | A | C | 13  | 16  | c.977A>C      | c.(976-978)GAC>GCC   | p.D326A        |
| Pat_28 | Post-Resistance | FERMT1         | 55612  | 37 | 20 | 6077617   | 6077617   | Missense_Mutation | SNP | C | T | 162 | 198 | c.1021G>A     | c.(1021-1023)GAT>AAT | p.D341N        |
| Pat_28 | Post-Resistance | ZNF341         | 84905  | 37 | 20 | 32358002  | 32358002  | Missense_Mutation | SNP | G | A | 23  | 36  | c.1526G>A     | c.(1525-1527)GGC>GAC | p.G509D        |
| Pat_28 | Post-Resistance | GDF5           | 8200   | 37 | 20 | 34022572  | 34022572  | Missense_Mutation | SNP | C | T | 89  | 141 | c.641G>A      | c.(640-642)GGT>GAT   | p.G214D        |
| Pat_28 | Post-Resistance | SLC32A1        | 140679 | 37 | 20 | 37356873  | 37356873  | Missense_Mutation | SNP | C | T | 27  | 35  | c.1169C>T     | c.(1168-1170)GCG>GTG | p.A390V        |
| Pat_28 | Post-Resistance | YWHAB          | 7529   | 37 | 20 | 43530226  | 43530226  | Missense_Mutation | SNP | G | A | 52  | 49  | c.52G>A       | c.(52-54)GCT>ACT     | p.A18T         |
| Pat_28 | Post-Resistance | SPINLW1        | 57119  | 37 | 20 | 44175908  | 44175908  | Missense_Mutation | SNP | G | A | 49  | 75  | c.89C>T       | c.(88-90)CCC>CTC     | p.P30L         |
| Pat_28 | Post-Resistance | UBE2C          | 11065  | 37 | 20 | 44442104  | 44442104  | Splice_Site       | SNP | G | A | 58  | 97  | c.129_splice  | c.e2+1               | p.M43_splice   |
| Pat_28 | Post-Resistance | NCOA3          | 8202   | 37 | 20 | 46265286  | 46265286  | Missense_Mutation | SNP | G | A | 29  | 47  | c.2156G>A     | c.(2155-2157)GGA>GAA | p.G719E        |
| Pat_28 | Post-Resistance | KCNB1          | 3745   | 37 | 20 | 47990653  | 47990653  | Missense_Mutation | SNP | G | A | 47  | 77  | c.1444C>T     | c.(1444-1446)CAC>TAC | p.H482Y        |
| Pat_28 | Post-Resistance | TMEM189-UBE2V' | 387522 | 37 | 20 | 48713345  | 48713345  | Missense_Mutation | SNP | G | A | 49  | 79  | c.704C>T      | c.(703-705)CCT>CTT   | p.P235L        |
| Pat_28 | Post-Resistance | PHACTR3        | 116154 | 37 | 20 | 58420278  | 58420278  | Missense_Mutation | SNP | G | A | 32  | 55  | c.1622G>A     | c.(1621-1623)AGT>AAT | p.S541N        |
| Pat_28 | Post-Resistance | SYCP2          | 10388  | 37 | 20 | 58467061  | 58467061  | Missense_Mutation | SNP | G | A | 29  | 40  | c.2348C>T     | c.(2347-2349)TCG>TTG | p.S783L        |
| Pat_28 | Post-Resistance | TMPRSS15       | 5651   | 37 | 21 | 19698793  | 19698793  | Missense_Mutation | SNP | C | T | 115 | 189 | c.1877G>A     | c.(1876-1878)GGG>GAG | p.G626E        |
| Pat_28 | Post-Resistance | ITSN1          | 6453   | 37 | 21 | 35183343  | 35183343  | Nonsense_Mutation | SNP | G | A | 37  | 51  | c.2384G>A     | c.(2383-2385)TGG>TAG | p.W795*        |
| Pat_28 | Post-Resistance | RUNX1          | 861    | 37 | 21 | 36206779  | 36206779  | Missense_Mutation | SNP | G | A | 83  | 123 | c.652C>T      | c.(652-654)CCC>TCC   | p.P218S        |
| Pat_28 | Post-Resistance | DOPEY2         | 9980   | 37 | 21 | 37591730  | 37591730  | Missense_Mutation | SNP | G | A | 29  | 39  | c.1190G>A     | c.(1189-1191)AGA>AAA | p.R397K        |
| Pat_28 | Post-Resistance | DSCAM          | 1826   | 37 | 21 | 41648105  | 41648105  | Missense_Mutation | SNP | C | T | 26  | 37  | c.2275G>A     | c.(2275-2277)GAA>AAA | p.E759K        |
| Pat_28 | Post-Resistance | DSCAM          | 1826   | 37 | 21 | 41725476  | 41725476  | Missense_Mutation | SNP | G | A | 33  | 62  | c.850C>T      | c.(850-852)CGC>TGC   | p.R284C        |
| Pat_28 | Post-Resistance | RRP1           | 8568   | 37 | 21 | 45217364  | 45217364  | Missense_Mutation | SNP | C | T | 8   | 11  | c.484C>T      | c.(484-486)CCC>TCC   | p.P162S        |
| Pat_28 | Post-Resistance | ITGB2          | 3689   | 37 | 21 | 46306326  | 46306326  | Missense_Mutation | SNP | C | T | 40  | 64  | c.2267G>A     | c.(2266-2268)AGC>AAC | p.S756N        |
| Pat_28 | Post-Resistance | PCNT           | 5116   | 37 | 21 | 47845764  | 47845764  | Missense_Mutation | SNP | G | A | 27  | 59  | c.7199G>A     | c.(7198-7200)CGT>CAT | p.R2400H       |
| Pat_28 | Post-Resistance | RTN4R          | 65078  | 37 | 22 | 20230523  | 20230523  | Nonsense_Mutation | SNP | G | A | 11  | 8   | c.133C>T      | c.(133-135)CAG>TAG   | p.Q45*         |
| Pat_28 | Post-Resistance | SCARF2         | 91179  | 37 | 22 | 20781781  | 20781781  | Missense_Mutation | SNP | C | T | 7   | 15  | c.1612G>A     | c.(1612-1614)GGG>AGG | p.G538R        |
| Pat_28 | Post-Resistance | CCDC116        | 164592 | 37 | 22 | 21991283  | 21991283  | Missense_Mutation | SNP | C | T | 31  | 40  | c.1766C>T     | c.(1765-1767)GCC>GTC | p.A589V        |
| Pat_28 | Post-Resistance | BCR            | 613    | 37 | 22 | 23631755  | 23631755  | Missense_Mutation | SNP | C | T | 17  | 43  | c.2654C>T     | c.(2653-2655)TCG>TTG | p.S885L        |
| Pat_28 | Post-Resistance | SLC2A11        | 66035  | 37 | 22 | 24219229  | 24219229  | Missense_Mutation | SNP | G | A | 27  | 38  | c.407G>A      | c.(406-408)GGT>GAT   | p.G136D        |
| Pat_28 | Post-Resistance | MYO18B         | 84700  | 37 | 22 | 26165166  | 26165166  | Missense_Mutation | SNP | C | T | 4   | 0   | c.1283C>T     | c.(1282-1284)TCG>TTG | p.S428L        |
| Pat_28 | Post-Resistance | MYO18B         | 84700  | 37 | 22 | 26224849  | 26224849  | Missense_Mutation | SNP | G | A | 18  | 33  | c.2893G>A     | c.(2893-2895)GAG>AAG | p.E965K        |
| Pat_28 | Post-Resistance | NEFH           | 4744   | 37 | 22 | 29886558  | 29886558  | Missense_Mutation | SNP | G | A | 12  | 26  | c.2929G>A     | c.(2929-2931)GAA>AAA | p.E977K        |
| Pat_28 | Post-Resistance | GCAT           | 23464  | 37 | 22 | 38211694  | 38211694  | Missense_Mutation | SNP | C | T | 38  | 49  | c.839C>T      | c.(838-840)CCC>CTC   | p.P280L        |



|        |                 |         |        |    |    |           |           |                   |     |    |    |     |     |                  |                           |               |
|--------|-----------------|---------|--------|----|----|-----------|-----------|-------------------|-----|----|----|-----|-----|------------------|---------------------------|---------------|
| Pat_28 | Post-Resistance | GTPBP1  | 9567   | 37 | 22 | 39122262  | 39122262  | Splice_Site       | SNP | G  | A  | 13  | 18  | c.1219_splice    | c.e8-1                    | p.G407_splice |
| Pat_28 | Post-Resistance | SMCR7L  | 54471  | 37 | 22 | 39909855  | 39909855  | Missense_Mutation | SNP | C  | T  | 76  | 127 | c.919C>T         | c.(919-921)CAT>TAT        | p.H307Y       |
| Pat_28 | Post-Resistance | EP300   | 2033   | 37 | 22 | 41513431  | 41513431  | Missense_Mutation | SNP | G  | A  | 60  | 99  | c.335G>A         | c.(334-336)AGT>AAT        | p.S112N       |
| Pat_28 | Post-Resistance | NAGA    | 4668   | 37 | 22 | 42456377  | 42456377  | Missense_Mutation | SNP | C  | T  | 93  | 127 | c.1142G>A        | c.(1141-1143)CGA>CAA      | p.R381Q       |
| Pat_28 | Post-Resistance | A4GALT  | 53947  | 37 | 22 | 43088994  | 43088994  | Nonsense_Mutation | SNP | G  | A  | 17  | 27  | c.964C>T         | c.(964-966)CAG>TAG        | p.Q322*       |
| Pat_28 | Post-Resistance | TLL1    | 25809  | 37 | 22 | 43464597  | 43464597  | Splice_Site       | SNP | C  | T  | 59  | 99  | c.323_splice     | c.e5-1                    | p.D108_splice |
| Pat_28 | Post-Resistance | BIK     | 638    | 37 | 22 | 43520033  | 43520033  | Missense_Mutation | SNP | C  | T  | 25  | 33  | c.5C>T           | c.(4-6)TCT>TTT            | p.S2F         |
| Pat_28 | Post-Resistance | ATXN10  | 25814  | 37 | 22 | 46239548  | 46239548  | Splice_Site       | SNP | G  | A  | 10  | 21  | c.1426_splice    | c.e12-1                   | p.*476_splice |
| Pat_28 | Post-Resistance | WNT7B   | 7477   | 37 | 22 | 46327195  | 46327195  | Missense_Mutation | SNP | G  | A  | 4   | 6   | c.353C>T         | c.(352-354)GCC>GTC        | p.A118V       |
| Pat_28 | Post-Resistance | LMF2    | 91289  | 37 | 22 | 50943572  | 50943572  | Missense_Mutation | SNP | C  | T  | 16  | 34  | c.1168G>A        | c.(1168-1170)GTG>ATG      | p.V390M       |
| Pat_28 | Post-Resistance | CPNE9   | 151835 | 37 | 3  | 9759889   | 9759889   | Missense_Mutation | SNP | C  | T  | 13  | 13  | c.1108C>T        | c.(1108-1110)CCC>TCC      | p.P370S       |
| Pat_28 | Post-Resistance | BRPF1   | 7862   | 37 | 3  | 9782600   | 9782600   | Missense_Mutation | SNP | C  | T  | 10  | 15  | c.1697C>T        | c.(1696-1698)TCT>TTT      | p.S566F       |
| Pat_28 | Post-Resistance | IL17RE  | 132014 | 37 | 3  | 9956268   | 9956268   | Missense_Mutation | SNP | C  | T  | 39  | 61  | c.1333C>T        | c.(1333-1335)CTC>TTC      | p.L445F       |
| Pat_28 | Post-Resistance | FANCD2  | 2177   | 37 | 3  | 10089610  | 10089610  | Missense_Mutation | SNP | G  | A  | 27  | 231 | c.1288G>A        | c.(1288-1290)GAT>AAT      | p.D430N       |
| Pat_28 | Post-Resistance | ATP2B2  | 491    | 37 | 3  | 10379966  | 10379966  | Missense_Mutation | SNP | G  | C  | 28  | 27  | c.3314C>G        | c.(3313-3315)CCG>CGG      | p.P1105R      |
| Pat_28 | Post-Resistance | ATP2B2  | 491    | 37 | 3  | 10452389  | 10452389  | Nonsense_Mutation | SNP | G  | A  | 109 | 169 | c.310C>T         | c.(310-312)CAG>TAG        | p.Q104*       |
| Pat_28 | Post-Resistance | HACL1   | 26061  | 37 | 3  | 15631058  | 15631058  | Missense_Mutation | SNP | C  | T  | 62  | 88  | c.370G>A         | c.(370-372)GAG>AAG        | p.E124K       |
| Pat_28 | Post-Resistance | GALNTL2 | 117248 | 37 | 3  | 16252690  | 16252690  | Missense_Mutation | SNP | G  | A  | 30  | 60  | c.1139G>A        | c.(1138-1140)GGA>GAA      | p.G380E       |
| Pat_28 | Post-Resistance | GALNTL2 | 117248 | 37 | 3  | 16254176  | 16254176  | Missense_Mutation | SNP | C  | T  | 48  | 67  | c.1298C>T        | c.(1297-1299)ACC>ATC      | p.T433I       |
| Pat_28 | Post-Resistance | ZNF385D | 79750  | 37 | 3  | 21706425  | 21706425  | Missense_Mutation | SNP | G  | A  | 35  | 68  | c.118C>T         | c.(118-120)CCT>TCT        | p.P40S        |
| Pat_28 | Post-Resistance | ZNF860  | 344787 | 37 | 3  | 32030630  | 32030630  | Missense_Mutation | SNP | C  | T  | 61  | 92  | c.59C>T          | c.(58-60)CCT>CTT          | p.P20L        |
| Pat_28 | Post-Resistance | ARPP21  | 10777  | 37 | 3  | 35750489  | 35750489  | Missense_Mutation | SNP | A  | C  | 39  | 44  | c.824A>C         | c.(823-825)GAC>GCC        | p.D275A       |
| Pat_28 | Post-Resistance | STAC    | 6769   | 37 | 3  | 36485039  | 36485039  | Missense_Mutation | SNP | G  | A  | 47  | 101 | c.295G>A         | c.(295-297)GCT>ACT        | p.A99T        |
| Pat_28 | Post-Resistance | STAC    | 6769   | 37 | 3  | 36485042  | 36485042  | Missense_Mutation | SNP | G  | A  | 49  | 106 | c.298G>A         | c.(298-300)GGT>AGT        | p.G100S       |
| Pat_28 | Post-Resistance | TRANK1  | 9881   | 37 | 3  | 36872900  | 36872900  | Missense_Mutation | SNP | C  | T  | 12  | 11  | c.6392G>A        | c.(6391-6393)AGG>AAG      | p.R2131K      |
| Pat_28 | Post-Resistance | DLEC1   | 9940   | 37 | 3  | 38137409  | 38137409  | Missense_Mutation | SNP | G  | A  | 43  | 52  | c.2143G>A        | c.(2143-2145)GTG>ATG      | p.V715M       |
| Pat_28 | Post-Resistance | MYRIP   | 25924  | 37 | 3  | 40085725  | 40085725  | Missense_Mutation | SNP | G  | A  | 36  | 72  | c.295G>A         | c.(295-297)GAA>AAA        | p.E99K        |
| Pat_28 | Post-Resistance | ZNF35   | 7584   | 37 | 3  | 44700600  | 44700601  | Missense_Mutation | DNP | CC | TT | 36  | 104 | c.745_746CC>TT   | c.(745-747)CCC>TTC        | p.P249F       |
| Pat_28 | Post-Resistance | KIF15   | 56992  | 37 | 3  | 44872502  | 44872502  | Missense_Mutation | SNP | G  | A  | 121 | 184 | c.3163G>A        | c.(3163-3165)GAC>AAC      | p.D1055N      |
| Pat_28 | Post-Resistance | FYCO1   | 79443  | 37 | 3  | 46008670  | 46008670  | Missense_Mutation | SNP | C  | T  | 60  | 83  | c.2156G>A        | c.(2155-2157)TGC>TAC      | p.C719Y       |
| Pat_28 | Post-Resistance | CSPG5   | 10675  | 37 | 3  | 47614300  | 47614301  | Nonsense_Mutation | DNP | GG | AA | 20  | 39  | c.1257_1258CC>TT | c.(1255-1260)TTCCAG>TTTTT | p.Q420*       |
| Pat_28 | Post-Resistance | TREX1   | 11277  | 37 | 3  | 48508929  | 48508929  | Missense_Mutation | SNP | G  | A  | 23  | 27  | c.1040G>A        | c.(1039-1041)GGT>GAT      | p.G347D       |
| Pat_28 | Post-Resistance | PRKAR2A | 5576   | 37 | 3  | 48884951  | 48884951  | Missense_Mutation | SNP | G  | A  | 5   | 3   | c.79C>T          | c.(79-81)CCT>TCT          | p.P27S        |
| Pat_28 | Post-Resistance | QARS    | 5859   | 37 | 3  | 49140824  | 49140824  | Missense_Mutation | SNP | A  | G  | 63  | 121 | c.470T>C         | c.(469-471)CTG>CCG        | p.L157P       |
| Pat_28 | Post-Resistance | DAG1    | 1605   | 37 | 3  | 49569597  | 49569597  | Nonsense_Mutation | SNP | G  | A  | 19  | 22  | c.1653G>A        | c.(1651-1653)TGG>TGA      | p.W551*       |
| Pat_28 | Post-Resistance | MST1    | 4485   | 37 | 3  | 49723375  | 49723375  | Missense_Mutation | SNP | C  | T  | 4   | 25  | c.1168G>A        | c.(1168-1170)GAG>AAG      | p.E390K       |
| Pat_28 | Post-Resistance | MON1A   | 84315  | 37 | 3  | 49948270  | 49948270  | Missense_Mutation | SNP | C  | T  | 19  | 30  | c.952G>A         | c.(952-954)GCC>ACG        | p.A318T       |
| Pat_28 | Post-Resistance | DNAH1   | 25981  | 37 | 3  | 52360908  | 52360908  | Splice_Site       | SNP | G  | A  | 16  | 17  | c.738_splice     | c.e5+1                    | p.K246_splice |
| Pat_28 | Post-Resistance | STAB1   | 23166  | 37 | 3  | 52536099  | 52536099  | Missense_Mutation | SNP | G  | A  | 19  | 26  | c.409G>A         | c.(409-411)GTG>ATG        | p.V137M       |
| Pat_28 | Post-Resistance | ITIH1   | 3697   | 37 | 3  | 52816017  | 52816017  | Missense_Mutation | SNP | C  | T  | 46  | 76  | c.749C>T         | c.(748-750)TCC>TTC        | p.S250F       |
| Pat_28 | Post-Resistance | LRIG1   | 26018  | 37 | 3  | 66434613  | 66434613  | Missense_Mutation | SNP | G  | A  | 84  | 97  | c.1873C>T        | c.(1873-1875)CAC>TAC      | p.H625Y       |
| Pat_28 | Post-Resistance | C3orf64 | 285203 | 37 | 3  | 69056913  | 69056913  | Missense_Mutation | SNP | G  | A  | 92  | 156 | c.371C>T         | c.(370-372)GCC>GTC        | p.A124V       |
| Pat_28 | Post-Resistance | CNTN3   | 5067   | 37 | 3  | 74548880  | 74548880  | Missense_Mutation | SNP | G  | A  | 33  | 67  | c.112C>T         | c.(112-114)CCT>TCT        | p.P38S        |
| Pat_28 | Post-Resistance | COL8A1  | 1295   | 37 | 3  | 99513844  | 99513844  | Missense_Mutation | SNP | G  | A  | 8   | 17  | c.1099G>A        | c.(1099-1101)GTT>ATT      | p.V367I       |
| Pat_28 | Post-Resistance | PCNP    | 57092  | 37 | 3  | 101311500 | 101311500 | Missense_Mutation | SNP | C  | T  | 41  | 19  | c.440C>T         | c.(439-441)TCC>TTC        | p.S147F       |
| Pat_28 | Post-Resistance | CEP97   | 79598  | 37 | 3  | 101484183 | 101484183 | Missense_Mutation | SNP | A  | G  | 140 | 45  | c.2386A>G        | c.(2386-2388)AGA>GGA      | p.R796G       |
| Pat_28 | Post-Resistance | PLCXD2  | 257068 | 37 | 3  | 111427090 | 111427090 | Missense_Mutation | SNP | G  | A  | 61  | 21  | c.481G>A         | c.(481-483)GAT>AAT        | p.D161N       |

|        |                 |          |        |    |   |           |           |                   |     |    |    |     |     |                                      |                      |               |
|--------|-----------------|----------|--------|----|---|-----------|-----------|-------------------|-----|----|----|-----|-----|--------------------------------------|----------------------|---------------|
| Pat_28 | Post-Resistance | C3orf15  | 89876  | 37 | 3 | 119445129 | 119445129 | Missense_Mutation | SNP | A  | C  | 14  | 5   | c.794A>C                             | c.(793-795)AAG>ACG   | p.K265T       |
| Pat_28 | Post-Resistance | SLC15A2  | 6565   | 37 | 3 | 121643880 | 121643880 | Missense_Mutation | SNP | C  | T  | 85  | 41  | c.1124C>T                            | c.(1123-1125)TCA>TTA | p.S375L       |
| Pat_28 | Post-Resistance | SEC61A1  | 29927  | 37 | 3 | 127783866 | 127783866 | Missense_Mutation | SNP | G  | A  | 87  | 20  | c.763G>A                             | c.(763-765)GTC>ATC   | p.V255I       |
| Pat_28 | Post-Resistance | STAG1    | 10274  | 37 | 3 | 136141269 | 136141269 | Missense_Mutation | SNP | C  | T  | 61  | 14  | c.2020G>A                            | c.(2020-2022)GAA>AAA | p.E674K       |
| Pat_28 | Post-Resistance | WWTR1    | 25937  | 37 | 3 | 149243815 | 149243815 | Missense_Mutation | SNP | C  | T  | 45  | 17  | c.1003G>A                            | c.(1003-1005)GAT>AAT | p.D335N       |
| Pat_28 | Post-Resistance | IGSF10   | 285313 | 37 | 3 | 151155253 | 151155253 | Missense_Mutation | SNP | G  | A  | 92  | 28  | c.7096C>T                            | c.(7096-7098)CCA>TCA | p.P2366S      |
| Pat_28 | Post-Resistance | C3orf79  | 152118 | 37 | 3 | 153202377 | 153202377 | Missense_Mutation | SNP | G  | A  | 59  | 36  | c.32G>A                              | c.(31-33)AGG>AAG     | p.R11K        |
| Pat_28 | Post-Resistance | NMD3     | 51068  | 37 | 3 | 160964203 | 160964203 | Missense_Mutation | SNP | G  | A  | 32  | 14  | c.1097G>A                            | c.(1096-1098)GGA>GAA | p.G366E       |
| Pat_28 | Post-Resistance | HTR3C    | 170572 | 37 | 3 | 183772559 | 183772559 | Missense_Mutation | SNP | G  | A  | 39  | 15  | c.118G>A                             | c.(118-120)GTT>ATT   | p.V40I        |
| Pat_28 | Post-Resistance | TP63     | 8626   | 37 | 3 | 189582204 | 189582204 | Missense_Mutation | SNP | G  | A  | 23  | 57  | c.763G>A                             | c.(763-765)GAG>AAG   | p.E255K       |
| Pat_28 | Post-Resistance | SDHAP1   | 255812 | 37 | 3 | 195690273 | 195690274 | Missense_Mutation | DNP | GG | TA | 35  | 70  | c.262_263CC>TA                       | c.(262-264)CCC>TAC   | p.P88Y        |
| Pat_28 | Post-Resistance | PDE6B    | 5158   | 37 | 4 | 654325    | 654325    | Missense_Mutation | SNP | G  | A  | 14  | 18  | c.1537G>A                            | c.(1537-1539)GAA>AAA | p.E513K       |
| Pat_28 | Post-Resistance | MFSD10   | 10227  | 37 | 4 | 2933320   | 2933320   | Missense_Mutation | SNP | G  | A  | 18  | 21  | c.985C>T                             | c.(985-987)CGG>TGG   | p.R329W       |
| Pat_28 | Post-Resistance | HGFAC    | 3083   | 37 | 4 | 3449646   | 3449646   | Missense_Mutation | SNP | G  | A  | 6   | 13  | c.1520G>A                            | c.(1519-1521)GGG>GAG | p.G507E       |
| Pat_28 | Post-Resistance | OTOP1    | 133060 | 37 | 4 | 4190688   | 4190688   | Missense_Mutation | SNP | G  | A  | 11  | 104 | c.1681C>T                            | c.(1681-1683)CCC>TCC | p.P561S       |
| Pat_28 | Post-Resistance | JAKMIP1  | 152789 | 37 | 4 | 6050637   | 6050637   | Missense_Mutation | SNP | C  | T  | 18  | 35  | c.1975G>A                            | c.(1975-1977)GAA>AAA | p.E659K       |
| Pat_28 | Post-Resistance | MAN2B2   | 23324  | 37 | 4 | 6596460   | 6596460   | Splice_Site       | SNP | G  | A  | 10  | 11  | c.1057_splice                        | c.e7+1               | p.E353_splice |
| Pat_28 | Post-Resistance | PROM1    | 8842   | 37 | 4 | 15981017  | 15981017  | Splice_Site       | SNP | C  | T  | 34  | 79  | c.2582_splice                        | c.e25+1              | p.S861_splice |
| Pat_28 | Post-Resistance | SEPSECS  | 51091  | 37 | 4 | 25157661  | 25157661  | Missense_Mutation | SNP | G  | A  | 85  | 131 | c.545C>T                             | c.(544-546)GCA>GTA   | p.A182V       |
| Pat_28 | Post-Resistance | WDR19    | 57728  | 37 | 4 | 39216257  | 39216257  | Missense_Mutation | SNP | G  | A  | 46  | 67  | c.927G>A                             | c.(925-927)ATG>ATA   | p.M309I       |
| Pat_28 | Post-Resistance | RFC1     | 5981   | 37 | 4 | 39301676  | 39301677  | Missense_Mutation | DNP | GG | AA | 15  | 43  | .:2775_2776CC>T:773-2778)ATCCGG>ATTT |                      | p.R926W       |
| Pat_28 | Post-Resistance | NSUN7    | 79730  | 37 | 4 | 40752969  | 40752969  | Nonsense_Mutation | SNP | C  | T  | 31  | 59  | c.259C>T                             | c.(259-261)CAG>TAG   | p.Q87*        |
| Pat_28 | Post-Resistance | KIAA1211 | 57482  | 37 | 4 | 57181815  | 57181815  | Missense_Mutation | SNP | A  | T  | 40  | 51  | c.2147A>T                            | c.(2146-2148)AAT>ATT | p.N716I       |
| Pat_28 | Post-Resistance | UGT2A1   | 10941  | 37 | 4 | 70460343  | 70460343  | Missense_Mutation | SNP | C  | T  | 43  | 62  | c.1156G>A                            | c.(1156-1158)GTC>ATC | p.V386I       |
| Pat_28 | Post-Resistance | SULT1E1  | 6783   | 37 | 4 | 70723320  | 70723320  | Missense_Mutation | SNP | G  | A  | 30  | 35  | c.43C>T                              | c.(43-45)CAT>TAT     | p.H15Y        |
| Pat_28 | Post-Resistance | SHROOM3  | 57619  | 37 | 4 | 77659967  | 77659967  | Missense_Mutation | SNP | C  | T  | 39  | 61  | c.641C>T                             | c.(640-642)CCT>CTT   | p.P214L       |
| Pat_28 | Post-Resistance | FRAS1    | 80144  | 37 | 4 | 79301123  | 79301123  | Missense_Mutation | SNP | G  | A  | 62  | 88  | c.3536G>A                            | c.(3535-3537)CGT>CAT | p.R1179H      |
| Pat_28 | Post-Resistance | FRAS1    | 80144  | 37 | 4 | 79362382  | 79362382  | Missense_Mutation | SNP | C  | T  | 17  | 18  | c.5596C>T                            | c.(5596-5598)CTC>TTC | p.L1866F      |
| Pat_28 | Post-Resistance | PAQR3    | 152559 | 37 | 4 | 79860269  | 79860269  | Missense_Mutation | SNP | G  | A  | 58  | 85  | c.110C>T                             | c.(109-111)CCC>CTC   | p.P37L        |
| Pat_28 | Post-Resistance | TMEM150C | 441027 | 37 | 4 | 83417310  | 83417310  | Missense_Mutation | SNP | G  | A  | 73  | 76  | c.274C>T                             | c.(274-276)CCG>TCG   | p.P92S        |
| Pat_28 | Post-Resistance | SEC31A   | 22872  | 37 | 4 | 83765625  | 83765625  | Missense_Mutation | SNP | C  | T  | 48  | 27  | c.2540G>A                            | c.(2539-2541)GGA>GAA | p.G847E       |
| Pat_28 | Post-Resistance | SEC31A   | 22872  | 37 | 4 | 83778844  | 83778844  | Missense_Mutation | SNP | C  | T  | 40  | 110 | c.1700G>A                            | c.(1699-1701)GGG>GAG | p.G567E       |
| Pat_28 | Post-Resistance | WDFY3    | 23001  | 37 | 4 | 85678114  | 85678114  | Missense_Mutation | SNP | G  | A  | 151 | 296 | c.5389C>T                            | c.(5389-5391)CCT>TCT | p.P1797S      |
| Pat_28 | Post-Resistance | DSPP     | 1834   | 37 | 4 | 88534072  | 88534072  | Missense_Mutation | SNP | G  | A  | 15  | 17  | c.734G>A                             | c.(733-735)AGT>AAT   | p.S245N       |
| Pat_28 | Post-Resistance | ABCG2    | 9429   | 37 | 4 | 89053785  | 89053785  | Missense_Mutation | SNP | C  | T  | 34  | 42  | c.206G>A                             | c.(205-207)GGG>GAG   | p.G69E        |
| Pat_28 | Post-Resistance | ADH1B    | 125    | 37 | 4 | 100237077 | 100237077 | Missense_Mutation | SNP | C  | T  | 85  | 200 | c.545G>A                             | c.(544-546)GGG>GAG   | p.G182E       |
| Pat_28 | Post-Resistance | CENPE    | 1062   | 37 | 4 | 104097137 | 104097137 | Missense_Mutation | SNP | C  | T  | 46  | 96  | c.1459G>A                            | c.(1459-1461)GCA>ACA | p.A487T       |
| Pat_28 | Post-Resistance | PAPSS1   | 9061   | 37 | 4 | 108622351 | 108622351 | Missense_Mutation | SNP | G  | A  | 67  | 102 | c.151C>T                             | c.(151-153)CGT>TGT   | p.R51C        |
| Pat_28 | Post-Resistance | COL25A1  | 84570  | 37 | 4 | 109766362 | 109766362 | Missense_Mutation | SNP | C  | T  | 100 | 168 | c.1561G>A                            | c.(1561-1563)GGT>AGT | p.G521S       |
| Pat_28 | Post-Resistance | EGF      | 1950   | 37 | 4 | 110884373 | 110884373 | Missense_Mutation | SNP | C  | T  | 109 | 189 | c.1357C>T                            | c.(1357-1359)CCT>TCT | p.P453S       |
| Pat_28 | Post-Resistance | ANKRD50  | 57182  | 37 | 4 | 125592742 | 125592742 | Missense_Mutation | SNP | G  | A  | 73  | 119 | c.1690C>T                            | c.(1690-1692)CTT>TTT | p.L564F       |
| Pat_28 | Post-Resistance | PCDH18   | 54510  | 37 | 4 | 138449631 | 138449631 | Splice_Site       | SNP | C  | T  | 81  | 97  | c.2740_splice                        | c.e3+1               | p.A914_splice |
| Pat_28 | Post-Resistance | FHDC1    | 85462  | 37 | 4 | 153884215 | 153884215 | Missense_Mutation | SNP | C  | T  | 105 | 133 | c.962C>T                             | c.(961-963)TCT>TTT   | p.S321F       |
| Pat_28 | Post-Resistance | DCHS2    | 54798  | 37 | 4 | 155156884 | 155156884 | Missense_Mutation | SNP | C  | T  | 57  | 78  | c.7555G>A                            | c.(7555-7557)GTT>ATT | p.V2519I      |
| Pat_28 | Post-Resistance | RXFP1    | 59350  | 37 | 4 | 159573068 | 159573068 | Missense_Mutation | SNP | C  | T  | 47  | 83  | c.2135C>T                            | c.(2134-2136)ACA>ATA | p.T712I       |
| Pat_28 | Post-Resistance | KLHL2    | 11275  | 37 | 4 | 166231776 | 166231776 | Missense_Mutation | SNP | G  | A  | 260 | 372 | c.1111G>A                            | c.(1111-1113)GAT>AAT | p.D371N       |
| Pat_28 | Post-Resistance | ODZ3     | 55714  | 37 | 4 | 183675922 | 183675922 | Missense_Mutation | SNP | G  | A  | 43  | 71  | c.4402G>A                            | c.(4402-4404)GAT>AAT | p.D1468N      |

|        |                 |          |        |    |   |           |           |                   |     |   |   |     |     |               |                        |               |
|--------|-----------------|----------|--------|----|---|-----------|-----------|-------------------|-----|---|---|-----|-----|---------------|------------------------|---------------|
| Pat_28 | Post-Resistance | SDHA     | 6389   | 37 | 5 | 218477    | 218477    | Missense_Mutation | SNP | G | A | 6   | 21  | c.7G>A        | c.(7-9)GGG>AGG         | p.G3R         |
| Pat_28 | Post-Resistance | SLC12A7  | 10723  | 37 | 5 | 1063982   | 1063982   | Missense_Mutation | SNP | C | T | 29  | 56  | c.2716G>A     | c.(2716-2718)GCC>ACC   | p.A906T       |
| Pat_28 | Post-Resistance | SLC6A3   | 6531   | 37 | 5 | 1441606   | 1441606   | Splice_Site       | SNP | C | T | 9   | 12  | c.287_splice  | c.e3-1                 | p.G96_splice  |
| Pat_28 | Post-Resistance | KIAA0947 | 23379  | 37 | 5 | 5465026   | 5465026   | Missense_Mutation | SNP | G | A | 7   | 6   | c.5579G>A     | c.(5578-5580)AGG>AAG   | p.R1860K      |
| Pat_28 | Post-Resistance | SEMA5A   | 9037   | 37 | 5 | 9202163   | 9202163   | Missense_Mutation | SNP | G | A | 33  | 55  | c.836C>T      | c.(835-837)TCC>TTC     | p.S279F       |
| Pat_28 | Post-Resistance | DNAH5    | 1767   | 37 | 5 | 13807795  | 13807795  | Missense_Mutation | SNP | C | T | 6   | 10  | c.7792G>A     | c.(7792-7794)GTA>ATA   | p.V2598I      |
| Pat_28 | Post-Resistance | CDH10    | 1008   | 37 | 5 | 24491808  | 24491808  | Nonsense_Mutation | SNP | G | A | 46  | 65  | c.1753C>T     | c.(1753-1755)CGA>TGA   | p.R585*       |
| Pat_28 | Post-Resistance | UGT3A1   | 133688 | 37 | 5 | 35954459  | 35954459  | Missense_Mutation | SNP | G | A | 25  | 35  | c.1417C>T     | c.(1417-1419)CCC>TCC   | p.P473S       |
| Pat_28 | Post-Resistance | EGFLAM   | 133584 | 37 | 5 | 38409148  | 38409148  | Missense_Mutation | SNP | G | A | 8   | 11  | c.1291G>A     | c.(1291-1293)GAA>AAA   | p.E431K       |
| Pat_28 | Post-Resistance | RICTOR   | 253260 | 37 | 5 | 38953151  | 38953151  | Missense_Mutation | SNP | C | T | 72  | 106 | c.2833G>A     | c.(2833-2835)GAA>AAA   | p.E945K       |
| Pat_28 | Post-Resistance | C6       | 729    | 37 | 5 | 41158798  | 41158798  | Missense_Mutation | SNP | G | A | 25  | 47  | c.1946C>T     | c.(1945-1947)CCT>CTT   | p.P649L       |
| Pat_28 | Post-Resistance | HMGCS1   | 3157   | 37 | 5 | 43294211  | 43294211  | Missense_Mutation | SNP | G | A | 46  | 111 | c.1130C>T     | c.(1129-1131)TCT>TTT   | p.S377F       |
| Pat_28 | Post-Resistance | GAPT     | 202309 | 37 | 5 | 57790683  | 57790683  | Missense_Mutation | SNP | C | T | 40  | 53  | c.320C>T      | c.(319-321)ACC>ATC     | p.T107I       |
| Pat_28 | Post-Resistance | RGS7BP   | 401190 | 37 | 5 | 63905020  | 63905020  | Missense_Mutation | SNP | C | T | 47  | 67  | c.715C>T      | c.(715-717)CCC>TCC     | p.P239S       |
| Pat_28 | Post-Resistance | PPWD1    | 23398  | 37 | 5 | 64865551  | 64865551  | Missense_Mutation | SNP | G | A | 31  | 57  | c.392G>A      | c.(391-393)AGT>AAT     | p.S131N       |
| Pat_28 | Post-Resistance | MAST4    | 375449 | 37 | 5 | 66462764  | 66462764  | Missense_Mutation | SNP | C | T | 7   | 15  | c.7190C>T     | c.(7189-7191)TCC>TTC   | p.S2397F      |
| Pat_28 | Post-Resistance | RGNEF    | 64283  | 37 | 5 | 73136449  | 73136449  | Missense_Mutation | SNP | G | A | 25  | 37  | c.1291G>A     | c.(1291-1293)GAA>AAA   | p.E431K       |
| Pat_28 | Post-Resistance | IQGAP2   | 10788  | 37 | 5 | 75886412  | 75886412  | Splice_Site       | SNP | G | A | 5   | 23  | c.819_splice  | c.e8+1                 | p.K273_splice |
| Pat_28 | Post-Resistance | VCAN     | 1462   | 37 | 5 | 82815700  | 82815700  | Missense_Mutation | SNP | G | A | 68  | 90  | c.1575G>A     | c.(1573-1575)ATG>ATA   | p.M525I       |
| Pat_28 | Post-Resistance | EDIL3    | 10085  | 37 | 5 | 83259133  | 83259133  | Missense_Mutation | SNP | C | T | 34  | 56  | c.1184G>A     | c.(1183-1185)GGA>GAA   | p.G395E       |
| Pat_28 | Post-Resistance | GPR98    | 84059  | 37 | 5 | 90159654  | 90159654  | Missense_Mutation | SNP | G | A | 97  | 148 | c.17836G>A    | c.(17836-17838)GCA>ACA | p.A5946T      |
| Pat_28 | Post-Resistance | AQPEP    | 206338 | 37 | 5 | 115335540 | 115335540 | Missense_Mutation | SNP | G | A | 38  | 81  | c.1456G>A     | c.(1456-1458)GTG>ATG   | p.V486M       |
| Pat_28 | Post-Resistance | SEMA6A   | 57556  | 37 | 5 | 115837950 | 115837950 | Missense_Mutation | SNP | G | C | 135 | 189 | c.174C>G      | c.(172-174)ATC>ATG     | p.I58M        |
| Pat_28 | Post-Resistance | FAM170A  | 340069 | 37 | 5 | 118965466 | 118965466 | Missense_Mutation | SNP | G | A | 65  | 83  | c.3G>A        | c.(1-3)ATG>ATA         | p.M1I         |
| Pat_28 | Post-Resistance | CSNK1G3  | 1456   | 37 | 5 | 122881506 | 122881506 | Missense_Mutation | SNP | G | A | 82  | 120 | c.149G>A      | c.(148-150)GGA>GAA     | p.G50E        |
| Pat_28 | Post-Resistance | C5orf56  | 441108 | 37 | 5 | 131821956 | 131821956 | Missense_Mutation | SNP | G | T | 51  | 81  | c.117G>T      | c.(115-117)GAG>GAT     | p.E39D        |
| Pat_28 | Post-Resistance | HSPA4    | 3308   | 37 | 5 | 132427028 | 132427028 | Missense_Mutation | SNP | G | A | 28  | 38  | c.1522G>A     | c.(1522-1524)GAG>AAG   | p.E508K       |
| Pat_28 | Post-Resistance | TCF7     | 6932   | 37 | 5 | 133451621 | 133451621 | Missense_Mutation | SNP | C | T | 26  | 45  | c.338C>T      | c.(337-339)ACC>ATC     | p.T113I       |
| Pat_28 | Post-Resistance | WNT8A    | 7478   | 37 | 5 | 137426514 | 137426514 | Missense_Mutation | SNP | A | T | 32  | 56  | c.808A>T      | c.(808-810)ACA>TCA     | p.T270S       |
| Pat_28 | Post-Resistance | KIF20A   | 10112  | 37 | 5 | 137523005 | 137523005 | Missense_Mutation | SNP | C | T | 26  | 49  | c.2576C>T     | c.(2575-2577)ACC>ATC   | p.T859I       |
| Pat_28 | Post-Resistance | PCDHA9   | 9752   | 37 | 5 | 140230475 | 140230475 | Splice_Site       | SNP | G | A | 21  | 26  | c.2394_splice | c.e1+1                 | p.K798_splice |
| Pat_28 | Post-Resistance | PCDHA13  | 56136  | 37 | 5 | 140264182 | 140264182 | Missense_Mutation | SNP | C | T | 14  | 19  | c.2329C>T     | c.(2329-2331)CCT>TCT   | p.P777S       |
| Pat_28 | Post-Resistance | PCDHB16  | 57717  | 37 | 5 | 140563779 | 140563779 | Missense_Mutation | SNP | G | A | 14  | 14  | c.1645G>A     | c.(1645-1647)GTG>ATG   | p.V549M       |
| Pat_28 | Post-Resistance | PCDHGB1  | 56104  | 37 | 5 | 140730554 | 140730554 | Missense_Mutation | SNP | G | A | 49  | 73  | c.727G>A      | c.(727-729)GTA>ATA     | p.V243I       |
| Pat_28 | Post-Resistance | PCDHGA5  | 56110  | 37 | 5 | 140744554 | 140744554 | Missense_Mutation | SNP | C | A | 46  | 64  | c.657C>A      | c.(655-657)GAC>GAA     | p.D219E       |
| Pat_28 | Post-Resistance | PCDHGA9  | 56107  | 37 | 5 | 140783741 | 140783741 | Nonsense_Mutation | SNP | C | T | 3   | 6   | c.1222C>T     | c.(1222-1224)CAA>TAA   | p.Q408*       |
| Pat_28 | Post-Resistance | PCDHGC3  | 5098   | 37 | 5 | 140857485 | 140857485 | Missense_Mutation | SNP | G | A | 14  | 18  | c.1802G>A     | c.(1801-1803)GGG>GAG   | p.G601E       |
| Pat_28 | Post-Resistance | SLC26A2  | 1836   | 37 | 5 | 149357903 | 149357903 | Missense_Mutation | SNP | G | A | 67  | 114 | c.688G>A      | c.(688-690)GGA>AGA     | p.G230R       |
| Pat_28 | Post-Resistance | CDC69    | 26112  | 37 | 5 | 150581189 | 150581189 | Missense_Mutation | SNP | C | T | 44  | 57  | c.185G>A      | c.(184-186)AGA>AAA     | p.R62K        |
| Pat_28 | Post-Resistance | SGCD     | 6444   | 37 | 5 | 155771587 | 155771587 | Missense_Mutation | SNP | G | A | 65  | 89  | c.89G>A       | c.(88-90)CGG>CAG       | p.R30Q        |
| Pat_28 | Post-Resistance | SLIT3    | 6586   | 37 | 5 | 168098390 | 168098390 | Missense_Mutation | SNP | C | T | 17  | 44  | c.3940G>A     | c.(3940-3942)GAG>AAG   | p.E1314K      |
| Pat_28 | Post-Resistance | STK10    | 6793   | 37 | 5 | 171472026 | 171472026 | Missense_Mutation | SNP | C | T | 41  | 53  | c.2767G>A     | c.(2767-2769)GCT>ACT   | p.A923T       |
| Pat_28 | Post-Resistance | C5orf25  | 375484 | 37 | 5 | 175740710 | 175740710 | Missense_Mutation | SNP | G | A | 141 | 216 | c.1694G>A     | c.(1693-1695)GGG>GAG   | p.G565E       |
| Pat_28 | Post-Resistance | GRM6     | 2916   | 37 | 5 | 178418532 | 178418532 | Missense_Mutation | SNP | C | A | 87  | 116 | c.750G>T      | c.(748-750)AAG>AAT     | p.K250N       |
| Pat_28 | Post-Resistance | EXOC2    | 55770  | 37 | 6 | 564872    | 564872    | Missense_Mutation | SNP | C | T | 143 | 83  | c.1501G>A     | c.(1501-1503)GAT>AAT   | p.D501N       |
| Pat_28 | Post-Resistance | PRPF4B   | 8899   | 37 | 6 | 4041062   | 4041062   | Missense_Mutation | SNP | G | A | 26  | 161 | c.1469G>A     | c.(1468-1470)GGT>GAT   | p.G490D       |
| Pat_28 | Post-Resistance | DSP      | 1832   | 37 | 6 | 7565599   | 7565599   | Missense_Mutation | SNP | C | T | 55  | 240 | c.785C>T      | c.(784-786)TCC>TTC     | p.S262F       |

|        |                 |           |        |    |   |           |           |                   |     |   |   |     |     |              |                        |               |
|--------|-----------------|-----------|--------|----|---|-----------|-----------|-------------------|-----|---|---|-----|-----|--------------|------------------------|---------------|
| Pat_28 | Post-Resistance | SYCP2L    | 221711 | 37 | 6 | 10956431  | 10956431  | Missense_Mutation | SNP | C | T | 23  | 97  | c.2119C>T    | c.(2119-2121)CCA>TCA   | p.P707S       |
| Pat_28 | Post-Resistance | JARID2    | 3720   | 37 | 6 | 15487537  | 15487537  | Splice_Site       | SNP | G | A | 3   | 27  | c.671_splice | c.e6-1                 | p.V224_splice |
| Pat_28 | Post-Resistance | FAM8A1    | 51439  | 37 | 6 | 17601299  | 17601299  | Missense_Mutation | SNP | G | A | 9   | 18  | c.659G>A     | c.(658-660)AGG>AAG     | p.R220K       |
| Pat_28 | Post-Resistance | NUP153    | 9972   | 37 | 6 | 17629327  | 17629327  | Missense_Mutation | SNP | G | A | 33  | 127 | c.3103C>T    | c.(3103-3105)CCT>TCT   | p.P1035S      |
| Pat_28 | Post-Resistance | E2F3      | 1871   | 37 | 6 | 20402789  | 20402789  | Missense_Mutation | SNP | G | A | 4   | 8   | c.326G>A     | c.(325-327)AGA>AAA     | p.R109K       |
| Pat_28 | Post-Resistance | CDKAL1    | 54901  | 37 | 6 | 21000457  | 21000457  | Splice_Site       | SNP | G | A | 100 | 141 | c.910_splice | c.e11-1                | p.E304_splice |
| Pat_28 | Post-Resistance | KIAA0319  | 9856   | 37 | 6 | 24596292  | 24596292  | Missense_Mutation | SNP | C | T | 8   | 36  | c.610G>A     | c.(610-612)GCG>ACG     | p.A204T       |
| Pat_28 | Post-Resistance | HIST1H2BB | 3018   | 37 | 6 | 26043810  | 26043810  | Missense_Mutation | SNP | C | T | 53  | 226 | c.76G>A      | c.(76-78)GAT>AAT       | p.D26N        |
| Pat_28 | Post-Resistance | HIST1H4F  | 8361   | 37 | 6 | 26240940  | 26240940  | Missense_Mutation | SNP | G | A | 44  | 129 | c.287G>A     | c.(286-288)CGC>CAC     | p.R96H        |
| Pat_28 | Post-Resistance | ZNF165    | 7718   | 37 | 6 | 28053992  | 28053992  | Missense_Mutation | SNP | G | A | 36  | 168 | c.454G>A     | c.(454-456)GTG>ATG     | p.V152M       |
| Pat_28 | Post-Resistance | TRIM10    | 10107  | 37 | 6 | 30123507  | 30123507  | Missense_Mutation | SNP | G | A | 17  | 72  | c.925C>T     | c.(925-927)CCA>TCA     | p.P309S       |
| Pat_28 | Post-Resistance | MDC1      | 9656   | 37 | 6 | 30672908  | 30672908  | Missense_Mutation | SNP | G | A | 56  | 225 | c.4052C>T    | c.(4051-4053)ACT>ATT   | p.T1351I      |
| Pat_28 | Post-Resistance | PSORS1C1  | 170679 | 37 | 6 | 31107430  | 31107430  | Missense_Mutation | SNP | C | A | 13  | 42  | c.180C>A     | c.(178-180)GAC>GAA     | p.D60E        |
| Pat_28 | Post-Resistance | PSORS1C1  | 170679 | 37 | 6 | 31107605  | 31107605  | Missense_Mutation | SNP | C | T | 37  | 102 | c.355C>T     | c.(355-357)CCT>TCT     | p.P119S       |
| Pat_28 | Post-Resistance | LY6G6F    | 259215 | 37 | 6 | 31685358  | 31685358  | Missense_Mutation | SNP | C | T | 130 | 580 | c.926C>T     | c.(925-927)CCC>CTC     | p.P309L       |
| Pat_28 | Post-Resistance | SLC44A4   | 80736  | 37 | 6 | 31833111  | 31833111  | Missense_Mutation | SNP | G | A | 110 | 506 | c.1741C>T    | c.(1741-1743)CTC>TTC   | p.L581F       |
| Pat_28 | Post-Resistance | EHMT2     | 10919  | 37 | 6 | 31854650  | 31854650  | Missense_Mutation | SNP | C | T | 82  | 334 | c.2143G>A    | c.(2143-2145)GAC>AAC   | p.D715N       |
| Pat_28 | Post-Resistance | CFB       | 629    | 37 | 6 | 31914225  | 31914225  | Missense_Mutation | SNP | G | A | 6   | 60  | c.140G>A     | c.(139-141)GGC>GAC     | p.G47D        |
| Pat_28 | Post-Resistance | CFB       | 629    | 37 | 6 | 31919797  | 31919797  | Missense_Mutation | SNP | G | A | 111 | 332 | c.2285G>A    | c.(2284-2286)GGT>GAT   | p.G762D       |
| Pat_28 | Post-Resistance | AGPAT1    | 10554  | 37 | 6 | 32139188  | 32139188  | Missense_Mutation | SNP | C | T | 22  | 57  | c.86G>A      | c.(85-87)AGC>AAC       | p.S29N        |
| Pat_28 | Post-Resistance | NOTCH4    | 4855   | 37 | 6 | 32189064  | 32189064  | Missense_Mutation | SNP | G | A | 20  | 91  | c.490C>T     | c.(490-492)CCA>TCA     | p.P164S       |
| Pat_28 | Post-Resistance | HLA-DQB1  | 3119   | 37 | 6 | 32629225  | 32629225  | Missense_Mutation | SNP | G | A | 11  | 7   | c.671C>T     | c.(670-672)TCT>TTT     | p.S224F       |
| Pat_28 | Post-Resistance | TAP1      | 6890   | 37 | 6 | 32821391  | 32821391  | Missense_Mutation | SNP | G | A | 20  | 29  | c.203C>T     | c.(202-204)GCT>GTT     | p.A68V        |
| Pat_28 | Post-Resistance | VPS52     | 6293   | 37 | 6 | 33219723  | 33219723  | Missense_Mutation | SNP | G | A | 27  | 73  | c.1820C>T    | c.(1819-1821)CCC>CTC   | p.P607L       |
| Pat_28 | Post-Resistance | RPS18     | 6222   | 37 | 6 | 33243844  | 33243844  | Splice_Site       | SNP | G | A | 26  | 73  | c.291_splice | c.e4+1                 | p.Q97_splice  |
| Pat_28 | Post-Resistance | WDR46     | 9277   | 37 | 6 | 33256444  | 33256444  | Missense_Mutation | SNP | G | A | 35  | 125 | c.307C>T     | c.(307-309)CCC>TCC     | p.P103S       |
| Pat_28 | Post-Resistance | ZBTB22    | 9278   | 37 | 6 | 33283427  | 33283427  | Missense_Mutation | SNP | C | T | 47  | 116 | c.1267G>A    | c.(1267-1269)GGC>AGC   | p.G423S       |
| Pat_28 | Post-Resistance | DAXX      | 1616   | 37 | 6 | 33286845  | 33286845  | Missense_Mutation | SNP | G | A | 49  | 157 | c.2092C>T    | c.(2092-2094)CTC>TTC   | p.L698F       |
| Pat_28 | Post-Resistance | ITPR3     | 3710   | 37 | 6 | 33644865  | 33644865  | Missense_Mutation | SNP | G | A | 15  | 61  | c.3521G>A    | c.(3520-3522)GGC>GAC   | p.G1174D      |
| Pat_28 | Post-Resistance | HMGA1     | 3159   | 37 | 6 | 34211249  | 34211249  | Missense_Mutation | SNP | C | T | 15  | 68  | c.224C>T     | c.(223-225)ACC>ATC     | p.T75I        |
| Pat_28 | Post-Resistance | ANKS1A    | 23294  | 37 | 6 | 34985363  | 34985363  | Missense_Mutation | SNP | G | A | 28  | 91  | c.1537G>A    | c.(1537-1539)GGG>AGG   | p.G513R       |
| Pat_28 | Post-Resistance | CDKN1A    | 1026   | 37 | 6 | 36652219  | 36652219  | Missense_Mutation | SNP | C | T | 12  | 12  | c.341C>T     | c.(340-342)TCA>TTA     | p.S114L       |
| Pat_28 | Post-Resistance | DNAH8     | 1769   | 37 | 6 | 38790697  | 38790697  | Missense_Mutation | SNP | G | A | 22  | 67  | c.2956G>A    | c.(2956-2958)GTC>ATC   | p.V986I       |
| Pat_28 | Post-Resistance | DNAH8     | 1769   | 37 | 6 | 38862525  | 38862525  | Nonsense_Mutation | SNP | C | T | 28  | 105 | c.7981C>T    | c.(7981-7983)CGA>TGA   | p.R2661*      |
| Pat_28 | Post-Resistance | DNAH8     | 1769   | 37 | 6 | 38917285  | 38917285  | Missense_Mutation | SNP | G | A | 51  | 164 | c.11536G>A   | c.(11536-11538)GAA>AAA | p.E3846K      |
| Pat_28 | Post-Resistance | ZNF318    | 24149  | 37 | 6 | 43316171  | 43316171  | Missense_Mutation | SNP | G | A | 70  | 206 | c.2963C>T    | c.(2962-2964)TCC>TTC   | p.S988F       |
| Pat_28 | Post-Resistance | ABCC10    | 89845  | 37 | 6 | 43415624  | 43415624  | Missense_Mutation | SNP | G | A | 14  | 30  | c.3908G>A    | c.(3907-3909)CGA>CAA   | p.R1303Q      |
| Pat_28 | Post-Resistance | GPR116    | 221395 | 37 | 6 | 46830722  | 46830722  | Missense_Mutation | SNP | C | T | 68  | 136 | c.2102G>A    | c.(2101-2103)GGC>GAC   | p.G701D       |
| Pat_28 | Post-Resistance | C6orf138  | 442213 | 37 | 6 | 47846952  | 47846952  | Missense_Mutation | SNP | C | T | 15  | 49  | c.1577G>A    | c.(1576-1578)AGT>AAT   | p.S526N       |
| Pat_28 | Post-Resistance | RHAG      | 6005   | 37 | 6 | 49586943  | 49586943  | Missense_Mutation | SNP | A | G | 65  | 208 | c.290T>C     | c.(289-291)GTA>GCA     | p.V97A        |
| Pat_28 | Post-Resistance | PGK2      | 5232   | 37 | 6 | 49753930  | 49753930  | Missense_Mutation | SNP | T | A | 97  | 361 | c.971A>T     | c.(970-972)CAT>CTT     | p.H324L       |
| Pat_28 | Post-Resistance | PKHD1     | 5314   | 37 | 6 | 51913410  | 51913410  | Missense_Mutation | SNP | G | A | 26  | 69  | c.2287C>T    | c.(2287-2289)CCC>TCC   | p.P763S       |
| Pat_28 | Post-Resistance | PAQR8     | 85315  | 37 | 6 | 52268486  | 52268486  | Missense_Mutation | SNP | G | A | 61  | 197 | c.475G>A     | c.(475-477)GCT>ACT     | p.A159T       |
| Pat_28 | Post-Resistance | ICK       | 22858  | 37 | 6 | 52880960  | 52880960  | Missense_Mutation | SNP | G | A | 53  | 232 | c.752C>T     | c.(751-753)CCC>CTC     | p.P251L       |
| Pat_28 | Post-Resistance | FAM83B    | 222584 | 37 | 6 | 54735297  | 54735297  | Missense_Mutation | SNP | G | A | 66  | 268 | c.253G>A     | c.(253-255)GAT>AAT     | p.D85N        |
| Pat_28 | Post-Resistance | DST       | 667    | 37 | 6 | 56496706  | 56496706  | Missense_Mutation | SNP | C | T | 61  | 251 | c.3839G>A    | c.(3838-3840)AGT>AAT   | p.S1280N      |
| Pat_28 | Post-Resistance | AIM1      | 202    | 37 | 6 | 106992663 | 106992663 | Missense_Mutation | SNP | G | A | 5   | 1   | c.3943G>A    | c.(3943-3945)GAT>AAT   | p.D1315N      |

|        |                 |          |        |    |   |           |           |                   |     |   |   |     |     |               |                        |               |
|--------|-----------------|----------|--------|----|---|-----------|-----------|-------------------|-----|---|---|-----|-----|---------------|------------------------|---------------|
| Pat_28 | Post-Resistance | FYN      | 2534   | 37 | 6 | 112035611 | 112035611 | Missense_Mutation | SNP | C | T | 32  | 16  | c.283G>A      | c.(283-285)GCA>ACA     | p.A95T        |
| Pat_28 | Post-Resistance | RFPL4B   | 442247 | 37 | 6 | 112671637 | 112671637 | Missense_Mutation | SNP | C | T | 21  | 8   | c.727C>T      | c.(727-729)CCA>TCA     | p.P243S       |
| Pat_28 | Post-Resistance | SAMD3    | 154075 | 37 | 6 | 130497110 | 130497110 | Missense_Mutation | SNP | C | T | 24  | 17  | c.698G>A      | c.(697-699)CGA>CAA     | p.R233Q       |
| Pat_28 | Post-Resistance | GPR126   | 57211  | 37 | 6 | 142725084 | 142725084 | Missense_Mutation | SNP | C | T | 71  | 24  | c.2101C>T     | c.(2101-2103)CCA>TCA   | p.P701S       |
| Pat_28 | Post-Resistance | FNDC1    | 84624  | 37 | 6 | 159654246 | 159654246 | Missense_Mutation | SNP | C | T | 5   | 1   | c.2702C>T     | c.(2701-2703)CCC>CTC   | p.P901L       |
| Pat_28 | Post-Resistance | BRP44L   | 51660  | 37 | 6 | 166779481 | 166779481 | Missense_Mutation | SNP | C | T | 45  | 18  | c.286G>A      | c.(286-288)GGG>AGG     | p.G96R        |
| Pat_28 | Post-Resistance | BZW2     | 28969  | 37 | 7 | 16729503  | 16729503  | Missense_Mutation | SNP | G | A | 8   | 41  | c.623G>A      | c.(622-624)AGA>AAA     | p.R208K       |
| Pat_28 | Post-Resistance | HDAC9    | 9734   | 37 | 7 | 18806771  | 18806771  | Missense_Mutation | SNP | G | A | 10  | 18  | c.2198G>A     | c.(2197-2199)GGA>GAA   | p.G733E       |
| Pat_28 | Post-Resistance | CCDC129  | 223075 | 37 | 7 | 31617513  | 31617513  | Missense_Mutation | SNP | C | T | 20  | 53  | c.635C>T      | c.(634-636)ACC>ATC     | p.T212I       |
| Pat_28 | Post-Resistance | SFRP4    | 6424   | 37 | 7 | 37955718  | 37955718  | Missense_Mutation | SNP | G | A | 51  | 127 | c.422C>T      | c.(421-423)GCC>GTC     | p.A141V       |
| Pat_28 | Post-Resistance | RAMP3    | 10268  | 37 | 7 | 45222964  | 45222964  | Missense_Mutation | SNP | G | A | 78  | 225 | c.400G>A      | c.(400-402)GCT>ACT     | p.A134T       |
| Pat_28 | Post-Resistance | PKD1L1   | 168507 | 37 | 7 | 47976441  | 47976441  | Splice_Site       | SNP | A | G | 19  | 53  | c.398_splice  | c.e4+1                 | p.R133_splice |
| Pat_28 | Post-Resistance | ABCA13   | 154664 | 37 | 7 | 48559881  | 48559881  | Missense_Mutation | SNP | G | A | 9   | 47  | c.14042G>A    | c.(14041-14043)CGA>CAA | p.R4681Q      |
| Pat_28 | Post-Resistance | EGFR     | 1956   | 37 | 7 | 55273036  | 55273036  | Missense_Mutation | SNP | G | A | 44  | 145 | c.3359G>A     | c.(3358-3360)AGC>AAC   | p.S1120N      |
| Pat_28 | Post-Resistance | ZNF716   | 441234 | 37 | 7 | 57528589  | 57528589  | Missense_Mutation | SNP | G | A | 16  | 87  | c.422G>A      | c.(421-423)GGT>GAT     | p.G141D       |
| Pat_28 | Post-Resistance | ASL      | 435    | 37 | 7 | 65557607  | 65557607  | Missense_Mutation | SNP | G | A | 36  | 58  | c.1207G>A     | c.(1207-1209)GTC>ATC   | p.V403I       |
| Pat_28 | Post-Resistance | SBDS     | 51119  | 37 | 7 | 66453486  | 66453486  | Missense_Mutation | SNP | C | T | 30  | 79  | c.625G>A      | c.(625-627)GTA>ATA     | p.V209I       |
| Pat_28 | Post-Resistance | AUTS2    | 26053  | 37 | 7 | 69364416  | 69364416  | Nonsense_Mutation | SNP | C | T | 228 | 165 | c.454C>T      | c.(454-456)CGA>TGA     | p.R152*       |
| Pat_28 | Post-Resistance | TYW1B    | 441250 | 37 | 7 | 72297543  | 72297543  | Missense_Mutation | SNP | T | C | 38  | 136 | c.26A>G       | c.(25-27)GAC>GGC       | p.D9G         |
| Pat_28 | Post-Resistance | MAGI2    | 9863   | 37 | 7 | 78130964  | 78130964  | Missense_Mutation | SNP | C | T | 125 | 110 | c.895G>A      | c.(895-897)GAG>AAG     | p.E299K       |
| Pat_28 | Post-Resistance | CACNA2D1 | 781    | 37 | 7 | 81641540  | 81641540  | Missense_Mutation | SNP | C | T | 44  | 133 | c.1292G>A     | c.(1291-1293)GGA>GAA   | p.G431E       |
| Pat_28 | Post-Resistance | ZNF804B  | 219578 | 37 | 7 | 88962766  | 88962766  | Missense_Mutation | SNP | G | A | 27  | 76  | c.470G>A      | c.(469-471)AGA>AAA     | p.R157K       |
| Pat_28 | Post-Resistance | SAMD9L   | 219285 | 37 | 7 | 92763843  | 92763843  | Nonsense_Mutation | SNP | C | T | 42  | 181 | c.1442G>A     | c.(1441-1443)TGG>TAG   | p.W481*       |
| Pat_28 | Post-Resistance | COL1A2   | 1278   | 37 | 7 | 94040207  | 94040207  | Missense_Mutation | SNP | C | T | 26  | 80  | c.1204C>T     | c.(1204-1206)CCT>TCT   | p.P402S       |
| Pat_28 | Post-Resistance | ASNS     | 440    | 37 | 7 | 97482371  | 97482371  | Splice_Site       | SNP | C | T | 14  | 63  | c.1476_splice | c.e12+1                | p.Q492_splice |
| Pat_28 | Post-Resistance | ARPC1A   | 10552  | 37 | 7 | 98961248  | 98961248  | Missense_Mutation | SNP | G | A | 27  | 63  | c.1066G>A     | c.(1066-1068)GAT>AAT   | p.D356N       |
| Pat_28 | Post-Resistance | ZKSCAN1  | 7586   | 37 | 7 | 99621460  | 99621460  | Missense_Mutation | SNP | G | A | 27  | 69  | c.331G>A      | c.(331-333)GAG>AAG     | p.E111K       |
| Pat_28 | Post-Resistance | COPS6    | 10980  | 37 | 7 | 99687039  | 99687039  | Splice_Site       | SNP | G | A | 57  | 161 | c.202_splice  | c.e2+1                 | p.V68_splice  |
| Pat_28 | Post-Resistance | AP4M1    | 9179   | 37 | 7 | 99704099  | 99704099  | Missense_Mutation | SNP | C | T | 26  | 34  | c.1099C>T     | c.(1099-1101)CGG>TGG   | p.R367W       |
| Pat_28 | Post-Resistance | GPC2     | 221914 | 37 | 7 | 99773341  | 99773341  | Missense_Mutation | SNP | C | T | 39  | 109 | c.502G>A      | c.(502-504)GCA>ACA     | p.A168T       |
| Pat_28 | Post-Resistance | GPC2     | 221914 | 37 | 7 | 99773506  | 99773506  | Missense_Mutation | SNP | C | T | 15  | 27  | c.337G>A      | c.(337-339)GAG>AAG     | p.E113K       |
| Pat_28 | Post-Resistance | GPC2     | 221914 | 37 | 7 | 99774815  | 99774815  | Missense_Mutation | SNP | G | A | 16  | 28  | c.8C>T        | c.(7-9)GCG>GTG         | p.A3V         |
| Pat_28 | Post-Resistance | EPHB4    | 2050   | 37 | 7 | 100416159 | 100416159 | Missense_Mutation | SNP | C | T | 17  | 48  | c.1405G>A     | c.(1405-1407)GTC>ATC   | p.V469I       |
| Pat_28 | Post-Resistance | SLC12A9  | 56996  | 37 | 7 | 100459495 | 100459495 | Missense_Mutation | SNP | G | A | 15  | 34  | c.1673G>A     | c.(1672-1674)GGG>GAG   | p.G558E       |
| Pat_28 | Post-Resistance | CDHR3    | 222256 | 37 | 7 | 105662865 | 105662865 | Missense_Mutation | SNP | C | T | 99  | 300 | c.2047C>T     | c.(2047-2049)CCA>TCA   | p.P683S       |
| Pat_28 | Post-Resistance | PRKAR2B  | 5577   | 37 | 7 | 106762448 | 106762448 | Missense_Mutation | SNP | G | A | 24  | 79  | c.395G>A      | c.(394-396)AGG>AAG     | p.R132K       |
| Pat_28 | Post-Resistance | CBLL1    | 79872  | 37 | 7 | 107399303 | 107399303 | Missense_Mutation | SNP | C | T | 213 | 521 | c.1156C>T     | c.(1156-1158)CCT>TCT   | p.P386S       |
| Pat_28 | Post-Resistance | LEP      | 3952   | 37 | 7 | 127894707 | 127894707 | Missense_Mutation | SNP | G | A | 10  | 28  | c.395G>A      | c.(394-396)GGG>GAG     | p.G132E       |
| Pat_28 | Post-Resistance | IMPDH1   | 3614   | 37 | 7 | 128041084 | 128041084 | Missense_Mutation | SNP | C | A | 27  | 62  | c.234G>T      | c.(232-234)ATG>ATT     | p.M78I        |
| Pat_28 | Post-Resistance | METTTL2B | 55798  | 37 | 7 | 128141925 | 128141925 | Nonsense_Mutation | SNP | G | A | 110 | 281 | c.1092G>A     | c.(1090-1092)TGG>TGA   | p.W364*       |
| Pat_28 | Post-Resistance | IRF5     | 3663   | 37 | 7 | 128587941 | 128587941 | Missense_Mutation | SNP | C | T | 11  | 30  | c.916C>T      | c.(916-918)CCC>TCC     | p.P306S       |
| Pat_28 | Post-Resistance | AHCYL2   | 23382  | 37 | 7 | 129066392 | 129066392 | Missense_Mutation | SNP | C | T | 26  | 68  | c.1817C>T     | c.(1816-1818)CCT>CTT   | p.P606L       |
| Pat_28 | Post-Resistance | FAM40B   | 57464  | 37 | 7 | 129079912 | 129079912 | Missense_Mutation | SNP | G | A | 34  | 104 | c.179G>A      | c.(178-180)GGG>GAG     | p.G60E        |
| Pat_28 | Post-Resistance | MKLN1    | 4289   | 37 | 7 | 131122712 | 131122712 | Missense_Mutation | SNP | G | A | 104 | 365 | c.1129G>A     | c.(1129-1131)GAT>AAT   | p.D377N       |
| Pat_28 | Post-Resistance | WDR91    | 29062  | 37 | 7 | 134893671 | 134893671 | Nonsense_Mutation | SNP | C | T | 87  | 215 | c.383G>A      | c.(382-384)TGG>TAG     | p.W128*       |
| Pat_28 | Post-Resistance | KIAA1549 | 57670  | 37 | 7 | 138556063 | 138556063 | Missense_Mutation | SNP | G | A | 22  | 73  | c.4391C>T     | c.(4390-4392)TCC>TTC   | p.S1464F      |
| Pat_28 | Post-Resistance | BRAF     | 673    | 37 | 7 | 140453136 | 140453136 | Missense_Mutation | SNP | A | T | 102 | 80  | c.1799T>A     | c.(1798-1800)GTG>GAG   | p.V600E       |



|        |                 |          |        |    |   |           |           |                   |     |    |    |     |     |                 |                          |               |
|--------|-----------------|----------|--------|----|---|-----------|-----------|-------------------|-----|----|----|-----|-----|-----------------|--------------------------|---------------|
| Pat_28 | Post-Resistance | AGK      | 55750  | 37 | 7 | 141336765 | 141336766 | Nonsense_Mutation | DNP | GG | AA | 43  | 39  | c.674_675GG>AA  | c.(673-675)TGG>TAA       | p.W225*       |
| Pat_28 | Post-Resistance | EPHA1    | 2041   | 37 | 7 | 143096814 | 143096814 | Nonsense_Mutation | SNP | C  | T  | 46  | 87  | c.765G>A        | c.(763-765)TGG>TGA       | p.W255*       |
| Pat_28 | Post-Resistance | OR2A5    | 393046 | 37 | 7 | 143748032 | 143748032 | Missense_Mutation | SNP | G  | A  | 293 | 254 | c.538G>A        | c.(538-540)GAA>AAA       | p.E180K       |
| Pat_28 | Post-Resistance | OR2A2    | 442361 | 37 | 7 | 143807483 | 143807483 | Missense_Mutation | SNP | G  | A  | 190 | 272 | c.808G>A        | c.(808-810)GAG>AAG       | p.E270K       |
| Pat_28 | Post-Resistance | TMEM176B | 28959  | 37 | 7 | 150488648 | 150488648 | Missense_Mutation | SNP | C  | T  | 22  | 42  | c.784G>A        | c.(784-786)GAG>AAG       | p.E262K       |
| Pat_28 | Post-Resistance | TMEM176B | 28959  | 37 | 7 | 150489212 | 150489212 | Missense_Mutation | SNP | C  | T  | 38  | 104 | c.652G>A        | c.(652-654)GTC>ATC       | p.V218I       |
| Pat_28 | Post-Resistance | MLL3     | 58508  | 37 | 7 | 151945619 | 151945619 | Missense_Mutation | SNP | C  | T  | 54  | 138 | c.1900G>A       | c.(1900-1902)GTG>ATG     | p.V634M       |
| Pat_28 | Post-Resistance | RBM33    | 155435 | 37 | 7 | 155567718 | 155567718 | Missense_Mutation | SNP | G  | A  | 45  | 93  | c.3496G>A       | c.(3496-3498)GCC>ACC     | p.A1166T      |
| Pat_28 | Post-Resistance | CSMD1    | 64478  | 37 | 8 | 2815259   | 2815259   | Missense_Mutation | SNP | A  | G  | 17  | 15  | c.9776T>C       | c.(9775-9777)CTT>CCT     | p.L3259P      |
| Pat_28 | Post-Resistance | DEFA6    | 1671   | 37 | 8 | 6783482   | 6783482   | Missense_Mutation | SNP | C  | T  | 6   | 21  | c.76G>A         | c.(76-78)GAT>AAT         | p.D26N        |
| Pat_28 | Post-Resistance | USP17L2  | 377630 | 37 | 8 | 11995072  | 11995072  | Missense_Mutation | SNP | C  | T  | 31  | 36  | c.1198G>A       | c.(1198-1200)GAC>AAC     | p.D400N       |
| Pat_28 | Post-Resistance | MSR1     | 4481   | 37 | 8 | 16012581  | 16012581  | Missense_Mutation | SNP | C  | T  | 22  | 68  | c.890G>A        | c.(889-891)GGT>GAT       | p.G297D       |
| Pat_28 | Post-Resistance | FAM160B2 | 64760  | 37 | 8 | 21959813  | 21959813  | Missense_Mutation | SNP | C  | T  | 22  | 70  | c.1979C>T       | c.(1978-1980)TCC>TTC     | p.S660F       |
| Pat_28 | Post-Resistance | RHOBTB2  | 23221  | 37 | 8 | 22862063  | 22862063  | Missense_Mutation | SNP | C  | T  | 28  | 69  | c.116C>T        | c.(115-117)ACC>ATC       | p.T39I        |
| Pat_28 | Post-Resistance | STMN4    | 81551  | 37 | 8 | 27097649  | 27097649  | Missense_Mutation | SNP | C  | T  | 17  | 86  | c.349G>A        | c.(349-351)GCA>ACA       | p.A117T       |
| Pat_28 | Post-Resistance | TEX15    | 56154  | 37 | 8 | 30694633  | 30694633  | Missense_Mutation | SNP | G  | A  | 100 | 254 | c.8018C>T       | c.(8017-8019)GCC>GTC     | p.A2673V      |
| Pat_28 | Post-Resistance | TACC1    | 6867   | 37 | 8 | 38693693  | 38693693  | Missense_Mutation | SNP | C  | T  | 19  | 44  | c.1727C>T       | c.(1726-1728)TCC>TTC     | p.S576F       |
| Pat_28 | Post-Resistance | ADAM18   | 8749   | 37 | 8 | 39502938  | 39502938  | Missense_Mutation | SNP | G  | A  | 77  | 196 | c.991G>A        | c.(991-993)GAC>AAC       | p.D331N       |
| Pat_28 | Post-Resistance | DKK4     | 27121  | 37 | 8 | 42231653  | 42231653  | Nonsense_Mutation | SNP | G  | A  | 48  | 118 | c.640C>T        | c.(640-642)CGA>TGA       | p.R214*       |
| Pat_28 | Post-Resistance | SLC20A2  | 6575   | 37 | 8 | 42296991  | 42296991  | Missense_Mutation | SNP | C  | T  | 34  | 80  | c.911G>A        | c.(910-912)GGC>GAC       | p.G304D       |
| Pat_28 | Post-Resistance | PXDNL    | 137902 | 37 | 8 | 52336213  | 52336214  | Missense_Mutation | DNP | GG | AA | 27  | 81  | c.1716_1717CC>T | c.(1714-1719)TTCCCT>TTTT | p.P573S       |
| Pat_28 | Post-Resistance | ST18     | 9705   | 37 | 8 | 53084562  | 53084562  | Missense_Mutation | SNP | C  | T  | 43  | 90  | c.859G>A        | c.(859-861)GCA>ACA       | p.A287T       |
| Pat_28 | Post-Resistance | RP1      | 6101   | 37 | 8 | 55538468  | 55538468  | Missense_Mutation | SNP | T  | G  | 32  | 31  | c.2026T>G       | c.(2026-2028)TCT>GCT     | p.S676A       |
| Pat_28 | Post-Resistance | RP1      | 6101   | 37 | 8 | 55542111  | 55542111  | Missense_Mutation | SNP | C  | T  | 56  | 163 | c.5669C>T       | c.(5668-5670)CCA>CTA     | p.P1890L      |
| Pat_28 | Post-Resistance | SDR16C5  | 195814 | 37 | 8 | 57228786  | 57228786  | Missense_Mutation | SNP | C  | T  | 22  | 56  | c.121G>A        | c.(121-123)GAA>AAA       | p.E41K        |
| Pat_28 | Post-Resistance | DNAJC5B  | 85479  | 37 | 8 | 66989064  | 66989064  | Missense_Mutation | SNP | G  | A  | 134 | 122 | c.289G>A        | c.(289-291)GAA>AAA       | p.E97K        |
| Pat_28 | Post-Resistance | SLCO5A1  | 81796  | 37 | 8 | 70594532  | 70594532  | Missense_Mutation | SNP | C  | T  | 55  | 140 | c.1669G>A       | c.(1669-1671)GTT>ATT     | p.V557I       |
| Pat_28 | Post-Resistance | SLCO5A1  | 81796  | 37 | 8 | 70744445  | 70744445  | Missense_Mutation | SNP | G  | A  | 15  | 29  | c.464C>T        | c.(463-465)ACC>ATC       | p.T155I       |
| Pat_28 | Post-Resistance | KCNB2    | 9312   | 37 | 8 | 73849632  | 73849632  | Missense_Mutation | SNP | G  | A  | 27  | 51  | c.2042G>A       | c.(2041-2043)AGT>AAT     | p.S681N       |
| Pat_28 | Post-Resistance | CRISPLD1 | 83690  | 37 | 8 | 75929610  | 75929610  | Missense_Mutation | SNP | G  | A  | 97  | 274 | c.1052G>A       | c.(1051-1053)GGC>GAC     | p.G351D       |
| Pat_28 | Post-Resistance | HNF4G    | 3174   | 37 | 8 | 76456106  | 76456106  | Missense_Mutation | SNP | C  | T  | 33  | 103 | c.38C>T         | c.(37-39)GCT>GTT         | p.A13V        |
| Pat_28 | Post-Resistance | ATP6V0D2 | 245972 | 37 | 8 | 87111316  | 87111316  | Missense_Mutation | SNP | G  | A  | 22  | 47  | c.109G>A        | c.(109-111)GTC>ATC       | p.V37I        |
| Pat_28 | Post-Resistance | CNGB3    | 54714  | 37 | 8 | 87680246  | 87680246  | Splice_Site       | SNP | C  | T  | 149 | 392 | c.643_splice    | c.e5+1                   | p.D215_splice |
| Pat_28 | Post-Resistance | KIAA1429 | 25962  | 37 | 8 | 95547111  | 95547111  | Missense_Mutation | SNP | G  | A  | 36  | 94  | c.440C>T        | c.(439-441)CCA>CTA       | p.P147L       |
| Pat_28 | Post-Resistance | PLEKHF2  | 79666  | 37 | 8 | 96166391  | 96166391  | Missense_Mutation | SNP | G  | A  | 71  | 208 | c.119G>A        | c.(118-120)GGA>GAA       | p.G40E        |
| Pat_28 | Post-Resistance | RIMS2    | 9699   | 37 | 8 | 105001612 | 105001612 | Missense_Mutation | SNP | C  | T  | 92  | 273 | c.2341C>T       | c.(2341-2343)CGT>TGT     | p.R781C       |
| Pat_28 | Post-Resistance | TRHR     | 7201   | 37 | 8 | 110100221 | 110100221 | Nonsense_Mutation | SNP | G  | A  | 41  | 105 | c.480G>A        | c.(478-480)TGG>TGA       | p.W160*       |
| Pat_28 | Post-Resistance | CSMD3    | 114788 | 37 | 8 | 114290895 | 114290895 | Missense_Mutation | SNP | G  | A  | 84  | 195 | c.440C>T        | c.(439-441)ACC>ATC       | p.T147I       |
| Pat_28 | Post-Resistance | FER1L6   | 654463 | 37 | 8 | 124988289 | 124988289 | Missense_Mutation | SNP | G  | A  | 76  | 170 | c.835G>A        | c.(835-837)GAT>AAT       | p.D279N       |
| Pat_28 | Post-Resistance | TATDN1   | 83940  | 37 | 8 | 125506121 | 125506121 | Nonsense_Mutation | SNP | C  | T  | 52  | 141 | c.744G>A        | c.(742-744)TGG>TGA       | p.W248*       |
| Pat_28 | Post-Resistance | KIAA0196 | 9897   | 37 | 8 | 126056124 | 126056124 | Missense_Mutation | SNP | A  | T  | 25  | 64  | c.2793T>A       | c.(2791-2793)TTT>TTA     | p.F931L       |
| Pat_28 | Post-Resistance | ZFAT     | 57623  | 37 | 8 | 135614011 | 135614011 | Missense_Mutation | SNP | G  | C  | 15  | 49  | c.1951C>G       | c.(1951-1953)CAG>GAG     | p.Q651E       |
| Pat_28 | Post-Resistance | FAM135B  | 51059  | 37 | 8 | 139163525 | 139163525 | Missense_Mutation | SNP | G  | A  | 21  | 76  | c.3193C>T       | c.(3193-3195)CCC>TCC     | p.P1065S      |
| Pat_28 | Post-Resistance | FAM135B  | 51059  | 37 | 8 | 139165162 | 139165162 | Nonsense_Mutation | SNP | C  | T  | 89  | 223 | c.1556G>A       | c.(1555-1557)TGG>TAG     | p.W519*       |
| Pat_28 | Post-Resistance | FAM135B  | 51059  | 37 | 8 | 139189650 | 139189650 | Missense_Mutation | SNP | G  | A  | 12  | 19  | c.1043C>T       | c.(1042-1044)TCT>TTT     | p.S348F       |
| Pat_28 | Post-Resistance | COL22A1  | 169044 | 37 | 8 | 139856375 | 139856375 | Missense_Mutation | SNP | C  | T  | 68  | 192 | c.685G>A        | c.(685-687)GAA>AAA       | p.E229K       |
| Pat_28 | Post-Resistance | ZNF696   | 79943  | 37 | 8 | 144378228 | 144378228 | Missense_Mutation | SNP | G  | A  | 3   | 4   | c.383G>A        | c.(382-384)GGC>GAC       | p.G128D       |

|        |                 |          |        |    |   |           |           |                        |     |   |   |     |     |               |                        |                |
|--------|-----------------|----------|--------|----|---|-----------|-----------|------------------------|-----|---|---|-----|-----|---------------|------------------------|----------------|
| Pat_28 | Post-Resistance | TIGD5    | 84948  | 37 | 8 | 144681454 | 144681454 | Missense_Mutation      | SNP | G | A | 8   | 13  | c.1234G>A     | c.(1234-1236)GCT>ACT   | p.A412T        |
| Pat_28 | Post-Resistance | OPLAH    | 26873  | 37 | 8 | 145107071 | 145107071 | Splice_Site            | SNP | C | T | 4   | 6   | c.3461_splice | c.e24+1                | p.R1154_splice |
| Pat_28 | Post-Resistance | OPLAH    | 26873  | 37 | 8 | 145110042 | 145110042 | Missense_Mutation      | SNP | C | T | 5   | 26  | c.2299G>A     | c.(2299-2301)GAG>AAG   | p.E767K        |
| Pat_28 | Post-Resistance | CPSF1    | 29894  | 37 | 8 | 145622574 | 145622574 | Missense_Mutation      | SNP | C | T | 3   | 5   | c.2440G>A     | c.(2440-2442)GGG>AGG   | p.G814R        |
| Pat_28 | Post-Resistance | SLC39A4  | 55630  | 37 | 8 | 145640175 | 145640175 | Nonsense_Mutation      | SNP | G | A | 18  | 57  | c.910C>T      | c.(910-912)CAG>TAG     | p.Q304*        |
| Pat_28 | Post-Resistance | NFKBIL2  | 4796   | 37 | 8 | 145661045 | 145661045 | Missense_Mutation      | SNP | G | A | 10  | 15  | c.2771C>T     | c.(2770-2772)CCC>CTC   | p.P924L        |
| Pat_28 | Post-Resistance | DOCK8    | 81704  | 37 | 9 | 377127    | 377127    | Missense_Mutation      | SNP | G | A | 12  | 15  | c.2356G>A     | c.(2356-2358)GAG>AAG   | p.E786K        |
| Pat_28 | Post-Resistance | SMARCA2  | 6595   | 37 | 9 | 2191365   | 2191365   | Missense_Mutation      | SNP | C | T | 45  | 52  | c.4694C>T     | c.(4693-4695)CCT>CTT   | p.P1565L       |
| Pat_28 | Post-Resistance | GLIS3    | 169792 | 37 | 9 | 3828352   | 3828352   | Missense_Mutation      | SNP | C | T | 21  | 21  | c.2248G>A     | c.(2248-2250)GCT>ACT   | p.A750T        |
| Pat_28 | Post-Resistance | KIAA2026 | 158358 | 37 | 9 | 5988406   | 5988406   | Missense_Mutation      | SNP | C | T | 62  | 98  | c.733G>A      | c.(733-735)GAA>AAA     | p.E245K        |
| Pat_28 | Post-Resistance | PTPRD    | 5789   | 37 | 9 | 8331594   | 8331594   | Missense_Mutation      | SNP | G | A | 58  | 97  | c.5522C>T     | c.(5521-5523)TCA>TTA   | p.S1841L       |
| Pat_28 | Post-Resistance | PTPRD    | 5789   | 37 | 9 | 8341785   | 8341785   | Missense_Mutation      | SNP | C | T | 117 | 166 | c.4855G>A     | c.(4855-4857)GAA>AAA   | p.E1619K       |
| Pat_28 | Post-Resistance | DENND4C  | 55667  | 37 | 9 | 19346258  | 19346258  | Missense_Mutation      | SNP | C | T | 72  | 85  | c.2636C>T     | c.(2635-2637)TCT>TTT   | p.S879F        |
| Pat_28 | Post-Resistance | KIAA1797 | 54914  | 37 | 9 | 20770128  | 20770128  | Missense_Mutation      | SNP | C | T | 56  | 71  | c.797C>T      | c.(796-798)ACC>ATC     | p.T266I        |
| Pat_28 | Post-Resistance | NFX1     | 4799   | 37 | 9 | 33328626  | 33328626  | Missense_Mutation      | SNP | C | T | 58  | 71  | c.1954C>T     | c.(1954-1956)CCA>TCA   | p.P652S        |
| Pat_28 | Post-Resistance | C9orf131 | 138724 | 37 | 9 | 35043539  | 35043539  | Missense_Mutation      | SNP | C | T | 34  | 60  | c.913C>T      | c.(913-915)CCC>TCC     | p.P305S        |
| Pat_28 | Post-Resistance | NPR2     | 4882   | 37 | 9 | 35800782  | 35800782  | Missense_Mutation      | SNP | C | T | 19  | 23  | c.1295C>T     | c.(1294-1296)CCT>CTT   | p.P432L        |
| Pat_28 | Post-Resistance | ZBTB5    | 9925   | 37 | 9 | 37441572  | 37441572  | Missense_Mutation      | SNP | C | T | 51  | 84  | c.977G>A      | c.(976-978)AGA>AAA     | p.R326K        |
| Pat_28 | Post-Resistance | ZBTB5    | 9925   | 37 | 9 | 37442149  | 37442149  | Nonsense_Mutation      | SNP | G | A | 45  | 74  | c.400C>T      | c.(400-402)CAG>TAG     | p.Q134*        |
| Pat_28 | Post-Resistance | FBXO10   | 26267  | 37 | 9 | 37537505  | 37537505  | Missense_Mutation      | SNP | C | T | 4   | 9   | c.1021G>A     | c.(1021-1023)GGT>AGT   | p.G341S        |
| Pat_28 | Post-Resistance | CNTNAP3  | 79937  | 37 | 9 | 39133127  | 39133127  | Missense_Mutation      | SNP | C | A | 3   | 18  | c.1882G>T     | c.(1882-1884)GCC>TCC   | p.A628S        |
| Pat_28 | Post-Resistance | RASEF    | 158158 | 37 | 9 | 85677455  | 85677455  | Missense_Mutation      | SNP | C | T | 6   | 8   | c.328G>A      | c.(328-330)GAC>AAC     | p.D110N        |
| Pat_28 | Post-Resistance | SPTLC1   | 10558  | 37 | 9 | 94809516  | 94809516  | Missense_Mutation      | SNP | G | A | 41  | 64  | c.1019C>T     | c.(1018-1020)TCG>TTG   | p.S340L        |
| Pat_28 | Post-Resistance | ECM2     | 1842   | 37 | 9 | 95280085  | 95280085  | Missense_Mutation      | SNP | G | A | 41  | 63  | c.365C>T      | c.(364-366)ACT>ATT     | p.T122I        |
| Pat_28 | Post-Resistance | SUSD3    | 203328 | 37 | 9 | 95846820  | 95846820  | Missense_Mutation      | SNP | G | A | 27  | 29  | c.559G>A      | c.(559-561)GAC>AAC     | p.D187N        |
| Pat_28 | Post-Resistance | SLC35D2  | 11046  | 37 | 9 | 99083559  | 99083559  | Missense_Mutation      | SNP | C | T | 56  | 98  | c.979G>A      | c.(979-981)GGT>AGT     | p.G327S        |
| Pat_28 | Post-Resistance | TSTD2    | 158427 | 37 | 9 | 100368457 | 100368457 | Missense_Mutation      | SNP | G | A | 21  | 37  | c.922C>T      | c.(922-924)CTT>TTT     | p.L308F        |
| Pat_28 | Post-Resistance | TRIM14   | 9830   | 37 | 9 | 100850154 | 100850154 | Missense_Mutation      | SNP | C | G | 8   | 5   | c.927G>C      | c.(925-927)TGG>TGC     | p.W309C        |
| Pat_28 | Post-Resistance | TEX10    | 54881  | 37 | 9 | 103064520 | 103064520 | Missense_Mutation      | SNP | T | C | 71  | 106 | c.2743A>G     | c.(2743-2745)ATC>GTC   | p.I915V        |
| Pat_28 | Post-Resistance | GRIN3A   | 116443 | 37 | 9 | 104448938 | 104448938 | Missense_Mutation      | SNP | C | T | 92  | 154 | c.1244G>A     | c.(1243-1245)AGC>AAC   | p.S415N        |
| Pat_28 | Post-Resistance | GRIN3A   | 116443 | 37 | 9 | 104499769 | 104499769 | Missense_Mutation      | SNP | G | A | 29  | 43  | c.493C>T      | c.(493-495)CCC>TCC     | p.P165S        |
| Pat_28 | Post-Resistance | SVEP1    | 79987  | 37 | 9 | 113245898 | 113245898 | Missense_Mutation      | SNP | C | T | 22  | 45  | c.2006G>A     | c.(2005-2007)AGC>AAC   | p.S669N        |
| Pat_28 | Post-Resistance | ZFP37    | 7539   | 37 | 9 | 115805811 | 115805811 | Missense_Mutation      | SNP | C | T | 80  | 117 | c.1087G>A     | c.(1087-1089)GCA>ACA   | p.A363T        |
| Pat_28 | Post-Resistance | TNFSF8   | 944    | 37 | 9 | 117692611 | 117692611 | Translation_Start_Site | SNP | C | T | 9   | 25  | c.-27G>A      | c.(-29--25)AGGTG>AGATG |                |
| Pat_28 | Post-Resistance | ANGPTL2  | 23452  | 37 | 9 | 129856110 | 129856110 | Missense_Mutation      | SNP | C | T | 8   | 103 | c.913G>A      | c.(913-915)GTG>ATG     | p.V305M        |
| Pat_28 | Post-Resistance | PPAPDC3  | 84814  | 37 | 9 | 134183496 | 134183496 | Missense_Mutation      | SNP | C | T | 10  | 11  | c.638C>T      | c.(637-639)CCC>CTC     | p.P213L        |
| Pat_28 | Post-Resistance | DBH      | 1621   | 37 | 9 | 136501807 | 136501807 | Missense_Mutation      | SNP | C | T | 20  | 29  | c.314C>T      | c.(313-315)ACC>ATC     | p.T105I        |
| Pat_28 | Post-Resistance | COL5A1   | 1289   | 37 | 9 | 137591910 | 137591910 | Missense_Mutation      | SNP | G | A | 28  | 22  | c.433G>A      | c.(433-435)GGG>AGG     | p.G145R        |
| Pat_28 | Post-Resistance | FCN2     | 2220   | 37 | 9 | 137775171 | 137775171 | Missense_Mutation      | SNP | C | T | 18  | 34  | c.238C>T      | c.(238-240)CCT>TCT     | p.P80S         |
| Pat_28 | Post-Resistance | CARD9    | 64170  | 37 | 9 | 139265364 | 139265364 | Missense_Mutation      | SNP | C | T | 4   | 4   | c.556G>A      | c.(556-558)GCC>ACC     | p.A186T        |
| Pat_28 | Post-Resistance | NOTCH1   | 4851   | 37 | 9 | 139401834 | 139401834 | Missense_Mutation      | SNP | G | A | 6   | 11  | c.3566C>T     | c.(3565-3567)TCC>TTC   | p.S1189F       |
| Pat_28 | Post-Resistance | LCN6     | 158062 | 37 | 9 | 139640346 | 139640346 | Missense_Mutation      | SNP | C | T | 38  | 41  | c.251G>A      | c.(250-252)AGT>AAT     | p.S84N         |
| Pat_28 | Post-Resistance | ABCA2    | 20     | 37 | 9 | 139912032 | 139912032 | Missense_Mutation      | SNP | C | T | 5   | 67  | c.2321G>A     | c.(2320-2322)GGC>GAC   | p.G774D        |
| Pat_28 | Post-Resistance | DPP7     | 29952  | 37 | 9 | 140008808 | 140008808 | Missense_Mutation      | SNP | G | A | 11  | 11  | c.208C>T      | c.(208-210)CCC>TCC     | p.P70S         |
| Pat_28 | Post-Resistance | EHMT1    | 79813  | 37 | 9 | 140637973 | 140637973 | Missense_Mutation      | SNP | G | A | 47  | 73  | c.974G>A      | c.(973-975)GGT>GAT     | p.G325D        |
| Pat_28 | Post-Resistance | MXRA5    | 25878  | 37 | X | 3238276   | 3238276   | Missense_Mutation      | SNP | G | A | 4   | 3   | c.5450C>T     | c.(5449-5451)TCC>TTC   | p.S1817F       |
| Pat_28 | Post-Resistance | MXRA5    | 25878  | 37 | X | 3240404   | 3240404   | Missense_Mutation      | SNP | G | A | 13  | 3   | c.3322C>T     | c.(3322-3324)CCA>TCA   | p.P1108S       |

|        |                 |          |        |    |    |           |           |                   |     |    |    |     |     |                                   |                      |               |
|--------|-----------------|----------|--------|----|----|-----------|-----------|-------------------|-----|----|----|-----|-----|-----------------------------------|----------------------|---------------|
| Pat_28 | Post-Resistance | DDX53    | 168400 | 37 | X  | 23020032  | 23020032  | Missense_Mutation | SNP | C  | T  | 28  | 6   | c.1858C>T                         | c.(1858-1860)CCT>TCT | p.P620S       |
| Pat_28 | Post-Resistance | ERAS     | 3266   | 37 | X  | 48687781  | 48687781  | Missense_Mutation | SNP | C  | T  | 25  | 6   | c.248C>T                          | c.(247-249)ACC>ATC   | p.T83I        |
| Pat_28 | Post-Resistance | NUDT11   | 55190  | 37 | X  | 51239162  | 51239162  | Nonsense_Mutation | SNP | C  | T  | 9   | 3   | c.135G>A                          | c.(133-135)TGG>TGA   | p.W45*        |
| Pat_28 | Post-Resistance | IQSEC2   | 23096  | 37 | X  | 53280209  | 53280209  | Missense_Mutation | SNP | G  | A  | 50  | 16  | c.1549C>T                         | c.(1549-1551)CCC>TCC | p.P517S       |
| Pat_28 | Post-Resistance | SNX12    | 29934  | 37 | X  | 70280897  | 70280897  | Missense_Mutation | SNP | C  | T  | 15  | 2   | c.458G>A                          | c.(457-459)AGG>AAG   | p.R153K       |
| Pat_28 | Post-Resistance | NAP1L2   | 4674   | 37 | X  | 72434172  | 72434172  | Missense_Mutation | SNP | C  | T  | 29  | 8   | c.157G>A                          | c.(157-159)GCT>ACT   | p.A53T        |
| Pat_28 | Post-Resistance | RAB9B    | 51209  | 37 | X  | 103080576 | 103080576 | Nonsense_Mutation | SNP | G  | A  | 51  | 11  | c.139C>T                          | c.(139-141)CGA>TGA   | p.R47*        |
| Pat_28 | Post-Resistance | IRS4     | 8471   | 37 | X  | 107978956 | 107978956 | Missense_Mutation | SNP | C  | T  | 5   | 2   | c.619G>A                          | c.(619-621)GGC>AGC   | p.G207S       |
| Pat_28 | Post-Resistance | SMARCA1  | 6594   | 37 | X  | 128625983 | 128625983 | Missense_Mutation | SNP | C  | T  | 223 | 38  | c.1750G>A                         | c.(1750-1752)GCA>ACA | p.A584T       |
| Pat_28 | Post-Resistance | SAGE1    | 55511  | 37 | X  | 134993770 | 134993770 | Missense_Mutation | SNP | G  | A  | 109 | 24  | c.2179G>A                         | c.(2179-2181)GAG>AAG | p.E727K       |
| Pat_28 | Post-Resistance | ARHGEF6  | 9459   | 37 | X  | 135829693 | 135829693 | Missense_Mutation | SNP | A  | G  | 68  | 14  | c.308T>C                          | c.(307-309)CTT>CCT   | p.L103P       |
| Pat_28 | Post-Resistance | RBMX     | 27316  | 37 | X  | 135956407 | 135956407 | Missense_Mutation | SNP | T  | C  | 50  | 12  | c.1070A>G                         | c.(1069-1071)TAC>TGC | p.Y357C       |
| Pat_28 | Post-Resistance | SPANXN3  | 139067 | 37 | X  | 142596922 | 142596922 | Missense_Mutation | SNP | G  | A  | 44  | 8   | c.148C>T                          | c.(148-150)CCA>TCA   | p.P50S        |
| Pat_28 | Post-Resistance | HAUS7    | 55559  | 37 | X  | 152736027 | 152736027 | Missense_Mutation | SNP | C  | T  | 10  | 2   | c.19G>A                           | c.(19-21)GGA>AGA     | p.G7R         |
| Pat_28 | Post-Resistance | FLNA     | 2316   | 37 | X  | 153594980 | 153594980 | Missense_Mutation | SNP | T  | G  | 28  | 8   | c.1015A>C                         | c.(1015-1017)AAC>CAC | p.N339H       |
| Pat_28 | Post-Resistance | F8       | 2157   | 37 | X  | 154158530 | 154158530 | Missense_Mutation | SNP | C  | T  | 60  | 9   | c.3535G>A                         | c.(3535-3537)GAC>AAC | p.D1179N      |
| Pat_28 | Post-Resistance | IL9R     | 3581   | 37 | X  | 155235146 | 155235146 | Splice_Site       | SNP | T  | C  | 7   | 21  | c.781_splice                      | c.e6+2               | p.G261_splice |
| Pat_28 | Post-Resistance | KDM5D    | 8284   | 37 | Y  | 21901512  | 21901512  | Missense_Mutation | SNP | C  | T  | 27  | 3   | c.559G>A                          | c.(559-561)GAT>AAT   | p.D187N       |
| Pat_30 | Pre-Treatment   | C1orf127 | 148345 | 37 | 1  | 11008613  | 11008613  | Nonsense_Mutation | SNP | G  | A  | 4   | 153 | c.1132C>T                         | c.(1132-1134)CGA>TGA | p.R378*       |
| Pat_30 | Pre-Treatment   | ESPNP    | 284729 | 37 | 1  | 17023110  | 17023110  | Missense_Mutation | SNP | G  | A  | 6   | 68  | c.1640C>T                         | c.(1639-1641)CCG>CTG | p.P547L       |
| Pat_30 | Pre-Treatment   | SERINC2  | 347735 | 37 | 1  | 31902304  | 31902305  | Missense_Mutation | DNP | CC | TT | 81  | 320 | c.944_945CC>TT                    | c.(943-945)CCC>CTT   | p.P315L       |
| Pat_30 | Pre-Treatment   | ZMYM1    | 79830  | 37 | 1  | 35579236  | 35579236  | Missense_Mutation | SNP | T  | A  | 38  | 54  | c.1805T>A                         | c.(1804-1806)TTT>TAT | p.F602Y       |
| Pat_30 | Pre-Treatment   | GUCA2B   | 2981   | 37 | 1  | 42621229  | 42621229  | Missense_Mutation | SNP | G  | A  | 9   | 452 | c.301G>A                          | c.(301-303)GAG>AAG   | p.E101K       |
| Pat_30 | Pre-Treatment   | PGM1     | 5236   | 37 | 1  | 64117438  | 64117438  | Missense_Mutation | SNP | C  | T  | 28  | 90  | c.1379C>T                         | c.(1378-1380)TCA>TTA | p.S460L       |
| Pat_30 | Pre-Treatment   | CLCA4    | 22802  | 37 | 1  | 87025658  | 87025658  | Missense_Mutation | SNP | A  | G  | 88  | 148 | c.203A>G                          | c.(202-204)GAA>GGA   | p.E68G        |
| Pat_30 | Pre-Treatment   | COL11A1  | 1301   | 37 | 1  | 103483375 | 103483375 | Splice_Site       | SNP | C  | T  | 5   | 278 | c.1413_splice                     | c.e11+1              | p.R471_splice |
| Pat_30 | Pre-Treatment   | PTGFRN   | 5738   | 37 | 1  | 117491852 | 117491852 | Missense_Mutation | SNP | G  | A  | 81  | 324 | c.871G>A                          | c.(871-873)GAA>AAA   | p.E291K       |
| Pat_30 | Pre-Treatment   | ITGA10   | 8515   | 37 | 1  | 145532599 | 145532599 | Missense_Mutation | SNP | G  | A  | 50  | 288 | c.1052G>A                         | c.(1051-1053)GGA>GAA | p.G351E       |
| Pat_30 | Pre-Treatment   | BCL9     | 607    | 37 | 1  | 147090788 | 147090788 | Missense_Mutation | SNP | G  | A  | 5   | 210 | c.827G>A                          | c.(826-828)CGG>CAG   | p.R276Q       |
| Pat_30 | Pre-Treatment   | TARS2    | 80222  | 37 | 1  | 150460488 | 150460488 | Missense_Mutation | SNP | T  | C  | 67  | 192 | c.221T>C                          | c.(220-222)GTG>GCG   | p.V74A        |
| Pat_30 | Pre-Treatment   | NUP210L  | 91181  | 37 | 1  | 154112300 | 154112300 | Missense_Mutation | SNP | C  | T  | 11  | 725 | c.695G>A                          | c.(694-696)CGA>CAA   | p.R232Q       |
| Pat_30 | Pre-Treatment   | ADAR     | 103    | 37 | 1  | 154574328 | 154574328 | Missense_Mutation | SNP | T  | C  | 7   | 477 | c.790A>G                          | c.(790-792)AGT>GGT   | p.S264G       |
| Pat_30 | Pre-Treatment   | GPATCH4  | 54865  | 37 | 1  | 156565292 | 156565293 | Missense_Mutation | DNP | CC | TT | 125 | 380 | c.840_841GG>AA338-843)GGGGAA>GGAA |                      | p.E281K       |
| Pat_30 | Pre-Treatment   | C1orf92  | 149499 | 37 | 1  | 156902735 | 156902735 | Missense_Mutation | SNP | G  | A  | 6   | 32  | c.1654G>A                         | c.(1654-1656)GAT>AAT | p.D552N       |
| Pat_30 | Pre-Treatment   | OR10K1   | 391109 | 37 | 1  | 158435715 | 158435715 | Missense_Mutation | SNP | C  | T  | 109 | 289 | c.364C>T                          | c.(364-366)CGC>TGC   | p.R122C       |
| Pat_30 | Pre-Treatment   | SELE     | 6401   | 37 | 1  | 169698706 | 169698706 | Missense_Mutation | SNP | C  | T  | 45  | 162 | c.824G>A                          | c.(823-825)GGA>GAA   | p.G275E       |
| Pat_30 | Pre-Treatment   | HMCN1    | 83872  | 37 | 1  | 185878628 | 185878628 | Missense_Mutation | SNP | C  | T  | 25  | 114 | c.781C>T                          | c.(781-783)CGC>TGC   | p.R261C       |
| Pat_30 | Pre-Treatment   | F13B     | 2165   | 37 | 1  | 197026515 | 197026515 | Missense_Mutation | SNP | C  | T  | 70  | 202 | c.886G>A                          | c.(886-888)GAA>AAA   | p.E296K       |
| Pat_30 | Pre-Treatment   | RAB3GAP2 | 25782  | 37 | 1  | 220338135 | 220338135 | Missense_Mutation | SNP | G  | A  | 3   | 37  | c.3094C>T                         | c.(3094-3096)CGT>TGT | p.R1032C      |
| Pat_30 | Pre-Treatment   | RHOU     | 58480  | 37 | 1  | 228879120 | 228879120 | Missense_Mutation | SNP | A  | G  | 108 | 384 | c.410A>G                          | c.(409-411)CAG>CGG   | p.Q137R       |
| Pat_30 | Pre-Treatment   | EDARADD  | 128178 | 37 | 1  | 236631574 | 236631574 | Missense_Mutation | SNP | C  | T  | 54  | 147 | c.263C>T                          | c.(262-264)CCA>CTA   | p.P88L        |
| Pat_30 | Pre-Treatment   | ZNF496   | 84838  | 37 | 1  | 247492847 | 247492847 | Missense_Mutation | SNP | G  | A  | 49  | 114 | c.34C>T                           | c.(34-36)CCG>TCG     | p.P12S        |
| Pat_30 | Pre-Treatment   | OR2G2    | 81470  | 37 | 1  | 247752179 | 247752179 | Missense_Mutation | SNP | G  | A  | 47  | 561 | c.518G>A                          | c.(517-519)GGG>GAG   | p.G173E       |
| Pat_30 | Pre-Treatment   | IL15RA   | 3601   | 37 | 10 | 6008146   | 6008146   | Missense_Mutation | SNP | T  | A  | 52  | 98  | c.245A>T                          | c.(244-246)AAT>ATT   | p.N82I        |
| Pat_30 | Pre-Treatment   | FRMD4A   | 55691  | 37 | 10 | 13698788  | 13698788  | Missense_Mutation | SNP | C  | T  | 4   | 64  | c.2801G>A                         | c.(2800-2802)CGT>CAT | p.R934H       |
| Pat_30 | Pre-Treatment   | NEBL     | 10529  | 37 | 10 | 21102879  | 21102879  | Missense_Mutation | SNP | G  | A  | 21  | 116 | c.2335C>T                         | c.(2335-2337)CAT>TAT | p.H779Y       |
| Pat_30 | Pre-Treatment   | ANKRD26  | 22852  | 37 | 10 | 27366301  | 27366301  | Missense_Mutation | SNP | G  | A  | 57  | 167 | c.1043C>T                         | c.(1042-1044)TCC>TTC | p.S348F       |

|        |               |         |        |    |    |           |           |                   |     |    |    |     |     |                                    |                      |          |
|--------|---------------|---------|--------|----|----|-----------|-----------|-------------------|-----|----|----|-----|-----|------------------------------------|----------------------|----------|
| Pat_30 | Pre-Treatment | ANK3    | 288    | 37 | 10 | 61956338  | 61956338  | Missense_Mutation | SNP | C  | G  | 3   | 78  | c.1735G>C                          | c.(1735-1737)GAA>CAA | p.E579Q  |
| Pat_30 | Pre-Treatment | HERC4   | 26091  | 37 | 10 | 69750933  | 69750933  | Missense_Mutation | SNP | G  | A  | 15  | 37  | c.1295C>T                          | c.(1294-1296)TCC>TTC | p.S432F  |
| Pat_30 | Pre-Treatment | PBLD    | 64081  | 37 | 10 | 70048273  | 70048273  | Missense_Mutation | SNP | G  | A  | 31  | 76  | c.658C>T                           | c.(658-660)CCG>TCG   | p.P220S  |
| Pat_30 | Pre-Treatment | CDH23   | 64072  | 37 | 10 | 73499431  | 73499431  | Missense_Mutation | SNP | G  | A  | 3   | 61  | c.4390G>A                          | c.(4390-4392)GCG>ACG | p.A1464T |
| Pat_30 | Pre-Treatment | ZMIZ1   | 57178  | 37 | 10 | 81060652  | 81060652  | Nonsense_Mutation | SNP | C  | T  | 5   | 289 | c.1972C>T                          | c.(1972-1974)CAG>TAG | p.Q658*  |
| Pat_30 | Pre-Treatment | TMEM20  | 159371 | 37 | 10 | 95660637  | 95660637  | Missense_Mutation | SNP | C  | T  | 8   | 418 | c.488C>T                           | c.(487-489)ACG>ATG   | p.T163M  |
| Pat_30 | Pre-Treatment | PLCE1   | 51196  | 37 | 10 | 96028758  | 96028758  | Missense_Mutation | SNP | C  | T  | 40  | 74  | c.4354C>T                          | c.(4354-4356)CAT>TAT | p.H1452Y |
| Pat_30 | Pre-Treatment | CYP2C8  | 1558   | 37 | 10 | 96824642  | 96824642  | Missense_Mutation | SNP | C  | T  | 95  | 178 | c.557G>A                           | c.(556-558)CGA>CAA   | p.R186Q  |
| Pat_30 | Pre-Treatment | TLL2    | 7093   | 37 | 10 | 98192579  | 98192579  | Missense_Mutation | SNP | C  | T  | 15  | 187 | c.505G>A                           | c.(505-507)GGA>AGA   | p.G169R  |
| Pat_30 | Pre-Treatment | OR51S1  | 119692 | 37 | 11 | 4870243   | 4870243   | Missense_Mutation | SNP | G  | A  | 33  | 176 | c.196C>T                           | c.(196-198)CCA>TCA   | p.P66S   |
| Pat_30 | Pre-Treatment | OR51B6  | 390058 | 37 | 11 | 5373230   | 5373230   | Missense_Mutation | SNP | C  | T  | 86  | 216 | c.493C>T                           | c.(493-495)CCC>TCC   | p.P165S  |
| Pat_30 | Pre-Treatment | BDNF    | 627    | 37 | 11 | 27679778  | 27679778  | Missense_Mutation | SNP | C  | T  | 16  | 59  | c.334G>A                           | c.(334-336)GAA>AAA   | p.E112K  |
| Pat_30 | Pre-Treatment | TTC17   | 55761  | 37 | 11 | 43515441  | 43515441  | Missense_Mutation | SNP | G  | A  | 181 | 560 | c.3413G>A                          | c.(3412-3414)CGG>CAG | p.R1138Q |
| Pat_30 | Pre-Treatment | OR5D18  | 219438 | 37 | 11 | 55587153  | 55587153  | Missense_Mutation | SNP | G  | T  | 4   | 119 | c.48G>T                            | c.(46-48)TTG>TTT     | p.L16F   |
| Pat_30 | Pre-Treatment | OR8H2   | 390151 | 37 | 11 | 55872803  | 55872804  | Missense_Mutation | DNP | GG | AA | 209 | 626 | c.285_286GG>AA283-288)ACGGGC>ACAAI |                      | p.G96S   |
| Pat_30 | Pre-Treatment | NPAS4   | 266743 | 37 | 11 | 66192136  | 66192136  | Missense_Mutation | SNP | C  | T  | 45  | 114 | c.1775C>T                          | c.(1774-1776)GCC>GTC | p.A592V  |
| Pat_30 | Pre-Treatment | PITPNM1 | 9600   | 37 | 11 | 67261510  | 67261510  | Missense_Mutation | SNP | G  | A  | 4   | 149 | c.2891C>T                          | c.(2890-2892)TCG>TTG | p.S964L  |
| Pat_30 | Pre-Treatment | MYO7A   | 4647   | 37 | 11 | 76893123  | 76893123  | Missense_Mutation | SNP | G  | A  | 77  | 279 | c.3031G>A                          | c.(3031-3033)GGG>AGG | p.G1011R |
| Pat_30 | Pre-Treatment | NNMT    | 4837   | 37 | 11 | 114182916 | 114182916 | Missense_Mutation | SNP | C  | T  | 26  | 170 | c.512C>T                           | c.(511-513)CCA>CTA   | p.P171L  |
| Pat_30 | Pre-Treatment | PHLDB1  | 23187  | 37 | 11 | 118498561 | 118498561 | Missense_Mutation | SNP | C  | T  | 3   | 47  | c.1022C>T                          | c.(1021-1023)GCG>GTG | p.A341V  |
| Pat_30 | Pre-Treatment | OR10G8  | 219869 | 37 | 11 | 123901051 | 123901051 | Missense_Mutation | SNP | C  | T  | 28  | 111 | c.722C>T                           | c.(721-723)GCC>GTC   | p.A241V  |
| Pat_30 | Pre-Treatment | GLB1L2  | 89944  | 37 | 11 | 134212688 | 134212688 | Nonsense_Mutation | SNP | C  | T  | 4   | 130 | c.127C>T                           | c.(127-129)CGA>TGA   | p.R43*   |
| Pat_30 | Pre-Treatment | C3AR1   | 719    | 37 | 12 | 8212106   | 8212106   | Missense_Mutation | SNP | G  | A  | 15  | 233 | c.676C>T                           | c.(676-678)CCC>TCC   | p.P226S  |
| Pat_30 | Pre-Treatment | TAS2R20 | 259295 | 37 | 12 | 11150318  | 11150318  | Missense_Mutation | SNP | C  | A  | 5   | 255 | c.157G>T                           | c.(157-159)GTC>TTC   | p.V53F   |
| Pat_30 | Pre-Treatment | SLCO1B1 | 10599  | 37 | 12 | 21391959  | 21391959  | Missense_Mutation | SNP | G  | C  | 24  | 43  | c.1912G>C                          | c.(1912-1914)GTT>CTT | p.V638L  |
| Pat_30 | Pre-Treatment | ALG10B  | 144245 | 37 | 12 | 38714749  | 38714749  | Missense_Mutation | SNP | G  | A  | 44  | 148 | c.1156G>A                          | c.(1156-1158)GAC>AAC | p.D386N  |
| Pat_30 | Pre-Treatment | ABCD2   | 225    | 37 | 12 | 40001403  | 40001403  | Nonsense_Mutation | SNP | C  | A  | 35  | 93  | c.1234G>T                          | c.(1234-1236)GAG>TAG | p.E412*  |
| Pat_30 | Pre-Treatment | ANKRD33 | 341405 | 37 | 12 | 52283221  | 52283221  | Nonsense_Mutation | SNP | C  | T  | 34  | 108 | c.187C>T                           | c.(187-189)CAG>TAG   | p.Q63*   |
| Pat_30 | Pre-Treatment | KRT7    | 3855   | 37 | 12 | 52635286  | 52635286  | Missense_Mutation | SNP | G  | A  | 67  | 228 | c.724G>A                           | c.(724-726)GAC>AAC   | p.D242N  |
| Pat_30 | Pre-Treatment | KRT84   | 3890   | 37 | 12 | 52774935  | 52774935  | Missense_Mutation | SNP | G  | A  | 6   | 420 | c.1132C>T                          | c.(1132-1134)CGG>TGG | p.R378W  |
| Pat_30 | Pre-Treatment | OR6C68  | 403284 | 37 | 12 | 55886390  | 55886390  | Missense_Mutation | SNP | C  | T  | 19  | 143 | c.244C>T                           | c.(244-246)CCA>TCA   | p.P82S   |
| Pat_30 | Pre-Treatment | DNAJC14 | 85406  | 37 | 12 | 56216235  | 56216235  | Missense_Mutation | SNP | C  | T  | 63  | 159 | c.1820G>A                          | c.(1819-1821)GGT>GAT | p.G607D  |
| Pat_30 | Pre-Treatment | GRIP1   | 23426  | 37 | 12 | 66765581  | 66765581  | Missense_Mutation | SNP | G  | A  | 119 | 380 | c.2749C>T                          | c.(2749-2751)CGG>TGG | p.R917W  |
| Pat_30 | Pre-Treatment | MDM1    | 56890  | 37 | 12 | 68720499  | 68720499  | Missense_Mutation | SNP | C  | G  | 21  | 72  | c.436G>C                           | c.(436-438)GTT>CTT   | p.V146L  |
| Pat_30 | Pre-Treatment | RAP1B   | 5908   | 37 | 12 | 69047982  | 69047982  | Missense_Mutation | SNP | G  | A  | 39  | 655 | c.274G>A                           | c.(274-276)GAT>AAT   | p.D92N   |
| Pat_30 | Pre-Treatment | ZDHHC17 | 23390  | 37 | 12 | 77158051  | 77158051  | Missense_Mutation | SNP | C  | T  | 3   | 48  | c.35C>T                            | c.(34-36)GCG>GTG     | p.A12V   |
| Pat_30 | Pre-Treatment | NR2C1   | 7181   | 37 | 12 | 95442888  | 95442888  | Missense_Mutation | SNP | C  | T  | 5   | 160 | c.1087G>A                          | c.(1087-1089)GAA>AAA | p.E363K  |
| Pat_30 | Pre-Treatment | SLC25A3 | 5250   | 37 | 12 | 98992448  | 98992448  | Missense_Mutation | SNP | C  | T  | 5   | 126 | c.611C>T                           | c.(610-612)GCT>GTT   | p.A204V  |
| Pat_30 | Pre-Treatment | CKAP4   | 10970  | 37 | 12 | 106633149 | 106633149 | Missense_Mutation | SNP | C  | T  | 6   | 298 | c.1462G>A                          | c.(1462-1464)GAG>AAG | p.E488K  |
| Pat_30 | Pre-Treatment | CIT     | 11113  | 37 | 12 | 120150494 | 120150494 | Missense_Mutation | SNP | T  | G  | 57  | 142 | c.4460A>C                          | c.(4459-4461)CAG>CCG | p.Q1487P |
| Pat_30 | Pre-Treatment | FLT1    | 2321   | 37 | 13 | 29002026  | 29002026  | Missense_Mutation | SNP | G  | A  | 80  | 224 | c.1139C>T                          | c.(1138-1140)TCT>TTT | p.S380F  |
| Pat_30 | Pre-Treatment | SLC46A3 | 283537 | 37 | 13 | 29287375  | 29287375  | Nonsense_Mutation | SNP | G  | A  | 26  | 122 | c.502C>T                           | c.(502-504)CGA>TGA   | p.R168*  |
| Pat_30 | Pre-Treatment | SLAIN1  | 122060 | 37 | 13 | 78337299  | 78337299  | Missense_Mutation | SNP | C  | G  | 19  | 149 | c.1225C>G                          | c.(1225-1227)CCT>GCT | p.P409A  |
| Pat_30 | Pre-Treatment | RBM26   | 64062  | 37 | 13 | 79940864  | 79940864  | Missense_Mutation | SNP | G  | A  | 4   | 131 | c.1039C>T                          | c.(1039-1041)CCC>TCC | p.P347S  |
| Pat_30 | Pre-Treatment | FARP1   | 10160  | 37 | 13 | 99038039  | 99038039  | Missense_Mutation | SNP | G  | A  | 5   | 165 | c.730G>A                           | c.(730-732)GTT>ATT   | p.V244I  |
| Pat_30 | Pre-Treatment | DOCK9   | 23348  | 37 | 13 | 99567688  | 99567688  | Missense_Mutation | SNP | C  | T  | 19  | 56  | c.790G>A                           | c.(790-792)GAC>AAC   | p.D264N  |
| Pat_30 | Pre-Treatment | TPPP2   | 122664 | 37 | 14 | 21500204  | 21500204  | Missense_Mutation | SNP | G  | A  | 57  | 249 | c.481G>A                           | c.(481-483)GGT>AGT   | p.G161S  |

|        |               |          |        |    |    |           |           |                   |     |    |    |     |     |                                     |                        |                |
|--------|---------------|----------|--------|----|----|-----------|-----------|-------------------|-----|----|----|-----|-----|-------------------------------------|------------------------|----------------|
| Pat_30 | Pre-Treatment | IPO4     | 79711  | 37 | 14 | 24654114  | 24654114  | Missense_Mutation | SNP | G  | A  | 4   | 101 | c.1481C>T                           | c.(1480-1482)CCC>CTC   | p.P494L        |
| Pat_30 | Pre-Treatment | KCNH5    | 27133  | 37 | 14 | 63468127  | 63468127  | Missense_Mutation | SNP | C  | T  | 5   | 52  | c.355G>A                            | c.(355-357)GAA>AAA     | p.E119K        |
| Pat_30 | Pre-Treatment | SYNE2    | 23224  | 37 | 14 | 64568695  | 64568695  | Missense_Mutation | SNP | C  | T  | 26  | 141 | c.12427C>T                          | c.(12427-12429)CTT>TTT | p.L4143F       |
| Pat_30 | Pre-Treatment | CCDC88C  | 440193 | 37 | 14 | 91779633  | 91779633  | Missense_Mutation | SNP | G  | A  | 5   | 264 | c.2527C>T                           | c.(2527-2529)CGG>TGG   | p.R843W        |
| Pat_30 | Pre-Treatment | SMEK1    | 55671  | 37 | 14 | 91929191  | 91929191  | Missense_Mutation | SNP | T  | C  | 40  | 109 | c.1861A>G                           | c.(1861-1863)ATT>GTT   | p.I621V        |
| Pat_30 | Pre-Treatment | PPP2R5C  | 5527   | 37 | 14 | 102229267 | 102229267 | Missense_Mutation | SNP | G  | A  | 6   | 29  | c.53G>A                             | c.(52-54)GGA>GAA       | p.G18E         |
| Pat_30 | Pre-Treatment | AHNAK2   | 113146 | 37 | 14 | 105421355 | 105421355 | Missense_Mutation | SNP | G  | A  | 9   | 55  | c.590C>T                            | c.(589-591)CCA>CTA     | p.P197L        |
| Pat_30 | Pre-Treatment | CHP      | 11261  | 37 | 15 | 41570983  | 41570983  | Missense_Mutation | SNP | G  | A  | 4   | 127 | c.430G>A                            | c.(430-432)GGA>AGA     | p.G144R        |
| Pat_30 | Pre-Treatment | MGA      | 23269  | 37 | 15 | 42053967  | 42053967  | Nonsense_Mutation | SNP | C  | T  | 5   | 39  | c.7429C>T                           | c.(7429-7431)CAG>TAG   | p.Q2477*       |
| Pat_30 | Pre-Treatment | MYO5A    | 4644   | 37 | 15 | 52638557  | 52638557  | Splice_Site       | SNP | C  | T  | 7   | 64  | c.3959_splice                       | c.e30+1                | p.R1320_splice |
| Pat_30 | Pre-Treatment | ARPP19   | 10776  | 37 | 15 | 52849310  | 52849310  | Missense_Mutation | SNP | C  | T  | 74  | 292 | c.155G>A                            | c.(154-156)CGG>CAG     | p.R52Q         |
| Pat_30 | Pre-Treatment | PIAS1    | 8554   | 37 | 15 | 68378810  | 68378810  | Missense_Mutation | SNP | G  | A  | 4   | 142 | c.191G>A                            | c.(190-192)CGG>CAG     | p.R64Q         |
| Pat_30 | Pre-Treatment | NOX5     | 79400  | 37 | 15 | 69341381  | 69341381  | Missense_Mutation | SNP | C  | T  | 14  | 63  | c.1982C>T                           | c.(1981-1983)GCC>GTC   | p.A661V        |
| Pat_30 | Pre-Treatment | RHCG     | 51458  | 37 | 15 | 90021130  | 90021130  | Missense_Mutation | SNP | C  | T  | 4   | 146 | c.913G>A                            | c.(913-915)GGT>AGT     | p.G305S        |
| Pat_30 | Pre-Treatment | WDR93    | 56964  | 37 | 15 | 90276361  | 90276361  | Missense_Mutation | SNP | G  | A  | 31  | 92  | c.1455G>A                           | c.(1453-1455)ATG>ATA   | p.M485I        |
| Pat_30 | Pre-Treatment | C16orf79 | 283870 | 37 | 16 | 2259391   | 2259391   | Missense_Mutation | SNP | G  | A  | 6   | 174 | c.755C>T                            | c.(754-756)TCG>TTG     | p.S252L        |
| Pat_30 | Pre-Treatment | NLRC3    | 197358 | 37 | 16 | 3614397   | 3614397   | Missense_Mutation | SNP | C  | T  | 37  | 138 | c.541G>A                            | c.(541-543)GAT>AAT     | p.D181N        |
| Pat_30 | Pre-Treatment | SRL      | 6345   | 37 | 16 | 4247914   | 4247914   | Missense_Mutation | SNP | C  | T  | 4   | 89  | c.262G>A                            | c.(262-264)GGA>AGA     | p.G88R         |
| Pat_30 | Pre-Treatment | ACSM1    | 116285 | 37 | 16 | 20636779  | 20636779  | Missense_Mutation | SNP | G  | A  | 48  | 139 | c.1493C>T                           | c.(1492-1494)GCC>GTC   | p.A498V        |
| Pat_30 | Pre-Treatment | ATXN2L   | 11273  | 37 | 16 | 28836712  | 28836712  | Missense_Mutation | SNP | C  | T  | 17  | 89  | c.325C>T                            | c.(325-327)CCA>TCA     | p.P109S        |
| Pat_30 | Pre-Treatment | PHKG2    | 5261   | 37 | 16 | 30767747  | 30767747  | Missense_Mutation | SNP | G  | A  | 5   | 245 | c.707G>A                            | c.(706-708)CGG>CAG     | p.R236Q        |
| Pat_30 | Pre-Treatment | MYLK3    | 91807  | 37 | 16 | 46744628  | 46744628  | Missense_Mutation | SNP | C  | T  | 90  | 581 | c.2188G>A                           | c.(2188-2190)GAT>AAT   | p.D730N        |
| Pat_30 | Pre-Treatment | CDH8     | 1006   | 37 | 16 | 61935302  | 61935302  | Nonsense_Mutation | SNP | G  | A  | 15  | 142 | c.328C>T                            | c.(328-330)CAA>TAA     | p.Q110*        |
| Pat_30 | Pre-Treatment | SPATA22  | 84690  | 37 | 17 | 3343629   | 3343629   | Missense_Mutation | SNP | G  | A  | 27  | 163 | c.904C>T                            | c.(904-906)CGT>TGT     | p.R302C        |
| Pat_30 | Pre-Treatment | ZZEF1    | 23140  | 37 | 17 | 3920987   | 3920987   | Missense_Mutation | SNP | G  | A  | 42  | 162 | c.7679C>T                           | c.(7678-7680)TCG>TTG   | p.S2560L       |
| Pat_30 | Pre-Treatment | CXCL16   | 58191  | 37 | 17 | 4641715   | 4641715   | Missense_Mutation | SNP | G  | A  | 15  | 76  | c.346C>T                            | c.(346-348)CTT>TTT     | p.L116F        |
| Pat_30 | Pre-Treatment | MYH8     | 4626   | 37 | 17 | 10296234  | 10296234  | Missense_Mutation | SNP | C  | T  | 73  | 252 | c.5377G>A                           | c.(5377-5379)GTG>ATG   | p.V1793M       |
| Pat_30 | Pre-Treatment | MYH4     | 4622   | 37 | 17 | 10359030  | 10359030  | Missense_Mutation | SNP | A  | G  | 23  | 98  | c.2075T>C                           | c.(2074-2076)CTT>CCT   | p.L692P        |
| Pat_30 | Pre-Treatment | MYH2     | 4620   | 37 | 17 | 10430076  | 10430077  | Missense_Mutation | DNP | GG | AA | 30  | 254 | .:4026_4027CC>T024-4029)TCCCGC>TCTT |                        | p.R1343C       |
| Pat_30 | Pre-Treatment | KCNJ12   | 3768   | 37 | 17 | 21319348  | 21319348  | Missense_Mutation | SNP | C  | T  | 12  | 122 | c.694C>T                            | c.(694-696)CTC>TTC     | p.L232F        |
| Pat_30 | Pre-Treatment | KSR1     | 8844   | 37 | 17 | 25932605  | 25932605  | Missense_Mutation | SNP | C  | T  | 9   | 14  | c.1415C>T                           | c.(1414-1416)CCC>CTC   | p.P472L        |
| Pat_30 | Pre-Treatment | AATF     | 26574  | 37 | 17 | 35310442  | 35310442  | Missense_Mutation | SNP | G  | T  | 40  | 114 | c.540G>T                            | c.(538-540)ATG>ATT     | p.M180I        |
| Pat_30 | Pre-Treatment | SLC25A39 | 51629  | 37 | 17 | 42398503  | 42398503  | Missense_Mutation | SNP | G  | A  | 4   | 71  | c.614C>T                            | c.(613-615)ACT>ATT     | p.T205I        |
| Pat_30 | Pre-Treatment | SPOP     | 8405   | 37 | 17 | 47684692  | 47684692  | Nonsense_Mutation | SNP | C  | A  | 51  | 141 | c.757G>T                            | c.(757-759)GAA>TAA     | p.E253*        |
| Pat_30 | Pre-Treatment | BCAS3    | 54828  | 37 | 17 | 58979987  | 58979987  | Nonsense_Mutation | SNP | C  | T  | 146 | 491 | c.745C>T                            | c.(745-747)CGA>TGA     | p.R249*        |
| Pat_30 | Pre-Treatment | CACNG1   | 786    | 37 | 17 | 65051302  | 65051302  | Missense_Mutation | SNP | G  | A  | 5   | 151 | c.388G>A                            | c.(388-390)GGG>AGG     | p.G130R        |
| Pat_30 | Pre-Treatment | AFMID    | 125061 | 37 | 17 | 76200807  | 76200807  | Missense_Mutation | SNP | G  | A  | 4   | 139 | c.379G>A                            | c.(379-381)GGC>AGC     | p.G127S        |
| Pat_30 | Pre-Treatment | CBX2     | 84733  | 37 | 17 | 77758699  | 77758699  | Missense_Mutation | SNP | C  | T  | 52  | 105 | c.1457C>T                           | c.(1456-1458)TCC>TTC   | p.S486F        |
| Pat_30 | Pre-Treatment | FASN     | 2194   | 37 | 17 | 80046136  | 80046136  | Missense_Mutation | SNP | C  | T  | 4   | 117 | c.2641G>A                           | c.(2641-2643)GAC>AAC   | p.D881N        |
| Pat_30 | Pre-Treatment | LAMA1    | 284217 | 37 | 18 | 6950864   | 6950865   | Missense_Mutation | DNP | GG | AA | 61  | 124 | .:8313_8314CC>T311-8316)GGCCGC>GGT  |                        | p.R2772C       |
| Pat_30 | Pre-Treatment | ABHD3    | 171586 | 37 | 18 | 19244083  | 19244083  | Missense_Mutation | SNP | C  | T  | 4   | 74  | c.664G>A                            | c.(664-666)GGA>AGA     | p.G222R        |
| Pat_30 | Pre-Treatment | PSMA8    | 143471 | 37 | 18 | 23713939  | 23713939  | Nonsense_Mutation | SNP | C  | T  | 75  | 184 | c.10C>T                             | c.(10-12)CGA>TGA       | p.R4*          |
| Pat_30 | Pre-Treatment | DSG1     | 1828   | 37 | 18 | 28934521  | 28934521  | Missense_Mutation | SNP | G  | A  | 40  | 175 | c.2362G>A                           | c.(2362-2364)GAA>AAA   | p.E788K        |
| Pat_30 | Pre-Treatment | KIAA1632 | 57724  | 37 | 18 | 43514816  | 43514816  | Missense_Mutation | SNP | G  | A  | 26  | 82  | c.2216C>T                           | c.(2215-2217)TCC>TTC   | p.S739F        |
| Pat_30 | Pre-Treatment | DCC      | 1630   | 37 | 18 | 50592482  | 50592482  | Missense_Mutation | SNP | G  | A  | 55  | 177 | c.1207G>A                           | c.(1207-1209)GAA>AAA   | p.E403K        |
| Pat_30 | Pre-Treatment | ALPK2    | 115701 | 37 | 18 | 56165294  | 56165294  | Missense_Mutation | SNP | T  | C  | 98  | 241 | c.6283A>G                           | c.(6283-6285)ACG>GCG   | p.T2095A       |
| Pat_30 | Pre-Treatment | CDH7     | 1005   | 37 | 18 | 63489391  | 63489391  | Missense_Mutation | SNP | G  | A  | 38  | 146 | c.700G>A                            | c.(700-702)GAT>AAT     | p.D234N        |



|        |               |          |        |    |    |           |           |                   |     |    |    |     |     |              |                        |               |
|--------|---------------|----------|--------|----|----|-----------|-----------|-------------------|-----|----|----|-----|-----|--------------|------------------------|---------------|
| Pat_30 | Pre-Treatment | ABCA7    | 10347  | 37 | 19 | 1058227   | 1058227   | Missense_Mutation | SNP | T  | A  | 53  | 111 | c.5108T>A    | c.(5107-5109)ATG>AAG   | p.M1703K      |
| Pat_30 | Pre-Treatment | BTBD2    | 55643  | 37 | 19 | 1990755   | 1990755   | Missense_Mutation | SNP | C  | T  | 3   | 43  | c.751G>A     | c.(751-753)GAC>AAC     | p.D251N       |
| Pat_30 | Pre-Treatment | VAV1     | 7409   | 37 | 19 | 6820829   | 6820830   | Splice_Site       | DNP | GG | AA | 45  | 348 | c.321_splice | c.e2+1                 | p.K107_splice |
| Pat_30 | Pre-Treatment | MUC16    | 94025  | 37 | 19 | 9073258   | 9073258   | Missense_Mutation | SNP | C  | T  | 58  | 336 | c.14188G>A   | c.(14188-14190)GAC>AAC | p.D4730N      |
| Pat_30 | Pre-Treatment | DCAF15   | 90379  | 37 | 19 | 14067244  | 14067244  | Nonsense_Mutation | SNP | C  | T  | 9   | 590 | c.694C>T     | c.(694-696)CAG>TAG     | p.Q232*       |
| Pat_30 | Pre-Treatment | ZNF208   | 7757   | 37 | 19 | 22155819  | 22155819  | Missense_Mutation | SNP | C  | T  | 5   | 196 | c.1717G>A    | c.(1717-1719)GCC>ACC   | p.A573T       |
| Pat_30 | Pre-Treatment | ZNF565   | 147929 | 37 | 19 | 36674056  | 36674056  | Missense_Mutation | SNP | C  | T  | 46  | 147 | c.812G>A     | c.(811-813)AGA>AAA     | p.R271K       |
| Pat_30 | Pre-Treatment | SYCN     | 342898 | 37 | 19 | 39694810  | 39694810  | Missense_Mutation | SNP | G  | A  | 4   | 87  | c.85C>T      | c.(85-87)CTC>TTC       | p.L29F        |
| Pat_30 | Pre-Treatment | ARHGEF1  | 9138   | 37 | 19 | 42406981  | 42406981  | Missense_Mutation | SNP | G  | A  | 36  | 194 | c.1671G>A    | c.(1669-1671)ATG>ATA   | p.M557I       |
| Pat_30 | Pre-Treatment | PSG3     | 5671   | 37 | 19 | 43243098  | 43243098  | Missense_Mutation | SNP | C  | T  | 51  | 648 | c.208G>A     | c.(208-210)GGG>AGG     | p.G70R        |
| Pat_30 | Pre-Treatment | PTH2     | 113091 | 37 | 19 | 49926533  | 49926533  | Missense_Mutation | SNP | G  | C  | 5   | 87  | c.64C>G      | c.(64-66)CTG>GTG       | p.L22V        |
| Pat_30 | Pre-Treatment | NKG7     | 4818   | 37 | 19 | 51875436  | 51875436  | Missense_Mutation | SNP | T  | C  | 9   | 446 | c.283A>G     | c.(283-285)ACC>GCC     | p.T95A        |
| Pat_30 | Pre-Treatment | SIGLEC6  | 946    | 37 | 19 | 52034460  | 52034460  | Nonsense_Mutation | SNP | C  | T  | 16  | 329 | c.381G>A     | c.(379-381)TGG>TGA     | p.W127*       |
| Pat_30 | Pre-Treatment | ZNF813   | 126017 | 37 | 19 | 53995179  | 53995179  | Missense_Mutation | SNP | C  | A  | 5   | 178 | c.1693C>A    | c.(1693-1695)CAC>AAC   | p.H565N       |
| Pat_30 | Pre-Treatment | ZNF835   | 90485  | 37 | 19 | 57175969  | 57175969  | Missense_Mutation | SNP | C  | T  | 3   | 30  | c.664G>A     | c.(664-666)GGC>AGC     | p.G222S       |
| Pat_30 | Pre-Treatment | ZNF497   | 162968 | 37 | 19 | 58868272  | 58868272  | Missense_Mutation | SNP | G  | A  | 3   | 34  | c.730C>T     | c.(730-732)CGG>TGG     | p.R244W       |
| Pat_30 | Pre-Treatment | ALK      | 238    | 37 | 2  | 29497997  | 29497997  | Missense_Mutation | SNP | G  | A  | 23  | 81  | c.2009C>T    | c.(2008-2010)TCA>TTA   | p.S670L       |
| Pat_30 | Pre-Treatment | KLRAQ1   | 129285 | 37 | 2  | 48718182  | 48718182  | Missense_Mutation | SNP | T  | C  | 143 | 392 | c.1472T>C    | c.(1471-1473)TTG>TCG   | p.L491S       |
| Pat_30 | Pre-Treatment | ACTG2    | 72     | 37 | 2  | 74140617  | 74140617  | Missense_Mutation | SNP | G  | A  | 6   | 182 | c.457G>A     | c.(457-459)GTC>ATC     | p.V153I       |
| Pat_30 | Pre-Treatment | SMYD1    | 150572 | 37 | 2  | 88409967  | 88409967  | Missense_Mutation | SNP | C  | T  | 20  | 55  | c.1409C>T    | c.(1408-1410)CCC>CTC   | p.P470L       |
| Pat_30 | Pre-Treatment | MERTK    | 10461  | 37 | 2  | 112686894 | 112686894 | Missense_Mutation | SNP | G  | A  | 21  | 113 | c.259G>A     | c.(259-261)GAA>AAA     | p.E87K        |
| Pat_30 | Pre-Treatment | ZC3H8    | 84524  | 37 | 2  | 112994195 | 112994195 | Missense_Mutation | SNP | C  | A  | 4   | 81  | c.448G>T     | c.(448-450)GGC>TGC     | p.G150C       |
| Pat_30 | Pre-Treatment | PAX8     | 7849   | 37 | 2  | 114004371 | 114004371 | Missense_Mutation | SNP | G  | A  | 6   | 304 | c.151C>T     | c.(151-153)CTC>TTC     | p.L51F        |
| Pat_30 | Pre-Treatment | SCTR     | 6344   | 37 | 2  | 120206299 | 120206299 | Nonsense_Mutation | SNP | G  | A  | 16  | 65  | c.979C>T     | c.(979-981)CAA>TAA     | p.Q327*       |
| Pat_30 | Pre-Treatment | NCKAP5   | 344148 | 37 | 2  | 133541973 | 133541973 | Missense_Mutation | SNP | G  | A  | 79  | 341 | c.2411C>T    | c.(2410-2412)CCT>CTT   | p.P804L       |
| Pat_30 | Pre-Treatment | CXCR4    | 7852   | 37 | 2  | 136873142 | 136873142 | Missense_Mutation | SNP | T  | C  | 5   | 236 | c.356A>G     | c.(355-357)AAC>AGC     | p.N119S       |
| Pat_30 | Pre-Treatment | MBD5     | 55777  | 37 | 2  | 149227938 | 149227938 | Missense_Mutation | SNP | C  | T  | 84  | 247 | c.2426C>T    | c.(2425-2427)CCC>CTC   | p.P809L       |
| Pat_30 | Pre-Treatment | NEB      | 4703   | 37 | 2  | 152534238 | 152534238 | Nonsense_Mutation | SNP | C  | T  | 34  | 743 | c.3615G>A    | c.(3613-3615)TGG>TGA   | p.W1205*      |
| Pat_30 | Pre-Treatment | TANK     | 10010  | 37 | 2  | 162088049 | 162088049 | Missense_Mutation | SNP | G  | A  | 4   | 133 | c.1088G>A    | c.(1087-1089)CGA>CAA   | p.R363Q       |
| Pat_30 | Pre-Treatment | TTN      | 7273   | 37 | 2  | 179432554 | 179432554 | Missense_Mutation | SNP | C  | T  | 77  | 313 | c.70601G>A   | c.(70600-70602)AGA>AAA | p.R23534K     |
| Pat_30 | Pre-Treatment | TTN      | 7273   | 37 | 2  | 179449452 | 179449452 | Missense_Mutation | SNP | C  | T  | 183 | 526 | c.57212G>A   | c.(57211-57213)CGA>CAA | p.R19071Q     |
| Pat_30 | Pre-Treatment | TTN      | 7273   | 37 | 2  | 179598097 | 179598097 | Missense_Mutation | SNP | C  | T  | 9   | 54  | c.12191G>A   | c.(12190-12192)CGA>CAA | p.R4064Q      |
| Pat_30 | Pre-Treatment | DNAH7    | 56171  | 37 | 2  | 196619064 | 196619064 | Missense_Mutation | SNP | C  | T  | 39  | 220 | c.11761G>A   | c.(11761-11763)GAT>AAT | p.D3921N      |
| Pat_30 | Pre-Treatment | C2orf57  | 165100 | 37 | 2  | 232458410 | 232458410 | Missense_Mutation | SNP | C  | A  | 116 | 370 | c.748C>A     | c.(748-750)CAC>AAC     | p.H250N       |
| Pat_30 | Pre-Treatment | GAL3ST2  | 64090  | 37 | 2  | 242738570 | 242738570 | Splice_Site       | SNP | G  | A  | 33  | 202 | c.119_splice | c.e2+1                 | p.P40_splice  |
| Pat_30 | Pre-Treatment | GPCPD1   | 56261  | 37 | 20 | 5559220   | 5559220   | Missense_Mutation | SNP | C  | T  | 4   | 83  | c.511G>A     | c.(511-513)GAT>AAT     | p.D171N       |
| Pat_30 | Pre-Treatment | LRRN4    | 164312 | 37 | 20 | 6022614   | 6022614   | Missense_Mutation | SNP | C  | T  | 4   | 118 | c.1277G>A    | c.(1276-1278)CGG>CAG   | p.R426Q       |
| Pat_30 | Pre-Treatment | C20orf12 | 55184  | 37 | 20 | 18445978  | 18445978  | Missense_Mutation | SNP | G  | A  | 18  | 72  | c.25C>T      | c.(25-27)CCT>TCT       | p.P9S         |
| Pat_30 | Pre-Treatment | NCOA6    | 23054  | 37 | 20 | 33330509  | 33330509  | Missense_Mutation | SNP | G  | A  | 4   | 143 | c.3551C>T    | c.(3550-3552)CCC>CTC   | p.P1184L      |
| Pat_30 | Pre-Treatment | APCDD1L  | 164284 | 37 | 20 | 57036037  | 57036037  | Missense_Mutation | SNP | C  | T  | 52  | 170 | c.1315G>A    | c.(1315-1317)GAT>AAT   | p.D439N       |
| Pat_30 | Pre-Treatment | GNAS     | 2778   | 37 | 20 | 57428528  | 57428528  | Missense_Mutation | SNP | C  | T  | 3   | 34  | c.208C>T     | c.(208-210)CCC>TCC     | p.P70S        |
| Pat_30 | Pre-Treatment | TCEA2    | 6919   | 37 | 20 | 62698274  | 62698274  | Nonsense_Mutation | SNP | C  | T  | 4   | 150 | c.142C>T     | c.(142-144)CGA>TGA     | p.R48*        |
| Pat_30 | Pre-Treatment | TPTE     | 7179   | 37 | 21 | 10941907  | 10941907  | Splice_Site       | SNP | C  | T  | 54  | 624 | c.795_splice | c.e14+1                | p.K265_splice |
| Pat_30 | Pre-Treatment | LIPI     | 149998 | 37 | 21 | 15558293  | 15558293  | Missense_Mutation | SNP | C  | T  | 32  | 154 | c.593G>A     | c.(592-594)GGA>GAA     | p.G198E       |
| Pat_30 | Pre-Treatment | DYRK1A   | 1859   | 37 | 21 | 38884451  | 38884451  | Missense_Mutation | SNP | A  | G  | 23  | 148 | c.1909A>G    | c.(1909-1911)ACG>GCG   | p.T637A       |
| Pat_30 | Pre-Treatment | DSCAM    | 1826   | 37 | 21 | 41385217  | 41385217  | Missense_Mutation | SNP | C  | T  | 27  | 59  | c.5783G>A    | c.(5782-5784)TGC>TAC   | p.C1928Y      |
| Pat_30 | Pre-Treatment | SGSM1    | 129049 | 37 | 22 | 25251579  | 25251579  | Missense_Mutation | SNP | G  | A  | 4   | 119 | c.733G>A     | c.(733-735)GTG>ATG     | p.V245M       |

|        |               |          |           |    |    |           |           |                   |     |   |   |     |     |               |                        |               |
|--------|---------------|----------|-----------|----|----|-----------|-----------|-------------------|-----|---|---|-----|-----|---------------|------------------------|---------------|
| Pat_30 | Pre-Treatment | TFIP11   | 24144     | 37 | 22 | 26888059  | 26888059  | Missense_Mutation | SNP | C | T | 4   | 45  | c.2434G>A     | c.(2434-2436)GAC>AAC   | p.D812N       |
| Pat_30 | Pre-Treatment | SFI1     | 9814      | 37 | 22 | 31976306  | 31976306  | Nonsense_Mutation | SNP | C | T | 50  | 93  | c.1204C>T     | c.(1204-1206)CAG>TAG   | p.Q402*       |
| Pat_30 | Pre-Treatment | EP300    | 2033      | 37 | 22 | 41553205  | 41553205  | Missense_Mutation | SNP | T | A | 16  | 62  | c.3294T>A     | c.(3292-3294)GAT>GAA   | p.D1098E      |
| Pat_30 | Pre-Treatment | PMM1     | 5372      | 37 | 22 | 41985784  | 41985784  | Missense_Mutation | SNP | C | T | 3   | 46  | c.26G>A       | c.(25-27)CGC>CAC       | p.R9H         |
| Pat_30 | Pre-Treatment | TLL12    | 23170     | 37 | 22 | 43564905  | 43564905  | Missense_Mutation | SNP | C | T | 4   | 46  | c.1658G>A     | c.(1657-1659)CGG>CAG   | p.R553Q       |
| Pat_30 | Pre-Treatment | SAPS2    | 9701      | 37 | 22 | 50873444  | 50873444  | Missense_Mutation | SNP | G | A | 4   | 141 | c.1450G>A     | c.(1450-1452)GCC>ACC   | p.A484T       |
| Pat_30 | Pre-Treatment | BHLHE40  | 8553      | 37 | 3  | 5025363   | 5025363   | Missense_Mutation | SNP | G | A | 55  | 177 | c.1225G>A     | c.(1225-1227)GAA>AAA   | p.E409K       |
| Pat_30 | Pre-Treatment | GRIP2    | 80852     | 37 | 3  | 14545082  | 14545082  | Missense_Mutation | SNP | C | T | 8   | 38  | c.2965G>A     | c.(2965-2967)GAA>AAA   | p.E989K       |
| Pat_30 | Pre-Treatment | TBC1D5   | 9779      | 37 | 3  | 17202637  | 17202637  | Nonsense_Mutation | SNP | G | A | 5   | 38  | c.2206C>T     | c.(2206-2208)CAG>TAG   | p.Q736*       |
| Pat_30 | Pre-Treatment | BSN      | 8927      | 37 | 3  | 49690215  | 49690215  | Missense_Mutation | SNP | C | T | 4   | 86  | c.3226C>T     | c.(3226-3228)CGG>TGG   | p.R1076W      |
| Pat_30 | Pre-Treatment | ZNF717   | 100131827 | 37 | 3  | 75790797  | 75790797  | Missense_Mutation | SNP | C | T | 4   | 24  | c.148G>A      | c.(148-150)GTG>ATG     | p.V50M        |
| Pat_30 | Pre-Treatment | TOMM70A  | 9868      | 37 | 3  | 100119757 | 100119757 | Missense_Mutation | SNP | C | T | 3   | 15  | c.37G>A       | c.(37-39)GCA>ACA       | p.A13T        |
| Pat_30 | Pre-Treatment | GRAMD1C  | 54762     | 37 | 3  | 113634601 | 113634601 | Missense_Mutation | SNP | C | T | 15  | 137 | c.1006C>T     | c.(1006-1008)CAT>TAT   | p.H336Y       |
| Pat_30 | Pre-Treatment | SLC15A2  | 6565      | 37 | 3  | 121647961 | 121647961 | Missense_Mutation | SNP | C | T | 175 | 526 | c.1474C>T     | c.(1474-1476)CGT>TGT   | p.R492C       |
| Pat_30 | Pre-Treatment | DZIP1L   | 199221    | 37 | 3  | 137786382 | 137786382 | Missense_Mutation | SNP | G | T | 4   | 151 | c.1993C>A     | c.(1993-1995)CAG>AAG   | p.Q665K       |
| Pat_30 | Pre-Treatment | CPA3     | 1359      | 37 | 3  | 148600313 | 148600313 | Missense_Mutation | SNP | C | T | 9   | 111 | c.709C>T      | c.(709-711)CGT>TGT     | p.R237C       |
| Pat_30 | Pre-Treatment | BCHE     | 590       | 37 | 3  | 165491217 | 165491217 | Nonsense_Mutation | SNP | G | A | 10  | 81  | c.1762C>T     | c.(1762-1764)CAA>TAA   | p.Q588*       |
| Pat_30 | Pre-Treatment | EPHB3    | 2049      | 37 | 3  | 184298516 | 184298516 | Splice_Site       | SNP | G | A | 10  | 95  | c.2389_splice | c.e13-1                | p.G797_splice |
| Pat_30 | Pre-Treatment | MUC4     | 4585      | 37 | 3  | 195505774 | 195505774 | Missense_Mutation | SNP | G | T | 3   | 36  | c.12293C>A    | c.(12292-12294)CCT>CAT | p.P4098H      |
| Pat_30 | Pre-Treatment | PCYT1A   | 5130      | 37 | 3  | 195968904 | 195968904 | Missense_Mutation | SNP | C | T | 6   | 372 | c.623G>A      | c.(622-624)CGA>CAA     | p.R208Q       |
| Pat_30 | Pre-Treatment | FAM53A   | 152877    | 37 | 4  | 1643193   | 1643193   | Missense_Mutation | SNP | C | T | 17  | 86  | c.1024G>A     | c.(1024-1026)GGC>AGC   | p.G342S       |
| Pat_30 | Pre-Treatment | HTT      | 3064      | 37 | 4  | 3240588   | 3240588   | Missense_Mutation | SNP | G | A | 4   | 110 | c.9104G>A     | c.(9103-9105)CGG>CAG   | p.R3035Q      |
| Pat_30 | Pre-Treatment | KCTD8    | 386617    | 37 | 4  | 44450237  | 44450237  | Missense_Mutation | SNP | C | G | 4   | 46  | c.304G>C      | c.(304-306)GAC>CAC     | p.D102H       |
| Pat_30 | Pre-Treatment | TECRL    | 253017    | 37 | 4  | 65194260  | 65194260  | Missense_Mutation | SNP | G | A | 28  | 191 | c.301C>T      | c.(301-303)CCT>TCT     | p.P101S       |
| Pat_30 | Pre-Treatment | PROL1    | 58503     | 37 | 4  | 71275623  | 71275623  | Missense_Mutation | SNP | C | T | 105 | 385 | c.578C>T      | c.(577-579)TCA>TTA     | p.S193L       |
| Pat_30 | Pre-Treatment | GC       | 2638      | 37 | 4  | 72620723  | 72620723  | Missense_Mutation | SNP | T | G | 49  | 144 | c.1136A>C     | c.(1135-1137)GAA>GCA   | p.E379A       |
| Pat_30 | Pre-Treatment | MYOZ2    | 51778     | 37 | 4  | 120107315 | 120107315 | Missense_Mutation | SNP | C | T | 23  | 116 | c.755C>T      | c.(754-756)CCT>CTT     | p.P252L       |
| Pat_30 | Pre-Treatment | KIAA1109 | 84162     | 37 | 4  | 123280759 | 123280759 | Missense_Mutation | SNP | C | T | 54  | 144 | c.14683C>T    | c.(14683-14685)CCA>TCA | p.P4895S      |
| Pat_30 | Pre-Treatment | FAT4     | 79633     | 37 | 4  | 126336743 | 126336743 | Missense_Mutation | SNP | G | A | 75  | 236 | c.6625G>A     | c.(6625-6627)GGT>AGT   | p.G2209S      |
| Pat_30 | Pre-Treatment | RWDD4A   | 201965    | 37 | 4  | 184567673 | 184567673 | Missense_Mutation | SNP | G | A | 58  | 221 | c.499C>T      | c.(499-501)CCT>TCT     | p.P167S       |
| Pat_30 | Pre-Treatment | SPEF2    | 79925     | 37 | 5  | 35740060  | 35740060  | Missense_Mutation | SNP | G | A | 24  | 71  | c.3103G>A     | c.(3103-3105)GAA>AAA   | p.E1035K      |
| Pat_30 | Pre-Treatment | C5orf42  | 65250     | 37 | 5  | 37169569  | 37169569  | Missense_Mutation | SNP | G | A | 4   | 123 | c.6557C>T     | c.(6556-6558)TCG>TTG   | p.S2186L      |
| Pat_30 | Pre-Treatment | ITGA1    | 3672      | 37 | 5  | 52243281  | 52243281  | Missense_Mutation | SNP | C | G | 7   | 228 | c.3485C>G     | c.(3484-3486)GCA>GGA   | p.A1162G      |
| Pat_30 | Pre-Treatment | CRHBP    | 1393      | 37 | 5  | 76251629  | 76251629  | Missense_Mutation | SNP | G | A | 4   | 145 | c.485G>A      | c.(484-486)CGA>CAA     | p.R162Q       |
| Pat_30 | Pre-Treatment | GPR98    | 84059     | 37 | 5  | 89933639  | 89933639  | Missense_Mutation | SNP | A | C | 13  | 63  | c.2114A>C     | c.(2113-2115)GAT>GCT   | p.D705A       |
| Pat_30 | Pre-Treatment | EPB41L4A | 64097     | 37 | 5  | 111600635 | 111600635 | Missense_Mutation | SNP | T | G | 38  | 175 | c.512A>C      | c.(511-513)GAA>GCA     | p.E171A       |
| Pat_30 | Pre-Treatment | PCDHB15  | 56121     | 37 | 5  | 140627305 | 140627305 | Missense_Mutation | SNP | C | T | 138 | 332 | c.2159C>T     | c.(2158-2160)GCC>GTC   | p.A720V       |
| Pat_30 | Pre-Treatment | PCDHGB1  | 56104     | 37 | 5  | 140730012 | 140730012 | Missense_Mutation | SNP | G | A | 4   | 110 | c.185G>A      | c.(184-186)CGA>CAA     | p.R62Q        |
| Pat_30 | Pre-Treatment | PPARGC1B | 133522    | 37 | 5  | 149225376 | 149225376 | Missense_Mutation | SNP | C | T | 4   | 120 | c.2870C>T     | c.(2869-2871)TCT>TTT   | p.S957F       |
| Pat_30 | Pre-Treatment | RARS     | 5917      | 37 | 5  | 167920965 | 167920965 | Missense_Mutation | SNP | C | T | 4   | 152 | c.436C>T      | c.(436-438)CCA>TCA     | p.P146S       |
| Pat_30 | Pre-Treatment | BTNL3    | 10917     | 37 | 5  | 180419834 | 180419834 | Missense_Mutation | SNP | C | T | 4   | 134 | c.71C>T       | c.(70-72)CCG>CTG       | p.P24L        |
| Pat_30 | Pre-Treatment | PHACTR1  | 221692    | 37 | 6  | 13206149  | 13206149  | Missense_Mutation | SNP | T | G | 5   | 325 | c.767T>G      | c.(766-768)CTC>CGC     | p.L256R       |
| Pat_30 | Pre-Treatment | ATXN1    | 6310      | 37 | 6  | 16326801  | 16326801  | Nonsense_Mutation | SNP | G | A | 52  | 154 | c.1741C>T     | c.(1741-1743)CAG>TAG   | p.Q581*       |
| Pat_30 | Pre-Treatment | ATXN1    | 6310      | 37 | 6  | 16327882  | 16327882  | Missense_Mutation | SNP | C | A | 3   | 45  | c.660G>T      | c.(658-660)CAG>CAT     | p.Q220H       |
| Pat_30 | Pre-Treatment | ATXN1    | 6310      | 37 | 6  | 16327888  | 16327888  | Missense_Mutation | SNP | C | A | 3   | 45  | c.654G>T      | c.(652-654)CAG>CAT     | p.Q218H       |
| Pat_30 | Pre-Treatment | CAP2     | 10486     | 37 | 6  | 17507881  | 17507881  | Missense_Mutation | SNP | C | T | 58  | 140 | c.454C>T      | c.(454-456)CCT>TCT     | p.P152S       |
| Pat_30 | Pre-Treatment | OR2B6    | 26212     | 37 | 6  | 27925296  | 27925296  | Missense_Mutation | SNP | G | A | 35  | 106 | c.278G>A      | c.(277-279)AGT>AAT     | p.S93N        |

|        |               |          |        |    |   |           |           |                   |     |    |    |     |     |                 |                      |                |
|--------|---------------|----------|--------|----|---|-----------|-----------|-------------------|-----|----|----|-----|-----|-----------------|----------------------|----------------|
| Pat_30 | Pre-Treatment | DHX16    | 8449   | 37 | 6 | 30632583  | 30632583  | Nonsense_Mutation | SNP | C  | A  | 26  | 100 | c.1312G>T       | c.(1312-1314)GAG>TAG | p.E438*        |
| Pat_30 | Pre-Treatment | MICB     | 4277   | 37 | 6 | 31473433  | 31473433  | Missense_Mutation | SNP | A  | G  | 6   | 303 | c.110A>G        | c.(109-111)CAG>CGG   | p.Q37R         |
| Pat_30 | Pre-Treatment | TAP2     | 6891   | 37 | 6 | 32781530  | 32781530  | Missense_Mutation | SNP | C  | T  | 4   | 22  | c.2545G>A       | c.(2545-2547)GGA>AGA | p.G849R        |
| Pat_30 | Pre-Treatment | SPDEF    | 25803  | 37 | 6 | 34512187  | 34512187  | Missense_Mutation | SNP | G  | T  | 27  | 76  | c.46C>A         | c.(46-48)CTC>ATC     | p.L16I         |
| Pat_30 | Pre-Treatment | PNPLA1   | 285848 | 37 | 6 | 36270156  | 36270156  | Missense_Mutation | SNP | G  | T  | 70  | 259 | c.1294G>T       | c.(1294-1296)GTG>TTG | p.V432L        |
| Pat_30 | Pre-Treatment | GLO1     | 2739   | 37 | 6 | 38650584  | 38650584  | Missense_Mutation | SNP | C  | T  | 4   | 139 | c.376G>A        | c.(376-378)GGT>AGT   | p.G126S        |
| Pat_30 | Pre-Treatment | TREML4   | 285852 | 37 | 6 | 41204319  | 41204319  | Nonstop_Mutation  | SNP | G  | T  | 3   | 34  | c.602G>T        | c.(601-603)TGA>TTA   | p.*201L        |
| Pat_30 | Pre-Treatment | FAM83B   | 222584 | 37 | 6 | 54805310  | 54805310  | Missense_Mutation | SNP | C  | T  | 47  | 131 | c.1541C>T       | c.(1540-1542)TCA>TTA | p.S514L        |
| Pat_30 | Pre-Treatment | EYS      | 346007 | 37 | 6 | 66204897  | 66204897  | Missense_Mutation | SNP | A  | G  | 8   | 154 | c.407T>C        | c.(406-408)GTT>GCT   | p.V136A        |
| Pat_30 | Pre-Treatment | KIAA0776 | 23376  | 37 | 6 | 97000377  | 97000377  | Nonsense_Mutation | SNP | C  | T  | 4   | 154 | c.2005C>T       | c.(2005-2007)CGA>TGA | p.R669*        |
| Pat_30 | Pre-Treatment | GOPC     | 57120  | 37 | 6 | 117642387 | 117642387 | Missense_Mutation | SNP | C  | T  | 64  | 313 | c.748G>A        | c.(748-750)GGC>AGC   | p.G250S        |
| Pat_30 | Pre-Treatment | THSD7A   | 221981 | 37 | 7 | 11521537  | 11521537  | Missense_Mutation | SNP | G  | A  | 5   | 242 | c.1895C>T       | c.(1894-1896)CCG>CTG | p.P632L        |
| Pat_30 | Pre-Treatment | SNX13    | 23161  | 37 | 7 | 17908074  | 17908074  | Nonsense_Mutation | SNP | G  | A  | 17  | 49  | c.793C>T        | c.(793-795)CAA>TAA   | p.Q265*        |
| Pat_30 | Pre-Treatment | ANLN     | 54443  | 37 | 7 | 36438918  | 36438918  | Missense_Mutation | SNP | G  | A  | 17  | 121 | c.403G>A        | c.(403-405)GAA>AAA   | p.E135K        |
| Pat_30 | Pre-Treatment | ABCA13   | 154664 | 37 | 7 | 48280486  | 48280486  | Missense_Mutation | SNP | G  | A  | 38  | 117 | c.1085G>A       | c.(1084-1086)GGT>GAT | p.G362D        |
| Pat_30 | Pre-Treatment | HSPB1    | 3315   | 37 | 7 | 75933173  | 75933173  | Missense_Mutation | SNP | G  | A  | 58  | 337 | c.419G>A        | c.(418-420)CCG>CAG   | p.R140Q        |
| Pat_30 | Pre-Treatment | CCDC146  | 57639  | 37 | 7 | 76908289  | 76908289  | Missense_Mutation | SNP | G  | A  | 25  | 47  | c.1565G>A       | c.(1564-1566)CGA>CAA | p.R522Q        |
| Pat_30 | Pre-Treatment | MTERF    | 7978   | 37 | 7 | 91503509  | 91503509  | Missense_Mutation | SNP | G  | A  | 5   | 269 | c.599C>T        | c.(598-600)GCC>GTC   | p.A200V        |
| Pat_30 | Pre-Treatment | FBXL13   | 222235 | 37 | 7 | 102665589 | 102665589 | Missense_Mutation | SNP | C  | T  | 27  | 41  | c.416G>A        | c.(415-417)CGA>CAA   | p.R139Q        |
| Pat_30 | Pre-Treatment | LAMB4    | 22798  | 37 | 7 | 107710246 | 107710246 | Missense_Mutation | SNP | C  | T  | 160 | 291 | c.2209G>A       | c.(2209-2211)GAA>AAA | p.E737K        |
| Pat_30 | Pre-Treatment | UBN2     | 254048 | 37 | 7 | 138968475 | 138968476 | Missense_Mutation | DNP | CC | TT | 40  | 252 | .:2824_2825CC>T | c.(2824-2826)CCA>TTA | p.P942L        |
| Pat_30 | Pre-Treatment | BRAF     | 673    | 37 | 7 | 140453136 | 140453136 | Missense_Mutation | SNP | A  | T  | 61  | 132 | c.1799T>A       | c.(1798-1800)GTG>GAG | p.V600E        |
| Pat_30 | Pre-Treatment | FAM131B  | 9715   | 37 | 7 | 143056833 | 143056833 | Missense_Mutation | SNP | C  | T  | 3   | 19  | c.82G>A         | c.(82-84)GGC>AGC     | p.G28S         |
| Pat_30 | Pre-Treatment | MYOM2    | 9172   | 37 | 8 | 2017410   | 2017410   | Missense_Mutation | SNP | G  | A  | 30  | 177 | c.667G>A        | c.(667-669)GAC>AAC   | p.D223N        |
| Pat_30 | Pre-Treatment | SNTG1    | 54212  | 37 | 8 | 51569530  | 51569530  | Missense_Mutation | SNP | C  | T  | 70  | 310 | c.911C>T        | c.(910-912)TCC>TTC   | p.S304F        |
| Pat_30 | Pre-Treatment | SNX31    | 169166 | 37 | 8 | 101612642 | 101612642 | Missense_Mutation | SNP | C  | T  | 46  | 276 | c.709G>A        | c.(709-711)GCC>ACC   | p.A237T        |
| Pat_30 | Pre-Treatment | LRP12    | 29967  | 37 | 8 | 105509486 | 105509486 | Missense_Mutation | SNP | G  | A  | 45  | 193 | c.1294C>T       | c.(1294-1296)CGC>TGC | p.R432C        |
| Pat_30 | Pre-Treatment | KCNV1    | 27012  | 37 | 8 | 110984516 | 110984516 | Missense_Mutation | SNP | C  | T  | 7   | 147 | c.962G>A        | c.(961-963)CCG>CAC   | p.R321H        |
| Pat_30 | Pre-Treatment | ASAP1    | 50807  | 37 | 8 | 131138295 | 131138295 | Missense_Mutation | SNP | A  | C  | 47  | 134 | c.1422T>G       | c.(1420-1422)TGT>TGG | p.C474W        |
| Pat_30 | Pre-Treatment | ARC      | 23237  | 37 | 8 | 143694456 | 143694456 | Missense_Mutation | SNP | T  | C  | 5   | 29  | c.1177A>G       | c.(1177-1179)ACC>GCC | p.T393A        |
| Pat_30 | Pre-Treatment | ZNF251   | 90987  | 37 | 8 | 145947109 | 145947109 | Missense_Mutation | SNP | C  | T  | 23  | 80  | c.1936G>A       | c.(1936-1938)GGA>AGA | p.G646R        |
| Pat_30 | Pre-Treatment | JAK2     | 3717   | 37 | 9 | 5090739   | 5090739   | Missense_Mutation | SNP | G  | A  | 14  | 198 | c.2887G>A       | c.(2887-2889)GGT>AGT | p.G963S        |
| Pat_30 | Pre-Treatment | DMRTA1   | 63951  | 37 | 9 | 22447096  | 22447096  | Missense_Mutation | SNP | G  | A  | 12  | 44  | c.32G>A         | c.(31-33)CGA>CAA     | p.R11Q         |
| Pat_30 | Pre-Treatment | SPINK4   | 27290  | 37 | 9 | 33246696  | 33246696  | Missense_Mutation | SNP | C  | T  | 5   | 273 | c.185C>T        | c.(184-186)ACG>ATG   | p.T62M         |
| Pat_30 | Pre-Treatment | UBAP1    | 51271  | 37 | 9 | 34251508  | 34251508  | Missense_Mutation | SNP | T  | A  | 24  | 69  | c.1487T>A       | c.(1486-1488)ATG>AAG | p.M496K        |
| Pat_30 | Pre-Treatment | NPR2     | 4882   | 37 | 9 | 35792463  | 35792463  | Missense_Mutation | SNP | C  | T  | 11  | 75  | c.58C>T         | c.(58-60)CCC>TCC     | p.P20S         |
| Pat_30 | Pre-Treatment | CNTNAP3  | 79937  | 37 | 9 | 39133108  | 39133108  | Missense_Mutation | SNP | T  | C  | 3   | 28  | c.1901A>G       | c.(1900-1902)CAG>CGG | p.Q634R        |
| Pat_30 | Pre-Treatment | FAM22F   | 54754  | 37 | 9 | 97082793  | 97082793  | Missense_Mutation | SNP | C  | G  | 4   | 72  | c.1065G>C       | c.(1063-1065)AAG>AAC | p.K355N        |
| Pat_30 | Pre-Treatment | COL15A1  | 1306   | 37 | 9 | 101806853 | 101806853 | Missense_Mutation | SNP | G  | A  | 13  | 150 | c.2578G>A       | c.(2578-2580)GAG>AAG | p.E860K        |
| Pat_30 | Pre-Treatment | ACTL7A   | 10881  | 37 | 9 | 111625872 | 111625872 | Missense_Mutation | SNP | G  | A  | 16  | 145 | c.1270G>A       | c.(1270-1272)GAA>AAA | p.E424K        |
| Pat_30 | Pre-Treatment | CEP110   | 11064  | 37 | 9 | 123900931 | 123900931 | Missense_Mutation | SNP | C  | T  | 4   | 138 | c.2311C>T       | c.(2311-2313)CTC>TTC | p.L771F        |
| Pat_30 | Pre-Treatment | DENND1A  | 57706  | 37 | 9 | 126214617 | 126214617 | Missense_Mutation | SNP | C  | T  | 32  | 106 | c.1237G>A       | c.(1237-1239)GGA>AGA | p.G413R        |
| Pat_30 | Pre-Treatment | PPAPDC3  | 84814  | 37 | 9 | 134165759 | 134165759 | Nonsense_Mutation | SNP | G  | A  | 46  | 302 | c.375G>A        | c.(373-375)TGG>TGA   | p.W125*        |
| Pat_30 | Pre-Treatment | CACNA1B  | 774    | 37 | 9 | 140948459 | 140948459 | Splice_Site       | SNP | G  | A  | 4   | 144 | c.3968_splice   | c.e26+1              | p.R1323_splice |
| Pat_30 | Pre-Treatment | ARSH     | 347527 | 37 | X | 2933194   | 2933194   | Missense_Mutation | SNP | C  | T  | 4   | 41  | c.524C>T        | c.(523-525)GCC>GTC   | p.A175V        |
| Pat_30 | Pre-Treatment | CLCN4    | 1183   | 37 | X | 10176514  | 10176514  | Missense_Mutation | SNP | C  | T  | 195 | 570 | c.1273C>T       | c.(1273-1275)CCT>TCT | p.P425S        |
| Pat_30 | Pre-Treatment | ZRSR2    | 8233   | 37 | X | 15833978  | 15833978  | Missense_Mutation | SNP | G  | A  | 5   | 211 | c.736G>A        | c.(736-738)GAG>AAG   | p.E246K        |

|        |                 |           |        |    |    |           |           |                   |     |    |    |     |     |                 |                        |               |
|--------|-----------------|-----------|--------|----|----|-----------|-----------|-------------------|-----|----|----|-----|-----|-----------------|------------------------|---------------|
| Pat_30 | Pre-Treatment   | SYAP1     | 94056  | 37 | X  | 16761957  | 16761957  | Missense_Mutation | SNP | C  | T  | 172 | 536 | c.569C>T        | c.(568-570)CCT>CTT     | p.P190L       |
| Pat_30 | Pre-Treatment   | ZFX       | 7543   | 37 | X  | 24229378  | 24229378  | Missense_Mutation | SNP | C  | T  | 130 | 353 | c.2303C>T       | c.(2302-2304)TCC>TTC   | p.S768F       |
| Pat_30 | Pre-Treatment   | CXorf59   | 286464 | 37 | X  | 36162735  | 36162735  | Missense_Mutation | SNP | G  | A  | 34  | 251 | c.1318G>A       | c.(1318-1320)GAA>AAA   | p.E440K       |
| Pat_30 | Pre-Treatment   | CXorf36   | 79742  | 37 | X  | 45011019  | 45011020  | Missense_Mutation | DNP | GG | AA | 18  | 109 | .:1179_1180CC>T | 1177-1182)ATCCGC>ATTT  | p.R394C       |
| Pat_30 | Pre-Treatment   | CHST7     | 56548  | 37 | X  | 46433721  | 46433721  | Missense_Mutation | SNP | G  | A  | 23  | 110 | c.355G>A        | c.(355-357)GAA>AAA     | p.E119K       |
| Pat_30 | Pre-Treatment   | RBM10     | 8241   | 37 | X  | 47030582  | 47030582  | Missense_Mutation | SNP | G  | T  | 4   | 95  | c.357G>T        | c.(355-357)GAG>GAT     | p.E119D       |
| Pat_30 | Pre-Treatment   | CCNB3     | 85417  | 37 | X  | 50053780  | 50053780  | Missense_Mutation | SNP | G  | A  | 17  | 42  | c.2611G>A       | c.(2611-2613)GAG>AAG   | p.E871K       |
| Pat_30 | Pre-Treatment   | FGD1      | 2245   | 37 | X  | 54481894  | 54481894  | Missense_Mutation | SNP | C  | T  | 4   | 73  | c.2002G>A       | c.(2002-2004)GAG>AAG   | p.E668K       |
| Pat_30 | Pre-Treatment   | STARD8    | 9754   | 37 | X  | 67938434  | 67938434  | Missense_Mutation | SNP | G  | A  | 20  | 54  | c.1438G>A       | c.(1438-1440)GAT>AAT   | p.D480N       |
| Pat_30 | Pre-Treatment   | NXF5      | 55998  | 37 | X  | 101096941 | 101096941 | Missense_Mutation | SNP | G  | A  | 27  | 376 | c.56C>T         | c.(55-57)CCT>CTT       | p.P19L        |
| Pat_30 | Pre-Treatment   | ARMCX5    | 64860  | 37 | X  | 101857632 | 101857632 | Missense_Mutation | SNP | C  | T  | 33  | 135 | c.563C>T        | c.(562-564)CCT>CTT     | p.P188L       |
| Pat_30 | Pre-Treatment   | HCFC1     | 3054   | 37 | X  | 153225613 | 153225613 | Splice_Site       | SNP | C  | T  | 7   | 19  | c.1085_splice   | c.e8-1                 | p.E362_splice |
| Pat_30 | Post-Resistance | PQLC2     | 54896  | 37 | 1  | 19651990  | 19651990  | Missense_Mutation | SNP | C  | T  | 50  | 59  | c.296C>T        | c.(295-297)ACC>ATC     | p.T99I        |
| Pat_30 | Post-Resistance | ZMYM1     | 79830  | 37 | 1  | 35579236  | 35579236  | Missense_Mutation | SNP | T  | A  | 6   | 8   | c.1805T>A       | c.(1804-1806)TTT>TAT   | p.F602Y       |
| Pat_30 | Post-Resistance | DAB1      | 1600   | 37 | 1  | 57491658  | 57491658  | Missense_Mutation | SNP | G  | A  | 58  | 95  | c.782C>T        | c.(781-783)CCC>CTC     | p.P261L       |
| Pat_30 | Post-Resistance | PGM1      | 5236   | 37 | 1  | 64117438  | 64117438  | Missense_Mutation | SNP | C  | T  | 20  | 15  | c.1379C>T       | c.(1378-1380)TCA>TTA   | p.S460L       |
| Pat_30 | Post-Resistance | CLCA4     | 22802  | 37 | 1  | 87025658  | 87025658  | Missense_Mutation | SNP | A  | G  | 35  | 25  | c.203A>G        | c.(202-204)GAA>GGA     | p.E68G        |
| Pat_30 | Post-Resistance | ITGA10    | 8515   | 37 | 1  | 145532599 | 145532599 | Missense_Mutation | SNP | G  | A  | 51  | 238 | c.1052G>A       | c.(1051-1053)GGA>GAA   | p.G351E       |
| Pat_30 | Post-Resistance | GPATCH4   | 54865  | 37 | 1  | 156565292 | 156565293 | Missense_Mutation | DNP | CC | TT | 33  | 166 | c.840_841GG>AA  | 838-843)GGGGAA>GGAA    | p.E281K       |
| Pat_30 | Post-Resistance | C1orf92   | 149499 | 37 | 1  | 156902735 | 156902735 | Missense_Mutation | SNP | G  | A  | 6   | 8   | c.1654G>A       | c.(1654-1656)GAT>AAT   | p.D552N       |
| Pat_30 | Post-Resistance | OR10K1    | 391109 | 37 | 1  | 158435715 | 158435715 | Missense_Mutation | SNP | C  | T  | 149 | 67  | c.364C>T        | c.(364-366)CGC>TGC     | p.R122C       |
| Pat_30 | Post-Resistance | SELE      | 6401   | 37 | 1  | 169698706 | 169698706 | Missense_Mutation | SNP | C  | T  | 10  | 67  | c.824G>A        | c.(823-825)GGA>GAA     | p.G275E       |
| Pat_30 | Post-Resistance | HMCN1     | 83872  | 37 | 1  | 185878628 | 185878628 | Missense_Mutation | SNP | C  | T  | 25  | 84  | c.781C>T        | c.(781-783)CGC>TGC     | p.R261C       |
| Pat_30 | Post-Resistance | F13B      | 2165   | 37 | 1  | 197026515 | 197026515 | Missense_Mutation | SNP | C  | T  | 65  | 38  | c.886G>A        | c.(886-888)GAA>AAA     | p.E296K       |
| Pat_30 | Post-Resistance | RHOJ      | 58480  | 37 | 1  | 228879120 | 228879120 | Missense_Mutation | SNP | A  | G  | 76  | 47  | c.410A>G        | c.(409-411)CAG>CGG     | p.Q137R       |
| Pat_30 | Post-Resistance | EDARADD   | 128178 | 37 | 1  | 236631574 | 236631574 | Missense_Mutation | SNP | C  | T  | 14  | 45  | c.263C>T        | c.(262-264)CCA>CTA     | p.P88L        |
| Pat_30 | Post-Resistance | ZNF695    | 57116  | 37 | 1  | 247163314 | 247163314 | Missense_Mutation | SNP | G  | T  | 48  | 109 | c.66C>A         | c.(64-66)GAC>GAA       | p.D22E        |
| Pat_30 | Post-Resistance | ZNF496    | 84838  | 37 | 1  | 247492847 | 247492847 | Missense_Mutation | SNP | G  | A  | 22  | 74  | c.34C>T         | c.(34-36)CCG>TCG       | p.P12S        |
| Pat_30 | Post-Resistance | IL15RA    | 3601   | 37 | 10 | 6008146   | 6008146   | Missense_Mutation | SNP | T  | A  | 37  | 10  | c.245A>T        | c.(244-246)AAT>ATT     | p.N82I        |
| Pat_30 | Post-Resistance | ANKRD26   | 22852  | 37 | 10 | 27366301  | 27366301  | Missense_Mutation | SNP | G  | A  | 38  | 24  | c.1043C>T       | c.(1042-1044)TCC>TTC   | p.S348F       |
| Pat_30 | Post-Resistance | HERC4     | 26091  | 37 | 10 | 69750933  | 69750933  | Missense_Mutation | SNP | G  | A  | 2   | 2   | c.1295C>T       | c.(1294-1296)TCC>TTC   | p.S432F       |
| Pat_30 | Post-Resistance | PBLD      | 64081  | 37 | 10 | 70048273  | 70048273  | Missense_Mutation | SNP | G  | A  | 25  | 7   | c.658C>T        | c.(658-660)CCG>TCG     | p.P220S       |
| Pat_30 | Post-Resistance | PLCE1     | 51196  | 37 | 10 | 96028758  | 96028758  | Missense_Mutation | SNP | C  | T  | 47  | 16  | c.4354C>T       | c.(4354-4356)CAT>TAT   | p.H1452Y      |
| Pat_30 | Post-Resistance | CYP2C8    | 1558   | 37 | 10 | 96824642  | 96824642  | Missense_Mutation | SNP | C  | T  | 45  | 21  | c.557G>A        | c.(556-558)CGA>CAA     | p.R186Q       |
| Pat_30 | Post-Resistance | LOC729020 | 729020 | 37 | 10 | 105005926 | 105005926 | Missense_Mutation | SNP | G  | A  | 18  | 235 | c.173G>A        | c.(172-174)CGA>CAA     | p.R58Q        |
| Pat_30 | Post-Resistance | MUC2      | 4583   | 37 | 11 | 1092947   | 1092947   | Missense_Mutation | SNP | C  | T  | 2   | 0   | c.11852C>T      | c.(11851-11853)ACC>ATC | p.T3951I      |
| Pat_30 | Post-Resistance | OR51S1    | 119692 | 37 | 11 | 4870243   | 4870243   | Missense_Mutation | SNP | G  | A  | 27  | 73  | c.196C>T        | c.(196-198)CCA>TCA     | p.P66S        |
| Pat_30 | Post-Resistance | OR51B6    | 390058 | 37 | 11 | 5373230   | 5373230   | Missense_Mutation | SNP | C  | T  | 78  | 61  | c.493C>T        | c.(493-495)CCC>TCC     | p.P165S       |
| Pat_30 | Post-Resistance | BDNF      | 627    | 37 | 11 | 27679778  | 27679778  | Missense_Mutation | SNP | C  | T  | 9   | 21  | c.334G>A        | c.(334-336)GAA>AAA     | p.E112K       |
| Pat_30 | Post-Resistance | TTC17     | 55761  | 37 | 11 | 43515441  | 43515441  | Missense_Mutation | SNP | G  | A  | 149 | 295 | c.3413G>A       | c.(3412-3414)CGG>CAG   | p.R1138Q      |
| Pat_30 | Post-Resistance | OR8H2     | 390151 | 37 | 11 | 55872803  | 55872804  | Missense_Mutation | DNP | GG | AA | 163 | 333 | c.285_286GG>AA  | 283-288)ACGGGC>ACAA    | p.G96S        |
| Pat_30 | Post-Resistance | NPAS4     | 266743 | 37 | 11 | 66192136  | 66192136  | Missense_Mutation | SNP | C  | T  | 29  | 42  | c.1775C>T       | c.(1774-1776)GCC>GTC   | p.A592V       |
| Pat_30 | Post-Resistance | MYO7A     | 4647   | 37 | 11 | 76893123  | 76893123  | Missense_Mutation | SNP | G  | A  | 65  | 161 | c.3031G>A       | c.(3031-3033)GGG>AGG   | p.G1011R      |
| Pat_30 | Post-Resistance | NNMT      | 4837   | 37 | 11 | 114182916 | 114182916 | Missense_Mutation | SNP | C  | T  | 41  | 73  | c.512C>T        | c.(511-513)CCA>CTA     | p.P171L       |
| Pat_30 | Post-Resistance | OR10G8    | 219869 | 37 | 11 | 123901051 | 123901051 | Missense_Mutation | SNP | C  | T  | 20  | 24  | c.722C>T        | c.(721-723)GCC>GTC     | p.A241V       |
| Pat_30 | Post-Resistance | PRB2      | 653247 | 37 | 12 | 11546795  | 11546795  | Missense_Mutation | SNP | G  | A  | 9   | 86  | c.217C>T        | c.(217-219)CCT>TCT     | p.P73S        |
| Pat_30 | Post-Resistance | ALG10B    | 144245 | 37 | 12 | 38714749  | 38714749  | Missense_Mutation | SNP | G  | A  | 21  | 33  | c.1156G>A       | c.(1156-1158)GAC>AAC   | p.D386N       |

|        |                 |          |        |    |    |           |           |                   |     |    |    |     |     |                                   |                      |          |
|--------|-----------------|----------|--------|----|----|-----------|-----------|-------------------|-----|----|----|-----|-----|-----------------------------------|----------------------|----------|
| Pat_30 | Post-Resistance | ABCD2    | 225    | 37 | 12 | 40001403  | 40001403  | Nonsense_Mutation | SNP | C  | A  | 9   | 24  | c.1234G>T                         | c.(1234-1236)GAG>TAG | p.E412*  |
| Pat_30 | Post-Resistance | ANKRD33  | 341405 | 37 | 12 | 52283221  | 52283221  | Nonsense_Mutation | SNP | C  | T  | 46  | 51  | c.187C>T                          | c.(187-189)CAG>TAG   | p.Q63*   |
| Pat_30 | Post-Resistance | KRT7     | 3855   | 37 | 12 | 52635286  | 52635286  | Missense_Mutation | SNP | G  | A  | 67  | 86  | c.724G>A                          | c.(724-726)GAC>AAC   | p.D242N  |
| Pat_30 | Post-Resistance | OR6C68   | 403284 | 37 | 12 | 55886390  | 55886390  | Missense_Mutation | SNP | C  | T  | 16  | 31  | c.244C>T                          | c.(244-246)CCA>TCA   | p.P82S   |
| Pat_30 | Post-Resistance | DNAJC14  | 85406  | 37 | 12 | 56216235  | 56216235  | Missense_Mutation | SNP | C  | T  | 81  | 79  | c.1820G>A                         | c.(1819-1821)GGT>GAT | p.G607D  |
| Pat_30 | Post-Resistance | GRIP1    | 23426  | 37 | 12 | 66765581  | 66765581  | Missense_Mutation | SNP | G  | A  | 91  | 128 | c.2749C>T                         | c.(2749-2751)CGG>TGG | p.R917W  |
| Pat_30 | Post-Resistance | MDM1     | 56890  | 37 | 12 | 68720499  | 68720499  | Missense_Mutation | SNP | C  | G  | 25  | 27  | c.436G>C                          | c.(436-438)GTT>CTT   | p.V146L  |
| Pat_30 | Post-Resistance | CIT      | 11113  | 37 | 12 | 120150494 | 120150494 | Missense_Mutation | SNP | T  | G  | 46  | 50  | c.4460A>C                         | c.(4459-4461)CAG>CCG | p.Q1487P |
| Pat_30 | Post-Resistance | GLT1D1   | 144423 | 37 | 12 | 129431969 | 129431969 | Missense_Mutation | SNP | C  | G  | 35  | 55  | c.761C>G                          | c.(760-762)TCT>TGT   | p.S254C  |
| Pat_30 | Post-Resistance | FLT1     | 2321   | 37 | 13 | 29002026  | 29002026  | Missense_Mutation | SNP | G  | A  | 78  | 93  | c.1139C>T                         | c.(1138-1140)TCT>TTT | p.S380F  |
| Pat_30 | Post-Resistance | SLC46A3  | 283537 | 37 | 13 | 29287375  | 29287375  | Nonsense_Mutation | SNP | G  | A  | 17  | 37  | c.502C>T                          | c.(502-504)CGA>TGA   | p.R168*  |
| Pat_30 | Post-Resistance | DOCK9    | 23348  | 37 | 13 | 99567688  | 99567688  | Missense_Mutation | SNP | C  | T  | 12  | 32  | c.790G>A                          | c.(790-792)GAC>AAC   | p.D264N  |
| Pat_30 | Post-Resistance | OR4K14   | 122740 | 37 | 14 | 20483275  | 20483275  | Missense_Mutation | SNP | A  | T  | 8   | 9   | c.78T>A                           | c.(76-78)TTT>TTA     | p.F26L   |
| Pat_30 | Post-Resistance | METT11D1 | 64745  | 37 | 14 | 21464997  | 21464997  | Missense_Mutation | SNP | T  | C  | 51  | 86  | c.1319T>C                         | c.(1318-1320)CTT>CCT | p.L440P  |
| Pat_30 | Post-Resistance | TPPP2    | 122664 | 37 | 14 | 21500204  | 21500204  | Missense_Mutation | SNP | G  | A  | 65  | 123 | c.481G>A                          | c.(481-483)GGT>AGT   | p.G161S  |
| Pat_30 | Post-Resistance | SMEK1    | 55671  | 37 | 14 | 91929191  | 91929191  | Missense_Mutation | SNP | T  | C  | 26  | 29  | c.1861A>G                         | c.(1861-1863)ATT>GTT | p.I621V  |
| Pat_30 | Post-Resistance | PPP2R5C  | 5527   | 37 | 14 | 102229267 | 102229267 | Missense_Mutation | SNP | G  | A  | 5   | 4   | c.53G>A                           | c.(52-54)GGA>GAA     | p.G18E   |
| Pat_30 | Post-Resistance | MGA      | 23269  | 37 | 15 | 42053967  | 42053967  | Nonsense_Mutation | SNP | C  | T  | 8   | 19  | c.7429C>T                         | c.(7429-7431)CAG>TAG | p.Q2477* |
| Pat_30 | Post-Resistance | ARPP19   | 10776  | 37 | 15 | 52849310  | 52849310  | Missense_Mutation | SNP | C  | T  | 44  | 64  | c.155G>A                          | c.(154-156)CGG>CAG   | p.R52Q   |
| Pat_30 | Post-Resistance | NOX5     | 79400  | 37 | 15 | 69341381  | 69341381  | Missense_Mutation | SNP | C  | T  | 18  | 17  | c.1982C>T                         | c.(1981-1983)GCC>GTC | p.A661V  |
| Pat_30 | Post-Resistance | WDR93    | 56964  | 37 | 15 | 90276361  | 90276361  | Missense_Mutation | SNP | G  | A  | 20  | 33  | c.1455G>A                         | c.(1453-1455)ATG>ATA | p.M485I  |
| Pat_30 | Post-Resistance | NLRC3    | 197358 | 37 | 16 | 3614397   | 3614397   | Missense_Mutation | SNP | C  | T  | 29  | 34  | c.541G>A                          | c.(541-543)GAT>AAT   | p.D181N  |
| Pat_30 | Post-Resistance | UMOD     | 7369   | 37 | 16 | 20360313  | 20360313  | Missense_Mutation | SNP | G  | C  | 2   | 5   | c.310C>G                          | c.(310-312)CTC>GTC   | p.L104V  |
| Pat_30 | Post-Resistance | ACSM1    | 116285 | 37 | 16 | 20636779  | 20636779  | Missense_Mutation | SNP | G  | A  | 41  | 49  | c.1493C>T                         | c.(1492-1494)GCC>GTC | p.A498V  |
| Pat_30 | Post-Resistance | ATXN2L   | 11273  | 37 | 16 | 28836712  | 28836712  | Missense_Mutation | SNP | C  | T  | 20  | 33  | c.325C>T                          | c.(325-327)CCA>TCA   | p.P109S  |
| Pat_30 | Post-Resistance | ADCY7    | 113    | 37 | 16 | 50344755  | 50344755  | Missense_Mutation | SNP | G  | A  | 7   | 11  | c.2318G>A                         | c.(2317-2319)GGC>GAC | p.G773D  |
| Pat_30 | Post-Resistance | CDH8     | 1006   | 37 | 16 | 61935302  | 61935302  | Nonsense_Mutation | SNP | G  | A  | 16  | 25  | c.328C>T                          | c.(328-330)CAA>TAA   | p.Q110*  |
| Pat_30 | Post-Resistance | ZZEF1    | 23140  | 37 | 17 | 3920987   | 3920987   | Missense_Mutation | SNP | G  | A  | 41  | 77  | c.7679C>T                         | c.(7678-7680)TCG>TTG | p.S2560L |
| Pat_30 | Post-Resistance | CXCL16   | 58191  | 37 | 17 | 4641715   | 4641715   | Missense_Mutation | SNP | G  | A  | 7   | 19  | c.346C>T                          | c.(346-348)CTT>TTT   | p.L116F  |
| Pat_30 | Post-Resistance | MYH8     | 4626   | 37 | 17 | 10296234  | 10296234  | Missense_Mutation | SNP | C  | T  | 18  | 36  | c.5377G>A                         | c.(5377-5379)GTG>ATG | p.V1793M |
| Pat_30 | Post-Resistance | MYH4     | 4622   | 37 | 17 | 10359030  | 10359030  | Missense_Mutation | SNP | A  | G  | 12  | 25  | c.2075T>C                         | c.(2074-2076)CTT>CCT | p.L692P  |
| Pat_30 | Post-Resistance | KCNJ12   | 3768   | 37 | 17 | 21319348  | 21319348  | Missense_Mutation | SNP | C  | T  | 11  | 86  | c.694C>T                          | c.(694-696)CTC>TTC   | p.L232F  |
| Pat_30 | Post-Resistance | KSR1     | 8844   | 37 | 17 | 25932605  | 25932605  | Missense_Mutation | SNP | C  | T  | 5   | 5   | c.1415C>T                         | c.(1414-1416)CCC>CTC | p.P472L  |
| Pat_30 | Post-Resistance | AATF     | 26574  | 37 | 17 | 35310442  | 35310442  | Missense_Mutation | SNP | G  | T  | 25  | 35  | c.540G>T                          | c.(538-540)ATG>ATT   | p.M180I  |
| Pat_30 | Post-Resistance | KRT15    | 3866   | 37 | 17 | 39674887  | 39674887  | Missense_Mutation | SNP | T  | C  | 107 | 183 | c.193A>G                          | c.(193-195)AGG>GGG   | p.R65G   |
| Pat_30 | Post-Resistance | KRT9     | 3857   | 37 | 17 | 39724810  | 39724810  | Missense_Mutation | SNP | G  | A  | 49  | 570 | c.1120C>T                         | c.(1120-1122)CGG>TGG | p.R374W  |
| Pat_30 | Post-Resistance | SPOP     | 8405   | 37 | 17 | 47684692  | 47684692  | Nonsense_Mutation | SNP | C  | A  | 39  | 35  | c.757G>T                          | c.(757-759)GAA>TAA   | p.E253*  |
| Pat_30 | Post-Resistance | BCAS3    | 54828  | 37 | 17 | 58979987  | 58979987  | Nonsense_Mutation | SNP | C  | T  | 96  | 157 | c.745C>T                          | c.(745-747)CGA>TGA   | p.R249*  |
| Pat_30 | Post-Resistance | CBX2     | 84733  | 37 | 17 | 77758699  | 77758699  | Missense_Mutation | SNP | C  | T  | 47  | 91  | c.1457C>T                         | c.(1456-1458)TCC>TTC | p.S486F  |
| Pat_30 | Post-Resistance | LAMA1    | 284217 | 37 | 18 | 6950864   | 6950865   | Missense_Mutation | DNP | GG | AA | 31  | 51  | :8313_8314CC>T311-8316)GGCCGC>GGT |                      | p.R2772C |
| Pat_30 | Post-Resistance | PSMA8    | 143471 | 37 | 18 | 23713939  | 23713939  | Nonsense_Mutation | SNP | C  | T  | 46  | 85  | c.10C>T                           | c.(10-12)CGA>TGA     | p.R4*    |
| Pat_30 | Post-Resistance | DSG1     | 1828   | 37 | 18 | 28934521  | 28934521  | Missense_Mutation | SNP | G  | A  | 30  | 57  | c.2362G>A                         | c.(2362-2364)GAA>AAA | p.E788K  |
| Pat_30 | Post-Resistance | KIAA1632 | 57724  | 37 | 18 | 43514816  | 43514816  | Missense_Mutation | SNP | G  | A  | 20  | 22  | c.2216C>T                         | c.(2215-2217)TCC>TTC | p.S739F  |
| Pat_30 | Post-Resistance | DCC      | 1630   | 37 | 18 | 50592482  | 50592482  | Missense_Mutation | SNP | G  | A  | 30  | 42  | c.1207G>A                         | c.(1207-1209)GAA>AAA | p.E403K  |
| Pat_30 | Post-Resistance | ALPK2    | 115701 | 37 | 18 | 56165294  | 56165294  | Missense_Mutation | SNP | T  | C  | 55  | 99  | c.6283A>G                         | c.(6283-6285)ACG>GCG | p.T2095A |
| Pat_30 | Post-Resistance | CDH7     | 1005   | 37 | 18 | 63489391  | 63489391  | Missense_Mutation | SNP | G  | A  | 24  | 58  | c.700G>A                          | c.(700-702)GAT>AAT   | p.D234N  |
| Pat_30 | Post-Resistance | ABCA7    | 10347  | 37 | 19 | 1058227   | 1058227   | Missense_Mutation | SNP | T  | A  | 42  | 53  | c.5108T>A                         | c.(5107-5109)ATG>AAG | p.M1703K |



|        |                 |          |        |    |    |           |           |                   |     |    |    |     |     |              |                        |               |
|--------|-----------------|----------|--------|----|----|-----------|-----------|-------------------|-----|----|----|-----|-----|--------------|------------------------|---------------|
| Pat_30 | Post-Resistance | VAV1     | 7409   | 37 | 19 | 6820829   | 6820830   | Splice_Site       | DNP | GG | AA | 29  | 72  | c.321_splice | c.e2+1                 | p.K107_splice |
| Pat_30 | Post-Resistance | MUC16    | 94025  | 37 | 19 | 9069841   | 9069841   | Missense_Mutation | SNP | C  | T  | 28  | 40  | c.17605G>A   | :(17605-17607)GGG>AGC  | p.G5869R      |
| Pat_30 | Post-Resistance | ZNF565   | 147929 | 37 | 19 | 36674056  | 36674056  | Missense_Mutation | SNP | C  | T  | 27  | 51  | c.812G>A     | c.(811-813)AGA>AAA     | p.R271K       |
| Pat_30 | Post-Resistance | ALK      | 238    | 37 | 2  | 29497997  | 29497997  | Missense_Mutation | SNP | G  | A  | 10  | 16  | c.2009C>T    | c.(2008-2010)TCA>TTA   | p.S670L       |
| Pat_30 | Post-Resistance | KLRAQ1   | 129285 | 37 | 2  | 48718182  | 48718182  | Missense_Mutation | SNP | T  | C  | 207 | 275 | c.1472T>C    | c.(1471-1473)TTG>TCG   | p.L491S       |
| Pat_30 | Post-Resistance | CLEC4F   | 165530 | 37 | 2  | 71046487  | 71046487  | Missense_Mutation | SNP | T  | C  | 43  | 53  | c.268A>G     | c.(268-270)AAT>GAT     | p.N90D        |
| Pat_30 | Post-Resistance | SMYD1    | 150572 | 37 | 2  | 88409967  | 88409967  | Missense_Mutation | SNP | C  | T  | 21  | 17  | c.1409C>T    | c.(1408-1410)CCC>CTC   | p.P470L       |
| Pat_30 | Post-Resistance | MERTK    | 10461  | 37 | 2  | 112686894 | 112686894 | Missense_Mutation | SNP | G  | A  | 20  | 50  | c.259G>A     | c.(259-261)GAA>AAA     | p.E87K        |
| Pat_30 | Post-Resistance | WASH2P   | 375260 | 37 | 2  | 114355129 | 114355129 | Missense_Mutation | SNP | G  | A  | 8   | 50  | c.506G>A     | c.(505-507)CGC>CAC     | p.R169H       |
| Pat_30 | Post-Resistance | SCTR     | 6344   | 37 | 2  | 120206299 | 120206299 | Nonsense_Mutation | SNP | G  | A  | 4   | 9   | c.979C>T     | c.(979-981)CAA>TAA     | p.Q327*       |
| Pat_30 | Post-Resistance | NCKAP5   | 344148 | 37 | 2  | 133541973 | 133541973 | Missense_Mutation | SNP | G  | A  | 59  | 99  | c.2411C>T    | c.(2410-2412)CCT>CTT   | p.P804L       |
| Pat_30 | Post-Resistance | MBD5     | 55777  | 37 | 2  | 149227938 | 149227938 | Missense_Mutation | SNP | C  | T  | 60  | 87  | c.2426C>T    | c.(2425-2427)CCC>CTC   | p.P809L       |
| Pat_30 | Post-Resistance | SCN1A    | 6323   | 37 | 2  | 166900378 | 166900378 | Missense_Mutation | SNP | C  | T  | 29  | 38  | c.1844G>A    | c.(1843-1845)GGA>GAA   | p.G615E       |
| Pat_30 | Post-Resistance | TTN      | 7273   | 37 | 2  | 179432554 | 179432554 | Missense_Mutation | SNP | C  | T  | 20  | 50  | c.70601G>A   | c.(70600-70602)AGA>AAA | p.R23534K     |
| Pat_30 | Post-Resistance | TTN      | 7273   | 37 | 2  | 179449452 | 179449452 | Missense_Mutation | SNP | C  | T  | 126 | 221 | c.57212G>A   | c.(57211-57213)CGA>CAA | p.R19071Q     |
| Pat_30 | Post-Resistance | TTN      | 7273   | 37 | 2  | 179598097 | 179598097 | Missense_Mutation | SNP | C  | T  | 5   | 13  | c.12191G>A   | :(12190-12192)CGA>CAA  | p.R4064Q      |
| Pat_30 | Post-Resistance | DNAH7    | 56171  | 37 | 2  | 196619064 | 196619064 | Missense_Mutation | SNP | C  | T  | 49  | 63  | c.11761G>A   | c.(11761-11763)GAT>AAT | p.D3921N      |
| Pat_30 | Post-Resistance | C2orf57  | 165100 | 37 | 2  | 232458410 | 232458410 | Missense_Mutation | SNP | C  | A  | 159 | 177 | c.748C>A     | c.(748-750)CAC>AAC     | p.H250N       |
| Pat_30 | Post-Resistance | APCDD1L  | 164284 | 37 | 20 | 57036037  | 57036037  | Missense_Mutation | SNP | C  | T  | 22  | 49  | c.1315G>A    | c.(1315-1317)GAT>AAT   | p.D439N       |
| Pat_30 | Post-Resistance | TPTE     | 7179   | 37 | 21 | 10941907  | 10941907  | Splice_Site       | SNP | C  | T  | 16  | 178 | c.795_splice | c.e14+1                | p.K265_splice |
| Pat_30 | Post-Resistance | LIP1     | 149998 | 37 | 21 | 15558293  | 15558293  | Missense_Mutation | SNP | C  | T  | 18  | 38  | c.593G>A     | c.(592-594)GGA>GAA     | p.G198E       |
| Pat_30 | Post-Resistance | DSCAM    | 1826   | 37 | 21 | 41385217  | 41385217  | Missense_Mutation | SNP | C  | T  | 11  | 13  | c.5783G>A    | c.(5782-5784)TGC>TAC   | p.C1928Y      |
| Pat_30 | Post-Resistance | SF11     | 9814   | 37 | 22 | 31976306  | 31976306  | Nonsense_Mutation | SNP | C  | T  | 70  | 8   | c.1204C>T    | c.(1204-1206)CAG>TAG   | p.Q402*       |
| Pat_30 | Post-Resistance | GRIP2    | 80852  | 37 | 3  | 14545082  | 14545082  | Missense_Mutation | SNP | C  | T  | 3   | 2   | c.2965G>A    | c.(2965-2967)GAA>AAA   | p.E989K       |
| Pat_30 | Post-Resistance | TBC1D5   | 9779   | 37 | 3  | 17202637  | 17202637  | Nonsense_Mutation | SNP | G  | A  | 16  | 2   | c.2206C>T    | c.(2206-2208)CAG>TAG   | p.Q736*       |
| Pat_30 | Post-Resistance | C3orf45  | 132228 | 37 | 3  | 50323943  | 50323943  | Missense_Mutation | SNP | C  | G  | 2   | 7   | c.100C>G     | c.(100-102)CCA>GCA     | p.P34A        |
| Pat_30 | Post-Resistance | MUC4     | 4585   | 37 | 3  | 195511283 | 195511283 | Missense_Mutation | SNP | C  | T  | 3   | 2   | c.7168G>A    | c.(7168-7170)GCT>ACT   | p.A2390T      |
| Pat_30 | Post-Resistance | NSUN7    | 79730  | 37 | 4  | 40776320  | 40776320  | Missense_Mutation | SNP | G  | A  | 35  | 55  | c.527G>A     | c.(526-528)CGA>CAA     | p.R176Q       |
| Pat_30 | Post-Resistance | PROL1    | 58503  | 37 | 4  | 71275623  | 71275623  | Missense_Mutation | SNP | C  | T  | 99  | 160 | c.578C>T     | c.(577-579)TCA>TTA     | p.S193L       |
| Pat_30 | Post-Resistance | GC       | 2638   | 37 | 4  | 72620723  | 72620723  | Missense_Mutation | SNP | T  | G  | 29  | 47  | c.1136A>C    | c.(1135-1137)GAA>GCA   | p.E379A       |
| Pat_30 | Post-Resistance | KIAA1109 | 84162  | 37 | 4  | 123280759 | 123280759 | Missense_Mutation | SNP | C  | T  | 22  | 34  | c.14683C>T   | c.(14683-14685)CCA>TCA | p.P4895S      |
| Pat_30 | Post-Resistance | FAT4     | 79633  | 37 | 4  | 126336743 | 126336743 | Missense_Mutation | SNP | G  | A  | 63  | 88  | c.6625G>A    | c.(6625-6627)GGT>AGT   | p.G2209S      |
| Pat_30 | Post-Resistance | RWDD4A   | 201965 | 37 | 4  | 184567673 | 184567673 | Missense_Mutation | SNP | G  | A  | 44  | 74  | c.499C>T     | c.(499-501)CCT>TCT     | p.P167S       |
| Pat_30 | Post-Resistance | PCDHA4   | 56144  | 37 | 5  | 140187989 | 140187989 | Missense_Mutation | SNP | C  | T  | 19  | 233 | c.1217C>T    | c.(1216-1218)TCG>TTG   | p.S406L       |
| Pat_30 | Post-Resistance | PCDHB15  | 56121  | 37 | 5  | 140627305 | 140627305 | Missense_Mutation | SNP | C  | T  | 96  | 39  | c.2159C>T    | c.(2158-2160)GCC>GTC   | p.A720V       |
| Pat_30 | Post-Resistance | FAT2     | 2196   | 37 | 5  | 150924239 | 150924239 | Missense_Mutation | SNP | G  | A  | 7   | 71  | c.6449C>T    | c.(6448-6450)ACG>ATG   | p.T2150M      |
| Pat_30 | Post-Resistance | ATXN1    | 6310   | 37 | 6  | 16326801  | 16326801  | Nonsense_Mutation | SNP | G  | A  | 37  | 115 | c.1741C>T    | c.(1741-1743)CAG>TAG   | p.Q581*       |
| Pat_30 | Post-Resistance | CAP2     | 10486  | 37 | 6  | 17507881  | 17507881  | Missense_Mutation | SNP | C  | T  | 17  | 76  | c.454C>T     | c.(454-456)CCT>TCT     | p.P152S       |
| Pat_30 | Post-Resistance | OR2B6    | 26212  | 37 | 6  | 27925296  | 27925296  | Missense_Mutation | SNP | G  | A  | 16  | 73  | c.278G>A     | c.(277-279)AGT>AAT     | p.S93N        |
| Pat_30 | Post-Resistance | TAP2     | 6891   | 37 | 6  | 32781530  | 32781530  | Missense_Mutation | SNP | C  | T  | 3   | 3   | c.2545G>A    | c.(2545-2547)GGA>AGA   | p.G849R       |
| Pat_30 | Post-Resistance | SPDEF    | 25803  | 37 | 6  | 34512187  | 34512187  | Missense_Mutation | SNP | G  | T  | 31  | 98  | c.46C>A      | c.(46-48)CTC>ATC       | p.L16I        |
| Pat_30 | Post-Resistance | PNPLA1   | 285848 | 37 | 6  | 36270156  | 36270156  | Missense_Mutation | SNP | G  | T  | 58  | 195 | c.1294G>T    | c.(1294-1296)GTG>TTG   | p.V432L       |
| Pat_30 | Post-Resistance | GTPBP2   | 54676  | 37 | 6  | 43591778  | 43591778  | Missense_Mutation | SNP | A  | C  | 82  | 62  | c.1128T>G    | c.(1126-1128)AGT>AGG   | p.S376R       |
| Pat_30 | Post-Resistance | FAM83B   | 222584 | 37 | 6  | 54805310  | 54805310  | Missense_Mutation | SNP | C  | T  | 51  | 32  | c.1541C>T    | c.(1540-1542)TCA>TTA   | p.S514L       |
| Pat_30 | Post-Resistance | C7orf10  | 79783  | 37 | 7  | 40488913  | 40488913  | Missense_Mutation | SNP | G  | T  | 15  | 33  | c.844G>T     | c.(844-846)GTA>TTA     | p.V282L       |
| Pat_30 | Post-Resistance | ABCA13   | 154664 | 37 | 7  | 48280486  | 48280486  | Missense_Mutation | SNP | G  | A  | 29  | 41  | c.1085G>A    | c.(1084-1086)GGT>GAT   | p.G362D       |
| Pat_30 | Post-Resistance | FBXL13   | 222235 | 37 | 7  | 102665589 | 102665589 | Missense_Mutation | SNP | C  | T  | 10  | 21  | c.416G>A     | c.(415-417)CGA>CAA     | p.R139Q       |

|        |                 |          |           |    |   |           |           |                   |     |   |   |     |     |               |                        |               |
|--------|-----------------|----------|-----------|----|---|-----------|-----------|-------------------|-----|---|---|-----|-----|---------------|------------------------|---------------|
| Pat_30 | Post-Resistance | LAMB4    | 22798     | 37 | 7 | 107710246 | 107710246 | Missense_Mutation | SNP | C | T | 95  | 342 | c.2209G>A     | c.(2209-2211)GAA>AAA   | p.E737K       |
| Pat_30 | Post-Resistance | CHRM2    | 1129      | 37 | 7 | 136699707 | 136699707 | Missense_Mutation | SNP | C | T | 25  | 73  | c.95C>T       | c.(94-96)TCC>TTC       | p.S32F        |
| Pat_30 | Post-Resistance | BRAF     | 673       | 37 | 7 | 140453136 | 140453136 | Missense_Mutation | SNP | A | T | 430 | 142 | c.1799T>A     | c.(1798-1800)GTG>GAG   | p.V600E       |
| Pat_30 | Post-Resistance | MYO2     | 9172      | 37 | 8 | 2017410   | 2017410   | Missense_Mutation | SNP | G | A | 74  | 49  | c.667G>A      | c.(667-669)GAC>AAC     | p.D223N       |
| Pat_30 | Post-Resistance | PPP1R3B  | 79660     | 37 | 8 | 8999115   | 8999115   | Missense_Mutation | SNP | G | A | 16  | 49  | c.47C>T       | c.(46-48)TCC>TTC       | p.S16F        |
| Pat_30 | Post-Resistance | SNX31    | 169166    | 37 | 8 | 101612642 | 101612642 | Missense_Mutation | SNP | C | T | 35  | 54  | c.709G>A      | c.(709-711)GCC>ACC     | p.A237T       |
| Pat_30 | Post-Resistance | LRP12    | 29967     | 37 | 8 | 105509486 | 105509486 | Missense_Mutation | SNP | G | A | 92  | 66  | c.1294C>T     | c.(1294-1296)CGC>TGC   | p.R432C       |
| Pat_30 | Post-Resistance | ASAP1    | 50807     | 37 | 8 | 131138295 | 131138295 | Missense_Mutation | SNP | A | C | 64  | 52  | c.1422T>G     | c.(1420-1422)TGT>TGG   | p.C474W       |
| Pat_30 | Post-Resistance | ARC      | 23237     | 37 | 8 | 143694456 | 143694456 | Missense_Mutation | SNP | T | C | 6   | 29  | c.1177A>G     | c.(1177-1179)ACC>GCC   | p.T393A       |
| Pat_30 | Post-Resistance | ZNF251   | 90987     | 37 | 8 | 145947109 | 145947109 | Missense_Mutation | SNP | C | T | 16  | 40  | c.1936G>A     | c.(1936-1938)GGA>AGA   | p.G646R       |
| Pat_30 | Post-Resistance | UBAP1    | 51271     | 37 | 9 | 34251508  | 34251508  | Missense_Mutation | SNP | T | A | 20  | 11  | c.1487T>A     | c.(1486-1488)ATG>AAG   | p.M496K       |
| Pat_30 | Post-Resistance | TRPM6    | 140803    | 37 | 9 | 77417080  | 77417080  | Missense_Mutation | SNP | T | C | 4   | 0   | c.1743A>G     | c.(1741-1743)ATA>ATG   | p.I581M       |
| Pat_30 | Post-Resistance | FLJ43950 | 347127    | 37 | 9 | 84530870  | 84530870  | Missense_Mutation | SNP | C | T | 10  | 3   | c.791C>T      | c.(790-792)TCC>TTC     | p.S264F       |
| Pat_30 | Post-Resistance | DENND1A  | 57706     | 37 | 9 | 126214617 | 126214617 | Missense_Mutation | SNP | C | T | 23  | 7   | c.1237G>A     | c.(1237-1239)GGA>AGA   | p.G413R       |
| Pat_30 | Post-Resistance | CLCN4    | 1183      | 37 | X | 10176514  | 10176514  | Missense_Mutation | SNP | C | T | 107 | 234 | c.1273C>T     | c.(1273-1275)CCT>TCT   | p.P425S       |
| Pat_30 | Post-Resistance | SYAP1    | 94056     | 37 | X | 16761957  | 16761957  | Missense_Mutation | SNP | C | T | 169 | 292 | c.569C>T      | c.(568-570)CCT>CTT     | p.P190L       |
| Pat_30 | Post-Resistance | ZFX      | 7543      | 37 | X | 24229378  | 24229378  | Missense_Mutation | SNP | C | T | 104 | 143 | c.2303C>T     | c.(2302-2304)TCC>TTC   | p.S768F       |
| Pat_30 | Post-Resistance | SRPX     | 8406      | 37 | X | 38033482  | 38033482  | Missense_Mutation | SNP | C | T | 90  | 83  | c.280G>A      | c.(280-282)GAG>AAG     | p.E94K        |
| Pat_30 | Post-Resistance | ZNF182   | 7569      | 37 | X | 47836909  | 47836909  | Missense_Mutation | SNP | G | A | 8   | 10  | c.577C>T      | c.(577-579)CAT>TAT     | p.H193Y       |
| Pat_30 | Post-Resistance | CCNB3    | 85417     | 37 | X | 50053780  | 50053780  | Missense_Mutation | SNP | G | A | 4   | 9   | c.2611G>A     | c.(2611-2613)GAG>AAG   | p.E871K       |
| Pat_30 | Post-Resistance | STARD8   | 9754      | 37 | X | 67938434  | 67938434  | Missense_Mutation | SNP | G | A | 23  | 32  | c.1438G>A     | c.(1438-1440)GAT>AAT   | p.D480N       |
| Pat_30 | Post-Resistance | ACRC     | 93953     | 37 | X | 70823920  | 70823920  | Missense_Mutation | SNP | C | T | 8   | 59  | c.793C>T      | c.(793-795)CCC>TCC     | p.P265S       |
| Pat_31 | Pre-Treatment   | CROCC    | 9696      | 37 | 1 | 17292241  | 17292241  | Missense_Mutation | SNP | C | T | 113 | 60  | c.4429C>T     | c.(4429-4431)CCC>TCC   | p.P1477S      |
| Pat_31 | Pre-Treatment   | CSMD2    | 114784    | 37 | 1 | 34276445  | 34276445  | Missense_Mutation | SNP | G | T | 55  | 120 | c.1225C>A     | c.(1225-1227)CTT>ATT   | p.L409I       |
| Pat_31 | Pre-Treatment   | MACF1    | 23499     | 37 | 1 | 39889724  | 39889724  | Nonsense_Mutation | SNP | C | T | 104 | 40  | c.11494C>T    | c.(11494-11496)CGA>TGA | p.R3832*      |
| Pat_31 | Pre-Treatment   | ZSWIM5   | 57643     | 37 | 1 | 45504680  | 45504680  | Missense_Mutation | SNP | G | A | 5   | 114 | c.1822C>T     | c.(1822-1824)CCC>TCC   | p.P608S       |
| Pat_31 | Pre-Treatment   | C1orf163 | 65260     | 37 | 1 | 53153418  | 53153418  | Missense_Mutation | SNP | C | T | 3   | 62  | c.670G>A      | c.(670-672)GGT>AGT     | p.G224S       |
| Pat_31 | Pre-Treatment   | MAGOH    | 4116      | 37 | 1 | 53692748  | 53692748  | Missense_Mutation | SNP | A | G | 3   | 50  | c.410T>C      | c.(409-411)ATT>ACT     | p.I137T       |
| Pat_31 | Pre-Treatment   | BSND     | 7809      | 37 | 1 | 55472863  | 55472863  | Missense_Mutation | SNP | G | T | 4   | 132 | c.466G>T      | c.(466-468)GCC>TCC     | p.A156S       |
| Pat_31 | Pre-Treatment   | C1orf168 | 199920    | 37 | 1 | 57258394  | 57258394  | Missense_Mutation | SNP | G | T | 13  | 477 | c.92C>A       | c.(91-93)CCA>CAA       | p.P31Q        |
| Pat_31 | Pre-Treatment   | CACHD1   | 57685     | 37 | 1 | 65130356  | 65130356  | Missense_Mutation | SNP | G | T | 112 | 53  | c.2117G>T     | c.(2116-2118)AGA>ATA   | p.R706I       |
| Pat_31 | Pre-Treatment   | AK5      | 26289     | 37 | 1 | 77806237  | 77806237  | Missense_Mutation | SNP | A | G | 3   | 125 | c.875A>G      | c.(874-876)AAG>AGG     | p.K292R       |
| Pat_31 | Pre-Treatment   | NBPF9    | 400818    | 37 | 1 | 144815953 | 144815953 | Missense_Mutation | SNP | A | G | 20  | 728 | c.1324A>G     | c.(1324-1326)AAT>GAT   | p.N442D       |
| Pat_31 | Pre-Treatment   | NBPF10   | 100132406 | 37 | 1 | 145311785 | 145311785 | Splice_Site       | SNP | C | G | 10  | 137 | c.1854_splice | c.e14-1                | p.R618_splice |
| Pat_31 | Pre-Treatment   | FLG2     | 388698    | 37 | 1 | 152324164 | 152324164 | Missense_Mutation | SNP | T | G | 10  | 866 | c.6098A>C     | c.(6097-6099)TAC>TCC   | p.Y2033S      |
| Pat_31 | Pre-Treatment   | FLG2     | 388698    | 37 | 1 | 152326017 | 152326017 | Missense_Mutation | SNP | C | A | 10  | 772 | c.4245G>T     | c.(4243-4245)AGG>AGT   | p.R1415S      |
| Pat_31 | Pre-Treatment   | CRNN     | 49860     | 37 | 1 | 152382749 | 152382749 | Missense_Mutation | SNP | G | A | 12  | 751 | c.809C>T      | c.(808-810)ACC>ATC     | p.T270I       |
| Pat_31 | Pre-Treatment   | TRIM46   | 80128     | 37 | 1 | 155148051 | 155148051 | Missense_Mutation | SNP | T | A | 111 | 177 | c.253T>A      | c.(253-255)TCC>ACC     | p.S85T        |
| Pat_31 | Pre-Treatment   | TRIM46   | 80128     | 37 | 1 | 155152368 | 155152368 | Missense_Mutation | SNP | G | A | 49  | 121 | c.1546G>A     | c.(1546-1548)GAA>AAA   | p.E516K       |
| Pat_31 | Pre-Treatment   | FCRL2    | 79368     | 37 | 1 | 157737066 | 157737066 | Missense_Mutation | SNP | C | T | 128 | 189 | c.1117G>A     | c.(1117-1119)GGC>AGC   | p.G373S       |
| Pat_31 | Pre-Treatment   | SPTA1    | 6708      | 37 | 1 | 158617430 | 158617430 | Missense_Mutation | SNP | C | T | 67  | 116 | c.3795G>A     | c.(3793-3795)ATG>ATA   | p.M1265I      |
| Pat_31 | Pre-Treatment   | MYOC     | 4653      | 37 | 1 | 171621343 | 171621343 | Missense_Mutation | SNP | C | T | 122 | 175 | c.409G>A      | c.(409-411)GAG>AAG     | p.E137K       |
| Pat_31 | Pre-Treatment   | PAPPA2   | 60676     | 37 | 1 | 176738864 | 176738864 | Missense_Mutation | SNP | G | C | 16  | 307 | c.4445G>C     | c.(4444-4446)GGA>GCA   | p.G1482A      |
| Pat_31 | Pre-Treatment   | DDX59    | 83479     | 37 | 1 | 200619608 | 200619608 | Missense_Mutation | SNP | A | C | 75  | 98  | c.1259T>G     | c.(1258-1260)ATT>AGT   | p.I420S       |
| Pat_31 | Pre-Treatment   | ESRRG    | 2104      | 37 | 1 | 216850805 | 216850805 | Nonsense_Mutation | SNP | G | A | 4   | 96  | c.85C>T       | c.(85-87)CGA>TGA       | p.R29*        |
| Pat_31 | Pre-Treatment   | OBSCN    | 84033     | 37 | 1 | 228495004 | 228495004 | Missense_Mutation | SNP | G | A | 137 | 226 | c.12238G>A    | c.(12238-12240)GAG>AAG | p.E4080K      |
| Pat_31 | Pre-Treatment   | OR2L2    | 26246     | 37 | 1 | 248201572 | 248201572 | Missense_Mutation | SNP | G | A | 188 | 186 | c.3G>A        | c.(1-3)ATG>ATA         | p.M1I         |

|        |               |           |        |    |    |           |           |                   |     |   |   |     |     |            |                        |          |
|--------|---------------|-----------|--------|----|----|-----------|-----------|-------------------|-----|---|---|-----|-----|------------|------------------------|----------|
| Pat_31 | Pre-Treatment | OR2M1P    | 388762 | 37 | 1  | 248285997 | 248285997 | Missense_Mutation | SNP | G | C | 10  | 683 | c.560G>C   | c.(559-561)GGT>GCT     | p.G187A  |
| Pat_31 | Pre-Treatment | TUBAL3    | 79861  | 37 | 10 | 5436384   | 5436384   | Missense_Mutation | SNP | C | T | 8   | 141 | c.437G>A   | c.(436-438)CGA>CAA     | p.R146Q  |
| Pat_31 | Pre-Treatment | FAM13C    | 220965 | 37 | 10 | 61014112  | 61014112  | Missense_Mutation | SNP | G | T | 86  | 267 | c.1328C>A  | c.(1327-1329)ACA>AAA   | p.T443K  |
| Pat_31 | Pre-Treatment | CDH23     | 64072  | 37 | 10 | 73553380  | 73553380  | Missense_Mutation | SNP | C | T | 4   | 39  | c.6695C>T  | c.(6694-6696)GCT>GTT   | p.A2232V |
| Pat_31 | Pre-Treatment | NRG3      | 10718  | 37 | 10 | 84745186  | 84745186  | Missense_Mutation | SNP | G | A | 30  | 74  | c.1916G>A  | c.(1915-1917)CGA>CAA   | p.R639Q  |
| Pat_31 | Pre-Treatment | PLCE1     | 51196  | 37 | 10 | 96014685  | 96014685  | Missense_Mutation | SNP | C | T | 111 | 579 | c.3433C>T  | c.(3433-3435)CCT>TCT   | p.P1145S |
| Pat_31 | Pre-Treatment | CYP2C18   | 1562   | 37 | 10 | 96495124  | 96495124  | Missense_Mutation | SNP | G | A | 101 | 281 | c.1396G>A  | c.(1396-1398)GAT>AAT   | p.D466N  |
| Pat_31 | Pre-Treatment | LOC653544 | 653544 | 37 | 10 | 135491123 | 135491123 | Missense_Mutation | SNP | G | A | 4   | 52  | c.734G>A   | c.(733-735)GGC>GAC     | p.G245D  |
| Pat_31 | Pre-Treatment | CDHR5     | 53841  | 37 | 11 | 618674    | 618674    | Missense_Mutation | SNP | C | T | 5   | 235 | c.1885G>A  | c.(1885-1887)GGT>AGT   | p.G629S  |
| Pat_31 | Pre-Treatment | MUC2      | 4583   | 37 | 11 | 1097769   | 1097769   | Missense_Mutation | SNP | C | A | 4   | 100 | c.13948C>A | c.(13948-13950)CAG>AAC | p.Q4650K |
| Pat_31 | Pre-Treatment | KRTAP5-3  | 387266 | 37 | 11 | 1628952   | 1628952   | Missense_Mutation | SNP | A | T | 11  | 706 | c.664T>A   | c.(664-666)TGC>AGC     | p.C222S  |
| Pat_31 | Pre-Treatment | TRIM48    | 79097  | 37 | 11 | 55035844  | 55035844  | Missense_Mutation | SNP | T | C | 6   | 221 | c.574T>C   | c.(574-576)TAC>CAC     | p.Y192H  |
| Pat_31 | Pre-Treatment | AHNAK     | 79026  | 37 | 11 | 62296070  | 62296070  | Missense_Mutation | SNP | A | G | 15  | 781 | c.5819T>C  | c.(5818-5820)GTG>GCG   | p.V1940A |
| Pat_31 | Pre-Treatment | UNC93B1   | 81622  | 37 | 11 | 67767119  | 67767119  | Missense_Mutation | SNP | C | G | 6   | 45  | c.424G>C   | c.(424-426)GCT>CCT     | p.A142P  |
| Pat_31 | Pre-Treatment | PDE2A     | 5138   | 37 | 11 | 72288490  | 72288490  | Missense_Mutation | SNP | C | T | 4   | 125 | c.2764G>A  | c.(2764-2766)GTG>ATG   | p.V922M  |
| Pat_31 | Pre-Treatment | CNTN5     | 53942  | 37 | 11 | 100221562 | 100221562 | Missense_Mutation | SNP | G | A | 8   | 167 | c.3160G>A  | c.(3160-3162)GGA>AGA   | p.G1054R |
| Pat_31 | Pre-Treatment | TPMRSS4   | 56649  | 37 | 11 | 117984114 | 117984114 | Missense_Mutation | SNP | G | C | 41  | 259 | c.874G>C   | c.(874-876)GCC>CCC     | p.A292P  |
| Pat_31 | Pre-Treatment | OR10S1    | 219873 | 37 | 11 | 123848356 | 123848356 | Missense_Mutation | SNP | C | T | 53  | 233 | c.43G>A    | c.(43-45)GAG>AAG       | p.E15K   |
| Pat_31 | Pre-Treatment | CD163     | 9332   | 37 | 12 | 7639539   | 7639539   | Missense_Mutation | SNP | C | A | 49  | 123 | c.2094G>T  | c.(2092-2094)TTG>TTT   | p.L698F  |
| Pat_31 | Pre-Treatment | PRB1      | 5542   | 37 | 12 | 11506690  | 11506690  | Missense_Mutation | SNP | C | T | 150 | 649 | c.347G>A   | c.(346-348)GGA>GAA     | p.G116E  |
| Pat_31 | Pre-Treatment | ABCC9     | 10060  | 37 | 12 | 21981927  | 21981927  | Missense_Mutation | SNP | G | A | 167 | 433 | c.3634C>T  | c.(3634-3636)CTC>TTC   | p.L1212F |
| Pat_31 | Pre-Treatment | IPO8      | 10526  | 37 | 12 | 30790032  | 30790032  | Missense_Mutation | SNP | T | G | 94  | 222 | c.2579A>C  | c.(2578-2580)CAG>CCG   | p.Q860P  |
| Pat_31 | Pre-Treatment | DDX11     | 1663   | 37 | 12 | 31237922  | 31237922  | Missense_Mutation | SNP | G | C | 4   | 53  | c.500G>C   | c.(499-501)AGA>ACA     | p.R167T  |
| Pat_31 | Pre-Treatment | TUBA1B    | 10376  | 37 | 12 | 49521767  | 49521767  | Missense_Mutation | SNP | C | T | 36  | 409 | c.1330G>A  | c.(1330-1332)GGT>AGT   | p.G444S  |
| Pat_31 | Pre-Treatment | SRGAP1    | 57522  | 37 | 12 | 64456773  | 64456773  | Missense_Mutation | SNP | C | G | 6   | 219 | c.878C>G   | c.(877-879)ACC>AGC     | p.T293S  |
| Pat_31 | Pre-Treatment | FRS2      | 10818  | 37 | 12 | 69966038  | 69966038  | Missense_Mutation | SNP | C | T | 148 | 240 | c.553C>T   | c.(553-555)CCT>TCT     | p.P185S  |
| Pat_31 | Pre-Treatment | ZMYM2     | 7750   | 37 | 13 | 20600897  | 20600897  | Missense_Mutation | SNP | C | T | 5   | 60  | c.1730C>T  | c.(1729-1731)TCA>TTA   | p.S577L  |
| Pat_31 | Pre-Treatment | LHFP      | 10186  | 37 | 13 | 40175179  | 40175179  | Missense_Mutation | SNP | G | A | 291 | 499 | c.175C>T   | c.(175-177)CGG>TGG     | p.R59W   |
| Pat_31 | Pre-Treatment | ERCC5     | 2073   | 37 | 13 | 103518233 | 103518233 | Missense_Mutation | SNP | C | T | 127 | 168 | c.2171C>T  | c.(2170-2172)TCG>TTG   | p.S724L  |
| Pat_31 | Pre-Treatment | OR4L1     | 122742 | 37 | 14 | 20528589  | 20528589  | Missense_Mutation | SNP | C | T | 68  | 151 | c.386C>T   | c.(385-387)CCC>CTC     | p.P129L  |
| Pat_31 | Pre-Treatment | PNN       | 5411   | 37 | 14 | 39645289  | 39645289  | Nonsense_Mutation | SNP | C | T | 35  | 68  | c.121C>T   | c.(121-123)CAA>TAA     | p.Q41*   |
| Pat_31 | Pre-Treatment | KCNH5     | 27133  | 37 | 14 | 63174990  | 63174990  | Nonsense_Mutation | SNP | G | A | 61  | 86  | c.2203C>T  | c.(2203-2205)CAG>TAG   | p.Q735*  |
| Pat_31 | Pre-Treatment | AHSA1     | 10598  | 37 | 14 | 77934803  | 77934803  | Missense_Mutation | SNP | C | T | 63  | 101 | c.796C>T   | c.(796-798)CCT>TCT     | p.P266S  |
| Pat_31 | Pre-Treatment | NRXN3     | 9369   | 37 | 14 | 79117602  | 79117602  | Missense_Mutation | SNP | G | A | 143 | 220 | c.35G>A    | c.(34-36)GGA>GAA       | p.G12E   |
| Pat_31 | Pre-Treatment | DEGS2     | 123099 | 37 | 14 | 100613240 | 100613240 | Missense_Mutation | SNP | C | T | 5   | 263 | c.830G>A   | c.(829-831)CGG>CAG     | p.R277Q  |
| Pat_31 | Pre-Treatment | MAP2K1    | 5604   | 37 | 15 | 66727442  | 66727442  | Missense_Mutation | SNP | T | A | 215 | 331 | c.158T>A   | c.(157-159)TTT>TAT     | p.F53Y   |
| Pat_31 | Pre-Treatment | PKD1      | 5310   | 37 | 16 | 2162933   | 2162933   | Missense_Mutation | SNP | G | A | 46  | 141 | c.3017C>T  | c.(3016-3018)ACC>ATC   | p.T1006I |
| Pat_31 | Pre-Treatment | ERN2      | 10595  | 37 | 16 | 23702234  | 23702234  | Missense_Mutation | SNP | C | T | 4   | 76  | c.2843G>A  | c.(2842-2844)TGC>TAC   | p.C948Y  |
| Pat_31 | Pre-Treatment | ZNF267    | 10308  | 37 | 16 | 31927534  | 31927534  | Missense_Mutation | SNP | C | G | 7   | 353 | c.1964C>G  | c.(1963-1965)ACT>AGT   | p.T655S  |
| Pat_31 | Pre-Treatment | SLC6A10P  | 386757 | 37 | 16 | 32890622  | 32890622  | Missense_Mutation | SNP | T | G | 6   | 85  | c.264A>C   | c.(262-264)AAA>AAC     | p.K88N   |
| Pat_31 | Pre-Treatment | SLC6A10P  | 386757 | 37 | 16 | 32890639  | 32890639  | Missense_Mutation | SNP | T | C | 5   | 91  | c.247A>G   | c.(247-249)AAG>GAG     | p.K83E   |
| Pat_31 | Pre-Treatment | CDH1      | 999    | 37 | 16 | 68842734  | 68842734  | Missense_Mutation | SNP | C | T | 4   | 94  | c.670C>T   | c.(670-672)CGC>TGC     | p.R224C  |
| Pat_31 | Pre-Treatment | CLEC18B   | 497190 | 37 | 16 | 74446997  | 74446997  | Missense_Mutation | SNP | G | A | 35  | 279 | c.614C>T   | c.(613-615)TCG>TTG     | p.S205L  |
| Pat_31 | Pre-Treatment | SPNS3     | 201305 | 37 | 17 | 4389577   | 4389577   | Missense_Mutation | SNP | G | A | 29  | 54  | c.1234G>A  | c.(1234-1236)GGC>AGC   | p.G412S  |
| Pat_31 | Pre-Treatment | C17orf61  | 254863 | 37 | 17 | 7307394   | 7307394   | Missense_Mutation | SNP | G | A | 3   | 14  | c.10C>T    | c.(10-12)CCA>TCA       | p.P4S    |
| Pat_31 | Pre-Treatment | C17orf74  | 201243 | 37 | 17 | 7330590   | 7330590   | Missense_Mutation | SNP | C | T | 22  | 97  | c.1280C>T  | c.(1279-1281)TCC>TTC   | p.S427F  |
| Pat_31 | Pre-Treatment | MYH10     | 4628   | 37 | 17 | 8397110   | 8397110   | Missense_Mutation | SNP | C | G | 4   | 134 | c.4057G>C  | c.(4057-4059)GAG>CAG   | p.E1353Q |

|        |               |           |           |    |    |           |           |                   |     |    |    |     |     |                                     |                        |          |
|--------|---------------|-----------|-----------|----|----|-----------|-----------|-------------------|-----|----|----|-----|-----|-------------------------------------|------------------------|----------|
| Pat_31 | Pre-Treatment | KRTAP4-7  | 100132476 | 37 | 17 | 39240745  | 39240745  | Missense_Mutation | SNP | A  | G  | 4   | 80  | c.287A>G                            | c.(286-288)AAG>AGG     | p.K96R   |
| Pat_31 | Pre-Treatment | KRTAP4-8  | 728224    | 37 | 17 | 39254013  | 39254013  | Missense_Mutation | SNP | G  | C  | 4   | 91  | c.324C>G                            | c.(322-324)AGC>AGG     | p.S108R  |
| Pat_31 | Pre-Treatment | KRTAP4-11 | 653240    | 37 | 17 | 39274150  | 39274150  | Missense_Mutation | SNP | T  | A  | 7   | 132 | c.418A>T                            | c.(418-420)AGC>TGC     | p.S140C  |
| Pat_31 | Pre-Treatment | KRTAP4-11 | 653240    | 37 | 17 | 39274214  | 39274214  | Missense_Mutation | SNP | G  | C  | 5   | 161 | c.354C>G                            | c.(352-354)AGC>AGG     | p.S118R  |
| Pat_31 | Pre-Treatment | ATP5H     | 10476     | 37 | 17 | 73035082  | 73035082  | Missense_Mutation | SNP | T  | A  | 61  | 53  | c.431A>T                            | c.(430-432)AAA>ATA     | p.K144I  |
| Pat_31 | Pre-Treatment | POTEC     | 388468    | 37 | 18 | 14513675  | 14513675  | Missense_Mutation | SNP | T  | C  | 6   | 256 | c.1519A>G                           | c.(1519-1521)AAA>GAA   | p.K507E  |
| Pat_31 | Pre-Treatment | CABLES1   | 91768     | 37 | 18 | 20716462  | 20716462  | Missense_Mutation | SNP | G  | A  | 3   | 59  | c.736G>A                            | c.(736-738)GGA>AGA     | p.G246R  |
| Pat_31 | Pre-Treatment | DCC       | 1630      | 37 | 18 | 50918172  | 50918172  | Missense_Mutation | SNP | C  | T  | 56  | 89  | c.2603C>T                           | c.(2602-2604)TCT>TTT   | p.S868F  |
| Pat_31 | Pre-Treatment | ZNF57     | 126295    | 37 | 19 | 2917807   | 2917807   | Missense_Mutation | SNP | A  | C  | 6   | 189 | c.1188A>C                           | c.(1186-1188)CAA>CAC   | p.Q396H  |
| Pat_31 | Pre-Treatment | ZNF57     | 126295    | 37 | 19 | 2917842   | 2917842   | Missense_Mutation | SNP | G  | A  | 9   | 169 | c.1223G>A                           | c.(1222-1224)CGA>CAA   | p.R408Q  |
| Pat_31 | Pre-Treatment | ZNF57     | 126295    | 37 | 19 | 2917857   | 2917857   | Missense_Mutation | SNP | C  | T  | 8   | 164 | c.1238C>T                           | c.(1237-1239)ACG>ATG   | p.T413M  |
| Pat_31 | Pre-Treatment | CD209     | 30835     | 37 | 19 | 7810766   | 7810766   | Missense_Mutation | SNP | C  | T  | 13  | 409 | c.386G>A                            | c.(385-387)CGG>CAG     | p.R129Q  |
| Pat_31 | Pre-Treatment | MUC16     | 94025     | 37 | 19 | 9059142   | 9059142   | Missense_Mutation | SNP | G  | A  | 102 | 111 | c.28304C>T                          | c.(28303-28305)TCC>TTC | p.S9435F |
| Pat_31 | Pre-Treatment | MUC16     | 94025     | 37 | 19 | 9066741   | 9066741   | Missense_Mutation | SNP | G  | A  | 124 | 363 | c.20705C>T                          | c.(20704-20706)TCC>TTC | p.S6902F |
| Pat_31 | Pre-Treatment | ZNF844    | 284391    | 37 | 19 | 12187443  | 12187443  | Missense_Mutation | SNP | C  | G  | 8   | 364 | c.1508C>G                           | c.(1507-1509)CCT>CGT   | p.P503R  |
| Pat_31 | Pre-Treatment | ZNF844    | 284391    | 37 | 19 | 12187502  | 12187502  | Missense_Mutation | SNP | A  | G  | 9   | 191 | c.1567A>G                           | c.(1567-1569)AAA>GAA   | p.K523E  |
| Pat_31 | Pre-Treatment | ZNF563    | 147837    | 37 | 19 | 12429722  | 12429722  | Missense_Mutation | SNP | T  | C  | 11  | 714 | c.1117A>G                           | c.(1117-1119)ACG>GCG   | p.T373A  |
| Pat_31 | Pre-Treatment | ZNF208    | 7757      | 37 | 19 | 22154417  | 22154417  | Missense_Mutation | SNP | G  | A  | 6   | 325 | c.3035C>T                           | c.(3034-3036)CCC>CTC   | p.P1012L |
| Pat_31 | Pre-Treatment | ZNF599    | 148103    | 37 | 19 | 35258305  | 35258305  | Missense_Mutation | SNP | G  | A  | 60  | 39  | c.157C>T                            | c.(157-159)CCC>TCC     | p.P53S   |
| Pat_31 | Pre-Treatment | FCGBP     | 8857      | 37 | 19 | 40392568  | 40392568  | Missense_Mutation | SNP | C  | T  | 45  | 103 | c.7936G>A                           | c.(7936-7938)GAG>AAG   | p.E2646K |
| Pat_31 | Pre-Treatment | ATF5      | 22809     | 37 | 19 | 50435732  | 50435732  | Missense_Mutation | SNP | C  | T  | 106 | 130 | c.232C>T                            | c.(232-234)CCT>TCT     | p.P78S   |
| Pat_31 | Pre-Treatment | KCNC3     | 3748      | 37 | 19 | 50823987  | 50823987  | Missense_Mutation | SNP | G  | A  | 4   | 100 | c.2033C>T                           | c.(2032-2034)CCA>CTA   | p.P678L  |
| Pat_31 | Pre-Treatment | KLK8      | 11202     | 37 | 19 | 51503311  | 51503311  | Missense_Mutation | SNP | C  | A  | 4   | 43  | c.434G>T                            | c.(433-435)TGC>TTC     | p.C145F  |
| Pat_31 | Pre-Treatment | ZNF816A   | 125893    | 37 | 19 | 53453890  | 53453890  | Missense_Mutation | SNP | G  | C  | 10  | 737 | c.1138C>G                           | c.(1138-1140)CAG>GAG   | p.Q380E  |
| Pat_31 | Pre-Treatment | ZNF17     | 7565      | 37 | 19 | 57932028  | 57932028  | Missense_Mutation | SNP | G  | A  | 5   | 271 | c.1168G>A                           | c.(1168-1170)GAA>AAA   | p.E390K  |
| Pat_31 | Pre-Treatment | ZNF749    | 388567    | 37 | 19 | 57955884  | 57955885  | Missense_Mutation | DNP | CC | TG | 6   | 245 | .1368_1369CC>T(366-1371)CACCAG>CATC |                        | p.Q457E  |
| Pat_31 | Pre-Treatment | ZNF551    | 90233     | 37 | 19 | 58196694  | 58196694  | Missense_Mutation | SNP | C  | T  | 151 | 194 | c.98C>T                             | c.(97-99)TCT>TTT       | p.S33F   |
| Pat_31 | Pre-Treatment | ZNF606    | 80095     | 37 | 19 | 58490292  | 58490292  | Missense_Mutation | SNP | G  | T  | 50  | 189 | c.1756C>A                           | c.(1756-1758)CAT>AAT   | p.H586N  |
| Pat_31 | Pre-Treatment | NT5C1B    | 93034     | 37 | 2  | 18768804  | 18768804  | Missense_Mutation | SNP | C  | T  | 9   | 350 | c.85G>A                             | c.(85-87)GAA>AAA       | p.E29K   |
| Pat_31 | Pre-Treatment | ZNF513    | 130557    | 37 | 2  | 27601466  | 27601466  | Missense_Mutation | SNP | G  | A  | 4   | 111 | c.667C>T                            | c.(667-669)CGG>TGG     | p.R223W  |
| Pat_31 | Pre-Treatment | MEIS1     | 4211      | 37 | 2  | 66794598  | 66794598  | Missense_Mutation | SNP | C  | T  | 4   | 152 | c.979C>T                            | c.(979-981)CGG>TGG     | p.R327W  |
| Pat_31 | Pre-Treatment | WASH2P    | 375260    | 37 | 2  | 114355998 | 114355998 | Missense_Mutation | SNP | C  | G  | 5   | 32  | c.616C>G                            | c.(616-618)CAC>GAC     | p.H206D  |
| Pat_31 | Pre-Treatment | GLI2      | 2736      | 37 | 2  | 121748042 | 121748042 | Missense_Mutation | SNP | G  | A  | 45  | 470 | c.4552G>A                           | c.(4552-4554)GAT>AAT   | p.D1518N |
| Pat_31 | Pre-Treatment | LRP1B     | 53353     | 37 | 2  | 141208192 | 141208192 | Nonsense_Mutation | SNP | C  | T  | 78  | 207 | c.10002G>A                          | ∓.(10000-10002)TGG>TGA | p.W3334* |
| Pat_31 | Pre-Treatment | PDK1      | 5163      | 37 | 2  | 173423531 | 173423531 | Missense_Mutation | SNP | C  | T  | 49  | 132 | c.292C>T                            | c.(292-294)CCA>TCA     | p.P98S   |
| Pat_31 | Pre-Treatment | TTN       | 7273      | 37 | 2  | 179632598 | 179632598 | Missense_Mutation | SNP | C  | T  | 52  | 130 | c.9359G>A                           | c.(9358-9360)CGG>CAG   | p.R3120Q |
| Pat_31 | Pre-Treatment | FAM171B   | 165215    | 37 | 2  | 187626849 | 187626849 | Missense_Mutation | SNP | C  | T  | 32  | 112 | c.1780C>T                           | c.(1780-1782)CAT>TAT   | p.H594Y  |
| Pat_31 | Pre-Treatment | DNAH7     | 56171     | 37 | 2  | 196737150 | 196737150 | Missense_Mutation | SNP | C  | T  | 169 | 163 | c.6457G>A                           | c.(6457-6459)GTA>ATA   | p.V2153I |
| Pat_31 | Pre-Treatment | NOP58     | 51602     | 37 | 2  | 203165073 | 203165073 | Missense_Mutation | SNP | C  | T  | 44  | 235 | c.1385C>T                           | c.(1384-1386)GCC>GTC   | p.A462V  |
| Pat_31 | Pre-Treatment | ABCA12    | 26154     | 37 | 2  | 215876189 | 215876189 | Missense_Mutation | SNP | G  | A  | 49  | 44  | c.2306C>T                           | c.(2305-2307)TCA>TTA   | p.S769L  |
| Pat_31 | Pre-Treatment | SP140     | 11262     | 37 | 2  | 231150484 | 231150484 | Missense_Mutation | SNP | G  | A  | 229 | 252 | c.1582G>A                           | c.(1582-1584)GCG>AGC   | p.G528S  |
| Pat_31 | Pre-Treatment | NGEF      | 25791     | 37 | 2  | 233757732 | 233757732 | Missense_Mutation | SNP | C  | T  | 33  | 112 | c.1018G>A                           | c.(1018-1020)GAG>AAG   | p.E340K  |
| Pat_31 | Pre-Treatment | FRG1B     | 284802    | 37 | 20 | 29614328  | 29614328  | Splice_Site       | SNP | G  | A  | 5   | 166 | c.-6_splice                         | c.e1+1                 |          |
| Pat_31 | Pre-Treatment | FRG1B     | 284802    | 37 | 20 | 29625941  | 29625941  | Missense_Mutation | SNP | A  | T  | 6   | 255 | c.95A>T                             | c.(94-96)GAT>GTT       | p.D32V   |
| Pat_31 | Pre-Treatment | FRG1B     | 284802    | 37 | 20 | 29628320  | 29628320  | Nonsense_Mutation | SNP | G  | T  | 8   | 179 | c.232G>T                            | c.(232-234)GAA>TAA     | p.E78*   |
| Pat_31 | Pre-Treatment | EMILIN3   | 90187     | 37 | 20 | 39989972  | 39989972  | Missense_Mutation | SNP | C  | T  | 12  | 112 | c.2237G>A                           | c.(2236-2238)CGG>CAG   | p.R746Q  |
| Pat_31 | Pre-Treatment | SEMG2     | 6407      | 37 | 20 | 43851445  | 43851445  | Missense_Mutation | SNP | G  | C  | 5   | 244 | c.1172G>C                           | c.(1171-1173)AGA>ACA   | p.R391T  |

|        |               |          |        |    |    |           |           |                   |     |    |    |     |     |                |                       |          |
|--------|---------------|----------|--------|----|----|-----------|-----------|-------------------|-----|----|----|-----|-----|----------------|-----------------------|----------|
| Pat_31 | Pre-Treatment | PREX1    | 57580  | 37 | 20 | 47244484  | 47244484  | Missense_Mutation | SNP | G  | A  | 11  | 50  | c.4784C>T      | c.(4783-4785)TCC>TTC  | p.S1595F |
| Pat_31 | Pre-Treatment | PTGIS    | 5740   | 37 | 20 | 48129663  | 48129663  | Missense_Mutation | SNP | G  | A  | 42  | 158 | c.1160C>T      | c.(1159-1161)CCC>CTC  | p.P387L  |
| Pat_31 | Pre-Treatment | TSHZ2    | 128553 | 37 | 20 | 51872447  | 51872447  | Missense_Mutation | SNP | C  | T  | 111 | 101 | c.2450C>T      | c.(2449-2451)CCC>CTC  | p.P817L  |
| Pat_31 | Pre-Treatment | DSCR3    | 10311  | 37 | 21 | 38600029  | 38600029  | Missense_Mutation | SNP | A  | G  | 3   | 50  | c.737T>C       | c.(736-738)CTC>CCC    | p.L246P  |
| Pat_31 | Pre-Treatment | TUBA8    | 51807  | 37 | 22 | 18604267  | 18604267  | Missense_Mutation | SNP | G  | A  | 5   | 254 | c.25G>A        | c.(25-27)GTG>ATG      | p.V9M    |
| Pat_31 | Pre-Treatment | TRIOBP   | 11078  | 37 | 22 | 38120023  | 38120023  | Missense_Mutation | SNP | C  | T  | 7   | 355 | c.1460C>T      | c.(1459-1461)CCC>CTC  | p.P487L  |
| Pat_31 | Pre-Treatment | SCN10A   | 6336   | 37 | 3  | 38768102  | 38768102  | Nonsense_Mutation | SNP | C  | A  | 56  | 23  | c.3082G>T      | c.(3082-3084)GGA>TGA  | p.G1028* |
| Pat_31 | Pre-Treatment | CCR2     | 729230 | 37 | 3  | 46401317  | 46401317  | Missense_Mutation | SNP | C  | T  | 61  | 35  | c.1091C>T      | c.(1090-1092)CCT>CTT  | p.P364L  |
| Pat_31 | Pre-Treatment | ASB14    | 142686 | 37 | 3  | 57312490  | 57312490  | Missense_Mutation | SNP | C  | T  | 221 | 81  | c.854G>A       | c.(853-855)CGA>CAA    | p.R285Q  |
| Pat_31 | Pre-Treatment | FLNB     | 2317   | 37 | 3  | 58116605  | 58116605  | Missense_Mutation | SNP | C  | T  | 20  | 7   | c.4360C>T      | c.(4360-4362)CCG>TCG  | p.P1454S |
| Pat_31 | Pre-Treatment | MCM2     | 4171   | 37 | 3  | 127325611 | 127325611 | Missense_Mutation | SNP | C  | T  | 179 | 55  | c.1052C>T      | c.(1051-1053)TCC>TTC  | p.S351F  |
| Pat_31 | Pre-Treatment | PLXND1   | 23129  | 37 | 3  | 129277296 | 129277296 | Missense_Mutation | SNP | G  | A  | 17  | 68  | c.5420C>T      | c.(5419-5421)TCC>TTC  | p.S1807F |
| Pat_31 | Pre-Treatment | CLCN2    | 1181   | 37 | 3  | 184071974 | 184071974 | Missense_Mutation | SNP | G  | T  | 14  | 110 | c.1636C>A      | c.(1636-1638)CAG>AAG  | p.Q546K  |
| Pat_31 | Pre-Treatment | ZNF595   | 152687 | 37 | 4  | 60041     | 60041     | Missense_Mutation | SNP | C  | T  | 38  | 812 | c.221C>T       | c.(220-222)CCC>CTC    | p.P74L   |
| Pat_31 | Pre-Treatment | ZNF732   | 654254 | 37 | 4  | 265103    | 265104    | Missense_Mutation | DNP | TG | CA | 5   | 119 | .1539_1540CA>T | (537-1542)TCCACA>TCTC | p.T514A  |
| Pat_31 | Pre-Treatment | ZNF732   | 654254 | 37 | 4  | 265139    | 265139    | Missense_Mutation | SNP | C  | T  | 6   | 125 | c.1504G>A      | c.(1504-1506)GAA>AAA  | p.E502K  |
| Pat_31 | Pre-Treatment | ZNF732   | 654254 | 37 | 4  | 265307    | 265307    | Missense_Mutation | SNP | T  | C  | 7   | 182 | c.1336A>G      | c.(1336-1338)AAA>GAA  | p.K446E  |
| Pat_31 | Pre-Treatment | LRRC66   | 339977 | 37 | 4  | 52860901  | 52860901  | Missense_Mutation | SNP | G  | A  | 9   | 182 | c.2287C>T      | c.(2287-2289)CCA>TCA  | p.P763S  |
| Pat_31 | Pre-Treatment | MUC7     | 4589   | 37 | 4  | 71347033  | 71347033  | Missense_Mutation | SNP | C  | T  | 8   | 678 | c.572C>T       | c.(571-573)GCC>GTC    | p.A191V  |
| Pat_31 | Pre-Treatment | FAM13A   | 10144  | 37 | 4  | 89671023  | 89671023  | Missense_Mutation | SNP | G  | T  | 4   | 115 | c.1978C>A      | c.(1978-1980)CAA>AAA  | p.Q660K  |
| Pat_31 | Pre-Treatment | FAT4     | 79633  | 37 | 4  | 126328170 | 126328170 | Missense_Mutation | SNP | C  | T  | 115 | 312 | c.5443C>T      | c.(5443-5445)CGT>TGT  | p.R1815C |
| Pat_31 | Pre-Treatment | KIAA1712 | 80817  | 37 | 4  | 175229858 | 175229858 | Missense_Mutation | SNP | C  | T  | 28  | 140 | c.526C>T       | c.(526-528)CGT>TGT    | p.R176C  |
| Pat_31 | Pre-Treatment | ODZ3     | 55714  | 37 | 4  | 183674704 | 183674704 | Missense_Mutation | SNP | G  | A  | 84  | 105 | c.3964G>A      | c.(3964-3966)GAT>AAT  | p.D1322N |
| Pat_31 | Pre-Treatment | IL7R     | 3575   | 37 | 5  | 35876293  | 35876293  | Missense_Mutation | SNP | G  | A  | 18  | 72  | c.1085G>A      | c.(1084-1086)GGA>GAA  | p.G362E  |
| Pat_31 | Pre-Treatment | SPZ1     | 84654  | 37 | 5  | 79616461  | 79616461  | Missense_Mutation | SNP | G  | C  | 9   | 255 | c.427G>C       | c.(427-429)GAG>CAG    | p.E143Q  |
| Pat_31 | Pre-Treatment | DCP2     | 167227 | 37 | 5  | 112339673 | 112339673 | Missense_Mutation | SNP | C  | T  | 38  | 61  | c.841C>T       | c.(841-843)CCT>TCT    | p.P281S  |
| Pat_31 | Pre-Treatment | ZSCAN16  | 80345  | 37 | 6  | 28097614  | 28097614  | Missense_Mutation | SNP | G  | C  | 38  | 131 | c.933G>C       | c.(931-933)CAG>CAC    | p.Q311H  |
| Pat_31 | Pre-Treatment | MDC1     | 9656   | 37 | 6  | 30672941  | 30672941  | Missense_Mutation | SNP | T  | C  | 6   | 392 | c.4019A>G      | c.(4018-4020)CAA>CGA  | p.Q1340R |
| Pat_31 | Pre-Treatment | C6orf27  | 80737  | 37 | 6  | 31737520  | 31737520  | Missense_Mutation | SNP | C  | T  | 103 | 92  | c.1249G>A      | c.(1249-1251)GAT>AAT  | p.D417N  |
| Pat_31 | Pre-Treatment | TNXB     | 7148   | 37 | 6  | 32021309  | 32021309  | Missense_Mutation | SNP | C  | T  | 20  | 99  | c.8641G>A      | c.(8641-8643)GGG>AGG  | p.G2881R |
| Pat_31 | Pre-Treatment | PEX6     | 5190   | 37 | 6  | 42936135  | 42936135  | Missense_Mutation | SNP | C  | A  | 4   | 73  | c.1581G>T      | c.(1579-1581)TTG>TTT  | p.L527F  |
| Pat_31 | Pre-Treatment | GPR110   | 266977 | 37 | 6  | 46977531  | 46977531  | Missense_Mutation | SNP | G  | A  | 4   | 86  | c.1640C>T      | c.(1639-1641)GCA>GTA  | p.A547V  |
| Pat_31 | Pre-Treatment | MDN1     | 23195  | 37 | 6  | 90402767  | 90402767  | Missense_Mutation | SNP | G  | C  | 3   | 93  | c.9982C>G      | c.(9982-9984)CAG>GAG  | p.Q3328E |
| Pat_31 | Pre-Treatment | GRIK2    | 2898   | 37 | 6  | 102307177 | 102307177 | Missense_Mutation | SNP | C  | T  | 13  | 66  | c.1333C>T      | c.(1333-1335)CTT>TTT  | p.L445F  |
| Pat_31 | Pre-Treatment | BEND3    | 57673  | 37 | 6  | 107390596 | 107390596 | Missense_Mutation | SNP | G  | A  | 15  | 41  | c.1799C>T      | c.(1798-1800)TCC>TTC  | p.S600F  |
| Pat_31 | Pre-Treatment | DSE      | 29940  | 37 | 6  | 116757333 | 116757333 | Missense_Mutation | SNP | C  | T  | 17  | 50  | c.1702C>T      | c.(1702-1704)CTT>TTT  | p.L568F  |
| Pat_31 | Pre-Treatment | TULP4    | 56995  | 37 | 6  | 158924649 | 158924650 | Missense_Mutation | DNP | CC | TT | 9   | 187 | .3954_3955CC>T | (952-3957)GTCCTC>GTTT | p.L1319F |
| Pat_31 | Pre-Treatment | AGPAT4   | 56895  | 37 | 6  | 161587390 | 161587390 | Missense_Mutation | SNP | G  | A  | 45  | 154 | c.238C>T       | c.(238-240)CGC>TGC    | p.R80C   |
| Pat_31 | Pre-Treatment | CHST12   | 55501  | 37 | 7  | 2473115   | 2473115   | Missense_Mutation | SNP | C  | T  | 18  | 271 | c.841C>T       | c.(841-843)CAC>TAC    | p.H281Y  |
| Pat_31 | Pre-Treatment | THSD7A   | 221981 | 37 | 7  | 11676229  | 11676229  | Missense_Mutation | SNP | C  | T  | 13  | 102 | c.550G>A       | c.(550-552)GAG>AAG    | p.E184K  |
| Pat_31 | Pre-Treatment | OSBPL3   | 26031  | 37 | 7  | 24854801  | 24854801  | Nonsense_Mutation | SNP | C  | T  | 98  | 190 | c.2049G>A      | c.(2047-2049)TGG>TGA  | p.W683*  |
| Pat_31 | Pre-Treatment | MYO1G    | 64005  | 37 | 7  | 45009452  | 45009452  | Missense_Mutation | SNP | G  | A  | 116 | 192 | c.1355C>T      | c.(1354-1356)ACC>ATC  | p.T452I  |
| Pat_31 | Pre-Treatment | MYO1G    | 64005  | 37 | 7  | 45015103  | 45015103  | Missense_Mutation | SNP | G  | A  | 13  | 103 | c.544C>T       | c.(544-546)CAC>TAC    | p.H182Y  |
| Pat_31 | Pre-Treatment | GRB10    | 2887   | 37 | 7  | 50682492  | 50682492  | Missense_Mutation | SNP | G  | C  | 8   | 313 | c.1070C>G      | c.(1069-1071)CCT>CGT  | p.P357R  |
| Pat_31 | Pre-Treatment | TECPR1   | 25851  | 37 | 7  | 97872840  | 97872840  | Missense_Mutation | SNP | C  | A  | 9   | 110 | c.596G>T       | c.(595-597)TGG>TTG    | p.W199L  |
| Pat_31 | Pre-Treatment | GAL3ST4  | 79690  | 37 | 7  | 99758125  | 99758125  | Missense_Mutation | SNP | G  | A  | 166 | 335 | c.887C>T       | c.(886-888)TCT>TTT    | p.S296F  |
| Pat_31 | Pre-Treatment | ZAN      | 7455   | 37 | 7  | 100350466 | 100350466 | Missense_Mutation | SNP | C  | T  | 15  | 776 | c.2738C>T      | c.(2737-2739)CCC>CTC  | p.P913L  |



|        |                 |          |        |    |   |           |           |                   |     |    |    |     |     |                 |                        |               |
|--------|-----------------|----------|--------|----|---|-----------|-----------|-------------------|-----|----|----|-----|-----|-----------------|------------------------|---------------|
| Pat_31 | Pre-Treatment   | SYPL1    | 6856   | 37 | 7 | 105733548 | 105733548 | Nonsense_Mutation | SNP | C  | T  | 5   | 113 | c.492G>A        | c.(490-492)TGG>TGA     | p.W164*       |
| Pat_31 | Pre-Treatment   | BRAF     | 673    | 37 | 7 | 140453136 | 140453136 | Missense_Mutation | SNP | A  | T  | 99  | 142 | c.1799T>A       | c.(1798-1800)GTG>GAG   | p.V600E       |
| Pat_31 | Pre-Treatment   | ACTR3C   | 653857 | 37 | 7 | 149983566 | 149983566 | Nonsense_Mutation | SNP | G  | A  | 79  | 201 | c.361C>T        | c.(361-363)CAG>TAG     | p.Q121*       |
| Pat_31 | Pre-Treatment   | KIF13B   | 23303  | 37 | 8 | 28980923  | 28980924  | Missense_Mutation | DNP | GG | TA | 93  | 189 | .:3438_3439CC>T | 436-3441)GTCCCC>GTTA   | p.P1147T      |
| Pat_31 | Pre-Treatment   | MYST3    | 7994   | 37 | 8 | 41798364  | 41798364  | Missense_Mutation | SNP | C  | T  | 269 | 467 | c.3035G>A       | c.(3034-3036)CGA>CAA   | p.R1012Q      |
| Pat_31 | Pre-Treatment   | OPRK1    | 4986   | 37 | 8 | 54142245  | 54142245  | Missense_Mutation | SNP | C  | T  | 68  | 87  | c.755G>A        | c.(754-756)CGT>CAT     | p.R252H       |
| Pat_31 | Pre-Treatment   | C8orf34  | 116328 | 37 | 8 | 69445300  | 69445300  | Missense_Mutation | SNP | G  | A  | 128 | 224 | c.763G>A        | c.(763-765)GAT>AAT     | p.D255N       |
| Pat_31 | Pre-Treatment   | JPH1     | 56704  | 37 | 8 | 75227565  | 75227565  | Missense_Mutation | SNP | G  | A  | 53  | 411 | c.670C>T        | c.(670-672)CGC>TGC     | p.R224C       |
| Pat_31 | Pre-Treatment   | ENPP2    | 5168   | 37 | 8 | 120629793 | 120629794 | Missense_Mutation | DNP | GG | AA | 16  | 108 | c.489_490CC>TT  | 487-492)CGCCCT>CGTTT   | p.P164S       |
| Pat_31 | Pre-Treatment   | ZNF251   | 90987  | 37 | 8 | 145947717 | 145947717 | Missense_Mutation | SNP | C  | T  | 118 | 140 | c.1328G>A       | c.(1327-1329)CGT>CAT   | p.R443H       |
| Pat_31 | Pre-Treatment   | FOXD4    | 2298   | 37 | 9 | 117809    | 117809    | Missense_Mutation | SNP | T  | A  | 8   | 400 | c.311A>T        | c.(310-312)AAG>ATG     | p.K104M       |
| Pat_31 | Pre-Treatment   | COL15A1  | 1306   | 37 | 9 | 101747945 | 101747945 | Missense_Mutation | SNP | T  | C  | 3   | 82  | c.199T>C        | c.(199-201)TAC>CAC     | p.Y67H        |
| Pat_31 | Pre-Treatment   | CYL2     | 1539   | 37 | 9 | 105767749 | 105767749 | Missense_Mutation | SNP | G  | A  | 4   | 82  | c.836G>A        | c.(835-837)AGT>AAT     | p.S279N       |
| Pat_31 | Pre-Treatment   | ZNF462   | 58499  | 37 | 9 | 109746535 | 109746535 | Missense_Mutation | SNP | C  | T  | 33  | 167 | c.6901C>T       | c.(6901-6903)CGC>TGC   | p.R2301C      |
| Pat_31 | Pre-Treatment   | ACTL7B   | 10880  | 37 | 9 | 111617225 | 111617225 | Missense_Mutation | SNP | G  | A  | 4   | 113 | c.986C>T        | c.(985-987)ACG>ATG     | p.T329M       |
| Pat_31 | Pre-Treatment   | COL5A1   | 1289   | 37 | 9 | 137620526 | 137620526 | Missense_Mutation | SNP | G  | A  | 230 | 106 | c.797G>A        | c.(796-798)GGA>GAA     | p.G266E       |
| Pat_31 | Pre-Treatment   | ABCA2    | 20     | 37 | 9 | 139910912 | 139910912 | Missense_Mutation | SNP | C  | A  | 5   | 211 | c.2932G>T       | c.(2932-2934)GGC>TGC   | p.G978C       |
| Pat_31 | Pre-Treatment   | WAS      | 7454   | 37 | X | 48544334  | 48544334  | Splice_Site       | SNP | G  | A  | 61  | 13  | c.464_splice    | c.e5-1                 | p.D155_splice |
| Pat_31 | Pre-Treatment   | DOCK11   | 139818 | 37 | X | 117722261 | 117722261 | Missense_Mutation | SNP | G  | A  | 97  | 21  | c.1957G>A       | c.(1957-1959)GAT>AAT   | p.D653N       |
| Pat_31 | Pre-Treatment   | GABRQ    | 55879  | 37 | X | 151821440 | 151821440 | Missense_Mutation | SNP | G  | T  | 21  | 94  | c.1595G>T       | c.(1594-1596)TGG>TTG   | p.W532L       |
| Pat_31 | Pre-Treatment   | ATP2B3   | 492    | 37 | X | 152813349 | 152813349 | Missense_Mutation | SNP | G  | T  | 4   | 110 | c.1015G>T       | c.(1015-1017)GGT>TGT   | p.G339C       |
| Pat_31 | Post-Resistance | DVL1     | 1855   | 37 | 1 | 1277117   | 1277117   | Missense_Mutation | SNP | A  | G  | 3   | 49  | c.535T>C        | c.(535-537)TCC>CCC     | p.S179P       |
| Pat_31 | Post-Resistance | PLCH2    | 9651   | 37 | 1 | 2421244   | 2421244   | Missense_Mutation | SNP | G  | A  | 4   | 141 | c.1453G>A       | c.(1453-1455)GAG>AAG   | p.E485K       |
| Pat_31 | Post-Resistance | CHD5     | 26038  | 37 | 1 | 6190319   | 6190319   | Missense_Mutation | SNP | G  | A  | 4   | 100 | c.3332C>T       | c.(3331-3333)ACG>ATG   | p.T1111M      |
| Pat_31 | Post-Resistance | PIK3CD   | 5293   | 37 | 1 | 9782036   | 9782036   | Missense_Mutation | SNP | G  | A  | 4   | 133 | c.2059G>A       | c.(2059-2061)GAA>AAA   | p.E687K       |
| Pat_31 | Post-Resistance | CASZ1    | 54897  | 37 | 1 | 10699598  | 10699598  | Missense_Mutation | SNP | C  | T  | 4   | 99  | c.4681G>A       | c.(4681-4683)GAC>AAC   | p.D1561N      |
| Pat_31 | Post-Resistance | DNAJC16  | 23341  | 37 | 1 | 15855713  | 15855713  | Missense_Mutation | SNP | G  | A  | 4   | 107 | c.113G>A        | c.(112-114)CGA>CAA     | p.R38Q        |
| Pat_31 | Post-Resistance | NBPF1    | 55672  | 37 | 1 | 16893781  | 16893781  | Missense_Mutation | SNP | T  | G  | 14  | 657 | c.2957A>C       | c.(2956-2958)TAT>TCT   | p.Y986S       |
| Pat_31 | Post-Resistance | CROCC    | 9696   | 37 | 1 | 17292241  | 17292241  | Missense_Mutation | SNP | C  | T  | 35  | 49  | c.4429C>T       | c.(4429-4431)CCC>TCC   | p.P1477S      |
| Pat_31 | Post-Resistance | MYOM3    | 127294 | 37 | 1 | 24426221  | 24426221  | Missense_Mutation | SNP | C  | T  | 4   | 128 | c.605G>A        | c.(604-606)GGA>GAA     | p.G202E       |
| Pat_31 | Post-Resistance | SRRM1    | 10250  | 37 | 1 | 24993374  | 24993374  | Missense_Mutation | SNP | C  | A  | 4   | 128 | c.1697C>A       | c.(1696-1698)CCT>CAT   | p.P566H       |
| Pat_31 | Post-Resistance | SRRM1    | 10250  | 37 | 1 | 24993386  | 24993386  | Missense_Mutation | SNP | G  | T  | 4   | 130 | c.1709G>T       | c.(1708-1710)CGC>CTC   | p.R570L       |
| Pat_31 | Post-Resistance | TXLNA    | 200081 | 37 | 1 | 32646954  | 32646954  | Missense_Mutation | SNP | G  | A  | 7   | 157 | c.281G>A        | c.(280-282)GGC>GAC     | p.G94D        |
| Pat_31 | Post-Resistance | CSMD2    | 114784 | 37 | 1 | 34276445  | 34276445  | Missense_Mutation | SNP | G  | T  | 28  | 140 | c.1225C>A       | c.(1225-1227)CTT>ATT   | p.L409I       |
| Pat_31 | Post-Resistance | MACF1    | 23499  | 37 | 1 | 39889724  | 39889724  | Nonsense_Mutation | SNP | C  | T  | 25  | 35  | c.11494C>T      | c.(11494-11496)CGA>TGA | p.R3832*      |
| Pat_31 | Post-Resistance | PPT1     | 5538   | 37 | 1 | 40555082  | 40555082  | Missense_Mutation | SNP | C  | T  | 4   | 152 | c.536G>A        | c.(535-537)CGC>CAC     | p.R179H       |
| Pat_31 | Post-Resistance | ZSWIM5   | 57643  | 37 | 1 | 45504680  | 45504680  | Missense_Mutation | SNP | G  | A  | 21  | 58  | c.1822C>T       | c.(1822-1824)CCC>TCC   | p.P608S       |
| Pat_31 | Post-Resistance | ZCCHC11  | 23318  | 37 | 1 | 52897080  | 52897080  | Missense_Mutation | SNP | G  | A  | 4   | 45  | c.4313C>T       | c.(4312-4314)TCC>TTC   | p.S1438F      |
| Pat_31 | Post-Resistance | INADL    | 10207  | 37 | 1 | 62374107  | 62374107  | Missense_Mutation | SNP | G  | A  | 3   | 49  | c.3445G>A       | c.(3445-3447)GGA>AGA   | p.G1149R      |
| Pat_31 | Post-Resistance | CACHD1   | 57685  | 37 | 1 | 65130356  | 65130356  | Missense_Mutation | SNP | G  | T  | 40  | 25  | c.2117G>T       | c.(2116-2118)AGA>ATA   | p.R706I       |
| Pat_31 | Post-Resistance | KIAA1324 | 57535  | 37 | 1 | 109731772 | 109731772 | Missense_Mutation | SNP | C  | T  | 3   | 49  | c.1304C>T       | c.(1303-1305)ACG>ATG   | p.T435M       |
| Pat_31 | Post-Resistance | NBPF9    | 400818 | 37 | 1 | 144621586 | 144621586 | Missense_Mutation | SNP | C  | G  | 8   | 516 | c.918C>G        | c.(916-918)TTC>TTG     | p.F306L       |
| Pat_31 | Post-Resistance | HIST2H3D | 653604 | 37 | 1 | 149785145 | 149785145 | Missense_Mutation | SNP | G  | A  | 4   | 63  | c.92C>T         | c.(91-93)CCG>CTG       | p.P31L        |
| Pat_31 | Post-Resistance | TUFT1    | 7286   | 37 | 1 | 151535142 | 151535142 | Missense_Mutation | SNP | G  | A  | 4   | 85  | c.217G>A        | c.(217-219)GGA>AGA     | p.G73R        |
| Pat_31 | Post-Resistance | TRIM46   | 80128  | 37 | 1 | 155148051 | 155148051 | Missense_Mutation | SNP | T  | A  | 118 | 255 | c.253T>A        | c.(253-255)TCC>ACC     | p.S85T        |
| Pat_31 | Post-Resistance | TRIM46   | 80128  | 37 | 1 | 155152368 | 155152368 | Missense_Mutation | SNP | G  | A  | 51  | 195 | c.1546G>A       | c.(1546-1548)GAA>AAA   | p.E516K       |
| Pat_31 | Post-Resistance | C1orf104 | 284618 | 37 | 1 | 155290636 | 155290636 | Missense_Mutation | SNP | C  | T  | 4   | 121 | c.644G>A        | c.(643-645)CGT>CAT     | p.R215H       |

|        |                 |          |        |    |    |           |           |                   |     |   |   |     |     |            |                        |          |
|--------|-----------------|----------|--------|----|----|-----------|-----------|-------------------|-----|---|---|-----|-----|------------|------------------------|----------|
| Pat_31 | Post-Resistance | FCRL2    | 79368  | 37 | 1  | 157737066 | 157737066 | Missense_Mutation | SNP | C | T | 63  | 121 | c.1117G>A  | c.(1117-1119)GGC>AGC   | p.G373S  |
| Pat_31 | Post-Resistance | SPTA1    | 6708   | 37 | 1  | 158617430 | 158617430 | Missense_Mutation | SNP | C | T | 24  | 68  | c.3795G>A  | c.(3793-3795)ATG>ATA   | p.M1265I |
| Pat_31 | Post-Resistance | CCDC19   | 25790  | 37 | 1  | 159854287 | 159854287 | Missense_Mutation | SNP | C | T | 5   | 243 | c.836G>A   | c.(835-837)CGG>CAG     | p.R279Q  |
| Pat_31 | Post-Resistance | FMO2     | 2327   | 37 | 1  | 171174681 | 171174681 | Nonsense_Mutation | SNP | C | A | 4   | 137 | c.1091C>A  | c.(1090-1092)TCA>TAA   | p.S364*  |
| Pat_31 | Post-Resistance | MYOC     | 4653   | 37 | 1  | 171621343 | 171621343 | Missense_Mutation | SNP | C | T | 25  | 37  | c.409G>A   | c.(409-411)GAG>AAG     | p.E137K  |
| Pat_31 | Post-Resistance | HMCN1    | 83872  | 37 | 1  | 186081953 | 186081953 | Nonsense_Mutation | SNP | C | T | 6   | 183 | c.10999C>T | c.(10999-11001)CGA>TGA | p.R3667* |
| Pat_31 | Post-Resistance | CDC73    | 79577  | 37 | 1  | 193117030 | 193117030 | Missense_Mutation | SNP | T | A | 9   | 52  | c.763T>A   | c.(763-765)TCT>ACT     | p.S255T  |
| Pat_31 | Post-Resistance | CFHR1    | 3078   | 37 | 1  | 196796100 | 196796100 | Missense_Mutation | SNP | G | A | 5   | 315 | c.395G>A   | c.(394-396)CGG>CAG     | p.R132Q  |
| Pat_31 | Post-Resistance | DDX59    | 83479  | 37 | 1  | 200619608 | 200619608 | Missense_Mutation | SNP | A | C | 17  | 20  | c.1259T>G  | c.(1258-1260)ATT>AGT   | p.I420S  |
| Pat_31 | Post-Resistance | DISP1    | 84976  | 37 | 1  | 223178706 | 223178706 | Missense_Mutation | SNP | G | A | 5   | 194 | c.3967G>A  | c.(3967-3969)GAG>AAG   | p.E1323K |
| Pat_31 | Post-Resistance | OBSCN    | 84033  | 37 | 1  | 228412298 | 228412298 | Missense_Mutation | SNP | G | T | 23  | 108 | c.2792G>T  | c.(2791-2793)AGC>ATC   | p.S931I  |
| Pat_31 | Post-Resistance | OBSCN    | 84033  | 37 | 1  | 228495004 | 228495004 | Missense_Mutation | SNP | G | A | 71  | 152 | c.12238G>A | c.(12238-12240)GAG>AAC | p.E4080K |
| Pat_31 | Post-Resistance | FMN2     | 56776  | 37 | 1  | 240371474 | 240371474 | Missense_Mutation | SNP | C | T | 10  | 721 | c.3362C>T  | c.(3361-3363)CCT>CTT   | p.P1121L |
| Pat_31 | Post-Resistance | OR2L2    | 26246  | 37 | 1  | 248201572 | 248201572 | Missense_Mutation | SNP | G | A | 70  | 104 | c.3G>A     | c.(1-3)ATG>ATA         | p.M1I    |
| Pat_31 | Post-Resistance | OR2T4    | 127074 | 37 | 1  | 248524937 | 248524937 | Missense_Mutation | SNP | A | T | 5   | 284 | c.55A>T    | c.(55-57)ATG>TTG       | p.M19L   |
| Pat_31 | Post-Resistance | C10orf18 | 54906  | 37 | 10 | 5790354   | 5790354   | Missense_Mutation | SNP | C | T | 3   | 47  | c.4970C>T  | c.(4969-4971)ACG>ATG   | p.T1657M |
| Pat_31 | Post-Resistance | MAP3K8   | 1326   | 37 | 10 | 30736733  | 30736733  | Missense_Mutation | SNP | G | A | 4   | 157 | c.359G>A   | c.(358-360)CGT>CAT     | p.R120H  |
| Pat_31 | Post-Resistance | ANKRD30A | 91074  | 37 | 10 | 37430754  | 37430754  | Missense_Mutation | SNP | T | C | 6   | 35  | c.761T>C   | c.(760-762)GTG>GCG     | p.V254A  |
| Pat_31 | Post-Resistance | FAM13C   | 220965 | 37 | 10 | 61014112  | 61014112  | Missense_Mutation | SNP | G | T | 36  | 180 | c.1328C>A  | c.(1327-1329)ACA>AAA   | p.T443K  |
| Pat_31 | Post-Resistance | CTNNA3   | 29119  | 37 | 10 | 68138957  | 68138957  | Missense_Mutation | SNP | G | A | 4   | 160 | c.1685C>T  | c.(1684-1686)GCT>GTT   | p.A562V  |
| Pat_31 | Post-Resistance | NRG3     | 10718  | 37 | 10 | 84745186  | 84745186  | Missense_Mutation | SNP | G | A | 7   | 27  | c.1916G>A  | c.(1915-1917)CGA>CAA   | p.R639Q  |
| Pat_31 | Post-Resistance | CYP2C18  | 1562   | 37 | 10 | 96495124  | 96495124  | Missense_Mutation | SNP | G | A | 38  | 167 | c.1396G>A  | c.(1396-1398)GAT>AAT   | p.D466N  |
| Pat_31 | Post-Resistance | RPL13AP6 | 644511 | 37 | 10 | 112696673 | 112696673 | Missense_Mutation | SNP | A | G | 3   | 59  | c.319T>C   | c.(319-321)TGC>CGC     | p.C107R  |
| Pat_31 | Post-Resistance | KRTAP5-5 | 439915 | 37 | 11 | 1651459   | 1651459   | Missense_Mutation | SNP | G | T | 5   | 56  | c.389G>T   | c.(388-390)GGC>GTC     | p.G130V  |
| Pat_31 | Post-Resistance | OSBPL5   | 114879 | 37 | 11 | 3128570   | 3128570   | Missense_Mutation | SNP | C | T | 4   | 124 | c.982G>A   | c.(982-984)GAC>AAC     | p.D328N  |
| Pat_31 | Post-Resistance | OR52K2   | 119774 | 37 | 11 | 4471233   | 4471233   | Missense_Mutation | SNP | T | A | 9   | 161 | c.664T>A   | c.(664-666)TTT>ATT     | p.F222I  |
| Pat_31 | Post-Resistance | OR52E2   | 119678 | 37 | 11 | 5080691   | 5080691   | Missense_Mutation | SNP | C | T | 4   | 91  | c.167G>A   | c.(166-168)AGC>AAC     | p.S56N   |
| Pat_31 | Post-Resistance | ARFIP2   | 23647  | 37 | 11 | 6500104   | 6500104   | Missense_Mutation | SNP | C | T | 4   | 132 | c.401G>A   | c.(400-402)CGT>CAT     | p.R134H  |
| Pat_31 | Post-Resistance | SLC6A5   | 9152   | 37 | 11 | 20673940  | 20673940  | Missense_Mutation | SNP | G | A | 4   | 146 | c.2176G>A  | c.(2176-2178)GTC>ATC   | p.V726I  |
| Pat_31 | Post-Resistance | NUP160   | 23279  | 37 | 11 | 47834555  | 47834555  | Missense_Mutation | SNP | G | A | 4   | 60  | c.1831C>T  | c.(1831-1833)CGG>TGG   | p.R611W  |
| Pat_31 | Post-Resistance | OR5M8    | 219484 | 37 | 11 | 56258261  | 56258261  | Missense_Mutation | SNP | A | C | 3   | 84  | c.586T>G   | c.(586-588)TTG>GTG     | p.L196V  |
| Pat_31 | Post-Resistance | CCDC88B  | 283234 | 37 | 11 | 64111735  | 64111735  | Nonsense_Mutation | SNP | G | A | 4   | 93  | c.1722G>A  | c.(1720-1722)TGG>TGA   | p.W574*  |
| Pat_31 | Post-Resistance | RPS6KA4  | 8986   | 37 | 11 | 64129374  | 64129374  | Missense_Mutation | SNP | C | T | 5   | 248 | c.806C>T   | c.(805-807)GCG>GTG     | p.A269V  |
| Pat_31 | Post-Resistance | MUS81    | 80198  | 37 | 11 | 65632782  | 65632782  | Missense_Mutation | SNP | G | A | 4   | 92  | c.1493G>A  | c.(1492-1494)AGC>AAC   | p.S498N  |
| Pat_31 | Post-Resistance | C11orf24 | 53838  | 37 | 11 | 68029495  | 68029495  | Missense_Mutation | SNP | G | A | 4   | 74  | c.968C>T   | c.(967-969)ACG>ATG     | p.T323M  |
| Pat_31 | Post-Resistance | ATM      | 472    | 37 | 11 | 108168038 | 108168038 | Missense_Mutation | SNP | T | C | 3   | 67  | c.4934T>C  | c.(4933-4935)GTG>GCG   | p.V1645A |
| Pat_31 | Post-Resistance | ARHGEF12 | 23365  | 37 | 11 | 120302604 | 120302604 | Missense_Mutation | SNP | G | A | 4   | 107 | c.908G>A   | c.(907-909)AGT>AAT     | p.S303N  |
| Pat_31 | Post-Resistance | SORL1    | 6653   | 37 | 11 | 121500252 | 121500252 | Missense_Mutation | SNP | G | A | 4   | 104 | c.6625G>A  | c.(6625-6627)GTC>ATC   | p.V2209I |
| Pat_31 | Post-Resistance | SIAE     | 54414  | 37 | 11 | 124507077 | 124507077 | Nonsense_Mutation | SNP | G | A | 5   | 258 | c.1342C>T  | c.(1342-1344)CGA>TGA   | p.R448*  |
| Pat_31 | Post-Resistance | FGF6     | 2251   | 37 | 12 | 4554680   | 4554680   | Missense_Mutation | SNP | C | A | 4   | 91  | c.57G>T    | c.(55-57)CAG>CAT       | p.Q19H   |
| Pat_31 | Post-Resistance | CD163    | 9332   | 37 | 12 | 7639539   | 7639539   | Missense_Mutation | SNP | C | A | 36  | 80  | c.2094G>T  | c.(2092-2094)TTG>TTT   | p.L698F  |
| Pat_31 | Post-Resistance | PRB1     | 5542   | 37 | 12 | 11506690  | 11506690  | Missense_Mutation | SNP | C | T | 60  | 400 | c.347G>A   | c.(346-348)GGA>GAA     | p.G116E  |
| Pat_31 | Post-Resistance | ABCC9    | 10060  | 37 | 12 | 21981927  | 21981927  | Missense_Mutation | SNP | G | A | 110 | 295 | c.3634C>T  | c.(3634-3636)CTC>TTC   | p.L1212F |
| Pat_31 | Post-Resistance | IPO8     | 10526  | 37 | 12 | 30790032  | 30790032  | Missense_Mutation | SNP | T | G | 73  | 144 | c.2579A>C  | c.(2578-2580)CAG>CCG   | p.Q860P  |
| Pat_31 | Post-Resistance | H3F3C    | 440093 | 37 | 12 | 31944920  | 31944920  | Missense_Mutation | SNP | G | A | 4   | 146 | c.181C>T   | c.(181-183)CTC>TTC     | p.L61F   |
| Pat_31 | Post-Resistance | TUBA1B   | 10376  | 37 | 12 | 49521767  | 49521767  | Missense_Mutation | SNP | C | T | 100 | 341 | c.1330G>A  | c.(1330-1332)GGT>AGT   | p.G444S  |
| Pat_31 | Post-Resistance | TROAP    | 10024  | 37 | 12 | 49724486  | 49724486  | Missense_Mutation | SNP | G | A | 4   | 49  | c.1858G>A  | c.(1858-1860)GGG>AGG   | p.G620R  |

|        |                 |          |        |    |    |           |           |                   |     |   |   |     |     |           |                      |          |
|--------|-----------------|----------|--------|----|----|-----------|-----------|-------------------|-----|---|---|-----|-----|-----------|----------------------|----------|
| Pat_31 | Post-Resistance | TARBP2   | 6895   | 37 | 12 | 53899895  | 53899895  | Missense_Mutation | SNP | C | T | 4   | 114 | c.1064C>T | c.(1063-1065)GCC>GTC | p.A355V  |
| Pat_31 | Post-Resistance | SRGAP1   | 57522  | 37 | 12 | 64458916  | 64458916  | Nonsense_Mutation | SNP | C | T | 4   | 142 | c.1042C>T | c.(1042-1044)CAG>TAG | p.Q348*  |
| Pat_31 | Post-Resistance | FRS2     | 10818  | 37 | 12 | 69966038  | 69966038  | Missense_Mutation | SNP | C | T | 104 | 173 | c.553C>T  | c.(553-555)CCT>TCT   | p.P185S  |
| Pat_31 | Post-Resistance | LGR5     | 8549   | 37 | 12 | 71978408  | 71978408  | Missense_Mutation | SNP | G | C | 5   | 318 | c.2618G>C | c.(2617-2619)AGC>ACC | p.S873T  |
| Pat_31 | Post-Resistance | HSP90B1  | 7184   | 37 | 12 | 104324300 | 104324300 | Missense_Mutation | SNP | G | A | 4   | 126 | c.7G>A    | c.(7-9)GCC>ACC       | p.A3T    |
| Pat_31 | Post-Resistance | CMKLR1   | 1240   | 37 | 12 | 108686070 | 108686070 | Missense_Mutation | SNP | G | A | 3   | 76  | c.670C>T  | c.(670-672)CGC>TGC   | p.R224C  |
| Pat_31 | Post-Resistance | SDSL     | 113675 | 37 | 12 | 113866995 | 113866995 | Missense_Mutation | SNP | C | T | 4   | 151 | c.245C>T  | c.(244-246)GCT>GTT   | p.A82V   |
| Pat_31 | Post-Resistance | LHFP     | 10186  | 37 | 13 | 40175179  | 40175179  | Missense_Mutation | SNP | G | A | 133 | 409 | c.175C>T  | c.(175-177)CGG>TGG   | p.R59W   |
| Pat_31 | Post-Resistance | COG6     | 57511  | 37 | 13 | 40293485  | 40293485  | Missense_Mutation | SNP | G | A | 3   | 57  | c.1397G>A | c.(1396-1398)CGT>CAT | p.R466H  |
| Pat_31 | Post-Resistance | ERCC5    | 2073   | 37 | 13 | 103518233 | 103518233 | Missense_Mutation | SNP | C | T | 29  | 95  | c.2171C>T | c.(2170-2172)TCG>TTG | p.S724L  |
| Pat_31 | Post-Resistance | OR4L1    | 122742 | 37 | 14 | 20528589  | 20528589  | Missense_Mutation | SNP | C | T | 16  | 44  | c.386C>T  | c.(385-387)CCC>CTC   | p.P129L  |
| Pat_31 | Post-Resistance | CHD8     | 57680  | 37 | 14 | 21868724  | 21868724  | Missense_Mutation | SNP | C | T | 3   | 25  | c.3581G>A | c.(3580-3582)CGT>CAT | p.R1194H |
| Pat_31 | Post-Resistance | PNN      | 5411   | 37 | 14 | 39645289  | 39645289  | Nonsense_Mutation | SNP | C | T | 22  | 57  | c.121C>T  | c.(121-123)CAA>TAA   | p.Q41*   |
| Pat_31 | Post-Resistance | KCNH5    | 27133  | 37 | 14 | 63174990  | 63174990  | Nonsense_Mutation | SNP | G | A | 4   | 20  | c.2203C>T | c.(2203-2205)CAG>TAG | p.Q735*  |
| Pat_31 | Post-Resistance | AHSA1    | 10598  | 37 | 14 | 77934803  | 77934803  | Missense_Mutation | SNP | C | T | 16  | 45  | c.796C>T  | c.(796-798)CCT>TCT   | p.P266S  |
| Pat_31 | Post-Resistance | C2CD4A   | 145741 | 37 | 15 | 62359913  | 62359913  | Missense_Mutation | SNP | C | T | 6   | 139 | c.101C>T  | c.(100-102)ACC>ATC   | p.T34I   |
| Pat_31 | Post-Resistance | MAP2K1   | 5604   | 37 | 15 | 66727442  | 66727442  | Missense_Mutation | SNP | T | A | 63  | 90  | c.158T>A  | c.(157-159)TTT>TAT   | p.F53Y   |
| Pat_31 | Post-Resistance | C15orf39 | 56905  | 37 | 15 | 75501033  | 75501033  | Missense_Mutation | SNP | C | T | 3   | 52  | c.2644C>T | c.(2644-2646)CGG>TGG | p.R882W  |
| Pat_31 | Post-Resistance | FURIN    | 5045   | 37 | 15 | 91422039  | 91422039  | Missense_Mutation | SNP | G | A | 4   | 151 | c.886G>A  | c.(886-888)GGG>AGG   | p.G296R  |
| Pat_31 | Post-Resistance | RGMA     | 56963  | 37 | 15 | 93595495  | 93595495  | Missense_Mutation | SNP | G | A | 4   | 94  | c.373C>T  | c.(373-375)CGC>TGC   | p.R125C  |
| Pat_31 | Post-Resistance | PKD1     | 5310   | 37 | 16 | 2162933   | 2162933   | Missense_Mutation | SNP | G | A | 31  | 162 | c.3017C>T | c.(3016-3018)ACC>ATC | p.T1006I |
| Pat_31 | Post-Resistance | GLYR1    | 84656  | 37 | 16 | 4871580   | 4871580   | Missense_Mutation | SNP | C | T | 4   | 95  | c.700G>A  | c.(700-702)GCA>ACA   | p.A234T  |
| Pat_31 | Post-Resistance | KIAA0430 | 9665   | 37 | 16 | 15694351  | 15694351  | Missense_Mutation | SNP | C | G | 4   | 142 | c.4747G>C | c.(4747-4749)GAG>CAG | p.E1583Q |
| Pat_31 | Post-Resistance | NUP93    | 9688   | 37 | 16 | 56792560  | 56792560  | Missense_Mutation | SNP | A | G | 6   | 85  | c.290A>G  | c.(289-291)GAC>GGC   | p.D97G   |
| Pat_31 | Post-Resistance | DPEP3    | 64180  | 37 | 16 | 68012486  | 68012486  | Missense_Mutation | SNP | G | A | 9   | 523 | c.533C>T  | c.(532-534)GCC>GTC   | p.A178V  |
| Pat_31 | Post-Resistance | AP1G1    | 164    | 37 | 16 | 71823331  | 71823331  | Nonsense_Mutation | SNP | G | A | 29  | 181 | c.52C>T   | c.(52-54)CGA>TGA     | p.R18*   |
| Pat_31 | Post-Resistance | CLEC18B  | 497190 | 37 | 16 | 74446997  | 74446997  | Missense_Mutation | SNP | G | A | 20  | 108 | c.614C>T  | c.(613-615)TCG>TTG   | p.S205L  |
| Pat_31 | Post-Resistance | LDHD     | 197257 | 37 | 16 | 75148022  | 75148022  | Missense_Mutation | SNP | C | T | 4   | 148 | c.740G>A  | c.(739-741)GGC>GAC   | p.G247D  |
| Pat_31 | Post-Resistance | C17orf97 | 400566 | 37 | 17 | 263384    | 263384    | Missense_Mutation | SNP | G | C | 4   | 33  | c.780G>C  | c.(778-780)GAG>GAC   | p.E260D  |
| Pat_31 | Post-Resistance | SMYD4    | 114826 | 37 | 17 | 1703561   | 1703561   | Missense_Mutation | SNP | T | C | 4   | 181 | c.1127A>G | c.(1126-1128)AAC>AGC | p.N376S  |
| Pat_31 | Post-Resistance | KIAA0664 | 23277  | 37 | 17 | 2598703   | 2598703   | Missense_Mutation | SNP | G | A | 8   | 208 | c.2392C>T | c.(2392-2394)CGG>TGG | p.R798W  |
| Pat_31 | Post-Resistance | ATP2A3   | 489    | 37 | 17 | 3850912   | 3850912   | Missense_Mutation | SNP | G | A | 4   | 123 | c.868C>T  | c.(868-870)CGT>TGT   | p.R290C  |
| Pat_31 | Post-Resistance | SPNS3    | 201305 | 37 | 17 | 4389577   | 4389577   | Missense_Mutation | SNP | G | A | 18  | 92  | c.1234G>A | c.(1234-1236)GGC>AGC | p.G412S  |
| Pat_31 | Post-Resistance | SLC25A11 | 8402   | 37 | 17 | 4841512   | 4841512   | Missense_Mutation | SNP | G | A | 4   | 89  | c.674C>T  | c.(673-675)GCC>GTC   | p.A225V  |
| Pat_31 | Post-Resistance | NLRP1    | 22861  | 37 | 17 | 5442796   | 5442796   | Missense_Mutation | SNP | C | T | 5   | 90  | c.2809G>A | c.(2809-2811)GTT>ATT | p.V937I  |
| Pat_31 | Post-Resistance | C17orf74 | 201243 | 37 | 17 | 7330590   | 7330590   | Missense_Mutation | SNP | C | T | 19  | 79  | c.1280C>T | c.(1279-1281)TCC>TTC | p.S427F  |
| Pat_31 | Post-Resistance | MYH13    | 8735   | 37 | 17 | 10216611  | 10216611  | Missense_Mutation | SNP | C | T | 6   | 345 | c.4045G>A | c.(4045-4047)GAA>AAA | p.E1349K |
| Pat_31 | Post-Resistance | SREBF1   | 6720   | 37 | 17 | 17720337  | 17720337  | Missense_Mutation | SNP | G | A | 7   | 200 | c.1720C>T | c.(1720-1722)CCC>TCC | p.P574S  |
| Pat_31 | Post-Resistance | SLFN5    | 162394 | 37 | 17 | 33586620  | 33586620  | Missense_Mutation | SNP | C | T | 5   | 298 | c.911C>T  | c.(910-912)GCG>GTG   | p.A304V  |
| Pat_31 | Post-Resistance | STARD3   | 10948  | 37 | 17 | 37809893  | 37809893  | Missense_Mutation | SNP | C | T | 4   | 84  | c.109C>T  | c.(109-111)CTT>TTT   | p.L37F   |
| Pat_31 | Post-Resistance | GSDMB    | 55876  | 37 | 17 | 38068616  | 38068616  | Missense_Mutation | SNP | G | A | 4   | 87  | c.370C>T  | c.(370-372)CGG>TGG   | p.R124W  |
| Pat_31 | Post-Resistance | KRT39    | 390792 | 37 | 17 | 39122910  | 39122910  | Missense_Mutation | SNP | G | A | 6   | 274 | c.199C>T  | c.(199-201)CGC>TGC   | p.R67C   |
| Pat_31 | Post-Resistance | KRTAP4-8 | 728224 | 37 | 17 | 39254013  | 39254013  | Missense_Mutation | SNP | G | C | 4   | 119 | c.324C>G  | c.(322-324)AGC>AGG   | p.S108R  |
| Pat_31 | Post-Resistance | KRTAP4-5 | 85289  | 37 | 17 | 39305839  | 39305839  | Missense_Mutation | SNP | A | T | 5   | 121 | c.181T>A  | c.(181-183)TGC>AGC   | p.C61S   |
| Pat_31 | Post-Resistance | KRT17    | 3872   | 37 | 17 | 39780455  | 39780455  | Missense_Mutation | SNP | G | A | 5   | 321 | c.307C>T  | c.(307-309)CGT>TGT   | p.R103C  |
| Pat_31 | Post-Resistance | STAT5B   | 6777   | 37 | 17 | 40359636  | 40359636  | Missense_Mutation | SNP | G | A | 6   | 245 | c.2017C>T | c.(2017-2019)CGG>TGG | p.R673W  |
| Pat_31 | Post-Resistance | CNTNAP1  | 8506   | 37 | 17 | 40847757  | 40847757  | Missense_Mutation | SNP | G | A | 4   | 110 | c.3211G>A | c.(3211-3213)GGT>AGT | p.G1071S |

|        |                 |          |        |    |    |           |           |                   |     |   |   |    |     |            |                        |          |
|--------|-----------------|----------|--------|----|----|-----------|-----------|-------------------|-----|---|---|----|-----|------------|------------------------|----------|
| Pat_31 | Post-Resistance | HDAC5    | 10014  | 37 | 17 | 42155941  | 42155941  | Missense_Mutation | SNP | C | T | 9  | 271 | c.3256G>A  | c.(3256-3258)GTG>ATG   | p.V1086M |
| Pat_31 | Post-Resistance | UTP18    | 51096  | 37 | 17 | 49343583  | 49343583  | Nonsense_Mutation | SNP | A | T | 4  | 93  | c.496A>T   | c.(496-498)AAA>TAA     | p.K166*  |
| Pat_31 | Post-Resistance | ATP5H    | 10476  | 37 | 17 | 73035082  | 73035082  | Missense_Mutation | SNP | T | A | 19 | 16  | c.431A>T   | c.(430-432)AAA>ATA     | p.K144I  |
| Pat_31 | Post-Resistance | EMILIN2  | 84034  | 37 | 18 | 2884967   | 2884967   | Missense_Mutation | SNP | G | A | 4  | 114 | c.263G>A   | c.(262-264)CGA>CAA     | p.R88Q   |
| Pat_31 | Post-Resistance | KIAA0802 | 23255  | 37 | 18 | 8798224   | 8798224   | Missense_Mutation | SNP | C | T | 4  | 129 | c.2371C>T  | c.(2371-2373)CGG>TGG   | p.R791W  |
| Pat_31 | Post-Resistance | APCDD1   | 147495 | 37 | 18 | 10471816  | 10471816  | Missense_Mutation | SNP | G | A | 4  | 127 | c.532G>A   | c.(532-534)GGG>AGG     | p.G178R  |
| Pat_31 | Post-Resistance | MYO5B    | 4645   | 37 | 18 | 47352938  | 47352938  | Missense_Mutation | SNP | A | G | 4  | 132 | c.5450T>C  | c.(5449-5451)ATG>ACG   | p.M1817T |
| Pat_31 | Post-Resistance | WDR7     | 23335  | 37 | 18 | 54339789  | 54339789  | Nonsense_Mutation | SNP | C | T | 4  | 84  | c.43C>T    | c.(43-45)CGA>TGA       | p.R15*   |
| Pat_31 | Post-Resistance | CNDP1    | 84735  | 37 | 18 | 72250923  | 72250923  | Missense_Mutation | SNP | C | T | 4  | 103 | c.1436C>T  | c.(1435-1437)TCG>TTG   | p.S479L  |
| Pat_31 | Post-Resistance | ZNF407   | 55628  | 37 | 18 | 72344495  | 72344495  | Missense_Mutation | SNP | G | A | 3  | 55  | c.1520G>A  | c.(1519-1521)CGT>CAT   | p.R507H  |
| Pat_31 | Post-Resistance | TSHZ1    | 10194  | 37 | 18 | 72998489  | 72998489  | Missense_Mutation | SNP | T | C | 4  | 81  | c.992T>C   | c.(991-993)CTG>CCG     | p.L331P  |
| Pat_31 | Post-Resistance | PNPLA6   | 10908  | 37 | 19 | 7605863   | 7605863   | Missense_Mutation | SNP | G | A | 4  | 40  | c.877G>A   | c.(877-879)GTG>ATG     | p.V293M  |
| Pat_31 | Post-Resistance | MUC16    | 94025  | 37 | 19 | 9059142   | 9059142   | Missense_Mutation | SNP | G | A | 15 | 46  | c.2830C>T  | c.(28303-28305)TCC>TTC | p.S9435F |
| Pat_31 | Post-Resistance | MUC16    | 94025  | 37 | 19 | 9066741   | 9066741   | Missense_Mutation | SNP | G | A | 26 | 100 | c.20705C>T | c.(20704-20706)TCC>TTC | p.S6902F |
| Pat_31 | Post-Resistance | C19orf66 | 55337  | 37 | 19 | 10202839  | 10202839  | Missense_Mutation | SNP | G | A | 4  | 100 | c.737G>A   | c.(736-738)AGC>AAC     | p.S246N  |
| Pat_31 | Post-Resistance | KANK2    | 25959  | 37 | 19 | 11280876  | 11280876  | Missense_Mutation | SNP | C | T | 4  | 125 | c.2260G>A  | c.(2260-2262)GTT>ATT   | p.V754I  |
| Pat_31 | Post-Resistance | ACP5     | 54     | 37 | 19 | 11687174  | 11687174  | Missense_Mutation | SNP | G | A | 4  | 84  | c.619C>T   | c.(619-621)CCC>TCC     | p.P207S  |
| Pat_31 | Post-Resistance | CC2D1A   | 54862  | 37 | 19 | 14031733  | 14031733  | Missense_Mutation | SNP | A | G | 3  | 83  | c.1639A>G  | c.(1639-1641)AAG>GAG   | p.K547E  |
| Pat_31 | Post-Resistance | ZNF430   | 80264  | 37 | 19 | 21240459  | 21240459  | Missense_Mutation | SNP | A | G | 6  | 123 | c.1345A>G  | c.(1345-1347)ATA>GTA   | p.I449V  |
| Pat_31 | Post-Resistance | ZNF430   | 80264  | 37 | 19 | 21240468  | 21240468  | Missense_Mutation | SNP | A | T | 6  | 134 | c.1354A>T  | c.(1354-1356)ACT>TCT   | p.T452S  |
| Pat_31 | Post-Resistance | ZNF676   | 163223 | 37 | 19 | 22362924  | 22362924  | Missense_Mutation | SNP | G | C | 4  | 192 | c.1595C>G  | c.(1594-1596)CCC>CGC   | p.P532R  |
| Pat_31 | Post-Resistance | ANKRD27  | 84079  | 37 | 19 | 33113428  | 33113428  | Missense_Mutation | SNP | C | T | 4  | 132 | c.1727G>A  | c.(1726-1728)GGC>GAC   | p.G576D  |
| Pat_31 | Post-Resistance | RHPN2    | 85415  | 37 | 19 | 33493266  | 33493266  | Missense_Mutation | SNP | G | A | 4  | 132 | c.992C>T   | c.(991-993)GCG>GTG     | p.A331V  |
| Pat_31 | Post-Resistance | ZNF599   | 148103 | 37 | 19 | 35258305  | 35258305  | Missense_Mutation | SNP | G | A | 22 | 54  | c.157C>T   | c.(157-159)CCC>TCC     | p.P53S   |
| Pat_31 | Post-Resistance | ZNF567   | 163081 | 37 | 19 | 37211295  | 37211295  | Missense_Mutation | SNP | G | A | 4  | 108 | c.1669G>A  | c.(1669-1671)GGC>AGC   | p.G557S  |
| Pat_31 | Post-Resistance | FCGBP    | 8857   | 37 | 19 | 40392568  | 40392568  | Missense_Mutation | SNP | C | T | 10 | 57  | c.7936G>A  | c.(7936-7938)GAG>AAG   | p.E2646K |
| Pat_31 | Post-Resistance | SIX5     | 147912 | 37 | 19 | 46271427  | 46271427  | Missense_Mutation | SNP | G | A | 4  | 54  | c.676C>T   | c.(676-678)CCC>TCC     | p.P226S  |
| Pat_31 | Post-Resistance | PPP5C    | 5536   | 37 | 19 | 46891861  | 46891861  | Missense_Mutation | SNP | G | A | 4  | 45  | c.1228G>A  | c.(1228-1230)GTC>ATC   | p.V410I  |
| Pat_31 | Post-Resistance | PRKD2    | 25865  | 37 | 19 | 47177818  | 47177818  | Missense_Mutation | SNP | C | T | 4  | 62  | c.2599G>A  | c.(2599-2601)GAC>AAC   | p.D867N  |
| Pat_31 | Post-Resistance | PRKD2    | 25865  | 37 | 19 | 47197209  | 47197209  | Nonsense_Mutation | SNP | C | T | 4  | 77  | c.1499G>A  | c.(1498-1500)TGG>TAG   | p.W500*  |
| Pat_31 | Post-Resistance | AP2S1    | 1175   | 37 | 19 | 47342032  | 47342032  | Missense_Mutation | SNP | C | T | 4  | 55  | c.292G>A   | c.(292-294)GTC>ATC     | p.V98I   |
| Pat_31 | Post-Resistance | ATF5     | 22809  | 37 | 19 | 50435732  | 50435732  | Missense_Mutation | SNP | C | T | 35 | 148 | c.232C>T   | c.(232-234)CCT>TCT     | p.P78S   |
| Pat_31 | Post-Resistance | ZNF701   | 55762  | 37 | 19 | 53086622  | 53086622  | Missense_Mutation | SNP | C | G | 5  | 65  | c.1310C>G  | c.(1309-1311)CCT>CGT   | p.P437R  |
| Pat_31 | Post-Resistance | OSCAR    | 126014 | 37 | 19 | 54600311  | 54600311  | Missense_Mutation | SNP | C | T | 4  | 123 | c.286G>A   | c.(286-288)GCT>ACT     | p.A96T   |
| Pat_31 | Post-Resistance | LILRA3   | 11026  | 37 | 19 | 54802518  | 54802518  | Missense_Mutation | SNP | G | A | 4  | 88  | c.923C>T   | c.(922-924)TCG>TTG     | p.S308L  |
| Pat_31 | Post-Resistance | LILRA4   | 23547  | 37 | 19 | 54848270  | 54848270  | Missense_Mutation | SNP | C | T | 5  | 183 | c.1097G>A  | c.(1096-1098)CGT>CAT   | p.R366H  |
| Pat_31 | Post-Resistance | NLRP2    | 55655  | 37 | 19 | 55492996  | 55492996  | Missense_Mutation | SNP | A | T | 4  | 55  | c.409A>T   | c.(409-411)ACG>TCG     | p.T137S  |
| Pat_31 | Post-Resistance | ZNF551   | 90233  | 37 | 19 | 58196694  | 58196694  | Missense_Mutation | SNP | C | T | 20 | 54  | c.98C>T    | c.(97-99)TCT>TTT       | p.S33F   |
| Pat_31 | Post-Resistance | ZNF606   | 80095  | 37 | 19 | 58490292  | 58490292  | Missense_Mutation | SNP | G | T | 18 | 56  | c.1756C>A  | c.(1756-1758)CAT>AAT   | p.H586N  |
| Pat_31 | Post-Resistance | KHK      | 3795   | 37 | 2  | 27317458  | 27317458  | Missense_Mutation | SNP | G | A | 6  | 359 | c.323G>A   | c.(322-324)CGC>CAC     | p.R108H  |
| Pat_31 | Post-Resistance | ATL2     | 64225  | 37 | 2  | 38545777  | 38545777  | Missense_Mutation | SNP | G | A | 4  | 57  | c.503C>T   | c.(502-504)GCT>GTT     | p.A168V  |
| Pat_31 | Post-Resistance | ITPRIPL1 | 150771 | 37 | 2  | 96992716  | 96992716  | Missense_Mutation | SNP | G | A | 3  | 51  | c.347G>A   | c.(346-348)GGC>GAC     | p.G116D  |
| Pat_31 | Post-Resistance | ANKRD39  | 51239  | 37 | 2  | 97519242  | 97519242  | Missense_Mutation | SNP | G | T | 4  | 96  | c.304C>A   | c.(304-306)CAC>AAC     | p.H102N  |
| Pat_31 | Post-Resistance | SEMA4C   | 54910  | 37 | 2  | 97529774  | 97529774  | Missense_Mutation | SNP | G | A | 4  | 93  | c.1219C>T  | c.(1219-1221)CGG>TGG   | p.R407W  |
| Pat_31 | Post-Resistance | GLI2     | 2736   | 37 | 2  | 121748042 | 121748042 | Missense_Mutation | SNP | G | A | 63 | 194 | c.4552G>A  | c.(4552-4554)GAT>AAT   | p.D1518N |
| Pat_31 | Post-Resistance | UGGT1    | 56886  | 37 | 2  | 128848960 | 128848960 | Missense_Mutation | SNP | C | T | 4  | 63  | c.29C>T    | c.(28-30)GCG>GTG       | p.A10V   |
| Pat_31 | Post-Resistance | LRP1B    | 53353  | 37 | 2  | 141208192 | 141208192 | Nonsense_Mutation | SNP | C | T | 45 | 241 | c.10002G>A | c.(10000-10002)TGG>TGA | p.W3334* |

|        |                 |           |        |    |    |           |           |                   |     |    |    |     |     |                  |                       |               |
|--------|-----------------|-----------|--------|----|----|-----------|-----------|-------------------|-----|----|----|-----|-----|------------------|-----------------------|---------------|
| Pat_31 | Post-Resistance | PDK1      | 5163   | 37 | 2  | 173423531 | 173423531 | Missense_Mutation | SNP | C  | T  | 10  | 66  | c.292C>T         | c.(292-294)CCA>TCA    | p.P98S        |
| Pat_31 | Post-Resistance | TTN       | 7273   | 37 | 2  | 179611379 | 179611379 | Missense_Mutation | SNP | C  | T  | 4   | 87  | c.15748G>A       | :(15748-15750)GGG>AGC | p.G5250R      |
| Pat_31 | Post-Resistance | TTN       | 7273   | 37 | 2  | 179632598 | 179632598 | Missense_Mutation | SNP | C  | T  | 18  | 105 | c.9359G>A        | c.(9358-9360)CGG>CAG  | p.R3120Q      |
| Pat_31 | Post-Resistance | DNAH7     | 56171  | 37 | 2  | 196737150 | 196737150 | Missense_Mutation | SNP | C  | T  | 89  | 77  | c.6457G>A        | c.(6457-6459)GTA>ATA  | p.V2153I      |
| Pat_31 | Post-Resistance | EEF1B2    | 1933   | 37 | 2  | 207025358 | 207025358 | Missense_Mutation | SNP | A  | G  | 9   | 490 | c.127A>G         | c.(127-129)AGC>GGC    | p.S43G        |
| Pat_31 | Post-Resistance | ABCA12    | 26154  | 37 | 2  | 215876189 | 215876189 | Missense_Mutation | SNP | G  | A  | 6   | 7   | c.2306C>T        | c.(2305-2307)TCA>TTA  | p.S769L       |
| Pat_31 | Post-Resistance | SP140     | 11262  | 37 | 2  | 231150484 | 231150484 | Missense_Mutation | SNP | G  | A  | 124 | 109 | c.1582G>A        | c.(1582-1584)GGC>AGC  | p.G528S       |
| Pat_31 | Post-Resistance | CHRND     | 1144   | 37 | 2  | 233392156 | 233392156 | Splice_Site       | SNP | G  | A  | 4   | 62  | c.243_splice     | c.e3+1                | p.H81_splice  |
| Pat_31 | Post-Resistance | NGEF      | 25791  | 37 | 2  | 233757732 | 233757732 | Missense_Mutation | SNP | C  | T  | 31  | 91  | c.1018G>A        | c.(1018-1020)GAG>AAG  | p.E340K       |
| Pat_31 | Post-Resistance | NEU2      | 4759   | 37 | 2  | 233899297 | 233899297 | Missense_Mutation | SNP | G  | A  | 4   | 105 | c.673G>A         | c.(673-675)GAG>AAG    | p.E225K       |
| Pat_31 | Post-Resistance | COL6A3    | 1293   | 37 | 2  | 238277739 | 238277739 | Missense_Mutation | SNP | C  | T  | 4   | 76  | c.4367G>A        | c.(4366-4368)CGA>CAA  | p.R1456Q      |
| Pat_31 | Post-Resistance | IDH3B     | 3420   | 37 | 20 | 2640783   | 2640783   | Missense_Mutation | SNP | G  | A  | 5   | 301 | c.808C>T         | c.(808-810)CCC>TCC    | p.P270S       |
| Pat_31 | Post-Resistance | PANK2     | 80025  | 37 | 20 | 3888897   | 3888897   | Missense_Mutation | SNP | C  | T  | 3   | 29  | c.953C>T         | c.(952-954)GCG>GTG    | p.A318V       |
| Pat_31 | Post-Resistance | C20orf103 | 24141  | 37 | 20 | 9496924   | 9496924   | Missense_Mutation | SNP | G  | A  | 4   | 116 | c.391G>A         | c.(391-393)GGA>AGA    | p.G131R       |
| Pat_31 | Post-Resistance | RPN2      | 6185   | 37 | 20 | 35852373  | 35852373  | Splice_Site       | SNP | G  | A  | 4   | 115 | c.1184_splice    | c.e10+1               | p.R395_splice |
| Pat_31 | Post-Resistance | RALGAPB   | 57148  | 37 | 20 | 37117167  | 37117167  | Missense_Mutation | SNP | G  | A  | 6   | 352 | c.92G>A          | c.(91-93)CGA>CAA      | p.R31Q        |
| Pat_31 | Post-Resistance | PREX1     | 57580  | 37 | 20 | 47244484  | 47244484  | Missense_Mutation | SNP | G  | A  | 8   | 90  | c.4784C>T        | c.(4783-4785)TCC>TTC  | p.S1595F      |
| Pat_31 | Post-Resistance | PTGIS     | 5740   | 37 | 20 | 48129663  | 48129663  | Missense_Mutation | SNP | G  | A  | 37  | 149 | c.1160C>T        | c.(1159-1161)CCC>CTC  | p.P387L       |
| Pat_31 | Post-Resistance | TSHZ2     | 128553 | 37 | 20 | 51872447  | 51872447  | Missense_Mutation | SNP | C  | T  | 36  | 49  | c.2450C>T        | c.(2449-2451)CCC>CTC  | p.P817L       |
| Pat_31 | Post-Resistance | PRPF6     | 24148  | 37 | 20 | 62664327  | 62664327  | Missense_Mutation | SNP | G  | A  | 7   | 231 | c.2807G>A        | c.(2806-2808)CGC>CAC  | p.R936H       |
| Pat_31 | Post-Resistance | ADAMTS1   | 9510   | 37 | 21 | 28212314  | 28212314  | Missense_Mutation | SNP | C  | T  | 4   | 126 | c.1732G>A        | c.(1732-1734)GGA>AGA  | p.G578R       |
| Pat_31 | Post-Resistance | CHEK2     | 11200  | 37 | 22 | 29091840  | 29091841  | Missense_Mutation | DNP | TG | CA | 4   | 34  | :.1116_1117CA>TC | (114-1119)TCCAAG>TCTG | p.K373E       |
| Pat_31 | Post-Resistance | SCUBE1    | 80274  | 37 | 22 | 43610107  | 43610107  | Missense_Mutation | SNP | G  | A  | 4   | 142 | c.2042C>T        | c.(2041-2043)TCG>TTG  | p.S681L       |
| Pat_31 | Post-Resistance | PHF21B    | 112885 | 37 | 22 | 45279115  | 45279115  | Missense_Mutation | SNP | G  | A  | 4   | 149 | c.1447C>T        | c.(1447-1449)CGG>TGG  | p.R483W       |
| Pat_31 | Post-Resistance | PLXNB2    | 23654  | 37 | 22 | 50728563  | 50728563  | Missense_Mutation | SNP | C  | T  | 3   | 40  | c.451G>A         | c.(451-453)GTG>ATG    | p.V151M       |
| Pat_31 | Post-Resistance | HDAC11    | 79885  | 37 | 3  | 13545696  | 13545696  | Missense_Mutation | SNP | C  | T  | 4   | 66  | c.752C>T         | c.(751-753)CCC>CTC    | p.P251L       |
| Pat_31 | Post-Resistance | SLC22A13  | 9390   | 37 | 3  | 38317807  | 38317807  | Missense_Mutation | SNP | G  | A  | 4   | 145 | c.1267G>A        | c.(1267-1269)GTG>ATG  | p.V423M       |
| Pat_31 | Post-Resistance | SCN10A    | 6336   | 37 | 3  | 38768102  | 38768102  | Nonsense_Mutation | SNP | C  | A  | 12  | 24  | c.3082G>T        | c.(3082-3084)GGA>TGA  | p.G1028*      |
| Pat_31 | Post-Resistance | CTNNB1    | 1499   | 37 | 3  | 41275191  | 41275191  | Missense_Mutation | SNP | C  | T  | 4   | 133 | c.1357C>T        | c.(1357-1359)CGG>TGG  | p.R453W       |
| Pat_31 | Post-Resistance | CCR2      | 729230 | 37 | 3  | 46401317  | 46401317  | Missense_Mutation | SNP | C  | T  | 20  | 16  | c.1091C>T        | c.(1090-1092)CCT>CTT  | p.P364L       |
| Pat_31 | Post-Resistance | CACNA1D   | 776    | 37 | 3  | 53844263  | 53844263  | Missense_Mutation | SNP | C  | T  | 4   | 162 | c.6130C>T        | c.(6130-6132)CCC>TCC  | p.P2044S      |
| Pat_31 | Post-Resistance | ASB14     | 142686 | 37 | 3  | 57312490  | 57312490  | Missense_Mutation | SNP | C  | T  | 111 | 126 | c.854G>A         | c.(853-855)CGA>CAA    | p.R285Q       |
| Pat_31 | Post-Resistance | FLNB      | 2317   | 37 | 3  | 58116605  | 58116605  | Missense_Mutation | SNP | C  | T  | 14  | 27  | c.4360C>T        | c.(4360-4362)CCG>TCG  | p.P1454S      |
| Pat_31 | Post-Resistance | OR5H2     | 79310  | 37 | 3  | 98002105  | 98002105  | Missense_Mutation | SNP | A  | G  | 4   | 106 | c.374A>G         | c.(373-375)TAT>TGT    | p.Y125C       |
| Pat_31 | Post-Resistance | FSTL1     | 11167  | 37 | 3  | 120121655 | 120121655 | Missense_Mutation | SNP | C  | T  | 4   | 162 | c.805G>A         | c.(805-807)GGA>AGA    | p.G269R       |
| Pat_31 | Post-Resistance | MCM2      | 4171   | 37 | 3  | 127325611 | 127325611 | Missense_Mutation | SNP | C  | T  | 80  | 71  | c.1052C>T        | c.(1051-1053)TCC>TTC  | p.S351F       |
| Pat_31 | Post-Resistance | CRIPAK    | 285464 | 37 | 4  | 1389062   | 1389062   | Nonsense_Mutation | SNP | C  | T  | 9   | 741 | c.763C>T         | c.(763-765)CGA>TGA    | p.R255*       |
| Pat_31 | Post-Resistance | LRRRC66   | 339977 | 37 | 4  | 52860901  | 52860901  | Missense_Mutation | SNP | G  | A  | 7   | 49  | c.2287C>T        | c.(2287-2289)CCA>TCA  | p.P763S       |
| Pat_31 | Post-Resistance | TMPRSS11F | 389208 | 37 | 4  | 68934445  | 68934445  | Missense_Mutation | SNP | C  | T  | 5   | 149 | c.646G>A         | c.(646-648)GGG>AGG    | p.G216R       |
| Pat_31 | Post-Resistance | AFF1      | 4299   | 37 | 4  | 88055758  | 88055758  | Missense_Mutation | SNP | G  | T  | 5   | 292 | c.3423G>T        | c.(3421-3423)ATG>ATT  | p.M1141I      |
| Pat_31 | Post-Resistance | ANK2      | 287    | 37 | 4  | 114275524 | 114275524 | Missense_Mutation | SNP | C  | T  | 3   | 35  | c.5750C>T        | c.(5749-5751)TCG>TTG  | p.S1917L      |
| Pat_31 | Post-Resistance | FAT4      | 79633  | 37 | 4  | 126328170 | 126328170 | Missense_Mutation | SNP | C  | T  | 119 | 216 | c.5443C>T        | c.(5443-5445)CGT>TGT  | p.R1815C      |
| Pat_31 | Post-Resistance | GRIA2     | 2891   | 37 | 4  | 158281195 | 158281195 | Missense_Mutation | SNP | G  | A  | 4   | 119 | c.2191G>A        | c.(2191-2193)GAG>AAG  | p.E731K       |
| Pat_31 | Post-Resistance | ODZ3      | 55714  | 37 | 4  | 183674704 | 183674704 | Missense_Mutation | SNP | G  | A  | 21  | 61  | c.3964G>A        | c.(3964-3966)GAT>AAT  | p.D1322N      |
| Pat_31 | Post-Resistance | CDH10     | 1008   | 37 | 5  | 24511590  | 24511590  | Missense_Mutation | SNP | G  | A  | 6   | 32  | c.848C>T         | c.(847-849)CCA>CTA    | p.P283L       |
| Pat_31 | Post-Resistance | IL7R      | 3575   | 37 | 5  | 35876293  | 35876293  | Missense_Mutation | SNP | G  | A  | 5   | 46  | c.1085G>A        | c.(1084-1086)GGA>GAA  | p.G362E       |
| Pat_31 | Post-Resistance | STARD4    | 134429 | 37 | 5  | 110837705 | 110837705 | Nonsense_Mutation | SNP | C  | T  | 4   | 102 | c.237G>A         | c.(235-237)TGG>TGA    | p.W79*        |



|        |                 |          |        |    |   |           |           |                   |     |    |    |     |     |                 |                      |          |
|--------|-----------------|----------|--------|----|---|-----------|-----------|-------------------|-----|----|----|-----|-----|-----------------|----------------------|----------|
| Pat_31 | Post-Resistance | DCP2     | 167227 | 37 | 5 | 112339673 | 112339673 | Missense_Mutation | SNP | C  | T  | 9   | 66  | c.841C>T        | c.(841-843)CCT>TCT   | p.P281S  |
| Pat_31 | Post-Resistance | TRPC7    | 57113  | 37 | 5 | 135587495 | 135587495 | Missense_Mutation | SNP | A  | G  | 3   | 120 | c.1418T>C       | c.(1417-1419)CTA>CCA | p.L473P  |
| Pat_31 | Post-Resistance | TRPC7    | 57113  | 37 | 5 | 135692613 | 135692613 | Missense_Mutation | SNP | C  | T  | 4   | 154 | c.460G>A        | c.(460-462)GAC>AAC   | p.D154N  |
| Pat_31 | Post-Resistance | PSD2     | 84249  | 37 | 5 | 139193118 | 139193118 | Missense_Mutation | SNP | G  | A  | 4   | 129 | c.596G>A        | c.(595-597)GGC>GAC   | p.G199D  |
| Pat_31 | Post-Resistance | ARHGAP26 | 23092  | 37 | 5 | 142586768 | 142586768 | Missense_Mutation | SNP | C  | T  | 4   | 156 | c.1994C>T       | c.(1993-1995)CCG>CTG | p.P665L  |
| Pat_31 | Post-Resistance | TCOF1    | 6949   | 37 | 5 | 149772343 | 149772343 | Missense_Mutation | SNP | C  | T  | 3   | 56  | c.3590C>T       | c.(3589-3591)GCG>GTG | p.A1197V |
| Pat_31 | Post-Resistance | GPRIN1   | 114787 | 37 | 5 | 176023846 | 176023846 | Missense_Mutation | SNP | G  | A  | 3   | 67  | c.2990C>T       | c.(2989-2991)CCG>CTG | p.P997L  |
| Pat_31 | Post-Resistance | EXOC2    | 55770  | 37 | 6 | 564149    | 564149    | Missense_Mutation | SNP | G  | A  | 4   | 98  | c.1673C>T       | c.(1672-1674)ACT>ATT | p.T558I  |
| Pat_31 | Post-Resistance | HIST1H4F | 8361   | 37 | 6 | 26240762  | 26240762  | Missense_Mutation | SNP | C  | T  | 3   | 62  | c.109C>T        | c.(109-111)CGC>TGC   | p.R37C   |
| Pat_31 | Post-Resistance | BTN2A1   | 11120  | 37 | 6 | 26460026  | 26460026  | Missense_Mutation | SNP | G  | A  | 4   | 60  | c.400G>A        | c.(400-402)GAT>AAT   | p.D134N  |
| Pat_31 | Post-Resistance | ZSCAN16  | 80345  | 37 | 6 | 28097614  | 28097614  | Missense_Mutation | SNP | G  | C  | 11  | 60  | c.933G>C        | c.(931-933)CAG>CAC   | p.Q311H  |
| Pat_31 | Post-Resistance | BAT2     | 7916   | 37 | 6 | 31600180  | 31600180  | Nonsense_Mutation | SNP | C  | T  | 4   | 82  | c.3730C>T       | c.(3730-3732)CGA>TGA | p.R1244* |
| Pat_31 | Post-Resistance | C6orf27  | 80737  | 37 | 6 | 31737520  | 31737520  | Missense_Mutation | SNP | C  | T  | 47  | 120 | c.1249G>A       | c.(1249-1251)GAT>AAT | p.D417N  |
| Pat_31 | Post-Resistance | TNXB     | 7148   | 37 | 6 | 32021309  | 32021309  | Missense_Mutation | SNP | C  | T  | 25  | 92  | c.8641G>A       | c.(8641-8643)GGG>AGG | p.G2881R |
| Pat_31 | Post-Resistance | PBX2     | 5089   | 37 | 6 | 32157481  | 32157481  | Missense_Mutation | SNP | G  | C  | 3   | 158 | c.212C>G        | c.(211-213)GCC>GGC   | p.A71G   |
| Pat_31 | Post-Resistance | GRIK2    | 2898   | 37 | 6 | 102307177 | 102307177 | Missense_Mutation | SNP | C  | T  | 3   | 20  | c.1333C>T       | c.(1333-1335)CTT>TTT | p.L445F  |
| Pat_31 | Post-Resistance | BEND3    | 57673  | 37 | 6 | 107390596 | 107390596 | Missense_Mutation | SNP | G  | A  | 13  | 21  | c.1799C>T       | c.(1798-1800)TCC>TTC | p.S600F  |
| Pat_31 | Post-Resistance | TULP4    | 56995  | 37 | 6 | 158924649 | 158924650 | Missense_Mutation | DNP | CC | TT | 7   | 25  | ..3954_3955CC>T | 952-3957)GTCCTC>GTTT | p.L1319F |
| Pat_31 | Post-Resistance | FNDC1    | 84624  | 37 | 6 | 159636091 | 159636091 | Missense_Mutation | SNP | G  | A  | 4   | 133 | c.575G>A        | c.(574-576)CGG>CAG   | p.R192Q  |
| Pat_31 | Post-Resistance | PNLDC1   | 154197 | 37 | 6 | 160240351 | 160240351 | Nonsense_Mutation | SNP | G  | A  | 4   | 129 | c.1466G>A       | c.(1465-1467)TGG>TAG | p.W489*  |
| Pat_31 | Post-Resistance | AGPAT4   | 56895  | 37 | 6 | 161587390 | 161587390 | Missense_Mutation | SNP | G  | A  | 40  | 99  | c.238C>T        | c.(238-240)CGC>TGC   | p.R80C   |
| Pat_31 | Post-Resistance | OSBPL3   | 26031  | 37 | 7 | 24854801  | 24854801  | Nonsense_Mutation | SNP | C  | T  | 25  | 57  | c.2049G>A       | c.(2047-2049)TGG>TGA | p.W683*  |
| Pat_31 | Post-Resistance | GARS     | 2617   | 37 | 7 | 30661106  | 30661106  | Missense_Mutation | SNP | T  | A  | 6   | 204 | c.1457T>A       | c.(1456-1458)CTG>CAG | p.L486Q  |
| Pat_31 | Post-Resistance | MYO1G    | 64005  | 37 | 7 | 45009452  | 45009452  | Missense_Mutation | SNP | G  | A  | 82  | 222 | c.1355C>T       | c.(1354-1356)ACC>ATC | p.T452I  |
| Pat_31 | Post-Resistance | ZNF716   | 441234 | 37 | 7 | 57529107  | 57529107  | Missense_Mutation | SNP | C  | T  | 5   | 145 | c.940C>T        | c.(940-942)CAC>TAC   | p.H314Y  |
| Pat_31 | Post-Resistance | ABCB1    | 5243   | 37 | 7 | 87168622  | 87168622  | Missense_Mutation | SNP | G  | A  | 4   | 136 | c.2359C>T       | c.(2359-2361)CGG>TGG | p.R787W  |
| Pat_31 | Post-Resistance | PPP1R9A  | 55607  | 37 | 7 | 94876803  | 94876803  | Missense_Mutation | SNP | G  | A  | 4   | 80  | c.2065G>A       | c.(2065-2067)GTT>ATT | p.V689I  |
| Pat_31 | Post-Resistance | SLC25A13 | 10165  | 37 | 7 | 95822414  | 95822414  | Nonsense_Mutation | SNP | G  | A  | 6   | 272 | c.550C>T        | c.(550-552)CGA>TGA   | p.R184*  |
| Pat_31 | Post-Resistance | GAL3ST4  | 79690  | 37 | 7 | 99758125  | 99758125  | Missense_Mutation | SNP | G  | A  | 81  | 289 | c.887C>T        | c.(886-888)TCT>TTT   | p.S296F  |
| Pat_31 | Post-Resistance | AGFG2    | 3268   | 37 | 7 | 100151115 | 100151115 | Missense_Mutation | SNP | T  | C  | 5   | 176 | c.577T>C        | c.(577-579)TCG>CCG   | p.S193P  |
| Pat_31 | Post-Resistance | DGKI     | 9162   | 37 | 7 | 137374674 | 137374674 | Missense_Mutation | SNP | G  | A  | 4   | 152 | c.476C>T        | c.(475-477)CCA>CTA   | p.P159L  |
| Pat_31 | Post-Resistance | BRAF     | 673    | 37 | 7 | 140453136 | 140453136 | Missense_Mutation | SNP | A  | T  | 59  | 91  | c.1799T>A       | c.(1798-1800)GTG>GAG | p.V600E  |
| Pat_31 | Post-Resistance | ABP1     | 26     | 37 | 7 | 150555107 | 150555107 | Missense_Mutation | SNP | C  | T  | 6   | 318 | c.1549C>T       | c.(1549-1551)CGC>TGC | p.R517C  |
| Pat_31 | Post-Resistance | USP17L2  | 377630 | 37 | 8 | 11995399  | 11995399  | Missense_Mutation | SNP | G  | T  | 7   | 231 | c.871C>A        | c.(871-873)CTT>ATT   | p.L291I  |
| Pat_31 | Post-Resistance | KIF13B   | 23303  | 37 | 8 | 28980923  | 28980924  | Missense_Mutation | DNP | GG | TA | 47  | 162 | ..3438_3439CC>T | 436-3441)GTCCC>GTTA  | p.P1147T |
| Pat_31 | Post-Resistance | DDHD2    | 23259  | 37 | 8 | 38090565  | 38090565  | Missense_Mutation | SNP | C  | T  | 4   | 155 | c.53C>T         | c.(52-54)CCG>CTG     | p.P18L   |
| Pat_31 | Post-Resistance | MYST3    | 7994   | 37 | 8 | 41798364  | 41798364  | Missense_Mutation | SNP | C  | T  | 166 | 387 | c.3035G>A       | c.(3034-3036)CGA>CAA | p.R1012Q |
| Pat_31 | Post-Resistance | OPRK1    | 4986   | 37 | 8 | 54142245  | 54142245  | Missense_Mutation | SNP | C  | T  | 32  | 64  | c.755G>A        | c.(754-756)CGT>CAT   | p.R252H  |
| Pat_31 | Post-Resistance | FAM110B  | 90362  | 37 | 8 | 59059012  | 59059012  | Missense_Mutation | SNP | G  | A  | 4   | 115 | c.223G>A        | c.(223-225)GTG>ATG   | p.V75M   |
| Pat_31 | Post-Resistance | C8orf34  | 116328 | 37 | 8 | 69445300  | 69445300  | Missense_Mutation | SNP | G  | A  | 39  | 125 | c.763G>A        | c.(763-765)GAT>AAT   | p.D255N  |
| Pat_31 | Post-Resistance | EIF2C2   | 27161  | 37 | 8 | 141595393 | 141595393 | Missense_Mutation | SNP | G  | A  | 5   | 260 | c.40C>T         | c.(40-42)CCG>TCG     | p.P14S   |
| Pat_31 | Post-Resistance | PLEC     | 5339   | 37 | 8 | 144997771 | 144997771 | Missense_Mutation | SNP | C  | T  | 4   | 109 | c.6737G>A       | c.(6736-6738)CGG>CAG | p.R2246Q |
| Pat_31 | Post-Resistance | ZNF251   | 90987  | 37 | 8 | 145947717 | 145947717 | Missense_Mutation | SNP | C  | T  | 40  | 39  | c.1328G>A       | c.(1327-1329)CGT>CAT | p.R443H  |
| Pat_31 | Post-Resistance | MLLT3    | 4300   | 37 | 9 | 20414323  | 20414323  | Missense_Mutation | SNP | C  | T  | 3   | 66  | c.521G>A        | c.(520-522)AGC>AAC   | p.S174N  |
| Pat_31 | Post-Resistance | ELAVL2   | 1993   | 37 | 9 | 23692733  | 23692733  | Missense_Mutation | SNP | G  | A  | 4   | 154 | c.902C>T        | c.(901-903)GCT>GTT   | p.A301V  |
| Pat_31 | Post-Resistance | BAG1     | 573    | 37 | 9 | 33261107  | 33261107  | Missense_Mutation | SNP | C  | T  | 4   | 152 | c.641G>A        | c.(640-642)CGG>CAG   | p.R214Q  |
| Pat_31 | Post-Resistance | NFX1     | 4799   | 37 | 9 | 33313755  | 33313755  | Missense_Mutation | SNP | G  | A  | 5   | 219 | c.1552G>A       | c.(1552-1554)GGT>AGT | p.G518S  |

|        |                 |            |        |    |   |           |           |                   |     |   |   |    |     |              |                        |               |
|--------|-----------------|------------|--------|----|---|-----------|-----------|-------------------|-----|---|---|----|-----|--------------|------------------------|---------------|
| Pat_31 | Post-Resistance | NOL6       | 65083  | 37 | 9 | 33466592  | 33466592  | Missense_Mutation | SNP | G | A | 4  | 126 | c.2066C>T    | c.(2065-2067)GCT>GTT   | p.A689V       |
| Pat_31 | Post-Resistance | FAM22F     | 54754  | 37 | 9 | 97084549  | 97084549  | Missense_Mutation | SNP | T | C | 6  | 190 | c.776A>G     | c.(775-777)CAG>CGG     | p.Q259R       |
| Pat_31 | Post-Resistance | STXBP1     | 6812   | 37 | 9 | 130415992 | 130415992 | Splice_Site       | SNP | A | G | 3  | 131 | c.88_splice  | c.e3-2                 | p.V30_splice  |
| Pat_31 | Post-Resistance | SARDH      | 1757   | 37 | 9 | 136584125 | 136584125 | Missense_Mutation | SNP | G | A | 4  | 108 | c.955C>T     | c.(955-957)CTC>TTC     | p.L319F       |
| Pat_31 | Post-Resistance | COL5A1     | 1289   | 37 | 9 | 137620526 | 137620526 | Missense_Mutation | SNP | G | A | 59 | 82  | c.797G>A     | c.(796-798)GGA>GAA     | p.G266E       |
| Pat_31 | Post-Resistance | MID1       | 4281   | 37 | X | 10535412  | 10535412  | Missense_Mutation | SNP | C | A | 4  | 114 | c.176G>T     | c.(175-177)TGC>TTC     | p.C59F        |
| Pat_31 | Post-Resistance | WAS        | 7454   | 37 | X | 48544334  | 48544334  | Splice_Site       | SNP | G | A | 33 | 28  | c.464_splice | c.e5-1                 | p.D155_splice |
| Pat_31 | Post-Resistance | SPIN2A     | 54466  | 37 | X | 57162607  | 57162607  | Missense_Mutation | SNP | C | T | 4  | 146 | c.424G>A     | c.(424-426)GGT>AGT     | p.G142S       |
| Pat_31 | Post-Resistance | ABCB7      | 22     | 37 | X | 74282185  | 74282185  | Missense_Mutation | SNP | G | A | 3  | 18  | c.1913C>T    | c.(1912-1914)TCG>TTG   | p.S638L       |
| Pat_31 | Post-Resistance | DOCK11     | 139818 | 37 | X | 117722261 | 117722261 | Missense_Mutation | SNP | G | A | 27 | 12  | c.1957G>A    | c.(1957-1959)GAT>AAT   | p.D653N       |
| Pat_31 | Post-Resistance | MAGEC1     | 9947   | 37 | X | 140994923 | 140994923 | Missense_Mutation | SNP | A | T | 5  | 289 | c.1733A>T    | c.(1732-1734)CAC>CTC   | p.H578L       |
| Pat_31 | Post-Resistance | ZNF185     | 7739   | 37 | X | 152088906 | 152088906 | Missense_Mutation | SNP | G | A | 4  | 146 | c.565G>A     | c.(565-567)GCT>ACT     | p.A189T       |
| Pat_31 | Post-Resistance | DNASE1L1   | 1774   | 37 | X | 153631344 | 153631344 | Missense_Mutation | SNP | C | T | 4  | 132 | c.713G>A     | c.(712-714)AGT>AAT     | p.S238N       |
| Pat_32 | Pre-Treatment   | CPSF3L     | 54973  | 37 | 1 | 1249252   | 1249252   | Missense_Mutation | SNP | C | T | 4  | 179 | c.817G>A     | c.(817-819)GAG>AAG     | p.E273K       |
| Pat_32 | Pre-Treatment   | MASP2      | 10747  | 37 | 1 | 11105485  | 11105485  | Missense_Mutation | SNP | C | T | 3  | 37  | c.524G>A     | c.(523-525)CGT>CAT     | p.R175H       |
| Pat_32 | Pre-Treatment   | MFN2       | 9927   | 37 | 1 | 12056305  | 12056305  | Missense_Mutation | SNP | G | A | 4  | 53  | c.404G>A     | c.(403-405)CGG>CAG     | p.R135Q       |
| Pat_32 | Pre-Treatment   | ARHGEF19   | 128272 | 37 | 1 | 16529023  | 16529023  | Nonsense_Mutation | SNP | G | A | 4  | 107 | c.1954C>T    | c.(1954-1956)CAG>TAG   | p.Q652*       |
| Pat_32 | Pre-Treatment   | IGSF21     | 84966  | 37 | 1 | 18691918  | 18691918  | Missense_Mutation | SNP | C | A | 36 | 67  | c.742C>A     | c.(742-744)CGT>AGT     | p.R248S       |
| Pat_32 | Pre-Treatment   | UBR4       | 23352  | 37 | 1 | 19421483  | 19421483  | Missense_Mutation | SNP | C | T | 4  | 173 | c.13663G>A   | c.(13663-13665)GGT>AGT | p.G4555S      |
| Pat_32 | Pre-Treatment   | HSPG2      | 3339   | 37 | 1 | 22170750  | 22170750  | Missense_Mutation | SNP | G | A | 5  | 109 | c.8507C>T    | c.(8506-8508)TCC>TTC   | p.S2836F      |
| Pat_32 | Pre-Treatment   | EPHB2      | 2048   | 37 | 1 | 23239043  | 23239043  | Missense_Mutation | SNP | G | A | 4  | 68  | c.2803G>A    | c.(2803-2805)GCC>ACC   | p.A935T       |
| Pat_32 | Pre-Treatment   | LYPLA2     | 11313  | 37 | 1 | 24120757  | 24120757  | Missense_Mutation | SNP | C | T | 4  | 94  | c.413C>T     | c.(412-414)CCT>CTT     | p.P138L       |
| Pat_32 | Pre-Treatment   | SRRM1      | 10250  | 37 | 1 | 24993386  | 24993386  | Missense_Mutation | SNP | G | T | 4  | 117 | c.1709G>T    | c.(1708-1710)CGC>CTC   | p.R570L       |
| Pat_32 | Pre-Treatment   | RPS6KA1    | 6195   | 37 | 1 | 26883501  | 26883501  | Missense_Mutation | SNP | C | T | 4  | 189 | c.994C>T     | c.(994-996)CGT>TGT     | p.R332C       |
| Pat_32 | Pre-Treatment   | PIGV       | 55650  | 37 | 1 | 27121636  | 27121636  | Missense_Mutation | SNP | G | A | 5  | 164 | c.1111G>A    | c.(1111-1113)GAT>AAT   | p.D371N       |
| Pat_32 | Pre-Treatment   | ZDHHC18    | 84243  | 37 | 1 | 27176929  | 27176929  | Missense_Mutation | SNP | C | T | 4  | 188 | c.784C>T     | c.(784-786)CGC>TGC     | p.R262C       |
| Pat_32 | Pre-Treatment   | ADC        | 113451 | 37 | 1 | 33583557  | 33583557  | Missense_Mutation | SNP | G | T | 54 | 125 | c.1084G>T    | c.(1084-1086)GAT>TAT   | p.D362Y       |
| Pat_32 | Pre-Treatment   | PHC2       | 1912   | 37 | 1 | 33794669  | 33794669  | Missense_Mutation | SNP | C | G | 3  | 139 | c.2224G>C    | c.(2224-2226)GAT>CAT   | p.D742H       |
| Pat_32 | Pre-Treatment   | KIAA0319L  | 79932  | 37 | 1 | 35915994  | 35915994  | Missense_Mutation | SNP | G | A | 4  | 179 | c.2179C>T    | c.(2179-2181)CTC>TTC   | p.L727F       |
| Pat_32 | Pre-Treatment   | GRIK3      | 2899   | 37 | 1 | 37324831  | 37324831  | Missense_Mutation | SNP | C | T | 4  | 196 | c.982G>A     | c.(982-984)GAC>AAC     | p.D328N       |
| Pat_32 | Pre-Treatment   | GRIK3      | 2899   | 37 | 1 | 37356523  | 37356523  | Missense_Mutation | SNP | T | C | 3  | 82  | c.290A>G     | c.(289-291)AAG>AGG     | p.K97R        |
| Pat_32 | Pre-Treatment   | MACF1      | 23499  | 37 | 1 | 39788607  | 39788607  | Missense_Mutation | SNP | C | T | 6  | 372 | c.4178C>T    | c.(4177-4179)ACG>ATG   | p.T1393M      |
| Pat_32 | Pre-Treatment   | PABPC4     | 8761   | 37 | 1 | 40030384  | 40030384  | Missense_Mutation | SNP | C | T | 4  | 149 | c.1307G>A    | c.(1306-1308)CGC>CAC   | p.R436H       |
| Pat_32 | Pre-Treatment   | RIMS3      | 9783   | 37 | 1 | 41101591  | 41101591  | Missense_Mutation | SNP | C | T | 4  | 92  | c.356G>A     | c.(355-357)GGC>GAC     | p.G119D       |
| Pat_32 | Pre-Treatment   | KIAA0467   | 23334  | 37 | 1 | 43885615  | 43885615  | Missense_Mutation | SNP | G | A | 3  | 76  | c.1090G>A    | c.(1090-1092)GGC>AGC   | p.G364S       |
| Pat_32 | Pre-Treatment   | PTPRF      | 5792   | 37 | 1 | 44044559  | 44044559  | Missense_Mutation | SNP | G | A | 4  | 72  | c.647G>A     | c.(646-648)CGT>CAT     | p.R216H       |
| Pat_32 | Pre-Treatment   | B4GALT2    | 8704   | 37 | 1 | 44450691  | 44450691  | Missense_Mutation | SNP | G | A | 3  | 28  | c.704G>A     | c.(703-705)CGC>CAC     | p.R235H       |
| Pat_32 | Pre-Treatment   | RNF220     | 55182  | 37 | 1 | 44878253  | 44878253  | Missense_Mutation | SNP | G | A | 28 | 69  | c.484G>A     | c.(484-486)GAA>AAA     | p.E162K       |
| Pat_32 | Pre-Treatment   | AKR1A1     | 10327  | 37 | 1 | 46033655  | 46033655  | Missense_Mutation | SNP | C | T | 4  | 24  | c.358C>T     | c.(358-360)CGG>TGG     | p.R120W       |
| Pat_32 | Pre-Treatment   | STIL       | 6491   | 37 | 1 | 47717257  | 47717257  | Missense_Mutation | SNP | C | T | 29 | 67  | c.3415G>A    | c.(3415-3417)GAG>AAG   | p.E1139K      |
| Pat_32 | Pre-Treatment   | C1orf168   | 199920 | 37 | 1 | 57216756  | 57216756  | Missense_Mutation | SNP | G | A | 40 | 86  | c.1348C>T    | c.(1348-1350)CCT>TCT   | p.P450S       |
| Pat_32 | Pre-Treatment   | LRRC7      | 57554  | 37 | 1 | 70504985  | 70504985  | Missense_Mutation | SNP | G | A | 4  | 171 | c.3364G>A    | c.(3364-3366)GCC>ACC   | p.A1122T      |
| Pat_32 | Pre-Treatment   | ST6GALNAC5 | 81849  | 37 | 1 | 77528748  | 77528748  | Missense_Mutation | SNP | C | T | 4  | 127 | c.868C>T     | c.(868-870)CGC>TGC     | p.R290C       |
| Pat_32 | Pre-Treatment   | MCOLN3     | 55283  | 37 | 1 | 85506767  | 85506767  | Missense_Mutation | SNP | C | A | 6  | 246 | c.322G>T     | c.(322-324)GAC>TAC     | p.D108Y       |
| Pat_32 | Pre-Treatment   | HFM1       | 164045 | 37 | 1 | 91817167  | 91817167  | Nonsense_Mutation | SNP | G | A | 4  | 173 | c.2011C>T    | c.(2011-2013)CGA>TGA   | p.R671*       |
| Pat_32 | Pre-Treatment   | AMY2B      | 280    | 37 | 1 | 104116937 | 104116937 | Missense_Mutation | SNP | G | A | 7  | 366 | c.800G>A     | c.(799-801)CGG>CAG     | p.R267Q       |
| Pat_32 | Pre-Treatment   | CELSR2     | 1952   | 37 | 1 | 109805471 | 109805471 | Missense_Mutation | SNP | G | T | 4  | 170 | c.4588G>T    | c.(4588-4590)GAC>TAC   | p.D1530Y      |

|        |               |          |           |    |    |           |           |                   |     |   |   |    |     |              |                        |              |
|--------|---------------|----------|-----------|----|----|-----------|-----------|-------------------|-----|---|---|----|-----|--------------|------------------------|--------------|
| Pat_32 | Pre-Treatment | LRIG2    | 9860      | 37 | 1  | 113662059 | 113662059 | Missense_Mutation | SNP | C | T | 3  | 76  | c.2885C>T    | c.(2884-2886)CCG>CTG   | p.P962L      |
| Pat_32 | Pre-Treatment | CASQ2    | 845       | 37 | 1  | 116310966 | 116310966 | Missense_Mutation | SNP | G | A | 4  | 165 | c.197C>T     | c.(196-198)ACG>ATG     | p.T66M       |
| Pat_32 | Pre-Treatment | IGSF3    | 3321      | 37 | 1  | 117150627 | 117150627 | Missense_Mutation | SNP | C | T | 4  | 186 | c.1159G>A    | c.(1159-1161)GGG>AGG   | p.G387R      |
| Pat_32 | Pre-Treatment | REG4     | 83998     | 37 | 1  | 120345764 | 120345764 | Missense_Mutation | SNP | G | A | 3  | 28  | c.92C>T      | c.(91-93)GCT>GTT       | p.A31V       |
| Pat_32 | Pre-Treatment | NBPF10   | 100132406 | 37 | 1  | 145325971 | 145325971 | Missense_Mutation | SNP | G | C | 10 | 90  | c.4069G>C    | c.(4069-4071)GAT>CAT   | p.D1357H     |
| Pat_32 | Pre-Treatment | NBPF10   | 100132406 | 37 | 1  | 145359049 | 145359049 | Missense_Mutation | SNP | A | G | 3  | 30  | c.9214A>G    | c.(9214-9216)AAA>GAA   | p.K3072E     |
| Pat_32 | Pre-Treatment | PEX11B   | 8799      | 37 | 1  | 145522734 | 145522734 | Nonsense_Mutation | SNP | C | T | 4  | 124 | c.595C>T     | c.(595-597)CGA>TGA     | p.R199*      |
| Pat_32 | Pre-Treatment | NBPF15   | 284565    | 37 | 1  | 148594465 | 148594465 | Missense_Mutation | SNP | C | T | 9  | 433 | c.1838C>T    | c.(1837-1839)TCG>TTG   | p.S613L      |
| Pat_32 | Pre-Treatment | LYSMD1   | 388695    | 37 | 1  | 151134363 | 151134363 | Missense_Mutation | SNP | G | A | 4  | 65  | c.394C>T     | c.(394-396)CGT>TGT     | p.R132C      |
| Pat_32 | Pre-Treatment | FLG      | 2312      | 37 | 1  | 152275826 | 152275826 | Missense_Mutation | SNP | C | T | 5  | 272 | c.11536G>A   | c.(11536-11538)GGC>AGC | p.G3846S     |
| Pat_32 | Pre-Treatment | CRTC2    | 200186    | 37 | 1  | 153921815 | 153921815 | Missense_Mutation | SNP | G | A | 4  | 112 | c.1450C>T    | c.(1450-1452)CCC>TCC   | p.P484S      |
| Pat_32 | Pre-Treatment | KCNN3    | 3782      | 37 | 1  | 154685948 | 154685948 | Missense_Mutation | SNP | G | A | 4  | 107 | c.1891C>T    | c.(1891-1893)CTT>TTT   | p.L631F      |
| Pat_32 | Pre-Treatment | ZBTB7B   | 51043     | 37 | 1  | 154987735 | 154987735 | Missense_Mutation | SNP | G | A | 4  | 135 | c.599G>A     | c.(598-600)CGC>CAC     | p.R200H      |
| Pat_32 | Pre-Treatment | PEAR1    | 375033    | 37 | 1  | 156883232 | 156883232 | Missense_Mutation | SNP | G | A | 6  | 38  | c.2561G>A    | c.(2560-2562)GGG>GAG   | p.G854E      |
| Pat_32 | Pre-Treatment | SPTA1    | 6708      | 37 | 1  | 158624522 | 158624522 | Missense_Mutation | SNP | G | A | 4  | 75  | c.2915C>T    | c.(2914-2916)CCA>CTA   | p.P972L      |
| Pat_32 | Pre-Treatment | SPTA1    | 6708      | 37 | 1  | 158636110 | 158636110 | Missense_Mutation | SNP | C | T | 11 | 80  | c.2216G>A    | c.(2215-2217)CGT>CAT   | p.R739H      |
| Pat_32 | Pre-Treatment | ITLN1    | 55600     | 37 | 1  | 160851853 | 160851853 | Nonsense_Mutation | SNP | C | T | 4  | 91  | c.299G>A     | c.(298-300)TGG>TAG     | p.W100*      |
| Pat_32 | Pre-Treatment | UHMK1    | 127933    | 37 | 1  | 162492278 | 162492278 | Missense_Mutation | SNP | G | A | 4  | 127 | c.1198G>A    | c.(1198-1200)GTG>ATG   | p.V400M      |
| Pat_32 | Pre-Treatment | NUF2     | 83540     | 37 | 1  | 163297332 | 163297332 | Nonsense_Mutation | SNP | C | T | 4  | 167 | c.178C>T     | c.(178-180)CGA>TGA     | p.R60*       |
| Pat_32 | Pre-Treatment | F5       | 2153      | 37 | 1  | 169510502 | 169510502 | Missense_Mutation | SNP | G | T | 8  | 297 | c.3826C>A    | c.(3826-3828)CTT>ATT   | p.L1276I     |
| Pat_32 | Pre-Treatment | FAM163A  | 148753    | 37 | 1  | 179783004 | 179783004 | Missense_Mutation | SNP | T | A | 4  | 66  | c.184T>A     | c.(184-186)TGC>AGC     | p.C62S       |
| Pat_32 | Pre-Treatment | SMG7     | 9887      | 37 | 1  | 183514293 | 183514293 | Missense_Mutation | SNP | C | T | 4  | 175 | c.2216C>T    | c.(2215-2217)CCT>CTT   | p.P739L      |
| Pat_32 | Pre-Treatment | CFHR5    | 81494     | 37 | 1  | 196965232 | 196965232 | Missense_Mutation | SNP | G | A | 4  | 182 | c.871G>A     | c.(871-873)GTT>ATT     | p.V291I      |
| Pat_32 | Pre-Treatment | ZNF281   | 23528     | 37 | 1  | 200376696 | 200376696 | Missense_Mutation | SNP | G | A | 4  | 140 | c.2138C>T    | c.(2137-2139)ACG>ATG   | p.T713M      |
| Pat_32 | Pre-Treatment | ZNF281   | 23528     | 37 | 1  | 200378305 | 200378305 | Missense_Mutation | SNP | G | A | 4  | 124 | c.529C>T     | c.(529-531)CTC>TTC     | p.L177F      |
| Pat_32 | Pre-Treatment | KIF14    | 9928      | 37 | 1  | 200574423 | 200574423 | Missense_Mutation | SNP | C | T | 4  | 93  | c.1734G>A    | c.(1732-1734)ATG>ATA   | p.M578I      |
| Pat_32 | Pre-Treatment | RNPEP    | 6051      | 37 | 1  | 201966574 | 201966574 | Missense_Mutation | SNP | T | C | 3  | 89  | c.982T>C     | c.(982-984)TCC>CCC     | p.S328P      |
| Pat_32 | Pre-Treatment | PIGR     | 5284      | 37 | 1  | 207105818 | 207105818 | Missense_Mutation | SNP | C | T | 4  | 105 | c.1991G>A    | c.(1990-1992)CGG>CAG   | p.R664Q      |
| Pat_32 | Pre-Treatment | USH2A    | 7399      | 37 | 1  | 216465589 | 216465589 | Missense_Mutation | SNP | C | A | 4  | 176 | c.1768G>T    | c.(1768-1770)GTA>TTA   | p.V590L      |
| Pat_32 | Pre-Treatment | HLX      | 3142      | 37 | 1  | 221053738 | 221053738 | Missense_Mutation | SNP | G | A | 4  | 170 | c.539G>A     | c.(538-540)CGC>CAC     | p.R180H      |
| Pat_32 | Pre-Treatment | URB2     | 9816      | 37 | 1  | 229770776 | 229770776 | Missense_Mutation | SNP | A | G | 10 | 22  | c.416A>G     | c.(415-417)TAC>TGC     | p.Y139C      |
| Pat_32 | Pre-Treatment | URB2     | 9816      | 37 | 1  | 229772521 | 229772521 | Missense_Mutation | SNP | G | A | 4  | 177 | c.2161G>A    | c.(2161-2163)GCT>ACT   | p.A721T      |
| Pat_32 | Pre-Treatment | OR2T4    | 127074    | 37 | 1  | 248524937 | 248524937 | Missense_Mutation | SNP | A | T | 6  | 171 | c.55A>T      | c.(55-57)ATG>TTG       | p.M19L       |
| Pat_32 | Pre-Treatment | PRPF18   | 8559      | 37 | 10 | 13658449  | 13658449  | Missense_Mutation | SNP | G | A | 52 | 95  | c.844G>A     | c.(844-846)GGT>AGT     | p.G282S      |
| Pat_32 | Pre-Treatment | CUBN     | 8029      | 37 | 10 | 17107618  | 17107618  | Missense_Mutation | SNP | G | A | 6  | 325 | c.3028C>T    | c.(3028-3030)CCG>TCG   | p.P1010S     |
| Pat_32 | Pre-Treatment | ANKRD30A | 91074     | 37 | 10 | 37430754  | 37430754  | Missense_Mutation | SNP | T | C | 5  | 60  | c.761T>C     | c.(760-762)GTG>GCG     | p.V254A      |
| Pat_32 | Pre-Treatment | PCDH15   | 65217     | 37 | 10 | 56106157  | 56106157  | Nonsense_Mutation | SNP | C | A | 16 | 48  | c.562G>T     | c.(562-564)GAG>TAG     | p.E188*      |
| Pat_32 | Pre-Treatment | BICC1    | 80114     | 37 | 10 | 60549640  | 60549640  | Missense_Mutation | SNP | G | A | 4  | 178 | c.994G>A     | c.(994-996)GTC>ATC     | p.V332I      |
| Pat_32 | Pre-Treatment | DDX50    | 79009     | 37 | 10 | 70706373  | 70706373  | Missense_Mutation | SNP | G | A | 4  | 188 | c.2201G>A    | c.(2200-2202)CGG>CAG   | p.R734Q      |
| Pat_32 | Pre-Treatment | TACR2    | 6865      | 37 | 10 | 71175863  | 71175863  | Missense_Mutation | SNP | C | T | 4  | 46  | c.217G>A     | c.(217-219)GTC>ATC     | p.V73I       |
| Pat_32 | Pre-Treatment | COL13A1  | 1305      | 37 | 10 | 71689832  | 71689832  | Missense_Mutation | SNP | G | A | 3  | 40  | c.1486G>A    | c.(1486-1488)GAT>AAT   | p.D496N      |
| Pat_32 | Pre-Treatment | ANXA11   | 311       | 37 | 10 | 81928784  | 81928784  | Missense_Mutation | SNP | G | A | 3  | 29  | c.502C>T     | c.(502-504)CCG>TCG     | p.P168S      |
| Pat_32 | Pre-Treatment | PCGF5    | 84333     | 37 | 10 | 93000338  | 93000338  | Splice_Site       | SNP | G | A | 4  | 106 | c.209_splice | c.e3+1                 | p.R70_splice |
| Pat_32 | Pre-Treatment | PPP1R3C  | 5507      | 37 | 10 | 93390208  | 93390208  | Missense_Mutation | SNP | C | T | 4  | 153 | c.430G>A     | c.(430-432)GAT>AAT     | p.D144N      |
| Pat_32 | Pre-Treatment | NPM3     | 10360     | 37 | 10 | 103542299 | 103542299 | Missense_Mutation | SNP | C | T | 4  | 55  | c.260G>A     | c.(259-261)CGG>CAG     | p.R87Q       |
| Pat_32 | Pre-Treatment | C10orf79 | 80217     | 37 | 10 | 105967456 | 105967456 | Missense_Mutation | SNP | C | T | 4  | 88  | c.862G>A     | c.(862-864)GTA>ATA     | p.V288I      |
| Pat_32 | Pre-Treatment | PDZD8    | 118987    | 37 | 10 | 119043998 | 119043998 | Missense_Mutation | SNP | G | A | 3  | 32  | c.2246C>T    | c.(2245-2247)ACG>ATG   | p.T749M      |

|        |               |              |        |    |    |           |           |                   |     |   |   |    |     |            |                        |          |
|--------|---------------|--------------|--------|----|----|-----------|-----------|-------------------|-----|---|---|----|-----|------------|------------------------|----------|
| Pat_32 | Pre-Treatment | TACC2        | 10579  | 37 | 10 | 123844731 | 123844731 | Missense_Mutation | SNP | C | T | 3  | 18  | c.2716C>T  | c.(2716-2718)CCC>TCC   | p.P906S  |
| Pat_32 | Pre-Treatment | OAT          | 4942   | 37 | 10 | 126090317 | 126090317 | Missense_Mutation | SNP | C | T | 4  | 67  | c.992G>A   | c.(991-993)CGA>CAA     | p.R331Q  |
| Pat_32 | Pre-Treatment | STK32C       | 282974 | 37 | 10 | 134038745 | 134038745 | Nonsense_Mutation | SNP | G | A | 3  | 26  | c.868C>T   | c.(868-870)CGA>TGA     | p.R290*  |
| Pat_32 | Pre-Treatment | TALDO1       | 6888   | 37 | 11 | 763815    | 763815    | Missense_Mutation | SNP | G | A | 5  | 186 | c.706G>A   | c.(706-708)GCC>ACC     | p.A236T  |
| Pat_32 | Pre-Treatment | TRIM6-TRIM34 | 445372 | 37 | 11 | 5663725   | 5663725   | Missense_Mutation | SNP | A | G | 15 | 27  | c.1925A>G  | c.(1924-1926)CAA>CGA   | p.Q642R  |
| Pat_32 | Pre-Treatment | C11orf42     | 160298 | 37 | 11 | 6231467   | 6231467   | Nonsense_Mutation | SNP | C | T | 4  | 162 | c.460C>T   | c.(460-462)CGA>TGA     | p.R154*  |
| Pat_32 | Pre-Treatment | TRIM3        | 10612  | 37 | 11 | 6477868   | 6477868   | Missense_Mutation | SNP | C | T | 4  | 83  | c.1088G>A  | c.(1087-1089)CGT>CAT   | p.R363H  |
| Pat_32 | Pre-Treatment | PARVA        | 55742  | 37 | 11 | 12399262  | 12399262  | Missense_Mutation | SNP | G | A | 4  | 20  | c.68G>A    | c.(67-69)CGC>CAC       | p.R23H   |
| Pat_32 | Pre-Treatment | IGSF22       | 283284 | 37 | 11 | 18739598  | 18739598  | Missense_Mutation | SNP | C | T | 4  | 88  | c.853G>A   | c.(853-855)GAT>AAT     | p.D285N  |
| Pat_32 | Pre-Treatment | NAV2         | 89797  | 37 | 11 | 19954827  | 19954827  | Missense_Mutation | SNP | C | T | 5  | 370 | c.1106C>T  | c.(1105-1107)TCG>TTG   | p.S369L  |
| Pat_32 | Pre-Treatment | C11orf46     | 120534 | 37 | 11 | 30352529  | 30352529  | Missense_Mutation | SNP | C | T | 4  | 104 | c.34C>T    | c.(34-36)CGT>TGT       | p.R12C   |
| Pat_32 | Pre-Treatment | C11orf41     | 25758  | 37 | 11 | 33566351  | 33566351  | Missense_Mutation | SNP | G | A | 3  | 53  | c.1939G>A  | c.(1939-1941)GCT>ACT   | p.A647T  |
| Pat_32 | Pre-Treatment | CKAP5        | 9793   | 37 | 11 | 46772672  | 46772672  | Missense_Mutation | SNP | C | T | 4  | 140 | c.5456G>A  | c.(5455-5457)CGA>CAA   | p.R1819Q |
| Pat_32 | Pre-Treatment | ZP1          | 22917  | 37 | 11 | 60640929  | 60640929  | Missense_Mutation | SNP | G | A | 4  | 105 | c.1322G>A  | c.(1321-1323)CGG>CAG   | p.R441Q  |
| Pat_32 | Pre-Treatment | LGALS12      | 85329  | 37 | 11 | 63283096  | 63283096  | Missense_Mutation | SNP | G | A | 4  | 71  | c.775G>A   | c.(775-777)GCA>ACA     | p.A259T  |
| Pat_32 | Pre-Treatment | MRPL49       | 740    | 37 | 11 | 64889826  | 64889826  | Missense_Mutation | SNP | C | T | 4  | 62  | c.8C>T     | c.(7-9)GCT>GTT         | p.A3V    |
| Pat_32 | Pre-Treatment | LTBP3        | 4054   | 37 | 11 | 65319749  | 65319749  | Missense_Mutation | SNP | G | A | 5  | 171 | c.1315C>T  | c.(1315-1317)CGG>TGG   | p.R439W  |
| Pat_32 | Pre-Treatment | KAT5         | 10524  | 37 | 11 | 65480967  | 65480967  | Missense_Mutation | SNP | G | A | 4  | 123 | c.434G>A   | c.(433-435)CGC>CAC     | p.R145H  |
| Pat_32 | Pre-Treatment | DPP3         | 10072  | 37 | 11 | 66249865  | 66249865  | Missense_Mutation | SNP | G | A | 4  | 88  | c.194G>A   | c.(193-195)CGC>CAC     | p.R65H   |
| Pat_32 | Pre-Treatment | RHOD         | 29984  | 37 | 11 | 66834317  | 66834317  | Missense_Mutation | SNP | G | A | 4  | 86  | c.329G>A   | c.(328-330)CGG>CAG     | p.R110Q  |
| Pat_32 | Pre-Treatment | ANKRD13D     | 338692 | 37 | 11 | 67059139  | 67059139  | Nonsense_Mutation | SNP | C | T | 4  | 167 | c.202C>T   | c.(202-204)CGA>TGA     | p.R68*   |
| Pat_32 | Pre-Treatment | LRRRC32      | 2615   | 37 | 11 | 76372167  | 76372167  | Missense_Mutation | SNP | G | A | 3  | 46  | c.470C>T   | c.(469-471)GCG>GTG     | p.A157V  |
| Pat_32 | Pre-Treatment | CUL5         | 8065   | 37 | 11 | 107969180 | 107969180 | Missense_Mutation | SNP | G | A | 4  | 111 | c.2072G>A  | c.(2071-2073)CGT>CAT   | p.R691H  |
| Pat_32 | Pre-Treatment | CEP164       | 22897  | 37 | 11 | 117232609 | 117232609 | Missense_Mutation | SNP | G | A | 4  | 116 | c.452G>A   | c.(451-453)CGA>CAA     | p.R151Q  |
| Pat_32 | Pre-Treatment | MLL          | 4297   | 37 | 11 | 118376958 | 118376958 | Missense_Mutation | SNP | G | A | 4  | 80  | c.10342G>A | c.(10342-10344)GAA>AAA | p.E3448K |
| Pat_32 | Pre-Treatment | USP2         | 9099   | 37 | 11 | 119243682 | 119243682 | Missense_Mutation | SNP | G | A | 3  | 60  | c.509C>T   | c.(508-510)CCC>CTC     | p.P170L  |
| Pat_32 | Pre-Treatment | SORL1        | 6653   | 37 | 11 | 121358825 | 121358825 | Missense_Mutation | SNP | C | T | 5  | 196 | c.613C>T   | c.(613-615)CGG>TGG     | p.R205W  |
| Pat_32 | Pre-Treatment | VSIG2        | 23584  | 37 | 11 | 124621372 | 124621372 | Missense_Mutation | SNP | C | T | 4  | 124 | c.166G>A   | c.(166-168)GCC>ACC     | p.A56T   |
| Pat_32 | Pre-Treatment | STT3A        | 3703   | 37 | 11 | 125481409 | 125481409 | Missense_Mutation | SNP | G | A | 4  | 150 | c.1204G>A  | c.(1204-1206)GTA>ATA   | p.V402I  |
| Pat_32 | Pre-Treatment | WNT5B        | 81029  | 37 | 12 | 1755323   | 1755323   | Missense_Mutation | SNP | G | A | 4  | 106 | c.985G>A   | c.(985-987)GTG>ATG     | p.V329M  |
| Pat_32 | Pre-Treatment | VWF          | 7450   | 37 | 12 | 6085278   | 6085278   | Missense_Mutation | SNP | G | A | 3  | 71  | c.7436C>T  | c.(7435-7437)TCG>TTG   | p.S2479L |
| Pat_32 | Pre-Treatment | PTPN6        | 5777   | 37 | 12 | 7069534   | 7069534   | Missense_Mutation | SNP | G | A | 4  | 172 | c.1609G>A  | c.(1609-1611)GGG>AGG   | p.G537R  |
| Pat_32 | Pre-Treatment | CD163L1      | 283316 | 37 | 12 | 7528575   | 7528575   | Missense_Mutation | SNP | G | A | 4  | 117 | c.2407C>T  | c.(2407-2409)CCC>TCC   | p.P803S  |
| Pat_32 | Pre-Treatment | DNM1L        | 10059  | 37 | 12 | 32866173  | 32866173  | Missense_Mutation | SNP | G | A | 4  | 62  | c.487G>A   | c.(487-489)GAG>AAG     | p.E163K  |
| Pat_32 | Pre-Treatment | CNTN1        | 1272   | 37 | 12 | 41387065  | 41387065  | Missense_Mutation | SNP | G | A | 3  | 32  | c.2107G>A  | c.(2107-2109)GGT>AGT   | p.G703S  |
| Pat_32 | Pre-Treatment | SFRS2IP      | 9169   | 37 | 12 | 46322549  | 46322549  | Missense_Mutation | SNP | C | T | 4  | 130 | c.935G>A   | c.(934-936)CGA>CAA     | p.R312Q  |
| Pat_32 | Pre-Treatment | OR10AD1      | 121275 | 37 | 12 | 48596709  | 48596709  | Missense_Mutation | SNP | G | A | 3  | 37  | c.367C>T   | c.(367-369)CGT>TGT     | p.R123C  |
| Pat_32 | Pre-Treatment | TUBA1B       | 10376  | 37 | 12 | 49521833  | 49521833  | Missense_Mutation | SNP | G | A | 6  | 381 | c.1264C>T  | c.(1264-1266)CGT>TGT   | p.R422C  |
| Pat_32 | Pre-Treatment | TUBA1C       | 84790  | 37 | 12 | 49666829  | 49666829  | Missense_Mutation | SNP | G | A | 4  | 191 | c.1169G>A  | c.(1168-1170)CGC>CAC   | p.R390H  |
| Pat_32 | Pre-Treatment | CSRNP2       | 81566  | 37 | 12 | 51458370  | 51458370  | Missense_Mutation | SNP | C | T | 3  | 51  | c.791G>A   | c.(790-792)CGG>CAG     | p.R264Q  |
| Pat_32 | Pre-Treatment | ESPL1        | 9700   | 37 | 12 | 53683252  | 53683252  | Missense_Mutation | SNP | G | A | 4  | 73  | c.4987G>A  | c.(4987-4989)GAG>AAG   | p.E1663K |
| Pat_32 | Pre-Treatment | SP7          | 121340 | 37 | 12 | 53722199  | 53722199  | Missense_Mutation | SNP | G | A | 4  | 160 | c.1027C>T  | c.(1027-1029)CGT>TGT   | p.R343C  |
| Pat_32 | Pre-Treatment | PCBP2        | 5094   | 37 | 12 | 53854853  | 53854853  | Missense_Mutation | SNP | C | T | 4  | 115 | c.430C>T   | c.(430-432)CGG>TGG     | p.R144W  |
| Pat_32 | Pre-Treatment | DNAJC14      | 85406  | 37 | 12 | 56221784  | 56221784  | Missense_Mutation | SNP | C | T | 4  | 106 | c.659G>A   | c.(658-660)CGA>CAA     | p.R220Q  |
| Pat_32 | Pre-Treatment | STAC3        | 246329 | 37 | 12 | 57638333  | 57638333  | Missense_Mutation | SNP | C | T | 6  | 374 | c.793G>A   | c.(793-795)GAT>AAT     | p.D265N  |
| Pat_32 | Pre-Treatment | IL26         | 55801  | 37 | 12 | 68618970  | 68618970  | Missense_Mutation | SNP | C | A | 4  | 121 | c.322G>T   | c.(322-324)GTG>TTG     | p.V108L  |
| Pat_32 | Pre-Treatment | LRRRC10      | 376132 | 37 | 12 | 70004282  | 70004282  | Missense_Mutation | SNP | G | A | 4  | 83  | c.337C>T   | c.(337-339)CTC>TTC     | p.L113F  |

|        |               |          |        |    |    |           |           |                   |     |   |   |    |     |              |                        |              |
|--------|---------------|----------|--------|----|----|-----------|-----------|-------------------|-----|---|---|----|-----|--------------|------------------------|--------------|
| Pat_32 | Pre-Treatment | ORAI1    | 84876  | 37 | 12 | 122079355 | 122079355 | Missense_Mutation | SNP | G | A | 4  | 84  | c.712G>A     | c.(712-714)GCC>ACC     | p.A238T      |
| Pat_32 | Pre-Treatment | TMEM120B | 144404 | 37 | 12 | 122199613 | 122199613 | Missense_Mutation | SNP | C | T | 4  | 90  | c.520C>T     | c.(520-522)CGG>TGG     | p.R174W      |
| Pat_32 | Pre-Treatment | RILPL1   | 353116 | 37 | 12 | 123984011 | 123984011 | Missense_Mutation | SNP | C | T | 4  | 135 | c.533G>A     | c.(532-534)CGC>CAC     | p.R178H      |
| Pat_32 | Pre-Treatment | RIMBP2   | 23504  | 37 | 12 | 130912813 | 130912813 | Missense_Mutation | SNP | C | T | 19 | 63  | c.2272G>A    | c.(2272-2274)GAG>AAG   | p.E758K      |
| Pat_32 | Pre-Treatment | ULK1     | 8408   | 37 | 12 | 132393323 | 132393323 | Missense_Mutation | SNP | G | A | 3  | 45  | c.451G>A     | c.(451-453)GGC>AGC     | p.G151S      |
| Pat_32 | Pre-Treatment | GOLGA3   | 2802   | 37 | 12 | 133384773 | 133384773 | Missense_Mutation | SNP | G | T | 4  | 147 | c.882C>A     | c.(880-882)GAC>GAA     | p.D294E      |
| Pat_32 | Pre-Treatment | MTMR6    | 9107   | 37 | 13 | 25823480  | 25823480  | Missense_Mutation | SNP | C | T | 4  | 131 | c.1756G>A    | c.(1756-1758)GAG>AAG   | p.E586K      |
| Pat_32 | Pre-Treatment | RNF6     | 6049   | 37 | 13 | 26788779  | 26788779  | Missense_Mutation | SNP | G | A | 4  | 188 | c.1240C>T    | c.(1240-1242)CGG>TGG   | p.R414W      |
| Pat_32 | Pre-Treatment | FREM2    | 341640 | 37 | 13 | 39263688  | 39263688  | Missense_Mutation | SNP | G | A | 4  | 120 | c.2207G>A    | c.(2206-2208)CGA>CAA   | p.R736Q      |
| Pat_32 | Pre-Treatment | COG6     | 57511  | 37 | 13 | 40254159  | 40254159  | Missense_Mutation | SNP | A | G | 60 | 66  | c.671A>G     | c.(670-672)GAA>GGA     | p.E224G      |
| Pat_32 | Pre-Treatment | SIAH3    | 283514 | 37 | 13 | 46358177  | 46358177  | Missense_Mutation | SNP | G | A | 4  | 175 | c.151C>T     | c.(151-153)CGC>TGC     | p.R51C       |
| Pat_32 | Pre-Treatment | ZC3H13   | 23091  | 37 | 13 | 46543404  | 46543404  | Missense_Mutation | SNP | C | T | 4  | 102 | c.3275G>A    | c.(3274-3276)AGT>AAT   | p.S1092N     |
| Pat_32 | Pre-Treatment | KPNA3    | 3839   | 37 | 13 | 50306795  | 50306795  | Splice_Site       | SNP | T | C | 4  | 153 | c.235_splice | c.e5-1                 | p.N79_splice |
| Pat_32 | Pre-Treatment | TBC1D4   | 9882   | 37 | 13 | 75886939  | 75886939  | Missense_Mutation | SNP | C | T | 4  | 92  | c.2318G>A    | c.(2317-2319)CGG>CAG   | p.R773Q      |
| Pat_32 | Pre-Treatment | FBXL3    | 26224  | 37 | 13 | 77592850  | 77592850  | Missense_Mutation | SNP | C | T | 5  | 187 | c.356G>A     | c.(355-357)AGC>AAC     | p.S119N      |
| Pat_32 | Pre-Treatment | TUBGCP3  | 10426  | 37 | 13 | 113181356 | 113181356 | Missense_Mutation | SNP | C | A | 3  | 42  | c.1455G>T    | c.(1453-1455)TTG>TTT   | p.L485F      |
| Pat_32 | Pre-Treatment | PCID2    | 55795  | 37 | 13 | 113838738 | 113838738 | Missense_Mutation | SNP | C | T | 4  | 184 | c.607G>A     | c.(607-609)GAT>AAT     | p.D203N      |
| Pat_32 | Pre-Treatment | TMCO3    | 55002  | 37 | 13 | 114150005 | 114150005 | Missense_Mutation | SNP | C | T | 3  | 32  | c.109C>T     | c.(109-111)CGC>TGC     | p.R37C       |
| Pat_32 | Pre-Treatment | GAS6     | 2621   | 37 | 13 | 114535424 | 114535424 | Missense_Mutation | SNP | C | T | 4  | 84  | c.991G>A     | c.(991-993)GAG>AAG     | p.E331K      |
| Pat_32 | Pre-Treatment | TTC5     | 91875  | 37 | 14 | 20760155  | 20760155  | Missense_Mutation | SNP | T | C | 3  | 62  | c.1190A>G    | c.(1189-1191)CAG>CGG   | p.Q397R      |
| Pat_32 | Pre-Treatment | RNASE4   | 6038   | 37 | 14 | 21167774  | 21167774  | Missense_Mutation | SNP | C | T | 4  | 196 | c.244C>T     | c.(244-246)CGT>TGT     | p.R82C       |
| Pat_32 | Pre-Treatment | OR10G2   | 26534  | 37 | 14 | 22102833  | 22102833  | Missense_Mutation | SNP | C | T | 4  | 74  | c.166G>A     | c.(166-168)GAC>AAC     | p.D56N       |
| Pat_32 | Pre-Treatment | MYH6     | 4624   | 37 | 14 | 23867937  | 23867937  | Missense_Mutation | SNP | C | T | 4  | 96  | c.1891G>A    | c.(1891-1893)GGG>AGG   | p.G631R      |
| Pat_32 | Pre-Treatment | TBPL2    | 387332 | 37 | 14 | 55907239  | 55907239  | Missense_Mutation | SNP | G | A | 3  | 30  | c.25C>T      | c.(25-27)CGG>TGG       | p.R9W        |
| Pat_32 | Pre-Treatment | FUT8     | 2530   | 37 | 14 | 66188556  | 66188556  | Missense_Mutation | SNP | G | A | 65 | 118 | c.899G>A     | c.(898-900)CGT>CAT     | p.R300H      |
| Pat_32 | Pre-Treatment | GPHN     | 10243  | 37 | 14 | 67647580  | 67647580  | Missense_Mutation | SNP | C | T | 4  | 73  | c.2137C>T    | c.(2137-2139)CCT>TCT   | p.P713S      |
| Pat_32 | Pre-Treatment | GALNTL1  | 57452  | 37 | 14 | 69795241  | 69795241  | Missense_Mutation | SNP | G | A | 4  | 115 | c.643G>A     | c.(643-645)GAA>AAA     | p.E215K      |
| Pat_32 | Pre-Treatment | ADAM21P1 | 145241 | 37 | 14 | 70713408  | 70713408  | Missense_Mutation | SNP | C | T | 4  | 132 | c.460G>A     | c.(460-462)GTT>ATT     | p.V154I      |
| Pat_32 | Pre-Treatment | DCAF4    | 26094  | 37 | 14 | 73413857  | 73413857  | Missense_Mutation | SNP | C | T | 4  | 173 | c.686C>T     | c.(685-687)TCG>TTG     | p.S229L      |
| Pat_32 | Pre-Treatment | ABCD4    | 5826   | 37 | 14 | 74761892  | 74761892  | Missense_Mutation | SNP | G | T | 15 | 78  | c.678C>A     | c.(676-678)CAC>CAA     | p.H226Q      |
| Pat_32 | Pre-Treatment | YLPM1    | 56252  | 37 | 14 | 75283295  | 75283295  | Missense_Mutation | SNP | G | A | 3  | 35  | c.5587G>A    | c.(5587-5589)GGA>AGA   | p.G1863R     |
| Pat_32 | Pre-Treatment | TSHR     | 7253   | 37 | 14 | 81609547  | 81609547  | Missense_Mutation | SNP | A | G | 3  | 65  | c.1145A>G    | c.(1144-1146)GAC>GGC   | p.D382G      |
| Pat_32 | Pre-Treatment | DEGS2    | 123099 | 37 | 14 | 100613207 | 100613207 | Missense_Mutation | SNP | G | A | 4  | 116 | c.863C>T     | c.(862-864)CCG>CTG     | p.P288L      |
| Pat_32 | Pre-Treatment | DYNC1H1  | 1778   | 37 | 14 | 102452250 | 102452250 | Missense_Mutation | SNP | G | A | 4  | 109 | c.1688G>A    | c.(1687-1689)CGG>CAG   | p.R563Q      |
| Pat_32 | Pre-Treatment | TMEM179  | 388021 | 37 | 14 | 105063337 | 105063337 | Missense_Mutation | SNP | C | T | 4  | 52  | c.433G>A     | c.(433-435)GTA>ATA     | p.V145I      |
| Pat_32 | Pre-Treatment | OR4N4    | 283694 | 37 | 15 | 22382807  | 22382807  | Missense_Mutation | SNP | G | A | 57 | 203 | c.335G>A     | c.(334-336)GGA>GAA     | p.G112E      |
| Pat_32 | Pre-Treatment | OR4N3P   | 390539 | 37 | 15 | 22413796  | 22413796  | Missense_Mutation | SNP | G | A | 18 | 317 | c.95G>A      | c.(94-96)GGA>GAA       | p.G32E       |
| Pat_32 | Pre-Treatment | CYFIP1   | 23191  | 37 | 15 | 22929783  | 22929783  | Missense_Mutation | SNP | G | A | 4  | 85  | c.457G>A     | c.(457-459)GTG>ATG     | p.V153M      |
| Pat_32 | Pre-Treatment | HERC2    | 8924   | 37 | 15 | 28525311  | 28525311  | Missense_Mutation | SNP | G | A | 4  | 169 | c.445C>T     | c.(445-447)CGC>TGC     | p.R149C      |
| Pat_32 | Pre-Treatment | TRPM1    | 4308   | 37 | 15 | 31334269  | 31334269  | Missense_Mutation | SNP | C | T | 4  | 32  | c.1906G>A    | c.(1906-1908)GAA>AAA   | p.E636K      |
| Pat_32 | Pre-Treatment | VPS18    | 57617  | 37 | 15 | 41191869  | 41191869  | Missense_Mutation | SNP | G | A | 4  | 158 | c.853G>A     | c.(853-855)GCC>ACC     | p.A285T      |
| Pat_32 | Pre-Treatment | SQRDL    | 58472  | 37 | 15 | 45974680  | 45974680  | Missense_Mutation | SNP | A | G | 3  | 64  | c.869A>G     | c.(868-870)GAA>GGA     | p.E290G      |
| Pat_32 | Pre-Treatment | FBN1     | 2200   | 37 | 15 | 48902936  | 48902936  | Missense_Mutation | SNP | C | G | 12 | 56  | c.335G>C     | c.(334-336)GGC>GCC     | p.G112A      |
| Pat_32 | Pre-Treatment | RFX7     | 64864  | 37 | 15 | 56385627  | 56385627  | Nonsense_Mutation | SNP | G | T | 4  | 60  | c.4299C>A    | c.(4297-4299)TGC>TGA   | p.C1433*     |
| Pat_32 | Pre-Treatment | LIPC     | 3990   | 37 | 15 | 58830636  | 58830636  | Nonsense_Mutation | SNP | C | T | 8  | 475 | c.193C>T     | c.(193-195)CGA>TGA     | p.R65*       |
| Pat_32 | Pre-Treatment | HERC1    | 8925   | 37 | 15 | 63904742  | 63904742  | Missense_Mutation | SNP | C | T | 4  | 149 | c.14108G>A   | c.(14107-14109)CGA>CAA | p.R4703Q     |
| Pat_32 | Pre-Treatment | CLPX     | 10845  | 37 | 15 | 65477431  | 65477431  | Missense_Mutation | SNP | G | A | 3  | 34  | c.61C>T      | c.(61-63)CTC>TTC       | p.L21F       |



|        |               |          |        |    |    |           |           |                   |     |   |   |    |     |           |                      |          |
|--------|---------------|----------|--------|----|----|-----------|-----------|-------------------|-----|---|---|----|-----|-----------|----------------------|----------|
| Pat_32 | Pre-Treatment | CT62     | 196993 | 37 | 15 | 71403623  | 71403623  | Missense_Mutation | SNP | C | T | 4  | 94  | c.278G>A  | c.(277-279)CGG>CAG   | p.R93Q   |
| Pat_32 | Pre-Treatment | C15orf59 | 388135 | 37 | 15 | 74032746  | 74032746  | Missense_Mutation | SNP | G | A | 4  | 120 | c.394C>T  | c.(394-396)CGG>TGG   | p.R132W  |
| Pat_32 | Pre-Treatment | MEX3B    | 84206  | 37 | 15 | 82336147  | 82336147  | Missense_Mutation | SNP | C | T | 4  | 77  | c.1064G>A | c.(1063-1065)GGC>GAC | p.G355D  |
| Pat_32 | Pre-Treatment | AP3B2    | 8120   | 37 | 15 | 83333195  | 83333195  | Missense_Mutation | SNP | C | T | 4  | 64  | c.2128G>A | c.(2128-2130)GGC>AGC | p.G710S  |
| Pat_32 | Pre-Treatment | BNC1     | 646    | 37 | 15 | 83932963  | 83932963  | Missense_Mutation | SNP | C | T | 4  | 93  | c.1040G>A | c.(1039-1041)AGG>AAG | p.R347K  |
| Pat_32 | Pre-Treatment | IQGAP1   | 8826   | 37 | 15 | 90991828  | 90991828  | Missense_Mutation | SNP | G | A | 4  | 112 | c.937G>A  | c.(937-939)GAC>AAC   | p.D313N  |
| Pat_32 | Pre-Treatment | BLM      | 641    | 37 | 15 | 91346808  | 91346808  | Missense_Mutation | SNP | G | A | 4  | 131 | c.3416G>A | c.(3415-3417)CGA>CAA | p.R1139Q |
| Pat_32 | Pre-Treatment | SLCO3A1  | 28232  | 37 | 15 | 92663701  | 92663701  | Missense_Mutation | SNP | C | T | 5  | 294 | c.1016C>T | c.(1015-1017)CCG>CTG | p.P339L  |
| Pat_32 | Pre-Treatment | PCSK6    | 5046   | 37 | 15 | 101933506 | 101933506 | Missense_Mutation | SNP | C | T | 4  | 88  | c.1120G>A | c.(1120-1122)GAG>AAG | p.E374K  |
| Pat_32 | Pre-Treatment | SOLH     | 6650   | 37 | 16 | 599035    | 599035    | Missense_Mutation | SNP | G | A | 4  | 146 | c.1492G>A | c.(1492-1494)GAG>AAG | p.E498K  |
| Pat_32 | Pre-Treatment | MAPK8IP3 | 23162  | 37 | 16 | 1816919   | 1816919   | Missense_Mutation | SNP | G | A | 5  | 122 | c.3032G>A | c.(3031-3033)CGT>CAT | p.R1011H |
| Pat_32 | Pre-Treatment | MEFV     | 4210   | 37 | 16 | 3293550   | 3293550   | Missense_Mutation | SNP | G | A | 4  | 156 | c.1937C>T | c.(1936-1938)CCG>CTG | p.P646L  |
| Pat_32 | Pre-Treatment | ATF7IP2  | 80063  | 37 | 16 | 10534245  | 10534245  | Missense_Mutation | SNP | C | T | 5  | 9   | c.1120C>T | c.(1120-1122)CGT>TGT | p.R374C  |
| Pat_32 | Pre-Treatment | ABCC1    | 4363   | 37 | 16 | 16218725  | 16218725  | Missense_Mutation | SNP | A | G | 3  | 62  | c.3670A>G | c.(3670-3672)AGC>GGC | p.S1224G |
| Pat_32 | Pre-Treatment | TMC7     | 79905  | 37 | 16 | 19058479  | 19058479  | Missense_Mutation | SNP | G | A | 5  | 333 | c.1648G>A | c.(1648-1650)GGG>AGG | p.G550R  |
| Pat_32 | Pre-Treatment | SYT17    | 51760  | 37 | 16 | 19195123  | 19195123  | Missense_Mutation | SNP | C | T | 4  | 192 | c.605C>T  | c.(604-606)ACC>ATC   | p.T202I  |
| Pat_32 | Pre-Treatment | EEF2K    | 29904  | 37 | 16 | 22268217  | 22268217  | Missense_Mutation | SNP | A | G | 3  | 97  | c.767A>G  | c.(766-768)CAG>CGG   | p.Q256R  |
| Pat_32 | Pre-Treatment | ATP2A1   | 487    | 37 | 16 | 28912115  | 28912115  | Missense_Mutation | SNP | G | A | 4  | 74  | c.1978G>A | c.(1978-1980)GAC>AAC | p.D660N  |
| Pat_32 | Pre-Treatment | ATP2A1   | 487    | 37 | 16 | 28912136  | 28912136  | Missense_Mutation | SNP | C | T | 4  | 84  | c.1999C>T | c.(1999-2001)CGG>TGG | p.R667W  |
| Pat_32 | Pre-Treatment | TBX6     | 6911   | 37 | 16 | 30100374  | 30100374  | Missense_Mutation | SNP | G | A | 5  | 124 | c.511C>T  | c.(511-513)CGT>TGT   | p.R171C  |
| Pat_32 | Pre-Treatment | ZNF689   | 115509 | 37 | 16 | 30616463  | 30616463  | Nonsense_Mutation | SNP | G | A | 4  | 92  | c.625C>T  | c.(625-627)CAG>TAG   | p.Q209*  |
| Pat_32 | Pre-Treatment | RNF40    | 9810   | 37 | 16 | 30783215  | 30783215  | Missense_Mutation | SNP | G | A | 4  | 85  | c.2648G>A | c.(2647-2649)CGG>CAG | p.R883Q  |
| Pat_32 | Pre-Treatment | ABCC11   | 85320  | 37 | 16 | 48264402  | 48264402  | Missense_Mutation | SNP | C | A | 4  | 75  | c.182G>T  | c.(181-183)TGG>TTG   | p.W61L   |
| Pat_32 | Pre-Treatment | MMP2     | 4313   | 37 | 16 | 55517984  | 55517984  | Missense_Mutation | SNP | G | A | 4  | 119 | c.437G>A  | c.(436-438)CGT>CAT   | p.R146H  |
| Pat_32 | Pre-Treatment | CSNK2A2  | 1459   | 37 | 16 | 58208381  | 58208381  | Missense_Mutation | SNP | G | A | 3  | 84  | c.403C>T  | c.(403-405)CGG>TGG   | p.R135W  |
| Pat_32 | Pre-Treatment | FHOD1    | 29109  | 37 | 16 | 67264519  | 67264519  | Missense_Mutation | SNP | C | T | 16 | 392 | c.2843G>A | c.(2842-2844)CGC>CAC | p.R948H  |
| Pat_32 | Pre-Treatment | TPPP3    | 51673  | 37 | 16 | 67424121  | 67424121  | Missense_Mutation | SNP | C | T | 3  | 37  | c.487G>A  | c.(487-489)GCC>ACC   | p.A163T  |
| Pat_32 | Pre-Treatment | GFOD2    | 81577  | 37 | 16 | 67709699  | 67709699  | Missense_Mutation | SNP | C | T | 3  | 75  | c.517G>A  | c.(517-519)GGG>AGG   | p.G173R  |
| Pat_32 | Pre-Treatment | HAS3     | 3038   | 37 | 16 | 69148312  | 69148312  | Missense_Mutation | SNP | G | A | 4  | 152 | c.805G>A  | c.(805-807)GTG>ATG   | p.V269M  |
| Pat_32 | Pre-Treatment | LDHD     | 197257 | 37 | 16 | 75149233  | 75149233  | Missense_Mutation | SNP | C | T | 4  | 190 | c.190G>A  | c.(190-192)GAA>AAA   | p.E64K   |
| Pat_32 | Pre-Treatment | MON1B    | 22879  | 37 | 16 | 77228628  | 77228628  | Missense_Mutation | SNP | G | A | 4  | 86  | c.872G>A  | c.(871-873)CGA>CAA   | p.R291Q  |
| Pat_32 | Pre-Treatment | PLCG2    | 5336   | 37 | 16 | 81960766  | 81960766  | Missense_Mutation | SNP | G | A | 4  | 117 | c.2497G>A | c.(2497-2499)GAG>AAG | p.E833K  |
| Pat_32 | Pre-Treatment | KIAA0513 | 9764   | 37 | 16 | 85109487  | 85109487  | Missense_Mutation | SNP | C | T | 4  | 108 | c.541C>T  | c.(541-543)CTC>TTC   | p.L181F  |
| Pat_32 | Pre-Treatment | MTHFSD   | 64779  | 37 | 16 | 86585659  | 86585659  | Missense_Mutation | SNP | C | T | 6  | 272 | c.217G>A  | c.(217-219)GTT>ATT   | p.V73I   |
| Pat_32 | Pre-Treatment | ZCCHC14  | 23174  | 37 | 16 | 87446498  | 87446498  | Missense_Mutation | SNP | G | A | 4  | 101 | c.1418C>T | c.(1417-1419)ACG>ATG | p.T473M  |
| Pat_32 | Pre-Treatment | PRDM7    | 11105  | 37 | 16 | 90126823  | 90126823  | Missense_Mutation | SNP | T | G | 4  | 138 | c.1159A>C | c.(1159-1161)ATG>CTG | p.M387L  |
| Pat_32 | Pre-Treatment | SLC43A2  | 124935 | 37 | 17 | 1494599   | 1494599   | Missense_Mutation | SNP | C | T | 4  | 167 | c.895G>A  | c.(895-897)GTC>ATC   | p.V299I  |
| Pat_32 | Pre-Treatment | SMYD4    | 114826 | 37 | 17 | 1703757   | 1703757   | Missense_Mutation | SNP | C | T | 4  | 166 | c.931G>A  | c.(931-933)GGA>AGA   | p.G311R  |
| Pat_32 | Pre-Treatment | ITGAE    | 3682   | 37 | 17 | 3626668   | 3626668   | Missense_Mutation | SNP | C | T | 4  | 154 | c.3151G>A | c.(3151-3153)GAA>AAA | p.E1051K |
| Pat_32 | Pre-Treatment | ZZEF1    | 23140  | 37 | 17 | 4020367   | 4020367   | Missense_Mutation | SNP | G | A | 4  | 166 | c.593C>T  | c.(592-594)GCG>GTG   | p.A198V  |
| Pat_32 | Pre-Treatment | CAMTA2   | 23125  | 37 | 17 | 4873732   | 4873732   | Missense_Mutation | SNP | G | A | 6  | 371 | c.2908C>T | c.(2908-2910)CGG>TGG | p.R970W  |
| Pat_32 | Pre-Treatment | ALOX12B  | 242    | 37 | 17 | 7978994   | 7978994   | Missense_Mutation | SNP | C | T | 5  | 343 | c.1573G>A | c.(1573-1575)GCA>ACA | p.A525T  |
| Pat_32 | Pre-Treatment | MYH10    | 4628   | 37 | 17 | 8439224   | 8439224   | Missense_Mutation | SNP | A | G | 3  | 78  | c.1601T>C | c.(1600-1602)CTT>CCT | p.L534P  |
| Pat_32 | Pre-Treatment | DNAH9    | 1770   | 37 | 17 | 11572500  | 11572500  | Missense_Mutation | SNP | G | A | 4  | 135 | c.2851G>A | c.(2851-2853)GGT>AGT | p.G951S  |
| Pat_32 | Pre-Treatment | MPRIP    | 23164  | 37 | 17 | 17053500  | 17053500  | Missense_Mutation | SNP | G | A | 5  | 373 | c.1318G>A | c.(1318-1320)GAT>AAT | p.D440N  |
| Pat_32 | Pre-Treatment | ULK2     | 9706   | 37 | 17 | 19750148  | 19750148  | Missense_Mutation | SNP | C | T | 5  | 164 | c.371G>A  | c.(370-372)AGC>AAC   | p.S124N  |
| Pat_32 | Pre-Treatment | MAP2K3   | 5606   | 37 | 17 | 21201752  | 21201752  | Missense_Mutation | SNP | G | A | 4  | 184 | c.77G>A   | c.(76-78)CGG>CAG     | p.R26Q   |

|        |               |           |        |    |    |          |          |                        |     |   |   |     |     |            |                        |           |
|--------|---------------|-----------|--------|----|----|----------|----------|------------------------|-----|---|---|-----|-----|------------|------------------------|-----------|
| Pat_32 | Pre-Treatment | KCNJ12    | 3768   | 37 | 17 | 21318935 | 21318935 | Missense_Mutation      | SNP | C | T | 4   | 64  | c.281C>T   | c.(280-282)TCC>TTC     | p.S94F    |
| Pat_32 | Pre-Treatment | NF1       | 4763   | 37 | 17 | 29559745 | 29559745 | Missense_Mutation      | SNP | G | T | 4   | 85  | c.3342G>T  | c.(3340-3342)TTG>TTT   | p.L1114F  |
| Pat_32 | Pre-Treatment | CDK5R1    | 8851   | 37 | 17 | 30815092 | 30815092 | Missense_Mutation      | SNP | C | T | 4   | 119 | c.454C>T   | c.(454-456)CTT>TTT     | p.L152F   |
| Pat_32 | Pre-Treatment | MYO19     | 80179  | 37 | 17 | 34854123 | 34854123 | Missense_Mutation      | SNP | C | T | 4   | 144 | c.2744G>A  | c.(2743-2745)CGA>CAA   | p.R915Q   |
| Pat_32 | Pre-Treatment | CASC3     | 22794  | 37 | 17 | 38324467 | 38324467 | Missense_Mutation      | SNP | C | T | 4   | 183 | c.1762C>T  | c.(1762-1764)CAC>TAC   | p.H588Y   |
| Pat_32 | Pre-Treatment | CCR7      | 1236   | 37 | 17 | 38711920 | 38711920 | Missense_Mutation      | SNP | C | T | 4   | 133 | c.211G>A   | c.(211-213)GTG>ATG     | p.V71M    |
| Pat_32 | Pre-Treatment | KRT27     | 342574 | 37 | 17 | 38935975 | 38935975 | Missense_Mutation      | SNP | C | T | 3   | 34  | c.823G>A   | c.(823-825)GCG>ACG     | p.A275T   |
| Pat_32 | Pre-Treatment | KRTAP9-9  | 81870  | 37 | 17 | 39411990 | 39411990 | Missense_Mutation      | SNP | C | T | 5   | 189 | c.308C>T   | c.(307-309)CCG>CTG     | p.P103L   |
| Pat_32 | Pre-Treatment | KRT33B    | 3884   | 37 | 17 | 39521500 | 39521500 | Missense_Mutation      | SNP | T | C | 3   | 86  | c.803A>G   | c.(802-804)TAC>TGC     | p.Y268C   |
| Pat_32 | Pre-Treatment | MLX       | 6945   | 37 | 17 | 40721609 | 40721609 | Missense_Mutation      | SNP | T | A | 4   | 85  | c.623T>A   | c.(622-624)CTA>CAA     | p.L208Q   |
| Pat_32 | Pre-Treatment | MEOX1     | 4222   | 37 | 17 | 41719349 | 41719349 | Missense_Mutation      | SNP | C | T | 4   | 173 | c.694G>A   | c.(694-696)GGT>AGT     | p.G232S   |
| Pat_32 | Pre-Treatment | ZNF652    | 22834  | 37 | 17 | 47376154 | 47376154 | Missense_Mutation      | SNP | G | A | 4   | 42  | c.1442C>T  | c.(1441-1443)TCG>TTG   | p.S481L   |
| Pat_32 | Pre-Treatment | SPATA20   | 64847  | 37 | 17 | 48626540 | 48626540 | Missense_Mutation      | SNP | G | A | 4   | 124 | c.605G>A   | c.(604-606)CGA>CAA     | p.R202Q   |
| Pat_32 | Pre-Treatment | OR4D2     | 124538 | 37 | 17 | 56247506 | 56247506 | Missense_Mutation      | SNP | C | T | 4   | 130 | c.490C>T   | c.(490-492)CTC>TTC     | p.L164F   |
| Pat_32 | Pre-Treatment | CSH1      | 1442   | 37 | 17 | 61973503 | 61973503 | Missense_Mutation      | SNP | G | A | 3   | 39  | c.103C>T   | c.(103-105)CTT>TTT     | p.L35F    |
| Pat_32 | Pre-Treatment | SCN4A     | 6329   | 37 | 17 | 62019123 | 62019123 | Missense_Mutation      | SNP | C | T | 4   | 139 | c.4519G>A  | c.(4519-4521)GTC>ATC   | p.V1507I  |
| Pat_32 | Pre-Treatment | PLEKHM1P  | 440456 | 37 | 17 | 62781423 | 62781423 | Missense_Mutation      | SNP | G | A | 4   | 51  | c.1547C>T  | c.(1546-1548)CCC>CTC   | p.P516L   |
| Pat_32 | Pre-Treatment | CACNG1    | 786    | 37 | 17 | 65052344 | 65052344 | Missense_Mutation      | SNP | G | A | 4   | 71  | c.626G>A   | c.(625-627)CGG>CAG     | p.R209Q   |
| Pat_32 | Pre-Treatment | ABCA9     | 10350  | 37 | 17 | 66980239 | 66980239 | Missense_Mutation      | SNP | G | A | 4   | 124 | c.4457C>T  | c.(4456-4458)GCG>GTG   | p.A1486V  |
| Pat_32 | Pre-Treatment | KIF19     | 124602 | 37 | 17 | 72345404 | 72345404 | Nonsense_Mutation      | SNP | C | T | 3   | 42  | c.1129C>T  | c.(1129-1131)CGA>TGA   | p.R377*   |
| Pat_32 | Pre-Treatment | UBE2O     | 63893  | 37 | 17 | 74394972 | 74394972 | Missense_Mutation      | SNP | G | A | 110 | 156 | c.1729C>T  | c.(1729-1731)CAC>TAC   | p.H577Y   |
| Pat_32 | Pre-Treatment | MXRA7     | 439921 | 37 | 17 | 74673728 | 74673728 | Missense_Mutation      | SNP | G | A | 4   | 148 | c.557C>T   | c.(556-558)ACG>ATG     | p.T186M   |
| Pat_32 | Pre-Treatment | FOXK2     | 3607   | 37 | 17 | 80521342 | 80521342 | Missense_Mutation      | SNP | C | T | 4   | 81  | c.532C>T   | c.(532-534)CAC>TAC     | p.H178Y   |
| Pat_32 | Pre-Treatment | ZNF750    | 79755  | 37 | 17 | 80788214 | 80788214 | Missense_Mutation      | SNP | G | A | 4   | 67  | c.1976C>T  | c.(1975-1977)CCG>CTG   | p.P659L   |
| Pat_32 | Pre-Treatment | B3GNTL1   | 146712 | 37 | 17 | 80915107 | 80915107 | Missense_Mutation      | SNP | C | T | 4   | 112 | c.880G>A   | c.(880-882)GTG>ATG     | p.V294M   |
| Pat_32 | Pre-Treatment | EMILIN2   | 84034  | 37 | 18 | 2891084  | 2891084  | Missense_Mutation      | SNP | G | A | 4   | 181 | c.959G>A   | c.(958-960)AGT>AAT     | p.S320N   |
| Pat_32 | Pre-Treatment | LOC727896 | 727896 | 37 | 18 | 2946184  | 2946184  | Missense_Mutation      | SNP | C | A | 4   | 154 | c.351G>T   | c.(349-351)TTG>TTT     | p.L117F   |
| Pat_32 | Pre-Treatment | L3MBTL4   | 91133  | 37 | 18 | 5969427  | 5969427  | Missense_Mutation      | SNP | G | A | 4   | 128 | c.1606C>T  | c.(1606-1608)CGG>TGG   | p.R536W   |
| Pat_32 | Pre-Treatment | LAMA3     | 3909   | 37 | 18 | 21444806 | 21444806 | Missense_Mutation      | SNP | G | A | 4   | 81  | c.4642G>A  | c.(4642-4644)GAC>AAC   | p.D1548N  |
| Pat_32 | Pre-Treatment | PIAS2     | 9063   | 37 | 18 | 44426791 | 44426791 | Missense_Mutation      | SNP | G | A | 3   | 24  | c.740C>T   | c.(739-741)CCG>CTG     | p.P247L   |
| Pat_32 | Pre-Treatment | ZCCHC2    | 54877  | 37 | 18 | 60206998 | 60206998 | Missense_Mutation      | SNP | G | A | 3   | 31  | c.1024G>A  | c.(1024-1026)GTG>ATG   | p.V342M   |
| Pat_32 | Pre-Treatment | DSEL      | 92126  | 37 | 18 | 65180296 | 65180296 | Missense_Mutation      | SNP | C | T | 4   | 85  | c.1580G>A  | c.(1579-1581)GGT>GAT   | p.G527D   |
| Pat_32 | Pre-Treatment | CNDP2     | 55748  | 37 | 18 | 72178216 | 72178216 | Missense_Mutation      | SNP | G | A | 4   | 54  | c.625G>A   | c.(625-627)GGC>AGC     | p.G209S   |
| Pat_32 | Pre-Treatment | PPAP2C    | 8612   | 37 | 19 | 282265   | 282265   | Nonsense_Mutation      | SNP | G | A | 4   | 52  | c.586C>T   | c.(586-588)CGA>TGA     | p.R196*   |
| Pat_32 | Pre-Treatment | ZNF555    | 148254 | 37 | 19 | 2853168  | 2853168  | Missense_Mutation      | SNP | G | A | 4   | 82  | c.1105G>A  | c.(1105-1107)GAA>AAA   | p.E369K   |
| Pat_32 | Pre-Treatment | PIP5K1C   | 23396  | 37 | 19 | 3664846  | 3664846  | Missense_Mutation      | SNP | C | T | 4   | 122 | c.193G>A   | c.(193-195)GCA>ACA     | p.A65T    |
| Pat_32 | Pre-Treatment | MUC16     | 94025  | 37 | 19 | 9015707  | 9015707  | Missense_Mutation      | SNP | T | C | 8   | 213 | c.38116A>G | c.(38116-38118)ACC>GCC | p.T12706A |
| Pat_32 | Pre-Treatment | OR7G1     | 125962 | 37 | 19 | 9226304  | 9226304  | Missense_Mutation      | SNP | G | A | 4   | 174 | c.136C>T   | c.(136-138)CTC>TTC     | p.L46F    |
| Pat_32 | Pre-Treatment | CDC37     | 11140  | 37 | 19 | 10506759 | 10506759 | Missense_Mutation      | SNP | C | T | 4   | 123 | c.223G>A   | c.(223-225)GAG>AAG     | p.E75K    |
| Pat_32 | Pre-Treatment | ELAVL3    | 1995   | 37 | 19 | 11577437 | 11577437 | Missense_Mutation      | SNP | C | T | 4   | 72  | c.215G>A   | c.(214-216)CGG>CAG     | p.R72Q    |
| Pat_32 | Pre-Treatment | ECSIT     | 51295  | 37 | 19 | 11618827 | 11618827 | Missense_Mutation      | SNP | G | A | 4   | 139 | c.775C>T   | c.(775-777)CCC>TCC     | p.P259S   |
| Pat_32 | Pre-Treatment | ZNF788    | 388507 | 37 | 19 | 12221164 | 12221164 | Translation_Start_Site | SNP | C | T | 4   | 154 | c.-384C>T  | (-386--382)GACGA>GATGA |           |
| Pat_32 | Pre-Treatment | MAST1     | 22983  | 37 | 19 | 12978321 | 12978321 | Missense_Mutation      | SNP | G | A | 4   | 140 | c.2173G>A  | c.(2173-2175)GAG>AAG   | p.E725K   |
| Pat_32 | Pre-Treatment | EMR2      | 30817  | 37 | 19 | 14854519 | 14854519 | Missense_Mutation      | SNP | G | A | 4   | 149 | c.2261C>T  | c.(2260-2262)CCG>CTG   | p.P754L   |
| Pat_32 | Pre-Treatment | NDUFA13   | 51079  | 37 | 19 | 19645867 | 19645867 | Missense_Mutation      | SNP | C | T | 4   | 165 | c.589C>T   | c.(589-591)CGG>TGG     | p.R197W   |
| Pat_32 | Pre-Treatment | DPY19L3   | 147991 | 37 | 19 | 32968457 | 32968457 | Missense_Mutation      | SNP | C | T | 4   | 94  | c.1727C>T  | c.(1726-1728)GCG>GTG   | p.A576V   |
| Pat_32 | Pre-Treatment | FXYP7     | 53822  | 37 | 19 | 35642576 | 35642576 | Missense_Mutation      | SNP | G | A | 4   | 121 | c.220G>A   | c.(220-222)GCC>ACC     | p.A74T    |

|        |               |         |        |    |    |           |           |                   |     |   |   |    |     |              |                        |               |
|--------|---------------|---------|--------|----|----|-----------|-----------|-------------------|-----|---|---|----|-----|--------------|------------------------|---------------|
| Pat_32 | Pre-Treatment | FAM98C  | 147965 | 37 | 19 | 38895635  | 38895635  | Missense_Mutation | SNP | G | A | 4  | 176 | c.437G>A     | c.(436-438)GGG>GAG     | p.G146E       |
| Pat_32 | Pre-Treatment | SUPT5H  | 6829   | 37 | 19 | 39949691  | 39949691  | Missense_Mutation | SNP | G | A | 4  | 184 | c.436G>A     | c.(436-438)GCC>ACC     | p.A146T       |
| Pat_32 | Pre-Treatment | CEACAM4 | 1089   | 37 | 19 | 42131974  | 42131974  | Splice_Site       | SNP | C | T | 4  | 161 | c.424_splice | c.e2+1                 | p.Q142_splice |
| Pat_32 | Pre-Treatment | ERF     | 2077   | 37 | 19 | 42753240  | 42753240  | Missense_Mutation | SNP | G | A | 5  | 61  | c.1024C>T    | c.(1024-1026)CCC>TCC   | p.P342S       |
| Pat_32 | Pre-Treatment | LIPE    | 3991   | 37 | 19 | 42907123  | 42907123  | Missense_Mutation | SNP | G | A | 4  | 86  | c.2603C>T    | c.(2602-2604)ACG>ATG   | p.T868M       |
| Pat_32 | Pre-Treatment | ZNF223  | 7766   | 37 | 19 | 44570873  | 44570873  | Missense_Mutation | SNP | C | T | 4  | 128 | c.892C>T     | c.(892-894)CGT>TGT     | p.R298C       |
| Pat_32 | Pre-Treatment | PVR     | 5817   | 37 | 19 | 45157228  | 45157228  | Missense_Mutation | SNP | G | A | 4  | 108 | c.784G>A     | c.(784-786)GCC>ACC     | p.A262T       |
| Pat_32 | Pre-Treatment | PRKD2   | 25865  | 37 | 19 | 47181690  | 47181690  | Missense_Mutation | SNP | C | T | 4  | 42  | c.2301G>A    | c.(2299-2301)ATG>ATA   | p.M767I       |
| Pat_32 | Pre-Treatment | LMTK3   | 114783 | 37 | 19 | 49001471  | 49001471  | Missense_Mutation | SNP | G | A | 16 | 23  | c.2942C>T    | c.(2941-2943)CCC>CTC   | p.P981L       |
| Pat_32 | Pre-Treatment | IL4I1   | 259307 | 37 | 19 | 50394307  | 50394307  | Missense_Mutation | SNP | C | T | 4  | 100 | c.694G>A     | c.(694-696)GTG>ATG     | p.V232M       |
| Pat_32 | Pre-Treatment | ACPT    | 93650  | 37 | 19 | 51294940  | 51294940  | Missense_Mutation | SNP | C | T | 4  | 160 | c.331C>T     | c.(331-333)CGC>TGC     | p.R111C       |
| Pat_32 | Pre-Treatment | KLK14   | 43847  | 37 | 19 | 51582802  | 51582802  | Missense_Mutation | SNP | C | T | 3  | 26  | c.418G>A     | c.(418-420)GGG>AGG     | p.G140R       |
| Pat_32 | Pre-Treatment | SIGLEC7 | 27036  | 37 | 19 | 51649282  | 51649282  | Missense_Mutation | SNP | C | T | 4  | 100 | c.931C>T     | c.(931-933)CAC>TAC     | p.H311Y       |
| Pat_32 | Pre-Treatment | SIGLEC6 | 946    | 37 | 19 | 52034213  | 52034213  | Missense_Mutation | SNP | G | A | 4  | 94  | c.428C>T     | c.(427-429)GCC>GTC     | p.A143V       |
| Pat_32 | Pre-Treatment | FPR3    | 2359   | 37 | 19 | 52327161  | 52327161  | Missense_Mutation | SNP | C | T | 4  | 133 | c.160C>T     | c.(160-162)CGG>TGG     | p.R54W        |
| Pat_32 | Pre-Treatment | ZNF528  | 84436  | 37 | 19 | 52918958  | 52918958  | Missense_Mutation | SNP | G | T | 5  | 117 | c.853G>T     | c.(853-855)GCA>TCA     | p.A285S       |
| Pat_32 | Pre-Treatment | ZNF600  | 162966 | 37 | 19 | 53270632  | 53270632  | Missense_Mutation | SNP | C | T | 4  | 84  | c.377G>A     | c.(376-378)AGA>AAA     | p.R126K       |
| Pat_32 | Pre-Treatment | ZNF320  | 162967 | 37 | 19 | 53384528  | 53384528  | Missense_Mutation | SNP | C | T | 4  | 171 | c.851G>A     | c.(850-852)CGA>CAA     | p.R284Q       |
| Pat_32 | Pre-Treatment | LILRB2  | 10288  | 37 | 19 | 54783664  | 54783664  | Missense_Mutation | SNP | G | T | 18 | 57  | c.337C>A     | c.(337-339)CTG>ATG     | p.L113M       |
| Pat_32 | Pre-Treatment | LILRA5  | 353514 | 37 | 19 | 54818709  | 54818709  | Missense_Mutation | SNP | C | T | 22 | 58  | c.889G>A     | c.(889-891)GCT>ACT     | p.A297T       |
| Pat_32 | Pre-Treatment | LILRA2  | 11027  | 37 | 19 | 55086264  | 55086264  | Missense_Mutation | SNP | C | T | 4  | 128 | c.419C>T     | c.(418-420)ACC>ATC     | p.T140I       |
| Pat_32 | Pre-Treatment | RPL28   | 6158   | 37 | 19 | 55897956  | 55897956  | Missense_Mutation | SNP | G | A | 4  | 140 | c.100G>A     | c.(100-102)GCC>ACC     | p.A34T        |
| Pat_32 | Pre-Treatment | ZNF256  | 10172  | 37 | 19 | 58455313  | 58455313  | Missense_Mutation | SNP | G | A | 4  | 123 | c.149C>T     | c.(148-150)ACA>ATA     | p.T50I        |
| Pat_32 | Pre-Treatment | ZNF135  | 7694   | 37 | 19 | 58574832  | 58574832  | Missense_Mutation | SNP | C | T | 4  | 71  | c.179C>T     | c.(178-180)CCG>CTG     | p.P60L        |
| Pat_32 | Pre-Treatment | KCNS3   | 3790   | 37 | 2  | 18113071  | 18113071  | Missense_Mutation | SNP | T | C | 32 | 67  | c.796T>C     | c.(796-798)TTC>CTC     | p.F266L       |
| Pat_32 | Pre-Treatment | MFSD2B  | 388931 | 37 | 2  | 24246538  | 24246538  | Missense_Mutation | SNP | G | A | 4  | 182 | c.1255G>A    | c.(1255-1257)GTC>ATC   | p.V419I       |
| Pat_32 | Pre-Treatment | ASXL2   | 55252  | 37 | 2  | 25965173  | 25965173  | Missense_Mutation | SNP | C | T | 8  | 53  | c.4033G>A    | c.(4033-4035)GTA>ATA   | p.V1345I      |
| Pat_32 | Pre-Treatment | C2orf70 | 339778 | 37 | 2  | 26798955  | 26798955  | Missense_Mutation | SNP | G | A | 4  | 178 | c.260G>A     | c.(259-261)AGC>AAC     | p.S87N        |
| Pat_32 | Pre-Treatment | ABHD1   | 84696  | 37 | 2  | 27352448  | 27352448  | Missense_Mutation | SNP | C | T | 4  | 147 | c.571C>T     | c.(571-573)CGT>TGT     | p.R191C       |
| Pat_32 | Pre-Treatment | C2orf16 | 84226  | 37 | 2  | 27804355  | 27804355  | Missense_Mutation | SNP | G | A | 5  | 244 | c.4916G>A    | c.(4915-4917)CGC>CAC   | p.R1639H      |
| Pat_32 | Pre-Treatment | SOS1    | 6654   | 37 | 2  | 39213384  | 39213384  | Nonsense_Mutation | SNP | G | A | 4  | 109 | c.3583C>T    | c.(3583-3585)CGA>TGA   | p.R1195*      |
| Pat_32 | Pre-Treatment | C2orf42 | 54980  | 37 | 2  | 70409005  | 70409005  | Missense_Mutation | SNP | C | T | 4  | 88  | c.113G>A     | c.(112-114)CGG>CAG     | p.R38Q        |
| Pat_32 | Pre-Treatment | C2orf78 | 388960 | 37 | 2  | 74043857  | 74043857  | Missense_Mutation | SNP | G | A | 3  | 69  | c.2507G>A    | c.(2506-2508)CGG>CAG   | p.R836Q       |
| Pat_32 | Pre-Treatment | MOGS    | 7841   | 37 | 2  | 74689115  | 74689115  | Nonsense_Mutation | SNP | G | A | 4  | 138 | c.1801C>T    | c.(1801-1803)CGA>TGA   | p.R601*       |
| Pat_32 | Pre-Treatment | CCDC142 | 84865  | 37 | 2  | 74708602  | 74708602  | Missense_Mutation | SNP | G | A | 4  | 108 | c.1085C>T    | c.(1084-1086)TCG>TTG   | p.S362L       |
| Pat_32 | Pre-Treatment | ADRA2B  | 151    | 37 | 2  | 96781147  | 96781147  | Missense_Mutation | SNP | C | T | 3  | 37  | c.742G>A     | c.(742-744)GGA>AGA     | p.G248R       |
| Pat_32 | Pre-Treatment | IL18R1  | 8809   | 37 | 2  | 102988526 | 102988526 | Missense_Mutation | SNP | C | T | 3  | 55  | c.416C>T     | c.(415-417)ACC>ATC     | p.T139I       |
| Pat_32 | Pre-Treatment | POLR1B  | 84172  | 37 | 2  | 113333092 | 113333092 | Missense_Mutation | SNP | C | T | 4  | 127 | c.3194C>T    | c.(3193-3195)TCG>TTG   | p.S1065L      |
| Pat_32 | Pre-Treatment | FAM168B | 130074 | 37 | 2  | 131813136 | 131813136 | Missense_Mutation | SNP | G | A | 4  | 133 | c.287C>T     | c.(286-288)CCG>CTG     | p.P96L        |
| Pat_32 | Pre-Treatment | LYPD6   | 130574 | 37 | 2  | 150325225 | 150325225 | Missense_Mutation | SNP | G | A | 6  | 309 | c.284G>A     | c.(283-285)CGC>CAC     | p.R95H        |
| Pat_32 | Pre-Treatment | NR4A2   | 4929   | 37 | 2  | 157183339 | 157183339 | Missense_Mutation | SNP | G | A | 4  | 182 | c.1252C>T    | c.(1252-1254)CGG>TGG   | p.R418W       |
| Pat_32 | Pre-Treatment | FIGN    | 55137  | 37 | 2  | 164468067 | 164468067 | Missense_Mutation | SNP | G | A | 5  | 198 | c.275C>T     | c.(274-276)TCG>TTG     | p.S92L        |
| Pat_32 | Pre-Treatment | OSBPL6  | 114880 | 37 | 2  | 179248776 | 179248776 | Missense_Mutation | SNP | C | T | 5  | 182 | c.1886C>T    | c.(1885-1887)GCC>GTC   | p.A629V       |
| Pat_32 | Pre-Treatment | TTN     | 7273   | 37 | 2  | 179623711 | 179623711 | Missense_Mutation | SNP | C | T | 4  | 69  | c.10303G>A   | c.(10303-10305)GCT>ACT | p.A3435T      |
| Pat_32 | Pre-Treatment | TTN     | 7273   | 37 | 2  | 179640583 | 179640583 | Missense_Mutation | SNP | C | T | 4  | 138 | c.6008G>A    | c.(6007-6009)CGC>CAC   | p.R2003H      |
| Pat_32 | Pre-Treatment | COL5A2  | 1290   | 37 | 2  | 189904043 | 189904043 | Missense_Mutation | SNP | G | A | 4  | 121 | c.3880C>T    | c.(3880-3882)CGC>TGC   | p.R1294C      |
| Pat_32 | Pre-Treatment | PGAP1   | 80055  | 37 | 2  | 197708675 | 197708675 | Missense_Mutation | SNP | T | C | 39 | 55  | c.2462A>G    | c.(2461-2463)AAC>AGC   | p.N821S       |

|        |               |           |        |    |    |           |           |                   |     |   |   |    |     |           |                      |          |
|--------|---------------|-----------|--------|----|----|-----------|-----------|-------------------|-----|---|---|----|-----|-----------|----------------------|----------|
| Pat_32 | Pre-Treatment | C2orf69   | 205327 | 37 | 2  | 200790460 | 200790460 | Missense_Mutation | SNP | C | T | 4  | 187 | c.1009C>T | c.(1009-1011)CGT>TGT | p.R337C  |
| Pat_32 | Pre-Treatment | PARD3B    | 117583 | 37 | 2  | 206480461 | 206480461 | Missense_Mutation | SNP | G | A | 4  | 85  | c.3542G>A | c.(3541-3543)CGT>CAT | p.R1181H |
| Pat_32 | Pre-Treatment | TNS1      | 7145   | 37 | 2  | 218762676 | 218762676 | Missense_Mutation | SNP | G | A | 3  | 28  | c.13C>T   | c.(13-15)CGG>TGG     | p.R5W    |
| Pat_32 | Pre-Treatment | TLL4      | 9654   | 37 | 2  | 219617532 | 219617532 | Missense_Mutation | SNP | G | A | 4  | 185 | c.3023G>A | c.(3022-3024)CGG>CAG | p.R1008Q |
| Pat_32 | Pre-Treatment | STK11IP   | 114790 | 37 | 2  | 220466052 | 220466052 | Missense_Mutation | SNP | G | A | 4  | 95  | c.190G>A  | c.(190-192)GGC>AGC   | p.G64S   |
| Pat_32 | Pre-Treatment | GIGYF2    | 26058  | 37 | 2  | 233684688 | 233684688 | Missense_Mutation | SNP | G | A | 4  | 92  | c.2522G>A | c.(2521-2523)CGC>CAC | p.R841H  |
| Pat_32 | Pre-Treatment | DGKD      | 8527   | 37 | 2  | 234346033 | 234346033 | Missense_Mutation | SNP | C | T | 15 | 46  | c.830C>T  | c.(829-831)TCG>TTG   | p.S277L  |
| Pat_32 | Pre-Treatment | SH3BP4    | 23677  | 37 | 2  | 235950569 | 235950569 | Missense_Mutation | SNP | G | C | 3  | 14  | c.1156G>C | c.(1156-1158)GAG>CAG | p.E386Q  |
| Pat_32 | Pre-Treatment | THAP4     | 51078  | 37 | 2  | 242542416 | 242542416 | Missense_Mutation | SNP | G | T | 4  | 124 | c.1479C>A | c.(1477-1479)AAC>AAA | p.N493K  |
| Pat_32 | Pre-Treatment | SIRPA     | 140885 | 37 | 20 | 1902292   | 1902292   | Missense_Mutation | SNP | G | A | 7  | 88  | c.688G>A  | c.(688-690)GTG>ATG   | p.V230M  |
| Pat_32 | Pre-Treatment | SIRPA     | 140885 | 37 | 20 | 1902301   | 1902301   | Missense_Mutation | SNP | G | A | 11 | 101 | c.697G>A  | c.(697-699)GTC>ATC   | p.V233I  |
| Pat_32 | Pre-Treatment | TGM3      | 7053   | 37 | 20 | 2308780   | 2308780   | Missense_Mutation | SNP | G | A | 4  | 115 | c.1102G>A | c.(1102-1104)GGC>AGC | p.G368S  |
| Pat_32 | Pre-Treatment | VPS16     | 64601  | 37 | 20 | 2845822   | 2845822   | Missense_Mutation | SNP | G | A | 4  | 161 | c.2033G>A | c.(2032-2034)CGG>CAG | p.R678Q  |
| Pat_32 | Pre-Treatment | ProSAPIP1 | 9762   | 37 | 20 | 3145179   | 3145179   | Missense_Mutation | SNP | G | A | 4  | 86  | c.1943C>T | c.(1942-1944)ACG>ATG | p.T648M  |
| Pat_32 | Pre-Treatment | C2orf191  | 149934 | 37 | 20 | 26084295  | 26084295  | Missense_Mutation | SNP | C | T | 3  | 47  | c.121G>A  | c.(121-123)GGA>AGA   | p.G41R   |
| Pat_32 | Pre-Treatment | RBL1      | 5933   | 37 | 20 | 35635837  | 35635837  | Missense_Mutation | SNP | C | T | 4  | 156 | c.2848G>A | c.(2848-2850)GAC>AAC | p.D950N  |
| Pat_32 | Pre-Treatment | WISP2     | 8839   | 37 | 20 | 43348589  | 43348589  | Nonsense_Mutation | SNP | C | T | 5  | 216 | c.112C>T  | c.(112-114)CGA>TGA   | p.R38*   |
| Pat_32 | Pre-Treatment | PABPC1L   | 80336  | 37 | 20 | 43566707  | 43566707  | Missense_Mutation | SNP | C | T | 4  | 168 | c.1651C>T | c.(1651-1653)CGT>TGT | p.R551C  |
| Pat_32 | Pre-Treatment | PLTP      | 5360   | 37 | 20 | 44533619  | 44533619  | Missense_Mutation | SNP | G | A | 4  | 194 | c.844C>T  | c.(844-846)CGG>TGG   | p.R282W  |
| Pat_32 | Pre-Treatment | C2orf195  | 79025  | 37 | 20 | 62187846  | 62187846  | Missense_Mutation | SNP | G | A | 6  | 364 | c.830G>A  | c.(829-831)CGA>CAA   | p.R277Q  |
| Pat_32 | Pre-Treatment | ZGPAT     | 84619  | 37 | 20 | 62366126  | 62366126  | Missense_Mutation | SNP | G | A | 4  | 138 | c.1001G>A | c.(1000-1002)CGA>CAA | p.R334Q  |
| Pat_32 | Pre-Treatment | ZNF512B   | 57473  | 37 | 20 | 62593986  | 62593986  | Nonsense_Mutation | SNP | C | T | 4  | 46  | c.2117G>A | c.(2116-2118)TGG>TAG | p.W706*  |
| Pat_32 | Pre-Treatment | DOPEY2    | 9980   | 37 | 21 | 37609674  | 37609674  | Missense_Mutation | SNP | G | A | 4  | 104 | c.2737G>A | c.(2737-2739)GAG>AAG | p.E913K  |
| Pat_32 | Pre-Treatment | DYRK1A    | 1859   | 37 | 21 | 38862710  | 38862710  | Missense_Mutation | SNP | C | T | 4  | 168 | c.898C>T  | c.(898-900)CGC>TGC   | p.R300C  |
| Pat_32 | Pre-Treatment | RIPK4     | 54101  | 37 | 21 | 43161318  | 43161318  | Missense_Mutation | SNP | G | A | 4  | 120 | c.2035C>T | c.(2035-2037)CGC>TGC | p.R679C  |
| Pat_32 | Pre-Treatment | CBS       | 875    | 37 | 21 | 44478298  | 44478298  | Missense_Mutation | SNP | G | A | 4  | 128 | c.1424C>T | c.(1423-1425)CCG>CTG | p.P475L  |
| Pat_32 | Pre-Treatment | RRP1      | 8568   | 37 | 21 | 45219501  | 45219501  | Missense_Mutation | SNP | G | A | 4  | 52  | c.862G>A  | c.(862-864)GAC>AAC   | p.D288N  |
| Pat_32 | Pre-Treatment | ADARB1    | 104    | 37 | 21 | 46596515  | 46596515  | Missense_Mutation | SNP | A | T | 5  | 148 | c.899A>T  | c.(898-900)CAC>CTC   | p.H300L  |
| Pat_32 | Pre-Treatment | DIP2A     | 23181  | 37 | 21 | 47987479  | 47987479  | Missense_Mutation | SNP | C | T | 4  | 143 | c.4660C>T | c.(4660-4662)CGG>TGG | p.R1554W |
| Pat_32 | Pre-Treatment | 5-Sep     | 5413   | 37 | 22 | 19708173  | 19708173  | Missense_Mutation | SNP | G | A | 4  | 88  | c.599G>A  | c.(598-600)CGG>CAG   | p.R200Q  |
| Pat_32 | Pre-Treatment | 5-Sep     | 5413   | 37 | 22 | 19709223  | 19709223  | Missense_Mutation | SNP | G | A | 4  | 105 | c.778G>A  | c.(778-780)GTC>ATC   | p.V260I  |
| Pat_32 | Pre-Treatment | TOP3B     | 8940   | 37 | 22 | 22326305  | 22326305  | Missense_Mutation | SNP | C | T | 4  | 163 | c.328G>A  | c.(328-330)GAC>AAC   | p.D110N  |
| Pat_32 | Pre-Treatment | MYO18B    | 84700  | 37 | 22 | 26423222  | 26423222  | Missense_Mutation | SNP | C | T | 4  | 144 | c.7282C>T | c.(7282-7284)CTC>TTC | p.L2428F |
| Pat_32 | Pre-Treatment | EWSR1     | 2130   | 37 | 22 | 29684603  | 29684603  | Nonsense_Mutation | SNP | C | T | 5  | 137 | c.802C>T  | c.(802-804)CGA>TGA   | p.R268*  |
| Pat_32 | Pre-Treatment | CABP7     | 164633 | 37 | 22 | 30123680  | 30123680  | Missense_Mutation | SNP | C | T | 4  | 140 | c.139C>T  | c.(139-141)CGT>TGT   | p.R47C   |
| Pat_32 | Pre-Treatment | DEPDC5    | 9681   | 37 | 22 | 32198806  | 32198806  | Nonsense_Mutation | SNP | C | T | 4  | 182 | c.1063C>T | c.(1063-1065)CAG>TAG | p.Q355*  |
| Pat_32 | Pre-Treatment | DNAJB7    | 150353 | 37 | 22 | 41257776  | 41257776  | Missense_Mutation | SNP | C | T | 5  | 230 | c.223G>A  | c.(223-225)GGA>AGA   | p.G75R   |
| Pat_32 | Pre-Treatment | C22orf9   | 23313  | 37 | 22 | 45601715  | 45601715  | Missense_Mutation | SNP | C | T | 4  | 34  | c.295G>A  | c.(295-297)GAC>AAC   | p.D99N   |
| Pat_32 | Pre-Treatment | GRAMD4    | 23151  | 37 | 22 | 47054119  | 47054119  | Missense_Mutation | SNP | G | A | 3  | 58  | c.319G>A  | c.(319-321)GCG>ACG   | p.A107T  |
| Pat_32 | Pre-Treatment | BRD1      | 23774  | 37 | 22 | 50187865  | 50187865  | Missense_Mutation | SNP | C | T | 4  | 90  | c.2176G>A | c.(2176-2178)GAC>AAC | p.D726N  |
| Pat_32 | Pre-Treatment | NCAPH2    | 29781  | 37 | 22 | 50954903  | 50954903  | Missense_Mutation | SNP | G | A | 4  | 126 | c.136G>A  | c.(136-138)GAA>AAA   | p.E46K   |
| Pat_32 | Pre-Treatment | CPT1B     | 1375   | 37 | 22 | 51008832  | 51008832  | Missense_Mutation | SNP | G | A | 3  | 46  | c.2032C>T | c.(2032-2034)CTC>TTC | p.L678F  |
| Pat_32 | Pre-Treatment | ITPR1     | 3708   | 37 | 3  | 4810392   | 4810392   | Nonsense_Mutation | SNP | C | T | 4  | 164 | c.5779C>T | c.(5779-5781)CAG>TAG | p.Q1927* |
| Pat_32 | Pre-Treatment | GRM7      | 2917   | 37 | 3  | 7503321   | 7503321   | Missense_Mutation | SNP | G | A | 5  | 210 | c.1427G>A | c.(1426-1428)CGT>CAT | p.R476H  |
| Pat_32 | Pre-Treatment | SGOL1     | 151648 | 37 | 3  | 20216232  | 20216232  | Missense_Mutation | SNP | G | A | 4  | 148 | c.791C>T  | c.(790-792)ACG>ATG   | p.T264M  |
| Pat_32 | Pre-Treatment | TGFBR2    | 7048   | 37 | 3  | 30713843  | 30713843  | Missense_Mutation | SNP | G | A | 6  | 373 | c.1168G>A | c.(1168-1170)GAC>AAC | p.D390N  |
| Pat_32 | Pre-Treatment | CLASP2    | 23122  | 37 | 3  | 33644501  | 33644501  | Missense_Mutation | SNP | C | T | 5  | 11  | c.1867G>A | c.(1867-1869)GTG>ATG | p.V623M  |

|        |               |          |        |    |   |           |           |                   |     |    |    |    |     |                 |                      |               |
|--------|---------------|----------|--------|----|---|-----------|-----------|-------------------|-----|----|----|----|-----|-----------------|----------------------|---------------|
| Pat_32 | Pre-Treatment | TRANK1   | 9881   | 37 | 3 | 36875205  | 36875205  | Missense_Mutation | SNP | T  | A  | 25 | 47  | c.4087A>T       | c.(4087-4089)AAC>TAC | p.N1363Y      |
| Pat_32 | Pre-Treatment | DLEC1    | 9940   | 37 | 3 | 38163567  | 38163567  | Nonsense_Mutation | SNP | C  | T  | 3  | 26  | c.5026C>T       | c.(5026-5028)CAG>TAG | p.Q1676*      |
| Pat_32 | Pre-Treatment | WDR48    | 57599  | 37 | 3 | 39104667  | 39104667  | Missense_Mutation | SNP | G  | A  | 4  | 181 | c.175G>A        | c.(175-177)GTC>ATC   | p.V59I        |
| Pat_32 | Pre-Treatment | NKTR     | 4820   | 37 | 3 | 42676768  | 42676768  | Missense_Mutation | SNP | G  | A  | 4  | 115 | c.1073G>A       | c.(1072-1074)AGC>AAC | p.S358N       |
| Pat_32 | Pre-Treatment | NBEAL2   | 23218  | 37 | 3 | 47049615  | 47049615  | Missense_Mutation | SNP | G  | A  | 4  | 79  | c.7658G>A       | c.(7657-7659)GGG>GAG | p.G2553E      |
| Pat_32 | Pre-Treatment | CELSR3   | 1951   | 37 | 3 | 48698077  | 48698077  | Missense_Mutation | SNP | G  | A  | 4  | 81  | c.1991C>T       | c.(1990-1992)GCT>GTT | p.A664V       |
| Pat_32 | Pre-Treatment | NDUFAB3  | 25915  | 37 | 3 | 49060595  | 49060595  | Missense_Mutation | SNP | C  | T  | 4  | 139 | c.545C>T        | c.(544-546)GCT>GTT   | p.A182V       |
| Pat_32 | Pre-Treatment | QRICH1   | 54870  | 37 | 3 | 49094328  | 49094329  | Missense_Mutation | DNP | CT | TG | 3  | 50  | .1304_1305AG>C, | c.(1303-1305)CAG>CCA | p.Q435P       |
| Pat_32 | Pre-Treatment | GNAT1    | 2779   | 37 | 3 | 50231059  | 50231059  | Missense_Mutation | SNP | C  | A  | 3  | 70  | c.412C>A        | c.(412-414)CGC>AGC   | p.R138S       |
| Pat_32 | Pre-Treatment | ITIH4    | 3700   | 37 | 3 | 52851074  | 52851074  | Missense_Mutation | SNP | C  | T  | 4  | 73  | c.2297G>A       | c.(2296-2298)GGG>GAG | p.G766E       |
| Pat_32 | Pre-Treatment | ATXN7    | 6314   | 37 | 3 | 63981293  | 63981293  | Missense_Mutation | SNP | G  | A  | 4  | 162 | c.1795G>A       | c.(1795-1797)GTC>ATC | p.V599I       |
| Pat_32 | Pre-Treatment | CNTN3    | 5067   | 37 | 3 | 74313619  | 74313619  | Missense_Mutation | SNP | G  | A  | 4  | 119 | c.3020C>T       | c.(3019-3021)TCG>TTG | p.S1007L      |
| Pat_32 | Pre-Treatment | CCDC80   | 151887 | 37 | 3 | 112358361 | 112358361 | Missense_Mutation | SNP | C  | T  | 4  | 163 | c.392G>A        | c.(391-393)CGT>CAT   | p.R131H       |
| Pat_32 | Pre-Treatment | ARHGAP31 | 57514  | 37 | 3 | 119118063 | 119118063 | Nonsense_Mutation | SNP | C  | T  | 5  | 65  | c.1024C>T       | c.(1024-1026)CGA>TGA | p.R342*       |
| Pat_32 | Pre-Treatment | ARHGAP31 | 57514  | 37 | 3 | 119134452 | 119134452 | Missense_Mutation | SNP | G  | A  | 6  | 36  | c.3676G>A       | c.(3676-3678)GTT>ATT | p.V1226I      |
| Pat_32 | Pre-Treatment | GOLGB1   | 2804   | 37 | 3 | 121415795 | 121415795 | Missense_Mutation | SNP | C  | T  | 4  | 143 | c.3560G>A       | c.(3559-3561)CGC>CAC | p.R1187H      |
| Pat_32 | Pre-Treatment | SEMA5B   | 54437  | 37 | 3 | 122634464 | 122634464 | Missense_Mutation | SNP | C  | T  | 4  | 26  | c.1811G>A       | c.(1810-1812)CGG>CAG | p.R604Q       |
| Pat_32 | Pre-Treatment | SEMA5B   | 54437  | 37 | 3 | 122646735 | 122646735 | Missense_Mutation | SNP | G  | A  | 4  | 52  | c.752C>T        | c.(751-753)ACG>ATG   | p.T251M       |
| Pat_32 | Pre-Treatment | AMOTL2   | 51421  | 37 | 3 | 134086424 | 134086424 | Missense_Mutation | SNP | C  | T  | 4  | 187 | c.1130G>A       | c.(1129-1131)AGG>AAG | p.R377K       |
| Pat_32 | Pre-Treatment | SGEF     | 26084  | 37 | 3 | 153972602 | 153972602 | Missense_Mutation | SNP | G  | A  | 4  | 192 | c.2462G>A       | c.(2461-2463)CGT>CAT | p.R821H       |
| Pat_32 | Pre-Treatment | WHSC1    | 7468   | 37 | 4 | 1980497   | 1980497   | Missense_Mutation | SNP | G  | A  | 4  | 93  | c.3959G>A       | c.(3958-3960)CGG>CAG | p.R1320Q      |
| Pat_32 | Pre-Treatment | GRK4     | 2868   | 37 | 4 | 2986281   | 2986281   | Missense_Mutation | SNP | G  | A  | 17 | 70  | c.94G>A         | c.(94-96)GAG>AAG     | p.E32K        |
| Pat_32 | Pre-Treatment | EVC      | 2121   | 37 | 4 | 5806511   | 5806511   | Missense_Mutation | SNP | C  | T  | 4  | 127 | c.2504C>T       | c.(2503-2505)TCG>TTG | p.S835L       |
| Pat_32 | Pre-Treatment | ABLIM2   | 84448  | 37 | 4 | 8010776   | 8010776   | Splice_Site       | SNP | C  | T  | 4  | 148 | c.1377_splice   | c.e14+1              | p.K459_splice |
| Pat_32 | Pre-Treatment | ZNF518B  | 85460  | 37 | 4 | 10446269  | 10446269  | Missense_Mutation | SNP | G  | A  | 4  | 60  | c.1684C>T       | c.(1684-1686)CCT>TCT | p.P562S       |
| Pat_32 | Pre-Treatment | GPR125   | 166647 | 37 | 4 | 22422643  | 22422643  | Missense_Mutation | SNP | C  | T  | 5  | 277 | c.1675G>A       | c.(1675-1677)GTG>ATG | p.V559M       |
| Pat_32 | Pre-Treatment | DHX15    | 1665   | 37 | 4 | 24572443  | 24572443  | Nonsense_Mutation | SNP | G  | A  | 5  | 63  | c.535C>T        | c.(535-537)CGA>TGA   | p.R179*       |
| Pat_32 | Pre-Treatment | RBM47    | 54502  | 37 | 4 | 40439807  | 40439807  | Missense_Mutation | SNP | G  | C  | 3  | 72  | c.1104C>G       | c.(1102-1104)AAC>AAG | p.N368K       |
| Pat_32 | Pre-Treatment | LNX1     | 84708  | 37 | 4 | 54374317  | 54374317  | Missense_Mutation | SNP | G  | A  | 4  | 49  | c.458C>T        | c.(457-459)GCG>GTG   | p.A153V       |
| Pat_32 | Pre-Treatment | AMBN     | 258    | 37 | 4 | 71471998  | 71471998  | Missense_Mutation | SNP | G  | A  | 4  | 61  | c.895G>A        | c.(895-897)GGC>AGC   | p.G299S       |
| Pat_32 | Pre-Treatment | SLC4A4   | 8671   | 37 | 4 | 72316945  | 72316945  | Missense_Mutation | SNP | G  | T  | 46 | 191 | c.1249G>T       | c.(1249-1251)GGG>TGG | p.G417W       |
| Pat_32 | Pre-Treatment | FRAS1    | 80144  | 37 | 4 | 79399122  | 79399122  | Missense_Mutation | SNP | G  | A  | 4  | 59  | c.8005G>A       | c.(8005-8007)GAT>AAT | p.D2669N      |
| Pat_32 | Pre-Treatment | HERC5    | 51191  | 37 | 4 | 89388313  | 89388313  | Missense_Mutation | SNP | C  | T  | 4  | 143 | c.1015C>T       | c.(1015-1017)CCG>TCG | p.P339S       |
| Pat_32 | Pre-Treatment | TET2     | 54790  | 37 | 4 | 106157980 | 106157980 | Missense_Mutation | SNP | G  | A  | 4  | 112 | c.2881G>A       | c.(2881-2883)GAA>AAA | p.E961K       |
| Pat_32 | Pre-Treatment | KIAA1109 | 84162  | 37 | 4 | 123160786 | 123160786 | Missense_Mutation | SNP | C  | T  | 5  | 243 | c.3949C>T       | c.(3949-3951)CGT>TGT | p.R1317C      |
| Pat_32 | Pre-Treatment | TTC29    | 83894  | 37 | 4 | 147628661 | 147628661 | Missense_Mutation | SNP | G  | A  | 16 | 32  | c.1373C>T       | c.(1372-1374)TCA>TTA | p.S458L       |
| Pat_32 | Pre-Treatment | PET112L  | 5188   | 37 | 4 | 152601041 | 152601041 | Missense_Mutation | SNP | G  | A  | 4  | 172 | c.1334C>T       | c.(1333-1335)CCT>CTT | p.P445L       |
| Pat_32 | Pre-Treatment | PLRG1    | 5356   | 37 | 4 | 155459133 | 155459133 | Missense_Mutation | SNP | G  | A  | 4  | 178 | c.1279C>T       | c.(1279-1281)CTT>TTT | p.L427F       |
| Pat_32 | Pre-Treatment | SPATA4   | 132851 | 37 | 4 | 177114113 | 177114113 | Nonsense_Mutation | SNP | G  | A  | 4  | 100 | c.463C>T        | c.(463-465)CGA>TGA   | p.R155*       |
| Pat_32 | Pre-Treatment | FAT1     | 2195   | 37 | 4 | 187557879 | 187557879 | Missense_Mutation | SNP | C  | T  | 6  | 315 | c.3832G>A       | c.(3832-3834)GAC>AAC | p.D1278N      |
| Pat_32 | Pre-Treatment | LPCAT1   | 79888  | 37 | 5 | 1489956   | 1489956   | Missense_Mutation | SNP | G  | A  | 8  | 325 | c.511C>T        | c.(511-513)CGG>TGG   | p.R171W       |
| Pat_32 | Pre-Treatment | MRPL36   | 64979  | 37 | 5 | 1798797   | 1798797   | Missense_Mutation | SNP | G  | A  | 4  | 144 | c.253C>T        | c.(253-255)CGG>TGG   | p.R85W        |
| Pat_32 | Pre-Treatment | DNAJC21  | 134218 | 37 | 5 | 34937509  | 34937509  | Nonsense_Mutation | SNP | C  | T  | 16 | 24  | c.517C>T        | c.(517-519)CGA>TGA   | p.R173*       |
| Pat_32 | Pre-Treatment | NIPBL    | 25836  | 37 | 5 | 36986086  | 36986086  | Missense_Mutation | SNP | C  | T  | 32 | 69  | c.2804C>T       | c.(2803-2805)CCT>CTT | p.P935L       |
| Pat_32 | Pre-Treatment | EGFLAM   | 133584 | 37 | 5 | 38425067  | 38425067  | Splice_Site       | SNP | A  | T  | 4  | 50  | c.1685_splice   | c.e13-2              | p.G562_splice |
| Pat_32 | Pre-Treatment | MAST4    | 375449 | 37 | 5 | 66459110  | 66459110  | Missense_Mutation | SNP | G  | A  | 4  | 133 | c.3536G>A       | c.(3535-3537)CGA>CAA | p.R1179Q      |
| Pat_32 | Pre-Treatment | RGNEF    | 64283  | 37 | 5 | 73072487  | 73072487  | Missense_Mutation | SNP | G  | A  | 5  | 256 | c.806G>A        | c.(805-807)CGG>CAG   | p.R269Q       |



|        |               |          |        |    |   |           |           |                        |     |   |   |   |     |               |                      |               |
|--------|---------------|----------|--------|----|---|-----------|-----------|------------------------|-----|---|---|---|-----|---------------|----------------------|---------------|
| Pat_32 | Pre-Treatment | DMGDH    | 29958  | 37 | 5 | 78347109  | 78347109  | Splice_Site            | SNP | C | T | 4 | 123 | c.745_splice  | c.e5+1               | p.G249_splice |
| Pat_32 | Pre-Treatment | NR2F1    | 7025   | 37 | 5 | 92923685  | 92923685  | Missense_Mutation      | SNP | G | A | 4 | 173 | c.526G>A      | c.(526-528)GGG>AGG   | p.G176R       |
| Pat_32 | Pre-Treatment | CAST     | 831    | 37 | 5 | 96090398  | 96090398  | Missense_Mutation      | SNP | G | A | 4 | 78  | c.1414G>A     | c.(1414-1416)GAA>AAA | p.E472K       |
| Pat_32 | Pre-Treatment | CHD1     | 1105   | 37 | 5 | 98229259  | 98229259  | Nonsense_Mutation      | SNP | G | A | 4 | 110 | c.1852C>T     | c.(1852-1854)CGA>TGA | p.R618*       |
| Pat_32 | Pre-Treatment | PPIP5K2  | 23262  | 37 | 5 | 102503001 | 102503001 | Missense_Mutation      | SNP | G | A | 4 | 136 | c.2039G>A     | c.(2038-2040)CGA>CAA | p.R680Q       |
| Pat_32 | Pre-Treatment | WDR36    | 134430 | 37 | 5 | 110448839 | 110448839 | Missense_Mutation      | SNP | C | T | 4 | 132 | c.1951C>T     | c.(1951-1953)CTT>TTT | p.L651F       |
| Pat_32 | Pre-Treatment | ALDH7A1  | 501    | 37 | 5 | 125929071 | 125929071 | Missense_Mutation      | SNP | T | G | 5 | 178 | c.218A>C      | c.(217-219)AAC>ACC   | p.N73T        |
| Pat_32 | Pre-Treatment | SLC12A2  | 6558   | 37 | 5 | 127493771 | 127493771 | Missense_Mutation      | SNP | C | T | 4 | 83  | c.2390C>T     | c.(2389-2391)GCT>GTT | p.A797V       |
| Pat_32 | Pre-Treatment | SLC27A6  | 28965  | 37 | 5 | 128324361 | 128324361 | Missense_Mutation      | SNP | G | T | 4 | 127 | c.754G>T      | c.(754-756)GGT>TGT   | p.G252C       |
| Pat_32 | Pre-Treatment | IL5      | 3567   | 37 | 5 | 131879182 | 131879182 | Translation_Start_Site | SNP | G | A | 3 | 63  | c.-11C>T      | c.(-13-9)AACGT>AATGT |               |
| Pat_32 | Pre-Treatment | TXNDC15  | 79770  | 37 | 5 | 134229210 | 134229210 | Missense_Mutation      | SNP | G | A | 5 | 302 | c.620G>A      | c.(619-621)GGT>GAT   | p.G207D       |
| Pat_32 | Pre-Treatment | KLHL3    | 26249  | 37 | 5 | 136969816 | 136969816 | Missense_Mutation      | SNP | G | A | 3 | 84  | c.1360C>T     | c.(1360-1362)CGC>TGC | p.R454C       |
| Pat_32 | Pre-Treatment | KIF20A   | 10112  | 37 | 5 | 137519954 | 137519954 | Missense_Mutation      | SNP | G | A | 5 | 242 | c.1379G>A     | c.(1378-1380)CGT>CAT | p.R460H       |
| Pat_32 | Pre-Treatment | CDC25C   | 995    | 37 | 5 | 137666711 | 137666711 | Missense_Mutation      | SNP | A | T | 4 | 150 | c.159T>A      | c.(157-159)TTT>TTA   | p.F53L        |
| Pat_32 | Pre-Treatment | PSD2     | 84249  | 37 | 5 | 139201522 | 139201522 | Missense_Mutation      | SNP | G | A | 5 | 189 | c.1142G>A     | c.(1141-1143)CGT>CAT | p.R381H       |
| Pat_32 | Pre-Treatment | HARS2    | 23438  | 37 | 5 | 140076194 | 140076194 | Missense_Mutation      | SNP | G | A | 4 | 78  | c.821G>A      | c.(820-822)TGT>TAT   | p.C274Y       |
| Pat_32 | Pre-Treatment | PCDHB15  | 56121  | 37 | 5 | 140627271 | 140627271 | Missense_Mutation      | SNP | G | A | 4 | 175 | c.2125G>A     | c.(2125-2127)GTG>ATG | p.V709M       |
| Pat_32 | Pre-Treatment | PCDH1    | 5097   | 37 | 5 | 141244687 | 141244687 | Missense_Mutation      | SNP | G | T | 4 | 135 | c.1209C>A     | c.(1207-1209)AAC>AAA | p.N403K       |
| Pat_32 | Pre-Treatment | ANXA6    | 309    | 37 | 5 | 150498887 | 150498887 | Missense_Mutation      | SNP | C | T | 4 | 101 | c.1412G>A     | c.(1411-1413)CGG>CAG | p.R471Q       |
| Pat_32 | Pre-Treatment | C5orf4   | 10826  | 37 | 5 | 154199982 | 154199982 | Missense_Mutation      | SNP | G | A | 4 | 126 | c.896C>T      | c.(895-897)ACT>ATT   | p.T299I       |
| Pat_32 | Pre-Treatment | TIMD4    | 91937  | 37 | 5 | 156378634 | 156378634 | Missense_Mutation      | SNP | C | T | 4 | 121 | c.568G>A      | c.(568-570)GTC>ATC   | p.V190I       |
| Pat_32 | Pre-Treatment | SLIT3    | 6586   | 37 | 5 | 168112718 | 168112718 | Nonsense_Mutation      | SNP | G | A | 3 | 49  | c.3529C>T     | c.(3529-3531)CGA>TGA | p.R1177*      |
| Pat_32 | Pre-Treatment | BTN2A3   | 54718  | 37 | 6 | 26423221  | 26423221  | Missense_Mutation      | SNP | C | T | 4 | 144 | c.140C>T      | c.(139-141)ACG>ATG   | p.T47M        |
| Pat_32 | Pre-Treatment | BAT5     | 7920   | 37 | 6 | 31655427  | 31655427  | Missense_Mutation      | SNP | C | A | 4 | 43  | c.1538G>T     | c.(1537-1539)TGG>TTG | p.W513L       |
| Pat_32 | Pre-Treatment | EGFL8    | 80864  | 37 | 6 | 32135716  | 32135716  | Missense_Mutation      | SNP | G | A | 4 | 167 | c.865G>A      | c.(865-867)GGC>AGC   | p.G289S       |
| Pat_32 | Pre-Treatment | PHF1     | 5252   | 37 | 6 | 33382064  | 33382064  | Missense_Mutation      | SNP | G | A | 4 | 107 | c.797G>A      | c.(796-798)TGT>TAT   | p.C266Y       |
| Pat_32 | Pre-Treatment | SCUBE3   | 222663 | 37 | 6 | 35210996  | 35210996  | Missense_Mutation      | SNP | G | A | 4 | 52  | c.1892G>A     | c.(1891-1893)CGT>CAT | p.R631H       |
| Pat_32 | Pre-Treatment | FKBP5    | 2289   | 37 | 6 | 35604904  | 35604904  | Missense_Mutation      | SNP | G | A | 3 | 70  | c.137C>T      | c.(136-138)ACG>ATG   | p.T46M        |
| Pat_32 | Pre-Treatment | TREML1   | 340205 | 37 | 6 | 41117416  | 41117416  | Missense_Mutation      | SNP | C | T | 3 | 54  | c.862G>A      | c.(862-864)GGA>AGA   | p.G288R       |
| Pat_32 | Pre-Treatment | ZNF318   | 24149  | 37 | 6 | 43323731  | 43323731  | Missense_Mutation      | SNP | C | A | 4 | 45  | c.1341G>T     | c.(1339-1341)CAG>CAT | p.Q447H       |
| Pat_32 | Pre-Treatment | SLC25A27 | 9481   | 37 | 6 | 46632515  | 46632515  | Missense_Mutation      | SNP | C | T | 4 | 36  | c.511C>T      | c.(511-513)CGT>TGT   | p.R171C       |
| Pat_32 | Pre-Treatment | TNFRSF21 | 27242  | 37 | 6 | 47253929  | 47253929  | Missense_Mutation      | SNP | G | A | 5 | 272 | c.499C>T      | c.(499-501)CGG>TGG   | p.R167W       |
| Pat_32 | Pre-Treatment | IL17A    | 3605   | 37 | 6 | 52054023  | 52054023  | Missense_Mutation      | SNP | G | A | 4 | 82  | c.401G>A      | c.(400-402)CGG>CAG   | p.R134Q       |
| Pat_32 | Pre-Treatment | MCM3     | 4172   | 37 | 6 | 52138606  | 52138606  | Missense_Mutation      | SNP | G | A | 4 | 109 | c.1483C>T     | c.(1483-1485)CGG>TGG | p.R495W       |
| Pat_32 | Pre-Treatment | RARS2    | 57038  | 37 | 6 | 88229427  | 88229427  | Splice_Site            | SNP | T | A | 4 | 54  | c.1113_splice | c.e14-1              | p.R371_splice |
| Pat_32 | Pre-Treatment | HDDC2    | 51020  | 37 | 6 | 125623283 | 125623283 | Splice_Site            | SNP | C | T | 3 | 9   | c.-203_splice | c.e1-1               |               |
| Pat_32 | Pre-Treatment | THEMIS   | 387357 | 37 | 6 | 128150855 | 128150855 | Missense_Mutation      | SNP | G | T | 4 | 107 | c.475C>A      | c.(475-477)CAA>AAA   | p.Q159K       |
| Pat_32 | Pre-Treatment | LAMA2    | 3908   | 37 | 6 | 129824276 | 129824276 | Missense_Mutation      | SNP | G | A | 4 | 125 | c.8398G>A     | c.(8398-8400)GGC>AGC | p.G2800S      |
| Pat_32 | Pre-Treatment | PDE7B    | 27115  | 37 | 6 | 136476819 | 136476819 | Missense_Mutation      | SNP | G | A | 4 | 48  | c.634G>A      | c.(634-636)GCA>ACA   | p.A212T       |
| Pat_32 | Pre-Treatment | HECA     | 51696  | 37 | 6 | 139487505 | 139487505 | Missense_Mutation      | SNP | A | G | 3 | 82  | c.356A>G      | c.(355-357)AAC>AGC   | p.N119S       |
| Pat_32 | Pre-Treatment | ULBP1    | 80329  | 37 | 6 | 150290465 | 150290465 | Missense_Mutation      | SNP | G | T | 5 | 90  | c.594G>T      | c.(592-594)TTG>TTT   | p.L198F       |
| Pat_32 | Pre-Treatment | MTHFD1L  | 25902  | 37 | 6 | 151281463 | 151281463 | Missense_Mutation      | SNP | C | T | 3 | 54  | c.1856C>T     | c.(1855-1857)ACG>ATG | p.T619M       |
| Pat_32 | Pre-Treatment | IGF2R    | 3482   | 37 | 6 | 160468929 | 160468929 | Missense_Mutation      | SNP | G | A | 4 | 48  | c.2335G>A     | c.(2335-2337)GAC>AAC | p.D779N       |
| Pat_32 | Pre-Treatment | HEATR2   | 54919  | 37 | 7 | 813785    | 813785    | Missense_Mutation      | SNP | G | A | 4 | 90  | c.2032G>A     | c.(2032-2034)GTG>ATG | p.V678M       |
| Pat_32 | Pre-Treatment | GPR146   | 115330 | 37 | 7 | 1097539   | 1097539   | Missense_Mutation      | SNP | G | A | 4 | 171 | c.388G>A      | c.(388-390)GAG>AAG   | p.E130K       |
| Pat_32 | Pre-Treatment | CHST12   | 55501  | 37 | 7 | 2473010   | 2473010   | Missense_Mutation      | SNP | G | A | 5 | 186 | c.736G>A      | c.(736-738)GAC>AAC   | p.D246N       |
| Pat_32 | Pre-Treatment | LFNG     | 3955   | 37 | 7 | 2565976   | 2565976   | Missense_Mutation      | SNP | G | A | 4 | 171 | c.920G>A      | c.(919-921)CGC>CAC   | p.R307H       |

|        |               |           |        |    |   |           |           |                   |     |   |   |     |     |            |                        |          |
|--------|---------------|-----------|--------|----|---|-----------|-----------|-------------------|-----|---|---|-----|-----|------------|------------------------|----------|
| Pat_32 | Pre-Treatment | EIF2AK1   | 27102  | 37 | 7 | 6078293   | 6078293   | Missense_Mutation | SNP | G | A | 4   | 104 | c.1129C>T  | c.(1129-1131)CAC>TAC   | p.H377Y  |
| Pat_32 | Pre-Treatment | EIF2AK1   | 27102  | 37 | 7 | 6094198   | 6094198   | Missense_Mutation | SNP | G | A | 4   | 151 | c.256C>T   | c.(256-258)CGT>TGT     | p.R86C   |
| Pat_32 | Pre-Treatment | ETV1      | 2115   | 37 | 7 | 13971154  | 13971154  | Missense_Mutation | SNP | C | T | 5   | 96  | c.775G>A   | c.(775-777)GAA>AAA     | p.E259K  |
| Pat_32 | Pre-Treatment | IGF2BP3   | 10643  | 37 | 7 | 23353172  | 23353172  | Missense_Mutation | SNP | G | A | 4   | 183 | c.1496C>T  | c.(1495-1497)GCT>GTT   | p.A499V  |
| Pat_32 | Pre-Treatment | AVL9      | 23080  | 37 | 7 | 32609732  | 32609732  | Missense_Mutation | SNP | G | A | 6   | 490 | c.1316G>A  | c.(1315-1317)CGA>CAA   | p.R439Q  |
| Pat_32 | Pre-Treatment | GCK       | 2645   | 37 | 7 | 44191932  | 44191932  | Missense_Mutation | SNP | C | T | 4   | 179 | c.301G>A   | c.(301-303)GTG>ATG     | p.V101M  |
| Pat_32 | Pre-Treatment | CAMK2B    | 816    | 37 | 7 | 44294171  | 44294171  | Missense_Mutation | SNP | G | A | 4   | 161 | c.311C>T   | c.(310-312)GCG>GTG     | p.A104V  |
| Pat_32 | Pre-Treatment | WBSCR17   | 64409  | 37 | 7 | 71177125  | 71177125  | Missense_Mutation | SNP | C | G | 20  | 77  | c.1791C>G  | c.(1789-1791)ATC>ATG   | p.I597M  |
| Pat_32 | Pre-Treatment | SEMA3D    | 223117 | 37 | 7 | 84694808  | 84694808  | Missense_Mutation | SNP | C | T | 104 | 51  | c.650G>A   | c.(649-651)CGA>CAA     | p.R217Q  |
| Pat_32 | Pre-Treatment | PON2      | 5445   | 37 | 7 | 95035519  | 95035519  | Missense_Mutation | SNP | T | G | 272 | 129 | c.818A>C   | c.(817-819)GAT>GCT     | p.D273A  |
| Pat_32 | Pre-Treatment | BRI3      | 25798  | 37 | 7 | 97920524  | 97920524  | Missense_Mutation | SNP | G | A | 4   | 144 | c.347G>A   | c.(346-348)CGA>CAA     | p.R116Q  |
| Pat_32 | Pre-Treatment | ZKSCAN5   | 23660  | 37 | 7 | 99129309  | 99129309  | Nonsense_Mutation | SNP | C | T | 5   | 162 | c.1957C>T  | c.(1957-1959)CGA>TGA   | p.R653*  |
| Pat_32 | Pre-Treatment | C7orf43   | 55262  | 37 | 7 | 99755485  | 99755485  | Missense_Mutation | SNP | G | T | 4   | 163 | c.488C>A   | c.(487-489)CCA>CAA     | p.P163Q  |
| Pat_32 | Pre-Treatment | C7orf61   | 402573 | 37 | 7 | 100061062 | 100061062 | Missense_Mutation | SNP | G | A | 5   | 368 | c.311C>T   | c.(310-312)CCG>CTG     | p.P104L  |
| Pat_32 | Pre-Treatment | FBXO24    | 26261  | 37 | 7 | 100184264 | 100184264 | Missense_Mutation | SNP | G | A | 7   | 261 | c.16G>A    | c.(16-18)GTC>ATC       | p.V6I    |
| Pat_32 | Pre-Treatment | MUC17     | 140453 | 37 | 7 | 100691297 | 100691297 | Missense_Mutation | SNP | C | T | 4   | 149 | c.12436C>T | c.(12436-12438)CGC>TGC | p.R4146C |
| Pat_32 | Pre-Treatment | MYL10     | 93408  | 37 | 7 | 101256769 | 101256769 | Missense_Mutation | SNP | C | T | 4   | 171 | c.667G>A   | c.(667-669)GAA>AAA     | p.E223K  |
| Pat_32 | Pre-Treatment | ASB15     | 142685 | 37 | 7 | 123267235 | 123267235 | Missense_Mutation | SNP | G | A | 6   | 197 | c.769G>A   | c.(769-771)GAC>AAC     | p.D257N  |
| Pat_32 | Pre-Treatment | TNPO3     | 23534  | 37 | 7 | 128633886 | 128633886 | Missense_Mutation | SNP | A | T | 26  | 157 | c.1241T>A  | c.(1240-1242)ATA>AAA   | p.I414K  |
| Pat_32 | Pre-Treatment | ZC3HC1    | 51530  | 37 | 7 | 129668867 | 129668867 | Nonsense_Mutation | SNP | G | A | 4   | 77  | c.496C>T   | c.(496-498)CGA>TGA     | p.R166*  |
| Pat_32 | Pre-Treatment | BRAF      | 673    | 37 | 7 | 140453136 | 140453136 | Missense_Mutation | SNP | A | T | 125 | 70  | c.1799T>A  | c.(1798-1800)GTG>GAG   | p.V600E  |
| Pat_32 | Pre-Treatment | CLCN1     | 1180   | 37 | 7 | 143029823 | 143029823 | Missense_Mutation | SNP | C | T | 7   | 491 | c.1258C>T  | c.(1258-1260)CCC>TCC   | p.P420S  |
| Pat_32 | Pre-Treatment | SSPO      | 23145  | 37 | 7 | 149474091 | 149474091 | Missense_Mutation | SNP | G | A | 4   | 148 | c.301G>A   | c.(301-303)GCC>ACC     | p.A101T  |
| Pat_32 | Pre-Treatment | NOS3      | 4846   | 37 | 7 | 150707839 | 150707839 | Missense_Mutation | SNP | G | A | 4   | 118 | c.2840G>A  | c.(2839-2841)AGC>AAC   | p.S947N  |
| Pat_32 | Pre-Treatment | SLC4A2    | 6522   | 37 | 7 | 150761787 | 150761787 | Missense_Mutation | SNP | C | T | 4   | 90  | c.392C>T   | c.(391-393)GCC>GTC     | p.A131V  |
| Pat_32 | Pre-Treatment | PTPRN2    | 5799   | 37 | 7 | 157926656 | 157926656 | Missense_Mutation | SNP | C | A | 10  | 93  | c.1269G>T  | c.(1267-1269)ATG>ATT   | p.M423I  |
| Pat_32 | Pre-Treatment | RP1L1     | 94137  | 37 | 8 | 10470173  | 10470173  | Missense_Mutation | SNP | C | T | 3   | 26  | c.1435G>A  | c.(1435-1437)GGG>AGG   | p.G479R  |
| Pat_32 | Pre-Treatment | RAB11FIP1 | 80223  | 37 | 8 | 37729460  | 37729460  | Missense_Mutation | SNP | C | T | 5   | 188 | c.2860G>A  | c.(2860-2862)GAT>AAT   | p.D954N  |
| Pat_32 | Pre-Treatment | TACC1     | 6867   | 37 | 8 | 38677330  | 38677330  | Missense_Mutation | SNP | G | A | 4   | 113 | c.568G>A   | c.(568-570)GCC>ACC     | p.A190T  |
| Pat_32 | Pre-Treatment | IDO1      | 3620   | 37 | 8 | 39780096  | 39780096  | Missense_Mutation | SNP | C | T | 13  | 44  | c.463C>T   | c.(463-465)CGT>TGT     | p.R155C  |
| Pat_32 | Pre-Treatment | LYPLA1    | 10434  | 37 | 8 | 54960666  | 54960666  | Missense_Mutation | SNP | C | G | 4   | 127 | c.652G>C   | c.(652-654)GTC>CTC     | p.V218L  |
| Pat_32 | Pre-Treatment | KCNB2     | 9312   | 37 | 8 | 73850301  | 73850301  | Missense_Mutation | SNP | G | A | 5   | 114 | c.2711G>A  | c.(2710-2712)TGT>TAT   | p.C904Y  |
| Pat_32 | Pre-Treatment | RPL7      | 6129   | 37 | 8 | 74203856  | 74203856  | Missense_Mutation | SNP | G | T | 4   | 114 | c.469C>A   | c.(469-471)CGT>AGT     | p.R157S  |
| Pat_32 | Pre-Treatment | KLF10     | 7071   | 37 | 8 | 103663709 | 103663709 | Missense_Mutation | SNP | G | A | 31  | 49  | c.851C>T   | c.(850-852)CCT>CTT     | p.P284L  |
| Pat_32 | Pre-Treatment | RIMS2     | 9699   | 37 | 8 | 105001612 | 105001612 | Missense_Mutation | SNP | C | T | 4   | 172 | c.2341C>T  | c.(2341-2343)CGT>TGT   | p.R781C  |
| Pat_32 | Pre-Treatment | TMEM74    | 157753 | 37 | 8 | 109797038 | 109797038 | Missense_Mutation | SNP | C | T | 4   | 116 | c.290G>A   | c.(289-291)CGG>CAG     | p.R97Q   |
| Pat_32 | Pre-Treatment | ZHX2      | 22882  | 37 | 8 | 123965305 | 123965305 | Missense_Mutation | SNP | G | A | 3   | 70  | c.1555G>A  | c.(1555-1557)GGT>AGT   | p.G519S  |
| Pat_32 | Pre-Treatment | KLHL38    | 340359 | 37 | 8 | 124664685 | 124664685 | Missense_Mutation | SNP | G | A | 4   | 91  | c.482C>T   | c.(481-483)ACG>ATG     | p.T161M  |
| Pat_32 | Pre-Treatment | GPR172A   | 79581  | 37 | 8 | 145583069 | 145583069 | Missense_Mutation | SNP | A | G | 3   | 34  | c.116A>G   | c.(115-117)AAA>AGA     | p.K39R   |
| Pat_32 | Pre-Treatment | TEK       | 7010   | 37 | 9 | 27180258  | 27180258  | Missense_Mutation | SNP | G | A | 4   | 132 | c.922G>A   | c.(922-924)GGG>AGG     | p.G308R  |
| Pat_32 | Pre-Treatment | SMU1      | 55234  | 37 | 9 | 33053233  | 33053233  | Missense_Mutation | SNP | G | A | 4   | 159 | c.1178C>T  | c.(1177-1179)ACC>ATC   | p.T393I  |
| Pat_32 | Pre-Treatment | GALT      | 2592   | 37 | 9 | 34648886  | 34648886  | Missense_Mutation | SNP | G | A | 3   | 30  | c.815G>A   | c.(814-816)CGT>CAT     | p.R272H  |
| Pat_32 | Pre-Treatment | TMEM2     | 23670  | 37 | 9 | 74365121  | 74365121  | Missense_Mutation | SNP | G | A | 4   | 169 | c.169C>T   | c.(169-171)CGG>TGG     | p.R57W   |
| Pat_32 | Pre-Treatment | BICD2     | 23299  | 37 | 9 | 95485026  | 95485026  | Missense_Mutation | SNP | C | T | 3   | 55  | c.518G>A   | c.(517-519)CGG>CAG     | p.R173Q  |
| Pat_32 | Pre-Treatment | C9orf5    | 23731  | 37 | 9 | 111819554 | 111819554 | Missense_Mutation | SNP | G | A | 4   | 82  | c.1771C>T  | c.(1771-1773)CGT>TGT   | p.R591C  |
| Pat_32 | Pre-Treatment | CEP110    | 11064  | 37 | 9 | 123902994 | 123902994 | Missense_Mutation | SNP | C | T | 3   | 45  | c.2413C>T  | c.(2413-2415)CGT>TGT   | p.R805C  |
| Pat_32 | Pre-Treatment | PTGS1     | 5742   | 37 | 9 | 125148833 | 125148833 | Missense_Mutation | SNP | G | A | 5   | 273 | c.1118G>A  | c.(1117-1119)CGC>CAC   | p.R373H  |

|        |                 |          |        |    |   |           |           |                   |     |   |   |     |     |               |                      |               |
|--------|-----------------|----------|--------|----|---|-----------|-----------|-------------------|-----|---|---|-----|-----|---------------|----------------------|---------------|
| Pat_32 | Pre-Treatment   | NEK6     | 10783  | 37 | 9 | 127101942 | 127101942 | Missense_Mutation | SNP | G | A | 4   | 137 | c.715G>A      | c.(715-717)GAG>AAG   | p.E239K       |
| Pat_32 | Pre-Treatment   | GARNL3   | 84253  | 37 | 9 | 130106529 | 130106529 | Nonsense_Mutation | SNP | C | T | 5   | 173 | c.1267C>T     | c.(1267-1269)CGA>TGA | p.R423*       |
| Pat_32 | Pre-Treatment   | C9orf117 | 286207 | 37 | 9 | 130474995 | 130474995 | Missense_Mutation | SNP | G | A | 4   | 152 | c.1145G>A     | c.(1144-1146)CGC>CAC | p.R382H       |
| Pat_32 | Pre-Treatment   | GOLGA2   | 2801   | 37 | 9 | 131023072 | 131023072 | Missense_Mutation | SNP | G | A | 3   | 26  | c.1349C>T     | c.(1348-1350)CCG>CTG | p.P450L       |
| Pat_32 | Pre-Treatment   | RAPGEF1  | 2889   | 37 | 9 | 134514039 | 134514039 | Missense_Mutation | SNP | C | T | 5   | 200 | c.583G>A      | c.(583-585)GTG>ATG   | p.V195M       |
| Pat_32 | Pre-Treatment   | C9orf171 | 389799 | 37 | 9 | 135374771 | 135374771 | Nonsense_Mutation | SNP | G | A | 5   | 92  | c.416G>A      | c.(415-417)TGG>TAG   | p.W139*       |
| Pat_32 | Pre-Treatment   | CAMSAP1  | 157922 | 37 | 9 | 138710442 | 138710442 | Missense_Mutation | SNP | C | T | 4   | 60  | c.3980G>A     | c.(3979-3981)CGG>CAG | p.R1327Q      |
| Pat_32 | Pre-Treatment   | NOTCH1   | 4851   | 37 | 9 | 139399496 | 139399496 | Nonsense_Mutation | SNP | G | T | 3   | 37  | c.4647C>A     | c.(4645-4647)TGC>TGA | p.C1549*      |
| Pat_32 | Pre-Treatment   | C9orf86  | 55684  | 37 | 9 | 139734188 | 139734188 | Missense_Mutation | SNP | G | A | 4   | 195 | c.1801G>A     | c.(1801-1803)GAG>AAG | p.E601K       |
| Pat_32 | Pre-Treatment   | PNPLA7   | 375775 | 37 | 9 | 140391712 | 140391712 | Missense_Mutation | SNP | C | T | 2   | 1   | c.1865G>A     | c.(1864-1866)CGC>CAC | p.R622H       |
| Pat_32 | Pre-Treatment   | PLCXD1   | 55344  | 37 | X | 215775    | 215775    | Missense_Mutation | SNP | G | A | 4   | 134 | c.745G>A      | c.(745-747)GTG>ATG   | p.V249M       |
| Pat_32 | Pre-Treatment   | SFRS17A  | 8227   | 37 | X | 1712719   | 1712719   | Missense_Mutation | SNP | C | T | 7   | 377 | c.364C>T      | c.(364-366)CCC>TCC   | p.P122S       |
| Pat_32 | Pre-Treatment   | ARSE     | 415    | 37 | X | 2856263   | 2856263   | Missense_Mutation | SNP | G | A | 4   | 85  | c.1162C>T     | c.(1162-1164)CGC>TGC | p.R388C       |
| Pat_32 | Pre-Treatment   | WWC3     | 55841  | 37 | X | 10085354  | 10085354  | Missense_Mutation | SNP | G | A | 4   | 153 | c.1255G>A     | c.(1255-1257)GAC>AAC | p.D419N       |
| Pat_32 | Pre-Treatment   | HCCS     | 3052   | 37 | X | 11139086  | 11139086  | Missense_Mutation | SNP | C | A | 6   | 365 | c.581C>A      | c.(580-582)CCA>CAA   | p.P194Q       |
| Pat_32 | Pre-Treatment   | ARHGAP6  | 395    | 37 | X | 11196273  | 11196273  | Missense_Mutation | SNP | G | A | 6   | 142 | c.1576C>T     | c.(1576-1578)CTC>TTC | p.L526F       |
| Pat_32 | Pre-Treatment   | OTC      | 5009   | 37 | X | 38260652  | 38260652  | Missense_Mutation | SNP | C | A | 19  | 122 | c.511C>A      | c.(511-513)CAG>AAG   | p.Q171K       |
| Pat_32 | Pre-Treatment   | RGN      | 9104   | 37 | X | 46949351  | 46949351  | Missense_Mutation | SNP | G | A | 4   | 192 | c.523G>A      | c.(523-525)GTG>ATG   | p.V175M       |
| Pat_32 | Pre-Treatment   | MAGIX    | 79917  | 37 | X | 49021378  | 49021378  | Missense_Mutation | SNP | G | A | 4   | 164 | c.457G>A      | c.(457-459)GTG>ATG   | p.V153M       |
| Pat_32 | Pre-Treatment   | SLC7A3   | 84889  | 37 | X | 70148757  | 70148757  | Missense_Mutation | SNP | C | T | 63  | 51  | c.466G>A      | c.(466-468)GTG>ATG   | p.V156M       |
| Pat_32 | Pre-Treatment   | NLGN3    | 54413  | 37 | X | 70387443  | 70387443  | Missense_Mutation | SNP | C | T | 4   | 151 | c.1496C>T     | c.(1495-1497)TCG>TTG | p.S499L       |
| Pat_32 | Pre-Treatment   | NONO     | 4841   | 37 | X | 70517748  | 70517748  | Missense_Mutation | SNP | G | A | 4   | 66  | c.1091G>A     | c.(1090-1092)CGG>CAG | p.R364Q       |
| Pat_32 | Pre-Treatment   | PCDH11X  | 27328  | 37 | X | 91133749  | 91133749  | Missense_Mutation | SNP | G | A | 4   | 172 | c.2510G>A     | c.(2509-2511)CGC>CAC | p.R837H       |
| Pat_32 | Pre-Treatment   | AMOT     | 154796 | 37 | X | 112021870 | 112021870 | Missense_Mutation | SNP | A | C | 128 | 168 | c.3180T>G     | c.(3178-3180)AAT>AAG | p.N1060K      |
| Pat_32 | Pre-Treatment   | CT47B1   | 643311 | 37 | X | 120009341 | 120009341 | Missense_Mutation | SNP | C | T | 6   | 164 | c.184G>A      | c.(184-186)GGG>AGG   | p.G62R        |
| Pat_32 | Pre-Treatment   | XPNPEP2  | 7512   | 37 | X | 128896706 | 128896706 | Missense_Mutation | SNP | G | A | 4   | 189 | c.1700G>A     | c.(1699-1701)CGT>CAT | p.R567H       |
| Pat_32 | Pre-Treatment   | L1CAM    | 3897   | 37 | X | 153130303 | 153130303 | Missense_Mutation | SNP | G | A | 4   | 167 | c.3019C>T     | c.(3019-3021)CGG>TGG | p.R1007W      |
| Pat_32 | Pre-Treatment   | FLNA     | 2316   | 37 | X | 153593066 | 153593066 | Missense_Mutation | SNP | G | A | 4   | 109 | c.1850C>T     | c.(1849-1851)TCG>TTG | p.S617L       |
| Pat_32 | Pre-Treatment   | FAM50A   | 9130   | 37 | X | 153678271 | 153678271 | Missense_Mutation | SNP | G | A | 4   | 99  | c.821G>A      | c.(820-822)GGG>GAG   | p.G274E       |
| Pat_32 | Pre-Treatment   | PLXNA3   | 55558  | 37 | X | 153698040 | 153698040 | Missense_Mutation | SNP | G | A | 4   | 123 | c.4708G>A     | c.(4708-4710)GGT>AGT | p.G1570S      |
| Pat_32 | Post-Resistance | CPSF3L   | 54973  | 37 | 1 | 1255905   | 1255905   | Missense_Mutation | SNP | C | T | 4   | 225 | c.131G>A      | c.(130-132)CGC>CAC   | p.R44H        |
| Pat_32 | Post-Resistance | PLCH2    | 9651   | 37 | 1 | 2436053   | 2436053   | Missense_Mutation | SNP | G | A | 3   | 46  | c.3652G>A     | c.(3652-3654)GAA>AAA | p.E1218K      |
| Pat_32 | Post-Resistance | PGD      | 5226   | 37 | 1 | 10471598  | 10471598  | Missense_Mutation | SNP | G | A | 4   | 166 | c.643G>A      | c.(643-645)GAG>AAG   | p.E215K       |
| Pat_32 | Post-Resistance | ATP13A2  | 23400  | 37 | 1 | 17316621  | 17316621  | Splice_Site       | SNP | C | T | 4   | 120 | c.2412_splice | c.e21+1              | p.K804_splice |
| Pat_32 | Post-Resistance | IGSF21   | 84966  | 37 | 1 | 18691918  | 18691918  | Missense_Mutation | SNP | C | A | 64  | 145 | c.742C>A      | c.(742-744)CGT>AGT   | p.R248S       |
| Pat_32 | Post-Resistance | MYOM3    | 127294 | 37 | 1 | 24384024  | 24384024  | Missense_Mutation | SNP | G | A | 4   | 107 | c.4144C>T     | c.(4144-4146)CGC>TGC | p.R1382C      |
| Pat_32 | Post-Resistance | NIPAL3   | 57185  | 37 | 1 | 24790611  | 24790611  | Splice_Site       | SNP | G | T | 5   | 71  | c.1021_splice | c.e11+1              | p.G341_splice |
| Pat_32 | Post-Resistance | ADC      | 113451 | 37 | 1 | 33583557  | 33583557  | Missense_Mutation | SNP | G | T | 93  | 242 | c.1084G>T     | c.(1084-1086)GAT>TAT | p.D362Y       |
| Pat_32 | Post-Resistance | CSMD2    | 114784 | 37 | 1 | 34100918  | 34100918  | Missense_Mutation | SNP | C | T | 3   | 45  | c.4862G>A     | c.(4861-4863)GGA>GAA | p.G1621E      |
| Pat_32 | Post-Resistance | ZMYM4    | 9202   | 37 | 1 | 35857903  | 35857903  | Missense_Mutation | SNP | C | A | 4   | 219 | c.2678C>A     | c.(2677-2679)GCA>GAA | p.A893E       |
| Pat_32 | Post-Resistance | C1orf50  | 79078  | 37 | 1 | 43239249  | 43239249  | Nonsense_Mutation | SNP | C | T | 4   | 176 | c.211C>T      | c.(211-213)CGA>TGA   | p.R71*        |
| Pat_32 | Post-Resistance | SLC2A1   | 6513   | 37 | 1 | 43396841  | 43396841  | Missense_Mutation | SNP | G | A | 4   | 162 | c.151C>T      | c.(151-153)CGC>TGC   | p.R51C        |
| Pat_32 | Post-Resistance | TIE1     | 7075   | 37 | 1 | 43785133  | 43785133  | Missense_Mutation | SNP | C | T | 5   | 394 | c.3040C>T     | c.(3040-3042)CGT>TGT | p.R1014C      |
| Pat_32 | Post-Resistance | RNF220   | 55182  | 37 | 1 | 44878253  | 44878253  | Missense_Mutation | SNP | G | A | 61  | 150 | c.484G>A      | c.(484-486)GAA>AAA   | p.E162K       |
| Pat_32 | Post-Resistance | STIL     | 6491   | 37 | 1 | 47717257  | 47717257  | Missense_Mutation | SNP | C | T | 95  | 176 | c.3415G>A     | c.(3415-3417)GAG>AAG | p.E1139K      |
| Pat_32 | Post-Resistance | C1orf168 | 199920 | 37 | 1 | 57216756  | 57216756  | Missense_Mutation | SNP | G | A | 65  | 192 | c.1348C>T     | c.(1348-1350)CCT>TCT | p.P450S       |
| Pat_32 | Post-Resistance | PGM1     | 5236   | 37 | 1 | 64101904  | 64101904  | Splice_Site       | SNP | G | A | 4   | 210 | c.874_splice  | c.e6-1               | p.D292_splice |

|        |                 |              |        |    |    |           |           |                   |     |   |   |    |     |           |                      |          |
|--------|-----------------|--------------|--------|----|----|-----------|-----------|-------------------|-----|---|---|----|-----|-----------|----------------------|----------|
| Pat_32 | Post-Resistance | JAK1         | 3716   | 37 | 1  | 65330535  | 65330535  | Nonsense_Mutation | SNP | C | A | 5  | 172 | c.1111G>T | c.(1111-1113)GAA>TAA | p.E371*  |
| Pat_32 | Post-Resistance | SFRS11       | 9295   | 37 | 1  | 70716106  | 70716106  | Nonsense_Mutation | SNP | C | T | 3  | 40  | c.1177C>T | c.(1177-1179)CGA>TGA | p.R393*  |
| Pat_32 | Post-Resistance | FAM73A       | 374986 | 37 | 1  | 78326966  | 78326966  | Missense_Mutation | SNP | G | A | 4  | 219 | c.1333G>A | c.(1333-1335)GAT>AAT | p.D445N  |
| Pat_32 | Post-Resistance | DENND2D      | 79961  | 37 | 1  | 111731865 | 111731865 | Missense_Mutation | SNP | A | G | 3  | 206 | c.983T>C  | c.(982-984)GTC>GCC   | p.V328A  |
| Pat_32 | Post-Resistance | SYCP1        | 6847   | 37 | 1  | 115399208 | 115399208 | Nonsense_Mutation | SNP | T | A | 15 | 142 | c.123T>A  | c.(121-123)TGT>TGA   | p.C41*   |
| Pat_32 | Post-Resistance | PGLYRP3      | 114771 | 37 | 1  | 153276341 | 153276341 | Missense_Mutation | SNP | G | A | 4  | 214 | c.521C>T  | c.(520-522)CCC>CTC   | p.P174L  |
| Pat_32 | Post-Resistance | PEAR1        | 375033 | 37 | 1  | 156883232 | 156883232 | Missense_Mutation | SNP | G | A | 55 | 30  | c.2561G>A | c.(2560-2562)GGG>GAG | p.G854E  |
| Pat_32 | Post-Resistance | SPTA1        | 6708   | 37 | 1  | 158636110 | 158636110 | Missense_Mutation | SNP | C | T | 51 | 185 | c.2216G>A | c.(2215-2217)CGT>CAT | p.R739H  |
| Pat_32 | Post-Resistance | DDR2         | 4921   | 37 | 1  | 162731149 | 162731149 | Missense_Mutation | SNP | C | T | 4  | 161 | c.1004C>T | c.(1003-1005)ACG>ATG | p.T335M  |
| Pat_32 | Post-Resistance | LMX1A        | 4009   | 37 | 1  | 165175236 | 165175236 | Missense_Mutation | SNP | C | T | 13 | 88  | c.853G>A  | c.(853-855)GGA>AGA   | p.G285R  |
| Pat_32 | Post-Resistance | LRRC52       | 440699 | 37 | 1  | 165532788 | 165532788 | Nonsense_Mutation | SNP | G | A | 4  | 84  | c.669G>A  | c.(667-669)TGG>TGA   | p.W223*  |
| Pat_32 | Post-Resistance | F5           | 2153   | 37 | 1  | 169510502 | 169510502 | Missense_Mutation | SNP | G | T | 12 | 482 | c.3826C>A | c.(3826-3828)CTT>ATT | p.L1276I |
| Pat_32 | Post-Resistance | PLA2G4A      | 5321   | 37 | 1  | 186880412 | 186880412 | Missense_Mutation | SNP | T | C | 33 | 174 | c.449T>C  | c.(448-450)CTG>CCG   | p.L150P  |
| Pat_32 | Post-Resistance | VASH2        | 79805  | 37 | 1  | 213134526 | 213134526 | Missense_Mutation | SNP | C | T | 13 | 122 | c.295C>T  | c.(295-297)CCA>TCA   | p.P99S   |
| Pat_32 | Post-Resistance | URB2         | 9816   | 37 | 1  | 229770776 | 229770776 | Missense_Mutation | SNP | A | G | 12 | 29  | c.416A>G  | c.(415-417)TAC>TGC   | p.Y139C  |
| Pat_32 | Post-Resistance | TRIM67       | 440730 | 37 | 1  | 231344960 | 231344960 | Missense_Mutation | SNP | G | A | 3  | 46  | c.2087G>A | c.(2086-2088)CGC>CAC | p.R696H  |
| Pat_32 | Post-Resistance | OR2T4        | 127074 | 37 | 1  | 248524937 | 248524937 | Missense_Mutation | SNP | A | T | 11 | 228 | c.55A>T   | c.(55-57)ATG>TTG     | p.M19L   |
| Pat_32 | Post-Resistance | PRPF18       | 8559   | 37 | 10 | 13658449  | 13658449  | Missense_Mutation | SNP | G | A | 86 | 148 | c.844G>A  | c.(844-846)GGT>AGT   | p.G282S  |
| Pat_32 | Post-Resistance | PTER         | 9317   | 37 | 10 | 16528567  | 16528567  | Missense_Mutation | SNP | C | A | 4  | 200 | c.649C>A  | c.(649-651)CAA>AAA   | p.Q217K  |
| Pat_32 | Post-Resistance | SVIL         | 6840   | 37 | 10 | 29759388  | 29759388  | Missense_Mutation | SNP | C | T | 4  | 148 | c.5660G>A | c.(5659-5661)CGT>CAT | p.R1887H |
| Pat_32 | Post-Resistance | ANKRD30A     | 91074  | 37 | 10 | 37430688  | 37430688  | Missense_Mutation | SNP | C | T | 7  | 104 | c.695C>T  | c.(694-696)GCG>GTG   | p.A232V  |
| Pat_32 | Post-Resistance | ANKRD30A     | 91074  | 37 | 10 | 37430754  | 37430754  | Missense_Mutation | SNP | T | C | 7  | 113 | c.761T>C  | c.(760-762)GTG>GCG   | p.V254A  |
| Pat_32 | Post-Resistance | ANKRD30A     | 91074  | 37 | 10 | 37431014  | 37431014  | Missense_Mutation | SNP | A | T | 4  | 163 | c.1021A>T | c.(1021-1023)AGT>TGT | p.S341C  |
| Pat_32 | Post-Resistance | PCDH15       | 65217  | 37 | 10 | 56106157  | 56106157  | Nonsense_Mutation | SNP | C | A | 78 | 132 | c.562G>T  | c.(562-564)GAG>TAG   | p.E188*  |
| Pat_32 | Post-Resistance | CISD1        | 55847  | 37 | 10 | 60047357  | 60047357  | Missense_Mutation | SNP | G | A | 3  | 63  | c.274G>A  | c.(274-276)GAA>AAA   | p.E92K   |
| Pat_32 | Post-Resistance | DLG5         | 9231   | 37 | 10 | 79576788  | 79576788  | Missense_Mutation | SNP | C | T | 4  | 177 | c.3851G>A | c.(3850-3852)CGG>CAG | p.R1284Q |
| Pat_32 | Post-Resistance | ZRANB1       | 54764  | 37 | 10 | 126673442 | 126673442 | Missense_Mutation | SNP | C | T | 4  | 144 | c.2008C>T | c.(2008-2010)CGG>TGG | p.R670W  |
| Pat_32 | Post-Resistance | MKI67        | 4288   | 37 | 10 | 129902825 | 129902825 | Missense_Mutation | SNP | G | T | 20 | 128 | c.7279C>A | c.(7279-7281)CCT>ACT | p.P2427T |
| Pat_32 | Post-Resistance | TRIM6-TRIM34 | 445372 | 37 | 11 | 5663725   | 5663725   | Missense_Mutation | SNP | A | G | 28 | 50  | c.1925A>G | c.(1924-1926)CAA>CGA | p.Q642R  |
| Pat_32 | Post-Resistance | ABCC8        | 6833   | 37 | 11 | 17483161  | 17483161  | Missense_Mutation | SNP | T | A | 8  | 70  | c.791A>T  | c.(790-792)CAA>CTA   | p.Q264L  |
| Pat_32 | Post-Resistance | USH1C        | 10083  | 37 | 11 | 17548874  | 17548874  | Missense_Mutation | SNP | C | T | 10 | 91  | c.392G>A  | c.(391-393)GGG>GAG   | p.G131E  |
| Pat_32 | Post-Resistance | CCDC86       | 79080  | 37 | 11 | 60609745  | 60609745  | Missense_Mutation | SNP | A | T | 3  | 23  | c.148A>T  | c.(148-150)AGT>TGT   | p.S50C   |
| Pat_32 | Post-Resistance | PLCB3        | 5331   | 37 | 11 | 64032908  | 64032908  | Missense_Mutation | SNP | G | A | 4  | 93  | c.2969G>A | c.(2968-2970)CGC>CAC | p.R990H  |
| Pat_32 | Post-Resistance | MAP6         | 4135   | 37 | 11 | 75319188  | 75319188  | Missense_Mutation | SNP | C | G | 3  | 110 | c.1085G>C | c.(1084-1086)AGC>ACC | p.S362T  |
| Pat_32 | Post-Resistance | MRE11A       | 4361   | 37 | 11 | 94197342  | 94197342  | Missense_Mutation | SNP | G | A | 4  | 193 | c.1162C>T | c.(1162-1164)CGG>TGG | p.R388W  |
| Pat_32 | Post-Resistance | CASP5        | 838    | 37 | 11 | 104872837 | 104872837 | Missense_Mutation | SNP | G | C | 4  | 98  | c.635C>G  | c.(634-636)GCT>GGT   | p.A212G  |
| Pat_32 | Post-Resistance | HTR3A        | 3359   | 37 | 11 | 113856791 | 113856791 | Missense_Mutation | SNP | G | A | 46 | 286 | c.617G>A  | c.(616-618)AGG>AAG   | p.R206K  |
| Pat_32 | Post-Resistance | ARHGAP32     | 9743   | 37 | 11 | 128840325 | 128840325 | Missense_Mutation | SNP | G | A | 3  | 135 | c.4741C>T | c.(4741-4743)CGG>TGG | p.R1581W |
| Pat_32 | Post-Resistance | LEPREL2      | 10536  | 37 | 12 | 6946600   | 6946600   | Missense_Mutation | SNP | G | A | 9  | 34  | c.1574G>A | c.(1573-1575)GGG>GAG | p.G525E  |
| Pat_32 | Post-Resistance | PTPN6        | 5777   | 37 | 12 | 7069358   | 7069358   | Missense_Mutation | SNP | G | A | 4  | 92  | c.1537G>A | c.(1537-1539)GCC>ACC | p.A513T  |
| Pat_32 | Post-Resistance | KLRC1        | 3821   | 37 | 12 | 10601985  | 10601985  | Missense_Mutation | SNP | G | A | 5  | 480 | c.340C>T  | c.(340-342)CGT>TGT   | p.R114C  |
| Pat_32 | Post-Resistance | KIAA0528     | 9847   | 37 | 12 | 22624408  | 22624408  | Missense_Mutation | SNP | T | A | 27 | 160 | c.2283A>T | c.(2281-2283)AAA>AAT | p.K761N  |
| Pat_32 | Post-Resistance | DHH          | 50846  | 37 | 12 | 49484169  | 49484169  | Missense_Mutation | SNP | C | T | 3  | 34  | c.664G>A  | c.(664-666)GGA>AGA   | p.G222R  |
| Pat_32 | Post-Resistance | KRT73        | 319101 | 37 | 12 | 53010074  | 53010074  | Missense_Mutation | SNP | C | G | 4  | 105 | c.538G>C  | c.(538-540)GAG>CAG   | p.E180Q  |
| Pat_32 | Post-Resistance | KIF5A        | 3798   | 37 | 12 | 57970140  | 57970140  | Missense_Mutation | SNP | A | T | 7  | 67  | c.2177A>T | c.(2176-2178)AAG>ATG | p.K726M  |
| Pat_32 | Post-Resistance | XPOT         | 11260  | 37 | 12 | 64823867  | 64823867  | Missense_Mutation | SNP | A | C | 84 | 69  | c.1776A>C | c.(1774-1776)CAA>CAC | p.Q592H  |
| Pat_32 | Post-Resistance | NAV3         | 89795  | 37 | 12 | 78513382  | 78513382  | Missense_Mutation | SNP | C | T | 4  | 169 | c.3406C>T | c.(3406-3408)CGC>TGC | p.R1136C |

|        |                 |          |        |    |    |           |           |                   |     |   |   |     |     |               |                      |               |
|--------|-----------------|----------|--------|----|----|-----------|-----------|-------------------|-----|---|---|-----|-----|---------------|----------------------|---------------|
| Pat_32 | Post-Resistance | FICD     | 11153  | 37 | 12 | 108912930 | 108912930 | Missense_Mutation | SNP | C | T | 4   | 139 | c.1055C>T     | c.(1054-1056)GCA>GTA | p.A352V       |
| Pat_32 | Post-Resistance | MMAB     | 326625 | 37 | 12 | 110011168 | 110011168 | Missense_Mutation | SNP | C | T | 3   | 65  | c.118G>A      | c.(118-120)GTG>ATG   | p.V40M        |
| Pat_32 | Post-Resistance | DDX54    | 79039  | 37 | 12 | 113618782 | 113618782 | Missense_Mutation | SNP | G | A | 4   | 115 | c.256C>T      | c.(256-258)CGT>TGT   | p.R86C        |
| Pat_32 | Post-Resistance | SBNO1    | 55206  | 37 | 12 | 123829937 | 123829937 | Nonsense_Mutation | SNP | G | A | 4   | 221 | c.418C>T      | c.(418-420)CGA>TGA   | p.R140*       |
| Pat_32 | Post-Resistance | RIMBP2   | 23504  | 37 | 12 | 130912813 | 130912813 | Missense_Mutation | SNP | C | T | 41  | 82  | c.2272G>A     | c.(2272-2274)GAG>AAG | p.E758K       |
| Pat_32 | Post-Resistance | PDS5B    | 23047  | 37 | 13 | 33309375  | 33309375  | Missense_Mutation | SNP | C | A | 5   | 210 | c.2314C>A     | c.(2314-2316)CAT>AAT | p.H772N       |
| Pat_32 | Post-Resistance | C13orf23 | 80209  | 37 | 13 | 39586829  | 39586829  | Missense_Mutation | SNP | C | T | 3   | 105 | c.2560G>A     | c.(2560-2562)GGT>AGT | p.G854S       |
| Pat_32 | Post-Resistance | COG6     | 57511  | 37 | 13 | 40254159  | 40254159  | Missense_Mutation | SNP | A | G | 142 | 27  | c.671A>G      | c.(670-672)GAA>GGA   | p.E224G       |
| Pat_32 | Post-Resistance | OR4N5    | 390437 | 37 | 14 | 20612341  | 20612341  | Missense_Mutation | SNP | G | T | 43  | 197 | c.447G>T      | c.(445-447)TGG>TGT   | p.W149C       |
| Pat_32 | Post-Resistance | FLJ10357 | 55701  | 37 | 14 | 21555554  | 21555554  | Missense_Mutation | SNP | G | A | 3   | 50  | c.4319G>A     | c.(4318-4320)GGA>GAA | p.G1440E      |
| Pat_32 | Post-Resistance | CPNE6    | 9362   | 37 | 14 | 24545577  | 24545577  | Missense_Mutation | SNP | G | A | 4   | 153 | c.1067G>A     | c.(1066-1068)CGG>CAG | p.R356Q       |
| Pat_32 | Post-Resistance | IRF9     | 10379  | 37 | 14 | 24633916  | 24633916  | Nonsense_Mutation | SNP | C | A | 5   | 75  | c.743C>A      | c.(742-744)TCA>TAA   | p.S248*       |
| Pat_32 | Post-Resistance | FUT8     | 2530   | 37 | 14 | 66188556  | 66188556  | Missense_Mutation | SNP | G | A | 167 | 110 | c.899G>A      | c.(898-900)CGT>CAT   | p.R300H       |
| Pat_32 | Post-Resistance | DCAF5    | 8816   | 37 | 14 | 69589066  | 69589066  | Missense_Mutation | SNP | G | A | 3   | 76  | c.226C>T      | c.(226-228)CGC>TGC   | p.R76C        |
| Pat_32 | Post-Resistance | KIAA0247 | 9766   | 37 | 14 | 70170201  | 70170201  | Missense_Mutation | SNP | G | A | 4   | 187 | c.211G>A      | c.(211-213)GAA>AAA   | p.E71K        |
| Pat_32 | Post-Resistance | ABCD4    | 5826   | 37 | 14 | 74761892  | 74761892  | Missense_Mutation | SNP | G | T | 50  | 44  | c.678C>A      | c.(676-678)CAC>CAA   | p.H226Q       |
| Pat_32 | Post-Resistance | STON2    | 85439  | 37 | 14 | 81743266  | 81743266  | Nonsense_Mutation | SNP | G | A | 4   | 238 | c.2389C>T     | c.(2389-2391)CGA>TGA | p.R797*       |
| Pat_32 | Post-Resistance | DICER1   | 23405  | 37 | 14 | 95571444  | 95571444  | Missense_Mutation | SNP | G | A | 4   | 163 | c.3233C>T     | c.(3232-3234)GCT>GTT | p.A1078V      |
| Pat_32 | Post-Resistance | BDKRB2   | 624    | 37 | 14 | 96707678  | 96707678  | Missense_Mutation | SNP | G | A | 4   | 74  | c.1013G>A     | c.(1012-1014)CGC>CAC | p.R338H       |
| Pat_32 | Post-Resistance | OR4N4    | 283694 | 37 | 15 | 22382807  | 22382807  | Missense_Mutation | SNP | G | A | 94  | 370 | c.335G>A      | c.(334-336)GGA>GAA   | p.G112E       |
| Pat_32 | Post-Resistance | TJP1     | 7082   | 37 | 15 | 30019011  | 30019011  | Missense_Mutation | SNP | C | T | 5   | 377 | c.2285G>A     | c.(2284-2286)CGT>CAT | p.R762H       |
| Pat_32 | Post-Resistance | ATPBD4   | 89978  | 37 | 15 | 35830596  | 35830596  | Missense_Mutation | SNP | G | A | 4   | 194 | c.191C>T      | c.(190-192)GCA>GTA   | p.A64V        |
| Pat_32 | Post-Resistance | SQRDL    | 58472  | 37 | 15 | 45965966  | 45965966  | Missense_Mutation | SNP | G | T | 30  | 90  | c.621G>T      | c.(619-621)AAG>AAT   | p.K207N       |
| Pat_32 | Post-Resistance | CEP152   | 22995  | 37 | 15 | 49074424  | 49074424  | Missense_Mutation | SNP | G | A | 4   | 231 | c.1325C>T     | c.(1324-1326)TCA>TTA | p.S442L       |
| Pat_32 | Post-Resistance | ATP8B4   | 79895  | 37 | 15 | 50223378  | 50223378  | Missense_Mutation | SNP | A | T | 5   | 284 | c.1580T>A     | c.(1579-1581)GTT>GAT | p.V527D       |
| Pat_32 | Post-Resistance | SPPL2A   | 84888  | 37 | 15 | 51000002  | 51000002  | Missense_Mutation | SNP | G | T | 4   | 184 | c.1558C>A     | c.(1558-1560)CAA>AAA | p.Q520K       |
| Pat_32 | Post-Resistance | MYO5A    | 4644   | 37 | 15 | 52606331  | 52606331  | Missense_Mutation | SNP | G | A | 4   | 180 | c.5404C>T     | c.(5404-5406)CGT>TGT | p.R1802C      |
| Pat_32 | Post-Resistance | LIPC     | 3990   | 37 | 15 | 58855853  | 58855853  | Missense_Mutation | SNP | G | A | 4   | 140 | c.1319G>A     | c.(1318-1320)AGC>AAC | p.S440N       |
| Pat_32 | Post-Resistance | MAP2K1   | 5604   | 37 | 15 | 66729175  | 66729175  | Missense_Mutation | SNP | G | T | 6   | 217 | c.383G>T      | c.(382-384)GGC>GTC   | p.G128V       |
| Pat_32 | Post-Resistance | NEO1     | 4756   | 37 | 15 | 73547099  | 73547099  | Missense_Mutation | SNP | G | A | 6   | 668 | c.2021G>A     | c.(2020-2022)CGA>CAA | p.R674Q       |
| Pat_32 | Post-Resistance | SNUPN    | 10073  | 37 | 15 | 75899560  | 75899560  | Missense_Mutation | SNP | G | C | 31  | 284 | c.597C>G      | c.(595-597)TGC>TGG   | p.C199W       |
| Pat_32 | Post-Resistance | C15orf42 | 90381  | 37 | 15 | 90168430  | 90168430  | Missense_Mutation | SNP | C | T | 4   | 132 | c.4889C>T     | c.(4888-4890)TCC>TTC | p.S1630F      |
| Pat_32 | Post-Resistance | WASH3P   | 374666 | 37 | 15 | 102515299 | 102515299 | Missense_Mutation | SNP | G | A | 23  | 58  | c.523G>A      | c.(523-525)GGC>AGC   | p.G175S       |
| Pat_32 | Post-Resistance | ATF7IP2  | 80063  | 37 | 16 | 10534245  | 10534245  | Missense_Mutation | SNP | C | T | 17  | 38  | c.1120C>T     | c.(1120-1122)CGT>TGT | p.R374C       |
| Pat_32 | Post-Resistance | TMC7     | 79905  | 37 | 16 | 19041576  | 19041576  | Missense_Mutation | SNP | G | A | 3   | 122 | c.742G>A      | c.(742-744)GGA>AGA   | p.G248R       |
| Pat_32 | Post-Resistance | TMC7     | 79905  | 37 | 16 | 19049196  | 19049196  | Missense_Mutation | SNP | G | A | 12  | 65  | c.1006G>A     | c.(1006-1008)GCA>ACA | p.A336T       |
| Pat_32 | Post-Resistance | TMEM159  | 57146  | 37 | 16 | 21181846  | 21181846  | Missense_Mutation | SNP | C | T | 4   | 172 | c.185C>T      | c.(184-186)TCG>TTG   | p.S62L        |
| Pat_32 | Post-Resistance | PALB2    | 79728  | 37 | 16 | 23640960  | 23640960  | Splice_Site       | SNP | C | T | 4   | 207 | c.2514_splice | c.e5+1               | p.Q838_splice |
| Pat_32 | Post-Resistance | PRKCB    | 5579   | 37 | 16 | 24196838  | 24196838  | Missense_Mutation | SNP | G | A | 4   | 143 | c.1672G>A     | c.(1672-1674)GTA>ATA | p.V558I       |
| Pat_32 | Post-Resistance | SETD1A   | 9739   | 37 | 16 | 30972675  | 30972675  | Missense_Mutation | SNP | G | T | 24  | 136 | c.334G>T      | c.(334-336)GAT>TAT   | p.D112Y       |
| Pat_32 | Post-Resistance | CHD9     | 80205  | 37 | 16 | 53319528  | 53319528  | Missense_Mutation | SNP | C | T | 4   | 123 | c.4988C>T     | c.(4987-4989)CCA>CTA | p.P1663L      |
| Pat_32 | Post-Resistance | GINS3    | 64785  | 37 | 16 | 58437077  | 58437077  | Missense_Mutation | SNP | C | T | 4   | 191 | c.262C>T      | c.(262-264)CTC>TTC   | p.L88F        |
| Pat_32 | Post-Resistance | CHST4    | 10164  | 37 | 16 | 71571404  | 71571404  | Missense_Mutation | SNP | G | A | 4   | 95  | c.824G>A      | c.(823-825)CGC>CAC   | p.R275H       |
| Pat_32 | Post-Resistance | PRDM7    | 11105  | 37 | 16 | 90126823  | 90126823  | Missense_Mutation | SNP | T | G | 9   | 202 | c.1159A>C     | c.(1159-1161)ATG>CTG | p.M387L       |
| Pat_32 | Post-Resistance | C17orf97 | 400566 | 37 | 17 | 263584    | 263584    | Missense_Mutation | SNP | C | T | 5   | 54  | c.980C>T      | c.(979-981)ACT>ATT   | p.T327I       |
| Pat_32 | Post-Resistance | USP6     | 9098   | 37 | 17 | 5042600   | 5042600   | Missense_Mutation | SNP | G | T | 4   | 117 | c.1129G>T     | c.(1129-1131)GGT>TGT | p.G377C       |
| Pat_32 | Post-Resistance | DLG4     | 1742   | 37 | 17 | 7107032   | 7107032   | Missense_Mutation | SNP | G | A | 4   | 127 | c.443C>T      | c.(442-444)GCG>GTG   | p.A148V       |



|        |                 |           |        |    |    |           |           |                        |     |   |   |     |     |           |                        |          |
|--------|-----------------|-----------|--------|----|----|-----------|-----------|------------------------|-----|---|---|-----|-----|-----------|------------------------|----------|
| Pat_32 | Post-Resistance | GPS2      | 2874   | 37 | 17 | 7216926   | 7216926   | Missense_Mutation      | SNP | G | A | 4   | 226 | c.595C>T  | c.(595-597)CCC>TCC     | p.P199S  |
| Pat_32 | Post-Resistance | SEZ6      | 124925 | 37 | 17 | 27285151  | 27285151  | Missense_Mutation      | SNP | G | A | 3   | 99  | c.2116C>T | c.(2116-2118)CGC>TGC   | p.R706C  |
| Pat_32 | Post-Resistance | KRT33B    | 3884   | 37 | 17 | 39525936  | 39525936  | Missense_Mutation      | SNP | G | A | 4   | 30  | c.67C>T   | c.(67-69)CCC>TCC       | p.P23S   |
| Pat_32 | Post-Resistance | CCDC103   | 388389 | 37 | 17 | 42979971  | 42979971  | Missense_Mutation      | SNP | G | A | 3   | 48  | c.515G>A  | c.(514-516)AGC>AAC     | p.S172N  |
| Pat_32 | Post-Resistance | SPAG9     | 9043   | 37 | 17 | 49072569  | 49072569  | Missense_Mutation      | SNP | C | G | 3   | 68  | c.2075G>C | c.(2074-2076)GGA>GCA   | p.G692A  |
| Pat_32 | Post-Resistance | C17orf82  | 388407 | 37 | 17 | 59490015  | 59490015  | Missense_Mutation      | SNP | G | A | 2   | 3   | c.679G>A  | c.(679-681)GAC>AAC     | p.D227N  |
| Pat_32 | Post-Resistance | GH2       | 2689   | 37 | 17 | 61958281  | 61958281  | Missense_Mutation      | SNP | G | A | 3   | 67  | c.307C>T  | c.(307-309)CGC>TGC     | p.R103C  |
| Pat_32 | Post-Resistance | ABCA9     | 10350  | 37 | 17 | 67003970  | 67003970  | Missense_Mutation      | SNP | G | A | 4   | 187 | c.3365C>T | c.(3364-3366)ACA>ATA   | p.T1122I |
| Pat_32 | Post-Resistance | QRICH2    | 84074  | 37 | 17 | 74288842  | 74288842  | Missense_Mutation      | SNP | C | T | 3   | 72  | c.1468G>A | c.(1468-1470)GGT>AGT   | p.G490S  |
| Pat_32 | Post-Resistance | UBE2O     | 63893  | 37 | 17 | 74394972  | 74394972  | Missense_Mutation      | SNP | G | A | 132 | 190 | c.1729C>T | c.(1729-1731)CAC>TAC   | p.H577Y  |
| Pat_32 | Post-Resistance | RNF213    | 57674  | 37 | 17 | 78323706  | 78323706  | Missense_Mutation      | SNP | G | A | 4   | 89  | c.4307G>A | c.(4306-4308)CGA>CAA   | p.R1436Q |
| Pat_32 | Post-Resistance | HCN2      | 610    | 37 | 19 | 613374    | 613374    | Missense_Mutation      | SNP | A | C | 4   | 108 | c.1711A>C | c.(1711-1713)ATC>CTC   | p.I571L  |
| Pat_32 | Post-Resistance | EVI5L     | 115704 | 37 | 19 | 7928427   | 7928427   | Missense_Mutation      | SNP | G | A | 3   | 14  | c.2224G>A | c.(2224-2226)GTA>ATA   | p.V742I  |
| Pat_32 | Post-Resistance | FARSA     | 2193   | 37 | 19 | 13035284  | 13035284  | Missense_Mutation      | SNP | C | T | 4   | 167 | c.1252G>A | c.(1252-1254)GAG>AAG   | p.E418K  |
| Pat_32 | Post-Resistance | NANOS3    | 342977 | 37 | 19 | 13988237  | 13988237  | Missense_Mutation      | SNP | G | A | 3   | 62  | c.175G>A  | c.(175-177)GGA>AGA     | p.G59R   |
| Pat_32 | Post-Resistance | SLC1A6    | 6511   | 37 | 19 | 15073056  | 15073056  | Missense_Mutation      | SNP | C | G | 24  | 95  | c.693G>C  | c.(691-693)GAG>GAC     | p.E231D  |
| Pat_32 | Post-Resistance | PDE4C     | 5143   | 37 | 19 | 18321833  | 18321833  | Missense_Mutation      | SNP | G | C | 11  | 41  | c.2045C>G | c.(2044-2046)GCC>GCC   | p.A682G  |
| Pat_32 | Post-Resistance | ZNF708    | 7562   | 37 | 19 | 21476519  | 21476519  | Missense_Mutation      | SNP | T | C | 5   | 156 | c.1249A>G | c.(1249-1251)AAG>GAG   | p.K417E  |
| Pat_32 | Post-Resistance | ZNF43     | 7594   | 37 | 19 | 21991550  | 21991550  | Missense_Mutation      | SNP | T | A | 5   | 378 | c.1289A>T | c.(1288-1290)GAA>GTA   | p.E430V  |
| Pat_32 | Post-Resistance | ZNF208    | 7757   | 37 | 19 | 22155903  | 22155903  | Missense_Mutation      | SNP | T | C | 5   | 290 | c.1633A>G | c.(1633-1635)ACC>GCC   | p.T545A  |
| Pat_32 | Post-Resistance | HPN       | 3249   | 37 | 19 | 35540274  | 35540274  | Missense_Mutation      | SNP | G | A | 4   | 204 | c.97G>A   | c.(97-99)GGG>AGG       | p.G33R   |
| Pat_32 | Post-Resistance | NPHS1     | 4868   | 37 | 19 | 36341266  | 36341266  | Missense_Mutation      | SNP | C | A | 7   | 61  | c.608G>T  | c.(607-609)AGG>ATG     | p.R203M  |
| Pat_32 | Post-Resistance | PRX       | 57716  | 37 | 19 | 40902089  | 40902089  | Missense_Mutation      | SNP | G | A | 4   | 173 | c.2170C>T | c.(2170-2172)CTC>TTC   | p.L724F  |
| Pat_32 | Post-Resistance | EGLN2     | 112398 | 37 | 19 | 41292842  | 41292842  | Translation_Start_Site | SNP | G | A | 3   | 71  | c.-275G>A | (-277--273)CCGTG>CCATG |          |
| Pat_32 | Post-Resistance | GPR77     | 27202  | 37 | 19 | 47844507  | 47844507  | Missense_Mutation      | SNP | G | A | 4   | 105 | c.451G>A  | c.(451-453)GTG>ATG     | p.V151M  |
| Pat_32 | Post-Resistance | LMTK3     | 114783 | 37 | 19 | 49001471  | 49001471  | Missense_Mutation      | SNP | G | A | 14  | 37  | c.2942C>T | c.(2941-2943)CCC>CTC   | p.P981L  |
| Pat_32 | Post-Resistance | SIGLEC9   | 27180  | 37 | 19 | 51628446  | 51628446  | Missense_Mutation      | SNP | C | T | 4   | 169 | c.215C>T  | c.(214-216)GCT>GTT     | p.A72V   |
| Pat_32 | Post-Resistance | LILRB2    | 10288  | 37 | 19 | 54783664  | 54783664  | Missense_Mutation      | SNP | G | T | 55  | 81  | c.337C>A  | c.(337-339)CTG>ATG     | p.L113M  |
| Pat_32 | Post-Resistance | LILRA5    | 353514 | 37 | 19 | 54818709  | 54818709  | Missense_Mutation      | SNP | C | T | 41  | 76  | c.889G>A  | c.(889-891)GCT>ACT     | p.A297T  |
| Pat_32 | Post-Resistance | NLRP2     | 55655  | 37 | 19 | 55494663  | 55494663  | Missense_Mutation      | SNP | G | T | 4   | 86  | c.1597G>T | c.(1597-1599)GGG>TGG   | p.G533W  |
| Pat_32 | Post-Resistance | ZNF460    | 10794  | 37 | 19 | 57802843  | 57802843  | Missense_Mutation      | SNP | G | A | 4   | 134 | c.934G>A  | c.(934-936)GAA>AAA     | p.E312K  |
| Pat_32 | Post-Resistance | MYT1L     | 23040  | 37 | 2  | 1893067   | 1893067   | Missense_Mutation      | SNP | G | T | 5   | 143 | c.2466C>A | c.(2464-2466)GAC>GAA   | p.D822E  |
| Pat_32 | Post-Resistance | KIDINS220 | 57498  | 37 | 2  | 8871289   | 8871289   | Missense_Mutation      | SNP | C | T | 3   | 73  | c.4877G>A | c.(4876-4878)CGG>CAG   | p.R1626Q |
| Pat_32 | Post-Resistance | KCNS3     | 3790   | 37 | 2  | 18113071  | 18113071  | Missense_Mutation      | SNP | T | C | 66  | 60  | c.796T>C  | c.(796-798)TTC>CTC     | p.F266L  |
| Pat_32 | Post-Resistance | ASXL2     | 55252  | 37 | 2  | 25965173  | 25965173  | Missense_Mutation      | SNP | C | T | 30  | 63  | c.4033G>A | c.(4033-4035)GTA>ATA   | p.V1345I |
| Pat_32 | Post-Resistance | C2orf16   | 84226  | 37 | 2  | 27803797  | 27803797  | Missense_Mutation      | SNP | G | T | 4   | 214 | c.4358G>T | c.(4357-4359)CGA>CTA   | p.R1453L |
| Pat_32 | Post-Resistance | MAP4K3    | 8491   | 37 | 2  | 39515286  | 39515286  | Missense_Mutation      | SNP | G | A | 4   | 226 | c.1450C>T | c.(1450-1452)CCG>TCC   | p.P484S  |
| Pat_32 | Post-Resistance | EML4      | 27436  | 37 | 2  | 42528474  | 42528474  | Missense_Mutation      | SNP | G | A | 3   | 88  | c.1583G>A | c.(1582-1584)GGG>GAG   | p.G528E  |
| Pat_32 | Post-Resistance | DYSF      | 8291   | 37 | 2  | 71906211  | 71906211  | Missense_Mutation      | SNP | G | A | 4   | 186 | c.5792G>A | c.(5791-5793)CGC>CAC   | p.R1931H |
| Pat_32 | Post-Resistance | SNRNP200  | 23020  | 37 | 2  | 96964654  | 96964654  | Missense_Mutation      | SNP | G | A | 4   | 195 | c.781C>T  | c.(781-783)CGG>TGG     | p.R261W  |
| Pat_32 | Post-Resistance | WASH2P    | 375260 | 37 | 2  | 114355998 | 114355998 | Missense_Mutation      | SNP | C | G | 7   | 45  | c.616C>G  | c.(616-618)CAC>GAC     | p.H206D  |
| Pat_32 | Post-Resistance | MARCO     | 8685   | 37 | 2  | 119750748 | 119750748 | Missense_Mutation      | SNP | G | A | 4   | 238 | c.1301G>A | c.(1300-1302)CGG>CAG   | p.R434Q  |
| Pat_32 | Post-Resistance | PTPN4     | 5775   | 37 | 2  | 120703991 | 120703991 | Missense_Mutation      | SNP | C | A | 4   | 206 | c.1590C>A | c.(1588-1590)TTC>TTA   | p.F530L  |
| Pat_32 | Post-Resistance | CLASP1    | 23332  | 37 | 2  | 122125337 | 122125337 | Missense_Mutation      | SNP | C | T | 4   | 76  | c.3713G>A | c.(3712-3714)CGG>CAG   | p.R1238Q |
| Pat_32 | Post-Resistance | MYO7B     | 4648   | 37 | 2  | 128327430 | 128327430 | Missense_Mutation      | SNP | T | G | 4   | 27  | c.537T>G  | c.(535-537)AGT>AGG     | p.S179R  |
| Pat_32 | Post-Resistance | ZRANB3    | 84083  | 37 | 2  | 136072981 | 136072981 | Missense_Mutation      | SNP | G | A | 3   | 64  | c.797C>T  | c.(796-798)CCC>CTC     | p.P266L  |
| Pat_32 | Post-Resistance | NEB       | 4703   | 37 | 2  | 152520327 | 152520327 | Missense_Mutation      | SNP | C | G | 8   | 106 | c.5498G>C | c.(5497-5499)GGC>GCC   | p.G1833A |

|        |                 |           |        |    |    |           |           |                   |     |   |   |    |     |               |                      |               |
|--------|-----------------|-----------|--------|----|----|-----------|-----------|-------------------|-----|---|---|----|-----|---------------|----------------------|---------------|
| Pat_32 | Post-Resistance | DHRS9     | 10170  | 37 | 2  | 169940008 | 169940008 | Missense_Mutation | SNP | T | G | 6  | 156 | c.483T>G      | c.(481-483)AAT>AAG   | p.N161K       |
| Pat_32 | Post-Resistance | PGAP1     | 80055  | 37 | 2  | 197708675 | 197708675 | Missense_Mutation | SNP | T | C | 76 | 119 | c.2462A>G     | c.(2461-2463)AAC>AGC | p.N821S       |
| Pat_32 | Post-Resistance | 4-Mar     | 57574  | 37 | 2  | 217142428 | 217142428 | Missense_Mutation | SNP | C | T | 6  | 266 | c.832G>A      | c.(832-834)GGG>AGG   | p.G278R       |
| Pat_32 | Post-Resistance | SMARCAL1  | 50485  | 37 | 2  | 217300060 | 217300060 | Splice_Site       | SNP | G | T | 4  | 120 | c.1486_splice | c.e9-1               | p.A496_splice |
| Pat_32 | Post-Resistance | IRS1      | 3667   | 37 | 2  | 227660463 | 227660463 | Missense_Mutation | SNP | G | A | 4  | 158 | c.2992C>T     | c.(2992-2994)CGT>TGT | p.R998C       |
| Pat_32 | Post-Resistance | CHRND     | 1144   | 37 | 2  | 233398813 | 233398813 | Missense_Mutation | SNP | G | A | 3  | 91  | c.1220G>A     | c.(1219-1221)CGG>CAG | p.R407Q       |
| Pat_32 | Post-Resistance | DGKD      | 8527   | 37 | 2  | 234346033 | 234346033 | Missense_Mutation | SNP | C | T | 36 | 65  | c.830C>T      | c.(829-831)TCG>TTG   | p.S277L       |
| Pat_32 | Post-Resistance | SH3BP4    | 23677  | 37 | 2  | 235950569 | 235950569 | Missense_Mutation | SNP | G | C | 21 | 20  | c.1156G>C     | c.(1156-1158)GAG>CAG | p.E386Q       |
| Pat_32 | Post-Resistance | SIRPA     | 140885 | 37 | 20 | 1902292   | 1902292   | Missense_Mutation | SNP | G | A | 6  | 168 | c.688G>A      | c.(688-690)GTG>ATG   | p.V230M       |
| Pat_32 | Post-Resistance | C20orf194 | 25943  | 37 | 20 | 3234419   | 3234419   | Missense_Mutation | SNP | C | A | 4  | 154 | c.3374G>T     | c.(3373-3375)GGC>GTC | p.G1125V      |
| Pat_32 | Post-Resistance | BFSP1     | 631    | 37 | 20 | 17495444  | 17495444  | Missense_Mutation | SNP | C | A | 4  | 235 | c.456G>T      | c.(454-456)TTG>TTT   | p.L152F       |
| Pat_32 | Post-Resistance | FRG1B     | 284802 | 37 | 20 | 29625947  | 29625947  | Missense_Mutation | SNP | T | C | 7  | 234 | c.101T>C      | c.(100-102)ATT>ACT   | p.I34T        |
| Pat_32 | Post-Resistance | DNMT3B    | 1789   | 37 | 20 | 31376801  | 31376801  | Missense_Mutation | SNP | G | A | 4  | 126 | c.796G>A      | c.(796-798)GAT>AAT   | p.D266N       |
| Pat_32 | Post-Resistance | BPIL3     | 128859 | 37 | 20 | 31622017  | 31622017  | Missense_Mutation | SNP | C | A | 35 | 359 | c.223C>A      | c.(223-225)CCC>ACC   | p.P75T        |
| Pat_32 | Post-Resistance | CDK5RAP1  | 51654  | 37 | 20 | 31984692  | 31984692  | Missense_Mutation | SNP | G | A | 24 | 41  | c.179C>T      | c.(178-180)GCT>GTT   | p.A60V        |
| Pat_32 | Post-Resistance | SNTA1     | 6640   | 37 | 20 | 32000563  | 32000563  | Missense_Mutation | SNP | C | A | 3  | 61  | c.727G>T      | c.(727-729)GGT>TGT   | p.G243C       |
| Pat_32 | Post-Resistance | MYH7B     | 57644  | 37 | 20 | 33585436  | 33585436  | Missense_Mutation | SNP | G | A | 4  | 70  | c.3866G>A     | c.(3865-3867)CGC>CAC | p.R1289H      |
| Pat_32 | Post-Resistance | TAF4      | 6874   | 37 | 20 | 60574083  | 60574083  | Missense_Mutation | SNP | T | A | 15 | 826 | c.2869A>T     | c.(2869-2871)AGG>TGG | p.R957W       |
| Pat_32 | Post-Resistance | OPRL1     | 4987   | 37 | 20 | 62730105  | 62730105  | Missense_Mutation | SNP | G | A | 4  | 100 | c.1066G>A     | c.(1066-1068)GTG>ATG | p.V356M       |
| Pat_32 | Post-Resistance | HUNK      | 30811  | 37 | 21 | 33346983  | 33346983  | Missense_Mutation | SNP | C | T | 28 | 158 | c.1127C>T     | c.(1126-1128)GCC>GTC | p.A376V       |
| Pat_32 | Post-Resistance | UMODL1    | 89766  | 37 | 21 | 43547170  | 43547170  | Missense_Mutation | SNP | G | T | 5  | 174 | c.3348G>T     | c.(3346-3348)ATG>ATT | p.M1116I      |
| Pat_32 | Post-Resistance | KRTAP10-1 | 386677 | 37 | 21 | 45959198  | 45959198  | Missense_Mutation | SNP | C | G | 4  | 55  | c.836G>C      | c.(835-837)CGC>CCC   | p.R279P       |
| Pat_32 | Post-Resistance | PCNT      | 5116   | 37 | 21 | 47786647  | 47786647  | Missense_Mutation | SNP | G | A | 5  | 132 | c.2758G>A     | c.(2758-2760)GAG>AAG | p.E920K       |
| Pat_32 | Post-Resistance | BPIL2     | 254240 | 37 | 22 | 32841934  | 32841934  | Missense_Mutation | SNP | C | T | 4  | 143 | c.424G>A      | c.(424-426)GGT>AGT   | p.G142S       |
| Pat_32 | Post-Resistance | APOL5     | 80831  | 37 | 22 | 36124797  | 36124797  | Missense_Mutation | SNP | T | C | 3  | 115 | c.1154T>C     | c.(1153-1155)GTT>GCT | p.V385A       |
| Pat_32 | Post-Resistance | TNRC6B    | 23112  | 37 | 22 | 40676091  | 40676091  | Missense_Mutation | SNP | C | T | 4  | 221 | c.3355C>T     | c.(3355-3357)CGT>TGT | p.R1119C      |
| Pat_32 | Post-Resistance | BRD1      | 23774  | 37 | 22 | 50167960  | 50167960  | Missense_Mutation | SNP | C | T | 4  | 177 | c.3098G>A     | c.(3097-3099)CGG>CAG | p.R1033Q      |
| Pat_32 | Post-Resistance | NR1D2     | 9975   | 37 | 3  | 23996244  | 23996244  | Missense_Mutation | SNP | C | A | 4  | 183 | c.233C>A      | c.(232-234)ACA>AAA   | p.T78K        |
| Pat_32 | Post-Resistance | CLASP2    | 23122  | 37 | 3  | 33644501  | 33644501  | Missense_Mutation | SNP | C | T | 10 | 16  | c.1867G>A     | c.(1867-1869)GTG>ATG | p.V623M       |
| Pat_32 | Post-Resistance | TRANK1    | 9881   | 37 | 3  | 36875205  | 36875205  | Missense_Mutation | SNP | T | A | 69 | 50  | c.4087A>T     | c.(4087-4089)AAC>TAC | p.N1363Y      |
| Pat_32 | Post-Resistance | IL17RB    | 55540  | 37 | 3  | 53894255  | 53894255  | Missense_Mutation | SNP | G | A | 4  | 152 | c.946G>A      | c.(946-948)GAA>AAA   | p.E316K       |
| Pat_32 | Post-Resistance | HHLA2     | 11148  | 37 | 3  | 108081229 | 108081229 | Nonsense_Mutation | SNP | G | A | 12 | 25  | c.1044G>A     | c.(1042-1044)TGG>TGA | p.W348*       |
| Pat_32 | Post-Resistance | PLXNA1    | 5361   | 37 | 3  | 126722246 | 126722246 | Missense_Mutation | SNP | G | A | 3  | 90  | c.1382G>A     | c.(1381-1383)AGC>AAC | p.S461N       |
| Pat_32 | Post-Resistance | THPO      | 7066   | 37 | 3  | 184090723 | 184090723 | Missense_Mutation | SNP | T | C | 6  | 28  | c.640A>G      | c.(640-642)ACT>GCT   | p.T214A       |
| Pat_32 | Post-Resistance | PDE6B     | 5158   | 37 | 4  | 657618    | 657618    | Missense_Mutation | SNP | G | A | 15 | 100 | c.1980G>A     | c.(1978-1980)ATG>ATA | p.M660I       |
| Pat_32 | Post-Resistance | GRK4      | 2868   | 37 | 4  | 2986281   | 2986281   | Missense_Mutation | SNP | G | A | 47 | 155 | c.94G>A       | c.(94-96)GAG>AAG     | p.E32K        |
| Pat_32 | Post-Resistance | BST1      | 683    | 37 | 4  | 15720550  | 15720550  | Missense_Mutation | SNP | G | A | 4  | 105 | c.725G>A      | c.(724-726)AGC>AAC   | p.S242N       |
| Pat_32 | Post-Resistance | CLRN2     | 645104 | 37 | 4  | 17517017  | 17517017  | Missense_Mutation | SNP | G | C | 43 | 154 | c.128G>C      | c.(127-129)GGA>GCA   | p.G43A        |
| Pat_32 | Post-Resistance | UGDH      | 7358   | 37 | 4  | 39522972  | 39522972  | Missense_Mutation | SNP | T | A | 7  | 265 | c.161A>T      | c.(160-162)GAG>GTG   | p.E54V        |
| Pat_32 | Post-Resistance | USP46     | 64854  | 37 | 4  | 53468102  | 53468102  | Missense_Mutation | SNP | G | A | 4  | 173 | c.841C>T      | c.(841-843)CGG>TGG   | p.R281W       |
| Pat_32 | Post-Resistance | UGT2B10   | 7365   | 37 | 4  | 69874738  | 69874738  | Missense_Mutation | SNP | T | C | 4  | 257 | c.1033A>G     | c.(1033-1035)ACA>GCA | p.T345A       |
| Pat_32 | Post-Resistance | SLC4A4    | 8671   | 37 | 4  | 72316945  | 72316945  | Missense_Mutation | SNP | G | T | 91 | 253 | c.1249G>T     | c.(1249-1251)GGG>TGG | p.G417W       |
| Pat_32 | Post-Resistance | FRAS1     | 80144  | 37 | 4  | 79284718  | 79284718  | Missense_Mutation | SNP | G | A | 4  | 109 | c.2474G>A     | c.(2473-2475)AGC>AAC | p.S825N       |
| Pat_32 | Post-Resistance | NUDT9     | 53343  | 37 | 4  | 88370382  | 88370382  | Missense_Mutation | SNP | T | C | 16 | 160 | c.619T>C      | c.(619-621)TGT>CGT   | p.C207R       |
| Pat_32 | Post-Resistance | DKK2      | 27123  | 37 | 4  | 107845346 | 107845346 | Missense_Mutation | SNP | G | A | 12 | 111 | c.545C>T      | c.(544-546)CCC>CTC   | p.P182L       |
| Pat_32 | Post-Resistance | PHF17     | 79960  | 37 | 4  | 129773269 | 129773269 | Missense_Mutation | SNP | G | A | 4  | 228 | c.542G>A      | c.(541-543)CGA>CAA   | p.R181Q       |
| Pat_32 | Post-Resistance | SETD7     | 80854  | 37 | 4  | 140454437 | 140454437 | Missense_Mutation | SNP | G | A | 4  | 217 | c.254C>T      | c.(253-255)ACG>ATG   | p.T85M        |

|        |                 |          |        |    |   |           |           |                        |     |    |    |     |     |               |                        |               |
|--------|-----------------|----------|--------|----|---|-----------|-----------|------------------------|-----|----|----|-----|-----|---------------|------------------------|---------------|
| Pat_32 | Post-Resistance | TTC29    | 83894  | 37 | 4 | 147628661 | 147628661 | Missense_Mutation      | SNP | G  | A  | 76  | 80  | c.1373C>T     | c.(1372-1374)TCA>TTA   | p.S458L       |
| Pat_32 | Post-Resistance | KLHL2    | 11275  | 37 | 4 | 166231897 | 166231897 | Missense_Mutation      | SNP | G  | A  | 5   | 323 | c.1232G>A     | c.(1231-1233)AGT>AAT   | p.S411N       |
| Pat_32 | Post-Resistance | SLC9A3   | 6550   | 37 | 5 | 488486    | 488486    | Missense_Mutation      | SNP | T  | C  | 13  | 82  | c.620A>G      | c.(619-621)GAG>GGG     | p.E207G       |
| Pat_32 | Post-Resistance | PRDM9    | 56979  | 37 | 5 | 23527251  | 23527251  | Missense_Mutation      | SNP | C  | G  | 4   | 233 | c.2054C>G     | c.(2053-2055)ACA>AGA   | p.T685R       |
| Pat_32 | Post-Resistance | CDH10    | 1008   | 37 | 5 | 24509674  | 24509674  | Splice_Site            | SNP | C  | A  | 5   | 126 | c.1256_splice | c.e7+1                 | p.R419_splice |
| Pat_32 | Post-Resistance | DNAJC21  | 134218 | 37 | 5 | 34937509  | 34937509  | Nonsense_Mutation      | SNP | C  | T  | 23  | 35  | c.517C>T      | c.(517-519)CGA>TGA     | p.R173*       |
| Pat_32 | Post-Resistance | NIPBL    | 25836  | 37 | 5 | 36986086  | 36986086  | Missense_Mutation      | SNP | C  | T  | 72  | 125 | c.2804C>T     | c.(2803-2805)CCT>CTT   | p.P935L       |
| Pat_32 | Post-Resistance | MARVELD2 | 153562 | 37 | 5 | 68715915  | 68715915  | Missense_Mutation      | SNP | G  | A  | 3   | 91  | c.703G>A      | c.(703-705)GGC>AGC     | p.G235S       |
| Pat_32 | Post-Resistance | ZFYVE16  | 9765   | 37 | 5 | 79768636  | 79768636  | Nonsense_Mutation      | SNP | C  | T  | 4   | 181 | c.4081C>T     | c.(4081-4083)CGA>TGA   | p.R1361*      |
| Pat_32 | Post-Resistance | GPR98    | 84059  | 37 | 5 | 90124906  | 90124906  | Missense_Mutation      | SNP | G  | A  | 5   | 315 | c.16514G>A    | c.(16513-16515)CGG>CAC | p.R5505Q      |
| Pat_32 | Post-Resistance | ANKRD32  | 84250  | 37 | 5 | 94030572  | 94030572  | Missense_Mutation      | SNP | A  | G  | 29  | 176 | c.2732A>G     | c.(2731-2733)GAA>GGA   | p.E911G       |
| Pat_32 | Post-Resistance | KDM3B    | 51780  | 37 | 5 | 137767187 | 137767187 | Missense_Mutation      | SNP | G  | A  | 4   | 146 | c.5144G>A     | c.(5143-5145)CGC>CAC   | p.R1715H      |
| Pat_32 | Post-Resistance | PPP2R2B  | 5521   | 37 | 5 | 145969713 | 145969713 | Missense_Mutation      | SNP | C  | T  | 22  | 141 | c.1129G>A     | c.(1129-1131)GCT>ACT   | p.A377T       |
| Pat_32 | Post-Resistance | ARSI     | 340075 | 37 | 5 | 149677736 | 149677736 | Missense_Mutation      | SNP | G  | A  | 3   | 68  | c.751C>T      | c.(751-753)CGC>TGC     | p.R251C       |
| Pat_32 | Post-Resistance | DBN1     | 1627   | 37 | 5 | 176884716 | 176884716 | Missense_Mutation      | SNP | C  | A  | 3   | 52  | c.1819G>T     | c.(1819-1821)GCC>TCC   | p.A607S       |
| Pat_32 | Post-Resistance | RNF130   | 55819  | 37 | 5 | 179393934 | 179393934 | Nonsense_Mutation      | SNP | G  | T  | 4   | 170 | c.1022C>A     | c.(1021-1023)TCA>TAA   | p.S341*       |
| Pat_32 | Post-Resistance | BMP6     | 654    | 37 | 6 | 7845454   | 7845454   | Missense_Mutation      | SNP | A  | T  | 8   | 183 | c.746A>T      | c.(745-747)GAG>GTG     | p.E249V       |
| Pat_32 | Post-Resistance | TRIM10   | 10107  | 37 | 6 | 30124770  | 30124770  | Missense_Mutation      | SNP | G  | A  | 4   | 148 | c.841C>T      | c.(841-843)CGG>TGG     | p.R281W       |
| Pat_32 | Post-Resistance | TRIM39   | 56658  | 37 | 6 | 30309578  | 30309578  | Missense_Mutation      | SNP | C  | T  | 4   | 99  | c.1099C>T     | c.(1099-1101)CGG>TGG   | p.R367W       |
| Pat_32 | Post-Resistance | HLA-DOA  | 3111   | 37 | 6 | 32976009  | 32976009  | Missense_Mutation      | SNP | A  | G  | 9   | 33  | c.112T>C      | c.(112-114)TTC>CTC     | p.F38L        |
| Pat_32 | Post-Resistance | CCND3    | 896    | 37 | 6 | 41904394  | 41904394  | Missense_Mutation      | SNP | G  | A  | 4   | 76  | c.614C>T      | c.(613-615)ACG>ATG     | p.T205M       |
| Pat_32 | Post-Resistance | TFAP2B   | 7021   | 37 | 6 | 50796342  | 50796342  | Missense_Mutation      | SNP | A  | G  | 20  | 234 | c.551A>G      | c.(550-552)GAT>GGT     | p.D184G       |
| Pat_32 | Post-Resistance | GCM1     | 8521   | 37 | 6 | 53010422  | 53010423  | Missense_Mutation      | DNP | AG | GT | 5   | 183 | c.8_9CT>AC    | c.(7-9)CCT>CAC         | p.P3H         |
| Pat_32 | Post-Resistance | RIMS1    | 22999  | 37 | 6 | 72968726  | 72968726  | Missense_Mutation      | SNP | T  | C  | 16  | 157 | c.2965T>C     | c.(2965-2967)TCT>CCT   | p.S989P       |
| Pat_32 | Post-Resistance | SMPD2    | 6610   | 37 | 6 | 109764992 | 109764992 | Missense_Mutation      | SNP | C  | A  | 3   | 31  | c.1156C>A     | c.(1156-1158)CAG>AAG   | p.Q386K       |
| Pat_32 | Post-Resistance | THEMIS   | 387357 | 37 | 6 | 128150761 | 128150761 | Missense_Mutation      | SNP | C  | A  | 4   | 81  | c.569G>T      | c.(568-570)TGG>TTG     | p.W190L       |
| Pat_32 | Post-Resistance | PHACTR2  | 9749   | 37 | 6 | 144093433 | 144093433 | Missense_Mutation      | SNP | A  | T  | 3   | 67  | c.1238A>T     | c.(1237-1239)CAG>CTG   | p.Q413L       |
| Pat_32 | Post-Resistance | TAX1BP1  | 8887   | 37 | 7 | 27839609  | 27839609  | Missense_Mutation      | SNP | A  | G  | 17  | 244 | c.1664A>G     | c.(1663-1665)TAT>TGT   | p.Y555C       |
| Pat_32 | Post-Resistance | INMT     | 11185  | 37 | 7 | 30795319  | 30795319  | Missense_Mutation      | SNP | C  | T  | 4   | 111 | c.644C>T      | c.(643-645)GCC>GTC     | p.A215V       |
| Pat_32 | Post-Resistance | WBSCR17  | 64409  | 37 | 7 | 71177125  | 71177125  | Missense_Mutation      | SNP | C  | G  | 35  | 135 | c.1791C>G     | c.(1789-1791)ATC>ATG   | p.I597M       |
| Pat_32 | Post-Resistance | CLIP2    | 7461   | 37 | 7 | 73768246  | 73768246  | Missense_Mutation      | SNP | G  | A  | 28  | 487 | c.715G>A      | c.(715-717)GGG>AGG     | p.G239R       |
| Pat_32 | Post-Resistance | SEMA3D   | 223117 | 37 | 7 | 84694808  | 84694808  | Missense_Mutation      | SNP | C  | T  | 234 | 96  | c.650G>A      | c.(649-651)CGA>CAA     | p.R217Q       |
| Pat_32 | Post-Resistance | PEX1     | 5189   | 37 | 7 | 92118669  | 92118669  | Missense_Mutation      | SNP | C  | A  | 6   | 288 | c.3705G>T     | c.(3703-3705)ATG>ATT   | p.M1235I      |
| Pat_32 | Post-Resistance | PON2     | 5445   | 37 | 7 | 95035519  | 95035519  | Missense_Mutation      | SNP | T  | G  | 461 | 135 | c.818A>C      | c.(817-819)GAT>GCT     | p.D273A       |
| Pat_32 | Post-Resistance | TRRAP    | 8295   | 37 | 7 | 98491479  | 98491479  | Missense_Mutation      | SNP | A  | T  | 20  | 586 | c.425A>T      | c.(424-426)CAG>CTG     | p.Q142L       |
| Pat_32 | Post-Resistance | ZNF498   | 221785 | 37 | 7 | 99227033  | 99227033  | Missense_Mutation      | SNP | G  | A  | 4   | 143 | c.1025G>A     | c.(1024-1026)AGC>AAC   | p.S342N       |
| Pat_32 | Post-Resistance | C7orf61  | 402573 | 37 | 7 | 100054433 | 100054433 | Missense_Mutation      | SNP | G  | A  | 4   | 79  | c.563C>T      | c.(562-564)GCT>GTT     | p.A188V       |
| Pat_32 | Post-Resistance | ZAN      | 7455   | 37 | 7 | 100350474 | 100350474 | Missense_Mutation      | SNP | T  | C  | 19  | 502 | c.2746T>C     | c.(2746-2748)TCC>CCC   | p.S916P       |
| Pat_32 | Post-Resistance | ZAN      | 7455   | 37 | 7 | 100363071 | 100363071 | Missense_Mutation      | SNP | G  | A  | 4   | 86  | c.4364G>A     | c.(4363-4365)CGG>CAG   | p.R1455Q      |
| Pat_32 | Post-Resistance | MUC17    | 140453 | 37 | 7 | 100680878 | 100680878 | Missense_Mutation      | SNP | G  | A  | 8   | 626 | c.6181G>A     | c.(6181-6183)GGT>AGT   | p.G2061S      |
| Pat_32 | Post-Resistance | DLD      | 1738   | 37 | 7 | 107557410 | 107557410 | Splice_Site            | SNP | G  | T  | 5   | 150 | c.1046_splice | c.e10+1                | p.N349_splice |
| Pat_32 | Post-Resistance | C7orf66  | 154907 | 37 | 7 | 108524288 | 108524288 | Missense_Mutation      | SNP | C  | T  | 14  | 395 | c.124G>A      | c.(124-126)GCA>ACA     | p.A42T        |
| Pat_32 | Post-Resistance | CAV1     | 857    | 37 | 7 | 116165101 | 116165101 | Translation_Start_Site | SNP | C  | G  | 18  | 789 | c.-15C>G      | c.(17-13)ATCCA>ATGCA   |               |
| Pat_32 | Post-Resistance | TNPO3    | 23534  | 37 | 7 | 128633886 | 128633886 | Missense_Mutation      | SNP | A  | T  | 47  | 287 | c.1241T>A     | c.(1240-1242)ATA>AAA   | p.I414K       |
| Pat_32 | Post-Resistance | TBXAS1   | 6916   | 37 | 7 | 139653246 | 139653246 | Missense_Mutation      | SNP | A  | G  | 12  | 244 | c.671A>G      | c.(670-672)GAC>GGC     | p.D224G       |
| Pat_32 | Post-Resistance | BRAF     | 673    | 37 | 7 | 140453136 | 140453136 | Missense_Mutation      | SNP | A  | T  | 268 | 103 | c.1799T>A     | c.(1798-1800)GTG>GAG   | p.V600E       |
| Pat_32 | Post-Resistance | PTPRN2   | 5799   | 37 | 7 | 157926656 | 157926656 | Missense_Mutation      | SNP | C  | A  | 27  | 188 | c.1269G>T     | c.(1267-1269)ATG>ATT   | p.M423I       |

|        |                 |           |           |    |    |           |           |                   |     |    |    |     |     |                |                      |          |
|--------|-----------------|-----------|-----------|----|----|-----------|-----------|-------------------|-----|----|----|-----|-----|----------------|----------------------|----------|
| Pat_32 | Post-Resistance | IDO1      | 3620      | 37 | 8  | 39780096  | 39780096  | Missense_Mutation | SNP | C  | T  | 35  | 44  | c.463C>T       | c.(463-465)CGT>TGT   | p.R155C  |
| Pat_32 | Post-Resistance | C8orf45   | 157777    | 37 | 8  | 67789635  | 67789635  | Missense_Mutation | SNP | C  | G  | 17  | 82  | c.337C>G       | c.(337-339)CTT>GTT   | p.L113V  |
| Pat_32 | Post-Resistance | KLF10     | 7071      | 37 | 8  | 103663709 | 103663709 | Missense_Mutation | SNP | G  | A  | 49  | 61  | c.851C>T       | c.(850-852)CCT>CTT   | p.P284L  |
| Pat_32 | Post-Resistance | BAALC     | 79870     | 37 | 8  | 104225179 | 104225179 | Missense_Mutation | SNP | G  | T  | 7   | 357 | c.193G>T       | c.(193-195)GTG>TTG   | p.V65L   |
| Pat_32 | Post-Resistance | ANGPT1    | 284       | 37 | 8  | 108296965 | 108296965 | Nonsense_Mutation | SNP | G  | A  | 6   | 313 | c.1150C>T      | c.(1150-1152)CGA>TGA | p.R384*  |
| Pat_32 | Post-Resistance | ADCK5     | 203054    | 37 | 8  | 145616137 | 145616137 | Missense_Mutation | SNP | G  | A  | 3   | 43  | c.424G>A       | c.(424-426)GGG>AGG   | p.G142R  |
| Pat_32 | Post-Resistance | RRAGA     | 10670     | 37 | 9  | 19050508  | 19050508  | Missense_Mutation | SNP | C  | T  | 6   | 178 | c.851C>T       | c.(850-852)GCG>GTG   | p.A284V  |
| Pat_32 | Post-Resistance | DNAJB5    | 25822     | 37 | 9  | 34993303  | 34993303  | Missense_Mutation | SNP | C  | T  | 4   | 220 | c.73C>T        | c.(73-75)CGG>TGG     | p.R25W   |
| Pat_32 | Post-Resistance | LOC442421 | 442421    | 37 | 9  | 66499680  | 66499680  | Missense_Mutation | SNP | C  | A  | 9   | 57  | c.490C>A       | c.(490-492)CCC>ACC   | p.P164T  |
| Pat_32 | Post-Resistance | FLJ46321  | 389763    | 37 | 9  | 84605975  | 84605975  | Missense_Mutation | SNP | C  | T  | 27  | 89  | c.590C>T       | c.(589-591)CCC>CTC   | p.P197L  |
| Pat_32 | Post-Resistance | ABCA1     | 19        | 37 | 9  | 107576411 | 107576411 | Missense_Mutation | SNP | C  | T  | 4   | 149 | c.3889G>A      | c.(3889-3891)GAC>AAC | p.D1297N |
| Pat_32 | Post-Resistance | PAPPA     | 5069      | 37 | 9  | 119115984 | 119115984 | Missense_Mutation | SNP | C  | A  | 5   | 180 | c.4259C>A      | c.(4258-4260)CCA>CAA | p.P1420Q |
| Pat_32 | Post-Resistance | PHYHD1    | 254295    | 37 | 9  | 131689386 | 131689386 | Missense_Mutation | SNP | A  | G  | 4   | 242 | c.103A>G       | c.(103-105)AGG>GGG   | p.R35G   |
| Pat_32 | Post-Resistance | KIAA0649  | 9858      | 37 | 9  | 138376660 | 138376660 | Missense_Mutation | SNP | G  | A  | 4   | 125 | c.304G>A       | c.(304-306)GTT>ATT   | p.V102I  |
| Pat_32 | Post-Resistance | OTC       | 5009      | 37 | X  | 38260652  | 38260652  | Missense_Mutation | SNP | C  | A  | 42  | 227 | c.511C>A       | c.(511-513)CAG>AAG   | p.Q171K  |
| Pat_32 | Post-Resistance | MAGED1    | 9500      | 37 | X  | 51640657  | 51640657  | Missense_Mutation | SNP | A  | G  | 11  | 337 | c.1501A>G      | c.(1501-1503)ATC>GTC | p.I501V  |
| Pat_32 | Post-Resistance | SMC1A     | 8243      | 37 | X  | 53421792  | 53421792  | Missense_Mutation | SNP | T  | C  | 4   | 218 | c.2879A>G      | c.(2878-2880)GAG>GGG | p.E960G  |
| Pat_32 | Post-Resistance | SLC7A3    | 84889     | 37 | X  | 70148757  | 70148757  | Missense_Mutation | SNP | C  | T  | 102 | 91  | c.466G>A       | c.(466-468)GTG>ATG   | p.V156M  |
| Pat_32 | Post-Resistance | ACRC      | 93953     | 37 | X  | 70823930  | 70823931  | Missense_Mutation | DNP | GC | AG | 5   | 223 | c.803_804GC>AG | c.(802-804)AGC>AAG   | p.S268K  |
| Pat_32 | Post-Resistance | AMOT      | 154796    | 37 | X  | 112021870 | 112021870 | Missense_Mutation | SNP | A  | C  | 259 | 246 | c.3180T>G      | c.(3178-3180)AAT>AAG | p.N1060K |
| Pat_32 | Post-Resistance | TKTL1     | 8277      | 37 | X  | 153555980 | 153555980 | Missense_Mutation | SNP | C  | T  | 14  | 365 | c.1445C>T      | c.(1444-1446)GCT>GTT | p.A482V  |
| Pat_36 | Post-Resistance | GNB1      | 2782      | 37 | 1  | 1721893   | 1721893   | Nonsense_Mutation | SNP | G  | A  | 4   | 99  | c.640C>T       | c.(640-642)CGA>TGA   | p.R214*  |
| Pat_36 | Post-Resistance | CLSTN1    | 22883     | 37 | 1  | 9793532   | 9793532   | Missense_Mutation | SNP | A  | G  | 18  | 36  | c.2354T>C      | c.(2353-2355)TTG>TCG | p.L785S  |
| Pat_36 | Post-Resistance | CSMD2     | 114784    | 37 | 1  | 34191055  | 34191055  | Missense_Mutation | SNP | C  | T  | 29  | 44  | c.2470G>A      | c.(2470-2472)GGG>AGG | p.G824R  |
| Pat_36 | Post-Resistance | UROD      | 7389      | 37 | 1  | 45479419  | 45479419  | Nonsense_Mutation | SNP | C  | T  | 5   | 130 | c.430C>T       | c.(430-432)CGA>TGA   | p.R144*  |
| Pat_36 | Post-Resistance | PCSK9     | 255738    | 37 | 1  | 55518327  | 55518327  | Missense_Mutation | SNP | G  | A  | 3   | 68  | c.662G>A       | c.(661-663)AGC>AAC   | p.S221N  |
| Pat_36 | Post-Resistance | AP4B1     | 10717     | 37 | 1  | 114437943 | 114437943 | Missense_Mutation | SNP | T  | C  | 61  | 119 | c.1964A>G      | c.(1963-1965)GAC>GGC | p.D655G  |
| Pat_36 | Post-Resistance | REG4      | 83998     | 37 | 1  | 120345767 | 120345767 | Missense_Mutation | SNP | C  | G  | 3   | 65  | c.89G>C        | c.(88-90)TGT>TCT     | p.C30S   |
| Pat_36 | Post-Resistance | NBPF10    | 100132406 | 37 | 1  | 145302695 | 145302695 | Missense_Mutation | SNP | C  | T  | 12  | 292 | c.1133C>T      | c.(1132-1134)ACC>ATC | p.T378I  |
| Pat_36 | Post-Resistance | NBPF10    | 100132406 | 37 | 1  | 145359049 | 145359049 | Missense_Mutation | SNP | A  | G  | 16  | 20  | c.9214A>G      | c.(9214-9216)AAA>GAA | p.K3072E |
| Pat_36 | Post-Resistance | NBPF10    | 100132406 | 37 | 1  | 145362127 | 145362127 | Missense_Mutation | SNP | G  | T  | 6   | 256 | c.9660G>T      | c.(9658-9660)GAG>GAT | p.E3220D |
| Pat_36 | Post-Resistance | ANKRD35   | 148741    | 37 | 1  | 145562153 | 145562153 | Missense_Mutation | SNP | A  | G  | 29  | 40  | c.1841A>G      | c.(1840-1842)GAG>GGG | p.E614G  |
| Pat_36 | Post-Resistance | TCHH      | 7062      | 37 | 1  | 152084627 | 152084627 | Missense_Mutation | SNP | C  | G  | 9   | 100 | c.1066G>C      | c.(1066-1068)GAG>CAG | p.E356Q  |
| Pat_36 | Post-Resistance | INSRR     | 3645      | 37 | 1  | 156823811 | 156823811 | Missense_Mutation | SNP | G  | A  | 3   | 53  | c.370C>T       | c.(370-372)CGT>TGT   | p.R124C  |
| Pat_36 | Post-Resistance | F5        | 2153      | 37 | 1  | 169510502 | 169510502 | Missense_Mutation | SNP | G  | T  | 11  | 413 | c.3826C>A      | c.(3826-3828)CTT>ATT | p.L1276I |
| Pat_36 | Post-Resistance | SLC9A11   | 284525    | 37 | 1  | 173494048 | 173494048 | Missense_Mutation | SNP | C  | T  | 88  | 162 | c.2384G>A      | c.(2383-2385)GGT>GAT | p.G795D  |
| Pat_36 | Post-Resistance | FAM5B     | 57795     | 37 | 1  | 177250597 | 177250597 | Missense_Mutation | SNP | C  | T  | 59  | 86  | c.2285C>T      | c.(2284-2286)TCC>TTC | p.S762F  |
| Pat_36 | Post-Resistance | CFH       | 3075      | 37 | 1  | 196709754 | 196709754 | Missense_Mutation | SNP | C  | T  | 66  | 324 | c.2788C>T      | c.(2788-2790)CCT>TCT | p.P930S  |
| Pat_36 | Post-Resistance | FAM58B    | 339521    | 37 | 1  | 200183175 | 200183175 | Missense_Mutation | SNP | T  | C  | 7   | 175 | c.484T>C       | c.(484-486)TGC>CGC   | p.C162R  |
| Pat_36 | Post-Resistance | TLR5      | 7100      | 37 | 1  | 223285653 | 223285653 | Missense_Mutation | SNP | C  | T  | 66  | 265 | c.721G>A       | c.(721-723)GAC>AAC   | p.D241N  |
| Pat_36 | Post-Resistance | BMS1      | 9790      | 37 | 10 | 43292130  | 43292130  | Missense_Mutation | SNP | G  | A  | 4   | 78  | c.1438G>A      | c.(1438-1440)GTT>ATT | p.V480I  |
| Pat_36 | Post-Resistance | CHAT      | 1103      | 37 | 10 | 50828610  | 50828610  | Missense_Mutation | SNP | G  | C  | 3   | 80  | c.649G>C       | c.(649-651)GCC>CCC   | p.A217P  |
| Pat_36 | Post-Resistance | FUT11     | 170384    | 37 | 10 | 75533357  | 75533357  | Nonsense_Mutation | SNP | G  | A  | 3   | 77  | c.1118G>A      | c.(1117-1119)TGG>TAG | p.W373*  |
| Pat_36 | Post-Resistance | CYP2C19   | 1557      | 37 | 10 | 96540270  | 96540270  | Missense_Mutation | SNP | C  | T  | 176 | 76  | c.496C>T       | c.(496-498)CCC>TCC   | p.P166S  |
| Pat_36 | Post-Resistance | PLEKHA1   | 59338     | 37 | 10 | 124159884 | 124159884 | Missense_Mutation | SNP | C  | T  | 72  | 40  | c.224C>T       | c.(223-225)CCA>CTA   | p.P75L   |
| Pat_36 | Post-Resistance | HMX3      | 340784    | 37 | 10 | 124896966 | 124896966 | Missense_Mutation | SNP | C  | A  | 4   | 46  | c.793C>A       | c.(793-795)CAC>AAC   | p.H265N  |
| Pat_36 | Post-Resistance | ADAM8     | 101       | 37 | 10 | 135085960 | 135085960 | Missense_Mutation | SNP | G  | A  | 4   | 70  | c.718C>T       | c.(718-720)CGG>TGG   | p.R240W  |

|        |                 |           |        |    |    |           |           |                   |     |   |   |     |     |               |                        |               |
|--------|-----------------|-----------|--------|----|----|-----------|-----------|-------------------|-----|---|---|-----|-----|---------------|------------------------|---------------|
| Pat_36 | Post-Resistance | OR4C3     | 256144 | 37 | 11 | 48347048  | 48347048  | Missense_Mutation | SNP | C | T | 14  | 153 | c.556C>T      | c.(556-558)CTC>TTC     | p.L186F       |
| Pat_36 | Post-Resistance | OR511     | 10798  | 37 | 11 | 55703323  | 55703323  | Missense_Mutation | SNP | G | A | 30  | 95  | c.554C>T      | c.(553-555)CCC>CTC     | p.P185L       |
| Pat_36 | Post-Resistance | TMEM132A  | 54972  | 37 | 11 | 60703442  | 60703442  | Missense_Mutation | SNP | G | A | 4   | 65  | c.2135G>A     | c.(2134-2136)GGT>GAT   | p.G712D       |
| Pat_36 | Post-Resistance | VEGFB     | 7423   | 37 | 11 | 64004908  | 64004908  | Missense_Mutation | SNP | C | T | 4   | 145 | c.427C>T      | c.(427-429)CAC>TAC     | p.H143Y       |
| Pat_36 | Post-Resistance | VEGFB     | 7423   | 37 | 11 | 64004995  | 64004995  | Missense_Mutation | SNP | C | T | 5   | 144 | c.514C>T      | c.(514-516)CCA>TCA     | p.P172S       |
| Pat_36 | Post-Resistance | SF3B2     | 10992  | 37 | 11 | 65828120  | 65828120  | Missense_Mutation | SNP | T | A | 99  | 94  | c.1697T>A     | c.(1696-1698)ATC>AAC   | p.I566N       |
| Pat_36 | Post-Resistance | LOC645332 | 645332 | 37 | 11 | 67564228  | 67564228  | Missense_Mutation | SNP | C | T | 4   | 91  | c.236G>A      | c.(235-237)AGC>AAC     | p.S79N        |
| Pat_36 | Post-Resistance | CNTN5     | 53942  | 37 | 11 | 99715584  | 99715584  | Missense_Mutation | SNP | A | G | 129 | 106 | c.278A>G      | c.(277-279)GAA>GGA     | p.E93G        |
| Pat_36 | Post-Resistance | TMPRSS13  | 84000  | 37 | 11 | 117789465 | 117789465 | Missense_Mutation | SNP | G | C | 6   | 120 | c.110C>G      | c.(109-111)GCC>GGC     | p.A37G        |
| Pat_36 | Post-Resistance | CBL       | 867    | 37 | 11 | 119149421 | 119149421 | Missense_Mutation | SNP | A | G | 8   | 125 | c.1429A>G     | c.(1429-1431)AAG>GAG   | p.K477E       |
| Pat_36 | Post-Resistance | CCDC15    | 80071  | 37 | 11 | 124857495 | 124857495 | Missense_Mutation | SNP | A | C | 13  | 504 | c.1373A>C     | c.(1372-1374)CAC>CCC   | p.H458P       |
| Pat_36 | Post-Resistance | CD163     | 9332   | 37 | 12 | 7636205   | 7636205   | Missense_Mutation | SNP | G | A | 69  | 121 | c.2846C>T     | c.(2845-2847)TCC>TTC   | p.S949F       |
| Pat_36 | Post-Resistance | PZP       | 5858   | 37 | 12 | 9346818   | 9346818   | Missense_Mutation | SNP | C | T | 45  | 90  | c.1109G>A     | c.(1108-1110)GGA>GAA   | p.G370E       |
| Pat_36 | Post-Resistance | PRB4      | 5545   | 37 | 12 | 11461753  | 11461753  | Missense_Mutation | SNP | C | T | 124 | 208 | c.164G>A      | c.(163-165)GGA>GAA     | p.G55E        |
| Pat_36 | Post-Resistance | LRP1      | 4035   | 37 | 12 | 57595327  | 57595327  | Missense_Mutation | SNP | C | T | 4   | 102 | c.10393C>T    | c.(10393-10395)CGG>TGC | p.R3465W      |
| Pat_36 | Post-Resistance | ATP2B1    | 490    | 37 | 12 | 90028875  | 90028875  | Missense_Mutation | SNP | C | T | 99  | 241 | c.560G>A      | c.(559-561)CGA>CAA     | p.R187Q       |
| Pat_36 | Post-Resistance | ANKS1B    | 56899  | 37 | 12 | 100200261 | 100200261 | Missense_Mutation | SNP | G | A | 93  | 129 | c.590C>T      | c.(589-591)CCA>CTA     | p.P197L       |
| Pat_36 | Post-Resistance | LOC220429 | 220429 | 37 | 13 | 50466615  | 50466615  | Missense_Mutation | SNP | G | C | 14  | 167 | c.1889G>C     | c.(1888-1890)TGT>TCT   | p.C630S       |
| Pat_36 | Post-Resistance | CLEC14A   | 161198 | 37 | 14 | 38724167  | 38724167  | Missense_Mutation | SNP | G | A | 3   | 74  | c.1061C>T     | c.(1060-1062)ACG>ATG   | p.T354M       |
| Pat_36 | Post-Resistance | LRFN5     | 145581 | 37 | 14 | 42360541  | 42360541  | Missense_Mutation | SNP | G | A | 172 | 260 | c.1474G>A     | c.(1474-1476)GAT>AAT   | p.D492N       |
| Pat_36 | Post-Resistance | PTGER2    | 5732   | 37 | 14 | 52781426  | 52781426  | Missense_Mutation | SNP | G | A | 3   | 32  | c.160G>A      | c.(160-162)GTG>ATG     | p.V54M        |
| Pat_36 | Post-Resistance | FBXO34    | 55030  | 37 | 14 | 55818498  | 55818498  | Missense_Mutation | SNP | G | C | 4   | 156 | c.1390G>C     | c.(1390-1392)GAC>CAC   | p.D464H       |
| Pat_36 | Post-Resistance | CATSPERB  | 79820  | 37 | 14 | 92136192  | 92136192  | Missense_Mutation | SNP | G | A | 48  | 73  | c.1253C>T     | c.(1252-1254)CCC>CTC   | p.P418L       |
| Pat_36 | Post-Resistance | ZNF839    | 55778  | 37 | 14 | 102808221 | 102808221 | Nonsense_Mutation | SNP | C | A | 4   | 49  | c.2141C>A     | c.(2140-2142)TCA>TAA   | p.S714*       |
| Pat_36 | Post-Resistance | JAG2      | 3714   | 37 | 14 | 105609345 | 105609345 | Missense_Mutation | SNP | C | T | 3   | 32  | c.3404G>A     | c.(3403-3405)CGC>CAC   | p.R1135H      |
| Pat_36 | Post-Resistance | CXADRP2   | 646243 | 37 | 15 | 22016334  | 22016334  | Missense_Mutation | SNP | C | T | 16  | 97  | c.383G>A      | c.(382-384)GGA>GAA     | p.G128E       |
| Pat_36 | Post-Resistance | OR4N4     | 283694 | 37 | 15 | 22382615  | 22382615  | Missense_Mutation | SNP | C | T | 97  | 470 | c.143C>T      | c.(142-144)ACC>ATC     | p.T48I        |
| Pat_36 | Post-Resistance | TGM5      | 9333   | 37 | 15 | 43533132  | 43533132  | Missense_Mutation | SNP | C | T | 65  | 82  | c.919G>A      | c.(919-921)GAT>AAT     | p.D307N       |
| Pat_36 | Post-Resistance | CYP19A1   | 1588   | 37 | 15 | 51503039  | 51503039  | Missense_Mutation | SNP | G | A | 93  | 169 | c.1478C>T     | c.(1477-1479)ACC>ATC   | p.T493I       |
| Pat_36 | Post-Resistance | DMXL2     | 23312  | 37 | 15 | 51795159  | 51795159  | Missense_Mutation | SNP | G | A | 91  | 107 | c.2836C>T     | c.(2836-2838)CCA>TCA   | p.P946S       |
| Pat_36 | Post-Resistance | VPS13C    | 54832  | 37 | 15 | 62254605  | 62254605  | Missense_Mutation | SNP | T | A | 321 | 442 | c.3568A>T     | c.(3568-3570)ATT>TTT   | p.I1190F      |
| Pat_36 | Post-Resistance | SMAD3     | 4088   | 37 | 15 | 67477073  | 67477073  | Missense_Mutation | SNP | G | A | 4   | 103 | c.880G>A      | c.(880-882)GTG>ATG     | p.V294M       |
| Pat_36 | Post-Resistance | SCAMP5    | 192683 | 37 | 15 | 75308954  | 75308954  | Missense_Mutation | SNP | G | A | 6   | 175 | c.157G>A      | c.(157-159)GTG>ATG     | p.V53M        |
| Pat_36 | Post-Resistance | NPIP      | 9284   | 37 | 16 | 15045671  | 15045671  | Nonsense_Mutation | SNP | C | A | 8   | 396 | c.842C>A      | c.(841-843)TCA>TAA     | p.S281*       |
| Pat_36 | Post-Resistance | FOXF1     | 2294   | 37 | 16 | 86546572  | 86546572  | Missense_Mutation | SNP | C | G | 3   | 78  | c.1021C>G     | c.(1021-1023)CGA>GGA   | p.R341G       |
| Pat_36 | Post-Resistance | NLRP1     | 22861  | 37 | 17 | 5424981   | 5424981   | Missense_Mutation | SNP | C | T | 34  | 26  | c.3646G>A     | c.(3646-3648)GGA>AGA   | p.G1216R      |
| Pat_36 | Post-Resistance | CYB5D1    | 124637 | 37 | 17 | 7762832   | 7762832   | Missense_Mutation | SNP | C | T | 4   | 150 | c.589C>T      | c.(589-591)CGG>TGG     | p.R197W       |
| Pat_36 | Post-Resistance | USP43     | 124739 | 37 | 17 | 9590195   | 9590195   | Missense_Mutation | SNP | G | A | 3   | 67  | c.1322G>A     | c.(1321-1323)CGC>CAC   | p.R441H       |
| Pat_36 | Post-Resistance | MYH2      | 4620   | 37 | 17 | 10436824  | 10436824  | Splice_Site       | SNP | A | T | 124 | 57  | c.2304_splice | c.e20+1                | p.K768_splice |
| Pat_36 | Post-Resistance | SLC4A1    | 6521   | 37 | 17 | 42328624  | 42328624  | Missense_Mutation | SNP | G | A | 3   | 53  | c.2558C>T     | c.(2557-2559)ACG>ATG   | p.T853M       |
| Pat_36 | Post-Resistance | SP2       | 6668   | 37 | 17 | 46000338  | 46000338  | Missense_Mutation | SNP | G | A | 6   | 202 | c.1070G>A     | c.(1069-1071)CGC>CAC   | p.R357H       |
| Pat_36 | Post-Resistance | SGCA      | 6442   | 37 | 17 | 48252775  | 48252775  | Missense_Mutation | SNP | C | T | 4   | 77  | c.1141C>T     | c.(1141-1143)CCC>TCC   | p.P381S       |
| Pat_36 | Post-Resistance | ANKFN1    | 162282 | 37 | 17 | 54534722  | 54534722  | Missense_Mutation | SNP | T | C | 69  | 269 | c.1421T>C     | c.(1420-1422)ATT>ACT   | p.I474T       |
| Pat_36 | Post-Resistance | TEX2      | 55852  | 37 | 17 | 62226409  | 62226409  | Missense_Mutation | SNP | T | G | 62  | 89  | c.3304A>C     | c.(3304-3306)ATA>CTA   | p.I1102L      |
| Pat_36 | Post-Resistance | CD300E    | 342510 | 37 | 17 | 72613304  | 72613304  | Missense_Mutation | SNP | G | A | 97  | 171 | c.341C>T      | c.(340-342)TCA>TTA     | p.S114L       |
| Pat_36 | Post-Resistance | C19orf28  | 126321 | 37 | 19 | 3551085   | 3551085   | Missense_Mutation | SNP | C | T | 3   | 68  | c.406G>A      | c.(406-408)GTG>ATG     | p.V136M       |
| Pat_36 | Post-Resistance | CD209     | 30835  | 37 | 19 | 7810766   | 7810766   | Missense_Mutation | SNP | C | T | 27  | 247 | c.386G>A      | c.(385-387)CGG>CAG     | p.R129Q       |



|        |                 |           |           |    |    |           |           |                   |     |    |    |     |     |                |                        |          |
|--------|-----------------|-----------|-----------|----|----|-----------|-----------|-------------------|-----|----|----|-----|-----|----------------|------------------------|----------|
| Pat_36 | Post-Resistance | ZNF560    | 147741    | 37 | 19 | 9578023   | 9578023   | Missense_Mutation | SNP | G  | A  | 53  | 99  | c.1600C>T      | c.(1600-1602)CAC>TAC   | p.H534Y  |
| Pat_36 | Post-Resistance | ZNF799    | 90576     | 37 | 19 | 12501446  | 12501446  | Missense_Mutation | SNP | T  | C  | 13  | 135 | c.1766A>G      | c.(1765-1767)GAA>GGA   | p.E589G  |
| Pat_36 | Post-Resistance | ANO8      | 57719     | 37 | 19 | 17438622  | 17438622  | Missense_Mutation | SNP | A  | G  | 6   | 150 | c.2294T>C      | c.(2293-2295)TTC>TCC   | p.F765S  |
| Pat_36 | Post-Resistance | ZNF93     | 81931     | 37 | 19 | 20045247  | 20045247  | Missense_Mutation | SNP | T  | A  | 14  | 422 | c.1483T>A      | c.(1483-1485)TCC>ACC   | p.S495T  |
| Pat_36 | Post-Resistance | ZNF737    | 100129842 | 37 | 19 | 20728254  | 20728254  | Missense_Mutation | SNP | C  | G  | 9   | 215 | c.755G>C       | c.(754-756)AGT>ACT     | p.S252T  |
| Pat_36 | Post-Resistance | ZNF208    | 7757      | 37 | 19 | 22155896  | 22155896  | Missense_Mutation | SNP | A  | C  | 19  | 281 | c.1640T>G      | c.(1639-1641)ATT>AGT   | p.I547S  |
| Pat_36 | Post-Resistance | ZNF257    | 113835    | 37 | 19 | 22271387  | 22271387  | Missense_Mutation | SNP | C  | T  | 41  | 65  | c.835C>T       | c.(835-837)CAT>TAT     | p.H279Y  |
| Pat_36 | Post-Resistance | ZNF676    | 163223    | 37 | 19 | 22363039  | 22363039  | Missense_Mutation | SNP | T  | C  | 7   | 279 | c.1480A>G      | c.(1480-1482)AAA>GAA   | p.K494E  |
| Pat_36 | Post-Resistance | ZNF492    | 57615     | 37 | 19 | 22847625  | 22847625  | Missense_Mutation | SNP | G  | T  | 10  | 222 | c.1154G>T      | c.(1153-1155)AGA>ATA   | p.R385I  |
| Pat_36 | Post-Resistance | ZNF99     | 7652      | 37 | 19 | 22941036  | 22941036  | Missense_Mutation | SNP | G  | A  | 48  | 132 | c.1402C>T      | c.(1402-1404)CAT>TAT   | p.H468Y  |
| Pat_36 | Post-Resistance | ZNF91     | 7644      | 37 | 19 | 23544808  | 23544808  | Missense_Mutation | SNP | C  | T  | 12  | 478 | c.973G>A       | c.(973-975)GAA>AAA     | p.E325K  |
| Pat_36 | Post-Resistance | ZNF780A   | 284323    | 37 | 19 | 40580552  | 40580552  | Missense_Mutation | SNP | T  | G  | 27  | 382 | c.1797A>C      | c.(1795-1797)CAA>CAC   | p.Q599H  |
| Pat_36 | Post-Resistance | BCL3      | 602       | 37 | 19 | 45259535  | 45259535  | Missense_Mutation | SNP | C  | T  | 4   | 96  | c.457C>T       | c.(457-459)CGG>TGG     | p.R153W  |
| Pat_36 | Post-Resistance | ZNF160    | 90338     | 37 | 19 | 53572562  | 53572562  | Missense_Mutation | SNP | G  | A  | 131 | 264 | c.1225C>T      | c.(1225-1227)CGT>TGT   | p.R409C  |
| Pat_36 | Post-Resistance | ZNF845    | 91664     | 37 | 19 | 53856702  | 53856702  | Missense_Mutation | SNP | G  | A  | 8   | 365 | c.2774G>A      | c.(2773-2775)CGT>CAT   | p.R925H  |
| Pat_36 | Post-Resistance | ZNF845    | 91664     | 37 | 19 | 53856761  | 53856761  | Missense_Mutation | SNP | T  | C  | 8   | 220 | c.2833T>C      | c.(2833-2835)TGT>CGT   | p.C945R  |
| Pat_36 | Post-Resistance | ZNF813    | 126017    | 37 | 19 | 53995130  | 53995130  | Missense_Mutation | SNP | T  | G  | 9   | 165 | c.1644T>G      | c.(1642-1644)GAT>GAG   | p.D548E  |
| Pat_36 | Post-Resistance | LILRA1    | 11024     | 37 | 19 | 55106681  | 55106681  | Missense_Mutation | SNP | G  | A  | 89  | 177 | c.475G>A       | c.(475-477)GAA>AAA     | p.E159K  |
| Pat_36 | Post-Resistance | AURKC     | 6795      | 37 | 19 | 57746762  | 57746763  | Missense_Mutation | DNP | CC | TT | 37  | 101 | c.907_908CC>TT | c.(907-909)CCC>TTC     | p.P303F  |
| Pat_36 | Post-Resistance | ZNF814    | 730051    | 37 | 19 | 58384315  | 58384315  | Missense_Mutation | SNP | G  | A  | 5   | 168 | c.2443C>T      | c.(2443-2445)CTC>TTC   | p.L815F  |
| Pat_36 | Post-Resistance | BIRC6     | 57448     | 37 | 2  | 32774431  | 32774431  | Nonsense_Mutation | SNP | C  | T  | 102 | 116 | c.13027C>T     | c.(13027-13029)CAG>TAG | p.Q4343* |
| Pat_36 | Post-Resistance | ARHGAP25  | 9938      | 37 | 2  | 69034596  | 69034596  | Missense_Mutation | SNP | C  | T  | 5   | 145 | c.655C>T       | c.(655-657)CGG>TGG     | p.R219W  |
| Pat_36 | Post-Resistance | XIRP2     | 129446    | 37 | 2  | 168104981 | 168104981 | Missense_Mutation | SNP | C  | T  | 61  | 146 | c.7079C>T      | c.(7078-7080)TCA>TTA   | p.S2360L |
| Pat_36 | Post-Resistance | SF3B1     | 23451     | 37 | 2  | 198288653 | 198288653 | Missense_Mutation | SNP | A  | T  | 57  | 70  | c.74T>A        | c.(73-75)CTT>CAT       | p.L25H   |
| Pat_36 | Post-Resistance | SPAG16    | 79582     | 37 | 2  | 214878736 | 214878736 | Missense_Mutation | SNP | C  | T  | 109 | 182 | c.1462C>T      | c.(1462-1464)CCT>TCT   | p.P488S  |
| Pat_36 | Post-Resistance | PSMD1     | 5707      | 37 | 2  | 231945017 | 231945017 | Missense_Mutation | SNP | G  | A  | 4   | 102 | c.1402G>A      | c.(1402-1404)GCC>ACC   | p.A468T  |
| Pat_36 | Post-Resistance | DGKD      | 8527      | 37 | 2  | 234350612 | 234350612 | Missense_Mutation | SNP | G  | A  | 5   | 117 | c.1165G>A      | c.(1165-1167)GAA>AAA   | p.E389K  |
| Pat_36 | Post-Resistance | SUN5      | 140732    | 37 | 20 | 31585473  | 31585473  | Missense_Mutation | SNP | G  | A  | 26  | 63  | c.361C>T       | c.(361-363)CAC>TAC     | p.H121Y  |
| Pat_36 | Post-Resistance | DDX27     | 55661     | 37 | 20 | 47843000  | 47843000  | Missense_Mutation | SNP | C  | T  | 22  | 116 | c.727C>T       | c.(727-729)CCG>TCG     | p.P243S  |
| Pat_36 | Post-Resistance | PMEPA1    | 56937     | 37 | 20 | 56234616  | 56234616  | Missense_Mutation | SNP | C  | T  | 15  | 63  | c.247G>A       | c.(247-249)GAA>AAA     | p.E83K   |
| Pat_36 | Post-Resistance | GNAS      | 2778      | 37 | 20 | 57430103  | 57430103  | Missense_Mutation | SNP | C  | T  | 20  | 63  | c.1783C>T      | c.(1783-1785)CGG>TGG   | p.R595W  |
| Pat_36 | Post-Resistance | BAGE2     | 85319     | 37 | 21 | 11058316  | 11058316  | Missense_Mutation | SNP | G  | T  | 29  | 512 | c.124C>A       | c.(124-126)CAT>AAT     | p.H42N   |
| Pat_36 | Post-Resistance | BAGE2     | 85319     | 37 | 21 | 11058322  | 11058322  | Missense_Mutation | SNP | C  | T  | 19  | 456 | c.118G>A       | c.(118-120)GAT>AAT     | p.D40N   |
| Pat_36 | Post-Resistance | KRTAP10-8 | 386681    | 37 | 21 | 46032751  | 46032751  | Missense_Mutation | SNP | G  | C  | 3   | 81  | c.734G>C       | c.(733-735)TGC>TCC     | p.C245S  |
| Pat_36 | Post-Resistance | LSS       | 4047      | 37 | 21 | 47614507  | 47614507  | Nonsense_Mutation | SNP | C  | T  | 3   | 44  | c.1886G>A      | c.(1885-1887)TGG>TAG   | p.W629*  |
| Pat_36 | Post-Resistance | FAM83F    | 113828    | 37 | 22 | 40415904  | 40415904  | Missense_Mutation | SNP | G  | T  | 42  | 47  | c.671G>T       | c.(670-672)CGG>CTC     | p.R224L  |
| Pat_36 | Post-Resistance | CCR3      | 1232      | 37 | 3  | 46306946  | 46306946  | Missense_Mutation | SNP | G  | T  | 9   | 518 | c.297G>T       | c.(295-297)TGG>TGT     | p.W99C   |
| Pat_36 | Post-Resistance | TLR9      | 54106     | 37 | 3  | 52256731  | 52256731  | Missense_Mutation | SNP | T  | C  | 3   | 77  | c.1601A>G      | c.(1600-1602)GAC>GGC   | p.D534G  |
| Pat_36 | Post-Resistance | GLT8D1    | 55830     | 37 | 3  | 52729519  | 52729519  | Missense_Mutation | SNP | C  | T  | 94  | 115 | c.730G>A       | c.(730-732)GGA>AGA     | p.G244R  |
| Pat_36 | Post-Resistance | IGSF10    | 285313    | 37 | 3  | 151163624 | 151163624 | Missense_Mutation | SNP | G  | A  | 121 | 242 | c.4145C>T      | c.(4144-4146)GCC>GTC   | p.A1382V |
| Pat_36 | Post-Resistance | SLITRK3   | 22865     | 37 | 3  | 164907675 | 164907675 | Missense_Mutation | SNP | G  | A  | 48  | 106 | c.944C>T       | c.(943-945)TCC>TTC     | p.S315F  |
| Pat_36 | Post-Resistance | TNFSF10   | 8743      | 37 | 3  | 172224614 | 172224614 | Missense_Mutation | SNP | C  | A  | 5   | 159 | c.514G>T       | c.(514-516)GGT>TGT     | p.G172C  |
| Pat_36 | Post-Resistance | SPATA16   | 83893     | 37 | 3  | 172643172 | 172643172 | Missense_Mutation | SNP | C  | T  | 42  | 47  | c.1192G>A      | c.(1192-1194)GAA>AAA   | p.E398K  |
| Pat_36 | Post-Resistance | EIF4G1    | 1981      | 37 | 3  | 184045020 | 184045020 | Missense_Mutation | SNP | G  | C  | 3   | 52  | c.3445G>C      | c.(3445-3447)GAA>CAA   | p.E1149Q |
| Pat_36 | Post-Resistance | FRYL      | 285527    | 37 | 4  | 48566058  | 48566058  | Missense_Mutation | SNP | T  | C  | 60  | 89  | c.3503A>G      | c.(3502-3504)AAC>AGC   | p.N1168S |
| Pat_36 | Post-Resistance | TECRL     | 253017    | 37 | 4  | 65180398  | 65180398  | Missense_Mutation | SNP | C  | A  | 7   | 180 | c.519G>T       | c.(517-519)GAG>GAT     | p.E173D  |
| Pat_36 | Post-Resistance | ABCG2     | 9429      | 37 | 4  | 89042886  | 89042886  | Missense_Mutation | SNP | C  | T  | 52  | 93  | c.590G>A       | c.(589-591)GGA>GAA     | p.G197E  |

|        |                 |           |        |    |   |           |           |                   |     |    |    |     |     |                 |                        |               |
|--------|-----------------|-----------|--------|----|---|-----------|-----------|-------------------|-----|----|----|-----|-----|-----------------|------------------------|---------------|
| Pat_36 | Post-Resistance | TRPC3     | 7222   | 37 | 4 | 122846307 | 122846307 | Missense_Mutation | SNP | C  | T  | 74  | 87  | c.1042G>A       | c.(1042-1044)GAT>AAT   | p.D348N       |
| Pat_36 | Post-Resistance | TLL1      | 7092   | 37 | 4 | 166914016 | 166914016 | Missense_Mutation | SNP | G  | A  | 33  | 60  | c.341G>A        | c.(340-342)AGG>AAG     | p.R114K       |
| Pat_36 | Post-Resistance | CTNND2    | 1501   | 37 | 5 | 11022885  | 11022885  | Missense_Mutation | SNP | C  | T  | 38  | 39  | c.2995G>A       | c.(2995-2997)GAT>AAT   | p.D999N       |
| Pat_36 | Post-Resistance | EGFLAM    | 133584 | 37 | 5 | 38350642  | 38350642  | Missense_Mutation | SNP | C  | T  | 115 | 170 | c.331C>T        | c.(331-333)CGT>TGT     | p.R111C       |
| Pat_36 | Post-Resistance | EGFLAM    | 133584 | 37 | 5 | 38418330  | 38418330  | Missense_Mutation | SNP | G  | A  | 12  | 41  | c.1657G>A       | c.(1657-1659)GGA>AGA   | p.G553R       |
| Pat_36 | Post-Resistance | SLIT3     | 6586   | 37 | 5 | 168176636 | 168176636 | Missense_Mutation | SNP | G  | T  | 44  | 60  | c.1978C>A       | c.(1978-1980)CTC>ATC   | p.L660I       |
| Pat_36 | Post-Resistance | PPARD     | 5467   | 37 | 6 | 35378976  | 35378976  | Missense_Mutation | SNP | C  | T  | 52  | 185 | c.112C>T        | c.(112-114)CCT>TCT     | p.P38S        |
| Pat_36 | Post-Resistance | SNX9      | 51429  | 37 | 6 | 158342574 | 158342574 | Missense_Mutation | SNP | G  | C  | 3   | 87  | c.961G>C        | c.(961-963)GAG>CAG     | p.E321Q       |
| Pat_36 | Post-Resistance | HOXA2     | 3199   | 37 | 7 | 27142080  | 27142080  | Missense_Mutation | SNP | T  | A  | 10  | 389 | c.40A>T         | c.(40-42)AGC>TGC       | p.S14C        |
| Pat_36 | Post-Resistance | CRHR2     | 1395   | 37 | 7 | 30693101  | 30693101  | Missense_Mutation | SNP | C  | T  | 178 | 101 | c.1211G>A       | c.(1210-1212)AGC>AAC   | p.S404N       |
| Pat_36 | Post-Resistance | CCDC129   | 223075 | 37 | 7 | 31614251  | 31614251  | Missense_Mutation | SNP | C  | T  | 51  | 138 | c.493C>T        | c.(493-495)CCA>TCA     | p.P165S       |
| Pat_36 | Post-Resistance | ZNF92     | 168374 | 37 | 7 | 64863839  | 64863839  | Missense_Mutation | SNP | C  | A  | 13  | 558 | c.812C>A        | c.(811-813)ACC>AAC     | p.T271N       |
| Pat_36 | Post-Resistance | AUTS2     | 26053  | 37 | 7 | 70239084  | 70239084  | Missense_Mutation | SNP | G  | A  | 7   | 225 | c.1901G>A       | c.(1900-1902)AGG>AAG   | p.R634K       |
| Pat_36 | Post-Resistance | LAMB1     | 3912   | 37 | 7 | 107626494 | 107626494 | Missense_Mutation | SNP | C  | T  | 19  | 66  | c.649G>A        | c.(649-651)GAA>AAA     | p.E217K       |
| Pat_36 | Post-Resistance | NUP205    | 23165  | 37 | 7 | 135322742 | 135322742 | Missense_Mutation | SNP | C  | G  | 64  | 260 | c.5200C>G       | c.(5200-5202)CAA>GAA   | p.Q1734E      |
| Pat_36 | Post-Resistance | DENND2A   | 27147  | 37 | 7 | 140221703 | 140221703 | Missense_Mutation | SNP | A  | G  | 66  | 33  | c.2863T>C       | c.(2863-2865)TTT>CTT   | p.F955L       |
| Pat_36 | Post-Resistance | BRAF      | 673    | 37 | 7 | 140453136 | 140453137 | Missense_Mutation | DNP | AC | TT | 141 | 134 | c.1798_1799GT>A | c.(1798-1800)GTG>AAG   | p.V600K       |
| Pat_36 | Post-Resistance | TRY6      | 154754 | 37 | 7 | 142481805 | 142481805 | Missense_Mutation | SNP | G  | A  | 186 | 28  | c.484G>A        | c.(484-486)GAC>AAC     | p.D162N       |
| Pat_36 | Post-Resistance | AMAC1L2   | 83650  | 37 | 8 | 11188846  | 11188847  | Missense_Mutation | DNP | CC | TA | 121 | 303 | c.231_232CC>TA  | c.(229-234)TGCCCT>TGTA | p.L78I        |
| Pat_36 | Post-Resistance | OPRK1     | 4986   | 37 | 8 | 54147645  | 54147645  | Missense_Mutation | SNP | T  | C  | 79  | 182 | c.284A>G        | c.(283-285)AAC>AGC     | p.N95S        |
| Pat_36 | Post-Resistance | DCAF4L2   | 138009 | 37 | 8 | 88885853  | 88885853  | Missense_Mutation | SNP | G  | A  | 149 | 91  | c.347C>T        | c.(346-348)CCG>CTG     | p.P116L       |
| Pat_36 | Post-Resistance | TAF2      | 6873   | 37 | 8 | 120800684 | 120800684 | Missense_Mutation | SNP | G  | A  | 44  | 133 | c.1687C>T       | c.(1687-1689)CCA>TCA   | p.P563S       |
| Pat_36 | Post-Resistance | PLEC      | 5339   | 37 | 8 | 144998339 | 144998339 | Missense_Mutation | SNP | G  | A  | 3   | 59  | c.6169C>T       | c.(6169-6171)CGG>TGG   | p.R2057W      |
| Pat_36 | Post-Resistance | ANKRD20A3 | 441425 | 37 | 9 | 67938633  | 67938633  | Missense_Mutation | SNP | G  | T  | 5   | 111 | c.768G>T        | c.(766-768)AAG>AAT     | p.K256N       |
| Pat_36 | Post-Resistance | TLE4      | 7091   | 37 | 9 | 82333807  | 82333807  | Missense_Mutation | SNP | C  | T  | 118 | 54  | c.1586C>T       | c.(1585-1587)ACG>ATG   | p.T529M       |
| Pat_36 | Post-Resistance | KIAA1958  | 158405 | 37 | 9 | 115422326 | 115422326 | Missense_Mutation | SNP | G  | T  | 4   | 80  | c.2128G>T       | c.(2128-2130)GGC>TGC   | p.G710C       |
| Pat_36 | Post-Resistance | GOLGA1    | 2800   | 37 | 9 | 127651544 | 127651544 | Missense_Mutation | SNP | C  | T  | 3   | 28  | c.1639G>A       | c.(1639-1641)GCC>ACC   | p.A547T       |
| Pat_36 | Post-Resistance | TOR1B     | 27348  | 37 | 9 | 132569576 | 132569576 | Missense_Mutation | SNP | C  | T  | 4   | 170 | c.575C>T        | c.(574-576)CCG>CTG     | p.P192L       |
| Pat_36 | Post-Resistance | COL5A1    | 1289   | 37 | 9 | 137676874 | 137676874 | Missense_Mutation | SNP | C  | T  | 33  | 38  | c.2524C>T       | c.(2524-2526)CCT>TCT   | p.P842S       |
| Pat_36 | Post-Resistance | MAMDC4    | 158056 | 37 | 9 | 139755051 | 139755051 | Missense_Mutation | SNP | C  | T  | 3   | 77  | c.3410C>T       | c.(3409-3411)CCG>CTG   | p.P1137L      |
| Pat_36 | Post-Resistance | FAM47C    | 442444 | 37 | X | 37027190  | 37027190  | Missense_Mutation | SNP | T  | C  | 7   | 237 | c.707T>C        | c.(706-708)CTG>CCG     | p.L236P       |
| Pat_36 | Post-Resistance | FAM47C    | 442444 | 37 | X | 37028699  | 37028699  | Missense_Mutation | SNP | G  | A  | 5   | 162 | c.2216G>A       | c.(2215-2217)CGC>CAC   | p.R739H       |
| Pat_36 | Post-Resistance | SRPX      | 8406   | 37 | X | 38024056  | 38024056  | Missense_Mutation | SNP | C  | T  | 38  | 78  | c.619G>A        | c.(619-621)GAA>AAA     | p.E207K       |
| Pat_36 | Post-Resistance | ACRC      | 93953  | 37 | X | 70823920  | 70823920  | Missense_Mutation | SNP | C  | T  | 8   | 251 | c.793C>T        | c.(793-795)CCC>TCC     | p.P265S       |
| Pat_36 | Post-Resistance | CITED1    | 4435   | 37 | X | 71521743  | 71521743  | Missense_Mutation | SNP | G  | A  | 56  | 191 | c.412C>T        | c.(412-414)CCT>TCT     | p.P138S       |
| Pat_36 | Post-Resistance | PHKA1     | 5255   | 37 | X | 71870239  | 71870239  | Splice_Site       | SNP | C  | T  | 48  | 39  | c.1324_splice   | c.e13+1                | p.V442_splice |
| Pat_36 | Post-Resistance | AIFM1     | 9131   | 37 | X | 129290539 | 129290539 | Nonsense_Mutation | SNP | G  | A  | 434 | 335 | c.145C>T        | c.(145-147)CAG>TAG     | p.Q49*        |
| Pat_36 | Post-Resistance | MAGEC1    | 9947   | 37 | X | 140994923 | 140994923 | Missense_Mutation | SNP | A  | T  | 14  | 824 | c.1733A>T       | c.(1732-1734)CAC>CTC   | p.H578L       |
| Pat_36 | Post-Resistance | MAGEA5    | 4104   | 37 | X | 151283715 | 151283715 | Missense_Mutation | SNP | C  | T  | 51  | 158 | c.298G>A        | c.(298-300)GAC>AAC     | p.D100N       |
| Pat_37 | Post-Resistance | CCDC27    | 148870 | 37 | 1 | 3677872   | 3677872   | Missense_Mutation | SNP | C  | A  | 3   | 62  | c.739C>A        | c.(739-741)CAG>AAG     | p.Q247K       |
| Pat_37 | Post-Resistance | CASZ1     | 54897  | 37 | 1 | 10720457  | 10720458  | Missense_Mutation | DNP | GG | AA | 27  | 20  | c.641_642CC>TT  | c.(640-642)ACC>ATT     | p.T214I       |
| Pat_37 | Post-Resistance | VPS13D    | 55187  | 37 | 1 | 12336563  | 12336563  | Missense_Mutation | SNP | G  | A  | 4   | 235 | c.2918G>A       | c.(2917-2919)CGG>CAG   | p.R973Q       |
| Pat_37 | Post-Resistance | MST1P9    | 11223  | 37 | 1 | 17085609  | 17085609  | Missense_Mutation | SNP | T  | C  | 3   | 151 | c.1112A>G       | c.(1111-1113)AAG>AGG   | p.K371R       |
| Pat_37 | Post-Resistance | PADI3     | 51702  | 37 | 1 | 17597609  | 17597610  | Missense_Mutation | DNP | GG | TA | 39  | 42  | c.983_984GG>TA  | c.(982-984)AGG>ATA     | p.R328I       |
| Pat_37 | Post-Resistance | KIF17     | 57576  | 37 | 1 | 21039967  | 21039967  | Missense_Mutation | SNP | C  | A  | 4   | 114 | c.460G>T        | c.(460-462)GAC>TAC     | p.D154Y       |
| Pat_37 | Post-Resistance | SH2D5     | 400745 | 37 | 1 | 21049335  | 21049335  | Missense_Mutation | SNP | C  | T  | 17  | 14  | c.730G>A        | c.(730-732)GGC>AGC     | p.G244S       |
| Pat_37 | Post-Resistance | SNRNP40   | 9410   | 37 | 1 | 31740760  | 31740760  | Missense_Mutation | SNP | C  | A  | 5   | 219 | c.878G>T        | c.(877-879)TGG>TTG     | p.W293L       |

|        |                 |           |        |    |    |           |           |                   |     |   |   |     |     |            |                        |          |
|--------|-----------------|-----------|--------|----|----|-----------|-----------|-------------------|-----|---|---|-----|-----|------------|------------------------|----------|
| Pat_37 | Post-Resistance | HIVEP3    | 59269  | 37 | 1  | 42049181  | 42049181  | Missense_Mutation | SNP | C | T | 41  | 53  | c.1288G>A  | c.(1288-1290)GCC>ACC   | p.A430T  |
| Pat_37 | Post-Resistance | KDM4A     | 9682   | 37 | 1  | 44137364  | 44137364  | Missense_Mutation | SNP | C | T | 4   | 56  | c.1552C>T  | c.(1552-1554)CGG>TGG   | p.R518W  |
| Pat_37 | Post-Resistance | PLK3      | 1263   | 37 | 1  | 45267582  | 45267582  | Missense_Mutation | SNP | G | A | 39  | 32  | c.631G>A   | c.(631-633)GAG>AAG     | p.E211K  |
| Pat_37 | Post-Resistance | EIF2B3    | 8891   | 37 | 1  | 45345603  | 45345603  | Missense_Mutation | SNP | C | T | 54  | 39  | c.862G>A   | c.(862-864)GAC>AAC     | p.D288N  |
| Pat_37 | Post-Resistance | ABCA4     | 24     | 37 | 1  | 94473802  | 94473802  | Missense_Mutation | SNP | G | A | 60  | 41  | c.5887C>T  | c.(5887-5889)CGC>TGC   | p.R1963C |
| Pat_37 | Post-Resistance | TBX15     | 6913   | 37 | 1  | 119456748 | 119456748 | Missense_Mutation | SNP | C | A | 4   | 193 | c.598G>T   | c.(598-600)GGG>TGG     | p.G200W  |
| Pat_37 | Post-Resistance | TBX15     | 6913   | 37 | 1  | 119466193 | 119466193 | Nonsense_Mutation | SNP | G | A | 154 | 166 | c.409C>T   | c.(409-411)CGA>TGA     | p.R137*  |
| Pat_37 | Post-Resistance | RBM8A     | 9939   | 37 | 1  | 145508251 | 145508251 | Missense_Mutation | SNP | G | A | 123 | 280 | c.172G>A   | c.(172-174)GAG>AAG     | p.E58K   |
| Pat_37 | Post-Resistance | NBPF16    | 728936 | 37 | 1  | 148754864 | 148754864 | Missense_Mutation | SNP | A | G | 3   | 118 | c.1520A>G  | c.(1519-1521)GAG>GGG   | p.E507G  |
| Pat_37 | Post-Resistance | SPTA1     | 6708   | 37 | 1  | 158590040 | 158590040 | Missense_Mutation | SNP | C | T | 42  | 82  | c.6337G>A  | c.(6337-6339)GGT>AGT   | p.G2113S |
| Pat_37 | Post-Resistance | SPTA1     | 6708   | 37 | 1  | 158592934 | 158592934 | Missense_Mutation | SNP | C | T | 328 | 545 | c.5959G>A  | c.(5959-5961)GAG>AAG   | p.E1987K |
| Pat_37 | Post-Resistance | NCSTN     | 23385  | 37 | 1  | 160325741 | 160325741 | Missense_Mutation | SNP | C | T | 44  | 104 | c.1544C>T  | c.(1543-1545)CCC>CTC   | p.P515L  |
| Pat_37 | Post-Resistance | ADCY10    | 55811  | 37 | 1  | 167823624 | 167823624 | Missense_Mutation | SNP | C | T | 85  | 202 | c.2275G>A  | c.(2275-2277)GAA>AAA   | p.E759K  |
| Pat_37 | Post-Resistance | SELE      | 6401   | 37 | 1  | 169701822 | 169701822 | Missense_Mutation | SNP | C | T | 15  | 44  | c.355G>A   | c.(355-357)GAA>AAA     | p.E119K  |
| Pat_37 | Post-Resistance | DNM3      | 26052  | 37 | 1  | 172002338 | 172002338 | Missense_Mutation | SNP | C | T | 18  | 23  | c.782C>T   | c.(781-783)TCC>TTC     | p.S261F  |
| Pat_37 | Post-Resistance | PIGC      | 5279   | 37 | 1  | 172411623 | 172411623 | Missense_Mutation | SNP | T | C | 254 | 337 | c.140A>G   | c.(139-141)CAA>CGA     | p.Q47R   |
| Pat_37 | Post-Resistance | CACNA1E   | 777    | 37 | 1  | 181705551 | 181705551 | Missense_Mutation | SNP | A | G | 34  | 42  | c.3403A>G  | c.(3403-3405)ATC>GTC   | p.I1135V |
| Pat_37 | Post-Resistance | GPR25     | 2848   | 37 | 1  | 200842308 | 200842308 | Missense_Mutation | SNP | C | T | 14  | 22  | c.143C>T   | c.(142-144)GCG>GTG     | p.A48V   |
| Pat_37 | Post-Resistance | DTL       | 51514  | 37 | 1  | 212236238 | 212236238 | Missense_Mutation | SNP | C | T | 5   | 313 | c.473C>T   | c.(472-474)ACG>ATG     | p.T158M  |
| Pat_37 | Post-Resistance | HHIPL2    | 79802  | 37 | 1  | 222717501 | 222717501 | Missense_Mutation | SNP | C | T | 121 | 293 | c.352G>A   | c.(352-354)GAC>AAC     | p.D118N  |
| Pat_37 | Post-Resistance | SUSD4     | 55061  | 37 | 1  | 223396657 | 223396657 | Missense_Mutation | SNP | G | A | 53  | 135 | c.1378C>T  | c.(1378-1380)CCT>TCT   | p.P460S  |
| Pat_37 | Post-Resistance | OBSCN     | 84033  | 37 | 1  | 228524810 | 228524810 | Missense_Mutation | SNP | C | T | 4   | 164 | c.16643C>T | c.(16642-16644)TCG>TTC | p.S5548L |
| Pat_37 | Post-Resistance | TAF5L     | 27097  | 37 | 1  | 229745874 | 229745874 | Nonsense_Mutation | SNP | G | A | 4   | 239 | c.226C>T   | c.(226-228)CGA>TGA     | p.R76*   |
| Pat_37 | Post-Resistance | ITI5      | 80760  | 37 | 10 | 7679199   | 7679199   | Missense_Mutation | SNP | C | T | 35  | 688 | c.644G>A   | c.(643-645)CGC>CAC     | p.R215H  |
| Pat_37 | Post-Resistance | PLXDC2    | 84898  | 37 | 10 | 20453449  | 20453449  | Missense_Mutation | SNP | G | A | 146 | 286 | c.836G>A   | c.(835-837)GGA>GAA     | p.G279E  |
| Pat_37 | Post-Resistance | MYO3A     | 53904  | 37 | 10 | 26305806  | 26305806  | Missense_Mutation | SNP | C | T | 124 | 258 | c.566C>T   | c.(565-567)CCG>CTG     | p.P189L  |
| Pat_37 | Post-Resistance | MASTL     | 84930  | 37 | 10 | 27459701  | 27459701  | Missense_Mutation | SNP | G | A | 12  | 37  | c.1813G>A  | c.(1813-1815)GAA>AAA   | p.E605K  |
| Pat_37 | Post-Resistance | MPP7      | 143098 | 37 | 10 | 28438925  | 28438925  | Missense_Mutation | SNP | C | T | 72  | 90  | c.220G>A   | c.(220-222)GCC>ACC     | p.A74T   |
| Pat_37 | Post-Resistance | ZNF33B    | 7582   | 37 | 10 | 43089957  | 43089957  | Missense_Mutation | SNP | C | T | 62  | 195 | c.441G>A   | c.(439-441)ATG>ATA     | p.M147I  |
| Pat_37 | Post-Resistance | PTEN      | 5728   | 37 | 10 | 89711993  | 89711993  | Missense_Mutation | SNP | C | T | 11  | 536 | c.611C>T   | c.(610-612)CCA>CTA     | p.P204L  |
| Pat_37 | Post-Resistance | CRTAC1    | 55118  | 37 | 10 | 99696061  | 99696061  | Missense_Mutation | SNP | G | A | 4   | 83  | c.287C>T   | c.(286-288)GCG>GTG     | p.A96V   |
| Pat_37 | Post-Resistance | C10orf81  | 79949  | 37 | 10 | 115535549 | 115535549 | Missense_Mutation | SNP | G | A | 107 | 85  | c.955G>A   | c.(955-957)GAG>AAG     | p.E319K  |
| Pat_37 | Post-Resistance | EMX2      | 2018   | 37 | 10 | 119305304 | 119305304 | Missense_Mutation | SNP | A | G | 3   | 48  | c.568A>G   | c.(568-570)AGC>GGC     | p.S190G  |
| Pat_37 | Post-Resistance | LOC653544 | 653544 | 37 | 10 | 135491009 | 135491009 | Missense_Mutation | SNP | G | T | 5   | 66  | c.620G>T   | c.(619-621)AGG>ATG     | p.R207M  |
| Pat_37 | Post-Resistance | PHRF1     | 57661  | 37 | 11 | 598398    | 598398    | Missense_Mutation | SNP | C | T | 20  | 25  | c.920C>T   | c.(919-921)TCC>TTC     | p.S307F  |
| Pat_37 | Post-Resistance | PNPLA2    | 57104  | 37 | 11 | 824073    | 824073    | Missense_Mutation | SNP | C | T | 3   | 57  | c.995C>T   | c.(994-996)ACG>ATG     | p.T332M  |
| Pat_37 | Post-Resistance | TRPM5     | 29850  | 37 | 11 | 2434797   | 2434797   | Missense_Mutation | SNP | A | C | 16  | 31  | c.1912T>G  | c.(1912-1914)TGG>GGG   | p.W638G  |
| Pat_37 | Post-Resistance | OR51G2    | 81282  | 37 | 11 | 4936880   | 4936880   | Missense_Mutation | SNP | G | A | 29  | 53  | c.14C>T    | c.(13-15)TCC>TTC       | p.S5F    |
| Pat_37 | Post-Resistance | TUB       | 7275   | 37 | 11 | 8122119   | 8122119   | Missense_Mutation | SNP | C | T | 41  | 90  | c.1186C>T  | c.(1186-1188)CAT>TAT   | p.H396Y  |
| Pat_37 | Post-Resistance | OR8J1     | 219477 | 37 | 11 | 56127862  | 56127862  | Missense_Mutation | SNP | C | T | 172 | 277 | c.140C>T   | c.(139-141)ACC>ATC     | p.T47I   |
| Pat_37 | Post-Resistance | ZP1       | 22917  | 37 | 11 | 60638702  | 60638702  | Nonsense_Mutation | SNP | C | T | 39  | 74  | c.1027C>T  | c.(1027-1029)CAG>TAG   | p.Q343*  |
| Pat_37 | Post-Resistance | B3GAT3    | 26229  | 37 | 11 | 62384611  | 62384611  | Missense_Mutation | SNP | G | A | 49  | 88  | c.466C>T   | c.(466-468)CGT>TGT     | p.R156C  |
| Pat_37 | Post-Resistance | PCNXL3    | 399909 | 37 | 11 | 65401705  | 65401705  | Missense_Mutation | SNP | G | A | 19  | 23  | c.4579G>A  | c.(4579-4581)GAT>AAT   | p.D1527N |
| Pat_37 | Post-Resistance | SAPS3     | 55291  | 37 | 11 | 68369378  | 68369378  | Missense_Mutation | SNP | G | A | 165 | 343 | c.2240G>A  | c.(2239-2241)AGC>AAC   | p.S747N  |
| Pat_37 | Post-Resistance | SHANK2    | 22941  | 37 | 11 | 70319483  | 70319483  | Missense_Mutation | SNP | G | A | 26  | 70  | c.5041C>T  | c.(5041-5043)CGC>TGC   | p.R1681C |
| Pat_37 | Post-Resistance | SYTL2     | 54843  | 37 | 11 | 85447625  | 85447625  | Missense_Mutation | SNP | G | A | 93  | 135 | c.502C>T   | c.(502-504)CCA>TCA     | p.P168S  |
| Pat_37 | Post-Resistance | DYNC2H1   | 79659  | 37 | 11 | 103025334 | 103025334 | Missense_Mutation | SNP | C | T | 22  | 55  | c.3457C>T  | c.(3457-3459)CGG>TGG   | p.R1153W |

|        |                 |           |        |    |    |           |           |                   |     |    |    |     |     |                |                      |              |
|--------|-----------------|-----------|--------|----|----|-----------|-----------|-------------------|-----|----|----|-----|-----|----------------|----------------------|--------------|
| Pat_37 | Post-Resistance | FXYD2     | 486    | 37 | 11 | 117691411 | 117691412 | Splice_Site       | DNP | CC | TT | 52  | 53  | c.177_splice   | c.e5-1               | p.R59_splice |
| Pat_37 | Post-Resistance | SORL1     | 6653   | 37 | 11 | 121495820 | 121495820 | Missense_Mutation | SNP | T  | G  | 152 | 111 | c.6198T>G      | c.(6196-6198)AGT>AGG | p.S2066R     |
| Pat_37 | Post-Resistance | CDON      | 50937  | 37 | 11 | 125853959 | 125853959 | Missense_Mutation | SNP | G  | A  | 28  | 25  | c.2803C>T      | c.(2803-2805)CCT>TCT | p.P935S      |
| Pat_37 | Post-Resistance | CHD4      | 1108   | 37 | 12 | 6702280   | 6702280   | Missense_Mutation | SNP | G  | A  | 87  | 154 | c.2629C>T      | c.(2629-2631)CGG>TGG | p.R877W      |
| Pat_37 | Post-Resistance | MFAP5     | 8076   | 37 | 12 | 8803177   | 8803177   | Missense_Mutation | SNP | C  | T  | 60  | 104 | c.256G>A       | c.(256-258)GAT>AAT   | p.D86N       |
| Pat_37 | Post-Resistance | PZP       | 5858   | 37 | 12 | 9353583   | 9353583   | Missense_Mutation | SNP | G  | A  | 95  | 186 | c.575C>T       | c.(574-576)CCC>CTC   | p.P192L      |
| Pat_37 | Post-Resistance | CLEC7A    | 64581  | 37 | 12 | 10275902  | 10275902  | Missense_Mutation | SNP | G  | A  | 34  | 101 | c.553C>T       | c.(553-555)CGG>TGG   | p.R185W      |
| Pat_37 | Post-Resistance | TAS2R42   | 353164 | 37 | 12 | 11338899  | 11338899  | Missense_Mutation | SNP | C  | G  | 52  | 69  | c.645G>C       | c.(643-645)AAG>AAC   | p.K215N      |
| Pat_37 | Post-Resistance | GRIN2B    | 2904   | 37 | 12 | 13717171  | 13717171  | Missense_Mutation | SNP | C  | T  | 45  | 86  | c.3001G>A      | c.(3001-3003)GAT>AAT | p.D1001N     |
| Pat_37 | Post-Resistance | CASC1     | 55259  | 37 | 12 | 25297373  | 25297373  | Missense_Mutation | SNP | C  | T  | 144 | 331 | c.910G>A       | c.(910-912)GAA>AAA   | p.E304K      |
| Pat_37 | Post-Resistance | MLL2      | 8085   | 37 | 12 | 49431693  | 49431693  | Missense_Mutation | SNP | G  | A  | 15  | 38  | c.9446C>T      | c.(9445-9447)TCC>TTC | p.S3149F     |
| Pat_37 | Post-Resistance | ACCN2     | 41     | 37 | 12 | 50473745  | 50473745  | Missense_Mutation | SNP | G  | A  | 6   | 498 | c.1112G>A      | c.(1111-1113)CGC>CAC | p.R371H      |
| Pat_37 | Post-Resistance | MFSD5     | 84975  | 37 | 12 | 53647014  | 53647014  | Missense_Mutation | SNP | T  | C  | 313 | 502 | c.395T>C       | c.(394-396)GTG>GCG   | p.V132A      |
| Pat_37 | Post-Resistance | OR6C6     | 283365 | 37 | 12 | 55688866  | 55688866  | Missense_Mutation | SNP | G  | A  | 105 | 167 | c.151C>T       | c.(151-153)CCC>TCC   | p.P51S       |
| Pat_37 | Post-Resistance | OR6C1     | 390321 | 37 | 12 | 55714592  | 55714592  | Missense_Mutation | SNP | C  | T  | 69  | 110 | c.209C>T       | c.(208-210)TCG>TTG   | p.S70L       |
| Pat_37 | Post-Resistance | OR6C4     | 341418 | 37 | 12 | 55945126  | 55945126  | Missense_Mutation | SNP | G  | A  | 263 | 494 | c.116G>A       | c.(115-117)GGA>GAA   | p.G39E       |
| Pat_37 | Post-Resistance | KIF5A     | 3798   | 37 | 12 | 57957903  | 57957903  | Missense_Mutation | SNP | G  | A  | 90  | 147 | c.304G>A       | c.(304-306)GAC>AAC   | p.D102N      |
| Pat_37 | Post-Resistance | TRHDE     | 29953  | 37 | 12 | 72956777  | 72956777  | Missense_Mutation | SNP | G  | A  | 153 | 254 | c.1864G>A      | c.(1864-1866)GAT>AAT | p.D622N      |
| Pat_37 | Post-Resistance | PPFIA2    | 8499   | 37 | 12 | 81741397  | 81741397  | Missense_Mutation | SNP | G  | A  | 213 | 432 | c.2147C>T      | c.(2146-2148)TCA>TTA | p.S716L      |
| Pat_37 | Post-Resistance | C12orf12  | 196477 | 37 | 12 | 91348239  | 91348239  | Missense_Mutation | SNP | G  | A  | 3   | 59  | c.281C>T       | c.(280-282)CCA>CTA   | p.P94L       |
| Pat_37 | Post-Resistance | ANO4      | 121601 | 37 | 12 | 101333122 | 101333122 | Missense_Mutation | SNP | G  | A  | 70  | 142 | c.190G>A       | c.(190-192)GAA>AAA   | p.E64K       |
| Pat_37 | Post-Resistance | UTP20     | 27340  | 37 | 12 | 101680285 | 101680285 | Nonsense_Mutation | SNP | C  | A  | 4   | 203 | c.513C>A       | c.(511-513)TAC>TAA   | p.Y171*      |
| Pat_37 | Post-Resistance | STAB2     | 55576  | 37 | 12 | 104102294 | 104102294 | Missense_Mutation | SNP | G  | A  | 107 | 187 | c.4268G>A      | c.(4267-4269)CGA>CAA | p.R1423Q     |
| Pat_37 | Post-Resistance | C12orf23  | 90488  | 37 | 12 | 107365098 | 107365098 | Missense_Mutation | SNP | G  | A  | 4   | 236 | c.280G>A       | c.(280-282)GTT>ATT   | p.V94I       |
| Pat_37 | Post-Resistance | FICD      | 11153  | 37 | 12 | 108912722 | 108912723 | Missense_Mutation | DNP | GG | AA | 44  | 107 | c.847_848GG>AA | c.(847-849)GGC>AAC   | p.G283N      |
| Pat_37 | Post-Resistance | TPCN1     | 53373  | 37 | 12 | 113711397 | 113711398 | Missense_Mutation | DNP | CC | TT | 201 | 374 | c.866_867CC>TT | c.(865-867)TCC>TTT   | p.S289F      |
| Pat_37 | Post-Resistance | FBXW8     | 26259  | 37 | 12 | 117365847 | 117365847 | Missense_Mutation | SNP | C  | T  | 65  | 127 | c.338C>T       | c.(337-339)CCT>CTT   | p.P113L      |
| Pat_37 | Post-Resistance | DIABLO    | 56616  | 37 | 12 | 122709099 | 122709099 | Missense_Mutation | SNP | A  | G  | 195 | 295 | c.143T>C       | c.(142-144)ATT>ACT   | p.I48T       |
| Pat_37 | Post-Resistance | HIP1R     | 9026   | 37 | 12 | 123333135 | 123333135 | Missense_Mutation | SNP | C  | T  | 50  | 100 | c.280C>T       | c.(280-282)CTT>TTT   | p.L94F       |
| Pat_37 | Post-Resistance | MTUS2     | 23281  | 37 | 13 | 29599659  | 29599659  | Missense_Mutation | SNP | C  | T  | 22  | 47  | c.854C>T       | c.(853-855)TCA>TTA   | p.S285L      |
| Pat_37 | Post-Resistance | NBEA      | 26960  | 37 | 13 | 35806678  | 35806678  | Missense_Mutation | SNP | C  | T  | 7   | 8   | c.5698C>T      | c.(5698-5700)CGT>TGT | p.R1900C     |
| Pat_37 | Post-Resistance | FREM2     | 341640 | 37 | 13 | 39266402  | 39266402  | Missense_Mutation | SNP | C  | T  | 74  | 113 | c.4921C>T      | c.(4921-4923)CCC>TCC | p.P1641S     |
| Pat_37 | Post-Resistance | GPC5      | 2262   | 37 | 13 | 92797179  | 92797179  | Missense_Mutation | SNP | G  | A  | 129 | 250 | c.1498G>A      | c.(1498-1500)GAT>AAT | p.D500N      |
| Pat_37 | Post-Resistance | NALCN     | 259232 | 37 | 13 | 101910822 | 101910822 | Missense_Mutation | SNP | C  | T  | 48  | 112 | c.1238G>A      | c.(1237-1239)AGG>AAG | p.R413K      |
| Pat_37 | Post-Resistance | OR4N2     | 390429 | 37 | 14 | 20295764  | 20295764  | Missense_Mutation | SNP | C  | T  | 15  | 305 | c.157C>T       | c.(157-159)CCT>TCT   | p.P53S       |
| Pat_37 | Post-Resistance | OR4L1     | 122742 | 37 | 14 | 20528650  | 20528650  | Nonsense_Mutation | SNP | G  | A  | 83  | 183 | c.447G>A       | c.(445-447)TGG>TGA   | p.W149*      |
| Pat_37 | Post-Resistance | CHD8      | 57680  | 37 | 14 | 21861354  | 21861354  | Missense_Mutation | SNP | G  | T  | 4   | 147 | c.5542C>A      | c.(5542-5544)CAA>AAA | p.Q1848K     |
| Pat_37 | Post-Resistance | MYH6      | 4624   | 37 | 14 | 23854151  | 23854151  | Missense_Mutation | SNP | C  | T  | 47  | 107 | c.5263G>A      | c.(5263-5265)GAG>AAG | p.E1755K     |
| Pat_37 | Post-Resistance | LRRC16B   | 90668  | 37 | 14 | 24534223  | 24534223  | Missense_Mutation | SNP | C  | A  | 5   | 249 | c.3137C>A      | c.(3136-3138)CCA>CAA | p.P1046Q     |
| Pat_37 | Post-Resistance | LRRC16B   | 90668  | 37 | 14 | 24534241  | 24534241  | Missense_Mutation | SNP | G  | A  | 4   | 100 | c.3155G>A      | c.(3154-3156)CGC>CAC | p.R1052H     |
| Pat_37 | Post-Resistance | ARHGAP5   | 394    | 37 | 14 | 32562852  | 32562852  | Missense_Mutation | SNP | C  | T  | 200 | 338 | c.2977C>T      | c.(2977-2979)CCA>TCA | p.P993S      |
| Pat_37 | Post-Resistance | FRMD6     | 122786 | 37 | 14 | 52194536  | 52194536  | Missense_Mutation | SNP | A  | G  | 216 | 284 | c.1658A>G      | c.(1657-1659)AAA>AGA | p.K553R      |
| Pat_37 | Post-Resistance | MAPK11P1L | 93487  | 37 | 14 | 55529606  | 55529606  | Missense_Mutation | SNP | C  | T  | 65  | 134 | c.289C>T       | c.(289-291)CCA>TCA   | p.P97S       |
| Pat_37 | Post-Resistance | DLGAP5    | 9787   | 37 | 14 | 55650429  | 55650429  | Missense_Mutation | SNP | A  | G  | 15  | 18  | c.281T>C       | c.(280-282)CTC>CCC   | p.L94P       |
| Pat_37 | Post-Resistance | RAD51L1   | 5890   | 37 | 14 | 68934923  | 68934923  | Missense_Mutation | SNP | C  | T  | 118 | 205 | c.992C>T       | c.(991-993)ACC>ATC   | p.T331I      |
| Pat_37 | Post-Resistance | SERPINA11 | 256394 | 37 | 14 | 94914736  | 94914736  | Missense_Mutation | SNP | G  | A  | 47  | 137 | c.376C>T       | c.(376-378)CTT>TTT   | p.L126F      |
| Pat_37 | Post-Resistance | DIO3      | 1735   | 37 | 14 | 102028737 | 102028737 | Missense_Mutation | SNP | C  | T  | 35  | 65  | c.826C>T       | c.(826-828)CGG>TGG   | p.R276W      |

|        |                 |          |        |    |    |           |           |                   |     |    |    |     |     |                 |                        |               |
|--------|-----------------|----------|--------|----|----|-----------|-----------|-------------------|-----|----|----|-----|-----|-----------------|------------------------|---------------|
| Pat_37 | Post-Resistance | TECPR2   | 9895   | 37 | 14 | 102874935 | 102874935 | Nonsense_Mutation | SNP | T  | A  | 66  | 139 | c.459T>A        | c.(457-459)TAT>TAA     | p.Y153*       |
| Pat_37 | Post-Resistance | ADAM6    | 8755   | 37 | 14 | 106354443 | 106354443 | Splice_Site       | SNP | G  | A  | 34  | 45  | c.49316_splice  | c.e3089+1              |               |
| Pat_37 | Post-Resistance | UBE3A    | 7337   | 37 | 15 | 25620797  | 25620797  | Missense_Mutation | SNP | C  | G  | 62  | 123 | c.185G>C        | c.(184-186)CGT>CCT     | p.R62P        |
| Pat_37 | Post-Resistance | GABRB3   | 2562   | 37 | 15 | 26793136  | 26793136  | Missense_Mutation | SNP | C  | T  | 52  | 84  | c.1226G>A       | c.(1225-1227)CGA>CAA   | p.R409Q       |
| Pat_37 | Post-Resistance | C15orf55 | 256646 | 37 | 15 | 34649346  | 34649347  | Missense_Mutation | DNP | CC | TT | 35  | 63  | .:3053_3054CC>T | c.(3052-3054)TCC>TTT   | p.S1018F      |
| Pat_37 | Post-Resistance | EIF2AK4  | 440275 | 37 | 15 | 40280268  | 40280268  | Nonsense_Mutation | SNP | C  | T  | 81  | 184 | c.2488C>T       | c.(2488-2490)CGA>TGA   | p.R830*       |
| Pat_37 | Post-Resistance | C15orf57 | 90416  | 37 | 15 | 40849511  | 40849511  | Missense_Mutation | SNP | C  | T  | 4   | 214 | c.305G>A        | c.(304-306)CGA>CAA     | p.R102Q       |
| Pat_37 | Post-Resistance | LEO1     | 123169 | 37 | 15 | 52252113  | 52252113  | Missense_Mutation | SNP | A  | T  | 100 | 156 | c.1143T>A       | c.(1141-1143)TTT>TTA   | p.F381L       |
| Pat_37 | Post-Resistance | UNC13C   | 440279 | 37 | 15 | 54305830  | 54305830  | Missense_Mutation | SNP | G  | A  | 48  | 107 | c.730G>A        | c.(730-732)GAA>AAA     | p.E244K       |
| Pat_37 | Post-Resistance | MAN2C1   | 4123   | 37 | 15 | 75660483  | 75660483  | Missense_Mutation | SNP | C  | T  | 11  | 8   | c.158G>A        | c.(157-159)AGA>AAA     | p.R53K        |
| Pat_37 | Post-Resistance | ACAN     | 176    | 37 | 15 | 89416239  | 89416239  | Missense_Mutation | SNP | C  | T  | 24  | 39  | c.7316C>T       | c.(7315-7317)ACG>ATG   | p.T2439M      |
| Pat_37 | Post-Resistance | MAN2A2   | 4122   | 37 | 15 | 91450650  | 91450650  | Missense_Mutation | SNP | G  | C  | 6   | 188 | c.1121G>C       | c.(1120-1122)CGC>CCC   | p.R374P       |
| Pat_37 | Post-Resistance | DECR2    | 26063  | 37 | 16 | 461501    | 461501    | Missense_Mutation | SNP | G  | A  | 4   | 200 | c.802G>A        | c.(802-804)GAT>AAT     | p.D268N       |
| Pat_37 | Post-Resistance | SOLH     | 6650   | 37 | 16 | 601598    | 601598    | Missense_Mutation | SNP | G  | A  | 4   | 80  | c.2279G>A       | c.(2278-2280)CGT>CAT   | p.R760H       |
| Pat_37 | Post-Resistance | FLYWCH1  | 84256  | 37 | 16 | 2980449   | 2980449   | Missense_Mutation | SNP | G  | A  | 9   | 5   | c.364G>A        | c.(364-366)GGG>AGG     | p.G122R       |
| Pat_37 | Post-Resistance | KREMEN2  | 79412  | 37 | 16 | 3016389   | 3016389   | Missense_Mutation | SNP | G  | A  | 69  | 72  | c.425G>A        | c.(424-426)GGC>GAC     | p.G142D       |
| Pat_37 | Post-Resistance | DNASE1   | 1773   | 37 | 16 | 3706147   | 3706147   | Missense_Mutation | SNP | G  | A  | 5   | 220 | c.281G>A        | c.(280-282)GGA>GAA     | p.G94E        |
| Pat_37 | Post-Resistance | PRKCB    | 5579   | 37 | 16 | 24231291  | 24231291  | Missense_Mutation | SNP | A  | G  | 3   | 95  | c.1873A>G       | c.(1873-1875)AGA>GGA   | p.R625G       |
| Pat_37 | Post-Resistance | FHOD1    | 29109  | 37 | 16 | 67265090  | 67265090  | Splice_Site       | SNP | C  | G  | 4   | 65  | c.2667_splice   | c.e17+1                | p.K889_splice |
| Pat_37 | Post-Resistance | ATP6V0D1 | 9114   | 37 | 16 | 67472954  | 67472954  | Missense_Mutation | SNP | G  | A  | 4   | 231 | c.736C>T        | c.(736-738)CGG>TGG     | p.R246W       |
| Pat_37 | Post-Resistance | SPG7     | 6687   | 37 | 16 | 89617007  | 89617007  | Missense_Mutation | SNP | C  | G  | 3   | 87  | c.1769C>G       | c.(1768-1770)GCC>GGC   | p.A590G       |
| Pat_37 | Post-Resistance | YWHAE    | 7531   | 37 | 17 | 1264431   | 1264431   | Missense_Mutation | SNP | G  | A  | 164 | 270 | c.533C>T        | c.(532-534)TCC>TTC     | p.S178F       |
| Pat_37 | Post-Resistance | PITPNA   | 5306   | 37 | 17 | 1451661   | 1451661   | Missense_Mutation | SNP | C  | T  | 4   | 213 | c.218G>A        | c.(217-219)CGA>CAA     | p.R73Q        |
| Pat_37 | Post-Resistance | SMTNL2   | 342527 | 37 | 17 | 4510744   | 4510744   | Missense_Mutation | SNP | G  | A  | 6   | 704 | c.1348G>A       | c.(1348-1350)GTC>ATC   | p.V450I       |
| Pat_37 | Post-Resistance | MINK1    | 50488  | 37 | 17 | 4797389   | 4797389   | Splice_Site       | SNP | G  | A  | 4   | 60  | c.2670_splice   | c.e22+1                | p.R890_splice |
| Pat_37 | Post-Resistance | CAMTA2   | 23125  | 37 | 17 | 4880437   | 4880438   | Missense_Mutation | DNP | GG | AA | 57  | 156 | .:1815_1816CC>T | 813-1818)CCCTT>CCTT    | p.L606F       |
| Pat_37 | Post-Resistance | TNK1     | 8711   | 37 | 17 | 7291865   | 7291865   | Missense_Mutation | SNP | A  | G  | 29  | 61  | c.1633A>G       | c.(1633-1635)AGC>GGC   | p.S545G       |
| Pat_37 | Post-Resistance | DNAH2    | 146754 | 37 | 17 | 7727983   | 7727983   | Missense_Mutation | SNP | C  | T  | 167 | 347 | c.11791C>T      | c.(11791-11793)CAC>TAC | p.H3931Y      |
| Pat_37 | Post-Resistance | SPDYE4   | 388333 | 37 | 17 | 8656641   | 8656641   | Missense_Mutation | SNP | C  | T  | 7   | 21  | c.652G>A        | c.(652-654)GAG>AAG     | p.E218K       |
| Pat_37 | Post-Resistance | TOM1L2   | 146691 | 37 | 17 | 17786101  | 17786101  | Missense_Mutation | SNP | G  | A  | 107 | 158 | c.578C>T        | c.(577-579)TCC>TTC     | p.S193F       |
| Pat_37 | Post-Resistance | LGALS9C  | 654346 | 37 | 17 | 18387232  | 18387232  | Missense_Mutation | SNP | G  | A  | 90  | 51  | c.83G>A         | c.(82-84)GGA>GAA       | p.G28E        |
| Pat_37 | Post-Resistance | MAPK7    | 5598   | 37 | 17 | 19284135  | 19284135  | Missense_Mutation | SNP | C  | T  | 3   | 63  | c.613C>T        | c.(613-615)CGT>TGT     | p.R205C       |
| Pat_37 | Post-Resistance | TRAF4    | 9618   | 37 | 17 | 27075388  | 27075388  | Missense_Mutation | SNP | C  | T  | 3   | 92  | c.571C>T        | c.(571-573)CGC>TGC     | p.R191C       |
| Pat_37 | Post-Resistance | CNTNAP1  | 8506   | 37 | 17 | 40845480  | 40845480  | Missense_Mutation | SNP | G  | A  | 4   | 159 | c.2918G>A       | c.(2917-2919)CGC>CAC   | p.R973H       |
| Pat_37 | Post-Resistance | KIF18B   | 146909 | 37 | 17 | 43012650  | 43012650  | Missense_Mutation | SNP | C  | T  | 3   | 29  | c.448G>A        | c.(448-450)GAG>AAG     | p.E150K       |
| Pat_37 | Post-Resistance | IGF2BP1  | 10642  | 37 | 17 | 47115636  | 47115636  | Missense_Mutation | SNP | G  | A  | 48  | 63  | c.508G>A        | c.(508-510)GGC>AGC     | p.G170S       |
| Pat_37 | Post-Resistance | COL1A1   | 1277   | 37 | 17 | 48271376  | 48271377  | Missense_Mutation | DNP | GG | AA | 47  | 113 | .:1694_1695CC>T | c.(1693-1695)CCC>CTT   | p.P565L       |
| Pat_37 | Post-Resistance | AKAP1    | 8165   | 37 | 17 | 55189933  | 55189933  | Missense_Mutation | SNP | C  | T  | 5   | 170 | c.2057C>T       | c.(2056-2058)CCC>CTC   | p.P686L       |
| Pat_37 | Post-Resistance | RECQL5   | 9400   | 37 | 17 | 73624834  | 73624834  | Missense_Mutation | SNP | G  | A  | 4   | 87  | c.2498C>T       | c.(2497-2499)CCG>CTG   | p.P833L       |
| Pat_37 | Post-Resistance | SPHK1    | 8877   | 37 | 17 | 74383533  | 74383533  | Missense_Mutation | SNP | G  | T  | 4   | 156 | c.1021G>T       | c.(1021-1023)GAT>TAT   | p.D341Y       |
| Pat_37 | Post-Resistance | UBE2O    | 63893  | 37 | 17 | 74387494  | 74387494  | Missense_Mutation | SNP | G  | A  | 4   | 200 | c.3409C>T       | c.(3409-3411)CGG>TGG   | p.R1137W      |
| Pat_37 | Post-Resistance | PCYT2    | 5833   | 37 | 17 | 79864636  | 79864637  | Missense_Mutation | DNP | GG | AA | 17  | 63  | c.675_676CC>TT  | (673-678)TTCCAC>TTTTA  | p.H226Y       |
| Pat_37 | Post-Resistance | LAMA3    | 3909   | 37 | 18 | 21512198  | 21512198  | Missense_Mutation | SNP | C  | T  | 180 | 293 | c.8651C>T       | c.(8650-8652)TCT>TTT   | p.S2884F      |
| Pat_37 | Post-Resistance | SYT4     | 6860   | 37 | 18 | 40853607  | 40853607  | Missense_Mutation | SNP | C  | T  | 34  | 95  | c.787G>A        | c.(787-789)GGA>AGA     | p.G263R       |
| Pat_37 | Post-Resistance | DCC      | 1630   | 37 | 18 | 50918076  | 50918076  | Missense_Mutation | SNP | C  | T  | 188 | 368 | c.2507C>T       | c.(2506-2508)TCG>TTG   | p.S836L       |
| Pat_37 | Post-Resistance | DCC      | 1630   | 37 | 18 | 50994305  | 50994305  | Missense_Mutation | SNP | G  | A  | 71  | 127 | c.3661G>A       | c.(3661-3663)GAG>AAG   | p.E1221K      |
| Pat_37 | Post-Resistance | NCLN     | 56926  | 37 | 19 | 3192594   | 3192594   | Missense_Mutation | SNP | C  | T  | 3   | 44  | c.311C>T        | c.(310-312)TCG>TTG     | p.S104L       |



|        |                 |           |        |    |    |           |           |                   |     |    |    |     |     |                |                        |               |
|--------|-----------------|-----------|--------|----|----|-----------|-----------|-------------------|-----|----|----|-----|-----|----------------|------------------------|---------------|
| Pat_37 | Post-Resistance | KDM4B     | 23030  | 37 | 19 | 5135389   | 5135390   | Missense_Mutation | DNP | GG | AA | 4   | 76  | .2125_2126GG>A | c.(2125-2127)GGA>AAA   | p.G709K       |
| Pat_37 | Post-Resistance | EMR1      | 2015   | 37 | 19 | 6897460   | 6897460   | Missense_Mutation | SNP | G  | A  | 4   | 158 | c.416G>A       | c.(415-417)AGC>AAC     | p.S139N       |
| Pat_37 | Post-Resistance | KIAA1543  | 57662  | 37 | 19 | 7671277   | 7671277   | Missense_Mutation | SNP | A  | T  | 26  | 49  | c.523A>T       | c.(523-525)ACG>TCG     | p.T175S       |
| Pat_37 | Post-Resistance | CD209     | 30835  | 37 | 19 | 7810560   | 7810560   | Missense_Mutation | SNP | G  | A  | 4   | 203 | c.592C>T       | c.(592-594)CGG>TGG     | p.R198W       |
| Pat_37 | Post-Resistance | HNRNPM    | 4670   | 37 | 19 | 8528389   | 8528389   | Splice_Site       | SNP | G  | A  | 5   | 339 | c.344_splice   | c.e4+1                 | p.A115_splice |
| Pat_37 | Post-Resistance | ADAMTS10  | 81794  | 37 | 19 | 8645836   | 8645836   | Nonsense_Mutation | SNP | G  | A  | 28  | 78  | c.3253C>T      | c.(3253-3255)CAG>TAG   | p.Q1085*      |
| Pat_37 | Post-Resistance | MUC16     | 94025  | 37 | 19 | 9063401   | 9063401   | Missense_Mutation | SNP | C  | A  | 4   | 163 | c.24045G>T     | c.(24043-24045)ATG>ATT | p.M8015I      |
| Pat_37 | Post-Resistance | COL5A3    | 50509  | 37 | 19 | 10071229  | 10071229  | Missense_Mutation | SNP | C  | T  | 14  | 271 | c.5096G>A      | c.(5095-5097)CGG>CAG   | p.R1699Q      |
| Pat_37 | Post-Resistance | CYP4F8    | 11283  | 37 | 19 | 15734027  | 15734027  | Missense_Mutation | SNP | C  | G  | 74  | 136 | c.760C>G       | c.(760-762)CGG>GGG     | p.R254G       |
| Pat_37 | Post-Resistance | MYO9B     | 4650   | 37 | 19 | 17213057  | 17213057  | Missense_Mutation | SNP | C  | T  | 7   | 625 | c.530C>T       | c.(529-531)ACG>ATG     | p.T177M       |
| Pat_37 | Post-Resistance | TMEM161A  | 54929  | 37 | 19 | 19243477  | 19243477  | Missense_Mutation | SNP | A  | T  | 25  | 71  | c.275T>A       | c.(274-276)GTG>GAG     | p.V92E        |
| Pat_37 | Post-Resistance | ZNF90     | 7643   | 37 | 19 | 20229760  | 20229760  | Missense_Mutation | SNP | C  | T  | 68  | 163 | c.1397C>T      | c.(1396-1398)TCA>TTA   | p.S466L       |
| Pat_37 | Post-Resistance | ZNF43     | 7594   | 37 | 19 | 21992169  | 21992169  | Missense_Mutation | SNP | T  | G  | 4   | 243 | c.670A>C       | c.(670-672)AAT>CAT     | p.N224H       |
| Pat_37 | Post-Resistance | HRC       | 3270   | 37 | 19 | 49657516  | 49657516  | Missense_Mutation | SNP | C  | T  | 37  | 31  | c.979G>A       | c.(979-981)GAA>AAA     | p.E327K       |
| Pat_37 | Post-Resistance | KLK7      | 5650   | 37 | 19 | 51483718  | 51483718  | Missense_Mutation | SNP | C  | T  | 53  | 48  | c.247G>A       | c.(247-249)GAT>AAT     | p.D83N        |
| Pat_37 | Post-Resistance | KLK14     | 43847  | 37 | 19 | 51582876  | 51582876  | Missense_Mutation | SNP | G  | A  | 4   | 36  | c.344C>T       | c.(343-345)ACG>ATG     | p.T115M       |
| Pat_37 | Post-Resistance | FPR3      | 2359   | 37 | 19 | 52327004  | 52327004  | Missense_Mutation | SNP | G  | A  | 23  | 27  | c.3G>A         | c.(1-3)ATG>ATA         | p.M1I         |
| Pat_37 | Post-Resistance | ZIM3      | 114026 | 37 | 19 | 57648292  | 57648292  | Missense_Mutation | SNP | C  | T  | 62  | 80  | c.190G>A       | c.(190-192)GGA>AGA     | p.G64R        |
| Pat_37 | Post-Resistance | C2orf48   | 348738 | 37 | 2  | 10350701  | 10350701  | Missense_Mutation | SNP | T  | C  | 5   | 182 | c.458T>C       | c.(457-459)CTC>CCC     | p.L153P       |
| Pat_37 | Post-Resistance | GPN1      | 11321  | 37 | 2  | 27870737  | 27870737  | Missense_Mutation | SNP | G  | T  | 4   | 120 | c.1008G>T      | c.(1006-1008)TTG>TTT   | p.L336F       |
| Pat_37 | Post-Resistance | SRBD1     | 55133  | 37 | 2  | 45807106  | 45807106  | Missense_Mutation | SNP | G  | A  | 4   | 214 | c.980C>T       | c.(979-981)GCA>GTA     | p.A327V       |
| Pat_37 | Post-Resistance | PROM2     | 150696 | 37 | 2  | 95953993  | 95953993  | Missense_Mutation | SNP | C  | T  | 90  | 94  | c.2279C>T      | c.(2278-2280)TCC>TTC   | p.S760F       |
| Pat_37 | Post-Resistance | ADRA2B    | 151    | 37 | 2  | 96781752  | 96781752  | Missense_Mutation | SNP | G  | A  | 3   | 37  | c.137C>T       | c.(136-138)CCT>CTT     | p.P46L        |
| Pat_37 | Post-Resistance | IWS1      | 55677  | 37 | 2  | 128262638 | 128262638 | Missense_Mutation | SNP | G  | A  | 152 | 105 | c.841C>T       | c.(841-843)CCC>TCC     | p.P281S       |
| Pat_37 | Post-Resistance | KCNH7     | 90134  | 37 | 2  | 163374282 | 163374282 | Missense_Mutation | SNP | C  | T  | 4   | 144 | c.850G>A       | c.(850-852)GTC>ATC     | p.V284I       |
| Pat_37 | Post-Resistance | TTN       | 7273   | 37 | 2  | 179463537 | 179463537 | Missense_Mutation | SNP | T  | C  | 6   | 464 | c.49196A>G     | c.(49195-49197)AAT>AGT | p.N16399S     |
| Pat_37 | Post-Resistance | TTN       | 7273   | 37 | 2  | 179469470 | 179469470 | Missense_Mutation | SNP | C  | T  | 132 | 106 | c.46642G>A     | c.(46642-46644)GAA>AAA | p.E15548K     |
| Pat_37 | Post-Resistance | PARD3B    | 117583 | 37 | 2  | 206265756 | 206265756 | Missense_Mutation | SNP | G  | A  | 14  | 6   | c.2650G>A      | c.(2650-2652)GAT>AAT   | p.D884N       |
| Pat_37 | Post-Resistance | ABCB6     | 10058  | 37 | 2  | 220077134 | 220077134 | Missense_Mutation | SNP | C  | T  | 4   | 178 | c.1943G>A      | c.(1942-1944)CGA>CAA   | p.R648Q       |
| Pat_37 | Post-Resistance | GPCPD1    | 56261  | 37 | 20 | 5547385   | 5547385   | Missense_Mutation | SNP | G  | A  | 88  | 158 | c.1261C>T      | c.(1261-1263)CGG>TGG   | p.R421W       |
| Pat_37 | Post-Resistance | TM9SF4    | 9777   | 37 | 20 | 30729426  | 30729426  | Missense_Mutation | SNP | G  | A  | 5   | 368 | c.356G>A       | c.(355-357)CGA>CAA     | p.R119Q       |
| Pat_37 | Post-Resistance | SEMG2     | 6407   | 37 | 20 | 43850512  | 43850512  | Missense_Mutation | SNP | G  | A  | 94  | 161 | c.239G>A       | c.(238-240)CGA>CAA     | p.R80Q        |
| Pat_37 | Post-Resistance | KRTAP13-2 | 337959 | 37 | 21 | 31744194  | 31744194  | Missense_Mutation | SNP | C  | T  | 49  | 112 | c.338G>A       | c.(337-339)GGA>GAA     | p.G113E       |
| Pat_37 | Post-Resistance | KRTAP19-5 | 337972 | 37 | 21 | 31874201  | 31874201  | Missense_Mutation | SNP | C  | T  | 178 | 402 | c.208G>A       | c.(208-210)GGA>AGA     | p.G70R        |
| Pat_37 | Post-Resistance | IFNAR1    | 3454   | 37 | 21 | 34707922  | 34707922  | Missense_Mutation | SNP | G  | A  | 102 | 192 | c.169G>A       | c.(169-171)GGG>AGG     | p.G57R        |
| Pat_37 | Post-Resistance | SLC37A1   | 54020  | 37 | 21 | 43979140  | 43979140  | Missense_Mutation | SNP | C  | T  | 28  | 59  | c.922C>T       | c.(922-924)CCC>TCC     | p.P308S       |
| Pat_37 | Post-Resistance | CABIN1    | 23523  | 37 | 22 | 24466790  | 24466790  | Missense_Mutation | SNP | G  | A  | 168 | 237 | c.2272G>A      | c.(2272-2274)GAG>AAG   | p.E758K       |
| Pat_37 | Post-Resistance | SEZ6L     | 23544  | 37 | 22 | 26692966  | 26692966  | Missense_Mutation | SNP | G  | A  | 33  | 80  | c.1082G>A      | c.(1081-1083)CGA>CAA   | p.R361Q       |
| Pat_37 | Post-Resistance | RFPL2     | 10739  | 37 | 22 | 32587079  | 32587079  | Missense_Mutation | SNP | C  | T  | 115 | 147 | c.817G>A       | c.(817-819)GAG>AAG     | p.E273K       |
| Pat_37 | Post-Resistance | RAC2      | 5880   | 37 | 22 | 37628869  | 37628869  | Missense_Mutation | SNP | C  | T  | 4   | 161 | c.197G>A       | c.(196-198)CGT>CAT     | p.R66H        |
| Pat_37 | Post-Resistance | ENTHD1    | 150350 | 37 | 22 | 40140252  | 40140252  | Missense_Mutation | SNP | G  | A  | 42  | 66  | c.1256C>T      | c.(1255-1257)CCT>CTT   | p.P419L       |
| Pat_37 | Post-Resistance | PKDREJ    | 10343  | 37 | 22 | 46657381  | 46657381  | Missense_Mutation | SNP | T  | A  | 75  | 155 | c.1839A>T      | c.(1837-1839)AAA>AAT   | p.K613N       |
| Pat_37 | Post-Resistance | PLXNB2    | 23654  | 37 | 22 | 50716039  | 50716039  | Missense_Mutation | SNP | G  | A  | 5   | 333 | c.5177C>T      | c.(5176-5178)ACG>ATG   | p.T1726M      |
| Pat_37 | Post-Resistance | ITPR1     | 3708   | 37 | 3  | 4730242   | 4730242   | Missense_Mutation | SNP | G  | A  | 15  | 323 | c.3739G>A      | c.(3739-3741)GCA>ACA   | p.A1247T      |
| Pat_37 | Post-Resistance | GRIP2     | 80852  | 37 | 3  | 14583492  | 14583492  | Missense_Mutation | SNP | G  | A  | 3   | 48  | c.97C>T        | c.(97-99)CGC>TGC       | p.R33C        |
| Pat_37 | Post-Resistance | TOP2B     | 7155   | 37 | 3  | 25665139  | 25665139  | Missense_Mutation | SNP | A  | G  | 67  | 100 | c.2594T>C      | c.(2593-2595)ATA>ACA   | p.I865T       |
| Pat_37 | Post-Resistance | KBTBD5    | 131377 | 37 | 3  | 42729733  | 42729733  | Missense_Mutation | SNP | G  | A  | 4   | 212 | c.1252G>A      | c.(1252-1254)GGT>AGT   | p.G418S       |

|        |                 |          |        |    |   |           |           |                   |     |    |    |     |     |                |                        |          |
|--------|-----------------|----------|--------|----|---|-----------|-----------|-------------------|-----|----|----|-----|-----|----------------|------------------------|----------|
| Pat_37 | Post-Resistance | CCDC36   | 339834 | 37 | 3 | 49274018  | 49274018  | Missense_Mutation | SNP | G  | A  | 11  | 42  | c.94G>A        | c.(94-96)GAT>AAT       | p.D32N   |
| Pat_37 | Post-Resistance | PCBP4    | 57060  | 37 | 3 | 51992163  | 51992163  | Missense_Mutation | SNP | G  | A  | 4   | 177 | c.1126C>T      | c.(1126-1128)CCG>TCG   | p.P376S  |
| Pat_37 | Post-Resistance | TLR9     | 54106  | 37 | 3 | 52257382  | 52257382  | Missense_Mutation | SNP | T  | C  | 48  | 106 | c.950A>G       | c.(949-951)GAG>GGG     | p.E317G  |
| Pat_37 | Post-Resistance | ITIH3    | 3699   | 37 | 3 | 52831911  | 52831911  | Missense_Mutation | SNP | G  | A  | 5   | 26  | c.628G>A       | c.(628-630)GGA>AGA     | p.G210R  |
| Pat_37 | Post-Resistance | CACNA1D  | 776    | 37 | 3 | 53531412  | 53531412  | Nonsense_Mutation | SNP | C  | T  | 103 | 230 | c.301C>T       | c.(301-303)CGA>TGA     | p.R101*  |
| Pat_37 | Post-Resistance | CRYBG3   | 131544 | 37 | 3 | 97662120  | 97662120  | Missense_Mutation | SNP | G  | A  | 40  | 37  | c.3031G>A      | c.(3031-3033)GGA>AGA   | p.G1011R |
| Pat_37 | Post-Resistance | SLC35A5  | 55032  | 37 | 3 | 112299458 | 112299458 | Missense_Mutation | SNP | C  | T  | 48  | 50  | c.494C>T       | c.(493-495)ACT>ATT     | p.T165I  |
| Pat_37 | Post-Resistance | PLXNA1   | 5361   | 37 | 3 | 126735834 | 126735834 | Missense_Mutation | SNP | G  | A  | 4   | 160 | c.3161G>A      | c.(3160-3162)CGT>CAT   | p.R1054H |
| Pat_37 | Post-Resistance | COL6A6   | 131873 | 37 | 3 | 130360517 | 130360517 | Missense_Mutation | SNP | G  | A  | 21  | 13  | c.5113G>A      | c.(5113-5115)GAG>AAG   | p.E1705K |
| Pat_37 | Post-Resistance | ATP1B3   | 483    | 37 | 3 | 141622560 | 141622560 | Missense_Mutation | SNP | C  | T  | 93  | 55  | c.208C>T       | c.(208-210)CCA>TCA     | p.P70S   |
| Pat_37 | Post-Resistance | IGSF10   | 285313 | 37 | 3 | 151176361 | 151176361 | Missense_Mutation | SNP | C  | T  | 4   | 147 | c.137G>A       | c.(136-138)CGG>CAG     | p.R46Q   |
| Pat_37 | Post-Resistance | SI       | 6476   | 37 | 3 | 164741528 | 164741528 | Missense_Mutation | SNP | G  | A  | 54  | 45  | c.2929C>T      | c.(2929-2931)CCC>TCC   | p.P977S  |
| Pat_37 | Post-Resistance | CHRD     | 8646   | 37 | 3 | 184106417 | 184106417 | Missense_Mutation | SNP | C  | T  | 43  | 52  | c.2597C>T      | c.(2596-2598)GCT>GTT   | p.A866V  |
| Pat_37 | Post-Resistance | TPRG1    | 285386 | 37 | 3 | 188925310 | 188925310 | Missense_Mutation | SNP | G  | A  | 212 | 119 | c.137G>A       | c.(136-138)AGT>AAT     | p.S46N   |
| Pat_37 | Post-Resistance | SLIT2    | 9353   | 37 | 4 | 20543093  | 20543093  | Missense_Mutation | SNP | C  | T  | 39  | 79  | c.1994C>T      | c.(1993-1995)CCT>CTT   | p.P665L  |
| Pat_37 | Post-Resistance | LIMCH1   | 22998  | 37 | 4 | 41684413  | 41684413  | Nonsense_Mutation | SNP | C  | T  | 65  | 122 | c.2629C>T      | c.(2629-2631)CAG>TAG   | p.Q877*  |
| Pat_37 | Post-Resistance | DCUN1D4  | 23142  | 37 | 4 | 52777312  | 52777312  | Missense_Mutation | SNP | T  | C  | 4   | 238 | c.692T>C       | c.(691-693)CTT>CCT     | p.L231P  |
| Pat_37 | Post-Resistance | EREG     | 2069   | 37 | 4 | 75248388  | 75248388  | Missense_Mutation | SNP | G  | A  | 4   | 240 | c.305G>A       | c.(304-306)CGA>CAA     | p.R102Q  |
| Pat_37 | Post-Resistance | STBD1    | 8987   | 37 | 4 | 77230595  | 77230595  | Missense_Mutation | SNP | G  | C  | 3   | 76  | c.519G>C       | c.(517-519)TTG>TTC     | p.L173F  |
| Pat_37 | Post-Resistance | ADH6     | 130    | 37 | 4 | 100137332 | 100137332 | Missense_Mutation | SNP | C  | T  | 33  | 103 | c.106G>A       | c.(106-108)GAA>AAA     | p.E36K   |
| Pat_37 | Post-Resistance | NHEDC2   | 133308 | 37 | 4 | 103971417 | 103971417 | Missense_Mutation | SNP | C  | T  | 106 | 193 | c.565G>A       | c.(565-567)GGC>AGC     | p.G189S  |
| Pat_37 | Post-Resistance | NDST4    | 64579  | 37 | 4 | 115891702 | 115891702 | Missense_Mutation | SNP | G  | A  | 49  | 109 | c.1105C>T      | c.(1105-1107)CGG>TGG   | p.R369W  |
| Pat_37 | Post-Resistance | PRSS12   | 8492   | 37 | 4 | 119239632 | 119239632 | Missense_Mutation | SNP | C  | A  | 27  | 246 | c.1051G>T      | c.(1051-1053)GGG>TGG   | p.G351W  |
| Pat_37 | Post-Resistance | FAT4     | 79633  | 37 | 4 | 126328278 | 126328278 | Missense_Mutation | SNP | C  | T  | 203 | 346 | c.5551C>T      | c.(5551-5553)CCT>TCT   | p.P1851S |
| Pat_37 | Post-Resistance | RXFP1    | 59350  | 37 | 4 | 159493870 | 159493870 | Missense_Mutation | SNP | G  | A  | 128 | 273 | c.70G>A        | c.(70-72)GAT>AAT       | p.D24N   |
| Pat_37 | Post-Resistance | RXFP1    | 59350  | 37 | 4 | 159493897 | 159493897 | Missense_Mutation | SNP | C  | T  | 129 | 250 | c.97C>T        | c.(97-99)CCC>TCC       | p.P33S   |
| Pat_37 | Post-Resistance | FAT1     | 2195   | 37 | 4 | 187532630 | 187532630 | Missense_Mutation | SNP | C  | T  | 4   | 207 | c.9763G>A      | c.(9763-9765)GCA>ACA   | p.A3255T |
| Pat_37 | Post-Resistance | DNAH5    | 1767   | 37 | 5 | 13753596  | 13753596  | Missense_Mutation | SNP | C  | T  | 96  | 228 | c.10618G>A     | c.(10618-10620)GAT>AAT | p.D3540N |
| Pat_37 | Post-Resistance | 11-Mar   | 441061 | 37 | 5 | 16177919  | 16177919  | Nonsense_Mutation | SNP | C  | T  | 77  | 131 | c.609G>A       | c.(607-609)TGG>TGA     | p.W203*  |
| Pat_37 | Post-Resistance | OSMR     | 9180   | 37 | 5 | 38876401  | 38876401  | Missense_Mutation | SNP | C  | T  | 113 | 178 | c.172C>T       | c.(172-174)CCT>TCT     | p.P58S   |
| Pat_37 | Post-Resistance | C9       | 735    | 37 | 5 | 39308368  | 39308368  | Missense_Mutation | SNP | T  | C  | 139 | 196 | c.1204A>G      | c.(1204-1206)AAA>GAA   | p.K402E  |
| Pat_37 | Post-Resistance | GHR      | 2690   | 37 | 5 | 42711394  | 42711394  | Missense_Mutation | SNP | G  | A  | 220 | 406 | c.704G>A       | c.(703-705)CGA>CAA     | p.R235Q  |
| Pat_37 | Post-Resistance | POLK     | 51426  | 37 | 5 | 74879192  | 74879192  | Missense_Mutation | SNP | C  | T  | 119 | 103 | c.1009C>T      | c.(1009-1011)CCC>TCC   | p.P337S  |
| Pat_37 | Post-Resistance | MEF2C    | 4208   | 37 | 5 | 88100438  | 88100438  | Missense_Mutation | SNP | G  | A  | 108 | 69  | c.235C>T       | c.(235-237)CGG>TGG     | p.R79W   |
| Pat_37 | Post-Resistance | MEF2C    | 4208   | 37 | 5 | 88100440  | 88100440  | Missense_Mutation | SNP | C  | G  | 107 | 72  | c.233G>C       | c.(232-234)AGC>ACC     | p.S78T   |
| Pat_37 | Post-Resistance | GPR98    | 84059  | 37 | 5 | 89981639  | 89981639  | Missense_Mutation | SNP | C  | T  | 28  | 124 | c.6317C>T      | c.(6316-6318)GCG>GTG   | p.A2106V |
| Pat_37 | Post-Resistance | PCDHA11  | 56138  | 37 | 5 | 140250186 | 140250186 | Missense_Mutation | SNP | G  | A  | 119 | 104 | c.1498G>A      | c.(1498-1500)GAC>AAC   | p.D500N  |
| Pat_37 | Post-Resistance | ARAP3    | 64411  | 37 | 5 | 141041751 | 141041751 | Missense_Mutation | SNP | G  | A  | 5   | 418 | c.2872C>T      | c.(2872-2874)CGT>TGT   | p.R958C  |
| Pat_37 | Post-Resistance | BTNL3    | 10917  | 37 | 5 | 180419833 | 180419833 | Missense_Mutation | SNP | C  | T  | 4   | 109 | c.70C>T        | c.(70-72)CCG>TCG       | p.P24S   |
| Pat_37 | Post-Resistance | PIP5K1P1 | 206426 | 37 | 6 | 7987864   | 7987864   | Missense_Mutation | SNP | G  | T  | 4   | 107 | c.1095G>T      | c.(1093-1095)ATG>ATT   | p.M365I  |
| Pat_37 | Post-Resistance | NUP153   | 9972   | 37 | 6 | 17616825  | 17616825  | Missense_Mutation | SNP | C  | T  | 16  | 321 | c.4276G>A      | c.(4276-4278)GCC>ACC   | p.A1426T |
| Pat_37 | Post-Resistance | SCAND3   | 114821 | 37 | 6 | 28543165  | 28543166  | Missense_Mutation | DNP | CC | TT | 68  | 165 | .1316_1317GG>A | c.(1315-1317)GGG>GAA   | p.G439E  |
| Pat_37 | Post-Resistance | TNXB     | 7148   | 37 | 6 | 32014050  | 32014050  | Missense_Mutation | SNP | G  | A  | 19  | 37  | c.10502C>T     | c.(10501-10503)ACC>ATC | p.T3501I |
| Pat_37 | Post-Resistance | TREM1    | 54210  | 37 | 6 | 41250147  | 41250147  | Missense_Mutation | SNP | A  | G  | 61  | 91  | c.392T>C       | c.(391-393)TTG>TCG     | p.L131S  |
| Pat_37 | Post-Resistance | MDFI     | 4188   | 37 | 6 | 41613921  | 41613921  | Missense_Mutation | SNP | C  | T  | 4   | 128 | c.134C>T       | c.(133-135)GCG>GTG     | p.A45V   |
| Pat_37 | Post-Resistance | RUNX2    | 860    | 37 | 6 | 45399628  | 45399628  | Missense_Mutation | SNP | G  | A  | 207 | 406 | c.452G>A       | c.(451-453)GGG>GAG     | p.G151E  |
| Pat_37 | Post-Resistance | ENPP5    | 59084  | 37 | 6 | 46135374  | 46135374  | Missense_Mutation | SNP | G  | A  | 90  | 151 | c.626C>T       | c.(625-627)TCA>TTA     | p.S209L  |

|        |                 |           |        |    |   |           |           |                   |     |    |    |     |     |                                      |                      |                |
|--------|-----------------|-----------|--------|----|---|-----------|-----------|-------------------|-----|----|----|-----|-----|--------------------------------------|----------------------|----------------|
| Pat_37 | Post-Resistance | PKHD1     | 5314   | 37 | 6 | 51892990  | 51892990  | Missense_Mutation | SNP | G  | A  | 227 | 499 | c.3524C>T                            | c.(3523-3525)TCC>TTC | p.S1175F       |
| Pat_37 | Post-Resistance | COL9A1    | 1297   | 37 | 6 | 70966482  | 70966482  | Missense_Mutation | SNP | G  | A  | 26  | 45  | c.1492C>T                            | c.(1492-1494)CCT>TCT | p.P498S        |
| Pat_37 | Post-Resistance | ME1       | 4199   | 37 | 6 | 84055900  | 84055900  | Missense_Mutation | SNP | C  | T  | 124 | 301 | c.592G>A                             | c.(592-594)GAA>AAA   | p.E198K        |
| Pat_37 | Post-Resistance | MDN1      | 23195  | 37 | 6 | 90409426  | 90409426  | Missense_Mutation | SNP | G  | A  | 62  | 189 | c.8891C>T                            | c.(8890-8892)CCC>CTC | p.P2964L       |
| Pat_37 | Post-Resistance | WISP3     | 8838   | 37 | 6 | 112385967 | 112385967 | Missense_Mutation | SNP | C  | G  | 164 | 276 | c.356C>G                             | c.(355-357)GCT>GGT   | p.A119G        |
| Pat_37 | Post-Resistance | ENPP3     | 5169   | 37 | 6 | 132004258 | 132004258 | Missense_Mutation | SNP | G  | A  | 171 | 309 | c.1076G>A                            | c.(1075-1077)CGG>CAG | p.R359Q        |
| Pat_37 | Post-Resistance | CTGF      | 1490   | 37 | 6 | 132271591 | 132271592 | Missense_Mutation | DNP | CC | TT | 93  | 83  | c.381_382GG>AA379-384)CTGGAC>CTAA/   |                      | p.D128N        |
| Pat_37 | Post-Resistance | EYA4      | 2070   | 37 | 6 | 133767851 | 133767851 | Missense_Mutation | SNP | C  | T  | 99  | 207 | c.167C>T                             | c.(166-168)TCT>TTT   | p.S56F         |
| Pat_37 | Post-Resistance | SGK1      | 6446   | 37 | 6 | 134528571 | 134528571 | Splice_Site       | SNP | T  | C  | 3   | 57  | c.286_splice                         | c.e3-1               | p.V96_splice   |
| Pat_37 | Post-Resistance | C6orf70   | 55780  | 37 | 6 | 170168250 | 170168250 | Missense_Mutation | SNP | C  | T  | 39  | 88  | c.1042C>T                            | c.(1042-1044)CTT>TTT | p.L348F        |
| Pat_37 | Post-Resistance | IQCE      | 23288  | 37 | 7 | 2611253   | 2611254   | Missense_Mutation | DNP | CC | TT | 46  | 157 | c.224_225CC>TT                       | c.(223-225)ACC>ATT   | p.T75I         |
| Pat_37 | Post-Resistance | CARD11    | 84433  | 37 | 7 | 2956974   | 2956975   | Missense_Mutation | DNP | CC | TT | 11  | 24  | .2652_2653GG>A650-2655)CGGGTC>CGA/   |                      | p.V885I        |
| Pat_37 | Post-Resistance | AIMP2     | 7965   | 37 | 7 | 6063098   | 6063098   | Missense_Mutation | SNP | G  | C  | 18  | 75  | c.739G>C                             | c.(739-741)GGA>CGA   | p.G247R        |
| Pat_37 | Post-Resistance | ISPD      | 729920 | 37 | 7 | 16348164  | 16348164  | Missense_Mutation | SNP | G  | A  | 26  | 59  | c.773C>T                             | c.(772-774)TCA>TTA   | p.S258L        |
| Pat_37 | Post-Resistance | HDAC9     | 9734   | 37 | 7 | 19015548  | 19015548  | Missense_Mutation | SNP | G  | A  | 50  | 107 | c.3142G>A                            | c.(3142-3144)GAA>AAA | p.E1048K       |
| Pat_37 | Post-Resistance | INMT      | 11185  | 37 | 7 | 30795310  | 30795310  | Missense_Mutation | SNP | C  | T  | 47  | 100 | c.635C>T                             | c.(634-636)TCC>TTC   | p.S212F        |
| Pat_37 | Post-Resistance | CCDC129   | 223075 | 37 | 7 | 31614330  | 31614330  | Missense_Mutation | SNP | T  | A  | 39  | 103 | c.572T>A                             | c.(571-573)ATG>AAG   | p.M191K        |
| Pat_37 | Post-Resistance | C7orf16   | 10842  | 37 | 7 | 31736630  | 31736630  | Missense_Mutation | SNP | C  | T  | 69  | 158 | c.287C>T                             | c.(286-288)CCA>CTA   | p.P96L         |
| Pat_37 | Post-Resistance | PGAM2     | 5224   | 37 | 7 | 44104935  | 44104935  | Missense_Mutation | SNP | C  | T  | 4   | 230 | c.194G>A                             | c.(193-195)CGC>CAC   | p.R65H         |
| Pat_37 | Post-Resistance | NPC1L1    | 29881  | 37 | 7 | 44560420  | 44560420  | Splice_Site       | SNP | C  | T  | 58  | 109 | c.3081_splice                        | c.e14-1              | p.G1027_splice |
| Pat_37 | Post-Resistance | POM121L12 | 285877 | 37 | 7 | 53103777  | 53103777  | Missense_Mutation | SNP | C  | T  | 33  | 41  | c.413C>T                             | c.(412-414)ACC>ATC   | p.T138I        |
| Pat_37 | Post-Resistance | LAT2      | 7462   | 37 | 7 | 73638115  | 73638115  | Splice_Site       | SNP | T  | C  | 30  | 306 | c.448_splice                         | c.e11+2              | p.G150_splice  |
| Pat_37 | Post-Resistance | HGF       | 3082   | 37 | 7 | 81346570  | 81346570  | Nonsense_Mutation | SNP | C  | T  | 180 | 317 | c.1383G>A                            | c.(1381-1383)TGG>TGA | p.W461*        |
| Pat_37 | Post-Resistance | DYNC111   | 1780   | 37 | 7 | 95726852  | 95726852  | Missense_Mutation | SNP | C  | T  | 121 | 208 | c.1885C>T                            | c.(1885-1887)CGT>TGT | p.R629C        |
| Pat_37 | Post-Resistance | DLX6      | 1750   | 37 | 7 | 96635385  | 96635385  | Splice_Site       | SNP | G  | A  | 5   | 46  | c.95_splice                          | c.e1+1               | p.H32_splice   |
| Pat_37 | Post-Resistance | PVRIG     | 79037  | 37 | 7 | 99818442  | 99818442  | Missense_Mutation | SNP | G  | T  | 48  | 65  | c.656G>T                             | c.(655-657)TGG>TTG   | p.W219L        |
| Pat_37 | Post-Resistance | SLC12A9   | 56996  | 37 | 7 | 100452361 | 100452361 | Missense_Mutation | SNP | G  | A  | 4   | 200 | c.301G>A                             | c.(301-303)GGG>AGG   | p.G101R        |
| Pat_37 | Post-Resistance | TMEM168   | 64418  | 37 | 7 | 112424369 | 112424369 | Missense_Mutation | SNP | G  | A  | 75  | 136 | c.512C>T                             | c.(511-513)ACT>ATT   | p.T171I        |
| Pat_37 | Post-Resistance | BRAF      | 673    | 37 | 7 | 140453136 | 140453136 | Missense_Mutation | SNP | A  | T  | 81  | 195 | c.1799T>A                            | c.(1798-1800)GTG>GAG | p.V600E        |
| Pat_37 | Post-Resistance | MGAM      | 8972   | 37 | 7 | 141738413 | 141738413 | Missense_Mutation | SNP | G  | A  | 17  | 30  | c.2314G>A                            | c.(2314-2316)GAA>AAA | p.E772K        |
| Pat_37 | Post-Resistance | TMEM176A  | 55365  | 37 | 7 | 150501930 | 150501930 | Missense_Mutation | SNP | G  | A  | 41  | 130 | c.682G>A                             | c.(682-684)GAA>AAA   | p.E228K        |
| Pat_37 | Post-Resistance | ABP1      | 26     | 37 | 7 | 150554225 | 150554225 | Missense_Mutation | SNP | C  | T  | 54  | 92  | c.667C>T                             | c.(667-669)CAT>TAT   | p.H223Y        |
| Pat_37 | Post-Resistance | ASB10     | 136371 | 37 | 7 | 150883992 | 150883993 | Missense_Mutation | DNP | CC | TT | 40  | 73  | c.360_361GG>AA358-363)GCGGAC>GCAA    |                      | p.D121N        |
| Pat_37 | Post-Resistance | PRKAG2    | 51422  | 37 | 7 | 151372621 | 151372621 | Missense_Mutation | SNP | C  | T  | 4   | 195 | c.569G>A                             | c.(568-570)CGC>CAC   | p.R190H        |
| Pat_37 | Post-Resistance | CSMD1     | 64478  | 37 | 8 | 3087634   | 3087634   | Missense_Mutation | SNP | C  | T  | 66  | 112 | c.4276G>A                            | c.(4276-4278)GGA>AGA | p.G1426R       |
| Pat_37 | Post-Resistance | PSD3      | 23362  | 37 | 8 | 18729272  | 18729272  | Missense_Mutation | SNP | G  | A  | 28  | 49  | c.1102C>T                            | c.(1102-1104)CCT>TCT | p.P368S        |
| Pat_37 | Post-Resistance | RP1       | 6101   | 37 | 8 | 55539813  | 55539813  | Missense_Mutation | SNP | C  | T  | 50  | 104 | c.3371C>T                            | c.(3370-3372)TCA>TTA | p.S1124L       |
| Pat_37 | Post-Resistance | LYN       | 4067   | 37 | 8 | 56912099  | 56912100  | Missense_Mutation | DNP | CC | AT | 44  | 149 | .1327_1328CC>A' c.(1327-1329)CCC>ATC |                      | p.P443I        |
| Pat_37 | Post-Resistance | STMN2     | 11075  | 37 | 8 | 80567254  | 80567254  | Missense_Mutation | SNP | G  | A  | 24  | 164 | c.437G>A                             | c.(436-438)CGT>CAT   | p.R146H        |
| Pat_37 | Post-Resistance | DCAF4L2   | 138009 | 37 | 8 | 88886004  | 88886004  | Missense_Mutation | SNP | G  | A  | 104 | 208 | c.196C>T                             | c.(196-198)CCC>TCC   | p.P66S         |
| Pat_37 | Post-Resistance | DPY19L4   | 286148 | 37 | 8 | 95800144  | 95800144  | Missense_Mutation | SNP | G  | A  | 4   | 148 | c.1871G>A                            | c.(1870-1872)CGA>CAA | p.R624Q        |
| Pat_37 | Post-Resistance | UBR5      | 51366  | 37 | 8 | 103306251 | 103306252 | Missense_Mutation | DNP | CC | TT | 44  | 85  | .4280_4281GG>A c.(4279-4281)AGG>AAA  |                      | p.R1427K       |
| Pat_37 | Post-Resistance | KCNV1     | 27012  | 37 | 8 | 110984906 | 110984906 | Missense_Mutation | SNP | G  | A  | 30  | 77  | c.572C>T                             | c.(571-573)ACT>ATT   | p.T191I        |
| Pat_37 | Post-Resistance | KCNQ3     | 3786   | 37 | 8 | 133150166 | 133150166 | Missense_Mutation | SNP | C  | T  | 163 | 279 | c.1666G>A                            | c.(1666-1668)GAC>AAC | p.D556N        |
| Pat_37 | Post-Resistance | OPLAH     | 26873  | 37 | 8 | 145112543 | 145112543 | Missense_Mutation | SNP | A  | C  | 3   | 36  | c.1230T>G                            | c.(1228-1230)TTT>TTG | p.F410L        |
| Pat_37 | Post-Resistance | VPS28     | 51160  | 37 | 8 | 145650178 | 145650178 | Missense_Mutation | SNP | G  | A  | 4   | 232 | c.325C>T                             | c.(325-327)CGG>TGG   | p.R109W        |
| Pat_37 | Post-Resistance | RECQL4    | 9401   | 37 | 8 | 145741403 | 145741403 | Missense_Mutation | SNP | C  | T  | 3   | 79  | c.1100G>A                            | c.(1099-1101)CGG>CAG | p.R367Q        |

|        |                 |          |        |    |   |           |           |                   |     |   |   |     |     |               |                        |               |
|--------|-----------------|----------|--------|----|---|-----------|-----------|-------------------|-----|---|---|-----|-----|---------------|------------------------|---------------|
| Pat_37 | Post-Resistance | GLIS3    | 169792 | 37 | 9 | 4118619   | 4118619   | Missense_Mutation | SNP | G | A | 91  | 201 | c.394C>T      | c.(394-396)CGG>TGG     | p.R132W       |
| Pat_37 | Post-Resistance | CNTLN    | 54875  | 37 | 9 | 17309195  | 17309195  | Missense_Mutation | SNP | C | T | 36  | 85  | c.1286C>T     | c.(1285-1287)TCA>TTA   | p.S429L       |
| Pat_37 | Post-Resistance | TAF1L    | 138474 | 37 | 9 | 32632451  | 32632451  | Missense_Mutation | SNP | C | T | 252 | 445 | c.3127G>A     | c.(3127-3129)GAA>AAA   | p.E1043K      |
| Pat_37 | Post-Resistance | UBAP2    | 55833  | 37 | 9 | 33923897  | 33923897  | Missense_Mutation | SNP | G | T | 4   | 202 | c.2692C>A     | c.(2692-2694)CAG>AAG   | p.Q898K       |
| Pat_37 | Post-Resistance | TLE4     | 7091   | 37 | 9 | 82333720  | 82333720  | Missense_Mutation | SNP | C | T | 175 | 171 | c.1499C>T     | c.(1498-1500)CCC>CTC   | p.P500L       |
| Pat_37 | Post-Resistance | C9orf79  | 286234 | 37 | 9 | 90503459  | 90503459  | Missense_Mutation | SNP | G | A | 42  | 30  | c.4057G>A     | c.(4057-4059)GAG>AAG   | p.E1353K      |
| Pat_37 | Post-Resistance | ASTN2    | 23245  | 37 | 9 | 119739065 | 119739065 | Splice_Site       | SNP | C | T | 38  | 41  | c.1592_splice | c.e8-1                 | p.G531_splice |
| Pat_37 | Post-Resistance | SFRS17A  | 8227   | 37 | X | 1720089   | 1720089   | Missense_Mutation | SNP | G | A | 4   | 235 | c.1690G>A     | c.(1690-1692)GAG>AAG   | p.E564K       |
| Pat_37 | Post-Resistance | MAGEB16  | 139604 | 37 | X | 35820428  | 35820428  | Missense_Mutation | SNP | C | T | 6   | 5   | c.115C>T      | c.(115-117)CTC>TTC     | p.L39F        |
| Pat_37 | Post-Resistance | RPGR     | 6103   | 37 | X | 38180334  | 38180334  | Missense_Mutation | SNP | G | A | 29  | 18  | c.256C>T      | c.(256-258)CCT>TCT     | p.P86S        |
| Pat_37 | Post-Resistance | OTUD6A   | 139562 | 37 | X | 69282378  | 69282378  | Missense_Mutation | SNP | G | A | 27  | 16  | c.4G>A        | c.(4-6)GAT>AAT         | p.D2N         |
| Pat_37 | Post-Resistance | PHKA1    | 5255   | 37 | X | 71870317  | 71870317  | Missense_Mutation | SNP | C | T | 17  | 9   | c.1247G>A     | c.(1246-1248)GGA>GAA   | p.G416E       |
| Pat_37 | Post-Resistance | NRK      | 203447 | 37 | X | 105153465 | 105153465 | Missense_Mutation | SNP | C | T | 30  | 23  | c.1832C>T     | c.(1831-1833)CCA>CTA   | p.P611L       |
| Pat_37 | Post-Resistance | COL4A5   | 1287   | 37 | X | 107866038 | 107866038 | Missense_Mutation | SNP | G | A | 48  | 24  | c.2900G>A     | c.(2899-2901)GGG>GAG   | p.G967E       |
| Pat_37 | Post-Resistance | REBP     | 5973   | 37 | X | 153208465 | 153208465 | Missense_Mutation | SNP | G | A | 3   | 47  | c.529C>T      | c.(529-531)CGG>TGG     | p.R177W       |
| Pat_40 | Pre-Treatment   | DVL1     | 1855   | 37 | 1 | 1271749   | 1271749   | Missense_Mutation | SNP | C | T | 4   | 20  | c.1786G>A     | c.(1786-1788)GCC>ACC   | p.A596T       |
| Pat_40 | Pre-Treatment   | ERRFI1   | 54206  | 37 | 1 | 8073629   | 8073629   | Missense_Mutation | SNP | C | T | 104 | 178 | c.1030G>A     | c.(1030-1032)GGG>AGG   | p.G344R       |
| Pat_40 | Pre-Treatment   | DFFA     | 1676   | 37 | 1 | 10532476  | 10532476  | Missense_Mutation | SNP | C | T | 15  | 77  | c.40G>A       | c.(40-42)GAG>AAG       | p.E14K        |
| Pat_40 | Pre-Treatment   | HSPG2    | 3339   | 37 | 1 | 22200957  | 22200957  | Missense_Mutation | SNP | G | A | 3   | 17  | c.3598C>T     | c.(3598-3600)CGG>TGG   | p.R1200W      |
| Pat_40 | Pre-Treatment   | IL22RA1  | 58985  | 37 | 1 | 24454633  | 24454633  | Missense_Mutation | SNP | G | T | 4   | 36  | c.668C>A      | c.(667-669)CCA>CAA     | p.P223Q       |
| Pat_40 | Pre-Treatment   | C1orf130 | 400746 | 37 | 1 | 24932116  | 24932116  | Missense_Mutation | SNP | G | A | 11  | 40  | c.187G>A      | c.(187-189)GAA>AAA     | p.E63K        |
| Pat_40 | Pre-Treatment   | AHDC1    | 27245  | 37 | 1 | 27876118  | 27876118  | Missense_Mutation | SNP | T | G | 7   | 99  | c.2509A>C     | c.(2509-2511)ACC>CCC   | p.T837P       |
| Pat_40 | Pre-Treatment   | LSM10    | 84967  | 37 | 1 | 36859448  | 36859448  | Nonsense_Mutation | SNP | C | A | 5   | 113 | c.283G>T      | c.(283-285)GAG>TAG     | p.E95*        |
| Pat_40 | Pre-Treatment   | MACF1    | 23499  | 37 | 1 | 39913514  | 39913514  | Nonsense_Mutation | SNP | C | T | 17  | 90  | c.15241C>T    | c.(15241-15243)CAG>TAG | p.Q5081*      |
| Pat_40 | Pre-Treatment   | KIAA0467 | 23334  | 37 | 1 | 43893365  | 43893365  | Missense_Mutation | SNP | G | A | 3   | 44  | c.1066G>A     | c.(1066-1068)GGC>AGC   | p.G356S       |
| Pat_40 | Pre-Treatment   | PTPRF    | 5792   | 37 | 1 | 44069513  | 44069513  | Missense_Mutation | SNP | G | A | 4   | 68  | c.2690G>A     | c.(2689-2691)CGG>CAG   | p.R897Q       |
| Pat_40 | Pre-Treatment   | PLK3     | 1263   | 37 | 1 | 45266313  | 45266313  | Missense_Mutation | SNP | C | T | 2   | 2   | c.178C>T      | c.(178-180)CGC>TGC     | p.R60C        |
| Pat_40 | Pre-Treatment   | MAST2    | 23139  | 37 | 1 | 46495803  | 46495803  | Missense_Mutation | SNP | C | T | 4   | 59  | c.2446C>T     | c.(2446-2448)CGC>TGC   | p.R816C       |
| Pat_40 | Pre-Treatment   | TM2D1    | 83941  | 37 | 1 | 62175095  | 62175095  | Missense_Mutation | SNP | C | T | 13  | 49  | c.253G>A      | c.(253-255)GCA>ACA     | p.A85T        |
| Pat_40 | Pre-Treatment   | IL23R    | 149233 | 37 | 1 | 67635270  | 67635270  | Missense_Mutation | SNP | C | T | 45  | 84  | c.316C>T      | c.(316-318)CCC>TCC     | p.P106S       |
| Pat_40 | Pre-Treatment   | LRRIQ3   | 127255 | 37 | 1 | 74540468  | 74540468  | Missense_Mutation | SNP | A | T | 7   | 36  | c.874T>A      | c.(874-876)TAT>AAT     | p.Y292N       |
| Pat_40 | Pre-Treatment   | LHX8     | 431707 | 37 | 1 | 75626530  | 75626530  | Nonsense_Mutation | SNP | C | T | 92  | 159 | c.1021C>T     | c.(1021-1023)CAG>TAG   | p.Q341*       |
| Pat_40 | Pre-Treatment   | MSH4     | 4438   | 37 | 1 | 76355016  | 76355016  | Missense_Mutation | SNP | G | A | 37  | 60  | c.2188G>A     | c.(2188-2190)GAA>AAA   | p.E730K       |
| Pat_40 | Pre-Treatment   | LPHN2    | 23266  | 37 | 1 | 82408790  | 82408790  | Missense_Mutation | SNP | C | T | 9   | 59  | c.535C>T      | c.(535-537)CGT>TGT     | p.R179C       |
| Pat_40 | Pre-Treatment   | LPPR4    | 9890   | 37 | 1 | 99771489  | 99771489  | Missense_Mutation | SNP | G | A | 4   | 50  | c.1215G>A     | c.(1213-1215)ATG>ATA   | p.M405I       |
| Pat_40 | Pre-Treatment   | HIAT1    | 64645  | 37 | 1 | 100534099 | 100534099 | Missense_Mutation | SNP | C | T | 66  | 96  | c.776C>T      | c.(775-777)CCG>CTG     | p.P259L       |
| Pat_40 | Pre-Treatment   | DPH5     | 51611  | 37 | 1 | 101458271 | 101458271 | Missense_Mutation | SNP | G | A | 5   | 112 | c.556C>T      | c.(556-558)CGG>TGG     | p.R186W       |
| Pat_40 | Pre-Treatment   | COL11A1  | 1301   | 37 | 1 | 103488381 | 103488381 | Missense_Mutation | SNP | C | T | 10  | 55  | c.1162G>A     | c.(1162-1164)GAA>AAA   | p.E388K       |
| Pat_40 | Pre-Treatment   | GSTM5    | 2949   | 37 | 1 | 110255773 | 110255773 | Missense_Mutation | SNP | G | A | 16  | 60  | c.145G>A      | c.(145-147)GAA>AAA     | p.E49K        |
| Pat_40 | Pre-Treatment   | AMPD1    | 270    | 37 | 1 | 115229401 | 115229401 | Nonsense_Mutation | SNP | G | A | 17  | 91  | c.346C>T      | c.(346-348)CAG>TAG     | p.Q116*       |
| Pat_40 | Pre-Treatment   | HAO2     | 51179  | 37 | 1 | 119925542 | 119925542 | Missense_Mutation | SNP | C | T | 10  | 55  | c.136C>T      | c.(136-138)CGC>TGC     | p.R46C        |
| Pat_40 | Pre-Treatment   | NBPF9    | 400818 | 37 | 1 | 144823878 | 144823878 | Missense_Mutation | SNP | A | C | 9   | 146 | c.1919A>C     | c.(1918-1920)TAT>TCT   | p.Y640S       |
| Pat_40 | Pre-Treatment   | ANKRD34A | 284615 | 37 | 1 | 145474041 | 145474041 | Missense_Mutation | SNP | C | T | 42  | 223 | c.713C>T      | c.(712-714)CCC>CTC     | p.P238L       |
| Pat_40 | Pre-Treatment   | NBPF16   | 728936 | 37 | 1 | 148753313 | 148753313 | Missense_Mutation | SNP | T | C | 13  | 329 | c.1330T>C     | c.(1330-1332)TAT>CAT   | p.Y444H       |
| Pat_40 | Pre-Treatment   | MCL1     | 4170   | 37 | 1 | 150551756 | 150551756 | Missense_Mutation | SNP | G | A | 2   | 0   | c.251C>T      | c.(250-252)GCC>GTC     | p.A84V        |
| Pat_40 | Pre-Treatment   | TCHH     | 7062   | 37 | 1 | 152084702 | 152084702 | Missense_Mutation | SNP | G | C | 6   | 65  | c.991C>G      | c.(991-993)CAG>GAG     | p.Q331E       |
| Pat_40 | Pre-Treatment   | HRNR     | 388697 | 37 | 1 | 152192447 | 152192447 | Missense_Mutation | SNP | C | T | 24  | 172 | c.1658G>A     | c.(1657-1659)AGG>AAG   | p.R553K       |

|        |               |           |        |    |    |           |           |                   |     |    |    |     |     |                |                      |               |
|--------|---------------|-----------|--------|----|----|-----------|-----------|-------------------|-----|----|----|-----|-----|----------------|----------------------|---------------|
| Pat_40 | Pre-Treatment | S100A8    | 6279   | 37 | 1  | 153363002 | 153363002 | Missense_Mutation | SNP | C  | T  | 137 | 117 | c.10G>A        | c.(10-12)GAG>AAG     | p.E4K         |
| Pat_40 | Pre-Treatment | NPR1      | 4881   | 37 | 1  | 153656215 | 153656215 | Splice_Site       | SNP | G  | A  | 17  | 40  | c.1400_splice  | c.e7-1               | p.D467_splice |
| Pat_40 | Pre-Treatment | FMO3      | 2328   | 37 | 1  | 171083391 | 171083391 | Missense_Mutation | SNP | C  | T  | 7   | 70  | c.1072C>T      | c.(1072-1074)CCT>TCT | p.P358S       |
| Pat_40 | Pre-Treatment | TNR       | 7143   | 37 | 1  | 175363013 | 175363014 | Missense_Mutation | DNP | CC | TT | 34  | 109 | .1258_1259GG>A | c.(1258-1260)GGG>AAG | p.G420K       |
| Pat_40 | Pre-Treatment | CEP350    | 9857   | 37 | 1  | 180053225 | 180053225 | Missense_Mutation | SNP | C  | T  | 10  | 24  | c.6197C>T      | c.(6196-6198)TCA>TTA | p.S2066L      |
| Pat_40 | Pre-Treatment | QSOX1     | 5768   | 37 | 1  | 180165636 | 180165636 | Nonsense_Mutation | SNP | G  | T  | 12  | 72  | c.1708G>T      | c.(1708-1710)GAG>TAG | p.E570*       |
| Pat_40 | Pre-Treatment | CACNA1E   | 777    | 37 | 1  | 181745324 | 181745324 | Missense_Mutation | SNP | G  | A  | 20  | 137 | c.5227G>A      | c.(5227-5229)GAG>AAG | p.E1743K      |
| Pat_40 | Pre-Treatment | CFHR1     | 3078   | 37 | 1  | 196801125 | 196801125 | Missense_Mutation | SNP | G  | A  | 27  | 55  | c.989G>A       | c.(988-990)AGA>AAA   | p.R330K       |
| Pat_40 | Pre-Treatment | CFHR5     | 81494  | 37 | 1  | 196964859 | 196964859 | Missense_Mutation | SNP | C  | T  | 36  | 85  | c.620C>T       | c.(619-621)TCA>TTA   | p.S207L       |
| Pat_40 | Pre-Treatment | CAMSAP1L1 | 23271  | 37 | 1  | 200817686 | 200817686 | Missense_Mutation | SNP | G  | A  | 22  | 71  | c.1822G>A      | c.(1822-1824)GGT>AGT | p.G608S       |
| Pat_40 | Pre-Treatment | TIMM17A   | 10440  | 37 | 1  | 201934630 | 201934630 | Missense_Mutation | SNP | G  | A  | 5   | 78  | c.389G>A       | c.(388-390)GGT>GAT   | p.G130D       |
| Pat_40 | Pre-Treatment | PPP1R12B  | 4660   | 37 | 1  | 202531971 | 202531971 | Missense_Mutation | SNP | C  | A  | 45  | 207 | c.2573C>A      | c.(2572-2574)GCC>GAC | p.A858D       |
| Pat_40 | Pre-Treatment | ADIPOR1   | 51094  | 37 | 1  | 202910727 | 202910727 | Missense_Mutation | SNP | C  | T  | 23  | 97  | c.1102G>A      | c.(1102-1104)GGC>AGC | p.G368S       |
| Pat_40 | Pre-Treatment | LAMB3     | 3914   | 37 | 1  | 209805978 | 209805978 | Missense_Mutation | SNP | G  | A  | 16  | 17  | c.772C>T       | c.(772-774)CGC>TGC   | p.R258C       |
| Pat_40 | Pre-Treatment | HLX       | 3142   | 37 | 1  | 221055685 | 221055685 | Missense_Mutation | SNP | G  | A  | 4   | 38  | c.952G>A       | c.(952-954)GCA>ACA   | p.A318T       |
| Pat_40 | Pre-Treatment | CAPN2     | 824    | 37 | 1  | 223959916 | 223959916 | Missense_Mutation | SNP | G  | A  | 18  | 91  | c.2054G>A      | c.(2053-2055)GGA>GAA | p.G685E       |
| Pat_40 | Pre-Treatment | LEFTY2    | 7044   | 37 | 1  | 226125308 | 226125308 | Missense_Mutation | SNP | C  | T  | 3   | 20  | c.934G>A       | c.(934-936)GGG>AGG   | p.G312R       |
| Pat_40 | Pre-Treatment | CDC42BPA  | 8476   | 37 | 1  | 227335101 | 227335101 | Missense_Mutation | SNP | C  | T  | 45  | 160 | c.853G>A       | c.(853-855)GAA>AAA   | p.E285K       |
| Pat_40 | Pre-Treatment | ZNF678    | 339500 | 37 | 1  | 227842427 | 227842427 | Missense_Mutation | SNP | G  | A  | 11  | 235 | c.476G>A       | c.(475-477)GGC>GAC   | p.G159D       |
| Pat_40 | Pre-Treatment | ZNF678    | 339500 | 37 | 1  | 227842460 | 227842460 | Missense_Mutation | SNP | A  | G  | 12  | 212 | c.509A>G       | c.(508-510)AAC>AGC   | p.N170S       |
| Pat_40 | Pre-Treatment | SDCCAG8   | 10806  | 37 | 1  | 243493952 | 243493952 | Missense_Mutation | SNP | G  | A  | 15  | 119 | c.1179G>A      | c.(1177-1179)ATG>ATA | p.M393I       |
| Pat_40 | Pre-Treatment | AKT3      | 10000  | 37 | 1  | 243736269 | 243736270 | Missense_Mutation | DNP | CC | TT | 13  | 168 | c.777_778GG>AA | (775-780)TTGGAC>TTAA | p.D260N       |
| Pat_40 | Pre-Treatment | OR2M5     | 127059 | 37 | 1  | 248308997 | 248308997 | Missense_Mutation | SNP | C  | T  | 55  | 508 | c.548C>T       | c.(547-549)TCC>TTC   | p.S183F       |
| Pat_40 | Pre-Treatment | OR2M7     | 391196 | 37 | 1  | 248487323 | 248487323 | Missense_Mutation | SNP | G  | A  | 87  | 82  | c.548C>T       | c.(547-549)TCC>TTC   | p.S183F       |
| Pat_40 | Pre-Treatment | OR2T5     | 401993 | 37 | 1  | 248651963 | 248651963 | Missense_Mutation | SNP | C  | T  | 32  | 220 | c.74C>T        | c.(73-75)TCC>TTC     | p.S25F        |
| Pat_40 | Pre-Treatment | MRC1      | 4360   | 37 | 10 | 18122660  | 18122660  | Missense_Mutation | SNP | C  | T  | 4   | 73  | c.670C>T       | c.(670-672)CCG>TCG   | p.P224S       |
| Pat_40 | Pre-Treatment | BMI1      | 648    | 37 | 10 | 22618172  | 22618172  | Nonsense_Mutation | SNP | C  | T  | 9   | 25  | c.682C>T       | c.(682-684)CGA>TGA   | p.R228*       |
| Pat_40 | Pre-Treatment | ABI1      | 10006  | 37 | 10 | 27037558  | 27037558  | Nonsense_Mutation | SNP | G  | A  | 4   | 109 | c.1468C>T      | c.(1468-1470)CGA>TGA | p.R490*       |
| Pat_40 | Pre-Treatment | EPC1      | 80314  | 37 | 10 | 32576138  | 32576138  | Missense_Mutation | SNP | G  | A  | 53  | 72  | c.1040C>T      | c.(1039-1041)TCG>TTG | p.S347L       |
| Pat_40 | Pre-Treatment | RBP3      | 5949   | 37 | 10 | 48390358  | 48390358  | Missense_Mutation | SNP | C  | T  | 4   | 25  | c.520G>A       | c.(520-522)GGA>AGA   | p.G174R       |
| Pat_40 | Pre-Treatment | A1CF      | 29974  | 37 | 10 | 52573720  | 52573720  | Missense_Mutation | SNP | C  | T  | 42  | 57  | c.1244G>A      | c.(1243-1245)GGA>GAA | p.G415E       |
| Pat_40 | Pre-Treatment | PCDH15    | 65217  | 37 | 10 | 55581646  | 55581646  | Missense_Mutation | SNP | T  | G  | 21  | 119 | c.5840A>C      | c.(5839-5841)CAA>CCA | p.Q1947P      |
| Pat_40 | Pre-Treatment | ANK3      | 288    | 37 | 10 | 61834299  | 61834299  | Missense_Mutation | SNP | C  | T  | 10  | 44  | c.6340G>A      | c.(6340-6342)GAC>AAC | p.D2114N      |
| Pat_40 | Pre-Treatment | CDH23     | 64072  | 37 | 10 | 73539073  | 73539073  | Missense_Mutation | SNP | G  | A  | 4   | 60  | c.5237G>A      | c.(5236-5238)CGG>CAG | p.R1746Q      |
| Pat_40 | Pre-Treatment | ZMIZ1     | 57178  | 37 | 10 | 81070900  | 81070900  | Missense_Mutation | SNP | G  | A  | 6   | 83  | c.3055G>A      | c.(3055-3057)GGA>AGA | p.G1019R      |
| Pat_40 | Pre-Treatment | SFTPA2    | 729238 | 37 | 10 | 81318720  | 81318720  | Missense_Mutation | SNP | T  | G  | 36  | 51  | c.214A>C       | c.(214-216)AAT>CAT   | p.N72H        |
| Pat_40 | Pre-Treatment | OPN4      | 94233  | 37 | 10 | 88417853  | 88417853  | Missense_Mutation | SNP | A  | G  | 31  | 23  | c.355A>G       | c.(355-357)ATG>GTG   | p.M119V       |
| Pat_40 | Pre-Treatment | GLUD1     | 2746   | 37 | 10 | 88836389  | 88836389  | Missense_Mutation | SNP | C  | T  | 6   | 116 | c.470G>A       | c.(469-471)AGT>AAT   | p.S157N       |
| Pat_40 | Pre-Treatment | ACTA2     | 59     | 37 | 10 | 90699450  | 90699450  | Missense_Mutation | SNP | G  | A  | 3   | 54  | c.622C>T       | c.(622-624)CGT>TGT   | p.R208C       |
| Pat_40 | Pre-Treatment | MYOF      | 26509  | 37 | 10 | 95159169  | 95159169  | Missense_Mutation | SNP | C  | T  | 9   | 29  | c.1201G>A      | c.(1201-1203)GTT>ATT | p.V401I       |
| Pat_40 | Pre-Treatment | CYP2C19   | 1557   | 37 | 10 | 96540336  | 96540336  | Missense_Mutation | SNP | G  | A  | 42  | 114 | c.562G>A       | c.(562-564)GAT>AAT   | p.D188N       |
| Pat_40 | Pre-Treatment | HPSE2     | 60495  | 37 | 10 | 100249833 | 100249833 | Missense_Mutation | SNP | A  | G  | 17  | 94  | c.1441T>C      | c.(1441-1443)TAT>CAT | p.Y481H       |
| Pat_40 | Pre-Treatment | ACSL5     | 51703  | 37 | 10 | 114173027 | 114173027 | Missense_Mutation | SNP | C  | T  | 19  | 89  | c.1045C>T      | c.(1045-1047)CCC>TCC | p.P349S       |
| Pat_40 | Pre-Treatment | FGFR2     | 2263   | 37 | 10 | 123245021 | 123245021 | Missense_Mutation | SNP | C  | T  | 15  | 48  | c.2083G>A      | c.(2083-2085)GAG>AAG | p.E695K       |
| Pat_40 | Pre-Treatment | DMBT1     | 1755   | 37 | 10 | 124392709 | 124392709 | Missense_Mutation | SNP | G  | A  | 46  | 61  | c.6013G>A      | c.(6013-6015)GAT>AAT | p.D2005N      |
| Pat_40 | Pre-Treatment | DOCK1     | 1793   | 37 | 10 | 129172323 | 129172323 | Missense_Mutation | SNP | C  | T  | 5   | 16  | c.3457C>T      | c.(3457-3459)CTT>TTT | p.L1153F      |
| Pat_40 | Pre-Treatment | CYP2E1    | 1571   | 37 | 10 | 135351354 | 135351354 | Missense_Mutation | SNP | G  | A  | 16  | 79  | c.1255G>A      | c.(1255-1257)GGA>AGA | p.G419R       |



|        |               |          |        |    |    |           |           |                   |     |    |    |     |     |                |                         |          |
|--------|---------------|----------|--------|----|----|-----------|-----------|-------------------|-----|----|----|-----|-----|----------------|-------------------------|----------|
| Pat_40 | Pre-Treatment | OR51G1   | 79324  | 37 | 11 | 4945065   | 4945065   | Nonsense_Mutation | SNP | G  | A  | 6   | 17  | c.505C>T       | c.(505-507)CAA>TAA      | p.Q169*  |
| Pat_40 | Pre-Treatment | OR52A5   | 390054 | 37 | 11 | 5153391   | 5153391   | Missense_Mutation | SNP | G  | A  | 12  | 91  | c.482C>T       | c.(481-483)TCC>TTC      | p.S161F  |
| Pat_40 | Pre-Treatment | OR51B4   | 79339  | 37 | 11 | 5322536   | 5322536   | Missense_Mutation | SNP | G  | A  | 7   | 22  | c.641C>T       | c.(640-642)TCT>TTT      | p.S214F  |
| Pat_40 | Pre-Treatment | OR51B2   | 79345  | 37 | 11 | 5345505   | 5345505   | Missense_Mutation | SNP | G  | A  | 7   | 8   | c.23C>T        | c.(22-24)GCC>GTC        | p.A8V    |
| Pat_40 | Pre-Treatment | UBQLN3   | 50613  | 37 | 11 | 5530502   | 5530502   | Missense_Mutation | SNP | C  | T  | 5   | 40  | c.287G>A       | c.(286-288)CGT>CAT      | p.R96H   |
| Pat_40 | Pre-Treatment | OR56B1   | 387748 | 37 | 11 | 5758588   | 5758588   | Missense_Mutation | SNP | C  | T  | 151 | 281 | c.842C>T       | c.(841-843)CCA>CTA      | p.P281L  |
| Pat_40 | Pre-Treatment | PPFIBP2  | 8495   | 37 | 11 | 7672168   | 7672168   | Missense_Mutation | SNP | G  | A  | 4   | 103 | c.2219G>A      | c.(2218-2220)CGA>CAA    | p.R740Q  |
| Pat_40 | Pre-Treatment | SWAP70   | 23075  | 37 | 11 | 9749608   | 9749608   | Missense_Mutation | SNP | G  | A  | 15  | 42  | c.651G>A       | c.(649-651)ATG>ATA      | p.M217I  |
| Pat_40 | Pre-Treatment | PLEKHA7  | 144100 | 37 | 11 | 16838766  | 16838767  | Missense_Mutation | DNP | CC | TT | 22  | 47  | .1446_1447GG>A | c.(1444-1449)GGGGGC>GGA | p.G483S  |
| Pat_40 | Pre-Treatment | ABCC8    | 6833   | 37 | 11 | 17419984  | 17419984  | Missense_Mutation | SNP | C  | T  | 13  | 17  | c.3655G>A      | c.(3655-3657)GAG>AAG    | p.E1219K |
| Pat_40 | Pre-Treatment | RCN1     | 5954   | 37 | 11 | 32124946  | 32124946  | Missense_Mutation | SNP | C  | T  | 11  | 74  | c.808C>T       | c.(808-810)CGC>TGC      | p.R270C  |
| Pat_40 | Pre-Treatment | PHF21A   | 51317  | 37 | 11 | 45959791  | 45959791  | Missense_Mutation | SNP | G  | A  | 4   | 113 | c.1522C>T      | c.(1522-1524)CGT>TGT    | p.R508C  |
| Pat_40 | Pre-Treatment | C1QTNF4  | 114900 | 37 | 11 | 47612076  | 47612076  | Missense_Mutation | SNP | C  | T  | 2   | 2   | c.287G>A       | c.(286-288)CGA>CAA      | p.R96Q   |
| Pat_40 | Pre-Treatment | PTPRJ    | 5795   | 37 | 11 | 48134314  | 48134314  | Missense_Mutation | SNP | C  | T  | 64  | 91  | c.131C>T       | c.(130-132)CCT>CTT      | p.P44L   |
| Pat_40 | Pre-Treatment | TRIM48   | 79097  | 37 | 11 | 55035844  | 55035844  | Missense_Mutation | SNP | T  | C  | 6   | 142 | c.574T>C       | c.(574-576)TAC>CAC      | p.Y192H  |
| Pat_40 | Pre-Treatment | OR4C11   | 219429 | 37 | 11 | 55371068  | 55371068  | Missense_Mutation | SNP | G  | A  | 18  | 89  | c.782C>T       | c.(781-783)ACC>ATC      | p.T261I  |
| Pat_40 | Pre-Treatment | OR4C6    | 219432 | 37 | 11 | 55433089  | 55433090  | Missense_Mutation | DNP | GG | AA | 9   | 62  | c.447_448GG>A  | c.(445-450)GGGGGA>GGAA  | p.G150R  |
| Pat_40 | Pre-Treatment | OR5D13   | 390142 | 37 | 11 | 55541362  | 55541362  | Missense_Mutation | SNP | C  | T  | 45  | 144 | c.449C>T       | c.(448-450)TCC>TTC      | p.S150F  |
| Pat_40 | Pre-Treatment | OR511    | 10798  | 37 | 11 | 55703012  | 55703012  | Missense_Mutation | SNP | G  | A  | 29  | 43  | c.865C>T       | c.(865-867)CCG>TCG      | p.P289S  |
| Pat_40 | Pre-Treatment | OR5M3    | 219482 | 37 | 11 | 56237733  | 56237733  | Missense_Mutation | SNP | C  | T  | 10  | 63  | c.241G>A       | c.(241-243)GAA>AAA      | p.E81K   |
| Pat_40 | Pre-Treatment | FAM111B  | 374393 | 37 | 11 | 58892997  | 58892997  | Missense_Mutation | SNP | C  | T  | 70  | 270 | c.1427C>T      | c.(1426-1428)ACT>ATT    | p.T476I  |
| Pat_40 | Pre-Treatment | GANAB    | 23193  | 37 | 11 | 62397931  | 62397931  | Missense_Mutation | SNP | C  | T  | 4   | 79  | c.1433G>A      | c.(1432-1434)CGA>CAA    | p.R478Q  |
| Pat_40 | Pre-Treatment | RTN3     | 10313  | 37 | 11 | 63486769  | 63486769  | Nonsense_Mutation | SNP | T  | A  | 32  | 42  | c.795T>A       | c.(793-795)TAT>TAA      | p.Y265*  |
| Pat_40 | Pre-Treatment | CCDC88B  | 283234 | 37 | 11 | 64118984  | 64118984  | Missense_Mutation | SNP | G  | A  | 2   | 2   | c.2995G>A      | c.(2995-2997)GGG>AGG    | p.G999R  |
| Pat_40 | Pre-Treatment | CDC42BPG | 55561  | 37 | 11 | 64602851  | 64602851  | Missense_Mutation | SNP | C  | T  | 36  | 216 | c.1921G>A      | c.(1921-1923)GAA>AAA    | p.E641K  |
| Pat_40 | Pre-Treatment | LRP5     | 4041   | 37 | 11 | 68171002  | 68171002  | Missense_Mutation | SNP | C  | T  | 20  | 57  | c.1636C>T      | c.(1636-1638)CCG>TCG    | p.P546S  |
| Pat_40 | Pre-Treatment | PHOX2A   | 401    | 37 | 11 | 71952310  | 71952310  | Missense_Mutation | SNP | G  | A  | 3   | 28  | c.241C>T       | c.(241-243)CCA>TCA      | p.P81S   |
| Pat_40 | Pre-Treatment | USP35    | 57558  | 37 | 11 | 77921528  | 77921528  | Missense_Mutation | SNP | C  | T  | 19  | 78  | c.2627C>T      | c.(2626-2628)GCT>GTT    | p.A876V  |
| Pat_40 | Pre-Treatment | PCF11    | 51585  | 37 | 11 | 82878325  | 82878325  | Missense_Mutation | SNP | C  | A  | 4   | 34  | c.1976C>A      | c.(1975-1977)GCA>GAA    | p.A659E  |
| Pat_40 | Pre-Treatment | TYR      | 7299   | 37 | 11 | 88924454  | 88924454  | Missense_Mutation | SNP | G  | A  | 47  | 57  | c.904G>A       | c.(904-906)GGA>AGA      | p.G302R  |
| Pat_40 | Pre-Treatment | DYNC2H1  | 79659  | 37 | 11 | 103306744 | 103306744 | Missense_Mutation | SNP | G  | A  | 4   | 58  | c.12440G>A     | c.(12439-12441)CGT>CAT  | p.R4147H |
| Pat_40 | Pre-Treatment | USP28    | 57646  | 37 | 11 | 113704150 | 113704150 | Nonsense_Mutation | SNP | C  | A  | 66  | 54  | c.751G>T       | c.(751-753)GAA>TAA      | p.E251*  |
| Pat_40 | Pre-Treatment | PAFAH1B2 | 5049   | 37 | 11 | 117038252 | 117038252 | Missense_Mutation | SNP | A  | G  | 3   | 44  | c.527A>G       | c.(526-528)GAC>GGC      | p.D176G  |
| Pat_40 | Pre-Treatment | B4GALNT3 | 283358 | 37 | 12 | 662410    | 662410    | Missense_Mutation | SNP | G  | A  | 19  | 101 | c.1321G>A      | c.(1321-1323)GAG>AAG    | p.E441K  |
| Pat_40 | Pre-Treatment | CACNA1C  | 775    | 37 | 12 | 2797838   | 2797838   | Missense_Mutation | SNP | G  | A  | 5   | 32  | c.6259G>A      | c.(6259-6261)GGC>AGC    | p.G2087S |
| Pat_40 | Pre-Treatment | CD9      | 928    | 37 | 12 | 6344459   | 6344459   | Missense_Mutation | SNP | C  | T  | 17  | 121 | c.413C>T       | c.(412-414)CCC>CTC      | p.P138L  |
| Pat_40 | Pre-Treatment | PLEKHG6  | 55200  | 37 | 12 | 6421516   | 6421517   | Missense_Mutation | DNP | GG | AA | 13  | 69  | c.124_125GG>A  | c.(124-126)GGA>AAA      | p.G42K   |
| Pat_40 | Pre-Treatment | TNFRSF1A | 7132   | 37 | 12 | 6442254   | 6442254   | Missense_Mutation | SNP | C  | T  | 5   | 95  | c.532G>A       | c.(532-534)GAG>AAG      | p.E178K  |
| Pat_40 | Pre-Treatment | VAMP1    | 6843   | 37 | 12 | 6575488   | 6575488   | Missense_Mutation | SNP | C  | T  | 10  | 45  | c.32G>A        | c.(31-33)GGG>GAG        | p.G11E   |
| Pat_40 | Pre-Treatment | PRB3     | 5544   | 37 | 12 | 11420548  | 11420548  | Missense_Mutation | SNP | C  | T  | 23  | 139 | c.635G>A       | c.(634-636)GGA>GAA      | p.G212E  |
| Pat_40 | Pre-Treatment | SLCO1C1  | 53919  | 37 | 12 | 20864329  | 20864329  | Nonsense_Mutation | SNP | T  | A  | 30  | 184 | c.414T>A       | c.(412-414)TAT>TAA      | p.Y138*  |
| Pat_40 | Pre-Treatment | ABCC9    | 10060  | 37 | 12 | 22015914  | 22015914  | Missense_Mutation | SNP | G  | A  | 7   | 58  | c.2312C>T      | c.(2311-2313)ACT>ATT    | p.T771I  |
| Pat_40 | Pre-Treatment | ADAMTS20 | 80070  | 37 | 12 | 43846171  | 43846171  | Missense_Mutation | SNP | C  | T  | 27  | 67  | c.1985G>A      | c.(1984-1986)GGA>GAA    | p.G662E  |
| Pat_40 | Pre-Treatment | ARID2    | 196528 | 37 | 12 | 46246081  | 46246081  | Missense_Mutation | SNP | C  | T  | 9   | 48  | c.4175C>T      | c.(4174-4176)CCA>CTA    | p.P1392L |
| Pat_40 | Pre-Treatment | TROAP    | 10024  | 37 | 12 | 49724313  | 49724313  | Missense_Mutation | SNP | G  | T  | 6   | 46  | c.1685G>T      | c.(1684-1686)AGT>ATT    | p.S562I  |
| Pat_40 | Pre-Treatment | TROAP    | 10024  | 37 | 12 | 49724403  | 49724403  | Missense_Mutation | SNP | A  | G  | 11  | 61  | c.1775A>G      | c.(1774-1776)TAC>TGC    | p.Y592C  |
| Pat_40 | Pre-Treatment | KCNH3    | 23416  | 37 | 12 | 49937265  | 49937265  | Missense_Mutation | SNP | G  | A  | 4   | 91  | c.787G>A       | c.(787-789)GTC>ATC      | p.V263I  |

|        |               |           |        |    |    |           |           |                   |     |    |    |     |     |                                      |                        |               |
|--------|---------------|-----------|--------|----|----|-----------|-----------|-------------------|-----|----|----|-----|-----|--------------------------------------|------------------------|---------------|
| Pat_40 | Pre-Treatment | KRT75     | 9119   | 37 | 12 | 52827025  | 52827025  | Missense_Mutation | SNP | C  | A  | 3   | 33  | c.510G>T                             | c.(508-510)TTG>TTT     | p.L170F       |
| Pat_40 | Pre-Treatment | KRT6C     | 286887 | 37 | 12 | 52863452  | 52863452  | Splice_Site       | SNP | A  | T  | 38  | 164 | c.1424_splice                        | c.e7+1                 | p.R475_splice |
| Pat_40 | Pre-Treatment | CSAD      | 51380  | 37 | 12 | 53565186  | 53565186  | Missense_Mutation | SNP | C  | T  | 4   | 70  | c.491G>A                             | c.(490-492)CGC>CAC     | p.R164H       |
| Pat_40 | Pre-Treatment | ITGB7     | 3695   | 37 | 12 | 53588070  | 53588070  | Missense_Mutation | SNP | G  | A  | 12  | 81  | c.1220C>T                            | c.(1219-1221)TCT>TTT   | p.S407F       |
| Pat_40 | Pre-Treatment | HOXC10    | 3226   | 37 | 12 | 54379286  | 54379286  | Missense_Mutation | SNP | C  | A  | 7   | 59  | c.243C>A                             | c.(241-243)GAC>GAA     | p.D81E        |
| Pat_40 | Pre-Treatment | ITGA5     | 3678   | 37 | 12 | 54802681  | 54802681  | Missense_Mutation | SNP | G  | A  | 33  | 90  | c.641C>T                             | c.(640-642)ACC>ATC     | p.T214I       |
| Pat_40 | Pre-Treatment | OR10A7    | 121364 | 37 | 12 | 55615268  | 55615268  | Missense_Mutation | SNP | C  | T  | 9   | 54  | c.460C>T                             | c.(460-462)CCT>TCT     | p.P154S       |
| Pat_40 | Pre-Treatment | OR6C2     | 341416 | 37 | 12 | 55846809  | 55846809  | Missense_Mutation | SNP | G  | A  | 36  | 84  | c.812G>A                             | c.(811-813)GGA>GAA     | p.G271E       |
| Pat_40 | Pre-Treatment | BAZ2A     | 11176  | 37 | 12 | 57003663  | 57003663  | Missense_Mutation | SNP | C  | T  | 3   | 34  | c.1955G>A                            | c.(1954-1956)CGG>CAG   | p.R652Q       |
| Pat_40 | Pre-Treatment | ATP5B     | 506    | 37 | 12 | 57037341  | 57037341  | Missense_Mutation | SNP | G  | A  | 21  | 113 | c.638C>T                             | c.(637-639)ACT>ATT     | p.T213I       |
| Pat_40 | Pre-Treatment | C12orf26  | 84190  | 37 | 12 | 82832521  | 82832521  | Missense_Mutation | SNP | C  | T  | 32  | 193 | c.1429C>T                            | c.(1429-1431)CGT>TGT   | p.R477C       |
| Pat_40 | Pre-Treatment | GALNT4    | 8693   | 37 | 12 | 89917357  | 89917358  | Missense_Mutation | DNP | GG | AA | 119 | 364 | c.969_970CC>TT.(967-972)TACCTT>TATTT |                        | p.L324F       |
| Pat_40 | Pre-Treatment | STAB2     | 55576  | 37 | 12 | 104089415 | 104089415 | Missense_Mutation | SNP | G  | A  | 33  | 114 | c.3463G>A                            | c.(3463-3465)GGC>AGC   | p.G1155S      |
| Pat_40 | Pre-Treatment | APPL2     | 55198  | 37 | 12 | 105610863 | 105610863 | Missense_Mutation | SNP | G  | A  | 22  | 51  | c.269C>T                             | c.(268-270)TCC>TTC     | p.S90F        |
| Pat_40 | Pre-Treatment | ALKBH2    | 121642 | 37 | 12 | 109527981 | 109527981 | Missense_Mutation | SNP | C  | G  | 15  | 93  | c.312G>C                             | c.(310-312)AAG>AAC     | p.K104N       |
| Pat_40 | Pre-Treatment | ACACB     | 32     | 37 | 12 | 109577469 | 109577469 | Missense_Mutation | SNP | C  | T  | 5   | 71  | c.259C>T                             | c.(259-261)CGG>TGG     | p.R87W        |
| Pat_40 | Pre-Treatment | CUX2      | 23316  | 37 | 12 | 111758227 | 111758227 | Missense_Mutation | SNP | C  | T  | 3   | 55  | c.2414C>T                            | c.(2413-2415)CCC>CTC   | p.P805L       |
| Pat_40 | Pre-Treatment | C12orf51  | 283450 | 37 | 12 | 112657240 | 112657240 | Missense_Mutation | SNP | G  | A  | 5   | 176 | c.5758C>T                            | c.(5758-5760)CGG>TGG   | p.R1920W      |
| Pat_40 | Pre-Treatment | RPH3A     | 22895  | 37 | 12 | 113307833 | 113307833 | Missense_Mutation | SNP | G  | A  | 10  | 21  | c.785G>A                             | c.(784-786)CGG>CAG     | p.R262Q       |
| Pat_40 | Pre-Treatment | MED13L    | 23389  | 37 | 12 | 116435017 | 116435017 | Missense_Mutation | SNP | C  | T  | 12  | 82  | c.2588G>A                            | c.(2587-2589)AGG>AAG   | p.R863K       |
| Pat_40 | Pre-Treatment | KSR2      | 283455 | 37 | 12 | 118016990 | 118016990 | Nonsense_Mutation | SNP | C  | T  | 9   | 46  | c.1172G>A                            | c.(1171-1173)TGG>TAG   | p.W391*       |
| Pat_40 | Pre-Treatment | RSRC2     | 65117  | 37 | 12 | 123003404 | 123003404 | Missense_Mutation | SNP | C  | T  | 92  | 600 | c.380G>A                             | c.(379-381)AGA>AAA     | p.R127K       |
| Pat_40 | Pre-Treatment | DNAH10    | 196385 | 37 | 12 | 124288369 | 124288369 | Missense_Mutation | SNP | C  | T  | 8   | 76  | c.2422C>T                            | c.(2422-2424)CCA>TCA   | p.P808S       |
| Pat_40 | Pre-Treatment | FZD10     | 11211  | 37 | 12 | 130648985 | 130648985 | Missense_Mutation | SNP | G  | A  | 4   | 25  | c.1498G>A                            | c.(1498-1500)GCC>ACC   | p.A500T       |
| Pat_40 | Pre-Treatment | RIMBP2    | 23504  | 37 | 12 | 130919401 | 130919401 | Missense_Mutation | SNP | C  | T  | 15  | 32  | c.2080G>A                            | c.(2080-2082)GAG>AAG   | p.E694K       |
| Pat_40 | Pre-Treatment | ULK1      | 8408   | 37 | 12 | 132400462 | 132400462 | Missense_Mutation | SNP | C  | T  | 5   | 69  | c.1636C>T                            | c.(1636-1638)CGC>TGC   | p.R546C       |
| Pat_40 | Pre-Treatment | SACS      | 26278  | 37 | 13 | 23904499  | 23904499  | Missense_Mutation | SNP | C  | T  | 19  | 71  | c.13516G>A                           | c.(13516-13518)GCT>ACT | p.A4506T      |
| Pat_40 | Pre-Treatment | FREM2     | 341640 | 37 | 13 | 39420787  | 39420787  | Missense_Mutation | SNP | A  | G  | 22  | 73  | c.6097A>G                            | c.(6097-6099)ACG>GCG   | p.T2033A      |
| Pat_40 | Pre-Treatment | ELF1      | 1997   | 37 | 13 | 41515089  | 41515089  | Missense_Mutation | SNP | A  | C  | 24  | 53  | c.1224T>G                            | c.(1222-1224)GAT>GAG   | p.D408E       |
| Pat_40 | Pre-Treatment | LOC220429 | 220429 | 37 | 13 | 50466086  | 50466086  | Missense_Mutation | SNP | T  | A  | 5   | 20  | c.1360T>A                            | c.(1360-1362)TAC>AAC   | p.Y454N       |
| Pat_40 | Pre-Treatment | OLFM4     | 10562  | 37 | 13 | 53603032  | 53603032  | Missense_Mutation | SNP | G  | A  | 27  | 85  | c.61G>A                              | c.(61-63)GAT>AAT       | p.D21N        |
| Pat_40 | Pre-Treatment | DCT       | 1638   | 37 | 13 | 95131305  | 95131305  | Missense_Mutation | SNP | T  | C  | 33  | 54  | c.205A>G                             | c.(205-207)AGG>GGG     | p.R69G        |
| Pat_40 | Pre-Treatment | DZIP1     | 22873  | 37 | 13 | 96241429  | 96241429  | Missense_Mutation | SNP | G  | A  | 25  | 58  | c.2006C>T                            | c.(2005-2007)CCC>CTC   | p.P669L       |
| Pat_40 | Pre-Treatment | SLC10A2   | 6555   | 37 | 13 | 103705031 | 103705031 | Missense_Mutation | SNP | G  | A  | 14  | 76  | c.524C>T                             | c.(523-525)CCT>CTT     | p.P175L       |
| Pat_40 | Pre-Treatment | EFNB2     | 1948   | 37 | 13 | 107145708 | 107145708 | Missense_Mutation | SNP | A  | G  | 14  | 117 | c.682T>C                             | c.(682-684)TTT>CTT     | p.F228L       |
| Pat_40 | Pre-Treatment | POTEG     | 404785 | 37 | 14 | 19553531  | 19553531  | Missense_Mutation | SNP | G  | A  | 10  | 296 | c.115G>A                             | c.(115-117)GGC>AGC     | p.G39S        |
| Pat_40 | Pre-Treatment | OR4L1     | 122742 | 37 | 14 | 20528889  | 20528889  | Missense_Mutation | SNP | C  | T  | 48  | 111 | c.686C>T                             | c.(685-687)TCA>TTA     | p.S229L       |
| Pat_40 | Pre-Treatment | TEP1      | 7011   | 37 | 14 | 20857894  | 20857894  | Missense_Mutation | SNP | G  | T  | 4   | 52  | c.2340C>A                            | c.(2338-2340)GAC>GAA   | p.D780E       |
| Pat_40 | Pre-Treatment | METTL3    | 56339  | 37 | 14 | 21969242  | 21969242  | Missense_Mutation | SNP | G  | A  | 10  | 85  | c.929C>T                             | c.(928-930)TCT>TTT     | p.S310F       |
| Pat_40 | Pre-Treatment | MYH6      | 4624   | 37 | 14 | 23855328  | 23855328  | Nonsense_Mutation | SNP | G  | A  | 4   | 57  | c.4972C>T                            | c.(4972-4974)CAG>TAG   | p.Q1658*      |
| Pat_40 | Pre-Treatment | MYH6      | 4624   | 37 | 14 | 23863057  | 23863057  | Nonsense_Mutation | SNP | G  | A  | 14  | 66  | c.2746C>T                            | c.(2746-2748)CAG>TAG   | p.Q916*       |
| Pat_40 | Pre-Treatment | MYH7      | 4625   | 37 | 14 | 23888763  | 23888763  | Missense_Mutation | SNP | C  | T  | 4   | 111 | c.3782G>A                            | c.(3781-3783)AGC>AAC   | p.S1261N      |
| Pat_40 | Pre-Treatment | FITM1     | 161247 | 37 | 14 | 24600818  | 24600818  | Nonsense_Mutation | SNP | C  | T  | 3   | 29  | c.46C>T                              | c.(46-48)CGA>TGA       | p.R16*        |
| Pat_40 | Pre-Treatment | RALGAPA1  | 253959 | 37 | 14 | 36207819  | 36207819  | Missense_Mutation | SNP | G  | A  | 35  | 95  | c.1487C>T                            | c.(1486-1488)TCC>TTC   | p.S496F       |
| Pat_40 | Pre-Treatment | PYGL      | 5836   | 37 | 14 | 51382622  | 51382622  | Missense_Mutation | SNP | C  | T  | 3   | 49  | c.1160G>A                            | c.(1159-1161)CGC>CAC   | p.R387H       |
| Pat_40 | Pre-Treatment | OTX2      | 5015   | 37 | 14 | 57272108  | 57272108  | Missense_Mutation | SNP | C  | T  | 6   | 51  | c.67G>A                              | c.(67-69)GAC>AAC       | p.D23N        |
| Pat_40 | Pre-Treatment | SPTB      | 6710   | 37 | 14 | 65246540  | 65246540  | Missense_Mutation | SNP | C  | T  | 4   | 116 | c.4376G>A                            | c.(4375-4377)CGG>CAG   | p.R1459Q      |

|        |               |           |        |    |    |           |           |                   |     |    |    |     |     |                |                      |          |
|--------|---------------|-----------|--------|----|----|-----------|-----------|-------------------|-----|----|----|-----|-----|----------------|----------------------|----------|
| Pat_40 | Pre-Treatment | SIPA1L1   | 26037  | 37 | 14 | 72128160  | 72128160  | Missense_Mutation | SNP | C  | T  | 30  | 101 | c.2231C>T      | c.(2230-2232)CCG>CTG | p.P744L  |
| Pat_40 | Pre-Treatment | SIPA1L1   | 26037  | 37 | 14 | 72152192  | 72152192  | Missense_Mutation | SNP | G  | A  | 3   | 28  | c.3218G>A      | c.(3217-3219)AGC>AAC | p.S1073N |
| Pat_40 | Pre-Treatment | RBM25     | 58517  | 37 | 14 | 73570138  | 73570138  | Missense_Mutation | SNP | G  | A  | 10  | 25  | c.1106G>A      | c.(1105-1107)CGG>CAG | p.R369Q  |
| Pat_40 | Pre-Treatment | C14orf115 | 55237  | 37 | 14 | 74825074  | 74825074  | Missense_Mutation | SNP | C  | T  | 30  | 121 | c.1588C>T      | c.(1588-1590)CGC>TGC | p.R530C  |
| Pat_40 | Pre-Treatment | KCNK13    | 56659  | 37 | 14 | 90651187  | 90651187  | Missense_Mutation | SNP | A  | C  | 10  | 47  | c.1067A>C      | c.(1066-1068)AAC>ACC | p.N356T  |
| Pat_40 | Pre-Treatment | CCDC88C   | 440193 | 37 | 14 | 91780280  | 91780281  | Missense_Mutation | DNP | CC | TT | 8   | 34  | .1879_1880GG>A | c.(1879-1881)GGG>AAG | p.G627K  |
| Pat_40 | Pre-Treatment | UBR7      | 55148  | 37 | 14 | 93686736  | 93686736  | Nonsense_Mutation | SNP | C  | T  | 10  | 221 | c.1102C>T      | c.(1102-1104)CAG>TAG | p.Q368*  |
| Pat_40 | Pre-Treatment | PPP2R5C   | 5527   | 37 | 14 | 102323122 | 102323122 | Nonsense_Mutation | SNP | G  | A  | 26  | 165 | c.194G>A       | c.(193-195)TGG>TAG   | p.W65*   |
| Pat_40 | Pre-Treatment | OR4M2     | 390538 | 37 | 15 | 22368697  | 22368697  | Missense_Mutation | SNP | G  | A  | 107 | 216 | c.122G>A       | c.(121-123)GGA>GAA   | p.G41E   |
| Pat_40 | Pre-Treatment | TJP1      | 7082   | 37 | 15 | 30008923  | 30008923  | Missense_Mutation | SNP | C  | T  | 15  | 66  | c.4094G>A      | c.(4093-4095)AGA>AAA | p.R1365K |
| Pat_40 | Pre-Treatment | THBS1     | 7057   | 37 | 15 | 39886363  | 39886363  | Missense_Mutation | SNP | C  | T  | 4   | 52  | c.3331C>T      | c.(3331-3333)CGT>TGT | p.R1111C |
| Pat_40 | Pre-Treatment | NDUFAF1   | 51103  | 37 | 15 | 41687083  | 41687083  | Missense_Mutation | SNP | C  | A  | 12  | 129 | c.733G>T       | c.(733-735)GGG>TGG   | p.G245W  |
| Pat_40 | Pre-Treatment | MGA       | 23269  | 37 | 15 | 42035184  | 42035184  | Missense_Mutation | SNP | C  | T  | 6   | 38  | c.5026C>T      | c.(5026-5028)CCT>TCT | p.P1676S |
| Pat_40 | Pre-Treatment | TGM7      | 116179 | 37 | 15 | 43584182  | 43584182  | Missense_Mutation | SNP | C  | T  | 9   | 36  | c.553G>A       | c.(553-555)GGG>AGG   | p.G185R  |
| Pat_40 | Pre-Treatment | TP53BP1   | 7158   | 37 | 15 | 43748444  | 43748444  | Missense_Mutation | SNP | C  | T  | 4   | 60  | c.2347G>A      | c.(2347-2349)GAT>AAT | p.D783N  |
| Pat_40 | Pre-Treatment | SLC28A2   | 9153   | 37 | 15 | 45554220  | 45554220  | Missense_Mutation | SNP | C  | T  | 40  | 155 | c.178C>T       | c.(178-180)CGG>TGG   | p.R60W   |
| Pat_40 | Pre-Treatment | PLDN      | 26258  | 37 | 15 | 45897629  | 45897629  | Missense_Mutation | SNP | G  | T  | 4   | 65  | c.316G>T       | c.(316-318)GCT>TCT   | p.A106S  |
| Pat_40 | Pre-Treatment | NEDD4     | 4734   | 37 | 15 | 56155202  | 56155202  | Missense_Mutation | SNP | G  | A  | 20  | 72  | c.1840C>T      | c.(1840-1842)CCA>TCA | p.P614S  |
| Pat_40 | Pre-Treatment | ALDH1A2   | 8854   | 37 | 15 | 58284979  | 58284979  | Missense_Mutation | SNP | C  | T  | 52  | 94  | c.722G>A       | c.(721-723)GGA>GAA   | p.G241E  |
| Pat_40 | Pre-Treatment | CCDC33    | 80125  | 37 | 15 | 74588131  | 74588131  | Missense_Mutation | SNP | G  | A  | 21  | 53  | c.1132G>A      | c.(1132-1134)GCT>ACT | p.A378T  |
| Pat_40 | Pre-Treatment | RPP25     | 54913  | 37 | 15 | 75248380  | 75248380  | Missense_Mutation | SNP | G  | A  | 3   | 15  | c.545C>T       | c.(544-546)TCC>TTC   | p.S182F  |
| Pat_40 | Pre-Treatment | CSPG4     | 1464   | 37 | 15 | 75977987  | 75977987  | Missense_Mutation | SNP | G  | A  | 3   | 20  | c.3845C>T      | c.(3844-3846)CCG>CTG | p.P1282L |
| Pat_40 | Pre-Treatment | ADAMTSL3  | 57188  | 37 | 15 | 84539574  | 84539574  | Nonsense_Mutation | SNP | C  | T  | 35  | 77  | c.823C>T       | c.(823-825)CAA>TAA   | p.Q275*  |
| Pat_40 | Pre-Treatment | ZNF592    | 9640   | 37 | 15 | 85327111  | 85327111  | Missense_Mutation | SNP | G  | A  | 3   | 23  | c.1205G>A      | c.(1204-1206)AGT>AAT | p.S402N  |
| Pat_40 | Pre-Treatment | AGBL1     | 123624 | 37 | 15 | 86687074  | 86687074  | Missense_Mutation | SNP | G  | A  | 23  | 48  | c.122G>A       | c.(121-123)AGA>AAA   | p.R41K   |
| Pat_40 | Pre-Treatment | WDR93     | 56964  | 37 | 15 | 90245132  | 90245132  | Missense_Mutation | SNP | C  | T  | 7   | 43  | c.155C>T       | c.(154-156)TCC>TTC   | p.S52F   |
| Pat_40 | Pre-Treatment | IQGAP1    | 8826   | 37 | 15 | 91026618  | 91026618  | Missense_Mutation | SNP | G  | A  | 4   | 72  | c.3581G>A      | c.(3580-3582)CGA>CAA | p.R1194Q |
| Pat_40 | Pre-Treatment | FAM173A   | 65990  | 37 | 16 | 772426    | 772426    | Nonsense_Mutation | SNP | C  | T  | 2   | 1   | c.577C>T       | c.(577-579)CGA>TGA   | p.R193*  |
| Pat_40 | Pre-Treatment | C16orf42  | 115939 | 37 | 16 | 1400907   | 1400907   | Missense_Mutation | SNP | G  | A  | 4   | 52  | c.427C>T       | c.(427-429)CGC>TGC   | p.R143C  |
| Pat_40 | Pre-Treatment | TELO2     | 9894   | 37 | 16 | 1549330   | 1549330   | Missense_Mutation | SNP | T  | A  | 6   | 22  | c.929T>A       | c.(928-930)CTC>CAC   | p.L310H  |
| Pat_40 | Pre-Treatment | C16orf72  | 29035  | 37 | 16 | 9186816   | 9186816   | Missense_Mutation | SNP | C  | T  | 3   | 27  | c.265C>T       | c.(265-267)CCC>TCC   | p.P89S   |
| Pat_40 | Pre-Treatment | ZC3H7A    | 29066  | 37 | 16 | 11850101  | 11850101  | Missense_Mutation | SNP | C  | T  | 31  | 184 | c.2554G>A      | c.(2554-2556)GAA>AAA | p.E852K  |
| Pat_40 | Pre-Treatment | C16orf88  | 400506 | 37 | 16 | 19725511  | 19725511  | Missense_Mutation | SNP | C  | T  | 39  | 146 | c.847G>A       | c.(847-849)GAG>AAG   | p.E283K  |
| Pat_40 | Pre-Treatment | ACSM5     | 54988  | 37 | 16 | 20430616  | 20430616  | Missense_Mutation | SNP | C  | T  | 17  | 70  | c.482C>T       | c.(481-483)TCC>TTC   | p.S161F  |
| Pat_40 | Pre-Treatment | DNAH3     | 55567  | 37 | 16 | 20994125  | 20994125  | Nonsense_Mutation | SNP | G  | A  | 35  | 65  | c.7777C>T      | c.(7777-7779)CAG>TAG | p.Q2593* |
| Pat_40 | Pre-Treatment | HS3ST4    | 9951   | 37 | 16 | 26147552  | 26147552  | Missense_Mutation | SNP | G  | A  | 7   | 19  | c.1354G>A      | c.(1354-1356)GAA>AAA | p.E452K  |
| Pat_40 | Pre-Treatment | IL27      | 246778 | 37 | 16 | 28515273  | 28515273  | Missense_Mutation | SNP | G  | A  | 4   | 31  | c.130C>T       | c.(130-132)CGG>TGG   | p.R44W   |
| Pat_40 | Pre-Treatment | MVP       | 9961   | 37 | 16 | 29848068  | 29848068  | Missense_Mutation | SNP | G  | A  | 3   | 43  | c.698G>A       | c.(697-699)CGG>CAG   | p.R233Q  |
| Pat_40 | Pre-Treatment | HIRIP3    | 8479   | 37 | 16 | 30004563  | 30004563  | Missense_Mutation | SNP | G  | A  | 3   | 42  | c.1636C>T      | c.(1636-1638)CGT>TGT | p.R546C  |
| Pat_40 | Pre-Treatment | TGFB11    | 7041   | 37 | 16 | 31488207  | 31488207  | Missense_Mutation | SNP | C  | T  | 10  | 12  | c.995C>T       | c.(994-996)CCC>CTC   | p.P332L  |
| Pat_40 | Pre-Treatment | ZNF267    | 10308  | 37 | 16 | 31927606  | 31927606  | Missense_Mutation | SNP | G  | A  | 7   | 133 | c.2036G>A      | c.(2035-2037)CGG>CAG | p.R679Q  |
| Pat_40 | Pre-Treatment | SALL1     | 6299   | 37 | 16 | 51172808  | 51172808  | Missense_Mutation | SNP | G  | A  | 17  | 60  | c.3325C>T      | c.(3325-3327)CCG>TCG | p.P1109S |
| Pat_40 | Pre-Treatment | E2F4      | 1874   | 37 | 16 | 67228322  | 67228322  | Missense_Mutation | SNP | G  | A  | 3   | 37  | c.473G>A       | c.(472-474)CGG>CAG   | p.R158Q  |
| Pat_40 | Pre-Treatment | RANBP10   | 57610  | 37 | 16 | 67762379  | 67762379  | Missense_Mutation | SNP | G  | A  | 11  | 74  | c.1388C>T      | c.(1387-1389)CCC>CTC | p.P463L  |
| Pat_40 | Pre-Treatment | NFATC3    | 4775   | 37 | 16 | 68260297  | 68260297  | Nonsense_Mutation | SNP | C  | T  | 8   | 41  | c.3151C>T      | c.(3151-3153)CAA>TAA | p.Q1051* |
| Pat_40 | Pre-Treatment | CALB2     | 794    | 37 | 16 | 71419498  | 71419498  | Missense_Mutation | SNP | G  | T  | 4   | 52  | c.646G>T       | c.(646-648)GAC>TAC   | p.D216Y  |
| Pat_40 | Pre-Treatment | ZFHX3     | 463    | 37 | 16 | 72992241  | 72992241  | Missense_Mutation | SNP | C  | T  | 4   | 30  | c.1804G>A      | c.(1804-1806)GCA>ACA | p.A602T  |

|        |               |          |        |    |    |          |          |                   |     |    |    |    |     |                                      |                        |           |
|--------|---------------|----------|--------|----|----|----------|----------|-------------------|-----|----|----|----|-----|--------------------------------------|------------------------|-----------|
| Pat_40 | Pre-Treatment | CHST5    | 23563  | 37 | 16 | 75563252 | 75563252 | Missense_Mutation | SNP | G  | A  | 18 | 57  | c.1031C>T                            | c.(1030-1032)TCG>TTG   | p.S344L   |
| Pat_40 | Pre-Treatment | MLYCD    | 23417  | 37 | 16 | 83948687 | 83948687 | Missense_Mutation | SNP | G  | A  | 57 | 190 | c.1075G>A                            | c.(1075-1077)GAA>AAA   | p.E359K   |
| Pat_40 | Pre-Treatment | C17orf97 | 400566 | 37 | 17 | 263277   | 263277   | Missense_Mutation | SNP | T  | A  | 4  | 34  | c.673T>A                             | c.(673-675)TTC>ATC     | p.F225I   |
| Pat_40 | Pre-Treatment | C1QB     | 708    | 37 | 17 | 5341507  | 5341507  | Missense_Mutation | SNP | C  | T  | 29 | 126 | c.319G>A                             | c.(319-321)GGA>AGA     | p.G107R   |
| Pat_40 | Pre-Treatment | PITPNM3  | 83394  | 37 | 17 | 6380394  | 6380394  | Missense_Mutation | SNP | G  | A  | 4  | 30  | c.1040C>T                            | c.(1039-1041)ACC>ATC   | p.T347I   |
| Pat_40 | Pre-Treatment | PITPNM3  | 83394  | 37 | 17 | 6381947  | 6381947  | Missense_Mutation | SNP | C  | T  | 3  | 20  | c.697G>A                             | c.(697-699)GTC>ATC     | p.V233I   |
| Pat_40 | Pre-Treatment | PLSCR3   | 57048  | 37 | 17 | 7296563  | 7296563  | Missense_Mutation | SNP | G  | A  | 2  | 2   | c.407C>T                             | c.(406-408)CCG>CTG     | p.P136L   |
| Pat_40 | Pre-Treatment | GUCY2D   | 3000   | 37 | 17 | 7910748  | 7910748  | Missense_Mutation | SNP | C  | T  | 7  | 112 | c.1468C>T                            | c.(1468-1470)CGG>TGG   | p.R490W   |
| Pat_40 | Pre-Treatment | ARHGEF15 | 22899  | 37 | 17 | 8222653  | 8222653  | Missense_Mutation | SNP | G  | A  | 34 | 170 | c.2210G>A                            | c.(2209-2211)GGA>GAA   | p.G737E   |
| Pat_40 | Pre-Treatment | MYOCD    | 93649  | 37 | 17 | 12626312 | 12626312 | Missense_Mutation | SNP | A  | T  | 35 | 143 | c.402A>T                             | c.(400-402)AAA>AAT     | p.K134N   |
| Pat_40 | Pre-Treatment | LGALS9   | 3965   | 37 | 17 | 25975908 | 25975908 | Missense_Mutation | SNP | G  | A  | 45 | 273 | c.968G>A                             | c.(967-969)GGT>GAT     | p.G323D   |
| Pat_40 | Pre-Treatment | SARM1    | 23098  | 37 | 17 | 26686410 | 26686410 | Missense_Mutation | SNP | C  | T  | 8  | 72  | c.358C>T                             | c.(358-360)CGC>TGC     | p.R120C   |
| Pat_40 | Pre-Treatment | SLFN11   | 91607  | 37 | 17 | 33687340 | 33687340 | Missense_Mutation | SNP | C  | T  | 15 | 101 | c.1120G>A                            | c.(1120-1122)GGG>AGG   | p.G374R   |
| Pat_40 | Pre-Treatment | GAS2L2   | 246176 | 37 | 17 | 34079495 | 34079495 | Missense_Mutation | SNP | C  | T  | 62 | 130 | c.375G>A                             | c.(373-375)ATG>ATA     | p.M125I   |
| Pat_40 | Pre-Treatment | PPP1R1B  | 84152  | 37 | 17 | 37790219 | 37790219 | Missense_Mutation | SNP | G  | A  | 12 | 77  | c.325G>A                             | c.(325-327)GGG>AGG     | p.G109R   |
| Pat_40 | Pre-Treatment | DHX40    | 79665  | 37 | 17 | 57644149 | 57644149 | Missense_Mutation | SNP | G  | A  | 7  | 37  | c.274G>A                             | c.(274-276)GAA>AAA     | p.E92K    |
| Pat_40 | Pre-Treatment | CYB561   | 1534   | 37 | 17 | 61512547 | 61512547 | Missense_Mutation | SNP | G  | A  | 4  | 101 | c.463C>T                             | c.(463-465)CGC>TGC     | p.R155C   |
| Pat_40 | Pre-Treatment | PSMD12   | 5718   | 37 | 17 | 65341882 | 65341882 | Missense_Mutation | SNP | A  | G  | 4  | 76  | c.887T>C                             | c.(886-888)TTA>TCA     | p.L296S   |
| Pat_40 | Pre-Treatment | SLC39A11 | 201266 | 37 | 17 | 70943992 | 70943992 | Missense_Mutation | SNP | G  | A  | 5  | 78  | c.329C>T                             | c.(328-330)ACG>ATG     | p.T110M   |
| Pat_40 | Pre-Treatment | QRICH2   | 84074  | 37 | 17 | 74289004 | 74289004 | Missense_Mutation | SNP | G  | A  | 5  | 128 | c.1306C>T                            | c.(1306-1308)CGG>TGG   | p.R436W   |
| Pat_40 | Pre-Treatment | TNRC6C   | 57690  | 37 | 17 | 76083091 | 76083091 | Missense_Mutation | SNP | C  | T  | 31 | 68  | c.3719C>T                            | c.(3718-3720)TCG>TTG   | p.S1240L  |
| Pat_40 | Pre-Treatment | AZ11     | 22994  | 37 | 17 | 79173231 | 79173231 | Missense_Mutation | SNP | G  | A  | 3  | 19  | c.1142C>T                            | c.(1141-1143)TCC>TTC   | p.S381F   |
| Pat_40 | Pre-Treatment | TMEM105  | 284186 | 37 | 17 | 79287596 | 79287596 | Missense_Mutation | SNP | C  | T  | 28 | 39  | c.245G>A                             | c.(244-246)CGA>CAA     | p.R82Q    |
| Pat_40 | Pre-Treatment | C17orf70 | 80233  | 37 | 17 | 79514375 | 79514375 | Missense_Mutation | SNP | C  | T  | 3  | 34  | c.1733G>A                            | c.(1732-1734)CGG>CAG   | p.R578Q   |
| Pat_40 | Pre-Treatment | DUS1L    | 64118  | 37 | 17 | 80016246 | 80016246 | Missense_Mutation | SNP | C  | T  | 5  | 56  | c.1253G>A                            | c.(1252-1254)CGA>CAA   | p.R418Q   |
| Pat_40 | Pre-Treatment | EPB41L3  | 23136  | 37 | 18 | 5406843  | 5406843  | Missense_Mutation | SNP | G  | A  | 6  | 92  | c.2282C>T                            | c.(2281-2283)ACC>ATC   | p.T761I   |
| Pat_40 | Pre-Treatment | L3MBTL4  | 91133  | 37 | 18 | 6244575  | 6244575  | Missense_Mutation | SNP | G  | A  | 52 | 150 | c.232C>T                             | c.(232-234)CCA>TCA     | p.P78S    |
| Pat_40 | Pre-Treatment | LAMA1    | 284217 | 37 | 18 | 7013833  | 7013833  | Missense_Mutation | SNP | G  | A  | 4  | 7   | c.3344C>T                            | c.(3343-3345)ACC>ATC   | p.T1115I  |
| Pat_40 | Pre-Treatment | MIB1     | 57534  | 37 | 18 | 19429266 | 19429266 | Missense_Mutation | SNP | G  | A  | 58 | 146 | c.2503G>A                            | c.(2503-2505)GGA>AGA   | p.G835R   |
| Pat_40 | Pre-Treatment | DSG4     | 147409 | 37 | 18 | 28968918 | 28968918 | Missense_Mutation | SNP | G  | A  | 65 | 133 | c.454G>A                             | c.(454-456)GAT>AAT     | p.D152N   |
| Pat_40 | Pre-Treatment | SMAD7    | 4092   | 37 | 18 | 46447797 | 46447797 | Missense_Mutation | SNP | C  | T  | 4  | 75  | c.1226G>A                            | c.(1225-1227)CGC>CAC   | p.R409H   |
| Pat_40 | Pre-Treatment | SMAD4    | 4089   | 37 | 18 | 48584806 | 48584806 | Missense_Mutation | SNP | C  | A  | 8  | 164 | c.884C>A                             | c.(883-885)CCG>CAG     | p.P295Q   |
| Pat_40 | Pre-Treatment | C18orf26 | 284254 | 37 | 18 | 52265254 | 52265254 | Missense_Mutation | SNP | C  | T  | 24 | 149 | c.511C>T                             | c.(511-513)CCT>TCT     | p.P171S   |
| Pat_40 | Pre-Treatment | CDH20    | 28316  | 37 | 18 | 59174723 | 59174723 | Missense_Mutation | SNP | G  | A  | 28 | 38  | c.947G>A                             | c.(946-948)GGA>GAA     | p.G316E   |
| Pat_40 | Pre-Treatment | CD226    | 10666  | 37 | 18 | 67614158 | 67614158 | Missense_Mutation | SNP | G  | A  | 10 | 46  | c.194C>T                             | c.(193-195)CCT>CTT     | p.P65L    |
| Pat_40 | Pre-Treatment | NETO1    | 81832  | 37 | 18 | 70423284 | 70423284 | Missense_Mutation | SNP | C  | T  | 23 | 102 | c.967G>A                             | c.(967-969)GAA>AAA     | p.E323K   |
| Pat_40 | Pre-Treatment | PRSSL1   | 400668 | 37 | 19 | 685829   | 685829   | Missense_Mutation | SNP | C  | T  | 2  | 0   | c.739G>A                             | c.(739-741)GTG>ATG     | p.V247M   |
| Pat_40 | Pre-Treatment | ABCA7    | 10347  | 37 | 19 | 1061880  | 1061880  | Missense_Mutation | SNP | G  | A  | 3  | 38  | c.5563G>A                            | c.(5563-5565)GGC>AGC   | p.G1855S  |
| Pat_40 | Pre-Treatment | S1PR4    | 8698   | 37 | 19 | 3179545  | 3179545  | Missense_Mutation | SNP | C  | T  | 3  | 19  | c.755C>T                             | c.(754-756)ACG>ATG     | p.T252M   |
| Pat_40 | Pre-Treatment | FZR1     | 51343  | 37 | 19 | 3530838  | 3530838  | Missense_Mutation | SNP | G  | A  | 3  | 21  | c.703G>A                             | c.(703-705)GTG>ATG     | p.V235M   |
| Pat_40 | Pre-Treatment | CHAF1A   | 10036  | 37 | 19 | 4428744  | 4428745  | Missense_Mutation | DNP | CC | TT | 23 | 34  | c.1461_1462CC>T1459-1464)TTCCAT>TTTT |                        | p.H488Y   |
| Pat_40 | Pre-Treatment | FUT3     | 2525   | 37 | 19 | 5844156  | 5844156  | Missense_Mutation | SNP | C  | T  | 11 | 58  | c.695G>A                             | c.(694-696)GGG>GAG     | p.G232E   |
| Pat_40 | Pre-Treatment | CD70     | 970    | 37 | 19 | 6586315  | 6586315  | Missense_Mutation | SNP | G  | A  | 4  | 41  | c.298C>T                             | c.(298-300)CGT>TGT     | p.R100C   |
| Pat_40 | Pre-Treatment | CD209    | 30835  | 37 | 19 | 7810698  | 7810698  | Missense_Mutation | SNP | A  | G  | 12 | 164 | c.454T>C                             | c.(454-456)TGG>CGG     | p.W152R   |
| Pat_40 | Pre-Treatment | TIMM44   | 10469  | 37 | 19 | 7993024  | 7993024  | Nonsense_Mutation | SNP | G  | A  | 3  | 25  | c.1066C>T                            | c.(1066-1068)CAG>TAG   | p.Q356*   |
| Pat_40 | Pre-Treatment | RAB11B   | 9230   | 37 | 19 | 8464792  | 8464792  | Missense_Mutation | SNP | C  | T  | 4  | 59  | c.86C>T                              | c.(85-87)TCG>TTG       | p.S29L    |
| Pat_40 | Pre-Treatment | MUC16    | 94025  | 37 | 19 | 9046043  | 9046043  | Missense_Mutation | SNP | G  | A  | 69 | 114 | c.35588C>T                           | c.(35587-35589)CCA>CTA | p.P11863L |

|        |               |          |           |    |    |          |          |                   |     |   |   |    |     |            |                        |           |
|--------|---------------|----------|-----------|----|----|----------|----------|-------------------|-----|---|---|----|-----|------------|------------------------|-----------|
| Pat_40 | Pre-Treatment | MUC16    | 94025     | 37 | 19 | 9049653  | 9049653  | Missense_Mutation | SNP | C | T | 8  | 68  | c.31978G>A | c.(31978-31980)GGG>AGC | p.G10660R |
| Pat_40 | Pre-Treatment | MUC16    | 94025     | 37 | 19 | 9056776  | 9056776  | Missense_Mutation | SNP | G | A | 11 | 25  | c.30670C>T | c.(30670-30672)CCA>TCA | p.P10224S |
| Pat_40 | Pre-Treatment | MUC16    | 94025     | 37 | 19 | 9060955  | 9060955  | Missense_Mutation | SNP | G | A | 19 | 90  | c.26491C>T | c.(26491-26493)CCT>TCT | p.P8831S  |
| Pat_40 | Pre-Treatment | MUC16    | 94025     | 37 | 19 | 9082516  | 9082516  | Missense_Mutation | SNP | A | T | 94 | 185 | c.9299T>A  | c.(9298-9300)ATT>AAT   | p.I3100N  |
| Pat_40 | Pre-Treatment | MUC16    | 94025     | 37 | 19 | 9087347  | 9087347  | Missense_Mutation | SNP | G | A | 33 | 165 | c.4468C>T  | c.(4468-4470)CCA>TCA   | p.P1490S  |
| Pat_40 | Pre-Treatment | ZNF700   | 90592     | 37 | 19 | 12060645 | 12060645 | Missense_Mutation | SNP | T | A | 16 | 315 | c.1806T>A  | c.(1804-1806)AGT>AGA   | p.S602R   |
| Pat_40 | Pre-Treatment | ZNF700   | 90592     | 37 | 19 | 12060647 | 12060647 | Missense_Mutation | SNP | G | C | 10 | 317 | c.1808G>C  | c.(1807-1809)TGT>TCT   | p.C603S   |
| Pat_40 | Pre-Treatment | ZNF443   | 10224     | 37 | 19 | 12542283 | 12542283 | Missense_Mutation | SNP | A | G | 19 | 262 | c.703T>C   | c.(703-705)TCT>CCT     | p.S235P   |
| Pat_40 | Pre-Treatment | OR7C2    | 26658     | 37 | 19 | 15053205 | 15053205 | Missense_Mutation | SNP | G | A | 8  | 48  | c.905G>A   | c.(904-906)AGA>AAA     | p.R302K   |
| Pat_40 | Pre-Treatment | OR10H1   | 26539     | 37 | 19 | 15918436 | 15918436 | Missense_Mutation | SNP | G | A | 25 | 33  | c.412C>T   | c.(412-414)CCG>TCG     | p.P138S   |
| Pat_40 | Pre-Treatment | CPAMD8   | 27151     | 37 | 19 | 17049247 | 17049247 | Missense_Mutation | SNP | C | T | 15 | 25  | c.2944G>A  | c.(2944-2946)GTC>ATC   | p.V982I   |
| Pat_40 | Pre-Treatment | SLC5A5   | 6528      | 37 | 19 | 17992969 | 17992969 | Missense_Mutation | SNP | G | A | 4  | 100 | c.1183G>A  | c.(1183-1185)GGA>AGA   | p.G395R   |
| Pat_40 | Pre-Treatment | ZNF14    | 7561      | 37 | 19 | 19822928 | 19822928 | Missense_Mutation | SNP | C | T | 18 | 102 | c.1162G>A  | c.(1162-1164)GAG>AAG   | p.E388K   |
| Pat_40 | Pre-Treatment | ZNF93    | 81931     | 37 | 19 | 20044933 | 20044933 | Missense_Mutation | SNP | T | G | 7  | 200 | c.1169T>G  | c.(1168-1170)GTT>GGT   | p.V390G   |
| Pat_40 | Pre-Treatment | ZNF737   | 100129842 | 37 | 19 | 20728170 | 20728170 | Missense_Mutation | SNP | G | C | 8  | 171 | c.839C>G   | c.(838-840)ACT>AGT     | p.T280S   |
| Pat_40 | Pre-Treatment | ZNF737   | 100129842 | 37 | 19 | 20728189 | 20728189 | Missense_Mutation | SNP | T | C | 6  | 149 | c.820A>G   | c.(820-822)ACA>GCA     | p.T274A   |
| Pat_40 | Pre-Treatment | ZNF85    | 7639      | 37 | 19 | 21132437 | 21132437 | Missense_Mutation | SNP | G | A | 5  | 100 | c.1117G>A  | c.(1117-1119)GAA>AAA   | p.E373K   |
| Pat_40 | Pre-Treatment | ZNF714   | 148206    | 37 | 19 | 21300738 | 21300738 | Missense_Mutation | SNP | T | C | 10 | 203 | c.1271T>C  | c.(1270-1272)CTC>CCC   | p.L424P   |
| Pat_40 | Pre-Treatment | ZNF100   | 163227    | 37 | 19 | 21909650 | 21909650 | Missense_Mutation | SNP | C | G | 10 | 287 | c.1464G>C  | c.(1462-1464)GAG>GAC   | p.E488D   |
| Pat_40 | Pre-Treatment | ZNF208   | 7757      | 37 | 19 | 22154826 | 22154826 | Missense_Mutation | SNP | C | T | 21 | 151 | c.2626G>A  | c.(2626-2628)GAA>AAA   | p.E876K   |
| Pat_40 | Pre-Treatment | ZNF208   | 7757      | 37 | 19 | 22157163 | 22157163 | Missense_Mutation | SNP | C | T | 41 | 110 | c.673G>A   | c.(673-675)GGA>AGA     | p.G225R   |
| Pat_40 | Pre-Treatment | ZNF99    | 7652      | 37 | 19 | 22941372 | 22941372 | Missense_Mutation | SNP | G | A | 16 | 76  | c.1066C>T  | c.(1066-1068)CAT>TAT   | p.H356Y   |
| Pat_40 | Pre-Treatment | ZNF91    | 7644      | 37 | 19 | 23544783 | 23544783 | Missense_Mutation | SNP | C | T | 12 | 268 | c.998G>A   | c.(997-999)CGT>CAT     | p.R333H   |
| Pat_40 | Pre-Treatment | ZNF675   | 171392    | 37 | 19 | 23836431 | 23836431 | Missense_Mutation | SNP | C | T | 7  | 211 | c.1304G>A  | c.(1303-1305)CGA>CAA   | p.R435Q   |
| Pat_40 | Pre-Treatment | ZNF681   | 148213    | 37 | 19 | 23926839 | 23926839 | Missense_Mutation | SNP | A | G | 12 | 212 | c.1513T>C  | c.(1513-1515)TCC>CCC   | p.S505P   |
| Pat_40 | Pre-Treatment | ZNF536   | 9745      | 37 | 19 | 31039065 | 31039065 | Missense_Mutation | SNP | G | A | 8  | 50  | c.2539G>A  | c.(2539-2541)GGA>AGA   | p.G847R   |
| Pat_40 | Pre-Treatment | RHPN2    | 85415     | 37 | 19 | 33470912 | 33470912 | Missense_Mutation | SNP | G | A | 8  | 56  | c.2051C>T  | c.(2050-2052)TCT>TTT   | p.S684F   |
| Pat_40 | Pre-Treatment | SLC7A10  | 56301     | 37 | 19 | 33702192 | 33702192 | Missense_Mutation | SNP | G | A | 7  | 43  | c.955C>T   | c.(955-957)CCT>TCT     | p.P319S   |
| Pat_40 | Pre-Treatment | PEPD     | 5184      | 37 | 19 | 34003584 | 34003584 | Missense_Mutation | SNP | G | A | 3  | 15  | c.116C>T   | c.(115-117)GCT>GTT     | p.A39V    |
| Pat_40 | Pre-Treatment | FFAR2    | 2867      | 37 | 19 | 35940779 | 35940779 | Missense_Mutation | SNP | G | A | 3  | 38  | c.163G>A   | c.(163-165)GAC>AAC     | p.D55N    |
| Pat_40 | Pre-Treatment | ZNF420   | 147923    | 37 | 19 | 37619580 | 37619580 | Missense_Mutation | SNP | G | A | 16 | 98  | c.1687G>A  | c.(1687-1689)GAA>AAA   | p.E563K   |
| Pat_40 | Pre-Treatment | ZNF527   | 84503     | 37 | 19 | 37871191 | 37871191 | Missense_Mutation | SNP | C | T | 8  | 49  | c.173C>T   | c.(172-174)TCT>TTT     | p.S58F    |
| Pat_40 | Pre-Treatment | AKT2     | 208       | 37 | 19 | 40739784 | 40739784 | Missense_Mutation | SNP | C | T | 4  | 66  | c.1441G>A  | c.(1441-1443)GAG>AAG   | p.E481K   |
| Pat_40 | Pre-Treatment | PRX      | 57716     | 37 | 19 | 40900057 | 40900057 | Missense_Mutation | SNP | G | A | 10 | 75  | c.4202C>T  | c.(4201-4203)TCC>TTC   | p.S1401F  |
| Pat_40 | Pre-Treatment | ZNF574   | 64763     | 37 | 19 | 42583483 | 42583483 | Missense_Mutation | SNP | C | T | 12 | 52  | c.725C>T   | c.(724-726)CCC>CTC     | p.P242L   |
| Pat_40 | Pre-Treatment | PAFAH1B3 | 5050      | 37 | 19 | 42801403 | 42801403 | Missense_Mutation | SNP | C | T | 5  | 59  | c.523G>A   | c.(523-525)GAC>AAC     | p.D175N   |
| Pat_40 | Pre-Treatment | PRR19    | 284338    | 37 | 19 | 42814720 | 42814720 | Missense_Mutation | SNP | C | T | 29 | 139 | c.899C>T   | c.(898-900)CCC>CTC     | p.P300L   |
| Pat_40 | Pre-Treatment | BCL3     | 602       | 37 | 19 | 45260400 | 45260400 | Missense_Mutation | SNP | C | T | 2  | 1   | c.646C>T   | c.(646-648)CGC>TGC     | p.R216C   |
| Pat_40 | Pre-Treatment | DMPK     | 1760      | 37 | 19 | 46283155 | 46283155 | Missense_Mutation | SNP | G | A | 5  | 24  | c.163C>T   | c.(163-165)CGG>TGG     | p.R55W    |
| Pat_40 | Pre-Treatment | PNMAL2   | 57469     | 37 | 19 | 46997818 | 46997818 | Missense_Mutation | SNP | G | A | 8  | 33  | c.905C>T   | c.(904-906)CCG>CTG     | p.P302L   |
| Pat_40 | Pre-Treatment | BCAT2    | 587       | 37 | 19 | 49302959 | 49302959 | Missense_Mutation | SNP | C | T | 3  | 8   | c.668G>A   | c.(667-669)GGC>GAC     | p.G223D   |
| Pat_40 | Pre-Treatment | KLK1     | 3816      | 37 | 19 | 51326967 | 51326967 | Missense_Mutation | SNP | C | T | 14 | 50  | c.38G>A    | c.(37-39)GGG>GAG       | p.G13E    |
| Pat_40 | Pre-Treatment | CD33     | 945       | 37 | 19 | 51729242 | 51729242 | Missense_Mutation | SNP | C | T | 5  | 73  | c.602C>T   | c.(601-603)CCA>CTA     | p.P201L   |
| Pat_40 | Pre-Treatment | FPR1     | 2357      | 37 | 19 | 52249241 | 52249241 | Missense_Mutation | SNP | G | A | 51 | 298 | c.1007C>T  | c.(1006-1008)ACC>ATC   | p.T336I   |
| Pat_40 | Pre-Treatment | ZNF350   | 59348     | 37 | 19 | 52468403 | 52468403 | Missense_Mutation | SNP | C | T | 13 | 74  | c.1303G>A  | c.(1303-1305)GAA>AAA   | p.E435K   |
| Pat_40 | Pre-Treatment | ZNF480   | 147657    | 37 | 19 | 52825082 | 52825082 | Missense_Mutation | SNP | A | C | 17 | 85  | c.579A>C   | c.(577-579)GAA>GAC     | p.E193D   |
| Pat_40 | Pre-Treatment | ZNF701   | 55762     | 37 | 19 | 53086622 | 53086622 | Missense_Mutation | SNP | C | G | 4  | 83  | c.1310C>G  | c.(1309-1311)CCT>CGT   | p.P437R   |



|        |               |           |        |    |    |           |           |                   |     |   |   |    |     |            |                        |          |
|--------|---------------|-----------|--------|----|----|-----------|-----------|-------------------|-----|---|---|----|-----|------------|------------------------|----------|
| Pat_40 | Pre-Treatment | ZNF611    | 81856  | 37 | 19 | 53208494  | 53208494  | Missense_Mutation | SNP | C | T | 15 | 513 | c.1814G>A  | c.(1813-1815)CGC>CAC   | p.R605H  |
| Pat_40 | Pre-Treatment | ZNF28     | 7576   | 37 | 19 | 53302941  | 53302941  | Nonstop_Mutation  | SNP | T | G | 25 | 261 | c.2157A>C  | c.(2155-2157)TGA>TGC   | p.*719C  |
| Pat_40 | Pre-Treatment | NLRP2     | 55655  | 37 | 19 | 55497572  | 55497572  | Missense_Mutation | SNP | G | A | 20 | 34  | c.2255G>A  | c.(2254-2256)CGA>CAA   | p.R752Q  |
| Pat_40 | Pre-Treatment | NLRP2     | 55655  | 37 | 19 | 55502033  | 55502033  | Missense_Mutation | SNP | A | C | 18 | 64  | c.2701A>C  | c.(2701-2703)ACC>CCC   | p.T901P  |
| Pat_40 | Pre-Treatment | NAT14     | 57106  | 37 | 19 | 55997836  | 55997836  | Missense_Mutation | SNP | T | C | 2  | 0   | c.134T>C   | c.(133-135)CTG>CCG     | p.L45P   |
| Pat_40 | Pre-Treatment | NLRP11    | 204801 | 37 | 19 | 56321318  | 56321318  | Missense_Mutation | SNP | C | T | 7  | 30  | c.658G>A   | c.(658-660)GAT>AAT     | p.D220N  |
| Pat_40 | Pre-Treatment | NLRP5     | 126206 | 37 | 19 | 56539203  | 56539203  | Missense_Mutation | SNP | C | T | 5  | 18  | c.1604C>T  | c.(1603-1605)GCT>GTT   | p.A535V  |
| Pat_40 | Pre-Treatment | GALP      | 85569  | 37 | 19 | 56696603  | 56696603  | Missense_Mutation | SNP | G | A | 16 | 71  | c.315G>A   | c.(313-315)ATG>ATA     | p.M105I  |
| Pat_40 | Pre-Treatment | ZNF835    | 90485  | 37 | 19 | 57175768  | 57175768  | Missense_Mutation | SNP | G | A | 3  | 12  | c.865C>T   | c.(865-867)CGC>TGC     | p.R289C  |
| Pat_40 | Pre-Treatment | ZIM3      | 114026 | 37 | 19 | 57646333  | 57646333  | Missense_Mutation | SNP | C | T | 19 | 127 | c.1372G>A  | c.(1372-1374)GAC>AAC   | p.D458N  |
| Pat_40 | Pre-Treatment | DUXA      | 503835 | 37 | 19 | 57666725  | 57666725  | Nonsense_Mutation | SNP | G | A | 8  | 23  | c.454C>T   | c.(454-456)CGA>TGA     | p.R152*  |
| Pat_40 | Pre-Treatment | ZNF776    | 284309 | 37 | 19 | 58265885  | 58265885  | Missense_Mutation | SNP | G | A | 5  | 117 | c.1387G>A  | c.(1387-1389)GGA>AGA   | p.G463R  |
| Pat_40 | Pre-Treatment | TRIM28    | 10155  | 37 | 19 | 59060116  | 59060116  | Missense_Mutation | SNP | G | A | 3  | 33  | c.1333G>A  | c.(1333-1335)GTG>ATG   | p.V445M  |
| Pat_40 | Pre-Treatment | MYT1L     | 23040  | 37 | 2  | 1926835   | 1926835   | Missense_Mutation | SNP | C | T | 20 | 91  | c.706G>A   | c.(706-708)GAT>AAT     | p.D236N  |
| Pat_40 | Pre-Treatment | KCNF1     | 3754   | 37 | 2  | 11053364  | 11053364  | Missense_Mutation | SNP | C | T | 4  | 26  | c.812C>T   | c.(811-813)ACG>ATG     | p.T271M  |
| Pat_40 | Pre-Treatment | NT5C1B    | 93034  | 37 | 2  | 18758129  | 18758129  | Missense_Mutation | SNP | C | T | 21 | 101 | c.1234G>A  | c.(1234-1236)GGA>AGA   | p.G412R  |
| Pat_40 | Pre-Treatment | APOB      | 338    | 37 | 2  | 21229243  | 21229243  | Missense_Mutation | SNP | A | C | 17 | 67  | c.10497T>G | c.(10495-10497)GAT>GAG | p.D3499E |
| Pat_40 | Pre-Treatment | APOB      | 338    | 37 | 2  | 21231815  | 21231815  | Missense_Mutation | SNP | G | A | 22 | 148 | c.7925C>T  | c.(7924-7926)CCA>CTA   | p.P2642L |
| Pat_40 | Pre-Treatment | EMILIN1   | 11117  | 37 | 2  | 27306645  | 27306645  | Missense_Mutation | SNP | C | T | 4  | 54  | c.2206C>T  | c.(2206-2208)CGG>TGG   | p.R736W  |
| Pat_40 | Pre-Treatment | FOSL2     | 2355   | 37 | 2  | 28635035  | 28635035  | Missense_Mutation | SNP | C | T | 5  | 27  | c.701C>T   | c.(700-702)TCG>TTG     | p.S234L  |
| Pat_40 | Pre-Treatment | C2orf56   | 55471  | 37 | 2  | 37473259  | 37473259  | Missense_Mutation | SNP | C | T | 26 | 128 | c.857C>T   | c.(856-858)TCT>TTT     | p.S286F  |
| Pat_40 | Pre-Treatment | C2orf56   | 55471  | 37 | 2  | 37473261  | 37473261  | Nonsense_Mutation | SNP | C | T | 26 | 124 | c.859C>T   | c.(859-861)CAA>TAA     | p.Q287*  |
| Pat_40 | Pre-Treatment | SPTBN1    | 6711   | 37 | 2  | 54876239  | 54876239  | Missense_Mutation | SNP | G | A | 5  | 122 | c.5114G>A  | c.(5113-5115)CGG>CAG   | p.R1705Q |
| Pat_40 | Pre-Treatment | ANTXR1    | 84168  | 37 | 2  | 69304577  | 69304577  | Missense_Mutation | SNP | C | T | 45 | 244 | c.599C>T   | c.(598-600)CCC>CTC     | p.P200L  |
| Pat_40 | Pre-Treatment | MPHOSPH10 | 10199  | 37 | 2  | 71360620  | 71360620  | Missense_Mutation | SNP | G | A | 12 | 55  | c.682G>A   | c.(682-684)GAT>AAT     | p.D228N  |
| Pat_40 | Pre-Treatment | DYSF      | 8291   | 37 | 2  | 71901417  | 71901417  | Missense_Mutation | SNP | G | A | 25 | 48  | c.5758G>A  | c.(5758-5760)GAT>AAT   | p.D1920N |
| Pat_40 | Pre-Treatment | WDR54     | 84058  | 37 | 2  | 74652245  | 74652245  | Missense_Mutation | SNP | G | A | 3  | 33  | c.679G>A   | c.(679-681)GCA>ACA     | p.A227T  |
| Pat_40 | Pre-Treatment | C2orf68   | 388969 | 37 | 2  | 85839056  | 85839056  | Missense_Mutation | SNP | G | A | 3  | 45  | c.52C>T    | c.(52-54)CGG>TGG       | p.R18W   |
| Pat_40 | Pre-Treatment | TMEM127   | 55654  | 37 | 2  | 96919611  | 96919611  | Missense_Mutation | SNP | C | T | 3  | 23  | c.652G>A   | c.(652-654)GAG>AAG     | p.E218K  |
| Pat_40 | Pre-Treatment | CIAO1     | 9391   | 37 | 2  | 96936947  | 96936947  | Missense_Mutation | SNP | C | T | 12 | 87  | c.878C>T   | c.(877-879)TCC>TTC     | p.S293F  |
| Pat_40 | Pre-Treatment | ANAPC1    | 64682  | 37 | 2  | 112583383 | 112583383 | Missense_Mutation | SNP | G | A | 13 | 75  | c.2675C>T  | c.(2674-2676)TCC>TTC   | p.S892F  |
| Pat_40 | Pre-Treatment | C2orf76   | 130355 | 37 | 2  | 120069246 | 120069246 | Missense_Mutation | SNP | C | T | 12 | 36  | c.256G>A   | c.(256-258)GAA>AAA     | p.E86K   |
| Pat_40 | Pre-Treatment | GLI2      | 2736   | 37 | 2  | 121708942 | 121708942 | Missense_Mutation | SNP | G | A | 22 | 36  | c.378G>A   | c.(376-378)ATG>ATA     | p.M126I  |
| Pat_40 | Pre-Treatment | LIMS2     | 55679  | 37 | 2  | 128412421 | 128412421 | Missense_Mutation | SNP | G | A | 13 | 69  | c.221C>T   | c.(220-222)CCG>CTG     | p.P74L   |
| Pat_40 | Pre-Treatment | NCKAP5    | 344148 | 37 | 2  | 133541812 | 133541812 | Missense_Mutation | SNP | C | T | 21 | 75  | c.2572G>A  | c.(2572-2574)GAA>AAA   | p.E858K  |
| Pat_40 | Pre-Treatment | LCT       | 3938   | 37 | 2  | 136575471 | 136575471 | Missense_Mutation | SNP | G | A | 20 | 116 | c.1147C>T  | c.(1147-1149)CCT>TCT   | p.P383S  |
| Pat_40 | Pre-Treatment | THSD7B    | 80731  | 37 | 2  | 138434125 | 138434125 | Missense_Mutation | SNP | C | T | 5  | 30  | c.4684C>T  | c.(4684-4686)CCC>TCC   | p.P1562S |
| Pat_40 | Pre-Treatment | LRP1B     | 53353  | 37 | 2  | 140995735 | 140995735 | Missense_Mutation | SNP | T | C | 36 | 138 | c.13546A>G | c.(13546-13548)ATA>GTA | p.I4516V |
| Pat_40 | Pre-Treatment | PABPC1P2  | 728773 | 37 | 2  | 147345742 | 147345742 | Missense_Mutation | SNP | G | A | 3  | 21  | c.202G>A   | c.(202-204)GCT>ACT     | p.A68T   |
| Pat_40 | Pre-Treatment | GALNT13   | 114805 | 37 | 2  | 155157995 | 155157995 | Missense_Mutation | SNP | C | T | 48 | 214 | c.1049C>T  | c.(1048-1050)CCA>CTA   | p.P350L  |
| Pat_40 | Pre-Treatment | KCNJ3     | 3760   | 37 | 2  | 155711754 | 155711754 | Missense_Mutation | SNP | G | A | 7  | 24  | c.1435G>A  | c.(1435-1437)GGA>AGA   | p.G479R  |
| Pat_40 | Pre-Treatment | GPD2      | 2820   | 37 | 2  | 157369987 | 157369987 | Missense_Mutation | SNP | G | A | 3  | 54  | c.640G>A   | c.(640-642)GGA>AGA     | p.G214R  |
| Pat_40 | Pre-Treatment | IFIH1     | 64135  | 37 | 2  | 163130442 | 163130442 | Missense_Mutation | SNP | C | T | 18 | 32  | c.2317G>A  | c.(2317-2319)GAA>AAA   | p.E773K  |
| Pat_40 | Pre-Treatment | SCN1A     | 6323   | 37 | 2  | 166892572 | 166892572 | Missense_Mutation | SNP | C | T | 37 | 203 | c.3382G>A  | c.(3382-3384)GAA>AAA   | p.E1128K |
| Pat_40 | Pre-Treatment | XIRP2     | 129446 | 37 | 2  | 168100354 | 168100354 | Missense_Mutation | SNP | G | A | 15 | 90  | c.2452G>A  | c.(2452-2454)GAG>AAG   | p.E818K  |
| Pat_40 | Pre-Treatment | B3GALT1   | 8708   | 37 | 2  | 168726108 | 168726108 | Missense_Mutation | SNP | C | T | 14 | 22  | c.559C>T   | c.(559-561)CTT>TTT     | p.L187F  |
| Pat_40 | Pre-Treatment | SPC25     | 57405  | 37 | 2  | 169745932 | 169745932 | Missense_Mutation | SNP | C | T | 24 | 83  | c.98G>A    | c.(97-99)AGA>AAA       | p.R33K   |

|        |               |           |        |    |    |           |           |                   |     |    |    |     |     |                |                        |           |
|--------|---------------|-----------|--------|----|----|-----------|-----------|-------------------|-----|----|----|-----|-----|----------------|------------------------|-----------|
| Pat_40 | Pre-Treatment | LRP2      | 4036   | 37 | 2  | 170070368 | 170070368 | Missense_Mutation | SNP | T  | A  | 8   | 49  | c.5839A>T      | c.(5839-5841)AAC>TAC   | p.N1947Y  |
| Pat_40 | Pre-Treatment | SLC25A12  | 8604   | 37 | 2  | 172712353 | 172712353 | Missense_Mutation | SNP | C  | T  | 58  | 374 | c.316G>A       | c.(316-318)GTG>ATG     | p.V106M   |
| Pat_40 | Pre-Treatment | TTN       | 7273   | 37 | 2  | 179452825 | 179452825 | Missense_Mutation | SNP | C  | T  | 21  | 99  | c.55605G>A     | c.(55603-55605)ATG>ATA | p.M18535I |
| Pat_40 | Pre-Treatment | TTN       | 7273   | 37 | 2  | 179454489 | 179454489 | Missense_Mutation | SNP | C  | T  | 43  | 218 | c.54259G>A     | c.(54259-54261)GAA>AAA | p.E18087K |
| Pat_40 | Pre-Treatment | TTN       | 7273   | 37 | 2  | 179457199 | 179457199 | Missense_Mutation | SNP | G  | A  | 108 | 226 | c.51829C>T     | c.(51829-51831)CGT>TGT | p.R17277C |
| Pat_40 | Pre-Treatment | TTN       | 7273   | 37 | 2  | 179464431 | 179464431 | Missense_Mutation | SNP | G  | A  | 15  | 108 | c.48493C>T     | c.(48493-48495)CTC>TTC | p.L16165F |
| Pat_40 | Pre-Treatment | TTN       | 7273   | 37 | 2  | 179592468 | 179592468 | Missense_Mutation | SNP | C  | T  | 113 | 179 | c.16105G>A     | c.(16105-16107)GAA>AAA | p.E5369K  |
| Pat_40 | Pre-Treatment | TTN       | 7273   | 37 | 2  | 179592569 | 179592569 | Missense_Mutation | SNP | T  | C  | 7   | 24  | c.16004A>G     | c.(16003-16005)AAA>AGA | p.K5335R  |
| Pat_40 | Pre-Treatment | ZNF804A   | 91752  | 37 | 2  | 185798364 | 185798364 | Missense_Mutation | SNP | G  | A  | 17  | 82  | c.290G>A       | c.(289-291)CGA>CAA     | p.R97Q    |
| Pat_40 | Pre-Treatment | CALCRL    | 10203  | 37 | 2  | 188245239 | 188245239 | Nonsense_Mutation | SNP | C  | T  | 128 | 244 | c.363G>A       | c.(361-363)TGG>TGA     | p.W121*   |
| Pat_40 | Pre-Treatment | DNAH7     | 56171  | 37 | 2  | 196722260 | 196722260 | Missense_Mutation | SNP | A  | C  | 17  | 74  | c.8255T>G      | c.(8254-8256)CTT>CGT   | p.L2752R  |
| Pat_40 | Pre-Treatment | DNAH7     | 56171  | 37 | 2  | 196729430 | 196729430 | Nonsense_Mutation | SNP | G  | A  | 20  | 82  | c.6949C>T      | c.(6949-6951)CGA>TGA   | p.R2317*  |
| Pat_40 | Pre-Treatment | DNAH7     | 56171  | 37 | 2  | 196746544 | 196746544 | Missense_Mutation | SNP | C  | T  | 27  | 163 | c.5936G>A      | c.(5935-5937)GGA>GAA   | p.G1979E  |
| Pat_40 | Pre-Treatment | HECW2     | 57520  | 37 | 2  | 197185066 | 197185066 | Missense_Mutation | SNP | C  | T  | 3   | 16  | c.982G>A       | c.(982-984)GAA>AAA     | p.E328K   |
| Pat_40 | Pre-Treatment | BMPR2     | 659    | 37 | 2  | 203417586 | 203417586 | Missense_Mutation | SNP | A  | G  | 70  | 80  | c.1561A>G      | c.(1561-1563)ATG>GTG   | p.M521V   |
| Pat_40 | Pre-Treatment | ABI2      | 10152  | 37 | 2  | 204292046 | 204292046 | Missense_Mutation | SNP | G  | A  | 3   | 54  | c.1513G>A      | c.(1513-1515)GTT>ATT   | p.V505I   |
| Pat_40 | Pre-Treatment | EEF1B2    | 1933   | 37 | 2  | 207025358 | 207025358 | Missense_Mutation | SNP | A  | G  | 8   | 214 | c.127A>G       | c.(127-129)AGC>GGC     | p.S43G    |
| Pat_40 | Pre-Treatment | ERBB4     | 2066   | 37 | 2  | 212587120 | 212587120 | Missense_Mutation | SNP | G  | A  | 13  | 66  | c.881C>T       | c.(880-882)CCA>CTA     | p.P294L   |
| Pat_40 | Pre-Treatment | RQCD1     | 9125   | 37 | 2  | 219449406 | 219449406 | Missense_Mutation | SNP | C  | T  | 128 | 233 | c.392C>T       | c.(391-393)CCC>CTC     | p.P131L   |
| Pat_40 | Pre-Treatment | ZNF142    | 7701   | 37 | 2  | 219521014 | 219521014 | Missense_Mutation | SNP | G  | A  | 4   | 59  | c.139C>T       | c.(139-141)CGG>TGG     | p.R47W    |
| Pat_40 | Pre-Treatment | ECEL1     | 9427   | 37 | 2  | 233347583 | 233347583 | Missense_Mutation | SNP | G  | A  | 42  | 189 | c.1663C>T      | c.(1663-1665)CGG>TGG   | p.R555W   |
| Pat_40 | Pre-Treatment | GIGYF2    | 26058  | 37 | 2  | 233655585 | 233655585 | Missense_Mutation | SNP | T  | C  | 22  | 106 | c.890T>C       | c.(889-891)ATG>ACG     | p.M297T   |
| Pat_40 | Pre-Treatment | GPR35     | 2859   | 37 | 2  | 241569694 | 241569694 | Missense_Mutation | SNP | G  | A  | 4   | 17  | c.325G>A       | c.(325-327)GCC>ACC     | p.A109T   |
| Pat_40 | Pre-Treatment | BOK       | 666    | 37 | 2  | 242501765 | 242501765 | Missense_Mutation | SNP | G  | A  | 4   | 48  | c.223G>A       | c.(223-225)GAT>AAT     | p.D75N    |
| Pat_40 | Pre-Treatment | THAP4     | 51078  | 37 | 2  | 242573324 | 242573324 | Missense_Mutation | SNP | G  | A  | 24  | 105 | c.248C>T       | c.(247-249)TCC>TTC     | p.S83F    |
| Pat_40 | Pre-Treatment | TGM6      | 343641 | 37 | 20 | 2377248   | 2377248   | Missense_Mutation | SNP | C  | T  | 13  | 31  | c.521C>T       | c.(520-522)GCC>GTC     | p.A174V   |
| Pat_40 | Pre-Treatment | PAK7      | 57144  | 37 | 20 | 9560919   | 9560919   | Missense_Mutation | SNP | G  | A  | 51  | 72  | c.863C>T       | c.(862-864)TCA>TTA     | p.S288L   |
| Pat_40 | Pre-Treatment | PAK7      | 57144  | 37 | 20 | 9561263   | 9561263   | Missense_Mutation | SNP | C  | T  | 68  | 128 | c.519G>A       | c.(517-519)ATG>ATA     | p.M173I   |
| Pat_40 | Pre-Treatment | OVOL2     | 58495  | 37 | 20 | 18022253  | 18022253  | Missense_Mutation | SNP | T  | C  | 3   | 50  | c.436A>G       | c.(436-438)AGA>GGA     | p.R146G   |
| Pat_40 | Pre-Treatment | POLR3F    | 10621  | 37 | 20 | 18453489  | 18453489  | Nonsense_Mutation | SNP | C  | T  | 38  | 70  | c.184C>T       | c.(184-186)CAG>TAG     | p.Q62*    |
| Pat_40 | Pre-Treatment | THBD      | 7056   | 37 | 20 | 23028806  | 23028806  | Missense_Mutation | SNP | C  | T  | 4   | 48  | c.1336G>A      | c.(1336-1338)GAA>AAA   | p.E446K   |
| Pat_40 | Pre-Treatment | NINL      | 22981  | 37 | 20 | 25456929  | 25456929  | Missense_Mutation | SNP | G  | A  | 4   | 54  | c.2998C>T      | c.(2998-3000)CGG>TGG   | p.R1000W  |
| Pat_40 | Pre-Treatment | TPX2      | 22974  | 37 | 20 | 30382317  | 30382317  | Missense_Mutation | SNP | G  | A  | 47  | 123 | c.1799G>A      | c.(1798-1800)AGA>AAA   | p.R600K   |
| Pat_40 | Pre-Treatment | ASXL1     | 171023 | 37 | 20 | 31017234  | 31017234  | Missense_Mutation | SNP | G  | A  | 20  | 71  | c.565G>A       | c.(565-567)GGG>AGG     | p.G189R   |
| Pat_40 | Pre-Treatment | C20orf186 | 149954 | 37 | 20 | 31671216  | 31671217  | Missense_Mutation | DNP | CC | TT | 17  | 130 | c.213_214CC>TT | 211-216)CCCCC>CCTT(    | p.P72S    |
| Pat_40 | Pre-Treatment | E2F1      | 1869   | 37 | 20 | 32267679  | 32267679  | Missense_Mutation | SNP | C  | T  | 4   | 69  | c.454G>A       | c.(454-456)GAC>AAC     | p.D152N   |
| Pat_40 | Pre-Treatment | EPB41L1   | 2036   | 37 | 20 | 34797782  | 34797782  | Nonsense_Mutation | SNP | C  | T  | 4   | 17  | c.2041C>T      | c.(2041-2043)CGA>TGA   | p.R681*   |
| Pat_40 | Pre-Treatment | RIMS4     | 140730 | 37 | 20 | 43384905  | 43384905  | Missense_Mutation | SNP | G  | A  | 15  | 47  | c.680C>T       | c.(679-681)ACC>ATC     | p.T227I   |
| Pat_40 | Pre-Treatment | PI3       | 5266   | 37 | 20 | 43803639  | 43803639  | Missense_Mutation | SNP | G  | A  | 3   | 51  | c.76G>A        | c.(76-78)GGA>AGA       | p.G26R    |
| Pat_40 | Pre-Treatment | EEF1A2    | 1917   | 37 | 20 | 62122040  | 62122040  | Missense_Mutation | SNP | G  | A  | 3   | 28  | c.821C>T       | c.(820-822)CCG>CTG     | p.P274L   |
| Pat_40 | Pre-Treatment | ZGPAT     | 84619  | 37 | 20 | 62340299  | 62340299  | Missense_Mutation | SNP | G  | A  | 4   | 30  | c.367G>A       | c.(367-369)GGA>AGA     | p.G123R   |
| Pat_40 | Pre-Treatment | USP25     | 29761  | 37 | 21 | 17214827  | 17214827  | Missense_Mutation | SNP | G  | A  | 32  | 172 | c.2305G>A      | c.(2305-2307)GAA>AAA   | p.E769K   |
| Pat_40 | Pre-Treatment | C21orf59  | 56683  | 37 | 21 | 33982292  | 33982292  | Missense_Mutation | SNP | C  | T  | 13  | 54  | c.163G>A       | c.(163-165)GGC>AGC     | p.G55S    |
| Pat_40 | Pre-Treatment | IL10RB    | 3588   | 37 | 21 | 34652102  | 34652102  | Missense_Mutation | SNP | C  | T  | 55  | 117 | c.377C>T       | c.(376-378)TCT>TTT     | p.S126F   |
| Pat_40 | Pre-Treatment | KCNJ15    | 3772   | 37 | 21 | 39672159  | 39672159  | Missense_Mutation | SNP | G  | A  | 23  | 109 | c.976G>A       | c.(976-978)GAT>AAT     | p.D326N   |
| Pat_40 | Pre-Treatment | DSCAM     | 1826   | 37 | 21 | 41719737  | 41719737  | Missense_Mutation | SNP | C  | T  | 40  | 291 | c.1070G>A      | c.(1069-1071)GGA>GAA   | p.G357E   |
| Pat_40 | Pre-Treatment | RIPK4     | 54101  | 37 | 21 | 43166796  | 43166796  | Missense_Mutation | SNP | G  | A  | 3   | 39  | c.809C>T       | c.(808-810)CCG>CTG     | p.P270L   |

|        |               |          |        |    |    |           |           |                   |     |    |    |    |     |                                     |                      |               |
|--------|---------------|----------|--------|----|----|-----------|-----------|-------------------|-----|----|----|----|-----|-------------------------------------|----------------------|---------------|
| Pat_40 | Pre-Treatment | PTTG1IP  | 754    | 37 | 21 | 46275124  | 46275124  | Splice_Site       | SNP | C  | T  | 9  | 20  | c.496_splice                        | c.e5+1               | p.G166_splice |
| Pat_40 | Pre-Treatment | MICAL3   | 57553  | 37 | 22 | 18370094  | 18370094  | Missense_Mutation | SNP | G  | A  | 23 | 10  | c.1999C>T                           | c.(1999-2001)CCC>TCC | p.P667S       |
| Pat_40 | Pre-Treatment | PRODH    | 5625   | 37 | 22 | 18912573  | 18912573  | Missense_Mutation | SNP | C  | T  | 3  | 27  | c.658G>A                            | c.(658-660)GAA>AAA   | p.E220K       |
| Pat_40 | Pre-Treatment | CLTCL1   | 8218   | 37 | 22 | 19170950  | 19170950  | Missense_Mutation | SNP | A  | T  | 15 | 32  | c.4780T>A                           | c.(4780-4782)TTG>ATG | p.L1594M      |
| Pat_40 | Pre-Treatment | ZDHHC8   | 29801  | 37 | 22 | 20126835  | 20126835  | Nonsense_Mutation | SNP | C  | T  | 4  | 86  | c.223C>T                            | c.(223-225)CGA>TGA   | p.R75*        |
| Pat_40 | Pre-Treatment | BCR      | 613    | 37 | 22 | 23610637  | 23610637  | Missense_Mutation | SNP | G  | A  | 15 | 6   | c.1795G>A                           | c.(1795-1797)GGA>AGA | p.G599R       |
| Pat_40 | Pre-Treatment | NEFH     | 4744   | 37 | 22 | 29885686  | 29885686  | Missense_Mutation | SNP | C  | A  | 10 | 102 | c.2057C>A                           | c.(2056-2058)GCA>GAA | p.A686E       |
| Pat_40 | Pre-Treatment | PATZ1    | 23598  | 37 | 22 | 31741521  | 31741521  | Missense_Mutation | SNP | C  | T  | 4  | 46  | c.68G>A                             | c.(67-69)AGC>AAC     | p.S23N        |
| Pat_40 | Pre-Treatment | CSF2RB   | 1439   | 37 | 22 | 37322150  | 37322150  | Missense_Mutation | SNP | G  | A  | 4  | 80  | c.322G>A                            | c.(322-324)GTT>ATT   | p.V108I       |
| Pat_40 | Pre-Treatment | SSTR3    | 6753   | 37 | 22 | 37603517  | 37603517  | Nonsense_Mutation | SNP | C  | T  | 15 | 12  | c.326G>A                            | c.(325-327)TGG>TAG   | p.W109*       |
| Pat_40 | Pre-Treatment | TRIOBP   | 11078  | 37 | 22 | 38120359  | 38120359  | Missense_Mutation | SNP | C  | G  | 12 | 319 | c.1796C>G                           | c.(1795-1797)ACA>AGA | p.T599R       |
| Pat_40 | Pre-Treatment | H1FO     | 3005   | 37 | 22 | 38201896  | 38201897  | Nonsense_Mutation | DNP | GA | AT | 15 | 35  | c.345_346GA>AT_343-348)AAGAAG>AAAT/ |                      | p.K116*       |
| Pat_40 | Pre-Treatment | BAIAP2L2 | 80115  | 37 | 22 | 38494156  | 38494156  | Missense_Mutation | SNP | G  | A  | 4  | 46  | c.379C>T                            | c.(379-381)CGC>TGC   | p.R127C       |
| Pat_40 | Pre-Treatment | PARVB    | 29780  | 37 | 22 | 44495969  | 44495969  | Missense_Mutation | SNP | C  | T  | 14 | 75  | c.239C>T                            | c.(238-240)TCC>TTC   | p.S80F        |
| Pat_40 | Pre-Treatment | WNT7B    | 7477   | 37 | 22 | 46345908  | 46345908  | Missense_Mutation | SNP | C  | T  | 31 | 37  | c.190G>A                            | c.(190-192)GAG>AAG   | p.E64K        |
| Pat_40 | Pre-Treatment | CELSR1   | 9620   | 37 | 22 | 46792517  | 46792517  | Missense_Mutation | SNP | G  | A  | 13 | 21  | c.5828C>T                           | c.(5827-5829)CCG>CTG | p.P1943L      |
| Pat_40 | Pre-Treatment | PLXNB2   | 23654  | 37 | 22 | 50715060  | 50715060  | Missense_Mutation | SNP | G  | A  | 14 | 74  | c.5335C>T                           | c.(5335-5337)CGG>TGG | p.R1779W      |
| Pat_40 | Pre-Treatment | SBF1     | 6305   | 37 | 22 | 50900836  | 50900836  | Missense_Mutation | SNP | G  | A  | 4  | 108 | c.2194C>T                           | c.(2194-2196)CGC>TGC | p.R732C       |
| Pat_40 | Pre-Treatment | MIOX     | 55586  | 37 | 22 | 50925884  | 50925884  | Missense_Mutation | SNP | G  | A  | 3  | 52  | c.86G>A                             | c.(85-87)CGG>CAG     | p.R29Q        |
| Pat_40 | Pre-Treatment | CNTN6    | 27255  | 37 | 3  | 1367579   | 1367579   | Missense_Mutation | SNP | G  | A  | 12 | 52  | c.1027G>A                           | c.(1027-1029)GGA>AGA | p.G343R       |
| Pat_40 | Pre-Treatment | GHRL     | 51738  | 37 | 3  | 10331857  | 10331857  | Missense_Mutation | SNP | G  | A  | 3  | 16  | c.8C>T                              | c.(7-9)TCC>TTC       | p.S3F         |
| Pat_40 | Pre-Treatment | HRH1     | 3269   | 37 | 3  | 11301460  | 11301460  | Missense_Mutation | SNP | G  | A  | 4  | 12  | c.737G>A                            | c.(736-738)GGG>GAG   | p.G246E       |
| Pat_40 | Pre-Treatment | CAND2    | 23066  | 37 | 3  | 12858191  | 12858191  | Missense_Mutation | SNP | T  | C  | 20 | 43  | c.1760T>C                           | c.(1759-1761)GTG>GCG | p.V587A       |
| Pat_40 | Pre-Treatment | PLCL2    | 23228  | 37 | 3  | 17053134  | 17053134  | Missense_Mutation | SNP | T  | A  | 12 | 22  | c.2272T>A                           | c.(2272-2274)TTT>ATT | p.F758I       |
| Pat_40 | Pre-Treatment | LRRRC3B  | 116135 | 37 | 3  | 26751248  | 26751248  | Missense_Mutation | SNP | C  | T  | 21 | 65  | c.85C>T                             | c.(85-87)CAT>TAT     | p.H29Y        |
| Pat_40 | Pre-Treatment | SCN5A    | 6331   | 37 | 3  | 38648165  | 38648165  | Nonsense_Mutation | SNP | G  | A  | 4  | 6   | c.1135C>T                           | c.(1135-1137)CAG>TAG | p.Q379*       |
| Pat_40 | Pre-Treatment | SCN10A   | 6336   | 37 | 3  | 38793820  | 38793820  | Missense_Mutation | SNP | G  | A  | 3  | 29  | c.1645C>T                           | c.(1645-1647)CTC>TTC | p.L549F       |
| Pat_40 | Pre-Treatment | CTNNB1   | 1499   | 37 | 3  | 41266137  | 41266137  | Missense_Mutation | SNP | C  | T  | 14 | 47  | c.134C>T                            | c.(133-135)TCT>TTT   | p.S45F        |
| Pat_40 | Pre-Treatment | CXCR6    | 10663  | 37 | 3  | 45988860  | 45988860  | Missense_Mutation | SNP | G  | A  | 8  | 19  | c.887G>A                            | c.(886-888)CGA>CAA   | p.R296Q       |
| Pat_40 | Pre-Treatment | CCR3     | 1232   | 37 | 3  | 46307479  | 46307479  | Missense_Mutation | SNP | A  | G  | 20 | 60  | c.830A>G                            | c.(829-831)AAG>AGG   | p.K277R       |
| Pat_40 | Pre-Treatment | SCAP     | 22937  | 37 | 3  | 47476586  | 47476586  | Missense_Mutation | SNP | A  | C  | 16 | 43  | c.164T>G                            | c.(163-165)GTG>GGG   | p.V55G        |
| Pat_40 | Pre-Treatment | PLXNB1   | 5364   | 37 | 3  | 48459905  | 48459905  | Missense_Mutation | SNP | A  | G  | 6  | 6   | c.3002T>C                           | c.(3001-3003)CTG>CCG | p.L1001P      |
| Pat_40 | Pre-Treatment | PLXNB1   | 5364   | 37 | 3  | 48461146  | 48461146  | Missense_Mutation | SNP | G  | A  | 6  | 0   | c.2549C>T                           | c.(2548-2550)CCC>CTC | p.P850L       |
| Pat_40 | Pre-Treatment | CELSR3   | 1951   | 37 | 3  | 48698392  | 48698392  | Missense_Mutation | SNP | C  | T  | 3  | 11  | c.1676G>A                           | c.(1675-1677)CGC>CAC | p.R559H       |
| Pat_40 | Pre-Treatment | LAMB2    | 3913   | 37 | 3  | 49163916  | 49163916  | Missense_Mutation | SNP | G  | A  | 23 | 47  | c.2033C>T                           | c.(2032-2034)CCT>CTT | p.P678L       |
| Pat_40 | Pre-Treatment | GNAT1    | 2779   | 37 | 3  | 50229208  | 50229208  | Missense_Mutation | SNP | A  | G  | 3  | 27  | c.50A>G                             | c.(49-51)AAG>AGG     | p.K17R        |
| Pat_40 | Pre-Treatment | DOCK3    | 1795   | 37 | 3  | 51395405  | 51395405  | Missense_Mutation | SNP | G  | T  | 14 | 93  | c.4781G>T                           | c.(4780-4782)GGA>GTA | p.G1594V      |
| Pat_40 | Pre-Treatment | DOCK3    | 1795   | 37 | 3  | 51418581  | 51418582  | Missense_Mutation | DNP | CC | TT | 9  | 41  | c.5684_5685CC>T                     | c.(5683-5685)TCC>TTT | p.S1895F      |
| Pat_40 | Pre-Treatment | CACNA1D  | 776    | 37 | 3  | 53781378  | 53781378  | Missense_Mutation | SNP | C  | T  | 24 | 83  | c.3217C>T                           | c.(3217-3219)CGT>TGT | p.R1073C      |
| Pat_40 | Pre-Treatment | CACNA2D3 | 55799  | 37 | 3  | 54615870  | 54615870  | Missense_Mutation | SNP | G  | A  | 12 | 41  | c.929G>A                            | c.(928-930)GGA>GAA   | p.G310E       |
| Pat_40 | Pre-Treatment | PXK      | 54899  | 37 | 3  | 58410506  | 58410506  | Missense_Mutation | SNP | C  | T  | 79 | 67  | c.1556C>T                           | c.(1555-1557)CCA>CTA | p.P519L       |
| Pat_40 | Pre-Treatment | CNTN3    | 5067   | 37 | 3  | 74315713  | 74315713  | Missense_Mutation | SNP | C  | T  | 39 | 617 | c.2905G>A                           | c.(2905-2907)GAC>AAC | p.D969N       |
| Pat_40 | Pre-Treatment | PROS1    | 5627   | 37 | 3  | 93624748  | 93624748  | Missense_Mutation | SNP | A  | C  | 19 | 63  | c.481T>G                            | c.(481-483)TGC>GGC   | p.C161G       |
| Pat_40 | Pre-Treatment | CD96     | 10225  | 37 | 3  | 111325559 | 111325559 | Missense_Mutation | SNP | C  | T  | 19 | 93  | c.1148C>T                           | c.(1147-1149)TCC>TTC | p.S383F       |
| Pat_40 | Pre-Treatment | PLXNA1   | 5361   | 37 | 3  | 126735849 | 126735849 | Missense_Mutation | SNP | G  | A  | 4  | 61  | c.3176G>A                           | c.(3175-3177)CGG>CAG | p.R1059Q      |
| Pat_40 | Pre-Treatment | MBD4     | 8930   | 37 | 3  | 129155742 | 129155742 | Missense_Mutation | SNP | C  | T  | 34 | 120 | c.745G>A                            | c.(745-747)GGA>AGA   | p.G249R       |
| Pat_40 | Pre-Treatment | PLXND1   | 23129  | 37 | 3  | 129305046 | 129305046 | Missense_Mutation | SNP | C  | T  | 3  | 11  | c.1690G>A                           | c.(1690-1692)GCC>ACC | p.A564T       |

|        |               |          |        |    |   |           |           |                   |     |    |    |    |     |                                    |                        |          |
|--------|---------------|----------|--------|----|---|-----------|-----------|-------------------|-----|----|----|----|-----|------------------------------------|------------------------|----------|
| Pat_40 | Pre-Treatment | NMNAT3   | 349565 | 37 | 3 | 139297817 | 139297817 | Missense_Mutation | SNP | G  | C  | 4  | 36  | c.190C>G                           | c.(190-192)CGA>GGA     | p.R64G   |
| Pat_40 | Pre-Treatment | AADACL2  | 344752 | 37 | 3 | 151475240 | 151475240 | Missense_Mutation | SNP | G  | A  | 13 | 68  | c.1064G>A                          | c.(1063-1065)CGA>CAA   | p.R355Q  |
| Pat_40 | Pre-Treatment | FNDC3B   | 64778  | 37 | 3 | 171965431 | 171965432 | Missense_Mutation | DNP | CC | TT | 47 | 250 | c.373_374CC>TT                     | c.(373-375)CCC>TTC     | p.P125F  |
| Pat_40 | Pre-Treatment | FNDC3B   | 64778  | 37 | 3 | 172115059 | 172115059 | Missense_Mutation | SNP | G  | A  | 20 | 47  | c.3409G>A                          | c.(3409-3411)GAG>AAG   | p.E1137K |
| Pat_40 | Pre-Treatment | AP2M1    | 1173   | 37 | 3 | 183899833 | 183899833 | Missense_Mutation | SNP | G  | A  | 4  | 17  | c.961G>A                           | c.(961-963)GAG>AAG     | p.E321K  |
| Pat_40 | Pre-Treatment | ABCF3    | 55324  | 37 | 3 | 183910456 | 183910456 | Missense_Mutation | SNP | G  | A  | 5  | 11  | c.1637G>A                          | c.(1636-1638)CGG>CAG   | p.R546Q  |
| Pat_40 | Pre-Treatment | KNG1     | 3827   | 37 | 3 | 186460082 | 186460082 | Missense_Mutation | SNP | G  | A  | 5  | 86  | c.1897G>A                          | c.(1897-1899)GAA>AAA   | p.E633K  |
| Pat_40 | Pre-Treatment | C3orf59  | 151963 | 37 | 3 | 192516621 | 192516621 | Missense_Mutation | SNP | G  | A  | 8  | 13  | c.1030C>T                          | c.(1030-1032)CCT>TCT   | p.P344S  |
| Pat_40 | Pre-Treatment | ZNF721   | 170960 | 37 | 4 | 435639    | 435639    | Missense_Mutation | SNP | T  | C  | 8  | 140 | c.2617A>G                          | c.(2617-2619)ACC>GCC   | p.T873A  |
| Pat_40 | Pre-Treatment | ZNF721   | 170960 | 37 | 4 | 436514    | 436514    | Missense_Mutation | SNP | C  | T  | 38 | 173 | c.1742G>A                          | c.(1741-1743)GGA>GAA   | p.G581E  |
| Pat_40 | Pre-Treatment | ZNF721   | 170960 | 37 | 4 | 437319    | 437319    | Missense_Mutation | SNP | C  | T  | 8  | 217 | c.937G>A                           | c.(937-939)GCC>ACC     | p.A313T  |
| Pat_40 | Pre-Treatment | GAK      | 2580   | 37 | 4 | 843819    | 843819    | Missense_Mutation | SNP | C  | T  | 2  | 3   | c.3695G>A                          | c.(3694-3696)CGG>CAG   | p.R1232Q |
| Pat_40 | Pre-Treatment | CRMP1    | 1400   | 37 | 4 | 5843131   | 5843131   | Missense_Mutation | SNP | C  | T  | 54 | 228 | c.715G>A                           | c.(715-717)GCC>ACC     | p.A239T  |
| Pat_40 | Pre-Treatment | JAKMIP1  | 152789 | 37 | 4 | 6066645   | 6066645   | Missense_Mutation | SNP | C  | T  | 20 | 38  | c.1393G>A                          | c.(1393-1395)GAC>AAC   | p.D465N  |
| Pat_40 | Pre-Treatment | AFAP1    | 60312  | 37 | 4 | 7770626   | 7770626   | Missense_Mutation | SNP | C  | T  | 22 | 58  | c.2111G>A                          | c.(2110-2112)AGC>AAC   | p.S704N  |
| Pat_40 | Pre-Treatment | BOD1L    | 259282 | 37 | 4 | 13602199  | 13602199  | Missense_Mutation | SNP | T  | C  | 3  | 22  | c.6325A>G                          | c.(6325-6327)AGA>GGA   | p.R2109G |
| Pat_40 | Pre-Treatment | CPEB2    | 132864 | 37 | 4 | 15063811  | 15063811  | Missense_Mutation | SNP | C  | T  | 71 | 252 | c.1469C>T                          | c.(1468-1470)TCC>TTC   | p.S490F  |
| Pat_40 | Pre-Treatment | RBPJ     | 3516   | 37 | 4 | 26431526  | 26431526  | Missense_Mutation | SNP | C  | T  | 5  | 38  | c.934C>T                           | c.(934-936)CCA>TCA     | p.P312S  |
| Pat_40 | Pre-Treatment | GUF1     | 60558  | 37 | 4 | 44691864  | 44691864  | Missense_Mutation | SNP | G  | A  | 23 | 108 | c.1207G>A                          | c.(1207-1209)GGA>AGA   | p.G403R  |
| Pat_40 | Pre-Treatment | REST     | 5978   | 37 | 4 | 57797744  | 57797744  | Missense_Mutation | SNP | C  | T  | 4  | 56  | c.2720C>T                          | c.(2719-2721)CCT>CTT   | p.P907L  |
| Pat_40 | Pre-Treatment | UGT2B28  | 54490  | 37 | 4 | 70146351  | 70146351  | Missense_Mutation | SNP | G  | A  | 44 | 203 | c.133G>A                           | c.(133-135)GAG>AAG     | p.E45K   |
| Pat_40 | Pre-Treatment | UGT2B28  | 54490  | 37 | 4 | 70146547  | 70146547  | Missense_Mutation | SNP | C  | T  | 30 | 124 | c.329C>T                           | c.(328-330)TCA>TTA     | p.S110L  |
| Pat_40 | Pre-Treatment | ALB      | 213    | 37 | 4 | 74285291  | 74285291  | Missense_Mutation | SNP | G  | A  | 40 | 84  | c.1720G>A                          | c.(1720-1722)GAT>AAT   | p.D574N  |
| Pat_40 | Pre-Treatment | CCDC158  | 339965 | 37 | 4 | 77292635  | 77292635  | Missense_Mutation | SNP | G  | A  | 4  | 90  | c.1084C>T                          | c.(1084-1086)CGG>TGG   | p.R362W  |
| Pat_40 | Pre-Treatment | FRAS1    | 80144  | 37 | 4 | 79301056  | 79301056  | Missense_Mutation | SNP | G  | A  | 32 | 47  | c.3469G>A                          | c.(3469-3471)GGA>AGA   | p.G1157R |
| Pat_40 | Pre-Treatment | BMP3     | 651    | 37 | 4 | 81967248  | 81967248  | Missense_Mutation | SNP | G  | A  | 59 | 95  | c.673G>A                           | c.(673-675)GGA>AGA     | p.G225R  |
| Pat_40 | Pre-Treatment | ADH1B    | 125    | 37 | 4 | 100232022 | 100232022 | Missense_Mutation | SNP | C  | T  | 36 | 162 | c.1003G>A                          | c.(1003-1005)GAT>AAT   | p.D335N  |
| Pat_40 | Pre-Treatment | ADH7     | 131    | 37 | 4 | 100349774 | 100349774 | Missense_Mutation | SNP | C  | T  | 45 | 183 | c.170G>A                           | c.(169-171)GGA>GAA     | p.G57E   |
| Pat_40 | Pre-Treatment | EGF      | 1950   | 37 | 4 | 110883099 | 110883099 | Missense_Mutation | SNP | C  | T  | 76 | 155 | c.1270C>T                          | c.(1270-1272)CCT>TCT   | p.P424S  |
| Pat_40 | Pre-Treatment | EGF      | 1950   | 37 | 4 | 110884429 | 110884430 | Missense_Mutation | DNP | GG | AA | 47 | 102 | .1413_1414GG>Al411-1416)CTGGAT>CTA |                        | p.D472N  |
| Pat_40 | Pre-Treatment | LARP7    | 51574  | 37 | 4 | 113568238 | 113568238 | Missense_Mutation | SNP | C  | T  | 34 | 117 | c.601C>T                           | c.(601-603)CCT>TCT     | p.P201S  |
| Pat_40 | Pre-Treatment | TBC1D9   | 23158  | 37 | 4 | 141590792 | 141590792 | Missense_Mutation | SNP | T  | C  | 7  | 29  | c.1433A>G                          | c.(1432-1434)AAA>AGA   | p.K478R  |
| Pat_40 | Pre-Treatment | MAB21L2  | 10586  | 37 | 4 | 151504863 | 151504863 | Missense_Mutation | SNP | G  | A  | 7  | 24  | c.682G>A                           | c.(682-684)GAC>AAC     | p.D228N  |
| Pat_40 | Pre-Treatment | TLR2     | 7097   | 37 | 4 | 154625141 | 154625141 | Missense_Mutation | SNP | C  | T  | 27 | 23  | c.1082C>T                          | c.(1081-1083)TCA>TTA   | p.S361L  |
| Pat_40 | Pre-Treatment | RBM46    | 166863 | 37 | 4 | 155719334 | 155719334 | Missense_Mutation | SNP | C  | T  | 9  | 95  | c.523C>T                           | c.(523-525)CCA>TCA     | p.P175S  |
| Pat_40 | Pre-Treatment | GUCY1A3  | 2982   | 37 | 4 | 156618119 | 156618119 | Missense_Mutation | SNP | G  | A  | 7  | 42  | c.100G>A                           | c.(100-102)GCA>ACA     | p.A34T   |
| Pat_40 | Pre-Treatment | GRIA2    | 2891   | 37 | 4 | 158284078 | 158284078 | Missense_Mutation | SNP | G  | A  | 19 | 83  | c.2534G>A                          | c.(2533-2535)CGA>CAA   | p.R845Q  |
| Pat_40 | Pre-Treatment | TLL1     | 7092   | 37 | 4 | 166963247 | 166963247 | Missense_Mutation | SNP | C  | T  | 43 | 205 | c.1330C>T                          | c.(1330-1332)CGT>TGT   | p.R444C  |
| Pat_40 | Pre-Treatment | NEK1     | 4750   | 37 | 4 | 170506576 | 170506576 | Missense_Mutation | SNP | C  | T  | 4  | 36  | c.731G>A                           | c.(730-732)AGG>AAG     | p.R244K  |
| Pat_40 | Pre-Treatment | C4orf41  | 60684  | 37 | 4 | 184598649 | 184598649 | Missense_Mutation | SNP | G  | A  | 21 | 152 | c.773G>A                           | c.(772-774)AGA>AAA     | p.R258K  |
| Pat_40 | Pre-Treatment | FAT1     | 2195   | 37 | 4 | 187541333 | 187541333 | Missense_Mutation | SNP | G  | A  | 21 | 56  | c.6407C>T                          | c.(6406-6408)TCA>TTA   | p.S2136L |
| Pat_40 | Pre-Treatment | ADAMTS16 | 170690 | 37 | 5 | 5262860   | 5262860   | Missense_Mutation | SNP | G  | A  | 19 | 74  | c.2753G>A                          | c.(2752-2754)GGG>GAG   | p.G918E  |
| Pat_40 | Pre-Treatment | FASTKD3  | 79072  | 37 | 5 | 7859553   | 7859553   | Missense_Mutation | SNP | C  | T  | 8  | 46  | c.1984G>A                          | c.(1984-1986)GAA>AAA   | p.E662K  |
| Pat_40 | Pre-Treatment | MTRR     | 4552   | 37 | 5 | 7892881   | 7892881   | Missense_Mutation | SNP | A  | G  | 91 | 141 | c.1493A>G                          | c.(1492-1494)AAC>AGC   | p.N498S  |
| Pat_40 | Pre-Treatment | DNAH5    | 1767   | 37 | 5 | 13700913  | 13700913  | Nonsense_Mutation | SNP | C  | T  | 67 | 101 | c.13559G>A                         | c.(13558-13560)TGG>TAG | p.W4520* |
| Pat_40 | Pre-Treatment | PRDM9    | 56979  | 37 | 5 | 23526999  | 23526999  | Missense_Mutation | SNP | C  | T  | 6  | 142 | c.1802C>T                          | c.(1801-1803)ACA>ATA   | p.T601I  |
| Pat_40 | Pre-Treatment | PRDM9    | 56979  | 37 | 5 | 23527083  | 23527083  | Missense_Mutation | SNP | G  | C  | 6  | 94  | c.1886G>C                          | c.(1885-1887)AGA>ACA   | p.R629T  |

|        |               |                 |        |    |   |           |           |                   |     |    |    |    |     |                |                        |               |
|--------|---------------|-----------------|--------|----|---|-----------|-----------|-------------------|-----|----|----|----|-----|----------------|------------------------|---------------|
| Pat_40 | Pre-Treatment | GOLPH3          | 64083  | 37 | 5 | 32126541  | 32126541  | Missense_Mutation | SNP | C  | G  | 47 | 102 | c.674G>C       | c.(673-675)TGG>TCG     | p.W225S       |
| Pat_40 | Pre-Treatment | ADAMTS12        | 81792  | 37 | 5 | 33637805  | 33637805  | Missense_Mutation | SNP | G  | A  | 4  | 72  | c.1765C>T      | c.(1765-1767)CGC>TGC   | p.R589C       |
| Pat_40 | Pre-Treatment | C9              | 735    | 37 | 5 | 39311479  | 39311479  | Missense_Mutation | SNP | C  | T  | 8  | 72  | c.871G>A       | c.(871-873)GAA>AAA     | p.E291K       |
| Pat_40 | Pre-Treatment | ITGA1           | 3672   | 37 | 5 | 52221138  | 52221138  | Missense_Mutation | SNP | G  | A  | 17 | 82  | c.2434G>A      | c.(2434-2436)GAA>AAA   | p.E812K       |
| Pat_40 | Pre-Treatment | DDX4            | 54514  | 37 | 5 | 55110910  | 55110910  | Missense_Mutation | SNP | C  | T  | 46 | 195 | c.1897C>T      | c.(1897-1899)CGT>TGT   | p.R633C       |
| Pat_40 | Pre-Treatment | F2RL1           | 2150   | 37 | 5 | 76128587  | 76128587  | Missense_Mutation | SNP | G  | A  | 25 | 112 | c.155G>A       | c.(154-156)GGA>GAA     | p.G52E        |
| Pat_40 | Pre-Treatment | GPR98           | 84059  | 37 | 5 | 89990494  | 89990494  | Missense_Mutation | SNP | G  | A  | 8  | 27  | c.7921G>A      | c.(7921-7923)GGA>AGA   | p.G2641R      |
| Pat_40 | Pre-Treatment | MCTP1           | 79772  | 37 | 5 | 94204141  | 94204141  | Missense_Mutation | SNP | A  | C  | 10 | 60  | c.2333T>G      | c.(2332-2334)TTT>TGT   | p.F778C       |
| Pat_40 | Pre-Treatment | WDR36           | 134430 | 37 | 5 | 110439905 | 110439905 | Missense_Mutation | SNP | C  | T  | 3  | 56  | c.928C>T       | c.(928-930)CCA>TCA     | p.P310S       |
| Pat_40 | Pre-Treatment | EPB41L4A        | 64097  | 37 | 5 | 111545588 | 111545588 | Splice_Site       | SNP | C  | T  | 33 | 56  | c.1178_splice  | c.e13+1                | p.S393_splice |
| Pat_40 | Pre-Treatment | FAM170A         | 340069 | 37 | 5 | 118969746 | 118969746 | Missense_Mutation | SNP | T  | G  | 45 | 44  | c.303T>G       | c.(301-303)CAT>CAG     | p.H101Q       |
| Pat_40 | Pre-Treatment | FTMT            | 94033  | 37 | 5 | 121188229 | 121188229 | Missense_Mutation | SNP | G  | A  | 15 | 117 | c.571G>A       | c.(571-573)GAT>AAT     | p.D191N       |
| Pat_40 | Pre-Treatment | P4HA2           | 8974   | 37 | 5 | 131545009 | 131545009 | Missense_Mutation | SNP | C  | A  | 54 | 105 | c.725G>T       | c.(724-726)CGA>CTA     | p.R242L       |
| Pat_40 | Pre-Treatment | KIF3A           | 11127  | 37 | 5 | 132037886 | 132037886 | Missense_Mutation | SNP | C  | T  | 13 | 81  | c.1696G>A      | c.(1696-1698)GAA>AAA   | p.E566K       |
| Pat_40 | Pre-Treatment | TIFAB           | 497189 | 37 | 5 | 134785386 | 134785386 | Missense_Mutation | SNP | C  | T  | 24 | 89  | c.244G>A       | c.(244-246)GGC>AGC     | p.G82S        |
| Pat_40 | Pre-Treatment | KLHL3           | 26249  | 37 | 5 | 136974690 | 136974691 | Missense_Mutation | DNP | CC | TT | 13 | 51  | .1170_1171GG>A | c.(168-1173)GCGGTG>GCA | p.V391M       |
| Pat_40 | Pre-Treatment | \NKHD1-EIF4EBP: | 404734 | 37 | 5 | 139906028 | 139906028 | Missense_Mutation | SNP | G  | A  | 4  | 107 | c.4940G>A      | c.(4939-4941)CGA>CAA   | p.R1647Q      |
| Pat_40 | Pre-Treatment | PCDHA2          | 56146  | 37 | 5 | 140175006 | 140175006 | Missense_Mutation | SNP | C  | T  | 24 | 28  | c.457C>T       | c.(457-459)CCT>TCT     | p.P153S       |
| Pat_40 | Pre-Treatment | PCDHA3          | 56145  | 37 | 5 | 140182748 | 140182748 | Missense_Mutation | SNP | G  | A  | 20 | 72  | c.1966G>A      | c.(1966-1968)GAA>AAA   | p.E656K       |
| Pat_40 | Pre-Treatment | PCDHA4          | 56144  | 37 | 5 | 140187721 | 140187721 | Missense_Mutation | SNP | G  | A  | 29 | 114 | c.949G>A       | c.(949-951)GAA>AAA     | p.E317K       |
| Pat_40 | Pre-Treatment | PCDHA5          | 56143  | 37 | 5 | 140202835 | 140202835 | Missense_Mutation | SNP | C  | T  | 17 | 83  | c.1475C>T      | c.(1474-1476)TCG>TTG   | p.S492L       |
| Pat_40 | Pre-Treatment | PCDHA10         | 56139  | 37 | 5 | 140237555 | 140237555 | Missense_Mutation | SNP | C  | T  | 9  | 14  | c.1922C>T      | c.(1921-1923)TCG>TTG   | p.S641L       |
| Pat_40 | Pre-Treatment | PCDHB6          | 56130  | 37 | 5 | 140530709 | 140530709 | Missense_Mutation | SNP | G  | A  | 53 | 79  | c.871G>A       | c.(871-873)GAA>AAA     | p.E291K       |
| Pat_40 | Pre-Treatment | PCDHB6          | 56130  | 37 | 5 | 140531786 | 140531786 | Missense_Mutation | SNP | C  | T  | 4  | 44  | c.1948C>T      | c.(1948-1950)CGC>TGC   | p.R650C       |
| Pat_40 | Pre-Treatment | PCDHB2          | 56103  | 37 | 5 | 140741165 | 140741165 | Missense_Mutation | SNP | C  | T  | 19 | 31  | c.1463C>T      | c.(1462-1464)TCC>TTC   | p.S488F       |
| Pat_40 | Pre-Treatment | PCDHB3          | 56102  | 37 | 5 | 140750571 | 140750571 | Missense_Mutation | SNP | G  | A  | 11 | 23  | c.610G>A       | c.(610-612)GAG>AAG     | p.E204K       |
| Pat_40 | Pre-Treatment | ARHGAP26        | 23092  | 37 | 5 | 142311641 | 142311641 | Missense_Mutation | SNP | C  | T  | 26 | 123 | c.1058C>T      | c.(1057-1059)TCG>TTG   | p.S353L       |
| Pat_40 | Pre-Treatment | FBXO38          | 81545  | 37 | 5 | 147778639 | 147778639 | Missense_Mutation | SNP | G  | A  | 18 | 76  | c.206G>A       | c.(205-207)CGA>CAA     | p.R69Q        |
| Pat_40 | Pre-Treatment | SLC36A2         | 153201 | 37 | 5 | 150704953 | 150704953 | Missense_Mutation | SNP | C  | T  | 7  | 41  | c.904G>A       | c.(904-906)GGA>AGA     | p.G302R       |
| Pat_40 | Pre-Treatment | PWWP2A          | 114825 | 37 | 5 | 159520269 | 159520269 | Missense_Mutation | SNP | T  | C  | 4  | 59  | c.1388A>G      | c.(1387-1389)CAG>CGG   | p.Q463R       |
| Pat_40 | Pre-Treatment | CCDC99          | 54908  | 37 | 5 | 169015538 | 169015538 | Nonsense_Mutation | SNP | C  | T  | 22 | 94  | c.118C>T       | c.(118-120)CAA>TAA     | p.Q40*        |
| Pat_40 | Pre-Treatment | CPLX2           | 10814  | 37 | 5 | 175305922 | 175305922 | Missense_Mutation | SNP | G  | A  | 3  | 21  | c.43G>A        | c.(43-45)GAC>AAC       | p.D15N        |
| Pat_40 | Pre-Treatment | NSD1            | 64324  | 37 | 5 | 176631253 | 176631253 | Missense_Mutation | SNP | G  | A  | 14 | 52  | c.1196G>A      | c.(1195-1197)AGG>AAG   | p.R399K       |
| Pat_40 | Pre-Treatment | DOK3            | 79930  | 37 | 5 | 176931802 | 176931802 | Missense_Mutation | SNP | C  | T  | 6  | 45  | c.755G>A       | c.(754-756)GGC>GAC     | p.G252D       |
| Pat_40 | Pre-Treatment | BTNL3           | 10917  | 37 | 5 | 180424335 | 180424335 | Missense_Mutation | SNP | G  | A  | 7  | 42  | c.520G>A       | c.(520-522)GAT>AAT     | p.D174N       |
| Pat_40 | Pre-Treatment | BTNL3           | 10917  | 37 | 5 | 180432588 | 180432588 | Missense_Mutation | SNP | C  | T  | 50 | 51  | c.1117C>T      | c.(1117-1119)CCC>TCC   | p.P373S       |
| Pat_40 | Pre-Treatment | GNB2L1          | 10399  | 37 | 5 | 180666075 | 180666075 | Missense_Mutation | SNP | C  | T  | 38 | 210 | c.628G>A       | c.(628-630)GGA>AGA     | p.G210R       |
| Pat_40 | Pre-Treatment | EXOC2           | 55770  | 37 | 6 | 572614    | 572614    | Missense_Mutation | SNP | G  | A  | 17 | 40  | c.1349C>T      | c.(1348-1350)GCC>GTC   | p.A450V       |
| Pat_40 | Pre-Treatment | RANBP9          | 10048  | 37 | 6 | 13634740  | 13634741  | Missense_Mutation | DNP | CC | TT | 23 | 47  | .1717_1718GG>A | c.(1717-1719)GGA>AAA   | p.G573K       |
| Pat_40 | Pre-Treatment | NUP153          | 9972   | 37 | 6 | 17675825  | 17675825  | Missense_Mutation | SNP | C  | T  | 10 | 68  | c.511G>A       | c.(511-513)GAT>AAT     | p.D171N       |
| Pat_40 | Pre-Treatment | GPLD1           | 2822   | 37 | 6 | 24445860  | 24445860  | Missense_Mutation | SNP | C  | T  | 29 | 50  | c.1934G>A      | c.(1933-1935)GGG>GAG   | p.G645E       |
| Pat_40 | Pre-Treatment | HIST1H2BC       | 8347   | 37 | 6 | 26123919  | 26123919  | Missense_Mutation | SNP | C  | T  | 28 | 132 | c.214G>A       | c.(214-216)GAG>AAG     | p.E72K        |
| Pat_40 | Pre-Treatment | BTN3A3          | 10384  | 37 | 6 | 26445976  | 26445976  | Missense_Mutation | SNP | G  | A  | 3  | 52  | c.478G>A       | c.(478-480)GGA>AGA     | p.G160R       |
| Pat_40 | Pre-Treatment | TRIM15          | 89870  | 37 | 6 | 30131681  | 30131681  | Missense_Mutation | SNP | C  | T  | 3  | 30  | c.220C>T       | c.(220-222)CCC>TCC     | p.P74S        |
| Pat_40 | Pre-Treatment | HLA-B           | 3106   | 37 | 6 | 31322904  | 31322904  | Missense_Mutation | SNP | A  | T  | 28 | 114 | c.992T>A       | c.(991-993)ATG>AAG     | p.M331K       |
| Pat_40 | Pre-Treatment | MSH5            | 4439   | 37 | 6 | 31727727  | 31727727  | Missense_Mutation | SNP | C  | T  | 8  | 13  | c.1660C>T      | c.(1660-1662)CTT>TTT   | p.L554F       |
| Pat_40 | Pre-Treatment | C6orf27         | 80737  | 37 | 6 | 31735258  | 31735259  | Missense_Mutation | DNP | GG | AA | 6  | 25  | .1669_1670CC>T | c.(1669-1671)CCT>TTT   | p.P557F       |



|        |               |         |        |    |   |           |           |                   |     |   |   |     |     |            |                        |          |
|--------|---------------|---------|--------|----|---|-----------|-----------|-------------------|-----|---|---|-----|-----|------------|------------------------|----------|
| Pat_40 | Pre-Treatment | BRD2    | 6046   | 37 | 6 | 32947723  | 32947723  | Missense_Mutation | SNP | A | T | 4   | 51  | c.1960A>T  | c.(1960-1962)ATC>TTC   | p.I654F  |
| Pat_40 | Pre-Treatment | ZNF318  | 24149  | 37 | 6 | 43323693  | 43323693  | Missense_Mutation | SNP | G | A | 10  | 54  | c.1379C>T  | c.(1378-1380)CCC>CTC   | p.P460L  |
| Pat_40 | Pre-Treatment | CAPN11  | 11131  | 37 | 6 | 44144035  | 44144035  | Missense_Mutation | SNP | C | T | 19  | 106 | c.961C>T   | c.(961-963)CCC>TCC     | p.P321S  |
| Pat_40 | Pre-Treatment | RCAN2   | 10231  | 37 | 6 | 46214583  | 46214583  | Missense_Mutation | SNP | G | A | 9   | 84  | c.335C>T   | c.(334-336)TCG>TTG     | p.S112L  |
| Pat_40 | Pre-Treatment | TINAG   | 27283  | 37 | 6 | 54173703  | 54173703  | Missense_Mutation | SNP | G | A | 24  | 66  | c.355G>A   | c.(355-357)GGT>AGT     | p.G119S  |
| Pat_40 | Pre-Treatment | DST     | 667    | 37 | 6 | 56347614  | 56347614  | Missense_Mutation | SNP | C | T | 4   | 87  | c.14912G>A | c.(14911-14913)CGA>CAA | p.R4971Q |
| Pat_40 | Pre-Treatment | BAI3    | 577    | 37 | 6 | 69665943  | 69665943  | Missense_Mutation | SNP | C | T | 13  | 75  | c.1223C>T  | c.(1222-1224)TCG>TTG   | p.S408L  |
| Pat_40 | Pre-Treatment | FAM135A | 57579  | 37 | 6 | 71238035  | 71238035  | Missense_Mutation | SNP | C | T | 28  | 62  | c.3655C>T  | c.(3655-3657)CCT>TCT   | p.P1219S |
| Pat_40 | Pre-Treatment | FAM135A | 57579  | 37 | 6 | 71266500  | 71266500  | Missense_Mutation | SNP | C | T | 21  | 116 | c.4276C>T  | c.(4276-4278)CGC>TGC   | p.R1426C |
| Pat_40 | Pre-Treatment | FILIP1  | 27145  | 37 | 6 | 76022621  | 76022621  | Missense_Mutation | SNP | C | T | 31  | 55  | c.2927G>A  | c.(2926-2928)CGA>CAA   | p.R976Q  |
| Pat_40 | Pre-Treatment | PRSS35  | 167681 | 37 | 6 | 84234328  | 84234328  | Missense_Mutation | SNP | C | T | 13  | 32  | c.1168C>T  | c.(1168-1170)CGC>TGC   | p.R390C  |
| Pat_40 | Pre-Treatment | LAMA4   | 3910   | 37 | 6 | 112476887 | 112476887 | Missense_Mutation | SNP | C | T | 60  | 139 | c.1839G>A  | c.(1837-1839)ATG>ATA   | p.M613I  |
| Pat_40 | Pre-Treatment | ROS1    | 6098   | 37 | 6 | 117662453 | 117662453 | Missense_Mutation | SNP | C | T | 29  | 106 | c.4924G>A  | c.(4924-4926)GAA>AAA   | p.E1642K |
| Pat_40 | Pre-Treatment | FAM184A | 79632  | 37 | 6 | 119295618 | 119295618 | Missense_Mutation | SNP | C | T | 40  | 171 | c.2890G>A  | c.(2890-2892)GAA>AAA   | p.E964K  |
| Pat_40 | Pre-Treatment | VNN2    | 8875   | 37 | 6 | 133078678 | 133078678 | Missense_Mutation | SNP | C | T | 12  | 105 | c.221G>A   | c.(220-222)CGA>CAA     | p.R74Q   |
| Pat_40 | Pre-Treatment | BCLAF1  | 9774   | 37 | 6 | 136599171 | 136599171 | Missense_Mutation | SNP | C | T | 4   | 39  | c.848G>A   | c.(847-849)CGA>CAA     | p.R283Q  |
| Pat_40 | Pre-Treatment | SHPRH   | 257218 | 37 | 6 | 146276260 | 146276260 | Missense_Mutation | SNP | G | A | 18  | 67  | c.199C>T   | c.(199-201)CAC>TAC     | p.H67Y   |
| Pat_40 | Pre-Treatment | ZBTB2   | 57621  | 37 | 6 | 151687684 | 151687684 | Missense_Mutation | SNP | C | T | 14  | 32  | c.517G>A   | c.(517-519)GAG>AAG     | p.E173K  |
| Pat_40 | Pre-Treatment | TULP4   | 56995  | 37 | 6 | 158923439 | 158923439 | Missense_Mutation | SNP | C | T | 16  | 70  | c.2744C>T  | c.(2743-2745)ACC>ATC   | p.T915I  |
| Pat_40 | Pre-Treatment | LPA     | 4018   | 37 | 6 | 160978522 | 160978522 | Nonsense_Mutation | SNP | C | T | 22  | 104 | c.4713G>A  | c.(4711-4713)TGG>TGA   | p.W1571* |
| Pat_40 | Pre-Treatment | LPA     | 4018   | 37 | 6 | 161020605 | 161020605 | Missense_Mutation | SNP | C | T | 116 | 339 | c.3214G>A  | c.(3214-3216)GGA>AGA   | p.G1072R |
| Pat_40 | Pre-Treatment | PLG     | 5340   | 37 | 6 | 161143526 | 161143526 | Missense_Mutation | SNP | G | A | 72  | 213 | c.1183G>A  | c.(1183-1185)GGA>AGA   | p.G395R  |
| Pat_40 | Pre-Treatment | MAD1L1  | 8379   | 37 | 7 | 2188787   | 2188787   | Missense_Mutation | SNP | C | T | 6   | 37  | c.1073G>A  | c.(1072-1074)AGC>AAC   | p.S358N  |
| Pat_40 | Pre-Treatment | AMZ1    | 155185 | 37 | 7 | 2740383   | 2740383   | Missense_Mutation | SNP | C | T | 23  | 63  | c.298C>T   | c.(298-300)CCG>TCG     | p.P100S  |
| Pat_40 | Pre-Treatment | SLC29A4 | 222962 | 37 | 7 | 5338625   | 5338625   | Missense_Mutation | SNP | C | T | 5   | 56  | c.889C>T   | c.(889-891)CCA>TCA     | p.P297S  |
| Pat_40 | Pre-Treatment | HDAC9   | 9734   | 37 | 7 | 18625110  | 18625110  | Missense_Mutation | SNP | C | T | 4   | 51  | c.229C>T   | c.(229-231)CGG>TGG     | p.R77W   |
| Pat_40 | Pre-Treatment | MACC1   | 346389 | 37 | 7 | 20199595  | 20199595  | Missense_Mutation | SNP | G | A | 8   | 63  | c.389C>T   | c.(388-390)TCC>TTC     | p.S130F  |
| Pat_40 | Pre-Treatment | DNAH11  | 8701   | 37 | 7 | 21747399  | 21747399  | Missense_Mutation | SNP | C | T | 23  | 57  | c.6650C>T  | c.(6649-6651)ACA>ATA   | p.T2217I |
| Pat_40 | Pre-Treatment | FAM188B | 84182  | 37 | 7 | 30831178  | 30831178  | Missense_Mutation | SNP | C | T | 12  | 53  | c.1061C>T  | c.(1060-1062)CCC>CTC   | p.P354L  |
| Pat_40 | Pre-Treatment | CCDC129 | 223075 | 37 | 7 | 31682490  | 31682490  | Missense_Mutation | SNP | G | A | 12  | 103 | c.1506G>A  | c.(1504-1506)ATG>ATA   | p.M502I  |
| Pat_40 | Pre-Treatment | PDE1C   | 5137   | 37 | 7 | 31877577  | 31877577  | Missense_Mutation | SNP | C | T | 89  | 185 | c.989G>A   | c.(988-990)CGA>CAA     | p.R330Q  |
| Pat_40 | Pre-Treatment | BMPER   | 168667 | 37 | 7 | 34097762  | 34097762  | Missense_Mutation | SNP | G | A | 21  | 56  | c.1019G>A  | c.(1018-1020)AGT>AAT   | p.S340N  |
| Pat_40 | Pre-Treatment | CDK13   | 8621   | 37 | 7 | 40038988  | 40038988  | Nonsense_Mutation | SNP | A | T | 13  | 66  | c.2071A>T  | c.(2071-2073)AAA>TAA   | p.R691*  |
| Pat_40 | Pre-Treatment | ZNF713  | 349075 | 37 | 7 | 55990859  | 55990859  | Missense_Mutation | SNP | C | T | 37  | 118 | c.53C>T    | c.(52-54)TCA>TTA       | p.S18L   |
| Pat_40 | Pre-Treatment | ZNF107  | 51427  | 37 | 7 | 64167982  | 64167982  | Missense_Mutation | SNP | C | T | 20  | 118 | c.1300C>T  | c.(1300-1302)CAT>TAT   | p.H434Y  |
| Pat_40 | Pre-Treatment | SPDYE5  | 442590 | 37 | 7 | 75130895  | 75130895  | Missense_Mutation | SNP | C | T | 26  | 361 | c.770C>T   | c.(769-771)CCG>CTG     | p.P257L  |
| Pat_40 | Pre-Treatment | SPDYE5  | 442590 | 37 | 7 | 75130970  | 75130970  | Missense_Mutation | SNP | T | C | 10  | 226 | c.845T>C   | c.(844-846)CTG>CCG     | p.L282P  |
| Pat_40 | Pre-Treatment | HIP1    | 3092   | 37 | 7 | 75184825  | 75184825  | Nonsense_Mutation | SNP | G | A | 3   | 24  | c.1858C>T  | c.(1858-1860)CGA>TGA   | p.R620*  |
| Pat_40 | Pre-Treatment | FGL2    | 10875  | 37 | 7 | 76825822  | 76825822  | Missense_Mutation | SNP | C | T | 39  | 197 | c.1094G>A  | c.(1093-1095)CGA>CAA   | p.R365Q  |
| Pat_40 | Pre-Treatment | PCLO    | 27445  | 37 | 7 | 82583350  | 82583350  | Missense_Mutation | SNP | C | T | 61  | 152 | c.6919G>A  | c.(6919-6921)GAA>AAA   | p.E2307K |
| Pat_40 | Pre-Treatment | PCLO    | 27445  | 37 | 7 | 82585683  | 82585683  | Missense_Mutation | SNP | C | T | 14  | 66  | c.4586G>A  | c.(4585-4587)CGA>CAA   | p.R1529Q |
| Pat_40 | Pre-Treatment | ABCB1   | 5243   | 37 | 7 | 87175289  | 87175289  | Missense_Mutation | SNP | G | A | 58  | 148 | c.1777C>T  | c.(1777-1779)CGT>TGT   | p.R593C  |
| Pat_40 | Pre-Treatment | CYP3A43 | 64816  | 37 | 7 | 99453321  | 99453321  | Missense_Mutation | SNP | C | A | 3   | 34  | c.778C>A   | c.(778-780)CGC>AGC     | p.R260S  |
| Pat_40 | Pre-Treatment | ZAN     | 7455   | 37 | 7 | 100349941 | 100349941 | Missense_Mutation | SNP | C | T | 8   | 193 | c.2213C>T  | c.(2212-2214)CCC>CTC   | p.P738L  |
| Pat_40 | Pre-Treatment | RELN    | 5649   | 37 | 7 | 103206794 | 103206794 | Missense_Mutation | SNP | C | T | 9   | 122 | c.4813G>A  | c.(4813-4815)GGA>AGA   | p.G1605R |
| Pat_40 | Pre-Treatment | PPP1R3A | 5506   | 37 | 7 | 113519829 | 113519829 | Missense_Mutation | SNP | C | T | 30  | 141 | c.1318G>A  | c.(1318-1320)GAT>AAT   | p.D440N  |
| Pat_40 | Pre-Treatment | FOXP2   | 93986  | 37 | 7 | 114292325 | 114292325 | Missense_Mutation | SNP | G | A | 101 | 84  | c.1162G>A  | c.(1162-1164)GTG>ATG   | p.V388M  |

|        |               |           |        |    |   |           |           |                   |     |    |    |     |     |                  |                      |          |
|--------|---------------|-----------|--------|----|---|-----------|-----------|-------------------|-----|----|----|-----|-----|------------------|----------------------|----------|
| Pat_40 | Pre-Treatment | CFTR      | 1080   | 37 | 7 | 117232308 | 117232308 | Missense_Mutation | SNP | A  | T  | 10  | 73  | c.2087A>T        | c.(2086-2088)AAA>ATA | p.K696I  |
| Pat_40 | Pre-Treatment | SLC13A1   | 6561   | 37 | 7 | 122759211 | 122759211 | Missense_Mutation | SNP | A  | C  | 19  | 42  | c.1436T>G        | c.(1435-1437)TTG>TGG | p.L479W  |
| Pat_40 | Pre-Treatment | ZNF800    | 168850 | 37 | 7 | 127013826 | 127013826 | Missense_Mutation | SNP | G  | A  | 19  | 109 | c.1564C>T        | c.(1564-1566)CCT>TCT | p.P522S  |
| Pat_40 | Pre-Treatment | TSPAN33   | 340348 | 37 | 7 | 128806635 | 128806635 | Missense_Mutation | SNP | G  | A  | 84  | 81  | c.476G>A         | c.(475-477)GGG>GAG   | p.G159E  |
| Pat_40 | Pre-Treatment | BRAF      | 673    | 37 | 7 | 140453136 | 140453136 | Missense_Mutation | SNP | A  | T  | 97  | 63  | c.1799T>A        | c.(1798-1800)GTG>GAG | p.V600E  |
| Pat_40 | Pre-Treatment | KEL       | 3792   | 37 | 7 | 142640960 | 142640961 | Missense_Mutation | DNP | CC | TT | 6   | 34  | c.1501_1502GG>A  | c.(1501-1503)GGA>AAA | p.G501K  |
| Pat_40 | Pre-Treatment | TAS2R41   | 259287 | 37 | 7 | 143175722 | 143175722 | Missense_Mutation | SNP | G  | A  | 29  | 146 | c.757G>A         | c.(757-759)GAT>AAT   | p.D253N  |
| Pat_40 | Pre-Treatment | LOC441294 | 441294 | 37 | 7 | 143270156 | 143270156 | Missense_Mutation | SNP | C  | T  | 14  | 298 | c.1246C>T        | c.(1246-1248)CTT>TTT | p.L416F  |
| Pat_40 | Pre-Treatment | ZNF777    | 27153  | 37 | 7 | 149129013 | 149129013 | Missense_Mutation | SNP | C  | T  | 3   | 31  | c.2350G>A        | c.(2350-2352)GGC>AGC | p.G784S  |
| Pat_40 | Pre-Treatment | REPIN1    | 29803  | 37 | 7 | 150068497 | 150068497 | Missense_Mutation | SNP | C  | T  | 2   | 1   | c.167C>T         | c.(166-168)GCC>GTC   | p.A56V   |
| Pat_40 | Pre-Treatment | MLL3      | 58508  | 37 | 7 | 151879283 | 151879283 | Missense_Mutation | SNP | T  | A  | 14  | 93  | c.5662A>T        | c.(5662-5664)AAC>TAC | p.N1888Y |
| Pat_40 | Pre-Treatment | MLL3      | 58508  | 37 | 7 | 151919131 | 151919131 | Missense_Mutation | SNP | C  | T  | 49  | 270 | c.3454G>A        | c.(3454-3456)GAA>AAA | p.E1152K |
| Pat_40 | Pre-Treatment | CSMD1     | 64478  | 37 | 8 | 2824251   | 2824251   | Missense_Mutation | SNP | G  | A  | 5   | 40  | c.8944C>T        | c.(8944-8946)CCT>TCT | p.P2982S |
| Pat_40 | Pre-Treatment | CSMD1     | 64478  | 37 | 8 | 3081309   | 3081309   | Missense_Mutation | SNP | C  | T  | 32  | 95  | c.4429G>A        | c.(4429-4431)GAA>AAA | p.E1477K |
| Pat_40 | Pre-Treatment | XPO7      | 23039  | 37 | 8 | 21857050  | 21857050  | Missense_Mutation | SNP | T  | G  | 56  | 214 | c.2647T>G        | c.(2647-2649)TAC>GAC | p.Y883D  |
| Pat_40 | Pre-Treatment | LGI3      | 203190 | 37 | 8 | 22013937  | 22013937  | Missense_Mutation | SNP | G  | A  | 2   | 1   | c.119C>T         | c.(118-120)CCG>CTG   | p.P40L   |
| Pat_40 | Pre-Treatment | TNFRSF10A | 8797   | 37 | 8 | 23049398  | 23049398  | Missense_Mutation | SNP | C  | T  | 45  | 89  | c.1216G>A        | c.(1216-1218)GAT>AAT | p.D406N  |
| Pat_40 | Pre-Treatment | ADAM7     | 8756   | 37 | 8 | 24324428  | 24324428  | Missense_Mutation | SNP | C  | T  | 27  | 194 | c.506C>T         | c.(505-507)TCC>TTC   | p.S169F  |
| Pat_40 | Pre-Treatment | DDHD2     | 23259  | 37 | 8 | 38092070  | 38092070  | Missense_Mutation | SNP | C  | T  | 28  | 169 | c.379C>T         | c.(379-381)CCC>TCC   | p.P127S  |
| Pat_40 | Pre-Treatment | POLB      | 5423   | 37 | 8 | 42227383  | 42227383  | Nonsense_Mutation | SNP | C  | T  | 10  | 48  | c.790C>T         | c.(790-792)CAG>TAG   | p.Q264*  |
| Pat_40 | Pre-Treatment | SNAI2     | 6591   | 37 | 8 | 49832783  | 49832783  | Missense_Mutation | SNP | G  | C  | 20  | 145 | c.297C>G         | c.(295-297)CAC>CAG   | p.H99Q   |
| Pat_40 | Pre-Treatment | PXDNL     | 137902 | 37 | 8 | 52320967  | 52320967  | Missense_Mutation | SNP | C  | T  | 23  | 16  | c.3217G>A        | c.(3217-3219)GAA>AAA | p.E1073K |
| Pat_40 | Pre-Treatment | RP1       | 6101   | 37 | 8 | 55537556  | 55537557  | Nonsense_Mutation | DNP | AG | TA | 19  | 45  | c.1114_1115AG>TA | c.(1114-1116)AGA>TAA | p.R372*  |
| Pat_40 | Pre-Treatment | RP1       | 6101   | 37 | 8 | 55539350  | 55539350  | Missense_Mutation | SNP | G  | A  | 34  | 41  | c.2908G>A        | c.(2908-2910)GAA>AAA | p.E970K  |
| Pat_40 | Pre-Treatment | CYP7B1    | 9420   | 37 | 8 | 65527628  | 65527628  | Missense_Mutation | SNP | G  | A  | 21  | 161 | c.1012C>T        | c.(1012-1014)CCC>TCC | p.P338S  |
| Pat_40 | Pre-Treatment | CPA6      | 57094  | 37 | 8 | 68346290  | 68346290  | Missense_Mutation | SNP | G  | A  | 25  | 299 | c.1024C>T        | c.(1024-1026)CCC>TCC | p.P342S  |
| Pat_40 | Pre-Treatment | PREX2     | 80243  | 37 | 8 | 69028131  | 69028131  | Missense_Mutation | SNP | C  | T  | 53  | 348 | c.3290C>T        | c.(3289-3291)TCT>TTT | p.S1097F |
| Pat_40 | Pre-Treatment | HNF4G     | 3174   | 37 | 8 | 76470899  | 76470899  | Missense_Mutation | SNP | G  | A  | 39  | 342 | c.739G>A         | c.(739-741)GAT>AAT   | p.D247N  |
| Pat_40 | Pre-Treatment | C8orf47   | 203111 | 37 | 8 | 99102024  | 99102024  | Missense_Mutation | SNP | G  | A  | 7   | 60  | c.779G>A         | c.(778-780)AGA>AAA   | p.R260K  |
| Pat_40 | Pre-Treatment | STK3      | 6788   | 37 | 8 | 99718703  | 99718703  | Missense_Mutation | SNP | G  | A  | 31  | 24  | c.676C>T         | c.(676-678)CCA>TCA   | p.P226S  |
| Pat_40 | Pre-Treatment | RIMS2     | 9699   | 37 | 8 | 104987692 | 104987692 | Missense_Mutation | SNP | G  | A  | 12  | 98  | c.2219G>A        | c.(2218-2220)GGA>GAA | p.G740E  |
| Pat_40 | Pre-Treatment | RIMS2     | 9699   | 37 | 8 | 105263859 | 105263859 | Missense_Mutation | SNP | G  | A  | 133 | 131 | c.3915G>A        | c.(3913-3915)ATG>ATA | p.M1305I |
| Pat_40 | Pre-Treatment | FAM83H    | 286077 | 37 | 8 | 144808878 | 144808878 | Missense_Mutation | SNP | G  | A  | 3   | 7   | c.2753C>T        | c.(2752-2754)CCC>CTC | p.P918L  |
| Pat_40 | Pre-Treatment | OPLAH     | 26873  | 37 | 8 | 145113548 | 145113548 | Missense_Mutation | SNP | C  | G  | 7   | 18  | c.634G>C         | c.(634-636)GGC>CGC   | p.G212R  |
| Pat_40 | Pre-Treatment | GPT       | 2875   | 37 | 8 | 145730651 | 145730651 | Missense_Mutation | SNP | C  | T  | 3   | 5   | c.518C>T         | c.(517-519)GCC>GTC   | p.A173V  |
| Pat_40 | Pre-Treatment | PTPRD     | 5789   | 37 | 9 | 8636785   | 8636785   | Missense_Mutation | SNP | A  | T  | 45  | 41  | c.124T>A         | c.(124-126)TCT>ACT   | p.S42T   |
| Pat_40 | Pre-Treatment | MPDZ      | 8777   | 37 | 9 | 13217180  | 13217180  | Missense_Mutation | SNP | C  | A  | 13  | 10  | c.1200G>T        | c.(1198-1200)TTG>TTT | p.L400F  |
| Pat_40 | Pre-Treatment | C9orf23   | 138716 | 37 | 9 | 34611158  | 34611158  | Missense_Mutation | SNP | G  | A  | 4   | 93  | c.136C>T         | c.(136-138)CGG>TGG   | p.R46W   |
| Pat_40 | Pre-Treatment | SHB       | 6461   | 37 | 9 | 38016038  | 38016038  | Missense_Mutation | SNP | C  | T  | 36  | 81  | c.808G>A         | c.(808-810)GAG>AAG   | p.E270K  |
| Pat_40 | Pre-Treatment | LOC442421 | 442421 | 37 | 9 | 66499716  | 66499716  | Missense_Mutation | SNP | A  | G  | 6   | 69  | c.526A>G         | c.(526-528)AAT>GAT   | p.N176D  |
| Pat_40 | Pre-Treatment | IARS      | 3376   | 37 | 9 | 95025293  | 95025293  | Missense_Mutation | SNP | G  | A  | 4   | 53  | c.1745C>T        | c.(1744-1746)CCG>CTG | p.P582L  |
| Pat_40 | Pre-Treatment | WNK2      | 65268  | 37 | 9 | 96054935  | 96054935  | Missense_Mutation | SNP | C  | T  | 2   | 2   | c.5299C>T        | c.(5299-5301)CGG>TGG | p.R1767W |
| Pat_40 | Pre-Treatment | C9orf156  | 51531  | 37 | 9 | 100672706 | 100672706 | Missense_Mutation | SNP | C  | T  | 3   | 46  | c.602G>A         | c.(601-603)CGA>CAA   | p.R201Q  |
| Pat_40 | Pre-Treatment | STX17     | 55014  | 37 | 9 | 102730759 | 102730759 | Missense_Mutation | SNP | T  | C  | 4   | 71  | c.713T>C         | c.(712-714)CTC>CCC   | p.L238P  |
| Pat_40 | Pre-Treatment | OR1N1     | 138883 | 37 | 9 | 125288794 | 125288794 | Missense_Mutation | SNP | G  | A  | 15  | 36  | c.779C>T         | c.(778-780)CCT>CTT   | p.P260L  |
| Pat_40 | Pre-Treatment | SLC2A8    | 29988  | 37 | 9 | 130167241 | 130167241 | Missense_Mutation | SNP | C  | T  | 15  | 57  | c.1121C>T        | c.(1120-1122)GCC>GTC | p.A374V  |
| Pat_40 | Pre-Treatment | C9orf78   | 51759  | 37 | 9 | 132594217 | 132594217 | Missense_Mutation | SNP | G  | A  | 28  | 102 | c.302C>T         | c.(301-303)TCG>TTG   | p.S101L  |

|        |               |          |        |    |   |           |           |                   |     |    |    |     |     |                |                      |          |
|--------|---------------|----------|--------|----|---|-----------|-----------|-------------------|-----|----|----|-----|-----|----------------|----------------------|----------|
| Pat_40 | Pre-Treatment | FIBCD1   | 84929  | 37 | 9 | 133780759 | 133780759 | Missense_Mutation | SNP | C  | T  | 3   | 24  | c.988G>A       | c.(988-990)GAG>AAG   | p.E330K  |
| Pat_40 | Pre-Treatment | RAPGEF1  | 2889   | 37 | 9 | 134514084 | 134514084 | Missense_Mutation | SNP | C  | T  | 27  | 87  | c.538G>A       | c.(538-540)GAA>AAA   | p.E180K  |
| Pat_40 | Pre-Treatment | COL5A1   | 1289   | 37 | 9 | 137582859 | 137582859 | Missense_Mutation | SNP | C  | T  | 16  | 40  | c.211C>T       | c.(211-213)CCG>TCG   | p.P71S   |
| Pat_40 | Pre-Treatment | SEC16A   | 9919   | 37 | 9 | 139370230 | 139370230 | Missense_Mutation | SNP | G  | A  | 2   | 1   | c.1838C>T      | c.(1837-1839)CCG>CTG | p.P613L  |
| Pat_40 | Pre-Treatment | C9orf172 | 389813 | 37 | 9 | 139740194 | 139740194 | Missense_Mutation | SNP | G  | A  | 2   | 1   | c.1328G>A      | c.(1327-1329)CGC>CAC | p.R443H  |
| Pat_40 | Pre-Treatment | FBXW5    | 54461  | 37 | 9 | 139836762 | 139836762 | Missense_Mutation | SNP | G  | A  | 2   | 3   | c.832C>T       | c.(832-834)CGC>TGC   | p.R278C  |
| Pat_40 | Pre-Treatment | TPRN     | 286262 | 37 | 9 | 140087077 | 140087077 | Missense_Mutation | SNP | C  | T  | 9   | 15  | c.1609G>A      | c.(1609-1611)GAG>AAG | p.E537K  |
| Pat_40 | Pre-Treatment | TUBB2C   | 10383  | 37 | 9 | 140137584 | 140137585 | Missense_Mutation | DNP | CC | TT | 17  | 61  | c.914_915CC>TT | c.(913-915)CCC>CTT   | p.P305L  |
| Pat_40 | Pre-Treatment | NLGN4X   | 57502  | 37 | X | 5810998   | 5810998   | Missense_Mutation | SNP | T  | A  | 35  | 160 | c.2311A>T      | c.(2311-2313)ATC>TTC | p.I771F  |
| Pat_40 | Pre-Treatment | KAL1     | 3730   | 37 | X | 8553380   | 8553380   | Nonsense_Mutation | SNP | G  | A  | 5   | 101 | c.784C>T       | c.(784-786)CGA>TGA   | p.R262*  |
| Pat_40 | Pre-Treatment | TLR7     | 51284  | 37 | X | 12903805  | 12903805  | Missense_Mutation | SNP | C  | T  | 48  | 144 | c.178C>T       | c.(178-180)CCT>TCT   | p.P60S   |
| Pat_40 | Pre-Treatment | TCEANC   | 170082 | 37 | X | 13681166  | 13681166  | Missense_Mutation | SNP | T  | C  | 55  | 207 | c.539T>C       | c.(538-540)CTT>CCT   | p.L180P  |
| Pat_40 | Pre-Treatment | KLHL15   | 80311  | 37 | X | 24024498  | 24024498  | Missense_Mutation | SNP | G  | A  | 18  | 122 | c.313C>T       | c.(313-315)CTT>TTT   | p.L105F  |
| Pat_40 | Pre-Treatment | DCAF8L2  | 347442 | 37 | X | 27766412  | 27766412  | Missense_Mutation | SNP | G  | A  | 7   | 14  | c.1400G>A      | c.(1399-1401)AGA>AAA | p.R467K  |
| Pat_40 | Pre-Treatment | MAGEB1   | 4112   | 37 | X | 30269469  | 30269469  | Missense_Mutation | SNP | G  | A  | 20  | 95  | c.859G>A       | c.(859-861)GAG>AAG   | p.E287K  |
| Pat_40 | Pre-Treatment | DMD      | 1756   | 37 | X | 32361316  | 32361316  | Missense_Mutation | SNP | A  | T  | 28  | 86  | c.5674T>A      | c.(5674-5676)TGC>AGC | p.C1892S |
| Pat_40 | Pre-Treatment | CXorf22  | 170063 | 37 | X | 35974281  | 35974281  | Missense_Mutation | SNP | G  | A  | 17  | 43  | c.1378G>A      | c.(1378-1380)GAA>AAA | p.E460K  |
| Pat_40 | Pre-Treatment | FAM47C   | 442444 | 37 | X | 37027156  | 37027156  | Missense_Mutation | SNP | C  | G  | 4   | 50  | c.673C>G       | c.(673-675)CAG>GAG   | p.Q225E  |
| Pat_40 | Pre-Treatment | OTC      | 5009   | 37 | X | 38212016  | 38212016  | Nonsense_Mutation | SNP | C  | T  | 23  | 72  | c.67C>T        | c.(67-69)CGA>TGA     | p.R23*   |
| Pat_40 | Pre-Treatment | MED14    | 9282   | 37 | X | 40518681  | 40518681  | Missense_Mutation | SNP | C  | T  | 15  | 51  | c.3863G>A      | c.(3862-3864)AGA>AAA | p.R1288K |
| Pat_40 | Pre-Treatment | RBM10    | 8241   | 37 | X | 47045530  | 47045530  | Missense_Mutation | SNP | C  | G  | 9   | 46  | c.2497C>G      | c.(2497-2499)CCC>GCC | p.P833A  |
| Pat_40 | Pre-Treatment | HUWE1    | 10075  | 37 | X | 53619528  | 53619528  | Nonsense_Mutation | SNP | G  | A  | 3   | 33  | c.3802C>T      | c.(3802-3804)CGA>TGA | p.R1268* |
| Pat_40 | Pre-Treatment | ITIH5L   | 347365 | 37 | X | 54823498  | 54823498  | Missense_Mutation | SNP | G  | A  | 11  | 71  | c.134C>T       | c.(133-135)ACG>ATG   | p.T45M   |
| Pat_40 | Pre-Treatment | TRO      | 7216   | 37 | X | 54949440  | 54949440  | Missense_Mutation | SNP | C  | T  | 16  | 43  | c.475C>T       | c.(475-477)CAT>TAT   | p.H159Y  |
| Pat_40 | Pre-Treatment | SPIN4    | 139886 | 37 | X | 62570220  | 62570220  | Missense_Mutation | SNP | G  | A  | 19  | 182 | c.479C>T       | c.(478-480)CCT>CTT   | p.P160L  |
| Pat_40 | Pre-Treatment | PJA1     | 64219  | 37 | X | 68381748  | 68381748  | Missense_Mutation | SNP | C  | T  | 12  | 95  | c.1334G>A      | c.(1333-1335)CGA>CAA | p.R445Q  |
| Pat_40 | Pre-Treatment | FOXO4    | 4303   | 37 | X | 70321239  | 70321239  | Missense_Mutation | SNP | G  | C  | 3   | 50  | c.1159G>C      | c.(1159-1161)GAT>CAT | p.D387H  |
| Pat_40 | Pre-Treatment | ACRC     | 93953  | 37 | X | 70823920  | 70823920  | Missense_Mutation | SNP | C  | T  | 8   | 119 | c.793C>T       | c.(793-795)CCC>TCC   | p.P265S  |
| Pat_40 | Pre-Treatment | ACRC     | 93953  | 37 | X | 70823950  | 70823950  | Missense_Mutation | SNP | C  | T  | 7   | 145 | c.823C>T       | c.(823-825)CCC>TCC   | p.P275S  |
| Pat_40 | Pre-Treatment | ACRC     | 93953  | 37 | X | 70823960  | 70823961  | Missense_Mutation | DNP | GC | AG | 6   | 160 | c.833_834GC>AG | c.(832-834)AGC>AAG   | p.S278K  |
| Pat_40 | Pre-Treatment | ABCB7    | 22     | 37 | X | 74273345  | 74273345  | Missense_Mutation | SNP | T  | C  | 10  | 20  | c.2119A>G      | c.(2119-2121)ACA>GCA | p.T707A  |
| Pat_40 | Pre-Treatment | MAGEE1   | 57692  | 37 | X | 75648828  | 75648828  | Missense_Mutation | SNP | G  | A  | 4   | 53  | c.505G>A       | c.(505-507)GGT>AGT   | p.G169S  |
| Pat_40 | Pre-Treatment | ATRX     | 546    | 37 | X | 76907828  | 76907828  | Missense_Mutation | SNP | C  | T  | 3   | 26  | c.4333G>A      | c.(4333-4335)GAA>AAA | p.E1445K |
| Pat_40 | Pre-Treatment | DACH2    | 117154 | 37 | X | 85403846  | 85403846  | Missense_Mutation | SNP | C  | A  | 18  | 94  | c.222C>A       | c.(220-222)CAC>CAA   | p.H74Q   |
| Pat_40 | Pre-Treatment | RAB40A   | 142684 | 37 | X | 102754855 | 102754855 | Missense_Mutation | SNP | G  | A  | 10  | 60  | c.830C>T       | c.(829-831)TCT>TTT   | p.S277F  |
| Pat_40 | Pre-Treatment | NRK      | 203447 | 37 | X | 105152811 | 105152811 | Missense_Mutation | SNP | G  | A  | 10  | 48  | c.1178G>A      | c.(1177-1179)AGG>AAG | p.R393K  |
| Pat_40 | Pre-Treatment | COL4A5   | 1287   | 37 | X | 107865120 | 107865120 | Missense_Mutation | SNP | A  | T  | 18  | 22  | c.2765A>T      | c.(2764-2766)AAA>ATA | p.K922I  |
| Pat_40 | Pre-Treatment | SLC6A14  | 11254  | 37 | X | 115588809 | 115588809 | Missense_Mutation | SNP | G  | A  | 47  | 210 | c.1649G>A      | c.(1648-1650)AGA>AAA | p.R550K  |
| Pat_40 | Pre-Treatment | KIAA1210 | 57481  | 37 | X | 118223262 | 118223262 | Missense_Mutation | SNP | G  | A  | 3   | 30  | c.1931C>T      | c.(1930-1932)TCC>TTC | p.S644F  |
| Pat_40 | Pre-Treatment | KIAA1210 | 57481  | 37 | X | 118227657 | 118227657 | Missense_Mutation | SNP | C  | T  | 10  | 68  | c.1456G>A      | c.(1456-1458)GAA>AAA | p.E486K  |
| Pat_40 | Pre-Treatment | THOC2    | 57187  | 37 | X | 122774460 | 122774460 | Missense_Mutation | SNP | C  | T  | 31  | 149 | c.1675G>A      | c.(1675-1677)GAA>AAA | p.E559K  |
| Pat_40 | Pre-Treatment | ODZ1     | 10178  | 37 | X | 123514532 | 123514532 | Missense_Mutation | SNP | C  | T  | 114 | 210 | c.8032G>A      | c.(8032-8034)GAA>AAA | p.E2678K |
| Pat_40 | Pre-Treatment | USP26    | 83844  | 37 | X | 132159788 | 132159788 | Missense_Mutation | SNP | C  | A  | 9   | 131 | c.2461G>T      | c.(2461-2463)GAT>TAT | p.D821Y  |
| Pat_40 | Pre-Treatment | USP26    | 83844  | 37 | X | 132159790 | 132159790 | Missense_Mutation | SNP | C  | A  | 9   | 123 | c.2459G>T      | c.(2458-2460)GGA>GTA | p.G820V  |
| Pat_40 | Pre-Treatment | GPR112   | 139378 | 37 | X | 135430610 | 135430610 | Missense_Mutation | SNP | C  | T  | 34  | 181 | c.4745C>T      | c.(4744-4746)TCC>TTC | p.S1582F |
| Pat_40 | Pre-Treatment | ATP11C   | 286410 | 37 | X | 138870439 | 138870439 | Missense_Mutation | SNP | C  | T  | 19  | 107 | c.1441G>A      | c.(1441-1443)GAT>AAT | p.D481N  |
| Pat_40 | Pre-Treatment | SPANXN2  | 494119 | 37 | X | 142795287 | 142795287 | Missense_Mutation | SNP | A  | G  | 15  | 164 | c.391T>C       | c.(391-393)TCT>CCT   | p.S131P  |

|        |                 |          |        |    |   |           |           |                   |     |    |    |     |     |                |                        |               |
|--------|-----------------|----------|--------|----|---|-----------|-----------|-------------------|-----|----|----|-----|-----|----------------|------------------------|---------------|
| Pat_40 | Pre-Treatment   | SPANXN2  | 494119 | 37 | X | 142795326 | 142795326 | Missense_Mutation | SNP | A  | C  | 8   | 152 | c.352T>G       | c.(352-354)TCT>GCT     | p.S118A       |
| Pat_40 | Pre-Treatment   | SPANXN1  | 494118 | 37 | X | 144337239 | 144337239 | Nonsense_Mutation | SNP | A  | T  | 24  | 50  | c.124A>T       | c.(124-126)AAG>TAG     | p.K42*        |
| Pat_40 | Pre-Treatment   | MAGEA12  | 4111   | 37 | X | 151900242 | 151900242 | Missense_Mutation | SNP | C  | T  | 38  | 132 | c.559G>A       | c.(559-561)GAT>AAT     | p.D187N       |
| Pat_40 | Pre-Treatment   | MPP1     | 4354   | 37 | X | 154011765 | 154011765 | Missense_Mutation | SNP | G  | A  | 6   | 32  | c.883C>T       | c.(883-885)CGC>TGC     | p.R295C       |
| Pat_40 | Pre-Treatment   | RAB39B   | 116442 | 37 | X | 154490329 | 154490329 | Missense_Mutation | SNP | G  | T  | 25  | 104 | c.401C>A       | c.(400-402)ACT>AAT     | p.T134N       |
| Pat_40 | Post-Resistance | ARHGEF16 | 27237  | 37 | 1 | 3394445   | 3394445   | Missense_Mutation | SNP | C  | G  | 3   | 98  | c.1480C>G      | c.(1480-1482)CCA>GCA   | p.P494A       |
| Pat_40 | Post-Resistance | CAMTA1   | 23261  | 37 | 1 | 7721851   | 7721851   | Missense_Mutation | SNP | G  | A  | 3   | 44  | c.730G>A       | c.(730-732)GTG>ATG     | p.V244M       |
| Pat_40 | Post-Resistance | ERRFI1   | 54206  | 37 | 1 | 8073629   | 8073629   | Missense_Mutation | SNP | C  | T  | 324 | 181 | c.1030G>A      | c.(1030-1032)GGG>AGG   | p.G344R       |
| Pat_40 | Post-Resistance | DFFA     | 1676   | 37 | 1 | 10532476  | 10532476  | Missense_Mutation | SNP | C  | T  | 51  | 135 | c.40G>A        | c.(40-42)GAG>AAG       | p.E14K        |
| Pat_40 | Post-Resistance | C1orf130 | 400746 | 37 | 1 | 24932116  | 24932116  | Missense_Mutation | SNP | G  | A  | 22  | 68  | c.187G>A       | c.(187-189)GAA>AAA     | p.E63K        |
| Pat_40 | Post-Resistance | CATSPER4 | 378807 | 37 | 1 | 26517249  | 26517249  | Missense_Mutation | SNP | C  | T  | 6   | 33  | c.131C>T       | c.(130-132)CCC>CTC     | p.P44L        |
| Pat_40 | Post-Resistance | AHDC1    | 27245  | 37 | 1 | 27876118  | 27876118  | Missense_Mutation | SNP | T  | G  | 26  | 77  | c.2509A>C      | c.(2509-2511)ACC>CCC   | p.T837P       |
| Pat_40 | Post-Resistance | PHC2     | 1912   | 37 | 1 | 33820513  | 33820513  | Missense_Mutation | SNP | C  | T  | 4   | 95  | c.1318G>A      | c.(1318-1320)GTG>ATG   | p.V440M       |
| Pat_40 | Post-Resistance | COL8A2   | 1296   | 37 | 1 | 36563643  | 36563643  | Missense_Mutation | SNP | G  | A  | 3   | 12  | c.1639C>T      | c.(1639-1641)CCC>TCC   | p.P547S       |
| Pat_40 | Post-Resistance | POU3F1   | 5453   | 37 | 1 | 38511393  | 38511393  | Missense_Mutation | SNP | C  | G  | 4   | 17  | c.1023G>C      | c.(1021-1023)AAG>AAC   | p.K341N       |
| Pat_40 | Post-Resistance | MACF1    | 23499  | 37 | 1 | 39913514  | 39913514  | Nonsense_Mutation | SNP | C  | T  | 28  | 163 | c.15241C>T     | c.(15241-15243)CAG>TAG | p.Q5081*      |
| Pat_40 | Post-Resistance | TIE1     | 7075   | 37 | 1 | 43773118  | 43773118  | Missense_Mutation | SNP | G  | A  | 3   | 37  | c.788G>A       | c.(787-789)CGT>CAT     | p.R263H       |
| Pat_40 | Post-Resistance | TM2D1    | 83941  | 37 | 1 | 62175095  | 62175095  | Missense_Mutation | SNP | C  | T  | 33  | 96  | c.253G>A       | c.(253-255)GCA>ACA     | p.A85T        |
| Pat_40 | Post-Resistance | IL23R    | 149233 | 37 | 1 | 67635270  | 67635270  | Missense_Mutation | SNP | C  | T  | 124 | 117 | c.316C>T       | c.(316-318)CCC>TCC     | p.P106S       |
| Pat_40 | Post-Resistance | LRRIQ3   | 127255 | 37 | 1 | 74540468  | 74540468  | Missense_Mutation | SNP | A  | T  | 29  | 59  | c.874T>A       | c.(874-876)TAT>AAT     | p.Y292N       |
| Pat_40 | Post-Resistance | LHX8     | 431707 | 37 | 1 | 75626530  | 75626530  | Nonsense_Mutation | SNP | C  | T  | 249 | 187 | c.1021C>T      | c.(1021-1023)CAG>TAG   | p.Q341*       |
| Pat_40 | Post-Resistance | MSH4     | 4438   | 37 | 1 | 76355016  | 76355016  | Missense_Mutation | SNP | G  | A  | 105 | 69  | c.2188G>A      | c.(2188-2190)GAA>AAA   | p.E730K       |
| Pat_40 | Post-Resistance | LPHN2    | 23266  | 37 | 1 | 82408790  | 82408790  | Missense_Mutation | SNP | C  | T  | 39  | 87  | c.535C>T       | c.(535-537)CGT>TGT     | p.R179C       |
| Pat_40 | Post-Resistance | HIAT1    | 64645  | 37 | 1 | 100534099 | 100534099 | Missense_Mutation | SNP | C  | T  | 145 | 109 | c.776C>T       | c.(775-777)CCG>CTG     | p.P259L       |
| Pat_40 | Post-Resistance | COL11A1  | 1301   | 37 | 1 | 103488381 | 103488381 | Missense_Mutation | SNP | C  | T  | 20  | 71  | c.1162G>A      | c.(1162-1164)GAA>AAA   | p.E388K       |
| Pat_40 | Post-Resistance | GSTM5    | 2949   | 37 | 1 | 110255773 | 110255773 | Missense_Mutation | SNP | G  | A  | 11  | 83  | c.145G>A       | c.(145-147)GAA>AAA     | p.E49K        |
| Pat_40 | Post-Resistance | AMPD1    | 270    | 37 | 1 | 115229401 | 115229401 | Nonsense_Mutation | SNP | G  | A  | 49  | 106 | c.346C>T       | c.(346-348)CAG>TAG     | p.Q116*       |
| Pat_40 | Post-Resistance | NRAS     | 4893   | 37 | 1 | 115256530 | 115256530 | Missense_Mutation | SNP | G  | T  | 69  | 438 | c.181C>A       | c.(181-183)CAA>AAA     | p.Q61K        |
| Pat_40 | Post-Resistance | HAO2     | 51179  | 37 | 1 | 119925542 | 119925542 | Missense_Mutation | SNP | C  | T  | 37  | 101 | c.136C>T       | c.(136-138)CGC>TGC     | p.R46C        |
| Pat_40 | Post-Resistance | NBPF9    | 400818 | 37 | 1 | 144220816 | 144220816 | Missense_Mutation | SNP | A  | G  | 7   | 384 | c.2189A>G      | c.(2188-2190)GAG>GGG   | p.E730G       |
| Pat_40 | Post-Resistance | ANKRD34A | 284615 | 37 | 1 | 145474041 | 145474041 | Missense_Mutation | SNP | C  | T  | 85  | 302 | c.713C>T       | c.(712-714)CCC>CTC     | p.P238L       |
| Pat_40 | Post-Resistance | NBPF16   | 728936 | 37 | 1 | 148753298 | 148753298 | Missense_Mutation | SNP | T  | C  | 11  | 302 | c.1315T>C      | c.(1315-1317)TCA>CCA   | p.S439P       |
| Pat_40 | Post-Resistance | NBPF16   | 728936 | 37 | 1 | 148753317 | 148753317 | Missense_Mutation | SNP | C  | T  | 9   | 409 | c.1334C>T      | c.(1333-1335)TCG>TTG   | p.S445L       |
| Pat_40 | Post-Resistance | TCHH     | 7062   | 37 | 1 | 152084702 | 152084702 | Missense_Mutation | SNP | G  | C  | 3   | 91  | c.991C>G       | c.(991-993)CAG>GAG     | p.Q331E       |
| Pat_40 | Post-Resistance | HRNR     | 388697 | 37 | 1 | 152192447 | 152192447 | Missense_Mutation | SNP | C  | T  | 51  | 255 | c.1658G>A      | c.(1657-1659)AGG>AAG   | p.R553K       |
| Pat_40 | Post-Resistance | FLG      | 2312   | 37 | 1 | 152284699 | 152284699 | Missense_Mutation | SNP | C  | T  | 257 | 97  | c.2663G>A      | c.(2662-2664)GGA>GAA   | p.G888E       |
| Pat_40 | Post-Resistance | S100A8   | 6279   | 37 | 1 | 153363002 | 153363002 | Missense_Mutation | SNP | C  | T  | 330 | 131 | c.10G>A        | c.(10-12)GAG>AAG       | p.E4K         |
| Pat_40 | Post-Resistance | S100A16  | 140576 | 37 | 1 | 153580138 | 153580138 | Missense_Mutation | SNP | G  | A  | 4   | 139 | c.184C>T       | c.(184-186)CTC>TTC     | p.L62F        |
| Pat_40 | Post-Resistance | NPR1     | 4881   | 37 | 1 | 153656215 | 153656215 | Splice_Site       | SNP | G  | A  | 49  | 71  | c.1400_splice  | c.e7-1                 | p.D467_splice |
| Pat_40 | Post-Resistance | F5       | 2153   | 37 | 1 | 169510220 | 169510220 | Missense_Mutation | SNP | G  | A  | 12  | 598 | c.4108C>T      | c.(4108-4110)CTC>TTC   | p.L1370F      |
| Pat_40 | Post-Resistance | F5       | 2153   | 37 | 1 | 169510259 | 169510259 | Missense_Mutation | SNP | G  | T  | 10  | 616 | c.4069C>A      | c.(4069-4071)CTT>ATT   | p.L1357I      |
| Pat_40 | Post-Resistance | PRRX1    | 5396   | 37 | 1 | 170633409 | 170633409 | Missense_Mutation | SNP | G  | A  | 4   | 59  | c.50G>A        | c.(49-51)GGC>GAC       | p.G17D        |
| Pat_40 | Post-Resistance | FMO3     | 2328   | 37 | 1 | 171083391 | 171083391 | Missense_Mutation | SNP | C  | T  | 37  | 119 | c.1072C>T      | c.(1072-1074)CCT>TCT   | p.P358S       |
| Pat_40 | Post-Resistance | TNR      | 7143   | 37 | 1 | 175363013 | 175363014 | Missense_Mutation | DNP | CC | TT | 60  | 157 | .1258_1259GG>A | c.(1258-1260)GGG>AAG   | p.G420K       |
| Pat_40 | Post-Resistance | FAM20B   | 9917   | 37 | 1 | 179041241 | 179041241 | Missense_Mutation | SNP | G  | A  | 3   | 80  | c.1192G>A      | c.(1192-1194)GTA>ATA   | p.V398I       |
| Pat_40 | Post-Resistance | CEP350   | 9857   | 37 | 1 | 180053225 | 180053225 | Missense_Mutation | SNP | C  | T  | 38  | 10  | c.6197C>T      | c.(6196-6198)TCA>TTA   | p.S2066L      |
| Pat_40 | Post-Resistance | QSOX1    | 5768   | 37 | 1 | 180165636 | 180165636 | Nonsense_Mutation | SNP | G  | T  | 14  | 91  | c.1708G>T      | c.(1708-1710)GAG>TAG   | p.E570*       |

|        |                 |           |        |    |    |           |           |                   |     |    |    |     |     |                |                        |          |
|--------|-----------------|-----------|--------|----|----|-----------|-----------|-------------------|-----|----|----|-----|-----|----------------|------------------------|----------|
| Pat_40 | Post-Resistance | CACNA1E   | 777    | 37 | 1  | 181745324 | 181745324 | Missense_Mutation | SNP | G  | A  | 56  | 227 | c.5227G>A      | c.(5227-5229)GAG>AAG   | p.E1743K |
| Pat_40 | Post-Resistance | CFHR1     | 3078   | 37 | 1  | 196801125 | 196801125 | Missense_Mutation | SNP | G  | A  | 136 | 54  | c.989G>A       | c.(988-990)AGA>AAA     | p.R330K  |
| Pat_40 | Post-Resistance | CFHR5     | 81494  | 37 | 1  | 196964859 | 196964859 | Missense_Mutation | SNP | C  | T  | 116 | 139 | c.620C>T       | c.(619-621)TCA>TTA     | p.S207L  |
| Pat_40 | Post-Resistance | CAMSAP1L1 | 23271  | 37 | 1  | 200817686 | 200817686 | Missense_Mutation | SNP | G  | A  | 64  | 137 | c.1822G>A      | c.(1822-1824)GGT>AGT   | p.G608S  |
| Pat_40 | Post-Resistance | PPP1R12B  | 4660   | 37 | 1  | 202531971 | 202531971 | Missense_Mutation | SNP | C  | A  | 108 | 424 | c.2573C>A      | c.(2572-2574)GCC>GAC   | p.A858D  |
| Pat_40 | Post-Resistance | ADIPOR1   | 51094  | 37 | 1  | 202910727 | 202910727 | Missense_Mutation | SNP | C  | T  | 40  | 156 | c.1102G>A      | c.(1102-1104)GGC>AGC   | p.G368S  |
| Pat_40 | Post-Resistance | PLXNA2    | 5362   | 37 | 1  | 208252741 | 208252741 | Missense_Mutation | SNP | G  | A  | 5   | 26  | c.2450C>T      | c.(2449-2451)GCC>GTC   | p.A817V  |
| Pat_40 | Post-Resistance | LAMB3     | 3914   | 37 | 1  | 209805978 | 209805978 | Missense_Mutation | SNP | G  | A  | 44  | 26  | c.772C>T       | c.(772-774)CGC>TGC     | p.R258C  |
| Pat_40 | Post-Resistance | CAPN2     | 824    | 37 | 1  | 223959916 | 223959916 | Missense_Mutation | SNP | G  | A  | 43  | 161 | c.2054G>A      | c.(2053-2055)GGA>GAA   | p.G685E  |
| Pat_40 | Post-Resistance | LEFTY2    | 7044   | 37 | 1  | 226125308 | 226125308 | Missense_Mutation | SNP | C  | T  | 35  | 14  | c.934G>A       | c.(934-936)GGG>AGG     | p.G312R  |
| Pat_40 | Post-Resistance | CDC42BPA  | 8476   | 37 | 1  | 227335101 | 227335101 | Missense_Mutation | SNP | C  | T  | 117 | 344 | c.853G>A       | c.(853-855)GAA>AAA     | p.E285K  |
| Pat_40 | Post-Resistance | GPR137B   | 7107   | 37 | 1  | 236306031 | 236306031 | Missense_Mutation | SNP | G  | A  | 3   | 65  | c.109G>A       | c.(109-111)GTG>ATG     | p.V37M   |
| Pat_40 | Post-Resistance | SDCCAG8   | 10806  | 37 | 1  | 243493952 | 243493952 | Missense_Mutation | SNP | G  | A  | 20  | 134 | c.1179G>A      | c.(1177-1179)ATG>ATA   | p.M393I  |
| Pat_40 | Post-Resistance | SDCCAG8   | 10806  | 37 | 1  | 243652386 | 243652386 | Nonsense_Mutation | SNP | C  | T  | 3   | 33  | c.2056C>T      | c.(2056-2058)CAG>TAG   | p.Q686*  |
| Pat_40 | Post-Resistance | AKT3      | 10000  | 37 | 1  | 243736269 | 243736270 | Missense_Mutation | DNP | CC | TT | 16  | 259 | c.777_778GG>AA | 775-780)TTGGAC>TTAA    | p.D260N  |
| Pat_40 | Post-Resistance | OR2M5     | 127059 | 37 | 1  | 248308997 | 248308997 | Missense_Mutation | SNP | C  | T  | 128 | 574 | c.548C>T       | c.(547-549)TCC>TTC     | p.S183F  |
| Pat_40 | Post-Resistance | OR2M7     | 391196 | 37 | 1  | 248487323 | 248487323 | Missense_Mutation | SNP | G  | A  | 210 | 94  | c.548C>T       | c.(547-549)TCC>TTC     | p.S183F  |
| Pat_40 | Post-Resistance | DIP2C     | 22982  | 37 | 10 | 460041    | 460041    | Missense_Mutation | SNP | G  | A  | 4   | 87  | c.869C>T       | c.(868-870)CCG>CTG     | p.P290L  |
| Pat_40 | Post-Resistance | BMI1      | 648    | 37 | 10 | 22618172  | 22618172  | Nonsense_Mutation | SNP | C  | T  | 25  | 31  | c.682C>T       | c.(682-684)CGA>TGA     | p.R228*  |
| Pat_40 | Post-Resistance | KIAA1217  | 56243  | 37 | 10 | 24762649  | 24762649  | Missense_Mutation | SNP | G  | A  | 4   | 98  | c.1339G>A      | c.(1339-1341)GAA>AAA   | p.E447K  |
| Pat_40 | Post-Resistance | EPC1      | 80314  | 37 | 10 | 32576138  | 32576138  | Missense_Mutation | SNP | G  | A  | 123 | 21  | c.1040C>T      | c.(1039-1041)TCG>TTG   | p.S347L  |
| Pat_40 | Post-Resistance | ANKRD30A  | 91074  | 37 | 10 | 37430910  | 37430910  | Missense_Mutation | SNP | C  | T  | 5   | 94  | c.917C>T       | c.(916-918)ACG>ATG     | p.T306M  |
| Pat_40 | Post-Resistance | ANKRD30A  | 91074  | 37 | 10 | 37431050  | 37431050  | Missense_Mutation | SNP | G  | C  | 9   | 111 | c.1057G>C      | c.(1057-1059)GCA>CCA   | p.A353P  |
| Pat_40 | Post-Resistance | RBP3      | 5949   | 37 | 10 | 48390358  | 48390358  | Missense_Mutation | SNP | C  | T  | 13  | 8   | c.520G>A       | c.(520-522)GGA>AGA     | p.G174R  |
| Pat_40 | Post-Resistance | A1CF      | 29974  | 37 | 10 | 52573720  | 52573720  | Missense_Mutation | SNP | C  | T  | 109 | 31  | c.1244G>A      | c.(1243-1245)GGA>GAA   | p.G415E  |
| Pat_40 | Post-Resistance | PCDH15    | 65217  | 37 | 10 | 55581646  | 55581646  | Missense_Mutation | SNP | T  | G  | 80  | 98  | c.5840A>C      | c.(5839-5841)CAA>CCA   | p.Q1947P |
| Pat_40 | Post-Resistance | ANK3      | 288    | 37 | 10 | 61834299  | 61834299  | Missense_Mutation | SNP | C  | T  | 18  | 27  | c.6340G>A      | c.(6340-6342)GAC>AAC   | p.D2114N |
| Pat_40 | Post-Resistance | SFTPA2    | 729238 | 37 | 10 | 81318720  | 81318720  | Missense_Mutation | SNP | T  | G  | 90  | 16  | c.214A>C       | c.(214-216)AAT>CAT     | p.N72H   |
| Pat_40 | Post-Resistance | OPN4      | 94233  | 37 | 10 | 88417853  | 88417853  | Missense_Mutation | SNP | A  | G  | 19  | 2   | c.355A>G       | c.(355-357)ATG>GTG     | p.M119V  |
| Pat_40 | Post-Resistance | KIF20B    | 9585   | 37 | 10 | 91522528  | 91522528  | Missense_Mutation | SNP | G  | A  | 4   | 101 | c.4925G>A      | c.(4924-4926)TGT>TAT   | p.C1642Y |
| Pat_40 | Post-Resistance | MYOF      | 26509  | 37 | 10 | 95159169  | 95159169  | Missense_Mutation | SNP | C  | T  | 12  | 31  | c.1201G>A      | c.(1201-1203)GTT>ATT   | p.V401I  |
| Pat_40 | Post-Resistance | CYP2C19   | 1557   | 37 | 10 | 96540336  | 96540336  | Missense_Mutation | SNP | G  | A  | 80  | 111 | c.562G>A       | c.(562-564)GAT>AAT     | p.D188N  |
| Pat_40 | Post-Resistance | HPSE2     | 60495  | 37 | 10 | 100249833 | 100249833 | Missense_Mutation | SNP | A  | G  | 103 | 125 | c.1441T>C      | c.(1441-1443)TAT>CAT   | p.Y481H  |
| Pat_40 | Post-Resistance | CALHM2    | 51063  | 37 | 10 | 105209250 | 105209250 | Nonsense_Mutation | SNP | G  | T  | 4   | 49  | c.449C>A       | c.(448-450)TCA>TAA     | p.S150*  |
| Pat_40 | Post-Resistance | ACSL5     | 51703  | 37 | 10 | 114173027 | 114173027 | Missense_Mutation | SNP | C  | T  | 93  | 68  | c.1045C>T      | c.(1045-1047)CCC>TCC   | p.P349S  |
| Pat_40 | Post-Resistance | WDR11     | 55717  | 37 | 10 | 122646253 | 122646253 | Missense_Mutation | SNP | C  | T  | 4   | 64  | c.2026C>T      | c.(2026-2028)CGG>TGG   | p.R676W  |
| Pat_40 | Post-Resistance | FGFR2     | 2263   | 37 | 10 | 123245021 | 123245021 | Missense_Mutation | SNP | C  | T  | 41  | 10  | c.2083G>A      | c.(2083-2085)GAG>AAG   | p.E695K  |
| Pat_40 | Post-Resistance | DMBT1     | 1755   | 37 | 10 | 124392709 | 124392709 | Missense_Mutation | SNP | G  | A  | 104 | 21  | c.6013G>A      | c.(6013-6015)GAT>AAT   | p.D2005N |
| Pat_40 | Post-Resistance | DOCK1     | 1793   | 37 | 10 | 129172323 | 129172323 | Missense_Mutation | SNP | C  | T  | 8   | 13  | c.3457C>T      | c.(3457-3459)CTT>TTT   | p.L1153F |
| Pat_40 | Post-Resistance | KNDC1     | 85442  | 37 | 10 | 135010625 | 135010625 | Missense_Mutation | SNP | G  | A  | 3   | 33  | c.1798G>A      | c.(1798-1800)GCT>ACT   | p.A600T  |
| Pat_40 | Post-Resistance | CYP2E1    | 1571   | 37 | 10 | 135351354 | 135351354 | Missense_Mutation | SNP | G  | A  | 17  | 113 | c.1255G>A      | c.(1255-1257)GGA>AGA   | p.G419R  |
| Pat_40 | Post-Resistance | CDHR5     | 53841  | 37 | 11 | 618833    | 618833    | Missense_Mutation | SNP | G  | C  | 4   | 123 | c.1726C>G      | c.(1726-1728)CCA>GCA   | p.P576A  |
| Pat_40 | Post-Resistance | MUC2      | 4583   | 37 | 11 | 1095290   | 1095290   | Missense_Mutation | SNP | C  | T  | 3   | 57  | c.13196C>T     | c.(13195-13197)ACG>ATG | p.T4399M |
| Pat_40 | Post-Resistance | OR51G1    | 79324  | 37 | 11 | 4945065   | 4945065   | Nonsense_Mutation | SNP | G  | A  | 26  | 43  | c.505C>T       | c.(505-507)CAA>TAA     | p.Q169*  |
| Pat_40 | Post-Resistance | OR52A5    | 390054 | 37 | 11 | 5153391   | 5153391   | Missense_Mutation | SNP | G  | A  | 77  | 147 | c.482C>T       | c.(481-483)TCC>TTC     | p.S161F  |
| Pat_40 | Post-Resistance | OR51B4    | 79339  | 37 | 11 | 5322536   | 5322536   | Missense_Mutation | SNP | G  | A  | 24  | 44  | c.641C>T       | c.(640-642)TCT>TTT     | p.S214F  |
| Pat_40 | Post-Resistance | OR51B2    | 79345  | 37 | 11 | 5345505   | 5345505   | Missense_Mutation | SNP | G  | A  | 20  | 23  | c.23C>T        | c.(22-24)GCC>GTC       | p.A8V    |



|        |                 |          |        |    |    |           |           |                   |     |    |    |     |     |                                   |                      |               |
|--------|-----------------|----------|--------|----|----|-----------|-----------|-------------------|-----|----|----|-----|-----|-----------------------------------|----------------------|---------------|
| Pat_40 | Post-Resistance | OR56B1   | 387748 | 37 | 11 | 5758164   | 5758164   | Missense_Mutation | SNP | C  | T  | 45  | 79  | c.418C>T                          | c.(418-420)CGC>TGC   | p.R140C       |
| Pat_40 | Post-Resistance | OR56B1   | 387748 | 37 | 11 | 5758588   | 5758588   | Missense_Mutation | SNP | C  | T  | 350 | 372 | c.842C>T                          | c.(841-843)CCA>CTA   | p.P281L       |
| Pat_40 | Post-Resistance | SWAP70   | 23075  | 37 | 11 | 9749608   | 9749608   | Missense_Mutation | SNP | G  | A  | 23  | 68  | c.651G>A                          | c.(649-651)ATG>ATA   | p.M217I       |
| Pat_40 | Post-Resistance | PLEKHA7  | 144100 | 37 | 11 | 16838766  | 16838767  | Missense_Mutation | DNP | CC | TT | 78  | 64  | .1446_1447GG>AI44-1449)GGGGGC>GGA |                      | p.G483S       |
| Pat_40 | Post-Resistance | ABCC8    | 6833   | 37 | 11 | 17419984  | 17419984  | Missense_Mutation | SNP | C  | T  | 15  | 12  | c.3655G>A                         | c.(3655-3657)GAG>AAG | p.E1219K      |
| Pat_40 | Post-Resistance | MARGPRX2 | 117194 | 37 | 11 | 19077222  | 19077222  | Nonsense_Mutation | SNP | C  | T  | 21  | 60  | c.728G>A                          | c.(727-729)TGG>TAG   | p.W243*       |
| Pat_40 | Post-Resistance | RCN1     | 5954   | 37 | 11 | 32124946  | 32124946  | Missense_Mutation | SNP | C  | T  | 42  | 80  | c.808C>T                          | c.(808-810)CGC>TGC   | p.R270C       |
| Pat_40 | Post-Resistance | PTPRJ    | 5795   | 37 | 11 | 48134314  | 48134314  | Missense_Mutation | SNP | C  | T  | 205 | 119 | c.131C>T                          | c.(130-132)CCT>CTT   | p.P44L        |
| Pat_40 | Post-Resistance | OR4C11   | 219429 | 37 | 11 | 55371068  | 55371068  | Missense_Mutation | SNP | G  | A  | 11  | 151 | c.782C>T                          | c.(781-783)ACC>ATC   | p.T261I       |
| Pat_40 | Post-Resistance | OR4C6    | 219432 | 37 | 11 | 55433089  | 55433090  | Missense_Mutation | DNP | GG | AA | 40  | 119 | c.447_448GG>AA145-450)GGGGGA>GGAA |                      | p.G150R       |
| Pat_40 | Post-Resistance | OR5D13   | 390142 | 37 | 11 | 55541362  | 55541362  | Missense_Mutation | SNP | C  | T  | 81  | 215 | c.449C>T                          | c.(448-450)TCC>TTC   | p.S150F       |
| Pat_40 | Post-Resistance | OR5I1    | 10798  | 37 | 11 | 55703012  | 55703012  | Missense_Mutation | SNP | G  | A  | 87  | 64  | c.865C>T                          | c.(865-867)CCG>TCG   | p.P289S       |
| Pat_40 | Post-Resistance | OR5M3    | 219482 | 37 | 11 | 56237733  | 56237733  | Missense_Mutation | SNP | C  | T  | 44  | 117 | c.241G>A                          | c.(241-243)GAA>AAA   | p.E81K        |
| Pat_40 | Post-Resistance | FAM111B  | 374393 | 37 | 11 | 58892997  | 58892997  | Missense_Mutation | SNP | C  | T  | 138 | 441 | c.1427C>T                         | c.(1426-1428)ACT>ATT | p.T476I       |
| Pat_40 | Post-Resistance | GPR44    | 11251  | 37 | 11 | 60620688  | 60620688  | Missense_Mutation | SNP | G  | A  | 9   | 40  | c.508C>T                          | c.(508-510)CGG>TGG   | p.R170W       |
| Pat_40 | Post-Resistance | RTN3     | 10313  | 37 | 11 | 63486769  | 63486769  | Nonsense_Mutation | SNP | T  | A  | 56  | 28  | c.795T>A                          | c.(793-795)TAT>TAA   | p.Y265*       |
| Pat_40 | Post-Resistance | C11orf20 | 25858  | 37 | 11 | 64070987  | 64070987  | Missense_Mutation | SNP | C  | T  | 4   | 47  | c.386C>T                          | c.(385-387)GCG>GTG   | p.A129V       |
| Pat_40 | Post-Resistance | CCDC88B  | 283234 | 37 | 11 | 64118984  | 64118984  | Missense_Mutation | SNP | G  | A  | 2   | 4   | c.2995G>A                         | c.(2995-2997)GGG>AGG | p.G999R       |
| Pat_40 | Post-Resistance | CDC42BPG | 55561  | 37 | 11 | 64602851  | 64602851  | Missense_Mutation | SNP | C  | T  | 84  | 225 | c.1921G>A                         | c.(1921-1923)GAA>AAA | p.E641K       |
| Pat_40 | Post-Resistance | LRP5     | 4041   | 37 | 11 | 68171002  | 68171002  | Missense_Mutation | SNP | C  | T  | 16  | 86  | c.1636C>T                         | c.(1636-1638)CCG>TCG | p.P546S       |
| Pat_40 | Post-Resistance | USP35    | 57558  | 37 | 11 | 77921528  | 77921528  | Missense_Mutation | SNP | C  | T  | 52  | 124 | c.2627C>T                         | c.(2626-2628)GCT>GTT | p.A876V       |
| Pat_40 | Post-Resistance | PCF11    | 51585  | 37 | 11 | 82876987  | 82876987  | Missense_Mutation | SNP | G  | A  | 11  | 12  | c.1048G>A                         | c.(1048-1050)GAA>AAA | p.E350K       |
| Pat_40 | Post-Resistance | TYR      | 7299   | 37 | 11 | 88924454  | 88924454  | Missense_Mutation | SNP | G  | A  | 181 | 26  | c.904G>A                          | c.(904-906)GGA>AGA   | p.G302R       |
| Pat_40 | Post-Resistance | GUCY1A2  | 2977   | 37 | 11 | 106810823 | 106810823 | Missense_Mutation | SNP | C  | T  | 6   | 134 | c.569G>A                          | c.(568-570)CGA>CAA   | p.R190Q       |
| Pat_40 | Post-Resistance | C11orf92 | 399948 | 37 | 11 | 111167004 | 111167004 | Missense_Mutation | SNP | T  | A  | 18  | 59  | c.200A>T                          | c.(199-201)AAG>ATG   | p.K67M        |
| Pat_40 | Post-Resistance | USP28    | 57646  | 37 | 11 | 113704150 | 113704150 | Nonsense_Mutation | SNP | C  | A  | 149 | 25  | c.751G>T                          | c.(751-753)GAA>TAA   | p.E251*       |
| Pat_40 | Post-Resistance | PAFAH1B2 | 5049   | 37 | 11 | 117038252 | 117038252 | Missense_Mutation | SNP | A  | G  | 26  | 54  | c.527A>G                          | c.(526-528)GAC>GGC   | p.D176G       |
| Pat_40 | Post-Resistance | PAFAH1B2 | 5049   | 37 | 11 | 117038293 | 117038293 | Missense_Mutation | SNP | G  | A  | 4   | 86  | c.568G>A                          | c.(568-570)GAC>AAC   | p.D190N       |
| Pat_40 | Post-Resistance | TECTA    | 7007   | 37 | 11 | 120989347 | 120989347 | Missense_Mutation | SNP | G  | A  | 4   | 82  | c.1123G>A                         | c.(1123-1125)GTC>ATC | p.V375I       |
| Pat_40 | Post-Resistance | ARHGAP32 | 9743   | 37 | 11 | 128963533 | 128963533 | Missense_Mutation | SNP | C  | T  | 3   | 75  | c.472G>A                          | c.(472-474)GTG>ATG   | p.V158M       |
| Pat_40 | Post-Resistance | KDM5A    | 5927   | 37 | 12 | 432896    | 432896    | Missense_Mutation | SNP | G  | A  | 12  | 275 | c.2020C>T                         | c.(2020-2022)CGG>TGG | p.R674W       |
| Pat_40 | Post-Resistance | B4GALNT3 | 283358 | 37 | 12 | 662410    | 662410    | Missense_Mutation | SNP | G  | A  | 34  | 150 | c.1321G>A                         | c.(1321-1323)GAG>AAG | p.E441K       |
| Pat_40 | Post-Resistance | CACNA1C  | 775    | 37 | 12 | 2797838   | 2797838   | Missense_Mutation | SNP | G  | A  | 9   | 46  | c.6259G>A                         | c.(6259-6261)GGC>AGC | p.G2087S      |
| Pat_40 | Post-Resistance | CD9      | 928    | 37 | 12 | 6344459   | 6344459   | Missense_Mutation | SNP | C  | T  | 30  | 192 | c.413C>T                          | c.(412-414)CCC>CTC   | p.P138L       |
| Pat_40 | Post-Resistance | PLEKHG6  | 55200  | 37 | 12 | 6421516   | 6421517   | Missense_Mutation | DNP | GG | AA | 30  | 126 | c.124_125GG>AA                    | c.(124-126)GGA>AAA   | p.G42K        |
| Pat_40 | Post-Resistance | SCNN1A   | 6337   | 37 | 12 | 6472790   | 6472790   | Missense_Mutation | SNP | G  | A  | 4   | 10  | c.503C>T                          | c.(502-504)ACC>ATC   | p.T168I       |
| Pat_40 | Post-Resistance | VAMP1    | 6843   | 37 | 12 | 6575488   | 6575488   | Missense_Mutation | SNP | C  | T  | 25  | 90  | c.32G>A                           | c.(31-33)GGG>GAG     | p.G11E        |
| Pat_40 | Post-Resistance | PRB3     | 5544   | 37 | 12 | 11420548  | 11420548  | Missense_Mutation | SNP | C  | T  | 49  | 187 | c.635G>A                          | c.(634-636)GGA>GAA   | p.G212E       |
| Pat_40 | Post-Resistance | PRB1     | 5542   | 37 | 12 | 11506835  | 11506835  | Missense_Mutation | SNP | G  | A  | 6   | 157 | c.202C>T                          | c.(202-204)CCT>TCT   | p.P68S        |
| Pat_40 | Post-Resistance | SLCO1C1  | 53919  | 37 | 12 | 20864329  | 20864329  | Nonsense_Mutation | SNP | T  | A  | 64  | 293 | c.414T>A                          | c.(412-414)TAT>TAA   | p.Y138*       |
| Pat_40 | Post-Resistance | ABCC9    | 10060  | 37 | 12 | 22015914  | 22015914  | Missense_Mutation | SNP | G  | A  | 28  | 97  | c.2312C>T                         | c.(2311-2313)ACT>ATT | p.T771I       |
| Pat_40 | Post-Resistance | ADAMTS20 | 80070  | 37 | 12 | 43846171  | 43846171  | Missense_Mutation | SNP | C  | T  | 79  | 127 | c.1985G>A                         | c.(1984-1986)GGA>GAA | p.G662E       |
| Pat_40 | Post-Resistance | ARID2    | 196528 | 37 | 12 | 46246081  | 46246081  | Missense_Mutation | SNP | C  | T  | 25  | 100 | c.4175C>T                         | c.(4174-4176)CCA>CTA | p.P1392L      |
| Pat_40 | Post-Resistance | MLL2     | 8085   | 37 | 12 | 49431867  | 49431867  | Missense_Mutation | SNP | G  | T  | 3   | 33  | c.9272C>A                         | c.(9271-9273)CCA>CAA | p.P3091Q      |
| Pat_40 | Post-Resistance | PRPH     | 5630   | 37 | 12 | 49691287  | 49691287  | Missense_Mutation | SNP | C  | T  | 5   | 92  | c.1144C>T                         | c.(1144-1146)CTC>TTC | p.L382F       |
| Pat_40 | Post-Resistance | KCNH3    | 23416  | 37 | 12 | 49951191  | 49951191  | Missense_Mutation | SNP | C  | T  | 4   | 38  | c.2707C>T                         | c.(2707-2709)CGC>TGC | p.R903C       |
| Pat_40 | Post-Resistance | KRT6B    | 3854   | 37 | 12 | 52841560  | 52841560  | Splice_Site       | SNP | A  | T  | 53  | 185 | c.1424_splice                     | c.e7+1               | p.R475_splice |

|        |                 |           |        |    |    |           |           |                   |     |    |    |     |     |                                      |                        |               |
|--------|-----------------|-----------|--------|----|----|-----------|-----------|-------------------|-----|----|----|-----|-----|--------------------------------------|------------------------|---------------|
| Pat_40 | Post-Resistance | KRT6C     | 286887 | 37 | 12 | 52863452  | 52863452  | Splice_Site       | SNP | A  | T  | 69  | 282 | c.1424_splice                        | c.e7+1                 | p.R475_splice |
| Pat_40 | Post-Resistance | ITGB7     | 3695   | 37 | 12 | 53588070  | 53588070  | Missense_Mutation | SNP | G  | A  | 28  | 167 | c.1220C>T                            | c.(1219-1221)TCT>TTT   | p.S407F       |
| Pat_40 | Post-Resistance | HOXC10    | 3226   | 37 | 12 | 54379286  | 54379286  | Missense_Mutation | SNP | C  | A  | 31  | 143 | c.243C>A                             | c.(241-243)GAC>GAA     | p.D81E        |
| Pat_40 | Post-Resistance | ITGA5     | 3678   | 37 | 12 | 54802681  | 54802681  | Missense_Mutation | SNP | G  | A  | 50  | 87  | c.641C>T                             | c.(640-642)ACC>ATC     | p.T214I       |
| Pat_40 | Post-Resistance | OR10A7    | 121364 | 37 | 12 | 55615268  | 55615268  | Missense_Mutation | SNP | C  | T  | 15  | 107 | c.460C>T                             | c.(460-462)CCT>TCT     | p.P154S       |
| Pat_40 | Post-Resistance | OR6C2     | 341416 | 37 | 12 | 55846809  | 55846809  | Missense_Mutation | SNP | G  | A  | 55  | 80  | c.812G>A                             | c.(811-813)GGA>GAA     | p.G271E       |
| Pat_40 | Post-Resistance | ATP5B     | 506    | 37 | 12 | 57037341  | 57037341  | Missense_Mutation | SNP | G  | A  | 44  | 160 | c.638C>T                             | c.(637-639)ACT>ATT     | p.T213I       |
| Pat_40 | Post-Resistance | C12orf26  | 84190  | 37 | 12 | 82832521  | 82832521  | Missense_Mutation | SNP | C  | T  | 68  | 210 | c.1429C>T                            | c.(1429-1431)CGT>TGT   | p.R477C       |
| Pat_40 | Post-Resistance | GALNT4    | 8693   | 37 | 12 | 89917357  | 89917358  | Missense_Mutation | DNP | GG | AA | 255 | 340 | c.969_970CC>TT.(967-972)TACCTT>TATTT |                        | p.L324F       |
| Pat_40 | Post-Resistance | STAB2     | 55576  | 37 | 12 | 104089415 | 104089415 | Missense_Mutation | SNP | G  | A  | 75  | 147 | c.3463G>A                            | c.(3463-3465)GGC>AGC   | p.G1155S      |
| Pat_40 | Post-Resistance | TXNRD1    | 7296   | 37 | 12 | 104645313 | 104645313 | Missense_Mutation | SNP | C  | T  | 3   | 48  | c.100C>T                             | c.(100-102)CAT>TAT     | p.H34Y        |
| Pat_40 | Post-Resistance | APPL2     | 55198  | 37 | 12 | 105610863 | 105610863 | Missense_Mutation | SNP | G  | A  | 30  | 79  | c.269C>T                             | c.(268-270)TCC>TTC     | p.S90F        |
| Pat_40 | Post-Resistance | ALKBH2    | 121642 | 37 | 12 | 109527981 | 109527981 | Missense_Mutation | SNP | C  | G  | 19  | 97  | c.312G>C                             | c.(310-312)AAG>AAC     | p.K104N       |
| Pat_40 | Post-Resistance | RPH3A     | 22895  | 37 | 12 | 113307833 | 113307833 | Missense_Mutation | SNP | G  | A  | 23  | 21  | c.785G>A                             | c.(784-786)CGG>CAG     | p.R262Q       |
| Pat_40 | Post-Resistance | MED13L    | 23389  | 37 | 12 | 116435017 | 116435017 | Missense_Mutation | SNP | C  | T  | 28  | 104 | c.2588G>A                            | c.(2587-2589)AGG>AAG   | p.R863K       |
| Pat_40 | Post-Resistance | KSR2      | 283455 | 37 | 12 | 118016990 | 118016990 | Nonsense_Mutation | SNP | C  | T  | 15  | 51  | c.1172G>A                            | c.(1171-1173)TGG>TAG   | p.W391*       |
| Pat_40 | Post-Resistance | KDM2B     | 84678  | 37 | 12 | 121947645 | 121947645 | Missense_Mutation | SNP | C  | T  | 3   | 83  | c.1372G>A                            | c.(1372-1374)GGG>AGG   | p.G458R       |
| Pat_40 | Post-Resistance | RSRC2     | 65117  | 37 | 12 | 123003404 | 123003404 | Missense_Mutation | SNP | C  | T  | 125 | 633 | c.380G>A                             | c.(379-381)AGA>AAA     | p.R127K       |
| Pat_40 | Post-Resistance | DNAH10    | 196385 | 37 | 12 | 124288369 | 124288369 | Missense_Mutation | SNP | C  | T  | 17  | 124 | c.2422C>T                            | c.(2422-2424)CCA>TCA   | p.P808S       |
| Pat_40 | Post-Resistance | ZNF664    | 144348 | 37 | 12 | 124497079 | 124497079 | Missense_Mutation | SNP | C  | A  | 33  | 291 | c.388C>A                             | c.(388-390)CTT>ATT     | p.L130I       |
| Pat_40 | Post-Resistance | FZD10     | 11211  | 37 | 12 | 130648985 | 130648985 | Missense_Mutation | SNP | G  | A  | 8   | 28  | c.1498G>A                            | c.(1498-1500)GCC>ACC   | p.A500T       |
| Pat_40 | Post-Resistance | RIMBP2    | 23504  | 37 | 12 | 130919401 | 130919401 | Missense_Mutation | SNP | C  | T  | 15  | 29  | c.2080G>A                            | c.(2080-2082)GAG>AAG   | p.E694K       |
| Pat_40 | Post-Resistance | ULK1      | 8408   | 37 | 12 | 132393324 | 132393324 | Missense_Mutation | SNP | G  | A  | 4   | 80  | c.452G>A                             | c.(451-453)GGC>GAC     | p.G151D       |
| Pat_40 | Post-Resistance | SACS      | 26278  | 37 | 13 | 23904499  | 23904499  | Missense_Mutation | SNP | C  | T  | 81  | 143 | c.13516G>A                           | c.(13516-13518)GCT>ACT | p.A4506T      |
| Pat_40 | Post-Resistance | FLT3      | 2322   | 37 | 13 | 28608541  | 28608541  | Missense_Mutation | SNP | G  | A  | 32  | 51  | c.1601C>T                            | c.(1600-1602)CCC>CTC   | p.P534L       |
| Pat_40 | Post-Resistance | ALOX5AP   | 241    | 37 | 13 | 31309800  | 31309800  | Missense_Mutation | SNP | G  | A  | 3   | 60  | c.58G>A                              | c.(58-60)GTG>ATG       | p.V20M        |
| Pat_40 | Post-Resistance | TRPC4     | 7223   | 37 | 13 | 38225576  | 38225576  | Nonsense_Mutation | SNP | C  | T  | 50  | 80  | c.1905G>A                            | c.(1903-1905)TGG>TGA   | p.W635*       |
| Pat_40 | Post-Resistance | FREM2     | 341640 | 37 | 13 | 39420787  | 39420787  | Missense_Mutation | SNP | A  | G  | 89  | 125 | c.6097A>G                            | c.(6097-6099)ACG>GCG   | p.T2033A      |
| Pat_40 | Post-Resistance | ELF1      | 1997   | 37 | 13 | 41515089  | 41515089  | Missense_Mutation | SNP | A  | C  | 42  | 89  | c.1224T>G                            | c.(1222-1224)GAT>GAG   | p.D408E       |
| Pat_40 | Post-Resistance | LOC220429 | 220429 | 37 | 13 | 50466086  | 50466086  | Missense_Mutation | SNP | T  | A  | 10  | 14  | c.1360T>A                            | c.(1360-1362)TAC>AAC   | p.Y454N       |
| Pat_40 | Post-Resistance | OLFM4     | 10562  | 37 | 13 | 53603032  | 53603032  | Missense_Mutation | SNP | G  | A  | 55  | 84  | c.61G>A                              | c.(61-63)GAT>AAT       | p.D21N        |
| Pat_40 | Post-Resistance | DCT       | 1638   | 37 | 13 | 95131305  | 95131305  | Missense_Mutation | SNP | T  | C  | 112 | 62  | c.205A>G                             | c.(205-207)AGG>GGG     | p.R69G        |
| Pat_40 | Post-Resistance | DZIP1     | 22873  | 37 | 13 | 96241429  | 96241429  | Missense_Mutation | SNP | G  | A  | 57  | 49  | c.2006C>T                            | c.(2005-2007)CCC>CTC   | p.P669L       |
| Pat_40 | Post-Resistance | SLC10A2   | 6555   | 37 | 13 | 103705031 | 103705031 | Missense_Mutation | SNP | G  | A  | 45  | 113 | c.524C>T                             | c.(523-525)CCT>CTT     | p.P175L       |
| Pat_40 | Post-Resistance | EFNB2     | 1948   | 37 | 13 | 107145708 | 107145708 | Missense_Mutation | SNP | A  | G  | 53  | 116 | c.682T>C                             | c.(682-684)TTT>CTT     | p.F228L       |
| Pat_40 | Post-Resistance | TNFSF13B  | 10673  | 37 | 13 | 108922751 | 108922751 | Missense_Mutation | SNP | G  | A  | 4   | 168 | c.403G>A                             | c.(403-405)GTT>ATT     | p.V135I       |
| Pat_40 | Post-Resistance | OR4L1     | 122742 | 37 | 14 | 20528889  | 20528889  | Missense_Mutation | SNP | C  | T  | 90  | 117 | c.686C>T                             | c.(685-687)TCA>TTA     | p.S229L       |
| Pat_40 | Post-Resistance | METTL3    | 56339  | 37 | 14 | 21969242  | 21969242  | Missense_Mutation | SNP | G  | A  | 42  | 108 | c.929C>T                             | c.(928-930)TCT>TTT     | p.S310F       |
| Pat_40 | Post-Resistance | MYH6      | 4624   | 37 | 14 | 23863057  | 23863057  | Nonsense_Mutation | SNP | G  | A  | 19  | 78  | c.2746C>T                            | c.(2746-2748)CAG>TAG   | p.Q916*       |
| Pat_40 | Post-Resistance | RALGAPA1  | 253959 | 37 | 14 | 36207819  | 36207819  | Missense_Mutation | SNP | G  | A  | 141 | 126 | c.1487C>T                            | c.(1486-1488)TCC>TTC   | p.S496F       |
| Pat_40 | Post-Resistance | NID2      | 22795  | 37 | 14 | 52520862  | 52520862  | Missense_Mutation | SNP | C  | G  | 24  | 53  | c.945G>C                             | c.(943-945)TTG>TTC     | p.L315F       |
| Pat_40 | Post-Resistance | OTX2      | 5015   | 37 | 14 | 57272108  | 57272108  | Missense_Mutation | SNP | C  | T  | 27  | 85  | c.67G>A                              | c.(67-69)GAC>AAC       | p.D23N        |
| Pat_40 | Post-Resistance | GPR135    | 64582  | 37 | 14 | 59930927  | 59930927  | Missense_Mutation | SNP | C  | T  | 3   | 32  | c.1018G>A                            | c.(1018-1020)GTC>ATC   | p.V340I       |
| Pat_40 | Post-Resistance | SIPA1L1   | 26037  | 37 | 14 | 72128160  | 72128160  | Missense_Mutation | SNP | C  | T  | 19  | 155 | c.2231C>T                            | c.(2230-2232)CCG>CTG   | p.P744L       |
| Pat_40 | Post-Resistance | RBM25     | 58517  | 37 | 14 | 73570138  | 73570138  | Missense_Mutation | SNP | G  | A  | 17  | 47  | c.1106G>A                            | c.(1105-1107)CGG>CAG   | p.R369Q       |
| Pat_40 | Post-Resistance | C14orf115 | 55237  | 37 | 14 | 74825074  | 74825074  | Missense_Mutation | SNP | C  | T  | 78  | 85  | c.1588C>T                            | c.(1588-1590)CGC>TGC   | p.R530C       |
| Pat_40 | Post-Resistance | KCNK13    | 56659  | 37 | 14 | 90651187  | 90651187  | Missense_Mutation | SNP | A  | C  | 6   | 80  | c.1067A>C                            | c.(1066-1068)AAC>ACC   | p.N356T       |

|        |                 |          |        |    |    |           |           |                   |     |    |    |     |     |                 |                       |          |
|--------|-----------------|----------|--------|----|----|-----------|-----------|-------------------|-----|----|----|-----|-----|-----------------|-----------------------|----------|
| Pat_40 | Post-Resistance | RPS6KA5  | 9252   | 37 | 14 | 91409424  | 91409424  | Missense_Mutation | SNP | C  | T  | 54  | 152 | c.616G>A        | c.(616-618)GAA>AAA    | p.E206K  |
| Pat_40 | Post-Resistance | CCDC88C  | 440193 | 37 | 14 | 91780280  | 91780281  | Missense_Mutation | DNP | CC | TT | 4   | 47  | .1879_1880GG>A  | c.(1879-1881)GGG>AAG  | p.G627K  |
| Pat_40 | Post-Resistance | BTBD7    | 55727  | 37 | 14 | 93712382  | 93712382  | Missense_Mutation | SNP | C  | T  | 4   | 169 | c.2372G>A       | c.(2371-2373)CGT>CAT  | p.R791H  |
| Pat_40 | Post-Resistance | PPP2R5C  | 5527   | 37 | 14 | 102323122 | 102323122 | Nonsense_Mutation | SNP | G  | A  | 38  | 343 | c.194G>A        | c.(193-195)TGG>TAG    | p.W65*   |
| Pat_40 | Post-Resistance | OR4M2    | 390538 | 37 | 15 | 22368697  | 22368697  | Missense_Mutation | SNP | G  | A  | 204 | 311 | c.122G>A        | c.(121-123)GGA>GAA    | p.G41E   |
| Pat_40 | Post-Resistance | TJP1     | 7082   | 37 | 15 | 30008923  | 30008923  | Missense_Mutation | SNP | C  | T  | 26  | 83  | c.4094G>A       | c.(4093-4095)AGA>AAA  | p.R1365K |
| Pat_40 | Post-Resistance | RPUSD2   | 27079  | 37 | 15 | 40866150  | 40866150  | Missense_Mutation | SNP | C  | T  | 34  | 170 | c.1328C>T       | c.(1327-1329)ACG>ATG  | p.T443M  |
| Pat_40 | Post-Resistance | NDUFAF1  | 51103  | 37 | 15 | 41687083  | 41687083  | Missense_Mutation | SNP | C  | A  | 37  | 145 | c.733G>T        | c.(733-735)GGG>TGG    | p.G245W  |
| Pat_40 | Post-Resistance | MGA      | 23269  | 37 | 15 | 42035184  | 42035184  | Missense_Mutation | SNP | C  | T  | 5   | 92  | c.5026C>T       | c.(5026-5028)CCT>TCT  | p.P1676S |
| Pat_40 | Post-Resistance | TGM7     | 116179 | 37 | 15 | 43584182  | 43584182  | Missense_Mutation | SNP | C  | T  | 24  | 78  | c.553G>A        | c.(553-555)GGG>AGG    | p.G185R  |
| Pat_40 | Post-Resistance | TP53BP1  | 7158   | 37 | 15 | 43748444  | 43748444  | Missense_Mutation | SNP | C  | T  | 20  | 44  | c.2347G>A       | c.(2347-2349)GAT>AAT  | p.D783N  |
| Pat_40 | Post-Resistance | SLC28A2  | 9153   | 37 | 15 | 45554220  | 45554220  | Missense_Mutation | SNP | C  | T  | 53  | 206 | c.178C>T        | c.(178-180)CGG>TGG    | p.R60W   |
| Pat_40 | Post-Resistance | NEDD4    | 4734   | 37 | 15 | 56155202  | 56155202  | Missense_Mutation | SNP | G  | A  | 53  | 117 | c.1840C>T       | c.(1840-1842)CCA>TCA  | p.P614S  |
| Pat_40 | Post-Resistance | RFX7     | 64864  | 37 | 15 | 56395783  | 56395783  | Missense_Mutation | SNP | C  | T  | 3   | 49  | c.487G>A        | c.(487-489)GCA>ACA    | p.A163T  |
| Pat_40 | Post-Resistance | ALDH1A2  | 8854   | 37 | 15 | 58284979  | 58284979  | Missense_Mutation | SNP | C  | T  | 89  | 87  | c.722G>A        | c.(721-723)GGA>GAA    | p.G241E  |
| Pat_40 | Post-Resistance | TLN2     | 83660  | 37 | 15 | 63097925  | 63097925  | Missense_Mutation | SNP | G  | A  | 4   | 140 | c.6604G>A       | c.(6604-6606)GTG>ATG  | p.V2202M |
| Pat_40 | Post-Resistance | CCDC33   | 80125  | 37 | 15 | 74588131  | 74588131  | Missense_Mutation | SNP | G  | A  | 49  | 37  | c.1132G>A       | c.(1132-1134)GCT>ACT  | p.A378T  |
| Pat_40 | Post-Resistance | IL16     | 3603   | 37 | 15 | 81558097  | 81558097  | Missense_Mutation | SNP | G  | C  | 7   | 51  | c.519G>C        | c.(517-519)AGG>AGC    | p.R173S  |
| Pat_40 | Post-Resistance | WHAMM    | 123720 | 37 | 15 | 83485576  | 83485576  | Missense_Mutation | SNP | A  | G  | 2   | 9   | c.916A>G        | c.(916-918)ACA>GCA    | p.T306A  |
| Pat_40 | Post-Resistance | ADAMTSL3 | 57188  | 37 | 15 | 84539574  | 84539574  | Nonsense_Mutation | SNP | C  | T  | 43  | 73  | c.823C>T        | c.(823-825)CAA>TAA    | p.Q275*  |
| Pat_40 | Post-Resistance | AGBL1    | 123624 | 37 | 15 | 86687074  | 86687074  | Missense_Mutation | SNP | G  | A  | 25  | 42  | c.122G>A        | c.(121-123)AGA>AAA    | p.R41K   |
| Pat_40 | Post-Resistance | WDR93    | 56964  | 37 | 15 | 90245132  | 90245132  | Missense_Mutation | SNP | C  | T  | 17  | 48  | c.155C>T        | c.(154-156)TCC>TTC    | p.S52F   |
| Pat_40 | Post-Resistance | TELO2    | 9894   | 37 | 16 | 1549330   | 1549330   | Missense_Mutation | SNP | T  | A  | 9   | 30  | c.929T>A        | c.(928-930)CTC>CAC    | p.L310H  |
| Pat_40 | Post-Resistance | TXNDC11  | 51061  | 37 | 16 | 11785884  | 11785884  | Missense_Mutation | SNP | G  | A  | 3   | 70  | c.1243C>T       | c.(1243-1245)CGT>TGT  | p.R415C  |
| Pat_40 | Post-Resistance | ZC3H7A   | 29066  | 37 | 16 | 11850101  | 11850101  | Missense_Mutation | SNP | C  | T  | 48  | 216 | c.2554G>A       | c.(2554-2556)GAA>AAA  | p.E852K  |
| Pat_40 | Post-Resistance | C16orf88 | 400506 | 37 | 16 | 19721878  | 19721878  | Missense_Mutation | SNP | C  | T  | 4   | 140 | c.1018G>A       | c.(1018-1020)GAT>AAT  | p.D340N  |
| Pat_40 | Post-Resistance | C16orf88 | 400506 | 37 | 16 | 19725511  | 19725511  | Missense_Mutation | SNP | C  | T  | 42  | 126 | c.847G>A        | c.(847-849)GAG>AAG    | p.E283K  |
| Pat_40 | Post-Resistance | ACSM5    | 54988  | 37 | 16 | 20430616  | 20430616  | Missense_Mutation | SNP | C  | T  | 28  | 73  | c.482C>T        | c.(481-483)TCC>TTC    | p.S161F  |
| Pat_40 | Post-Resistance | DNAH3    | 55567  | 37 | 16 | 20994125  | 20994125  | Nonsense_Mutation | SNP | G  | A  | 96  | 52  | c.7777C>T       | c.(7777-7779)CAG>TAG  | p.Q2593* |
| Pat_40 | Post-Resistance | HS3ST4   | 9951   | 37 | 16 | 26147552  | 26147552  | Missense_Mutation | SNP | G  | A  | 8   | 31  | c.1354G>A       | c.(1354-1356)GAA>AAA  | p.E452K  |
| Pat_40 | Post-Resistance | IL27     | 246778 | 37 | 16 | 28515273  | 28515273  | Missense_Mutation | SNP | G  | A  | 6   | 34  | c.130C>T        | c.(130-132)CGG>TGG    | p.R44W   |
| Pat_40 | Post-Resistance | ATP2A1   | 487    | 37 | 16 | 28900230  | 28900230  | Missense_Mutation | SNP | G  | A  | 10  | 431 | c.1051G>A       | c.(1051-1053)GAC>AAC  | p.D351N  |
| Pat_40 | Post-Resistance | MVP      | 9961   | 37 | 16 | 29853121  | 29853121  | Missense_Mutation | SNP | G  | A  | 4   | 67  | c.1396G>A       | c.(1396-1398)GCT>ACT  | p.A466T  |
| Pat_40 | Post-Resistance | ASPHD1   | 253982 | 37 | 16 | 29916256  | 29916256  | Missense_Mutation | SNP | G  | A  | 28  | 81  | c.1033G>A       | c.(1033-1035)GAC>AAC  | p.D345N  |
| Pat_40 | Post-Resistance | TGFB11   | 7041   | 37 | 16 | 31488207  | 31488207  | Missense_Mutation | SNP | C  | T  | 13  | 8   | c.995C>T        | c.(994-996)CCC>CTC    | p.P332L  |
| Pat_40 | Post-Resistance | ZNF267   | 10308  | 37 | 16 | 31927613  | 31927613  | Missense_Mutation | SNP | A  | T  | 6   | 270 | c.2043A>T       | c.(2041-2043)AGA>AGT  | p.R681S  |
| Pat_40 | Post-Resistance | SALL1    | 6299   | 37 | 16 | 51172808  | 51172808  | Missense_Mutation | SNP | G  | A  | 27  | 70  | c.3325C>T       | c.(3325-3327)CCG>TCG  | p.P1109S |
| Pat_40 | Post-Resistance | CETP     | 1071   | 37 | 16 | 57005960  | 57005960  | Missense_Mutation | SNP | G  | A  | 4   | 87  | c.715G>A        | c.(715-717)GTC>ATC    | p.V239I  |
| Pat_40 | Post-Resistance | TMEM208  | 29100  | 37 | 16 | 67262984  | 67262984  | Nonsense_Mutation | SNP | C  | T  | 3   | 60  | c.490C>T        | c.(490-492)CGA>TGA    | p.R164*  |
| Pat_40 | Post-Resistance | FHOD1    | 29109  | 37 | 16 | 67266028  | 67266028  | Missense_Mutation | SNP | C  | T  | 4   | 93  | c.2116G>A       | c.(2116-2118)GGC>AGC  | p.G706S  |
| Pat_40 | Post-Resistance | FAM65A   | 79567  | 37 | 16 | 67577052  | 67577052  | Missense_Mutation | SNP | G  | A  | 4   | 26  | c.2423G>A       | c.(2422-2424)AGG>AAG  | p.R808K  |
| Pat_40 | Post-Resistance | RANBP10  | 57610  | 37 | 16 | 67762379  | 67762379  | Missense_Mutation | SNP | G  | A  | 19  | 50  | c.1388C>T       | c.(1387-1389)CCC>CTC  | p.P463L  |
| Pat_40 | Post-Resistance | NFATC3   | 4775   | 37 | 16 | 68260296  | 68260297  | Nonsense_Mutation | DNP | CC | TT | 24  | 81  | .:3150_3151CC>T | 3148-3153)TCCCAA>TCTT | p.Q1051* |
| Pat_40 | Post-Resistance | CHST5    | 23563  | 37 | 16 | 75563252  | 75563252  | Missense_Mutation | SNP | G  | A  | 59  | 37  | c.1031C>T       | c.(1030-1032)TCG>TTG  | p.S344L  |
| Pat_40 | Post-Resistance | MLYCD    | 23417  | 37 | 16 | 83948687  | 83948687  | Missense_Mutation | SNP | G  | A  | 81  | 215 | c.1075G>A       | c.(1075-1077)GAA>AAA  | p.E359K  |
| Pat_40 | Post-Resistance | KLHL36   | 79786  | 37 | 16 | 84691170  | 84691170  | Missense_Mutation | SNP | G  | A  | 4   | 79  | c.757G>A        | c.(757-759)GTG>ATG    | p.V253M  |
| Pat_40 | Post-Resistance | TRPV3    | 162514 | 37 | 17 | 3422088   | 3422088   | Missense_Mutation | SNP | C  | T  | 3   | 48  | c.1867G>A       | c.(1867-1869)GGC>AGC  | p.G623S  |

|        |                 |          |        |    |    |          |          |                   |     |    |    |     |     |                 |                          |               |
|--------|-----------------|----------|--------|----|----|----------|----------|-------------------|-----|----|----|-----|-----|-----------------|--------------------------|---------------|
| Pat_40 | Post-Resistance | P2RX1    | 5023   | 37 | 17 | 3801803  | 3801803  | Missense_Mutation | SNP | C  | T  | 3   | 60  | c.1007G>A       | c.(1006-1008)GGC>GAC     | p.G336D       |
| Pat_40 | Post-Resistance | MINK1    | 50488  | 37 | 17 | 4796834  | 4796834  | Missense_Mutation | SNP | G  | A  | 4   | 24  | c.2506G>A       | c.(2506-2508)GAC>AAC     | p.D836N       |
| Pat_40 | Post-Resistance | C1QBP    | 708    | 37 | 17 | 5341507  | 5341507  | Missense_Mutation | SNP | C  | T  | 63  | 224 | c.319G>A        | c.(319-321)GGA>AGA       | p.G107R       |
| Pat_40 | Post-Resistance | PITPNM3  | 83394  | 37 | 17 | 6380394  | 6380394  | Missense_Mutation | SNP | G  | A  | 11  | 22  | c.1040C>T       | c.(1039-1041)ACC>ATC     | p.T347I       |
| Pat_40 | Post-Resistance | DNAH2    | 146754 | 37 | 17 | 7722666  | 7722666  | Missense_Mutation | SNP | G  | A  | 4   | 90  | c.10955G>A      | c.(10954-10956)AGC>AAC   | p.S3652N      |
| Pat_40 | Post-Resistance | ARHGEF15 | 22899  | 37 | 17 | 8222653  | 8222653  | Missense_Mutation | SNP | G  | A  | 91  | 213 | c.2210G>A       | c.(2209-2211)GGA>GAA     | p.G737E       |
| Pat_40 | Post-Resistance | MYOCD    | 93649  | 37 | 17 | 12626312 | 12626312 | Missense_Mutation | SNP | A  | T  | 60  | 166 | c.402A>T        | c.(400-402)AAA>AAT       | p.K134N       |
| Pat_40 | Post-Resistance | RAI1     | 10743  | 37 | 17 | 17701574 | 17701574 | Missense_Mutation | SNP | C  | T  | 6   | 2   | c.5312C>T       | c.(5311-5313)ACC>ATC     | p.T1771I      |
| Pat_40 | Post-Resistance | LGALS9   | 3965   | 37 | 17 | 25975908 | 25975908 | Missense_Mutation | SNP | G  | A  | 103 | 300 | c.968G>A        | c.(967-969)GGT>GAT       | p.G323D       |
| Pat_40 | Post-Resistance | SARM1    | 23098  | 37 | 17 | 26686410 | 26686410 | Missense_Mutation | SNP | C  | T  | 28  | 141 | c.358C>T        | c.(358-360)CGC>TGC       | p.R120C       |
| Pat_40 | Post-Resistance | SLFN11   | 91607  | 37 | 17 | 33687340 | 33687340 | Missense_Mutation | SNP | C  | T  | 26  | 100 | c.1120G>A       | c.(1120-1122)GGG>AGG     | p.G374R       |
| Pat_40 | Post-Resistance | RASL10B  | 91608  | 37 | 17 | 34062220 | 34062220 | Missense_Mutation | SNP | G  | A  | 3   | 70  | c.17G>A         | c.(16-18)CGG>CAG         | p.R6Q         |
| Pat_40 | Post-Resistance | GAS2L2   | 246176 | 37 | 17 | 34079495 | 34079495 | Missense_Mutation | SNP | C  | T  | 125 | 116 | c.375G>A        | c.(373-375)ATG>ATA       | p.M125I       |
| Pat_40 | Post-Resistance | GPR179   | 440435 | 37 | 17 | 36492965 | 36492965 | Missense_Mutation | SNP | C  | T  | 7   | 12  | c.1123G>A       | c.(1123-1125)GAA>AAA     | p.E375K       |
| Pat_40 | Post-Resistance | PPP1R1B  | 84152  | 37 | 17 | 37790219 | 37790219 | Missense_Mutation | SNP | G  | A  | 33  | 86  | c.325G>A        | c.(325-327)GGG>AGG       | p.G109R       |
| Pat_40 | Post-Resistance | PLCD3    | 113026 | 37 | 17 | 43190532 | 43190532 | Missense_Mutation | SNP | C  | T  | 3   | 39  | c.2089G>A       | c.(2089-2091)GCA>ACA     | p.A697T       |
| Pat_40 | Post-Resistance | TBKBP1   | 9755   | 37 | 17 | 45776096 | 45776096 | Missense_Mutation | SNP | G  | T  | 9   | 41  | c.589G>T        | c.(589-591)GAC>TAC       | p.D197Y       |
| Pat_40 | Post-Resistance | DHX40    | 79665  | 37 | 17 | 57644149 | 57644149 | Missense_Mutation | SNP | G  | A  | 21  | 107 | c.274G>A        | c.(274-276)GAA>AAA       | p.E92K        |
| Pat_40 | Post-Resistance | CYB561   | 1534   | 37 | 17 | 61513475 | 61513475 | Missense_Mutation | SNP | G  | A  | 5   | 108 | c.241C>T        | c.(241-243)CGC>TGC       | p.R81C        |
| Pat_40 | Post-Resistance | SDK2     | 54549  | 37 | 17 | 71415426 | 71415426 | Missense_Mutation | SNP | G  | A  | 3   | 35  | c.2065C>T       | c.(2065-2067)CCC>TCC     | p.P689S       |
| Pat_40 | Post-Resistance | TSEN54   | 283989 | 37 | 17 | 73519416 | 73519416 | Missense_Mutation | SNP | G  | A  | 6   | 191 | c.1313G>A       | c.(1312-1314)CGG>CAG     | p.R438Q       |
| Pat_40 | Post-Resistance | TNRC6C   | 57690  | 37 | 17 | 76083091 | 76083091 | Missense_Mutation | SNP | C  | T  | 96  | 80  | c.3719C>T       | c.(3718-3720)TCG>TTG     | p.S1240L      |
| Pat_40 | Post-Resistance | TMEM105  | 284186 | 37 | 17 | 79287596 | 79287596 | Missense_Mutation | SNP | C  | T  | 72  | 45  | c.245G>A        | c.(244-246)CGA>CAA       | p.R82Q        |
| Pat_40 | Post-Resistance | USP14    | 9097   | 37 | 18 | 163321   | 163322   | Nonsense_Mutation | DNP | GG | AA | 4   | 16  | c.30_31GG>AA    | c.(28-33)TGGGGA>TGAAG    | p.G10_11WG>*F |
| Pat_40 | Post-Resistance | L3MBTL4  | 91133  | 37 | 18 | 6244575  | 6244575  | Missense_Mutation | SNP | G  | A  | 209 | 185 | c.232C>T        | c.(232-234)CCA>TCA       | p.P78S        |
| Pat_40 | Post-Resistance | LAMA1    | 284217 | 37 | 18 | 7013833  | 7013833  | Missense_Mutation | SNP | G  | A  | 20  | 17  | c.3344C>T       | c.(3343-3345)ACC>ATC     | p.T115I       |
| Pat_40 | Post-Resistance | MIB1     | 57534  | 37 | 18 | 19429266 | 19429266 | Missense_Mutation | SNP | G  | A  | 125 | 163 | c.2503G>A       | c.(2503-2505)GGA>AGA     | p.G835R       |
| Pat_40 | Post-Resistance | CABLES1  | 91768  | 37 | 18 | 20817209 | 20817209 | Missense_Mutation | SNP | G  | A  | 26  | 101 | c.1446G>A       | c.(1444-1446)ATG>ATA     | p.M482I       |
| Pat_40 | Post-Resistance | DSG4     | 147409 | 37 | 18 | 28968918 | 28968918 | Missense_Mutation | SNP | G  | A  | 72  | 175 | c.454G>A        | c.(454-456)GAT>AAT       | p.D152N       |
| Pat_40 | Post-Resistance | C18orf26 | 284254 | 37 | 18 | 52265254 | 52265254 | Missense_Mutation | SNP | C  | T  | 43  | 160 | c.511C>T        | c.(511-513)CCT>TCT       | p.P171S       |
| Pat_40 | Post-Resistance | CDH20    | 28316  | 37 | 18 | 59174723 | 59174723 | Missense_Mutation | SNP | G  | A  | 56  | 51  | c.947G>A        | c.(946-948)GGA>GAA       | p.G316E       |
| Pat_40 | Post-Resistance | CD226    | 10666  | 37 | 18 | 67614158 | 67614158 | Missense_Mutation | SNP | G  | A  | 12  | 59  | c.194C>T        | c.(193-195)CCT>CTT       | p.P65L        |
| Pat_40 | Post-Resistance | NETO1    | 81832  | 37 | 18 | 70423284 | 70423284 | Missense_Mutation | SNP | C  | T  | 40  | 155 | c.967G>A        | c.(967-969)GAA>AAA       | p.E323K       |
| Pat_40 | Post-Resistance | C19orf26 | 255057 | 37 | 19 | 1231025  | 1231025  | Missense_Mutation | SNP | G  | C  | 3   | 8   | c.1211C>G       | c.(1210-1212)CCC>CGC     | p.P404R       |
| Pat_40 | Post-Resistance | SLC39A3  | 29985  | 37 | 19 | 2737177  | 2737177  | Missense_Mutation | SNP | C  | T  | 5   | 92  | c.79G>A         | c.(79-81)GTG>ATG         | p.V27M        |
| Pat_40 | Post-Resistance | GNA11    | 2767   | 37 | 19 | 3113418  | 3113418  | Missense_Mutation | SNP | G  | A  | 3   | 37  | c.412G>A        | c.(412-414)GAC>AAC       | p.D138N       |
| Pat_40 | Post-Resistance | CHAF1A   | 10036  | 37 | 19 | 4428744  | 4428745  | Missense_Mutation | DNP | CC | TT | 28  | 58  | c.1461_1462CC>T | c.(1459-1464)TTCCAT>TTTT | p.H488Y       |
| Pat_40 | Post-Resistance | LRG1     | 116844 | 37 | 19 | 4538773  | 4538773  | Missense_Mutation | SNP | C  | T  | 3   | 74  | c.223G>A        | c.(223-225)GTG>ATG       | p.V75M        |
| Pat_40 | Post-Resistance | PTPRS    | 5802   | 37 | 19 | 5220014  | 5220014  | Missense_Mutation | SNP | C  | T  | 4   | 165 | c.3701G>A       | c.(3700-3702)CGG>CAG     | p.R1234Q      |
| Pat_40 | Post-Resistance | FUT3     | 2525   | 37 | 19 | 5844156  | 5844156  | Missense_Mutation | SNP | C  | T  | 35  | 69  | c.695G>A        | c.(694-696)GGG>GAG       | p.G232E       |
| Pat_40 | Post-Resistance | SLC25A41 | 284427 | 37 | 19 | 6433610  | 6433610  | Missense_Mutation | SNP | G  | A  | 4   | 89  | c.95C>T         | c.(94-96)CCC>CTC         | p.P32L        |
| Pat_40 | Post-Resistance | MYO1F    | 4542   | 37 | 19 | 8587588  | 8587588  | Nonsense_Mutation | SNP | G  | A  | 3   | 67  | c.2980C>T       | c.(2980-2982)CGA>TGA     | p.R994*       |
| Pat_40 | Post-Resistance | MUC16    | 94025  | 37 | 19 | 9045677  | 9045677  | Missense_Mutation | SNP | G  | A  | 4   | 69  | c.35954C>T      | c.(35953-35955)CCC>CTC   | p.P11985L     |
| Pat_40 | Post-Resistance | MUC16    | 94025  | 37 | 19 | 9046043  | 9046043  | Missense_Mutation | SNP | G  | A  | 115 | 80  | c.35588C>T      | c.(35587-35589)CCA>CTA   | p.P11863L     |
| Pat_40 | Post-Resistance | MUC16    | 94025  | 37 | 19 | 9049653  | 9049653  | Missense_Mutation | SNP | C  | T  | 15  | 80  | c.31978G>A      | c.(31978-31980)GGG>AGC   | p.G10660R     |
| Pat_40 | Post-Resistance | MUC16    | 94025  | 37 | 19 | 9056776  | 9056776  | Missense_Mutation | SNP | G  | A  | 55  | 28  | c.30670C>T      | c.(30670-30672)CCA>TCA   | p.P10224S     |
| Pat_40 | Post-Resistance | MUC16    | 94025  | 37 | 19 | 9060955  | 9060955  | Missense_Mutation | SNP | G  | A  | 28  | 108 | c.26491C>T      | c.(26491-26493)CCT>TCT   | p.P8831S      |

|        |                 |         |        |    |    |          |          |                   |     |   |   |     |     |            |                        |          |
|--------|-----------------|---------|--------|----|----|----------|----------|-------------------|-----|---|---|-----|-----|------------|------------------------|----------|
| Pat_40 | Post-Resistance | MUC16   | 94025  | 37 | 19 | 9063550  | 9063550  | Missense_Mutation | SNP | C | T | 9   | 27  | c.23896G>A | c.(23896-23898)GAA>AAA | p.E7966K |
| Pat_40 | Post-Resistance | MUC16   | 94025  | 37 | 19 | 9082516  | 9082516  | Missense_Mutation | SNP | A | T | 221 | 149 | c.9299T>A  | c.(9298-9300)ATT>AAT   | p.I3100N |
| Pat_40 | Post-Resistance | MUC16   | 94025  | 37 | 19 | 9087347  | 9087347  | Missense_Mutation | SNP | G | A | 94  | 243 | c.4468C>T  | c.(4468-4470)CCA>TCA   | p.P1490S |
| Pat_40 | Post-Resistance | OR7D2   | 162998 | 37 | 19 | 9297215  | 9297215  | Missense_Mutation | SNP | G | A | 26  | 73  | c.758G>A   | c.(757-759)GGG>GAG     | p.G253E  |
| Pat_40 | Post-Resistance | ZNF700  | 90592  | 37 | 19 | 12060645 | 12060645 | Missense_Mutation | SNP | T | A | 13  | 521 | c.1806T>A  | c.(1804-1806)AGT>AGA   | p.S602R  |
| Pat_40 | Post-Resistance | ZNF700  | 90592  | 37 | 19 | 12060647 | 12060647 | Missense_Mutation | SNP | G | C | 9   | 511 | c.1808G>C  | c.(1807-1809)TGT>TCT   | p.C603S  |
| Pat_40 | Post-Resistance | ZNF878  | 729747 | 37 | 19 | 12155282 | 12155282 | Missense_Mutation | SNP | C | T | 27  | 148 | c.1075G>A  | c.(1075-1077)GAG>AAG   | p.E359K  |
| Pat_40 | Post-Resistance | ZNF443  | 10224  | 37 | 19 | 12542142 | 12542142 | Missense_Mutation | SNP | T | C | 9   | 367 | c.844A>G   | c.(844-846)AAA>GAA     | p.K282E  |
| Pat_40 | Post-Resistance | OR7C2   | 26658  | 37 | 19 | 15053205 | 15053205 | Missense_Mutation | SNP | G | A | 19  | 54  | c.905G>A   | c.(904-906)AGA>AAA     | p.R302K  |
| Pat_40 | Post-Resistance | SLC1A6  | 6511   | 37 | 19 | 15061164 | 15061164 | Missense_Mutation | SNP | G | A | 33  | 88  | c.1538C>T  | c.(1537-1539)TCA>TTA   | p.S513L  |
| Pat_40 | Post-Resistance | RASAL3  | 64926  | 37 | 19 | 15572101 | 15572101 | Nonsense_Mutation | SNP | G | A | 13  | 21  | c.472C>T   | c.(472-474)CGA>TGA     | p.R158*  |
| Pat_40 | Post-Resistance | OR10H1  | 26539  | 37 | 19 | 15918436 | 15918436 | Missense_Mutation | SNP | G | A | 42  | 35  | c.412C>T   | c.(412-414)CCG>TCG     | p.P138S  |
| Pat_40 | Post-Resistance | CPAMD8  | 27151  | 37 | 19 | 17049247 | 17049247 | Missense_Mutation | SNP | C | T | 31  | 21  | c.2944G>A  | c.(2944-2946)GTC>ATC   | p.V982I  |
| Pat_40 | Post-Resistance | ZNF14   | 7561   | 37 | 19 | 19822928 | 19822928 | Missense_Mutation | SNP | C | T | 39  | 122 | c.1162G>A  | c.(1162-1164)GAG>AAG   | p.E388K  |
| Pat_40 | Post-Resistance | ZNF93   | 81931  | 37 | 19 | 20045254 | 20045254 | Missense_Mutation | SNP | C | T | 14  | 314 | c.1490C>T  | c.(1489-1491)ACT>ATT   | p.T497I  |
| Pat_40 | Post-Resistance | ZNF93   | 81931  | 37 | 19 | 20045277 | 20045277 | Missense_Mutation | SNP | G | A | 10  | 328 | c.1513G>A  | c.(1513-1515)GGA>AGA   | p.G505R  |
| Pat_40 | Post-Resistance | ZNF429  | 353088 | 37 | 19 | 21720411 | 21720411 | Missense_Mutation | SNP | T | A | 8   | 221 | c.1556T>A  | c.(1555-1557)ATC>AAC   | p.I519N  |
| Pat_40 | Post-Resistance | ZNF429  | 353088 | 37 | 19 | 21720414 | 21720414 | Missense_Mutation | SNP | T | G | 8   | 225 | c.1559T>G  | c.(1558-1560)CTG>CGG   | p.L520R  |
| Pat_40 | Post-Resistance | ZNF208  | 7757   | 37 | 19 | 22154826 | 22154826 | Missense_Mutation | SNP | C | T | 62  | 197 | c.2626G>A  | c.(2626-2628)GAA>AAA   | p.E876K  |
| Pat_40 | Post-Resistance | ZNF208  | 7757   | 37 | 19 | 22155896 | 22155896 | Missense_Mutation | SNP | A | C | 13  | 279 | c.1640T>G  | c.(1639-1641)ATT>AGT   | p.I547S  |
| Pat_40 | Post-Resistance | ZNF208  | 7757   | 37 | 19 | 22157163 | 22157163 | Missense_Mutation | SNP | C | T | 85  | 78  | c.673G>A   | c.(673-675)GGA>AGA     | p.G225R  |
| Pat_40 | Post-Resistance | ZNF99   | 7652   | 37 | 19 | 22941372 | 22941372 | Missense_Mutation | SNP | G | A | 27  | 73  | c.1066C>T  | c.(1066-1068)CAT>TAT   | p.H356Y  |
| Pat_40 | Post-Resistance | ZNF91   | 7644   | 37 | 19 | 23544724 | 23544724 | Missense_Mutation | SNP | T | C | 13  | 136 | c.1057A>G  | c.(1057-1059)AAA>GAA   | p.K353E  |
| Pat_40 | Post-Resistance | ZNF91   | 7644   | 37 | 19 | 23544783 | 23544783 | Missense_Mutation | SNP | C | T | 15  | 383 | c.998G>A   | c.(997-999)CGT>CAT     | p.R333H  |
| Pat_40 | Post-Resistance | ZNF536  | 9745   | 37 | 19 | 31039065 | 31039065 | Missense_Mutation | SNP | G | A | 20  | 75  | c.2539G>A  | c.(2539-2541)GGA>AGA   | p.G847R  |
| Pat_40 | Post-Resistance | RHPN2   | 85415  | 37 | 19 | 33470912 | 33470912 | Missense_Mutation | SNP | G | A | 22  | 70  | c.2051C>T  | c.(2050-2052)TCT>TTT   | p.S684F  |
| Pat_40 | Post-Resistance | SLC7A10 | 56301  | 37 | 19 | 33702192 | 33702192 | Missense_Mutation | SNP | G | A | 20  | 65  | c.955C>T   | c.(955-957)CCT>TCT     | p.P319S  |
| Pat_40 | Post-Resistance | KIRREL2 | 84063  | 37 | 19 | 36350402 | 36350402 | Missense_Mutation | SNP | C | T | 4   | 50  | c.542C>T   | c.(541-543)ACC>ATC     | p.T181I  |
| Pat_40 | Post-Resistance | ZNF420  | 147923 | 37 | 19 | 37619580 | 37619580 | Missense_Mutation | SNP | G | A | 35  | 119 | c.1687G>A  | c.(1687-1689)GAA>AAA   | p.E563K  |
| Pat_40 | Post-Resistance | ZNF383  | 163087 | 37 | 19 | 37726939 | 37726939 | Nonsense_Mutation | SNP | G | A | 32  | 152 | c.195G>A   | c.(193-195)TGG>TGA     | p.W65*   |
| Pat_40 | Post-Resistance | ZNF527  | 84503  | 37 | 19 | 37871191 | 37871191 | Missense_Mutation | SNP | C | T | 35  | 63  | c.173C>T   | c.(172-174)TCT>TTT     | p.S58F   |
| Pat_40 | Post-Resistance | SIPA1L3 | 23094  | 37 | 19 | 38652944 | 38652944 | Missense_Mutation | SNP | G | A | 4   | 55  | c.3713G>A  | c.(3712-3714)AGC>AAC   | p.S1238N |
| Pat_40 | Post-Resistance | MAP3K10 | 4294   | 37 | 19 | 40698501 | 40698501 | Missense_Mutation | SNP | G | A | 4   | 66  | c.563G>A   | c.(562-564)GGT>GAT     | p.G188D  |
| Pat_40 | Post-Resistance | PRX     | 57716  | 37 | 19 | 40900057 | 40900057 | Missense_Mutation | SNP | G | A | 25  | 65  | c.4202C>T  | c.(4201-4203)TCC>TTC   | p.S1401F |
| Pat_40 | Post-Resistance | LTBP4   | 8425   | 37 | 19 | 41128336 | 41128336 | Missense_Mutation | SNP | C | T | 2   | 3   | c.3449C>T  | c.(3448-3450)CCT>CTT   | p.P1150L |
| Pat_40 | Post-Resistance | ZNF574  | 64763  | 37 | 19 | 42583483 | 42583483 | Missense_Mutation | SNP | C | T | 14  | 88  | c.725C>T   | c.(724-726)CCC>CTC     | p.P242L  |
| Pat_40 | Post-Resistance | PRR19   | 284338 | 37 | 19 | 42814720 | 42814720 | Missense_Mutation | SNP | C | T | 45  | 164 | c.899C>T   | c.(898-900)CCC>CTC     | p.P300L  |
| Pat_40 | Post-Resistance | DMPK    | 1760   | 37 | 19 | 46283155 | 46283155 | Missense_Mutation | SNP | G | A | 10  | 26  | c.163C>T   | c.(163-165)CGG>TGG     | p.R55W   |
| Pat_40 | Post-Resistance | SYMPK   | 8189   | 37 | 19 | 46330823 | 46330823 | Missense_Mutation | SNP | C | T | 3   | 70  | c.2126G>A  | c.(2125-2127)CGC>CAC   | p.R709H  |
| Pat_40 | Post-Resistance | PNMAL2  | 57469  | 37 | 19 | 46997818 | 46997818 | Missense_Mutation | SNP | G | A | 14  | 28  | c.905C>T   | c.(904-906)CCG>CTG     | p.P302L  |
| Pat_40 | Post-Resistance | BCAT2   | 587    | 37 | 19 | 49302959 | 49302959 | Missense_Mutation | SNP | C | T | 7   | 10  | c.668G>A   | c.(667-669)GGC>GAC     | p.G223D  |
| Pat_40 | Post-Resistance | PPFIA3  | 8541   | 37 | 19 | 49649230 | 49649230 | Missense_Mutation | SNP | G | A | 5   | 193 | c.2776G>A  | c.(2776-2778)GAG>AAG   | p.E926K  |
| Pat_40 | Post-Resistance | KLK1    | 3816   | 37 | 19 | 51326967 | 51326967 | Missense_Mutation | SNP | C | T | 35  | 57  | c.38G>A    | c.(37-39)GGG>GAG       | p.G13E   |
| Pat_40 | Post-Resistance | KLK3    | 354    | 37 | 19 | 51359627 | 51359627 | Missense_Mutation | SNP | G | A | 5   | 175 | c.178G>A   | c.(178-180)GTC>ATC     | p.V60I   |
| Pat_40 | Post-Resistance | CD33    | 945    | 37 | 19 | 51729242 | 51729242 | Missense_Mutation | SNP | C | T | 18  | 71  | c.602C>T   | c.(601-603)CCA>CTA     | p.P201L  |
| Pat_40 | Post-Resistance | FPR1    | 2357   | 37 | 19 | 52249241 | 52249241 | Missense_Mutation | SNP | G | A | 93  | 327 | c.1007C>T  | c.(1006-1008)ACC>ATC   | p.T336I  |
| Pat_40 | Post-Resistance | ZNF649  | 65251  | 37 | 19 | 52394619 | 52394619 | Missense_Mutation | SNP | T | C | 4   | 132 | c.770A>G   | c.(769-771)AAA>AGA     | p.K257R  |



|        |                 |           |        |    |    |           |           |                   |     |   |   |     |     |            |                        |          |
|--------|-----------------|-----------|--------|----|----|-----------|-----------|-------------------|-----|---|---|-----|-----|------------|------------------------|----------|
| Pat_40 | Post-Resistance | ZNF350    | 59348  | 37 | 19 | 52468403  | 52468403  | Missense_Mutation | SNP | C | T | 37  | 115 | c.1303G>A  | c.(1303-1305)GAA>AAA   | p.E435K  |
| Pat_40 | Post-Resistance | ZNF480    | 147657 | 37 | 19 | 52825082  | 52825082  | Missense_Mutation | SNP | A | C | 43  | 102 | c.579A>C   | c.(577-579)GAA>GAC     | p.E193D  |
| Pat_40 | Post-Resistance | LAIR1     | 3903   | 37 | 19 | 54868145  | 54868145  | Missense_Mutation | SNP | G | A | 3   | 87  | c.538C>T   | c.(538-540)CTC>TTC     | p.L180F  |
| Pat_40 | Post-Resistance | LENG8     | 114823 | 37 | 19 | 54967876  | 54967876  | Missense_Mutation | SNP | C | T | 3   | 14  | c.1396C>T  | c.(1396-1398)CCG>TCG   | p.P466S  |
| Pat_40 | Post-Resistance | NLRP2     | 55655  | 37 | 19 | 55497572  | 55497572  | Missense_Mutation | SNP | G | A | 59  | 33  | c.2255G>A  | c.(2254-2256)CGA>CAA   | p.R752Q  |
| Pat_40 | Post-Resistance | NLRP2     | 55655  | 37 | 19 | 55502033  | 55502033  | Missense_Mutation | SNP | A | C | 39  | 54  | c.2701A>C  | c.(2701-2703)ACC>CCC   | p.T901P  |
| Pat_40 | Post-Resistance | NLRP11    | 204801 | 37 | 19 | 56321318  | 56321318  | Missense_Mutation | SNP | C | T | 20  | 53  | c.658G>A   | c.(658-660)GAT>AAT     | p.D220N  |
| Pat_40 | Post-Resistance | NLRP5     | 126206 | 37 | 19 | 56539203  | 56539203  | Missense_Mutation | SNP | C | T | 35  | 18  | c.1604C>T  | c.(1603-1605)GCT>GTT   | p.A535V  |
| Pat_40 | Post-Resistance | GALP      | 85569  | 37 | 19 | 56696603  | 56696603  | Missense_Mutation | SNP | G | A | 37  | 91  | c.315G>A   | c.(313-315)ATG>ATA     | p.M105I  |
| Pat_40 | Post-Resistance | ZIM3      | 114026 | 37 | 19 | 57646333  | 57646333  | Missense_Mutation | SNP | C | T | 45  | 163 | c.1372G>A  | c.(1372-1374)GAC>AAC   | p.D458N  |
| Pat_40 | Post-Resistance | DUXA      | 503835 | 37 | 19 | 57666725  | 57666725  | Nonsense_Mutation | SNP | G | A | 5   | 6   | c.454C>T   | c.(454-456)CGA>TGA     | p.R152*  |
| Pat_40 | Post-Resistance | PXDN      | 7837   | 37 | 2  | 1647244   | 1647244   | Missense_Mutation | SNP | C | T | 4   | 142 | c.3848G>A  | c.(3847-3849)CGG>CAG   | p.R1283Q |
| Pat_40 | Post-Resistance | MYT1L     | 23040  | 37 | 2  | 1926835   | 1926835   | Missense_Mutation | SNP | C | T | 51  | 109 | c.706G>A   | c.(706-708)GAT>AAT     | p.D236N  |
| Pat_40 | Post-Resistance | COLEC11   | 78989  | 37 | 2  | 3691415   | 3691415   | Missense_Mutation | SNP | G | A | 3   | 36  | c.523G>A   | c.(523-525)GGC>AGC     | p.G175S  |
| Pat_40 | Post-Resistance | ITGB1BP1  | 9270   | 37 | 2  | 9558775   | 9558775   | Missense_Mutation | SNP | C | T | 10  | 723 | c.52G>A    | c.(52-54)GAA>AAA       | p.E18K   |
| Pat_40 | Post-Resistance | NT5C1B    | 93034  | 37 | 2  | 18758129  | 18758129  | Missense_Mutation | SNP | C | T | 67  | 124 | c.1234G>A  | c.(1234-1236)GGA>AGA   | p.G412R  |
| Pat_40 | Post-Resistance | APOB      | 338    | 37 | 2  | 21229243  | 21229243  | Missense_Mutation | SNP | A | C | 39  | 91  | c.1049T>G  | c.(10495-10497)GAT>GAC | p.D3499E |
| Pat_40 | Post-Resistance | APOB      | 338    | 37 | 2  | 21231815  | 21231815  | Missense_Mutation | SNP | G | A | 53  | 154 | c.7925C>T  | c.(7924-7926)CCA>CTA   | p.P2642L |
| Pat_40 | Post-Resistance | KRTCAP3   | 200634 | 37 | 2  | 27666104  | 27666104  | Missense_Mutation | SNP | G | A | 4   | 30  | c.437G>A   | c.(436-438)GGG>GAG     | p.G146E  |
| Pat_40 | Post-Resistance | HEATR5B   | 54497  | 37 | 2  | 37276944  | 37276944  | Missense_Mutation | SNP | G | A | 4   | 56  | c.2548C>T  | c.(2548-2550)CGT>TGT   | p.R850C  |
| Pat_40 | Post-Resistance | C2orf56   | 55471  | 37 | 2  | 37473259  | 37473259  | Missense_Mutation | SNP | C | T | 87  | 270 | c.857C>T   | c.(856-858)TCT>TTT     | p.S286F  |
| Pat_40 | Post-Resistance | C2orf56   | 55471  | 37 | 2  | 37473261  | 37473261  | Nonsense_Mutation | SNP | C | T | 85  | 273 | c.859C>T   | c.(859-861)CAA>TAA     | p.Q287*  |
| Pat_40 | Post-Resistance | ANTXR1    | 84168  | 37 | 2  | 69304577  | 69304577  | Missense_Mutation | SNP | C | T | 108 | 309 | c.599C>T   | c.(598-600)CCC>CTC     | p.P200L  |
| Pat_40 | Post-Resistance | ATP6V1B1  | 525    | 37 | 2  | 71190758  | 71190758  | Missense_Mutation | SNP | G | A | 4   | 144 | c.1117G>A  | c.(1117-1119)GTG>ATG   | p.V373M  |
| Pat_40 | Post-Resistance | MPHOSPH10 | 10199  | 37 | 2  | 71360620  | 71360620  | Missense_Mutation | SNP | G | A | 25  | 85  | c.682G>A   | c.(682-684)GAT>AAT     | p.D228N  |
| Pat_40 | Post-Resistance | DYSF      | 8291   | 37 | 2  | 71901417  | 71901417  | Missense_Mutation | SNP | G | A | 52  | 49  | c.5758G>A  | c.(5758-5760)GAT>AAT   | p.D1920N |
| Pat_40 | Post-Resistance | KCNIP3    | 30818  | 37 | 2  | 96048160  | 96048160  | Missense_Mutation | SNP | G | T | 4   | 43  | c.591G>T   | c.(589-591)ATG>ATT     | p.M197I  |
| Pat_40 | Post-Resistance | CIAO1     | 9391   | 37 | 2  | 96936947  | 96936947  | Missense_Mutation | SNP | C | T | 51  | 125 | c.878C>T   | c.(877-879)TCC>TTC     | p.S293F  |
| Pat_40 | Post-Resistance | SNRNP200  | 23020  | 37 | 2  | 96952204  | 96952204  | Missense_Mutation | SNP | G | A | 3   | 81  | c.3848C>T  | c.(3847-3849)CCT>CTT   | p.P1283L |
| Pat_40 | Post-Resistance | INPP4A    | 3631   | 37 | 2  | 99152605  | 99152605  | Missense_Mutation | SNP | G | T | 19  | 67  | c.401G>T   | c.(400-402)GGC>GTC     | p.G134V  |
| Pat_40 | Post-Resistance | MALL      | 7851   | 37 | 2  | 110873353 | 110873353 | Missense_Mutation | SNP | G | A | 2   | 6   | c.17C>T    | c.(16-18)CCG>CTG       | p.P6L    |
| Pat_40 | Post-Resistance | ANAPC1    | 64682  | 37 | 2  | 112583383 | 112583383 | Missense_Mutation | SNP | G | A | 43  | 85  | c.2675C>T  | c.(2674-2676)TCC>TTC   | p.S892F  |
| Pat_40 | Post-Resistance | GLI2      | 2736   | 37 | 2  | 121708942 | 121708942 | Missense_Mutation | SNP | G | A | 61  | 52  | c.378G>A   | c.(376-378)ATG>ATA     | p.M126I  |
| Pat_40 | Post-Resistance | CNTNAP5   | 129684 | 37 | 2  | 124979303 | 124979303 | Missense_Mutation | SNP | C | T | 4   | 85  | c.104C>T   | c.(103-105)GCA>GTA     | p.A35V   |
| Pat_40 | Post-Resistance | LIMS2     | 55679  | 37 | 2  | 128412421 | 128412421 | Missense_Mutation | SNP | G | A | 25  | 86  | c.221C>T   | c.(220-222)CCG>CTG     | p.P74L   |
| Pat_40 | Post-Resistance | NCKAP5    | 344148 | 37 | 2  | 133541515 | 133541515 | Missense_Mutation | SNP | C | T | 7   | 7   | c.2869G>A  | c.(2869-2871)GAA>AAA   | p.E957K  |
| Pat_40 | Post-Resistance | NCKAP5    | 344148 | 37 | 2  | 133541812 | 133541812 | Missense_Mutation | SNP | C | T | 30  | 56  | c.2572G>A  | c.(2572-2574)GAA>AAA   | p.E858K  |
| Pat_40 | Post-Resistance | LCT       | 3938   | 37 | 2  | 136575471 | 136575471 | Missense_Mutation | SNP | G | A | 47  | 118 | c.1147C>T  | c.(1147-1149)CCT>TCT   | p.P383S  |
| Pat_40 | Post-Resistance | THSD7B    | 80731  | 37 | 2  | 138434125 | 138434125 | Missense_Mutation | SNP | C | T | 6   | 18  | c.4684C>T  | c.(4684-4686)CCC>TCC   | p.P1562S |
| Pat_40 | Post-Resistance | LRP1B     | 53353  | 37 | 2  | 140995735 | 140995735 | Missense_Mutation | SNP | T | C | 68  | 201 | c.13546A>G | c.(13546-13548)ATA>GTA | p.I4516V |
| Pat_40 | Post-Resistance | PABPC1P2  | 728773 | 37 | 2  | 147345742 | 147345742 | Missense_Mutation | SNP | G | A | 3   | 14  | c.202G>A   | c.(202-204)GCT>ACT     | p.A68T   |
| Pat_40 | Post-Resistance | GALNT13   | 114805 | 37 | 2  | 155157995 | 155157995 | Missense_Mutation | SNP | C | T | 67  | 360 | c.1049C>T  | c.(1048-1050)CCA>CTA   | p.P350L  |
| Pat_40 | Post-Resistance | UPP2      | 151531 | 37 | 2  | 158971625 | 158971625 | Missense_Mutation | SNP | G | A | 5   | 164 | c.193G>A   | c.(193-195)GGT>AGT     | p.G65S   |
| Pat_40 | Post-Resistance | IFIH1     | 64135  | 37 | 2  | 163130442 | 163130442 | Missense_Mutation | SNP | C | T | 39  | 34  | c.2317G>A  | c.(2317-2319)GAA>AAA   | p.E773K  |
| Pat_40 | Post-Resistance | SCN1A     | 6323   | 37 | 2  | 166892572 | 166892572 | Missense_Mutation | SNP | C | T | 101 | 296 | c.3382G>A  | c.(3382-3384)GAA>AAA   | p.E1128K |
| Pat_40 | Post-Resistance | XIRP2     | 129446 | 37 | 2  | 168100354 | 168100354 | Missense_Mutation | SNP | G | A | 56  | 117 | c.2452G>A  | c.(2452-2454)GAG>AAG   | p.E818K  |
| Pat_40 | Post-Resistance | B3GALT1   | 8708   | 37 | 2  | 168726108 | 168726108 | Missense_Mutation | SNP | C | T | 29  | 21  | c.559C>T   | c.(559-561)CTT>TTT     | p.L187F  |

|        |                 |           |        |    |    |           |           |                   |     |    |    |     |     |                                    |                        |           |
|--------|-----------------|-----------|--------|----|----|-----------|-----------|-------------------|-----|----|----|-----|-----|------------------------------------|------------------------|-----------|
| Pat_40 | Post-Resistance | SPC25     | 57405  | 37 | 2  | 169745932 | 169745932 | Missense_Mutation | SNP | C  | T  | 45  | 160 | c.98G>A                            | c.(97-99)AGA>AAA       | p.R33K    |
| Pat_40 | Post-Resistance | LRP2      | 4036   | 37 | 2  | 170070368 | 170070368 | Missense_Mutation | SNP | T  | A  | 26  | 77  | c.5839A>T                          | c.(5839-5841)AAC>TAC   | p.N1947Y  |
| Pat_40 | Post-Resistance | SLC25A12  | 8604   | 37 | 2  | 172712353 | 172712353 | Missense_Mutation | SNP | C  | T  | 145 | 431 | c.316G>A                           | c.(316-318)GTG>ATG     | p.V106M   |
| Pat_40 | Post-Resistance | TTN       | 7273   | 37 | 2  | 179452825 | 179452825 | Missense_Mutation | SNP | C  | T  | 68  | 142 | c.55605G>A                         | c.(55603-55605)ATG>ATA | p.M18535I |
| Pat_40 | Post-Resistance | TTN       | 7273   | 37 | 2  | 179454489 | 179454489 | Missense_Mutation | SNP | C  | T  | 126 | 259 | c.54259G>A                         | c.(54259-54261)GAA>AAA | p.E18087K |
| Pat_40 | Post-Resistance | TTN       | 7273   | 37 | 2  | 179457199 | 179457199 | Missense_Mutation | SNP | G  | A  | 207 | 214 | c.51829C>T                         | c.(51829-51831)CGT>TGT | p.R17277C |
| Pat_40 | Post-Resistance | TTN       | 7273   | 37 | 2  | 179464431 | 179464431 | Missense_Mutation | SNP | G  | A  | 32  | 142 | c.48493C>T                         | c.(48493-48495)CTC>TTC | p.L16165F |
| Pat_40 | Post-Resistance | TTN       | 7273   | 37 | 2  | 179592468 | 179592468 | Missense_Mutation | SNP | C  | T  | 239 | 198 | c.16105G>A                         | c.(16105-16107)GAA>AAA | p.E5369K  |
| Pat_40 | Post-Resistance | TTN       | 7273   | 37 | 2  | 179592569 | 179592569 | Missense_Mutation | SNP | T  | C  | 14  | 18  | c.16004A>G                         | c.(16003-16005)AAA>AGA | p.K5335R  |
| Pat_40 | Post-Resistance | TTN       | 7273   | 37 | 2  | 179600590 | 179600590 | Missense_Mutation | SNP | A  | T  | 4   | 105 | c.10851T>A                         | c.(10849-10851)GAT>GAA | p.D3617E  |
| Pat_40 | Post-Resistance | ZNF804A   | 91752  | 37 | 2  | 185798364 | 185798364 | Missense_Mutation | SNP | G  | A  | 28  | 84  | c.290G>A                           | c.(289-291)CGA>CAA     | p.R97Q    |
| Pat_40 | Post-Resistance | CALCRL    | 10203  | 37 | 2  | 188245239 | 188245239 | Nonsense_Mutation | SNP | C  | T  | 327 | 322 | c.363G>A                           | c.(361-363)TGG>TGA     | p.W121*   |
| Pat_40 | Post-Resistance | COL3A1    | 1281   | 37 | 2  | 189860512 | 189860512 | Missense_Mutation | SNP | T  | C  | 3   | 4   | c.1604T>C                          | c.(1603-1605)ATG>ACG   | p.M535T   |
| Pat_40 | Post-Resistance | DNAH7     | 56171  | 37 | 2  | 196722260 | 196722260 | Missense_Mutation | SNP | A  | C  | 34  | 77  | c.8255T>G                          | c.(8254-8256)CTT>CGT   | p.L2752R  |
| Pat_40 | Post-Resistance | DNAH7     | 56171  | 37 | 2  | 196729430 | 196729430 | Nonsense_Mutation | SNP | G  | A  | 56  | 136 | c.6949C>T                          | c.(6949-6951)CGA>TGA   | p.R2317*  |
| Pat_40 | Post-Resistance | DNAH7     | 56171  | 37 | 2  | 196746544 | 196746544 | Missense_Mutation | SNP | C  | T  | 106 | 236 | c.5936G>A                          | c.(5935-5937)GGA>GAA   | p.G1979E  |
| Pat_40 | Post-Resistance | BMPR2     | 659    | 37 | 2  | 203417586 | 203417586 | Missense_Mutation | SNP | A  | G  | 131 | 108 | c.1561A>G                          | c.(1561-1563)ATG>GTG   | p.M521V   |
| Pat_40 | Post-Resistance | EEF1B2    | 1933   | 37 | 2  | 207025358 | 207025358 | Missense_Mutation | SNP | A  | G  | 9   | 379 | c.127A>G                           | c.(127-129)AGC>GGC     | p.S43G    |
| Pat_40 | Post-Resistance | ZDBF2     | 57683  | 37 | 2  | 207173258 | 207173258 | Missense_Mutation | SNP | C  | T  | 28  | 143 | c.4006C>T                          | c.(4006-4008)CCT>TCT   | p.P1336S  |
| Pat_40 | Post-Resistance | ACADL     | 33     | 37 | 2  | 211085509 | 211085509 | Missense_Mutation | SNP | C  | T  | 10  | 10  | c.95G>A                            | c.(94-96)GGG>GAG       | p.G32E    |
| Pat_40 | Post-Resistance | ERBB4     | 2066   | 37 | 2  | 212587120 | 212587120 | Missense_Mutation | SNP | G  | A  | 43  | 98  | c.881C>T                           | c.(880-882)CCA>CTA     | p.P294L   |
| Pat_40 | Post-Resistance | TNS1      | 7145   | 37 | 2  | 218750535 | 218750535 | Missense_Mutation | SNP | G  | A  | 40  | 71  | c.673C>T                           | c.(673-675)CCA>TCA     | p.P225S   |
| Pat_40 | Post-Resistance | RQCD1     | 9125   | 37 | 2  | 219449406 | 219449406 | Missense_Mutation | SNP | C  | T  | 311 | 225 | c.392C>T                           | c.(391-393)CCC>CTC     | p.P131L   |
| Pat_40 | Post-Resistance | OBSL1     | 23363  | 37 | 2  | 220434979 | 220434980 | Missense_Mutation | DNP | CC | TT | 5   | 20  | c.975_976GG>AA373-978)GCGGGC>GCAA  |                        | p.G326S   |
| Pat_40 | Post-Resistance | COL4A3    | 1285   | 37 | 2  | 228142267 | 228142267 | Missense_Mutation | SNP | A  | G  | 4   | 4   | c.2123A>G                          | c.(2122-2124)AAG>AGG   | p.K708R   |
| Pat_40 | Post-Resistance | ECEL1     | 9427   | 37 | 2  | 233347583 | 233347583 | Missense_Mutation | SNP | G  | A  | 102 | 188 | c.1663C>T                          | c.(1663-1665)CGG>TGG   | p.R555W   |
| Pat_40 | Post-Resistance | GIGYF2    | 26058  | 37 | 2  | 233655585 | 233655585 | Missense_Mutation | SNP | T  | C  | 76  | 122 | c.890T>C                           | c.(889-891)ATG>ACG     | p.M297T   |
| Pat_40 | Post-Resistance | SNED1     | 25992  | 37 | 2  | 241974013 | 241974013 | Missense_Mutation | SNP | G  | A  | 3   | 61  | c.671G>A                           | c.(670-672)CGT>CAT     | p.R224H   |
| Pat_40 | Post-Resistance | BOK       | 666    | 37 | 2  | 242501765 | 242501765 | Missense_Mutation | SNP | G  | A  | 27  | 42  | c.223G>A                           | c.(223-225)GAT>AAT     | p.D75N    |
| Pat_40 | Post-Resistance | THAP4     | 51078  | 37 | 2  | 242573324 | 242573324 | Missense_Mutation | SNP | G  | A  | 30  | 154 | c.248C>T                           | c.(247-249)TCC>TTC     | p.S83F    |
| Pat_40 | Post-Resistance | TGM6      | 343641 | 37 | 20 | 2377248   | 2377248   | Missense_Mutation | SNP | C  | T  | 38  | 40  | c.521C>T                           | c.(520-522)GCC>GTC     | p.A174V   |
| Pat_40 | Post-Resistance | VPS16     | 64601  | 37 | 20 | 2842708   | 2842708   | Missense_Mutation | SNP | G  | A  | 4   | 56  | c.1003G>A                          | c.(1003-1005)GAG>AAG   | p.E335K   |
| Pat_40 | Post-Resistance | LRRN4     | 164312 | 37 | 20 | 6031588   | 6031588   | Missense_Mutation | SNP | G  | A  | 3   | 56  | c.697C>T                           | c.(697-699)CTC>TTC     | p.L233F   |
| Pat_40 | Post-Resistance | PAK7      | 57144  | 37 | 20 | 9560919   | 9560919   | Missense_Mutation | SNP | G  | A  | 110 | 121 | c.863C>T                           | c.(862-864)TCA>TTA     | p.S288L   |
| Pat_40 | Post-Resistance | PAK7      | 57144  | 37 | 20 | 9561263   | 9561263   | Missense_Mutation | SNP | C  | T  | 159 | 228 | c.519G>A                           | c.(517-519)ATG>ATA     | p.M173I   |
| Pat_40 | Post-Resistance | POLR3F    | 10621  | 37 | 20 | 18453489  | 18453489  | Nonsense_Mutation | SNP | C  | T  | 60  | 65  | c.184C>T                           | c.(184-186)CAG>TAG     | p.Q62*    |
| Pat_40 | Post-Resistance | TPX2      | 22974  | 37 | 20 | 30382317  | 30382317  | Missense_Mutation | SNP | G  | A  | 101 | 209 | c.1799G>A                          | c.(1798-1800)AGA>AAA   | p.R600K   |
| Pat_40 | Post-Resistance | ASXL1     | 171023 | 37 | 20 | 31017234  | 31017234  | Missense_Mutation | SNP | G  | A  | 52  | 78  | c.565G>A                           | c.(565-567)GGG>AGG     | p.G189R   |
| Pat_40 | Post-Resistance | C20orf186 | 149954 | 37 | 20 | 31671216  | 31671217  | Missense_Mutation | DNP | CC | TT | 62  | 175 | c.213_214CC>TT 211-216)CCCCC>CCTT( |                        | p.P72S    |
| Pat_40 | Post-Resistance | EPB41L1   | 2036   | 37 | 20 | 34797782  | 34797782  | Nonsense_Mutation | SNP | C  | T  | 8   | 18  | c.2041C>T                          | c.(2041-2043)CGA>TGA   | p.R681*   |
| Pat_40 | Post-Resistance | MYBL2     | 4605   | 37 | 20 | 42315498  | 42315498  | Missense_Mutation | SNP | G  | A  | 4   | 83  | c.286G>A                           | c.(286-288)GAG>AAG     | p.E96K    |
| Pat_40 | Post-Resistance | HNF4A     | 3172   | 37 | 20 | 43052879  | 43052879  | Missense_Mutation | SNP | G  | A  | 4   | 64  | c.1114G>A                          | c.(1114-1116)GAG>AAG   | p.E372K   |
| Pat_40 | Post-Resistance | RIMS4     | 140730 | 37 | 20 | 43384905  | 43384905  | Missense_Mutation | SNP | G  | A  | 33  | 46  | c.680C>T                           | c.(679-681)ACC>ATC     | p.T227I   |
| Pat_40 | Post-Resistance | CASS4     | 57091  | 37 | 20 | 55026876  | 55026876  | Missense_Mutation | SNP | G  | T  | 27  | 166 | c.644G>T                           | c.(643-645)GGG>GTG     | p.G215V   |
| Pat_40 | Post-Resistance | PRPF6     | 24148  | 37 | 20 | 62659922  | 62659922  | Missense_Mutation | SNP | G  | A  | 5   | 112 | c.2431G>A                          | c.(2431-2433)GGT>AGT   | p.G811S   |
| Pat_40 | Post-Resistance | USP25     | 29761  | 37 | 21 | 17214827  | 17214827  | Missense_Mutation | SNP | G  | A  | 56  | 234 | c.2305G>A                          | c.(2305-2307)GAA>AAA   | p.E769K   |
| Pat_40 | Post-Resistance | C21orf59  | 56683  | 37 | 21 | 33982292  | 33982292  | Missense_Mutation | SNP | C  | T  | 27  | 101 | c.163G>A                           | c.(163-165)GGC>AGC     | p.G55S    |

|        |                 |          |        |    |    |          |          |                   |     |    |    |     |     |                                       |                      |               |
|--------|-----------------|----------|--------|----|----|----------|----------|-------------------|-----|----|----|-----|-----|---------------------------------------|----------------------|---------------|
| Pat_40 | Post-Resistance | SYNJ1    | 8867   | 37 | 21 | 34014274 | 34014274 | Missense_Mutation | SNP | G  | A  | 4   | 94  | c.3637C>T                             | c.(3637-3639)CGC>TGC | p.R1213C      |
| Pat_40 | Post-Resistance | IL10RB   | 3588   | 37 | 21 | 34652102 | 34652102 | Missense_Mutation | SNP | C  | T  | 150 | 220 | c.377C>T                              | c.(376-378)TCT>TTT   | p.S126F       |
| Pat_40 | Post-Resistance | KCNJ15   | 3772   | 37 | 21 | 39672159 | 39672159 | Missense_Mutation | SNP | G  | A  | 54  | 112 | c.976G>A                              | c.(976-978)GAT>AAT   | p.D326N       |
| Pat_40 | Post-Resistance | DSCAM    | 1826   | 37 | 21 | 41719737 | 41719737 | Missense_Mutation | SNP | C  | T  | 122 | 393 | c.1070G>A                             | c.(1069-1071)GGA>GAA | p.G357E       |
| Pat_40 | Post-Resistance | TRAPPC10 | 7109   | 37 | 21 | 45518395 | 45518395 | Missense_Mutation | SNP | C  | T  | 37  | 178 | c.3326C>T                             | c.(3325-3327)TCG>TTG | p.S1109L      |
| Pat_40 | Post-Resistance | PTTG1IP  | 754    | 37 | 21 | 46275124 | 46275124 | Splice_Site       | SNP | C  | T  | 23  | 39  | c.496_splice                          | c.e5+1               | p.G166_splice |
| Pat_40 | Post-Resistance | FTCD     | 10841  | 37 | 21 | 47570044 | 47570044 | Missense_Mutation | SNP | G  | A  | 3   | 37  | c.895C>T                              | c.(895-897)CGG>TGG   | p.R299W       |
| Pat_40 | Post-Resistance | MICAL3   | 57553  | 37 | 22 | 18370094 | 18370094 | Missense_Mutation | SNP | G  | A  | 37  | 8   | c.1999C>T                             | c.(1999-2001)CCC>TCC | p.P667S       |
| Pat_40 | Post-Resistance | DGCR2    | 9993   | 37 | 22 | 19050757 | 19050757 | Missense_Mutation | SNP | G  | A  | 3   | 104 | c.583C>T                              | c.(583-585)CGG>TGG   | p.R195W       |
| Pat_40 | Post-Resistance | DGCR2    | 9993   | 37 | 22 | 19055633 | 19055633 | Missense_Mutation | SNP | G  | A  | 4   | 100 | c.308C>T                              | c.(307-309)GCG>GTG   | p.A103V       |
| Pat_40 | Post-Resistance | CLTCL1   | 8218   | 37 | 22 | 19170950 | 19170950 | Missense_Mutation | SNP | A  | T  | 18  | 46  | c.4780T>A                             | c.(4780-4782)TTG>ATG | p.L1594M      |
| Pat_40 | Post-Resistance | BCR      | 613    | 37 | 22 | 23610637 | 23610637 | Missense_Mutation | SNP | G  | A  | 38  | 4   | c.1795G>A                             | c.(1795-1797)GGA>AGA | p.G599R       |
| Pat_40 | Post-Resistance | VPREB3   | 29802  | 37 | 22 | 24095239 | 24095239 | Nonsense_Mutation | SNP | G  | A  | 4   | 109 | c.196C>T                              | c.(196-198)CGA>TGA   | p.R66*        |
| Pat_40 | Post-Resistance | CHEK2    | 11200  | 37 | 22 | 29091840 | 29091841 | Missense_Mutation | DNP | TG | CA | 17  | 98  | ..1116_1117CA>TC(114-1119)TCCAAG>TCTG |                      | p.K373E       |
| Pat_40 | Post-Resistance | CCDC157  | 550631 | 37 | 22 | 30772567 | 30772567 | Missense_Mutation | SNP | T  | C  | 7   | 397 | c.2092T>C                             | c.(2092-2094)TCT>CCT | p.S698P       |
| Pat_40 | Post-Resistance | SYN3     | 8224   | 37 | 22 | 32992686 | 32992686 | Missense_Mutation | SNP | C  | T  | 5   | 99  | c.748G>A                              | c.(748-750)GGA>AGA   | p.G250R       |
| Pat_40 | Post-Resistance | IFT27    | 11020  | 37 | 22 | 37159046 | 37159046 | Missense_Mutation | SNP | C  | T  | 3   | 87  | c.364G>A                              | c.(364-366)GGG>AGG   | p.G122R       |
| Pat_40 | Post-Resistance | SSTR3    | 6753   | 37 | 22 | 37603516 | 37603517 | Nonsense_Mutation | DNP | CC | TT | 40  | 9   | c.326_327GG>AA                        | c.(325-327)TGG>TAA   | p.W109*       |
| Pat_40 | Post-Resistance | TRIOBP   | 11078  | 37 | 22 | 38120290 | 38120290 | Missense_Mutation | SNP | G  | C  | 8   | 376 | c.1727G>C                             | c.(1726-1728)AGA>ACA | p.R576T       |
| Pat_40 | Post-Resistance | H1F0     | 3005   | 37 | 22 | 38201896 | 38201897 | Nonsense_Mutation | DNP | GA | AT | 22  | 64  | c.345_346GA>AT(343-348)AAGAAG>AAAT    |                      | p.K116*       |
| Pat_40 | Post-Resistance | EP300    | 2033   | 37 | 22 | 41573548 | 41573548 | Missense_Mutation | SNP | G  | A  | 4   | 115 | c.5833G>A                             | c.(5833-5835)GTG>ATG | p.V1945M      |
| Pat_40 | Post-Resistance | ZC3H7B   | 23264  | 37 | 22 | 41721779 | 41721779 | Missense_Mutation | SNP | C  | T  | 3   | 60  | c.142C>T                              | c.(142-144)CGG>TGG   | p.R48W        |
| Pat_40 | Post-Resistance | PARVB    | 29780  | 37 | 22 | 44495969 | 44495969 | Missense_Mutation | SNP | C  | T  | 35  | 99  | c.239C>T                              | c.(238-240)TCC>TTC   | p.S80F        |
| Pat_40 | Post-Resistance | WNT7B    | 7477   | 37 | 22 | 46345908 | 46345908 | Missense_Mutation | SNP | C  | T  | 48  | 42  | c.190G>A                              | c.(190-192)GAG>AAG   | p.E64K        |
| Pat_40 | Post-Resistance | CELSR1   | 9620   | 37 | 22 | 46792517 | 46792517 | Missense_Mutation | SNP | G  | A  | 40  | 7   | c.5828C>T                             | c.(5827-5829)CCG>CTG | p.P1943L      |
| Pat_40 | Post-Resistance | PLXNB2   | 23654  | 37 | 22 | 50715060 | 50715060 | Missense_Mutation | SNP | G  | A  | 60  | 42  | c.5335C>T                             | c.(5335-5337)CGG>TGG | p.R1779W      |
| Pat_40 | Post-Resistance | CNTN6    | 27255  | 37 | 3  | 1367579  | 1367579  | Missense_Mutation | SNP | G  | A  | 49  | 57  | c.1027G>A                             | c.(1027-1029)GGA>AGA | p.G343R       |
| Pat_40 | Post-Resistance | HRH1     | 3269   | 37 | 3  | 11301460 | 11301460 | Missense_Mutation | SNP | G  | A  | 5   | 13  | c.737G>A                              | c.(736-738)GGG>GAG   | p.G246E       |
| Pat_40 | Post-Resistance | CAND2    | 23066  | 37 | 3  | 12858191 | 12858191 | Missense_Mutation | SNP | T  | C  | 24  | 58  | c.1760T>C                             | c.(1759-1761)GTG>GCG | p.V587A       |
| Pat_40 | Post-Resistance | NUP210   | 23225  | 37 | 3  | 13461569 | 13461569 | Missense_Mutation | SNP | C  | T  | 4   | 6   | c.158G>A                              | c.(157-159)TGC>TAC   | p.C53Y        |
| Pat_40 | Post-Resistance | PLCL2    | 23228  | 37 | 3  | 17053134 | 17053134 | Missense_Mutation | SNP | T  | A  | 25  | 32  | c.2272T>A                             | c.(2272-2274)TTT>ATT | p.F758I       |
| Pat_40 | Post-Resistance | LRRRC3B  | 116135 | 37 | 3  | 26751248 | 26751248 | Missense_Mutation | SNP | C  | T  | 44  | 84  | c.85C>T                               | c.(85-87)CAT>TAT     | p.H29Y        |
| Pat_40 | Post-Resistance | DYNC1L11 | 51143  | 37 | 3  | 32571119 | 32571119 | Nonsense_Mutation | SNP | G  | A  | 3   | 55  | c.1219C>T                             | c.(1219-1221)CGA>TGA | p.R407*       |
| Pat_40 | Post-Resistance | GLB1     | 2720   | 37 | 3  | 33087713 | 33087713 | Missense_Mutation | SNP | G  | A  | 4   | 96  | c.967C>T                              | c.(967-969)CCC>TCC   | p.P323S       |
| Pat_40 | Post-Resistance | SCN5A    | 6331   | 37 | 3  | 38648165 | 38648165 | Nonsense_Mutation | SNP | G  | A  | 7   | 3   | c.1135C>T                             | c.(1135-1137)CAG>TAG | p.Q379*       |
| Pat_40 | Post-Resistance | SCN10A   | 6336   | 37 | 3  | 38793820 | 38793820 | Missense_Mutation | SNP | G  | A  | 19  | 18  | c.1645C>T                             | c.(1645-1647)CTC>TTC | p.L549F       |
| Pat_40 | Post-Resistance | CTNNB1   | 1499   | 37 | 3  | 41266137 | 41266137 | Missense_Mutation | SNP | C  | T  | 22  | 64  | c.134C>T                              | c.(133-135)TCT>TTT   | p.S45F        |
| Pat_40 | Post-Resistance | CXCR6    | 10663  | 37 | 3  | 45988860 | 45988860 | Missense_Mutation | SNP | G  | A  | 16  | 28  | c.887G>A                              | c.(886-888)CGA>CAA   | p.R296Q       |
| Pat_40 | Post-Resistance | CCR3     | 1232   | 37 | 3  | 46307479 | 46307479 | Missense_Mutation | SNP | A  | G  | 31  | 47  | c.830A>G                              | c.(829-831)AAG>AGG   | p.K277R       |
| Pat_40 | Post-Resistance | PTH1R    | 5745   | 37 | 3  | 46939575 | 46939575 | Nonsense_Mutation | SNP | C  | T  | 4   | 89  | c.436C>T                              | c.(436-438)CGA>TGA   | p.R146*       |
| Pat_40 | Post-Resistance | SCAP     | 22937  | 37 | 3  | 47476586 | 47476586 | Missense_Mutation | SNP | A  | C  | 37  | 59  | c.164T>G                              | c.(163-165)GTG>GGG   | p.V55G        |
| Pat_40 | Post-Resistance | PLXNB1   | 5364   | 37 | 3  | 48459905 | 48459905 | Missense_Mutation | SNP | A  | G  | 10  | 17  | c.3002T>C                             | c.(3001-3003)CTG>CCG | p.L1001P      |
| Pat_40 | Post-Resistance | PLXNB1   | 5364   | 37 | 3  | 48465923 | 48465923 | Missense_Mutation | SNP | G  | A  | 2   | 4   | c.98C>T                               | c.(97-99)ACG>ATG     | p.T33M        |
| Pat_40 | Post-Resistance | LAMB2    | 3913   | 37 | 3  | 49163916 | 49163916 | Missense_Mutation | SNP | G  | A  | 43  | 36  | c.2033C>T                             | c.(2032-2034)CCT>CTT | p.P678L       |
| Pat_40 | Post-Resistance | DOCK3    | 1795   | 37 | 3  | 51395405 | 51395405 | Missense_Mutation | SNP | G  | T  | 48  | 84  | c.4781G>T                             | c.(4780-4782)GGA>GTA | p.G1594V      |
| Pat_40 | Post-Resistance | DOCK3    | 1795   | 37 | 3  | 51418581 | 51418582 | Missense_Mutation | DNP | CC | TT | 22  | 49  | ..5684_5685CC>T                       | c.(5683-5685)TCC>TTT | p.S1895F      |
| Pat_40 | Post-Resistance | ITIH4    | 3700   | 37 | 3  | 52850994 | 52850994 | Missense_Mutation | SNP | A  | G  | 3   | 94  | c.2377T>C                             | c.(2377-2379)TGG>CGG | p.W793R       |

|        |                 |          |        |    |   |           |           |                   |     |    |    |     |     |                 |                      |                |
|--------|-----------------|----------|--------|----|---|-----------|-----------|-------------------|-----|----|----|-----|-----|-----------------|----------------------|----------------|
| Pat_40 | Post-Resistance | TKT      | 7086   | 37 | 3 | 53263409  | 53263409  | Missense_Mutation | SNP | G  | A  | 9   | 10  | c.1151C>T       | c.(1150-1152)CCC>CTC | p.P384L        |
| Pat_40 | Post-Resistance | CACNA1D  | 776    | 37 | 3 | 53781378  | 53781378  | Missense_Mutation | SNP | C  | T  | 71  | 76  | c.3217C>T       | c.(3217-3219)CGT>TGT | p.R1073C       |
| Pat_40 | Post-Resistance | CACNA2D3 | 55799  | 37 | 3 | 54615870  | 54615870  | Missense_Mutation | SNP | G  | A  | 26  | 25  | c.929G>A        | c.(928-930)GGA>GAA   | p.G310E        |
| Pat_40 | Post-Resistance | C3orf63  | 23272  | 37 | 3 | 56680705  | 56680705  | Missense_Mutation | SNP | A  | G  | 32  | 85  | c.2060T>C       | c.(2059-2061)TTA>TCA | p.L687S        |
| Pat_40 | Post-Resistance | PXK      | 54899  | 37 | 3 | 58410506  | 58410506  | Missense_Mutation | SNP | C  | T  | 757 | 32  | c.1556C>T       | c.(1555-1557)CCA>CTA | p.P519L        |
| Pat_40 | Post-Resistance | CNTN3    | 5067   | 37 | 3 | 74315713  | 74315713  | Missense_Mutation | SNP | C  | T  | 41  | 876 | c.2905G>A       | c.(2905-2907)GAC>AAC | p.D969N        |
| Pat_40 | Post-Resistance | PROS1    | 5627   | 37 | 3 | 93624748  | 93624748  | Missense_Mutation | SNP | A  | C  | 25  | 63  | c.481T>G        | c.(481-483)TGC>GGC   | p.C161G        |
| Pat_40 | Post-Resistance | IMPG2    | 50939  | 37 | 3 | 100962459 | 100962459 | Nonsense_Mutation | SNP | G  | A  | 15  | 10  | c.2716C>T       | c.(2716-2718)CGA>TGA | p.R906*        |
| Pat_40 | Post-Resistance | CD96     | 10225  | 37 | 3 | 111325559 | 111325559 | Missense_Mutation | SNP | C  | T  | 88  | 124 | c.1148C>T       | c.(1147-1149)TCC>TTC | p.S383F        |
| Pat_40 | Post-Resistance | MBD4     | 8930   | 37 | 3 | 129155742 | 129155742 | Missense_Mutation | SNP | C  | T  | 52  | 101 | c.745G>A        | c.(745-747)GGA>AGA   | p.G249R        |
| Pat_40 | Post-Resistance | NMNAT3   | 349565 | 37 | 3 | 139297817 | 139297817 | Missense_Mutation | SNP | G  | C  | 15  | 34  | c.190C>G        | c.(190-192)CGA>GGA   | p.R64G         |
| Pat_40 | Post-Resistance | AADACL2  | 344752 | 37 | 3 | 151475240 | 151475240 | Missense_Mutation | SNP | G  | A  | 56  | 91  | c.1064G>A       | c.(1063-1065)CGA>CAA | p.R355Q        |
| Pat_40 | Post-Resistance | SLITRK3  | 22865  | 37 | 3 | 164905945 | 164905945 | Missense_Mutation | SNP | G  | A  | 10  | 13  | c.2674C>T       | c.(2674-2676)CCT>TCT | p.P892S        |
| Pat_40 | Post-Resistance | FNDC3B   | 64778  | 37 | 3 | 171965431 | 171965432 | Missense_Mutation | DNP | CC | TT | 126 | 264 | c.373_374CC>TT  | c.(373-375)CCC>TTC   | p.P125F        |
| Pat_40 | Post-Resistance | FNDC3B   | 64778  | 37 | 3 | 172115059 | 172115059 | Missense_Mutation | SNP | G  | A  | 35  | 66  | c.3409G>A       | c.(3409-3411)GAG>AAG | p.E1137K       |
| Pat_40 | Post-Resistance | KLHL6    | 89857  | 37 | 3 | 183273180 | 183273180 | Missense_Mutation | SNP | C  | T  | 4   | 207 | c.262G>A        | c.(262-264)GTG>ATG   | p.V88M         |
| Pat_40 | Post-Resistance | ABCF3    | 55324  | 37 | 3 | 183910456 | 183910456 | Missense_Mutation | SNP | G  | A  | 11  | 14  | c.1637G>A       | c.(1636-1638)CGG>CAG | p.R546Q        |
| Pat_40 | Post-Resistance | C3orf59  | 151963 | 37 | 3 | 192516621 | 192516621 | Missense_Mutation | SNP | G  | A  | 13  | 29  | c.1030C>T       | c.(1030-1032)CCT>TCT | p.P344S        |
| Pat_40 | Post-Resistance | C3orf59  | 151963 | 37 | 3 | 192517362 | 192517362 | Missense_Mutation | SNP | C  | T  | 4   | 99  | c.289G>A        | c.(289-291)GTG>ATG   | p.V97M         |
| Pat_40 | Post-Resistance | ZNF721   | 170960 | 37 | 4 | 436514    | 436514    | Missense_Mutation | SNP | C  | T  | 65  | 302 | c.1742G>A       | c.(1741-1743)GGA>GAA | p.G581E        |
| Pat_40 | Post-Resistance | ZNF721   | 170960 | 37 | 4 | 436658    | 436658    | Missense_Mutation | SNP | A  | T  | 12  | 373 | c.1598T>A       | c.(1597-1599)GTA>GAA | p.V533E        |
| Pat_40 | Post-Resistance | PIGG     | 54872  | 37 | 4 | 502757    | 502757    | Missense_Mutation | SNP | C  | T  | 24  | 59  | c.899C>T        | c.(898-900)CCC>CTC   | p.P300L        |
| Pat_40 | Post-Resistance | FAM193A  | 8603   | 37 | 4 | 2696821   | 2696821   | Missense_Mutation | SNP | G  | A  | 5   | 177 | c.2368G>A       | c.(2368-2370)GAC>AAC | p.D790N        |
| Pat_40 | Post-Resistance | ADD1     | 118    | 37 | 4 | 2906492   | 2906492   | Missense_Mutation | SNP | G  | T  | 10  | 202 | c.1163G>T       | c.(1162-1164)GGC>GTC | p.G388V        |
| Pat_40 | Post-Resistance | HTT      | 3064   | 37 | 4 | 3208651   | 3208651   | Missense_Mutation | SNP | C  | T  | 4   | 104 | c.6022C>T       | c.(6022-6024)CGC>TGC | p.R2008C       |
| Pat_40 | Post-Resistance | EVC2     | 132884 | 37 | 4 | 5624469   | 5624469   | Missense_Mutation | SNP | G  | T  | 4   | 61  | c.2296C>A       | c.(2296-2298)CGT>AGT | p.R766S        |
| Pat_40 | Post-Resistance | CRMP1    | 1400   | 37 | 4 | 5843131   | 5843131   | Missense_Mutation | SNP | C  | T  | 98  | 283 | c.715G>A        | c.(715-717)GCC>ACC   | p.A239T        |
| Pat_40 | Post-Resistance | JAKMIP1  | 152789 | 37 | 4 | 6066645   | 6066645   | Missense_Mutation | SNP | C  | T  | 46  | 37  | c.1393G>A       | c.(1393-1395)GAC>AAC | p.D465N        |
| Pat_40 | Post-Resistance | WFS1     | 7466   | 37 | 4 | 6303478   | 6303478   | Nonsense_Mutation | SNP | C  | A  | 66  | 243 | c.1956C>A       | c.(1954-1956)TAC>TAA | p.Y652*        |
| Pat_40 | Post-Resistance | AFAP1    | 60312  | 37 | 4 | 7770626   | 7770626   | Missense_Mutation | SNP | C  | T  | 30  | 97  | c.2111G>A       | c.(2110-2112)AGC>AAC | p.S704N        |
| Pat_40 | Post-Resistance | CPEB2    | 132864 | 37 | 4 | 15063811  | 15063811  | Missense_Mutation | SNP | C  | T  | 167 | 518 | c.1469C>T       | c.(1468-1470)TCC>TTC | p.S490F        |
| Pat_40 | Post-Resistance | RBPJ     | 3516   | 37 | 4 | 26431526  | 26431526  | Missense_Mutation | SNP | C  | T  | 10  | 33  | c.934C>T        | c.(934-936)CCA>TCA   | p.P312S        |
| Pat_40 | Post-Resistance | GUF1     | 60558  | 37 | 4 | 44691864  | 44691864  | Missense_Mutation | SNP | G  | A  | 44  | 111 | c.1207G>A       | c.(1207-1209)GGA>AGA | p.G403R        |
| Pat_40 | Post-Resistance | UGT2B28  | 54490  | 37 | 4 | 70146351  | 70146351  | Missense_Mutation | SNP | G  | A  | 150 | 338 | c.133G>A        | c.(133-135)GAG>AAG   | p.E45K         |
| Pat_40 | Post-Resistance | UGT2B28  | 54490  | 37 | 4 | 70146547  | 70146547  | Missense_Mutation | SNP | C  | T  | 49  | 177 | c.329C>T        | c.(328-330)TCA>TTA   | p.S110L        |
| Pat_40 | Post-Resistance | ALB      | 213    | 37 | 4 | 74285291  | 74285291  | Missense_Mutation | SNP | G  | A  | 81  | 61  | c.1720G>A       | c.(1720-1722)GAT>AAT | p.D574N        |
| Pat_40 | Post-Resistance | FRAS1    | 80144  | 37 | 4 | 79301056  | 79301056  | Missense_Mutation | SNP | G  | A  | 43  | 53  | c.3469G>A       | c.(3469-3471)GGA>AGA | p.G1157R       |
| Pat_40 | Post-Resistance | BMP2K    | 55589  | 37 | 4 | 79832861  | 79832861  | Missense_Mutation | SNP | G  | T  | 65  | 256 | c.3160G>T       | c.(3160-3162)GAT>TAT | p.D1054Y       |
| Pat_40 | Post-Resistance | BMP3     | 651    | 37 | 4 | 81967248  | 81967248  | Missense_Mutation | SNP | G  | A  | 127 | 93  | c.673G>A        | c.(673-675)GGA>AGA   | p.G225R        |
| Pat_40 | Post-Resistance | RASGEF1B | 153020 | 37 | 4 | 82378748  | 82378748  | Missense_Mutation | SNP | T  | A  | 25  | 252 | c.205A>T        | c.(205-207)AGT>TGT   | p.S69C         |
| Pat_40 | Post-Resistance | HPSE     | 10855  | 37 | 4 | 84230632  | 84230632  | Missense_Mutation | SNP | G  | A  | 5   | 195 | c.907C>T        | c.(907-909)CGG>TGG   | p.R303W        |
| Pat_40 | Post-Resistance | ADH1B    | 125    | 37 | 4 | 100232022 | 100232022 | Missense_Mutation | SNP | C  | T  | 78  | 250 | c.1003G>A       | c.(1003-1005)GAT>AAT | p.D335N        |
| Pat_40 | Post-Resistance | ADH7     | 131    | 37 | 4 | 100349774 | 100349774 | Missense_Mutation | SNP | C  | T  | 131 | 324 | c.170G>A        | c.(169-171)GGA>GAA   | p.G57E         |
| Pat_40 | Post-Resistance | CENPE    | 1062   | 37 | 4 | 104072535 | 104072535 | Splice_Site       | SNP | C  | T  | 7   | 14  | c.3238_splice   | c.e26-1              | p.T1080_splice |
| Pat_40 | Post-Resistance | EGF      | 1950   | 37 | 4 | 110883099 | 110883099 | Missense_Mutation | SNP | C  | T  | 218 | 159 | c.1270C>T       | c.(1270-1272)CCT>TCT | p.P424S        |
| Pat_40 | Post-Resistance | EGF      | 1950   | 37 | 4 | 110884429 | 110884430 | Missense_Mutation | DNP | GG | AA | 109 | 129 | .1413_1414GG>AI | 411-1416)CTGGAT>CTAA | p.D472N        |
| Pat_40 | Post-Resistance | LARP7    | 51574  | 37 | 4 | 113568238 | 113568238 | Missense_Mutation | SNP | C  | T  | 49  | 182 | c.601C>T        | c.(601-603)CCT>TCT   | p.P201S        |

|        |                 |          |        |    |   |           |           |                   |     |    |    |     |     |                                     |                        |               |
|--------|-----------------|----------|--------|----|---|-----------|-----------|-------------------|-----|----|----|-----|-----|-------------------------------------|------------------------|---------------|
| Pat_40 | Post-Resistance | PHF17    | 79960  | 37 | 4 | 129773398 | 129773398 | Missense_Mutation | SNP | A  | G  | 14  | 148 | c.671A>G                            | c.(670-672)GAC>GGC     | p.D224G       |
| Pat_40 | Post-Resistance | TBC1D9   | 23158  | 37 | 4 | 141590792 | 141590792 | Missense_Mutation | SNP | T  | C  | 14  | 43  | c.1433A>G                           | c.(1432-1434)AAA>AGA   | p.K478R       |
| Pat_40 | Post-Resistance | MAB21L2  | 10586  | 37 | 4 | 151504863 | 151504863 | Missense_Mutation | SNP | G  | A  | 51  | 37  | c.682G>A                            | c.(682-684)GAC>AAC     | p.D228N       |
| Pat_40 | Post-Resistance | TLR2     | 7097   | 37 | 4 | 154625141 | 154625141 | Missense_Mutation | SNP | C  | T  | 30  | 34  | c.1082C>T                           | c.(1081-1083)TCA>TTA   | p.S361L       |
| Pat_40 | Post-Resistance | RBM46    | 166863 | 37 | 4 | 155719334 | 155719334 | Missense_Mutation | SNP | C  | T  | 47  | 136 | c.523C>T                            | c.(523-525)CCA>TCA     | p.P175S       |
| Pat_40 | Post-Resistance | GUCY1A3  | 2982   | 37 | 4 | 156618119 | 156618119 | Missense_Mutation | SNP | G  | A  | 19  | 53  | c.100G>A                            | c.(100-102)GCA>ACA     | p.A34T        |
| Pat_40 | Post-Resistance | GRIA2    | 2891   | 37 | 4 | 158284078 | 158284078 | Missense_Mutation | SNP | G  | A  | 42  | 148 | c.2534G>A                           | c.(2533-2535)CGA>CAA   | p.R845Q       |
| Pat_40 | Post-Resistance | TLL1     | 7092   | 37 | 4 | 166963247 | 166963247 | Missense_Mutation | SNP | C  | T  | 94  | 267 | c.1330C>T                           | c.(1330-1332)CGT>TGT   | p.R444C       |
| Pat_40 | Post-Resistance | DDX60    | 55601  | 37 | 4 | 169227743 | 169227743 | Nonsense_Mutation | SNP | C  | T  | 42  | 203 | c.393G>A                            | c.(391-393)TGG>TGA     | p.W131*       |
| Pat_40 | Post-Resistance | PALLD    | 23022  | 37 | 4 | 169630191 | 169630191 | Missense_Mutation | SNP | C  | A  | 18  | 275 | c.1514C>A                           | c.(1513-1515)ACC>AAC   | p.T505N       |
| Pat_40 | Post-Resistance | NEK1     | 4750   | 37 | 4 | 170506576 | 170506576 | Missense_Mutation | SNP | C  | T  | 25  | 48  | c.731G>A                            | c.(730-732)AGG>AAG     | p.R244K       |
| Pat_40 | Post-Resistance | C4orf41  | 60684  | 37 | 4 | 184598649 | 184598649 | Missense_Mutation | SNP | G  | A  | 66  | 192 | c.773G>A                            | c.(772-774)AGA>AAA     | p.R258K       |
| Pat_40 | Post-Resistance | FAT1     | 2195   | 37 | 4 | 187541333 | 187541333 | Missense_Mutation | SNP | G  | A  | 35  | 105 | c.6407C>T                           | c.(6406-6408)TCA>TTA   | p.S2136L      |
| Pat_40 | Post-Resistance | AHRR     | 57491  | 37 | 5 | 433016    | 433016    | Missense_Mutation | SNP | C  | A  | 3   | 5   | c.1132C>A                           | c.(1132-1134)CTC>ATC   | p.L378I       |
| Pat_40 | Post-Resistance | ADAMTS16 | 170690 | 37 | 5 | 5262860   | 5262860   | Missense_Mutation | SNP | G  | A  | 41  | 109 | c.2753G>A                           | c.(2752-2754)GGG>GAG   | p.G918E       |
| Pat_40 | Post-Resistance | FASTKD3  | 79072  | 37 | 5 | 7859553   | 7859553   | Missense_Mutation | SNP | C  | T  | 37  | 73  | c.1984G>A                           | c.(1984-1986)GAA>AAA   | p.E662K       |
| Pat_40 | Post-Resistance | MTRR     | 4552   | 37 | 5 | 7892881   | 7892881   | Missense_Mutation | SNP | A  | G  | 286 | 188 | c.1493A>G                           | c.(1492-1494)AAC>AGC   | p.N498S       |
| Pat_40 | Post-Resistance | DNAH5    | 1767   | 37 | 5 | 13700913  | 13700913  | Nonsense_Mutation | SNP | C  | T  | 151 | 133 | c.13559G>A                          | c.(13558-13560)TGG>TAG | p.W4520*      |
| Pat_40 | Post-Resistance | DNAH5    | 1767   | 37 | 5 | 13823473  | 13823473  | Missense_Mutation | SNP | C  | T  | 18  | 58  | c.6586G>A                           | c.(6586-6588)GAG>AAG   | p.E2196K      |
| Pat_40 | Post-Resistance | GOLPH3   | 64083  | 37 | 5 | 32126541  | 32126541  | Missense_Mutation | SNP | C  | G  | 101 | 106 | c.674G>C                            | c.(673-675)TGG>TCG     | p.W225S       |
| Pat_40 | Post-Resistance | C9       | 735    | 37 | 5 | 39311479  | 39311479  | Missense_Mutation | SNP | C  | T  | 44  | 85  | c.871G>A                            | c.(871-873)GAA>AAA     | p.E291K       |
| Pat_40 | Post-Resistance | ITGA1    | 3672   | 37 | 5 | 52221138  | 52221138  | Missense_Mutation | SNP | G  | A  | 38  | 126 | c.2434G>A                           | c.(2434-2436)GAA>AAA   | p.E812K       |
| Pat_40 | Post-Resistance | DDX4     | 54514  | 37 | 5 | 55110910  | 55110910  | Missense_Mutation | SNP | C  | T  | 116 | 296 | c.1897C>T                           | c.(1897-1899)CGT>TGT   | p.R633C       |
| Pat_40 | Post-Resistance | F2RL1    | 2150   | 37 | 5 | 76128587  | 76128587  | Missense_Mutation | SNP | G  | A  | 53  | 120 | c.155G>A                            | c.(154-156)GGA>GAA     | p.G52E        |
| Pat_40 | Post-Resistance | GPR98    | 84059  | 37 | 5 | 89990494  | 89990494  | Missense_Mutation | SNP | G  | A  | 48  | 37  | c.7921G>A                           | c.(7921-7923)GGA>AGA   | p.G2641R      |
| Pat_40 | Post-Resistance | MCTP1    | 79772  | 37 | 5 | 94204141  | 94204141  | Missense_Mutation | SNP | A  | C  | 47  | 84  | c.2333T>G                           | c.(2332-2334)TTT>TGT   | p.F778C       |
| Pat_40 | Post-Resistance | EPB41L4A | 64097  | 37 | 5 | 111545588 | 111545588 | Splice_Site       | SNP | C  | T  | 63  | 63  | c.1178_splice                       | c.e13+1                | p.S393_splice |
| Pat_40 | Post-Resistance | MCC      | 4163   | 37 | 5 | 112824014 | 112824014 | Missense_Mutation | SNP | C  | T  | 3   | 44  | c.98G>A                             | c.(97-99)AGC>AAC       | p.S33N        |
| Pat_40 | Post-Resistance | FAM170A  | 340069 | 37 | 5 | 118969746 | 118969746 | Missense_Mutation | SNP | T  | G  | 67  | 58  | c.303T>G                            | c.(301-303)CAT>CAG     | p.H101Q       |
| Pat_40 | Post-Resistance | FTMT     | 94033  | 37 | 5 | 121188229 | 121188229 | Missense_Mutation | SNP | G  | A  | 64  | 178 | c.571G>A                            | c.(571-573)GAT>AAT     | p.D191N       |
| Pat_40 | Post-Resistance | P4HA2    | 8974   | 37 | 5 | 131545009 | 131545009 | Missense_Mutation | SNP | C  | A  | 93  | 75  | c.725G>T                            | c.(724-726)CGA>CTA     | p.R242L       |
| Pat_40 | Post-Resistance | KIF3A    | 11127  | 37 | 5 | 132037886 | 132037886 | Missense_Mutation | SNP | C  | T  | 54  | 143 | c.1696G>A                           | c.(1696-1698)GAA>AAA   | p.E566K       |
| Pat_40 | Post-Resistance | TIFAB    | 497189 | 37 | 5 | 134785386 | 134785386 | Missense_Mutation | SNP | C  | T  | 61  | 113 | c.244G>A                            | c.(244-246)GGC>AGC     | p.G82S        |
| Pat_40 | Post-Resistance | KLHL3    | 26249  | 37 | 5 | 136974690 | 136974691 | Missense_Mutation | DNP | CC | TT | 23  | 65  | c.1170_1171GG>A168-1173)GCGGTG>GCA/ |                        | p.V391M       |
| Pat_40 | Post-Resistance | PCDHA2   | 56146  | 37 | 5 | 140175006 | 140175006 | Missense_Mutation | SNP | C  | T  | 43  | 24  | c.457C>T                            | c.(457-459)CCT>TCT     | p.P153S       |
| Pat_40 | Post-Resistance | PCDHA3   | 56145  | 37 | 5 | 140182748 | 140182748 | Missense_Mutation | SNP | G  | A  | 30  | 75  | c.1966G>A                           | c.(1966-1968)GAA>AAA   | p.E656K       |
| Pat_40 | Post-Resistance | PCDHA4   | 56144  | 37 | 5 | 140187721 | 140187721 | Missense_Mutation | SNP | G  | A  | 45  | 140 | c.949G>A                            | c.(949-951)GAA>AAA     | p.E317K       |
| Pat_40 | Post-Resistance | PCDHA5   | 56143  | 37 | 5 | 140202835 | 140202835 | Missense_Mutation | SNP | C  | T  | 39  | 85  | c.1475C>T                           | c.(1474-1476)TCG>TTG   | p.S492L       |
| Pat_40 | Post-Resistance | PCDHA10  | 56139  | 37 | 5 | 140237555 | 140237555 | Missense_Mutation | SNP | C  | T  | 25  | 15  | c.1922C>T                           | c.(1921-1923)TCG>TTG   | p.S641L       |
| Pat_40 | Post-Resistance | PCDHB6   | 56130  | 37 | 5 | 140530709 | 140530709 | Missense_Mutation | SNP | G  | A  | 100 | 76  | c.871G>A                            | c.(871-873)GAA>AAA     | p.E291K       |
| Pat_40 | Post-Resistance | PCDHB6   | 56130  | 37 | 5 | 140531786 | 140531786 | Missense_Mutation | SNP | C  | T  | 9   | 54  | c.1948C>T                           | c.(1948-1950)CGC>TGC   | p.R650C       |
| Pat_40 | Post-Resistance | PCDHGB2  | 56103  | 37 | 5 | 140741165 | 140741165 | Missense_Mutation | SNP | C  | T  | 28  | 20  | c.1463C>T                           | c.(1462-1464)TCC>TTC   | p.S488F       |
| Pat_40 | Post-Resistance | PCDHGB3  | 56102  | 37 | 5 | 140750571 | 140750571 | Missense_Mutation | SNP | G  | A  | 36  | 23  | c.610G>A                            | c.(610-612)GAG>AAG     | p.E204K       |
| Pat_40 | Post-Resistance | PCDHGA8  | 9708   | 37 | 5 | 140773695 | 140773695 | Missense_Mutation | SNP | G  | A  | 3   | 70  | c.1315G>A                           | c.(1315-1317)GCT>ACT   | p.A439T       |
| Pat_40 | Post-Resistance | PCDHGC5  | 56097  | 37 | 5 | 140869774 | 140869774 | Missense_Mutation | SNP | C  | T  | 3   | 61  | c.967C>T                            | c.(967-969)CGT>TGT     | p.R323C       |
| Pat_40 | Post-Resistance | ARHGAP26 | 23092  | 37 | 5 | 142311641 | 142311641 | Missense_Mutation | SNP | C  | T  | 50  | 168 | c.1058C>T                           | c.(1057-1059)TCG>TTG   | p.S353L       |
| Pat_40 | Post-Resistance | FBXO38   | 81545  | 37 | 5 | 147778639 | 147778639 | Missense_Mutation | SNP | G  | A  | 89  | 144 | c.206G>A                            | c.(205-207)CGA>CAA     | p.R69Q        |



|        |                 |           |        |    |   |           |           |                   |     |    |    |     |     |                |                      |          |
|--------|-----------------|-----------|--------|----|---|-----------|-----------|-------------------|-----|----|----|-----|-----|----------------|----------------------|----------|
| Pat_40 | Post-Resistance | CSF1R     | 1436   | 37 | 5 | 149460399 | 149460399 | Missense_Mutation | SNP | C  | T  | 3   | 27  | c.238G>A       | c.(238-240)GGG>AGG   | p.G80R   |
| Pat_40 | Post-Resistance | SLC36A2   | 153201 | 37 | 5 | 150704953 | 150704953 | Missense_Mutation | SNP | C  | T  | 25  | 40  | c.904G>A       | c.(904-906)GGA>AGA   | p.G302R  |
| Pat_40 | Post-Resistance | SLIT3     | 6586   | 37 | 5 | 168135006 | 168135006 | Missense_Mutation | SNP | C  | T  | 4   | 79  | c.2819G>A      | c.(2818-2820)CGC>CAC | p.R940H  |
| Pat_40 | Post-Resistance | CCDC99    | 54908  | 37 | 5 | 169015538 | 169015538 | Nonsense_Mutation | SNP | C  | T  | 53  | 179 | c.118C>T       | c.(118-120)CAA>TAA   | p.Q40*   |
| Pat_40 | Post-Resistance | DOCK2     | 1794   | 37 | 5 | 169461444 | 169461444 | Missense_Mutation | SNP | C  | T  | 5   | 139 | c.3509C>T      | c.(3508-3510)TCG>TTG | p.S1170L |
| Pat_40 | Post-Resistance | CPLX2     | 10814  | 37 | 5 | 175305922 | 175305922 | Missense_Mutation | SNP | G  | A  | 12  | 31  | c.43G>A        | c.(43-45)GAC>AAC     | p.D15N   |
| Pat_40 | Post-Resistance | NSD1      | 64324  | 37 | 5 | 176631253 | 176631253 | Missense_Mutation | SNP | G  | A  | 29  | 69  | c.1196G>A      | c.(1195-1197)AGG>AAG | p.R399K  |
| Pat_40 | Post-Resistance | DOK3      | 79930  | 37 | 5 | 176931802 | 176931802 | Missense_Mutation | SNP | C  | T  | 14  | 35  | c.755G>A       | c.(754-756)GGC>GAC   | p.G252D  |
| Pat_40 | Post-Resistance | BTNL8     | 79908  | 37 | 5 | 180377053 | 180377053 | Missense_Mutation | SNP | G  | A  | 16  | 66  | c.1012G>A      | c.(1012-1014)GCA>ACA | p.A338T  |
| Pat_40 | Post-Resistance | BTNL3     | 10917  | 37 | 5 | 180424335 | 180424335 | Missense_Mutation | SNP | G  | A  | 13  | 50  | c.520G>A       | c.(520-522)GAT>AAT   | p.D174N  |
| Pat_40 | Post-Resistance | BTNL3     | 10917  | 37 | 5 | 180432588 | 180432588 | Missense_Mutation | SNP | C  | T  | 89  | 51  | c.1117C>T      | c.(1117-1119)CCC>TCC | p.P373S  |
| Pat_40 | Post-Resistance | GNB2L1    | 10399  | 37 | 5 | 180666075 | 180666075 | Missense_Mutation | SNP | C  | T  | 138 | 270 | c.628G>A       | c.(628-630)GGA>AGA   | p.G210R  |
| Pat_40 | Post-Resistance | EXOC2     | 55770  | 37 | 6 | 572614    | 572614    | Missense_Mutation | SNP | G  | A  | 56  | 65  | c.1349C>T      | c.(1348-1350)GCC>GTC | p.A450V  |
| Pat_40 | Post-Resistance | WRNIP1    | 56897  | 37 | 6 | 2766550   | 2766550   | Missense_Mutation | SNP | C  | T  | 3   | 52  | c.694C>T       | c.(694-696)CGT>TGT   | p.R232C  |
| Pat_40 | Post-Resistance | RANBP9    | 10048  | 37 | 6 | 13634740  | 13634741  | Missense_Mutation | DNP | CC | TT | 66  | 80  | .1717_1718GG>A | c.(1717-1719)GGA>AAA | p.G573K  |
| Pat_40 | Post-Resistance | NUP153    | 9972   | 37 | 6 | 17675825  | 17675825  | Missense_Mutation | SNP | C  | T  | 33  | 128 | c.511G>A       | c.(511-513)GAT>AAT   | p.D171N  |
| Pat_40 | Post-Resistance | CDKAL1    | 54901  | 37 | 6 | 21201495  | 21201495  | Missense_Mutation | SNP | G  | T  | 8   | 172 | c.1538G>T      | c.(1537-1539)GGT>GTT | p.G513V  |
| Pat_40 | Post-Resistance | GPLD1     | 2822   | 37 | 6 | 24445860  | 24445860  | Missense_Mutation | SNP | C  | T  | 50  | 62  | c.1934G>A      | c.(1933-1935)GGG>GAG | p.G645E  |
| Pat_40 | Post-Resistance | HIST1H2BC | 8347   | 37 | 6 | 26123919  | 26123919  | Missense_Mutation | SNP | C  | T  | 219 | 313 | c.214G>A       | c.(214-216)GAG>AAG   | p.E72K   |
| Pat_40 | Post-Resistance | OR5V1     | 81696  | 37 | 6 | 29323822  | 29323822  | Missense_Mutation | SNP | T  | A  | 27  | 332 | c.151A>T       | c.(151-153)ACT>TCT   | p.T51S   |
| Pat_40 | Post-Resistance | CCHCR1    | 54535  | 37 | 6 | 31124662  | 31124662  | Missense_Mutation | SNP | T  | C  | 4   | 149 | c.76A>G        | c.(76-78)AGA>GGA     | p.R26G   |
| Pat_40 | Post-Resistance | HLA-B     | 3106   | 37 | 6 | 31322904  | 31322904  | Missense_Mutation | SNP | A  | T  | 79  | 145 | c.992T>A       | c.(991-993)ATG>AAG   | p.M331K  |
| Pat_40 | Post-Resistance | MSH5      | 4439   | 37 | 6 | 31727727  | 31727727  | Missense_Mutation | SNP | C  | T  | 15  | 30  | c.1660C>T      | c.(1660-1662)CTT>TTT | p.L554F  |
| Pat_40 | Post-Resistance | C6orf27   | 80737  | 37 | 6 | 31735258  | 31735259  | Missense_Mutation | DNP | GG | AA | 23  | 70  | .1669_1670CC>T | c.(1669-1671)CCT>TTT | p.P557F  |
| Pat_40 | Post-Resistance | PBX2      | 5089   | 37 | 6 | 32157623  | 32157623  | Missense_Mutation | SNP | C  | T  | 7   | 15  | c.70G>A        | c.(70-72)GAG>AAG     | p.E24K   |
| Pat_40 | Post-Resistance | ZNF318    | 24149  | 37 | 6 | 43323693  | 43323693  | Missense_Mutation | SNP | G  | A  | 28  | 120 | c.1379C>T      | c.(1378-1380)CCC>CTC | p.P460L  |
| Pat_40 | Post-Resistance | CAPN11    | 11131  | 37 | 6 | 44144035  | 44144035  | Missense_Mutation | SNP | C  | T  | 76  | 143 | c.961C>T       | c.(961-963)CCC>TCC   | p.P321S  |
| Pat_40 | Post-Resistance | RCAN2     | 10231  | 37 | 6 | 46214583  | 46214583  | Missense_Mutation | SNP | G  | A  | 36  | 121 | c.335C>T       | c.(334-336)TCG>TTG   | p.S112L  |
| Pat_40 | Post-Resistance | GPR116    | 221395 | 37 | 6 | 46827142  | 46827142  | Missense_Mutation | SNP | G  | A  | 41  | 88  | c.2498C>T      | c.(2497-2499)TCC>TTC | p.S833F  |
| Pat_40 | Post-Resistance | GSTA1     | 2938   | 37 | 6 | 52658965  | 52658965  | Missense_Mutation | SNP | G  | C  | 31  | 465 | c.372C>G       | c.(370-372)ATC>ATG   | p.I124M  |
| Pat_40 | Post-Resistance | TINAG     | 27283  | 37 | 6 | 54173703  | 54173703  | Missense_Mutation | SNP | G  | A  | 93  | 86  | c.355G>A       | c.(355-357)GGT>AGT   | p.G119S  |
| Pat_40 | Post-Resistance | BAI3      | 577    | 37 | 6 | 69665943  | 69665943  | Missense_Mutation | SNP | C  | T  | 29  | 81  | c.1223C>T      | c.(1222-1224)TCG>TTG | p.S408L  |
| Pat_40 | Post-Resistance | FAM135A   | 57579  | 37 | 6 | 71238035  | 71238035  | Missense_Mutation | SNP | C  | T  | 75  | 74  | c.3655C>T      | c.(3655-3657)CCT>TCT | p.P1219S |
| Pat_40 | Post-Resistance | FAM135A   | 57579  | 37 | 6 | 71266500  | 71266500  | Missense_Mutation | SNP | C  | T  | 81  | 147 | c.4276C>T      | c.(4276-4278)CGC>TGC | p.R1426C |
| Pat_40 | Post-Resistance | COL12A1   | 1303   | 37 | 6 | 75822998  | 75822998  | Missense_Mutation | SNP | C  | A  | 57  | 266 | c.7872G>T      | c.(7870-7872)AAG>AAT | p.K2624N |
| Pat_40 | Post-Resistance | FILIP1    | 27145  | 37 | 6 | 76022621  | 76022621  | Missense_Mutation | SNP | C  | T  | 64  | 58  | c.2927G>A      | c.(2926-2928)CGA>CAA | p.R976Q  |
| Pat_40 | Post-Resistance | PRSS35    | 167681 | 37 | 6 | 84234328  | 84234328  | Missense_Mutation | SNP | C  | T  | 46  | 29  | c.1168C>T      | c.(1168-1170)CGC>TGC | p.R390C  |
| Pat_40 | Post-Resistance | GRIK2     | 2898   | 37 | 6 | 102503320 | 102503320 | Missense_Mutation | SNP | C  | A  | 35  | 98  | c.2427C>A      | c.(2425-2427)AGC>AGA | p.S809R  |
| Pat_40 | Post-Resistance | LAMA4     | 3910   | 37 | 6 | 112476887 | 112476887 | Missense_Mutation | SNP | C  | T  | 168 | 160 | c.1839G>A      | c.(1837-1839)ATG>ATA | p.M613I  |
| Pat_40 | Post-Resistance | ROS1      | 6098   | 37 | 6 | 117662453 | 117662453 | Missense_Mutation | SNP | C  | T  | 73  | 94  | c.4924G>A      | c.(4924-4926)GAA>AAA | p.E1642K |
| Pat_40 | Post-Resistance | FAM184A   | 79632  | 37 | 6 | 119295618 | 119295618 | Missense_Mutation | SNP | C  | T  | 102 | 187 | c.2890G>A      | c.(2890-2892)GAA>AAA | p.E964K  |
| Pat_40 | Post-Resistance | VNN2      | 8875   | 37 | 6 | 133078678 | 133078678 | Missense_Mutation | SNP | C  | T  | 57  | 124 | c.221G>A       | c.(220-222)CGA>CAA   | p.R74Q   |
| Pat_40 | Post-Resistance | BCLAF1    | 9774   | 37 | 6 | 136599171 | 136599171 | Missense_Mutation | SNP | C  | T  | 11  | 54  | c.848G>A       | c.(847-849)CGA>CAA   | p.R283Q  |
| Pat_40 | Post-Resistance | MAP7      | 9053   | 37 | 6 | 136683834 | 136683834 | Missense_Mutation | SNP | G  | T  | 3   | 22  | c.1280C>A      | c.(1279-1281)CCA>CAA | p.P427Q  |
| Pat_40 | Post-Resistance | SHPRH     | 257218 | 37 | 6 | 146276260 | 146276260 | Missense_Mutation | SNP | G  | A  | 48  | 74  | c.199C>T       | c.(199-201)CAC>TAC   | p.H67Y   |
| Pat_40 | Post-Resistance | ZBTB2     | 57621  | 37 | 6 | 151687684 | 151687684 | Missense_Mutation | SNP | C  | T  | 26  | 27  | c.517G>A       | c.(517-519)GAG>AAG   | p.E173K  |
| Pat_40 | Post-Resistance | TULP4     | 56995  | 37 | 6 | 158923439 | 158923439 | Missense_Mutation | SNP | C  | T  | 28  | 42  | c.2744C>T      | c.(2743-2745)ACC>ATC | p.T915I  |

|        |                 |           |        |    |   |           |           |                   |     |    |    |     |     |                |                      |               |
|--------|-----------------|-----------|--------|----|---|-----------|-----------|-------------------|-----|----|----|-----|-----|----------------|----------------------|---------------|
| Pat_40 | Post-Resistance | IGF2R     | 3482   | 37 | 6 | 160455485 | 160455485 | Nonsense_Mutation | SNP | G  | T  | 4   | 132 | c.1246G>T      | c.(1246-1248)GGA>TGA | p.G416*       |
| Pat_40 | Post-Resistance | IGF2R     | 3482   | 37 | 6 | 160511078 | 160511078 | Missense_Mutation | SNP | G  | A  | 3   | 73  | c.6598G>A      | c.(6598-6600)GAT>AAT | p.D2200N      |
| Pat_40 | Post-Resistance | LPA       | 4018   | 37 | 6 | 160978522 | 160978522 | Nonsense_Mutation | SNP | C  | T  | 56  | 82  | c.4713G>A      | c.(4711-4713)TGG>TGA | p.W1571*      |
| Pat_40 | Post-Resistance | LPA       | 4018   | 37 | 6 | 161020605 | 161020605 | Missense_Mutation | SNP | C  | T  | 218 | 303 | c.3214G>A      | c.(3214-3216)GGA>AGA | p.G1072R      |
| Pat_40 | Post-Resistance | PLG       | 5340   | 37 | 6 | 161143526 | 161143526 | Missense_Mutation | SNP | G  | A  | 162 | 226 | c.1183G>A      | c.(1183-1185)GGA>AGA | p.G395R       |
| Pat_40 | Post-Resistance | THBS2     | 7058   | 37 | 6 | 169629684 | 169629684 | Missense_Mutation | SNP | C  | T  | 5   | 174 | c.2242G>A      | c.(2242-2244)GGT>AGT | p.G748S       |
| Pat_40 | Post-Resistance | AMZ1      | 155185 | 37 | 7 | 2740383   | 2740383   | Missense_Mutation | SNP | C  | T  | 33  | 40  | c.298C>T       | c.(298-300)CCG>TCG   | p.P100S       |
| Pat_40 | Post-Resistance | PHF14     | 9678   | 37 | 7 | 11209061  | 11209061  | Missense_Mutation | SNP | G  | A  | 6   | 20  | c.2791G>A      | c.(2791-2793)GAA>AAA | p.E931K       |
| Pat_40 | Post-Resistance | TMEM106B  | 54664  | 37 | 7 | 12258147  | 12258147  | Missense_Mutation | SNP | C  | T  | 5   | 190 | c.281C>T       | c.(280-282)ACA>ATA   | p.T94I        |
| Pat_40 | Post-Resistance | MACC1     | 346389 | 37 | 7 | 20199595  | 20199595  | Missense_Mutation | SNP | G  | A  | 33  | 86  | c.389C>T       | c.(388-390)TCC>TTC   | p.S130F       |
| Pat_40 | Post-Resistance | DNAH11    | 8701   | 37 | 7 | 21747399  | 21747399  | Missense_Mutation | SNP | C  | T  | 61  | 84  | c.6650C>T      | c.(6649-6651)ACA>ATA | p.T2217I      |
| Pat_40 | Post-Resistance | FAM188B   | 84182  | 37 | 7 | 30831178  | 30831178  | Missense_Mutation | SNP | C  | T  | 26  | 43  | c.1061C>T      | c.(1060-1062)CCC>CTC | p.P354L       |
| Pat_40 | Post-Resistance | CCDC129   | 223075 | 37 | 7 | 31682490  | 31682490  | Missense_Mutation | SNP | G  | A  | 35  | 130 | c.1506G>A      | c.(1504-1506)ATG>ATA | p.M502I       |
| Pat_40 | Post-Resistance | PDE1C     | 5137   | 37 | 7 | 31877577  | 31877577  | Missense_Mutation | SNP | C  | T  | 202 | 291 | c.989G>A       | c.(988-990)CGA>CAA   | p.R330Q       |
| Pat_40 | Post-Resistance | BMPER     | 168667 | 37 | 7 | 34097762  | 34097762  | Missense_Mutation | SNP | G  | A  | 78  | 108 | c.1019G>A      | c.(1018-1020)AGT>AAT | p.S340N       |
| Pat_40 | Post-Resistance | CDK13     | 8621   | 37 | 7 | 40038988  | 40038988  | Nonsense_Mutation | SNP | A  | T  | 26  | 109 | c.2071A>T      | c.(2071-2073)AAA>TAA | p.K691*       |
| Pat_40 | Post-Resistance | ZNF713    | 349075 | 37 | 7 | 55990859  | 55990859  | Missense_Mutation | SNP | C  | T  | 89  | 151 | c.53C>T        | c.(52-54)TCA>TTA     | p.S18L        |
| Pat_40 | Post-Resistance | ZNF479    | 90827  | 37 | 7 | 57187788  | 57187788  | Missense_Mutation | SNP | G  | A  | 8   | 332 | c.1334C>T      | c.(1333-1335)GCC>GTC | p.A445V       |
| Pat_40 | Post-Resistance | ZNF107    | 51427  | 37 | 7 | 64167982  | 64167982  | Missense_Mutation | SNP | C  | T  | 36  | 167 | c.1300C>T      | c.(1300-1302)CAT>TAT | p.H434Y       |
| Pat_40 | Post-Resistance | HIP1      | 3092   | 37 | 7 | 75189170  | 75189170  | Missense_Mutation | SNP | G  | T  | 3   | 43  | c.1241C>A      | c.(1240-1242)GCA>GAA | p.A414E       |
| Pat_40 | Post-Resistance | FGL2      | 10875  | 37 | 7 | 76825822  | 76825822  | Missense_Mutation | SNP | C  | T  | 73  | 337 | c.1094G>A      | c.(1093-1095)CGA>CAA | p.R365Q       |
| Pat_40 | Post-Resistance | PCLO      | 27445  | 37 | 7 | 82583350  | 82583350  | Missense_Mutation | SNP | C  | T  | 112 | 148 | c.6919G>A      | c.(6919-6921)GAA>AAA | p.E2307K      |
| Pat_40 | Post-Resistance | PCLO      | 27445  | 37 | 7 | 82585683  | 82585683  | Missense_Mutation | SNP | C  | T  | 20  | 58  | c.4586G>A      | c.(4585-4587)CGA>CAA | p.R1529Q      |
| Pat_40 | Post-Resistance | ABCB1     | 5243   | 37 | 7 | 87160681  | 87160681  | Missense_Mutation | SNP | C  | T  | 68  | 519 | c.2614G>A      | c.(2614-2616)GGA>AGA | p.G872R       |
| Pat_40 | Post-Resistance | ABCB1     | 5243   | 37 | 7 | 87175289  | 87175289  | Missense_Mutation | SNP | G  | A  | 136 | 227 | c.1777C>T      | c.(1777-1779)CGT>TGT | p.R593C       |
| Pat_40 | Post-Resistance | ZAN       | 7455   | 37 | 7 | 100349941 | 100349941 | Missense_Mutation | SNP | C  | T  | 7   | 157 | c.2213C>T      | c.(2212-2214)CCC>CTC | p.P738L       |
| Pat_40 | Post-Resistance | RELN      | 5649   | 37 | 7 | 103206793 | 103206794 | Missense_Mutation | DNP | CC | TT | 45  | 218 | .4813_4814GG>A | c.(4813-4815)GGA>AAA | p.G1605K      |
| Pat_40 | Post-Resistance | PPP1R3A   | 5506   | 37 | 7 | 113519829 | 113519829 | Missense_Mutation | SNP | C  | T  | 74  | 258 | c.1318G>A      | c.(1318-1320)GAT>AAT | p.D440N       |
| Pat_40 | Post-Resistance | FOXP2     | 93986  | 37 | 7 | 114292325 | 114292325 | Missense_Mutation | SNP | G  | A  | 319 | 30  | c.1162G>A      | c.(1162-1164)GTG>ATG | p.V388M       |
| Pat_40 | Post-Resistance | CFTR      | 1080   | 37 | 7 | 117232308 | 117232308 | Missense_Mutation | SNP | A  | T  | 18  | 69  | c.2087A>T      | c.(2086-2088)AAA>ATA | p.K696I       |
| Pat_40 | Post-Resistance | SLC13A1   | 6561   | 37 | 7 | 122759211 | 122759211 | Missense_Mutation | SNP | A  | C  | 31  | 106 | c.1436T>G      | c.(1435-1437)TTG>TGG | p.L479W       |
| Pat_40 | Post-Resistance | ZNF800    | 168850 | 37 | 7 | 127013826 | 127013826 | Missense_Mutation | SNP | G  | A  | 57  | 260 | c.1564C>T      | c.(1564-1566)CCT>TCT | p.P522S       |
| Pat_40 | Post-Resistance | TSPAN33   | 340348 | 37 | 7 | 128806635 | 128806635 | Missense_Mutation | SNP | G  | A  | 302 | 22  | c.476G>A       | c.(475-477)GGG>GAG   | p.G159E       |
| Pat_40 | Post-Resistance | DGKI      | 9162   | 37 | 7 | 137080445 | 137080445 | Splice_Site       | SNP | T  | A  | 4   | 99  | c.2982_splice  | c.e33-1              | p.T994_splice |
| Pat_40 | Post-Resistance | BRAF      | 673    | 37 | 7 | 140453136 | 140453136 | Missense_Mutation | SNP | A  | T  | 311 | 34  | c.1799T>A      | c.(1798-1800)GTG>GAG | p.V600E       |
| Pat_40 | Post-Resistance | KEL       | 3792   | 37 | 7 | 142640960 | 142640961 | Missense_Mutation | DNP | CC | TT | 6   | 45  | .1501_1502GG>A | c.(1501-1503)GGA>AAA | p.G501K       |
| Pat_40 | Post-Resistance | TAS2R41   | 259287 | 37 | 7 | 143175722 | 143175722 | Missense_Mutation | SNP | G  | A  | 48  | 230 | c.757G>A       | c.(757-759)GAT>AAT   | p.D253N       |
| Pat_40 | Post-Resistance | LOC441294 | 441294 | 37 | 7 | 143270156 | 143270156 | Missense_Mutation | SNP | C  | T  | 26  | 326 | c.1246C>T      | c.(1246-1248)CTT>TTT | p.L416F       |
| Pat_40 | Post-Resistance | ZNF282    | 8427   | 37 | 7 | 148895647 | 148895647 | Missense_Mutation | SNP | G  | A  | 4   | 100 | c.388G>A       | c.(388-390)GAG>AAG   | p.E130K       |
| Pat_40 | Post-Resistance | ZNF777    | 27153  | 37 | 7 | 149152312 | 149152312 | Missense_Mutation | SNP | A  | G  | 17  | 107 | c.802T>C       | c.(802-804)TGG>CGG   | p.W268R       |
| Pat_40 | Post-Resistance | C7orf29   | 113763 | 37 | 7 | 150027503 | 150027503 | Missense_Mutation | SNP | C  | T  | 4   | 178 | c.10C>T        | c.(10-12)CGC>TGC     | p.R4C         |
| Pat_40 | Post-Resistance | MLL3      | 58508  | 37 | 7 | 151879283 | 151879283 | Missense_Mutation | SNP | T  | A  | 56  | 187 | c.5662A>T      | c.(5662-5664)AAC>TAC | p.N1888Y      |
| Pat_40 | Post-Resistance | MLL3      | 58508  | 37 | 7 | 151919131 | 151919131 | Missense_Mutation | SNP | C  | T  | 90  | 446 | c.3454G>A      | c.(3454-3456)GAA>AAA | p.E1152K      |
| Pat_40 | Post-Resistance | CSMD1     | 64478  | 37 | 8 | 2824251   | 2824251   | Missense_Mutation | SNP | G  | A  | 26  | 49  | c.8944C>T      | c.(8944-8946)CCT>TCT | p.P2982S      |
| Pat_40 | Post-Resistance | CSMD1     | 64478  | 37 | 8 | 3081309   | 3081309   | Missense_Mutation | SNP | C  | T  | 52  | 96  | c.4429G>A      | c.(4429-4431)GAA>AAA | p.E1477K      |
| Pat_40 | Post-Resistance | CSMD1     | 64478  | 37 | 8 | 3224730   | 3224730   | Missense_Mutation | SNP | G  | A  | 8   | 18  | c.2942C>T      | c.(2941-2943)TCC>TTC | p.S981F       |
| Pat_40 | Post-Resistance | XPO7      | 23039  | 37 | 8 | 21857050  | 21857050  | Missense_Mutation | SNP | T  | G  | 96  | 155 | c.2647T>G      | c.(2647-2649)TAC>GAC | p.Y883D       |

|        |                 |           |        |    |   |           |           |                   |     |    |    |     |     |                  |                        |          |
|--------|-----------------|-----------|--------|----|---|-----------|-----------|-------------------|-----|----|----|-----|-----|------------------|------------------------|----------|
| Pat_40 | Post-Resistance | TNFRSF10A | 8797   | 37 | 8 | 23049398  | 23049398  | Missense_Mutation | SNP | C  | T  | 74  | 122 | c.1216G>A        | c.(1216-1218)GAT>AAT   | p.D406N  |
| Pat_40 | Post-Resistance | ADAM7     | 8756   | 37 | 8 | 24324428  | 24324428  | Missense_Mutation | SNP | C  | T  | 99  | 158 | c.506C>T         | c.(505-507)TCC>TTC     | p.S169F  |
| Pat_40 | Post-Resistance | NEFM      | 4741   | 37 | 8 | 24775836  | 24775836  | Missense_Mutation | SNP | G  | A  | 9   | 9   | c.2468G>A        | c.(2467-2469)AGG>AAG   | p.R823K  |
| Pat_40 | Post-Resistance | DDHD2     | 23259  | 37 | 8 | 38092070  | 38092070  | Missense_Mutation | SNP | C  | T  | 109 | 149 | c.379C>T         | c.(379-381)CCC>TCC     | p.P127S  |
| Pat_40 | Post-Resistance | SNAI2     | 6591   | 37 | 8 | 49832783  | 49832783  | Missense_Mutation | SNP | G  | C  | 44  | 257 | c.297C>G         | c.(295-297)CAC>CAG     | p.H99Q   |
| Pat_40 | Post-Resistance | PXDNL     | 137902 | 37 | 8 | 52320967  | 52320967  | Missense_Mutation | SNP | C  | T  | 48  | 7   | c.3217G>A        | c.(3217-3219)GAA>AAA   | p.E1073K |
| Pat_40 | Post-Resistance | RP1       | 6101   | 37 | 8 | 55537556  | 55537557  | Nonsense_Mutation | DNP | AG | TA | 64  | 55  | c.1114_1115AG>TA | c.(1114-1116)AGA>TAA   | p.R372*  |
| Pat_40 | Post-Resistance | RP1       | 6101   | 37 | 8 | 55539350  | 55539350  | Missense_Mutation | SNP | G  | A  | 141 | 42  | c.2908G>A        | c.(2908-2910)GAA>AAA   | p.E970K  |
| Pat_40 | Post-Resistance | RP1       | 6101   | 37 | 8 | 55542726  | 55542726  | Missense_Mutation | SNP | A  | G  | 8   | 310 | c.6284A>G        | c.(6283-6285)TAC>TGC   | p.Y2095C |
| Pat_40 | Post-Resistance | CYP7B1    | 9420   | 37 | 8 | 65527628  | 65527628  | Missense_Mutation | SNP | G  | A  | 43  | 402 | c.1012C>T        | c.(1012-1014)CCC>TCC   | p.P338S  |
| Pat_40 | Post-Resistance | VCPIP1    | 80124  | 37 | 8 | 67579161  | 67579161  | Missense_Mutation | SNP | C  | A  | 4   | 22  | c.33G>T          | c.(31-33)TTG>TTT       | p.L11F   |
| Pat_40 | Post-Resistance | CPA6      | 57094  | 37 | 8 | 68346290  | 68346290  | Missense_Mutation | SNP | G  | A  | 90  | 565 | c.1024C>T        | c.(1024-1026)CCC>TCC   | p.P342S  |
| Pat_40 | Post-Resistance | PREX2     | 80243  | 37 | 8 | 69028131  | 69028131  | Missense_Mutation | SNP | C  | T  | 96  | 553 | c.3290C>T        | c.(3289-3291)TCT>TTT   | p.S1097F |
| Pat_40 | Post-Resistance | RPL7      | 6129   | 37 | 8 | 74203316  | 74203316  | Missense_Mutation | SNP | T  | C  | 4   | 178 | c.710A>G         | c.(709-711)GAG>GGG     | p.E237G  |
| Pat_40 | Post-Resistance | HNF4G     | 3174   | 37 | 8 | 76470899  | 76470899  | Missense_Mutation | SNP | G  | A  | 63  | 543 | c.739G>A         | c.(739-741)GAT>AAT     | p.D247N  |
| Pat_40 | Post-Resistance | HEY1      | 23462  | 37 | 8 | 80677704  | 80677705  | Missense_Mutation | DNP | CC | TT | 6   | 85  | c.633_634GG>AA   | c.(631-636)ACGGAA>ACAA | p.E212K  |
| Pat_40 | Post-Resistance | C8orf47   | 203111 | 37 | 8 | 99102024  | 99102024  | Missense_Mutation | SNP | G  | A  | 9   | 121 | c.779G>A         | c.(778-780)AGA>AAA     | p.R260K  |
| Pat_40 | Post-Resistance | STK3      | 6788   | 37 | 8 | 99718703  | 99718703  | Missense_Mutation | SNP | G  | A  | 93  | 31  | c.676C>T         | c.(676-678)CCA>TCA     | p.P226S  |
| Pat_40 | Post-Resistance | RIMS2     | 9699   | 37 | 8 | 104987692 | 104987692 | Missense_Mutation | SNP | G  | A  | 30  | 270 | c.2219G>A        | c.(2218-2220)GGA>GAA   | p.G740E  |
| Pat_40 | Post-Resistance | RIMS2     | 9699   | 37 | 8 | 105263859 | 105263859 | Missense_Mutation | SNP | G  | A  | 315 | 253 | c.3915G>A        | c.(3913-3915)ATG>ATA   | p.M1305I |
| Pat_40 | Post-Resistance | NRBP2     | 340371 | 37 | 8 | 144920908 | 144920908 | Missense_Mutation | SNP | C  | T  | 4   | 54  | c.784G>A         | c.(784-786)GTC>ATC     | p.V262I  |
| Pat_40 | Post-Resistance | PTPRD     | 5789   | 37 | 9 | 8636785   | 8636785   | Missense_Mutation | SNP | A  | T  | 130 | 14  | c.124T>A         | c.(124-126)TCT>ACT     | p.S42T   |
| Pat_40 | Post-Resistance | MPDZ      | 8777   | 37 | 9 | 13217180  | 13217180  | Missense_Mutation | SNP | C  | A  | 24  | 4   | c.1200G>T        | c.(1198-1200)TTG>TTT   | p.L400F  |
| Pat_40 | Post-Resistance | UNC13B    | 10497  | 37 | 9 | 35313966  | 35313966  | Missense_Mutation | SNP | G  | T  | 23  | 207 | c.1147G>T        | c.(1147-1149)GTT>TTT   | p.V383F  |
| Pat_40 | Post-Resistance | SHB       | 6461   | 37 | 9 | 38016038  | 38016038  | Missense_Mutation | SNP | C  | T  | 84  | 34  | c.808G>A         | c.(808-810)GAG>AAG     | p.E270K  |
| Pat_40 | Post-Resistance | LOC442421 | 442421 | 37 | 9 | 66499716  | 66499716  | Missense_Mutation | SNP | A  | G  | 8   | 114 | c.526A>G         | c.(526-528)AAT>GAT     | p.N176D  |
| Pat_40 | Post-Resistance | CENPP     | 401541 | 37 | 9 | 95373672  | 95373672  | Missense_Mutation | SNP | C  | T  | 8   | 17  | c.641C>T         | c.(640-642)CCA>CTA     | p.P214L  |
| Pat_40 | Post-Resistance | SNX30     | 401548 | 37 | 9 | 115567122 | 115567122 | Missense_Mutation | SNP | C  | T  | 5   | 195 | c.223C>T         | c.(223-225)CTC>TTC     | p.L75F   |
| Pat_40 | Post-Resistance | OR1N1     | 138883 | 37 | 9 | 125288794 | 125288794 | Missense_Mutation | SNP | G  | A  | 64  | 8   | c.779C>T         | c.(778-780)CCT>CTT     | p.P260L  |
| Pat_40 | Post-Resistance | HSPA5     | 3309   | 37 | 9 | 128003071 | 128003071 | Missense_Mutation | SNP | C  | T  | 3   | 87  | c.238G>A         | c.(238-240)GCC>ACC     | p.A80T   |
| Pat_40 | Post-Resistance | ANGPTL2   | 23452  | 37 | 9 | 129856164 | 129856164 | Missense_Mutation | SNP | C  | T  | 3   | 98  | c.859G>A         | c.(859-861)GAC>AAC     | p.D287N  |
| Pat_40 | Post-Resistance | SLC2A8    | 29988  | 37 | 9 | 130167241 | 130167241 | Missense_Mutation | SNP | C  | T  | 15  | 41  | c.1121C>T        | c.(1120-1122)GCC>GTC   | p.A374V  |
| Pat_40 | Post-Resistance | LRSAM1    | 90678  | 37 | 9 | 130241696 | 130241696 | Missense_Mutation | SNP | G  | A  | 3   | 65  | c.815G>A         | c.(814-816)CGG>CAG     | p.R272Q  |
| Pat_40 | Post-Resistance | C9orf78   | 51759  | 37 | 9 | 132594217 | 132594217 | Missense_Mutation | SNP | G  | A  | 80  | 102 | c.302C>T         | c.(301-303)TCG>TTG     | p.S101L  |
| Pat_40 | Post-Resistance | RAPGEF1   | 2889   | 37 | 9 | 134514084 | 134514084 | Missense_Mutation | SNP | C  | T  | 60  | 95  | c.538G>A         | c.(538-540)GAA>AAA     | p.E180K  |
| Pat_40 | Post-Resistance | WDR5      | 11091  | 37 | 9 | 137007527 | 137007527 | Missense_Mutation | SNP | C  | T  | 38  | 38  | c.427C>T         | c.(427-429)CTT>TTT     | p.L143F  |
| Pat_40 | Post-Resistance | COL5A1    | 1289   | 37 | 9 | 137582859 | 137582859 | Missense_Mutation | SNP | C  | T  | 17  | 17  | c.211C>T         | c.(211-213)CCG>TCG     | p.P71S   |
| Pat_40 | Post-Resistance | NOTCH1    | 4851   | 37 | 9 | 139413213 | 139413213 | Missense_Mutation | SNP | C  | T  | 3   | 50  | c.929G>A         | c.(928-930)GGG>GAG     | p.G310E  |
| Pat_40 | Post-Resistance | TPRN      | 286262 | 37 | 9 | 140087077 | 140087077 | Missense_Mutation | SNP | C  | T  | 13  | 10  | c.1609G>A        | c.(1609-1611)GAG>AAG   | p.E537K  |
| Pat_40 | Post-Resistance | TUBB2C    | 10383  | 37 | 9 | 140137584 | 140137585 | Missense_Mutation | DNP | CC | TT | 55  | 54  | c.914_915CC>TT   | c.(913-915)CCC>CTT     | p.P305L  |
| Pat_40 | Post-Resistance | NLGN4X    | 57502  | 37 | X | 5810998   | 5810998   | Missense_Mutation | SNP | T  | A  | 59  | 205 | c.2311A>T        | c.(2311-2313)ATC>TTC   | p.I771F  |
| Pat_40 | Post-Resistance | TLR7      | 51284  | 37 | X | 12903805  | 12903805  | Missense_Mutation | SNP | C  | T  | 159 | 179 | c.178C>T         | c.(178-180)CCT>TCT     | p.P60S   |
| Pat_40 | Post-Resistance | TCEANC    | 170082 | 37 | X | 13681166  | 13681166  | Missense_Mutation | SNP | T  | C  | 180 | 312 | c.539T>C         | c.(538-540)CTT>CCT     | p.L180P  |
| Pat_40 | Post-Resistance | KLHL15    | 80311  | 37 | X | 24024498  | 24024498  | Missense_Mutation | SNP | G  | A  | 53  | 216 | c.313C>T         | c.(313-315)CTT>TTT     | p.L105F  |
| Pat_40 | Post-Resistance | DCAF8L2   | 347442 | 37 | X | 27766412  | 27766412  | Missense_Mutation | SNP | G  | A  | 29  | 33  | c.1400G>A        | c.(1399-1401)AGA>AAA   | p.R467K  |
| Pat_40 | Post-Resistance | MAGEB1    | 4112   | 37 | X | 30269469  | 30269469  | Missense_Mutation | SNP | G  | A  | 61  | 94  | c.859G>A         | c.(859-861)GAG>AAG     | p.E287K  |
| Pat_40 | Post-Resistance | DMD       | 1756   | 37 | X | 32361316  | 32361316  | Missense_Mutation | SNP | A  | T  | 58  | 142 | c.5674T>A        | c.(5674-5676)TGC>AGC   | p.C1892S |

|        |                 |              |           |    |   |           |           |                   |     |    |    |     |     |              |                      |          |
|--------|-----------------|--------------|-----------|----|---|-----------|-----------|-------------------|-----|----|----|-----|-----|--------------|----------------------|----------|
| Pat_40 | Post-Resistance | CXorf22      | 170063    | 37 | X | 35974281  | 35974281  | Missense_Mutation | SNP | G  | A  | 39  | 59  | c.1378G>A    | c.(1378-1380)GAA>AAA | p.E460K  |
| Pat_40 | Post-Resistance | OTC          | 5009      | 37 | X | 38212016  | 38212016  | Nonsense_Mutation | SNP | C  | T  | 76  | 93  | c.67C>T      | c.(67-69)CGA>TGA     | p.R23*   |
| Pat_40 | Post-Resistance | MED14        | 9282      | 37 | X | 40518681  | 40518681  | Missense_Mutation | SNP | C  | T  | 49  | 62  | c.3863G>A    | c.(3862-3864)AGA>AAA | p.R1288K |
| Pat_40 | Post-Resistance | RBM10        | 8241      | 37 | X | 47045530  | 47045530  | Missense_Mutation | SNP | C  | G  | 25  | 44  | c.2497C>G    | c.(2497-2499)CCC>GCC | p.P833A  |
| Pat_40 | Post-Resistance | LOC100133957 | 100133957 | 37 | X | 47518383  | 47518384  | Missense_Mutation | DNP | CT | AA | 26  | 69  | c.59_60CT>AA | c.(58-60)CCT>CAA     | p.P20Q   |
| Pat_40 | Post-Resistance | ZNF81        | 347344    | 37 | X | 47774499  | 47774499  | Missense_Mutation | SNP | C  | T  | 25  | 35  | c.454C>T     | c.(454-456)CGC>TGC   | p.R152C  |
| Pat_40 | Post-Resistance | CACNA1F      | 778       | 37 | X | 49066097  | 49066097  | Missense_Mutation | SNP | C  | T  | 5   | 23  | c.4846G>A    | c.(4846-4848)GCC>ACC | p.A1616T |
| Pat_40 | Post-Resistance | ITIH5L       | 347365    | 37 | X | 54823498  | 54823498  | Missense_Mutation | SNP | G  | A  | 36  | 52  | c.134C>T     | c.(133-135)ACG>ATG   | p.T45M   |
| Pat_40 | Post-Resistance | TRO          | 7216      | 37 | X | 54949440  | 54949440  | Missense_Mutation | SNP | C  | T  | 19  | 45  | c.475C>T     | c.(475-477)CAT>TAT   | p.H159Y  |
| Pat_40 | Post-Resistance | SPIN4        | 139886    | 37 | X | 62570220  | 62570220  | Missense_Mutation | SNP | G  | A  | 78  | 229 | c.479C>T     | c.(478-480)CCT>CTT   | p.P160L  |
| Pat_40 | Post-Resistance | PJA1         | 64219     | 37 | X | 68381748  | 68381748  | Missense_Mutation | SNP | C  | T  | 28  | 107 | c.1334G>A    | c.(1333-1335)CGA>CAA | p.R445Q  |
| Pat_40 | Post-Resistance | ACRC         | 93953     | 37 | X | 70823920  | 70823920  | Missense_Mutation | SNP | C  | T  | 6   | 137 | c.793C>T     | c.(793-795)CCC>TCC   | p.P265S  |
| Pat_40 | Post-Resistance | KIAA2022     | 340533    | 37 | X | 73963813  | 73963813  | Missense_Mutation | SNP | C  | T  | 6   | 7   | c.579G>A     | c.(577-579)ATG>ATA   | p.M193I  |
| Pat_40 | Post-Resistance | ABCB7        | 22        | 37 | X | 74273345  | 74273345  | Missense_Mutation | SNP | T  | C  | 12  | 8   | c.2119A>G    | c.(2119-2121)ACA>GCA | p.T707A  |
| Pat_40 | Post-Resistance | DACH2        | 117154    | 37 | X | 85403846  | 85403846  | Missense_Mutation | SNP | C  | A  | 30  | 127 | c.222C>A     | c.(220-222)CAC>CAA   | p.H74Q   |
| Pat_40 | Post-Resistance | RAB40A       | 142684    | 37 | X | 102754855 | 102754855 | Missense_Mutation | SNP | G  | A  | 21  | 54  | c.830C>T     | c.(829-831)TCT>TTT   | p.S277F  |
| Pat_40 | Post-Resistance | NRK          | 203447    | 37 | X | 105152811 | 105152811 | Missense_Mutation | SNP | G  | A  | 24  | 64  | c.1178G>A    | c.(1177-1179)AGG>AAG | p.R393K  |
| Pat_40 | Post-Resistance | COL4A5       | 1287      | 37 | X | 107865120 | 107865120 | Missense_Mutation | SNP | A  | T  | 32  | 38  | c.2765A>T    | c.(2764-2766)AAA>ATA | p.K922I  |
| Pat_40 | Post-Resistance | SLC6A14      | 11254     | 37 | X | 115588809 | 115588809 | Missense_Mutation | SNP | G  | A  | 170 | 375 | c.1649G>A    | c.(1648-1650)AGA>AAA | p.R550K  |
| Pat_40 | Post-Resistance | KIAA1210     | 57481     | 37 | X | 118223262 | 118223262 | Missense_Mutation | SNP | G  | A  | 16  | 39  | c.1931C>T    | c.(1930-1932)TCC>TTC | p.S644F  |
| Pat_40 | Post-Resistance | KIAA1210     | 57481     | 37 | X | 118227657 | 118227657 | Missense_Mutation | SNP | C  | T  | 11  | 55  | c.1456G>A    | c.(1456-1458)GAA>AAA | p.E486K  |
| Pat_40 | Post-Resistance | THOC2        | 57187     | 37 | X | 122774460 | 122774460 | Missense_Mutation | SNP | C  | T  | 84  | 212 | c.1675G>A    | c.(1675-1677)GAA>AAA | p.E559K  |
| Pat_40 | Post-Resistance | ODZ1         | 10178     | 37 | X | 123514532 | 123514532 | Missense_Mutation | SNP | C  | T  | 198 | 210 | c.8032G>A    | c.(8032-8034)GAA>AAA | p.E2678K |
| Pat_40 | Post-Resistance | USP26        | 83844     | 37 | X | 132159788 | 132159788 | Missense_Mutation | SNP | C  | A  | 28  | 99  | c.2461G>T    | c.(2461-2463)GAT>TAT | p.D821Y  |
| Pat_40 | Post-Resistance | USP26        | 83844     | 37 | X | 132159790 | 132159790 | Missense_Mutation | SNP | C  | A  | 24  | 93  | c.2459G>T    | c.(2458-2460)GGA>GTA | p.G820V  |
| Pat_40 | Post-Resistance | GPR112       | 139378    | 37 | X | 135430610 | 135430610 | Missense_Mutation | SNP | C  | T  | 70  | 172 | c.4745C>T    | c.(4744-4746)TCC>TTC | p.S1582F |
| Pat_40 | Post-Resistance | ATP11C       | 286410    | 37 | X | 138870439 | 138870439 | Missense_Mutation | SNP | C  | T  | 66  | 104 | c.1441G>A    | c.(1441-1443)GAT>AAT | p.D481N  |
| Pat_40 | Post-Resistance | MAGEC1       | 9947      | 37 | X | 140994583 | 140994583 | Nonsense_Mutation | SNP | A  | T  | 8   | 179 | c.1393A>T    | c.(1393-1395)AGA>TGA | p.R465*  |
| Pat_40 | Post-Resistance | MAGEC1       | 9947      | 37 | X | 140994585 | 140994585 | Missense_Mutation | SNP | A  | T  | 9   | 186 | c.1395A>T    | c.(1393-1395)AGA>AGT | p.R465S  |
| Pat_40 | Post-Resistance | SPANXN1      | 494118    | 37 | X | 144337239 | 144337239 | Nonsense_Mutation | SNP | A  | T  | 57  | 38  | c.124A>T     | c.(124-126)AAG>TAG   | p.K42*   |
| Pat_40 | Post-Resistance | MAGEA12      | 4111      | 37 | X | 151900242 | 151900242 | Missense_Mutation | SNP | C  | T  | 88  | 124 | c.559G>A     | c.(559-561)GAT>AAT   | p.D187N  |
| Pat_40 | Post-Resistance | SRPK3        | 26576     | 37 | X | 153049213 | 153049213 | Missense_Mutation | SNP | G  | A  | 3   | 34  | c.781G>A     | c.(781-783)GGT>AGT   | p.G261S  |
| Pat_40 | Post-Resistance | MPP1         | 4354      | 37 | X | 154011765 | 154011765 | Missense_Mutation | SNP | G  | A  | 26  | 49  | c.883C>T     | c.(883-885)CGC>TGC   | p.R295C  |
| Pat_40 | Post-Resistance | RAB39B       | 116442    | 37 | X | 154490329 | 154490329 | Missense_Mutation | SNP | G  | T  | 66  | 131 | c.401C>A     | c.(400-402)ACT>AAT   | p.T134N  |
| Pat_41 | Pre-Treatment   | CHD5         | 26038     | 37 | 1 | 6166767   | 6166767   | Missense_Mutation | SNP | C  | T  | 4   | 84  | c.5651G>A    | c.(5650-5652)CGC>CAC | p.R1884H |
| Pat_41 | Pre-Treatment   | TAS1R1       | 80835     | 37 | 1 | 6634701   | 6634701   | Missense_Mutation | SNP | C  | T  | 4   | 173 | c.509C>T     | c.(508-510)GCG>GTG   | p.A170V  |
| Pat_41 | Pre-Treatment   | ENO1         | 2023      | 37 | 1 | 8924017   | 8924017   | Missense_Mutation | SNP | C  | T  | 8   | 612 | c.1000G>A    | c.(1000-1002)GAG>AAG | p.E334K  |
| Pat_41 | Pre-Treatment   | VPS13D       | 55187     | 37 | 1 | 12368580  | 12368580  | Missense_Mutation | SNP | G  | A  | 5   | 449 | c.6532G>A    | c.(6532-6534)GCA>ACA | p.A2178T |
| Pat_41 | Pre-Treatment   | EPHA2        | 1969      | 37 | 1 | 16475418  | 16475418  | Missense_Mutation | SNP | C  | T  | 5   | 197 | c.278G>A     | c.(277-279)CGT>CAT   | p.R93H   |
| Pat_41 | Pre-Treatment   | MST1P9       | 11223     | 37 | 1 | 17085865  | 17085865  | Missense_Mutation | SNP | A  | G  | 3   | 61  | c.956T>C     | c.(955-957)CTC>CCC   | p.L319P  |
| Pat_41 | Pre-Treatment   | ALDH4A1      | 8659      | 37 | 1 | 19201071  | 19201071  | Missense_Mutation | SNP | C  | T  | 4   | 200 | c.1465G>A    | c.(1465-1467)GTC>ATC | p.V489I  |
| Pat_41 | Pre-Treatment   | HSPG2        | 3339      | 37 | 1 | 22188296  | 22188296  | Missense_Mutation | SNP | G  | A  | 4   | 58  | c.4909C>T    | c.(4909-4911)CGC>TGC | p.R1637C |
| Pat_41 | Pre-Treatment   | C1orf172     | 126695    | 37 | 1 | 27277919  | 27277919  | Missense_Mutation | SNP | C  | T  | 5   | 35  | c.953G>A     | c.(952-954)GGT>GAT   | p.G318D  |
| Pat_41 | Pre-Treatment   | TFAP2E       | 339488    | 37 | 1 | 36054105  | 36054105  | Missense_Mutation | SNP | C  | T  | 6   | 338 | c.737C>T     | c.(736-738)TCG>TTG   | p.S246L  |
| Pat_41 | Pre-Treatment   | KIAA0754     | 643314    | 37 | 1 | 39879806  | 39879806  | Missense_Mutation | SNP | T  | C  | 3   | 43  | c.3869T>C    | c.(3868-3870)CTA>CCA | p.L1290P |
| Pat_41 | Pre-Treatment   | KIAA0754     | 643314    | 37 | 1 | 39879817  | 39879817  | Missense_Mutation | SNP | G  | A  | 4   | 37  | c.3880G>A    | c.(3880-3882)GCC>ACC | p.A1294T |
| Pat_41 | Pre-Treatment   | CYP4B1       | 1580      | 37 | 1 | 47282803  | 47282803  | Missense_Mutation | SNP | G  | A  | 4   | 121 | c.1154G>A    | c.(1153-1155)CGC>CAC | p.R385H  |

|        |               |            |        |    |    |           |           |                   |     |    |    |    |     |                                               |                        |          |
|--------|---------------|------------|--------|----|----|-----------|-----------|-------------------|-----|----|----|----|-----|-----------------------------------------------|------------------------|----------|
| Pat_41 | Pre-Treatment | ELAVL4     | 1996   | 37 | 1  | 50610767  | 50610767  | Missense_Mutation | SNP | G  | A  | 4  | 225 | c.148G>A                                      | c.(148-150)GTC>ATC     | p.V50I   |
| Pat_41 | Pre-Treatment | ZCCHC11    | 23318  | 37 | 1  | 52991639  | 52991639  | Missense_Mutation | SNP | G  | A  | 5  | 447 | c.314C>T                                      | c.(313-315)CCG>CTG     | p.P105L  |
| Pat_41 | Pre-Treatment | KANK4      | 163782 | 37 | 1  | 62737205  | 62737205  | Missense_Mutation | SNP | G  | A  | 4  | 234 | c.1957C>T                                     | c.(1957-1959)CGT>TGT   | p.R653C  |
| Pat_41 | Pre-Treatment | JAK1       | 3716   | 37 | 1  | 65312338  | 65312338  | Missense_Mutation | SNP | C  | T  | 4  | 71  | c.1981G>A                                     | c.(1981-1983)GTG>ATG   | p.V661M  |
| Pat_41 | Pre-Treatment | ST6GALNAC3 | 256435 | 37 | 1  | 76779652  | 76779652  | Missense_Mutation | SNP | C  | T  | 15 | 154 | c.181C>T                                      | c.(181-183)CAC>TAC     | p.H61Y   |
| Pat_41 | Pre-Treatment | CELSR2     | 1952   | 37 | 1  | 109812339 | 109812339 | Missense_Mutation | SNP | C  | T  | 4  | 191 | c.7004C>T                                     | c.(7003-7005)TCG>TTG   | p.S2335L |
| Pat_41 | Pre-Treatment | PSMA5      | 5686   | 37 | 1  | 109957975 | 109957975 | Missense_Mutation | SNP | G  | A  | 6  | 165 | c.107C>T                                      | c.(106-108)ACA>ATA     | p.T36I   |
| Pat_41 | Pre-Treatment | ECM1       | 1893   | 37 | 1  | 150484015 | 150484015 | Missense_Mutation | SNP | A  | G  | 4  | 94  | c.791A>G                                      | c.(790-792)GAG>GGG     | p.E264G  |
| Pat_41 | Pre-Treatment | FLG2       | 388698 | 37 | 1  | 152324407 | 152324407 | Missense_Mutation | SNP | C  | G  | 7  | 683 | c.5855G>C                                     | c.(5854-5856)GGA>GCA   | p.G1952A |
| Pat_41 | Pre-Treatment | INTS3      | 65123  | 37 | 1  | 153723712 | 153723713 | Missense_Mutation | DNP | AC | TT | 5  | 102 | c.726_727AC>TT724-729)GAACGG>GATT(242_243ER>D |                        |          |
| Pat_41 | Pre-Treatment | MUC1       | 4582   | 37 | 1  | 155159796 | 155159796 | Missense_Mutation | SNP | G  | A  | 4  | 174 | c.883C>T                                      | c.(883-885)CGG>TGG     | p.R295W  |
| Pat_41 | Pre-Treatment | ISG20L2    | 81875  | 37 | 1  | 156697269 | 156697269 | Missense_Mutation | SNP | G  | A  | 15 | 203 | c.176C>T                                      | c.(175-177)TCA>TTA     | p.S59L   |
| Pat_41 | Pre-Treatment | OR10K1     | 391109 | 37 | 1  | 158435419 | 158435419 | Missense_Mutation | SNP | T  | A  | 10 | 120 | c.68T>A                                       | c.(67-69)CTG>CAG       | p.L23Q   |
| Pat_41 | Pre-Treatment | SPTA1      | 6708   | 37 | 1  | 158621161 | 158621161 | Missense_Mutation | SNP | C  | T  | 5  | 477 | c.3473G>A                                     | c.(3472-3474)CGG>CAG   | p.R1158Q |
| Pat_41 | Pre-Treatment | DARC       | 2532   | 37 | 1  | 159175495 | 159175495 | Missense_Mutation | SNP | G  | A  | 6  | 459 | c.266G>A                                      | c.(265-267)CGC>CAC     | p.R89H   |
| Pat_41 | Pre-Treatment | CRP        | 1401   | 37 | 1  | 159683792 | 159683793 | Missense_Mutation | DNP | CC | TT | 8  | 157 | c.197_198GG>AA                                | c.(196-198)GGG>GAA     | p.G66E   |
| Pat_41 | Pre-Treatment | USP21      | 27005  | 37 | 1  | 161134655 | 161134655 | Missense_Mutation | SNP | C  | T  | 15 | 266 | c.1415C>T                                     | c.(1414-1416)TCC>TTC   | p.S472F  |
| Pat_41 | Pre-Treatment | PTPRC      | 5788   | 37 | 1  | 198671552 | 198671552 | Missense_Mutation | SNP | C  | T  | 35 | 564 | c.470C>T                                      | c.(469-471)CCT>CTT     | p.P157L  |
| Pat_41 | Pre-Treatment | PPP1R12B   | 4660   | 37 | 1  | 202462390 | 202462390 | Missense_Mutation | SNP | C  | T  | 5  | 54  | c.2090C>T                                     | c.(2089-2091)CCA>CTA   | p.P697L  |
| Pat_41 | Pre-Treatment | ZC3H11A    | 9877   | 37 | 1  | 203821508 | 203821508 | Nonsense_Mutation | SNP | C  | G  | 4  | 90  | c.2414C>G                                     | c.(2413-2415)TCA>TGA   | p.S805*  |
| Pat_41 | Pre-Treatment | SDCCAG8    | 10806  | 37 | 1  | 243589838 | 243589838 | Missense_Mutation | SNP | G  | A  | 4  | 190 | c.1963G>A                                     | c.(1963-1965)GTA>ATA   | p.V655I  |
| Pat_41 | Pre-Treatment | DIP2C      | 22982  | 37 | 10 | 532401    | 532401    | Missense_Mutation | SNP | G  | A  | 4  | 167 | c.155C>T                                      | c.(154-156)CCG>CTG     | p.P52L   |
| Pat_41 | Pre-Treatment | A1CF       | 29974  | 37 | 10 | 52603882  | 52603882  | Missense_Mutation | SNP | C  | T  | 14 | 86  | c.100G>A                                      | c.(100-102)GAA>AAA     | p.E34K   |
| Pat_41 | Pre-Treatment | CTNNA3     | 29119  | 37 | 10 | 68940163  | 68940163  | Missense_Mutation | SNP | G  | A  | 5  | 185 | c.959C>T                                      | c.(958-960)ACG>ATG     | p.T320M  |
| Pat_41 | Pre-Treatment | TSPAN15    | 23555  | 37 | 10 | 71244945  | 71244945  | Missense_Mutation | SNP | G  | A  | 5  | 234 | c.331G>A                                      | c.(331-333)GTG>ATG     | p.V111M  |
| Pat_41 | Pre-Treatment | DLG5       | 9231   | 37 | 10 | 79579739  | 79579739  | Missense_Mutation | SNP | G  | A  | 5  | 166 | c.3440C>T                                     | c.(3439-3441)CCG>CTG   | p.P1147L |
| Pat_41 | Pre-Treatment | MYOF       | 26509  | 37 | 10 | 95093597  | 95093597  | Missense_Mutation | SNP | G  | A  | 4  | 100 | c.4637C>T                                     | c.(4636-4638)CCT>CTT   | p.P1546L |
| Pat_41 | Pre-Treatment | PIPSL      | 266971 | 37 | 10 | 95719498  | 95719498  | Missense_Mutation | SNP | G  | C  | 3  | 75  | c.1656C>G                                     | c.(1654-1656)GAC>GAG   | p.D552E  |
| Pat_41 | Pre-Treatment | MMS19      | 64210  | 37 | 10 | 99238117  | 99238117  | Missense_Mutation | SNP | G  | A  | 4  | 36  | c.292C>T                                      | c.(292-294)CGG>TGG     | p.R98W   |
| Pat_41 | Pre-Treatment | DNMBP      | 23268  | 37 | 10 | 101657896 | 101657896 | Missense_Mutation | SNP | G  | A  | 4  | 222 | c.2867C>T                                     | c.(2866-2868)GCG>GTG   | p.A956V  |
| Pat_41 | Pre-Treatment | POLL       | 27343  | 37 | 10 | 103339574 | 103339574 | Missense_Mutation | SNP | C  | T  | 3  | 74  | c.1364G>A                                     | c.(1363-1365)GGG>GAG   | p.G455E  |
| Pat_41 | Pre-Treatment | CUEDC2     | 79004  | 37 | 10 | 104184887 | 104184887 | Missense_Mutation | SNP | G  | T  | 4  | 98  | c.59C>A                                       | c.(58-60)CCG>CAG       | p.P20Q   |
| Pat_41 | Pre-Treatment | RPL13AP6   | 644511 | 37 | 10 | 112696573 | 112696573 | Missense_Mutation | SNP | T  | C  | 4  | 38  | c.419A>G                                      | c.(418-420)CAC>CGC     | p.H140R  |
| Pat_41 | Pre-Treatment | TACC2      | 10579  | 37 | 10 | 123842859 | 123842859 | Missense_Mutation | SNP | G  | A  | 4  | 200 | c.844G>A                                      | c.(844-846)GCC>ACC     | p.A282T  |
| Pat_41 | Pre-Treatment | CUZD1      | 50624  | 37 | 10 | 124596466 | 124596466 | Missense_Mutation | SNP | G  | A  | 10 | 235 | c.698C>T                                      | c.(697-699)ACT>ATT     | p.T233I  |
| Pat_41 | Pre-Treatment | B4GALNT4   | 338707 | 37 | 11 | 380355    | 380355    | Missense_Mutation | SNP | G  | A  | 4  | 148 | c.2779G>A                                     | c.(2779-2781)GGC>AGC   | p.G927S  |
| Pat_41 | Pre-Treatment | RNH1       | 6050   | 37 | 11 | 500626    | 500626    | Missense_Mutation | SNP | G  | A  | 16 | 92  | c.130C>T                                      | c.(130-132)CGG>TGG     | p.R44W   |
| Pat_41 | Pre-Treatment | MUC6       | 4588   | 37 | 11 | 1019280   | 1019280   | Missense_Mutation | SNP | G  | A  | 3  | 41  | c.4025C>T                                     | c.(4024-4026)ACG>ATG   | p.T1342M |
| Pat_41 | Pre-Treatment | MUC6       | 4588   | 37 | 11 | 1020252   | 1020252   | Missense_Mutation | SNP | G  | A  | 4  | 60  | c.3646C>T                                     | c.(3646-3648)CGG>TGG   | p.R1216W |
| Pat_41 | Pre-Treatment | MUC5B      | 727897 | 37 | 11 | 1271468   | 1271468   | Missense_Mutation | SNP | C  | T  | 7  | 282 | c.14777C>T                                    | c.(14776-14778)CCG>CTC | p.P4926L |
| Pat_41 | Pre-Treatment | MUC5B      | 727897 | 37 | 11 | 1271471   | 1271471   | Missense_Mutation | SNP | G  | C  | 7  | 269 | c.14780G>C                                    | c.(14779-14781)AGC>ACC | p.S4927T |
| Pat_41 | Pre-Treatment | MUC5B      | 727897 | 37 | 11 | 1272554   | 1272554   | Missense_Mutation | SNP | C  | T  | 6  | 307 | c.15410C>T                                    | c.(15409-15411)ACG>ATG | p.T5137M |
| Pat_41 | Pre-Treatment | UBQLNL     | 143630 | 37 | 11 | 5537331   | 5537331   | Missense_Mutation | SNP | C  | T  | 4  | 148 | c.341G>A                                      | c.(340-342)CGG>CAG     | p.R114Q  |
| Pat_41 | Pre-Treatment | OR52E4     | 390081 | 37 | 11 | 5905799   | 5905799   | Missense_Mutation | SNP | G  | A  | 11 | 226 | c.277G>A                                      | c.(277-279)GAG>AAG     | p.E93K   |
| Pat_41 | Pre-Treatment | MPPED2     | 744    | 37 | 11 | 30433088  | 30433088  | Missense_Mutation | SNP | G  | A  | 4  | 207 | c.812C>T                                      | c.(811-813)TCG>TTG     | p.S271L  |
| Pat_41 | Pre-Treatment | PTPRJ      | 5795   | 37 | 11 | 48149416  | 48149416  | Missense_Mutation | SNP | C  | T  | 6  | 367 | c.1178C>T                                     | c.(1177-1179)TCG>TTG   | p.S393L  |
| Pat_41 | Pre-Treatment | MAP4K2     | 5871   | 37 | 11 | 64566894  | 64566894  | Missense_Mutation | SNP | G  | A  | 9  | 233 | c.1052C>T                                     | c.(1051-1053)CCG>CTG   | p.P351L  |



|        |               |           |        |    |    |           |           |                   |     |   |   |    |     |                |                      |          |
|--------|---------------|-----------|--------|----|----|-----------|-----------|-------------------|-----|---|---|----|-----|----------------|----------------------|----------|
| Pat_41 | Pre-Treatment | CHKA      | 1119   | 37 | 11 | 67842270  | 67842270  | Missense_Mutation | SNP | C | T | 4  | 124 | c.544G>A       | c.(544-546)GTT>ATT   | p.V182I  |
| Pat_41 | Pre-Treatment | ATM       | 472    | 37 | 11 | 108235884 | 108235884 | Missense_Mutation | SNP | G | A | 17 | 220 | c.8926G>A      | c.(8926-8928)GAT>AAT | p.D2976N |
| Pat_41 | Pre-Treatment | BCL9L     | 283149 | 37 | 11 | 118772324 | 118772324 | Missense_Mutation | SNP | G | A | 4  | 217 | c.2128C>T      | c.(2128-2130)CGG>TGG | p.R710W  |
| Pat_41 | Pre-Treatment | KIRREL3   | 84623  | 37 | 11 | 126314916 | 126314916 | Missense_Mutation | SNP | G | A | 4  | 172 | c.1210C>T      | c.(1210-1212)CGT>TGT | p.R404C  |
| Pat_41 | Pre-Treatment | WNK1      | 65125  | 37 | 12 | 1005396   | 1005396   | Missense_Mutation | SNP | C | T | 7  | 104 | c.5743C>T      | c.(5743-5745)CCT>TCT | p.P1915S |
| Pat_41 | Pre-Treatment | MRPL51    | 51258  | 37 | 12 | 6601441   | 6601441   | Missense_Mutation | SNP | C | T | 6  | 343 | c.383G>A       | c.(382-384)CGA>CAA   | p.R128Q  |
| Pat_41 | Pre-Treatment | LRRC23    | 10233  | 37 | 12 | 7022090   | 7022090   | Nonsense_Mutation | SNP | C | T | 7  | 512 | c.955C>T       | c.(955-957)CGA>TGA   | p.R319*  |
| Pat_41 | Pre-Treatment | SLCO1B1   | 10599  | 37 | 12 | 21370086  | 21370086  | Missense_Mutation | SNP | G | A | 4  | 226 | c.1531G>A      | c.(1531-1533)GGT>AGT | p.G511S  |
| Pat_41 | Pre-Treatment | ITPR2     | 3709   | 37 | 12 | 26553126  | 26553126  | Missense_Mutation | SNP | C | T | 5  | 428 | c.7465G>A      | c.(7465-7467)GTG>ATG | p.V2489M |
| Pat_41 | Pre-Treatment | DDX11     | 1663   | 37 | 12 | 31237922  | 31237922  | Missense_Mutation | SNP | G | C | 6  | 43  | c.500G>C       | c.(499-501)AGA>ACA   | p.R167T  |
| Pat_41 | Pre-Treatment | DDX11     | 1663   | 37 | 12 | 31256617  | 31256617  | Missense_Mutation | SNP | T | C | 6  | 168 | c.2638T>C      | c.(2638-2640)TGT>CGT | p.C880R  |
| Pat_41 | Pre-Treatment | SFRS2IP   | 9169   | 37 | 12 | 46345434  | 46345434  | Missense_Mutation | SNP | T | C | 21 | 268 | c.296A>G       | c.(295-297)AAG>AGG   | p.K99R   |
| Pat_41 | Pre-Treatment | KCNH3     | 23416  | 37 | 12 | 49948198  | 49948198  | Missense_Mutation | SNP | C | T | 4  | 229 | c.1997C>T      | c.(1996-1998)ACG>ATG | p.T666M  |
| Pat_41 | Pre-Treatment | DIP2B     | 57609  | 37 | 12 | 51128860  | 51128860  | Missense_Mutation | SNP | C | T | 5  | 191 | c.4048C>T      | c.(4048-4050)CGT>TGT | p.R1350C |
| Pat_41 | Pre-Treatment | NR4A1     | 3164   | 37 | 12 | 52448795  | 52448795  | Missense_Mutation | SNP | C | T | 6  | 341 | c.683C>T       | c.(682-684)ACG>ATG   | p.T228M  |
| Pat_41 | Pre-Treatment | KRT73     | 319101 | 37 | 12 | 53003040  | 53003040  | Missense_Mutation | SNP | C | T | 4  | 228 | c.1357G>A      | c.(1357-1359)GTG>ATG | p.V453M  |
| Pat_41 | Pre-Treatment | NCKAP1L   | 3071   | 37 | 12 | 54894338  | 54894338  | Missense_Mutation | SNP | C | T | 5  | 415 | c.235C>T       | c.(235-237)CGT>TGT   | p.R79C   |
| Pat_41 | Pre-Treatment | NCKAP1L   | 3071   | 37 | 12 | 54917676  | 54917676  | Missense_Mutation | SNP | G | A | 5  | 194 | c.2092G>A      | c.(2092-2094)GTG>ATG | p.V698M  |
| Pat_41 | Pre-Treatment | OR6C1     | 390321 | 37 | 12 | 55714592  | 55714592  | Missense_Mutation | SNP | C | T | 15 | 137 | c.209C>T       | c.(208-210)TCG>TTG   | p.S70L   |
| Pat_41 | Pre-Treatment | BAZ2A     | 11176  | 37 | 12 | 56994000  | 56994000  | Missense_Mutation | SNP | C | T | 4  | 38  | c.4883G>A      | c.(4882-4884)GGC>GAC | p.G1628D |
| Pat_41 | Pre-Treatment | SHMT2     | 6472   | 37 | 12 | 57627789  | 57627789  | Missense_Mutation | SNP | C | T | 5  | 219 | c.1283C>T      | c.(1282-1284)GCC>GTC | p.A428V  |
| Pat_41 | Pre-Treatment | PPM1H     | 57460  | 37 | 12 | 63042293  | 63042293  | Missense_Mutation | SNP | T | A | 4  | 209 | c.1521A>T      | c.(1519-1521)TTA>TTT | p.L507F  |
| Pat_41 | Pre-Treatment | C12orf26  | 84190  | 37 | 12 | 82780698  | 82780698  | Missense_Mutation | SNP | T | A | 28 | 337 | c.376T>A       | c.(376-378)TTT>ATT   | p.F126I  |
| Pat_41 | Pre-Treatment | CDK17     | 5128   | 37 | 12 | 96674618  | 96674618  | Missense_Mutation | SNP | G | A | 4  | 150 | c.1502C>T      | c.(1501-1503)CCG>CTG | p.P501L  |
| Pat_41 | Pre-Treatment | GCN1L1    | 10985  | 37 | 12 | 120595667 | 120595667 | Missense_Mutation | SNP | C | T | 4  | 67  | c.3073G>A      | c.(3073-3075)GGG>AGG | p.G1025R |
| Pat_41 | Pre-Treatment | KDM2B     | 84678  | 37 | 12 | 122016778 | 122016778 | Missense_Mutation | SNP | C | T | 4  | 176 | c.200G>A       | c.(199-201)GGC>GAC   | p.G67D   |
| Pat_41 | Pre-Treatment | NCOR2     | 9612   | 37 | 12 | 124957628 | 124957628 | Missense_Mutation | SNP | G | A | 4  | 151 | c.461C>T       | c.(460-462)CCG>CTG   | p.P154L  |
| Pat_41 | Pre-Treatment | EP400     | 57634  | 37 | 12 | 132445261 | 132445261 | Missense_Mutation | SNP | A | C | 7  | 40  | c.97A>C        | c.(97-99)AAC>CAC     | p.N33H   |
| Pat_41 | Pre-Treatment | DDX51     | 317781 | 37 | 12 | 132624223 | 132624223 | Missense_Mutation | SNP | G | A | 5  | 82  | c.1931C>T      | c.(1930-1932)CCT>CTT | p.P644L  |
| Pat_41 | Pre-Treatment | MPHOSPH8  | 54737  | 37 | 13 | 20221066  | 20221066  | Missense_Mutation | SNP | G | A | 6  | 476 | c.853G>A       | c.(853-855)GAC>AAC   | p.D285N  |
| Pat_41 | Pre-Treatment | RASL11A   | 387496 | 37 | 13 | 27847209  | 27847209  | Missense_Mutation | SNP | G | A | 4  | 218 | c.307G>A       | c.(307-309)GTG>ATG   | p.V103M  |
| Pat_41 | Pre-Treatment | SLC25A30  | 253512 | 37 | 13 | 45980097  | 45980097  | Missense_Mutation | SNP | C | T | 4  | 120 | c.228G>A       | c.(226-228)ATG>ATA   | p.M76I   |
| Pat_41 | Pre-Treatment | ATP11A    | 23250  | 37 | 13 | 113508684 | 113508684 | Missense_Mutation | SNP | G | A | 4  | 96  | c.2083G>A      | c.(2083-2085)GCG>ACG | p.A695T  |
| Pat_41 | Pre-Treatment | MCF2L     | 23263  | 37 | 13 | 113730403 | 113730403 | Missense_Mutation | SNP | G | C | 6  | 67  | c.1603G>C      | c.(1603-1605)GAA>CAA | p.E535Q  |
| Pat_41 | Pre-Treatment | P704P     | 641455 | 37 | 14 | 20020008  | 20020008  | Missense_Mutation | SNP | C | G | 6  | 607 | c.213G>C       | c.(211-213)TGG>TGC   | p.W71C   |
| Pat_41 | Pre-Treatment | P704P     | 641455 | 37 | 14 | 20020013  | 20020013  | Missense_Mutation | SNP | G | C | 6  | 550 | c.208C>G       | c.(208-210)CCC>GCC   | p.P70A   |
| Pat_41 | Pre-Treatment | MYH6      | 4624   | 37 | 14 | 23855654  | 23855654  | Missense_Mutation | SNP | C | T | 5  | 294 | c.4829G>A      | c.(4828-4830)CGC>CAC | p.R1610H |
| Pat_41 | Pre-Treatment | COCH      | 1690   | 37 | 14 | 31355068  | 31355068  | Missense_Mutation | SNP | G | A | 5  | 245 | c.1027G>A      | c.(1027-1029)GTA>ATA | p.V343I  |
| Pat_41 | Pre-Treatment | STRN3     | 29966  | 37 | 14 | 31380279  | 31380279  | Missense_Mutation | SNP | G | A | 4  | 230 | c.1688C>T      | c.(1687-1689)CCG>CTG | p.P563L  |
| Pat_41 | Pre-Treatment | HECTD1    | 25831  | 37 | 14 | 31642515  | 31642515  | Nonsense_Mutation | SNP | G | A | 7  | 446 | c.1003C>T      | c.(1003-1005)CGA>TGA | p.R335*  |
| Pat_41 | Pre-Treatment | C14orf179 | 112752 | 37 | 14 | 76455273  | 76455273  | Missense_Mutation | SNP | G | A | 5  | 232 | c.100G>A       | c.(100-102)GAG>AAG   | p.E34K   |
| Pat_41 | Pre-Treatment | TECPR2    | 9895   | 37 | 14 | 102900744 | 102900744 | Missense_Mutation | SNP | C | A | 4  | 139 | c.1590C>A      | c.(1588-1590)TTC>TTA | p.F530L  |
| Pat_41 | Pre-Treatment | CDC42BPB  | 9578   | 37 | 14 | 103447186 | 103447186 | Missense_Mutation | SNP | G | A | 4  | 156 | c.1064C>T      | c.(1063-1065)GCA>GTA | p.A355V  |
| Pat_41 | Pre-Treatment | AKT1      | 207    | 37 | 14 | 105243030 | 105243030 | Missense_Mutation | SNP | C | T | 6  | 195 | c.253G>A       | c.(253-255)GAA>AAA   | p.E85K   |
| Pat_41 | Pre-Treatment | AHNAK2    | 113146 | 37 | 14 | 105420232 | 105420232 | Missense_Mutation | SNP | G | A | 4  | 152 | c.1556C>T      | c.(1555-1557)GCG>GTG | p.A519V  |
| Pat_41 | Pre-Treatment | PACS2     | 23241  | 37 | 14 | 105836206 | 105836206 | Missense_Mutation | SNP | C | G | 3  | 43  | c.770C>G       | c.(769-771)GCG>GGG   | p.A257G  |
| Pat_41 | Pre-Treatment | ADAM6     | 8755   | 37 | 14 | 106573144 | 106573144 | Splice_Site       | SNP | T | A | 4  | 86  | c.29299_splice | c.e1363-1            |          |

|        |               |           |        |    |    |          |          |                   |     |    |    |    |     |                |                       |               |
|--------|---------------|-----------|--------|----|----|----------|----------|-------------------|-----|----|----|----|-----|----------------|-----------------------|---------------|
| Pat_41 | Pre-Treatment | HERC2     | 8924   | 37 | 15 | 28377842 | 28377842 | Missense_Mutation | SNP | C  | T  | 4  | 147 | c.12365G>A     | .(12364-12366)CGG>CAC | p.R4122Q      |
| Pat_41 | Pre-Treatment | C15orf55  | 256646 | 37 | 15 | 34642939 | 34642939 | Missense_Mutation | SNP | A  | G  | 8  | 121 | c.760A>G       | c.(760-762)ACT>GCT    | p.T254A       |
| Pat_41 | Pre-Treatment | AQR       | 9716   | 37 | 15 | 35202473 | 35202473 | Missense_Mutation | SNP | C  | T  | 4  | 196 | c.1526G>A      | c.(1525-1527)CGA>CAA  | p.R509Q       |
| Pat_41 | Pre-Treatment | BUB1B     | 701    | 37 | 15 | 40477780 | 40477780 | Missense_Mutation | SNP | C  | T  | 4  | 220 | c.995C>T       | c.(994-996)GCT>GTT    | p.A332V       |
| Pat_41 | Pre-Treatment | ULK3      | 25989  | 37 | 15 | 75134640 | 75134640 | Missense_Mutation | SNP | A  | T  | 13 | 135 | c.224T>A       | c.(223-225)GTG>GAG    | p.V75E        |
| Pat_41 | Pre-Treatment | ADAMTSL3  | 57188  | 37 | 15 | 84442357 | 84442357 | Missense_Mutation | SNP | G  | A  | 4  | 162 | c.272G>A       | c.(271-273)TGT>TAT    | p.C91Y        |
| Pat_41 | Pre-Treatment | POLG      | 5428   | 37 | 15 | 89861811 | 89861811 | Missense_Mutation | SNP | C  | T  | 8  | 248 | c.3443G>A      | c.(3442-3444)CGC>CAC  | p.R1148H      |
| Pat_41 | Pre-Treatment | POLG      | 5428   | 37 | 15 | 89864150 | 89864150 | Missense_Mutation | SNP | C  | T  | 4  | 148 | c.2828G>A      | c.(2827-2829)CGT>CAT  | p.R943H       |
| Pat_41 | Pre-Treatment | NPRL3     | 8131   | 37 | 16 | 162729   | 162729   | Missense_Mutation | SNP | G  | A  | 4  | 63  | c.439C>T       | c.(439-441)CGT>TGT    | p.R147C       |
| Pat_41 | Pre-Treatment | MSLNL     | 401827 | 37 | 16 | 830799   | 830799   | Missense_Mutation | SNP | T  | G  | 6  | 393 | c.202A>C       | c.(202-204)ACC>CCC    | p.T68P        |
| Pat_41 | Pre-Treatment | RPUSD1    | 113000 | 37 | 16 | 836138   | 836138   | Missense_Mutation | SNP | C  | T  | 4  | 74  | c.751G>A       | c.(751-753)GTG>ATG    | p.V251M       |
| Pat_41 | Pre-Treatment | PTX4      | 390667 | 37 | 16 | 1537647  | 1537647  | Missense_Mutation | SNP | G  | A  | 3  | 45  | c.451C>T       | c.(451-453)CGC>TGC    | p.R151C       |
| Pat_41 | Pre-Treatment | ABCA3     | 21     | 37 | 16 | 2369709  | 2369709  | Missense_Mutation | SNP | G  | A  | 4  | 117 | c.746C>T       | c.(745-747)CCG>CTG    | p.P249L       |
| Pat_41 | Pre-Treatment | NTN3      | 4917   | 37 | 16 | 2522489  | 2522489  | Missense_Mutation | SNP | C  | T  | 4  | 103 | c.787C>T       | c.(787-789)CGG>TGG    | p.R263W       |
| Pat_41 | Pre-Treatment | CORO7     | 79585  | 37 | 16 | 4414276  | 4414276  | Splice_Site       | SNP | C  | T  | 3  | 24  | c.1275_splice  | c.e14+1               | p.S425_splice |
| Pat_41 | Pre-Treatment | ABAT      | 18     | 37 | 16 | 8866748  | 8866748  | Missense_Mutation | SNP | C  | T  | 13 | 105 | c.928C>T       | c.(928-930)CGG>TGG    | p.R310W       |
| Pat_41 | Pre-Treatment | UMOD      | 7369   | 37 | 16 | 20357602 | 20357602 | Missense_Mutation | SNP | G  | A  | 4  | 195 | c.1028C>T      | c.(1027-1029)TCG>TTG  | p.S343L       |
| Pat_41 | Pre-Treatment | RBBP6     | 5930   | 37 | 16 | 24580584 | 24580584 | Missense_Mutation | SNP | A  | T  | 13 | 182 | c.2573A>T      | c.(2572-2574)GAG>GTG  | p.E858V       |
| Pat_41 | Pre-Treatment | IL4R      | 3566   | 37 | 16 | 27374931 | 27374931 | Missense_Mutation | SNP | C  | T  | 4  | 95  | c.2258C>T      | c.(2257-2259)TCG>TTG  | p.S753L       |
| Pat_41 | Pre-Treatment | ZNF267    | 10308  | 37 | 16 | 31927690 | 31927690 | Missense_Mutation | SNP | G  | A  | 5  | 249 | c.2120G>A      | c.(2119-2121)CGG>CAG  | p.R707Q       |
| Pat_41 | Pre-Treatment | ZNF267    | 10308  | 37 | 16 | 31927702 | 31927702 | Missense_Mutation | SNP | G  | C  | 5  | 253 | c.2132G>C      | c.(2131-2133)AGT>ACT  | p.S711T       |
| Pat_41 | Pre-Treatment | SLC6A10P  | 386757 | 37 | 16 | 32890622 | 32890622 | Missense_Mutation | SNP | T  | G  | 4  | 73  | c.264A>C       | c.(262-264)AAA>AAC    | p.K88N        |
| Pat_41 | Pre-Treatment | ZNF423    | 23090  | 37 | 16 | 49660102 | 49660102 | Missense_Mutation | SNP | G  | A  | 40 | 363 | c.3556C>T      | c.(3556-3558)CAC>TAC  | p.H1186Y      |
| Pat_41 | Pre-Treatment | NOD2      | 64127  | 37 | 16 | 50744988 | 50744988 | Missense_Mutation | SNP | C  | T  | 4  | 186 | c.1166C>T      | c.(1165-1167)ACG>ATG  | p.T389M       |
| Pat_41 | Pre-Treatment | NUP93     | 9688   | 37 | 16 | 56832442 | 56832442 | Missense_Mutation | SNP | C  | T  | 4  | 145 | c.352C>T       | c.(352-354)CGG>TGG    | p.R118W       |
| Pat_41 | Pre-Treatment | NQO1      | 1728   | 37 | 16 | 69746963 | 69746963 | Missense_Mutation | SNP | C  | T  | 6  | 650 | c.487G>A       | c.(487-489)GGG>AGG    | p.G163R       |
| Pat_41 | Pre-Treatment | WVOX      | 51741  | 37 | 16 | 78466647 | 78466647 | Missense_Mutation | SNP | A  | G  | 32 | 490 | c.1054A>G      | c.(1054-1056)ATG>GTG  | p.M352V       |
| Pat_41 | Pre-Treatment | PKD1L2    | 114780 | 37 | 16 | 81181855 | 81181855 | Missense_Mutation | SNP | G  | A  | 4  | 109 | c.4861C>T      | c.(4861-4863)CGG>TGG  | p.R1621W      |
| Pat_41 | Pre-Treatment | GAN       | 8139   | 37 | 16 | 81399016 | 81399016 | Missense_Mutation | SNP | C  | T  | 5  | 356 | c.1435C>T      | c.(1435-1437)CGT>TGT  | p.R479C       |
| Pat_41 | Pre-Treatment | KLHL36    | 79786  | 37 | 16 | 84690665 | 84690665 | Missense_Mutation | SNP | G  | C  | 3  | 90  | c.252G>C       | c.(250-252)CAG>CAC    | p.Q84H        |
| Pat_41 | Pre-Treatment | PRDM7     | 11105  | 37 | 16 | 90126823 | 90126823 | Missense_Mutation | SNP | T  | G  | 5  | 165 | c.1159A>C      | c.(1159-1161)ATG>CTG  | p.M387L       |
| Pat_41 | Pre-Treatment | SMG6      | 23293  | 37 | 17 | 2203337  | 2203337  | Missense_Mutation | SNP | C  | T  | 4  | 141 | c.710G>A       | c.(709-711)AGG>AAG    | p.R237K       |
| Pat_41 | Pre-Treatment | ANKFY1    | 51479  | 37 | 17 | 4074017  | 4074017  | Missense_Mutation | SNP | C  | T  | 4  | 163 | c.3278G>A      | c.(3277-3279)CGA>CAA  | p.R1093Q      |
| Pat_41 | Pre-Treatment | POLR2A    | 5430   | 37 | 17 | 7401483  | 7401483  | Missense_Mutation | SNP | G  | A  | 4  | 141 | c.1289G>A      | c.(1288-1290)CGT>CAT  | p.R430H       |
| Pat_41 | Pre-Treatment | TP53      | 7157   | 37 | 17 | 7577139  | 7577139  | Missense_Mutation | SNP | G  | C  | 5  | 29  | c.799C>G       | c.(799-801)CGG>GGG    | p.R267G       |
| Pat_41 | Pre-Treatment | NLK       | 51701  | 37 | 17 | 26495646 | 26495646 | Missense_Mutation | SNP | G  | A  | 5  | 209 | c.1010G>A      | c.(1009-1011)CGA>CAA  | p.R337Q       |
| Pat_41 | Pre-Treatment | CORO6     | 84940  | 37 | 17 | 27943849 | 27943849 | Missense_Mutation | SNP | C  | T  | 8  | 272 | c.875G>A       | c.(874-876)CGG>CAG    | p.R292Q       |
| Pat_41 | Pre-Treatment | MLLT6     | 4302   | 37 | 17 | 36863766 | 36863766 | Missense_Mutation | SNP | G  | A  | 4  | 202 | c.217G>A       | c.(217-219)GGG>AGG    | p.G73R        |
| Pat_41 | Pre-Treatment | KRT28     | 162605 | 37 | 17 | 38953286 | 38953286 | Missense_Mutation | SNP | G  | A  | 4  | 88  | c.860C>T       | c.(859-861)TCG>TTG    | p.S287L       |
| Pat_41 | Pre-Treatment | KRTAP4-11 | 653240 | 37 | 17 | 39274310 | 39274311 | Missense_Mutation | DNP | CT | TC | 4  | 162 | c.257_258AG>GA | c.(256-258)AAG>AGA    | p.K86R        |
| Pat_41 | Pre-Treatment | HOXB3     | 3213   | 37 | 17 | 46628349 | 46628349 | Missense_Mutation | SNP | G  | A  | 5  | 461 | c.643C>T       | c.(643-645)CGG>TGG    | p.R215W       |
| Pat_41 | Pre-Treatment | LRRRC59   | 55379  | 37 | 17 | 48465438 | 48465438 | Missense_Mutation | SNP | C  | T  | 6  | 419 | c.485G>A       | c.(484-486)CGG>CAG    | p.R162Q       |
| Pat_41 | Pre-Treatment | RNF43     | 54894  | 37 | 17 | 56435252 | 56435252 | Missense_Mutation | SNP | C  | T  | 4  | 166 | c.1885G>A      | c.(1885-1887)GCC>ACC  | p.A629T       |
| Pat_41 | Pre-Treatment | TNRC6C    | 57690  | 37 | 17 | 76047011 | 76047011 | Missense_Mutation | SNP | G  | A  | 4  | 184 | c.1868G>A      | c.(1867-1869)AGT>AAT  | p.S623N       |
| Pat_41 | Pre-Treatment | RPTOR     | 57521  | 37 | 17 | 78933974 | 78933974 | Missense_Mutation | SNP | G  | A  | 5  | 113 | c.3574G>A      | c.(3574-3576)GTC>ATC  | p.V1192I      |
| Pat_41 | Pre-Treatment | EMILIN2   | 84034  | 37 | 18 | 2885114  | 2885114  | Missense_Mutation | SNP | G  | A  | 11 | 174 | c.410G>A       | c.(409-411)CGA>CAA    | p.R137Q       |
| Pat_41 | Pre-Treatment | DLGAP1    | 9229   | 37 | 18 | 3879678  | 3879678  | Missense_Mutation | SNP | G  | A  | 15 | 249 | c.391C>T       | c.(391-393)CGC>TGC    | p.R131C       |

|        |               |          |        |    |    |           |           |                   |     |   |   |    |     |            |                        |           |
|--------|---------------|----------|--------|----|----|-----------|-----------|-------------------|-----|---|---|----|-----|------------|------------------------|-----------|
| Pat_41 | Pre-Treatment | CEP192   | 55125  | 37 | 18 | 13055903  | 13055903  | Missense_Mutation | SNP | C | T | 10 | 153 | c.3314C>T  | c.(3313-3315)TCA>TTA   | p.S1105L  |
| Pat_41 | Pre-Treatment | ASXL3    | 80816  | 37 | 18 | 31251776  | 31251776  | Missense_Mutation | SNP | C | T | 4  | 69  | c.661C>T   | c.(661-663)CCC>TCC     | p.P221S   |
| Pat_41 | Pre-Treatment | ZBTB7C   | 201501 | 37 | 18 | 45556097  | 45556097  | Missense_Mutation | SNP | C | T | 3  | 27  | c.1394G>A  | c.(1393-1395)CGC>CAC   | p.R465H   |
| Pat_41 | Pre-Treatment | MYO5B    | 4645   | 37 | 18 | 47500907  | 47500907  | Missense_Mutation | SNP | G | A | 5  | 363 | c.1135C>T  | c.(1135-1137)CGC>TGC   | p.R379C   |
| Pat_41 | Pre-Treatment | CTDP1    | 9150   | 37 | 18 | 77513743  | 77513743  | Missense_Mutation | SNP | G | A | 4  | 70  | c.2839G>A  | c.(2839-2841)GAC>AAC   | p.D947N   |
| Pat_41 | Pre-Treatment | ZNF556   | 80032  | 37 | 19 | 2877321   | 2877321   | Missense_Mutation | SNP | G | A | 4  | 112 | c.365G>A   | c.(364-366)CGT>CAT     | p.R122H   |
| Pat_41 | Pre-Treatment | NCLN     | 56926  | 37 | 19 | 3207456   | 3207456   | Missense_Mutation | SNP | G | A | 4  | 219 | c.1621G>A  | c.(1621-1623)GTG>ATG   | p.V541M   |
| Pat_41 | Pre-Treatment | STAP2    | 55620  | 37 | 19 | 4325471   | 4325471   | Missense_Mutation | SNP | G | A | 5  | 275 | c.901C>T   | c.(901-903)CCC>TCC     | p.P301S   |
| Pat_41 | Pre-Treatment | PLIN4    | 729359 | 37 | 19 | 4511094   | 4511094   | Missense_Mutation | SNP | C | T | 4  | 139 | c.2836G>A  | c.(2836-2838)GCT>ACT   | p.A946T   |
| Pat_41 | Pre-Treatment | KIAA1543 | 57662  | 37 | 19 | 7675610   | 7675610   | Missense_Mutation | SNP | G | A | 5  | 228 | c.925G>A   | c.(925-927)GAG>AAG     | p.E309K   |
| Pat_41 | Pre-Treatment | MUC16    | 94025  | 37 | 19 | 9045743   | 9045743   | Missense_Mutation | SNP | C | T | 4  | 137 | c.35888G>A | c.(35887-35889)AGT>AAT | p.S11963N |
| Pat_41 | Pre-Treatment | MUC16    | 94025  | 37 | 19 | 9084835   | 9084835   | Missense_Mutation | SNP | G | A | 6  | 76  | c.6980C>T  | c.(6979-6981)TCC>TTC   | p.S2327F  |
| Pat_41 | Pre-Treatment | ZNF564   | 163050 | 37 | 19 | 12638407  | 12638407  | Missense_Mutation | SNP | G | A | 6  | 383 | c.515C>T   | c.(514-516)CCG>CTG     | p.P172L   |
| Pat_41 | Pre-Treatment | FBXW9    | 84261  | 37 | 19 | 12805466  | 12805466  | Missense_Mutation | SNP | G | A | 4  | 94  | c.590C>T   | c.(589-591)ACG>ATG     | p.T197M   |
| Pat_41 | Pre-Treatment | SYDE1    | 85360  | 37 | 19 | 15224616  | 15224616  | Missense_Mutation | SNP | G | A | 6  | 426 | c.2050G>A  | c.(2050-2052)GAG>AAG   | p.E684K   |
| Pat_41 | Pre-Treatment | ILVBL    | 10994  | 37 | 19 | 15228714  | 15228714  | Nonsense_Mutation | SNP | C | T | 14 | 152 | c.1164G>A  | c.(1162-1164)TGG>TGA   | p.W388*   |
| Pat_41 | Pre-Treatment | TMEM38A  | 79041  | 37 | 19 | 16791303  | 16791303  | Missense_Mutation | SNP | G | A | 6  | 431 | c.377G>A   | c.(376-378)CGA>CAA     | p.R126Q   |
| Pat_41 | Pre-Treatment | FAM129C  | 199786 | 37 | 19 | 17654201  | 17654201  | Missense_Mutation | SNP | G | A | 5  | 321 | c.1498G>A  | c.(1498-1500)GCT>ACT   | p.A500T   |
| Pat_41 | Pre-Treatment | ZNF626   | 199777 | 37 | 19 | 20808006  | 20808006  | Missense_Mutation | SNP | T | C | 7  | 403 | c.677A>G   | c.(676-678)GAG>GGG     | p.E226G   |
| Pat_41 | Pre-Treatment | ZNF493   | 284443 | 37 | 19 | 21606468  | 21606468  | Missense_Mutation | SNP | C | T | 4  | 172 | c.623C>T   | c.(622-624)CCT>CTT     | p.P208L   |
| Pat_41 | Pre-Treatment | ZNF91    | 7644   | 37 | 19 | 23544783  | 23544783  | Missense_Mutation | SNP | C | T | 8  | 537 | c.998G>A   | c.(997-999)CGT>CAT     | p.R333H   |
| Pat_41 | Pre-Treatment | HAUS5    | 23354  | 37 | 19 | 36110393  | 36110393  | Missense_Mutation | SNP | G | A | 3  | 38  | c.1247G>A  | c.(1246-1248)CGG>CAG   | p.R416Q   |
| Pat_41 | Pre-Treatment | IL28B    | 282617 | 37 | 19 | 39735086  | 39735086  | Missense_Mutation | SNP | G | A | 3  | 31  | c.229C>T   | c.(229-231)CCC>TCC     | p.P77S    |
| Pat_41 | Pre-Treatment | ZNF780B  | 163131 | 37 | 19 | 40541297  | 40541297  | Missense_Mutation | SNP | C | T | 6  | 300 | c.1469G>A  | c.(1468-1470)CGA>CAA   | p.R490Q   |
| Pat_41 | Pre-Treatment | CCDC97   | 90324  | 37 | 19 | 41828519  | 41828519  | Missense_Mutation | SNP | G | A | 5  | 310 | c.931G>A   | c.(931-933)GAC>AAC     | p.D311N   |
| Pat_41 | Pre-Treatment | PSG3     | 5671   | 37 | 19 | 43234208  | 43234208  | Missense_Mutation | SNP | G | A | 5  | 425 | c.710C>T   | c.(709-711)CCG>CTG     | p.P237L   |
| Pat_41 | Pre-Treatment | PSG5     | 5673   | 37 | 19 | 43689023  | 43689023  | Missense_Mutation | SNP | C | A | 54 | 757 | c.341G>T   | c.(340-342)CCG>CTG     | p.R114L   |
| Pat_41 | Pre-Treatment | SYMPK    | 8189   | 37 | 19 | 46338422  | 46338422  | Missense_Mutation | SNP | G | A | 4  | 188 | c.1307C>T  | c.(1306-1308)CCC>CTC   | p.P436L   |
| Pat_41 | Pre-Treatment | CRX      | 1406   | 37 | 19 | 48339605  | 48339605  | Missense_Mutation | SNP | G | A | 4  | 144 | c.206G>A   | c.(205-207)CGT>CAT     | p.R69H    |
| Pat_41 | Pre-Treatment | PPFIA3   | 8541   | 37 | 19 | 49637315  | 49637315  | Missense_Mutation | SNP | G | A | 5  | 260 | c.1270G>A  | c.(1270-1272)GAT>AAT   | p.D424N   |
| Pat_41 | Pre-Treatment | AP2A1    | 160    | 37 | 19 | 50270427  | 50270427  | Missense_Mutation | SNP | C | T | 4  | 144 | c.37C>T    | c.(37-39)CTC>TTC       | p.L13F    |
| Pat_41 | Pre-Treatment | ZNF649   | 65251  | 37 | 19 | 52394736  | 52394736  | Missense_Mutation | SNP | T | C | 4  | 233 | c.653A>G   | c.(652-654)AAG>AGG     | p.K218R   |
| Pat_41 | Pre-Treatment | ZNF578   | 147660 | 37 | 19 | 53014551  | 53014551  | Missense_Mutation | SNP | G | A | 7  | 393 | c.917G>A   | c.(916-918)CGT>CAT     | p.R306H   |
| Pat_41 | Pre-Treatment | ZNF845   | 91664  | 37 | 19 | 53856702  | 53856702  | Missense_Mutation | SNP | G | A | 9  | 264 | c.2774G>A  | c.(2773-2775)CGT>CAT   | p.R925H   |
| Pat_41 | Pre-Treatment | ZNF845   | 91664  | 37 | 19 | 53856761  | 53856761  | Missense_Mutation | SNP | T | C | 6  | 180 | c.2833T>C  | c.(2833-2835)TGT>CGT   | p.C945R   |
| Pat_41 | Pre-Treatment | LILRA3   | 11026  | 37 | 19 | 54802193  | 54802193  | Missense_Mutation | SNP | G | A | 3  | 67  | c.995C>T   | c.(994-996)CCG>CTG     | p.P332L   |
| Pat_41 | Pre-Treatment | ZBTB45   | 84878  | 37 | 19 | 59028425  | 59028425  | Nonsense_Mutation | SNP | G | A | 5  | 472 | c.616C>T   | c.(616-618)CGA>TGA     | p.R206*   |
| Pat_41 | Pre-Treatment | PDIA6    | 10130  | 37 | 2  | 10942730  | 10942730  | Missense_Mutation | SNP | C | A | 14 | 226 | c.56G>T    | c.(55-57)GGT>GTT       | p.G19V    |
| Pat_41 | Pre-Treatment | KIF3C    | 3797   | 37 | 2  | 26204170  | 26204170  | Missense_Mutation | SNP | C | T | 4  | 169 | c.617G>A   | c.(616-618)AGC>AAC     | p.S206N   |
| Pat_41 | Pre-Treatment | GPR113   | 165082 | 37 | 2  | 26537309  | 26537309  | Missense_Mutation | SNP | C | T | 4  | 123 | c.1105G>A  | c.(1105-1107)GCC>ACC   | p.A369T   |
| Pat_41 | Pre-Treatment | SEMA4F   | 10505  | 37 | 2  | 74889932  | 74889932  | Missense_Mutation | SNP | G | A | 8  | 293 | c.530G>A   | c.(529-531)CGG>CAG     | p.R177Q   |
| Pat_41 | Pre-Treatment | VWA3B    | 200403 | 37 | 2  | 98866818  | 98866818  | Missense_Mutation | SNP | A | C | 18 | 157 | c.2711A>C  | c.(2710-2712)AAG>ACG   | p.K904T   |
| Pat_41 | Pre-Treatment | MAP4K4   | 9448   | 37 | 2  | 102486786 | 102486786 | Missense_Mutation | SNP | C | T | 3  | 46  | c.2426C>T  | c.(2425-2427)ACG>ATG   | p.T809M   |
| Pat_41 | Pre-Treatment | ZC3H6    | 376940 | 37 | 2  | 113089358 | 113089358 | Missense_Mutation | SNP | G | A | 4  | 213 | c.2863G>A  | c.(2863-2865)GGT>AGT   | p.G955S   |
| Pat_41 | Pre-Treatment | POLR1B   | 84172  | 37 | 2  | 113333019 | 113333019 | Missense_Mutation | SNP | G | A | 22 | 267 | c.3121G>A  | c.(3121-3123)GAA>AAA   | p.E1041K  |
| Pat_41 | Pre-Treatment | TMEM177  | 80775  | 37 | 2  | 120439210 | 120439210 | Missense_Mutation | SNP | C | T | 4  | 124 | c.781C>T   | c.(781-783)CGC>TGC     | p.R261C   |
| Pat_41 | Pre-Treatment | POTEF    | 728378 | 37 | 2  | 130877802 | 130877802 | Missense_Mutation | SNP | T | C | 6  | 680 | c.287A>G   | c.(286-288)AAC>AGC     | p.N96S    |

|        |               |           |        |    |    |           |           |                   |     |    |    |    |     |                |                        |          |
|--------|---------------|-----------|--------|----|----|-----------|-----------|-------------------|-----|----|----|----|-----|----------------|------------------------|----------|
| Pat_41 | Pre-Treatment | NEB       | 4703   | 37 | 2  | 152426597 | 152426597 | Missense_Mutation | SNP | C  | T  | 4  | 27  | c.12325G>A     | c.(12325-12327)GAT>AAT | p.D4109N |
| Pat_41 | Pre-Treatment | LY75      | 4065   | 37 | 2  | 160690699 | 160690699 | Missense_Mutation | SNP | G  | A  | 16 | 224 | c.3697C>T      | c.(3697-3699)CCA>TCA   | p.P1233S |
| Pat_41 | Pre-Treatment | COL3A1    | 1281   | 37 | 2  | 189873777 | 189873777 | Missense_Mutation | SNP | C  | T  | 5  | 322 | c.3653C>T      | c.(3652-3654)CCG>CTG   | p.P1218L |
| Pat_41 | Pre-Treatment | DNAH7     | 56171  | 37 | 2  | 196801470 | 196801470 | Missense_Mutation | SNP | C  | T  | 4  | 108 | c.3125G>A      | c.(3124-3126)AGG>AAG   | p.R1042K |
| Pat_41 | Pre-Treatment | FN1       | 2335   | 37 | 2  | 216236954 | 216236954 | Missense_Mutation | SNP | G  | A  | 12 | 126 | c.6392C>T      | c.(6391-6393)TCT>TTT   | p.S2131F |
| Pat_41 | Pre-Treatment | NCL       | 4691   | 37 | 2  | 232319964 | 232319964 | Nonsense_Mutation | SNP | G  | A  | 4  | 192 | c.2071C>T      | c.(2071-2073)CGA>TGA   | p.R691*  |
| Pat_41 | Pre-Treatment | ALPP      | 250    | 37 | 2  | 233244579 | 233244579 | Missense_Mutation | SNP | C  | T  | 4  | 127 | c.590C>T       | c.(589-591)CCT>CTT     | p.P197L  |
| Pat_41 | Pre-Treatment | COL6A3    | 1293   | 37 | 2  | 238243521 | 238243521 | Missense_Mutation | SNP | G  | A  | 4  | 241 | c.8977C>T      | c.(8977-8979)CGT>TGT   | p.R2993C |
| Pat_41 | Pre-Treatment | OR6B2     | 389090 | 37 | 2  | 240969130 | 240969131 | Missense_Mutation | DNP | AG | GA | 4  | 105 | c.716_717CT>TC | c.(715-717)TCT>TTC     | p.S239F  |
| Pat_41 | Pre-Treatment | SNAP25    | 6616   | 37 | 20 | 10279933  | 10279933  | Missense_Mutation | SNP | G  | A  | 34 | 604 | c.425G>A       | c.(424-426)CGA>CAA     | p.R142Q  |
| Pat_41 | Pre-Treatment | GGTLC1    | 92086  | 37 | 20 | 23966333  | 23966333  | Missense_Mutation | SNP | C  | T  | 5  | 305 | c.502G>A       | c.(502-504)GTC>ATC     | p.V168I  |
| Pat_41 | Pre-Treatment | PTPRT     | 11122  | 37 | 20 | 40790038  | 40790038  | Missense_Mutation | SNP | G  | A  | 4  | 227 | c.2636C>T      | c.(2635-2637)ACG>ATG   | p.T879M  |
| Pat_41 | Pre-Treatment | LAMA5     | 3911   | 37 | 20 | 60927114  | 60927114  | Missense_Mutation | SNP | C  | T  | 4  | 79  | c.709G>A       | c.(709-711)GGA>AGA     | p.G237R  |
| Pat_41 | Pre-Treatment | DIDO1     | 11083  | 37 | 20 | 61542508  | 61542508  | Missense_Mutation | SNP | C  | T  | 4  | 161 | c.457G>A       | c.(457-459)GAT>AAT     | p.D153N  |
| Pat_41 | Pre-Treatment | KRTAP10-7 | 386675 | 37 | 21 | 46021245  | 46021245  | Missense_Mutation | SNP | G  | A  | 9  | 703 | c.709G>A       | c.(709-711)GTC>ATC     | p.V237I  |
| Pat_41 | Pre-Treatment | MCM3AP    | 8888   | 37 | 21 | 47703734  | 47703734  | Missense_Mutation | SNP | G  | A  | 4  | 193 | c.1238C>T      | c.(1237-1239)CCG>CTG   | p.P413L  |
| Pat_41 | Pre-Treatment | PI4KA     | 5297   | 37 | 22 | 21087345  | 21087345  | Missense_Mutation | SNP | C  | T  | 4  | 87  | c.4028G>A      | c.(4027-4029)CGT>CAT   | p.R1343H |
| Pat_41 | Pre-Treatment | ZNF70     | 7621   | 37 | 22 | 24086331  | 24086331  | Missense_Mutation | SNP | C  | T  | 4  | 233 | c.997G>A       | c.(997-999)GAG>AAG     | p.E333K  |
| Pat_41 | Pre-Treatment | SLC2A11   | 66035  | 37 | 22 | 24226594  | 24226594  | Missense_Mutation | SNP | G  | A  | 4  | 124 | c.1268G>A      | c.(1267-1269)GGC>GAC   | p.G423D  |
| Pat_41 | Pre-Treatment | SSTR3     | 6753   | 37 | 22 | 37602887  | 37602887  | Missense_Mutation | SNP | C  | T  | 4  | 159 | c.956G>A       | c.(955-957)CGC>CAC     | p.R319H  |
| Pat_41 | Pre-Treatment | MGAT3     | 4248   | 37 | 22 | 39884335  | 39884335  | Missense_Mutation | SNP | T  | C  | 5  | 308 | c.983T>C       | c.(982-984)CTT>CCT     | p.L328P  |
| Pat_41 | Pre-Treatment | MEI1      | 150365 | 37 | 22 | 42172199  | 42172199  | Missense_Mutation | SNP | G  | A  | 5  | 130 | c.2638G>A      | c.(2638-2640)GGT>AGT   | p.G880S  |
| Pat_41 | Pre-Treatment | ZNF860    | 344787 | 37 | 3  | 32031962  | 32031962  | Missense_Mutation | SNP | A  | G  | 22 | 437 | c.1391A>G      | c.(1390-1392)CAT>CGT   | p.H464R  |
| Pat_41 | Pre-Treatment | TRANK1    | 9881   | 37 | 3  | 36871069  | 36871069  | Missense_Mutation | SNP | C  | T  | 5  | 175 | c.7013G>A      | c.(7012-7014)CGC>CAC   | p.R2338H |
| Pat_41 | Pre-Treatment | MST1R     | 4486   | 37 | 3  | 49940664  | 49940664  | Missense_Mutation | SNP | G  | A  | 20 | 205 | c.379C>T       | c.(379-381)CCC>TCC     | p.P127S  |
| Pat_41 | Pre-Treatment | GNAI2     | 2771   | 37 | 3  | 50293707  | 50293707  | Missense_Mutation | SNP | C  | T  | 4  | 171 | c.548C>T       | c.(547-549)ACG>ATG     | p.T183M  |
| Pat_41 | Pre-Treatment | GRM2      | 2912   | 37 | 3  | 51749086  | 51749086  | Missense_Mutation | SNP | C  | T  | 4  | 127 | c.1297C>T      | c.(1297-1299)CGC>TGC   | p.R433C  |
| Pat_41 | Pre-Treatment | TLR9      | 54106  | 37 | 3  | 52263753  | 52263753  | Missense_Mutation | SNP | C  | T  | 4  | 116 | c.218G>A       | c.(217-219)CGA>CAA     | p.R73Q   |
| Pat_41 | Pre-Treatment | MAGI1     | 9223   | 37 | 3  | 66023736  | 66023736  | Missense_Mutation | SNP | C  | T  | 5  | 355 | c.248G>A       | c.(247-249)CGC>CAC     | p.R83H   |
| Pat_41 | Pre-Treatment | UBA3      | 9039   | 37 | 3  | 69112237  | 69112237  | Missense_Mutation | SNP | G  | A  | 5  | 220 | c.589C>T       | c.(589-591)CCT>TCT     | p.P197S  |
| Pat_41 | Pre-Treatment | FAM86D    | 692099 | 37 | 3  | 75476581  | 75476581  | Missense_Mutation | SNP | C  | T  | 3  | 48  | c.484G>A       | c.(484-486)GCA>ACA     | p.A162T  |
| Pat_41 | Pre-Treatment | ABI3BP    | 25890  | 37 | 3  | 100489784 | 100489784 | Missense_Mutation | SNP | C  | T  | 4  | 191 | c.2411G>A      | c.(2410-2412)CGA>CAA   | p.R804Q  |
| Pat_41 | Pre-Treatment | PLXND1    | 23129  | 37 | 3  | 129290536 | 129290536 | Missense_Mutation | SNP | G  | A  | 4  | 213 | c.3229C>T      | c.(3229-3231)CGC>TGC   | p.R1077C |
| Pat_41 | Pre-Treatment | TMCC1     | 23023  | 37 | 3  | 129370592 | 129370592 | Missense_Mutation | SNP | T  | A  | 4  | 156 | c.1694A>T      | c.(1693-1695)CAG>CTG   | p.Q565L  |
| Pat_41 | Pre-Treatment | C3orf57   | 165679 | 37 | 3  | 161064020 | 161064020 | Missense_Mutation | SNP | C  | T  | 9  | 163 | c.92G>A        | c.(91-93)CGA>CAA       | p.R31Q   |
| Pat_41 | Pre-Treatment | ACTL6A    | 86     | 37 | 3  | 179291252 | 179291252 | Missense_Mutation | SNP | G  | A  | 4  | 114 | c.373G>A       | c.(373-375)GCA>ACA     | p.A125T  |
| Pat_41 | Pre-Treatment | ALG3      | 10195  | 37 | 3  | 183961676 | 183961676 | Missense_Mutation | SNP | G  | A  | 3  | 49  | c.835C>T       | c.(835-837)CTC>TTC     | p.L279F  |
| Pat_41 | Pre-Treatment | EIF4G1    | 1981   | 37 | 3  | 184042681 | 184042681 | Missense_Mutation | SNP | C  | T  | 4  | 218 | c.2635C>T      | c.(2635-2637)CGC>TGC   | p.R879C  |
| Pat_41 | Pre-Treatment | EPHB3     | 2049   | 37 | 3  | 184298637 | 184298637 | Nonsense_Mutation | SNP | C  | T  | 4  | 210 | c.2509C>T      | c.(2509-2511)CGA>TGA   | p.R837*  |
| Pat_41 | Pre-Treatment | TBC1D14   | 57533  | 37 | 4  | 7026952   | 7026952   | Missense_Mutation | SNP | C  | T  | 4  | 126 | c.1979C>T      | c.(1978-1980)ACG>ATG   | p.T660M  |
| Pat_41 | Pre-Treatment | SORCS2    | 57537  | 37 | 4  | 7725544   | 7725544   | Missense_Mutation | SNP | C  | T  | 4  | 138 | c.2545C>T      | c.(2545-2547)CGC>TGC   | p.R849C  |
| Pat_41 | Pre-Treatment | PCDH7     | 5099   | 37 | 4  | 30726141  | 30726141  | Missense_Mutation | SNP | G  | A  | 4  | 150 | c.3097G>A      | c.(3097-3099)GCA>ACA   | p.A1033T |
| Pat_41 | Pre-Treatment | LIMCH1    | 22998  | 37 | 4  | 41684416  | 41684416  | Missense_Mutation | SNP | G  | C  | 8  | 135 | c.2632G>C      | c.(2632-2634)GGA>CGA   | p.G878R  |
| Pat_41 | Pre-Treatment | MUC7      | 4589   | 37 | 4  | 71346978  | 71346978  | Missense_Mutation | SNP | T  | C  | 6  | 622 | c.517T>C       | c.(517-519)TCT>CCT     | p.S173P  |
| Pat_41 | Pre-Treatment | KIAA1109  | 84162  | 37 | 4  | 123167965 | 123167965 | Missense_Mutation | SNP | G  | A  | 4  | 234 | c.5312G>A      | c.(5311-5313)AGA>AAA   | p.R1771K |
| Pat_41 | Pre-Treatment | GAB1      | 2549   | 37 | 4  | 144387286 | 144387286 | Missense_Mutation | SNP | G  | A  | 5  | 345 | c.1834G>A      | c.(1834-1836)GGA>AGA   | p.G612R  |
| Pat_41 | Pre-Treatment | TIGD4     | 201798 | 37 | 4  | 153691826 | 153691826 | Missense_Mutation | SNP | G  | A  | 6  | 388 | c.331C>T       | c.(331-333)CGT>TGT     | p.R111C  |

|        |               |          |        |    |   |           |           |                   |     |    |    |    |     |                |                          |          |
|--------|---------------|----------|--------|----|---|-----------|-----------|-------------------|-----|----|----|----|-----|----------------|--------------------------|----------|
| Pat_41 | Pre-Treatment | ETFDH    | 2110   | 37 | 4 | 159627981 | 159627981 | Missense_Mutation | SNP | G  | A  | 5  | 193 | c.1669G>A      | c.(1669-1671)GAG>AAG     | p.E557K  |
| Pat_41 | Pre-Treatment | FAT1     | 2195   | 37 | 4 | 187542860 | 187542860 | Missense_Mutation | SNP | C  | T  | 4  | 70  | c.4880G>A      | c.(4879-4881)CGA>CAA     | p.R1627Q |
| Pat_41 | Pre-Treatment | ADAMTS16 | 170690 | 37 | 5 | 5242271   | 5242271   | Missense_Mutation | SNP | G  | A  | 4  | 104 | c.2629G>A      | c.(2629-2631)GTG>ATG     | p.V877M  |
| Pat_41 | Pre-Treatment | MED10    | 84246  | 37 | 5 | 6372626   | 6372626   | Missense_Mutation | SNP | G  | T  | 4  | 154 | c.398C>A       | c.(397-399)CCG>CAG       | p.P133Q  |
| Pat_41 | Pre-Treatment | PRDM9    | 56979  | 37 | 5 | 23527083  | 23527083  | Missense_Mutation | SNP | G  | C  | 4  | 190 | c.1886G>C      | c.(1885-1887)AGA>ACA     | p.R629T  |
| Pat_41 | Pre-Treatment | MSH3     | 4437   | 37 | 5 | 79966006  | 79966006  | Missense_Mutation | SNP | C  | T  | 4  | 151 | c.670C>T       | c.(670-672)CGG>TGG       | p.R224W  |
| Pat_41 | Pre-Treatment | MBLAC2   | 153364 | 37 | 5 | 89757012  | 89757012  | Missense_Mutation | SNP | C  | T  | 4  | 81  | c.812G>A       | c.(811-813)CGT>CAT       | p.R271H  |
| Pat_41 | Pre-Treatment | GPR98    | 84059  | 37 | 5 | 90074707  | 90074707  | Missense_Mutation | SNP | G  | C  | 34 | 418 | c.12875G>C     | c.(12874-12876)AGT>ACT   | p.S4292T |
| Pat_41 | Pre-Treatment | GPR98    | 84059  | 37 | 5 | 90106705  | 90106705  | Missense_Mutation | SNP | G  | A  | 20 | 122 | c.15628G>A     | c.(15628-15630)GTA>ATA   | p.V5210I |
| Pat_41 | Pre-Treatment | 3-Mar    | 115123 | 37 | 5 | 126253769 | 126253769 | Missense_Mutation | SNP | C  | T  | 4  | 154 | c.95G>A        | c.(94-96)AGC>AAC         | p.S32N   |
| Pat_41 | Pre-Treatment | FBN2     | 2201   | 37 | 5 | 127710438 | 127710438 | Missense_Mutation | SNP | C  | G  | 6  | 84  | c.1978G>C      | c.(1978-1980)GAT>CAT     | p.D660H  |
| Pat_41 | Pre-Treatment | FBN2     | 2201   | 37 | 5 | 127744405 | 127744405 | Missense_Mutation | SNP | C  | T  | 4  | 127 | c.1040G>A      | c.(1039-1041)CGT>CAT     | p.R347H  |
| Pat_41 | Pre-Treatment | FSTL4    | 23105  | 37 | 5 | 132652206 | 132652206 | Missense_Mutation | SNP | A  | C  | 6  | 107 | c.548T>G       | c.(547-549)TTC>TGC       | p.F183C  |
| Pat_41 | Pre-Treatment | SPOCK1   | 6695   | 37 | 5 | 136448165 | 136448165 | Missense_Mutation | SNP | C  | A  | 4  | 181 | c.433G>T       | c.(433-435)GCC>TCC       | p.A145S  |
| Pat_41 | Pre-Treatment | PCDHAC2  | 56134  | 37 | 5 | 140362082 | 140362082 | Missense_Mutation | SNP | G  | C  | 6  | 132 | c.2647G>C      | c.(2647-2649)GGC>CGC     | p.G883R  |
| Pat_41 | Pre-Treatment | PCDHGA6  | 56109  | 37 | 5 | 140754753 | 140754753 | Missense_Mutation | SNP | T  | C  | 4  | 228 | c.1103T>C      | c.(1102-1104)CTT>CCT     | p.L368P  |
| Pat_41 | Pre-Treatment | SH3PXD2B | 285590 | 37 | 5 | 171833335 | 171833335 | Missense_Mutation | SNP | G  | A  | 26 | 366 | c.178C>T       | c.(178-180)CCC>TCC       | p.P60S   |
| Pat_41 | Pre-Treatment | CCHCR1   | 54535  | 37 | 6 | 31113476  | 31113476  | Missense_Mutation | SNP | G  | A  | 4  | 174 | c.1423C>T      | c.(1423-1425)CGG>TGG     | p.R475W  |
| Pat_41 | Pre-Treatment | MICB     | 4277   | 37 | 6 | 31474904  | 31474904  | Missense_Mutation | SNP | G  | A  | 4  | 128 | c.719G>A       | c.(718-720)CGT>CAT       | p.R240H  |
| Pat_41 | Pre-Treatment | TNXB     | 7148   | 37 | 6 | 32049975  | 32049975  | Nonsense_Mutation | SNP | G  | A  | 4  | 31  | c.3574C>T      | c.(3574-3576)CAG>TAG     | p.Q1192* |
| Pat_41 | Pre-Treatment | KIFC1    | 3833   | 37 | 6 | 33372825  | 33372825  | Missense_Mutation | SNP | G  | A  | 4  | 230 | c.953G>A       | c.(952-954)CGC>CAC       | p.R318H  |
| Pat_41 | Pre-Treatment | TCTE1    | 202500 | 37 | 6 | 44254149  | 44254149  | Missense_Mutation | SNP | C  | T  | 4  | 166 | c.398G>A       | c.(397-399)CGC>CAC       | p.R133H  |
| Pat_41 | Pre-Treatment | BAI3     | 577    | 37 | 6 | 69772890  | 69772890  | Missense_Mutation | SNP | G  | A  | 5  | 302 | c.2398G>A      | c.(2398-2400)GAT>AAT     | p.D800N  |
| Pat_41 | Pre-Treatment | C6orf165 | 154313 | 37 | 6 | 88127995  | 88127995  | Missense_Mutation | SNP | G  | A  | 4  | 182 | c.701G>A       | c.(700-702)CGG>CAG       | p.R234Q  |
| Pat_41 | Pre-Treatment | DSE      | 29940  | 37 | 6 | 116720546 | 116720546 | Missense_Mutation | SNP | A  | G  | 13 | 144 | c.133A>G       | c.(133-135)ATG>GTG       | p.M45V   |
| Pat_41 | Pre-Treatment | EZR      | 7430   | 37 | 6 | 159188399 | 159188399 | Missense_Mutation | SNP | G  | A  | 5  | 254 | c.1490C>T      | c.(1489-1491)ACG>ATG     | p.T497M  |
| Pat_41 | Pre-Treatment | WTAP     | 9589   | 37 | 6 | 160164786 | 160164786 | Nonsense_Mutation | SNP | C  | T  | 5  | 155 | c.235C>T       | c.(235-237)CGA>TGA       | p.R79*   |
| Pat_41 | Pre-Treatment | FAM120B  | 84498  | 37 | 6 | 170626797 | 170626797 | Missense_Mutation | SNP | A  | G  | 4  | 192 | c.319A>G       | c.(319-321)AAG>GAG       | p.K107E  |
| Pat_41 | Pre-Treatment | INTS1    | 26173  | 37 | 7 | 1542717   | 1542717   | Missense_Mutation | SNP | G  | A  | 4  | 104 | c.169C>T       | c.(169-171)CGC>TGC       | p.R57C   |
| Pat_41 | Pre-Treatment | TTYH3    | 80727  | 37 | 7 | 2696113   | 2696113   | Missense_Mutation | SNP | G  | A  | 4  | 168 | c.1195G>A      | c.(1195-1197)GCC>ACC     | p.A399T  |
| Pat_41 | Pre-Treatment | USP42    | 84132  | 37 | 7 | 6193668   | 6193668   | Missense_Mutation | SNP | C  | T  | 4  | 183 | c.2483C>T      | c.(2482-2484)GCG>GTG     | p.A828V  |
| Pat_41 | Pre-Treatment | ZDHHC4   | 55146  | 37 | 7 | 6628363   | 6628363   | Missense_Mutation | SNP | C  | A  | 4  | 212 | c.857C>A       | c.(856-858)ACT>AAT       | p.T286N  |
| Pat_41 | Pre-Treatment | TMEM195  | 392636 | 37 | 7 | 15433792  | 15433793  | Missense_Mutation | DNP | GG | AA | 8  | 193 | c.621_622CC>TT | c.(619-624)AACCTT>AATTTI | p.L208F  |
| Pat_41 | Pre-Treatment | ZMIZ2    | 83637  | 37 | 7 | 44806206  | 44806206  | Missense_Mutation | SNP | G  | A  | 4  | 104 | c.2599G>A      | c.(2599-2601)GTG>ATG     | p.V867M  |
| Pat_41 | Pre-Treatment | ZNF727   | 442319 | 37 | 7 | 63538806  | 63538806  | Missense_Mutation | SNP | C  | G  | 6  | 118 | c.1379C>G      | c.(1378-1380)ACC>AGC     | p.T460S  |
| Pat_41 | Pre-Treatment | CCDC146  | 57639  | 37 | 7 | 76891535  | 76891535  | Nonsense_Mutation | SNP | C  | T  | 5  | 190 | c.1084C>T      | c.(1084-1086)CGA>TGA     | p.R362*  |
| Pat_41 | Pre-Treatment | POT1     | 25913  | 37 | 7 | 124464120 | 124464120 | Missense_Mutation | SNP | G  | A  | 4  | 125 | c.1801C>T      | c.(1801-1803)CCG>TCG     | p.P601S  |
| Pat_41 | Pre-Treatment | UBE3C    | 9690   | 37 | 7 | 156963025 | 156963025 | Missense_Mutation | SNP | C  | T  | 9  | 427 | c.223C>T       | c.(223-225)CGC>TGC       | p.R75C   |
| Pat_41 | Pre-Treatment | FBXO25   | 26260  | 37 | 8 | 413124    | 413124    | Missense_Mutation | SNP | C  | T  | 5  | 372 | c.961C>T       | c.(961-963)CGG>TGG       | p.R321W  |
| Pat_41 | Pre-Treatment | MTMR9    | 66036  | 37 | 8 | 11172484  | 11172484  | Nonsense_Mutation | SNP | C  | T  | 22 | 181 | c.1024C>T      | c.(1024-1026)CAG>TAG     | p.Q342*  |
| Pat_41 | Pre-Treatment | ADAMDEC1 | 27299  | 37 | 8 | 24257743  | 24257743  | Missense_Mutation | SNP | C  | T  | 4  | 155 | c.1072C>T      | c.(1072-1074)CTT>TTT     | p.L358F  |
| Pat_41 | Pre-Treatment | PURG     | 29942  | 37 | 8 | 30889512  | 30889512  | Missense_Mutation | SNP | C  | T  | 15 | 150 | c.787G>A       | c.(787-789)GAG>AAG       | p.E263K  |
| Pat_41 | Pre-Treatment | CHD7     | 55636  | 37 | 8 | 61764739  | 61764739  | Missense_Mutation | SNP | C  | T  | 5  | 199 | c.5827C>T      | c.(5827-5829)CGG>TGG     | p.R1943W |
| Pat_41 | Pre-Treatment | SLC10A5  | 347051 | 37 | 8 | 82607156  | 82607156  | Missense_Mutation | SNP | C  | T  | 7  | 93  | c.52G>A        | c.(52-54)GAA>AAA         | p.E18K   |
| Pat_41 | Pre-Treatment | HAS2     | 3037   | 37 | 8 | 122641376 | 122641377 | Nonsense_Mutation | DNP | GG | AA | 47 | 460 | c.204_205CC>TT | c.(202-207)CACCGA>CATTG  | p.R69*   |
| Pat_41 | Pre-Treatment | MTSS1    | 9788   | 37 | 8 | 125601951 | 125601951 | Missense_Mutation | SNP | C  | T  | 5  | 410 | c.295G>A       | c.(295-297)GCT>ACT       | p.A99T   |
| Pat_41 | Pre-Treatment | FAM135B  | 51059  | 37 | 8 | 139160771 | 139160771 | Missense_Mutation | SNP | C  | T  | 4  | 197 | c.3440G>A      | c.(3439-3441)GGC>GAC     | p.G1147D |



|        |                 |          |        |    |   |           |           |                   |     |   |   |    |     |           |                      |          |
|--------|-----------------|----------|--------|----|---|-----------|-----------|-------------------|-----|---|---|----|-----|-----------|----------------------|----------|
| Pat_41 | Pre-Treatment   | TOP1MT   | 116447 | 37 | 8 | 144407583 | 144407583 | Missense_Mutation | SNP | C | T | 4  | 121 | c.604G>A  | c.(604-606)GAC>AAC   | p.D202N  |
| Pat_41 | Pre-Treatment   | TSTA3    | 7264   | 37 | 8 | 144695735 | 144695735 | Missense_Mutation | SNP | C | T | 3  | 53  | c.769G>A  | c.(769-771)GAG>AAG   | p.E257K  |
| Pat_41 | Pre-Treatment   | CCL27    | 10850  | 37 | 9 | 34662059  | 34662059  | Missense_Mutation | SNP | C | T | 6  | 254 | c.221G>A  | c.(220-222)CGC>CAC   | p.R74H   |
| Pat_41 | Pre-Treatment   | TMEM2    | 23670  | 37 | 9 | 74319553  | 74319553  | Missense_Mutation | SNP | G | A | 4  | 203 | c.3152C>T | c.(3151-3153)CCG>CTG | p.P1051L |
| Pat_41 | Pre-Treatment   | FAM75C1  | 441452 | 37 | 9 | 90536665  | 90536665  | Missense_Mutation | SNP | G | A | 7  | 362 | c.1843G>A | c.(1843-1845)GTA>ATA | p.V615I  |
| Pat_41 | Pre-Treatment   | LPAR1    | 1902   | 37 | 9 | 113637878 | 113637878 | Missense_Mutation | SNP | C | T | 21 | 197 | c.918G>A  | c.(916-918)ATG>ATA   | p.M306I  |
| Pat_41 | Pre-Treatment   | TLR4     | 7099   | 37 | 9 | 120476765 | 120476765 | Missense_Mutation | SNP | C | T | 4  | 152 | c.2359C>T | c.(2359-2361)CGC>TGC | p.R787C  |
| Pat_41 | Pre-Treatment   | OR1N1    | 138883 | 37 | 9 | 125288851 | 125288851 | Missense_Mutation | SNP | G | A | 9  | 117 | c.722C>T  | c.(721-723)TCC>TTC   | p.S241F  |
| Pat_41 | Pre-Treatment   | ODF2     | 4957   | 37 | 9 | 131233716 | 131233716 | Missense_Mutation | SNP | G | A | 5  | 247 | c.550G>A  | c.(550-552)GAG>AAG   | p.E184K  |
| Pat_41 | Pre-Treatment   | GBGT1    | 26301  | 37 | 9 | 136029595 | 136029595 | Missense_Mutation | SNP | C | T | 4  | 140 | c.413G>A  | c.(412-414)CGT>CAT   | p.R138H  |
| Pat_41 | Pre-Treatment   | COL5A1   | 1289   | 37 | 9 | 137591886 | 137591886 | Missense_Mutation | SNP | G | A | 4  | 105 | c.409G>A  | c.(409-411)GTC>ATC   | p.V137I  |
| Pat_41 | Pre-Treatment   | NELF     | 26012  | 37 | 9 | 140347597 | 140347597 | Missense_Mutation | SNP | C | T | 4  | 99  | c.958G>A  | c.(958-960)GAG>AAG   | p.E320K  |
| Pat_41 | Pre-Treatment   | ASB11    | 140456 | 37 | X | 15301701  | 15301701  | Missense_Mutation | SNP | C | T | 6  | 443 | c.898G>A  | c.(898-900)GGT>AGT   | p.G300S  |
| Pat_41 | Pre-Treatment   | NHS      | 4810   | 37 | X | 17750562  | 17750562  | Missense_Mutation | SNP | G | A | 5  | 292 | c.4871G>A | c.(4870-4872)CGT>CAT | p.R1624H |
| Pat_41 | Pre-Treatment   | MAP7D2   | 256714 | 37 | X | 20033394  | 20033394  | Missense_Mutation | SNP | C | T | 5  | 306 | c.1573G>A | c.(1573-1575)GAG>AAG | p.E525K  |
| Pat_41 | Pre-Treatment   | RPS6KA6  | 27330  | 37 | X | 83402002  | 83402002  | Missense_Mutation | SNP | A | C | 19 | 158 | c.405T>G  | c.(403-405)ATT>ATG   | p.I135M  |
| Pat_41 | Pre-Treatment   | MCART6   | 401612 | 37 | X | 103349910 | 103349910 | Missense_Mutation | SNP | C | T | 5  | 109 | c.31G>A   | c.(31-33)GAG>AAG     | p.E11K   |
| Pat_41 | Post-Resistance | AGRN     | 375790 | 37 | 1 | 957839    | 957839    | Missense_Mutation | SNP | G | A | 5  | 171 | c.460G>A  | c.(460-462)GAA>AAA   | p.E154K  |
| Pat_41 | Post-Resistance | SDF4     | 51150  | 37 | 1 | 1154193   | 1154193   | Missense_Mutation | SNP | C | T | 5  | 193 | c.692G>A  | c.(691-693)CGG>CAG   | p.R231Q  |
| Pat_41 | Post-Resistance | TAS1R3   | 83756  | 37 | 1 | 1268373   | 1268373   | Missense_Mutation | SNP | G | A | 7  | 43  | c.1348G>A | c.(1348-1350)GTG>ATG | p.V450M  |
| Pat_41 | Post-Resistance | TAS1R3   | 83756  | 37 | 1 | 1269318   | 1269318   | Missense_Mutation | SNP | G | A | 7  | 65  | c.2033G>A | c.(2032-2034)GGG>GAG | p.G678E  |
| Pat_41 | Post-Resistance | CCNL2    | 81669  | 37 | 1 | 1322823   | 1322823   | Missense_Mutation | SNP | C | T | 10 | 100 | c.1351G>A | c.(1351-1353)GAC>AAC | p.D451N  |
| Pat_41 | Post-Resistance | MIB2     | 142678 | 37 | 1 | 1559324   | 1559324   | Missense_Mutation | SNP | C | T | 12 | 33  | c.592C>T  | c.(592-594)CCT>TCT   | p.P198S  |
| Pat_41 | Post-Resistance | MIB2     | 142678 | 37 | 1 | 1562727   | 1562727   | Missense_Mutation | SNP | G | A | 9  | 121 | c.1600G>A | c.(1600-1602)GGC>AGC | p.G534S  |
| Pat_41 | Post-Resistance | CDK11B   | 984    | 37 | 1 | 1653122   | 1653122   | Missense_Mutation | SNP | G | A | 6  | 60  | c.140C>T  | c.(139-141)TCC>TTC   | p.S47F   |
| Pat_41 | Post-Resistance | TNFRSF14 | 8764   | 37 | 1 | 2492081   | 2492081   | Missense_Mutation | SNP | C | T | 6  | 52  | c.479C>T  | c.(478-480)ACC>ATC   | p.T160I  |
| Pat_41 | Post-Resistance | TP73     | 7161   | 37 | 1 | 3624249   | 3624249   | Missense_Mutation | SNP | C | T | 15 | 77  | c.323C>T  | c.(322-324)ACC>ATC   | p.T108I  |
| Pat_41 | Post-Resistance | LRRRC47  | 57470  | 37 | 1 | 3703477   | 3703477   | Missense_Mutation | SNP | C | T | 6  | 13  | c.1013G>A | c.(1012-1014)GGG>GAG | p.G338E  |
| Pat_41 | Post-Resistance | KIAA0562 | 9731   | 37 | 1 | 3755608   | 3755608   | Missense_Mutation | SNP | C | T | 18 | 254 | c.811G>A  | c.(811-813)GAG>AAG   | p.E271K  |
| Pat_41 | Post-Resistance | KIAA0562 | 9731   | 37 | 1 | 3765275   | 3765275   | Missense_Mutation | SNP | G | A | 10 | 84  | c.184C>T  | c.(184-186)CTT>TTT   | p.L62F   |
| Pat_41 | Post-Resistance | AJAP1    | 55966  | 37 | 1 | 4772045   | 4772045   | Missense_Mutation | SNP | C | T | 19 | 253 | c.115C>T  | c.(115-117)CCC>TCC   | p.P39S   |
| Pat_41 | Post-Resistance | AJAP1    | 55966  | 37 | 1 | 4772072   | 4772072   | Missense_Mutation | SNP | C | T | 8  | 123 | c.142C>T  | c.(142-144)CCG>TCG   | p.P48S   |
| Pat_41 | Post-Resistance | RPL22    | 6146   | 37 | 1 | 6253111   | 6253111   | Nonsense_Mutation | SNP | G | A | 11 | 212 | c.121C>T  | c.(121-123)CAG>TAG   | p.Q41*   |
| Pat_41 | Post-Resistance | ESPN     | 83715  | 37 | 1 | 6504683   | 6504683   | Missense_Mutation | SNP | C | T | 11 | 275 | c.1133C>T | c.(1132-1134)TCC>TTC | p.S378F  |
| Pat_41 | Post-Resistance | TAS1R1   | 80835  | 37 | 1 | 6635378   | 6635378   | Missense_Mutation | SNP | G | A | 13 | 90  | c.1186G>A | c.(1186-1188)GTG>ATG | p.V396M  |
| Pat_41 | Post-Resistance | ZBTB48   | 3104   | 37 | 1 | 6640677   | 6640677   | Missense_Mutation | SNP | G | A | 7  | 91  | c.8G>A    | c.(7-9)GGC>GAC       | p.G3D    |
| Pat_41 | Post-Resistance | PHF13    | 148479 | 37 | 1 | 6680248   | 6680248   | Missense_Mutation | SNP | C | T | 4  | 74  | c.527C>T  | c.(526-528)CCC>CTC   | p.P176L  |
| Pat_41 | Post-Resistance | PER3     | 8863   | 37 | 1 | 7887280   | 7887280   | Missense_Mutation | SNP | G | A | 13 | 115 | c.2267G>A | c.(2266-2268)GGC>GAC | p.G756D  |
| Pat_41 | Post-Resistance | PER3     | 8863   | 37 | 1 | 7887297   | 7887297   | Missense_Mutation | SNP | G | A | 11 | 126 | c.2284G>A | c.(2284-2286)GGA>AGA | p.G762R  |
| Pat_41 | Post-Resistance | PER3     | 8863   | 37 | 1 | 7887696   | 7887696   | Missense_Mutation | SNP | C | T | 13 | 167 | c.2683C>T | c.(2683-2685)CCT>TCT | p.P895S  |
| Pat_41 | Post-Resistance | ERRF1    | 54206  | 37 | 1 | 8075578   | 8075578   | Nonsense_Mutation | SNP | C | T | 16 | 611 | c.102G>A  | c.(100-102)TGG>TGA   | p.W34*   |
| Pat_41 | Post-Resistance | RERE     | 473    | 37 | 1 | 8420002   | 8420002   | Missense_Mutation | SNP | G | A | 6  | 169 | c.3440C>T | c.(3439-3441)ACA>ATA | p.T1147I |
| Pat_41 | Post-Resistance | RERE     | 473    | 37 | 1 | 8425920   | 8425920   | Missense_Mutation | SNP | C | T | 13 | 235 | c.1399G>A | c.(1399-1401)GCG>ACG | p.A467T  |
| Pat_41 | Post-Resistance | RERE     | 473    | 37 | 1 | 8616586   | 8616586   | Nonsense_Mutation | SNP | G | A | 13 | 514 | c.673C>T  | c.(673-675)CGA>TGA   | p.R225*  |
| Pat_41 | Post-Resistance | RERE     | 473    | 37 | 1 | 8674729   | 8674729   | Missense_Mutation | SNP | G | A | 16 | 317 | c.413C>T  | c.(412-414)GCC>GTC   | p.A138V  |
| Pat_41 | Post-Resistance | ENO1     | 2023   | 37 | 1 | 8926451   | 8926451   | Missense_Mutation | SNP | C | T | 20 | 282 | c.554G>A  | c.(553-555)GGA>GAA   | p.G185E  |
| Pat_41 | Post-Resistance | UBE4B    | 10277  | 37 | 1 | 10197139  | 10197139  | Missense_Mutation | SNP | C | T | 35 | 143 | c.2239C>T | c.(2239-2241)CCA>TCA | p.P747S  |

|        |                 |          |        |    |   |          |          |                   |     |    |    |    |     |                |                        |             |
|--------|-----------------|----------|--------|----|---|----------|----------|-------------------|-----|----|----|----|-----|----------------|------------------------|-------------|
| Pat_41 | Post-Resistance | KIF1B    | 23095  | 37 | 1 | 10357072 | 10357072 | Missense_Mutation | SNP | C  | T  | 12 | 143 | c.1979C>T      | c.(1978-1980)ACA>ATA   | p.T660I     |
| Pat_41 | Post-Resistance | KIF1B    | 23095  | 37 | 1 | 10383982 | 10383982 | Missense_Mutation | SNP | C  | T  | 39 | 296 | c.2399C>T      | c.(2398-2400)TCC>TTC   | p.S800F     |
| Pat_41 | Post-Resistance | PGD      | 5226   | 37 | 1 | 10459183 | 10459183 | Splice_Site       | SNP | G  | A  | 7  | 79  | c.8_splice     | c.e1+1                 | p.Q3_splice |
| Pat_41 | Post-Resistance | PGD      | 5226   | 37 | 1 | 10460522 | 10460522 | Missense_Mutation | SNP | G  | A  | 17 | 153 | c.157G>A       | c.(157-159)GTG>ATG     | p.V53M      |
| Pat_41 | Post-Resistance | CORT     | 1325   | 37 | 1 | 10510162 | 10510162 | Missense_Mutation | SNP | G  | A  | 11 | 209 | c.32G>A        | c.(31-33)GGC>GAC       | p.G11D      |
| Pat_41 | Post-Resistance | C1orf127 | 148345 | 37 | 1 | 11008707 | 11008707 | Nonsense_Mutation | SNP | C  | T  | 12 | 105 | c.1038G>A      | c.(1036-1038)TGG>TGA   | p.W346*     |
| Pat_41 | Post-Resistance | EXOSC10  | 5394   | 37 | 1 | 11147617 | 11147617 | Missense_Mutation | SNP | G  | A  | 25 | 497 | c.977C>T       | c.(976-978)ACC>ATC     | p.T326I     |
| Pat_41 | Post-Resistance | EXOSC10  | 5394   | 37 | 1 | 11159836 | 11159836 | Missense_Mutation | SNP | G  | T  | 11 | 94  | c.53C>A        | c.(52-54)ACC>AAC       | p.T18N      |
| Pat_41 | Post-Resistance | MTOR     | 2475   | 37 | 1 | 11169738 | 11169738 | Missense_Mutation | SNP | C  | T  | 34 | 171 | c.7415G>A      | c.(7414-7416)GGG>GAG   | p.G2472E    |
| Pat_41 | Post-Resistance | ANGPTL7  | 10218  | 37 | 1 | 11254552 | 11254552 | Missense_Mutation | SNP | G  | A  | 28 | 457 | c.707G>A       | c.(706-708)AGC>AAC     | p.S236N     |
| Pat_41 | Post-Resistance | MTOR     | 2475   | 37 | 1 | 11264622 | 11264622 | Missense_Mutation | SNP | C  | T  | 33 | 356 | c.3940G>A      | c.(3940-3942)GCC>ACC   | p.A1314T    |
| Pat_41 | Post-Resistance | PTCHD2   | 57540  | 37 | 1 | 11586751 | 11586751 | Missense_Mutation | SNP | C  | T  | 40 | 220 | c.2657C>T      | c.(2656-2658)GCT>GTT   | p.A886V     |
| Pat_41 | Post-Resistance | PTCHD2   | 57540  | 37 | 1 | 11591714 | 11591714 | Missense_Mutation | SNP | G  | A  | 6  | 59  | c.3322G>A      | c.(3322-3324)GCA>ACA   | p.A1108T    |
| Pat_41 | Post-Resistance | PTCHD2   | 57540  | 37 | 1 | 11595687 | 11595687 | Missense_Mutation | SNP | C  | T  | 8  | 132 | c.3802C>T      | c.(3802-3804)CCC>TCC   | p.P1268S    |
| Pat_41 | Post-Resistance | CLCN6    | 1185   | 37 | 1 | 11894605 | 11894605 | Missense_Mutation | SNP | G  | A  | 14 | 182 | c.1751G>A      | c.(1750-1752)GGC>GAC   | p.G584D     |
| Pat_41 | Post-Resistance | KIAA2013 | 90231  | 37 | 1 | 11983300 | 11983300 | Missense_Mutation | SNP | G  | A  | 4  | 27  | c.1280C>T      | c.(1279-1281)TCT>TTT   | p.S427F     |
| Pat_41 | Post-Resistance | PLOD1    | 5351   | 37 | 1 | 12030823 | 12030823 | Missense_Mutation | SNP | G  | A  | 15 | 120 | c.1852G>A      | c.(1852-1854)GAG>AAG   | p.E618K     |
| Pat_41 | Post-Resistance | MFN2     | 9927   | 37 | 1 | 12061576 | 12061576 | Missense_Mutation | SNP | C  | T  | 9  | 33  | c.935C>T       | c.(934-936)GCC>GTC     | p.A312V     |
| Pat_41 | Post-Resistance | MFN2     | 9927   | 37 | 1 | 12064581 | 12064581 | Missense_Mutation | SNP | G  | A  | 23 | 316 | c.1303G>A      | c.(1303-1305)GCC>ACC   | p.A435T     |
| Pat_41 | Post-Resistance | TNFRSF8  | 943    | 37 | 1 | 12202385 | 12202386 | Missense_Mutation | DNP | AC | GT | 4  | 21  | .1585_1586AC>G | c.(1585-1587)ACC>GTC   | p.T529V     |
| Pat_41 | Post-Resistance | VPS13D   | 55187  | 37 | 1 | 12337031 | 12337031 | Missense_Mutation | SNP | C  | T  | 12 | 15  | c.3386C>T      | c.(3385-3387)TCC>TTC   | p.S1129F    |
| Pat_41 | Post-Resistance | VPS13D   | 55187  | 37 | 1 | 12337883 | 12337883 | Missense_Mutation | SNP | G  | A  | 13 | 114 | c.4238G>A      | c.(4237-4239)GGA>GAA   | p.G1413E    |
| Pat_41 | Post-Resistance | VPS13D   | 55187  | 37 | 1 | 12439601 | 12439601 | Missense_Mutation | SNP | G  | A  | 18 | 339 | c.11141G>A     | c.(11140-11142)AGT>AAT | p.S3714N    |
| Pat_41 | Post-Resistance | PRAMEF4  | 400735 | 37 | 1 | 12943177 | 12943177 | Missense_Mutation | SNP | C  | A  | 15 | 265 | c.39G>T        | c.(37-39)GAG>GAT       | p.E13D      |
| Pat_41 | Post-Resistance | PRAMEF14 | 729528 | 37 | 1 | 13669128 | 13669128 | Missense_Mutation | SNP | G  | A  | 23 | 223 | c.1058C>T      | c.(1057-1059)ACC>ATC   | p.T353I     |
| Pat_41 | Post-Resistance | PRDM2    | 7799   | 37 | 1 | 14105534 | 14105534 | Missense_Mutation | SNP | G  | A  | 5  | 86  | c.1244G>A      | c.(1243-1245)GGG>GAG   | p.G415E     |
| Pat_41 | Post-Resistance | CELA2A   | 63036  | 37 | 1 | 15793896 | 15793896 | Missense_Mutation | SNP | C  | T  | 11 | 119 | c.655C>T       | c.(655-657)CCA>TCA     | p.P219S     |
| Pat_41 | Post-Resistance | CELA2B   | 51032  | 37 | 1 | 15807599 | 15807599 | Missense_Mutation | SNP | C  | A  | 17 | 263 | c.136C>A       | c.(136-138)CTG>ATG     | p.L46M      |
| Pat_41 | Post-Resistance | DNAJC16  | 23341  | 37 | 1 | 15863277 | 15863277 | Nonsense_Mutation | SNP | G  | A  | 5  | 173 | c.542G>A       | c.(541-543)TGG>TAG     | p.W181*     |
| Pat_41 | Post-Resistance | DNAJC16  | 23341  | 37 | 1 | 15873296 | 15873296 | Missense_Mutation | SNP | G  | A  | 25 | 138 | c.794G>A       | c.(793-795)GGC>GAC     | p.G265D     |
| Pat_41 | Post-Resistance | DNAJC16  | 23341  | 37 | 1 | 15894367 | 15894367 | Missense_Mutation | SNP | C  | T  | 45 | 340 | c.2044C>T      | c.(2044-2046)CCA>TCA   | p.P682S     |
| Pat_41 | Post-Resistance | FBLIM1   | 54751  | 37 | 1 | 16091651 | 16091651 | Missense_Mutation | SNP | G  | A  | 5  | 16  | c.173G>A       | c.(172-174)GGG>GAG     | p.G58E      |
| Pat_41 | Post-Resistance | FBLIM1   | 54751  | 37 | 1 | 16111082 | 16111082 | Missense_Mutation | SNP | G  | A  | 29 | 296 | c.1048G>A      | c.(1048-1050)GGC>AGC   | p.G350S     |
| Pat_41 | Post-Resistance | SPEN     | 23013  | 37 | 1 | 16199556 | 16199556 | Missense_Mutation | SNP | G  | A  | 7  | 144 | c.329G>A       | c.(328-330)GGT>GAT     | p.G110D     |
| Pat_41 | Post-Resistance | HSPB7    | 27129  | 37 | 1 | 16344421 | 16344421 | Missense_Mutation | SNP | C  | T  | 6  | 50  | c.38G>A        | c.(37-39)AGA>AAA       | p.R13K      |
| Pat_41 | Post-Resistance | CLCNKA   | 1187   | 37 | 1 | 16359707 | 16359707 | Missense_Mutation | SNP | G  | A  | 37 | 524 | c.1972G>A      | c.(1972-1974)GTG>ATG   | p.V658M     |
| Pat_41 | Post-Resistance | NECAP2   | 55707  | 37 | 1 | 16782376 | 16782376 | Missense_Mutation | SNP | C  | T  | 13 | 99  | c.731C>T       | c.(730-732)ACC>ATC     | p.T244I     |
| Pat_41 | Post-Resistance | CROCC    | 9696   | 37 | 1 | 17280827 | 17280827 | Missense_Mutation | SNP | C  | T  | 4  | 77  | c.3296C>T      | c.(3295-3297)GCC>GTC   | p.A1099V    |
| Pat_41 | Post-Resistance | MFAP2    | 4237   | 37 | 1 | 17302186 | 17302186 | Missense_Mutation | SNP | G  | A  | 9  | 87  | c.326C>T       | c.(325-327)TCC>TTC     | p.S109F     |
| Pat_41 | Post-Resistance | ATP13A2  | 23400  | 37 | 1 | 17318267 | 17318267 | Missense_Mutation | SNP | G  | A  | 22 | 157 | c.2213C>T      | c.(2212-2214)GCT>GTT   | p.A738V     |
| Pat_41 | Post-Resistance | ATP13A2  | 23400  | 37 | 1 | 17332032 | 17332032 | Missense_Mutation | SNP | C  | T  | 16 | 85  | c.125G>A       | c.(124-126)GGC>GAC     | p.G42D      |
| Pat_41 | Post-Resistance | ATP13A2  | 23400  | 37 | 1 | 17332252 | 17332252 | Missense_Mutation | SNP | C  | T  | 5  | 10  | c.32G>A        | c.(31-33)AGC>AAC       | p.S11N      |
| Pat_41 | Post-Resistance | PADI2    | 11240  | 37 | 1 | 17396618 | 17396618 | Missense_Mutation | SNP | C  | T  | 6  | 98  | c.1729G>A      | c.(1729-1731)GAG>AAG   | p.E577K     |
| Pat_41 | Post-Resistance | PADI2    | 11240  | 37 | 1 | 17402220 | 17402220 | Missense_Mutation | SNP | C  | T  | 7  | 310 | c.1409G>A      | c.(1408-1410)GGC>GAC   | p.G470D     |
| Pat_41 | Post-Resistance | PADI3    | 51702  | 37 | 1 | 17603144 | 17603144 | Missense_Mutation | SNP | G  | A  | 11 | 86  | c.1438G>A      | c.(1438-1440)GCC>ACC   | p.A480T     |
| Pat_41 | Post-Resistance | PAX7     | 5081   | 37 | 1 | 19027178 | 19027178 | Missense_Mutation | SNP | G  | A  | 5  | 138 | c.818G>A       | c.(817-819)CGT>CAT     | p.R273H     |
| Pat_41 | Post-Resistance | KIAA0090 | 23065  | 37 | 1 | 19570460 | 19570460 | Missense_Mutation | SNP | C  | T  | 30 | 199 | c.270G>A       | c.(268-270)ATG>ATA     | p.M90I      |

|        |                 |          |        |    |   |          |          |                   |     |    |    |    |     |                                   |                      |               |
|--------|-----------------|----------|--------|----|---|----------|----------|-------------------|-----|----|----|----|-----|-----------------------------------|----------------------|---------------|
| Pat_41 | Post-Resistance | AKR7L    | 246181 | 37 | 1 | 19593943 | 19593943 | Missense_Mutation | SNP | C  | T  | 11 | 131 | c.847G>A                          | c.(847-849)GAC>AAC   | p.D283N       |
| Pat_41 | Post-Resistance | CAPZB    | 832    | 37 | 1 | 19705143 | 19705143 | Missense_Mutation | SNP | G  | A  | 8  | 68  | c.307C>T                          | c.(307-309)CCA>TCA   | p.P103S       |
| Pat_41 | Post-Resistance | HTR6     | 3362   | 37 | 1 | 20005526 | 20005526 | Missense_Mutation | SNP | G  | A  | 4  | 82  | c.988G>A                          | c.(988-990)GCG>ACG   | p.A330T       |
| Pat_41 | Post-Resistance | OTUD3    | 23252  | 37 | 1 | 20216981 | 20216981 | Missense_Mutation | SNP | G  | A  | 20 | 562 | c.325G>A                          | c.(325-327)GAT>AAT   | p.D109N       |
| Pat_41 | Post-Resistance | OTUD3    | 23252  | 37 | 1 | 20220894 | 20220894 | Missense_Mutation | SNP | G  | A  | 23 | 202 | c.404G>A                          | c.(403-405)GGC>GAC   | p.G135D       |
| Pat_41 | Post-Resistance | PINK1    | 65018  | 37 | 1 | 20964533 | 20964533 | Missense_Mutation | SNP | C  | T  | 4  | 55  | c.586C>T                          | c.(586-588)CCA>TCA   | p.P196S       |
| Pat_41 | Post-Resistance | PINK1    | 65018  | 37 | 1 | 20975600 | 20975600 | Missense_Mutation | SNP | G  | A  | 5  | 18  | c.1364G>A                         | c.(1363-1365)GGC>GAC | p.G455D       |
| Pat_41 | Post-Resistance | KIF17    | 57576  | 37 | 1 | 21014275 | 21014275 | Missense_Mutation | SNP | G  | A  | 16 | 154 | c.1544C>T                         | c.(1543-1545)ACT>ATT | p.T515I       |
| Pat_41 | Post-Resistance | EIF4G3   | 8672   | 37 | 1 | 21205934 | 21205934 | Missense_Mutation | SNP | C  | T  | 41 | 737 | c.2336G>A                         | c.(2335-2337)GGA>GAA | p.G779E       |
| Pat_41 | Post-Resistance | EIF4G3   | 8672   | 37 | 1 | 21226436 | 21226436 | Missense_Mutation | SNP | G  | A  | 8  | 145 | c.1585C>T                         | c.(1585-1587)CTT>TTT | p.L529F       |
| Pat_41 | Post-Resistance | NBPF3    | 84224  | 37 | 1 | 21798133 | 21798133 | Missense_Mutation | SNP | G  | A  | 34 | 409 | c.518G>A                          | c.(517-519)AGA>AAA   | p.R173K       |
| Pat_41 | Post-Resistance | LDLRAD2  | 401944 | 37 | 1 | 22138997 | 22138997 | Missense_Mutation | SNP | C  | T  | 7  | 79  | c.53C>T                           | c.(52-54)GCA>GTA     | p.A18V        |
| Pat_41 | Post-Resistance | HSPG2    | 3339   | 37 | 1 | 22201443 | 22201444 | Missense_Mutation | DNP | GG | AA | 30 | 25  | .:3354_3355CC>T352-3357)GACCC>GAT |                      | p.P1119S      |
| Pat_41 | Post-Resistance | HSPG2    | 3339   | 37 | 1 | 22214512 | 22214512 | Missense_Mutation | SNP | T  | C  | 5  | 77  | c.622A>G                          | c.(622-624)AGC>GGC   | p.S208G       |
| Pat_41 | Post-Resistance | CDC42    | 998    | 37 | 1 | 22413183 | 22413183 | Missense_Mutation | SNP | C  | T  | 10 | 422 | c.310C>T                          | c.(310-312)CAC>TAC   | p.H104Y       |
| Pat_41 | Post-Resistance | ZBTB40   | 9923   | 37 | 1 | 22818024 | 22818024 | Missense_Mutation | SNP | G  | A  | 7  | 157 | c.829G>A                          | c.(829-831)GAG>AAG   | p.E277K       |
| Pat_41 | Post-Resistance | ZBTB40   | 9923   | 37 | 1 | 22834619 | 22834619 | Missense_Mutation | SNP | G  | A  | 4  | 75  | c.1486G>A                         | c.(1486-1488)GGA>AGA | p.G496R       |
| Pat_41 | Post-Resistance | EPHB2    | 2048   | 37 | 1 | 23233205 | 23233205 | Missense_Mutation | SNP | G  | A  | 6  | 72  | c.1891G>A                         | c.(1891-1893)GAG>AAG | p.E631K       |
| Pat_41 | Post-Resistance | ZNF436   | 80818  | 37 | 1 | 23688598 | 23688598 | Missense_Mutation | SNP | C  | T  | 23 | 213 | c.1277G>A                         | c.(1276-1278)GGT>GAT | p.G426D       |
| Pat_41 | Post-Resistance | ZNF436   | 80818  | 37 | 1 | 23689360 | 23689360 | Missense_Mutation | SNP | C  | T  | 7  | 191 | c.515G>A                          | c.(514-516)GGA>GAA   | p.G172E       |
| Pat_41 | Post-Resistance | E2F2     | 1870   | 37 | 1 | 23848503 | 23848503 | Missense_Mutation | SNP | C  | T  | 14 | 184 | c.404G>A                          | c.(403-405)GGG>GAG   | p.G135E       |
| Pat_41 | Post-Resistance | LYPLA2   | 11313  | 37 | 1 | 24120984 | 24120984 | Missense_Mutation | SNP | C  | T  | 4  | 79  | c.539C>T                          | c.(538-540)CCC>CTC   | p.P180L       |
| Pat_41 | Post-Resistance | C1orf130 | 400746 | 37 | 1 | 24921982 | 24921982 | Missense_Mutation | SNP | G  | A  | 8  | 121 | c.61G>A                           | c.(61-63)GGA>AGA     | p.G21R        |
| Pat_41 | Post-Resistance | TMEM57   | 55219  | 37 | 1 | 25818024 | 25818024 | Missense_Mutation | SNP | G  | A  | 15 | 121 | c.1741G>A                         | c.(1741-1743)GAC>AAC | p.D581N       |
| Pat_41 | Post-Resistance | MAN1C1   | 57134  | 37 | 1 | 26080020 | 26080020 | Missense_Mutation | SNP | G  | A  | 16 | 102 | c.880G>A                          | c.(880-882)GCG>ACG   | p.A294T       |
| Pat_41 | Post-Resistance | MAN1C1   | 57134  | 37 | 1 | 26104735 | 26104735 | Missense_Mutation | SNP | C  | T  | 6  | 45  | c.1397C>T                         | c.(1396-1398)GCC>GTC | p.A466V       |
| Pat_41 | Post-Resistance | C1orf135 | 79000  | 37 | 1 | 26161653 | 26161653 | Missense_Mutation | SNP | G  | A  | 20 | 266 | c.905C>T                          | c.(904-906)ACT>ATT   | p.T302I       |
| Pat_41 | Post-Resistance | ZNF593   | 51042  | 37 | 1 | 26497181 | 26497181 | Missense_Mutation | SNP | G  | A  | 8  | 161 | c.379G>A                          | c.(379-381)GTC>ATC   | p.V127I       |
| Pat_41 | Post-Resistance | CNKSR1   | 10256  | 37 | 1 | 26515939 | 26515939 | Missense_Mutation | SNP | C  | T  | 8  | 91  | c.2063C>T                         | c.(2062-2064)TCC>TTC | p.S688F       |
| Pat_41 | Post-Resistance | UBXN11   | 91544  | 37 | 1 | 26628190 | 26628190 | Missense_Mutation | SNP | C  | T  | 12 | 78  | c.95G>A                           | c.(94-96)GGA>GAA     | p.G32E        |
| Pat_41 | Post-Resistance | NR0B2    | 8431   | 37 | 1 | 27238395 | 27238395 | Missense_Mutation | SNP | G  | A  | 16 | 248 | c.715C>T                          | c.(715-717)CCT>TCT   | p.P239S       |
| Pat_41 | Post-Resistance | C1orf172 | 126695 | 37 | 1 | 27277919 | 27277919 | Missense_Mutation | SNP | C  | T  | 21 | 21  | c.953G>A                          | c.(952-954)GGT>GAT   | p.G318D       |
| Pat_41 | Post-Resistance | FGR      | 2268   | 37 | 1 | 27948098 | 27948098 | Missense_Mutation | SNP | C  | T  | 26 | 190 | c.400G>A                          | c.(400-402)GCC>ACC   | p.A134T       |
| Pat_41 | Post-Resistance | STX12    | 23673  | 37 | 1 | 28148833 | 28148833 | Missense_Mutation | SNP | C  | T  | 13 | 351 | c.824C>T                          | c.(823-825)ACG>ATG   | p.T275M       |
| Pat_41 | Post-Resistance | PPP1R8   | 5511   | 37 | 1 | 28167569 | 28167569 | Missense_Mutation | SNP | C  | T  | 10 | 441 | c.316C>T                          | c.(316-318)CCT>TCT   | p.P106S       |
| Pat_41 | Post-Resistance | C1orf38  | 9473   | 37 | 1 | 28212407 | 28212407 | Missense_Mutation | SNP | C  | T  | 19 | 139 | c.1906C>T                         | c.(1906-1908)CTT>TTT | p.L636F       |
| Pat_41 | Post-Resistance | SMPDL3B  | 27293  | 37 | 1 | 28282459 | 28282459 | Splice_Site       | SNP | G  | A  | 5  | 76  | c.872_splice                      | c.e7-1               | p.G291_splice |
| Pat_41 | Post-Resistance | XKR8     | 55113  | 37 | 1 | 28293040 | 28293040 | Missense_Mutation | SNP | G  | A  | 6  | 164 | c.517G>A                          | c.(517-519)GGC>AGC   | p.G173S       |
| Pat_41 | Post-Resistance | XKR8     | 55113  | 37 | 1 | 28293258 | 28293258 | Nonsense_Mutation | SNP | G  | A  | 5  | 46  | c.735G>A                          | c.(733-735)TGG>TGA   | p.W245*       |
| Pat_41 | Post-Resistance | EYA3     | 2140   | 37 | 1 | 28362061 | 28362061 | Missense_Mutation | SNP | G  | A  | 25 | 516 | c.355C>T                          | c.(355-357)CCT>TCT   | p.P119S       |
| Pat_41 | Post-Resistance | RCC1     | 1104   | 37 | 1 | 28863271 | 28863271 | Missense_Mutation | SNP | G  | A  | 23 | 165 | c.950G>A                          | c.(949-951)AGC>AAC   | p.S317N       |
| Pat_41 | Post-Resistance | EPB41    | 2035   | 37 | 1 | 29379747 | 29379747 | Missense_Mutation | SNP | G  | A  | 15 | 189 | c.1768G>A                         | c.(1768-1770)GAA>AAA | p.E590K       |
| Pat_41 | Post-Resistance | MECR     | 51102  | 37 | 1 | 29528490 | 29528490 | Missense_Mutation | SNP | C  | T  | 57 | 415 | c.721G>A                          | c.(721-723)GAG>AAG   | p.E241K       |
| Pat_41 | Post-Resistance | PTPRU    | 10076  | 37 | 1 | 29647228 | 29647228 | Missense_Mutation | SNP | C  | T  | 13 | 132 | c.3749C>T                         | c.(3748-3750)ACC>ATC | p.T1250I      |
| Pat_41 | Post-Resistance | LAPTM5   | 7805   | 37 | 1 | 31206764 | 31206764 | Missense_Mutation | SNP | C  | T  | 9  | 60  | c.700G>A                          | c.(700-702)GTG>ATG   | p.V234M       |
| Pat_41 | Post-Resistance | PUM1     | 9698   | 37 | 1 | 31440139 | 31440139 | Missense_Mutation | SNP | G  | A  | 17 | 239 | c.1664C>T                         | c.(1663-1665)CCT>CTT | p.P555L       |
| Pat_41 | Post-Resistance | PUM1     | 9698   | 37 | 1 | 31441205 | 31441205 | Missense_Mutation | SNP | C  | T  | 5  | 190 | c.1641G>A                         | c.(1639-1641)ATG>ATA | p.M547I       |

|        |                 |          |        |    |   |          |          |                        |     |   |   |    |     |               |                        |               |
|--------|-----------------|----------|--------|----|---|----------|----------|------------------------|-----|---|---|----|-----|---------------|------------------------|---------------|
| Pat_41 | Post-Resistance | PUM1     | 9698   | 37 | 1 | 31454168 | 31454168 | Missense_Mutation      | SNP | G | A | 5  | 162 | c.1243C>T     | c.(1243-1245)CCG>TCG   | p.P415S       |
| Pat_41 | Post-Resistance | SNRNP40  | 9410   | 37 | 1 | 31766101 | 31766101 | Missense_Mutation      | SNP | G | A | 26 | 155 | c.236C>T      | c.(235-237)TCC>TTC     | p.S79F        |
| Pat_41 | Post-Resistance | COL16A1  | 1307   | 37 | 1 | 32148591 | 32148591 | Missense_Mutation      | SNP | C | T | 8  | 61  | c.2482G>A     | c.(2482-2484)GTG>ATG   | p.V828M       |
| Pat_41 | Post-Resistance | COL16A1  | 1307   | 37 | 1 | 32155377 | 32155377 | Missense_Mutation      | SNP | G | A | 16 | 109 | c.1585C>T     | c.(1585-1587)CCC>TCC   | p.P529S       |
| Pat_41 | Post-Resistance | COL16A1  | 1307   | 37 | 1 | 32157658 | 32157658 | Missense_Mutation      | SNP | C | T | 15 | 169 | c.1205G>A     | c.(1204-1206)GGC>GAC   | p.G402D       |
| Pat_41 | Post-Resistance | BAI2     | 576    | 37 | 1 | 32196445 | 32196445 | Missense_Mutation      | SNP | G | A | 16 | 164 | c.4336C>T     | c.(4336-4338)CCT>TCT   | p.P1446S      |
| Pat_41 | Post-Resistance | CCDC28B  | 79140  | 37 | 1 | 32669792 | 32669792 | Missense_Mutation      | SNP | G | A | 12 | 146 | c.337G>A      | c.(337-339)GAA>AAA     | p.E113K       |
| Pat_41 | Post-Resistance | LCK      | 3932   | 37 | 1 | 32742054 | 32742054 | Missense_Mutation      | SNP | C | T | 5  | 49  | c.748C>T      | c.(748-750)CGG>TGG     | p.R250W       |
| Pat_41 | Post-Resistance | HDAC1    | 3065   | 37 | 1 | 32790131 | 32790131 | Missense_Mutation      | SNP | A | C | 10 | 446 | c.332A>C      | c.(331-333)CAG>CCG     | p.Q111P       |
| Pat_41 | Post-Resistance | KIAA1522 | 57648  | 37 | 1 | 33236888 | 33236888 | Missense_Mutation      | SNP | G | A | 7  | 151 | c.1931G>A     | c.(1930-1932)AGT>AAT   | p.S644N       |
| Pat_41 | Post-Resistance | KIAA1522 | 57648  | 37 | 1 | 33237295 | 33237295 | Missense_Mutation      | SNP | C | T | 10 | 89  | c.2338C>T     | c.(2338-2340)CCG>TCG   | p.P780S       |
| Pat_41 | Post-Resistance | YARS     | 8565   | 37 | 1 | 33248080 | 33248080 | Missense_Mutation      | SNP | G | A | 7  | 116 | c.967C>T      | c.(967-969)CCA>TCA     | p.P323S       |
| Pat_41 | Post-Resistance | ZNF362   | 149076 | 37 | 1 | 33745785 | 33745785 | Missense_Mutation      | SNP | G | A | 45 | 375 | c.410G>A      | c.(409-411)GGC>GAC     | p.G137D       |
| Pat_41 | Post-Resistance | ZNF362   | 149076 | 37 | 1 | 33745887 | 33745887 | Missense_Mutation      | SNP | C | T | 11 | 332 | c.512C>T      | c.(511-513)CCT>CTT     | p.P171L       |
| Pat_41 | Post-Resistance | PHC2     | 1912   | 37 | 1 | 33833029 | 33833029 | Missense_Mutation      | SNP | C | T | 13 | 261 | c.664G>A      | c.(664-666)GTA>ATA     | p.V222I       |
| Pat_41 | Post-Resistance | CSMD2    | 114784 | 37 | 1 | 34204766 | 34204766 | Nonsense_Mutation      | SNP | C | T | 3  | 17  | c.2223G>A     | c.(2221-2223)TGG>TGA   | p.W741*       |
| Pat_41 | Post-Resistance | CSMD2    | 114784 | 37 | 1 | 34401462 | 34401462 | Missense_Mutation      | SNP | C | T | 34 | 232 | c.491G>A      | c.(490-492)AGC>AAC     | p.S164N       |
| Pat_41 | Post-Resistance | DLGAP3   | 58512  | 37 | 1 | 35365280 | 35365280 | Missense_Mutation      | SNP | G | A | 17 | 225 | c.1376C>T     | c.(1375-1377)ACC>ATC   | p.T459I       |
| Pat_41 | Post-Resistance | ZMYM1    | 79830  | 37 | 1 | 35577723 | 35577723 | Missense_Mutation      | SNP | A | G | 6  | 222 | c.1138A>G     | c.(1138-1140)ATT>GTT   | p.I380V       |
| Pat_41 | Post-Resistance | ZMYM1    | 79830  | 37 | 1 | 35578630 | 35578630 | Missense_Mutation      | SNP | C | T | 5  | 143 | c.1199C>T     | c.(1198-1200)ACG>ATG   | p.T400M       |
| Pat_41 | Post-Resistance | ZMYM4    | 9202   | 37 | 1 | 35847190 | 35847190 | Missense_Mutation      | SNP | G | A | 43 | 423 | c.1400G>A     | c.(1399-1401)TGC>TAC   | p.C467Y       |
| Pat_41 | Post-Resistance | NCDN     | 23154  | 37 | 1 | 36030965 | 36030965 | Missense_Mutation      | SNP | G | A | 23 | 83  | c.1891G>A     | c.(1891-1893)GCC>ACC   | p.A631T       |
| Pat_41 | Post-Resistance | CLSPN    | 63967  | 37 | 1 | 36215406 | 36215406 | Missense_Mutation      | SNP | C | T | 12 | 65  | c.2035G>A     | c.(2035-2037)GAA>AAA   | p.E679K       |
| Pat_41 | Post-Resistance | CLSPN    | 63967  | 37 | 1 | 36225942 | 36225942 | Splice_Site            | SNP | C | T | 5  | 96  | c.1579_splice | c.e8+1                 | p.E527_splice |
| Pat_41 | Post-Resistance | EIF2C1   | 26523  | 37 | 1 | 36381006 | 36381006 | Nonsense_Mutation      | SNP | C | T | 19 | 430 | c.1891C>T     | c.(1891-1893)CGA>TGA   | p.R631*       |
| Pat_41 | Post-Resistance | ADPRHL2  | 54936  | 37 | 1 | 36557313 | 36557313 | Missense_Mutation      | SNP | G | A | 5  | 124 | c.403G>A      | c.(403-405)GTC>ATC     | p.V135I       |
| Pat_41 | Post-Resistance | MAP7D1   | 55700  | 37 | 1 | 36636617 | 36636617 | Missense_Mutation      | SNP | G | A | 11 | 234 | c.92G>A       | c.(91-93)GGT>GAT       | p.G31D        |
| Pat_41 | Post-Resistance | MACF1    | 23499  | 37 | 1 | 39696859 | 39696859 | Translation_Start_Site | SNP | C | T | 44 | 693 | c.-50C>T      | :(-52--48)AACGG>AATGG  |               |
| Pat_41 | Post-Resistance | MACF1    | 23499  | 37 | 1 | 39752983 | 39752983 | Missense_Mutation      | SNP | G | A | 13 | 321 | c.1549G>A     | c.(1549-1551)GTC>ATC   | p.V517I       |
| Pat_41 | Post-Resistance | MACF1    | 23499  | 37 | 1 | 39776656 | 39776656 | Missense_Mutation      | SNP | G | A | 9  | 218 | c.3269G>A     | c.(3268-3270)AGG>AAG   | p.R1090K      |
| Pat_41 | Post-Resistance | MACF1    | 23499  | 37 | 1 | 39806597 | 39806597 | Missense_Mutation      | SNP | G | A | 28 | 138 | c.5873G>A     | c.(5872-5874)AGC>AAC   | p.S1958N      |
| Pat_41 | Post-Resistance | MACF1    | 23499  | 37 | 1 | 39827140 | 39827140 | Missense_Mutation      | SNP | G | A | 27 | 381 | c.7882G>A     | c.(7882-7884)GGC>AGC   | p.G2628S      |
| Pat_41 | Post-Resistance | KIAA0754 | 643314 | 37 | 1 | 39879016 | 39879016 | Missense_Mutation      | SNP | A | G | 3  | 36  | c.3079A>G     | c.(3079-3081)ACC>GCC   | p.T1027A      |
| Pat_41 | Post-Resistance | KIAA0754 | 643314 | 37 | 1 | 39879250 | 39879250 | Missense_Mutation      | SNP | A | G | 7  | 20  | c.3313A>G     | c.(3313-3315)ACC>GCC   | p.T1105A      |
| Pat_41 | Post-Resistance | MACF1    | 23499  | 37 | 1 | 39898297 | 39898297 | Nonsense_Mutation      | SNP | C | T | 14 | 107 | c.12748C>T    | c.(12748-12750)CAG>TAG | p.Q4250*      |
| Pat_41 | Post-Resistance | MACF1    | 23499  | 37 | 1 | 39906787 | 39906787 | Missense_Mutation      | SNP | G | A | 13 | 70  | c.13889G>A    | :(13888-13890)AGC>AAC  | p.S4630N      |
| Pat_41 | Post-Resistance | PABPC4   | 8761   | 37 | 1 | 40035636 | 40035636 | Missense_Mutation      | SNP | G | A | 19 | 187 | c.542C>T      | c.(541-543)GCT>GTT     | p.A181V       |
| Pat_41 | Post-Resistance | PABPC4   | 8761   | 37 | 1 | 40041641 | 40041641 | Translation_Start_Site | SNP | C | T | 5  | 27  | c.-17G>A      | :(-19--15)GGGTG>GGATG  |               |
| Pat_41 | Post-Resistance | PPIE     | 10450  | 37 | 1 | 40207050 | 40207050 | Missense_Mutation      | SNP | G | A | 30 | 342 | c.143G>A      | c.(142-144)GGA>GAA     | p.G48E        |
| Pat_41 | Post-Resistance | MYCL1    | 4610   | 37 | 1 | 40366805 | 40366805 | Missense_Mutation      | SNP | G | A | 4  | 18  | c.302C>T      | c.(301-303)GCC>GTC     | p.A101V       |
| Pat_41 | Post-Resistance | MFSD2A   | 84879  | 37 | 1 | 40431657 | 40431657 | Missense_Mutation      | SNP | A | G | 4  | 135 | c.724A>G      | c.(724-726)ACA>GCA     | p.T242A       |
| Pat_41 | Post-Resistance | PPT1     | 5538   | 37 | 1 | 40542513 | 40542513 | Splice_Site            | SNP | C | T | 13 | 175 | c.798_splice  | c.e8+1                 | p.Q266_splice |
| Pat_41 | Post-Resistance | RLF      | 6018   | 37 | 1 | 40702766 | 40702766 | Missense_Mutation      | SNP | G | A | 12 | 327 | c.2392G>A     | c.(2392-2394)GAT>AAT   | p.D798N       |
| Pat_41 | Post-Resistance | ZNF684   | 127396 | 37 | 1 | 41012864 | 41012864 | Missense_Mutation      | SNP | C | T | 13 | 141 | c.869C>T      | c.(868-870)TCC>TTC     | p.S290F       |
| Pat_41 | Post-Resistance | HIVEP3   | 59269  | 37 | 1 | 41979218 | 41979218 | Missense_Mutation      | SNP | C | T | 4  | 41  | c.5674G>A     | c.(5674-5676)GCA>ACA   | p.A1892T      |
| Pat_41 | Post-Resistance | FOXJ3    | 22887  | 37 | 1 | 42671492 | 42671492 | Missense_Mutation      | SNP | C | T | 11 | 163 | c.571G>A      | c.(571-573)GAG>AAG     | p.E191K       |
| Pat_41 | Post-Resistance | PPCS     | 79717  | 37 | 1 | 42925484 | 42925484 | Missense_Mutation      | SNP | G | A | 11 | 254 | c.823G>A      | c.(823-825)GAA>AAA     | p.E275K       |

|        |                 |          |        |    |   |          |          |                   |     |   |   |     |     |              |                      |              |
|--------|-----------------|----------|--------|----|---|----------|----------|-------------------|-----|---|---|-----|-----|--------------|----------------------|--------------|
| Pat_41 | Post-Resistance | LEPRE1   | 64175  | 37 | 1 | 43232591 | 43232591 | Missense_Mutation | SNP | C | T | 9   | 181 | c.52G>A      | c.(52-54)GCT>ACT     | p.A18T       |
| Pat_41 | Post-Resistance | ERMAP    | 114625 | 37 | 1 | 43308506 | 43308506 | Missense_Mutation | SNP | C | T | 7   | 60  | c.1031C>T    | c.(1030-1032)TCC>TTC | p.S344F      |
| Pat_41 | Post-Resistance | SLC2A1   | 6513   | 37 | 1 | 43393347 | 43393347 | Missense_Mutation | SNP | C | T | 7   | 57  | c.1207G>A    | c.(1207-1209)GCC>ACC | p.A403T      |
| Pat_41 | Post-Resistance | EBNA1BP2 | 10969  | 37 | 1 | 43630345 | 43630345 | Missense_Mutation | SNP | C | T | 5   | 57  | c.839G>A     | c.(838-840)GCC>GAC   | p.G280D      |
| Pat_41 | Post-Resistance | WDR65    | 149465 | 37 | 1 | 43672465 | 43672465 | Nonsense_Mutation | SNP | G | A | 13  | 241 | c.1617G>A    | c.(1615-1617)TGG>TGA | p.W539*      |
| Pat_41 | Post-Resistance | WDR65    | 149465 | 37 | 1 | 43675684 | 43675684 | Missense_Mutation | SNP | C | T | 34  | 163 | c.2026C>T    | c.(2026-2028)CTT>TTT | p.L676F      |
| Pat_41 | Post-Resistance | TMEM125  | 128218 | 37 | 1 | 43738856 | 43738856 | Missense_Mutation | SNP | G | A | 6   | 55  | c.463G>A     | c.(463-465)GCT>ACT   | p.A155T      |
| Pat_41 | Post-Resistance | MPL      | 4352   | 37 | 1 | 43805047 | 43805047 | Missense_Mutation | SNP | G | A | 5   | 102 | c.497G>A     | c.(496-498)AGG>AAG   | p.R166K      |
| Pat_41 | Post-Resistance | KIAA0467 | 23334  | 37 | 1 | 43908520 | 43908520 | Missense_Mutation | SNP | G | A | 33  | 174 | c.5485G>A    | c.(5485-5487)GAA>AAA | p.E1829K     |
| Pat_41 | Post-Resistance | KIAA0467 | 23334  | 37 | 1 | 43908599 | 43908599 | Missense_Mutation | SNP | G | A | 7   | 87  | c.5564G>A    | c.(5563-5565)GGG>GAG | p.G1855E     |
| Pat_41 | Post-Resistance | PTPRF    | 5792   | 37 | 1 | 44057183 | 44057183 | Missense_Mutation | SNP | G | A | 4   | 32  | c.1490G>A    | c.(1489-1491)GGC>GAC | p.G497D      |
| Pat_41 | Post-Resistance | PTPRF    | 5792   | 37 | 1 | 44069683 | 44069683 | Missense_Mutation | SNP | G | A | 7   | 123 | c.2860G>A    | c.(2860-2862)GTG>ATG | p.V954M      |
| Pat_41 | Post-Resistance | PTPRF    | 5792   | 37 | 1 | 44084726 | 44084726 | Missense_Mutation | SNP | C | T | 8   | 128 | c.4499C>T    | c.(4498-4500)TCC>TTC | p.S1500F     |
| Pat_41 | Post-Resistance | SLC6A9   | 6536   | 37 | 1 | 44474134 | 44474134 | Missense_Mutation | SNP | C | T | 9   | 128 | c.700G>A     | c.(700-702)GAC>AAC   | p.D234N      |
| Pat_41 | Post-Resistance | SLC6A9   | 6536   | 37 | 1 | 44482780 | 44482780 | Missense_Mutation | SNP | G | A | 5   | 77  | c.26C>T      | c.(25-27)GCG>GTG     | p.A9V        |
| Pat_41 | Post-Resistance | KLF17    | 128209 | 37 | 1 | 44596372 | 44596372 | Missense_Mutation | SNP | C | T | 8   | 137 | c.1114C>T    | c.(1114-1116)CCA>TCA | p.P372S      |
| Pat_41 | Post-Resistance | DMAP1    | 55929  | 37 | 1 | 44684067 | 44684067 | Missense_Mutation | SNP | C | T | 14  | 323 | c.478C>T     | c.(478-480)CTC>TTC   | p.L160F      |
| Pat_41 | Post-Resistance | KIF2C    | 11004  | 37 | 1 | 45206657 | 45206657 | Missense_Mutation | SNP | G | A | 6   | 150 | c.143G>A     | c.(142-144)GGA>GAA   | p.G48E       |
| Pat_41 | Post-Resistance | PLK3     | 1263   | 37 | 1 | 45268722 | 45268722 | Missense_Mutation | SNP | G | A | 4   | 117 | c.845G>A     | c.(844-846)AGC>AAC   | p.S282N      |
| Pat_41 | Post-Resistance | PLK3     | 1263   | 37 | 1 | 45270380 | 45270380 | Missense_Mutation | SNP | C | T | 41  | 634 | c.1564C>T    | c.(1564-1566)CCC>TCC | p.P522S      |
| Pat_41 | Post-Resistance | PTCH2    | 8643   | 37 | 1 | 45292305 | 45292305 | Missense_Mutation | SNP | G | A | 4   | 21  | c.2831C>T    | c.(2830-2832)GCC>GTC | p.A944V      |
| Pat_41 | Post-Resistance | ZSWIM5   | 57643  | 37 | 1 | 45501794 | 45501794 | Missense_Mutation | SNP | T | G | 6   | 87  | c.2072A>C    | c.(2071-2073)CAG>CCG | p.Q691P      |
| Pat_41 | Post-Resistance | HPDL     | 84842  | 37 | 1 | 45793335 | 45793335 | Missense_Mutation | SNP | G | A | 4   | 104 | c.515G>A     | c.(514-516)AGC>AAC   | p.S172N      |
| Pat_41 | Post-Resistance | MAST2    | 23139  | 37 | 1 | 46501709 | 46501709 | Missense_Mutation | SNP | G | A | 5   | 146 | c.5368G>A    | c.(5368-5370)GTT>ATT | p.V1790I     |
| Pat_41 | Post-Resistance | PIK3R3   | 8503   | 37 | 1 | 46509370 | 46509370 | Missense_Mutation | SNP | G | A | 12  | 266 | c.1361C>T    | c.(1360-1362)GCA>GTA | p.A454V      |
| Pat_41 | Post-Resistance | DMBX1    | 127343 | 37 | 1 | 46976784 | 46976784 | Missense_Mutation | SNP | C | T | 157 | 170 | c.526C>T     | c.(526-528)CCT>TCT   | p.P176S      |
| Pat_41 | Post-Resistance | MOBK2L2C | 148932 | 37 | 1 | 47075807 | 47075807 | Missense_Mutation | SNP | A | G | 7   | 213 | c.488T>C     | c.(487-489)GTC>GCC   | p.V163A      |
| Pat_41 | Post-Resistance | CYP4Z1   | 199974 | 37 | 1 | 47571916 | 47571916 | Missense_Mutation | SNP | G | A | 27  | 114 | c.1184G>A    | c.(1183-1185)GGA>GAA | p.G395E      |
| Pat_41 | Post-Resistance | FOXE3    | 2301   | 37 | 1 | 47882381 | 47882381 | Missense_Mutation | SNP | G | A | 12  | 224 | c.394G>A     | c.(394-396)GTG>ATG   | p.V132M      |
| Pat_41 | Post-Resistance | SLC5A9   | 200010 | 37 | 1 | 48699363 | 48699363 | Missense_Mutation | SNP | G | A | 11  | 104 | c.1070G>A    | c.(1069-1071)AGA>AAA | p.R357K      |
| Pat_41 | Post-Resistance | SLC5A9   | 200010 | 37 | 1 | 48701532 | 48701532 | Missense_Mutation | SNP | G | A | 10  | 153 | c.1273G>A    | c.(1273-1275)GAG>AAG | p.E425K      |
| Pat_41 | Post-Resistance | SPATA6   | 54558  | 37 | 1 | 48764422 | 48764422 | Missense_Mutation | SNP | G | A | 14  | 203 | c.1430C>T    | c.(1429-1431)GCC>GTC | p.A477V      |
| Pat_41 | Post-Resistance | FAF1     | 11124  | 37 | 1 | 51204547 | 51204547 | Missense_Mutation | SNP | G | A | 9   | 209 | c.539C>T     | c.(538-540)TCT>TTT   | p.S180F      |
| Pat_41 | Post-Resistance | CDKN2C   | 1031   | 37 | 1 | 51436056 | 51436056 | Missense_Mutation | SNP | G | A | 4   | 61  | c.16G>A      | c.(16-18)GGG>AGG     | p.G6R        |
| Pat_41 | Post-Resistance | OSBPL9   | 114883 | 37 | 1 | 52231608 | 52231608 | Missense_Mutation | SNP | C | T | 11  | 155 | c.893C>T     | c.(892-894)GCT>GTT   | p.A298V      |
| Pat_41 | Post-Resistance | RAB3B    | 5865   | 37 | 1 | 52399097 | 52399097 | Missense_Mutation | SNP | G | A | 15  | 178 | c.365C>T     | c.(364-366)ACC>ATC   | p.T122I      |
| Pat_41 | Post-Resistance | KTI12    | 112970 | 37 | 1 | 52498737 | 52498737 | Missense_Mutation | SNP | C | T | 10  | 43  | c.697G>A     | c.(697-699)GTG>ATG   | p.V233M      |
| Pat_41 | Post-Resistance | KTI12    | 112970 | 37 | 1 | 52498898 | 52498898 | Missense_Mutation | SNP | G | A | 13  | 156 | c.536C>T     | c.(535-537)TCC>TTC   | p.S179F      |
| Pat_41 | Post-Resistance | ZFYVE9   | 9372   | 37 | 1 | 52703852 | 52703852 | Missense_Mutation | SNP | G | A | 35  | 727 | c.763G>A     | c.(763-765)GAC>AAC   | p.D255N      |
| Pat_41 | Post-Resistance | FAM159A  | 348378 | 37 | 1 | 53122521 | 53122521 | Missense_Mutation | SNP | C | T | 8   | 153 | c.382C>T     | c.(382-384)CCA>TCA   | p.P128S      |
| Pat_41 | Post-Resistance | ZYG11B   | 79699  | 37 | 1 | 53237373 | 53237373 | Missense_Mutation | SNP | G | A | 31  | 218 | c.878G>A     | c.(877-879)AGC>AAC   | p.S293N      |
| Pat_41 | Post-Resistance | PODN     | 127435 | 37 | 1 | 53543381 | 53543381 | Missense_Mutation | SNP | C | T | 22  | 373 | c.907C>T     | c.(907-909)CCG>TCG   | p.P303S      |
| Pat_41 | Post-Resistance | C1orf123 | 54987  | 37 | 1 | 53684085 | 53684085 | Splice_Site       | SNP | C | T | 17  | 297 | c.229_splice | c.e4+1               | p.E77_splice |
| Pat_41 | Post-Resistance | LRP8     | 7804   | 37 | 1 | 53726227 | 53726227 | Missense_Mutation | SNP | A | T | 25  | 288 | c.1965T>A    | c.(1963-1965)AAT>AAA | p.N655K      |
| Pat_41 | Post-Resistance | CDCP2    | 200008 | 37 | 1 | 54605260 | 54605260 | Missense_Mutation | SNP | G | A | 7   | 49  | c.1283C>T    | c.(1282-1284)CCC>CTC | p.P428L      |
| Pat_41 | Post-Resistance | C1orf175 | 374977 | 37 | 1 | 55118771 | 55118771 | Missense_Mutation | SNP | G | A | 6   | 122 | c.172G>A     | c.(172-174)GTT>ATT   | p.V58I       |
| Pat_41 | Post-Resistance | USP24    | 23358  | 37 | 1 | 55561066 | 55561066 | Missense_Mutation | SNP | T | G | 4   | 46  | c.5585A>C    | c.(5584-5586)AAC>ACC | p.N1862T     |



|        |                 |            |        |    |   |          |          |                   |     |   |   |    |     |               |                      |               |
|--------|-----------------|------------|--------|----|---|----------|----------|-------------------|-----|---|---|----|-----|---------------|----------------------|---------------|
| Pat_41 | Post-Resistance | PRKAA2     | 5563   | 37 | 1 | 57111134 | 57111134 | Missense_Mutation | SNP | G | A | 4  | 20  | c.74G>A       | c.(73-75)GGC>GAC     | p.G25D        |
| Pat_41 | Post-Resistance | C1orf168   | 199920 | 37 | 1 | 57185911 | 57185911 | Missense_Mutation | SNP | T | C | 30 | 129 | c.2066A>G     | c.(2065-2067)GAA>GGA | p.E689G       |
| Pat_41 | Post-Resistance | C8A        | 731    | 37 | 1 | 57372418 | 57372418 | Missense_Mutation | SNP | G | A | 10 | 143 | c.1175G>A     | c.(1174-1176)GGA>GAA | p.G392E       |
| Pat_41 | Post-Resistance | DAB1       | 1600   | 37 | 1 | 57480825 | 57480825 | Missense_Mutation | SNP | C | T | 6  | 118 | c.1175G>A     | c.(1174-1176)GGC>GAC | p.G392D       |
| Pat_41 | Post-Resistance | DAB1       | 1600   | 37 | 1 | 57491682 | 57491682 | Missense_Mutation | SNP | G | A | 12 | 263 | c.758C>T      | c.(757-759)TCC>TTC   | p.S253F       |
| Pat_41 | Post-Resistance | MYSM1      | 114803 | 37 | 1 | 59142648 | 59142648 | Missense_Mutation | SNP | C | T | 11 | 314 | c.1340G>A     | c.(1339-1341)GGA>GAA | p.G447E       |
| Pat_41 | Post-Resistance | HOOK1      | 51361  | 37 | 1 | 60325957 | 60325957 | Missense_Mutation | SNP | G | A | 38 | 552 | c.1489G>A     | c.(1489-1491)GAA>AAA | p.E497K       |
| Pat_41 | Post-Resistance | HOOK1      | 51361  | 37 | 1 | 60330918 | 60330918 | Splice_Site       | SNP | G | A | 7  | 72  | c.1744_splice | c.e19+1              | p.V582_splice |
| Pat_41 | Post-Resistance | C1orf87    | 127795 | 37 | 1 | 60505689 | 60505689 | Missense_Mutation | SNP | G | A | 9  | 62  | c.647C>T      | c.(646-648)TCT>TTT   | p.S216F       |
| Pat_41 | Post-Resistance | INADL      | 10207  | 37 | 1 | 62253469 | 62253469 | Missense_Mutation | SNP | G | A | 10 | 142 | c.893G>A      | c.(892-894)GGC>GAC   | p.G298D       |
| Pat_41 | Post-Resistance | CACHD1     | 57685  | 37 | 1 | 65157210 | 65157210 | Missense_Mutation | SNP | C | T | 8  | 168 | c.3638C>T     | c.(3637-3639)GCC>GTC | p.A1213V      |
| Pat_41 | Post-Resistance | DNAJC6     | 9829   | 37 | 1 | 65860607 | 65860607 | Missense_Mutation | SNP | C | T | 15 | 170 | c.1759C>T     | c.(1759-1761)CCT>TCT | p.P587S       |
| Pat_41 | Post-Resistance | DNAJC6     | 9829   | 37 | 1 | 65871719 | 65871719 | Missense_Mutation | SNP | G | A | 13 | 132 | c.2223G>A     | c.(2221-2223)ATG>ATA | p.M741I       |
| Pat_41 | Post-Resistance | PDE4B      | 5142   | 37 | 1 | 66384379 | 66384379 | Nonsense_Mutation | SNP | G | T | 8  | 122 | c.142G>T      | c.(142-144)GGA>TGA   | p.G48*        |
| Pat_41 | Post-Resistance | TCTEX1D1   | 200132 | 37 | 1 | 67236072 | 67236072 | Missense_Mutation | SNP | C | T | 50 | 345 | c.122C>T      | c.(121-123)TCT>TTT   | p.S41F        |
| Pat_41 | Post-Resistance | WDR78      | 79819  | 37 | 1 | 67299760 | 67299760 | Missense_Mutation | SNP | C | T | 22 | 92  | c.1805G>A     | c.(1804-1806)GGA>GAA | p.G602E       |
| Pat_41 | Post-Resistance | WDR78      | 79819  | 37 | 1 | 67299805 | 67299805 | Missense_Mutation | SNP | G | A | 11 | 77  | c.1760C>T     | c.(1759-1761)CCT>CTT | p.P587L       |
| Pat_41 | Post-Resistance | MIER1      | 57708  | 37 | 1 | 67425406 | 67425406 | Missense_Mutation | SNP | C | T | 29 | 143 | c.679C>T      | c.(679-681)CCA>TCA   | p.P227S       |
| Pat_41 | Post-Resistance | SLC35D1    | 23169  | 37 | 1 | 67470040 | 67470040 | Missense_Mutation | SNP | C | T | 9  | 305 | c.1051G>A     | c.(1051-1053)GGG>AGG | p.G351R       |
| Pat_41 | Post-Resistance | SLC35D1    | 23169  | 37 | 1 | 67519582 | 67519582 | Missense_Mutation | SNP | C | T | 5  | 58  | c.115G>A      | c.(115-117)GTG>ATG   | p.V39M        |
| Pat_41 | Post-Resistance | IL23R      | 149233 | 37 | 1 | 67724160 | 67724160 | Splice_Site       | SNP | G | A | 4  | 174 | c.1240_splice | c.e11-1              | p.E414_splice |
| Pat_41 | Post-Resistance | SERBP1     | 26135  | 37 | 1 | 67880913 | 67880913 | Missense_Mutation | SNP | C | T | 19 | 134 | c.1106G>A     | c.(1105-1107)GGC>GAC | p.G369D       |
| Pat_41 | Post-Resistance | DEPDC1     | 55635  | 37 | 1 | 68947788 | 68947788 | Missense_Mutation | SNP | G | A | 10 | 105 | c.1703C>T     | c.(1702-1704)ACA>ATA | p.T568I       |
| Pat_41 | Post-Resistance | FPGT       | 8790   | 37 | 1 | 74670431 | 74670431 | Missense_Mutation | SNP | G | A | 8  | 112 | c.700G>A      | c.(700-702)GAA>AAA   | p.E234K       |
| Pat_41 | Post-Resistance | TNNI3K     | 51086  | 37 | 1 | 74701803 | 74701803 | Missense_Mutation | SNP | G | A | 12 | 94  | c.58G>A       | c.(58-60)GTC>ATC     | p.V20I        |
| Pat_41 | Post-Resistance | C1orf173   | 127254 | 37 | 1 | 75037060 | 75037060 | Missense_Mutation | SNP | C | T | 10 | 202 | c.4334G>A     | c.(4333-4335)GGA>GAA | p.G1445E      |
| Pat_41 | Post-Resistance | C1orf173   | 127254 | 37 | 1 | 75037804 | 75037804 | Missense_Mutation | SNP | G | A | 25 | 236 | c.3590C>T     | c.(3589-3591)TCC>TTC | p.S1197F      |
| Pat_41 | Post-Resistance | C1orf173   | 127254 | 37 | 1 | 75038600 | 75038600 | Missense_Mutation | SNP | C | T | 27 | 181 | c.2794G>A     | c.(2794-2796)GAG>AAG | p.E932K       |
| Pat_41 | Post-Resistance | SLC44A5    | 204962 | 37 | 1 | 75672389 | 75672389 | Missense_Mutation | SNP | C | T | 8  | 213 | c.2063G>A     | c.(2062-2064)AGA>AAA | p.R688K       |
| Pat_41 | Post-Resistance | MSH4       | 4438   | 37 | 1 | 76346936 | 76346936 | Missense_Mutation | SNP | T | C | 12 | 181 | c.1787T>C     | c.(1786-1788)GTG>GCG | p.V596A       |
| Pat_41 | Post-Resistance | ST6GALNAC3 | 256435 | 37 | 1 | 76779652 | 76779652 | Missense_Mutation | SNP | C | T | 55 | 66  | c.181C>T      | c.(181-183)CAC>TAC   | p.H61Y        |
| Pat_41 | Post-Resistance | PIGK       | 10026  | 37 | 1 | 77627084 | 77627084 | Missense_Mutation | SNP | G | A | 12 | 110 | c.709C>T      | c.(709-711)CCT>TCT   | p.P237S       |
| Pat_41 | Post-Resistance | FUBP1      | 8880   | 37 | 1 | 78444637 | 78444637 | Missense_Mutation | SNP | C | T | 7  | 53  | c.52G>A       | c.(52-54)GGT>AGT     | p.G18S        |
| Pat_41 | Post-Resistance | GIPC2      | 54810  | 37 | 1 | 78601393 | 78601393 | Missense_Mutation | SNP | G | A | 7  | 154 | c.914G>A      | c.(913-915)GGA>GAA   | p.G305E       |
| Pat_41 | Post-Resistance | IFI44L     | 10964  | 37 | 1 | 79101047 | 79101047 | Missense_Mutation | SNP | G | A | 11 | 235 | c.749G>A      | c.(748-750)GGA>GAA   | p.G250E       |
| Pat_41 | Post-Resistance | ELTD1      | 64123  | 37 | 1 | 79387426 | 79387426 | Missense_Mutation | SNP | G | A | 5  | 124 | c.1129C>T     | c.(1129-1131)CCT>TCT | p.P377S       |
| Pat_41 | Post-Resistance | LPHN2      | 23266  | 37 | 1 | 82431862 | 82431862 | Missense_Mutation | SNP | G | A | 30 | 166 | c.2087G>A     | c.(2086-2088)AGG>AAG | p.R696K       |
| Pat_41 | Post-Resistance | CTBS       | 1486   | 37 | 1 | 85039948 | 85039948 | Missense_Mutation | SNP | G | A | 4  | 18  | c.151C>T      | c.(151-153)CCG>TCG   | p.P51S        |
| Pat_41 | Post-Resistance | SSX2IP     | 117178 | 37 | 1 | 85130099 | 85130099 | Splice_Site       | SNP | C | T | 6  | 237 | c.673_splice  | c.e7+1               | p.A225_splice |
| Pat_41 | Post-Resistance | MCOLN3     | 55283  | 37 | 1 | 85510881 | 85510881 | Missense_Mutation | SNP | C | T | 19 | 102 | c.163G>A      | c.(163-165)GCT>ACT   | p.A55T        |
| Pat_41 | Post-Resistance | DDAH1      | 23576  | 37 | 1 | 85787205 | 85787205 | Missense_Mutation | SNP | G | A | 8  | 103 | c.788C>T      | c.(787-789)TCT>TTT   | p.S263F       |
| Pat_41 | Post-Resistance | COL24A1    | 255631 | 37 | 1 | 86313446 | 86313446 | Missense_Mutation | SNP | C | T | 4  | 105 | c.3364G>A     | c.(3364-3366)GGA>AGA | p.G1122R      |
| Pat_41 | Post-Resistance | CLCA1      | 1179   | 37 | 1 | 86965618 | 86965618 | Missense_Mutation | SNP | G | A | 49 | 345 | c.2635G>A     | c.(2635-2637)GAA>AAA | p.E879K       |
| Pat_41 | Post-Resistance | CLCA1      | 1179   | 37 | 1 | 86965625 | 86965625 | Missense_Mutation | SNP | C | T | 55 | 313 | c.2642C>T     | c.(2641-2643)TCT>TTT | p.S881F       |
| Pat_41 | Post-Resistance | GBP1       | 2633   | 37 | 1 | 89522803 | 89522803 | Missense_Mutation | SNP | C | T | 24 | 194 | c.889G>A      | c.(889-891)GTG>ATG   | p.V297M       |
| Pat_41 | Post-Resistance | GBP2       | 2634   | 37 | 1 | 89579779 | 89579779 | Missense_Mutation | SNP | C | T | 66 | 248 | c.1069G>A     | c.(1069-1071)GAC>AAC | p.D357N       |
| Pat_41 | Post-Resistance | GBP7       | 388646 | 37 | 1 | 89613341 | 89613341 | Missense_Mutation | SNP | G | A | 25 | 202 | c.1274C>T     | c.(1273-1275)ACT>ATT | p.T425I       |

|        |                 |          |        |    |   |           |           |                   |     |   |   |    |     |               |                      |               |
|--------|-----------------|----------|--------|----|---|-----------|-----------|-------------------|-----|---|---|----|-----|---------------|----------------------|---------------|
| Pat_41 | Post-Resistance | GBP6     | 163351 | 37 | 1 | 89843986  | 89843986  | Missense_Mutation | SNP | G | A | 42 | 316 | c.439G>A      | c.(439-441)GAG>AAG   | p.E147K       |
| Pat_41 | Post-Resistance | LRR8B    | 23507  | 37 | 1 | 90049189  | 90049189  | Missense_Mutation | SNP | G | A | 8  | 161 | c.980G>A      | c.(979-981)GGT>GAT   | p.G327D       |
| Pat_41 | Post-Resistance | ZNF644   | 84146  | 37 | 1 | 91403258  | 91403258  | Missense_Mutation | SNP | G | A | 25 | 207 | c.3472C>T     | c.(3472-3474)CCA>TCA | p.P1158S      |
| Pat_41 | Post-Resistance | BTBD8    | 284697 | 37 | 1 | 92604938  | 92604938  | Missense_Mutation | SNP | C | T | 10 | 211 | c.784C>T      | c.(784-786)CAT>TAT   | p.H262Y       |
| Pat_41 | Post-Resistance | BTBD8    | 284697 | 37 | 1 | 92604954  | 92604954  | Missense_Mutation | SNP | G | A | 10 | 190 | c.800G>A      | c.(799-801)GGA>GAA   | p.G267E       |
| Pat_41 | Post-Resistance | MTF2     | 22823  | 37 | 1 | 93594945  | 93594945  | Missense_Mutation | SNP | G | A | 14 | 223 | c.1100G>A     | c.(1099-1101)GGA>GAA | p.G367E       |
| Pat_41 | Post-Resistance | MTF2     | 22823  | 37 | 1 | 93594972  | 93594972  | Missense_Mutation | SNP | G | A | 19 | 241 | c.1127G>A     | c.(1126-1128)GGC>GAC | p.G376D       |
| Pat_41 | Post-Resistance | CCDC18   | 343099 | 37 | 1 | 93646148  | 93646148  | Missense_Mutation | SNP | G | A | 7  | 112 | c.61G>A       | c.(61-63)GCT>ACT     | p.A21T        |
| Pat_41 | Post-Resistance | FNBP1L   | 54874  | 37 | 1 | 93988987  | 93988987  | Missense_Mutation | SNP | C | T | 7  | 65  | c.281C>T      | c.(280-282)GCG>GTG   | p.A94V        |
| Pat_41 | Post-Resistance | ABCA4    | 24     | 37 | 1 | 94502814  | 94502814  | Missense_Mutation | SNP | G | A | 13 | 181 | c.3700C>T     | c.(3700-3702)CCA>TCA | p.P1234S      |
| Pat_41 | Post-Resistance | ARHGAP29 | 9411   | 37 | 1 | 94640149  | 94640149  | Missense_Mutation | SNP | G | A | 10 | 227 | c.3062C>T     | c.(3061-3063)CCT>CTT | p.P1021L      |
| Pat_41 | Post-Resistance | RWDD3    | 25950  | 37 | 1 | 95710043  | 95710043  | Missense_Mutation | SNP | G | A | 19 | 184 | c.362G>A      | c.(361-363)GGC>GAC   | p.G121D       |
| Pat_41 | Post-Resistance | DPYD     | 1806   | 37 | 1 | 97658624  | 97658624  | Splice_Site       | SNP | C | T | 9  | 173 | c.2622_splice | c.e20+1              | p.K874_splice |
| Pat_41 | Post-Resistance | LPPR5    | 163404 | 37 | 1 | 99380362  | 99380362  | Missense_Mutation | SNP | C | T | 7  | 147 | c.913G>A      | c.(913-915)GAA>AAA   | p.E305K       |
| Pat_41 | Post-Resistance | LPPR4    | 9890   | 37 | 1 | 99764654  | 99764654  | Missense_Mutation | SNP | G | A | 22 | 218 | c.602G>A      | c.(601-603)GGA>GAA   | p.G201E       |
| Pat_41 | Post-Resistance | FRRS1    | 391059 | 37 | 1 | 100203679 | 100203679 | Missense_Mutation | SNP | C | T | 20 | 351 | c.722G>A      | c.(721-723)GGC>GAC   | p.G241D       |
| Pat_41 | Post-Resistance | SLC35A3  | 23443  | 37 | 1 | 100464904 | 100464904 | Missense_Mutation | SNP | G | A | 34 | 192 | c.275G>A      | c.(274-276)GGG>GAG   | p.G92E        |
| Pat_41 | Post-Resistance | SLC35A3  | 23443  | 37 | 1 | 100488006 | 100488006 | Missense_Mutation | SNP | C | T | 4  | 123 | c.952C>T      | c.(952-954)CCT>TCT   | p.P318S       |
| Pat_41 | Post-Resistance | SASS6    | 163786 | 37 | 1 | 100584644 | 100584644 | Missense_Mutation | SNP | G | A | 4  | 85  | c.599C>T      | c.(598-600)GCG>GTG   | p.A200V       |
| Pat_41 | Post-Resistance | DBT      | 1629   | 37 | 1 | 100672153 | 100672153 | Missense_Mutation | SNP | C | T | 20 | 481 | c.1057G>A     | c.(1057-1059)GGT>AGT | p.G353S       |
| Pat_41 | Post-Resistance | VAV3     | 10451  | 37 | 1 | 108247184 | 108247184 | Missense_Mutation | SNP | C | T | 16 | 256 | c.1693G>A     | c.(1693-1695)GTT>ATT | p.V565I       |
| Pat_41 | Post-Resistance | C1orf59  | 113802 | 37 | 1 | 109192835 | 109192835 | Missense_Mutation | SNP | C | T | 17 | 322 | c.754G>A      | c.(754-756)GCT>ACT   | p.A252T       |
| Pat_41 | Post-Resistance | WDR47    | 22911  | 37 | 1 | 109524409 | 109524409 | Missense_Mutation | SNP | C | T | 35 | 314 | c.2344G>A     | c.(2344-2346)GAT>AAT | p.D782N       |
| Pat_41 | Post-Resistance | KIAA1324 | 57535  | 37 | 1 | 109704625 | 109704625 | Missense_Mutation | SNP | G | A | 6  | 127 | c.263G>A      | c.(262-264)GGC>GAC   | p.G88D        |
| Pat_41 | Post-Resistance | CELSR2   | 1952   | 37 | 1 | 109793887 | 109793887 | Missense_Mutation | SNP | G | A | 5  | 108 | c.1186G>A     | c.(1186-1188)GCC>ACC | p.A396T       |
| Pat_41 | Post-Resistance | CELSR2   | 1952   | 37 | 1 | 109803751 | 109803751 | Missense_Mutation | SNP | G | A | 8  | 232 | c.4046G>A     | c.(4045-4047)GGC>GAC | p.G1349D      |
| Pat_41 | Post-Resistance | CELSR2   | 1952   | 37 | 1 | 109804176 | 109804176 | Missense_Mutation | SNP | G | A | 7  | 297 | c.4223G>A     | c.(4222-4224)GGG>GAG | p.G1408E      |
| Pat_41 | Post-Resistance | CELSR2   | 1952   | 37 | 1 | 109812092 | 109812092 | Missense_Mutation | SNP | G | A | 5  | 61  | c.6859G>A     | c.(6859-6861)GTC>ATC | p.V2287I      |
| Pat_41 | Post-Resistance | CELSR2   | 1952   | 37 | 1 | 109814127 | 109814127 | Missense_Mutation | SNP | G | A | 16 | 210 | c.7796G>A     | c.(7795-7797)TGC>TAC | p.C2599Y      |
| Pat_41 | Post-Resistance | AMIGO1   | 57463  | 37 | 1 | 110051098 | 110051098 | Missense_Mutation | SNP | A | C | 17 | 180 | c.437T>G      | c.(436-438)ATC>AGC   | p.I146S       |
| Pat_41 | Post-Resistance | GSTM2    | 2946   | 37 | 1 | 110224435 | 110224435 | Missense_Mutation | SNP | C | T | 8  | 104 | c.572C>T      | c.(571-573)TCC>TTC   | p.S191F       |
| Pat_41 | Post-Resistance | EPS8L3   | 79574  | 37 | 1 | 110301901 | 110301901 | Missense_Mutation | SNP | G | A | 31 | 583 | c.364C>T      | c.(364-366)CCA>TCA   | p.P122S       |
| Pat_41 | Post-Resistance | FAM40A   | 85369  | 37 | 1 | 110584222 | 110584222 | Missense_Mutation | SNP | G | A | 15 | 158 | c.715G>A      | c.(715-717)GCT>ACT   | p.A239T       |
| Pat_41 | Post-Resistance | SLC6A17  | 388662 | 37 | 1 | 110738259 | 110738259 | Missense_Mutation | SNP | C | T | 10 | 191 | c.1544C>T     | c.(1543-1545)TCC>TTC | p.S515F       |
| Pat_41 | Post-Resistance | RBM15    | 64783  | 37 | 1 | 110884155 | 110884155 | Missense_Mutation | SNP | G | A | 6  | 153 | c.2128G>A     | c.(2128-2130)GAG>AAG | p.E710K       |
| Pat_41 | Post-Resistance | SLC16A4  | 9122   | 37 | 1 | 110919577 | 110919577 | Missense_Mutation | SNP | C | T | 16 | 78  | c.1237G>A     | c.(1237-1239)GTA>ATA | p.V413I       |
| Pat_41 | Post-Resistance | SLC16A4  | 9122   | 37 | 1 | 110921759 | 110921759 | Missense_Mutation | SNP | C | T | 9  | 332 | c.746G>A      | c.(745-747)AGC>AAC   | p.S249N       |
| Pat_41 | Post-Resistance | KCNA10   | 3744   | 37 | 1 | 111060116 | 111060116 | Missense_Mutation | SNP | G | A | 9  | 45  | c.1294C>T     | c.(1294-1296)CCA>TCA | p.P432S       |
| Pat_41 | Post-Resistance | KCNA3    | 3738   | 37 | 1 | 111216162 | 111216162 | Missense_Mutation | SNP | G | A | 27 | 47  | c.1270C>T     | c.(1270-1272)CCC>TCC | p.P424S       |
| Pat_41 | Post-Resistance | C1orf103 | 55791  | 37 | 1 | 111492639 | 111492639 | Missense_Mutation | SNP | G | A | 5  | 116 | c.1703C>T     | c.(1702-1704)GCT>GTT | p.A568V       |
| Pat_41 | Post-Resistance | C1orf103 | 55791  | 37 | 1 | 111495306 | 111495306 | Missense_Mutation | SNP | G | A | 10 | 138 | c.200C>T      | c.(199-201)GCT>GTT   | p.A67V        |
| Pat_41 | Post-Resistance | CEPT1    | 10390  | 37 | 1 | 111702080 | 111702080 | Missense_Mutation | SNP | G | A | 17 | 271 | c.418G>A      | c.(418-420)GCA>ACA   | p.A140T       |
| Pat_41 | Post-Resistance | CHI3L2   | 1117   | 37 | 1 | 111778665 | 111778665 | Missense_Mutation | SNP | C | T | 32 | 489 | c.625C>T      | c.(625-627)CTC>TTC   | p.L209F       |
| Pat_41 | Post-Resistance | CHIA     | 27159  | 37 | 1 | 111860652 | 111860652 | Missense_Mutation | SNP | C | T | 11 | 141 | c.650C>T      | c.(649-651)TCC>TTC   | p.S217F       |
| Pat_41 | Post-Resistance | OVGP1    | 5016   | 37 | 1 | 111957946 | 111957946 | Missense_Mutation | SNP | G | A | 7  | 112 | c.1177C>T     | c.(1177-1179)CCA>TCA | p.P393S       |
| Pat_41 | Post-Resistance | OVGP1    | 5016   | 37 | 1 | 111966292 | 111966292 | Missense_Mutation | SNP | T | C | 21 | 173 | c.356A>G      | c.(355-357)AAG>AGG   | p.K119R       |
| Pat_41 | Post-Resistance | ATP5F1   | 515    | 37 | 1 | 112002095 | 112002095 | Missense_Mutation | SNP | C | T | 8  | 176 | c.530C>T      | c.(529-531)GCT>GTT   | p.A177V       |

|        |                 |           |        |    |   |           |           |                   |     |   |   |     |     |               |                      |               |
|--------|-----------------|-----------|--------|----|---|-----------|-----------|-------------------|-----|---|---|-----|-----|---------------|----------------------|---------------|
| Pat_41 | Post-Resistance | DDX20     | 11218  | 37 | 1 | 112308860 | 112308860 | Missense_Mutation | SNP | G | A | 5   | 112 | c.1814G>A     | c.(1813-1815)GGG>GAG | p.G605E       |
| Pat_41 | Post-Resistance | MOV10     | 4343   | 37 | 1 | 113231577 | 113231577 | Missense_Mutation | SNP | G | A | 22  | 152 | c.158G>A      | c.(157-159)GGC>GAC   | p.G53D        |
| Pat_41 | Post-Resistance | MOV10     | 4343   | 37 | 1 | 113232218 | 113232218 | Missense_Mutation | SNP | C | T | 36  | 394 | c.523C>T      | c.(523-525)CCC>TCC   | p.P175S       |
| Pat_41 | Post-Resistance | MOV10     | 4343   | 37 | 1 | 113232266 | 113232266 | Missense_Mutation | SNP | G | A | 11  | 126 | c.571G>A      | c.(571-573)GGC>AGC   | p.G191S       |
| Pat_41 | Post-Resistance | PPM1J     | 333926 | 37 | 1 | 113253130 | 113253130 | Missense_Mutation | SNP | G | A | 10  | 178 | c.1322C>T     | c.(1321-1323)GCC>GTC | p.A441V       |
| Pat_41 | Post-Resistance | FAM19A3   | 284467 | 37 | 1 | 113266686 | 113266686 | Missense_Mutation | SNP | G | A | 11  | 78  | c.317G>A      | c.(316-318)GGG>GAG   | p.G106E       |
| Pat_41 | Post-Resistance | HIPK1     | 204851 | 37 | 1 | 114499792 | 114499792 | Missense_Mutation | SNP | C | T | 32  | 278 | c.1639C>T     | c.(1639-1641)CAC>TAC | p.H547Y       |
| Pat_41 | Post-Resistance | HIPK1     | 204851 | 37 | 1 | 114505028 | 114505028 | Missense_Mutation | SNP | C | T | 19  | 187 | c.2071C>T     | c.(2071-2073)CCA>TCA | p.P691S       |
| Pat_41 | Post-Resistance | HIPK1     | 204851 | 37 | 1 | 114508860 | 114508860 | Missense_Mutation | SNP | G | A | 17  | 80  | c.2347G>A     | c.(2347-2349)GCC>ACC | p.A783T       |
| Pat_41 | Post-Resistance | TRIM33    | 51592  | 37 | 1 | 114948110 | 114948110 | Missense_Mutation | SNP | C | T | 39  | 641 | c.2690G>A     | c.(2689-2691)GGA>GAA | p.G897E       |
| Pat_41 | Post-Resistance | AMPD1     | 270    | 37 | 1 | 115215853 | 115215853 | Missense_Mutation | SNP | C | T | 29  | 206 | c.2126G>A     | c.(2125-2127)GGC>GAC | p.G709D       |
| Pat_41 | Post-Resistance | AMPD1     | 270    | 37 | 1 | 115216529 | 115216529 | Splice_Site       | SNP | C | T | 126 | 238 | c.1974_splice | c.e14+1              | p.K658_splice |
| Pat_41 | Post-Resistance | NRAS      | 4893   | 37 | 1 | 115256529 | 115256529 | Missense_Mutation | SNP | T | C | 27  | 681 | c.182A>G      | c.(181-183)CAA>CGA   | p.Q61R        |
| Pat_41 | Post-Resistance | NRAS      | 4893   | 37 | 1 | 115256538 | 115256538 | Missense_Mutation | SNP | G | A | 261 | 449 | c.173C>T      | c.(172-174)ACA>ATA   | p.T58I        |
| Pat_41 | Post-Resistance | CSDE1     | 7812   | 37 | 1 | 115261250 | 115261250 | Missense_Mutation | SNP | C | T | 16  | 232 | c.2333G>A     | c.(2332-2334)GGA>GAA | p.G778E       |
| Pat_41 | Post-Resistance | CSDE1     | 7812   | 37 | 1 | 115263285 | 115263285 | Missense_Mutation | SNP | C | T | 22  | 443 | c.1927G>A     | c.(1927-1929)GGG>AGG | p.G643R       |
| Pat_41 | Post-Resistance | VANGL1    | 81839  | 37 | 1 | 116206309 | 116206309 | Missense_Mutation | SNP | G | A | 95  | 189 | c.232G>A      | c.(232-234)GCC>ACC   | p.A78T        |
| Pat_41 | Post-Resistance | VANGL1    | 81839  | 37 | 1 | 116206471 | 116206471 | Missense_Mutation | SNP | C | T | 11  | 71  | c.394C>T      | c.(394-396)CTT>TTT   | p.L132F       |
| Pat_41 | Post-Resistance | VANGL1    | 81839  | 37 | 1 | 116226583 | 116226583 | Missense_Mutation | SNP | C | T | 51  | 374 | c.965C>T      | c.(964-966)ACT>ATT   | p.T322I       |
| Pat_41 | Post-Resistance | IGSF3     | 3321   | 37 | 1 | 117146321 | 117146321 | Missense_Mutation | SNP | C | T | 17  | 447 | c.1549G>A     | c.(1549-1551)GTG>ATG | p.V517M       |
| Pat_41 | Post-Resistance | IGSF3     | 3321   | 37 | 1 | 117158986 | 117158986 | Missense_Mutation | SNP | C | T | 6   | 277 | c.137G>A      | c.(136-138)GGC>GAC   | p.G46D        |
| Pat_41 | Post-Resistance | CD101     | 9398   | 37 | 1 | 117556219 | 117556219 | Missense_Mutation | SNP | G | A | 65  | 69  | c.1033G>A     | c.(1033-1035)GCA>ACA | p.A345T       |
| Pat_41 | Post-Resistance | TTF2      | 8458   | 37 | 1 | 117617599 | 117617599 | Missense_Mutation | SNP | G | T | 6   | 285 | c.393G>T      | c.(391-393)AAG>AAT   | p.K131N       |
| Pat_41 | Post-Resistance | TTF2      | 8458   | 37 | 1 | 117633200 | 117633200 | Missense_Mutation | SNP | C | T | 21  | 199 | c.2543C>T     | c.(2542-2544)TCT>TTT | p.S848F       |
| Pat_41 | Post-Resistance | TRIM45    | 80263  | 37 | 1 | 117654973 | 117654973 | Missense_Mutation | SNP | C | T | 70  | 112 | c.1697G>A     | c.(1696-1698)GGT>GAT | p.G566D       |
| Pat_41 | Post-Resistance | TRIM45    | 80263  | 37 | 1 | 117660679 | 117660679 | Missense_Mutation | SNP | G | A | 11  | 338 | c.1199C>T     | c.(1198-1200)GCC>GTC | p.A400V       |
| Pat_41 | Post-Resistance | TRIM45    | 80263  | 37 | 1 | 117663750 | 117663750 | Missense_Mutation | SNP | C | T | 17  | 148 | c.74G>A       | c.(73-75)GGC>GAC     | p.G25D        |
| Pat_41 | Post-Resistance | SPAG17    | 200162 | 37 | 1 | 118535096 | 118535096 | Missense_Mutation | SNP | G | A | 10  | 303 | c.5354C>T     | c.(5353-5355)TCC>TTC | p.S1785F      |
| Pat_41 | Post-Resistance | SPAG17    | 200162 | 37 | 1 | 118644362 | 118644362 | Splice_Site       | SNP | C | T | 6   | 156 | c.634_splice  | c.e5+1               | p.D212_splice |
| Pat_41 | Post-Resistance | TBX15     | 6913   | 37 | 1 | 119427477 | 119427477 | Missense_Mutation | SNP | C | T | 7   | 89  | c.1369G>A     | c.(1369-1371)GAG>AAG | p.E457K       |
| Pat_41 | Post-Resistance | TBX15     | 6913   | 37 | 1 | 119427938 | 119427938 | Missense_Mutation | SNP | G | A | 4   | 81  | c.908C>T      | c.(907-909)GCC>GTC   | p.A303V       |
| Pat_41 | Post-Resistance | WARS2     | 10352  | 37 | 1 | 119619077 | 119619077 | Missense_Mutation | SNP | G | A | 11  | 204 | c.244C>T      | c.(244-246)CCC>TCC   | p.P82S        |
| Pat_41 | Post-Resistance | HMGCS2    | 3158   | 37 | 1 | 120300046 | 120300046 | Missense_Mutation | SNP | G | A | 18  | 157 | c.866C>T      | c.(865-867)CCC>CTC   | p.P289L       |
| Pat_41 | Post-Resistance | NOTCH2    | 4853   | 37 | 1 | 120458965 | 120458965 | Missense_Mutation | SNP | T | C | 13  | 157 | c.6380A>G     | c.(6379-6381)AAG>AGG | p.K2127R      |
| Pat_41 | Post-Resistance | PDE4DIP   | 9659   | 37 | 1 | 144879561 | 144879561 | Missense_Mutation | SNP | A | G | 3   | 40  | c.3889T>C     | c.(3889-3891)TGT>CGT | p.C1297R      |
| Pat_41 | Post-Resistance | PDE4DIP   | 9659   | 37 | 1 | 144886128 | 144886128 | Missense_Mutation | SNP | C | T | 9   | 108 | c.3106G>A     | c.(3106-3108)GAA>AAA | p.E1036K      |
| Pat_41 | Post-Resistance | PDE4DIP   | 9659   | 37 | 1 | 144892575 | 144892575 | Missense_Mutation | SNP | C | T | 11  | 425 | c.2830G>A     | c.(2830-2832)GAT>AAT | p.D944N       |
| Pat_41 | Post-Resistance | PDE4DIP   | 9659   | 37 | 1 | 144906091 | 144906091 | Missense_Mutation | SNP | C | T | 18  | 261 | c.2542G>A     | c.(2542-2544)GGT>AGT | p.G848S       |
| Pat_41 | Post-Resistance | PDE4DIP   | 9659   | 37 | 1 | 144917498 | 144917498 | Splice_Site       | SNP | C | T | 22  | 791 | c.1605_splice | c.e12+1              | p.Q535_splice |
| Pat_41 | Post-Resistance | LIX1L     | 128077 | 37 | 1 | 145492269 | 145492269 | Missense_Mutation | SNP | C | T | 12  | 352 | c.491C>T      | c.(490-492)GCT>GTT   | p.A164V       |
| Pat_41 | Post-Resistance | RBM8A     | 9939   | 37 | 1 | 145508953 | 145508953 | Missense_Mutation | SNP | C | T | 8   | 77  | c.380C>T      | c.(379-381)GCC>GTC   | p.A127V       |
| Pat_41 | Post-Resistance | POLR3C    | 10623  | 37 | 1 | 145606342 | 145606342 | Missense_Mutation | SNP | G | A | 43  | 243 | c.611C>T      | c.(610-612)TCA>TTA   | p.S204L       |
| Pat_41 | Post-Resistance | POLR3C    | 10623  | 37 | 1 | 145608177 | 145608177 | Missense_Mutation | SNP | G | A | 11  | 247 | c.520C>T      | c.(520-522)CCA>TCA   | p.P174S       |
| Pat_41 | Post-Resistance | LOC728989 | 728989 | 37 | 1 | 146496484 | 146496484 | Splice_Site       | SNP | C | T | 13  | 31  | c.17_splice   | c.e2-1               | p.D6_splice   |
| Pat_41 | Post-Resistance | PDIA3P    | 171423 | 37 | 1 | 146649927 | 146649927 | Missense_Mutation | SNP | C | T | 16  | 234 | c.235C>T      | c.(235-237)CCA>TCA   | p.P79S        |
| Pat_41 | Post-Resistance | BCL9      | 607    | 37 | 1 | 147094189 | 147094189 | Missense_Mutation | SNP | C | T | 12  | 527 | c.3020C>T     | c.(3019-3021)TCT>TTT | p.S1007F      |
| Pat_41 | Post-Resistance | GJA5      | 2702   | 37 | 1 | 147230524 | 147230524 | Missense_Mutation | SNP | G | A | 18  | 163 | c.823C>T      | c.(823-825)CCT>TCT   | p.P275S       |

|        |                 |           |        |    |   |           |           |                   |     |   |   |     |     |            |                        |          |
|--------|-----------------|-----------|--------|----|---|-----------|-----------|-------------------|-----|---|---|-----|-----|------------|------------------------|----------|
| Pat_41 | Post-Resistance | NBPF14    | 25832  | 37 | 1 | 148015766 | 148015766 | Missense_Mutation | SNP | G | A | 16  | 397 | c.865C>T   | c.(865-867)CCT>TCT     | p.P289S  |
| Pat_41 | Post-Resistance | LOC200030 | 200030 | 37 | 1 | 148342473 | 148342473 | Missense_Mutation | SNP | G | A | 40  | 691 | c.563C>T   | c.(562-564)CCC>CTC     | p.P188L  |
| Pat_41 | Post-Resistance | HIST2H2BF | 440689 | 37 | 1 | 149783685 | 149783685 | Missense_Mutation | SNP | G | A | 21  | 254 | c.194C>T   | c.(193-195)TCC>TTC     | p.S65F   |
| Pat_41 | Post-Resistance | SV2A      | 9900   | 37 | 1 | 149885365 | 149885365 | Missense_Mutation | SNP | C | T | 6   | 159 | c.28G>A    | c.(28-30)GCT>ACT       | p.A10T   |
| Pat_41 | Post-Resistance | OTUD7B    | 56957  | 37 | 1 | 149916315 | 149916315 | Missense_Mutation | SNP | C | T | 14  | 210 | c.1973G>A  | c.(1972-1974)GGG>GAG   | p.G658E  |
| Pat_41 | Post-Resistance | OTUD7B    | 56957  | 37 | 1 | 149916928 | 149916928 | Missense_Mutation | SNP | C | T | 10  | 73  | c.1360G>A  | c.(1360-1362)GCT>ACT   | p.A454T  |
| Pat_41 | Post-Resistance | VPS45     | 11311  | 37 | 1 | 150082640 | 150082640 | Missense_Mutation | SNP | G | A | 18  | 92  | c.1523G>A  | c.(1522-1524)GGA>GAA   | p.G508E  |
| Pat_41 | Post-Resistance | C1orf51   | 148523 | 37 | 1 | 150259056 | 150259056 | Missense_Mutation | SNP | C | T | 45  | 231 | c.848C>T   | c.(847-849)CCT>CTT     | p.P283L  |
| Pat_41 | Post-Resistance | RPRD2     | 23248  | 37 | 1 | 150444176 | 150444176 | Missense_Mutation | SNP | G | A | 83  | 424 | c.2752G>A  | c.(2752-2754)GTA>ATA   | p.V918I  |
| Pat_41 | Post-Resistance | RPRD2     | 23248  | 37 | 1 | 150444887 | 150444887 | Missense_Mutation | SNP | G | A | 6   | 64  | c.3463G>A  | c.(3463-3465)GGC>AGC   | p.G1155S |
| Pat_41 | Post-Resistance | TARS2     | 80222  | 37 | 1 | 150469355 | 150469355 | Missense_Mutation | SNP | G | A | 5   | 70  | c.991G>A   | c.(991-993)GTG>ATG     | p.V331M  |
| Pat_41 | Post-Resistance | ECM1      | 1893   | 37 | 1 | 150482181 | 150482181 | Missense_Mutation | SNP | C | T | 18  | 325 | c.166C>T   | c.(166-168)CCC>TCC     | p.P56S   |
| Pat_41 | Post-Resistance | MCL1      | 4170   | 37 | 1 | 150549889 | 150549889 | Missense_Mutation | SNP | C | T | 100 | 653 | c.1015G>A  | c.(1015-1017)GCT>ACT   | p.A339T  |
| Pat_41 | Post-Resistance | ANXA9     | 8416   | 37 | 1 | 150967112 | 150967112 | Missense_Mutation | SNP | C | G | 39  | 291 | c.912C>G   | c.(910-912)GAC>GAG     | p.D304E  |
| Pat_41 | Post-Resistance | MLLT11    | 10962  | 37 | 1 | 151039951 | 151039951 | Missense_Mutation | SNP | C | T | 22  | 460 | c.251C>T   | c.(250-252)TCC>TTC     | p.S84F   |
| Pat_41 | Post-Resistance | SEMA6C    | 10500  | 37 | 1 | 151107673 | 151107673 | Missense_Mutation | SNP | G | A | 5   | 91  | c.1546C>T  | c.(1546-1548)CTC>TTC   | p.L516F  |
| Pat_41 | Post-Resistance | LYSMD1    | 388695 | 37 | 1 | 151133381 | 151133381 | Missense_Mutation | SNP | C | T | 19  | 329 | c.661G>A   | c.(661-663)GAG>AAG     | p.E221K  |
| Pat_41 | Post-Resistance | PIP5K1A   | 8394   | 37 | 1 | 151210722 | 151210722 | Missense_Mutation | SNP | G | A | 5   | 153 | c.1210G>A  | c.(1210-1212)GAC>AAC   | p.D404N  |
| Pat_41 | Post-Resistance | SELENBP1  | 8991   | 37 | 1 | 151339246 | 151339246 | Missense_Mutation | SNP | C | T | 30  | 331 | c.616G>A   | c.(616-618)GCT>ACT     | p.A206T  |
| Pat_41 | Post-Resistance | SELENBP1  | 8991   | 37 | 1 | 151341550 | 151341550 | Missense_Mutation | SNP | G | A | 5   | 139 | c.290C>T   | c.(289-291)CCC>CTC     | p.P97L   |
| Pat_41 | Post-Resistance | POGZ      | 23126  | 37 | 1 | 151400683 | 151400683 | Missense_Mutation | SNP | G | A | 15  | 203 | c.775C>T   | c.(775-777)CCC>TCC     | p.P259S  |
| Pat_41 | Post-Resistance | CGN       | 57530  | 37 | 1 | 151508765 | 151508765 | Missense_Mutation | SNP | G | A | 16  | 137 | c.3250G>A  | c.(3250-3252)GAA>AAA   | p.E1084K |
| Pat_41 | Post-Resistance | CGN       | 57530  | 37 | 1 | 151509224 | 151509224 | Missense_Mutation | SNP | G | A | 9   | 114 | c.3325G>A  | c.(3325-3327)GCT>ACT   | p.A1109T |
| Pat_41 | Post-Resistance | SNX27     | 81609  | 37 | 1 | 151611384 | 151611384 | Missense_Mutation | SNP | G | A | 5   | 258 | c.332G>A   | c.(331-333)GGG>GAG     | p.G111E  |
| Pat_41 | Post-Resistance | SNX27     | 81609  | 37 | 1 | 151630880 | 151630880 | Missense_Mutation | SNP | G | A | 15  | 158 | c.713G>A   | c.(712-714)GGA>GAA     | p.G238E  |
| Pat_41 | Post-Resistance | TDRKH     | 11022  | 37 | 1 | 151752463 | 151752463 | Missense_Mutation | SNP | G | A | 12  | 158 | c.385C>T   | c.(385-387)CTT>TTT     | p.L129F  |
| Pat_41 | Post-Resistance | LINGO4    | 339398 | 37 | 1 | 151773413 | 151773413 | Missense_Mutation | SNP | C | T | 5   | 114 | c.1768G>A  | c.(1768-1770)GCC>ACC   | p.A590T  |
| Pat_41 | Post-Resistance | LINGO4    | 339398 | 37 | 1 | 151773935 | 151773935 | Nonsense_Mutation | SNP | G | A | 4   | 120 | c.1246C>T  | c.(1246-1248)CGA>TGA   | p.R416*  |
| Pat_41 | Post-Resistance | LINGO4    | 339398 | 37 | 1 | 151774058 | 151774058 | Missense_Mutation | SNP | G | A | 5   | 58  | c.1123C>T  | c.(1123-1125)CAC>TAC   | p.H375Y  |
| Pat_41 | Post-Resistance | LINGO4    | 339398 | 37 | 1 | 151774919 | 151774919 | Missense_Mutation | SNP | C | T | 6   | 31  | c.262G>A   | c.(262-264)GAA>AAA     | p.E88K   |
| Pat_41 | Post-Resistance | S100A11   | 6282   | 37 | 1 | 152005164 | 152005164 | Missense_Mutation | SNP | C | T | 7   | 78  | c.292G>A   | c.(292-294)GCT>ACT     | p.A98T   |
| Pat_41 | Post-Resistance | TCHH      | 7062   | 37 | 1 | 152081093 | 152081093 | Missense_Mutation | SNP | G | A | 7   | 50  | c.4600C>T  | c.(4600-4602)CTC>TTC   | p.L1534F |
| Pat_41 | Post-Resistance | TCHH      | 7062   | 37 | 1 | 152084165 | 152084165 | Missense_Mutation | SNP | C | T | 5   | 82  | c.1528G>A  | c.(1528-1530)GAG>AAG   | p.E510K  |
| Pat_41 | Post-Resistance | RPTN      | 126638 | 37 | 1 | 152127456 | 152127456 | Missense_Mutation | SNP | C | T | 40  | 335 | c.2119G>A  | c.(2119-2121)GAA>AAA   | p.E707K  |
| Pat_41 | Post-Resistance | HRNR      | 388697 | 37 | 1 | 152187617 | 152187617 | Missense_Mutation | SNP | C | T | 15  | 828 | c.6488G>A  | c.(6487-6489)GGG>GAG   | p.G2163E |
| Pat_41 | Post-Resistance | FLG       | 2312   | 37 | 1 | 152276792 | 152276792 | Missense_Mutation | SNP | C | T | 27  | 397 | c.10570G>A | c.(10570-10572)GGA>AG/ | p.G3524R |
| Pat_41 | Post-Resistance | FLG       | 2312   | 37 | 1 | 152277097 | 152277097 | Missense_Mutation | SNP | G | A | 8   | 299 | c.10265C>T | c.(10264-10266)TCC>TTC | p.S3422F |
| Pat_41 | Post-Resistance | FLG       | 2312   | 37 | 1 | 152283904 | 152283904 | Missense_Mutation | SNP | G | A | 9   | 325 | c.3458C>T  | c.(3457-3459)TCC>TTC   | p.S1153F |
| Pat_41 | Post-Resistance | FLG       | 2312   | 37 | 1 | 152284948 | 152284948 | Missense_Mutation | SNP | G | A | 15  | 309 | c.2414C>T  | c.(2413-2415)TCC>TTC   | p.S805F  |
| Pat_41 | Post-Resistance | FLG       | 2312   | 37 | 1 | 152285591 | 152285591 | Missense_Mutation | SNP | C | T | 33  | 464 | c.1771G>A  | c.(1771-1773)GCT>ACT   | p.A591T  |
| Pat_41 | Post-Resistance | FLG2      | 388698 | 37 | 1 | 152325436 | 152325436 | Missense_Mutation | SNP | G | A | 13  | 505 | c.4826C>T  | c.(4825-4827)CCA>CTA   | p.P1609L |
| Pat_41 | Post-Resistance | FLG2      | 388698 | 37 | 1 | 152325865 | 152325865 | Missense_Mutation | SNP | C | T | 39  | 675 | c.4397G>A  | c.(4396-4398)GGA>GAA   | p.G1466E |
| Pat_41 | Post-Resistance | FLG2      | 388698 | 37 | 1 | 152327749 | 152327749 | Missense_Mutation | SNP | G | A | 51  | 745 | c.2513C>T  | c.(2512-2514)JCT>TTT   | p.S838F  |
| Pat_41 | Post-Resistance | FLG2      | 388698 | 37 | 1 | 152329195 | 152329195 | Missense_Mutation | SNP | C | T | 33  | 114 | c.1067G>A  | c.(1066-1068)GGA>GAA   | p.G356E  |
| Pat_41 | Post-Resistance | CRNN      | 49860  | 37 | 1 | 152384655 | 152384655 | Missense_Mutation | SNP | C | T | 23  | 141 | c.55G>A    | c.(55-57)GCA>ACA       | p.A19T   |
| Pat_41 | Post-Resistance | KPRP      | 448834 | 37 | 1 | 152732125 | 152732125 | Missense_Mutation | SNP | C | T | 16  | 233 | c.61C>T    | c.(61-63)CCC>TCC       | p.P21S   |
| Pat_41 | Post-Resistance | SPRR1B    | 6699   | 37 | 1 | 153005056 | 153005056 | Missense_Mutation | SNP | C | T | 16  | 280 | c.235C>T   | c.(235-237)CCA>TCA     | p.P79S   |

|        |                 |         |        |    |   |           |           |                   |     |    |    |    |     |                                               |                      |               |
|--------|-----------------|---------|--------|----|---|-----------|-----------|-------------------|-----|----|----|----|-----|-----------------------------------------------|----------------------|---------------|
| Pat_41 | Post-Resistance | SPRR2G  | 6706   | 37 | 1 | 153122457 | 153122457 | Missense_Mutation | SNP | C  | T  | 12 | 179 | c.130G>A                                      | c.(130-132)GAG>AAG   | p.E44K        |
| Pat_41 | Post-Resistance | S100A7A | 338324 | 37 | 1 | 153391778 | 153391778 | Missense_Mutation | SNP | G  | A  | 7  | 55  | c.299G>A                                      | c.(298-300)AGC>AAC   | p.S100N       |
| Pat_41 | Post-Resistance | INTS3   | 65123  | 37 | 1 | 153701196 | 153701196 | Missense_Mutation | SNP | G  | A  | 6  | 97  | c.86G>A                                       | c.(85-87)GGA>GAA     | p.G29E        |
| Pat_41 | Post-Resistance | INTS3   | 65123  | 37 | 1 | 153723712 | 153723713 | Missense_Mutation | DNP | AC | TT | 50 | 89  | c.726_727AC>TT724-729)GAACGG>GATT(242_243ER>D |                      |               |
| Pat_41 | Post-Resistance | INTS3   | 65123  | 37 | 1 | 153735307 | 153735307 | Missense_Mutation | SNP | G  | T  | 16 | 155 | c.1620G>T                                     | c.(1618-1620)GAG>GAT | p.E540D       |
| Pat_41 | Post-Resistance | GATAD2B | 57459  | 37 | 1 | 153788820 | 153788820 | Missense_Mutation | SNP | C  | T  | 16 | 240 | c.1145G>A                                     | c.(1144-1146)AGT>AAT | p.S382N       |
| Pat_41 | Post-Resistance | NUP210L | 91181  | 37 | 1 | 153994680 | 153994680 | Missense_Mutation | SNP | G  | A  | 16 | 219 | c.4438C>T                                     | c.(4438-4440)CAT>TAT | p.H1480Y      |
| Pat_41 | Post-Resistance | NUP210L | 91181  | 37 | 1 | 154098842 | 154098842 | Missense_Mutation | SNP | C  | T  | 8  | 271 | c.1283G>A                                     | c.(1282-1284)GGT>GAT | p.G428D       |
| Pat_41 | Post-Resistance | NUP210L | 91181  | 37 | 1 | 154113906 | 154113906 | Splice_Site       | SNP | C  | T  | 20 | 244 | c.566_splice                                  | c.e4+1               | p.R189_splice |
| Pat_41 | Post-Resistance | UBAP2L  | 9898   | 37 | 1 | 154207702 | 154207702 | Missense_Mutation | SNP | C  | T  | 7  | 29  | c.479C>T                                      | c.(478-480)ACC>ATC   | p.T160I       |
| Pat_41 | Post-Resistance | HAX1    | 10456  | 37 | 1 | 154247728 | 154247728 | Missense_Mutation | SNP | C  | T  | 6  | 105 | c.655C>T                                      | c.(655-657)CCA>TCA   | p.P219S       |
| Pat_41 | Post-Resistance | SHE     | 126669 | 37 | 1 | 154461626 | 154461626 | Missense_Mutation | SNP | G  | A  | 7  | 66  | c.925C>T                                      | c.(925-927)CCC>TCC   | p.P309S       |
| Pat_41 | Post-Resistance | SHE     | 126669 | 37 | 1 | 154473961 | 154473961 | Missense_Mutation | SNP | G  | A  | 10 | 69  | c.542C>T                                      | c.(541-543)TCC>TTC   | p.S181F       |
| Pat_41 | Post-Resistance | UBE2Q1  | 55585  | 37 | 1 | 154524445 | 154524445 | Missense_Mutation | SNP | G  | A  | 7  | 106 | c.977C>T                                      | c.(976-978)CCC>CTC   | p.P326L       |
| Pat_41 | Post-Resistance | ADAR    | 103    | 37 | 1 | 154574774 | 154574774 | Missense_Mutation | SNP | C  | T  | 13 | 57  | c.344G>A                                      | c.(343-345)GGC>GAC   | p.G115D       |
| Pat_41 | Post-Resistance | KCNN3   | 3782   | 37 | 1 | 154794630 | 154794630 | Missense_Mutation | SNP | G  | A  | 8  | 104 | c.964C>T                                      | c.(964-966)CTT>TTT   | p.L322F       |
| Pat_41 | Post-Resistance | PBXIP1  | 57326  | 37 | 1 | 154918265 | 154918265 | Missense_Mutation | SNP | C  | T  | 13 | 81  | c.1885G>A                                     | c.(1885-1887)GCT>ACT | p.A629T       |
| Pat_41 | Post-Resistance | PBXIP1  | 57326  | 37 | 1 | 154919237 | 154919237 | Missense_Mutation | SNP | C  | T  | 5  | 41  | c.913G>A                                      | c.(913-915)GGG>AGG   | p.G305R       |
| Pat_41 | Post-Resistance | SHC1    | 6464   | 37 | 1 | 154938680 | 154938680 | Missense_Mutation | SNP | G  | A  | 7  | 74  | c.1210C>T                                     | c.(1210-1212)CCA>TCA | p.P404S       |
| Pat_41 | Post-Resistance | FLAD1   | 80308  | 37 | 1 | 154962075 | 154962075 | Missense_Mutation | SNP | C  | T  | 20 | 134 | c.1157C>T                                     | c.(1156-1158)ACC>ATC | p.T386I       |
| Pat_41 | Post-Resistance | ADAM15  | 8751   | 37 | 1 | 155029544 | 155029544 | Missense_Mutation | SNP | C  | T  | 5  | 52  | c.1115C>T                                     | c.(1114-1116)CCA>CTA | p.P372L       |
| Pat_41 | Post-Resistance | TRIM46  | 80128  | 37 | 1 | 155147944 | 155147944 | Missense_Mutation | SNP | C  | T  | 6  | 227 | c.146C>T                                      | c.(145-147)ACC>ATC   | p.T49I        |
| Pat_41 | Post-Resistance | THBS3   | 7059   | 37 | 1 | 155165886 | 155165886 | Missense_Mutation | SNP | C  | T  | 12 | 235 | c.2704G>A                                     | c.(2704-2706)GCG>ACG | p.A902T       |
| Pat_41 | Post-Resistance | CLK2    | 1196   | 37 | 1 | 155233104 | 155233104 | Missense_Mutation | SNP | T  | A  | 9  | 107 | c.1405A>T                                     | c.(1405-1407)ACC>TCC | p.T469S       |
| Pat_41 | Post-Resistance | PKLR    | 5313   | 37 | 1 | 155265054 | 155265054 | Missense_Mutation | SNP | C  | T  | 5  | 241 | c.547G>A                                      | c.(547-549)GTG>ATG   | p.V183M       |
| Pat_41 | Post-Resistance | ASH1L   | 55870  | 37 | 1 | 155311810 | 155311810 | Missense_Mutation | SNP | G  | A  | 17 | 365 | c.8392C>T                                     | c.(8392-8394)CAC>TAC | p.H2798Y      |
| Pat_41 | Post-Resistance | ASH1L   | 55870  | 37 | 1 | 155448141 | 155448141 | Missense_Mutation | SNP | G  | A  | 4  | 79  | c.4520C>T                                     | c.(4519-4521)TCC>TTC | p.S1507F      |
| Pat_41 | Post-Resistance | ASH1L   | 55870  | 37 | 1 | 155448984 | 155448984 | Missense_Mutation | SNP | G  | A  | 8  | 268 | c.3677C>T                                     | c.(3676-3678)TCT>TTT | p.S1226F      |
| Pat_41 | Post-Resistance | ASH1L   | 55870  | 37 | 1 | 155450143 | 155450143 | Missense_Mutation | SNP | C  | T  | 5  | 82  | c.2518G>A                                     | c.(2518-2520)GAA>AAA | p.E840K       |
| Pat_41 | Post-Resistance | ASH1L   | 55870  | 37 | 1 | 155491252 | 155491252 | Missense_Mutation | SNP | C  | T  | 15 | 294 | c.59G>A                                       | c.(58-60)AGA>AAA     | p.R20K        |
| Pat_41 | Post-Resistance | MSTO1   | 55154  | 37 | 1 | 155582276 | 155582276 | Missense_Mutation | SNP | G  | A  | 19 | 167 | c.881G>A                                      | c.(880-882)AGC>AAC   | p.S294N       |
| Pat_41 | Post-Resistance | GON4L   | 54856  | 37 | 1 | 155735525 | 155735525 | Missense_Mutation | SNP | G  | A  | 10 | 83  | c.3739C>T                                     | c.(3739-3741)CCC>TCC | p.P1247S      |
| Pat_41 | Post-Resistance | ARHGEF2 | 9181   | 37 | 1 | 155920227 | 155920227 | Missense_Mutation | SNP | G  | A  | 9  | 191 | c.2750C>T                                     | c.(2749-2751)TCT>TTT | p.S917F       |
| Pat_41 | Post-Resistance | ARHGEF2 | 9181   | 37 | 1 | 155936257 | 155936257 | Missense_Mutation | SNP | G  | A  | 36 | 251 | c.290C>T                                      | c.(289-291)GCC>GTC   | p.A97V        |
| Pat_41 | Post-Resistance | UBQLN4  | 56893  | 37 | 1 | 156012620 | 156012620 | Missense_Mutation | SNP | G  | A  | 5  | 27  | c.1211C>T                                     | c.(1210-1212)CCC>CTC | p.P404L       |
| Pat_41 | Post-Resistance | LMNA    | 4000   | 37 | 1 | 156105913 | 156105913 | Splice_Site       | SNP | G  | A  | 5  | 70  | c.1157_splice                                 | c.e6+1               | p.R386_splice |
| Pat_41 | Post-Resistance | PAQR6   | 79957  | 37 | 1 | 156215990 | 156215990 | Missense_Mutation | SNP | C  | T  | 5  | 124 | c.103G>A                                      | c.(103-105)GCT>ACT   | p.A35T        |
| Pat_41 | Post-Resistance | APOA1BP | 128240 | 37 | 1 | 156563845 | 156563845 | Missense_Mutation | SNP | C  | T  | 13 | 320 | c.836C>T                                      | c.(835-837)CCT>CTT   | p.P279L       |
| Pat_41 | Post-Resistance | GPATCH4 | 54865  | 37 | 1 | 156565333 | 156565333 | Missense_Mutation | SNP | C  | T  | 27 | 240 | c.800G>A                                      | c.(799-801)GGG>GAG   | p.G267E       |
| Pat_41 | Post-Resistance | ISG20L2 | 81875  | 37 | 1 | 156697269 | 156697269 | Missense_Mutation | SNP | G  | A  | 24 | 37  | c.176C>T                                      | c.(175-177)TCA>TTA   | p.S59L        |
| Pat_41 | Post-Resistance | MRPL24  | 79590  | 37 | 1 | 156707878 | 156707878 | Missense_Mutation | SNP | G  | A  | 4  | 129 | c.328C>T                                      | c.(328-330)CCT>TCT   | p.P110S       |
| Pat_41 | Post-Resistance | MRPL24  | 79590  | 37 | 1 | 156708343 | 156708343 | Missense_Mutation | SNP | C  | T  | 13 | 218 | c.154G>A                                      | c.(154-156)GAA>AAA   | p.E52K        |
| Pat_41 | Post-Resistance | INSRR   | 3645   | 37 | 1 | 156823618 | 156823618 | Missense_Mutation | SNP | C  | T  | 9  | 118 | c.563G>A                                      | c.(562-564)GGT>GAT   | p.G188D       |
| Pat_41 | Post-Resistance | NTRK1   | 4914   | 37 | 1 | 156845344 | 156845344 | Missense_Mutation | SNP | G  | A  | 14 | 151 | c.1387G>A                                     | c.(1387-1389)GCC>ACC | p.A463T       |
| Pat_41 | Post-Resistance | C1orf92 | 149499 | 37 | 1 | 156897544 | 156897544 | Missense_Mutation | SNP | C  | T  | 4  | 64  | c.842C>T                                      | c.(841-843)TCC>TTC   | p.S281F       |
| Pat_41 | Post-Resistance | ETV3    | 2117   | 37 | 1 | 157103937 | 157103937 | Missense_Mutation | SNP | G  | A  | 9  | 181 | c.367C>T                                      | c.(367-369)CCC>TCC   | p.P123S       |
| Pat_41 | Post-Resistance | FCRL4   | 83417  | 37 | 1 | 157556215 | 157556215 | Missense_Mutation | SNP | G  | A  | 11 | 131 | c.878C>T                                      | c.(877-879)ACC>ATC   | p.T293I       |



|        |                 |          |        |    |   |           |           |                   |     |    |    |    |     |                |                      |               |
|--------|-----------------|----------|--------|----|---|-----------|-----------|-------------------|-----|----|----|----|-----|----------------|----------------------|---------------|
| Pat_41 | Post-Resistance | FCRL2    | 79368  | 37 | 1 | 157718718 | 157718718 | Missense_Mutation | SNP | G  | A  | 13 | 166 | c.1340C>T      | c.(1339-1341)ACC>ATC | p.T447I       |
| Pat_41 | Post-Resistance | FCRL1    | 115350 | 37 | 1 | 157771365 | 157771365 | Missense_Mutation | SNP | G  | A  | 5  | 89  | c.889C>T       | c.(889-891)CCT>TCT   | p.P297S       |
| Pat_41 | Post-Resistance | KIRREL   | 55243  | 37 | 1 | 158059292 | 158059292 | Missense_Mutation | SNP | G  | A  | 6  | 101 | c.1045G>A      | c.(1045-1047)GTC>ATC | p.V349I       |
| Pat_41 | Post-Resistance | KIRREL   | 55243  | 37 | 1 | 158061185 | 158061185 | Missense_Mutation | SNP | C  | T  | 7  | 274 | c.1310C>T      | c.(1309-1311)ACC>ATC | p.T437I       |
| Pat_41 | Post-Resistance | OR10K1   | 391109 | 37 | 1 | 158435419 | 158435419 | Missense_Mutation | SNP | T  | A  | 19 | 41  | c.68T>A        | c.(67-69)CTG>CAG     | p.L23Q        |
| Pat_41 | Post-Resistance | OR10R2   | 343406 | 37 | 1 | 158449836 | 158449836 | Missense_Mutation | SNP | G  | A  | 10 | 124 | c.169G>A       | c.(169-171)GTC>ATC   | p.V57I        |
| Pat_41 | Post-Resistance | SPTA1    | 6708   | 37 | 1 | 158582744 | 158582744 | Missense_Mutation | SNP | A  | G  | 4  | 84  | c.6997T>C      | c.(6997-6999)TAT>CAT | p.Y2333H      |
| Pat_41 | Post-Resistance | SPTA1    | 6708   | 37 | 1 | 158651378 | 158651378 | Missense_Mutation | SNP | G  | A  | 29 | 299 | c.470C>T       | c.(469-471)GCC>GTC   | p.A157V       |
| Pat_41 | Post-Resistance | AIM2     | 9447   | 37 | 1 | 159043148 | 159043148 | Missense_Mutation | SNP | C  | T  | 11 | 124 | c.142G>A       | c.(142-144)GTA>ATA   | p.V48I        |
| Pat_41 | Post-Resistance | DARC     | 2532   | 37 | 1 | 159176016 | 159176016 | Missense_Mutation | SNP | G  | A  | 4  | 95  | c.787G>A       | c.(787-789)GAT>AAT   | p.D263N       |
| Pat_41 | Post-Resistance | CRP      | 1401   | 37 | 1 | 159683792 | 159683793 | Missense_Mutation | DNP | CC | TT | 69 | 102 | c.197_198GG>AA | c.(196-198)GGG>GAA   | p.G66E        |
| Pat_41 | Post-Resistance | VSIG8    | 391123 | 37 | 1 | 159827708 | 159827708 | Missense_Mutation | SNP | C  | T  | 13 | 67  | c.479G>A       | c.(478-480)GGC>GAC   | p.G160D       |
| Pat_41 | Post-Resistance | CCDC19   | 25790  | 37 | 1 | 159862980 | 159862980 | Missense_Mutation | SNP | C  | T  | 10 | 120 | c.119G>A       | c.(118-120)GGA>GAA   | p.G40E        |
| Pat_41 | Post-Resistance | COPA     | 1314   | 37 | 1 | 160261641 | 160261641 | Missense_Mutation | SNP | C  | T  | 85 | 452 | c.3226G>A      | c.(3226-3228)GAG>AAG | p.E1076K      |
| Pat_41 | Post-Resistance | NCSTN    | 23385  | 37 | 1 | 160328042 | 160328042 | Missense_Mutation | SNP | C  | T  | 7  | 94  | c.2111C>T      | c.(2110-2112)CCA>CTA | p.P704L       |
| Pat_41 | Post-Resistance | LY9      | 4063   | 37 | 1 | 160786503 | 160786503 | Missense_Mutation | SNP | C  | T  | 17 | 99  | c.1192C>T      | c.(1192-1194)CCG>TCG | p.P398S       |
| Pat_41 | Post-Resistance | USF1     | 7391   | 37 | 1 | 161010461 | 161010461 | Splice_Site       | SNP | C  | T  | 6  | 97  | c.620_splice   | c.e9-1               | p.V207_splice |
| Pat_41 | Post-Resistance | USF1     | 7391   | 37 | 1 | 161012650 | 161012650 | Missense_Mutation | SNP | C  | T  | 25 | 381 | c.31G>A        | c.(31-33)GAA>AAA     | p.E11K        |
| Pat_41 | Post-Resistance | ARHGAP30 | 257106 | 37 | 1 | 161021425 | 161021425 | Missense_Mutation | SNP | C  | T  | 10 | 64  | c.1099G>A      | c.(1099-1101)GCA>ACA | p.A367T       |
| Pat_41 | Post-Resistance | KLHDC9   | 126823 | 37 | 1 | 161069216 | 161069216 | Missense_Mutation | SNP | G  | A  | 5  | 70  | c.608G>A       | c.(607-609)GGT>GAT   | p.G203D       |
| Pat_41 | Post-Resistance | PPOX     | 5498   | 37 | 1 | 161140923 | 161140923 | Missense_Mutation | SNP | G  | A  | 29 | 275 | c.1391G>A      | c.(1390-1392)CGC>CAC | p.R464H       |
| Pat_41 | Post-Resistance | B4GALT3  | 8703   | 37 | 1 | 161145700 | 161145700 | Missense_Mutation | SNP | G  | A  | 22 | 159 | c.151C>T       | c.(151-153)CCT>TCT   | p.P51S        |
| Pat_41 | Post-Resistance | B4GALT3  | 8703   | 37 | 1 | 161145798 | 161145798 | Missense_Mutation | SNP | G  | A  | 16 | 192 | c.53C>T        | c.(52-54)TCC>TTC     | p.S18F        |
| Pat_41 | Post-Resistance | NDUFS2   | 4720   | 37 | 1 | 161183505 | 161183505 | Missense_Mutation | SNP | C  | T  | 16 | 199 | c.1279C>T      | c.(1279-1281)CCT>TCT | p.P427S       |
| Pat_41 | Post-Resistance | PCP4L1   | 654790 | 37 | 1 | 161254224 | 161254224 | Missense_Mutation | SNP | G  | A  | 7  | 41  | c.160G>A       | c.(160-162)GGC>AGC   | p.G54S        |
| Pat_41 | Post-Resistance | C1orf192 | 257177 | 37 | 1 | 161337654 | 161337654 | Missense_Mutation | SNP | G  | A  | 18 | 290 | c.5C>T         | c.(4-6)GCC>GTC       | p.A2V         |
| Pat_41 | Post-Resistance | FCGR2A   | 2212   | 37 | 1 | 161476138 | 161476138 | Missense_Mutation | SNP | G  | A  | 16 | 285 | c.121G>A       | c.(121-123)GCT>ACT   | p.A41T        |
| Pat_41 | Post-Resistance | FCGR2A   | 2212   | 37 | 1 | 161480714 | 161480714 | Missense_Mutation | SNP | C  | T  | 82 | 578 | c.710C>T       | c.(709-711)GCC>GTC   | p.A237V       |
| Pat_41 | Post-Resistance | FCGR2C   | 9103   | 37 | 1 | 161569489 | 161569489 | Missense_Mutation | SNP | G  | A  | 14 | 85  | c.868G>A       | c.(868-870)GCT>ACT   | p.A290T       |
| Pat_41 | Post-Resistance | FCGR2B   | 2213   | 37 | 1 | 161641275 | 161641275 | Missense_Mutation | SNP | G  | A  | 13 | 164 | c.227G>A       | c.(226-228)AGC>AAC   | p.S76N        |
| Pat_41 | Post-Resistance | PBX1     | 5087   | 37 | 1 | 164776807 | 164776807 | Missense_Mutation | SNP | G  | A  | 62 | 287 | c.730G>A       | c.(730-732)GCG>ACG   | p.A244T       |
| Pat_41 | Post-Resistance | ILDR2    | 387597 | 37 | 1 | 166904616 | 166904616 | Missense_Mutation | SNP | G  | A  | 5  | 139 | c.802C>T       | c.(802-804)CCC>TCC   | p.P268S       |
| Pat_41 | Post-Resistance | MAEL     | 84944  | 37 | 1 | 166973459 | 166973459 | Missense_Mutation | SNP | G  | A  | 61 | 147 | c.566G>A       | c.(565-567)GGG>GAG   | p.G189E       |
| Pat_41 | Post-Resistance | POU2F1   | 5451   | 37 | 1 | 167341226 | 167341226 | Missense_Mutation | SNP | G  | A  | 37 | 513 | c.286G>A       | c.(286-288)GCC>ACC   | p.A96T        |
| Pat_41 | Post-Resistance | ADCY10   | 55811  | 37 | 1 | 167805716 | 167805716 | Missense_Mutation | SNP | G  | A  | 10 | 192 | c.3140C>T      | c.(3139-3141)ACA>ATA | p.T1047I      |
| Pat_41 | Post-Resistance | SLC19A2  | 10560  | 37 | 1 | 169439360 | 169439360 | Missense_Mutation | SNP | G  | A  | 28 | 194 | c.872C>T       | c.(871-873)TCC>TTC   | p.S291F       |
| Pat_41 | Post-Resistance | F5       | 2153   | 37 | 1 | 169493067 | 169493067 | Missense_Mutation | SNP | G  | A  | 23 | 402 | c.5864C>T      | c.(5863-5865)GCA>GTA | p.A1955V      |
| Pat_41 | Post-Resistance | F5       | 2153   | 37 | 1 | 169510897 | 169510897 | Missense_Mutation | SNP | G  | A  | 44 | 281 | c.3431C>T      | c.(3430-3432)CCC>CTC | p.P1144L      |
| Pat_41 | Post-Resistance | F5       | 2153   | 37 | 1 | 169511764 | 169511764 | Missense_Mutation | SNP | C  | T  | 11 | 240 | c.2564G>A      | c.(2563-2565)GGA>GAA | p.G855E       |
| Pat_41 | Post-Resistance | SELE     | 6401   | 37 | 1 | 169696574 | 169696574 | Missense_Mutation | SNP | G  | A  | 23 | 100 | c.1561C>T      | c.(1561-1563)CCT>TCT | p.P521S       |
| Pat_41 | Post-Resistance | C1orf112 | 55732  | 37 | 1 | 169801648 | 169801648 | Splice_Site       | SNP | G  | A  | 7  | 260 | c.1539_splice  | c.e17+1              | p.Q513_splice |
| Pat_41 | Post-Resistance | SCYL3    | 57147  | 37 | 1 | 169822897 | 169822897 | Nonsense_Mutation | SNP | C  | T  | 27 | 465 | c.2186G>A      | c.(2185-2187)TGG>TAG | p.W729*       |
| Pat_41 | Post-Resistance | BAT2L2   | 23215  | 37 | 1 | 171510135 | 171510135 | Missense_Mutation | SNP | G  | A  | 9  | 82  | c.3524G>A      | c.(3523-3525)AGA>AAA | p.R1175K      |
| Pat_41 | Post-Resistance | BAT2L2   | 23215  | 37 | 1 | 171511112 | 171511112 | Missense_Mutation | SNP | G  | A  | 13 | 153 | c.4501G>A      | c.(4501-4503)GAA>AAA | p.E1501K      |
| Pat_41 | Post-Resistance | BAT2L2   | 23215  | 37 | 1 | 171527198 | 171527198 | Missense_Mutation | SNP | C  | T  | 14 | 322 | c.5941C>T      | c.(5941-5943)CCA>TCA | p.P1981S      |
| Pat_41 | Post-Resistance | CENPL    | 91687  | 37 | 1 | 173769605 | 173769605 | Missense_Mutation | SNP | G  | A  | 10 | 71  | c.1016C>T      | c.(1015-1017)GCA>GTA | p.A339V       |
| Pat_41 | Post-Resistance | DARS2    | 55157  | 37 | 1 | 173822936 | 173822936 | Missense_Mutation | SNP | C  | T  | 16 | 264 | c.1567C>T      | c.(1567-1569)CGT>TGT | p.R523C       |

|        |                 |          |        |    |   |           |           |                   |     |   |   |     |     |              |                        |              |
|--------|-----------------|----------|--------|----|---|-----------|-----------|-------------------|-----|---|---|-----|-----|--------------|------------------------|--------------|
| Pat_41 | Post-Resistance | SERPINC1 | 462    | 37 | 1 | 173876629 | 173876629 | Missense_Mutation | SNP | C | T | 73  | 355 | c.1177G>A    | c.(1177-1179)GAC>AAC   | p.D393N      |
| Pat_41 | Post-Resistance | SERPINC1 | 462    | 37 | 1 | 173878981 | 173878981 | Missense_Mutation | SNP | C | T | 14  | 162 | c.862G>A     | c.(862-864)GGC>AGC     | p.G288S      |
| Pat_41 | Post-Resistance | RC3H1    | 149041 | 37 | 1 | 173933204 | 173933204 | Missense_Mutation | SNP | C | T | 9   | 141 | c.1738G>A    | c.(1738-1740)GGT>AGT   | p.G580S      |
| Pat_41 | Post-Resistance | RABGAP1L | 9910   | 37 | 1 | 174221712 | 174221712 | Missense_Mutation | SNP | G | A | 14  | 132 | c.970G>A     | c.(970-972)GAA>AAA     | p.E324K      |
| Pat_41 | Post-Resistance | CACYBP   | 27101  | 37 | 1 | 174976316 | 174976316 | Missense_Mutation | SNP | G | A | 26  | 223 | c.415G>A     | c.(415-417)GAA>AAA     | p.E139K      |
| Pat_41 | Post-Resistance | TNR      | 7143   | 37 | 1 | 175304895 | 175304895 | Missense_Mutation | SNP | C | T | 13  | 419 | c.3583G>A    | c.(3583-3585)GCT>ACT   | p.A1195T     |
| Pat_41 | Post-Resistance | TNR      | 7143   | 37 | 1 | 175323620 | 175323620 | Missense_Mutation | SNP | C | T | 16  | 145 | c.3289G>A    | c.(3289-3291)GAG>AAG   | p.E1097K     |
| Pat_41 | Post-Resistance | PAPPA2   | 60676  | 37 | 1 | 176525967 | 176525967 | Missense_Mutation | SNP | C | T | 10  | 139 | c.509C>T     | c.(508-510)GCC>GTC     | p.A170V      |
| Pat_41 | Post-Resistance | PAPPA2   | 60676  | 37 | 1 | 176563933 | 176563933 | Missense_Mutation | SNP | C | T | 39  | 140 | c.1193C>T    | c.(1192-1194)CCC>CTC   | p.P398L      |
| Pat_41 | Post-Resistance | PAPPA2   | 60676  | 37 | 1 | 176668608 | 176668608 | Missense_Mutation | SNP | C | T | 14  | 111 | c.3119C>T    | c.(3118-3120)CCC>CTC   | p.P1040L     |
| Pat_41 | Post-Resistance | ASTN1    | 460    | 37 | 1 | 176918351 | 176918351 | Missense_Mutation | SNP | G | A | 17  | 253 | c.2024C>T    | c.(2023-2025)CCC>CTC   | p.P675L      |
| Pat_41 | Post-Resistance | RASAL2   | 9462   | 37 | 1 | 178442367 | 178442367 | Missense_Mutation | SNP | G | A | 7   | 142 | c.3413G>A    | c.(3412-3414)AGC>AAC   | p.S1138N     |
| Pat_41 | Post-Resistance | ANGPTL1  | 9068   | 37 | 1 | 178820378 | 178820378 | Nonsense_Mutation | SNP | C | T | 25  | 200 | c.1362G>A    | c.(1360-1362)TGG>TGA   | p.W454*      |
| Pat_41 | Post-Resistance | C1orf125 | 126859 | 37 | 1 | 179347827 | 179347827 | Missense_Mutation | SNP | G | A | 18  | 242 | c.430G>A     | c.(430-432)GCA>ACA     | p.A144T      |
| Pat_41 | Post-Resistance | C1orf125 | 126859 | 37 | 1 | 179363073 | 179363073 | Missense_Mutation | SNP | G | A | 44  | 374 | c.899G>A     | c.(898-900)CGG>CAG     | p.R300Q      |
| Pat_41 | Post-Resistance | TDRD5    | 163589 | 37 | 1 | 179604997 | 179604997 | Missense_Mutation | SNP | C | T | 12  | 212 | c.1495C>T    | c.(1495-1497)CTC>TTC   | p.L499F      |
| Pat_41 | Post-Resistance | KIAA1614 | 57710  | 37 | 1 | 180905430 | 180905430 | Nonsense_Mutation | SNP | G | A | 10  | 90  | c.2385G>A    | c.(2383-2385)TGG>TGA   | p.W795*      |
| Pat_41 | Post-Resistance | RNASEL   | 6041   | 37 | 1 | 182553275 | 182553275 | Missense_Mutation | SNP | C | T | 13  | 200 | c.1507G>A    | c.(1507-1509)GAT>AAT   | p.D503N      |
| Pat_41 | Post-Resistance | RGS16    | 6004   | 37 | 1 | 182569471 | 182569471 | Missense_Mutation | SNP | C | T | 5   | 211 | c.565G>A     | c.(565-567)GCC>ACC     | p.A189T      |
| Pat_41 | Post-Resistance | RGS8     | 85397  | 37 | 1 | 182635155 | 182635155 | Missense_Mutation | SNP | C | T | 21  | 180 | c.142G>A     | c.(142-144)GAA>AAA     | p.E48K       |
| Pat_41 | Post-Resistance | NPL      | 80896  | 37 | 1 | 182791321 | 182791321 | Missense_Mutation | SNP | C | T | 7   | 73  | c.725C>T     | c.(724-726)GCC>GTC     | p.A242V      |
| Pat_41 | Post-Resistance | DHX9     | 1660   | 37 | 1 | 182821367 | 182821367 | Splice_Site       | SNP | G | A | 7   | 119 | c.253_splice | c.e4-1                 | p.V85_splice |
| Pat_41 | Post-Resistance | SMG7     | 9887   | 37 | 1 | 183515189 | 183515189 | Missense_Mutation | SNP | A | G | 8   | 203 | c.2459A>G    | c.(2458-2460)TAC>TGC   | p.Y820C      |
| Pat_41 | Post-Resistance | SMG7     | 9887   | 37 | 1 | 183521038 | 183521038 | Missense_Mutation | SNP | G | A | 11  | 188 | c.3386G>A    | c.(3385-3387)GGA>GAA   | p.G1129E     |
| Pat_41 | Post-Resistance | RGL1     | 23179  | 37 | 1 | 183816833 | 183816833 | Missense_Mutation | SNP | C | T | 7   | 114 | c.272C>T     | c.(271-273)ACC>ATC     | p.T91I       |
| Pat_41 | Post-Resistance | IVNS1ABP | 10625  | 37 | 1 | 185277946 | 185277946 | Missense_Mutation | SNP | C | T | 82  | 520 | c.343G>A     | c.(343-345)GAT>AAT     | p.D115N      |
| Pat_41 | Post-Resistance | HMCN1    | 83872  | 37 | 1 | 185939535 | 185939535 | Missense_Mutation | SNP | G | A | 19  | 310 | c.2281G>A    | c.(2281-2283)GAA>AAA   | p.E761K      |
| Pat_41 | Post-Resistance | HMCN1    | 83872  | 37 | 1 | 185951441 | 185951441 | Missense_Mutation | SNP | G | A | 26  | 372 | c.2710G>A    | c.(2710-2712)GGA>AGA   | p.G904R      |
| Pat_41 | Post-Resistance | HMCN1    | 83872  | 37 | 1 | 185976273 | 185976273 | Missense_Mutation | SNP | G | A | 7   | 76  | c.4489G>A    | c.(4489-4491)GGC>AGC   | p.G1497S     |
| Pat_41 | Post-Resistance | HMCN1    | 83872  | 37 | 1 | 186055459 | 186055459 | Missense_Mutation | SNP | C | T | 14  | 221 | c.8966C>T    | c.(8965-8967)TCT>TTT   | p.S2989F     |
| Pat_41 | Post-Resistance | HMCN1    | 83872  | 37 | 1 | 186059961 | 186059961 | Missense_Mutation | SNP | G | A | 20  | 343 | c.9799G>A    | c.(9799-9801)GTC>ATC   | p.V3267I     |
| Pat_41 | Post-Resistance | HMCN1    | 83872  | 37 | 1 | 186158693 | 186158693 | Missense_Mutation | SNP | C | T | 31  | 210 | c.16591C>T   | c.(16591-16593)CCA>TCA | p.P5531S     |
| Pat_41 | Post-Resistance | PRG4     | 10216  | 37 | 1 | 186269222 | 186269222 | Splice_Site       | SNP | G | A | 13  | 117 | c.77_splice  | c.e3-1                 | p.D26_splice |
| Pat_41 | Post-Resistance | PRG4     | 10216  | 37 | 1 | 186277079 | 186277079 | Missense_Mutation | SNP | C | T | 9   | 132 | c.2228C>T    | c.(2227-2229)TCC>TTC   | p.S743F      |
| Pat_41 | Post-Resistance | PRG4     | 10216  | 37 | 1 | 186277960 | 186277960 | Missense_Mutation | SNP | C | T | 10  | 39  | c.3109C>T    | c.(3109-3111)CCA>TCA   | p.P1037S     |
| Pat_41 | Post-Resistance | CFHR3    | 10878  | 37 | 1 | 196748402 | 196748402 | Missense_Mutation | SNP | G | A | 9   | 114 | c.169G>A     | c.(169-171)GAA>AAA     | p.E57K       |
| Pat_41 | Post-Resistance | CFHR2    | 3080   | 37 | 1 | 196918584 | 196918584 | Splice_Site       | SNP | G | A | 4   | 43  | c.59_splice  | c.e2-1                 | p.A20_splice |
| Pat_41 | Post-Resistance | ASPM     | 259266 | 37 | 1 | 197062351 | 197062351 | Missense_Mutation | SNP | C | T | 13  | 305 | c.9125G>A    | c.(9124-9126)GGA>GAA   | p.G3042E     |
| Pat_41 | Post-Resistance | PTPRC    | 5788   | 37 | 1 | 198665870 | 198665870 | Missense_Mutation | SNP | C | T | 25  | 508 | c.124C>T     | c.(124-126)CCA>TCA     | p.P42S       |
| Pat_41 | Post-Resistance | PTPRC    | 5788   | 37 | 1 | 198671552 | 198671552 | Missense_Mutation | SNP | C | T | 157 | 239 | c.470C>T     | c.(469-471)CCT>CTT     | p.P157L      |
| Pat_41 | Post-Resistance | PTPRC    | 5788   | 37 | 1 | 198719669 | 198719669 | Missense_Mutation | SNP | G | A | 8   | 164 | c.3115G>A    | c.(3115-3117)GAG>AAG   | p.E1039K     |
| Pat_41 | Post-Resistance | FAM58B   | 339521 | 37 | 1 | 200182828 | 200182828 | Missense_Mutation | SNP | G | A | 19  | 108 | c.137G>A     | c.(136-138)GGG>GAG     | p.G46E       |
| Pat_41 | Post-Resistance | ZNF281   | 23528  | 37 | 1 | 200378092 | 200378092 | Missense_Mutation | SNP | C | T | 5   | 146 | c.742G>A     | c.(742-744)GAT>AAT     | p.D248N      |
| Pat_41 | Post-Resistance | KIF14    | 9928   | 37 | 1 | 200561223 | 200561223 | Missense_Mutation | SNP | A | G | 30  | 306 | c.2798T>C    | c.(2797-2799)ATG>ACG   | p.M933T      |
| Pat_41 | Post-Resistance | KIF14    | 9928   | 37 | 1 | 200575908 | 200575908 | Missense_Mutation | SNP | G | A | 68  | 461 | c.1573C>T    | c.(1573-1575)CCT>TCT   | p.P525S      |
| Pat_41 | Post-Resistance | C1orf106 | 55765  | 37 | 1 | 200860739 | 200860739 | Missense_Mutation | SNP | G | A | 6   | 54  | c.71G>A      | c.(70-72)GGA>GAA       | p.G24E       |
| Pat_41 | Post-Resistance | KIF21B   | 23046  | 37 | 1 | 200948781 | 200948781 | Missense_Mutation | SNP | G | A | 17  | 673 | c.4042C>T    | c.(4042-4044)CCC>TCC   | p.P1348S     |

|        |                 |          |        |    |   |           |           |                   |     |   |   |    |     |           |                      |          |
|--------|-----------------|----------|--------|----|---|-----------|-----------|-------------------|-----|---|---|----|-----|-----------|----------------------|----------|
| Pat_41 | Post-Resistance | KIF21B   | 23046  | 37 | 1 | 200973529 | 200973529 | Missense_Mutation | SNP | G | A | 4  | 18  | c.955C>T  | c.(955-957)CAC>TAC   | p.H319Y  |
| Pat_41 | Post-Resistance | NAV1     | 89796  | 37 | 1 | 201778357 | 201778357 | Missense_Mutation | SNP | G | A | 29 | 392 | c.4264G>A | c.(4264-4266)GTG>ATG | p.V1422M |
| Pat_41 | Post-Resistance | NAV1     | 89796  | 37 | 1 | 201781751 | 201781751 | Missense_Mutation | SNP | C | T | 23 | 312 | c.5174C>T | c.(5173-5175)ACC>ATC | p.T1725I |
| Pat_41 | Post-Resistance | RNPEP    | 6051   | 37 | 1 | 201958137 | 201958137 | Missense_Mutation | SNP | C | T | 22 | 280 | c.553C>T  | c.(553-555)CCT>TCT   | p.P185S  |
| Pat_41 | Post-Resistance | ELF3     | 1999   | 37 | 1 | 201981217 | 201981217 | Missense_Mutation | SNP | G | A | 22 | 68  | c.296G>A  | c.(295-297)GGC>GAC   | p.G99D   |
| Pat_41 | Post-Resistance | LGR6     | 59352  | 37 | 1 | 202287248 | 202287248 | Missense_Mutation | SNP | G | A | 8  | 64  | c.1817G>A | c.(1816-1818)GGC>GAC | p.G606D  |
| Pat_41 | Post-Resistance | PPP1R12B | 4660   | 37 | 1 | 202462390 | 202462390 | Missense_Mutation | SNP | C | T | 11 | 19  | c.2090C>T | c.(2089-2091)CCA>CTA | p.P697L  |
| Pat_41 | Post-Resistance | SYT2     | 127833 | 37 | 1 | 202569487 | 202569487 | Missense_Mutation | SNP | G | A | 8  | 128 | c.917C>T  | c.(916-918)TCA>TTA   | p.S306L  |
| Pat_41 | Post-Resistance | CYB5R1   | 51706  | 37 | 1 | 202935712 | 202935712 | Missense_Mutation | SNP | G | A | 15 | 111 | c.182C>T  | c.(181-183)ACC>ATC   | p.T61I   |
| Pat_41 | Post-Resistance | CHI3L1   | 1116   | 37 | 1 | 203148936 | 203148936 | Missense_Mutation | SNP | C | T | 20 | 149 | c.964G>A  | c.(964-966)GGC>AGC   | p.G322S  |
| Pat_41 | Post-Resistance | FMOD     | 2331   | 37 | 1 | 203316579 | 203316579 | Missense_Mutation | SNP | G | A | 29 | 191 | c.820C>T  | c.(820-822)CGG>TGG   | p.R274W  |
| Pat_41 | Post-Resistance | FMOD     | 2331   | 37 | 1 | 203317272 | 203317272 | Missense_Mutation | SNP | C | T | 8  | 76  | c.127G>A  | c.(127-129)GAC>AAC   | p.D43N   |
| Pat_41 | Post-Resistance | ATP2B4   | 493    | 37 | 1 | 203672848 | 203672848 | Missense_Mutation | SNP | G | A | 11 | 133 | c.1006G>A | c.(1006-1008)GAA>AAA | p.E336K  |
| Pat_41 | Post-Resistance | ATP2B4   | 493    | 37 | 1 | 203682323 | 203682323 | Missense_Mutation | SNP | C | T | 17 | 496 | c.2242C>T | c.(2242-2244)CCT>TCT | p.P748S  |
| Pat_41 | Post-Resistance | ATP2B4   | 493    | 37 | 1 | 203683341 | 203683341 | Missense_Mutation | SNP | C | T | 31 | 406 | c.2342C>T | c.(2341-2343)GCT>GTT | p.A781V  |
| Pat_41 | Post-Resistance | ATP2B4   | 493    | 37 | 1 | 203690430 | 203690430 | Missense_Mutation | SNP | C | T | 4  | 113 | c.2704C>T | c.(2704-2706)CGG>TGG | p.R902W  |
| Pat_41 | Post-Resistance | SOX13    | 9580   | 37 | 1 | 204083684 | 204083684 | Nonsense_Mutation | SNP | G | A | 9  | 155 | c.369G>A  | c.(367-369)TGG>TGA   | p.W123*  |
| Pat_41 | Post-Resistance | PIK3C2B  | 5287   | 37 | 1 | 204418348 | 204418348 | Missense_Mutation | SNP | G | A | 5  | 31  | c.2311C>T | c.(2311-2313)CCT>TCT | p.P771S  |
| Pat_41 | Post-Resistance | CDK18    | 5129   | 37 | 1 | 205492348 | 205492348 | Missense_Mutation | SNP | C | T | 5  | 43  | c.53C>T   | c.(52-54)CCC>CTC     | p.P18L   |
| Pat_41 | Post-Resistance | MFSD4    | 148808 | 37 | 1 | 205569545 | 205569545 | Missense_Mutation | SNP | G | A | 14 | 99  | c.1501G>A | c.(1501-1503)GAC>AAC | p.D501N  |
| Pat_41 | Post-Resistance | SLC45A3  | 85414  | 37 | 1 | 205628444 | 205628444 | Missense_Mutation | SNP | G | A | 11 | 165 | c.1580C>T | c.(1579-1581)GCC>GTC | p.A527V  |
| Pat_41 | Post-Resistance | SLC41A1  | 254428 | 37 | 1 | 205767092 | 205767092 | Missense_Mutation | SNP | G | A | 8  | 106 | c.932C>T  | c.(931-933)GCC>GTC   | p.A311V  |
| Pat_41 | Post-Resistance | C1orf116 | 79098  | 37 | 1 | 207196099 | 207196099 | Missense_Mutation | SNP | G | A | 4  | 53  | c.1010C>T | c.(1009-1011)TCC>TTC | p.S337F  |
| Pat_41 | Post-Resistance | CD55     | 1604   | 37 | 1 | 207495876 | 207495876 | Missense_Mutation | SNP | G | A | 15 | 187 | c.250G>A  | c.(250-252)GGC>AGC   | p.G84S   |
| Pat_41 | Post-Resistance | CR2      | 1380   | 37 | 1 | 207642514 | 207642514 | Missense_Mutation | SNP | C | T | 31 | 483 | c.754C>T  | c.(754-756)CCT>TCT   | p.P252S  |
| Pat_41 | Post-Resistance | PLXNA2   | 5362   | 37 | 1 | 208217993 | 208217993 | Missense_Mutation | SNP | C | T | 9  | 66  | c.3734G>A | c.(3733-3735)GGC>GAC | p.G1245D |
| Pat_41 | Post-Resistance | PLXNA2   | 5362   | 37 | 1 | 208390682 | 208390682 | Missense_Mutation | SNP | G | A | 18 | 383 | c.586C>T  | c.(586-588)CCG>TCG   | p.P196S  |
| Pat_41 | Post-Resistance | LAMB3    | 3914   | 37 | 1 | 209797251 | 209797251 | Missense_Mutation | SNP | C | T | 15 | 111 | c.2071G>A | c.(2071-2073)GGT>AGT | p.G691S  |
| Pat_41 | Post-Resistance | LPGAT1   | 9926   | 37 | 1 | 211923371 | 211923371 | Missense_Mutation | SNP | C | T | 8  | 138 | c.983G>A  | c.(982-984)GGC>GAC   | p.G328D  |
| Pat_41 | Post-Resistance | TMEM206  | 55248  | 37 | 1 | 212538715 | 212538715 | Missense_Mutation | SNP | C | T | 17 | 268 | c.895G>A  | c.(895-897)GTC>ATC   | p.V299I  |
| Pat_41 | Post-Resistance | ANGEL2   | 90806  | 37 | 1 | 213170601 | 213170601 | Missense_Mutation | SNP | G | A | 11 | 253 | c.1379C>T | c.(1378-1380)CCT>CTT | p.P460L  |
| Pat_41 | Post-Resistance | ANGEL2   | 90806  | 37 | 1 | 213188986 | 213188986 | Missense_Mutation | SNP | C | T | 12 | 215 | c.28G>A   | c.(28-30)GGC>AGC     | p.G10S   |
| Pat_41 | Post-Resistance | RPS6KC1  | 26750  | 37 | 1 | 213415575 | 213415575 | Missense_Mutation | SNP | C | T | 14 | 292 | c.2756C>T | c.(2755-2757)GCT>GTT | p.A919V  |
| Pat_41 | Post-Resistance | CENPF    | 1063   | 37 | 1 | 214787102 | 214787102 | Missense_Mutation | SNP | G | A | 8  | 107 | c.5G>A    | c.(4-6)AGC>AAC       | p.S2N    |
| Pat_41 | Post-Resistance | CENPF    | 1063   | 37 | 1 | 214794119 | 214794119 | Missense_Mutation | SNP | C | T | 37 | 177 | c.695C>T  | c.(694-696)TCT>TTT   | p.S232F  |
| Pat_41 | Post-Resistance | CENPF    | 1063   | 37 | 1 | 214818053 | 214818053 | Missense_Mutation | SNP | G | A | 8  | 91  | c.5140G>A | c.(5140-5142)GCA>ACA | p.A1714T |
| Pat_41 | Post-Resistance | CENPF    | 1063   | 37 | 1 | 214836955 | 214836955 | Missense_Mutation | SNP | C | T | 5  | 146 | c.9163C>T | c.(9163-9165)CCA>TCA | p.P3055S |
| Pat_41 | Post-Resistance | USH2A    | 7399   | 37 | 1 | 216011345 | 216011345 | Missense_Mutation | SNP | C | T | 26 | 334 | c.9359G>A | c.(9358-9360)GGC>GAC | p.G3120D |
| Pat_41 | Post-Resistance | USH2A    | 7399   | 37 | 1 | 216074176 | 216074176 | Missense_Mutation | SNP | G | A | 12 | 186 | c.7372C>T | c.(7372-7374)CCA>TCA | p.P2458S |
| Pat_41 | Post-Resistance | USH2A    | 7399   | 37 | 1 | 216246236 | 216246236 | Missense_Mutation | SNP | C | T | 19 | 450 | c.5852G>A | c.(5851-5853)GGA>GAA | p.G1951E |
| Pat_41 | Post-Resistance | USH2A    | 7399   | 37 | 1 | 216260094 | 216260094 | Missense_Mutation | SNP | G | A | 4  | 134 | c.4954C>T | c.(4954-4956)CCG>TCG | p.P1652S |
| Pat_41 | Post-Resistance | USH2A    | 7399   | 37 | 1 | 216262426 | 216262426 | Missense_Mutation | SNP | C | T | 31 | 207 | c.4814G>A | c.(4813-4815)GGA>GAA | p.G1605E |
| Pat_41 | Post-Resistance | USH2A    | 7399   | 37 | 1 | 216370001 | 216370001 | Nonsense_Mutation | SNP | C | T | 5  | 137 | c.4145G>A | c.(4144-4146)TGG>TAG | p.W1382* |
| Pat_41 | Post-Resistance | USH2A    | 7399   | 37 | 1 | 216380702 | 216380702 | Missense_Mutation | SNP | G | A | 33 | 222 | c.3229C>T | c.(3229-3231)CCT>TCT | p.P1077S |
| Pat_41 | Post-Resistance | USH2A    | 7399   | 37 | 1 | 216498829 | 216498829 | Missense_Mutation | SNP | G | A | 73 | 111 | c.961C>T  | c.(961-963)CCT>TCT   | p.P321S  |
| Pat_41 | Post-Resistance | GPATCH2  | 55105  | 37 | 1 | 217793198 | 217793198 | Missense_Mutation | SNP | C | T | 5  | 181 | c.700G>A  | c.(700-702)GAA>AAA   | p.E234K  |
| Pat_41 | Post-Resistance | GPATCH2  | 55105  | 37 | 1 | 217793841 | 217793841 | Nonsense_Mutation | SNP | C | T | 8  | 73  | c.57G>A   | c.(55-57)TGG>TGA     | p.W19*   |

|        |                 |          |        |    |   |           |           |                   |     |   |   |    |     |               |                        |               |
|--------|-----------------|----------|--------|----|---|-----------|-----------|-------------------|-----|---|---|----|-----|---------------|------------------------|---------------|
| Pat_41 | Post-Resistance | EPRS     | 2058   | 37 | 1 | 220146740 | 220146740 | Missense_Mutation | SNP | C | T | 4  | 108 | c.4084G>A     | c.(4084-4086)GGA>AGA   | p.G1362R      |
| Pat_41 | Post-Resistance | EPRS     | 2058   | 37 | 1 | 220192341 | 220192341 | Missense_Mutation | SNP | G | A | 56 | 380 | c.1430C>T     | c.(1429-1431)GCT>GTT   | p.A477V       |
| Pat_41 | Post-Resistance | MARK1    | 4139   | 37 | 1 | 220791990 | 220791990 | Nonsense_Mutation | SNP | C | T | 36 | 160 | c.802C>T      | c.(802-804)CGA>TGA     | p.R268*       |
| Pat_41 | Post-Resistance | MARK1    | 4139   | 37 | 1 | 220826621 | 220826621 | Missense_Mutation | SNP | G | A | 20 | 226 | c.1915G>A     | c.(1915-1917)GGT>AGT   | p.G639S       |
| Pat_41 | Post-Resistance | HHIPL2   | 79802  | 37 | 1 | 222711990 | 222711990 | Missense_Mutation | SNP | C | T | 8  | 88  | c.1577G>A     | c.(1576-1578)GGT>GAT   | p.G526D       |
| Pat_41 | Post-Resistance | MIA3     | 375056 | 37 | 1 | 222805585 | 222805585 | Missense_Mutation | SNP | C | T | 8  | 243 | c.3248C>T     | c.(3247-3249)ACC>ATC   | p.T1083I      |
| Pat_41 | Post-Resistance | MIA3     | 375056 | 37 | 1 | 222827755 | 222827755 | Missense_Mutation | SNP | G | A | 5  | 113 | c.4402G>A     | c.(4402-4404)GAA>AAA   | p.E1468K      |
| Pat_41 | Post-Resistance | C1orf58  | 148362 | 37 | 1 | 222895852 | 222895852 | Missense_Mutation | SNP | G | A | 4  | 99  | c.397G>A      | c.(397-399)GAA>AAA     | p.E133K       |
| Pat_41 | Post-Resistance | DISP1    | 84976  | 37 | 1 | 223116199 | 223116199 | Missense_Mutation | SNP | G | A | 19 | 254 | c.34G>A       | c.(34-36)GTT>ATT       | p.V12I        |
| Pat_41 | Post-Resistance | DISP1    | 84976  | 37 | 1 | 223165415 | 223165415 | Nonsense_Mutation | SNP | G | A | 15 | 174 | c.852G>A      | c.(850-852)TGG>TGA     | p.W284*       |
| Pat_41 | Post-Resistance | DISP1    | 84976  | 37 | 1 | 223179114 | 223179114 | Missense_Mutation | SNP | G | A | 9  | 146 | c.4375G>A     | c.(4375-4377)GAA>AAA   | p.E1459K      |
| Pat_41 | Post-Resistance | C1orf65  | 164127 | 37 | 1 | 223567494 | 223567494 | Missense_Mutation | SNP | C | T | 6  | 169 | c.677C>T      | c.(676-678)TCC>TTC     | p.S226F       |
| Pat_41 | Post-Resistance | CAPN2    | 824    | 37 | 1 | 223931838 | 223931838 | Missense_Mutation | SNP | C | T | 14 | 135 | c.344C>T      | c.(343-345)ACC>ATC     | p.T115I       |
| Pat_41 | Post-Resistance | LBR      | 3930   | 37 | 1 | 225599038 | 225599038 | Splice_Site       | SNP | C | T | 19 | 263 | c.1188_splice | c.e9+1                 | p.W396_splice |
| Pat_41 | Post-Resistance | ENAH     | 55740  | 37 | 1 | 225702590 | 225702590 | Missense_Mutation | SNP | C | T | 15 | 142 | c.926G>A      | c.(925-927)GGA>GAA     | p.G309E       |
| Pat_41 | Post-Resistance | ENAH     | 55740  | 37 | 1 | 225754977 | 225754977 | Missense_Mutation | SNP | C | T | 50 | 643 | c.145G>A      | c.(145-147)GTG>ATG     | p.V49M        |
| Pat_41 | Post-Resistance | LEFTY1   | 10637  | 37 | 1 | 226111406 | 226111406 | Missense_Mutation | SNP | G | A | 9  | 165 | c.133C>T      | c.(133-135)CTC>TTC     | p.L45F        |
| Pat_41 | Post-Resistance | C1orf55  | 163859 | 37 | 1 | 226175658 | 226175658 | Missense_Mutation | SNP | G | A | 8  | 113 | c.1073C>T     | c.(1072-1074)GCA>GTA   | p.A358V       |
| Pat_41 | Post-Resistance | ACBD3    | 64746  | 37 | 1 | 226353612 | 226353612 | Missense_Mutation | SNP | G | A | 28 | 129 | c.376C>T      | c.(376-378)CCA>TCA     | p.P126S       |
| Pat_41 | Post-Resistance | ITPKB    | 3707   | 37 | 1 | 226836382 | 226836382 | Missense_Mutation | SNP | C | T | 47 | 188 | c.2023G>A     | c.(2023-2025)GGA>AGA   | p.G675R       |
| Pat_41 | Post-Resistance | CDC42BPA | 8476   | 37 | 1 | 227221050 | 227221050 | Missense_Mutation | SNP | T | C | 4  | 150 | c.3438A>G     | c.(3436-3438)ATA>ATG   | p.I1146M      |
| Pat_41 | Post-Resistance | SNAP47   | 116841 | 37 | 1 | 227946862 | 227946862 | Missense_Mutation | SNP | G | A | 4  | 116 | c.799G>A      | c.(799-801)GAG>AAG     | p.E267K       |
| Pat_41 | Post-Resistance | OBSCN    | 84033  | 37 | 1 | 228437677 | 228437677 | Missense_Mutation | SNP | G | A | 11 | 193 | c.4045G>A     | c.(4045-4047)GTG>ATG   | p.V1349M      |
| Pat_41 | Post-Resistance | OBSCN    | 84033  | 37 | 1 | 228523926 | 228523926 | Missense_Mutation | SNP | G | A | 7  | 219 | c.16492G>A    | c.(16492-16494)GGG>AGC | p.G5498R      |
| Pat_41 | Post-Resistance | HIST3H3  | 8290   | 37 | 1 | 228612633 | 228612633 | Missense_Mutation | SNP | G | A | 14 | 198 | c.394C>T      | c.(394-396)CGC>TGC     | p.R132C       |
| Pat_41 | Post-Resistance | C1orf96  | 126731 | 37 | 1 | 229461116 | 229461116 | Missense_Mutation | SNP | C | T | 7  | 49  | c.679G>A      | c.(679-681)GAA>AAA     | p.E227K       |
| Pat_41 | Post-Resistance | C1orf96  | 126731 | 37 | 1 | 229478092 | 229478092 | Missense_Mutation | SNP | C | T | 3  | 23  | c.121G>A      | c.(121-123)GAG>AAG     | p.E41K        |
| Pat_41 | Post-Resistance | ACTA1    | 58     | 37 | 1 | 229567578 | 229567578 | Missense_Mutation | SNP | C | T | 26 | 343 | c.880G>A      | c.(880-882)GAC>AAC     | p.D294N       |
| Pat_41 | Post-Resistance | NUP133   | 55746  | 37 | 1 | 229635550 | 229635550 | Missense_Mutation | SNP | C | T | 17 | 144 | c.529G>A      | c.(529-531)GTT>ATT     | p.V177I       |
| Pat_41 | Post-Resistance | URB2     | 9816   | 37 | 1 | 229773334 | 229773334 | Missense_Mutation | SNP | C | T | 4  | 24  | c.2974C>T     | c.(2974-2976)CCC>TCC   | p.P992S       |
| Pat_41 | Post-Resistance | PGBD5    | 79605  | 37 | 1 | 230486717 | 230486717 | Missense_Mutation | SNP | C | T | 18 | 170 | c.674G>A      | c.(673-675)GGC>GAC     | p.G225D       |
| Pat_41 | Post-Resistance | CAPN9    | 10753  | 37 | 1 | 230931004 | 230931004 | Missense_Mutation | SNP | G | A | 4  | 51  | c.1966G>A     | c.(1966-1968)GTC>ATC   | p.V656I       |
| Pat_41 | Post-Resistance | C1orf198 | 84886  | 37 | 1 | 230979617 | 230979617 | Missense_Mutation | SNP | G | A | 7  | 232 | c.410C>T      | c.(409-411)GCC>GTC     | p.A137V       |
| Pat_41 | Post-Resistance | TRIM67   | 440730 | 37 | 1 | 231335990 | 231335990 | Missense_Mutation | SNP | T | C | 6  | 195 | c.1360T>C     | c.(1360-1362)TCC>CCC   | p.S454P       |
| Pat_41 | Post-Resistance | GNPAT    | 8443   | 37 | 1 | 231386830 | 231386830 | Missense_Mutation | SNP | C | T | 10 | 175 | c.202C>T      | c.(202-204)CCA>TCA     | p.P68S        |
| Pat_41 | Post-Resistance | SIPA1L2  | 57568  | 37 | 1 | 232539293 | 232539293 | Missense_Mutation | SNP | G | A | 16 | 77  | c.4841C>T     | c.(4840-4842)ACC>ATC   | p.T1614I      |
| Pat_41 | Post-Resistance | SIPA1L2  | 57568  | 37 | 1 | 232564275 | 232564275 | Missense_Mutation | SNP | G | A | 10 | 238 | c.4292C>T     | c.(4291-4293)ACT>ATT   | p.T1431I      |
| Pat_41 | Post-Resistance | SIPA1L2  | 57568  | 37 | 1 | 232568171 | 232568171 | Missense_Mutation | SNP | T | C | 18 | 148 | c.4078A>G     | c.(4078-4080)AGT>GGT   | p.S1360G      |
| Pat_41 | Post-Resistance | KIAA1383 | 54627  | 37 | 1 | 232942168 | 232942168 | Missense_Mutation | SNP | C | T | 12 | 133 | c.1399C>T     | c.(1399-1401)CCT>TCT   | p.P467S       |
| Pat_41 | Post-Resistance | KIAA1383 | 54627  | 37 | 1 | 232942258 | 232942258 | Missense_Mutation | SNP | C | T | 15 | 60  | c.1489C>T     | c.(1489-1491)CCA>TCA   | p.P497S       |
| Pat_41 | Post-Resistance | PCNXL2   | 80003  | 37 | 1 | 233122245 | 233122245 | Missense_Mutation | SNP | C | T | 3  | 18  | c.5833G>A     | c.(5833-5835)GCG>ACG   | p.A1945T      |
| Pat_41 | Post-Resistance | PCNXL2   | 80003  | 37 | 1 | 233136119 | 233136119 | Missense_Mutation | SNP | C | T | 8  | 304 | c.5260G>A     | c.(5260-5262)GAC>AAC   | p.D1754N      |
| Pat_41 | Post-Resistance | KIAA1804 | 84451  | 37 | 1 | 233507862 | 233507862 | Missense_Mutation | SNP | C | T | 28 | 163 | c.1631C>T     | c.(1630-1632)CCC>CTC   | p.P544L       |
| Pat_41 | Post-Resistance | KCNK1    | 3775   | 37 | 1 | 233750260 | 233750260 | Missense_Mutation | SNP | C | T | 5  | 40  | c.343C>T      | c.(343-345)CTC>TTC     | p.L115F       |
| Pat_41 | Post-Resistance | IRF2BP2  | 359948 | 37 | 1 | 234743275 | 234743275 | Missense_Mutation | SNP | G | A | 32 | 522 | c.1372C>T     | c.(1372-1374)CCG>TCG   | p.P458S       |
| Pat_41 | Post-Resistance | ARID4B   | 51742  | 37 | 1 | 235345619 | 235345619 | Missense_Mutation | SNP | T | C | 33 | 71  | c.2615A>G     | c.(2614-2616)AAG>AGG   | p.K872R       |
| Pat_41 | Post-Resistance | ARID4B   | 51742  | 37 | 1 | 235386549 | 235386549 | Missense_Mutation | SNP | G | A | 13 | 130 | c.997C>T      | c.(997-999)CTT>TTT     | p.L333F       |

|        |                 |          |        |    |    |           |           |                   |     |   |   |    |     |               |                        |                |
|--------|-----------------|----------|--------|----|----|-----------|-----------|-------------------|-----|---|---|----|-----|---------------|------------------------|----------------|
| Pat_41 | Post-Resistance | LYST     | 1130   | 37 | 1  | 235866153 | 235866153 | Missense_Mutation | SNP | G | A | 31 | 470 | c.10268C>T    | c.(10267-10269)CCT>CTT | p.P3423L       |
| Pat_41 | Post-Resistance | LYST     | 1130   | 37 | 1  | 235872510 | 235872510 | Missense_Mutation | SNP | G | A | 16 | 180 | c.10024C>T    | c.(10024-10026)CGG>TGC | p.R3342W       |
| Pat_41 | Post-Resistance | LYST     | 1130   | 37 | 1  | 235904850 | 235904850 | Missense_Mutation | SNP | G | A | 13 | 115 | c.8230C>T     | c.(8230-8232)CTT>TTT   | p.L2744F       |
| Pat_41 | Post-Resistance | LYST     | 1130   | 37 | 1  | 235922474 | 235922474 | Missense_Mutation | SNP | G | A | 5  | 125 | c.6679C>T     | c.(6679-6681)CCT>TCT   | p.P2227S       |
| Pat_41 | Post-Resistance | LYST     | 1130   | 37 | 1  | 235929378 | 235929378 | Splice_Site       | SNP | C | T | 15 | 336 | c.6121_splice | c.e21+1                | p.D2041_splice |
| Pat_41 | Post-Resistance | LYST     | 1130   | 37 | 1  | 235969930 | 235969930 | Missense_Mutation | SNP | C | T | 40 | 606 | c.2506G>A     | c.(2506-2508)GTT>ATT   | p.V836I        |
| Pat_41 | Post-Resistance | EDARADD  | 128178 | 37 | 1  | 236645720 | 236645720 | Missense_Mutation | SNP | G | A | 10 | 212 | c.419G>A      | c.(418-420)AGG>AAG     | p.R140K        |
| Pat_41 | Post-Resistance | RYR2     | 6262   | 37 | 1  | 237777469 | 237777469 | Missense_Mutation | SNP | G | A | 4  | 108 | c.5041G>A     | c.(5041-5043)GAT>AAT   | p.D1681N       |
| Pat_41 | Post-Resistance | RYR2     | 6262   | 37 | 1  | 237780746 | 237780746 | Missense_Mutation | SNP | C | T | 30 | 220 | c.5876C>T     | c.(5875-5877)GCC>GTC   | p.A1959V       |
| Pat_41 | Post-Resistance | ZP4      | 57829  | 37 | 1  | 238048125 | 238048125 | Missense_Mutation | SNP | G | A | 27 | 140 | c.1334C>T     | c.(1333-1335)TCA>TTA   | p.S445L        |
| Pat_41 | Post-Resistance | FMN2     | 56776  | 37 | 1  | 240371090 | 240371090 | Missense_Mutation | SNP | C | T | 12 | 259 | c.2978C>T     | c.(2977-2979)CCC>CTC   | p.P993L        |
| Pat_41 | Post-Resistance | FMN2     | 56776  | 37 | 1  | 240421333 | 240421333 | Splice_Site       | SNP | G | A | 5  | 85  | c.4153_splice | c.e7+1                 | p.A1385_splice |
| Pat_41 | Post-Resistance | FH       | 2271   | 37 | 1  | 241680504 | 241680504 | Missense_Mutation | SNP | C | T | 22 | 364 | c.245G>A      | c.(244-246)GGA>GAA     | p.G82E         |
| Pat_41 | Post-Resistance | MAP1LC3C | 440738 | 37 | 1  | 242161877 | 242161877 | Missense_Mutation | SNP | C | T | 29 | 129 | c.160G>A      | c.(160-162)GAC>AAC     | p.D54N         |
| Pat_41 | Post-Resistance | CEP170   | 9859   | 37 | 1  | 243327952 | 243327952 | Missense_Mutation | SNP | G | A | 14 | 120 | c.3310C>T     | c.(3310-3312)CGC>TGC   | p.R1104C       |
| Pat_41 | Post-Resistance | C1orf101 | 257044 | 37 | 1  | 244640891 | 244640891 | Missense_Mutation | SNP | G | A | 30 | 491 | c.163G>A      | c.(163-165)GAA>AAA     | p.E55K         |
| Pat_41 | Post-Resistance | C1orf101 | 257044 | 37 | 1  | 244756696 | 244756696 | Splice_Site       | SNP | G | A | 8  | 172 | c.2190_splice | c.e16-1                | p.K730_splice  |
| Pat_41 | Post-Resistance | HNRNPU   | 3192   | 37 | 1  | 245023714 | 245023714 | Missense_Mutation | SNP | C | T | 19 | 128 | c.940G>A      | c.(940-942)GAG>AAG     | p.E314K        |
| Pat_41 | Post-Resistance | KIF26B   | 55083  | 37 | 1  | 245766051 | 245766051 | Missense_Mutation | SNP | C | T | 5  | 234 | c.1523C>T     | c.(1522-1524)GCC>GTC   | p.A508V        |
| Pat_41 | Post-Resistance | KIF26B   | 55083  | 37 | 1  | 245862193 | 245862193 | Missense_Mutation | SNP | C | T | 6  | 77  | c.6032C>T     | c.(6031-6033)GCC>GTC   | p.A2011V       |
| Pat_41 | Post-Resistance | SMYD3    | 64754  | 37 | 1  | 246021912 | 246021912 | Missense_Mutation | SNP | G | A | 22 | 186 | c.962C>T      | c.(961-963)CCC>CTC     | p.P321L        |
| Pat_41 | Post-Resistance | TFB2M    | 64216  | 37 | 1  | 246729173 | 246729173 | Missense_Mutation | SNP | C | T | 20 | 213 | c.268G>A      | c.(268-270)GGA>AGA     | p.G90R         |
| Pat_41 | Post-Resistance | AHCTF1   | 25909  | 37 | 1  | 247013349 | 247013349 | Missense_Mutation | SNP | C | T | 10 | 81  | c.5959G>A     | c.(5959-5961)GGA>AGA   | p.G1987R       |
| Pat_41 | Post-Resistance | OR13G1   | 441933 | 37 | 1  | 247835739 | 247835739 | Missense_Mutation | SNP | G | A | 8  | 121 | c.605C>T      | c.(604-606)ACC>ATC     | p.T202I        |
| Pat_41 | Post-Resistance | OR6F1    | 343169 | 37 | 1  | 247875184 | 247875184 | Missense_Mutation | SNP | G | A | 7  | 162 | c.874C>T      | c.(874-876)CTT>TTT     | p.L292F        |
| Pat_41 | Post-Resistance | OR2M5    | 127059 | 37 | 1  | 248308496 | 248308496 | Missense_Mutation | SNP | G | A | 17 | 417 | c.47G>A       | c.(46-48)GGA>GAA       | p.G16E         |
| Pat_41 | Post-Resistance | OR2M4    | 26245  | 37 | 1  | 248402768 | 248402768 | Missense_Mutation | SNP | G | A | 15 | 314 | c.538G>A      | c.(538-540)GAT>AAT     | p.D180N        |
| Pat_41 | Post-Resistance | OR2M4    | 26245  | 37 | 1  | 248402786 | 248402786 | Missense_Mutation | SNP | C | T | 15 | 320 | c.556C>T      | c.(556-558)CCT>TCT     | p.P186S        |
| Pat_41 | Post-Resistance | OR2T4    | 127074 | 37 | 1  | 248524908 | 248524908 | Missense_Mutation | SNP | G | A | 6  | 163 | c.26G>A       | c.(25-27)AGC>AAC       | p.S9N          |
| Pat_41 | Post-Resistance | OR2T3    | 343173 | 37 | 1  | 248636994 | 248636994 | Missense_Mutation | SNP | G | A | 4  | 98  | c.343G>A      | c.(343-345)GCT>ACT     | p.A115T        |
| Pat_41 | Post-Resistance | OR2G6    | 391211 | 37 | 1  | 248685462 | 248685462 | Missense_Mutation | SNP | G | A | 13 | 118 | c.515G>A      | c.(514-516)CGC>CAC     | p.R172H        |
| Pat_41 | Post-Resistance | DIP2C    | 22982  | 37 | 10 | 410400    | 410400    | Missense_Mutation | SNP | C | T | 17 | 108 | c.2391G>A     | c.(2389-2391)ATG>ATA   | p.M797I        |
| Pat_41 | Post-Resistance | KLF6     | 1316   | 37 | 10 | 3827122   | 3827122   | Missense_Mutation | SNP | C | T | 8  | 49  | c.85G>A       | c.(85-87)GAG>AAG       | p.E29K         |
| Pat_41 | Post-Resistance | UCN3     | 114131 | 37 | 10 | 5415733   | 5415733   | Missense_Mutation | SNP | G | A | 20 | 66  | c.50G>A       | c.(49-51)GGC>GAC       | p.G17D         |
| Pat_41 | Post-Resistance | NET1     | 10276  | 37 | 10 | 5495479   | 5495479   | Missense_Mutation | SNP | C | T | 40 | 231 | c.724C>T      | c.(724-726)CCT>TCT     | p.P242S        |
| Pat_41 | Post-Resistance | C10orf18 | 54906  | 37 | 10 | 5803267   | 5803267   | Missense_Mutation | SNP | C | T | 14 | 137 | c.7007C>T     | c.(7006-7008)GCA>GTA   | p.A2336V       |
| Pat_41 | Post-Resistance | USP6NL   | 9712   | 37 | 10 | 11505396  | 11505396  | Missense_Mutation | SNP | C | T | 27 | 136 | c.1531G>A     | c.(1531-1533)GCG>ACG   | p.A511T        |
| Pat_41 | Post-Resistance | USP6NL   | 9712   | 37 | 10 | 11505675  | 11505675  | Missense_Mutation | SNP | G | A | 4  | 26  | c.1252C>T     | c.(1252-1254)CCC>TCC   | p.P418S        |
| Pat_41 | Post-Resistance | UPF2     | 26019  | 37 | 10 | 12071162  | 12071162  | Missense_Mutation | SNP | C | T | 9  | 88  | c.727G>A      | c.(727-729)GTC>ATC     | p.V243I        |
| Pat_41 | Post-Resistance | CDC123   | 8872   | 37 | 10 | 12292309  | 12292309  | Splice_Site       | SNP | G | A | 9  | 70  | c.985_splice  | c.e13-1                | p.K329_splice  |
| Pat_41 | Post-Resistance | FAM107B  | 83641  | 37 | 10 | 14563275  | 14563275  | Missense_Mutation | SNP | C | T | 26 | 55  | c.310G>A      | c.(310-312)GAG>AAG     | p.E104K        |
| Pat_41 | Post-Resistance | SUV39H2  | 79723  | 37 | 10 | 14944497  | 14944497  | Missense_Mutation | SNP | G | A | 12 | 45  | c.1039G>A     | c.(1039-1041)GGT>AGT   | p.G347S        |
| Pat_41 | Post-Resistance | DCLRE1C  | 64421  | 37 | 10 | 14976425  | 14976425  | Missense_Mutation | SNP | C | T | 46 | 322 | c.632G>A      | c.(631-633)GGC>GAC     | p.G211D        |
| Pat_41 | Post-Resistance | RSU1     | 6251   | 37 | 10 | 16737067  | 16737067  | Missense_Mutation | SNP | C | A | 4  | 136 | c.686G>T      | c.(685-687)GGC>GTC     | p.G229V        |
| Pat_41 | Post-Resistance | CUBN     | 8029   | 37 | 10 | 16975248  | 16975248  | Missense_Mutation | SNP | G | A | 18 | 47  | c.5962C>T     | c.(5962-5964)CCC>TCC   | p.P1988S       |
| Pat_41 | Post-Resistance | CUBN     | 8029   | 37 | 10 | 17146516  | 17146516  | Missense_Mutation | SNP | G | A | 13 | 68  | c.1319C>T     | c.(1318-1320)CCC>CTC   | p.P440L        |
| Pat_41 | Post-Resistance | TRDMT1   | 1787   | 37 | 10 | 17210858  | 17210858  | Missense_Mutation | SNP | G | A | 19 | 64  | c.233C>T      | c.(232-234)CCC>CTC     | p.P78L         |



|        |                 |           |        |    |    |          |          |                   |     |   |   |    |     |               |                      |               |
|--------|-----------------|-----------|--------|----|----|----------|----------|-------------------|-----|---|---|----|-----|---------------|----------------------|---------------|
| Pat_41 | Post-Resistance | VIM       | 7431   | 37 | 10 | 17271902 | 17271902 | Missense_Mutation | SNP | G | A | 8  | 31  | c.481G>A      | c.(481-483)GTG>ATG   | p.V161M       |
| Pat_41 | Post-Resistance | SLC39A12  | 221074 | 37 | 10 | 18280107 | 18280107 | Missense_Mutation | SNP | C | T | 4  | 39  | c.1297C>T     | c.(1297-1299)CCA>TCA | p.P433S       |
| Pat_41 | Post-Resistance | CACNB2    | 783    | 37 | 10 | 18690890 | 18690890 | Missense_Mutation | SNP | C | T | 13 | 50  | c.251C>T      | c.(250-252)TCC>TTC   | p.S84F        |
| Pat_41 | Post-Resistance | NEBL      | 10529  | 37 | 10 | 21117503 | 21117503 | Missense_Mutation | SNP | G | A | 14 | 48  | c.1732C>T     | c.(1732-1734)CCT>TCT | p.P578S       |
| Pat_41 | Post-Resistance | ARMC3     | 219681 | 37 | 10 | 23321789 | 23321789 | Splice_Site       | SNP | G | A | 11 | 42  | c.2247_splice | c.e18-1              | p.K749_splice |
| Pat_41 | Post-Resistance | KIAA1217  | 56243  | 37 | 10 | 24762385 | 24762385 | Missense_Mutation | SNP | C | T | 10 | 91  | c.1075C>T     | c.(1075-1077)CCC>TCC | p.P359S       |
| Pat_41 | Post-Resistance | GPR158    | 57512  | 37 | 10 | 25464869 | 25464869 | Missense_Mutation | SNP | G | A | 8  | 29  | c.520G>A      | c.(520-522)GCG>ACG   | p.A174T       |
| Pat_41 | Post-Resistance | MYO3A     | 53904  | 37 | 10 | 26446321 | 26446321 | Missense_Mutation | SNP | A | G | 12 | 114 | c.2876A>G     | c.(2875-2877)CAG>CGG | p.Q959R       |
| Pat_41 | Post-Resistance | ANKRD26   | 22852  | 37 | 10 | 27301983 | 27301983 | Missense_Mutation | SNP | C | T | 9  | 65  | c.4778G>A     | c.(4777-4779)AGC>AAC | p.S1593N      |
| Pat_41 | Post-Resistance | ANKRD26   | 22852  | 37 | 10 | 27389230 | 27389230 | Missense_Mutation | SNP | C | T | 4  | 7   | c.26G>A       | c.(25-27)GGC>GAC     | p.G9D         |
| Pat_41 | Post-Resistance | YME1L1    | 10730  | 37 | 10 | 27400938 | 27400938 | Missense_Mutation | SNP | C | T | 17 | 155 | c.2290G>A     | c.(2290-2292)GTT>ATT | p.V764I       |
| Pat_41 | Post-Resistance | LOC387646 | 387646 | 37 | 10 | 27539046 | 27539046 | Missense_Mutation | SNP | G | A | 3  | 47  | c.347C>T      | c.(346-348)CCT>CTT   | p.P116L       |
| Pat_41 | Post-Resistance | PTCHD3    | 374308 | 37 | 10 | 27703106 | 27703106 | Missense_Mutation | SNP | G | A | 31 | 141 | c.74C>T       | c.(73-75)ACC>ATC     | p.T25I        |
| Pat_41 | Post-Resistance | LYZL1     | 84569  | 37 | 10 | 29599945 | 29599945 | Missense_Mutation | SNP | G | A | 16 | 234 | c.542G>A      | c.(541-543)GGC>GAC   | p.G181D       |
| Pat_41 | Post-Resistance | MTPAP     | 55149  | 37 | 10 | 30611359 | 30611359 | Missense_Mutation | SNP | G | A | 9  | 89  | c.1180C>T     | c.(1180-1182)CCT>TCT | p.P394S       |
| Pat_41 | Post-Resistance | LYZL2     | 119180 | 37 | 10 | 30915129 | 30915129 | Missense_Mutation | SNP | C | T | 6  | 75  | c.341G>A      | c.(340-342)GGC>GAC   | p.G114D       |
| Pat_41 | Post-Resistance | ARHGAP12  | 94134  | 37 | 10 | 32132425 | 32132425 | Nonsense_Mutation | SNP | C | T | 16 | 108 | c.1260G>A     | c.(1258-1260)TGG>TGA | p.W420*       |
| Pat_41 | Post-Resistance | KIF5B     | 3799   | 37 | 10 | 32310198 | 32310198 | Missense_Mutation | SNP | C | T | 7  | 67  | c.2050G>A     | c.(2050-2052)GAA>AAA | p.E684K       |
| Pat_41 | Post-Resistance | EPC1      | 80314  | 37 | 10 | 32560834 | 32560834 | Missense_Mutation | SNP | C | T | 5  | 20  | c.2086G>A     | c.(2086-2088)GGC>AGC | p.G696S       |
| Pat_41 | Post-Resistance | PARD3     | 56288  | 37 | 10 | 34400110 | 34400110 | Missense_Mutation | SNP | G | A | 9  | 53  | c.4058C>T     | c.(4057-4059)CCC>CTC | p.P1353L      |
| Pat_41 | Post-Resistance | ANKRD30A  | 91074  | 37 | 10 | 37430948 | 37430948 | Missense_Mutation | SNP | C | G | 7  | 83  | c.955C>G      | c.(955-957)CCA>GCA   | p.P319A       |
| Pat_41 | Post-Resistance | ANKRD30A  | 91074  | 37 | 10 | 37508134 | 37508134 | Missense_Mutation | SNP | G | A | 8  | 188 | c.3326G>A     | c.(3325-3327)AGT>AAT | p.S1109N      |
| Pat_41 | Post-Resistance | ZNF33A    | 7581   | 37 | 10 | 38344166 | 38344166 | Missense_Mutation | SNP | C | T | 17 | 62  | c.1111C>T     | c.(1111-1113)CTC>TTC | p.L371F       |
| Pat_41 | Post-Resistance | ZNF33B    | 7582   | 37 | 10 | 43089722 | 43089722 | Missense_Mutation | SNP | C | T | 36 | 121 | c.676G>A      | c.(676-678)GAA>AAA   | p.E226K       |
| Pat_41 | Post-Resistance | RASGEF1A  | 221002 | 37 | 10 | 43694401 | 43694401 | Missense_Mutation | SNP | C | T | 10 | 79  | c.1012G>A     | c.(1012-1014)GCC>ACC | p.A338T       |
| Pat_41 | Post-Resistance | ZNF239    | 8187   | 37 | 10 | 44052878 | 44052878 | Missense_Mutation | SNP | C | T | 13 | 44  | c.650G>A      | c.(649-651)AGT>AAT   | p.S217N       |
| Pat_41 | Post-Resistance | GDF2      | 2658   | 37 | 10 | 48413825 | 48413825 | Missense_Mutation | SNP | G | A | 5  | 57  | c.1043C>T     | c.(1042-1044)CCC>CTC | p.P348L       |
| Pat_41 | Post-Resistance | ARHGAP22  | 58504  | 37 | 10 | 49667836 | 49667836 | Missense_Mutation | SNP | G | A | 4  | 95  | c.550C>T      | c.(550-552)CGG>TGG   | p.R184W       |
| Pat_41 | Post-Resistance | C10orf71  | 118461 | 37 | 10 | 50531089 | 50531089 | Missense_Mutation | SNP | C | T | 5  | 17  | c.499C>T      | c.(499-501)CCT>TCT   | p.P167S       |
| Pat_41 | Post-Resistance | A1CF      | 29974  | 37 | 10 | 52603882 | 52603882 | Missense_Mutation | SNP | C | T | 47 | 7   | c.100G>A      | c.(100-102)GAA>AAA   | p.E34K        |
| Pat_41 | Post-Resistance | DKK1      | 22943  | 37 | 10 | 54074202 | 54074202 | Missense_Mutation | SNP | C | T | 29 | 68  | c.8C>T        | c.(7-9)GCT>GTT       | p.A3V         |
| Pat_41 | Post-Resistance | PCDH15    | 65217  | 37 | 10 | 55626560 | 55626560 | Missense_Mutation | SNP | G | A | 6  | 95  | c.3559C>T     | c.(3559-3561)CCA>TCA | p.P1187S      |
| Pat_41 | Post-Resistance | ZWINT     | 11130  | 37 | 10 | 58118627 | 58118627 | Missense_Mutation | SNP | C | T | 16 | 106 | c.562G>A      | c.(562-564)GTG>ATG   | p.V188M       |
| Pat_41 | Post-Resistance | BICC1     | 80114  | 37 | 10 | 60556281 | 60556281 | Missense_Mutation | SNP | G | A | 13 | 16  | c.1361G>A     | c.(1360-1362)GGA>GAA | p.G454E       |
| Pat_41 | Post-Resistance | ANK3      | 288    | 37 | 10 | 61836191 | 61836191 | Missense_Mutation | SNP | C | T | 7  | 44  | c.4448G>A     | c.(4447-4449)GGA>GAA | p.G1483E      |
| Pat_41 | Post-Resistance | ANK3      | 288    | 37 | 10 | 61965594 | 61965594 | Missense_Mutation | SNP | C | T | 10 | 91  | c.1249G>A     | c.(1249-1251)GAA>AAA | p.E417K       |
| Pat_41 | Post-Resistance | ARID5B    | 84159  | 37 | 10 | 63810682 | 63810682 | Missense_Mutation | SNP | C | T | 18 | 205 | c.769C>T      | c.(769-771)CCA>TCA   | p.P257S       |
| Pat_41 | Post-Resistance | ADO       | 84890  | 37 | 10 | 64565459 | 64565459 | Missense_Mutation | SNP | C | T | 6  | 21  | c.640C>T      | c.(640-642)CCG>TCG   | p.P214S       |
| Pat_41 | Post-Resistance | EGR2      | 1959   | 37 | 10 | 64575632 | 64575632 | Missense_Mutation | SNP | C | T | 6  | 16  | c.158G>A      | c.(157-159)GGA>GAA   | p.G53E        |
| Pat_41 | Post-Resistance | CTNNA3    | 29119  | 37 | 10 | 69299332 | 69299332 | Missense_Mutation | SNP | C | T | 11 | 75  | c.388G>A      | c.(388-390)GCT>ACT   | p.A130T       |
| Pat_41 | Post-Resistance | DNAJC12   | 56521  | 37 | 10 | 69583081 | 69583081 | Missense_Mutation | SNP | G | A | 4  | 69  | c.148C>T      | c.(148-150)CCC>TCC   | p.P50S        |
| Pat_41 | Post-Resistance | MYPN      | 84665  | 37 | 10 | 69934232 | 69934232 | Missense_Mutation | SNP | C | T | 4  | 59  | c.2383C>T     | c.(2383-2385)CCA>TCA | p.P795S       |
| Pat_41 | Post-Resistance | DNA2      | 1763   | 37 | 10 | 70178897 | 70178897 | Missense_Mutation | SNP | A | G | 7  | 51  | c.3119T>C     | c.(3118-3120)TTG>TCG | p.L1040S      |
| Pat_41 | Post-Resistance | DDX50     | 79009  | 37 | 10 | 70706156 | 70706156 | Missense_Mutation | SNP | C | T | 12 | 108 | c.1984C>T     | c.(1984-1986)CCT>TCT | p.P662S       |
| Pat_41 | Post-Resistance | HKDC1     | 80201  | 37 | 10 | 70992797 | 70992797 | Missense_Mutation | SNP | G | A | 7  | 37  | c.403G>A      | c.(403-405)GCA>ACA   | p.A135T       |
| Pat_41 | Post-Resistance | HKDC1     | 80201  | 37 | 10 | 71008289 | 71008289 | Missense_Mutation | SNP | G | A | 3  | 19  | c.1375G>A     | c.(1375-1377)GTG>ATG | p.V459M       |
| Pat_41 | Post-Resistance | HK1       | 3098   | 37 | 10 | 71139668 | 71139668 | Missense_Mutation | SNP | T | C | 11 | 147 | c.1082T>C     | c.(1081-1083)GTG>GCG | p.V361A       |

|        |                 |          |        |    |    |           |           |                   |     |   |   |    |     |              |                      |               |
|--------|-----------------|----------|--------|----|----|-----------|-----------|-------------------|-----|---|---|----|-----|--------------|----------------------|---------------|
| Pat_41 | Post-Resistance | HK1      | 3098   | 37 | 10 | 71151947  | 71151947  | Missense_Mutation | SNP | G | A | 19 | 117 | c.2102G>A    | c.(2101-2103)GGG>GAG | p.G701E       |
| Pat_41 | Post-Resistance | COL13A1  | 1305   | 37 | 10 | 71677064  | 71677064  | Missense_Mutation | SNP | G | A | 3  | 26  | c.971G>A     | c.(970-972)GGG>GAG   | p.G324E       |
| Pat_41 | Post-Resistance | NODAL    | 4838   | 37 | 10 | 72192822  | 72192822  | Missense_Mutation | SNP | G | A | 7  | 150 | c.914C>T     | c.(913-915)CCC>CTC   | p.P305L       |
| Pat_41 | Post-Resistance | DNAJB12  | 54788  | 37 | 10 | 74104768  | 74104768  | Missense_Mutation | SNP | C | T | 42 | 303 | c.353G>A     | c.(352-354)GGT>GAT   | p.G118D       |
| Pat_41 | Post-Resistance | NUDT13   | 25961  | 37 | 10 | 74884888  | 74884888  | Missense_Mutation | SNP | C | T | 14 | 99  | c.478C>T     | c.(478-480)CTC>TTC   | p.L160F       |
| Pat_41 | Post-Resistance | USP54    | 159195 | 37 | 10 | 75276288  | 75276288  | Missense_Mutation | SNP | C | T | 9  | 105 | c.3896G>A    | c.(3895-3897)AGA>AAA | p.R1299K      |
| Pat_41 | Post-Resistance | MYOZ1    | 58529  | 37 | 10 | 75393725  | 75393725  | Missense_Mutation | SNP | C | T | 24 | 57  | c.601G>A     | c.(601-603)GAA>AAA   | p.E201K       |
| Pat_41 | Post-Resistance | MYOZ1    | 58529  | 37 | 10 | 75394274  | 75394274  | Missense_Mutation | SNP | G | A | 14 | 99  | c.470C>T     | c.(469-471)GCT>GTT   | p.A157V       |
| Pat_41 | Post-Resistance | PLAU     | 5328   | 37 | 10 | 75674575  | 75674575  | Missense_Mutation | SNP | C | T | 9  | 47  | c.871C>T     | c.(871-873)CCA>TCA   | p.P291S       |
| Pat_41 | Post-Resistance | AP3M1    | 26985  | 37 | 10 | 75889711  | 75889711  | Missense_Mutation | SNP | G | A | 17 | 47  | c.623C>T     | c.(622-624)GCT>GTT   | p.A208V       |
| Pat_41 | Post-Resistance | MYST4    | 23522  | 37 | 10 | 76603178  | 76603178  | Missense_Mutation | SNP | C | T | 18 | 64  | c.563C>T     | c.(562-564)CCC>CTC   | p.P188L       |
| Pat_41 | Post-Resistance | DUSP13   | 51207  | 37 | 10 | 76868815  | 76868815  | Missense_Mutation | SNP | G | A | 6  | 58  | c.101C>T     | c.(100-102)TCT>TTT   | p.S34F        |
| Pat_41 | Post-Resistance | VDAC2    | 7417   | 37 | 10 | 76978928  | 76978928  | Nonsense_Mutation | SNP | G | A | 7  | 111 | c.258G>A     | c.(256-258)TGG>TGA   | p.W86*        |
| Pat_41 | Post-Resistance | POLR3A   | 11128  | 37 | 10 | 79753058  | 79753058  | Missense_Mutation | SNP | C | T | 8  | 68  | c.2684G>A    | c.(2683-2685)GGC>GAC | p.G895D       |
| Pat_41 | Post-Resistance | NRG3     | 10718  | 37 | 10 | 84733566  | 84733566  | Missense_Mutation | SNP | C | T | 17 | 144 | c.1307C>T    | c.(1306-1308)CCT>CTT | p.P436L       |
| Pat_41 | Post-Resistance | OPN4     | 94233  | 37 | 10 | 88415939  | 88415939  | Missense_Mutation | SNP | G | A | 5  | 53  | c.172G>A     | c.(172-174)GTC>ATC   | p.V58I        |
| Pat_41 | Post-Resistance | LIPF     | 8513   | 37 | 10 | 90429695  | 90429695  | Missense_Mutation | SNP | C | T | 35 | 353 | c.524C>T     | c.(523-525)ACC>ATC   | p.T175I       |
| Pat_41 | Post-Resistance | STAMBPL1 | 57559  | 37 | 10 | 90674416  | 90674416  | Splice_Site       | SNP | G | A | 19 | 20  | c.903_splice | c.e7+1               | p.L301_splice |
| Pat_41 | Post-Resistance | ANKRD1   | 27063  | 37 | 10 | 92672669  | 92672669  | Missense_Mutation | SNP | C | T | 44 | 300 | c.914G>A     | c.(913-915)AGC>AAC   | p.S305N       |
| Pat_41 | Post-Resistance | BTAF1    | 9044   | 37 | 10 | 93713506  | 93713506  | Missense_Mutation | SNP | G | A | 22 | 147 | c.577G>A     | c.(577-579)GCT>ACT   | p.A193T       |
| Pat_41 | Post-Resistance | BTAF1    | 9044   | 37 | 10 | 93773718  | 93773718  | Missense_Mutation | SNP | G | A | 8  | 129 | c.4516G>A    | c.(4516-4518)GAA>AAA | p.E1506K      |
| Pat_41 | Post-Resistance | PIPSL    | 266971 | 37 | 10 | 95719353  | 95719353  | Missense_Mutation | SNP | G | A | 3  | 7   | c.1801C>T    | c.(1801-1803)CCG>TCG | p.P601S       |
| Pat_41 | Post-Resistance | SORBS1   | 10580  | 37 | 10 | 97158873  | 97158873  | Missense_Mutation | SNP | C | A | 8  | 65  | c.1059G>T    | c.(1057-1059)AAG>AAT | p.K353N       |
| Pat_41 | Post-Resistance | TM9SF3   | 56889  | 37 | 10 | 98321767  | 98321767  | Missense_Mutation | SNP | C | T | 12 | 118 | c.550G>A     | c.(550-552)GTT>ATT   | p.V184I       |
| Pat_41 | Post-Resistance | SLIT1    | 6585   | 37 | 10 | 98802757  | 98802757  | Missense_Mutation | SNP | G | A | 6  | 41  | c.2065C>T    | c.(2065-2067)CGC>TGC | p.R689C       |
| Pat_41 | Post-Resistance | SLIT1    | 6585   | 37 | 10 | 98807477  | 98807477  | Missense_Mutation | SNP | G | A | 9  | 102 | c.1604C>T    | c.(1603-1605)CCT>CTT | p.P535L       |
| Pat_41 | Post-Resistance | ZDHHC16  | 84287  | 37 | 10 | 99216604  | 99216604  | Missense_Mutation | SNP | C | T | 12 | 42  | c.1090C>T    | c.(1090-1092)CCT>TCT | p.P364S       |
| Pat_41 | Post-Resistance | CRTAC1   | 55118  | 37 | 10 | 99655716  | 99655716  | Missense_Mutation | SNP | C | T | 42 | 84  | c.1243G>A    | c.(1243-1245)GAC>AAC | p.D415N       |
| Pat_41 | Post-Resistance | CWF19L1  | 55280  | 37 | 10 | 102006574 | 102006574 | Missense_Mutation | SNP | C | T | 18 | 41  | c.827G>A     | c.(826-828)GGA>GAA   | p.G276E       |
| Pat_41 | Post-Resistance | BLOC1S2  | 282991 | 37 | 10 | 102045956 | 102045956 | Missense_Mutation | SNP | C | T | 8  | 53  | c.70G>A      | c.(70-72)GAG>AAG     | p.E24K        |
| Pat_41 | Post-Resistance | SCD      | 6319   | 37 | 10 | 102107962 | 102107962 | Missense_Mutation | SNP | C | T | 9  | 72  | c.169C>T     | c.(169-171)CCC>TCC   | p.P57S        |
| Pat_41 | Post-Resistance | WNT8B    | 7479   | 37 | 10 | 102241690 | 102241690 | Missense_Mutation | SNP | G | A | 10 | 50  | c.389G>A     | c.(388-390)GGA>GAA   | p.G130E       |
| Pat_41 | Post-Resistance | NDUFB8   | 4714   | 37 | 10 | 102289560 | 102289560 | Missense_Mutation | SNP | C | T | 12 | 73  | c.49G>A      | c.(49-51)GCA>ACA     | p.A17T        |
| Pat_41 | Post-Resistance | HIF1AN   | 55662  | 37 | 10 | 102300469 | 102300469 | Nonsense_Mutation | SNP | G | A | 9  | 79  | c.507G>A     | c.(505-507)TGG>TGA   | p.W169*       |
| Pat_41 | Post-Resistance | PDZD7    | 79955  | 37 | 10 | 102778003 | 102778003 | Missense_Mutation | SNP | C | T | 3  | 69  | c.1375G>A    | c.(1375-1377)GGT>AGT | p.G459S       |
| Pat_41 | Post-Resistance | POLL     | 27343  | 37 | 10 | 103339574 | 103339574 | Missense_Mutation | SNP | C | T | 26 | 0   | c.1364G>A    | c.(1363-1365)GGG>GAG | p.G455E       |
| Pat_41 | Post-Resistance | MGEA5    | 10724  | 37 | 10 | 103546243 | 103546243 | Missense_Mutation | SNP | G | A | 28 | 92  | c.2716C>T    | c.(2716-2718)CCA>TCA | p.P906S       |
| Pat_41 | Post-Resistance | MGEA5    | 10724  | 37 | 10 | 103559090 | 103559090 | Missense_Mutation | SNP | G | T | 4  | 85  | c.1318C>A    | c.(1318-1320)CAG>AAG | p.Q440K       |
| Pat_41 | Post-Resistance | KCNIP2   | 30819  | 37 | 10 | 103588911 | 103588911 | Missense_Mutation | SNP | G | A | 12 | 107 | c.269C>T     | c.(268-270)CCT>CTT   | p.P90L        |
| Pat_41 | Post-Resistance | HPS6     | 79803  | 37 | 10 | 103826571 | 103826571 | Missense_Mutation | SNP | C | T | 6  | 54  | c.1340C>T    | c.(1339-1341)CCC>CTC | p.P447L       |
| Pat_41 | Post-Resistance | PPRC1    | 23082  | 37 | 10 | 103907092 | 103907092 | Missense_Mutation | SNP | C | T | 7  | 75  | c.4343C>T    | c.(4342-4344)JCT>TTT | p.S1448F      |
| Pat_41 | Post-Resistance | ELOVL3   | 83401  | 37 | 10 | 103986333 | 103986333 | Missense_Mutation | SNP | G | A | 13 | 89  | c.28G>A      | c.(28-30)GAA>AAA     | p.E10K        |
| Pat_41 | Post-Resistance | GBF1     | 8729   | 37 | 10 | 104111600 | 104111600 | Missense_Mutation | SNP | G | A | 8  | 54  | c.415G>A     | c.(415-417)GTT>ATT   | p.V139I       |
| Pat_41 | Post-Resistance | GBF1     | 8729   | 37 | 10 | 104141903 | 104141903 | Missense_Mutation | SNP | C | T | 9  | 53  | c.5390C>T    | c.(5389-5391)CCC>CTC | p.P1797L      |
| Pat_41 | Post-Resistance | NFKB2    | 4791   | 37 | 10 | 104156537 | 104156537 | Missense_Mutation | SNP | G | A | 7  | 100 | c.200G>A     | c.(199-201)GGT>GAT   | p.G67D        |
| Pat_41 | Post-Resistance | NFKB2    | 4791   | 37 | 10 | 104158595 | 104158595 | Missense_Mutation | SNP | C | T | 3  | 13  | c.1091C>T    | c.(1090-1092)GCC>GTC | p.A364V       |
| Pat_41 | Post-Resistance | PSD      | 5662   | 37 | 10 | 104176267 | 104176267 | Missense_Mutation | SNP | G | A | 4  | 20  | c.529C>T     | c.(529-531)CCG>TCG   | p.P177S       |

|        |                 |          |        |    |    |           |           |                   |     |   |   |     |     |               |                        |               |
|--------|-----------------|----------|--------|----|----|-----------|-----------|-------------------|-----|---|---|-----|-----|---------------|------------------------|---------------|
| Pat_41 | Post-Resistance | NT5C2    | 22978  | 37 | 10 | 104852961 | 104852961 | Missense_Mutation | SNP | C | T | 4   | 132 | c.1094G>A     | c.(1093-1095)GGG>GAG   | p.G365E       |
| Pat_41 | Post-Resistance | SORCS3   | 22986  | 37 | 10 | 106976824 | 106976824 | Missense_Mutation | SNP | C | T | 30  | 106 | c.2678C>T     | c.(2677-2679)GCC>GTC   | p.A893V       |
| Pat_41 | Post-Resistance | SORCS1   | 114815 | 37 | 10 | 108923950 | 108923950 | Missense_Mutation | SNP | C | T | 3   | 40  | c.335G>A      | c.(334-336)GGA>GAA     | p.G112E       |
| Pat_41 | Post-Resistance | ADD3     | 120    | 37 | 10 | 111876017 | 111876017 | Missense_Mutation | SNP | G | A | 11  | 117 | c.335G>A      | c.(334-336)AGT>AAT     | p.S112N       |
| Pat_41 | Post-Resistance | SMC3     | 9126   | 37 | 10 | 112350822 | 112350822 | Missense_Mutation | SNP | C | T | 33  | 74  | c.1744C>T     | c.(1744-1746)CCT>TCT   | p.P582S       |
| Pat_41 | Post-Resistance | PDCD4    | 27250  | 37 | 10 | 112641189 | 112641189 | Missense_Mutation | SNP | G | A | 11  | 156 | c.242G>A      | c.(241-243)GGG>GAG     | p.G81E        |
| Pat_41 | Post-Resistance | ACSL5    | 51703  | 37 | 10 | 114168182 | 114168182 | Nonsense_Mutation | SNP | G | A | 48  | 130 | c.435G>A      | c.(433-435)TGG>TGA     | p.W145*       |
| Pat_41 | Post-Resistance | ABLIM1   | 3983   | 37 | 10 | 116196119 | 116196119 | Missense_Mutation | SNP | G | A | 5   | 76  | c.2237C>T     | c.(2236-2238)CCT>CTT   | p.P746L       |
| Pat_41 | Post-Resistance | C10orf84 | 63877  | 37 | 10 | 120095065 | 120095065 | Splice_Site       | SNP | C | T | 16  | 42  | c.322_splice  | c.e4+1                 | p.D108_splice |
| Pat_41 | Post-Resistance | FAM45A   | 404636 | 37 | 10 | 120867497 | 120867497 | Missense_Mutation | SNP | G | A | 18  | 132 | c.73G>A       | c.(73-75)GAA>AAA       | p.E25K        |
| Pat_41 | Post-Resistance | SFXN4    | 119559 | 37 | 10 | 120917556 | 120917556 | Missense_Mutation | SNP | G | A | 12  | 123 | c.379C>T      | c.(379-381)CCA>TCA     | p.P127S       |
| Pat_41 | Post-Resistance | GRK5     | 2869   | 37 | 10 | 121207758 | 121207758 | Missense_Mutation | SNP | C | T | 28  | 87  | c.1390C>T     | c.(1390-1392)CCC>TCC   | p.P464S       |
| Pat_41 | Post-Resistance | INPP5F   | 22876  | 37 | 10 | 121586205 | 121586205 | Missense_Mutation | SNP | C | T | 17  | 105 | c.2312C>T     | c.(2311-2313)GCC>GTC   | p.A771V       |
| Pat_41 | Post-Resistance | DMBT1    | 1755   | 37 | 10 | 124351902 | 124351902 | Missense_Mutation | SNP | C | T | 80  | 172 | c.2291C>T     | c.(2290-2292)ACC>ATC   | p.T764I       |
| Pat_41 | Post-Resistance | DMBT1    | 1755   | 37 | 10 | 124351968 | 124351968 | Missense_Mutation | SNP | C | T | 22  | 147 | c.2357C>T     | c.(2356-2358)GCC>GTC   | p.A786V       |
| Pat_41 | Post-Resistance | CUZD1    | 50624  | 37 | 10 | 124596466 | 124596466 | Missense_Mutation | SNP | G | A | 113 | 37  | c.698C>T      | c.(697-699)ACT>ATT     | p.T233I       |
| Pat_41 | Post-Resistance | LHPP     | 64077  | 37 | 10 | 126172851 | 126172851 | Missense_Mutation | SNP | T | C | 6   | 88  | c.269T>C      | c.(268-270)ATC>ACC     | p.I90T        |
| Pat_41 | Post-Resistance | DHX32    | 55760  | 37 | 10 | 127525392 | 127525392 | Missense_Mutation | SNP | C | T | 15  | 92  | c.2096G>A     | c.(2095-2097)AGT>AAT   | p.S699N       |
| Pat_41 | Post-Resistance | DHX32    | 55760  | 37 | 10 | 127529566 | 127529566 | Splice_Site       | SNP | C | T | 8   | 17  | c.1544_splice | c.e8-1                 | p.A515_splice |
| Pat_41 | Post-Resistance | ADAM12   | 8038   | 37 | 10 | 127843809 | 127843809 | Missense_Mutation | SNP | G | A | 38  | 349 | c.326C>T      | c.(325-327)GCT>GTT     | p.A109V       |
| Pat_41 | Post-Resistance | DOCK1    | 1793   | 37 | 10 | 129172401 | 129172401 | Missense_Mutation | SNP | G | A | 5   | 24  | c.3535G>A     | c.(3535-3537)GAA>AAA   | p.E1179K      |
| Pat_41 | Post-Resistance | DOCK1    | 1793   | 37 | 10 | 129224261 | 129224261 | Missense_Mutation | SNP | G | A | 28  | 211 | c.4837G>A     | c.(4837-4839)GGC>AGC   | p.G1613S      |
| Pat_41 | Post-Resistance | MKI67    | 4288   | 37 | 10 | 129913827 | 129913827 | Missense_Mutation | SNP | C | T | 8   | 67  | c.845G>A      | c.(844-846)GGG>GAG     | p.G282E       |
| Pat_41 | Post-Resistance | STK32C   | 282974 | 37 | 10 | 134145201 | 134145201 | Missense_Mutation | SNP | C | T | 11  | 63  | c.40G>A       | c.(40-42)GGC>AGC       | p.G14S        |
| Pat_41 | Post-Resistance | FRG2B    | 441581 | 37 | 10 | 135440209 | 135440209 | Missense_Mutation | SNP | G | A | 15  | 401 | c.38C>T       | c.(37-39)TCC>TTC       | p.S13F        |
| Pat_41 | Post-Resistance | SCGB1C1  | 147199 | 37 | 11 | 193798    | 193798    | Missense_Mutation | SNP | G | A | 4   | 49  | c.142G>A      | c.(142-144)GGG>AGG     | p.G48R        |
| Pat_41 | Post-Resistance | B4GALNT4 | 338707 | 37 | 11 | 375477    | 375477    | Missense_Mutation | SNP | C | T | 58  | 312 | c.800C>T      | c.(799-801)CCC>CTC     | p.P267L       |
| Pat_41 | Post-Resistance | RNH1     | 6050   | 37 | 11 | 499857    | 499857    | Missense_Mutation | SNP | C | T | 4   | 96  | c.415G>A      | c.(415-417)GAC>AAC     | p.D139N       |
| Pat_41 | Post-Resistance | RNH1     | 6050   | 37 | 11 | 500626    | 500626    | Missense_Mutation | SNP | G | A | 40  | 69  | c.130C>T      | c.(130-132)CGG>TGG     | p.R44W        |
| Pat_41 | Post-Resistance | PHRF1    | 57661  | 37 | 11 | 597524    | 597524    | Missense_Mutation | SNP | G | A | 10  | 60  | c.848G>A      | c.(847-849)AGA>AAA     | p.R283K       |
| Pat_41 | Post-Resistance | PHRF1    | 57661  | 37 | 11 | 607705    | 607705    | Missense_Mutation | SNP | C | T | 3   | 6   | c.2249C>T     | c.(2248-2250)CCC>CTC   | p.P750L       |
| Pat_41 | Post-Resistance | CDHR5    | 53841  | 37 | 11 | 618767    | 618767    | Missense_Mutation | SNP | C | T | 5   | 199 | c.1792G>A     | c.(1792-1794)GGT>AGT   | p.G598S       |
| Pat_41 | Post-Resistance | DRD4     | 1815   | 37 | 11 | 640481    | 640481    | Missense_Mutation | SNP | C | T | 12  | 115 | c.1138C>T     | c.(1138-1140)CGG>TGG   | p.R380W       |
| Pat_41 | Post-Resistance | TALDO1   | 6888   | 37 | 11 | 763505    | 763505    | Missense_Mutation | SNP | C | A | 13  | 150 | c.623C>A      | c.(622-624)CCC>CAC     | p.P208H       |
| Pat_41 | Post-Resistance | EFCAB4A  | 283229 | 37 | 11 | 831296    | 831296    | Splice_Site       | SNP | G | A | 6   | 77  | c.1025_splice | c.e8+1                 | p.R342_splice |
| Pat_41 | Post-Resistance | TSPAN4   | 7106   | 37 | 11 | 862698    | 862698    | Missense_Mutation | SNP | G | A | 6   | 56  | c.212G>A      | c.(211-213)GGC>GAC     | p.G71D        |
| Pat_41 | Post-Resistance | MUC6     | 4588   | 37 | 11 | 1017910   | 1017910   | Missense_Mutation | SNP | C | T | 16  | 475 | c.4891G>A     | c.(4891-4893)GTC>ATC   | p.V1631I      |
| Pat_41 | Post-Resistance | MUC6     | 4588   | 37 | 11 | 1019409   | 1019409   | Missense_Mutation | SNP | G | A | 21  | 195 | c.3896C>T     | c.(3895-3897)CCC>CTC   | p.P1299L      |
| Pat_41 | Post-Resistance | MUC5B    | 727897 | 37 | 11 | 1247931   | 1247931   | Missense_Mutation | SNP | C | T | 4   | 53  | c.2254C>T     | c.(2254-2256)CCT>TCT   | p.P752S       |
| Pat_41 | Post-Resistance | MUC5B    | 727897 | 37 | 11 | 1271468   | 1271468   | Missense_Mutation | SNP | C | T | 5   | 157 | c.14777C>T    | c.(14776-14778)CCG>CTC | p.P4926L      |
| Pat_41 | Post-Resistance | SYT8     | 90019  | 37 | 11 | 1857722   | 1857722   | Missense_Mutation | SNP | G | A | 3   | 7   | c.626G>A      | c.(625-627)GGG>GAG     | p.G209E       |
| Pat_41 | Post-Resistance | LSP1     | 4046   | 37 | 11 | 1908085   | 1908085   | Missense_Mutation | SNP | C | T | 10  | 69  | c.841C>T      | c.(841-843)CCG>TCG     | p.P281S       |
| Pat_41 | Post-Resistance | ZNF195   | 7748   | 37 | 11 | 3380555   | 3380555   | Nonsense_Mutation | SNP | C | T | 10  | 160 | c.1683G>A     | c.(1681-1683)TGG>TGA   | p.W561*       |
| Pat_41 | Post-Resistance | CHRNA10  | 57053  | 37 | 11 | 3688647   | 3688647   | Missense_Mutation | SNP | G | A | 5   | 38  | c.710C>T      | c.(709-711)GCC>GTC     | p.A237V       |
| Pat_41 | Post-Resistance | NUP98    | 4928   | 37 | 11 | 3714493   | 3714493   | Missense_Mutation | SNP | C | T | 15  | 261 | c.4280G>A     | c.(4279-4281)AGG>AAG   | p.R1427K      |
| Pat_41 | Post-Resistance | NUP98    | 4928   | 37 | 11 | 3797200   | 3797200   | Missense_Mutation | SNP | G | A | 19  | 306 | c.407C>T      | c.(406-408)ACC>ATC     | p.T136I       |
| Pat_41 | Post-Resistance | STIM1    | 6786   | 37 | 11 | 4104112   | 4104112   | Missense_Mutation | SNP | G | A | 9   | 65  | c.1138G>A     | c.(1138-1140)GCT>ACT   | p.A380T       |

|        |                 |         |        |    |    |          |          |                   |     |   |   |     |     |               |                        |               |
|--------|-----------------|---------|--------|----|----|----------|----------|-------------------|-----|---|---|-----|-----|---------------|------------------------|---------------|
| Pat_41 | Post-Resistance | OR5211  | 390037 | 37 | 11 | 4616149  | 4616149  | Missense_Mutation | SNP | C | T | 23  | 323 | c.881C>T      | c.(880-882)CCC>CTC     | p.P294L       |
| Pat_41 | Post-Resistance | OR5211  | 390037 | 37 | 11 | 4616208  | 4616208  | Missense_Mutation | SNP | C | T | 13  | 276 | c.940C>T      | c.(940-942)CAC>TAC     | p.H314Y       |
| Pat_41 | Post-Resistance | MMP26   | 56547  | 37 | 11 | 5011001  | 5011001  | Missense_Mutation | SNP | G | A | 10  | 123 | c.223G>A      | c.(223-225)GCT>ACT     | p.A75T        |
| Pat_41 | Post-Resistance | OR51V1  | 283111 | 37 | 11 | 5221782  | 5221782  | Missense_Mutation | SNP | C | T | 12  | 316 | c.149G>A      | c.(148-150)GGC>GAC     | p.G50D        |
| Pat_41 | Post-Resistance | OR51Q1  | 390061 | 37 | 11 | 5443989  | 5443989  | Missense_Mutation | SNP | A | G | 6   | 213 | c.559A>G      | c.(559-561)ATC>GTC     | p.I187V       |
| Pat_41 | Post-Resistance | UBQLN3  | 50613  | 37 | 11 | 5529393  | 5529393  | Missense_Mutation | SNP | C | T | 4   | 55  | c.1396G>A     | c.(1396-1398)GCA>ACA   | p.A466T       |
| Pat_41 | Post-Resistance | OR52E4  | 390081 | 37 | 11 | 5905799  | 5905799  | Missense_Mutation | SNP | G | A | 80  | 107 | c.277G>A      | c.(277-279)GAG>AAG     | p.E93K        |
| Pat_41 | Post-Resistance | OR56A4  | 120793 | 37 | 11 | 6023409  | 6023409  | Missense_Mutation | SNP | G | A | 14  | 45  | c.970C>T      | c.(970-972)CCT>TCT     | p.P324S       |
| Pat_41 | Post-Resistance | DNHD1   | 144132 | 37 | 11 | 6592105  | 6592105  | Missense_Mutation | SNP | G | A | 6   | 170 | c.13363G>A    | c.(13363-13365)GAT>AAT | p.D4455N      |
| Pat_41 | Post-Resistance | ILK     | 3611   | 37 | 11 | 6629392  | 6629392  | Missense_Mutation | SNP | C | T | 18  | 262 | c.206C>T      | c.(205-207)ACC>ATC     | p.T69I        |
| Pat_41 | Post-Resistance | DCHS1   | 8642   | 37 | 11 | 6643131  | 6643131  | Missense_Mutation | SNP | G | A | 4   | 39  | c.9776C>T     | c.(9775-9777)TCT>TTT   | p.S3259F      |
| Pat_41 | Post-Resistance | DCHS1   | 8642   | 37 | 11 | 6643339  | 6643339  | Missense_Mutation | SNP | C | T | 5   | 91  | c.9568G>A     | c.(9568-9570)GCT>ACT   | p.A3190T      |
| Pat_41 | Post-Resistance | OR10A5  | 144124 | 37 | 11 | 6867203  | 6867203  | Missense_Mutation | SNP | G | A | 4   | 86  | c.290G>A      | c.(289-291)GGC>GAC     | p.G97D        |
| Pat_41 | Post-Resistance | OR2D3   | 120775 | 37 | 11 | 6943121  | 6943121  | Missense_Mutation | SNP | G | A | 29  | 149 | c.889G>A      | c.(889-891)GTG>ATG     | p.V297M       |
| Pat_41 | Post-Resistance | NLRP14  | 338323 | 37 | 11 | 7065164  | 7065164  | Missense_Mutation | SNP | C | T | 8   | 184 | c.1907C>T     | c.(1906-1908)ACT>ATT   | p.T636I       |
| Pat_41 | Post-Resistance | PPFIBP2 | 8495   | 37 | 11 | 7652158  | 7652158  | Missense_Mutation | SNP | C | T | 15  | 247 | c.967C>T      | c.(967-969)CCT>TCT     | p.P323S       |
| Pat_41 | Post-Resistance | OR5P3   | 120066 | 37 | 11 | 7846759  | 7846759  | Missense_Mutation | SNP | G | A | 15  | 240 | c.761C>T      | c.(760-762)ACC>ATC     | p.T254I       |
| Pat_41 | Post-Resistance | SCUBE2  | 57758  | 37 | 11 | 9042672  | 9042672  | Missense_Mutation | SNP | C | T | 16  | 219 | c.2920G>A     | c.(2920-2922)GAG>AAG   | p.E974K       |
| Pat_41 | Post-Resistance | SCUBE2  | 57758  | 37 | 11 | 9055305  | 9055305  | Missense_Mutation | SNP | C | T | 4   | 120 | c.1954G>A     | c.(1954-1956)GAA>AAA   | p.E652K       |
| Pat_41 | Post-Resistance | SWAP70  | 23075  | 37 | 11 | 9769469  | 9769469  | Missense_Mutation | SNP | G | A | 21  | 211 | c.1420G>A     | c.(1420-1422)GCC>ACC   | p.A474T       |
| Pat_41 | Post-Resistance | SBF2    | 81846  | 37 | 11 | 10064425 | 10064425 | Missense_Mutation | SNP | C | T | 20  | 310 | c.245G>A      | c.(244-246)TGC>TAC     | p.C82Y        |
| Pat_41 | Post-Resistance | AMPD3   | 272    | 37 | 11 | 10503679 | 10503679 | Missense_Mutation | SNP | G | A | 25  | 330 | c.496G>A      | c.(496-498)GCG>ACG     | p.A166T       |
| Pat_41 | Post-Resistance | USP47   | 55031  | 37 | 11 | 11963920 | 11963920 | Missense_Mutation | SNP | G | A | 27  | 371 | c.2412G>A     | c.(2410-2412)ATG>ATA   | p.M804I       |
| Pat_41 | Post-Resistance | DKK3    | 27122  | 37 | 11 | 11989941 | 11989941 | Splice_Site       | SNP | C | T | 9   | 106 | c.528_splice  | c.e4+1                 | p.M176_splice |
| Pat_41 | Post-Resistance | MICAL2  | 9645   | 37 | 11 | 12225923 | 12225923 | Missense_Mutation | SNP | C | T | 43  | 273 | c.391C>T      | c.(391-393)CCT>TCT     | p.P131S       |
| Pat_41 | Post-Resistance | MICAL2  | 9645   | 37 | 11 | 12244255 | 12244255 | Missense_Mutation | SNP | C | T | 5   | 108 | c.1414C>T     | c.(1414-1416)CCA>TCA   | p.P472S       |
| Pat_41 | Post-Resistance | MICAL2  | 9645   | 37 | 11 | 12277227 | 12277227 | Missense_Mutation | SNP | C | T | 9   | 105 | c.2885C>T     | c.(2884-2886)GCA>GTA   | p.A962V       |
| Pat_41 | Post-Resistance | ARNTL   | 406    | 37 | 11 | 13395658 | 13395658 | Missense_Mutation | SNP | G | A | 21  | 151 | c.1084G>A     | c.(1084-1086)GCA>ACA   | p.A362T       |
| Pat_41 | Post-Resistance | BTBD10  | 84280  | 37 | 11 | 13410679 | 13410679 | Missense_Mutation | SNP | G | A | 5   | 25  | c.1127C>T     | c.(1126-1128)ACC>ATC   | p.T376I       |
| Pat_41 | Post-Resistance | PDE3B   | 5140   | 37 | 11 | 14825489 | 14825489 | Splice_Site       | SNP | G | A | 11  | 67  | c.1416_splice | c.e5-1                 | p.S472_splice |
| Pat_41 | Post-Resistance | PIK3C2A | 5286   | 37 | 11 | 17170266 | 17170266 | Missense_Mutation | SNP | C | T | 18  | 144 | c.1396G>A     | c.(1396-1398)GAT>AAT   | p.D466N       |
| Pat_41 | Post-Resistance | ABCC8   | 6833   | 37 | 11 | 17428954 | 17428954 | Missense_Mutation | SNP | G | A | 5   | 176 | c.2867C>T     | c.(2866-2868)TCT>TTT   | p.S956F       |
| Pat_41 | Post-Resistance | ABCC8   | 6833   | 37 | 11 | 17452463 | 17452463 | Missense_Mutation | SNP | G | A | 4   | 90  | c.1715C>T     | c.(1714-1716)TCG>TTG   | p.S572L       |
| Pat_41 | Post-Resistance | USH1C   | 10083  | 37 | 11 | 17553037 | 17553037 | Missense_Mutation | SNP | G | A | 6   | 78  | c.157C>T      | c.(157-159)CCC>TCC     | p.P53S        |
| Pat_41 | Post-Resistance | HPS5    | 11234  | 37 | 11 | 18309185 | 18309185 | Missense_Mutation | SNP | G | A | 5   | 151 | c.2614C>T     | c.(2614-2616)CCA>TCA   | p.P872S       |
| Pat_41 | Post-Resistance | UEVLD   | 55293  | 37 | 11 | 18566169 | 18566169 | Splice_Site       | SNP | C | T | 8   | 452 | c.1060_splice | c.e9+1                 | p.V354_splice |
| Pat_41 | Post-Resistance | TMEM86A | 144110 | 37 | 11 | 18723324 | 18723324 | Missense_Mutation | SNP | G | A | 11  | 68  | c.491G>A      | c.(490-492)GGG>GAG     | p.G164E       |
| Pat_41 | Post-Resistance | ZDHHC13 | 54503  | 37 | 11 | 19197497 | 19197497 | Missense_Mutation | SNP | G | A | 29  | 368 | c.1859G>A     | c.(1858-1860)CGC>CAC   | p.R620H       |
| Pat_41 | Post-Resistance | NAV2    | 89797  | 37 | 11 | 19954803 | 19954803 | Missense_Mutation | SNP | C | T | 16  | 552 | c.1082C>T     | c.(1081-1083)ACC>ATC   | p.T361I       |
| Pat_41 | Post-Resistance | NAV2    | 89797  | 37 | 11 | 20129210 | 20129210 | Missense_Mutation | SNP | G | A | 131 | 645 | c.6851G>A     | c.(6850-6852)GGC>GAC   | p.G2284D      |
| Pat_41 | Post-Resistance | SLC6A5  | 9152   | 37 | 11 | 20648329 | 20648329 | Missense_Mutation | SNP | G | A | 11  | 181 | c.1336G>A     | c.(1336-1338)GCT>ACT   | p.A446T       |
| Pat_41 | Post-Resistance | NELL1   | 4745   | 37 | 11 | 21135228 | 21135228 | Missense_Mutation | SNP | G | A | 33  | 343 | c.1394G>A     | c.(1393-1395)GGA>GAA   | p.G465E       |
| Pat_41 | Post-Resistance | ANO5    | 203859 | 37 | 11 | 22249029 | 22249029 | Missense_Mutation | SNP | C | T | 26  | 225 | c.545C>T      | c.(544-546)CCC>CTC     | p.P182L       |
| Pat_41 | Post-Resistance | SLC17A6 | 57084  | 37 | 11 | 22360113 | 22360113 | Missense_Mutation | SNP | G | A | 7   | 102 | c.34G>A       | c.(34-36)GGA>AGA       | p.G12R        |
| Pat_41 | Post-Resistance | FANCF   | 2188   | 37 | 11 | 22646594 | 22646594 | Missense_Mutation | SNP | G | A | 14  | 195 | c.763C>T      | c.(763-765)CTC>TTC     | p.L255F       |
| Pat_41 | Post-Resistance | LUZP2   | 338645 | 37 | 11 | 24759789 | 24759789 | Missense_Mutation | SNP | G | A | 5   | 57  | c.274G>A      | c.(274-276)GAG>AAG     | p.E92K        |
| Pat_41 | Post-Resistance | LGR4    | 55366  | 37 | 11 | 27389985 | 27389985 | Missense_Mutation | SNP | G | A | 9   | 146 | c.2285C>T     | c.(2284-2286)CCT>CTT   | p.P762L       |

|        |                 |          |        |    |    |          |          |                   |     |   |   |    |     |              |                      |               |
|--------|-----------------|----------|--------|----|----|----------|----------|-------------------|-----|---|---|----|-----|--------------|----------------------|---------------|
| Pat_41 | Post-Resistance | KIF18A   | 81930  | 37 | 11 | 28080523 | 28080523 | Missense_Mutation | SNP | G | A | 78 | 428 | c.1898C>T    | c.(1897-1899)TCT>TTT | p.S633F       |
| Pat_41 | Post-Resistance | KIF18A   | 81930  | 37 | 11 | 28116299 | 28116299 | Missense_Mutation | SNP | C | T | 66 | 339 | c.374G>A     | c.(373-375)GGA>GAA   | p.G125E       |
| Pat_41 | Post-Resistance | MPPED2   | 744    | 37 | 11 | 30516958 | 30516958 | Missense_Mutation | SNP | C | T | 16 | 184 | c.421G>A     | c.(421-423)GTG>ATG   | p.V141M       |
| Pat_41 | Post-Resistance | IMMP1L   | 196294 | 37 | 11 | 31484777 | 31484777 | Missense_Mutation | SNP | G | A | 17 | 211 | c.47C>T      | c.(46-48)ACT>ATT     | p.T16I        |
| Pat_41 | Post-Resistance | QSER1    | 79832  | 37 | 11 | 32954948 | 32954948 | Missense_Mutation | SNP | C | T | 15 | 212 | c.1757C>T    | c.(1756-1758)TCT>TTT | p.S586F       |
| Pat_41 | Post-Resistance | DEPDC7   | 91614  | 37 | 11 | 33047225 | 33047225 | Missense_Mutation | SNP | C | T | 15 | 129 | c.94C>T      | c.(94-96)CCA>TCA     | p.P32S        |
| Pat_41 | Post-Resistance | TCP11L1  | 55346  | 37 | 11 | 33065407 | 33065407 | Missense_Mutation | SNP | G | A | 28 | 559 | c.88G>A      | c.(88-90)GAA>AAA     | p.E30K        |
| Pat_41 | Post-Resistance | CSTF3    | 1479   | 37 | 11 | 33106835 | 33106835 | Missense_Mutation | SNP | G | A | 9  | 79  | c.1952C>T    | c.(1951-1953)ACT>ATT | p.T651I       |
| Pat_41 | Post-Resistance | CSTF3    | 1479   | 37 | 11 | 33118472 | 33118472 | Missense_Mutation | SNP | C | T | 6  | 86  | c.1181G>A    | c.(1180-1182)GGA>GAA | p.G394E       |
| Pat_41 | Post-Resistance | HIPK3    | 10114  | 37 | 11 | 33369738 | 33369738 | Nonsense_Mutation | SNP | G | A | 5  | 87  | c.2333G>A    | c.(2332-2334)TGG>TAG | p.W778*       |
| Pat_41 | Post-Resistance | C11orf41 | 25758  | 37 | 11 | 33564178 | 33564178 | Missense_Mutation | SNP | C | T | 16 | 149 | c.178C>T     | c.(178-180)CCT>TCT   | p.P60S        |
| Pat_41 | Post-Resistance | ABTB2    | 25841  | 37 | 11 | 34378509 | 34378509 | Missense_Mutation | SNP | C | T | 3  | 13  | c.64G>A      | c.(64-66)GGT>AGT     | p.G22S        |
| Pat_41 | Post-Resistance | SLC1A2   | 6506   | 37 | 11 | 35282502 | 35282502 | Missense_Mutation | SNP | G | A | 11 | 164 | c.1664C>T    | c.(1663-1665)GCA>GTA | p.A555V       |
| Pat_41 | Post-Resistance | SLC1A2   | 6506   | 37 | 11 | 35302498 | 35302498 | Missense_Mutation | SNP | C | T | 14 | 50  | c.1337G>A    | c.(1336-1338)GGG>GAG | p.G446E       |
| Pat_41 | Post-Resistance | PAMR1    | 25891  | 37 | 11 | 35454164 | 35454164 | Nonsense_Mutation | SNP | C | A | 3  | 17  | c.1903G>T    | c.(1903-1905)GAG>TAG | p.E635*       |
| Pat_41 | Post-Resistance | COMMD9   | 29099  | 37 | 11 | 36302296 | 36302296 | Missense_Mutation | SNP | G | A | 21 | 179 | c.143C>T     | c.(142-144)TCC>TTC   | p.S48F        |
| Pat_41 | Post-Resistance | RAG1     | 5896   | 37 | 11 | 36595272 | 36595272 | Missense_Mutation | SNP | C | T | 9  | 58  | c.418C>T     | c.(418-420)CTT>TTT   | p.L140F       |
| Pat_41 | Post-Resistance | RAG1     | 5896   | 37 | 11 | 36597564 | 36597564 | Missense_Mutation | SNP | G | A | 8  | 100 | c.2710G>A    | c.(2710-2712)GAG>AAG | p.E904K       |
| Pat_41 | Post-Resistance | RAG2     | 5897   | 37 | 11 | 36614172 | 36614172 | Missense_Mutation | SNP | G | A | 11 | 57  | c.1547C>T    | c.(1546-1548)CCT>CTT | p.P516L       |
| Pat_41 | Post-Resistance | LRRC4C   | 57689  | 37 | 11 | 40136126 | 40136126 | Missense_Mutation | SNP | C | T | 9  | 151 | c.1717G>A    | c.(1717-1719)GAT>AAT | p.D573N       |
| Pat_41 | Post-Resistance | TTC17    | 55761  | 37 | 11 | 43513648 | 43513648 | Missense_Mutation | SNP | G | A | 24 | 321 | c.3229G>A    | c.(3229-3231)GCA>ACA | p.A1077T      |
| Pat_41 | Post-Resistance | SLC35C1  | 55343  | 37 | 11 | 45827888 | 45827888 | Splice_Site       | SNP | G | A | 5  | 41  | c.535_splice | c.e1+1               | p.G179_splice |
| Pat_41 | Post-Resistance | CREB3L1  | 90993  | 37 | 11 | 46338979 | 46338979 | Missense_Mutation | SNP | G | A | 13 | 103 | c.1199G>A    | c.(1198-1200)GGC>GAC | p.G400D       |
| Pat_41 | Post-Resistance | AMBRA1   | 55626  | 37 | 11 | 46563502 | 46563502 | Missense_Mutation | SNP | G | A | 42 | 194 | c.2065C>T    | c.(2065-2067)CTC>TTC | p.L689F       |
| Pat_41 | Post-Resistance | AMBRA1   | 55626  | 37 | 11 | 46564479 | 46564479 | Missense_Mutation | SNP | C | T | 45 | 237 | c.1088G>A    | c.(1087-1089)GGC>GAC | p.G363D       |
| Pat_41 | Post-Resistance | AMBRA1   | 55626  | 37 | 11 | 46564888 | 46564888 | Missense_Mutation | SNP | C | T | 7  | 148 | c.679G>A     | c.(679-681)GCC>ACC   | p.A227T       |
| Pat_41 | Post-Resistance | CKAP5    | 9793   | 37 | 11 | 46829663 | 46829663 | Missense_Mutation | SNP | G | A | 9  | 143 | c.896C>T     | c.(895-897)GCC>GTC   | p.A299V       |
| Pat_41 | Post-Resistance | MADD     | 8567   | 37 | 11 | 47303271 | 47303271 | Missense_Mutation | SNP | G | A | 13 | 105 | c.1436G>A    | c.(1435-1437)GGC>GAC | p.G479D       |
| Pat_41 | Post-Resistance | MYBPC3   | 4607   | 37 | 11 | 47353709 | 47353709 | Missense_Mutation | SNP | G | A | 4  | 68  | c.3728C>T    | c.(3727-3729)CCC>CTC | p.P1243L      |
| Pat_41 | Post-Resistance | MYBPC3   | 4607   | 37 | 11 | 47353809 | 47353809 | Missense_Mutation | SNP | G | A | 9  | 86  | c.3628C>T    | c.(3628-3630)CCC>TCC | p.P1210S      |
| Pat_41 | Post-Resistance | SLC39A13 | 91252  | 37 | 11 | 47435155 | 47435155 | Missense_Mutation | SNP | G | A | 17 | 88  | c.653G>A     | c.(652-654)GGC>GAC   | p.G218D       |
| Pat_41 | Post-Resistance | PSMC3    | 5702   | 37 | 11 | 47440466 | 47440466 | Missense_Mutation | SNP | C | T | 5  | 68  | c.1240G>A    | c.(1240-1242)GAG>AAG | p.E414K       |
| Pat_41 | Post-Resistance | PSMC3    | 5702   | 37 | 11 | 47445695 | 47445695 | Missense_Mutation | SNP | G | A | 14 | 262 | c.493C>T     | c.(493-495)CCC>TCC   | p.P165S       |
| Pat_41 | Post-Resistance | AGBL2    | 79841  | 37 | 11 | 47711872 | 47711872 | Missense_Mutation | SNP | G | A | 14 | 135 | c.1387C>T    | c.(1387-1389)CCT>TCT | p.P463S       |
| Pat_41 | Post-Resistance | FNBP4    | 23360  | 37 | 11 | 47786906 | 47786906 | Missense_Mutation | SNP | C | T | 16 | 264 | c.229G>A     | c.(229-231)GAA>AAA   | p.E77K        |
| Pat_41 | Post-Resistance | NUP160   | 23279  | 37 | 11 | 47869834 | 47869834 | Missense_Mutation | SNP | C | T | 6  | 128 | c.139G>A     | c.(139-141)GAG>AAG   | p.E47K        |
| Pat_41 | Post-Resistance | FOLH1    | 2346   | 37 | 11 | 49204764 | 49204764 | Missense_Mutation | SNP | G | A | 17 | 145 | c.857C>T     | c.(856-858)GCT>GTT   | p.A286V       |
| Pat_41 | Post-Resistance | OR4C13   | 283092 | 37 | 11 | 49974380 | 49974380 | Missense_Mutation | SNP | C | A | 4  | 120 | c.406C>A     | c.(406-408)CAG>AAG   | p.Q136K       |
| Pat_41 | Post-Resistance | OR4C11   | 219429 | 37 | 11 | 55371495 | 55371495 | Missense_Mutation | SNP | C | T | 12 | 69  | c.355G>A     | c.(355-357)GAT>AAT   | p.D119N       |
| Pat_41 | Post-Resistance | OR8H2    | 390151 | 37 | 11 | 55872874 | 55872874 | Missense_Mutation | SNP | C | T | 28 | 358 | c.356C>T     | c.(355-357)GCC>GTC   | p.A119V       |
| Pat_41 | Post-Resistance | OR8K3    | 219473 | 37 | 11 | 56086182 | 56086182 | Missense_Mutation | SNP | G | A | 7  | 190 | c.400G>A     | c.(400-402)GTA>ATA   | p.V134I       |
| Pat_41 | Post-Resistance | OR5M11   | 219487 | 37 | 11 | 56310081 | 56310081 | Missense_Mutation | SNP | G | A | 10 | 113 | c.653C>T     | c.(652-654)GCC>GTC   | p.A218V       |
| Pat_41 | Post-Resistance | TNKS1BP1 | 85456  | 37 | 11 | 57076871 | 57076871 | Missense_Mutation | SNP | C | T | 18 | 214 | c.3314G>A    | c.(3313-3315)GGG>GAG | p.G1105E      |
| Pat_41 | Post-Resistance | TNKS1BP1 | 85456  | 37 | 11 | 57088045 | 57088045 | Missense_Mutation | SNP | C | T | 7  | 43  | c.236G>A     | c.(235-237)AGG>AAG   | p.R79K        |
| Pat_41 | Post-Resistance | SLC43A1  | 8501   | 37 | 11 | 57259305 | 57259305 | Missense_Mutation | SNP | G | A | 7  | 63  | c.902C>T     | c.(901-903)TCC>TTC   | p.S301F       |
| Pat_41 | Post-Resistance | UBE2L6   | 9246   | 37 | 11 | 57322020 | 57322020 | Missense_Mutation | SNP | A | G | 11 | 423 | c.200T>C     | c.(199-201)ATG>ACG   | p.M67T        |
| Pat_41 | Post-Resistance | CLP1     | 10978  | 37 | 11 | 57428648 | 57428648 | Missense_Mutation | SNP | C | T | 22 | 279 | c.1018C>T    | c.(1018-1020)CCT>TCT | p.P340S       |



|        |                 |          |        |    |    |          |          |                   |     |   |   |    |     |               |                        |               |
|--------|-----------------|----------|--------|----|----|----------|----------|-------------------|-----|---|---|----|-----|---------------|------------------------|---------------|
| Pat_41 | Post-Resistance | ZDHC5    | 25921  | 37 | 11 | 57463461 | 57463461 | Missense_Mutation | SNP | G | A | 23 | 88  | c.955G>A      | c.(955-957)GAC>AAC     | p.D319N       |
| Pat_41 | Post-Resistance | CTNND1   | 1500   | 37 | 11 | 57571197 | 57571197 | Missense_Mutation | SNP | G | A | 6  | 88  | c.1525G>A     | c.(1525-1527)GAG>AAG   | p.E509K       |
| Pat_41 | Post-Resistance | OR6Q1    | 219952 | 37 | 11 | 57799031 | 57799031 | Missense_Mutation | SNP | G | A | 10 | 187 | c.607G>A      | c.(607-609)GAT>AAT     | p.D203N       |
| Pat_41 | Post-Resistance | OR5B2    | 390190 | 37 | 11 | 58190191 | 58190191 | Missense_Mutation | SNP | C | T | 17 | 119 | c.544G>A      | c.(544-546)GTC>ATC     | p.V182I       |
| Pat_41 | Post-Resistance | FAM111A  | 63901  | 37 | 11 | 58920286 | 58920286 | Missense_Mutation | SNP | C | T | 10 | 405 | c.1145C>T     | c.(1144-1146)ACT>ATT   | p.T382I       |
| Pat_41 | Post-Resistance | MPEG1    | 219972 | 37 | 11 | 58979621 | 58979621 | Missense_Mutation | SNP | C | T | 4  | 72  | c.718G>A      | c.(718-720)GCT>ACT     | p.A240T       |
| Pat_41 | Post-Resistance | OR5A2    | 219981 | 37 | 11 | 59189969 | 59189969 | Missense_Mutation | SNP | C | T | 7  | 78  | c.458G>A      | c.(457-459)GGA>GAA     | p.G153E       |
| Pat_41 | Post-Resistance | ZP1      | 22917  | 37 | 11 | 60637136 | 60637136 | Missense_Mutation | SNP | G | A | 10 | 113 | c.445G>A      | c.(445-447)GCA>ACA     | p.A149T       |
| Pat_41 | Post-Resistance | ZP1      | 22917  | 37 | 11 | 60641136 | 60641136 | Missense_Mutation | SNP | C | T | 21 | 180 | c.1460C>T     | c.(1459-1461)ACC>ATC   | p.T487I       |
| Pat_41 | Post-Resistance | TMEM109  | 79073  | 37 | 11 | 60689264 | 60689264 | Missense_Mutation | SNP | G | A | 19 | 167 | c.359G>A      | c.(358-360)GGC>GAC     | p.G120D       |
| Pat_41 | Post-Resistance | CD5      | 921    | 37 | 11 | 60889344 | 60889344 | Missense_Mutation | SNP | G | T | 9  | 116 | c.1067G>T     | c.(1066-1068)AGA>ATA   | p.R356I       |
| Pat_41 | Post-Resistance | C11orf9  | 745    | 37 | 11 | 61536761 | 61536761 | Missense_Mutation | SNP | G | A | 5  | 23  | c.428G>A      | c.(427-429)GGC>GAC     | p.G143D       |
| Pat_41 | Post-Resistance | C11orf9  | 745    | 37 | 11 | 61553601 | 61553601 | Missense_Mutation | SNP | C | T | 5  | 114 | c.3442C>T     | c.(3442-3444)CGC>TGC   | p.R1148C      |
| Pat_41 | Post-Resistance | AHNAK    | 79026  | 37 | 11 | 62287166 | 62287166 | Missense_Mutation | SNP | G | A | 13 | 84  | c.14723C>T    | c.(14722-14724)TCG>TTC | p.S4908L      |
| Pat_41 | Post-Resistance | AHNAK    | 79026  | 37 | 11 | 62287578 | 62287578 | Missense_Mutation | SNP | C | T | 67 | 408 | c.14311G>A    | c.(14311-14313)GTT>ATT | p.V4771I      |
| Pat_41 | Post-Resistance | AHNAK    | 79026  | 37 | 11 | 62294080 | 62294080 | Missense_Mutation | SNP | T | G | 9  | 395 | c.7809A>C     | c.(7807-7809)AAA>AAC   | p.K2603N      |
| Pat_41 | Post-Resistance | AHNAK    | 79026  | 37 | 11 | 62294327 | 62294327 | Missense_Mutation | SNP | G | A | 62 | 433 | c.7562C>T     | c.(7561-7563)CCT>CTT   | p.P2521L      |
| Pat_41 | Post-Resistance | AHNAK    | 79026  | 37 | 11 | 62294675 | 62294675 | Missense_Mutation | SNP | T | C | 4  | 53  | c.7214A>G     | c.(7213-7215)GAT>GGT   | p.D2405G      |
| Pat_41 | Post-Resistance | AHNAK    | 79026  | 37 | 11 | 62295483 | 62295483 | Missense_Mutation | SNP | C | T | 10 | 510 | c.6406G>A     | c.(6406-6408)GAT>AAT   | p.D2136N      |
| Pat_41 | Post-Resistance | AHNAK    | 79026  | 37 | 11 | 62300864 | 62300864 | Missense_Mutation | SNP | C | T | 5  | 128 | c.1025G>A     | c.(1024-1026)GGC>GAC   | p.G342D       |
| Pat_41 | Post-Resistance | AHNAK    | 79026  | 37 | 11 | 62300970 | 62300970 | Missense_Mutation | SNP | G | A | 9  | 132 | c.919C>T      | c.(919-921)CCC>TCC     | p.P307S       |
| Pat_41 | Post-Resistance | ROM1     | 6094   | 37 | 11 | 62380819 | 62380819 | Nonsense_Mutation | SNP | G | A | 5  | 13  | c.66G>A       | c.(64-66)TGG>TGA       | p.W22*        |
| Pat_41 | Post-Resistance | GANAB    | 23193  | 37 | 11 | 62400135 | 62400135 | Missense_Mutation | SNP | G | A | 47 | 489 | c.898C>T      | c.(898-900)CCT>TCT     | p.P300S       |
| Pat_41 | Post-Resistance | GANAB    | 23193  | 37 | 11 | 62402383 | 62402383 | Missense_Mutation | SNP | C | T | 17 | 244 | c.470G>A      | c.(469-471)CGC>CAC     | p.R157H       |
| Pat_41 | Post-Resistance | INTS5    | 80789  | 37 | 11 | 62414839 | 62414839 | Missense_Mutation | SNP | C | T | 11 | 153 | c.2713G>A     | c.(2713-2715)GAG>AAG   | p.E905K       |
| Pat_41 | Post-Resistance | POLR2G   | 5436   | 37 | 11 | 62532658 | 62532658 | Missense_Mutation | SNP | G | A | 14 | 276 | c.287G>A      | c.(286-288)GGA>GAA     | p.G96E        |
| Pat_41 | Post-Resistance | TAF6L    | 10629  | 37 | 11 | 62545577 | 62545577 | Missense_Mutation | SNP | G | A | 7  | 100 | c.362G>A      | c.(361-363)GGC>GAC     | p.G121D       |
| Pat_41 | Post-Resistance | SLC3A2   | 6520   | 37 | 11 | 62655947 | 62655947 | Nonsense_Mutation | SNP | C | T | 8  | 193 | c.1675C>T     | c.(1675-1677)CAG>TAG   | p.Q559*       |
| Pat_41 | Post-Resistance | SLC22A8  | 9376   | 37 | 11 | 62762217 | 62762217 | Missense_Mutation | SNP | C | T | 5  | 64  | c.1013G>A     | c.(1012-1014)GGT>GAT   | p.G338D       |
| Pat_41 | Post-Resistance | SLC22A25 | 387601 | 37 | 11 | 62985134 | 62985134 | Missense_Mutation | SNP | G | A | 8  | 86  | c.580C>T      | c.(580-582)CCC>TCC     | p.P194S       |
| Pat_41 | Post-Resistance | RARRES3  | 5920   | 37 | 11 | 63312342 | 63312342 | Missense_Mutation | SNP | G | A | 26 | 436 | c.368G>A      | c.(367-369)GGC>GAC     | p.G123D       |
| Pat_41 | Post-Resistance | ATL3     | 25923  | 37 | 11 | 63396870 | 63396870 | Missense_Mutation | SNP | G | A | 9  | 105 | c.1547C>T     | c.(1546-1548)TCT>TTT   | p.S516F       |
| Pat_41 | Post-Resistance | ATL3     | 25923  | 37 | 11 | 63400536 | 63400536 | Missense_Mutation | SNP | C | T | 13 | 133 | c.1069G>A     | c.(1069-1071)GCC>ACC   | p.A357T       |
| Pat_41 | Post-Resistance | RTN3     | 10313  | 37 | 11 | 63517562 | 63517562 | Missense_Mutation | SNP | G | A | 5  | 25  | c.2630G>A     | c.(2629-2631)AGT>AAT   | p.S877N       |
| Pat_41 | Post-Resistance | C11orf84 | 144097 | 37 | 11 | 63586454 | 63586454 | Missense_Mutation | SNP | G | A | 3  | 41  | c.914G>A      | c.(913-915)CGG>CAG     | p.R305Q       |
| Pat_41 | Post-Resistance | MARK2    | 2011   | 37 | 11 | 63672516 | 63672516 | Splice_Site       | SNP | G | A | 34 | 182 | c.1934_splice | c.e16+1                | p.R645_splice |
| Pat_41 | Post-Resistance | RCOR2    | 283248 | 37 | 11 | 63681590 | 63681590 | Missense_Mutation | SNP | C | T | 6  | 99  | c.727G>A      | c.(727-729)GTC>ATC     | p.V243I       |
| Pat_41 | Post-Resistance | PLCB3    | 5331   | 37 | 11 | 64025948 | 64025948 | Missense_Mutation | SNP | G | A | 5  | 26  | c.1016G>A     | c.(1015-1017)GGG>GAG   | p.G339E       |
| Pat_41 | Post-Resistance | PLCB3    | 5331   | 37 | 11 | 64029423 | 64029423 | Splice_Site       | SNP | G | A | 17 | 190 | c.1914_splice | c.e17-1                | p.E638_splice |
| Pat_41 | Post-Resistance | PRDX5    | 25824  | 37 | 11 | 64087243 | 64087243 | Missense_Mutation | SNP | G | A | 21 | 265 | c.209G>A      | c.(208-210)GGG>GAG     | p.G70E        |
| Pat_41 | Post-Resistance | NRXN2    | 9379   | 37 | 11 | 64453251 | 64453251 | Missense_Mutation | SNP | G | A | 17 | 258 | c.1019C>T     | c.(1018-1020)TCC>TTC   | p.S340F       |
| Pat_41 | Post-Resistance | SF1      | 7536   | 37 | 11 | 64543988 | 64543988 | Nonsense_Mutation | SNP | G | A | 7  | 132 | c.142C>T      | c.(142-144)CAA>TAA     | p.Q48*        |
| Pat_41 | Post-Resistance | SF1      | 7536   | 37 | 11 | 64544006 | 64544006 | Missense_Mutation | SNP | G | A | 11 | 143 | c.124C>T      | c.(124-126)CCT>TCT     | p.P42S        |
| Pat_41 | Post-Resistance | CDC42BPG | 55561  | 37 | 11 | 64600104 | 64600104 | Missense_Mutation | SNP | C | A | 4  | 122 | c.2977G>T     | c.(2977-2979)GGG>TGG   | p.G993W       |
| Pat_41 | Post-Resistance | CDC42BPG | 55561  | 37 | 11 | 64609299 | 64609299 | Missense_Mutation | SNP | C | T | 5  | 69  | c.238G>A      | c.(238-240)GGA>AGA     | p.G80R        |
| Pat_41 | Post-Resistance | EHD1     | 10938  | 37 | 11 | 64645605 | 64645605 | Missense_Mutation | SNP | C | T | 7  | 48  | c.332G>A      | c.(331-333)GGC>GAC     | p.G111D       |
| Pat_41 | Post-Resistance | ATG2A    | 23130  | 37 | 11 | 64668527 | 64668527 | Missense_Mutation | SNP | G | A | 4  | 21  | c.4157C>T     | c.(4156-4158)CCC>CTC   | p.P1386L      |

|        |                 |              |        |    |    |          |          |                   |     |   |   |    |     |           |                      |          |
|--------|-----------------|--------------|--------|----|----|----------|----------|-------------------|-----|---|---|----|-----|-----------|----------------------|----------|
| Pat_41 | Post-Resistance | SAC3D1       | 29901  | 37 | 11 | 64811748 | 64811748 | Missense_Mutation | SNP | C | T | 7  | 143 | c.626C>T  | c.(625-627)GCC>GTC   | p.A209V  |
| Pat_41 | Post-Resistance | CDCA5        | 113130 | 37 | 11 | 64847030 | 64847030 | Missense_Mutation | SNP | G | A | 7  | 35  | c.473C>T  | c.(472-474)TCC>TTC   | p.S158F  |
| Pat_41 | Post-Resistance | C11orf2      | 738    | 37 | 11 | 64875941 | 64875941 | Missense_Mutation | SNP | G | A | 4  | 22  | c.998G>A  | c.(997-999)GGT>GAT   | p.G333D  |
| Pat_41 | Post-Resistance | SLC25A45     | 283130 | 37 | 11 | 65144006 | 65144006 | Missense_Mutation | SNP | C | T | 8  | 286 | c.739G>A  | c.(739-741)GTG>ATG   | p.V247M  |
| Pat_41 | Post-Resistance | SLC25A45     | 283130 | 37 | 11 | 65144292 | 65144292 | Missense_Mutation | SNP | G | A | 47 | 608 | c.595C>T  | c.(595-597)CCC>TCC   | p.P199S  |
| Pat_41 | Post-Resistance | SIPA1        | 6494   | 37 | 11 | 65417614 | 65417614 | Missense_Mutation | SNP | C | T | 11 | 166 | c.2854C>T | c.(2854-2856)CCC>TCC | p.P952S  |
| Pat_41 | Post-Resistance | SIPA1        | 6494   | 37 | 11 | 65417939 | 65417939 | Missense_Mutation | SNP | G | A | 5  | 44  | c.2971G>A | c.(2971-2973)GAC>AAC | p.D991N  |
| Pat_41 | Post-Resistance | RELA         | 5970   | 37 | 11 | 65423216 | 65423216 | Missense_Mutation | SNP | G | A | 5  | 93  | c.976C>T  | c.(976-978)CCT>TCT   | p.P326S  |
| Pat_41 | Post-Resistance | KAT5         | 10524  | 37 | 11 | 65482350 | 65482350 | Missense_Mutation | SNP | C | T | 8  | 152 | c.899C>T  | c.(898-900)TCC>TTC   | p.S300F  |
| Pat_41 | Post-Resistance | DKFZp761E198 | 91056  | 37 | 11 | 65545809 | 65545809 | Missense_Mutation | SNP | G | A | 3  | 36  | c.1984C>T | c.(1984-1986)CGC>TGC | p.R662C  |
| Pat_41 | Post-Resistance | SF3B2        | 10992  | 37 | 11 | 65826355 | 65826355 | Missense_Mutation | SNP | G | A | 4  | 66  | c.1021G>A | c.(1021-1023)GGG>AGG | p.G341R  |
| Pat_41 | Post-Resistance | PACS1        | 55690  | 37 | 11 | 65988665 | 65988665 | Missense_Mutation | SNP | G | A | 17 | 226 | c.1240G>A | c.(1240-1242)GAG>AAG | p.E414K  |
| Pat_41 | Post-Resistance | TMEM151A     | 256472 | 37 | 11 | 66061887 | 66061887 | Missense_Mutation | SNP | C | T | 3  | 20  | c.170C>T  | c.(169-171)GCC>GTC   | p.A57V   |
| Pat_41 | Post-Resistance | CD248        | 57124  | 37 | 11 | 66083718 | 66083718 | Missense_Mutation | SNP | C | T | 4  | 50  | c.781G>A  | c.(781-783)GGC>AGC   | p.G261S  |
| Pat_41 | Post-Resistance | B3GNT1       | 11041  | 37 | 11 | 66114284 | 66114284 | Missense_Mutation | SNP | C | T | 18 | 234 | c.733G>A  | c.(733-735)GAT>AAT   | p.D245N  |
| Pat_41 | Post-Resistance | PELI3        | 246330 | 37 | 11 | 66235712 | 66235712 | Missense_Mutation | SNP | G | A | 24 | 171 | c.113G>A  | c.(112-114)GGC>GAC   | p.G38D   |
| Pat_41 | Post-Resistance | DPP3         | 10072  | 37 | 11 | 66272120 | 66272120 | Missense_Mutation | SNP | C | T | 32 | 128 | c.1916C>T | c.(1915-1917)GCC>GTC | p.A639V  |
| Pat_41 | Post-Resistance | CCDC87       | 55231  | 37 | 11 | 66360360 | 66360360 | Missense_Mutation | SNP | G | A | 8  | 37  | c.127C>T  | c.(127-129)CGG>TGG   | p.R43W   |
| Pat_41 | Post-Resistance | RBM4         | 5936   | 37 | 11 | 66411212 | 66411212 | Missense_Mutation | SNP | C | T | 15 | 79  | c.704C>T  | c.(703-705)GCA>GTA   | p.A235V  |
| Pat_41 | Post-Resistance | SPTBN2       | 6712   | 37 | 11 | 66454493 | 66454493 | Nonsense_Mutation | SNP | G | A | 28 | 162 | c.6868C>T | c.(6868-6870)CGA>TGA | p.R2290* |
| Pat_41 | Post-Resistance | C11orf80     | 79703  | 37 | 11 | 66555658 | 66555658 | Missense_Mutation | SNP | C | T | 15 | 182 | c.551C>T  | c.(550-552)TCT>TTT   | p.S184F  |
| Pat_41 | Post-Resistance | C11orf80     | 79703  | 37 | 11 | 66571561 | 66571561 | Missense_Mutation | SNP | G | A | 28 | 467 | c.938G>A  | c.(937-939)GGC>GAC   | p.G313D  |
| Pat_41 | Post-Resistance | RCE1         | 9986   | 37 | 11 | 66613400 | 66613400 | Missense_Mutation | SNP | C | T | 9  | 203 | c.824C>T  | c.(823-825)GCC>GTC   | p.A275V  |
| Pat_41 | Post-Resistance | PC           | 5091   | 37 | 11 | 66617225 | 66617225 | Missense_Mutation | SNP | C | T | 5  | 110 | c.3004G>A | c.(3004-3006)GTG>ATG | p.V1002M |
| Pat_41 | Post-Resistance | ADRBK1       | 156    | 37 | 11 | 67046932 | 67046932 | Missense_Mutation | SNP | C | T | 6  | 110 | c.308C>T  | c.(307-309)GCC>GTC   | p.A103V  |
| Pat_41 | Post-Resistance | RAD9A        | 5883   | 37 | 11 | 67160165 | 67160165 | Missense_Mutation | SNP | C | T | 30 | 214 | c.146C>T  | c.(145-147)GCC>GTC   | p.A49V   |
| Pat_41 | Post-Resistance | PITPNM1      | 9600   | 37 | 11 | 67267787 | 67267787 | Missense_Mutation | SNP | G | A | 47 | 246 | c.746C>T  | c.(745-747)GCT>GTT   | p.A249V  |
| Pat_41 | Post-Resistance | C11orf24     | 53838  | 37 | 11 | 68029831 | 68029831 | Missense_Mutation | SNP | G | A | 11 | 144 | c.632C>T  | c.(631-633)GCC>GTC   | p.A211V  |
| Pat_41 | Post-Resistance | LRP5         | 4041   | 37 | 11 | 68174207 | 68174207 | Missense_Mutation | SNP | G | A | 7  | 41  | c.2017G>A | c.(2017-2019)GGC>AGC | p.G673S  |
| Pat_41 | Post-Resistance | SAPS3        | 55291  | 37 | 11 | 68367812 | 68367812 | Missense_Mutation | SNP | C | T | 6  | 275 | c.2042C>T | c.(2041-2043)CCC>CTC | p.P681L  |
| Pat_41 | Post-Resistance | IGHMBP2      | 3508   | 37 | 11 | 68675720 | 68675720 | Missense_Mutation | SNP | C | T | 21 | 164 | c.364C>T  | c.(364-366)CAC>TAC   | p.H122Y  |
| Pat_41 | Post-Resistance | TPCN2        | 219931 | 37 | 11 | 68825148 | 68825148 | Missense_Mutation | SNP | C | T | 14 | 137 | c.532C>T  | c.(532-534)CTC>TTC   | p.L178F  |
| Pat_41 | Post-Resistance | ANO1         | 55107  | 37 | 11 | 70028704 | 70028704 | Missense_Mutation | SNP | A | G | 5  | 89  | c.2500A>G | c.(2500-2502)ACC>GCC | p.T834A  |
| Pat_41 | Post-Resistance | PPFIA1       | 8500   | 37 | 11 | 70194417 | 70194417 | Missense_Mutation | SNP | C | T | 50 | 470 | c.2054C>T | c.(2053-2055)CCT>CTT | p.P685L  |
| Pat_41 | Post-Resistance | SHANK2       | 22941  | 37 | 11 | 70331537 | 70331537 | Missense_Mutation | SNP | C | T | 5  | 79  | c.4861G>A | c.(4861-4863)GCA>ACA | p.A1621T |
| Pat_41 | Post-Resistance | SHANK2       | 22941  | 37 | 11 | 70332164 | 70332164 | Missense_Mutation | SNP | G | A | 18 | 73  | c.4234C>T | c.(4234-4236)CCT>TCT | p.P1412S |
| Pat_41 | Post-Resistance | SHANK2       | 22941  | 37 | 11 | 70505982 | 70505982 | Missense_Mutation | SNP | C | T | 7  | 64  | c.2012G>A | c.(2011-2013)GGT>GAT | p.G671D  |
| Pat_41 | Post-Resistance | NADSYN1      | 55191  | 37 | 11 | 71169538 | 71169538 | Missense_Mutation | SNP | G | A | 30 | 136 | c.211G>A  | c.(211-213)GCG>ACG   | p.A71T   |
| Pat_41 | Post-Resistance | NUMA1        | 4926   | 37 | 11 | 71715350 | 71715350 | Missense_Mutation | SNP | G | A | 12 | 105 | c.6044C>T | c.(6043-6045)ACT>ATT | p.T2015I |
| Pat_41 | Post-Resistance | NUMA1        | 4926   | 37 | 11 | 71715858 | 71715858 | Missense_Mutation | SNP | G | A | 4  | 20  | c.5834C>T | c.(5833-5835)TCC>TTC | p.S1945F |
| Pat_41 | Post-Resistance | INPPL1       | 3636   | 37 | 11 | 71948415 | 71948415 | Missense_Mutation | SNP | G | A | 12 | 121 | c.3127G>A | c.(3127-3129)GAG>AAG | p.E1043K |
| Pat_41 | Post-Resistance | CLPB         | 81570  | 37 | 11 | 72084016 | 72084016 | Missense_Mutation | SNP | C | A | 13 | 292 | c.689G>T  | c.(688-690)TGG>TTG   | p.W230L  |
| Pat_41 | Post-Resistance | ARAP1        | 116985 | 37 | 11 | 72407682 | 72407682 | Missense_Mutation | SNP | C | T | 8  | 68  | c.3184G>A | c.(3184-3186)GAG>AAG | p.E1062K |
| Pat_41 | Post-Resistance | ARHGEF17     | 9828   | 37 | 11 | 73022621 | 73022621 | Missense_Mutation | SNP | C | T | 10 | 127 | c.2938C>T | c.(2938-2940)CCC>TCC | p.P980S  |
| Pat_41 | Post-Resistance | C2CD3        | 26005  | 37 | 11 | 73811664 | 73811664 | Missense_Mutation | SNP | C | T | 7  | 85  | c.2638G>A | c.(2638-2640)GTA>ATA | p.V880I  |
| Pat_41 | Post-Resistance | PGM2L1       | 283209 | 37 | 11 | 74054003 | 74054003 | Missense_Mutation | SNP | C | T | 24 | 422 | c.1369G>A | c.(1369-1371)GTT>ATT | p.V457I  |
| Pat_41 | Post-Resistance | GDPD5        | 81544  | 37 | 11 | 75160621 | 75160621 | Missense_Mutation | SNP | G | A | 7  | 23  | c.509C>T  | c.(508-510)GCA>GTA   | p.A170V  |

|        |                 |          |        |    |    |           |           |                   |     |   |   |    |     |              |                        |               |
|--------|-----------------|----------|--------|----|----|-----------|-----------|-------------------|-----|---|---|----|-----|--------------|------------------------|---------------|
| Pat_41 | Post-Resistance | MAP6     | 4135   | 37 | 11 | 75298411  | 75298411  | Missense_Mutation | SNP | G | A | 10 | 90  | c.2135C>T    | c.(2134-2136)TCC>TTC   | p.S712F       |
| Pat_41 | Post-Resistance | UVRAG    | 7405   | 37 | 11 | 75827011  | 75827011  | Missense_Mutation | SNP | C | T | 7  | 162 | c.1349C>T    | c.(1348-1350)ACC>ATC   | p.T450I       |
| Pat_41 | Post-Resistance | PRKRIR   | 5612   | 37 | 11 | 76063133  | 76063133  | Missense_Mutation | SNP | G | A | 15 | 233 | c.1061C>T    | c.(1060-1062)GCT>GTT   | p.A354V       |
| Pat_41 | Post-Resistance | C11orf30 | 56946  | 37 | 11 | 76183846  | 76183846  | Missense_Mutation | SNP | C | T | 20 | 371 | c.1070C>T    | c.(1069-1071)TCC>TTC   | p.S357F       |
| Pat_41 | Post-Resistance | LRRC32   | 2615   | 37 | 11 | 76370955  | 76370955  | Missense_Mutation | SNP | G | A | 5  | 20  | c.1682C>T    | c.(1681-1683)ACC>ATC   | p.T561I       |
| Pat_41 | Post-Resistance | AQP11    | 282679 | 37 | 11 | 77301255  | 77301255  | Missense_Mutation | SNP | C | T | 5  | 103 | c.218C>T     | c.(217-219)GCG>GTG     | p.A73V        |
| Pat_41 | Post-Resistance | RSF1     | 51773  | 37 | 11 | 77413346  | 77413346  | Missense_Mutation | SNP | C | T | 5  | 86  | c.928G>A     | c.(928-930)GAA>AAA     | p.E310K       |
| Pat_41 | Post-Resistance | USP35    | 57558  | 37 | 11 | 77911777  | 77911777  | Missense_Mutation | SNP | G | A | 4  | 46  | c.1120G>A    | c.(1120-1122)GCG>ACG   | p.A374T       |
| Pat_41 | Post-Resistance | GAB2     | 9846   | 37 | 11 | 77937766  | 77937766  | Missense_Mutation | SNP | C | T | 5  | 70  | c.952G>A     | c.(952-954)GCC>ACC     | p.A318T       |
| Pat_41 | Post-Resistance | C11orf82 | 220042 | 37 | 11 | 82644551  | 82644551  | Missense_Mutation | SNP | C | T | 23 | 166 | c.2171C>T    | c.(2170-2172)TCT>TTT   | p.S724F       |
| Pat_41 | Post-Resistance | PCF11    | 51585  | 37 | 11 | 82882888  | 82882888  | Missense_Mutation | SNP | C | T | 15 | 189 | c.3689C>T    | c.(3688-3690)GCT>GTT   | p.A1230V      |
| Pat_41 | Post-Resistance | DLG2     | 1740   | 37 | 11 | 83252779  | 83252779  | Missense_Mutation | SNP | C | T | 18 | 158 | c.1748G>A    | c.(1747-1749)AGA>AAA   | p.R583K       |
| Pat_41 | Post-Resistance | CREBZF   | 58487  | 37 | 11 | 85375129  | 85375129  | Missense_Mutation | SNP | C | T | 31 | 571 | c.791G>A     | c.(790-792)AGT>AAT     | p.S264N       |
| Pat_41 | Post-Resistance | CCDC83   | 220047 | 37 | 11 | 85610046  | 85610046  | Nonsense_Mutation | SNP | G | A | 14 | 128 | c.660G>A     | c.(658-660)TGG>TGA     | p.W220*       |
| Pat_41 | Post-Resistance | PICALM   | 8301   | 37 | 11 | 85712202  | 85712202  | Splice_Site       | SNP | C | T | 9  | 323 | c.894_splice | c.e10-1                | p.R298_splice |
| Pat_41 | Post-Resistance | PRSS23   | 11098  | 37 | 11 | 86519167  | 86519167  | Missense_Mutation | SNP | C | T | 8  | 167 | c.482C>T     | c.(481-483)ACC>ATC     | p.T161I       |
| Pat_41 | Post-Resistance | FZD4     | 8322   | 37 | 11 | 86663026  | 86663026  | Missense_Mutation | SNP | G | A | 4  | 41  | c.772C>T     | c.(772-774)CTC>TTC     | p.L258F       |
| Pat_41 | Post-Resistance | TYR      | 7299   | 37 | 11 | 89028403  | 89028403  | Missense_Mutation | SNP | G | A | 10 | 87  | c.1459G>A    | c.(1459-1461)GTC>ATC   | p.V487I       |
| Pat_41 | Post-Resistance | NOX4     | 50507  | 37 | 11 | 89075338  | 89075338  | Missense_Mutation | SNP | C | T | 24 | 168 | c.1241G>A    | c.(1240-1242)GGA>GAA   | p.G414E       |
| Pat_41 | Post-Resistance | FAT3     | 120114 | 37 | 11 | 92087958  | 92087958  | Missense_Mutation | SNP | C | T | 9  | 145 | c.2680C>T    | c.(2680-2682)CGG>TGG   | p.R894W       |
| Pat_41 | Post-Resistance | FAT3     | 120114 | 37 | 11 | 92088525  | 92088525  | Missense_Mutation | SNP | A | G | 15 | 137 | c.3247A>G    | c.(3247-3249)AGG>GGG   | p.R1083G      |
| Pat_41 | Post-Resistance | FAT3     | 120114 | 37 | 11 | 92531452  | 92531452  | Missense_Mutation | SNP | A | G | 3  | 70  | c.5273A>G    | c.(5272-5274)CAG>CGG   | p.Q1758R      |
| Pat_41 | Post-Resistance | FAT3     | 120114 | 37 | 11 | 92616434  | 92616434  | Missense_Mutation | SNP | C | T | 24 | 254 | c.12812C>T   | c.(12811-12813)CCC>CTC | p.P4271L      |
| Pat_41 | Post-Resistance | FAT3     | 120114 | 37 | 11 | 92624253  | 92624253  | Nonsense_Mutation | SNP | G | T | 3  | 55  | c.13648G>T   | c.(13648-13650)GAG>TAG | p.E4550*      |
| Pat_41 | Post-Resistance | MRE11A   | 4361   | 37 | 11 | 94209570  | 94209570  | Splice_Site       | SNP | C | T | 10 | 107 | c.545_splice | c.e7-1                 | p.G182_splice |
| Pat_41 | Post-Resistance | KDM4D    | 55693  | 37 | 11 | 94731499  | 94731499  | Missense_Mutation | SNP | G | A | 11 | 70  | c.963G>A     | c.(961-963)ATG>ATA     | p.M321I       |
| Pat_41 | Post-Resistance | SFRS2B   | 10929  | 37 | 11 | 94800803  | 94800803  | Missense_Mutation | SNP | G | A | 5  | 4   | c.413G>A     | c.(412-414)GGT>GAT     | p.G138D       |
| Pat_41 | Post-Resistance | SESN3    | 143686 | 37 | 11 | 94923022  | 94923022  | Missense_Mutation | SNP | G | A | 16 | 229 | c.446C>T     | c.(445-447)CCA>CTA     | p.P149L       |
| Pat_41 | Post-Resistance | FAM76B   | 143684 | 37 | 11 | 95509103  | 95509103  | Missense_Mutation | SNP | T | C | 8  | 82  | c.913A>G     | c.(913-915)ACT>GCT     | p.T305A       |
| Pat_41 | Post-Resistance | FAM76B   | 143684 | 37 | 11 | 95512806  | 95512806  | Missense_Mutation | SNP | C | A | 11 | 269 | c.657G>T     | c.(655-657)AAG>AAT     | p.K219N       |
| Pat_41 | Post-Resistance | JRKL     | 8690   | 37 | 11 | 96125326  | 96125326  | Missense_Mutation | SNP | G | A | 9  | 191 | c.1513G>A    | c.(1513-1515)GTA>ATA   | p.V505I       |
| Pat_41 | Post-Resistance | CNTN5    | 53942  | 37 | 11 | 100126494 | 100126494 | Missense_Mutation | SNP | C | T | 22 | 163 | c.2008C>T    | c.(2008-2010)CCC>TCC   | p.P670S       |
| Pat_41 | Post-Resistance | CNTN5    | 53942  | 37 | 11 | 100179193 | 100179193 | Missense_Mutation | SNP | G | A | 9  | 59  | c.2723G>A    | c.(2722-2724)GGA>GAA   | p.G908E       |
| Pat_41 | Post-Resistance | PGR      | 5241   | 37 | 11 | 100922221 | 100922221 | Missense_Mutation | SNP | C | T | 17 | 202 | c.2291G>A    | c.(2290-2292)GGA>GAA   | p.G764E       |
| Pat_41 | Post-Resistance | YAP1     | 10413  | 37 | 11 | 102076672 | 102076672 | Missense_Mutation | SNP | C | T | 13 | 178 | c.851C>T     | c.(850-852)CCC>CTC     | p.P284L       |
| Pat_41 | Post-Resistance | BIRC3    | 330    | 37 | 11 | 102195460 | 102195460 | Missense_Mutation | SNP | G | A | 6  | 194 | c.220G>A     | c.(220-222)GAT>AAT     | p.D74N        |
| Pat_41 | Post-Resistance | MMP8     | 4317   | 37 | 11 | 102593314 | 102593314 | Missense_Mutation | SNP | C | T | 25 | 294 | c.193G>A     | c.(193-195)GAA>AAA     | p.E65K        |
| Pat_41 | Post-Resistance | MMP13    | 4322   | 37 | 11 | 102820942 | 102820942 | Missense_Mutation | SNP | C | T | 11 | 446 | c.814G>A     | c.(814-816)GAC>AAC     | p.D272N       |
| Pat_41 | Post-Resistance | DYNC2H1  | 79659  | 37 | 11 | 103006658 | 103006658 | Missense_Mutation | SNP | C | T | 10 | 67  | c.2555C>T    | c.(2554-2556)GCT>GTT   | p.A852V       |
| Pat_41 | Post-Resistance | DYNC2H1  | 79659  | 37 | 11 | 103070077 | 103070077 | Missense_Mutation | SNP | G | A | 17 | 143 | c.7960G>A    | c.(7960-7962)GCA>ACA   | p.A2654T      |
| Pat_41 | Post-Resistance | PDGFD    | 80310  | 37 | 11 | 103797716 | 103797716 | Missense_Mutation | SNP | C | T | 10 | 89  | c.911G>A     | c.(910-912)GGA>GAA     | p.G304E       |
| Pat_41 | Post-Resistance | CASP5    | 838    | 37 | 11 | 104878026 | 104878026 | Missense_Mutation | SNP | C | T | 15 | 89  | c.217G>A     | c.(217-219)GAA>AAA     | p.E73K        |
| Pat_41 | Post-Resistance | CASP1    | 834    | 37 | 11 | 104897633 | 104897633 | Missense_Mutation | SNP | C | T | 17 | 223 | c.1052G>A    | c.(1051-1053)GGA>GAA   | p.G351E       |
| Pat_41 | Post-Resistance | CARD16   | 114769 | 37 | 11 | 104915346 | 104915346 | Missense_Mutation | SNP | G | A | 90 | 596 | c.47C>T      | c.(46-48)TCC>TTC       | p.S16F        |
| Pat_41 | Post-Resistance | GRIA4    | 2893   | 37 | 11 | 105797547 | 105797547 | Missense_Mutation | SNP | C | T | 6  | 287 | c.1928C>T    | c.(1927-1929)GCT>GTT   | p.A643V       |
| Pat_41 | Post-Resistance | AASDHPPT | 60496  | 37 | 11 | 105961310 | 105961310 | Missense_Mutation | SNP | C | T | 10 | 196 | c.436C>T     | c.(436-438)CAT>TAT     | p.H146Y       |
| Pat_41 | Post-Resistance | GUCY1A2  | 2977   | 37 | 11 | 106647210 | 106647210 | Missense_Mutation | SNP | C | T | 3  | 39  | c.1791G>A    | c.(1789-1791)ATG>ATA   | p.M597I       |

|        |                 |         |        |    |    |           |           |                   |     |   |   |    |     |           |                      |          |
|--------|-----------------|---------|--------|----|----|-----------|-----------|-------------------|-----|---|---|----|-----|-----------|----------------------|----------|
| Pat_41 | Post-Resistance | CWF19L2 | 143884 | 37 | 11 | 107205636 | 107205636 | Missense_Mutation | SNP | C | T | 17 | 149 | c.2410G>A | c.(2410-2412)GAT>AAT | p.D804N  |
| Pat_41 | Post-Resistance | SLC35F2 | 54733  | 37 | 11 | 107686665 | 107686665 | Missense_Mutation | SNP | C | T | 12 | 107 | c.137G>A  | c.(136-138)GGT>GAT   | p.G46D   |
| Pat_41 | Post-Resistance | NPAT    | 4863   | 37 | 11 | 108032511 | 108032511 | Missense_Mutation | SNP | G | A | 4  | 32  | c.3302C>T | c.(3301-3303)CCC>CTC | p.P1101L |
| Pat_41 | Post-Resistance | ATM     | 472    | 37 | 11 | 108235884 | 108235884 | Missense_Mutation | SNP | G | A | 56 | 102 | c.8926G>A | c.(8926-8928)GAT>AAT | p.D2976N |
| Pat_41 | Post-Resistance | EXPH5   | 23086  | 37 | 11 | 108383046 | 108383046 | Missense_Mutation | SNP | C | T | 7  | 88  | c.3188G>A | c.(3187-3189)GGG>GAG | p.G1063E |
| Pat_41 | Post-Resistance | RDX     | 5962   | 37 | 11 | 110135599 | 110135599 | Missense_Mutation | SNP | C | T | 16 | 156 | c.97G>A   | c.(97-99)GTG>ATG     | p.V33M   |
| Pat_41 | Post-Resistance | BTG4    | 54766  | 37 | 11 | 111365997 | 111365997 | Missense_Mutation | SNP | G | A | 12 | 202 | c.553C>T  | c.(553-555)CCC>TCC   | p.P185S  |
| Pat_41 | Post-Resistance | C11orf8 | 399949 | 37 | 11 | 111407547 | 111407547 | Missense_Mutation | SNP | G | A | 21 | 136 | c.505G>A  | c.(505-507)GAC>AAC   | p.D169N  |
| Pat_41 | Post-Resistance | FDXACB1 | 91893  | 37 | 11 | 111745660 | 111745660 | Missense_Mutation | SNP | C | T | 4  | 122 | c.1861G>A | c.(1861-1863)GTT>ATT | p.V621I  |
| Pat_41 | Post-Resistance | DLAT    | 1737   | 37 | 11 | 111914190 | 111914190 | Missense_Mutation | SNP | G | A | 31 | 509 | c.1130G>A | c.(1129-1131)GGG>GAG | p.G377E  |
| Pat_41 | Post-Resistance | DLAT    | 1737   | 37 | 11 | 111930682 | 111930682 | Missense_Mutation | SNP | C | T | 10 | 48  | c.1570C>T | c.(1570-1572)CCT>TCT | p.P524S  |
| Pat_41 | Post-Resistance | PIH1D2  | 120379 | 37 | 11 | 111941916 | 111941916 | Missense_Mutation | SNP | C | T | 21 | 396 | c.393G>A  | c.(391-393)ATG>ATA   | p.M131I  |
| Pat_41 | Post-Resistance | TPRSS5  | 80975  | 37 | 11 | 113569713 | 113569713 | Missense_Mutation | SNP | G | A | 4  | 20  | c.242C>T  | c.(241-243)TCC>TTC   | p.S81F   |
| Pat_41 | Post-Resistance | USP28   | 57646  | 37 | 11 | 113699951 | 113699951 | Missense_Mutation | SNP | G | A | 6  | 188 | c.1027C>T | c.(1027-1029)CCC>TCC | p.P343S  |
| Pat_41 | Post-Resistance | HTR3B   | 9177   | 37 | 11 | 113780103 | 113780103 | Missense_Mutation | SNP | G | A | 11 | 142 | c.139G>A  | c.(139-141)GTG>ATG   | p.V47M   |
| Pat_41 | Post-Resistance | ZBTB16  | 7704   | 37 | 11 | 114121087 | 114121087 | Missense_Mutation | SNP | C | T | 16 | 169 | c.1832C>T | c.(1831-1833)TCC>TTC | p.S611F  |
| Pat_41 | Post-Resistance | FAM55A  | 120400 | 37 | 11 | 114401213 | 114401213 | Missense_Mutation | SNP | C | T | 9  | 88  | c.91G>A   | c.(91-93)GAG>AAG     | p.E31K   |
| Pat_41 | Post-Resistance | CADM1   | 23705  | 37 | 11 | 115099967 | 115099967 | Missense_Mutation | SNP | G | A | 8  | 223 | c.587C>T  | c.(586-588)TCA>TTA   | p.S196L  |
| Pat_41 | Post-Resistance | BUD13   | 84811  | 37 | 11 | 116628632 | 116628632 | Missense_Mutation | SNP | C | T | 15 | 96  | c.1534G>A | c.(1534-1536)GAG>AAG | p.E512K  |
| Pat_41 | Post-Resistance | BUD13   | 84811  | 37 | 11 | 116640903 | 116640903 | Missense_Mutation | SNP | G | A | 39 | 123 | c.179C>T  | c.(178-180)GCT>GTT   | p.A60V   |
| Pat_41 | Post-Resistance | SIK3    | 23387  | 37 | 11 | 116718272 | 116718272 | Missense_Mutation | SNP | C | T | 19 | 407 | c.3554G>A | c.(3553-3555)AGC>AAC | p.S1185N |
| Pat_41 | Post-Resistance | SIK3    | 23387  | 37 | 11 | 116728588 | 116728588 | Missense_Mutation | SNP | C | T | 6  | 142 | c.3275G>A | c.(3274-3276)GGG>GAG | p.G1092E |
| Pat_41 | Post-Resistance | SIK3    | 23387  | 37 | 11 | 116730309 | 116730309 | Missense_Mutation | SNP | A | T | 16 | 90  | c.2119T>A | c.(2119-2121)TCT>ACT | p.S707T  |
| Pat_41 | Post-Resistance | SIK3    | 23387  | 37 | 11 | 116744298 | 116744298 | Missense_Mutation | SNP | G | A | 10 | 57  | c.1462C>T | c.(1462-1464)CTT>TTT | p.L488F  |
| Pat_41 | Post-Resistance | SIDT2   | 51092  | 37 | 11 | 117062698 | 117062698 | Missense_Mutation | SNP | G | A | 11 | 220 | c.1840G>A | c.(1840-1842)GCC>ACC | p.A614T  |
| Pat_41 | Post-Resistance | PCSK7   | 9159   | 37 | 11 | 117089857 | 117089857 | Nonsense_Mutation | SNP | C | T | 4  | 49  | c.1347G>A | c.(1345-1347)TGG>TGA | p.W449*  |
| Pat_41 | Post-Resistance | PCSK7   | 9159   | 37 | 11 | 117100259 | 117100259 | Missense_Mutation | SNP | G | A | 17 | 113 | c.302C>T  | c.(301-303)CCT>CTT   | p.P101L  |
| Pat_41 | Post-Resistance | RNF214  | 257160 | 37 | 11 | 117109585 | 117109585 | Missense_Mutation | SNP | G | A | 4  | 79  | c.376G>A  | c.(376-378)GAG>AAG   | p.E126K  |
| Pat_41 | Post-Resistance | BACE1   | 23621  | 37 | 11 | 117162498 | 117162498 | Missense_Mutation | SNP | C | T | 5  | 207 | c.872G>A  | c.(871-873)GGC>GAC   | p.G291D  |
| Pat_41 | Post-Resistance | CEP164  | 22897  | 37 | 11 | 117263215 | 117263215 | Missense_Mutation | SNP | G | A | 6  | 34  | c.2365G>A | c.(2365-2367)GTC>ATC | p.V789I  |
| Pat_41 | Post-Resistance | CEP164  | 22897  | 37 | 11 | 117280574 | 117280574 | Missense_Mutation | SNP | C | T | 5  | 159 | c.3989C>T | c.(3988-3990)ACG>ATG | p.T1330M |
| Pat_41 | Post-Resistance | CEP164  | 22897  | 37 | 11 | 117282626 | 117282626 | Missense_Mutation | SNP | C | T | 9  | 51  | c.4279C>T | c.(4279-4281)CCC>TCC | p.P1427S |
| Pat_41 | Post-Resistance | DSCAML1 | 57453  | 37 | 11 | 117306485 | 117306485 | Missense_Mutation | SNP | C | T | 7  | 176 | c.4931G>A | c.(4930-4932)GGT>GAT | p.G1644D |
| Pat_41 | Post-Resistance | TPRSS13 | 84000  | 37 | 11 | 117789142 | 117789142 | Missense_Mutation | SNP | C | T | 8  | 86  | c.433G>A  | c.(433-435)GCC>ACC   | p.A145T  |
| Pat_41 | Post-Resistance | AMICA1  | 120425 | 37 | 11 | 118081393 | 118081393 | Missense_Mutation | SNP | C | T | 16 | 273 | c.233G>A  | c.(232-234)AGT>AAT   | p.S78N   |
| Pat_41 | Post-Resistance | CD3D    | 915    | 37 | 11 | 118211164 | 118211164 | Missense_Mutation | SNP | G | A | 23 | 109 | c.200C>T  | c.(199-201)CCA>CTA   | p.P67L   |
| Pat_41 | Post-Resistance | UBE4A   | 9354   | 37 | 11 | 118263519 | 118263519 | Missense_Mutation | SNP | C | T | 59 | 285 | c.2983C>T | c.(2983-2985)CCC>TCC | p.P995S  |
| Pat_41 | Post-Resistance | MLL     | 4297   | 37 | 11 | 118344806 | 118344806 | Missense_Mutation | SNP | C | T | 8  | 43  | c.2932C>T | c.(2932-2934)CCA>TCA | p.P978S  |
| Pat_41 | Post-Resistance | MLL     | 4297   | 37 | 11 | 118348697 | 118348697 | Missense_Mutation | SNP | C | T | 48 | 669 | c.3350C>T | c.(3349-3351)GCT>GTT | p.A1117V |
| Pat_41 | Post-Resistance | MLL     | 4297   | 37 | 11 | 118373572 | 118373572 | Missense_Mutation | SNP | C | T | 17 | 162 | c.6956C>T | c.(6955-6957)JCT>TTT | p.S2319F |
| Pat_41 | Post-Resistance | IFT46   | 56912  | 37 | 11 | 118425302 | 118425302 | Missense_Mutation | SNP | C | T | 23 | 114 | c.355G>A  | c.(355-357)GTC>ATC   | p.V119I  |
| Pat_41 | Post-Resistance | VPS11   | 55823  | 37 | 11 | 118938614 | 118938614 | Missense_Mutation | SNP | C | T | 3  | 30  | c.80C>T   | c.(79-81)GCC>GTC     | p.A27V   |
| Pat_41 | Post-Resistance | NLRX1   | 79671  | 37 | 11 | 119043648 | 119043648 | Missense_Mutation | SNP | C | T | 7  | 148 | c.179C>T  | c.(178-180)GCT>GTT   | p.A60V   |
| Pat_41 | Post-Resistance | NLRX1   | 79671  | 37 | 11 | 119045592 | 119045592 | Missense_Mutation | SNP | G | A | 4  | 90  | c.1280G>A | c.(1279-1281)CGA>CAA | p.R427Q  |
| Pat_41 | Post-Resistance | MCAM    | 4162   | 37 | 11 | 119182805 | 119182805 | Missense_Mutation | SNP | G | A | 9  | 72  | c.1100C>T | c.(1099-1101)GCA>GTA | p.A367V  |
| Pat_41 | Post-Resistance | RNF26   | 79102  | 37 | 11 | 119206316 | 119206316 | Missense_Mutation | SNP | C | T | 8  | 58  | c.484C>T  | c.(484-486)CTC>TTC   | p.L162F  |
| Pat_41 | Post-Resistance | TRIM29  | 23650  | 37 | 11 | 119996552 | 119996552 | Missense_Mutation | SNP | G | A | 13 | 101 | c.1180C>T | c.(1180-1182)CCC>TCC | p.P394S  |

|        |                 |          |        |    |    |           |           |                   |     |   |   |    |     |           |                      |          |
|--------|-----------------|----------|--------|----|----|-----------|-----------|-------------------|-----|---|---|----|-----|-----------|----------------------|----------|
| Pat_41 | Post-Resistance | TECTA    | 7007   | 37 | 11 | 121008283 | 121008283 | Missense_Mutation | SNP | C | T | 15 | 72  | c.3095C>T | c.(3094-3096)ACG>ATG | p.T1032M |
| Pat_41 | Post-Resistance | TECTA    | 7007   | 37 | 11 | 121016279 | 121016279 | Missense_Mutation | SNP | C | T | 43 | 520 | c.3559C>T | c.(3559-3561)CTC>TTC | p.L1187F |
| Pat_41 | Post-Resistance | SC5DL    | 6309   | 37 | 11 | 121175190 | 121175190 | Missense_Mutation | SNP | G | A | 27 | 163 | c.331G>A  | c.(331-333)GAG>AAG   | p.E111K  |
| Pat_41 | Post-Resistance | BLID     | 414899 | 37 | 11 | 121986317 | 121986317 | Missense_Mutation | SNP | G | A | 15 | 127 | c.314C>T  | c.(313-315)GCT>GTT   | p.A105V  |
| Pat_41 | Post-Resistance | UBASH3B  | 84959  | 37 | 11 | 122671960 | 122671960 | Nonsense_Mutation | SNP | G | A | 98 | 543 | c.1515G>A | c.(1513-1515)TGG>TGA | p.W505*  |
| Pat_41 | Post-Resistance | UBASH3B  | 84959  | 37 | 11 | 122677152 | 122677152 | Missense_Mutation | SNP | G | A | 16 | 139 | c.1630G>A | c.(1630-1632)GAA>AAA | p.E544K  |
| Pat_41 | Post-Resistance | HSPA8    | 3312   | 37 | 11 | 122931842 | 122931842 | Missense_Mutation | SNP | G | A | 9  | 154 | c.191C>T  | c.(190-192)ACC>ATC   | p.T64I   |
| Pat_41 | Post-Resistance | GRAMD1B  | 57476  | 37 | 11 | 123465538 | 123465538 | Missense_Mutation | SNP | G | A | 17 | 112 | c.436G>A  | c.(436-438)GAA>AAA   | p.E146K  |
| Pat_41 | Post-Resistance | OR6M1    | 390261 | 37 | 11 | 123676504 | 123676504 | Missense_Mutation | SNP | G | A | 12 | 60  | c.554C>T  | c.(553-555)GCC>GTC   | p.A185V  |
| Pat_41 | Post-Resistance | OR10G4   | 390264 | 37 | 11 | 123886700 | 123886700 | Missense_Mutation | SNP | G | A | 49 | 462 | c.419G>A  | c.(418-420)TGT>TAT   | p.C140Y  |
| Pat_41 | Post-Resistance | OR8D2    | 283160 | 37 | 11 | 124190047 | 124190047 | Missense_Mutation | SNP | C | T | 15 | 287 | c.47G>A   | c.(46-48)GGC>GAC     | p.G16D   |
| Pat_41 | Post-Resistance | ROBO4    | 54538  | 37 | 11 | 124761435 | 124761435 | Missense_Mutation | SNP | G | A | 18 | 87  | c.1708C>T | c.(1708-1710)CCC>TCC | p.P570S  |
| Pat_41 | Post-Resistance | PKNOX2   | 63876  | 37 | 11 | 125280141 | 125280141 | Missense_Mutation | SNP | C | T | 36 | 231 | c.638C>T  | c.(637-639)CCC>CTC   | p.P213L  |
| Pat_41 | Post-Resistance | DCPS     | 28960  | 37 | 11 | 126208245 | 126208245 | Missense_Mutation | SNP | C | T | 22 | 148 | c.587C>T  | c.(586-588)CCC>CTC   | p.P196L  |
| Pat_41 | Post-Resistance | KIRREL3  | 84623  | 37 | 11 | 126299174 | 126299174 | Missense_Mutation | SNP | C | T | 13 | 53  | c.1706G>A | c.(1705-1707)GGT>GAT | p.G569D  |
| Pat_41 | Post-Resistance | FLI1     | 2313   | 37 | 11 | 128680431 | 128680431 | Missense_Mutation | SNP | G | A | 11 | 34  | c.907G>A  | c.(907-909)GAG>AAG   | p.E303K  |
| Pat_41 | Post-Resistance | FLI1     | 2313   | 37 | 11 | 128680488 | 128680488 | Missense_Mutation | SNP | G | A | 5  | 53  | c.964G>A  | c.(964-966)GGC>AGC   | p.G322S  |
| Pat_41 | Post-Resistance | KCNJ5    | 3762   | 37 | 11 | 128781857 | 128781857 | Missense_Mutation | SNP | T | G | 14 | 137 | c.689T>G  | c.(688-690)GTG>GGG   | p.V230G  |
| Pat_41 | Post-Resistance | ARHGAP32 | 9743   | 37 | 11 | 128844534 | 128844534 | Missense_Mutation | SNP | C | T | 13 | 161 | c.2516G>A | c.(2515-2517)GGT>GAT | p.G839D  |
| Pat_41 | Post-Resistance | TMEM45B  | 120224 | 37 | 11 | 129727230 | 129727230 | Missense_Mutation | SNP | C | T | 21 | 230 | c.593C>T  | c.(592-594)CCT>CTT   | p.P198L  |
| Pat_41 | Post-Resistance | NFRKB    | 4798   | 37 | 11 | 129744763 | 129744763 | Missense_Mutation | SNP | C | T | 12 | 202 | c.1903G>A | c.(1903-1905)GAT>AAT | p.D635N  |
| Pat_41 | Post-Resistance | NFRKB    | 4798   | 37 | 11 | 129754679 | 129754679 | Missense_Mutation | SNP | C | T | 6  | 125 | c.703G>A  | c.(703-705)GTG>ATG   | p.V235M  |
| Pat_41 | Post-Resistance | APLP2    | 334    | 37 | 11 | 129990604 | 129990604 | Missense_Mutation | SNP | G | A | 4  | 86  | c.407G>A  | c.(406-408)GGT>GAT   | p.G136D  |
| Pat_41 | Post-Resistance | SNX19    | 399979 | 37 | 11 | 130775944 | 130775944 | Missense_Mutation | SNP | G | A | 6  | 106 | c.2347C>T | c.(2347-2349)CCA>TCA | p.P783S  |
| Pat_41 | Post-Resistance | JAM3     | 83700  | 37 | 11 | 134019041 | 134019041 | Missense_Mutation | SNP | G | A | 20 | 116 | c.1033G>A | c.(1033-1035)GGC>AGC | p.G345S  |
| Pat_41 | Post-Resistance | THYN1    | 29087  | 37 | 11 | 134122734 | 134122734 | Missense_Mutation | SNP | C | T | 12 | 131 | c.43G>A   | c.(43-45)GAC>AAC     | p.D15N   |
| Pat_41 | Post-Resistance | GLB1L2   | 89944  | 37 | 11 | 134239737 | 134239737 | Missense_Mutation | SNP | G | A | 7  | 179 | c.1066G>A | c.(1066-1068)GCC>ACC | p.A356T  |
| Pat_41 | Post-Resistance | GLB1L2   | 89944  | 37 | 11 | 134240951 | 134240951 | Missense_Mutation | SNP | G | A | 14 | 189 | c.1265G>A | c.(1264-1266)GGG>GAG | p.G422E  |
| Pat_41 | Post-Resistance | IQSEC3   | 440073 | 37 | 12 | 266719    | 266719    | Missense_Mutation | SNP | G | A | 42 | 303 | c.1393G>A | c.(1393-1395)GAA>AAA | p.E465K  |
| Pat_41 | Post-Resistance | SLC6A12  | 6539   | 37 | 12 | 318973    | 318973    | Nonsense_Mutation | SNP | C | T | 19 | 349 | c.180G>A  | c.(178-180)TGG>TGA   | p.W60*   |
| Pat_41 | Post-Resistance | KDM5A    | 5927   | 37 | 12 | 463271    | 463271    | Missense_Mutation | SNP | C | T | 10 | 202 | c.1000G>A | c.(1000-1002)GAC>AAC | p.D334N  |
| Pat_41 | Post-Resistance | B4GALNT3 | 283358 | 37 | 12 | 665987    | 665987    | Missense_Mutation | SNP | G | A | 4  | 73  | c.2335G>A | c.(2335-2337)GGT>AGT | p.G779S  |
| Pat_41 | Post-Resistance | WNK1     | 65125  | 37 | 12 | 988967    | 988967    | Missense_Mutation | SNP | G | A | 9  | 219 | c.2602G>A | c.(2602-2604)GGC>AGC | p.G868S  |
| Pat_41 | Post-Resistance | WNK1     | 65125  | 37 | 12 | 992952    | 992952    | Missense_Mutation | SNP | G | A | 33 | 164 | c.3676G>A | c.(3676-3678)GAG>AAG | p.E1226K |
| Pat_41 | Post-Resistance | WNK1     | 65125  | 37 | 12 | 993365    | 993365    | Missense_Mutation | SNP | G | A | 22 | 379 | c.3800G>A | c.(3799-3801)CGA>CAA | p.R1267Q |
| Pat_41 | Post-Resistance | WNK1     | 65125  | 37 | 12 | 1005396   | 1005396   | Missense_Mutation | SNP | C | T | 28 | 44  | c.5743C>T | c.(5743-5745)CCT>TCT | p.P1915S |
| Pat_41 | Post-Resistance | ADIPOR2  | 79602  | 37 | 12 | 1889700   | 1889700   | Missense_Mutation | SNP | G | A | 9  | 173 | c.547G>A  | c.(547-549)GTC>ATC   | p.V183I  |
| Pat_41 | Post-Resistance | LRTM2    | 654429 | 37 | 12 | 1940232   | 1940232   | Missense_Mutation | SNP | C | T | 7  | 226 | c.199C>T  | c.(199-201)CCC>TCC   | p.P67S   |
| Pat_41 | Post-Resistance | FOXM1    | 2305   | 37 | 12 | 2983554   | 2983554   | Missense_Mutation | SNP | C | T | 13 | 140 | c.91G>A   | c.(91-93)GAA>AAA     | p.E31K   |
| Pat_41 | Post-Resistance | TULP3    | 7289   | 37 | 12 | 3048509   | 3048509   | Missense_Mutation | SNP | G | A | 23 | 447 | c.1228G>A | c.(1228-1230)GCA>ACA | p.A410T  |
| Pat_41 | Post-Resistance | C12orf4  | 57102  | 37 | 12 | 4634694   | 4634694   | Nonsense_Mutation | SNP | G | A | 26 | 363 | c.562C>T  | c.(562-564)CAA>TAA   | p.Q188*  |
| Pat_41 | Post-Resistance | KCNA5    | 3741   | 37 | 12 | 5154839   | 5154839   | Missense_Mutation | SNP | C | T | 13 | 146 | c.1526C>T | c.(1525-1527)GCC>GTC | p.A509V  |
| Pat_41 | Post-Resistance | ANO2     | 57101  | 37 | 12 | 5848527   | 5848527   | Nonsense_Mutation | SNP | G | A | 7  | 22  | c.1378C>T | c.(1378-1380)CGA>TGA | p.R460*  |
| Pat_41 | Post-Resistance | VWF      | 7450   | 37 | 12 | 6204741   | 6204741   | Missense_Mutation | SNP | G | A | 5  | 151 | c.542C>T  | c.(541-543)ACC>ATC   | p.T181I  |
| Pat_41 | Post-Resistance | CD9      | 928    | 37 | 12 | 6309670   | 6309670   | Missense_Mutation | SNP | C | T | 8  | 152 | c.5C>T    | c.(4-6)CCG>CTG       | p.P2L    |
| Pat_41 | Post-Resistance | SCNN1A   | 6337   | 37 | 12 | 6472649   | 6472649   | Missense_Mutation | SNP | G | A | 4  | 66  | c.644C>T  | c.(643-645)CCC>CTC   | p.P215L  |
| Pat_41 | Post-Resistance | LTBR     | 4055   | 37 | 12 | 6497621   | 6497621   | Missense_Mutation | SNP | C | T | 6  | 187 | c.725C>T  | c.(724-726)ACC>ATC   | p.T242I  |



|        |                 |          |        |    |    |          |          |                   |     |   |   |    |     |              |                      |              |
|--------|-----------------|----------|--------|----|----|----------|----------|-------------------|-----|---|---|----|-----|--------------|----------------------|--------------|
| Pat_41 | Post-Resistance | NCAPD2   | 9918   | 37 | 12 | 6639978  | 6639978  | Missense_Mutation | SNP | C | T | 13 | 135 | c.3959C>T    | c.(3958-3960)TCC>TTC | p.S1320F     |
| Pat_41 | Post-Resistance | CHD4     | 1108   | 37 | 12 | 6708980  | 6708980  | Missense_Mutation | SNP | G | A | 19 | 171 | c.1441C>T    | c.(1441-1443)CCA>TCA | p.P481S      |
| Pat_41 | Post-Resistance | CHD4     | 1108   | 37 | 12 | 6710674  | 6710674  | Missense_Mutation | SNP | G | A | 33 | 614 | c.580C>T     | c.(580-582)CCC>TCC   | p.P194S      |
| Pat_41 | Post-Resistance | CHD4     | 1108   | 37 | 12 | 6710932  | 6710932  | Missense_Mutation | SNP | C | T | 16 | 292 | c.439G>A     | c.(439-441)GAG>AAG   | p.E147K      |
| Pat_41 | Post-Resistance | LPAR5    | 57121  | 37 | 12 | 6729382  | 6729382  | Missense_Mutation | SNP | C | T | 5  | 30  | c.1033G>A    | c.(1033-1035)GAT>AAT | p.D345N      |
| Pat_41 | Post-Resistance | LPAR5    | 57121  | 37 | 12 | 6729589  | 6729589  | Missense_Mutation | SNP | G | A | 4  | 28  | c.826C>T     | c.(826-828)CGC>TGC   | p.R276C      |
| Pat_41 | Post-Resistance | C12orf53 | 196500 | 37 | 12 | 6806564  | 6806564  | Missense_Mutation | SNP | G | A | 13 | 99  | c.412C>T     | c.(412-414)CTC>TTC   | p.L138F      |
| Pat_41 | Post-Resistance | COPS7A   | 50813  | 37 | 12 | 6839618  | 6839618  | Missense_Mutation | SNP | G | A | 5  | 263 | c.581G>A     | c.(580-582)CGT>CAT   | p.R194H      |
| Pat_41 | Post-Resistance | LAG3     | 3902   | 37 | 12 | 6882474  | 6882474  | Missense_Mutation | SNP | G | A | 8  | 123 | c.175G>A     | c.(175-177)GCA>ACA   | p.A59T       |
| Pat_41 | Post-Resistance | GNB3     | 2784   | 37 | 12 | 6952852  | 6952852  | Missense_Mutation | SNP | G | A | 8  | 95  | c.487G>A     | c.(487-489)GAC>AAC   | p.D163N      |
| Pat_41 | Post-Resistance | USP5     | 8078   | 37 | 12 | 6961416  | 6961416  | Missense_Mutation | SNP | G | A | 4  | 59  | c.73G>A      | c.(73-75)GTC>ATC     | p.V25I       |
| Pat_41 | Post-Resistance | USP5     | 8078   | 37 | 12 | 6968699  | 6968699  | Missense_Mutation | SNP | C | T | 23 | 185 | c.1124C>T    | c.(1123-1125)ACC>ATC | p.T375I      |
| Pat_41 | Post-Resistance | USP5     | 8078   | 37 | 12 | 6971706  | 6971706  | Nonsense_Mutation | SNP | G | A | 14 | 199 | c.1746G>A    | c.(1744-1746)TGG>TGA | p.W582*      |
| Pat_41 | Post-Resistance | PTPN6    | 5777   | 37 | 12 | 7064827  | 7064827  | Missense_Mutation | SNP | T | C | 6  | 152 | c.752T>C     | c.(751-753)TTG>TCG   | p.L251S      |
| Pat_41 | Post-Resistance | PHB2     | 11331  | 37 | 12 | 7076922  | 7076922  | Missense_Mutation | SNP | C | T | 53 | 178 | c.628G>A     | c.(628-630)GCC>ACC   | p.A210T      |
| Pat_41 | Post-Resistance | C1R      | 715    | 37 | 12 | 7244047  | 7244047  | Splice_Site       | SNP | C | T | 4  | 11  | c.231_splice | c.e2+1               | p.K77_splice |
| Pat_41 | Post-Resistance | CD163L1  | 283316 | 37 | 12 | 7527238  | 7527238  | Missense_Mutation | SNP | G | A | 8  | 117 | c.3209C>T    | c.(3208-3210)GCC>GTC | p.A1070V     |
| Pat_41 | Post-Resistance | C3AR1    | 719    | 37 | 12 | 8212427  | 8212427  | Missense_Mutation | SNP | C | T | 14 | 245 | c.355G>A     | c.(355-357)GAT>AAT   | p.D119N      |
| Pat_41 | Post-Resistance | A2ML1    | 144568 | 37 | 12 | 9009850  | 9009850  | Missense_Mutation | SNP | C | T | 26 | 258 | c.2939C>T    | c.(2938-2940)CCC>CTC | p.P980L      |
| Pat_41 | Post-Resistance | A2ML1    | 144568 | 37 | 12 | 9016534  | 9016534  | Missense_Mutation | SNP | C | T | 12 | 87  | c.3647C>T    | c.(3646-3648)GCG>GTG | p.A1216V     |
| Pat_41 | Post-Resistance | DDX12    | 440081 | 37 | 12 | 9572580  | 9572580  | Missense_Mutation | SNP | C | T | 9  | 48  | c.2369G>A    | c.(2368-2370)GCG>GAC | p.G790D      |
| Pat_41 | Post-Resistance | DDX12    | 440081 | 37 | 12 | 9572644  | 9572644  | Missense_Mutation | SNP | C | T | 7  | 63  | c.2305G>A    | c.(2305-2307)GCC>ACC | p.A769T      |
| Pat_41 | Post-Resistance | CLEC2D   | 29121  | 37 | 12 | 9822341  | 9822341  | Missense_Mutation | SNP | G | A | 22 | 224 | c.11G>A      | c.(10-12)AGT>AAT     | p.S4N        |
| Pat_41 | Post-Resistance | KLRC3    | 3823   | 37 | 12 | 10588566 | 10588566 | Missense_Mutation | SNP | G | A | 22 | 392 | c.20C>T      | c.(19-21)ACC>ATC     | p.T7I        |
| Pat_41 | Post-Resistance | STYK1    | 55359  | 37 | 12 | 10787209 | 10787209 | Missense_Mutation | SNP | C | T | 13 | 192 | c.9G>A       | c.(7-9)ATG>ATA       | p.M3I        |
| Pat_41 | Post-Resistance | CSDA     | 8531   | 37 | 12 | 10853922 | 10853922 | Missense_Mutation | SNP | G | A | 13 | 152 | c.1084C>T    | c.(1084-1086)CCT>TCT | p.P362S      |
| Pat_41 | Post-Resistance | PRH1     | 5554   | 37 | 12 | 11036753 | 11036753 | Missense_Mutation | SNP | C | T | 4  | 91  | c.64G>A      | c.(64-66)GAT>AAT     | p.D22N       |
| Pat_41 | Post-Resistance | TAS2R50  | 259296 | 37 | 12 | 11138991 | 11138991 | Missense_Mutation | SNP | C | T | 67 | 314 | c.469G>A     | c.(469-471)GAA>AAA   | p.E157K      |
| Pat_41 | Post-Resistance | PRB3     | 5544   | 37 | 12 | 11420846 | 11420846 | Missense_Mutation | SNP | G | A | 12 | 258 | c.337C>T     | c.(337-339)CCC>TCC   | p.P113S      |
| Pat_41 | Post-Resistance | PRB1     | 5542   | 37 | 12 | 11506618 | 11506618 | Missense_Mutation | SNP | C | T | 9  | 219 | c.419G>A     | c.(418-420)GGA>GAA   | p.G140E      |
| Pat_41 | Post-Resistance | BCL2L14  | 79370  | 37 | 12 | 12240209 | 12240209 | Missense_Mutation | SNP | C | T | 49 | 174 | c.496C>T     | c.(496-498)CCA>TCA   | p.P166S      |
| Pat_41 | Post-Resistance | LRP6     | 4040   | 37 | 12 | 12303821 | 12303821 | Nonsense_Mutation | SNP | C | T | 35 | 492 | c.2943G>A    | c.(2941-2943)TGG>TGA | p.W981*      |
| Pat_41 | Post-Resistance | LRP6     | 4040   | 37 | 12 | 12312002 | 12312002 | Missense_Mutation | SNP | C | T | 11 | 120 | c.2552G>A    | c.(2551-2553)AGC>AAC | p.S851N      |
| Pat_41 | Post-Resistance | LRP6     | 4040   | 37 | 12 | 12312776 | 12312776 | Missense_Mutation | SNP | G | A | 8  | 296 | c.2402C>T    | c.(2401-2403)GCT>GTT | p.A801V      |
| Pat_41 | Post-Resistance | MANSC1   | 54682  | 37 | 12 | 12491408 | 12491408 | Missense_Mutation | SNP | C | T | 38 | 252 | c.310G>A     | c.(310-312)GAA>AAA   | p.E104K      |
| Pat_41 | Post-Resistance | GPR19    | 2842   | 37 | 12 | 12815333 | 12815333 | Missense_Mutation | SNP | G | A | 9  | 342 | c.50C>T      | c.(49-51)CCT>CTT     | p.P17L       |
| Pat_41 | Post-Resistance | GRIN2B   | 2904   | 37 | 12 | 13906731 | 13906731 | Missense_Mutation | SNP | G | T | 12 | 174 | c.530C>A     | c.(529-531)CCT>CAT   | p.P177H      |
| Pat_41 | Post-Resistance | ATF7IP   | 55729  | 37 | 12 | 14577424 | 14577424 | Missense_Mutation | SNP | G | A | 35 | 228 | c.575G>A     | c.(574-576)GGT>GAT   | p.G192D      |
| Pat_41 | Post-Resistance | PLBD1    | 79887  | 37 | 12 | 14659170 | 14659170 | Missense_Mutation | SNP | G | A | 4  | 96  | c.1405C>T    | c.(1405-1407)CCC>TCC | p.P469S      |
| Pat_41 | Post-Resistance | AEBP2    | 121536 | 37 | 12 | 19646756 | 19646756 | Missense_Mutation | SNP | C | T | 13 | 88  | c.1010C>T    | c.(1009-1011)GCC>GTC | p.A337V      |
| Pat_41 | Post-Resistance | SLCO1C1  | 53919  | 37 | 12 | 20874932 | 20874932 | Missense_Mutation | SNP | G | A | 9  | 83  | c.970G>A     | c.(970-972)GAC>AAC   | p.D324N      |
| Pat_41 | Post-Resistance | SLCO1A2  | 6579   | 37 | 12 | 21422693 | 21422693 | Missense_Mutation | SNP | T | C | 17 | 96  | c.1802A>G    | c.(1801-1803)TAC>TGC | p.Y601C      |
| Pat_41 | Post-Resistance | ABCC9    | 10060  | 37 | 12 | 21965085 | 21965085 | Missense_Mutation | SNP | A | T | 15 | 143 | c.4109T>A    | c.(4108-4110)ATT>AAT | p.I1370N     |
| Pat_41 | Post-Resistance | CMAS     | 55907  | 37 | 12 | 22218169 | 22218169 | Missense_Mutation | SNP | G | A | 20 | 260 | c.1229G>A    | c.(1228-1230)GGC>GAC | p.G410D      |
| Pat_41 | Post-Resistance | ST8SIA1  | 6489   | 37 | 12 | 22354896 | 22354896 | Missense_Mutation | SNP | G | A | 5  | 149 | c.661C>T     | c.(661-663)CCT>TCT   | p.P221S      |
| Pat_41 | Post-Resistance | KIAA0528 | 9847   | 37 | 12 | 22622643 | 22622643 | Missense_Mutation | SNP | C | T | 8  | 144 | c.2533G>A    | c.(2533-2535)GCC>ACC | p.A845T      |
| Pat_41 | Post-Resistance | KIAA0528 | 9847   | 37 | 12 | 22688216 | 22688216 | Nonsense_Mutation | SNP | C | T | 32 | 185 | c.153G>A     | c.(151-153)TGG>TGA   | p.W51*       |

|        |                 |          |        |    |    |          |          |                   |     |   |   |     |     |               |                        |               |
|--------|-----------------|----------|--------|----|----|----------|----------|-------------------|-----|---|---|-----|-----|---------------|------------------------|---------------|
| Pat_41 | Post-Resistance | LRMP     | 4033   | 37 | 12 | 25257380 | 25257380 | Missense_Mutation | SNP | G | A | 7   | 149 | c.1132G>A     | c.(1132-1134)GAA>AAA   | p.E378K       |
| Pat_41 | Post-Resistance | CASC1    | 55259  | 37 | 12 | 25300020 | 25300020 | Missense_Mutation | SNP | C | T | 6   | 220 | c.586G>A      | c.(586-588)GAT>AAT     | p.D196N       |
| Pat_41 | Post-Resistance | SSPN     | 8082   | 37 | 12 | 26383863 | 26383863 | Missense_Mutation | SNP | C | T | 28  | 394 | c.586C>T      | c.(586-588)CTC>TTC     | p.L196F       |
| Pat_41 | Post-Resistance | SSPN     | 8082   | 37 | 12 | 26383956 | 26383956 | Missense_Mutation | SNP | G | A | 17  | 105 | c.679G>A      | c.(679-681)GGT>AGT     | p.G227S       |
| Pat_41 | Post-Resistance | ITPR2    | 3709   | 37 | 12 | 26492338 | 26492338 | Missense_Mutation | SNP | G | A | 9   | 185 | c.8098C>T     | c.(8098-8100)CCA>TCA   | p.P2700S      |
| Pat_41 | Post-Resistance | FAR2     | 55711  | 37 | 12 | 29462124 | 29462124 | Nonsense_Mutation | SNP | G | A | 33  | 346 | c.729G>A      | c.(727-729)TGG>TGA     | p.W243*       |
| Pat_41 | Post-Resistance | ERGIC2   | 51290  | 37 | 12 | 29519860 | 29519860 | Missense_Mutation | SNP | C | T | 14  | 111 | c.283G>A      | c.(283-285)GAT>AAT     | p.D95N        |
| Pat_41 | Post-Resistance | TMTC1    | 83857  | 37 | 12 | 29669397 | 29669397 | Missense_Mutation | SNP | C | T | 21  | 120 | c.1868G>A     | c.(1867-1869)GGT>GAT   | p.G623D       |
| Pat_41 | Post-Resistance | DENND5B  | 160518 | 37 | 12 | 31551174 | 31551174 | Missense_Mutation | SNP | G | A | 4   | 50  | c.3191C>T     | c.(3190-3192)CCC>CTC   | p.P1064L      |
| Pat_41 | Post-Resistance | DENND5B  | 160518 | 37 | 12 | 31632982 | 31632982 | Missense_Mutation | SNP | C | T | 10  | 134 | c.445G>A      | c.(445-447)GCT>ACT     | p.A149T       |
| Pat_41 | Post-Resistance | CPNE8    | 144402 | 37 | 12 | 39047769 | 39047769 | Missense_Mutation | SNP | G | A | 18  | 82  | c.1610C>T     | c.(1609-1611)TCC>TTC   | p.S537F       |
| Pat_41 | Post-Resistance | CPNE8    | 144402 | 37 | 12 | 39233743 | 39233743 | Missense_Mutation | SNP | G | A | 7   | 49  | c.305C>T      | c.(304-306)TCA>TTA     | p.S102L       |
| Pat_41 | Post-Resistance | KIF21A   | 55605  | 37 | 12 | 39716617 | 39716617 | Missense_Mutation | SNP | G | A | 44  | 508 | c.3524C>T     | c.(3523-3525)ACT>ATT   | p.T1175I      |
| Pat_41 | Post-Resistance | ABCD2    | 225    | 37 | 12 | 40012802 | 40012802 | Missense_Mutation | SNP | G | A | 8   | 255 | c.616C>T      | c.(616-618)CCT>TCT     | p.P206S       |
| Pat_41 | Post-Resistance | PDZRN4   | 29951  | 37 | 12 | 41966971 | 41966971 | Missense_Mutation | SNP | C | T | 14  | 281 | c.1793C>T     | c.(1792-1794)ACC>ATC   | p.T598I       |
| Pat_41 | Post-Resistance | PPHLN1   | 51535  | 37 | 12 | 42778756 | 42778756 | Missense_Mutation | SNP | G | A | 19  | 231 | c.526G>A      | c.(526-528)GGT>AGT     | p.G176S       |
| Pat_41 | Post-Resistance | PPHLN1   | 51535  | 37 | 12 | 42836476 | 42836476 | Missense_Mutation | SNP | C | T | 33  | 686 | c.1058C>T     | c.(1057-1059)CCT>CTT   | p.P353L       |
| Pat_41 | Post-Resistance | ADAMTS20 | 80070  | 37 | 12 | 43824267 | 43824267 | Missense_Mutation | SNP | G | A | 12  | 128 | c.3269C>T     | c.(3268-3270)ACC>ATC   | p.T1090I      |
| Pat_41 | Post-Resistance | PUS7L    | 83448  | 37 | 12 | 44148787 | 44148787 | Missense_Mutation | SNP | C | T | 10  | 77  | c.262G>A      | c.(262-264)GTT>ATT     | p.V88I        |
| Pat_41 | Post-Resistance | SFRS2IP  | 9169   | 37 | 12 | 46321186 | 46321186 | Missense_Mutation | SNP | C | A | 14  | 239 | c.2298G>T     | c.(2296-2298)AAG>AAT   | p.K766N       |
| Pat_41 | Post-Resistance | SFRS2IP  | 9169   | 37 | 12 | 46345434 | 46345434 | Missense_Mutation | SNP | T | C | 141 | 161 | c.296A>G      | c.(295-297)AAG>AGG     | p.K99R        |
| Pat_41 | Post-Resistance | SLC38A2  | 54407  | 37 | 12 | 46760858 | 46760858 | Splice_Site       | SNP | C | T | 26  | 110 | c.481_splice  | c.e6+1                 | p.A161_splice |
| Pat_41 | Post-Resistance | SLC38A2  | 54407  | 37 | 12 | 46764585 | 46764585 | Missense_Mutation | SNP | C | T | 6   | 93  | c.172G>A      | c.(172-174)GGG>AGG     | p.G58R        |
| Pat_41 | Post-Resistance | AMIGO2   | 347902 | 37 | 12 | 47472676 | 47472676 | Missense_Mutation | SNP | G | A | 12  | 158 | c.110C>T      | c.(109-111)GCC>GTC     | p.A37V        |
| Pat_41 | Post-Resistance | RPAP3    | 79657  | 37 | 12 | 48063889 | 48063889 | Splice_Site       | SNP | C | T | 18  | 349 | c.1526_splice | c.e13+1                | p.Q509_splice |
| Pat_41 | Post-Resistance | COL2A1   | 1280   | 37 | 12 | 48389081 | 48389081 | Missense_Mutation | SNP | C | T | 22  | 132 | c.719G>A      | c.(718-720)GGT>GAT     | p.G240D       |
| Pat_41 | Post-Resistance | COL2A1   | 1280   | 37 | 12 | 48389699 | 48389699 | Missense_Mutation | SNP | G | A | 4   | 59  | c.613C>T      | c.(613-615)CCC>TCC     | p.P205S       |
| Pat_41 | Post-Resistance | COL2A1   | 1280   | 37 | 12 | 48393815 | 48393815 | Missense_Mutation | SNP | C | T | 13  | 128 | c.179G>A      | c.(178-180)GGG>GAG     | p.G60E        |
| Pat_41 | Post-Resistance | PFKM     | 5213   | 37 | 12 | 48529077 | 48529077 | Missense_Mutation | SNP | G | A | 16  | 133 | c.847G>A      | c.(847-849)GTG>ATG     | p.V283M       |
| Pat_41 | Post-Resistance | ZNF641   | 121274 | 37 | 12 | 48736877 | 48736877 | Missense_Mutation | SNP | G | A | 12  | 278 | c.1196C>T     | c.(1195-1197)CCC>CTC   | p.P399L       |
| Pat_41 | Post-Resistance | ZNF641   | 121274 | 37 | 12 | 48737394 | 48737394 | Missense_Mutation | SNP | C | T | 4   | 45  | c.679G>A      | c.(679-681)GAT>AAT     | p.D227N       |
| Pat_41 | Post-Resistance | LALBA    | 3906   | 37 | 12 | 48963721 | 48963721 | Missense_Mutation | SNP | G | A | 4   | 65  | c.83C>T       | c.(82-84)TCC>TTC       | p.S28F        |
| Pat_41 | Post-Resistance | CCNT1    | 904    | 37 | 12 | 49099637 | 49099637 | Missense_Mutation | SNP | C | G | 27  | 141 | c.286G>C      | c.(286-288)GAG>CAG     | p.E96Q        |
| Pat_41 | Post-Resistance | ADCY6    | 112    | 37 | 12 | 49170302 | 49170302 | Missense_Mutation | SNP | A | G | 5   | 190 | c.1444T>C     | c.(1444-1446)TGC>CGC   | p.C482R       |
| Pat_41 | Post-Resistance | CCDC65   | 85478  | 37 | 12 | 49312652 | 49312652 | Missense_Mutation | SNP | C | T | 11  | 105 | c.992C>T      | c.(991-993)GCC>GTC     | p.A331V       |
| Pat_41 | Post-Resistance | PRKAG1   | 5571   | 37 | 12 | 49399244 | 49399244 | Splice_Site       | SNP | C | T | 12  | 61  | c.250_splice  | c.e4+1                 | p.G84_splice  |
| Pat_41 | Post-Resistance | MLL2     | 8085   | 37 | 12 | 49431087 | 49431087 | Missense_Mutation | SNP | G | A | 4   | 46  | c.10052C>T    | c.(10051-10053)TCC>TTC | p.S3351F      |
| Pat_41 | Post-Resistance | RHEBL1   | 121268 | 37 | 12 | 49462827 | 49462827 | Missense_Mutation | SNP | C | T | 48  | 356 | c.115G>A      | c.(115-117)GTG>ATG     | p.V39M        |
| Pat_41 | Post-Resistance | LMBR1L   | 55716  | 37 | 12 | 49496286 | 49496286 | Missense_Mutation | SNP | G | A | 15  | 235 | c.734C>T      | c.(733-735)GCC>GTC     | p.A245V       |
| Pat_41 | Post-Resistance | TUBA1C   | 84790  | 37 | 12 | 49663372 | 49663372 | Missense_Mutation | SNP | G | A | 24  | 290 | c.128G>A      | c.(127-129)GGG>GAG     | p.G43E        |
| Pat_41 | Post-Resistance | PRPH     | 5630   | 37 | 12 | 49690690 | 49690690 | Missense_Mutation | SNP | G | A | 3   | 26  | c.721G>A      | c.(721-723)GTG>ATG     | p.V241M       |
| Pat_41 | Post-Resistance | TROAP    | 10024  | 37 | 12 | 49719410 | 49719410 | Missense_Mutation | SNP | G | A | 6   | 129 | c.464G>A      | c.(463-465)GGA>GAA     | p.G155E       |
| Pat_41 | Post-Resistance | SPATS2   | 65244  | 37 | 12 | 49918587 | 49918587 | Missense_Mutation | SNP | C | T | 49  | 236 | c.1234C>T     | c.(1234-1236)CTT>TTT   | p.L412F       |
| Pat_41 | Post-Resistance | FAM186B  | 84070  | 37 | 12 | 49994386 | 49994386 | Missense_Mutation | SNP | G | A | 7   | 110 | c.1037C>T     | c.(1036-1038)ACC>ATC   | p.T346I       |
| Pat_41 | Post-Resistance | NCKAP5L  | 57701  | 37 | 12 | 50189167 | 50189167 | Missense_Mutation | SNP | C | T | 7   | 38  | c.2476G>A     | c.(2476-2478)GTG>ATG   | p.V826M       |
| Pat_41 | Post-Resistance | AQP5     | 362    | 37 | 12 | 50356024 | 50356024 | Missense_Mutation | SNP | C | T | 4   | 34  | c.224C>T      | c.(223-225)GCC>GTC     | p.A75V        |
| Pat_41 | Post-Resistance | AQP5     | 362    | 37 | 12 | 50357426 | 50357426 | Missense_Mutation | SNP | G | A | 6   | 115 | c.515G>A      | c.(514-516)GGC>GAC     | p.G172D       |

|        |                 |          |        |    |    |          |          |                   |     |   |   |    |     |              |                      |               |
|--------|-----------------|----------|--------|----|----|----------|----------|-------------------|-----|---|---|----|-----|--------------|----------------------|---------------|
| Pat_41 | Post-Resistance | RACGAP1  | 29127  | 37 | 12 | 50385802 | 50385802 | Missense_Mutation | SNP | G | A | 23 | 282 | c.1693C>T    | c.(1693-1695)CCA>TCA | p.P565S       |
| Pat_41 | Post-Resistance | ACCN2    | 41     | 37 | 12 | 50472758 | 50472758 | Missense_Mutation | SNP | C | T | 27 | 115 | c.1046C>T    | c.(1045-1047)GCT>GTT | p.A349V       |
| Pat_41 | Post-Resistance | LIMA1    | 51474  | 37 | 12 | 50571778 | 50571778 | Missense_Mutation | SNP | C | T | 9  | 151 | c.1349G>A    | c.(1348-1350)GGC>GAC | p.G450D       |
| Pat_41 | Post-Resistance | LIMA1    | 51474  | 37 | 12 | 50625483 | 50625483 | Missense_Mutation | SNP | C | T | 13 | 131 | c.130G>A     | c.(130-132)GCA>ACA   | p.A44T        |
| Pat_41 | Post-Resistance | DIP2B    | 57609  | 37 | 12 | 51100366 | 51100366 | Missense_Mutation | SNP | G | A | 25 | 427 | c.2452G>A    | c.(2452-2454)GTT>ATT | p.V818I       |
| Pat_41 | Post-Resistance | ATF1     | 466    | 37 | 12 | 51189692 | 51189692 | Missense_Mutation | SNP | G | A | 4  | 53  | c.94G>A      | c.(94-96)GTA>ATA     | p.V32I        |
| Pat_41 | Post-Resistance | SLC11A2  | 4891   | 37 | 12 | 51393137 | 51393137 | Missense_Mutation | SNP | C | T | 7  | 181 | c.598G>A     | c.(598-600)GAC>AAC   | p.D200N       |
| Pat_41 | Post-Resistance | LETMD1   | 25875  | 37 | 12 | 51442260 | 51442260 | Missense_Mutation | SNP | C | T | 7  | 152 | c.121C>T     | c.(121-123)CGG>TGG   | p.R41W        |
| Pat_41 | Post-Resistance | TFCP2    | 7024   | 37 | 12 | 51510112 | 51510112 | Missense_Mutation | SNP | C | T | 21 | 143 | c.443G>A     | c.(442-444)AGA>AAA   | p.R148K       |
| Pat_41 | Post-Resistance | TFCP2    | 7024   | 37 | 12 | 51510129 | 51510129 | Nonsense_Mutation | SNP | C | T | 16 | 202 | c.426G>A     | c.(424-426)TGG>TGA   | p.W142*       |
| Pat_41 | Post-Resistance | POU6F1   | 5463   | 37 | 12 | 51586239 | 51586239 | Missense_Mutation | SNP | G | A | 8  | 152 | c.265C>T     | c.(265-267)CCC>TCC   | p.P89S        |
| Pat_41 | Post-Resistance | SCN8A    | 6334   | 37 | 12 | 52056803 | 52056803 | Missense_Mutation | SNP | A | G | 9  | 141 | c.202A>G     | c.(202-204)ATC>GTC   | p.I68V        |
| Pat_41 | Post-Resistance | SCN8A    | 6334   | 37 | 12 | 52093499 | 52093499 | Nonsense_Mutation | SNP | G | A | 10 | 73  | c.852G>A     | c.(850-852)TGG>TGA   | p.W284*       |
| Pat_41 | Post-Resistance | NR4A1    | 3164   | 37 | 12 | 52435692 | 52435692 | Missense_Mutation | SNP | G | A | 4  | 27  | c.16G>A      | c.(16-18)GCC>ACC     | p.A6T         |
| Pat_41 | Post-Resistance | NR4A1    | 3164   | 37 | 12 | 52448711 | 52448711 | Missense_Mutation | SNP | C | T | 10 | 187 | c.599C>T     | c.(598-600)CCC>CTC   | p.P200L       |
| Pat_41 | Post-Resistance | NR4A1    | 3164   | 37 | 12 | 52451006 | 52451006 | Missense_Mutation | SNP | G | A | 9  | 59  | c.1324G>A    | c.(1324-1326)GCC>ACC | p.A442T       |
| Pat_41 | Post-Resistance | KRT80    | 144501 | 37 | 12 | 52566100 | 52566100 | Nonsense_Mutation | SNP | G | A | 5  | 113 | c.1060C>T    | c.(1060-1062)CAG>TAG | p.Q354*       |
| Pat_41 | Post-Resistance | KRT81    | 3887   | 37 | 12 | 52681471 | 52681471 | Missense_Mutation | SNP | C | T | 10 | 63  | c.935G>A     | c.(934-936)GGG>GAG   | p.G312E       |
| Pat_41 | Post-Resistance | KRT86    | 3892   | 37 | 12 | 52695765 | 52695765 | Missense_Mutation | SNP | C | T | 14 | 66  | c.65C>T      | c.(64-66)CCC>CTC     | p.P22L        |
| Pat_41 | Post-Resistance | KRT83    | 3889   | 37 | 12 | 52712989 | 52712989 | Missense_Mutation | SNP | C | T | 27 | 416 | c.544G>A     | c.(544-546)GCC>ACC   | p.A182T       |
| Pat_41 | Post-Resistance | KRT83    | 3889   | 37 | 12 | 52714836 | 52714836 | Missense_Mutation | SNP | G | A | 8  | 231 | c.284C>T     | c.(283-285)CCC>CTC   | p.P95L        |
| Pat_41 | Post-Resistance | KRT84    | 3890   | 37 | 12 | 52776824 | 52776824 | Missense_Mutation | SNP | C | T | 17 | 301 | c.781G>A     | c.(781-783)GCC>ACC   | p.A261T       |
| Pat_41 | Post-Resistance | KRT75    | 9119   | 37 | 12 | 52818464 | 52818464 | Missense_Mutation | SNP | C | T | 5  | 83  | c.1493G>A    | c.(1492-1494)GGG>GAG | p.G498E       |
| Pat_41 | Post-Resistance | KRT5     | 3852   | 37 | 12 | 52913627 | 52913627 | Missense_Mutation | SNP | G | A | 7  | 89  | c.454C>T     | c.(454-456)CCC>TCC   | p.P152S       |
| Pat_41 | Post-Resistance | KRT72    | 140807 | 37 | 12 | 52986179 | 52986179 | Splice_Site       | SNP | C | T | 6  | 67  | c.798_splice | c.e4+1               | p.G266_splice |
| Pat_41 | Post-Resistance | KRT73    | 319101 | 37 | 12 | 53004580 | 53004580 | Missense_Mutation | SNP | G | A | 8  | 85  | c.1150C>T    | c.(1150-1152)CGG>TGG | p.R384W       |
| Pat_41 | Post-Resistance | TENC1    | 23371  | 37 | 12 | 53451359 | 53451359 | Missense_Mutation | SNP | G | A | 59 | 514 | c.854G>A     | c.(853-855)AGC>AAC   | p.S285N       |
| Pat_41 | Post-Resistance | TENC1    | 23371  | 37 | 12 | 53454959 | 53454959 | Missense_Mutation | SNP | G | A | 15 | 184 | c.3269G>A    | c.(3268-3270)GGC>GAC | p.G1090D      |
| Pat_41 | Post-Resistance | ESPL1    | 9700   | 37 | 12 | 53666582 | 53666582 | Missense_Mutation | SNP | C | T | 6  | 91  | c.1447C>T    | c.(1447-1449)CTC>TTC | p.L483F       |
| Pat_41 | Post-Resistance | ESPL1    | 9700   | 37 | 12 | 53680497 | 53680497 | Missense_Mutation | SNP | C | T | 6  | 26  | c.3977C>T    | c.(3976-3978)GCT>GTT | p.A1326V      |
| Pat_41 | Post-Resistance | SP1      | 6667   | 37 | 12 | 53776440 | 53776440 | Missense_Mutation | SNP | C | T | 14 | 142 | c.709C>T     | c.(709-711)CCC>TCC   | p.P237S       |
| Pat_41 | Post-Resistance | MAP3K12  | 7786   | 37 | 12 | 53876945 | 53876945 | Missense_Mutation | SNP | G | A | 5  | 106 | c.1543C>T    | c.(1543-1545)CTC>TTC | p.L515F       |
| Pat_41 | Post-Resistance | ATF7     | 11016  | 37 | 12 | 53911103 | 53911103 | Missense_Mutation | SNP | G | A | 3  | 23  | c.1303C>T    | c.(1303-1305)CCA>TCA | p.P435S       |
| Pat_41 | Post-Resistance | ATF7     | 11016  | 37 | 12 | 53926943 | 53926943 | Splice_Site       | SNP | C | T | 4  | 68  | c.693_splice | c.e6+1               | p.S231_splice |
| Pat_41 | Post-Resistance | HNRNP1A1 | 3178   | 37 | 12 | 54677677 | 54677677 | Missense_Mutation | SNP | G | A | 17 | 232 | c.989G>A     | c.(988-990)GGA>GAA   | p.G330E       |
| Pat_41 | Post-Resistance | ZNF385A  | 25946  | 37 | 12 | 54767846 | 54767846 | Missense_Mutation | SNP | C | T | 10 | 50  | c.272G>A     | c.(271-273)AGA>AAA   | p.R91K        |
| Pat_41 | Post-Resistance | ITGA5    | 3678   | 37 | 12 | 54793695 | 54793695 | Missense_Mutation | SNP | G | A | 12 | 157 | c.2680C>T    | c.(2680-2682)CGG>TGG | p.R894W       |
| Pat_41 | Post-Resistance | ITGA5    | 3678   | 37 | 12 | 54797521 | 54797521 | Missense_Mutation | SNP | C | T | 6  | 72  | c.1664G>A    | c.(1663-1665)GGA>GAA | p.G555E       |
| Pat_41 | Post-Resistance | OR6C1    | 390321 | 37 | 12 | 55714592 | 55714592 | Missense_Mutation | SNP | C | T | 28 | 34  | c.209C>T     | c.(208-210)TCG>TTG   | p.S70L        |
| Pat_41 | Post-Resistance | OR6C3    | 254786 | 37 | 12 | 55725953 | 55725953 | Missense_Mutation | SNP | C | T | 32 | 366 | c.469C>T     | c.(469-471)CTT>TTT   | p.L157F       |
| Pat_41 | Post-Resistance | OR6C3    | 254786 | 37 | 12 | 55726266 | 55726266 | Missense_Mutation | SNP | C | T | 6  | 41  | c.782C>T     | c.(781-783)GCA>GTA   | p.A261V       |
| Pat_41 | Post-Resistance | OR6C65   | 403282 | 37 | 12 | 55794818 | 55794818 | Missense_Mutation | SNP | C | T | 28 | 435 | c.506C>T     | c.(505-507)TCC>TTC   | p.S169F       |
| Pat_41 | Post-Resistance | OR10P1   | 121130 | 37 | 12 | 56030910 | 56030910 | Missense_Mutation | SNP | C | T | 11 | 113 | c.235C>T     | c.(235-237)CCC>TCC   | p.P79S        |
| Pat_41 | Post-Resistance | DNAJC14  | 85406  | 37 | 12 | 56216410 | 56216410 | Missense_Mutation | SNP | C | T | 15 | 270 | c.1741G>A    | c.(1741-1743)GGC>AGC | p.G581S       |
| Pat_41 | Post-Resistance | SUOX     | 6821   | 37 | 12 | 56398807 | 56398807 | Missense_Mutation | SNP | C | T | 22 | 182 | c.1634C>T    | c.(1633-1635)CCA>CTA | p.P545L       |
| Pat_41 | Post-Resistance | ESYT1    | 23344  | 37 | 12 | 56522413 | 56522413 | Missense_Mutation | SNP | G | A | 7  | 29  | c.310G>A     | c.(310-312)GCA>ACA   | p.A104T       |
| Pat_41 | Post-Resistance | ESYT1    | 23344  | 37 | 12 | 56526022 | 56526022 | Missense_Mutation | SNP | C | T | 43 | 551 | c.890C>T     | c.(889-891)TCC>TTC   | p.S297F       |

|        |                 |          |        |    |    |          |          |                   |     |   |   |    |     |               |                        |               |
|--------|-----------------|----------|--------|----|----|----------|----------|-------------------|-----|---|---|----|-----|---------------|------------------------|---------------|
| Pat_41 | Post-Resistance | SMARCC2  | 6601   | 37 | 12 | 56572780 | 56572780 | Splice_Site       | SNP | C | T | 9  | 77  | c.1141_splice | c.e12+1                | p.D381_splice |
| Pat_41 | Post-Resistance | SLC39A5  | 283375 | 37 | 12 | 56629058 | 56629058 | Missense_Mutation | SNP | C | T | 15 | 84  | c.752C>T      | c.(751-753)GCC>GTC     | p.A251V       |
| Pat_41 | Post-Resistance | ANKRD52  | 283373 | 37 | 12 | 56648691 | 56648691 | Missense_Mutation | SNP | C | T | 15 | 168 | c.508G>A      | c.(508-510)GAC>AAC     | p.D170N       |
| Pat_41 | Post-Resistance | PAN2     | 9924   | 37 | 12 | 56721357 | 56721357 | Missense_Mutation | SNP | C | T | 13 | 158 | c.710G>A      | c.(709-711)GGA>GAA     | p.G237E       |
| Pat_41 | Post-Resistance | GLS2     | 27165  | 37 | 12 | 56872924 | 56872924 | Missense_Mutation | SNP | C | T | 4  | 116 | c.446G>A      | c.(445-447)CGA>CAA     | p.R149Q       |
| Pat_41 | Post-Resistance | BAZ2A    | 11176  | 37 | 12 | 56996577 | 56996577 | Missense_Mutation | SNP | C | T | 5  | 63  | c.3350G>A     | c.(3349-3351)GGT>GAT   | p.G1117D      |
| Pat_41 | Post-Resistance | ATP5B    | 506    | 37 | 12 | 57036294 | 57036294 | Missense_Mutation | SNP | G | A | 24 | 151 | c.1022C>T     | c.(1021-1023)ACT>ATT   | p.T341I       |
| Pat_41 | Post-Resistance | STAT6    | 6778   | 37 | 12 | 57496686 | 57496686 | Missense_Mutation | SNP | C | T | 19 | 100 | c.1231G>A     | c.(1231-1233)GTG>ATG   | p.V411M       |
| Pat_41 | Post-Resistance | LRP1     | 4035   | 37 | 12 | 57574222 | 57574222 | Missense_Mutation | SNP | G | A | 13 | 130 | c.5346G>A     | c.(5344-5346)ATG>ATA   | p.M1782I      |
| Pat_41 | Post-Resistance | LRP1     | 4035   | 37 | 12 | 57593076 | 57593076 | Missense_Mutation | SNP | C | T | 45 | 313 | c.9758C>T     | c.(9757-9759)TCC>TTC   | p.S3253F      |
| Pat_41 | Post-Resistance | LRP1     | 4035   | 37 | 12 | 57594589 | 57594589 | Missense_Mutation | SNP | G | A | 26 | 170 | c.10216G>A    | c.(10216-10218)GCC>ACC | p.A3406T      |
| Pat_41 | Post-Resistance | SHMT2    | 6472   | 37 | 12 | 57626991 | 57626991 | Missense_Mutation | SNP | G | A | 6  | 91  | c.886G>A      | c.(886-888)GTG>ATG     | p.V296M       |
| Pat_41 | Post-Resistance | GLI1     | 2735   | 37 | 12 | 57861780 | 57861780 | Missense_Mutation | SNP | C | T | 6  | 48  | c.1081C>T     | c.(1081-1083)CCG>TCG   | p.P361S       |
| Pat_41 | Post-Resistance | KIF5A    | 3798   | 37 | 12 | 57944134 | 57944134 | Missense_Mutation | SNP | G | A | 9  | 130 | c.80G>A       | c.(79-81)GGA>GAA       | p.G27E        |
| Pat_41 | Post-Resistance | DTX3     | 196403 | 37 | 12 | 58002510 | 58002510 | Missense_Mutation | SNP | G | A | 5  | 79  | c.958G>A      | c.(958-960)GGA>AGA     | p.G320R       |
| Pat_41 | Post-Resistance | AGAP2    | 116986 | 37 | 12 | 58129185 | 58129185 | Nonsense_Mutation | SNP | C | T | 11 | 62  | c.1194G>A     | c.(1192-1194)TGG>TGA   | p.W398*       |
| Pat_41 | Post-Resistance | TSPAN31  | 6302   | 37 | 12 | 58139615 | 58139615 | Missense_Mutation | SNP | G | A | 49 | 191 | c.151G>A      | c.(151-153)GCT>ACT     | p.A51T        |
| Pat_41 | Post-Resistance | CDK4     | 1019   | 37 | 12 | 58144505 | 58144505 | Missense_Mutation | SNP | G | A | 10 | 264 | c.566C>T      | c.(565-567)TCC>TTC     | p.S189F       |
| Pat_41 | Post-Resistance | 9-Mar    | 92979  | 37 | 12 | 58151912 | 58151912 | Missense_Mutation | SNP | G | A | 25 | 126 | c.535G>A      | c.(535-537)GTC>ATC     | p.V179I       |
| Pat_41 | Post-Resistance | XRCC6BP1 | 91419  | 37 | 12 | 58350489 | 58350489 | Missense_Mutation | SNP | C | T | 6  | 145 | c.557C>T      | c.(556-558)GCC>GTC     | p.A186V       |
| Pat_41 | Post-Resistance | LRIG3    | 121227 | 37 | 12 | 59274444 | 59274444 | Missense_Mutation | SNP | C | T | 18 | 151 | c.1720G>A     | c.(1720-1722)GCC>ACC   | p.A574T       |
| Pat_41 | Post-Resistance | SLC16A7  | 9194   | 37 | 12 | 60098595 | 60098595 | Missense_Mutation | SNP | C | T | 4  | 39  | c.13C>T       | c.(13-15)CCA>TCA       | p.P5S         |
| Pat_41 | Post-Resistance | USP15    | 9958   | 37 | 12 | 62777862 | 62777862 | Missense_Mutation | SNP | G | A | 7  | 129 | c.1252G>A     | c.(1252-1254)GTT>ATT   | p.V418I       |
| Pat_41 | Post-Resistance | USP15    | 9958   | 37 | 12 | 62783460 | 62783460 | Missense_Mutation | SNP | G | A | 7  | 384 | c.1633G>A     | c.(1633-1635)GAA>AAA   | p.E545K       |
| Pat_41 | Post-Resistance | MON2     | 23041  | 37 | 12 | 62946851 | 62946851 | Missense_Mutation | SNP | C | T | 27 | 325 | c.3107C>T     | c.(3106-3108)CCC>CTC   | p.P1036L      |
| Pat_41 | Post-Resistance | PPM1H    | 57460  | 37 | 12 | 63114045 | 63114045 | Missense_Mutation | SNP | C | T | 24 | 126 | c.979G>A      | c.(979-981)GGA>AGA     | p.G327R       |
| Pat_41 | Post-Resistance | PPM1H    | 57460  | 37 | 12 | 63195703 | 63195703 | Missense_Mutation | SNP | C | T | 6  | 55  | c.649G>A      | c.(649-651)GGG>AGG     | p.G217R       |
| Pat_41 | Post-Resistance | SRGAP1   | 57522  | 37 | 12 | 64472840 | 64472840 | Missense_Mutation | SNP | C | T | 20 | 212 | c.1267C>T     | c.(1267-1269)CCC>TCC   | p.P423S       |
| Pat_41 | Post-Resistance | TBK1     | 29110  | 37 | 12 | 64858132 | 64858132 | Missense_Mutation | SNP | G | A | 8  | 91  | c.247G>A      | c.(247-249)GTA>ATA     | p.V83I        |
| Pat_41 | Post-Resistance | TBK1     | 29110  | 37 | 12 | 64875671 | 64875671 | Missense_Mutation | SNP | G | A | 17 | 215 | c.862G>A      | c.(862-864)GAT>AAT     | p.D288N       |
| Pat_41 | Post-Resistance | LEMD3    | 23592  | 37 | 12 | 65609824 | 65609824 | Splice_Site       | SNP | G | A | 16 | 141 | c.1627_splice | c.e3+1                 | p.G543_splice |
| Pat_41 | Post-Resistance | LEMD3    | 23592  | 37 | 12 | 65639671 | 65639671 | Missense_Mutation | SNP | G | A | 7  | 253 | c.2524G>A     | c.(2524-2526)GAA>AAA   | p.E842K       |
| Pat_41 | Post-Resistance | MSRB3    | 253827 | 37 | 12 | 65857031 | 65857031 | Missense_Mutation | SNP | G | A | 15 | 124 | c.508G>A      | c.(508-510)GAT>AAT     | p.D170N       |
| Pat_41 | Post-Resistance | TMBIM4   | 51643  | 37 | 12 | 66546107 | 66546107 | Missense_Mutation | SNP | C | T | 13 | 200 | c.256G>A      | c.(256-258)GCG>ACG     | p.A86T        |
| Pat_41 | Post-Resistance | GRIP1    | 23426  | 37 | 12 | 66773093 | 66773093 | Missense_Mutation | SNP | C | T | 36 | 487 | c.2432G>A     | c.(2431-2433)AGT>AAT   | p.S811N       |
| Pat_41 | Post-Resistance | CAND1    | 55832  | 37 | 12 | 67698469 | 67698469 | Missense_Mutation | SNP | G | A | 7  | 80  | c.1378G>A     | c.(1378-1380)GAG>AAG   | p.E460K       |
| Pat_41 | Post-Resistance | CAND1    | 55832  | 37 | 12 | 67705555 | 67705555 | Missense_Mutation | SNP | C | T | 70 | 317 | c.3443C>T     | c.(3442-3444)CCA>CTA   | p.P1148L      |
| Pat_41 | Post-Resistance | DYRK2    | 8445   | 37 | 12 | 68050997 | 68050997 | Missense_Mutation | SNP | C | T | 21 | 178 | c.310C>T      | c.(310-312)CTC>TTC     | p.L104F       |
| Pat_41 | Post-Resistance | NUP107   | 57122  | 37 | 12 | 69128526 | 69128526 | Missense_Mutation | SNP | G | A | 8  | 90  | c.2301G>A     | c.(2299-2301)ATG>ATA   | p.M767I       |
| Pat_41 | Post-Resistance | LYZ      | 4069   | 37 | 12 | 69746066 | 69746066 | Missense_Mutation | SNP | G | A | 22 | 231 | c.368G>A      | c.(367-369)GGC>GAC     | p.G123D       |
| Pat_41 | Post-Resistance | RAB3IP   | 117177 | 37 | 12 | 70189072 | 70189072 | Missense_Mutation | SNP | G | A | 4  | 76  | c.884G>A      | c.(883-885)GGC>GAC     | p.G295D       |
| Pat_41 | Post-Resistance | CNOT2    | 4848   | 37 | 12 | 70724165 | 70724165 | Missense_Mutation | SNP | G | A | 7  | 290 | c.485G>A      | c.(484-486)GGG>GAG     | p.G162E       |
| Pat_41 | Post-Resistance | PTPRR    | 5801   | 37 | 12 | 71139697 | 71139697 | Missense_Mutation | SNP | A | G | 6  | 90  | c.908T>C      | c.(907-909)GTG>GCG     | p.V303A       |
| Pat_41 | Post-Resistance | TPH2     | 121278 | 37 | 12 | 72372795 | 72372795 | Missense_Mutation | SNP | G | A | 30 | 326 | c.869G>A      | c.(868-870)GGA>GAA     | p.G290E       |
| Pat_41 | Post-Resistance | TRHDE    | 29953  | 37 | 12 | 72771880 | 72771880 | Missense_Mutation | SNP | C | T | 32 | 165 | c.1159C>T     | c.(1159-1161)CCC>TCC   | p.P387S       |
| Pat_41 | Post-Resistance | PHLDA1   | 22822  | 37 | 12 | 76424788 | 76424788 | Missense_Mutation | SNP | C | T | 18 | 138 | c.734G>A      | c.(733-735)CGC>CAC     | p.R245H       |
| Pat_41 | Post-Resistance | BBS10    | 79738  | 37 | 12 | 76740260 | 76740260 | Missense_Mutation | SNP | G | A | 8  | 321 | c.1505C>T     | c.(1504-1506)ACA>ATA   | p.T502I       |

|        |                 |           |        |    |    |           |           |                   |     |   |   |     |     |               |                      |               |
|--------|-----------------|-----------|--------|----|----|-----------|-----------|-------------------|-----|---|---|-----|-----|---------------|----------------------|---------------|
| Pat_41 | Post-Resistance | ZDHHC17   | 23390  | 37 | 12 | 77220718  | 77220718  | Missense_Mutation | SNP | C | T | 22  | 125 | c.928C>T      | c.(928-930)CCT>TCT   | p.P310S       |
| Pat_41 | Post-Resistance | NAV3      | 89795  | 37 | 12 | 78571464  | 78571464  | Missense_Mutation | SNP | C | T | 6   | 131 | c.5362C>T     | c.(5362-5364)CGG>TGG | p.R1788W      |
| Pat_41 | Post-Resistance | PPP1R12A  | 4659   | 37 | 12 | 80199528  | 80199528  | Missense_Mutation | SNP | G | A | 4   | 55  | c.1844C>T     | c.(1843-1845)GCT>GTT | p.A615V       |
| Pat_41 | Post-Resistance | PPFIA2    | 8499   | 37 | 12 | 81688815  | 81688815  | Splice_Site       | SNP | C | T | 12  | 87  | c.2725_splice | c.e24-1              | p.L909_splice |
| Pat_41 | Post-Resistance | C12orf26  | 84190  | 37 | 12 | 82780698  | 82780698  | Missense_Mutation | SNP | T | A | 153 | 177 | c.376T>A      | c.(376-378)TTT>ATT   | p.F126I       |
| Pat_41 | Post-Resistance | RASSF9    | 9182   | 37 | 12 | 86199624  | 86199624  | Missense_Mutation | SNP | G | A | 13  | 205 | c.164C>T      | c.(163-165)GCT>GTT   | p.A55V        |
| Pat_41 | Post-Resistance | GALNT4    | 8693   | 37 | 12 | 89917699  | 89917699  | Missense_Mutation | SNP | C | T | 55  | 224 | c.628G>A      | c.(628-630)GCC>ACC   | p.A210T       |
| Pat_41 | Post-Resistance | ATP2B1    | 490    | 37 | 12 | 89995107  | 89995107  | Missense_Mutation | SNP | C | T | 18  | 245 | c.3164G>A     | c.(3163-3165)GGC>GAC | p.G1055D      |
| Pat_41 | Post-Resistance | ATP2B1    | 490    | 37 | 12 | 90010785  | 90010785  | Missense_Mutation | SNP | C | T | 5   | 138 | c.1861G>A     | c.(1861-1863)GCA>ACA | p.A621T       |
| Pat_41 | Post-Resistance | ATP2B1    | 490    | 37 | 12 | 90024380  | 90024380  | Missense_Mutation | SNP | G | A | 11  | 178 | c.830C>T      | c.(829-831)GCT>GTT   | p.A277V       |
| Pat_41 | Post-Resistance | ATP2B1    | 490    | 37 | 12 | 90028936  | 90028936  | Missense_Mutation | SNP | C | T | 26  | 346 | c.499G>A      | c.(499-501)GTG>ATG   | p.V167M       |
| Pat_41 | Post-Resistance | KERA      | 11081  | 37 | 12 | 91449398  | 91449398  | Missense_Mutation | SNP | C | T | 16  | 166 | c.661G>A      | c.(661-663)GAC>AAC   | p.D221N       |
| Pat_41 | Post-Resistance | DCN       | 1634   | 37 | 12 | 91546915  | 91546915  | Missense_Mutation | SNP | C | T | 16  | 270 | c.704G>A      | c.(703-705)AGA>AAA   | p.R235K       |
| Pat_41 | Post-Resistance | EEA1      | 8411   | 37 | 12 | 93171859  | 93171859  | Missense_Mutation | SNP | C | T | 36  | 403 | c.3751G>A     | c.(3751-3753)GGC>AGC | p.G1251S      |
| Pat_41 | Post-Resistance | NUDT4     | 11163  | 37 | 12 | 93789271  | 93789271  | Missense_Mutation | SNP | G | A | 7   | 115 | c.217G>A      | c.(217-219)GTC>ATC   | p.V73I        |
| Pat_41 | Post-Resistance | PLXNC1    | 10154  | 37 | 12 | 94543726  | 94543726  | Missense_Mutation | SNP | G | A | 3   | 4   | c.979G>A      | c.(979-981)GCG>ACG   | p.A327T       |
| Pat_41 | Post-Resistance | PLXNC1    | 10154  | 37 | 12 | 94603365  | 94603365  | Splice_Site       | SNP | G | A | 8   | 298 | c.1440_splice | c.e5-1               | p.R480_splice |
| Pat_41 | Post-Resistance | LTA4H     | 4048   | 37 | 12 | 96397692  | 96397692  | Missense_Mutation | SNP | G | A | 8   | 92  | c.1537C>T     | c.(1537-1539)CTT>TTT | p.L513F       |
| Pat_41 | Post-Resistance | ELK3      | 2004   | 37 | 12 | 96617354  | 96617354  | Missense_Mutation | SNP | G | A | 15  | 221 | c.10G>A       | c.(10-12)GCA>ACA     | p.A4T         |
| Pat_41 | Post-Resistance | TMPO      | 7112   | 37 | 12 | 98921775  | 98921775  | Missense_Mutation | SNP | C | T | 17  | 201 | c.391C>T      | c.(391-393)CCT>TCT   | p.P131S       |
| Pat_41 | Post-Resistance | APAF1     | 317    | 37 | 12 | 99071301  | 99071301  | Missense_Mutation | SNP | C | T | 12  | 192 | c.1892C>T     | c.(1891-1893)GCT>GTT | p.A631V       |
| Pat_41 | Post-Resistance | ANKS1B    | 56899  | 37 | 12 | 100377906 | 100377906 | Missense_Mutation | SNP | G | A | 14  | 142 | c.110C>T      | c.(109-111)CCC>CTC   | p.P37L        |
| Pat_41 | Post-Resistance | UHRF1BP1L | 23074  | 37 | 12 | 100491142 | 100491142 | Splice_Site       | SNP | C | T | 4   | 85  | c.669_splice  | c.e6+1               | p.R223_splice |
| Pat_41 | Post-Resistance | UTP20     | 27340  | 37 | 12 | 101764222 | 101764222 | Missense_Mutation | SNP | C | T | 23  | 243 | c.6568C>T     | c.(6568-6570)CTT>TTT | p.L2190F      |
| Pat_41 | Post-Resistance | MYBPC1    | 4604   | 37 | 12 | 102054971 | 102054971 | Missense_Mutation | SNP | G | A | 9   | 78  | c.1888G>A     | c.(1888-1890)GAG>AAG | p.E630K       |
| Pat_41 | Post-Resistance | GNPTAB    | 79158  | 37 | 12 | 102158533 | 102158533 | Missense_Mutation | SNP | C | T | 18  | 123 | c.2162G>A     | c.(2161-2163)GGA>GAA | p.G721E       |
| Pat_41 | Post-Resistance | GNPTAB    | 79158  | 37 | 12 | 102158638 | 102158638 | Missense_Mutation | SNP | G | A | 4   | 31  | c.2057C>T     | c.(2056-2058)ACA>ATA | p.T686I       |
| Pat_41 | Post-Resistance | CCDC53    | 51019  | 37 | 12 | 102433677 | 102433677 | Missense_Mutation | SNP | C | T | 34  | 472 | c.404G>A      | c.(403-405)AGA>AAA   | p.R135K       |
| Pat_41 | Post-Resistance | C12orf48  | 55010  | 37 | 12 | 102572470 | 102572470 | Missense_Mutation | SNP | C | T | 16  | 62  | c.1106C>T     | c.(1105-1107)ACC>ATC | p.T369I       |
| Pat_41 | Post-Resistance | IGF1      | 3479   | 37 | 12 | 102813330 | 102813330 | Missense_Mutation | SNP | G | A | 14  | 178 | c.359C>T      | c.(358-360)TCT>TTT   | p.S120F       |
| Pat_41 | Post-Resistance | STAB2     | 55576  | 37 | 12 | 104138951 | 104138951 | Missense_Mutation | SNP | C | T | 14  | 114 | c.6032C>T     | c.(6031-6033)CCC>CTC | p.P2011L      |
| Pat_41 | Post-Resistance | HSP90B1   | 7184   | 37 | 12 | 104336961 | 104336961 | Missense_Mutation | SNP | G | A | 7   | 88  | c.1754G>A     | c.(1753-1755)GGG>GAG | p.G585E       |
| Pat_41 | Post-Resistance | TDG       | 6996   | 37 | 12 | 104373816 | 104373816 | Missense_Mutation | SNP | C | T | 6   | 83  | c.374C>T      | c.(373-375)CCC>CTC   | p.P125L       |
| Pat_41 | Post-Resistance | KIAA1033  | 23325  | 37 | 12 | 105512246 | 105512246 | Missense_Mutation | SNP | G | A | 45  | 226 | c.458G>A      | c.(457-459)AGG>AAG   | p.R153K       |
| Pat_41 | Post-Resistance | NUAK1     | 9891   | 37 | 12 | 106532346 | 106532346 | Missense_Mutation | SNP | C | T | 3   | 21  | c.86G>A       | c.(85-87)GGG>GAG     | p.G29E        |
| Pat_41 | Post-Resistance | CKAP4     | 10970  | 37 | 12 | 106633769 | 106633769 | Missense_Mutation | SNP | C | T | 12  | 212 | c.842G>A      | c.(841-843)GGG>GAG   | p.G281E       |
| Pat_41 | Post-Resistance | TCP11L2   | 255394 | 37 | 12 | 106740111 | 106740111 | Missense_Mutation | SNP | C | T | 3   | 38  | c.1363C>T     | c.(1363-1365)CCT>TCT | p.P455S       |
| Pat_41 | Post-Resistance | POLR3B    | 55703  | 37 | 12 | 106889833 | 106889833 | Missense_Mutation | SNP | G | A | 8   | 546 | c.2714G>A     | c.(2713-2715)GGT>GAT | p.G905D       |
| Pat_41 | Post-Resistance | RFX4      | 5992   | 37 | 12 | 107126012 | 107126012 | Missense_Mutation | SNP | G | A | 10  | 212 | c.1456G>A     | c.(1456-1458)GGA>AGA | p.G486R       |
| Pat_41 | Post-Resistance | RFX4      | 5992   | 37 | 12 | 107141349 | 107141349 | Missense_Mutation | SNP | C | T | 12  | 195 | c.1768C>T     | c.(1768-1770)CCA>TCA | p.P590S       |
| Pat_41 | Post-Resistance | SART3     | 9733   | 37 | 12 | 108932789 | 108932789 | Missense_Mutation | SNP | C | T | 5   | 238 | c.983G>A      | c.(982-984)CGC>CAC   | p.R328H       |
| Pat_41 | Post-Resistance | ISCU      | 23479  | 37 | 12 | 108959182 | 108959182 | Missense_Mutation | SNP | C | T | 16  | 165 | c.314C>T      | c.(313-315)GCC>GTC   | p.A105V       |
| Pat_41 | Post-Resistance | USP30     | 84749  | 37 | 12 | 109523716 | 109523716 | Missense_Mutation | SNP | G | A | 4   | 42  | c.1534G>A     | c.(1534-1536)GAG>AAG | p.E512K       |
| Pat_41 | Post-Resistance | ACACB     | 32     | 37 | 12 | 109677720 | 109677720 | Missense_Mutation | SNP | C | T | 11  | 182 | c.4748C>T     | c.(4747-4749)ACC>ATC | p.T1583I      |
| Pat_41 | Post-Resistance | TCHP      | 84260  | 37 | 12 | 110352355 | 110352355 | Missense_Mutation | SNP | G | A | 11  | 40  | c.1243G>A     | c.(1243-1245)GTG>ATG | p.V415M       |
| Pat_41 | Post-Resistance | ANAPC7    | 51434  | 37 | 12 | 110826391 | 110826391 | Missense_Mutation | SNP | C | T | 16  | 167 | c.548G>A      | c.(547-549)GGT>GAT   | p.G183D       |
| Pat_41 | Post-Resistance | RAD9B     | 144715 | 37 | 12 | 110957645 | 110957645 | Missense_Mutation | SNP | A | G | 6   | 71  | c.814A>G      | c.(814-816)ATT>GTT   | p.I272V       |



|        |                 |          |        |    |    |           |           |                   |     |   |   |    |     |               |                      |               |
|--------|-----------------|----------|--------|----|----|-----------|-----------|-------------------|-----|---|---|----|-----|---------------|----------------------|---------------|
| Pat_41 | Post-Resistance | ACAD10   | 80724  | 37 | 12 | 112187060 | 112187060 | Missense_Mutation | SNP | G | A | 21 | 77  | c.2728G>A     | c.(2728-2730)GCC>ACC | p.A910T       |
| Pat_41 | Post-Resistance | ALDH2    | 217    | 37 | 12 | 112236000 | 112236000 | Missense_Mutation | SNP | C | T | 18 | 146 | c.1202C>T     | c.(1201-1203)ACT>ATT | p.T401I       |
| Pat_41 | Post-Resistance | TRAFD1   | 10906  | 37 | 12 | 112589871 | 112589871 | Missense_Mutation | SNP | C | T | 20 | 329 | c.1546C>T     | c.(1546-1548)CCT>TCT | p.P516S       |
| Pat_41 | Post-Resistance | TPCN1    | 53373  | 37 | 12 | 113724826 | 113724826 | Missense_Mutation | SNP | G | A | 7  | 165 | c.1561G>A     | c.(1561-1563)GGA>AGA | p.G521R       |
| Pat_41 | Post-Resistance | TPCN1    | 53373  | 37 | 12 | 113733789 | 113733789 | Missense_Mutation | SNP | G | A | 5  | 14  | c.2359G>A     | c.(2359-2361)GAG>AAG | p.E787K       |
| Pat_41 | Post-Resistance | SLC24A6  | 80024  | 37 | 12 | 113748104 | 113748104 | Missense_Mutation | SNP | C | T | 13 | 160 | c.1192G>A     | c.(1192-1194)GGC>AGC | p.G398S       |
| Pat_41 | Post-Resistance | RBM19    | 9904   | 37 | 12 | 114390340 | 114390340 | Missense_Mutation | SNP | C | T | 31 | 146 | c.977G>A      | c.(976-978)AGA>AAA   | p.R326K       |
| Pat_41 | Post-Resistance | MED13L   | 23389  | 37 | 12 | 116424196 | 116424196 | Missense_Mutation | SNP | C | T | 13 | 85  | c.4213G>A     | c.(4213-4215)GAG>AAG | p.E1405K      |
| Pat_41 | Post-Resistance | FBXW8    | 26259  | 37 | 12 | 117426562 | 117426562 | Missense_Mutation | SNP | C | T | 21 | 327 | c.1127C>T     | c.(1126-1128)TCC>TTC | p.S376F       |
| Pat_41 | Post-Resistance | TESC     | 54997  | 37 | 12 | 117494657 | 117494657 | Missense_Mutation | SNP | G | A | 10 | 205 | c.322C>T      | c.(322-324)CTC>TTC   | p.L108F       |
| Pat_41 | Post-Resistance | FBXO21   | 23014  | 37 | 12 | 117604702 | 117604702 | Splice_Site       | SNP | C | T | 12 | 189 | c.1193_splice | c.e8+1               | p.R398_splice |
| Pat_41 | Post-Resistance | NOS1     | 4842   | 37 | 12 | 117672499 | 117672499 | Missense_Mutation | SNP | C | T | 4  | 40  | c.3106G>A     | c.(3106-3108)GAC>AAC | p.D1036N      |
| Pat_41 | Post-Resistance | WSB2     | 55884  | 37 | 12 | 118474207 | 118474207 | Missense_Mutation | SNP | C | T | 42 | 236 | c.769G>A      | c.(769-771)GCT>ACT   | p.A257T       |
| Pat_41 | Post-Resistance | CCDC60   | 160777 | 37 | 12 | 119909831 | 119909831 | Missense_Mutation | SNP | G | A | 4  | 119 | c.203G>A      | c.(202-204)GGA>GAA   | p.G68E        |
| Pat_41 | Post-Resistance | CCDC64   | 92558  | 37 | 12 | 120499613 | 120499613 | Missense_Mutation | SNP | G | A | 9  | 49  | c.745G>A      | c.(745-747)GAG>AAG   | p.E249K       |
| Pat_41 | Post-Resistance | GCN1L1   | 10985  | 37 | 12 | 120580442 | 120580442 | Missense_Mutation | SNP | C | T | 5  | 109 | c.5698G>A     | c.(5698-5700)GTG>ATG | p.V1900M      |
| Pat_41 | Post-Resistance | GCN1L1   | 10985  | 37 | 12 | 120580635 | 120580635 | Missense_Mutation | SNP | G | A | 32 | 148 | c.5606C>T     | c.(5605-5607)TCC>TTC | p.S1869F      |
| Pat_41 | Post-Resistance | GCN1L1   | 10985  | 37 | 12 | 120582137 | 120582137 | Missense_Mutation | SNP | C | T | 13 | 114 | c.5468G>A     | c.(5467-5469)GGC>GAC | p.G1823D      |
| Pat_41 | Post-Resistance | GCN1L1   | 10985  | 37 | 12 | 120597757 | 120597757 | Missense_Mutation | SNP | G | A | 12 | 117 | c.2621C>T     | c.(2620-2622)ACC>ATC | p.T874I       |
| Pat_41 | Post-Resistance | GCN1L1   | 10985  | 37 | 12 | 120599745 | 120599745 | Missense_Mutation | SNP | C | T | 12 | 94  | c.2281G>A     | c.(2281-2283)GAG>AAG | p.E761K       |
| Pat_41 | Post-Resistance | RNF10    | 9921   | 37 | 12 | 120995259 | 120995259 | Missense_Mutation | SNP | G | A | 7  | 203 | c.820G>A      | c.(820-822)GAT>AAT   | p.D274N       |
| Pat_41 | Post-Resistance | POP5     | 51367  | 37 | 12 | 121017705 | 121017705 | Missense_Mutation | SNP | G | A | 13 | 127 | c.185C>T      | c.(184-186)ACT>ATT   | p.T62I        |
| Pat_41 | Post-Resistance | ACADS    | 35     | 37 | 12 | 121177223 | 121177223 | Missense_Mutation | SNP | G | A | 4  | 37  | c.1211G>A     | c.(1210-1212)GGG>GAG | p.G404E       |
| Pat_41 | Post-Resistance | OASL     | 8638   | 37 | 12 | 121458612 | 121458612 | Missense_Mutation | SNP | C | T | 40 | 52  | c.1297G>A     | c.(1297-1299)GAG>AAG | p.E433K       |
| Pat_41 | Post-Resistance | P2RX7    | 5027   | 37 | 12 | 121603916 | 121603916 | Missense_Mutation | SNP | C | T | 35 | 384 | c.670C>T      | c.(670-672)CCA>TCA   | p.P224S       |
| Pat_41 | Post-Resistance | CAMKK2   | 10645  | 37 | 12 | 121691153 | 121691153 | Missense_Mutation | SNP | G | A | 12 | 110 | c.1030C>T     | c.(1030-1032)CTC>TTC | p.L344F       |
| Pat_41 | Post-Resistance | CAMKK2   | 10645  | 37 | 12 | 121712148 | 121712148 | Missense_Mutation | SNP | C | T | 19 | 69  | c.182G>A      | c.(181-183)GGC>GAC   | p.G61D        |
| Pat_41 | Post-Resistance | ANAPC5   | 51433  | 37 | 12 | 121783808 | 121783808 | Missense_Mutation | SNP | C | T | 11 | 78  | c.424G>A      | c.(424-426)GCC>ACC   | p.A142T       |
| Pat_41 | Post-Resistance | KDM2B    | 84678  | 37 | 12 | 121881913 | 121881913 | Missense_Mutation | SNP | C | T | 8  | 136 | c.2353G>A     | c.(2353-2355)GTG>ATG | p.V785M       |
| Pat_41 | Post-Resistance | HPD      | 3242   | 37 | 12 | 122287697 | 122287697 | Splice_Site       | SNP | C | T | 5  | 53  | c.415_splice  | c.e8-1               | p.Y139_splice |
| Pat_41 | Post-Resistance | HPD      | 3242   | 37 | 12 | 122294229 | 122294229 | Splice_Site       | SNP | C | T | 10 | 157 | c.324_splice  | c.e6+1               | p.Q108_splice |
| Pat_41 | Post-Resistance | PSMD9    | 5715   | 37 | 12 | 122326772 | 122326772 | Missense_Mutation | SNP | G | A | 4  | 4   | c.10G>A       | c.(10-12)GAG>AAG     | p.E4K         |
| Pat_41 | Post-Resistance | VPS33A   | 65082  | 37 | 12 | 122727031 | 122727031 | Missense_Mutation | SNP | C | T | 5  | 102 | c.994G>A      | c.(994-996)GGG>AGG   | p.G332R       |
| Pat_41 | Post-Resistance | ZCCHC8   | 55596  | 37 | 12 | 122958637 | 122958637 | Missense_Mutation | SNP | C | T | 8  | 62  | c.1531G>A     | c.(1531-1533)GAT>AAT | p.D511N       |
| Pat_41 | Post-Resistance | ABCB9    | 23457  | 37 | 12 | 123444595 | 123444595 | Missense_Mutation | SNP | C | T | 10 | 104 | c.188G>A      | c.(187-189)GGA>GAA   | p.G63E        |
| Pat_41 | Post-Resistance | SBNO1    | 55206  | 37 | 12 | 123810879 | 123810879 | Nonsense_Mutation | SNP | C | T | 32 | 198 | c.1695G>A     | c.(1693-1695)TGG>TGA | p.W565*       |
| Pat_41 | Post-Resistance | EIF2B1   | 1967   | 37 | 12 | 124111643 | 124111643 | Missense_Mutation | SNP | C | T | 37 | 286 | c.430G>A      | c.(430-432)GCC>ACC   | p.A144T       |
| Pat_41 | Post-Resistance | DNAH10   | 196385 | 37 | 12 | 124289517 | 124289517 | Missense_Mutation | SNP | C | T | 8  | 112 | c.2563C>T     | c.(2563-2565)CCC>TCC | p.P855S       |
| Pat_41 | Post-Resistance | DNAH10   | 196385 | 37 | 12 | 124352080 | 124352080 | Missense_Mutation | SNP | G | A | 4  | 48  | c.6880G>A     | c.(6880-6882)GAA>AAA | p.E2294K      |
| Pat_41 | Post-Resistance | CCDC92   | 80212  | 37 | 12 | 124427987 | 124427987 | Missense_Mutation | SNP | C | T | 26 | 292 | c.88G>A       | c.(88-90)GCA>ACA     | p.A30T        |
| Pat_41 | Post-Resistance | NCOR2    | 9612   | 37 | 12 | 124941668 | 124941668 | Missense_Mutation | SNP | C | T | 16 | 30  | c.746G>A      | c.(745-747)GGG>GAG   | p.G249E       |
| Pat_41 | Post-Resistance | NCOR2    | 9612   | 37 | 12 | 124950813 | 124950813 | Missense_Mutation | SNP | G | A | 4  | 95  | c.611C>T      | c.(610-612)GCT>GTT   | p.A204V       |
| Pat_41 | Post-Resistance | NCOR2    | 9612   | 37 | 12 | 124970986 | 124970986 | Splice_Site       | SNP | C | T | 4  | 31  | c.233_splice  | c.e2+1               | p.R78_splice  |
| Pat_41 | Post-Resistance | DHX37    | 57647  | 37 | 12 | 125457048 | 125457048 | Splice_Site       | SNP | C | T | 22 | 283 | c.1077_splice | c.e7+1               | p.K359_splice |
| Pat_41 | Post-Resistance | TMEM132B | 114795 | 37 | 12 | 125834801 | 125834801 | Missense_Mutation | SNP | G | A | 59 | 412 | c.856G>A      | c.(856-858)GTA>ATA   | p.V286I       |
| Pat_41 | Post-Resistance | SFRS8    | 6433   | 37 | 12 | 132237821 | 132237821 | Missense_Mutation | SNP | C | T | 15 | 251 | c.1235C>T     | c.(1234-1236)GCC>GTC | p.A412V       |
| Pat_41 | Post-Resistance | SFRS8    | 6433   | 37 | 12 | 132237830 | 132237830 | Missense_Mutation | SNP | C | T | 23 | 215 | c.1244C>T     | c.(1243-1245)CCT>CTT | p.P415L       |

|        |                 |         |        |    |    |           |           |                   |     |    |    |     |     |                |                        |                |
|--------|-----------------|---------|--------|----|----|-----------|-----------|-------------------|-----|----|----|-----|-----|----------------|------------------------|----------------|
| Pat_41 | Post-Resistance | DDX51   | 317781 | 37 | 12 | 132624223 | 132624223 | Missense_Mutation | SNP | G  | A  | 23  | 21  | c.1931C>T      | c.(1930-1932)CCT>CTT   | p.P644L        |
| Pat_41 | Post-Resistance | POLE    | 5426   | 37 | 12 | 133219913 | 133219913 | Missense_Mutation | SNP | C  | T  | 10  | 97  | c.4448G>A      | c.(4447-4449)AGT>AAT   | p.S1483N       |
| Pat_41 | Post-Resistance | POLE    | 5426   | 37 | 12 | 133226345 | 133226345 | Missense_Mutation | SNP | C  | T  | 6   | 95  | c.3713G>A      | c.(3712-3714)AGC>AAC   | p.S1238N       |
| Pat_41 | Post-Resistance | POLE    | 5426   | 37 | 12 | 133235987 | 133235987 | Missense_Mutation | SNP | C  | T  | 13  | 86  | c.3169G>A      | c.(3169-3171)GCA>ACA   | p.A1057T       |
| Pat_41 | Post-Resistance | POLE    | 5426   | 37 | 12 | 133238271 | 133238271 | Splice_Site       | SNP | C  | T  | 11  | 153 | c.2707_splice  | c.e24-1                | p.E903_splice  |
| Pat_41 | Post-Resistance | PGAM5   | 192111 | 37 | 12 | 133294030 | 133294030 | Missense_Mutation | SNP | G  | A  | 4   | 47  | c.376G>A       | c.(376-378)GAG>AAG     | p.E126K        |
| Pat_41 | Post-Resistance | ANKLE2  | 23141  | 37 | 12 | 133324818 | 133324818 | Missense_Mutation | SNP | G  | A  | 5   | 112 | c.947C>T       | c.(946-948)GCT>GTT     | p.A316V        |
| Pat_41 | Post-Resistance | GOLGA3  | 2802   | 37 | 12 | 133359063 | 133359063 | Missense_Mutation | SNP | C  | T  | 6   | 59  | c.3284G>A      | c.(3283-3285)GGC>GAC   | p.G1095D       |
| Pat_41 | Post-Resistance | TUBA3C  | 7278   | 37 | 13 | 19751504  | 19751504  | Missense_Mutation | SNP | C  | T  | 14  | 190 | c.619G>A       | c.(619-621)GAA>AAA     | p.E207K        |
| Pat_41 | Post-Resistance | PSPC1   | 55269  | 37 | 13 | 20356848  | 20356848  | Missense_Mutation | SNP | G  | A  | 7   | 88  | c.50C>T        | c.(49-51)GCC>GTC       | p.A17V         |
| Pat_41 | Post-Resistance | ZMYM5   | 9205   | 37 | 13 | 20411908  | 20411908  | Missense_Mutation | SNP | G  | A  | 5   | 115 | c.926C>T       | c.(925-927)TCC>TTC     | p.S309F        |
| Pat_41 | Post-Resistance | ZMYM5   | 9205   | 37 | 13 | 20426275  | 20426275  | Missense_Mutation | SNP | G  | A  | 115 | 605 | c.46C>T        | c.(46-48)CCT>TCT       | p.P16S         |
| Pat_41 | Post-Resistance | ZMYM2   | 7750   | 37 | 13 | 20577074  | 20577074  | Missense_Mutation | SNP | C  | T  | 21  | 278 | c.932C>T       | c.(931-933)CCT>CTT     | p.P311L        |
| Pat_41 | Post-Resistance | XPO4    | 64328  | 37 | 13 | 21476858  | 21476858  | Missense_Mutation | SNP | C  | T  | 6   | 26  | c.20G>A        | c.(19-21)GGG>GAG       | p.G7E          |
| Pat_41 | Post-Resistance | SGCG    | 6445   | 37 | 13 | 23894876  | 23894876  | Missense_Mutation | SNP | C  | T  | 4   | 122 | c.679C>T       | c.(679-681)CTT>TTT     | p.L227F        |
| Pat_41 | Post-Resistance | SACS    | 26278  | 37 | 13 | 23905090  | 23905090  | Missense_Mutation | SNP | C  | T  | 9   | 259 | c.12925G>A     | c.(12925-12927)GAA>AAA | p.E4309K       |
| Pat_41 | Post-Resistance | SACS    | 26278  | 37 | 13 | 23905651  | 23905651  | Missense_Mutation | SNP | C  | T  | 10  | 398 | c.12364G>A     | c.(12364-12366)GCT>ACT | p.A4122T       |
| Pat_41 | Post-Resistance | SACS    | 26278  | 37 | 13 | 23909083  | 23909083  | Missense_Mutation | SNP | C  | T  | 11  | 250 | c.8932G>A      | c.(8932-8934)GTG>ATG   | p.V2978M       |
| Pat_41 | Post-Resistance | SACS    | 26278  | 37 | 13 | 23910426  | 23910426  | Missense_Mutation | SNP | C  | T  | 8   | 237 | c.7589G>A      | c.(7588-7590)AGC>AAC   | p.S2530N       |
| Pat_41 | Post-Resistance | SACS    | 26278  | 37 | 13 | 23911068  | 23911068  | Missense_Mutation | SNP | G  | A  | 11  | 516 | c.6947C>T      | c.(6946-6948)ACC>ATC   | p.T2316I       |
| Pat_41 | Post-Resistance | MIPEP   | 4285   | 37 | 13 | 24411810  | 24411810  | Missense_Mutation | SNP | G  | A  | 26  | 474 | c.1424C>T      | c.(1423-1425)CCC>CTC   | p.P475L        |
| Pat_41 | Post-Resistance | PARP4   | 143    | 37 | 13 | 25023855  | 25023855  | Splice_Site       | SNP | C  | T  | 7   | 149 | c.3114_splice  | c.e25+1                | p.Q1038_splice |
| Pat_41 | Post-Resistance | ATP12A  | 479    | 37 | 13 | 25265219  | 25265219  | Missense_Mutation | SNP | C  | T  | 18  | 83  | c.899C>T       | c.(898-900)GCC>GTC     | p.A300V        |
| Pat_41 | Post-Resistance | CENPJ   | 55835  | 37 | 13 | 25479958  | 25479958  | Missense_Mutation | SNP | G  | A  | 21  | 280 | c.2218C>T      | c.(2218-2220)CCT>TCT   | p.P740S        |
| Pat_41 | Post-Resistance | PABPC3  | 5042   | 37 | 13 | 25670469  | 25670469  | Missense_Mutation | SNP | G  | A  | 15  | 270 | c.133G>A       | c.(133-135)GAC>AAC     | p.D45N         |
| Pat_41 | Post-Resistance | FAM123A | 219287 | 37 | 13 | 25744127  | 25744127  | Missense_Mutation | SNP | C  | T  | 4   | 90  | c.1631G>A      | c.(1630-1632)GGC>GAC   | p.G544D        |
| Pat_41 | Post-Resistance | FAM123A | 219287 | 37 | 13 | 25744190  | 25744191  | Missense_Mutation | DNP | CC | TT | 7   | 189 | .1567_1568GG>A | c.(1567-1569)GGC>AAC   | p.G523N        |
| Pat_41 | Post-Resistance | ATP8A2  | 51761  | 37 | 13 | 26116129  | 26116129  | Missense_Mutation | SNP | G  | A  | 34  | 239 | c.724G>A       | c.(724-726)GGG>AGG     | p.G242R        |
| Pat_41 | Post-Resistance | RNF6    | 6049   | 37 | 13 | 26789003  | 26789003  | Missense_Mutation | SNP | C  | T  | 8   | 240 | c.1016G>A      | c.(1015-1017)AGA>AAA   | p.R339K        |
| Pat_41 | Post-Resistance | CDK8    | 1024   | 37 | 13 | 26974611  | 26974611  | Missense_Mutation | SNP | G  | A  | 23  | 627 | c.955G>A       | c.(955-957)GAC>AAC     | p.D319N        |
| Pat_41 | Post-Resistance | LNX2    | 222484 | 37 | 13 | 28127475  | 28127475  | Missense_Mutation | SNP | G  | A  | 29  | 381 | c.1648C>T      | c.(1648-1650)CTT>TTT   | p.L550F        |
| Pat_41 | Post-Resistance | POLR1D  | 51082  | 37 | 13 | 28222587  | 28222587  | Missense_Mutation | SNP | G  | A  | 7   | 77  | c.98G>A        | c.(97-99)GGT>GAT       | p.G33D         |
| Pat_41 | Post-Resistance | CDX2    | 1045   | 37 | 13 | 28537367  | 28537367  | Missense_Mutation | SNP | C  | T  | 7   | 149 | c.827G>A       | c.(826-828)AGA>AAA     | p.R276K        |
| Pat_41 | Post-Resistance | FLT3    | 2322   | 37 | 13 | 28592707  | 28592707  | Missense_Mutation | SNP | G  | A  | 17  | 327 | c.2438C>T      | c.(2437-2439)GCC>GTC   | p.A813V        |
| Pat_41 | Post-Resistance | FLT3    | 2322   | 37 | 13 | 28623803  | 28623803  | Missense_Mutation | SNP | G  | A  | 12  | 348 | c.851C>T       | c.(850-852)ACC>ATC     | p.T284I        |
| Pat_41 | Post-Resistance | FLT1    | 2321   | 37 | 13 | 28877396  | 28877396  | Missense_Mutation | SNP | A  | G  | 22  | 379 | c.3925T>C      | c.(3925-3927)TAC>CAC   | p.Y1309H       |
| Pat_41 | Post-Resistance | MTUS2   | 23281  | 37 | 13 | 29600285  | 29600285  | Missense_Mutation | SNP | C  | T  | 6   | 124 | c.1480C>T      | c.(1480-1482)CCT>TCT   | p.P494S        |
| Pat_41 | Post-Resistance | MTUS2   | 23281  | 37 | 13 | 29600633  | 29600633  | Missense_Mutation | SNP | C  | T  | 6   | 115 | c.1828C>T      | c.(1828-1830)CCT>TCT   | p.P610S        |
| Pat_41 | Post-Resistance | USPL1   | 10208  | 37 | 13 | 31205029  | 31205029  | Missense_Mutation | SNP | G  | A  | 20  | 160 | c.286G>A       | c.(286-288)GAA>AAA     | p.E96K         |
| Pat_41 | Post-Resistance | USPL1   | 10208  | 37 | 13 | 31205454  | 31205454  | Nonsense_Mutation | SNP | G  | A  | 23  | 629 | c.711G>A       | c.(709-711)TGG>TGA     | p.W237*        |
| Pat_41 | Post-Resistance | USPL1   | 10208  | 37 | 13 | 31231754  | 31231754  | Missense_Mutation | SNP | C  | T  | 19  | 268 | c.1540C>T      | c.(1540-1542)CTT>TTT   | p.L514F        |
| Pat_41 | Post-Resistance | HSPH1   | 10808  | 37 | 13 | 31719741  | 31719741  | Missense_Mutation | SNP | C  | T  | 6   | 199 | c.1543G>A      | c.(1543-1545)GAG>AAG   | p.E515K        |
| Pat_41 | Post-Resistance | HSPH1   | 10808  | 37 | 13 | 31722586  | 31722586  | Missense_Mutation | SNP | C  | T  | 18  | 412 | c.1169G>A      | c.(1168-1170)AGA>AAA   | p.R390K        |
| Pat_41 | Post-Resistance | B3GALTL | 145173 | 37 | 13 | 31848749  | 31848749  | Missense_Mutation | SNP | C  | T  | 10  | 307 | c.764C>T       | c.(763-765)TCT>TTT     | p.S255F        |
| Pat_41 | Post-Resistance | FRY     | 10129  | 37 | 13 | 32768380  | 32768380  | Missense_Mutation | SNP | C  | T  | 15  | 313 | c.3692C>T      | c.(3691-3693)TCC>TTC   | p.S1231F       |
| Pat_41 | Post-Resistance | FRY     | 10129  | 37 | 13 | 32808710  | 32808710  | Splice_Site       | SNP | G  | A  | 31  | 267 | c.5528_splice  | c.e42-1                | p.G1843_splice |
| Pat_41 | Post-Resistance | BRCA2   | 675    | 37 | 13 | 32944629  | 32944629  | Missense_Mutation | SNP | C  | T  | 15  | 331 | c.8422C>T      | c.(8422-8424)CTT>TTT   | p.L2808F       |

|        |                 |          |        |    |    |          |          |                   |     |   |   |    |     |              |                      |               |
|--------|-----------------|----------|--------|----|----|----------|----------|-------------------|-----|---|---|----|-----|--------------|----------------------|---------------|
| Pat_41 | Post-Resistance | BRCA2    | 675    | 37 | 13 | 32950872 | 32950872 | Missense_Mutation | SNP | G | A | 7  | 251 | c.8698G>A    | c.(8698-8700)GAT>AAT | p.D2900N      |
| Pat_41 | Post-Resistance | PDS5B    | 23047  | 37 | 13 | 33225940 | 33225940 | Splice_Site       | SNP | G | A | 7  | 62  | c.109_splice | c.e3-1               | p.M37_splice  |
| Pat_41 | Post-Resistance | KL       | 9365   | 37 | 13 | 33629252 | 33629252 | Missense_Mutation | SNP | C | T | 14 | 333 | c.1399C>T    | c.(1399-1401)CAC>TAC | p.H467Y       |
| Pat_41 | Post-Resistance | STARD13  | 90627  | 37 | 13 | 33685998 | 33685998 | Missense_Mutation | SNP | G | A | 5  | 131 | c.2524C>T    | c.(2524-2526)CCA>TCA | p.P842S       |
| Pat_41 | Post-Resistance | RFC3     | 5983   | 37 | 13 | 34404101 | 34404101 | Missense_Mutation | SNP | C | T | 25 | 463 | c.520C>T     | c.(520-522)CCT>TCT   | p.P174S       |
| Pat_41 | Post-Resistance | MAB21L1  | 4081   | 37 | 13 | 36049687 | 36049687 | Missense_Mutation | SNP | G | A | 9  | 280 | c.589C>T     | c.(589-591)CCC>TCC   | p.P197S       |
| Pat_41 | Post-Resistance | NBEA     | 26960  | 37 | 13 | 36141093 | 36141093 | Missense_Mutation | SNP | C | T | 7  | 363 | c.6974C>T    | c.(6973-6975)ACC>ATC | p.T2325I      |
| Pat_41 | Post-Resistance | DCLK1    | 9201   | 37 | 13 | 36445414 | 36445414 | Missense_Mutation | SNP | G | A | 37 | 186 | c.887C>T     | c.(886-888)ACC>ATC   | p.T296I       |
| Pat_41 | Post-Resistance | DCLK1    | 9201   | 37 | 13 | 36686043 | 36686043 | Missense_Mutation | SNP | C | T | 12 | 222 | c.686G>A     | c.(685-687)GGA>GAA   | p.G229E       |
| Pat_41 | Post-Resistance | CCNA1    | 8900   | 37 | 13 | 37011860 | 37011860 | Missense_Mutation | SNP | C | T | 14 | 74  | c.392C>T     | c.(391-393)CCC>CTC   | p.P131L       |
| Pat_41 | Post-Resistance | CCNA1    | 8900   | 37 | 13 | 37016395 | 37016395 | Missense_Mutation | SNP | C | T | 33 | 284 | c.1300C>T    | c.(1300-1302)CCC>TCC | p.P434S       |
| Pat_41 | Post-Resistance | SMAD9    | 4093   | 37 | 13 | 37453675 | 37453675 | Missense_Mutation | SNP | G | A | 10 | 57  | c.152C>T     | c.(151-153)GCC>GTC   | p.A51V        |
| Pat_41 | Post-Resistance | TRPC4    | 7223   | 37 | 13 | 38211071 | 38211071 | Missense_Mutation | SNP | G | A | 8  | 130 | c.2903C>T    | c.(2902-2904)ACC>ATC | p.T968I       |
| Pat_41 | Post-Resistance | FREM2    | 341640 | 37 | 13 | 39265781 | 39265781 | Missense_Mutation | SNP | G | A | 20 | 305 | c.4300G>A    | c.(4300-4302)GGT>AGT | p.G1434S      |
| Pat_41 | Post-Resistance | FREM2    | 341640 | 37 | 13 | 39425180 | 39425180 | Missense_Mutation | SNP | C | T | 14 | 186 | c.6677C>T    | c.(6676-6678)TCT>TTT | p.S2226F      |
| Pat_41 | Post-Resistance | COG6     | 57511  | 37 | 13 | 40273640 | 40273640 | Missense_Mutation | SNP | G | A | 9  | 191 | c.1169G>A    | c.(1168-1170)GGT>GAT | p.G390D       |
| Pat_41 | Post-Resistance | SLC25A15 | 10166  | 37 | 13 | 41373452 | 41373452 | Splice_Site       | SNP | G | A | 13 | 156 | c.314_splice | c.e3+1               | p.S105_splice |
| Pat_41 | Post-Resistance | KBTD6    | 89890  | 37 | 13 | 41704716 | 41704716 | Nonsense_Mutation | SNP | C | T | 20 | 150 | c.1932G>A    | c.(1930-1932)TGG>TGA | p.W644*       |
| Pat_41 | Post-Resistance | KIAA0564 | 23078  | 37 | 13 | 42144619 | 42144619 | Missense_Mutation | SNP | C | T | 42 | 174 | c.5594G>A    | c.(5593-5595)GGT>GAT | p.G1865D      |
| Pat_41 | Post-Resistance | KIAA0564 | 23078  | 37 | 13 | 42357951 | 42357951 | Missense_Mutation | SNP | G | A | 9  | 183 | c.2257C>T    | c.(2257-2259)CTT>TTT | p.L753F       |
| Pat_41 | Post-Resistance | KIAA0564 | 23078  | 37 | 13 | 42361635 | 42361635 | Missense_Mutation | SNP | G | A | 11 | 187 | c.2108C>T    | c.(2107-2109)GCA>GTA | p.A703V       |
| Pat_41 | Post-Resistance | KIAA0564 | 23078  | 37 | 13 | 42460141 | 42460141 | Missense_Mutation | SNP | G | A | 4  | 47  | c.890C>T     | c.(889-891)GCC>GTC   | p.A297V       |
| Pat_41 | Post-Resistance | DGKH     | 160851 | 37 | 13 | 42740744 | 42740744 | Missense_Mutation | SNP | G | A | 14 | 187 | c.1052G>A    | c.(1051-1053)CGT>CAT | p.R351H       |
| Pat_41 | Post-Resistance | DGKH     | 160851 | 37 | 13 | 42783164 | 42783164 | Missense_Mutation | SNP | G | A | 19 | 168 | c.2671G>A    | c.(2671-2673)GCA>ACA | p.A891T       |
| Pat_41 | Post-Resistance | TNFSF11  | 8600   | 37 | 13 | 43155355 | 43155355 | Missense_Mutation | SNP | G | A | 11 | 123 | c.313G>A     | c.(313-315)GAG>AAG   | p.E105K       |
| Pat_41 | Post-Resistance | SERP2    | 387923 | 37 | 13 | 44953819 | 44953819 | Missense_Mutation | SNP | G | A | 10 | 371 | c.127G>A     | c.(127-129)GCA>ACA   | p.A43T        |
| Pat_41 | Post-Resistance | NUFIP1   | 26747  | 37 | 13 | 45563534 | 45563534 | Missense_Mutation | SNP | C | T | 5  | 54  | c.38G>A      | c.(37-39)GGG>GAG     | p.G13E        |
| Pat_41 | Post-Resistance | TPT1     | 7178   | 37 | 13 | 45914846 | 45914846 | Splice_Site       | SNP | C | T | 5  | 110 | c.102_splice | c.e2+1               | p.K34_splice  |
| Pat_41 | Post-Resistance | TPT1     | 7178   | 37 | 13 | 45914851 | 45914851 | Missense_Mutation | SNP | C | T | 5  | 115 | c.98G>A      | c.(97-99)GGG>GAG     | p.G33E        |
| Pat_41 | Post-Resistance | TPT1     | 7178   | 37 | 13 | 45914861 | 45914861 | Missense_Mutation | SNP | C | T | 5  | 128 | c.88G>A      | c.(88-90)GAG>AAG     | p.E30K        |
| Pat_41 | Post-Resistance | COG3     | 83548  | 37 | 13 | 46039337 | 46039337 | Missense_Mutation | SNP | C | T | 10 | 65  | c.166C>T     | c.(166-168)CCA>TCA   | p.P56S        |
| Pat_41 | Post-Resistance | ZC3H13   | 23091  | 37 | 13 | 46542124 | 46542124 | Missense_Mutation | SNP | G | A | 56 | 357 | c.3836C>T    | c.(3835-3837)TCT>TTT | p.S1279F      |
| Pat_41 | Post-Resistance | ZC3H13   | 23091  | 37 | 13 | 46543375 | 46543375 | Missense_Mutation | SNP | G | A | 6  | 73  | c.3304C>T    | c.(3304-3306)CCT>TCT | p.P1102S      |
| Pat_41 | Post-Resistance | LCP1     | 3936   | 37 | 13 | 46705015 | 46705015 | Missense_Mutation | SNP | C | T | 42 | 201 | c.1685G>A    | c.(1684-1686)GGT>GAT | p.G562D       |
| Pat_41 | Post-Resistance | C13orf18 | 80183  | 37 | 13 | 46946234 | 46946234 | Missense_Mutation | SNP | C | T | 10 | 67  | c.377G>A     | c.(376-378)AGC>AAC   | p.S126N       |
| Pat_41 | Post-Resistance | ITM2B    | 9445   | 37 | 13 | 48828005 | 48828005 | Missense_Mutation | SNP | G | A | 28 | 258 | c.179G>A     | c.(178-180)GGA>GAA   | p.G60E        |
| Pat_41 | Post-Resistance | LPAR6    | 10161  | 37 | 13 | 48986036 | 48986036 | Missense_Mutation | SNP | G | A | 3  | 35  | c.524C>T     | c.(523-525)GCC>GTC   | p.A175V       |
| Pat_41 | Post-Resistance | RCBTB2   | 1102   | 37 | 13 | 49084793 | 49084793 | Missense_Mutation | SNP | G | A | 20 | 381 | c.898C>T     | c.(898-900)CCT>TCT   | p.P300S       |
| Pat_41 | Post-Resistance | FNDC3A   | 22862  | 37 | 13 | 49705348 | 49705348 | Missense_Mutation | SNP | G | A | 30 | 471 | c.328G>A     | c.(328-330)GTT>ATT   | p.V110I       |
| Pat_41 | Post-Resistance | FNDC3A   | 22862  | 37 | 13 | 49771876 | 49771876 | Missense_Mutation | SNP | G | A | 19 | 129 | c.2356G>A    | c.(2356-2358)GGA>AGA | p.G786R       |
| Pat_41 | Post-Resistance | CAB39L   | 81617  | 37 | 13 | 49885120 | 49885120 | Missense_Mutation | SNP | C | T | 19 | 354 | c.844G>A     | c.(844-846)GCC>ACC   | p.A282T       |
| Pat_41 | Post-Resistance | PHF11    | 51131  | 37 | 13 | 50102755 | 50102755 | Missense_Mutation | SNP | G | A | 7  | 96  | c.950G>A     | c.(949-951)AGA>AAA   | p.R317K       |
| Pat_41 | Post-Resistance | ATP7B    | 540    | 37 | 13 | 52513243 | 52513243 | Missense_Mutation | SNP | C | T | 14 | 269 | c.3643G>A    | c.(3643-3645)GAC>AAC | p.D1215N      |
| Pat_41 | Post-Resistance | UTP14C   | 9724   | 37 | 13 | 52602995 | 52602995 | Missense_Mutation | SNP | G | A | 8  | 96  | c.55G>A      | c.(55-57)GTG>ATG     | p.V19M        |
| Pat_41 | Post-Resistance | UTP14C   | 9724   | 37 | 13 | 52604220 | 52604220 | Missense_Mutation | SNP | C | T | 6  | 66  | c.1280C>T    | c.(1279-1281)TCC>TTC | p.S427F       |
| Pat_41 | Post-Resistance | NEK5     | 341676 | 37 | 13 | 52646166 | 52646166 | Missense_Mutation | SNP | C | T | 8  | 70  | c.1838G>A    | c.(1837-1839)GGC>GAC | p.G613D       |
| Pat_41 | Post-Resistance | LECT1    | 11061  | 37 | 13 | 53282696 | 53282696 | Missense_Mutation | SNP | G | A | 8  | 86  | c.764C>T     | c.(763-765)GCC>GTC   | p.A255V       |

|        |                 |          |        |    |    |           |           |                   |     |   |   |    |     |               |                        |               |
|--------|-----------------|----------|--------|----|----|-----------|-----------|-------------------|-----|---|---|----|-----|---------------|------------------------|---------------|
| Pat_41 | Post-Resistance | PCDH8    | 5100   | 37 | 13 | 53422450  | 53422450  | Missense_Mutation | SNP | G | A | 9  | 164 | c.122C>T      | c.(121-123)GCC>GTC     | p.A41V        |
| Pat_41 | Post-Resistance | PCDH20   | 64881  | 37 | 13 | 61987784  | 61987784  | Missense_Mutation | SNP | C | T | 6  | 39  | c.448G>A      | c.(448-450)GAG>AAG     | p.E150K       |
| Pat_41 | Post-Resistance | DACH1    | 1602   | 37 | 13 | 72049847  | 72049847  | Missense_Mutation | SNP | C | T | 36 | 634 | c.2005G>A     | c.(2005-2007)GTC>ATC   | p.V669I       |
| Pat_41 | Post-Resistance | KLF5     | 688    | 37 | 13 | 73636627  | 73636627  | Missense_Mutation | SNP | C | T | 10 | 184 | c.890C>T      | c.(889-891)GCC>GTC     | p.A297V       |
| Pat_41 | Post-Resistance | TBC1D4   | 9882   | 37 | 13 | 75861071  | 75861071  | Missense_Mutation | SNP | C | T | 13 | 178 | c.3754G>A     | c.(3754-3756)GAA>AAA   | p.E1252K      |
| Pat_41 | Post-Resistance | TBC1D4   | 9882   | 37 | 13 | 75915639  | 75915639  | Missense_Mutation | SNP | C | T | 6  | 98  | c.1493G>A     | c.(1492-1494)AGA>AAA   | p.R498K       |
| Pat_41 | Post-Resistance | LMO7     | 4008   | 37 | 13 | 76379781  | 76379781  | Missense_Mutation | SNP | C | T | 32 | 601 | c.382C>T      | c.(382-384)CCA>TCA     | p.P128S       |
| Pat_41 | Post-Resistance | LMO7     | 4008   | 37 | 13 | 76395650  | 76395650  | Missense_Mutation | SNP | C | T | 6  | 161 | c.1846C>T     | c.(1846-1848)CGG>TGG   | p.R616W       |
| Pat_41 | Post-Resistance | LMO7     | 4008   | 37 | 13 | 76430682  | 76430682  | Missense_Mutation | SNP | G | A | 6  | 315 | c.4003G>A     | c.(4003-4005)GAG>AAG   | p.E1335K      |
| Pat_41 | Post-Resistance | MYCBP2   | 23077  | 37 | 13 | 77656037  | 77656037  | Missense_Mutation | SNP | C | T | 6  | 390 | c.11014G>A    | c.(11014-11016)GAT>AAT | p.D3672N      |
| Pat_41 | Post-Resistance | MYCBP2   | 23077  | 37 | 13 | 77672108  | 77672108  | Missense_Mutation | SNP | G | A | 8  | 66  | c.9067C>T     | c.(9067-9069)CTT>TTT   | p.L3023F      |
| Pat_41 | Post-Resistance | MYCBP2   | 23077  | 37 | 13 | 77739436  | 77739436  | Missense_Mutation | SNP | C | T | 15 | 88  | c.6317G>A     | c.(6316-6318)GGA>GAA   | p.G2106E      |
| Pat_41 | Post-Resistance | MYCBP2   | 23077  | 37 | 13 | 77825286  | 77825286  | Missense_Mutation | SNP | C | T | 7  | 113 | c.2267G>A     | c.(2266-2268)GGG>GAG   | p.G756E       |
| Pat_41 | Post-Resistance | SCEL     | 8796   | 37 | 13 | 78163334  | 78163334  | Missense_Mutation | SNP | C | T | 21 | 238 | c.601C>T      | c.(601-603)CCT>TCT     | p.P201S       |
| Pat_41 | Post-Resistance | SLITRK6  | 84189  | 37 | 13 | 86368273  | 86368273  | Missense_Mutation | SNP | G | A | 6  | 124 | c.2371C>T     | c.(2371-2373)CCT>TCT   | p.P791S       |
| Pat_41 | Post-Resistance | SLITRK5  | 26050  | 37 | 13 | 88328385  | 88328385  | Missense_Mutation | SNP | G | A | 8  | 270 | c.742G>A      | c.(742-744)GAT>AAT     | p.D248N       |
| Pat_41 | Post-Resistance | SLITRK5  | 26050  | 37 | 13 | 88328767  | 88328767  | Missense_Mutation | SNP | C | T | 21 | 137 | c.1124C>T     | c.(1123-1125)CCC>CTC   | p.P375L       |
| Pat_41 | Post-Resistance | ABCC4    | 10257  | 37 | 13 | 95673857  | 95673857  | Missense_Mutation | SNP | G | A | 34 | 242 | c.3950C>T     | c.(3949-3951)ACC>ATC   | p.T1317I      |
| Pat_41 | Post-Resistance | ABCC4    | 10257  | 37 | 13 | 95725537  | 95725537  | Missense_Mutation | SNP | C | T | 25 | 164 | c.2939G>A     | c.(2938-2940)GGT>GAT   | p.G980D       |
| Pat_41 | Post-Resistance | UGGT2    | 55757  | 37 | 13 | 96536846  | 96536846  | Missense_Mutation | SNP | G | A | 9  | 174 | c.3127C>T     | c.(3127-3129)CCT>TCT   | p.P1043S      |
| Pat_41 | Post-Resistance | UGGT2    | 55757  | 37 | 13 | 96638618  | 96638618  | Missense_Mutation | SNP | C | T | 25 | 131 | c.1000G>A     | c.(1000-1002)GAC>AAC   | p.D334N       |
| Pat_41 | Post-Resistance | OXGR1    | 27199  | 37 | 13 | 97639130  | 97639130  | Missense_Mutation | SNP | G | A | 15 | 230 | c.884C>T      | c.(883-885)ACC>ATC     | p.T295I       |
| Pat_41 | Post-Resistance | OXGR1    | 27199  | 37 | 13 | 97639230  | 97639230  | Missense_Mutation | SNP | C | T | 10 | 126 | c.784G>A      | c.(784-786)GTC>ATC     | p.V262I       |
| Pat_41 | Post-Resistance | FARP1    | 10160  | 37 | 13 | 99092246  | 99092246  | Missense_Mutation | SNP | C | T | 20 | 387 | c.2465C>T     | c.(2464-2466)CCC>CTC   | p.P822L       |
| Pat_41 | Post-Resistance | DOCK9    | 23348  | 37 | 13 | 99535386  | 99535386  | Splice_Site       | SNP | C | T | 5  | 24  | c.2473_splice | c.e23-1                | p.D825_splice |
| Pat_41 | Post-Resistance | DOCK9    | 23348  | 37 | 13 | 99537337  | 99537337  | Missense_Mutation | SNP | G | A | 7  | 113 | c.2273C>T     | c.(2272-2274)TCC>TTC   | p.S758F       |
| Pat_41 | Post-Resistance | DOCK9    | 23348  | 37 | 13 | 99554091  | 99554091  | Missense_Mutation | SNP | G | A | 4  | 33  | c.1447C>T     | c.(1447-1449)CTT>TTT   | p.L483F       |
| Pat_41 | Post-Resistance | DOCK9    | 23348  | 37 | 13 | 99567691  | 99567691  | Missense_Mutation | SNP | C | T | 3  | 59  | c.787G>A      | c.(787-789)GCA>ACA     | p.A263T       |
| Pat_41 | Post-Resistance | ZIC2     | 7546   | 37 | 13 | 100634962 | 100634962 | Missense_Mutation | SNP | G | A | 6  | 38  | c.644G>A      | c.(643-645)GGC>GAC     | p.G215D       |
| Pat_41 | Post-Resistance | TMTC4    | 84899  | 37 | 13 | 101277863 | 101277863 | Missense_Mutation | SNP | C | T | 5  | 168 | c.1705G>A     | c.(1705-1707)GCA>ACA   | p.A569T       |
| Pat_41 | Post-Resistance | TMTC4    | 84899  | 37 | 13 | 101287166 | 101287166 | Missense_Mutation | SNP | C | T | 5  | 202 | c.1342G>A     | c.(1342-1344)GGA>AGA   | p.G448R       |
| Pat_41 | Post-Resistance | TMTC4    | 84899  | 37 | 13 | 101289856 | 101289856 | Missense_Mutation | SNP | G | A | 29 | 219 | c.878C>T      | c.(877-879)ACG>ATG     | p.T293M       |
| Pat_41 | Post-Resistance | TPP2     | 7174   | 37 | 13 | 103309439 | 103309439 | Missense_Mutation | SNP | C | T | 9  | 179 | c.2986C>T     | c.(2986-2988)CCA>TCA   | p.P996S       |
| Pat_41 | Post-Resistance | C13orf39 | 196541 | 37 | 13 | 103339383 | 103339383 | Missense_Mutation | SNP | C | T | 10 | 119 | c.307G>A      | c.(307-309)GAG>AAG     | p.E103K       |
| Pat_41 | Post-Resistance | SLC10A2  | 6555   | 37 | 13 | 103718402 | 103718402 | Nonsense_Mutation | SNP | C | T | 19 | 136 | c.198G>A      | c.(196-198)TGG>TGA     | p.W66*        |
| Pat_41 | Post-Resistance | FAM155A  | 728215 | 37 | 13 | 108518842 | 108518842 | Missense_Mutation | SNP | C | T | 18 | 355 | c.103G>A      | c.(103-105)GCT>ACT     | p.A35T        |
| Pat_41 | Post-Resistance | COL4A1   | 1282   | 37 | 13 | 110833727 | 110833727 | Missense_Mutation | SNP | C | T | 5  | 20  | c.2105G>A     | c.(2104-2106)GGC>GAC   | p.G702D       |
| Pat_41 | Post-Resistance | COL4A1   | 1282   | 37 | 13 | 110847454 | 110847454 | Missense_Mutation | SNP | C | T | 4  | 87  | c.1297G>A     | c.(1297-1299)GAA>AAA   | p.E433K       |
| Pat_41 | Post-Resistance | COL4A1   | 1282   | 37 | 13 | 110863993 | 110863993 | Splice_Site       | SNP | C | T | 4  | 135 | c.468_splice  | c.e8+1                 | p.K156_splice |
| Pat_41 | Post-Resistance | ING1     | 3621   | 37 | 13 | 111368182 | 111368182 | Missense_Mutation | SNP | G | A | 5  | 35  | c.392G>A      | c.(391-393)AGC>AAC     | p.S131N       |
| Pat_41 | Post-Resistance | MCF2L    | 23263  | 37 | 13 | 113730403 | 113730403 | Missense_Mutation | SNP | G | C | 29 | 28  | c.1603G>C     | c.(1603-1605)GAA>CAA   | p.E535Q       |
| Pat_41 | Post-Resistance | CUL4A    | 8451   | 37 | 13 | 113907510 | 113907510 | Splice_Site       | SNP | G | A | 6  | 109 | c.1752_splice | c.e17+1                | p.E584_splice |
| Pat_41 | Post-Resistance | FAM70B   | 348013 | 37 | 13 | 114507949 | 114507949 | Missense_Mutation | SNP | G | A | 4  | 47  | c.761G>A      | c.(760-762)CGC>CAC     | p.R254H       |
| Pat_41 | Post-Resistance | GAS6     | 2621   | 37 | 13 | 114531521 | 114531521 | Missense_Mutation | SNP | G | A | 24 | 92  | c.1307C>T     | c.(1306-1308)CCT>CTT   | p.P436L       |
| Pat_41 | Post-Resistance | POTEG    | 404785 | 37 | 14 | 19553531  | 19553531  | Missense_Mutation | SNP | G | A | 13 | 248 | c.115G>A      | c.(115-117)GGC>AGC     | p.G39S        |
| Pat_41 | Post-Resistance | P704P    | 641455 | 37 | 14 | 20020008  | 20020008  | Missense_Mutation | SNP | C | G | 9  | 531 | c.213G>C      | c.(211-213)TGG>TGC     | p.W71C        |
| Pat_41 | Post-Resistance | OR4K13   | 390433 | 37 | 14 | 20502229  | 20502229  | Missense_Mutation | SNP | G | A | 8  | 140 | c.689C>T      | c.(688-690)GCT>GTT     | p.A230V       |

|        |                 |          |        |    |    |          |          |                   |     |   |   |    |     |              |                      |               |
|--------|-----------------|----------|--------|----|----|----------|----------|-------------------|-----|---|---|----|-----|--------------|----------------------|---------------|
| Pat_41 | Post-Resistance | OR4K13   | 390433 | 37 | 14 | 20502748 | 20502748 | Missense_Mutation | SNP | G | A | 7  | 104 | c.170C>T     | c.(169-171)ACA>ATA   | p.T57I        |
| Pat_41 | Post-Resistance | TEP1     | 7011   | 37 | 14 | 20839657 | 20839657 | Missense_Mutation | SNP | G | A | 21 | 361 | c.7211C>T    | c.(7210-7212)TCT>TTT | p.S2404F      |
| Pat_41 | Post-Resistance | TEP1     | 7011   | 37 | 14 | 20859138 | 20859138 | Missense_Mutation | SNP | C | T | 42 | 187 | c.2215G>A    | c.(2215-2217)GGC>AGC | p.G739S       |
| Pat_41 | Post-Resistance | TEP1     | 7011   | 37 | 14 | 20859195 | 20859195 | Missense_Mutation | SNP | C | T | 11 | 171 | c.2158G>A    | c.(2158-2160)GAC>AAC | p.D720N       |
| Pat_41 | Post-Resistance | TEP1     | 7011   | 37 | 14 | 20876360 | 20876360 | Missense_Mutation | SNP | T | C | 6  | 205 | c.239A>G     | c.(238-240)CAG>CGG   | p.Q80R        |
| Pat_41 | Post-Resistance | TEP1     | 7011   | 37 | 14 | 20876416 | 20876416 | Missense_Mutation | SNP | C | T | 26 | 88  | c.183G>A     | c.(181-183)ATG>ATA   | p.M61I        |
| Pat_41 | Post-Resistance | APEX1    | 328    | 37 | 14 | 20924902 | 20924902 | Missense_Mutation | SNP | C | T | 6  | 191 | c.322C>T     | c.(322-324)CTT>TTT   | p.L108F       |
| Pat_41 | Post-Resistance | PNP      | 4860   | 37 | 14 | 20942959 | 20942959 | Missense_Mutation | SNP | C | T | 3  | 52  | c.313C>T     | c.(313-315)CTT>TTT   | p.L105F       |
| Pat_41 | Post-Resistance | RNASE9   | 390443 | 37 | 14 | 21024667 | 21024667 | Missense_Mutation | SNP | G | A | 12 | 45  | c.562C>T     | c.(562-564)CCA>TCA   | p.P188S       |
| Pat_41 | Post-Resistance | RNASE4   | 6038   | 37 | 14 | 21167940 | 21167940 | Missense_Mutation | SNP | G | A | 37 | 462 | c.410G>A     | c.(409-411)GGT>GAT   | p.G137D       |
| Pat_41 | Post-Resistance | METT11D1 | 64745  | 37 | 14 | 21458680 | 21458680 | Missense_Mutation | SNP | G | A | 14 | 187 | c.287G>A     | c.(286-288)AGC>AAC   | p.S96N        |
| Pat_41 | Post-Resistance | METT11D1 | 64745  | 37 | 14 | 21464991 | 21464991 | Missense_Mutation | SNP | C | T | 6  | 177 | c.1313C>T    | c.(1312-1314)CCT>CTT | p.P438L       |
| Pat_41 | Post-Resistance | TPPP2    | 122664 | 37 | 14 | 21500117 | 21500117 | Missense_Mutation | SNP | G | A | 9  | 195 | c.394G>A     | c.(394-396)GAG>AAG   | p.E132K       |
| Pat_41 | Post-Resistance | FLJ10357 | 55701  | 37 | 14 | 21548928 | 21548928 | Missense_Mutation | SNP | G | A | 10 | 88  | c.2483G>A    | c.(2482-2484)AGC>AAC | p.S828N       |
| Pat_41 | Post-Resistance | TOX4     | 9878   | 37 | 14 | 21960997 | 21960997 | Missense_Mutation | SNP | G | A | 21 | 305 | c.1222G>A    | c.(1222-1224)GCT>ACT | p.A408T       |
| Pat_41 | Post-Resistance | OR4E2    | 26686  | 37 | 14 | 22133916 | 22133916 | Missense_Mutation | SNP | C | T | 6  | 123 | c.620C>T     | c.(619-621)TCC>TTC   | p.S207F       |
| Pat_41 | Post-Resistance | SLC7A7   | 9056   | 37 | 14 | 23243585 | 23243585 | Missense_Mutation | SNP | G | A | 20 | 291 | c.1223C>T    | c.(1222-1224)CCT>CTT | p.P408L       |
| Pat_41 | Post-Resistance | PSMB11   | 122706 | 37 | 14 | 23511780 | 23511780 | Missense_Mutation | SNP | G | A | 7  | 179 | c.346G>A     | c.(346-348)GAA>AAA   | p.E116K       |
| Pat_41 | Post-Resistance | ACIN1    | 22985  | 37 | 14 | 23530758 | 23530758 | Missense_Mutation | SNP | G | A | 4  | 50  | c.3347C>T    | c.(3346-3348)CCC>CTC | p.P1116L      |
| Pat_41 | Post-Resistance | ACIN1    | 22985  | 37 | 14 | 23547399 | 23547399 | Missense_Mutation | SNP | G | A | 42 | 553 | c.2258C>T    | c.(2257-2259)ACC>ATC | p.T753I       |
| Pat_41 | Post-Resistance | ACIN1    | 22985  | 37 | 14 | 23549793 | 23549793 | Missense_Mutation | SNP | C | T | 11 | 205 | c.925G>A     | c.(925-927)GAA>AAA   | p.E309K       |
| Pat_41 | Post-Resistance | EFS      | 10278  | 37 | 14 | 23829034 | 23829034 | Missense_Mutation | SNP | G | A | 5  | 115 | c.653C>T     | c.(652-654)GCT>GTT   | p.A218V       |
| Pat_41 | Post-Resistance | MYH6     | 4624   | 37 | 14 | 23858711 | 23858711 | Missense_Mutation | SNP | G | A | 5  | 65  | c.3869C>T    | c.(3868-3870)GCC>GTC | p.A1290V      |
| Pat_41 | Post-Resistance | THTPA    | 79178  | 37 | 14 | 24026265 | 24026265 | Missense_Mutation | SNP | G | A | 10 | 209 | c.299G>A     | c.(298-300)GGC>GAC   | p.G100D       |
| Pat_41 | Post-Resistance | DHRS4L1  | 728635 | 37 | 14 | 24507086 | 24507086 | Missense_Mutation | SNP | G | A | 6  | 17  | c.263G>A     | c.(262-264)TGC>TAC   | p.C88Y        |
| Pat_41 | Post-Resistance | LRRC16B  | 90668  | 37 | 14 | 24534948 | 24534948 | Missense_Mutation | SNP | G | A | 21 | 227 | c.3514G>A    | c.(3514-3516)GGG>AGG | p.G1172R      |
| Pat_41 | Post-Resistance | DCAF11   | 80344  | 37 | 14 | 24586528 | 24586528 | Missense_Mutation | SNP | G | A | 20 | 115 | c.337G>A     | c.(337-339)GTG>ATG   | p.V113M       |
| Pat_41 | Post-Resistance | DCAF11   | 80344  | 37 | 14 | 24592252 | 24592252 | Nonsense_Mutation | SNP | G | A | 5  | 230 | c.1472G>A    | c.(1471-1473)TGG>TAG | p.W491*       |
| Pat_41 | Post-Resistance | FAM158A  | 51016  | 37 | 14 | 24610461 | 24610461 | Missense_Mutation | SNP | G | A | 48 | 223 | c.53C>T      | c.(52-54)GCT>GTT     | p.A18V        |
| Pat_41 | Post-Resistance | RNF31    | 55072  | 37 | 14 | 24619482 | 24619482 | Missense_Mutation | SNP | G | A | 10 | 64  | c.1022G>A    | c.(1021-1023)GGA>GAA | p.G341E       |
| Pat_41 | Post-Resistance | REC8     | 9985   | 37 | 14 | 24648087 | 24648087 | Missense_Mutation | SNP | G | A | 20 | 224 | c.1168G>A    | c.(1168-1170)GAA>AAA | p.E390K       |
| Pat_41 | Post-Resistance | IPO4     | 79711  | 37 | 14 | 24651230 | 24651230 | Missense_Mutation | SNP | G | A | 6  | 75  | c.2738C>T    | c.(2737-2739)CCC>CTC | p.P913L       |
| Pat_41 | Post-Resistance | IPO4     | 79711  | 37 | 14 | 24652682 | 24652682 | Missense_Mutation | SNP | C | T | 7  | 30  | c.2101G>A    | c.(2101-2103)GAA>AAA | p.E701K       |
| Pat_41 | Post-Resistance | IPO4     | 79711  | 37 | 14 | 24655388 | 24655388 | Missense_Mutation | SNP | C | T | 24 | 291 | c.1006G>A    | c.(1006-1008)GTT>ATT | p.V336I       |
| Pat_41 | Post-Resistance | TGM1     | 7051   | 37 | 14 | 24731474 | 24731474 | Missense_Mutation | SNP | G | A | 13 | 158 | c.85C>T      | c.(85-87)CCA>TCA     | p.P29S        |
| Pat_41 | Post-Resistance | RABGGTA  | 5875   | 37 | 14 | 24735669 | 24735669 | Missense_Mutation | SNP | G | A | 17 | 202 | c.1522C>T    | c.(1522-1524)CCC>TCC | p.P508S       |
| Pat_41 | Post-Resistance | CIDEB    | 27141  | 37 | 14 | 24776591 | 24776591 | Missense_Mutation | SNP | C | T | 15 | 174 | c.172G>A     | c.(172-174)GAG>AAG   | p.E58K        |
| Pat_41 | Post-Resistance | LTB4R2   | 56413  | 37 | 14 | 24780820 | 24780820 | Missense_Mutation | SNP | G | A | 6  | 98  | c.1043G>A    | c.(1042-1044)GGC>GAC | p.G348D       |
| Pat_41 | Post-Resistance | NYNRIN   | 57523  | 37 | 14 | 24884569 | 24884569 | Missense_Mutation | SNP | G | A | 13 | 78  | c.3614G>A    | c.(3613-3615)GGG>GAG | p.G1205E      |
| Pat_41 | Post-Resistance | GZMB     | 3002   | 37 | 14 | 25101204 | 25101204 | Missense_Mutation | SNP | C | T | 18 | 205 | c.460G>A     | c.(460-462)GGA>AGA   | p.G154R       |
| Pat_41 | Post-Resistance | NOVA1    | 4857   | 37 | 14 | 26918111 | 26918111 | Missense_Mutation | SNP | G | A | 35 | 298 | c.578C>T     | c.(577-579)ACT>ATT   | p.T193I       |
| Pat_41 | Post-Resistance | SCFD1    | 23256  | 37 | 14 | 31119857 | 31119857 | Splice_Site       | SNP | G | A | 9  | 132 | c.755_splice | c.e9+1               | p.S252_splice |
| Pat_41 | Post-Resistance | SCFD1    | 23256  | 37 | 14 | 31169453 | 31169453 | Missense_Mutation | SNP | G | A | 32 | 199 | c.1399G>A    | c.(1399-1401)GCA>ACA | p.A467T       |
| Pat_41 | Post-Resistance | HEATR5A  | 25938  | 37 | 14 | 31787492 | 31787492 | Missense_Mutation | SNP | C | T | 25 | 425 | c.3097G>A    | c.(3097-3099)GCA>ACA | p.A1033T      |
| Pat_41 | Post-Resistance | AKAP6    | 9472   | 37 | 14 | 33004938 | 33004938 | Missense_Mutation | SNP | G | A | 12 | 132 | c.503G>A     | c.(502-504)GGT>GAT   | p.G168D       |
| Pat_41 | Post-Resistance | AKAP6    | 9472   | 37 | 14 | 33204888 | 33204888 | Missense_Mutation | SNP | G | A | 4  | 76  | c.3172G>A    | c.(3172-3174)GAC>AAC | p.D1058N      |
| Pat_41 | Post-Resistance | AKAP6    | 9472   | 37 | 14 | 33293569 | 33293569 | Missense_Mutation | SNP | G | A | 14 | 83  | c.6550G>A    | c.(6550-6552)GAA>AAA | p.E2184K      |



|        |                 |           |        |    |    |          |          |                   |     |   |   |    |     |              |                        |               |
|--------|-----------------|-----------|--------|----|----|----------|----------|-------------------|-----|---|---|----|-----|--------------|------------------------|---------------|
| Pat_41 | Post-Resistance | NPAS3     | 64067  | 37 | 14 | 33684482 | 33684482 | Missense_Mutation | SNP | C | T | 29 | 257 | c.235C>T     | c.(235-237)CCT>TCT     | p.P79S        |
| Pat_41 | Post-Resistance | EGLN3     | 112399 | 37 | 14 | 34419841 | 34419841 | Missense_Mutation | SNP | C | T | 6  | 51  | c.118G>A     | c.(118-120)GGC>AGC     | p.G40S        |
| Pat_41 | Post-Resistance | BAZ1A     | 11177  | 37 | 14 | 35331464 | 35331464 | Missense_Mutation | SNP | G | A | 96 | 387 | c.178C>T     | c.(178-180)CCT>TCT     | p.P60S        |
| Pat_41 | Post-Resistance | FAM177A1  | 283635 | 37 | 14 | 35522625 | 35522625 | Missense_Mutation | SNP | G | A | 40 | 286 | c.238G>A     | c.(238-240)GAG>AAG     | p.E80K        |
| Pat_41 | Post-Resistance | RALGAPA1  | 253959 | 37 | 14 | 36230200 | 36230200 | Missense_Mutation | SNP | C | T | 4  | 20  | c.382G>A     | c.(382-384)GGT>AGT     | p.G128S       |
| Pat_41 | Post-Resistance | NKX2-1    | 7080   | 37 | 14 | 36987148 | 36987148 | Missense_Mutation | SNP | T | C | 5  | 2   | c.451A>G     | c.(451-453)AAG>GAG     | p.K151E       |
| Pat_41 | Post-Resistance | PAX9      | 5083   | 37 | 14 | 37132609 | 37132609 | Missense_Mutation | SNP | C | T | 6  | 47  | c.512C>T     | c.(511-513)GCC>GTC     | p.A171V       |
| Pat_41 | Post-Resistance | SLC25A21  | 89874  | 37 | 14 | 37180638 | 37180638 | Nonsense_Mutation | SNP | C | T | 5  | 88  | c.488G>A     | c.(487-489)TGG>TAG     | p.W163*       |
| Pat_41 | Post-Resistance | CTAGE5    | 4253   | 37 | 14 | 39819370 | 39819370 | Missense_Mutation | SNP | C | T | 76 | 407 | c.2317C>T    | c.(2317-2319)CCC>TCC   | p.P773S       |
| Pat_41 | Post-Resistance | FAM179B   | 23116  | 37 | 14 | 45496510 | 45496510 | Missense_Mutation | SNP | G | A | 30 | 356 | c.3337G>A    | c.(3337-3339)GGA>AGA   | p.G1113R      |
| Pat_41 | Post-Resistance | FANCM     | 57697  | 37 | 14 | 45636294 | 45636294 | Missense_Mutation | SNP | C | T | 6  | 230 | c.1930C>T    | c.(1930-1932)CAT>TAT   | p.H644Y       |
| Pat_41 | Post-Resistance | C14orf106 | 55320  | 37 | 14 | 45679592 | 45679592 | Missense_Mutation | SNP | G | A | 11 | 85  | c.3143C>T    | c.(3142-3144)TCT>TTT   | p.S1048F      |
| Pat_41 | Post-Resistance | MDGA2     | 161357 | 37 | 14 | 47342764 | 47342764 | Missense_Mutation | SNP | G | A | 6  | 245 | c.2417C>T    | c.(2416-2418)CCC>CTC   | p.P806L       |
| Pat_41 | Post-Resistance | RPL36AL   | 6166   | 37 | 14 | 50085540 | 50085540 | Missense_Mutation | SNP | C | T | 7  | 317 | c.283G>A     | c.(283-285)GGA>AGA     | p.G95R        |
| Pat_41 | Post-Resistance | C14orf138 | 79609  | 37 | 14 | 50582884 | 50582884 | Missense_Mutation | SNP | C | T | 11 | 291 | c.280G>A     | c.(280-282)GTC>ATC     | p.V94I        |
| Pat_41 | Post-Resistance | SOS2      | 6655   | 37 | 14 | 50585072 | 50585072 | Missense_Mutation | SNP | G | A | 5  | 162 | c.3989C>T    | c.(3988-3990)ACT>ATT   | p.T1330I      |
| Pat_41 | Post-Resistance | NIN       | 51199  | 37 | 14 | 51224387 | 51224387 | Missense_Mutation | SNP | C | T | 14 | 251 | c.3361G>A    | c.(3361-3363)GAA>AAA   | p.E1121K      |
| Pat_41 | Post-Resistance | NIN       | 51199  | 37 | 14 | 51228576 | 51228576 | Missense_Mutation | SNP | C | T | 13 | 306 | c.1828G>A    | c.(1828-1830)GTC>ATC   | p.V610I       |
| Pat_41 | Post-Resistance | TRIM9     | 114088 | 37 | 14 | 51492006 | 51492006 | Missense_Mutation | SNP | G | A | 43 | 616 | c.895C>T     | c.(895-897)CGC>TGC     | p.R299C       |
| Pat_41 | Post-Resistance | FRMD6     | 122786 | 37 | 14 | 52174941 | 52174941 | Missense_Mutation | SNP | G | A | 5  | 107 | c.704G>A     | c.(703-705)AGA>AAA     | p.R235K       |
| Pat_41 | Post-Resistance | PTGER2    | 5732   | 37 | 14 | 52781508 | 52781508 | Missense_Mutation | SNP | G | A | 9  | 57  | c.242G>A     | c.(241-243)GGG>GAG     | p.G81E        |
| Pat_41 | Post-Resistance | GNPNAT1   | 64841  | 37 | 14 | 53250203 | 53250203 | Missense_Mutation | SNP | C | T | 11 | 115 | c.155G>A     | c.(154-156)GGT>GAT     | p.G52D        |
| Pat_41 | Post-Resistance | DDHD1     | 80821  | 37 | 14 | 53529728 | 53529728 | Missense_Mutation | SNP | G | A | 33 | 372 | c.1699C>T    | c.(1699-1701)CCT>TCT   | p.P567S       |
| Pat_41 | Post-Resistance | BMP4      | 652    | 37 | 14 | 54417499 | 54417499 | Missense_Mutation | SNP | G | A | 8  | 56  | c.478C>T     | c.(478-480)CTC>TTC     | p.L160F       |
| Pat_41 | Post-Resistance | SAMD4A    | 23034  | 37 | 14 | 55255652 | 55255652 | Missense_Mutation | SNP | C | T | 14 | 160 | c.2144C>T    | c.(2143-2145)TCC>TTC   | p.S715F       |
| Pat_41 | Post-Resistance | WDHD1     | 11169  | 37 | 14 | 55477026 | 55477026 | Splice_Site       | SNP | C | T | 20 | 287 | c.341_splice | c.e4+1                 | p.S114_splice |
| Pat_41 | Post-Resistance | WDHD1     | 11169  | 37 | 14 | 55480289 | 55480289 | Missense_Mutation | SNP | C | T | 17 | 237 | c.103G>A     | c.(103-105)GGT>AGT     | p.G35S        |
| Pat_41 | Post-Resistance | KIAA0831  | 22863  | 37 | 14 | 55847290 | 55847290 | Splice_Site       | SNP | C | T | 12 | 232 | c.995_splice | c.e7+1                 | p.S332_splice |
| Pat_41 | Post-Resistance | NAA30     | 122830 | 37 | 14 | 57857757 | 57857757 | Missense_Mutation | SNP | C | T | 4  | 6   | c.82C>T      | c.(82-84)CCC>TCC       | p.P28S        |
| Pat_41 | Post-Resistance | C14orf105 | 55195  | 37 | 14 | 57948309 | 57948309 | Nonsense_Mutation | SNP | G | A | 19 | 285 | c.463C>T     | c.(463-465)CAA>TAA     | p.Q155*       |
| Pat_41 | Post-Resistance | C14orf105 | 55195  | 37 | 14 | 57960247 | 57960247 | Missense_Mutation | SNP | G | A | 21 | 251 | c.187C>T     | c.(187-189)CCT>TCT     | p.P63S        |
| Pat_41 | Post-Resistance | ARID4A    | 5926   | 37 | 14 | 58814531 | 58814531 | Missense_Mutation | SNP | C | T | 13 | 184 | c.1339C>T    | c.(1339-1341)CCT>TCT   | p.P447S       |
| Pat_41 | Post-Resistance | C14orf135 | 64430  | 37 | 14 | 60581747 | 60581747 | Missense_Mutation | SNP | C | T | 9  | 98  | c.223C>T     | c.(223-225)CCA>TCA     | p.P75S        |
| Pat_41 | Post-Resistance | C14orf39  | 317761 | 37 | 14 | 60936330 | 60936330 | Missense_Mutation | SNP | G | A | 23 | 240 | c.596C>T     | c.(595-597)GCC>GTC     | p.A199V       |
| Pat_41 | Post-Resistance | SIX1      | 6495   | 37 | 14 | 61113141 | 61113141 | Missense_Mutation | SNP | C | T | 9  | 164 | c.715G>A     | c.(715-717)GGC>AGC     | p.G239S       |
| Pat_41 | Post-Resistance | MNAT1     | 4331   | 37 | 14 | 61285492 | 61285492 | Missense_Mutation | SNP | C | T | 12 | 220 | c.614C>T     | c.(613-615)TCT>TTT     | p.S205F       |
| Pat_41 | Post-Resistance | TRMT5     | 57570  | 37 | 14 | 61442231 | 61442231 | Missense_Mutation | SNP | G | A | 14 | 221 | c.1406C>T    | c.(1405-1407)CCT>CTT   | p.P469L       |
| Pat_41 | Post-Resistance | TRMT5     | 57570  | 37 | 14 | 61446390 | 61446390 | Missense_Mutation | SNP | G | A | 21 | 400 | c.226C>T     | c.(226-228)CCT>TCT     | p.P76S        |
| Pat_41 | Post-Resistance | SLC38A6   | 145389 | 37 | 14 | 61517308 | 61517308 | Missense_Mutation | SNP | G | A | 16 | 176 | c.1004G>A    | c.(1003-1005)TGC>TAC   | p.C335Y       |
| Pat_41 | Post-Resistance | PRKCH     | 5583   | 37 | 14 | 61920000 | 61920000 | Missense_Mutation | SNP | G | A | 33 | 215 | c.889G>A     | c.(889-891)GTA>ATA     | p.V297I       |
| Pat_41 | Post-Resistance | GPHB5     | 122876 | 37 | 14 | 63784554 | 63784554 | Missense_Mutation | SNP | C | T | 4  | 44  | c.10G>A      | c.(10-12)GCA>ACA       | p.A4T         |
| Pat_41 | Post-Resistance | SYNE2     | 23224  | 37 | 14 | 64518670 | 64518670 | Missense_Mutation | SNP | C | T | 27 | 215 | c.8039C>T    | c.(8038-8040)TCT>TTT   | p.S2680F      |
| Pat_41 | Post-Resistance | SYNE2     | 23224  | 37 | 14 | 64560166 | 64560166 | Missense_Mutation | SNP | C | T | 68 | 504 | c.12076C>T   | c.(12076-12078)CCA>TCA | p.P4026S      |
| Pat_41 | Post-Resistance | SYNE2     | 23224  | 37 | 14 | 64676163 | 64676163 | Missense_Mutation | SNP | G | A | 13 | 56  | c.18407G>A   | c.(18406-18408)CGC>CAC | p.R6136H      |
| Pat_41 | Post-Resistance | MTHFD1    | 4522   | 37 | 14 | 64894107 | 64894107 | Missense_Mutation | SNP | G | A | 19 | 178 | c.1180G>A    | c.(1180-1182)GTG>ATG   | p.V394M       |
| Pat_41 | Post-Resistance | HSPA2     | 3306   | 37 | 14 | 65009020 | 65009020 | Missense_Mutation | SNP | G | A | 7  | 95  | c.1453G>A    | c.(1453-1455)GCC>ACC   | p.A485T       |
| Pat_41 | Post-Resistance | C14orf50  | 145376 | 37 | 14 | 65019531 | 65019531 | Splice_Site       | SNP | G | A | 16 | 153 | c.135_splice | c.e3-1                 | p.R45_splice  |

|        |                 |           |        |    |    |          |          |                   |     |   |   |    |     |              |                      |               |
|--------|-----------------|-----------|--------|----|----|----------|----------|-------------------|-----|---|---|----|-----|--------------|----------------------|---------------|
| Pat_41 | Post-Resistance | C14orf50  | 145376 | 37 | 14 | 65054832 | 65054832 | Missense_Mutation | SNP | G | A | 5  | 180 | c.901G>A     | c.(901-903)GCA>ACA   | p.A301T       |
| Pat_41 | Post-Resistance | PLEKHG3   | 26030  | 37 | 14 | 65208274 | 65208274 | Missense_Mutation | SNP | G | A | 4  | 105 | c.2039G>A    | c.(2038-2040)AGC>AAC | p.S680N       |
| Pat_41 | Post-Resistance | SPTB      | 6710   | 37 | 14 | 65234389 | 65234389 | Missense_Mutation | SNP | G | A | 6  | 151 | c.6211C>T    | c.(6211-6213)CCC>TCC | p.P2071S      |
| Pat_41 | Post-Resistance | SPTB      | 6710   | 37 | 14 | 65263411 | 65263411 | Missense_Mutation | SNP | G | A | 7  | 80  | c.1205C>T    | c.(1204-1206)GCT>GTT | p.A402V       |
| Pat_41 | Post-Resistance | GPHN      | 10243  | 37 | 14 | 67626201 | 67626201 | Missense_Mutation | SNP | C | T | 31 | 321 | c.1807C>T    | c.(1807-1809)CCA>TCA | p.P603S       |
| Pat_41 | Post-Resistance | GPHN      | 10243  | 37 | 14 | 67647637 | 67647637 | Missense_Mutation | SNP | G | A | 9  | 187 | c.2194G>A    | c.(2194-2196)GTC>ATC | p.V732I       |
| Pat_41 | Post-Resistance | RDH12     | 145226 | 37 | 14 | 68195941 | 68195941 | Missense_Mutation | SNP | G | A | 93 | 368 | c.692G>A     | c.(691-693)GGC>GAC   | p.G231D       |
| Pat_41 | Post-Resistance | ZFYVE26   | 23503  | 37 | 14 | 68233124 | 68233124 | Missense_Mutation | SNP | T | C | 11 | 262 | c.5831A>G    | c.(5830-5832)CAC>CGC | p.H1944R      |
| Pat_41 | Post-Resistance | ZFYVE26   | 23503  | 37 | 14 | 68256267 | 68256267 | Missense_Mutation | SNP | G | A | 16 | 251 | c.2804C>T    | c.(2803-2805)ACC>ATC | p.T935I       |
| Pat_41 | Post-Resistance | ZFYVE26   | 23503  | 37 | 14 | 68273324 | 68273324 | Missense_Mutation | SNP | C | T | 14 | 147 | c.955G>A     | c.(955-957)GCT>ACT   | p.A319T       |
| Pat_41 | Post-Resistance | RAD51L1   | 5890   | 37 | 14 | 68331819 | 68331819 | Missense_Mutation | SNP | G | A | 7  | 165 | c.415G>A     | c.(415-417)GTG>ATG   | p.V139M       |
| Pat_41 | Post-Resistance | ZFP36L1   | 677    | 37 | 14 | 69256443 | 69256443 | Missense_Mutation | SNP | G | A | 14 | 153 | c.824C>T     | c.(823-825)ACC>ATC   | p.T275I       |
| Pat_41 | Post-Resistance | GALNTL1   | 57452  | 37 | 14 | 69787567 | 69787567 | Missense_Mutation | SNP | G | A | 5  | 143 | c.317G>A     | c.(316-318)CGG>CAG   | p.R106Q       |
| Pat_41 | Post-Resistance | ADAM21    | 8747   | 37 | 14 | 70924713 | 70924713 | Missense_Mutation | SNP | C | T | 5  | 137 | c.497C>T     | c.(496-498)ACA>ATA   | p.T166I       |
| Pat_41 | Post-Resistance | MAP3K9    | 4293   | 37 | 14 | 71227752 | 71227752 | Missense_Mutation | SNP | G | A | 28 | 345 | c.968C>T     | c.(967-969)GCC>GTC   | p.A323V       |
| Pat_41 | Post-Resistance | PCNX      | 22990  | 37 | 14 | 71443928 | 71443928 | Missense_Mutation | SNP | G | A | 20 | 157 | c.874G>A     | c.(874-876)GCT>ACT   | p.A292T       |
| Pat_41 | Post-Resistance | PCNX      | 22990  | 37 | 14 | 71492934 | 71492934 | Missense_Mutation | SNP | C | T | 4  | 109 | c.3284C>T    | c.(3283-3285)ACC>ATC | p.T1095I      |
| Pat_41 | Post-Resistance | PCNX      | 22990  | 37 | 14 | 71575321 | 71575321 | Missense_Mutation | SNP | G | A | 8  | 237 | c.6302G>A    | c.(6301-6303)GGC>GAC | p.G2101D      |
| Pat_41 | Post-Resistance | SIPA1L1   | 26037  | 37 | 14 | 72172002 | 72172002 | Missense_Mutation | SNP | G | A | 45 | 261 | c.3773G>A    | c.(3772-3774)GGG>GAG | p.G1258E      |
| Pat_41 | Post-Resistance | SIPA1L1   | 26037  | 37 | 14 | 72176117 | 72176117 | Missense_Mutation | SNP | G | A | 26 | 224 | c.4007G>A    | c.(4006-4008)AGC>AAC | p.S1336N      |
| Pat_41 | Post-Resistance | SIPA1L1   | 26037  | 37 | 14 | 72176140 | 72176140 | Missense_Mutation | SNP | G | A | 41 | 136 | c.4030G>A    | c.(4030-4032)GGG>AGG | p.G1344R      |
| Pat_41 | Post-Resistance | RGS6      | 9628   | 37 | 14 | 72936756 | 72936756 | Nonsense_Mutation | SNP | G | A | 18 | 169 | c.501G>A     | c.(499-501)TGG>TGA   | p.W167*       |
| Pat_41 | Post-Resistance | ZFYVE1    | 53349  | 37 | 14 | 73437604 | 73437604 | Missense_Mutation | SNP | G | A | 10 | 75  | c.2320C>T    | c.(2320-2322)CCC>TCC | p.P774S       |
| Pat_41 | Post-Resistance | ZFYVE1    | 53349  | 37 | 14 | 73440794 | 73440794 | Missense_Mutation | SNP | G | A | 14 | 200 | c.2095C>T    | c.(2095-2097)CCA>TCA | p.P699S       |
| Pat_41 | Post-Resistance | RBM25     | 58517  | 37 | 14 | 73576052 | 73576052 | Missense_Mutation | SNP | G | A | 11 | 168 | c.1544G>A    | c.(1543-1545)GGA>GAA | p.G515E       |
| Pat_41 | Post-Resistance | ACOT1     | 641371 | 37 | 14 | 74008335 | 74008335 | Missense_Mutation | SNP | C | T | 28 | 240 | c.596C>T     | c.(595-597)ACC>ATC   | p.T199I       |
| Pat_41 | Post-Resistance | C14orf43  | 91748  | 37 | 14 | 74196600 | 74196600 | Missense_Mutation | SNP | G | A | 10 | 122 | c.1838C>T    | c.(1837-1839)ACC>ATC | p.T613I       |
| Pat_41 | Post-Resistance | FAM161B   | 145483 | 37 | 14 | 74404361 | 74404361 | Missense_Mutation | SNP | C | T | 14 | 298 | c.1609G>A    | c.(1609-1611)GAG>AAG | p.E537K       |
| Pat_41 | Post-Resistance | VSX2      | 338917 | 37 | 14 | 74726396 | 74726396 | Missense_Mutation | SNP | C | T | 12 | 188 | c.671C>T     | c.(670-672)GCC>GTC   | p.A224V       |
| Pat_41 | Post-Resistance | YLPM1     | 56252  | 37 | 14 | 75230492 | 75230492 | Nonsense_Mutation | SNP | G | A | 5  | 122 | c.300G>A     | c.(298-300)TGG>TGA   | p.W100*       |
| Pat_41 | Post-Resistance | YLPM1     | 56252  | 37 | 14 | 75283760 | 75283760 | Missense_Mutation | SNP | G | A | 3  | 64  | c.5812G>A    | c.(5812-5814)GTT>ATT | p.V1938I      |
| Pat_41 | Post-Resistance | PROX2     | 283571 | 37 | 14 | 75329567 | 75329567 | Missense_Mutation | SNP | G | A | 16 | 81  | c.971C>T     | c.(970-972)CCC>CTC   | p.P324L       |
| Pat_41 | Post-Resistance | DLST      | 1743   | 37 | 14 | 75360128 | 75360128 | Splice_Site       | SNP | G | A | 10 | 195 | c.672_splice | c.e9+1               | p.R224_splice |
| Pat_41 | Post-Resistance | EIF2B2    | 8892   | 37 | 14 | 75470313 | 75470313 | Missense_Mutation | SNP | C | T | 7  | 185 | c.344C>T     | c.(343-345)TCC>TTC   | p.S115F       |
| Pat_41 | Post-Resistance | NEK9      | 91754  | 37 | 14 | 75558055 | 75558055 | Missense_Mutation | SNP | C | T | 10 | 136 | c.2360G>A    | c.(2359-2361)GGA>GAA | p.G787E       |
| Pat_41 | Post-Resistance | BATF      | 10538  | 37 | 14 | 76013009 | 76013009 | Missense_Mutation | SNP | C | T | 7  | 16  | c.373C>T     | c.(373-375)CCC>TCC   | p.P125S       |
| Pat_41 | Post-Resistance | FLVCR2    | 55640  | 37 | 14 | 76112793 | 76112793 | Missense_Mutation | SNP | C | T | 6  | 123 | c.1559C>T    | c.(1558-1560)GCT>GTT | p.A520V       |
| Pat_41 | Post-Resistance | C14orf118 | 55668  | 37 | 14 | 76642970 | 76642970 | Missense_Mutation | SNP | C | T | 14 | 223 | c.989C>T     | c.(988-990)ACC>ATC   | p.T330I       |
| Pat_41 | Post-Resistance | KIAA1737  | 85457  | 37 | 14 | 77580174 | 77580174 | Missense_Mutation | SNP | G | A | 10 | 84  | c.713G>A     | c.(712-714)GGA>GAA   | p.G238E       |
| Pat_41 | Post-Resistance | SPTLC2    | 9517   | 37 | 14 | 78021671 | 78021671 | Missense_Mutation | SNP | G | A | 25 | 374 | c.1148C>T    | c.(1147-1149)GCT>GTT | p.A383V       |
| Pat_41 | Post-Resistance | C14orf156 | 81892  | 37 | 14 | 78177234 | 78177234 | Missense_Mutation | SNP | C | T | 8  | 293 | c.151C>T     | c.(151-153)CCT>TCT   | p.P51S        |
| Pat_41 | Post-Resistance | SNW1      | 22938  | 37 | 14 | 78189609 | 78189609 | Missense_Mutation | SNP | C | T | 22 | 229 | c.1045G>A    | c.(1045-1047)GCA>ACA | p.A349T       |
| Pat_41 | Post-Resistance | NRXN3     | 9369   | 37 | 14 | 79432716 | 79432716 | Missense_Mutation | SNP | G | A | 17 | 397 | c.1625G>A    | c.(1624-1626)GGC>GAC | p.G542D       |
| Pat_41 | Post-Resistance | STON2     | 85439  | 37 | 14 | 81837504 | 81837504 | Nonsense_Mutation | SNP | C | T | 7  | 170 | c.399G>A     | c.(397-399)TGG>TGA   | p.W133*       |
| Pat_41 | Post-Resistance | GALC      | 2581   | 37 | 14 | 88407853 | 88407853 | Missense_Mutation | SNP | C | T | 11 | 445 | c.1720G>A    | c.(1720-1722)GGA>AGA | p.G574R       |
| Pat_41 | Post-Resistance | GALC      | 2581   | 37 | 14 | 88454487 | 88454487 | Splice_Site       | SNP | C | T | 28 | 221 | c.328_splice | c.e3+1               | p.D110_splice |
| Pat_41 | Post-Resistance | PTPN21    | 11099  | 37 | 14 | 88946585 | 88946585 | Missense_Mutation | SNP | G | A | 10 | 87  | c.1190C>T    | c.(1189-1191)GCA>GTA | p.A397V       |

|        |                 |           |        |    |    |           |           |                   |     |   |   |    |     |               |                        |                |
|--------|-----------------|-----------|--------|----|----|-----------|-----------|-------------------|-----|---|---|----|-----|---------------|------------------------|----------------|
| Pat_41 | Post-Resistance | TDP1      | 55775  | 37 | 14 | 90450989  | 90450989  | Nonsense_Mutation | SNP | G | A | 18 | 319 | c.1014G>A     | c.(1012-1014)TGG>TGA   | p.W338*        |
| Pat_41 | Post-Resistance | C14orf102 | 55051  | 37 | 14 | 90778814  | 90778814  | Missense_Mutation | SNP | C | T | 8  | 266 | c.481G>A      | c.(481-483)GAA>AAA     | p.E161K        |
| Pat_41 | Post-Resistance | C14orf102 | 55051  | 37 | 14 | 90778817  | 90778817  | Missense_Mutation | SNP | C | T | 20 | 248 | c.478G>A      | c.(478-480)GGA>AGA     | p.G160R        |
| Pat_41 | Post-Resistance | CATSPERB  | 79820  | 37 | 14 | 92126274  | 92126274  | Missense_Mutation | SNP | G | A | 15 | 133 | c.1339C>T     | c.(1339-1341)CAT>TAT   | p.H447Y        |
| Pat_41 | Post-Resistance | TC2N      | 123036 | 37 | 14 | 92258724  | 92258724  | Missense_Mutation | SNP | G | A | 16 | 262 | c.1034C>T     | c.(1033-1035)CCT>CTT   | p.P345L        |
| Pat_41 | Post-Resistance | FBLN5     | 10516  | 37 | 14 | 92347741  | 92347741  | Missense_Mutation | SNP | C | T | 16 | 218 | c.884G>A      | c.(883-885)AGG>AAG     | p.R295K        |
| Pat_41 | Post-Resistance | TRIP11    | 9321   | 37 | 14 | 92480721  | 92480721  | Missense_Mutation | SNP | C | T | 8  | 99  | c.1024G>A     | c.(1024-1026)GAA>AAA   | p.E342K        |
| Pat_41 | Post-Resistance | ATXN3     | 4287   | 37 | 14 | 92530756  | 92530756  | Missense_Mutation | SNP | C | T | 20 | 265 | c.994G>A      | c.(994-996)GAT>AAT     | p.D332N        |
| Pat_41 | Post-Resistance | SLC24A4   | 123041 | 37 | 14 | 92953035  | 92953035  | Missense_Mutation | SNP | G | A | 4  | 132 | c.1397G>A     | c.(1396-1398)GGG>GAG   | p.G466E        |
| Pat_41 | Post-Resistance | RIN3      | 79890  | 37 | 14 | 93142951  | 93142951  | Missense_Mutation | SNP | G | A | 5  | 66  | c.2467G>A     | c.(2467-2469)GGT>AGT   | p.G823S        |
| Pat_41 | Post-Resistance | UBR7      | 55148  | 37 | 14 | 93686745  | 93686745  | Missense_Mutation | SNP | G | A | 26 | 304 | c.1111G>A     | c.(1111-1113)GAA>AAA   | p.E371K        |
| Pat_41 | Post-Resistance | KIAA1409  | 57578  | 37 | 14 | 94069654  | 94069654  | Missense_Mutation | SNP | G | A | 31 | 175 | c.3113G>A     | c.(3112-3114)CGC>CAC   | p.R1038H       |
| Pat_41 | Post-Resistance | KIAA1409  | 57578  | 37 | 14 | 94120289  | 94120289  | Missense_Mutation | SNP | G | A | 26 | 487 | c.5852G>A     | c.(5851-5853)GGG>GAG   | p.G1951E       |
| Pat_41 | Post-Resistance | ASB2      | 51676  | 37 | 14 | 94420818  | 94420818  | Missense_Mutation | SNP | G | A | 7  | 82  | c.179C>T      | c.(178-180)CCC>CTC     | p.P60L         |
| Pat_41 | Post-Resistance | DDX24     | 57062  | 37 | 14 | 94528586  | 94528586  | Missense_Mutation | SNP | C | T | 6  | 248 | c.1100G>A     | c.(1099-1101)GGA>GAA   | p.G367E        |
| Pat_41 | Post-Resistance | PPP4R4    | 57718  | 37 | 14 | 94733334  | 94733334  | Missense_Mutation | SNP | G | A | 18 | 149 | c.2417G>A     | c.(2416-2418)GGG>GAG   | p.G806E        |
| Pat_41 | Post-Resistance | SERPINA6  | 866    | 37 | 14 | 94770892  | 94770892  | Missense_Mutation | SNP | C | T | 23 | 106 | c.1081G>A     | c.(1081-1083)GCT>ACT   | p.A361T        |
| Pat_41 | Post-Resistance | SERPINA6  | 866    | 37 | 14 | 94780820  | 94780820  | Missense_Mutation | SNP | C | T | 7  | 104 | c.166G>A      | c.(166-168)GCC>ACC     | p.A56T         |
| Pat_41 | Post-Resistance | SERPINA11 | 256394 | 37 | 14 | 94915078  | 94915078  | Missense_Mutation | SNP | C | T | 10 | 101 | c.34G>A       | c.(34-36)GGG>AGG       | p.G12R         |
| Pat_41 | Post-Resistance | DICER1    | 23405  | 37 | 14 | 95570047  | 95570047  | Missense_Mutation | SNP | G | A | 45 | 177 | c.3686C>T     | c.(3685-3687)CCC>CTC   | p.P1229L       |
| Pat_41 | Post-Resistance | DICER1    | 23405  | 37 | 14 | 95570392  | 95570392  | Missense_Mutation | SNP | G | A | 6  | 59  | c.3341C>T     | c.(3340-3342)TCT>TTT   | p.S1114F       |
| Pat_41 | Post-Resistance | TCL1A     | 8115   | 37 | 14 | 96178636  | 96178636  | Missense_Mutation | SNP | G | A | 13 | 130 | c.218C>T      | c.(217-219)CCT>CTT     | p.P73L         |
| Pat_41 | Post-Resistance | ATG2B     | 55102  | 37 | 14 | 96781490  | 96781490  | Splice_Site       | SNP | C | T | 6  | 107 | c.3642_splice | c.e23+1                | p.Q1214_splice |
| Pat_41 | Post-Resistance | C14orf129 | 51527  | 37 | 14 | 96848664  | 96848664  | Missense_Mutation | SNP | G | A | 8  | 345 | c.80G>A       | c.(79-81)GGA>GAA       | p.G27E         |
| Pat_41 | Post-Resistance | AK7       | 122481 | 37 | 14 | 96924474  | 96924474  | Missense_Mutation | SNP | G | A | 6  | 60  | c.1282G>A     | c.(1282-1284)GAA>AAA   | p.E428K        |
| Pat_41 | Post-Resistance | PAPOLA    | 10914  | 37 | 14 | 96994315  | 96994315  | Missense_Mutation | SNP | T | C | 28 | 422 | c.467T>C      | c.(466-468)GTT>GCT     | p.V156A        |
| Pat_41 | Post-Resistance | SETD3     | 84193  | 37 | 14 | 99880270  | 99880270  | Missense_Mutation | SNP | G | A | 9  | 146 | c.677C>T      | c.(676-678)ACC>ATC     | p.T226I        |
| Pat_41 | Post-Resistance | C14orf68  | 283600 | 37 | 14 | 100795750 | 100795750 | Nonsense_Mutation | SNP | G | A | 19 | 219 | c.695G>A      | c.(694-696)TGG>TAG     | p.W232*        |
| Pat_41 | Post-Resistance | DYNC1H1   | 1778   | 37 | 14 | 102469268 | 102469268 | Missense_Mutation | SNP | G | A | 4  | 92  | c.4849G>A     | c.(4849-4851)GAA>AAA   | p.E1617K       |
| Pat_41 | Post-Resistance | DYNC1H1   | 1778   | 37 | 14 | 102481607 | 102481607 | Missense_Mutation | SNP | G | A | 6  | 49  | c.7180G>A     | c.(7180-7182)GCA>ACA   | p.A2394T       |
| Pat_41 | Post-Resistance | HSP90AA1  | 3320   | 37 | 14 | 102548063 | 102548063 | Missense_Mutation | SNP | C | T | 35 | 388 | c.2185G>A     | c.(2185-2187)GAA>AAA   | p.E729K        |
| Pat_41 | Post-Resistance | TECPR2    | 9895   | 37 | 14 | 102901274 | 102901274 | Missense_Mutation | SNP | G | A | 5  | 96  | c.2120G>A     | c.(2119-2121)GGT>GAT   | p.G707D        |
| Pat_41 | Post-Resistance | TRAF3     | 7187   | 37 | 14 | 103371855 | 103371855 | Missense_Mutation | SNP | G | A | 15 | 234 | c.1441G>A     | c.(1441-1443)GAA>AAA   | p.E481K        |
| Pat_41 | Post-Resistance | CDC42BPB  | 9578   | 37 | 14 | 103404464 | 103404464 | Missense_Mutation | SNP | G | A | 32 | 204 | c.4981C>T     | c.(4981-4983)CCA>TCA   | p.P1661S       |
| Pat_41 | Post-Resistance | BAG5      | 9529   | 37 | 14 | 104027231 | 104027231 | Missense_Mutation | SNP | G | A | 19 | 343 | c.271C>T      | c.(271-273)CGG>TGG     | p.R91W         |
| Pat_41 | Post-Resistance | KLC1      | 3831   | 37 | 14 | 104038036 | 104038036 | Missense_Mutation | SNP | C | T | 16 | 225 | c.200C>T      | c.(199-201)CCT>CTT     | p.P67L         |
| Pat_41 | Post-Resistance | ZFYVE21   | 79038  | 37 | 14 | 104195517 | 104195517 | Missense_Mutation | SNP | G | A | 13 | 54  | c.524G>A      | c.(523-525)GGA>GAA     | p.G175E        |
| Pat_41 | Post-Resistance | AHNAK2    | 113146 | 37 | 14 | 105405604 | 105405604 | Missense_Mutation | SNP | G | A | 4  | 87  | c.16184C>T    | c.(16183-16185)TCC>TTC | p.S5395F       |
| Pat_41 | Post-Resistance | AHNAK2    | 113146 | 37 | 14 | 105411634 | 105411634 | Missense_Mutation | SNP | G | A | 25 | 125 | c.10154C>T    | c.(10153-10155)GCT>GTT | p.A3385V       |
| Pat_41 | Post-Resistance | AHNAK2    | 113146 | 37 | 14 | 105414474 | 105414474 | Missense_Mutation | SNP | C | T | 10 | 176 | c.7314G>A     | c.(7312-7314)ATG>ATA   | p.M2438I       |
| Pat_41 | Post-Resistance | AHNAK2    | 113146 | 37 | 14 | 105414536 | 105414536 | Missense_Mutation | SNP | C | T | 9  | 154 | c.7252G>A     | c.(7252-7254)GGC>AGC   | p.G2418S       |
| Pat_41 | Post-Resistance | AHNAK2    | 113146 | 37 | 14 | 105414764 | 105414764 | Missense_Mutation | SNP | C | T | 24 | 277 | c.7024G>A     | c.(7024-7026)GAT>AAT   | p.D2342N       |
| Pat_41 | Post-Resistance | AHNAK2    | 113146 | 37 | 14 | 105417320 | 105417320 | Missense_Mutation | SNP | C | T | 78 | 422 | c.4468G>A     | c.(4468-4470)GAC>AAC   | p.D1490N       |
| Pat_41 | Post-Resistance | CDCA4     | 55038  | 37 | 14 | 105478184 | 105478184 | Missense_Mutation | SNP | G | A | 27 | 148 | c.83C>T       | c.(82-84)TCC>TTC       | p.S28F         |
| Pat_41 | Post-Resistance | NUDT14    | 256281 | 37 | 14 | 105643073 | 105643073 | Missense_Mutation | SNP | C | T | 6  | 185 | c.226G>A      | c.(226-228)GGG>AGG     | p.G76R         |
| Pat_41 | Post-Resistance | PACS2     | 23241  | 37 | 14 | 105846131 | 105846131 | Missense_Mutation | SNP | C | T | 25 | 135 | c.1015C>T     | c.(1015-1017)CAC>TAC   | p.H339Y        |
| Pat_41 | Post-Resistance | OR4M2     | 390538 | 37 | 15 | 22368615  | 22368615  | Missense_Mutation | SNP | C | T | 17 | 233 | c.40C>T       | c.(40-42)CTC>TTC       | p.L14F         |

|        |                 |               |        |    |    |          |          |                   |     |   |   |    |     |              |                        |               |
|--------|-----------------|---------------|--------|----|----|----------|----------|-------------------|-----|---|---|----|-----|--------------|------------------------|---------------|
| Pat_41 | Post-Resistance | TUBGCP5       | 114791 | 37 | 15 | 22848242 | 22848242 | Missense_Mutation | SNP | C | T | 7  | 73  | c.832C>T     | c.(832-834)CTT>TTT     | p.L278F       |
| Pat_41 | Post-Resistance | SNRPN         | 6638   | 37 | 15 | 25221514 | 25221514 | Missense_Mutation | SNP | G | A | 8  | 209 | c.218G>A     | c.(217-219)CGT>CAT     | p.R73H        |
| Pat_41 | Post-Resistance | SNRPN         | 6638   | 37 | 15 | 25222934 | 25222934 | Missense_Mutation | SNP | C | T | 7  | 133 | c.430C>T     | c.(430-432)CCA>TCA     | p.P144S       |
| Pat_41 | Post-Resistance | ATP10A        | 57194  | 37 | 15 | 25981245 | 25981245 | Missense_Mutation | SNP | C | T | 12 | 160 | c.698G>A     | c.(697-699)TGC>TAC     | p.C233Y       |
| Pat_41 | Post-Resistance | OCA2          | 4948   | 37 | 15 | 28202856 | 28202856 | Nonsense_Mutation | SNP | C | T | 9  | 70  | c.1662G>A    | c.(1660-1662)TGG>TGA   | p.W554*       |
| Pat_41 | Post-Resistance | HERC2         | 8924   | 37 | 15 | 28422190 | 28422190 | Missense_Mutation | SNP | G | A | 8  | 90  | c.9338C>T    | c.(9337-9339)GCC>GTC   | p.A3113V      |
| Pat_41 | Post-Resistance | HERC2         | 8924   | 37 | 15 | 28474855 | 28474855 | Missense_Mutation | SNP | C | T | 8  | 436 | c.4948G>A    | c.(4948-4950)GAT>AAT   | p.D1650N      |
| Pat_41 | Post-Resistance | APBA2         | 321    | 37 | 15 | 29346358 | 29346358 | Missense_Mutation | SNP | C | T | 39 | 178 | c.271C>T     | c.(271-273)CCT>TCT     | p.P91S        |
| Pat_41 | Post-Resistance | APBA2         | 321    | 37 | 15 | 29346562 | 29346562 | Missense_Mutation | SNP | G | A | 7  | 75  | c.475G>A     | c.(475-477)GAC>AAC     | p.D159N       |
| Pat_41 | Post-Resistance | TJP1          | 7082   | 37 | 15 | 30012903 | 30012903 | Missense_Mutation | SNP | C | T | 11 | 90  | c.2422G>A    | c.(2422-2424)GCT>ACT   | p.A808T       |
| Pat_41 | Post-Resistance | MTMR10        | 54893  | 37 | 15 | 31234238 | 31234238 | Missense_Mutation | SNP | G | A | 22 | 352 | c.1769C>T    | c.(1768-1770)GCC>GTC   | p.A590V       |
| Pat_41 | Post-Resistance | ARHGAP11A     | 9824   | 37 | 15 | 32908495 | 32908495 | Missense_Mutation | SNP | G | A | 10 | 48  | c.83G>A      | c.(82-84)GGG>GAG       | p.G28E        |
| Pat_41 | Post-Resistance | RYR3          | 6263   | 37 | 15 | 33842432 | 33842432 | Missense_Mutation | SNP | C | T | 5  | 48  | c.887C>T     | c.(886-888)GCC>GTC     | p.A296V       |
| Pat_41 | Post-Resistance | RYR3          | 6263   | 37 | 15 | 33855095 | 33855095 | Missense_Mutation | SNP | C | T | 6  | 63  | c.1030C>T    | c.(1030-1032)CCA>TCA   | p.P344S       |
| Pat_41 | Post-Resistance | RYR3          | 6263   | 37 | 15 | 33916169 | 33916169 | Missense_Mutation | SNP | C | T | 72 | 282 | c.2519C>T    | c.(2518-2520)ACC>ATC   | p.T840I       |
| Pat_41 | Post-Resistance | RYR3          | 6263   | 37 | 15 | 33916180 | 33916180 | Missense_Mutation | SNP | C | T | 43 | 350 | c.2530C>T    | c.(2530-2532)CTC>TTC   | p.L844F       |
| Pat_41 | Post-Resistance | RYR3          | 6263   | 37 | 15 | 34133026 | 34133026 | Missense_Mutation | SNP | G | A | 15 | 84  | c.12979G>A   | c.(12979-12981)GCA>ACA | p.A4327T      |
| Pat_41 | Post-Resistance | TMEM85        | 51234  | 37 | 15 | 34520009 | 34520009 | Missense_Mutation | SNP | C | T | 9  | 147 | c.317C>T     | c.(316-318)GCC>GTC     | p.A106V       |
| Pat_41 | Post-Resistance | SLC12A6       | 9990   | 37 | 15 | 34533510 | 34533510 | Missense_Mutation | SNP | G | A | 5  | 179 | c.2191C>T    | c.(2191-2193)CGT>TGT   | p.R731C       |
| Pat_41 | Post-Resistance | C15orf55      | 256646 | 37 | 15 | 34642915 | 34642915 | Missense_Mutation | SNP | C | T | 4  | 113 | c.736C>T     | c.(736-738)CGT>TGT     | p.R246C       |
| Pat_41 | Post-Resistance | C15orf55      | 256646 | 37 | 15 | 34642939 | 34642939 | Missense_Mutation | SNP | A | G | 65 | 78  | c.760A>G     | c.(760-762)ACT>GCT     | p.T254A       |
| Pat_41 | Post-Resistance | C15orf55      | 256646 | 37 | 15 | 34647827 | 34647827 | Missense_Mutation | SNP | C | T | 8  | 53  | c.1534C>T    | c.(1534-1536)CCT>TCT   | p.P512S       |
| Pat_41 | Post-Resistance | C15orf55      | 256646 | 37 | 15 | 34648920 | 34648920 | Missense_Mutation | SNP | C | T | 12 | 35  | c.2627C>T    | c.(2626-2628)TCC>TTC   | p.S876F       |
| Pat_41 | Post-Resistance | FAM98B        | 283742 | 37 | 15 | 38757556 | 38757556 | Missense_Mutation | SNP | G | A | 4  | 110 | c.304G>A     | c.(304-306)GAT>AAT     | p.D102N       |
| Pat_41 | Post-Resistance | EIF2AK4       | 440275 | 37 | 15 | 40265849 | 40265849 | Missense_Mutation | SNP | G | A | 36 | 316 | c.1717G>A    | c.(1717-1719)GCT>ACT   | p.A573T       |
| Pat_41 | Post-Resistance | BUB1B         | 701    | 37 | 15 | 40494795 | 40494795 | Missense_Mutation | SNP | C | T | 22 | 456 | c.1634C>T    | c.(1633-1635)CCT>CTT   | p.P545L       |
| Pat_41 | Post-Resistance | BUB1B         | 701    | 37 | 15 | 40498511 | 40498511 | Missense_Mutation | SNP | C | T | 6  | 119 | c.1861C>T    | c.(1861-1863)CCT>TCT   | p.P621S       |
| Pat_41 | Post-Resistance | BUB1B         | 701    | 37 | 15 | 40505561 | 40505561 | Missense_Mutation | SNP | C | T | 13 | 128 | c.2564C>T    | c.(2563-2565)ACC>ATC   | p.T855I       |
| Pat_41 | Post-Resistance | PAK6          | 56924  | 37 | 15 | 40558338 | 40558338 | Missense_Mutation | SNP | G | A | 7  | 32  | c.500G>A     | c.(499-501)CGG>CAG     | p.R167Q       |
| Pat_41 | Post-Resistance | DISP2         | 85455  | 37 | 15 | 40659601 | 40659601 | Missense_Mutation | SNP | G | A | 15 | 515 | c.1288G>A    | c.(1288-1290)GTG>ATG   | p.V430M       |
| Pat_41 | Post-Resistance | DISP2         | 85455  | 37 | 15 | 40662506 | 40662506 | Missense_Mutation | SNP | G | A | 6  | 113 | c.4193G>A    | c.(4192-4194)GGC>GAC   | p.G1398D      |
| Pat_41 | Post-Resistance | CHST14        | 113189 | 37 | 15 | 40764301 | 40764301 | Missense_Mutation | SNP | G | A | 5  | 103 | c.889G>A     | c.(889-891)GGC>AGC     | p.G297S       |
| Pat_41 | Post-Resistance | CASC5         | 57082  | 37 | 15 | 40916810 | 40916810 | Missense_Mutation | SNP | C | T | 8  | 118 | c.4426C>T    | c.(4426-4428)CCT>TCT   | p.P1476S      |
| Pat_41 | Post-Resistance | EXD1          | 161829 | 37 | 15 | 41476314 | 41476314 | Missense_Mutation | SNP | C | T | 16 | 171 | c.1360G>A    | c.(1360-1362)GAA>AAA   | p.E454K       |
| Pat_41 | Post-Resistance | EXD1          | 161829 | 37 | 15 | 41487977 | 41487977 | Missense_Mutation | SNP | G | A | 7  | 63  | c.542C>T     | c.(541-543)ACA>ATA     | p.T181I       |
| Pat_41 | Post-Resistance | RTF1          | 23168  | 37 | 15 | 41763531 | 41763531 | Missense_Mutation | SNP | G | A | 7  | 205 | c.1187G>A    | c.(1186-1188)AGC>AAC   | p.S396N       |
| Pat_41 | Post-Resistance | RPAP1         | 26015  | 37 | 15 | 41814373 | 41814373 | Missense_Mutation | SNP | G | A | 7  | 53  | c.2818C>T    | c.(2818-2820)CTC>TTC   | p.L940F       |
| Pat_41 | Post-Resistance | RPAP1         | 26015  | 37 | 15 | 41822178 | 41822178 | Splice_Site       | SNP | C | T | 5  | 45  | c.944_splice | c.e8-1                 | p.A315_splice |
| Pat_41 | Post-Resistance | TYRO3         | 7301   | 37 | 15 | 41861190 | 41861190 | Missense_Mutation | SNP | C | T | 10 | 116 | c.1222C>T    | c.(1222-1224)CCA>TCA   | p.P408S       |
| Pat_41 | Post-Resistance | MGA           | 23269  | 37 | 15 | 42003155 | 42003155 | Missense_Mutation | SNP | G | A | 71 | 425 | c.2692G>A    | c.(2692-2694)GCA>ACA   | p.A898T       |
| Pat_41 | Post-Resistance | MAPKBP1       | 23005  | 37 | 15 | 42105184 | 42105184 | Missense_Mutation | SNP | C | T | 16 | 216 | c.704C>T     | c.(703-705)ACT>ATT     | p.T235I       |
| Pat_41 | Post-Resistance | JMJD7-PLA2G4B | 8681   | 37 | 15 | 42136691 | 42136691 | Missense_Mutation | SNP | C | T | 16 | 97  | c.902C>T     | c.(901-903)GCC>GTC     | p.A301V       |
| Pat_41 | Post-Resistance | SPTBN5        | 51332  | 37 | 15 | 42166131 | 42166131 | Missense_Mutation | SNP | C | T | 9  | 54  | c.4697G>A    | c.(4696-4698)TGC>TAC   | p.C1566Y      |
| Pat_41 | Post-Resistance | PLA2G4E       | 123745 | 37 | 15 | 42278083 | 42278083 | Missense_Mutation | SNP | G | A | 5  | 22  | c.2069C>T    | c.(2068-2070)GCC>GTC   | p.A690V       |
| Pat_41 | Post-Resistance | TMEM87A       | 25963  | 37 | 15 | 42523457 | 42523457 | Missense_Mutation | SNP | G | A | 22 | 113 | c.1064C>T    | c.(1063-1065)GCC>GTC   | p.A355V       |
| Pat_41 | Post-Resistance | TMEM87A       | 25963  | 37 | 15 | 42556401 | 42556401 | Missense_Mutation | SNP | C | T | 6  | 39  | c.292G>A     | c.(292-294)GCA>ACA     | p.A98T        |
| Pat_41 | Post-Resistance | ZFP106        | 64397  | 37 | 15 | 42730815 | 42730815 | Missense_Mutation | SNP | G | A | 3  | 68  | c.4526C>T    | c.(4525-4527)TCT>TTT   | p.S1509F      |

|        |                 |           |        |    |    |          |          |                        |     |   |   |    |     |               |                        |                |
|--------|-----------------|-----------|--------|----|----|----------|----------|------------------------|-----|---|---|----|-----|---------------|------------------------|----------------|
| Pat_41 | Post-Resistance | ZFP106    | 64397  | 37 | 15 | 42742210 | 42742210 | Missense_Mutation      | SNP | C | T | 11 | 145 | c.2191G>A     | c.(2191-2193)GAT>AAT   | p.D731N        |
| Pat_41 | Post-Resistance | CDAN1     | 146059 | 37 | 15 | 43028515 | 43028515 | Missense_Mutation      | SNP | G | A | 5  | 37  | c.554C>T      | c.(553-555)CCC>CTC     | p.P185L        |
| Pat_41 | Post-Resistance | UBR1      | 197131 | 37 | 15 | 43347061 | 43347061 | Missense_Mutation      | SNP | C | T | 20 | 139 | c.1318G>A     | c.(1318-1320)GTC>ATC   | p.V440I        |
| Pat_41 | Post-Resistance | UBR1      | 197131 | 37 | 15 | 43351996 | 43351996 | Missense_Mutation      | SNP | G | A | 22 | 114 | c.889C>T      | c.(889-891)CCA>TCA     | p.P297S        |
| Pat_41 | Post-Resistance | UBR1      | 197131 | 37 | 15 | 43367242 | 43367242 | Missense_Mutation      | SNP | C | T | 78 | 330 | c.463G>A      | c.(463-465)GAG>AAG     | p.E155K        |
| Pat_41 | Post-Resistance | TP53BP1   | 7158   | 37 | 15 | 43739659 | 43739659 | Missense_Mutation      | SNP | G | A | 5  | 77  | c.2726C>T     | c.(2725-2727)CCT>CTT   | p.P909L        |
| Pat_41 | Post-Resistance | STRC      | 161497 | 37 | 15 | 43892271 | 43892271 | Missense_Mutation      | SNP | G | A | 4  | 97  | c.5126C>T     | c.(5125-5127)ACC>ATC   | p.T1709I       |
| Pat_41 | Post-Resistance | PDIA3     | 2923   | 37 | 15 | 44038801 | 44038801 | Missense_Mutation      | SNP | G | A | 11 | 76  | c.64G>A       | c.(64-66)GCC>ACC       | p.A22T         |
| Pat_41 | Post-Resistance | PDIA3     | 2923   | 37 | 15 | 44058135 | 44058135 | Missense_Mutation      | SNP | G | A | 15 | 119 | c.770G>A      | c.(769-771)GGC>GAC     | p.G257D        |
| Pat_41 | Post-Resistance | SERINC4   | 619189 | 37 | 15 | 44089112 | 44089112 | Missense_Mutation      | SNP | C | T | 36 | 303 | c.139G>A      | c.(139-141)GCT>ACT     | p.A47T         |
| Pat_41 | Post-Resistance | C15orf63  | 25764  | 37 | 15 | 44092969 | 44092969 | Missense_Mutation      | SNP | C | T | 4  | 45  | c.173C>T      | c.(172-174)TCC>TTC     | p.S58F         |
| Pat_41 | Post-Resistance | MFAP1     | 4236   | 37 | 15 | 44097432 | 44097432 | Missense_Mutation      | SNP | G | A | 5  | 143 | c.1180C>T     | c.(1180-1182)CTT>TTT   | p.L394F        |
| Pat_41 | Post-Resistance | SPG11     | 80208  | 37 | 15 | 44865859 | 44865859 | Nonsense_Mutation      | SNP | G | A | 5  | 55  | c.6091C>T     | c.(6091-6093)CGA>TGA   | p.R2031*       |
| Pat_41 | Post-Resistance | SPG11     | 80208  | 37 | 15 | 44951346 | 44951346 | Missense_Mutation      | SNP | C | T | 9  | 305 | c.598G>A      | c.(598-600)GTG>ATG     | p.V200M        |
| Pat_41 | Post-Resistance | DUOX2     | 50506  | 37 | 15 | 45404102 | 45404102 | Missense_Mutation      | SNP | G | A | 5  | 58  | c.377C>T      | c.(376-378)GCC>GTC     | p.A126V        |
| Pat_41 | Post-Resistance | DUOX1     | 53905  | 37 | 15 | 45448032 | 45448032 | Missense_Mutation      | SNP | G | A | 15 | 259 | c.3607G>A     | c.(3607-3609)GCC>ACC   | p.A1203T       |
| Pat_41 | Post-Resistance | MYEF2     | 50804  | 37 | 15 | 48450388 | 48450388 | Missense_Mutation      | SNP | G | A | 6  | 145 | c.905C>T      | c.(904-906)CCT>CTT     | p.P302L        |
| Pat_41 | Post-Resistance | SLC12A1   | 6557   | 37 | 15 | 48539187 | 48539187 | Missense_Mutation      | SNP | C | T | 8  | 626 | c.1534C>T     | c.(1534-1536)CTT>TTT   | p.L512F        |
| Pat_41 | Post-Resistance | FBN1      | 2200   | 37 | 15 | 48714178 | 48714178 | Missense_Mutation      | SNP | C | T | 26 | 117 | c.7541G>A     | c.(7540-7542)GGA>GAA   | p.G2514E       |
| Pat_41 | Post-Resistance | FBN1      | 2200   | 37 | 15 | 48808499 | 48808499 | Missense_Mutation      | SNP | G | A | 8  | 163 | c.1208C>T     | c.(1207-1209)CCC>CTC   | p.P403L        |
| Pat_41 | Post-Resistance | CEP152    | 22995  | 37 | 15 | 49030589 | 49030589 | Missense_Mutation      | SNP | C | T | 35 | 449 | c.4822G>A     | c.(4822-4824)GCT>ACT   | p.A1608T       |
| Pat_41 | Post-Resistance | CEP152    | 22995  | 37 | 15 | 49054863 | 49054863 | Missense_Mutation      | SNP | C | T | 6  | 73  | c.2287G>A     | c.(2287-2289)GAA>AAA   | p.E763K        |
| Pat_41 | Post-Resistance | SHC4      | 399694 | 37 | 15 | 49127160 | 49127160 | Missense_Mutation      | SNP | G | A | 4  | 32  | c.1543C>T     | c.(1543-1545)CCA>TCA   | p.P515S        |
| Pat_41 | Post-Resistance | SECISBP2L | 9728   | 37 | 15 | 49301504 | 49301504 | Missense_Mutation      | SNP | G | A | 35 | 279 | c.1936C>T     | c.(1936-1938)CCT>TCT   | p.P646S        |
| Pat_41 | Post-Resistance | SPPL2A    | 84888  | 37 | 15 | 51039816 | 51039816 | Missense_Mutation      | SNP | C | T | 11 | 179 | c.460G>A      | c.(460-462)GAT>AAT     | p.D154N        |
| Pat_41 | Post-Resistance | AP4E1     | 23431  | 37 | 15 | 51223077 | 51223077 | Missense_Mutation      | SNP | C | T | 13 | 162 | c.778C>T      | c.(778-780)CCA>TCA     | p.P260S        |
| Pat_41 | Post-Resistance | AP4E1     | 23431  | 37 | 15 | 51250845 | 51250845 | Missense_Mutation      | SNP | A | G | 57 | 195 | c.1705A>G     | c.(1705-1707)AAT>GAT   | p.N569D        |
| Pat_41 | Post-Resistance | CYP19A1   | 1588   | 37 | 15 | 51503123 | 51503123 | Missense_Mutation      | SNP | C | T | 14 | 175 | c.1394G>A     | c.(1393-1395)GGA>GAA   | p.G465E        |
| Pat_41 | Post-Resistance | CYP19A1   | 1588   | 37 | 15 | 51504669 | 51504669 | Missense_Mutation      | SNP | C | T | 8  | 223 | c.1111G>A     | c.(1111-1113)GAC>AAC   | p.D371N        |
| Pat_41 | Post-Resistance | GLDN      | 342035 | 37 | 15 | 51693888 | 51693888 | Missense_Mutation      | SNP | G | A | 5  | 82  | c.1126G>A     | c.(1126-1128)GTT>ATT   | p.V376I        |
| Pat_41 | Post-Resistance | TMOD2     | 29767  | 37 | 15 | 52090395 | 52090395 | Missense_Mutation      | SNP | C | T | 3  | 36  | c.734C>T      | c.(733-735)GCT>GTT     | p.A245V        |
| Pat_41 | Post-Resistance | TMOD2     | 29767  | 37 | 15 | 52100629 | 52100629 | Missense_Mutation      | SNP | G | A | 8  | 200 | c.1034G>A     | c.(1033-1035)AGA>AAA   | p.R345K        |
| Pat_41 | Post-Resistance | MYO5C     | 55930  | 37 | 15 | 52506800 | 52506800 | Missense_Mutation      | SNP | C | T | 6  | 45  | c.4042G>A     | c.(4042-4044)GCC>ACC   | p.A1348T       |
| Pat_41 | Post-Resistance | MYO5C     | 55930  | 37 | 15 | 52521391 | 52521391 | Missense_Mutation      | SNP | C | T | 31 | 232 | c.3146G>A     | c.(3145-3147)GGG>GAG   | p.G1049E       |
| Pat_41 | Post-Resistance | ONECUT1   | 3175   | 37 | 15 | 53081177 | 53081177 | Missense_Mutation      | SNP | G | A | 4  | 106 | c.905C>T      | c.(904-906)ACC>ATC     | p.T302I        |
| Pat_41 | Post-Resistance | UNC13C    | 440279 | 37 | 15 | 54542591 | 54542591 | Missense_Mutation      | SNP | G | A | 15 | 118 | c.3397G>A     | c.(3397-3399)GTG>ATG   | p.V1133M       |
| Pat_41 | Post-Resistance | PYGO1     | 26108  | 37 | 15 | 55838474 | 55838474 | Missense_Mutation      | SNP | G | A | 11 | 560 | c.1007C>T     | c.(1006-1008)JCT>TTT   | p.S336F        |
| Pat_41 | Post-Resistance | ZNF280D   | 54816  | 37 | 15 | 56961124 | 56961124 | Missense_Mutation      | SNP | C | T | 19 | 297 | c.1442G>A     | c.(1441-1443)AGG>AAG   | p.R481K        |
| Pat_41 | Post-Resistance | ALDH1A2   | 8854   | 37 | 15 | 58302858 | 58302858 | Missense_Mutation      | SNP | G | A | 29 | 112 | c.482C>T      | c.(481-483)ACC>ATC     | p.T161I        |
| Pat_41 | Post-Resistance | CCNB2     | 9133   | 37 | 15 | 59406644 | 59406644 | Missense_Mutation      | SNP | G | A | 15 | 74  | c.269G>A      | c.(268-270)GGT>GAT     | p.G90D         |
| Pat_41 | Post-Resistance | NARG2     | 79664  | 37 | 15 | 60770197 | 60770197 | Translation_Start_Site | SNP | C | T | 11 | 195 | c.-20G>A      | ∴(-22--18)GAGTG>GAATG  |                |
| Pat_41 | Post-Resistance | VPS13C    | 54832  | 37 | 15 | 62242617 | 62242617 | Splice_Site            | SNP | C | T | 34 | 202 | c.4537_splice | c.e41-1                | p.A1513_splice |
| Pat_41 | Post-Resistance | VPS13C    | 54832  | 37 | 15 | 62253795 | 62253795 | Missense_Mutation      | SNP | G | A | 13 | 78  | c.3901C>T     | c.(3901-3903)CTT>TTT   | p.L1301F       |
| Pat_41 | Post-Resistance | VPS13C    | 54832  | 37 | 15 | 62259578 | 62259578 | Missense_Mutation      | SNP | C | T | 4  | 110 | c.2980G>A     | c.(2980-2982)GAG>AAG   | p.E994K        |
| Pat_41 | Post-Resistance | TLN2      | 83660  | 37 | 15 | 62967473 | 62967473 | Missense_Mutation      | SNP | C | T | 18 | 172 | c.910C>T      | c.(910-912)CTC>TTC     | p.L304F        |
| Pat_41 | Post-Resistance | TLN2      | 83660  | 37 | 15 | 63131181 | 63131181 | Splice_Site            | SNP | G | A | 10 | 225 | c.7500_splice | c.e55+1                | p.Q2500_splice |
| Pat_41 | Post-Resistance | HERC1     | 8925   | 37 | 15 | 63904493 | 63904493 | Missense_Mutation      | SNP | G | A | 3  | 42  | c.14357C>T    | c.(14356-14358)ACT>ATT | p.T4786I       |



|        |                 |          |        |    |    |          |          |                   |     |   |   |     |     |               |                      |               |
|--------|-----------------|----------|--------|----|----|----------|----------|-------------------|-----|---|---|-----|-----|---------------|----------------------|---------------|
| Pat_41 | Post-Resistance | HERC1    | 8925   | 37 | 15 | 63986511 | 63986511 | Missense_Mutation | SNP | C | T | 6   | 29  | c.5480G>A     | c.(5479-5481)GGG>GAG | p.G1827E      |
| Pat_41 | Post-Resistance | HERC1    | 8925   | 37 | 15 | 64041612 | 64041612 | Missense_Mutation | SNP | C | T | 114 | 507 | c.2173G>A     | c.(2173-2175)GCT>ACT | p.A725T       |
| Pat_41 | Post-Resistance | DAPK2    | 23604  | 37 | 15 | 64204397 | 64204397 | Splice_Site       | SNP | C | T | 36  | 170 | c.859_splice  | c.e10-1              | p.P287_splice |
| Pat_41 | Post-Resistance | DAPK2    | 23604  | 37 | 15 | 64218255 | 64218255 | Nonsense_Mutation | SNP | G | A | 28  | 148 | c.697C>T      | c.(697-699)CAG>TAG   | p.Q233*       |
| Pat_41 | Post-Resistance | ZNF609   | 23060  | 37 | 15 | 64915161 | 64915161 | Missense_Mutation | SNP | G | A | 10  | 88  | c.883G>A      | c.(883-885)GCT>ACT   | p.A295T       |
| Pat_41 | Post-Resistance | ZNF609   | 23060  | 37 | 15 | 64973514 | 64973514 | Missense_Mutation | SNP | C | T | 36  | 592 | c.4169C>T     | c.(4168-4170)TCT>TTT | p.S1390F      |
| Pat_41 | Post-Resistance | PIF1     | 80119  | 37 | 15 | 65112045 | 65112045 | Splice_Site       | SNP | C | T | 6   | 34  | c.1333_splice | c.e8+1               | p.G445_splice |
| Pat_41 | Post-Resistance | SPG21    | 51324  | 37 | 15 | 65262548 | 65262548 | Missense_Mutation | SNP | C | T | 20  | 154 | c.465G>A      | c.(463-465)ATG>ATA   | p.M155I       |
| Pat_41 | Post-Resistance | OSTBETA  | 123264 | 37 | 15 | 65345356 | 65345356 | Missense_Mutation | SNP | G | A | 8   | 22  | c.241G>A      | c.(241-243)GAT>AAT   | p.D81N        |
| Pat_41 | Post-Resistance | CLPX     | 10845  | 37 | 15 | 65447338 | 65447338 | Missense_Mutation | SNP | C | T | 25  | 99  | c.1393G>A     | c.(1393-1395)GAA>AAA | p.E465K       |
| Pat_41 | Post-Resistance | IGDCC4   | 57722  | 37 | 15 | 65686851 | 65686851 | Missense_Mutation | SNP | G | A | 4   | 118 | c.1612C>T     | c.(1612-1614)CCC>TCC | p.P538S       |
| Pat_41 | Post-Resistance | IGDCC4   | 57722  | 37 | 15 | 65703556 | 65703556 | Missense_Mutation | SNP | C | T | 7   | 90  | c.223G>A      | c.(223-225)GAT>AAT   | p.D75N        |
| Pat_41 | Post-Resistance | C15orf44 | 81556  | 37 | 15 | 65899703 | 65899703 | Missense_Mutation | SNP | C | T | 19  | 89  | c.16G>A       | c.(16-18)GTA>ATA     | p.V6I         |
| Pat_41 | Post-Resistance | DENND4A  | 10260  | 37 | 15 | 65989644 | 65989644 | Nonsense_Mutation | SNP | G | A | 24  | 121 | c.2779C>T     | c.(2779-2781)CAA>TAA | p.Q927*       |
| Pat_41 | Post-Resistance | MEGF11   | 84465  | 37 | 15 | 66210399 | 66210399 | Missense_Mutation | SNP | G | A | 12  | 82  | c.1991C>T     | c.(1990-1992)GCC>GTC | p.A664V       |
| Pat_41 | Post-Resistance | MAP2K1   | 5604   | 37 | 15 | 66727463 | 66727463 | Missense_Mutation | SNP | T | A | 24  | 320 | c.179T>A      | c.(178-180)GTG>GAG   | p.V60E        |
| Pat_41 | Post-Resistance | SMAD3    | 4088   | 37 | 15 | 67358595 | 67358595 | Missense_Mutation | SNP | G | A | 5   | 49  | c.103G>A      | c.(103-105)GTC>ATC   | p.V35I        |
| Pat_41 | Post-Resistance | IQCH     | 64799  | 37 | 15 | 67649682 | 67649682 | Splice_Site       | SNP | G | A | 6   | 166 | c.638_splice  | c.e7-1               | p.A213_splice |
| Pat_41 | Post-Resistance | PIAS1    | 8554   | 37 | 15 | 68466133 | 68466133 | Missense_Mutation | SNP | G | A | 12  | 82  | c.1072G>A     | c.(1072-1074)GAC>AAC | p.D358N       |
| Pat_41 | Post-Resistance | FEM1B    | 10116  | 37 | 15 | 68583233 | 68583233 | Missense_Mutation | SNP | C | T | 28  | 382 | c.1537C>T     | c.(1537-1539)CTT>TTT | p.L513F       |
| Pat_41 | Post-Resistance | CORO2B   | 10391  | 37 | 15 | 69006908 | 69006908 | Missense_Mutation | SNP | C | T | 32  | 173 | c.776C>T      | c.(775-777)TCC>TTC   | p.S259F       |
| Pat_41 | Post-Resistance | CORO2B   | 10391  | 37 | 15 | 69006925 | 69006925 | Missense_Mutation | SNP | G | A | 16  | 251 | c.793G>A      | c.(793-795)GAG>AAG   | p.E265K       |
| Pat_41 | Post-Resistance | TLE3     | 7090   | 37 | 15 | 70351756 | 70351756 | Missense_Mutation | SNP | G | A | 14  | 33  | c.758C>T      | c.(757-759)TCC>TTC   | p.S253F       |
| Pat_41 | Post-Resistance | THSD4    | 79875  | 37 | 15 | 71535088 | 71535088 | Missense_Mutation | SNP | C | T | 14  | 143 | c.565C>T      | c.(565-567)CTC>TTC   | p.L189F       |
| Pat_41 | Post-Resistance | THSD4    | 79875  | 37 | 15 | 72037505 | 72037505 | Missense_Mutation | SNP | G | A | 38  | 379 | c.1967G>A     | c.(1966-1968)AGT>AAT | p.S656N       |
| Pat_41 | Post-Resistance | THSD4    | 79875  | 37 | 15 | 72050323 | 72050323 | Missense_Mutation | SNP | G | A | 17  | 99  | c.2498G>A     | c.(2497-2499)GGC>GAC | p.G833D       |
| Pat_41 | Post-Resistance | MYO9A    | 4649   | 37 | 15 | 72154922 | 72154922 | Missense_Mutation | SNP | C | T | 20  | 226 | c.6010G>A     | c.(6010-6012)GCC>ACC | p.A2004T      |
| Pat_41 | Post-Resistance | MYO9A    | 4649   | 37 | 15 | 72190435 | 72190435 | Missense_Mutation | SNP | C | T | 8   | 124 | c.4409G>A     | c.(4408-4410)GGA>GAA | p.G1470E      |
| Pat_41 | Post-Resistance | MYO9A    | 4649   | 37 | 15 | 72193596 | 72193596 | Nonsense_Mutation | SNP | C | T | 14  | 139 | c.3086G>A     | c.(3085-3087)TGG>TAG | p.W1029*      |
| Pat_41 | Post-Resistance | MYO9A    | 4649   | 37 | 15 | 72227775 | 72227775 | Missense_Mutation | SNP | C | T | 18  | 169 | c.2429G>A     | c.(2428-2430)AGA>AAA | p.R810K       |
| Pat_41 | Post-Resistance | MYO9A    | 4649   | 37 | 15 | 72338085 | 72338085 | Missense_Mutation | SNP | C | T | 10  | 131 | c.820G>A      | c.(820-822)GGA>AGA   | p.G274R       |
| Pat_41 | Post-Resistance | PKM2     | 5315   | 37 | 15 | 72511407 | 72511407 | Missense_Mutation | SNP | G | A | 14  | 201 | c.32C>T       | c.(31-33)GCC>GTC     | p.A11V        |
| Pat_41 | Post-Resistance | PARP6    | 56965  | 37 | 15 | 72552862 | 72552862 | Missense_Mutation | SNP | G | A | 22  | 292 | c.713C>T      | c.(712-714)CCT>CTT   | p.P238L       |
| Pat_41 | Post-Resistance | ADPGK    | 83440  | 37 | 15 | 73064173 | 73064173 | Missense_Mutation | SNP | C | T | 10  | 105 | c.473G>A      | c.(472-474)GGA>GAA   | p.G158E       |
| Pat_41 | Post-Resistance | NEO1     | 4756   | 37 | 15 | 73590859 | 73590859 | Missense_Mutation | SNP | C | T | 21  | 192 | c.4072C>T     | c.(4072-4074)CCA>TCA | p.P1358S      |
| Pat_41 | Post-Resistance | CD276    | 80381  | 37 | 15 | 74001997 | 74001997 | Missense_Mutation | SNP | G | A | 4   | 112 | c.1513G>A     | c.(1513-1515)GAC>AAC | p.D505N       |
| Pat_41 | Post-Resistance | PML      | 5371   | 37 | 15 | 74336714 | 74336714 | Missense_Mutation | SNP | C | T | 17  | 51  | c.2014C>T     | c.(2014-2016)CCT>TCT | p.P672S       |
| Pat_41 | Post-Resistance | STRA6    | 64220  | 37 | 15 | 74483219 | 74483219 | Missense_Mutation | SNP | C | T | 6   | 93  | c.889G>A      | c.(889-891)GTG>ATG   | p.V297M       |
| Pat_41 | Post-Resistance | SEMA7A   | 8482   | 37 | 15 | 74703085 | 74703085 | Nonsense_Mutation | SNP | C | T | 3   | 37  | c.1881G>A     | c.(1879-1881)TGG>TGA | p.W627*       |
| Pat_41 | Post-Resistance | ARID3B   | 10620  | 37 | 15 | 74836480 | 74836480 | Missense_Mutation | SNP | C | T | 4   | 101 | c.203C>T      | c.(202-204)CCC>CTC   | p.P68L        |
| Pat_41 | Post-Resistance | ULK3     | 25989  | 37 | 15 | 75134640 | 75134640 | Missense_Mutation | SNP | A | T | 29  | 48  | c.224T>A      | c.(223-225)GTG>GAG   | p.V75E        |
| Pat_41 | Post-Resistance | NEIL1    | 79661  | 37 | 15 | 75641568 | 75641568 | Missense_Mutation | SNP | C | T | 13  | 73  | c.322C>T      | c.(322-324)CCC>TCC   | p.P108S       |
| Pat_41 | Post-Resistance | MAN2C1   | 4123   | 37 | 15 | 75649222 | 75649222 | Missense_Mutation | SNP | C | T | 16  | 132 | c.2569G>A     | c.(2569-2571)GAT>AAT | p.D857N       |
| Pat_41 | Post-Resistance | CSPG4    | 1464   | 37 | 15 | 75968751 | 75968751 | Missense_Mutation | SNP | C | T | 8   | 113 | c.6109G>A     | c.(6109-6111)GCC>ACC | p.A2037T      |
| Pat_41 | Post-Resistance | CSPG4    | 1464   | 37 | 15 | 75970054 | 75970054 | Nonsense_Mutation | SNP | C | T | 48  | 270 | c.5124G>A     | c.(5122-5124)TGG>TGA | p.W1708*      |
| Pat_41 | Post-Resistance | C15orf27 | 123591 | 37 | 15 | 76467899 | 76467899 | Splice_Site       | SNP | G | A | 5   | 64  | c.653_splice  | c.e8-1               | p.A218_splice |
| Pat_41 | Post-Resistance | ETFA     | 2108   | 37 | 15 | 76576148 | 76576148 | Missense_Mutation | SNP | C | T | 5   | 84  | c.683G>A      | c.(682-684)GGA>GAA   | p.G228E       |

|        |                 |          |        |    |    |           |           |                   |     |   |   |    |     |              |                      |               |
|--------|-----------------|----------|--------|----|----|-----------|-----------|-------------------|-----|---|---|----|-----|--------------|----------------------|---------------|
| Pat_41 | Post-Resistance | RCN2     | 5955   | 37 | 15 | 77239805  | 77239805  | Missense_Mutation | SNP | G | A | 10 | 195 | c.605G>A     | c.(604-606)GGT>GAT   | p.G202D       |
| Pat_41 | Post-Resistance | HMG20A   | 10363  | 37 | 15 | 77750772  | 77750772  | Missense_Mutation | SNP | C | T | 22 | 118 | c.23C>T      | c.(22-24)TCC>TTC     | p.S8F         |
| Pat_41 | Post-Resistance | LINGO1   | 84894  | 37 | 15 | 77907294  | 77907294  | Missense_Mutation | SNP | C | T | 3  | 32  | c.955G>A     | c.(955-957)GTG>ATG   | p.V319M       |
| Pat_41 | Post-Resistance | TBC1D2B  | 23102  | 37 | 15 | 78305252  | 78305252  | Missense_Mutation | SNP | G | A | 10 | 68  | c.2183C>T    | c.(2182-2184)ACC>ATC | p.T728I       |
| Pat_41 | Post-Resistance | ACSBG1   | 23205  | 37 | 15 | 78486346  | 78486346  | Missense_Mutation | SNP | G | A | 4  | 102 | c.470C>T     | c.(469-471)GCC>GTC   | p.A157V       |
| Pat_41 | Post-Resistance | MORF4L1  | 10933  | 37 | 15 | 79177389  | 79177389  | Missense_Mutation | SNP | G | A | 8  | 160 | c.236G>A     | c.(235-237)GGA>GAA   | p.G79E        |
| Pat_41 | Post-Resistance | FAH      | 2184   | 37 | 15 | 80452789  | 80452789  | Missense_Mutation | SNP | C | T | 26 | 147 | c.352C>T     | c.(352-354)CCA>TCA   | p.P118S       |
| Pat_41 | Post-Resistance | KIAA1199 | 57214  | 37 | 15 | 81234254  | 81234254  | Missense_Mutation | SNP | G | A | 5  | 75  | c.3472G>A    | c.(3472-3474)GGC>AGC | p.G1158S      |
| Pat_41 | Post-Resistance | C15orf26 | 161502 | 37 | 15 | 81440695  | 81440695  | Missense_Mutation | SNP | G | A | 10 | 224 | c.727G>A     | c.(727-729)GAG>AAG   | p.E243K       |
| Pat_41 | Post-Resistance | IL16     | 3603   | 37 | 15 | 81582852  | 81582852  | Missense_Mutation | SNP | G | A | 5  | 68  | c.1391G>A    | c.(1390-1392)GGA>GAA | p.G464E       |
| Pat_41 | Post-Resistance | IL16     | 3603   | 37 | 15 | 81592083  | 81592083  | Missense_Mutation | SNP | C | T | 6  | 120 | c.2416C>T    | c.(2416-2418)CCA>TCA | p.P806S       |
| Pat_41 | Post-Resistance | IL16     | 3603   | 37 | 15 | 81593774  | 81593774  | Missense_Mutation | SNP | C | T | 5  | 89  | c.3239C>T    | c.(3238-3240)TCC>TTC | p.S1080F      |
| Pat_41 | Post-Resistance | IL16     | 3603   | 37 | 15 | 81601023  | 81601023  | Missense_Mutation | SNP | C | T | 13 | 120 | c.3883C>T    | c.(3883-3885)CTC>TTC | p.L1295F      |
| Pat_41 | Post-Resistance | STARD5   | 80765  | 37 | 15 | 81614753  | 81614753  | Missense_Mutation | SNP | G | A | 22 | 271 | c.278C>T     | c.(277-279)ACT>ATT   | p.T93I        |
| Pat_41 | Post-Resistance | FAM154B  | 283726 | 37 | 15 | 82555224  | 82555224  | Missense_Mutation | SNP | G | A | 5  | 9   | c.4G>A       | c.(4-6)GGA>AGA       | p.G2R         |
| Pat_41 | Post-Resistance | FAM154B  | 283726 | 37 | 15 | 82574472  | 82574472  | Missense_Mutation | SNP | C | T | 7  | 101 | c.266C>T     | c.(265-267)GCT>GTT   | p.A89V        |
| Pat_41 | Post-Resistance | BTBD1    | 53339  | 37 | 15 | 83718861  | 83718861  | Missense_Mutation | SNP | C | T | 16 | 185 | c.628G>A     | c.(628-630)GCA>ACA   | p.A210T       |
| Pat_41 | Post-Resistance | ZNF592   | 9640   | 37 | 15 | 85326544  | 85326544  | Missense_Mutation | SNP | G | A | 5  | 81  | c.638G>A     | c.(637-639)GGG>GAG   | p.G213E       |
| Pat_41 | Post-Resistance | ALPK3    | 57538  | 37 | 15 | 85407795  | 85407795  | Missense_Mutation | SNP | C | T | 7  | 67  | c.5228C>T    | c.(5227-5229)CCG>CTG | p.P1743L      |
| Pat_41 | Post-Resistance | PDE8A    | 5151   | 37 | 15 | 85666332  | 85666332  | Missense_Mutation | SNP | G | A | 25 | 202 | c.1993G>A    | c.(1993-1995)GTC>ATC | p.V665I       |
| Pat_41 | Post-Resistance | AKAP13   | 11214  | 37 | 15 | 86123382  | 86123382  | Missense_Mutation | SNP | G | A | 48 | 194 | c.2083G>A    | c.(2083-2085)GCA>ACA | p.A695T       |
| Pat_41 | Post-Resistance | AKAP13   | 11214  | 37 | 15 | 86125252  | 86125252  | Missense_Mutation | SNP | C | T | 5  | 150 | c.3953C>T    | c.(3952-3954)GCC>GTC | p.A1318V      |
| Pat_41 | Post-Resistance | AKAP13   | 11214  | 37 | 15 | 86198921  | 86198921  | Missense_Mutation | SNP | G | A | 12 | 108 | c.4648G>A    | c.(4648-4650)GTC>ATC | p.V1550I      |
| Pat_41 | Post-Resistance | KLHL25   | 64410  | 37 | 15 | 86312573  | 86312573  | Missense_Mutation | SNP | C | T | 8  | 81  | c.469G>A     | c.(469-471)GAC>AAC   | p.D157N       |
| Pat_41 | Post-Resistance | NTRK3    | 4916   | 37 | 15 | 88472468  | 88472468  | Missense_Mutation | SNP | C | T | 17 | 180 | c.2087G>A    | c.(2086-2088)GGG>GAG | p.G696E       |
| Pat_41 | Post-Resistance | DET1     | 55070  | 37 | 15 | 89056328  | 89056328  | Missense_Mutation | SNP | C | T | 8  | 43  | c.1507G>A    | c.(1507-1509)GCG>ACG | p.A503T       |
| Pat_41 | Post-Resistance | AEN      | 64782  | 37 | 15 | 89169838  | 89169838  | Missense_Mutation | SNP | C | T | 13 | 416 | c.398C>T     | c.(397-399)TCC>TTC   | p.S133F       |
| Pat_41 | Post-Resistance | FANCI    | 55215  | 37 | 15 | 89804815  | 89804815  | Splice_Site       | SNP | G | A | 22 | 256 | c.289_splice | c.e5-1               | p.A97_splice  |
| Pat_41 | Post-Resistance | FANCI    | 55215  | 37 | 15 | 89820021  | 89820021  | Missense_Mutation | SNP | G | A | 4  | 136 | c.1192G>A    | c.(1192-1194)GTT>ATT | p.V398I       |
| Pat_41 | Post-Resistance | C15orf42 | 90381  | 37 | 15 | 90161420  | 90161420  | Missense_Mutation | SNP | G | A | 11 | 448 | c.2998G>A    | c.(2998-3000)GAG>AAG | p.E1000K      |
| Pat_41 | Post-Resistance | C15orf42 | 90381  | 37 | 15 | 90167155  | 90167155  | Missense_Mutation | SNP | G | A | 14 | 184 | c.3614G>A    | c.(3613-3615)GGG>GAG | p.G1205E      |
| Pat_41 | Post-Resistance | C15orf42 | 90381  | 37 | 15 | 90168430  | 90168430  | Missense_Mutation | SNP | C | T | 5  | 80  | c.4889C>T    | c.(4888-4890)TCC>TTC | p.S1630F      |
| Pat_41 | Post-Resistance | ANPEP    | 290    | 37 | 15 | 90348690  | 90348690  | Missense_Mutation | SNP | C | T | 4  | 41  | c.619G>A     | c.(619-621)GTG>ATG   | p.V207M       |
| Pat_41 | Post-Resistance | IDH2     | 3418   | 37 | 15 | 90631606  | 90631606  | Missense_Mutation | SNP | C | T | 8  | 201 | c.663G>A     | c.(661-663)ATG>ATA   | p.M221I       |
| Pat_41 | Post-Resistance | IQGAP1   | 8826   | 37 | 15 | 90984917  | 90984917  | Splice_Site       | SNP | G | A | 4  | 96  | c.828_splice | c.e8+1               | p.R276_splice |
| Pat_41 | Post-Resistance | IQGAP1   | 8826   | 37 | 15 | 90996028  | 90996028  | Missense_Mutation | SNP | T | A | 17 | 264 | c.1184T>A    | c.(1183-1185)ATT>AAT | p.I395N       |
| Pat_41 | Post-Resistance | UNC45A   | 55898  | 37 | 15 | 91491911  | 91491911  | Missense_Mutation | SNP | G | A | 5  | 112 | c.1765G>A    | c.(1765-1767)GTG>ATG | p.V589M       |
| Pat_41 | Post-Resistance | SV2B     | 9899   | 37 | 15 | 91803625  | 91803625  | Missense_Mutation | SNP | G | A | 14 | 117 | c.994G>A     | c.(994-996)GAG>AAG   | p.E332K       |
| Pat_41 | Post-Resistance | CHD2     | 1106   | 37 | 15 | 93528792  | 93528792  | Missense_Mutation | SNP | C | T | 7  | 149 | c.3302C>T    | c.(3301-3303)TCT>TTT | p.S1101F      |
| Pat_41 | Post-Resistance | CHD2     | 1106   | 37 | 15 | 93558139  | 93558139  | Missense_Mutation | SNP | G | A | 12 | 170 | c.4906G>A    | c.(4906-4908)GAT>AAT | p.D1636N      |
| Pat_41 | Post-Resistance | IGF1R    | 3480   | 37 | 15 | 99459931  | 99459931  | Missense_Mutation | SNP | G | A | 9  | 87  | c.2027G>A    | c.(2026-2028)GGC>GAC | p.G676D       |
| Pat_41 | Post-Resistance | IGF1R    | 3480   | 37 | 15 | 99478132  | 99478132  | Missense_Mutation | SNP | G | A | 16 | 93  | c.3036G>A    | c.(3034-3036)ATG>ATA | p.M1012I      |
| Pat_41 | Post-Resistance | SYNM     | 23336  | 37 | 15 | 99670421  | 99670421  | Missense_Mutation | SNP | G | A | 6  | 44  | c.1856G>A    | c.(1855-1857)AGG>AAG | p.R619K       |
| Pat_41 | Post-Resistance | SYNM     | 23336  | 37 | 15 | 99672538  | 99672538  | Missense_Mutation | SNP | G | A | 44 | 215 | c.3973G>A    | c.(3973-3975)GTT>ATT | p.V1325I      |
| Pat_41 | Post-Resistance | ADAMTS17 | 170691 | 37 | 15 | 100636666 | 100636666 | Missense_Mutation | SNP | C | A | 23 | 206 | c.2032G>T    | c.(2032-2034)GGC>TGC | p.G678C       |
| Pat_41 | Post-Resistance | ALDH1A3  | 220    | 37 | 15 | 101434188 | 101434188 | Nonsense_Mutation | SNP | G | A | 9  | 268 | c.567G>A     | c.(565-567)TGG>TGA   | p.W189*       |
| Pat_41 | Post-Resistance | LRRK1    | 79705  | 37 | 15 | 101552327 | 101552327 | Missense_Mutation | SNP | C | T | 14 | 192 | c.1396C>T    | c.(1396-1398)CCC>TCC | p.P466S       |

|        |                 |          |        |    |    |           |           |                   |     |   |   |    |     |               |                      |               |
|--------|-----------------|----------|--------|----|----|-----------|-----------|-------------------|-----|---|---|----|-----|---------------|----------------------|---------------|
| Pat_41 | Post-Resistance | LRRK1    | 79705  | 37 | 15 | 101566179 | 101566179 | Missense_Mutation | SNP | C | T | 19 | 108 | c.2242C>T     | c.(2242-2244)CCA>TCA | p.P748S       |
| Pat_41 | Post-Resistance | LRRK1    | 79705  | 37 | 15 | 101606055 | 101606055 | Missense_Mutation | SNP | C | T | 5  | 92  | c.5413C>T     | c.(5413-5415)CCA>TCA | p.P1805S      |
| Pat_41 | Post-Resistance | NPRL3    | 8131   | 37 | 16 | 142724    | 142724    | Splice_Site       | SNP | C | T | 14 | 84  | c.1032_splice | c.e11-1              | p.L344_splice |
| Pat_41 | Post-Resistance | TMEM8A   | 58986  | 37 | 16 | 427422    | 427422    | Missense_Mutation | SNP | C | T | 4  | 53  | c.463G>A      | c.(463-465)GTG>ATG   | p.V155M       |
| Pat_41 | Post-Resistance | PIGQ     | 9091   | 37 | 16 | 633095    | 633095    | Missense_Mutation | SNP | G | A | 4  | 66  | c.1744G>A     | c.(1744-1746)GGG>AGG | p.G582R       |
| Pat_41 | Post-Resistance | WDR90    | 197335 | 37 | 16 | 700070    | 700070    | Missense_Mutation | SNP | G | A | 20 | 411 | c.182G>A      | c.(181-183)AGC>AAC   | p.S61N        |
| Pat_41 | Post-Resistance | WDR90    | 197335 | 37 | 16 | 708906    | 708906    | Missense_Mutation | SNP | G | A | 5  | 184 | c.2906G>A     | c.(2905-2907)GGC>GAC | p.G969D       |
| Pat_41 | Post-Resistance | WDR90    | 197335 | 37 | 16 | 716059    | 716059    | Missense_Mutation | SNP | C | T | 5  | 195 | c.4544C>T     | c.(4543-4545)ACG>ATG | p.T1515M      |
| Pat_41 | Post-Resistance | CCDC78   | 124093 | 37 | 16 | 773876    | 773876    | Missense_Mutation | SNP | C | T | 3  | 12  | c.1114G>A     | c.(1114-1116)GGG>AGG | p.G372R       |
| Pat_41 | Post-Resistance | MSLN     | 10232  | 37 | 16 | 816980    | 816980    | Missense_Mutation | SNP | C | T | 5  | 62  | c.1493C>T     | c.(1492-1494)TCC>TTC | p.S498F       |
| Pat_41 | Post-Resistance | PRR25    | 388199 | 37 | 16 | 855624    | 855624    | Missense_Mutation | SNP | G | A | 4  | 34  | c.182G>A      | c.(181-183)AGC>AAC   | p.S61N        |
| Pat_41 | Post-Resistance | C1QTNF8  | 390664 | 37 | 16 | 1144721   | 1144721   | Missense_Mutation | SNP | G | A | 9  | 56  | c.202C>T      | c.(202-204)CTC>TTC   | p.L68F        |
| Pat_41 | Post-Resistance | BAIAP3   | 8938   | 37 | 16 | 1397964   | 1397964   | Missense_Mutation | SNP | G | A | 23 | 244 | c.3200G>A     | c.(3199-3201)AGG>AAG | p.R1067K      |
| Pat_41 | Post-Resistance | MAPK8IP3 | 23162  | 37 | 16 | 1797255   | 1797255   | Missense_Mutation | SNP | G | A | 6  | 102 | c.970G>A      | c.(970-972)GAG>AAG   | p.E324K       |
| Pat_41 | Post-Resistance | EME2     | 197342 | 37 | 16 | 1825622   | 1825622   | Missense_Mutation | SNP | C | T | 7  | 106 | c.869C>T      | c.(868-870)TCT>TTT   | p.S290F       |
| Pat_41 | Post-Resistance | EME2     | 197342 | 37 | 16 | 1826204   | 1826204   | Missense_Mutation | SNP | G | A | 9  | 166 | c.1300G>A     | c.(1300-1302)GCC>ACC | p.A434T       |
| Pat_41 | Post-Resistance | NUBP2    | 10101  | 37 | 16 | 1837746   | 1837746   | Missense_Mutation | SNP | C | T | 19 | 120 | c.403C>T      | c.(403-405)CCG>TCG   | p.P135S       |
| Pat_41 | Post-Resistance | HAGH     | 3029   | 37 | 16 | 1872338   | 1872338   | Missense_Mutation | SNP | C | T | 15 | 197 | c.277G>A      | c.(277-279)GTG>ATG   | p.V93M        |
| Pat_41 | Post-Resistance | C16orf73 | 254528 | 37 | 16 | 1891834   | 1891834   | Missense_Mutation | SNP | C | T | 8  | 105 | c.1021G>A     | c.(1021-1023)GTT>ATT | p.V341I       |
| Pat_41 | Post-Resistance | RPL3L    | 6123   | 37 | 16 | 1995618   | 1995618   | Missense_Mutation | SNP | G | A | 5  | 121 | c.1049C>T     | c.(1048-1050)TCC>TTC | p.S350F       |
| Pat_41 | Post-Resistance | SLC9A3R2 | 9351   | 37 | 16 | 2087564   | 2087564   | Missense_Mutation | SNP | C | T | 7  | 43  | c.818C>T      | c.(817-819)TCC>TTC   | p.S273F       |
| Pat_41 | Post-Resistance | SLC9A3R2 | 9351   | 37 | 16 | 2087952   | 2087952   | Nonsense_Mutation | SNP | G | A | 4  | 45  | c.981G>A      | c.(979-981)TGG>TGA   | p.W327*       |
| Pat_41 | Post-Resistance | MLST8    | 64223  | 37 | 16 | 2258289   | 2258289   | Missense_Mutation | SNP | G | A | 26 | 383 | c.652G>A      | c.(652-654)GCC>ACC   | p.A218T       |
| Pat_41 | Post-Resistance | RNPS1    | 10921  | 37 | 16 | 2305604   | 2305604   | Missense_Mutation | SNP | G | A | 4  | 118 | c.800C>T      | c.(799-801)CCC>CTC   | p.P267L       |
| Pat_41 | Post-Resistance | TBC1D24  | 57465  | 37 | 16 | 2548309   | 2548309   | Missense_Mutation | SNP | G | A | 4  | 32  | c.1054G>A     | c.(1054-1056)GAC>AAC | p.D352N       |
| Pat_41 | Post-Resistance | SRRM2    | 23524  | 37 | 16 | 2816014   | 2816014   | Missense_Mutation | SNP | G | A | 10 | 62  | c.5485G>A     | c.(5485-5487)GAA>AAA | p.E1829K      |
| Pat_41 | Post-Resistance | SRRM2    | 23524  | 37 | 16 | 2819233   | 2819233   | Nonsense_Mutation | SNP | C | T | 25 | 211 | c.7969C>T     | c.(7969-7971)CAG>TAG | p.Q2657*      |
| Pat_41 | Post-Resistance | TCEB2    | 6923   | 37 | 16 | 2822016   | 2822016   | Missense_Mutation | SNP | C | T | 11 | 62  | c.332G>A      | c.(331-333)AGT>AAT   | p.S111N       |
| Pat_41 | Post-Resistance | PRSS22   | 64063  | 37 | 16 | 2906134   | 2906134   | Missense_Mutation | SNP | C | T | 7  | 99  | c.230G>A      | c.(229-231)GGT>GAT   | p.G77D        |
| Pat_41 | Post-Resistance | FLYWCH1  | 84256  | 37 | 16 | 2983538   | 2983538   | Nonsense_Mutation | SNP | C | T | 4  | 48  | c.1204C>T     | c.(1204-1206)CAG>TAG | p.Q402*       |
| Pat_41 | Post-Resistance | PAQR4    | 124222 | 37 | 16 | 3021518   | 3021518   | Missense_Mutation | SNP | G | A | 35 | 148 | c.391G>A      | c.(391-393)GCC>ACC   | p.A131T       |
| Pat_41 | Post-Resistance | CCDC64B  | 146439 | 37 | 16 | 3079737   | 3079737   | Missense_Mutation | SNP | C | T | 3  | 4   | c.766G>A      | c.(766-768)GAA>AAA   | p.E256K       |
| Pat_41 | Post-Resistance | ZNF205   | 7755   | 37 | 16 | 3165426   | 3165426   | Missense_Mutation | SNP | C | T | 30 | 102 | c.128C>T      | c.(127-129)ACT>ATT   | p.T43I        |
| Pat_41 | Post-Resistance | OR1F1    | 4992   | 37 | 16 | 3254437   | 3254437   | Missense_Mutation | SNP | G | A | 16 | 285 | c.191G>A      | c.(190-192)AGC>AAC   | p.S64N        |
| Pat_41 | Post-Resistance | ZNF200   | 7752   | 37 | 16 | 3283734   | 3283734   | Missense_Mutation | SNP | G | A | 24 | 258 | c.22C>T       | c.(22-24)CCT>TCT     | p.P8S         |
| Pat_41 | Post-Resistance | TIGD7    | 91151  | 37 | 16 | 3350395   | 3350395   | Missense_Mutation | SNP | C | T | 18 | 225 | c.220G>A      | c.(220-222)GGA>AGA   | p.G74R        |
| Pat_41 | Post-Resistance | ZNF174   | 7727   | 37 | 16 | 3454425   | 3454425   | Splice_Site       | SNP | G | A | 14 | 225 | c.403_splice  | c.e2-1               | p.V135_splice |
| Pat_41 | Post-Resistance | NAT15    | 79903  | 37 | 16 | 3533585   | 3533585   | Missense_Mutation | SNP | C | T | 4  | 62  | c.560C>T      | c.(559-561)CCC>CTC   | p.P187L       |
| Pat_41 | Post-Resistance | NLRC3    | 197358 | 37 | 16 | 3614586   | 3614586   | Missense_Mutation | SNP | G | A | 10 | 73  | c.352C>T      | c.(352-354)CCC>TCC   | p.P118S       |
| Pat_41 | Post-Resistance | CREBBP   | 1387   | 37 | 16 | 3781408   | 3781408   | Missense_Mutation | SNP | C | T | 3  | 25  | c.4957G>A     | c.(4957-4959)GAC>AAC | p.D1653N      |
| Pat_41 | Post-Resistance | CREBBP   | 1387   | 37 | 16 | 3820797   | 3820797   | Missense_Mutation | SNP | G | A | 7  | 82  | c.2654C>T     | c.(2653-2655)CCC>CTC | p.P885L       |
| Pat_41 | Post-Resistance | CREBBP   | 1387   | 37 | 16 | 3843581   | 3843581   | Missense_Mutation | SNP | G | A | 8  | 134 | c.1022C>T     | c.(1021-1023)GCA>GTA | p.A341V       |
| Pat_41 | Post-Resistance | ADCY9    | 115    | 37 | 16 | 4016216   | 4016216   | Missense_Mutation | SNP | C | T | 14 | 306 | c.3622G>A     | c.(3622-3624)GTG>ATG | p.V1208M      |
| Pat_41 | Post-Resistance | GLIS2    | 84662  | 37 | 16 | 4382336   | 4382336   | Missense_Mutation | SNP | G | A | 3  | 47  | c.55G>A       | c.(55-57)GCG>ACG     | p.A19T        |
| Pat_41 | Post-Resistance | NMRAL1   | 57407  | 37 | 16 | 4511851   | 4511851   | Missense_Mutation | SNP | C | T | 22 | 285 | c.830G>A      | c.(829-831)AGA>AAA   | p.R277K       |
| Pat_41 | Post-Resistance | HMOX2    | 3163   | 37 | 16 | 4557882   | 4557882   | Missense_Mutation | SNP | G | A | 5  | 34  | c.373G>A      | c.(373-375)GTG>ATG   | p.V125M       |
| Pat_41 | Post-Resistance | MGRN1    | 23295  | 37 | 16 | 4731713   | 4731713   | Missense_Mutation | SNP | G | A | 15 | 85  | c.1294G>A     | c.(1294-1296)GCT>ACT | p.A432T       |

|        |                 |          |        |    |    |          |          |                   |     |   |   |     |     |              |                        |               |
|--------|-----------------|----------|--------|----|----|----------|----------|-------------------|-----|---|---|-----|-----|--------------|------------------------|---------------|
| Pat_41 | Post-Resistance | MGRN1    | 23295  | 37 | 16 | 4733883  | 4733883  | Missense_Mutation | SNP | G | A | 5   | 60  | c.1568G>A    | c.(1567-1569)AGC>AAC   | p.S523N       |
| Pat_41 | Post-Resistance | ANKS3    | 124401 | 37 | 16 | 4755113  | 4755113  | Missense_Mutation | SNP | G | A | 17  | 140 | c.851C>T     | c.(850-852)GCC>GTC     | p.A284V       |
| Pat_41 | Post-Resistance | ANKS3    | 124401 | 37 | 16 | 4776659  | 4776659  | Splice_Site       | SNP | C | T | 7   | 97  | c.491_splice | c.e5+1                 | p.R164_splice |
| Pat_41 | Post-Resistance | ANKS3    | 124401 | 37 | 16 | 4776766  | 4776766  | Missense_Mutation | SNP | C | T | 19  | 74  | c.385G>A     | c.(385-387)GAA>AAA     | p.E129K       |
| Pat_41 | Post-Resistance | GLYR1    | 84656  | 37 | 16 | 4861639  | 4861639  | Missense_Mutation | SNP | C | T | 9   | 72  | c.1447G>A    | c.(1447-1449)GAC>AAC   | p.D483N       |
| Pat_41 | Post-Resistance | UBN1     | 29855  | 37 | 16 | 4925341  | 4925341  | Missense_Mutation | SNP | C | T | 5   | 156 | c.2930C>T    | c.(2929-2931)TCC>TTC   | p.S977F       |
| Pat_41 | Post-Resistance | PPL      | 5493   | 37 | 16 | 4934980  | 4934980  | Missense_Mutation | SNP | C | T | 4   | 18  | c.3676G>A    | c.(3676-3678)GTG>ATG   | p.V1226M      |
| Pat_41 | Post-Resistance | PPL      | 5493   | 37 | 16 | 4937225  | 4937225  | Missense_Mutation | SNP | C | T | 7   | 267 | c.2518G>A    | c.(2518-2520)GCA>ACA   | p.A840T       |
| Pat_41 | Post-Resistance | A2BP1    | 54715  | 37 | 16 | 7568356  | 7568356  | Missense_Mutation | SNP | G | A | 44  | 356 | c.235G>A     | c.(235-237)GAC>AAC     | p.D79N        |
| Pat_41 | Post-Resistance | ABAT     | 18     | 37 | 16 | 8866748  | 8866748  | Missense_Mutation | SNP | C | T | 49  | 48  | c.928C>T     | c.(928-930)CGG>TGG     | p.R310W       |
| Pat_41 | Post-Resistance | USP7     | 7874   | 37 | 16 | 8998314  | 8998314  | Missense_Mutation | SNP | G | A | 10  | 91  | c.1682C>T    | c.(1681-1683)GCC>GTC   | p.A561V       |
| Pat_41 | Post-Resistance | GRIN2A   | 2903   | 37 | 16 | 10032359 | 10032359 | Missense_Mutation | SNP | G | A | 7   | 148 | c.464C>T     | c.(463-465)GCC>GTC     | p.A155V       |
| Pat_41 | Post-Resistance | ATF7IP2  | 80063  | 37 | 16 | 10524713 | 10524713 | Missense_Mutation | SNP | C | T | 3   | 64  | c.236C>T     | c.(235-237)TCT>TTT     | p.S79F        |
| Pat_41 | Post-Resistance | NUBP1    | 4682   | 37 | 16 | 10851733 | 10851733 | Missense_Mutation | SNP | T | C | 104 | 124 | c.455T>C     | c.(454-456)ATG>ACG     | p.M152T       |
| Pat_41 | Post-Resistance | CIITA    | 4261   | 37 | 16 | 10989537 | 10989537 | Missense_Mutation | SNP | G | A | 8   | 157 | c.211G>A     | c.(211-213)GAC>AAC     | p.D71N        |
| Pat_41 | Post-Resistance | CIITA    | 4261   | 37 | 16 | 10997657 | 10997657 | Missense_Mutation | SNP | C | T | 34  | 202 | c.842C>T     | c.(841-843)CCA>CTA     | p.P281L       |
| Pat_41 | Post-Resistance | CIITA    | 4261   | 37 | 16 | 11001028 | 11001028 | Missense_Mutation | SNP | C | T | 4   | 9   | c.1679C>T    | c.(1678-1680)GCC>GTC   | p.A560V       |
| Pat_41 | Post-Resistance | CLEC16A  | 23274  | 37 | 16 | 11096938 | 11096938 | Missense_Mutation | SNP | C | T | 3   | 39  | c.1079C>T    | c.(1078-1080)CCC>CTC   | p.P360L       |
| Pat_41 | Post-Resistance | CLEC16A  | 23274  | 37 | 16 | 11260257 | 11260257 | Missense_Mutation | SNP | C | T | 5   | 90  | c.2654C>T    | c.(2653-2655)GCC>GTC   | p.A885V       |
| Pat_41 | Post-Resistance | GSPT1    | 2935   | 37 | 16 | 11981536 | 11981536 | Missense_Mutation | SNP | G | A | 16  | 253 | c.434C>T     | c.(433-435)GCC>GTC     | p.A145V       |
| Pat_41 | Post-Resistance | ERCC4    | 2072   | 37 | 16 | 14029291 | 14029291 | Missense_Mutation | SNP | C | T | 4   | 78  | c.1502C>T    | c.(1501-1503)CCT>CTT   | p.P501L       |
| Pat_41 | Post-Resistance | ERCC4    | 2072   | 37 | 16 | 14031696 | 14031696 | Missense_Mutation | SNP | G | A | 11  | 132 | c.1885G>A    | c.(1885-1887)GCT>ACT   | p.A629T       |
| Pat_41 | Post-Resistance | MKL2     | 57496  | 37 | 16 | 14354874 | 14354874 | Missense_Mutation | SNP | C | T | 36  | 365 | c.2873C>T    | c.(2872-2874)CCC>CTC   | p.P958L       |
| Pat_41 | Post-Resistance | KIAA0430 | 9665   | 37 | 16 | 15711297 | 15711297 | Missense_Mutation | SNP | G | A | 22  | 44  | c.2816C>T    | c.(2815-2817)CCC>CTC   | p.P939L       |
| Pat_41 | Post-Resistance | NDE1     | 54820  | 37 | 16 | 15771806 | 15771806 | Missense_Mutation | SNP | G | A | 15  | 222 | c.386G>A     | c.(385-387)CGC>CAC     | p.R129H       |
| Pat_41 | Post-Resistance | NDE1     | 54820  | 37 | 16 | 15790678 | 15790678 | Missense_Mutation | SNP | G | A | 17  | 113 | c.908G>A     | c.(907-909)AGA>AAA     | p.R303K       |
| Pat_41 | Post-Resistance | ABCC1    | 4363   | 37 | 16 | 16110374 | 16110374 | Missense_Mutation | SNP | C | T | 25  | 440 | c.511C>T     | c.(511-513)CGT>TGT     | p.R171C       |
| Pat_41 | Post-Resistance | ABCC1    | 4363   | 37 | 16 | 16208623 | 16208623 | Missense_Mutation | SNP | G | A | 11  | 95  | c.3080G>A    | c.(3079-3081)GGG>GAG   | p.G1027E      |
| Pat_41 | Post-Resistance | XYLT1    | 64131  | 37 | 16 | 17353093 | 17353093 | Missense_Mutation | SNP | C | T | 18  | 300 | c.665G>A     | c.(664-666)AGA>AAA     | p.R222K       |
| Pat_41 | Post-Resistance | TMC7     | 79905  | 37 | 16 | 19047075 | 19047075 | Missense_Mutation | SNP | G | A | 9   | 300 | c.935G>A     | c.(934-936)GGC>GAC     | p.G312D       |
| Pat_41 | Post-Resistance | SYT17    | 51760  | 37 | 16 | 19191802 | 19191802 | Missense_Mutation | SNP | G | A | 11  | 163 | c.272G>A     | c.(271-273)GGA>GAA     | p.G91E        |
| Pat_41 | Post-Resistance | TMC5     | 79838  | 37 | 16 | 19483534 | 19483534 | Missense_Mutation | SNP | C | T | 6   | 88  | c.1907C>T    | c.(1906-1908)GCC>GTC   | p.A636V       |
| Pat_41 | Post-Resistance | C16orf62 | 57020  | 37 | 16 | 19621688 | 19621688 | Missense_Mutation | SNP | G | A | 13  | 153 | c.974G>A     | c.(973-975)GGG>GAG     | p.G325E       |
| Pat_41 | Post-Resistance | IQCK     | 124152 | 37 | 16 | 19775207 | 19775207 | Missense_Mutation | SNP | C | T | 18  | 300 | c.512C>T     | c.(511-513)ACT>ATT     | p.T171I       |
| Pat_41 | Post-Resistance | UMOD     | 7369   | 37 | 16 | 20357498 | 20357498 | Missense_Mutation | SNP | C | T | 6   | 67  | c.1132G>A    | c.(1132-1134)GTG>ATG   | p.V378M       |
| Pat_41 | Post-Resistance | ERI2     | 112479 | 37 | 16 | 20814927 | 20814927 | Missense_Mutation | SNP | G | A | 5   | 90  | c.89C>T      | c.(88-90)TCC>TTC       | p.S30F        |
| Pat_41 | Post-Resistance | DCUN1D3  | 123879 | 37 | 16 | 20873643 | 20873643 | Missense_Mutation | SNP | C | T | 14  | 306 | c.218G>A     | c.(217-219)GGA>GAA     | p.G73E        |
| Pat_41 | Post-Resistance | DNAH3    | 55567  | 37 | 16 | 20944756 | 20944756 | Missense_Mutation | SNP | C | T | 6   | 104 | c.12071G>A   | c.(12070-12072)GGT>GAT | p.G4024D      |
| Pat_41 | Post-Resistance | DNAH3    | 55567  | 37 | 16 | 21038385 | 21038385 | Missense_Mutation | SNP | G | A | 22  | 163 | c.5504C>T    | c.(5503-5505)GCC>GTC   | p.A1835V      |
| Pat_41 | Post-Resistance | ZP2      | 7783   | 37 | 16 | 21221037 | 21221037 | Missense_Mutation | SNP | C | T | 11  | 146 | c.245G>A     | c.(244-246)GGT>GAT     | p.G82D        |
| Pat_41 | Post-Resistance | ANKS4B   | 257629 | 37 | 16 | 21261140 | 21261140 | Missense_Mutation | SNP | G | A | 27  | 93  | c.253G>A     | c.(253-255)GTC>ATC     | p.V85I        |
| Pat_41 | Post-Resistance | OTOA     | 146183 | 37 | 16 | 21771817 | 21771817 | Missense_Mutation | SNP | C | T | 7   | 106 | c.3376C>T    | c.(3376-3378)CTT>TTT   | p.L1126F      |
| Pat_41 | Post-Resistance | PDZD9    | 255762 | 37 | 16 | 21995620 | 21995620 | Missense_Mutation | SNP | C | T | 126 | 653 | c.577G>A     | c.(577-579)GGT>AGT     | p.G193S       |
| Pat_41 | Post-Resistance | SCNN1B   | 6338   | 37 | 16 | 23360152 | 23360152 | Missense_Mutation | SNP | G | A | 7   | 61  | c.232G>A     | c.(232-234)GAG>AAG     | p.E78K        |
| Pat_41 | Post-Resistance | SCNN1B   | 6338   | 37 | 16 | 23388525 | 23388525 | Missense_Mutation | SNP | G | A | 6   | 77  | c.1310G>A    | c.(1309-1311)AGA>AAA   | p.R437K       |
| Pat_41 | Post-Resistance | EARS2    | 124454 | 37 | 16 | 23568562 | 23568562 | Missense_Mutation | SNP | C | T | 9   | 39  | c.103G>A     | c.(103-105)GTT>ATT     | p.V35I        |
| Pat_41 | Post-Resistance | PLK1     | 5347   | 37 | 16 | 23692258 | 23692258 | Missense_Mutation | SNP | G | A | 23  | 248 | c.601G>A     | c.(601-603)GTC>ATC     | p.V201I       |

|        |                 |          |        |    |    |          |          |                   |     |   |   |     |     |               |                      |               |
|--------|-----------------|----------|--------|----|----|----------|----------|-------------------|-----|---|---|-----|-----|---------------|----------------------|---------------|
| Pat_41 | Post-Resistance | RBBP6    | 5930   | 37 | 16 | 24574823 | 24574823 | Splice_Site       | SNP | G | A | 20  | 178 | c.1465_splice | c.e12+1              | p.G489_splice |
| Pat_41 | Post-Resistance | RBBP6    | 5930   | 37 | 16 | 24578789 | 24578789 | Missense_Mutation | SNP | G | A | 6   | 306 | c.1915G>A     | c.(1915-1917)GAA>AAA | p.E639K       |
| Pat_41 | Post-Resistance | RBBP6    | 5930   | 37 | 16 | 24580584 | 24580584 | Missense_Mutation | SNP | A | T | 69  | 66  | c.2573A>T     | c.(2572-2574)GAG>GTG | p.E858V       |
| Pat_41 | Post-Resistance | RBBP6    | 5930   | 37 | 16 | 24581717 | 24581717 | Missense_Mutation | SNP | G | A | 6   | 100 | c.3706G>A     | c.(3706-3708)GAG>AAG | p.E1236K      |
| Pat_41 | Post-Resistance | TNRC6A   | 27327  | 37 | 16 | 24801456 | 24801456 | Missense_Mutation | SNP | G | A | 5   | 71  | c.1493G>A     | c.(1492-1494)GGT>GAT | p.G498D       |
| Pat_41 | Post-Resistance | TNRC6A   | 27327  | 37 | 16 | 24802535 | 24802535 | Missense_Mutation | SNP | G | A | 5   | 83  | c.2572G>A     | c.(2572-2574)GGA>AGA | p.G858R       |
| Pat_41 | Post-Resistance | TNRC6A   | 27327  | 37 | 16 | 24809245 | 24809245 | Missense_Mutation | SNP | C | T | 6   | 118 | c.3652C>T     | c.(3652-3654)CCA>TCA | p.P1218S      |
| Pat_41 | Post-Resistance | TNRC6A   | 27327  | 37 | 16 | 24828149 | 24828149 | Missense_Mutation | SNP | G | A | 26  | 285 | c.4844G>A     | c.(4843-4845)GGT>GAT | p.G1615D      |
| Pat_41 | Post-Resistance | TNRC6A   | 27327  | 37 | 16 | 24834914 | 24834914 | Missense_Mutation | SNP | C | T | 24  | 346 | c.5675C>T     | c.(5674-5676)TCC>TTC | p.S1892F      |
| Pat_41 | Post-Resistance | AQP8     | 343    | 37 | 16 | 25228522 | 25228522 | Missense_Mutation | SNP | G | A | 8   | 422 | c.16G>A       | c.(16-18)GCC>ACC     | p.A6T         |
| Pat_41 | Post-Resistance | AQP8     | 343    | 37 | 16 | 25238444 | 25238444 | Missense_Mutation | SNP | G | A | 11  | 137 | c.658G>A      | c.(658-660)GTG>ATG   | p.V220M       |
| Pat_41 | Post-Resistance | ZKSCAN2  | 342357 | 37 | 16 | 25258673 | 25258673 | Missense_Mutation | SNP | C | T | 4   | 106 | c.844G>A      | c.(844-846)GAA>AAA   | p.E282K       |
| Pat_41 | Post-Resistance | C16orf82 | 162083 | 37 | 16 | 27078584 | 27078584 | Missense_Mutation | SNP | G | A | 3   | 22  | c.268G>A      | c.(268-270)GGG>AGG   | p.G90R        |
| Pat_41 | Post-Resistance | JMJD5    | 79831  | 37 | 16 | 27230300 | 27230300 | Missense_Mutation | SNP | G | A | 7   | 285 | c.862G>A      | c.(862-864)GAC>AAC   | p.D288N       |
| Pat_41 | Post-Resistance | IL21R    | 50615  | 37 | 16 | 27460078 | 27460078 | Missense_Mutation | SNP | G | A | 12  | 105 | c.1091G>A     | c.(1090-1092)AGT>AAT | p.S364N       |
| Pat_41 | Post-Resistance | GTF3C1   | 2975   | 37 | 16 | 27506155 | 27506155 | Missense_Mutation | SNP | C | T | 5   | 132 | c.2707G>A     | c.(2707-2709)GCT>ACT | p.A903T       |
| Pat_41 | Post-Resistance | KIAA0556 | 23247  | 37 | 16 | 27772814 | 27772814 | Missense_Mutation | SNP | G | A | 8   | 147 | c.3712G>A     | c.(3712-3714)GGC>AGC | p.G1238S      |
| Pat_41 | Post-Resistance | ATXN2L   | 11273  | 37 | 16 | 28836973 | 28836973 | Missense_Mutation | SNP | G | A | 33  | 503 | c.365G>A      | c.(364-366)AGA>AAA   | p.R122K       |
| Pat_41 | Post-Resistance | ATXN2L   | 11273  | 37 | 16 | 28843565 | 28843565 | Missense_Mutation | SNP | C | T | 9   | 135 | c.1361C>T     | c.(1360-1362)GCC>GTC | p.A454V       |
| Pat_41 | Post-Resistance | ATXN2L   | 11273  | 37 | 16 | 28844809 | 28844809 | Missense_Mutation | SNP | A | G | 13  | 104 | c.2005A>G     | c.(2005-2007)ACA>GCA | p.T669A       |
| Pat_41 | Post-Resistance | TUFM     | 7284   | 37 | 16 | 28856355 | 28856355 | Missense_Mutation | SNP | G | A | 4   | 80  | c.436C>T      | c.(436-438)CCC>TCC   | p.P146S       |
| Pat_41 | Post-Resistance | SH2B1    | 25970  | 37 | 16 | 28884792 | 28884792 | Missense_Mutation | SNP | C | T | 20  | 76  | c.1922C>T     | c.(1921-1923)CCC>CTC | p.P641L       |
| Pat_41 | Post-Resistance | RABEP2   | 79874  | 37 | 16 | 28925906 | 28925906 | Missense_Mutation | SNP | C | T | 5   | 28  | c.545G>A      | c.(544-546)AGA>AAA   | p.R182K       |
| Pat_41 | Post-Resistance | CD19     | 930    | 37 | 16 | 28948978 | 28948978 | Missense_Mutation | SNP | C | T | 14  | 122 | c.1406C>T     | c.(1405-1407)ACC>ATC | p.T469I       |
| Pat_41 | Post-Resistance | C16orf53 | 79447  | 37 | 16 | 29830875 | 29830875 | Splice_Site       | SNP | G | A | 89  | 498 | c.566_splice  | c.e3-1               | p.G189_splice |
| Pat_41 | Post-Resistance | MVP      | 9961   | 37 | 16 | 29848044 | 29848044 | Missense_Mutation | SNP | C | T | 5   | 140 | c.674C>T      | c.(673-675)ACA>ATA   | p.T225I       |
| Pat_41 | Post-Resistance | SEZ6L2   | 26470  | 37 | 16 | 29884904 | 29884904 | Missense_Mutation | SNP | C | T | 16  | 90  | c.2251G>A     | c.(2251-2253)GAC>AAC | p.D751N       |
| Pat_41 | Post-Resistance | TAOK2    | 9344   | 37 | 16 | 29994887 | 29994887 | Missense_Mutation | SNP | C | T | 20  | 756 | c.1324C>T     | c.(1324-1326)CCT>TCT | p.P442S       |
| Pat_41 | Post-Resistance | ITGAL    | 3683   | 37 | 16 | 30500468 | 30500468 | Missense_Mutation | SNP | C | T | 12  | 84  | c.1072C>T     | c.(1072-1074)CTC>TTC | p.L358F       |
| Pat_41 | Post-Resistance | ZNF747   | 65988  | 37 | 16 | 30544408 | 30544408 | Missense_Mutation | SNP | G | A | 6   | 83  | c.548C>T      | c.(547-549)ACC>ATC   | p.T183I       |
| Pat_41 | Post-Resistance | ZNF785   | 146540 | 37 | 16 | 30593963 | 30593963 | Missense_Mutation | SNP | G | A | 18  | 187 | c.1136C>T     | c.(1135-1137)TCA>TTA | p.S379L       |
| Pat_41 | Post-Resistance | SRCAP    | 10847  | 37 | 16 | 30749754 | 30749754 | Missense_Mutation | SNP | G | A | 21  | 148 | c.8393G>A     | c.(8392-8394)GGG>GAG | p.G2798E      |
| Pat_41 | Post-Resistance | ORAI3    | 93129  | 37 | 16 | 30964596 | 30964596 | Missense_Mutation | SNP | G | A | 10  | 150 | c.319G>A      | c.(319-321)GCT>ACT   | p.A107T       |
| Pat_41 | Post-Resistance | SETD1A   | 9739   | 37 | 16 | 30975478 | 30975478 | Missense_Mutation | SNP | G | A | 27  | 216 | c.703G>A      | c.(703-705)GGC>AGC   | p.G235S       |
| Pat_41 | Post-Resistance | ZNF646   | 9726   | 37 | 16 | 31092837 | 31092837 | Missense_Mutation | SNP | G | A | 33  | 255 | c.5192G>A     | c.(5191-5193)CGC>CAC | p.R1731H      |
| Pat_41 | Post-Resistance | BCKDK    | 10295  | 37 | 16 | 31120731 | 31120731 | Missense_Mutation | SNP | G | A | 5   | 37  | c.187G>A      | c.(187-189)GCC>ACG   | p.A63T        |
| Pat_41 | Post-Resistance | PRSS36   | 146547 | 37 | 16 | 31152070 | 31152070 | Missense_Mutation | SNP | G | A | 9   | 105 | c.1910C>T     | c.(1909-1911)JCT>TTT | p.S637F       |
| Pat_41 | Post-Resistance | ITGAX    | 3687   | 37 | 16 | 31374356 | 31374356 | Missense_Mutation | SNP | C | T | 15  | 73  | c.1460C>T     | c.(1459-1461)ACC>ATC | p.T487I       |
| Pat_41 | Post-Resistance | ITGAX    | 3687   | 37 | 16 | 31383814 | 31383814 | Missense_Mutation | SNP | G | A | 6   | 23  | c.2276G>A     | c.(2275-2277)AGA>AAA | p.R759K       |
| Pat_41 | Post-Resistance | SLC6A10P | 386757 | 37 | 16 | 32890984 | 32890984 | Missense_Mutation | SNP | G | A | 7   | 80  | c.70C>T       | c.(70-72)CTC>TTC     | p.L24F        |
| Pat_41 | Post-Resistance | SHCBP1   | 79801  | 37 | 16 | 46652201 | 46652201 | Missense_Mutation | SNP | C | T | 9   | 63  | c.187G>A      | c.(187-189)GGA>AGA   | p.G63R        |
| Pat_41 | Post-Resistance | VPS35    | 55737  | 37 | 16 | 46712869 | 46712869 | Missense_Mutation | SNP | C | T | 18  | 395 | c.706G>A      | c.(706-708)GAA>AAA   | p.E236K       |
| Pat_41 | Post-Resistance | ORC6L    | 23594  | 37 | 16 | 46724994 | 46724994 | Missense_Mutation | SNP | G | A | 17  | 177 | c.157G>A      | c.(157-159)GAC>AAC   | p.D53N        |
| Pat_41 | Post-Resistance | ITFG1    | 81533  | 37 | 16 | 47462714 | 47462714 | Splice_Site       | SNP | C | T | 20  | 310 | c.655_splice  | c.e6+1               | p.D219_splice |
| Pat_41 | Post-Resistance | PHKB     | 5257   | 37 | 16 | 47581441 | 47581441 | Missense_Mutation | SNP | G | A | 16  | 138 | c.692G>A      | c.(691-693)AGC>AAC   | p.S231N       |
| Pat_41 | Post-Resistance | ABCC12   | 94160  | 37 | 16 | 48121981 | 48121981 | Missense_Mutation | SNP | C | T | 6   | 92  | c.3491G>A     | c.(3490-3492)GGA>GAA | p.G1164E      |
| Pat_41 | Post-Resistance | ZNF423   | 23090  | 37 | 16 | 49660102 | 49660102 | Missense_Mutation | SNP | G | A | 159 | 282 | c.3556C>T     | c.(3556-3558)CAC>TAC | p.H1186Y      |



|        |                 |          |        |    |    |          |          |                   |     |    |    |    |     |                |                      |                |
|--------|-----------------|----------|--------|----|----|----------|----------|-------------------|-----|----|----|----|-----|----------------|----------------------|----------------|
| Pat_41 | Post-Resistance | ZNF423   | 23090  | 37 | 16 | 49672465 | 49672465 | Missense_Mutation | SNP | C  | T  | 4  | 49  | c.598G>A       | c.(598-600)GAG>AAG   | p.E200K        |
| Pat_41 | Post-Resistance | ZNF423   | 23090  | 37 | 16 | 49856580 | 49856580 | Splice_Site       | SNP | C  | T  | 10 | 174 | c.16_splice    | c.e2+1               | p.V6_splice    |
| Pat_41 | Post-Resistance | HEATR3   | 55027  | 37 | 16 | 50104158 | 50104158 | Missense_Mutation | SNP | G  | A  | 23 | 168 | c.469G>A       | c.(469-471)GAG>AAG   | p.E157K        |
| Pat_41 | Post-Resistance | BRD7     | 29117  | 37 | 16 | 50367507 | 50367507 | Missense_Mutation | SNP | G  | A  | 41 | 674 | c.989C>T       | c.(988-990)ACC>ATC   | p.T330I        |
| Pat_41 | Post-Resistance | NKD1     | 85407  | 37 | 16 | 50583351 | 50583351 | Missense_Mutation | SNP | G  | A  | 5  | 54  | c.77G>A        | c.(76-78)AGC>AAC     | p.S26N         |
| Pat_41 | Post-Resistance | CYLD     | 1540   | 37 | 16 | 50813809 | 50813809 | Missense_Mutation | SNP | C  | T  | 4  | 82  | c.1372C>T      | c.(1372-1374)CCA>TCA | p.P458S        |
| Pat_41 | Post-Resistance | CYLD     | 1540   | 37 | 16 | 50818352 | 50818352 | Missense_Mutation | SNP | C  | T  | 8  | 108 | c.1939C>T      | c.(1939-1941)CCT>TCT | p.P647S        |
| Pat_41 | Post-Resistance | TOX3     | 27324  | 37 | 16 | 52484245 | 52484245 | Missense_Mutation | SNP | C  | T  | 8  | 168 | c.622G>A       | c.(622-624)GCC>ACC   | p.A208T        |
| Pat_41 | Post-Resistance | CHD9     | 80205  | 37 | 16 | 53358307 | 53358307 | Missense_Mutation | SNP | A  | G  | 10 | 171 | c.8194A>G      | c.(8194-8196)ACA>GCA | p.T2732A       |
| Pat_41 | Post-Resistance | IRX5     | 10265  | 37 | 16 | 54966409 | 54966409 | Splice_Site       | SNP | G  | A  | 9  | 134 | c.250_splice   | c.e2-1               | p.G84_splice   |
| Pat_41 | Post-Resistance | NLRC5    | 84166  | 37 | 16 | 57111875 | 57111875 | Missense_Mutation | SNP | G  | A  | 7  | 55  | c.5024G>A      | c.(5023-5025)GGG>GAG | p.G1675E       |
| Pat_41 | Post-Resistance | RSPRY1   | 89970  | 37 | 16 | 57238692 | 57238692 | Missense_Mutation | SNP | G  | A  | 19 | 389 | c.122G>A       | c.(121-123)GGT>GAT   | p.G41D         |
| Pat_41 | Post-Resistance | ARL2BP   | 23568  | 37 | 16 | 57284322 | 57284322 | Splice_Site       | SNP | G  | A  | 7  | 206 | c.294_splice   | c.e5-1               | p.Q98_splice   |
| Pat_41 | Post-Resistance | CCDC102A | 92922  | 37 | 16 | 57546774 | 57546774 | Missense_Mutation | SNP | C  | T  | 7  | 144 | c.1532G>A      | c.(1531-1533)AGG>AAG | p.R511K        |
| Pat_41 | Post-Resistance | CCDC135  | 84229  | 37 | 16 | 57732829 | 57732829 | Missense_Mutation | SNP | G  | A  | 10 | 529 | c.271G>A       | c.(271-273)GAG>AAG   | p.E91K         |
| Pat_41 | Post-Resistance | CCDC135  | 84229  | 37 | 16 | 57738809 | 57738809 | Missense_Mutation | SNP | G  | A  | 10 | 69  | c.721G>A       | c.(721-723)GTG>ATG   | p.V241M        |
| Pat_41 | Post-Resistance | KIFC3    | 3801   | 37 | 16 | 57794222 | 57794222 | Missense_Mutation | SNP | C  | T  | 4  | 71  | c.2339G>A      | c.(2338-2340)GGG>GAG | p.G780E        |
| Pat_41 | Post-Resistance | KIFC3    | 3801   | 37 | 16 | 57796052 | 57796052 | Missense_Mutation | SNP | C  | T  | 4  | 93  | c.1748G>A      | c.(1747-1749)AGG>AAG | p.R583K        |
| Pat_41 | Post-Resistance | CNGB1    | 1258   | 37 | 16 | 57994760 | 57994760 | Missense_Mutation | SNP | G  | A  | 4  | 54  | c.518C>T       | c.(517-519)CCC>CTC   | p.P173L        |
| Pat_41 | Post-Resistance | CNGB1    | 1258   | 37 | 16 | 57996888 | 57996889 | Missense_Mutation | DNP | TC | CT | 9  | 93  | c.370_371GA>AG | c.(370-372)GAC>AGC   | p.D124S        |
| Pat_41 | Post-Resistance | CNOT1    | 23019  | 37 | 16 | 58576436 | 58576436 | Missense_Mutation | SNP | C  | T  | 51 | 679 | c.4471G>A      | c.(4471-4473)GCA>ACA | p.A1491T       |
| Pat_41 | Post-Resistance | CNOT1    | 23019  | 37 | 16 | 58576463 | 58576463 | Missense_Mutation | SNP | G  | A  | 82 | 492 | c.4444C>T      | c.(4444-4446)CCA>TCA | p.P1482S       |
| Pat_41 | Post-Resistance | SLC38A7  | 55238  | 37 | 16 | 58709939 | 58709939 | Missense_Mutation | SNP | G  | A  | 8  | 68  | c.788C>T       | c.(787-789)CCC>CTC   | p.P263L        |
| Pat_41 | Post-Resistance | GOT2     | 2806   | 37 | 16 | 58757759 | 58757759 | Missense_Mutation | SNP | C  | T  | 11 | 117 | c.137G>A       | c.(136-138)GGA>GAA   | p.G46E         |
| Pat_41 | Post-Resistance | CDH8     | 1006   | 37 | 16 | 61687646 | 61687646 | Missense_Mutation | SNP | C  | T  | 6  | 48  | c.2266G>A      | c.(2266-2268)GCT>ACT | p.A756T        |
| Pat_41 | Post-Resistance | CDH11    | 1009   | 37 | 16 | 64981616 | 64981616 | Missense_Mutation | SNP | C  | T  | 20 | 140 | c.2281G>A      | c.(2281-2283)GCC>ACC | p.A761T        |
| Pat_41 | Post-Resistance | CDH11    | 1009   | 37 | 16 | 65025839 | 65025839 | Splice_Site       | SNP | C  | T  | 8  | 175 | c.644_splice   | c.e6-1               | p.G215_splice  |
| Pat_41 | Post-Resistance | CDH5     | 1003   | 37 | 16 | 66436942 | 66436942 | Missense_Mutation | SNP | C  | T  | 3  | 21  | c.2225C>T      | c.(2224-2226)TCC>TTC | p.S742F        |
| Pat_41 | Post-Resistance | CMTM1    | 113540 | 37 | 16 | 66612897 | 66612897 | Missense_Mutation | SNP | C  | T  | 5  | 111 | c.503C>T       | c.(502-504)CCC>CTC   | p.P168L        |
| Pat_41 | Post-Resistance | CMTM4    | 146223 | 37 | 16 | 66657389 | 66657389 | Missense_Mutation | SNP | C  | T  | 5  | 57  | c.380G>A       | c.(379-381)GGA>GAA   | p.G127E        |
| Pat_41 | Post-Resistance | DYNC11L2 | 1783   | 37 | 16 | 66776499 | 66776499 | Missense_Mutation | SNP | G  | A  | 32 | 136 | c.371C>T       | c.(370-372)TCT>TTT   | p.S124F        |
| Pat_41 | Post-Resistance | C16orf70 | 80262  | 37 | 16 | 67174447 | 67174447 | Missense_Mutation | SNP | G  | A  | 7  | 255 | c.829G>A       | c.(829-831)GTT>ATT   | p.V277I        |
| Pat_41 | Post-Resistance | KCTD19   | 146212 | 37 | 16 | 67325617 | 67325617 | Missense_Mutation | SNP | C  | T  | 10 | 169 | c.2342G>A      | c.(2341-2343)AGC>AAC | p.S781N        |
| Pat_41 | Post-Resistance | TPPP3    | 51673  | 37 | 16 | 67424120 | 67424120 | Missense_Mutation | SNP | G  | A  | 14 | 47  | c.488C>T       | c.(487-489)GCC>GTC   | p.A163V        |
| Pat_41 | Post-Resistance | FAM65A   | 79567  | 37 | 16 | 67576319 | 67576319 | Missense_Mutation | SNP | C  | T  | 52 | 688 | c.1690C>T      | c.(1690-1692)CCC>TCC | p.P564S        |
| Pat_41 | Post-Resistance | FAM65A   | 79567  | 37 | 16 | 67576449 | 67576449 | Missense_Mutation | SNP | C  | T  | 53 | 708 | c.1820C>T      | c.(1819-1821)CCT>CTT | p.P607L        |
| Pat_41 | Post-Resistance | FAM65A   | 79567  | 37 | 16 | 67579764 | 67579764 | Splice_Site       | SNP | G  | A  | 5  | 58  | c.3447_splice  | c.e19+1              | p.R1149_splice |
| Pat_41 | Post-Resistance | RLTPR    | 146206 | 37 | 16 | 67685847 | 67685847 | Missense_Mutation | SNP | G  | A  | 23 | 209 | c.2612G>A      | c.(2611-2613)GGG>GAG | p.G871E        |
| Pat_41 | Post-Resistance | RANBP10  | 57610  | 37 | 16 | 67778202 | 67778202 | Missense_Mutation | SNP | C  | T  | 8  | 141 | c.557G>A       | c.(556-558)GGC>GAC   | p.G186D        |
| Pat_41 | Post-Resistance | NRN1L    | 123904 | 37 | 16 | 67918850 | 67918850 | Missense_Mutation | SNP | C  | T  | 14 | 91  | c.44C>T        | c.(43-45)CCC>CTC     | p.P15L         |
| Pat_41 | Post-Resistance | PSMB10   | 5699   | 37 | 16 | 67969912 | 67969912 | Missense_Mutation | SNP | G  | A  | 5  | 72  | c.337C>T       | c.(337-339)CCC>TCC   | p.P113S        |
| Pat_41 | Post-Resistance | PSMB10   | 5699   | 37 | 16 | 67970375 | 67970375 | Missense_Mutation | SNP | C  | T  | 5  | 56  | c.70G>A        | c.(70-72)GAA>AAA     | p.E24K         |
| Pat_41 | Post-Resistance | SLC12A4  | 6560   | 37 | 16 | 67980907 | 67980907 | Missense_Mutation | SNP | G  | A  | 4  | 53  | c.2174C>T      | c.(2173-2175)ACC>ATC | p.T725I        |
| Pat_41 | Post-Resistance | DDX28    | 55794  | 37 | 16 | 68055722 | 68055722 | Missense_Mutation | SNP | C  | T  | 4  | 77  | c.1384G>A      | c.(1384-1386)GAC>AAC | p.D462N        |
| Pat_41 | Post-Resistance | NFATC3   | 4775   | 37 | 16 | 68200898 | 68200898 | Missense_Mutation | SNP | C  | T  | 22 | 347 | c.1754C>T      | c.(1753-1755)GCC>GTC | p.A585V        |
| Pat_41 | Post-Resistance | ESRP2    | 80004  | 37 | 16 | 68267964 | 68267964 | Missense_Mutation | SNP | G  | A  | 13 | 62  | c.374C>T       | c.(373-375)CCC>CTC   | p.P125L        |
| Pat_41 | Post-Resistance | ESRP2    | 80004  | 37 | 16 | 68267998 | 68267998 | Missense_Mutation | SNP | C  | T  | 5  | 32  | c.340G>A       | c.(340-342)GTG>ATG   | p.V114M        |

|        |                 |          |        |    |    |          |          |                   |     |   |   |     |     |            |                        |          |
|--------|-----------------|----------|--------|----|----|----------|----------|-------------------|-----|---|---|-----|-----|------------|------------------------|----------|
| Pat_41 | Post-Resistance | SLC7A6   | 9057   | 37 | 16 | 68331224 | 68331224 | Missense_Mutation | SNP | C | T | 4   | 89  | c.1541C>T  | c.(1540-1542)ACT>ATT   | p.T514I  |
| Pat_41 | Post-Resistance | SLC7A6OS | 84138  | 37 | 16 | 68344687 | 68344687 | Missense_Mutation | SNP | C | T | 22  | 151 | c.143G>A   | c.(142-144)AGA>AAA     | p.R48K   |
| Pat_41 | Post-Resistance | PRMT7    | 54496  | 37 | 16 | 68373735 | 68373735 | Missense_Mutation | SNP | G | A | 31  | 128 | c.791G>A   | c.(790-792)AGC>AAC     | p.S264N  |
| Pat_41 | Post-Resistance | CIRH1A   | 84916  | 37 | 16 | 69184788 | 69184788 | Missense_Mutation | SNP | G | A | 34  | 157 | c.983G>A   | c.(982-984)CGA>CAA     | p.R328Q  |
| Pat_41 | Post-Resistance | TMED6    | 146456 | 37 | 16 | 69381804 | 69381804 | Missense_Mutation | SNP | G | A | 116 | 337 | c.376C>T   | c.(376-378)CAC>TAC     | p.H126Y  |
| Pat_41 | Post-Resistance | CYB5B    | 80777  | 37 | 16 | 69482030 | 69482030 | Missense_Mutation | SNP | C | T | 22  | 330 | c.316C>T   | c.(316-318)CCT>TCT     | p.P106S  |
| Pat_41 | Post-Resistance | NFAT5    | 10725  | 37 | 16 | 69726828 | 69726828 | Missense_Mutation | SNP | G | A | 26  | 176 | c.3046G>A  | c.(3046-3048)GAC>AAC   | p.D1016N |
| Pat_41 | Post-Resistance | WWP2     | 11060  | 37 | 16 | 69832662 | 69832662 | Missense_Mutation | SNP | C | T | 9   | 326 | c.148C>T   | c.(148-150)CCC>TCC     | p.P50S   |
| Pat_41 | Post-Resistance | CLEC18A  | 348174 | 37 | 16 | 69988328 | 69988328 | Missense_Mutation | SNP | C | T | 5   | 41  | c.308C>T   | c.(307-309)ACC>ATC     | p.T103I  |
| Pat_41 | Post-Resistance | P DPR    | 55066  | 37 | 16 | 70177414 | 70177414 | Missense_Mutation | SNP | C | T | 7   | 120 | c.1607C>T  | c.(1606-1608)TCC>TTC   | p.S536F  |
| Pat_41 | Post-Resistance | DDX19A   | 55308  | 37 | 16 | 70400544 | 70400544 | Missense_Mutation | SNP | G | A | 8   | 91  | c.800G>A   | c.(799-801)TGC>TAC     | p.C267Y  |
| Pat_41 | Post-Resistance | ST3GAL2  | 6483   | 37 | 16 | 70422372 | 70422372 | Missense_Mutation | SNP | C | T | 25  | 322 | c.611G>A   | c.(610-612)AGT>AAT     | p.S204N  |
| Pat_41 | Post-Resistance | FUK      | 197258 | 37 | 16 | 70500038 | 70500038 | Nonsense_Mutation | SNP | C | T | 6   | 182 | c.289C>T   | c.(289-291)CGA>TGA     | p.R97*   |
| Pat_41 | Post-Resistance | FUK      | 197258 | 37 | 16 | 70501825 | 70501825 | Missense_Mutation | SNP | G | A | 23  | 166 | c.619G>A   | c.(619-621)GCA>ACA     | p.A207T  |
| Pat_41 | Post-Resistance | SF3B3    | 23450  | 37 | 16 | 70562835 | 70562835 | Missense_Mutation | SNP | G | A | 6   | 180 | c.130G>A   | c.(130-132)GAC>AAC     | p.D44N   |
| Pat_41 | Post-Resistance | VAC14    | 55697  | 37 | 16 | 70778362 | 70778362 | Missense_Mutation | SNP | G | A | 9   | 88  | c.1492C>T  | c.(1492-1494)CCC>TCC   | p.P498S  |
| Pat_41 | Post-Resistance | HYDIN    | 54768  | 37 | 16 | 70841859 | 70841859 | Missense_Mutation | SNP | C | T | 21  | 166 | c.14987G>A | c.(14986-14988)GGT>GAT | p.G4996D |
| Pat_41 | Post-Resistance | HYDIN    | 54768  | 37 | 16 | 70908211 | 70908211 | Missense_Mutation | SNP | C | T | 12  | 413 | c.10942G>A | c.(10942-10944)GCA>ACA | p.A3648T |
| Pat_41 | Post-Resistance | CALB2    | 794    | 37 | 16 | 71406125 | 71406125 | Missense_Mutation | SNP | C | T | 5   | 88  | c.164C>T   | c.(163-165)TCT>TTT     | p.S55F   |
| Pat_41 | Post-Resistance | ZNF19    | 7567   | 37 | 16 | 71512186 | 71512186 | Nonsense_Mutation | SNP | C | T | 15  | 95  | c.219G>A   | c.(217-219)TGG>TGA     | p.W73*   |
| Pat_41 | Post-Resistance | AP1G1    | 164    | 37 | 16 | 71779145 | 71779145 | Missense_Mutation | SNP | C | T | 6   | 111 | c.1901G>A  | c.(1900-1902)GGA>GAA   | p.G634E  |
| Pat_41 | Post-Resistance | AP1G1    | 164    | 37 | 16 | 71783825 | 71783825 | Missense_Mutation | SNP | C | T | 34  | 610 | c.1469G>A  | c.(1468-1470)GGC>GAC   | p.G490D  |
| Pat_41 | Post-Resistance | ZNF821   | 55565  | 37 | 16 | 71898940 | 71898940 | Missense_Mutation | SNP | C | T | 23  | 468 | c.178G>A   | c.(178-180)GGT>AGT     | p.G60S   |
| Pat_41 | Post-Resistance | KIAA0174 | 9798   | 37 | 16 | 71950374 | 71950374 | Missense_Mutation | SNP | C | T | 13  | 170 | c.137C>T   | c.(136-138)GCC>GTC     | p.A46V   |
| Pat_41 | Post-Resistance | ZFHX3    | 463    | 37 | 16 | 72827214 | 72827214 | Missense_Mutation | SNP | G | A | 14  | 252 | c.9367C>T  | c.(9367-9369)CCT>TCT   | p.P3123S |
| Pat_41 | Post-Resistance | ZFHX3    | 463    | 37 | 16 | 72827669 | 72827669 | Missense_Mutation | SNP | G | A | 10  | 115 | c.8912C>T  | c.(8911-8913)CCC>CTC   | p.P2971L |
| Pat_41 | Post-Resistance | ZFHX3    | 463    | 37 | 16 | 72845508 | 72845508 | Missense_Mutation | SNP | C | T | 4   | 60  | c.3832G>A  | c.(3832-3834)GCA>ACA   | p.A1278T |
| Pat_41 | Post-Resistance | CLEC18B  | 497190 | 37 | 16 | 74443750 | 74443750 | Missense_Mutation | SNP | C | T | 4   | 135 | c.1238G>A  | c.(1237-1239)GGG>GAG   | p.G413E  |
| Pat_41 | Post-Resistance | GLG1     | 2734   | 37 | 16 | 74528714 | 74528714 | Missense_Mutation | SNP | C | T | 12  | 190 | c.994G>A   | c.(994-996)GGC>AGC     | p.G332S  |
| Pat_41 | Post-Resistance | LDHD     | 197257 | 37 | 16 | 75148802 | 75148802 | Missense_Mutation | SNP | G | A | 8   | 59  | c.392C>T   | c.(391-393)TCT>TTT     | p.S131F  |
| Pat_41 | Post-Resistance | BCAR1    | 9564   | 37 | 16 | 75269059 | 75269059 | Missense_Mutation | SNP | C | T | 15  | 20  | c.1738G>A  | c.(1738-1740)GTG>ATG   | p.V580M  |
| Pat_41 | Post-Resistance | ADAT1    | 23536  | 37 | 16 | 75646733 | 75646733 | Missense_Mutation | SNP | G | A | 7   | 116 | c.451C>T   | c.(451-453)CTT>TTT     | p.L151F  |
| Pat_41 | Post-Resistance | ADAMTS18 | 170692 | 37 | 16 | 77393255 | 77393255 | Missense_Mutation | SNP | G | A | 9   | 134 | c.1282C>T  | c.(1282-1284)CTT>TTT   | p.L428F  |
| Pat_41 | Post-Resistance | WVOX     | 51741  | 37 | 16 | 78466647 | 78466647 | Missense_Mutation | SNP | A | G | 265 | 258 | c.1054A>G  | c.(1054-1056)ATG>GTG   | p.M352V  |
| Pat_41 | Post-Resistance | CDYL2    | 124359 | 37 | 16 | 80718975 | 80718975 | Missense_Mutation | SNP | G | A | 45  | 137 | c.76C>T    | c.(76-78)CTT>TTT       | p.L26F   |
| Pat_41 | Post-Resistance | C16orf46 | 123775 | 37 | 16 | 81095064 | 81095064 | Missense_Mutation | SNP | C | T | 4   | 102 | c.890G>A   | c.(889-891)CGC>CAC     | p.R297H  |
| Pat_41 | Post-Resistance | PKD1L2   | 114780 | 37 | 16 | 81134798 | 81134798 | Missense_Mutation | SNP | C | T | 6   | 52  | c.7310G>A  | c.(7309-7311)AGC>AAC   | p.S2437N |
| Pat_41 | Post-Resistance | PKD1L2   | 114780 | 37 | 16 | 81209334 | 81209334 | Missense_Mutation | SNP | G | A | 10  | 75  | c.2459C>T  | c.(2458-2460)CCT>CTT   | p.P820L  |
| Pat_41 | Post-Resistance | BCMO1    | 53630  | 37 | 16 | 81272557 | 81272557 | Missense_Mutation | SNP | C | T | 5   | 68  | c.44C>T    | c.(43-45)CCT>CTT       | p.P15L   |
| Pat_41 | Post-Resistance | GAN      | 8139   | 37 | 16 | 81398963 | 81398963 | Missense_Mutation | SNP | C | T | 14  | 185 | c.1382C>T  | c.(1381-1383)GCG>GTG   | p.A461V  |
| Pat_41 | Post-Resistance | PLCG2    | 5336   | 37 | 16 | 81979856 | 81979856 | Missense_Mutation | SNP | G | A | 11  | 91  | c.3558G>A  | c.(3556-3558)ATG>ATA   | p.M1186I |
| Pat_41 | Post-Resistance | SDR42E1  | 93517  | 37 | 16 | 82033150 | 82033150 | Nonsense_Mutation | SNP | G | A | 33  | 134 | c.748C>T   | c.(748-750)CAG>TAG     | p.Q250*  |
| Pat_41 | Post-Resistance | CDH13    | 1012   | 37 | 16 | 82892060 | 82892060 | Missense_Mutation | SNP | G | A | 15  | 50  | c.139G>A   | c.(139-141)GAC>AAC     | p.D47N   |
| Pat_41 | Post-Resistance | HSDL1    | 83693  | 37 | 16 | 84163634 | 84163634 | Missense_Mutation | SNP | C | T | 24  | 67  | c.623G>A   | c.(622-624)TGC>TAC     | p.C208Y  |
| Pat_41 | Post-Resistance | LRRC50   | 123872 | 37 | 16 | 84203504 | 84203504 | Missense_Mutation | SNP | C | T | 5   | 60  | c.1070C>T  | c.(1069-1071)GCC>GTC   | p.A357V  |
| Pat_41 | Post-Resistance | LRRC50   | 123872 | 37 | 16 | 84205881 | 84205881 | Missense_Mutation | SNP | C | T | 4   | 32  | c.1544C>T  | c.(1543-1545)GCT>GTT   | p.A515V  |
| Pat_41 | Post-Resistance | CRISPLD2 | 83716  | 37 | 16 | 84879430 | 84879430 | Nonsense_Mutation | SNP | G | A | 15  | 68  | c.279G>A   | c.(277-279)TGG>TGA     | p.W93*   |

|        |                 |          |        |    |    |          |          |                   |     |   |   |    |     |               |                      |               |
|--------|-----------------|----------|--------|----|----|----------|----------|-------------------|-----|---|---|----|-----|---------------|----------------------|---------------|
| Pat_41 | Post-Resistance | ZDHC7    | 55625  | 37 | 16 | 85010020 | 85010020 | Missense_Mutation | SNP | G | A | 14 | 30  | c.856C>T      | c.(856-858)CCC>TCC   | p.P286S       |
| Pat_41 | Post-Resistance | IRF8     | 3394   | 37 | 16 | 85952185 | 85952185 | Missense_Mutation | SNP | C | T | 4  | 14  | c.764C>T      | c.(763-765)GCC>GTC   | p.A255V       |
| Pat_41 | Post-Resistance | MTHFSD   | 64779  | 37 | 16 | 86575392 | 86575392 | Missense_Mutation | SNP | C | T | 4  | 57  | c.592G>A      | c.(592-594)GAC>AAC   | p.D198N       |
| Pat_41 | Post-Resistance | FBXO31   | 79791  | 37 | 16 | 87380785 | 87380785 | Missense_Mutation | SNP | C | T | 28 | 288 | c.484G>A      | c.(484-486)GTG>ATG   | p.V162M       |
| Pat_41 | Post-Resistance | ZCCHC14  | 23174  | 37 | 16 | 87448055 | 87448055 | Missense_Mutation | SNP | C | T | 16 | 96  | c.1157G>A     | c.(1156-1158)GGG>GAG | p.G386E       |
| Pat_41 | Post-Resistance | GALNS    | 2588   | 37 | 16 | 88902257 | 88902257 | Missense_Mutation | SNP | C | T | 5  | 31  | c.634G>A      | c.(634-636)GAA>AAA   | p.E212K       |
| Pat_41 | Post-Resistance | PRDM7    | 11105  | 37 | 16 | 90126753 | 90126753 | Missense_Mutation | SNP | C | T | 9  | 56  | c.1229G>A     | c.(1228-1230)GGA>GAA | p.G410E       |
| Pat_41 | Post-Resistance | PRDM7    | 11105  | 37 | 16 | 90126823 | 90126823 | Missense_Mutation | SNP | T | G | 9  | 127 | c.1159A>C     | c.(1159-1161)ATG>CTG | p.M387L       |
| Pat_41 | Post-Resistance | RNMTL1   | 55178  | 37 | 17 | 694896   | 694896   | Missense_Mutation | SNP | G | A | 5  | 141 | c.850G>A      | c.(850-852)GTC>ATC   | p.V284I       |
| Pat_41 | Post-Resistance | RNMTL1   | 55178  | 37 | 17 | 694905   | 694905   | Missense_Mutation | SNP | G | A | 19 | 131 | c.859G>A      | c.(859-861)GCT>ACT   | p.A287T       |
| Pat_41 | Post-Resistance | INPP5K   | 51763  | 37 | 17 | 1399391  | 1399391  | Missense_Mutation | SNP | C | T | 24 | 115 | c.1253G>A     | c.(1252-1254)AGT>AAT | p.S418N       |
| Pat_41 | Post-Resistance | INPP5K   | 51763  | 37 | 17 | 1411456  | 1411456  | Missense_Mutation | SNP | C | T | 65 | 460 | c.619G>A      | c.(619-621)GAA>AAA   | p.E207K       |
| Pat_41 | Post-Resistance | PITPNA   | 5306   | 37 | 17 | 1442186  | 1442186  | Missense_Mutation | SNP | C | T | 21 | 77  | c.433G>A      | c.(433-435)GAT>AAT   | p.D145N       |
| Pat_41 | Post-Resistance | PRPF8    | 10594  | 37 | 17 | 1557147  | 1557147  | Missense_Mutation | SNP | C | T | 38 | 183 | c.6151G>A     | c.(6151-6153)GGC>AGC | p.G2051S      |
| Pat_41 | Post-Resistance | OR1A2    | 26189  | 37 | 17 | 3101255  | 3101255  | Missense_Mutation | SNP | C | T | 15 | 96  | c.443C>T      | c.(442-444)TCT>TTT   | p.S148F       |
| Pat_41 | Post-Resistance | OR1E2    | 8388   | 37 | 17 | 3336178  | 3336178  | Missense_Mutation | SNP | G | A | 8  | 46  | c.958C>T      | c.(958-960)CCC>TCC   | p.P320S       |
| Pat_41 | Post-Resistance | TRPV1    | 7442   | 37 | 17 | 3483784  | 3483784  | Missense_Mutation | SNP | G | A | 7  | 216 | c.1514C>T     | c.(1513-1515)ACC>ATC | p.T505I       |
| Pat_41 | Post-Resistance | ITGAE    | 3682   | 37 | 17 | 3643153  | 3643153  | Missense_Mutation | SNP | C | T | 12 | 91  | c.2468G>A     | c.(2467-2469)TGC>TAC | p.C823Y       |
| Pat_41 | Post-Resistance | ZZEF1    | 23140  | 37 | 17 | 3984678  | 3984678  | Missense_Mutation | SNP | C | T | 45 | 161 | c.2821G>A     | c.(2821-2823)GCT>ACT | p.A941T       |
| Pat_41 | Post-Resistance | MYBBP1A  | 10514  | 37 | 17 | 4446207  | 4446207  | Splice_Site       | SNP | C | T | 6  | 27  | c.2892_splice | c.e20+1              | p.Q964_splice |
| Pat_41 | Post-Resistance | MYBBP1A  | 10514  | 37 | 17 | 4449005  | 4449005  | Missense_Mutation | SNP | A | G | 2  | 2   | c.1973T>C     | c.(1972-1974)CTG>CCG | p.L658P       |
| Pat_41 | Post-Resistance | SMTNL2   | 342527 | 37 | 17 | 4495686  | 4495686  | Missense_Mutation | SNP | G | A | 12 | 85  | c.430G>A      | c.(430-432)GAG>AAG   | p.E144K       |
| Pat_41 | Post-Resistance | VMO1     | 284013 | 37 | 17 | 4688820  | 4688820  | Missense_Mutation | SNP | C | T | 9  | 59  | c.446G>A      | c.(445-447)GGC>GAC   | p.G149D       |
| Pat_41 | Post-Resistance | CHRNE    | 1145   | 37 | 17 | 4805992  | 4805992  | Missense_Mutation | SNP | C | T | 19 | 137 | c.113G>A      | c.(112-114)GGA>GAA   | p.G38E        |
| Pat_41 | Post-Resistance | SLC25A11 | 8402   | 37 | 17 | 4842369  | 4842369  | Missense_Mutation | SNP | C | A | 4  | 104 | c.234G>T      | c.(232-234)AGG>AGT   | p.R78S        |
| Pat_41 | Post-Resistance | KIF1C    | 10749  | 37 | 17 | 4907332  | 4907332  | Missense_Mutation | SNP | G | A | 12 | 126 | c.904G>A      | c.(904-906)GAC>AAC   | p.D302N       |
| Pat_41 | Post-Resistance | KIF1C    | 10749  | 37 | 17 | 4923900  | 4923900  | Missense_Mutation | SNP | G | A | 7  | 63  | c.1864G>A     | c.(1864-1866)GTC>ATC | p.V622I       |
| Pat_41 | Post-Resistance | ZNF232   | 7775   | 37 | 17 | 5009466  | 5009466  | Missense_Mutation | SNP | G | A | 26 | 139 | c.907C>T      | c.(907-909)CCC>TCC   | p.P303S       |
| Pat_41 | Post-Resistance | NUP88    | 4927   | 37 | 17 | 5319903  | 5319903  | Missense_Mutation | SNP | C | T | 13 | 55  | c.397G>A      | c.(397-399)GTA>ATA   | p.V133I       |
| Pat_41 | Post-Resistance | KIAA0753 | 9851   | 37 | 17 | 6499486  | 6499486  | Missense_Mutation | SNP | C | T | 39 | 231 | c.2350G>A     | c.(2350-2352)GAG>AAG | p.E784K       |
| Pat_41 | Post-Resistance | KIAA0753 | 9851   | 37 | 17 | 6531482  | 6531482  | Missense_Mutation | SNP | C | T | 7  | 31  | c.673G>A      | c.(673-675)GAA>AAA   | p.E225K       |
| Pat_41 | Post-Resistance | ALOX12   | 239    | 37 | 17 | 6908616  | 6908616  | Missense_Mutation | SNP | C | T | 40 | 404 | c.1202C>T     | c.(1201-1203)ACC>ATC | p.T401I       |
| Pat_41 | Post-Resistance | SLC16A13 | 201232 | 37 | 17 | 6939775  | 6939775  | Missense_Mutation | SNP | C | T | 4  | 38  | c.74C>T       | c.(73-75)GCG>GTG     | p.A25V        |
| Pat_41 | Post-Resistance | DLG4     | 1742   | 37 | 17 | 7111554  | 7111554  | Missense_Mutation | SNP | T | C | 11 | 86  | c.164A>G      | c.(163-165)TAC>TGC   | p.Y55C        |
| Pat_41 | Post-Resistance | YBX2     | 51087  | 37 | 17 | 7193698  | 7193698  | Missense_Mutation | SNP | G | A | 4  | 32  | c.616C>T      | c.(616-618)CCT>TCT   | p.P206S       |
| Pat_41 | Post-Resistance | NEURL4   | 84461  | 37 | 17 | 7228960  | 7228960  | Missense_Mutation | SNP | C | T | 10 | 80  | c.1366G>A     | c.(1366-1368)GGA>AGA | p.G456R       |
| Pat_41 | Post-Resistance | TMEM95   | 339168 | 37 | 17 | 7259219  | 7259219  | Missense_Mutation | SNP | C | T | 11 | 42  | c.289C>T      | c.(289-291)CCT>TCT   | p.P97S        |
| Pat_41 | Post-Resistance | NLGN2    | 57555  | 37 | 17 | 7315493  | 7315493  | Missense_Mutation | SNP | C | T | 11 | 88  | c.475C>T      | c.(475-477)CGT>TGT   | p.R159C       |
| Pat_41 | Post-Resistance | C17orf74 | 201243 | 37 | 17 | 7329740  | 7329740  | Missense_Mutation | SNP | C | T | 9  | 8   | c.430C>T      | c.(430-432)CGG>TGG   | p.R144W       |
| Pat_41 | Post-Resistance | C17orf74 | 201243 | 37 | 17 | 7330495  | 7330495  | Nonsense_Mutation | SNP | G | A | 9  | 24  | c.1185G>A     | c.(1183-1185)TGG>TGA | p.W395*       |
| Pat_41 | Post-Resistance | CHRNA1   | 1140   | 37 | 17 | 7350188  | 7350188  | Missense_Mutation | SNP | G | A | 9  | 86  | c.280G>A      | c.(280-282)GAG>AAG   | p.E94K        |
| Pat_41 | Post-Resistance | ZBTB4    | 57659  | 37 | 17 | 7369423  | 7369423  | Missense_Mutation | SNP | G | A | 3  | 40  | c.698C>T      | c.(697-699)CCC>CTC   | p.P233L       |
| Pat_41 | Post-Resistance | TP53     | 7157   | 37 | 17 | 7577139  | 7577139  | Missense_Mutation | SNP | G | C | 10 | 2   | c.799C>G      | c.(799-801)CGG>GGG   | p.R267G       |
| Pat_41 | Post-Resistance | EFNB3    | 1949   | 37 | 17 | 7611403  | 7611403  | Missense_Mutation | SNP | G | A | 28 | 86  | c.250G>A      | c.(250-252)GTA>ATA   | p.V84I        |
| Pat_41 | Post-Resistance | LSMD1    | 84316  | 37 | 17 | 7760087  | 7760087  | Missense_Mutation | SNP | C | T | 15 | 137 | c.340G>A      | c.(340-342)GTG>ATG   | p.V114M       |
| Pat_41 | Post-Resistance | GUCY2D   | 3000   | 37 | 17 | 7915632  | 7915632  | Nonsense_Mutation | SNP | G | A | 5  | 56  | c.1920G>A     | c.(1918-1920)TGG>TGA | p.W640*       |
| Pat_41 | Post-Resistance | PFAS     | 5198   | 37 | 17 | 8160203  | 8160203  | Missense_Mutation | SNP | G | A | 17 | 115 | c.997G>A      | c.(997-999)GAT>AAT   | p.D333N       |

|        |                 |          |        |    |    |          |          |                   |     |   |   |    |     |            |                        |          |
|--------|-----------------|----------|--------|----|----|----------|----------|-------------------|-----|---|---|----|-----|------------|------------------------|----------|
| Pat_41 | Post-Resistance | MYH10    | 4628   | 37 | 17 | 8396255  | 8396255  | Missense_Mutation | SNP | C | T | 9  | 19  | c.4204G>A  | c.(4204-4206)GAG>AAG   | p.E1402K |
| Pat_41 | Post-Resistance | MFSD6L   | 162387 | 37 | 17 | 8702098  | 8702098  | Missense_Mutation | SNP | C | T | 12 | 103 | c.341G>A   | c.(340-342)GGC>GAC     | p.G114D  |
| Pat_41 | Post-Resistance | GLP2R    | 9340   | 37 | 17 | 9757914  | 9757914  | Missense_Mutation | SNP | C | T | 42 | 96  | c.607C>T   | c.(607-609)CTT>TTT     | p.L203F  |
| Pat_41 | Post-Resistance | MYH13    | 8735   | 37 | 17 | 10216655 | 10216655 | Missense_Mutation | SNP | G | A | 13 | 152 | c.4001C>T  | c.(4000-4002)GCG>GTG   | p.A1334V |
| Pat_41 | Post-Resistance | MYH8     | 4626   | 37 | 17 | 10318659 | 10318659 | Missense_Mutation | SNP | C | T | 22 | 119 | c.691G>A   | c.(691-693)GAG>AAG     | p.E231K  |
| Pat_41 | Post-Resistance | MYH1     | 4619   | 37 | 17 | 10408209 | 10408209 | Missense_Mutation | SNP | G | A | 9  | 41  | c.2609C>T  | c.(2608-2610)ACC>ATC   | p.T870I  |
| Pat_41 | Post-Resistance | MYH1     | 4619   | 37 | 17 | 10408751 | 10408751 | Missense_Mutation | SNP | C | T | 11 | 78  | c.2252G>A  | c.(2251-2253)GGG>GAG   | p.G751E  |
| Pat_41 | Post-Resistance | MYH3     | 4621   | 37 | 17 | 10535165 | 10535165 | Missense_Mutation | SNP | C | T | 26 | 43  | c.5125G>A  | c.(5125-5127)GAC>AAC   | p.D1709N |
| Pat_41 | Post-Resistance | DNAH9    | 1770   | 37 | 17 | 11666845 | 11666845 | Missense_Mutation | SNP | C | T | 15 | 85  | c.7084C>T  | c.(7084-7086)CCT>TCT   | p.P2362S |
| Pat_41 | Post-Resistance | DNAH9    | 1770   | 37 | 17 | 11774922 | 11774922 | Missense_Mutation | SNP | G | A | 17 | 125 | c.10061G>A | c.(10060-10062)GGA>GAA | p.G3354E |
| Pat_41 | Post-Resistance | ZNF18    | 7566   | 37 | 17 | 11895783 | 11895783 | Missense_Mutation | SNP | C | T | 6  | 114 | c.364G>A   | c.(364-366)GAC>AAC     | p.D122N  |
| Pat_41 | Post-Resistance | TRPV2    | 51393  | 37 | 17 | 16325966 | 16325966 | Missense_Mutation | SNP | G | A | 5  | 53  | c.388G>A   | c.(388-390)GGA>AGA     | p.G130R  |
| Pat_41 | Post-Resistance | ZNF624   | 57547  | 37 | 17 | 16527271 | 16527271 | Missense_Mutation | SNP | C | T | 4  | 25  | c.929G>A   | c.(928-930)GGG>GAG     | p.G310E  |
| Pat_41 | Post-Resistance | FLCN     | 201163 | 37 | 17 | 17117006 | 17117006 | Missense_Mutation | SNP | G | A | 4  | 122 | c.1703C>T  | c.(1702-1704)ACG>ATG   | p.T568M  |
| Pat_41 | Post-Resistance | RASD1    | 51655  | 37 | 17 | 17399332 | 17399332 | Missense_Mutation | SNP | G | A | 20 | 92  | c.164C>T   | c.(163-165)CCT>CTT     | p.P55L   |
| Pat_41 | Post-Resistance | SREBF1   | 6720   | 37 | 17 | 17722535 | 17722535 | Missense_Mutation | SNP | C | T | 12 | 79  | c.860G>A   | c.(859-861)GGC>GAC     | p.G287D  |
| Pat_41 | Post-Resistance | TOM1L2   | 146691 | 37 | 17 | 17786143 | 17786143 | Missense_Mutation | SNP | G | A | 18 | 71  | c.536C>T   | c.(535-537)CCC>CTC     | p.P179L  |
| Pat_41 | Post-Resistance | FLII     | 2314   | 37 | 17 | 18157489 | 18157489 | Missense_Mutation | SNP | G | A | 14 | 3   | c.583C>T   | c.(583-585)CCA>TCA     | p.P195S  |
| Pat_41 | Post-Resistance | SMCR7    | 125170 | 37 | 17 | 18166111 | 18166111 | Missense_Mutation | SNP | C | T | 6  | 49  | c.77C>T    | c.(76-78)GCC>GTC       | p.A26V   |
| Pat_41 | Post-Resistance | KCNJ12   | 3768   | 37 | 17 | 21319175 | 21319175 | Missense_Mutation | SNP | C | T | 4  | 109 | c.521C>T   | c.(520-522)TCC>TTC     | p.S174F  |
| Pat_41 | Post-Resistance | NLK      | 51701  | 37 | 17 | 26495580 | 26495580 | Missense_Mutation | SNP | G | A | 21 | 190 | c.944G>A   | c.(943-945)AGC>AAC     | p.S315N  |
| Pat_41 | Post-Resistance | IFT20    | 90410  | 37 | 17 | 26658936 | 26658936 | Missense_Mutation | SNP | C | T | 19 | 90  | c.76G>A    | c.(76-78)GTT>ATT       | p.V26I   |
| Pat_41 | Post-Resistance | PIGS     | 94005  | 37 | 17 | 26898185 | 26898185 | Missense_Mutation | SNP | G | A | 5  | 48  | c.56C>T    | c.(55-57)GCC>GTC       | p.A19V   |
| Pat_41 | Post-Resistance | SPAG5    | 10615  | 37 | 17 | 26904721 | 26904721 | Missense_Mutation | SNP | C | T | 9  | 40  | c.3578G>A  | c.(3577-3579)AGC>AAC   | p.S1193N |
| Pat_41 | Post-Resistance | KIAA0100 | 9703   | 37 | 17 | 26961666 | 26961666 | Missense_Mutation | SNP | G | A | 34 | 67  | c.2939C>T  | c.(2938-2940)TCC>TTC   | p.S980F  |
| Pat_41 | Post-Resistance | TRAF4    | 9618   | 37 | 17 | 27076479 | 27076479 | Missense_Mutation | SNP | G | A | 4  | 39  | c.1297G>A  | c.(1297-1299)GGC>AGC   | p.G433S  |
| Pat_41 | Post-Resistance | SEZ6     | 124925 | 37 | 17 | 27286811 | 27286811 | Missense_Mutation | SNP | C | T | 16 | 17  | c.1676G>A  | c.(1675-1677)TGC>TAC   | p.C559Y  |
| Pat_41 | Post-Resistance | NUFIP2   | 57532  | 37 | 17 | 27613053 | 27613053 | Nonsense_Mutation | SNP | C | T | 18 | 89  | c.1959G>A  | c.(1957-1959)TGG>TGA   | p.W653*  |
| Pat_41 | Post-Resistance | GIT1     | 28964  | 37 | 17 | 27902114 | 27902114 | Missense_Mutation | SNP | C | T | 4  | 73  | c.2056G>A  | c.(2056-2058)GCC>ACC   | p.A686T  |
| Pat_41 | Post-Resistance | GIT1     | 28964  | 37 | 17 | 27905368 | 27905368 | Missense_Mutation | SNP | C | T | 7  | 65  | c.832G>A   | c.(832-834)GAA>AAA     | p.E278K  |
| Pat_41 | Post-Resistance | CPD      | 1362   | 37 | 17 | 28788905 | 28788905 | Missense_Mutation | SNP | G | A | 9  | 111 | c.3641G>A  | c.(3640-3642)GGA>GAA   | p.G1214E |
| Pat_41 | Post-Resistance | C17orf79 | 55352  | 37 | 17 | 30183833 | 30183833 | Missense_Mutation | SNP | C | T | 37 | 575 | c.151G>A   | c.(151-153)GCT>ACT     | p.A51T   |
| Pat_41 | Post-Resistance | CCL1     | 6346   | 37 | 17 | 32690113 | 32690113 | Missense_Mutation | SNP | C | T | 12 | 97  | c.68G>A    | c.(67-69)AGC>AAC       | p.S23N   |
| Pat_41 | Post-Resistance | FNDC8    | 54752  | 37 | 17 | 33456546 | 33456546 | Missense_Mutation | SNP | C | T | 15 | 60  | c.691C>T   | c.(691-693)CGT>TGT     | p.R231C  |
| Pat_41 | Post-Resistance | NLE1     | 54475  | 37 | 17 | 33464882 | 33464882 | Missense_Mutation | SNP | G | A | 9  | 41  | c.488C>T   | c.(487-489)TCC>TTC     | p.S163F  |
| Pat_41 | Post-Resistance | UNC45B   | 146862 | 37 | 17 | 33513459 | 33513459 | Missense_Mutation | SNP | G | A | 9  | 35  | c.2677G>A  | c.(2677-2679)GAG>AAG   | p.E893K  |
| Pat_41 | Post-Resistance | PEX12    | 5193   | 37 | 17 | 33904063 | 33904063 | Missense_Mutation | SNP | G | A | 18 | 153 | c.674C>T   | c.(673-675)GCC>GTC     | p.A225V  |
| Pat_41 | Post-Resistance | PEX12    | 5193   | 37 | 17 | 33904112 | 33904112 | Nonsense_Mutation | SNP | G | A | 40 | 237 | c.625C>T   | c.(625-627)CAA>TAA     | p.Q209*  |
| Pat_41 | Post-Resistance | RASL10B  | 91608  | 37 | 17 | 34067433 | 34067433 | Nonsense_Mutation | SNP | G | A | 12 | 28  | c.222G>A   | c.(220-222)TGG>TGA     | p.W74*   |
| Pat_41 | Post-Resistance | ACACA    | 31     | 37 | 17 | 35518748 | 35518748 | Missense_Mutation | SNP | C | T | 20 | 212 | c.5185G>A  | c.(5185-5187)GAA>AAA   | p.E1729K |
| Pat_41 | Post-Resistance | C17orf78 | 284099 | 37 | 17 | 35736233 | 35736233 | Missense_Mutation | SNP | G | A | 7  | 158 | c.304G>A   | c.(304-306)GCT>ACT     | p.A102T  |
| Pat_41 | Post-Resistance | GPR179   | 440435 | 37 | 17 | 36491997 | 36491997 | Missense_Mutation | SNP | C | T | 21 | 112 | c.1258G>A  | c.(1258-1260)GAA>AAA   | p.E420K  |
| Pat_41 | Post-Resistance | FBXO47   | 494188 | 37 | 17 | 37118187 | 37118187 | Missense_Mutation | SNP | G | A | 9  | 95  | c.295C>T   | c.(295-297)CTT>TTT     | p.L99F   |
| Pat_41 | Post-Resistance | TCAP     | 8557   | 37 | 17 | 37821691 | 37821691 | Missense_Mutation | SNP | G | A | 5  | 47  | c.79G>A    | c.(79-81)GAT>AAT       | p.D27N   |
| Pat_41 | Post-Resistance | IKZF3    | 22806  | 37 | 17 | 37944619 | 37944619 | Missense_Mutation | SNP | G | A | 4  | 47  | c.601C>T   | c.(601-603)CCC>TCC     | p.P201S  |
| Pat_41 | Post-Resistance | ORMDL3   | 94103  | 37 | 17 | 38080447 | 38080447 | Missense_Mutation | SNP | C | T | 24 | 153 | c.10G>A    | c.(10-12)GGC>AGC       | p.G4S    |
| Pat_41 | Post-Resistance | MED24    | 9862   | 37 | 17 | 38183655 | 38183655 | Missense_Mutation | SNP | G | A | 5  | 27  | c.1511C>T  | c.(1510-1512)GCC>GTC   | p.A504V  |

|        |                 |           |           |    |    |          |          |                   |     |   |   |    |     |               |                      |               |
|--------|-----------------|-----------|-----------|----|----|----------|----------|-------------------|-----|---|---|----|-----|---------------|----------------------|---------------|
| Pat_41 | Post-Resistance | KRT39     | 390792    | 37 | 17 | 39122976 | 39122976 | Nonsense_Mutation | SNP | G | A | 12 | 155 | c.133C>T      | c.(133-135)CAA>TAA   | p.Q45*        |
| Pat_41 | Post-Resistance | KRTAP1-5  | 83895     | 37 | 17 | 39183247 | 39183247 | Missense_Mutation | SNP | C | T | 9  | 68  | c.161G>A      | c.(160-162)GGG>GAG   | p.G54E        |
| Pat_41 | Post-Resistance | KRTAP4-9  | 100132386 | 37 | 17 | 39262049 | 39262049 | Missense_Mutation | SNP | C | T | 6  | 45  | c.409C>T      | c.(409-411)CCC>TCC   | p.P137S       |
| Pat_41 | Post-Resistance | KRTAP4-5  | 85289     | 37 | 17 | 39305892 | 39305892 | Missense_Mutation | SNP | G | A | 4  | 101 | c.128C>T      | c.(127-129)CCC>CTC   | p.P43L        |
| Pat_41 | Post-Resistance | KRTAP4-3  | 85290     | 37 | 17 | 39323934 | 39323934 | Missense_Mutation | SNP | C | T | 4  | 31  | c.491G>A      | c.(490-492)TGC>TAC   | p.C164Y       |
| Pat_41 | Post-Resistance | KRT31     | 3881      | 37 | 17 | 39550386 | 39550386 | Missense_Mutation | SNP | C | T | 4  | 92  | c.1133G>A     | c.(1132-1134)TGC>TAC | p.C378Y       |
| Pat_41 | Post-Resistance | KRT37     | 8688      | 37 | 17 | 39580664 | 39580664 | Missense_Mutation | SNP | C | T | 5  | 65  | c.112G>A      | c.(112-114)GCC>ACC   | p.A38T        |
| Pat_41 | Post-Resistance | KRT32     | 3882      | 37 | 17 | 39616408 | 39616408 | Missense_Mutation | SNP | C | T | 5  | 42  | c.1301G>A     | c.(1300-1302)CGC>CAC | p.R434H       |
| Pat_41 | Post-Resistance | KRT32     | 3882      | 37 | 17 | 39619212 | 39619212 | Missense_Mutation | SNP | C | T | 4  | 100 | c.1087G>A     | c.(1087-1089)GCC>ACC | p.A363T       |
| Pat_41 | Post-Resistance | SC65      | 10609     | 37 | 17 | 39963047 | 39963047 | Splice_Site       | SNP | C | T | 4  | 20  | c.1146_splice | c.e6+1               | p.E382_splice |
| Pat_41 | Post-Resistance | DHX58     | 79132     | 37 | 17 | 40262862 | 40262862 | Missense_Mutation | SNP | C | T | 15 | 150 | c.440G>A      | c.(439-441)AGC>AAC   | p.S147N       |
| Pat_41 | Post-Resistance | KAT2A     | 2648      | 37 | 17 | 40273054 | 40273054 | Missense_Mutation | SNP | C | T | 3  | 13  | c.269G>A      | c.(268-270)AGG>AAG   | p.R90K        |
| Pat_41 | Post-Resistance | RAB5C     | 5878      | 37 | 17 | 40278824 | 40278824 | Missense_Mutation | SNP | C | T | 18 | 269 | c.484G>A      | c.(484-486)GAG>AAG   | p.E162K       |
| Pat_41 | Post-Resistance | KCNH4     | 23415     | 37 | 17 | 40318534 | 40318534 | Missense_Mutation | SNP | C | T | 13 | 94  | c.1621G>A     | c.(1621-1623)GCT>ACT | p.A541T       |
| Pat_41 | Post-Resistance | FAM134C   | 162427    | 37 | 17 | 40761296 | 40761296 | Missense_Mutation | SNP | C | T | 6  | 18  | c.47G>A       | c.(46-48)GGG>GAG     | p.G16E        |
| Pat_41 | Post-Resistance | TUBG2     | 27175     | 37 | 17 | 40818461 | 40818461 | Missense_Mutation | SNP | G | A | 26 | 85  | c.1117G>A     | c.(1117-1119)GTC>ATC | p.V373I       |
| Pat_41 | Post-Resistance | CNTNAP1   | 8506      | 37 | 17 | 40845338 | 40845338 | Missense_Mutation | SNP | C | T | 13 | 71  | c.2776C>T     | c.(2776-2778)CCC>TCC | p.P926S       |
| Pat_41 | Post-Resistance | DHX8      | 1659      | 37 | 17 | 41585294 | 41585294 | Missense_Mutation | SNP | C | T | 23 | 71  | c.2227C>T     | c.(2227-2229)CCA>TCA | p.P743S       |
| Pat_41 | Post-Resistance | MPP2      | 4355      | 37 | 17 | 41955302 | 41955302 | Missense_Mutation | SNP | C | T | 14 | 48  | c.1667G>A     | c.(1666-1668)GGC>GAC | p.G556D       |
| Pat_41 | Post-Resistance | FZD2      | 2535      | 37 | 17 | 42635786 | 42635786 | Missense_Mutation | SNP | G | A | 5  | 62  | c.730G>A      | c.(730-732)GCG>ACG   | p.A244T       |
| Pat_41 | Post-Resistance | GFAP      | 2670      | 37 | 17 | 42992644 | 42992644 | Missense_Mutation | SNP | C | T | 9  | 47  | c.211G>A      | c.(211-213)GCA>ACA   | p.A71T        |
| Pat_41 | Post-Resistance | MAPT      | 4137      | 37 | 17 | 44061231 | 44061231 | Missense_Mutation | SNP | C | T | 8  | 44  | c.1061C>T     | c.(1060-1062)CCC>CTC | p.P354L       |
| Pat_41 | Post-Resistance | MAPT      | 4137      | 37 | 17 | 44073905 | 44073905 | Missense_Mutation | SNP | C | T | 8  | 18  | c.1648C>T     | c.(1648-1650)CCC>TCC | p.P550S       |
| Pat_41 | Post-Resistance | NSF       | 4905      | 37 | 17 | 44803982 | 44803982 | Splice_Site       | SNP | G | A | 22 | 256 | c.1828_splice | c.e16+1              | p.D610_splice |
| Pat_41 | Post-Resistance | C17orf57  | 124989    | 37 | 17 | 45452260 | 45452260 | Missense_Mutation | SNP | C | T | 13 | 35  | c.1300C>T     | c.(1300-1302)CCA>TCA | p.P434S       |
| Pat_41 | Post-Resistance | KPNB1     | 3837      | 37 | 17 | 45735929 | 45735929 | Missense_Mutation | SNP | G | A | 9  | 74  | c.539G>A      | c.(538-540)GGG>GAG   | p.G180E       |
| Pat_41 | Post-Resistance | KPNB1     | 3837      | 37 | 17 | 45757887 | 45757887 | Missense_Mutation | SNP | G | A | 5  | 186 | c.2482G>A     | c.(2482-2484)GCA>ACA | p.A828T       |
| Pat_41 | Post-Resistance | TBX21     | 30009     | 37 | 17 | 45820554 | 45820554 | Missense_Mutation | SNP | C | T | 5  | 43  | c.764C>T      | c.(763-765)ACC>ATC   | p.T255I       |
| Pat_41 | Post-Resistance | COP22     | 51226     | 37 | 17 | 46105876 | 46105876 | Missense_Mutation | SNP | C | T | 8  | 20  | c.547G>A      | c.(547-549)GCA>ACA   | p.A183T       |
| Pat_41 | Post-Resistance | HOXB2     | 3212      | 37 | 17 | 46620540 | 46620540 | Missense_Mutation | SNP | C | T | 13 | 58  | c.961G>A      | c.(961-963)GGC>AGC   | p.G321S       |
| Pat_41 | Post-Resistance | HOXB3     | 3213      | 37 | 17 | 46627886 | 46627886 | Missense_Mutation | SNP | G | A | 4  | 6   | c.1106C>T     | c.(1105-1107)TCC>TTC | p.S369F       |
| Pat_41 | Post-Resistance | CALCOCO2  | 10241     | 37 | 17 | 46933509 | 46933509 | Missense_Mutation | SNP | C | T | 9  | 54  | c.968C>T      | c.(967-969)GCT>GTT   | p.A323V       |
| Pat_41 | Post-Resistance | IGF2BP1   | 10642     | 37 | 17 | 47118754 | 47118754 | Missense_Mutation | SNP | C | T | 14 | 30  | c.833C>T      | c.(832-834)CCC>CTC   | p.P278L       |
| Pat_41 | Post-Resistance | ZNF652    | 22834     | 37 | 17 | 47394681 | 47394681 | Missense_Mutation | SNP | C | T | 12 | 83  | c.407G>A      | c.(406-408)GGT>GAT   | p.G136D       |
| Pat_41 | Post-Resistance | COL1A1    | 1277      | 37 | 17 | 48276792 | 48276792 | Missense_Mutation | SNP | G | A | 6  | 11  | c.356C>T      | c.(355-357)CCC>CTC   | p.P119L       |
| Pat_41 | Post-Resistance | RSAD1     | 55316     | 37 | 17 | 48557041 | 48557041 | Missense_Mutation | SNP | C | T | 5  | 74  | c.187C>T      | c.(187-189)CCT>TCT   | p.P63S        |
| Pat_41 | Post-Resistance | MYCBPAP   | 84073     | 37 | 17 | 48606386 | 48606386 | Missense_Mutation | SNP | C | T | 8  | 99  | c.2690C>T     | c.(2689-2691)CCC>CTC | p.P897L       |
| Pat_41 | Post-Resistance | EPN3      | 55040     | 37 | 17 | 48618939 | 48618939 | Missense_Mutation | SNP | C | T | 12 | 35  | c.1469C>T     | c.(1468-1470)GCC>GTC | p.A490V       |
| Pat_41 | Post-Resistance | ABCC3     | 8714      | 37 | 17 | 48752818 | 48752818 | Missense_Mutation | SNP | G | A | 5  | 44  | c.2695G>A     | c.(2695-2697)GTC>ATC | p.V899I       |
| Pat_41 | Post-Resistance | ANKRD40   | 91369     | 37 | 17 | 48777117 | 48777117 | Missense_Mutation | SNP | C | T | 16 | 37  | c.421G>A      | c.(421-423)GCC>ACC   | p.A141T       |
| Pat_41 | Post-Resistance | WFIKKN2   | 124857    | 37 | 17 | 48918031 | 48918031 | Missense_Mutation | SNP | G | A | 7  | 32  | c.1382G>A     | c.(1381-1383)AGC>AAC | p.S461N       |
| Pat_41 | Post-Resistance | SPAG9     | 9043      | 37 | 17 | 49118995 | 49118995 | Missense_Mutation | SNP | G | A | 10 | 123 | c.608C>T      | c.(607-609)TCA>TTA   | p.S203L       |
| Pat_41 | Post-Resistance | NME1-NME2 | 654364    | 37 | 17 | 49231736 | 49231736 | Missense_Mutation | SNP | T | C | 4  | 97  | c.2T>C        | c.(1-3)ATG>ACG       | p.M1T         |
| Pat_41 | Post-Resistance | STXBP4    | 252983    | 37 | 17 | 53150348 | 53150348 | Missense_Mutation | SNP | G | A | 34 | 87  | c.1099G>A     | c.(1099-1101)GAA>AAA | p.E367K       |
| Pat_41 | Post-Resistance | PRR11     | 55771     | 37 | 17 | 57270974 | 57270974 | Missense_Mutation | SNP | C | T | 9  | 72  | c.524C>T      | c.(523-525)CCC>CTC   | p.P175L       |
| Pat_41 | Post-Resistance | PTRH2     | 51651     | 37 | 17 | 57774879 | 57774879 | Missense_Mutation | SNP | C | T | 8  | 67  | c.461G>A      | c.(460-462)GGC>GAC   | p.G154D       |
| Pat_41 | Post-Resistance | RPS6KB1   | 6198      | 37 | 17 | 57990133 | 57990133 | Missense_Mutation | SNP | C | T | 23 | 284 | c.280C>T      | c.(280-282)CTT>TTT   | p.L94F        |



|        |                 |          |        |    |    |          |          |                   |     |   |   |    |     |               |                      |               |
|--------|-----------------|----------|--------|----|----|----------|----------|-------------------|-----|---|---|----|-----|---------------|----------------------|---------------|
| Pat_41 | Post-Resistance | RPS6KB1  | 6198   | 37 | 17 | 58013613 | 58013613 | Missense_Mutation | SNP | G | A | 17 | 102 | c.1016G>A     | c.(1015-1017)GGT>GAT | p.G339D       |
| Pat_41 | Post-Resistance | RPS6KB1  | 6198   | 37 | 17 | 58018279 | 58018279 | Missense_Mutation | SNP | G | A | 18 | 127 | c.1202G>A     | c.(1201-1203)AGT>AAT | p.S401N       |
| Pat_41 | Post-Resistance | RNFT1    | 51136  | 37 | 17 | 58040217 | 58040217 | Missense_Mutation | SNP | C | T | 20 | 120 | c.485G>A      | c.(484-486)AGC>AAC   | p.S162N       |
| Pat_41 | Post-Resistance | PPM1D    | 8493   | 37 | 17 | 58740647 | 58740647 | Missense_Mutation | SNP | C | T | 21 | 48  | c.1552C>T     | c.(1552-1554)CCT>TCT | p.P518S       |
| Pat_41 | Post-Resistance | BCAS3    | 54828  | 37 | 17 | 59445709 | 59445709 | Missense_Mutation | SNP | C | T | 19 | 165 | c.2492C>T     | c.(2491-2493)ACC>ATC | p.T831I       |
| Pat_41 | Post-Resistance | C17orf82 | 388407 | 37 | 17 | 59489518 | 59489518 | Missense_Mutation | SNP | C | T | 3  | 4   | c.182C>T      | c.(181-183)CCC>CTC   | p.P61L        |
| Pat_41 | Post-Resistance | INTS2    | 57508  | 37 | 17 | 59989332 | 59989332 | Missense_Mutation | SNP | G | A | 16 | 134 | c.773C>T      | c.(772-774)CCT>CTT   | p.P258L       |
| Pat_41 | Post-Resistance | METTL2A  | 339175 | 37 | 17 | 60526017 | 60526017 | Missense_Mutation | SNP | G | A | 17 | 199 | c.1064G>A     | c.(1063-1065)GGA>GAA | p.G355E       |
| Pat_41 | Post-Resistance | DCAF7    | 10238  | 37 | 17 | 61662613 | 61662613 | Missense_Mutation | SNP | C | T | 32 | 138 | c.779C>T      | c.(778-780)GCC>GTC   | p.A260V       |
| Pat_41 | Post-Resistance | ERN1     | 2081   | 37 | 17 | 62142568 | 62142568 | Splice_Site       | SNP | C | T | 5  | 18  | c.921_splice  | c.e9+1               | p.V307_splice |
| Pat_41 | Post-Resistance | SMURF2   | 64750  | 37 | 17 | 62589560 | 62589560 | Missense_Mutation | SNP | C | T | 42 | 123 | c.332G>A      | c.(331-333)GGT>GAT   | p.G111D       |
| Pat_41 | Post-Resistance | PLEKHM1P | 440456 | 37 | 17 | 62793381 | 62793381 | Splice_Site       | SNP | C | T | 5  | 14  | c.1068_splice | c.e7+1               | p.P356_splice |
| Pat_41 | Post-Resistance | LRRC37A3 | 374819 | 37 | 17 | 62855682 | 62855682 | Missense_Mutation | SNP | G | A | 6  | 248 | c.4582C>T     | c.(4582-4584)CTC>TTC | p.L1528F      |
| Pat_41 | Post-Resistance | AXIN2    | 8313   | 37 | 17 | 63554534 | 63554534 | Missense_Mutation | SNP | C | T | 15 | 56  | c.205G>A      | c.(205-207)GCA>ACA   | p.A69T        |
| Pat_41 | Post-Resistance | CACNG4   | 27092  | 37 | 17 | 65027112 | 65027112 | Missense_Mutation | SNP | C | T | 17 | 113 | c.976C>T      | c.(976-978)CCT>TCT   | p.P326S       |
| Pat_41 | Post-Resistance | CACNG1   | 786    | 37 | 17 | 65040852 | 65040852 | Missense_Mutation | SNP | G | A | 7  | 167 | c.76G>A       | c.(76-78)GCC>ACC     | p.A26T        |
| Pat_41 | Post-Resistance | PITPNC1  | 26207  | 37 | 17 | 65688789 | 65688789 | Missense_Mutation | SNP | C | T | 21 | 320 | c.784C>T      | c.(784-786)CCC>TCC   | p.P262S       |
| Pat_41 | Post-Resistance | NOL11    | 25926  | 37 | 17 | 65733697 | 65733697 | Missense_Mutation | SNP | C | T | 29 | 312 | c.1292C>T     | c.(1291-1293)ACT>ATT | p.T431I       |
| Pat_41 | Post-Resistance | BPTF     | 2186   | 37 | 17 | 65909084 | 65909084 | Missense_Mutation | SNP | G | A | 5  | 93  | c.5084G>A     | c.(5083-5085)AGA>AAA | p.R1695K      |
| Pat_41 | Post-Resistance | ARSG     | 22901  | 37 | 17 | 66381213 | 66381213 | Missense_Mutation | SNP | C | T | 24 | 302 | c.991C>T      | c.(991-993)CCA>TCA   | p.P331S       |
| Pat_41 | Post-Resistance | WIP1     | 55062  | 37 | 17 | 66430733 | 66430733 | Missense_Mutation | SNP | C | T | 8  | 94  | c.656G>A      | c.(655-657)GGG>GAG   | p.G219E       |
| Pat_41 | Post-Resistance | PRKAR1A  | 5573   | 37 | 17 | 66525098 | 66525098 | Missense_Mutation | SNP | G | A | 17 | 240 | c.857G>A      | c.(856-858)GGA>GAA   | p.G286E       |
| Pat_41 | Post-Resistance | ABCA9    | 10350  | 37 | 17 | 67012509 | 67012509 | Missense_Mutation | SNP | C | T | 32 | 248 | c.2924G>A     | c.(2923-2925)TGT>TAT | p.C975Y       |
| Pat_41 | Post-Resistance | ABCA10   | 10349  | 37 | 17 | 67145193 | 67145193 | Missense_Mutation | SNP | G | A | 23 | 343 | c.4514C>T     | c.(4513-4515)TCT>TTT | p.S1505F      |
| Pat_41 | Post-Resistance | MAP2K6   | 5608   | 37 | 17 | 67515454 | 67515454 | Missense_Mutation | SNP | C | T | 5  | 194 | c.247C>T      | c.(247-249)CGG>TGG   | p.R83W        |
| Pat_41 | Post-Resistance | DNAI2    | 64446  | 37 | 17 | 72306255 | 72306255 | Missense_Mutation | SNP | C | T | 3  | 37  | c.1447C>T     | c.(1447-1449)CCT>TCT | p.P483S       |
| Pat_41 | Post-Resistance | GPRC5C   | 55890  | 37 | 17 | 72443045 | 72443045 | Missense_Mutation | SNP | G | A | 9  | 99  | c.1204G>A     | c.(1204-1206)GGC>AGC | p.G402S       |
| Pat_41 | Post-Resistance | RAB37    | 326624 | 37 | 17 | 72667766 | 72667766 | Missense_Mutation | SNP | G | A | 7  | 96  | c.41G>A       | c.(40-42)GGC>GAC     | p.G14D        |
| Pat_41 | Post-Resistance | TMEM104  | 54868  | 37 | 17 | 72832612 | 72832612 | Missense_Mutation | SNP | G | A | 3  | 64  | c.1277G>A     | c.(1276-1278)GGG>GAG | p.G426E       |
| Pat_41 | Post-Resistance | GRIN2C   | 2905   | 37 | 17 | 72840518 | 72840518 | Missense_Mutation | SNP | C | T | 23 | 93  | c.2480G>A     | c.(2479-2481)GGG>GAG | p.G827E       |
| Pat_41 | Post-Resistance | FDXR     | 2232   | 37 | 17 | 72861921 | 72861921 | Missense_Mutation | SNP | C | T | 11 | 64  | c.529G>A      | c.(529-531)GAC>AAC   | p.D177N       |
| Pat_41 | Post-Resistance | OTOP2    | 92736  | 37 | 17 | 72926818 | 72926818 | Missense_Mutation | SNP | C | T | 11 | 134 | c.1088C>T     | c.(1087-1089)CCC>CTC | p.P363L       |
| Pat_41 | Post-Resistance | SLC16A5  | 9121   | 37 | 17 | 73089912 | 73089912 | Missense_Mutation | SNP | G | A | 28 | 219 | c.181G>A      | c.(181-183)GCT>ACT   | p.A61T        |
| Pat_41 | Post-Resistance | SLC16A5  | 9121   | 37 | 17 | 73094133 | 73094133 | Missense_Mutation | SNP | G | A | 10 | 108 | c.200G>A      | c.(199-201)GGG>GAG   | p.G67E        |
| Pat_41 | Post-Resistance | GGA3     | 23163  | 37 | 17 | 73242797 | 73242797 | Missense_Mutation | SNP | C | T | 9  | 129 | c.121G>A      | c.(121-123)GAA>AAA   | p.E41K        |
| Pat_41 | Post-Resistance | LLGL2    | 3993   | 37 | 17 | 73566246 | 73566246 | Missense_Mutation | SNP | C | T | 3  | 5   | c.1784C>T     | c.(1783-1785)GCC>GTC | p.A595V       |
| Pat_41 | Post-Resistance | RECQL5   | 9400   | 37 | 17 | 73625116 | 73625116 | Missense_Mutation | SNP | C | T | 4  | 42  | c.2387G>A     | c.(2386-2388)GGA>GAA | p.G796E       |
| Pat_41 | Post-Resistance | UNK      | 85451  | 37 | 17 | 73780812 | 73780812 | Missense_Mutation | SNP | G | A | 21 | 162 | c.79G>A       | c.(79-81)GAC>AAC     | p.D27N        |
| Pat_41 | Post-Resistance | UNC13D   | 201294 | 37 | 17 | 73827364 | 73827364 | Missense_Mutation | SNP | C | T | 9  | 80  | c.2513G>A     | c.(2512-2514)AGC>AAC | p.S838N       |
| Pat_41 | Post-Resistance | TRIM47   | 91107  | 37 | 17 | 73871127 | 73871127 | Missense_Mutation | SNP | C | T | 25 | 158 | c.1354G>A     | c.(1354-1356)GTG>ATG | p.V452M       |
| Pat_41 | Post-Resistance | FBF1     | 85302  | 37 | 17 | 73910115 | 73910115 | Missense_Mutation | SNP | T | C | 4  | 18  | c.2963A>G     | c.(2962-2964)TAC>TGC | p.Y988C       |
| Pat_41 | Post-Resistance | FBF1     | 85302  | 37 | 17 | 73926110 | 73926110 | Missense_Mutation | SNP | C | T | 3  | 21  | c.205G>A      | c.(205-207)GCA>ACA   | p.A69T        |
| Pat_41 | Post-Resistance | EVPL     | 2125   | 37 | 17 | 74008108 | 74008108 | Missense_Mutation | SNP | C | A | 3  | 35  | c.2436G>T     | c.(2434-2436)CAG>CAT | p.Q812H       |
| Pat_41 | Post-Resistance | EXOC7    | 23265  | 37 | 17 | 74080606 | 74080606 | Missense_Mutation | SNP | C | T | 6  | 74  | c.1921G>A     | c.(1921-1923)GGA>AGA | p.G641R       |
| Pat_41 | Post-Resistance | EXOC7    | 23265  | 37 | 17 | 74097787 | 74097787 | Missense_Mutation | SNP | C | T | 22 | 301 | c.284G>A      | c.(283-285)AGT>AAT   | p.S95N        |
| Pat_41 | Post-Resistance | FOXJ1    | 2302   | 37 | 17 | 74134153 | 74134153 | Missense_Mutation | SNP | G | A | 4  | 101 | c.547C>T      | c.(547-549)CCT>TCT   | p.P183S       |
| Pat_41 | Post-Resistance | RNF157   | 114804 | 37 | 17 | 74150376 | 74150376 | Missense_Mutation | SNP | G | A | 7  | 284 | c.1798C>T     | c.(1798-1800)CCC>TCC | p.P600S       |

|        |                 |          |        |    |    |          |          |                   |     |    |    |     |     |                |                      |                |
|--------|-----------------|----------|--------|----|----|----------|----------|-------------------|-----|----|----|-----|-----|----------------|----------------------|----------------|
| Pat_41 | Post-Resistance | FAM100B  | 283991 | 37 | 17 | 74266309 | 74266309 | Missense_Mutation | SNP | C  | T  | 20  | 189 | c.218C>T       | c.(217-219)CCC>CTC   | p.P73L         |
| Pat_41 | Post-Resistance | QRICH2   | 84074  | 37 | 17 | 74271977 | 74271977 | Missense_Mutation | SNP | C  | T  | 15  | 58  | c.4907G>A      | c.(4906-4908)AGG>AAG | p.R1636K       |
| Pat_41 | Post-Resistance | QRICH2   | 84074  | 37 | 17 | 74287704 | 74287704 | Missense_Mutation | SNP | C  | T  | 19  | 185 | c.2606G>A      | c.(2605-2607)GGT>GAT | p.G869D        |
| Pat_41 | Post-Resistance | UBE2O    | 63893  | 37 | 17 | 74393939 | 74393939 | Missense_Mutation | SNP | C  | T  | 23  | 221 | c.2056G>A      | c.(2056-2058)GTC>ATC | p.V686I        |
| Pat_41 | Post-Resistance | RHBDF2   | 79651  | 37 | 17 | 74467899 | 74467899 | Missense_Mutation | SNP | C  | T  | 5   | 23  | c.2387G>A      | c.(2386-2388)AGC>AAC | p.S796N        |
| Pat_41 | Post-Resistance | TNRC6C   | 57690  | 37 | 17 | 76045785 | 76045785 | Missense_Mutation | SNP | G  | A  | 50  | 404 | c.642G>A       | c.(640-642)ATG>ATA   | p.M214I        |
| Pat_41 | Post-Resistance | TMC8     | 147138 | 37 | 17 | 76134118 | 76134118 | Nonsense_Mutation | SNP | G  | A  | 5   | 108 | c.1382G>A      | c.(1381-1383)TGG>TAG | p.W461*        |
| Pat_41 | Post-Resistance | SOCS3    | 9021   | 37 | 17 | 76354629 | 76354629 | Missense_Mutation | SNP | G  | A  | 6   | 173 | c.548C>T       | c.(547-549)TCC>TTC   | p.S183F        |
| Pat_41 | Post-Resistance | DNAH17   | 8632   | 37 | 17 | 76447667 | 76447667 | Missense_Mutation | SNP | G  | A  | 60  | 252 | c.1618C>T      | c.(1618-1620)CCA>TCA | p.P540S        |
| Pat_41 | Post-Resistance | DNAH17   | 8632   | 37 | 17 | 76459036 | 76459036 | Missense_Mutation | SNP | C  | T  | 18  | 72  | c.64G>A        | c.(64-66)GAG>AAG     | p.E22K         |
| Pat_41 | Post-Resistance | USP36    | 57602  | 37 | 17 | 76799789 | 76799789 | Missense_Mutation | SNP | G  | A  | 3   | 36  | c.2488C>T      | c.(2488-2490)CCA>TCA | p.P830S        |
| Pat_41 | Post-Resistance | USP36    | 57602  | 37 | 17 | 76809938 | 76809938 | Nonsense_Mutation | SNP | C  | T  | 16  | 136 | c.1182G>A      | c.(1180-1182)TGG>TGA | p.W394*        |
| Pat_41 | Post-Resistance | CANT1    | 124583 | 37 | 17 | 76993359 | 76993359 | Missense_Mutation | SNP | C  | T  | 45  | 300 | c.346G>A       | c.(346-348)GAG>AAG   | p.E116K        |
| Pat_41 | Post-Resistance | ENPP7    | 339221 | 37 | 17 | 77709013 | 77709013 | Missense_Mutation | SNP | G  | A  | 8   | 102 | c.571G>A       | c.(571-573)GTC>ATC   | p.V191I        |
| Pat_41 | Post-Resistance | CBX4     | 8535   | 37 | 17 | 77807985 | 77807985 | Missense_Mutation | SNP | C  | T  | 4   | 31  | c.1456G>A      | c.(1456-1458)GAG>AAG | p.E486K        |
| Pat_41 | Post-Resistance | CCDC40   | 55036  | 37 | 17 | 78023713 | 78023713 | Missense_Mutation | SNP | G  | A  | 7   | 67  | c.864G>A       | c.(862-864)ATG>ATA   | p.M288I        |
| Pat_41 | Post-Resistance | CCDC40   | 55036  | 37 | 17 | 78023718 | 78023718 | Missense_Mutation | SNP | G  | A  | 8   | 70  | c.869G>A       | c.(868-870)AGA>AAA   | p.R290K        |
| Pat_41 | Post-Resistance | RPTOR    | 57521  | 37 | 17 | 78865520 | 78865520 | Missense_Mutation | SNP | G  | A  | 25  | 465 | c.1984G>A      | c.(1984-1986)GAG>AAG | p.E662K        |
| Pat_41 | Post-Resistance | RPTOR    | 57521  | 37 | 17 | 78897397 | 78897397 | Missense_Mutation | SNP | C  | T  | 3   | 46  | c.2732C>T      | c.(2731-2733)CCC>CTC | p.P911L        |
| Pat_41 | Post-Resistance | BAIAP2   | 10458  | 37 | 17 | 79082309 | 79082309 | Missense_Mutation | SNP | G  | A  | 9   | 102 | c.1535G>A      | c.(1534-1536)AGG>AAG | p.R512K        |
| Pat_41 | Post-Resistance | AZ11     | 22994  | 37 | 17 | 79176097 | 79176097 | Missense_Mutation | SNP | G  | A  | 12  | 136 | c.731C>T       | c.(730-732)ACT>ATT   | p.T244I        |
| Pat_41 | Post-Resistance | TMEM105  | 284186 | 37 | 17 | 79287501 | 79287501 | Missense_Mutation | SNP | C  | T  | 6   | 182 | c.340G>A       | c.(340-342)GTG>ATG   | p.V114M        |
| Pat_41 | Post-Resistance | ACTG1    | 71     | 37 | 17 | 79478405 | 79478405 | Missense_Mutation | SNP | G  | A  | 11  | 294 | c.611C>T       | c.(610-612)GCC>GTC   | p.A204V        |
| Pat_41 | Post-Resistance | HGS      | 9146   | 37 | 17 | 79660976 | 79660976 | Missense_Mutation | SNP | G  | A  | 7   | 67  | c.917G>A       | c.(916-918)AGC>AAC   | p.S306N        |
| Pat_41 | Post-Resistance | HGS      | 9146   | 37 | 17 | 79661961 | 79661961 | Missense_Mutation | DNP | GG | AA | 12  | 212 | c.983_984GG>AA | c.(982-984)CGG>CAA   | p.R328Q        |
| Pat_41 | Post-Resistance | P4HB     | 5034   | 37 | 17 | 79804397 | 79804397 | Missense_Mutation | SNP | C  | T  | 6   | 120 | c.964G>A       | c.(964-966)GAG>AAG   | p.E322K        |
| Pat_41 | Post-Resistance | THOC4    | 10189  | 37 | 17 | 79846247 | 79846247 | Missense_Mutation | SNP | C  | T  | 5   | 48  | c.650G>A       | c.(649-651)GGT>GAT   | p.G217D        |
| Pat_41 | Post-Resistance | ANAPC11  | 51529  | 37 | 17 | 79852387 | 79852387 | Missense_Mutation | SNP | G  | A  | 29  | 276 | c.34G>A        | c.(34-36)GCC>ACC     | p.A12T         |
| Pat_41 | Post-Resistance | PYCR1    | 5831   | 37 | 17 | 79892993 | 79892993 | Missense_Mutation | SNP | C  | T  | 6   | 54  | c.349G>A       | c.(349-351)GTC>ATC   | p.V117I        |
| Pat_41 | Post-Resistance | GPS1     | 2873   | 37 | 17 | 80012628 | 80012628 | Missense_Mutation | SNP | C  | T  | 15  | 74  | c.563C>T       | c.(562-564)GCC>GTC   | p.A188V        |
| Pat_41 | Post-Resistance | SECTM1   | 6398   | 37 | 17 | 80282536 | 80282536 | Missense_Mutation | SNP | C  | T  | 5   | 82  | c.325G>A       | c.(325-327)GAC>AAC   | p.D109N        |
| Pat_41 | Post-Resistance | HEXDC    | 284004 | 37 | 17 | 80395080 | 80395080 | Missense_Mutation | SNP | C  | T  | 13  | 400 | c.740C>T       | c.(739-741)CCG>CTG   | p.P247L        |
| Pat_41 | Post-Resistance | HEXDC    | 284004 | 37 | 17 | 80397523 | 80397523 | Missense_Mutation | SNP | G  | A  | 40  | 233 | c.916G>A       | c.(916-918)GTG>ATG   | p.V306M        |
| Pat_41 | Post-Resistance | NARF     | 26502  | 37 | 17 | 80441612 | 80441612 | Missense_Mutation | SNP | G  | A  | 8   | 199 | c.790G>A       | c.(790-792)GAG>AAG   | p.E264K        |
| Pat_41 | Post-Resistance | FN3KRP   | 79672  | 37 | 17 | 80674738 | 80674738 | Missense_Mutation | SNP | G  | A  | 9   | 151 | c.107G>A       | c.(106-108)GGA>GAA   | p.G36E         |
| Pat_41 | Post-Resistance | METRNL   | 284207 | 37 | 17 | 81043197 | 81043197 | Missense_Mutation | SNP | C  | T  | 9   | 189 | c.554C>T       | c.(553-555)TCT>TTT   | p.S185F        |
| Pat_41 | Post-Resistance | METRNL   | 284207 | 37 | 17 | 81052055 | 81052055 | Missense_Mutation | SNP | C  | T  | 13  | 242 | c.671C>T       | c.(670-672)GCC>GTC   | p.A224V        |
| Pat_41 | Post-Resistance | CLUL1    | 27098  | 37 | 18 | 627217   | 627217   | Missense_Mutation | SNP | G  | A  | 37  | 432 | c.544G>A       | c.(544-546)GAT>AAT   | p.D182N        |
| Pat_41 | Post-Resistance | METTL4   | 64863  | 37 | 18 | 2554742  | 2554742  | Missense_Mutation | SNP | C  | T  | 5   | 48  | c.755G>A       | c.(754-756)GGA>GAA   | p.G252E        |
| Pat_41 | Post-Resistance | NDC80    | 10403  | 37 | 18 | 2577833  | 2577833  | Missense_Mutation | SNP | G  | A  | 25  | 230 | c.268G>A       | c.(268-270)GCA>ACA   | p.A90T         |
| Pat_41 | Post-Resistance | EMILIN2  | 84034  | 37 | 18 | 2885114  | 2885114  | Missense_Mutation | SNP | G  | A  | 60  | 48  | c.410G>A       | c.(409-411)CGA>CAA   | p.R137Q        |
| Pat_41 | Post-Resistance | EMILIN2  | 84034  | 37 | 18 | 2891675  | 2891675  | Missense_Mutation | SNP | G  | A  | 8   | 92  | c.1550G>A      | c.(1549-1551)AGT>AAT | p.S517N        |
| Pat_41 | Post-Resistance | MYOM1    | 8736   | 37 | 18 | 3168976  | 3168976  | Missense_Mutation | SNP | C  | T  | 6   | 44  | c.1178G>A      | c.(1177-1179)GGT>GAT | p.G393D        |
| Pat_41 | Post-Resistance | DLGAP1   | 9229   | 37 | 18 | 3879678  | 3879678  | Missense_Mutation | SNP | G  | A  | 114 | 177 | c.391C>T       | c.(391-393)CGC>TGC   | p.R131C        |
| Pat_41 | Post-Resistance | EPB41L3  | 23136  | 37 | 18 | 5433986  | 5433986  | Missense_Mutation | SNP | C  | T  | 42  | 398 | c.740G>A       | c.(739-741)AGC>AAC   | p.S247N        |
| Pat_41 | Post-Resistance | ARHGAP28 | 79822  | 37 | 18 | 6868197  | 6868197  | Missense_Mutation | SNP | C  | T  | 28  | 178 | c.244C>T       | c.(244-246)CCG>TCG   | p.P82S         |
| Pat_41 | Post-Resistance | LAMA1    | 284217 | 37 | 18 | 6943402  | 6943402  | Splice_Site       | SNP | C  | T  | 5   | 106 | c.8845_splice  | c.e62-1              | p.V2949_splice |

|        |                 |          |        |    |    |          |          |                   |     |   |   |    |     |               |                      |                |
|--------|-----------------|----------|--------|----|----|----------|----------|-------------------|-----|---|---|----|-----|---------------|----------------------|----------------|
| Pat_41 | Post-Resistance | LAMA1    | 284217 | 37 | 18 | 6950780  | 6950780  | Splice_Site       | SNP | C | T | 10 | 214 | c.8397_splice | c.e58+1              | p.T2799_splice |
| Pat_41 | Post-Resistance | KIAA0802 | 23255  | 37 | 18 | 8819025  | 8819025  | Missense_Mutation | SNP | T | C | 6  | 141 | c.2924T>C     | c.(2923-2925)GTT>GCT | p.V975A        |
| Pat_41 | Post-Resistance | ANKRD12  | 23253  | 37 | 18 | 9256993  | 9256993  | Missense_Mutation | SNP | C | T | 4  | 135 | c.3728C>T     | c.(3727-3729)TCC>TTC | p.S1243F       |
| Pat_41 | Post-Resistance | VAPA     | 9218   | 37 | 18 | 9950446  | 9950446  | Missense_Mutation | SNP | C | T | 16 | 203 | c.472C>T      | c.(472-474)CCT>TCT   | p.P158S        |
| Pat_41 | Post-Resistance | CEP192   | 55125  | 37 | 18 | 13049213 | 13049213 | Missense_Mutation | SNP | C | T | 22 | 135 | c.2423C>T     | c.(2422-2424)ACT>ATT | p.T808I        |
| Pat_41 | Post-Resistance | CEP192   | 55125  | 37 | 18 | 13052932 | 13052932 | Missense_Mutation | SNP | C | T | 72 | 417 | c.3032C>T     | c.(3031-3033)TCC>TTC | p.S1011F       |
| Pat_41 | Post-Resistance | CEP192   | 55125  | 37 | 18 | 13055903 | 13055903 | Missense_Mutation | SNP | C | T | 29 | 41  | c.3314C>T     | c.(3313-3315)TCA>TTA | p.S1105L       |
| Pat_41 | Post-Resistance | C18orf19 | 125228 | 37 | 18 | 13681685 | 13681685 | Missense_Mutation | SNP | C | T | 12 | 160 | c.392G>A      | c.(391-393)AGA>AAA   | p.R131K        |
| Pat_41 | Post-Resistance | RNMT     | 8731   | 37 | 18 | 13741509 | 13741509 | Missense_Mutation | SNP | G | A | 12 | 289 | c.793G>A      | c.(793-795)GAA>AAA   | p.E265K        |
| Pat_41 | Post-Resistance | POTEC    | 388468 | 37 | 18 | 14542790 | 14542790 | Missense_Mutation | SNP | G | A | 7  | 178 | c.356C>T      | c.(355-357)GCT>GTT   | p.A119V        |
| Pat_41 | Post-Resistance | ANKRD30B | 374860 | 37 | 18 | 14752654 | 14752654 | Missense_Mutation | SNP | G | A | 12 | 46  | c.311G>A      | c.(310-312)GGC>GAC   | p.G104D        |
| Pat_41 | Post-Resistance | ROCK1    | 6093   | 37 | 18 | 18622532 | 18622532 | Missense_Mutation | SNP | G | A | 39 | 249 | c.814C>T      | c.(814-816)CTT>TTT   | p.L272F        |
| Pat_41 | Post-Resistance | CTAGE1   | 64693  | 37 | 18 | 19996309 | 19996309 | Missense_Mutation | SNP | C | T | 5  | 276 | c.1466G>A     | c.(1465-1467)GGT>GAT | p.G489D        |
| Pat_41 | Post-Resistance | CTAGE1   | 64693  | 37 | 18 | 19996346 | 19996346 | Missense_Mutation | SNP | G | A | 5  | 166 | c.1429C>T     | c.(1429-1431)CCA>TCA | p.P477S        |
| Pat_41 | Post-Resistance | CABLES1  | 91768  | 37 | 18 | 20774501 | 20774501 | Missense_Mutation | SNP | G | A | 12 | 166 | c.1007G>A     | c.(1006-1008)GGC>GAC | p.G336D        |
| Pat_41 | Post-Resistance | RIOK3    | 8780   | 37 | 18 | 21056969 | 21056969 | Splice_Site       | SNP | G | A | 11 | 148 | c.1174_splice | c.e10-1              | p.L392_splice  |
| Pat_41 | Post-Resistance | NPC1     | 4864   | 37 | 18 | 21118549 | 21118549 | Missense_Mutation | SNP | G | A | 17 | 260 | c.2998C>T     | c.(2998-3000)CCC>TCC | p.P1000S       |
| Pat_41 | Post-Resistance | NPC1     | 4864   | 37 | 18 | 21136332 | 21136332 | Missense_Mutation | SNP | G | A | 5  | 40  | c.1201C>T     | c.(1201-1203)CCT>TCT | p.P401S        |
| Pat_41 | Post-Resistance | NPC1     | 4864   | 37 | 18 | 21153480 | 21153480 | Missense_Mutation | SNP | C | T | 38 | 446 | c.116G>A      | c.(115-117)AGG>AAG   | p.R39K         |
| Pat_41 | Post-Resistance | TTC39C   | 125488 | 37 | 18 | 21649143 | 21649143 | Missense_Mutation | SNP | C | T | 16 | 340 | c.368C>T      | c.(367-369)CCC>CTC   | p.P123L        |
| Pat_41 | Post-Resistance | ZNF521   | 25925  | 37 | 18 | 22805060 | 22805060 | Missense_Mutation | SNP | G | A | 9  | 159 | c.2822C>T     | c.(2821-2823)TCC>TTC | p.S941F        |
| Pat_41 | Post-Resistance | ZNF521   | 25925  | 37 | 18 | 22806363 | 22806363 | Missense_Mutation | SNP | C | T | 13 | 149 | c.1519G>A     | c.(1519-1521)GCT>ACT | p.A507T        |
| Pat_41 | Post-Resistance | KCTD1    | 284252 | 37 | 18 | 24081090 | 24081090 | Missense_Mutation | SNP | C | T | 9  | 158 | c.110G>A      | c.(109-111)GGC>GAC   | p.G37D         |
| Pat_41 | Post-Resistance | CDH2     | 1000   | 37 | 18 | 25589790 | 25589790 | Missense_Mutation | SNP | G | A | 13 | 147 | c.593C>T      | c.(592-594)ACT>ATT   | p.T198I        |
| Pat_41 | Post-Resistance | DSC2     | 1824   | 37 | 18 | 28659833 | 28659833 | Missense_Mutation | SNP | G | A | 26 | 158 | c.1643C>T     | c.(1642-1644)ACA>ATA | p.T548I        |
| Pat_41 | Post-Resistance | DSC2     | 1824   | 37 | 18 | 28669488 | 28669488 | Missense_Mutation | SNP | G | A | 6  | 91  | c.544C>T      | c.(544-546)CCT>TCT   | p.P182S        |
| Pat_41 | Post-Resistance | DSG1     | 1828   | 37 | 18 | 28910000 | 28910000 | Splice_Site       | SNP | G | A | 15 | 142 | c.517_splice  | c.e5+1               | p.N173_splice  |
| Pat_41 | Post-Resistance | DSG3     | 1830   | 37 | 18 | 29027850 | 29027850 | Missense_Mutation | SNP | C | T | 5  | 80  | c.10C>T       | c.(10-12)CTC>TTC     | p.L4F          |
| Pat_41 | Post-Resistance | TTR      | 7276   | 37 | 18 | 29178567 | 29178567 | Missense_Mutation | SNP | T | C | 20 | 340 | c.373T>C      | c.(373-375)TAC>CAC   | p.Y125H        |
| Pat_41 | Post-Resistance | RNF138   | 51444  | 37 | 18 | 29706735 | 29706735 | Missense_Mutation | SNP | G | A | 27 | 177 | c.641G>A      | c.(640-642)AGA>AAA   | p.R214K        |
| Pat_41 | Post-Resistance | ASXL3    | 80816  | 37 | 18 | 31251776 | 31251776 | Missense_Mutation | SNP | C | T | 21 | 29  | c.661C>T      | c.(661-663)CCC>TCC   | p.P221S        |
| Pat_41 | Post-Resistance | ASXL3    | 80816  | 37 | 18 | 31325625 | 31325625 | Missense_Mutation | SNP | C | T | 3  | 28  | c.5813C>T     | c.(5812-5814)GCC>GTC | p.A1938V       |
| Pat_41 | Post-Resistance | DTNA     | 1837   | 37 | 18 | 32345951 | 32345951 | Missense_Mutation | SNP | C | T | 18 | 194 | c.94C>T       | c.(94-96)CTC>TTC     | p.L32F         |
| Pat_41 | Post-Resistance | ZNF24    | 7572   | 37 | 18 | 32917477 | 32917477 | Missense_Mutation | SNP | C | T | 12 | 212 | c.826G>A      | c.(826-828)GAG>AAG   | p.E276K        |
| Pat_41 | Post-Resistance | GALNT1   | 2589   | 37 | 18 | 33271108 | 33271108 | Missense_Mutation | SNP | G | A | 7  | 184 | c.1111G>A     | c.(1111-1113)GAA>AAA | p.E371K        |
| Pat_41 | Post-Resistance | MOCOS    | 55034  | 37 | 18 | 33780034 | 33780034 | Missense_Mutation | SNP | C | T | 14 | 132 | c.688C>T      | c.(688-690)CCT>TCT   | p.P230S        |
| Pat_41 | Post-Resistance | SLC14A1  | 6563   | 37 | 18 | 43328362 | 43328362 | Missense_Mutation | SNP | G | A | 34 | 370 | c.968G>A      | c.(967-969)GGA>GAA   | p.G323E        |
| Pat_41 | Post-Resistance | KIAA1632 | 57724  | 37 | 18 | 43534415 | 43534415 | Missense_Mutation | SNP | C | T | 34 | 267 | c.953G>A      | c.(952-954)TGC>TAC   | p.C318Y        |
| Pat_41 | Post-Resistance | HDHD2    | 84064  | 37 | 18 | 44656699 | 44656699 | Missense_Mutation | SNP | C | T | 32 | 180 | c.311G>A      | c.(310-312)GGA>GAA   | p.G104E        |
| Pat_41 | Post-Resistance | MYO5B    | 4645   | 37 | 18 | 47379941 | 47379941 | Missense_Mutation | SNP | C | T | 15 | 95  | c.4099G>A     | c.(4099-4101)GCC>ACC | p.A1367T       |
| Pat_41 | Post-Resistance | CCDC11   | 220136 | 37 | 18 | 47769387 | 47769387 | Missense_Mutation | SNP | C | T | 17 | 285 | c.1096G>A     | c.(1096-1098)GAA>AAA | p.E366K        |
| Pat_41 | Post-Resistance | MBD1     | 4152   | 37 | 18 | 47799063 | 47799063 | Missense_Mutation | SNP | C | T | 23 | 623 | c.1762G>A     | c.(1762-1764)GCA>ACA | p.A588T        |
| Pat_41 | Post-Resistance | CXXC1    | 30827  | 37 | 18 | 47810355 | 47810355 | Missense_Mutation | SNP | C | T | 11 | 190 | c.1322G>A     | c.(1321-1323)CGC>CAC | p.R441H        |
| Pat_41 | Post-Resistance | CXXC1    | 30827  | 37 | 18 | 47811184 | 47811184 | Missense_Mutation | SNP | G | A | 7  | 131 | c.938C>T      | c.(937-939)TCC>TTC   | p.S313F        |
| Pat_41 | Post-Resistance | MAPK4    | 5596   | 37 | 18 | 48190423 | 48190423 | Missense_Mutation | SNP | G | A | 8  | 177 | c.95G>A       | c.(94-96)GGT>GAT     | p.G32D         |
| Pat_41 | Post-Resistance | MAPK4    | 5596   | 37 | 18 | 48248397 | 48248397 | Missense_Mutation | SNP | C | T | 5  | 42  | c.781C>T      | c.(781-783)CCT>TCT   | p.P261S        |
| Pat_41 | Post-Resistance | MRO      | 83876  | 37 | 18 | 48327762 | 48327762 | Missense_Mutation | SNP | G | A | 55 | 191 | c.542C>T      | c.(541-543)TCC>TTC   | p.S181F        |

|        |                 |           |        |    |    |          |          |                   |     |   |   |    |     |               |                      |               |
|--------|-----------------|-----------|--------|----|----|----------|----------|-------------------|-----|---|---|----|-----|---------------|----------------------|---------------|
| Pat_41 | Post-Resistance | DCC       | 1630   | 37 | 18 | 50592443 | 50592443 | Missense_Mutation | SNP | G | A | 17 | 236 | c.1168G>A     | c.(1168-1170)GTG>ATG | p.V390M       |
| Pat_41 | Post-Resistance | DCC       | 1630   | 37 | 18 | 51025758 | 51025758 | Missense_Mutation | SNP | C | T | 17 | 335 | c.3989C>T     | c.(3988-3990)ACC>ATC | p.T1330I      |
| Pat_41 | Post-Resistance | C18orf54  | 162681 | 37 | 18 | 51888064 | 51888064 | Missense_Mutation | SNP | G | A | 8  | 121 | c.335G>A      | c.(334-336)AGA>AAA   | p.R112K       |
| Pat_41 | Post-Resistance | TCF4      | 6925   | 37 | 18 | 53131311 | 53131311 | Missense_Mutation | SNP | G | A | 27 | 343 | c.203C>T      | c.(202-204)TCC>TTC   | p.S68F        |
| Pat_41 | Post-Resistance | TXNL1     | 9352   | 37 | 18 | 54281660 | 54281660 | Missense_Mutation | SNP | C | T | 7  | 162 | c.730G>A      | c.(730-732)GTA>ATA   | p.V244I       |
| Pat_41 | Post-Resistance | WDR7      | 23335  | 37 | 18 | 54363622 | 54363622 | Missense_Mutation | SNP | G | A | 16 | 250 | c.1507G>A     | c.(1507-1509)GAA>AAA | p.E503K       |
| Pat_41 | Post-Resistance | WDR7      | 23335  | 37 | 18 | 54398829 | 54398829 | Splice_Site       | SNP | G | A | 7  | 118 | c.1989_splice | c.e14+1              | p.K663_splice |
| Pat_41 | Post-Resistance | WDR7      | 23335  | 37 | 18 | 54448804 | 54448804 | Missense_Mutation | SNP | G | A | 9  | 91  | c.3107G>A     | c.(3106-3108)AGA>AAA | p.R1036K      |
| Pat_41 | Post-Resistance | NARS      | 4677   | 37 | 18 | 55287847 | 55287847 | Missense_Mutation | SNP | G | A | 33 | 217 | c.47C>T       | c.(46-48)GCC>GTC     | p.A16V        |
| Pat_41 | Post-Resistance | ALPK2     | 115701 | 37 | 18 | 56204126 | 56204126 | Missense_Mutation | SNP | T | C | 18 | 362 | c.3293A>G     | c.(3292-3294)AAT>AGT | p.N1098S      |
| Pat_41 | Post-Resistance | ALPK2     | 115701 | 37 | 18 | 56205078 | 56205078 | Missense_Mutation | SNP | G | A | 4  | 127 | c.2341C>T     | c.(2341-2343)CCC>TCC | p.P781S       |
| Pat_41 | Post-Resistance | ALPK2     | 115701 | 37 | 18 | 56247083 | 56247083 | Missense_Mutation | SNP | C | T | 18 | 256 | c.925G>A      | c.(925-927)GAA>AAA   | p.E309K       |
| Pat_41 | Post-Resistance | ZNF532    | 55205  | 37 | 18 | 56585646 | 56585646 | Nonsense_Mutation | SNP | C | T | 14 | 85  | c.127C>T      | c.(127-129)CAG>TAG   | p.Q43*        |
| Pat_41 | Post-Resistance | ZNF532    | 55205  | 37 | 18 | 56586991 | 56586991 | Missense_Mutation | SNP | G | A | 6  | 54  | c.1472G>A     | c.(1471-1473)AGC>AAC | p.S491N       |
| Pat_41 | Post-Resistance | ZNF532    | 55205  | 37 | 18 | 56606750 | 56606750 | Missense_Mutation | SNP | G | A | 18 | 304 | c.2602G>A     | c.(2602-2604)GTC>ATC | p.V868I       |
| Pat_41 | Post-Resistance | LMAN1     | 3998   | 37 | 18 | 57026292 | 57026292 | Missense_Mutation | SNP | C | T | 11 | 160 | c.185G>A      | c.(184-186)GGG>GAG   | p.G62E        |
| Pat_41 | Post-Resistance | CCBE1     | 147372 | 37 | 18 | 57134012 | 57134012 | Missense_Mutation | SNP | C | T | 28 | 415 | c.512G>A      | c.(511-513)GGG>GAG   | p.G171E       |
| Pat_41 | Post-Resistance | MC4R      | 4160   | 37 | 18 | 58038721 | 58038721 | Missense_Mutation | SNP | G | A | 9  | 199 | c.862C>T      | c.(862-864)CTC>TTC   | p.L288F       |
| Pat_41 | Post-Resistance | CDH20     | 28316  | 37 | 18 | 59167622 | 59167622 | Missense_Mutation | SNP | C | T | 13 | 207 | c.548C>T      | c.(547-549)TCC>TTC   | p.S183F       |
| Pat_41 | Post-Resistance | ZCCHC2    | 54877  | 37 | 18 | 60227835 | 60227835 | Missense_Mutation | SNP | C | T | 13 | 233 | c.1508C>T     | c.(1507-1509)GCC>GTC | p.A503V       |
| Pat_41 | Post-Resistance | SERPINB13 | 5275   | 37 | 18 | 61256932 | 61256932 | Missense_Mutation | SNP | G | A | 8  | 61  | c.208G>A      | c.(208-210)GCT>ACT   | p.A70T        |
| Pat_41 | Post-Resistance | SERPINB13 | 5275   | 37 | 18 | 61262408 | 61262408 | Missense_Mutation | SNP | G | A | 20 | 176 | c.761G>A      | c.(760-762)GGC>GAC   | p.G254D       |
| Pat_41 | Post-Resistance | CDH7      | 1005   | 37 | 18 | 63526179 | 63526179 | Missense_Mutation | SNP | G | A | 7  | 84  | c.1391G>A     | c.(1390-1392)GGA>GAA | p.G464E       |
| Pat_41 | Post-Resistance | CDH19     | 28513  | 37 | 18 | 64172386 | 64172386 | Missense_Mutation | SNP | C | T | 23 | 316 | c.1982G>A     | c.(1981-1983)AGT>AAT | p.S661N       |
| Pat_41 | Post-Resistance | DSEL      | 92126  | 37 | 18 | 65181334 | 65181334 | Missense_Mutation | SNP | C | T | 11 | 81  | c.542G>A      | c.(541-543)GGC>GAC   | p.G181D       |
| Pat_41 | Post-Resistance | TMX3      | 54495  | 37 | 18 | 66351458 | 66351458 | Missense_Mutation | SNP | C | T | 11 | 111 | c.817G>A      | c.(817-819)GTT>ATT   | p.V273I       |
| Pat_41 | Post-Resistance | NETO1     | 81832  | 37 | 18 | 70532440 | 70532440 | Missense_Mutation | SNP | G | A | 4  | 23  | c.65C>T       | c.(64-66)GCA>GTA     | p.A22V        |
| Pat_41 | Post-Resistance | ZNF407    | 55628  | 37 | 18 | 72343232 | 72343232 | Missense_Mutation | SNP | C | T | 11 | 76  | c.257C>T      | c.(256-258)TCT>TTT   | p.S86F        |
| Pat_41 | Post-Resistance | ZNF407    | 55628  | 37 | 18 | 72589198 | 72589198 | Nonsense_Mutation | SNP | G | A | 13 | 41  | c.4923G>A     | c.(4921-4923)TGG>TGA | p.W1641*      |
| Pat_41 | Post-Resistance | ZNF236    | 7776   | 37 | 18 | 74625807 | 74625807 | Missense_Mutation | SNP | G | A | 20 | 65  | c.3008G>A     | c.(3007-3009)GGC>GAC | p.G1003D      |
| Pat_41 | Post-Resistance | SALL3     | 27164  | 37 | 18 | 76753535 | 76753535 | Missense_Mutation | SNP | G | A | 3  | 20  | c.1544G>A     | c.(1543-1545)AGC>AAC | p.S515N       |
| Pat_41 | Post-Resistance | ADNP2     | 22850  | 37 | 18 | 77891008 | 77891008 | Missense_Mutation | SNP | G | A | 10 | 20  | c.131G>A      | c.(130-132)GGA>GAA   | p.G44E        |
| Pat_41 | Post-Resistance | PPAP2C    | 8612   | 37 | 19 | 282238   | 282238   | Missense_Mutation | SNP | C | T | 20 | 44  | c.613G>A      | c.(613-615)GCC>ACC   | p.A205T       |
| Pat_41 | Post-Resistance | PALM      | 5064   | 37 | 19 | 746516   | 746516   | Missense_Mutation | SNP | G | A | 3  | 23  | c.866G>A      | c.(865-867)GGG>GAG   | p.G289E       |
| Pat_41 | Post-Resistance | LPPR3     | 79948  | 37 | 19 | 814885   | 814885   | Splice_Site       | SNP | C | T | 15 | 64  | c.599_splice  | c.e5+1               | p.R200_splice |
| Pat_41 | Post-Resistance | UQCR11    | 10975  | 37 | 19 | 1599554  | 1599554  | Missense_Mutation | SNP | G | T | 3  | 58  | c.56C>A       | c.(55-57)CCG>CAG     | p.P19Q        |
| Pat_41 | Post-Resistance | ATP8B3    | 148229 | 37 | 19 | 1795962  | 1795962  | Missense_Mutation | SNP | C | T | 9  | 23  | c.1967G>A     | c.(1966-1968)TGC>TAC | p.C656Y       |
| Pat_41 | Post-Resistance | MKNK2     | 2872   | 37 | 19 | 2039752  | 2039752  | Missense_Mutation | SNP | C | T | 5  | 16  | c.1258G>A     | c.(1258-1260)GGG>AGG | p.G420R       |
| Pat_41 | Post-Resistance | ZNF554    | 115196 | 37 | 19 | 2834596  | 2834596  | Missense_Mutation | SNP | G | A | 8  | 78  | c.1363G>A     | c.(1363-1365)GAG>AAG | p.E455K       |
| Pat_41 | Post-Resistance | PIP5K1C   | 23396  | 37 | 19 | 3644084  | 3644084  | Splice_Site       | SNP | C | T | 18 | 68  | c.1510_splice | c.e12+1              | p.G504_splice |
| Pat_41 | Post-Resistance | CHAF1A    | 10036  | 37 | 19 | 4433262  | 4433262  | Missense_Mutation | SNP | G | A | 4  | 106 | c.2399G>A     | c.(2398-2400)CGG>CAG | p.R800Q       |
| Pat_41 | Post-Resistance | PLIN5     | 440503 | 37 | 19 | 4523680  | 4523680  | Missense_Mutation | SNP | C | T | 24 | 180 | c.1252G>A     | c.(1252-1254)GCC>ACC | p.A418T       |
| Pat_41 | Post-Resistance | C19orf10  | 56005  | 37 | 19 | 4660005  | 4660005  | Missense_Mutation | SNP | G | A | 11 | 97  | c.380C>T      | c.(379-381)GCA>GTA   | p.A127V       |
| Pat_41 | Post-Resistance | FEM1A     | 55527  | 37 | 19 | 4792581  | 4792581  | Missense_Mutation | SNP | C | T | 7  | 72  | c.715C>T      | c.(715-717)CCC>TCC   | p.P239S       |
| Pat_41 | Post-Resistance | PTPRS     | 5802   | 37 | 19 | 5231452  | 5231452  | Missense_Mutation | SNP | G | A | 4  | 57  | c.2024C>T     | c.(2023-2025)CCC>CTC | p.P675L       |
| Pat_41 | Post-Resistance | SAFB2     | 9667   | 37 | 19 | 5587339  | 5587339  | Missense_Mutation | SNP | C | T | 8  | 21  | c.2777G>A     | c.(2776-2778)GGA>GAA | p.G926E       |
| Pat_41 | Post-Resistance | ACER1     | 125981 | 37 | 19 | 6309807  | 6309807  | Missense_Mutation | SNP | A | G | 12 | 29  | c.389T>C      | c.(388-390)GTC>GCC   | p.V130A       |

|        |                 |          |        |    |    |          |          |                   |     |   |   |    |     |               |                        |                |
|--------|-----------------|----------|--------|----|----|----------|----------|-------------------|-----|---|---|----|-----|---------------|------------------------|----------------|
| Pat_41 | Post-Resistance | CLPP     | 8192   | 37 | 19 | 6362493  | 6362493  | Missense_Mutation | SNP | C | T | 14 | 91  | c.307C>T      | c.(307-309)CTC>TTC     | p.L103F        |
| Pat_41 | Post-Resistance | C3       | 718    | 37 | 19 | 6719238  | 6719238  | Missense_Mutation | SNP | C | T | 8  | 156 | c.251G>A      | c.(250-252)GGC>GAC     | p.G84D         |
| Pat_41 | Post-Resistance | TRIP10   | 9322   | 37 | 19 | 6746515  | 6746515  | Missense_Mutation | SNP | G | A | 4  | 133 | c.1205G>A     | c.(1204-1206)CGG>CAG   | p.R402Q        |
| Pat_41 | Post-Resistance | INSR     | 3643   | 37 | 19 | 7184645  | 7184645  | Missense_Mutation | SNP | C | T | 3  | 21  | c.656G>A      | c.(655-657)TGC>TAC     | p.C219Y        |
| Pat_41 | Post-Resistance | PNPLA6   | 10908  | 37 | 19 | 7600838  | 7600838  | Missense_Mutation | SNP | G | A | 5  | 14  | c.191G>A      | c.(190-192)GGG>GAG     | p.G64E         |
| Pat_41 | Post-Resistance | CD209    | 30835  | 37 | 19 | 7810835  | 7810835  | Missense_Mutation | SNP | T | C | 6  | 105 | c.317A>G      | c.(316-318)CAG>CGG     | p.Q106R        |
| Pat_41 | Post-Resistance | FBN3     | 84467  | 37 | 19 | 8159329  | 8159329  | Splice_Site       | SNP | C | T | 4  | 22  | c.5905_splice | c.e46+1                | p.D1969_splice |
| Pat_41 | Post-Resistance | FBN3     | 84467  | 37 | 19 | 8203338  | 8203338  | Missense_Mutation | SNP | C | T | 3  | 30  | c.976G>A      | c.(976-978)GCA>ACA     | p.A326T        |
| Pat_41 | Post-Resistance | 2-Mar    | 51257  | 37 | 19 | 8491579  | 8491579  | Missense_Mutation | SNP | C | T | 3  | 41  | c.263C>T      | c.(262-264)GCC>GTC     | p.A88V         |
| Pat_41 | Post-Resistance | HNRNPM   | 4670   | 37 | 19 | 8539129  | 8539129  | Splice_Site       | SNP | G | A | 5  | 119 | c.1120_splice | c.e12+1                | p.E374_splice  |
| Pat_41 | Post-Resistance | OR2Z1    | 284383 | 37 | 19 | 8841526  | 8841526  | Missense_Mutation | SNP | C | T | 22 | 45  | c.136C>T      | c.(136-138)CTC>TTC     | p.L46F         |
| Pat_41 | Post-Resistance | OR2Z1    | 284383 | 37 | 19 | 8842192  | 8842192  | Missense_Mutation | SNP | C | T | 4  | 64  | c.802C>T      | c.(802-804)CCA>TCA     | p.P268S        |
| Pat_41 | Post-Resistance | MUC16    | 94025  | 37 | 19 | 9009710  | 9009710  | Missense_Mutation | SNP | C | T | 21 | 127 | c.39016G>A    | c.(39016-39018)GCT>ACT | p.A13006T      |
| Pat_41 | Post-Resistance | MUC16    | 94025  | 37 | 19 | 9061564  | 9061564  | Missense_Mutation | SNP | C | T | 12 | 48  | c.25882G>A    | :(25882-25884)GCC>ACC  | p.A8628T       |
| Pat_41 | Post-Resistance | MUC16    | 94025  | 37 | 19 | 9065791  | 9065791  | Missense_Mutation | SNP | C | T | 6  | 119 | c.21655G>A    | :(21655-21657)GAG>AAC  | p.E7219K       |
| Pat_41 | Post-Resistance | MUC16    | 94025  | 37 | 19 | 9069555  | 9069555  | Missense_Mutation | SNP | C | T | 5  | 34  | c.17891G>A    | :(17890-17892)GGC>GAC  | p.G5964D       |
| Pat_41 | Post-Resistance | MUC16    | 94025  | 37 | 19 | 9082631  | 9082631  | Missense_Mutation | SNP | C | T | 12 | 50  | c.9184G>A     | c.(9184-9186)GCA>ACA   | p.A3062T       |
| Pat_41 | Post-Resistance | MUC16    | 94025  | 37 | 19 | 9083483  | 9083483  | Missense_Mutation | SNP | C | T | 3  | 15  | c.8332G>A     | c.(8332-8334)GCT>ACT   | p.A2778T       |
| Pat_41 | Post-Resistance | MUC16    | 94025  | 37 | 19 | 9084835  | 9084835  | Missense_Mutation | SNP | G | A | 27 | 7   | c.6980C>T     | c.(6979-6981)TCC>TTC   | p.S2327F       |
| Pat_41 | Post-Resistance | MUC16    | 94025  | 37 | 19 | 9084874  | 9084874  | Missense_Mutation | SNP | C | T | 9  | 28  | c.6941G>A     | c.(6940-6942)GGA>GAA   | p.G2314E       |
| Pat_41 | Post-Resistance | MUC16    | 94025  | 37 | 19 | 9091478  | 9091478  | Missense_Mutation | SNP | G | A | 16 | 97  | c.337C>T      | c.(337-339)CCC>TCC     | p.P113S        |
| Pat_41 | Post-Resistance | ZNF317   | 57693  | 37 | 19 | 9271786  | 9271786  | Missense_Mutation | SNP | C | T | 3  | 32  | c.1465C>T     | c.(1465-1467)CGG>TGG   | p.R489W        |
| Pat_41 | Post-Resistance | ZNF559   | 84527  | 37 | 19 | 9453635  | 9453635  | Missense_Mutation | SNP | C | T | 25 | 52  | c.1508C>T     | c.(1507-1509)ACT>ATT   | p.T503I        |
| Pat_41 | Post-Resistance | ZNF560   | 147741 | 37 | 19 | 9578040  | 9578040  | Missense_Mutation | SNP | G | A | 10 | 60  | c.1583C>T     | c.(1582-1584)TCT>TTT   | p.S528F        |
| Pat_41 | Post-Resistance | ZNF560   | 147741 | 37 | 19 | 9578698  | 9578698  | Missense_Mutation | SNP | C | T | 29 | 74  | c.925G>A      | c.(925-927)GCA>ACA     | p.A309T        |
| Pat_41 | Post-Resistance | ZNF846   | 162993 | 37 | 19 | 9874060  | 9874060  | Missense_Mutation | SNP | C | T | 20 | 323 | c.40G>A       | c.(40-42)GCT>ACT       | p.A14T         |
| Pat_41 | Post-Resistance | COL5A3   | 50509  | 37 | 19 | 10100032 | 10100032 | Missense_Mutation | SNP | C | T | 4  | 13  | c.2057G>A     | c.(2056-2058)GGA>GAA   | p.G686E        |
| Pat_41 | Post-Resistance | TYK2     | 7297   | 37 | 19 | 10478786 | 10478786 | Missense_Mutation | SNP | G | A | 5  | 31  | c.410C>T      | c.(409-411)ACA>ATA     | p.T137I        |
| Pat_41 | Post-Resistance | CDC37    | 11140  | 37 | 19 | 10504024 | 10504024 | Missense_Mutation | SNP | C | T | 10 | 72  | c.820G>A      | c.(820-822)GCC>ACC     | p.A274T        |
| Pat_41 | Post-Resistance | PDE4A    | 5141   | 37 | 19 | 10574509 | 10574509 | Missense_Mutation | SNP | C | T | 63 | 164 | c.1784C>T     | c.(1783-1785)CCC>CTC   | p.P595L        |
| Pat_41 | Post-Resistance | ILF3     | 3609   | 37 | 19 | 10782072 | 10782072 | Missense_Mutation | SNP | G | A | 67 | 155 | c.272G>A      | c.(271-273)GGA>GAA     | p.G91E         |
| Pat_41 | Post-Resistance | TMED1    | 11018  | 37 | 19 | 10945621 | 10945621 | Missense_Mutation | SNP | C | T | 22 | 262 | c.454G>A      | c.(454-456)GAG>AAG     | p.E152K        |
| Pat_41 | Post-Resistance | SMARCA4  | 6597   | 37 | 19 | 11141409 | 11141409 | Missense_Mutation | SNP | C | T | 11 | 26  | c.3386C>T     | c.(3385-3387)ACC>ATC   | p.T1129I       |
| Pat_41 | Post-Resistance | TSPAN16  | 26526  | 37 | 19 | 11422815 | 11422815 | Missense_Mutation | SNP | G | A | 5  | 12  | c.604G>A      | c.(604-606)GGC>AGC     | p.G202S        |
| Pat_41 | Post-Resistance | RGL3     | 57139  | 37 | 19 | 11527509 | 11527509 | Splice_Site       | SNP | C | T | 9  | 87  | c.371_splice  | c.e3+1                 | p.G124_splice  |
| Pat_41 | Post-Resistance | ZNF700   | 90592  | 37 | 19 | 12060645 | 12060645 | Missense_Mutation | SNP | T | A | 7  | 304 | c.1806T>A     | c.(1804-1806)AGT>AGA   | p.S602R        |
| Pat_41 | Post-Resistance | ZNF763   | 284390 | 37 | 19 | 12087898 | 12087898 | Missense_Mutation | SNP | G | A | 16 | 161 | c.49G>A       | c.(49-51)GAG>AAG       | p.E17K         |
| Pat_41 | Post-Resistance | ZNF563   | 147837 | 37 | 19 | 12429458 | 12429458 | Missense_Mutation | SNP | G | A | 17 | 116 | c.1381C>T     | c.(1381-1383)CCC>TCC   | p.P461S        |
| Pat_41 | Post-Resistance | ZNF791   | 163049 | 37 | 19 | 12739658 | 12739658 | Missense_Mutation | SNP | C | T | 8  | 133 | c.1315C>T     | c.(1315-1317)CCT>TCT   | p.P439S        |
| Pat_41 | Post-Resistance | MAST1    | 22983  | 37 | 19 | 12962965 | 12962965 | Missense_Mutation | SNP | G | A | 26 | 81  | c.913G>A      | c.(913-915)GCG>ACG     | p.A305T        |
| Pat_41 | Post-Resistance | CALR     | 811    | 37 | 19 | 13049584 | 13049584 | Missense_Mutation | SNP | G | A | 4  | 13  | c.91G>A       | c.(91-93)GAC>AAC       | p.D31N         |
| Pat_41 | Post-Resistance | NACC1    | 112939 | 37 | 19 | 13249071 | 13249071 | Missense_Mutation | SNP | G | A | 36 | 172 | c.1435G>A     | c.(1435-1437)GTC>ATC   | p.V479I        |
| Pat_41 | Post-Resistance | CACNA1A  | 773    | 37 | 19 | 13394121 | 13394121 | Missense_Mutation | SNP | G | T | 4  | 52  | c.3785C>A     | c.(3784-3786)GCC>GAC   | p.A1262D       |
| Pat_41 | Post-Resistance | ZSWIM4   | 65249  | 37 | 19 | 13928045 | 13928045 | Missense_Mutation | SNP | G | A | 25 | 80  | c.1196G>A     | c.(1195-1197)GGC>GAC   | p.G399D        |
| Pat_41 | Post-Resistance | ZSWIM4   | 65249  | 37 | 19 | 13936397 | 13936397 | Missense_Mutation | SNP | C | T | 11 | 131 | c.1898C>T     | c.(1897-1899)TCC>TTC   | p.S633F        |
| Pat_41 | Post-Resistance | NANOS3   | 342977 | 37 | 19 | 13988237 | 13988237 | Missense_Mutation | SNP | G | A | 4  | 130 | c.175G>A      | c.(175-177)GGA>AGA     | p.G59R         |
| Pat_41 | Post-Resistance | C19orf57 | 79173  | 37 | 19 | 14000681 | 14000681 | Missense_Mutation | SNP | C | T | 6  | 76  | c.988G>A      | c.(988-990)GGA>AGA     | p.G330R        |



|        |                 |         |        |    |    |          |          |                   |     |   |   |    |     |               |                      |               |
|--------|-----------------|---------|--------|----|----|----------|----------|-------------------|-----|---|---|----|-----|---------------|----------------------|---------------|
| Pat_41 | Post-Resistance | CC2D1A  | 54862  | 37 | 19 | 14029357 | 14029357 | Missense_Mutation | SNP | C | T | 5  | 170 | c.914C>T      | c.(913-915)CCC>CTC   | p.P305L       |
| Pat_41 | Post-Resistance | CC2D1A  | 54862  | 37 | 19 | 14031688 | 14031688 | Missense_Mutation | SNP | C | T | 14 | 232 | c.1594C>T     | c.(1594-1596)CCT>TCT | p.P532S       |
| Pat_41 | Post-Resistance | CC2D1A  | 54862  | 37 | 19 | 14040256 | 14040256 | Splice_Site       | SNP | G | A | 14 | 307 | c.2583_splice | c.e25+1              | p.K861_splice |
| Pat_41 | Post-Resistance | RFX1    | 5989   | 37 | 19 | 14094327 | 14094327 | Missense_Mutation | SNP | C | T | 5  | 62  | c.400G>A      | c.(400-402)GTG>ATG   | p.V134M       |
| Pat_41 | Post-Resistance | IL27RA  | 9466   | 37 | 19 | 14150325 | 14150325 | Missense_Mutation | SNP | C | T | 20 | 414 | c.224C>T      | c.(223-225)TCC>TTC   | p.S75F        |
| Pat_41 | Post-Resistance | IL27RA  | 9466   | 37 | 19 | 14150354 | 14150354 | Missense_Mutation | SNP | G | A | 16 | 460 | c.253G>A      | c.(253-255)GCC>ACC   | p.A85T        |
| Pat_41 | Post-Resistance | IL27RA  | 9466   | 37 | 19 | 14157140 | 14157140 | Missense_Mutation | SNP | G | A | 14 | 278 | c.943G>A      | c.(943-945)GTC>ATC   | p.V315I       |
| Pat_41 | Post-Resistance | IL27RA  | 9466   | 37 | 19 | 14157257 | 14157257 | Missense_Mutation | SNP | C | T | 20 | 206 | c.968C>T      | c.(967-969)CCC>CTC   | p.P323L       |
| Pat_41 | Post-Resistance | DNAJB1  | 3337   | 37 | 19 | 14627750 | 14627750 | Missense_Mutation | SNP | C | T | 12 | 276 | c.320G>A      | c.(319-321)GGT>GAT   | p.G107D       |
| Pat_41 | Post-Resistance | EMR2    | 30817  | 37 | 19 | 14854260 | 14854260 | Missense_Mutation | SNP | G | A | 33 | 633 | c.2435C>T     | c.(2434-2436)GCT>GTT | p.A812V       |
| Pat_41 | Post-Resistance | OR7C1   | 26664  | 37 | 19 | 14910029 | 14910029 | Missense_Mutation | SNP | C | T | 10 | 243 | c.920G>A      | c.(919-921)AGG>AAG   | p.R307K       |
| Pat_41 | Post-Resistance | SYDE1   | 85360  | 37 | 19 | 15224542 | 15224542 | Missense_Mutation | SNP | G | A | 7  | 170 | c.1976G>A     | c.(1975-1977)GGG>GAG | p.G659E       |
| Pat_41 | Post-Resistance | ILVBL   | 10994  | 37 | 19 | 15228714 | 15228714 | Nonsense_Mutation | SNP | C | T | 55 | 105 | c.1164G>A     | c.(1162-1164)TGG>TGA | p.W388*       |
| Pat_41 | Post-Resistance | NOTCH3  | 4854   | 37 | 19 | 15297975 | 15297975 | Missense_Mutation | SNP | C | T | 7  | 63  | c.1781G>A     | c.(1780-1782)GGC>GAC | p.G594D       |
| Pat_41 | Post-Resistance | AKAP8L  | 26993  | 37 | 19 | 15512311 | 15512311 | Missense_Mutation | SNP | C | T | 13 | 65  | c.466G>A      | c.(466-468)GCC>ACC   | p.A156T       |
| Pat_41 | Post-Resistance | RASAL3  | 64926  | 37 | 19 | 15569407 | 15569407 | Missense_Mutation | SNP | C | T | 3  | 38  | c.722G>A      | c.(721-723)GGT>GAT   | p.G241D       |
| Pat_41 | Post-Resistance | CYP4F12 | 66002  | 37 | 19 | 15807283 | 15807283 | Missense_Mutation | SNP | G | A | 18 | 365 | c.1358G>A     | c.(1357-1359)AGG>AAG | p.R453K       |
| Pat_41 | Post-Resistance | OR10H2  | 26538  | 37 | 19 | 15839353 | 15839353 | Missense_Mutation | SNP | C | T | 6  | 117 | c.500C>T      | c.(499-501)ACT>ATT   | p.T167I       |
| Pat_41 | Post-Resistance | OR10H5  | 284433 | 37 | 19 | 15905699 | 15905699 | Missense_Mutation | SNP | G | A | 8  | 59  | c.841G>A      | c.(841-843)GTC>ATC   | p.V281I       |
| Pat_41 | Post-Resistance | CYP4F2  | 8529   | 37 | 19 | 16000439 | 16000439 | Missense_Mutation | SNP | C | T | 24 | 202 | c.712G>A      | c.(712-714)GAG>AAG   | p.E238K       |
| Pat_41 | Post-Resistance | TPM4    | 7171   | 37 | 19 | 16204358 | 16204358 | Missense_Mutation | SNP | G | A | 13 | 159 | c.544G>A      | c.(544-546)GAG>AAG   | p.E182K       |
| Pat_41 | Post-Resistance | CIB3    | 117286 | 37 | 19 | 16280518 | 16280518 | Missense_Mutation | SNP | G | A | 9  | 63  | c.121C>T      | c.(121-123)CTC>TTC   | p.L41F        |
| Pat_41 | Post-Resistance | AP1M1   | 8907   | 37 | 19 | 16319915 | 16319915 | Missense_Mutation | SNP | C | T | 13 | 153 | c.473C>T      | c.(472-474)TCC>TTC   | p.S158F       |
| Pat_41 | Post-Resistance | EPS15L1 | 58513  | 37 | 19 | 16496996 | 16496996 | Missense_Mutation | SNP | G | A | 5  | 75  | c.2150C>T     | c.(2149-2151)TCC>TTC | p.S717F       |
| Pat_41 | Post-Resistance | CHERP   | 10523  | 37 | 19 | 16632398 | 16632398 | Missense_Mutation | SNP | C | T | 7  | 38  | c.2048G>A     | c.(2047-2049)AGC>AAC | p.S683N       |
| Pat_41 | Post-Resistance | CHERP   | 10523  | 37 | 19 | 16638953 | 16638953 | Missense_Mutation | SNP | G | A | 7  | 135 | c.1243C>T     | c.(1243-1245)CCA>TCA | p.P415S       |
| Pat_41 | Post-Resistance | CHERP   | 10523  | 37 | 19 | 16639054 | 16639054 | Missense_Mutation | SNP | G | A | 5  | 92  | c.1142C>T     | c.(1141-1143)CCT>CTT | p.P381L       |
| Pat_41 | Post-Resistance | SLC35E1 | 79939  | 37 | 19 | 16664575 | 16664575 | Missense_Mutation | SNP | C | T | 26 | 441 | c.1148G>A     | c.(1147-1149)GGC>GAC | p.G383D       |
| Pat_41 | Post-Resistance | CPAMD8  | 27151  | 37 | 19 | 17015321 | 17015321 | Missense_Mutation | SNP | C | T | 15 | 103 | c.4210G>A     | c.(4210-4212)GAC>AAC | p.D1404N      |
| Pat_41 | Post-Resistance | CPAMD8  | 27151  | 37 | 19 | 17115144 | 17115144 | Nonsense_Mutation | SNP | C | T | 17 | 66  | c.753G>A      | c.(751-753)TGG>TGA   | p.W251*       |
| Pat_41 | Post-Resistance | USHBP1  | 83878  | 37 | 19 | 17367318 | 17367318 | Missense_Mutation | SNP | C | T | 4  | 130 | c.1432G>A     | c.(1432-1434)GAG>AAG | p.E478K       |
| Pat_41 | Post-Resistance | SLC27A1 | 376497 | 37 | 19 | 17597766 | 17597766 | Missense_Mutation | SNP | G | A | 3  | 22  | c.562G>A      | c.(562-564)GCG>ACG   | p.A188T       |
| Pat_41 | Post-Resistance | SLC27A1 | 376497 | 37 | 19 | 17608082 | 17608082 | Missense_Mutation | SNP | G | A | 4  | 109 | c.1015G>A     | c.(1015-1017)GAG>AAG | p.E339K       |
| Pat_41 | Post-Resistance | JAK3    | 3718   | 37 | 19 | 17949128 | 17949128 | Nonsense_Mutation | SNP | G | A | 7  | 252 | c.1513C>T     | c.(1513-1515)CAA>TAA | p.Q505*       |
| Pat_41 | Post-Resistance | SLC5A5  | 6528   | 37 | 19 | 17986872 | 17986872 | Missense_Mutation | SNP | G | A | 9  | 179 | c.655G>A      | c.(655-657)GTG>ATG   | p.V219M       |
| Pat_41 | Post-Resistance | SLC5A5  | 6528   | 37 | 19 | 17988645 | 17988645 | Missense_Mutation | SNP | C | T | 18 | 198 | c.812C>T      | c.(811-813)GCT>GTT   | p.A271V       |
| Pat_41 | Post-Resistance | ARRDC2  | 27106  | 37 | 19 | 18120711 | 18120711 | Missense_Mutation | SNP | G | A | 6  | 75  | c.712G>A      | c.(712-714)GCA>ACA   | p.A238T       |
| Pat_41 | Post-Resistance | ARRDC2  | 27106  | 37 | 19 | 18120741 | 18120741 | Missense_Mutation | SNP | G | A | 4  | 55  | c.742G>A      | c.(742-744)GTG>ATG   | p.V248M       |
| Pat_41 | Post-Resistance | ARRDC2  | 27106  | 37 | 19 | 18121024 | 18121024 | Missense_Mutation | SNP | G | A | 7  | 190 | c.869G>A      | c.(868-870)GGA>GAA   | p.G290E       |
| Pat_41 | Post-Resistance | MAST3   | 23031  | 37 | 19 | 18246595 | 18246595 | Missense_Mutation | SNP | C | T | 3  | 22  | c.1829C>T     | c.(1828-1830)GCC>GTC | p.A610V       |
| Pat_41 | Post-Resistance | MAST3   | 23031  | 37 | 19 | 18260483 | 18260483 | Missense_Mutation | SNP | G | A | 4  | 138 | c.3877G>A     | c.(3877-3879)GTG>ATG | p.V1293M      |
| Pat_41 | Post-Resistance | MPV17L2 | 84769  | 37 | 19 | 18304706 | 18304706 | Missense_Mutation | SNP | C | T | 36 | 237 | c.220C>T      | c.(220-222)CCC>TCC   | p.P74S        |
| Pat_41 | Post-Resistance | LRRRC25 | 126364 | 37 | 19 | 18507019 | 18507019 | Missense_Mutation | SNP | G | A | 9  | 222 | c.755C>T      | c.(754-756)GCC>GTC   | p.A252V       |
| Pat_41 | Post-Resistance | FKBP8   | 23770  | 37 | 19 | 18648560 | 18648560 | Missense_Mutation | SNP | C | T | 20 | 153 | c.793G>A      | c.(793-795)GCA>ACA   | p.A265T       |
| Pat_41 | Post-Resistance | CRTC1   | 23373  | 37 | 19 | 18888085 | 18888085 | Missense_Mutation | SNP | C | T | 49 | 612 | c.1798C>T     | c.(1798-1800)CTC>TTC | p.L600F       |
| Pat_41 | Post-Resistance | SFRS14  | 10147  | 37 | 19 | 19115455 | 19115455 | Nonsense_Mutation | SNP | C | T | 7  | 102 | c.2451G>A     | c.(2449-2451)TGG>TGA | p.W817*       |
| Pat_41 | Post-Resistance | SFRS14  | 10147  | 37 | 19 | 19135659 | 19135659 | Missense_Mutation | SNP | C | T | 17 | 174 | c.1498G>A     | c.(1498-1500)GAA>AAA | p.E500K       |

|        |                 |          |           |    |    |          |          |                   |     |   |   |    |     |           |                      |         |
|--------|-----------------|----------|-----------|----|----|----------|----------|-------------------|-----|---|---|----|-----|-----------|----------------------|---------|
| Pat_41 | Post-Resistance | GATAD2A  | 54815     | 37 | 19 | 19576357 | 19576357 | Missense_Mutation | SNP | C | T | 4  | 44  | c.203C>T  | c.(202-204)GCC>GTC   | p.A68V  |
| Pat_41 | Post-Resistance | GATAD2A  | 54815     | 37 | 19 | 19603465 | 19603465 | Missense_Mutation | SNP | G | A | 9  | 194 | c.478G>A  | c.(478-480)GTG>ATG   | p.V160M |
| Pat_41 | Post-Resistance | GMIP     | 51291     | 37 | 19 | 19751151 | 19751151 | Missense_Mutation | SNP | C | T | 26 | 136 | c.383G>A  | c.(382-384)AGC>AAC   | p.S128N |
| Pat_41 | Post-Resistance | ZNF253   | 56242     | 37 | 19 | 19989407 | 19989407 | Missense_Mutation | SNP | G | A | 7  | 196 | c.121G>A  | c.(121-123)GTC>ATC   | p.V41I  |
| Pat_41 | Post-Resistance | ZNF93    | 81931     | 37 | 19 | 20044608 | 20044608 | Missense_Mutation | SNP | G | A | 7  | 261 | c.844G>A  | c.(844-846)GAG>AAG   | p.E282K |
| Pat_41 | Post-Resistance | ZNF93    | 81931     | 37 | 19 | 20045277 | 20045277 | Missense_Mutation | SNP | G | A | 8  | 311 | c.1513G>A | c.(1513-1515)GGA>AGA | p.G505R |
| Pat_41 | Post-Resistance | ZNF93    | 81931     | 37 | 19 | 20045454 | 20045454 | Missense_Mutation | SNP | C | T | 4  | 87  | c.1690C>T | c.(1690-1692)CCT>TCT | p.P564S |
| Pat_41 | Post-Resistance | ZNF90    | 7643      | 37 | 19 | 20229964 | 20229964 | Missense_Mutation | SNP | C | A | 6  | 154 | c.1601C>A | c.(1600-1602)GCG>GAG | p.A534E |
| Pat_41 | Post-Resistance | ZNF737   | 100129842 | 37 | 19 | 20728179 | 20728179 | Missense_Mutation | SNP | A | T | 6  | 210 | c.830T>A  | c.(829-831)ATA>AAA   | p.I277K |
| Pat_41 | Post-Resistance | ZNF626   | 199777    | 37 | 19 | 20807706 | 20807706 | Missense_Mutation | SNP | T | G | 5  | 228 | c.977A>C  | c.(976-978)TAT>TCT   | p.Y326S |
| Pat_41 | Post-Resistance | ZNF714   | 148206    | 37 | 19 | 21300738 | 21300738 | Missense_Mutation | SNP | T | C | 16 | 239 | c.1271T>C | c.(1270-1272)CTC>CCC | p.L424P |
| Pat_41 | Post-Resistance | ZNF493   | 284443    | 37 | 19 | 21605856 | 21605856 | Missense_Mutation | SNP | G | A | 25 | 310 | c.11G>A   | c.(10-12)TGT>TAT     | p.C4Y   |
| Pat_41 | Post-Resistance | ZNF493   | 284443    | 37 | 19 | 21606876 | 21606876 | Missense_Mutation | SNP | G | A | 5  | 147 | c.1031G>A | c.(1030-1032)CGA>CAA | p.R344Q |
| Pat_41 | Post-Resistance | ZNF493   | 284443    | 37 | 19 | 21606988 | 21606988 | Missense_Mutation | SNP | A | G | 7  | 126 | c.1143A>G | c.(1141-1143)ATA>ATG | p.I381M |
| Pat_41 | Post-Resistance | ZNF43    | 7594      | 37 | 19 | 21991191 | 21991191 | Missense_Mutation | SNP | A | T | 6  | 237 | c.1648T>A | c.(1648-1650)TTC>ATC | p.F550I |
| Pat_41 | Post-Resistance | ZNF208   | 7757      | 37 | 19 | 22155626 | 22155626 | Missense_Mutation | SNP | G | A | 12 | 243 | c.1910C>T | c.(1909-1911)ACT>ATT | p.T637I |
| Pat_41 | Post-Resistance | ZNF208   | 7757      | 37 | 19 | 22155891 | 22155891 | Missense_Mutation | SNP | C | T | 12 | 265 | c.1645G>A | c.(1645-1647)GTC>ATC | p.V549I |
| Pat_41 | Post-Resistance | ZNF208   | 7757      | 37 | 19 | 22155975 | 22155975 | Missense_Mutation | SNP | C | T | 32 | 209 | c.1561G>A | c.(1561-1563)GTC>ATC | p.V521I |
| Pat_41 | Post-Resistance | ZNF208   | 7757      | 37 | 19 | 22156034 | 22156034 | Missense_Mutation | SNP | C | T | 7  | 123 | c.1502G>A | c.(1501-1503)AGA>AAA | p.R501K |
| Pat_41 | Post-Resistance | ZNF208   | 7757      | 37 | 19 | 22170068 | 22170068 | Missense_Mutation | SNP | C | T | 10 | 159 | c.176G>A  | c.(175-177)GGA>GAA   | p.G59E  |
| Pat_41 | Post-Resistance | ZNF98    | 148198    | 37 | 19 | 22574676 | 22574676 | Missense_Mutation | SNP | A | C | 7  | 110 | c.1361T>G | c.(1360-1362)ATA>AGA | p.I454R |
| Pat_41 | Post-Resistance | ZNF99    | 7652      | 37 | 19 | 22939472 | 22939472 | Missense_Mutation | SNP | A | G | 5  | 150 | c.2699T>C | c.(2698-2700)TTC>TCC | p.F900S |
| Pat_41 | Post-Resistance | ZNF91    | 7644      | 37 | 19 | 23544073 | 23544073 | Missense_Mutation | SNP | C | T | 5  | 82  | c.1708G>A | c.(1708-1710)GGA>AGA | p.G570R |
| Pat_41 | Post-Resistance | ZNF675   | 171392    | 37 | 19 | 23836350 | 23836350 | Missense_Mutation | SNP | A | T | 7  | 102 | c.1385T>A | c.(1384-1386)ATC>AAC | p.I462N |
| Pat_41 | Post-Resistance | ZNF681   | 148213    | 37 | 19 | 23926839 | 23926839 | Missense_Mutation | SNP | A | G | 13 | 212 | c.1513T>C | c.(1513-1515)TCC>CCC | p.S505P |
| Pat_41 | Post-Resistance | ZNF681   | 148213    | 37 | 19 | 23927181 | 23927181 | Missense_Mutation | SNP | C | T | 22 | 395 | c.1171G>A | c.(1171-1173)GAG>AAG | p.E391K |
| Pat_41 | Post-Resistance | ZNF536   | 9745      | 37 | 19 | 31025778 | 31025778 | Missense_Mutation | SNP | C | T | 55 | 287 | c.2195C>T | c.(2194-2196)TCT>TTT | p.S732F |
| Pat_41 | Post-Resistance | ZNF507   | 22847     | 37 | 19 | 32844671 | 32844671 | Missense_Mutation | SNP | G | A | 41 | 619 | c.935G>A  | c.(934-936)AGT>AAT   | p.S312N |
| Pat_41 | Post-Resistance | DPY19L3  | 147991    | 37 | 19 | 32923625 | 32923625 | Missense_Mutation | SNP | G | A | 7  | 138 | c.241G>A  | c.(241-243)GTG>ATG   | p.V81M  |
| Pat_41 | Post-Resistance | RHPN2    | 85415     | 37 | 19 | 33502637 | 33502637 | Missense_Mutation | SNP | C | T | 10 | 118 | c.541G>A  | c.(541-543)GTC>ATC   | p.V181I |
| Pat_41 | Post-Resistance | WDR88    | 126248    | 37 | 19 | 33639799 | 33639799 | Missense_Mutation | SNP | C | T | 4  | 66  | c.662C>T  | c.(661-663)ACC>ATC   | p.T221I |
| Pat_41 | Post-Resistance | CHST8    | 64377     | 37 | 19 | 34180267 | 34180267 | Missense_Mutation | SNP | C | T | 10 | 177 | c.100C>T  | c.(100-102)CCT>TCT   | p.P34S  |
| Pat_41 | Post-Resistance | KCTD15   | 79047     | 37 | 19 | 34297820 | 34297820 | Nonsense_Mutation | SNP | C | T | 6  | 163 | c.295C>T  | c.(295-297)CAA>TAA   | p.Q99*  |
| Pat_41 | Post-Resistance | KCTD15   | 79047     | 37 | 19 | 34297905 | 34297905 | Missense_Mutation | SNP | A | T | 6  | 138 | c.380A>T  | c.(379-381)GAC>GTC   | p.D127V |
| Pat_41 | Post-Resistance | KIAA0355 | 9710      | 37 | 19 | 34832863 | 34832863 | Missense_Mutation | SNP | C | T | 7  | 119 | c.2024C>T | c.(2023-2025)GCC>GTC | p.A675V |
| Pat_41 | Post-Resistance | KIAA0355 | 9710      | 37 | 19 | 34832977 | 34832977 | Missense_Mutation | SNP | C | T | 22 | 207 | c.2138C>T | c.(2137-2139)CCC>CTC | p.P713L |
| Pat_41 | Post-Resistance | KIAA0355 | 9710      | 37 | 19 | 34833273 | 34833273 | Missense_Mutation | SNP | G | A | 47 | 313 | c.2434G>A | c.(2434-2436)GGA>AGA | p.G812R |
| Pat_41 | Post-Resistance | PDCD2L   | 84306     | 37 | 19 | 34900385 | 34900385 | Missense_Mutation | SNP | G | A | 17 | 126 | c.656G>A  | c.(655-657)GGC>GAC   | p.G219D |
| Pat_41 | Post-Resistance | UBA2     | 10054     | 37 | 19 | 34942921 | 34942921 | Missense_Mutation | SNP | C | T | 8  | 65  | c.907C>T  | c.(907-909)CCC>TCC   | p.P303S |
| Pat_41 | Post-Resistance | ZNF599   | 148103    | 37 | 19 | 35250222 | 35250222 | Missense_Mutation | SNP | G | A | 15 | 223 | c.1484C>T | c.(1483-1485)ACT>ATT | p.T495I |
| Pat_41 | Post-Resistance | ZNF30    | 90075     | 37 | 19 | 35435233 | 35435233 | Missense_Mutation | SNP | C | T | 9  | 154 | c.1363C>T | c.(1363-1365)CCC>TCC | p.P455S |
| Pat_41 | Post-Resistance | GRAMD1A  | 57655     | 37 | 19 | 35505283 | 35505283 | Missense_Mutation | SNP | G | A | 6  | 86  | c.1061G>A | c.(1060-1062)GGG>GAG | p.G354E |
| Pat_41 | Post-Resistance | USF2     | 7392      | 37 | 19 | 35760507 | 35760507 | Missense_Mutation | SNP | G | A | 6  | 45  | c.133G>A  | c.(133-135)GAG>AAG   | p.E45K  |
| Pat_41 | Post-Resistance | CD22     | 933       | 37 | 19 | 35828853 | 35828853 | Missense_Mutation | SNP | G | A | 7  | 97  | c.914G>A  | c.(913-915)GGG>GAG   | p.G305E |
| Pat_41 | Post-Resistance | SBSN     | 374897    | 37 | 19 | 36015792 | 36015792 | Missense_Mutation | SNP | C | T | 4  | 55  | c.644G>A  | c.(643-645)GGA>GAA   | p.G215E |
| Pat_41 | Post-Resistance | ETV2     | 2116      | 37 | 19 | 36133387 | 36133387 | Missense_Mutation | SNP | G | A | 16 | 79  | c.25G>A   | c.(25-27)GCA>ACA     | p.A9T   |
| Pat_41 | Post-Resistance | ARHGAP33 | 115703    | 37 | 19 | 36276138 | 36276138 | Missense_Mutation | SNP | G | A | 5  | 50  | c.1769G>A | c.(1768-1770)AGC>AAC | p.S590N |

|        |                 |          |        |    |    |          |          |                   |     |   |   |    |     |              |                        |               |
|--------|-----------------|----------|--------|----|----|----------|----------|-------------------|-----|---|---|----|-----|--------------|------------------------|---------------|
| Pat_41 | Post-Resistance | ARHGAP33 | 115703 | 37 | 19 | 36278765 | 36278765 | Missense_Mutation | SNP | C | T | 4  | 49  | c.2815C>T    | c.(2815-2817)CCC>TCC   | p.P939S       |
| Pat_41 | Post-Resistance | NPHS1    | 4868   | 37 | 19 | 36317527 | 36317527 | Nonsense_Mutation | SNP | C | T | 6  | 105 | c.3615G>A    | c.(3613-3615)TGG>TGA   | p.W1205*      |
| Pat_41 | Post-Resistance | NPHS1    | 4868   | 37 | 19 | 36333362 | 36333362 | Missense_Mutation | SNP | C | T | 18 | 170 | c.2425G>A    | c.(2425-2427)GCC>ACC   | p.A809T       |
| Pat_41 | Post-Resistance | ZFP82    | 284406 | 37 | 19 | 36884856 | 36884856 | Missense_Mutation | SNP | C | T | 13 | 92  | c.386G>A     | c.(385-387)GGA>GAA     | p.G129E       |
| Pat_41 | Post-Resistance | ZNF260   | 339324 | 37 | 19 | 37005543 | 37005543 | Missense_Mutation | SNP | C | T | 6  | 142 | c.598G>A     | c.(598-600)GCT>ACT     | p.A200T       |
| Pat_41 | Post-Resistance | ZNF461   | 92283  | 37 | 19 | 37129761 | 37129761 | Missense_Mutation | SNP | G | A | 23 | 174 | c.1486C>T    | c.(1486-1488)CCC>TCC   | p.P496S       |
| Pat_41 | Post-Resistance | ZNF790   | 388536 | 37 | 19 | 37310041 | 37310041 | Missense_Mutation | SNP | G | A | 8  | 107 | c.1205C>T    | c.(1204-1206)GCC>GTC   | p.A402V       |
| Pat_41 | Post-Resistance | ZNF345   | 25850  | 37 | 19 | 37368684 | 37368684 | Missense_Mutation | SNP | G | A | 8  | 192 | c.952G>A     | c.(952-954)GAG>AAG     | p.E318K       |
| Pat_41 | Post-Resistance | ZNF571   | 51276  | 37 | 19 | 38074980 | 38074980 | Missense_Mutation | SNP | C | T | 22 | 349 | c.28G>A      | c.(28-30)GAT>AAT       | p.D10N        |
| Pat_41 | Post-Resistance | ZNF607   | 84775  | 37 | 19 | 38190232 | 38190232 | Missense_Mutation | SNP | C | T | 16 | 60  | c.800G>A     | c.(799-801)GGC>GAC     | p.G267D       |
| Pat_41 | Post-Resistance | ZNF573   | 126231 | 37 | 19 | 38262270 | 38262270 | Missense_Mutation | SNP | C | T | 13 | 266 | c.136G>A     | c.(136-138)GAC>AAC     | p.D46N        |
| Pat_41 | Post-Resistance | YIF1B    | 90522  | 37 | 19 | 38798276 | 38798276 | Missense_Mutation | SNP | G | A | 12 | 147 | c.656C>T     | c.(655-657)ACC>ATC     | p.T219I       |
| Pat_41 | Post-Resistance | FAM98C   | 147965 | 37 | 19 | 38899394 | 38899394 | Missense_Mutation | SNP | C | T | 15 | 105 | c.922C>T     | c.(922-924)CTT>TTT     | p.L308F       |
| Pat_41 | Post-Resistance | RYR1     | 6261   | 37 | 19 | 38934424 | 38934424 | Missense_Mutation | SNP | G | A | 8  | 153 | c.412G>A     | c.(412-414)GAG>AAG     | p.E138K       |
| Pat_41 | Post-Resistance | RYR1     | 6261   | 37 | 19 | 38958349 | 38958349 | Missense_Mutation | SNP | C | T | 12 | 153 | c.3278C>T    | c.(3277-3279)GCA>GTA   | p.A1093V      |
| Pat_41 | Post-Resistance | RYR1     | 6261   | 37 | 19 | 38985033 | 38985033 | Missense_Mutation | SNP | G | A | 4  | 60  | c.6316G>A    | c.(6316-6318)GCC>ACC   | p.A2106T      |
| Pat_41 | Post-Resistance | RYR1     | 6261   | 37 | 19 | 38997495 | 38997495 | Missense_Mutation | SNP | C | T | 16 | 64  | c.8719C>T    | c.(8719-8721)CCC>TCC   | p.P2907S      |
| Pat_41 | Post-Resistance | EIF3K    | 27335  | 37 | 19 | 39123287 | 39123287 | Nonsense_Mutation | SNP | G | A | 12 | 67  | c.468G>A     | c.(466-468)TGG>TGA     | p.W156*       |
| Pat_41 | Post-Resistance | ACTN4    | 81     | 37 | 19 | 39219729 | 39219729 | Missense_Mutation | SNP | G | A | 15 | 282 | c.2512G>A    | c.(2512-2514)GAG>AAG   | p.E838K       |
| Pat_41 | Post-Resistance | ECH1     | 1891   | 37 | 19 | 39306955 | 39306955 | Missense_Mutation | SNP | C | T | 7  | 72  | c.700G>A     | c.(700-702)GCT>ACT     | p.A234T       |
| Pat_41 | Post-Resistance | RINL     | 126432 | 37 | 19 | 39362299 | 39362299 | Missense_Mutation | SNP | C | T | 12 | 170 | c.97G>A      | c.(97-99)GAT>AAT       | p.D33N        |
| Pat_41 | Post-Resistance | SIRT2    | 22933  | 37 | 19 | 39384083 | 39384083 | Missense_Mutation | SNP | C | T | 10 | 90  | c.197G>A     | c.(196-198)GGG>GAG     | p.G66E        |
| Pat_41 | Post-Resistance | NFKBIB   | 4793   | 37 | 19 | 39395761 | 39395761 | Splice_Site       | SNP | G | A | 13 | 194 | c.285_splice | c.e2+1                 | p.Q95_splice  |
| Pat_41 | Post-Resistance | PAPL     | 390928 | 37 | 19 | 39590911 | 39590911 | Missense_Mutation | SNP | G | A | 14 | 211 | c.550G>A     | c.(550-552)GAT>AAT     | p.D184N       |
| Pat_41 | Post-Resistance | IL28B    | 282617 | 37 | 19 | 39735086 | 39735086 | Missense_Mutation | SNP | G | A | 18 | 21  | c.229C>T     | c.(229-231)CCC>TCC     | p.P77S        |
| Pat_41 | Post-Resistance | IL29     | 282618 | 37 | 19 | 39787066 | 39787066 | Missense_Mutation | SNP | C | T | 38 | 198 | c.5C>T       | c.(4-6)GCT>GTT         | p.A2V         |
| Pat_41 | Post-Resistance | PLEKHG2  | 64857  | 37 | 19 | 39908303 | 39908303 | Missense_Mutation | SNP | C | T | 6  | 69  | c.853C>T     | c.(853-855)CGC>TGC     | p.R285C       |
| Pat_41 | Post-Resistance | PLEKHG2  | 64857  | 37 | 19 | 39914454 | 39914454 | Missense_Mutation | SNP | G | A | 4  | 55  | c.2681G>A    | c.(2680-2682)GGT>GAT   | p.G894D       |
| Pat_41 | Post-Resistance | TIMM50   | 92609  | 37 | 19 | 39978722 | 39978722 | Missense_Mutation | SNP | G | A | 16 | 330 | c.1027G>A    | c.(1027-1029)GAC>AAC   | p.D343N       |
| Pat_41 | Post-Resistance | FCGBP    | 8857   | 37 | 19 | 40357760 | 40357760 | Missense_Mutation | SNP | C | T | 10 | 57  | c.15553G>A   | c.(15553-15555)GTA>ATA | p.V5185I      |
| Pat_41 | Post-Resistance | FCGBP    | 8857   | 37 | 19 | 40384065 | 40384065 | Missense_Mutation | SNP | C | T | 6  | 170 | c.9545G>A    | c.(9544-9546)GGC>GAC   | p.G3182D      |
| Pat_41 | Post-Resistance | FCGBP    | 8857   | 37 | 19 | 40423988 | 40423988 | Missense_Mutation | SNP | C | T | 11 | 108 | c.2215G>A    | c.(2215-2217)GCC>ACC   | p.A739T       |
| Pat_41 | Post-Resistance | ZNF546   | 339327 | 37 | 19 | 40520195 | 40520195 | Missense_Mutation | SNP | C | T | 12 | 95  | c.1018C>T    | c.(1018-1020)CTT>TTT   | p.L340F       |
| Pat_41 | Post-Resistance | ZNF780A  | 284323 | 37 | 19 | 40581774 | 40581774 | Missense_Mutation | SNP | G | A | 5  | 249 | c.575C>T     | c.(574-576)CCC>CTC     | p.P192L       |
| Pat_41 | Post-Resistance | C19orf47 | 126526 | 37 | 19 | 40832322 | 40832322 | Missense_Mutation | SNP | C | T | 7  | 96  | c.622G>A     | c.(622-624)GAG>AAG     | p.E208K       |
| Pat_41 | Post-Resistance | PLD3     | 23646  | 37 | 19 | 40882551 | 40882551 | Missense_Mutation | SNP | C | T | 35 | 191 | c.1055C>T    | c.(1054-1056)GCC>GTC   | p.A352V       |
| Pat_41 | Post-Resistance | HIPK4    | 147746 | 37 | 19 | 40886664 | 40886664 | Missense_Mutation | SNP | G | A | 7  | 72  | c.1234C>T    | c.(1234-1236)CCC>TCC   | p.P412S       |
| Pat_41 | Post-Resistance | HIPK4    | 147746 | 37 | 19 | 40886789 | 40886789 | Missense_Mutation | SNP | C | T | 14 | 155 | c.1109G>A    | c.(1108-1110)CGC>CAC   | p.R370H       |
| Pat_41 | Post-Resistance | HIPK4    | 147746 | 37 | 19 | 40889961 | 40889961 | Missense_Mutation | SNP | G | A | 16 | 86  | c.551C>T     | c.(550-552)CCT>CTT     | p.P184L       |
| Pat_41 | Post-Resistance | SPTBN4   | 57731  | 37 | 19 | 41076387 | 41076387 | Missense_Mutation | SNP | A | G | 6  | 79  | c.7072A>G    | c.(7072-7074)AAC>GAC   | p.N2358D      |
| Pat_41 | Post-Resistance | ITPKC    | 80271  | 37 | 19 | 41243624 | 41243624 | Missense_Mutation | SNP | G | A | 21 | 221 | c.1798G>A    | c.(1798-1800)GAA>AAA   | p.E600K       |
| Pat_41 | Post-Resistance | CYP2A6   | 1548   | 37 | 19 | 41350653 | 41350653 | Missense_Mutation | SNP | C | T | 12 | 160 | c.1186G>A    | c.(1186-1188)GGC>AGC   | p.G396S       |
| Pat_41 | Post-Resistance | CYP2A7   | 1549   | 37 | 19 | 41383877 | 41383877 | Missense_Mutation | SNP | C | T | 12 | 101 | c.853G>A     | c.(853-855)GAG>AAG     | p.E285K       |
| Pat_41 | Post-Resistance | CYP2A7   | 1549   | 37 | 19 | 41386092 | 41386092 | Missense_Mutation | SNP | G | A | 9  | 62  | c.551C>T     | c.(550-552)TCC>TTC     | p.S184F       |
| Pat_41 | Post-Resistance | CYP2B6   | 1555   | 37 | 19 | 41510291 | 41510291 | Missense_Mutation | SNP | G | A | 6  | 49  | c.424G>A     | c.(424-426)GTG>ATG     | p.V142M       |
| Pat_41 | Post-Resistance | CYP2A13  | 1553   | 37 | 19 | 41595951 | 41595951 | Splice_Site       | SNP | G | A | 4  | 45  | c.344_splice | c.e3-1                 | p.G115_splice |
| Pat_41 | Post-Resistance | CYP2S1   | 29785  | 37 | 19 | 41703762 | 41703762 | Missense_Mutation | SNP | G | A | 7  | 16  | c.422G>A     | c.(421-423)GGG>GAG     | p.G141E       |

|        |                 |          |        |    |    |          |          |                   |     |   |   |     |     |               |                      |               |
|--------|-----------------|----------|--------|----|----|----------|----------|-------------------|-----|---|---|-----|-----|---------------|----------------------|---------------|
| Pat_41 | Post-Resistance | CYP2S1   | 29785  | 37 | 19 | 41707216 | 41707216 | Missense_Mutation | SNP | G | A | 20  | 349 | c.915G>A      | c.(913-915)ATG>ATA   | p.M305I       |
| Pat_41 | Post-Resistance | AXL      | 558    | 37 | 19 | 41765687 | 41765687 | Missense_Mutation | SNP | C | T | 9   | 79  | c.2563C>T     | c.(2563-2565)CTC>TTC | p.L855F       |
| Pat_41 | Post-Resistance | B9D2     | 80776  | 37 | 19 | 41869415 | 41869415 | Missense_Mutation | SNP | C | T | 8   | 122 | c.10G>A       | c.(10-12)GTG>ATG     | p.V4M         |
| Pat_41 | Post-Resistance | BCKDHA   | 593    | 37 | 19 | 41884272 | 41884272 | Missense_Mutation | SNP | G | A | 7   | 107 | c.58G>A       | c.(58-60)GAG>AAG     | p.E20K        |
| Pat_41 | Post-Resistance | CEACAM5  | 1048   | 37 | 19 | 42224059 | 42224059 | Missense_Mutation | SNP | C | T | 17  | 231 | c.1703C>T     | c.(1702-1704)GCC>GTC | p.A568V       |
| Pat_41 | Post-Resistance | ATP1A3   | 478    | 37 | 19 | 42474550 | 42474550 | Missense_Mutation | SNP | C | T | 5   | 73  | c.2408G>A     | c.(2407-2409)GGC>GAC | p.G803D       |
| Pat_41 | Post-Resistance | GRIK5    | 2901   | 37 | 19 | 42510015 | 42510015 | Missense_Mutation | SNP | C | T | 3   | 40  | c.2123G>A     | c.(2122-2124)GGC>GAC | p.G708D       |
| Pat_41 | Post-Resistance | GRIK5    | 2901   | 37 | 19 | 42510823 | 42510823 | Missense_Mutation | SNP | C | T | 3   | 52  | c.2011G>A     | c.(2011-2013)GCC>ACC | p.A671T       |
| Pat_41 | Post-Resistance | ZNF574   | 64763  | 37 | 19 | 42583899 | 42583899 | Missense_Mutation | SNP | G | A | 4   | 55  | c.1141G>A     | c.(1141-1143)GCC>ACC | p.A381T       |
| Pat_41 | Post-Resistance | POU2F2   | 5452   | 37 | 19 | 42598025 | 42598025 | Missense_Mutation | SNP | C | T | 15  | 295 | c.1154G>A     | c.(1153-1155)GGG>GAG | p.G385E       |
| Pat_41 | Post-Resistance | POU2F2   | 5452   | 37 | 19 | 42600332 | 42600332 | Missense_Mutation | SNP | C | T | 5   | 64  | c.565G>A      | c.(565-567)GAG>AAG   | p.E189K       |
| Pat_41 | Post-Resistance | ZNF526   | 116115 | 37 | 19 | 42728907 | 42728907 | Missense_Mutation | SNP | C | T | 8   | 109 | c.352C>T      | c.(352-354)CTC>TTC   | p.L118F       |
| Pat_41 | Post-Resistance | ERF      | 2077   | 37 | 19 | 42754672 | 42754672 | Missense_Mutation | SNP | C | T | 7   | 56  | c.68G>A       | c.(67-69)GGC>GAC     | p.G23D        |
| Pat_41 | Post-Resistance | CIC      | 23152  | 37 | 19 | 42795519 | 42795519 | Missense_Mutation | SNP | C | T | 7   | 102 | c.2599C>T     | c.(2599-2601)CCA>TCA | p.P867S       |
| Pat_41 | Post-Resistance | TMEM145  | 284339 | 37 | 19 | 42821922 | 42821922 | Missense_Mutation | SNP | G | A | 14  | 101 | c.962G>A      | c.(961-963)GGA>GAA   | p.G321E       |
| Pat_41 | Post-Resistance | TMEM145  | 284339 | 37 | 19 | 42824573 | 42824573 | Missense_Mutation | SNP | C | T | 7   | 50  | c.1178C>T     | c.(1177-1179)GCC>GTC | p.A393V       |
| Pat_41 | Post-Resistance | CEACAM8  | 1088   | 37 | 19 | 43087426 | 43087426 | Missense_Mutation | SNP | C | T | 18  | 138 | c.1022G>A     | c.(1021-1023)GGA>GAA | p.G341E       |
| Pat_41 | Post-Resistance | PSG5     | 5673   | 37 | 19 | 43679396 | 43679396 | Missense_Mutation | SNP | C | T | 25  | 198 | c.935G>A      | c.(934-936)AGC>AAC   | p.S312N       |
| Pat_41 | Post-Resistance | PSG5     | 5673   | 37 | 19 | 43689023 | 43689023 | Missense_Mutation | SNP | C | A | 287 | 317 | c.341G>T      | c.(340-342)CGG>CTG   | p.R114L       |
| Pat_41 | Post-Resistance | XRCC1    | 7515   | 37 | 19 | 44050783 | 44050783 | Missense_Mutation | SNP | G | A | 14  | 250 | c.1390C>T     | c.(1390-1392)CTC>TTC | p.L464F       |
| Pat_41 | Post-Resistance | KCNN4    | 3783   | 37 | 19 | 44273891 | 44273891 | Missense_Mutation | SNP | C | T | 19  | 316 | c.910G>A      | c.(910-912)GAT>AAT   | p.D304N       |
| Pat_41 | Post-Resistance | LYPD5    | 284348 | 37 | 19 | 44303051 | 44303051 | Missense_Mutation | SNP | G | A | 4   | 10  | c.283C>T      | c.(283-285)CCA>TCA   | p.P95S        |
| Pat_41 | Post-Resistance | ZNF283   | 284349 | 37 | 19 | 44351576 | 44351576 | Missense_Mutation | SNP | G | A | 18  | 226 | c.823G>A      | c.(823-825)GGA>AGA   | p.G275R       |
| Pat_41 | Post-Resistance | ZNF404   | 342908 | 37 | 19 | 44376924 | 44376924 | Missense_Mutation | SNP | C | T | 4   | 26  | c.1433G>A     | c.(1432-1434)GGT>GAT | p.G478D       |
| Pat_41 | Post-Resistance | ZNF45    | 7596   | 37 | 19 | 44418989 | 44418989 | Missense_Mutation | SNP | G | A | 26  | 474 | c.599C>T      | c.(598-600)GCC>GTC   | p.A200V       |
| Pat_41 | Post-Resistance | ZNF222   | 7673   | 37 | 19 | 44536302 | 44536302 | Missense_Mutation | SNP | G | A | 21  | 441 | c.475G>A      | c.(475-477)GCC>ACC   | p.A159T       |
| Pat_41 | Post-Resistance | ZNF222   | 7673   | 37 | 19 | 44537091 | 44537091 | Missense_Mutation | SNP | G | A | 20  | 100 | c.1264G>A     | c.(1264-1266)GAA>AAA | p.E422K       |
| Pat_41 | Post-Resistance | ZNF225   | 7768   | 37 | 19 | 44636500 | 44636500 | Missense_Mutation | SNP | G | A | 19  | 133 | c.1733G>A     | c.(1732-1734)AGC>AAC | p.S578N       |
| Pat_41 | Post-Resistance | ZNF226   | 7769   | 37 | 19 | 44681461 | 44681461 | Nonsense_Mutation | SNP | G | A | 22  | 166 | c.2046G>A     | c.(2044-2046)TGG>TGA | p.W682*       |
| Pat_41 | Post-Resistance | CEACAM20 | 125931 | 37 | 19 | 45017289 | 45017289 | Missense_Mutation | SNP | C | T | 4   | 110 | c.1369G>A     | c.(1369-1371)GCT>ACT | p.A457T       |
| Pat_41 | Post-Resistance | CEACAM20 | 125931 | 37 | 19 | 45021256 | 45021256 | Missense_Mutation | SNP | C | T | 6   | 144 | c.1060G>A     | c.(1060-1062)GAG>AAG | p.E354K       |
| Pat_41 | Post-Resistance | CBLC     | 23624  | 37 | 19 | 45284568 | 45284568 | Missense_Mutation | SNP | G | A | 9   | 226 | c.605G>A      | c.(604-606)TGC>TAC   | p.C202Y       |
| Pat_41 | Post-Resistance | CBLC     | 23624  | 37 | 19 | 45295727 | 45295727 | Missense_Mutation | SNP | C | T | 7   | 93  | c.1093C>T     | c.(1093-1095)CCG>TCG | p.P365S       |
| Pat_41 | Post-Resistance | BCAM     | 4059   | 37 | 19 | 45322748 | 45322748 | Splice_Site       | SNP | G | A | 16  | 106 | c.1618_splice | c.e12+1              | p.V540_splice |
| Pat_41 | Post-Resistance | CKM      | 1158   | 37 | 19 | 45815178 | 45815178 | Missense_Mutation | SNP | G | A | 13  | 111 | c.482C>T      | c.(481-483)GCT>GTT   | p.A161V       |
| Pat_41 | Post-Resistance | CKM      | 1158   | 37 | 19 | 45818854 | 45818854 | Missense_Mutation | SNP | C | T | 8   | 63  | c.350G>A      | c.(349-351)GGT>GAT   | p.G117D       |
| Pat_41 | Post-Resistance | KLC3     | 147700 | 37 | 19 | 45850774 | 45850774 | Missense_Mutation | SNP | G | A | 4   | 101 | c.559G>A      | c.(559-561)GGT>AGT   | p.G187S       |
| Pat_41 | Post-Resistance | KLC3     | 147700 | 37 | 19 | 45852840 | 45852840 | Missense_Mutation | SNP | G | A | 13  | 67  | c.1123G>A     | c.(1123-1125)GCC>ACC | p.A375T       |
| Pat_41 | Post-Resistance | PPP1R13L | 10848  | 37 | 19 | 45889405 | 45889405 | Missense_Mutation | SNP | G | A | 3   | 14  | c.1849C>T     | c.(1849-1851)CCG>TCG | p.P617S       |
| Pat_41 | Post-Resistance | CD3EAP   | 10849  | 37 | 19 | 45912202 | 45912202 | Missense_Mutation | SNP | C | T | 9   | 187 | c.976C>T      | c.(976-978)CCT>TCT   | p.P326S       |
| Pat_41 | Post-Resistance | GPR4     | 2828   | 37 | 19 | 46094106 | 46094106 | Missense_Mutation | SNP | C | T | 12  | 123 | c.1019G>A     | c.(1018-1020)GGC>GAC | p.G340D       |
| Pat_41 | Post-Resistance | EML2     | 24139  | 37 | 19 | 46119804 | 46119804 | Missense_Mutation | SNP | A | G | 4   | 94  | c.1424T>C     | c.(1423-1425)CTG>CCG | p.L475P       |
| Pat_41 | Post-Resistance | SYMPK    | 8189   | 37 | 19 | 46324653 | 46324653 | Missense_Mutation | SNP | G | A | 10  | 93  | c.2882C>T     | c.(2881-2883)TCC>TTC | p.S961F       |
| Pat_41 | Post-Resistance | SYMPK    | 8189   | 37 | 19 | 46332303 | 46332303 | Missense_Mutation | SNP | C | T | 15  | 80  | c.1910G>A     | c.(1909-1911)GGC>GAC | p.G637D       |
| Pat_41 | Post-Resistance | SYMPK    | 8189   | 37 | 19 | 46338461 | 46338461 | Missense_Mutation | SNP | G | A | 8   | 145 | c.1268C>T     | c.(1267-1269)CCC>CTC | p.P423L       |
| Pat_41 | Post-Resistance | SYMPK    | 8189   | 37 | 19 | 46347405 | 46347405 | Missense_Mutation | SNP | C | T | 10  | 250 | c.730G>A      | c.(730-732)GTG>ATG   | p.V244M       |
| Pat_41 | Post-Resistance | FOXA3    | 3171   | 37 | 19 | 46375649 | 46375649 | Missense_Mutation | SNP | C | T | 20  | 367 | c.386C>T      | c.(385-387)GCC>GTC   | p.A129V       |

|        |                 |          |        |    |    |          |          |                   |     |    |    |    |     |                |                                 |               |
|--------|-----------------|----------|--------|----|----|----------|----------|-------------------|-----|----|----|----|-----|----------------|---------------------------------|---------------|
| Pat_41 | Post-Resistance | NOVA2    | 4858   | 37 | 19 | 46443231 | 46443231 | Missense_Mutation | SNP | C  | T  | 12 | 91  | c.1369G>A      | c.(1369-1371)GTC>ATC            | p.V457I       |
| Pat_41 | Post-Resistance | PPP5C    | 5536   | 37 | 19 | 46850457 | 46850457 | Missense_Mutation | SNP | C  | T  | 4  | 22  | c.104C>T       | c.(103-105)GCC>GTC              | p.A35V        |
| Pat_41 | Post-Resistance | CCDC8    | 83987  | 37 | 19 | 46915017 | 46915018 | Missense_Mutation | DNP | CC | GG | 7  | 223 | .1050_1051GG>C | 348-1053)GAGGAG>GAC(350_351EE>D |               |
| Pat_41 | Post-Resistance | STRN4    | 29888  | 37 | 19 | 47236348 | 47236348 | Missense_Mutation | SNP | G  | A  | 4  | 45  | c.685C>T       | c.(685-687)CTC>TTC              | p.L229F       |
| Pat_41 | Post-Resistance | GRLF1    | 2909   | 37 | 19 | 47422582 | 47422582 | Missense_Mutation | SNP | C  | T  | 4  | 58  | c.650C>T       | c.(649-651)GCC>GTC              | p.A217V       |
| Pat_41 | Post-Resistance | BBC3     | 27113  | 37 | 19 | 47725147 | 47725147 | Missense_Mutation | SNP | G  | A  | 5  | 62  | c.494C>T       | c.(493-495)CCC>CTC              | p.P165L       |
| Pat_41 | Post-Resistance | C5AR1    | 728    | 37 | 19 | 47823581 | 47823581 | Missense_Mutation | SNP | C  | T  | 11 | 113 | c.547C>T       | c.(547-549)CCA>TCA              | p.P183S       |
| Pat_41 | Post-Resistance | DHX34    | 9704   | 37 | 19 | 47879317 | 47879317 | Missense_Mutation | SNP | C  | T  | 10 | 76  | c.2444C>T      | c.(2443-2445)CCC>CTC            | p.P815L       |
| Pat_41 | Post-Resistance | SLC8A2   | 6543   | 37 | 19 | 47941153 | 47941153 | Missense_Mutation | SNP | C  | T  | 9  | 197 | c.1963G>A      | c.(1963-1965)GAG>AAG            | p.E655K       |
| Pat_41 | Post-Resistance | EHD2     | 30846  | 37 | 19 | 48221837 | 48221837 | Missense_Mutation | SNP | C  | T  | 6  | 35  | c.476C>T       | c.(475-477)TCG>TTG              | p.S159L       |
| Pat_41 | Post-Resistance | EHD2     | 30846  | 37 | 19 | 48229413 | 48229413 | Nonsense_Mutation | SNP | C  | T  | 4  | 28  | c.847C>T       | c.(847-849)CAG>TAG              | p.Q283*       |
| Pat_41 | Post-Resistance | GLTSCR2  | 29997  | 37 | 19 | 48253530 | 48253530 | Missense_Mutation | SNP | C  | T  | 10 | 69  | c.385C>T       | c.(385-387)CCT>TCT              | p.P129S       |
| Pat_41 | Post-Resistance | PLA2G4C  | 8605   | 37 | 19 | 48556253 | 48556253 | Splice_Site       | SNP | C  | T  | 5  | 148 | c.1580_splice  | c.e16+1                         | p.G527_splice |
| Pat_41 | Post-Resistance | CARD8    | 22900  | 37 | 19 | 48725012 | 48725012 | Missense_Mutation | SNP | G  | A  | 9  | 102 | c.818C>T       | c.(817-819)TCT>TTT              | p.S273F       |
| Pat_41 | Post-Resistance | KDELR1   | 10945  | 37 | 19 | 48892866 | 48892866 | Missense_Mutation | SNP | C  | T  | 8  | 109 | c.295G>A       | c.(295-297)GTC>ATC              | p.V99I        |
| Pat_41 | Post-Resistance | SPHK2    | 56848  | 37 | 19 | 49132000 | 49132000 | Missense_Mutation | SNP | G  | A  | 16 | 290 | c.935G>A       | c.(934-936)GGT>GAT              | p.G312D       |
| Pat_41 | Post-Resistance | CA11     | 770    | 37 | 19 | 49143086 | 49143086 | Missense_Mutation | SNP | G  | A  | 17 | 340 | c.526C>T       | c.(526-528)CGC>TGC              | p.R176C       |
| Pat_41 | Post-Resistance | FUT1     | 2523   | 37 | 19 | 49254351 | 49254351 | Missense_Mutation | SNP | C  | T  | 11 | 97  | c.188G>A       | c.(187-189)GGC>GAC              | p.G63D        |
| Pat_41 | Post-Resistance | HRC      | 3270   | 37 | 19 | 49657944 | 49657944 | Missense_Mutation | SNP | C  | T  | 10 | 118 | c.551G>A       | c.(550-552)GGC>GAC              | p.G184D       |
| Pat_41 | Post-Resistance | TRPM4    | 54795  | 37 | 19 | 49671229 | 49671229 | Missense_Mutation | SNP | G  | A  | 13 | 296 | c.323G>A       | c.(322-324)CGC>CAC              | p.R108H       |
| Pat_41 | Post-Resistance | TRPM4    | 54795  | 37 | 19 | 49671238 | 49671238 | Missense_Mutation | SNP | G  | A  | 5  | 276 | c.332G>A       | c.(331-333)GGC>GAC              | p.G111D       |
| Pat_41 | Post-Resistance | TRPM4    | 54795  | 37 | 19 | 49684701 | 49684701 | Missense_Mutation | SNP | G  | A  | 10 | 120 | c.1246G>A      | c.(1246-1248)GGG>AGG            | p.G416R       |
| Pat_41 | Post-Resistance | TRPM4    | 54795  | 37 | 19 | 49691902 | 49691902 | Missense_Mutation | SNP | C  | T  | 10 | 83  | c.1748C>T      | c.(1747-1749)TCC>TTC            | p.S583F       |
| Pat_41 | Post-Resistance | PIH1D1   | 55011  | 37 | 19 | 49952756 | 49952756 | Missense_Mutation | SNP | C  | T  | 13 | 168 | c.313G>A       | c.(313-315)GAG>AAG              | p.E105K       |
| Pat_41 | Post-Resistance | RPL13A   | 23521  | 37 | 19 | 49993768 | 49993768 | Missense_Mutation | SNP | C  | T  | 6  | 169 | c.191C>T       | c.(190-192)ACC>ATC              | p.T64I        |
| Pat_41 | Post-Resistance | PRR12    | 57479  | 37 | 19 | 50098041 | 50098041 | Missense_Mutation | SNP | C  | T  | 7  | 38  | c.449C>T       | c.(448-450)GCT>GTT              | p.A150V       |
| Pat_41 | Post-Resistance | NR1H2    | 7376   | 37 | 19 | 50880894 | 50880894 | Missense_Mutation | SNP | C  | T  | 31 | 217 | c.32C>T        | c.(31-33)ACC>ATC                | p.T11I        |
| Pat_41 | Post-Resistance | NR1H2    | 7376   | 37 | 19 | 50882377 | 50882377 | Missense_Mutation | SNP | C  | T  | 13 | 205 | c.869C>T       | c.(868-870)CCT>CTT              | p.P290L       |
| Pat_41 | Post-Resistance | GPR32    | 2854   | 37 | 19 | 51274188 | 51274188 | Missense_Mutation | SNP | G  | A  | 5  | 74  | c.331G>A       | c.(331-333)GAG>AAG              | p.E111K       |
| Pat_41 | Post-Resistance | KLK10    | 5655   | 37 | 19 | 51519411 | 51519411 | Missense_Mutation | SNP | G  | A  | 3  | 25  | c.271C>T       | c.(271-273)CCA>TCA              | p.P91S        |
| Pat_41 | Post-Resistance | SIGLEC7  | 27036  | 37 | 19 | 51656411 | 51656411 | Missense_Mutation | SNP | C  | T  | 16 | 149 | c.1313C>T      | c.(1312-1314)GCA>GTA            | p.A438V       |
| Pat_41 | Post-Resistance | C19orf75 | 284369 | 37 | 19 | 51770758 | 51770758 | Missense_Mutation | SNP | C  | T  | 11 | 143 | c.542C>T       | c.(541-543)GCC>GTC              | p.A181V       |
| Pat_41 | Post-Resistance | SIGLEC8  | 27181  | 37 | 19 | 51957998 | 51957998 | Missense_Mutation | SNP | G  | A  | 6  | 222 | c.1088C>T      | c.(1087-1089)GCA>GTA            | p.A363V       |
| Pat_41 | Post-Resistance | ZNF175   | 7728   | 37 | 19 | 52090251 | 52090251 | Missense_Mutation | SNP | C  | T  | 6  | 166 | c.667C>T       | c.(667-669)CTT>TTT              | p.L223F       |
| Pat_41 | Post-Resistance | ZNF649   | 65251  | 37 | 19 | 52394077 | 52394077 | Missense_Mutation | SNP | C  | T  | 34 | 314 | c.1312G>A      | c.(1312-1314)GCT>ACT            | p.A438T       |
| Pat_41 | Post-Resistance | ZNF649   | 65251  | 37 | 19 | 52394413 | 52394413 | Missense_Mutation | SNP | C  | T  | 9  | 152 | c.976G>A       | c.(976-978)GGC>AGC              | p.G326S       |
| Pat_41 | Post-Resistance | ZNF649   | 65251  | 37 | 19 | 52394703 | 52394703 | Missense_Mutation | SNP | C  | T  | 6  | 160 | c.686G>A       | c.(685-687)AGA>AAA              | p.R229K       |
| Pat_41 | Post-Resistance | ZNF649   | 65251  | 37 | 19 | 52399808 | 52399808 | Missense_Mutation | SNP | C  | T  | 18 | 211 | c.155G>A       | c.(154-156)GGC>GAC              | p.G52D        |
| Pat_41 | Post-Resistance | ZNF350   | 59348  | 37 | 19 | 52468819 | 52468819 | Missense_Mutation | SNP | C  | T  | 8  | 157 | c.887G>A       | c.(886-888)GGA>GAA              | p.G296E       |
| Pat_41 | Post-Resistance | ZNF615   | 284370 | 37 | 19 | 52497574 | 52497574 | Missense_Mutation | SNP | C  | T  | 26 | 205 | c.755G>A       | c.(754-756)AGA>AAA              | p.R252K       |
| Pat_41 | Post-Resistance | ZNF880   | 400713 | 37 | 19 | 52876433 | 52876433 | Nonsense_Mutation | SNP | C  | T  | 14 | 229 | c.82C>T        | c.(82-84)CAG>TAG                | p.Q28*        |
| Pat_41 | Post-Resistance | ZNF880   | 400713 | 37 | 19 | 52887427 | 52887427 | Missense_Mutation | SNP | A  | T  | 3  | 42  | c.594A>T       | c.(592-594)AGA>AGT              | p.R198S       |
| Pat_41 | Post-Resistance | ZNF528   | 84436  | 37 | 19 | 52919495 | 52919495 | Missense_Mutation | SNP | C  | T  | 7  | 106 | c.1390C>T      | c.(1390-1392)CCT>TCT            | p.P464S       |
| Pat_41 | Post-Resistance | ZNF534   | 147658 | 37 | 19 | 52942391 | 52942391 | Missense_Mutation | SNP | A  | C  | 4  | 92  | c.1717A>C      | c.(1717-1719)AGT>CGT            | p.S573R       |
| Pat_41 | Post-Resistance | ZNF808   | 388558 | 37 | 19 | 53057109 | 53057109 | Missense_Mutation | SNP | C  | T  | 29 | 432 | c.940C>T       | c.(940-942)CCT>TCT              | p.P314S       |
| Pat_41 | Post-Resistance | ZNF808   | 388558 | 37 | 19 | 53058514 | 53058514 | Missense_Mutation | SNP | G  | A  | 35 | 576 | c.2345G>A      | c.(2344-2346)CGT>CAT            | p.R782H       |
| Pat_41 | Post-Resistance | ZNF701   | 55762  | 37 | 19 | 53086538 | 53086538 | Missense_Mutation | SNP | G  | C  | 5  | 144 | c.1226G>C      | c.(1225-1227)CGT>CCT            | p.R409P       |



|        |                 |         |        |    |    |          |          |                   |     |    |    |    |     |                |                      |               |
|--------|-----------------|---------|--------|----|----|----------|----------|-------------------|-----|----|----|----|-----|----------------|----------------------|---------------|
| Pat_41 | Post-Resistance | ZNF83   | 55769  | 37 | 19 | 53116509 | 53116509 | Missense_Mutation | SNP | C  | T  | 8  | 147 | c.1309G>A      | c.(1309-1311)GTC>ATC | p.V437I       |
| Pat_41 | Post-Resistance | ZNF347  | 84671  | 37 | 19 | 53644931 | 53644931 | Missense_Mutation | SNP | C  | T  | 13 | 218 | c.1150G>A      | c.(1150-1152)GCT>ACT | p.A384T       |
| Pat_41 | Post-Resistance | ZNF347  | 84671  | 37 | 19 | 53645156 | 53645156 | Missense_Mutation | SNP | C  | T  | 49 | 358 | c.925G>A       | c.(925-927)GTG>ATG   | p.V309M       |
| Pat_41 | Post-Resistance | ZNF347  | 84671  | 37 | 19 | 53645558 | 53645558 | Missense_Mutation | SNP | C  | T  | 8  | 84  | c.523G>A       | c.(523-525)GCA>ACA   | p.A175T       |
| Pat_41 | Post-Resistance | ZNF665  | 79788  | 37 | 19 | 53668095 | 53668095 | Missense_Mutation | SNP | C  | T  | 57 | 323 | c.1648G>A      | c.(1648-1650)GTC>ATC | p.V550I       |
| Pat_41 | Post-Resistance | ZNF665  | 79788  | 37 | 19 | 53669192 | 53669192 | Missense_Mutation | SNP | C  | T  | 27 | 247 | c.551G>A       | c.(550-552)GGC>GAC   | p.G184D       |
| Pat_41 | Post-Resistance | BIRC8   | 112401 | 37 | 19 | 53793477 | 53793477 | Missense_Mutation | SNP | G  | A  | 7  | 53  | c.151C>T       | c.(151-153)CCC>TCC   | p.P51S        |
| Pat_41 | Post-Resistance | ZNF845  | 91664  | 37 | 19 | 53856669 | 53856669 | Missense_Mutation | SNP | C  | T  | 5  | 255 | c.2741C>T      | c.(2740-2742)CCT>CTT | p.P914L       |
| Pat_41 | Post-Resistance | ZNF845  | 91664  | 37 | 19 | 53856702 | 53856702 | Missense_Mutation | SNP | G  | A  | 9  | 243 | c.2774G>A      | c.(2773-2775)CGT>CAT | p.R925H       |
| Pat_41 | Post-Resistance | ZNF845  | 91664  | 37 | 19 | 53856761 | 53856761 | Missense_Mutation | SNP | T  | C  | 8  | 131 | c.2833T>C      | c.(2833-2835)TGT>CGT | p.C945R       |
| Pat_41 | Post-Resistance | ZNF761  | 388561 | 37 | 19 | 53958365 | 53958365 | Missense_Mutation | SNP | C  | T  | 7  | 189 | c.604C>T       | c.(604-606)CTC>TTC   | p.L202F       |
| Pat_41 | Post-Resistance | ZNF761  | 388561 | 37 | 19 | 53959854 | 53959854 | Missense_Mutation | SNP | A  | C  | 10 | 286 | c.2093A>C      | c.(2092-2094)AAC>ACC | p.N698T       |
| Pat_41 | Post-Resistance | ZNF813  | 126017 | 37 | 19 | 53994037 | 53994037 | Missense_Mutation | SNP | C  | T  | 28 | 199 | c.551C>T       | c.(550-552)CCC>CTC   | p.P184L       |
| Pat_41 | Post-Resistance | ZNF813  | 126017 | 37 | 19 | 53995104 | 53995105 | Missense_Mutation | DNP | CA | TG | 6  | 122 | .1618_1619CA>T | c.(1618-1620)CAT>TGT | p.H540C       |
| Pat_41 | Post-Resistance | NLRP12  | 91662  | 37 | 19 | 54313193 | 54313193 | Missense_Mutation | SNP | G  | A  | 11 | 44  | c.1720C>T      | c.(1720-1722)CAC>TAC | p.H574Y       |
| Pat_41 | Post-Resistance | MYADM   | 91663  | 37 | 19 | 54377265 | 54377265 | Missense_Mutation | SNP | G  | A  | 3  | 25  | c.482G>A       | c.(481-483)CGG>CAG   | p.R161Q       |
| Pat_41 | Post-Resistance | PRKCG   | 5582   | 37 | 19 | 54404004 | 54404004 | Splice_Site       | SNP | G  | A  | 59 | 488 | c.1575_splice  | c.e14+1              | p.E525_splice |
| Pat_41 | Post-Resistance | CNOT3   | 4849   | 37 | 19 | 54656680 | 54656680 | Missense_Mutation | SNP | G  | A  | 46 | 382 | c.1981G>A      | c.(1981-1983)GAA>AAA | p.E661K       |
| Pat_41 | Post-Resistance | LILRB3  | 11025  | 37 | 19 | 54726003 | 54726003 | Splice_Site       | SNP | C  | T  | 4  | 53  | c.356_splice   | c.e4-1               | p.G119_splice |
| Pat_41 | Post-Resistance | LILRA3  | 11026  | 37 | 19 | 54803139 | 54803139 | Missense_Mutation | SNP | C  | T  | 12 | 49  | c.538G>A       | c.(538-540)GCC>ACC   | p.A180T       |
| Pat_41 | Post-Resistance | LENG8   | 114823 | 37 | 19 | 54963881 | 54963881 | Missense_Mutation | SNP | T  | C  | 10 | 315 | c.265T>C       | c.(265-267)TGG>CGG   | p.W89R        |
| Pat_41 | Post-Resistance | LILRB4  | 11006  | 37 | 19 | 55177346 | 55177346 | Missense_Mutation | SNP | C  | T  | 3  | 63  | c.838C>T       | c.(838-840)CTC>TTC   | p.L280F       |
| Pat_41 | Post-Resistance | KIR2DL4 | 3805   | 37 | 19 | 55316292 | 55316292 | Missense_Mutation | SNP | G  | A  | 4  | 43  | c.121G>A       | c.(121-123)GTG>ATG   | p.V41M        |
| Pat_41 | Post-Resistance | RDH13   | 112724 | 37 | 19 | 55558826 | 55558826 | Missense_Mutation | SNP | G  | A  | 6  | 20  | c.689C>T       | c.(688-690)CCC>CTC   | p.P230L       |
| Pat_41 | Post-Resistance | BRSK1   | 84446  | 37 | 19 | 55805413 | 55805413 | Missense_Mutation | SNP | C  | T  | 14 | 398 | c.487C>T       | c.(487-489)CTT>TTT   | p.L163F       |
| Pat_41 | Post-Resistance | SBK2    | 646643 | 37 | 19 | 56041138 | 56041138 | Missense_Mutation | SNP | C  | T  | 7  | 85  | c.1009G>A      | c.(1009-1011)GAG>AAG | p.E337K       |
| Pat_41 | Post-Resistance | ZNF524  | 147807 | 37 | 19 | 56113672 | 56113672 | Missense_Mutation | SNP | C  | T  | 3  | 10  | c.194C>T       | c.(193-195)CCA>CTA   | p.P65L        |
| Pat_41 | Post-Resistance | NLRP11  | 204801 | 37 | 19 | 56320832 | 56320832 | Missense_Mutation | SNP | C  | T  | 40 | 168 | c.1144G>A      | c.(1144-1146)GCT>ACT | p.A382T       |
| Pat_41 | Post-Resistance | ZNF582  | 147948 | 37 | 19 | 56896420 | 56896420 | Nonsense_Mutation | SNP | C  | T  | 20 | 444 | c.366G>A       | c.(364-366)TGG>TGA   | p.W122*       |
| Pat_41 | Post-Resistance | ZNF583  | 147949 | 37 | 19 | 56934484 | 56934484 | Missense_Mutation | SNP | G  | A  | 18 | 231 | c.457G>A       | c.(457-459)GTT>ATT   | p.V153I       |
| Pat_41 | Post-Resistance | ZNF471  | 57573  | 37 | 19 | 57037178 | 57037178 | Missense_Mutation | SNP | G  | A  | 7  | 96  | c.1742G>A      | c.(1741-1743)AGT>AAT | p.S581N       |
| Pat_41 | Post-Resistance | ZNF71   | 58491  | 37 | 19 | 57133428 | 57133428 | Missense_Mutation | SNP | T  | C  | 7  | 179 | c.773T>C       | c.(772-774)ATC>ACC   | p.I258T       |
| Pat_41 | Post-Resistance | ZNF71   | 58491  | 37 | 19 | 57133431 | 57133431 | Missense_Mutation | SNP | T  | A  | 7  | 181 | c.776T>A       | c.(775-777)GTG>GAG   | p.V259E       |
| Pat_41 | Post-Resistance | PEG3    | 5178   | 37 | 19 | 57328186 | 57328186 | Missense_Mutation | SNP | C  | T  | 12 | 273 | c.1624G>A      | c.(1624-1626)GAA>AAA | p.E542K       |
| Pat_41 | Post-Resistance | AURKC   | 6795   | 37 | 19 | 57743435 | 57743435 | Missense_Mutation | SNP | C  | T  | 3  | 48  | c.139C>T       | c.(139-141)CGT>TGT   | p.R47C        |
| Pat_41 | Post-Resistance | ZNF304  | 57343  | 37 | 19 | 57868567 | 57868567 | Missense_Mutation | SNP | G  | A  | 16 | 140 | c.1330G>A      | c.(1330-1332)GCA>ACA | p.A444T       |
| Pat_41 | Post-Resistance | ZNF17   | 7565   | 37 | 19 | 57931018 | 57931018 | Missense_Mutation | SNP | C  | T  | 7  | 81  | c.158C>T       | c.(157-159)GCC>GTC   | p.A53V        |
| Pat_41 | Post-Resistance | ZNF419  | 79744  | 37 | 19 | 58004332 | 58004332 | Missense_Mutation | SNP | C  | T  | 4  | 51  | c.407C>T       | c.(406-408)CCC>CTC   | p.P136L       |
| Pat_41 | Post-Resistance | ZNF416  | 55659  | 37 | 19 | 58084370 | 58084370 | Missense_Mutation | SNP | C  | T  | 23 | 110 | c.902G>A       | c.(901-903)GGT>GAT   | p.G301D       |
| Pat_41 | Post-Resistance | ZNF134  | 7693   | 37 | 19 | 58132739 | 58132739 | Missense_Mutation | SNP | C  | T  | 16 | 715 | c.1252C>T      | c.(1252-1254)CAC>TAC | p.H418Y       |
| Pat_41 | Post-Resistance | ZSCAN4  | 201516 | 37 | 19 | 58187859 | 58187859 | Missense_Mutation | SNP | G  | A  | 13 | 91  | c.346G>A       | c.(346-348)GAG>AAG   | p.E116K       |
| Pat_41 | Post-Resistance | ZNF551  | 90233  | 37 | 19 | 58196637 | 58196637 | Missense_Mutation | SNP | C  | T  | 11 | 141 | c.41C>T        | c.(40-42)ACC>ATC     | p.T14I        |
| Pat_41 | Post-Resistance | ZNF671  | 79891  | 37 | 19 | 58234633 | 58234633 | Missense_Mutation | SNP | G  | A  | 23 | 215 | c.214C>T       | c.(214-216)CTT>TTT   | p.L72F        |
| Pat_41 | Post-Resistance | ZNF776  | 284309 | 37 | 19 | 58265369 | 58265369 | Missense_Mutation | SNP | C  | T  | 10 | 325 | c.871C>T       | c.(871-873)CCT>TCT   | p.P291S       |
| Pat_41 | Post-Resistance | ZNF776  | 284309 | 37 | 19 | 58265885 | 58265885 | Missense_Mutation | SNP | G  | A  | 5  | 192 | c.1387G>A      | c.(1387-1389)GGA>AGA | p.G463R       |
| Pat_41 | Post-Resistance | ZNF586  | 54807  | 37 | 19 | 58290602 | 58290602 | Missense_Mutation | SNP | C  | T  | 20 | 181 | c.647C>T       | c.(646-648)GCT>GTT   | p.A216V       |
| Pat_41 | Post-Resistance | ZNF418  | 147686 | 37 | 19 | 58437684 | 58437684 | Missense_Mutation | SNP | C  | T  | 41 | 217 | c.1865G>A      | c.(1864-1866)AGC>AAC | p.S622N       |

|        |                 |           |        |    |    |          |          |                   |     |   |   |    |     |               |                        |               |
|--------|-----------------|-----------|--------|----|----|----------|----------|-------------------|-----|---|---|----|-----|---------------|------------------------|---------------|
| Pat_41 | Post-Resistance | ZNF418    | 147686 | 37 | 19 | 58438011 | 58438011 | Missense_Mutation | SNP | C | T | 23 | 296 | c.1538G>A     | c.(1537-1539)AGT>AAT   | p.S513N       |
| Pat_41 | Post-Resistance | ZNF544    | 27300  | 37 | 19 | 58772991 | 58772991 | Missense_Mutation | SNP | C | T | 4  | 72  | c.1019C>T     | c.(1018-1020)TCT>TTT   | p.S340F       |
| Pat_41 | Post-Resistance | ZSCAN22   | 342945 | 37 | 19 | 58850304 | 58850304 | Missense_Mutation | SNP | G | A | 10 | 195 | c.1088G>A     | c.(1087-1089)CGC>CAC   | p.R363H       |
| Pat_41 | Post-Resistance | ZBTB45    | 84878  | 37 | 19 | 59028301 | 59028301 | Missense_Mutation | SNP | G | A | 14 | 293 | c.740C>T      | c.(739-741)GCT>GTT     | p.A247V       |
| Pat_41 | Post-Resistance | TRIM28    | 10155  | 37 | 19 | 59059749 | 59059749 | Missense_Mutation | SNP | C | T | 17 | 67  | c.1190C>T     | c.(1189-1191)GCC>GTC   | p.A397V       |
| Pat_41 | Post-Resistance | UBE2M     | 9040   | 37 | 19 | 59067682 | 59067682 | Splice_Site       | SNP | C | T | 36 | 171 | c.411_splice  | c.e5+1                 | p.L137_splice |
| Pat_41 | Post-Resistance | SH3YL1    | 26751  | 37 | 2  | 231169   | 231169   | Missense_Mutation | SNP | C | T | 4  | 13  | c.556G>A      | c.(556-558)GCT>ACT     | p.A186T       |
| Pat_41 | Post-Resistance | TPO       | 7173   | 37 | 2  | 1507750  | 1507750  | Missense_Mutation | SNP | C | T | 12 | 70  | c.2417C>T     | c.(2416-2418)CCC>CTC   | p.P806L       |
| Pat_41 | Post-Resistance | PXDN      | 7837   | 37 | 2  | 1670036  | 1670036  | Missense_Mutation | SNP | G | A | 5  | 83  | c.1241C>T     | c.(1240-1242)GCG>GTG   | p.A414V       |
| Pat_41 | Post-Resistance | CMPK2     | 129607 | 37 | 2  | 7001358  | 7001358  | Nonsense_Mutation | SNP | C | A | 4  | 125 | c.949G>T      | c.(949-951)GAA>TAA     | p.E317*       |
| Pat_41 | Post-Resistance | KIDINS220 | 57498  | 37 | 2  | 8888060  | 8888060  | Missense_Mutation | SNP | G | A | 11 | 221 | c.3485C>T     | c.(3484-3486)CCA>CTA   | p.P1162L      |
| Pat_41 | Post-Resistance | KIDINS220 | 57498  | 37 | 2  | 8926455  | 8926455  | Missense_Mutation | SNP | C | T | 31 | 320 | c.1820G>A     | c.(1819-1821)AGT>AAT   | p.S607N       |
| Pat_41 | Post-Resistance | ASAP2     | 8853   | 37 | 2  | 9484745  | 9484745  | Missense_Mutation | SNP | C | T | 15 | 209 | c.934C>T      | c.(934-936)CTC>TTC     | p.L312F       |
| Pat_41 | Post-Resistance | IAH1      | 285148 | 37 | 2  | 9621510  | 9621510  | Nonsense_Mutation | SNP | C | T | 4  | 118 | c.379C>T      | c.(379-381)CGA>TGA     | p.R127*       |
| Pat_41 | Post-Resistance | TAF1B     | 9014   | 37 | 2  | 10008460 | 10008460 | Missense_Mutation | SNP | G | A | 7  | 136 | c.455G>A      | c.(454-456)AGT>AAT     | p.S152N       |
| Pat_41 | Post-Resistance | PDIA6     | 10130  | 37 | 2  | 10942730 | 10942730 | Missense_Mutation | SNP | C | A | 71 | 120 | c.56G>T       | c.(55-57)GGT>GTT       | p.G19V        |
| Pat_41 | Post-Resistance | E2F6      | 1876   | 37 | 2  | 11587752 | 11587752 | Splice_Site       | SNP | C | T | 8  | 236 | c.799_splice  | c.e6+1                 | p.E267_splice |
| Pat_41 | Post-Resistance | GREB1     | 9687   | 37 | 2  | 11702678 | 11702678 | Missense_Mutation | SNP | C | T | 14 | 185 | c.247C>T      | c.(247-249)CCT>TCT     | p.P83S        |
| Pat_41 | Post-Resistance | GREB1     | 9687   | 37 | 2  | 11720832 | 11720832 | Missense_Mutation | SNP | C | T | 13 | 436 | c.775C>T      | c.(775-777)CCA>TCA     | p.P259S       |
| Pat_41 | Post-Resistance | GREB1     | 9687   | 37 | 2  | 11728961 | 11728961 | Missense_Mutation | SNP | G | A | 57 | 282 | c.1249G>A     | c.(1249-1251)GTC>ATC   | p.V417I       |
| Pat_41 | Post-Resistance | GREB1     | 9687   | 37 | 2  | 11735461 | 11735461 | Missense_Mutation | SNP | G | A | 9  | 101 | c.1781G>A     | c.(1780-1782)GGG>GAG   | p.G594E       |
| Pat_41 | Post-Resistance | GREB1     | 9687   | 37 | 2  | 11756826 | 11756826 | Missense_Mutation | SNP | C | T | 9  | 148 | c.3392C>T     | c.(3391-3393)TCC>TTC   | p.S1131F      |
| Pat_41 | Post-Resistance | FAM84A    | 151354 | 37 | 2  | 14774290 | 14774290 | Missense_Mutation | SNP | C | T | 4  | 30  | c.187C>T      | c.(187-189)CCC>TCC     | p.P63S        |
| Pat_41 | Post-Resistance | NBAS      | 51594  | 37 | 2  | 15378686 | 15378686 | Missense_Mutation | SNP | G | A | 8  | 49  | c.5849C>T     | c.(5848-5850)ACC>ATC   | p.T1950I      |
| Pat_41 | Post-Resistance | NBAS      | 51594  | 37 | 2  | 15470778 | 15470778 | Missense_Mutation | SNP | C | T | 24 | 256 | c.4291G>A     | c.(4291-4293)GCC>ACC   | p.A1431T      |
| Pat_41 | Post-Resistance | MYCN      | 4613   | 37 | 2  | 16086074 | 16086074 | Missense_Mutation | SNP | C | T | 10 | 174 | c.1250C>T     | c.(1249-1251)GCC>GTC   | p.A417V       |
| Pat_41 | Post-Resistance | RAD51AP2  | 729475 | 37 | 2  | 17699318 | 17699318 | Missense_Mutation | SNP | C | T | 9  | 134 | c.365G>A      | c.(364-366)AGT>AAT     | p.S122N       |
| Pat_41 | Post-Resistance | SMC6      | 79677  | 37 | 2  | 17847700 | 17847700 | Missense_Mutation | SNP | G | A | 5  | 59  | c.3148C>T     | c.(3148-3150)CCT>TCT   | p.P1050S      |
| Pat_41 | Post-Resistance | OSR1      | 130497 | 37 | 2  | 19552052 | 19552052 | Missense_Mutation | SNP | G | A | 4  | 61  | c.785C>T      | c.(784-786)TCC>TTC     | p.S262F       |
| Pat_41 | Post-Resistance | PUM2      | 23369  | 37 | 2  | 20460228 | 20460228 | Splice_Site       | SNP | C | T | 7  | 150 | c.2226_splice | c.e14-1                | p.R742_splice |
| Pat_41 | Post-Resistance | PUM2      | 23369  | 37 | 2  | 20512172 | 20512172 | Missense_Mutation | SNP | G | A | 13 | 123 | c.173C>T      | c.(172-174)TCC>TTC     | p.S58F        |
| Pat_41 | Post-Resistance | APOB      | 338    | 37 | 2  | 21225030 | 21225030 | Missense_Mutation | SNP | G | A | 13 | 76  | c.13264C>T    | c.(13264-13266)CAT>TAT | p.H4422Y      |
| Pat_41 | Post-Resistance | APOB      | 338    | 37 | 2  | 21236115 | 21236115 | Missense_Mutation | SNP | G | A | 56 | 460 | c.4133C>T     | c.(4132-4134)ACC>ATC   | p.T1378I      |
| Pat_41 | Post-Resistance | APOB      | 338    | 37 | 2  | 21237399 | 21237399 | Missense_Mutation | SNP | G | A | 17 | 64  | c.3763C>T     | c.(3763-3765)CTC>TTC   | p.L1255F      |
| Pat_41 | Post-Resistance | APOB      | 338    | 37 | 2  | 21252786 | 21252786 | Missense_Mutation | SNP | G | A | 23 | 257 | c.1454C>T     | c.(1453-1455)ACC>ATC   | p.T485I       |
| Pat_41 | Post-Resistance | ATAD2B    | 54454  | 37 | 2  | 23985186 | 23985186 | Missense_Mutation | SNP | G | A | 7  | 82  | c.3287C>T     | c.(3286-3288)CCT>CTT   | p.P1096L      |
| Pat_41 | Post-Resistance | ATAD2B    | 54454  | 37 | 2  | 24021016 | 24021016 | Missense_Mutation | SNP | G | A | 3  | 12  | c.2632C>T     | c.(2632-2634)CCT>TCT   | p.P878S       |
| Pat_41 | Post-Resistance | ATAD2B    | 54454  | 37 | 2  | 24051809 | 24051809 | Missense_Mutation | SNP | C | T | 7  | 113 | c.1729G>A     | c.(1729-1731)GCA>ACA   | p.A577T       |
| Pat_41 | Post-Resistance | ITSN2     | 50618  | 37 | 2  | 24432880 | 24432880 | Missense_Mutation | SNP | G | A | 10 | 128 | c.4280C>T     | c.(4279-4281)ACC>ATC   | p.T1427I      |
| Pat_41 | Post-Resistance | NCOA1     | 8648   | 37 | 2  | 24881548 | 24881548 | Missense_Mutation | SNP | T | C | 18 | 195 | c.2T>C        | c.(1-3)ATG>ACG         | p.M1T         |
| Pat_41 | Post-Resistance | NCOA1     | 8648   | 37 | 2  | 24951236 | 24951236 | Missense_Mutation | SNP | G | A | 21 | 102 | c.2777G>A     | c.(2776-2778)AGA>AAA   | p.R926K       |
| Pat_41 | Post-Resistance | NCOA1     | 8648   | 37 | 2  | 24974860 | 24974860 | Missense_Mutation | SNP | C | T | 4  | 102 | c.3716C>T     | c.(3715-3717)CCC>CTC   | p.P1239L      |
| Pat_41 | Post-Resistance | ADCY3     | 109    | 37 | 2  | 25064427 | 25064427 | Missense_Mutation | SNP | C | T | 3  | 27  | c.1066G>A     | c.(1066-1068)GCT>ACT   | p.A356T       |
| Pat_41 | Post-Resistance | DNAJC27   | 51277  | 37 | 2  | 25170549 | 25170549 | Missense_Mutation | SNP | C | T | 21 | 202 | c.758G>A      | c.(757-759)GGC>GAC     | p.G253D       |
| Pat_41 | Post-Resistance | DNMT3A    | 1788   | 37 | 2  | 25463208 | 25463208 | Missense_Mutation | SNP | C | T | 18 | 219 | c.2285G>A     | c.(2284-2286)GGC>GAC   | p.G762D       |
| Pat_41 | Post-Resistance | ASXL2     | 55252  | 37 | 2  | 25964976 | 25964976 | Nonsense_Mutation | SNP | G | T | 5  | 272 | c.4230C>A     | c.(4228-4230)TGC>TGA   | p.C1410*      |
| Pat_41 | Post-Resistance | ASXL2     | 55252  | 37 | 2  | 25982365 | 25982365 | Missense_Mutation | SNP | C | T | 19 | 312 | c.925G>A      | c.(925-927)GAG>AAG     | p.E309K       |

|        |                 |          |        |    |   |          |          |                   |     |   |   |    |     |               |                      |               |
|--------|-----------------|----------|--------|----|---|----------|----------|-------------------|-----|---|---|----|-----|---------------|----------------------|---------------|
| Pat_41 | Post-Resistance | ASXL2    | 55252  | 37 | 2 | 25990505 | 25990505 | Missense_Mutation | SNP | G | A | 5  | 93  | c.722C>T      | c.(721-723)ACT>ATT   | p.T241I       |
| Pat_41 | Post-Resistance | ASXL2    | 55252  | 37 | 2 | 25994346 | 25994346 | Missense_Mutation | SNP | G | A | 17 | 180 | c.467C>T      | c.(466-468)TCT>TTT   | p.S156F       |
| Pat_41 | Post-Resistance | KIF3C    | 3797   | 37 | 2 | 26204432 | 26204432 | Missense_Mutation | SNP | C | T | 19 | 198 | c.355G>A      | c.(355-357)GTC>ATC   | p.V119I       |
| Pat_41 | Post-Resistance | HADHB    | 3032   | 37 | 2 | 26507065 | 26507065 | Missense_Mutation | SNP | C | T | 12 | 243 | c.1142C>T     | c.(1141-1143)GCT>GTT | p.A381V       |
| Pat_41 | Post-Resistance | GPR113   | 165082 | 37 | 2 | 26534851 | 26534851 | Missense_Mutation | SNP | G | A | 3  | 48  | c.1745C>T     | c.(1744-1746)ACT>ATT | p.T582I       |
| Pat_41 | Post-Resistance | OTOF     | 9381   | 37 | 2 | 26725265 | 26725265 | Missense_Mutation | SNP | G | A | 14 | 53  | c.613C>T      | c.(613-615)CTT>TTT   | p.L205F       |
| Pat_41 | Post-Resistance | DPYSL5   | 56896  | 37 | 2 | 27157511 | 27157511 | Nonsense_Mutation | SNP | C | T | 46 | 574 | c.856C>T      | c.(856-858)CAG>TAG   | p.Q286*       |
| Pat_41 | Post-Resistance | TMEM214  | 54867  | 37 | 2 | 27259431 | 27259431 | Missense_Mutation | SNP | G | A | 12 | 215 | c.797G>A      | c.(796-798)GGT>GAT   | p.G266D       |
| Pat_41 | Post-Resistance | PREB     | 10113  | 37 | 2 | 27354608 | 27354608 | Missense_Mutation | SNP | G | A | 20 | 301 | c.1091C>T     | c.(1090-1092)TCC>TTC | p.S364F       |
| Pat_41 | Post-Resistance | CAD      | 790    | 37 | 2 | 27444165 | 27444165 | Missense_Mutation | SNP | C | T | 7  | 94  | c.302C>T      | c.(301-303)ACC>ATC   | p.T101I       |
| Pat_41 | Post-Resistance | CAD      | 790    | 37 | 2 | 27447329 | 27447329 | Missense_Mutation | SNP | G | A | 10 | 114 | c.1225G>A     | c.(1225-1227)GCT>ACT | p.A409T       |
| Pat_41 | Post-Resistance | CAD      | 790    | 37 | 2 | 27465599 | 27465599 | Missense_Mutation | SNP | C | T | 24 | 202 | c.6334C>T     | c.(6334-6336)CCA>TCA | p.P2112S      |
| Pat_41 | Post-Resistance | SNX17    | 9784   | 37 | 2 | 27598548 | 27598548 | Missense_Mutation | SNP | G | A | 8  | 113 | c.950G>A      | c.(949-951)CGC>CAC   | p.R317H       |
| Pat_41 | Post-Resistance | NRBP1    | 29959  | 37 | 2 | 27664656 | 27664656 | Missense_Mutation | SNP | G | A | 45 | 253 | c.1585G>A     | c.(1585-1587)GCC>ACC | p.A529T       |
| Pat_41 | Post-Resistance | IFT172   | 26160  | 37 | 2 | 27677269 | 27677269 | Missense_Mutation | SNP | G | A | 7  | 220 | c.3482C>T     | c.(3481-3483)GCT>GTT | p.A1161V      |
| Pat_41 | Post-Resistance | FNDC4    | 64838  | 37 | 2 | 27716802 | 27716802 | Missense_Mutation | SNP | C | T | 14 | 204 | c.449G>A      | c.(448-450)AGC>AAC   | p.S150N       |
| Pat_41 | Post-Resistance | GCKR     | 2646   | 37 | 2 | 27746206 | 27746206 | Missense_Mutation | SNP | C | T | 8  | 49  | c.1778C>T     | c.(1777-1779)GCA>GTA | p.A593V       |
| Pat_41 | Post-Resistance | C2orf16  | 84226  | 37 | 2 | 27804067 | 27804067 | Missense_Mutation | SNP | G | A | 21 | 209 | c.4628G>A     | c.(4627-4629)AGC>AAC | p.S1543N      |
| Pat_41 | Post-Resistance | C2orf16  | 84226  | 37 | 2 | 27804870 | 27804870 | Missense_Mutation | SNP | G | A | 27 | 199 | c.5431G>A     | c.(5431-5433)GAG>AAG | p.E1811K      |
| Pat_41 | Post-Resistance | ZNF512   | 84450  | 37 | 2 | 27822521 | 27822521 | Missense_Mutation | SNP | C | T | 8  | 73  | c.349C>T      | c.(349-351)CCT>TCT   | p.P117S       |
| Pat_41 | Post-Resistance | SUPT7L   | 9913   | 37 | 2 | 27878382 | 27878382 | Missense_Mutation | SNP | C | T | 7  | 108 | c.832G>A      | c.(832-834)GAA>AAA   | p.E278K       |
| Pat_41 | Post-Resistance | PLB1     | 151056 | 37 | 2 | 28801018 | 28801018 | Missense_Mutation | SNP | A | G | 4  | 96  | c.1478A>G     | c.(1477-1479)AAT>AGT | p.N493S       |
| Pat_41 | Post-Resistance | PLB1     | 151056 | 37 | 2 | 28825688 | 28825688 | Missense_Mutation | SNP | G | A | 19 | 182 | c.2674G>A     | c.(2674-2676)GTG>ATG | p.V892M       |
| Pat_41 | Post-Resistance | PLB1     | 151056 | 37 | 2 | 28841216 | 28841216 | Missense_Mutation | SNP | C | T | 67 | 492 | c.3265C>T     | c.(3265-3267)CTC>TTC | p.L1089F      |
| Pat_41 | Post-Resistance | CLIP4    | 79745  | 37 | 2 | 29344297 | 29344297 | Missense_Mutation | SNP | C | T | 12 | 146 | c.43C>T       | c.(43-45)CCT>TCT     | p.P15S        |
| Pat_41 | Post-Resistance | CLIP4    | 79745  | 37 | 2 | 29354184 | 29354184 | Missense_Mutation | SNP | C | T | 8  | 179 | c.194C>T      | c.(193-195)ACT>ATT   | p.T65I        |
| Pat_41 | Post-Resistance | ALK      | 238    | 37 | 2 | 29416599 | 29416599 | Missense_Mutation | SNP | C | T | 17 | 216 | c.4354G>A     | c.(4354-4356)GCT>ACT | p.A1452T      |
| Pat_41 | Post-Resistance | ALK      | 238    | 37 | 2 | 29446380 | 29446380 | Missense_Mutation | SNP | G | A | 15 | 74  | c.3187C>T     | c.(3187-3189)CAC>TAC | p.H1063Y      |
| Pat_41 | Post-Resistance | ALK      | 238    | 37 | 2 | 29917868 | 29917868 | Missense_Mutation | SNP | C | T | 12 | 176 | c.800G>A      | c.(799-801)AGC>AAC   | p.S267N       |
| Pat_41 | Post-Resistance | MEMO1    | 51072  | 37 | 2 | 32108531 | 32108531 | Missense_Mutation | SNP | C | T | 45 | 374 | c.581G>A      | c.(580-582)GGT>GAT   | p.G194D       |
| Pat_41 | Post-Resistance | NLRC4    | 58484  | 37 | 2 | 32474873 | 32474873 | Missense_Mutation | SNP | G | A | 6  | 81  | c.2060C>T     | c.(2059-2061)GCC>GTC | p.A687V       |
| Pat_41 | Post-Resistance | NLRC4    | 58484  | 37 | 2 | 32475537 | 32475537 | Missense_Mutation | SNP | C | T | 13 | 169 | c.1396G>A     | c.(1396-1398)GAG>AAG | p.E466K       |
| Pat_41 | Post-Resistance | BIRC6    | 57448  | 37 | 2 | 32641130 | 32641130 | Missense_Mutation | SNP | C | T | 21 | 69  | c.2771C>T     | c.(2770-2772)GCC>GTC | p.A924V       |
| Pat_41 | Post-Resistance | BIRC6    | 57448  | 37 | 2 | 32715153 | 32715153 | Missense_Mutation | SNP | C | T | 33 | 574 | c.8141C>T     | c.(8140-8142)ACT>ATT | p.T2714I      |
| Pat_41 | Post-Resistance | LTBP1    | 4052   | 37 | 2 | 33246023 | 33246023 | Nonsense_Mutation | SNP | C | T | 45 | 567 | c.613C>T      | c.(613-615)CAA>TAA   | p.Q205*       |
| Pat_41 | Post-Resistance | LTBP1    | 4052   | 37 | 2 | 33335776 | 33335776 | Missense_Mutation | SNP | C | T | 7  | 234 | c.991C>T      | c.(991-993)CCT>TCT   | p.P331S       |
| Pat_41 | Post-Resistance | LTBP1    | 4052   | 37 | 2 | 33359917 | 33359917 | Missense_Mutation | SNP | C | T | 13 | 143 | c.1091C>T     | c.(1090-1092)ACC>ATC | p.T364I       |
| Pat_41 | Post-Resistance | FAM98A   | 25940  | 37 | 2 | 33810177 | 33810177 | Missense_Mutation | SNP | C | T | 38 | 202 | c.1223G>A     | c.(1222-1224)GGC>GAC | p.G408D       |
| Pat_41 | Post-Resistance | FAM98A   | 25940  | 37 | 2 | 33817276 | 33817276 | Missense_Mutation | SNP | T | G | 24 | 363 | c.208A>C      | c.(208-210)AGT>CGT   | p.S70R        |
| Pat_41 | Post-Resistance | VIT      | 5212   | 37 | 2 | 36982107 | 36982107 | Missense_Mutation | SNP | G | A | 9  | 292 | c.319G>A      | c.(319-321)GTT>ATT   | p.V107I       |
| Pat_41 | Post-Resistance | CEBPZ    | 10153  | 37 | 2 | 37443458 | 37443458 | Splice_Site       | SNP | C | T | 8  | 105 | c.2311_splice | c.e7+1               | p.E771_splice |
| Pat_41 | Post-Resistance | CDC42EP3 | 10602  | 37 | 2 | 37873007 | 37873007 | Missense_Mutation | SNP | G | A | 9  | 133 | c.724C>T      | c.(724-726)CTT>TTT   | p.L242F       |
| Pat_41 | Post-Resistance | CDC42EP3 | 10602  | 37 | 2 | 37873370 | 37873370 | Missense_Mutation | SNP | G | A | 7  | 100 | c.361C>T      | c.(361-363)CCC>TCC   | p.P121S       |
| Pat_41 | Post-Resistance | SOS1     | 6654   | 37 | 2 | 39213279 | 39213279 | Missense_Mutation | SNP | G | T | 22 | 189 | c.3688C>A     | c.(3688-3690)CCA>ACA | p.P1230T      |
| Pat_41 | Post-Resistance | SOS1     | 6654   | 37 | 2 | 39224083 | 39224083 | Missense_Mutation | SNP | G | A | 13 | 272 | c.3061C>T     | c.(3061-3063)CCT>TCT | p.P1021S      |
| Pat_41 | Post-Resistance | MAP4K3   | 8491   | 37 | 2 | 39553381 | 39553381 | Missense_Mutation | SNP | C | T | 29 | 488 | c.568G>A      | c.(568-570)GGT>AGT   | p.G190S       |
| Pat_41 | Post-Resistance | SLC8A1   | 6546   | 37 | 2 | 40392083 | 40392083 | Missense_Mutation | SNP | C | T | 26 | 257 | c.2080G>A     | c.(2080-2082)GAG>AAG | p.E694K       |

|        |                 |               |        |    |   |          |          |                   |     |   |   |    |     |               |                      |               |
|--------|-----------------|---------------|--------|----|---|----------|----------|-------------------|-----|---|---|----|-----|---------------|----------------------|---------------|
| Pat_41 | Post-Resistance | SLC8A1        | 6546   | 37 | 2 | 40656072 | 40656072 | Missense_Mutation | SNP | G | A | 24 | 253 | c.1349C>T     | c.(1348-1350)ACA>ATA | p.T450I       |
| Pat_41 | Post-Resistance | EML4          | 27436  | 37 | 2 | 42508017 | 42508017 | Missense_Mutation | SNP | G | A | 20 | 95  | c.695G>A      | c.(694-696)CGC>CAC   | p.R232H       |
| Pat_41 | Post-Resistance | LOC728819     | 728819 | 37 | 2 | 43902939 | 43902939 | Missense_Mutation | SNP | C | T | 24 | 426 | c.523G>A      | c.(523-525)GAC>AAC   | p.D175N       |
| Pat_41 | Post-Resistance | PLEKHH2       | 130271 | 37 | 2 | 43939514 | 43939514 | Missense_Mutation | SNP | C | T | 4  | 115 | c.2452C>T     | c.(2452-2454)CTC>TTC | p.L818F       |
| Pat_41 | Post-Resistance | LRPPRC        | 10128  | 37 | 2 | 44176749 | 44176749 | Missense_Mutation | SNP | C | T | 19 | 141 | c.1727G>A     | c.(1726-1728)GGA>GAA | p.G576E       |
| Pat_41 | Post-Resistance | PPM1B         | 5495   | 37 | 2 | 44428835 | 44428835 | Missense_Mutation | SNP | C | T | 9  | 337 | c.497C>T      | c.(496-498)ACC>ATC   | p.T166I       |
| Pat_41 | Post-Resistance | SLC3A1        | 6519   | 37 | 2 | 44541007 | 44541007 | Missense_Mutation | SNP | G | A | 7  | 177 | c.1534G>A     | c.(1534-1536)GAC>AAC | p.D512N       |
| Pat_41 | Post-Resistance | PREPL         | 9581   | 37 | 2 | 44553948 | 44553948 | Missense_Mutation | SNP | G | A | 4  | 111 | c.1649C>T     | c.(1648-1650)CCA>CTA | p.P550L       |
| Pat_41 | Post-Resistance | PRKCE         | 5581   | 37 | 2 | 46378189 | 46378189 | Missense_Mutation | SNP | G | A | 5  | 60  | c.1741G>A     | c.(1741-1743)GAG>AAG | p.E581K       |
| Pat_41 | Post-Resistance | RHOQ          | 23433  | 37 | 2 | 46770261 | 46770261 | Missense_Mutation | SNP | C | T | 25 | 261 | c.76C>T       | c.(76-78)CTC>TTC     | p.L26F        |
| Pat_41 | Post-Resistance | MSH2          | 4436   | 37 | 2 | 47643505 | 47643505 | Missense_Mutation | SNP | G | T | 18 | 260 | c.1013G>T     | c.(1012-1014)GGA>GTA | p.G338V       |
| Pat_41 | Post-Resistance | KCNK12        | 56660  | 37 | 2 | 47748459 | 47748459 | Missense_Mutation | SNP | G | A | 4  | 24  | c.880C>T      | c.(880-882)CTC>TTC   | p.L294F       |
| Pat_41 | Post-Resistance | MSH6          | 2956   | 37 | 2 | 48018065 | 48018065 | Splice_Site       | SNP | G | A | 24 | 168 | c.261_splice  | c.e2-1               | p.S87_splice  |
| Pat_41 | Post-Resistance | FOXN2         | 3344   | 37 | 2 | 48600496 | 48600496 | Missense_Mutation | SNP | G | A | 31 | 130 | c.769G>A      | c.(769-771)GAA>AAA   | p.E257K       |
| Pat_41 | Post-Resistance | KLRAQ1        | 129285 | 37 | 2 | 48688296 | 48688296 | Missense_Mutation | SNP | C | T | 4  | 88  | c.619C>T      | c.(619-621)CTT>TTT   | p.L207F       |
| Pat_41 | Post-Resistance | STON1-GTF2A1L | 286749 | 37 | 2 | 48808655 | 48808655 | Missense_Mutation | SNP | G | A | 6  | 91  | c.883G>A      | c.(883-885)GGA>AGA   | p.G295R       |
| Pat_41 | Post-Resistance | LHCGR         | 3973   | 37 | 2 | 48915873 | 48915873 | Missense_Mutation | SNP | C | T | 20 | 222 | c.1063G>A     | c.(1063-1065)GAT>AAT | p.D355N       |
| Pat_41 | Post-Resistance | FSHR          | 2492   | 37 | 2 | 49191017 | 49191017 | Missense_Mutation | SNP | C | T | 18 | 464 | c.943G>A      | c.(943-945)GCA>ACA   | p.A315T       |
| Pat_41 | Post-Resistance | CHAC2         | 494143 | 37 | 2 | 53995144 | 53995144 | Missense_Mutation | SNP | G | A | 16 | 140 | c.121G>A      | c.(121-123)GGG>AGG   | p.G41R        |
| Pat_41 | Post-Resistance | ERLEC1        | 27248  | 37 | 2 | 54040096 | 54040096 | Missense_Mutation | SNP | G | A | 5  | 175 | c.1112G>A     | c.(1111-1113)AGT>AAT | p.S371N       |
| Pat_41 | Post-Resistance | SPTBN1        | 6711   | 37 | 2 | 54858180 | 54858180 | Missense_Mutation | SNP | C | T | 17 | 220 | c.2996C>T     | c.(2995-2997)ACC>ATC | p.T999I       |
| Pat_41 | Post-Resistance | SPTBN1        | 6711   | 37 | 2 | 54880977 | 54880977 | Nonsense_Mutation | SNP | C | T | 8  | 63  | c.5809C>T     | c.(5809-5811)CAG>TAG | p.Q1937*      |
| Pat_41 | Post-Resistance | CCDC88A       | 55704  | 37 | 2 | 55518866 | 55518866 | Missense_Mutation | SNP | C | T | 9  | 160 | c.5594G>A     | c.(5593-5595)AGG>AAG | p.R1865K      |
| Pat_41 | Post-Resistance | CCDC88A       | 55704  | 37 | 2 | 55522765 | 55522765 | Missense_Mutation | SNP | G | A | 13 | 384 | c.5516C>T     | c.(5515-5517)GCT>GTT | p.A1839V      |
| Pat_41 | Post-Resistance | CCDC88A       | 55704  | 37 | 2 | 55522802 | 55522802 | Missense_Mutation | SNP | C | T | 23 | 475 | c.5479G>A     | c.(5479-5481)GAC>AAC | p.D1827N      |
| Pat_41 | Post-Resistance | PAPOLG        | 64895  | 37 | 2 | 61014666 | 61014666 | Nonsense_Mutation | SNP | G | A | 29 | 118 | c.1307G>A     | c.(1306-1308)TGG>TAG | p.W436*       |
| Pat_41 | Post-Resistance | PAPOLG        | 64895  | 37 | 2 | 61022111 | 61022111 | Missense_Mutation | SNP | G | A | 7  | 245 | c.2068G>A     | c.(2068-2070)GGA>AGA | p.G690R       |
| Pat_41 | Post-Resistance | REL           | 5966   | 37 | 2 | 61149357 | 61149357 | Missense_Mutation | SNP | G | A | 16 | 166 | c.1547G>A     | c.(1546-1548)AGC>AAC | p.S516N       |
| Pat_41 | Post-Resistance | PUS10         | 150962 | 37 | 2 | 61175236 | 61175236 | Missense_Mutation | SNP | C | T | 41 | 464 | c.1393G>A     | c.(1393-1395)GAG>AAG | p.E465K       |
| Pat_41 | Post-Resistance | USP34         | 9736   | 37 | 2 | 61524004 | 61524004 | Nonsense_Mutation | SNP | C | T | 34 | 512 | c.4185G>A     | c.(4183-4185)TGG>TGA | p.W1395*      |
| Pat_41 | Post-Resistance | B3GNT2        | 10678  | 37 | 2 | 62449597 | 62449597 | Missense_Mutation | SNP | C | T | 43 | 784 | c.242C>T      | c.(241-243)ACG>ATG   | p.T81M        |
| Pat_41 | Post-Resistance | B3GNT2        | 10678  | 37 | 2 | 62449728 | 62449728 | Missense_Mutation | SNP | T | C | 33 | 371 | c.373T>C      | c.(373-375)TGC>CGC   | p.C125R       |
| Pat_41 | Post-Resistance | EHBP1         | 23301  | 37 | 2 | 63176236 | 63176236 | Missense_Mutation | SNP | C | T | 8  | 110 | c.2360C>T     | c.(2359-2361)TCT>TTT | p.S787F       |
| Pat_41 | Post-Resistance | C2orf86       | 51057  | 37 | 2 | 63660953 | 63660953 | Missense_Mutation | SNP | G | A | 30 | 131 | c.751C>T      | c.(751-753)CCT>TCT   | p.P251S       |
| Pat_41 | Post-Resistance | UGP2          | 7360   | 37 | 2 | 64114737 | 64114737 | Missense_Mutation | SNP | C | T | 33 | 425 | c.1273C>T     | c.(1273-1275)CCT>TCT | p.P425S       |
| Pat_41 | Post-Resistance | AFTPH         | 54812  | 37 | 2 | 64800203 | 64800203 | Splice_Site       | SNP | G | A | 14 | 203 | c.2394_splice | c.e5+1               | p.Q798_splice |
| Pat_41 | Post-Resistance | WDR92         | 116143 | 37 | 2 | 68384458 | 68384458 | Missense_Mutation | SNP | C | T | 21 | 146 | c.118G>A      | c.(118-120)GCA>ACA   | p.A40T        |
| Pat_41 | Post-Resistance | PNO1          | 56902  | 37 | 2 | 68385656 | 68385656 | Missense_Mutation | SNP | A | T | 11 | 152 | c.352A>T      | c.(352-354)ATC>TTC   | p.I118F       |
| Pat_41 | Post-Resistance | PNO1          | 56902  | 37 | 2 | 68389753 | 68389753 | Missense_Mutation | SNP | C | T | 15 | 426 | c.578C>T      | c.(577-579)ACC>ATC   | p.T193I       |
| Pat_41 | Post-Resistance | ARHGAP25      | 9938   | 37 | 2 | 69049701 | 69049701 | Missense_Mutation | SNP | C | T | 9  | 165 | c.1427C>T     | c.(1426-1428)GCT>GTT | p.A476V       |
| Pat_41 | Post-Resistance | PCBP1         | 5093   | 37 | 2 | 70315398 | 70315398 | Nonsense_Mutation | SNP | C | T | 33 | 119 | c.523C>T      | c.(523-525)CAA>TAA   | p.Q175*       |
| Pat_41 | Post-Resistance | TIA1          | 7072   | 37 | 2 | 70442564 | 70442564 | Missense_Mutation | SNP | C | T | 11 | 198 | c.827G>A      | c.(826-828)GGT>GAT   | p.G276D       |
| Pat_41 | Post-Resistance | CLEC4F        | 165530 | 37 | 2 | 71044113 | 71044113 | Nonsense_Mutation | SNP | G | A | 38 | 256 | c.400C>T      | c.(400-402)CAG>TAG   | p.Q134*       |
| Pat_41 | Post-Resistance | TEX261        | 113419 | 37 | 2 | 71221839 | 71221839 | Missense_Mutation | SNP | C | T | 6  | 39  | c.49G>A       | c.(49-51)GCC>ACC     | p.A17T        |
| Pat_41 | Post-Resistance | MPHOSPH10     | 10199  | 37 | 2 | 71360278 | 71360278 | Missense_Mutation | SNP | G | A | 6  | 73  | c.340G>A      | c.(340-342)GAA>AAA   | p.E114K       |
| Pat_41 | Post-Resistance | MPHOSPH10     | 10199  | 37 | 2 | 71368380 | 71368380 | Missense_Mutation | SNP | C | T | 6  | 211 | c.1327C>T     | c.(1327-1329)CGT>TGT | p.R443C       |
| Pat_41 | Post-Resistance | ZNF638        | 27332  | 37 | 2 | 71576166 | 71576166 | Missense_Mutation | SNP | C | T | 16 | 109 | c.82C>T       | c.(82-84)CCA>TCA     | p.P28S        |

|        |                 |           |        |    |   |           |           |                   |     |   |   |    |     |               |                        |                |
|--------|-----------------|-----------|--------|----|---|-----------|-----------|-------------------|-----|---|---|----|-----|---------------|------------------------|----------------|
| Pat_41 | Post-Resistance | ZNF638    | 27332  | 37 | 2 | 71623280  | 71623280  | Missense_Mutation | SNP | G | A | 11 | 141 | c.2387G>A     | c.(2386-2388)GGA>GAA   | p.G796E        |
| Pat_41 | Post-Resistance | ZNF638    | 27332  | 37 | 2 | 71627260  | 71627260  | Missense_Mutation | SNP | C | T | 4  | 123 | c.2606C>T     | c.(2605-2607)ACC>ATC   | p.T869I        |
| Pat_41 | Post-Resistance | RAB11FIP5 | 26056  | 37 | 2 | 73315638  | 73315638  | Missense_Mutation | SNP | C | T | 19 | 66  | c.1108G>A     | c.(1108-1110)GCT>ACT   | p.A370T        |
| Pat_41 | Post-Resistance | CCT7      | 10574  | 37 | 2 | 73467624  | 73467624  | Missense_Mutation | SNP | C | T | 5  | 110 | c.220C>T      | c.(220-222)CCT>TCT     | p.P74S         |
| Pat_41 | Post-Resistance | FBXO41    | 150726 | 37 | 2 | 73490957  | 73490957  | Missense_Mutation | SNP | C | T | 7  | 40  | c.2107G>A     | c.(2107-2109)GGC>AGC   | p.G703S        |
| Pat_41 | Post-Resistance | ALMS1     | 7840   | 37 | 2 | 73762077  | 73762077  | Splice_Site       | SNP | G | A | 49 | 489 | c.9910_splice | c.e14+1                | p.G3304_splice |
| Pat_41 | Post-Resistance | ALMS1     | 7840   | 37 | 2 | 73800181  | 73800181  | Missense_Mutation | SNP | G | A | 15 | 102 | c.11180G>A    | c.(11179-11181)GGT>GAT | p.G3727D       |
| Pat_41 | Post-Resistance | DUSP11    | 8446   | 37 | 2 | 73989876  | 73989876  | Missense_Mutation | SNP | G | A | 15 | 187 | c.1046C>T     | c.(1045-1047)GCC>GTC   | p.A349V        |
| Pat_41 | Post-Resistance | ACTG2     | 72     | 37 | 2 | 74136264  | 74136264  | Missense_Mutation | SNP | C | T | 23 | 311 | c.449C>T      | c.(448-450)ACA>ATA     | p.T150I        |
| Pat_41 | Post-Resistance | TET3      | 200424 | 37 | 2 | 74275025  | 74275025  | Missense_Mutation | SNP | G | A | 5  | 21  | c.1576G>A     | c.(1576-1578)GAA>AAA   | p.E526K        |
| Pat_41 | Post-Resistance | SLC4A5    | 57835  | 37 | 2 | 74542125  | 74542125  | Missense_Mutation | SNP | C | T | 18 | 333 | c.26G>A       | c.(25-27)GGG>GAG       | p.G9E          |
| Pat_41 | Post-Resistance | DCTN1     | 1639   | 37 | 2 | 74590452  | 74590452  | Missense_Mutation | SNP | G | A | 5  | 38  | c.3314C>T     | c.(3313-3315)TCC>TTC   | p.S1105F       |
| Pat_41 | Post-Resistance | DCTN1     | 1639   | 37 | 2 | 74597318  | 74597318  | Missense_Mutation | SNP | C | T | 11 | 70  | c.1282G>A     | c.(1282-1284)GAG>AAG   | p.E428K        |
| Pat_41 | Post-Resistance | RTKN      | 6242   | 37 | 2 | 74656046  | 74656046  | Missense_Mutation | SNP | G | A | 8  | 160 | c.779C>T      | c.(778-780)GCT>GTT     | p.A260V        |
| Pat_41 | Post-Resistance | INO80B    | 83444  | 37 | 2 | 74683256  | 74683256  | Missense_Mutation | SNP | C | T | 7  | 94  | c.397C>T      | c.(397-399)CCA>TCA     | p.P133S        |
| Pat_41 | Post-Resistance | LOXL3     | 84695  | 37 | 2 | 74761253  | 74761253  | Missense_Mutation | SNP | C | T | 27 | 102 | c.2050G>A     | c.(2050-2052)GTG>ATG   | p.V684M        |
| Pat_41 | Post-Resistance | LOXL3     | 84695  | 37 | 2 | 74762821  | 74762821  | Missense_Mutation | SNP | G | A | 7  | 46  | c.1310C>T     | c.(1309-1311)CCT>CTT   | p.P437L        |
| Pat_41 | Post-Resistance | DOK1      | 1796   | 37 | 2 | 74784033  | 74784033  | Missense_Mutation | SNP | C | T | 28 | 488 | c.1238C>T     | c.(1237-1239)CCC>CTC   | p.P413L        |
| Pat_41 | Post-Resistance | HK2       | 3099   | 37 | 2 | 75094799  | 75094799  | Missense_Mutation | SNP | C | T | 57 | 656 | c.263C>T      | c.(262-264)ACC>ATC     | p.T88I         |
| Pat_41 | Post-Resistance | TGOLN2    | 10618  | 37 | 2 | 85553665  | 85553665  | Missense_Mutation | SNP | G | A | 32 | 245 | c.1190C>T     | c.(1189-1191)GCT>GTT   | p.A397V        |
| Pat_41 | Post-Resistance | RETSAT    | 54884  | 37 | 2 | 85577249  | 85577249  | Missense_Mutation | SNP | G | A | 25 | 188 | c.713C>T      | c.(712-714)TCC>TTC     | p.S238F        |
| Pat_41 | Post-Resistance | USP39     | 10713  | 37 | 2 | 85850775  | 85850775  | Missense_Mutation | SNP | G | A | 44 | 650 | c.440G>A      | c.(439-441)GGT>GAT     | p.G147D        |
| Pat_41 | Post-Resistance | POLR1A    | 25885  | 37 | 2 | 86297328  | 86297328  | Missense_Mutation | SNP | G | A | 13 | 96  | c.1679C>T     | c.(1678-1680)TCC>TTC   | p.S560F        |
| Pat_41 | Post-Resistance | KDM3A     | 55818  | 37 | 2 | 86701976  | 86701976  | Missense_Mutation | SNP | G | A | 50 | 362 | c.1802G>A     | c.(1801-1803)GGC>GAC   | p.G601D        |
| Pat_41 | Post-Resistance | KDM3A     | 55818  | 37 | 2 | 86707369  | 86707369  | Missense_Mutation | SNP | G | A | 11 | 82  | c.2396G>A     | c.(2395-2397)GGT>GAT   | p.G799D        |
| Pat_41 | Post-Resistance | VPS24     | 51652  | 37 | 2 | 86756464  | 86756464  | Missense_Mutation | SNP | C | T | 21 | 232 | c.163G>A      | c.(163-165)GGC>AGC     | p.G55S         |
| Pat_41 | Post-Resistance | VPS24     | 51652  | 37 | 2 | 86790432  | 86790432  | Missense_Mutation | SNP | C | T | 50 | 553 | c.40G>A       | c.(40-42)GAA>AAA       | p.E14K         |
| Pat_41 | Post-Resistance | RNF103    | 7844   | 37 | 2 | 86831817  | 86831817  | Missense_Mutation | SNP | C | T | 9  | 89  | c.1207G>A     | c.(1207-1209)GCT>ACT   | p.A403T        |
| Pat_41 | Post-Resistance | TEKT4     | 150483 | 37 | 2 | 95540645  | 95540645  | Missense_Mutation | SNP | G | A | 5  | 15  | c.838G>A      | c.(838-840)GAC>AAC     | p.D280N        |
| Pat_41 | Post-Resistance | ZNF514    | 84874  | 37 | 2 | 95818919  | 95818919  | Missense_Mutation | SNP | C | T | 21 | 209 | c.80G>A       | c.(79-81)AGG>AAG       | p.R27K         |
| Pat_41 | Post-Resistance | FAHD2A    | 51011  | 37 | 2 | 96071313  | 96071313  | Missense_Mutation | SNP | G | A | 6  | 98  | c.7G>A        | c.(7-9)GTG>ATG         | p.V3M          |
| Pat_41 | Post-Resistance | FER1L5    | 90342  | 37 | 2 | 97370253  | 97370253  | Missense_Mutation | SNP | C | T | 19 | 243 | c.6106C>T     | c.(6106-6108)CCC>TCC   | p.P2036S       |
| Pat_41 | Post-Resistance | SEMA4C    | 54910  | 37 | 2 | 97527532  | 97527532  | Missense_Mutation | SNP | G | A | 10 | 65  | c.1543C>T     | c.(1543-1545)CCC>TCC   | p.P515S        |
| Pat_41 | Post-Resistance | VWA3B     | 200403 | 37 | 2 | 98866818  | 98866818  | Missense_Mutation | SNP | A | C | 68 | 89  | c.2711A>C     | c.(2710-2712)AAG>ACG   | p.K904T        |
| Pat_41 | Post-Resistance | UNC50     | 25972  | 37 | 2 | 99232764  | 99232764  | Missense_Mutation | SNP | C | T | 36 | 205 | c.496C>T      | c.(496-498)CCA>TCA     | p.P166S        |
| Pat_41 | Post-Resistance | MGAT4A    | 11320  | 37 | 2 | 99291564  | 99291564  | Missense_Mutation | SNP | G | A | 12 | 143 | c.337C>T      | c.(337-339)CCT>TCT     | p.P113S        |
| Pat_41 | Post-Resistance | TSGA10    | 80705  | 37 | 2 | 99651772  | 99651772  | Missense_Mutation | SNP | C | T | 16 | 107 | c.1535G>A     | c.(1534-1536)AGG>AAG   | p.R512K        |
| Pat_41 | Post-Resistance | EIF5B     | 9669   | 37 | 2 | 99980878  | 99980878  | Missense_Mutation | SNP | G | A | 23 | 372 | c.1282G>A     | c.(1282-1284)GCT>ACT   | p.A428T        |
| Pat_41 | Post-Resistance | EIF5B     | 9669   | 37 | 2 | 99995860  | 99995860  | Missense_Mutation | SNP | C | T | 9  | 121 | c.2030C>T     | c.(2029-2031)GCT>GTT   | p.A677V        |
| Pat_41 | Post-Resistance | REV1      | 51455  | 37 | 2 | 100065967 | 100065967 | Splice_Site       | SNP | C | T | 4  | 63  | c.182_splice  | c.e4-1                 | p.D61_splice   |
| Pat_41 | Post-Resistance | CREG2     | 200407 | 37 | 2 | 102000094 | 102000094 | Missense_Mutation | SNP | G | A | 9  | 75  | c.512C>T      | c.(511-513)CCT>CTT     | p.P171L        |
| Pat_41 | Post-Resistance | IL1RL2    | 8808   | 37 | 2 | 102851396 | 102851396 | Missense_Mutation | SNP | G | A | 18 | 145 | c.1337G>A     | c.(1336-1338)AGG>AAG   | p.R446K        |
| Pat_41 | Post-Resistance | IL18RAP   | 8807   | 37 | 2 | 103063647 | 103063647 | Missense_Mutation | SNP | G | A | 14 | 522 | c.1190G>A     | c.(1189-1191)AGC>AAC   | p.S397N        |
| Pat_41 | Post-Resistance | SLC9A2    | 6549   | 37 | 2 | 103274281 | 103274281 | Missense_Mutation | SNP | G | A | 46 | 433 | c.548G>A      | c.(547-549)GGC>GAC     | p.G183D        |
| Pat_41 | Post-Resistance | SLC9A2    | 6549   | 37 | 2 | 103324775 | 103324775 | Missense_Mutation | SNP | G | A | 50 | 257 | c.2266G>A     | c.(2266-2268)GGC>AGC   | p.G756S        |
| Pat_41 | Post-Resistance | TMEM182   | 130827 | 37 | 2 | 103379073 | 103379073 | Missense_Mutation | SNP | G | A | 22 | 192 | c.160G>A      | c.(160-162)GGG>AGG     | p.G54R         |
| Pat_41 | Post-Resistance | C2orf49   | 79074  | 37 | 2 | 105959681 | 105959681 | Splice_Site       | SNP | G | A | 8  | 38  | c.642_splice  | c.e3+1                 | p.M214_splice  |



|        |                 |         |        |    |   |           |           |                   |     |   |   |     |     |               |                      |               |
|--------|-----------------|---------|--------|----|---|-----------|-----------|-------------------|-----|---|---|-----|-----|---------------|----------------------|---------------|
| Pat_41 | Post-Resistance | UXS1    | 80146  | 37 | 2 | 106739425 | 106739425 | Splice_Site       | SNP | C | T | 9   | 195 | c.744_splice  | c.e9+1               | p.Q248_splice |
| Pat_41 | Post-Resistance | RGPD3   | 653489 | 37 | 2 | 107041181 | 107041181 | Missense_Mutation | SNP | C | T | 103 | 424 | c.3242G>A     | c.(3241-3243)GGC>GAC | p.G1081D      |
| Pat_41 | Post-Resistance | ST6GAL2 | 84620  | 37 | 2 | 107459547 | 107459547 | Missense_Mutation | SNP | C | T | 4   | 24  | c.887G>A      | c.(886-888)TGC>TAC   | p.C296Y       |
| Pat_41 | Post-Resistance | ST6GAL2 | 84620  | 37 | 2 | 107460014 | 107460014 | Nonsense_Mutation | SNP | C | T | 22  | 219 | c.420G>A      | c.(418-420)TGG>TGA   | p.W140*       |
| Pat_41 | Post-Resistance | RGPD4   | 285190 | 37 | 2 | 108488208 | 108488208 | Missense_Mutation | SNP | G | A | 54  | 420 | c.3748G>A     | c.(3748-3750)GAT>AAT | p.D1250N      |
| Pat_41 | Post-Resistance | RGPD4   | 285190 | 37 | 2 | 108488274 | 108488274 | Missense_Mutation | SNP | C | T | 38  | 426 | c.3814C>T     | c.(3814-3816)CCA>TCA | p.P1272S      |
| Pat_41 | Post-Resistance | SULT1C3 | 442038 | 37 | 2 | 108875240 | 108875240 | Missense_Mutation | SNP | G | A | 18  | 172 | c.577G>A      | c.(577-579)GAC>AAC   | p.D193N       |
| Pat_41 | Post-Resistance | GCC2    | 9648   | 37 | 2 | 109086800 | 109086800 | Missense_Mutation | SNP | G | A | 7   | 39  | c.1015G>A     | c.(1015-1017)GAT>AAT | p.D339N       |
| Pat_41 | Post-Resistance | GCC2    | 9648   | 37 | 2 | 109087679 | 109087679 | Missense_Mutation | SNP | G | A | 15  | 186 | c.1894G>A     | c.(1894-1896)GAG>AAG | p.E632K       |
| Pat_41 | Post-Resistance | RANBP2  | 5903   | 37 | 2 | 109383056 | 109383056 | Missense_Mutation | SNP | G | A | 32  | 506 | c.6061G>A     | c.(6061-6063)GAA>AAA | p.E2021K      |
| Pat_41 | Post-Resistance | RANBP2  | 5903   | 37 | 2 | 109384545 | 109384545 | Missense_Mutation | SNP | G | A | 14  | 599 | c.7550G>A     | c.(7549-7551)GGT>GAT | p.G2517D      |
| Pat_41 | Post-Resistance | RANBP2  | 5903   | 37 | 2 | 109399254 | 109399254 | Missense_Mutation | SNP | G | A | 22  | 306 | c.9305G>A     | c.(9304-9306)GGA>GAA | p.G3102E      |
| Pat_41 | Post-Resistance | CCDC138 | 165055 | 37 | 2 | 109404537 | 109404537 | Missense_Mutation | SNP | C | T | 8   | 70  | c.143C>T      | c.(142-144)ACC>ATC   | p.T48I        |
| Pat_41 | Post-Resistance | NPHP1   | 4867   | 37 | 2 | 110926131 | 110926131 | Splice_Site       | SNP | C | T | 3   | 54  | c.523_splice  | c.e6-1               | p.K175_splice |
| Pat_41 | Post-Resistance | ANAPC1  | 64682  | 37 | 2 | 112615898 | 112615898 | Missense_Mutation | SNP | G | A | 6   | 129 | c.1343C>T     | c.(1342-1344)TCC>TTC | p.S448F       |
| Pat_41 | Post-Resistance | MERTK   | 10461  | 37 | 2 | 112751934 | 112751934 | Missense_Mutation | SNP | G | A | 25  | 245 | c.1403G>A     | c.(1402-1404)GGA>GAA | p.G468E       |
| Pat_41 | Post-Resistance | TMEM87B | 84910  | 37 | 2 | 112843588 | 112843588 | Missense_Mutation | SNP | G | A | 5   | 53  | c.845G>A      | c.(844-846)GGC>GAC   | p.G282D       |
| Pat_41 | Post-Resistance | POLR1B  | 84172  | 37 | 2 | 113305001 | 113305001 | Missense_Mutation | SNP | G | A | 12  | 242 | c.349G>A      | c.(349-351)GAT>AAT   | p.D117N       |
| Pat_41 | Post-Resistance | POLR1B  | 84172  | 37 | 2 | 113316891 | 113316891 | Missense_Mutation | SNP | C | T | 82  | 461 | c.1352C>T     | c.(1351-1353)TCT>TTT | p.S451F       |
| Pat_41 | Post-Resistance | POLR1B  | 84172  | 37 | 2 | 113333019 | 113333019 | Missense_Mutation | SNP | G | A | 82  | 161 | c.3121G>A     | c.(3121-3123)GAA>AAA | p.E1041K      |
| Pat_41 | Post-Resistance | PSD4    | 23550  | 37 | 2 | 113942976 | 113942976 | Missense_Mutation | SNP | G | A | 24  | 96  | c.1208G>A     | c.(1207-1209)GGT>GAT | p.G403D       |
| Pat_41 | Post-Resistance | PSD4    | 23550  | 37 | 2 | 113955140 | 113955140 | Splice_Site       | SNP | G | A | 4   | 91  | c.2387_splice | c.e13-1              | p.T796_splice |
| Pat_41 | Post-Resistance | DPP10   | 57628  | 37 | 2 | 116599842 | 116599842 | Missense_Mutation | SNP | G | A | 5   | 125 | c.2312G>A     | c.(2311-2313)AGC>AAC | p.S771N       |
| Pat_41 | Post-Resistance | DDX18   | 8886   | 37 | 2 | 118583129 | 118583129 | Missense_Mutation | SNP | C | T | 51  | 180 | c.1475C>T     | c.(1474-1476)CCT>CTT | p.P492L       |
| Pat_41 | Post-Resistance | MARCO   | 8685   | 37 | 2 | 119739968 | 119739968 | Missense_Mutation | SNP | G | A | 9   | 101 | c.1045G>A     | c.(1045-1047)GGA>AGA | p.G349R       |
| Pat_41 | Post-Resistance | TMEM37  | 140738 | 37 | 2 | 120194496 | 120194496 | Missense_Mutation | SNP | G | A | 3   | 42  | c.53G>A       | c.(52-54)CGC>CAC     | p.R18H        |
| Pat_41 | Post-Resistance | TMEM37  | 140738 | 37 | 2 | 120194946 | 120194946 | Missense_Mutation | SNP | C | T | 29  | 422 | c.503C>T      | c.(502-504)GCC>GTC   | p.A168V       |
| Pat_41 | Post-Resistance | SCTR    | 6344   | 37 | 2 | 120252123 | 120252123 | Missense_Mutation | SNP | G | A | 10  | 115 | c.74C>T       | c.(73-75)ACT>ATT     | p.T25I        |
| Pat_41 | Post-Resistance | TMEM177 | 80775  | 37 | 2 | 120438577 | 120438577 | Missense_Mutation | SNP | C | T | 12  | 222 | c.148C>T      | c.(148-150)CCT>TCT   | p.P50S        |
| Pat_41 | Post-Resistance | PTPN4   | 5775   | 37 | 2 | 120643453 | 120643453 | Missense_Mutation | SNP | G | A | 11  | 192 | c.670G>A      | c.(670-672)GCA>ACA   | p.A224T       |
| Pat_41 | Post-Resistance | EPB41L5 | 57669  | 37 | 2 | 120776715 | 120776715 | Missense_Mutation | SNP | G | A | 70  | 615 | c.55G>A       | c.(55-57)GAG>AAG     | p.E19K        |
| Pat_41 | Post-Resistance | EPB41L5 | 57669  | 37 | 2 | 120776841 | 120776841 | Splice_Site       | SNP | G | A | 23  | 304 | c.180_splice  | c.e2+1               | p.P60_splice  |
| Pat_41 | Post-Resistance | GLI2    | 2736   | 37 | 2 | 121747352 | 121747352 | Missense_Mutation | SNP | G | A | 8   | 69  | c.3862G>A     | c.(3862-3864)GTG>ATG | p.V1288M      |
| Pat_41 | Post-Resistance | TFCP2L1 | 29842  | 37 | 2 | 122006620 | 122006620 | Missense_Mutation | SNP | G | A | 4   | 34  | c.335C>T      | c.(334-336)ACG>ATG   | p.T112M       |
| Pat_41 | Post-Resistance | TFCP2L1 | 29842  | 37 | 2 | 122038726 | 122038726 | Missense_Mutation | SNP | G | A | 23  | 156 | c.184C>T      | c.(184-186)CAT>TAT   | p.H62Y        |
| Pat_41 | Post-Resistance | MKI67IP | 84365  | 37 | 2 | 122485887 | 122485887 | Missense_Mutation | SNP | G | A | 9   | 70  | c.670C>T      | c.(670-672)CCT>TCT   | p.P224S       |
| Pat_41 | Post-Resistance | CNTNAP5 | 129684 | 37 | 2 | 124999929 | 124999929 | Missense_Mutation | SNP | G | A | 8   | 108 | c.340G>A      | c.(340-342)GGA>AGA   | p.G114R       |
| Pat_41 | Post-Resistance | GYPC    | 2995   | 37 | 2 | 127453576 | 127453576 | Missense_Mutation | SNP | G | A | 47  | 335 | c.245G>A      | c.(244-246)CGC>CAC   | p.R82H        |
| Pat_41 | Post-Resistance | BIN1    | 274    | 37 | 2 | 127864485 | 127864485 | Missense_Mutation | SNP | C | T | 4   | 76  | c.35G>A       | c.(34-36)GGA>GAA     | p.G12E        |
| Pat_41 | Post-Resistance | CYP27C1 | 339761 | 37 | 2 | 127957069 | 127957069 | Missense_Mutation | SNP | C | T | 15  | 48  | c.435G>A      | c.(433-435)ATG>ATA   | p.M145I       |
| Pat_41 | Post-Resistance | ERCC3   | 2071   | 37 | 2 | 128044527 | 128044527 | Missense_Mutation | SNP | C | T | 18  | 193 | c.1094G>A     | c.(1093-1095)GGC>GAC | p.G365D       |
| Pat_41 | Post-Resistance | IWS1    | 55677  | 37 | 2 | 128250895 | 128250895 | Missense_Mutation | SNP | G | A | 4   | 132 | c.1891C>T     | c.(1891-1893)CTC>TTC | p.L631F       |
| Pat_41 | Post-Resistance | MYO7B   | 4648   | 37 | 2 | 128384589 | 128384589 | Nonsense_Mutation | SNP | C | T | 6   | 37  | c.4177C>T     | c.(4177-4179)CGA>TGA | p.R1393*      |
| Pat_41 | Post-Resistance | WDR33   | 55339  | 37 | 2 | 128477840 | 128477840 | Missense_Mutation | SNP | G | A | 21  | 172 | c.1759C>T     | c.(1759-1761)CCT>TCT | p.P587S       |
| Pat_41 | Post-Resistance | RAB6C   | 84084  | 37 | 2 | 130738091 | 130738091 | Nonsense_Mutation | SNP | C | T | 42  | 440 | c.403C>T      | c.(403-405)CAA>TAA   | p.Q135*       |
| Pat_41 | Post-Resistance | POTEF   | 728378 | 37 | 2 | 130877782 | 130877782 | Missense_Mutation | SNP | A | G | 12  | 299 | c.307T>C      | c.(307-309)TGC>CGC   | p.C103R       |
| Pat_41 | Post-Resistance | ARHGEF4 | 50649  | 37 | 2 | 131798881 | 131798881 | Missense_Mutation | SNP | C | T | 33  | 251 | c.1183C>T     | c.(1183-1185)CTC>TTC | p.L395F       |

|        |                 |          |        |    |   |           |           |                   |     |   |   |    |     |            |                        |          |
|--------|-----------------|----------|--------|----|---|-----------|-----------|-------------------|-----|---|---|----|-----|------------|------------------------|----------|
| Pat_41 | Post-Resistance | PLEKHB2  | 55041  | 37 | 2 | 131888310 | 131888310 | Missense_Mutation | SNP | C | T | 5  | 74  | c.310C>T   | c.(310-312)CTC>TTC     | p.L104F  |
| Pat_41 | Post-Resistance | TUBA3D   | 113457 | 37 | 2 | 132237838 | 132237838 | Missense_Mutation | SNP | C | T | 12 | 302 | c.572C>T   | c.(571-573)ACC>ATC     | p.T191I  |
| Pat_41 | Post-Resistance | GPR39    | 2863   | 37 | 2 | 133174850 | 133174850 | Missense_Mutation | SNP | G | A | 15 | 171 | c.235G>A   | c.(235-237)GAC>AAC     | p.D79N   |
| Pat_41 | Post-Resistance | LYPD1    | 116372 | 37 | 2 | 133426065 | 133426065 | Missense_Mutation | SNP | A | G | 7  | 69  | c.98T>C    | c.(97-99)CTG>CCG       | p.L33P   |
| Pat_41 | Post-Resistance | NCKAP5   | 344148 | 37 | 2 | 133486419 | 133486419 | Nonsense_Mutation | SNP | C | T | 30 | 308 | c.5550G>A  | c.(5548-5550)TGG>TGA   | p.W1850* |
| Pat_41 | Post-Resistance | YSK4     | 80122  | 37 | 2 | 135738500 | 135738500 | Missense_Mutation | SNP | C | T | 12 | 72  | c.3811G>A  | c.(3811-3813)GAC>AAC   | p.D1271N |
| Pat_41 | Post-Resistance | RAB3GAP1 | 22930  | 37 | 2 | 135809891 | 135809891 | Missense_Mutation | SNP | G | A | 9  | 40  | c.14G>A    | c.(13-15)AGT>AAT       | p.S5N    |
| Pat_41 | Post-Resistance | DARS     | 1615   | 37 | 2 | 136668717 | 136668717 | Missense_Mutation | SNP | C | T | 8  | 106 | c.1406G>A  | c.(1405-1407)GGA>GAA   | p.G469E  |
| Pat_41 | Post-Resistance | THSD7B   | 80731  | 37 | 2 | 137852567 | 137852567 | Missense_Mutation | SNP | C | T | 9  | 37  | c.982C>T   | c.(982-984)CCA>TCA     | p.P328S  |
| Pat_41 | Post-Resistance | ACVR2A   | 92     | 37 | 2 | 148677894 | 148677894 | Missense_Mutation | SNP | C | T | 12 | 148 | c.1058C>T  | c.(1057-1059)GCA>GTA   | p.A353V  |
| Pat_41 | Post-Resistance | MBD5     | 55777  | 37 | 2 | 149247133 | 149247133 | Missense_Mutation | SNP | G | A | 14 | 146 | c.3233G>A  | c.(3232-3234)GGT>GAT   | p.G1078D |
| Pat_41 | Post-Resistance | EPC2     | 26122  | 37 | 2 | 149520303 | 149520303 | Missense_Mutation | SNP | G | A | 6  | 47  | c.880G>A   | c.(880-882)GAG>AAG     | p.E294K  |
| Pat_41 | Post-Resistance | RIF1     | 55183  | 37 | 2 | 152273165 | 152273165 | Missense_Mutation | SNP | C | T | 42 | 698 | c.371C>T   | c.(370-372)TCT>TTT     | p.S124F  |
| Pat_41 | Post-Resistance | RIF1     | 55183  | 37 | 2 | 152322461 | 152322461 | Missense_Mutation | SNP | G | A | 4  | 82  | c.6427G>A  | c.(6427-6429)GCA>ACA   | p.A2143T |
| Pat_41 | Post-Resistance | NEB      | 4703   | 37 | 2 | 152409277 | 152409277 | Missense_Mutation | SNP | G | A | 7  | 62  | c.14642C>T | c.(14641-14643)GCT>GTT | p.A4881V |
| Pat_41 | Post-Resistance | NEB      | 4703   | 37 | 2 | 152426597 | 152426597 | Missense_Mutation | SNP | C | T | 12 | 24  | c.12325G>A | c.(12325-12327)GAT>AAT | p.D4109N |
| Pat_41 | Post-Resistance | CACNB4   | 785    | 37 | 2 | 152739806 | 152739806 | Missense_Mutation | SNP | C | T | 23 | 349 | c.226G>A   | c.(226-228)GAG>AAG     | p.E76K   |
| Pat_41 | Post-Resistance | PRPF40A  | 55660  | 37 | 2 | 153535943 | 153535943 | Missense_Mutation | SNP | G | A | 4  | 10  | c.581C>T   | c.(580-582)TCT>TTT     | p.S194F  |
| Pat_41 | Post-Resistance | GPD2     | 2820   | 37 | 2 | 157414034 | 157414034 | Missense_Mutation | SNP | G | A | 10 | 145 | c.1105G>A  | c.(1105-1107)GAA>AAA   | p.E369K  |
| Pat_41 | Post-Resistance | ACVR1    | 90     | 37 | 2 | 158617440 | 158617440 | Missense_Mutation | SNP | C | T | 6  | 99  | c.1216G>A  | c.(1216-1218)GCC>ACC   | p.A406T  |
| Pat_41 | Post-Resistance | DAPL1    | 92196  | 37 | 2 | 159663569 | 159663569 | Missense_Mutation | SNP | C | T | 7  | 135 | c.149C>T   | c.(148-150)GCC>GTC     | p.A50V   |
| Pat_41 | Post-Resistance | TANC1    | 85461  | 37 | 2 | 160053240 | 160053240 | Missense_Mutation | SNP | C | T | 7  | 177 | c.3101C>T  | c.(3100-3102)ACC>ATC   | p.T1034I |
| Pat_41 | Post-Resistance | TANC1    | 85461  | 37 | 2 | 160076253 | 160076253 | Missense_Mutation | SNP | G | A | 14 | 98  | c.3553G>A  | c.(3553-3555)GCT>ACT   | p.A1185T |
| Pat_41 | Post-Resistance | WDSUB1   | 151525 | 37 | 2 | 160139436 | 160139436 | Missense_Mutation | SNP | G | A | 5  | 140 | c.145C>T   | c.(145-147)CCA>TCA     | p.P49S   |
| Pat_41 | Post-Resistance | 7-Mar    | 64844  | 37 | 2 | 160599612 | 160599612 | Missense_Mutation | SNP | C | T | 9  | 254 | c.194C>T   | c.(193-195)GCA>GTA     | p.A65V   |
| Pat_41 | Post-Resistance | LY75     | 4065   | 37 | 2 | 160663489 | 160663489 | Missense_Mutation | SNP | G | A | 12 | 204 | c.4985C>T  | c.(4984-4986)CCT>CTT   | p.P1662L |
| Pat_41 | Post-Resistance | LY75     | 4065   | 37 | 2 | 160690699 | 160690699 | Missense_Mutation | SNP | G | A | 99 | 156 | c.3697C>T  | c.(3697-3699)CCA>TCA   | p.P1233S |
| Pat_41 | Post-Resistance | ITGB6    | 3694   | 37 | 2 | 160958260 | 160958260 | Missense_Mutation | SNP | G | A | 5  | 90  | c.2354C>T  | c.(2353-2355)TCC>TTC   | p.S785F  |
| Pat_41 | Post-Resistance | IFIH1    | 64135  | 37 | 2 | 163133374 | 163133374 | Missense_Mutation | SNP | C | T | 16 | 251 | c.2127G>A  | c.(2125-2127)ATG>ATA   | p.M709I  |
| Pat_41 | Post-Resistance | IFIH1    | 64135  | 37 | 2 | 163137899 | 163137899 | Missense_Mutation | SNP | G | A | 18 | 225 | c.1463C>T  | c.(1462-1464)ACA>ATA   | p.T488I  |
| Pat_41 | Post-Resistance | COBLL1   | 22837  | 37 | 2 | 165550903 | 165550903 | Missense_Mutation | SNP | C | T | 7  | 109 | c.3314G>A  | c.(3313-3315)AGT>AAT   | p.S1105N |
| Pat_41 | Post-Resistance | SLC38A11 | 151258 | 37 | 2 | 165765269 | 165765269 | Missense_Mutation | SNP | C | T | 9  | 215 | c.808G>A   | c.(808-810)GTG>ATG     | p.V270M  |
| Pat_41 | Post-Resistance | SCN3A    | 6328   | 37 | 2 | 165994501 | 165994501 | Missense_Mutation | SNP | G | A | 19 | 250 | c.2279C>T  | c.(2278-2280)CCA>CTA   | p.P760L  |
| Pat_41 | Post-Resistance | SCN3A    | 6328   | 37 | 2 | 165996042 | 165996042 | Missense_Mutation | SNP | G | A | 13 | 196 | c.2096C>T  | c.(2095-2097)TCC>TTC   | p.S699F  |
| Pat_41 | Post-Resistance | SCN2A    | 6326   | 37 | 2 | 166170192 | 166170192 | Missense_Mutation | SNP | G | A | 25 | 160 | c.1097G>A  | c.(1096-1098)AGC>AAC   | p.S366N  |
| Pat_41 | Post-Resistance | SCN2A    | 6326   | 37 | 2 | 166179958 | 166179958 | Missense_Mutation | SNP | C | T | 11 | 83  | c.1964C>T  | c.(1963-1965)TCC>TTC   | p.S655F  |
| Pat_41 | Post-Resistance | SCN2A    | 6326   | 37 | 2 | 166245950 | 166245950 | Missense_Mutation | SNP | G | C | 6  | 125 | c.5634G>C  | c.(5632-5634)CAG>CAC   | p.Q1878H |
| Pat_41 | Post-Resistance | CSRNP3   | 80034  | 37 | 2 | 166535401 | 166535401 | Missense_Mutation | SNP | G | A | 26 | 164 | c.896G>A   | c.(895-897)AGT>AAT     | p.S299N  |
| Pat_41 | Post-Resistance | SCN1A    | 6323   | 37 | 2 | 166915152 | 166915152 | Missense_Mutation | SNP | G | A | 15 | 116 | c.311C>T   | c.(310-312)GCC>GTC     | p.A104V  |
| Pat_41 | Post-Resistance | SCN9A    | 6335   | 37 | 2 | 167056222 | 167056222 | Missense_Mutation | SNP | C | T | 30 | 280 | c.4894G>A  | c.(4894-4896)GCG>ACG   | p.A1632T |
| Pat_41 | Post-Resistance | NOSTRIN  | 115677 | 37 | 2 | 169711956 | 169711956 | Missense_Mutation | SNP | C | T | 4  | 46  | c.950C>T   | c.(949-951)TCA>TTA     | p.S317L  |
| Pat_41 | Post-Resistance | ABCB11   | 8647   | 37 | 2 | 169874631 | 169874631 | Missense_Mutation | SNP | G | A | 5  | 122 | c.5C>T     | c.(4-6)TCT>TTT         | p.S2F    |
| Pat_41 | Post-Resistance | LRP2     | 4036   | 37 | 2 | 170026233 | 170026233 | Missense_Mutation | SNP | C | T | 30 | 399 | c.11476G>A | c.(11476-11478)GCG>ACC | p.A3826T |
| Pat_41 | Post-Resistance | LRP2     | 4036   | 37 | 2 | 170096163 | 170096163 | Missense_Mutation | SNP | C | T | 16 | 149 | c.4168G>A  | c.(4168-4170)GAC>AAC   | p.D1390N |
| Pat_41 | Post-Resistance | UBR3     | 130507 | 37 | 2 | 170843250 | 170843250 | Missense_Mutation | SNP | C | T | 18 | 268 | c.3730C>T  | c.(3730-3732)CCC>TCC   | p.P1244S |
| Pat_41 | Post-Resistance | MYO3B    | 140469 | 37 | 2 | 171356256 | 171356256 | Missense_Mutation | SNP | G | A | 11 | 136 | c.3227G>A  | c.(3226-3228)GGA>GAA   | p.G1076E |
| Pat_41 | Post-Resistance | MYO3B    | 140469 | 37 | 2 | 171356268 | 171356268 | Missense_Mutation | SNP | A | G | 15 | 120 | c.3239A>G  | c.(3238-3240)TAC>TGC   | p.Y1080C |

|        |                 |         |        |    |   |           |           |                   |     |   |   |    |     |               |                        |               |
|--------|-----------------|---------|--------|----|---|-----------|-----------|-------------------|-----|---|---|----|-----|---------------|------------------------|---------------|
| Pat_41 | Post-Resistance | MAP1D   | 254042 | 37 | 2 | 172926384 | 172926384 | Splice_Site       | SNP | G | A | 22 | 352 | c.198_splice  | c.e2+1                 | p.K66_splice  |
| Pat_41 | Post-Resistance | MAP1D   | 254042 | 37 | 2 | 172935770 | 172935770 | Missense_Mutation | SNP | C | T | 5  | 32  | c.676C>T      | c.(676-678)CCC>TCC     | p.P226S       |
| Pat_41 | Post-Resistance | DLX2    | 1746   | 37 | 2 | 172965299 | 172965299 | Missense_Mutation | SNP | G | A | 9  | 104 | c.959C>T      | c.(958-960)GCC>GTC     | p.A320V       |
| Pat_41 | Post-Resistance | SP3     | 6670   | 37 | 2 | 174820032 | 174820032 | Missense_Mutation | SNP | G | A | 14 | 106 | c.1208C>T     | c.(1207-1209)TCT>TTT   | p.S403F       |
| Pat_41 | Post-Resistance | GPR155  | 151556 | 37 | 2 | 175311340 | 175311340 | Missense_Mutation | SNP | G | A | 10 | 139 | c.2012C>T     | c.(2011-2013)GCT>GTT   | p.A671V       |
| Pat_41 | Post-Resistance | GPR155  | 151556 | 37 | 2 | 175333744 | 175333744 | Missense_Mutation | SNP | C | T | 5  | 253 | c.1078G>A     | c.(1078-1080)GTT>ATT   | p.V360I       |
| Pat_41 | Post-Resistance | MTX2    | 10651  | 37 | 2 | 177188121 | 177188121 | Missense_Mutation | SNP | C | T | 10 | 242 | c.137C>T      | c.(136-138)GCC>GTC     | p.A46V        |
| Pat_41 | Post-Resistance | RBM45   | 129831 | 37 | 2 | 178977382 | 178977382 | Missense_Mutation | SNP | C | T | 9  | 80  | c.109C>T      | c.(109-111)CCT>TCT     | p.P37S        |
| Pat_41 | Post-Resistance | OSBPL6  | 114880 | 37 | 2 | 179213954 | 179213954 | Missense_Mutation | SNP | C | T | 50 | 545 | c.991C>T      | c.(991-993)CCT>TCT     | p.P331S       |
| Pat_41 | Post-Resistance | DFNB59  | 494513 | 37 | 2 | 179323262 | 179323262 | Missense_Mutation | SNP | C | T | 7  | 98  | c.575C>T      | c.(574-576)CCC>CTC     | p.P192L       |
| Pat_41 | Post-Resistance | TTN     | 7273   | 37 | 2 | 179396353 | 179396353 | Missense_Mutation | SNP | G | A | 5  | 57  | c.97285C>T    | c.(97285-97287)CTC>TTC | p.L32429F     |
| Pat_41 | Post-Resistance | TTN     | 7273   | 37 | 2 | 179399496 | 179399496 | Missense_Mutation | SNP | G | A | 4  | 50  | c.94142C>T    | c.(94141-94143)ACC>ATC | p.T31381I     |
| Pat_41 | Post-Resistance | TTN     | 7273   | 37 | 2 | 179404897 | 179404897 | Missense_Mutation | SNP | G | A | 58 | 578 | c.90292C>T    | c.(90292-90294)CCT>TCT | p.P30098S     |
| Pat_41 | Post-Resistance | TTN     | 7273   | 37 | 2 | 179425690 | 179425690 | Missense_Mutation | SNP | G | A | 5  | 110 | c.77465C>T    | c.(77464-77466)TCC>TTC | p.S25822F     |
| Pat_41 | Post-Resistance | TTN     | 7273   | 37 | 2 | 179431165 | 179431165 | Missense_Mutation | SNP | G | A | 12 | 273 | c.71990C>T    | c.(71989-71991)GCC>GTC | p.A23997V     |
| Pat_41 | Post-Resistance | TTN     | 7273   | 37 | 2 | 179441092 | 179441092 | Missense_Mutation | SNP | G | A | 10 | 44  | c.62063C>T    | c.(62062-62064)TCT>TTT | p.S20688F     |
| Pat_41 | Post-Resistance | TTN     | 7273   | 37 | 2 | 179482973 | 179482973 | Missense_Mutation | SNP | C | T | 47 | 460 | c.39508G>A    | c.(39508-39510)GTT>ATT | p.V13170I     |
| Pat_41 | Post-Resistance | TTN     | 7273   | 37 | 2 | 179495564 | 179495564 | Nonsense_Mutation | SNP | C | T | 7  | 210 | c.36417G>A    | c.(36415-36417)TGG>TGA | p.W12139*     |
| Pat_41 | Post-Resistance | TTN     | 7273   | 37 | 2 | 179516255 | 179516255 | Missense_Mutation | SNP | C | T | 5  | 42  | c.32170G>A    | c.(32170-32172)GTG>ATG | p.V10724M     |
| Pat_41 | Post-Resistance | TTN     | 7273   | 37 | 2 | 179544687 | 179544687 | Missense_Mutation | SNP | C | T | 10 | 56  | c.29782G>A    | c.(29782-29784)GAG>AAC | p.E9928K      |
| Pat_41 | Post-Resistance | TTN     | 7273   | 37 | 2 | 179575875 | 179575875 | Missense_Mutation | SNP | G | A | 28 | 188 | c.24356C>T    | c.(24355-24357)ACT>ATT | p.T8119I      |
| Pat_41 | Post-Resistance | TTN     | 7273   | 37 | 2 | 179578665 | 179578665 | Missense_Mutation | SNP | G | A | 5  | 94  | c.22988C>T    | c.(22987-22989)CCT>CTT | p.P7663L      |
| Pat_41 | Post-Resistance | TTN     | 7273   | 37 | 2 | 179586661 | 179586661 | Missense_Mutation | SNP | C | T | 29 | 156 | c.18997G>A    | c.(18997-18999)GTA>ATA | p.V6333I      |
| Pat_41 | Post-Resistance | TTN     | 7273   | 37 | 2 | 179594477 | 179594477 | Missense_Mutation | SNP | G | A | 20 | 205 | c.14771C>T    | c.(14770-14772)GCC>GTC | p.A4924V      |
| Pat_41 | Post-Resistance | TTN     | 7273   | 37 | 2 | 179611780 | 179611780 | Missense_Mutation | SNP | C | T | 13 | 137 | c.15347G>A    | c.(15346-15348)AGA>AAA | p.R5116K      |
| Pat_41 | Post-Resistance | TTN     | 7273   | 37 | 2 | 179638404 | 179638404 | Missense_Mutation | SNP | G | A | 29 | 171 | c.7379C>T     | c.(7378-7380)ACC>ATC   | p.T2460I      |
| Pat_41 | Post-Resistance | TTN     | 7273   | 37 | 2 | 179643629 | 179643629 | Missense_Mutation | SNP | G | A | 17 | 104 | c.4180C>T     | c.(4180-4182)CCC>TCC   | p.P1394S      |
| Pat_41 | Post-Resistance | TTN     | 7273   | 37 | 2 | 179644795 | 179644795 | Missense_Mutation | SNP | C | T | 4  | 69  | c.3661G>A     | c.(3661-3663)GAA>AAA   | p.E1221K      |
| Pat_41 | Post-Resistance | ITGA4   | 3676   | 37 | 2 | 182359509 | 182359509 | Nonsense_Mutation | SNP | C | T | 68 | 305 | c.1309C>T     | c.(1309-1311)CAA>TAA   | p.Q437*       |
| Pat_41 | Post-Resistance | NCKAP1  | 10787  | 37 | 2 | 183792864 | 183792864 | Missense_Mutation | SNP | C | T | 28 | 181 | c.3161G>A     | c.(3160-3162)CGT>CAT   | p.R1054H      |
| Pat_41 | Post-Resistance | NCKAP1  | 10787  | 37 | 2 | 183817944 | 183817944 | Missense_Mutation | SNP | C | T | 21 | 121 | c.2269G>A     | c.(2269-2271)GTG>ATG   | p.V757M       |
| Pat_41 | Post-Resistance | ITGAV   | 3685   | 37 | 2 | 187519436 | 187519436 | Splice_Site       | SNP | G | A | 4  | 107 | c.1564_splice | c.e16+1                | p.N522_splice |
| Pat_41 | Post-Resistance | FAM171B | 165215 | 37 | 2 | 187627083 | 187627083 | Missense_Mutation | SNP | G | A | 15 | 118 | c.2014G>A     | c.(2014-2016)GCC>ACC   | p.A672T       |
| Pat_41 | Post-Resistance | COL3A1  | 1281   | 37 | 2 | 189849566 | 189849566 | Missense_Mutation | SNP | G | A | 11 | 314 | c.160G>A      | c.(160-162)GTC>ATC     | p.V54I        |
| Pat_41 | Post-Resistance | COL3A1  | 1281   | 37 | 2 | 189868140 | 189868140 | Missense_Mutation | SNP | C | T | 8  | 84  | c.2557C>T     | c.(2557-2559)CCT>TCT   | p.P853S       |
| Pat_41 | Post-Resistance | SLC40A1 | 30061  | 37 | 2 | 190436512 | 190436512 | Missense_Mutation | SNP | G | A | 38 | 335 | c.443C>T      | c.(442-444)ACT>ATT     | p.T148I       |
| Pat_41 | Post-Resistance | ASNSD1  | 54529  | 37 | 2 | 190532629 | 190532629 | Missense_Mutation | SNP | G | A | 54 | 315 | c.1604G>A     | c.(1603-1605)GGT>GAT   | p.G535D       |
| Pat_41 | Post-Resistance | ANKAR   | 150709 | 37 | 2 | 190593096 | 190593096 | Missense_Mutation | SNP | G | A | 19 | 83  | c.2768G>A     | c.(2767-2769)AGC>AAC   | p.S923N       |
| Pat_41 | Post-Resistance | INPP1   | 3628   | 37 | 2 | 191235635 | 191235635 | Missense_Mutation | SNP | C | T | 8  | 446 | c.707C>T      | c.(706-708)ACC>ATC     | p.T236I       |
| Pat_41 | Post-Resistance | STAT1   | 6772   | 37 | 2 | 191844559 | 191844559 | Missense_Mutation | SNP | G | A | 13 | 53  | c.1666C>T     | c.(1666-1668)CTT>TTT   | p.L556F       |
| Pat_41 | Post-Resistance | MYO1B   | 4430   | 37 | 2 | 192256880 | 192256880 | Missense_Mutation | SNP | G | A | 7  | 160 | c.2029G>A     | c.(2029-2031)GAA>AAA   | p.E677K       |
| Pat_41 | Post-Resistance | OBFC2A  | 64859  | 37 | 2 | 192548984 | 192548984 | Missense_Mutation | SNP | T | C | 32 | 319 | c.407T>C      | c.(406-408)ATG>ACG     | p.M136T       |
| Pat_41 | Post-Resistance | SDPR    | 8436   | 37 | 2 | 192711237 | 192711237 | Missense_Mutation | SNP | C | T | 4  | 78  | c.415G>A      | c.(415-417)GTG>ATG     | p.V139M       |
| Pat_41 | Post-Resistance | TMEFF2  | 23671  | 37 | 2 | 192863893 | 192863893 | Missense_Mutation | SNP | G | A | 21 | 107 | c.578C>T      | c.(577-579)CCC>CTC     | p.P193L       |
| Pat_41 | Post-Resistance | DNAH7   | 56171  | 37 | 2 | 196726664 | 196726664 | Missense_Mutation | SNP | G | A | 10 | 79  | c.7513C>T     | c.(7513-7515)CCT>TCT   | p.P2505S      |
| Pat_41 | Post-Resistance | DNAH7   | 56171  | 37 | 2 | 196851812 | 196851812 | Missense_Mutation | SNP | C | T | 7  | 96  | c.1732G>A     | c.(1732-1734)GAT>AAT   | p.D578N       |
| Pat_41 | Post-Resistance | DNAH7   | 56171  | 37 | 2 | 196889208 | 196889208 | Missense_Mutation | SNP | G | A | 4  | 27  | c.688C>T      | c.(688-690)CCT>TCT     | p.P230S       |

|        |                 |           |        |    |   |           |           |                   |     |   |   |    |     |               |                      |               |
|--------|-----------------|-----------|--------|----|---|-----------|-----------|-------------------|-----|---|---|----|-----|---------------|----------------------|---------------|
| Pat_41 | Post-Resistance | GTF3C3    | 9330   | 37 | 2 | 197645291 | 197645291 | Missense_Mutation | SNP | G | A | 15 | 239 | c.1210C>T     | c.(1210-1212)CCA>TCA | p.P404S       |
| Pat_41 | Post-Resistance | GTF3C3    | 9330   | 37 | 2 | 197654056 | 197654056 | Nonsense_Mutation | SNP | C | T | 5  | 76  | c.765G>A      | c.(763-765)TGG>TGA   | p.W255*       |
| Pat_41 | Post-Resistance | MOBK13    | 25843  | 37 | 2 | 198404858 | 198404858 | Missense_Mutation | SNP | G | A | 10 | 120 | c.248G>A      | c.(247-249)GGA>GAA   | p.G83E        |
| Pat_41 | Post-Resistance | RFTN2     | 130132 | 37 | 2 | 198436751 | 198436751 | Missense_Mutation | SNP | G | A | 8  | 112 | c.1487C>T     | c.(1486-1488)ACT>ATT | p.T496I       |
| Pat_41 | Post-Resistance | MARS2     | 92935  | 37 | 2 | 198571186 | 198571186 | Missense_Mutation | SNP | G | A | 53 | 585 | c.1057G>A     | c.(1057-1059)GGC>AGC | p.G353S       |
| Pat_41 | Post-Resistance | PLCL1     | 5334   | 37 | 2 | 198948668 | 198948668 | Missense_Mutation | SNP | G | A | 6  | 33  | c.427G>A      | c.(427-429)GCT>ACT   | p.A143T       |
| Pat_41 | Post-Resistance | SGOL2     | 151246 | 37 | 2 | 201434502 | 201434502 | Missense_Mutation | SNP | C | T | 26 | 185 | c.590C>T      | c.(589-591)CCT>CTT   | p.P197L       |
| Pat_41 | Post-Resistance | SGOL2     | 151246 | 37 | 2 | 201436499 | 201436499 | Missense_Mutation | SNP | C | T | 27 | 607 | c.1430C>T     | c.(1429-1431)ACT>ATT | p.T477I       |
| Pat_41 | Post-Resistance | AOX1      | 316    | 37 | 2 | 201485445 | 201485445 | Missense_Mutation | SNP | G | A | 16 | 156 | c.1777G>A     | c.(1777-1779)GCC>ACC | p.A593T       |
| Pat_41 | Post-Resistance | AOX1      | 316    | 37 | 2 | 201499601 | 201499601 | Missense_Mutation | SNP | A | G | 4  | 107 | c.2309A>G     | c.(2308-2310)GAT>GGT | p.D770G       |
| Pat_41 | Post-Resistance | ORC2L     | 4999   | 37 | 2 | 201802656 | 201802656 | Missense_Mutation | SNP | G | A | 20 | 102 | c.487C>T      | c.(487-489)CCT>TCT   | p.P163S       |
| Pat_41 | Post-Resistance | CASP10    | 843    | 37 | 2 | 202072858 | 202072858 | Missense_Mutation | SNP | C | T | 16 | 70  | c.874C>T      | c.(874-876)CAC>TAC   | p.H292Y       |
| Pat_41 | Post-Resistance | TRAK2     | 66008  | 37 | 2 | 202264105 | 202264105 | Missense_Mutation | SNP | C | T | 6  | 134 | c.475G>A      | c.(475-477)GAT>AAT   | p.D159N       |
| Pat_41 | Post-Resistance | TRAK2     | 66008  | 37 | 2 | 202265811 | 202265811 | Missense_Mutation | SNP | C | T | 21 | 258 | c.293G>A      | c.(292-294)GGC>GAC   | p.G98D        |
| Pat_41 | Post-Resistance | MPP4      | 58538  | 37 | 2 | 202545629 | 202545629 | Nonsense_Mutation | SNP | C | T | 3  | 43  | c.861G>A      | c.(859-861)TGG>TGA   | p.W287*       |
| Pat_41 | Post-Resistance | ALS2      | 57679  | 37 | 2 | 202574734 | 202574734 | Missense_Mutation | SNP | C | T | 16 | 192 | c.4150G>A     | c.(4150-4152)GGC>AGC | p.G1384S      |
| Pat_41 | Post-Resistance | ALS2      | 57679  | 37 | 2 | 202591410 | 202591410 | Nonsense_Mutation | SNP | C | T | 4  | 88  | c.3159G>A     | c.(3157-3159)TGG>TGA | p.W1053*      |
| Pat_41 | Post-Resistance | ALS2      | 57679  | 37 | 2 | 202611318 | 202611318 | Missense_Mutation | SNP | T | G | 8  | 384 | c.1969A>C     | c.(1969-1971)AAG>CAG | p.K657Q       |
| Pat_41 | Post-Resistance | CDK15     | 65061  | 37 | 2 | 202687532 | 202687532 | Missense_Mutation | SNP | C | T | 24 | 223 | c.449C>T      | c.(448-450)GCT>GTT   | p.A150V       |
| Pat_41 | Post-Resistance | CDK15     | 65061  | 37 | 2 | 202700468 | 202700468 | Missense_Mutation | SNP | C | T | 20 | 188 | c.833C>T      | c.(832-834)TCC>TTC   | p.S278F       |
| Pat_41 | Post-Resistance | FZD7      | 8324   | 37 | 2 | 202899702 | 202899702 | Missense_Mutation | SNP | C | T | 31 | 169 | c.332C>T      | c.(331-333)ACC>ATC   | p.T111I       |
| Pat_41 | Post-Resistance | FZD7      | 8324   | 37 | 2 | 202899716 | 202899716 | Missense_Mutation | SNP | G | A | 5  | 189 | c.346G>A      | c.(346-348)GCC>ACC   | p.A116T       |
| Pat_41 | Post-Resistance | FZD7      | 8324   | 37 | 2 | 202899836 | 202899836 | Missense_Mutation | SNP | G | A | 9  | 55  | c.466G>A      | c.(466-468)GCG>ACG   | p.A156T       |
| Pat_41 | Post-Resistance | BMPR2     | 659    | 37 | 2 | 203420052 | 203420052 | Missense_Mutation | SNP | C | T | 31 | 117 | c.1664C>T     | c.(1663-1665)TCT>TTT | p.S555F       |
| Pat_41 | Post-Resistance | FAM117B   | 150864 | 37 | 2 | 203624030 | 203624030 | Missense_Mutation | SNP | G | A | 5  | 123 | c.1405G>A     | c.(1405-1407)GAA>AAA | p.E469K       |
| Pat_41 | Post-Resistance | ALS2CR8   | 79800  | 37 | 2 | 203846332 | 203846332 | Missense_Mutation | SNP | G | A | 21 | 111 | c.1613G>A     | c.(1612-1614)GGT>GAT | p.G538D       |
| Pat_41 | Post-Resistance | ALS2CR8   | 79800  | 37 | 2 | 203846937 | 203846937 | Missense_Mutation | SNP | G | A | 12 | 128 | c.1832G>A     | c.(1831-1833)GGT>GAT | p.G611D       |
| Pat_41 | Post-Resistance | RAPH1     | 65059  | 37 | 2 | 204305305 | 204305305 | Missense_Mutation | SNP | G | A | 30 | 134 | c.2608C>T     | c.(2608-2610)CCA>TCA | p.P870S       |
| Pat_41 | Post-Resistance | RAPH1     | 65059  | 37 | 2 | 204305682 | 204305682 | Missense_Mutation | SNP | G | A | 21 | 240 | c.2231C>T     | c.(2230-2232)CCT>CTT | p.P744L       |
| Pat_41 | Post-Resistance | PARD3B    | 117583 | 37 | 2 | 205989104 | 205989104 | Missense_Mutation | SNP | C | T | 24 | 183 | c.1219C>T     | c.(1219-1221)CCC>TCC | p.P407S       |
| Pat_41 | Post-Resistance | NRP2      | 8828   | 37 | 2 | 206607930 | 206607930 | Missense_Mutation | SNP | C | T | 38 | 485 | c.1295C>T     | c.(1294-1296)GCT>GTT | p.A432V       |
| Pat_41 | Post-Resistance | GPR1      | 2825   | 37 | 2 | 207041418 | 207041418 | Missense_Mutation | SNP | G | A | 12 | 101 | c.554C>T      | c.(553-555)ACT>ATT   | p.T185I       |
| Pat_41 | Post-Resistance | LOC200726 | 200726 | 37 | 2 | 207509225 | 207509225 | Missense_Mutation | SNP | G | A | 10 | 62  | c.265G>A      | c.(265-267)GCA>ACA   | p.A89T        |
| Pat_41 | Post-Resistance | PIKFYVE   | 200576 | 37 | 2 | 209191008 | 209191008 | Missense_Mutation | SNP | G | A | 5  | 77  | c.3473G>A     | c.(3472-3474)AGA>AAA | p.R1158K      |
| Pat_41 | Post-Resistance | PTH2R     | 5746   | 37 | 2 | 209358014 | 209358014 | Nonsense_Mutation | SNP | G | A | 10 | 95  | c.1283G>A     | c.(1282-1284)TGG>TAG | p.W428*       |
| Pat_41 | Post-Resistance | MAP2      | 4133   | 37 | 2 | 210558884 | 210558884 | Missense_Mutation | SNP | C | T | 4  | 35  | c.1990C>T     | c.(1990-1992)CCA>TCA | p.P664S       |
| Pat_41 | Post-Resistance | MAP2      | 4133   | 37 | 2 | 210574835 | 210574835 | Missense_Mutation | SNP | G | A | 8  | 131 | c.4930G>A     | c.(4930-4932)GTC>ATC | p.V1644I      |
| Pat_41 | Post-Resistance | C2orf67   | 151050 | 37 | 2 | 211018438 | 211018438 | Missense_Mutation | SNP | G | A | 37 | 286 | c.869C>T      | c.(868-870)ACT>ATT   | p.T290I       |
| Pat_41 | Post-Resistance | CPS1      | 1373   | 37 | 2 | 211464095 | 211464095 | Splice_Site       | SNP | G | A | 6  | 155 | c.1360_splice | c.e14-1              | p.E454_splice |
| Pat_41 | Post-Resistance | CPS1      | 1373   | 37 | 2 | 211476989 | 211476989 | Missense_Mutation | SNP | G | A | 18 | 265 | c.2540G>A     | c.(2539-2541)AGC>AAC | p.S847N       |
| Pat_41 | Post-Resistance | SPAG16    | 79582  | 37 | 2 | 215274959 | 215274959 | Missense_Mutation | SNP | G | A | 23 | 286 | c.1816G>A     | c.(1816-1818)GCA>ACA | p.A606T       |
| Pat_41 | Post-Resistance | BARD1     | 580    | 37 | 2 | 215674215 | 215674215 | Missense_Mutation | SNP | C | T | 3  | 13  | c.79G>A       | c.(79-81)GAA>AAA     | p.E27K        |
| Pat_41 | Post-Resistance | FN1       | 2335   | 37 | 2 | 216236805 | 216236805 | Missense_Mutation | SNP | G | A | 19 | 106 | c.6541C>T     | c.(6541-6543)CCC>TCC | p.P2181S      |
| Pat_41 | Post-Resistance | FN1       | 2335   | 37 | 2 | 216236954 | 216236954 | Missense_Mutation | SNP | G | A | 53 | 85  | c.6392C>T     | c.(6391-6393)TCT>TTT | p.S2131F      |
| Pat_41 | Post-Resistance | FN1       | 2335   | 37 | 2 | 216257783 | 216257783 | Missense_Mutation | SNP | C | T | 8  | 108 | c.3940G>A     | c.(3940-3942)GAT>AAT | p.D1314N      |
| Pat_41 | Post-Resistance | PNKD      | 25953  | 37 | 2 | 219206769 | 219206769 | Missense_Mutation | SNP | G | A | 9  | 79  | c.683G>A      | c.(682-684)GGC>GAC   | p.G228D       |
| Pat_41 | Post-Resistance | SLC11A1   | 6556   | 37 | 2 | 219257753 | 219257753 | Missense_Mutation | SNP | G | A | 11 | 131 | c.1214G>A     | c.(1213-1215)CGC>CAC | p.R405H       |

|        |                 |          |        |    |   |           |           |                   |     |   |   |    |     |               |                      |               |
|--------|-----------------|----------|--------|----|---|-----------|-----------|-------------------|-----|---|---|----|-----|---------------|----------------------|---------------|
| Pat_41 | Post-Resistance | USP37    | 57695  | 37 | 2 | 219328071 | 219328071 | Missense_Mutation | SNP | C | T | 23 | 90  | c.2485G>A     | c.(2485-2487)GAA>AAA | p.E829K       |
| Pat_41 | Post-Resistance | USP37    | 57695  | 37 | 2 | 219423307 | 219423307 | Missense_Mutation | SNP | C | T | 39 | 221 | c.70G>A       | c.(70-72)GAA>AAA     | p.E24K        |
| Pat_41 | Post-Resistance | ZNF142   | 7701   | 37 | 2 | 219507247 | 219507247 | Missense_Mutation | SNP | G | A | 9  | 93  | c.3992C>T     | c.(3991-3993)TCC>TTC | p.S1331F      |
| Pat_41 | Post-Resistance | STK36    | 27148  | 37 | 2 | 219559006 | 219559006 | Missense_Mutation | SNP | G | A | 47 | 238 | c.2356G>A     | c.(2356-2358)GAC>AAC | p.D786N       |
| Pat_41 | Post-Resistance | STK36    | 27148  | 37 | 2 | 219563988 | 219563988 | Missense_Mutation | SNP | G | A | 27 | 69  | c.3721G>A     | c.(3721-3723)GCA>ACA | p.A1241T      |
| Pat_41 | Post-Resistance | TLL4     | 9654   | 37 | 2 | 219602830 | 219602830 | Missense_Mutation | SNP | G | A | 18 | 117 | c.431G>A      | c.(430-432)AGC>AAC   | p.S144N       |
| Pat_41 | Post-Resistance | TLL4     | 9654   | 37 | 2 | 219603268 | 219603268 | Missense_Mutation | SNP | C | T | 22 | 432 | c.869C>T      | c.(868-870)GCT>GTT   | p.A290V       |
| Pat_41 | Post-Resistance | PRKAG3   | 53632  | 37 | 2 | 219691750 | 219691750 | Nonsense_Mutation | SNP | G | A | 53 | 296 | c.1069C>T     | c.(1069-1071)CGA>TGA | p.R357*       |
| Pat_41 | Post-Resistance | WNT10A   | 80326  | 37 | 2 | 219747031 | 219747031 | Missense_Mutation | SNP | G | A | 8  | 144 | c.262G>A      | c.(262-264)GGC>AGC   | p.G88S        |
| Pat_41 | Post-Resistance | CCDC108  | 255101 | 37 | 2 | 219895848 | 219895848 | Missense_Mutation | SNP | C | T | 6  | 6   | c.995G>A      | c.(994-996)AGC>AAC   | p.S332N       |
| Pat_41 | Post-Resistance | ABCB6    | 10058  | 37 | 2 | 220075486 | 220075486 | Missense_Mutation | SNP | C | T | 4  | 131 | c.2203G>A     | c.(2203-2205)GTC>ATC | p.V735I       |
| Pat_41 | Post-Resistance | ATG9A    | 79065  | 37 | 2 | 220087033 | 220087033 | Missense_Mutation | SNP | G | A | 5  | 194 | c.1988C>T     | c.(1987-1989)GCG>GTG | p.A663V       |
| Pat_41 | Post-Resistance | ANKZF1   | 55139  | 37 | 2 | 220095062 | 220095062 | Missense_Mutation | SNP | G | A | 7  | 60  | c.83G>A       | c.(82-84)GGC>GAC     | p.G28D        |
| Pat_41 | Post-Resistance | PTPRN    | 5798   | 37 | 2 | 220155547 | 220155547 | Splice_Site       | SNP | C | T | 9  | 129 | c.2794_splice | c.e21+1              | p.G932_splice |
| Pat_41 | Post-Resistance | PTPRN    | 5798   | 37 | 2 | 220164831 | 220164831 | Missense_Mutation | SNP | G | A | 12 | 65  | c.1312C>T     | c.(1312-1314)CCC>TCC | p.P438S       |
| Pat_41 | Post-Resistance | SPEG     | 10290  | 37 | 2 | 220338478 | 220338478 | Missense_Mutation | SNP | G | A | 47 | 269 | c.4300G>A     | c.(4300-4302)GCC>ACC | p.A1434T      |
| Pat_41 | Post-Resistance | SPEG     | 10290  | 37 | 2 | 220350095 | 220350095 | Missense_Mutation | SNP | G | A | 3  | 69  | c.7637G>A     | c.(7636-7638)CGC>CAC | p.R2546H      |
| Pat_41 | Post-Resistance | SPEG     | 10290  | 37 | 2 | 220356934 | 220356934 | Missense_Mutation | SNP | C | T | 6  | 81  | c.9563C>T     | c.(9562-9564)TCC>TTC | p.S3188F      |
| Pat_41 | Post-Resistance | ACCN4    | 55515  | 37 | 2 | 220380015 | 220380015 | Missense_Mutation | SNP | G | A | 18 | 91  | c.950G>A      | c.(949-951)AGC>AAC   | p.S317N       |
| Pat_41 | Post-Resistance | OBSL1    | 23363  | 37 | 2 | 220421305 | 220421305 | Missense_Mutation | SNP | G | A | 4  | 66  | c.4207C>T     | c.(4207-4209)CCC>TCC | p.P1403S      |
| Pat_41 | Post-Resistance | MRPL44   | 65080  | 37 | 2 | 224824261 | 224824261 | Missense_Mutation | SNP | C | T | 41 | 327 | c.190C>T      | c.(190-192)CCG>TCG   | p.P64S        |
| Pat_41 | Post-Resistance | SERPINE2 | 5270   | 37 | 2 | 224866547 | 224866547 | Missense_Mutation | SNP | G | A | 21 | 207 | c.71C>T       | c.(70-72)CCT>CTT     | p.P24L        |
| Pat_41 | Post-Resistance | DOCK10   | 55619  | 37 | 2 | 225659648 | 225659648 | Missense_Mutation | SNP | G | A | 24 | 390 | c.5102C>T     | c.(5101-5103)ACC>ATC | p.T1701I      |
| Pat_41 | Post-Resistance | DOCK10   | 55619  | 37 | 2 | 225706558 | 225706558 | Missense_Mutation | SNP | G | A | 38 | 395 | c.2624C>T     | c.(2623-2625)TCT>TTT | p.S875F       |
| Pat_41 | Post-Resistance | IRS1     | 3667   | 37 | 2 | 227661668 | 227661668 | Missense_Mutation | SNP | C | T | 4  | 59  | c.1787G>A     | c.(1786-1788)GGG>GAG | p.G596E       |
| Pat_41 | Post-Resistance | COL4A4   | 1286   | 37 | 2 | 227953439 | 227953439 | Missense_Mutation | SNP | C | T | 7  | 32  | c.1553G>A     | c.(1552-1554)GGG>GAG | p.G518E       |
| Pat_41 | Post-Resistance | COL4A4   | 1286   | 37 | 2 | 227983386 | 227983386 | Missense_Mutation | SNP | C | T | 5  | 112 | c.464G>A      | c.(463-465)GGA>GAA   | p.G155E       |
| Pat_41 | Post-Resistance | COL4A3   | 1285   | 37 | 2 | 228110679 | 228110679 | Missense_Mutation | SNP | G | A | 9  | 163 | c.334G>A      | c.(334-336)GGC>AGC   | p.G112S       |
| Pat_41 | Post-Resistance | COL4A3   | 1285   | 37 | 2 | 228175595 | 228175595 | Missense_Mutation | SNP | G | A | 10 | 140 | c.4859G>A     | c.(4858-4860)GGA>GAA | p.G1620E      |
| Pat_41 | Post-Resistance | AGFG1    | 3267   | 37 | 2 | 228384668 | 228384668 | Missense_Mutation | SNP | G | A | 17 | 58  | c.266G>A      | c.(265-267)TGT>TAT   | p.C89Y        |
| Pat_41 | Post-Resistance | AGFG1    | 3267   | 37 | 2 | 228398316 | 228398316 | Missense_Mutation | SNP | C | T | 17 | 253 | c.866C>T      | c.(865-867)CCC>CTC   | p.P289L       |
| Pat_41 | Post-Resistance | SLC19A3  | 80704  | 37 | 2 | 228563653 | 228563653 | Missense_Mutation | SNP | C | T | 17 | 99  | c.778G>A      | c.(778-780)GAC>AAC   | p.D260N       |
| Pat_41 | Post-Resistance | SLC19A3  | 80704  | 37 | 2 | 228563779 | 228563779 | Missense_Mutation | SNP | C | T | 3  | 14  | c.652G>A      | c.(652-654)GAG>AAG   | p.E218K       |
| Pat_41 | Post-Resistance | WDR69    | 164781 | 37 | 2 | 228750112 | 228750112 | Missense_Mutation | SNP | C | T | 6  | 170 | c.86C>T       | c.(85-87)TCC>TTC     | p.S29F        |
| Pat_41 | Post-Resistance | TRIP12   | 9320   | 37 | 2 | 230643186 | 230643186 | Missense_Mutation | SNP | C | T | 15 | 290 | c.5102G>A     | c.(5101-5103)GGA>GAA | p.G1701E      |
| Pat_41 | Post-Resistance | TRIP12   | 9320   | 37 | 2 | 230656612 | 230656612 | Missense_Mutation | SNP | G | A | 32 | 484 | c.4160C>T     | c.(4159-4161)GCT>GTT | p.A1387V      |
| Pat_41 | Post-Resistance | SP110    | 3431   | 37 | 2 | 231076211 | 231076211 | Missense_Mutation | SNP | G | A | 8  | 76  | c.725C>T      | c.(724-726)CCC>CTC   | p.P242L       |
| Pat_41 | Post-Resistance | SP100    | 6672   | 37 | 2 | 231282365 | 231282365 | Missense_Mutation | SNP | G | A | 62 | 352 | c.92G>A       | c.(91-93)AGC>AAC     | p.S31N        |
| Pat_41 | Post-Resistance | ITM2C    | 81618  | 37 | 2 | 231740489 | 231740489 | Missense_Mutation | SNP | G | A | 37 | 427 | c.416G>A      | c.(415-417)GGT>GAT   | p.G139D       |
| Pat_41 | Post-Resistance | ARMC9    | 80210  | 37 | 2 | 232137775 | 232137775 | Nonsense_Mutation | SNP | C | T | 35 | 194 | c.1318C>T     | c.(1318-1320)CAG>TAG | p.Q440*       |
| Pat_41 | Post-Resistance | C2orf52  | 151477 | 37 | 2 | 232373844 | 232373844 | Missense_Mutation | SNP | C | T | 27 | 214 | c.247G>A      | c.(247-249)GGG>AGG   | p.G83R        |
| Pat_41 | Post-Resistance | C2orf52  | 151477 | 37 | 2 | 232373910 | 232373910 | Nonsense_Mutation | SNP | G | A | 71 | 314 | c.181C>T      | c.(181-183)CAG>TAG   | p.Q61*        |
| Pat_41 | Post-Resistance | DIS3L2   | 129563 | 37 | 2 | 233001350 | 233001350 | Missense_Mutation | SNP | G | A | 15 | 285 | c.871G>A      | c.(871-873)GCA>ACA   | p.A291T       |
| Pat_41 | Post-Resistance | CHRND    | 1144   | 37 | 2 | 233399032 | 233399032 | Missense_Mutation | SNP | G | A | 5  | 78  | c.1351G>A     | c.(1351-1353)GAC>AAC | p.D451N       |
| Pat_41 | Post-Resistance | GIGYF2   | 26058  | 37 | 2 | 233709136 | 233709136 | Missense_Mutation | SNP | C | T | 11 | 147 | c.3157C>T     | c.(3157-3159)CCT>TCT | p.P1053S      |
| Pat_41 | Post-Resistance | NGEF     | 25791  | 37 | 2 | 233839419 | 233839419 | Missense_Mutation | SNP | C | T | 10 | 134 | c.182G>A      | c.(181-183)AGA>AAA   | p.R61K        |
| Pat_41 | Post-Resistance | DGKD     | 8527   | 37 | 2 | 234375787 | 234375787 | Missense_Mutation | SNP | C | T | 16 | 276 | c.3362C>T     | c.(3361-3363)ACC>ATC | p.T1121I      |



|        |                 |           |        |    |    |           |           |                   |     |   |   |     |     |           |                      |          |
|--------|-----------------|-----------|--------|----|----|-----------|-----------|-------------------|-----|---|---|-----|-----|-----------|----------------------|----------|
| Pat_41 | Post-Resistance | USP40     | 55230  | 37 | 2  | 234465553 | 234465553 | Missense_Mutation | SNP | G | A | 5   | 110 | c.494C>T  | c.(493-495)ACC>ATC   | p.T165I  |
| Pat_41 | Post-Resistance | UGT1A6    | 54578  | 37 | 2  | 234602384 | 234602384 | Missense_Mutation | SNP | C | T | 67  | 320 | c.734C>T  | c.(733-735)ACC>ATC   | p.T245I  |
| Pat_41 | Post-Resistance | UGT1A4    | 54657  | 37 | 2  | 234627602 | 234627602 | Missense_Mutation | SNP | G | A | 5   | 53  | c.136G>A  | c.(136-138)GAG>AAG   | p.E46K   |
| Pat_41 | Post-Resistance | UGT1A1    | 54658  | 37 | 2  | 234669559 | 234669559 | Missense_Mutation | SNP | G | A | 25  | 265 | c.626G>A  | c.(625-627)CGG>CAG   | p.R209Q  |
| Pat_41 | Post-Resistance | HJURP     | 55355  | 37 | 2  | 234750429 | 234750429 | Missense_Mutation | SNP | C | T | 4   | 35  | c.997G>A  | c.(997-999)GGG>AGG   | p.G333R  |
| Pat_41 | Post-Resistance | COL6A3    | 1293   | 37 | 2  | 238234284 | 238234284 | Missense_Mutation | SNP | C | T | 21  | 192 | c.9412G>A | c.(9412-9414)GCA>ACA | p.A3138T |
| Pat_41 | Post-Resistance | COL6A3    | 1293   | 37 | 2  | 238253297 | 238253297 | Missense_Mutation | SNP | G | A | 7   | 76  | c.7364C>T | c.(7363-7365)ACC>ATC | p.T2455I |
| Pat_41 | Post-Resistance | COL6A3    | 1293   | 37 | 2  | 238280506 | 238280506 | Missense_Mutation | SNP | G | A | 13  | 113 | c.4154C>T | c.(4153-4155)CCC>CTC | p.P1385L |
| Pat_41 | Post-Resistance | LRRFIP1   | 9208   | 37 | 2  | 238668762 | 238668762 | Missense_Mutation | SNP | C | T | 9   | 102 | c.803C>T  | c.(802-804)ACC>ATC   | p.T268I  |
| Pat_41 | Post-Resistance | ASB1      | 51665  | 37 | 2  | 239353257 | 239353257 | Missense_Mutation | SNP | G | A | 10  | 89  | c.769G>A  | c.(769-771)GTA>ATA   | p.V257I  |
| Pat_41 | Post-Resistance | ANKMY1    | 51281  | 37 | 2  | 241421640 | 241421640 | Missense_Mutation | SNP | G | A | 15  | 31  | c.2578C>T | c.(2578-2580)CCC>TCC | p.P860S  |
| Pat_41 | Post-Resistance | SNED1     | 25992  | 37 | 2  | 242021733 | 242021733 | Missense_Mutation | SNP | G | A | 13  | 129 | c.4075G>A | c.(4075-4077)GAG>AAG | p.E1359K |
| Pat_41 | Post-Resistance | PASK      | 23178  | 37 | 2  | 242065707 | 242065707 | Missense_Mutation | SNP | G | A | 7   | 95  | c.2623C>T | c.(2623-2625)CCC>TCC | p.P875S  |
| Pat_41 | Post-Resistance | ANO7      | 50636  | 37 | 2  | 242138798 | 242138798 | Missense_Mutation | SNP | G | A | 18  | 41  | c.539G>A  | c.(538-540)TGC>TAC   | p.C180Y  |
| Pat_41 | Post-Resistance | ANO7      | 50636  | 37 | 2  | 242162649 | 242162649 | Nonsense_Mutation | SNP | G | A | 28  | 248 | c.2532G>A | c.(2530-2532)TGG>TGA | p.W844*  |
| Pat_41 | Post-Resistance | HDLBP     | 3069   | 37 | 2  | 242169102 | 242169102 | Missense_Mutation | SNP | C | T | 5   | 12  | c.3721G>A | c.(3721-3723)GCT>ACT | p.A1241T |
| Pat_41 | Post-Resistance | 2-Sep     | 4735   | 37 | 2  | 242275509 | 242275509 | Missense_Mutation | SNP | G | A | 9   | 55  | c.337G>A  | c.(337-339)GAT>AAT   | p.D113N  |
| Pat_41 | Post-Resistance | FARP2     | 9855   | 37 | 2  | 242402876 | 242402876 | Missense_Mutation | SNP | G | A | 6   | 81  | c.1804G>A | c.(1804-1806)GCA>ACA | p.A602T  |
| Pat_41 | Post-Resistance | THAP4     | 51078  | 37 | 2  | 242573291 | 242573291 | Missense_Mutation | SNP | G | A | 28  | 87  | c.281C>T  | c.(280-282)GCT>GTT   | p.A94V   |
| Pat_41 | Post-Resistance | PDCD1     | 5133   | 37 | 2  | 242794415 | 242794415 | Missense_Mutation | SNP | C | T | 13  | 10  | c.527G>A  | c.(526-528)GGC>GAC   | p.G176D  |
| Pat_41 | Post-Resistance | DEFB129   | 140881 | 37 | 20 | 210243    | 210243    | Missense_Mutation | SNP | C | T | 6   | 209 | c.383C>T  | c.(382-384)GCC>GTC   | p.A128V  |
| Pat_41 | Post-Resistance | PSMF1     | 9491   | 37 | 20 | 1099469   | 1099469   | Missense_Mutation | SNP | G | A | 10  | 98  | c.53G>A   | c.(52-54)AGG>AAG     | p.R18K   |
| Pat_41 | Post-Resistance | PSMF1     | 9491   | 37 | 20 | 1145117   | 1145117   | Missense_Mutation | SNP | C | T | 9   | 187 | c.761C>T  | c.(760-762)CCC>CTC   | p.P254L  |
| Pat_41 | Post-Resistance | SNPH      | 9751   | 37 | 20 | 1285635   | 1285635   | Missense_Mutation | SNP | A | G | 18  | 206 | c.422A>G  | c.(421-423)GAG>GGG   | p.E141G  |
| Pat_41 | Post-Resistance | SIRPG     | 55423  | 37 | 20 | 1616139   | 1616139   | Nonsense_Mutation | SNP | C | T | 10  | 187 | c.855G>A  | c.(853-855)TGG>TGA   | p.W285*  |
| Pat_41 | Post-Resistance | SIRPG     | 55423  | 37 | 20 | 1616227   | 1616227   | Missense_Mutation | SNP | A | G | 18  | 33  | c.767T>C  | c.(766-768)GTT>GCT   | p.V256A  |
| Pat_41 | Post-Resistance | SIRPA     | 140885 | 37 | 20 | 1895915   | 1895915   | Missense_Mutation | SNP | G | A | 9   | 89  | c.250G>A  | c.(250-252)GAA>AAA   | p.E84K   |
| Pat_41 | Post-Resistance | TMC2      | 117532 | 37 | 20 | 2591183   | 2591183   | Missense_Mutation | SNP | C | T | 6   | 129 | c.1532C>T | c.(1531-1533)GCA>GTA | p.A511V  |
| Pat_41 | Post-Resistance | IDH3B     | 3420   | 37 | 20 | 2641366   | 2641366   | Missense_Mutation | SNP | C | T | 33  | 143 | c.508G>A  | c.(508-510)GAG>AAG   | p.E170K  |
| Pat_41 | Post-Resistance | VPS16     | 64601  | 37 | 20 | 2845854   | 2845854   | Missense_Mutation | SNP | G | A | 24  | 153 | c.2065G>A | c.(2065-2067)GGC>AGC | p.G689S  |
| Pat_41 | Post-Resistance | C20orf194 | 25943  | 37 | 20 | 3245087   | 3245087   | Missense_Mutation | SNP | C | T | 8   | 78  | c.2870G>A | c.(2869-2871)GGC>GAC | p.G957D  |
| Pat_41 | Post-Resistance | C20orf194 | 25943  | 37 | 20 | 3297413   | 3297413   | Missense_Mutation | SNP | G | A | 18  | 133 | c.1496C>T | c.(1495-1497)TCC>TTC | p.S499F  |
| Pat_41 | Post-Resistance | ATRN      | 8455   | 37 | 20 | 3543933   | 3543933   | Missense_Mutation | SNP | G | A | 43  | 315 | c.1709G>A | c.(1708-1710)GGA>GAA | p.G570E  |
| Pat_41 | Post-Resistance | C20orf27  | 54976  | 37 | 20 | 3735088   | 3735088   | Missense_Mutation | SNP | C | T | 15  | 200 | c.380G>A  | c.(379-381)GGC>GAC   | p.G127D  |
| Pat_41 | Post-Resistance | CENPB     | 1059   | 37 | 20 | 3765656   | 3765656   | Missense_Mutation | SNP | G | A | 16  | 102 | c.1475C>T | c.(1474-1476)GCC>GTC | p.A492V  |
| Pat_41 | Post-Resistance | CDC25B    | 994    | 37 | 20 | 3785265   | 3785265   | Missense_Mutation | SNP | C | T | 25  | 423 | c.1540C>T | c.(1540-1542)CTC>TTC | p.L514F  |
| Pat_41 | Post-Resistance | CDS2      | 8760   | 37 | 20 | 5155911   | 5155911   | Missense_Mutation | SNP | G | A | 14  | 327 | c.277G>A  | c.(277-279)GTT>ATT   | p.V93I   |
| Pat_41 | Post-Resistance | MCM8      | 84515  | 37 | 20 | 5974160   | 5974160   | Missense_Mutation | SNP | G | A | 8   | 137 | c.2249G>A | c.(2248-2250)GGA>GAA | p.G750E  |
| Pat_41 | Post-Resistance | BMP2      | 650    | 37 | 20 | 6759129   | 6759129   | Missense_Mutation | SNP | G | A | 9   | 142 | c.584G>A  | c.(583-585)AGG>AAG   | p.R195K  |
| Pat_41 | Post-Resistance | PLCB4     | 5332   | 37 | 20 | 9351932   | 9351932   | Missense_Mutation | SNP | C | T | 32  | 188 | c.575C>T  | c.(574-576)CCC>CTC   | p.P192L  |
| Pat_41 | Post-Resistance | PLCB4     | 5332   | 37 | 20 | 9374316   | 9374316   | Missense_Mutation | SNP | G | A | 8   | 67  | c.1405G>A | c.(1405-1407)GTT>ATT | p.V469I  |
| Pat_41 | Post-Resistance | PAK7      | 57144  | 37 | 20 | 9543635   | 9543635   | Missense_Mutation | SNP | C | T | 15  | 464 | c.1519G>A | c.(1519-1521)GTT>ATT | p.V507I  |
| Pat_41 | Post-Resistance | SNAP25    | 6616   | 37 | 20 | 10279933  | 10279933  | Missense_Mutation | SNP | G | A | 190 | 280 | c.425G>A  | c.(424-426)CGA>CAA   | p.R142Q  |
| Pat_41 | Post-Resistance | JAG1      | 182    | 37 | 20 | 10637056  | 10637056  | Missense_Mutation | SNP | C | T | 9   | 151 | c.745G>A  | c.(745-747)GGT>AGT   | p.G249S  |
| Pat_41 | Post-Resistance | SPTLC3    | 55304  | 37 | 20 | 13098233  | 13098233  | Missense_Mutation | SNP | C | T | 27  | 151 | c.1013C>T | c.(1012-1014)GCT>GTT | p.A338V  |
| Pat_41 | Post-Resistance | TASP1     | 55617  | 37 | 20 | 13398114  | 13398114  | Missense_Mutation | SNP | G | A | 21  | 140 | c.1151C>T | c.(1150-1152)GCC>GTC | p.A384V  |
| Pat_41 | Post-Resistance | TASP1     | 55617  | 37 | 20 | 13605867  | 13605867  | Missense_Mutation | SNP | C | T | 20  | 289 | c.178G>A  | c.(178-180)GAG>AAG   | p.E60K   |

|        |                 |           |        |    |    |          |          |                   |     |   |   |    |     |               |                      |               |
|--------|-----------------|-----------|--------|----|----|----------|----------|-------------------|-----|---|---|----|-----|---------------|----------------------|---------------|
| Pat_41 | Post-Resistance | FLRT3     | 23767  | 37 | 20 | 14306531 | 14306531 | Missense_Mutation | SNP | G | A | 7  | 148 | c.1622C>T     | c.(1621-1623)ACC>ATC | p.T541I       |
| Pat_41 | Post-Resistance | MACROD2   | 140733 | 37 | 20 | 15967795 | 15967795 | Missense_Mutation | SNP | G | A | 9  | 81  | c.1145G>A     | c.(1144-1146)GGT>GAT | p.G382D       |
| Pat_41 | Post-Resistance | KIF16B    | 55614  | 37 | 20 | 16359631 | 16359631 | Missense_Mutation | SNP | C | T | 6  | 100 | c.3016G>A     | c.(3016-3018)GAG>AAG | p.E1006K      |
| Pat_41 | Post-Resistance | RRBP1     | 6238   | 37 | 20 | 17614165 | 17614165 | Missense_Mutation | SNP | C | T | 5  | 64  | c.8G>A        | c.(7-9)AGC>AAC       | p.S3N         |
| Pat_41 | Post-Resistance | SNX5      | 27131  | 37 | 20 | 17932164 | 17932164 | Missense_Mutation | SNP | C | T | 17 | 216 | c.589G>A      | c.(589-591)GTC>ATC   | p.V197I       |
| Pat_41 | Post-Resistance | OVOL2     | 58495  | 37 | 20 | 18022295 | 18022295 | Missense_Mutation | SNP | G | A | 5  | 103 | c.394C>T      | c.(394-396)CGC>TGC   | p.R132C       |
| Pat_41 | Post-Resistance | C20orf26  | 26074  | 37 | 20 | 20150016 | 20150016 | Missense_Mutation | SNP | C | T | 10 | 320 | c.1297C>T     | c.(1297-1299)CTC>TTC | p.L433F       |
| Pat_41 | Post-Resistance | CST5      | 1473   | 37 | 20 | 23856908 | 23856908 | Missense_Mutation | SNP | C | T | 5  | 41  | c.346G>A      | c.(346-348)GAA>AAA   | p.E116K       |
| Pat_41 | Post-Resistance | C20orf3   | 57136  | 37 | 20 | 24964612 | 24964612 | Missense_Mutation | SNP | C | T | 8  | 149 | c.139G>A      | c.(139-141)GCT>ACT   | p.A47T        |
| Pat_41 | Post-Resistance | PYGB      | 5834   | 37 | 20 | 25249831 | 25249831 | Missense_Mutation | SNP | G | A | 10 | 81  | c.412G>A      | c.(412-414)GGG>AGG   | p.G138R       |
| Pat_41 | Post-Resistance | PYGB      | 5834   | 37 | 20 | 25261584 | 25261584 | Splice_Site       | SNP | G | A | 20 | 222 | c.1240_splice | c.e11-1              | p.H414_splice |
| Pat_41 | Post-Resistance | NINL      | 22981  | 37 | 20 | 25443114 | 25443114 | Missense_Mutation | SNP | C | T | 7  | 304 | c.3487G>A     | c.(3487-3489)GCT>ACT | p.A1163T      |
| Pat_41 | Post-Resistance | NINL      | 22981  | 37 | 20 | 25478877 | 25478877 | Missense_Mutation | SNP | C | T | 7  | 56  | c.1138G>A     | c.(1138-1140)GCC>ACC | p.A380T       |
| Pat_41 | Post-Resistance | DEFB123   | 245936 | 37 | 20 | 30037835 | 30037835 | Missense_Mutation | SNP | G | A | 14 | 201 | c.62G>A       | c.(61-63)GGC>GAC     | p.G21D        |
| Pat_41 | Post-Resistance | BCL2L1    | 598    | 37 | 20 | 30309813 | 30309813 | Missense_Mutation | SNP | C | T | 5  | 259 | c.209G>A      | c.(208-210)GGC>GAC   | p.G70D        |
| Pat_41 | Post-Resistance | TPX2      | 22974  | 37 | 20 | 30366746 | 30366746 | Missense_Mutation | SNP | C | T | 7  | 171 | c.1013C>T     | c.(1012-1014)ACC>ATC | p.T338I       |
| Pat_41 | Post-Resistance | MYLK2     | 85366  | 37 | 20 | 30409498 | 30409498 | Missense_Mutation | SNP | C | T | 40 | 321 | c.730C>T      | c.(730-732)CTC>TTC   | p.L244F       |
| Pat_41 | Post-Resistance | C20orf160 | 140706 | 37 | 20 | 30610479 | 30610479 | Missense_Mutation | SNP | C | T | 10 | 249 | c.950C>T      | c.(949-951)TCC>TTC   | p.S317F       |
| Pat_41 | Post-Resistance | TM9SF4    | 9777   | 37 | 20 | 30729625 | 30729625 | Missense_Mutation | SNP | G | A | 8  | 308 | c.455G>A      | c.(454-456)AGC>AAC   | p.S152N       |
| Pat_41 | Post-Resistance | KIF3B     | 9371   | 37 | 20 | 30915391 | 30915391 | Missense_Mutation | SNP | C | T | 21 | 254 | c.1895C>T     | c.(1894-1896)GCC>GTC | p.A632V       |
| Pat_41 | Post-Resistance | ASXL1     | 171023 | 37 | 20 | 31023022 | 31023022 | Missense_Mutation | SNP | C | T | 37 | 430 | c.2507C>T     | c.(2506-2508)ACT>ATT | p.T836I       |
| Pat_41 | Post-Resistance | ASXL1     | 171023 | 37 | 20 | 31023360 | 31023360 | Missense_Mutation | SNP | G | A | 8  | 119 | c.2845G>A     | c.(2845-2847)GGT>AGT | p.G949S       |
| Pat_41 | Post-Resistance | DNMT3B    | 1789   | 37 | 20 | 31380463 | 31380463 | Missense_Mutation | SNP | C | T | 27 | 151 | c.953C>T      | c.(952-954)CCC>CTC   | p.P318L       |
| Pat_41 | Post-Resistance | CDK5RAP1  | 51654  | 37 | 20 | 31954712 | 31954712 | Missense_Mutation | SNP | C | T | 6  | 268 | c.1537G>A     | c.(1537-1539)GCC>ACC | p.A513T       |
| Pat_41 | Post-Resistance | CHMP4B    | 128866 | 37 | 20 | 32436417 | 32436417 | Missense_Mutation | SNP | C | T | 16 | 90  | c.335C>T      | c.(334-336)GCC>GTC   | p.A112V       |
| Pat_41 | Post-Resistance | CHMP4B    | 128866 | 37 | 20 | 32439907 | 32439907 | Missense_Mutation | SNP | G | A | 18 | 110 | c.508G>A      | c.(508-510)GAA>AAA   | p.E170K       |
| Pat_41 | Post-Resistance | AHCY      | 191    | 37 | 20 | 32880221 | 32880221 | Missense_Mutation | SNP | C | T | 6  | 119 | c.388G>A      | c.(388-390)GAC>AAC   | p.D130N       |
| Pat_41 | Post-Resistance | NCOA6     | 23054  | 37 | 20 | 33330006 | 33330006 | Missense_Mutation | SNP | G | A | 15 | 77  | c.4054C>T     | c.(4054-4056)CCT>TCT | p.P1352S      |
| Pat_41 | Post-Resistance | MYH7B     | 57644  | 37 | 20 | 33575479 | 33575479 | Splice_Site       | SNP | G | A | 8  | 229 | c.1392_splice | c.e15+1              | p.Q464_splice |
| Pat_41 | Post-Resistance | MYH7B     | 57644  | 37 | 20 | 33575943 | 33575943 | Nonsense_Mutation | SNP | C | T | 9  | 217 | c.1591C>T     | c.(1591-1593)CAG>TAG | p.Q531*       |
| Pat_41 | Post-Resistance | MYH7B     | 57644  | 37 | 20 | 33584554 | 33584554 | Missense_Mutation | SNP | C | T | 5  | 70  | c.3385C>T     | c.(3385-3387)CTC>TTC | p.L1129F      |
| Pat_41 | Post-Resistance | CEP250    | 11190  | 37 | 20 | 34060642 | 34060642 | Missense_Mutation | SNP | C | T | 45 | 230 | c.1195C>T     | c.(1195-1197)CGC>TGC | p.R399C       |
| Pat_41 | Post-Resistance | SPAG4     | 6676   | 37 | 20 | 34205157 | 34205157 | Missense_Mutation | SNP | T | C | 4  | 35  | c.404T>C      | c.(403-405)TTT>TCT   | p.F135S       |
| Pat_41 | Post-Resistance | NFS1      | 9054   | 37 | 20 | 34278370 | 34278370 | Missense_Mutation | SNP | G | A | 20 | 394 | c.526C>T      | c.(526-528)CTC>TTC   | p.L176F       |
| Pat_41 | Post-Resistance | RBM39     | 9584   | 37 | 20 | 34313043 | 34313043 | Missense_Mutation | SNP | C | T | 13 | 366 | c.451G>A      | c.(451-453)GAT>AAT   | p.D151N       |
| Pat_41 | Post-Resistance | PHF20     | 51230  | 37 | 20 | 34526750 | 34526750 | Missense_Mutation | SNP | C | T | 10 | 45  | c.2432C>T     | c.(2431-2433)ACT>ATT | p.T811I       |
| Pat_41 | Post-Resistance | C20orf152 | 140894 | 37 | 20 | 34599169 | 34599169 | Missense_Mutation | SNP | G | A | 9  | 132 | c.1259G>A     | c.(1258-1260)GGA>GAA | p.G420E       |
| Pat_41 | Post-Resistance | EPB41L1   | 2036   | 37 | 20 | 34763533 | 34763533 | Missense_Mutation | SNP | C | T | 5  | 88  | c.238C>T      | c.(238-240)CCC>TCC   | p.P80S        |
| Pat_41 | Post-Resistance | DLGAP4    | 22839  | 37 | 20 | 35060295 | 35060295 | Missense_Mutation | SNP | C | T | 7  | 30  | c.175C>T      | c.(175-177)CCC>TCC   | p.P59S        |
| Pat_41 | Post-Resistance | SLA2      | 84174  | 37 | 20 | 35242722 | 35242722 | Nonsense_Mutation | SNP | C | T | 9  | 290 | c.651G>A      | c.(649-651)TGG>TGA   | p.W217*       |
| Pat_41 | Post-Resistance | SAMHD1    | 25939  | 37 | 20 | 35547790 | 35547790 | Missense_Mutation | SNP | C | T | 13 | 205 | c.829G>A      | c.(829-831)GAA>AAA   | p.E277K       |
| Pat_41 | Post-Resistance | RBL1      | 5933   | 37 | 20 | 35695224 | 35695224 | Missense_Mutation | SNP | G | A | 13 | 224 | c.749C>T      | c.(748-750)GCT>GTT   | p.A250V       |
| Pat_41 | Post-Resistance | C20orf132 | 140699 | 37 | 20 | 35749312 | 35749312 | Missense_Mutation | SNP | G | A | 4  | 95  | c.2134C>T     | c.(2134-2136)CTC>TTC | p.L712F       |
| Pat_41 | Post-Resistance | C20orf132 | 140699 | 37 | 20 | 35776234 | 35776234 | Missense_Mutation | SNP | C | T | 12 | 38  | c.1183G>A     | c.(1183-1185)GCT>ACT | p.A395T       |
| Pat_41 | Post-Resistance | KIAA0406  | 9675   | 37 | 20 | 36625327 | 36625327 | Missense_Mutation | SNP | C | T | 15 | 162 | c.2822G>A     | c.(2821-2823)GGT>GAT | p.G941D       |
| Pat_41 | Post-Resistance | KIAA0406  | 9675   | 37 | 20 | 36631125 | 36631125 | Missense_Mutation | SNP | C | T | 32 | 231 | c.2557G>A     | c.(2557-2559)GAG>AAG | p.E853K       |
| Pat_41 | Post-Resistance | RPRD1B    | 58490  | 37 | 20 | 36685990 | 36685990 | Missense_Mutation | SNP | G | A | 8  | 138 | c.472G>A      | c.(472-474)GAT>AAT   | p.D158N       |

|        |                 |          |        |    |    |          |          |                   |     |   |   |    |     |              |                      |               |
|--------|-----------------|----------|--------|----|----|----------|----------|-------------------|-----|---|---|----|-----|--------------|----------------------|---------------|
| Pat_41 | Post-Resistance | TGM2     | 7052   | 37 | 20 | 36775133 | 36775133 | Missense_Mutation | SNP | G | A | 10 | 117 | c.845C>T     | c.(844-846)GCC>GTC   | p.A282V       |
| Pat_41 | Post-Resistance | KIAA1755 | 85449  | 37 | 20 | 36841505 | 36841505 | Missense_Mutation | SNP | C | T | 4  | 35  | c.3542G>A    | c.(3541-3543)GGG>GAG | p.G1181E      |
| Pat_41 | Post-Resistance | KIAA1755 | 85449  | 37 | 20 | 36845824 | 36845824 | Missense_Mutation | SNP | G | A | 3  | 20  | c.2732C>T    | c.(2731-2733)GCT>GTT | p.A911V       |
| Pat_41 | Post-Resistance | LBP      | 3929   | 37 | 20 | 36975013 | 36975013 | Missense_Mutation | SNP | G | A | 11 | 98  | c.94G>A      | c.(94-96)GCC>ACC     | p.A32T        |
| Pat_41 | Post-Resistance | RALGAPB  | 57148  | 37 | 20 | 37153503 | 37153503 | Missense_Mutation | SNP | C | T | 66 | 418 | c.1702C>T    | c.(1702-1704)CCT>TCT | p.P568S       |
| Pat_41 | Post-Resistance | ACTR5    | 79913  | 37 | 20 | 37394896 | 37394896 | Missense_Mutation | SNP | G | A | 12 | 158 | c.1309G>A    | c.(1309-1311)GCA>ACA | p.A437T       |
| Pat_41 | Post-Resistance | ACTR5    | 79913  | 37 | 20 | 37396174 | 37396174 | Missense_Mutation | SNP | C | T | 18 | 232 | c.1501C>T    | c.(1501-1503)CCT>TCT | p.P501S       |
| Pat_41 | Post-Resistance | DHX35    | 60625  | 37 | 20 | 37634870 | 37634870 | Missense_Mutation | SNP | C | T | 40 | 722 | c.1093C>T    | c.(1093-1095)CTC>TTC | p.L365F       |
| Pat_41 | Post-Resistance | DHX35    | 60625  | 37 | 20 | 37647476 | 37647476 | Missense_Mutation | SNP | C | T | 42 | 681 | c.1432C>T    | c.(1432-1434)CCG>TCG | p.P478S       |
| Pat_41 | Post-Resistance | PLCG1    | 5335   | 37 | 20 | 39794436 | 39794436 | Missense_Mutation | SNP | C | T | 6  | 131 | c.1769C>T    | c.(1768-1770)ACC>ATC | p.T590I       |
| Pat_41 | Post-Resistance | ZHX3     | 23051  | 37 | 20 | 39831193 | 39831193 | Nonsense_Mutation | SNP | C | T | 8  | 485 | c.2364G>A    | c.(2362-2364)TGG>TGA | p.W788*       |
| Pat_41 | Post-Resistance | ZHX3     | 23051  | 37 | 20 | 39832329 | 39832329 | Missense_Mutation | SNP | G | A | 15 | 449 | c.1228C>T    | c.(1228-1230)CTT>TTT | p.L410F       |
| Pat_41 | Post-Resistance | LPIN3    | 64900  | 37 | 20 | 39986971 | 39986971 | Missense_Mutation | SNP | G | A | 9  | 78  | c.2287G>A    | c.(2287-2289)GCC>ACC | p.A763T       |
| Pat_41 | Post-Resistance | EMILIN3  | 90187  | 37 | 20 | 39990030 | 39990030 | Missense_Mutation | SNP | G | A | 5  | 55  | c.2179C>T    | c.(2179-2181)CAT>TAT | p.H727Y       |
| Pat_41 | Post-Resistance | CHD6     | 84181  | 37 | 20 | 40116325 | 40116325 | Missense_Mutation | SNP | C | T | 10 | 112 | c.1981G>A    | c.(1981-1983)GAT>AAT | p.D661N       |
| Pat_41 | Post-Resistance | PTPRT    | 11122  | 37 | 20 | 40733309 | 40733309 | Missense_Mutation | SNP | C | T | 22 | 273 | c.3440G>A    | c.(3439-3441)GGC>GAC | p.G1147D      |
| Pat_41 | Post-Resistance | PTPRT    | 11122  | 37 | 20 | 41101188 | 41101188 | Missense_Mutation | SNP | G | A | 8  | 82  | c.1168C>T    | c.(1168-1170)CCA>TCA | p.P390S       |
| Pat_41 | Post-Resistance | PTPRT    | 11122  | 37 | 20 | 41306536 | 41306536 | Missense_Mutation | SNP | G | A | 5  | 94  | c.1123C>T    | c.(1123-1125)CCT>TCT | p.P375S       |
| Pat_41 | Post-Resistance | SFRS6    | 6431   | 37 | 20 | 42089549 | 42089549 | Missense_Mutation | SNP | G | A | 12 | 231 | c.881G>A     | c.(880-882)AGA>AAA   | p.R294K       |
| Pat_41 | Post-Resistance | SGK2     | 10110  | 37 | 20 | 42195097 | 42195097 | Missense_Mutation | SNP | C | T | 29 | 267 | c.142C>T     | c.(142-144)CTC>TTC   | p.L48F        |
| Pat_41 | Post-Resistance | SGK2     | 10110  | 37 | 20 | 42195107 | 42195107 | Missense_Mutation | SNP | C | T | 14 | 277 | c.152C>T     | c.(151-153)CCC>CTC   | p.P51L        |
| Pat_41 | Post-Resistance | SGK2     | 10110  | 37 | 20 | 42199281 | 42199281 | Missense_Mutation | SNP | C | T | 15 | 189 | c.565C>T     | c.(565-567)CGC>TGC   | p.R189C       |
| Pat_41 | Post-Resistance | MYBL2    | 4605   | 37 | 20 | 42344713 | 42344713 | Missense_Mutation | SNP | C | T | 15 | 279 | c.2089C>T    | c.(2089-2091)CTC>TTC | p.L697F       |
| Pat_41 | Post-Resistance | JPH2     | 57158  | 37 | 20 | 42744483 | 42744483 | Missense_Mutation | SNP | C | T | 3  | 21  | c.1832G>A    | c.(1831-1833)GGC>GAC | p.G611D       |
| Pat_41 | Post-Resistance | GDAP1L1  | 78997  | 37 | 20 | 42907898 | 42907898 | Missense_Mutation | SNP | G | T | 7  | 160 | c.1062G>T    | c.(1060-1062)ATG>ATT | p.M354I       |
| Pat_41 | Post-Resistance | SERINC3  | 10955  | 37 | 20 | 43150567 | 43150567 | Missense_Mutation | SNP | G | A | 13 | 112 | c.26C>T      | c.(25-27)TCC>TTC     | p.S9F         |
| Pat_41 | Post-Resistance | ADA      | 100    | 37 | 20 | 43257697 | 43257697 | Missense_Mutation | SNP | G | A | 9  | 314 | c.209C>T     | c.(208-210)CCT>CTT   | p.P70L        |
| Pat_41 | Post-Resistance | RIMS4    | 140730 | 37 | 20 | 43384893 | 43384893 | Missense_Mutation | SNP | C | T | 10 | 107 | c.692G>A     | c.(691-693)GGC>GAC   | p.G231D       |
| Pat_41 | Post-Resistance | PABPC1L  | 80336  | 37 | 20 | 43559221 | 43559221 | Missense_Mutation | SNP | G | A | 10 | 395 | c.1093G>A    | c.(1093-1095)GTG>ATG | p.V365M       |
| Pat_41 | Post-Resistance | WFDC3    | 140686 | 37 | 20 | 44418584 | 44418584 | Missense_Mutation | SNP | C | T | 10 | 202 | c.31G>A      | c.(31-33)GCA>ACA     | p.A11T        |
| Pat_41 | Post-Resistance | TNNC2    | 7125   | 37 | 20 | 44452716 | 44452716 | Missense_Mutation | SNP | G | A | 33 | 354 | c.365C>T     | c.(364-366)GCC>GTC   | p.A122V       |
| Pat_41 | Post-Resistance | ZSWIM3   | 140831 | 37 | 20 | 44506821 | 44506821 | Missense_Mutation | SNP | G | A | 8  | 142 | c.1624G>A    | c.(1624-1626)GTT>ATT | p.V542I       |
| Pat_41 | Post-Resistance | NEURL2   | 140825 | 37 | 20 | 44519150 | 44519150 | Missense_Mutation | SNP | C | T | 16 | 217 | c.481G>A     | c.(481-483)GGC>AGC   | p.G161S       |
| Pat_41 | Post-Resistance | PCIF1    | 63935  | 37 | 20 | 44575921 | 44575921 | Missense_Mutation | SNP | C | T | 25 | 262 | c.1727C>T    | c.(1726-1728)CCG>CTG | p.P576L       |
| Pat_41 | Post-Resistance | ZNF335   | 63925  | 37 | 20 | 44596415 | 44596415 | Missense_Mutation | SNP | C | T | 8  | 212 | c.772G>A     | c.(772-774)GCC>ACC   | p.A258T       |
| Pat_41 | Post-Resistance | CD40     | 958    | 37 | 20 | 44756812 | 44756812 | Missense_Mutation | SNP | C | T | 11 | 201 | c.595C>T     | c.(595-597)CCC>TCC   | p.P199S       |
| Pat_41 | Post-Resistance | ELMO2    | 63916  | 37 | 20 | 45003204 | 45003204 | Missense_Mutation | SNP | C | T | 11 | 201 | c.1141G>A    | c.(1141-1143)GCT>ACT | p.A381T       |
| Pat_41 | Post-Resistance | ZNF334   | 55713  | 37 | 20 | 45130777 | 45130777 | Missense_Mutation | SNP | C | T | 7  | 346 | c.1201G>A    | c.(1201-1203)GGG>AGG | p.G401R       |
| Pat_41 | Post-Resistance | SLC2A10  | 81031  | 37 | 20 | 45354285 | 45354285 | Missense_Mutation | SNP | G | A | 18 | 92  | c.610G>A     | c.(610-612)GGT>AGT   | p.G204S       |
| Pat_41 | Post-Resistance | EYA2     | 2139   | 37 | 20 | 45618758 | 45618758 | Missense_Mutation | SNP | G | A | 7  | 93  | c.109G>A     | c.(109-111)GGC>AGC   | p.G37S        |
| Pat_41 | Post-Resistance | ZMYND8   | 23613  | 37 | 20 | 45905538 | 45905538 | Missense_Mutation | SNP | C | T | 6  | 110 | c.940G>A     | c.(940-942)GCC>ACC   | p.A314T       |
| Pat_41 | Post-Resistance | ZMYND8   | 23613  | 37 | 20 | 45976600 | 45976600 | Missense_Mutation | SNP | C | T | 18 | 485 | c.25G>A      | c.(25-27)GAT>AAT     | p.D9N         |
| Pat_41 | Post-Resistance | NCOA3    | 8202   | 37 | 20 | 46271001 | 46271001 | Missense_Mutation | SNP | C | T | 12 | 285 | c.3125C>T    | c.(3124-3126)TCC>TTC | p.S1042F      |
| Pat_41 | Post-Resistance | PREX1    | 57580  | 37 | 20 | 47256399 | 47256399 | Missense_Mutation | SNP | C | T | 6  | 359 | c.3809G>A    | c.(3808-3810)GGC>GAC | p.G1270D      |
| Pat_41 | Post-Resistance | PREX1    | 57580  | 37 | 20 | 47317290 | 47317290 | Splice_Site       | SNP | C | T | 13 | 286 | c.917_splice | c.e7+1               | p.R306_splice |
| Pat_41 | Post-Resistance | ARFGEF2  | 10564  | 37 | 20 | 47630164 | 47630164 | Missense_Mutation | SNP | G | A | 15 | 134 | c.3982G>A    | c.(3982-3984)GGC>AGC | p.G1328S      |
| Pat_41 | Post-Resistance | CSE1L    | 1434   | 37 | 20 | 47682952 | 47682952 | Nonsense_Mutation | SNP | G | A | 15 | 366 | c.381G>A     | c.(379-381)TGG>TGA   | p.W127*       |

|        |                 |           |        |    |    |          |          |                   |     |   |   |    |     |           |                      |          |
|--------|-----------------|-----------|--------|----|----|----------|----------|-------------------|-----|---|---|----|-----|-----------|----------------------|----------|
| Pat_41 | Post-Resistance | CSE1L     | 1434   | 37 | 20 | 47691980 | 47691980 | Missense_Mutation | SNP | C | T | 21 | 213 | c.1258C>T | c.(1258-1260)CCA>TCA | p.P420S  |
| Pat_41 | Post-Resistance | DDX27     | 55661  | 37 | 20 | 47839962 | 47839962 | Missense_Mutation | SNP | C | T | 12 | 295 | c.551C>T  | c.(550-552)ACC>ATC   | p.T184I  |
| Pat_41 | Post-Resistance | ZNF51     | 57169  | 37 | 20 | 47864502 | 47864502 | Missense_Mutation | SNP | C | T | 28 | 199 | c.5059G>A | c.(5059-5061)GAG>AAG | p.E1687K |
| Pat_41 | Post-Resistance | PTPN1     | 5770   | 37 | 20 | 49196374 | 49196374 | Nonsense_Mutation | SNP | G | A | 5  | 160 | c.999G>A  | c.(997-999)TGG>TGA   | p.W333*  |
| Pat_41 | Post-Resistance | FAM65C    | 140876 | 37 | 20 | 49214229 | 49214229 | Missense_Mutation | SNP | C | T | 4  | 38  | c.1666G>A | c.(1666-1668)GAG>AAG | p.E556K  |
| Pat_41 | Post-Resistance | ZFP64     | 55734  | 37 | 20 | 50776736 | 50776736 | Missense_Mutation | SNP | G | A | 36 | 283 | c.689C>T  | c.(688-690)CCC>CTC   | p.P230L  |
| Pat_41 | Post-Resistance | ZNF217    | 7764   | 37 | 20 | 52193402 | 52193402 | Missense_Mutation | SNP | G | A | 7  | 213 | c.1901C>T | c.(1900-1902)ACT>ATT | p.T634I  |
| Pat_41 | Post-Resistance | ZNF217    | 7764   | 37 | 20 | 52198432 | 52198432 | Missense_Mutation | SNP | C | T | 5  | 247 | c.934G>A  | c.(934-936)GAA>AAA   | p.E312K  |
| Pat_41 | Post-Resistance | ZNF217    | 7764   | 37 | 20 | 52199177 | 52199177 | Missense_Mutation | SNP | C | T | 16 | 261 | c.189G>A  | c.(187-189)ATG>ATA   | p.M63I   |
| Pat_41 | Post-Resistance | CYP24A1   | 1591   | 37 | 20 | 52775661 | 52775661 | Missense_Mutation | SNP | G | A | 28 | 230 | c.992C>T  | c.(991-993)ACA>ATA   | p.T331I  |
| Pat_41 | Post-Resistance | CBLN4     | 140689 | 37 | 20 | 54579029 | 54579029 | Missense_Mutation | SNP | C | T | 7  | 83  | c.199G>A  | c.(199-201)GCC>ACC   | p.A67T   |
| Pat_41 | Post-Resistance | MC3R      | 4159   | 37 | 20 | 54823949 | 54823949 | Missense_Mutation | SNP | G | A | 40 | 289 | c.50G>A   | c.(49-51)GGC>GAC     | p.G17D   |
| Pat_41 | Post-Resistance | CSTF1     | 1477   | 37 | 20 | 54978748 | 54978748 | Missense_Mutation | SNP | G | A | 32 | 684 | c.1261G>A | c.(1261-1263)GCG>ACG | p.A421T  |
| Pat_41 | Post-Resistance | C20orf43  | 51507  | 37 | 20 | 55093268 | 55093268 | Missense_Mutation | SNP | C | T | 11 | 310 | c.868C>T  | c.(868-870)CGC>TGC   | p.R290C  |
| Pat_41 | Post-Resistance | SPO11     | 23626  | 37 | 20 | 55909080 | 55909080 | Nonsense_Mutation | SNP | C | T | 12 | 246 | c.439C>T  | c.(439-441)CAG>TAG   | p.Q147*  |
| Pat_41 | Post-Resistance | RAE1      | 8480   | 37 | 20 | 55931523 | 55931523 | Missense_Mutation | SNP | G | A | 6  | 106 | c.217G>A  | c.(217-219)GAC>AAC   | p.D73N   |
| Pat_41 | Post-Resistance | CTCF1     | 140690 | 37 | 20 | 56078514 | 56078514 | Nonsense_Mutation | SNP | C | T | 16 | 298 | c.1818G>A | c.(1816-1818)TGG>TGA | p.W606*  |
| Pat_41 | Post-Resistance | CTCF1     | 140690 | 37 | 20 | 56078519 | 56078519 | Missense_Mutation | SNP | C | T | 7  | 309 | c.1813G>A | c.(1813-1815)GGA>AGA | p.G605R  |
| Pat_41 | Post-Resistance | CTCF1     | 140690 | 37 | 20 | 56099144 | 56099144 | Missense_Mutation | SNP | C | T | 24 | 610 | c.118G>A  | c.(118-120)GAC>AAC   | p.D40N   |
| Pat_41 | Post-Resistance | ZBP1      | 81030  | 37 | 20 | 56185397 | 56185397 | Missense_Mutation | SNP | C | T | 8  | 259 | c.901G>A  | c.(901-903)GCT>ACT   | p.A301T  |
| Pat_41 | Post-Resistance | PMEPA1    | 56937  | 37 | 20 | 56227483 | 56227483 | Missense_Mutation | SNP | G | A | 4  | 57  | c.490C>T  | c.(490-492)CCC>TCC   | p.P164S  |
| Pat_41 | Post-Resistance | STX16     | 8675   | 37 | 20 | 57227168 | 57227168 | Missense_Mutation | SNP | C | T | 31 | 144 | c.106C>T  | c.(106-108)CCT>TCT   | p.P36S   |
| Pat_41 | Post-Resistance | GNAS      | 2778   | 37 | 20 | 57478605 | 57478605 | Nonsense_Mutation | SNP | C | T | 10 | 203 | c.2206C>T | c.(2206-2208)CAG>TAG | p.Q736*  |
| Pat_41 | Post-Resistance | TH1L      | 51497  | 37 | 20 | 57564660 | 57564660 | Missense_Mutation | SNP | G | A | 11 | 435 | c.649G>A  | c.(649-651)GAA>AAA   | p.E217K  |
| Pat_41 | Post-Resistance | ZNF831    | 128611 | 37 | 20 | 57767386 | 57767386 | Missense_Mutation | SNP | G | A | 3  | 39  | c.1312G>A | c.(1312-1314)GGC>AGC | p.G438S  |
| Pat_41 | Post-Resistance | EDN3      | 1908   | 37 | 20 | 57876763 | 57876763 | Nonsense_Mutation | SNP | G | A | 21 | 289 | c.351G>A  | c.(349-351)TGG>TGA   | p.W117*  |
| Pat_41 | Post-Resistance | PPP1R3D   | 5509   | 37 | 20 | 58514517 | 58514517 | Missense_Mutation | SNP | G | A | 9  | 111 | c.470C>T  | c.(469-471)CCC>CTC   | p.P157L  |
| Pat_41 | Post-Resistance | CDH4      | 1002   | 37 | 20 | 60504676 | 60504676 | Missense_Mutation | SNP | C | T | 14 | 68  | c.2015C>T | c.(2014-2016)GCC>GTC | p.A672V  |
| Pat_41 | Post-Resistance | C20orf200 | 253868 | 37 | 20 | 61143493 | 61143493 | Missense_Mutation | SNP | G | A | 7  | 107 | c.355C>T  | c.(355-357)CCG>TCG   | p.P119S  |
| Pat_41 | Post-Resistance | C20orf200 | 253868 | 37 | 20 | 61143684 | 61143684 | Missense_Mutation | SNP | C | T | 8  | 124 | c.164G>A  | c.(163-165)AGG>AAG   | p.R55K   |
| Pat_41 | Post-Resistance | SLCO4A1   | 28231  | 37 | 20 | 61292419 | 61292419 | Missense_Mutation | SNP | C | T | 5  | 186 | c.1013C>T | c.(1012-1014)TCC>TTC | p.S338F  |
| Pat_41 | Post-Resistance | DIDO1     | 11083  | 37 | 20 | 61511454 | 61511454 | Missense_Mutation | SNP | C | T | 5  | 245 | c.5854G>A | c.(5854-5856)GCG>ACG | p.A1952T |
| Pat_41 | Post-Resistance | SLC17A9   | 63910  | 37 | 20 | 61595601 | 61595601 | Missense_Mutation | SNP | C | T | 28 | 465 | c.844C>T  | c.(844-846)CCT>TCT   | p.P282S  |
| Pat_41 | Post-Resistance | ARFGAP1   | 55738  | 37 | 20 | 61907923 | 61907923 | Missense_Mutation | SNP | G | A | 8  | 98  | c.262G>A  | c.(262-264)GAG>AAG   | p.E88K   |
| Pat_41 | Post-Resistance | EEF1A2    | 1917   | 37 | 20 | 62129076 | 62129076 | Missense_Mutation | SNP | C | T | 14 | 255 | c.41G>A   | c.(40-42)GGC>GAC     | p.G14D   |
| Pat_41 | Post-Resistance | TPD52L2   | 7165   | 37 | 20 | 62507201 | 62507201 | Nonsense_Mutation | SNP | G | A | 12 | 274 | c.347G>A  | c.(346-348)TGG>TAG   | p.W116*  |
| Pat_41 | Post-Resistance | UCKL1     | 54963  | 37 | 20 | 62571373 | 62571373 | Missense_Mutation | SNP | C | T | 4  | 98  | c.1603G>A | c.(1603-1605)GTC>ATC | p.V535I  |
| Pat_41 | Post-Resistance | ZNF512B   | 57473  | 37 | 20 | 62597849 | 62597849 | Missense_Mutation | SNP | C | T | 54 | 693 | c.679G>A  | c.(679-681)GCC>ACC   | p.A227T  |
| Pat_41 | Post-Resistance | TCEA2     | 6919   | 37 | 20 | 62698350 | 62698350 | Missense_Mutation | SNP | T | C | 7  | 60  | c.218T>C  | c.(217-219)ATC>ACC   | p.I73T   |
| Pat_41 | Post-Resistance | OPRL1     | 4987   | 37 | 20 | 62729860 | 62729860 | Missense_Mutation | SNP | G | A | 4  | 41  | c.821G>A  | c.(820-822)GGC>GAC   | p.G274D  |
| Pat_41 | Post-Resistance | MYT1      | 4661   | 37 | 20 | 62839670 | 62839670 | Missense_Mutation | SNP | C | T | 4  | 114 | c.1121C>T | c.(1120-1122)ACC>ATC | p.T374I  |
| Pat_41 | Post-Resistance | PCMTD2    | 55251  | 37 | 20 | 62891376 | 62891376 | Missense_Mutation | SNP | G | A | 5  | 190 | c.58G>A   | c.(58-60)GAA>AAA     | p.E20K   |
| Pat_41 | Post-Resistance | TPTE      | 7179   | 37 | 21 | 10910378 | 10910378 | Missense_Mutation | SNP | C | T | 7  | 431 | c.1378G>A | c.(1378-1380)GAC>AAC | p.D460N  |
| Pat_41 | Post-Resistance | TPTE      | 7179   | 37 | 21 | 10933860 | 10933860 | Missense_Mutation | SNP | C | T | 15 | 695 | c.1019G>A | c.(1018-1020)GGA>GAA | p.G340E  |
| Pat_41 | Post-Resistance | LIPI      | 149998 | 37 | 21 | 15537681 | 15537681 | Missense_Mutation | SNP | C | T | 20 | 129 | c.827G>A  | c.(826-828)AGA>AAA   | p.R276K  |
| Pat_41 | Post-Resistance | RNF160    | 26046  | 37 | 21 | 30304959 | 30304959 | Missense_Mutation | SNP | C | T | 22 | 335 | c.5041G>A | c.(5041-5043)GTA>ATA | p.V1681I |
| Pat_41 | Post-Resistance | C21orf7   | 56911  | 37 | 21 | 30458185 | 30458185 | Missense_Mutation | SNP | G | A | 16 | 304 | c.4G>A    | c.(4-6)GTT>ATT       | p.V2I    |

|        |                 |           |        |    |    |          |          |                   |     |   |   |    |     |              |                      |               |
|--------|-----------------|-----------|--------|----|----|----------|----------|-------------------|-----|---|---|----|-----|--------------|----------------------|---------------|
| Pat_41 | Post-Resistance | BACH1     | 571    | 37 | 21 | 30714988 | 30714988 | Missense_Mutation | SNP | C | T | 25 | 190 | c.2045C>T    | c.(2044-2046)CCC>CTC | p.P682L       |
| Pat_41 | Post-Resistance | GRIK1     | 2897   | 37 | 21 | 30959845 | 30959845 | Missense_Mutation | SNP | G | A | 12 | 44  | c.1634C>T    | c.(1633-1635)TCC>TTC | p.S545F       |
| Pat_41 | Post-Resistance | KRTAP19-4 | 337971 | 37 | 21 | 31869256 | 31869256 | Missense_Mutation | SNP | C | T | 14 | 419 | c.173G>A     | c.(172-174)GGA>GAA   | p.G58E        |
| Pat_41 | Post-Resistance | SFRS15    | 57466  | 37 | 21 | 33064678 | 33064678 | Missense_Mutation | SNP | G | A | 8  | 210 | c.1598C>T    | c.(1597-1599)CCA>CTA | p.P533L       |
| Pat_41 | Post-Resistance | C21orf63  | 59271  | 37 | 21 | 33825767 | 33825767 | Missense_Mutation | SNP | C | T | 4  | 24  | c.308C>T     | c.(307-309)GCC>GTC   | p.A103V       |
| Pat_41 | Post-Resistance | SYNJ1     | 8867   | 37 | 21 | 34018840 | 34018840 | Missense_Mutation | SNP | C | T | 9  | 195 | c.3227G>A    | c.(3226-3228)GGC>GAC | p.G1076D      |
| Pat_41 | Post-Resistance | GCFC1     | 94104  | 37 | 21 | 34117134 | 34117134 | Missense_Mutation | SNP | G | A | 8  | 263 | c.2159C>T    | c.(2158-2160)TCA>TTA | p.S720L       |
| Pat_41 | Post-Resistance | GCFC1     | 94104  | 37 | 21 | 34117208 | 34117208 | Missense_Mutation | SNP | C | T | 12 | 102 | c.2085G>A    | c.(2083-2085)ATG>ATA | p.M695I       |
| Pat_41 | Post-Resistance | GCFC1     | 94104  | 37 | 21 | 34134467 | 34134467 | Missense_Mutation | SNP | G | A | 25 | 295 | c.811C>T     | c.(811-813)CGC>TGC   | p.R271C       |
| Pat_41 | Post-Resistance | GART      | 2618   | 37 | 21 | 34892715 | 34892715 | Missense_Mutation | SNP | G | A | 38 | 169 | c.1658C>T    | c.(1657-1659)GCT>GTT | p.A553V       |
| Pat_41 | Post-Resistance | GART      | 2618   | 37 | 21 | 34900841 | 34900841 | Missense_Mutation | SNP | C | T | 43 | 223 | c.881G>A     | c.(880-882)GGT>GAT   | p.G294D       |
| Pat_41 | Post-Resistance | DONSON    | 29980  | 37 | 21 | 34954276 | 34954276 | Missense_Mutation | SNP | C | T | 7  | 163 | c.1132G>A    | c.(1132-1134)GAC>AAC | p.D378N       |
| Pat_41 | Post-Resistance | DONSON    | 29980  | 37 | 21 | 34958319 | 34958319 | Missense_Mutation | SNP | T | C | 16 | 216 | c.571A>G     | c.(571-573)AGG>GGG   | p.R191G       |
| Pat_41 | Post-Resistance | CRYZL1    | 9946   | 37 | 21 | 34974587 | 34974587 | Missense_Mutation | SNP | C | T | 8  | 259 | c.530G>A     | c.(529-531)TGC>TAC   | p.C177Y       |
| Pat_41 | Post-Resistance | ITSN1     | 6453   | 37 | 21 | 35127655 | 35127655 | Missense_Mutation | SNP | G | A | 11 | 140 | c.677G>A     | c.(676-678)AGG>AAG   | p.R226K       |
| Pat_41 | Post-Resistance | ITSN1     | 6453   | 37 | 21 | 35183468 | 35183468 | Missense_Mutation | SNP | G | A | 40 | 309 | c.2509G>A    | c.(2509-2511)GCA>ACA | p.A837T       |
| Pat_41 | Post-Resistance | ITSN1     | 6453   | 37 | 21 | 35255878 | 35255878 | Missense_Mutation | SNP | G | A | 10 | 235 | c.4579G>A    | c.(4579-4581)GTA>ATA | p.V1527I      |
| Pat_41 | Post-Resistance | SETD4     | 54093  | 37 | 21 | 37418152 | 37418152 | Missense_Mutation | SNP | G | A | 19 | 262 | c.454C>T     | c.(454-456)CCC>TCC   | p.P152S       |
| Pat_41 | Post-Resistance | DOPEY2    | 9980   | 37 | 21 | 37600023 | 37600023 | Missense_Mutation | SNP | G | A | 6  | 86  | c.1513G>A    | c.(1513-1515)GTG>ATG | p.V505M       |
| Pat_41 | Post-Resistance | MORC3     | 23515  | 37 | 21 | 37713822 | 37713822 | Missense_Mutation | SNP | C | T | 14 | 185 | c.734C>T     | c.(733-735)CCT>CTT   | p.P245L       |
| Pat_41 | Post-Resistance | CHAF1B    | 8208   | 37 | 21 | 37785376 | 37785376 | Missense_Mutation | SNP | C | T | 5  | 121 | c.1256C>T    | c.(1255-1257)ACC>ATC | p.T419I       |
| Pat_41 | Post-Resistance | DSCR6     | 53820  | 37 | 21 | 38390460 | 38390460 | Missense_Mutation | SNP | C | T | 10 | 129 | c.526C>T     | c.(526-528)CCT>TCT   | p.P176S       |
| Pat_41 | Post-Resistance | TTC3      | 7267   | 37 | 21 | 38525381 | 38525381 | Nonsense_Mutation | SNP | G | A | 18 | 300 | c.2544G>A    | c.(2542-2544)TGG>TGA | p.W848*       |
| Pat_41 | Post-Resistance | TTC3      | 7267   | 37 | 21 | 38538301 | 38538301 | Missense_Mutation | SNP | C | T | 16 | 170 | c.3785C>T    | c.(3784-3786)TCT>TTT | p.S1262F      |
| Pat_41 | Post-Resistance | TTC3      | 7267   | 37 | 21 | 38538357 | 38538357 | Missense_Mutation | SNP | C | T | 17 | 223 | c.3841C>T    | c.(3841-3843)CCA>TCA | p.P1281S      |
| Pat_41 | Post-Resistance | DSCR3     | 10311  | 37 | 21 | 38610871 | 38610871 | Missense_Mutation | SNP | G | A | 28 | 430 | c.241C>T     | c.(241-243)CCG>TCG   | p.P81S        |
| Pat_41 | Post-Resistance | KCNJ6     | 3763   | 37 | 21 | 38997688 | 38997688 | Missense_Mutation | SNP | C | T | 13 | 91  | c.1045G>A    | c.(1045-1047)GTT>ATT | p.V349I       |
| Pat_41 | Post-Resistance | ERG       | 2078   | 37 | 21 | 39755693 | 39755693 | Missense_Mutation | SNP | G | A | 8  | 126 | c.1093C>T    | c.(1093-1095)CCC>TCC | p.P365S       |
| Pat_41 | Post-Resistance | BRWD1     | 54014  | 37 | 21 | 40571024 | 40571024 | Missense_Mutation | SNP | G | A | 26 | 291 | c.5318C>T    | c.(5317-5319)GCT>GTT | p.A1773V      |
| Pat_41 | Post-Resistance | BRWD1     | 54014  | 37 | 21 | 40597076 | 40597076 | Missense_Mutation | SNP | C | T | 34 | 543 | c.3256G>A    | c.(3256-3258)GTG>ATG | p.V1086M      |
| Pat_41 | Post-Resistance | DSCAM     | 1826   | 37 | 21 | 41427723 | 41427723 | Missense_Mutation | SNP | G | A | 67 | 345 | c.4964C>T    | c.(4963-4965)ACC>ATC | p.T1655I      |
| Pat_41 | Post-Resistance | DSCAM     | 1826   | 37 | 21 | 41648185 | 41648185 | Missense_Mutation | SNP | G | A | 5  | 73  | c.2195C>T    | c.(2194-2196)CCC>CTC | p.P732L       |
| Pat_41 | Post-Resistance | MX2       | 4600   | 37 | 21 | 42748852 | 42748852 | Missense_Mutation | SNP | C | T | 5  | 173 | c.19C>T      | c.(19-21)CCT>TCT     | p.P7S         |
| Pat_41 | Post-Resistance | MX1       | 4599   | 37 | 21 | 42817957 | 42817957 | Missense_Mutation | SNP | G | A | 9  | 133 | c.1162G>A    | c.(1162-1164)GCT>ACT | p.A388T       |
| Pat_41 | Post-Resistance | RIPK4     | 54101  | 37 | 21 | 43187057 | 43187057 | Missense_Mutation | SNP | C | T | 4  | 114 | c.145G>A     | c.(145-147)GCC>ACC   | p.A49T        |
| Pat_41 | Post-Resistance | PRDM15    | 63977  | 37 | 21 | 43222894 | 43222894 | Missense_Mutation | SNP | G | A | 48 | 288 | c.4019C>T    | c.(4018-4020)TCC>TTC | p.S1340F      |
| Pat_41 | Post-Resistance | PRDM15    | 63977  | 37 | 21 | 43274852 | 43274852 | Missense_Mutation | SNP | G | A | 4  | 78  | c.1459C>T    | c.(1459-1461)CGG>TGG | p.R487W       |
| Pat_41 | Post-Resistance | PRDM15    | 63977  | 37 | 21 | 43279771 | 43279771 | Missense_Mutation | SNP | G | A | 4  | 93  | c.961C>T     | c.(961-963)CAC>TAC   | p.H321Y       |
| Pat_41 | Post-Resistance | C2CD2     | 25966  | 37 | 21 | 43309243 | 43309243 | Missense_Mutation | SNP | G | A | 4  | 69  | c.2081C>T    | c.(2080-2082)CCC>CTC | p.P694L       |
| Pat_41 | Post-Resistance | ZNF295    | 49854  | 37 | 21 | 43413526 | 43413526 | Missense_Mutation | SNP | C | T | 4  | 114 | c.679G>A     | c.(679-681)GAT>AAT   | p.D227N       |
| Pat_41 | Post-Resistance | ZNF295    | 49854  | 37 | 21 | 43413639 | 43413639 | Missense_Mutation | SNP | G | A | 37 | 457 | c.566C>T     | c.(565-567)CCA>CTA   | p.P189L       |
| Pat_41 | Post-Resistance | TMPRSS3   | 64699  | 37 | 21 | 43795859 | 43795859 | Missense_Mutation | SNP | G | A | 9  | 186 | c.1313C>T    | c.(1312-1314)ACC>ATC | p.T438I       |
| Pat_41 | Post-Resistance | SLC37A1   | 54020  | 37 | 21 | 43955661 | 43955661 | Splice_Site       | SNP | G | A | 31 | 161 | c.350_splice | c.e6+1               | p.S117_splice |
| Pat_41 | Post-Resistance | WDR4      | 10785  | 37 | 21 | 44270239 | 44270239 | Nonsense_Mutation | SNP | G | A | 4  | 57  | c.1159C>T    | c.(1159-1161)CAG>TAG | p.Q387*       |
| Pat_41 | Post-Resistance | SIK1      | 150094 | 37 | 21 | 44838403 | 44838403 | Missense_Mutation | SNP | G | A | 8  | 67  | c.1481C>T    | c.(1480-1482)TCC>TTC | p.S494F       |
| Pat_41 | Post-Resistance | SIK1      | 150094 | 37 | 21 | 44845286 | 44845286 | Splice_Site       | SNP | C | T | 10 | 134 | c.273_splice | c.e3+1               | p.Q91_splice  |
| Pat_41 | Post-Resistance | TRAPPC10  | 7109   | 37 | 21 | 45494238 | 45494238 | Missense_Mutation | SNP | G | A | 13 | 221 | c.1072G>A    | c.(1072-1074)GTG>ATG | p.V358M       |



|        |                 |           |        |    |    |          |          |                   |     |   |   |    |     |              |                      |               |
|--------|-----------------|-----------|--------|----|----|----------|----------|-------------------|-----|---|---|----|-----|--------------|----------------------|---------------|
| Pat_41 | Post-Resistance | PWP2      | 5822   | 37 | 21 | 45547828 | 45547828 | Missense_Mutation | SNP | C | T | 12 | 154 | c.2156C>T    | c.(2155-2157)GCC>GTC | p.A719V       |
| Pat_41 | Post-Resistance | C21orf33  | 8209   | 37 | 21 | 45555968 | 45555968 | Missense_Mutation | SNP | G | A | 5  | 42  | c.221G>A     | c.(220-222)GGG>GAG   | p.G74E        |
| Pat_41 | Post-Resistance | AIRE      | 326    | 37 | 21 | 45716315 | 45716315 | Missense_Mutation | SNP | C | T | 5  | 123 | c.1553C>T    | c.(1552-1554)TCC>TTC | p.S518F       |
| Pat_41 | Post-Resistance | KRTAP10-4 | 386672 | 37 | 21 | 45993670 | 45993670 | Missense_Mutation | SNP | G | A | 25 | 218 | c.35G>A      | c.(34-36)AGC>AAC     | p.S12N        |
| Pat_41 | Post-Resistance | KRTAP10-4 | 386672 | 37 | 21 | 45993688 | 45993688 | Missense_Mutation | SNP | G | A | 27 | 142 | c.53G>A      | c.(52-54)GGT>GAT     | p.G18D        |
| Pat_41 | Post-Resistance | KRTAP10-4 | 386672 | 37 | 21 | 45994705 | 45994705 | Missense_Mutation | SNP | C | T | 7  | 327 | c.1070C>T    | c.(1069-1071)CCC>CTC | p.P357L       |
| Pat_41 | Post-Resistance | KRTAP10-6 | 386674 | 37 | 21 | 46011464 | 46011464 | Missense_Mutation | SNP | G | A | 13 | 246 | c.902C>T     | c.(901-903)TCC>TTC   | p.S301F       |
| Pat_41 | Post-Resistance | PTTG1IP   | 754    | 37 | 21 | 46281144 | 46281144 | Missense_Mutation | SNP | C | T | 13 | 88  | c.211G>A     | c.(211-213)GTT>ATT   | p.V71I        |
| Pat_41 | Post-Resistance | ADARB1    | 104    | 37 | 21 | 46624559 | 46624559 | Missense_Mutation | SNP | A | G | 5  | 167 | c.1775A>G    | c.(1774-1776)CAC>CGC | p.H592R       |
| Pat_41 | Post-Resistance | POFUT2    | 23275  | 37 | 21 | 46689858 | 46689858 | Missense_Mutation | SNP | C | T | 6  | 128 | c.908G>A     | c.(907-909)AGA>AAA   | p.R303K       |
| Pat_41 | Post-Resistance | COL6A1    | 1291   | 37 | 21 | 47410909 | 47410909 | Missense_Mutation | SNP | C | T | 3  | 41  | c.1073C>T    | c.(1072-1074)CCT>CTT | p.P358L       |
| Pat_41 | Post-Resistance | MCM3AP    | 8888   | 37 | 21 | 47656826 | 47656826 | Missense_Mutation | SNP | G | A | 13 | 210 | c.5701C>T    | c.(5701-5703)CCC>TCC | p.P1901S      |
| Pat_41 | Post-Resistance | C21orf58  | 54058  | 37 | 21 | 47731445 | 47731445 | Missense_Mutation | SNP | G | A | 9  | 35  | c.646C>T     | c.(646-648)CCT>TCT   | p.P216S       |
| Pat_41 | Post-Resistance | PCNT      | 5116   | 37 | 21 | 47773939 | 47773939 | Missense_Mutation | SNP | G | A | 4  | 55  | c.1718G>A    | c.(1717-1719)GGA>GAA | p.G573E       |
| Pat_41 | Post-Resistance | PCNT      | 5116   | 37 | 21 | 47776987 | 47776987 | Missense_Mutation | SNP | G | A | 5  | 68  | c.2035G>A    | c.(2035-2037)GTG>ATG | p.V679M       |
| Pat_41 | Post-Resistance | PCNT      | 5116   | 37 | 21 | 47809325 | 47809325 | Missense_Mutation | SNP | G | A | 3  | 24  | c.3819G>A    | c.(3817-3819)ATG>ATA | p.M1273I      |
| Pat_41 | Post-Resistance | DIP2A     | 23181  | 37 | 21 | 47969737 | 47969737 | Missense_Mutation | SNP | C | T | 72 | 452 | c.2576C>T    | c.(2575-2577)GCT>GTT | p.A859V       |
| Pat_41 | Post-Resistance | S100B     | 6285   | 37 | 21 | 48019416 | 48019416 | Missense_Mutation | SNP | C | T | 16 | 161 | c.139G>A     | c.(139-141)GAA>AAA   | p.E47K        |
| Pat_41 | Post-Resistance | PRMT2     | 3275   | 37 | 21 | 48068433 | 48068433 | Nonsense_Mutation | SNP | C | T | 24 | 164 | c.391C>T     | c.(391-393)CAG>TAG   | p.Q131*       |
| Pat_41 | Post-Resistance | OR11H1    | 81061  | 37 | 22 | 16449638 | 16449638 | Missense_Mutation | SNP | C | T | 12 | 397 | c.167G>A     | c.(166-168)GGG>GAG   | p.G56E        |
| Pat_41 | Post-Resistance | GAB4      | 128954 | 37 | 22 | 17449205 | 17449205 | Missense_Mutation | SNP | C | T | 10 | 186 | c.1006G>A    | c.(1006-1008)GGA>AGA | p.G336R       |
| Pat_41 | Post-Resistance | CECR2     | 27443  | 37 | 22 | 18028668 | 18028668 | Missense_Mutation | SNP | C | T | 5  | 89  | c.3625C>T    | c.(3625-3627)CCC>TCC | p.P1209S      |
| Pat_41 | Post-Resistance | MICAL3    | 57553  | 37 | 22 | 18273773 | 18273773 | Missense_Mutation | SNP | C | T | 8  | 59  | c.5815G>A    | c.(5815-5817)GCA>ACA | p.A1939T      |
| Pat_41 | Post-Resistance | MICAL3    | 57553  | 37 | 22 | 18387479 | 18387479 | Missense_Mutation | SNP | G | A | 66 | 425 | c.391C>T     | c.(391-393)CCA>TCA   | p.P131S       |
| Pat_41 | Post-Resistance | HIRA      | 7290   | 37 | 22 | 19394767 | 19394767 | Missense_Mutation | SNP | C | T | 17 | 229 | c.242G>A     | c.(241-243)AGT>AAT   | p.S81N        |
| Pat_41 | Post-Resistance | DGCR8     | 54487  | 37 | 22 | 20079038 | 20079038 | Missense_Mutation | SNP | G | A | 44 | 491 | c.1387G>A    | c.(1387-1389)GAG>AAG | p.E463K       |
| Pat_41 | Post-Resistance | DGCR8     | 54487  | 37 | 22 | 20080365 | 20080365 | Missense_Mutation | SNP | C | T | 7  | 272 | c.1640C>T    | c.(1639-1641)ACC>ATC | p.T547I       |
| Pat_41 | Post-Resistance | ZDHHC8    | 29801  | 37 | 22 | 20127387 | 20127387 | Missense_Mutation | SNP | G | A | 5  | 34  | c.529G>A     | c.(529-531)GGG>AGG   | p.G177R       |
| Pat_41 | Post-Resistance | ZDHHC8    | 29801  | 37 | 22 | 20127394 | 20127394 | Missense_Mutation | SNP | G | A | 3  | 38  | c.536G>A     | c.(535-537)GGA>GAA   | p.G179E       |
| Pat_41 | Post-Resistance | DGCR6L    | 85359  | 37 | 22 | 20302927 | 20302927 | Missense_Mutation | SNP | C | T | 6  | 106 | c.445G>A     | c.(445-447)GTG>ATG   | p.V149M       |
| Pat_41 | Post-Resistance | PI4KA     | 5297   | 37 | 22 | 21081565 | 21081565 | Missense_Mutation | SNP | G | A | 8  | 75  | c.4720C>T    | c.(4720-4722)CCT>TCT | p.P1574S      |
| Pat_41 | Post-Resistance | PI4KA     | 5297   | 37 | 22 | 21115619 | 21115619 | Missense_Mutation | SNP | C | T | 8  | 120 | c.2590G>A    | c.(2590-2592)GAT>AAT | p.D864N       |
| Pat_41 | Post-Resistance | SERPIND1  | 3053   | 37 | 22 | 21133718 | 21133718 | Missense_Mutation | SNP | C | T | 6  | 17  | c.118C>T     | c.(118-120)CCC>TCC   | p.P40S        |
| Pat_41 | Post-Resistance | SNAP29    | 9342   | 37 | 22 | 21235390 | 21235390 | Missense_Mutation | SNP | G | A | 7  | 99  | c.488G>A     | c.(487-489)AGC>AAC   | p.S163N       |
| Pat_41 | Post-Resistance | CCDC116   | 164592 | 37 | 22 | 21988818 | 21988818 | Missense_Mutation | SNP | G | A | 5  | 31  | c.580G>A     | c.(580-582)GAG>AAG   | p.E194K       |
| Pat_41 | Post-Resistance | RGL4      | 266747 | 37 | 22 | 24035981 | 24035981 | Missense_Mutation | SNP | G | T | 5  | 161 | c.732G>T     | c.(730-732)TTG>TTT   | p.L244F       |
| Pat_41 | Post-Resistance | SLC2A11   | 66035  | 37 | 22 | 24226914 | 24226914 | Missense_Mutation | SNP | C | T | 9  | 103 | c.1369C>T    | c.(1369-1371)CCT>TCT | p.P457S       |
| Pat_41 | Post-Resistance | CABIN1    | 23523  | 37 | 22 | 24432610 | 24432610 | Missense_Mutation | SNP | C | T | 6  | 247 | c.77C>T      | c.(76-78)ACC>ATC     | p.T26I        |
| Pat_41 | Post-Resistance | CABIN1    | 23523  | 37 | 22 | 24463064 | 24463064 | Missense_Mutation | SNP | G | A | 18 | 89  | c.2164G>A    | c.(2164-2166)GAC>AAC | p.D722N       |
| Pat_41 | Post-Resistance | CYTSA     | 23384  | 37 | 22 | 24718563 | 24718563 | Missense_Mutation | SNP | G | A | 8  | 36  | c.1615G>A    | c.(1615-1617)GAA>AAA | p.E539K       |
| Pat_41 | Post-Resistance | MYO18B    | 84700  | 37 | 22 | 26239830 | 26239830 | Missense_Mutation | SNP | G | A | 3  | 19  | c.3337G>A    | c.(3337-3339)GAT>AAT | p.D1113N      |
| Pat_41 | Post-Resistance | MYO18B    | 84700  | 37 | 22 | 26423258 | 26423258 | Missense_Mutation | SNP | G | A | 10 | 231 | c.7318G>A    | c.(7318-7320)GAC>AAC | p.D2440N      |
| Pat_41 | Post-Resistance | HPS4      | 89781  | 37 | 22 | 26861420 | 26861420 | Splice_Site       | SNP | C | T | 10 | 141 | c.803_splice | c.e10+1              | p.R268_splice |
| Pat_41 | Post-Resistance | HPS4      | 89781  | 37 | 22 | 26861434 | 26861434 | Missense_Mutation | SNP | C | T | 16 | 180 | c.790G>A     | c.(790-792)GAA>AAA   | p.E264K       |
| Pat_41 | Post-Resistance | SRRD      | 402055 | 37 | 22 | 26884440 | 26884440 | Missense_Mutation | SNP | C | T | 16 | 182 | c.595C>T     | c.(595-597)CTC>TTC   | p.L199F       |
| Pat_41 | Post-Resistance | CCDC117   | 150275 | 37 | 22 | 29169756 | 29169756 | Missense_Mutation | SNP | G | A | 16 | 181 | c.229G>A     | c.(229-231)GAG>AAG   | p.E77K        |
| Pat_41 | Post-Resistance | ZNRF3     | 84133  | 37 | 22 | 29445419 | 29445419 | Missense_Mutation | SNP | G | A | 5  | 105 | c.950G>A     | c.(949-951)CGC>CAC   | p.R317H       |

|        |                 |           |        |    |    |          |          |                        |     |   |   |    |     |              |                       |               |
|--------|-----------------|-----------|--------|----|----|----------|----------|------------------------|-----|---|---|----|-----|--------------|-----------------------|---------------|
| Pat_41 | Post-Resistance | NF2       | 4771   | 37 | 22 | 30054177 | 30054177 | Splice_Site            | SNP | G | A | 9  | 125 | c.600_splice | c.e7-1                | p.R200_splice |
| Pat_41 | Post-Resistance | ASCC2     | 84164  | 37 | 22 | 30189353 | 30189353 | Missense_Mutation      | SNP | G | A | 9  | 57  | c.1915C>T    | c.(1915-1917)CGC>TGC  | p.R639C       |
| Pat_41 | Post-Resistance | SF3A1     | 10291  | 37 | 22 | 30731676 | 30731676 | Nonsense_Mutation      | SNP | G | A | 16 | 222 | c.2173C>T    | c.(2173-2175)CAG>TAG  | p.Q725*       |
| Pat_41 | Post-Resistance | SF3A1     | 10291  | 37 | 22 | 30738296 | 30738296 | Missense_Mutation      | SNP | C | T | 6  | 31  | c.770G>A     | c.(769-771)AGG>AAG    | p.R257K       |
| Pat_41 | Post-Resistance | SF3A1     | 10291  | 37 | 22 | 30741179 | 30741179 | Missense_Mutation      | SNP | C | T | 11 | 113 | c.394G>A     | c.(394-396)GTC>ATC    | p.V132I       |
| Pat_41 | Post-Resistance | CCDC157   | 550631 | 37 | 22 | 30762185 | 30762185 | Missense_Mutation      | SNP | C | T | 14 | 272 | c.196C>T     | c.(196-198)CCC>TCC    | p.P66S        |
| Pat_41 | Post-Resistance | MORC2     | 22880  | 37 | 22 | 31330977 | 31330977 | Missense_Mutation      | SNP | C | T | 6  | 24  | c.1798G>A    | c.(1798-1800)GCC>ACC  | p.A600T       |
| Pat_41 | Post-Resistance | INPP5J    | 27124  | 37 | 22 | 31529938 | 31529938 | Missense_Mutation      | SNP | G | A | 8  | 87  | c.2554G>A    | c.(2554-2556)GAC>AAC  | p.D852N       |
| Pat_41 | Post-Resistance | PATZ1     | 23598  | 37 | 22 | 31723196 | 31723196 | Missense_Mutation      | SNP | G | A | 8  | 108 | c.1745C>T    | c.(1744-1746)GCC>GTC  | p.A582V       |
| Pat_41 | Post-Resistance | EIF4ENIF1 | 56478  | 37 | 22 | 31843443 | 31843443 | Missense_Mutation      | SNP | C | T | 17 | 165 | c.1957G>A    | c.(1957-1959)GTG>ATG  | p.V653M       |
| Pat_41 | Post-Resistance | SF11      | 9814   | 37 | 22 | 31924693 | 31924693 | Missense_Mutation      | SNP | C | T | 15 | 61  | c.110C>T     | c.(109-111)GCA>GTA    | p.A37V        |
| Pat_41 | Post-Resistance | SF11      | 9814   | 37 | 22 | 31957301 | 31957301 | Nonsense_Mutation      | SNP | C | T | 9  | 135 | c.688C>T     | c.(688-690)CGA>TGA    | p.R230*       |
| Pat_41 | Post-Resistance | C22orf28  | 51493  | 37 | 22 | 32789949 | 32789949 | Missense_Mutation      | SNP | G | A | 16 | 207 | c.1220C>T    | c.(1219-1221)ACC>ATC  | p.T407I       |
| Pat_41 | Post-Resistance | FBXO7     | 25793  | 37 | 22 | 32880106 | 32880106 | Missense_Mutation      | SNP | C | T | 22 | 276 | c.640C>T     | c.(640-642)CCT>TCT    | p.P214S       |
| Pat_41 | Post-Resistance | LARGE     | 9215   | 37 | 22 | 34046631 | 34046631 | Missense_Mutation      | SNP | G | A | 8  | 91  | c.130C>T     | c.(130-132)CCG>TCG    | p.P44S        |
| Pat_41 | Post-Resistance | RASD2     | 23551  | 37 | 22 | 35948051 | 35948051 | Missense_Mutation      | SNP | G | A | 16 | 93  | c.773G>A     | c.(772-774)CGT>CAT    | p.R258H       |
| Pat_41 | Post-Resistance | MB        | 4151   | 37 | 22 | 36006948 | 36006948 | Missense_Mutation      | SNP | G | A | 4  | 47  | c.301C>T     | c.(301-303)CCC>TCC    | p.P101S       |
| Pat_41 | Post-Resistance | APOL2     | 23780  | 37 | 22 | 36629202 | 36629202 | Missense_Mutation      | SNP | G | A | 44 | 268 | c.7C>T       | c.(7-9)CCA>TCA        | p.P3S         |
| Pat_41 | Post-Resistance | MYH9      | 4627   | 37 | 22 | 36684330 | 36684330 | Missense_Mutation      | SNP | C | T | 9  | 148 | c.4900G>A    | c.(4900-4902)GAC>AAC  | p.D1634N      |
| Pat_41 | Post-Resistance | IL2RB     | 3560   | 37 | 22 | 37535186 | 37535186 | Missense_Mutation      | SNP | G | A | 8  | 91  | c.359C>T     | c.(358-360)GCC>GTC    | p.A120V       |
| Pat_41 | Post-Resistance | CYTH4     | 27128  | 37 | 22 | 37705337 | 37705337 | Missense_Mutation      | SNP | G | A | 18 | 258 | c.781G>A     | c.(781-783)GAC>AAC    | p.D261N       |
| Pat_41 | Post-Resistance | TRIOBP    | 11078  | 37 | 22 | 38120212 | 38120212 | Missense_Mutation      | SNP | C | G | 6  | 356 | c.1649C>G    | c.(1648-1650)ACA>AGA  | p.T550R       |
| Pat_41 | Post-Resistance | TRIOBP    | 11078  | 37 | 22 | 38120290 | 38120290 | Missense_Mutation      | SNP | G | C | 6  | 235 | c.1727G>C    | c.(1726-1728)AGA>ACA  | p.R576T       |
| Pat_41 | Post-Resistance | TRIOBP    | 11078  | 37 | 22 | 38120296 | 38120296 | Missense_Mutation      | SNP | C | T | 11 | 252 | c.1733C>T    | c.(1732-1734)TCC>TTC  | p.S578F       |
| Pat_41 | Post-Resistance | TRIOBP    | 11078  | 37 | 22 | 38121418 | 38121418 | Missense_Mutation      | SNP | C | T | 36 | 361 | c.2855C>T    | c.(2854-2856)CCC>CTC  | p.P952L       |
| Pat_41 | Post-Resistance | GALR3     | 8484   | 37 | 22 | 38219532 | 38219532 | Missense_Mutation      | SNP | C | T | 4  | 50  | c.119C>T     | c.(118-120)GCA>GTA    | p.A40V        |
| Pat_41 | Post-Resistance | PICK1     | 9463   | 37 | 22 | 38468589 | 38468589 | Missense_Mutation      | SNP | G | A | 19 | 153 | c.662G>A     | c.(661-663)GGC>GAC    | p.G221D       |
| Pat_41 | Post-Resistance | KCNJ4     | 3761   | 37 | 22 | 38824159 | 38824159 | Translation_Start_Site | SNP | C | T | 12 | 125 | c.-21G>A     | :(-23--19)AGGTG>AGATG |               |
| Pat_41 | Post-Resistance | APOBEC3B  | 9582   | 37 | 22 | 39385461 | 39385461 | Splice_Site            | SNP | G | A | 7  | 60  | c.570_splice | c.e5-1                | p.R190_splice |
| Pat_41 | Post-Resistance | PDGFB     | 5155   | 37 | 22 | 39621852 | 39621852 | Missense_Mutation      | SNP | G | A | 5  | 50  | c.602C>T     | c.(601-603)GCC>GTC    | p.A201V       |
| Pat_41 | Post-Resistance | CACNA1I   | 8911   | 37 | 22 | 40061886 | 40061886 | Missense_Mutation      | SNP | C | T | 30 | 231 | c.3979C>T    | c.(3979-3981)CTC>TTC  | p.L1327F      |
| Pat_41 | Post-Resistance | CACNA1I   | 8911   | 37 | 22 | 40061913 | 40061913 | Missense_Mutation      | SNP | C | A | 5  | 222 | c.4006C>A    | c.(4006-4008)CTG>ATG  | p.L1336M      |
| Pat_41 | Post-Resistance | TNRC6B    | 23112  | 37 | 22 | 40711366 | 40711366 | Nonsense_Mutation      | SNP | G | A | 12 | 163 | c.4758G>A    | c.(4756-4758)TGG>TGA  | p.W1586*      |
| Pat_41 | Post-Resistance | ADSL      | 158    | 37 | 22 | 40760884 | 40760884 | Missense_Mutation      | SNP | G | A | 6  | 185 | c.1192G>A    | c.(1192-1194)GAT>AAT  | p.D398N       |
| Pat_41 | Post-Resistance | MKL1      | 57591  | 37 | 22 | 40815348 | 40815348 | Missense_Mutation      | SNP | G | A | 7  | 77  | c.1094C>T    | c.(1093-1095)CCT>CTT  | p.P365L       |
| Pat_41 | Post-Resistance | XRCC6     | 2547   | 37 | 22 | 42049664 | 42049664 | Missense_Mutation      | SNP | G | A | 25 | 134 | c.1261G>A    | c.(1261-1263)GAT>AAT  | p.D421N       |
| Pat_41 | Post-Resistance | CENPM     | 79019  | 37 | 22 | 42343100 | 42343100 | Translation_Start_Site | SNP | G | A | 3  | 30  | c.-19C>T     | :(-21--17)AACGG>AATGG |               |
| Pat_41 | Post-Resistance | 3-Sep     | 55964  | 37 | 22 | 42390326 | 42390326 | Missense_Mutation      | SNP | C | T | 7  | 168 | c.898C>T     | c.(898-900)CTT>TTT    | p.L300F       |
| Pat_41 | Post-Resistance | TCF20     | 6942   | 37 | 22 | 42607342 | 42607342 | Missense_Mutation      | SNP | C | T | 8  | 123 | c.3970G>A    | c.(3970-3972)GAT>AAT  | p.D1324N      |
| Pat_41 | Post-Resistance | ARFGAP3   | 26286  | 37 | 22 | 43195130 | 43195130 | Missense_Mutation      | SNP | G | A | 18 | 303 | c.1448C>T    | c.(1447-1449)CCC>CTC  | p.P483L       |
| Pat_41 | Post-Resistance | ARFGAP3   | 26286  | 37 | 22 | 43230267 | 43230267 | Missense_Mutation      | SNP | G | A | 48 | 459 | c.458C>T     | c.(457-459)GCC>GTC    | p.A153V       |
| Pat_41 | Post-Resistance | EFCAB6    | 64800  | 37 | 22 | 43986065 | 43986065 | Missense_Mutation      | SNP | G | A | 11 | 148 | c.2921C>T    | c.(2920-2922)ACC>ATC  | p.T974I       |
| Pat_41 | Post-Resistance | PHF21B    | 112885 | 37 | 22 | 45309824 | 45309824 | Nonsense_Mutation      | SNP | G | A | 18 | 244 | c.709C>T     | c.(709-711)CAA>TAA    | p.Q237*       |
| Pat_41 | Post-Resistance | GTSE1     | 51512  | 37 | 22 | 46704322 | 46704322 | Missense_Mutation      | SNP | C | T | 27 | 314 | c.244C>T     | c.(244-246)CCC>TCC    | p.P82S        |
| Pat_41 | Post-Resistance | GTSE1     | 51512  | 37 | 22 | 46725279 | 46725279 | Missense_Mutation      | SNP | G | A | 20 | 301 | c.1951G>A    | c.(1951-1953)GAA>AAA  | p.E651K       |
| Pat_41 | Post-Resistance | CELSR1    | 9620   | 37 | 22 | 46835245 | 46835245 | Missense_Mutation      | SNP | C | T | 4  | 132 | c.4247G>A    | c.(4246-4248)GGC>GAC  | p.G1416D      |
| Pat_41 | Post-Resistance | CELSR1    | 9620   | 37 | 22 | 46931300 | 46931300 | Missense_Mutation      | SNP | C | T | 3  | 44  | c.1768G>A    | c.(1768-1770)GTG>ATG  | p.V590M       |

|        |                 |           |        |    |    |          |          |                   |     |   |   |    |     |               |                      |                |
|--------|-----------------|-----------|--------|----|----|----------|----------|-------------------|-----|---|---|----|-----|---------------|----------------------|----------------|
| Pat_41 | Post-Resistance | CELSR1    | 9620   | 37 | 22 | 46931672 | 46931672 | Missense_Mutation | SNP | C | T | 6  | 110 | c.1396G>A     | c.(1396-1398)GTC>ATC | p.V466I        |
| Pat_41 | Post-Resistance | TBC1D22A  | 25771  | 37 | 22 | 47287172 | 47287172 | Missense_Mutation | SNP | C | T | 11 | 63  | c.719C>T      | c.(718-720)CCC>CTC   | p.P240L        |
| Pat_41 | Post-Resistance | BRD1      | 23774  | 37 | 22 | 50170699 | 50170699 | Missense_Mutation | SNP | G | A | 5  | 98  | c.2711C>T     | c.(2710-2712)GCG>GTG | p.A904V        |
| Pat_41 | Post-Resistance | BRD1      | 23774  | 37 | 22 | 50217766 | 50217766 | Missense_Mutation | SNP | G | A | 7  | 74  | c.200C>T      | c.(199-201)GCT>GTT   | p.A67V         |
| Pat_41 | Post-Resistance | ALG12     | 79087  | 37 | 22 | 50307401 | 50307401 | Missense_Mutation | SNP | C | T | 7  | 111 | c.13G>A       | c.(13-15)GGG>AGG     | p.G5R          |
| Pat_41 | Post-Resistance | CRELD2    | 79174  | 37 | 22 | 50320917 | 50320917 | Missense_Mutation | SNP | G | A | 25 | 287 | c.1024G>A     | c.(1024-1026)GAA>AAA | p.E342K        |
| Pat_41 | Post-Resistance | SELO      | 83642  | 37 | 22 | 50649175 | 50649175 | Missense_Mutation | SNP | G | A | 6  | 85  | c.1186G>A     | c.(1186-1188)GAA>AAA | p.E396K        |
| Pat_41 | Post-Resistance | TUBGCP6   | 85378  | 37 | 22 | 50660114 | 50660114 | Missense_Mutation | SNP | C | T | 4  | 98  | c.2674G>A     | c.(2674-2676)GAC>AAC | p.D892N        |
| Pat_41 | Post-Resistance | TUBGCP6   | 85378  | 37 | 22 | 50682668 | 50682668 | Missense_Mutation | SNP | G | A | 18 | 170 | c.221C>T      | c.(220-222)TCC>TTC   | p.S74F         |
| Pat_41 | Post-Resistance | MAPK11    | 5600   | 37 | 22 | 50703885 | 50703885 | Missense_Mutation | SNP | C | T | 9  | 112 | c.880G>A      | c.(880-882)GAC>AAC   | p.D294N        |
| Pat_41 | Post-Resistance | MAPK11    | 5600   | 37 | 22 | 50705022 | 50705022 | Missense_Mutation | SNP | C | T | 5  | 87  | c.629G>A      | c.(628-630)GGC>GAC   | p.G210D        |
| Pat_41 | Post-Resistance | PLXNB2    | 23654  | 37 | 22 | 50716313 | 50716313 | Missense_Mutation | SNP | C | T | 5  | 98  | c.5017G>A     | c.(5017-5019)GAA>AAA | p.E1673K       |
| Pat_41 | Post-Resistance | PLXNB2    | 23654  | 37 | 22 | 50717332 | 50717332 | Missense_Mutation | SNP | G | A | 3  | 55  | c.4498C>T     | c.(4498-4500)CGT>TGT | p.R1500C       |
| Pat_41 | Post-Resistance | PLXNB2    | 23654  | 37 | 22 | 50721230 | 50721230 | Missense_Mutation | SNP | C | T | 7  | 50  | c.2897G>A     | c.(2896-2898)GGG>GAG | p.G966E        |
| Pat_41 | Post-Resistance | SAPS2     | 9701   | 37 | 22 | 50876607 | 50876607 | Missense_Mutation | SNP | G | A | 12 | 180 | c.1844G>A     | c.(1843-1845)AGC>AAC | p.S615N        |
| Pat_41 | Post-Resistance | SBF1      | 6305   | 37 | 22 | 50899024 | 50899024 | Missense_Mutation | SNP | C | T | 20 | 191 | c.3085G>A     | c.(3085-3087)GGC>AGC | p.G1029S       |
| Pat_41 | Post-Resistance | SBF1      | 6305   | 37 | 22 | 50900531 | 50900531 | Missense_Mutation | SNP | G | A | 18 | 111 | c.2414C>T     | c.(2413-2415)GCC>GTC | p.A805V        |
| Pat_41 | Post-Resistance | MIOX      | 55586  | 37 | 22 | 50928211 | 50928211 | Missense_Mutation | SNP | C | T | 14 | 250 | c.784C>T      | c.(784-786)CCG>TCG   | p.P262S        |
| Pat_41 | Post-Resistance | ODF3B     | 440836 | 37 | 22 | 50968920 | 50968920 | Missense_Mutation | SNP | C | T | 3  | 16  | c.751G>A      | c.(751-753)GCG>ACG   | p.A251T        |
| Pat_41 | Post-Resistance | CPT1B     | 1375   | 37 | 22 | 51014526 | 51014526 | Missense_Mutation | SNP | C | T | 7  | 117 | c.715G>A      | c.(715-717)GAA>AAA   | p.E239K        |
| Pat_41 | Post-Resistance | CPT1B     | 1375   | 37 | 22 | 51015819 | 51015819 | Missense_Mutation | SNP | G | A | 7  | 94  | c.215C>T      | c.(214-216)TCC>TTC   | p.S72F         |
| Pat_41 | Post-Resistance | ITPR1     | 3708   | 37 | 3  | 4702715  | 4702715  | Missense_Mutation | SNP | G | A | 6  | 44  | c.1195G>A     | c.(1195-1197)GTT>ATT | p.V399I        |
| Pat_41 | Post-Resistance | ITPR1     | 3708   | 37 | 3  | 4704808  | 4704808  | Missense_Mutation | SNP | G | A | 9  | 68  | c.1472G>A     | c.(1471-1473)GGT>GAT | p.G491D        |
| Pat_41 | Post-Resistance | ITPR1     | 3708   | 37 | 3  | 4723047  | 4723047  | Splice_Site       | SNP | G | A | 13 | 61  | c.3080_splice | c.e26-1              | p.G1027_splice |
| Pat_41 | Post-Resistance | BHLHE40   | 8553   | 37 | 3  | 5024833  | 5024833  | Missense_Mutation | SNP | G | A | 34 | 174 | c.695G>A      | c.(694-696)GGG>GAG   | p.G232E        |
| Pat_41 | Post-Resistance | SETD5     | 55209  | 37 | 3  | 9482218  | 9482218  | Nonsense_Mutation | SNP | C | T | 6  | 72  | c.646C>T      | c.(646-648)CAG>TAG   | p.Q216*        |
| Pat_41 | Post-Resistance | TADA3     | 10474  | 37 | 3  | 9832961  | 9832961  | Missense_Mutation | SNP | G | A | 11 | 72  | c.190C>T      | c.(190-192)CTT>TTT   | p.L64F         |
| Pat_41 | Post-Resistance | CIDEC     | 63924  | 37 | 3  | 9911976  | 9911976  | Missense_Mutation | SNP | G | A | 13 | 80  | c.238C>T      | c.(238-240)CCC>TCC   | p.P80S         |
| Pat_41 | Post-Resistance | JAGN1     | 84522  | 37 | 3  | 9934738  | 9934738  | Missense_Mutation | SNP | C | T | 6  | 26  | c.229C>T      | c.(229-231)CCG>TCG   | p.P77S         |
| Pat_41 | Post-Resistance | PRRT3     | 285368 | 37 | 3  | 9990915  | 9990915  | Missense_Mutation | SNP | C | A | 7  | 64  | c.885G>T      | c.(883-885)GAG>GAT   | p.E295D        |
| Pat_41 | Post-Resistance | TATDN2    | 9797   | 37 | 3  | 10312178 | 10312178 | Missense_Mutation | SNP | G | A | 11 | 97  | c.1312G>A     | c.(1312-1314)GAG>AAG | p.E438K        |
| Pat_41 | Post-Resistance | ATP2B2    | 491    | 37 | 3  | 10387112 | 10387112 | Missense_Mutation | SNP | C | T | 10 | 34  | c.2659G>A     | c.(2659-2661)GTG>ATG | p.V887M        |
| Pat_41 | Post-Resistance | TSEN2     | 80746  | 37 | 3  | 12560606 | 12560606 | Missense_Mutation | SNP | C | T | 6  | 87  | c.1009C>T     | c.(1009-1011)CCC>TCC | p.P337S        |
| Pat_41 | Post-Resistance | TSEN2     | 80746  | 37 | 3  | 12573097 | 12573097 | Missense_Mutation | SNP | C | T | 6  | 61  | c.1277C>T     | c.(1276-1278)CCC>CTC | p.P426L        |
| Pat_41 | Post-Resistance | NUP210    | 23225  | 37 | 3  | 13383264 | 13383264 | Missense_Mutation | SNP | G | A | 8  | 78  | c.3212C>T     | c.(3211-3213)GCC>GTC | p.A1071V       |
| Pat_41 | Post-Resistance | NUP210    | 23225  | 37 | 3  | 13429877 | 13429877 | Missense_Mutation | SNP | C | T | 5  | 27  | c.610G>A      | c.(610-612)GAC>AAC   | p.D204N        |
| Pat_41 | Post-Resistance | RFTN1     | 23180  | 37 | 3  | 16419321 | 16419321 | Missense_Mutation | SNP | C | T | 17 | 39  | c.730G>A      | c.(730-732)GGA>AGA   | p.G244R        |
| Pat_41 | Post-Resistance | KCNH8     | 131096 | 37 | 3  | 19389238 | 19389238 | Missense_Mutation | SNP | G | A | 8  | 78  | c.592G>A      | c.(592-594)GCA>ACA   | p.A198T        |
| Pat_41 | Post-Resistance | RAB5A     | 5868   | 37 | 3  | 19992545 | 19992545 | Missense_Mutation | SNP | C | T | 5  | 148 | c.155C>T      | c.(154-156)ACC>ATC   | p.T52I         |
| Pat_41 | Post-Resistance | SGOL1     | 151648 | 37 | 3  | 20216343 | 20216343 | Missense_Mutation | SNP | C | T | 32 | 109 | c.680G>A      | c.(679-681)GGA>GAA   | p.G227E        |
| Pat_41 | Post-Resistance | UBE2E1    | 7324   | 37 | 3  | 23930708 | 23930708 | Missense_Mutation | SNP | G | A | 20 | 113 | c.442G>A      | c.(442-444)GTC>ATC   | p.V148I        |
| Pat_41 | Post-Resistance | NKIRAS1   | 28512  | 37 | 3  | 23942517 | 23942517 | Missense_Mutation | SNP | C | T | 14 | 205 | c.118G>A      | c.(118-120)GAA>AAA   | p.E40K         |
| Pat_41 | Post-Resistance | NR1D2     | 9975   | 37 | 3  | 23996028 | 23996028 | Missense_Mutation | SNP | G | A | 23 | 122 | c.17G>A       | c.(16-18)GGA>GAA     | p.G6E          |
| Pat_41 | Post-Resistance | SLC4A7    | 9497   | 37 | 3  | 27444754 | 27444754 | Missense_Mutation | SNP | C | T | 32 | 121 | c.2170G>A     | c.(2170-2172)GAA>AAA | p.E724K        |
| Pat_41 | Post-Resistance | ZNF860    | 344787 | 37 | 3  | 32032046 | 32032046 | Missense_Mutation | SNP | G | A | 26 | 334 | c.1475G>A     | c.(1474-1476)CGT>CAT | p.R492H        |
| Pat_41 | Post-Resistance | CMTM7     | 112616 | 37 | 3  | 32493951 | 32493951 | Missense_Mutation | SNP | T | C | 22 | 193 | c.500T>C      | c.(499-501)GTA>GCA   | p.V167A        |
| Pat_41 | Post-Resistance | DYNC1L1L1 | 51143  | 37 | 3  | 32576067 | 32576067 | Nonsense_Mutation | SNP | G | A | 6  | 61  | c.904C>T      | c.(904-906)CAG>TAG   | p.Q302*        |

|        |                 |          |        |    |   |          |          |                        |     |   |   |    |     |               |                          |               |
|--------|-----------------|----------|--------|----|---|----------|----------|------------------------|-----|---|---|----|-----|---------------|--------------------------|---------------|
| Pat_41 | Post-Resistance | UBP1     | 7342   | 37 | 3 | 33458275 | 33458275 | Missense_Mutation      | SNP | G | A | 38 | 148 | c.317C>T      | c.(316-318)CCT>CTT       | p.P106L       |
| Pat_41 | Post-Resistance | UBP1     | 7342   | 37 | 3 | 33467192 | 33467192 | Missense_Mutation      | SNP | C | T | 7  | 53  | c.155G>A      | c.(154-156)AGC>AAC       | p.S52N        |
| Pat_41 | Post-Resistance | UBP1     | 7342   | 37 | 3 | 33467217 | 33467217 | Missense_Mutation      | SNP | G | A | 25 | 51  | c.130C>T      | c.(130-132)CCC>TCC       | p.P44S        |
| Pat_41 | Post-Resistance | PDCD6IP  | 10015  | 37 | 3 | 33887037 | 33887037 | Missense_Mutation      | SNP | C | T | 6  | 195 | c.1598C>T     | c.(1597-1599)GCC>GTC     | p.A533V       |
| Pat_41 | Post-Resistance | MLH1     | 4292   | 37 | 3 | 37045965 | 37045965 | Missense_Mutation      | SNP | G | A | 93 | 81  | c.380G>A      | c.(379-381)AGA>AAA       | p.R127K       |
| Pat_41 | Post-Resistance | MLH1     | 4292   | 37 | 3 | 37081748 | 37081748 | Nonsense_Mutation      | SNP | C | T | 33 | 128 | c.1630C>T     | c.(1630-1632)CAA>TAA     | p.Q544*       |
| Pat_41 | Post-Resistance | ACAA1    | 30     | 37 | 3 | 38168066 | 38168066 | Missense_Mutation      | SNP | C | T | 10 | 62  | c.752G>A      | c.(751-753)AGC>AAC       | p.S251N       |
| Pat_41 | Post-Resistance | ACAA1    | 30     | 37 | 3 | 38173086 | 38173086 | Splice_Site            | SNP | C | T | 6  | 76  | c.446_splice  | c.e5+1                   | p.G149_splice |
| Pat_41 | Post-Resistance | SLC22A13 | 9390   | 37 | 3 | 38316202 | 38316202 | Missense_Mutation      | SNP | C | T | 10 | 71  | c.590C>T      | c.(589-591)GCT>GTT       | p.A197V       |
| Pat_41 | Post-Resistance | SCN5A    | 6331   | 37 | 3 | 38595943 | 38595943 | Missense_Mutation      | SNP | A | G | 6  | 103 | c.4640T>C     | c.(4639-4641)GTG>GCG     | p.V1547A      |
| Pat_41 | Post-Resistance | SCN5A    | 6331   | 37 | 3 | 38627264 | 38627264 | Missense_Mutation      | SNP | G | A | 8  | 114 | c.2705C>T     | c.(2704-2706)ACC>ATC     | p.T902I       |
| Pat_41 | Post-Resistance | SCN10A   | 6336   | 37 | 3 | 38738979 | 38738979 | Missense_Mutation      | SNP | G | A | 9  | 194 | c.5732C>T     | c.(5731-5733)ACT>ATT     | p.T1911I      |
| Pat_41 | Post-Resistance | WDR48    | 57599  | 37 | 3 | 39104625 | 39104625 | Missense_Mutation      | SNP | C | T | 30 | 170 | c.133C>T      | c.(133-135)CTT>TTT       | p.L45F        |
| Pat_41 | Post-Resistance | GORASP1  | 64689  | 37 | 3 | 39139810 | 39139810 | Missense_Mutation      | SNP | C | T | 20 | 132 | c.1240G>A     | c.(1240-1242)GAA>AAA     | p.E414K       |
| Pat_41 | Post-Resistance | CSRNP1   | 64651  | 37 | 3 | 39184674 | 39184674 | Missense_Mutation      | SNP | C | T | 20 | 43  | c.1642G>A     | c.(1642-1644)GCC>ACC     | p.A548T       |
| Pat_41 | Post-Resistance | ZNF619   | 285267 | 37 | 3 | 40528516 | 40528516 | Missense_Mutation      | SNP | C | T | 10 | 92  | c.635C>T      | c.(634-636)ACC>ATC       | p.T212I       |
| Pat_41 | Post-Resistance | CTNNB1   | 1499   | 37 | 3 | 41266201 | 41266201 | Nonsense_Mutation      | SNP | G | A | 4  | 72  | c.198G>A      | c.(196-198)TGG>TGA       | p.W66*        |
| Pat_41 | Post-Resistance | ULK4     | 54986  | 37 | 3 | 41977324 | 41977324 | Missense_Mutation      | SNP | C | T | 7  | 109 | c.347G>A      | c.(346-348)GGC>GAC       | p.G116D       |
| Pat_41 | Post-Resistance | NKTR     | 4820   | 37 | 3 | 42672739 | 42672739 | Missense_Mutation      | SNP | G | A | 3  | 50  | c.481G>A      | c.(481-483)GCA>ACA       | p.A161T       |
| Pat_41 | Post-Resistance | HHATL    | 57467  | 37 | 3 | 42739750 | 42739750 | Missense_Mutation      | SNP | C | T | 31 | 97  | c.577G>A      | c.(577-579)GAG>AAG       | p.E193K       |
| Pat_41 | Post-Resistance | CCDC13   | 152206 | 37 | 3 | 42781266 | 42781266 | Missense_Mutation      | SNP | G | A | 27 | 63  | c.1024C>T     | c.(1024-1026)CTT>TTT     | p.L342F       |
| Pat_41 | Post-Resistance | C3orf39  | 84892  | 37 | 3 | 43122413 | 43122413 | Missense_Mutation      | SNP | C | T | 16 | 44  | c.511G>A      | c.(511-513)GAC>AAC       | p.D171N       |
| Pat_41 | Post-Resistance | ZNF445   | 353274 | 37 | 3 | 44488854 | 44488854 | Missense_Mutation      | SNP | G | A | 15 | 28  | c.2309C>T     | c.(2308-2310)GCC>GTC     | p.A770V       |
| Pat_41 | Post-Resistance | ZNF445   | 353274 | 37 | 3 | 44489930 | 44489930 | Missense_Mutation      | SNP | T | G | 6  | 55  | c.1233A>C     | c.(1231-1233)GAA>GAC     | p.E411D       |
| Pat_41 | Post-Resistance | ZNF167   | 55888  | 37 | 3 | 44612067 | 44612067 | Missense_Mutation      | SNP | C | T | 8  | 94  | c.1465C>T     | c.(1465-1467)CAT>TAT     | p.H489Y       |
| Pat_41 | Post-Resistance | ZNF501   | 115560 | 37 | 3 | 44775975 | 44775975 | Missense_Mutation      | SNP | C | T | 7  | 121 | c.62C>T       | c.(61-63)CCT>CTT         | p.P21L        |
| Pat_41 | Post-Resistance | KIF15    | 56992  | 37 | 3 | 44803231 | 44803231 | Translation_Start_Site | SNP | C | T | 3  | 8   | c.-126C>T     | c.(-128--124)AACGT>AATGT |               |
| Pat_41 | Post-Resistance | KIF15    | 56992  | 37 | 3 | 44822385 | 44822385 | Missense_Mutation      | SNP | C | T | 22 | 211 | c.332C>T      | c.(331-333)ACT>ATT       | p.T111I       |
| Pat_41 | Post-Resistance | KIF15    | 56992  | 37 | 3 | 44839050 | 44839050 | Missense_Mutation      | SNP | G | A | 21 | 57  | c.857G>A      | c.(856-858)GGT>GAT       | p.G286D       |
| Pat_41 | Post-Resistance | CDCP1    | 64866  | 37 | 3 | 45153724 | 45153724 | Missense_Mutation      | SNP | G | A | 61 | 155 | c.506C>T      | c.(505-507)GCC>GTC       | p.A169V       |
| Pat_41 | Post-Resistance | LARS2    | 23395  | 37 | 3 | 45458999 | 45458999 | Missense_Mutation      | SNP | C | T | 25 | 163 | c.389C>T      | c.(388-390)GCT>GTT       | p.A130V       |
| Pat_41 | Post-Resistance | LIMD1    | 8994   | 37 | 3 | 45636997 | 45636997 | Missense_Mutation      | SNP | C | T | 19 | 41  | c.626C>T      | c.(625-627)CCT>CTT       | p.P209L       |
| Pat_41 | Post-Resistance | FYCO1    | 79443  | 37 | 3 | 45996748 | 45996748 | Missense_Mutation      | SNP | C | T | 37 | 302 | c.3937G>A     | c.(3937-3939)GCT>ACT     | p.A1313T      |
| Pat_41 | Post-Resistance | CCR2     | 729230 | 37 | 3 | 46399356 | 46399356 | Missense_Mutation      | SNP | G | A | 15 | 373 | c.338G>A      | c.(337-339)TGC>TAC       | p.C113Y       |
| Pat_41 | Post-Resistance | PTH1R    | 5745   | 37 | 3 | 46939953 | 46939953 | Missense_Mutation      | SNP | C | T | 15 | 52  | c.629C>T      | c.(628-630)GCC>GTC       | p.A210V       |
| Pat_41 | Post-Resistance | SETD2    | 29072  | 37 | 3 | 47125676 | 47125676 | Missense_Mutation      | SNP | C | T | 18 | 143 | c.5594G>A     | c.(5593-5595)AGC>AAC     | p.S1865N      |
| Pat_41 | Post-Resistance | SETD2    | 29072  | 37 | 3 | 47144843 | 47144843 | Missense_Mutation      | SNP | G | A | 59 | 164 | c.4910C>T     | c.(4909-4911)ACC>ATC     | p.T1637I      |
| Pat_41 | Post-Resistance | SETD2    | 29072  | 37 | 3 | 47163062 | 47163062 | Missense_Mutation      | SNP | C | T | 21 | 128 | c.3064G>A     | c.(3064-3066)GAC>AAC     | p.D1022N      |
| Pat_41 | Post-Resistance | KLHL18   | 23276  | 37 | 3 | 47382136 | 47382136 | Missense_Mutation      | SNP | C | T | 6  | 176 | c.1196C>T     | c.(1195-1197)TCC>TTC     | p.S399F       |
| Pat_41 | Post-Resistance | PTPN23   | 25930  | 37 | 3 | 47453591 | 47453591 | Missense_Mutation      | SNP | C | T | 6  | 58  | c.4081C>T     | c.(4081-4083)CCC>TCC     | p.P1361S      |
| Pat_41 | Post-Resistance | ZNF589   | 51385  | 37 | 3 | 48310166 | 48310166 | Missense_Mutation      | SNP | G | A | 14 | 128 | c.985G>A      | c.(985-987)GAG>AAG       | p.E329K       |
| Pat_41 | Post-Resistance | COL7A1   | 1294   | 37 | 3 | 48623653 | 48623653 | Missense_Mutation      | SNP | C | T | 22 | 177 | c.3577G>A     | c.(3577-3579)GCT>ACT     | p.A1193T      |
| Pat_41 | Post-Resistance | CELSR3   | 1951   | 37 | 3 | 48677720 | 48677720 | Missense_Mutation      | SNP | C | T | 4  | 70  | c.9298G>A     | c.(9298-9300)GGG>AGG     | p.G3100R      |
| Pat_41 | Post-Resistance | QARS     | 5859   | 37 | 3 | 49137393 | 49137393 | Splice_Site            | SNP | C | T | 17 | 85  | c.1295_splice | c.e14+1                  | p.W432_splice |
| Pat_41 | Post-Resistance | QARS     | 5859   | 37 | 3 | 49141139 | 49141139 | Missense_Mutation      | SNP | C | T | 6  | 17  | c.376G>A      | c.(376-378)GTG>ATG       | p.V126M       |
| Pat_41 | Post-Resistance | LAMB2    | 3913   | 37 | 3 | 49160681 | 49160681 | Missense_Mutation      | SNP | C | T | 22 | 165 | c.4108G>A     | c.(4108-4110)GCA>ACA     | p.A1370T      |
| Pat_41 | Post-Resistance | KLHDC8B  | 200942 | 37 | 3 | 49212225 | 49212225 | Missense_Mutation      | SNP | G | A | 3  | 24  | c.592G>A      | c.(592-594)GAG>AAG       | p.E198K       |

|        |                 |           |        |    |   |          |          |                   |     |   |   |    |     |               |                        |               |
|--------|-----------------|-----------|--------|----|---|----------|----------|-------------------|-----|---|---|----|-----|---------------|------------------------|---------------|
| Pat_41 | Post-Resistance | LOC646498 | 646498 | 37 | 3 | 49227385 | 49227385 | Missense_Mutation | SNP | A | G | 13 | 232 | c.37T>C       | c.(37-39)TCC>CCC       | p.S13P        |
| Pat_41 | Post-Resistance | DAG1      | 1605   | 37 | 3 | 49568864 | 49568864 | Missense_Mutation | SNP | C | T | 5  | 104 | c.920C>T      | c.(919-921)CCC>CTC     | p.P307L       |
| Pat_41 | Post-Resistance | APEH      | 327    | 37 | 3 | 49718663 | 49718663 | Missense_Mutation | SNP | G | A | 12 | 45  | c.1429G>A     | c.(1429-1431)GTG>ATG   | p.V477M       |
| Pat_41 | Post-Resistance | RNF123    | 63891  | 37 | 3 | 49740160 | 49740160 | Missense_Mutation | SNP | C | T | 37 | 281 | c.1724C>T     | c.(1723-1725)TCC>TTC   | p.S575F       |
| Pat_41 | Post-Resistance | AMIGO3    | 386724 | 37 | 3 | 49756430 | 49756430 | Missense_Mutation | SNP | G | A | 26 | 89  | c.469C>T      | c.(469-471)CGC>TGC     | p.R157C       |
| Pat_41 | Post-Resistance | MST1R     | 4486   | 37 | 3 | 49924853 | 49924853 | Missense_Mutation | SNP | C | T | 20 | 85  | c.4090G>A     | c.(4090-4092)GGC>AGC   | p.G1364S      |
| Pat_41 | Post-Resistance | MST1R     | 4486   | 37 | 3 | 49940664 | 49940664 | Missense_Mutation | SNP | G | A | 57 | 16  | c.379C>T      | c.(379-381)CCC>TCC     | p.P127S       |
| Pat_41 | Post-Resistance | MON1A     | 84315  | 37 | 3 | 49949136 | 49949136 | Missense_Mutation | SNP | C | T | 13 | 54  | c.727G>A      | c.(727-729)GAT>AAT     | p.D243N       |
| Pat_41 | Post-Resistance | SEMA3F    | 6405   | 37 | 3 | 50211674 | 50211674 | Missense_Mutation | SNP | G | A | 11 | 29  | c.347G>A      | c.(346-348)GGG>GAG     | p.G116E       |
| Pat_41 | Post-Resistance | SEMA3B    | 7869   | 37 | 3 | 50311816 | 50311816 | Missense_Mutation | SNP | C | T | 16 | 149 | c.1160C>T     | c.(1159-1161)ACC>ATC   | p.T387I       |
| Pat_41 | Post-Resistance | CACNA2D2  | 9254   | 37 | 3 | 50403578 | 50403578 | Missense_Mutation | SNP | C | T | 12 | 88  | c.2747G>A     | c.(2746-2748)AGT>AAT   | p.S916N       |
| Pat_41 | Post-Resistance | MAPKAPK3  | 7867   | 37 | 3 | 50677846 | 50677846 | Missense_Mutation | SNP | A | C | 24 | 185 | c.269A>C      | c.(268-270)CAG>CCG     | p.Q90P        |
| Pat_41 | Post-Resistance | DOCK3     | 1795   | 37 | 3 | 51127763 | 51127763 | Missense_Mutation | SNP | G | A | 4  | 6   | c.694G>A      | c.(694-696)GAT>AAT     | p.D232N       |
| Pat_41 | Post-Resistance | RBM15B    | 29890  | 37 | 3 | 51430158 | 51430158 | Missense_Mutation | SNP | G | A | 20 | 91  | c.1328G>A     | c.(1327-1329)AGC>AAC   | p.S443N       |
| Pat_41 | Post-Resistance | RBM15B    | 29890  | 37 | 3 | 51430191 | 51430191 | Missense_Mutation | SNP | G | A | 23 | 41  | c.1361G>A     | c.(1360-1362)AGC>AAC   | p.S454N       |
| Pat_41 | Post-Resistance | VPRBP     | 9730   | 37 | 3 | 51457803 | 51457803 | Missense_Mutation | SNP | G | A | 11 | 52  | c.2621C>T     | c.(2620-2622)GCT>GTT   | p.A874V       |
| Pat_41 | Post-Resistance | GRM2      | 2912   | 37 | 3 | 51747282 | 51747282 | Missense_Mutation | SNP | G | A | 9  | 36  | c.1244G>A     | c.(1243-1245)GGG>GAG   | p.G415E       |
| Pat_41 | Post-Resistance | GRM2      | 2912   | 37 | 3 | 51749819 | 51749819 | Missense_Mutation | SNP | C | T | 8  | 19  | c.2030C>T     | c.(2029-2031)GCC>GTC   | p.A677V       |
| Pat_41 | Post-Resistance | IQCF3     | 401067 | 37 | 3 | 51864522 | 51864522 | Missense_Mutation | SNP | C | T | 3  | 18  | c.170C>T      | c.(169-171)GCC>GTC     | p.A57V        |
| Pat_41 | Post-Resistance | PCBP4     | 57060  | 37 | 3 | 51993271 | 51993271 | Missense_Mutation | SNP | G | A | 5  | 28  | c.674C>T      | c.(673-675)CCC>CTC     | p.P225L       |
| Pat_41 | Post-Resistance | POC1A     | 25886  | 37 | 3 | 52172229 | 52172229 | Missense_Mutation | SNP | C | T | 6  | 80  | c.769G>A      | c.(769-771)GAC>AAC     | p.D257N       |
| Pat_41 | Post-Resistance | ALAS1     | 211    | 37 | 3 | 52238853 | 52238853 | Missense_Mutation | SNP | C | T | 7  | 112 | c.722C>T      | c.(721-723)ACC>ATC     | p.T241I       |
| Pat_41 | Post-Resistance | TLR9      | 54106  | 37 | 3 | 52257056 | 52257056 | Missense_Mutation | SNP | G | A | 4  | 132 | c.1276C>T     | c.(1276-1278)CGC>TGC   | p.R426C       |
| Pat_41 | Post-Resistance | DNAH1     | 25981  | 37 | 3 | 52426949 | 52426949 | Missense_Mutation | SNP | C | T | 27 | 162 | c.10382C>T    | c.(10381-10383)TCC>TTC | p.S3461F      |
| Pat_41 | Post-Resistance | STAB1     | 23166  | 37 | 3 | 52543996 | 52543996 | Missense_Mutation | SNP | G | A | 4  | 66  | c.2458G>A     | c.(2458-2460)GGG>AGG   | p.G820R       |
| Pat_41 | Post-Resistance | STAB1     | 23166  | 37 | 3 | 52548421 | 52548421 | Missense_Mutation | SNP | C | T | 12 | 90  | c.3587C>T     | c.(3586-3588)GCC>GTC   | p.A1196V      |
| Pat_41 | Post-Resistance | STAB1     | 23166  | 37 | 3 | 52554689 | 52554689 | Missense_Mutation | SNP | C | T | 13 | 143 | c.5681C>T     | c.(5680-5682)CCC>CTC   | p.P1894L      |
| Pat_41 | Post-Resistance | PBRM1     | 55193  | 37 | 3 | 52597379 | 52597379 | Missense_Mutation | SNP | C | T | 8  | 46  | c.4006G>A     | c.(4006-4008)GTC>ATC   | p.V1336I      |
| Pat_41 | Post-Resistance | PBRM1     | 55193  | 37 | 3 | 52620524 | 52620524 | Missense_Mutation | SNP | C | T | 18 | 129 | c.3304G>A     | c.(3304-3306)GCA>ACA   | p.A1102T      |
| Pat_41 | Post-Resistance | GLT8D1    | 55830  | 37 | 3 | 52729233 | 52729233 | Missense_Mutation | SNP | C | T | 5  | 259 | c.898G>A      | c.(898-900)GAT>AAT     | p.D300N       |
| Pat_41 | Post-Resistance | ITIH4     | 3700   | 37 | 3 | 52855115 | 52855115 | Missense_Mutation | SNP | G | A | 17 | 172 | c.1571C>T     | c.(1570-1572)TCC>TTC   | p.S524F       |
| Pat_41 | Post-Resistance | CACNA2D3  | 55799  | 37 | 3 | 54798245 | 54798245 | Missense_Mutation | SNP | G | A | 17 | 549 | c.1247G>A     | c.(1246-1248)GGA>GAA   | p.G416E       |
| Pat_41 | Post-Resistance | LRTM1     | 57408  | 37 | 3 | 54952686 | 54952686 | Missense_Mutation | SNP | C | T | 5  | 199 | c.838G>A      | c.(838-840)GCC>ACC     | p.A280T       |
| Pat_41 | Post-Resistance | CACNA2D3  | 55799  | 37 | 3 | 55107555 | 55107555 | Missense_Mutation | SNP | C | T | 33 | 170 | c.3071C>T     | c.(3070-3072)CCC>CTC   | p.P1024L      |
| Pat_41 | Post-Resistance | CCDC66    | 285331 | 37 | 3 | 56650082 | 56650082 | Splice_Site       | SNP | G | A | 10 | 382 | c.1843_splice | c.e13+1                | p.D615_splice |
| Pat_41 | Post-Resistance | C3orf63   | 23272  | 37 | 3 | 56667301 | 56667301 | Missense_Mutation | SNP | G | A | 23 | 378 | c.3335C>T     | c.(3334-3336)ACT>ATT   | p.T1112I      |
| Pat_41 | Post-Resistance | IL17RD    | 54756  | 37 | 3 | 57132071 | 57132071 | Missense_Mutation | SNP | C | T | 7  | 65  | c.1660G>A     | c.(1660-1662)GAC>AAC   | p.D554N       |
| Pat_41 | Post-Resistance | APPL1     | 26060  | 37 | 3 | 57303657 | 57303657 | Missense_Mutation | SNP | G | A | 29 | 368 | c.2072G>A     | c.(2071-2073)AGC>AAC   | p.S691N       |
| Pat_41 | Post-Resistance | FLNB      | 2317   | 37 | 3 | 58083621 | 58083621 | Missense_Mutation | SNP | G | A | 5  | 119 | c.1064G>A     | c.(1063-1065)AGT>AAT   | p.S355N       |
| Pat_41 | Post-Resistance | FLNB      | 2317   | 37 | 3 | 58104698 | 58104698 | Missense_Mutation | SNP | C | T | 22 | 252 | c.2845C>T     | c.(2845-2847)CTC>TTC   | p.L949F       |
| Pat_41 | Post-Resistance | FLNB      | 2317   | 37 | 3 | 58110221 | 58110221 | Missense_Mutation | SNP | C | T | 6  | 129 | c.3887C>T     | c.(3886-3888)CCC>CTC   | p.P1296L      |
| Pat_41 | Post-Resistance | PXK       | 54899  | 37 | 3 | 58398639 | 58398639 | Missense_Mutation | SNP | G | A | 18 | 388 | c.1477G>A     | c.(1477-1479)GCC>ACC   | p.A493T       |
| Pat_41 | Post-Resistance | CADPS     | 8618   | 37 | 3 | 62739376 | 62739376 | Missense_Mutation | SNP | C | T | 16 | 108 | c.628G>A      | c.(628-630)GTC>ATC     | p.V210I       |
| Pat_41 | Post-Resistance | ATXN7     | 6314   | 37 | 3 | 63973979 | 63973979 | Missense_Mutation | SNP | C | T | 5  | 142 | c.1340C>T     | c.(1339-1341)CCT>CTT   | p.P447L       |
| Pat_41 | Post-Resistance | PSMD6     | 9861   | 37 | 3 | 63999166 | 63999166 | Missense_Mutation | SNP | G | A | 32 | 330 | c.944C>T      | c.(943-945)ACC>ATC     | p.T315I       |
| Pat_41 | Post-Resistance | ADAMTS9   | 56999  | 37 | 3 | 64589614 | 64589614 | Missense_Mutation | SNP | G | A | 26 | 247 | c.3731C>T     | c.(3730-3732)GCC>GTC   | p.A1244V      |
| Pat_41 | Post-Resistance | ADAMTS9   | 56999  | 37 | 3 | 64601700 | 64601700 | Missense_Mutation | SNP | C | T | 25 | 492 | c.2960G>A     | c.(2959-2961)AGC>AAC   | p.S987N       |



|        |                 |          |        |    |   |           |           |                   |     |   |   |     |     |               |                      |                |
|--------|-----------------|----------|--------|----|---|-----------|-----------|-------------------|-----|---|---|-----|-----|---------------|----------------------|----------------|
| Pat_41 | Post-Resistance | MAG11    | 9223   | 37 | 3 | 65377002  | 65377002  | Missense_Mutation | SNP | C | T | 11  | 100 | c.2231G>A     | c.(2230-2232)AGT>AAT | p.S744N        |
| Pat_41 | Post-Resistance | LMOD3    | 56203  | 37 | 3 | 69168233  | 69168233  | Missense_Mutation | SNP | C | T | 19  | 196 | c.1273G>A     | c.(1273-1275)GGG>AGG | p.G425R        |
| Pat_41 | Post-Resistance | FRMD4B   | 23150  | 37 | 3 | 69362662  | 69362662  | Missense_Mutation | SNP | C | T | 5   | 28  | c.169G>A      | c.(169-171)GAA>AAA   | p.E57K         |
| Pat_41 | Post-Resistance | FOXP1    | 27086  | 37 | 3 | 71021743  | 71021743  | Missense_Mutation | SNP | C | T | 10  | 463 | c.1615G>A     | c.(1615-1617)GTA>ATA | p.V539I        |
| Pat_41 | Post-Resistance | SHQ1     | 55164  | 37 | 3 | 72799569  | 72799569  | Missense_Mutation | SNP | C | T | 6   | 121 | c.1600G>A     | c.(1600-1602)GTG>ATG | p.V534M        |
| Pat_41 | Post-Resistance | FLJ10213 | 55096  | 37 | 3 | 73111963  | 73111963  | Missense_Mutation | SNP | G | A | 104 | 535 | c.731G>A      | c.(730-732)AGC>AAC   | p.S244N        |
| Pat_41 | Post-Resistance | PDZRN3   | 23024  | 37 | 3 | 73432809  | 73432809  | Missense_Mutation | SNP | C | T | 6   | 156 | c.2908G>A     | c.(2908-2910)GGG>AGG | p.G970R        |
| Pat_41 | Post-Resistance | ROBO2    | 6092   | 37 | 3 | 77526715  | 77526715  | Missense_Mutation | SNP | G | A | 6   | 76  | c.539G>A      | c.(538-540)AGA>AAA   | p.R180K        |
| Pat_41 | Post-Resistance | ROBO1    | 6091   | 37 | 3 | 78663797  | 78663797  | Splice_Site       | SNP | C | T | 4   | 96  | c.4435_splice | c.e28+1              | p.D1479_splice |
| Pat_41 | Post-Resistance | ROBO1    | 6091   | 37 | 3 | 78667175  | 78667175  | Missense_Mutation | SNP | G | A | 6   | 89  | c.3892C>T     | c.(3892-3894)CCT>TCT | p.P1298S       |
| Pat_41 | Post-Resistance | ROBO1    | 6091   | 37 | 3 | 78680405  | 78680405  | Missense_Mutation | SNP | C | T | 5   | 92  | c.3532G>A     | c.(3532-3534)GGT>AGT | p.G1178S       |
| Pat_41 | Post-Resistance | POU1F1   | 5449   | 37 | 3 | 87309106  | 87309106  | Missense_Mutation | SNP | C | T | 5   | 168 | c.814G>A      | c.(814-816)GTG>ATG   | p.V272M        |
| Pat_41 | Post-Resistance | HTR1F    | 3355   | 37 | 3 | 88040911  | 88040911  | Missense_Mutation | SNP | C | T | 9   | 76  | c.1012C>T     | c.(1012-1014)CTC>TTC | p.L338F        |
| Pat_41 | Post-Resistance | PROS1    | 5627   | 37 | 3 | 93619768  | 93619768  | Missense_Mutation | SNP | C | T | 3   | 22  | c.607G>A      | c.(607-609)GAT>AAT   | p.D203N        |
| Pat_41 | Post-Resistance | ARL13B   | 200894 | 37 | 3 | 93772088  | 93772088  | Missense_Mutation | SNP | C | T | 10  | 125 | c.1268C>T     | c.(1267-1269)GCT>GTT | p.A423V        |
| Pat_41 | Post-Resistance | DHFRL1   | 200895 | 37 | 3 | 93780286  | 93780286  | Missense_Mutation | SNP | G | A | 27  | 268 | c.70C>T       | c.(70-72)CCC>TCC     | p.P24S         |
| Pat_41 | Post-Resistance | EPHA6    | 285220 | 37 | 3 | 97356825  | 97356825  | Missense_Mutation | SNP | G | A | 13  | 186 | c.2683G>A     | c.(2683-2685)GCT>ACT | p.A895T        |
| Pat_41 | Post-Resistance | ST3GAL6  | 10402  | 37 | 3 | 98507174  | 98507174  | Missense_Mutation | SNP | C | T | 20  | 138 | c.623C>T      | c.(622-624)ACT>ATT   | p.T208I        |
| Pat_41 | Post-Resistance | DCBLD2   | 131566 | 37 | 3 | 98518310  | 98518310  | Missense_Mutation | SNP | G | A | 70  | 417 | c.2234C>T     | c.(2233-2235)CCA>CTA | p.P745L        |
| Pat_41 | Post-Resistance | C3orf26  | 84319  | 37 | 3 | 99891191  | 99891191  | Missense_Mutation | SNP | G | A | 9   | 119 | c.611G>A      | c.(610-612)CGT>CAT   | p.R204H        |
| Pat_41 | Post-Resistance | TBC1D23  | 55773  | 37 | 3 | 100018107 | 100018107 | Missense_Mutation | SNP | G | A | 9   | 151 | c.1024G>A     | c.(1024-1026)GAT>AAT | p.D342N        |
| Pat_41 | Post-Resistance | NIT2     | 56954  | 37 | 3 | 100067673 | 100067673 | Missense_Mutation | SNP | G | A | 7   | 56  | c.532G>A      | c.(532-534)GCT>ACT   | p.A178T        |
| Pat_41 | Post-Resistance | NIT2     | 56954  | 37 | 3 | 100073671 | 100073671 | Missense_Mutation | SNP | G | A | 13  | 139 | c.739G>A      | c.(739-741)GAC>AAC   | p.D247N        |
| Pat_41 | Post-Resistance | ABI3BP   | 25890  | 37 | 3 | 100621470 | 100621470 | Missense_Mutation | SNP | G | A | 4   | 68  | c.341C>T      | c.(340-342)TCA>TTA   | p.S114L        |
| Pat_41 | Post-Resistance | SENP7    | 57337  | 37 | 3 | 101044800 | 101044800 | Missense_Mutation | SNP | C | T | 56  | 338 | c.3140G>A     | c.(3139-3141)GGC>GAC | p.G1047D       |
| Pat_41 | Post-Resistance | SENP7    | 57337  | 37 | 3 | 101177827 | 101177827 | Missense_Mutation | SNP | G | A | 25  | 458 | c.256C>T      | c.(256-258)CCT>TCT   | p.P86S         |
| Pat_41 | Post-Resistance | CEP97    | 79598  | 37 | 3 | 101443551 | 101443551 | Missense_Mutation | SNP | C | T | 5   | 141 | c.31C>T       | c.(31-33)CCT>TCT     | p.P11S         |
| Pat_41 | Post-Resistance | NFKBIZ   | 64332  | 37 | 3 | 101571756 | 101571756 | Missense_Mutation | SNP | G | A | 17  | 267 | c.487G>A      | c.(487-489)GGG>AGG   | p.G163R        |
| Pat_41 | Post-Resistance | ALCAM    | 214    | 37 | 3 | 105252457 | 105252457 | Missense_Mutation | SNP | G | A | 11  | 183 | c.470G>A      | c.(469-471)TGC>TAC   | p.C157Y        |
| Pat_41 | Post-Resistance | CBLB     | 868    | 37 | 3 | 105378031 | 105378031 | Missense_Mutation | SNP | C | T | 10  | 115 | c.2732G>A     | c.(2731-2733)CGC>CAC | p.R911H        |
| Pat_41 | Post-Resistance | CBLB     | 868    | 37 | 3 | 105459350 | 105459350 | Missense_Mutation | SNP | C | T | 6   | 235 | c.971G>A      | c.(970-972)AGC>AAC   | p.S324N        |
| Pat_41 | Post-Resistance | MYH15    | 22989  | 37 | 3 | 108103629 | 108103629 | Missense_Mutation | SNP | C | T | 11  | 101 | c.5596G>A     | c.(5596-5598)GCA>ACA | p.A1866T       |
| Pat_41 | Post-Resistance | MYH15    | 22989  | 37 | 3 | 108129642 | 108129642 | Missense_Mutation | SNP | C | T | 4   | 50  | c.4343G>A     | c.(4342-4344)CGC>CAC | p.R1448H       |
| Pat_41 | Post-Resistance | KIAA1524 | 57650  | 37 | 3 | 108288376 | 108288376 | Missense_Mutation | SNP | G | A | 10  | 86  | c.973C>T      | c.(973-975)CCA>TCA   | p.P325S        |
| Pat_41 | Post-Resistance | CD96     | 10225  | 37 | 3 | 111325595 | 111325595 | Missense_Mutation | SNP | C | T | 13  | 347 | c.1184C>T     | c.(1183-1185)ACC>ATC | p.T395I        |
| Pat_41 | Post-Resistance | TAGLN3   | 29114  | 37 | 3 | 111719686 | 111719686 | Missense_Mutation | SNP | C | T | 6   | 243 | c.248C>T      | c.(247-249)TCA>TTA   | p.S83L         |
| Pat_41 | Post-Resistance | SLC9A10  | 285335 | 37 | 3 | 111918221 | 111918221 | Missense_Mutation | SNP | C | T | 5   | 104 | c.2470G>A     | c.(2470-2472)GCT>ACT | p.A824T        |
| Pat_41 | Post-Resistance | SLC9A10  | 285335 | 37 | 3 | 111988919 | 111988919 | Missense_Mutation | SNP | C | T | 9   | 112 | c.619G>A      | c.(619-621)GAG>AAG   | p.E207K        |
| Pat_41 | Post-Resistance | SLC9A10  | 285335 | 37 | 3 | 111999631 | 111999631 | Splice_Site       | SNP | C | T | 5   | 83  | c.89_splice   | c.e3-1               | p.A30_splice   |
| Pat_41 | Post-Resistance | CDC80    | 151887 | 37 | 3 | 112349098 | 112349098 | Missense_Mutation | SNP | C | T | 26  | 311 | c.1897G>A     | c.(1897-1899)GCT>ACT | p.A633T        |
| Pat_41 | Post-Resistance | CDC80    | 151887 | 37 | 3 | 112356931 | 112356931 | Missense_Mutation | SNP | G | A | 36  | 340 | c.1822C>T     | c.(1822-1824)CCC>TCC | p.P608S        |
| Pat_41 | Post-Resistance | BOC      | 91653  | 37 | 3 | 112969573 | 112969573 | Missense_Mutation | SNP | C | T | 5   | 85  | c.269C>T      | c.(268-270)ACC>ATC   | p.T90I         |
| Pat_41 | Post-Resistance | CDC52    | 152185 | 37 | 3 | 113172702 | 113172702 | Missense_Mutation | SNP | G | A | 4   | 138 | c.1753C>T     | c.(1753-1755)CCT>TCT | p.P585S        |
| Pat_41 | Post-Resistance | CDC52    | 152185 | 37 | 3 | 113212965 | 113212965 | Nonsense_Mutation | SNP | G | A | 7   | 132 | c.316C>T      | c.(316-318)CAA>TAA   | p.Q106*        |
| Pat_41 | Post-Resistance | KIAA2018 | 205717 | 37 | 3 | 113375055 | 113375055 | Missense_Mutation | SNP | G | T | 6   | 189 | c.5474C>A     | c.(5473-5475)GCC>GAC | p.A1825D       |
| Pat_41 | Post-Resistance | KIAA2018 | 205717 | 37 | 3 | 113375784 | 113375784 | Missense_Mutation | SNP | G | A | 7   | 73  | c.4745C>T     | c.(4744-4746)CCT>CTT | p.P1582L       |
| Pat_41 | Post-Resistance | KIAA2018 | 205717 | 37 | 3 | 113379561 | 113379561 | Missense_Mutation | SNP | C | T | 14  | 82  | c.968G>A      | c.(967-969)AGC>AAC   | p.S323N        |

|        |                 |          |        |    |   |           |           |                   |     |   |   |     |     |               |                      |                |
|--------|-----------------|----------|--------|----|---|-----------|-----------|-------------------|-----|---|---|-----|-----|---------------|----------------------|----------------|
| Pat_41 | Post-Resistance | KIAA1407 | 57577  | 37 | 3 | 113775306 | 113775306 | Missense_Mutation | SNP | A | G | 15  | 237 | c.8T>C        | c.(7-9)CTG>CCG       | p.L3P          |
| Pat_41 | Post-Resistance | IGSF11   | 152404 | 37 | 3 | 118621687 | 118621687 | Missense_Mutation | SNP | G | A | 27  | 386 | c.976C>T      | c.(976-978)CCA>TCA   | p.P326S        |
| Pat_41 | Post-Resistance | ARHGAP31 | 57514  | 37 | 3 | 119132904 | 119132904 | Missense_Mutation | SNP | C | T | 9   | 51  | c.2128C>T     | c.(2128-2130)CCA>TCA | p.P710S        |
| Pat_41 | Post-Resistance | TMEM39A  | 55254  | 37 | 3 | 119180854 | 119180854 | Missense_Mutation | SNP | G | A | 11  | 118 | c.68C>T       | c.(67-69)ACT>ATT     | p.T23I         |
| Pat_41 | Post-Resistance | GTF2E1   | 2960   | 37 | 3 | 120495464 | 120495464 | Missense_Mutation | SNP | G | A | 6   | 139 | c.845G>A      | c.(844-846)AGA>AAA   | p.R282K        |
| Pat_41 | Post-Resistance | GTF2E1   | 2960   | 37 | 3 | 120499893 | 120499893 | Missense_Mutation | SNP | G | A | 4   | 57  | c.896G>A      | c.(895-897)GGC>GAC   | p.G299D        |
| Pat_41 | Post-Resistance | HCLS1    | 3059   | 37 | 3 | 121353262 | 121353262 | Missense_Mutation | SNP | G | A | 10  | 48  | c.695C>T      | c.(694-696)TCT>TTT   | p.S232F        |
| Pat_41 | Post-Resistance | GOLGB1   | 2804   | 37 | 3 | 121415064 | 121415064 | Missense_Mutation | SNP | C | T | 6   | 58  | c.4291G>A     | c.(4291-4293)GAA>AAA | p.E1431K       |
| Pat_41 | Post-Resistance | CASR     | 846    | 37 | 3 | 121976185 | 121976185 | Missense_Mutation | SNP | G | A | 5   | 147 | c.443G>A      | c.(442-444)GGC>GAC   | p.G148D        |
| Pat_41 | Post-Resistance | DTX3L    | 151636 | 37 | 3 | 122283428 | 122283428 | Missense_Mutation | SNP | G | A | 19  | 176 | c.155G>A      | c.(154-156)GGC>GAC   | p.G52D         |
| Pat_41 | Post-Resistance | PARP14   | 54625  | 37 | 3 | 122437289 | 122437289 | Missense_Mutation | SNP | G | A | 25  | 211 | c.4291G>A     | c.(4291-4293)GTG>ATG | p.V1431M       |
| Pat_41 | Post-Resistance | ADCY5    | 111    | 37 | 3 | 123022988 | 123022988 | Missense_Mutation | SNP | G | A | 6   | 103 | c.2485C>T     | c.(2485-2487)CGG>TGG | p.R829W        |
| Pat_41 | Post-Resistance | ADCY5    | 111    | 37 | 3 | 123166400 | 123166400 | Nonsense_Mutation | SNP | C | T | 3   | 24  | c.993G>A      | c.(991-993)TGG>TGA   | p.W331*        |
| Pat_41 | Post-Resistance | KALRN    | 8997   | 37 | 3 | 124196182 | 124196182 | Splice_Site       | SNP | G | A | 8   | 161 | c.4185_splice | c.e27+1              | p.D1395_splice |
| Pat_41 | Post-Resistance | KALRN    | 8997   | 37 | 3 | 124351368 | 124351368 | Missense_Mutation | SNP | C | T | 8   | 107 | c.5278C>T     | c.(5278-5280)CCC>TCC | p.P1760S       |
| Pat_41 | Post-Resistance | KALRN    | 8997   | 37 | 3 | 124438283 | 124438283 | Missense_Mutation | SNP | G | A | 20  | 237 | c.8927G>A     | c.(8926-8928)AGC>AAC | p.S2976N       |
| Pat_41 | Post-Resistance | ITGB5    | 3693   | 37 | 3 | 124560267 | 124560267 | Missense_Mutation | SNP | C | T | 5   | 114 | c.743G>A      | c.(742-744)GGG>GAG   | p.G248E        |
| Pat_41 | Post-Resistance | HEG1     | 57493  | 37 | 3 | 124731685 | 124731685 | Missense_Mutation | SNP | C | T | 11  | 112 | c.2738G>A     | c.(2737-2739)GGA>GAA | p.G913E        |
| Pat_41 | Post-Resistance | SLC12A8  | 84561  | 37 | 3 | 124826453 | 124826453 | Missense_Mutation | SNP | G | A | 9   | 118 | c.1577C>T     | c.(1576-1578)GCC>GTC | p.A526V        |
| Pat_41 | Post-Resistance | ZNF148   | 7707   | 37 | 3 | 124951726 | 124951726 | Missense_Mutation | SNP | C | T | 44  | 234 | c.1844G>A     | c.(1843-1845)AGA>AAA | p.R615K        |
| Pat_41 | Post-Resistance | CCDC37   | 348807 | 37 | 3 | 126139060 | 126139060 | Missense_Mutation | SNP | G | A | 5   | 95  | c.1070G>A     | c.(1069-1071)GGC>GAC | p.G357D        |
| Pat_41 | Post-Resistance | CCDC37   | 348807 | 37 | 3 | 126142406 | 126142406 | Missense_Mutation | SNP | T | G | 9   | 87  | c.1205T>G     | c.(1204-1206)CTG>CGG | p.L402R        |
| Pat_41 | Post-Resistance | PLXNA1   | 5361   | 37 | 3 | 126749146 | 126749146 | Missense_Mutation | SNP | G | A | 9   | 205 | c.5053G>A     | c.(5053-5055)GGC>AGC | p.G1685S       |
| Pat_41 | Post-Resistance | RUVBL1   | 8607   | 37 | 3 | 127842528 | 127842528 | Missense_Mutation | SNP | G | A | 10  | 136 | c.40C>T       | c.(40-42)CGC>TGC     | p.R14C         |
| Pat_41 | Post-Resistance | EEFSEC   | 60678  | 37 | 3 | 128060472 | 128060472 | Missense_Mutation | SNP | G | A | 5   | 26  | c.1183G>A     | c.(1183-1185)GAC>AAC | p.D395N        |
| Pat_41 | Post-Resistance | RAB7A    | 7879   | 37 | 3 | 128525231 | 128525231 | Missense_Mutation | SNP | G | A | 7   | 318 | c.197G>A      | c.(196-198)GGA>GAA   | p.G66E         |
| Pat_41 | Post-Resistance | ACAD9    | 28976  | 37 | 3 | 128622923 | 128622923 | Missense_Mutation | SNP | C | T | 10  | 201 | c.977C>T      | c.(976-978)GCC>GTC   | p.A326V        |
| Pat_41 | Post-Resistance | CNBP     | 7555   | 37 | 3 | 128890366 | 128890366 | Missense_Mutation | SNP | G | A | 12  | 132 | c.140C>T      | c.(139-141)TCC>TTC   | p.S47F         |
| Pat_41 | Post-Resistance | COPG     | 22820  | 37 | 3 | 128973582 | 128973582 | Missense_Mutation | SNP | C | T | 7   | 90  | c.395C>T      | c.(394-396)ACT>ATT   | p.T132I        |
| Pat_41 | Post-Resistance | COPG     | 22820  | 37 | 3 | 128987397 | 128987397 | Missense_Mutation | SNP | T | C | 5   | 240 | c.1708T>C     | c.(1708-1710)TCA>CCA | p.S570P        |
| Pat_41 | Post-Resistance | COPG     | 22820  | 37 | 3 | 128996146 | 128996146 | Missense_Mutation | SNP | G | A | 6   | 406 | c.2504G>A     | c.(2503-2505)CGG>CAG | p.R835Q        |
| Pat_41 | Post-Resistance | MBD4     | 8930   | 37 | 3 | 129151389 | 129151389 | Missense_Mutation | SNP | C | T | 20  | 531 | c.1622G>A     | c.(1621-1623)GGC>GAC | p.G541D        |
| Pat_41 | Post-Resistance | IFT122   | 55764  | 37 | 3 | 129218874 | 129218874 | Missense_Mutation | SNP | G | A | 10  | 220 | c.2338G>A     | c.(2338-2340)GCC>ACC | p.A780T        |
| Pat_41 | Post-Resistance | IFT122   | 55764  | 37 | 3 | 129231201 | 129231201 | Missense_Mutation | SNP | C | T | 17  | 515 | c.2933C>T     | c.(2932-2934)TCC>TTC | p.S978F        |
| Pat_41 | Post-Resistance | RHO      | 6010   | 37 | 3 | 129251376 | 129251376 | Missense_Mutation | SNP | G | A | 8   | 88  | c.697G>A      | c.(697-699)GCC>ACC   | p.A233T        |
| Pat_41 | Post-Resistance | PLXND1   | 23129  | 37 | 3 | 129278518 | 129278518 | Missense_Mutation | SNP | C | T | 6   | 231 | c.5242G>A     | c.(5242-5244)GCT>ACT | p.A1748T       |
| Pat_41 | Post-Resistance | PLXND1   | 23129  | 37 | 3 | 129290547 | 129290547 | Missense_Mutation | SNP | G | A | 24  | 243 | c.3218C>T     | c.(3217-3219)GCC>GTC | p.A1073V       |
| Pat_41 | Post-Resistance | PLXND1   | 23129  | 37 | 3 | 129304838 | 129304838 | Missense_Mutation | SNP | A | G | 155 | 273 | c.1808T>C     | c.(1807-1809)ATG>ACG | p.M603T        |
| Pat_41 | Post-Resistance | COL6A6   | 131873 | 37 | 3 | 130282226 | 130282226 | Missense_Mutation | SNP | G | A | 8   | 44  | c.379G>A      | c.(379-381)GAC>AAC   | p.D127N        |
| Pat_41 | Post-Resistance | COL6A6   | 131873 | 37 | 3 | 130300551 | 130300551 | Missense_Mutation | SNP | G | A | 6   | 89  | c.3694G>A     | c.(3694-3696)GGC>AGC | p.G1232S       |
| Pat_41 | Post-Resistance | PIK3R4   | 30849  | 37 | 3 | 130452517 | 130452517 | Missense_Mutation | SNP | G | A | 13  | 211 | c.1325C>T     | c.(1324-1326)ACC>ATC | p.T442I        |
| Pat_41 | Post-Resistance | ATP2C1   | 27032  | 37 | 3 | 130686196 | 130686196 | Missense_Mutation | SNP | C | T | 5   | 201 | c.1241C>T     | c.(1240-1242)GCT>GTT | p.A414V        |
| Pat_41 | Post-Resistance | DNAJC13  | 23317  | 37 | 3 | 132226150 | 132226150 | Missense_Mutation | SNP | G | A | 9   | 244 | c.5068G>A     | c.(5068-5070)GAG>AAG | p.E1690K       |
| Pat_41 | Post-Resistance | NPHP3    | 27031  | 37 | 3 | 132403444 | 132403444 | Missense_Mutation | SNP | G | A | 6   | 113 | c.3524C>T     | c.(3523-3525)TCT>TTT | p.S1175F       |
| Pat_41 | Post-Resistance | NPHP3    | 27031  | 37 | 3 | 132407549 | 132407549 | Missense_Mutation | SNP | G | A | 23  | 446 | c.3070C>T     | c.(3070-3072)CCA>TCA | p.P1024S       |
| Pat_41 | Post-Resistance | NPHP3    | 27031  | 37 | 3 | 132420320 | 132420320 | Missense_Mutation | SNP | C | T | 4   | 121 | c.1582G>A     | c.(1582-1584)GTG>ATG | p.V528M        |
| Pat_41 | Post-Resistance | NPHP3    | 27031  | 37 | 3 | 132424642 | 132424642 | Missense_Mutation | SNP | C | T | 5   | 128 | c.1292G>A     | c.(1291-1293)GGA>GAA | p.G431E        |

|        |                 |          |        |    |   |           |           |                   |     |   |   |    |     |               |                      |                |
|--------|-----------------|----------|--------|----|---|-----------|-----------|-------------------|-----|---|---|----|-----|---------------|----------------------|----------------|
| Pat_41 | Post-Resistance | NPHP3    | 27031  | 37 | 3 | 132427061 | 132427061 | Missense_Mutation | SNP | G | A | 9  | 206 | c.1159C>T     | c.(1159-1161)CCT>TCT | p.P387S        |
| Pat_41 | Post-Resistance | BFSP2    | 8419   | 37 | 3 | 133119157 | 133119157 | Missense_Mutation | SNP | C | T | 16 | 81  | c.230C>T      | c.(229-231)GCC>GTC   | p.A77V         |
| Pat_41 | Post-Resistance | BFSP2    | 8419   | 37 | 3 | 133191402 | 133191402 | Missense_Mutation | SNP | G | A | 3  | 31  | c.1237G>A     | c.(1237-1239)GAG>AAG | p.E413K        |
| Pat_41 | Post-Resistance | CDV3     | 55573  | 37 | 3 | 133305512 | 133305512 | Missense_Mutation | SNP | G | A | 7  | 222 | c.572G>A      | c.(571-573)AGT>AAT   | p.S191N        |
| Pat_41 | Post-Resistance | SRPRB    | 58477  | 37 | 3 | 133526666 | 133526666 | Missense_Mutation | SNP | G | A | 41 | 359 | c.326G>A      | c.(325-327)AGG>AAG   | p.R109K        |
| Pat_41 | Post-Resistance | SLCO2A1  | 6578   | 37 | 3 | 133664028 | 133664028 | Missense_Mutation | SNP | C | T | 26 | 528 | c.1372G>A     | c.(1372-1374)GTC>ATC | p.V458I        |
| Pat_41 | Post-Resistance | AMOTL2   | 51421  | 37 | 3 | 134077483 | 134077483 | Missense_Mutation | SNP | C | T | 8  | 80  | c.2354G>A     | c.(2353-2355)AGC>AAC | p.S785N        |
| Pat_41 | Post-Resistance | EPHB1    | 2047   | 37 | 3 | 134670736 | 134670736 | Missense_Mutation | SNP | C | T | 18 | 388 | c.647C>T      | c.(646-648)ACA>ATA   | p.T216I        |
| Pat_41 | Post-Resistance | MSL2     | 55167  | 37 | 3 | 135870860 | 135870860 | Missense_Mutation | SNP | G | A | 5  | 166 | c.863C>T      | c.(862-864)CCT>CTT   | p.P288L        |
| Pat_41 | Post-Resistance | MSL2     | 55167  | 37 | 3 | 135913882 | 135913882 | Missense_Mutation | SNP | G | A | 49 | 467 | c.74C>T       | c.(73-75)CCC>CTC     | p.P25L         |
| Pat_41 | Post-Resistance | PCCB     | 5096   | 37 | 3 | 136019912 | 136019912 | Missense_Mutation | SNP | G | A | 10 | 212 | c.925G>A      | c.(925-927)GAA>AAA   | p.E309K        |
| Pat_41 | Post-Resistance | STAG1    | 10274  | 37 | 3 | 136096591 | 136096591 | Missense_Mutation | SNP | C | T | 20 | 261 | c.2281G>A     | c.(2281-2283)GAT>AAT | p.D761N        |
| Pat_41 | Post-Resistance | IL20RB   | 53833  | 37 | 3 | 136710799 | 136710799 | Missense_Mutation | SNP | G | A | 16 | 110 | c.551G>A      | c.(550-552)AGG>AAG   | p.R184K        |
| Pat_41 | Post-Resistance | DZIP1L   | 199221 | 37 | 3 | 137822620 | 137822620 | Missense_Mutation | SNP | C | T | 6  | 97  | c.194G>A      | c.(193-195)TGC>TAC   | p.C65Y         |
| Pat_41 | Post-Resistance | ESYT3    | 83850  | 37 | 3 | 138187543 | 138187543 | Missense_Mutation | SNP | G | A | 20 | 273 | c.1355G>A     | c.(1354-1356)AGT>AAT | p.S452N        |
| Pat_41 | Post-Resistance | ESYT3    | 83850  | 37 | 3 | 138188347 | 138188347 | Splice_Site       | SNP | G | A | 7  | 152 | c.1503_splice | c.e15+1              | p.K501_splice  |
| Pat_41 | Post-Resistance | CEP70    | 80321  | 37 | 3 | 138213904 | 138213904 | Missense_Mutation | SNP | C | T | 7  | 44  | c.1747G>A     | c.(1747-1749)GAT>AAT | p.D583N        |
| Pat_41 | Post-Resistance | FAIM     | 55179  | 37 | 3 | 138351772 | 138351772 | Missense_Mutation | SNP | G | A | 15 | 178 | c.391G>A      | c.(391-393)GGT>AGT   | p.G131S        |
| Pat_41 | Post-Resistance | FAIM     | 55179  | 37 | 3 | 138351839 | 138351839 | Missense_Mutation | SNP | C | T | 11 | 210 | c.458C>T      | c.(457-459)GCT>GTT   | p.A153V        |
| Pat_41 | Post-Resistance | PIK3CB   | 5291   | 37 | 3 | 138374254 | 138374254 | Missense_Mutation | SNP | C | T | 22 | 207 | c.3190G>A     | c.(3190-3192)GTT>ATT | p.V1064I       |
| Pat_41 | Post-Resistance | PRR23B   | 389151 | 37 | 3 | 138738911 | 138738911 | Missense_Mutation | SNP | C | T | 5  | 60  | c.593G>A      | c.(592-594)TGT>TAT   | p.C198Y        |
| Pat_41 | Post-Resistance | NMNAT3   | 349565 | 37 | 3 | 139280028 | 139280028 | Missense_Mutation | SNP | G | A | 5  | 66  | c.583C>T      | c.(583-585)CCT>TCT   | p.P195S        |
| Pat_41 | Post-Resistance | SLC25A36 | 55186  | 37 | 3 | 140675386 | 140675386 | Missense_Mutation | SNP | G | A | 6  | 71  | c.59G>A       | c.(58-60)GGA>GAA     | p.G20E         |
| Pat_41 | Post-Resistance | ZBTB38   | 253461 | 37 | 3 | 141163769 | 141163769 | Missense_Mutation | SNP | G | A | 5  | 97  | c.2539G>A     | c.(2539-2541)GCC>ACC | p.A847T        |
| Pat_41 | Post-Resistance | GRK7     | 131890 | 37 | 3 | 141535653 | 141535653 | Missense_Mutation | SNP | C | T | 26 | 342 | c.1423C>T     | c.(1423-1425)CCT>TCT | p.P475S        |
| Pat_41 | Post-Resistance | XRN1     | 54464  | 37 | 3 | 142051319 | 142051319 | Missense_Mutation | SNP | G | A | 10 | 84  | c.4117C>T     | c.(4117-4119)CAT>TAT | p.H1373Y       |
| Pat_41 | Post-Resistance | XRN1     | 54464  | 37 | 3 | 142151675 | 142151675 | Missense_Mutation | SNP | G | A | 17 | 186 | c.136C>T      | c.(136-138)CCT>TCT   | p.P46S         |
| Pat_41 | Post-Resistance | ATR      | 545    | 37 | 3 | 142185236 | 142185236 | Missense_Mutation | SNP | G | A | 18 | 246 | c.6827C>T     | c.(6826-6828)ACC>ATC | p.T2276I       |
| Pat_41 | Post-Resistance | ATR      | 545    | 37 | 3 | 142215363 | 142215363 | Splice_Site       | SNP | C | T | 17 | 281 | c.5739_splice | c.e34-1              | p.R1913_splice |
| Pat_41 | Post-Resistance | PCOLCE2  | 26577  | 37 | 3 | 142539878 | 142539878 | Missense_Mutation | SNP | C | T | 26 | 182 | c.959G>A      | c.(958-960)GGC>GAC   | p.G320D        |
| Pat_41 | Post-Resistance | SLC9A9   | 285195 | 37 | 3 | 143185984 | 143185984 | Missense_Mutation | SNP | G | A | 13 | 212 | c.1364C>T     | c.(1363-1365)TCT>TTT | p.S455F        |
| Pat_41 | Post-Resistance | PLOD2    | 5352   | 37 | 3 | 145788906 | 145788906 | Missense_Mutation | SNP | G | A | 4  | 129 | c.1981C>T     | c.(1981-1983)CGT>TGT | p.R661C        |
| Pat_41 | Post-Resistance | PLOD2    | 5352   | 37 | 3 | 145789114 | 145789114 | Missense_Mutation | SNP | C | T | 22 | 239 | c.1882G>A     | c.(1882-1884)GAG>AAG | p.E628K        |
| Pat_41 | Post-Resistance | ZIC4     | 84107  | 37 | 3 | 147113714 | 147113714 | Missense_Mutation | SNP | G | A | 27 | 140 | c.613C>T      | c.(613-615)CCT>TCT   | p.P205S        |
| Pat_41 | Post-Resistance | CPA3     | 1359   | 37 | 3 | 148583288 | 148583288 | Missense_Mutation | SNP | G | A | 5  | 105 | c.97G>A       | c.(97-99)GAT>AAT     | p.D33N         |
| Pat_41 | Post-Resistance | HPS3     | 84343  | 37 | 3 | 148889920 | 148889920 | Missense_Mutation | SNP | G | A | 16 | 197 | c.2926G>A     | c.(2926-2928)GAT>AAT | p.D976N        |
| Pat_41 | Post-Resistance | CP       | 1356   | 37 | 3 | 148924006 | 148924006 | Missense_Mutation | SNP | G | A | 8  | 204 | c.1157C>T     | c.(1156-1158)GCT>GTT | p.A386V        |
| Pat_41 | Post-Resistance | TM4SF4   | 7104   | 37 | 3 | 149205491 | 149205491 | Missense_Mutation | SNP | G | A | 21 | 110 | c.350G>A      | c.(349-351)GGT>GAT   | p.G117D        |
| Pat_41 | Post-Resistance | EIF2A    | 83939  | 37 | 3 | 150285708 | 150285708 | Missense_Mutation | SNP | G | A | 8  | 206 | c.569G>A      | c.(568-570)GGA>GAA   | p.G190E        |
| Pat_41 | Post-Resistance | FAM194A  | 131831 | 37 | 3 | 150404085 | 150404085 | Missense_Mutation | SNP | C | T | 8  | 164 | c.610G>A      | c.(610-612)GAA>AAA   | p.E204K        |
| Pat_41 | Post-Resistance | SIAH2    | 6478   | 37 | 3 | 150480554 | 150480554 | Missense_Mutation | SNP | G | A | 4  | 21  | c.83C>T       | c.(82-84)TCC>TTC     | p.S28F         |
| Pat_41 | Post-Resistance | CLRN1    | 7401   | 37 | 3 | 150645781 | 150645781 | Missense_Mutation | SNP | G | A | 17 | 125 | c.641C>T      | c.(640-642)CCT>CTT   | p.P214L        |
| Pat_41 | Post-Resistance | MED12L   | 116931 | 37 | 3 | 150845669 | 150845669 | Missense_Mutation | SNP | C | T | 5  | 105 | c.454C>T      | c.(454-456)CCA>TCA   | p.P152S        |
| Pat_41 | Post-Resistance | MED12L   | 116931 | 37 | 3 | 150845718 | 150845718 | Missense_Mutation | SNP | C | T | 7  | 116 | c.503C>T      | c.(502-504)TCT>TTT   | p.S168F        |
| Pat_41 | Post-Resistance | MED12L   | 116931 | 37 | 3 | 150911329 | 150911329 | Missense_Mutation | SNP | G | A | 11 | 177 | c.2021G>A     | c.(2020-2022)GGC>GAC | p.G674D        |
| Pat_41 | Post-Resistance | MED12L   | 116931 | 37 | 3 | 151105767 | 151105767 | Missense_Mutation | SNP | C | T | 5  | 160 | c.5153C>T     | c.(5152-5154)CCC>CTC | p.P1718L       |
| Pat_41 | Post-Resistance | MED12L   | 116931 | 37 | 3 | 151129190 | 151129190 | Missense_Mutation | SNP | C | T | 17 | 379 | c.5930C>T     | c.(5929-5931)TCC>TTC | p.S1977F       |

|        |                 |          |        |    |   |           |           |                   |     |   |   |    |     |               |                      |               |
|--------|-----------------|----------|--------|----|---|-----------|-----------|-------------------|-----|---|---|----|-----|---------------|----------------------|---------------|
| Pat_41 | Post-Resistance | IGSF10   | 285313 | 37 | 3 | 151161217 | 151161217 | Missense_Mutation | SNP | C | T | 5  | 68  | c.5518G>A     | c.(5518-5520)GCA>ACA | p.A1840T      |
| Pat_41 | Post-Resistance | IGSF10   | 285313 | 37 | 3 | 151163246 | 151163246 | Missense_Mutation | SNP | G | A | 10 | 280 | c.4523C>T     | c.(4522-4524)TCC>TTC | p.S1508F      |
| Pat_41 | Post-Resistance | IGSF10   | 285313 | 37 | 3 | 151171274 | 151171274 | Missense_Mutation | SNP | C | T | 11 | 117 | c.613G>A      | c.(613-615)GTC>ATC   | p.V205I       |
| Pat_41 | Post-Resistance | PLCH1    | 23007  | 37 | 3 | 155203205 | 155203205 | Missense_Mutation | SNP | C | T | 21 | 108 | c.2938G>A     | c.(2938-2940)GCT>ACT | p.A980T       |
| Pat_41 | Post-Resistance | PTX3     | 5806   | 37 | 3 | 157160721 | 157160721 | Missense_Mutation | SNP | G | A | 9  | 66  | c.1099G>A     | c.(1099-1101)GGA>AGA | p.G367R       |
| Pat_41 | Post-Resistance | IL12A    | 3592   | 37 | 3 | 159710853 | 159710853 | Missense_Mutation | SNP | G | A | 46 | 100 | c.319G>A      | c.(319-321)GAT>AAT   | p.D107N       |
| Pat_41 | Post-Resistance | SMC4     | 10051  | 37 | 3 | 160120605 | 160120605 | Missense_Mutation | SNP | G | A | 23 | 80  | c.460G>A      | c.(460-462)GAC>AAC   | p.D154N       |
| Pat_41 | Post-Resistance | C3orf57  | 165679 | 37 | 3 | 161064020 | 161064020 | Missense_Mutation | SNP | C | T | 83 | 17  | c.92G>A       | c.(91-93)CGA>CAA     | p.R31Q        |
| Pat_41 | Post-Resistance | SI       | 6476   | 37 | 3 | 164792327 | 164792327 | Missense_Mutation | SNP | G | A | 11 | 31  | c.247C>T      | c.(247-249)CCA>TCA   | p.P83S        |
| Pat_41 | Post-Resistance | MECOM    | 2122   | 37 | 3 | 168833693 | 168833693 | Missense_Mutation | SNP | C | T | 11 | 93  | c.1403G>A     | c.(1402-1404)GGA>GAA | p.G468E       |
| Pat_41 | Post-Resistance | SLC7A14  | 57709  | 37 | 3 | 170198641 | 170198641 | Missense_Mutation | SNP | G | A | 12 | 75  | c.1430C>T     | c.(1429-1431)GCC>GTC | p.A477V       |
| Pat_41 | Post-Resistance | TNIK     | 23043  | 37 | 3 | 170846532 | 170846532 | Missense_Mutation | SNP | G | A | 6  | 97  | c.1744C>T     | c.(1744-1746)CCC>TCC | p.P582S       |
| Pat_41 | Post-Resistance | NLGN1    | 22871  | 37 | 3 | 173525539 | 173525539 | Missense_Mutation | SNP | C | T | 28 | 99  | c.563C>T      | c.(562-564)ACT>ATT   | p.T188I       |
| Pat_41 | Post-Resistance | TBL1XR1  | 79718  | 37 | 3 | 176769495 | 176769495 | Missense_Mutation | SNP | C | T | 9  | 35  | c.224G>A      | c.(223-225)GGT>GAT   | p.G75D        |
| Pat_41 | Post-Resistance | MRPL47   | 57129  | 37 | 3 | 179322315 | 179322315 | Missense_Mutation | SNP | C | T | 22 | 130 | c.98G>A       | c.(97-99)GGG>GAG     | p.G33E        |
| Pat_41 | Post-Resistance | NDUFB5   | 4711   | 37 | 3 | 179336299 | 179336299 | Missense_Mutation | SNP | G | A | 9  | 44  | c.439G>A      | c.(439-441)GCT>ACT   | p.A147T       |
| Pat_41 | Post-Resistance | FXR1     | 8087   | 37 | 3 | 180685964 | 180685964 | Missense_Mutation | SNP | C | T | 18 | 87  | c.1324C>T     | c.(1324-1326)CCA>TCA | p.P442S       |
| Pat_41 | Post-Resistance | KLHL24   | 54800  | 37 | 3 | 183368160 | 183368160 | Missense_Mutation | SNP | G | A | 4  | 63  | c.16G>A       | c.(16-18)GGA>AGA     | p.G6R         |
| Pat_41 | Post-Resistance | DVL3     | 1857   | 37 | 3 | 183882109 | 183882109 | Missense_Mutation | SNP | C | T | 13 | 115 | c.286C>T      | c.(286-288)CCA>TCA   | p.P96S        |
| Pat_41 | Post-Resistance | FAM131A  | 131408 | 37 | 3 | 184059806 | 184059806 | Missense_Mutation | SNP | C | T | 17 | 144 | c.185C>T      | c.(184-186)TCC>TTC   | p.S62F        |
| Pat_41 | Post-Resistance | FAM131A  | 131408 | 37 | 3 | 184062559 | 184062559 | Missense_Mutation | SNP | C | T | 14 | 102 | c.809C>T      | c.(808-810)GCC>GTC   | p.A270V       |
| Pat_41 | Post-Resistance | CLCN2    | 1181   | 37 | 3 | 184076859 | 184076859 | Missense_Mutation | SNP | G | A | 6  | 41  | c.124C>T      | c.(124-126)CGC>TGC   | p.R42C        |
| Pat_41 | Post-Resistance | EPHB3    | 2049   | 37 | 3 | 184297322 | 184297322 | Missense_Mutation | SNP | C | T | 16 | 54  | c.1859C>T     | c.(1858-1860)GCT>GTT | p.A620V       |
| Pat_41 | Post-Resistance | MAP3K13  | 9175   | 37 | 3 | 185167687 | 185167687 | Splice_Site       | SNP | G | A | 32 | 217 | c.1011_splice | c.e7-1               | p.W337_splice |
| Pat_41 | Post-Resistance | DGKG     | 1608   | 37 | 3 | 185993402 | 185993402 | Missense_Mutation | SNP | G | A | 19 | 51  | c.844C>T      | c.(844-846)CCA>TCA   | p.P282S       |
| Pat_41 | Post-Resistance | FETUB    | 26998  | 37 | 3 | 186360306 | 186360306 | Missense_Mutation | SNP | G | A | 5  | 91  | c.383G>A      | c.(382-384)AGA>AAA   | p.R128K       |
| Pat_41 | Post-Resistance | EIF4A2   | 1974   | 37 | 3 | 186502795 | 186502795 | Missense_Mutation | SNP | G | A | 8  | 213 | c.253G>A      | c.(253-255)GCC>ACC   | p.A85T        |
| Pat_41 | Post-Resistance | CLDN1    | 9076   | 37 | 3 | 190039851 | 190039851 | Missense_Mutation | SNP | C | T | 31 | 80  | c.145G>A      | c.(145-147)GGG>AGG   | p.G49R        |
| Pat_41 | Post-Resistance | FGF12    | 2257   | 37 | 3 | 192125817 | 192125817 | Missense_Mutation | SNP | G | A | 8  | 233 | c.196C>T      | c.(196-198)CCA>TCA   | p.P66S        |
| Pat_41 | Post-Resistance | ATP13A4  | 84239  | 37 | 3 | 193210705 | 193210705 | Splice_Site       | SNP | C | T | 27 | 163 | c.533_splice  | c.e5+1               | p.R178_splice |
| Pat_41 | Post-Resistance | GP5      | 2814   | 37 | 3 | 194118947 | 194118947 | Missense_Mutation | SNP | G | A | 5  | 41  | c.65C>T       | c.(64-66)CCG>CTG     | p.P22L        |
| Pat_41 | Post-Resistance | ATP13A3  | 79572  | 37 | 3 | 194162080 | 194162080 | Missense_Mutation | SNP | C | T | 14 | 210 | c.1670G>A     | c.(1669-1671)GGT>GAT | p.G557D       |
| Pat_41 | Post-Resistance | MUC20    | 200958 | 37 | 3 | 195452822 | 195452822 | Missense_Mutation | SNP | G | A | 4  | 90  | c.835G>A      | c.(835-837)GTG>ATG   | p.V279M       |
| Pat_41 | Post-Resistance | TFRC     | 7037   | 37 | 3 | 195778890 | 195778890 | Missense_Mutation | SNP | C | T | 10 | 95  | c.2206G>A     | c.(2206-2208)GCT>ACT | p.A736T       |
| Pat_41 | Post-Resistance | RNF168   | 165918 | 37 | 3 | 196210677 | 196210677 | Missense_Mutation | SNP | C | T | 15 | 233 | c.644G>A      | c.(643-645)AGT>AAT   | p.S215N       |
| Pat_41 | Post-Resistance | LRRC33   | 375387 | 37 | 3 | 196387643 | 196387643 | Missense_Mutation | SNP | G | A | 9  | 128 | c.1129G>A     | c.(1129-1131)GCG>ACG | p.A377T       |
| Pat_41 | Post-Resistance | LRRC33   | 375387 | 37 | 3 | 196388160 | 196388160 | Missense_Mutation | SNP | C | T | 20 | 101 | c.1646C>T     | c.(1645-1647)ACC>ATC | p.T549I       |
| Pat_41 | Post-Resistance | LRRC33   | 375387 | 37 | 3 | 196388457 | 196388457 | Missense_Mutation | SNP | T | C | 15 | 177 | c.1943T>C     | c.(1942-1944)CTG>CCG | p.L648P       |
| Pat_41 | Post-Resistance | SENP5    | 205564 | 37 | 3 | 196612242 | 196612242 | Missense_Mutation | SNP | C | T | 8  | 76  | c.190C>T      | c.(190-192)CTT>TTT   | p.L64F        |
| Pat_41 | Post-Resistance | SENP5    | 205564 | 37 | 3 | 196613553 | 196613553 | Missense_Mutation | SNP | G | A | 9  | 92  | c.1501G>A     | c.(1501-1503)GTC>ATC | p.V501I       |
| Pat_41 | Post-Resistance | KIAA0226 | 9711   | 37 | 3 | 197402064 | 197402064 | Missense_Mutation | SNP | C | T | 8  | 89  | c.2744G>A     | c.(2743-2745)JGT>TAT | p.C915Y       |
| Pat_41 | Post-Resistance | KIAA0226 | 9711   | 37 | 3 | 197408178 | 197408178 | Missense_Mutation | SNP | T | C | 18 | 249 | c.2252A>G     | c.(2251-2253)CAC>CGC | p.H751R       |
| Pat_41 | Post-Resistance | KIAA0226 | 9711   | 37 | 3 | 197409434 | 197409434 | Missense_Mutation | SNP | G | A | 6  | 162 | c.2033C>T     | c.(2032-2034)GCT>GTT | p.A678V       |
| Pat_41 | Post-Resistance | LRCH3    | 84859  | 37 | 3 | 197562680 | 197562680 | Missense_Mutation | SNP | G | A | 25 | 386 | c.1238G>A     | c.(1237-1239)CGA>CAA | p.R413Q       |
| Pat_41 | Post-Resistance | ZNF595   | 152687 | 37 | 4 | 86829     | 86829     | Missense_Mutation | SNP | C | T | 15 | 199 | c.1435C>T     | c.(1435-1437)CCC>TCC | p.P479S       |
| Pat_41 | Post-Resistance | ZNF141   | 7700   | 37 | 4 | 367245    | 367245    | Missense_Mutation | SNP | C | A | 8  | 331 | c.1019C>A     | c.(1018-1020)ACA>AAA | p.T340K       |
| Pat_41 | Post-Resistance | ABCA11P  | 79963  | 37 | 4 | 420613    | 420613    | Missense_Mutation | SNP | G | A | 11 | 125 | c.293C>T      | c.(292-294)ACT>ATT   | p.T98I        |

|        |                 |          |        |    |   |          |          |                   |     |   |   |    |     |               |                      |               |
|--------|-----------------|----------|--------|----|---|----------|----------|-------------------|-----|---|---|----|-----|---------------|----------------------|---------------|
| Pat_41 | Post-Resistance | ZNF721   | 170960 | 37 | 4 | 437330   | 437330   | Missense_Mutation | SNP | A | T | 9  | 374 | c.926T>A      | c.(925-927)GTA>GAA   | p.V309E       |
| Pat_41 | Post-Resistance | PIGG     | 54872  | 37 | 4 | 514955   | 514955   | Missense_Mutation | SNP | C | T | 8  | 112 | c.1225C>T     | c.(1225-1227)CTC>TTC | p.L409F       |
| Pat_41 | Post-Resistance | PIGG     | 54872  | 37 | 4 | 524535   | 524535   | Splice_Site       | SNP | G | A | 10 | 215 | c.2571_splice | c.e11+1              | p.Q857_splice |
| Pat_41 | Post-Resistance | MFSD7    | 84179  | 37 | 4 | 678282   | 678282   | Missense_Mutation | SNP | C | T | 8  | 134 | c.833G>A      | c.(832-834)GGC>GAC   | p.G278D       |
| Pat_41 | Post-Resistance | GAK      | 2580   | 37 | 4 | 871402   | 871402   | Splice_Site       | SNP | C | T | 11 | 92  | c.1856_splice | c.e16+1              | p.R619_splice |
| Pat_41 | Post-Resistance | DGKQ     | 1609   | 37 | 4 | 956927   | 956927   | Missense_Mutation | SNP | C | T | 3  | 12  | c.1886G>A     | c.(1885-1887)GGG>GAG | p.G629E       |
| Pat_41 | Post-Resistance | SLC26A1  | 10861  | 37 | 4 | 982930   | 982930   | Missense_Mutation | SNP | C | A | 6  | 8   | c.1797G>T     | c.(1795-1797)AGG>AGT | p.R599S       |
| Pat_41 | Post-Resistance | LETM1    | 3954   | 37 | 4 | 1843078  | 1843078  | Missense_Mutation | SNP | C | T | 4  | 54  | c.590G>A      | c.(589-591)AGG>AAG   | p.R197K       |
| Pat_41 | Post-Resistance | POLN     | 353497 | 37 | 4 | 2082718  | 2082718  | Missense_Mutation | SNP | G | A | 13 | 355 | c.2354C>T     | c.(2353-2355)ACT>ATT | p.T785I       |
| Pat_41 | Post-Resistance | HAUS3    | 79441  | 37 | 4 | 2242433  | 2242433  | Missense_Mutation | SNP | G | A | 9  | 186 | c.241C>T      | c.(241-243)CTT>TTT   | p.L81F        |
| Pat_41 | Post-Resistance | ADD1     | 118    | 37 | 4 | 2930165  | 2930165  | Missense_Mutation | SNP | C | T | 9  | 248 | c.2129C>T     | c.(2128-2130)TCT>TTT | p.S710F       |
| Pat_41 | Post-Resistance | HTT      | 3064   | 37 | 4 | 3123027  | 3123027  | Nonsense_Mutation | SNP | C | T | 8  | 214 | c.1147C>T     | c.(1147-1149)CAG>TAG | p.Q383*       |
| Pat_41 | Post-Resistance | HTT      | 3064   | 37 | 4 | 3123111  | 3123111  | Missense_Mutation | SNP | G | A | 13 | 140 | c.1231G>A     | c.(1231-1233)GAG>AAG | p.E411K       |
| Pat_41 | Post-Resistance | HTT      | 3064   | 37 | 4 | 3137689  | 3137689  | Missense_Mutation | SNP | A | G | 4  | 128 | c.2698A>G     | c.(2698-2700)ACA>GCA | p.T900A       |
| Pat_41 | Post-Resistance | HTT      | 3064   | 37 | 4 | 3189471  | 3189471  | Missense_Mutation | SNP | C | T | 7  | 213 | c.5089C>T     | c.(5089-5091)CGT>TGT | p.R1697C      |
| Pat_41 | Post-Resistance | HTT      | 3064   | 37 | 4 | 3221987  | 3221987  | Nonsense_Mutation | SNP | C | T | 20 | 187 | c.7327C>T     | c.(7327-7329)CAG>TAG | p.Q2443*      |
| Pat_41 | Post-Resistance | HTT      | 3064   | 37 | 4 | 3225190  | 3225190  | Missense_Mutation | SNP | G | A | 7  | 144 | c.7534G>A     | c.(7534-7536)GTG>ATG | p.V2512M      |
| Pat_41 | Post-Resistance | DOK7     | 285489 | 37 | 4 | 3495224  | 3495224  | Missense_Mutation | SNP | C | T | 7  | 29  | c.1511C>T     | c.(1510-1512)CCT>CTT | p.P504L       |
| Pat_41 | Post-Resistance | OTOP1    | 133060 | 37 | 4 | 4214714  | 4214714  | Missense_Mutation | SNP | C | T | 12 | 172 | c.421G>A      | c.(421-423)GCA>ACA   | p.A141T       |
| Pat_41 | Post-Resistance | ZBTB49   | 166793 | 37 | 4 | 4304317  | 4304317  | Missense_Mutation | SNP | G | A | 40 | 385 | c.754G>A      | c.(754-756)GTA>ATA   | p.V252I       |
| Pat_41 | Post-Resistance | ZBTB49   | 166793 | 37 | 4 | 4317446  | 4317446  | Splice_Site       | SNP | G | A | 6  | 61  | c.1459_splice | c.e6+1               | p.G487_splice |
| Pat_41 | Post-Resistance | CYTL1    | 54360  | 37 | 4 | 5018664  | 5018664  | Missense_Mutation | SNP | C | T | 7  | 498 | c.226G>A      | c.(226-228)GAC>AAC   | p.D76N        |
| Pat_41 | Post-Resistance | EVC2     | 132884 | 37 | 4 | 5624502  | 5624502  | Nonsense_Mutation | SNP | G | A | 4  | 83  | c.2263C>T     | c.(2263-2265)CAG>TAG | p.Q755*       |
| Pat_41 | Post-Resistance | EVC      | 2121   | 37 | 4 | 5754687  | 5754687  | Missense_Mutation | SNP | C | T | 4  | 41  | c.1223C>T     | c.(1222-1224)GCT>GTT | p.A408V       |
| Pat_41 | Post-Resistance | EVC      | 2121   | 37 | 4 | 5798859  | 5798859  | Missense_Mutation | SNP | G | A | 7  | 139 | c.1997G>A     | c.(1996-1998)GGG>GAG | p.G666E       |
| Pat_41 | Post-Resistance | MAN2B2   | 23324  | 37 | 4 | 6598927  | 6598927  | Missense_Mutation | SNP | G | A | 11 | 211 | c.1145G>A     | c.(1144-1146)GGG>GAG | p.G382E       |
| Pat_41 | Post-Resistance | KIAA0232 | 9778   | 37 | 4 | 6863389  | 6863389  | Missense_Mutation | SNP | G | A | 37 | 172 | c.1280G>A     | c.(1279-1281)AGA>AAA | p.R427K       |
| Pat_41 | Post-Resistance | KIAA0232 | 9778   | 37 | 4 | 6863529  | 6863529  | Missense_Mutation | SNP | C | T | 13 | 186 | c.1420C>T     | c.(1420-1422)CCT>TCT | p.P474S       |
| Pat_41 | Post-Resistance | CCDC96   | 257236 | 37 | 4 | 7043644  | 7043644  | Missense_Mutation | SNP | G | A | 23 | 283 | c.1022C>T     | c.(1021-1023)GCC>GTC | p.A341V       |
| Pat_41 | Post-Resistance | SH3TC1   | 54436  | 37 | 4 | 8220014  | 8220014  | Missense_Mutation | SNP | C | T | 10 | 74  | c.856C>T      | c.(856-858)CCC>TCC   | p.P286S       |
| Pat_41 | Post-Resistance | HS3ST1   | 9957   | 37 | 4 | 11400774 | 11400774 | Missense_Mutation | SNP | G | A | 35 | 327 | c.856C>T      | c.(856-858)CAC>TAC   | p.H286Y       |
| Pat_41 | Post-Resistance | HS3ST1   | 9957   | 37 | 4 | 11401460 | 11401460 | Missense_Mutation | SNP | G | A | 6  | 47  | c.170C>T      | c.(169-171)ACC>ATC   | p.T57I        |
| Pat_41 | Post-Resistance | RAB28    | 9364   | 37 | 4 | 13383114 | 13383114 | Splice_Site       | SNP | C | T | 7  | 140 | c.495_splice  | c.e5+1               | p.S165_splice |
| Pat_41 | Post-Resistance | BOD1L    | 259282 | 37 | 4 | 13604302 | 13604302 | Missense_Mutation | SNP | C | T | 17 | 150 | c.4222G>A     | c.(4222-4224)GAC>AAC | p.D1408N      |
| Pat_41 | Post-Resistance | BOD1L    | 259282 | 37 | 4 | 13617083 | 13617083 | Missense_Mutation | SNP | C | T | 12 | 148 | c.412G>A      | c.(412-414)GTT>ATT   | p.V138I       |
| Pat_41 | Post-Resistance | CC2D2A   | 57545  | 37 | 4 | 15587859 | 15587859 | Missense_Mutation | SNP | G | A | 27 | 451 | c.4055G>A     | c.(4054-4056)AGC>AAC | p.S1352N      |
| Pat_41 | Post-Resistance | MED28    | 80306  | 37 | 4 | 17616332 | 17616332 | Missense_Mutation | SNP | G | A | 5  | 39  | c.55G>A       | c.(55-57)GCC>ACC     | p.A19T        |
| Pat_41 | Post-Resistance | NCAPG    | 64151  | 37 | 4 | 17841784 | 17841784 | Missense_Mutation | SNP | G | A | 16 | 178 | c.2719G>A     | c.(2719-2721)GCA>ACA | p.A907T       |
| Pat_41 | Post-Resistance | SLIT2    | 9353   | 37 | 4 | 20569002 | 20569002 | Missense_Mutation | SNP | G | A | 22 | 267 | c.2843G>A     | c.(2842-2844)GGT>GAT | p.G948D       |
| Pat_41 | Post-Resistance | GPR125   | 166647 | 37 | 4 | 22390103 | 22390103 | Missense_Mutation | SNP | C | T | 8  | 142 | c.3191G>A     | c.(3190-3192)GGA>GAA | p.G1064E      |
| Pat_41 | Post-Resistance | GPR125   | 166647 | 37 | 4 | 22394222 | 22394222 | Missense_Mutation | SNP | G | A | 12 | 140 | c.2573C>T     | c.(2572-2574)GCT>GTT | p.A858V       |
| Pat_41 | Post-Resistance | PPARGC1A | 10891  | 37 | 4 | 23833375 | 23833375 | Splice_Site       | SNP | C | T | 14 | 180 | c.235_splice  | c.e3-1               | p.K79_splice  |
| Pat_41 | Post-Resistance | LGI2     | 55203  | 37 | 4 | 25005407 | 25005407 | Missense_Mutation | SNP | G | A | 47 | 610 | c.1304C>T     | c.(1303-1305)TCC>TTC | p.S435F       |
| Pat_41 | Post-Resistance | PCDH7    | 5099   | 37 | 4 | 30725308 | 30725308 | Missense_Mutation | SNP | C | T | 24 | 211 | c.2264C>T     | c.(2263-2265)CCT>CTT | p.P755L       |
| Pat_41 | Post-Resistance | PCDH7    | 5099   | 37 | 4 | 30921959 | 30921959 | Missense_Mutation | SNP | G | A | 14 | 171 | c.3359G>A     | c.(3358-3360)GGC>GAC | p.G1120D      |
| Pat_41 | Post-Resistance | PCDH7    | 5099   | 37 | 4 | 31144257 | 31144257 | Missense_Mutation | SNP | G | A | 6  | 149 | c.3530G>A     | c.(3529-3531)AGC>AAC | p.S1177N      |
| Pat_41 | Post-Resistance | TBC1D1   | 23216  | 37 | 4 | 38046089 | 38046089 | Missense_Mutation | SNP | C | T | 9  | 144 | c.1520C>T     | c.(1519-1521)TCT>TTT | p.S507F       |



|        |                 |          |        |    |   |          |          |                   |     |   |   |     |     |            |                      |             |
|--------|-----------------|----------|--------|----|---|----------|----------|-------------------|-----|---|---|-----|-----|------------|----------------------|-------------|
| Pat_41 | Post-Resistance | TLR10    | 81793  | 37 | 4 | 38776620 | 38776620 | Missense_Mutation | SNP | G | A | 6   | 165 | c.592C>T   | c.(592-594)CCA>TCA   | p.P198S     |
| Pat_41 | Post-Resistance | FAM114A1 | 92689  | 37 | 4 | 38880025 | 38880025 | Missense_Mutation | SNP | C | T | 8   | 220 | c.326C>T   | c.(325-327)CCC>CTC   | p.P109L     |
| Pat_41 | Post-Resistance | KLHL5    | 51088  | 37 | 4 | 39109203 | 39109203 | Missense_Mutation | SNP | G | A | 11  | 219 | c.1678G>A  | c.(1678-1680)GAA>AAA | p.E560K     |
| Pat_41 | Post-Resistance | WDR19    | 57728  | 37 | 4 | 39184184 | 39184184 | Splice_Site       | SNP | G | A | 7   | 68  | c.6_splice | c.e1+1               | p.K2_splice |
| Pat_41 | Post-Resistance | WDR19    | 57728  | 37 | 4 | 39217532 | 39217532 | Missense_Mutation | SNP | G | A | 9   | 113 | c.1033G>A  | c.(1033-1035)GTT>ATT | p.V345I     |
| Pat_41 | Post-Resistance | WDR19    | 57728  | 37 | 4 | 39233548 | 39233548 | Missense_Mutation | SNP | G | A | 26  | 345 | c.2114G>A  | c.(2113-2115)GGC>GAC | p.G705D     |
| Pat_41 | Post-Resistance | WDR19    | 57728  | 37 | 4 | 39269615 | 39269615 | Missense_Mutation | SNP | G | A | 7   | 26  | c.3262G>A  | c.(3262-3264)GAT>AAT | p.D1088N    |
| Pat_41 | Post-Resistance | RFC1     | 5981   | 37 | 4 | 39306496 | 39306496 | Missense_Mutation | SNP | C | T | 113 | 642 | c.2051G>A  | c.(2050-2052)AGC>AAC | p.S684N     |
| Pat_41 | Post-Resistance | UGDH     | 7358   | 37 | 4 | 39512134 | 39512134 | Missense_Mutation | SNP | C | T | 31  | 125 | c.502G>A   | c.(502-504)GCC>ACC   | p.A168T     |
| Pat_41 | Post-Resistance | LIMCH1   | 22998  | 37 | 4 | 41664924 | 41664924 | Missense_Mutation | SNP | G | A | 4   | 112 | c.2059G>A  | c.(2059-2061)GAT>AAT | p.D687N     |
| Pat_41 | Post-Resistance | LIMCH1   | 22998  | 37 | 4 | 41684416 | 41684416 | Missense_Mutation | SNP | G | C | 53  | 62  | c.2632G>C  | c.(2632-2634)GGA>CGA | p.G878R     |
| Pat_41 | Post-Resistance | SLC30A9  | 10463  | 37 | 4 | 41992727 | 41992727 | Missense_Mutation | SNP | G | A | 3   | 37  | c.59G>A    | c.(58-60)CGG>CAG     | p.R20Q      |
| Pat_41 | Post-Resistance | SHISA3   | 152573 | 37 | 4 | 42403227 | 42403227 | Missense_Mutation | SNP | C | T | 18  | 230 | c.476C>T   | c.(475-477)TCC>TTC   | p.S159F     |
| Pat_41 | Post-Resistance | GABRG1   | 2565   | 37 | 4 | 46043100 | 46043100 | Missense_Mutation | SNP | G | A | 10  | 139 | c.1303C>T  | c.(1303-1305)CGC>TGC | p.R435C     |
| Pat_41 | Post-Resistance | GABRG1   | 2565   | 37 | 4 | 46060350 | 46060350 | Missense_Mutation | SNP | C | T | 5   | 96  | c.800G>A   | c.(799-801)AGC>AAC   | p.S267N     |
| Pat_41 | Post-Resistance | ATP10D   | 57205  | 37 | 4 | 47538510 | 47538510 | Missense_Mutation | SNP | C | T | 80  | 334 | c.1072C>T  | c.(1072-1074)CCT>TCT | p.P358S     |
| Pat_41 | Post-Resistance | ATP10D   | 57205  | 37 | 4 | 47560009 | 47560009 | Missense_Mutation | SNP | C | T | 6   | 65  | c.2153C>T  | c.(2152-2154)GCC>GTC | p.A718V     |
| Pat_41 | Post-Resistance | NFXL1    | 152518 | 37 | 4 | 47850221 | 47850221 | Missense_Mutation | SNP | C | T | 26  | 247 | c.2695G>A  | c.(2695-2697)GTT>ATT | p.V899I     |
| Pat_41 | Post-Resistance | NIPAL1   | 152519 | 37 | 4 | 48027108 | 48027108 | Missense_Mutation | SNP | C | T | 15  | 194 | c.70C>T    | c.(70-72)CCA>TCA     | p.P24S      |
| Pat_41 | Post-Resistance | NIPAL1   | 152519 | 37 | 4 | 48037013 | 48037013 | Missense_Mutation | SNP | G | A | 12  | 181 | c.577G>A   | c.(577-579)GAA>AAA   | p.E193K     |
| Pat_41 | Post-Resistance | FRYL     | 285527 | 37 | 4 | 48503750 | 48503750 | Missense_Mutation | SNP | C | T | 15  | 269 | c.8482G>A  | c.(8482-8484)GAA>AAA | p.E2828K    |
| Pat_41 | Post-Resistance | FRYL     | 285527 | 37 | 4 | 48523199 | 48523199 | Missense_Mutation | SNP | G | A | 5   | 112 | c.7555C>T  | c.(7555-7557)CCA>TCA | p.P2519S    |
| Pat_41 | Post-Resistance | FRYL     | 285527 | 37 | 4 | 48537729 | 48537729 | Missense_Mutation | SNP | T | C | 14  | 151 | c.6509A>G  | c.(6508-6510)TAC>TGC | p.Y2170C    |
| Pat_41 | Post-Resistance | OCIAD1   | 54940  | 37 | 4 | 48859335 | 48859335 | Missense_Mutation | SNP | C | T | 10  | 146 | c.653C>T   | c.(652-654)ACT>ATT   | p.T218I     |
| Pat_41 | Post-Resistance | CWH43    | 80157  | 37 | 4 | 49032865 | 49032865 | Missense_Mutation | SNP | G | A | 9   | 108 | c.1396G>A  | c.(1396-1398)GAG>AAG | p.E466K     |
| Pat_41 | Post-Resistance | LRRRC66  | 339977 | 37 | 4 | 52861488 | 52861488 | Missense_Mutation | SNP | C | T | 16  | 170 | c.1700G>A  | c.(1699-1701)GGC>GAC | p.G567D     |
| Pat_41 | Post-Resistance | LRRRC66  | 339977 | 37 | 4 | 52861713 | 52861713 | Missense_Mutation | SNP | C | T | 34  | 137 | c.1475G>A  | c.(1474-1476)GGG>GAG | p.G492E     |
| Pat_41 | Post-Resistance | LNX1     | 84708  | 37 | 4 | 54344908 | 54344908 | Missense_Mutation | SNP | G | A | 5   | 51  | c.1487C>T  | c.(1486-1488)CCC>CTC | p.P496L     |
| Pat_41 | Post-Resistance | LNX1     | 84708  | 37 | 4 | 54362405 | 54362405 | Missense_Mutation | SNP | T | C | 15  | 76  | c.1135A>G  | c.(1135-1137)AGC>GGC | p.S379G     |
| Pat_41 | Post-Resistance | PDGFRA   | 5156   | 37 | 4 | 55127445 | 55127445 | Missense_Mutation | SNP | G | A | 51  | 471 | c.233G>A   | c.(232-234)AGC>AAC   | p.S78N      |
| Pat_41 | Post-Resistance | KIAA1211 | 57482  | 37 | 4 | 57173741 | 57173741 | Missense_Mutation | SNP | C | T | 30  | 104 | c.161C>T   | c.(160-162)CCC>CTC   | p.P54L      |
| Pat_41 | Post-Resistance | KIAA1211 | 57482  | 37 | 4 | 57181769 | 57181769 | Missense_Mutation | SNP | G | A | 7   | 259 | c.2101G>A  | c.(2101-2103)GGC>AGC | p.G701S     |
| Pat_41 | Post-Resistance | KIAA1211 | 57482  | 37 | 4 | 57193878 | 57193878 | Missense_Mutation | SNP | G | A | 50  | 537 | c.3610G>A  | c.(3610-3612)GAT>AAT | p.D1204N    |
| Pat_41 | Post-Resistance | PPAT     | 5471   | 37 | 4 | 57267627 | 57267627 | Missense_Mutation | SNP | G | A | 14  | 73  | c.755C>T   | c.(754-756)CCT>CTT   | p.P252L     |
| Pat_41 | Post-Resistance | PAICS    | 10606  | 37 | 4 | 57312960 | 57312960 | Missense_Mutation | SNP | C | T | 4   | 25  | c.314C>T   | c.(313-315)ACT>ATT   | p.T105I     |
| Pat_41 | Post-Resistance | C4orf14  | 84273  | 37 | 4 | 57830661 | 57830661 | Missense_Mutation | SNP | C | T | 23  | 276 | c.1796G>A  | c.(1795-1797)GGA>GAA | p.G599E     |
| Pat_41 | Post-Resistance | UBA6     | 55236  | 37 | 4 | 68490716 | 68490716 | Missense_Mutation | SNP | C | T | 4   | 108 | c.2708G>A  | c.(2707-2709)GGC>GAC | p.G903D     |
| Pat_41 | Post-Resistance | UGT2B7   | 7364   | 37 | 4 | 69968562 | 69968562 | Missense_Mutation | SNP | G | A | 18  | 451 | c.908G>A   | c.(907-909)GGT>GAT   | p.G303D     |
| Pat_41 | Post-Resistance | STATH    | 6779   | 37 | 4 | 70866607 | 70866607 | Missense_Mutation | SNP | C | T | 28  | 415 | c.130C>T   | c.(130-132)CCA>TCA   | p.P44S      |
| Pat_41 | Post-Resistance | MUC7     | 4589   | 37 | 4 | 71347018 | 71347018 | Missense_Mutation | SNP | C | A | 10  | 598 | c.557C>A   | c.(556-558)CCA>CAA   | p.P186Q     |
| Pat_41 | Post-Resistance | AMBN     | 258    | 37 | 4 | 71472004 | 71472004 | Missense_Mutation | SNP | G | A | 3   | 38  | c.901G>A   | c.(901-903)GAC>AAC   | p.D301N     |
| Pat_41 | Post-Resistance | ENAM     | 10117  | 37 | 4 | 71509592 | 71509592 | Missense_Mutation | SNP | C | T | 10  | 90  | c.2449C>T  | c.(2449-2451)CTT>TTT | p.L817F     |
| Pat_41 | Post-Resistance | GRSF1    | 2926   | 37 | 4 | 71698066 | 71698066 | Missense_Mutation | SNP | G | A | 13  | 192 | c.772C>T   | c.(772-774)CCT>TCT   | p.P258S     |
| Pat_41 | Post-Resistance | GC       | 2638   | 37 | 4 | 72618237 | 72618237 | Missense_Mutation | SNP | C | T | 24  | 84  | c.1393G>A  | c.(1393-1395)GAG>AAG | p.E465K     |
| Pat_41 | Post-Resistance | ADAMTS3  | 9508   | 37 | 4 | 73433114 | 73433114 | Missense_Mutation | SNP | C | T | 8   | 91  | c.74G>A    | c.(73-75)GGT>GAT     | p.G25D      |
| Pat_41 | Post-Resistance | ANKRD17  | 26057  | 37 | 4 | 73956714 | 73956714 | Missense_Mutation | SNP | G | A | 30  | 228 | c.6631C>T  | c.(6631-6633)CCT>TCT | p.P2211S    |
| Pat_41 | Post-Resistance | EREG     | 2069   | 37 | 4 | 75246757 | 75246757 | Missense_Mutation | SNP | G | A | 26  | 295 | c.181G>A   | c.(181-183)GCT>ACT   | p.A61T      |

|        |                 |          |        |    |   |           |           |                   |     |   |   |    |     |               |                        |               |
|--------|-----------------|----------|--------|----|---|-----------|-----------|-------------------|-----|---|---|----|-----|---------------|------------------------|---------------|
| Pat_41 | Post-Resistance | USO1     | 8615   | 37 | 4 | 76714968  | 76714968  | Missense_Mutation | SNP | G | A | 8  | 131 | c.1366G>A     | c.(1366-1368)GAA>AAA   | p.E456K       |
| Pat_41 | Post-Resistance | USO1     | 8615   | 37 | 4 | 76733470  | 76733470  | Missense_Mutation | SNP | C | T | 4  | 20  | c.2741C>T     | c.(2740-2742)GCC>GTC   | p.A914V       |
| Pat_41 | Post-Resistance | PPEF2    | 5470   | 37 | 4 | 76797517  | 76797517  | Missense_Mutation | SNP | C | T | 8  | 47  | c.1243G>A     | c.(1243-1245)GAG>AAG   | p.E415K       |
| Pat_41 | Post-Resistance | SDAD1    | 55153  | 37 | 4 | 76882236  | 76882236  | Missense_Mutation | SNP | G | A | 13 | 224 | c.1301C>T     | c.(1300-1302)ACT>ATT   | p.T434I       |
| Pat_41 | Post-Resistance | SDAD1    | 55153  | 37 | 4 | 76903090  | 76903090  | Missense_Mutation | SNP | G | A | 23 | 108 | c.191C>T      | c.(190-192)GCA>GTA     | p.A64V        |
| Pat_41 | Post-Resistance | STBD1    | 8987   | 37 | 4 | 77231062  | 77231062  | Missense_Mutation | SNP | G | A | 13 | 171 | c.986G>A      | c.(985-987)GGG>GAG     | p.G329E       |
| Pat_41 | Post-Resistance | FRAS1    | 80144  | 37 | 4 | 79202565  | 79202565  | Missense_Mutation | SNP | C | T | 4  | 46  | c.1085C>T     | c.(1084-1086)GCT>GTT   | p.A362V       |
| Pat_41 | Post-Resistance | FRAS1    | 80144  | 37 | 4 | 79240129  | 79240129  | Missense_Mutation | SNP | G | A | 12 | 403 | c.2126G>A     | c.(2125-2127)GGC>GAC   | p.G709D       |
| Pat_41 | Post-Resistance | BMP2K    | 55589  | 37 | 4 | 79763592  | 79763592  | Missense_Mutation | SNP | C | T | 7  | 156 | c.457C>T      | c.(457-459)CCA>TCA     | p.P153S       |
| Pat_41 | Post-Resistance | BMP2K    | 55589  | 37 | 4 | 79786842  | 79786842  | Missense_Mutation | SNP | C | T | 16 | 266 | c.1199C>T     | c.(1198-1200)GCT>GTT   | p.A400V       |
| Pat_41 | Post-Resistance | NAA11    | 84779  | 37 | 4 | 80246532  | 80246532  | Missense_Mutation | SNP | C | T | 12 | 35  | c.500G>A      | c.(499-501)GGC>GAC     | p.G167D       |
| Pat_41 | Post-Resistance | GK2      | 2712   | 37 | 4 | 80327742  | 80327742  | Missense_Mutation | SNP | C | T | 7  | 81  | c.1613G>A     | c.(1612-1614)JAGT>AAT  | p.S538N       |
| Pat_41 | Post-Resistance | SEC31A   | 22872  | 37 | 4 | 83800048  | 83800048  | Missense_Mutation | SNP | C | T | 10 | 73  | c.237G>A      | c.(235-237)ATG>ATA     | p.M79I        |
| Pat_41 | Post-Resistance | FAM175A  | 84142  | 37 | 4 | 84383770  | 84383770  | Missense_Mutation | SNP | C | T | 37 | 390 | c.1082G>A     | c.(1081-1083)CGG>CAG   | p.R361Q       |
| Pat_41 | Post-Resistance | WDFY3    | 23001  | 37 | 4 | 85598446  | 85598446  | Missense_Mutation | SNP | C | T | 7  | 97  | c.10363G>A    | c.(10363-10365)GAA>AAA | p.E3455K      |
| Pat_41 | Post-Resistance | WDFY3    | 23001  | 37 | 4 | 85612927  | 85612927  | Missense_Mutation | SNP | G | A | 5  | 27  | c.9061C>T     | c.(9061-9063)CCT>TCT   | p.P3021S      |
| Pat_41 | Post-Resistance | WDFY3    | 23001  | 37 | 4 | 85630100  | 85630100  | Missense_Mutation | SNP | G | A | 14 | 177 | c.8179C>T     | c.(8179-8181)CCT>TCT   | p.P2727S      |
| Pat_41 | Post-Resistance | WDFY3    | 23001  | 37 | 4 | 85687151  | 85687151  | Missense_Mutation | SNP | C | T | 30 | 339 | c.5000G>A     | c.(4999-5001)GGT>GAT   | p.G1667D      |
| Pat_41 | Post-Resistance | WDFY3    | 23001  | 37 | 4 | 85715759  | 85715759  | Nonsense_Mutation | SNP | G | A | 37 | 520 | c.3400C>T     | c.(3400-3402)CAA>TAA   | p.Q1134*      |
| Pat_41 | Post-Resistance | WDFY3    | 23001  | 37 | 4 | 85729487  | 85729487  | Missense_Mutation | SNP | C | T | 21 | 268 | c.2429G>A     | c.(2428-2430)AGG>AAG   | p.R810K       |
| Pat_41 | Post-Resistance | AFF1     | 4299   | 37 | 4 | 87968735  | 87968735  | Nonsense_Mutation | SNP | C | T | 15 | 188 | c.1027C>T     | c.(1027-1029)CAG>TAG   | p.Q343*       |
| Pat_41 | Post-Resistance | AFF1     | 4299   | 37 | 4 | 88036399  | 88036399  | Missense_Mutation | SNP | G | A | 3  | 18  | c.2393G>A     | c.(2392-2394)AGC>AAC   | p.S798N       |
| Pat_41 | Post-Resistance | AFF1     | 4299   | 37 | 4 | 88048794  | 88048794  | Splice_Site       | SNP | G | A | 10 | 133 | c.2883_splice | c.e15-1                | p.K961_splice |
| Pat_41 | Post-Resistance | HSD17B13 | 345275 | 37 | 4 | 88235098  | 88235098  | Missense_Mutation | SNP | G | A | 17 | 166 | c.572C>T      | c.(571-573)GCC>GTC     | p.A191V       |
| Pat_41 | Post-Resistance | HSD17B11 | 51170  | 37 | 4 | 88261676  | 88261676  | Missense_Mutation | SNP | G | A | 5  | 57  | c.778C>T      | c.(778-780)CCA>TCA     | p.P260S       |
| Pat_41 | Post-Resistance | HSD17B11 | 51170  | 37 | 4 | 88293907  | 88293907  | Missense_Mutation | SNP | C | T | 8  | 239 | c.511G>A      | c.(511-513)GCT>ACT     | p.A171T       |
| Pat_41 | Post-Resistance | DMP1     | 1758   | 37 | 4 | 88584093  | 88584093  | Missense_Mutation | SNP | G | A | 43 | 449 | c.1163G>A     | c.(1162-1164)AGC>AAC   | p.S388N       |
| Pat_41 | Post-Resistance | MEPE     | 56955  | 37 | 4 | 88767513  | 88767513  | Missense_Mutation | SNP | C | T | 23 | 430 | c.1493C>T     | c.(1492-1494)TCC>TTC   | p.S498F       |
| Pat_41 | Post-Resistance | HERC6    | 55008  | 37 | 4 | 89363442  | 89363442  | Missense_Mutation | SNP | G | A | 9  | 57  | c.2899G>A     | c.(2899-2901)GTA>ATA   | p.V967I       |
| Pat_41 | Post-Resistance | HERC5    | 51191  | 37 | 4 | 89407357  | 89407357  | Missense_Mutation | SNP | G | A | 43 | 253 | c.1829G>A     | c.(1828-1830)AGG>AAG   | p.R610K       |
| Pat_41 | Post-Resistance | TIGD2    | 166815 | 37 | 4 | 90034868  | 90034868  | Missense_Mutation | SNP | C | T | 4  | 125 | c.743C>T      | c.(742-744)ACA>ATA     | p.T248I       |
| Pat_41 | Post-Resistance | SMARCAD1 | 56916  | 37 | 4 | 95173991  | 95173991  | Missense_Mutation | SNP | G | A | 11 | 142 | c.1114G>A     | c.(1114-1116)GAG>AAG   | p.E372K       |
| Pat_41 | Post-Resistance | ADH7     | 131    | 37 | 4 | 100341758 | 100341758 | Missense_Mutation | SNP | C | T | 4  | 124 | c.793G>A      | c.(793-795)GTG>ATG     | p.V265M       |
| Pat_41 | Post-Resistance | PPP3CA   | 5530   | 37 | 4 | 101953423 | 101953423 | Splice_Site       | SNP | C | T | 5  | 76  | c.1339_splice | c.e12+1                | p.A447_splice |
| Pat_41 | Post-Resistance | BANK1    | 55024  | 37 | 4 | 102783822 | 102783822 | Splice_Site       | SNP | G | A | 4  | 66  | c.763_splice  | c.e4+1                 | p.E255_splice |
| Pat_41 | Post-Resistance | BANK1    | 55024  | 37 | 4 | 102981511 | 102981511 | Nonsense_Mutation | SNP | C | T | 15 | 188 | c.2113C>T     | c.(2113-2115)CAG>TAG   | p.Q705*       |
| Pat_41 | Post-Resistance | NFKB1    | 4790   | 37 | 4 | 103534660 | 103534660 | Missense_Mutation | SNP | G | A | 7  | 91  | c.2668G>A     | c.(2668-2670)GCA>ACA   | p.A890T       |
| Pat_41 | Post-Resistance | NFKB1    | 4790   | 37 | 4 | 103537695 | 103537695 | Missense_Mutation | SNP | C | T | 8  | 118 | c.2851C>T     | c.(2851-2853)CTC>TTC   | p.L951F       |
| Pat_41 | Post-Resistance | INTS12   | 57117  | 37 | 4 | 106621110 | 106621110 | Missense_Mutation | SNP | C | T | 19 | 359 | c.53G>A       | c.(52-54)GGT>GAT       | p.G18D        |
| Pat_41 | Post-Resistance | GSTCD    | 79807  | 37 | 4 | 106647965 | 106647965 | Missense_Mutation | SNP | G | A | 20 | 242 | c.1124G>A     | c.(1123-1125)AGA>AAA   | p.R375K       |
| Pat_41 | Post-Resistance | PAPSS1   | 9061   | 37 | 4 | 108574760 | 108574760 | Nonsense_Mutation | SNP | C | T | 8  | 119 | c.1124G>A     | c.(1123-1125)TGG>TAG   | p.W375*       |
| Pat_41 | Post-Resistance | GAR1     | 54433  | 37 | 4 | 110737478 | 110737478 | Missense_Mutation | SNP | G | A | 26 | 142 | c.158G>A      | c.(157-159)GGT>GAT     | p.G53D        |
| Pat_41 | Post-Resistance | ENPEP    | 2028   | 37 | 4 | 111463931 | 111463931 | Missense_Mutation | SNP | C | T | 17 | 206 | c.1832C>T     | c.(1831-1833)CCT>CTT   | p.P611L       |
| Pat_41 | Post-Resistance | C4orf21  | 55345  | 37 | 4 | 113508775 | 113508775 | Nonsense_Mutation | SNP | C | T | 4  | 97  | c.3438G>A     | c.(3436-3438)TGG>TGA   | p.W1146*      |
| Pat_41 | Post-Resistance | C4orf21  | 55345  | 37 | 4 | 113539521 | 113539521 | Nonsense_Mutation | SNP | C | T | 15 | 295 | c.1677G>A     | c.(1675-1677)TGG>TGA   | p.W559*       |
| Pat_41 | Post-Resistance | LARP7    | 51574  | 37 | 4 | 113567786 | 113567786 | Missense_Mutation | SNP | G | A | 3  | 25  | c.346G>A      | c.(346-348)GGG>AGG     | p.G116R       |
| Pat_41 | Post-Resistance | LARP7    | 51574  | 37 | 4 | 113575292 | 113575292 | Missense_Mutation | SNP | G | A | 7  | 163 | c.1645G>A     | c.(1645-1647)GAA>AAA   | p.E549K       |

|        |                 |          |        |    |   |           |           |                   |     |   |   |    |     |            |                        |          |
|--------|-----------------|----------|--------|----|---|-----------|-----------|-------------------|-----|---|---|----|-----|------------|------------------------|----------|
| Pat_41 | Post-Resistance | ANK2     | 287    | 37 | 4 | 114274530 | 114274530 | Missense_Mutation | SNP | G | A | 8  | 101 | c.4756G>A  | c.(4756-4758)GGA>AGA   | p.G1586R |
| Pat_41 | Post-Resistance | ANK2     | 287    | 37 | 4 | 114278005 | 114278005 | Missense_Mutation | SNP | C | T | 8  | 96  | c.8231C>T  | c.(8230-8232)GCT>GTT   | p.A2744V |
| Pat_41 | Post-Resistance | ANK2     | 287    | 37 | 4 | 114278824 | 114278824 | Missense_Mutation | SNP | C | T | 26 | 268 | c.9050C>T  | c.(9049-9051)CCT>CTT   | p.P3017L |
| Pat_41 | Post-Resistance | CAMK2D   | 817    | 37 | 4 | 114378559 | 114378559 | Nonsense_Mutation | SNP | C | T | 17 | 417 | c.1365G>A  | c.(1363-1365)TGG>TGA   | p.W455*  |
| Pat_41 | Post-Resistance | PRSS12   | 8492   | 37 | 4 | 119259448 | 119259448 | Missense_Mutation | SNP | C | T | 13 | 154 | c.524G>A   | c.(523-525)GGC>GAC     | p.G175D  |
| Pat_41 | Post-Resistance | SEC24D   | 9871   | 37 | 4 | 119678893 | 119678893 | Missense_Mutation | SNP | C | T | 5  | 65  | c.1404G>A  | c.(1402-1404)ATG>ATA   | p.M468I  |
| Pat_41 | Post-Resistance | SEC24D   | 9871   | 37 | 4 | 119686070 | 119686070 | Missense_Mutation | SNP | G | A | 20 | 90  | c.1183C>T  | c.(1183-1185)CCA>TCA   | p.P395S  |
| Pat_41 | Post-Resistance | SEC24D   | 9871   | 37 | 4 | 119736851 | 119736851 | Missense_Mutation | SNP | G | A | 22 | 60  | c.428C>T   | c.(427-429)CCC>CTC     | p.P143L  |
| Pat_41 | Post-Resistance | MYO22    | 51778  | 37 | 4 | 120107252 | 120107252 | Missense_Mutation | SNP | C | T | 15 | 161 | c.692C>T   | c.(691-693)TCC>TTC     | p.S231F  |
| Pat_41 | Post-Resistance | PDE5A    | 8654   | 37 | 4 | 120474796 | 120474796 | Nonsense_Mutation | SNP | C | T | 8  | 114 | c.1305G>A  | c.(1303-1305)TGG>TGA   | p.W435*  |
| Pat_41 | Post-Resistance | QRFR     | 84109  | 37 | 4 | 122254103 | 122254103 | Missense_Mutation | SNP | G | A | 20 | 116 | c.670C>T   | c.(670-672)CTC>TTC     | p.L224F  |
| Pat_41 | Post-Resistance | TRPC3    | 7222   | 37 | 4 | 122833127 | 122833127 | Missense_Mutation | SNP | G | A | 24 | 305 | c.1463C>T  | c.(1462-1464)CCC>CTC   | p.P488L  |
| Pat_41 | Post-Resistance | KIAA1109 | 84162  | 37 | 4 | 123264711 | 123264711 | Missense_Mutation | SNP | G | A | 14 | 170 | c.12499G>A | c.(12499-12501)GCA>ACA | p.A4167T |
| Pat_41 | Post-Resistance | KIAA1109 | 84162  | 37 | 4 | 123277779 | 123277779 | Missense_Mutation | SNP | C | T | 24 | 314 | c.14504C>T | c.(14503-14505)GCC>GTC | p.A4835V |
| Pat_41 | Post-Resistance | ADAD1    | 132612 | 37 | 4 | 123333760 | 123333760 | Missense_Mutation | SNP | G | A | 10 | 222 | c.1045G>A  | c.(1045-1047)GCA>ACA   | p.A349T  |
| Pat_41 | Post-Resistance | SPATA5   | 166378 | 37 | 4 | 123977570 | 123977570 | Missense_Mutation | SNP | G | A | 7  | 67  | c.2108G>A  | c.(2107-2109)GGT>GAT   | p.G703D  |
| Pat_41 | Post-Resistance | ANKRD50  | 57182  | 37 | 4 | 125631177 | 125631177 | Missense_Mutation | SNP | T | G | 5  | 170 | c.490A>C   | c.(490-492)AAC>CAC     | p.N164H  |
| Pat_41 | Post-Resistance | FAT4     | 79633  | 37 | 4 | 126373138 | 126373138 | Missense_Mutation | SNP | C | T | 16 | 90  | c.10967C>T | c.(10966-10968)ACC>ATC | p.T3656I |
| Pat_41 | Post-Resistance | FAT4     | 79633  | 37 | 4 | 126373635 | 126373635 | Missense_Mutation | SNP | G | A | 4  | 59  | c.11464G>A | c.(11464-11466)GCT>ACT | p.A3822T |
| Pat_41 | Post-Resistance | FAT4     | 79633  | 37 | 4 | 126373893 | 126373893 | Missense_Mutation | SNP | C | T | 18 | 110 | c.11722C>T | c.(11722-11724)CCT>TCT | p.P3908S |
| Pat_41 | Post-Resistance | HSPA4L   | 22824  | 37 | 4 | 128719766 | 128719766 | Missense_Mutation | SNP | C | T | 20 | 185 | c.331C>T   | c.(331-333)CCT>TCT     | p.P111S  |
| Pat_41 | Post-Resistance | SCLT1    | 132320 | 37 | 4 | 129924948 | 129924948 | Missense_Mutation | SNP | G | A | 12 | 480 | c.374C>T   | c.(373-375)GCA>GTA     | p.A125V  |
| Pat_41 | Post-Resistance | C4orf49  | 84709  | 37 | 4 | 140188063 | 140188063 | Missense_Mutation | SNP | G | A | 29 | 334 | c.413C>T   | c.(412-414)GCC>GTC     | p.A138V  |
| Pat_41 | Post-Resistance | CLGN     | 1047   | 37 | 4 | 141317301 | 141317301 | Missense_Mutation | SNP | G | A | 23 | 789 | c.943C>T   | c.(943-945)CTT>TTT     | p.L315F  |
| Pat_41 | Post-Resistance | TBC1D9   | 23158  | 37 | 4 | 141590810 | 141590810 | Missense_Mutation | SNP | G | A | 16 | 203 | c.1415C>T  | c.(1414-1416)CCC>CTC   | p.P472L  |
| Pat_41 | Post-Resistance | TBC1D9   | 23158  | 37 | 4 | 141590867 | 141590867 | Missense_Mutation | SNP | C | T | 6  | 190 | c.1358G>A  | c.(1357-1359)GGC>GAC   | p.G453D  |
| Pat_41 | Post-Resistance | INPP4B   | 8821   | 37 | 4 | 143324156 | 143324156 | Missense_Mutation | SNP | G | A | 13 | 216 | c.307C>T   | c.(307-309)CCC>TCC     | p.P103S  |
| Pat_41 | Post-Resistance | USP38    | 84640  | 37 | 4 | 144133521 | 144133521 | Nonsense_Mutation | SNP | G | A | 29 | 246 | c.1548G>A  | c.(1546-1548)TGG>TGA   | p.W516*  |
| Pat_41 | Post-Resistance | USP38    | 84640  | 37 | 4 | 144135257 | 144135257 | Missense_Mutation | SNP | C | T | 10 | 80  | c.2128C>T  | c.(2128-2130)CCA>TCA   | p.P710S  |
| Pat_41 | Post-Resistance | HHIP     | 64399  | 37 | 4 | 145627791 | 145627791 | Missense_Mutation | SNP | C | T | 4  | 65  | c.940C>T   | c.(940-942)CCT>TCT     | p.P314S  |
| Pat_41 | Post-Resistance | HHIP     | 64399  | 37 | 4 | 145628315 | 145628315 | Missense_Mutation | SNP | G | A | 16 | 67  | c.1060G>A  | c.(1060-1062)GGA>AGA   | p.G354R  |
| Pat_41 | Post-Resistance | MMAA     | 166785 | 37 | 4 | 146560602 | 146560602 | Missense_Mutation | SNP | C | T | 5  | 88  | c.311C>T   | c.(310-312)GCC>GTC     | p.A104V  |
| Pat_41 | Post-Resistance | ZNF827   | 152485 | 37 | 4 | 146744579 | 146744579 | Missense_Mutation | SNP | G | A | 15 | 177 | c.2378C>T  | c.(2377-2379)GCT>GTT   | p.A793V  |
| Pat_41 | Post-Resistance | TTC29    | 83894  | 37 | 4 | 147824811 | 147824811 | Nonsense_Mutation | SNP | C | T | 5  | 22  | c.471G>A   | c.(469-471)TGG>TGA     | p.W157*  |
| Pat_41 | Post-Resistance | PRMT10   | 90826  | 37 | 4 | 148582127 | 148582127 | Missense_Mutation | SNP | G | A | 32 | 145 | c.1016C>T  | c.(1015-1017)GCT>GTT   | p.A339V  |
| Pat_41 | Post-Resistance | LRBA     | 987    | 37 | 4 | 151242487 | 151242487 | Missense_Mutation | SNP | C | T | 10 | 106 | c.7519G>A  | c.(7519-7521)GAT>AAT   | p.D2507N |
| Pat_41 | Post-Resistance | LRBA     | 987    | 37 | 4 | 151773974 | 151773974 | Missense_Mutation | SNP | C | T | 11 | 80  | c.2888G>A  | c.(2887-2889)AGG>AAG   | p.R963K  |
| Pat_41 | Post-Resistance | LRBA     | 987    | 37 | 4 | 151837635 | 151837635 | Missense_Mutation | SNP | C | T | 18 | 59  | c.812G>A   | c.(811-813)GGA>GAA     | p.G271E  |
| Pat_41 | Post-Resistance | SH3D19   | 152503 | 37 | 4 | 152069099 | 152069099 | Missense_Mutation | SNP | C | T | 4  | 70  | c.1217G>A  | c.(1216-1218)GGA>GAA   | p.G406E  |
| Pat_41 | Post-Resistance | PET112L  | 5188   | 37 | 4 | 152638156 | 152638156 | Missense_Mutation | SNP | G | A | 44 | 248 | c.512C>T   | c.(511-513)GCA>GTA     | p.A171V  |
| Pat_41 | Post-Resistance | PET112L  | 5188   | 37 | 4 | 152679997 | 152679997 | Missense_Mutation | SNP | G | A | 19 | 370 | c.254C>T   | c.(253-255)TCT>TTT     | p.S85F   |
| Pat_41 | Post-Resistance | FHDC1    | 85462  | 37 | 4 | 153874667 | 153874667 | Missense_Mutation | SNP | C | T | 19 | 178 | c.515C>T   | c.(514-516)GCA>GTA     | p.A172V  |
| Pat_41 | Post-Resistance | FHDC1    | 85462  | 37 | 4 | 153896179 | 153896179 | Missense_Mutation | SNP | C | T | 4  | 37  | c.1736C>T  | c.(1735-1737)GCC>GTC   | p.A579V  |
| Pat_41 | Post-Resistance | FHDC1    | 85462  | 37 | 4 | 153896457 | 153896457 | Missense_Mutation | SNP | G | A | 7  | 37  | c.2014G>A  | c.(2014-2016)GAG>AAG   | p.E672K  |
| Pat_41 | Post-Resistance | MND1     | 84057  | 37 | 4 | 154318389 | 154318389 | Missense_Mutation | SNP | G | A | 5  | 82  | c.370G>A   | c.(370-372)GCA>ACA     | p.A124T  |
| Pat_41 | Post-Resistance | KIAA0922 | 23240  | 37 | 4 | 154555385 | 154555385 | Missense_Mutation | SNP | G | A | 25 | 417 | c.4367G>A  | c.(4366-4368)AGC>AAC   | p.S1456N |
| Pat_41 | Post-Resistance | KIAA0922 | 23240  | 37 | 4 | 154557691 | 154557691 | Missense_Mutation | SNP | C | T | 26 | 206 | c.4793C>T  | c.(4792-4794)CCA>CTA   | p.P1598L |

|        |                 |          |        |    |   |           |           |                   |     |   |   |    |     |           |                      |          |
|--------|-----------------|----------|--------|----|---|-----------|-----------|-------------------|-----|---|---|----|-----|-----------|----------------------|----------|
| Pat_41 | Post-Resistance | DCHS2    | 54798  | 37 | 4 | 155254493 | 155254493 | Missense_Mutation | SNP | C | T | 26 | 185 | c.1370G>A | c.(1369-1371)AGC>AAC | p.S457N  |
| Pat_41 | Post-Resistance | DCHS2    | 54798  | 37 | 4 | 155305552 | 155305552 | Missense_Mutation | SNP | C | T | 12 | 64  | c.202G>A  | c.(202-204)GAA>AAA   | p.E68K   |
| Pat_41 | Post-Resistance | FGB      | 2244   | 37 | 4 | 155488861 | 155488861 | Missense_Mutation | SNP | G | A | 18 | 216 | c.607G>A  | c.(607-609)GAA>AAA   | p.E203K  |
| Pat_41 | Post-Resistance | FGA      | 2243   | 37 | 4 | 155507724 | 155507724 | Missense_Mutation | SNP | G | A | 8  | 72  | c.857C>T  | c.(856-858)CCC>CTC   | p.P286L  |
| Pat_41 | Post-Resistance | FGG      | 2266   | 37 | 4 | 155528006 | 155528006 | Missense_Mutation | SNP | T | A | 9  | 308 | c.980A>T  | c.(979-981)GAC>GTC   | p.D327V  |
| Pat_41 | Post-Resistance | CTSO     | 1519   | 37 | 4 | 156864349 | 156864349 | Missense_Mutation | SNP | C | T | 24 | 343 | c.203G>A  | c.(202-204)GGA>GAA   | p.G68E   |
| Pat_41 | Post-Resistance | GLRB     | 2743   | 37 | 4 | 158057829 | 158057829 | Missense_Mutation | SNP | G | A | 11 | 139 | c.506G>A  | c.(505-507)GGA>GAA   | p.G169E  |
| Pat_41 | Post-Resistance | GRIA2    | 2891   | 37 | 4 | 158281249 | 158281249 | Missense_Mutation | SNP | G | A | 13 | 149 | c.2245G>A | c.(2245-2247)GAT>AAT | p.D749N  |
| Pat_41 | Post-Resistance | RXFP1    | 59350  | 37 | 4 | 159569708 | 159569708 | Missense_Mutation | SNP | G | A | 15 | 68  | c.1814G>A | c.(1813-1815)AGT>AAT | p.S605N  |
| Pat_41 | Post-Resistance | ETFDH    | 2110   | 37 | 4 | 159606330 | 159606330 | Missense_Mutation | SNP | G | A | 28 | 269 | c.565G>A  | c.(565-567)GCC>ACC   | p.A189T  |
| Pat_41 | Post-Resistance | PPID     | 5481   | 37 | 4 | 159638217 | 159638217 | Missense_Mutation | SNP | C | T | 17 | 343 | c.469G>A  | c.(469-471)GGA>AGA   | p.G157R  |
| Pat_41 | Post-Resistance | C4orf45  | 152940 | 37 | 4 | 159836345 | 159836345 | Missense_Mutation | SNP | G | A | 6  | 34  | c.523C>T  | c.(523-525)CCG>TCG   | p.P175S  |
| Pat_41 | Post-Resistance | RAPGEF2  | 9693   | 37 | 4 | 160225608 | 160225608 | Missense_Mutation | SNP | C | T | 36 | 261 | c.175C>T  | c.(175-177)CTT>TTT   | p.L59F   |
| Pat_41 | Post-Resistance | GK3P     | 2713   | 37 | 4 | 166200742 | 166200742 | Missense_Mutation | SNP | C | T | 20 | 80  | c.56G>A   | c.(55-57)GGC>GAC     | p.G19D   |
| Pat_41 | Post-Resistance | KLHL2    | 11275  | 37 | 4 | 166235280 | 166235280 | Missense_Mutation | SNP | G | A | 34 | 310 | c.1571G>A | c.(1570-1572)AGA>AAA | p.R524K  |
| Pat_41 | Post-Resistance | ANXA10   | 11199  | 37 | 4 | 169049259 | 169049259 | Missense_Mutation | SNP | C | T | 5  | 161 | c.43C>T   | c.(43-45)CCC>TCC     | p.P15S   |
| Pat_41 | Post-Resistance | ANXA10   | 11199  | 37 | 4 | 169105717 | 169105717 | Missense_Mutation | SNP | G | A | 7  | 120 | c.791G>A  | c.(790-792)GGT>GAT   | p.G264D  |
| Pat_41 | Post-Resistance | PALLD    | 23022  | 37 | 4 | 169589448 | 169589448 | Missense_Mutation | SNP | C | T | 14 | 131 | c.1016C>T | c.(1015-1017)ACA>ATA | p.T339I  |
| Pat_41 | Post-Resistance | SH3RF1   | 57630  | 37 | 4 | 170042042 | 170042042 | Nonsense_Mutation | SNP | C | T | 17 | 123 | c.1445G>A | c.(1444-1446)TGG>TAG | p.W482*  |
| Pat_41 | Post-Resistance | GALNTL6  | 442117 | 37 | 4 | 173803945 | 173803945 | Missense_Mutation | SNP | C | T | 9  | 244 | c.928C>T  | c.(928-930)CCT>TCT   | p.P310S  |
| Pat_41 | Post-Resistance | HMGB2    | 3148   | 37 | 4 | 174254268 | 174254268 | Missense_Mutation | SNP | C | T | 12 | 138 | c.248G>A  | c.(247-249)GGT>GAT   | p.G83D   |
| Pat_41 | Post-Resistance | SAP30    | 8819   | 37 | 4 | 174294545 | 174294545 | Missense_Mutation | SNP | G | A | 5  | 41  | c.320G>A  | c.(319-321)AGG>AAG   | p.R107K  |
| Pat_41 | Post-Resistance | HAND2    | 9464   | 37 | 4 | 174448483 | 174448483 | Missense_Mutation | SNP | G | A | 31 | 154 | c.599C>T  | c.(598-600)ACC>ATC   | p.T200I  |
| Pat_41 | Post-Resistance | MORF4    | 10934  | 37 | 4 | 174537275 | 174537275 | Missense_Mutation | SNP | G | A | 7  | 295 | c.520C>T  | c.(520-522)CAT>TAT   | p.H174Y  |
| Pat_41 | Post-Resistance | KIAA1712 | 80817  | 37 | 4 | 175225510 | 175225510 | Missense_Mutation | SNP | C | T | 7  | 124 | c.497C>T  | c.(496-498)ACC>ATC   | p.T166I  |
| Pat_41 | Post-Resistance | GPM6A    | 2823   | 37 | 4 | 176622841 | 176622841 | Missense_Mutation | SNP | C | T | 15 | 535 | c.115G>A  | c.(115-117)GGT>AGT   | p.G39S   |
| Pat_41 | Post-Resistance | WDR17    | 116966 | 37 | 4 | 177098240 | 177098240 | Missense_Mutation | SNP | C | T | 12 | 260 | c.3598C>T | c.(3598-3600)CCT>TCT | p.P1200S |
| Pat_41 | Post-Resistance | ODZ3     | 55714  | 37 | 4 | 183696262 | 183696262 | Missense_Mutation | SNP | G | A | 8  | 118 | c.5260G>A | c.(5260-5262)GAG>AAG | p.E1754K |
| Pat_41 | Post-Resistance | IRF2     | 3660   | 37 | 4 | 185309964 | 185309964 | Missense_Mutation | SNP | C | T | 11 | 114 | c.998G>A  | c.(997-999)AGC>AAC   | p.S333N  |
| Pat_41 | Post-Resistance | IRF2     | 3660   | 37 | 4 | 185339698 | 185339698 | Missense_Mutation | SNP | G | A | 14 | 161 | c.352C>T  | c.(352-354)CCT>TCT   | p.P118S  |
| Pat_41 | Post-Resistance | HELT     | 391723 | 37 | 4 | 185941613 | 185941613 | Missense_Mutation | SNP | C | T | 5  | 32  | c.671C>T  | c.(670-672)TCG>TTG   | p.S224L  |
| Pat_41 | Post-Resistance | LRP2BP   | 55805  | 37 | 4 | 186291963 | 186291963 | Missense_Mutation | SNP | G | A | 28 | 119 | c.809C>T  | c.(808-810)GCT>GTT   | p.A270V  |
| Pat_41 | Post-Resistance | UFSP2    | 55325  | 37 | 4 | 186336886 | 186336886 | Missense_Mutation | SNP | C | T | 14 | 219 | c.469G>A  | c.(469-471)GCT>ACT   | p.A157T  |
| Pat_41 | Post-Resistance | SORBS2   | 8470   | 37 | 4 | 186545621 | 186545621 | Missense_Mutation | SNP | G | A | 15 | 150 | c.950C>T  | c.(949-951)TCC>TTC   | p.S317F  |
| Pat_41 | Post-Resistance | FAT1     | 2195   | 37 | 4 | 187540874 | 187540874 | Missense_Mutation | SNP | G | A | 14 | 140 | c.6866C>T | c.(6865-6867)GCG>GTG | p.A2289V |
| Pat_41 | Post-Resistance | FAT1     | 2195   | 37 | 4 | 187541709 | 187541709 | Missense_Mutation | SNP | G | A | 38 | 382 | c.6031C>T | c.(6031-6033)CCT>TCT | p.P2011S |
| Pat_41 | Post-Resistance | FAT1     | 2195   | 37 | 4 | 187584680 | 187584680 | Missense_Mutation | SNP | G | A | 18 | 145 | c.3353C>T | c.(3352-3354)CCT>CTT | p.P1118L |
| Pat_41 | Post-Resistance | SDHA     | 6389   | 37 | 5 | 230999    | 230999    | Missense_Mutation | SNP | G | A | 9  | 336 | c.779G>A  | c.(778-780)GGG>GAG   | p.G260E  |
| Pat_41 | Post-Resistance | AHRR     | 57491  | 37 | 5 | 424037    | 424037    | Missense_Mutation | SNP | C | T | 10 | 158 | c.665C>T  | c.(664-666)ACC>ATC   | p.T222I  |
| Pat_41 | Post-Resistance | AHRR     | 57491  | 37 | 5 | 434254    | 434254    | Missense_Mutation | SNP | C | T | 5  | 206 | c.1465C>T | c.(1465-1467)CCC>TCC | p.P489S  |
| Pat_41 | Post-Resistance | SLC9A3   | 6550   | 37 | 5 | 484708    | 484708    | Missense_Mutation | SNP | G | A | 10 | 104 | c.859C>T  | c.(859-861)CCC>TCC   | p.P287S  |
| Pat_41 | Post-Resistance | SLC9A3   | 6550   | 37 | 5 | 492022    | 492022    | Missense_Mutation | SNP | C | T | 4  | 50  | c.376G>A  | c.(376-378)GAC>AAC   | p.D126N  |
| Pat_41 | Post-Resistance | CEP72    | 55722  | 37 | 5 | 644435    | 644435    | Missense_Mutation | SNP | G | A | 10 | 236 | c.1561G>A | c.(1561-1563)GAT>AAT | p.D521N  |
| Pat_41 | Post-Resistance | TPPP     | 11076  | 37 | 5 | 665227    | 665227    | Missense_Mutation | SNP | C | T | 5  | 91  | c.650G>A  | c.(649-651)GGG>GAG   | p.G217E  |
| Pat_41 | Post-Resistance | TERT     | 7015   | 37 | 5 | 1278860   | 1278860   | Missense_Mutation | SNP | C | T | 22 | 299 | c.2182G>A | c.(2182-2184)GTC>ATC | p.V728I  |
| Pat_41 | Post-Resistance | IRX4     | 50805  | 37 | 5 | 1879867   | 1879867   | Missense_Mutation | SNP | C | T | 11 | 83  | c.487G>A  | c.(487-489)GAG>AAG   | p.E163K  |
| Pat_41 | Post-Resistance | IRX2     | 153572 | 37 | 5 | 2749547   | 2749547   | Missense_Mutation | SNP | C | T | 3  | 21  | c.604G>A  | c.(604-606)GAG>AAG   | p.E202K  |

|        |                 |          |        |    |   |          |          |                   |     |   |   |    |     |              |                      |               |
|--------|-----------------|----------|--------|----|---|----------|----------|-------------------|-----|---|---|----|-----|--------------|----------------------|---------------|
| Pat_41 | Post-Resistance | ADAMTS16 | 170690 | 37 | 5 | 5190184  | 5190184  | Missense_Mutation | SNP | C | T | 24 | 117 | c.1148C>T    | c.(1147-1149)GCC>GTC | p.A383V       |
| Pat_41 | Post-Resistance | NSUN2    | 54888  | 37 | 5 | 6607428  | 6607428  | Missense_Mutation | SNP | G | A | 25 | 164 | c.1393C>T    | c.(1393-1395)CCC>TCC | p.P465S       |
| Pat_41 | Post-Resistance | CMBL     | 134147 | 37 | 5 | 10288642 | 10288642 | Splice_Site       | SNP | C | T | 8  | 48  | c.216_splice | c.e3-1               | p.T72_splice  |
| Pat_41 | Post-Resistance | 6-Mar    | 10299  | 37 | 5 | 10394222 | 10394222 | Nonsense_Mutation | SNP | G | A | 9  | 96  | c.795G>A     | c.(793-795)TGG>TGA   | p.W265*       |
| Pat_41 | Post-Resistance | CTNND2   | 1501   | 37 | 5 | 10981913 | 10981913 | Missense_Mutation | SNP | G | A | 22 | 392 | c.3389C>T    | c.(3388-3390)GCG>GTG | p.A1130V      |
| Pat_41 | Post-Resistance | TRIO     | 7204   | 37 | 5 | 14291188 | 14291188 | Missense_Mutation | SNP | G | A | 25 | 141 | c.904G>A     | c.(904-906)GCG>ACG   | p.A302T       |
| Pat_41 | Post-Resistance | TRIO     | 7204   | 37 | 5 | 14480082 | 14480082 | Missense_Mutation | SNP | C | T | 7  | 189 | c.6298C>T    | c.(6298-6300)CCA>TCA | p.P2100S      |
| Pat_41 | Post-Resistance | TRIO     | 7204   | 37 | 5 | 14482853 | 14482853 | Missense_Mutation | SNP | C | T | 15 | 273 | c.6628C>T    | c.(6628-6630)CCG>TCG | p.P2210S      |
| Pat_41 | Post-Resistance | FAM105A  | 54491  | 37 | 5 | 14609067 | 14609067 | Missense_Mutation | SNP | C | T | 29 | 194 | c.838C>T     | c.(838-840)CCT>TCT   | p.P280S       |
| Pat_41 | Post-Resistance | ANKH     | 56172  | 37 | 5 | 14758707 | 14758707 | Missense_Mutation | SNP | G | A | 11 | 148 | c.314C>T     | c.(313-315)GCT>GTT   | p.A105V       |
| Pat_41 | Post-Resistance | ZNF622   | 90441  | 37 | 5 | 16465521 | 16465521 | Missense_Mutation | SNP | T | A | 5  | 169 | c.254A>T     | c.(253-255)CAC>CTC   | p.H85L        |
| Pat_41 | Post-Resistance | FAM134B  | 54463  | 37 | 5 | 16475203 | 16475203 | Missense_Mutation | SNP | C | T | 14 | 212 | c.1141G>A    | c.(1141-1143)GAC>AAC | p.D381N       |
| Pat_41 | Post-Resistance | CDH6     | 1004   | 37 | 5 | 31302272 | 31302272 | Missense_Mutation | SNP | G | A | 10 | 65  | c.866G>A     | c.(865-867)AGA>AAA   | p.R289K       |
| Pat_41 | Post-Resistance | ZFR      | 51663  | 37 | 5 | 32397416 | 32397416 | Missense_Mutation | SNP | C | T | 19 | 177 | c.1742G>A    | c.(1741-1743)CGG>CAG | p.R581Q       |
| Pat_41 | Post-Resistance | ADAMTS12 | 81792  | 37 | 5 | 33546283 | 33546283 | Missense_Mutation | SNP | C | T | 5  | 47  | c.4327G>A    | c.(4327-4329)GTT>ATT | p.V1443I      |
| Pat_41 | Post-Resistance | ADAMTS12 | 81792  | 37 | 5 | 33577237 | 33577237 | Missense_Mutation | SNP | C | T | 8  | 256 | c.2894G>A    | c.(2893-2895)CGG>CAG | p.R965Q       |
| Pat_41 | Post-Resistance | TTC23L   | 153657 | 37 | 5 | 34869071 | 34869071 | Missense_Mutation | SNP | C | T | 3  | 49  | c.902C>T     | c.(901-903)GCG>GTG   | p.A301V       |
| Pat_41 | Post-Resistance | AGXT2    | 64902  | 37 | 5 | 35039589 | 35039589 | Missense_Mutation | SNP | C | T | 18 | 63  | c.202G>A     | c.(202-204)GAA>AAA   | p.E68K        |
| Pat_41 | Post-Resistance | PRLR     | 5618   | 37 | 5 | 35066060 | 35066060 | Missense_Mutation | SNP | G | A | 15 | 91  | c.1000C>T    | c.(1000-1002)CCA>TCA | p.P334S       |
| Pat_41 | Post-Resistance | PRLR     | 5618   | 37 | 5 | 35066123 | 35066123 | Missense_Mutation | SNP | C | T | 9  | 104 | c.937G>A     | c.(937-939)GAG>AAG   | p.E313K       |
| Pat_41 | Post-Resistance | SPEF2    | 79925  | 37 | 5 | 35793295 | 35793295 | Missense_Mutation | SNP | C | T | 8  | 185 | c.4589C>T    | c.(4588-4590)TCC>TTC | p.S1530F      |
| Pat_41 | Post-Resistance | SLC1A3   | 6507   | 37 | 5 | 36671250 | 36671250 | Missense_Mutation | SNP | C | T | 5  | 131 | c.439C>T     | c.(439-441)CCT>TCT   | p.P147S       |
| Pat_41 | Post-Resistance | NIPBL    | 25836  | 37 | 5 | 36985800 | 36985800 | Missense_Mutation | SNP | G | A | 6  | 97  | c.2518G>A    | c.(2518-2520)GTT>ATT | p.V840I       |
| Pat_41 | Post-Resistance | NIPBL    | 25836  | 37 | 5 | 37045695 | 37045695 | Missense_Mutation | SNP | G | A | 73 | 343 | c.6494G>A    | c.(6493-6495)AGC>AAC | p.S2165N      |
| Pat_41 | Post-Resistance | C5orf42  | 65250  | 37 | 5 | 37187861 | 37187861 | Missense_Mutation | SNP | C | T | 7  | 82  | c.3895G>A    | c.(3895-3897)GCA>ACA | p.A1299T      |
| Pat_41 | Post-Resistance | WDR70    | 55100  | 37 | 5 | 37438051 | 37438051 | Missense_Mutation | SNP | C | T | 17 | 65  | c.520C>T     | c.(520-522)CAT>TAT   | p.H174Y       |
| Pat_41 | Post-Resistance | LIFR     | 3977   | 37 | 5 | 38484947 | 38484947 | Missense_Mutation | SNP | G | A | 5  | 129 | c.2521C>T    | c.(2521-2523)CTC>TTC | p.L841F       |
| Pat_41 | Post-Resistance | LIFR     | 3977   | 37 | 5 | 38510653 | 38510653 | Missense_Mutation | SNP | G | A | 13 | 117 | c.904C>T     | c.(904-906)CGT>TGT   | p.R302C       |
| Pat_41 | Post-Resistance | RICTOR   | 253260 | 37 | 5 | 38942952 | 38942952 | Missense_Mutation | SNP | C | T | 11 | 100 | c.5035G>A    | c.(5035-5037)GAT>AAT | p.D1679N      |
| Pat_41 | Post-Resistance | PTGER4   | 5734   | 37 | 5 | 40691880 | 40691880 | Splice_Site       | SNP | G | A | 6  | 146 | c.868_splice | c.e3-1               | p.V290_splice |
| Pat_41 | Post-Resistance | OXCT1    | 5019   | 37 | 5 | 41842795 | 41842795 | Missense_Mutation | SNP | G | A | 15 | 393 | c.653C>T     | c.(652-654)GCA>GTA   | p.A218V       |
| Pat_41 | Post-Resistance | ZNF131   | 7690   | 37 | 5 | 43175095 | 43175095 | Missense_Mutation | SNP | G | A | 15 | 148 | c.1732G>A    | c.(1732-1734)GAG>AAG | p.E578K       |
| Pat_41 | Post-Resistance | HMGCS1   | 3157   | 37 | 5 | 43294962 | 43294962 | Missense_Mutation | SNP | C | T | 8  | 100 | c.907G>A     | c.(907-909)GAT>AAT   | p.D303N       |
| Pat_41 | Post-Resistance | PARP8    | 79668  | 37 | 5 | 50059055 | 50059055 | Missense_Mutation | SNP | G | A | 6  | 103 | c.497G>A     | c.(496-498)GGG>GAG   | p.G166E       |
| Pat_41 | Post-Resistance | PELO     | 53918  | 37 | 5 | 52096686 | 52096686 | Missense_Mutation | SNP | C | T | 8  | 97  | c.458C>T     | c.(457-459)ACT>ATT   | p.T153I       |
| Pat_41 | Post-Resistance | ITGA2    | 3673   | 37 | 5 | 52340912 | 52340912 | Missense_Mutation | SNP | G | A | 7  | 171 | c.377G>A     | c.(376-378)GGA>GAA   | p.G126E       |
| Pat_41 | Post-Resistance | ITGA2    | 3673   | 37 | 5 | 52358731 | 52358731 | Missense_Mutation | SNP | G | A | 4  | 86  | c.1574G>A    | c.(1573-1575)GGA>GAA | p.G525E       |
| Pat_41 | Post-Resistance | ITGA2    | 3673   | 37 | 5 | 52367835 | 52367835 | Missense_Mutation | SNP | G | A | 4  | 101 | c.2303G>A    | c.(2302-2304)AGC>AAC | p.S768N       |
| Pat_41 | Post-Resistance | HSPB3    | 8988   | 37 | 5 | 53751731 | 53751731 | Missense_Mutation | SNP | C | T | 4  | 92  | c.112C>T     | c.(112-114)CCT>TCT   | p.P38S        |
| Pat_41 | Post-Resistance | SNX18    | 112574 | 37 | 5 | 53839089 | 53839089 | Missense_Mutation | SNP | G | A | 18 | 287 | c.1702G>A    | c.(1702-1704)GAT>AAT | p.D568N       |
| Pat_41 | Post-Resistance | DHX29    | 54505  | 37 | 5 | 54562988 | 54562988 | Missense_Mutation | SNP | C | T | 17 | 187 | c.3503G>A    | c.(3502-3504)AGA>AAA | p.R1168K      |
| Pat_41 | Post-Resistance | DHX29    | 54505  | 37 | 5 | 54563554 | 54563554 | Missense_Mutation | SNP | C | T | 45 | 359 | c.3391G>A    | c.(3391-3393)GCG>ACG | p.A1131T      |
| Pat_41 | Post-Resistance | DHX29    | 54505  | 37 | 5 | 54570732 | 54570732 | Missense_Mutation | SNP | A | C | 24 | 290 | c.2534T>G    | c.(2533-2535)ATC>AGC | p.I845S       |
| Pat_41 | Post-Resistance | DHX29    | 54505  | 37 | 5 | 54593151 | 54593151 | Missense_Mutation | SNP | C | T | 8  | 196 | c.337G>A     | c.(337-339)GGA>AGA   | p.G113R       |
| Pat_41 | Post-Resistance | SLC38A9  | 153129 | 37 | 5 | 54948533 | 54948533 | Missense_Mutation | SNP | C | T | 14 | 78  | c.776G>A     | c.(775-777)GGG>GAG   | p.G259E       |
| Pat_41 | Post-Resistance | IL6ST    | 3572   | 37 | 5 | 55237200 | 55237200 | Missense_Mutation | SNP | C | T | 46 | 314 | c.2467G>A    | c.(2467-2469)GAA>AAA | p.E823K       |
| Pat_41 | Post-Resistance | MAP3K1   | 4214   | 37 | 5 | 56184123 | 56184123 | Missense_Mutation | SNP | C | T | 12 | 145 | c.4328C>T    | c.(4327-4329)GCT>GTT | p.A1443V      |



|        |                 |          |        |    |   |          |          |                   |     |   |   |     |     |               |                        |                |
|--------|-----------------|----------|--------|----|---|----------|----------|-------------------|-----|---|---|-----|-----|---------------|------------------------|----------------|
| Pat_41 | Post-Resistance | C5orf43  | 643155 | 37 | 5 | 60455907 | 60455907 | Missense_Mutation | SNP | G | A | 14  | 176 | c.92C>T       | c.(91-93)ACT>ATT       | p.T31I         |
| Pat_41 | Post-Resistance | PPWD1    | 23398  | 37 | 5 | 64867940 | 64867940 | Missense_Mutation | SNP | G | A | 9   | 154 | c.796G>A      | c.(796-798)GAA>AAA     | p.E266K        |
| Pat_41 | Post-Resistance | C5orf44  | 80006  | 37 | 5 | 64933539 | 64933539 | Missense_Mutation | SNP | G | A | 3   | 58  | c.232G>A      | c.(232-234)GAG>AAG     | p.E78K         |
| Pat_41 | Post-Resistance | SGTB     | 54557  | 37 | 5 | 65016567 | 65016567 | Missense_Mutation | SNP | G | A | 9   | 289 | c.68C>T       | c.(67-69)ACT>ATT       | p.T23I         |
| Pat_41 | Post-Resistance | ERBB2IP  | 55914  | 37 | 5 | 65346625 | 65346625 | Missense_Mutation | SNP | A | T | 10  | 199 | c.1918A>T     | c.(1918-1920)ACA>TCA   | p.T640S        |
| Pat_41 | Post-Resistance | SFRS12   | 140890 | 37 | 5 | 65458045 | 65458045 | Missense_Mutation | SNP | C | T | 6   | 171 | c.172C>T      | c.(172-174)CCT>TCT     | p.P58S         |
| Pat_41 | Post-Resistance | SFRS12   | 140890 | 37 | 5 | 65458097 | 65458097 | Missense_Mutation | SNP | C | T | 3   | 41  | c.224C>T      | c.(223-225)TCC>TTC     | p.S75F         |
| Pat_41 | Post-Resistance | CDK7     | 1022   | 37 | 5 | 68568800 | 68568800 | Missense_Mutation | SNP | G | A | 12  | 171 | c.796G>A      | c.(796-798)GAC>AAC     | p.D266N        |
| Pat_41 | Post-Resistance | RAD17    | 5884   | 37 | 5 | 68682092 | 68682092 | Missense_Mutation | SNP | C | T | 14  | 171 | c.817C>T      | c.(817-819)CCC>TCC     | p.P273S        |
| Pat_41 | Post-Resistance | RAD17    | 5884   | 37 | 5 | 68689015 | 68689015 | Missense_Mutation | SNP | T | C | 13  | 214 | c.1256T>C     | c.(1255-1257)TTG>TCG   | p.L419S        |
| Pat_41 | Post-Resistance | MARVELD2 | 153562 | 37 | 5 | 68715289 | 68715289 | Missense_Mutation | SNP | C | T | 17  | 63  | c.77C>T       | c.(76-78)ACC>ATC       | p.T26I         |
| Pat_41 | Post-Resistance | GTF2H2C  | 728340 | 37 | 5 | 68875685 | 68875685 | Missense_Mutation | SNP | C | T | 7   | 378 | c.751C>T      | c.(751-753)CGT>TGT     | p.R251C        |
| Pat_41 | Post-Resistance | BDP1     | 55814  | 37 | 5 | 70819765 | 70819765 | Splice_Site       | SNP | G | A | 22  | 268 | c.5388_splice | c.e25-1                | p.S1796_splice |
| Pat_41 | Post-Resistance | MAP1B    | 4131   | 37 | 5 | 71495073 | 71495073 | Missense_Mutation | SNP | C | T | 5   | 71  | c.5891C>T     | c.(5890-5892)ACC>ATC   | p.T1964I       |
| Pat_41 | Post-Resistance | TNPO1    | 3842   | 37 | 5 | 72189277 | 72189277 | Missense_Mutation | SNP | G | A | 11  | 91  | c.1970G>A     | c.(1969-1971)AGT>AAT   | p.S657N        |
| Pat_41 | Post-Resistance | BTF3     | 689    | 37 | 5 | 72801044 | 72801044 | Missense_Mutation | SNP | C | T | 14  | 159 | c.602C>T      | c.(601-603)TCC>TTC     | p.S201F        |
| Pat_41 | Post-Resistance | RGNEF    | 64283  | 37 | 5 | 73136341 | 73136341 | Missense_Mutation | SNP | G | A | 17  | 134 | c.1183G>A     | c.(1183-1185)GGA>AGA   | p.G395R        |
| Pat_41 | Post-Resistance | HMGR     | 3156   | 37 | 5 | 74639678 | 74639678 | Missense_Mutation | SNP | G | A | 10  | 143 | c.166G>A      | c.(166-168)GAT>AAT     | p.D56N         |
| Pat_41 | Post-Resistance | COL4A3BP | 10087  | 37 | 5 | 74677889 | 74677889 | Missense_Mutation | SNP | G | A | 4   | 88  | c.1502C>T     | c.(1501-1503)GCT>GTT   | p.A501V        |
| Pat_41 | Post-Resistance | COL4A3BP | 10087  | 37 | 5 | 74721224 | 74721224 | Missense_Mutation | SNP | G | A | 34  | 208 | c.557C>T      | c.(556-558)GCT>GTT     | p.A186V        |
| Pat_41 | Post-Resistance | POLK     | 51426  | 37 | 5 | 74842834 | 74842834 | Splice_Site       | SNP | G | A | 14  | 222 | c.-12_splice  | c.e2-1                 |                |
| Pat_41 | Post-Resistance | POLK     | 51426  | 37 | 5 | 74879196 | 74879196 | Missense_Mutation | SNP | A | G | 21  | 204 | c.1013A>G     | c.(1012-1014)AAT>AGT   | p.N338S        |
| Pat_41 | Post-Resistance | IQGAP2   | 10788  | 37 | 5 | 75906892 | 75906892 | Missense_Mutation | SNP | C | T | 10  | 99  | c.1405C>T     | c.(1405-1407)CCT>TCT   | p.P469S        |
| Pat_41 | Post-Resistance | IQGAP2   | 10788  | 37 | 5 | 75970386 | 75970386 | Missense_Mutation | SNP | G | A | 7   | 80  | c.3379G>A     | c.(3379-3381)GGA>AGA   | p.G1127R       |
| Pat_41 | Post-Resistance | F2RL1    | 2150   | 37 | 5 | 76129178 | 76129178 | Missense_Mutation | SNP | G | A | 4   | 84  | c.746G>A      | c.(745-747)GGG>GAG     | p.G249E        |
| Pat_41 | Post-Resistance | AGGF1    | 55109  | 37 | 5 | 76355529 | 76355529 | Missense_Mutation | SNP | G | A | 4   | 137 | c.1805G>A     | c.(1804-1806)GGA>GAA   | p.G602E        |
| Pat_41 | Post-Resistance | AP3B1    | 8546   | 37 | 5 | 77423912 | 77423912 | Missense_Mutation | SNP | G | A | 7   | 183 | c.1910C>T     | c.(1909-1911)TCT>TTT   | p.S637F        |
| Pat_41 | Post-Resistance | BHMT     | 635    | 37 | 5 | 78416243 | 78416243 | Missense_Mutation | SNP | C | T | 20  | 82  | c.356C>T      | c.(355-357)GCA>GTA     | p.A119V        |
| Pat_41 | Post-Resistance | CMYA5    | 202333 | 37 | 5 | 79031151 | 79031151 | Missense_Mutation | SNP | G | A | 7   | 61  | c.6563G>A     | c.(6562-6564)GGA>GAA   | p.G2188E       |
| Pat_41 | Post-Resistance | CMYA5    | 202333 | 37 | 5 | 79032029 | 79032029 | Missense_Mutation | SNP | G | A | 9   | 59  | c.7441G>A     | c.(7441-7443)GCC>ACC   | p.A2481T       |
| Pat_41 | Post-Resistance | MTX3     | 345778 | 37 | 5 | 79279605 | 79279605 | Missense_Mutation | SNP | G | A | 12  | 174 | c.841C>T      | c.(841-843)CTT>TTT     | p.L281F        |
| Pat_41 | Post-Resistance | SERINC5  | 256987 | 37 | 5 | 79473176 | 79473176 | Missense_Mutation | SNP | C | T | 14  | 150 | c.418G>A      | c.(418-420)GGA>AGA     | p.G140R        |
| Pat_41 | Post-Resistance | ZFYVE16  | 9765   | 37 | 5 | 79733583 | 79733583 | Missense_Mutation | SNP | C | T | 14  | 206 | c.1079C>T     | c.(1078-1080)TCC>TTC   | p.S360F        |
| Pat_41 | Post-Resistance | ANKRD34B | 340120 | 37 | 5 | 79854305 | 79854305 | Missense_Mutation | SNP | C | T | 7   | 47  | c.1534G>A     | c.(1534-1536)GTA>ATA   | p.V512I        |
| Pat_41 | Post-Resistance | RASGRF2  | 5924   | 37 | 5 | 80381703 | 80381703 | Missense_Mutation | SNP | C | T | 10  | 124 | c.1244C>T     | c.(1243-1245)GCC>GTC   | p.A415V        |
| Pat_41 | Post-Resistance | ACOT12   | 134526 | 37 | 5 | 80643708 | 80643708 | Missense_Mutation | SNP | C | T | 38  | 548 | c.538G>A      | c.(538-540)GGC>AGC     | p.G180S        |
| Pat_41 | Post-Resistance | SSBP2    | 23635  | 37 | 5 | 80738527 | 80738527 | Missense_Mutation | SNP | C | T | 19  | 124 | c.794G>A      | c.(793-795)GGT>GAT     | p.G265D        |
| Pat_41 | Post-Resistance | ATP6AP1L | 92270  | 37 | 5 | 81608459 | 81608459 | Missense_Mutation | SNP | C | T | 31  | 417 | c.161C>T      | c.(160-162)TCC>TTC     | p.S54F         |
| Pat_41 | Post-Resistance | VCAN     | 1462   | 37 | 5 | 82816521 | 82816521 | Missense_Mutation | SNP | C | T | 21  | 157 | c.2396C>T     | c.(2395-2397)ACT>ATT   | p.T799I        |
| Pat_41 | Post-Resistance | VCAN     | 1462   | 37 | 5 | 82834788 | 82834788 | Missense_Mutation | SNP | C | T | 7   | 109 | c.5966C>T     | c.(5965-5967)CCC>CTC   | p.P1989L       |
| Pat_41 | Post-Resistance | LYSMD3   | 116068 | 37 | 5 | 89814746 | 89814746 | Missense_Mutation | SNP | C | T | 24  | 208 | c.811G>A      | c.(811-813)GAA>AAA     | p.E271K        |
| Pat_41 | Post-Resistance | GPR98    | 84059  | 37 | 5 | 89938716 | 89938716 | Missense_Mutation | SNP | C | T | 39  | 205 | c.2411C>T     | c.(2410-2412)TCC>TTC   | p.S804F        |
| Pat_41 | Post-Resistance | GPR98    | 84059  | 37 | 5 | 90001249 | 90001249 | Missense_Mutation | SNP | G | A | 54  | 419 | c.8419G>A     | c.(8419-8421)GCT>ACT   | p.A2807T       |
| Pat_41 | Post-Resistance | GPR98    | 84059  | 37 | 5 | 90059198 | 90059198 | Missense_Mutation | SNP | G | A | 5   | 52  | c.12197G>A    | c.(12196-12198)GGA>GAA | p.G4066E       |
| Pat_41 | Post-Resistance | GPR98    | 84059  | 37 | 5 | 90074707 | 90074707 | Missense_Mutation | SNP | G | C | 155 | 316 | c.12875G>C    | c.(12874-12876)AGT>ACT | p.S4292T       |
| Pat_41 | Post-Resistance | GPR98    | 84059  | 37 | 5 | 90079082 | 90079082 | Missense_Mutation | SNP | C | T | 7   | 78  | c.13373C>T    | c.(13372-13374)ACC>ATC | p.T4458I       |
| Pat_41 | Post-Resistance | GPR98    | 84059  | 37 | 5 | 90106705 | 90106705 | Missense_Mutation | SNP | G | A | 45  | 86  | c.15628G>A    | c.(15628-15630)GTA>ATA | p.V5210I       |

|        |                 |              |           |    |   |           |           |                   |     |   |   |    |     |              |                        |               |
|--------|-----------------|--------------|-----------|----|---|-----------|-----------|-------------------|-----|---|---|----|-----|--------------|------------------------|---------------|
| Pat_41 | Post-Resistance | GPR98        | 84059     | 37 | 5 | 90398082  | 90398082  | Nonsense_Mutation | SNP | G | A | 6  | 65  | c.18357G>A   | c.(18355-18357)TGG>TGA | p.W6119*      |
| Pat_41 | Post-Resistance | C5orf36      | 285600    | 37 | 5 | 93856004  | 93856004  | Missense_Mutation | SNP | C | T | 18 | 209 | c.919G>A     | c.(919-921)GTT>ATT     | p.V307I       |
| Pat_41 | Post-Resistance | ELL2         | 22936     | 37 | 5 | 95226932  | 95226932  | Missense_Mutation | SNP | C | T | 16 | 140 | c.1636G>A    | c.(1636-1638)GAT>AAT   | p.D546N       |
| Pat_41 | Post-Resistance | ELL2         | 22936     | 37 | 5 | 95234357  | 95234357  | Missense_Mutation | SNP | G | A | 7  | 183 | c.1112C>T    | c.(1111-1113)GCC>GTC   | p.A371V       |
| Pat_41 | Post-Resistance | ERAP1        | 51752     | 37 | 5 | 96139274  | 96139274  | Missense_Mutation | SNP | G | A | 14 | 85  | c.356C>T     | c.(355-357)CCC>CTC     | p.P119L       |
| Pat_41 | Post-Resistance | LNPEP        | 4012      | 37 | 5 | 96315082  | 96315082  | Missense_Mutation | SNP | G | A | 6  | 93  | c.260G>A     | c.(259-261)GGC>GAC     | p.G87D        |
| Pat_41 | Post-Resistance | CHD1         | 1105      | 37 | 5 | 98205478  | 98205478  | Missense_Mutation | SNP | A | G | 7  | 55  | c.4087T>C    | c.(4087-4089)TCT>CCT   | p.S1363P      |
| Pat_41 | Post-Resistance | CHD1         | 1105      | 37 | 5 | 98234106  | 98234106  | Missense_Mutation | SNP | G | A | 4  | 92  | c.1219C>T    | c.(1219-1221)CCT>TCT   | p.P407S       |
| Pat_41 | Post-Resistance | PPIP5K2      | 23262     | 37 | 5 | 102508940 | 102508940 | Missense_Mutation | SNP | C | T | 25 | 140 | c.2368C>T    | c.(2368-2370)CTT>TTT   | p.L790F       |
| Pat_41 | Post-Resistance | NUDT12       | 83594     | 37 | 5 | 102894955 | 102894955 | Missense_Mutation | SNP | C | T | 7  | 92  | c.421G>A     | c.(421-423)GCT>ACT     | p.A141T       |
| Pat_41 | Post-Resistance | FBXL17       | 64839     | 37 | 5 | 107700632 | 107700632 | Missense_Mutation | SNP | G | A | 18 | 223 | c.1181C>T    | c.(1180-1182)TCT>TTT   | p.S394F       |
| Pat_41 | Post-Resistance | FER          | 2241      | 37 | 5 | 108168579 | 108168579 | Missense_Mutation | SNP | G | A | 24 | 346 | c.316G>A     | c.(316-318)GAC>AAC     | p.D106N       |
| Pat_41 | Post-Resistance | PJA2         | 9867      | 37 | 5 | 108698712 | 108698712 | Missense_Mutation | SNP | G | A | 6  | 267 | c.1481C>T    | c.(1480-1482)TCC>TTC   | p.S494F       |
| Pat_41 | Post-Resistance | PJA2         | 9867      | 37 | 5 | 108714877 | 108714877 | Missense_Mutation | SNP | G | A | 6  | 221 | c.311C>T     | c.(310-312)ACT>ATT     | p.T104I       |
| Pat_41 | Post-Resistance | CAMK4        | 814       | 37 | 5 | 110560343 | 110560343 | Splice_Site       | SNP | G | A | 8  | 18  | c.161_splice | c.e2+1                 | p.R54_splice  |
| Pat_41 | Post-Resistance | APC          | 324       | 37 | 5 | 112173495 | 112173495 | Missense_Mutation | SNP | C | T | 3  | 56  | c.2204C>T    | c.(2203-2205)GCG>GTG   | p.A735V       |
| Pat_41 | Post-Resistance | YTHDC2       | 64848     | 37 | 5 | 112849752 | 112849752 | Missense_Mutation | SNP | G | A | 8  | 47  | c.160G>A     | c.(160-162)GAG>AAG     | p.E54K        |
| Pat_41 | Post-Resistance | KCNN2        | 3781      | 37 | 5 | 113831790 | 113831790 | Missense_Mutation | SNP | G | A | 22 | 240 | c.1651G>A    | c.(1651-1653)GTC>ATC   | p.V551I       |
| Pat_41 | Post-Resistance | PGGT1B       | 5229      | 37 | 5 | 114572085 | 114572085 | Splice_Site       | SNP | A | G | 12 | 253 | c.612_splice | c.e5+1                 | p.M204_splice |
| Pat_41 | Post-Resistance | PGGT1B       | 5229      | 37 | 5 | 114572154 | 114572154 | Missense_Mutation | SNP | C | T | 19 | 190 | c.545G>A     | c.(544-546)TGC>TAC     | p.C182Y       |
| Pat_41 | Post-Resistance | TMED7-TICAM2 | 100302736 | 37 | 5 | 114916389 | 114916389 | Missense_Mutation | SNP | G | A | 20 | 119 | c.565C>T     | c.(565-567)CTC>TTC     | p.L189F       |
| Pat_41 | Post-Resistance | CDO1         | 1036      | 37 | 5 | 115151991 | 115151991 | Missense_Mutation | SNP | G | A | 16 | 184 | c.104C>T     | c.(103-105)GCC>GTC     | p.A35V        |
| Pat_41 | Post-Resistance | SEMA6A       | 57556     | 37 | 5 | 115783136 | 115783136 | Missense_Mutation | SNP | G | A | 23 | 263 | c.2266C>T    | c.(2266-2268)CCC>TCC   | p.P756S       |
| Pat_41 | Post-Resistance | DTWD2        | 285605    | 37 | 5 | 118274985 | 118274985 | Missense_Mutation | SNP | C | T | 8  | 75  | c.310G>A     | c.(310-312)GAA>AAA     | p.E104K       |
| Pat_41 | Post-Resistance | DMXL1        | 1657      | 37 | 5 | 118484967 | 118484967 | Missense_Mutation | SNP | G | A | 5  | 87  | c.3445G>A    | c.(3445-3447)GAC>AAC   | p.D1149N      |
| Pat_41 | Post-Resistance | DMXL1        | 1657      | 37 | 5 | 118485163 | 118485163 | Missense_Mutation | SNP | C | T | 39 | 199 | c.3641C>T    | c.(3640-3642)CCT>CTT   | p.P1214L      |
| Pat_41 | Post-Resistance | DMXL1        | 1657      | 37 | 5 | 118582832 | 118582832 | Missense_Mutation | SNP | G | A | 17 | 166 | c.9002G>A    | c.(9001-9003)GGA>GAA   | p.G3001E      |
| Pat_41 | Post-Resistance | HSD17B4      | 3295      | 37 | 5 | 118860969 | 118860969 | Missense_Mutation | SNP | C | T | 5  | 191 | c.1562C>T    | c.(1561-1563)GCT>GTT   | p.A521V       |
| Pat_41 | Post-Resistance | PRR16        | 51334     | 37 | 5 | 120022208 | 120022208 | Missense_Mutation | SNP | C | T | 4  | 74  | c.719C>T     | c.(718-720)CCA>CTA     | p.P240L       |
| Pat_41 | Post-Resistance | SNX2         | 6643      | 37 | 5 | 122131019 | 122131019 | Missense_Mutation | SNP | C | T | 16 | 221 | c.167C>T     | c.(166-168)TCC>TTC     | p.S56F        |
| Pat_41 | Post-Resistance | CEP120       | 153241    | 37 | 5 | 122682380 | 122682380 | Missense_Mutation | SNP | G | A | 21 | 276 | c.2794C>T    | c.(2794-2796)CCC>TCC   | p.P932S       |
| Pat_41 | Post-Resistance | CEP120       | 153241    | 37 | 5 | 122725741 | 122725741 | Missense_Mutation | SNP | G | A | 8  | 144 | c.1132C>T    | c.(1132-1134)CCA>TCA   | p.P378S       |
| Pat_41 | Post-Resistance | LMNB1        | 4001      | 37 | 5 | 126145924 | 126145924 | Missense_Mutation | SNP | C | T | 15 | 206 | c.695C>T     | c.(694-696)TCT>TTT     | p.S232F       |
| Pat_41 | Post-Resistance | 3-Mar        | 115123    | 37 | 5 | 126253836 | 126253836 | Missense_Mutation | SNP | G | A | 9  | 86  | c.28C>T      | c.(28-30)CCC>TCC       | p.P10S        |
| Pat_41 | Post-Resistance | PRRC1        | 133619    | 37 | 5 | 126859233 | 126859233 | Missense_Mutation | SNP | G | A | 6  | 140 | c.62G>A      | c.(61-63)GGG>GAG       | p.G21E        |
| Pat_41 | Post-Resistance | SLC12A2      | 6558      | 37 | 5 | 127520164 | 127520164 | Missense_Mutation | SNP | G | A | 12 | 72  | c.3406G>A    | c.(3406-3408)GAT>AAT   | p.D1136N      |
| Pat_41 | Post-Resistance | FBN2         | 2201      | 37 | 5 | 127710438 | 127710438 | Missense_Mutation | SNP | C | G | 20 | 41  | c.1978G>C    | c.(1978-1980)GAT>CAT   | p.D660H       |
| Pat_41 | Post-Resistance | ADAMTS19     | 171019    | 37 | 5 | 129015481 | 129015481 | Missense_Mutation | SNP | C | T | 5  | 208 | c.2513C>T    | c.(2512-2514)TCT>TTT   | p.S838F       |
| Pat_41 | Post-Resistance | ADAMTS19     | 171019    | 37 | 5 | 129070718 | 129070718 | Missense_Mutation | SNP | G | A | 22 | 222 | c.3388G>A    | c.(3388-3390)GAA>AAA   | p.E1130K      |
| Pat_41 | Post-Resistance | CHSY3        | 337876    | 37 | 5 | 129519976 | 129519976 | Missense_Mutation | SNP | G | A | 23 | 195 | c.1141G>A    | c.(1141-1143)GAC>AAC   | p.D381N       |
| Pat_41 | Post-Resistance | CHSY3        | 337876    | 37 | 5 | 129520694 | 129520694 | Missense_Mutation | SNP | A | G | 6  | 64  | c.1859A>G    | c.(1858-1860)AAA>AGA   | p.K620R       |
| Pat_41 | Post-Resistance | CHSY3        | 337876    | 37 | 5 | 129520885 | 129520885 | Missense_Mutation | SNP | G | A | 4  | 46  | c.2050G>A    | c.(2050-2052)GCA>ACA   | p.A684T       |
| Pat_41 | Post-Resistance | RAPGEF6      | 51735     | 37 | 5 | 130769267 | 130769267 | Missense_Mutation | SNP | C | T | 30 | 161 | c.3830G>A    | c.(3829-3831)AGC>AAC   | p.S1277N      |
| Pat_41 | Post-Resistance | FNIP1        | 96459     | 37 | 5 | 131046307 | 131046307 | Missense_Mutation | SNP | G | A | 7  | 71  | c.670C>T     | c.(670-672)CCG>TCG     | p.P224S       |
| Pat_41 | Post-Resistance | IL3          | 3562      | 37 | 5 | 131398222 | 131398222 | Missense_Mutation | SNP | C | A | 35 | 444 | c.298C>A     | c.(298-300)CTC>ATC     | p.L100I       |
| Pat_41 | Post-Resistance | SLC22A5      | 6584      | 37 | 5 | 131722845 | 131722845 | Splice_Site       | SNP | T | C | 38 | 629 | c.951_splice | c.e5+2                 | p.E317_splice |
| Pat_41 | Post-Resistance | SLC22A5      | 6584      | 37 | 5 | 131724664 | 131724664 | Missense_Mutation | SNP | C | T | 10 | 202 | c.1003C>T    | c.(1003-1005)CTT>TTT   | p.L335F       |

|        |                 |                 |        |    |   |           |           |                   |     |   |   |    |     |              |                      |               |
|--------|-----------------|-----------------|--------|----|---|-----------|-----------|-------------------|-----|---|---|----|-----|--------------|----------------------|---------------|
| Pat_41 | Post-Resistance | C5orf56         | 441108 | 37 | 5 | 131796323 | 131796323 | Missense_Mutation | SNP | C | T | 27 | 261 | c.158C>T     | c.(157-159)TCC>TTC   | p.S53F        |
| Pat_41 | Post-Resistance | IRF1            | 3659   | 37 | 5 | 131821384 | 131821384 | Missense_Mutation | SNP | C | T | 16 | 172 | c.692G>A     | c.(691-693)GGG>GAG   | p.G231E       |
| Pat_41 | Post-Resistance | IL4             | 3565   | 37 | 5 | 132009806 | 132009806 | Missense_Mutation | SNP | G | A | 13 | 428 | c.64G>A      | c.(64-66)GTC>ATC     | p.V22I        |
| Pat_41 | Post-Resistance | 8-Sep           | 23176  | 37 | 5 | 132099397 | 132099397 | Splice_Site       | SNP | C | T | 40 | 301 | c.534_splice | c.e4+1               | p.K178_splice |
| Pat_41 | Post-Resistance | AFF4            | 27125  | 37 | 5 | 132232233 | 132232233 | Missense_Mutation | SNP | C | T | 16 | 80  | c.2089G>A    | c.(2089-2091)GAA>AAA | p.E697K       |
| Pat_41 | Post-Resistance | FSTL4           | 23105  | 37 | 5 | 132560976 | 132560976 | Missense_Mutation | SNP | G | A | 18 | 279 | c.1178C>T    | c.(1177-1179)GCC>GTC | p.A393V       |
| Pat_41 | Post-Resistance | FSTL4           | 23105  | 37 | 5 | 132652206 | 132652206 | Missense_Mutation | SNP | A | C | 23 | 48  | c.548T>G     | c.(547-549)TTC>TGC   | p.F183C       |
| Pat_41 | Post-Resistance | CDKL3           | 51265  | 37 | 5 | 133634380 | 133634380 | Missense_Mutation | SNP | C | T | 16 | 156 | c.1741G>A    | c.(1741-1743)GGG>AGG | p.G581R       |
| Pat_41 | Post-Resistance | PHF15           | 23338  | 37 | 5 | 133895530 | 133895530 | Missense_Mutation | SNP | C | T | 11 | 73  | c.322C>T     | c.(322-324)CCA>TCA   | p.P108S       |
| Pat_41 | Post-Resistance | SEC24A          | 10802  | 37 | 5 | 134059317 | 134059317 | Missense_Mutation | SNP | C | T | 36 | 223 | c.3124C>T    | c.(3124-3126)CTT>TTT | p.L1042F      |
| Pat_41 | Post-Resistance | CAMLG           | 819    | 37 | 5 | 134086557 | 134086557 | Missense_Mutation | SNP | G | A | 8  | 159 | c.808G>A     | c.(808-810)GTC>ATC   | p.V270I       |
| Pat_41 | Post-Resistance | DDX46           | 9879   | 37 | 5 | 134131783 | 134131783 | Missense_Mutation | SNP | G | A | 24 | 109 | c.1897G>A    | c.(1897-1899)GAT>AAT | p.D633N       |
| Pat_41 | Post-Resistance | PITX1           | 5307   | 37 | 5 | 134366967 | 134366967 | Missense_Mutation | SNP | C | T | 4  | 44  | c.401G>A     | c.(400-402)CGG>CAG   | p.R134Q       |
| Pat_41 | Post-Resistance | NEUROG1         | 4762   | 37 | 5 | 134870695 | 134870695 | Missense_Mutation | SNP | G | A | 6  | 55  | c.686C>T     | c.(685-687)ACA>ATA   | p.T229I       |
| Pat_41 | Post-Resistance | LOC153328       | 153328 | 37 | 5 | 135188482 | 135188482 | Missense_Mutation | SNP | G | T | 3  | 30  | c.393G>T     | c.(391-393)TTG>TTT   | p.L131F       |
| Pat_41 | Post-Resistance | PKD2L2          | 27039  | 37 | 5 | 137228247 | 137228247 | Missense_Mutation | SNP | C | T | 17 | 218 | c.212C>T     | c.(211-213)CCT>CTT   | p.P71L        |
| Pat_41 | Post-Resistance | BRD8            | 10902  | 37 | 5 | 137500585 | 137500585 | Missense_Mutation | SNP | G | A | 9  | 114 | c.1549C>T    | c.(1549-1551)CCA>TCA | p.P517S       |
| Pat_41 | Post-Resistance | KIF20A          | 10112  | 37 | 5 | 137518302 | 137518302 | Missense_Mutation | SNP | C | T | 8  | 85  | c.542C>T     | c.(541-543)CCC>CTC   | p.P181L       |
| Pat_41 | Post-Resistance | CDC23           | 8697   | 37 | 5 | 137528045 | 137528045 | Missense_Mutation | SNP | C | T | 6  | 144 | c.1199G>A    | c.(1198-1200)AGA>AAA | p.R400K       |
| Pat_41 | Post-Resistance | CDC23           | 8697   | 37 | 5 | 137528052 | 137528052 | Missense_Mutation | SNP | C | T | 5  | 148 | c.1192G>A    | c.(1192-1194)GAC>AAC | p.D398N       |
| Pat_41 | Post-Resistance | FAM53C          | 51307  | 37 | 5 | 137681153 | 137681153 | Missense_Mutation | SNP | C | T | 10 | 166 | c.776C>T     | c.(775-777)CCC>CTC   | p.P259L       |
| Pat_41 | Post-Resistance | REEP2           | 51308  | 37 | 5 | 137781166 | 137781166 | Missense_Mutation | SNP | C | T | 7  | 128 | c.569C>T     | c.(568-570)CCT>CTT   | p.P190L       |
| Pat_41 | Post-Resistance | CTNNA1          | 1495   | 37 | 5 | 138260240 | 138260240 | Missense_Mutation | SNP | C | T | 12 | 91  | c.1588C>T    | c.(1588-1590)CTC>TTC | p.L530F       |
| Pat_41 | Post-Resistance | SIL1            | 64374  | 37 | 5 | 138386626 | 138386626 | Splice_Site       | SNP | C | T | 19 | 108 | c.353_splice | c.e3+1               | p.R118_splice |
| Pat_41 | Post-Resistance | TMEM173         | 340061 | 37 | 5 | 138858040 | 138858040 | Missense_Mutation | SNP | C | T | 67 | 473 | c.574G>A     | c.(574-576)GGT>AGT   | p.G192S       |
| Pat_41 | Post-Resistance | \NKHD1-EIF4EBP: | 404734 | 37 | 5 | 139864709 | 139864709 | Missense_Mutation | SNP | C | T | 10 | 180 | c.1874C>T    | c.(1873-1875)GCC>GTC | p.A625V       |
| Pat_41 | Post-Resistance | \NKHD1-EIF4EBP: | 404734 | 37 | 5 | 139909283 | 139909283 | Missense_Mutation | SNP | G | A | 21 | 273 | c.6752G>A    | c.(6751-6753)GGT>GAT | p.G2251D      |
| Pat_41 | Post-Resistance | APBB3           | 10307  | 37 | 5 | 139940050 | 139940050 | Missense_Mutation | SNP | G | A | 4  | 98  | c.1087C>T    | c.(1087-1089)CCT>TCT | p.P363S       |
| Pat_41 | Post-Resistance | APBB3           | 10307  | 37 | 5 | 139940065 | 139940065 | Missense_Mutation | SNP | G | A | 4  | 68  | c.1072C>T    | c.(1072-1074)CCA>TCA | p.P358S       |
| Pat_41 | Post-Resistance | IK              | 3550   | 37 | 5 | 140037215 | 140037215 | Missense_Mutation | SNP | C | T | 30 | 159 | c.878C>T     | c.(877-879)ACC>ATC   | p.T293I       |
| Pat_41 | Post-Resistance | WDR55           | 54853  | 37 | 5 | 140044597 | 140044597 | Missense_Mutation | SNP | G | A | 5  | 40  | c.100G>A     | c.(100-102)GAC>AAC   | p.D34N        |
| Pat_41 | Post-Resistance | DND1            | 373863 | 37 | 5 | 140050913 | 140050913 | Missense_Mutation | SNP | C | T | 18 | 154 | c.1027G>A    | c.(1027-1029)GCT>ACT | p.A343T       |
| Pat_41 | Post-Resistance | HARS            | 3035   | 37 | 5 | 140056370 | 140056370 | Missense_Mutation | SNP | C | T | 5  | 218 | c.1063G>A    | c.(1063-1065)GGC>AGC | p.G355S       |
| Pat_41 | Post-Resistance | HARS2           | 23438  | 37 | 5 | 140076166 | 140076166 | Missense_Mutation | SNP | G | A | 5  | 141 | c.793G>A     | c.(793-795)GCT>ACT   | p.A265T       |
| Pat_41 | Post-Resistance | PCDHA12         | 56137  | 37 | 5 | 140256900 | 140256900 | Missense_Mutation | SNP | G | A | 8  | 212 | c.1843G>A    | c.(1843-1845)GCG>ACG | p.A615T       |
| Pat_41 | Post-Resistance | PCDHAC2         | 56134  | 37 | 5 | 140362082 | 140362082 | Missense_Mutation | SNP | G | C | 70 | 74  | c.2647G>C    | c.(2647-2649)GGC>CGC | p.G883R       |
| Pat_41 | Post-Resistance | PCDHB4          | 56131  | 37 | 5 | 140502320 | 140502320 | Missense_Mutation | SNP | G | A | 19 | 136 | c.740G>A     | c.(739-741)GGG>GAG   | p.G247E       |
| Pat_41 | Post-Resistance | PCDHB7          | 56129  | 37 | 5 | 140553110 | 140553110 | Missense_Mutation | SNP | G | A | 9  | 70  | c.694G>A     | c.(694-696)GTT>ATT   | p.V232I       |
| Pat_41 | Post-Resistance | PCDHB7          | 56129  | 37 | 5 | 140553204 | 140553204 | Missense_Mutation | SNP | C | T | 17 | 75  | c.788C>T     | c.(787-789)TCC>TTC   | p.S263F       |
| Pat_41 | Post-Resistance | PCDHB8          | 56128  | 37 | 5 | 140558060 | 140558060 | Missense_Mutation | SNP | C | T | 11 | 190 | c.445C>T     | c.(445-447)CCT>TCT   | p.P149S       |
| Pat_41 | Post-Resistance | PCDHB9          | 56127  | 37 | 5 | 140568333 | 140568333 | Missense_Mutation | SNP | G | A | 18 | 395 | c.1442G>A    | c.(1441-1443)GGC>GAC | p.G481D       |
| Pat_41 | Post-Resistance | PCDHB12         | 56124  | 37 | 5 | 140589471 | 140589471 | Missense_Mutation | SNP | C | T | 10 | 62  | c.992C>T     | c.(991-993)TCT>TTT   | p.S331F       |
| Pat_41 | Post-Resistance | SLC25A2         | 83884  | 37 | 5 | 140682748 | 140682748 | Missense_Mutation | SNP | G | A | 8  | 130 | c.685C>T     | c.(685-687)CCA>TCA   | p.P229S       |
| Pat_41 | Post-Resistance | PCDHGA1         | 56114  | 37 | 5 | 140711560 | 140711560 | Missense_Mutation | SNP | C | T | 11 | 100 | c.1309C>T    | c.(1309-1311)CAC>TAC | p.H437Y       |
| Pat_41 | Post-Resistance | PCDHGA2         | 56113  | 37 | 5 | 140720640 | 140720640 | Missense_Mutation | SNP | C | T | 49 | 265 | c.2102C>T    | c.(2101-2103)TCC>TTC | p.S701F       |
| Pat_41 | Post-Resistance | PCDHGA3         | 56112  | 37 | 5 | 140724288 | 140724288 | Missense_Mutation | SNP | G | A | 12 | 122 | c.688G>A     | c.(688-690)GTG>ATG   | p.V230M       |
| Pat_41 | Post-Resistance | PCDHGA3         | 56112  | 37 | 5 | 140725009 | 140725009 | Missense_Mutation | SNP | C | T | 20 | 159 | c.1409C>T    | c.(1408-1410)TCC>TTC | p.S470F       |

|        |                 |          |        |    |   |           |           |                   |     |   |   |    |     |               |                        |               |
|--------|-----------------|----------|--------|----|---|-----------|-----------|-------------------|-----|---|---|----|-----|---------------|------------------------|---------------|
| Pat_41 | Post-Resistance | PCDHGB2  | 56103  | 37 | 5 | 140740664 | 140740664 | Missense_Mutation | SNP | C | T | 6  | 47  | c.962C>T      | c.(961-963)GCA>GTA     | p.A321V       |
| Pat_41 | Post-Resistance | PCDHGB4  | 8641   | 37 | 5 | 140768607 | 140768607 | Missense_Mutation | SNP | G | A | 5  | 95  | c.1156G>A     | c.(1156-1158)GGT>AGT   | p.G386S       |
| Pat_41 | Post-Resistance | PCDHGA10 | 56106  | 37 | 5 | 140794520 | 140794520 | Missense_Mutation | SNP | C | T | 46 | 252 | c.1778C>T     | c.(1777-1779)ACC>ATC   | p.T593I       |
| Pat_41 | Post-Resistance | PCDHGB7  | 56099  | 37 | 5 | 140799446 | 140799446 | Missense_Mutation | SNP | G | A | 23 | 134 | c.2020G>A     | c.(2020-2022)GAT>AAT   | p.D674N       |
| Pat_41 | Post-Resistance | PCDHGB8P | 56120  | 37 | 5 | 140807703 | 140807703 | Missense_Mutation | SNP | G | A | 5  | 66  | c.1492G>A     | c.(1492-1494)GGG>AGG   | p.G498R       |
| Pat_41 | Post-Resistance | PCDHGC4  | 56098  | 37 | 5 | 140865107 | 140865107 | Missense_Mutation | SNP | A | G | 15 | 221 | c.367A>G      | c.(367-369)ATC>GTC     | p.I123V       |
| Pat_41 | Post-Resistance | PCDHGC5  | 56097  | 37 | 5 | 140869495 | 140869495 | Missense_Mutation | SNP | G | A | 26 | 225 | c.688G>A      | c.(688-690)GTC>ATC     | p.V230I       |
| Pat_41 | Post-Resistance | PCDH1    | 5097   | 37 | 5 | 141244410 | 141244410 | Missense_Mutation | SNP | C | T | 50 | 258 | c.1486G>A     | c.(1486-1488)GTG>ATG   | p.V496M       |
| Pat_41 | Post-Resistance | PCDH12   | 51294  | 37 | 5 | 141335744 | 141335744 | Missense_Mutation | SNP | G | A | 11 | 119 | c.1673C>T     | c.(1672-1674)GCC>GTC   | p.A558V       |
| Pat_41 | Post-Resistance | PCDH12   | 51294  | 37 | 5 | 141335892 | 141335892 | Missense_Mutation | SNP | C | T | 19 | 106 | c.1525G>A     | c.(1525-1527)GCT>ACT   | p.A509T       |
| Pat_41 | Post-Resistance | PCDH12   | 51294  | 37 | 5 | 141336072 | 141336072 | Nonsense_Mutation | SNP | G | A | 9  | 219 | c.1345C>T     | c.(1345-1347)CAG>TAG   | p.Q449*       |
| Pat_41 | Post-Resistance | GNPDA1   | 10007  | 37 | 5 | 141385892 | 141385892 | Splice_Site       | SNP | C | T | 14 | 78  | c.227_splice  | c.e3-1                 | p.G76_splice  |
| Pat_41 | Post-Resistance | NR3C1    | 2908   | 37 | 5 | 142779602 | 142779602 | Missense_Mutation | SNP | G | A | 20 | 342 | c.803C>T      | c.(802-804)CCC>CTC     | p.P268L       |
| Pat_41 | Post-Resistance | YIPF5    | 81555  | 37 | 5 | 143545124 | 143545124 | Missense_Mutation | SNP | G | A | 55 | 339 | c.155C>T      | c.(154-156)CCT>CTT     | p.P52L        |
| Pat_41 | Post-Resistance | KCTD16   | 57528  | 37 | 5 | 143853291 | 143853291 | Missense_Mutation | SNP | G | A | 14 | 162 | c.901G>A      | c.(901-903)GGG>AGG     | p.G301R       |
| Pat_41 | Post-Resistance | LARS     | 51520  | 37 | 5 | 145512537 | 145512537 | Missense_Mutation | SNP | C | T | 16 | 148 | c.2320G>A     | c.(2320-2322)GTG>ATG   | p.V774M       |
| Pat_41 | Post-Resistance | LARS     | 51520  | 37 | 5 | 145522435 | 145522435 | Missense_Mutation | SNP | C | T | 4  | 61  | c.2090G>A     | c.(2089-2091)AGT>AAT   | p.S697N       |
| Pat_41 | Post-Resistance | LARS     | 51520  | 37 | 5 | 145547779 | 145547779 | Missense_Mutation | SNP | G | A | 18 | 103 | c.344C>T      | c.(343-345)CCT>CTT     | p.P115L       |
| Pat_41 | Post-Resistance | TCERG1   | 10915  | 37 | 5 | 145849152 | 145849152 | Missense_Mutation | SNP | C | T | 48 | 657 | c.1244C>T     | c.(1243-1245)CCC>CTC   | p.P415L       |
| Pat_41 | Post-Resistance | GPR151   | 134391 | 37 | 5 | 145894924 | 145894924 | Missense_Mutation | SNP | C | T | 7  | 122 | c.753G>A      | c.(751-753)ATG>ATA     | p.M251I       |
| Pat_41 | Post-Resistance | SH3TC2   | 79628  | 37 | 5 | 148421162 | 148421162 | Missense_Mutation | SNP | G | A | 16 | 176 | c.548C>T      | c.(547-549)GCC>GTC     | p.A183V       |
| Pat_41 | Post-Resistance | ABLIM3   | 22885  | 37 | 5 | 148624443 | 148624443 | Splice_Site       | SNP | G | A | 21 | 234 | c.1352_splice | c.e16-1                | p.G451_splice |
| Pat_41 | Post-Resistance | CSNK1A1  | 1452   | 37 | 5 | 148929726 | 148929726 | Missense_Mutation | SNP | C | T | 19 | 274 | c.142G>A      | c.(142-144)GAA>AAA     | p.E48K        |
| Pat_41 | Post-Resistance | PPARGC1B | 133522 | 37 | 5 | 149206399 | 149206399 | Missense_Mutation | SNP | C | T | 14 | 167 | c.416C>T      | c.(415-417)GCC>GTC     | p.A139V       |
| Pat_41 | Post-Resistance | PPARGC1B | 133522 | 37 | 5 | 149212247 | 149212247 | Missense_Mutation | SNP | C | T | 28 | 440 | c.611C>T      | c.(610-612)CCC>CTC     | p.P204L       |
| Pat_41 | Post-Resistance | PPARGC1B | 133522 | 37 | 5 | 149216308 | 149216308 | Missense_Mutation | SNP | C | T | 13 | 293 | c.2290C>T     | c.(2290-2292)CTC>TTC   | p.L764F       |
| Pat_41 | Post-Resistance | CSF1R    | 1436   | 37 | 5 | 149433666 | 149433666 | Missense_Mutation | SNP | G | A | 26 | 102 | c.2885C>T     | c.(2884-2886)CCC>CTC   | p.P962L       |
| Pat_41 | Post-Resistance | CSF1R    | 1436   | 37 | 5 | 149449526 | 149449526 | Missense_Mutation | SNP | C | T | 5  | 123 | c.1420G>A     | c.(1420-1422)GTT>ATT   | p.V474I       |
| Pat_41 | Post-Resistance | PDGFRB   | 5159   | 37 | 5 | 149515324 | 149515324 | Missense_Mutation | SNP | G | A | 5  | 39  | c.158C>T      | c.(157-159)ACC>ATC     | p.T53I        |
| Pat_41 | Post-Resistance | CAMK2A   | 815    | 37 | 5 | 149602774 | 149602774 | Missense_Mutation | SNP | G | A | 8  | 68  | c.1211C>T     | c.(1210-1212)TCC>TTC   | p.S404F       |
| Pat_41 | Post-Resistance | ARSI     | 340075 | 37 | 5 | 149677591 | 149677591 | Missense_Mutation | SNP | C | T | 7  | 122 | c.896G>A      | c.(895-897)GGT>GAT     | p.G299D       |
| Pat_41 | Post-Resistance | TCOF1    | 6949   | 37 | 5 | 149755468 | 149755468 | Missense_Mutation | SNP | C | T | 4  | 39  | c.1889C>T     | c.(1888-1890)GCT>GTT   | p.A630V       |
| Pat_41 | Post-Resistance | TCOF1    | 6949   | 37 | 5 | 149758876 | 149758876 | Missense_Mutation | SNP | G | A | 12 | 110 | c.2563G>A     | c.(2563-2565)GCT>ACT   | p.A855T       |
| Pat_41 | Post-Resistance | RBM22    | 55696  | 37 | 5 | 150075153 | 150075153 | Missense_Mutation | SNP | G | A | 16 | 173 | c.661C>T      | c.(661-663)CCT>TCT     | p.P221S       |
| Pat_41 | Post-Resistance | RBM22    | 55696  | 37 | 5 | 150075165 | 150075165 | Missense_Mutation | SNP | C | T | 17 | 134 | c.649G>A      | c.(649-651)GCT>ACT     | p.A217T       |
| Pat_41 | Post-Resistance | GPX3     | 2878   | 37 | 5 | 150406470 | 150406470 | Missense_Mutation | SNP | C | T | 23 | 135 | c.251C>T      | c.(250-252)GCA>GTA     | p.A84V        |
| Pat_41 | Post-Resistance | ANXA6    | 309    | 37 | 5 | 150496699 | 150496699 | Missense_Mutation | SNP | C | T | 9  | 71  | c.1561G>A     | c.(1561-1563)GAA>AAA   | p.E521K       |
| Pat_41 | Post-Resistance | ANXA6    | 309    | 37 | 5 | 150516883 | 150516883 | Splice_Site       | SNP | C | T | 10 | 35  | c.319_splice  | c.e6-1                 | p.G107_splice |
| Pat_41 | Post-Resistance | FAT2     | 2196   | 37 | 5 | 150886780 | 150886780 | Missense_Mutation | SNP | G | A | 22 | 208 | c.12452C>T    | c.(12451-12453)GCT>GTT | p.A4151V      |
| Pat_41 | Post-Resistance | FAT2     | 2196   | 37 | 5 | 150900978 | 150900978 | Missense_Mutation | SNP | G | A | 12 | 157 | c.11176C>T    | c.(11176-11178)CCC>TCC | p.P3726S      |
| Pat_41 | Post-Resistance | FAT2     | 2196   | 37 | 5 | 150923484 | 150923484 | Nonsense_Mutation | SNP | G | A | 3  | 40  | c.7204C>T     | c.(7204-7206)CAG>TAG   | p.Q2402*      |
| Pat_41 | Post-Resistance | FAT2     | 2196   | 37 | 5 | 150947235 | 150947235 | Missense_Mutation | SNP | G | A | 7  | 91  | c.1258C>T     | c.(1258-1260)CTC>TTC   | p.L420F       |
| Pat_41 | Post-Resistance | G3BP1    | 10146  | 37 | 5 | 151166204 | 151166204 | Missense_Mutation | SNP | C | T | 59 | 374 | c.23C>T       | c.(22-24)CCC>CTC       | p.P8L         |
| Pat_41 | Post-Resistance | GRIA1    | 2890   | 37 | 5 | 153078544 | 153078544 | Missense_Mutation | SNP | C | T | 9  | 112 | c.1363C>T     | c.(1363-1365)CGT>TGT   | p.R455C       |
| Pat_41 | Post-Resistance | FAM114A2 | 10827  | 37 | 5 | 153382525 | 153382525 | Missense_Mutation | SNP | C | T | 10 | 129 | c.998G>A      | c.(997-999)AGA>AAA     | p.R333K       |
| Pat_41 | Post-Resistance | FAM114A2 | 10827  | 37 | 5 | 153409129 | 153409129 | Missense_Mutation | SNP | C | T | 9  | 42  | c.415G>A      | c.(415-417)GCC>ACC     | p.A139T       |
| Pat_41 | Post-Resistance | GALNT10  | 55568  | 37 | 5 | 153789203 | 153789203 | Nonsense_Mutation | SNP | C | T | 11 | 121 | c.1267C>T     | c.(1267-1269)CAG>TAG   | p.Q423*       |

|        |                 |          |        |    |   |           |           |                   |     |   |   |     |     |              |                      |               |
|--------|-----------------|----------|--------|----|---|-----------|-----------|-------------------|-----|---|---|-----|-----|--------------|----------------------|---------------|
| Pat_41 | Post-Resistance | LARP1    | 23367  | 37 | 5 | 154183836 | 154183836 | Missense_Mutation | SNP | C | T | 7   | 364 | c.2515C>T    | c.(2515-2517)CGT>TGT | p.R839C       |
| Pat_41 | Post-Resistance | GEMIN5   | 25929  | 37 | 5 | 154282236 | 154282236 | Missense_Mutation | SNP | C | T | 42  | 176 | c.2729G>A    | c.(2728-2730)GGA>GAA | p.G910E       |
| Pat_41 | Post-Resistance | KIF4B    | 285643 | 37 | 5 | 154393943 | 154393943 | Missense_Mutation | SNP | G | A | 17  | 363 | c.524G>A     | c.(523-525)GGA>GAA   | p.G175E       |
| Pat_41 | Post-Resistance | KIF4B    | 285643 | 37 | 5 | 154396685 | 154396685 | Missense_Mutation | SNP | C | T | 10  | 68  | c.3266C>T    | c.(3265-3267)TCC>TTC | p.S1089F      |
| Pat_41 | Post-Resistance | PPP1R2P3 | 153743 | 37 | 5 | 156278129 | 156278129 | Missense_Mutation | SNP | G | A | 13  | 153 | c.556G>A     | c.(556-558)GAA>AAA   | p.E186K       |
| Pat_41 | Post-Resistance | HAVCR1   | 26762  | 37 | 5 | 156479456 | 156479456 | Missense_Mutation | SNP | G | A | 42  | 628 | c.589C>T     | c.(589-591)CCA>TCA   | p.P197S       |
| Pat_41 | Post-Resistance | CYFIP2   | 26999  | 37 | 5 | 156760384 | 156760384 | Missense_Mutation | SNP | C | T | 38  | 609 | c.2315C>T    | c.(2314-2316)TCT>TTT | p.S772F       |
| Pat_41 | Post-Resistance | ADAM19   | 8728   | 37 | 5 | 156991397 | 156991397 | Missense_Mutation | SNP | C | T | 4   | 127 | c.235G>A     | c.(235-237)GAC>AAC   | p.D79N        |
| Pat_41 | Post-Resistance | SOX30    | 11063  | 37 | 5 | 157078471 | 157078471 | Missense_Mutation | SNP | C | T | 13  | 238 | c.616G>A     | c.(616-618)GCC>ACC   | p.A206T       |
| Pat_41 | Post-Resistance | RNF145   | 153830 | 37 | 5 | 158630538 | 158630538 | Missense_Mutation | SNP | C | T | 38  | 223 | c.88G>A      | c.(88-90)GAT>AAT     | p.D30N        |
| Pat_41 | Post-Resistance | CCNJL    | 79616  | 37 | 5 | 159680569 | 159680569 | Missense_Mutation | SNP | C | T | 9   | 76  | c.1124G>A    | c.(1123-1125)GGC>GAC | p.G375D       |
| Pat_41 | Post-Resistance | ATP10B   | 23120  | 37 | 5 | 159996596 | 159996596 | Missense_Mutation | SNP | G | A | 12  | 200 | c.3845C>T    | c.(3844-3846)CCC>CTC | p.P1282L      |
| Pat_41 | Post-Resistance | GABRG2   | 2566   | 37 | 5 | 161569169 | 161569169 | Splice_Site       | SNP | G | T | 26  | 402 | c.770_splice | c.e7-1               | p.G257_splice |
| Pat_41 | Post-Resistance | ODZ2     | 57451  | 37 | 5 | 167420131 | 167420131 | Missense_Mutation | SNP | C | T | 14  | 107 | c.1130C>T    | c.(1129-1131)GCC>GTC | p.A377V       |
| Pat_41 | Post-Resistance | ODZ2     | 57451  | 37 | 5 | 167645925 | 167645925 | Missense_Mutation | SNP | C | T | 18  | 219 | c.5002C>T    | c.(5002-5004)CTT>TTT | p.L1668F      |
| Pat_41 | Post-Resistance | ODZ2     | 57451  | 37 | 5 | 167655066 | 167655066 | Missense_Mutation | SNP | C | G | 5   | 64  | c.5424C>G    | c.(5422-5424)AAC>AAG | p.N1808K      |
| Pat_41 | Post-Resistance | WWC1     | 23286  | 37 | 5 | 167881036 | 167881036 | Missense_Mutation | SNP | G | T | 12  | 89  | c.2589G>T    | c.(2587-2589)GAG>GAT | p.E863D       |
| Pat_41 | Post-Resistance | WWC1     | 23286  | 37 | 5 | 167882439 | 167882439 | Missense_Mutation | SNP | C | T | 19  | 220 | c.2737C>T    | c.(2737-2739)CCG>TCG | p.P913S       |
| Pat_41 | Post-Resistance | SLIT3    | 6586   | 37 | 5 | 168127629 | 168127629 | Missense_Mutation | SNP | C | T | 7   | 130 | c.2900G>A    | c.(2899-2901)GGA>GAA | p.G967E       |
| Pat_41 | Post-Resistance | DOCK2    | 1794   | 37 | 5 | 169502991 | 169502991 | Missense_Mutation | SNP | G | A | 12  | 150 | c.4769G>A    | c.(4768-4770)AGG>AAG | p.R1590K      |
| Pat_41 | Post-Resistance | TLX3     | 30012  | 37 | 5 | 170737360 | 170737360 | Missense_Mutation | SNP | G | A | 3   | 38  | c.628G>A     | c.(628-630)GTC>ATC   | p.V210I       |
| Pat_41 | Post-Resistance | FGF18    | 8817   | 37 | 5 | 170863256 | 170863256 | Missense_Mutation | SNP | G | A | 6   | 29  | c.229G>A     | c.(229-231)GGC>AGC   | p.G77S        |
| Pat_41 | Post-Resistance | STK10    | 6793   | 37 | 5 | 171554401 | 171554401 | Missense_Mutation | SNP | C | T | 21  | 84  | c.346G>A     | c.(346-348)GGA>AGA   | p.G116R       |
| Pat_41 | Post-Resistance | SH3PXD2B | 285590 | 37 | 5 | 171773171 | 171773171 | Missense_Mutation | SNP | C | T | 16  | 251 | c.1157G>A    | c.(1156-1158)GGC>GAC | p.G386D       |
| Pat_41 | Post-Resistance | SH3PXD2B | 285590 | 37 | 5 | 171833335 | 171833335 | Missense_Mutation | SNP | G | A | 145 | 199 | c.178C>T     | c.(178-180)CCC>TCC   | p.P60S        |
| Pat_41 | Post-Resistance | C5orf41  | 153222 | 37 | 5 | 172535810 | 172535810 | Missense_Mutation | SNP | G | A | 14  | 178 | c.1406G>A    | c.(1405-1407)GGC>GAC | p.G469D       |
| Pat_41 | Post-Resistance | CPEB4    | 80315  | 37 | 5 | 173317682 | 173317682 | Missense_Mutation | SNP | G | A | 9   | 184 | c.946G>A     | c.(946-948)GAT>AAT   | p.D316N       |
| Pat_41 | Post-Resistance | KIAA1191 | 57179  | 37 | 5 | 175774742 | 175774742 | Missense_Mutation | SNP | G | A | 5   | 132 | c.779C>T     | c.(778-780)GCC>GTC   | p.A260V       |
| Pat_41 | Post-Resistance | HIGD2A   | 192286 | 37 | 5 | 175816374 | 175816374 | Missense_Mutation | SNP | C | T | 18  | 260 | c.197C>T     | c.(196-198)TCC>TTC   | p.S66F        |
| Pat_41 | Post-Resistance | GPRIN1   | 114787 | 37 | 5 | 176026667 | 176026667 | Missense_Mutation | SNP | G | A | 23  | 80  | c.169C>T     | c.(169-171)CCC>TCC   | p.P57S        |
| Pat_41 | Post-Resistance | HK3      | 3101   | 37 | 5 | 176317706 | 176317706 | Missense_Mutation | SNP | C | T | 63  | 263 | c.560G>A     | c.(559-561)GGT>GAT   | p.G187D       |
| Pat_41 | Post-Resistance | UIMC1    | 51720  | 37 | 5 | 176332440 | 176332440 | Missense_Mutation | SNP | G | A | 12  | 138 | c.2003C>T    | c.(2002-2004)TCT>TTT | p.S668F       |
| Pat_41 | Post-Resistance | NSD1     | 64324  | 37 | 5 | 176639013 | 176639013 | Missense_Mutation | SNP | G | A | 5   | 157 | c.3613G>A    | c.(3613-3615)GAG>AAG | p.E1205K      |
| Pat_41 | Post-Resistance | NSD1     | 64324  | 37 | 5 | 176721018 | 176721018 | Missense_Mutation | SNP | G | A | 20  | 63  | c.6649G>A    | c.(6649-6651)GAG>AAG | p.E2217K      |
| Pat_41 | Post-Resistance | FAM153A  | 285596 | 37 | 5 | 177164096 | 177164096 | Missense_Mutation | SNP | C | T | 7   | 89  | c.349G>A     | c.(349-351)GAG>AAG   | p.E117K       |
| Pat_41 | Post-Resistance | N4BP3    | 23138  | 37 | 5 | 177546868 | 177546868 | Missense_Mutation | SNP | G | A | 32  | 183 | c.284G>A     | c.(283-285)GGT>GAT   | p.G95D        |
| Pat_41 | Post-Resistance | C5orf45  | 51149  | 37 | 5 | 179268973 | 179268973 | Missense_Mutation | SNP | C | T | 15  | 333 | c.383G>A     | c.(382-384)AGC>AAC   | p.S128N       |
| Pat_41 | Post-Resistance | BTNL8    | 79908  | 37 | 5 | 180338356 | 180338356 | Missense_Mutation | SNP | C | T | 17  | 638 | c.415C>T     | c.(415-417)CTC>TTC   | p.L139F       |
| Pat_41 | Post-Resistance | BTNL9    | 153579 | 37 | 5 | 180483007 | 180483007 | Missense_Mutation | SNP | G | A | 13  | 256 | c.947G>A     | c.(946-948)GGC>GAC   | p.G316D       |
| Pat_41 | Post-Resistance | TRIM41   | 90933  | 37 | 5 | 180661740 | 180661740 | Missense_Mutation | SNP | C | T | 8   | 94  | c.1858C>T    | c.(1858-1860)CTC>TTC | p.L620F       |
| Pat_41 | Post-Resistance | TRIM52   | 84851  | 37 | 5 | 180687240 | 180687240 | Missense_Mutation | SNP | C | T | 9   | 158 | c.575G>A     | c.(574-576)CGT>CAT   | p.R192H       |
| Pat_41 | Post-Resistance | TRIM52   | 84851  | 37 | 5 | 180687601 | 180687601 | Missense_Mutation | SNP | C | T | 20  | 143 | c.214G>A     | c.(214-216)GTG>ATG   | p.V72M        |
| Pat_41 | Post-Resistance | EXOC2    | 55770  | 37 | 6 | 553885    | 553885    | Missense_Mutation | SNP | C | T | 29  | 174 | c.2090G>A    | c.(2089-2091)GGA>GAA | p.G697E       |
| Pat_41 | Post-Resistance | EXOC2    | 55770  | 37 | 6 | 592521    | 592521    | Nonsense_Mutation | SNP | C | T | 8   | 173 | c.1140G>A    | c.(1138-1140)TGG>TGA | p.W380*       |
| Pat_41 | Post-Resistance | EXOC2    | 55770  | 37 | 6 | 637749    | 637749    | Missense_Mutation | SNP | C | T | 18  | 312 | c.70G>A      | c.(70-72)GTC>ATC     | p.V24I        |
| Pat_41 | Post-Resistance | FOXF2    | 2295   | 37 | 6 | 1390673   | 1390673   | Missense_Mutation | SNP | G | A | 22  | 121 | c.491G>A     | c.(490-492)GGC>GAC   | p.G164D       |
| Pat_41 | Post-Resistance | MYLK4    | 340156 | 37 | 6 | 2679604   | 2679604   | Missense_Mutation | SNP | G | A | 39  | 601 | c.797C>T     | c.(796-798)ACC>ATC   | p.T266I       |



|        |                 |           |        |    |   |          |          |                   |     |   |   |    |     |           |                      |          |
|--------|-----------------|-----------|--------|----|---|----------|----------|-------------------|-----|---|---|----|-----|-----------|----------------------|----------|
| Pat_41 | Post-Resistance | SERPINB1  | 1992   | 37 | 6 | 2836113  | 2836113  | Missense_Mutation | SNP | C | T | 4  | 116 | c.712G>A  | c.(712-714)GAC>AAC   | p.D238N  |
| Pat_41 | Post-Resistance | SERPINB1  | 1992   | 37 | 6 | 2836377  | 2836377  | Missense_Mutation | SNP | C | T | 9  | 461 | c.532G>A  | c.(532-534)GAA>AAA   | p.E178K  |
| Pat_41 | Post-Resistance | SERPINB9  | 5272   | 37 | 6 | 2892117  | 2892117  | Missense_Mutation | SNP | C | T | 7  | 119 | c.673G>A  | c.(673-675)GAG>AAG   | p.E225K  |
| Pat_41 | Post-Resistance | SERPINB6  | 5269   | 37 | 6 | 2948668  | 2948668  | Missense_Mutation | SNP | G | A | 13 | 68  | c.995C>T  | c.(994-996)GCC>GTC   | p.A332V  |
| Pat_41 | Post-Resistance | SLC22A23  | 63027  | 37 | 6 | 3273552  | 3273552  | Missense_Mutation | SNP | G | A | 9  | 186 | c.1798C>T | c.(1798-1800)CAC>TAC | p.H600Y  |
| Pat_41 | Post-Resistance | C6orf146  | 222826 | 37 | 6 | 4074813  | 4074813  | Missense_Mutation | SNP | C | T | 8  | 176 | c.143G>A  | c.(142-144)GGT>GAT   | p.G48D   |
| Pat_41 | Post-Resistance | LY86      | 9450   | 37 | 6 | 6654829  | 6654829  | Missense_Mutation | SNP | C | T | 24 | 127 | c.458C>T  | c.(457-459)GCC>GTC   | p.A153V  |
| Pat_41 | Post-Resistance | RIOK1     | 83732  | 37 | 6 | 7413164  | 7413164  | Missense_Mutation | SNP | G | A | 6  | 132 | c.1432G>A | c.(1432-1434)GGA>AGA | p.G478R  |
| Pat_41 | Post-Resistance | DSP       | 1832   | 37 | 6 | 7585744  | 7585744  | Missense_Mutation | SNP | C | T | 13 | 59  | c.8249C>T | c.(8248-8250)GCC>GTC | p.A2750V |
| Pat_41 | Post-Resistance | DSP       | 1832   | 37 | 6 | 7586038  | 7586038  | Missense_Mutation | SNP | G | A | 13 | 131 | c.8543G>A | c.(8542-8544)GGA>GAA | p.G2848E |
| Pat_41 | Post-Resistance | SNRNP48   | 154007 | 37 | 6 | 7606305  | 7606305  | Missense_Mutation | SNP | C | T | 12 | 345 | c.848C>T  | c.(847-849)TCT>TTT   | p.S283F  |
| Pat_41 | Post-Resistance | HIVEP1    | 3096   | 37 | 6 | 12122729 | 12122729 | Missense_Mutation | SNP | G | A | 8  | 202 | c.2701G>A | c.(2701-2703)GCC>ACC | p.A901T  |
| Pat_41 | Post-Resistance | HIVEP1    | 3096   | 37 | 6 | 12131064 | 12131064 | Missense_Mutation | SNP | G | A | 12 | 193 | c.6274G>A | c.(6274-6276)GAA>AAA | p.E2092K |
| Pat_41 | Post-Resistance | HIVEP1    | 3096   | 37 | 6 | 12162014 | 12162014 | Missense_Mutation | SNP | C | T | 23 | 196 | c.6830C>T | c.(6829-6831)GCC>GTC | p.A2277V |
| Pat_41 | Post-Resistance | TBC1D7    | 51256  | 37 | 6 | 13321219 | 13321219 | Missense_Mutation | SNP | G | A | 41 | 674 | c.302C>T  | c.(301-303)GCC>GTC   | p.A101V  |
| Pat_41 | Post-Resistance | C6orf114  | 85411  | 37 | 6 | 13470469 | 13470469 | Missense_Mutation | SNP | G | A | 13 | 85  | c.44C>T   | c.(43-45)GCC>GTC     | p.A15V   |
| Pat_41 | Post-Resistance | RNF182    | 221687 | 37 | 6 | 13977756 | 13977756 | Missense_Mutation | SNP | G | A | 4  | 82  | c.406G>A  | c.(406-408)GTG>ATG   | p.V136M  |
| Pat_41 | Post-Resistance | JARID2    | 3720   | 37 | 6 | 15487685 | 15487685 | Missense_Mutation | SNP | C | T | 26 | 171 | c.818C>T  | c.(817-819)GCC>GTC   | p.A273V  |
| Pat_41 | Post-Resistance | DTNBP1    | 84062  | 37 | 6 | 15533578 | 15533578 | Missense_Mutation | SNP | G | A | 13 | 298 | c.560C>T  | c.(559-561)ACC>ATC   | p.T187I  |
| Pat_41 | Post-Resistance | ATXN1     | 6310   | 37 | 6 | 16307041 | 16307041 | Missense_Mutation | SNP | C | T | 14 | 208 | c.1967G>A | c.(1966-1968)GGC>GAC | p.G656D  |
| Pat_41 | Post-Resistance | NUP153    | 9972   | 37 | 6 | 17626279 | 17626279 | Missense_Mutation | SNP | G | A | 6  | 120 | c.3661C>T | c.(3661-3663)CCA>TCA | p.P1221S |
| Pat_41 | Post-Resistance | NUP153    | 9972   | 37 | 6 | 17629443 | 17629443 | Missense_Mutation | SNP | G | A | 5  | 50  | c.2987C>T | c.(2986-2988)ACT>ATT | p.T996I  |
| Pat_41 | Post-Resistance | KDM1B     | 221656 | 37 | 6 | 18197453 | 18197453 | Missense_Mutation | SNP | G | A | 4  | 38  | c.526G>A  | c.(526-528)GAC>AAC   | p.D176N  |
| Pat_41 | Post-Resistance | CDKAL1    | 54901  | 37 | 6 | 20546595 | 20546595 | Missense_Mutation | SNP | C | T | 20 | 320 | c.14C>T   | c.(13-15)TCC>TTC     | p.S5F    |
| Pat_41 | Post-Resistance | KIAA0319  | 9856   | 37 | 6 | 24596114 | 24596114 | Missense_Mutation | SNP | C | T | 47 | 509 | c.788G>A  | c.(787-789)AGC>AAC   | p.S263N  |
| Pat_41 | Post-Resistance | TRIM38    | 10475  | 37 | 6 | 25967132 | 25967132 | Missense_Mutation | SNP | C | T | 15 | 293 | c.382C>T  | c.(382-384)CTT>TTT   | p.L128F  |
| Pat_41 | Post-Resistance | HIST1H1A  | 3024   | 37 | 6 | 26017440 | 26017440 | Missense_Mutation | SNP | G | A | 9  | 186 | c.521C>T  | c.(520-522)ACT>ATT   | p.T174I  |
| Pat_41 | Post-Resistance | HIST1H3D  | 8351   | 37 | 6 | 26197156 | 26197156 | Missense_Mutation | SNP | G | A | 30 | 411 | c.323C>T  | c.(322-324)ACC>ATC   | p.T108I  |
| Pat_41 | Post-Resistance | PRSS16    | 10279  | 37 | 6 | 27220684 | 27220684 | Missense_Mutation | SNP | G | A | 32 | 388 | c.1106G>A | c.(1105-1107)GGT>GAT | p.G369D  |
| Pat_41 | Post-Resistance | ZNF391    | 346157 | 37 | 6 | 27369215 | 27369215 | Missense_Mutation | SNP | A | G | 19 | 106 | c.1066A>G | c.(1066-1068)ACT>GCT | p.T356A  |
| Pat_41 | Post-Resistance | HIST1H2AK | 8330   | 37 | 6 | 27806095 | 27806095 | Missense_Mutation | SNP | C | T | 13 | 229 | c.23G>A   | c.(22-24)GGC>GAC     | p.G8D    |
| Pat_41 | Post-Resistance | HIST1H1B  | 3009   | 37 | 6 | 27834956 | 27834956 | Missense_Mutation | SNP | C | T | 23 | 109 | c.352G>A  | c.(352-354)GAA>AAA   | p.E118K  |
| Pat_41 | Post-Resistance | PGBD1     | 84547  | 37 | 6 | 28251930 | 28251930 | Missense_Mutation | SNP | G | A | 25 | 419 | c.340G>A  | c.(340-342)GAG>AAG   | p.E114K  |
| Pat_41 | Post-Resistance | PGBD1     | 84547  | 37 | 6 | 28269811 | 28269811 | Missense_Mutation | SNP | C | T | 12 | 146 | c.2180C>T | c.(2179-2181)TCC>TTC | p.S727F  |
| Pat_41 | Post-Resistance | ZNF323    | 64288  | 37 | 6 | 28297458 | 28297458 | Missense_Mutation | SNP | C | T | 42 | 235 | c.3G>A    | c.(1-3)ATG>ATA       | p.M1I    |
| Pat_41 | Post-Resistance | ZKSCAN3   | 80317  | 37 | 6 | 28333227 | 28333227 | Missense_Mutation | SNP | G | A | 5  | 149 | c.782G>A  | c.(781-783)AGG>AAG   | p.R261K  |
| Pat_41 | Post-Resistance | ZNF311    | 282890 | 37 | 6 | 28963251 | 28963251 | Missense_Mutation | SNP | C | T | 13 | 106 | c.1528G>A | c.(1528-1530)GAT>AAT | p.D510N  |
| Pat_41 | Post-Resistance | OR2H1     | 26716  | 37 | 6 | 29430081 | 29430081 | Missense_Mutation | SNP | G | A | 30 | 390 | c.535G>A  | c.(535-537)GTC>ATC   | p.V179I  |
| Pat_41 | Post-Resistance | GABBR1    | 2550   | 37 | 6 | 29577084 | 29577084 | Missense_Mutation | SNP | G | A | 24 | 61  | c.1781C>T | c.(1780-1782)TCC>TTC | p.S594F  |
| Pat_41 | Post-Resistance | GABBR1    | 2550   | 37 | 6 | 29588918 | 29588918 | Missense_Mutation | SNP | A | G | 13 | 191 | c.1283T>C | c.(1282-1284)GTC>GCC | p.V428A  |
| Pat_41 | Post-Resistance | GABBR1    | 2550   | 37 | 6 | 29595301 | 29595301 | Missense_Mutation | SNP | G | A | 4  | 57  | c.619C>T  | c.(619-621)CCG>TCG   | p.P207S  |
| Pat_41 | Post-Resistance | HLA-G     | 3135   | 37 | 6 | 29795664 | 29795664 | Missense_Mutation | SNP | G | A | 10 | 87  | c.43G>A   | c.(43-45)GGG>AGG     | p.G15R   |
| Pat_41 | Post-Resistance | HLA-H     | 3136   | 37 | 6 | 29856286 | 29856286 | Missense_Mutation | SNP | C | T | 15 | 124 | c.281C>T  | c.(280-282)CCC>CTC   | p.P94L   |
| Pat_41 | Post-Resistance | TRIM10    | 10107  | 37 | 6 | 30122087 | 30122087 | Missense_Mutation | SNP | C | T | 5  | 47  | c.1105G>A | c.(1105-1107)GTG>ATG | p.V369M  |
| Pat_41 | Post-Resistance | TRIM15    | 89870  | 37 | 6 | 30131822 | 30131822 | Missense_Mutation | SNP | G | A | 12 | 111 | c.361G>A  | c.(361-363)GAG>AAG   | p.E121K  |
| Pat_41 | Post-Resistance | TRIM39    | 56658  | 37 | 6 | 30307703 | 30307703 | Missense_Mutation | SNP | G | A | 9  | 99  | c.799G>A  | c.(799-801)GAA>AAA   | p.E267K  |
| Pat_41 | Post-Resistance | TRIM39    | 56658  | 37 | 6 | 30308331 | 30308331 | Missense_Mutation | SNP | G | A | 14 | 239 | c.943G>A  | c.(943-945)GAA>AAA   | p.E315K  |

|        |                 |          |        |    |   |          |          |                   |     |   |   |    |     |               |                      |               |
|--------|-----------------|----------|--------|----|---|----------|----------|-------------------|-----|---|---|----|-----|---------------|----------------------|---------------|
| Pat_41 | Post-Resistance | TRIM39   | 56658  | 37 | 6 | 30309749 | 30309749 | Missense_Mutation | SNP | C | T | 14 | 130 | c.1270C>T     | c.(1270-1272)CCT>TCT | p.P424S       |
| Pat_41 | Post-Resistance | C6orf136 | 221545 | 37 | 6 | 30617539 | 30617539 | Missense_Mutation | SNP | G | A | 40 | 259 | c.277G>A      | c.(277-279)GAG>AAG   | p.E93K        |
| Pat_41 | Post-Resistance | DHX16    | 8449   | 37 | 6 | 30640513 | 30640513 | Missense_Mutation | SNP | G | A | 11 | 117 | c.106C>T      | c.(106-108)CGC>TGC   | p.R36C        |
| Pat_41 | Post-Resistance | MDC1     | 9656   | 37 | 6 | 30672593 | 30672593 | Missense_Mutation | SNP | T | A | 14 | 235 | c.4367A>T     | c.(4366-4368)CAG>CTG | p.Q1456L      |
| Pat_41 | Post-Resistance | MDC1     | 9656   | 37 | 6 | 30681789 | 30681789 | Missense_Mutation | SNP | G | A | 5  | 90  | c.308C>T      | c.(307-309)CCT>CTT   | p.P103L       |
| Pat_41 | Post-Resistance | DDR1     | 780    | 37 | 6 | 30856724 | 30856724 | Missense_Mutation | SNP | T | C | 6  | 253 | c.125T>C      | c.(124-126)ATC>ACC   | p.I42T        |
| Pat_41 | Post-Resistance | DDR1     | 780    | 37 | 6 | 30860155 | 30860155 | Missense_Mutation | SNP | C | T | 5  | 49  | c.935C>T      | c.(934-936)GCC>GTC   | p.A312V       |
| Pat_41 | Post-Resistance | GTF2H4   | 2968   | 37 | 6 | 30879272 | 30879272 | Missense_Mutation | SNP | G | A | 11 | 264 | c.737G>A      | c.(736-738)GGC>GAC   | p.G246D       |
| Pat_41 | Post-Resistance | VARS2    | 57176  | 37 | 6 | 30892294 | 30892294 | Missense_Mutation | SNP | C | T | 4  | 56  | c.2630C>T     | c.(2629-2631)GCC>GTC | p.A877V       |
| Pat_41 | Post-Resistance | C6orf15  | 29113  | 37 | 6 | 31079240 | 31079240 | Missense_Mutation | SNP | C | T | 9  | 49  | c.896G>A      | c.(895-897)GGA>GAA   | p.G299E       |
| Pat_41 | Post-Resistance | CCHCR1   | 54535  | 37 | 6 | 31118537 | 31118537 | Missense_Mutation | SNP | C | T | 24 | 298 | c.799G>A      | c.(799-801)GAA>AAA   | p.E267K       |
| Pat_41 | Post-Resistance | TCF19    | 6941   | 37 | 6 | 31129226 | 31129226 | Missense_Mutation | SNP | A | G | 9  | 232 | c.241A>G      | c.(241-243)ACT>GCT   | p.T81A        |
| Pat_41 | Post-Resistance | MICB     | 4277   | 37 | 6 | 31474987 | 31474987 | Missense_Mutation | SNP | G | A | 8  | 81  | c.802G>A      | c.(802-804)GTG>ATG   | p.V268M       |
| Pat_41 | Post-Resistance | MICB     | 4277   | 37 | 6 | 31475045 | 31475045 | Missense_Mutation | SNP | G | A | 4  | 106 | c.860G>A      | c.(859-861)AGC>AAC   | p.S287N       |
| Pat_41 | Post-Resistance | LTA      | 4049   | 37 | 6 | 31540715 | 31540715 | Missense_Mutation | SNP | G | A | 6  | 89  | c.110G>A      | c.(109-111)GGT>GAT   | p.G37D        |
| Pat_41 | Post-Resistance | LTA      | 4049   | 37 | 6 | 31540721 | 31540721 | Missense_Mutation | SNP | G | A | 8  | 116 | c.116G>A      | c.(115-117)GGC>GAC   | p.G39D        |
| Pat_41 | Post-Resistance | BAT2     | 7916   | 37 | 6 | 31596016 | 31596016 | Missense_Mutation | SNP | G | A | 10 | 66  | c.1765G>A     | c.(1765-1767)GTG>ATG | p.V589M       |
| Pat_41 | Post-Resistance | BAT2     | 7916   | 37 | 6 | 31599025 | 31599025 | Missense_Mutation | SNP | C | T | 20 | 77  | c.2575C>T     | c.(2575-2577)CCA>TCA | p.P859S       |
| Pat_41 | Post-Resistance | BAT3     | 7917   | 37 | 6 | 31615534 | 31615534 | Missense_Mutation | SNP | C | T | 21 | 319 | c.640G>A      | c.(640-642)GTA>ATA   | p.V214I       |
| Pat_41 | Post-Resistance | C6orf47  | 57827  | 37 | 6 | 31627214 | 31627214 | Missense_Mutation | SNP | C | T | 13 | 177 | c.511G>A      | c.(511-513)GGC>AGC   | p.G171S       |
| Pat_41 | Post-Resistance | BAT5     | 7920   | 37 | 6 | 31668790 | 31668790 | Missense_Mutation | SNP | G | A | 7  | 175 | c.272C>T      | c.(271-273)TCC>TTC   | p.S91F        |
| Pat_41 | Post-Resistance | LY6G6F   | 259215 | 37 | 6 | 31678132 | 31678132 | Missense_Mutation | SNP | C | T | 40 | 540 | c.806C>T      | c.(805-807)GCC>GTC   | p.A269V       |
| Pat_41 | Post-Resistance | DDAH2    | 23564  | 37 | 6 | 31695340 | 31695340 | Missense_Mutation | SNP | C | T | 19 | 403 | c.721G>A      | c.(721-723)GAT>AAT   | p.D241N       |
| Pat_41 | Post-Resistance | DDAH2    | 23564  | 37 | 6 | 31695400 | 31695400 | Missense_Mutation | SNP | G | A | 48 | 208 | c.661C>T      | c.(661-663)CTC>TTC   | p.L221F       |
| Pat_41 | Post-Resistance | VARS     | 7407   | 37 | 6 | 31760581 | 31760581 | Missense_Mutation | SNP | C | T | 6  | 94  | c.614G>A      | c.(613-615)GGA>GAA   | p.G205E       |
| Pat_41 | Post-Resistance | HSPA1A   | 3303   | 37 | 6 | 31785170 | 31785170 | Missense_Mutation | SNP | C | T | 5  | 32  | c.1637C>T     | c.(1636-1638)GCC>GTC | p.A546V       |
| Pat_41 | Post-Resistance | NEU1     | 4758   | 37 | 6 | 31829962 | 31829962 | Missense_Mutation | SNP | G | A | 9  | 93  | c.166C>T      | c.(166-168)CCG>TCG   | p.P56S        |
| Pat_41 | Post-Resistance | SLC44A4  | 80736  | 37 | 6 | 31832501 | 31832501 | Missense_Mutation | SNP | C | T | 9  | 96  | c.1939G>A     | c.(1939-1941)GGG>AGG | p.G647R       |
| Pat_41 | Post-Resistance | CFB      | 629    | 37 | 6 | 31917040 | 31917040 | Missense_Mutation | SNP | G | T | 9  | 112 | c.1189G>T     | c.(1189-1191)GAC>TAC | p.D397Y       |
| Pat_41 | Post-Resistance | RDBP     | 7936   | 37 | 6 | 31922602 | 31922602 | Missense_Mutation | SNP | C | T | 41 | 266 | c.472G>A      | c.(472-474)GCT>ACT   | p.A158T       |
| Pat_41 | Post-Resistance | TNXB     | 7148   | 37 | 6 | 32032682 | 32032682 | Missense_Mutation | SNP | C | T | 4  | 71  | c.6757G>A     | c.(6757-6759)GAG>AAG | p.E2253K      |
| Pat_41 | Post-Resistance | TNXB     | 7148   | 37 | 6 | 32036433 | 32036433 | Missense_Mutation | SNP | G | A | 6  | 94  | c.5954C>T     | c.(5953-5955)CCC>CTC | p.P1985L      |
| Pat_41 | Post-Resistance | TNXB     | 7148   | 37 | 6 | 32049975 | 32049975 | Nonsense_Mutation | SNP | G | A | 15 | 16  | c.3574C>T     | c.(3574-3576)CAG>TAG | p.Q1192*      |
| Pat_41 | Post-Resistance | TNXB     | 7148   | 37 | 6 | 32063792 | 32063792 | Missense_Mutation | SNP | C | T | 16 | 107 | c.1838G>A     | c.(1837-1839)AGT>AAT | p.S613N       |
| Pat_41 | Post-Resistance | GPSM3    | 63940  | 37 | 6 | 32159259 | 32159259 | Missense_Mutation | SNP | G | A | 5  | 115 | c.367C>T      | c.(367-369)CGG>TGG   | p.R123W       |
| Pat_41 | Post-Resistance | TAP2     | 6891   | 37 | 6 | 32784671 | 32784671 | Missense_Mutation | SNP | C | T | 7  | 180 | c.1991G>A     | c.(1990-1992)GGA>GAA | p.G664E       |
| Pat_41 | Post-Resistance | PSMB8    | 5696   | 37 | 6 | 32809307 | 32809307 | Splice_Site       | SNP | C | T | 8  | 200 | c.742_splice  | c.e5+1               | p.M248_splice |
| Pat_41 | Post-Resistance | PSMB8    | 5696   | 37 | 6 | 32809940 | 32809940 | Missense_Mutation | SNP | C | T | 14 | 209 | c.508G>A      | c.(508-510)GGC>AGC   | p.G170S       |
| Pat_41 | Post-Resistance | HLA-DPA1 | 3113   | 37 | 6 | 33036530 | 33036530 | Missense_Mutation | SNP | G | A | 21 | 166 | c.680C>T      | c.(679-681)GCC>GTC   | p.A227V       |
| Pat_41 | Post-Resistance | COL11A2  | 1302   | 37 | 6 | 33131493 | 33131493 | Missense_Mutation | SNP | C | T | 25 | 69  | c.5173G>A     | c.(5173-5175)GGA>AGA | p.G1725R      |
| Pat_41 | Post-Resistance | COL11A2  | 1302   | 37 | 6 | 33144527 | 33144527 | Missense_Mutation | SNP | C | T | 12 | 35  | c.2086G>A     | c.(2086-2088)GAA>AAA | p.E696K       |
| Pat_41 | Post-Resistance | RXRB     | 6257   | 37 | 6 | 33165539 | 33165539 | Missense_Mutation | SNP | C | T | 3  | 66  | c.820G>A      | c.(820-822)GCG>ACG   | p.A274T       |
| Pat_41 | Post-Resistance | RXRB     | 6257   | 37 | 6 | 33166147 | 33166147 | Missense_Mutation | SNP | G | A | 37 | 290 | c.578C>T      | c.(577-579)CCC>CTC   | p.P193L       |
| Pat_41 | Post-Resistance | SLC39A7  | 7922   | 37 | 6 | 33169260 | 33169260 | Missense_Mutation | SNP | G | A | 12 | 245 | c.238G>A      | c.(238-240)GAC>AAC   | p.D80N        |
| Pat_41 | Post-Resistance | VPS52    | 6293   | 37 | 6 | 33236299 | 33236299 | Missense_Mutation | SNP | C | T | 7  | 168 | c.676G>A      | c.(676-678)GTG>ATG   | p.V226M       |
| Pat_41 | Post-Resistance | TAPBP    | 6892   | 37 | 6 | 33271992 | 33271992 | Missense_Mutation | SNP | G | A | 7  | 106 | c.1213C>T     | c.(1213-1215)CTT>TTT | p.L405F       |
| Pat_41 | Post-Resistance | DAXX     | 1616   | 37 | 6 | 33288156 | 33288156 | Splice_Site       | SNP | C | T | 12 | 129 | c.1251_splice | c.e4+1               | p.E417_splice |

|        |                 |          |        |    |   |          |          |                   |     |   |   |    |     |               |                        |               |
|--------|-----------------|----------|--------|----|---|----------|----------|-------------------|-----|---|---|----|-----|---------------|------------------------|---------------|
| Pat_41 | Post-Resistance | DAXX     | 1616   | 37 | 6 | 33288677 | 33288677 | Missense_Mutation | SNP | G | A | 16 | 137 | c.875C>T      | c.(874-876)GCT>GTT     | p.A292V       |
| Pat_41 | Post-Resistance | PHF1     | 5252   | 37 | 6 | 33381232 | 33381232 | Missense_Mutation | SNP | G | A | 6  | 76  | c.485G>A      | c.(484-486)GGT>GAT     | p.G162D       |
| Pat_41 | Post-Resistance | ITPR3    | 3710   | 37 | 6 | 33643499 | 33643499 | Missense_Mutation | SNP | G | A | 5  | 180 | c.3148G>A     | c.(3148-3150)GAG>AAG   | p.E1050K      |
| Pat_41 | Post-Resistance | ITPR3    | 3710   | 37 | 6 | 33648444 | 33648444 | Missense_Mutation | SNP | G | A | 17 | 215 | c.4463G>A     | c.(4462-4464)AGC>AAC   | p.S1488N      |
| Pat_41 | Post-Resistance | ITPR3    | 3710   | 37 | 6 | 33653298 | 33653298 | Missense_Mutation | SNP | C | T | 6  | 18  | c.5470C>T     | c.(5470-5472)CCC>TCC   | p.P1824S      |
| Pat_41 | Post-Resistance | LEMD2    | 221496 | 37 | 6 | 33756811 | 33756811 | Missense_Mutation | SNP | C | T | 11 | 62  | c.83G>A       | c.(82-84)CGG>CAG       | p.R28Q        |
| Pat_41 | Post-Resistance | PACSN1   | 29993  | 37 | 6 | 34497237 | 34497237 | Missense_Mutation | SNP | G | A | 7  | 131 | c.520G>A      | c.(520-522)GAG>AAG     | p.E174K       |
| Pat_41 | Post-Resistance | UHRF1BP1 | 54887  | 37 | 6 | 34826973 | 34826973 | Missense_Mutation | SNP | G | A | 4  | 48  | c.2840G>A     | c.(2839-2841)AGG>AAG   | p.R947K       |
| Pat_41 | Post-Resistance | UHRF1BP1 | 54887  | 37 | 6 | 34850779 | 34850779 | Splice_Site       | SNP | G | A | 4  | 50  | c.4570_splice | c.e22-1                |               |
| Pat_41 | Post-Resistance | TCP11    | 6954   | 37 | 6 | 35087097 | 35087097 | Missense_Mutation | SNP | C | T | 31 | 141 | c.1226G>A     | c.(1225-1227)GGC>GAC   | p.G409D       |
| Pat_41 | Post-Resistance | TCP11    | 6954   | 37 | 6 | 35088424 | 35088424 | Splice_Site       | SNP | C | T | 4  | 35  | c.755_splice  | c.e7-1                 | p.S252_splice |
| Pat_41 | Post-Resistance | SCUBE3   | 222663 | 37 | 6 | 35209404 | 35209404 | Missense_Mutation | SNP | T | C | 11 | 229 | c.1280T>C     | c.(1279-1281)CTG>CCG   | p.L427P       |
| Pat_41 | Post-Resistance | DEF6     | 50619  | 37 | 6 | 35289140 | 35289140 | Missense_Mutation | SNP | G | A | 7  | 101 | c.1849G>A     | c.(1849-1851)GCT>ACT   | p.A617T       |
| Pat_41 | Post-Resistance | FANCE    | 2178   | 37 | 6 | 35427148 | 35427148 | Missense_Mutation | SNP | C | T | 10 | 246 | c.1154C>T     | c.(1153-1155)ACT>ATT   | p.T385I       |
| Pat_41 | Post-Resistance | FKBP5    | 2289   | 37 | 6 | 35558986 | 35558986 | Missense_Mutation | SNP | C | T | 18 | 103 | c.677G>A      | c.(676-678)GGA>GAA     | p.G226E       |
| Pat_41 | Post-Resistance | LHFPL5   | 222662 | 37 | 6 | 35773572 | 35773572 | Missense_Mutation | SNP | C | T | 27 | 393 | c.125C>T      | c.(124-126)GCC>GTC     | p.A42V        |
| Pat_41 | Post-Resistance | SRPK1    | 6732   | 37 | 6 | 35837616 | 35837616 | Missense_Mutation | SNP | C | T | 61 | 422 | c.1054G>A     | c.(1054-1056)GCA>ACA   | p.A352T       |
| Pat_41 | Post-Resistance | SLC26A8  | 116369 | 37 | 6 | 35980092 | 35980092 | Nonsense_Mutation | SNP | C | T | 29 | 115 | c.246G>A      | c.(244-246)TGG>TGA     | p.W82*        |
| Pat_41 | Post-Resistance | MAPK14   | 1432   | 37 | 6 | 36040661 | 36040661 | Missense_Mutation | SNP | C | T | 15 | 105 | c.317C>T      | c.(316-318)ACC>ATC     | p.T106I       |
| Pat_41 | Post-Resistance | MAPK13   | 5603   | 37 | 6 | 36106190 | 36106190 | Missense_Mutation | SNP | C | T | 4  | 109 | c.731C>T      | c.(730-732)ACG>ATG     | p.T244M       |
| Pat_41 | Post-Resistance | BRPF3    | 27154  | 37 | 6 | 36178288 | 36178288 | Missense_Mutation | SNP | G | A | 12 | 83  | c.2162G>A     | c.(2161-2163)CGC>CAC   | p.R721H       |
| Pat_41 | Post-Resistance | BRPF3    | 27154  | 37 | 6 | 36181732 | 36181732 | Missense_Mutation | SNP | C | T | 20 | 103 | c.2558C>T     | c.(2557-2559)CCC>CTC   | p.P853L       |
| Pat_41 | Post-Resistance | PNPLA1   | 285848 | 37 | 6 | 36270015 | 36270015 | Missense_Mutation | SNP | C | T | 28 | 251 | c.1153C>T     | c.(1153-1155)CCT>TCT   | p.P385S       |
| Pat_41 | Post-Resistance | STK38    | 11329  | 37 | 6 | 36483240 | 36483240 | Missense_Mutation | SNP | C | T | 17 | 156 | c.544G>A      | c.(544-546)GAC>AAC     | p.D182N       |
| Pat_41 | Post-Resistance | CDKN1A   | 1026   | 37 | 6 | 36652012 | 36652012 | Missense_Mutation | SNP | C | T | 20 | 122 | c.134C>T      | c.(133-135)GCC>GTC     | p.A45V        |
| Pat_41 | Post-Resistance | PI16     | 221476 | 37 | 6 | 36931691 | 36931691 | Missense_Mutation | SNP | C | T | 5  | 55  | c.1363C>T     | c.(1363-1365)CCT>TCT   | p.P455S       |
| Pat_41 | Post-Resistance | TBC1D22B | 55633  | 37 | 6 | 37249996 | 37249996 | Nonsense_Mutation | SNP | C | T | 8  | 217 | c.457C>T      | c.(457-459)CAA>TAA     | p.Q153*       |
| Pat_41 | Post-Resistance | FTSJD2   | 23070  | 37 | 6 | 37443943 | 37443943 | Missense_Mutation | SNP | C | T | 27 | 237 | c.2078C>T     | c.(2077-2079)CCT>CTT   | p.P693L       |
| Pat_41 | Post-Resistance | BTBD9    | 114781 | 37 | 6 | 38142775 | 38142775 | Missense_Mutation | SNP | G | A | 6  | 337 | c.1825C>T     | c.(1825-1827)CGG>TGG   | p.R609W       |
| Pat_41 | Post-Resistance | DNAH8    | 1769   | 37 | 6 | 38879353 | 38879353 | Missense_Mutation | SNP | A | G | 3  | 77  | c.9199A>G     | c.(9199-9201)ATG>GTG   | p.M3067V      |
| Pat_41 | Post-Resistance | DNAH8    | 1769   | 37 | 6 | 38881726 | 38881726 | Missense_Mutation | SNP | G | A | 6  | 60  | c.9310G>A     | c.(9310-9312)GAA>AAA   | p.E3104K      |
| Pat_41 | Post-Resistance | DNAH8    | 1769   | 37 | 6 | 38885845 | 38885845 | Missense_Mutation | SNP | G | A | 19 | 166 | c.9802G>A     | c.(9802-9804)GCT>ACT   | p.A3268T      |
| Pat_41 | Post-Resistance | DNAH8    | 1769   | 37 | 6 | 38941554 | 38941554 | Missense_Mutation | SNP | G | A | 12 | 106 | c.11992G>A    | c.(11992-11994)GAG>AAC | p.E3998K      |
| Pat_41 | Post-Resistance | DNAH8    | 1769   | 37 | 6 | 38998080 | 38998080 | Missense_Mutation | SNP | C | T | 16 | 180 | c.13385C>T    | c.(13384-13386)ACC>ATC | p.T4462I      |
| Pat_41 | Post-Resistance | DNAH8    | 1769   | 37 | 6 | 38998148 | 38998148 | Missense_Mutation | SNP | C | T | 17 | 135 | c.13453C>T    | c.(13453-13455)CTT>TTT | p.L4485F      |
| Pat_41 | Post-Resistance | GLP1R    | 2740   | 37 | 6 | 39046128 | 39046128 | Missense_Mutation | SNP | G | A | 9  | 221 | c.854G>A      | c.(853-855)GGC>GAC     | p.G285D       |
| Pat_41 | Post-Resistance | GLP1R    | 2740   | 37 | 6 | 39046924 | 39046924 | Missense_Mutation | SNP | G | A | 9  | 360 | c.991G>A      | c.(991-993)GTG>ATG     | p.V331M       |
| Pat_41 | Post-Resistance | KCNK16   | 83795  | 37 | 6 | 39285729 | 39285729 | Splice_Site       | SNP | C | T | 5  | 30  | c.329_splice  | c.e3-1                 | p.G110_splice |
| Pat_41 | Post-Resistance | DAAM2    | 23500  | 37 | 6 | 39843120 | 39843120 | Missense_Mutation | SNP | G | A | 30 | 418 | c.1177G>A     | c.(1177-1179)GGC>AGC   | p.G393S       |
| Pat_41 | Post-Resistance | MOCS1    | 4337   | 37 | 6 | 39893527 | 39893527 | Missense_Mutation | SNP | C | T | 15 | 100 | c.313G>A      | c.(313-315)GAG>AAG     | p.E105K       |
| Pat_41 | Post-Resistance | NFYA     | 4800   | 37 | 6 | 41062193 | 41062193 | Missense_Mutation | SNP | G | A | 14 | 223 | c.947G>A      | c.(946-948)GGA>GAA     | p.G316E       |
| Pat_41 | Post-Resistance | TRERF1   | 55809  | 37 | 6 | 42237117 | 42237117 | Missense_Mutation | SNP | G | A | 7  | 113 | c.212C>T      | c.(211-213)TCC>TTC     | p.S71F        |
| Pat_41 | Post-Resistance | PRPH2    | 5961   | 37 | 6 | 42672326 | 42672326 | Missense_Mutation | SNP | C | T | 14 | 221 | c.605G>A      | c.(604-606)GGG>GAG     | p.G202E       |
| Pat_41 | Post-Resistance | KIAA0240 | 23506  | 37 | 6 | 42833126 | 42833126 | Missense_Mutation | SNP | G | A | 68 | 421 | c.3182G>A     | c.(3181-3183)GGT>GAT   | p.G1061D      |
| Pat_41 | Post-Resistance | CUL7     | 9820   | 37 | 6 | 43014327 | 43014327 | Nonsense_Mutation | SNP | G | A | 4  | 91  | c.2410C>T     | c.(2410-2412)CAG>TAG   | p.Q804*       |
| Pat_41 | Post-Resistance | CUL7     | 9820   | 37 | 6 | 43019191 | 43019191 | Missense_Mutation | SNP | G | A | 27 | 139 | c.748C>T      | c.(748-750)CTC>TTC     | p.L250F       |
| Pat_41 | Post-Resistance | PTK7     | 5754   | 37 | 6 | 43096754 | 43096754 | Missense_Mutation | SNP | C | T | 14 | 125 | c.119C>T      | c.(118-120)TCC>TTC     | p.S40F        |

|        |                 |          |        |    |   |          |          |                   |     |   |   |    |     |               |                        |                |
|--------|-----------------|----------|--------|----|---|----------|----------|-------------------|-----|---|---|----|-----|---------------|------------------------|----------------|
| Pat_41 | Post-Resistance | PTK7     | 5754   | 37 | 6 | 43111196 | 43111196 | Missense_Mutation | SNP | C | T | 26 | 147 | c.2089C>T     | c.(2089-2091)CCC>TCC   | p.P697S        |
| Pat_41 | Post-Resistance | PTK7     | 5754   | 37 | 6 | 43126554 | 43126554 | Splice_Site       | SNP | G | A | 4  | 27  | c.2722_splice | c.e18-1                | p.V908_splice  |
| Pat_41 | Post-Resistance | CUL9     | 23113  | 37 | 6 | 43171173 | 43171173 | Missense_Mutation | SNP | G | A | 17 | 227 | c.3868G>A     | c.(3868-3870)GTT>ATT   | p.V1290I       |
| Pat_41 | Post-Resistance | TTBK1    | 84630  | 37 | 6 | 43220597 | 43220597 | Missense_Mutation | SNP | G | A | 16 | 240 | c.229G>A      | c.(229-231)GAG>AAG     | p.E77K         |
| Pat_41 | Post-Resistance | TTBK1    | 84630  | 37 | 6 | 43226906 | 43226906 | Missense_Mutation | SNP | G | A | 17 | 135 | c.1147G>A     | c.(1147-1149)GGC>AGC   | p.G383S        |
| Pat_41 | Post-Resistance | ZNF318   | 24149  | 37 | 6 | 43307112 | 43307112 | Missense_Mutation | SNP | G | A | 25 | 70  | c.4624C>T     | c.(4624-4626)CTC>TTC   | p.L1542F       |
| Pat_41 | Post-Resistance | ZNF318   | 24149  | 37 | 6 | 43307505 | 43307505 | Missense_Mutation | SNP | C | T | 21 | 87  | c.4231G>A     | c.(4231-4233)GGA>AGA   | p.G1411R       |
| Pat_41 | Post-Resistance | ZNF318   | 24149  | 37 | 6 | 43316061 | 43316061 | Splice_Site       | SNP | C | T | 22 | 127 | c.3072_splice | c.e6+1                 | p.K1024_splice |
| Pat_41 | Post-Resistance | ABCC10   | 89845  | 37 | 6 | 43400078 | 43400078 | Nonsense_Mutation | SNP | G | A | 12 | 57  | c.360G>A      | c.(358-360)TGG>TGA     | p.W120*        |
| Pat_41 | Post-Resistance | YIPF3    | 25844  | 37 | 6 | 43483384 | 43483384 | Missense_Mutation | SNP | A | C | 8  | 175 | c.344T>G      | c.(343-345)ATC>AGC     | p.I115S        |
| Pat_41 | Post-Resistance | POLH     | 5429   | 37 | 6 | 43572476 | 43572476 | Splice_Site       | SNP | G | A | 9  | 189 | c.1008_splice | c.e8+1                 | p.Q336_splice  |
| Pat_41 | Post-Resistance | HSP90AB1 | 3326   | 37 | 6 | 44221050 | 44221050 | Missense_Mutation | SNP | G | A | 48 | 783 | c.2000G>A     | c.(1999-2001)GGC>GAC   | p.G667D        |
| Pat_41 | Post-Resistance | AARS2    | 57505  | 37 | 6 | 44274997 | 44274997 | Missense_Mutation | SNP | C | T | 6  | 83  | c.1029G>A     | c.(1027-1029)ATG>ATA   | p.M343I        |
| Pat_41 | Post-Resistance | ENPP4    | 22875  | 37 | 6 | 46111307 | 46111307 | Missense_Mutation | SNP | G | A | 25 | 457 | c.1292G>A     | c.(1291-1293)AGA>AAA   | p.R431K        |
| Pat_41 | Post-Resistance | ENPP5    | 59084  | 37 | 6 | 46135583 | 46135583 | Nonsense_Mutation | SNP | C | T | 14 | 255 | c.417G>A      | c.(415-417)TGG>TGA     | p.W139*        |
| Pat_41 | Post-Resistance | TDRD6    | 221400 | 37 | 6 | 46657517 | 46657517 | Missense_Mutation | SNP | G | A | 24 | 281 | c.1652G>A     | c.(1651-1653)GGT>GAT   | p.G551D        |
| Pat_41 | Post-Resistance | PLA2G7   | 7941   | 37 | 6 | 46684800 | 46684800 | Missense_Mutation | SNP | G | A | 19 | 327 | c.143C>T      | c.(142-144)GCT>GTT     | p.A48V         |
| Pat_41 | Post-Resistance | GPR116   | 221395 | 37 | 6 | 46826579 | 46826579 | Missense_Mutation | SNP | C | T | 4  | 91  | c.3061G>A     | c.(3061-3063)GGC>AGC   | p.G1021S       |
| Pat_41 | Post-Resistance | GPR116   | 221395 | 37 | 6 | 46826769 | 46826769 | Nonsense_Mutation | SNP | C | T | 11 | 218 | c.2871G>A     | c.(2869-2871)TGG>TGA   | p.W957*        |
| Pat_41 | Post-Resistance | GPR116   | 221395 | 37 | 6 | 46836787 | 46836787 | Missense_Mutation | SNP | C | T | 5  | 73  | c.1454G>A     | c.(1453-1455)GGA>GAA   | p.G485E        |
| Pat_41 | Post-Resistance | TNFRSF21 | 27242  | 37 | 6 | 47253680 | 47253680 | Missense_Mutation | SNP | C | T | 13 | 44  | c.748G>A      | c.(748-750)GGC>AGC     | p.G250S        |
| Pat_41 | Post-Resistance | GPR111   | 222611 | 37 | 6 | 47646772 | 47646772 | Missense_Mutation | SNP | C | T | 20 | 107 | c.373C>T      | c.(373-375)CCA>TCA     | p.P125S        |
| Pat_41 | Post-Resistance | CRISP2   | 7180   | 37 | 6 | 49667525 | 49667525 | Missense_Mutation | SNP | C | T | 12 | 155 | c.263G>A      | c.(262-264)CGC>CAC     | p.R88H         |
| Pat_41 | Post-Resistance | TFAP2D   | 83741  | 37 | 6 | 50740386 | 50740386 | Missense_Mutation | SNP | G | A | 11 | 229 | c.1168G>A     | c.(1168-1170)GCA>ACA   | p.A390T        |
| Pat_41 | Post-Resistance | PKHD1    | 5314   | 37 | 6 | 51612717 | 51612717 | Missense_Mutation | SNP | G | A | 9  | 159 | c.9697C>T     | c.(9697-9699)CCC>TCC   | p.P3233S       |
| Pat_41 | Post-Resistance | PKHD1    | 5314   | 37 | 6 | 51875247 | 51875247 | Missense_Mutation | SNP | C | T | 9  | 171 | c.5611G>A     | c.(5611-5613)GAA>AAA   | p.E1871K       |
| Pat_41 | Post-Resistance | PKHD1    | 5314   | 37 | 6 | 51889519 | 51889519 | Missense_Mutation | SNP | C | T | 13 | 51  | c.5089G>A     | c.(5089-5091)GGT>AGT   | p.G1697S       |
| Pat_41 | Post-Resistance | PKHD1    | 5314   | 37 | 6 | 51913308 | 51913308 | Missense_Mutation | SNP | G | A | 35 | 297 | c.2389C>T     | c.(2389-2391)CCT>TCT   | p.P797S        |
| Pat_41 | Post-Resistance | PKHD1    | 5314   | 37 | 6 | 51923254 | 51923254 | Missense_Mutation | SNP | C | T | 22 | 282 | c.1379G>A     | c.(1378-1380)GGG>GAG   | p.G460E        |
| Pat_41 | Post-Resistance | PKHD1    | 5314   | 37 | 6 | 51924779 | 51924779 | Missense_Mutation | SNP | C | T | 29 | 194 | c.1180G>A     | c.(1180-1182)GCA>ACA   | p.A394T        |
| Pat_41 | Post-Resistance | MCM3     | 4172   | 37 | 6 | 52141130 | 52141130 | Missense_Mutation | SNP | C | T | 11 | 124 | c.1310G>A     | c.(1309-1311)GGC>GAC   | p.G437D        |
| Pat_41 | Post-Resistance | EFHC1    | 114327 | 37 | 6 | 52319001 | 52319001 | Missense_Mutation | SNP | G | A | 21 | 349 | c.832G>A      | c.(832-834)GTC>ATC     | p.V278I        |
| Pat_41 | Post-Resistance | TRAM2    | 9697   | 37 | 6 | 52372379 | 52372379 | Missense_Mutation | SNP | C | T | 9  | 116 | c.598G>A      | c.(598-600)GTG>ATG     | p.V200M        |
| Pat_41 | Post-Resistance | GSTA3    | 2940   | 37 | 6 | 52768479 | 52768479 | Missense_Mutation | SNP | C | T | 20 | 153 | c.134G>A      | c.(133-135)AGA>AAA     | p.R45K         |
| Pat_41 | Post-Resistance | ICK      | 22858  | 37 | 6 | 52905955 | 52905955 | Missense_Mutation | SNP | C | T | 10 | 285 | c.80G>A       | c.(79-81)GGG>GAG       | p.G27E         |
| Pat_41 | Post-Resistance | HMGCLL1  | 54511  | 37 | 6 | 55304335 | 55304335 | Missense_Mutation | SNP | G | A | 20 | 247 | c.908C>T      | c.(907-909)TCC>TTC     | p.S303F        |
| Pat_41 | Post-Resistance | DST      | 667    | 37 | 6 | 56323951 | 56323951 | Missense_Mutation | SNP | G | A | 7  | 85  | c.16880C>T    | c.(16879-16881)TCC>TTC | p.S5627F       |
| Pat_41 | Post-Resistance | DST      | 667    | 37 | 6 | 56366452 | 56366452 | Missense_Mutation | SNP | C | T | 21 | 176 | c.13249G>A    | c.(13249-13251)GAA>AAA | p.E4417K       |
| Pat_41 | Post-Resistance | DST      | 667    | 37 | 6 | 56425130 | 56425130 | Missense_Mutation | SNP | G | A | 7  | 56  | c.8045C>T     | c.(8044-8046)CCT>CTT   | p.P2682L       |
| Pat_41 | Post-Resistance | KIAA1586 | 57691  | 37 | 6 | 56917809 | 56917809 | Missense_Mutation | SNP | G | T | 10 | 307 | c.512G>T      | c.(511-513)GGA>GTA     | p.G171V        |
| Pat_41 | Post-Resistance | PHF3     | 23469  | 37 | 6 | 64390030 | 64390030 | Missense_Mutation | SNP | C | T | 21 | 390 | c.374C>T      | c.(373-375)TCT>TTT     | p.S125F        |
| Pat_41 | Post-Resistance | PHF3     | 23469  | 37 | 6 | 64422708 | 64422708 | Missense_Mutation | SNP | G | A | 6  | 138 | c.5224G>A     | c.(5224-5226)GAT>AAT   | p.D1742N       |
| Pat_41 | Post-Resistance | COL19A1  | 1310   | 37 | 6 | 70873248 | 70873248 | Missense_Mutation | SNP | G | A | 9  | 85  | c.2360G>A     | c.(2359-2361)AGA>AAA   | p.R787K        |
| Pat_41 | Post-Resistance | COL19A1  | 1310   | 37 | 6 | 70873263 | 70873263 | Missense_Mutation | SNP | G | A | 5  | 85  | c.2375G>A     | c.(2374-2376)GGT>GAT   | p.G792D        |
| Pat_41 | Post-Resistance | COL19A1  | 1310   | 37 | 6 | 70897807 | 70897807 | Missense_Mutation | SNP | G | A | 8  | 99  | c.2885G>A     | c.(2884-2886)GGC>GAC   | p.G962D        |
| Pat_41 | Post-Resistance | COL9A1   | 1297   | 37 | 6 | 70944555 | 70944555 | Missense_Mutation | SNP | G | A | 5  | 54  | c.2201C>T     | c.(2200-2202)CCC>CTC   | p.P734L        |
| Pat_41 | Post-Resistance | COL9A1   | 1297   | 37 | 6 | 70980033 | 70980033 | Missense_Mutation | SNP | C | T | 5  | 126 | c.1181G>A     | c.(1180-1182)GGC>GAC   | p.G394D        |

|        |                 |          |        |    |   |           |           |                   |     |   |   |    |     |               |                        |               |
|--------|-----------------|----------|--------|----|---|-----------|-----------|-------------------|-----|---|---|----|-----|---------------|------------------------|---------------|
| Pat_41 | Post-Resistance | SMAP1    | 60682  | 37 | 6 | 71567732  | 71567732  | Missense_Mutation | SNP | G | A | 10 | 128 | c.1069G>A     | c.(1069-1071)GGA>AGA   | p.G357R       |
| Pat_41 | Post-Resistance | RIMS1    | 22999  | 37 | 6 | 73043413  | 73043413  | Missense_Mutation | SNP | G | A | 4  | 25  | c.4241G>A     | c.(4240-4242)AGC>AAC   | p.S1414N      |
| Pat_41 | Post-Resistance | KCNQ5    | 56479  | 37 | 6 | 73821047  | 73821047  | Missense_Mutation | SNP | G | A | 9  | 74  | c.1046G>A     | c.(1045-1047)GGT>GAT   | p.G349D       |
| Pat_41 | Post-Resistance | COL12A1  | 1303   | 37 | 6 | 75838026  | 75838026  | Missense_Mutation | SNP | C | T | 19 | 269 | c.6326G>A     | c.(6325-6327)GGA>GAA   | p.G2109E      |
| Pat_41 | Post-Resistance | COL12A1  | 1303   | 37 | 6 | 75893101  | 75893101  | Missense_Mutation | SNP | G | A | 61 | 302 | c.1556C>T     | c.(1555-1557)ACT>ATT   | p.T519I       |
| Pat_41 | Post-Resistance | FILIP1   | 27145  | 37 | 6 | 76024752  | 76024752  | Nonsense_Mutation | SNP | G | A | 21 | 264 | c.796C>T      | c.(796-798)CAG>TAG     | p.Q266*       |
| Pat_41 | Post-Resistance | SENP6    | 26054  | 37 | 6 | 76425110  | 76425110  | Missense_Mutation | SNP | C | T | 19 | 391 | c.3139C>T     | c.(3139-3141)CTC>TTC   | p.L1047F      |
| Pat_41 | Post-Resistance | MYO6     | 4646   | 37 | 6 | 76538267  | 76538267  | Missense_Mutation | SNP | G | A | 8  | 188 | c.198G>A      | c.(196-198)ATG>ATA     | p.M66I        |
| Pat_41 | Post-Resistance | MYO6     | 4646   | 37 | 6 | 76572354  | 76572354  | Missense_Mutation | SNP | G | A | 17 | 94  | c.1588G>A     | c.(1588-1590)GAT>AAT   | p.D530N       |
| Pat_41 | Post-Resistance | MYO6     | 4646   | 37 | 6 | 76618239  | 76618239  | Missense_Mutation | SNP | G | A | 14 | 182 | c.3307G>A     | c.(3307-3309)GAA>AAA   | p.E1103K      |
| Pat_41 | Post-Resistance | HMGN3    | 9324   | 37 | 6 | 79924715  | 79924715  | Missense_Mutation | SNP | C | T | 15 | 98  | c.40G>A       | c.(40-42)GAT>AAT       | p.D14N        |
| Pat_41 | Post-Resistance | BCKDHB   | 594    | 37 | 6 | 80878691  | 80878691  | Missense_Mutation | SNP | G | A | 7  | 57  | c.577G>A      | c.(577-579)GCT>ACT     | p.A193T       |
| Pat_41 | Post-Resistance | IBTK     | 25998  | 37 | 6 | 82912293  | 82912293  | Missense_Mutation | SNP | G | A | 30 | 272 | c.2681C>T     | c.(2680-2682)TCT>TTT   | p.S894F       |
| Pat_41 | Post-Resistance | TPBG     | 7162   | 37 | 6 | 83075178  | 83075178  | Missense_Mutation | SNP | C | T | 37 | 221 | c.500C>T      | c.(499-501)GCC>GTC     | p.A167V       |
| Pat_41 | Post-Resistance | RWDD2A   | 112611 | 37 | 6 | 83905771  | 83905771  | Missense_Mutation | SNP | C | T | 5  | 79  | c.659C>T      | c.(658-660)TCC>TTC     | p.S220F       |
| Pat_41 | Post-Resistance | SNAP91   | 9892   | 37 | 6 | 84290226  | 84290226  | Missense_Mutation | SNP | C | T | 52 | 110 | c.2242G>A     | c.(2242-2244)GCA>ACA   | p.A748T       |
| Pat_41 | Post-Resistance | ZNF292   | 23036  | 37 | 6 | 87970656  | 87970656  | Missense_Mutation | SNP | G | A | 3  | 24  | c.7309G>A     | c.(7309-7311)GAA>AAA   | p.E2437K      |
| Pat_41 | Post-Resistance | GJB7     | 375519 | 37 | 6 | 87994516  | 87994516  | Missense_Mutation | SNP | C | T | 10 | 158 | c.115G>A      | c.(115-117)GCA>ACA     | p.A39T        |
| Pat_41 | Post-Resistance | C6orf165 | 154313 | 37 | 6 | 88173913  | 88173913  | Missense_Mutation | SNP | G | A | 15 | 46  | c.1814G>A     | c.(1813-1815)AGC>AAC   | p.S605N       |
| Pat_41 | Post-Resistance | SLC35A1  | 10559  | 37 | 6 | 88187175  | 88187175  | Missense_Mutation | SNP | G | A | 5  | 107 | c.112G>A      | c.(112-114)GAC>AAC     | p.D38N        |
| Pat_41 | Post-Resistance | UBE2J1   | 51465  | 37 | 6 | 90053466  | 90053466  | Missense_Mutation | SNP | C | T | 3  | 37  | c.41G>A       | c.(40-42)CGT>CAT       | p.R14H        |
| Pat_41 | Post-Resistance | MDN1     | 23195  | 37 | 6 | 90359807  | 90359807  | Missense_Mutation | SNP | C | T | 52 | 107 | c.16142G>A    | c.(16141-16143)CGC>CAC | p.R5381H      |
| Pat_41 | Post-Resistance | MDN1     | 23195  | 37 | 6 | 90359833  | 90359833  | Nonsense_Mutation | SNP | C | T | 20 | 104 | c.16116G>A    | c.(16114-16116)TGG>TGA | p.W5372*      |
| Pat_41 | Post-Resistance | MDN1     | 23195  | 37 | 6 | 90365584  | 90365584  | Missense_Mutation | SNP | G | A | 13 | 79  | c.15389C>T    | c.(15388-15390)GCC>GTC | p.A5130V      |
| Pat_41 | Post-Resistance | EPHA7    | 2045   | 37 | 6 | 93964405  | 93964405  | Missense_Mutation | SNP | G | A | 7  | 250 | c.2492C>T     | c.(2491-2493)TCT>TTT   | p.S831F       |
| Pat_41 | Post-Resistance | FUT9     | 10690  | 37 | 6 | 96651915  | 96651915  | Missense_Mutation | SNP | C | T | 8  | 29  | c.884C>T      | c.(883-885)CCC>CTC     | p.P295L       |
| Pat_41 | Post-Resistance | C6orf167 | 253714 | 37 | 6 | 97677017  | 97677017  | Missense_Mutation | SNP | C | T | 7  | 52  | c.1792G>A     | c.(1792-1794)GCT>ACT   | p.A598T       |
| Pat_41 | Post-Resistance | USP45    | 85015  | 37 | 6 | 99912955  | 99912955  | Splice_Site       | SNP | C | T | 7  | 42  | c.1164_splice | c.e12+1                | p.R388_splice |
| Pat_41 | Post-Resistance | SIM1     | 6492   | 37 | 6 | 100838517 | 100838517 | Missense_Mutation | SNP | G | A | 32 | 78  | c.2021C>T     | c.(2020-2022)GCT>GTT   | p.A674V       |
| Pat_41 | Post-Resistance | SIM1     | 6492   | 37 | 6 | 100895230 | 100895230 | Nonsense_Mutation | SNP | C | T | 9  | 51  | c.912G>A      | c.(910-912)TGG>TGA     | p.W304*       |
| Pat_41 | Post-Resistance | AIM1     | 202    | 37 | 6 | 107006431 | 107006431 | Missense_Mutation | SNP | C | T | 4  | 111 | c.4562C>T     | c.(4561-4563)GCA>GTA   | p.A1521V      |
| Pat_41 | Post-Resistance | QRSL1    | 55278  | 37 | 6 | 107100368 | 107100368 | Missense_Mutation | SNP | G | A | 26 | 94  | c.760G>A      | c.(760-762)GAC>AAC     | p.D254N       |
| Pat_41 | Post-Resistance | SOBP     | 55084  | 37 | 6 | 107955643 | 107955643 | Missense_Mutation | SNP | C | T | 6  | 52  | c.1595C>T     | c.(1594-1596)CCC>CTC   | p.P532L       |
| Pat_41 | Post-Resistance | SESN1    | 27244  | 37 | 6 | 109323539 | 109323539 | Missense_Mutation | SNP | C | T | 23 | 65  | c.110G>A      | c.(109-111)GGC>GAC     | p.G37D        |
| Pat_41 | Post-Resistance | SLC22A16 | 85413  | 37 | 6 | 110777942 | 110777942 | Missense_Mutation | SNP | C | T | 27 | 209 | c.332G>A      | c.(331-333)AGT>AAT     | p.S111N       |
| Pat_41 | Post-Resistance | CDK19    | 23097  | 37 | 6 | 110942440 | 110942440 | Missense_Mutation | SNP | C | T | 8  | 45  | c.1244G>A     | c.(1243-1245)GGG>GAG   | p.G415E       |
| Pat_41 | Post-Resistance | REV3L    | 5980   | 37 | 6 | 111670513 | 111670513 | Missense_Mutation | SNP | C | T | 30 | 113 | c.7327G>A     | c.(7327-7329)GCT>ACT   | p.A2443T      |
| Pat_41 | Post-Resistance | REV3L    | 5980   | 37 | 6 | 111710320 | 111710320 | Missense_Mutation | SNP | G | A | 48 | 144 | c.851C>T      | c.(850-852)CCT>CTT     | p.P284L       |
| Pat_41 | Post-Resistance | TRAF3IP2 | 10758  | 37 | 6 | 111912557 | 111912557 | Missense_Mutation | SNP | G | A | 7  | 30  | c.733C>T      | c.(733-735)CCA>TCA     | p.P245S       |
| Pat_41 | Post-Resistance | LAMA4    | 3910   | 37 | 6 | 112476148 | 112476148 | Missense_Mutation | SNP | G | A | 4  | 85  | c.1961C>T     | c.(1960-1962)GCG>GTG   | p.A654V       |
| Pat_41 | Post-Resistance | DSE      | 29940  | 37 | 6 | 116720546 | 116720546 | Missense_Mutation | SNP | A | G | 52 | 6   | c.133A>G      | c.(133-135)ATG>GTG     | p.M45V        |
| Pat_41 | Post-Resistance | RWDD1    | 51389  | 37 | 6 | 116910006 | 116910006 | Missense_Mutation | SNP | C | T | 15 | 73  | c.272C>T      | c.(271-273)GCT>GTT     | p.A91V        |
| Pat_41 | Post-Resistance | RWDD1    | 51389  | 37 | 6 | 116914232 | 116914232 | Missense_Mutation | SNP | C | T | 12 | 99  | c.700C>T      | c.(700-702)CCT>TCT     | p.P234S       |
| Pat_41 | Post-Resistance | RFX6     | 222546 | 37 | 6 | 117250125 | 117250125 | Missense_Mutation | SNP | C | T | 23 | 136 | c.2602C>T     | c.(2602-2604)CCA>TCA   | p.P868S       |
| Pat_41 | Post-Resistance | C6orf170 | 221322 | 37 | 6 | 121544399 | 121544399 | Missense_Mutation | SNP | C | T | 18 | 63  | c.2464G>A     | c.(2464-2466)GTC>ATC   | p.V822I       |
| Pat_41 | Post-Resistance | GJA1     | 2697   | 37 | 6 | 121768171 | 121768171 | Missense_Mutation | SNP | G | T | 4  | 43  | c.178G>T      | c.(178-180)GGT>TGT     | p.G60C        |
| Pat_41 | Post-Resistance | HSF2     | 3298   | 37 | 6 | 122743976 | 122743976 | Missense_Mutation | SNP | G | A | 6  | 91  | c.944G>A      | c.(943-945)GGC>GAC     | p.G315D       |



|        |                 |          |        |    |   |           |           |                   |     |   |   |    |     |               |                        |                |
|--------|-----------------|----------|--------|----|---|-----------|-----------|-------------------|-----|---|---|----|-----|---------------|------------------------|----------------|
| Pat_41 | Post-Resistance | NCOA7    | 135112 | 37 | 6 | 126242132 | 126242132 | Missense_Mutation | SNP | G | A | 21 | 107 | c.2288G>A     | c.(2287-2289)AGC>AAC   | p.S763N        |
| Pat_41 | Post-Resistance | ARHGAP18 | 93663  | 37 | 6 | 129905244 | 129905244 | Missense_Mutation | SNP | T | C | 4  | 72  | c.1727A>G     | c.(1726-1728)CAG>CGG   | p.Q576R        |
| Pat_41 | Post-Resistance | EPB41L2  | 2037   | 37 | 6 | 131206241 | 131206241 | Missense_Mutation | SNP | C | T | 12 | 221 | c.1828G>A     | c.(1828-1830)GGA>AGA   | p.G610R        |
| Pat_41 | Post-Resistance | EPB41L2  | 2037   | 37 | 6 | 131215562 | 131215562 | Missense_Mutation | SNP | G | A | 6  | 228 | c.1409C>T     | c.(1408-1410)ACC>ATC   | p.T470I        |
| Pat_41 | Post-Resistance | AKAP7    | 9465   | 37 | 6 | 131602750 | 131602750 | Missense_Mutation | SNP | G | A | 12 | 55  | c.199G>A      | c.(199-201)GCT>ACT     | p.A67T         |
| Pat_41 | Post-Resistance | MED23    | 9439   | 37 | 6 | 131926429 | 131926429 | Missense_Mutation | SNP | G | A | 7  | 78  | c.1564C>T     | c.(1564-1566)CCC>TCC   | p.P522S        |
| Pat_41 | Post-Resistance | MED23    | 9439   | 37 | 6 | 131929121 | 131929121 | Missense_Mutation | SNP | C | T | 9  | 90  | c.1168G>A     | c.(1168-1170)GCT>ACT   | p.A390T        |
| Pat_41 | Post-Resistance | ENPP3    | 5169   | 37 | 6 | 132047335 | 132047335 | Nonsense_Mutation | SNP | C | T | 15 | 121 | c.1948C>T     | c.(1948-1950)CAG>TAG   | p.Q650*        |
| Pat_41 | Post-Resistance | TAAR2    | 9287   | 37 | 6 | 132938716 | 132938716 | Missense_Mutation | SNP | C | T | 6  | 79  | c.629G>A      | c.(628-630)GGG>GAG     | p.G210E        |
| Pat_41 | Post-Resistance | VNN1     | 8876   | 37 | 6 | 133005556 | 133005556 | Missense_Mutation | SNP | G | A | 13 | 157 | c.1277C>T     | c.(1276-1278)TCC>TTC   | p.S426F        |
| Pat_41 | Post-Resistance | EYA4     | 2070   | 37 | 6 | 133849899 | 133849899 | Missense_Mutation | SNP | G | A | 21 | 418 | c.1876G>A     | c.(1876-1878)GAC>AAC   | p.D626N        |
| Pat_41 | Post-Resistance | TCF21    | 6943   | 37 | 6 | 134210849 | 134210849 | Missense_Mutation | SNP | C | T | 28 | 159 | c.314C>T      | c.(313-315)ACC>ATC     | p.T105I        |
| Pat_41 | Post-Resistance | HBS1L    | 10767  | 37 | 6 | 135318631 | 135318631 | Missense_Mutation | SNP | C | T | 15 | 132 | c.703G>A      | c.(703-705)GTG>ATG     | p.V235M        |
| Pat_41 | Post-Resistance | MYB      | 4602   | 37 | 6 | 135515596 | 135515596 | Missense_Mutation | SNP | C | T | 7  | 60  | c.946C>T      | c.(946-948)CCA>TCA     | p.P316S        |
| Pat_41 | Post-Resistance | BCLAF1   | 9774   | 37 | 6 | 136582453 | 136582453 | Missense_Mutation | SNP | C | T | 19 | 148 | c.2707G>A     | c.(2707-2709)GAG>AAG   | p.E903K        |
| Pat_41 | Post-Resistance | MAP7     | 9053   | 37 | 6 | 136742895 | 136742895 | Missense_Mutation | SNP | C | T | 9  | 86  | c.110G>A      | c.(109-111)AGC>AAC     | p.S37N         |
| Pat_41 | Post-Resistance | MAP3K5   | 4217   | 37 | 6 | 136935302 | 136935302 | Missense_Mutation | SNP | G | A | 5  | 60  | c.2273C>T     | c.(2272-2274)CCT>CTT   | p.P758L        |
| Pat_41 | Post-Resistance | IL22RA2  | 116379 | 37 | 6 | 137476092 | 137476092 | Missense_Mutation | SNP | G | A | 18 | 122 | c.458C>T      | c.(457-459)ACT>ATT     | p.T153I        |
| Pat_41 | Post-Resistance | IL22RA2  | 116379 | 37 | 6 | 137477929 | 137477929 | Missense_Mutation | SNP | G | A | 22 | 136 | c.260C>T      | c.(259-261)TCT>TTT     | p.S87F         |
| Pat_41 | Post-Resistance | OLIG3    | 167826 | 37 | 6 | 137814884 | 137814884 | Missense_Mutation | SNP | C | T | 6  | 29  | c.424G>A      | c.(424-426)GAG>AAG     | p.E142K        |
| Pat_41 | Post-Resistance | TNFAIP3  | 7128   | 37 | 6 | 138196877 | 138196877 | Missense_Mutation | SNP | C | T | 10 | 193 | c.539C>T      | c.(538-540)CCC>CTC     | p.P180L        |
| Pat_41 | Post-Resistance | KIAA1244 | 57221  | 37 | 6 | 138584656 | 138584656 | Missense_Mutation | SNP | C | T | 3  | 27  | c.2036C>T     | c.(2035-2037)TCC>TTC   | p.S679F        |
| Pat_41 | Post-Resistance | GPR126   | 57211  | 37 | 6 | 142688820 | 142688820 | Missense_Mutation | SNP | C | T | 4  | 63  | c.218C>T      | c.(217-219)GCC>GTC     | p.A73V         |
| Pat_41 | Post-Resistance | HIVEP2   | 3097   | 37 | 6 | 143089518 | 143089518 | Splice_Site       | SNP | C | T | 29 | 245 | c.5342_splice | c.e6+1                 | p.G1781_splice |
| Pat_41 | Post-Resistance | HIVEP2   | 3097   | 37 | 6 | 143094096 | 143094096 | Missense_Mutation | SNP | C | T | 17 | 148 | c.1780G>A     | c.(1780-1782)GCG>ACG   | p.A594T        |
| Pat_41 | Post-Resistance | AIG1     | 51390  | 37 | 6 | 143458050 | 143458050 | Missense_Mutation | SNP | G | A | 15 | 140 | c.220G>A      | c.(220-222)GAG>AAG     | p.E74K         |
| Pat_41 | Post-Resistance | PHACTR2  | 9749   | 37 | 6 | 144081633 | 144081633 | Missense_Mutation | SNP | C | T | 6  | 2   | c.517C>T      | c.(517-519)CCT>TCT     | p.P173S        |
| Pat_41 | Post-Resistance | PHACTR2  | 9749   | 37 | 6 | 144081723 | 144081723 | Nonsense_Mutation | SNP | C | T | 30 | 91  | c.607C>T      | c.(607-609)CAG>TAG     | p.Q203*        |
| Pat_41 | Post-Resistance | SHPRH    | 257218 | 37 | 6 | 146275869 | 146275869 | Missense_Mutation | SNP | C | T | 19 | 63  | c.590G>A      | c.(589-591)AGA>AAA     | p.R197K        |
| Pat_41 | Post-Resistance | SHPRH    | 257218 | 37 | 6 | 146276256 | 146276256 | Missense_Mutation | SNP | C | T | 11 | 61  | c.203G>A      | c.(202-204)AGA>AAA     | p.R68K         |
| Pat_41 | Post-Resistance | SASH1    | 23328  | 37 | 6 | 148711373 | 148711373 | Missense_Mutation | SNP | G | A | 3  | 13  | c.260G>A      | c.(259-261)CGG>CAG     | p.R87Q         |
| Pat_41 | Post-Resistance | PCMT1    | 5110   | 37 | 6 | 150117584 | 150117584 | Missense_Mutation | SNP | C | T | 30 | 118 | c.626C>T      | c.(625-627)GCC>GTC     | p.A209V        |
| Pat_41 | Post-Resistance | AKAP12   | 9590   | 37 | 6 | 151670613 | 151670613 | Missense_Mutation | SNP | G | A | 27 | 101 | c.1087G>A     | c.(1087-1089)GAA>AAA   | p.E363K        |
| Pat_41 | Post-Resistance | RMND1    | 55005  | 37 | 6 | 151766870 | 151766870 | Missense_Mutation | SNP | C | T | 4  | 58  | c.77G>A       | c.(76-78)GGT>GAT       | p.G26D         |
| Pat_41 | Post-Resistance | SYNE1    | 23345  | 37 | 6 | 152497620 | 152497620 | Missense_Mutation | SNP | C | T | 25 | 232 | c.23536G>A    | c.(23536-23538)GCC>ACC | p.A7846T       |
| Pat_41 | Post-Resistance | SYNE1    | 23345  | 37 | 6 | 152542003 | 152542003 | Missense_Mutation | SNP | C | T | 28 | 213 | c.21835G>A    | c.(21835-21837)GTT>ATT | p.V7279I       |
| Pat_41 | Post-Resistance | SYNE1    | 23345  | 37 | 6 | 152651401 | 152651401 | Missense_Mutation | SNP | C | T | 12 | 27  | c.14419G>A    | c.(14419-14421)GAA>AAA | p.E4807K       |
| Pat_41 | Post-Resistance | SYNE1    | 23345  | 37 | 6 | 152725448 | 152725448 | Missense_Mutation | SNP | G | A | 16 | 93  | c.6725C>T     | c.(6724-6726)TCT>TTT   | p.S2242F       |
| Pat_41 | Post-Resistance | TFB1M    | 51106  | 37 | 6 | 155581535 | 155581535 | Splice_Site       | SNP | C | T | 22 | 85  | c.667_splice  | c.e6-1                 | p.V223_splice  |
| Pat_41 | Post-Resistance | ARID1B   | 57492  | 37 | 6 | 157502166 | 157502166 | Missense_Mutation | SNP | C | T | 9  | 42  | c.3145C>T     | c.(3145-3147)CCA>TCA   | p.P1049S       |
| Pat_41 | Post-Resistance | ARID1B   | 57492  | 37 | 6 | 157502238 | 157502238 | Missense_Mutation | SNP | C | T | 12 | 58  | c.3217C>T     | c.(3217-3219)CCT>TCT   | p.P1073S       |
| Pat_41 | Post-Resistance | ARID1B   | 57492  | 37 | 6 | 157519985 | 157519985 | Missense_Mutation | SNP | C | T | 13 | 31  | c.4000C>T     | c.(4000-4002)CCC>TCC   | p.P1334S       |
| Pat_41 | Post-Resistance | ARID1B   | 57492  | 37 | 6 | 157527697 | 157527697 | Missense_Mutation | SNP | C | T | 36 | 313 | c.5368C>T     | c.(5368-5370)CGT>TGT   | p.R1790C       |
| Pat_41 | Post-Resistance | SERAC1   | 84947  | 37 | 6 | 158571497 | 158571497 | Missense_Mutation | SNP | C | T | 4  | 37  | c.253G>A      | c.(253-255)GGA>AGA     | p.G85R         |
| Pat_41 | Post-Resistance | TMEM181  | 57583  | 37 | 6 | 159029496 | 159029496 | Splice_Site       | SNP | G | A | 25 | 207 | c.1215_splice | c.e9+1                 | p.Q405_splice  |
| Pat_41 | Post-Resistance | SYTL3    | 94120  | 37 | 6 | 159184350 | 159184350 | Missense_Mutation | SNP | C | T | 9  | 102 | c.1532C>T     | c.(1531-1533)CCA>CTA   | p.P511L        |
| Pat_41 | Post-Resistance | ACAT2    | 39     | 37 | 6 | 160197211 | 160197211 | Missense_Mutation | SNP | C | T | 11 | 99  | c.664C>T      | c.(664-666)CCT>TCT     | p.P222S        |

|        |                 |          |        |    |   |           |           |                   |     |    |    |     |     |                                      |                      |                |
|--------|-----------------|----------|--------|----|---|-----------|-----------|-------------------|-----|----|----|-----|-----|--------------------------------------|----------------------|----------------|
| Pat_41 | Post-Resistance | PNLDC1   | 154197 | 37 | 6 | 160240050 | 160240050 | Missense_Mutation | SNP | G  | A  | 6   | 97  | c.1297G>A                            | c.(1297-1299)GTC>ATC | p.V433I        |
| Pat_41 | Post-Resistance | IGF2R    | 3482   | 37 | 6 | 160484638 | 160484638 | Missense_Mutation | SNP | C  | T  | 4   | 34  | c.3862C>T                            | c.(3862-3864)CCG>TCG | p.P1288S       |
| Pat_41 | Post-Resistance | LPA      | 4018   | 37 | 6 | 160999554 | 160999554 | Splice_Site       | SNP | C  | T  | 23  | 67  | c.4471_splice                        | c.e28+1              | p.A1491_splice |
| Pat_41 | Post-Resistance | TLL2     | 83887  | 37 | 6 | 167754397 | 167754397 | Missense_Mutation | SNP | G  | A  | 22  | 177 | c.1009G>A                            | c.(1009-1011)GAC>AAC | p.D337N        |
| Pat_41 | Post-Resistance | KIF25    | 3834   | 37 | 6 | 168430266 | 168430266 | Missense_Mutation | SNP | A  | C  | 3   | 94  | c.1A>C                               | c.(1-3)ATG>CTG       | p.M1L          |
| Pat_41 | Post-Resistance | THBS2    | 7058   | 37 | 6 | 169640546 | 169640546 | Splice_Site       | SNP | C  | T  | 10  | 87  | c.1032_splice                        | c.e7+1               | p.K344_splice  |
| Pat_41 | Post-Resistance | WDR27    | 253769 | 37 | 6 | 170060792 | 170060792 | Missense_Mutation | SNP | T  | C  | 6   | 74  | c.1096A>G                            | c.(1096-1098)AAC>GAC | p.N366D        |
| Pat_41 | Post-Resistance | TBP      | 6908   | 37 | 6 | 170870889 | 170870889 | Missense_Mutation | SNP | C  | T  | 7   | 310 | c.65C>T                              | c.(64-66)ACT>ATT     | p.T22I         |
| Pat_41 | Post-Resistance | TBP      | 6908   | 37 | 6 | 170880559 | 170880559 | Missense_Mutation | SNP | C  | T  | 12  | 63  | c.907C>T                             | c.(907-909)CTT>TTT   | p.L303F        |
| Pat_41 | Post-Resistance | PDCD2    | 5134   | 37 | 6 | 170887992 | 170887992 | Missense_Mutation | SNP | C  | T  | 14  | 112 | c.829G>A                             | c.(829-831)GAT>AAT   | p.D277N        |
| Pat_41 | Post-Resistance | FAM20C   | 56975  | 37 | 7 | 195733    | 195733    | Splice_Site       | SNP | G  | A  | 8   | 147 | c.784_splice                         | c.e2+1               | p.A262_splice  |
| Pat_41 | Post-Resistance | C7orf50  | 84310  | 37 | 7 | 1037352   | 1037352   | Missense_Mutation | SNP | G  | A  | 20  | 81  | c.494C>T                             | c.(493-495)GCC>GTC   | p.A165V        |
| Pat_41 | Post-Resistance | INTS1    | 26173  | 37 | 7 | 1512800   | 1512800   | Missense_Mutation | SNP | C  | T  | 15  | 76  | c.5978G>A                            | c.(5977-5979)AGT>AAT | p.S1993N       |
| Pat_41 | Post-Resistance | TMEM184A | 202915 | 37 | 7 | 1586805   | 1586805   | Missense_Mutation | SNP | G  | A  | 3   | 38  | c.1025C>T                            | c.(1024-1026)CCC>CTC | p.P342L        |
| Pat_41 | Post-Resistance | MAD1L1   | 8379   | 37 | 7 | 2054240   | 2054240   | Missense_Mutation | SNP | T  | C  | 13  | 68  | c.1256A>G                            | c.(1255-1257)GAC>GGC | p.D419G        |
| Pat_41 | Post-Resistance | EIF3B    | 8662   | 37 | 7 | 2409142   | 2409142   | Missense_Mutation | SNP | C  | T  | 20  | 323 | c.1439C>T                            | c.(1438-1440)GCC>GTC | p.A480V        |
| Pat_41 | Post-Resistance | TTYH3    | 80727  | 37 | 7 | 2686850   | 2686850   | Missense_Mutation | SNP | G  | T  | 3   | 38  | c.368G>T                             | c.(367-369)CGC>CTC   | p.R123L        |
| Pat_41 | Post-Resistance | TTYH3    | 80727  | 37 | 7 | 2698650   | 2698650   | Splice_Site       | SNP | G  | A  | 11  | 277 | c.1500_splice                        | c.e13+1              | p.S500_splice  |
| Pat_41 | Post-Resistance | CARD11   | 84433  | 37 | 7 | 2962947   | 2962947   | Missense_Mutation | SNP | G  | A  | 4   | 97  | c.1961C>T                            | c.(1960-1962)ACC>ATC | p.T654I        |
| Pat_41 | Post-Resistance | CARD11   | 84433  | 37 | 7 | 2979526   | 2979526   | Missense_Mutation | SNP | C  | T  | 10  | 215 | c.721G>A                             | c.(721-723)GAG>AAG   | p.E241K        |
| Pat_41 | Post-Resistance | SDK1     | 221935 | 37 | 7 | 4185505   | 4185505   | Nonsense_Mutation | SNP | G  | A  | 13  | 84  | c.4380G>A                            | c.(4378-4380)TGG>TGA | p.W1460*       |
| Pat_41 | Post-Resistance | KIAA0415 | 9907   | 37 | 7 | 4825967   | 4825967   | Missense_Mutation | SNP | G  | A  | 5   | 177 | c.1219G>A                            | c.(1219-1221)GCC>ACC | p.A407T        |
| Pat_41 | Post-Resistance | RADIL    | 55698  | 37 | 7 | 4856943   | 4856943   | Missense_Mutation | SNP | C  | T  | 5   | 89  | c.1655G>A                            | c.(1654-1656)AGC>AAC | p.S552N        |
| Pat_41 | Post-Resistance | TNRC18   | 84629  | 37 | 7 | 5355635   | 5355635   | Missense_Mutation | SNP | T  | C  | 15  | 72  | c.6814A>G                            | c.(6814-6816)ATC>GTC | p.I2272V       |
| Pat_41 | Post-Resistance | RNF216   | 54476  | 37 | 7 | 5662589   | 5662589   | Missense_Mutation | SNP | G  | A  | 18  | 249 | c.2503C>T                            | c.(2503-2505)CCC>TCC | p.P835S        |
| Pat_41 | Post-Resistance | PMS2     | 5395   | 37 | 7 | 6042224   | 6042224   | Missense_Mutation | SNP | T  | C  | 93  | 563 | c.397A>G                             | c.(397-399)ACT>GCT   | p.T133A        |
| Pat_41 | Post-Resistance | PMS2     | 5395   | 37 | 7 | 6043405   | 6043405   | Missense_Mutation | SNP | G  | A  | 23  | 146 | c.269C>T                             | c.(268-270)TCT>TTT   | p.S90F         |
| Pat_41 | Post-Resistance | PMS2     | 5395   | 37 | 7 | 6045630   | 6045630   | Missense_Mutation | SNP | T  | G  | 14  | 546 | c.56A>C                              | c.(55-57)GAT>GCT     | p.D19A         |
| Pat_41 | Post-Resistance | USP42    | 84132  | 37 | 7 | 6189806   | 6189806   | Missense_Mutation | SNP | C  | T  | 7   | 47  | c.1979C>T                            | c.(1978-1980)GCT>GTT | p.A660V        |
| Pat_41 | Post-Resistance | USP42    | 84132  | 37 | 7 | 6193634   | 6193634   | Missense_Mutation | SNP | G  | A  | 4   | 109 | c.2449G>A                            | c.(2449-2451)GAC>AAC | p.D817N        |
| Pat_41 | Post-Resistance | USP42    | 84132  | 37 | 7 | 6196570   | 6196570   | Missense_Mutation | SNP | G  | A  | 5   | 31  | c.3827G>A                            | c.(3826-3828)GGC>GAC | p.G1276D       |
| Pat_41 | Post-Resistance | C7orf70  | 84792  | 37 | 7 | 6370391   | 6370391   | Missense_Mutation | SNP | C  | T  | 6   | 108 | c.395G>A                             | c.(394-396)GGA>GAA   | p.G132E        |
| Pat_41 | Post-Resistance | DAGLB    | 221955 | 37 | 7 | 6449592   | 6449592   | Missense_Mutation | SNP | C  | T  | 15  | 356 | c.1895G>A                            | c.(1894-1896)GGT>GAT | p.G632D        |
| Pat_41 | Post-Resistance | DAGLB    | 221955 | 37 | 7 | 6474499   | 6474499   | Missense_Mutation | SNP | C  | T  | 30  | 428 | c.572G>A                             | c.(571-573)AGC>AAC   | p.S191N        |
| Pat_41 | Post-Resistance | MIOS     | 54468  | 37 | 7 | 7613064   | 7613064   | Missense_Mutation | SNP | C  | T  | 14  | 432 | c.958C>T                             | c.(958-960)CCT>TCT   | p.P320S        |
| Pat_41 | Post-Resistance | ICA1     | 3382   | 37 | 7 | 8167583   | 8167583   | Missense_Mutation | SNP | G  | A  | 6   | 160 | c.1250C>T                            | c.(1249-1251)CCC>CTC | p.P417L        |
| Pat_41 | Post-Resistance | PHF14    | 9678   | 37 | 7 | 11076259  | 11076259  | Missense_Mutation | SNP | G  | A  | 14  | 100 | c.1817G>A                            | c.(1816-1818)GGA>GAA | p.G606E        |
| Pat_41 | Post-Resistance | PHF14    | 9678   | 37 | 7 | 11101648  | 11101648  | Missense_Mutation | SNP | G  | A  | 5   | 41  | c.2590G>A                            | c.(2590-2592)GCT>ACT | p.A864T        |
| Pat_41 | Post-Resistance | THSD7A   | 221981 | 37 | 7 | 11418814  | 11418814  | Missense_Mutation | SNP | G  | A  | 42  | 168 | c.4684C>T                            | c.(4684-4686)CCC>TCC | p.P1562S       |
| Pat_41 | Post-Resistance | THSD7A   | 221981 | 37 | 7 | 11676199  | 11676199  | Missense_Mutation | SNP | C  | T  | 6   | 100 | c.580G>A                             | c.(580-582)GAT>AAT   | p.D194N        |
| Pat_41 | Post-Resistance | TMEM195  | 392636 | 37 | 7 | 15433792  | 15433793  | Missense_Mutation | DNP | GG | AA | 109 | 141 | c.621_622CC>TT(619-624)AACCTT>AATTTI |                      | p.L208F        |
| Pat_41 | Post-Resistance | ANKMY2   | 57037  | 37 | 7 | 16642096  | 16642096  | Nonsense_Mutation | SNP | C  | T  | 37  | 215 | c.1050G>A                            | c.(1048-1050)TGG>TGA | p.W350*        |
| Pat_41 | Post-Resistance | AHR      | 196    | 37 | 7 | 17382575  | 17382575  | Missense_Mutation | SNP | C  | T  | 30  | 155 | c.2434C>T                            | c.(2434-2436)CCA>TCA | p.P812S        |
| Pat_41 | Post-Resistance | HDAC9    | 9734   | 37 | 7 | 18706005  | 18706005  | Missense_Mutation | SNP | G  | A  | 5   | 53  | c.1628G>A                            | c.(1627-1629)GGG>GAG | p.G543E        |
| Pat_41 | Post-Resistance | ITGB8    | 3696   | 37 | 7 | 20406758  | 20406758  | Missense_Mutation | SNP | G  | A  | 13  | 231 | c.337G>A                             | c.(337-339)GAA>AAA   | p.E113K        |
| Pat_41 | Post-Resistance | DNAH11   | 8701   | 37 | 7 | 21744166  | 21744166  | Missense_Mutation | SNP | A  | T  | 4   | 116 | c.6409A>T                            | c.(6409-6411)AGG>TGG | p.R2137W       |
| Pat_41 | Post-Resistance | DNAH11   | 8701   | 37 | 7 | 21788281  | 21788281  | Missense_Mutation | SNP | C  | T  | 13  | 95  | c.8615C>T                            | c.(8614-8616)TCC>TTC | p.S2872F       |

|        |                 |          |        |    |   |          |          |                   |     |   |   |    |     |               |                        |               |
|--------|-----------------|----------|--------|----|---|----------|----------|-------------------|-----|---|---|----|-----|---------------|------------------------|---------------|
| Pat_41 | Post-Resistance | DNAH11   | 8701   | 37 | 7 | 21920430 | 21920430 | Nonsense_Mutation | SNP | G | A | 11 | 86  | c.12327G>A    | c.(12325-12327)TGG>TGA | p.W4109*      |
| Pat_41 | Post-Resistance | RAPGEF5  | 9771   | 37 | 7 | 22194192 | 22194192 | Missense_Mutation | SNP | G | A | 7  | 217 | c.1208C>T     | c.(1207-1209)TCC>TTC   | p.S403F       |
| Pat_41 | Post-Resistance | NUPL2    | 11097  | 37 | 7 | 23240257 | 23240257 | Missense_Mutation | SNP | C | T | 26 | 371 | c.1165C>T     | c.(1165-1167)CCC>TCC   | p.P389S       |
| Pat_41 | Post-Resistance | NUPL2    | 11097  | 37 | 7 | 23240312 | 23240312 | Missense_Mutation | SNP | C | T | 8  | 102 | c.1220C>T     | c.(1219-1221)ACT>ATT   | p.T407I       |
| Pat_41 | Post-Resistance | IGF2BP3  | 10643  | 37 | 7 | 23352079 | 23352079 | Missense_Mutation | SNP | C | T | 7  | 67  | c.1642G>A     | c.(1642-1644)GTT>ATT   | p.V548I       |
| Pat_41 | Post-Resistance | IGF2BP3  | 10643  | 37 | 7 | 23357275 | 23357275 | Missense_Mutation | SNP | G | A | 19 | 338 | c.1378C>T     | c.(1378-1380)CCA>TCA   | p.P460S       |
| Pat_41 | Post-Resistance | CLK2P    | 1197   | 37 | 7 | 23624917 | 23624917 | Missense_Mutation | SNP | C | T | 20 | 200 | c.580G>A      | c.(580-582)GAT>AAT     | p.D194N       |
| Pat_41 | Post-Resistance | C7orf46  | 340277 | 37 | 7 | 23731120 | 23731120 | Missense_Mutation | SNP | C | A | 35 | 302 | c.542C>A      | c.(541-543)CCA>CAA     | p.P181Q       |
| Pat_41 | Post-Resistance | C7orf46  | 340277 | 37 | 7 | 23737882 | 23737882 | Missense_Mutation | SNP | G | A | 7  | 383 | c.709G>A      | c.(709-711)GCA>ACA     | p.A237T       |
| Pat_41 | Post-Resistance | C7orf46  | 340277 | 37 | 7 | 23740488 | 23740488 | Splice_Site       | SNP | G | A | 17 | 219 | c.828_splice  | c.e6+1                 | p.R276_splice |
| Pat_41 | Post-Resistance | OSBPL3   | 26031  | 37 | 7 | 24901388 | 24901388 | Missense_Mutation | SNP | C | T | 7  | 139 | c.871G>A      | c.(871-873)GTC>ATC     | p.V291I       |
| Pat_41 | Post-Resistance | CBX3     | 11335  | 37 | 7 | 26251312 | 26251312 | Missense_Mutation | SNP | C | T | 8  | 251 | c.361C>T      | c.(361-363)CTT>TTT     | p.L121F       |
| Pat_41 | Post-Resistance | SKAP2    | 8935   | 37 | 7 | 26765179 | 26765179 | Missense_Mutation | SNP | C | T | 4  | 88  | c.664G>A      | c.(664-666)GAA>AAA     | p.E222K       |
| Pat_41 | Post-Resistance | HOXA1    | 3198   | 37 | 7 | 27135161 | 27135161 | Missense_Mutation | SNP | G | A | 12 | 170 | c.371C>T      | c.(370-372)CCC>CTC     | p.P124L       |
| Pat_41 | Post-Resistance | HOXA2    | 3199   | 37 | 7 | 27142064 | 27142064 | Missense_Mutation | SNP | G | A | 20 | 385 | c.56C>T       | c.(55-57)GCT>GTT       | p.A19V        |
| Pat_41 | Post-Resistance | HOXA6    | 3203   | 37 | 7 | 27185506 | 27185506 | Missense_Mutation | SNP | C | T | 16 | 160 | c.473G>A      | c.(472-474)GGC>GAC     | p.G158D       |
| Pat_41 | Post-Resistance | HIBADH   | 11112  | 37 | 7 | 27565940 | 27565940 | Missense_Mutation | SNP | G | A | 7  | 62  | c.904C>T      | c.(904-906)CTT>TTT     | p.L302F       |
| Pat_41 | Post-Resistance | CREB5    | 9586   | 37 | 7 | 28547246 | 28547246 | Missense_Mutation | SNP | C | T | 12 | 467 | c.182C>T      | c.(181-183)ACC>ATC     | p.T61I        |
| Pat_41 | Post-Resistance | CPVL     | 54504  | 37 | 7 | 29070228 | 29070228 | Missense_Mutation | SNP | C | T | 45 | 570 | c.1285G>A     | c.(1285-1287)GCT>ACT   | p.A429T       |
| Pat_41 | Post-Resistance | CHN2     | 1124   | 37 | 7 | 29539497 | 29539497 | Missense_Mutation | SNP | G | A | 5  | 239 | c.754G>A      | c.(754-756)GTA>ATA     | p.V252I       |
| Pat_41 | Post-Resistance | WIPF3    | 644150 | 37 | 7 | 29928987 | 29928987 | Missense_Mutation | SNP | C | T | 7  | 126 | c.1315C>T     | c.(1315-1317)CCA>TCA   | p.P439S       |
| Pat_41 | Post-Resistance | AQP1     | 358    | 37 | 7 | 30951784 | 30951784 | Missense_Mutation | SNP | G | A | 7  | 161 | c.260G>A      | c.(259-261)TGC>TAC     | p.C87Y        |
| Pat_41 | Post-Resistance | PDE1C    | 5137   | 37 | 7 | 31904613 | 31904613 | Missense_Mutation | SNP | C | T | 12 | 131 | c.693G>A      | c.(691-693)ATG>ATA     | p.M231I       |
| Pat_41 | Post-Resistance | FKBP9    | 11328  | 37 | 7 | 33020054 | 33020054 | Missense_Mutation | SNP | C | T | 31 | 348 | c.782C>T      | c.(781-783)TCC>TTC     | p.S261F       |
| Pat_41 | Post-Resistance | EYPD1    | 80820  | 37 | 7 | 36194114 | 36194114 | Missense_Mutation | SNP | G | A | 28 | 195 | c.181G>A      | c.(181-183)GCA>ACA     | p.A61T        |
| Pat_41 | Post-Resistance | EYPD1    | 80820  | 37 | 7 | 36194759 | 36194759 | Missense_Mutation | SNP | G | A | 8  | 100 | c.826G>A      | c.(826-828)GCC>ACC     | p.A276T       |
| Pat_41 | Post-Resistance | ANLN     | 54443  | 37 | 7 | 36438964 | 36438964 | Missense_Mutation | SNP | C | T | 7  | 157 | c.449C>T      | c.(448-450)GCA>GTA     | p.A150V       |
| Pat_41 | Post-Resistance | ANLN     | 54443  | 37 | 7 | 36450314 | 36450314 | Splice_Site       | SNP | G | A | 26 | 401 | c.1287_splice | c.e6+1                 | p.Q429_splice |
| Pat_41 | Post-Resistance | ELMO1    | 9844   | 37 | 7 | 37252945 | 37252945 | Missense_Mutation | SNP | C | T | 10 | 237 | c.949G>A      | c.(949-951)GAC>AAC     | p.D317N       |
| Pat_41 | Post-Resistance | STARD3NL | 83930  | 37 | 7 | 38256888 | 38256888 | Missense_Mutation | SNP | G | A | 5  | 131 | c.535G>A      | c.(535-537)GAA>AAA     | p.E179K       |
| Pat_41 | Post-Resistance | POU6F2   | 11281  | 37 | 7 | 39243911 | 39243911 | Missense_Mutation | SNP | C | T | 21 | 126 | c.268C>T      | c.(268-270)CCA>TCA     | p.P90S        |
| Pat_41 | Post-Resistance | RALA     | 5898   | 37 | 7 | 39730128 | 39730128 | Missense_Mutation | SNP | G | A | 7  | 155 | c.262G>A      | c.(262-264)GGG>AGG     | p.G88R        |
| Pat_41 | Post-Resistance | C7orf10  | 79783  | 37 | 7 | 40789033 | 40789033 | Missense_Mutation | SNP | G | A | 8  | 222 | c.1090G>A     | c.(1090-1092)GTA>ATA   | p.V364I       |
| Pat_41 | Post-Resistance | C7orf10  | 79783  | 37 | 7 | 40899963 | 40899963 | Missense_Mutation | SNP | C | T | 41 | 478 | c.1202C>T     | c.(1201-1203)CCC>CTC   | p.P401L       |
| Pat_41 | Post-Resistance | GLI3     | 2737   | 37 | 7 | 42063207 | 42063207 | Missense_Mutation | SNP | C | T | 5  | 77  | c.1357G>A     | c.(1357-1359)GAA>AAA   | p.E453K       |
| Pat_41 | Post-Resistance | GLI3     | 2737   | 37 | 7 | 42065985 | 42065985 | Missense_Mutation | SNP | G | A | 4  | 58  | c.1055C>T     | c.(1054-1056)TCC>TTC   | p.S352F       |
| Pat_41 | Post-Resistance | C7orf25  | 79020  | 37 | 7 | 42949470 | 42949470 | Missense_Mutation | SNP | G | A | 7  | 106 | c.1030C>T     | c.(1030-1032)CGT>TGT   | p.R344C       |
| Pat_41 | Post-Resistance | C7orf25  | 79020  | 37 | 7 | 42950138 | 42950138 | Missense_Mutation | SNP | C | T | 17 | 218 | c.362G>A      | c.(361-363)GGC>GAC     | p.G121D       |
| Pat_41 | Post-Resistance | POLD2    | 5425   | 37 | 7 | 44157597 | 44157597 | Missense_Mutation | SNP | G | A | 32 | 197 | c.287C>T      | c.(286-288)ACT>ATT     | p.T96I        |
| Pat_41 | Post-Resistance | TMED4    | 222068 | 37 | 7 | 44620754 | 44620754 | Missense_Mutation | SNP | G | A | 10 | 149 | c.472C>T      | c.(472-474)CTC>TTC     | p.L158F       |
| Pat_41 | Post-Resistance | ZMIZ2    | 83637  | 37 | 7 | 44806248 | 44806248 | Missense_Mutation | SNP | G | A | 4  | 53  | c.2641G>A     | c.(2641-2643)GAA>AAA   | p.E881K       |
| Pat_41 | Post-Resistance | PURB     | 5814   | 37 | 7 | 44924157 | 44924157 | Missense_Mutation | SNP | G | A | 18 | 233 | c.791C>T      | c.(790-792)GCC>GTC     | p.A264V       |
| Pat_41 | Post-Resistance | MYO1G    | 64005  | 37 | 7 | 45009350 | 45009350 | Missense_Mutation | SNP | G | A | 9  | 246 | c.1457C>T     | c.(1456-1458)ACC>ATC   | p.T486I       |
| Pat_41 | Post-Resistance | ADCY1    | 107    | 37 | 7 | 45614510 | 45614510 | Missense_Mutation | SNP | G | A | 4  | 76  | c.368G>A      | c.(367-369)GGC>GAC     | p.G123D       |
| Pat_41 | Post-Resistance | PKD1L1   | 168507 | 37 | 7 | 47894505 | 47894505 | Missense_Mutation | SNP | C | T | 45 | 513 | c.4834G>A     | c.(4834-4836)GCA>ACA   | p.A1612T      |
| Pat_41 | Post-Resistance | ABCA13   | 154664 | 37 | 7 | 48287983 | 48287983 | Missense_Mutation | SNP | C | T | 51 | 417 | c.1807C>T     | c.(1807-1809)CCC>TCC   | p.P603S       |
| Pat_41 | Post-Resistance | GRB10    | 2887   | 37 | 7 | 50673084 | 50673084 | Missense_Mutation | SNP | G | A | 11 | 124 | c.1292C>T     | c.(1291-1293)TCC>TTC   | p.S431F       |

|        |                 |          |        |    |   |          |          |                   |     |   |   |    |     |               |                        |               |
|--------|-----------------|----------|--------|----|---|----------|----------|-------------------|-----|---|---|----|-----|---------------|------------------------|---------------|
| Pat_41 | Post-Resistance | COBL     | 23242  | 37 | 7 | 51096946 | 51096946 | Missense_Mutation | SNP | G | A | 9  | 82  | c.1847C>T     | c.(1846-1848)TCT>TTT   | p.S616F       |
| Pat_41 | Post-Resistance | EGFR     | 1956   | 37 | 7 | 55220293 | 55220293 | Missense_Mutation | SNP | C | T | 78 | 153 | c.683C>T      | c.(682-684)CCC>CTC     | p.P228L       |
| Pat_41 | Post-Resistance | ZNF479   | 90827  | 37 | 7 | 57187686 | 57187686 | Missense_Mutation | SNP | G | A | 17 | 181 | c.1436C>T     | c.(1435-1437)ACC>ATC   | p.T479I       |
| Pat_41 | Post-Resistance | ZNF716   | 441234 | 37 | 7 | 57529068 | 57529068 | Missense_Mutation | SNP | T | C | 6  | 242 | c.901T>C      | c.(901-903)TGT>CGT     | p.C301R       |
| Pat_41 | Post-Resistance | ZNF679   | 168417 | 37 | 7 | 63727184 | 63727184 | Nonsense_Mutation | SNP | G | A | 5  | 112 | c.1173G>A     | c.(1171-1173)TGG>TGA   | p.W391*       |
| Pat_41 | Post-Resistance | ASL      | 435    | 37 | 7 | 65552326 | 65552326 | Missense_Mutation | SNP | C | T | 9  | 146 | c.608C>T      | c.(607-609)GCC>GTC     | p.A203V       |
| Pat_41 | Post-Resistance | POM121   | 9883   | 37 | 7 | 72413675 | 72413675 | Missense_Mutation | SNP | G | A | 15 | 36  | c.3143G>A     | c.(3142-3144)GGC>GAC   | p.G1048D      |
| Pat_41 | Post-Resistance | NCF1B    | 654816 | 37 | 7 | 72639965 | 72639965 | Missense_Mutation | SNP | G | A | 7  | 243 | c.196G>A      | c.(196-198)GGC>AGC     | p.G66S        |
| Pat_41 | Post-Resistance | BAZ1B    | 9031   | 37 | 7 | 72892541 | 72892541 | Missense_Mutation | SNP | G | A | 12 | 194 | c.1250C>T     | c.(1249-1251)TCC>TTC   | p.S417F       |
| Pat_41 | Post-Resistance | STX1A    | 6804   | 37 | 7 | 73118149 | 73118149 | Missense_Mutation | SNP | G | A | 13 | 68  | c.476C>T      | c.(475-477)ACC>ATC     | p.T159I       |
| Pat_41 | Post-Resistance | CLIP2    | 7461   | 37 | 7 | 73752811 | 73752811 | Missense_Mutation | SNP | C | T | 6  | 49  | c.155C>T      | c.(154-156)TCC>TTC     | p.S52F        |
| Pat_41 | Post-Resistance | GTF2IRD1 | 9569   | 37 | 7 | 73973250 | 73973250 | Missense_Mutation | SNP | C | T | 4  | 95  | c.2212C>T     | c.(2212-2214)CCC>TCC   | p.P738S       |
| Pat_41 | Post-Resistance | TRIM74   | 378108 | 37 | 7 | 75034352 | 75034352 | Nonsense_Mutation | SNP | G | A | 8  | 93  | c.726G>A      | c.(724-726)TGG>TGA     | p.W242*       |
| Pat_41 | Post-Resistance | POR      | 5447   | 37 | 7 | 75612839 | 75612839 | Missense_Mutation | SNP | C | T | 17 | 118 | c.832C>T      | c.(832-834)CCC>TCC     | p.P278S       |
| Pat_41 | Post-Resistance | UPK3B    | 80761  | 37 | 7 | 76140051 | 76140051 | Missense_Mutation | SNP | C | A | 3  | 24  | c.82C>A       | c.(82-84)CTG>ATG       | p.L28M        |
| Pat_41 | Post-Resistance | UPK3B    | 80761  | 37 | 7 | 76143388 | 76143388 | Missense_Mutation | SNP | G | A | 6  | 184 | c.751G>A      | c.(751-753)GCG>ACG     | p.A251T       |
| Pat_41 | Post-Resistance | MAGI2    | 9863   | 37 | 7 | 77764430 | 77764430 | Missense_Mutation | SNP | C | T | 32 | 220 | c.2939G>A     | c.(2938-2940)GGC>GAC   | p.G980D       |
| Pat_41 | Post-Resistance | GNAI1    | 2770   | 37 | 7 | 79833051 | 79833051 | Missense_Mutation | SNP | C | T | 21 | 216 | c.493C>T      | c.(493-495)CCA>TCA     | p.P165S       |
| Pat_41 | Post-Resistance | SEMA3C   | 10512  | 37 | 7 | 80387731 | 80387731 | Missense_Mutation | SNP | G | A | 20 | 327 | c.1559C>T     | c.(1558-1560)GCC>GTC   | p.A520V       |
| Pat_41 | Post-Resistance | PCLO     | 27445  | 37 | 7 | 82451814 | 82451814 | Missense_Mutation | SNP | G | A | 15 | 519 | c.14788C>T    | c.(14788-14790)CCA>TCA | p.P4930S      |
| Pat_41 | Post-Resistance | PCLO     | 27445  | 37 | 7 | 82579001 | 82579001 | Missense_Mutation | SNP | C | T | 21 | 230 | c.10903G>A    | c.(10903-10905)GCC>ACC | p.A3635T      |
| Pat_41 | Post-Resistance | SEMA3E   | 9723   | 37 | 7 | 83014750 | 83014750 | Splice_Site       | SNP | C | T | 44 | 434 | c.1736_splice | c.e16-1                | p.G579_splice |
| Pat_41 | Post-Resistance | DMTF1    | 9988   | 37 | 7 | 86824069 | 86824069 | Missense_Mutation | SNP | C | T | 27 | 256 | c.2098C>T     | c.(2098-2100)CCT>TCT   | p.P700S       |
| Pat_41 | Post-Resistance | C7orf23  | 79161  | 37 | 7 | 86827279 | 86827279 | Missense_Mutation | SNP | C | T | 59 | 515 | c.212G>A      | c.(211-213)AGT>AAT     | p.S71N        |
| Pat_41 | Post-Resistance | C7orf23  | 79161  | 37 | 7 | 86827362 | 86827362 | Splice_Site       | SNP | C | T | 21 | 278 | c.130_splice  | c.e3-1                 | p.V44_splice  |
| Pat_41 | Post-Resistance | CROT     | 54677  | 37 | 7 | 87011233 | 87011233 | Missense_Mutation | SNP | C | T | 6  | 138 | c.986C>T      | c.(985-987)CCT>CTT     | p.P329L       |
| Pat_41 | Post-Resistance | ABCB1    | 5243   | 37 | 7 | 87183123 | 87183123 | Missense_Mutation | SNP | G | A | 20 | 332 | c.953C>T      | c.(952-954)ACC>ATC     | p.T318I       |
| Pat_41 | Post-Resistance | ABCB1    | 5243   | 37 | 7 | 87225093 | 87225093 | Missense_Mutation | SNP | C | T | 9  | 245 | c.106G>A      | c.(106-108)GTA>ATA     | p.V36I        |
| Pat_41 | Post-Resistance | DBF4     | 10926  | 37 | 7 | 87514318 | 87514318 | Missense_Mutation | SNP | G | A | 11 | 115 | c.244G>A      | c.(244-246)GAT>AAT     | p.D82N        |
| Pat_41 | Post-Resistance | ADAM22   | 53616  | 37 | 7 | 87704955 | 87704955 | Missense_Mutation | SNP | C | T | 11 | 260 | c.338C>T      | c.(337-339)TCT>TTT     | p.S113F       |
| Pat_41 | Post-Resistance | ADAM22   | 53616  | 37 | 7 | 87785270 | 87785270 | Missense_Mutation | SNP | G | A | 8  | 421 | c.1856G>A     | c.(1855-1857)GGT>GAT   | p.G619D       |
| Pat_41 | Post-Resistance | SRI      | 6717   | 37 | 7 | 87838663 | 87838663 | Missense_Mutation | SNP | C | T | 8  | 215 | c.502G>A      | c.(502-504)GCT>ACT     | p.A168T       |
| Pat_41 | Post-Resistance | C7orf63  | 79846  | 37 | 7 | 89903303 | 89903303 | Missense_Mutation | SNP | C | T | 6  | 76  | c.863C>T      | c.(862-864)GCT>GTT     | p.A288V       |
| Pat_41 | Post-Resistance | GTPBP10  | 85865  | 37 | 7 | 90014364 | 90014364 | Missense_Mutation | SNP | C | T | 27 | 473 | c.1060C>T     | c.(1060-1062)CTT>TTT   | p.L354F       |
| Pat_41 | Post-Resistance | CLDN12   | 9069   | 37 | 7 | 90042445 | 90042445 | Missense_Mutation | SNP | T | A | 31 | 361 | c.455T>A      | c.(454-456)ATC>AAC     | p.I152N       |
| Pat_41 | Post-Resistance | AKAP9    | 10142  | 37 | 7 | 91668009 | 91668009 | Missense_Mutation | SNP | C | T | 34 | 364 | c.4615C>T     | c.(4615-4617)CCA>TCA   | p.P1539S      |
| Pat_41 | Post-Resistance | AKAP9    | 10142  | 37 | 7 | 91674387 | 91674387 | Missense_Mutation | SNP | C | T | 14 | 393 | c.5228C>T     | c.(5227-5229)GCA>GTA   | p.A1743V      |
| Pat_41 | Post-Resistance | AKAP9    | 10142  | 37 | 7 | 91690647 | 91690647 | Missense_Mutation | SNP | C | T | 26 | 305 | c.5675C>T     | c.(5674-5676)TCC>TTC   | p.S1892F      |
| Pat_41 | Post-Resistance | AKAP9    | 10142  | 37 | 7 | 91736646 | 91736646 | Missense_Mutation | SNP | G | A | 12 | 344 | c.11456G>A    | c.(11455-11457)GGG>GAC | p.G3819E      |
| Pat_41 | Post-Resistance | PEX1     | 5189   | 37 | 7 | 92147353 | 92147353 | Missense_Mutation | SNP | G | A | 8  | 95  | c.476C>T      | c.(475-477)GCA>GTA     | p.A159V       |
| Pat_41 | Post-Resistance | SAMD9    | 54809  | 37 | 7 | 92731132 | 92731132 | Nonsense_Mutation | SNP | G | A | 22 | 444 | c.4279C>T     | c.(4279-4281)CAG>TAG   | p.Q1427*      |
| Pat_41 | Post-Resistance | SAMD9    | 54809  | 37 | 7 | 92733004 | 92733004 | Missense_Mutation | SNP | C | T | 30 | 247 | c.2407G>A     | c.(2407-2409)GAA>AAA   | p.E803K       |
| Pat_41 | Post-Resistance | SAMD9L   | 219285 | 37 | 7 | 92762127 | 92762127 | Missense_Mutation | SNP | G | A | 6  | 321 | c.3158C>T     | c.(3157-3159)ACT>ATT   | p.T1053I      |
| Pat_41 | Post-Resistance | CCDC132  | 55610  | 37 | 7 | 92935281 | 92935281 | Missense_Mutation | SNP | G | A | 32 | 443 | c.1594G>A     | c.(1594-1596)GAT>AAT   | p.D532N       |
| Pat_41 | Post-Resistance | CCDC132  | 55610  | 37 | 7 | 92940543 | 92940543 | Missense_Mutation | SNP | C | T | 64 | 568 | c.1814C>T     | c.(1813-1815)CCT>CTT   | p.P605L       |
| Pat_41 | Post-Resistance | CALCR    | 799    | 37 | 7 | 93090240 | 93090240 | Missense_Mutation | SNP | C | T | 15 | 300 | c.643G>A      | c.(643-645)GTA>ATA     | p.V215I       |
| Pat_41 | Post-Resistance | BET1     | 10282  | 37 | 7 | 93628543 | 93628543 | Missense_Mutation | SNP | C | T | 21 | 179 | c.83G>A       | c.(82-84)TGT>TAT       | p.C28Y        |

|        |                 |         |        |    |   |           |           |                   |     |   |   |    |     |              |                        |               |
|--------|-----------------|---------|--------|----|---|-----------|-----------|-------------------|-----|---|---|----|-----|--------------|------------------------|---------------|
| Pat_41 | Post-Resistance | COL1A2  | 1278   | 37 | 7 | 94037541  | 94037541  | Missense_Mutation | SNP | G | A | 4  | 119 | c.686G>A     | c.(685-687)GGC>GAC     | p.G229D       |
| Pat_41 | Post-Resistance | PON1    | 5444   | 37 | 7 | 94944760  | 94944760  | Missense_Mutation | SNP | G | A | 11 | 193 | c.244C>T     | c.(244-246)CCT>TCT     | p.P82S        |
| Pat_41 | Post-Resistance | ASB4    | 51666  | 37 | 7 | 95115471  | 95115471  | Splice_Site       | SNP | G | A | 21 | 272 | c.187_splice | c.e1+1                 | p.G63_splice  |
| Pat_41 | Post-Resistance | LMTK2   | 22853  | 37 | 7 | 97822521  | 97822521  | Missense_Mutation | SNP | G | A | 21 | 307 | c.2744G>A    | c.(2743-2745)GGG>GAG   | p.G915E       |
| Pat_41 | Post-Resistance | LMTK2   | 22853  | 37 | 7 | 97822571  | 97822571  | Missense_Mutation | SNP | G | A | 19 | 309 | c.2794G>A    | c.(2794-2796)GAA>AAA   | p.E932K       |
| Pat_41 | Post-Resistance | TECPR1  | 25851  | 37 | 7 | 97851059  | 97851059  | Missense_Mutation | SNP | C | T | 9  | 152 | c.3071G>A    | c.(3070-3072)TGC>TAC   | p.C1024Y      |
| Pat_41 | Post-Resistance | TECPR1  | 25851  | 37 | 7 | 97862970  | 97862970  | Missense_Mutation | SNP | C | T | 5  | 161 | c.1435G>A    | c.(1435-1437)GCC>ACC   | p.A479T       |
| Pat_41 | Post-Resistance | TRRAP   | 8295   | 37 | 7 | 98515090  | 98515090  | Missense_Mutation | SNP | G | A | 10 | 165 | c.2410G>A    | c.(2410-2412)GAC>AAC   | p.D804N       |
| Pat_41 | Post-Resistance | TRRAP   | 8295   | 37 | 7 | 98527726  | 98527726  | Missense_Mutation | SNP | C | T | 5  | 206 | c.3290C>T    | c.(3289-3291)GCT>GTT   | p.A1097V      |
| Pat_41 | Post-Resistance | TRRAP   | 8295   | 37 | 7 | 98564710  | 98564710  | Missense_Mutation | SNP | C | T | 10 | 179 | c.7202C>T    | c.(7201-7203)ACT>ATT   | p.T2401I      |
| Pat_41 | Post-Resistance | TRRAP   | 8295   | 37 | 7 | 98606051  | 98606051  | Missense_Mutation | SNP | C | T | 15 | 564 | c.10763C>T   | c.(10762-10764)CCC>CTC | p.P3588L      |
| Pat_41 | Post-Resistance | SMURF1  | 57154  | 37 | 7 | 98643330  | 98643330  | Missense_Mutation | SNP | C | T | 19 | 239 | c.1325G>A    | c.(1324-1326)GGT>GAT   | p.G442D       |
| Pat_41 | Post-Resistance | SMURF1  | 57154  | 37 | 7 | 98645402  | 98645402  | Missense_Mutation | SNP | C | T | 11 | 368 | c.1135G>A    | c.(1135-1137)GTC>ATC   | p.V379I       |
| Pat_41 | Post-Resistance | SMURF1  | 57154  | 37 | 7 | 98654839  | 98654839  | Missense_Mutation | SNP | C | T | 30 | 684 | c.392G>A     | c.(391-393)GGC>GAC     | p.G131D       |
| Pat_41 | Post-Resistance | ARPC1A  | 10552  | 37 | 7 | 98946500  | 98946500  | Missense_Mutation | SNP | C | T | 27 | 384 | c.418C>T     | c.(418-420)CCG>TCG     | p.P140S       |
| Pat_41 | Post-Resistance | ARPC1A  | 10552  | 37 | 7 | 98956034  | 98956034  | Missense_Mutation | SNP | C | T | 7  | 274 | c.785C>T     | c.(784-786)GCT>GTT     | p.A262V       |
| Pat_41 | Post-Resistance | PTCD1   | 26024  | 37 | 7 | 99030947  | 99030947  | Missense_Mutation | SNP | C | T | 37 | 541 | c.548G>A     | c.(547-549)TGC>TAC     | p.C183Y       |
| Pat_41 | Post-Resistance | ZNF789  | 285989 | 37 | 7 | 99077329  | 99077329  | Missense_Mutation | SNP | G | A | 12 | 235 | c.70G>A      | c.(70-72)GAG>AAG       | p.E24K        |
| Pat_41 | Post-Resistance | CYP3A5  | 1577   | 37 | 7 | 99247830  | 99247830  | Missense_Mutation | SNP | C | T | 54 | 481 | c.1279G>A    | c.(1279-1281)GAT>AAT   | p.D427N       |
| Pat_41 | Post-Resistance | CYP3A5  | 1577   | 37 | 7 | 99261613  | 99261613  | Missense_Mutation | SNP | C | T | 19 | 166 | c.776G>A     | c.(775-777)AGT>AAT     | p.S259N       |
| Pat_41 | Post-Resistance | CYP3A7  | 1551   | 37 | 7 | 99314831  | 99314831  | Missense_Mutation | SNP | C | T | 12 | 386 | c.490G>A     | c.(490-492)GCA>ACA     | p.A164T       |
| Pat_41 | Post-Resistance | CYP3A43 | 64816  | 37 | 7 | 99445199  | 99445199  | Missense_Mutation | SNP | C | T | 11 | 237 | c.407C>T     | c.(406-408)GCT>GTT     | p.A136V       |
| Pat_41 | Post-Resistance | CYP3A43 | 64816  | 37 | 7 | 99447177  | 99447177  | Missense_Mutation | SNP | G | A | 6  | 275 | c.530G>A     | c.(529-531)GGG>GAG     | p.G177E       |
| Pat_41 | Post-Resistance | GJC3    | 349149 | 37 | 7 | 99527119  | 99527119  | Missense_Mutation | SNP | C | T | 6  | 209 | c.125G>A     | c.(124-126)GGA>GAA     | p.G42E        |
| Pat_41 | Post-Resistance | GJC3    | 349149 | 37 | 7 | 99527156  | 99527156  | Missense_Mutation | SNP | C | T | 13 | 91  | c.88G>A      | c.(88-90)GGA>AGA       | p.G30R        |
| Pat_41 | Post-Resistance | AZGP1   | 563    | 37 | 7 | 99569368  | 99569368  | Splice_Site       | SNP | C | T | 11 | 332 | c.337_splice | c.e2+1                 | p.G113_splice |
| Pat_41 | Post-Resistance | ZKSCAN1 | 7586   | 37 | 7 | 99631096  | 99631096  | Missense_Mutation | SNP | C | T | 4  | 43  | c.968C>T     | c.(967-969)ACC>ATC     | p.T323I       |
| Pat_41 | Post-Resistance | MCM7    | 4176   | 37 | 7 | 99696317  | 99696317  | Missense_Mutation | SNP | G | A | 15 | 167 | c.604C>T     | c.(604-606)CCT>TCT     | p.P202S       |
| Pat_41 | Post-Resistance | AP4M1   | 9179   | 37 | 7 | 99699520  | 99699520  | Missense_Mutation | SNP | G | A | 11 | 152 | c.76G>A      | c.(76-78)GGC>AGC       | p.G26S        |
| Pat_41 | Post-Resistance | AP4M1   | 9179   | 37 | 7 | 99701032  | 99701032  | Missense_Mutation | SNP | G | A | 10 | 219 | c.352G>A     | c.(352-354)GAC>AAC     | p.D118N       |
| Pat_41 | Post-Resistance | GPC2    | 221914 | 37 | 7 | 99773257  | 99773257  | Missense_Mutation | SNP | C | T | 3  | 58  | c.586G>A     | c.(586-588)GCC>ACC     | p.A196T       |
| Pat_41 | Post-Resistance | STAG3   | 10734  | 37 | 7 | 99798462  | 99798462  | Missense_Mutation | SNP | C | T | 12 | 208 | c.1931C>T    | c.(1930-1932)GCT>GTT   | p.A644V       |
| Pat_41 | Post-Resistance | STAG3   | 10734  | 37 | 7 | 99808640  | 99808640  | Missense_Mutation | SNP | C | T | 5  | 177 | c.3245C>T    | c.(3244-3246)GCC>GTC   | p.A1082V      |
| Pat_41 | Post-Resistance | MEPCE   | 56257  | 37 | 7 | 100028425 | 100028425 | Missense_Mutation | SNP | C | T | 28 | 738 | c.784C>T     | c.(784-786)CGG>TGG     | p.R262W       |
| Pat_41 | Post-Resistance | TSC22D4 | 81628  | 37 | 7 | 100074905 | 100074905 | Missense_Mutation | SNP | C | T | 10 | 207 | c.757G>A     | c.(757-759)GGG>AGG     | p.G253R       |
| Pat_41 | Post-Resistance | AGFG2   | 3268   | 37 | 7 | 100153284 | 100153284 | Missense_Mutation | SNP | G | A | 6  | 224 | c.803G>A     | c.(802-804)GGC>GAC     | p.G268D       |
| Pat_41 | Post-Resistance | LRCH4   | 4034   | 37 | 7 | 100180040 | 100180040 | Missense_Mutation | SNP | C | T | 9  | 112 | c.263G>A     | c.(262-264)TGC>TAC     | p.C88Y        |
| Pat_41 | Post-Resistance | TFR2    | 7036   | 37 | 7 | 100230916 | 100230916 | Missense_Mutation | SNP | C | T | 10 | 123 | c.662G>A     | c.(661-663)GGA>GAA     | p.G221E       |
| Pat_41 | Post-Resistance | GIGYF1  | 64599  | 37 | 7 | 100284410 | 100284410 | Missense_Mutation | SNP | G | A | 5  | 41  | c.556C>T     | c.(556-558)CCA>TCA     | p.P186S       |
| Pat_41 | Post-Resistance | ZAN     | 7455   | 37 | 7 | 100350706 | 100350706 | Missense_Mutation | SNP | C | T | 13 | 371 | c.2978C>T    | c.(2977-2979)CCC>CTC   | p.P993L       |
| Pat_41 | Post-Resistance | SLC12A9 | 56996  | 37 | 7 | 100457825 | 100457825 | Missense_Mutation | SNP | G | A | 11 | 61  | c.1189G>A    | c.(1189-1191)GCT>ACT   | p.A397T       |
| Pat_41 | Post-Resistance | MUC17   | 140453 | 37 | 7 | 100679202 | 100679202 | Missense_Mutation | SNP | C | T | 30 | 605 | c.4505C>T    | c.(4504-4506)ACC>ATC   | p.T1502I      |
| Pat_41 | Post-Resistance | MUC17   | 140453 | 37 | 7 | 100680999 | 100680999 | Missense_Mutation | SNP | G | A | 30 | 712 | c.6302G>A    | c.(6301-6303)AGT>AAT   | p.S2101N      |
| Pat_41 | Post-Resistance | MUC17   | 140453 | 37 | 7 | 100682754 | 100682754 | Missense_Mutation | SNP | C | T | 13 | 806 | c.8057C>T    | c.(8056-8058)ACT>ATT   | p.T2686I      |
| Pat_41 | Post-Resistance | MUC17   | 140453 | 37 | 7 | 100683071 | 100683071 | Missense_Mutation | SNP | C | T | 27 | 750 | c.8374C>T    | c.(8374-8376)CCT>TCT   | p.P2792S      |
| Pat_41 | Post-Resistance | MUC17   | 140453 | 37 | 7 | 100683423 | 100683423 | Missense_Mutation | SNP | C | T | 27 | 764 | c.8726C>T    | c.(8725-8727)TCT>TTT   | p.S2909F      |
| Pat_41 | Post-Resistance | MUC17   | 140453 | 37 | 7 | 100695189 | 100695189 | Missense_Mutation | SNP | C | T | 16 | 396 | c.13049C>T   | c.(13048-13050)TCC>TTC | p.S4350F      |



|        |                 |           |        |    |   |           |           |                   |     |   |   |    |     |               |                      |               |
|--------|-----------------|-----------|--------|----|---|-----------|-----------|-------------------|-----|---|---|----|-----|---------------|----------------------|---------------|
| Pat_41 | Post-Resistance | TRIM56    | 81844  | 37 | 7 | 100732323 | 100732323 | Missense_Mutation | SNP | G | A | 10 | 254 | c.1730G>A     | c.(1729-1731)GGC>GAC | p.G577D       |
| Pat_41 | Post-Resistance | PLOD3     | 8985   | 37 | 7 | 100855182 | 100855182 | Missense_Mutation | SNP | C | T | 4  | 46  | c.1177G>A     | c.(1177-1179)GCC>ACC | p.A393T       |
| Pat_41 | Post-Resistance | ZNHIT1    | 10467  | 37 | 7 | 100866973 | 100866973 | Missense_Mutation | SNP | G | A | 7  | 139 | c.293G>A      | c.(292-294)GGC>GAC   | p.G98D        |
| Pat_41 | Post-Resistance | CUX1      | 1523   | 37 | 7 | 101843453 | 101843453 | Splice_Site       | SNP | G | A | 5  | 78  | c.2062_splice | c.e17+1              | p.A688_splice |
| Pat_41 | Post-Resistance | LRWD1     | 222229 | 37 | 7 | 102106607 | 102106607 | Missense_Mutation | SNP | G | A | 9  | 214 | c.322G>A      | c.(322-324)GAC>AAC   | p.D108N       |
| Pat_41 | Post-Resistance | FBXL13    | 222235 | 37 | 7 | 102553582 | 102553582 | Missense_Mutation | SNP | C | T | 6  | 197 | c.959G>A      | c.(958-960)GGG>GAG   | p.G320E       |
| Pat_41 | Post-Resistance | DPY19L2P2 | 349152 | 37 | 7 | 102825941 | 102825941 | Missense_Mutation | SNP | C | T | 42 | 264 | c.1054G>A     | c.(1054-1056)GCT>ACT | p.A352T       |
| Pat_41 | Post-Resistance | PMPCB     | 9512   | 37 | 7 | 102939942 | 102939942 | Missense_Mutation | SNP | G | A | 15 | 328 | c.293G>A      | c.(292-294)GGA>GAA   | p.G98E        |
| Pat_41 | Post-Resistance | SLC26A5   | 375611 | 37 | 7 | 103018221 | 103018221 | Missense_Mutation | SNP | G | A | 44 | 283 | c.1811C>T     | c.(1810-1812)GCT>GTT | p.A604V       |
| Pat_41 | Post-Resistance | RELN      | 5649   | 37 | 7 | 103393659 | 103393659 | Missense_Mutation | SNP | G | A | 8  | 335 | c.547C>T      | c.(547-549)CCA>TCA   | p.P183S       |
| Pat_41 | Post-Resistance | ORC5L     | 5001   | 37 | 7 | 103807252 | 103807252 | Missense_Mutation | SNP | G | A | 10 | 277 | c.958C>T      | c.(958-960)CCA>TCA   | p.P320S       |
| Pat_41 | Post-Resistance | LHFPL3    | 375612 | 37 | 7 | 103969607 | 103969607 | Missense_Mutation | SNP | C | T | 8  | 134 | c.380C>T      | c.(379-381)ACC>ATC   | p.T127I       |
| Pat_41 | Post-Resistance | MLL5      | 55904  | 37 | 7 | 104742023 | 104742023 | Missense_Mutation | SNP | C | T | 7  | 163 | c.1874C>T     | c.(1873-1875)GCT>GTT | p.A625V       |
| Pat_41 | Post-Resistance | MLL5      | 55904  | 37 | 7 | 104753127 | 104753127 | Nonsense_Mutation | SNP | C | T | 15 | 589 | c.4924C>T     | c.(4924-4926)CAA>TAA | p.Q1642*      |
| Pat_41 | Post-Resistance | PUS7      | 54517  | 37 | 7 | 105143011 | 105143011 | Missense_Mutation | SNP | C | T | 7  | 107 | c.586G>A      | c.(586-588)GTT>ATT   | p.V196I       |
| Pat_41 | Post-Resistance | PUS7      | 54517  | 37 | 7 | 105146464 | 105146464 | Missense_Mutation | SNP | C | T | 9  | 278 | c.523G>A      | c.(523-525)GAA>AAA   | p.E175K       |
| Pat_41 | Post-Resistance | SYPL1     | 6856   | 37 | 7 | 105752618 | 105752618 | Missense_Mutation | SNP | C | T | 5  | 101 | c.91G>A       | c.(91-93)GAG>AAG     | p.E31K        |
| Pat_41 | Post-Resistance | PIK3CG    | 5294   | 37 | 7 | 106508716 | 106508716 | Missense_Mutation | SNP | C | T | 40 | 449 | c.710C>T      | c.(709-711)CCC>CTC   | p.P237L       |
| Pat_41 | Post-Resistance | PIK3CG    | 5294   | 37 | 7 | 106509321 | 106509321 | Missense_Mutation | SNP | C | T | 5  | 207 | c.1315C>T     | c.(1315-1317)CCA>TCA | p.P439S       |
| Pat_41 | Post-Resistance | COG5      | 10466  | 37 | 7 | 107188745 | 107188745 | Missense_Mutation | SNP | C | T | 23 | 734 | c.418G>A      | c.(418-420)GCT>ACT   | p.A140T       |
| Pat_41 | Post-Resistance | DUS4L     | 11062  | 37 | 7 | 107215727 | 107215727 | Missense_Mutation | SNP | C | T | 6  | 203 | c.451C>T      | c.(451-453)CCT>TCT   | p.P151S       |
| Pat_41 | Post-Resistance | SLC26A4   | 5172   | 37 | 7 | 107314726 | 107314726 | Missense_Mutation | SNP | C | T | 16 | 462 | c.533C>T      | c.(532-534)ACT>ATT   | p.T178I       |
| Pat_41 | Post-Resistance | SLC26A4   | 5172   | 37 | 7 | 107315403 | 107315403 | Missense_Mutation | SNP | G | A | 47 | 443 | c.614G>A      | c.(613-615)GGC>GAC   | p.G205D       |
| Pat_41 | Post-Resistance | CBLL1     | 79872  | 37 | 7 | 107398769 | 107398769 | Missense_Mutation | SNP | C | T | 25 | 623 | c.622C>T      | c.(622-624)CCT>TCT   | p.P208S       |
| Pat_41 | Post-Resistance | CBLL1     | 79872  | 37 | 7 | 107399240 | 107399240 | Missense_Mutation | SNP | C | T | 21 | 774 | c.1093C>T     | c.(1093-1095)CCT>TCT | p.P365S       |
| Pat_41 | Post-Resistance | SLC26A3   | 1811   | 37 | 7 | 107423462 | 107423462 | Missense_Mutation | SNP | C | T | 81 | 491 | c.1196G>A     | c.(1195-1197)AGA>AAA | p.R399K       |
| Pat_41 | Post-Resistance | SLC26A3   | 1811   | 37 | 7 | 107432319 | 107432319 | Missense_Mutation | SNP | G | A | 25 | 390 | c.338C>T      | c.(337-339)GCC>GTC   | p.A113V       |
| Pat_41 | Post-Resistance | LAMB1     | 3912   | 37 | 7 | 107615483 | 107615483 | Missense_Mutation | SNP | C | T | 22 | 277 | c.1430G>A     | c.(1429-1431)GGT>GAT | p.G477D       |
| Pat_41 | Post-Resistance | LAMB4     | 22798  | 37 | 7 | 107696131 | 107696131 | Missense_Mutation | SNP | G | A | 6  | 93  | c.3701C>T     | c.(3700-3702)CCT>CTT | p.P1234L      |
| Pat_41 | Post-Resistance | THAP5     | 168451 | 37 | 7 | 108205072 | 108205072 | Missense_Mutation | SNP | G | A | 34 | 353 | c.751C>T      | c.(751-753)CCA>TCA   | p.P251S       |
| Pat_41 | Post-Resistance | DNAJB9    | 4189   | 37 | 7 | 108213565 | 108213565 | Missense_Mutation | SNP | G | A | 15 | 269 | c.440G>A      | c.(439-441)GGT>GAT   | p.G147D       |
| Pat_41 | Post-Resistance | LRRN3     | 54674  | 37 | 7 | 110764299 | 110764299 | Missense_Mutation | SNP | G | A | 6  | 160 | c.1471G>A     | c.(1471-1473)GGG>AGG | p.G491R       |
| Pat_41 | Post-Resistance | DOCK4     | 9732   | 37 | 7 | 111379221 | 111379221 | Missense_Mutation | SNP | G | A | 18 | 295 | c.5174C>T     | c.(5173-5175)GCC>GTC | p.A1725V      |
| Pat_41 | Post-Resistance | DOCK4     | 9732   | 37 | 7 | 111381153 | 111381153 | Missense_Mutation | SNP | C | T | 8  | 461 | c.5010G>A     | c.(5008-5010)ATG>ATA | p.M1670I      |
| Pat_41 | Post-Resistance | DOCK4     | 9732   | 37 | 7 | 111484938 | 111484938 | Missense_Mutation | SNP | C | T | 33 | 206 | c.2617G>A     | c.(2617-2619)GAG>AAG | p.E873K       |
| Pat_41 | Post-Resistance | DOCK4     | 9732   | 37 | 7 | 111617186 | 111617186 | Splice_Site       | SNP | C | T | 8  | 124 | c.701_splice  | c.e8+1               | p.S234_splice |
| Pat_41 | Post-Resistance | IFRD1     | 3475   | 37 | 7 | 112102181 | 112102181 | Nonsense_Mutation | SNP | G | A | 7  | 443 | c.744G>A      | c.(742-744)TGG>TGA   | p.W248*       |
| Pat_41 | Post-Resistance | TFEC      | 22797  | 37 | 7 | 115594691 | 115594691 | Missense_Mutation | SNP | C | T | 12 | 112 | c.388G>A      | c.(388-390)GAC>AAC   | p.D130N       |
| Pat_41 | Post-Resistance | WNT2      | 7472   | 37 | 7 | 116955306 | 116955306 | Missense_Mutation | SNP | G | A | 10 | 204 | c.407C>T      | c.(406-408)TCC>TTC   | p.S136F       |
| Pat_41 | Post-Resistance | CFTR      | 1080   | 37 | 7 | 117254688 | 117254688 | Missense_Mutation | SNP | G | A | 14 | 461 | c.3389G>A     | c.(3388-3390)GGT>GAT | p.G1130D      |
| Pat_41 | Post-Resistance | CTTNBP2   | 83992  | 37 | 7 | 117432428 | 117432428 | Missense_Mutation | SNP | G | T | 4  | 97  | c.822C>A      | c.(820-822)GAC>GAA   | p.D274E       |
| Pat_41 | Post-Resistance | ANKRD7    | 56311  | 37 | 7 | 117876878 | 117876878 | Missense_Mutation | SNP | C | T | 30 | 469 | c.610C>T      | c.(610-612)CCA>TCA   | p.P204S       |
| Pat_41 | Post-Resistance | KCND2     | 3751   | 37 | 7 | 119914895 | 119914895 | Missense_Mutation | SNP | C | T | 74 | 476 | c.209C>T      | c.(208-210)TCT>TTT   | p.S70F        |
| Pat_41 | Post-Resistance | KCND2     | 3751   | 37 | 7 | 119915042 | 119915042 | Missense_Mutation | SNP | T | C | 31 | 580 | c.356T>C      | c.(355-357)CTG>CCG   | p.L119P       |
| Pat_41 | Post-Resistance | ING3      | 54556  | 37 | 7 | 120608117 | 120608117 | Missense_Mutation | SNP | C | T | 5  | 124 | c.686C>T      | c.(685-687)GCT>GTT   | p.A229V       |
| Pat_41 | Post-Resistance | C7orf58   | 79974  | 37 | 7 | 120935675 | 120935675 | Missense_Mutation | SNP | G | A | 14 | 350 | c.3050G>A     | c.(3049-3051)AGC>AAC | p.S1017N      |
| Pat_41 | Post-Resistance | PTPRZ1    | 5803   | 37 | 7 | 121653814 | 121653814 | Missense_Mutation | SNP | G | A | 48 | 260 | c.4714G>A     | c.(4714-4716)GAC>AAC | p.D1572N      |

|        |                 |          |        |    |   |           |           |                   |     |   |   |    |     |               |                      |               |
|--------|-----------------|----------|--------|----|---|-----------|-----------|-------------------|-----|---|---|----|-----|---------------|----------------------|---------------|
| Pat_41 | Post-Resistance | PTPRZ1   | 5803   | 37 | 7 | 121653847 | 121653847 | Missense_Mutation | SNP | G | A | 31 | 542 | c.4747G>A     | c.(4747-4749)GCA>ACA | p.A1583T      |
| Pat_41 | Post-Resistance | PTPRZ1   | 5803   | 37 | 7 | 121691519 | 121691519 | Missense_Mutation | SNP | C | T | 19 | 391 | c.6122C>T     | c.(6121-6123)TCT>TTT | p.S2041F      |
| Pat_41 | Post-Resistance | AASS     | 10157  | 37 | 7 | 121726122 | 121726122 | Missense_Mutation | SNP | C | T | 9  | 437 | c.2128G>A     | c.(2128-2130)GAG>AAG | p.E710K       |
| Pat_41 | Post-Resistance | FEZF1    | 389549 | 37 | 7 | 121942272 | 121942272 | Missense_Mutation | SNP | G | A | 34 | 269 | c.1207C>T     | c.(1207-1209)CCC>TCC | p.P403S       |
| Pat_41 | Post-Resistance | TAS2R16  | 50833  | 37 | 7 | 122635189 | 122635189 | Missense_Mutation | SNP | G | A | 48 | 336 | c.500C>T      | c.(499-501)ACT>ATT   | p.T167I       |
| Pat_41 | Post-Resistance | IQUB     | 154865 | 37 | 7 | 123097539 | 123097539 | Missense_Mutation | SNP | C | T | 28 | 776 | c.2089G>A     | c.(2089-2091)GTC>ATC | p.V697I       |
| Pat_41 | Post-Resistance | IQUB     | 154865 | 37 | 7 | 123142718 | 123142718 | Missense_Mutation | SNP | G | A | 5  | 205 | c.956C>T      | c.(955-957)ACT>ATT   | p.T319I       |
| Pat_41 | Post-Resistance | LMOD2    | 442721 | 37 | 7 | 123302785 | 123302785 | Missense_Mutation | SNP | G | A | 10 | 266 | c.1145G>A     | c.(1144-1146)AGA>AAA | p.R382K       |
| Pat_41 | Post-Resistance | SPAM1    | 6677   | 37 | 7 | 123593991 | 123593991 | Missense_Mutation | SNP | C | T | 9  | 345 | c.367C>T      | c.(367-369)CAT>TAT   | p.H123Y       |
| Pat_41 | Post-Resistance | SPAM1    | 6677   | 37 | 7 | 123595115 | 123595115 | Missense_Mutation | SNP | G | A | 57 | 455 | c.1019G>A     | c.(1018-1020)GGA>GAA | p.G340E       |
| Pat_41 | Post-Resistance | POT1     | 25913  | 37 | 7 | 124503616 | 124503616 | Missense_Mutation | SNP | C | T | 8  | 163 | c.334G>A      | c.(334-336)GCC>ACC   | p.A112T       |
| Pat_41 | Post-Resistance | GRM8     | 2918   | 37 | 7 | 126882871 | 126882871 | Missense_Mutation | SNP | C | T | 13 | 217 | c.388G>A      | c.(388-390)GAT>AAT   | p.D130N       |
| Pat_41 | Post-Resistance | ZNF800   | 168850 | 37 | 7 | 127013448 | 127013448 | Missense_Mutation | SNP | G | A | 4  | 89  | c.1942C>T     | c.(1942-1944)CCT>TCT | p.P648S       |
| Pat_41 | Post-Resistance | PAX4     | 5078   | 37 | 7 | 127253864 | 127253864 | Missense_Mutation | SNP | C | T | 20 | 166 | c.484G>A      | c.(484-486)GGC>AGC   | p.G162S       |
| Pat_41 | Post-Resistance | SND1     | 27044  | 37 | 7 | 127569307 | 127569307 | Missense_Mutation | SNP | G | A | 44 | 299 | c.1594G>A     | c.(1594-1596)GAA>AAA | p.E532K       |
| Pat_41 | Post-Resistance | RBM28    | 55131  | 37 | 7 | 127955018 | 127955018 | Missense_Mutation | SNP | G | A | 8  | 251 | c.1844C>T     | c.(1843-1845)CCT>CTT | p.P615L       |
| Pat_41 | Post-Resistance | IMPDH1   | 3614   | 37 | 7 | 128040569 | 128040569 | Missense_Mutation | SNP | C | T | 6  | 86  | c.349G>A      | c.(349-351)GAC>AAC   | p.D117N       |
| Pat_41 | Post-Resistance | CALU     | 813    | 37 | 7 | 128398946 | 128398946 | Missense_Mutation | SNP | G | A | 8  | 526 | c.437G>A      | c.(436-438)GGA>GAA   | p.G146E       |
| Pat_41 | Post-Resistance | OPN1SW   | 611    | 37 | 7 | 128415045 | 128415045 | Nonsense_Mutation | SNP | C | T | 14 | 193 | c.516G>A      | c.(514-516)TGG>TGA   | p.W172*       |
| Pat_41 | Post-Resistance | FLNC     | 2318   | 37 | 7 | 128480646 | 128480646 | Missense_Mutation | SNP | G | A | 24 | 450 | c.1594G>A     | c.(1594-1596)GTG>ATG | p.V532M       |
| Pat_41 | Post-Resistance | FLNC     | 2318   | 37 | 7 | 128481563 | 128481563 | Missense_Mutation | SNP | C | T | 17 | 397 | c.2063C>T     | c.(2062-2064)GCT>GTT | p.A688V       |
| Pat_41 | Post-Resistance | FLNC     | 2318   | 37 | 7 | 128483512 | 128483512 | Missense_Mutation | SNP | G | A | 6  | 115 | c.2692G>A     | c.(2692-2694)GGC>AGC | p.G898S       |
| Pat_41 | Post-Resistance | FLNC     | 2318   | 37 | 7 | 128496677 | 128496677 | Missense_Mutation | SNP | G | A | 5  | 106 | c.7357G>A     | c.(7357-7359)GAG>AAG | p.E2453K      |
| Pat_41 | Post-Resistance | IRF5     | 3663   | 37 | 7 | 128586043 | 128586043 | Missense_Mutation | SNP | C | T | 5  | 160 | c.340C>T      | c.(340-342)CCC>TCC   | p.P114S       |
| Pat_41 | Post-Resistance | TNPO3    | 23534  | 37 | 7 | 128694821 | 128694821 | Missense_Mutation | SNP | C | T | 7  | 93  | c.4G>A        | c.(4-6)GAA>AAA       | p.E2K         |
| Pat_41 | Post-Resistance | SMO      | 6608   | 37 | 7 | 128851543 | 128851543 | Missense_Mutation | SNP | C | T | 9  | 221 | c.1868C>T     | c.(1867-1869)ACC>ATC | p.T623I       |
| Pat_41 | Post-Resistance | AHCYL2   | 23382  | 37 | 7 | 129066405 | 129066405 | Splice_Site       | SNP | G | A | 8  | 89  | c.1829_splice | c.e16+1              | p.R610_splice |
| Pat_41 | Post-Resistance | ZC3HC1   | 51530  | 37 | 7 | 129658530 | 129658530 | Nonsense_Mutation | SNP | G | A | 53 | 380 | c.1483C>T     | c.(1483-1485)CAG>TAG | p.Q495*       |
| Pat_41 | Post-Resistance | KLHDC10  | 23008  | 37 | 7 | 129769366 | 129769366 | Missense_Mutation | SNP | C | T | 16 | 237 | c.1069C>T     | c.(1069-1071)CCA>TCA | p.P357S       |
| Pat_41 | Post-Resistance | TMEM209  | 84928  | 37 | 7 | 129841722 | 129841722 | Missense_Mutation | SNP | C | T | 4  | 136 | c.541G>A      | c.(541-543)GTG>ATG   | p.V181M       |
| Pat_41 | Post-Resistance | CPA4     | 51200  | 37 | 7 | 129944382 | 129944382 | Missense_Mutation | SNP | G | A | 8  | 448 | c.449G>A      | c.(448-450)GGA>GAA   | p.G150E       |
| Pat_41 | Post-Resistance | CPA1     | 1357   | 37 | 7 | 130023625 | 130023625 | Missense_Mutation | SNP | C | T | 6  | 296 | c.686C>T      | c.(685-687)ACG>ATG   | p.T229M       |
| Pat_41 | Post-Resistance | PLXNA4   | 91584  | 37 | 7 | 132193067 | 132193067 | Missense_Mutation | SNP | G | A | 11 | 56  | c.386C>T      | c.(385-387)GCC>GTC   | p.A129V       |
| Pat_41 | Post-Resistance | AKR1B10  | 57016  | 37 | 7 | 134225822 | 134225822 | Missense_Mutation | SNP | C | T | 9  | 106 | c.932C>T      | c.(931-933)CCC>CTC   | p.P311L       |
| Pat_41 | Post-Resistance | AKR1B15  | 441282 | 37 | 7 | 134256425 | 134256425 | Missense_Mutation | SNP | G | A | 12 | 362 | c.505G>A      | c.(505-507)GCC>ACC   | p.A169T       |
| Pat_41 | Post-Resistance | BPGM     | 669    | 37 | 7 | 134346389 | 134346389 | Nonsense_Mutation | SNP | C | T | 6  | 168 | c.130C>T      | c.(130-132)CAA>TAA   | p.Q44*        |
| Pat_41 | Post-Resistance | CNOT4    | 4850   | 37 | 7 | 135047690 | 135047690 | Missense_Mutation | SNP | G | A | 30 | 723 | c.2089C>T     | c.(2089-2091)CCC>TCC | p.P697S       |
| Pat_41 | Post-Resistance | SLC13A4  | 26266  | 37 | 7 | 135368912 | 135368912 | Missense_Mutation | SNP | G | A | 21 | 157 | c.1703C>T     | c.(1702-1704)GCC>GTC | p.A568V       |
| Pat_41 | Post-Resistance | LUZP6    | 767558 | 37 | 7 | 135614697 | 135614697 | Missense_Mutation | SNP | C | T | 73 | 556 | c.334G>A      | c.(334-336)GCA>ACA   | p.A112T       |
| Pat_41 | Post-Resistance | DGKI     | 9162   | 37 | 7 | 137271908 | 137271908 | Missense_Mutation | SNP | G | A | 7  | 279 | c.1360C>T     | c.(1360-1362)CCT>TCT | p.P454S       |
| Pat_41 | Post-Resistance | AKR1D1   | 6718   | 37 | 7 | 137791435 | 137791435 | Missense_Mutation | SNP | C | T | 19 | 357 | c.661C>T      | c.(661-663)CCT>TCT   | p.P221S       |
| Pat_41 | Post-Resistance | ATP6V0A4 | 50617  | 37 | 7 | 138432246 | 138432246 | Missense_Mutation | SNP | C | T | 5  | 112 | c.1244G>A     | c.(1243-1245)GGA>GAA | p.G415E       |
| Pat_41 | Post-Resistance | ATP6V0A4 | 50617  | 37 | 7 | 138437504 | 138437504 | Missense_Mutation | SNP | C | T | 10 | 219 | c.895G>A      | c.(895-897)GTG>ATG   | p.V299M       |
| Pat_41 | Post-Resistance | KIAA1549 | 57670  | 37 | 7 | 138603546 | 138603546 | Missense_Mutation | SNP | C | T | 4  | 56  | c.826G>A      | c.(826-828)GGT>AGT   | p.G276S       |
| Pat_41 | Post-Resistance | ZC3HAV1  | 56829  | 37 | 7 | 138768753 | 138768753 | Missense_Mutation | SNP | C | T | 6  | 131 | c.470G>A      | c.(469-471)GGT>GAT   | p.G157D       |
| Pat_41 | Post-Resistance | UBN2     | 254048 | 37 | 7 | 138969256 | 138969256 | Missense_Mutation | SNP | C | T | 10 | 258 | c.3605C>T     | c.(3604-3606)CCA>CTA | p.P1202L      |
| Pat_41 | Post-Resistance | LUC7L2   | 51631  | 37 | 7 | 139030283 | 139030283 | Missense_Mutation | SNP | C | T | 11 | 176 | c.175C>T      | c.(175-177)CTT>TTT   | p.L59F        |

|        |                 |         |        |    |   |           |           |                        |     |    |    |     |     |                 |                          |                |
|--------|-----------------|---------|--------|----|---|-----------|-----------|------------------------|-----|----|----|-----|-----|-----------------|--------------------------|----------------|
| Pat_41 | Post-Resistance | LUC7L2  | 51631  | 37 | 7 | 139102364 | 139102364 | Missense_Mutation      | SNP | G  | A  | 12  | 489 | c.890G>A        | c.(889-891)CGG>CAG       | p.R297Q        |
| Pat_41 | Post-Resistance | JHDM1D  | 80853  | 37 | 7 | 139796441 | 139796441 | Missense_Mutation      | SNP | C  | T  | 23  | 339 | c.2288G>A       | c.(2287-2289)AGA>AAA     | p.R763K        |
| Pat_41 | Post-Resistance | JHDM1D  | 80853  | 37 | 7 | 139810984 | 139810984 | Missense_Mutation      | SNP | G  | A  | 7   | 116 | c.1339C>T       | c.(1339-1341)CTT>TTT     | p.L447F        |
| Pat_41 | Post-Resistance | BRAF    | 673    | 37 | 7 | 140439683 | 140439683 | Missense_Mutation      | SNP | G  | A  | 5   | 95  | c.2056C>T       | c.(2056-2058)CCA>TCA     | p.P686S        |
| Pat_41 | Post-Resistance | BRAF    | 673    | 37 | 7 | 140453136 | 140453136 | Missense_Mutation      | SNP | A  | T  | 260 | 18  | c.1799T>A       | c.(1798-1800)GTG>GAG     | p.V600E        |
| Pat_41 | Post-Resistance | BRAF    | 673    | 37 | 7 | 140476715 | 140476715 | Missense_Mutation      | SNP | A  | G  | 11  | 373 | c.1691T>C       | c.(1690-1692)ATG>ACG     | p.M564T        |
| Pat_41 | Post-Resistance | MRPS33  | 51650  | 37 | 7 | 140710402 | 140710402 | Missense_Mutation      | SNP | A  | G  | 22  | 633 | c.32T>C         | c.(31-33)ATG>ACG         | p.M11T         |
| Pat_41 | Post-Resistance | WEE2    | 494551 | 37 | 7 | 141414144 | 141414144 | Missense_Mutation      | SNP | C  | T  | 6   | 96  | c.478C>T        | c.(478-480)CCA>TCA       | p.P160S        |
| Pat_41 | Post-Resistance | WEE2    | 494551 | 37 | 7 | 141422958 | 141422958 | Missense_Mutation      | SNP | C  | T  | 9   | 339 | c.905C>T        | c.(904-906)TCT>TTT       | p.S302F        |
| Pat_41 | Post-Resistance | WEE2    | 494551 | 37 | 7 | 141427132 | 141427132 | Missense_Mutation      | SNP | G  | A  | 37  | 440 | c.1421G>A       | c.(1420-1422)AGA>AAA     | p.R474K        |
| Pat_41 | Post-Resistance | TAS2R4  | 50832  | 37 | 7 | 141478958 | 141478958 | Missense_Mutation      | SNP | G  | A  | 7   | 121 | c.670G>A        | c.(670-672)GCT>ACT       | p.A224T        |
| Pat_41 | Post-Resistance | PRSS37  | 136242 | 37 | 7 | 141540827 | 141540827 | Missense_Mutation      | SNP | C  | T  | 62  | 432 | c.23G>A         | c.(22-24)GGT>GAT         | p.G8D          |
| Pat_41 | Post-Resistance | MGAM    | 8972   | 37 | 7 | 141805680 | 141805680 | Missense_Mutation      | SNP | A  | G  | 7   | 382 | c.5563A>G       | c.(5563-5565)AGC>GGC     | p.S1855G       |
| Pat_41 | Post-Resistance | TRY6    | 154754 | 37 | 7 | 142480022 | 142480022 | Missense_Mutation      | SNP | C  | T  | 36  | 570 | c.154C>T        | c.(154-156)CTC>TTC       | p.L52F         |
| Pat_41 | Post-Resistance | TRY6    | 154754 | 37 | 7 | 142481270 | 142481270 | Missense_Mutation      | SNP | C  | T  | 30  | 324 | c.344C>T        | c.(343-345)ACA>ATA       | p.T115I        |
| Pat_41 | Post-Resistance | EPHB6   | 2051   | 37 | 7 | 142568053 | 142568053 | Nonsense_Mutation      | SNP | G  | A  | 9   | 408 | c.2694G>A       | c.(2692-2694)TGG>TGA     | p.W898*        |
| Pat_41 | Post-Resistance | TRPV6   | 55503  | 37 | 7 | 142573566 | 142573566 | Missense_Mutation      | SNP | G  | A  | 21  | 220 | c.854C>T        | c.(853-855)TCC>TTC       | p.S285F        |
| Pat_41 | Post-Resistance | C7orf34 | 135927 | 37 | 7 | 142636707 | 142636707 | Missense_Mutation      | SNP | G  | A  | 5   | 95  | c.64G>A         | c.(64-66)GTG>ATG         | p.V22M         |
| Pat_41 | Post-Resistance | OR6V1   | 346517 | 37 | 7 | 142749823 | 142749823 | Missense_Mutation      | SNP | G  | A  | 10  | 215 | c.386G>A        | c.(385-387)CGC>CAC       | p.R129H        |
| Pat_41 | Post-Resistance | OR6V1   | 346517 | 37 | 7 | 142750170 | 142750170 | Missense_Mutation      | SNP | C  | G  | 36  | 257 | c.733C>G        | c.(733-735)CTG>GTG       | p.L245V        |
| Pat_41 | Post-Resistance | TAS2R39 | 259285 | 37 | 7 | 142880944 | 142880944 | Missense_Mutation      | SNP | C  | T  | 5   | 239 | c.433C>T        | c.(433-435)CCC>TCC       | p.P145S        |
| Pat_41 | Post-Resistance | TAS2R40 | 259286 | 37 | 7 | 142920027 | 142920027 | Missense_Mutation      | SNP | G  | A  | 16  | 361 | c.856G>A        | c.(856-858)GCT>ACT       | p.A286T        |
| Pat_41 | Post-Resistance | GSTK1   | 373156 | 37 | 7 | 142965883 | 142965883 | Missense_Mutation      | SNP | G  | A  | 11  | 169 | c.634G>A        | c.(634-636)GAG>AAG       | p.E212K        |
| Pat_41 | Post-Resistance | CLCN1   | 1180   | 37 | 7 | 143036392 | 143036392 | Missense_Mutation      | SNP | G  | A  | 23  | 407 | c.1448G>A       | c.(1447-1449)GGC>GAC     | p.G483D        |
| Pat_41 | Post-Resistance | FAM131B | 9715   | 37 | 7 | 143056055 | 143056055 | Missense_Mutation      | SNP | C  | T  | 7   | 140 | c.247G>A        | c.(247-249)GCC>ACC       | p.A83T         |
| Pat_41 | Post-Resistance | ZYX     | 7791   | 37 | 7 | 143085929 | 143085929 | Missense_Mutation      | SNP | G  | A  | 8   | 220 | c.1384G>A       | c.(1384-1386)GCC>ACC     | p.A462T        |
| Pat_41 | Post-Resistance | FAM115C | 285966 | 37 | 7 | 143421678 | 143421678 | Missense_Mutation      | SNP | C  | T  | 4   | 23  | c.2393C>T       | c.(2392-2394)GCC>GTC     | p.A798V        |
| Pat_41 | Post-Resistance | FAM115A | 9747   | 37 | 7 | 143573641 | 143573641 | Missense_Mutation      | SNP | G  | A  | 9   | 155 | c.61C>T         | c.(61-63)CCC>TCC         | p.P21S         |
| Pat_41 | Post-Resistance | OR2F2   | 135948 | 37 | 7 | 143632797 | 143632797 | Missense_Mutation      | SNP | G  | A  | 8   | 192 | c.472G>A        | c.(472-474)GTG>ATG       | p.V158M        |
| Pat_41 | Post-Resistance | OR2F1   | 26211  | 37 | 7 | 143657961 | 143657961 | Missense_Mutation      | SNP | G  | A  | 15  | 214 | c.898G>A        | c.(898-900)GCC>ACC       | p.A300T        |
| Pat_41 | Post-Resistance | ARHGEF5 | 7984   | 37 | 7 | 144075960 | 144075960 | Splice_Site            | SNP | G  | A  | 14  | 347 | c.4636_splice   | c.e14+1                  | p.G1546_splice |
| Pat_41 | Post-Resistance | CUL1    | 8454   | 37 | 7 | 148427162 | 148427162 | Translation_Start_Site | SNP | C  | A  | 16  | 423 | c.-52C>A        | c.(-54--50)AGCTG>AGATG   |                |
| Pat_41 | Post-Resistance | CUL1    | 8454   | 37 | 7 | 148454172 | 148454172 | Missense_Mutation      | SNP | C  | T  | 16  | 531 | c.413C>T        | c.(412-414)GCC>GTC       | p.A138V        |
| Pat_41 | Post-Resistance | EZH2    | 2146   | 37 | 7 | 148512598 | 148512598 | Missense_Mutation      | SNP | C  | T  | 18  | 456 | c.1531G>A       | c.(1531-1533)GAC>AAC     | p.D511N        |
| Pat_41 | Post-Resistance | EZH2    | 2146   | 37 | 7 | 148544387 | 148544387 | Missense_Mutation      | SNP | C  | T  | 72  | 734 | c.4G>A          | c.(4-6)GGC>AGC           | p.G2S          |
| Pat_41 | Post-Resistance | ZNF425  | 155054 | 37 | 7 | 148802082 | 148802082 | Missense_Mutation      | SNP | C  | T  | 9   | 94  | c.881G>A        | c.(880-882)TGT>TAT       | p.C294Y        |
| Pat_41 | Post-Resistance | ZNF425  | 155054 | 37 | 7 | 148809285 | 148809285 | Missense_Mutation      | SNP | C  | T  | 16  | 296 | c.248G>A        | c.(247-249)AGC>AAC       | p.S83N         |
| Pat_41 | Post-Resistance | ZNF425  | 155054 | 37 | 7 | 148815350 | 148815350 | Missense_Mutation      | SNP | C  | T  | 32  | 349 | c.109G>A        | c.(109-111)GAG>AAG       | p.E37K         |
| Pat_41 | Post-Resistance | ZNF398  | 57541  | 37 | 7 | 148851154 | 148851154 | Missense_Mutation      | SNP | G  | A  | 7   | 257 | c.142G>A        | c.(142-144)GCC>ACC       | p.A48T         |
| Pat_41 | Post-Resistance | ZNF777  | 27153  | 37 | 7 | 149133753 | 149133753 | Missense_Mutation      | SNP | G  | A  | 5   | 157 | c.1252C>T       | c.(1252-1254)CCA>TCA     | p.P418S        |
| Pat_41 | Post-Resistance | ZNF862  | 643641 | 37 | 7 | 149556569 | 149556569 | Nonsense_Mutation      | SNP | G  | A  | 8   | 58  | c.1176G>A       | c.(1174-1176)TGG>TGA     | p.W392*        |
| Pat_41 | Post-Resistance | ZNF775  | 285971 | 37 | 7 | 150094991 | 150094992 | Missense_Mutation      | DNP | CC | TT | 6   | 130 | c.1422_1423CC>T | c.(1420-1425)TACCCG>TATT | p.P475S        |
| Pat_41 | Post-Resistance | GIMAP8  | 155038 | 37 | 7 | 150167948 | 150167948 | Missense_Mutation      | SNP | G  | A  | 12  | 184 | c.668G>A        | c.(667-669)GGA>GAA       | p.G223E        |
| Pat_41 | Post-Resistance | GIMAP4  | 55303  | 37 | 7 | 150269490 | 150269490 | Missense_Mutation      | SNP | C  | T  | 14  | 138 | c.332C>T        | c.(331-333)TCC>TTC       | p.S111F        |
| Pat_41 | Post-Resistance | GIMAP1  | 170575 | 37 | 7 | 150417432 | 150417432 | Missense_Mutation      | SNP | G  | A  | 9   | 117 | c.340G>A        | c.(340-342)GCG>ACG       | p.A114T        |
| Pat_41 | Post-Resistance | NOS3    | 4846   | 37 | 7 | 150703991 | 150703991 | Missense_Mutation      | SNP | G  | A  | 22  | 217 | c.1835G>A       | c.(1834-1836)CGC>CAC     | p.R612H        |
| Pat_41 | Post-Resistance | ACCN3   | 9311   | 37 | 7 | 150747649 | 150747649 | Missense_Mutation      | SNP | G  | A  | 19  | 193 | c.767G>A        | c.(766-768)GGG>GAG       | p.G256E        |

|        |                 |          |        |    |   |           |           |                   |     |   |   |     |     |                |                      |                |
|--------|-----------------|----------|--------|----|---|-----------|-----------|-------------------|-----|---|---|-----|-----|----------------|----------------------|----------------|
| Pat_41 | Post-Resistance | SLC4A2   | 6522   | 37 | 7 | 150761690 | 150761690 | Missense_Mutation | SNP | C | T | 33  | 285 | c.295C>T       | c.(295-297)CCC>TCC   | p.P99S         |
| Pat_41 | Post-Resistance | SLC4A2   | 6522   | 37 | 7 | 150763962 | 150763962 | Missense_Mutation | SNP | G | A | 6   | 66  | c.848G>A       | c.(847-849)GGG>GAG   | p.G283E        |
| Pat_41 | Post-Resistance | ABCF2    | 10061  | 37 | 7 | 150921903 | 150921903 | Missense_Mutation | SNP | T | C | 7   | 217 | c.326A>G       | c.(325-327)AAC>AGC   | p.N109S        |
| Pat_41 | Post-Resistance | SMARCD3  | 6604   | 37 | 7 | 150939647 | 150939647 | Missense_Mutation | SNP | G | A | 11  | 381 | c.499C>T       | c.(499-501)CCT>TCT   | p.P167S        |
| Pat_41 | Post-Resistance | RHEB     | 6009   | 37 | 7 | 151181827 | 151181827 | Missense_Mutation | SNP | C | T | 9   | 398 | c.188G>A       | c.(187-189)GGG>GAG   | p.G63E         |
| Pat_41 | Post-Resistance | MLL3     | 58508  | 37 | 7 | 151851351 | 151851351 | Splice_Site       | SNP | C | T | 16  | 145 | c.12139_splice | c.e47+1              | p.S4047_splice |
| Pat_41 | Post-Resistance | MLL3     | 58508  | 37 | 7 | 151879505 | 151879505 | Missense_Mutation | SNP | G | A | 32  | 759 | c.5440C>T      | c.(5440-5442)CCT>TCT | p.P1814S       |
| Pat_41 | Post-Resistance | MLL3     | 58508  | 37 | 7 | 151884799 | 151884799 | Splice_Site       | SNP | C | T | 6   | 279 | c.4793_splice  | c.e32+1              | p.R1598_splice |
| Pat_41 | Post-Resistance | DPP6     | 1804   | 37 | 7 | 154595584 | 154595584 | Missense_Mutation | SNP | G | A | 9   | 182 | c.1418G>A      | c.(1417-1419)AGC>AAC | p.S473N        |
| Pat_41 | Post-Resistance | INSIG1   | 3638   | 37 | 7 | 155093396 | 155093396 | Missense_Mutation | SNP | G | A | 18  | 426 | c.533G>A       | c.(532-534)AGT>AAT   | p.S178N        |
| Pat_41 | Post-Resistance | RBM33    | 155435 | 37 | 7 | 155473567 | 155473567 | Missense_Mutation | SNP | G | A | 19  | 128 | c.532G>A       | c.(532-534)GAC>AAC   | p.D178N        |
| Pat_41 | Post-Resistance | NOM1     | 64434  | 37 | 7 | 156746904 | 156746904 | Missense_Mutation | SNP | C | T | 10  | 199 | c.1220C>T      | c.(1219-1221)GCC>GTC | p.A407V        |
| Pat_41 | Post-Resistance | NOM1     | 64434  | 37 | 7 | 156754844 | 156754844 | Splice_Site       | SNP | G | A | 17  | 555 | c.1633_splice  | c.e5-1               | p.I545_splice  |
| Pat_41 | Post-Resistance | UBE3C    | 9690   | 37 | 7 | 157000567 | 157000567 | Missense_Mutation | SNP | A | G | 9   | 142 | c.1747A>G      | c.(1747-1749)ACT>GCT | p.T583A        |
| Pat_41 | Post-Resistance | UBE3C    | 9690   | 37 | 7 | 157049658 | 157049658 | Missense_Mutation | SNP | G | A | 7   | 312 | c.3001G>A      | c.(3001-3003)GAA>AAA | p.E1001K       |
| Pat_41 | Post-Resistance | NCAPG2   | 54892  | 37 | 7 | 158457348 | 158457348 | Missense_Mutation | SNP | G | A | 15  | 121 | c.1574C>T      | c.(1573-1575)TCT>TTT | p.S525F        |
| Pat_41 | Post-Resistance | ZNF596   | 169270 | 37 | 8 | 195811    | 195811    | Missense_Mutation | SNP | C | T | 5   | 31  | c.964C>T       | c.(964-966)CTT>TTT   | p.L322F        |
| Pat_41 | Post-Resistance | ARHGEF10 | 9639   | 37 | 8 | 1851528   | 1851528   | Missense_Mutation | SNP | G | A | 7   | 187 | c.1732G>A      | c.(1732-1734)GAG>AAG | p.E578K        |
| Pat_41 | Post-Resistance | ARHGEF10 | 9639   | 37 | 8 | 1853773   | 1853773   | Missense_Mutation | SNP | G | A | 21  | 351 | c.1858G>A      | c.(1858-1860)GAT>AAT | p.D620N        |
| Pat_41 | Post-Resistance | MYOM2    | 9172   | 37 | 8 | 2005865   | 2005865   | Missense_Mutation | SNP | C | T | 6   | 157 | c.527C>T       | c.(526-528)ACC>ATC   | p.T176I        |
| Pat_41 | Post-Resistance | MYOM2    | 9172   | 37 | 8 | 2089063   | 2089063   | Splice_Site       | SNP | G | A | 16  | 215 | c.3965_splice  | c.e34-1              | p.A1322_splice |
| Pat_41 | Post-Resistance | CSMD1    | 64478  | 37 | 8 | 2830795   | 2830795   | Missense_Mutation | SNP | G | A | 26  | 603 | c.8770C>T      | c.(8770-8772)CCG>TCG | p.P2924S       |
| Pat_41 | Post-Resistance | CSMD1    | 64478  | 37 | 8 | 3165912   | 3165912   | Missense_Mutation | SNP | C | T | 7   | 132 | c.3748G>A      | c.(3748-3750)GCC>ACC | p.A1250T       |
| Pat_41 | Post-Resistance | CSMD1    | 64478  | 37 | 8 | 3889615   | 3889615   | Missense_Mutation | SNP | G | A | 8   | 52  | c.422C>T       | c.(421-423)CCT>CTT   | p.P141L        |
| Pat_41 | Post-Resistance | MCPH1    | 79648  | 37 | 8 | 6302747   | 6302747   | Missense_Mutation | SNP | G | A | 10  | 124 | c.1504G>A      | c.(1504-1506)GCC>ACC | p.A502T        |
| Pat_41 | Post-Resistance | SGK223   | 157285 | 37 | 8 | 8176743   | 8176743   | Missense_Mutation | SNP | C | T | 11  | 144 | c.3142G>A      | c.(3142-3144)GAC>AAC | p.D1048N       |
| Pat_41 | Post-Resistance | SGK223   | 157285 | 37 | 8 | 8234750   | 8234750   | Missense_Mutation | SNP | C | T | 10  | 30  | c.1169G>A      | c.(1168-1170)GGG>GAG | p.G390E        |
| Pat_41 | Post-Resistance | TNKS     | 8658   | 37 | 8 | 9623824   | 9623824   | Missense_Mutation | SNP | C | T | 43  | 246 | c.3629C>T      | c.(3628-3630)GCC>GTC | p.A1210V       |
| Pat_41 | Post-Resistance | RP1L1    | 94137  | 37 | 8 | 10466636  | 10466636  | Missense_Mutation | SNP | G | A | 6   | 55  | c.4972C>T      | c.(4972-4974)CCC>TCC | p.P1658S       |
| Pat_41 | Post-Resistance | RP1L1    | 94137  | 37 | 8 | 10468205  | 10468205  | Missense_Mutation | SNP | G | A | 12  | 124 | c.3403C>T      | c.(3403-3405)CCT>TCT | p.P1135S       |
| Pat_41 | Post-Resistance | MTMR9    | 66036  | 37 | 8 | 11172484  | 11172484  | Nonsense_Mutation | SNP | C | T | 124 | 101 | c.1024C>T      | c.(1024-1026)CAG>TAG | p.Q342*        |
| Pat_41 | Post-Resistance | AMAC1L2  | 83650  | 37 | 8 | 11189118  | 11189118  | Missense_Mutation | SNP | G | A | 23  | 427 | c.503G>A       | c.(502-504)GGA>GAA   | p.G168E        |
| Pat_41 | Post-Resistance | FAM167A  | 83648  | 37 | 8 | 11301799  | 11301799  | Missense_Mutation | SNP | G | A | 9   | 106 | c.122C>T       | c.(121-123)ACC>ATC   | p.T41I         |
| Pat_41 | Post-Resistance | BLK      | 640    | 37 | 8 | 11400822  | 11400822  | Missense_Mutation | SNP | C | T | 5   | 101 | c.89C>T        | c.(88-90)GCC>GTC     | p.A30V         |
| Pat_41 | Post-Resistance | GATA4    | 2626   | 37 | 8 | 11614533  | 11614533  | Missense_Mutation | SNP | C | T | 19  | 353 | c.1087C>T      | c.(1087-1089)CCC>TCC | p.P363S        |
| Pat_41 | Post-Resistance | FDF1     | 2222   | 37 | 8 | 11660420  | 11660420  | Missense_Mutation | SNP | G | A | 10  | 94  | c.79G>A        | c.(79-81)GTG>ATG     | p.V27M         |
| Pat_41 | Post-Resistance | USP17L2  | 377630 | 37 | 8 | 11994816  | 11994816  | Missense_Mutation | SNP | G | A | 15  | 181 | c.1454C>T      | c.(1453-1455)TCC>TTC | p.S485F        |
| Pat_41 | Post-Resistance | TUSC3    | 7991   | 37 | 8 | 15605895  | 15605895  | Missense_Mutation | SNP | G | A | 13  | 191 | c.949G>A       | c.(949-951)GTG>ATG   | p.V317M        |
| Pat_41 | Post-Resistance | EFHA2    | 286097 | 37 | 8 | 16962981  | 16962981  | Missense_Mutation | SNP | G | A | 4   | 54  | c.1145G>A      | c.(1144-1146)GGA>GAA | p.G382E        |
| Pat_41 | Post-Resistance | SLC7A2   | 6542   | 37 | 8 | 17415833  | 17415833  | Missense_Mutation | SNP | G | A | 13  | 112 | c.1225G>A      | c.(1225-1227)GCG>ACG | p.A409T        |
| Pat_41 | Post-Resistance | PDGFRL   | 5157   | 37 | 8 | 17486196  | 17486196  | Missense_Mutation | SNP | C | T | 15  | 178 | c.706C>T       | c.(706-708)CCT>TCT   | p.P236S        |
| Pat_41 | Post-Resistance | MTUS1    | 57509  | 37 | 8 | 17581330  | 17581330  | Missense_Mutation | SNP | G | A | 8   | 329 | c.2300C>T      | c.(2299-2301)TCC>TTC | p.S767F        |
| Pat_41 | Post-Resistance | PCM1     | 5108   | 37 | 8 | 17804812  | 17804812  | Missense_Mutation | SNP | G | A | 26  | 447 | c.901G>A       | c.(901-903)GCT>ACT   | p.A301T        |
| Pat_41 | Post-Resistance | PCM1     | 5108   | 37 | 8 | 17814921  | 17814921  | Missense_Mutation | SNP | C | T | 8   | 258 | c.1795C>T      | c.(1795-1797)CCT>TCT | p.P599S        |
| Pat_41 | Post-Resistance | ASAH1    | 427    | 37 | 8 | 17918954  | 17918954  | Nonsense_Mutation | SNP | C | T | 19  | 217 | c.717G>A       | c.(715-717)TGG>TGA   | p.W239*        |
| Pat_41 | Post-Resistance | NAT2     | 10     | 37 | 8 | 18257965  | 18257965  | Missense_Mutation | SNP | G | A | 20  | 85  | c.452G>A       | c.(451-453)TGC>TAC   | p.C151Y        |
| Pat_41 | Post-Resistance | LZTS1    | 11178  | 37 | 8 | 20107711  | 20107711  | Missense_Mutation | SNP | C | T | 13  | 170 | c.1313G>A      | c.(1312-1314)GGC>GAC | p.G438D        |

|        |                 |           |        |    |   |          |          |                   |     |   |   |    |     |           |                      |          |
|--------|-----------------|-----------|--------|----|---|----------|----------|-------------------|-----|---|---|----|-----|-----------|----------------------|----------|
| Pat_41 | Post-Resistance | DOK2      | 9046   | 37 | 8 | 21768189 | 21768189 | Missense_Mutation | SNP | C | T | 12 | 81  | c.613G>A  | c.(613-615)GAC>AAC   | p.D205N  |
| Pat_41 | Post-Resistance | EPB49     | 2039   | 37 | 8 | 21927705 | 21927705 | Missense_Mutation | SNP | G | A | 16 | 344 | c.464G>A  | c.(463-465)GGC>GAC   | p.G155D  |
| Pat_41 | Post-Resistance | HR        | 55806  | 37 | 8 | 21980040 | 21980040 | Missense_Mutation | SNP | G | A | 7  | 54  | c.2087C>T | c.(2086-2088)GCC>GTC | p.A696V  |
| Pat_41 | Post-Resistance | HR        | 55806  | 37 | 8 | 21984894 | 21984894 | Missense_Mutation | SNP | C | T | 13 | 96  | c.1061G>A | c.(1060-1062)GGA>GAA | p.G354E  |
| Pat_41 | Post-Resistance | POLR3D    | 661    | 37 | 8 | 22105687 | 22105687 | Missense_Mutation | SNP | G | A | 4  | 78  | c.382G>A  | c.(382-384)GAT>AAT   | p.D128N  |
| Pat_41 | Post-Resistance | PPP3CC    | 5533   | 37 | 8 | 22385005 | 22385005 | Nonsense_Mutation | SNP | G | A | 32 | 378 | c.1044G>A | c.(1042-1044)TGG>TGA | p.W348*  |
| Pat_41 | Post-Resistance | SORBS3    | 10174  | 37 | 8 | 22424218 | 22424218 | Missense_Mutation | SNP | G | A | 6  | 117 | c.1135G>A | c.(1135-1137)GAG>AAG | p.E379K  |
| Pat_41 | Post-Resistance | EGR3      | 1960   | 37 | 8 | 22550325 | 22550325 | Missense_Mutation | SNP | G | A | 7  | 214 | c.133C>T  | c.(133-135)CAT>TAT   | p.H45Y   |
| Pat_41 | Post-Resistance | RHOBTB2   | 23221  | 37 | 8 | 22868064 | 22868064 | Missense_Mutation | SNP | A | G | 12 | 436 | c.1634A>G | c.(1633-1635)TAC>TGC | p.Y545C  |
| Pat_41 | Post-Resistance | CHMP7     | 91782  | 37 | 8 | 23106878 | 23106878 | Missense_Mutation | SNP | C | T | 4  | 71  | c.455C>T  | c.(454-456)GCT>GTT   | p.A152V  |
| Pat_41 | Post-Resistance | LOXL2     | 4017   | 37 | 8 | 23156381 | 23156381 | Missense_Mutation | SNP | C | T | 12 | 185 | c.2213G>A | c.(2212-2214)GGC>GAC | p.G738D  |
| Pat_41 | Post-Resistance | LOXL2     | 4017   | 37 | 8 | 23225765 | 23225765 | Missense_Mutation | SNP | G | A | 15 | 112 | c.100C>T  | c.(100-102)CCC>TCC   | p.P34S   |
| Pat_41 | Post-Resistance | SLC25A37  | 51312  | 37 | 8 | 23429241 | 23429241 | Missense_Mutation | SNP | G | A | 10 | 108 | c.890G>A  | c.(889-891)GGC>GAC   | p.G297D  |
| Pat_41 | Post-Resistance | ADAM28    | 10863  | 37 | 8 | 24209561 | 24209561 | Missense_Mutation | SNP | C | T | 6  | 161 | c.2240C>T | c.(2239-2241)TCT>TTT | p.S747F  |
| Pat_41 | Post-Resistance | NEFL      | 4747   | 37 | 8 | 24811169 | 24811169 | Missense_Mutation | SNP | C | T | 9  | 247 | c.1310G>A | c.(1309-1311)CGC>CAC | p.R437H  |
| Pat_41 | Post-Resistance | DOCK5     | 80005  | 37 | 8 | 25174634 | 25174634 | Missense_Mutation | SNP | G | A | 34 | 650 | c.1430G>A | c.(1429-1431)GGC>GAC | p.G477D  |
| Pat_41 | Post-Resistance | PPP2R2A   | 5520   | 37 | 8 | 26218626 | 26218626 | Missense_Mutation | SNP | G | A | 21 | 354 | c.596G>A  | c.(595-597)CGG>CAG   | p.R199Q  |
| Pat_41 | Post-Resistance | PNMA2     | 10687  | 37 | 8 | 26365578 | 26365578 | Missense_Mutation | SNP | C | T | 4  | 72  | c.694G>A  | c.(694-696)GAG>AAG   | p.E232K  |
| Pat_41 | Post-Resistance | DPYSL2    | 1808   | 37 | 8 | 26484171 | 26484171 | Missense_Mutation | SNP | C | T | 31 | 208 | c.517C>T  | c.(517-519)CGC>TGC   | p.R173C  |
| Pat_41 | Post-Resistance | DPYSL2    | 1808   | 37 | 8 | 26509827 | 26509827 | Missense_Mutation | SNP | G | A | 13 | 140 | c.1336G>A | c.(1336-1338)GTC>ATC | p.V446I  |
| Pat_41 | Post-Resistance | DPYSL2    | 1808   | 37 | 8 | 26510899 | 26510899 | Missense_Mutation | SNP | G | A | 31 | 402 | c.1613G>A | c.(1612-1614)GGA>GAA | p.G538E  |
| Pat_41 | Post-Resistance | CLU       | 1191   | 37 | 8 | 27463878 | 27463878 | Missense_Mutation | SNP | C | T | 6  | 129 | c.410G>A  | c.(409-411)GGC>GAC   | p.G137D  |
| Pat_41 | Post-Resistance | SCARA3    | 51435  | 37 | 8 | 27509117 | 27509117 | Missense_Mutation | SNP | G | A | 19 | 180 | c.199G>A  | c.(199-201)GTG>ATG   | p.V67M   |
| Pat_41 | Post-Resistance | ESCO2     | 157570 | 37 | 8 | 27634013 | 27634013 | Missense_Mutation | SNP | C | T | 11 | 108 | c.188C>T  | c.(187-189)ACT>ATT   | p.T63I   |
| Pat_41 | Post-Resistance | ZNF395    | 55893  | 37 | 8 | 28217209 | 28217209 | Missense_Mutation | SNP | C | T | 15 | 61  | c.373G>A  | c.(373-375)GCA>ACA   | p.A125T  |
| Pat_41 | Post-Resistance | FZD3      | 7976   | 37 | 8 | 28384768 | 28384768 | Nonsense_Mutation | SNP | G | A | 16 | 269 | c.491G>A  | c.(490-492)TGG>TAG   | p.W164*  |
| Pat_41 | Post-Resistance | INTS9     | 55756  | 37 | 8 | 28635392 | 28635392 | Missense_Mutation | SNP | G | A | 11 | 105 | c.1349C>T | c.(1348-1350)ACC>ATC | p.T450I  |
| Pat_41 | Post-Resistance | TMEM66    | 51669  | 37 | 8 | 29931557 | 29931557 | Missense_Mutation | SNP | G | A | 7  | 192 | c.118C>T  | c.(118-120)CGG>TGG   | p.R40W   |
| Pat_41 | Post-Resistance | RBPM5     | 11030  | 37 | 8 | 30361818 | 30361818 | Missense_Mutation | SNP | C | T | 27 | 478 | c.262C>T  | c.(262-264)CCT>TCT   | p.P88S   |
| Pat_41 | Post-Resistance | TEX15     | 56154  | 37 | 8 | 30706455 | 30706455 | Missense_Mutation | SNP | G | A | 5  | 157 | c.79C>T   | c.(79-81)CTT>TTT     | p.L27F   |
| Pat_41 | Post-Resistance | PURG      | 29942  | 37 | 8 | 30889512 | 30889512 | Missense_Mutation | SNP | C | T | 38 | 63  | c.787G>A  | c.(787-789)GAG>AAG   | p.E263K  |
| Pat_41 | Post-Resistance | ERLIN2    | 11160  | 37 | 8 | 37607115 | 37607115 | Missense_Mutation | SNP | G | A | 32 | 244 | c.463G>A  | c.(463-465)GAC>AAC   | p.D155N  |
| Pat_41 | Post-Resistance | GPR124    | 25960  | 37 | 8 | 37690531 | 37690531 | Nonsense_Mutation | SNP | G | A | 24 | 472 | c.1101G>A | c.(1099-1101)TGG>TGA | p.W367*  |
| Pat_41 | Post-Resistance | GPR124    | 25960  | 37 | 8 | 37698647 | 37698647 | Missense_Mutation | SNP | C | T | 15 | 301 | c.2791C>T | c.(2791-2793)CCT>TCT | p.P931S  |
| Pat_41 | Post-Resistance | RAB11FIP1 | 80223  | 37 | 8 | 37730678 | 37730678 | Missense_Mutation | SNP | C | T | 7  | 89  | c.1642G>A | c.(1642-1644)GCG>ACG | p.A548T  |
| Pat_41 | Post-Resistance | ASH2L     | 9070   | 37 | 8 | 37978591 | 37978591 | Nonsense_Mutation | SNP | G | A | 14 | 256 | c.1089G>A | c.(1087-1089)TGG>TGA | p.W363*  |
| Pat_41 | Post-Resistance | BAG4      | 9530   | 37 | 8 | 38067931 | 38067931 | Missense_Mutation | SNP | G | A | 5  | 68  | c.1294G>A | c.(1294-1296)GAC>AAC | p.D432N  |
| Pat_41 | Post-Resistance | PPAPDC1B  | 84513  | 37 | 8 | 38125418 | 38125418 | Missense_Mutation | SNP | C | T | 11 | 281 | c.335G>A  | c.(334-336)GGG>GAG   | p.G112E  |
| Pat_41 | Post-Resistance | WHSC1L1   | 54904  | 37 | 8 | 38148031 | 38148031 | Missense_Mutation | SNP | G | A | 27 | 499 | c.3080C>T | c.(3079-3081)GCT>GTT | p.A1027V |
| Pat_41 | Post-Resistance | FGFR1     | 2260   | 37 | 8 | 38272147 | 38272147 | Missense_Mutation | SNP | C | T | 13 | 209 | c.1978G>A | c.(1978-1980)GGC>AGC | p.G660S  |
| Pat_41 | Post-Resistance | RNF5P1    | 286140 | 37 | 8 | 38458435 | 38458435 | Missense_Mutation | SNP | G | A | 6  | 63  | c.284C>T  | c.(283-285)CCC>CTC   | p.P95L   |
| Pat_41 | Post-Resistance | HTRA4     | 203100 | 37 | 8 | 38831861 | 38831861 | Missense_Mutation | SNP | C | T | 6  | 69  | c.79C>T   | c.(79-81)CTC>TTC     | p.L27F   |
| Pat_41 | Post-Resistance | HTRA4     | 203100 | 37 | 8 | 38840022 | 38840022 | Missense_Mutation | SNP | G | A | 8  | 179 | c.1120G>A | c.(1120-1122)GCG>ACG | p.A374T  |
| Pat_41 | Post-Resistance | ADAM32    | 203102 | 37 | 8 | 39044437 | 39044437 | Missense_Mutation | SNP | G | A | 13 | 138 | c.925G>A  | c.(925-927)GAG>AAG   | p.E309K  |
| Pat_41 | Post-Resistance | AGPAT6    | 137964 | 37 | 8 | 41467272 | 41467272 | Missense_Mutation | SNP | C | T | 16 | 271 | c.334C>T  | c.(334-336)CTC>TTC   | p.L112F  |
| Pat_41 | Post-Resistance | AP3M2     | 10947  | 37 | 8 | 42015612 | 42015612 | Missense_Mutation | SNP | G | A | 32 | 218 | c.427G>A  | c.(427-429)GTT>ATT   | p.V143I  |
| Pat_41 | Post-Resistance | PLAT      | 5327   | 37 | 8 | 42046545 | 42046545 | Nonsense_Mutation | SNP | G | A | 42 | 485 | c.160C>T  | c.(160-162)CAG>TAG   | p.Q54*   |



|        |                 |          |        |    |   |          |          |                   |     |   |   |    |     |              |                        |               |
|--------|-----------------|----------|--------|----|---|----------|----------|-------------------|-----|---|---|----|-----|--------------|------------------------|---------------|
| Pat_41 | Post-Resistance | SLC20A2  | 6575   | 37 | 8 | 42297133 | 42297133 | Missense_Mutation | SNP | C | T | 4  | 133 | c.769G>A     | c.(769-771)GAC>AAC     | p.D257N       |
| Pat_41 | Post-Resistance | CHRN3    | 1142   | 37 | 8 | 42587433 | 42587433 | Missense_Mutation | SNP | A | G | 47 | 366 | c.983A>G     | c.(982-984)TAC>TGC     | p.Y328C       |
| Pat_41 | Post-Resistance | RNF170   | 81790  | 37 | 8 | 42711321 | 42711321 | Missense_Mutation | SNP | G | A | 9  | 216 | c.758C>T     | c.(757-759)ACC>ATC     | p.T253I       |
| Pat_41 | Post-Resistance | FNTA     | 2339   | 37 | 8 | 42940318 | 42940318 | Missense_Mutation | SNP | G | A | 4  | 69  | c.1033G>A    | c.(1033-1035)GCT>ACT   | p.A345T       |
| Pat_41 | Post-Resistance | KIAA0146 | 23514  | 37 | 8 | 48614415 | 48614415 | Missense_Mutation | SNP | G | A | 28 | 464 | c.1906G>A    | c.(1906-1908)GAC>AAC   | p.D636N       |
| Pat_41 | Post-Resistance | KIAA0146 | 23514  | 37 | 8 | 48625377 | 48625377 | Missense_Mutation | SNP | G | A | 15 | 251 | c.2131G>A    | c.(2131-2133)GCA>ACA   | p.A711T       |
| Pat_41 | Post-Resistance | KIAA0146 | 23514  | 37 | 8 | 48626086 | 48626086 | Missense_Mutation | SNP | C | T | 18 | 247 | c.2224C>T    | c.(2224-2226)CTT>TTT   | p.L742F       |
| Pat_41 | Post-Resistance | KIAA0146 | 23514  | 37 | 8 | 48626174 | 48626174 | Missense_Mutation | SNP | C | T | 9  | 164 | c.2312C>T    | c.(2311-2313)ACA>ATA   | p.T771I       |
| Pat_41 | Post-Resistance | PRKDC    | 5591   | 37 | 8 | 48690356 | 48690356 | Missense_Mutation | SNP | C | T | 11 | 191 | c.11933G>A   | c.(11932-11934)GGC>GAC | p.G3978D      |
| Pat_41 | Post-Resistance | PRKDC    | 5591   | 37 | 8 | 48866432 | 48866432 | Missense_Mutation | SNP | G | A | 5  | 21  | c.556C>T     | c.(556-558)CCT>TCT     | p.P186S       |
| Pat_41 | Post-Resistance | RB1CC1   | 9821   | 37 | 8 | 53568656 | 53568656 | Missense_Mutation | SNP | C | T | 9  | 109 | c.3733G>A    | c.(3733-3735)GCC>ACC   | p.A1245T      |
| Pat_41 | Post-Resistance | LYPLA1   | 10434  | 37 | 8 | 54963590 | 54963590 | Missense_Mutation | SNP | C | T | 11 | 606 | c.621G>A     | c.(619-621)ATG>ATA     | p.M207I       |
| Pat_41 | Post-Resistance | LYPLA1   | 10434  | 37 | 8 | 54974859 | 54974859 | Missense_Mutation | SNP | C | T | 10 | 163 | c.241G>A     | c.(241-243)GAT>AAT     | p.D81N        |
| Pat_41 | Post-Resistance | MRPL15   | 29088  | 37 | 8 | 55049973 | 55049973 | Missense_Mutation | SNP | G | A | 22 | 134 | c.409G>A     | c.(409-411)GGT>AGT     | p.G137S       |
| Pat_41 | Post-Resistance | MRPL15   | 29088  | 37 | 8 | 55055224 | 55055224 | Missense_Mutation | SNP | G | A | 4  | 105 | c.431G>A     | c.(430-432)GGT>GAT     | p.G144D       |
| Pat_41 | Post-Resistance | RP1      | 6101   | 37 | 8 | 55541286 | 55541286 | Missense_Mutation | SNP | G | A | 27 | 235 | c.4844G>A    | c.(4843-4845)GGC>GAC   | p.G1615D      |
| Pat_41 | Post-Resistance | TGS1     | 96764  | 37 | 8 | 56698347 | 56698347 | Missense_Mutation | SNP | G | A | 13 | 204 | c.236G>A     | c.(235-237)GGC>GAC     | p.G79D        |
| Pat_41 | Post-Resistance | PLAG1    | 5324   | 37 | 8 | 57078812 | 57078812 | Missense_Mutation | SNP | G | A | 53 | 453 | c.1493C>T    | c.(1492-1494)GCT>GTT   | p.A498V       |
| Pat_41 | Post-Resistance | PLAG1    | 5324   | 37 | 8 | 57079254 | 57079254 | Missense_Mutation | SNP | G | A | 13 | 359 | c.1051C>T    | c.(1051-1053)CCA>TCA   | p.P351S       |
| Pat_41 | Post-Resistance | SDR16C5  | 195814 | 37 | 8 | 57221564 | 57221564 | Missense_Mutation | SNP | G | A | 6  | 139 | c.488C>T     | c.(487-489)GCT>GTT     | p.A163V       |
| Pat_41 | Post-Resistance | SDR16C5  | 195814 | 37 | 8 | 57228653 | 57228653 | Missense_Mutation | SNP | C | T | 7  | 283 | c.254G>A     | c.(253-255)CGG>CAG     | p.R85Q        |
| Pat_41 | Post-Resistance | IMPAD1   | 54928  | 37 | 8 | 57878851 | 57878851 | Missense_Mutation | SNP | G | A | 10 | 198 | c.707C>T     | c.(706-708)ACC>ATC     | p.T236I       |
| Pat_41 | Post-Resistance | CYP7A1   | 1581   | 37 | 8 | 59411012 | 59411012 | Missense_Mutation | SNP | G | A | 30 | 547 | c.97C>T      | c.(97-99)CCT>TCT       | p.P33S        |
| Pat_41 | Post-Resistance | NSMAF    | 8439   | 37 | 8 | 59500237 | 59500237 | Missense_Mutation | SNP | C | A | 10 | 205 | c.2235G>T    | c.(2233-2235)GAG>GAT   | p.E745D       |
| Pat_41 | Post-Resistance | GGH      | 8836   | 37 | 8 | 63936638 | 63936638 | Splice_Site       | SNP | C | T | 10 | 109 | c.606_splice | c.e6+1                 | p.K202_splice |
| Pat_41 | Post-Resistance | GGH      | 8836   | 37 | 8 | 63939739 | 63939739 | Splice_Site       | SNP | C | T | 8  | 182 | c.360_splice | c.e4+1                 | p.Q120_splice |
| Pat_41 | Post-Resistance | YTHDF3   | 253943 | 37 | 8 | 64100128 | 64100128 | Missense_Mutation | SNP | G | A | 26 | 40  | c.1559G>A    | c.(1558-1560)CGC>CAC   | p.R520H       |
| Pat_41 | Post-Resistance | DNAJC5B  | 85479  | 37 | 8 | 67012241 | 67012241 | Missense_Mutation | SNP | C | T | 14 | 105 | c.575C>T     | c.(574-576)TCT>TTT     | p.S192F       |
| Pat_41 | Post-Resistance | TRIM55   | 84675  | 37 | 8 | 67040644 | 67040644 | Missense_Mutation | SNP | G | A | 13 | 362 | c.274G>A     | c.(274-276)GTA>ATA     | p.V92I        |
| Pat_41 | Post-Resistance | VCPIP1   | 80124  | 37 | 8 | 67578206 | 67578206 | Missense_Mutation | SNP | C | T | 19 | 190 | c.988G>A     | c.(988-990)GAG>AAG     | p.E330K       |
| Pat_41 | Post-Resistance | CSPP1    | 79848  | 37 | 8 | 68015300 | 68015300 | Missense_Mutation | SNP | C | T | 6  | 208 | c.1084C>T    | c.(1084-1086)CCT>TCT   | p.P362S       |
| Pat_41 | Post-Resistance | CSPP1    | 79848  | 37 | 8 | 68031010 | 68031010 | Missense_Mutation | SNP | G | A | 13 | 210 | c.1741G>A    | c.(1741-1743)GCT>ACT   | p.A581T       |
| Pat_41 | Post-Resistance | CSPP1    | 79848  | 37 | 8 | 68107721 | 68107721 | Missense_Mutation | SNP | G | A | 21 | 244 | c.3664G>A    | c.(3664-3666)GAA>AAA   | p.E1222K      |
| Pat_41 | Post-Resistance | ARFGEF1  | 10565  | 37 | 8 | 68130264 | 68130264 | Missense_Mutation | SNP | G | A | 14 | 309 | c.4448C>T    | c.(4447-4449)GCT>GTT   | p.A1483V      |
| Pat_41 | Post-Resistance | ARFGEF1  | 10565  | 37 | 8 | 68130312 | 68130312 | Missense_Mutation | SNP | G | A | 37 | 232 | c.4400C>T    | c.(4399-4401)ACT>ATT   | p.T1467I      |
| Pat_41 | Post-Resistance | ARFGEF1  | 10565  | 37 | 8 | 68179613 | 68179613 | Nonsense_Mutation | SNP | C | T | 20 | 333 | c.1637G>A    | c.(1636-1638)TGG>TAG   | p.W546*       |
| Pat_41 | Post-Resistance | CPA6     | 57094  | 37 | 8 | 68340293 | 68340293 | Missense_Mutation | SNP | G | A | 8  | 192 | c.1115C>T    | c.(1114-1116)TCC>TTC   | p.S372F       |
| Pat_41 | Post-Resistance | SULF1    | 23213  | 37 | 8 | 70476235 | 70476235 | Missense_Mutation | SNP | G | A | 21 | 250 | c.25G>A      | c.(25-27)GTT>ATT       | p.V9I         |
| Pat_41 | Post-Resistance | SULF1    | 23213  | 37 | 8 | 70501307 | 70501307 | Missense_Mutation | SNP | C | T | 6  | 149 | c.665C>T     | c.(664-666)GCT>GTT     | p.A222V       |
| Pat_41 | Post-Resistance | SLCO5A1  | 81796  | 37 | 8 | 70617279 | 70617279 | Missense_Mutation | SNP | G | A | 16 | 285 | c.1609C>T    | c.(1609-1611)CCT>TCT   | p.P537S       |
| Pat_41 | Post-Resistance | PRDM14   | 63978  | 37 | 8 | 70981642 | 70981642 | Missense_Mutation | SNP | G | A | 9  | 138 | c.454C>T     | c.(454-456)CCG>TCG     | p.P152S       |
| Pat_41 | Post-Resistance | PRDM14   | 63978  | 37 | 8 | 70981662 | 70981662 | Missense_Mutation | SNP | C | T | 8  | 138 | c.434G>A     | c.(433-435)GGA>GAA     | p.G145E       |
| Pat_41 | Post-Resistance | LACTB2   | 51110  | 37 | 8 | 71550135 | 71550135 | Missense_Mutation | SNP | C | T | 11 | 79  | c.827G>A     | c.(826-828)AGC>AAC     | p.S276N       |
| Pat_41 | Post-Resistance | XKR9     | 389668 | 37 | 8 | 71646393 | 71646393 | Missense_Mutation | SNP | C | T | 6  | 62  | c.856C>T     | c.(856-858)CCA>TCA     | p.P286S       |
| Pat_41 | Post-Resistance | EYA1     | 2138   | 37 | 8 | 72123426 | 72123426 | Missense_Mutation | SNP | C | T | 12 | 344 | c.1663G>A    | c.(1663-1665)GGA>AGA   | p.G555R       |
| Pat_41 | Post-Resistance | TRPA1    | 8989   | 37 | 8 | 72973868 | 72973868 | Missense_Mutation | SNP | C | T | 24 | 314 | c.936G>A     | c.(934-936)ATG>ATA     | p.M312I       |
| Pat_41 | Post-Resistance | TRPA1    | 8989   | 37 | 8 | 72973983 | 72973983 | Missense_Mutation | SNP | G | A | 6  | 162 | c.821C>T     | c.(820-822)ACA>ATA     | p.T274I       |

|        |                 |          |        |    |   |           |           |                   |     |   |   |    |     |              |                        |               |
|--------|-----------------|----------|--------|----|---|-----------|-----------|-------------------|-----|---|---|----|-----|--------------|------------------------|---------------|
| Pat_41 | Post-Resistance | KCNB2    | 9312   | 37 | 8 | 73480201  | 73480201  | Missense_Mutation | SNP | G | A | 7  | 80  | c.232G>A     | c.(232-234)GAC>AAC     | p.D78N        |
| Pat_41 | Post-Resistance | RPL7     | 6129   | 37 | 8 | 74204077  | 74204077  | Missense_Mutation | SNP | C | T | 15 | 217 | c.359G>A     | c.(358-360)GGA>GAA     | p.G120E       |
| Pat_41 | Post-Resistance | STAU2    | 27067  | 37 | 8 | 74600967  | 74600967  | Missense_Mutation | SNP | C | T | 48 | 387 | c.196G>A     | c.(196-198)GCC>ACC     | p.A66T        |
| Pat_41 | Post-Resistance | TMEM70   | 54968  | 37 | 8 | 74891055  | 74891055  | Missense_Mutation | SNP | G | A | 25 | 237 | c.275G>A     | c.(274-276)GGA>GAA     | p.G92E        |
| Pat_41 | Post-Resistance | ZFHX4    | 79776  | 37 | 8 | 77618080  | 77618080  | Missense_Mutation | SNP | C | T | 10 | 158 | c.1757C>T    | c.(1756-1758)GCC>GTC   | p.A586V       |
| Pat_41 | Post-Resistance | ZFHX4    | 79776  | 37 | 8 | 77763770  | 77763770  | Missense_Mutation | SNP | C | T | 7  | 92  | c.4478C>T    | c.(4477-4479)TCT>TTT   | p.S1493F      |
| Pat_41 | Post-Resistance | ZFHX4    | 79776  | 37 | 8 | 77766995  | 77766995  | Missense_Mutation | SNP | C | T | 4  | 46  | c.7703C>T    | c.(7702-7704)ACC>ATC   | p.T2568I      |
| Pat_41 | Post-Resistance | ZNF704   | 619279 | 37 | 8 | 81577201  | 81577201  | Missense_Mutation | SNP | G | A | 14 | 236 | c.776C>T     | c.(775-777)TCC>TTC     | p.S259F       |
| Pat_41 | Post-Resistance | PAG1     | 55824  | 37 | 8 | 81897456  | 81897456  | Missense_Mutation | SNP | G | A | 24 | 126 | c.431C>T     | c.(430-432)ACC>ATC     | p.T144I       |
| Pat_41 | Post-Resistance | FABP12   | 646486 | 37 | 8 | 82441810  | 82441810  | Missense_Mutation | SNP | C | T | 9  | 74  | c.109G>A     | c.(109-111)GCA>ACA     | p.A37T        |
| Pat_41 | Post-Resistance | SLC10A5  | 347051 | 37 | 8 | 82607156  | 82607156  | Missense_Mutation | SNP | C | T | 24 | 29  | c.52G>A      | c.(52-54)GAA>AAA       | p.E18K        |
| Pat_41 | Post-Resistance | CA1      | 759    | 37 | 8 | 86244782  | 86244782  | Splice_Site       | SNP | C | T | 6  | 142 | c.451_splice | c.e7-1                 | p.V151_splice |
| Pat_41 | Post-Resistance | WWP1     | 11059  | 37 | 8 | 87437514  | 87437514  | Missense_Mutation | SNP | C | T | 7  | 170 | c.1124C>T    | c.(1123-1125)ACC>ATC   | p.T375I       |
| Pat_41 | Post-Resistance | CNGB3    | 54714  | 37 | 8 | 87656054  | 87656054  | Missense_Mutation | SNP | G | A | 18 | 296 | c.1103C>T    | c.(1102-1104)GCC>GTC   | p.A368V       |
| Pat_41 | Post-Resistance | DCAF4L2  | 138009 | 37 | 8 | 88885197  | 88885197  | Missense_Mutation | SNP | C | T | 6  | 104 | c.1003G>A    | c.(1003-1005)GAC>AAC   | p.D335N       |
| Pat_41 | Post-Resistance | DCAF4L2  | 138009 | 37 | 8 | 88885309  | 88885309  | Nonsense_Mutation | SNP | C | T | 13 | 258 | c.891G>A     | c.(889-891)TGG>TGA     | p.W297*       |
| Pat_41 | Post-Resistance | MMP16    | 4325   | 37 | 8 | 89209469  | 89209469  | Missense_Mutation | SNP | C | T | 14 | 211 | c.199G>A     | c.(199-201)GAG>AAG     | p.E67K        |
| Pat_41 | Post-Resistance | TMEM55A  | 55529  | 37 | 8 | 92052878  | 92052878  | Missense_Mutation | SNP | G | A | 9  | 159 | c.100C>T     | c.(100-102)CCC>TCC     | p.P34S        |
| Pat_41 | Post-Resistance | SLC26A7  | 115111 | 37 | 8 | 92330549  | 92330549  | Missense_Mutation | SNP | G | A | 9  | 280 | c.583G>A     | c.(583-585)GTC>ATC     | p.V195I       |
| Pat_41 | Post-Resistance | RUNX1T1  | 862    | 37 | 8 | 92982981  | 92982981  | Missense_Mutation | SNP | C | T | 10 | 120 | c.1444G>A    | c.(1444-1446)GAG>AAG   | p.E482K       |
| Pat_41 | Post-Resistance | RUNX1T1  | 862    | 37 | 8 | 92983014  | 92983014  | Missense_Mutation | SNP | C | T | 5  | 117 | c.1411G>A    | c.(1411-1413)GCG>ACG   | p.A471T       |
| Pat_41 | Post-Resistance | RBM12B   | 389677 | 37 | 8 | 94746603  | 94746603  | Missense_Mutation | SNP | G | A | 19 | 185 | c.2036C>T    | c.(2035-2037)CCA>CTA   | p.P679L       |
| Pat_41 | Post-Resistance | RBM12B   | 389677 | 37 | 8 | 94747366  | 94747366  | Missense_Mutation | SNP | G | A | 14 | 278 | c.1273C>T    | c.(1273-1275)CTT>TTT   | p.L425F       |
| Pat_41 | Post-Resistance | TMEM67   | 91147  | 37 | 8 | 94798514  | 94798514  | Missense_Mutation | SNP | G | A | 14 | 238 | c.1352G>A    | c.(1351-1353)CGA>CAA   | p.R451Q       |
| Pat_41 | Post-Resistance | TMEM67   | 91147  | 37 | 8 | 94798541  | 94798541  | Missense_Mutation | SNP | G | A | 18 | 200 | c.1379G>A    | c.(1378-1380)AGA>AAA   | p.R460K       |
| Pat_41 | Post-Resistance | KIAA1429 | 25962  | 37 | 8 | 95523736  | 95523736  | Missense_Mutation | SNP | C | T | 10 | 202 | c.3067G>A    | c.(3067-3069)GGT>AGT   | p.G1023S      |
| Pat_41 | Post-Resistance | KIAA1429 | 25962  | 37 | 8 | 95547100  | 95547100  | Missense_Mutation | SNP | G | A | 15 | 145 | c.451C>T     | c.(451-453)CCA>TCA     | p.P151S       |
| Pat_41 | Post-Resistance | INTS8    | 55656  | 37 | 8 | 95853759  | 95853759  | Missense_Mutation | SNP | G | A | 34 | 405 | c.1058G>A    | c.(1057-1059)AGT>AAT   | p.S353N       |
| Pat_41 | Post-Resistance | MTERFD1  | 51001  | 37 | 8 | 97258116  | 97258116  | Missense_Mutation | SNP | C | T | 14 | 292 | c.869G>A     | c.(868-870)AGT>AAT     | p.S290N       |
| Pat_41 | Post-Resistance | PGCP     | 10404  | 37 | 8 | 98155400  | 98155400  | Missense_Mutation | SNP | C | T | 9  | 127 | c.1408C>T    | c.(1408-1410)CCT>TCT   | p.P470S       |
| Pat_41 | Post-Resistance | HRSP12   | 10247  | 37 | 8 | 99118553  | 99118553  | Missense_Mutation | SNP | G | A | 10 | 207 | c.173C>T     | c.(172-174)GCT>GTT     | p.A58V        |
| Pat_41 | Post-Resistance | POP1     | 10940  | 37 | 8 | 99148764  | 99148764  | Missense_Mutation | SNP | G | A | 65 | 523 | c.1066G>A    | c.(1066-1068)GCT>ACT   | p.A356T       |
| Pat_41 | Post-Resistance | STK3     | 6788   | 37 | 8 | 99761557  | 99761557  | Missense_Mutation | SNP | C | T | 8  | 390 | c.298G>A     | c.(298-300)GAG>AAG     | p.E100K       |
| Pat_41 | Post-Resistance | VPS13B   | 157680 | 37 | 8 | 100494001 | 100494001 | Missense_Mutation | SNP | C | T | 14 | 131 | c.3841C>T    | c.(3841-3843)CCA>TCA   | p.P1281S      |
| Pat_41 | Post-Resistance | VPS13B   | 157680 | 37 | 8 | 100871565 | 100871565 | Missense_Mutation | SNP | G | T | 9  | 108 | c.10976G>T   | c.(10975-10977)AGC>ATC | p.S3659I      |
| Pat_41 | Post-Resistance | VPS13B   | 157680 | 37 | 8 | 100871666 | 100871666 | Missense_Mutation | SNP | G | A | 16 | 82  | c.11077G>A   | c.(11077-11079)GTC>ATC | p.V3693I      |
| Pat_41 | Post-Resistance | RGS22    | 26166  | 37 | 8 | 101074878 | 101074878 | Nonsense_Mutation | SNP | C | T | 5  | 86  | c.1455G>A    | c.(1453-1455)TGG>TGA   | p.W485*       |
| Pat_41 | Post-Resistance | FBXO43   | 286151 | 37 | 8 | 101153190 | 101153190 | Missense_Mutation | SNP | G | A | 14 | 238 | c.1292C>T    | c.(1291-1293)ACC>ATC   | p.T431I       |
| Pat_41 | Post-Resistance | RNF19A   | 25897  | 37 | 8 | 101271296 | 101271296 | Missense_Mutation | SNP | C | T | 11 | 420 | c.2005G>A    | c.(2005-2007)GCA>ACA   | p.A669T       |
| Pat_41 | Post-Resistance | PABPC1   | 26986  | 37 | 8 | 101724600 | 101724600 | Missense_Mutation | SNP | G | A | 16 | 687 | c.962C>T     | c.(961-963)ACT>ATT     | p.T321I       |
| Pat_41 | Post-Resistance | ZNF706   | 51123  | 37 | 8 | 102213926 | 102213926 | Missense_Mutation | SNP | G | A | 6  | 174 | c.44C>T      | c.(43-45)GCC>GTC       | p.A15V        |
| Pat_41 | Post-Resistance | GRHL2    | 79977  | 37 | 8 | 102555642 | 102555642 | Missense_Mutation | SNP | G | A | 28 | 143 | c.194G>A     | c.(193-195)GGC>GAC     | p.G65D        |
| Pat_41 | Post-Resistance | NCALD    | 83988  | 37 | 8 | 102731503 | 102731503 | Missense_Mutation | SNP | C | T | 8  | 307 | c.355G>A     | c.(355-357)GCA>ACA     | p.A119T       |
| Pat_41 | Post-Resistance | RRM2B    | 50484  | 37 | 8 | 103236342 | 103236342 | Missense_Mutation | SNP | G | A | 13 | 169 | c.482C>T     | c.(481-483)ACC>ATC     | p.T161I       |
| Pat_41 | Post-Resistance | UBR5     | 51366  | 37 | 8 | 103279234 | 103279234 | Missense_Mutation | SNP | C | T | 17 | 166 | c.7363G>A    | c.(7363-7365)GAA>AAA   | p.E2455K      |
| Pat_41 | Post-Resistance | UBR5     | 51366  | 37 | 8 | 103297454 | 103297454 | Missense_Mutation | SNP | C | T | 11 | 206 | c.5597G>A    | c.(5596-5598)GGA>GAA   | p.G1866E      |
| Pat_41 | Post-Resistance | UBR5     | 51366  | 37 | 8 | 103326043 | 103326043 | Missense_Mutation | SNP | G | A | 11 | 191 | c.1996C>T    | c.(1996-1998)CCT>TCT   | p.P666S       |

|        |                 |          |        |    |   |           |           |                   |     |    |    |     |     |                |                       |                |
|--------|-----------------|----------|--------|----|---|-----------|-----------|-------------------|-----|----|----|-----|-----|----------------|-----------------------|----------------|
| Pat_41 | Post-Resistance | ATP6V1C1 | 528    | 37 | 8 | 104053185 | 104053185 | Missense_Mutation | SNP | C  | T  | 15  | 338 | c.121C>T       | c.(121-123)CCT>TCT    | p.P41S         |
| Pat_41 | Post-Resistance | FZD6     | 8323   | 37 | 8 | 104340583 | 104340583 | Missense_Mutation | SNP | G  | A  | 12  | 198 | c.1480G>A      | c.(1480-1482)GTT>ATT  | p.V494I        |
| Pat_41 | Post-Resistance | SLC25A32 | 81034  | 37 | 8 | 104419914 | 104419914 | Missense_Mutation | SNP | C  | T  | 13  | 365 | c.253G>A       | c.(253-255)GTA>ATA    | p.V85I         |
| Pat_41 | Post-Resistance | DCAF13   | 25879  | 37 | 8 | 104453777 | 104453777 | Missense_Mutation | SNP | G  | A  | 25  | 324 | c.1637G>A      | c.(1636-1638)CGA>CAA  | p.R546Q        |
| Pat_41 | Post-Resistance | RIMS2    | 9699   | 37 | 8 | 105026742 | 105026742 | Missense_Mutation | SNP | C  | T  | 11  | 206 | c.2453C>T      | c.(2452-2454)CCT>CTT  | p.P818L        |
| Pat_41 | Post-Resistance | LRP12    | 29967  | 37 | 8 | 105503247 | 105503247 | Missense_Mutation | SNP | C  | T  | 9   | 153 | c.2234G>A      | c.(2233-2235)GGA>GAA  | p.G745E        |
| Pat_41 | Post-Resistance | LRP12    | 29967  | 37 | 8 | 105510163 | 105510163 | Missense_Mutation | SNP | G  | A  | 25  | 600 | c.617C>T       | c.(616-618)CCT>CTT    | p.P206L        |
| Pat_41 | Post-Resistance | ZFPM2    | 23414  | 37 | 8 | 106456570 | 106456570 | Missense_Mutation | SNP | G  | A  | 13  | 73  | c.262G>A       | c.(262-264)GGG>AGG    | p.G88R         |
| Pat_41 | Post-Resistance | PKHD1L1  | 93035  | 37 | 8 | 110425717 | 110425717 | Missense_Mutation | SNP | G  | A  | 6   | 42  | c.2303G>A      | c.(2302-2304)AGC>AAC  | p.S768N        |
| Pat_41 | Post-Resistance | PKHD1L1  | 93035  | 37 | 8 | 110457317 | 110457317 | Missense_Mutation | SNP | C  | T  | 16  | 223 | c.5219C>T      | c.(5218-5220)ACC>ATC  | p.T1740I       |
| Pat_41 | Post-Resistance | PKHD1L1  | 93035  | 37 | 8 | 110477106 | 110477106 | Missense_Mutation | SNP | G  | A  | 9   | 50  | c.8045G>A      | c.(8044-8046)GGA>GAA  | p.G2682E       |
| Pat_41 | Post-Resistance | EBAG9    | 9166   | 37 | 8 | 110569213 | 110569213 | Missense_Mutation | SNP | G  | A  | 14  | 70  | c.371G>A       | c.(370-372)AGC>AAC    | p.S124N        |
| Pat_41 | Post-Resistance | TRPS1    | 7227   | 37 | 8 | 116426877 | 116426877 | Missense_Mutation | SNP | G  | A  | 17  | 266 | c.3220C>T      | c.(3220-3222)CCT>TCT  | p.P1074S       |
| Pat_41 | Post-Resistance | TRPS1    | 7227   | 37 | 8 | 116427012 | 116427012 | Missense_Mutation | SNP | G  | A  | 4   | 109 | c.3085C>T      | c.(3085-3087)CAC>TAC  | p.H1029Y       |
| Pat_41 | Post-Resistance | EIF3H    | 8667   | 37 | 8 | 117668154 | 117668154 | Nonsense_Mutation | SNP | C  | T  | 23  | 229 | c.648G>A       | c.(646-648)TGG>TGA    | p.W216*        |
| Pat_41 | Post-Resistance | EIF3H    | 8667   | 37 | 8 | 117738276 | 117738276 | Missense_Mutation | SNP | C  | T  | 9   | 299 | c.268G>A       | c.(268-270)GAT>AAT    | p.D90N         |
| Pat_41 | Post-Resistance | RAD21    | 5885   | 37 | 8 | 117864201 | 117864201 | Missense_Mutation | SNP | C  | T  | 33  | 434 | c.1456G>A      | c.(1456-1458)GAG>AAG  | p.E486K        |
| Pat_41 | Post-Resistance | SLC30A8  | 169026 | 37 | 8 | 118159291 | 118159291 | Missense_Mutation | SNP | C  | T  | 30  | 269 | c.170C>T       | c.(169-171)TCC>TTC    | p.S57F         |
| Pat_41 | Post-Resistance | SLC30A8  | 169026 | 37 | 8 | 118183402 | 118183402 | Missense_Mutation | SNP | C  | T  | 9   | 471 | c.959C>T       | c.(958-960)GCT>GTT    | p.A320V        |
| Pat_41 | Post-Resistance | EXT1     | 2131   | 37 | 8 | 119122876 | 119122876 | Missense_Mutation | SNP | G  | A  | 9   | 123 | c.410C>T       | c.(409-411)GCC>GTC    | p.A137V        |
| Pat_41 | Post-Resistance | ENPP2    | 5168   | 37 | 8 | 120650688 | 120650688 | Missense_Mutation | SNP | C  | T  | 27  | 497 | c.113G>A       | c.(112-114)GGA>GAA    | p.G38E         |
| Pat_41 | Post-Resistance | TAF2     | 6873   | 37 | 8 | 120795872 | 120795872 | Missense_Mutation | SNP | C  | T  | 19  | 92  | c.1861G>A      | c.(1861-1863)GCT>ACT  | p.A621T        |
| Pat_41 | Post-Resistance | TAF2     | 6873   | 37 | 8 | 120809305 | 120809305 | Missense_Mutation | SNP | G  | A  | 13  | 144 | c.1016C>T      | c.(1015-1017)ACA>ATA  | p.T339I        |
| Pat_41 | Post-Resistance | DSCC1    | 79075  | 37 | 8 | 120854069 | 120854069 | Missense_Mutation | SNP | G  | A  | 27  | 178 | c.889C>T       | c.(889-891)CCT>TCT    | p.P297S        |
| Pat_41 | Post-Resistance | COL14A1  | 7373   | 37 | 8 | 121219269 | 121219269 | Missense_Mutation | SNP | C  | T  | 4   | 76  | c.1127C>T      | c.(1126-1128)GCC>GTC  | p.A376V        |
| Pat_41 | Post-Resistance | MTBP     | 27085  | 37 | 8 | 121458681 | 121458681 | Missense_Mutation | SNP | G  | A  | 9   | 303 | c.127G>A       | c.(127-129)GCA>ACA    | p.A43T         |
| Pat_41 | Post-Resistance | MTBP     | 27085  | 37 | 8 | 121535549 | 121535549 | Nonsense_Mutation | SNP | G  | A  | 18  | 477 | c.2688G>A      | c.(2686-2688)TGG>TGA  | p.W896*        |
| Pat_41 | Post-Resistance | HAS2     | 3037   | 37 | 8 | 122626858 | 122626858 | Missense_Mutation | SNP | C  | T  | 66  | 455 | c.1150G>A      | c.(1150-1152)GGA>AGA  | p.G384R        |
| Pat_41 | Post-Resistance | HAS2     | 3037   | 37 | 8 | 122641376 | 122641377 | Nonsense_Mutation | DNP | GG | AA | 131 | 148 | c.204_205CC>TT | 202-207)CACCGA>CATT(C | p.R69*         |
| Pat_41 | Post-Resistance | HAS2     | 3037   | 37 | 8 | 122641581 | 122641581 | Splice_Site       | SNP | C  | T  | 6   | 163 | c.1_splice     | c.e2-1                | p.M1_splice    |
| Pat_41 | Post-Resistance | ZHX2     | 22882  | 37 | 8 | 123965971 | 123965971 | Missense_Mutation | SNP | G  | A  | 11  | 157 | c.2221G>A      | c.(2221-2223)GAC>AAC  | p.D741N        |
| Pat_41 | Post-Resistance | WDR67    | 93594  | 37 | 8 | 124113180 | 124113180 | Missense_Mutation | SNP | C  | T  | 13  | 191 | c.965C>T       | c.(964-966)GCA>GTA    | p.A322V        |
| Pat_41 | Post-Resistance | FAM91A1  | 157769 | 37 | 8 | 124799566 | 124799566 | Missense_Mutation | SNP | T  | A  | 20  | 402 | c.1144T>A      | c.(1144-1146)TTT>ATT  | p.F382I        |
| Pat_41 | Post-Resistance | RNF139   | 11236  | 37 | 8 | 125498239 | 125498239 | Missense_Mutation | SNP | G  | A  | 23  | 193 | c.349G>A       | c.(349-351)GAG>AAG    | p.E117K        |
| Pat_41 | Post-Resistance | RNF139   | 11236  | 37 | 8 | 125499364 | 125499364 | Missense_Mutation | SNP | G  | A  | 7   | 367 | c.1474G>A      | c.(1474-1476)GGA>AGA  | p.G492R        |
| Pat_41 | Post-Resistance | NDUFB9   | 4715   | 37 | 8 | 125559341 | 125559341 | Missense_Mutation | SNP | G  | A  | 12  | 374 | c.395G>A       | c.(394-396)AGC>AAC    | p.S132N        |
| Pat_41 | Post-Resistance | ZNF572   | 137209 | 37 | 8 | 125988797 | 125988797 | Missense_Mutation | SNP | G  | A  | 19  | 134 | c.287G>A       | c.(286-288)GGA>GAA    | p.G96E         |
| Pat_41 | Post-Resistance | ZNF572   | 137209 | 37 | 8 | 125989117 | 125989117 | Missense_Mutation | SNP | C  | T  | 18  | 272 | c.607C>T       | c.(607-609)CTT>TTT    | p.L203F        |
| Pat_41 | Post-Resistance | KIAA0196 | 9897   | 37 | 8 | 126085397 | 126085397 | Missense_Mutation | SNP | G  | A  | 27  | 171 | c.1148C>T      | c.(1147-1149)TCA>TTA  | p.S383L        |
| Pat_41 | Post-Resistance | MYC      | 4609   | 37 | 8 | 128751046 | 128751046 | Missense_Mutation | SNP | G  | A  | 10  | 90  | c.583G>A       | c.(583-585)GAT>AAT    | p.D195N        |
| Pat_41 | Post-Resistance | FAM49B   | 51571  | 37 | 8 | 130864442 | 130864442 | Missense_Mutation | SNP | G  | A  | 17  | 199 | c.599C>T       | c.(598-600)ACC>ATC    | p.T200I        |
| Pat_41 | Post-Resistance | ASAP1    | 50807  | 37 | 8 | 131070323 | 131070323 | Splice_Site       | SNP | C  | T  | 7   | 125 | c.3193_splice  | c.e28-1               | p.G1065_splice |
| Pat_41 | Post-Resistance | ADCY8    | 114    | 37 | 8 | 131880179 | 131880179 | Missense_Mutation | SNP | C  | T  | 28  | 126 | c.2123G>A      | c.(2122-2124)AGG>AAG  | p.R708K        |
| Pat_41 | Post-Resistance | EFR3A    | 23167  | 37 | 8 | 132971875 | 132971875 | Missense_Mutation | SNP | G  | A  | 6   | 152 | c.820G>A       | c.(820-822)GTT>ATT    | p.V274I        |
| Pat_41 | Post-Resistance | EFR3A    | 23167  | 37 | 8 | 133014911 | 133014911 | Missense_Mutation | SNP | G  | T  | 10  | 108 | c.2268G>T      | c.(2266-2268)CAG>CAT  | p.Q756H        |
| Pat_41 | Post-Resistance | PHF20L1  | 51105  | 37 | 8 | 133827045 | 133827045 | Missense_Mutation | SNP | C  | T  | 18  | 365 | c.1094C>T      | c.(1093-1095)CCC>CTC  | p.P365L        |
| Pat_41 | Post-Resistance | TG       | 7038   | 37 | 8 | 134125739 | 134125739 | Missense_Mutation | SNP | G  | A  | 14  | 134 | c.7646G>A      | c.(7645-7647)GGC>GAC  | p.G2549D       |

|        |                 |          |        |    |   |           |           |                        |     |   |   |    |     |               |                        |               |
|--------|-----------------|----------|--------|----|---|-----------|-----------|------------------------|-----|---|---|----|-----|---------------|------------------------|---------------|
| Pat_41 | Post-Resistance | WISP1    | 8840   | 37 | 8 | 134237642 | 134237642 | Missense_Mutation      | SNP | G | A | 49 | 346 | c.620G>A      | c.(619-621)GGT>GAT     | p.G207D       |
| Pat_41 | Post-Resistance | ST3GAL1  | 6482   | 37 | 8 | 134477115 | 134477115 | Missense_Mutation      | SNP | C | T | 24 | 348 | c.589G>A      | c.(589-591)GAG>AAG     | p.E197K       |
| Pat_41 | Post-Resistance | ZFAT     | 57623  | 37 | 8 | 135577626 | 135577626 | Missense_Mutation      | SNP | C | T | 16 | 190 | c.2926G>A     | c.(2926-2928)GCC>ACC   | p.A976T       |
| Pat_41 | Post-Resistance | COL22A1  | 169044 | 37 | 8 | 139606439 | 139606439 | Missense_Mutation      | SNP | C | T | 4  | 69  | c.4436G>A     | c.(4435-4437)AGA>AAA   | p.R1479K      |
| Pat_41 | Post-Resistance | COL22A1  | 169044 | 37 | 8 | 139703116 | 139703116 | Missense_Mutation      | SNP | C | T | 5  | 61  | c.2756G>A     | c.(2755-2757)GGT>GAT   | p.G919D       |
| Pat_41 | Post-Resistance | TRAPPC9  | 83696  | 37 | 8 | 141461088 | 141461088 | Missense_Mutation      | SNP | G | A | 12 | 120 | c.385C>T      | c.(385-387)CGC>TGC     | p.R129C       |
| Pat_41 | Post-Resistance | PTK2     | 5747   | 37 | 8 | 141712714 | 141712714 | Nonsense_Mutation      | SNP | C | T | 20 | 387 | c.2322G>A     | c.(2320-2322)TGG>TGA   | p.W774*       |
| Pat_41 | Post-Resistance | DENND3   | 22898  | 37 | 8 | 142146714 | 142146714 | Translation_Start_Site | SNP | G | A | 4  | 25  | c.-31G>A      | c.(-33--29)CGGTG>CGATG |               |
| Pat_41 | Post-Resistance | DENND3   | 22898  | 37 | 8 | 142176489 | 142176489 | Splice_Site            | SNP | G | A | 4  | 109 | c.1513_splice | c.e12+1                | p.V505_splice |
| Pat_41 | Post-Resistance | TSNARE1  | 203062 | 37 | 8 | 143425575 | 143425575 | Missense_Mutation      | SNP | C | T | 15 | 241 | c.497G>A      | c.(496-498)CGC>CAC     | p.R166H       |
| Pat_41 | Post-Resistance | TSNARE1  | 203062 | 37 | 8 | 143427211 | 143427211 | Missense_Mutation      | SNP | G | A | 8  | 204 | c.131C>T      | c.(130-132)CCC>CTC     | p.P44L        |
| Pat_41 | Post-Resistance | BAI1     | 575    | 37 | 8 | 143603435 | 143603435 | Missense_Mutation      | SNP | G | T | 3  | 53  | c.3134G>T     | c.(3133-3135)CGG>CTG   | p.R1045L      |
| Pat_41 | Post-Resistance | GML      | 2765   | 37 | 8 | 143921857 | 143921857 | Missense_Mutation      | SNP | C | T | 5  | 87  | c.4C>T        | c.(4-6)CTC>TTC         | p.L2F         |
| Pat_41 | Post-Resistance | CYP11B1  | 1584   | 37 | 8 | 143961144 | 143961144 | Missense_Mutation      | SNP | G | A | 9  | 38  | c.86C>T       | c.(85-87)GCC>GTC       | p.A29V        |
| Pat_41 | Post-Resistance | GLI4     | 2738   | 37 | 8 | 144358607 | 144358607 | Missense_Mutation      | SNP | C | T | 8  | 145 | c.764C>T      | c.(763-765)ACG>ATG     | p.T255M       |
| Pat_41 | Post-Resistance | FAM83H   | 286077 | 37 | 8 | 144808356 | 144808356 | Missense_Mutation      | SNP | G | A | 3  | 46  | c.3275C>T     | c.(3274-3276)GCC>GTC   | p.A1092V      |
| Pat_41 | Post-Resistance | EPPK1    | 83481  | 37 | 8 | 144943070 | 144943070 | Missense_Mutation      | SNP | C | T | 15 | 60  | c.4352G>A     | c.(4351-4353)AGG>AAG   | p.R1451K      |
| Pat_41 | Post-Resistance | PLEC     | 5339   | 37 | 8 | 144990973 | 144990973 | Missense_Mutation      | SNP | C | T | 6  | 147 | c.13427G>A    | c.(13426-13428)GGC>GAC | p.G4476D      |
| Pat_41 | Post-Resistance | PLEC     | 5339   | 37 | 8 | 144997775 | 144997775 | Missense_Mutation      | SNP | G | A | 9  | 53  | c.6733C>T     | c.(6733-6735)CGG>TGG   | p.R2245W      |
| Pat_41 | Post-Resistance | PLEC     | 5339   | 37 | 8 | 145012819 | 145012819 | Missense_Mutation      | SNP | C | T | 16 | 311 | c.565G>A      | c.(565-567)GTC>ATC     | p.V189I       |
| Pat_41 | Post-Resistance | GRINA    | 2907   | 37 | 8 | 145065764 | 145065764 | Missense_Mutation      | SNP | C | T | 7  | 196 | c.373C>T      | c.(373-375)CCT>TCT     | p.P125S       |
| Pat_41 | Post-Resistance | OPLAH    | 26873  | 37 | 8 | 145111352 | 145111352 | Missense_Mutation      | SNP | C | T | 4  | 26  | c.1919G>A     | c.(1918-1920)GGC>GAC   | p.G640D       |
| Pat_41 | Post-Resistance | OPLAH    | 26873  | 37 | 8 | 145111358 | 145111358 | Missense_Mutation      | SNP | C | T | 3  | 24  | c.1913G>A     | c.(1912-1914)GGC>GAC   | p.G638D       |
| Pat_41 | Post-Resistance | GPAA1    | 8733   | 37 | 8 | 145139502 | 145139502 | Missense_Mutation      | SNP | G | A | 12 | 136 | c.1000G>A     | c.(1000-1002)GCA>ACA   | p.A334T       |
| Pat_41 | Post-Resistance | SHARPIN  | 81858  | 37 | 8 | 145154251 | 145154251 | Missense_Mutation      | SNP | G | A | 6  | 113 | c.851C>T      | c.(850-852)GCC>GTC     | p.A284V       |
| Pat_41 | Post-Resistance | HEATR7A  | 727957 | 37 | 8 | 145245825 | 145245825 | Missense_Mutation      | SNP | G | A | 5  | 36  | c.701G>A      | c.(700-702)AGT>AAT     | p.S234N       |
| Pat_41 | Post-Resistance | HEATR7A  | 727957 | 37 | 8 | 145247237 | 145247237 | Missense_Mutation      | SNP | C | T | 4  | 27  | c.881C>T      | c.(880-882)GCT>GTT     | p.A294V       |
| Pat_41 | Post-Resistance | HSF1     | 3297   | 37 | 8 | 145537564 | 145537564 | Missense_Mutation      | SNP | G | A | 13 | 257 | c.1304G>A     | c.(1303-1305)AGC>AAC   | p.S435N       |
| Pat_41 | Post-Resistance | DGAT1    | 8694   | 37 | 8 | 145541660 | 145541660 | Missense_Mutation      | SNP | C | T | 16 | 100 | c.772G>A      | c.(772-774)GCC>ACC     | p.A258T       |
| Pat_41 | Post-Resistance | FBXL6    | 26233  | 37 | 8 | 145580576 | 145580576 | Splice_Site            | SNP | C | T | 5  | 61  | c.772_splice  | c.e5-1                 | p.V258_splice |
| Pat_41 | Post-Resistance | ADCK5    | 203054 | 37 | 8 | 145616060 | 145616060 | Missense_Mutation      | SNP | G | A | 15 | 153 | c.347G>A      | c.(346-348)AGC>AAC     | p.S116N       |
| Pat_41 | Post-Resistance | CPSF1    | 29894  | 37 | 8 | 145623961 | 145623961 | Missense_Mutation      | SNP | C | T | 22 | 260 | c.1706G>A     | c.(1705-1707)GGC>GAC   | p.G569D       |
| Pat_41 | Post-Resistance | CPSF1    | 29894  | 37 | 8 | 145624695 | 145624695 | Missense_Mutation      | SNP | C | T | 9  | 151 | c.1363G>A     | c.(1363-1365)GGA>AGA   | p.G455R       |
| Pat_41 | Post-Resistance | NFKBIL2  | 4796   | 37 | 8 | 145661985 | 145661985 | Missense_Mutation      | SNP | G | A | 6  | 38  | c.1970C>T     | c.(1969-1971)GCC>GTC   | p.A657V       |
| Pat_41 | Post-Resistance | NFKBIL2  | 4796   | 37 | 8 | 145665547 | 145665547 | Missense_Mutation      | SNP | G | A | 6  | 122 | c.1337C>T     | c.(1336-1338)CCC>CTC   | p.P446L       |
| Pat_41 | Post-Resistance | GPT      | 2875   | 37 | 8 | 145730175 | 145730175 | Missense_Mutation      | SNP | C | T | 42 | 617 | c.274C>T      | c.(274-276)CCT>TCT     | p.P92S        |
| Pat_41 | Post-Resistance | LRRRC14  | 9684   | 37 | 8 | 145746452 | 145746452 | Missense_Mutation      | SNP | G | A | 15 | 104 | c.1072G>A     | c.(1072-1074)GGT>AGT   | p.G358S       |
| Pat_41 | Post-Resistance | ZNF34    | 80778  | 37 | 8 | 146003512 | 146003512 | Missense_Mutation      | SNP | G | A | 4  | 89  | c.134C>T      | c.(133-135)TCC>TTC     | p.S45F        |
| Pat_41 | Post-Resistance | ZNF7     | 7553   | 37 | 8 | 146067688 | 146067688 | Missense_Mutation      | SNP | G | A | 7  | 134 | c.1196G>A     | c.(1195-1197)AGC>AAC   | p.S399N       |
| Pat_41 | Post-Resistance | ZNF7     | 7553   | 37 | 8 | 146068449 | 146068449 | Nonsense_Mutation      | SNP | C | T | 9  | 165 | c.1957C>T     | c.(1957-1959)CAG>TAG   | p.Q653*       |
| Pat_41 | Post-Resistance | ZNF250   | 58500  | 37 | 8 | 146107292 | 146107292 | Missense_Mutation      | SNP | C | T | 11 | 222 | c.1291G>A     | c.(1291-1293)GCC>ACC   | p.A431T       |
| Pat_41 | Post-Resistance | FOXD4    | 2298   | 37 | 9 | 117939    | 117939    | Missense_Mutation      | SNP | C | T | 7  | 62  | c.181G>A      | c.(181-183)GGC>AGC     | p.G61S        |
| Pat_41 | Post-Resistance | DOCK8    | 81704  | 37 | 9 | 428399    | 428399    | Missense_Mutation      | SNP | G | A | 11 | 85  | c.4376G>A     | c.(4375-4377)GGA>GAA   | p.G1459E      |
| Pat_41 | Post-Resistance | KANK1    | 23189  | 37 | 9 | 711024    | 711024    | Nonsense_Mutation      | SNP | G | A | 12 | 74  | c.258G>A      | c.(256-258)TGG>TGA     | p.W86*        |
| Pat_41 | Post-Resistance | KANK1    | 23189  | 37 | 9 | 738385    | 738385    | Missense_Mutation      | SNP | C | T | 34 | 82  | c.3434C>T     | c.(3433-3435)GCC>GTC   | p.A1145V      |
| Pat_41 | Post-Resistance | KIAA0020 | 9933   | 37 | 9 | 2837362   | 2837362   | Missense_Mutation      | SNP | G | A | 3  | 34  | c.122C>T      | c.(121-123)GCT>GTT     | p.A41V        |
| Pat_41 | Post-Resistance | RFX3     | 5991   | 37 | 9 | 3346713   | 3346713   | Missense_Mutation      | SNP | C | T | 18 | 170 | c.169G>A      | c.(169-171)GTG>ATG     | p.V57M        |

|        |                 |          |        |    |   |          |          |                   |     |   |   |    |     |               |                      |               |
|--------|-----------------|----------|--------|----|---|----------|----------|-------------------|-----|---|---|----|-----|---------------|----------------------|---------------|
| Pat_41 | Post-Resistance | RCL1     | 10171  | 37 | 9 | 4844622  | 4844622  | Missense_Mutation | SNP | G | A | 33 | 135 | c.808G>A      | c.(808-810)GTA>ATA   | p.V270I       |
| Pat_41 | Post-Resistance | ERMP1    | 79956  | 37 | 9 | 5810154  | 5810154  | Missense_Mutation | SNP | G | A | 22 | 211 | c.1405C>T     | c.(1405-1407)CTC>TTC | p.L469F       |
| Pat_41 | Post-Resistance | KIAA2026 | 158358 | 37 | 9 | 6007224  | 6007224  | Missense_Mutation | SNP | C | T | 24 | 151 | c.564G>A      | c.(562-564)ATG>ATA   | p.M188I       |
| Pat_41 | Post-Resistance | KDM4C    | 23081  | 37 | 9 | 7103728  | 7103728  | Missense_Mutation | SNP | C | T | 27 | 81  | c.2468C>T     | c.(2467-2469)GCC>GTC | p.A823V       |
| Pat_41 | Post-Resistance | PTPRD    | 5789   | 37 | 9 | 8500931  | 8500931  | Missense_Mutation | SNP | C | T | 47 | 195 | c.1951G>A     | c.(1951-1953)GCA>ACA | p.A651T       |
| Pat_41 | Post-Resistance | MPDZ     | 8777   | 37 | 9 | 13221445 | 13221445 | Missense_Mutation | SNP | C | T | 9  | 91  | c.802G>A      | c.(802-804)GGA>AGA   | p.G268R       |
| Pat_41 | Post-Resistance | C9orf93  | 203238 | 37 | 9 | 15678820 | 15678820 | Missense_Mutation | SNP | G | A | 3  | 13  | c.1141G>A     | c.(1141-1143)GTA>ATA | p.V381I       |
| Pat_41 | Post-Resistance | DENND4C  | 55667  | 37 | 9 | 19360267 | 19360267 | Missense_Mutation | SNP | C | T | 23 | 151 | c.4331C>T     | c.(4330-4332)CCT>CTT | p.P1444L      |
| Pat_41 | Post-Resistance | ACER2    | 340485 | 37 | 9 | 19450551 | 19450551 | Missense_Mutation | SNP | C | T | 25 | 54  | c.745C>T      | c.(745-747)CCC>TCC   | p.P249S       |
| Pat_41 | Post-Resistance | SLC24A2  | 25769  | 37 | 9 | 19786422 | 19786422 | Missense_Mutation | SNP | G | A | 4  | 50  | c.443C>T      | c.(442-444)GCC>GTC   | p.A148V       |
| Pat_41 | Post-Resistance | MLLT3    | 4300   | 37 | 9 | 20363517 | 20363517 | Missense_Mutation | SNP | C | T | 11 | 63  | c.1288G>A     | c.(1288-1290)GAA>AAA | p.E430K       |
| Pat_41 | Post-Resistance | IFNA16   | 3449   | 37 | 9 | 21216814 | 21216814 | Nonsense_Mutation | SNP | C | T | 69 | 480 | c.491G>A      | c.(490-492)TGG>TAG   | p.W164*       |
| Pat_41 | Post-Resistance | DMRTA1   | 63951  | 37 | 9 | 22451101 | 22451101 | Nonsense_Mutation | SNP | C | T | 13 | 88  | c.706C>T      | c.(706-708)CAA>TAA   | p.Q236*       |
| Pat_41 | Post-Resistance | C9orf72  | 203228 | 37 | 9 | 27562426 | 27562426 | Missense_Mutation | SNP | C | T | 24 | 160 | c.553G>A      | c.(553-555)GAA>AAA   | p.E185K       |
| Pat_41 | Post-Resistance | C9orf72  | 203228 | 37 | 9 | 27566773 | 27566773 | Missense_Mutation | SNP | G | A | 36 | 81  | c.346C>T      | c.(346-348)CTT>TTT   | p.L116F       |
| Pat_41 | Post-Resistance | NOL6     | 65083  | 37 | 9 | 33469208 | 33469208 | Missense_Mutation | SNP | C | T | 12 | 57  | c.859G>A      | c.(859-861)GAT>AAT   | p.D287N       |
| Pat_41 | Post-Resistance | UBAP2    | 55833  | 37 | 9 | 33922537 | 33922537 | Missense_Mutation | SNP | G | A | 4  | 21  | c.3325C>T     | c.(3325-3327)CCT>TCT | p.P1109S      |
| Pat_41 | Post-Resistance | DCAF12   | 25853  | 37 | 9 | 34093419 | 34093419 | Missense_Mutation | SNP | G | A | 4  | 69  | c.889C>T      | c.(889-891)CGT>TGT   | p.R297C       |
| Pat_41 | Post-Resistance | IL11RA   | 3590   | 37 | 9 | 34657458 | 34657458 | Missense_Mutation | SNP | C | T | 6  | 50  | c.520C>T      | c.(520-522)CCC>TCC   | p.P174S       |
| Pat_41 | Post-Resistance | C9orf131 | 138724 | 37 | 9 | 35043155 | 35043155 | Missense_Mutation | SNP | C | T | 5  | 54  | c.529C>T      | c.(529-531)CCT>TCT   | p.P177S       |
| Pat_41 | Post-Resistance | C9orf131 | 138724 | 37 | 9 | 35043738 | 35043738 | Missense_Mutation | SNP | C | T | 14 | 78  | c.1112C>T     | c.(1111-1113)ACC>ATC | p.T371I       |
| Pat_41 | Post-Resistance | C9orf131 | 138724 | 37 | 9 | 35044205 | 35044205 | Missense_Mutation | SNP | C | T | 54 | 200 | c.1579C>T     | c.(1579-1581)CCA>TCA | p.P527S       |
| Pat_41 | Post-Resistance | C9orf131 | 138724 | 37 | 9 | 35044316 | 35044316 | Missense_Mutation | SNP | C | T | 19 | 145 | c.1690C>T     | c.(1690-1692)CCA>TCA | p.P564S       |
| Pat_41 | Post-Resistance | CD72     | 971    | 37 | 9 | 35611800 | 35611800 | Splice_Site       | SNP | C | T | 24 | 56  | c.950_splice  | c.e7+1               | p.R317_splice |
| Pat_41 | Post-Resistance | CA9      | 768    | 37 | 9 | 35680970 | 35680970 | Missense_Mutation | SNP | C | T | 9  | 134 | c.1328C>T     | c.(1327-1329)ACC>ATC | p.T443I       |
| Pat_41 | Post-Resistance | NPR2     | 4882   | 37 | 9 | 35800146 | 35800146 | Missense_Mutation | SNP | G | A | 11 | 147 | c.1115G>A     | c.(1114-1116)AGA>AAA | p.R372K       |
| Pat_41 | Post-Resistance | CLTA     | 1211   | 37 | 9 | 36199075 | 36199075 | Missense_Mutation | SNP | G | A | 39 | 105 | c.355G>A      | c.(355-357)GAA>AAA   | p.E119K       |
| Pat_41 | Post-Resistance | POLR1E   | 64425  | 37 | 9 | 37503099 | 37503099 | Missense_Mutation | SNP | C | T | 6  | 30  | c.1346C>T     | c.(1345-1347)GCC>GTC | p.A449V       |
| Pat_41 | Post-Resistance | PIP5K1B  | 8395   | 37 | 9 | 71532542 | 71532542 | Missense_Mutation | SNP | G | A | 31 | 121 | c.850G>A      | c.(850-852)GAG>AAG   | p.E284K       |
| Pat_41 | Post-Resistance | VPS13A   | 23230  | 37 | 9 | 79952399 | 79952399 | Nonsense_Mutation | SNP | G | A | 15 | 136 | c.6324G>A     | c.(6322-6324)TGG>TGA | p.W2108*      |
| Pat_41 | Post-Resistance | CEP78    | 84131  | 37 | 9 | 80861630 | 80861630 | Missense_Mutation | SNP | C | T | 15 | 69  | c.824C>T      | c.(823-825)GCT>GTT   | p.A275V       |
| Pat_41 | Post-Resistance | TLE4     | 7091   | 37 | 9 | 82333666 | 82333666 | Missense_Mutation | SNP | G | A | 9  | 45  | c.1445G>A     | c.(1444-1446)GGT>GAT | p.G482D       |
| Pat_41 | Post-Resistance | RASEF    | 158158 | 37 | 9 | 85605342 | 85605342 | Missense_Mutation | SNP | C | T | 6  | 195 | c.2081G>A     | c.(2080-2082)GGT>GAT | p.G694D       |
| Pat_41 | Post-Resistance | UBQLN1   | 29979  | 37 | 9 | 86297946 | 86297946 | Missense_Mutation | SNP | G | A | 14 | 132 | c.368C>T      | c.(367-369)GCT>GTT   | p.A123V       |
| Pat_41 | Post-Resistance | GKAP1    | 80318  | 37 | 9 | 86383767 | 86383767 | Missense_Mutation | SNP | C | T | 5  | 55  | c.704G>A      | c.(703-705)GGA>GAA   | p.G235E       |
| Pat_41 | Post-Resistance | KIF27    | 55582  | 37 | 9 | 86452059 | 86452059 | Missense_Mutation | SNP | G | A | 8  | 73  | c.4063C>T     | c.(4063-4065)CCT>TCT | p.P1355S      |
| Pat_41 | Post-Resistance | C9orf64  | 84267  | 37 | 9 | 86571229 | 86571229 | Missense_Mutation | SNP | C | T | 11 | 27  | c.187G>A      | c.(187-189)GCC>ACC   | p.A63T        |
| Pat_41 | Post-Resistance | RMI1     | 80010  | 37 | 9 | 86616913 | 86616913 | Missense_Mutation | SNP | C | T | 7  | 33  | c.1012C>T     | c.(1012-1014)CCA>TCA | p.P338S       |
| Pat_41 | Post-Resistance | DAPK1    | 1612   | 37 | 9 | 90263777 | 90263777 | Missense_Mutation | SNP | C | T | 21 | 170 | c.1411C>T     | c.(1411-1413)CCC>TCC | p.P471S       |
| Pat_41 | Post-Resistance | CTSL3    | 392360 | 37 | 9 | 90401723 | 90401723 | Missense_Mutation | SNP | G | A | 18 | 58  | c.575G>A      | c.(574-576)GGT>GAT   | p.G192D       |
| Pat_41 | Post-Resistance | SECISBP2 | 79048  | 37 | 9 | 91943656 | 91943656 | Missense_Mutation | SNP | C | T | 7  | 104 | c.656C>T      | c.(655-657)ACC>ATC   | p.T219I       |
| Pat_41 | Post-Resistance | SEMA4D   | 10507  | 37 | 9 | 92003963 | 92003963 | Splice_Site       | SNP | C | T | 10 | 29  | c.775_splice  | c.e12-1              | p.G259_splice |
| Pat_41 | Post-Resistance | SYK      | 6850   | 37 | 9 | 93640016 | 93640016 | Missense_Mutation | SNP | G | A | 5  | 89  | c.1345G>A     | c.(1345-1347)GAG>AAG | p.E449K       |
| Pat_41 | Post-Resistance | ROR2     | 4920   | 37 | 9 | 94486207 | 94486207 | Missense_Mutation | SNP | G | A | 6  | 53  | c.2569C>T     | c.(2569-2571)CCC>TCC | p.P857S       |
| Pat_41 | Post-Resistance | ROR2     | 4920   | 37 | 9 | 94519784 | 94519784 | Missense_Mutation | SNP | G | A | 3  | 40  | c.233C>T      | c.(232-234)ACG>ATG   | p.T78M        |
| Pat_41 | Post-Resistance | SPTLC1   | 10558  | 37 | 9 | 94797091 | 94797091 | Splice_Site       | SNP | C | T | 19 | 112 | c.1328_splice | c.e14+1              | p.S443_splice |
| Pat_41 | Post-Resistance | WNK2     | 65268  | 37 | 9 | 95993352 | 95993352 | Missense_Mutation | SNP | C | T | 72 | 142 | c.1037C>T     | c.(1036-1038)GCC>GTC | p.A346V       |



|        |                 |          |        |    |   |           |           |                   |     |   |   |     |     |               |                      |                |
|--------|-----------------|----------|--------|----|---|-----------|-----------|-------------------|-----|---|---|-----|-----|---------------|----------------------|----------------|
| Pat_41 | Post-Resistance | ZNF169   | 169841 | 37 | 9 | 97054659  | 97054659  | Missense_Mutation | SNP | A | G | 31  | 103 | c.70A>G       | c.(70-72)ACC>GCC     | p.T24A         |
| Pat_41 | Post-Resistance | C9orf3   | 84909  | 37 | 9 | 97522426  | 97522426  | Missense_Mutation | SNP | C | T | 7   | 321 | c.361C>T      | c.(361-363)CAT>TAT   | p.H121Y        |
| Pat_41 | Post-Resistance | PTCH1    | 5727   | 37 | 9 | 98209459  | 98209459  | Missense_Mutation | SNP | G | A | 8   | 17  | c.4079C>T     | c.(4078-4080)TCC>TTC | p.S1360F       |
| Pat_41 | Post-Resistance | CDC14B   | 8555   | 37 | 9 | 99327738  | 99327738  | Missense_Mutation | SNP | C | T | 23  | 203 | c.188G>A      | c.(187-189)AGC>AAC   | p.S63N         |
| Pat_41 | Post-Resistance | TDRD7    | 23424  | 37 | 9 | 100190809 | 100190809 | Missense_Mutation | SNP | G | A | 18  | 58  | c.62G>A       | c.(61-63)GGA>GAA     | p.G21E         |
| Pat_41 | Post-Resistance | TDRD7    | 23424  | 37 | 9 | 100222550 | 100222550 | Missense_Mutation | SNP | G | A | 5   | 50  | c.946G>A      | c.(946-948)GTA>ATA   | p.V316I        |
| Pat_41 | Post-Resistance | TBC1D2   | 55357  | 37 | 9 | 100963810 | 100963810 | Missense_Mutation | SNP | C | T | 11  | 87  | c.2408G>A     | c.(2407-2409)AGC>AAC | p.S803N        |
| Pat_41 | Post-Resistance | ANKS6    | 203286 | 37 | 9 | 101552434 | 101552434 | Missense_Mutation | SNP | C | T | 22  | 85  | c.814G>A      | c.(814-816)GAC>AAC   | p.D272N        |
| Pat_41 | Post-Resistance | STX17    | 55014  | 37 | 9 | 102730902 | 102730902 | Missense_Mutation | SNP | C | T | 6   | 91  | c.856C>T      | c.(856-858)CTC>TTC   | p.L286F        |
| Pat_41 | Post-Resistance | LPPR1    | 54886  | 37 | 9 | 104075216 | 104075216 | Missense_Mutation | SNP | T | A | 275 | 37  | c.773T>A      | c.(772-774)ATT>AAT   | p.I258N        |
| Pat_41 | Post-Resistance | MRPL50   | 54534  | 37 | 9 | 104153098 | 104153098 | Missense_Mutation | SNP | C | T | 10  | 56  | c.127G>A      | c.(127-129)GAA>AAA   | p.E43K         |
| Pat_41 | Post-Resistance | SMC2     | 10592  | 37 | 9 | 106901489 | 106901489 | Missense_Mutation | SNP | G | A | 9   | 74  | c.3487G>A     | c.(3487-3489)GAT>AAT | p.D1163N       |
| Pat_41 | Post-Resistance | OR13C9   | 286362 | 37 | 9 | 107380046 | 107380046 | Missense_Mutation | SNP | C | T | 14  | 131 | c.440G>A      | c.(439-441)GGG>GAG   | p.G147E        |
| Pat_41 | Post-Resistance | ABCA1    | 19     | 37 | 9 | 107562184 | 107562184 | Missense_Mutation | SNP | T | C | 3   | 99  | c.4859A>G     | c.(4858-4860)AAG>AGG | p.K1620R       |
| Pat_41 | Post-Resistance | ZNF462   | 58499  | 37 | 9 | 109765657 | 109765657 | Missense_Mutation | SNP | G | A | 9   | 45  | c.7139G>A     | c.(7138-7140)AGC>AAC | p.S2380N       |
| Pat_41 | Post-Resistance | CTNNAL1  | 8727   | 37 | 9 | 111706289 | 111706289 | Missense_Mutation | SNP | C | T | 5   | 140 | c.1894G>A     | c.(1894-1896)GCA>ACA | p.A632T        |
| Pat_41 | Post-Resistance | C9orf5   | 23731  | 37 | 9 | 111822716 | 111822716 | Missense_Mutation | SNP | C | T | 29  | 69  | c.1640G>A     | c.(1639-1641)GGA>GAA | p.G547E        |
| Pat_41 | Post-Resistance | SVEP1    | 79987  | 37 | 9 | 113192285 | 113192285 | Splice_Site       | SNP | C | T | 20  | 67  | c.5531_splice | c.e34-1              | p.A1844_splice |
| Pat_41 | Post-Resistance | LPAR1    | 1902   | 37 | 9 | 113637878 | 113637878 | Missense_Mutation | SNP | C | T | 92  | 22  | c.918G>A      | c.(916-918)ATG>ATA   | p.M306I        |
| Pat_41 | Post-Resistance | KIAA0368 | 23392  | 37 | 9 | 114134762 | 114134762 | Missense_Mutation | SNP | G | A | 20  | 139 | c.5009C>T     | c.(5008-5010)TCC>TTC | p.S1670F       |
| Pat_41 | Post-Resistance | UGCG     | 7357   | 37 | 9 | 114695126 | 114695126 | Missense_Mutation | SNP | C | T | 28  | 85  | c.1034C>T     | c.(1033-1035)TCA>TTA | p.S345L        |
| Pat_41 | Post-Resistance | ALAD     | 210    | 37 | 9 | 116155769 | 116155769 | Missense_Mutation | SNP | G | A | 6   | 66  | c.71C>T       | c.(70-72)ACC>ATC     | p.T24I         |
| Pat_41 | Post-Resistance | C9orf43  | 257169 | 37 | 9 | 116185634 | 116185634 | Missense_Mutation | SNP | G | A | 20  | 48  | c.512G>A      | c.(511-513)GGA>GAA   | p.G171E        |
| Pat_41 | Post-Resistance | RGS3     | 5998   | 37 | 9 | 116224012 | 116224012 | Missense_Mutation | SNP | C | T | 9   | 93  | c.106C>T      | c.(106-108)CCC>TCC   | p.P36S         |
| Pat_41 | Post-Resistance | AMBP     | 259    | 37 | 9 | 116838957 | 116838957 | Missense_Mutation | SNP | C | T | 20  | 80  | c.181G>A      | c.(181-183)GAC>AAC   | p.D61N         |
| Pat_41 | Post-Resistance | COL27A1  | 85301  | 37 | 9 | 116967403 | 116967403 | Missense_Mutation | SNP | C | T | 10  | 90  | c.2146C>T     | c.(2146-2148)CCG>TCG | p.P716S        |
| Pat_41 | Post-Resistance | COL27A1  | 85301  | 37 | 9 | 116999979 | 116999979 | Missense_Mutation | SNP | G | A | 6   | 53  | c.2711G>A     | c.(2710-2712)GGG>GAG | p.G904E        |
| Pat_41 | Post-Resistance | COL27A1  | 85301  | 37 | 9 | 117062942 | 117062942 | Missense_Mutation | SNP | G | A | 7   | 20  | c.4676G>A     | c.(4675-4677)GGC>GAC | p.G1559D       |
| Pat_41 | Post-Resistance | AKNA     | 80709  | 37 | 9 | 117106084 | 117106084 | Splice_Site       | SNP | C | T | 5   | 40  | c.3662_splice | c.e18-1              | p.G1221_splice |
| Pat_41 | Post-Resistance | DFNB31   | 25861  | 37 | 9 | 117166342 | 117166342 | Missense_Mutation | SNP | G | A | 5   | 32  | c.2252C>T     | c.(2251-2253)TCC>TTC | p.S751F        |
| Pat_41 | Post-Resistance | ASTN2    | 23245  | 37 | 9 | 119413883 | 119413883 | Missense_Mutation | SNP | C | T | 10  | 83  | c.2996G>A     | c.(2995-2997)AGC>AAC | p.S999N        |
| Pat_41 | Post-Resistance | TRIM32   | 22954  | 37 | 9 | 119460041 | 119460041 | Missense_Mutation | SNP | C | T | 9   | 51  | c.20C>T       | c.(19-21)TCT>TTT     | p.S7F          |
| Pat_41 | Post-Resistance | C5       | 727    | 37 | 9 | 123739097 | 123739097 | Missense_Mutation | SNP | C | T | 9   | 121 | c.3745G>A     | c.(3745-3747)GAA>AAA | p.E1249K       |
| Pat_41 | Post-Resistance | C5       | 727    | 37 | 9 | 123770685 | 123770685 | Splice_Site       | SNP | C | T | 40  | 90  | c.2348_splice | c.e18+1              | p.R783_splice  |
| Pat_41 | Post-Resistance | C5       | 727    | 37 | 9 | 123777506 | 123777506 | Missense_Mutation | SNP | C | T | 3   | 63  | c.2030G>A     | c.(2029-2031)AGA>AAA | p.R677K        |
| Pat_41 | Post-Resistance | C5       | 727    | 37 | 9 | 123778579 | 123778579 | Missense_Mutation | SNP | C | T | 25  | 130 | c.1949G>A     | c.(1948-1950)GGA>GAA | p.G650E        |
| Pat_41 | Post-Resistance | CEP110   | 11064  | 37 | 9 | 123920340 | 123920340 | Missense_Mutation | SNP | G | A | 4   | 44  | c.4717G>A     | c.(4717-4719)GTG>ATG | p.V1573M       |
| Pat_41 | Post-Resistance | OR1J1    | 347168 | 37 | 9 | 125239683 | 125239683 | Missense_Mutation | SNP | G | A | 12  | 22  | c.523C>T      | c.(523-525)CCT>TCT   | p.P175S        |
| Pat_41 | Post-Resistance | OR1N1    | 138883 | 37 | 9 | 125288851 | 125288851 | Missense_Mutation | SNP | G | A | 50  | 10  | c.722C>T      | c.(721-723)TCC>TTC   | p.S241F        |
| Pat_41 | Post-Resistance | OR1L3    | 26735  | 37 | 9 | 125437417 | 125437417 | Missense_Mutation | SNP | G | A | 4   | 135 | c.9G>A        | c.(7-9)ATG>ATA       | p.M3I          |
| Pat_41 | Post-Resistance | OR1L4    | 254973 | 37 | 9 | 125486969 | 125486969 | Missense_Mutation | SNP | G | A | 21  | 237 | c.701G>A      | c.(700-702)GGG>GAG   | p.G234E        |
| Pat_41 | Post-Resistance | OR5C1    | 392391 | 37 | 9 | 125551815 | 125551815 | Missense_Mutation | SNP | C | T | 4   | 54  | c.604C>T      | c.(604-606)CTT>TTT   | p.L202F        |
| Pat_41 | Post-Resistance | SCAI     | 286205 | 37 | 9 | 127733699 | 127733699 | Missense_Mutation | SNP | T | C | 12  | 81  | c.1624A>G     | c.(1624-1626)ACA>GCA | p.T542A        |
| Pat_41 | Post-Resistance | HSPA5    | 3309   | 37 | 9 | 128003049 | 128003049 | Missense_Mutation | SNP | T | C | 22  | 130 | c.260A>G      | c.(259-261)AAC>AGC   | p.N87S         |
| Pat_41 | Post-Resistance | RALGPS1  | 9649   | 37 | 9 | 129728169 | 129728169 | Missense_Mutation | SNP | C | T | 15  | 125 | c.104C>T      | c.(103-105)GCC>GTC   | p.A35V         |
| Pat_41 | Post-Resistance | LRSAM1   | 90678  | 37 | 9 | 130236172 | 130236172 | Missense_Mutation | SNP | C | T | 4   | 61  | c.712C>T      | c.(712-714)CCC>TCC   | p.P238S        |
| Pat_41 | Post-Resistance | FAM129B  | 64855  | 37 | 9 | 130286123 | 130286123 | Missense_Mutation | SNP | T | A | 33  | 69  | c.424A>T      | c.(424-426)ACC>TCC   | p.T142S        |

|        |                 |            |        |    |   |           |           |                   |     |   |   |    |     |               |                      |                |
|--------|-----------------|------------|--------|----|---|-----------|-----------|-------------------|-----|---|---|----|-----|---------------|----------------------|----------------|
| Pat_41 | Post-Resistance | ST6GALNAC6 | 30815  | 37 | 9 | 130652997 | 130652997 | Missense_Mutation | SNP | G | A | 15 | 69  | c.623C>T      | c.(622-624)CCC>CTC   | p.P208L        |
| Pat_41 | Post-Resistance | ST6GALNAC4 | 27090  | 37 | 9 | 130672239 | 130672239 | Missense_Mutation | SNP | C | T | 4  | 33  | c.710G>A      | c.(709-711)AGC>AAC   | p.S237N        |
| Pat_41 | Post-Resistance | DPM2       | 8818   | 37 | 9 | 130699801 | 130699801 | Missense_Mutation | SNP | G | A | 4  | 20  | c.5C>T        | c.(4-6)GCC>GTC       | p.A2V          |
| Pat_41 | Post-Resistance | PTGES2     | 80142  | 37 | 9 | 130885987 | 130885987 | Missense_Mutation | SNP | G | A | 5  | 57  | c.680C>T      | c.(679-681)GCC>GTC   | p.A227V        |
| Pat_41 | Post-Resistance | CIZ1       | 25792  | 37 | 9 | 130931372 | 130931372 | Missense_Mutation | SNP | C | T | 8  | 184 | c.2254G>A     | c.(2254-2256)GAT>AAT | p.D752N        |
| Pat_41 | Post-Resistance | GOLGA2     | 2801   | 37 | 9 | 131022360 | 131022360 | Missense_Mutation | SNP | C | T | 10 | 40  | c.1786G>A     | c.(1786-1788)GAA>AAA | p.E596K        |
| Pat_41 | Post-Resistance | CERCAM     | 51148  | 37 | 9 | 131191057 | 131191057 | Missense_Mutation | SNP | C | T | 14 | 78  | c.908C>T      | c.(907-909)GCC>GTC   | p.A303V        |
| Pat_41 | Post-Resistance | DOLK       | 22845  | 37 | 9 | 131708828 | 131708828 | Missense_Mutation | SNP | G | A | 4  | 48  | c.755C>T      | c.(754-756)ACC>ATC   | p.T252I        |
| Pat_41 | Post-Resistance | CRAT       | 1384   | 37 | 9 | 131860302 | 131860302 | Missense_Mutation | SNP | G | A | 26 | 103 | c.1454C>T     | c.(1453-1455)TCC>TTC | p.S485F        |
| Pat_41 | Post-Resistance | LAMC3      | 10319  | 37 | 9 | 133917032 | 133917032 | Missense_Mutation | SNP | C | T | 10 | 33  | c.1292C>T     | c.(1291-1293)ACT>ATT | p.T431I        |
| Pat_41 | Post-Resistance | NUP214     | 8021   | 37 | 9 | 134073823 | 134073823 | Missense_Mutation | SNP | C | T | 24 | 111 | c.4942C>T     | c.(4942-4944)CCT>TCT | p.P1648S       |
| Pat_41 | Post-Resistance | BAT2L1     | 84726  | 37 | 9 | 134353234 | 134353234 | Missense_Mutation | SNP | C | T | 3  | 22  | c.4510C>T     | c.(4510-4512)CCC>TCC | p.P1504S       |
| Pat_41 | Post-Resistance | BAT2L1     | 84726  | 37 | 9 | 134362594 | 134362594 | Missense_Mutation | SNP | C | T | 7  | 42  | c.5897C>T     | c.(5896-5898)TCT>TTT | p.S1966F       |
| Pat_41 | Post-Resistance | RAPGEF1    | 2889   | 37 | 9 | 134458071 | 134458071 | Missense_Mutation | SNP | T | C | 6  | 104 | c.2875A>G     | c.(2875-2877)ACA>GCA | p.T959A        |
| Pat_41 | Post-Resistance | SETX       | 23064  | 37 | 9 | 135202229 | 135202229 | Missense_Mutation | SNP | G | A | 7  | 127 | c.4756C>T     | c.(4756-4758)CCT>TCT | p.P1586S       |
| Pat_41 | Post-Resistance | MED22      | 6837   | 37 | 9 | 136211178 | 136211178 | Missense_Mutation | SNP | C | T | 7  | 44  | c.215G>A      | c.(214-216)GGC>GAC   | p.G72D         |
| Pat_41 | Post-Resistance | SURF1      | 6834   | 37 | 9 | 136221547 | 136221547 | Missense_Mutation | SNP | C | A | 20 | 311 | c.290G>T      | c.(289-291)AGA>ATA   | p.R97I         |
| Pat_41 | Post-Resistance | SARDH      | 1757   | 37 | 9 | 136568051 | 136568051 | Missense_Mutation | SNP | G | A | 5  | 42  | c.1655C>T     | c.(1654-1656)CCC>CTC | p.P552L        |
| Pat_41 | Post-Resistance | SARDH      | 1757   | 37 | 9 | 136597637 | 136597637 | Missense_Mutation | SNP | C | T | 66 | 178 | c.418G>A      | c.(418-420)GAG>AAG   | p.E140K        |
| Pat_41 | Post-Resistance | BRD3       | 8019   | 37 | 9 | 136913400 | 136913400 | Missense_Mutation | SNP | C | A | 6  | 25  | c.891G>T      | c.(889-891)GAG>GAT   | p.E297D        |
| Pat_41 | Post-Resistance | BRD3       | 8019   | 37 | 9 | 136913488 | 136913488 | Missense_Mutation | SNP | G | A | 6  | 34  | c.803C>T      | c.(802-804)TCA>TTA   | p.S268L        |
| Pat_41 | Post-Resistance | WDR5       | 11091  | 37 | 9 | 137005070 | 137005070 | Missense_Mutation | SNP | C | T | 15 | 54  | c.71C>T       | c.(70-72)ACT>ATT     | p.T24I         |
| Pat_41 | Post-Resistance | COL5A1     | 1289   | 37 | 9 | 137693854 | 137693854 | Splice_Site       | SNP | G | A | 4  | 47  | c.3006_splice | c.e38+1              | p.Q1002_splice |
| Pat_41 | Post-Resistance | KCNT1      | 57582  | 37 | 9 | 138651556 | 138651556 | Missense_Mutation | SNP | G | A | 9  | 27  | c.886G>A      | c.(886-888)GGC>AGC   | p.G296S        |
| Pat_41 | Post-Resistance | CAMSAP1    | 157922 | 37 | 9 | 138712831 | 138712831 | Missense_Mutation | SNP | G | A | 3  | 7   | c.3676C>T     | c.(3676-3678)CCT>TCT | p.P1226S       |
| Pat_41 | Post-Resistance | CAMSAP1    | 157922 | 37 | 9 | 138716676 | 138716676 | Missense_Mutation | SNP | C | T | 6  | 19  | c.1274G>A     | c.(1273-1275)AGA>AAA | p.R425K        |
| Pat_41 | Post-Resistance | SEC16A     | 9919   | 37 | 9 | 139369229 | 139369229 | Missense_Mutation | SNP | C | T | 4  | 92  | c.2839G>A     | c.(2839-2841)GCA>ACA | p.A947T        |
| Pat_41 | Post-Resistance | SEC16A     | 9919   | 37 | 9 | 139370783 | 139370783 | Missense_Mutation | SNP | G | A | 11 | 36  | c.1285C>T     | c.(1285-1287)CCA>TCA | p.P429S        |
| Pat_41 | Post-Resistance | NOTCH1     | 4851   | 37 | 9 | 139391956 | 139391956 | Missense_Mutation | SNP | C | T | 3  | 30  | c.6235G>A     | c.(6235-6237)GTG>ATG | p.V2079M       |
| Pat_41 | Post-Resistance | MAMDC4     | 158056 | 37 | 9 | 139752008 | 139752008 | Missense_Mutation | SNP | C | T | 20 | 44  | c.2296C>T     | c.(2296-2298)CCA>TCA | p.P766S        |
| Pat_41 | Post-Resistance | NPDC1      | 56654  | 37 | 9 | 139934304 | 139934304 | Missense_Mutation | SNP | C | T | 7  | 49  | c.898G>A      | c.(898-900)GAG>AAG   | p.E300K        |
| Pat_41 | Post-Resistance | DPP7       | 29952  | 37 | 9 | 140006162 | 140006162 | Missense_Mutation | SNP | C | T | 9  | 47  | c.1252G>A     | c.(1252-1254)GAC>AAC | p.D418N        |
| Pat_41 | Post-Resistance | ANAPC2     | 29882  | 37 | 9 | 140077608 | 140077608 | Missense_Mutation | SNP | C | T | 7  | 98  | c.1255G>A     | c.(1255-1257)GTG>ATG | p.V419M        |
| Pat_41 | Post-Resistance | PNPLA7     | 375775 | 37 | 9 | 140358901 | 140358901 | Missense_Mutation | SNP | G | A | 18 | 87  | c.2972C>T     | c.(2971-2973)ACG>ATG | p.T991M        |
| Pat_41 | Post-Resistance | ARRDC1     | 92714  | 37 | 9 | 140508073 | 140508073 | Missense_Mutation | SNP | C | T | 38 | 41  | c.287C>T      | c.(286-288)GCA>GTA   | p.A96V         |
| Pat_41 | Post-Resistance | ARRDC1     | 92714  | 37 | 9 | 140509416 | 140509416 | Missense_Mutation | SNP | C | T | 5  | 73  | c.1201C>T     | c.(1201-1203)CTT>TTT | p.L401F        |
| Pat_41 | Post-Resistance | CACNA1B    | 774    | 37 | 9 | 140777284 | 140777284 | Missense_Mutation | SNP | C | T | 15 | 172 | c.479C>T      | c.(478-480)TCT>TTT   | p.S160F        |
| Pat_41 | Post-Resistance | CSF2RA     | 1438   | 37 | X | 1424364   | 1424364   | Missense_Mutation | SNP | C | T | 37 | 165 | c.1069C>T     | c.(1069-1071)CCG>TCG | p.P357S        |
| Pat_41 | Post-Resistance | SLC25A6    | 293    | 37 | X | 1508422   | 1508422   | Missense_Mutation | SNP | C | T | 75 | 306 | c.310G>A      | c.(310-312)GAC>AAC   | p.D104N        |
| Pat_41 | Post-Resistance | ZBED1      | 9189   | 37 | X | 2407863   | 2407863   | Nonsense_Mutation | SNP | G | A | 22 | 104 | c.898C>T      | c.(898-900)CAG>TAG   | p.Q300*        |
| Pat_41 | Post-Resistance | CD99       | 4267   | 37 | X | 2641376   | 2641376   | Missense_Mutation | SNP | G | A | 13 | 234 | c.332G>A      | c.(331-333)GGA>GAA   | p.G111E        |
| Pat_41 | Post-Resistance | ARSH       | 347527 | 37 | X | 2931166   | 2931166   | Missense_Mutation | SNP | C | T | 11 | 220 | c.293C>T      | c.(292-294)ACT>ATT   | p.T98I         |
| Pat_41 | Post-Resistance | ARSF       | 416    | 37 | X | 3021821   | 3021821   | Missense_Mutation | SNP | G | A | 24 | 184 | c.1121G>A     | c.(1120-1122)GGC>GAC | p.G374D        |
| Pat_41 | Post-Resistance | ARSF       | 416    | 37 | X | 3030389   | 3030389   | Missense_Mutation | SNP | C | T | 12 | 138 | c.1565C>T     | c.(1564-1566)GCC>GTC | p.A522V        |
| Pat_41 | Post-Resistance | MXRA5      | 25878  | 37 | X | 3238810   | 3238810   | Missense_Mutation | SNP | G | A | 19 | 353 | c.4916C>T     | c.(4915-4917)CCT>CTT | p.P1639L       |
| Pat_41 | Post-Resistance | MXRA5      | 25878  | 37 | X | 3238838   | 3238838   | Missense_Mutation | SNP | A | G | 28 | 235 | c.4888T>C     | c.(4888-4890)TCC>CCC | p.S1630P       |
| Pat_41 | Post-Resistance | SHROOM2    | 357    | 37 | X | 9862532   | 9862532   | Missense_Mutation | SNP | G | A | 15 | 112 | c.584G>A      | c.(583-585)AGC>AAC   | p.S195N        |

|        |                 |         |        |    |   |          |          |                   |     |   |   |    |     |              |                      |              |
|--------|-----------------|---------|--------|----|---|----------|----------|-------------------|-----|---|---|----|-----|--------------|----------------------|--------------|
| Pat_41 | Post-Resistance | SHROOM2 | 357    | 37 | X | 9863421  | 9863421  | Nonsense_Mutation | SNP | G | A | 3  | 12  | c.1473G>A    | c.(1471-1473)TGG>TGA | p.W491*      |
| Pat_41 | Post-Resistance | WWC3    | 55841  | 37 | X | 10085264 | 10085264 | Missense_Mutation | SNP | G | A | 16 | 129 | c.1165G>A    | c.(1165-1167)GTC>ATC | p.V389I      |
| Pat_41 | Post-Resistance | WWC3    | 55841  | 37 | X | 10085394 | 10085394 | Missense_Mutation | SNP | G | A | 4  | 81  | c.1295G>A    | c.(1294-1296)GGC>GAC | p.G432D      |
| Pat_41 | Post-Resistance | AMELX   | 265    | 37 | X | 11316809 | 11316809 | Missense_Mutation | SNP | C | T | 38 | 507 | c.286C>T     | c.(286-288)CCC>TCC   | p.P96S       |
| Pat_41 | Post-Resistance | MSL3    | 10943  | 37 | X | 11793181 | 11793181 | Missense_Mutation | SNP | C | T | 25 | 144 | c.1549C>T    | c.(1549-1551)CCC>TCC | p.P517S      |
| Pat_41 | Post-Resistance | ATXN3L  | 92552  | 37 | X | 13337953 | 13337953 | Missense_Mutation | SNP | G | A | 30 | 291 | c.101C>T     | c.(100-102)GCC>GTC   | p.A34V       |
| Pat_41 | Post-Resistance | OFD1    | 8481   | 37 | X | 13756972 | 13756972 | Missense_Mutation | SNP | C | T | 7  | 235 | c.320C>T     | c.(319-321)ACT>ATT   | p.T107I      |
| Pat_41 | Post-Resistance | GLRA2   | 2742   | 37 | X | 14708949 | 14708949 | Missense_Mutation | SNP | C | T | 14 | 206 | c.1048C>T    | c.(1048-1050)CGC>TGC | p.R350C      |
| Pat_41 | Post-Resistance | PIR     | 8544   | 37 | X | 15477779 | 15477779 | Splice_Site       | SNP | C | T | 49 | 786 | c.273_splice | c.e4+1               | p.Q91_splice |
| Pat_41 | Post-Resistance | ACE2    | 59272  | 37 | X | 15582271 | 15582271 | Missense_Mutation | SNP | G | A | 34 | 402 | c.2185C>T    | c.(2185-2187)CCA>TCA | p.P729S      |
| Pat_41 | Post-Resistance | ACE2    | 59272  | 37 | X | 15589806 | 15589806 | Missense_Mutation | SNP | G | A | 43 | 236 | c.1778C>T    | c.(1777-1779)ACC>ATC | p.T593I      |
| Pat_41 | Post-Resistance | ZRSR2   | 8233   | 37 | X | 15840977 | 15840977 | Missense_Mutation | SNP | G | A | 14 | 143 | c.1061G>A    | c.(1060-1062)GGC>GAC | p.G354D      |
| Pat_41 | Post-Resistance | NHS     | 4810   | 37 | X | 17739693 | 17739693 | Missense_Mutation | SNP | G | A | 18 | 240 | c.985G>A     | c.(985-987)GAG>AAG   | p.E329K      |
| Pat_41 | Post-Resistance | NHS     | 4810   | 37 | X | 17745815 | 17745815 | Missense_Mutation | SNP | G | A | 23 | 261 | c.3526G>A    | c.(3526-3528)GAC>AAC | p.D1176N     |
| Pat_41 | Post-Resistance | NHS     | 4810   | 37 | X | 17750444 | 17750444 | Missense_Mutation | SNP | G | A | 14 | 158 | c.4753G>A    | c.(4753-4755)GCC>ACC | p.A1585T     |
| Pat_41 | Post-Resistance | RAI2    | 10742  | 37 | X | 17819827 | 17819827 | Missense_Mutation | SNP | G | A | 7  | 81  | c.304C>T     | c.(304-306)CCA>TCA   | p.P102S      |
| Pat_41 | Post-Resistance | SCML2   | 10389  | 37 | X | 18343086 | 18343086 | Missense_Mutation | SNP | A | G | 6  | 157 | c.103T>C     | c.(103-105)TGG>CGG   | p.W35R       |
| Pat_41 | Post-Resistance | CDKL5   | 6792   | 37 | X | 18622915 | 18622915 | Missense_Mutation | SNP | G | A | 74 | 365 | c.1871G>A    | c.(1870-1872)GGC>GAC | p.G624D      |
| Pat_41 | Post-Resistance | GPR64   | 10149  | 37 | X | 19054078 | 19054078 | Missense_Mutation | SNP | G | A | 31 | 293 | c.244C>T     | c.(244-246)CTC>TTC   | p.L82F       |
| Pat_41 | Post-Resistance | CXorf23 | 256643 | 37 | X | 19954004 | 19954004 | Nonsense_Mutation | SNP | G | A | 32 | 446 | c.1786C>T    | c.(1786-1788)CAG>TAG | p.Q596*      |
| Pat_41 | Post-Resistance | RPS6KA3 | 6197   | 37 | X | 20206014 | 20206014 | Missense_Mutation | SNP | C | T | 15 | 399 | c.706G>A     | c.(706-708)GCT>ACT   | p.A236T      |
| Pat_41 | Post-Resistance | CNKSR2  | 22866  | 37 | X | 21450862 | 21450862 | Missense_Mutation | SNP | C | T | 38 | 420 | c.361C>T     | c.(361-363)CCA>TCA   | p.P121S      |
| Pat_41 | Post-Resistance | PHEX    | 5251   | 37 | X | 22132611 | 22132611 | Nonsense_Mutation | SNP | G | A | 8  | 239 | c.1209G>A    | c.(1207-1209)TGG>TGA | p.W403*      |
| Pat_41 | Post-Resistance | ZFX     | 7543   | 37 | X | 24226463 | 24226463 | Missense_Mutation | SNP | C | T | 15 | 138 | c.1069C>T    | c.(1069-1071)CCG>TCG | p.P357S      |
| Pat_41 | Post-Resistance | ZFX     | 7543   | 37 | X | 24229398 | 24229398 | Missense_Mutation | SNP | C | T | 10 | 309 | c.2323C>T    | c.(2323-2325)CCT>TCT | p.P775S      |
| Pat_41 | Post-Resistance | FAM48B2 | 170067 | 37 | X | 24330676 | 24330676 | Nonsense_Mutation | SNP | G | A | 7  | 157 | c.757C>T     | c.(757-759)CAG>TAG   | p.Q253*      |
| Pat_41 | Post-Resistance | POLA1   | 5422   | 37 | X | 24735451 | 24735451 | Missense_Mutation | SNP | G | A | 8  | 128 | c.733G>A     | c.(733-735)GGG>AGG   | p.G245R      |
| Pat_41 | Post-Resistance | POLA1   | 5422   | 37 | X | 24760138 | 24760138 | Missense_Mutation | SNP | G | A | 16 | 264 | c.2348G>A    | c.(2347-2349)GGA>GAA | p.G783E      |
| Pat_41 | Post-Resistance | MAGEB6  | 158809 | 37 | X | 26212043 | 26212043 | Missense_Mutation | SNP | G | A | 4  | 59  | c.80G>A      | c.(79-81)GGT>GAT     | p.G27D       |
| Pat_41 | Post-Resistance | DCAF8L1 | 139425 | 37 | X | 27998457 | 27998457 | Missense_Mutation | SNP | T | C | 5  | 108 | c.995A>G     | c.(994-996)GAT>GGT   | p.D332G      |
| Pat_41 | Post-Resistance | CXorf21 | 80231  | 37 | X | 30578037 | 30578037 | Missense_Mutation | SNP | A | G | 5  | 142 | c.436T>C     | c.(436-438)TCT>CCT   | p.S146P      |
| Pat_41 | Post-Resistance | CXorf21 | 80231  | 37 | X | 30578411 | 30578411 | Missense_Mutation | SNP | G | A | 8  | 73  | c.62C>T      | c.(61-63)GCC>GTC     | p.A21V       |
| Pat_41 | Post-Resistance | DMD     | 1756   | 37 | X | 32383153 | 32383153 | Nonsense_Mutation | SNP | C | T | 11 | 191 | c.5009G>A    | c.(5008-5010)TGG>TAG | p.W1670*     |
| Pat_41 | Post-Resistance | CXorf59 | 286464 | 37 | X | 36156093 | 36156093 | Missense_Mutation | SNP | G | A | 7  | 88  | c.1064G>A    | c.(1063-1065)AGA>AAA | p.R355K      |
| Pat_41 | Post-Resistance | FAM47C  | 442444 | 37 | X | 37027907 | 37027907 | Missense_Mutation | SNP | G | A | 7  | 109 | c.1424G>A    | c.(1423-1425)TGC>TAC | p.C475Y      |
| Pat_41 | Post-Resistance | FAM47C  | 442444 | 37 | X | 37028134 | 37028134 | Missense_Mutation | SNP | C | T | 7  | 175 | c.1651C>T    | c.(1651-1653)CCT>TCT | p.P551S      |
| Pat_41 | Post-Resistance | FAM47C  | 442444 | 37 | X | 37028662 | 37028662 | Missense_Mutation | SNP | T | C | 6  | 90  | c.2179T>C    | c.(2179-2181)TGC>CGC | p.C727R      |
| Pat_41 | Post-Resistance | FAM47C  | 442444 | 37 | X | 37028708 | 37028708 | Missense_Mutation | SNP | C | T | 6  | 111 | c.2225C>T    | c.(2224-2226)CCT>CTT | p.P742L      |
| Pat_41 | Post-Resistance | LANCL3  | 347404 | 37 | X | 37431196 | 37431196 | Missense_Mutation | SNP | G | A | 5  | 6   | c.73G>A      | c.(73-75)GAG>AAG     | p.E25K       |
| Pat_41 | Post-Resistance | BCOR    | 54880  | 37 | X | 39934241 | 39934241 | Missense_Mutation | SNP | G | A | 8  | 72  | c.358C>T     | c.(358-360)CCA>TCA   | p.P120S      |
| Pat_41 | Post-Resistance | ATP6AP2 | 10159  | 37 | X | 40450564 | 40450564 | Missense_Mutation | SNP | G | A | 14 | 195 | c.247G>A     | c.(247-249)GTG>ATG   | p.V83M       |
| Pat_41 | Post-Resistance | USP9X   | 8239   | 37 | X | 41002601 | 41002601 | Missense_Mutation | SNP | C | T | 4  | 60  | c.1219C>T    | c.(1219-1221)CCA>TCA | p.P407S      |
| Pat_41 | Post-Resistance | USP9X   | 8239   | 37 | X | 41027288 | 41027288 | Missense_Mutation | SNP | C | T | 53 | 298 | c.2453C>T    | c.(2452-2454)JCT>TTT | p.S818F      |
| Pat_41 | Post-Resistance | DDX3X   | 1654   | 37 | X | 41203334 | 41203334 | Missense_Mutation | SNP | G | A | 4  | 65  | c.817G>A     | c.(817-819)GCA>ACA   | p.A273T      |
| Pat_41 | Post-Resistance | DDX3X   | 1654   | 37 | X | 41205761 | 41205761 | Missense_Mutation | SNP | G | A | 7  | 339 | c.1501G>A    | c.(1501-1503)GCA>ACA | p.A501T      |
| Pat_41 | Post-Resistance | GPR34   | 2857   | 37 | X | 41555440 | 41555440 | Missense_Mutation | SNP | G | A | 12 | 110 | c.554G>A     | c.(553-555)GGA>GAA   | p.G185E      |
| Pat_41 | Post-Resistance | MAOA    | 4128   | 37 | X | 43603621 | 43603621 | Missense_Mutation | SNP | C | T | 4  | 103 | c.1445C>T    | c.(1444-1446)CCA>CTA | p.P482L      |

|        |                 |          |        |    |   |          |          |                   |     |   |   |    |     |               |                        |               |
|--------|-----------------|----------|--------|----|---|----------|----------|-------------------|-----|---|---|----|-----|---------------|------------------------|---------------|
| Pat_41 | Post-Resistance | SLC9A7   | 84679  | 37 | X | 46532013 | 46532013 | Missense_Mutation | SNP | C | T | 10 | 189 | c.653G>A      | c.(652-654)GGG>GAG     | p.G218E       |
| Pat_41 | Post-Resistance | RP2      | 6102   | 37 | X | 46713343 | 46713343 | Missense_Mutation | SNP | C | T | 7  | 112 | c.535C>T      | c.(535-537)CCT>TCT     | p.P179S       |
| Pat_41 | Post-Resistance | ZNF157   | 7712   | 37 | X | 47271863 | 47271863 | Missense_Mutation | SNP | G | A | 8  | 107 | c.391G>A      | c.(391-393)GAT>AAT     | p.D131N       |
| Pat_41 | Post-Resistance | ZNF41    | 7592   | 37 | X | 47307520 | 47307520 | Missense_Mutation | SNP | G | A | 11 | 98  | c.1775C>T     | c.(1774-1776)CCC>CTC   | p.P592L       |
| Pat_41 | Post-Resistance | CFP      | 5199   | 37 | X | 47486897 | 47486897 | Missense_Mutation | SNP | C | T | 4  | 57  | c.547G>A      | c.(547-549)GCC>ACC     | p.A183T       |
| Pat_41 | Post-Resistance | ELK1     | 2002   | 37 | X | 47497422 | 47497422 | Missense_Mutation | SNP | C | T | 5  | 50  | c.814G>A      | c.(814-816)GCC>ACC     | p.A272T       |
| Pat_41 | Post-Resistance | SLC38A5  | 92745  | 37 | X | 48326126 | 48326126 | Missense_Mutation | SNP | G | A | 3  | 32  | c.100C>T      | c.(100-102)CCT>TCT     | p.P34S        |
| Pat_41 | Post-Resistance | FTSJ1    | 24140  | 37 | X | 48340040 | 48340040 | Missense_Mutation | SNP | G | A | 5  | 73  | c.592G>A      | c.(592-594)GGC>AGC     | p.G198S       |
| Pat_41 | Post-Resistance | TBC1D25  | 4943   | 37 | X | 48419014 | 48419014 | Missense_Mutation | SNP | C | T | 8  | 95  | c.1718C>T     | c.(1717-1719)CCC>CTC   | p.P573L       |
| Pat_41 | Post-Resistance | WDR13    | 64743  | 37 | X | 48460595 | 48460595 | Splice_Site       | SNP | G | A | 4  | 105 | c.1154_splice | c.e8+1                 | p.R385_splice |
| Pat_41 | Post-Resistance | WAS      | 7454   | 37 | X | 48542276 | 48542276 | Missense_Mutation | SNP | G | A | 4  | 76  | c.34G>A       | c.(34-36)GGC>AGC       | p.G12S        |
| Pat_41 | Post-Resistance | SUV39H1  | 6839   | 37 | X | 48559067 | 48559067 | Missense_Mutation | SNP | G | A | 15 | 102 | c.751G>A      | c.(751-753)GAT>AAT     | p.D251N       |
| Pat_41 | Post-Resistance | PQBP1    | 10084  | 37 | X | 48759548 | 48759548 | Missense_Mutation | SNP | G | A | 12 | 89  | c.331G>A      | c.(331-333)GAC>AAC     | p.D111N       |
| Pat_41 | Post-Resistance | CCDC120  | 90060  | 37 | X | 48920089 | 48920089 | Missense_Mutation | SNP | G | A | 3  | 11  | c.140G>A      | c.(139-141)AGC>AAC     | p.S47N        |
| Pat_41 | Post-Resistance | PRICKLE3 | 4007   | 37 | X | 49035625 | 49035625 | Missense_Mutation | SNP | G | A | 4  | 71  | c.539C>T      | c.(538-540)ACC>ATC     | p.T180I       |
| Pat_41 | Post-Resistance | SYP      | 6855   | 37 | X | 49048118 | 49048118 | Missense_Mutation | SNP | G | A | 5  | 13  | c.718C>T      | c.(718-720)CCC>TCC     | p.P240S       |
| Pat_41 | Post-Resistance | FOXP3    | 50943  | 37 | X | 49113934 | 49113934 | Missense_Mutation | SNP | G | T | 7  | 26  | c.404C>A      | c.(403-405)ACC>AAC     | p.T135N       |
| Pat_41 | Post-Resistance | PPP1R3F  | 89801  | 37 | X | 49142746 | 49142746 | Missense_Mutation | SNP | C | T | 3  | 46  | c.1594C>T     | c.(1594-1596)CGC>TGC   | p.R532C       |
| Pat_41 | Post-Resistance | GAGE2A   | 729447 | 37 | X | 49355903 | 49355903 | Missense_Mutation | SNP | G | A | 41 | 620 | c.185G>A      | c.(184-186)GGA>GAA     | p.G62E        |
| Pat_41 | Post-Resistance | CCNB3    | 85417  | 37 | X | 50053127 | 50053127 | Missense_Mutation | SNP | C | T | 5  | 71  | c.1958C>T     | c.(1957-1959)TCC>TTC   | p.S653F       |
| Pat_41 | Post-Resistance | MAGED1   | 9500   | 37 | X | 51639671 | 51639671 | Missense_Mutation | SNP | G | A | 4  | 57  | c.920G>A      | c.(919-921)GGC>GAC     | p.G307D       |
| Pat_41 | Post-Resistance | XAGE5    | 170627 | 37 | X | 52841618 | 52841618 | Missense_Mutation | SNP | C | T | 71 | 388 | c.28C>T       | c.(28-30)CCA>TCA       | p.P10S        |
| Pat_41 | Post-Resistance | KDM5C    | 8242   | 37 | X | 53222411 | 53222411 | Missense_Mutation | SNP | C | T | 3  | 63  | c.4421G>A     | c.(4420-4422)CGA>CAA   | p.R1474Q      |
| Pat_41 | Post-Resistance | KDM5C    | 8242   | 37 | X | 53228300 | 53228300 | Missense_Mutation | SNP | G | A | 36 | 182 | c.2102C>T     | c.(2101-2103)CCA>CTA   | p.P701L       |
| Pat_41 | Post-Resistance | SMC1A    | 8243   | 37 | X | 53407569 | 53407569 | Missense_Mutation | SNP | G | A | 5  | 50  | c.3590C>T     | c.(3589-3591)GCC>GTC   | p.A1197V      |
| Pat_41 | Post-Resistance | SMC1A    | 8243   | 37 | X | 53432762 | 53432762 | Nonsense_Mutation | SNP | G | A | 10 | 42  | c.1672C>T     | c.(1672-1674)CAG>TAG   | p.Q558*       |
| Pat_41 | Post-Resistance | RIBC1    | 158787 | 37 | X | 53455500 | 53455500 | Nonsense_Mutation | SNP | C | T | 20 | 53  | c.469C>T      | c.(469-471)CAG>TAG     | p.Q157*       |
| Pat_41 | Post-Resistance | HUWE1    | 10075  | 37 | X | 53561490 | 53561490 | Missense_Mutation | SNP | G | A | 27 | 141 | c.12818C>T    | c.(12817-12819)TCC>TTC | p.S4273F      |
| Pat_41 | Post-Resistance | HUWE1    | 10075  | 37 | X | 53566717 | 53566717 | Missense_Mutation | SNP | G | A | 18 | 51  | c.11533C>T    | c.(11533-11535)CCC>TCC | p.P3845S      |
| Pat_41 | Post-Resistance | FAM120C  | 54954  | 37 | X | 54117836 | 54117836 | Missense_Mutation | SNP | C | T | 4  | 113 | c.2336G>A     | c.(2335-2337)GGC>GAC   | p.G779D       |
| Pat_41 | Post-Resistance | WNK3     | 65267  | 37 | X | 54224765 | 54224765 | Missense_Mutation | SNP | G | A | 5  | 35  | c.5224C>T     | c.(5224-5226)CCT>TCT   | p.P1742S      |
| Pat_41 | Post-Resistance | WNK3     | 65267  | 37 | X | 54334405 | 54334405 | Missense_Mutation | SNP | G | A | 26 | 267 | c.1039C>T     | c.(1039-1041)CCT>TCT   | p.P347S       |
| Pat_41 | Post-Resistance | GNL3L    | 54552  | 37 | X | 54578319 | 54578319 | Missense_Mutation | SNP | G | A | 18 | 105 | c.1093G>A     | c.(1093-1095)GCA>ACA   | p.A365T       |
| Pat_41 | Post-Resistance | ITIH5L   | 347365 | 37 | X | 54785182 | 54785182 | Missense_Mutation | SNP | G | A | 4  | 33  | c.1325C>T     | c.(1324-1326)TCC>TTC   | p.S442F       |
| Pat_41 | Post-Resistance | FAAH2    | 158584 | 37 | X | 57407425 | 57407425 | Missense_Mutation | SNP | C | T | 7  | 112 | c.959C>T      | c.(958-960)TCC>TTC     | p.S320F       |
| Pat_41 | Post-Resistance | MTMR8    | 55613  | 37 | X | 63557195 | 63557195 | Missense_Mutation | SNP | C | T | 8  | 89  | c.1054G>A     | c.(1054-1056)GCT>ACT   | p.A352T       |
| Pat_41 | Post-Resistance | LAS1L    | 81887  | 37 | X | 64744016 | 64744016 | Missense_Mutation | SNP | G | A | 6  | 58  | c.1220C>T     | c.(1219-1221)CCA>CTA   | p.P407L       |
| Pat_41 | Post-Resistance | MSN      | 4478   | 37 | X | 64949432 | 64949432 | Missense_Mutation | SNP | G | A | 16 | 122 | c.325G>A      | c.(325-327)GGC>AGC     | p.G109S       |
| Pat_41 | Post-Resistance | VSIG4    | 11326  | 37 | X | 65253510 | 65253510 | Missense_Mutation | SNP | G | A | 13 | 133 | c.218C>T      | c.(217-219)TCT>TTT     | p.S73F        |
| Pat_41 | Post-Resistance | OPHN1    | 4983   | 37 | X | 67430060 | 67430060 | Missense_Mutation | SNP | G | T | 5  | 58  | c.767C>A      | c.(766-768)GCT>GAT     | p.A256D       |
| Pat_41 | Post-Resistance | PJA1     | 64219  | 37 | X | 68381658 | 68381658 | Missense_Mutation | SNP | C | T | 49 | 368 | c.1424G>A     | c.(1423-1425)GGG>GAG   | p.G475E       |
| Pat_41 | Post-Resistance | PJA1     | 64219  | 37 | X | 68382516 | 68382516 | Missense_Mutation | SNP | C | T | 4  | 17  | c.566G>A      | c.(565-567)AGA>AAA     | p.R189K       |
| Pat_41 | Post-Resistance | KIF4A    | 24137  | 37 | X | 69510387 | 69510387 | Missense_Mutation | SNP | G | A | 13 | 47  | c.79G>A       | c.(79-81)GGC>AGC       | p.G27S        |
| Pat_41 | Post-Resistance | KIF4A    | 24137  | 37 | X | 69563595 | 69563595 | Missense_Mutation | SNP | C | T | 9  | 124 | c.1309C>T     | c.(1309-1311)CTC>TTC   | p.L437F       |
| Pat_41 | Post-Resistance | DLG3     | 1741   | 37 | X | 69719025 | 69719025 | Splice_Site       | SNP | G | A | 7  | 54  | c.1871_splice | c.e15-1                | p.I624_splice |
| Pat_41 | Post-Resistance | FOXO4    | 4303   | 37 | X | 70321153 | 70321153 | Missense_Mutation | SNP | G | A | 4  | 28  | c.1073G>A     | c.(1072-1074)GGG>GAG   | p.G358E       |
| Pat_41 | Post-Resistance | CXorf65  | 158830 | 37 | X | 70324618 | 70324618 | Splice_Site       | SNP | C | T | 10 | 199 | c.319_splice  | c.e4+1                 | p.V107_splice |

|        |                 |          |        |    |   |           |           |                   |     |    |    |     |     |                |                      |          |
|--------|-----------------|----------|--------|----|---|-----------|-----------|-------------------|-----|----|----|-----|-----|----------------|----------------------|----------|
| Pat_41 | Post-Resistance | MED12    | 9968   | 37 | X | 70356132  | 70356132  | Missense_Mutation | SNP | G  | A  | 8   | 83  | c.5027G>A      | c.(5026-5028)GGT>GAT | p.G1676D |
| Pat_41 | Post-Resistance | NLGN3    | 54413  | 37 | X | 70389546  | 70389546  | Missense_Mutation | SNP | G  | A  | 8   | 37  | c.2086G>A      | c.(2086-2088)GCC>ACC | p.A696T  |
| Pat_41 | Post-Resistance | ZMYM3    | 9203   | 37 | X | 70467360  | 70467360  | Missense_Mutation | SNP | C  | T  | 5   | 42  | c.2149G>A      | c.(2149-2151)GCT>ACT | p.A717T  |
| Pat_41 | Post-Resistance | ITGB1BP2 | 26548  | 37 | X | 70524453  | 70524453  | Missense_Mutation | SNP | G  | A  | 4   | 57  | c.815G>A       | c.(814-816)GGG>GAG   | p.G272E  |
| Pat_41 | Post-Resistance | TAF1     | 6872   | 37 | X | 70618504  | 70618504  | Missense_Mutation | SNP | C  | T  | 4   | 63  | c.3700C>T      | c.(3700-3702)CTT>TTT | p.L1234F |
| Pat_41 | Post-Resistance | TAF1     | 6872   | 37 | X | 70679537  | 70679537  | Missense_Mutation | SNP | G  | A  | 30  | 199 | c.5197G>A      | c.(5197-5199)GAA>AAA | p.E1733K |
| Pat_41 | Post-Resistance | OGT      | 8473   | 37 | X | 70767761  | 70767761  | Missense_Mutation | SNP | G  | A  | 21  | 395 | c.536G>A       | c.(535-537)TGT>TAT   | p.C179Y  |
| Pat_41 | Post-Resistance | OGT      | 8473   | 37 | X | 70775894  | 70775894  | Missense_Mutation | SNP | G  | A  | 27  | 350 | c.1015G>A      | c.(1015-1017)GAA>AAA | p.E339K  |
| Pat_41 | Post-Resistance | ACRC     | 93953  | 37 | X | 70823920  | 70823920  | Missense_Mutation | SNP | C  | T  | 17  | 156 | c.793C>T       | c.(793-795)CCC>TCC   | p.P265S  |
| Pat_41 | Post-Resistance | ACRC     | 93953  | 37 | X | 70823950  | 70823950  | Missense_Mutation | SNP | C  | T  | 5   | 202 | c.823C>T       | c.(823-825)CCC>TCC   | p.P275S  |
| Pat_41 | Post-Resistance | ACRC     | 93953  | 37 | X | 70823960  | 70823961  | Missense_Mutation | DNP | GC | AG | 7   | 226 | c.833_834GC>AG | c.(832-834)AGC>AAG   | p.S278K  |
| Pat_41 | Post-Resistance | ACRC     | 93953  | 37 | X | 70830569  | 70830569  | Missense_Mutation | SNP | G  | A  | 16  | 50  | c.1650G>A      | c.(1648-1650)ATG>ATA | p.M550I  |
| Pat_41 | Post-Resistance | CXCR3    | 2833   | 37 | X | 70837269  | 70837269  | Missense_Mutation | SNP | G  | A  | 3   | 45  | c.53C>T        | c.(52-54)GCC>GTC     | p.A18V   |
| Pat_41 | Post-Resistance | ERCC6L   | 54821  | 37 | X | 71425492  | 71425492  | Missense_Mutation | SNP | C  | T  | 24  | 139 | c.3125G>A      | c.(3124-3126)AGC>AAC | p.S1042N |
| Pat_41 | Post-Resistance | RPS4X    | 6191   | 37 | X | 71492601  | 71492601  | Missense_Mutation | SNP | G  | A  | 15  | 150 | c.712C>T       | c.(712-714)CTT>TTT   | p.L238F  |
| Pat_41 | Post-Resistance | PHKA1    | 5255   | 37 | X | 71840649  | 71840649  | Missense_Mutation | SNP | C  | T  | 13  | 122 | c.2063G>A      | c.(2062-2064)CGG>CAG | p.R688Q  |
| Pat_41 | Post-Resistance | MAGEE1   | 57692  | 37 | X | 75649929  | 75649929  | Missense_Mutation | SNP | G  | A  | 5   | 42  | c.1606G>A      | c.(1606-1608)GCA>ACA | p.A536T  |
| Pat_41 | Post-Resistance | PGAM4    | 441531 | 37 | X | 77224618  | 77224618  | Missense_Mutation | SNP | G  | A  | 13  | 110 | c.518C>T       | c.(517-519)CCC>CTC   | p.P173L  |
| Pat_41 | Post-Resistance | LPAR4    | 2846   | 37 | X | 78011400  | 78011400  | Missense_Mutation | SNP | C  | T  | 11  | 222 | c.1034C>T      | c.(1033-1035)TCC>TTC | p.S345F  |
| Pat_41 | Post-Resistance | LPAR4    | 2846   | 37 | X | 78011423  | 78011423  | Missense_Mutation | SNP | G  | A  | 19  | 177 | c.1057G>A      | c.(1057-1059)GTG>ATG | p.V353M  |
| Pat_41 | Post-Resistance | BRWD3    | 254065 | 37 | X | 79999541  | 79999541  | Missense_Mutation | SNP | G  | A  | 20  | 76  | c.803C>T       | c.(802-804)ACT>ATT   | p.T268I  |
| Pat_41 | Post-Resistance | SH3BGRL  | 6451   | 37 | X | 80532622  | 80532622  | Missense_Mutation | SNP | G  | A  | 21  | 85  | c.185G>A       | c.(184-186)GGT>GAT   | p.G62D   |
| Pat_41 | Post-Resistance | RPS6KA6  | 27330  | 37 | X | 83402002  | 83402002  | Missense_Mutation | SNP | A  | C  | 159 | 24  | c.405T>G       | c.(403-405)ATT>ATG   | p.I135M  |
| Pat_41 | Post-Resistance | HDX      | 139324 | 37 | X | 83723587  | 83723587  | Missense_Mutation | SNP | C  | T  | 10  | 148 | c.1144G>A      | c.(1144-1146)GCA>ACA | p.A382T  |
| Pat_41 | Post-Resistance | POF1B    | 79983  | 37 | X | 84600891  | 84600891  | Missense_Mutation | SNP | C  | T  | 89  | 501 | c.698G>A       | c.(697-699)AGT>AAT   | p.S233N  |
| Pat_41 | Post-Resistance | DACH2    | 117154 | 37 | X | 85969707  | 85969707  | Missense_Mutation | SNP | G  | A  | 36  | 162 | c.1088G>A      | c.(1087-1089)GGT>GAT | p.G363D  |
| Pat_41 | Post-Resistance | RPA4     | 29935  | 37 | X | 96139881  | 96139881  | Missense_Mutation | SNP | G  | A  | 16  | 220 | c.572G>A       | c.(571-573)GGG>GAG   | p.G191E  |
| Pat_41 | Post-Resistance | PCDH19   | 57526  | 37 | X | 99551804  | 99551804  | Missense_Mutation | SNP | G  | A  | 11  | 181 | c.2918C>T      | c.(2917-2919)CCC>CTC | p.P973L  |
| Pat_41 | Post-Resistance | NOX1     | 27035  | 37 | X | 100117507 | 100117507 | Missense_Mutation | SNP | G  | A  | 24  | 578 | c.545C>T       | c.(544-546)ACA>ATA   | p.T182I  |
| Pat_41 | Post-Resistance | CENPI    | 2491   | 37 | X | 100403022 | 100403022 | Missense_Mutation | SNP | C  | T  | 6   | 309 | c.1966C>T      | c.(1966-1968)CCC>TCC | p.P656S  |
| Pat_41 | Post-Resistance | DRP2     | 1821   | 37 | X | 100513423 | 100513423 | Missense_Mutation | SNP | C  | T  | 3   | 14  | c.2516C>T      | c.(2515-2517)GCC>GTC | p.A839V  |
| Pat_41 | Post-Resistance | TAF7L    | 54457  | 37 | X | 100533088 | 100533088 | Missense_Mutation | SNP | C  | T  | 5   | 220 | c.784G>A       | c.(784-786)GAA>AAA   | p.E262K  |
| Pat_41 | Post-Resistance | BTK      | 695    | 37 | X | 100611144 | 100611144 | Missense_Mutation | SNP | C  | T  | 20  | 202 | c.1462G>A      | c.(1462-1464)GAG>AAG | p.E488K  |
| Pat_41 | Post-Resistance | ARMCX2   | 9823   | 37 | X | 100911455 | 100911455 | Missense_Mutation | SNP | G  | A  | 7   | 73  | c.1120C>T      | c.(1120-1122)CCC>TCC | p.P374S  |
| Pat_41 | Post-Resistance | ARMCX2   | 9823   | 37 | X | 100912304 | 100912304 | Missense_Mutation | SNP | C  | T  | 6   | 55  | c.271G>A       | c.(271-273)GAC>AAC   | p.D91N   |
| Pat_41 | Post-Resistance | ZMAT1    | 84460  | 37 | X | 101138643 | 101138643 | Missense_Mutation | SNP | C  | T  | 4   | 130 | c.1243G>A      | c.(1243-1245)GTC>ATC | p.V415I  |
| Pat_41 | Post-Resistance | ARMCX5   | 64860  | 37 | X | 101857806 | 101857806 | Missense_Mutation | SNP | G  | A  | 14  | 77  | c.737G>A       | c.(736-738)GGA>GAA   | p.G246E  |
| Pat_41 | Post-Resistance | ARMCX5   | 64860  | 37 | X | 101858195 | 101858195 | Missense_Mutation | SNP | G  | A  | 40  | 188 | c.1126G>A      | c.(1126-1128)GTG>ATG | p.V376M  |
| Pat_41 | Post-Resistance | GPRASP1  | 9737   | 37 | X | 101911416 | 101911416 | Missense_Mutation | SNP | G  | A  | 14  | 113 | c.2575G>A      | c.(2575-2577)GGA>AGA | p.G859R  |
| Pat_41 | Post-Resistance | GPRASP2  | 114928 | 37 | X | 101969910 | 101969910 | Missense_Mutation | SNP | C  | T  | 9   | 173 | c.113C>T       | c.(112-114)CCC>CTC   | p.P38L   |
| Pat_41 | Post-Resistance | BHLHB9   | 80823  | 37 | X | 102004992 | 102004992 | Missense_Mutation | SNP | G  | A  | 12  | 113 | c.1069G>A      | c.(1069-1071)GCC>ACC | p.A357T  |
| Pat_41 | Post-Resistance | BHLHB9   | 80823  | 37 | X | 102005388 | 102005388 | Missense_Mutation | SNP | G  | A  | 33  | 403 | c.1465G>A      | c.(1465-1467)GCA>ACA | p.A489T  |
| Pat_41 | Post-Resistance | TCEAL5   | 340543 | 37 | X | 102528993 | 102528993 | Missense_Mutation | SNP | C  | T  | 6   | 116 | c.499G>A       | c.(499-501)GGT>AGT   | p.G167S  |
| Pat_41 | Post-Resistance | GLRA4    | 441509 | 37 | X | 102978793 | 102978793 | Missense_Mutation | SNP | G  | A  | 13  | 71  | c.568C>T       | c.(568-570)CTT>TTT   | p.L190F  |
| Pat_41 | Post-Resistance | MCART6   | 401612 | 37 | X | 103349910 | 103349910 | Missense_Mutation | SNP | C  | T  | 70  | 3   | c.31G>A        | c.(31-33)GAG>AAG     | p.E11K   |
| Pat_41 | Post-Resistance | MUM1L1   | 139221 | 37 | X | 105449736 | 105449736 | Missense_Mutation | SNP | G  | A  | 8   | 101 | c.311G>A       | c.(310-312)AGT>AAT   | p.S104N  |
| Pat_41 | Post-Resistance | TBC1D8B  | 54885  | 37 | X | 106066546 | 106066546 | Missense_Mutation | SNP | G  | A  | 33  | 188 | c.677G>A       | c.(676-678)GGA>GAA   | p.G226E  |



|        |                 |           |        |    |   |           |           |                   |     |    |    |     |     |                |                      |               |
|--------|-----------------|-----------|--------|----|---|-----------|-----------|-------------------|-----|----|----|-----|-----|----------------|----------------------|---------------|
| Pat_41 | Post-Resistance | RBM41     | 55285  | 37 | X | 106358597 | 106358597 | Missense_Mutation | SNP | C  | T  | 29  | 303 | c.508G>A       | c.(508-510)GCT>ACT   | p.A170T       |
| Pat_41 | Post-Resistance | NUP62CL   | 54830  | 37 | X | 106391040 | 106391040 | Splice_Site       | SNP | C  | T  | 34  | 183 | c.531_splice   | c.e8-1               | p.I177_splice |
| Pat_41 | Post-Resistance | PSMD10    | 5716   | 37 | X | 107331203 | 107331203 | Missense_Mutation | SNP | C  | T  | 55  | 531 | c.340G>A       | c.(340-342)GCT>ACT   | p.A114T       |
| Pat_41 | Post-Resistance | COL4A6    | 1288   | 37 | X | 107418412 | 107418412 | Missense_Mutation | SNP | G  | A  | 16  | 365 | c.2867C>T      | c.(2866-2868)CCT>CTT | p.P956L       |
| Pat_41 | Post-Resistance | COL4A6    | 1288   | 37 | X | 107430395 | 107430395 | Missense_Mutation | SNP | G  | T  | 25  | 475 | c.1885C>A      | c.(1885-1887)CCC>ACC | p.P629T       |
| Pat_41 | Post-Resistance | COL4A5    | 1287   | 37 | X | 107924124 | 107924124 | Missense_Mutation | SNP | G  | A  | 21  | 409 | c.4025G>A      | c.(4024-4026)GGA>GAA | p.G1342E      |
| Pat_41 | Post-Resistance | IRS4      | 8471   | 37 | X | 107979483 | 107979483 | Missense_Mutation | SNP | G  | A  | 13  | 80  | c.92C>T        | c.(91-93)ACC>ATC     | p.T31I        |
| Pat_41 | Post-Resistance | GUCY2F    | 2986   | 37 | X | 108625390 | 108625390 | Missense_Mutation | SNP | C  | T  | 100 | 443 | c.3107G>A      | c.(3106-3108)AGT>AAT | p.S1036N      |
| Pat_41 | Post-Resistance | ACSL4     | 2182   | 37 | X | 108926546 | 108926546 | Missense_Mutation | SNP | C  | T  | 38  | 417 | c.170G>A       | c.(169-171)AGT>AAT   | p.S57N        |
| Pat_41 | Post-Resistance | RGAG1     | 57529  | 37 | X | 109695158 | 109695158 | Missense_Mutation | SNP | C  | T  | 12  | 265 | c.1313C>T      | c.(1312-1314)ACC>ATC | p.T438I       |
| Pat_41 | Post-Resistance | CHRDL1    | 91851  | 37 | X | 109964741 | 109964741 | Missense_Mutation | SNP | C  | T  | 13  | 284 | c.319G>A       | c.(319-321)GTG>ATG   | p.V107M       |
| Pat_41 | Post-Resistance | ALG13     | 79868  | 37 | X | 110970674 | 110970674 | Splice_Site       | SNP | G  | A  | 6   | 25  | c.2090_splice  | c.e17+1              | p.R697_splice |
| Pat_41 | Post-Resistance | LHFPL1    | 340596 | 37 | X | 111914526 | 111914526 | Nonsense_Mutation | SNP | G  | C  | 24  | 354 | c.93C>G        | c.(91-93)TAC>TAG     | p.Y31*        |
| Pat_41 | Post-Resistance | PLS3      | 5358   | 37 | X | 114856629 | 114856629 | Missense_Mutation | SNP | C  | T  | 51  | 234 | c.145C>T       | c.(145-147)CCA>TCA   | p.P49S        |
| Pat_41 | Post-Resistance | AGTR2     | 186    | 37 | X | 115303837 | 115303838 | Missense_Mutation | DNP | AC | GT | 12  | 226 | c.304_305AC>GT | c.(304-306)ACC>GTC   | p.T102V       |
| Pat_41 | Post-Resistance | KLHL13    | 90293  | 37 | X | 117043960 | 117043960 | Missense_Mutation | SNP | G  | A  | 45  | 280 | c.670C>T       | c.(670-672)CCT>TCT   | p.P224S       |
| Pat_41 | Post-Resistance | WDR44     | 54521  | 37 | X | 117577637 | 117577637 | Nonsense_Mutation | SNP | G  | A  | 37  | 155 | c.2499G>A      | c.(2497-2499)TGG>TGA | p.W833*       |
| Pat_41 | Post-Resistance | DOCK11    | 139818 | 37 | X | 117700109 | 117700109 | Missense_Mutation | SNP | G  | A  | 27  | 141 | c.835G>A       | c.(835-837)GTT>ATT   | p.V279I       |
| Pat_41 | Post-Resistance | DOCK11    | 139818 | 37 | X | 117707929 | 117707929 | Missense_Mutation | SNP | C  | T  | 9   | 171 | c.1337C>T      | c.(1336-1338)CCC>CTC | p.P446L       |
| Pat_41 | Post-Resistance | DOCK11    | 139818 | 37 | X | 117809980 | 117809980 | Missense_Mutation | SNP | G  | A  | 3   | 29  | c.5281G>A      | c.(5281-5283)GGC>AGC | p.G1761S      |
| Pat_41 | Post-Resistance | LONRF3    | 79836  | 37 | X | 118148200 | 118148200 | Missense_Mutation | SNP | G  | A  | 50  | 422 | c.2005G>A      | c.(2005-2007)GGA>AGA | p.G669R       |
| Pat_41 | Post-Resistance | ATP1B4    | 23439  | 37 | X | 119500562 | 119500562 | Nonsense_Mutation | SNP | G  | A  | 6   | 115 | c.246G>A       | c.(244-246)TGG>TGA   | p.W82*        |
| Pat_41 | Post-Resistance | C1GALT1C1 | 29071  | 37 | X | 119760514 | 119760514 | Missense_Mutation | SNP | C  | T  | 9   | 64  | c.508G>A       | c.(508-510)GGC>AGC   | p.G170S       |
| Pat_41 | Post-Resistance | GRIA3     | 2892   | 37 | X | 122598771 | 122598771 | Missense_Mutation | SNP | C  | T  | 18  | 243 | c.2132C>T      | c.(2131-2133)CCA>CTA | p.P711L       |
| Pat_41 | Post-Resistance | STAG2     | 10735  | 37 | X | 123229247 | 123229247 | Missense_Mutation | SNP | G  | A  | 7   | 269 | c.3620G>A      | c.(3619-3621)AGA>AAA | p.R1207K      |
| Pat_41 | Post-Resistance | ODZ1      | 10178  | 37 | X | 123517525 | 123517525 | Missense_Mutation | SNP | T  | C  | 17  | 262 | c.7235A>G      | c.(7234-7236)TAC>TGC | p.Y2412C      |
| Pat_41 | Post-Resistance | ODZ1      | 10178  | 37 | X | 123556304 | 123556304 | Missense_Mutation | SNP | G  | A  | 6   | 172 | c.4268C>T      | c.(4267-4269)TCC>TTC | p.S1423F      |
| Pat_41 | Post-Resistance | ODZ1      | 10178  | 37 | X | 123838968 | 123838968 | Missense_Mutation | SNP | C  | T  | 55  | 455 | c.910G>A       | c.(910-912)GCC>ACC   | p.A304T       |
| Pat_41 | Post-Resistance | DCAF12L2  | 340578 | 37 | X | 125298880 | 125298880 | Missense_Mutation | SNP | G  | A  | 10  | 68  | c.1028C>T      | c.(1027-1029)CCC>CTC | p.P343L       |
| Pat_41 | Post-Resistance | ACTRT1    | 139741 | 37 | X | 127185299 | 127185299 | Missense_Mutation | SNP | G  | A  | 17  | 215 | c.887C>T       | c.(886-888)GCA>GTA   | p.A296V       |
| Pat_41 | Post-Resistance | ACTRT1    | 139741 | 37 | X | 127185414 | 127185414 | Missense_Mutation | SNP | C  | T  | 25  | 277 | c.772G>A       | c.(772-774)GTG>ATG   | p.V258M       |
| Pat_41 | Post-Resistance | SMARCA1   | 6594   | 37 | X | 128614788 | 128614788 | Missense_Mutation | SNP | G  | A  | 15  | 54  | c.2332C>T      | c.(2332-2334)CCA>TCA | p.P778S       |
| Pat_41 | Post-Resistance | ZDHHC9    | 51114  | 37 | X | 128975782 | 128975782 | Missense_Mutation | SNP | C  | T  | 45  | 206 | c.140G>A       | c.(139-141)GGG>GAG   | p.G47E        |
| Pat_41 | Post-Resistance | ELF4      | 2000   | 37 | X | 129201460 | 129201460 | Missense_Mutation | SNP | G  | A  | 4   | 107 | c.1228C>T      | c.(1228-1230)CCC>TCC | p.P410S       |
| Pat_41 | Post-Resistance | SLC25A14  | 9016   | 37 | X | 129499537 | 129499537 | Missense_Mutation | SNP | G  | A  | 52  | 165 | c.742G>A       | c.(742-744)GCT>ACT   | p.A248T       |
| Pat_41 | Post-Resistance | RBMX2     | 51634  | 37 | X | 129546445 | 129546445 | Missense_Mutation | SNP | G  | A  | 13  | 148 | c.592G>A       | c.(592-594)GAT>AAT   | p.D198N       |
| Pat_41 | Post-Resistance | ENOX2     | 10495  | 37 | X | 129803996 | 129803996 | Missense_Mutation | SNP | G  | A  | 15  | 237 | c.724C>T       | c.(724-726)CCC>TCC   | p.P242S       |
| Pat_41 | Post-Resistance | IGSF1     | 3547   | 37 | X | 130417206 | 130417206 | Missense_Mutation | SNP | G  | A  | 6   | 117 | c.700C>T       | c.(700-702)CCT>TCT   | p.P234S       |
| Pat_41 | Post-Resistance | TFDP3     | 51270  | 37 | X | 132352019 | 132352019 | Missense_Mutation | SNP | G  | A  | 22  | 145 | c.269C>T       | c.(268-270)TCC>TTC   | p.S90F        |
| Pat_41 | Post-Resistance | FAM127B   | 26071  | 37 | X | 134185895 | 134185895 | Missense_Mutation | SNP | G  | A  | 5   | 104 | c.244C>T       | c.(244-246)CCC>TCC   | p.P82S        |
| Pat_41 | Post-Resistance | FAM127B   | 26071  | 37 | X | 134186057 | 134186057 | Missense_Mutation | SNP | G  | A  | 15  | 280 | c.82C>T        | c.(82-84)CCC>TCC     | p.P28S        |
| Pat_41 | Post-Resistance | BRS3      | 680    | 37 | X | 135574292 | 135574292 | Missense_Mutation | SNP | T  | A  | 40  | 471 | c.958T>A       | c.(958-960)TTC>ATC   | p.F320I       |
| Pat_41 | Post-Resistance | ARHGEF6   | 9459   | 37 | X | 135814317 | 135814317 | Missense_Mutation | SNP | G  | A  | 3   | 46  | c.676C>T       | c.(676-678)CCA>TCA   | p.P226S       |
| Pat_41 | Post-Resistance | GPR101    | 83550  | 37 | X | 136112666 | 136112666 | Missense_Mutation | SNP | G  | A  | 25  | 112 | c.1168C>T      | c.(1168-1170)CCC>TCC | p.P390S       |
| Pat_41 | Post-Resistance | GPR101    | 83550  | 37 | X | 136112783 | 136112783 | Missense_Mutation | SNP | C  | T  | 31  | 220 | c.1051G>A      | c.(1051-1053)GAT>AAT | p.D351N       |
| Pat_41 | Post-Resistance | ZIC3      | 7547   | 37 | X | 136649563 | 136649563 | Missense_Mutation | SNP | C  | T  | 5   | 61  | c.713C>T       | c.(712-714)GCC>GTC   | p.A238V       |
| Pat_41 | Post-Resistance | CDR1      | 1038   | 37 | X | 139866528 | 139866528 | Missense_Mutation | SNP | C  | T  | 10  | 365 | c.4G>A         | c.(4-6)GCT>ACT       | p.A2T         |

|        |                 |          |        |    |   |           |           |                   |     |   |   |    |     |            |                        |          |
|--------|-----------------|----------|--------|----|---|-----------|-----------|-------------------|-----|---|---|----|-----|------------|------------------------|----------|
| Pat_41 | Post-Resistance | MAGEC1   | 9947   | 37 | X | 140995972 | 140995972 | Missense_Mutation | SNP | C | T | 12 | 359 | c.2782C>T  | c.(2782-2784)CCT>TCT   | p.P928S  |
| Pat_41 | Post-Resistance | FMR1NB   | 158521 | 37 | X | 147106459 | 147106459 | Missense_Mutation | SNP | A | G | 18 | 147 | c.707A>G   | c.(706-708)AAG>AGG     | p.K236R  |
| Pat_41 | Post-Resistance | AFF2     | 2334   | 37 | X | 147744131 | 147744131 | Nonsense_Mutation | SNP | C | T | 36 | 254 | c.883C>T   | c.(883-885)CAG>TAG     | p.Q295*  |
| Pat_41 | Post-Resistance | AFF2     | 2334   | 37 | X | 148044294 | 148044294 | Missense_Mutation | SNP | C | T | 4  | 95  | c.2740C>T  | c.(2740-2742)CCT>TCT   | p.P914S  |
| Pat_41 | Post-Resistance | IDS      | 3423   | 37 | X | 148564719 | 148564719 | Missense_Mutation | SNP | A | G | 3  | 122 | c.1211T>C  | c.(1210-1212)GTG>GCG   | p.V404A  |
| Pat_41 | Post-Resistance | CXorf40A | 91966  | 37 | X | 148628300 | 148628300 | Missense_Mutation | SNP | G | A | 4  | 41  | c.269G>A   | c.(268-270)GGG>GAG     | p.G90E   |
| Pat_41 | Post-Resistance | CXorf40B | 541578 | 37 | X | 149102028 | 149102028 | Missense_Mutation | SNP | G | A | 7  | 39  | c.65C>T    | c.(64-66)ACT>ATT       | p.T22I   |
| Pat_41 | Post-Resistance | HMGB3    | 3149   | 37 | X | 150156340 | 150156340 | Missense_Mutation | SNP | G | A | 4  | 51  | c.556G>A   | c.(556-558)GAA>AAA     | p.E186K  |
| Pat_41 | Post-Resistance | PNMA5    | 114824 | 37 | X | 152158908 | 152158908 | Missense_Mutation | SNP | G | A | 7  | 111 | c.1235C>T  | c.(1234-1236)CCC>CTC   | p.P412L  |
| Pat_41 | Post-Resistance | MAGEA1   | 4100   | 37 | X | 152482965 | 152482965 | Missense_Mutation | SNP | G | A | 4  | 71  | c.46C>T    | c.(46-48)CTT>TTT       | p.L16F   |
| Pat_41 | Post-Resistance | ZNF275   | 10838  | 37 | X | 152612435 | 152612435 | Missense_Mutation | SNP | G | A | 6  | 86  | c.292G>A   | c.(292-294)GAA>AAA     | p.E98K   |
| Pat_41 | Post-Resistance | BGN      | 633    | 37 | X | 152772563 | 152772563 | Missense_Mutation | SNP | C | T | 6  | 16  | c.829C>T   | c.(829-831)CCC>TCC     | p.P277S  |
| Pat_41 | Post-Resistance | BGN      | 633    | 37 | X | 152773823 | 152773823 | Missense_Mutation | SNP | C | T | 4  | 132 | c.1027C>T  | c.(1027-1029)CCC>TCC   | p.P343S  |
| Pat_41 | Post-Resistance | ATP2B3   | 492    | 37 | X | 152823634 | 152823634 | Missense_Mutation | SNP | C | T | 6  | 216 | c.2498C>T  | c.(2497-2499)ACC>ATC   | p.T833I  |
| Pat_41 | Post-Resistance | ATP2B3   | 492    | 37 | X | 152845520 | 152845520 | Missense_Mutation | SNP | G | A | 92 | 344 | c.3427G>A  | c.(3427-3429)GCC>ACC   | p.A1143T |
| Pat_41 | Post-Resistance | DUSP9    | 1852   | 37 | X | 152915026 | 152915026 | Missense_Mutation | SNP | C | T | 55 | 316 | c.713C>T   | c.(712-714)CCC>CTC     | p.P238L  |
| Pat_41 | Post-Resistance | PLXNB3   | 5365   | 37 | X | 153035389 | 153035389 | Missense_Mutation | SNP | G | A | 5  | 33  | c.1624G>A  | c.(1624-1626)GGC>AGC   | p.G542S  |
| Pat_41 | Post-Resistance | PLXNB3   | 5365   | 37 | X | 153040816 | 153040816 | Missense_Mutation | SNP | C | T | 6  | 62  | c.4292C>T  | c.(4291-4293)GCG>GTG   | p.A1431V |
| Pat_41 | Post-Resistance | PLXNB3   | 5365   | 37 | X | 153041597 | 153041597 | Missense_Mutation | SNP | G | A | 5  | 33  | c.4657G>A  | c.(4657-4659)GAG>AAG   | p.E1553K |
| Pat_41 | Post-Resistance | PLXNB3   | 5365   | 37 | X | 153043904 | 153043904 | Missense_Mutation | SNP | C | T | 4  | 71  | c.5528C>T  | c.(5527-5529)TCT>TTT   | p.S1843F |
| Pat_41 | Post-Resistance | SRPK3    | 26576  | 37 | X | 153050556 | 153050556 | Missense_Mutation | SNP | G | A | 5  | 75  | c.1447G>A  | c.(1447-1449)GAG>AAG   | p.E483K  |
| Pat_41 | Post-Resistance | L1CAM    | 3897   | 37 | X | 153130159 | 153130159 | Missense_Mutation | SNP | C | T | 9  | 164 | c.3047G>A  | c.(3046-3048)GGG>GAG   | p.G1016E |
| Pat_41 | Post-Resistance | L1CAM    | 3897   | 37 | X | 153130447 | 153130447 | Missense_Mutation | SNP | C | T | 9  | 176 | c.2875G>A  | c.(2875-2877)GAT>AAT   | p.D959N  |
| Pat_41 | Post-Resistance | L1CAM    | 3897   | 37 | X | 153134326 | 153134326 | Missense_Mutation | SNP | G | A | 45 | 446 | c.1349C>T  | c.(1348-1350)GCC>GTC   | p.A450V  |
| Pat_41 | Post-Resistance | ARHGAP4  | 393    | 37 | X | 153186600 | 153186600 | Missense_Mutation | SNP | C | T | 3  | 11  | c.448G>A   | c.(448-450)GAG>AAG     | p.E150K  |
| Pat_41 | Post-Resistance | HCFC1    | 3054   | 37 | X | 153220945 | 153220945 | Missense_Mutation | SNP | C | T | 5  | 81  | c.2905G>A  | c.(2905-2907)GTG>ATG   | p.V969M  |
| Pat_41 | Post-Resistance | HCFC1    | 3054   | 37 | X | 153224816 | 153224816 | Missense_Mutation | SNP | C | T | 11 | 446 | c.1571G>A  | c.(1570-1572)CGG>CAG   | p.R524Q  |
| Pat_41 | Post-Resistance | TMEM187  | 8269   | 37 | X | 153247619 | 153247619 | Missense_Mutation | SNP | G | A | 16 | 289 | c.106G>A   | c.(106-108)GGC>AGC     | p.G36S   |
| Pat_41 | Post-Resistance | MECP2    | 4204   | 37 | X | 153296025 | 153296025 | Missense_Mutation | SNP | C | T | 17 | 129 | c.1254G>A  | c.(1252-1254)ATG>ATA   | p.M418I  |
| Pat_41 | Post-Resistance | OPN1LW   | 5956   | 37 | X | 153421817 | 153421817 | Missense_Mutation | SNP | G | A | 32 | 226 | c.793G>A   | c.(793-795)GAA>AAA     | p.E265K  |
| Pat_41 | Post-Resistance | TKTL1    | 8277   | 37 | X | 153557940 | 153557940 | Missense_Mutation | SNP | G | A | 31 | 267 | c.1693G>A  | c.(1693-1695)GGA>AGA   | p.G565R  |
| Pat_41 | Post-Resistance | FLNA     | 2316   | 37 | X | 153581793 | 153581793 | Missense_Mutation | SNP | C | T | 6  | 102 | c.5893G>A  | c.(5893-5895)GTC>ATC   | p.V1965I |
| Pat_41 | Post-Resistance | FLNA     | 2316   | 37 | X | 153594823 | 153594823 | Missense_Mutation | SNP | C | T | 9  | 45  | c.1081G>A  | c.(1081-1083)GCT>ACT   | p.A361T  |
| Pat_41 | Post-Resistance | RPL10    | 6134   | 37 | X | 153627728 | 153627728 | Missense_Mutation | SNP | G | A | 22 | 414 | c.73G>A    | c.(73-75)GGT>AGT       | p.G25S   |
| Pat_41 | Post-Resistance | RPL10    | 6134   | 37 | X | 153631631 | 153631631 | Missense_Mutation | SNP | G | A | 9  | 236 | c.295G>A   | c.(295-297)GAC>AAC     | p.D99N   |
| Pat_41 | Post-Resistance | PLXNA3   | 55558  | 37 | X | 153690615 | 153690615 | Missense_Mutation | SNP | G | A | 10 | 97  | c.1282G>A  | c.(1282-1284)GTC>ATC   | p.V428I  |
| Pat_41 | Post-Resistance | CTAG2    | 30848  | 37 | X | 153880816 | 153880816 | Missense_Mutation | SNP | C | T | 5  | 113 | c.359G>A   | c.(358-360)GGG>GAG     | p.G120E  |
| Pat_41 | Post-Resistance | MPP1     | 4354   | 37 | X | 154014612 | 154014612 | Missense_Mutation | SNP | C | T | 11 | 770 | c.544G>A   | c.(544-546)GCG>ACG     | p.A182T  |
| Pat_41 | Post-Resistance | F8       | 2157   | 37 | X | 154176005 | 154176005 | Missense_Mutation | SNP | C | T | 27 | 287 | c.2081G>A  | c.(2080-2082)GGA>GAA   | p.G694E  |
| Pat_41 | Post-Resistance | F8       | 2157   | 37 | X | 154225280 | 154225280 | Missense_Mutation | SNP | G | A | 27 | 533 | c.356C>T   | c.(355-357)GCT>GTT     | p.A119V  |
| Pat_41 | Post-Resistance | F8       | 2157   | 37 | X | 154225304 | 154225304 | Missense_Mutation | SNP | G | A | 21 | 599 | c.332C>T   | c.(331-333)GCT>GTT     | p.A111V  |
| Pat_41 | Post-Resistance | SPRY3    | 10251  | 37 | X | 155003630 | 155003630 | Missense_Mutation | SNP | G | A | 15 | 194 | c.97G>A    | c.(97-99)GCC>ACC       | p.A33T   |
| Pat_44 | Pre-Treatment   | CAMTA1   | 23261  | 37 | 1 | 7805007   | 7805007   | Missense_Mutation | SNP | C | T | 21 | 32  | c.4295C>T  | c.(4294-4296)ACC>ATC   | p.T1432I |
| Pat_44 | Pre-Treatment   | PRAMEF4  | 400735 | 37 | 1 | 12942930  | 12942930  | Missense_Mutation | SNP | G | A | 4  | 32  | c.286C>T   | c.(286-288)CGT>TGT     | p.R96C   |
| Pat_44 | Pre-Treatment   | UBR4     | 23352  | 37 | 1 | 19439223  | 19439223  | Missense_Mutation | SNP | G | A | 89 | 210 | c.11596C>T | c.(11596-11598)CAC>TAC | p.H3866Y |
| Pat_44 | Pre-Treatment   | EPHA10   | 284656 | 37 | 1 | 38185631  | 38185631  | Missense_Mutation | SNP | C | T | 16 | 25  | c.2512G>A  | c.(2512-2514)GAG>AAG   | p.E838K  |
| Pat_44 | Pre-Treatment   | PTCH2    | 8643   | 37 | 1 | 45296644  | 45296644  | Missense_Mutation | SNP | G | A | 4  | 9   | c.689C>T   | c.(688-690)TCC>TTC     | p.S230F  |

|        |               |          |        |    |    |           |           |                   |     |   |   |     |     |              |                      |               |
|--------|---------------|----------|--------|----|----|-----------|-----------|-------------------|-----|---|---|-----|-----|--------------|----------------------|---------------|
| Pat_44 | Pre-Treatment | DAB1     | 1600   | 37 | 1  | 57480934  | 57480934  | Missense_Mutation | SNP | T | C | 16  | 31  | c.1066A>G    | c.(1066-1068)ACT>GCT | p.T356A       |
| Pat_44 | Pre-Treatment | FNDC7    | 163479 | 37 | 1  | 109270469 | 109270469 | Missense_Mutation | SNP | C | T | 28  | 90  | c.1151C>T    | c.(1150-1152)TCC>TTC | p.S384F       |
| Pat_44 | Pre-Treatment | FAM40A   | 85369  | 37 | 1  | 110590491 | 110590491 | Missense_Mutation | SNP | C | T | 2   | 1   | c.1661C>T    | c.(1660-1662)CCC>CTC | p.P554L       |
| Pat_44 | Pre-Treatment | DENND2C  | 163259 | 37 | 1  | 115143490 | 115143490 | Missense_Mutation | SNP | G | A | 11  | 11  | c.1907C>T    | c.(1906-1908)CCT>CTT | p.P636L       |
| Pat_44 | Pre-Treatment | OTUD7B   | 56957  | 37 | 1  | 149915985 | 149915985 | Missense_Mutation | SNP | G | A | 3   | 8   | c.2303C>T    | c.(2302-2304)CCC>CTC | p.P768L       |
| Pat_44 | Pre-Treatment | FLG2     | 388698 | 37 | 1  | 152325707 | 152325707 | Missense_Mutation | SNP | C | T | 73  | 185 | c.4555G>A    | c.(4555-4557)GGA>AGA | p.G1519R      |
| Pat_44 | Pre-Treatment | FCRL3    | 115352 | 37 | 1  | 157665283 | 157665283 | Missense_Mutation | SNP | C | T | 8   | 23  | c.1247G>A    | c.(1246-1248)CGA>CAA | p.R416Q       |
| Pat_44 | Pre-Treatment | KIRREL   | 55243  | 37 | 1  | 158064813 | 158064813 | Missense_Mutation | SNP | C | T | 5   | 13  | c.2177C>T    | c.(2176-2178)CCC>CTC | p.P726L       |
| Pat_44 | Pre-Treatment | CD1C     | 911    | 37 | 1  | 158261127 | 158261127 | Missense_Mutation | SNP | C | T | 10  | 23  | c.265C>T     | c.(265-267)CGT>TGT   | p.R89C        |
| Pat_44 | Pre-Treatment | LY9      | 4063   | 37 | 1  | 160769588 | 160769588 | Missense_Mutation | SNP | G | A | 5   | 26  | c.170G>A     | c.(169-171)GGG>GAG   | p.G57E        |
| Pat_44 | Pre-Treatment | C1orf112 | 55732  | 37 | 1  | 169806207 | 169806207 | Missense_Mutation | SNP | G | A | 11  | 49  | c.1679G>A    | c.(1678-1680)AGG>AAG | p.R560K       |
| Pat_44 | Pre-Treatment | TNR      | 7143   | 37 | 1  | 175375790 | 175375790 | Missense_Mutation | SNP | G | A | 15  | 38  | c.61C>T      | c.(61-63)CTT>TTT     | p.L21F        |
| Pat_44 | Pre-Treatment | FAM163A  | 148753 | 37 | 1  | 179782945 | 179782945 | Missense_Mutation | SNP | T | C | 6   | 18  | c.125T>C     | c.(124-126)GTT>GCT   | p.V42A        |
| Pat_44 | Pre-Treatment | RNASEL   | 6041   | 37 | 1  | 182555806 | 182555806 | Missense_Mutation | SNP | C | T | 23  | 32  | c.136G>A     | c.(136-138)GAA>AAA   | p.E46K        |
| Pat_44 | Pre-Treatment | SLC30A10 | 55532  | 37 | 1  | 220088927 | 220088927 | Missense_Mutation | SNP | C | T | 8   | 39  | c.1322G>A    | c.(1321-1323)GGA>GAA | p.G441E       |
| Pat_44 | Pre-Treatment | ZNF695   | 57116  | 37 | 1  | 247150500 | 247150500 | Missense_Mutation | SNP | A | T | 4   | 32  | c.1317T>A    | c.(1315-1317)GAT>GAA | p.D439E       |
| Pat_44 | Pre-Treatment | PRKCC    | 5588   | 37 | 10 | 6470194   | 6470194   | Missense_Mutation | SNP | G | A | 4   | 36  | c.2096C>T    | c.(2095-2097)CCC>CTC | p.P699L       |
| Pat_44 | Pre-Treatment | PLXDC2   | 84898  | 37 | 10 | 20335828  | 20335828  | Nonsense_Mutation | SNP | C | T | 9   | 65  | c.355C>T     | c.(355-357)CGA>TGA   | p.R119*       |
| Pat_44 | Pre-Treatment | PLXDC2   | 84898  | 37 | 10 | 20506391  | 20506391  | Missense_Mutation | SNP | G | A | 10  | 6   | c.1159G>A    | c.(1159-1161)GAA>AAA | p.E387K       |
| Pat_44 | Pre-Treatment | NEBL     | 10529  | 37 | 10 | 21120192  | 21120192  | Missense_Mutation | SNP | C | T | 5   | 15  | c.1604G>A    | c.(1603-1605)GGA>GAA | p.G535E       |
| Pat_44 | Pre-Treatment | ANKRD30A | 91074  | 37 | 10 | 37431050  | 37431050  | Missense_Mutation | SNP | G | C | 4   | 12  | c.1057G>C    | c.(1057-1059)GCA>CCA | p.A353P       |
| Pat_44 | Pre-Treatment | SGMS1    | 259230 | 37 | 10 | 52103400  | 52103400  | Nonsense_Mutation | SNP | G | A | 2   | 1   | c.475C>T     | c.(475-477)CGA>TGA   | p.R159*       |
| Pat_44 | Pre-Treatment | PTEN     | 5728   | 37 | 10 | 89690846  | 89690846  | Missense_Mutation | SNP | G | C | 15  | 29  | c.253G>C     | c.(253-255)GTT>CTT   | p.V85L        |
| Pat_44 | Pre-Treatment | LIPN     | 643418 | 37 | 10 | 90521203  | 90521203  | Missense_Mutation | SNP | G | A | 18  | 20  | c.41G>A      | c.(40-42)GGA>GAA     | p.G14E        |
| Pat_44 | Pre-Treatment | CDHR5    | 53841  | 37 | 11 | 618833    | 618833    | Missense_Mutation | SNP | G | C | 4   | 30  | c.1726C>G    | c.(1726-1728)CCA>GCA | p.P576A       |
| Pat_44 | Pre-Treatment | C11orf49 | 79096  | 37 | 11 | 47185766  | 47185766  | Missense_Mutation | SNP | C | T | 2   | 0   | c.944C>T     | c.(943-945)CCG>CTG   | p.P315L       |
| Pat_44 | Pre-Treatment | MED17    | 9440   | 37 | 11 | 93523785  | 93523785  | Missense_Mutation | SNP | G | A | 23  | 39  | c.463G>A     | c.(463-465)GGA>AGA   | p.G155R       |
| Pat_44 | Pre-Treatment | OR8D1    | 283159 | 37 | 11 | 124180013 | 124180013 | Missense_Mutation | SNP | G | A | 4   | 3   | c.650C>T     | c.(649-651)TCC>TTC   | p.S217F       |
| Pat_44 | Pre-Treatment | C3AR1    | 719    | 37 | 12 | 8211934   | 8211934   | Missense_Mutation | SNP | A | G | 6   | 8   | c.848T>C     | c.(847-849)CTG>CCG   | p.L283P       |
| Pat_44 | Pre-Treatment | PRB2     | 653247 | 37 | 12 | 11546795  | 11546795  | Missense_Mutation | SNP | G | A | 4   | 21  | c.217C>T     | c.(217-219)CCT>TCT   | p.P73S        |
| Pat_44 | Pre-Treatment | RERG     | 85004  | 37 | 12 | 15262420  | 15262420  | Missense_Mutation | SNP | C | T | 111 | 227 | c.224G>A     | c.(223-225)CGA>CAA   | p.R75Q        |
| Pat_44 | Pre-Treatment | PKP2     | 5318   | 37 | 12 | 33021868  | 33021868  | Missense_Mutation | SNP | C | T | 17  | 37  | c.1163G>A    | c.(1162-1164)CGG>CAG | p.R388Q       |
| Pat_44 | Pre-Treatment | KIF21A   | 55605  | 37 | 12 | 39760186  | 39760186  | Missense_Mutation | SNP | C | T | 7   | 29  | c.869G>A     | c.(868-870)AGG>AAG   | p.R290K       |
| Pat_44 | Pre-Treatment | KRT83    | 3889   | 37 | 12 | 52710275  | 52710275  | Missense_Mutation | SNP | C | T | 10  | 16  | c.1018G>A    | c.(1018-1020)GAG>AAG | p.E340K       |
| Pat_44 | Pre-Treatment | ARHGAP9  | 64333  | 37 | 12 | 57870685  | 57870685  | Missense_Mutation | SNP | C | T | 12  | 11  | c.1145G>A    | c.(1144-1146)CGA>CAA | p.R382Q       |
| Pat_44 | Pre-Treatment | CAND1    | 55832  | 37 | 12 | 67699646  | 67699646  | Missense_Mutation | SNP | C | T | 26  | 40  | c.2198C>T    | c.(2197-2199)TCC>TTC | p.S733F       |
| Pat_44 | Pre-Treatment | TMCC3    | 57458  | 37 | 12 | 94975900  | 94975900  | Missense_Mutation | SNP | G | A | 12  | 25  | c.493C>T     | c.(493-495)CGC>TGC   | p.R165C       |
| Pat_44 | Pre-Treatment | ACTR6    | 64431  | 37 | 12 | 100601549 | 100601549 | Missense_Mutation | SNP | G | A | 3   | 22  | c.364G>A     | c.(364-366)GTA>ATA   | p.V122I       |
| Pat_44 | Pre-Treatment | TMEM132D | 121256 | 37 | 12 | 129559291 | 129559291 | Missense_Mutation | SNP | C | T | 21  | 27  | c.2429G>A    | c.(2428-2430)AGA>AAA | p.R810K       |
| Pat_44 | Pre-Treatment | FZD10    | 11211  | 37 | 12 | 130648391 | 130648391 | Missense_Mutation | SNP | G | A | 4   | 16  | c.904G>A     | c.(904-906)GAG>AAG   | p.E302K       |
| Pat_44 | Pre-Treatment | SUGT1    | 10910  | 37 | 13 | 53236839  | 53236839  | Splice_Site       | SNP | T | C | 19  | 27  | c.478_splice | c.e7+2               | p.G160_splice |
| Pat_44 | Pre-Treatment | P704P    | 641455 | 37 | 14 | 20019914  | 20019914  | Missense_Mutation | SNP | A | G | 9   | 84  | c.307T>C     | c.(307-309)TGC>CGC   | p.C103R       |
| Pat_44 | Pre-Treatment | OR4E2    | 26686  | 37 | 14 | 22133489  | 22133489  | Missense_Mutation | SNP | A | C | 26  | 86  | c.193A>C     | c.(193-195)AAT>CAT   | p.N65H        |
| Pat_44 | Pre-Treatment | KIAA1409 | 57578  | 37 | 14 | 94088434  | 94088434  | Missense_Mutation | SNP | G | A | 21  | 44  | c.4390G>A    | c.(4390-4392)GAA>AAA | p.E1464K      |
| Pat_44 | Pre-Treatment | EVL      | 51466  | 37 | 14 | 100589879 | 100589879 | Missense_Mutation | SNP | C | T | 8   | 9   | c.356C>T     | c.(355-357)CCC>CTC   | p.P119L       |
| Pat_44 | Pre-Treatment | AHNAK2   | 113146 | 37 | 14 | 105418834 | 105418834 | Missense_Mutation | SNP | G | A | 70  | 252 | c.2954C>T    | c.(2953-2955)TCC>TTC | p.S985F       |
| Pat_44 | Pre-Treatment | OR4M2    | 390538 | 37 | 15 | 22369141  | 22369141  | Missense_Mutation | SNP | G | T | 11  | 40  | c.566G>T     | c.(565-567)TGT>TTT   | p.C189F       |

|        |               |          |        |    |    |          |          |                   |     |   |   |    |     |            |                        |          |
|--------|---------------|----------|--------|----|----|----------|----------|-------------------|-----|---|---|----|-----|------------|------------------------|----------|
| Pat_44 | Pre-Treatment | DUOX2    | 50506  | 37 | 15 | 45396472 | 45396472 | Missense_Mutation | SNP | G | T | 2  | 0   | c.2426C>A  | c.(2425-2427)GCC>GAC   | p.A809D  |
| Pat_44 | Pre-Treatment | CILP     | 8483   | 37 | 15 | 65496872 | 65496872 | Missense_Mutation | SNP | G | A | 3  | 16  | c.653C>T   | c.(652-654)GCC>GTC     | p.A218V  |
| Pat_44 | Pre-Treatment | C15orf39 | 56905  | 37 | 15 | 75498897 | 75498897 | Missense_Mutation | SNP | G | A | 9  | 22  | c.508G>A   | c.(508-510)GCT>ACT     | p.A170T  |
| Pat_44 | Pre-Treatment | ADAMTSL3 | 57188  | 37 | 15 | 84373159 | 84373159 | Missense_Mutation | SNP | C | T | 6  | 29  | c.88C>T    | c.(88-90)CCT>TCT       | p.P30S   |
| Pat_44 | Pre-Treatment | ADAMTSL3 | 57188  | 37 | 15 | 84651288 | 84651288 | Missense_Mutation | SNP | C | T | 8  | 48  | c.2908C>T  | c.(2908-2910)CAT>TAT   | p.H970Y  |
| Pat_44 | Pre-Treatment | RGMA     | 56963  | 37 | 15 | 93588419 | 93588419 | Missense_Mutation | SNP | C | T | 2  | 2   | c.1162G>A  | c.(1162-1164)GTG>ATG   | p.V388M  |
| Pat_44 | Pre-Treatment | OR1F1    | 4992   | 37 | 16 | 3254951  | 3254951  | Nonsense_Mutation | SNP | G | A | 8  | 16  | c.705G>A   | c.(703-705)TGG>TGA     | p.W235*  |
| Pat_44 | Pre-Treatment | A2BP1    | 54715  | 37 | 16 | 7568201  | 7568201  | Missense_Mutation | SNP | C | T | 11 | 74  | c.80C>T    | c.(79-81)TCG>TTG       | p.S27L   |
| Pat_44 | Pre-Treatment | TMC5     | 79838  | 37 | 16 | 19451548 | 19451548 | Missense_Mutation | SNP | C | T | 4  | 25  | c.188C>T   | c.(187-189)CCA>CTA     | p.P63L   |
| Pat_44 | Pre-Treatment | SEZ6L2   | 26470  | 37 | 16 | 29907064 | 29907064 | Missense_Mutation | SNP | G | A | 5  | 16  | c.629C>T   | c.(628-630)CCT>CTT     | p.P210L  |
| Pat_44 | Pre-Treatment | NUDT21   | 11051  | 37 | 16 | 56473646 | 56473646 | Nonsense_Mutation | SNP | G | A | 24 | 96  | c.394C>T   | c.(394-396)CAG>TAG     | p.Q132*  |
| Pat_44 | Pre-Treatment | NDRG4    | 65009  | 37 | 16 | 58538102 | 58538102 | Missense_Mutation | SNP | G | A | 11 | 38  | c.172G>A   | c.(172-174)GAG>AAG     | p.E58K   |
| Pat_44 | Pre-Treatment | ADAT1    | 23536  | 37 | 16 | 75646166 | 75646166 | Missense_Mutation | SNP | C | T | 9  | 18  | c.1018G>A  | c.(1018-1020)GCC>ACC   | p.A340T  |
| Pat_44 | Pre-Treatment | VAT1L    | 57687  | 37 | 16 | 77822748 | 77822748 | Missense_Mutation | SNP | C | T | 2  | 2   | c.169C>T   | c.(169-171)CGG>TGG     | p.R57W   |
| Pat_44 | Pre-Treatment | PKD1L2   | 114780 | 37 | 16 | 81232607 | 81232607 | Missense_Mutation | SNP | C | A | 7  | 11  | c.1203G>T  | c.(1201-1203)AAG>AAT   | p.K401N  |
| Pat_44 | Pre-Treatment | KIAA0182 | 23199  | 37 | 16 | 85667541 | 85667541 | Missense_Mutation | SNP | C | T | 3  | 21  | c.29C>T    | c.(28-30)TCC>TTC       | p.S10F   |
| Pat_44 | Pre-Treatment | PRDM7    | 11105  | 37 | 16 | 90126823 | 90126823 | Missense_Mutation | SNP | T | G | 5  | 49  | c.1159A>C  | c.(1159-1161)ATG>CTG   | p.M387L  |
| Pat_44 | Pre-Treatment | PRDM7    | 11105  | 37 | 16 | 90126912 | 90126912 | Missense_Mutation | SNP | G | T | 6  | 48  | c.1070C>A  | c.(1069-1071)TCT>TAT   | p.S357Y  |
| Pat_44 | Pre-Treatment | DNAH2    | 146754 | 37 | 17 | 7704907  | 7704907  | Missense_Mutation | SNP | G | A | 21 | 120 | c.8711G>A  | c.(8710-8712)CGC>CAC   | p.R2904H |
| Pat_44 | Pre-Treatment | PER1     | 5187   | 37 | 17 | 8047057  | 8047057  | Missense_Mutation | SNP | G | A | 3  | 14  | c.2599C>T  | c.(2599-2601)CCC>TCC   | p.P867S  |
| Pat_44 | Pre-Treatment | MYH4     | 4622   | 37 | 17 | 10358351 | 10358351 | Missense_Mutation | SNP | C | T | 10 | 23  | c.2342G>A  | c.(2341-2343)CGA>CAA   | p.R781Q  |
| Pat_44 | Pre-Treatment | TMEM98   | 26022  | 37 | 17 | 31263453 | 31263453 | Missense_Mutation | SNP | G | T | 4  | 26  | c.401G>T   | c.(400-402)CGG>CTG     | p.R134L  |
| Pat_44 | Pre-Treatment | KRTAP3-3 | 85293  | 37 | 17 | 39150276 | 39150276 | Missense_Mutation | SNP | G | A | 8  | 115 | c.74C>T    | c.(73-75)TCC>TTC       | p.S25F   |
| Pat_44 | Pre-Treatment | KRTAP3-2 | 83897  | 37 | 17 | 39156032 | 39156032 | Missense_Mutation | SNP | G | A | 20 | 115 | c.74C>T    | c.(73-75)TCC>TTC       | p.S25F   |
| Pat_44 | Pre-Treatment | KRTAP4-4 | 84616  | 37 | 17 | 39316759 | 39316759 | Missense_Mutation | SNP | T | C | 10 | 113 | c.185A>G   | c.(184-186)CAC>CGC     | p.H62R   |
| Pat_44 | Pre-Treatment | FZD2     | 2535   | 37 | 17 | 42636236 | 42636236 | Missense_Mutation | SNP | G | A | 13 | 25  | c.1180G>A  | c.(1180-1182)GAC>AAC   | p.D394N  |
| Pat_44 | Pre-Treatment | SPATA20  | 64847  | 37 | 17 | 48625781 | 48625781 | Missense_Mutation | SNP | A | G | 6  | 12  | c.215A>G   | c.(214-216)TAC>TGC     | p.Y72C   |
| Pat_44 | Pre-Treatment | KIF2B    | 84643  | 37 | 17 | 51900764 | 51900764 | Missense_Mutation | SNP | C | A | 3  | 17  | c.370C>A   | c.(370-372)CAA>AAA     | p.Q124K  |
| Pat_44 | Pre-Treatment | MRC2     | 9902   | 37 | 17 | 60741911 | 60741911 | Missense_Mutation | SNP | C | T | 4  | 20  | c.121C>T   | c.(121-123)CCC>TCC     | p.P41S   |
| Pat_44 | Pre-Treatment | ZBTB7C   | 201501 | 37 | 18 | 45567019 | 45567019 | Missense_Mutation | SNP | C | T | 2  | 2   | c.460G>A   | c.(460-462)GAA>AAA     | p.E154K  |
| Pat_44 | Pre-Treatment | SERPINB4 | 6318   | 37 | 18 | 61305069 | 61305069 | Missense_Mutation | SNP | C | T | 4  | 22  | c.1057G>A  | c.(1057-1059)GAA>AAA   | p.E353K  |
| Pat_44 | Pre-Treatment | ZNF556   | 80032  | 37 | 19 | 2877745  | 2877745  | Missense_Mutation | SNP | C | G | 5  | 11  | c.789C>G   | c.(787-789)CAC>CAG     | p.H263Q  |
| Pat_44 | Pre-Treatment | 2-Mar    | 51257  | 37 | 19 | 8495569  | 8495569  | Missense_Mutation | SNP | G | A | 24 | 48  | c.400G>A   | c.(400-402)GAG>AAG     | p.E134K  |
| Pat_44 | Pre-Treatment | MUC16    | 94025  | 37 | 19 | 9071943  | 9071943  | Missense_Mutation | SNP | G | A | 31 | 77  | c.15503C>T | c.(15502-15504)TCA>TTA | p.S5168L |
| Pat_44 | Pre-Treatment | MUC16    | 94025  | 37 | 19 | 9076723  | 9076723  | Missense_Mutation | SNP | T | C | 10 | 22  | c.10723A>G | c.(10723-10725)ACT>GCT | p.T3575A |
| Pat_44 | Pre-Treatment | ZNF878   | 729747 | 37 | 19 | 12155757 | 12155757 | Missense_Mutation | SNP | C | A | 12 | 64  | c.600G>T   | c.(598-600)AGG>AGT     | p.R200S  |
| Pat_44 | Pre-Treatment | ZNF799   | 90576  | 37 | 19 | 12501446 | 12501446 | Missense_Mutation | SNP | T | C | 5  | 6   | c.1766A>G  | c.(1765-1767)GAA>GGA   | p.E589G  |
| Pat_44 | Pre-Treatment | ANO8     | 57719  | 37 | 19 | 17439459 | 17439459 | Missense_Mutation | SNP | C | T | 2  | 2   | c.1738G>A  | c.(1738-1740)GGC>AGC   | p.G580S  |
| Pat_44 | Pre-Treatment | ZNF93    | 81931  | 37 | 19 | 20044933 | 20044933 | Missense_Mutation | SNP | T | G | 6  | 35  | c.1169T>G  | c.(1168-1170)GTT>GGT   | p.V390G  |
| Pat_44 | Pre-Treatment | ZNF626   | 199777 | 37 | 19 | 20808006 | 20808006 | Missense_Mutation | SNP | T | C | 7  | 40  | c.677A>G   | c.(676-678)GAG>GGG     | p.E226G  |
| Pat_44 | Pre-Treatment | ZNF257   | 113835 | 37 | 19 | 22271366 | 22271366 | Missense_Mutation | SNP | A | C | 3  | 15  | c.814A>C   | c.(814-816)ATT>CTT     | p.I272L  |
| Pat_44 | Pre-Treatment | ZNF675   | 171392 | 37 | 19 | 23836350 | 23836350 | Missense_Mutation | SNP | A | T | 6  | 14  | c.1385T>A  | c.(1384-1386)ATC>AAC   | p.I462N  |
| Pat_44 | Pre-Treatment | ZNF540   | 163255 | 37 | 19 | 38090627 | 38090627 | Missense_Mutation | SNP | A | G | 3  | 33  | c.110A>G   | c.(109-111)GAG>GGG     | p.E37G   |
| Pat_44 | Pre-Treatment | RYR1     | 6261   | 37 | 19 | 38990289 | 38990289 | Missense_Mutation | SNP | G | A | 4  | 21  | c.7042G>A  | c.(7042-7044)GAG>AAG   | p.E2348K |
| Pat_44 | Pre-Treatment | ZNF780A  | 284323 | 37 | 19 | 40580552 | 40580552 | Missense_Mutation | SNP | T | G | 6  | 47  | c.1797A>C  | c.(1795-1797)CAA>CAC   | p.Q599H  |
| Pat_44 | Pre-Treatment | PSG4     | 5672   | 37 | 19 | 43697536 | 43697536 | Nonsense_Mutation | SNP | C | T | 17 | 14  | c.1248G>A  | c.(1246-1248)TGG>TGA   | p.W416*  |
| Pat_44 | Pre-Treatment | BCL3     | 602    | 37 | 19 | 45262002 | 45262002 | Missense_Mutation | SNP | A | G | 2  | 5   | c.1081A>G  | c.(1081-1083)AAG>GAG   | p.K361E  |

|        |               |          |        |    |    |           |           |                   |     |    |    |    |    |                |                        |               |
|--------|---------------|----------|--------|----|----|-----------|-----------|-------------------|-----|----|----|----|----|----------------|------------------------|---------------|
| Pat_44 | Pre-Treatment | CCDC8    | 83987  | 37 | 19 | 46914959  | 46914959  | Missense_Mutation | SNP | T  | C  | 4  | 33 | c.1109A>G      | c.(1108-1110)GAG>GGG   | p.E370G       |
| Pat_44 | Pre-Treatment | NAPSB    | 256236 | 37 | 19 | 50837578  | 50837578  | Missense_Mutation | SNP | C  | T  | 12 | 16 | c.238G>A       | c.(238-240)GAT>AAT     | p.D80N        |
| Pat_44 | Pre-Treatment | NR1H2    | 7376   | 37 | 19 | 50882034  | 50882034  | Missense_Mutation | SNP | C  | T  | 12 | 58 | c.731C>T       | c.(730-732)TCC>TTC     | p.S244F       |
| Pat_44 | Pre-Treatment | ZNF649   | 65251  | 37 | 19 | 52394652  | 52394652  | Missense_Mutation | SNP | C  | T  | 4  | 17 | c.737G>A       | c.(736-738)AGG>AAG     | p.R246K       |
| Pat_44 | Pre-Treatment | LILRA6   | 79168  | 37 | 19 | 54745739  | 54745739  | Missense_Mutation | SNP | G  | A  | 10 | 86 | c.371C>T       | c.(370-372)CCC>CTC     | p.P124L       |
| Pat_44 | Pre-Treatment | LILRA1   | 11024  | 37 | 19 | 55107864  | 55107864  | Missense_Mutation | SNP | C  | T  | 20 | 55 | c.1169C>T      | c.(1168-1170)GCC>GTC   | p.A390V       |
| Pat_44 | Pre-Treatment | RDH13    | 112724 | 37 | 19 | 55560029  | 55560029  | Missense_Mutation | SNP | A  | C  | 19 | 27 | c.443T>G       | c.(442-444)CTG>CGG     | p.L148R       |
| Pat_44 | Pre-Treatment | TNNI3    | 7137   | 37 | 19 | 55666144  | 55666144  | Missense_Mutation | SNP | C  | T  | 3  | 15 | c.337G>A       | c.(337-339)GAC>AAC     | p.D113N       |
| Pat_44 | Pre-Treatment | KIF3C    | 3797   | 37 | 2  | 26177197  | 26177197  | Missense_Mutation | SNP | T  | C  | 5  | 6  | c.1828A>G      | c.(1828-1830)ATC>GTC   | p.I610V       |
| Pat_44 | Pre-Treatment | C2orf16  | 84226  | 37 | 2  | 27804477  | 27804477  | Missense_Mutation | SNP | G  | A  | 7  | 61 | c.5038G>A      | c.(5038-5040)GGT>AGT   | p.G1680S      |
| Pat_44 | Pre-Treatment | NRXN1    | 9378   | 37 | 2  | 50850687  | 50850687  | Missense_Mutation | SNP | G  | A  | 6  | 32 | c.998C>T       | c.(997-999)CCC>CTC     | p.P333L       |
| Pat_44 | Pre-Treatment | PTCD3    | 55037  | 37 | 2  | 86333474  | 86333474  | Missense_Mutation | SNP | G  | A  | 6  | 55 | c.104G>A       | c.(103-105)AGA>AAA     | p.R35K        |
| Pat_44 | Pre-Treatment | MGAT4A   | 11320  | 37 | 2  | 99279513  | 99279513  | Missense_Mutation | SNP | C  | T  | 8  | 18 | c.533G>A       | c.(532-534)GGA>GAA     | p.G178E       |
| Pat_44 | Pre-Treatment | PSD4     | 23550  | 37 | 2  | 113955150 | 113955150 | Missense_Mutation | SNP | G  | A  | 3  | 18 | c.2396G>A      | c.(2395-2397)GGC>GAC   | p.G799D       |
| Pat_44 | Pre-Treatment | POTEF    | 728378 | 37 | 2  | 130877782 | 130877782 | Missense_Mutation | SNP | A  | G  | 6  | 64 | c.307T>C       | c.(307-309)TGC>CGC     | p.C103R       |
| Pat_44 | Pre-Treatment | LRP1B    | 53353  | 37 | 2  | 141143575 | 141143575 | Missense_Mutation | SNP | T  | G  | 12 | 8  | c.10418A>C     | c.(10417-10419)AAA>ACA | p.K3473T      |
| Pat_44 | Pre-Treatment | ACVR1C   | 130399 | 37 | 2  | 158443750 | 158443750 | Missense_Mutation | SNP | C  | T  | 39 | 41 | c.253G>A       | c.(253-255)GAA>AAA     | p.E85K        |
| Pat_44 | Pre-Treatment | BAZ2B    | 29994  | 37 | 2  | 160295582 | 160295582 | Missense_Mutation | SNP | C  | T  | 4  | 6  | c.838G>A       | c.(838-840)GAA>AAA     | p.E280K       |
| Pat_44 | Pre-Treatment | SCN1A    | 6323   | 37 | 2  | 166848048 | 166848048 | Missense_Mutation | SNP | T  | G  | 10 | 23 | c.5704A>C      | c.(5704-5706)AAA>CAA   | p.K1902Q      |
| Pat_44 | Pre-Treatment | TTN      | 7273   | 37 | 2  | 179437213 | 179437213 | Missense_Mutation | SNP | G  | A  | 4  | 3  | c.65942C>T     | c.(65941-65943)TCA>TTA | p.S21981L     |
| Pat_44 | Pre-Treatment | TTN      | 7273   | 37 | 2  | 179472521 | 179472521 | Missense_Mutation | SNP | C  | T  | 25 | 57 | c.45289G>A     | c.(45289-45291)GAA>AAA | p.E15097K     |
| Pat_44 | Pre-Treatment | TTN      | 7273   | 37 | 2  | 179483347 | 179483347 | Missense_Mutation | SNP | C  | T  | 6  | 36 | c.39226G>A     | c.(39226-39228)GGA>AGA | p.G13076R     |
| Pat_44 | Pre-Treatment | TTN      | 7273   | 37 | 2  | 179633436 | 179633436 | Missense_Mutation | SNP | C  | T  | 13 | 31 | c.9127G>A      | c.(9127-9129)GGA>AGA   | p.G3043R      |
| Pat_44 | Pre-Treatment | COL5A2   | 1290   | 37 | 2  | 189943814 | 189943814 | Missense_Mutation | SNP | C  | T  | 6  | 17 | c.980G>A       | c.(979-981)GGT>GAT     | p.G327D       |
| Pat_44 | Pre-Treatment | FZD7     | 8324   | 37 | 2  | 202899662 | 202899662 | Missense_Mutation | SNP | C  | T  | 4  | 34 | c.292C>T       | c.(292-294)CTC>TTC     | p.L98F        |
| Pat_44 | Pre-Treatment | NOP58    | 51602  | 37 | 2  | 203139870 | 203139870 | Missense_Mutation | SNP | G  | A  | 3  | 10 | c.80G>A        | c.(79-81)AGT>AAT       | p.S27N        |
| Pat_44 | Pre-Treatment | WNT10A   | 80326  | 37 | 2  | 219754939 | 219754939 | Missense_Mutation | SNP | G  | A  | 6  | 10 | c.610G>A       | c.(610-612)GGC>AGC     | p.G204S       |
| Pat_44 | Pre-Treatment | DES      | 1674   | 37 | 2  | 220285045 | 220285045 | Missense_Mutation | SNP | T  | C  | 3  | 8  | c.712T>C       | c.(712-714)TTC>CTC     | p.F238L       |
| Pat_44 | Pre-Treatment | INPP5D   | 3635   | 37 | 2  | 233990491 | 233990491 | Missense_Mutation | SNP | G  | A  | 7  | 15 | c.386G>A       | c.(385-387)AGA>AAA     | p.R129K       |
| Pat_44 | Pre-Treatment | TGM3     | 7053   | 37 | 20 | 2291763   | 2291763   | Nonsense_Mutation | SNP | G  | A  | 6  | 45 | c.528G>A       | c.(526-528)TGG>TGA     | p.W176*       |
| Pat_44 | Pre-Treatment | MYH7B    | 57644  | 37 | 20 | 33586367  | 33586367  | Missense_Mutation | SNP | C  | T  | 3  | 13 | c.4054C>T      | c.(4054-4056)CGT>TGT   | p.R1352C      |
| Pat_44 | Pre-Treatment | DLGAP4   | 22839  | 37 | 20 | 35155384  | 35155384  | Missense_Mutation | SNP | A  | G  | 4  | 23 | c.2920A>G      | c.(2920-2922)AGC>GGC   | p.S974G       |
| Pat_44 | Pre-Treatment | KCNB1    | 3745   | 37 | 20 | 47990401  | 47990401  | Missense_Mutation | SNP | G  | A  | 7  | 14 | c.1696C>T      | c.(1696-1698)CCC>TCC   | p.P566S       |
| Pat_44 | Pre-Treatment | RTEL1    | 51750  | 37 | 20 | 62305428  | 62305428  | Missense_Mutation | SNP | G  | A  | 3  | 14 | c.901G>A       | c.(901-903)GCG>ACG     | p.A301T       |
| Pat_44 | Pre-Treatment | ADARB1   | 104    | 37 | 21 | 46604892  | 46604892  | Missense_Mutation | SNP | T  | A  | 12 | 36 | c.1571T>A      | c.(1570-1572)ATA>AAA   | p.I524K       |
| Pat_44 | Pre-Treatment | TXNRD2   | 10587  | 37 | 22 | 19864642  | 19864642  | Missense_Mutation | SNP | C  | T  | 3  | 9  | c.1561G>A      | c.(1561-1563)GGC>AGC   | p.G521S       |
| Pat_44 | Pre-Treatment | EP300    | 2033   | 37 | 22 | 41551082  | 41551082  | Missense_Mutation | SNP | C  | T  | 29 | 69 | c.3226C>T      | c.(3226-3228)CGT>TGT   | p.R1076C      |
| Pat_44 | Pre-Treatment | CPT1B    | 1375   | 37 | 22 | 51012763  | 51012763  | Splice_Site       | SNP | C  | T  | 3  | 12 | c.970_splice   | c.e8+1                 | p.D324_splice |
| Pat_44 | Pre-Treatment | THUMPD3  | 25917  | 37 | 3  | 9406849   | 9406849   | Missense_Mutation | SNP | G  | C  | 2  | 10 | c.97G>C        | c.(97-99)GAA>CAA       | p.E33Q        |
| Pat_44 | Pre-Treatment | IRAK2    | 3656   | 37 | 3  | 10242054  | 10242054  | Nonsense_Mutation | SNP | G  | A  | 7  | 48 | c.279G>A       | c.(277-279)TGG>TGA     | p.W93*        |
| Pat_44 | Pre-Treatment | GHRL     | 51738  | 37 | 3  | 10331851  | 10331851  | Missense_Mutation | SNP | C  | T  | 6  | 8  | c.14G>A        | c.(13-15)GGG>GAG       | p.G5E         |
| Pat_44 | Pre-Treatment | ARPP21   | 10777  | 37 | 3  | 35729262  | 35729262  | Missense_Mutation | SNP | C  | T  | 3  | 7  | c.293C>T       | c.(292-294)TCC>TTC     | p.S98F        |
| Pat_44 | Pre-Treatment | UBA7     | 7318   | 37 | 3  | 49849440  | 49849440  | Missense_Mutation | SNP | C  | T  | 12 | 21 | c.802G>A       | c.(802-804)GAC>AAC     | p.D268N       |
| Pat_44 | Pre-Treatment | PRICKLE2 | 166336 | 37 | 3  | 64084864  | 64084864  | Missense_Mutation | SNP | G  | A  | 5  | 27 | c.2398C>T      | c.(2398-2400)CGC>TGC   | p.R800C       |
| Pat_44 | Pre-Treatment | ADAMTS9  | 56999  | 37 | 3  | 64527257  | 64527257  | Missense_Mutation | SNP | T  | A  | 23 | 47 | c.5237A>T      | c.(5236-5238)AAA>ATA   | p.K1746I      |
| Pat_44 | Pre-Treatment | CADM2    | 253559 | 37 | 3  | 85935366  | 85935367  | Missense_Mutation | DNP | GG | AA | 5  | 22 | c.391_392GG>AA | c.(391-393)GGA>AAA     | p.G131K       |
| Pat_44 | Pre-Treatment | NEK11    | 79858  | 37 | 3  | 130889665 | 130889665 | Missense_Mutation | SNP | C  | A  | 16 | 78 | c.1333C>A      | c.(1333-1335)CCT>ACT   | p.P445T       |



|        |               |          |        |    |   |           |           |                   |     |    |    |    |     |                |                        |          |
|--------|---------------|----------|--------|----|---|-----------|-----------|-------------------|-----|----|----|----|-----|----------------|------------------------|----------|
| Pat_44 | Pre-Treatment | IGSF10   | 285313 | 37 | 3 | 151161504 | 151161504 | Missense_Mutation | SNP | G  | A  | 4  | 17  | c.5231C>T      | c.(5230-5232)CCT>CTT   | p.P1744L |
| Pat_44 | Pre-Treatment | UBXN7    | 26043  | 37 | 3 | 196083689 | 196083689 | Missense_Mutation | SNP | C  | T  | 6  | 7   | c.1337G>A      | c.(1336-1338)GGA>GAA   | p.G446E  |
| Pat_44 | Pre-Treatment | CPLX1    | 10815  | 37 | 4 | 786295    | 786295    | Missense_Mutation | SNP | C  | T  | 2  | 1   | c.133G>A       | c.(133-135)GAG>AAG     | p.E45K   |
| Pat_44 | Pre-Treatment | SLC10A4  | 201780 | 37 | 4 | 48485582  | 48485582  | Missense_Mutation | SNP | G  | A  | 2  | 1   | c.4G>A         | c.(4-6)GAC>AAC         | p.D2N    |
| Pat_44 | Pre-Treatment | ALB      | 213    | 37 | 4 | 74276060  | 74276060  | Missense_Mutation | SNP | C  | T  | 7  | 41  | c.647C>T       | c.(646-648)TCG>TTG     | p.S216L  |
| Pat_44 | Pre-Treatment | AIMP1    | 9255   | 37 | 4 | 107258144 | 107258144 | Missense_Mutation | SNP | C  | T  | 23 | 33  | c.722C>T       | c.(721-723)CCT>CTT     | p.P241L  |
| Pat_44 | Pre-Treatment | DCHS2    | 54798  | 37 | 4 | 155191120 | 155191120 | Missense_Mutation | SNP | T  | G  | 5  | 20  | c.5144A>C      | c.(5143-5145)CAG>CCG   | p.Q1715P |
| Pat_44 | Pre-Treatment | ADAMTS16 | 170690 | 37 | 5 | 5318284   | 5318284   | Missense_Mutation | SNP | C  | A  | 2  | 0   | c.3449C>A      | c.(3448-3450)TCC>TAC   | p.S1150Y |
| Pat_44 | Pre-Treatment | PRDM9    | 56979  | 37 | 5 | 23527167  | 23527167  | Missense_Mutation | SNP | G  | C  | 4  | 31  | c.1970G>C      | c.(1969-1971)AGA>ACA   | p.R657T  |
| Pat_44 | Pre-Treatment | ANKRD34B | 340120 | 37 | 5 | 79854737  | 79854737  | Missense_Mutation | SNP | G  | A  | 3  | 2   | c.1102C>T      | c.(1102-1104)CAC>TAC   | p.H368Y  |
| Pat_44 | Pre-Treatment | SEC24A   | 10802  | 37 | 5 | 134011777 | 134011777 | Missense_Mutation | SNP | C  | T  | 8  | 16  | c.1216C>T      | c.(1216-1218)CCT>TCT   | p.P406S  |
| Pat_44 | Pre-Treatment | PCDHB7   | 56129  | 37 | 5 | 140554361 | 140554361 | Missense_Mutation | SNP | G  | A  | 5  | 14  | c.1945G>A      | c.(1945-1947)GAG>AAG   | p.E649K  |
| Pat_44 | Pre-Treatment | PCDHB16  | 57717  | 37 | 5 | 140563942 | 140563942 | Missense_Mutation | SNP | C  | T  | 37 | 35  | c.1808C>T      | c.(1807-1809)TCG>TTG   | p.S603L  |
| Pat_44 | Pre-Treatment | F13A1    | 2162   | 37 | 6 | 6222398   | 6222398   | Missense_Mutation | SNP | C  | T  | 8  | 26  | c.980G>A       | c.(979-981)CGA>CAA     | p.R327Q  |
| Pat_44 | Pre-Treatment | SCAND3   | 114821 | 37 | 6 | 28543412  | 28543412  | Missense_Mutation | SNP | G  | A  | 7  | 27  | c.1070C>T      | c.(1069-1071)TCA>TTA   | p.S357L  |
| Pat_44 | Pre-Treatment | HLA-DRB1 | 3123   | 37 | 6 | 32549440  | 32549440  | Nonsense_Mutation | SNP | C  | T  | 15 | 73  | c.546G>A       | c.(544-546)TGG>TGA     | p.W182*  |
| Pat_44 | Pre-Treatment | BRD2     | 6046   | 37 | 6 | 32945615  | 32945615  | Missense_Mutation | SNP | C  | T  | 15 | 17  | c.1411C>T      | c.(1411-1413)CCT>TCT   | p.P471S  |
| Pat_44 | Pre-Treatment | DNAH8    | 1769   | 37 | 6 | 38980336  | 38980336  | Missense_Mutation | SNP | G  | A  | 11 | 50  | c.12986G>A     | c.(12985-12987)AGA>AAA | p.R4329K |
| Pat_44 | Pre-Treatment | CUL7     | 9820   | 37 | 6 | 43018716  | 43018716  | Missense_Mutation | SNP | G  | A  | 44 | 109 | c.1223C>T      | c.(1222-1224)CCT>CTT   | p.P408L  |
| Pat_44 | Pre-Treatment | ENPP5    | 59084  | 37 | 6 | 46129128  | 46129128  | Missense_Mutation | SNP | G  | A  | 4  | 18  | c.1369C>T      | c.(1369-1371)CAC>TAC   | p.H457Y  |
| Pat_44 | Pre-Treatment | ENPP5    | 59084  | 37 | 6 | 46133259  | 46133259  | Missense_Mutation | SNP | G  | A  | 7  | 18  | c.871C>T       | c.(871-873)CCT>TCT     | p.P291S  |
| Pat_44 | Pre-Treatment | CRISP1   | 167    | 37 | 6 | 49819748  | 49819748  | Missense_Mutation | SNP | C  | T  | 5  | 26  | c.161G>A       | c.(160-162)AGA>AAA     | p.R54K   |
| Pat_44 | Pre-Treatment | TRMT11   | 60487  | 37 | 6 | 126317137 | 126317137 | Missense_Mutation | SNP | C  | T  | 10 | 24  | c.163C>T       | c.(163-165)CCC>TCC     | p.P55S   |
| Pat_44 | Pre-Treatment | ENPP1    | 5167   | 37 | 6 | 132206128 | 132206128 | Missense_Mutation | SNP | G  | A  | 6  | 13  | c.2369G>A      | c.(2368-2370)GGT>GAT   | p.G790D  |
| Pat_44 | Pre-Treatment | NOX3     | 50508  | 37 | 6 | 155732380 | 155732380 | Missense_Mutation | SNP | G  | A  | 6  | 26  | c.1423C>T      | c.(1423-1425)CAT>TAT   | p.H475Y  |
| Pat_44 | Pre-Treatment | SDK1     | 221935 | 37 | 7 | 4152925   | 4152925   | Nonsense_Mutation | SNP | C  | T  | 6  | 62  | c.3439C>T      | c.(3439-3441)CGA>TGA   | p.R1147* |
| Pat_44 | Pre-Treatment | DGKB     | 1607   | 37 | 7 | 14758205  | 14758205  | Missense_Mutation | SNP | G  | A  | 7  | 33  | c.428C>T       | c.(427-429)TCT>TTT     | p.S143F  |
| Pat_44 | Pre-Treatment | DNAH11   | 8701   | 37 | 7 | 21906088  | 21906088  | Missense_Mutation | SNP | G  | A  | 25 | 55  | c.11518G>A     | c.(11518-11520)GCA>ACA | p.A3840T |
| Pat_44 | Pre-Treatment | ZNF92    | 168374 | 37 | 7 | 64863839  | 64863840  | Missense_Mutation | DNP | CC | AT | 9  | 85  | c.812_813CC>AT | c.(811-813)ACC>AAT     | p.T271N  |
| Pat_44 | Pre-Treatment | PCLO     | 27445  | 37 | 7 | 82595241  | 82595241  | Missense_Mutation | SNP | C  | T  | 4  | 10  | c.3863G>A      | c.(3862-3864)GGG>GAG   | p.G1288E |
| Pat_44 | Pre-Treatment | NPTX2    | 4885   | 37 | 7 | 98249123  | 98249123  | Missense_Mutation | SNP | G  | A  | 4  | 10  | c.595G>A       | c.(595-597)GAG>AAG     | p.E199K  |
| Pat_44 | Pre-Treatment | NPTX2    | 4885   | 37 | 7 | 98257909  | 98257909  | Missense_Mutation | SNP | G  | A  | 3  | 2   | c.1264G>A      | c.(1264-1266)GAG>AAG   | p.E422K  |
| Pat_44 | Pre-Treatment | GIGYF1   | 64599  | 37 | 7 | 100282236 | 100282236 | Missense_Mutation | SNP | G  | A  | 17 | 27  | c.1466C>T      | c.(1465-1467)CCC>CTC   | p.P489L  |
| Pat_44 | Pre-Treatment | MUC17    | 140453 | 37 | 7 | 100677456 | 100677456 | Missense_Mutation | SNP | G  | A  | 94 | 280 | c.2759G>A      | c.(2758-2760)GGG>GAG   | p.G920E  |
| Pat_44 | Pre-Treatment | MUC17    | 140453 | 37 | 7 | 100684305 | 100684305 | Missense_Mutation | SNP | C  | T  | 92 | 186 | c.9608C>T      | c.(9607-9609)TCA>TTA   | p.S3203L |
| Pat_44 | Pre-Treatment | FOXP2    | 93986  | 37 | 7 | 114284742 | 114284742 | Missense_Mutation | SNP | C  | T  | 5  | 16  | c.992C>T       | c.(991-993)TCG>TTG     | p.S331L  |
| Pat_44 | Pre-Treatment | SLC35B4  | 84912  | 37 | 7 | 133981162 | 133981162 | Missense_Mutation | SNP | G  | A  | 4  | 30  | c.730C>T       | c.(730-732)CTC>TTC     | p.L244F  |
| Pat_44 | Pre-Treatment | KIAA1549 | 57670  | 37 | 7 | 138556030 | 138556030 | Missense_Mutation | SNP | G  | A  | 5  | 21  | c.4424C>T      | c.(4423-4425)CCC>CTC   | p.P1475L |
| Pat_44 | Pre-Treatment | UBN2     | 254048 | 37 | 7 | 138957074 | 138957074 | Missense_Mutation | SNP | C  | T  | 3  | 16  | c.1603C>T      | c.(1603-1605)CGT>TGT   | p.R535C  |
| Pat_44 | Pre-Treatment | BRAF     | 673    | 37 | 7 | 140453136 | 140453136 | Missense_Mutation | SNP | A  | T  | 12 | 29  | c.1799T>A      | c.(1798-1800)GTG>GAG   | p.V600E  |
| Pat_44 | Pre-Treatment | TMEM176A | 55365  | 37 | 7 | 150499363 | 150499363 | Missense_Mutation | SNP | G  | A  | 8  | 17  | c.235G>A       | c.(235-237)GAC>AAC     | p.D79N   |
| Pat_44 | Pre-Treatment | MLL3     | 58508  | 37 | 7 | 151896402 | 151896402 | Missense_Mutation | SNP | A  | C  | 12 | 26  | c.4235T>G      | c.(4234-4236)CTT>CGT   | p.L1412R |
| Pat_44 | Pre-Treatment | RP1L1    | 94137  | 37 | 8 | 10466059  | 10466059  | Missense_Mutation | SNP | C  | T  | 6  | 32  | c.5549G>A      | c.(5548-5550)GGT>GAT   | p.G1850D |
| Pat_44 | Pre-Treatment | HR       | 55806  | 37 | 8 | 21978651  | 21978651  | Missense_Mutation | SNP | G  | A  | 30 | 53  | c.2294C>T      | c.(2293-2295)ACC>ATC   | p.T765I  |
| Pat_44 | Pre-Treatment | ADAM28   | 10863  | 37 | 8 | 24181463  | 24181463  | Nonsense_Mutation | SNP | G  | A  | 11 | 10  | c.837G>A       | c.(835-837)TGG>TGA     | p.W279*  |
| Pat_44 | Pre-Treatment | CA8      | 767    | 37 | 8 | 61144872  | 61144872  | Missense_Mutation | SNP | C  | T  | 63 | 245 | c.484G>A       | c.(484-486)GGA>AGA     | p.G162R  |
| Pat_44 | Pre-Treatment | PREX2    | 80243  | 37 | 8 | 68965372  | 68965372  | Nonsense_Mutation | SNP | G  | A  | 15 | 69  | c.984G>A       | c.(982-984)TGG>TGA     | p.W328*  |

|        |                 |          |        |    |   |           |           |                   |     |   |   |     |     |               |                      |               |
|--------|-----------------|----------|--------|----|---|-----------|-----------|-------------------|-----|---|---|-----|-----|---------------|----------------------|---------------|
| Pat_44 | Pre-Treatment   | C8orf34  | 116328 | 37 | 8 | 69699772  | 69699772  | Splice_Site       | SNP | G | A | 4   | 36  | c.1291_splice | c.e12+1              | p.R431_splice |
| Pat_44 | Pre-Treatment   | NACAP1   | 83955  | 37 | 8 | 102381492 | 102381492 | Missense_Mutation | SNP | A | G | 12  | 62  | c.355A>G      | c.(355-357)ACA>GCA   | p.T119A       |
| Pat_44 | Pre-Treatment   | ZFPM2    | 23414  | 37 | 8 | 106811077 | 106811077 | Missense_Mutation | SNP | G | A | 103 | 57  | c.865G>A      | c.(865-867)GAC>AAC   | p.D289N       |
| Pat_44 | Pre-Treatment   | CSMD3    | 114788 | 37 | 8 | 113697683 | 113697683 | Nonsense_Mutation | SNP | G | A | 117 | 59  | c.2434C>T     | c.(2434-2436)CAG>TAG | p.Q812*       |
| Pat_44 | Pre-Treatment   | MAPK15   | 225689 | 37 | 8 | 144801568 | 144801568 | Missense_Mutation | SNP | C | T | 4   | 36  | c.637C>T      | c.(637-639)CGG>TGG   | p.R213W       |
| Pat_44 | Pre-Treatment   | RFX3     | 5991   | 37 | 9 | 3257189   | 3257189   | Missense_Mutation | SNP | G | A | 9   | 6   | c.1616C>T     | c.(1615-1617)TCC>TTC | p.S539F       |
| Pat_44 | Pre-Treatment   | PTPRD    | 5789   | 37 | 9 | 8319881   | 8319881   | Nonsense_Mutation | SNP | G | A | 14  | 18  | c.5620C>T     | c.(5620-5622)CAG>TAG | p.Q1874*      |
| Pat_44 | Pre-Treatment   | LINGO2   | 158038 | 37 | 9 | 27950023  | 27950023  | Missense_Mutation | SNP | A | C | 13  | 15  | c.647T>G      | c.(646-648)ATG>AGG   | p.M216R       |
| Pat_44 | Pre-Treatment   | C9orf79  | 286234 | 37 | 9 | 90498092  | 90498092  | Missense_Mutation | SNP | G | A | 2   | 1   | c.286G>A      | c.(286-288)GGG>AGG   | p.G96R        |
| Pat_44 | Pre-Treatment   | RBM18    | 92400  | 37 | 9 | 125023747 | 125023747 | Missense_Mutation | SNP | G | A | 3   | 7   | c.25C>T       | c.(25-27)CCC>TCC     | p.P9S         |
| Pat_44 | Pre-Treatment   | ZER1     | 10444  | 37 | 9 | 131513520 | 131513520 | Missense_Mutation | SNP | C | T | 11  | 8   | c.1066G>A     | c.(1066-1068)GTG>ATG | p.V356M       |
| Pat_44 | Pre-Treatment   | RNF208   | 727800 | 37 | 9 | 140115622 | 140115622 | Missense_Mutation | SNP | C | T | 3   | 7   | c.43G>A       | c.(43-45)GGC>AGC     | p.G15S        |
| Pat_44 | Pre-Treatment   | SPANXN5  | 494197 | 37 | X | 52825650  | 52825650  | Missense_Mutation | SNP | C | T | 10  | 3   | c.97G>A       | c.(97-99)GAC>AAC     | p.D33N        |
| Pat_44 | Pre-Treatment   | TEX11    | 56159  | 37 | X | 69825324  | 69825324  | Missense_Mutation | SNP | C | T | 15  | 10  | c.2039G>A     | c.(2038-2040)CGG>CAG | p.R680Q       |
| Pat_44 | Pre-Treatment   | ACRC     | 93953  | 37 | X | 70823916  | 70823916  | Missense_Mutation | SNP | A | T | 7   | 19  | c.789A>T      | c.(787-789)GAA>GAT   | p.E263D       |
| Pat_44 | Pre-Treatment   | ACRC     | 93953  | 37 | X | 70823918  | 70823918  | Missense_Mutation | SNP | C | T | 7   | 18  | c.791C>T      | c.(790-792)GCT>GTT   | p.A264V       |
| Pat_44 | Pre-Treatment   | CYLC1    | 1538   | 37 | X | 83128420  | 83128420  | Missense_Mutation | SNP | C | T | 4   | 6   | c.704C>T      | c.(703-705)TCA>TTA   | p.S235L       |
| Pat_44 | Pre-Treatment   | SATL1    | 340562 | 37 | X | 84363364  | 84363364  | Missense_Mutation | SNP | C | T | 4   | 35  | c.611G>A      | c.(610-612)AGC>AAC   | p.S204N       |
| Pat_44 | Pre-Treatment   | SRPX2    | 27286  | 37 | X | 99921932  | 99921932  | Splice_Site       | SNP | T | A | 2   | 6   | c.961_splice  | c.e8+2               | p.P321_splice |
| Pat_44 | Pre-Treatment   | GPRASP2  | 114928 | 37 | X | 101969946 | 101969946 | Missense_Mutation | SNP | C | T | 3   | 17  | c.149C>T      | c.(148-150)CCC>CTC   | p.P50L        |
| Pat_44 | Pre-Treatment   | SPANXN2  | 494119 | 37 | X | 142795358 | 142795358 | Missense_Mutation | SNP | C | T | 28  | 20  | c.320G>A      | c.(319-321)GGA>GAA   | p.G107E       |
| Pat_44 | Pre-Treatment   | GPR50    | 9248   | 37 | X | 150348653 | 150348653 | Missense_Mutation | SNP | C | T | 17  | 32  | c.598C>T      | c.(598-600)CCT>TCT   | p.P200S       |
| Pat_44 | Pre-Treatment   | MAGEA1   | 4100   | 37 | X | 152482755 | 152482755 | Missense_Mutation | SNP | C | T | 8   | 7   | c.256G>A      | c.(256-258)GAG>AAG   | p.E86K        |
| Pat_44 | Pre-Treatment   | ZFY      | 7544   | 37 | Y | 2844779   | 2844779   | Missense_Mutation | SNP | G | A | 2   | 0   | c.997G>A      | c.(997-999)GCA>ACA   | p.A333T       |
| Pat_44 | Post-Resistance | DVL1     | 1855   | 37 | 1 | 1271820   | 1271820   | Missense_Mutation | SNP | G | A | 4   | 38  | c.1715C>T     | c.(1714-1716)GCT>GTT | p.A572V       |
| Pat_44 | Post-Resistance | RNF207   | 388591 | 37 | 1 | 6272420   | 6272420   | Missense_Mutation | SNP | G | A | 4   | 100 | c.1426G>A     | c.(1426-1428)GTG>ATG | p.V476M       |
| Pat_44 | Post-Resistance | TNFRSF9  | 3604   | 37 | 1 | 7997775   | 7997775   | Missense_Mutation | SNP | G | A | 4   | 160 | c.388C>T      | c.(388-390)CGT>TGT   | p.R130C       |
| Pat_44 | Post-Resistance | H6PD     | 9563   | 37 | 1 | 9324162   | 9324162   | Missense_Mutation | SNP | C | T | 3   | 43  | c.1610C>T     | c.(1609-1611)GCC>GTC | p.A537V       |
| Pat_44 | Post-Resistance | CLSTN1   | 22883  | 37 | 1 | 9815188   | 9815188   | Missense_Mutation | SNP | C | T | 4   | 120 | c.424G>A      | c.(424-426)GTG>ATG   | p.V142M       |
| Pat_44 | Post-Resistance | TARDBP   | 23435  | 37 | 1 | 11073983  | 11073983  | Missense_Mutation | SNP | G | T | 4   | 174 | c.199G>T      | c.(199-201)GGC>TGC   | p.G67C        |
| Pat_44 | Post-Resistance | TAS1R2   | 80834  | 37 | 1 | 19175984  | 19175984  | Missense_Mutation | SNP | G | A | 4   | 116 | c.1318C>T     | c.(1318-1320)CCG>TCG | p.P440S       |
| Pat_44 | Post-Resistance | EPHA8    | 2046   | 37 | 1 | 22924331  | 22924331  | Missense_Mutation | SNP | G | A | 5   | 116 | c.2093G>A     | c.(2092-2094)CGC>CAC | p.R698H       |
| Pat_44 | Post-Resistance | CCDC21   | 64793  | 37 | 1 | 26582163  | 26582163  | Missense_Mutation | SNP | G | A | 4   | 138 | c.710G>A      | c.(709-711)CGG>CAG   | p.R237Q       |
| Pat_44 | Post-Resistance | WDTC1    | 23038  | 37 | 1 | 27621115  | 27621115  | Missense_Mutation | SNP | G | A | 4   | 62  | c.868G>A      | c.(868-870)GAA>AAA   | p.E290K       |
| Pat_44 | Post-Resistance | TMEM222  | 84065  | 37 | 1 | 27660733  | 27660733  | Missense_Mutation | SNP | C | T | 4   | 153 | c.500C>T      | c.(499-501)ACG>ATG   | p.T167M       |
| Pat_44 | Post-Resistance | TMEM200B | 399474 | 37 | 1 | 29447653  | 29447653  | Missense_Mutation | SNP | C | T | 3   | 41  | c.688G>A      | c.(688-690)GGG>AGG   | p.G230R       |
| Pat_44 | Post-Resistance | COL16A1  | 1307   | 37 | 1 | 32122645  | 32122645  | Missense_Mutation | SNP | C | T | 4   | 228 | c.4045G>A     | c.(4045-4047)GCT>ACT | p.A1349T      |
| Pat_44 | Post-Resistance | PABPC4   | 8761   | 37 | 1 | 40030188  | 40030188  | Missense_Mutation | SNP | G | A | 4   | 191 | c.1360C>T     | c.(1360-1362)CGC>TGC | p.R454C       |
| Pat_44 | Post-Resistance | ZNF684   | 127396 | 37 | 1 | 41007374  | 41007374  | Missense_Mutation | SNP | G | A | 4   | 53  | c.230G>A      | c.(229-231)AGC>AAC   | p.S77N        |
| Pat_44 | Post-Resistance | KIAA0467 | 23334  | 37 | 1 | 43909271  | 43909271  | Missense_Mutation | SNP | C | T | 3   | 32  | c.5932C>T     | c.(5932-5934)CGC>TGC | p.R1978C      |
| Pat_44 | Post-Resistance | ZSWIM5   | 57643  | 37 | 1 | 45484542  | 45484542  | Missense_Mutation | SNP | G | A | 4   | 71  | c.3142C>T     | c.(3142-3144)CTC>TTC | p.L1048F      |
| Pat_44 | Post-Resistance | C1orf175 | 374977 | 37 | 1 | 55172183  | 55172183  | Missense_Mutation | SNP | C | T | 4   | 172 | c.3640C>T     | c.(3640-3642)CTC>TTC | p.L1214F      |
| Pat_44 | Post-Resistance | INADL    | 10207  | 37 | 1 | 62594540  | 62594540  | Missense_Mutation | SNP | G | A | 5   | 351 | c.5194G>A     | c.(5194-5196)GGG>AGG | p.G1732R      |
| Pat_44 | Post-Resistance | SGIP1    | 84251  | 37 | 1 | 67145406  | 67145406  | Missense_Mutation | SNP | G | A | 5   | 279 | c.785G>A      | c.(784-786)CGA>CAA   | p.R262Q       |
| Pat_44 | Post-Resistance | IL12RB2  | 3595   | 37 | 1 | 67793971  | 67793971  | Nonsense_Mutation | SNP | G | T | 6   | 392 | c.568G>T      | c.(568-570)GAA>TAA   | p.E190*       |
| Pat_44 | Post-Resistance | LPHN2    | 23266  | 37 | 1 | 82409013  | 82409013  | Missense_Mutation | SNP | C | T | 4   | 166 | c.758C>T      | c.(757-759)ACC>ATC   | p.T253I       |
| Pat_44 | Post-Resistance | DPYD     | 1806   | 37 | 1 | 98187146  | 98187146  | Missense_Mutation | SNP | G | A | 4   | 193 | c.403C>T      | c.(403-405)CTT>TTT   | p.L135F       |

|        |                 |           |        |    |    |           |           |                   |     |   |   |   |     |               |                        |                |
|--------|-----------------|-----------|--------|----|----|-----------|-----------|-------------------|-----|---|---|---|-----|---------------|------------------------|----------------|
| Pat_44 | Post-Resistance | AP4B1     | 10717  | 37 | 1  | 114438057 | 114438057 | Missense_Mutation | SNP | G | A | 4 | 132 | c.1850C>T     | c.(1849-1851)GCC>GTC   | p.A617V        |
| Pat_44 | Post-Resistance | AMPD1     | 270    | 37 | 1  | 115231293 | 115231293 | Missense_Mutation | SNP | C | T | 5 | 229 | c.104G>A      | c.(103-105)CGT>CAT     | p.R35H         |
| Pat_44 | Post-Resistance | NOTCH2NL  | 388677 | 37 | 1  | 145281653 | 145281653 | Missense_Mutation | SNP | G | A | 5 | 297 | c.583G>A      | c.(583-585)GGC>AGC     | p.G195S        |
| Pat_44 | Post-Resistance | TCHH      | 7062   | 37 | 1  | 152082220 | 152082220 | Missense_Mutation | SNP | G | C | 3 | 54  | c.3473C>G     | c.(3472-3474)CCG>CGG   | p.P1158R       |
| Pat_44 | Post-Resistance | CRNN      | 49860  | 37 | 1  | 152382873 | 152382873 | Missense_Mutation | SNP | C | T | 5 | 269 | c.685G>A      | c.(685-687)GGA>AGA     | p.G229R        |
| Pat_44 | Post-Resistance | KPRP      | 448834 | 37 | 1  | 152732734 | 152732734 | Missense_Mutation | SNP | C | T | 4 | 196 | c.670C>T      | c.(670-672)CCG>TGG     | p.R224W        |
| Pat_44 | Post-Resistance | HCN3      | 57657  | 37 | 1  | 155253804 | 155253804 | Missense_Mutation | SNP | C | T | 4 | 176 | c.748C>T      | c.(748-750)CGC>TGC     | p.R250C        |
| Pat_44 | Post-Resistance | IGSF9     | 57549  | 37 | 1  | 159906306 | 159906306 | Missense_Mutation | SNP | C | T | 4 | 144 | c.556G>A      | c.(556-558)GTG>ATG     | p.V186M        |
| Pat_44 | Post-Resistance | PBX1      | 5087   | 37 | 1  | 164781327 | 164781327 | Missense_Mutation | SNP | C | T | 4 | 131 | c.938C>T      | c.(937-939)GCT>GTT     | p.A313V        |
| Pat_44 | Post-Resistance | F5        | 2153   | 37 | 1  | 169510571 | 169510571 | Missense_Mutation | SNP | G | A | 6 | 313 | c.3757C>T     | c.(3757-3759)CTC>TTC   | p.L1253F       |
| Pat_44 | Post-Resistance | MYOC      | 4653   | 37 | 1  | 171605481 | 171605481 | Missense_Mutation | SNP | C | T | 4 | 134 | c.1099G>A     | c.(1099-1101)GGA>AGA   | p.G367R        |
| Pat_44 | Post-Resistance | ZBTB37    | 84614  | 37 | 1  | 173839887 | 173839887 | Missense_Mutation | SNP | G | A | 5 | 141 | c.524G>A      | c.(523-525)CGA>CAA     | p.R175Q        |
| Pat_44 | Post-Resistance | HMCN1     | 83872  | 37 | 1  | 185984537 | 185984537 | Missense_Mutation | SNP | C | T | 4 | 130 | c.4877C>T     | c.(4876-4878)ACT>ATT   | p.T1626I       |
| Pat_44 | Post-Resistance | PRG4      | 10216  | 37 | 1  | 186276274 | 186276274 | Missense_Mutation | SNP | G | T | 6 | 84  | c.1423G>T     | c.(1423-1425)GCA>TCA   | p.A475S        |
| Pat_44 | Post-Resistance | CFHR4     | 10877  | 37 | 1  | 196871608 | 196871608 | Missense_Mutation | SNP | G | A | 4 | 222 | c.119G>A      | c.(118-120)CGT>CAT     | p.R40H         |
| Pat_44 | Post-Resistance | KIF14     | 9928   | 37 | 1  | 200574423 | 200574423 | Missense_Mutation | SNP | C | G | 4 | 103 | c.1734G>C     | c.(1732-1734)ATG>ATC   | p.M578I        |
| Pat_44 | Post-Resistance | CAMSAP1L1 | 23271  | 37 | 1  | 200816783 | 200816783 | Missense_Mutation | SNP | C | T | 4 | 89  | c.1241C>T     | c.(1240-1242)TCT>TTT   | p.S414F        |
| Pat_44 | Post-Resistance | KIF21B    | 23046  | 37 | 1  | 200943915 | 200943915 | Missense_Mutation | SNP | C | T | 4 | 167 | c.4741G>A     | c.(4741-4743)GGT>AGT   | p.G1581S       |
| Pat_44 | Post-Resistance | KIF21B    | 23046  | 37 | 1  | 200954057 | 200954057 | Missense_Mutation | SNP | G | A | 6 | 182 | c.3733C>T     | c.(3733-3735)CGG>TGG   | p.R1245W       |
| Pat_44 | Post-Resistance | CACNA1S   | 779    | 37 | 1  | 201047107 | 201047107 | Missense_Mutation | SNP | C | T | 4 | 148 | c.1519G>A     | c.(1519-1521)GGT>AGT   | p.G507S        |
| Pat_44 | Post-Resistance | LGR6      | 59352  | 37 | 1  | 202205106 | 202205106 | Missense_Mutation | SNP | C | T | 3 | 62  | c.413C>T      | c.(412-414)CCG>CTG     | p.P138L        |
| Pat_44 | Post-Resistance | PPP1R12B  | 4660   | 37 | 1  | 202411616 | 202411616 | Missense_Mutation | SNP | G | A | 4 | 108 | c.1583G>A     | c.(1582-1584)CGG>CAG   | p.R528Q        |
| Pat_44 | Post-Resistance | PPP1R12B  | 4660   | 37 | 1  | 202532031 | 202532031 | Missense_Mutation | SNP | G | A | 5 | 177 | c.2633G>A     | c.(2632-2634)AGC>AAC   | p.S878N        |
| Pat_44 | Post-Resistance | ADIPOR1   | 51094  | 37 | 1  | 202920072 | 202920072 | Missense_Mutation | SNP | C | T | 4 | 237 | c.127G>A      | c.(127-129)GCC>ACC     | p.A43T         |
| Pat_44 | Post-Resistance | CR1L      | 1379   | 37 | 1  | 207874932 | 207874932 | Missense_Mutation | SNP | G | A | 6 | 281 | c.1297G>A     | c.(1297-1299)GGA>AGA   | p.G433R        |
| Pat_44 | Post-Resistance | USH2A     | 7399   | 37 | 1  | 216595602 | 216595602 | Missense_Mutation | SNP | G | A | 4 | 106 | c.77C>T       | c.(76-78)GCT>GTT       | p.A26V         |
| Pat_44 | Post-Resistance | C1orf55   | 163859 | 37 | 1  | 226175973 | 226175973 | Missense_Mutation | SNP | C | T | 6 | 291 | c.758G>A      | c.(757-759)AGC>AAC     | p.S253N        |
| Pat_44 | Post-Resistance | GJC2      | 57165  | 37 | 1  | 228346178 | 228346178 | Missense_Mutation | SNP | G | A | 4 | 153 | c.719G>A      | c.(718-720)CGA>CAA     | p.R240Q        |
| Pat_44 | Post-Resistance | OBSCN     | 84033  | 37 | 1  | 228553829 | 228553829 | Missense_Mutation | SNP | C | T | 4 | 117 | c.19118C>T    | c.(19117-19119)ACG>ATG | p.T6373M       |
| Pat_44 | Post-Resistance | HIST3H3   | 8290   | 37 | 1  | 228612899 | 228612899 | Missense_Mutation | SNP | C | T | 4 | 147 | c.128G>A      | c.(127-129)CCG>CAG     | p.R43Q         |
| Pat_44 | Post-Resistance | GALNT2    | 2590   | 37 | 1  | 230379054 | 230379054 | Missense_Mutation | SNP | C | T | 5 | 189 | c.610C>T      | c.(610-612)CTC>TTC     | p.L204F        |
| Pat_44 | Post-Resistance | EDARADD   | 128178 | 37 | 1  | 236645918 | 236645918 | Missense_Mutation | SNP | G | A | 4 | 153 | c.617G>A      | c.(616-618)CCG>CAG     | p.R206Q        |
| Pat_44 | Post-Resistance | CEP170    | 9859   | 37 | 1  | 243388551 | 243388551 | Missense_Mutation | SNP | C | T | 4 | 51  | c.32G>A       | c.(31-33)AGT>AAT       | p.S11N         |
| Pat_44 | Post-Resistance | C1orf100  | 200159 | 37 | 1  | 244538721 | 244538721 | Missense_Mutation | SNP | G | A | 4 | 125 | c.104G>A      | c.(103-105)GGG>GAG     | p.G35E         |
| Pat_44 | Post-Resistance | KIF26B    | 55083  | 37 | 1  | 245704194 | 245704194 | Missense_Mutation | SNP | C | T | 4 | 107 | c.1292C>T     | c.(1291-1293)GCC>GTC   | p.A431V        |
| Pat_44 | Post-Resistance | OR2G2     | 81470  | 37 | 1  | 247752034 | 247752034 | Missense_Mutation | SNP | C | T | 6 | 363 | c.373C>T      | c.(373-375)CCG>TGC     | p.R125C        |
| Pat_44 | Post-Resistance | OR2T4     | 127074 | 37 | 1  | 248524908 | 248524908 | Missense_Mutation | SNP | G | A | 6 | 114 | c.26G>A       | c.(25-27)AGC>AAC       | p.S9N          |
| Pat_44 | Post-Resistance | OR2T4     | 127074 | 37 | 1  | 248524937 | 248524937 | Missense_Mutation | SNP | A | T | 8 | 128 | c.55A>T       | c.(55-57)ATG>TTG       | p.M19L         |
| Pat_44 | Post-Resistance | PGBD2     | 267002 | 37 | 1  | 249212035 | 249212035 | Missense_Mutation | SNP | G | A | 4 | 102 | c.1252G>A     | c.(1252-1254)GTG>ATG   | p.V418M        |
| Pat_44 | Post-Resistance | C10orf18  | 54906  | 37 | 10 | 5788743   | 5788743   | Missense_Mutation | SNP | G | A | 4 | 178 | c.3359G>A     | c.(3358-3360)GGC>GAC   | p.G1120D       |
| Pat_44 | Post-Resistance | PRKCCQ    | 5588   | 37 | 10 | 6539181   | 6539181   | Splice_Site       | SNP | C | T | 4 | 186 | c.574_splice  | c.e6+1                 | p.Q192_splice  |
| Pat_44 | Post-Resistance | ECHDC3    | 79746  | 37 | 10 | 11791562  | 11791562  | Missense_Mutation | SNP | C | T | 4 | 146 | c.361C>T      | c.(361-363)CAT>TAT     | p.H121Y        |
| Pat_44 | Post-Resistance | BEND7     | 222389 | 37 | 10 | 13541865  | 13541865  | Missense_Mutation | SNP | G | A | 4 | 53  | c.205C>T      | c.(205-207)CCG>TCG     | p.P69S         |
| Pat_44 | Post-Resistance | ANKRD26   | 22852  | 37 | 10 | 27368041  | 27368041  | Missense_Mutation | SNP | C | T | 4 | 122 | c.790G>A      | c.(790-792)GAA>AAA     | p.E264K        |
| Pat_44 | Post-Resistance | MKX       | 283078 | 37 | 10 | 27964213  | 27964213  | Missense_Mutation | SNP | G | A | 5 | 198 | c.1004C>T     | c.(1003-1005)TCG>TTG   | p.S335L        |
| Pat_44 | Post-Resistance | SVIL      | 6840   | 37 | 10 | 29782322  | 29782322  | Splice_Site       | SNP | T | A | 4 | 74  | c.3842_splice | c.e21-1                | p.V1281_splice |
| Pat_44 | Post-Resistance | KIAA1462  | 57608  | 37 | 10 | 30317428  | 30317428  | Missense_Mutation | SNP | C | T | 5 | 153 | c.1649G>A     | c.(1648-1650)AGC>AAC   | p.S550N        |

|        |                 |          |        |    |    |           |           |                   |     |   |   |    |     |           |                      |          |
|--------|-----------------|----------|--------|----|----|-----------|-----------|-------------------|-----|---|---|----|-----|-----------|----------------------|----------|
| Pat_44 | Post-Resistance | ANKRD30A | 91074  | 37 | 10 | 37430754  | 37430754  | Missense_Mutation | SNP | T | C | 11 | 86  | c.761T>C  | c.(760-762)GTG>GCG   | p.V254A  |
| Pat_44 | Post-Resistance | ATOH7    | 220202 | 37 | 10 | 69991119  | 69991119  | Missense_Mutation | SNP | G | A | 4  | 48  | c.316C>T  | c.(316-318)CGG>TGG   | p.R106W  |
| Pat_44 | Post-Resistance | DNA2     | 1763   | 37 | 10 | 70182463  | 70182463  | Missense_Mutation | SNP | C | T | 3  | 47  | c.2651G>A | c.(2650-2652)CGT>CAT | p.R884H  |
| Pat_44 | Post-Resistance | DDX21    | 9188   | 37 | 10 | 70737388  | 70737388  | Missense_Mutation | SNP | G | A | 4  | 108 | c.1846G>A | c.(1846-1848)GCC>ACC | p.A616T  |
| Pat_44 | Post-Resistance | SUPV3L1  | 6832   | 37 | 10 | 70956825  | 70956825  | Missense_Mutation | SNP | G | A | 4  | 209 | c.1009G>A | c.(1009-1011)GGG>AGG | p.G337R  |
| Pat_44 | Post-Resistance | GRID1    | 2894   | 37 | 10 | 87379700  | 87379700  | Missense_Mutation | SNP | C | T | 4  | 147 | c.2284G>A | c.(2284-2286)GGC>AGC | p.G762S  |
| Pat_44 | Post-Resistance | CYP2C8   | 1558   | 37 | 10 | 96818190  | 96818190  | Nonsense_Mutation | SNP | G | A | 5  | 147 | c.721C>T  | c.(721-723)CGA>TGA   | p.R241*  |
| Pat_44 | Post-Resistance | PSD      | 5662   | 37 | 10 | 104163019 | 104163019 | Missense_Mutation | SNP | G | A | 3  | 29  | c.3013C>T | c.(3013-3015)CGG>TGG | p.R1005W |
| Pat_44 | Post-Resistance | MKI67    | 4288   | 37 | 10 | 129910469 | 129910469 | Nonsense_Mutation | SNP | G | A | 4  | 172 | c.1897C>T | c.(1897-1899)CGA>TGA | p.R633*  |
| Pat_44 | Post-Resistance | KNDC1    | 85442  | 37 | 10 | 135027499 | 135027499 | Missense_Mutation | SNP | C | T | 4  | 129 | c.4550C>T | c.(4549-4551)TCG>TTG | p.S1517L |
| Pat_44 | Post-Resistance | PHRF1    | 57661  | 37 | 11 | 607537    | 607537    | Missense_Mutation | SNP | G | A | 4  | 168 | c.2081G>A | c.(2080-2082)CGG>CAG | p.R694Q  |
| Pat_44 | Post-Resistance | CDHR5    | 53841  | 37 | 11 | 619577    | 619577    | Missense_Mutation | SNP | G | A | 4  | 57  | c.1190C>T | c.(1189-1191)TCG>TTG | p.S397L  |
| Pat_44 | Post-Resistance | OR51B4   | 79339  | 37 | 11 | 5322800   | 5322800   | Missense_Mutation | SNP | G | A | 6  | 305 | c.377C>T  | c.(376-378)CCA>CTA   | p.P126L  |
| Pat_44 | Post-Resistance | SPTY2D1  | 144108 | 37 | 11 | 18637412  | 18637412  | Missense_Mutation | SNP | C | T | 6  | 130 | c.409G>A  | c.(409-411)GCA>ACA   | p.A137T  |
| Pat_44 | Post-Resistance | MARGPRX2 | 117194 | 37 | 11 | 19077579  | 19077579  | Missense_Mutation | SNP | C | T | 4  | 203 | c.371G>A  | c.(370-372)AGC>AAC   | p.S124N  |
| Pat_44 | Post-Resistance | PRDM11   | 56981  | 37 | 11 | 45246079  | 45246079  | Missense_Mutation | SNP | G | A | 5  | 187 | c.1156G>A | c.(1156-1158)GGT>AGT | p.G386S  |
| Pat_44 | Post-Resistance | F2       | 2147   | 37 | 11 | 46745005  | 46745005  | Missense_Mutation | SNP | G | A | 4  | 102 | c.496G>A  | c.(496-498)GGA>AGA   | p.G166R  |
| Pat_44 | Post-Resistance | MYBPC3   | 4607   | 37 | 11 | 47356686  | 47356686  | Missense_Mutation | SNP | C | T | 4  | 44  | c.2812G>A | c.(2812-2814)GCC>ACC | p.A938T  |
| Pat_44 | Post-Resistance | CNTF     | 1270   | 37 | 11 | 58391958  | 58391958  | Missense_Mutation | SNP | G | A | 4  | 88  | c.566G>A  | c.(565-567)CGT>CAT   | p.R189H  |
| Pat_44 | Post-Resistance | DAK      | 26007  | 37 | 11 | 61113919  | 61113919  | Missense_Mutation | SNP | G | A | 4  | 184 | c.1672G>A | c.(1672-1674)GGG>AGG | p.G558R  |
| Pat_44 | Post-Resistance | STIP1    | 10963  | 37 | 11 | 63965415  | 63965415  | Missense_Mutation | SNP | G | A | 4  | 213 | c.992G>A  | c.(991-993)CGA>CAA   | p.R331Q  |
| Pat_44 | Post-Resistance | RPS6KB2  | 6199   | 37 | 11 | 67198881  | 67198881  | Missense_Mutation | SNP | G | A | 4  | 192 | c.352G>A  | c.(352-354)GCT>ACT   | p.A118T  |
| Pat_44 | Post-Resistance | SUV420H1 | 51111  | 37 | 11 | 67925969  | 67925969  | Missense_Mutation | SNP | C | T | 3  | 36  | c.1844G>A | c.(1843-1845)CGA>CAA | p.R615Q  |
| Pat_44 | Post-Resistance | CREBZF   | 58487  | 37 | 11 | 85375234  | 85375234  | Missense_Mutation | SNP | A | T | 6  | 239 | c.686T>A  | c.(685-687)GTG>GAG   | p.V229E  |
| Pat_44 | Post-Resistance | FAT3     | 120114 | 37 | 11 | 92088309  | 92088309  | Missense_Mutation | SNP | C | T | 3  | 64  | c.3031C>T | c.(3031-3033)CGG>TGG | p.R1011W |
| Pat_44 | Post-Resistance | MMP27    | 64066  | 37 | 11 | 102573794 | 102573794 | Missense_Mutation | SNP | C | T | 4  | 169 | c.397G>A  | c.(397-399)GAA>AAA   | p.E133K  |
| Pat_44 | Post-Resistance | DYNC2H1  | 79659  | 37 | 11 | 103049787 | 103049787 | Missense_Mutation | SNP | A | G | 3  | 128 | c.6172A>G | c.(6172-6174)ATT>GTT | p.I2058V |
| Pat_44 | Post-Resistance | CASP1    | 834    | 37 | 11 | 104904952 | 104904952 | Missense_Mutation | SNP | G | A | 5  | 226 | c.257C>T  | c.(256-258)ACG>ATG   | p.T86M   |
| Pat_44 | Post-Resistance | POU2AF1  | 5450   | 37 | 11 | 111228204 | 111228204 | Missense_Mutation | SNP | G | A | 4  | 89  | c.422C>T  | c.(421-423)ACC>ATC   | p.T141I  |
| Pat_44 | Post-Resistance | BACE1    | 23621  | 37 | 11 | 117167631 | 117167631 | Missense_Mutation | SNP | G | A | 5  | 172 | c.308C>T  | c.(307-309)GCT>GTT   | p.A103V  |
| Pat_44 | Post-Resistance | CDON     | 50937  | 37 | 11 | 125864887 | 125864887 | Missense_Mutation | SNP | G | A | 4  | 143 | c.2423C>T | c.(2422-2424)TCA>TTA | p.S808L  |
| Pat_44 | Post-Resistance | ERC1     | 23085  | 37 | 12 | 1137358   | 1137358   | Missense_Mutation | SNP | C | T | 5  | 206 | c.289C>T  | c.(289-291)CGT>TGT   | p.R97C   |
| Pat_44 | Post-Resistance | TAPBPL   | 55080  | 37 | 12 | 6567939   | 6567939   | Missense_Mutation | SNP | G | A | 4  | 61  | c.1033G>A | c.(1033-1035)GCC>ACC | p.A345T  |
| Pat_44 | Post-Resistance | PZP      | 5858   | 37 | 12 | 9345287   | 9345287   | Missense_Mutation | SNP | C | T | 4  | 114 | c.1303G>A | c.(1303-1305)GAA>AAA | p.E435K  |
| Pat_44 | Post-Resistance | PRB4     | 5545   | 37 | 12 | 11461682  | 11461682  | Missense_Mutation | SNP | C | G | 7  | 501 | c.235G>C  | c.(235-237)GAA>CAA   | p.E79Q   |
| Pat_44 | Post-Resistance | SLCO1B1  | 10599  | 37 | 12 | 21377737  | 21377737  | Missense_Mutation | SNP | G | A | 5  | 224 | c.1829G>A | c.(1828-1830)CGT>CAT | p.R610H  |
| Pat_44 | Post-Resistance | CAPRN2   | 65981  | 37 | 12 | 30886568  | 30886568  | Missense_Mutation | SNP | G | A | 4  | 153 | c.887C>T  | c.(886-888)ACG>ATG   | p.T296M  |
| Pat_44 | Post-Resistance | ABCD2    | 225    | 37 | 12 | 39980088  | 39980088  | Missense_Mutation | SNP | G | C | 3  | 153 | c.1658C>G | c.(1657-1659)TCT>TGT | p.S553C  |
| Pat_44 | Post-Resistance | SLC2A13  | 114134 | 37 | 12 | 40265629  | 40265629  | Missense_Mutation | SNP | C | T | 4  | 178 | c.1169G>A | c.(1168-1170)CGC>CAC | p.R390H  |
| Pat_44 | Post-Resistance | PPHLN1   | 51535  | 37 | 12 | 42729721  | 42729721  | Missense_Mutation | SNP | G | A | 5  | 193 | c.17G>A   | c.(16-18)CGA>CAA     | p.R6Q    |
| Pat_44 | Post-Resistance | ADAMTS20 | 80070  | 37 | 12 | 43769235  | 43769235  | Missense_Mutation | SNP | C | T | 4  | 125 | c.5393G>A | c.(5392-5394)GGA>GAA | p.G1798E |
| Pat_44 | Post-Resistance | KRT5     | 3852   | 37 | 12 | 52913972  | 52913972  | Missense_Mutation | SNP | G | A | 4  | 156 | c.109C>T  | c.(109-111)CGG>TGG   | p.R37W   |
| Pat_44 | Post-Resistance | EIF4B    | 1975   | 37 | 12 | 53410370  | 53410370  | Missense_Mutation | SNP | G | A | 4  | 106 | c.127G>A  | c.(127-129)GAA>AAA   | p.E43K   |
| Pat_44 | Post-Resistance | ATF7     | 11016  | 37 | 12 | 53910973  | 53910973  | Missense_Mutation | SNP | G | A | 4  | 201 | c.1433C>T | c.(1432-1434)CCG>CTG | p.P478L  |
| Pat_44 | Post-Resistance | OR6C70   | 390327 | 37 | 12 | 55863565  | 55863565  | Missense_Mutation | SNP | G | A | 4  | 132 | c.358C>T  | c.(358-360)CGC>TGC   | p.R120C  |
| Pat_44 | Post-Resistance | ITGA7    | 3679   | 37 | 12 | 56094174  | 56094174  | Missense_Mutation | SNP | G | A | 4  | 155 | c.674C>T  | c.(673-675)ACG>ATG   | p.T225M  |
| Pat_44 | Post-Resistance | LRP1     | 4035   | 37 | 12 | 57591091  | 57591091  | Missense_Mutation | SNP | C | T | 6  | 433 | c.9086C>T | c.(9085-9087)CCG>CTG | p.P3029L |

|        |                 |          |        |    |    |           |           |                   |     |   |   |   |     |           |                      |          |
|--------|-----------------|----------|--------|----|----|-----------|-----------|-------------------|-----|---|---|---|-----|-----------|----------------------|----------|
| Pat_44 | Post-Resistance | KIF5A    | 3798   | 37 | 12 | 57963893  | 57963893  | Missense_Mutation | SNP | G | A | 3 | 27  | c.1241G>A | c.(1240-1242)CGG>CAG | p.R414Q  |
| Pat_44 | Post-Resistance | PPFIA2   | 8499   | 37 | 12 | 81741473  | 81741473  | Missense_Mutation | SNP | C | T | 4 | 198 | c.2071G>A | c.(2071-2073)GAA>AAA | p.E691K  |
| Pat_44 | Post-Resistance | KERA     | 11081  | 37 | 12 | 91445232  | 91445232  | Missense_Mutation | SNP | C | T | 4 | 93  | c.950G>A  | c.(949-951)AGT>AAT   | p.S317N  |
| Pat_44 | Post-Resistance | UBE3B    | 89910  | 37 | 12 | 109959040 | 109959040 | Missense_Mutation | SNP | G | A | 4 | 211 | c.2164G>A | c.(2164-2166)GAA>AAA | p.E722K  |
| Pat_44 | Post-Resistance | ABCB9    | 23457  | 37 | 12 | 123430679 | 123430679 | Missense_Mutation | SNP | C | T | 4 | 95  | c.1144G>A | c.(1144-1146)GCC>ACC | p.A382T  |
| Pat_44 | Post-Resistance | CDK2AP1  | 8099   | 37 | 12 | 123749848 | 123749848 | Missense_Mutation | SNP | G | A | 4 | 110 | c.175C>T  | c.(175-177)CCC>TCC   | p.P59S   |
| Pat_44 | Post-Resistance | NCOR2    | 9612   | 37 | 12 | 124821355 | 124821355 | Missense_Mutation | SNP | C | T | 5 | 90  | c.6089G>A | c.(6088-6090)CGG>CAG | p.R2030Q |
| Pat_44 | Post-Resistance | MMP17    | 4326   | 37 | 12 | 132335520 | 132335520 | Missense_Mutation | SNP | G | A | 4 | 64  | c.1513G>A | c.(1513-1515)GAG>AAG | p.E505K  |
| Pat_44 | Post-Resistance | CHFR     | 55743  | 37 | 12 | 133438077 | 133438077 | Missense_Mutation | SNP | G | A | 4 | 96  | c.763C>T  | c.(763-765)CCC>TCC   | p.P255S  |
| Pat_44 | Post-Resistance | KIAA0564 | 23078  | 37 | 13 | 42439903  | 42439903  | Missense_Mutation | SNP | C | T | 4 | 131 | c.1394G>A | c.(1393-1395)GGA>GAA | p.G465E  |
| Pat_44 | Post-Resistance | CPB2     | 1361   | 37 | 13 | 46632333  | 46632333  | Missense_Mutation | SNP | C | T | 4 | 210 | c.980G>A  | c.(979-981)AGC>AAC   | p.S327N  |
| Pat_44 | Post-Resistance | ATP7B    | 540    | 37 | 13 | 52515217  | 52515217  | Missense_Mutation | SNP | C | T | 4 | 142 | c.3556G>A | c.(3556-3558)GGT>AGT | p.G1186S |
| Pat_44 | Post-Resistance | ATP11A   | 23250  | 37 | 13 | 113473681 | 113473681 | Missense_Mutation | SNP | G | A | 6 | 221 | c.634G>A  | c.(634-636)GCC>ACC   | p.A212T  |
| Pat_44 | Post-Resistance | ATP11A   | 23250  | 37 | 13 | 113485726 | 113485726 | Missense_Mutation | SNP | C | A | 4 | 155 | c.1259C>A | c.(1258-1260)ACG>AAG | p.T420K  |
| Pat_44 | Post-Resistance | OR4M1    | 441670 | 37 | 14 | 20248846  | 20248846  | Missense_Mutation | SNP | G | A | 6 | 454 | c.365G>A  | c.(364-366)CGC>CAC   | p.R122H  |
| Pat_44 | Post-Resistance | OR10G2   | 26534  | 37 | 14 | 22102815  | 22102815  | Missense_Mutation | SNP | G | A | 4 | 112 | c.184C>T  | c.(184-186)CGC>TGC   | p.R62C   |
| Pat_44 | Post-Resistance | REC8     | 9985   | 37 | 14 | 24647390  | 24647390  | Nonsense_Mutation | SNP | C | T | 5 | 124 | c.958C>T  | c.(958-960)CAG>TAG   | p.Q320*  |
| Pat_44 | Post-Resistance | MDP1     | 145553 | 37 | 14 | 24684770  | 24684770  | Missense_Mutation | SNP | G | A | 6 | 463 | c.197C>T  | c.(196-198)GCG>GTG   | p.A66V   |
| Pat_44 | Post-Resistance | TGM1     | 7051   | 37 | 14 | 24727849  | 24727849  | Missense_Mutation | SNP | G | A | 4 | 137 | c.1190C>T | c.(1189-1191)ACT>ATT | p.T397I  |
| Pat_44 | Post-Resistance | NID2     | 22795  | 37 | 14 | 52481816  | 52481816  | Missense_Mutation | SNP | C | T | 4 | 38  | c.3206G>A | c.(3205-3207)AGA>AAA | p.R1069K |
| Pat_44 | Post-Resistance | KIAA0831 | 22863  | 37 | 14 | 55836558  | 55836558  | Missense_Mutation | SNP | C | T | 4 | 101 | c.1258G>A | c.(1258-1260)GGA>AGA | p.G420R  |
| Pat_44 | Post-Resistance | C14orf37 | 145407 | 37 | 14 | 58471800  | 58471800  | Missense_Mutation | SNP | C | T | 4 | 148 | c.2222G>A | c.(2221-2223)CGA>CAA | p.R741Q  |
| Pat_44 | Post-Resistance | KIAA0586 | 9786   | 37 | 14 | 58949374  | 58949374  | Missense_Mutation | SNP | G | A | 4 | 159 | c.2860G>A | c.(2860-2862)GGT>AGT | p.G954S  |
| Pat_44 | Post-Resistance | RTN1     | 6252   | 37 | 14 | 60072171  | 60072171  | Missense_Mutation | SNP | G | A | 4 | 105 | c.2027C>T | c.(2026-2028)ACG>ATG | p.T676M  |
| Pat_44 | Post-Resistance | SPTB     | 6710   | 37 | 14 | 65237808  | 65237808  | Missense_Mutation | SNP | C | T | 5 | 347 | c.5593G>A | c.(5593-5595)GCA>ACA | p.A1865T |
| Pat_44 | Post-Resistance | YLPM1    | 56252  | 37 | 14 | 75265245  | 75265245  | Missense_Mutation | SNP | G | A | 4 | 103 | c.3245G>A | c.(3244-3246)GGG>GAG | p.G1082E |
| Pat_44 | Post-Resistance | GPR65    | 8477   | 37 | 14 | 88477274  | 88477274  | Missense_Mutation | SNP | G | A | 4 | 144 | c.83G>A   | c.(82-84)AGC>AAC     | p.S28N   |
| Pat_44 | Post-Resistance | BCL11B   | 64919  | 37 | 14 | 99641023  | 99641023  | Missense_Mutation | SNP | G | A | 3 | 16  | c.2150C>T | c.(2149-2151)GCG>GTG | p.A717V  |
| Pat_44 | Post-Resistance | BCL11B   | 64919  | 37 | 14 | 99723849  | 99723849  | Missense_Mutation | SNP | G | A | 4 | 171 | c.386C>T  | c.(385-387)TCA>TTA   | p.S129L  |
| Pat_44 | Post-Resistance | RAGE     | 5891   | 37 | 14 | 102695832 | 102695832 | Missense_Mutation | SNP | C | T | 4 | 130 | c.1144G>A | c.(1144-1146)GTG>ATG | p.V382M  |
| Pat_44 | Post-Resistance | RYR3     | 6263   | 37 | 15 | 34018665  | 34018665  | Missense_Mutation | SNP | G | A | 3 | 17  | c.6991G>A | c.(6991-6993)GGG>AGG | p.G2331R |
| Pat_44 | Post-Resistance | RASGRP1  | 10125  | 37 | 15 | 38791042  | 38791042  | Missense_Mutation | SNP | C | T | 4 | 198 | c.1826G>A | c.(1825-1827)GGG>GAG | p.G609E  |
| Pat_44 | Post-Resistance | THBS1    | 7057   | 37 | 15 | 39882090  | 39882090  | Missense_Mutation | SNP | G | A | 4 | 92  | c.2011G>A | c.(2011-2013)GAC>AAC | p.D671N  |
| Pat_44 | Post-Resistance | MGA      | 23269  | 37 | 15 | 41961330  | 41961330  | Missense_Mutation | SNP | G | A | 4 | 189 | c.238G>A  | c.(238-240)GAT>AAT   | p.D80N   |
| Pat_44 | Post-Resistance | EHD4     | 30844  | 37 | 15 | 42192955  | 42192955  | Missense_Mutation | SNP | G | A | 4 | 65  | c.1514C>T | c.(1513-1515)GCG>GTG | p.A505V  |
| Pat_44 | Post-Resistance | VPS39    | 23339  | 37 | 15 | 42461978  | 42461978  | Missense_Mutation | SNP | G | A | 4 | 127 | c.1210C>T | c.(1210-1212)CTC>TTC | p.L404F  |
| Pat_44 | Post-Resistance | MYO1E    | 4643   | 37 | 15 | 59487726  | 59487726  | Missense_Mutation | SNP | G | A | 4 | 210 | c.1739C>T | c.(1738-1740)ACG>ATG | p.T580M  |
| Pat_44 | Post-Resistance | TLN2     | 83660  | 37 | 15 | 62942372  | 62942372  | Missense_Mutation | SNP | C | T | 4 | 162 | c.226C>T  | c.(226-228)CGG>TGG   | p.R76W   |
| Pat_44 | Post-Resistance | TLN2     | 83660  | 37 | 15 | 62991013  | 62991013  | Missense_Mutation | SNP | G | A | 4 | 137 | c.1534G>A | c.(1534-1536)GCC>ACC | p.A512T  |
| Pat_44 | Post-Resistance | USP3     | 9960   | 37 | 15 | 63848880  | 63848880  | Missense_Mutation | SNP | C | T | 3 | 26  | c.383C>T  | c.(382-384)GCT>GTT   | p.A128V  |
| Pat_44 | Post-Resistance | C15orf59 | 388135 | 37 | 15 | 74032707  | 74032707  | Missense_Mutation | SNP | C | T | 4 | 74  | c.433G>A  | c.(433-435)GGC>AGC   | p.G145S  |
| Pat_44 | Post-Resistance | CLK3     | 1198   | 37 | 15 | 74912408  | 74912408  | Missense_Mutation | SNP | C | T | 4 | 194 | c.655C>T  | c.(655-657)CGG>TGG   | p.R219W  |
| Pat_44 | Post-Resistance | CYP1A1   | 1543   | 37 | 15 | 75014747  | 75014747  | Missense_Mutation | SNP | C | T | 4 | 102 | c.692G>A  | c.(691-693)GGA>GAA   | p.G231E  |
| Pat_44 | Post-Resistance | DET1     | 55070  | 37 | 15 | 89070848  | 89070848  | Missense_Mutation | SNP | G | C | 4 | 115 | c.1253C>G | c.(1252-1254)GCA>GGA | p.A418G  |
| Pat_44 | Post-Resistance | APS32    | 10239  | 37 | 15 | 90451601  | 90451601  | Missense_Mutation | SNP | C | T | 4 | 88  | c.212G>A  | c.(211-213)CGC>CAC   | p.R71H   |
| Pat_44 | Post-Resistance | C16orf59 | 80178  | 37 | 16 | 2512205   | 2512205   | Missense_Mutation | SNP | G | A | 4 | 149 | c.715G>A  | c.(715-717)GCC>ACC   | p.A239T  |
| Pat_44 | Post-Resistance | THOC6    | 79228  | 37 | 16 | 3075788   | 3075788   | Missense_Mutation | SNP | C | T | 4 | 78  | c.119C>T  | c.(118-120)GCG>GTG   | p.A40V   |



|        |                 |          |        |    |    |          |          |                   |     |   |   |   |     |           |                      |          |
|--------|-----------------|----------|--------|----|----|----------|----------|-------------------|-----|---|---|---|-----|-----------|----------------------|----------|
| Pat_44 | Post-Resistance | ZSCAN10  | 84891  | 37 | 16 | 3140123  | 3140123  | Missense_Mutation | SNP | C | T | 4 | 48  | c.1147G>A | c.(1147-1149)GGC>AGC | p.G383S  |
| Pat_44 | Post-Resistance | DNAJA3   | 9093   | 37 | 16 | 4496917  | 4496917  | Missense_Mutation | SNP | G | A | 4 | 84  | c.1027G>A | c.(1027-1029)GGC>AGC | p.G343S  |
| Pat_44 | Post-Resistance | ABCC6P1  | 653190 | 37 | 16 | 18597216 | 18597216 | Missense_Mutation | SNP | C | T | 5 | 130 | c.580C>T  | c.(580-582)CGG>TGG   | p.R194W  |
| Pat_44 | Post-Resistance | COQ7     | 10229  | 37 | 16 | 19083411 | 19083411 | Missense_Mutation | SNP | G | A | 4 | 171 | c.235G>A  | c.(235-237)GTC>ATC   | p.V79I   |
| Pat_44 | Post-Resistance | UMOD     | 7369   | 37 | 16 | 20355365 | 20355365 | Missense_Mutation | SNP | C | T | 4 | 61  | c.1312G>A | c.(1312-1314)GCC>ACC | p.A438T  |
| Pat_44 | Post-Resistance | ACSM1    | 116285 | 37 | 16 | 20682922 | 20682922 | Missense_Mutation | SNP | C | T | 4 | 91  | c.683G>A  | c.(682-684)GGG>GAG   | p.G228E  |
| Pat_44 | Post-Resistance | SULT1A1  | 6817   | 37 | 16 | 28618125 | 28618125 | Missense_Mutation | SNP | C | T | 4 | 230 | c.551G>A  | c.(550-552)CGC>CAC   | p.R184H  |
| Pat_44 | Post-Resistance | ZNF629   | 23361  | 37 | 16 | 30794877 | 30794877 | Missense_Mutation | SNP | C | T | 4 | 110 | c.772G>A  | c.(772-774)GGC>AGC   | p.G258S  |
| Pat_44 | Post-Resistance | TRIM72   | 493829 | 37 | 16 | 31230631 | 31230631 | Missense_Mutation | SNP | G | A | 4 | 200 | c.508G>A  | c.(508-510)GGG>AGG   | p.G170R  |
| Pat_44 | Post-Resistance | ORC6L    | 23594  | 37 | 16 | 46729982 | 46729982 | Missense_Mutation | SNP | G | A | 4 | 111 | c.616G>A  | c.(616-618)GAA>AAA   | p.E206K  |
| Pat_44 | Post-Resistance | ABCC12   | 94160  | 37 | 16 | 48145704 | 48145704 | Nonsense_Mutation | SNP | G | A | 4 | 214 | c.2107C>T | c.(2107-2109)CGA>TGA | p.R703*  |
| Pat_44 | Post-Resistance | CNOT1    | 23019  | 37 | 16 | 58554896 | 58554896 | Missense_Mutation | SNP | G | A | 5 | 214 | c.7097C>T | c.(7096-7098)GCC>GTC | p.A2366V |
| Pat_44 | Post-Resistance | CDH8     | 1006   | 37 | 16 | 61687612 | 61687612 | Missense_Mutation | SNP | G | A | 5 | 87  | c.2300C>T | c.(2299-2301)TCA>TTA | p.S767L  |
| Pat_44 | Post-Resistance | CDH11    | 1009   | 37 | 16 | 64981667 | 64981667 | Missense_Mutation | SNP | C | T | 4 | 112 | c.2230G>A | c.(2230-2232)GGT>AGT | p.G744S  |
| Pat_44 | Post-Resistance | RLTPR    | 146206 | 37 | 16 | 67690199 | 67690199 | Missense_Mutation | SNP | G | A | 4 | 212 | c.3811G>A | c.(3811-3813)GCT>ACT | p.A1271T |
| Pat_44 | Post-Resistance | TAT      | 6898   | 37 | 16 | 71602163 | 71602163 | Nonsense_Mutation | SNP | G | A | 4 | 63  | c.1249C>T | c.(1249-1251)CGA>TGA | p.R417*  |
| Pat_44 | Post-Resistance | PMFBP1   | 83449  | 37 | 16 | 72173243 | 72173243 | Missense_Mutation | SNP | G | A | 5 | 112 | c.863C>T  | c.(862-864)ACA>ATA   | p.T288I  |
| Pat_44 | Post-Resistance | PSMD7    | 5713   | 37 | 16 | 74336162 | 74336162 | Missense_Mutation | SNP | C | T | 4 | 200 | c.410C>T  | c.(409-411)GCG>GTG   | p.A137V  |
| Pat_44 | Post-Resistance | HSD17B2  | 3294   | 37 | 16 | 82131796 | 82131796 | Missense_Mutation | SNP | C | T | 4 | 185 | c.919C>T  | c.(919-921)CTC>TTC   | p.L307F  |
| Pat_44 | Post-Resistance | PRDM7    | 11105  | 37 | 16 | 90126823 | 90126823 | Missense_Mutation | SNP | T | G | 7 | 135 | c.1159A>C | c.(1159-1161)ATG>CTG | p.M387L  |
| Pat_44 | Post-Resistance | FAM101B  | 359845 | 37 | 17 | 293163   | 293163   | Missense_Mutation | SNP | C | T | 4 | 96  | c.227G>A  | c.(226-228)CGC>CAC   | p.R76H   |
| Pat_44 | Post-Resistance | SERPINF2 | 5345   | 37 | 17 | 1657484  | 1657484  | Missense_Mutation | SNP | G | A | 6 | 228 | c.1132G>A | c.(1132-1134)GTG>ATG | p.V378M  |
| Pat_44 | Post-Resistance | OR3A4    | 390756 | 37 | 17 | 3214529  | 3214529  | Missense_Mutation | SNP | G | A | 4 | 203 | c.925G>A  | c.(925-927)GAT>AAT   | p.D309N  |
| Pat_44 | Post-Resistance | ATP2A3   | 489    | 37 | 17 | 3850810  | 3850810  | Missense_Mutation | SNP | G | A | 4 | 123 | c.970C>T  | c.(970-972)CGG>TGG   | p.R324W  |
| Pat_44 | Post-Resistance | ATP2A3   | 489    | 37 | 17 | 3854563  | 3854563  | Missense_Mutation | SNP | C | T | 5 | 59  | c.445G>A  | c.(445-447)GAC>AAC   | p.D149N  |
| Pat_44 | Post-Resistance | DHX33    | 56919  | 37 | 17 | 5358585  | 5358585  | Missense_Mutation | SNP | G | A | 4 | 178 | c.1042C>T | c.(1042-1044)CGC>TGC | p.R348C  |
| Pat_44 | Post-Resistance | C17orf81 | 23587  | 37 | 17 | 7156274  | 7156274  | Missense_Mutation | SNP | G | A | 4 | 167 | c.193G>A  | c.(193-195)GAG>AAG   | p.E65K   |
| Pat_44 | Post-Resistance | SAT2     | 112483 | 37 | 17 | 7530306  | 7530306  | Missense_Mutation | SNP | G | A | 4 | 135 | c.259C>T  | c.(259-261)CGC>TGC   | p.R87C   |
| Pat_44 | Post-Resistance | MYH4     | 4622   | 37 | 17 | 10363399 | 10363399 | Missense_Mutation | SNP | G | A | 6 | 433 | c.1286C>T | c.(1285-1287)GCT>GTT | p.A429V  |
| Pat_44 | Post-Resistance | TEKT3    | 64518  | 37 | 17 | 15234435 | 15234435 | Nonsense_Mutation | SNP | C | T | 4 | 93  | c.468G>A  | c.(466-468)TGG>TGA   | p.W156*  |
| Pat_44 | Post-Resistance | KCNJ12   | 3768   | 37 | 17 | 21318691 | 21318691 | Missense_Mutation | SNP | G | A | 4 | 109 | c.37G>A   | c.(37-39)GTG>ATG     | p.V13M   |
| Pat_44 | Post-Resistance | TAOK1    | 57551  | 37 | 17 | 27869789 | 27869789 | Missense_Mutation | SNP | G | A | 4 | 120 | c.2755G>A | c.(2755-2757)GGA>AGA | p.G919R  |
| Pat_44 | Post-Resistance | ACCN1    | 40     | 37 | 17 | 31439018 | 31439018 | Missense_Mutation | SNP | G | A | 4 | 171 | c.623C>T  | c.(622-624)ACG>ATG   | p.T208M  |
| Pat_44 | Post-Resistance | SLFN13   | 146857 | 37 | 17 | 33769098 | 33769098 | Missense_Mutation | SNP | G | A | 4 | 169 | c.1406C>T | c.(1405-1407)ACC>ATC | p.T469I  |
| Pat_44 | Post-Resistance | MYO19    | 80179  | 37 | 17 | 34854231 | 34854231 | Missense_Mutation | SNP | C | T | 4 | 170 | c.2636G>A | c.(2635-2637)AGC>AAC | p.S879N  |
| Pat_44 | Post-Resistance | ACACA    | 31     | 37 | 17 | 35508300 | 35508300 | Missense_Mutation | SNP | C | T | 4 | 62  | c.5383G>A | c.(5383-5385)GAG>AAG | p.E1795K |
| Pat_44 | Post-Resistance | KRT40    | 125115 | 37 | 17 | 39140251 | 39140251 | Missense_Mutation | SNP | G | A | 7 | 371 | c.275C>T  | c.(274-276)ACG>ATG   | p.T92M   |
| Pat_44 | Post-Resistance | STAT3    | 6774   | 37 | 17 | 40485716 | 40485716 | Missense_Mutation | SNP | C | T | 4 | 131 | c.1024G>A | c.(1024-1026)GGC>AGC | p.G342S  |
| Pat_44 | Post-Resistance | AOC2     | 314    | 37 | 17 | 40997683 | 40997683 | Missense_Mutation | SNP | G | A | 5 | 210 | c.1040G>A | c.(1039-1041)CGG>CAG | p.R347Q  |
| Pat_44 | Post-Resistance | AOC3     | 8639   | 37 | 17 | 41003382 | 41003382 | Missense_Mutation | SNP | G | A | 5 | 328 | c.22G>A   | c.(22-24)GTG>ATG     | p.V8M    |
| Pat_44 | Post-Resistance | BRCA1    | 672    | 37 | 17 | 41201142 | 41201142 | Missense_Mutation | SNP | C | T | 4 | 65  | c.5402G>A | c.(5401-5403)GGC>GAC | p.G1801D |
| Pat_44 | Post-Resistance | BRCA1    | 672    | 37 | 17 | 41209094 | 41209094 | Missense_Mutation | SNP | C | T | 4 | 240 | c.5252G>A | c.(5251-5253)CGA>CAA | p.R1751Q |
| Pat_44 | Post-Resistance | SLC4A1   | 6521   | 37 | 17 | 42336626 | 42336626 | Missense_Mutation | SNP | G | A | 4 | 46  | c.781C>T  | c.(781-783)CCT>TCT   | p.P261S  |
| Pat_44 | Post-Resistance | DBF4B    | 80174  | 37 | 17 | 42807343 | 42807343 | Missense_Mutation | SNP | G | A | 4 | 134 | c.296G>A  | c.(295-297)AGC>AAC   | p.S99N   |
| Pat_44 | Post-Resistance | OSBPL7   | 114881 | 37 | 17 | 45885746 | 45885746 | Missense_Mutation | SNP | C | T | 4 | 135 | c.2440G>A | c.(2440-2442)GGG>AGG | p.G814R  |
| Pat_44 | Post-Resistance | ACSF2    | 80221  | 37 | 17 | 48551148 | 48551148 | Missense_Mutation | SNP | C | T | 5 | 250 | c.1598C>T | c.(1597-1599)CCG>CTG | p.P533L  |
| Pat_44 | Post-Resistance | RGS9     | 8787   | 37 | 17 | 63221522 | 63221522 | Missense_Mutation | SNP | C | T | 4 | 135 | c.1810C>T | c.(1810-1812)CCT>TCT | p.P604S  |

|        |                 |          |        |    |    |          |          |                   |     |   |   |    |     |            |                        |          |
|--------|-----------------|----------|--------|----|----|----------|----------|-------------------|-----|---|---|----|-----|------------|------------------------|----------|
| Pat_44 | Post-Resistance | USH1G    | 124590 | 37 | 17 | 72916242 | 72916242 | Missense_Mutation | SNP | G | A | 4  | 49  | c.689C>T   | c.(688-690)ACC>ATC     | p.T230I  |
| Pat_44 | Post-Resistance | CASKIN2  | 57513  | 37 | 17 | 73498246 | 73498246 | Missense_Mutation | SNP | G | A | 4  | 157 | c.2909C>T  | c.(2908-2910)CCG>CTG   | p.P970L  |
| Pat_44 | Post-Resistance | PRPSAP1  | 5635   | 37 | 17 | 74307751 | 74307751 | Missense_Mutation | SNP | C | T | 4  | 165 | c.1030G>A  | c.(1030-1032)GTT>ATT   | p.V344I  |
| Pat_44 | Post-Resistance | SPHK1    | 8877   | 37 | 17 | 74383333 | 74383333 | Missense_Mutation | SNP | C | T | 4  | 25  | c.821C>T   | c.(820-822)GCT>GTT     | p.A274V  |
| Pat_44 | Post-Resistance | RHBDF2   | 79651  | 37 | 17 | 74472931 | 74472931 | Missense_Mutation | SNP | C | T | 2  | 2   | c.1183G>A  | c.(1183-1185)GAG>AAG   | p.E395K  |
| Pat_44 | Post-Resistance | MGAT5B   | 146664 | 37 | 17 | 74922744 | 74922744 | Missense_Mutation | SNP | C | T | 4  | 139 | c.1256C>T  | c.(1255-1257)ACG>ATG   | p.T419M  |
| Pat_44 | Post-Resistance | RNF213   | 57674  | 37 | 17 | 78353466 | 78353466 | Missense_Mutation | SNP | C | T | 4  | 237 | c.7811C>T  | c.(7810-7812)CCG>CTG   | p.P2604L |
| Pat_44 | Post-Resistance | RPTOR    | 57521  | 37 | 17 | 78867626 | 78867626 | Missense_Mutation | SNP | C | T | 4  | 164 | c.2362C>T  | c.(2362-2364)CGC>TGC   | p.R788C  |
| Pat_44 | Post-Resistance | AZ11     | 22994  | 37 | 17 | 79163585 | 79163585 | Missense_Mutation | SNP | G | A | 5  | 232 | c.3236C>T  | c.(3235-3237)ACG>ATG   | p.T1079M |
| Pat_44 | Post-Resistance | SIRT7    | 51547  | 37 | 17 | 79872523 | 79872523 | Missense_Mutation | SNP | G | A | 4  | 141 | c.536C>T   | c.(535-537)CCG>CTG     | p.P179L  |
| Pat_44 | Post-Resistance | UTS2R    | 2837   | 37 | 17 | 80332865 | 80332865 | Missense_Mutation | SNP | G | A | 4  | 13  | c.665G>A   | c.(664-666)GGG>GAG     | p.G222E  |
| Pat_44 | Post-Resistance | L3MBTL4  | 91133  | 37 | 18 | 6093472  | 6093472  | Missense_Mutation | SNP | C | T | 4  | 191 | c.1255G>A  | c.(1255-1257)GAT>AAT   | p.D419N  |
| Pat_44 | Post-Resistance | LAMA1    | 284217 | 37 | 18 | 7023295  | 7023295  | Missense_Mutation | SNP | G | A | 5  | 130 | c.2569C>T  | c.(2569-2571)CCC>TCC   | p.P857S  |
| Pat_44 | Post-Resistance | RAB12    | 201475 | 37 | 18 | 8633230  | 8633230  | Missense_Mutation | SNP | T | A | 5  | 162 | c.331T>A   | c.(331-333)TAT>AAT     | p.Y111N  |
| Pat_44 | Post-Resistance | ANKRD12  | 23253  | 37 | 18 | 9258637  | 9258637  | Missense_Mutation | SNP | G | A | 5  | 117 | c.5372G>A  | c.(5371-5373)CGT>CAT   | p.R1791H |
| Pat_44 | Post-Resistance | FAM38B   | 63895  | 37 | 18 | 10675247 | 10675247 | Missense_Mutation | SNP | G | A | 4  | 87  | c.1652C>T  | c.(1651-1653)CCT>CTT   | p.P551L  |
| Pat_44 | Post-Resistance | MPPE1    | 65258  | 37 | 18 | 11886734 | 11886734 | Missense_Mutation | SNP | G | A | 3  | 65  | c.722C>T   | c.(721-723)ACG>ATG     | p.T241M  |
| Pat_44 | Post-Resistance | C18orf1  | 753    | 37 | 18 | 13621212 | 13621212 | Missense_Mutation | SNP | C | T | 4  | 118 | c.278C>T   | c.(277-279)ACG>ATG     | p.T93M   |
| Pat_44 | Post-Resistance | DTNA     | 1837   | 37 | 18 | 32345949 | 32345949 | Missense_Mutation | SNP | G | A | 4  | 174 | c.92G>A    | c.(91-93)CGA>CAA       | p.R31Q   |
| Pat_44 | Post-Resistance | DTNA     | 1837   | 37 | 18 | 32374168 | 32374168 | Nonsense_Mutation | SNP | C | T | 5  | 273 | c.316C>T   | c.(316-318)CAG>TAG     | p.Q106*  |
| Pat_44 | Post-Resistance | MYO5B    | 4645   | 37 | 18 | 47462691 | 47462691 | Missense_Mutation | SNP | T | C | 2  | 10  | c.1934A>G  | c.(1933-1935)GAG>GGG   | p.E645G  |
| Pat_44 | Post-Resistance | MBD2     | 8932   | 37 | 18 | 51731393 | 51731393 | Missense_Mutation | SNP | C | T | 5  | 284 | c.677G>A   | c.(676-678)CGA>CAA     | p.R226Q  |
| Pat_44 | Post-Resistance | FECH     | 2235   | 37 | 18 | 55238716 | 55238716 | Missense_Mutation | SNP | C | T | 4  | 228 | c.371G>A   | c.(370-372)CGC>CAC     | p.R124H  |
| Pat_44 | Post-Resistance | KIAA1468 | 57614  | 37 | 18 | 59854865 | 59854865 | Missense_Mutation | SNP | G | A | 4  | 164 | c.127G>A   | c.(127-129)GCC>ACC     | p.A43T   |
| Pat_44 | Post-Resistance | RTTN     | 25914  | 37 | 18 | 67755290 | 67755290 | Missense_Mutation | SNP | C | T | 5  | 180 | c.4237G>A  | c.(4237-4239)GGG>AGG   | p.G1413R |
| Pat_44 | Post-Resistance | ZNF407   | 55628  | 37 | 18 | 72347621 | 72347621 | Missense_Mutation | SNP | G | A | 6  | 257 | c.4646G>A  | c.(4645-4647)AGC>AAC   | p.S1549N |
| Pat_44 | Post-Resistance | NFATC1   | 4772   | 37 | 18 | 77211046 | 77211046 | Missense_Mutation | SNP | G | A | 7  | 322 | c.1682G>A  | c.(1681-1683)CGG>CAG   | p.R561Q  |
| Pat_44 | Post-Resistance | SHC2     | 25759  | 37 | 19 | 440898   | 440898   | Missense_Mutation | SNP | C | T | 4  | 196 | c.503G>A   | c.(502-504)CGC>CAC     | p.R168H  |
| Pat_44 | Post-Resistance | HCN2     | 610    | 37 | 19 | 613374   | 613374   | Missense_Mutation | SNP | A | C | 3  | 83  | c.1711A>C  | c.(1711-1713)ATC>CTC   | p.I571L  |
| Pat_44 | Post-Resistance | C19orf22 | 91300  | 37 | 19 | 900092   | 900092   | Missense_Mutation | SNP | C | T | 4  | 90  | c.530G>A   | c.(529-531)CGA>CAA     | p.R177Q  |
| Pat_44 | Post-Resistance | MUM1     | 84939  | 37 | 19 | 1360146  | 1360146  | Missense_Mutation | SNP | G | A | 4  | 70  | c.226G>A   | c.(226-228)GAG>AAG     | p.E76K   |
| Pat_44 | Post-Resistance | TCF3     | 6929   | 37 | 19 | 1622133  | 1622133  | Missense_Mutation | SNP | G | A | 4  | 17  | c.742C>T   | c.(742-744)CCC>TCC     | p.P248S  |
| Pat_44 | Post-Resistance | S1PR4    | 8698   | 37 | 19 | 3179824  | 3179824  | Missense_Mutation | SNP | A | T | 4  | 69  | c.1034A>T  | c.(1033-1035)CAC>CTC   | p.H345L  |
| Pat_44 | Post-Resistance | ATCAY    | 85300  | 37 | 19 | 3907767  | 3907767  | Missense_Mutation | SNP | G | A | 4  | 130 | c.394G>A   | c.(394-396)GGG>AGG     | p.G132R  |
| Pat_44 | Post-Resistance | ZNF557   | 79230  | 37 | 19 | 7083178  | 7083178  | Missense_Mutation | SNP | G | A | 5  | 141 | c.695G>A   | c.(694-696)AGT>AAT     | p.S232N  |
| Pat_44 | Post-Resistance | MUC16    | 94025  | 37 | 19 | 9060720  | 9060720  | Missense_Mutation | SNP | G | A | 4  | 191 | c.26726C>T | c.(26725-26727)CCT>CTT | p.P8909L |
| Pat_44 | Post-Resistance | ZNF177   | 7730   | 37 | 19 | 9492142  | 9492142  | Missense_Mutation | SNP | G | A | 5  | 296 | c.655G>A   | c.(655-657)GAT>AAT     | p.D219N  |
| Pat_44 | Post-Resistance | ZNF878   | 729747 | 37 | 19 | 12155693 | 12155693 | Missense_Mutation | SNP | G | C | 6  | 446 | c.664C>G   | c.(664-666)CAG>GAG     | p.Q222E  |
| Pat_44 | Post-Resistance | BEST2    | 54831  | 37 | 19 | 12866976 | 12866976 | Missense_Mutation | SNP | G | A | 5  | 285 | c.970G>A   | c.(970-972)GAG>AAG     | p.E324K  |
| Pat_44 | Post-Resistance | NFIX     | 4784   | 37 | 19 | 13136063 | 13136063 | Missense_Mutation | SNP | G | A | 5  | 131 | c.280G>A   | c.(280-282)GAG>AAG     | p.E94K   |
| Pat_44 | Post-Resistance | CASP14   | 23581  | 37 | 19 | 15164697 | 15164697 | Missense_Mutation | SNP | G | A | 4  | 131 | c.331G>A   | c.(331-333)GCC>ACC     | p.A111T  |
| Pat_44 | Post-Resistance | WIZ      | 58525  | 37 | 19 | 15535181 | 15535181 | Missense_Mutation | SNP | G | A | 4  | 119 | c.2560C>T  | c.(2560-2562)CGC>TGC   | p.R854C  |
| Pat_44 | Post-Resistance | IL12RB1  | 3594   | 37 | 19 | 18197581 | 18197581 | Missense_Mutation | SNP | G | A | 3  | 29  | c.53C>T    | c.(52-54)TCC>TTC       | p.S18F   |
| Pat_44 | Post-Resistance | ZNF626   | 199777 | 37 | 19 | 20808006 | 20808006 | Missense_Mutation | SNP | T | C | 10 | 200 | c.677A>G   | c.(676-678)GAG>GGG     | p.E226G  |
| Pat_44 | Post-Resistance | ZNF99    | 7652   | 37 | 19 | 22939400 | 22939400 | Missense_Mutation | SNP | G | C | 7  | 160 | c.2771C>G  | c.(2770-2772)GCT>GGT   | p.A924G  |
| Pat_44 | Post-Resistance | MLL4     | 9757   | 37 | 19 | 36212330 | 36212330 | Missense_Mutation | SNP | G | A | 3  | 40  | c.2081G>A  | c.(2080-2082)CGG>CAG   | p.R694Q  |
| Pat_44 | Post-Resistance | COX7A1   | 1346   | 37 | 19 | 36642623 | 36642623 | Missense_Mutation | SNP | G | A | 3  | 26  | c.50C>T    | c.(49-51)ACC>ATC       | p.T17I   |

|        |                 |          |        |    |    |           |           |                   |     |   |   |    |     |            |                        |           |
|--------|-----------------|----------|--------|----|----|-----------|-----------|-------------------|-----|---|---|----|-----|------------|------------------------|-----------|
| Pat_44 | Post-Resistance | RYR1     | 6261   | 37 | 19 | 39019018  | 39019018  | Missense_Mutation | SNP | G | A | 4  | 216 | c.10897G>A | c.(10897-10899)GTG>ATG | p.V3633M  |
| Pat_44 | Post-Resistance | AKT2     | 208    | 37 | 19 | 40741933  | 40741933  | Missense_Mutation | SNP | G | A | 4  | 122 | c.1039C>T  | c.(1039-1041)CGC>TGC   | p.R347C   |
| Pat_44 | Post-Resistance | SPTBN4   | 57731  | 37 | 19 | 41007935  | 41007935  | Missense_Mutation | SNP | G | A | 4  | 114 | c.892G>A   | c.(892-894)GGG>AGG     | p.G298R   |
| Pat_44 | Post-Resistance | ERF      | 2077   | 37 | 19 | 42753743  | 42753743  | Missense_Mutation | SNP | G | A | 4  | 144 | c.521C>T   | c.(520-522)TCG>TTG     | p.S174L   |
| Pat_44 | Post-Resistance | TEX101   | 83639  | 37 | 19 | 43922496  | 43922496  | Missense_Mutation | SNP | G | A | 4  | 194 | c.697G>A   | c.(697-699)GGG>AGG     | p.G233R   |
| Pat_44 | Post-Resistance | CD3EAP   | 10849  | 37 | 19 | 45912475  | 45912475  | Missense_Mutation | SNP | G | A | 4  | 40  | c.1249G>A  | c.(1249-1251)GCT>ACT   | p.A417T   |
| Pat_44 | Post-Resistance | ERCC1    | 2067   | 37 | 19 | 45917271  | 45917271  | Missense_Mutation | SNP | C | T | 5  | 100 | c.724G>A   | c.(724-726)GTG>ATG     | p.V242M   |
| Pat_44 | Post-Resistance | SYMPK    | 8189   | 37 | 19 | 46345703  | 46345703  | Missense_Mutation | SNP | G | A | 4  | 202 | c.892C>T   | c.(892-894)CGT>TGT     | p.R298C   |
| Pat_44 | Post-Resistance | GYS1     | 2997   | 37 | 19 | 49484803  | 49484803  | Missense_Mutation | SNP | C | T | 4  | 64  | c.1153G>A  | c.(1153-1155)GTG>ATG   | p.V385M   |
| Pat_44 | Post-Resistance | HRC      | 3270   | 37 | 19 | 49656843  | 49656843  | Missense_Mutation | SNP | C | T | 3  | 21  | c.1652G>A  | c.(1651-1653)AGG>AAG   | p.R551K   |
| Pat_44 | Post-Resistance | KLK3     | 354    | 37 | 19 | 51359603  | 51359603  | Missense_Mutation | SNP | G | A | 7  | 236 | c.154G>A   | c.(154-156)GGT>AGT     | p.G52S    |
| Pat_44 | Post-Resistance | FPR2     | 2358   | 37 | 19 | 52272221  | 52272221  | Missense_Mutation | SNP | G | A | 5  | 272 | c.310G>A   | c.(310-312)GTG>ATG     | p.V104M   |
| Pat_44 | Post-Resistance | ZNF649   | 65251  | 37 | 19 | 52394769  | 52394769  | Missense_Mutation | SNP | A | C | 4  | 80  | c.620T>G   | c.(619-621)GTG>GGG     | p.V207G   |
| Pat_44 | Post-Resistance | ZNF534   | 147658 | 37 | 19 | 52942191  | 52942191  | Missense_Mutation | SNP | T | C | 3  | 66  | c.1517T>C  | c.(1516-1518)CTT>CCT   | p.L506P   |
| Pat_44 | Post-Resistance | ZNF534   | 147658 | 37 | 19 | 52942308  | 52942308  | Missense_Mutation | SNP | G | A | 4  | 76  | c.1634G>A  | c.(1633-1635)CGT>CAT   | p.R545H   |
| Pat_44 | Post-Resistance | LILRA3   | 11026  | 37 | 19 | 54802530  | 54802530  | Missense_Mutation | SNP | G | A | 5  | 126 | c.911C>T   | c.(910-912)TCC>TTC     | p.S304F   |
| Pat_44 | Post-Resistance | LILRA2   | 11027  | 37 | 19 | 55085974  | 55085974  | Missense_Mutation | SNP | G | A | 4  | 132 | c.277G>A   | c.(277-279)GGG>AGG     | p.G93R    |
| Pat_44 | Post-Resistance | ZNF776   | 284309 | 37 | 19 | 58265928  | 58265928  | Missense_Mutation | SNP | G | A | 7  | 153 | c.1430G>A  | c.(1429-1431)CGA>CAA   | p.R477Q   |
| Pat_44 | Post-Resistance | CHMP2A   | 27243  | 37 | 19 | 59063796  | 59063796  | Missense_Mutation | SNP | G | A | 4  | 95  | c.178C>T   | c.(178-180)CGC>TGC     | p.R60C    |
| Pat_44 | Post-Resistance | RNF144A  | 9781   | 37 | 2  | 7164576   | 7164576   | Missense_Mutation | SNP | G | A | 4  | 113 | c.586G>A   | c.(586-588)GAA>AAA     | p.E196K   |
| Pat_44 | Post-Resistance | LAPTM4A  | 9741   | 37 | 2  | 20240746  | 20240746  | Missense_Mutation | SNP | C | A | 6  | 222 | c.138G>T   | c.(136-138)TTG>TTT     | p.L46F    |
| Pat_44 | Post-Resistance | ITSN2    | 50618  | 37 | 2  | 24480820  | 24480820  | Missense_Mutation | SNP | C | T | 5  | 213 | c.2825G>A  | c.(2824-2826)GGA>GAA   | p.G942E   |
| Pat_44 | Post-Resistance | CENPA    | 1058   | 37 | 2  | 27015046  | 27015046  | Missense_Mutation | SNP | G | A | 4  | 51  | c.148G>A   | c.(148-150)GAG>AAG     | p.E50K    |
| Pat_44 | Post-Resistance | LCLAT1   | 253558 | 37 | 2  | 30682522  | 30682522  | Nonsense_Mutation | SNP | G | A | 5  | 389 | c.44G>A    | c.(43-45)TGG>TAG       | p.W15*    |
| Pat_44 | Post-Resistance | BIRC6    | 57448  | 37 | 2  | 32756472  | 32756472  | Missense_Mutation | SNP | G | A | 4  | 144 | c.12145G>A | c.(12145-12147)GGT>AGT | p.G4049S  |
| Pat_44 | Post-Resistance | ABCG8    | 64241  | 37 | 2  | 44079980  | 44079980  | Missense_Mutation | SNP | C | T | 4  | 181 | c.937C>T   | c.(937-939)CGC>TGC     | p.R313C   |
| Pat_44 | Post-Resistance | USP34    | 9736   | 37 | 2  | 61441818  | 61441818  | Missense_Mutation | SNP | G | A | 4  | 120 | c.8059C>T  | c.(8059-8061)CTT>TTT   | p.L2687F  |
| Pat_44 | Post-Resistance | USP34    | 9736   | 37 | 2  | 61493200  | 61493200  | Missense_Mutation | SNP | C | T | 4  | 180 | c.5536G>A  | c.(5536-5538)GAT>AAT   | p.D1846N  |
| Pat_44 | Post-Resistance | GFPT1    | 2673   | 37 | 2  | 69565679  | 69565679  | Missense_Mutation | SNP | C | T | 4  | 188 | c.1168G>A  | c.(1168-1170)GAG>AAG   | p.E390K   |
| Pat_44 | Post-Resistance | DYSF     | 8291   | 37 | 2  | 71795377  | 71795377  | Missense_Mutation | SNP | G | A | 8  | 636 | c.2719G>A  | c.(2719-2721)GTC>ATC   | p.V907I   |
| Pat_44 | Post-Resistance | SFXN5    | 94097  | 37 | 2  | 73228695  | 73228695  | Missense_Mutation | SNP | G | A | 4  | 78  | c.370C>T   | c.(370-372)CTC>TTC     | p.L124F   |
| Pat_44 | Post-Resistance | IMMT     | 10989  | 37 | 2  | 86393643  | 86393643  | Missense_Mutation | SNP | C | T | 5  | 142 | c.780G>A   | c.(778-780)ATG>ATA     | p.M260I   |
| Pat_44 | Post-Resistance | KIAA1310 | 55683  | 37 | 2  | 97267994  | 97267994  | Missense_Mutation | SNP | G | A | 5  | 34  | c.2341C>T  | c.(2341-2343)CCT>TCT   | p.P781S   |
| Pat_44 | Post-Resistance | ZC3H6    | 376940 | 37 | 2  | 113082075 | 113082075 | Missense_Mutation | SNP | G | A | 4  | 45  | c.1687G>A  | c.(1687-1689)GTA>ATA   | p.V563I   |
| Pat_44 | Post-Resistance | POTEF    | 728378 | 37 | 2  | 130877782 | 130877782 | Missense_Mutation | SNP | A | G | 14 | 269 | c.307T>C   | c.(307-309)TGC>CGC     | p.C103R   |
| Pat_44 | Post-Resistance | PTPN18   | 26469  | 37 | 2  | 131128815 | 131128815 | Missense_Mutation | SNP | C | T | 4  | 116 | c.968C>T   | c.(967-969)CCC>CTC     | p.P323L   |
| Pat_44 | Post-Resistance | GPR39    | 2863   | 37 | 2  | 133175270 | 133175270 | Missense_Mutation | SNP | G | A | 5  | 121 | c.655G>A   | c.(655-657)GTG>ATG     | p.V219M   |
| Pat_44 | Post-Resistance | NCKAP5   | 344148 | 37 | 2  | 133486432 | 133486432 | Missense_Mutation | SNP | G | A | 6  | 293 | c.5537C>T  | c.(5536-5538)CCG>CTG   | p.P1846L  |
| Pat_44 | Post-Resistance | MCM6     | 4175   | 37 | 2  | 136615478 | 136615478 | Missense_Mutation | SNP | C | T | 4  | 142 | c.1459G>A  | c.(1459-1461)GCA>ACA   | p.A487T   |
| Pat_44 | Post-Resistance | EPC2     | 26122  | 37 | 2  | 149528439 | 149528439 | Missense_Mutation | SNP | C | T | 5  | 224 | c.1309C>T  | c.(1309-1311)CTT>TTT   | p.L437F   |
| Pat_44 | Post-Resistance | NEB      | 4703   | 37 | 2  | 152581387 | 152581387 | Missense_Mutation | SNP | G | A | 4  | 107 | c.491C>T   | c.(490-492)TCG>TTG     | p.S164L   |
| Pat_44 | Post-Resistance | BAZZB    | 29994  | 37 | 2  | 160269014 | 160269014 | Missense_Mutation | SNP | G | A | 4  | 100 | c.2509C>T  | c.(2509-2511)CGT>TGT   | p.R837C   |
| Pat_44 | Post-Resistance | RBMS1    | 5937   | 37 | 2  | 161135124 | 161135124 | Missense_Mutation | SNP | G | A | 4  | 77  | c.997C>T   | c.(997-999)CCC>TCC     | p.P333S   |
| Pat_44 | Post-Resistance | GCA      | 25801  | 37 | 2  | 163215596 | 163215596 | Missense_Mutation | SNP | G | A | 5  | 274 | c.497G>A   | c.(496-498)CGT>CAT     | p.R166H   |
| Pat_44 | Post-Resistance | ABCB11   | 8647   | 37 | 2  | 169780296 | 169780296 | Missense_Mutation | SNP | G | A | 4  | 160 | c.3802C>T  | c.(3802-3804)CGG>TGG   | p.R1268W  |
| Pat_44 | Post-Resistance | TTN      | 7273   | 37 | 2  | 179481213 | 179481213 | Nonsense_Mutation | SNP | C | T | 6  | 456 | c.40601G>A | c.(40600-40602)TGG>TAG | p.W13534* |
| Pat_44 | Post-Resistance | TTN      | 7273   | 37 | 2  | 179599451 | 179599451 | Missense_Mutation | SNP | G | A | 5  | 348 | c.11468C>T | c.(11467-11469)ACT>ATT | p.T3823I  |

|        |                 |           |        |    |    |           |           |                   |     |   |   |    |     |              |                      |               |
|--------|-----------------|-----------|--------|----|----|-----------|-----------|-------------------|-----|---|---|----|-----|--------------|----------------------|---------------|
| Pat_44 | Post-Resistance | SESTD1    | 91404  | 37 | 2  | 180011158 | 180011158 | Missense_Mutation | SNP | G | A | 4  | 159 | c.608C>T     | c.(607-609)TCG>TTG   | p.S203L       |
| Pat_44 | Post-Resistance | COL3A1    | 1281   | 37 | 2  | 189876393 | 189876393 | Nonsense_Mutation | SNP | C | T | 4  | 210 | c.4294C>T    | c.(4294-4296)CGA>TGA | p.R1432*      |
| Pat_44 | Post-Resistance | COL5A2    | 1290   | 37 | 2  | 189921752 | 189921752 | Missense_Mutation | SNP | C | T | 4  | 156 | c.2338G>A    | c.(2338-2340)GGT>AGT | p.G780S       |
| Pat_44 | Post-Resistance | STAT4     | 6775   | 37 | 2  | 191940952 | 191940952 | Splice_Site       | SNP | C | T | 4  | 167 | c.372_splice | c.e4+1               | p.Q124_splice |
| Pat_44 | Post-Resistance | SATB2     | 23314  | 37 | 2  | 200213711 | 200213711 | Missense_Mutation | SNP | C | T | 4  | 158 | c.886G>A     | c.(886-888)GGT>AGT   | p.G296S       |
| Pat_44 | Post-Resistance | ZDBF2     | 57683  | 37 | 2  | 207171443 | 207171443 | Missense_Mutation | SNP | C | T | 4  | 109 | c.2191C>T    | c.(2191-2193)CTT>TTT | p.L731F       |
| Pat_44 | Post-Resistance | ADAM23    | 8745   | 37 | 2  | 207431970 | 207431970 | Missense_Mutation | SNP | C | T | 5  | 178 | c.1418C>T    | c.(1417-1419)TCA>TTA | p.S473L       |
| Pat_44 | Post-Resistance | PLCD4     | 84812  | 37 | 2  | 219499249 | 219499249 | Missense_Mutation | SNP | G | A | 4  | 153 | c.1792G>A    | c.(1792-1794)GGC>AGC | p.G598S       |
| Pat_44 | Post-Resistance | ZNF142    | 7701   | 37 | 2  | 219508114 | 219508114 | Missense_Mutation | SNP | G | A | 4  | 121 | c.3125C>T    | c.(3124-3126)ACC>ATC | p.T1042I      |
| Pat_44 | Post-Resistance | STK36     | 27148  | 37 | 2  | 219559039 | 219559039 | Missense_Mutation | SNP | G | A | 4  | 242 | c.2389G>A    | c.(2389-2391)GTC>ATC | p.V797I       |
| Pat_44 | Post-Resistance | ABCB6     | 10058  | 37 | 2  | 220075504 | 220075504 | Missense_Mutation | SNP | C | T | 4  | 82  | c.2185G>A    | c.(2185-2187)GGC>AGC | p.G729S       |
| Pat_44 | Post-Resistance | SP100     | 6672   | 37 | 2  | 231405602 | 231405602 | Missense_Mutation | SNP | G | A | 6  | 296 | c.2222G>A    | c.(2221-2223)AGT>AAT | p.S741N       |
| Pat_44 | Post-Resistance | NGEF      | 25791  | 37 | 2  | 233757690 | 233757690 | Missense_Mutation | SNP | G | A | 4  | 164 | c.1060C>T    | c.(1060-1062)CGT>TGT | p.R354C       |
| Pat_44 | Post-Resistance | PPP1R7    | 5510   | 37 | 2  | 242122110 | 242122110 | Missense_Mutation | SNP | G | A | 4  | 76  | c.955G>A     | c.(955-957)GGA>AGA   | p.G319R       |
| Pat_44 | Post-Resistance | SIRPG     | 55423  | 37 | 20 | 1616242   | 1616242   | Missense_Mutation | SNP | G | A | 3  | 61  | c.752C>T     | c.(751-753)CCA>CTA   | p.P251L       |
| Pat_44 | Post-Resistance | ATRN      | 8455   | 37 | 20 | 3571942   | 3571942   | Missense_Mutation | SNP | G | A | 5  | 257 | c.3311G>A    | c.(3310-3312)GGG>GAG | p.G1104E      |
| Pat_44 | Post-Resistance | ATRN      | 8455   | 37 | 20 | 3575197   | 3575197   | Missense_Mutation | SNP | G | A | 4  | 182 | c.3394G>A    | c.(3394-3396)GTC>ATC | p.V1132I      |
| Pat_44 | Post-Resistance | PCSK2     | 5126   | 37 | 20 | 17339005  | 17339005  | Nonsense_Mutation | SNP | C | T | 4  | 158 | c.316C>T     | c.(316-318)CGA>TGA   | p.R106*       |
| Pat_44 | Post-Resistance | CBFA2T2   | 9139   | 37 | 20 | 32217661  | 32217661  | Missense_Mutation | SNP | C | T | 4  | 60  | c.1196C>T    | c.(1195-1197)ACG>ATG | p.T399M       |
| Pat_44 | Post-Resistance | GSS       | 2937   | 37 | 20 | 33530388  | 33530388  | Missense_Mutation | SNP | G | A | 4  | 101 | c.394C>T     | c.(394-396)CGC>TGC   | p.R132C       |
| Pat_44 | Post-Resistance | PROCR     | 10544  | 37 | 20 | 33764184  | 33764184  | Missense_Mutation | SNP | G | A | 4  | 238 | c.536G>A     | c.(535-537)CGG>CAG   | p.R179Q       |
| Pat_44 | Post-Resistance | CHD6      | 84181  | 37 | 20 | 40143496  | 40143496  | Missense_Mutation | SNP | G | A | 4  | 100 | c.650C>T     | c.(649-651)ACG>ATG   | p.T217M       |
| Pat_44 | Post-Resistance | DDX27     | 55661  | 37 | 20 | 47860213  | 47860213  | Missense_Mutation | SNP | G | A | 4  | 121 | c.2345G>A    | c.(2344-2346)CGA>CAA | p.R782Q       |
| Pat_44 | Post-Resistance | PTPN1     | 5770   | 37 | 20 | 49196301  | 49196301  | Missense_Mutation | SNP | C | T | 4  | 159 | c.926C>T     | c.(925-927)CCT>CTT   | p.P309L       |
| Pat_44 | Post-Resistance | FAM65C    | 140876 | 37 | 20 | 49212784  | 49212784  | Missense_Mutation | SNP | G | A | 6  | 190 | c.1795C>T    | c.(1795-1797)CCC>TCC | p.P599S       |
| Pat_44 | Post-Resistance | CYP24A1   | 1591   | 37 | 20 | 52779318  | 52779318  | Missense_Mutation | SNP | G | A | 4  | 85  | c.928C>T     | c.(928-930)CGG>TGG   | p.R310W       |
| Pat_44 | Post-Resistance | STX16     | 8675   | 37 | 20 | 57244455  | 57244455  | Missense_Mutation | SNP | G | A | 3  | 35  | c.502G>A     | c.(502-504)GCC>ACC   | p.A168T       |
| Pat_44 | Post-Resistance | TCFL5     | 10732  | 37 | 20 | 61492676  | 61492676  | Missense_Mutation | SNP | G | A | 3  | 17  | c.347C>T     | c.(346-348)GCC>GTC   | p.A116V       |
| Pat_44 | Post-Resistance | KCNQ2     | 3785   | 37 | 20 | 62046309  | 62046309  | Missense_Mutation | SNP | C | T | 5  | 136 | c.1472G>A    | c.(1471-1473)CGG>CAG | p.R491Q       |
| Pat_44 | Post-Resistance | RGS19     | 10287  | 37 | 20 | 62705333  | 62705333  | Missense_Mutation | SNP | G | A | 4  | 169 | c.527C>T     | c.(526-528)ACG>ATG   | p.T176M       |
| Pat_44 | Post-Resistance | MRPL39    | 54148  | 37 | 21 | 26958036  | 26958036  | Missense_Mutation | SNP | C | T | 4  | 153 | c.1000G>A    | c.(1000-1002)GAA>AAA | p.E334K       |
| Pat_44 | Post-Resistance | BACH1     | 571    | 37 | 21 | 30714987  | 30714987  | Missense_Mutation | SNP | C | T | 4  | 145 | c.2044C>T    | c.(2044-2046)CCC>TCC | p.P682S       |
| Pat_44 | Post-Resistance | KCNJ6     | 3763   | 37 | 21 | 39087081  | 39087081  | Missense_Mutation | SNP | G | A | 4  | 129 | c.379C>T     | c.(379-381)CCC>TCC   | p.P127S       |
| Pat_44 | Post-Resistance | TRAPPC10  | 7109   | 37 | 21 | 45523267  | 45523267  | Missense_Mutation | SNP | C | T | 3  | 33  | c.3635C>T    | c.(3634-3636)TCG>TTG | p.S1212L      |
| Pat_44 | Post-Resistance | KRTAP10-1 | 386677 | 37 | 21 | 45959208  | 45959208  | Missense_Mutation | SNP | C | T | 4  | 67  | c.826G>A     | c.(826-828)GCG>ACG   | p.A276T       |
| Pat_44 | Post-Resistance | KRTAP10-3 | 386682 | 37 | 21 | 45978063  | 45978063  | Missense_Mutation | SNP | G | A | 4  | 149 | c.536C>T     | c.(535-537)GCC>GTC   | p.A179V       |
| Pat_44 | Post-Resistance | KRTAP10-4 | 386672 | 37 | 21 | 45994249  | 45994249  | Missense_Mutation | SNP | C | T | 4  | 100 | c.614C>T     | c.(613-615)ACG>ATG   | p.T205M       |
| Pat_44 | Post-Resistance | HIRA      | 7290   | 37 | 22 | 19385557  | 19385557  | Missense_Mutation | SNP | C | T | 4  | 76  | c.451G>A     | c.(451-453)GTG>ATG   | p.V151M       |
| Pat_44 | Post-Resistance | PPIL2     | 23759  | 37 | 22 | 22029404  | 22029404  | Missense_Mutation | SNP | G | A | 4  | 134 | c.295G>A     | c.(295-297)GGG>AGG   | p.G99R        |
| Pat_44 | Post-Resistance | DUSP18    | 150290 | 37 | 22 | 31059759  | 31059759  | Missense_Mutation | SNP | G | A | 4  | 106 | c.232C>T     | c.(232-234)CGT>TGT   | p.R78C        |
| Pat_44 | Post-Resistance | LIMK2     | 3985   | 37 | 22 | 31663886  | 31663886  | Missense_Mutation | SNP | G | A | 4  | 116 | c.1253G>A    | c.(1252-1254)CGC>CAC | p.R418H       |
| Pat_44 | Post-Resistance | SFI1      | 9814   | 37 | 22 | 32009138  | 32009138  | Missense_Mutation | SNP | G | A | 5  | 32  | c.2501G>A    | c.(2500-2502)AGG>AAG | p.R834K       |
| Pat_44 | Post-Resistance | SSTR3     | 6753   | 37 | 22 | 37603625  | 37603625  | Missense_Mutation | SNP | G | A | 4  | 144 | c.218C>T     | c.(217-219)ACG>ATG   | p.T73M        |
| Pat_44 | Post-Resistance | ELFN2     | 114794 | 37 | 22 | 37771192  | 37771192  | Missense_Mutation | SNP | C | T | 3  | 50  | c.383G>A     | c.(382-384)CGC>CAC   | p.R128H       |
| Pat_44 | Post-Resistance | TRIOBP    | 11078  | 37 | 22 | 38120290  | 38120290  | Missense_Mutation | SNP | G | C | 10 | 445 | c.1727G>C    | c.(1726-1728)AGA>ACA | p.R576T       |
| Pat_44 | Post-Resistance | TRIOBP    | 11078  | 37 | 22 | 38120359  | 38120359  | Missense_Mutation | SNP | C | G | 9  | 474 | c.1796C>G    | c.(1795-1797)ACA>AGA | p.T599R       |
| Pat_44 | Post-Resistance | TRIOBP    | 11078  | 37 | 22 | 38120596  | 38120596  | Missense_Mutation | SNP | T | A | 4  | 99  | c.2033T>A    | c.(2032-2034)CTA>CAA | p.L678Q       |

|        |                 |         |        |    |    |           |           |                   |     |   |   |   |     |              |                      |               |
|--------|-----------------|---------|--------|----|----|-----------|-----------|-------------------|-----|---|---|---|-----|--------------|----------------------|---------------|
| Pat_44 | Post-Resistance | ADSL    | 158    | 37 | 22 | 40760954  | 40760954  | Missense_Mutation | SNP | A | G | 5 | 243 | c.1262A>G    | c.(1261-1263)AAT>AGT | p.N421S       |
| Pat_44 | Post-Resistance | SCUBE1  | 80274  | 37 | 22 | 43625140  | 43625140  | Missense_Mutation | SNP | G | A | 4 | 85  | c.1022C>T    | c.(1021-1023)CCG>CTG | p.P341L       |
| Pat_44 | Post-Resistance | MPPED1  | 758    | 37 | 22 | 43898598  | 43898598  | Missense_Mutation | SNP | G | A | 6 | 200 | c.823G>A     | c.(823-825)GTC>ATC   | p.V275I       |
| Pat_44 | Post-Resistance | RIBC2   | 26150  | 37 | 22 | 45813680  | 45813680  | Missense_Mutation | SNP | G | A | 4 | 109 | c.395G>A     | c.(394-396)CGG>CAG   | p.R132Q       |
| Pat_44 | Post-Resistance | TRABD   | 80305  | 37 | 22 | 50636361  | 50636361  | Missense_Mutation | SNP | G | A | 4 | 135 | c.781G>A     | c.(781-783)GTC>ATC   | p.V261I       |
| Pat_44 | Post-Resistance | TUBGCP6 | 85378  | 37 | 22 | 50659166  | 50659166  | Missense_Mutation | SNP | T | C | 5 | 104 | c.3622A>G    | c.(3622-3624)ACC>GCC | p.T1208A      |
| Pat_44 | Post-Resistance | MAPK12  | 6300   | 37 | 22 | 50694090  | 50694090  | Missense_Mutation | SNP | G | A | 5 | 185 | c.725C>T     | c.(724-726)ACG>ATG   | p.T242M       |
| Pat_44 | Post-Resistance | LMF2    | 91289  | 37 | 22 | 50942257  | 50942257  | Missense_Mutation | SNP | G | A | 4 | 148 | c.1795C>T    | c.(1795-1797)CTC>TTC | p.L599F       |
| Pat_44 | Post-Resistance | CHL1    | 10752  | 37 | 3  | 391214    | 391214    | Missense_Mutation | SNP | G | A | 6 | 338 | c.973G>A     | c.(973-975)GTT>ATT   | p.V325I       |
| Pat_44 | Post-Resistance | SRGAP3  | 9901   | 37 | 3  | 9036109   | 9036109   | Missense_Mutation | SNP | G | A | 4 | 203 | c.2326C>T    | c.(2326-2328)CGC>TGC | p.R776C       |
| Pat_44 | Post-Resistance | CPNE9   | 151835 | 37 | 3  | 9746653   | 9746653   | Missense_Mutation | SNP | G | A | 4 | 42  | c.235G>A     | c.(235-237)GAA>AAA   | p.E79K        |
| Pat_44 | Post-Resistance | CRELD1  | 78987  | 37 | 3  | 9982711   | 9982711   | Splice_Site       | SNP | G | A | 4 | 88  | c.637_splice | c.e6+1               | p.A213_splice |
| Pat_44 | Post-Resistance | KCNH8   | 131096 | 37 | 3  | 19190216  | 19190216  | Missense_Mutation | SNP | C | T | 4 | 236 | c.5C>T       | c.(4-6)CCG>CTG       | p.P2L         |
| Pat_44 | Post-Resistance | OXSM    | 54995  | 37 | 3  | 25832705  | 25832705  | Missense_Mutation | SNP | G | A | 4 | 216 | c.194G>A     | c.(193-195)CGT>CAT   | p.R65H        |
| Pat_44 | Post-Resistance | DCLK3   | 85443  | 37 | 3  | 36779024  | 36779024  | Missense_Mutation | SNP | C | T | 4 | 158 | c.1127G>A    | c.(1126-1128)CGC>CAC | p.R376H       |
| Pat_44 | Post-Resistance | ITGA9   | 3680   | 37 | 3  | 37523026  | 37523026  | Missense_Mutation | SNP | C | T | 5 | 112 | c.472C>T     | c.(472-474)CCC>TCC   | p.P158S       |
| Pat_44 | Post-Resistance | DLEC1   | 9940   | 37 | 3  | 38139274  | 38139274  | Missense_Mutation | SNP | G | T | 4 | 62  | c.2605G>T    | c.(2605-2607)GGT>TGT | p.G869C       |
| Pat_44 | Post-Resistance | LTF     | 4057   | 37 | 3  | 46480833  | 46480833  | Missense_Mutation | SNP | C | T | 4 | 194 | c.1862G>A    | c.(1861-1863)CGG>CAG | p.R621Q       |
| Pat_44 | Post-Resistance | PLXNB1  | 5364   | 37 | 3  | 48457802  | 48457802  | Missense_Mutation | SNP | C | T | 4 | 172 | c.3433G>A    | c.(3433-3435)GTG>ATG | p.V1145M      |
| Pat_44 | Post-Resistance | COL7A1  | 1294   | 37 | 3  | 48615945  | 48615945  | Missense_Mutation | SNP | G | A | 3 | 20  | c.5428C>T    | c.(5428-5430)CTT>TTT | p.L1810F      |
| Pat_44 | Post-Resistance | BSN     | 8927   | 37 | 3  | 49693768  | 49693768  | Missense_Mutation | SNP | G | A | 4 | 187 | c.6779G>A    | c.(6778-6780)CGC>CAC | p.R2260H      |
| Pat_44 | Post-Resistance | GMPPB   | 29925  | 37 | 3  | 49760087  | 49760087  | Missense_Mutation | SNP | G | A | 4 | 66  | c.503C>T     | c.(502-504)TCC>TTC   | p.S168F       |
| Pat_44 | Post-Resistance | C3orf54 | 389119 | 37 | 3  | 49842317  | 49842317  | Missense_Mutation | SNP | C | T | 5 | 196 | c.761C>T     | c.(760-762)CCT>CTT   | p.P254L       |
| Pat_44 | Post-Resistance | CAMKV   | 79012  | 37 | 3  | 49898933  | 49898933  | Missense_Mutation | SNP | C | T | 4 | 78  | c.380G>A     | c.(379-381)CGG>CAG   | p.R127Q       |
| Pat_44 | Post-Resistance | MST1R   | 4486   | 37 | 3  | 49936581  | 49936581  | Missense_Mutation | SNP | G | A | 4 | 155 | c.1346C>T    | c.(1345-1347)ACT>ATT | p.T449I       |
| Pat_44 | Post-Resistance | SEMA3F  | 6405   | 37 | 3  | 50219837  | 50219837  | Splice_Site       | SNP | G | A | 4 | 207 | c.763_splice | c.e8+1               | p.D255_splice |
| Pat_44 | Post-Resistance | RAD54L2 | 23132  | 37 | 3  | 51667774  | 51667774  | Missense_Mutation | SNP | C | T | 4 | 96  | c.1007C>T    | c.(1006-1008)CCG>CTG | p.P336L       |
| Pat_44 | Post-Resistance | STAB1   | 23166  | 37 | 3  | 52536244  | 52536244  | Missense_Mutation | SNP | G | A | 4 | 82  | c.487G>A     | c.(487-489)GTG>ATG   | p.V163M       |
| Pat_44 | Post-Resistance | PRKCD   | 5580   | 37 | 3  | 53226233  | 53226233  | Missense_Mutation | SNP | C | T | 4 | 94  | c.1982C>T    | c.(1981-1983)GCT>GTT | p.A661V       |
| Pat_44 | Post-Resistance | CCDC66  | 285331 | 37 | 3  | 56627639  | 56627639  | Missense_Mutation | SNP | G | C | 3 | 76  | c.1189G>C    | c.(1189-1191)GAC>CAC | p.D397H       |
| Pat_44 | Post-Resistance | SLMAP   | 7871   | 37 | 3  | 57847758  | 57847758  | Missense_Mutation | SNP | C | T | 6 | 168 | c.911C>T     | c.(910-912)GCC>GTC   | p.A304V       |
| Pat_44 | Post-Resistance | CADPS   | 8618   | 37 | 3  | 62570894  | 62570894  | Nonsense_Mutation | SNP | G | A | 4 | 213 | c.1543C>T    | c.(1543-1545)CGA>TGA | p.R515*       |
| Pat_44 | Post-Resistance | ADAMTS9 | 56999  | 37 | 3  | 64527080  | 64527080  | Missense_Mutation | SNP | G | A | 4 | 218 | c.5303C>T    | c.(5302-5304)GCG>GTG | p.A1768V      |
| Pat_44 | Post-Resistance | TMF1    | 7110   | 37 | 3  | 69097282  | 69097282  | Missense_Mutation | SNP | C | T | 5 | 184 | c.574G>A     | c.(574-576)GTA>ATA   | p.V192I       |
| Pat_44 | Post-Resistance | FOXP1   | 27086  | 37 | 3  | 71015123  | 71015123  | Missense_Mutation | SNP | G | A | 6 | 374 | c.1807C>T    | c.(1807-1809)CGG>TGG | p.R603W       |
| Pat_44 | Post-Resistance | CLDND1  | 56650  | 37 | 3  | 98235555  | 98235555  | Missense_Mutation | SNP | G | A | 5 | 140 | c.710C>T     | c.(709-711)GCT>GTT   | p.A237V       |
| Pat_44 | Post-Resistance | IMPG2   | 50939  | 37 | 3  | 100976394 | 100976394 | Missense_Mutation | SNP | C | A | 5 | 235 | c.1132G>T    | c.(1132-1134)GAT>TAT | p.D378Y       |
| Pat_44 | Post-Resistance | SEMA5B  | 54437  | 37 | 3  | 122680068 | 122680068 | Missense_Mutation | SNP | C | T | 5 | 95  | c.43G>A      | c.(43-45)GTC>ATC     | p.V15I        |
| Pat_44 | Post-Resistance | ADCY5   | 111    | 37 | 3  | 123003523 | 123003523 | Missense_Mutation | SNP | C | T | 6 | 364 | c.3718G>A    | c.(3718-3720)GTG>ATG | p.V1240M      |
| Pat_44 | Post-Resistance | MUC13   | 56667  | 37 | 3  | 124646640 | 124646640 | Missense_Mutation | SNP | G | A | 6 | 228 | c.250C>T     | c.(250-252)CCT>TCT   | p.P84S        |
| Pat_44 | Post-Resistance | COPG    | 22820  | 37 | 3  | 128976643 | 128976643 | Missense_Mutation | SNP | G | A | 5 | 311 | c.811G>A     | c.(811-813)GCC>ACC   | p.A271T       |
| Pat_44 | Post-Resistance | PLS1    | 5357   | 37 | 3  | 142413338 | 142413338 | Missense_Mutation | SNP | G | A | 4 | 207 | c.1205G>A    | c.(1204-1206)CGG>CAG | p.R402Q       |
| Pat_44 | Post-Resistance | TM4SF18 | 116441 | 37 | 3  | 149051160 | 149051160 | Missense_Mutation | SNP | G | A | 6 | 84  | c.10C>T      | c.(10-12)CGG>TGG     | p.R4W         |
| Pat_44 | Post-Resistance | GPR160  | 26996  | 37 | 3  | 169802385 | 169802385 | Nonsense_Mutation | SNP | C | T | 4 | 119 | c.625C>T     | c.(625-627)CAG>TAG   | p.Q209*       |
| Pat_44 | Post-Resistance | NDUFB5  | 4711   | 37 | 3  | 179322646 | 179322646 | Missense_Mutation | SNP | G | A | 4 | 31  | c.43G>A      | c.(43-45)GTG>ATG     | p.V15M        |
| Pat_44 | Post-Resistance | PEX5L   | 51555  | 37 | 3  | 179529629 | 179529629 | Missense_Mutation | SNP | C | T | 5 | 212 | c.1114G>A    | c.(1114-1116)GAG>AAG | p.E372K       |
| Pat_44 | Post-Resistance | MCF2L2  | 23101  | 37 | 3  | 183029470 | 183029470 | Missense_Mutation | SNP | G | A | 6 | 311 | c.844C>T     | c.(844-846)CTC>TTC   | p.L282F       |



|        |                 |          |        |    |   |           |           |                   |     |   |   |   |     |            |                        |          |
|--------|-----------------|----------|--------|----|---|-----------|-----------|-------------------|-----|---|---|---|-----|------------|------------------------|----------|
| Pat_44 | Post-Resistance | EIF4G1   | 1981   | 37 | 3 | 184039630 | 184039630 | Missense_Mutation | SNP | G | A | 6 | 439 | c.1258G>A  | c.(1258-1260)GAG>AAG   | p.E420K  |
| Pat_44 | Post-Resistance | EHHADH   | 1962   | 37 | 3 | 184922411 | 184922411 | Missense_Mutation | SNP | G | A | 4 | 194 | c.703C>T   | c.(703-705)CGT>TGT     | p.R235C  |
| Pat_44 | Post-Resistance | MUC4     | 4585   | 37 | 3 | 195511778 | 195511778 | Missense_Mutation | SNP | G | C | 5 | 9   | c.6673C>G  | c.(6673-6675)CTT>GTT   | p.L2225V |
| Pat_44 | Post-Resistance | PIGX     | 54965  | 37 | 3 | 196449387 | 196449387 | Missense_Mutation | SNP | C | T | 6 | 296 | c.155C>T   | c.(154-156)CCG>CTG     | p.P52L   |
| Pat_44 | Post-Resistance | HTT      | 3064   | 37 | 4 | 3208355   | 3208355   | Missense_Mutation | SNP | G | A | 4 | 96  | c.5857G>A  | c.(5857-5859)GGC>AGC   | p.G1953S |
| Pat_44 | Post-Resistance | CCDC96   | 257236 | 37 | 4 | 7043201   | 7043201   | Missense_Mutation | SNP | G | A | 4 | 159 | c.1465C>T  | c.(1465-1467)CGG>TGG   | p.R489W  |
| Pat_44 | Post-Resistance | GPR78    | 27201  | 37 | 4 | 8589002   | 8589002   | Missense_Mutation | SNP | A | G | 4 | 204 | c.1004A>G  | c.(1003-1005)CAG>CGG   | p.Q335R  |
| Pat_44 | Post-Resistance | SLIT2    | 9353   | 37 | 4 | 20597399  | 20597399  | Missense_Mutation | SNP | G | A | 5 | 363 | c.3262G>A  | c.(3262-3264)GGA>AGA   | p.G1088R |
| Pat_44 | Post-Resistance | FRYL     | 285527 | 37 | 4 | 48542805  | 48542805  | Missense_Mutation | SNP | G | A | 4 | 157 | c.5860C>T  | c.(5860-5862)CGG>TGG   | p.R1954W |
| Pat_44 | Post-Resistance | KDR      | 3791   | 37 | 4 | 55955042  | 55955042  | Missense_Mutation | SNP | G | A | 4 | 67  | c.3503C>T  | c.(3502-3504)GCT>GTT   | p.A1168V |
| Pat_44 | Post-Resistance | UGT2B4   | 7363   | 37 | 4 | 70346495  | 70346495  | Missense_Mutation | SNP | C | T | 6 | 452 | c.1444G>A  | c.(1444-1446)GAC>AAC   | p.D482N  |
| Pat_44 | Post-Resistance | AFM      | 173    | 37 | 4 | 74350000  | 74350000  | Missense_Mutation | SNP | G | A | 4 | 155 | c.163G>A   | c.(163-165)GTT>ATT     | p.V55I   |
| Pat_44 | Post-Resistance | BTC      | 685    | 37 | 4 | 75681097  | 75681097  | Missense_Mutation | SNP | C | T | 5 | 208 | c.253G>A   | c.(253-255)GTG>ATG     | p.V85M   |
| Pat_44 | Post-Resistance | PRDM8    | 56978  | 37 | 4 | 81124579  | 81124579  | Missense_Mutation | SNP | G | A | 3 | 38  | c.1963G>A  | c.(1963-1965)GAG>AAG   | p.E655K  |
| Pat_44 | Post-Resistance | HPSE     | 10855  | 37 | 4 | 84227444  | 84227444  | Missense_Mutation | SNP | G | A | 4 | 161 | c.1118C>T  | c.(1117-1119)GCC>GTC   | p.A373V  |
| Pat_44 | Post-Resistance | PDHA2    | 5161   | 37 | 4 | 96761395  | 96761395  | Missense_Mutation | SNP | G | A | 4 | 62  | c.94G>A    | c.(94-96)GCT>ACT       | p.A32T   |
| Pat_44 | Post-Resistance | SPRY1    | 10252  | 37 | 4 | 124323405 | 124323405 | Missense_Mutation | SNP | C | T | 4 | 163 | c.659C>T   | c.(658-660)ACC>ATC     | p.T220I  |
| Pat_44 | Post-Resistance | PLK4     | 10733  | 37 | 4 | 128807661 | 128807661 | Missense_Mutation | SNP | C | T | 4 | 123 | c.1136C>T  | c.(1135-1137)TCT>TTT   | p.S379F  |
| Pat_44 | Post-Resistance | HHIP     | 64399  | 37 | 4 | 145655991 | 145655991 | Missense_Mutation | SNP | C | T | 4 | 129 | c.1859C>T  | c.(1858-1860)ACG>ATG   | p.T620M  |
| Pat_44 | Post-Resistance | NR3C2    | 4306   | 37 | 4 | 149356701 | 149356701 | Missense_Mutation | SNP | C | T | 4 | 92  | c.1312G>A  | c.(1312-1314)GGC>AGC   | p.G438S  |
| Pat_44 | Post-Resistance | MAP9     | 79884  | 37 | 4 | 156281477 | 156281477 | Missense_Mutation | SNP | G | A | 4 | 104 | c.893C>T   | c.(892-894)GCA>GTA     | p.A298V  |
| Pat_44 | Post-Resistance | PALLD    | 23022  | 37 | 4 | 169846223 | 169846223 | Missense_Mutation | SNP | G | A | 4 | 117 | c.3352G>A  | c.(3352-3354)GTT>ATT   | p.V1118I |
| Pat_44 | Post-Resistance | CLCN3    | 1182   | 37 | 4 | 170613332 | 170613332 | Missense_Mutation | SNP | C | T | 4 | 219 | c.797C>T   | c.(796-798)ACC>ATC     | p.T266I  |
| Pat_44 | Post-Resistance | FAT1     | 2195   | 37 | 4 | 187540997 | 187540997 | Missense_Mutation | SNP | G | A | 4 | 161 | c.6743C>T  | c.(6742-6744)CCG>CTG   | p.P2248L |
| Pat_44 | Post-Resistance | CEP72    | 55722  | 37 | 5 | 637644    | 637644    | Missense_Mutation | SNP | C | T | 4 | 96  | c.917C>T   | c.(916-918)ACC>ATC     | p.T306I  |
| Pat_44 | Post-Resistance | NKD2     | 85409  | 37 | 5 | 1038460   | 1038460   | Missense_Mutation | SNP | A | C | 2 | 3   | c.1328A>C  | c.(1327-1329)CAC>CCC   | p.H443P  |
| Pat_44 | Post-Resistance | ADAMTS16 | 170690 | 37 | 5 | 5303769   | 5303769   | Missense_Mutation | SNP | C | A | 4 | 68  | c.3076C>A  | c.(3076-3078)CCC>ACC   | p.P1026T |
| Pat_44 | Post-Resistance | SEMA5A   | 9037   | 37 | 5 | 9063104   | 9063104   | Missense_Mutation | SNP | G | A | 4 | 139 | c.2413C>T  | c.(2413-2415)CGG>TGG   | p.R805W  |
| Pat_44 | Post-Resistance | CTNND2   | 1501   | 37 | 5 | 11018111  | 11018111  | Missense_Mutation | SNP | C | T | 4 | 145 | c.3059G>A  | c.(3058-3060)CGA>CAA   | p.R1020Q |
| Pat_44 | Post-Resistance | CTNND2   | 1501   | 37 | 5 | 11023077  | 11023077  | Nonsense_Mutation | SNP | G | A | 4 | 81  | c.2803C>T  | c.(2803-2805)CGA>TGA   | p.R935*  |
| Pat_44 | Post-Resistance | DNAH5    | 1767   | 37 | 5 | 13737439  | 13737439  | Missense_Mutation | SNP | C | T | 4 | 165 | c.11377G>A | c.(11377-11379)GAG>AAC | p.E3793K |
| Pat_44 | Post-Resistance | PDZD2    | 23037  | 37 | 5 | 32058041  | 32058041  | Missense_Mutation | SNP | C | T | 4 | 203 | c.2032C>T  | c.(2032-2034)CTC>TTC   | p.L678F  |
| Pat_44 | Post-Resistance | C9       | 735    | 37 | 5 | 39342204  | 39342204  | Missense_Mutation | SNP | G | A | 4 | 188 | c.172C>T   | c.(172-174)CTC>TTC     | p.L58F   |
| Pat_44 | Post-Resistance | GZMA     | 3001   | 37 | 5 | 54403740  | 54403740  | Missense_Mutation | SNP | G | A | 4 | 181 | c.334G>A   | c.(334-336)GAA>AAA     | p.E112K  |
| Pat_44 | Post-Resistance | RGNEF    | 64283  | 37 | 5 | 73193828  | 73193828  | Missense_Mutation | SNP | G | A | 3 | 32  | c.3883G>A  | c.(3883-3885)GCC>ACC   | p.A1295T |
| Pat_44 | Post-Resistance | IQGAP2   | 10788  | 37 | 5 | 75998398  | 75998398  | Missense_Mutation | SNP | G | A | 4 | 110 | c.4597G>A  | c.(4597-4599)GTG>ATG   | p.V1533M |
| Pat_44 | Post-Resistance | ARSB     | 411    | 37 | 5 | 78076321  | 78076321  | Missense_Mutation | SNP | G | A | 4 | 133 | c.1501C>T  | c.(1501-1503)CGC>TGC   | p.R501C  |
| Pat_44 | Post-Resistance | DMGDH    | 29958  | 37 | 5 | 78338269  | 78338269  | Nonsense_Mutation | SNP | G | A | 4 | 163 | c.1030C>T  | c.(1030-1032)CGA>TGA   | p.R344*  |
| Pat_44 | Post-Resistance | THBS4    | 7060   | 37 | 5 | 79374926  | 79374926  | Missense_Mutation | SNP | C | T | 4 | 140 | c.2356C>T  | c.(2356-2358)CAT>TAT   | p.H786Y  |
| Pat_44 | Post-Resistance | PCSK1    | 5122   | 37 | 5 | 95759156  | 95759156  | Missense_Mutation | SNP | G | A | 5 | 111 | c.404C>T   | c.(403-405)ACC>ATC     | p.T135I  |
| Pat_44 | Post-Resistance | PRRC1    | 133619 | 37 | 5 | 126860489 | 126860489 | Missense_Mutation | SNP | C | T | 6 | 405 | c.370C>T   | c.(370-372)CCC>TCC     | p.P124S  |
| Pat_44 | Post-Resistance | PCDHA8   | 56140  | 37 | 5 | 140221559 | 140221559 | Missense_Mutation | SNP | G | A | 4 | 102 | c.653G>A   | c.(652-654)GGC>GAC     | p.G218D  |
| Pat_44 | Post-Resistance | WWC1     | 23286  | 37 | 5 | 167882478 | 167882478 | Missense_Mutation | SNP | C | T | 7 | 242 | c.2776C>T  | c.(2776-2778)CGC>TGC   | p.R926C  |
| Pat_44 | Post-Resistance | STK10    | 6793   | 37 | 5 | 171520450 | 171520450 | Missense_Mutation | SNP | G | A | 4 | 119 | c.1520C>T  | c.(1519-1521)TCG>TTG   | p.S507L  |
| Pat_44 | Post-Resistance | CPEB4    | 80315  | 37 | 5 | 173370044 | 173370044 | Missense_Mutation | SNP | G | A | 5 | 207 | c.1274G>A  | c.(1273-1275)CGA>CAA   | p.R425Q  |
| Pat_44 | Post-Resistance | FGFR4    | 2264   | 37 | 5 | 176519689 | 176519689 | Missense_Mutation | SNP | C | T | 4 | 144 | c.961C>T   | c.(961-963)CGG>TGG     | p.R321W  |
| Pat_44 | Post-Resistance | NHP2     | 55651  | 37 | 5 | 177577981 | 177577981 | Missense_Mutation | SNP | C | G | 4 | 238 | c.244G>C   | c.(244-246)GCA>CCA     | p.A82P   |

|        |                 |           |        |    |   |           |           |                   |     |   |   |   |     |           |                      |          |
|--------|-----------------|-----------|--------|----|---|-----------|-----------|-------------------|-----|---|---|---|-----|-----------|----------------------|----------|
| Pat_44 | Post-Resistance | COL23A1   | 91522  | 37 | 5 | 177683382 | 177683382 | Missense_Mutation | SNP | C | T | 3 | 28  | c.854G>A  | c.(853-855)CGA>CAA   | p.R285Q  |
| Pat_44 | Post-Resistance | C5orf45   | 51149  | 37 | 5 | 179264450 | 179264450 | Nonsense_Mutation | SNP | G | A | 5 | 283 | c.973C>T  | c.(973-975)CGA>TGA   | p.R325*  |
| Pat_44 | Post-Resistance | MYLK4     | 340156 | 37 | 6 | 2678592   | 2678592   | Missense_Mutation | SNP | G | A | 4 | 190 | c.902C>T  | c.(901-903)TCG>TTG   | p.S301L  |
| Pat_44 | Post-Resistance | GCM2      | 9247   | 37 | 6 | 10877576  | 10877576  | Missense_Mutation | SNP | C | T | 3 | 85  | c.140G>A  | c.(139-141)CGC>CAC   | p.R47H   |
| Pat_44 | Post-Resistance | HIST1H2AD | 3013   | 37 | 6 | 26199413  | 26199413  | Missense_Mutation | SNP | G | A | 3 | 31  | c.59C>T   | c.(58-60)TCG>TTG     | p.S20L   |
| Pat_44 | Post-Resistance | BTN1A1    | 696    | 37 | 6 | 26508798  | 26508798  | Missense_Mutation | SNP | G | A | 5 | 299 | c.977G>A  | c.(976-978)CGA>CAA   | p.R326Q  |
| Pat_44 | Post-Resistance | MDC1      | 9656   | 37 | 6 | 30672288  | 30672288  | Missense_Mutation | SNP | C | A | 5 | 153 | c.4672G>T | c.(4672-4674)GGC>TGC | p.G1558C |
| Pat_44 | Post-Resistance | BAT1      | 7919   | 37 | 6 | 31498907  | 31498907  | Nonsense_Mutation | SNP | G | A | 4 | 139 | c.1045C>T | c.(1045-1047)CGA>TGA | p.R349*  |
| Pat_44 | Post-Resistance | SKIV2L    | 6499   | 37 | 6 | 31929327  | 31929327  | Missense_Mutation | SNP | G | A | 4 | 106 | c.793G>A  | c.(793-795)GCG>ACG   | p.A265T  |
| Pat_44 | Post-Resistance | SKIV2L    | 6499   | 37 | 6 | 31932075  | 31932075  | Missense_Mutation | SNP | C | T | 4 | 94  | c.1927C>T | c.(1927-1929)CTC>TTC | p.L643F  |
| Pat_44 | Post-Resistance | EGFL8     | 80864  | 37 | 6 | 32134938  | 32134938  | Missense_Mutation | SNP | G | A | 4 | 162 | c.505G>A  | c.(505-507)GGC>AGC   | p.G169S  |
| Pat_44 | Post-Resistance | HLA-DMA   | 3108   | 37 | 6 | 32918577  | 32918577  | Missense_Mutation | SNP | G | A | 5 | 200 | c.92C>T   | c.(91-93)CCT>CTT     | p.P31L   |
| Pat_44 | Post-Resistance | TEAD3     | 7005   | 37 | 6 | 35454289  | 35454289  | Missense_Mutation | SNP | G | A | 4 | 100 | c.151C>T  | c.(151-153)CCG>TCG   | p.P51S   |
| Pat_44 | Post-Resistance | KCNK17    | 89822  | 37 | 6 | 39267504  | 39267504  | Missense_Mutation | SNP | G | A | 4 | 154 | c.698C>T  | c.(697-699)CCC>CTC   | p.P233L  |
| Pat_44 | Post-Resistance | UNC5CL    | 222643 | 37 | 6 | 40999485  | 40999485  | Missense_Mutation | SNP | C | T | 4 | 182 | c.1054G>A | c.(1054-1056)GAT>AAT | p.D352N  |
| Pat_44 | Post-Resistance | TREM2     | 54209  | 37 | 6 | 41129150  | 41129150  | Missense_Mutation | SNP | C | T | 4 | 128 | c.242G>A  | c.(241-243)AGC>AAC   | p.S81N   |
| Pat_44 | Post-Resistance | PEX6      | 5190   | 37 | 6 | 42932612  | 42932612  | Nonsense_Mutation | SNP | G | A | 4 | 156 | c.2722C>T | c.(2722-2724)CAG>TAG | p.Q908*  |
| Pat_44 | Post-Resistance | TTBK1     | 84630  | 37 | 6 | 43221397  | 43221397  | Missense_Mutation | SNP | C | A | 4 | 28  | c.422C>A  | c.(421-423)TCC>TAC   | p.S141Y  |
| Pat_44 | Post-Resistance | TCTE1     | 202500 | 37 | 6 | 44253853  | 44253853  | Missense_Mutation | SNP | C | T | 4 | 194 | c.694G>A  | c.(694-696)GAT>AAT   | p.D232N  |
| Pat_44 | Post-Resistance | MUT       | 4594   | 37 | 6 | 49426989  | 49426989  | Missense_Mutation | SNP | G | A | 4 | 63  | c.191C>T  | c.(190-192)CCG>CTG   | p.P64L   |
| Pat_44 | Post-Resistance | GSTA3     | 2940   | 37 | 6 | 52762685  | 52762685  | Missense_Mutation | SNP | C | T | 5 | 180 | c.484G>A  | c.(484-486)GAA>AAA   | p.E162K  |
| Pat_44 | Post-Resistance | GCM1      | 8521   | 37 | 6 | 52998936  | 52998936  | Missense_Mutation | SNP | C | T | 8 | 270 | c.262G>A  | c.(262-264)GCA>ACA   | p.A88T   |
| Pat_44 | Post-Resistance | FAM83B    | 222584 | 37 | 6 | 54805208  | 54805208  | Missense_Mutation | SNP | G | A | 8 | 355 | c.1439G>A | c.(1438-1440)CGA>CAA | p.R480Q  |
| Pat_44 | Post-Resistance | RIMS1     | 22999  | 37 | 6 | 73110297  | 73110297  | Missense_Mutation | SNP | G | A | 4 | 234 | c.4960G>A | c.(4960-4962)GGA>AGA | p.G1654R |
| Pat_44 | Post-Resistance | COL12A1   | 1303   | 37 | 6 | 75844499  | 75844499  | Missense_Mutation | SNP | C | T | 5 | 208 | c.5467G>A | c.(5467-5469)GTA>ATA | p.V1823I |
| Pat_44 | Post-Resistance | RRAGD     | 58528  | 37 | 6 | 90089954  | 90089954  | Missense_Mutation | SNP | G | T | 5 | 271 | c.577C>A  | c.(577-579)CAA>AAA   | p.Q193K  |
| Pat_44 | Post-Resistance | BEND3     | 57673  | 37 | 6 | 107390255 | 107390255 | Missense_Mutation | SNP | G | A | 5 | 207 | c.2140C>T | c.(2140-2142)CCG>TCG | p.P714S  |
| Pat_44 | Post-Resistance | REV3L     | 5980   | 37 | 6 | 111680156 | 111680156 | Missense_Mutation | SNP | G | A | 5 | 239 | c.6941C>T | c.(6940-6942)CCG>CTG | p.P2314L |
| Pat_44 | Post-Resistance | DSE       | 29940  | 37 | 6 | 116720742 | 116720742 | Missense_Mutation | SNP | C | T | 5 | 98  | c.329C>T  | c.(328-330)GCA>GTA   | p.A110V  |
| Pat_44 | Post-Resistance | EYA4      | 2070   | 37 | 6 | 133802609 | 133802609 | Missense_Mutation | SNP | G | A | 4 | 193 | c.979G>A  | c.(979-981)GAT>AAT   | p.D327N  |
| Pat_44 | Post-Resistance | MAP7      | 9053   | 37 | 6 | 136677864 | 136677864 | Missense_Mutation | SNP | C | T | 4 | 105 | c.1981G>A | c.(1981-1983)GTT>ATT | p.V661I  |
| Pat_44 | Post-Resistance | PLAGL1    | 5325   | 37 | 6 | 144263033 | 144263033 | Missense_Mutation | SNP | G | C | 3 | 53  | c.920C>G  | c.(919-921)TCT>TGT   | p.S307C  |
| Pat_44 | Post-Resistance | GRM1      | 2911   | 37 | 6 | 146350780 | 146350780 | Missense_Mutation | SNP | G | A | 4 | 128 | c.127G>A  | c.(127-129)GGA>AGA   | p.G43R   |
| Pat_44 | Post-Resistance | GRM1      | 2911   | 37 | 6 | 146755453 | 146755453 | Missense_Mutation | SNP | G | A | 4 | 141 | c.3106G>A | c.(3106-3108)GGA>AGA | p.G1036R |
| Pat_44 | Post-Resistance | SASH1     | 23328  | 37 | 6 | 148711291 | 148711291 | Missense_Mutation | SNP | G | A | 5 | 340 | c.178G>A  | c.(178-180)GAT>AAT   | p.D60N   |
| Pat_44 | Post-Resistance | NUP43     | 348995 | 37 | 6 | 150057610 | 150057610 | Missense_Mutation | SNP | C | T | 4 | 86  | c.787G>A  | c.(787-789)GAA>AAA   | p.E263K  |
| Pat_44 | Post-Resistance | MTHFD1L   | 25902  | 37 | 6 | 151281429 | 151281429 | Missense_Mutation | SNP | G | A | 4 | 230 | c.1822G>A | c.(1822-1824)GTG>ATG | p.V608M  |
| Pat_44 | Post-Resistance | TIAM2     | 26230  | 37 | 6 | 155458470 | 155458470 | Missense_Mutation | SNP | G | A | 6 | 341 | c.1354G>A | c.(1354-1356)GAT>AAT | p.D452N  |
| Pat_44 | Post-Resistance | SERAC1    | 84947  | 37 | 6 | 158535847 | 158535847 | Missense_Mutation | SNP | G | A | 5 | 271 | c.1658C>T | c.(1657-1659)TCG>TTG | p.S553L  |
| Pat_44 | Post-Resistance | RSPH3     | 83861  | 37 | 6 | 159398793 | 159398793 | Missense_Mutation | SNP | G | A | 5 | 226 | c.1460C>T | c.(1459-1461)CCT>CTT | p.P487L  |
| Pat_44 | Post-Resistance | GPER      | 2852   | 37 | 7 | 1131797   | 1131797   | Missense_Mutation | SNP | G | A | 5 | 134 | c.433G>A  | c.(433-435)GTC>ATC   | p.V145I  |
| Pat_44 | Post-Resistance | SCIN      | 85477  | 37 | 7 | 12664737  | 12664737  | Missense_Mutation | SNP | G | A | 4 | 42  | c.862G>A  | c.(862-864)GGG>AGG   | p.G288R  |
| Pat_44 | Post-Resistance | ABCB5     | 340273 | 37 | 7 | 20766690  | 20766690  | Missense_Mutation | SNP | C | T | 4 | 151 | c.1318C>T | c.(1318-1320)CGT>TGT | p.R440C  |
| Pat_44 | Post-Resistance | DNAH11    | 8701   | 37 | 7 | 21603969  | 21603969  | Missense_Mutation | SNP | G | A | 3 | 78  | c.1148G>A | c.(1147-1149)CGG>CAG | p.R383Q  |
| Pat_44 | Post-Resistance | TRA2A     | 29896  | 37 | 7 | 23556103  | 23556103  | Missense_Mutation | SNP | C | T | 4 | 160 | c.215G>A  | c.(214-216)AGA>AAA   | p.R72K   |
| Pat_44 | Post-Resistance | DPY19L2P1 | 554236 | 37 | 7 | 35144260  | 35144260  | Missense_Mutation | SNP | C | T | 4 | 79  | c.848G>A  | c.(847-849)CGA>CAA   | p.R283Q  |
| Pat_44 | Post-Resistance | IGFBP1    | 3484   | 37 | 7 | 45930257  | 45930257  | Missense_Mutation | SNP | G | A | 4 | 103 | c.460G>A  | c.(460-462)GCC>ACC   | p.A154T  |

|        |                 |          |        |    |   |           |           |                   |     |   |   |   |     |               |                      |               |
|--------|-----------------|----------|--------|----|---|-----------|-----------|-------------------|-----|---|---|---|-----|---------------|----------------------|---------------|
| Pat_44 | Post-Resistance | PKD1L1   | 168507 | 37 | 7 | 47969091  | 47969091  | Missense_Mutation | SNP | G | A | 4 | 56  | c.770C>T      | c.(769-771)ACC>ATC   | p.T257I       |
| Pat_44 | Post-Resistance | ZNF735   | 730291 | 37 | 7 | 63680322  | 63680322  | Missense_Mutation | SNP | A | C | 4 | 176 | c.893A>C      | c.(892-894)AAA>ACA   | p.K298T       |
| Pat_44 | Post-Resistance | C7orf42  | 55069  | 37 | 7 | 66410200  | 66410200  | Missense_Mutation | SNP | G | A | 5 | 258 | c.397G>A      | c.(397-399)GTC>ATC   | p.V133I       |
| Pat_44 | Post-Resistance | FKBP6    | 8468   | 37 | 7 | 72744261  | 72744261  | Missense_Mutation | SNP | C | T | 4 | 187 | c.374C>T      | c.(373-375)CCC>CTC   | p.P125L       |
| Pat_44 | Post-Resistance | FKBP6    | 8468   | 37 | 7 | 72744270  | 72744270  | Missense_Mutation | SNP | C | T | 4 | 206 | c.383C>T      | c.(382-384)CCC>CTC   | p.P128L       |
| Pat_44 | Post-Resistance | POR      | 5447   | 37 | 7 | 75612905  | 75612905  | Missense_Mutation | SNP | G | A | 6 | 317 | c.898G>A      | c.(898-900)GAG>AAG   | p.E300K       |
| Pat_44 | Post-Resistance | DTX2     | 113878 | 37 | 7 | 76132897  | 76132897  | Missense_Mutation | SNP | G | A | 4 | 53  | c.1544G>A     | c.(1543-1545)GGT>GAT | p.G515D       |
| Pat_44 | Post-Resistance | ABCB1    | 5243   | 37 | 7 | 87160669  | 87160669  | Missense_Mutation | SNP | T | C | 5 | 282 | c.2626A>G     | c.(2626-2628)ATG>GTG | p.M876V       |
| Pat_44 | Post-Resistance | STEAP4   | 79689  | 37 | 7 | 87912078  | 87912078  | Missense_Mutation | SNP | G | A | 4 | 166 | c.862C>T      | c.(862-864)CTT>TTT   | p.L288F       |
| Pat_44 | Post-Resistance | DYNC111  | 1780   | 37 | 7 | 95614264  | 95614264  | Missense_Mutation | SNP | G | A | 4 | 232 | c.769G>A      | c.(769-771)GGC>AGC   | p.G257S       |
| Pat_44 | Post-Resistance | BRI3     | 25798  | 37 | 7 | 97920521  | 97920521  | Missense_Mutation | SNP | G | A | 4 | 71  | c.344G>A      | c.(343-345)CGA>CAA   | p.R115Q       |
| Pat_44 | Post-Resistance | PILRA    | 29992  | 37 | 7 | 99995510  | 99995510  | Missense_Mutation | SNP | C | T | 4 | 206 | c.682C>T      | c.(682-684)CGG>TGG   | p.R228W       |
| Pat_44 | Post-Resistance | ZAN      | 7455   | 37 | 7 | 100361687 | 100361687 | Missense_Mutation | SNP | G | A | 4 | 125 | c.4135G>A     | c.(4135-4137)GAC>AAC | p.D1379N      |
| Pat_44 | Post-Resistance | EPHB4    | 2050   | 37 | 7 | 100404041 | 100404041 | Splice_Site       | SNP | C | T | 4 | 129 | c.2484_splice | c.e14+1              | p.D828_splice |
| Pat_44 | Post-Resistance | PSMC2    | 5701   | 37 | 7 | 103008167 | 103008167 | Missense_Mutation | SNP | C | T | 4 | 102 | c.1055C>T     | c.(1054-1056)ACC>ATC | p.T352I       |
| Pat_44 | Post-Resistance | CDHR3    | 222256 | 37 | 7 | 105645010 | 105645010 | Missense_Mutation | SNP | C | T | 4 | 97  | c.929C>T      | c.(928-930)ACC>ATC   | p.T310I       |
| Pat_44 | Post-Resistance | LAMB4    | 22798  | 37 | 7 | 107732813 | 107732813 | Missense_Mutation | SNP | C | G | 4 | 126 | c.1519G>C     | c.(1519-1521)GAC>CAC | p.D507H       |
| Pat_44 | Post-Resistance | SPAM1    | 6677   | 37 | 7 | 123595094 | 123595094 | Missense_Mutation | SNP | C | T | 6 | 349 | c.998C>T      | c.(997-999)GCT>GTT   | p.A333V       |
| Pat_44 | Post-Resistance | IRF5     | 3663   | 37 | 7 | 128588332 | 128588332 | Missense_Mutation | SNP | G | A | 4 | 97  | c.1219G>A     | c.(1219-1221)GAA>AAA | p.E407K       |
| Pat_44 | Post-Resistance | PLXNA4   | 91584  | 37 | 7 | 131831448 | 131831448 | Missense_Mutation | SNP | G | A | 5 | 297 | c.4876C>T     | c.(4876-4878)CGG>TGG | p.R1626W      |
| Pat_44 | Post-Resistance | TRIM24   | 8805   | 37 | 7 | 138223473 | 138223473 | Missense_Mutation | SNP | G | T | 4 | 192 | c.1068G>T     | c.(1066-1068)TTG>TTT | p.L356F       |
| Pat_44 | Post-Resistance | TRIM24   | 8805   | 37 | 7 | 138269680 | 138269680 | Missense_Mutation | SNP | G | A | 4 | 115 | c.3137G>A     | c.(3136-3138)CGC>CAC | p.R1046H      |
| Pat_44 | Post-Resistance | KIAA1549 | 57670  | 37 | 7 | 138603918 | 138603918 | Missense_Mutation | SNP | C | T | 6 | 406 | c.454G>A      | c.(454-456)GTC>ATC   | p.V152I       |
| Pat_44 | Post-Resistance | PRSS1    | 5644   | 37 | 7 | 142460762 | 142460762 | Missense_Mutation | SNP | G | A | 4 | 95  | c.635G>A      | c.(634-636)GGA>GAA   | p.G212E       |
| Pat_44 | Post-Resistance | OR6V1    | 346517 | 37 | 7 | 142749903 | 142749903 | Missense_Mutation | SNP | C | T | 4 | 160 | c.466C>T      | c.(466-468)CCC>TCC   | p.P156S       |
| Pat_44 | Post-Resistance | ZYX      | 7791   | 37 | 7 | 143085594 | 143085594 | Missense_Mutation | SNP | G | A | 4 | 103 | c.1157G>A     | c.(1156-1158)CGA>CAA | p.R386Q       |
| Pat_44 | Post-Resistance | ZNF786   | 136051 | 37 | 7 | 148767871 | 148767871 | Missense_Mutation | SNP | C | T | 4 | 121 | c.1993G>A     | c.(1993-1995)GAG>AAG | p.E665K       |
| Pat_44 | Post-Resistance | WDR86    | 349136 | 37 | 7 | 151082210 | 151082210 | Missense_Mutation | SNP | G | A | 3 | 55  | c.826C>T      | c.(826-828)CGC>TGC   | p.R276C       |
| Pat_44 | Post-Resistance | DLGAP2   | 9228   | 37 | 8 | 1497104   | 1497104   | Missense_Mutation | SNP | C | T | 4 | 78  | c.245C>T      | c.(244-246)CCG>CTG   | p.P82L        |
| Pat_44 | Post-Resistance | FGF20    | 26281  | 37 | 8 | 16850642  | 16850642  | Missense_Mutation | SNP | G | A | 5 | 129 | c.575C>T      | c.(574-576)CCT>CTT   | p.P192L       |
| Pat_44 | Post-Resistance | XPO7     | 23039  | 37 | 8 | 21848421  | 21848421  | Missense_Mutation | SNP | G | A | 6 | 462 | c.2032G>A     | c.(2032-2034)GTG>ATG | p.V678M       |
| Pat_44 | Post-Resistance | LGI3     | 203190 | 37 | 8 | 22005857  | 22005857  | Missense_Mutation | SNP | G | A | 4 | 43  | c.1463C>T     | c.(1462-1464)TCC>TTC | p.S488F       |
| Pat_44 | Post-Resistance | BMP1     | 649    | 37 | 8 | 22067071  | 22067071  | Missense_Mutation | SNP | G | A | 4 | 234 | c.2689G>A     | c.(2689-2691)GAG>AAG | p.E897K       |
| Pat_44 | Post-Resistance | RHOBTB2  | 23221  | 37 | 8 | 22864257  | 22864257  | Missense_Mutation | SNP | G | A | 4 | 72  | c.499G>A      | c.(499-501)GAA>AAA   | p.E167K       |
| Pat_44 | Post-Resistance | PTK2B    | 2185   | 37 | 8 | 27311809  | 27311809  | Splice_Site       | SNP | G | A | 3 | 29  | c.2733_splice | c.e34+1              | p.K911_splice |
| Pat_44 | Post-Resistance | GPR124   | 25960  | 37 | 8 | 37690527  | 37690527  | Splice_Site       | SNP | G | A | 7 | 362 | c.1098_splice | c.e9-1               | p.R366_splice |
| Pat_44 | Post-Resistance | JPH1     | 56704  | 37 | 8 | 75157194  | 75157194  | Missense_Mutation | SNP | G | A | 5 | 182 | c.1475C>T     | c.(1474-1476)GCG>GTG | p.A492V       |
| Pat_44 | Post-Resistance | WWP1     | 11059  | 37 | 8 | 87473549  | 87473549  | Missense_Mutation | SNP | G | A | 5 | 198 | c.2596G>A     | c.(2596-2598)GGA>AGA | p.G866R       |
| Pat_44 | Post-Resistance | RBM12B   | 389677 | 37 | 8 | 94748493  | 94748493  | Missense_Mutation | SNP | G | A | 4 | 89  | c.146C>T      | c.(145-147)ACA>ATA   | p.T49I        |
| Pat_44 | Post-Resistance | TMEM67   | 91147  | 37 | 8 | 94777638  | 94777638  | Missense_Mutation | SNP | G | A | 4 | 146 | c.511G>A      | c.(511-513)GTC>ATC   | p.V171I       |
| Pat_44 | Post-Resistance | GRHL2    | 79977  | 37 | 8 | 102505011 | 102505011 | Missense_Mutation | SNP | C | T | 4 | 154 | c.14C>T       | c.(13-15)TCG>TTG     | p.S5L         |
| Pat_44 | Post-Resistance | CSMD3    | 114788 | 37 | 8 | 113668416 | 113668416 | Missense_Mutation | SNP | G | A | 4 | 116 | c.2971C>T     | c.(2971-2973)CGT>TGT | p.R991C       |
| Pat_44 | Post-Resistance | CSMD3    | 114788 | 37 | 8 | 113668487 | 113668487 | Missense_Mutation | SNP | C | T | 4 | 126 | c.2900G>A     | c.(2899-2901)GGC>GAC | p.G967D       |
| Pat_44 | Post-Resistance | COLEC10  | 10584  | 37 | 8 | 120079546 | 120079546 | Missense_Mutation | SNP | G | A | 4 | 94  | c.26G>A       | c.(25-27)CGA>CAA     | p.R9Q         |
| Pat_44 | Post-Resistance | OC90     | 729330 | 37 | 8 | 133062080 | 133062080 | Nonsense_Mutation | SNP | G | A | 5 | 232 | c.37C>T       | c.(37-39)CAG>TAG     | p.Q13*        |
| Pat_44 | Post-Resistance | TG       | 7038   | 37 | 8 | 133900673 | 133900673 | Missense_Mutation | SNP | G | A | 3 | 39  | c.2621G>A     | c.(2620-2622)GGC>GAC | p.G874D       |
| Pat_44 | Post-Resistance | NDRG1    | 10397  | 37 | 8 | 134260140 | 134260140 | Missense_Mutation | SNP | C | T | 4 | 244 | c.785G>A      | c.(784-786)AGC>AAC   | p.S262N       |

|        |                 |           |        |    |   |           |           |                   |     |   |   |    |     |               |                      |               |
|--------|-----------------|-----------|--------|----|---|-----------|-----------|-------------------|-----|---|---|----|-----|---------------|----------------------|---------------|
| Pat_44 | Post-Resistance | BAI1      | 575    | 37 | 8 | 143602201 | 143602201 | Missense_Mutation | SNP | G | A | 4  | 83  | c.2939G>A     | c.(2938-2940)CGT>CAT | p.R980H       |
| Pat_44 | Post-Resistance | EPPK1     | 83481  | 37 | 8 | 144940844 | 144940844 | Missense_Mutation | SNP | G | A | 5  | 282 | c.6578C>T     | c.(6577-6579)ACG>ATG | p.T2193M      |
| Pat_44 | Post-Resistance | EPPK1     | 83481  | 37 | 8 | 144943152 | 144943152 | Missense_Mutation | SNP | C | T | 4  | 143 | c.4270G>A     | c.(4270-4272)GAC>AAC | p.D1424N      |
| Pat_44 | Post-Resistance | KIAA2026  | 158358 | 37 | 9 | 5922299   | 5922299   | Missense_Mutation | SNP | C | T | 5  | 133 | c.3697G>A     | c.(3697-3699)GGT>AGT | p.G1233S      |
| Pat_44 | Post-Resistance | UHRF2     | 115426 | 37 | 9 | 6506075   | 6506075   | Missense_Mutation | SNP | C | T | 4  | 148 | c.2305C>T     | c.(2305-2307)CCT>TCT | p.P769S       |
| Pat_44 | Post-Resistance | GLDC      | 2731   | 37 | 9 | 6554754   | 6554754   | Missense_Mutation | SNP | C | T | 3  | 49  | c.2230G>A     | c.(2230-2232)GGG>AGG | p.G744R       |
| Pat_44 | Post-Resistance | OR2S2     | 56656  | 37 | 9 | 35957483  | 35957483  | Missense_Mutation | SNP | C | T | 5  | 147 | c.613G>A      | c.(613-615)GTG>ATG   | p.V205M       |
| Pat_44 | Post-Resistance | PAX5      | 5079   | 37 | 9 | 36923376  | 36923376  | Missense_Mutation | SNP | G | A | 4  | 168 | c.886C>T      | c.(886-888)CCG>TCG   | p.P296S       |
| Pat_44 | Post-Resistance | RG9MTD3   | 158234 | 37 | 9 | 37769975  | 37769975  | Missense_Mutation | SNP | C | T | 5  | 412 | c.611C>T      | c.(610-612)CCC>CTC   | p.P204L       |
| Pat_44 | Post-Resistance | VPS13A    | 23230  | 37 | 9 | 79996953  | 79996953  | Missense_Mutation | SNP | G | A | 4  | 107 | c.9139G>A     | c.(9139-9141)GTT>ATT | p.V3047I      |
| Pat_44 | Post-Resistance | DAPK1     | 1612   | 37 | 9 | 90322028  | 90322028  | Missense_Mutation | SNP | G | A | 4  | 112 | c.4042G>A     | c.(4042-4044)GGG>AGG | p.G1348R      |
| Pat_44 | Post-Resistance | SEMA4D    | 10507  | 37 | 9 | 92020266  | 92020266  | Missense_Mutation | SNP | C | T | 4  | 84  | c.106G>A      | c.(106-108)GAG>AAG   | p.E36K        |
| Pat_44 | Post-Resistance | CDC14B    | 8555   | 37 | 9 | 99296754  | 99296754  | Missense_Mutation | SNP | C | T | 4  | 160 | c.698G>A      | c.(697-699)AGA>AAA   | p.R233K       |
| Pat_44 | Post-Resistance | NCBP1     | 4686   | 37 | 9 | 100426677 | 100426677 | Missense_Mutation | SNP | C | T | 4  | 206 | c.1853C>T     | c.(1852-1854)GCC>GTC | p.A618V       |
| Pat_44 | Post-Resistance | TBC1D2    | 55357  | 37 | 9 | 100963825 | 100963825 | Missense_Mutation | SNP | G | A | 4  | 188 | c.2393C>T     | c.(2392-2394)GCG>GTG | p.A798V       |
| Pat_44 | Post-Resistance | ZNF462    | 58499  | 37 | 9 | 109746677 | 109746677 | Missense_Mutation | SNP | G | A | 4  | 145 | c.7043G>A     | c.(7042-7044)CGG>CAG | p.R2348Q      |
| Pat_44 | Post-Resistance | RAD23B    | 5887   | 37 | 9 | 110073982 | 110073982 | Missense_Mutation | SNP | C | T | 4  | 119 | c.517C>T      | c.(517-519)CGG>TGG   | p.R173W       |
| Pat_44 | Post-Resistance | ZNF483    | 158399 | 37 | 9 | 114304755 | 114304755 | Missense_Mutation | SNP | C | A | 4  | 49  | c.1540C>A     | c.(1540-1542)CAG>AAG | p.Q514K       |
| Pat_44 | Post-Resistance | ORM1      | 5004   | 37 | 9 | 117086085 | 117086085 | Missense_Mutation | SNP | G | A | 4  | 82  | c.257G>A      | c.(256-258)CGA>CAA   | p.R86Q        |
| Pat_44 | Post-Resistance | ASTN2     | 23245  | 37 | 9 | 119903655 | 119903655 | Missense_Mutation | SNP | G | A | 4  | 108 | c.1118C>T     | c.(1117-1119)CCC>CTC | p.P373L       |
| Pat_44 | Post-Resistance | C5        | 727    | 37 | 9 | 123724984 | 123724984 | Missense_Mutation | SNP | G | A | 5  | 422 | c.4469C>T     | c.(4468-4470)CCT>CTT | p.P1490L      |
| Pat_44 | Post-Resistance | SCAI      | 286205 | 37 | 9 | 127733949 | 127733949 | Splice_Site       | SNP | C | T | 6  | 428 | c.1573_splice | c.e16+1              | p.D525_splice |
| Pat_44 | Post-Resistance | CDK9      | 1025   | 37 | 9 | 130550841 | 130550841 | Missense_Mutation | SNP | C | T | 2  | 2   | c.623C>T      | c.(622-624)CCC>CTC   | p.P208L       |
| Pat_44 | Post-Resistance | CIZ1      | 25792  | 37 | 9 | 130938655 | 130938655 | Missense_Mutation | SNP | G | A | 4  | 193 | c.1918C>T     | c.(1918-1920)CGG>TGG | p.R640W       |
| Pat_44 | Post-Resistance | CAMSAP1   | 157922 | 37 | 9 | 138703415 | 138703415 | Missense_Mutation | SNP | G | A | 4  | 23  | c.4549C>T     | c.(4549-4551)CGT>TGT | p.R1517C      |
| Pat_44 | Post-Resistance | CTPS2     | 56474  | 37 | X | 16716382  | 16716382  | Missense_Mutation | SNP | C | T | 6  | 282 | c.415G>A      | c.(415-417)GAG>AAG   | p.E139K       |
| Pat_44 | Post-Resistance | YY2       | 404281 | 37 | X | 21875236  | 21875236  | Missense_Mutation | SNP | G | A | 5  | 187 | c.634G>A      | c.(634-636)GAG>AAG   | p.E212K       |
| Pat_44 | Post-Resistance | DCAF8L1   | 139425 | 37 | X | 27998611  | 27998611  | Missense_Mutation | SNP | G | A | 3  | 64  | c.841C>T      | c.(841-843)CGT>TGT   | p.R281C       |
| Pat_44 | Post-Resistance | OTUD5     | 55593  | 37 | X | 48792014  | 48792014  | Missense_Mutation | SNP | G | A | 4  | 67  | c.880C>T      | c.(880-882)CGT>TGT   | p.R294C       |
| Pat_44 | Post-Resistance | PFKFB1    | 5207   | 37 | X | 54982667  | 54982667  | Missense_Mutation | SNP | C | T | 3  | 66  | c.557G>A      | c.(556-558)CGG>CAG   | p.R186Q       |
| Pat_44 | Post-Resistance | RAB40A    | 142684 | 37 | X | 102755651 | 102755651 | Missense_Mutation | SNP | C | A | 4  | 89  | c.34G>T       | c.(34-36)GAC>TAC     | p.D12Y        |
| Pat_44 | Post-Resistance | RAB40A    | 142684 | 37 | X | 102755657 | 102755657 | Missense_Mutation | SNP | C | T | 4  | 78  | c.28G>A       | c.(28-30)GCC>ACC     | p.A10T        |
| Pat_44 | Post-Resistance | VGLL1     | 51442  | 37 | X | 135630918 | 135630918 | Missense_Mutation | SNP | G | A | 7  | 170 | c.385G>A      | c.(385-387)GAG>AAG   | p.E129K       |
| Pat_44 | Post-Resistance | MAGEC1    | 9947   | 37 | X | 140994583 | 140994583 | Nonsense_Mutation | SNP | A | T | 5  | 120 | c.1393A>T     | c.(1393-1395)AGA>TGA | p.R465*       |
| Pat_44 | Post-Resistance | MAGEC1    | 9947   | 37 | X | 140994923 | 140994923 | Missense_Mutation | SNP | A | T | 7  | 287 | c.1733A>T     | c.(1732-1734)CAC>CTC | p.H578L       |
| Pat_44 | Post-Resistance | SPANXN2   | 494119 | 37 | X | 142795287 | 142795287 | Missense_Mutation | SNP | A | G | 12 | 112 | c.391T>C      | c.(391-393)TCT>CCT   | p.S131P       |
| Pat_44 | Post-Resistance | MTM1      | 4534   | 37 | X | 149839923 | 149839923 | Missense_Mutation | SNP | G | A | 4  | 54  | c.1667G>A     | c.(1666-1668)CGT>CAT | p.R556H       |
| Pat_44 | Post-Resistance | SLC6A8    | 6535   | 37 | X | 152959631 | 152959631 | Missense_Mutation | SNP | C | T | 4  | 75  | c.1301C>T     | c.(1300-1302)CCG>CTG | p.P434L       |
| Pat_44 | Post-Resistance | USP9Y     | 8287   | 37 | Y | 14922709  | 14922709  | Missense_Mutation | SNP | G | A | 4  | 66  | c.4195G>A     | c.(4195-4197)GAA>AAA | p.E1399K      |
| Pat_45 | Pre-Treatment   | AGRN      | 375790 | 37 | 1 | 957741    | 957741    | Missense_Mutation | SNP | C | T | 5  | 93  | c.362C>T      | c.(361-363)CCC>CTC   | p.P121L       |
| Pat_45 | Pre-Treatment   | NADK      | 65220  | 37 | 1 | 1688674   | 1688674   | Missense_Mutation | SNP | C | A | 43 | 71  | c.339G>T      | c.(337-339)ATG>ATT   | p.M113I       |
| Pat_45 | Pre-Treatment   | ENO1      | 2023   | 37 | 1 | 8930542   | 8930542   | Missense_Mutation | SNP | T | C | 18 | 64  | c.209A>G      | c.(208-210)AAT>AGT   | p.N70S        |
| Pat_45 | Pre-Treatment   | MTOR      | 2475   | 37 | 1 | 11186732  | 11186732  | Missense_Mutation | SNP | G | A | 4  | 94  | c.6473C>T     | c.(6472-6474)CCG>CTG | p.P2158L      |
| Pat_45 | Pre-Treatment   | LOC440563 | 440563 | 37 | 1 | 13183290  | 13183290  | Missense_Mutation | SNP | C | T | 60 | 287 | c.583G>A      | c.(583-585)GAT>AAT   | p.D195N       |
| Pat_45 | Pre-Treatment   | FBLIM1    | 54751  | 37 | 1 | 16091650  | 16091650  | Missense_Mutation | SNP | G | A | 3  | 17  | c.172G>A      | c.(172-174)GGG>AGG   | p.G58R        |
| Pat_45 | Pre-Treatment   | SPEN      | 23013  | 37 | 1 | 16260971  | 16260971  | Missense_Mutation | SNP | G | A | 4  | 73  | c.8236G>A     | c.(8236-8238)GTT>ATT | p.V2746I      |
| Pat_45 | Pre-Treatment   | ZBTB17    | 7709   | 37 | 1 | 16271646  | 16271646  | Missense_Mutation | SNP | T | C | 2  | 8   | c.713A>G      | c.(712-714)GAG>GGG   | p.E238G       |

|        |               |          |           |    |   |           |           |                   |     |    |    |     |     |                 |                        |          |
|--------|---------------|----------|-----------|----|---|-----------|-----------|-------------------|-----|----|----|-----|-----|-----------------|------------------------|----------|
| Pat_45 | Pre-Treatment | CLCNKB   | 1188      | 37 | 1 | 16372118  | 16372118  | Missense_Mutation | SNP | C  | A  | 3   | 37  | c.166C>A        | c.(166-168)CTC>ATC     | p.L56I   |
| Pat_45 | Pre-Treatment | EPHA2    | 1969      | 37 | 1 | 16458313  | 16458313  | Missense_Mutation | SNP | T  | C  | 3   | 42  | c.2378A>G       | c.(2377-2379)AAG>AGG   | p.K793R  |
| Pat_45 | Pre-Treatment | FBXO42   | 54455     | 37 | 1 | 16577955  | 16577955  | Missense_Mutation | SNP | G  | A  | 3   | 23  | c.1364C>T       | c.(1363-1365)TCT>TTT   | p.S455F  |
| Pat_45 | Pre-Treatment | PADI2    | 11240     | 37 | 1 | 17420088  | 17420088  | Missense_Mutation | SNP | C  | T  | 4   | 108 | c.503G>A        | c.(502-504)CGT>CAT     | p.R168H  |
| Pat_45 | Pre-Treatment | PADI1    | 29943     | 37 | 1 | 17550188  | 17550188  | Missense_Mutation | SNP | G  | A  | 3   | 30  | c.346G>A        | c.(346-348)GAT>AAT     | p.D116N  |
| Pat_45 | Pre-Treatment | UBR4     | 23352     | 37 | 1 | 19404519  | 19404519  | Missense_Mutation | SNP | G  | A  | 11  | 87  | c.15275C>T      | c.(15274-15276)TCT>TTT | p.S5092F |
| Pat_45 | Pre-Treatment | UBR4     | 23352     | 37 | 1 | 19474509  | 19474509  | Missense_Mutation | SNP | C  | T  | 4   | 117 | c.7607G>A       | c.(7606-7608)CGC>CAC   | p.R2536H |
| Pat_45 | Pre-Treatment | UBR4     | 23352     | 37 | 1 | 19504038  | 19504038  | Missense_Mutation | SNP | G  | A  | 6   | 244 | c.2554C>T       | c.(2554-2556)CCG>TCG   | p.P852S  |
| Pat_45 | Pre-Treatment | RNF186   | 54546     | 37 | 1 | 20141465  | 20141465  | Missense_Mutation | SNP | G  | A  | 4   | 62  | c.130C>T        | c.(130-132)CCG>TGG     | p.R44W   |
| Pat_45 | Pre-Treatment | C1orf63  | 57035     | 37 | 1 | 25573127  | 25573127  | Missense_Mutation | SNP | G  | A  | 3   | 36  | c.328C>T        | c.(328-330)CCG>TGG     | p.R110W  |
| Pat_45 | Pre-Treatment | LDLRAP1  | 26119     | 37 | 1 | 25889602  | 25889602  | Missense_Mutation | SNP | G  | A  | 4   | 125 | c.574G>A        | c.(574-576)GTC>ATC     | p.V192I  |
| Pat_45 | Pre-Treatment | SESN2    | 83667     | 37 | 1 | 28598946  | 28598946  | Missense_Mutation | SNP | G  | A  | 4   | 88  | c.506G>A        | c.(505-507)CCG>CAG     | p.R169Q  |
| Pat_45 | Pre-Treatment | ZSCAN20  | 7579      | 37 | 1 | 33959999  | 33959999  | Nonsense_Mutation | SNP | G  | A  | 4   | 104 | c.2055G>A       | c.(2053-2055)TGG>TGA   | p.W685*  |
| Pat_45 | Pre-Treatment | CSMD2    | 114784    | 37 | 1 | 34006125  | 34006125  | Missense_Mutation | SNP | G  | A  | 4   | 71  | c.9199C>T       | c.(9199-9201)CCT>TCT   | p.P3067S |
| Pat_45 | Pre-Treatment | EIF2C1   | 26523     | 37 | 1 | 36358825  | 36358825  | Missense_Mutation | SNP | C  | T  | 10  | 97  | c.458C>T        | c.(457-459)CCC>CTC     | p.P153L  |
| Pat_45 | Pre-Treatment | KIAA0754 | 643314    | 37 | 1 | 39879817  | 39879817  | Missense_Mutation | SNP | G  | A  | 3   | 11  | c.3880G>A       | c.(3880-3882)GCC>ACC   | p.A1294T |
| Pat_45 | Pre-Treatment | ZNF691   | 51058     | 37 | 1 | 43317387  | 43317387  | Missense_Mutation | SNP | G  | A  | 5   | 153 | c.839G>A        | c.(838-840)CCG>CAG     | p.R280Q  |
| Pat_45 | Pre-Treatment | FAM151A  | 338094    | 37 | 1 | 55076117  | 55076117  | Missense_Mutation | SNP | C  | T  | 4   | 97  | c.1052G>A       | c.(1051-1053)GGC>GAC   | p.G351D  |
| Pat_45 | Pre-Treatment | USP24    | 23358     | 37 | 1 | 55567369  | 55567369  | Missense_Mutation | SNP | G  | A  | 4   | 67  | c.4553C>T       | c.(4552-4554)CCC>CTC   | p.P1518L |
| Pat_45 | Pre-Treatment | USP24    | 23358     | 37 | 1 | 55590162  | 55590162  | Missense_Mutation | SNP | C  | T  | 4   | 38  | c.3620G>A       | c.(3619-3621)CGA>CAA   | p.R1207Q |
| Pat_45 | Pre-Treatment | LRRRC8D  | 55144     | 37 | 1 | 90401185  | 90401185  | Missense_Mutation | SNP | C  | T  | 42  | 156 | c.2558C>T       | c.(2557-2559)CCC>CTC   | p.P853L  |
| Pat_45 | Pre-Treatment | C1orf146 | 388649    | 37 | 1 | 92707815  | 92707815  | Missense_Mutation | SNP | G  | A  | 36  | 190 | c.113G>A        | c.(112-114)CGA>CAA     | p.R38Q   |
| Pat_45 | Pre-Treatment | CDC14A   | 8556      | 37 | 1 | 100964760 | 100964760 | Missense_Mutation | SNP | G  | A  | 4   | 123 | c.1697G>A       | c.(1696-1698)CGA>CAA   | p.R566Q  |
| Pat_45 | Pre-Treatment | SORT1    | 6272      | 37 | 1 | 109869773 | 109869773 | Missense_Mutation | SNP | C  | T  | 15  | 104 | c.1484G>A       | c.(1483-1485)GGG>GAG   | p.G495E  |
| Pat_45 | Pre-Treatment | RBM15    | 64783     | 37 | 1 | 110882755 | 110882755 | Missense_Mutation | SNP | G  | A  | 4   | 107 | c.728G>A        | c.(727-729)CCG>CAG     | p.R243Q  |
| Pat_45 | Pre-Treatment | PTGFRN   | 5738      | 37 | 1 | 117527332 | 117527332 | Missense_Mutation | SNP | C  | T  | 4   | 62  | c.2198C>T       | c.(2197-2199)GCG>GTG   | p.A733V  |
| Pat_45 | Pre-Treatment | NBPF10   | 100132406 | 37 | 1 | 145360576 | 145360576 | Missense_Mutation | SNP | T  | A  | 11  | 81  | c.9426T>A       | c.(9424-9426)GAT>GAA   | p.D3142E |
| Pat_45 | Pre-Treatment | ANKRD35  | 148741    | 37 | 1 | 145560154 | 145560154 | Missense_Mutation | SNP | G  | A  | 4   | 61  | c.640G>A        | c.(640-642)GCT>ACT     | p.A214T  |
| Pat_45 | Pre-Treatment | CTSS     | 1520      | 37 | 1 | 150730438 | 150730438 | Missense_Mutation | SNP | G  | A  | 3   | 60  | c.145C>T        | c.(145-147)CGT>TGT     | p.R49C   |
| Pat_45 | Pre-Treatment | ZNF687   | 57592     | 37 | 1 | 151260469 | 151260469 | Missense_Mutation | SNP | C  | T  | 4   | 86  | c.1702C>T       | c.(1702-1704)CGC>TGC   | p.R568C  |
| Pat_45 | Pre-Treatment | CRNN     | 49860     | 37 | 1 | 152382821 | 152382821 | Missense_Mutation | SNP | C  | T  | 4   | 125 | c.737G>A        | c.(736-738)AGC>AAC     | p.S246N  |
| Pat_45 | Pre-Treatment | DENND4B  | 9909      | 37 | 1 | 153912212 | 153912212 | Missense_Mutation | SNP | G  | A  | 3   | 47  | c.1672C>T       | c.(1672-1674)CGC>TGC   | p.R558C  |
| Pat_45 | Pre-Treatment | C1orf43  | 25912     | 37 | 1 | 154180096 | 154180096 | Nonsense_Mutation | SNP | G  | A  | 4   | 103 | c.595C>T        | c.(595-597)CGA>TGA     | p.R199*  |
| Pat_45 | Pre-Treatment | HAX1     | 10456     | 37 | 1 | 154247935 | 154247935 | Missense_Mutation | SNP | G  | A  | 6   | 272 | c.730G>A        | c.(730-732)GAA>AAA     | p.E244K  |
| Pat_45 | Pre-Treatment | GON4L    | 54856     | 37 | 1 | 155764858 | 155764858 | Missense_Mutation | SNP | C  | T  | 4   | 151 | c.1730G>A       | c.(1729-1731)CGG>CAG   | p.R577Q  |
| Pat_45 | Pre-Treatment | INSRR    | 3645      | 37 | 1 | 156816443 | 156816443 | Missense_Mutation | SNP | C  | T  | 4   | 46  | c.1678G>A       | c.(1678-1680)GTG>ATG   | p.V560M  |
| Pat_45 | Pre-Treatment | FCRL5    | 83416     | 37 | 1 | 157512843 | 157512843 | Missense_Mutation | SNP | G  | A  | 4   | 70  | c.929C>T        | c.(928-930)ACC>ATC     | p.T310I  |
| Pat_45 | Pre-Treatment | FCRL1    | 115350    | 37 | 1 | 157776892 | 157776892 | Missense_Mutation | SNP | C  | T  | 33  | 86  | c.52G>A         | c.(52-54)GAG>AAG       | p.E18K   |
| Pat_45 | Pre-Treatment | OR10T2   | 128360    | 37 | 1 | 158368742 | 158368742 | Missense_Mutation | SNP | G  | A  | 3   | 44  | c.515C>T        | c.(514-516)CCC>CTC     | p.P172L  |
| Pat_45 | Pre-Treatment | CRP      | 1401      | 37 | 1 | 159683787 | 159683787 | Missense_Mutation | SNP | C  | T  | 19  | 107 | c.203G>A        | c.(202-204)AGT>AAT     | p.S68N   |
| Pat_45 | Pre-Treatment | ARHGAP30 | 257106    | 37 | 1 | 161021356 | 161021356 | Nonsense_Mutation | SNP | G  | A  | 4   | 103 | c.1168C>T       | c.(1168-1170)CGA>TGA   | p.R390*  |
| Pat_45 | Pre-Treatment | RGS5     | 8490      | 37 | 1 | 163122354 | 163122354 | Missense_Mutation | SNP | C  | T  | 225 | 307 | c.370G>A        | c.(370-372)GAG>AAG     | p.E124K  |
| Pat_45 | Pre-Treatment | DUSP27   | 92235     | 37 | 1 | 167096607 | 167096607 | Missense_Mutation | SNP | C  | T  | 4   | 113 | c.2239C>T       | c.(2239-2241)CGC>TGC   | p.R747C  |
| Pat_45 | Pre-Treatment | RC3H1    | 149041    | 37 | 1 | 173907863 | 173907864 | Missense_Mutation | DNP | GG | AA | 8   | 156 | ..3397_3398CC>T | c.(3397-3399)CCT>TTT   | p.P1133F |
| Pat_45 | Pre-Treatment | TNN      | 63923     | 37 | 1 | 175087853 | 175087853 | Missense_Mutation | SNP | G  | A  | 4   | 93  | c.2543G>A       | c.(2542-2544)AGC>AAC   | p.S848N  |
| Pat_45 | Pre-Treatment | ASTN1    | 460       | 37 | 1 | 176853559 | 176853559 | Missense_Mutation | SNP | G  | A  | 5   | 104 | c.3142C>T       | c.(3142-3144)CCA>TCA   | p.P1048S |
| Pat_45 | Pre-Treatment | CACNA1E  | 777       | 37 | 1 | 181690901 | 181690901 | Missense_Mutation | SNP | C  | T  | 4   | 90  | c.1964C>T       | c.(1963-1965)ACG>ATG   | p.T655M  |



|        |               |          |        |    |    |           |           |                   |     |    |    |    |     |                |                      |               |
|--------|---------------|----------|--------|----|----|-----------|-----------|-------------------|-----|----|----|----|-----|----------------|----------------------|---------------|
| Pat_45 | Pre-Treatment | RNASEL   | 6041   | 37 | 1  | 182555277 | 182555277 | Missense_Mutation | SNP | G  | A  | 4  | 81  | c.665C>T       | c.(664-666)ACG>ATG   | p.T222M       |
| Pat_45 | Pre-Treatment | FAM129A  | 116496 | 37 | 1  | 184777287 | 184777287 | Missense_Mutation | SNP | C  | T  | 6  | 157 | c.1256G>A      | c.(1255-1257)CGC>CAC | p.R419H       |
| Pat_45 | Pre-Treatment | DENND1B  | 163486 | 37 | 1  | 197479988 | 197479988 | Missense_Mutation | SNP | G  | A  | 4  | 98  | c.1870C>T      | c.(1870-1872)CCT>TCT | p.P624S       |
| Pat_45 | Pre-Treatment | SHISA4   | 149345 | 37 | 1  | 201860675 | 201860675 | Missense_Mutation | SNP | C  | T  | 53 | 63  | c.526C>T       | c.(526-528)CCC>TCC   | p.P176S       |
| Pat_45 | Pre-Treatment | MDM4     | 4194   | 37 | 1  | 204515928 | 204515928 | Missense_Mutation | SNP | A  | G  | 3  | 92  | c.826A>G       | c.(826-828)ATT>GTT   | p.I276V       |
| Pat_45 | Pre-Treatment | DSTYK    | 25778  | 37 | 1  | 205156710 | 205156710 | Missense_Mutation | SNP | T  | C  | 14 | 70  | c.490A>G       | c.(490-492)AGC>GGC   | p.S164G       |
| Pat_45 | Pre-Treatment | CR1      | 1378   | 37 | 1  | 207758068 | 207758068 | Missense_Mutation | SNP | G  | A  | 25 | 152 | c.4027G>A      | c.(4027-4029)GGA>AGA | p.G1343R      |
| Pat_45 | Pre-Treatment | RCOR3    | 55758  | 37 | 1  | 211487015 | 211487015 | Missense_Mutation | SNP | C  | T  | 17 | 128 | c.1393C>T      | c.(1393-1395)CGT>TGT | p.R465C       |
| Pat_45 | Pre-Treatment | TMEM63A  | 9725   | 37 | 1  | 226044656 | 226044656 | Missense_Mutation | SNP | G  | A  | 4  | 51  | c.1439C>T      | c.(1438-1440)CCC>CTC | p.P480L       |
| Pat_45 | Pre-Treatment | LEFTY2   | 7044   | 37 | 1  | 226128594 | 226128594 | Nonsense_Mutation | SNP | G  | A  | 9  | 32  | c.247C>T       | c.(247-249)CGA>TGA   | p.R83*        |
| Pat_45 | Pre-Treatment | TRIM67   | 440730 | 37 | 1  | 231335945 | 231335945 | Missense_Mutation | SNP | G  | A  | 5  | 209 | c.1315G>A      | c.(1315-1317)GGA>AGA | p.G439R       |
| Pat_45 | Pre-Treatment | NID1     | 4811   | 37 | 1  | 236157029 | 236157029 | Missense_Mutation | SNP | C  | T  | 6  | 23  | c.2671G>A      | c.(2671-2673)GGC>AGC | p.G891S       |
| Pat_45 | Pre-Treatment | OR2G6    | 391211 | 37 | 1  | 248684984 | 248684984 | Missense_Mutation | SNP | C  | T  | 59 | 117 | c.37C>T        | c.(37-39)CTT>TTT     | p.L13F        |
| Pat_45 | Pre-Treatment | DIP2C    | 22982  | 37 | 10 | 518453    | 518453    | Missense_Mutation | SNP | G  | A  | 4  | 88  | c.194C>T       | c.(193-195)CCT>CTT   | p.P65L        |
| Pat_45 | Pre-Treatment | TUBAL3   | 79861  | 37 | 10 | 5437346   | 5437346   | Missense_Mutation | SNP | G  | A  | 34 | 94  | c.340C>T       | c.(340-342)CGT>TGT   | p.R114C       |
| Pat_45 | Pre-Treatment | C10orf18 | 54906  | 37 | 10 | 5781863   | 5781863   | Missense_Mutation | SNP | G  | A  | 4  | 108 | c.1730G>A      | c.(1729-1731)CGA>CAA | p.R577Q       |
| Pat_45 | Pre-Treatment | KIAA1217 | 56243  | 37 | 10 | 24820827  | 24820827  | Missense_Mutation | SNP | C  | T  | 4  | 62  | c.3151C>T      | c.(3151-3153)CCT>TCT | p.P1051S      |
| Pat_45 | Pre-Treatment | ARHGAP22 | 58504  | 37 | 10 | 49658349  | 49658349  | Missense_Mutation | SNP | G  | A  | 2  | 4   | c.1823C>T      | c.(1822-1824)GCC>GTC | p.A608V       |
| Pat_45 | Pre-Treatment | RHOBTB1  | 9886   | 37 | 10 | 62671193  | 62671193  | Nonsense_Mutation | SNP | G  | T  | 6  | 128 | c.108C>A       | c.(106-108)TGC>TGA   | p.C36*        |
| Pat_45 | Pre-Treatment | ARID5B   | 84159  | 37 | 10 | 63851728  | 63851728  | Missense_Mutation | SNP | C  | T  | 5  | 100 | c.2506C>T      | c.(2506-2508)CAT>TAT | p.H836Y       |
| Pat_45 | Pre-Treatment | CYP2C18  | 1562   | 37 | 10 | 96447632  | 96447632  | Missense_Mutation | SNP | G  | A  | 33 | 86  | c.274G>A       | c.(274-276)GAG>AAG   | p.E92K        |
| Pat_45 | Pre-Treatment | CYP2C8   | 1558   | 37 | 10 | 96802652  | 96802652  | Missense_Mutation | SNP | G  | A  | 31 | 64  | c.1144C>T      | c.(1144-1146)CCC>TCC | p.P382S       |
| Pat_45 | Pre-Treatment | C10orf2  | 56652  | 37 | 10 | 102747987 | 102747987 | Missense_Mutation | SNP | G  | A  | 4  | 60  | c.20G>A        | c.(19-21)AGT>AAT     | p.S7N         |
| Pat_45 | Pre-Treatment | TRIM8    | 81603  | 37 | 10 | 104416597 | 104416597 | Missense_Mutation | SNP | C  | T  | 4  | 96  | c.1142C>T      | c.(1141-1143)ACG>ATG | p.T381M       |
| Pat_45 | Pre-Treatment | GSTO1    | 9446   | 37 | 10 | 106014944 | 106014944 | Missense_Mutation | SNP | C  | T  | 3  | 70  | c.58C>T        | c.(58-60)CCG>TCG     | p.P20S        |
| Pat_45 | Pre-Treatment | CCDC147  | 159686 | 37 | 10 | 106118145 | 106118145 | Missense_Mutation | SNP | T  | C  | 27 | 48  | c.56T>C        | c.(55-57)ATG>ACG     | p.M19T        |
| Pat_45 | Pre-Treatment | TDRD1    | 56165  | 37 | 10 | 115985820 | 115985820 | Missense_Mutation | SNP | G  | T  | 4  | 133 | c.3020G>T      | c.(3019-3021)TGG>TTG | p.W1007L      |
| Pat_45 | Pre-Treatment | GPR26    | 2849   | 37 | 10 | 125434408 | 125434408 | Missense_Mutation | SNP | G  | A  | 4  | 15  | c.743G>A       | c.(742-744)GGG>GAG   | p.G248E       |
| Pat_45 | Pre-Treatment | PKP3     | 11187  | 37 | 11 | 397603    | 397603    | Missense_Mutation | SNP | G  | A  | 4  | 55  | c.1009G>A      | c.(1009-1011)GTG>ATG | p.V337M       |
| Pat_45 | Pre-Treatment | SYT8     | 90019  | 37 | 11 | 1856367   | 1856367   | Missense_Mutation | SNP | C  | T  | 3  | 33  | c.74C>T        | c.(73-75)CCG>CTG     | p.P25L        |
| Pat_45 | Pre-Treatment | OSBPL5   | 114879 | 37 | 11 | 3128545   | 3128545   | Missense_Mutation | SNP | G  | A  | 3  | 51  | c.1007C>T      | c.(1006-1008)CCG>CTG | p.P336L       |
| Pat_45 | Pre-Treatment | NUP98    | 4928   | 37 | 11 | 3792977   | 3792977   | Splice_Site       | SNP | C  | T  | 4  | 88  | c.784_splice   | c.e7+1               | p.S262_splice |
| Pat_45 | Pre-Treatment | OR52B2   | 255725 | 37 | 11 | 6191508   | 6191508   | Missense_Mutation | SNP | G  | A  | 21 | 31  | c.49C>T        | c.(49-51)CCT>TCT     | p.P17S        |
| Pat_45 | Pre-Treatment | SMPD1    | 6609   | 37 | 11 | 6415448   | 6415448   | Missense_Mutation | SNP | G  | A  | 4  | 102 | c.1507G>A      | c.(1507-1509)GAT>AAT | p.D503N       |
| Pat_45 | Pre-Treatment | TRIM3    | 10612  | 37 | 11 | 6478003   | 6478003   | Missense_Mutation | SNP | G  | A  | 4  | 50  | c.953C>T       | c.(952-954)ACG>ATG   | p.T318M       |
| Pat_45 | Pre-Treatment | MICAL2   | 9645   | 37 | 11 | 12183950  | 12183950  | Missense_Mutation | SNP | C  | T  | 4  | 101 | c.248C>T       | c.(247-249)TCG>TTG   | p.S83L        |
| Pat_45 | Pre-Treatment | ABCC8    | 6833   | 37 | 11 | 17482154  | 17482154  | Missense_Mutation | SNP | G  | A  | 4  | 58  | c.892C>T       | c.(892-894)CGC>TGC   | p.R298C       |
| Pat_45 | Pre-Treatment | IGSF22   | 283284 | 37 | 11 | 18737158  | 18737158  | Nonsense_Mutation | SNP | C  | T  | 4  | 109 | c.1352G>A      | c.(1351-1353)TGG>TAG | p.W451*       |
| Pat_45 | Pre-Treatment | GAS2     | 2620   | 37 | 11 | 22696432  | 22696432  | Missense_Mutation | SNP | G  | A  | 12 | 68  | c.17G>A        | c.(16-18)AGC>AAC     | p.S6N         |
| Pat_45 | Pre-Treatment | SLC5A12  | 159963 | 37 | 11 | 26743146  | 26743146  | Missense_Mutation | SNP | C  | T  | 3  | 50  | c.116G>A       | c.(115-117)CGA>CAA   | p.R39Q        |
| Pat_45 | Pre-Treatment | CAPRIN1  | 4076   | 37 | 11 | 34107903  | 34107903  | Missense_Mutation | SNP | G  | A  | 4  | 131 | c.1174G>A      | c.(1174-1176)GCA>ACA | p.A392T       |
| Pat_45 | Pre-Treatment | CAT      | 847    | 37 | 11 | 34478267  | 34478267  | Missense_Mutation | SNP | G  | A  | 5  | 219 | c.959G>A       | c.(958-960)CGG>CAG   | p.R320Q       |
| Pat_45 | Pre-Treatment | SLC35C1  | 55343  | 37 | 11 | 45832791  | 45832791  | Missense_Mutation | SNP | T  | C  | 2  | 4   | c.1000T>C      | c.(1000-1002)TCC>CCC | p.S334P       |
| Pat_45 | Pre-Treatment | PTPRJ    | 5795   | 37 | 11 | 48185942  | 48185942  | Missense_Mutation | SNP | G  | A  | 4  | 49  | c.3730G>A      | c.(3730-3732)GGA>AGA | p.G1244R      |
| Pat_45 | Pre-Treatment | OR5M1    | 390168 | 37 | 11 | 56380431  | 56380432  | Missense_Mutation | DNP | GG | AA | 7  | 57  | c.547_548CC>TT | c.(547-549)CCT>TTT   | p.P183F       |
| Pat_45 | Pre-Treatment | OR9G9    | 504191 | 37 | 11 | 56468324  | 56468324  | Missense_Mutation | SNP | A  | T  | 6  | 150 | c.461A>T       | c.(460-462)AAC>ATC   | p.N154I       |
| Pat_45 | Pre-Treatment | SSRP1    | 6749   | 37 | 11 | 57099626  | 57099626  | Missense_Mutation | SNP | C  | T  | 4  | 123 | c.1001G>A      | c.(1000-1002)GGG>GAG | p.G334E       |

|        |               |          |        |    |    |           |           |                   |     |    |    |     |     |                |                      |               |
|--------|---------------|----------|--------|----|----|-----------|-----------|-------------------|-----|----|----|-----|-----|----------------|----------------------|---------------|
| Pat_45 | Pre-Treatment | CTNND1   | 1500   | 37 | 11 | 57564344  | 57564344  | Missense_Mutation | SNP | C  | T  | 35  | 161 | c.836C>T       | c.(835-837)CCT>CTT   | p.P279L       |
| Pat_45 | Pre-Treatment | OR5B17   | 219965 | 37 | 11 | 58126271  | 58126271  | Missense_Mutation | SNP | G  | A  | 9   | 53  | c.272C>T       | c.(271-273)TCC>TTC   | p.S91F        |
| Pat_45 | Pre-Treatment | MTA2     | 9219   | 37 | 11 | 62366009  | 62366009  | Missense_Mutation | SNP | G  | A  | 7   | 413 | c.293C>T       | c.(292-294)CCA>CTA   | p.P98L        |
| Pat_45 | Pre-Treatment | UBXN1    | 51035  | 37 | 11 | 62444096  | 62444096  | Missense_Mutation | SNP | G  | A  | 2   | 3   | c.860C>T       | c.(859-861)GCT>GTT   | p.A287V       |
| Pat_45 | Pre-Treatment | DPF2     | 5977   | 37 | 11 | 65108977  | 65108977  | Nonsense_Mutation | SNP | C  | T  | 4   | 110 | c.409C>T       | c.(409-411)CGA>TGA   | p.R137*       |
| Pat_45 | Pre-Treatment | RBM14    | 10432  | 37 | 11 | 66393948  | 66393948  | Missense_Mutation | SNP | C  | T  | 4   | 98  | c.1819C>T      | c.(1819-1821)CGT>TGT | p.R607C       |
| Pat_45 | Pre-Treatment | SYT12    | 91683  | 37 | 11 | 66807334  | 66807334  | Missense_Mutation | SNP | G  | A  | 3   | 61  | c.281G>A       | c.(280-282)CGC>CAC   | p.R94H        |
| Pat_45 | Pre-Treatment | ACY3     | 91703  | 37 | 11 | 67410203  | 67410203  | Missense_Mutation | SNP | C  | T  | 4   | 90  | c.952G>A       | c.(952-954)GCT>ACT   | p.A318T       |
| Pat_45 | Pre-Treatment | CHKA     | 1119   | 37 | 11 | 67842213  | 67842213  | Missense_Mutation | SNP | G  | A  | 32  | 114 | c.601C>T       | c.(601-603)CCC>TCC   | p.P201S       |
| Pat_45 | Pre-Treatment | ARHGEF17 | 9828   | 37 | 11 | 73076914  | 73076914  | Missense_Mutation | SNP | G  | A  | 3   | 43  | c.5917G>A      | c.(5917-5919)GTC>ATC | p.V1973I      |
| Pat_45 | Pre-Treatment | RELT     | 84957  | 37 | 11 | 73101611  | 73101611  | Missense_Mutation | SNP | C  | T  | 22  | 85  | c.61C>T        | c.(61-63)CTC>TTC     | p.L21F        |
| Pat_45 | Pre-Treatment | RELT     | 84957  | 37 | 11 | 73106179  | 73106179  | Missense_Mutation | SNP | C  | T  | 4   | 71  | c.1094C>T      | c.(1093-1095)JCT>TTT | p.S365F       |
| Pat_45 | Pre-Treatment | ARRB1    | 408    | 37 | 11 | 74994459  | 74994459  | Missense_Mutation | SNP | G  | A  | 6   | 29  | c.226C>T       | c.(226-228)CGC>TGC   | p.R76C        |
| Pat_45 | Pre-Treatment | HEPHL1   | 341208 | 37 | 11 | 93800692  | 93800692  | Missense_Mutation | SNP | C  | T  | 18  | 125 | c.839C>T       | c.(838-840)CCG>CTG   | p.P280L       |
| Pat_45 | Pre-Treatment | HTR3A    | 3359   | 37 | 11 | 113853870 | 113853870 | Missense_Mutation | SNP | C  | T  | 4   | 96  | c.421C>T       | c.(421-423)CCG>TCG   | p.P141S       |
| Pat_45 | Pre-Treatment | IL10RA   | 3587   | 37 | 11 | 117860281 | 117860281 | Missense_Mutation | SNP | G  | A  | 4   | 62  | c.313G>A       | c.(313-315)GGC>AGC   | p.G105S       |
| Pat_45 | Pre-Treatment | C2CD2L   | 9854   | 37 | 11 | 118983554 | 118983554 | Nonsense_Mutation | SNP | C  | T  | 4   | 107 | c.1357C>T      | c.(1357-1359)CAG>TAG | p.Q453*       |
| Pat_45 | Pre-Treatment | C11orf63 | 79864  | 37 | 11 | 122756805 | 122756805 | Missense_Mutation | SNP | G  | A  | 5   | 235 | c.248G>A       | c.(247-249)GGA>GAA   | p.G83E        |
| Pat_45 | Pre-Treatment | VWA5A    | 4013   | 37 | 11 | 124015943 | 124015943 | Splice_Site       | SNP | G  | A  | 4   | 81  | c.2155_splice  | c.e18-1              | p.L719_splice |
| Pat_45 | Pre-Treatment | OR8B2    | 26595  | 37 | 11 | 124252879 | 124252879 | Missense_Mutation | SNP | C  | T  | 14  | 50  | c.361G>A       | c.(361-363)GAT>AAT   | p.D121N       |
| Pat_45 | Pre-Treatment | VSIG2    | 23584  | 37 | 11 | 124621425 | 124621425 | Missense_Mutation | SNP | C  | T  | 3   | 48  | c.113G>A       | c.(112-114)GGG>GAG   | p.G38E        |
| Pat_45 | Pre-Treatment | CCDC15   | 80071  | 37 | 11 | 124857870 | 124857870 | Missense_Mutation | SNP | A  | G  | 6   | 264 | c.1748A>G      | c.(1747-1749)CAG>CGG | p.Q583R       |
| Pat_45 | Pre-Treatment | WNK1     | 65125  | 37 | 12 | 970285    | 970285    | Missense_Mutation | SNP | G  | A  | 5   | 205 | c.1727G>A      | c.(1726-1728)CGG>CAG | p.R576Q       |
| Pat_45 | Pre-Treatment | WNK1     | 65125  | 37 | 12 | 970384    | 970384    | Missense_Mutation | SNP | C  | T  | 4   | 104 | c.1826C>T      | c.(1825-1827)GCT>GTT | p.A609V       |
| Pat_45 | Pre-Treatment | CACNA2D4 | 93589  | 37 | 12 | 1910248   | 1910249   | Missense_Mutation | DNP | GG | TT | 25  | 28  | .2828_2829CC>A | c.(2827-2829)CCC>CAA | p.P943Q       |
| Pat_45 | Pre-Treatment | PRB1     | 5542   | 37 | 12 | 11506208  | 11506208  | Missense_Mutation | SNP | G  | A  | 59  | 73  | c.829C>T       | c.(829-831)CCT>TCT   | p.P277S       |
| Pat_45 | Pre-Treatment | PRB2     | 653247 | 37 | 12 | 11546195  | 11546195  | Missense_Mutation | SNP | T  | G  | 4   | 62  | c.817A>C       | c.(817-819)AAA>CAA   | p.K273Q       |
| Pat_45 | Pre-Treatment | PLEKHA5  | 54477  | 37 | 12 | 19514631  | 19514631  | Missense_Mutation | SNP | T  | A  | 4   | 85  | c.3101T>A      | c.(3100-3102)GTT>GAT | p.V1034D      |
| Pat_45 | Pre-Treatment | PDE3A    | 5139   | 37 | 12 | 20807046  | 20807046  | Missense_Mutation | SNP | G  | A  | 4   | 56  | c.3091G>A      | c.(3091-3093)GAT>AAT | p.D1031N      |
| Pat_45 | Pre-Treatment | SLCO1B3  | 28234  | 37 | 12 | 21030726  | 21030726  | Missense_Mutation | SNP | A  | G  | 8   | 113 | c.991A>G       | c.(991-993)AGC>GGC   | p.S331G       |
| Pat_45 | Pre-Treatment | PKP2     | 5318   | 37 | 12 | 32955384  | 32955384  | Missense_Mutation | SNP | G  | A  | 135 | 133 | c.2252C>T      | c.(2251-2253)TCG>TTG | p.S751L       |
| Pat_45 | Pre-Treatment | PKP2     | 5318   | 37 | 12 | 33021871  | 33021871  | Missense_Mutation | SNP | G  | A  | 4   | 136 | c.1160C>T      | c.(1159-1161)GCT>GTT | p.A387V       |
| Pat_45 | Pre-Treatment | FAM113B  | 91523  | 37 | 12 | 47629951  | 47629951  | Missense_Mutation | SNP | G  | A  | 4   | 117 | c.1105G>A      | c.(1105-1107)GTC>ATC | p.V369I       |
| Pat_45 | Pre-Treatment | COL2A1   | 1280   | 37 | 12 | 48376648  | 48376648  | Missense_Mutation | SNP | C  | T  | 3   | 61  | c.2176G>A      | c.(2176-2178)GGC>AGC | p.G726S       |
| Pat_45 | Pre-Treatment | SPATS2   | 65244  | 37 | 12 | 49893916  | 49893916  | Missense_Mutation | SNP | G  | A  | 4   | 58  | c.767G>A       | c.(766-768)CGA>CAA   | p.R256Q       |
| Pat_45 | Pre-Treatment | SPATS2   | 65244  | 37 | 12 | 49919815  | 49919815  | Missense_Mutation | SNP | G  | A  | 3   | 68  | c.1415G>A      | c.(1414-1416)AGT>AAT | p.S472N       |
| Pat_45 | Pre-Treatment | POU6F1   | 5463   | 37 | 12 | 51586223  | 51586223  | Missense_Mutation | SNP | G  | A  | 25  | 49  | c.281C>T       | c.(280-282)CCC>CTC   | p.P94L        |
| Pat_45 | Pre-Treatment | SCN8A    | 6334   | 37 | 12 | 52056612  | 52056612  | Missense_Mutation | SNP | G  | A  | 5   | 168 | c.11G>A        | c.(10-12)CGG>CAG     | p.R4Q         |
| Pat_45 | Pre-Treatment | SMARCC2  | 6601   | 37 | 12 | 56558236  | 56558236  | Missense_Mutation | SNP | G  | A  | 4   | 99  | c.3419C>T      | c.(3418-3420)GCG>GTG | p.A1140V      |
| Pat_45 | Pre-Treatment | SMARCC2  | 6601   | 37 | 12 | 56574800  | 56574800  | Missense_Mutation | SNP | G  | A  | 4   | 93  | c.1042C>T      | c.(1042-1044)CCA>TCA | p.P348S       |
| Pat_45 | Pre-Treatment | PAN2     | 9924   | 37 | 12 | 56712197  | 56712197  | Missense_Mutation | SNP | G  | A  | 4   | 82  | c.3398C>T      | c.(3397-3399)ACC>ATC | p.T1133I      |
| Pat_45 | Pre-Treatment | TIMELESS | 8914   | 37 | 12 | 56824014  | 56824014  | Missense_Mutation | SNP | G  | A  | 4   | 65  | c.961C>T       | c.(961-963)CGT>TGT   | p.R321C       |
| Pat_45 | Pre-Treatment | NT5DC3   | 51559  | 37 | 12 | 104187760 | 104187760 | Missense_Mutation | SNP | C  | T  | 5   | 185 | c.769G>A       | c.(769-771)GTC>ATC   | p.V257I       |
| Pat_45 | Pre-Treatment | NUAK1    | 9891   | 37 | 12 | 106461685 | 106461685 | Missense_Mutation | SNP | C  | T  | 3   | 78  | c.881G>A       | c.(880-882)CGG>CAG   | p.R294Q       |
| Pat_45 | Pre-Treatment | SART3    | 9733   | 37 | 12 | 108920304 | 108920304 | Missense_Mutation | SNP | C  | T  | 4   | 84  | c.1942G>A      | c.(1942-1944)GAG>AAG | p.E648K       |
| Pat_45 | Pre-Treatment | DAO      | 1610   | 37 | 12 | 109278786 | 109278786 | Missense_Mutation | SNP | C  | T  | 3   | 56  | c.4C>T         | c.(4-6)CGT>TGT       | p.R2C         |
| Pat_45 | Pre-Treatment | ACACB    | 32     | 37 | 12 | 109623454 | 109623454 | Missense_Mutation | SNP | T  | G  | 24  | 28  | c.1889T>G      | c.(1888-1890)GTG>GGG | p.V630G       |

|        |               |           |        |    |    |           |           |                   |     |    |    |     |     |                |                        |               |
|--------|---------------|-----------|--------|----|----|-----------|-----------|-------------------|-----|----|----|-----|-----|----------------|------------------------|---------------|
| Pat_45 | Pre-Treatment | ATP2A2    | 488    | 37 | 12 | 110784091 | 110784091 | Missense_Mutation | SNP | C  | T  | 3   | 34  | c.2945C>T      | c.(2944-2946)ACG>ATG   | p.T982M       |
| Pat_45 | Pre-Treatment | IQCD      | 115811 | 37 | 12 | 113645722 | 113645722 | Missense_Mutation | SNP | C  | T  | 4   | 120 | c.250G>A       | c.(250-252)GGG>AGG     | p.G84R        |
| Pat_45 | Pre-Treatment | ACADS     | 35     | 37 | 12 | 121174813 | 121174813 | Missense_Mutation | SNP | C  | T  | 2   | 4   | c.235C>T       | c.(235-237)CTT>TTT     | p.L79F        |
| Pat_45 | Pre-Treatment | KDM2B     | 84678  | 37 | 12 | 121880476 | 121880476 | Missense_Mutation | SNP | C  | T  | 2   | 3   | c.2768G>A      | c.(2767-2769)GGG>GAG   | p.G923E       |
| Pat_45 | Pre-Treatment | VPS33A    | 65082  | 37 | 12 | 122745944 | 122745944 | Missense_Mutation | SNP | C  | T  | 4   | 120 | c.347G>A       | c.(346-348)CGC>CAC     | p.R116H       |
| Pat_45 | Pre-Treatment | VPS37B    | 79720  | 37 | 12 | 123355437 | 123355437 | Missense_Mutation | SNP | C  | T  | 4   | 109 | c.283G>A       | c.(283-285)GAC>AAC     | p.D95N        |
| Pat_45 | Pre-Treatment | DHX37     | 57647  | 37 | 12 | 125455913 | 125455913 | Missense_Mutation | SNP | C  | T  | 4   | 32  | c.1126G>A      | c.(1126-1128)GAG>AAG   | p.E376K       |
| Pat_45 | Pre-Treatment | MTIF3     | 219402 | 37 | 13 | 28014482  | 28014482  | Missense_Mutation | SNP | G  | A  | 4   | 111 | c.104C>T       | c.(103-105)GCA>GTA     | p.A35V        |
| Pat_45 | Pre-Treatment | POLR1D    | 51082  | 37 | 13 | 28239855  | 28239855  | Missense_Mutation | SNP | G  | T  | 27  | 43  | c.134G>T       | c.(133-135)AGA>ATA     | p.R45I        |
| Pat_45 | Pre-Treatment | STAR13    | 90627  | 37 | 13 | 33704351  | 33704351  | Missense_Mutation | SNP | G  | A  | 24  | 56  | c.463C>T       | c.(463-465)CGT>TGT     | p.R155C       |
| Pat_45 | Pre-Treatment | FREM2     | 341640 | 37 | 13 | 39264041  | 39264041  | Missense_Mutation | SNP | G  | A  | 4   | 83  | c.2560G>A      | c.(2560-2562)GTG>ATG   | p.V854M       |
| Pat_45 | Pre-Treatment | NEK5      | 341676 | 37 | 13 | 52639613  | 52639613  | Missense_Mutation | SNP | G  | A  | 4   | 123 | c.2057C>T      | c.(2056-2058)TCT>TTT   | p.S686F       |
| Pat_45 | Pre-Treatment | DCT       | 1638   | 37 | 13 | 95131376  | 95131376  | Missense_Mutation | SNP | C  | T  | 10  | 57  | c.134G>A       | c.(133-135)GGT>GAT     | p.G45D        |
| Pat_45 | Pre-Treatment | GPR18     | 2841   | 37 | 13 | 99907672  | 99907672  | Missense_Mutation | SNP | G  | A  | 4   | 112 | c.455C>T       | c.(454-456)ACG>ATG     | p.T152M       |
| Pat_45 | Pre-Treatment | SLC10A2   | 6555   | 37 | 13 | 103703661 | 103703661 | Missense_Mutation | SNP | G  | A  | 43  | 71  | c.707C>T       | c.(706-708)GCG>GTG     | p.A236V       |
| Pat_45 | Pre-Treatment | MYO16     | 23026  | 37 | 13 | 109793674 | 109793675 | Missense_Mutation | DNP | GG | AA | 10  | 14  | .5048_5049G>A  | c.(5047-5049)AGG>AAA   | p.R1683K      |
| Pat_45 | Pre-Treatment | COL4A1    | 1282   | 37 | 13 | 110839513 | 110839513 | Missense_Mutation | SNP | G  | A  | 5   | 221 | c.1700C>T      | c.(1699-1701)CCG>CTG   | p.P567L       |
| Pat_45 | Pre-Treatment | OR4K14    | 122740 | 37 | 14 | 20483294  | 20483294  | Missense_Mutation | SNP | G  | A  | 28  | 84  | c.59C>T        | c.(58-60)TCA>TTA       | p.S20L        |
| Pat_45 | Pre-Treatment | RNASE11   | 122651 | 37 | 14 | 21052064  | 21052064  | Missense_Mutation | SNP | C  | T  | 4   | 110 | c.570G>A       | c.(568-570)ATG>ATA     | p.M190I       |
| Pat_45 | Pre-Treatment | ACIN1     | 22985  | 37 | 14 | 23530699  | 23530699  | Missense_Mutation | SNP | G  | A  | 5   | 187 | c.3406C>T      | c.(3406-3408)CGG>TGG   | p.R1136W      |
| Pat_45 | Pre-Treatment | FSCB      | 84075  | 37 | 14 | 44975115  | 44975115  | Missense_Mutation | SNP | G  | T  | 32  | 72  | c.1076C>A      | c.(1075-1077)CCT>CAT   | p.P359H       |
| Pat_45 | Pre-Treatment | POLE2     | 5427   | 37 | 14 | 50140840  | 50140840  | Splice_Site       | SNP | C  | T  | 10  | 655 | c.417_splice   | c.e5+1                 | p.Q139_splice |
| Pat_45 | Pre-Treatment | POLE2     | 5427   | 37 | 14 | 50140909  | 50140909  | Missense_Mutation | SNP | G  | A  | 133 | 300 | c.349C>T       | c.(349-351)CCA>TCA     | p.P117S       |
| Pat_45 | Pre-Treatment | DACT1     | 51339  | 37 | 14 | 59113551  | 59113551  | Missense_Mutation | SNP | C  | T  | 4   | 113 | c.2210C>T      | c.(2209-2211)ACC>ATC   | p.T737I       |
| Pat_45 | Pre-Treatment | GPHB5     | 122876 | 37 | 14 | 63779784  | 63779784  | Missense_Mutation | SNP | C  | T  | 3   | 15  | c.250G>A       | c.(250-252)GTA>ATA     | p.V84I        |
| Pat_45 | Pre-Treatment | SYNE2     | 23224  | 37 | 14 | 64586214  | 64586214  | Missense_Mutation | SNP | G  | A  | 4   | 131 | c.12910G>A     | c.(12910-12912)GAT>AAT | p.D4304N      |
| Pat_45 | Pre-Treatment | SMOC1     | 64093  | 37 | 14 | 70490077  | 70490077  | Missense_Mutation | SNP | C  | T  | 5   | 219 | c.1204C>T      | c.(1204-1206)CGG>TGG   | p.R402W       |
| Pat_45 | Pre-Treatment | TMEM63C   | 57156  | 37 | 14 | 77715198  | 77715198  | Missense_Mutation | SNP | C  | T  | 14  | 65  | c.1853C>T      | c.(1852-1854)CCC>CTC   | p.P618L       |
| Pat_45 | Pre-Treatment | C14orf102 | 55051  | 37 | 14 | 90778814  | 90778814  | Missense_Mutation | SNP | C  | T  | 5   | 198 | c.481G>A       | c.(481-483)GAA>AAA     | p.E161K       |
| Pat_45 | Pre-Treatment | CATSPERB  | 79820  | 37 | 14 | 92157893  | 92157893  | Missense_Mutation | SNP | T  | A  | 66  | 130 | c.838A>T       | c.(838-840)AGG>TGG     | p.R280W       |
| Pat_45 | Pre-Treatment | MOAP1     | 64112  | 37 | 14 | 93650424  | 93650424  | Missense_Mutation | SNP | A  | C  | 7   | 242 | c.164T>G       | c.(163-165)ATG>AGG     | p.M55R        |
| Pat_45 | Pre-Treatment | ATG2B     | 55102  | 37 | 14 | 96752132  | 96752132  | Missense_Mutation | SNP | C  | T  | 4   | 135 | c.6197G>A      | c.(6196-6198)CGG>CAG   | p.R2066Q      |
| Pat_45 | Pre-Treatment | MARK3     | 4140   | 37 | 14 | 103932728 | 103932728 | Missense_Mutation | SNP | C  | T  | 4   | 118 | c.946C>T       | c.(946-948)CTC>TTC     | p.L316F       |
| Pat_45 | Pre-Treatment | AHNAK2    | 113146 | 37 | 14 | 105413426 | 105413426 | Missense_Mutation | SNP | C  | T  | 4   | 135 | c.8362G>A      | c.(8362-8364)GCA>ACA   | p.A2788T      |
| Pat_45 | Pre-Treatment | C15orf2   | 23742  | 37 | 15 | 24922887  | 24922887  | Missense_Mutation | SNP | C  | T  | 17  | 62  | c.1873C>T      | c.(1873-1875)CCA>TCA   | p.P625S       |
| Pat_45 | Pre-Treatment | BMF       | 90427  | 37 | 15 | 40396431  | 40396431  | Nonsense_Mutation | SNP | G  | A  | 6   | 407 | c.403C>T       | c.(403-405)CGA>TGA     | p.R135*       |
| Pat_45 | Pre-Treatment | BAHD1     | 22893  | 37 | 15 | 40756213  | 40756213  | Missense_Mutation | SNP | G  | A  | 3   | 36  | c.1969G>A      | c.(1969-1971)GAG>AAG   | p.E657K       |
| Pat_45 | Pre-Treatment | SPTBN5    | 51332  | 37 | 15 | 42155949  | 42155949  | Missense_Mutation | SNP | C  | T  | 4   | 127 | c.6997G>A      | c.(6997-6999)GTG>ATG   | p.V2333M      |
| Pat_45 | Pre-Treatment | SPG11     | 80208  | 37 | 15 | 44892732  | 44892732  | Missense_Mutation | SNP | G  | A  | 8   | 323 | c.3619C>T      | c.(3619-3621)CGG>TGG   | p.R1207W      |
| Pat_45 | Pre-Treatment | SQRDL     | 58472  | 37 | 15 | 45983208  | 45983208  | Missense_Mutation | SNP | T  | A  | 62  | 151 | c.1333T>A      | c.(1333-1335)TTT>ATT   | p.F445I       |
| Pat_45 | Pre-Treatment | C15orf33  | 196951 | 37 | 15 | 49800512  | 49800512  | Nonsense_Mutation | SNP | C  | T  | 18  | 86  | c.908G>A       | c.(907-909)TGG>TAG     | p.W303*       |
| Pat_45 | Pre-Treatment | CYP19A1   | 1588   | 37 | 15 | 51520084  | 51520084  | Nonsense_Mutation | SNP | G  | A  | 60  | 138 | c.343C>T       | c.(343-345)CGA>TGA     | p.R115*       |
| Pat_45 | Pre-Treatment | FAM81A    | 145773 | 37 | 15 | 59784573  | 59784573  | Missense_Mutation | SNP | G  | A  | 3   | 52  | c.398G>A       | c.(397-399)CGA>CAA     | p.R133Q       |
| Pat_45 | Pre-Treatment | VPS13C    | 54832  | 37 | 15 | 62160902  | 62160902  | Missense_Mutation | SNP | G  | A  | 4   | 93  | c.10819C>T     | c.(10819-10821)CGT>TGT | p.R3607C      |
| Pat_45 | Pre-Treatment | USP3      | 9960   | 37 | 15 | 63862770  | 63862771  | Missense_Mutation | DNP | GT | AA | 50  | 170 | c.900_901GT>AA | 898-903)AAGTGT>AAAA(   | p.C301S       |
| Pat_45 | Pre-Treatment | PIAS1     | 8554   | 37 | 15 | 68466136  | 68466136  | Missense_Mutation | SNP | G  | A  | 4   | 71  | c.1075G>A      | c.(1075-1077)GCA>ACA   | p.A359T       |
| Pat_45 | Pre-Treatment | PARP6     | 56965  | 37 | 15 | 72543226  | 72543226  | Missense_Mutation | SNP | G  | A  | 3   | 51  | c.1378C>T      | c.(1378-1380)CGG>TGG   | p.R460W       |

|        |               |           |        |    |    |           |           |                   |     |   |   |    |     |               |                      |               |
|--------|---------------|-----------|--------|----|----|-----------|-----------|-------------------|-----|---|---|----|-----|---------------|----------------------|---------------|
| Pat_45 | Pre-Treatment | CYP1A1    | 1543   | 37 | 15 | 75014865  | 75014865  | Missense_Mutation | SNP | C | T | 4  | 71  | c.574G>A      | c.(574-576)GTA>ATA   | p.V192I       |
| Pat_45 | Pre-Treatment | SNX33     | 257364 | 37 | 15 | 75949506  | 75949506  | Missense_Mutation | SNP | C | T | 5  | 183 | c.1675C>T     | c.(1675-1677)CGG>TGG | p.R559W       |
| Pat_45 | Pre-Treatment | LOC645752 | 645752 | 37 | 15 | 78211546  | 78211546  | Missense_Mutation | SNP | G | A | 39 | 71  | c.221C>T      | c.(220-222)TCC>TTC   | p.S74F        |
| Pat_45 | Pre-Treatment | KIAA1024  | 23251  | 37 | 15 | 79755620  | 79755620  | Missense_Mutation | SNP | G | A | 4  | 69  | c.2510G>A     | c.(2509-2511)CGG>CAG | p.R837Q       |
| Pat_45 | Pre-Treatment | TM6SF1    | 53346  | 37 | 15 | 83776476  | 83776476  | Missense_Mutation | SNP | C | T | 4  | 14  | c.44C>T       | c.(43-45)TCG>TTG     | p.S15L        |
| Pat_45 | Pre-Treatment | BNC1      | 646    | 37 | 15 | 83932330  | 83932330  | Missense_Mutation | SNP | C | T | 23 | 43  | c.1673G>A     | c.(1672-1674)AGA>AAA | p.R558K       |
| Pat_45 | Pre-Treatment | ADAMTSL3  | 57188  | 37 | 15 | 84566671  | 84566671  | Missense_Mutation | SNP | G | A | 39 | 83  | c.1529G>A     | c.(1528-1530)GGA>GAA | p.G510E       |
| Pat_45 | Pre-Treatment | ACAN      | 176    | 37 | 15 | 89400555  | 89400555  | Missense_Mutation | SNP | C | T | 6  | 31  | c.4739C>T     | c.(4738-4740)GCT>GTT | p.A1580V      |
| Pat_45 | Pre-Treatment | MFGE8     | 4240   | 37 | 15 | 89444955  | 89444955  | Missense_Mutation | SNP | G | A | 12 | 41  | c.697C>T      | c.(697-699)CCC>TCC   | p.P233S       |
| Pat_45 | Pre-Treatment | TTL13     | 440307 | 37 | 15 | 90802123  | 90802123  | Missense_Mutation | SNP | G | A | 4  | 131 | c.1316G>A     | c.(1315-1317)CGG>CAG | p.R439Q       |
| Pat_45 | Pre-Treatment | WASH3P    | 374666 | 37 | 15 | 102515299 | 102515299 | Missense_Mutation | SNP | G | A | 3  | 20  | c.523G>A      | c.(523-525)GGC>AGC   | p.G175S       |
| Pat_45 | Pre-Treatment | MRPL28    | 10573  | 37 | 16 | 420112    | 420112    | Missense_Mutation | SNP | C | T | 2  | 4   | c.107G>A      | c.(106-108)CGG>CAG   | p.R36Q        |
| Pat_45 | Pre-Treatment | SOLH      | 6650   | 37 | 16 | 597460    | 597460    | Missense_Mutation | SNP | G | A | 2  | 0   | c.622G>A      | c.(622-624)GGT>AGT   | p.G208S       |
| Pat_45 | Pre-Treatment | NDUFB10   | 4716   | 37 | 16 | 2011166   | 2011166   | Missense_Mutation | SNP | G | A | 4  | 44  | c.143G>A      | c.(142-144)CGG>CAG   | p.R48Q        |
| Pat_45 | Pre-Treatment | PKD1      | 5310   | 37 | 16 | 2167572   | 2167572   | Missense_Mutation | SNP | G | T | 2  | 0   | c.1303C>A     | c.(1303-1305)CAG>AAG | p.Q435K       |
| Pat_45 | Pre-Treatment | ZNF205    | 7755   | 37 | 16 | 3165844   | 3165844   | Missense_Mutation | SNP | C | T | 4  | 20  | c.286C>T      | c.(286-288)CGG>TGG   | p.R96W        |
| Pat_45 | Pre-Treatment | CLUAP1    | 23059  | 37 | 16 | 3554783   | 3554783   | Missense_Mutation | SNP | C | T | 4  | 137 | c.86C>T       | c.(85-87)ACA>ATA     | p.T29I        |
| Pat_45 | Pre-Treatment | CLUAP1    | 23059  | 37 | 16 | 3562394   | 3562394   | Missense_Mutation | SNP | G | T | 4  | 84  | c.411G>T      | c.(409-411)TTG>TTT   | p.L137F       |
| Pat_45 | Pre-Treatment | KIAA0430  | 9665   | 37 | 16 | 15729949  | 15729949  | Missense_Mutation | SNP | G | A | 6  | 301 | c.395C>T      | c.(394-396)CCG>CTG   | p.P132L       |
| Pat_45 | Pre-Treatment | GTF3C1    | 2975   | 37 | 16 | 27475716  | 27475716  | Missense_Mutation | SNP | C | T | 3  | 87  | c.5797G>A     | c.(5797-5799)GGT>AGT | p.G1933S      |
| Pat_45 | Pre-Treatment | SETD1A    | 9739   | 37 | 16 | 30976033  | 30976033  | Missense_Mutation | SNP | T | C | 3  | 71  | c.970T>C      | c.(970-972)TCC>CCC   | p.S324P       |
| Pat_45 | Pre-Treatment | NUP93     | 9688   | 37 | 16 | 56782307  | 56782307  | Missense_Mutation | SNP | C | T | 3  | 45  | c.148C>T      | c.(148-150)CGC>TGC   | p.R50C        |
| Pat_45 | Pre-Treatment | NLRC5     | 84166  | 37 | 16 | 57088981  | 57088981  | Missense_Mutation | SNP | G | A | 5  | 82  | c.3634G>A     | c.(3634-3636)GAG>AAG | p.E1212K      |
| Pat_45 | Pre-Treatment | CDH8      | 1006   | 37 | 16 | 61858972  | 61858972  | Missense_Mutation | SNP | G | A | 5  | 110 | c.779C>T      | c.(778-780)ACG>ATG   | p.T260M       |
| Pat_45 | Pre-Treatment | CES2      | 8824   | 37 | 16 | 66973139  | 66973139  | Missense_Mutation | SNP | G | A | 4  | 104 | c.493G>A      | c.(493-495)GCA>ACA   | p.A165T       |
| Pat_45 | Pre-Treatment | LRRC50    | 123872 | 37 | 16 | 84182710  | 84182710  | Missense_Mutation | SNP | G | A | 4  | 133 | c.223G>A      | c.(223-225)GCA>ACA   | p.A75T        |
| Pat_45 | Pre-Treatment | ABR       | 29     | 37 | 17 | 1028606   | 1028606   | Missense_Mutation | SNP | G | A | 4  | 47  | c.158C>T      | c.(157-159)TCG>TTG   | p.S53L        |
| Pat_45 | Pre-Treatment | PAFAH1B1  | 5048   | 37 | 17 | 2577437   | 2577437   | Missense_Mutation | SNP | G | A | 4  | 121 | c.755G>A      | c.(754-756)TGT>TAT   | p.C252Y       |
| Pat_45 | Pre-Treatment | OR3A1     | 4994   | 37 | 17 | 3195798   | 3195798   | Nonsense_Mutation | SNP | G | A | 3  | 55  | c.79C>T       | c.(79-81)CAG>TAG     | p.Q27*        |
| Pat_45 | Pre-Treatment | OR3A3     | 8392   | 37 | 17 | 3324354   | 3324354   | Missense_Mutation | SNP | G | A | 4  | 137 | c.493G>A      | c.(493-495)GCA>ACA   | p.A165T       |
| Pat_45 | Pre-Treatment | C17orf74  | 201243 | 37 | 17 | 7329824   | 7329824   | Nonsense_Mutation | SNP | C | T | 4  | 97  | c.514C>T      | c.(514-516)CGA>TGA   | p.R172*       |
| Pat_45 | Pre-Treatment | MYH10     | 4628   | 37 | 17 | 8424195   | 8424195   | Splice_Site       | SNP | C | T | 4  | 82  | c.2180_splice | c.e17+1              | p.R727_splice |
| Pat_45 | Pre-Treatment | MYH8      | 4626   | 37 | 17 | 10307736  | 10307736  | Missense_Mutation | SNP | C | T | 4  | 83  | c.2599G>A     | c.(2599-2601)GCC>ACC | p.A867T       |
| Pat_45 | Pre-Treatment | ELAC2     | 60528  | 37 | 17 | 12899865  | 12899865  | Missense_Mutation | SNP | G | A | 3  | 60  | c.1658C>T     | c.(1657-1659)ACG>ATG | p.T553M       |
| Pat_45 | Pre-Treatment | EVI2B     | 2124   | 37 | 17 | 29631910  | 29631910  | Missense_Mutation | SNP | C | T | 4  | 79  | c.718G>A      | c.(718-720)GGT>AGT   | p.G240S       |
| Pat_45 | Pre-Treatment | AP2B1     | 163    | 37 | 17 | 33977594  | 33977594  | Missense_Mutation | SNP | C | T | 4  | 84  | c.1582C>T     | c.(1582-1584)CGC>TGC | p.R528C       |
| Pat_45 | Pre-Treatment | GGNBP2    | 79893  | 37 | 17 | 34945798  | 34945798  | Missense_Mutation | SNP | G | A | 5  | 188 | c.2051G>A     | c.(2050-2052)AGG>AAG | p.R684K       |
| Pat_45 | Pre-Treatment | SMARCE1   | 6605   | 37 | 17 | 38787103  | 38787103  | Missense_Mutation | SNP | C | T | 3  | 72  | c.890G>A      | c.(889-891)CGC>CAC   | p.R297H       |
| Pat_45 | Pre-Treatment | KRT23     | 25984  | 37 | 17 | 39092582  | 39092582  | Missense_Mutation | SNP | C | T | 4  | 118 | c.274G>A      | c.(274-276)GCC>ACC   | p.A92T        |
| Pat_45 | Pre-Treatment | KRT33A    | 3883   | 37 | 17 | 39502820  | 39502820  | Missense_Mutation | SNP | G | A | 4  | 81  | c.977C>T      | c.(976-978)GCG>GTG   | p.A326V       |
| Pat_45 | Pre-Treatment | JUP       | 3728   | 37 | 17 | 39681184  | 39681184  | Missense_Mutation | SNP | C | T | 49 | 55  | c.1060G>A     | c.(1060-1062)GAT>AAT | p.D354N       |
| Pat_45 | Pre-Treatment | KCNH4     | 23415  | 37 | 17 | 40323967  | 40323967  | Missense_Mutation | SNP | A | G | 2  | 4   | c.1034T>C     | c.(1033-1035)CTG>CCG | p.L345P       |
| Pat_45 | Pre-Treatment | KCNH4     | 23415  | 37 | 17 | 40330137  | 40330137  | Missense_Mutation | SNP | C | T | 29 | 45  | c.566G>A      | c.(565-567)GGA>GAA   | p.G189E       |
| Pat_45 | Pre-Treatment | BRCA1     | 672    | 37 | 17 | 41228590  | 41228590  | Nonsense_Mutation | SNP | G | A | 4  | 112 | c.4399C>T     | c.(4399-4401)CAG>TAG | p.Q1467*      |
| Pat_45 | Pre-Treatment | CDC27     | 996    | 37 | 17 | 45219248  | 45219248  | Missense_Mutation | SNP | C | T | 11 | 354 | c.1522G>A     | c.(1522-1524)GCC>ACC | p.A508T       |
| Pat_45 | Pre-Treatment | KPNB1     | 3837   | 37 | 17 | 45755440  | 45755440  | Missense_Mutation | SNP | C | T | 5  | 203 | c.2132C>T     | c.(2131-2133)CCG>CTG | p.P711L       |
| Pat_45 | Pre-Treatment | CBX1      | 10951  | 37 | 17 | 46153428  | 46153428  | Missense_Mutation | SNP | G | A | 3  | 49  | c.253C>T      | c.(253-255)CGC>TGC   | p.R85C        |

|        |               |              |           |    |    |          |          |                   |     |   |   |    |     |            |                        |          |
|--------|---------------|--------------|-----------|----|----|----------|----------|-------------------|-----|---|---|----|-----|------------|------------------------|----------|
| Pat_45 | Pre-Treatment | B4GALNT2     | 124872    | 37 | 17 | 47247085 | 47247085 | Missense_Mutation | SNP | G | A | 3  | 19  | c.1696G>A  | c.(1696-1698)GCA>ACA   | p.A566T  |
| Pat_45 | Pre-Treatment | CA4          | 762       | 37 | 17 | 58234829 | 58234829 | Missense_Mutation | SNP | G | A | 3  | 57  | c.310G>A   | c.(310-312)GGA>AGA     | p.G104R  |
| Pat_45 | Pre-Treatment | DDX42        | 11325     | 37 | 17 | 61886234 | 61886234 | Missense_Mutation | SNP | G | A | 6  | 254 | c.1078G>A  | c.(1078-1080)GTA>ATA   | p.V360I  |
| Pat_45 | Pre-Treatment | HELZ         | 9931      | 37 | 17 | 65214908 | 65214908 | Nonsense_Mutation | SNP | T | A | 3  | 87  | c.13A>T    | c.(13-15)AGA>TGA       | p.R5*    |
| Pat_45 | Pre-Treatment | NUP85        | 79902     | 37 | 17 | 73208149 | 73208149 | Missense_Mutation | SNP | A | G | 3  | 110 | c.353A>G   | c.(352-354)CAG>CGG     | p.Q118R  |
| Pat_45 | Pre-Treatment | EVPL         | 2125      | 37 | 17 | 74005546 | 74005546 | Missense_Mutation | SNP | G | A | 3  | 51  | c.3740C>T  | c.(3739-3741)ACG>ATG   | p.T1247M |
| Pat_45 | Pre-Treatment | EVPL         | 2125      | 37 | 17 | 74019694 | 74019694 | Missense_Mutation | SNP | C | G | 2  | 4   | c.240G>C   | c.(238-240)CAG>CAC     | p.Q80H   |
| Pat_45 | Pre-Treatment | CARD14       | 79092     | 37 | 17 | 78163634 | 78163634 | Missense_Mutation | SNP | G | A | 3  | 23  | c.926G>A   | c.(925-927)CGG>CAG     | p.R309Q  |
| Pat_45 | Pre-Treatment | FLJ35220     | 284131    | 37 | 17 | 78402411 | 78402411 | Nonsense_Mutation | SNP | C | T | 2  | 2   | c.730C>T   | c.(730-732)CGA>TGA     | p.R244*  |
| Pat_45 | Pre-Treatment | DLGAP1       | 9229      | 37 | 18 | 3582121  | 3582121  | Missense_Mutation | SNP | C | T | 4  | 110 | c.1717G>A  | c.(1717-1719)GGA>AGA   | p.G573R  |
| Pat_45 | Pre-Treatment | CABLES1      | 91768     | 37 | 18 | 20815983 | 20815983 | Missense_Mutation | SNP | G | A | 3  | 93  | c.1310G>A  | c.(1309-1311)CGG>CAG   | p.R437Q  |
| Pat_45 | Pre-Treatment | KIAA1012     | 22878     | 37 | 18 | 29447422 | 29447422 | Missense_Mutation | SNP | T | G | 27 | 83  | c.2406A>C  | c.(2404-2406)GAA>GAC   | p.E802D  |
| Pat_45 | Pre-Treatment | DTNA         | 1837      | 37 | 18 | 32335949 | 32335949 | Missense_Mutation | SNP | A | C | 4  | 78  | c.9A>C     | c.(7-9)GAA>GAC         | p.E3D    |
| Pat_45 | Pre-Treatment | SLC14A2      | 8170      | 37 | 18 | 43219790 | 43219790 | Missense_Mutation | SNP | C | T | 3  | 65  | c.923C>T   | c.(922-924)GCT>GTT     | p.A308V  |
| Pat_45 | Pre-Treatment | PSTPIP2      | 9050      | 37 | 18 | 43579439 | 43579439 | Missense_Mutation | SNP | C | T | 4  | 131 | c.479G>A   | c.(478-480)CGG>CAG     | p.R160Q  |
| Pat_45 | Pre-Treatment | MYO5B        | 4645      | 37 | 18 | 47432958 | 47432958 | Nonsense_Mutation | SNP | G | A | 17 | 36  | c.2245C>T  | c.(2245-2247)CGA>TGA   | p.R749*  |
| Pat_45 | Pre-Treatment | ALPK2        | 115701    | 37 | 18 | 56247145 | 56247145 | Missense_Mutation | SNP | C | G | 9  | 36  | c.863G>C   | c.(862-864)AGT>ACT     | p.S288T  |
| Pat_45 | Pre-Treatment | CDH7         | 1005      | 37 | 18 | 63511183 | 63511183 | Missense_Mutation | SNP | G | A | 23 | 95  | c.1117G>A  | c.(1117-1119)GAG>AAG   | p.E373K  |
| Pat_45 | Pre-Treatment | CBLN2        | 147381    | 37 | 18 | 70205419 | 70205419 | Missense_Mutation | SNP | G | A | 18 | 48  | c.667C>T   | c.(667-669)CCT>TCT     | p.P223S  |
| Pat_45 | Pre-Treatment | NETO1        | 81832     | 37 | 18 | 70450954 | 70450954 | Missense_Mutation | SNP | C | T | 33 | 175 | c.827G>A   | c.(826-828)CGA>CAA     | p.R276Q  |
| Pat_45 | Pre-Treatment | CNDP2        | 55748     | 37 | 18 | 72185827 | 72185827 | Missense_Mutation | SNP | G | A | 4  | 103 | c.1162G>A  | c.(1162-1164)GAC>AAC   | p.D388N  |
| Pat_45 | Pre-Treatment | BTBD2        | 55643     | 37 | 19 | 1997440  | 1997440  | Missense_Mutation | SNP | C | T | 4  | 112 | c.430G>A   | c.(430-432)GCC>ACC     | p.A144T  |
| Pat_45 | Pre-Treatment | PIP5K1C      | 23396     | 37 | 19 | 3642933  | 3642933  | Missense_Mutation | SNP | G | A | 6  | 89  | c.1654C>T  | c.(1654-1656)CGC>TGC   | p.R552C  |
| Pat_45 | Pre-Treatment | CHAF1A       | 10036     | 37 | 19 | 4409310  | 4409310  | Missense_Mutation | SNP | C | T | 16 | 68  | c.514C>T   | c.(514-516)CCT>TCT     | p.P172S  |
| Pat_45 | Pre-Treatment | TNFSF14      | 8740      | 37 | 19 | 6669966  | 6669966  | Missense_Mutation | SNP | C | T | 33 | 173 | c.115G>A   | c.(115-117)GGT>AGT     | p.G39S   |
| Pat_45 | Pre-Treatment | INSR         | 3643      | 37 | 19 | 7122913  | 7122913  | Missense_Mutation | SNP | G | A | 2  | 2   | c.3346C>T  | c.(3346-3348)CGT>TGT   | p.R1116C |
| Pat_45 | Pre-Treatment | CLEC4G       | 339390    | 37 | 19 | 7794279  | 7794279  | Nonsense_Mutation | SNP | C | T | 6  | 4   | c.855G>A   | c.(853-855)TGG>TGA     | p.W285*  |
| Pat_45 | Pre-Treatment | KANK3        | 256949    | 37 | 19 | 8389972  | 8389972  | Missense_Mutation | SNP | C | T | 3  | 18  | c.1945G>A  | c.(1945-1947)GAG>AAG   | p.E649K  |
| Pat_45 | Pre-Treatment | MUC16        | 94025     | 37 | 19 | 9068846  | 9068846  | Missense_Mutation | SNP | C | T | 25 | 66  | c.18600G>A | c.(18598-18600)ATG>ATA | p.M6200I |
| Pat_45 | Pre-Treatment | ZNF426       | 79088     | 37 | 19 | 9639255  | 9639255  | Missense_Mutation | SNP | C | T | 5  | 203 | c.1466G>A  | c.(1465-1467)AGT>AAT   | p.S489N  |
| Pat_45 | Pre-Treatment | ZNF625       | 90589     | 37 | 19 | 12256929 | 12256929 | Missense_Mutation | SNP | G | A | 30 | 43  | c.104C>T   | c.(103-105)TCA>TTA     | p.S35L   |
| Pat_45 | Pre-Treatment | IL27RA       | 9466      | 37 | 19 | 14161617 | 14161617 | Missense_Mutation | SNP | C | T | 3  | 38  | c.1450C>T  | c.(1450-1452)CCC>TCC   | p.P484S  |
| Pat_45 | Pre-Treatment | CD97         | 976       | 37 | 19 | 14517213 | 14517213 | Missense_Mutation | SNP | G | A | 2  | 1   | c.1892G>A  | c.(1891-1893)AGC>AAC   | p.S631N  |
| Pat_45 | Pre-Treatment | LOC100130932 | 100130932 | 37 | 19 | 14600293 | 14600293 | Missense_Mutation | SNP | C | T | 4  | 95  | c.94C>T    | c.(94-96)CGG>TGG       | p.R32W   |
| Pat_45 | Pre-Treatment | C19orf44     | 84167     | 37 | 19 | 16612191 | 16612191 | Missense_Mutation | SNP | G | T | 4  | 84  | c.588G>T   | c.(586-588)TTG>TTT     | p.L196F  |
| Pat_45 | Pre-Treatment | NWD1         | 284434    | 37 | 19 | 16902281 | 16902281 | Missense_Mutation | SNP | G | A | 3  | 12  | c.3061G>A  | c.(3061-3063)GAT>AAT   | p.D1021N |
| Pat_45 | Pre-Treatment | NWD1         | 284434    | 37 | 19 | 16908590 | 16908590 | Missense_Mutation | SNP | C | T | 5  | 159 | c.3352C>T  | c.(3352-3354)CGC>TGC   | p.R1118C |
| Pat_45 | Pre-Treatment | GLT25D1      | 79709     | 37 | 19 | 17671237 | 17671237 | Missense_Mutation | SNP | T | C | 3  | 82  | c.452T>C   | c.(451-453)CTG>CCG     | p.L151P  |
| Pat_45 | Pre-Treatment | MAP1S        | 55201     | 37 | 19 | 17837868 | 17837868 | Missense_Mutation | SNP | G | A | 2  | 3   | c.1675G>A  | c.(1675-1677)GCA>ACA   | p.A559T  |
| Pat_45 | Pre-Treatment | PDE4C        | 5143      | 37 | 19 | 18322645 | 18322645 | Missense_Mutation | SNP | C | T | 13 | 68  | c.1715G>A  | c.(1714-1716)GGA>GAA   | p.G572E  |
| Pat_45 | Pre-Treatment | LOC284441    | 284441    | 37 | 19 | 20369281 | 20369281 | Missense_Mutation | SNP | G | A | 51 | 175 | c.74G>A    | c.(73-75)CGA>CAA       | p.R25Q   |
| Pat_45 | Pre-Treatment | ZNF493       | 284443    | 37 | 19 | 21606988 | 21606988 | Missense_Mutation | SNP | A | G | 5  | 204 | c.1143A>G  | c.(1141-1143)ATA>ATG   | p.I381M  |
| Pat_45 | Pre-Treatment | ZNF208       | 7757      | 37 | 19 | 22155282 | 22155282 | Missense_Mutation | SNP | T | C | 4  | 184 | c.2254A>G  | c.(2254-2256)AAG>GAG   | p.K752E  |
| Pat_45 | Pre-Treatment | RGS9BP       | 388531    | 37 | 19 | 33167684 | 33167684 | Missense_Mutation | SNP | G | A | 2  | 3   | c.515G>A   | c.(514-516)CGC>CAC     | p.R172H  |
| Pat_45 | Pre-Treatment | GRAMD1A      | 57655     | 37 | 19 | 35500079 | 35500079 | Missense_Mutation | SNP | G | A | 4  | 111 | c.65G>A    | c.(64-66)CGG>CAG       | p.R22Q   |
| Pat_45 | Pre-Treatment | ZNF568       | 374900    | 37 | 19 | 37441709 | 37441709 | Missense_Mutation | SNP | C | T | 10 | 52  | c.1654C>T  | c.(1654-1656)CAT>TAT   | p.H552Y  |
| Pat_45 | Pre-Treatment | RYR1         | 6261      | 37 | 19 | 38942437 | 38942437 | Missense_Mutation | SNP | G | A | 3  | 52  | c.1156G>A  | c.(1156-1158)GCA>ACA   | p.A386T  |



|        |               |           |        |    |    |          |          |                   |     |    |    |     |     |              |                      |          |
|--------|---------------|-----------|--------|----|----|----------|----------|-------------------|-----|----|----|-----|-----|--------------|----------------------|----------|
| Pat_45 | Pre-Treatment | GMFG      | 9535   | 37 | 19 | 39819654 | 39819654 | Missense_Mutation | SNP | C  | T  | 4   | 103 | c.343G>A     | c.(343-345)GCA>ACA   | p.A115T  |
| Pat_45 | Pre-Treatment | BLVRB     | 645    | 37 | 19 | 40964341 | 40964341 | Missense_Mutation | SNP | G  | A  | 4   | 14  | c.191C>T     | c.(190-192)ACC>ATC   | p.T64I   |
| Pat_45 | Pre-Treatment | NUMBL     | 9253   | 37 | 19 | 41188842 | 41188842 | Missense_Mutation | SNP | C  | T  | 4   | 108 | c.281G>A     | c.(280-282)CGG>CAG   | p.R94Q   |
| Pat_45 | Pre-Treatment | CYP2S1    | 29785  | 37 | 19 | 41704369 | 41704369 | Missense_Mutation | SNP | C  | T  | 4   | 91  | c.496C>T     | c.(496-498)CGC>TGC   | p.R166C  |
| Pat_45 | Pre-Treatment | ARHGEF1   | 9138   | 37 | 19 | 42408220 | 42408220 | Missense_Mutation | SNP | G  | A  | 4   | 72  | c.1951G>A    | c.(1951-1953)GAG>AAG | p.E651K  |
| Pat_45 | Pre-Treatment | ZNF223    | 7766   | 37 | 19 | 44570909 | 44570909 | Missense_Mutation | SNP | C  | T  | 32  | 143 | c.928C>T     | c.(928-930)CAC>TAC   | p.H310Y  |
| Pat_45 | Pre-Treatment | APOC2     | 344    | 37 | 19 | 45451740 | 45451740 | Missense_Mutation | SNP | G  | A  | 3   | 81  | c.5G>A       | c.(4-6)GGC>GAC       | p.G2D    |
| Pat_45 | Pre-Treatment | MARK4     | 57787  | 37 | 19 | 45790890 | 45790890 | Missense_Mutation | SNP | C  | T  | 4   | 23  | c.1462C>T    | c.(1462-1464)CCA>TCA | p.P488S  |
| Pat_45 | Pre-Treatment | GRLF1     | 2909   | 37 | 19 | 47424681 | 47424681 | Missense_Mutation | SNP | G  | A  | 5   | 221 | c.2749G>A    | c.(2749-2751)GGA>AGA | p.G917R  |
| Pat_45 | Pre-Treatment | DHX34     | 9704   | 37 | 19 | 47856634 | 47856634 | Missense_Mutation | SNP | G  | A  | 4   | 116 | c.347G>A     | c.(346-348)CGG>CAG   | p.R116Q  |
| Pat_45 | Pre-Treatment | GLTSCR1   | 29998  | 37 | 19 | 48183493 | 48183493 | Missense_Mutation | SNP | G  | A  | 2   | 0   | c.1066G>A    | c.(1066-1068)GCG>ACG | p.A356T  |
| Pat_45 | Pre-Treatment | IZUMO1    | 284359 | 37 | 19 | 49248955 | 49248955 | Missense_Mutation | SNP | C  | T  | 31  | 148 | c.162G>A     | c.(160-162)ATG>ATA   | p.M54I   |
| Pat_45 | Pre-Treatment | GYS1      | 2997   | 37 | 19 | 49494681 | 49494681 | Missense_Mutation | SNP | C  | T  | 5   | 274 | c.178G>A     | c.(178-180)GAC>AAC   | p.D60N   |
| Pat_45 | Pre-Treatment | PRR12     | 57479  | 37 | 19 | 50105048 | 50105048 | Missense_Mutation | SNP | C  | T  | 6   | 23  | c.4646C>T    | c.(4645-4647)GCC>GTC | p.A1549V |
| Pat_45 | Pre-Treatment | SIGLEC11  | 114132 | 37 | 19 | 50462331 | 50462331 | Missense_Mutation | SNP | G  | A  | 3   | 40  | c.1061C>T    | c.(1060-1062)CCT>CTT | p.P354L  |
| Pat_45 | Pre-Treatment | MYBPC2    | 4606   | 37 | 19 | 50962555 | 50962555 | Missense_Mutation | SNP | G  | A  | 3   | 24  | c.2783G>A    | c.(2782-2784)CGC>CAC | p.R928H  |
| Pat_45 | Pre-Treatment | KLK15     | 55554  | 37 | 19 | 51329900 | 51329900 | Missense_Mutation | SNP | C  | T  | 3   | 69  | c.595G>A     | c.(595-597)GGC>AGC   | p.G199S  |
| Pat_45 | Pre-Treatment | HAS1      | 3036   | 37 | 19 | 52220383 | 52220383 | Missense_Mutation | SNP | C  | T  | 26  | 76  | c.766G>A     | c.(766-768)GAG>AAG   | p.E256K  |
| Pat_45 | Pre-Treatment | ZNF616    | 90317  | 37 | 19 | 52618799 | 52618799 | Missense_Mutation | SNP | G  | A  | 5   | 247 | c.1618C>T    | c.(1618-1620)CGG>TGG | p.R540W  |
| Pat_45 | Pre-Treatment | ZNF160    | 90338  | 37 | 19 | 53589523 | 53589524 | Missense_Mutation | DNP | GG | AA | 23  | 63  | c.6_7CC>TT   | c.(4-9)GCCCTT>GCTTTT | p.L3F    |
| Pat_45 | Pre-Treatment | DPRX      | 503834 | 37 | 19 | 54140183 | 54140183 | Missense_Mutation | SNP | G  | A  | 5   | 157 | c.517G>A     | c.(517-519)GCT>ACT   | p.A173T  |
| Pat_45 | Pre-Treatment | CACNG7    | 59284  | 37 | 19 | 54418696 | 54418696 | Missense_Mutation | SNP | G  | A  | 4   | 94  | c.361G>A     | c.(361-363)GGC>AGC   | p.G121S  |
| Pat_45 | Pre-Treatment | RPS9      | 6203   | 37 | 19 | 54711307 | 54711307 | Missense_Mutation | SNP | G  | A  | 4   | 85  | c.449G>A     | c.(448-450)CGC>CAC   | p.R150H  |
| Pat_45 | Pre-Treatment | LILRA1    | 11024  | 37 | 19 | 55106729 | 55106729 | Missense_Mutation | SNP | C  | T  | 25  | 104 | c.523C>T     | c.(523-525)CAT>TAT   | p.H175Y  |
| Pat_45 | Pre-Treatment | LILRB1    | 10859  | 37 | 19 | 55146735 | 55146735 | Missense_Mutation | SNP | G  | A  | 16  | 57  | c.1585G>A    | c.(1585-1587)GAA>AAA | p.E529K  |
| Pat_45 | Pre-Treatment | KIR2DS4   | 3809   | 37 | 19 | 55354347 | 55354347 | Missense_Mutation | SNP | C  | T  | 107 | 181 | c.689C>T     | c.(688-690)TCA>TTA   | p.S230L  |
| Pat_45 | Pre-Treatment | BRSK1     | 84446  | 37 | 19 | 55800943 | 55800943 | Missense_Mutation | SNP | G  | A  | 4   | 97  | c.413G>A     | c.(412-414)CGC>CAC   | p.R138H  |
| Pat_45 | Pre-Treatment | CCDC106   | 29903  | 37 | 19 | 56160423 | 56160423 | Missense_Mutation | SNP | G  | A  | 4   | 110 | c.11G>A      | c.(10-12)CGG>CAG     | p.R4Q    |
| Pat_45 | Pre-Treatment | NLRP11    | 204801 | 37 | 19 | 56307518 | 56307518 | Missense_Mutation | SNP | G  | A  | 5   | 164 | c.2270C>T    | c.(2269-2271)CCG>CTG | p.P757L  |
| Pat_45 | Pre-Treatment | NLRP4     | 147945 | 37 | 19 | 56363558 | 56363558 | Missense_Mutation | SNP | G  | A  | 8   | 47  | c.112G>A     | c.(112-114)GAA>AAA   | p.E38K   |
| Pat_45 | Pre-Treatment | NLRP4     | 147945 | 37 | 19 | 56372838 | 56372838 | Missense_Mutation | SNP | G  | A  | 3   | 58  | c.1943G>A    | c.(1942-1944)AGC>AAC | p.S648N  |
| Pat_45 | Pre-Treatment | NLRP5     | 126206 | 37 | 19 | 56539247 | 56539247 | Missense_Mutation | SNP | G  | A  | 8   | 7   | c.1648G>A    | c.(1648-1650)GAC>AAC | p.D550N  |
| Pat_45 | Pre-Treatment | KIDINS220 | 57498  | 37 | 2  | 8934045  | 8934045  | Missense_Mutation | SNP | G  | A  | 44  | 95  | c.1171C>T    | c.(1171-1173)CCC>TCC | p.P391S  |
| Pat_45 | Pre-Treatment | GREB1     | 9687   | 37 | 2  | 11767162 | 11767162 | Missense_Mutation | SNP | G  | A  | 3   | 48  | c.4381G>A    | c.(4381-4383)GCA>ACA | p.A1461T |
| Pat_45 | Pre-Treatment | LPIN1     | 23175  | 37 | 2  | 11955254 | 11955254 | Missense_Mutation | SNP | G  | A  | 3   | 73  | c.2182G>A    | c.(2182-2184)GGG>AGG | p.G728R  |
| Pat_45 | Pre-Treatment | MATN3     | 4148   | 37 | 2  | 20205796 | 20205796 | Nonsense_Mutation | SNP | G  | A  | 20  | 40  | c.499C>T     | c.(499-501)CAG>TAG   | p.Q167*  |
| Pat_45 | Pre-Treatment | ATAD2B    | 54454  | 37 | 2  | 23980810 | 23980810 | Missense_Mutation | SNP | C  | T  | 3   | 82  | c.3556G>A    | c.(3556-3558)GTA>ATA | p.V1186I |
| Pat_45 | Pre-Treatment | NCOA1     | 8648   | 37 | 2  | 24964714 | 24964714 | Missense_Mutation | SNP | G  | A  | 3   | 56  | c.3365G>A    | c.(3364-3366)CGA>CAA | p.R1122Q |
| Pat_45 | Pre-Treatment | C2orf70   | 339778 | 37 | 2  | 26800463 | 26800463 | Missense_Mutation | SNP | G  | A  | 4   | 61  | c.428G>A     | c.(427-429)AGG>AAG   | p.R143K  |
| Pat_45 | Pre-Treatment | DPYSL5    | 56896  | 37 | 2  | 27121425 | 27121425 | Missense_Mutation | SNP | G  | A  | 4   | 135 | c.58G>A      | c.(58-60)GAT>AAT     | p.D20N   |
| Pat_45 | Pre-Treatment | ABHD1     | 84696  | 37 | 2  | 27352478 | 27352478 | Missense_Mutation | SNP | G  | A  | 4   | 36  | c.601G>A     | c.(601-603)GGC>AGC   | p.G201S  |
| Pat_45 | Pre-Treatment | C2orf16   | 84226  | 37 | 2  | 27803008 | 27803008 | Missense_Mutation | SNP | G  | A  | 10  | 67  | c.3569G>A    | c.(3568-3570)CGG>CAG | p.R1190Q |
| Pat_45 | Pre-Treatment | SLC4A1AP  | 22950  | 37 | 2  | 27900620 | 27900620 | Missense_Mutation | SNP | C  | T  | 31  | 108 | c.1592C>T    | c.(1591-1593)CCA>CTA | p.P531L  |
| Pat_45 | Pre-Treatment | CEP68     | 23177  | 37 | 2  | 65299218 | 65299218 | Nonsense_Mutation | SNP | C  | T  | 4   | 87  | c.988C>T     | c.(988-990)CAG>TAG   | p.Q330*  |
| Pat_45 | Pre-Treatment | SEMA4F    | 10505  | 37 | 2  | 74902386 | 74902386 | Missense_Mutation | SNP | G  | A  | 4   | 79  | c.1247G>A    | c.(1246-1248)AGG>AAG | p.R416K  |
| Pat_45 | Pre-Treatment | FLJ40330  | 645784 | 37 | 2  | 89082281 | 89082281 | Splice_Site       | SNP | T  | C  | 3   | 136 | c.397_splice | c.e3+2               |          |
| Pat_45 | Pre-Treatment | ASTL      | 431705 | 37 | 2  | 96798324 | 96798324 | Missense_Mutation | SNP | C  | T  | 4   | 89  | c.592G>A     | c.(592-594)GAC>AAC   | p.D198N  |

|        |               |         |        |    |    |           |           |                   |     |    |    |     |     |                 |                        |               |
|--------|---------------|---------|--------|----|----|-----------|-----------|-------------------|-----|----|----|-----|-----|-----------------|------------------------|---------------|
| Pat_45 | Pre-Treatment | ST6GAL2 | 84620  | 37 | 2  | 107459979 | 107459979 | Missense_Mutation | SNP | G  | A  | 4   | 133 | c.455C>T        | c.(454-456)TCC>TTC     | p.S152F       |
| Pat_45 | Pre-Treatment | POTEE   | 445582 | 37 | 2  | 132020967 | 132020967 | Missense_Mutation | SNP | G  | A  | 9   | 48  | c.1939G>A       | c.(1939-1941)GAA>AAA   | p.E647K       |
| Pat_45 | Pre-Treatment | GPR39   | 2863   | 37 | 2  | 133174679 | 133174679 | Missense_Mutation | SNP | G  | A  | 4   | 87  | c.64G>A         | c.(64-66)GAG>AAG       | p.E22K        |
| Pat_45 | Pre-Treatment | ZRANB3  | 84083  | 37 | 2  | 136033282 | 136033282 | Missense_Mutation | SNP | T  | C  | 21  | 59  | c.1010A>G       | c.(1009-1011)GAT>GGT   | p.D337G       |
| Pat_45 | Pre-Treatment | CACNB4  | 785    | 37 | 2  | 152739875 | 152739875 | Missense_Mutation | SNP | C  | T  | 36  | 164 | c.157G>A        | c.(157-159)GAT>AAT     | p.D53N        |
| Pat_45 | Pre-Treatment | NOSTRIN | 115677 | 37 | 2  | 169716093 | 169716093 | Missense_Mutation | SNP | A  | C  | 58  | 154 | c.1125A>C       | c.(1123-1125)CAA>CAC   | p.Q375H       |
| Pat_45 | Pre-Treatment | LRP2    | 4036   | 37 | 2  | 170062971 | 170062971 | Missense_Mutation | SNP | G  | A  | 4   | 94  | c.7259C>T       | c.(7258-7260)ACT>ATT   | p.T2420I      |
| Pat_45 | Pre-Treatment | GPR155  | 151556 | 37 | 2  | 175346273 | 175346273 | Missense_Mutation | SNP | G  | A  | 57  | 465 | c.412C>T        | c.(412-414)CCT>TCT     | p.P138S       |
| Pat_45 | Pre-Treatment | TTN     | 7273   | 37 | 2  | 179459373 | 179459373 | Missense_Mutation | SNP | G  | A  | 5   | 138 | c.50144C>T      | c.(50143-50145)ACT>ATT | p.T16715I     |
| Pat_45 | Pre-Treatment | TTN     | 7273   | 37 | 2  | 179469836 | 179469836 | Missense_Mutation | SNP | C  | T  | 5   | 141 | c.46364G>A      | c.(46363-46365)CGA>CAA | p.R15455Q     |
| Pat_45 | Pre-Treatment | TTN     | 7273   | 37 | 2  | 179614255 | 179614255 | Missense_Mutation | SNP | G  | A  | 27  | 85  | c.12872C>T      | c.(12871-12873)GCT>GTT | p.A4291V      |
| Pat_45 | Pre-Treatment | CERKL   | 375298 | 37 | 2  | 182430229 | 182430229 | Missense_Mutation | SNP | C  | T  | 7   | 369 | c.686G>A        | c.(685-687)CGG>CAG     | p.R229Q       |
| Pat_45 | Pre-Treatment | NAB1    | 4664   | 37 | 2  | 191524260 | 191524260 | Missense_Mutation | SNP | G  | T  | 4   | 97  | c.358G>T        | c.(358-360)GCC>TCC     | p.A120S       |
| Pat_45 | Pre-Treatment | SDPR    | 8436   | 37 | 2  | 192701344 | 192701344 | Missense_Mutation | SNP | C  | T  | 14  | 32  | c.583G>A        | c.(583-585)GAA>AAA     | p.E195K       |
| Pat_45 | Pre-Treatment | AOX1    | 316    | 37 | 2  | 201527615 | 201527616 | Missense_Mutation | DNP | GG | AA | 50  | 152 | c.3466_3467GG>A | c.(3466-3468)GGC>AAC   | p.G1156N      |
| Pat_45 | Pre-Treatment | NOP58   | 51602  | 37 | 2  | 203149129 | 203149129 | Missense_Mutation | SNP | G  | A  | 4   | 129 | c.359G>A        | c.(358-360)CGT>CAT     | p.R120H       |
| Pat_45 | Pre-Treatment | DYTN    | 391475 | 37 | 2  | 207564538 | 207564538 | Missense_Mutation | SNP | G  | A  | 3   | 59  | c.632C>T        | c.(631-633)CCG>CTG     | p.P211L       |
| Pat_45 | Pre-Treatment | ABCA12  | 26154  | 37 | 2  | 215875192 | 215875192 | Missense_Mutation | SNP | G  | A  | 4   | 54  | c.2335C>T       | c.(2335-2337)CCA>TCA   | p.P779S       |
| Pat_45 | Pre-Treatment | CXCR2   | 3579   | 37 | 2  | 219000231 | 219000231 | Missense_Mutation | SNP | G  | A  | 5   | 264 | c.707G>A        | c.(706-708)CGT>CAT     | p.R236H       |
| Pat_45 | Pre-Treatment | COL4A4  | 1286   | 37 | 2  | 227973581 | 227973581 | Missense_Mutation | SNP | G  | A  | 3   | 34  | c.661C>T        | c.(661-663)CCT>TCT     | p.P221S       |
| Pat_45 | Pre-Treatment | PSMD1   | 5707   | 37 | 2  | 231948392 | 231948392 | Missense_Mutation | SNP | G  | A  | 4   | 137 | c.1637G>A       | c.(1636-1638)CGT>CAT   | p.R546H       |
| Pat_45 | Pre-Treatment | HDAC4   | 9759   | 37 | 2  | 240016726 | 240016726 | Missense_Mutation | SNP | G  | A  | 4   | 127 | c.2245C>T       | c.(2245-2247)CTC>TTC   | p.L749F       |
| Pat_45 | Pre-Treatment | ATG4B   | 23192  | 37 | 2  | 242590687 | 242590687 | Missense_Mutation | SNP | G  | A  | 3   | 25  | c.121G>A        | c.(121-123)GAG>AAG     | p.E41K        |
| Pat_45 | Pre-Treatment | TRIB3   | 57761  | 37 | 20 | 372154    | 372155    | Missense_Mutation | DNP | AC | TT | 7   | 18  | c.515_516AC>TT  | c.(514-516)CAC>CTT     | p.H172L       |
| Pat_45 | Pre-Treatment | SIRPG   | 55423  | 37 | 20 | 1616833   | 1616833   | Splice_Site       | SNP | C  | T  | 3   | 55  | c.748_splice    | c.e3+1                 | p.V250_splice |
| Pat_45 | Pre-Treatment | FASTKD5 | 60493  | 37 | 20 | 3127727   | 3127727   | Missense_Mutation | SNP | G  | A  | 5   | 76  | c.1990C>T       | c.(1990-1992)CCT>TCT   | p.P664S       |
| Pat_45 | Pre-Treatment | JAG1    | 182    | 37 | 20 | 10630918  | 10630918  | Nonsense_Mutation | SNP | C  | T  | 24  | 74  | c.1211G>A       | c.(1210-1212)TGG>TAG   | p.W404*       |
| Pat_45 | Pre-Treatment | CD93    | 22918  | 37 | 20 | 23065529  | 23065529  | Missense_Mutation | SNP | G  | A  | 4   | 74  | c.1301C>T       | c.(1300-1302)CCG>CTG   | p.P434L       |
| Pat_45 | Pre-Treatment | PLUNC   | 51297  | 37 | 20 | 31829222  | 31829222  | Missense_Mutation | SNP | G  | A  | 125 | 245 | c.613G>A        | c.(613-615)GAC>AAC     | p.D205N       |
| Pat_45 | Pre-Treatment | NCOA6   | 23054  | 37 | 20 | 33337708  | 33337708  | Missense_Mutation | SNP | C  | T  | 3   | 60  | c.2290G>A       | c.(2290-2292)GGA>AGA   | p.G764R       |
| Pat_45 | Pre-Treatment | RALGAPB | 57148  | 37 | 20 | 37126006  | 37126006  | Missense_Mutation | SNP | G  | A  | 4   | 113 | c.400G>A        | c.(400-402)GGT>AGT     | p.G134S       |
| Pat_45 | Pre-Treatment | ADA     | 100    | 37 | 20 | 43255157  | 43255157  | Missense_Mutation | SNP | C  | T  | 4   | 76  | c.302G>A        | c.(301-303)CGG>CAG     | p.R101Q       |
| Pat_45 | Pre-Treatment | SLC35C2 | 51006  | 37 | 20 | 44987058  | 44987058  | Missense_Mutation | SNP | C  | T  | 4   | 120 | c.88G>A         | c.(88-90)GGC>AGC       | p.G30S        |
| Pat_45 | Pre-Treatment | PHACTR3 | 116154 | 37 | 20 | 58318169  | 58318169  | Missense_Mutation | SNP | G  | A  | 37  | 94  | c.126G>A        | c.(124-126)ATG>ATA     | p.M42I        |
| Pat_45 | Pre-Treatment | PHACTR3 | 116154 | 37 | 20 | 58342267  | 58342267  | Missense_Mutation | SNP | G  | A  | 27  | 37  | c.568G>A        | c.(568-570)GAA>AAA     | p.E190K       |
| Pat_45 | Pre-Treatment | DIDO1   | 11083  | 37 | 20 | 61510767  | 61510767  | Missense_Mutation | SNP | G  | A  | 2   | 2   | c.6541C>T       | c.(6541-6543)CGC>TGC   | p.R2181C      |
| Pat_45 | Pre-Treatment | TIAM1   | 7074   | 37 | 21 | 32513700  | 32513700  | Missense_Mutation | SNP | G  | A  | 4   | 85  | c.3598C>T       | c.(3598-3600)CTC>TTC   | p.L1200F      |
| Pat_45 | Pre-Treatment | TIAM1   | 7074   | 37 | 21 | 32595763  | 32595763  | Missense_Mutation | SNP | C  | T  | 70  | 175 | c.1954G>A       | c.(1954-1956)GGC>AGC   | p.G652S       |
| Pat_45 | Pre-Treatment | DYRK1A  | 1859   | 37 | 21 | 38845021  | 38845021  | Missense_Mutation | SNP | C  | T  | 5   | 169 | c.46C>T         | c.(46-48)CGG>TGG       | p.R16W        |
| Pat_45 | Pre-Treatment | BRWD1   | 54014  | 37 | 21 | 40582064  | 40582064  | Missense_Mutation | SNP | C  | T  | 29  | 98  | c.4054G>A       | c.(4054-4056)GAT>AAT   | p.D1352N      |
| Pat_45 | Pre-Treatment | COL18A1 | 80781  | 37 | 21 | 46930009  | 46930009  | Missense_Mutation | SNP | C  | T  | 2   | 1   | c.4763C>T       | c.(4762-4764)TCA>TTA   | p.S1588L      |
| Pat_45 | Pre-Treatment | PCNT    | 5116   | 37 | 21 | 47754455  | 47754455  | Missense_Mutation | SNP | C  | T  | 4   | 77  | c.412C>T        | c.(412-414)CAC>TAC     | p.H138Y       |
| Pat_45 | Pre-Treatment | CECR6   | 27439  | 37 | 22 | 17600757  | 17600757  | Missense_Mutation | SNP | G  | A  | 2   | 1   | c.1261C>T       | c.(1261-1263)CCC>TCC   | p.P421S       |
| Pat_45 | Pre-Treatment | CECR5   | 27440  | 37 | 22 | 17624015  | 17624015  | Missense_Mutation | SNP | G  | A  | 21  | 40  | c.544C>T        | c.(544-546)CCG>TCG     | p.P182S       |
| Pat_45 | Pre-Treatment | TBX1    | 6899   | 37 | 22 | 19766821  | 19766821  | Missense_Mutation | SNP | G  | A  | 4   | 61  | c.1088G>A       | c.(1087-1089)AGG>AAG   | p.R363K       |
| Pat_45 | Pre-Treatment | ZDHC8   | 29801  | 37 | 22 | 20128852  | 20128852  | Missense_Mutation | SNP | G  | A  | 3   | 31  | c.1007G>A       | c.(1006-1008)GGC>GAC   | p.G336D       |
| Pat_45 | Pre-Treatment | RTDR1   | 27156  | 37 | 22 | 23401726  | 23401726  | Missense_Mutation | SNP | C  | T  | 4   | 57  | c.961G>A        | c.(961-963)GTG>ATG     | p.V321M       |

|        |               |         |        |    |    |           |           |                   |     |   |   |     |     |               |                      |                |
|--------|---------------|---------|--------|----|----|-----------|-----------|-------------------|-----|---|---|-----|-----|---------------|----------------------|----------------|
| Pat_45 | Pre-Treatment | BCR     | 613    | 37 | 22 | 23631788  | 23631788  | Missense_Mutation | SNP | C | T | 7   | 38  | c.2687C>T     | c.(2686-2688)CCG>CTG | p.P896L        |
| Pat_45 | Pre-Treatment | ZNF70   | 7621   | 37 | 22 | 24086387  | 24086387  | Missense_Mutation | SNP | C | T | 4   | 103 | c.941G>A      | c.(940-942)GGG>GAG   | p.G314E        |
| Pat_45 | Pre-Treatment | MYO18B  | 84700  | 37 | 22 | 26400684  | 26400684  | Missense_Mutation | SNP | G | A | 13  | 45  | c.6333G>A     | c.(6331-6333)ATG>ATA | p.M2111I       |
| Pat_45 | Pre-Treatment | SEZ6L   | 23544  | 37 | 22 | 26688759  | 26688759  | Missense_Mutation | SNP | C | T | 3   | 15  | c.482C>T      | c.(481-483)ACG>ATG   | p.T161M        |
| Pat_45 | Pre-Treatment | HPS4    | 89781  | 37 | 22 | 26854482  | 26854482  | Missense_Mutation | SNP | C | A | 3   | 48  | c.1775G>T     | c.(1774-1776)AGG>ATG | p.R592M        |
| Pat_45 | Pre-Treatment | KREMEN1 | 83999  | 37 | 22 | 29537939  | 29537939  | Missense_Mutation | SNP | C | T | 4   | 124 | c.1267C>T     | c.(1267-1269)CGT>TGT | p.R423C        |
| Pat_45 | Pre-Treatment | AP1B1   | 162    | 37 | 22 | 29746040  | 29746040  | Missense_Mutation | SNP | G | A | 6   | 167 | c.1255C>T     | c.(1255-1257)CGC>TGC | p.R419C        |
| Pat_45 | Pre-Treatment | OSBP2   | 23762  | 37 | 22 | 31289161  | 31289161  | Nonsense_Mutation | SNP | G | A | 4   | 35  | c.1922G>A     | c.(1921-1923)TGG>TAG | p.W641*        |
| Pat_45 | Pre-Treatment | SF11    | 9814   | 37 | 22 | 31946325  | 31946325  | Missense_Mutation | SNP | G | A | 3   | 42  | c.535G>A      | c.(535-537)GAG>AAG   | p.E179K        |
| Pat_45 | Pre-Treatment | MYH9    | 4627   | 37 | 22 | 36714329  | 36714329  | Missense_Mutation | SNP | C | T | 6   | 309 | c.1150G>A     | c.(1150-1152)GAT>AAT | p.D384N        |
| Pat_45 | Pre-Treatment | TPRSS6  | 164656 | 37 | 22 | 37466570  | 37466570  | Missense_Mutation | SNP | C | T | 4   | 94  | c.1822G>A     | c.(1822-1824)GCT>ACT | p.A608T        |
| Pat_45 | Pre-Treatment | TAB1    | 10454  | 37 | 22 | 39811633  | 39811633  | Missense_Mutation | SNP | C | T | 12  | 28  | c.299C>T      | c.(298-300)GCC>GTC   | p.A100V        |
| Pat_45 | Pre-Treatment | MPPED1  | 758    | 37 | 22 | 43870764  | 43870764  | Missense_Mutation | SNP | G | C | 3   | 100 | c.555G>C      | c.(553-555)CAG>CAC   | p.Q185H        |
| Pat_45 | Pre-Treatment | UPK3A   | 7380   | 37 | 22 | 45685025  | 45685025  | Splice_Site       | SNP | G | A | 4   | 128 | c.571_splice  | c.e4+1               | p.L191_splice  |
| Pat_45 | Pre-Treatment | PKDREJ  | 10343  | 37 | 22 | 46654188  | 46654188  | Missense_Mutation | SNP | C | T | 4   | 122 | c.5032G>A     | c.(5032-5034)GTC>ATC | p.V1678I       |
| Pat_45 | Pre-Treatment | JAGN1   | 84522  | 37 | 3  | 9934877   | 9934877   | Missense_Mutation | SNP | T | G | 89  | 69  | c.368T>G      | c.(367-369)TTC>TGC   | p.F123C        |
| Pat_45 | Pre-Treatment | IQSEC1  | 9922   | 37 | 3  | 12962047  | 12962047  | Missense_Mutation | SNP | G | A | 4   | 78  | c.1945C>T     | c.(1945-1947)CCA>TCA | p.P649S        |
| Pat_45 | Pre-Treatment | PLCL2   | 23228  | 37 | 3  | 17131387  | 17131387  | Missense_Mutation | SNP | G | A | 3   | 52  | c.3343G>A     | c.(3343-3345)GAT>AAT | p.D1115N       |
| Pat_45 | Pre-Treatment | DLEC1   | 9940   | 37 | 3  | 38158478  | 38158478  | Missense_Mutation | SNP | G | A | 3   | 45  | c.4192G>A     | c.(4192-4194)GGG>AGG | p.G1398R       |
| Pat_45 | Pre-Treatment | COL7A1  | 1294   | 37 | 3  | 48607707  | 48607707  | Splice_Site       | SNP | C | T | 3   | 35  | c.7440_splice | c.e97+1              | p.R2480_splice |
| Pat_45 | Pre-Treatment | QARS    | 5859   | 37 | 3  | 49133496  | 49133496  | Missense_Mutation | SNP | G | A | 4   | 42  | c.2294C>T     | c.(2293-2295)ACT>ATT | p.T765I        |
| Pat_45 | Pre-Treatment | GPX1    | 2876   | 37 | 3  | 49395482  | 49395482  | Missense_Mutation | SNP | G | C | 6   | 20  | c.230C>G      | c.(229-231)CCG>CGG   | p.P77R         |
| Pat_45 | Pre-Treatment | DAG1    | 1605   | 37 | 3  | 49569062  | 49569062  | Missense_Mutation | SNP | G | A | 4   | 107 | c.1118G>A     | c.(1117-1119)CGA>CAA | p.R373Q        |
| Pat_45 | Pre-Treatment | RBM5    | 10181  | 37 | 3  | 50155830  | 50155830  | Missense_Mutation | SNP | G | A | 4   | 48  | c.2389G>A     | c.(2389-2391)GAT>AAT | p.D797N        |
| Pat_45 | Pre-Treatment | TLR9    | 54106  | 37 | 3  | 52255324  | 52255324  | Missense_Mutation | SNP | C | T | 3   | 24  | c.3008G>A     | c.(3007-3009)CGC>CAC | p.R1003H       |
| Pat_45 | Pre-Treatment | TWF2    | 11344  | 37 | 3  | 52265154  | 52265154  | Missense_Mutation | SNP | G | A | 4   | 59  | c.472C>T      | c.(472-474)CGC>TGC   | p.R158C        |
| Pat_45 | Pre-Treatment | PRKCD   | 5580   | 37 | 3  | 53217169  | 53217169  | Missense_Mutation | SNP | G | A | 4   | 66  | c.604G>A      | c.(604-606)GAC>AAC   | p.D202N        |
| Pat_45 | Pre-Treatment | FLNB    | 2317   | 37 | 3  | 58108856  | 58108856  | Missense_Mutation | SNP | G | A | 4   | 104 | c.3163G>A     | c.(3163-3165)GTG>ATG | p.V1055M       |
| Pat_45 | Pre-Treatment | ATXN7   | 6314   | 37 | 3  | 63981842  | 63981842  | Missense_Mutation | SNP | G | A | 4   | 127 | c.2344G>A     | c.(2344-2346)GGG>AGG | p.G782R        |
| Pat_45 | Pre-Treatment | ADCY5   | 111    | 37 | 3  | 123166474 | 123166474 | Missense_Mutation | SNP | C | T | 2   | 0   | c.919G>A      | c.(919-921)GCC>ACC   | p.A307T        |
| Pat_45 | Pre-Treatment | SLC12A8 | 84561  | 37 | 3  | 124909229 | 124909229 | Missense_Mutation | SNP | C | T | 4   | 115 | c.188G>A      | c.(187-189)GGC>GAC   | p.G63D         |
| Pat_45 | Pre-Treatment | MCM2    | 4171   | 37 | 3  | 127325110 | 127325110 | Missense_Mutation | SNP | G | A | 5   | 152 | c.823G>A      | c.(823-825)GAC>AAC   | p.D275N        |
| Pat_45 | Pre-Treatment | ZBTB38  | 253461 | 37 | 3  | 141163272 | 141163272 | Missense_Mutation | SNP | C | T | 5   | 138 | c.2042C>T     | c.(2041-2043)GCT>GTT | p.A681V        |
| Pat_45 | Pre-Treatment | RNF13   | 11342  | 37 | 3  | 149613348 | 149613348 | Splice_Site       | SNP | G | A | 5   | 189 | c.409_splice  | c.e6+1               | p.I137_splice  |
| Pat_45 | Pre-Treatment | GPR87   | 53836  | 37 | 3  | 151011986 | 151011986 | Missense_Mutation | SNP | G | A | 8   | 361 | c.1048C>T     | c.(1048-1050)CGC>TGC | p.R350C        |
| Pat_45 | Pre-Treatment | C3orf55 | 152078 | 37 | 3  | 157289043 | 157289043 | Missense_Mutation | SNP | G | A | 3   | 40  | c.161G>A      | c.(160-162)GGA>GAA   | p.G54E         |
| Pat_45 | Pre-Treatment | ARPM1   | 84517  | 37 | 3  | 169486133 | 169486133 | Missense_Mutation | SNP | G | A | 4   | 76  | c.206C>T      | c.(205-207)CCA>CTA   | p.P69L         |
| Pat_45 | Pre-Treatment | THPO    | 7066   | 37 | 3  | 184090434 | 184090434 | Missense_Mutation | SNP | G | A | 4   | 72  | c.929C>T      | c.(928-930)CCA>CTA   | p.P310L        |
| Pat_45 | Pre-Treatment | GP5     | 2814   | 37 | 3  | 194118791 | 194118791 | Missense_Mutation | SNP | G | A | 30  | 36  | c.221C>T      | c.(220-222)ACC>ATC   | p.T74I         |
| Pat_45 | Pre-Treatment | MUC4    | 4585   | 37 | 3  | 195512117 | 195512117 | Missense_Mutation | SNP | C | G | 5   | 4   | c.6334G>C     | c.(6334-6336)GCT>CCT | p.A2112P       |
| Pat_45 | Pre-Treatment | PCYT1A  | 5130   | 37 | 3  | 195965671 | 195965671 | Missense_Mutation | SNP | G | A | 7   | 18  | c.992C>T      | c.(991-993)TCC>TTC   | p.S331F        |
| Pat_45 | Pre-Treatment | FGFR3   | 2261   | 37 | 4  | 1805525   | 1805525   | Missense_Mutation | SNP | G | A | 3   | 34  | c.1037G>A     | c.(1036-1038)GGG>GAG | p.G346E        |
| Pat_45 | Pre-Treatment | RGS12   | 6002   | 37 | 4  | 3415832   | 3415832   | Missense_Mutation | SNP | G | A | 2   | 2   | c.2054G>A     | c.(2053-2055)AGC>AAC | p.S685N        |
| Pat_45 | Pre-Treatment | HGFAC   | 3083   | 37 | 4  | 3444502   | 3444502   | Missense_Mutation | SNP | C | T | 5   | 83  | c.161C>T      | c.(160-162)GCG>GTG   | p.A54V         |
| Pat_45 | Pre-Treatment | ZBTB49  | 166793 | 37 | 4  | 4322555   | 4322555   | Missense_Mutation | SNP | G | A | 3   | 30  | c.1810G>A     | c.(1810-1812)GAG>AAG | p.E604K        |
| Pat_45 | Pre-Treatment | PSAPL1  | 768239 | 37 | 4  | 7435406   | 7435406   | Missense_Mutation | SNP | T | C | 2   | 6   | c.1201A>G     | c.(1201-1203)AGG>GGG | p.R401G        |
| Pat_45 | Pre-Treatment | TLR1    | 7096   | 37 | 4  | 38798346  | 38798346  | Nonsense_Mutation | SNP | G | A | 167 | 259 | c.2107C>T     | c.(2107-2109)CAG>TAG | p.Q703*        |

|        |               |          |        |    |   |           |           |                   |     |    |    |    |     |                |                        |          |
|--------|---------------|----------|--------|----|---|-----------|-----------|-------------------|-----|----|----|----|-----|----------------|------------------------|----------|
| Pat_45 | Pre-Treatment | RFC1     | 5981   | 37 | 4 | 39297270  | 39297270  | Missense_Mutation | SNP | C  | T  | 4  | 105 | c.2921G>A      | c.(2920-2922)CGT>CAT   | p.R974H  |
| Pat_45 | Pre-Treatment | ATP8A1   | 10396  | 37 | 4 | 42454025  | 42454025  | Missense_Mutation | SNP | A  | G  | 3  | 49  | c.2869T>C      | c.(2869-2871)TGG>CGG   | p.W957R  |
| Pat_45 | Pre-Treatment | RASSF6   | 166824 | 37 | 4 | 74450977  | 74450977  | Missense_Mutation | SNP | T  | C  | 4  | 86  | c.583A>G       | c.(583-585)AGG>GGG     | p.R195G  |
| Pat_45 | Pre-Treatment | LIN54    | 132660 | 37 | 4 | 83861083  | 83861083  | Missense_Mutation | SNP | G  | A  | 5  | 215 | c.1201C>T      | c.(1201-1203)CGG>TGG   | p.R401W  |
| Pat_45 | Pre-Treatment | PPM1K    | 152926 | 37 | 4 | 89199310  | 89199310  | Missense_Mutation | SNP | C  | T  | 4  | 79  | c.426G>A       | c.(424-426)ATG>ATA     | p.M142I  |
| Pat_45 | Pre-Treatment | NDST3    | 9348   | 37 | 4 | 119064828 | 119064828 | Missense_Mutation | SNP | G  | A  | 3  | 59  | c.1528G>A      | c.(1528-1530)GTC>ATC   | p.V510I  |
| Pat_45 | Pre-Treatment | FAT4     | 79633  | 37 | 4 | 126240061 | 126240061 | Missense_Mutation | SNP | C  | T  | 4  | 99  | c.2495C>T      | c.(2494-2496)ACT>ATT   | p.T832I  |
| Pat_45 | Pre-Treatment | GLRB     | 2743   | 37 | 4 | 158091830 | 158091830 | Missense_Mutation | SNP | C  | T  | 8  | 180 | c.1444C>T      | c.(1444-1446)CCT>TCT   | p.P482S  |
| Pat_45 | Pre-Treatment | NPY5R    | 4889   | 37 | 4 | 164272176 | 164272176 | Missense_Mutation | SNP | G  | A  | 13 | 132 | c.751G>A       | c.(751-753)GAA>AAA     | p.E251K  |
| Pat_45 | Pre-Treatment | ANP32C   | 23520  | 37 | 4 | 165118166 | 165118166 | Missense_Mutation | SNP | C  | T  | 25 | 39  | c.698G>A       | c.(697-699)CGA>CAA     | p.R233Q  |
| Pat_45 | Pre-Treatment | GK3P     | 2713   | 37 | 4 | 166199849 | 166199849 | Missense_Mutation | SNP | C  | T  | 5  | 210 | c.949G>A       | c.(949-951)GCT>ACT     | p.A317T  |
| Pat_45 | Pre-Treatment | TLL1     | 7092   | 37 | 4 | 166915635 | 166915635 | Missense_Mutation | SNP | G  | T  | 12 | 38  | c.464G>T       | c.(463-465)AGA>ATA     | p.R155I  |
| Pat_45 | Pre-Treatment | FAM149A  | 25854  | 37 | 4 | 187088231 | 187088231 | Missense_Mutation | SNP | G  | A  | 4  | 42  | c.1274G>A      | c.(1273-1275)AGC>AAC   | p.S425N  |
| Pat_45 | Pre-Treatment | CYP4V2   | 285440 | 37 | 4 | 187118110 | 187118110 | Missense_Mutation | SNP | C  | T  | 4  | 107 | c.430C>T       | c.(430-432)CGC>TGC     | p.R144C  |
| Pat_45 | Pre-Treatment | NKD2     | 85409  | 37 | 5 | 1038318   | 1038318   | Missense_Mutation | SNP | C  | T  | 2  | 2   | c.1186C>T      | c.(1186-1188)CTC>TTC   | p.L396F  |
| Pat_45 | Pre-Treatment | TERT     | 7015   | 37 | 5 | 1282710   | 1282710   | Missense_Mutation | SNP | G  | A  | 3  | 24  | c.1603C>T      | c.(1603-1605)CGT>TGT   | p.R535C  |
| Pat_45 | Pre-Treatment | SLC6A3   | 6531   | 37 | 5 | 1406365   | 1406365   | Missense_Mutation | SNP | C  | T  | 4  | 63  | c.1537G>A      | c.(1537-1539)GGG>AGG   | p.G513R  |
| Pat_45 | Pre-Treatment | CTNND2   | 1501   | 37 | 5 | 11346553  | 11346553  | Missense_Mutation | SNP | C  | T  | 4  | 129 | c.1559G>A      | c.(1558-1560)GGC>GAC   | p.G520D  |
| Pat_45 | Pre-Treatment | PRDM9    | 56979  | 37 | 5 | 23526999  | 23526999  | Missense_Mutation | SNP | C  | T  | 4  | 111 | c.1802C>T      | c.(1801-1803)ACA>ATA   | p.T601I  |
| Pat_45 | Pre-Treatment | C6       | 729    | 37 | 5 | 41159253  | 41159253  | Missense_Mutation | SNP | C  | T  | 48 | 137 | c.1787G>A      | c.(1786-1788)CGA>CAA   | p.R596Q  |
| Pat_45 | Pre-Treatment | BDP1     | 55814  | 37 | 5 | 70818718  | 70818718  | Missense_Mutation | SNP | G  | A  | 4  | 89  | c.5329G>A      | c.(5329-5331)GTA>ATA   | p.V1777I |
| Pat_45 | Pre-Treatment | CMYA5    | 202333 | 37 | 5 | 79034609  | 79034609  | Missense_Mutation | SNP | C  | T  | 6  | 52  | c.10021C>T     | c.(10021-10023)CCA>TCA | p.P3341S |
| Pat_45 | Pre-Treatment | VCAN     | 1462   | 37 | 5 | 82834931  | 82834931  | Missense_Mutation | SNP | G  | A  | 4  | 39  | c.6109G>A      | c.(6109-6111)GCT>ACT   | p.A2037T |
| Pat_45 | Pre-Treatment | SLCO6A1  | 133482 | 37 | 5 | 101813557 | 101813557 | Missense_Mutation | SNP | C  | T  | 47 | 139 | c.625G>A       | c.(625-627)GAA>AAA     | p.E209K  |
| Pat_45 | Pre-Treatment | TRPC7    | 57113  | 37 | 5 | 135561775 | 135561775 | Missense_Mutation | SNP | C  | T  | 3  | 16  | c.2206G>A      | c.(2206-2208)GCC>ACC   | p.A736T  |
| Pat_45 | Pre-Treatment | PCDHA6   | 56142  | 37 | 5 | 140209564 | 140209564 | Missense_Mutation | SNP | G  | A  | 4  | 62  | c.1888G>A      | c.(1888-1890)GAG>AAG   | p.E630K  |
| Pat_45 | Pre-Treatment | PCDHGA1  | 56114  | 37 | 5 | 140712640 | 140712640 | Missense_Mutation | SNP | T  | A  | 29 | 35  | c.2389T>A      | c.(2389-2391)TTA>ATA   | p.L797I  |
| Pat_45 | Pre-Treatment | HDAC3    | 8841   | 37 | 5 | 141009255 | 141009255 | Missense_Mutation | SNP | G  | A  | 4  | 134 | c.472C>T       | c.(472-474)CTC>TTC     | p.L158F  |
| Pat_45 | Pre-Treatment | FCHSD1   | 89848  | 37 | 5 | 141024239 | 141024239 | Missense_Mutation | SNP | C  | T  | 4  | 81  | c.1543G>A      | c.(1543-1545)GAG>AAG   | p.E515K  |
| Pat_45 | Pre-Treatment | PCDH1    | 5097   | 37 | 5 | 141242829 | 141242829 | Missense_Mutation | SNP | G  | A  | 21 | 37  | c.3067C>T      | c.(3067-3069)CGC>TGC   | p.R1023C |
| Pat_45 | Pre-Treatment | SH3RF2   | 153769 | 37 | 5 | 145439449 | 145439449 | Missense_Mutation | SNP | C  | T  | 18 | 50  | c.1576C>T      | c.(1576-1578)CTC>TTC   | p.L526F  |
| Pat_45 | Pre-Treatment | DPYSL3   | 1809   | 37 | 5 | 146781115 | 146781115 | Missense_Mutation | SNP | G  | A  | 9  | 25  | c.956C>T       | c.(955-957)TCC>TTC     | p.S319F  |
| Pat_45 | Pre-Treatment | FBXO38   | 81545  | 37 | 5 | 147806803 | 147806803 | Missense_Mutation | SNP | G  | A  | 4  | 68  | c.1946G>A      | c.(1945-1947)CGA>CAA   | p.R649Q  |
| Pat_45 | Pre-Treatment | PPARGC1B | 133522 | 37 | 5 | 149212805 | 149212805 | Missense_Mutation | SNP | C  | T  | 3  | 46  | c.1169C>T      | c.(1168-1170)TCG>TTG   | p.S390L  |
| Pat_45 | Pre-Treatment | FAT2     | 2196   | 37 | 5 | 150921921 | 150921921 | Missense_Mutation | SNP | C  | T  | 13 | 187 | c.8767G>A      | c.(8767-8769)GAA>AAA   | p.E2923K |
| Pat_45 | Pre-Treatment | TIMD4    | 91937  | 37 | 5 | 156381747 | 156381747 | Missense_Mutation | SNP | C  | T  | 4  | 62  | c.79G>A        | c.(79-81)GTT>ATT       | p.V27I   |
| Pat_45 | Pre-Treatment | ADAM19   | 8728   | 37 | 5 | 156929917 | 156929917 | Missense_Mutation | SNP | C  | T  | 24 | 96  | c.1202G>A      | c.(1201-1203)GGA>GAA   | p.G401E  |
| Pat_45 | Pre-Treatment | DOCK2    | 1794   | 37 | 5 | 169116299 | 169116299 | Missense_Mutation | SNP | G  | A  | 23 | 97  | c.805G>A       | c.(805-807)GAG>AAG     | p.E269K  |
| Pat_45 | Pre-Treatment | CNOT6    | 57472  | 37 | 5 | 179998353 | 179998353 | Missense_Mutation | SNP | G  | A  | 4  | 88  | c.1382G>A      | c.(1381-1383)AGG>AAG   | p.R461K  |
| Pat_45 | Pre-Treatment | PIP5K1P1 | 206426 | 37 | 6 | 7987158   | 7987158   | Missense_Mutation | SNP | C  | T  | 4  | 97  | c.389C>T       | c.(388-390)GCG>GTG     | p.A130V  |
| Pat_45 | Pre-Treatment | GFOD1    | 54438  | 37 | 6 | 13486885  | 13486885  | Missense_Mutation | SNP | C  | T  | 4  | 38  | c.238G>A       | c.(238-240)GCT>ACT     | p.A80T   |
| Pat_45 | Pre-Treatment | JARID2   | 3720   | 37 | 6 | 15501269  | 15501269  | Missense_Mutation | SNP | C  | T  | 4  | 36  | c.2077C>T      | c.(2077-2079)CGG>TGG   | p.R693W  |
| Pat_45 | Pre-Treatment | CAP2     | 10486  | 37 | 6 | 17551741  | 17551741  | Missense_Mutation | SNP | G  | T  | 4  | 127 | c.1256G>T      | c.(1255-1257)TGC>TTC   | p.C419F  |
| Pat_45 | Pre-Treatment | DCDC2    | 51473  | 37 | 6 | 24174966  | 24174966  | Missense_Mutation | SNP | C  | T  | 5  | 122 | c.1423G>A      | c.(1423-1425)GTG>ATG   | p.V475M  |
| Pat_45 | Pre-Treatment | SLC17A1  | 6568   | 37 | 6 | 25826840  | 25826840  | Missense_Mutation | SNP | C  | A  | 3  | 22  | c.56G>T        | c.(55-57)CGC>CTC       | p.R19L   |
| Pat_45 | Pre-Treatment | OR12D2   | 26529  | 37 | 6 | 29365320  | 29365320  | Missense_Mutation | SNP | C  | T  | 32 | 182 | c.844C>T       | c.(844-846)CCT>TCT     | p.P282S  |
| Pat_45 | Pre-Treatment | DPCR1    | 135656 | 37 | 6 | 30919836  | 30919837  | Missense_Mutation | DNP | GG | AA | 23 | 91  | .3595_3596GG>A | c.(3595-3597)GGG>AAG   | p.G1199K |

|        |               |          |        |    |   |           |           |                   |     |   |   |     |     |               |                        |               |
|--------|---------------|----------|--------|----|---|-----------|-----------|-------------------|-----|---|---|-----|-----|---------------|------------------------|---------------|
| Pat_45 | Pre-Treatment | PSORS1C1 | 170679 | 37 | 6 | 31106510  | 31106510  | Missense_Mutation | SNP | G | A | 5   | 159 | c.121G>A      | c.(121-123)GTT>ATT     | p.V41I        |
| Pat_45 | Pre-Treatment | SLC39A7  | 7922   | 37 | 6 | 33170780  | 33170780  | Missense_Mutation | SNP | G | A | 6   | 351 | c.1034G>A     | c.(1033-1035)CGG>CAG   | p.R345Q       |
| Pat_45 | Pre-Treatment | KIFC1    | 3833   | 37 | 6 | 33374184  | 33374184  | Missense_Mutation | SNP | G | A | 4   | 69  | c.1748G>A     | c.(1747-1749)CGG>CAG   | p.R583Q       |
| Pat_45 | Pre-Treatment | C6orf106 | 64771  | 37 | 6 | 34614410  | 34614410  | Missense_Mutation | SNP | C | T | 4   | 123 | c.479G>A      | c.(478-480)CGG>CAG     | p.R160Q       |
| Pat_45 | Pre-Treatment | TREML4   | 285852 | 37 | 6 | 41196184  | 41196184  | Missense_Mutation | SNP | C | A | 3   | 23  | c.19C>A       | c.(19-21)CAC>AAC       | p.H7N         |
| Pat_45 | Pre-Treatment | PRPH2    | 5961   | 37 | 6 | 42689774  | 42689774  | Missense_Mutation | SNP | G | A | 3   | 32  | c.299C>T      | c.(298-300)CCG>CTG     | p.P100L       |
| Pat_45 | Pre-Treatment | TCTE1    | 202500 | 37 | 6 | 44254138  | 44254138  | Missense_Mutation | SNP | G | T | 4   | 41  | c.409C>A      | c.(409-411)CAT>AAT     | p.H137N       |
| Pat_45 | Pre-Treatment | EYS      | 346007 | 37 | 6 | 66204958  | 66204958  | Missense_Mutation | SNP | G | T | 4   | 131 | c.346C>A      | c.(346-348)CAA>AAA     | p.Q116K       |
| Pat_45 | Pre-Treatment | IMPG1    | 3617   | 37 | 6 | 76713637  | 76713637  | Missense_Mutation | SNP | G | A | 25  | 92  | c.1166C>T     | c.(1165-1167)CCT>CTT   | p.P389L       |
| Pat_45 | Pre-Treatment | BVES     | 11149  | 37 | 6 | 105573398 | 105573398 | Missense_Mutation | SNP | C | T | 5   | 272 | c.407G>A      | c.(406-408)CGT>CAT     | p.R136H       |
| Pat_45 | Pre-Treatment | FAM26E   | 254228 | 37 | 6 | 116833142 | 116833142 | Missense_Mutation | SNP | C | T | 4   | 112 | c.283C>T      | c.(283-285)CGT>TGT     | p.R95C        |
| Pat_45 | Pre-Treatment | ROS1     | 6098   | 37 | 6 | 117724427 | 117724427 | Missense_Mutation | SNP | G | A | 3   | 54  | c.452C>T      | c.(451-453)CCG>CTG     | p.P151L       |
| Pat_45 | Pre-Treatment | IL20RA   | 53832  | 37 | 6 | 137330594 | 137330594 | Missense_Mutation | SNP | C | T | 19  | 79  | c.439G>A      | c.(439-441)GAT>AAT     | p.D147N       |
| Pat_45 | Pre-Treatment | SYNE1    | 23345  | 37 | 6 | 152765647 | 152765647 | Missense_Mutation | SNP | C | T | 20  | 78  | c.3736G>A     | c.(3736-3738)GAA>AAA   | p.E1246K      |
| Pat_45 | Pre-Treatment | RNASET2  | 8635   | 37 | 6 | 167366005 | 167366005 | Missense_Mutation | SNP | C | T | 28  | 91  | c.118G>A      | c.(118-120)GTT>ATT     | p.V40I        |
| Pat_45 | Pre-Treatment | MICALL2  | 79778  | 37 | 7 | 1481914   | 1481914   | Missense_Mutation | SNP | G | A | 14  | 10  | c.1625C>T     | c.(1624-1626)TCC>TTC   | p.S542F       |
| Pat_45 | Pre-Treatment | PMS2     | 5395   | 37 | 7 | 6026810   | 6026810   | Missense_Mutation | SNP | G | A | 4   | 92  | c.1586C>T     | c.(1585-1587)TCG>TTG   | p.S529L       |
| Pat_45 | Pre-Treatment | ZNF853   | 54753  | 37 | 7 | 6662322   | 6662322   | Missense_Mutation | SNP | G | A | 2   | 2   | c.1700G>A     | c.(1699-1701)CGA>CAA   | p.R567Q       |
| Pat_45 | Pre-Treatment | NXPH1    | 30010  | 37 | 7 | 8790885   | 8790885   | Missense_Mutation | SNP | G | A | 4   | 98  | c.302G>A      | c.(301-303)CGG>CAG     | p.R101Q       |
| Pat_45 | Pre-Treatment | TRA2A    | 29896  | 37 | 7 | 23552565  | 23552565  | Missense_Mutation | SNP | C | T | 28  | 191 | c.473G>A      | c.(472-474)CGA>CAA     | p.R158Q       |
| Pat_45 | Pre-Treatment | CLK2P    | 1197   | 37 | 7 | 23625138  | 23625138  | Missense_Mutation | SNP | C | T | 4   | 85  | c.359G>A      | c.(358-360)CGA>CAA     | p.R120Q       |
| Pat_45 | Pre-Treatment | HOXA11   | 3207   | 37 | 7 | 27222585  | 27222585  | Missense_Mutation | SNP | G | A | 6   | 133 | c.772C>T      | c.(772-774)CGG>TGG     | p.R258W       |
| Pat_45 | Pre-Treatment | CPVL     | 54504  | 37 | 7 | 29126138  | 29126138  | Missense_Mutation | SNP | G | A | 115 | 113 | c.571C>T      | c.(571-573)CCT>TCT     | p.P191S       |
| Pat_45 | Pre-Treatment | CHN2     | 1124   | 37 | 7 | 29535581  | 29535581  | Missense_Mutation | SNP | G | T | 4   | 106 | c.668G>T      | c.(667-669)CGA>CTA     | p.R223L       |
| Pat_45 | Pre-Treatment | DPY19L1  | 23333  | 37 | 7 | 35013211  | 35013211  | Missense_Mutation | SNP | G | A | 3   | 73  | c.610C>T      | c.(610-612)CGT>TGT     | p.R204C       |
| Pat_45 | Pre-Treatment | MYO1G    | 64005  | 37 | 7 | 45002693  | 45002693  | Missense_Mutation | SNP | C | T | 2   | 0   | c.2776G>A     | c.(2776-2778)GAC>AAC   | p.D926N       |
| Pat_45 | Pre-Treatment | IGFBP3   | 3486   | 37 | 7 | 45956840  | 45956840  | Missense_Mutation | SNP | G | A | 29  | 246 | c.602C>T      | c.(601-603)TCC>TTC     | p.S201F       |
| Pat_45 | Pre-Treatment | TYW1B    | 441250 | 37 | 7 | 72081656  | 72081656  | Splice_Site       | SNP | C | T | 5   | 183 | c.1785_splice | c.e16+1                | p.K595_splice |
| Pat_45 | Pre-Treatment | ELN      | 2006   | 37 | 7 | 73458236  | 73458236  | Missense_Mutation | SNP | G | A | 3   | 21  | c.455G>A      | c.(454-456)GGT>GAT     | p.G152D       |
| Pat_45 | Pre-Treatment | ELN      | 2006   | 37 | 7 | 73458239  | 73458239  | Missense_Mutation | SNP | G | C | 3   | 21  | c.458G>C      | c.(457-459)GGC>GCC     | p.G153A       |
| Pat_45 | Pre-Treatment | LIMK1    | 3984   | 37 | 7 | 73521482  | 73521482  | Missense_Mutation | SNP | G | A | 3   | 31  | c.1024G>A     | c.(1024-1026)GGG>AGG   | p.G342R       |
| Pat_45 | Pre-Treatment | PCLO     | 27445  | 37 | 7 | 82430898  | 82430898  | Missense_Mutation | SNP | C | T | 46  | 57  | c.14943G>A    | c.(14941-14943)ATG>ATA | p.M4981I      |
| Pat_45 | Pre-Treatment | PCLO     | 27445  | 37 | 7 | 82584325  | 82584325  | Missense_Mutation | SNP | C | T | 22  | 254 | c.5944G>A     | c.(5944-5946)GGA>AGA   | p.G1982R      |
| Pat_45 | Pre-Treatment | ABCB4    | 5244   | 37 | 7 | 87037363  | 87037363  | Missense_Mutation | SNP | G | A | 6   | 219 | c.3269C>T     | c.(3268-3270)GCG>GTG   | p.A1090V      |
| Pat_45 | Pre-Treatment | SRI      | 6717   | 37 | 7 | 87846436  | 87846436  | Splice_Site       | SNP | C | T | 5   | 266 | c.205_splice  | c.e3+1                 | p.P69_splice  |
| Pat_45 | Pre-Treatment | STEAP2   | 261729 | 37 | 7 | 89854678  | 89854678  | Missense_Mutation | SNP | C | G | 114 | 109 | c.282C>G      | c.(280-282)CAC>CAG     | p.H94Q        |
| Pat_45 | Pre-Treatment | AP4M1    | 9179   | 37 | 7 | 99701259  | 99701259  | Missense_Mutation | SNP | A | G | 215 | 194 | c.487A>G      | c.(487-489)AAA>GAA     | p.K163E       |
| Pat_45 | Pre-Treatment | MUC17    | 140453 | 37 | 7 | 100683878 | 100683878 | Missense_Mutation | SNP | C | T | 87  | 435 | c.9181C>T     | c.(9181-9183)CCT>TCT   | p.P3061S      |
| Pat_45 | Pre-Treatment | RELN     | 5649   | 37 | 7 | 103244910 | 103244910 | Missense_Mutation | SNP | C | T | 6   | 163 | c.3029G>A     | c.(3028-3030)CGC>CAC   | p.R1010H      |
| Pat_45 | Pre-Treatment | DLD      | 1738   | 37 | 7 | 107556059 | 107556059 | Missense_Mutation | SNP | C | T | 109 | 93  | c.793C>T      | c.(793-795)CTT>TTT     | p.L265F       |
| Pat_45 | Pre-Treatment | IRF5     | 3663   | 37 | 7 | 128586065 | 128586065 | Missense_Mutation | SNP | G | A | 5   | 58  | c.362G>A      | c.(361-363)TGC>TAC     | p.C121Y       |
| Pat_45 | Pre-Treatment | BRAF     | 673    | 37 | 7 | 140453136 | 140453136 | Missense_Mutation | SNP | A | T | 114 | 105 | c.1799T>A     | c.(1798-1800)GTG>GAG   | p.V600E       |
| Pat_45 | Pre-Treatment | CNTNAP2  | 26047  | 37 | 7 | 146805370 | 146805370 | Missense_Mutation | SNP | G | A | 56  | 48  | c.682G>A      | c.(682-684)GGA>AGA     | p.G228R       |
| Pat_45 | Pre-Treatment | SSPO     | 23145  | 37 | 7 | 149477982 | 149477982 | Missense_Mutation | SNP | G | A | 3   | 26  | c.1753G>A     | c.(1753-1755)GGT>AGT   | p.G585S       |
| Pat_45 | Pre-Treatment | SSPO     | 23145  | 37 | 7 | 149500187 | 149500187 | Missense_Mutation | SNP | G | A | 2   | 0   | c.7813G>A     | c.(7813-7815)GGC>AGC   | p.G2605S      |
| Pat_45 | Pre-Treatment | GALNTL5  | 168391 | 37 | 7 | 151664473 | 151664473 | Missense_Mutation | SNP | C | T | 3   | 30  | c.142C>T      | c.(142-144)CCT>TCT     | p.P48S        |
| Pat_45 | Pre-Treatment | VIPR2    | 7434   | 37 | 7 | 158935207 | 158935207 | Missense_Mutation | SNP | G | A | 158 | 102 | c.82C>T       | c.(82-84)CAT>TAT       | p.H28Y        |



|        |               |          |        |    |   |           |           |                   |     |    |    |     |     |                |                      |               |
|--------|---------------|----------|--------|----|---|-----------|-----------|-------------------|-----|----|----|-----|-----|----------------|----------------------|---------------|
| Pat_45 | Pre-Treatment | DEFA4    | 1669   | 37 | 8 | 6794369   | 6794369   | Missense_Mutation | SNP | C  | T  | 3   | 19  | c.53G>A        | c.(52-54)CGG>CAG     | p.R18Q        |
| Pat_45 | Pre-Treatment | PINX1    | 54984  | 37 | 8 | 10677719  | 10677719  | Missense_Mutation | SNP | C  | T  | 4   | 84  | c.455G>A       | c.(454-456)AGT>AAT   | p.S152N       |
| Pat_45 | Pre-Treatment | SH2D4A   | 63898  | 37 | 8 | 19231157  | 19231157  | Missense_Mutation | SNP | C  | T  | 4   | 93  | c.1034C>T      | c.(1033-1035)GCC>GTC | p.A345V       |
| Pat_45 | Pre-Treatment | REEP4    | 80346  | 37 | 8 | 21996301  | 21996301  | Missense_Mutation | SNP | G  | A  | 3   | 56  | c.559C>T       | c.(559-561)CGG>TGG   | p.R187W       |
| Pat_45 | Pre-Treatment | LOXL2    | 4017   | 37 | 8 | 23159641  | 23159641  | Missense_Mutation | SNP | C  | T  | 35  | 27  | c.2032G>A      | c.(2032-2034)GAT>AAT | p.D678N       |
| Pat_45 | Pre-Treatment | NEFL     | 4747   | 37 | 8 | 24813629  | 24813629  | Missense_Mutation | SNP | C  | T  | 2   | 2   | c.401G>A       | c.(400-402)CGC>CAC   | p.R134H       |
| Pat_45 | Pre-Treatment | PTK2B    | 2185   | 37 | 8 | 27297754  | 27297754  | Missense_Mutation | SNP | C  | T  | 3   | 31  | c.1835C>T      | c.(1834-1836)GCC>GTC | p.A612V       |
| Pat_45 | Pre-Treatment | C8orf41  | 80185  | 37 | 8 | 33357868  | 33357868  | Missense_Mutation | SNP | C  | T  | 3   | 99  | c.1400G>A      | c.(1399-1401)CGC>CAC | p.R467H       |
| Pat_45 | Pre-Treatment | GPR124   | 25960  | 37 | 8 | 37693220  | 37693220  | Missense_Mutation | SNP | C  | T  | 4   | 87  | c.1982C>T      | c.(1981-1983)TCC>TTC | p.S661F       |
| Pat_45 | Pre-Treatment | ADRB3    | 155    | 37 | 8 | 37823923  | 37823923  | Missense_Mutation | SNP | G  | T  | 2   | 0   | c.65C>A        | c.(64-66)CCC>CAC     | p.P22H        |
| Pat_45 | Pre-Treatment | WHSC1L1  | 54904  | 37 | 8 | 38146018  | 38146018  | Missense_Mutation | SNP | C  | T  | 4   | 132 | c.3488G>A      | c.(3487-3489)AGG>AAG | p.R1163K      |
| Pat_45 | Pre-Treatment | IKBKB    | 3551   | 37 | 8 | 42178346  | 42178346  | Missense_Mutation | SNP | G  | A  | 4   | 97  | c.1672G>A      | c.(1672-1674)GGA>AGA | p.G558R       |
| Pat_45 | Pre-Treatment | PRKDC    | 5591   | 37 | 8 | 48746808  | 48746808  | Missense_Mutation | SNP | C  | A  | 5   | 276 | c.8101G>T      | c.(8101-8103)GGG>TGG | p.G2701W      |
| Pat_45 | Pre-Treatment | ST18     | 9705   | 37 | 8 | 53079523  | 53079523  | Missense_Mutation | SNP | C  | T  | 83  | 137 | c.1093G>A      | c.(1093-1095)GAG>AAG | p.E365K       |
| Pat_45 | Pre-Treatment | TMEM68   | 137695 | 37 | 8 | 56663561  | 56663561  | Missense_Mutation | SNP | G  | A  | 75  | 127 | c.649C>T       | c.(649-651)CGC>TGC   | p.R217C       |
| Pat_45 | Pre-Treatment | CYP7B1   | 9420   | 37 | 8 | 65527628  | 65527628  | Missense_Mutation | SNP | G  | A  | 32  | 138 | c.1012C>T      | c.(1012-1014)CCC>TCC | p.P338S       |
| Pat_45 | Pre-Treatment | PTDSS1   | 9791   | 37 | 8 | 97321851  | 97321851  | Splice_Site       | SNP | G  | A  | 4   | 118 | c.1073_splice  | c.e9+1               | p.G358_splice |
| Pat_45 | Pre-Treatment | RGS22    | 26166  | 37 | 8 | 100994197 | 100994197 | Missense_Mutation | SNP | C  | T  | 126 | 248 | c.3328G>A      | c.(3328-3330)GAG>AAG | p.E1110K      |
| Pat_45 | Pre-Treatment | ZHX1     | 11244  | 37 | 8 | 124267180 | 124267180 | Missense_Mutation | SNP | C  | T  | 6   | 345 | c.1007G>A      | c.(1006-1008)CGT>CAT | p.R336H       |
| Pat_45 | Pre-Treatment | ZNF572   | 137209 | 37 | 8 | 125988764 | 125988764 | Missense_Mutation | SNP | C  | T  | 58  | 78  | c.254C>T       | c.(253-255)TCC>TTC   | p.S85F        |
| Pat_45 | Pre-Treatment | BAI1     | 575    | 37 | 8 | 143561116 | 143561116 | Missense_Mutation | SNP | G  | A  | 3   | 41  | c.1789G>A      | c.(1789-1791)GGA>AGA | p.G597R       |
| Pat_45 | Pre-Treatment | KIFC2    | 90990  | 37 | 8 | 145694113 | 145694113 | Missense_Mutation | SNP | C  | T  | 4   | 113 | c.1009C>T      | c.(1009-1011)CGG>TGG | p.R337W       |
| Pat_45 | Pre-Treatment | MFSD3    | 113655 | 37 | 8 | 145736372 | 145736372 | Splice_Site       | SNP | A  | G  | 2   | 6   | c.1066_splice  | c.e5-2               | p.A356_splice |
| Pat_45 | Pre-Treatment | CER1     | 9350   | 37 | 9 | 14722231  | 14722231  | Missense_Mutation | SNP | C  | T  | 19  | 35  | c.440G>A       | c.(439-441)GGG>GAG   | p.G147E       |
| Pat_45 | Pre-Treatment | FREM1    | 158326 | 37 | 9 | 14776179  | 14776179  | Missense_Mutation | SNP | G  | A  | 3   | 48  | c.4465C>T      | c.(4465-4467)CGG>TGG | p.R1489W      |
| Pat_45 | Pre-Treatment | FREM1    | 158326 | 37 | 9 | 14859270  | 14859270  | Missense_Mutation | SNP | C  | T  | 4   | 138 | c.542G>A       | c.(541-543)CGG>CAG   | p.R181Q       |
| Pat_45 | Pre-Treatment | C9orf93  | 203238 | 37 | 9 | 15623350  | 15623350  | Missense_Mutation | SNP | G  | A  | 7   | 411 | c.761G>A       | c.(760-762)CGA>CAA   | p.R254Q       |
| Pat_45 | Pre-Treatment | FANCG    | 2189   | 37 | 9 | 35078250  | 35078250  | Missense_Mutation | SNP | G  | A  | 4   | 71  | c.398C>T       | c.(397-399)CCG>CTG   | p.P133L       |
| Pat_45 | Pre-Treatment | FRMPD1   | 22844  | 37 | 9 | 37733588  | 37733588  | Nonsense_Mutation | SNP | C  | T  | 4   | 47  | c.1114C>T      | c.(1114-1116)CGA>TGA | p.R372*       |
| Pat_45 | Pre-Treatment | FLJ43859 | 389761 | 37 | 9 | 84547469  | 84547469  | Missense_Mutation | SNP | C  | T  | 26  | 21  | c.2393C>T      | c.(2392-2394)TCT>TTT | p.S798F       |
| Pat_45 | Pre-Treatment | SLC28A3  | 64078  | 37 | 9 | 86905169  | 86905169  | Missense_Mutation | SNP | G  | A  | 31  | 36  | c.1049C>T      | c.(1048-1050)CCA>CTA | p.P350L       |
| Pat_45 | Pre-Treatment | CDK20    | 23552  | 37 | 9 | 90584248  | 90584248  | Missense_Mutation | SNP | G  | A  | 4   | 51  | c.704C>T       | c.(703-705)CCG>CTG   | p.P235L       |
| Pat_45 | Pre-Treatment | ANKRD19  | 138649 | 37 | 9 | 95576241  | 95576241  | Missense_Mutation | SNP | C  | T  | 4   | 100 | c.407C>T       | c.(406-408)ACT>ATT   | p.T136I       |
| Pat_45 | Pre-Treatment | OR2K2    | 26248  | 37 | 9 | 114090194 | 114090194 | Missense_Mutation | SNP | C  | T  | 3   | 56  | c.520G>A       | c.(520-522)GAT>AAT   | p.D174N       |
| Pat_45 | Pre-Treatment | PTGR1    | 22949  | 37 | 9 | 114337092 | 114337092 | Missense_Mutation | SNP | C  | T  | 3   | 93  | c.682G>A       | c.(682-684)GGC>AGC   | p.G228S       |
| Pat_45 | Pre-Treatment | OR1J1    | 347168 | 37 | 9 | 125240181 | 125240181 | Missense_Mutation | SNP | C  | T  | 4   | 93  | c.25G>A        | c.(25-27)GTG>ATG     | p.V9M         |
| Pat_45 | Pre-Treatment | AK1      | 203    | 37 | 9 | 130635040 | 130635040 | Missense_Mutation | SNP | C  | T  | 3   | 46  | c.136G>A       | c.(136-138)GAG>AAG   | p.E46K        |
| Pat_45 | Pre-Treatment | NUP188   | 23511  | 37 | 9 | 131731770 | 131731770 | Missense_Mutation | SNP | G  | A  | 4   | 55  | c.889G>A       | c.(889-891)GCG>ACG   | p.A297T       |
| Pat_45 | Pre-Treatment | C9orf106 | 414318 | 37 | 9 | 132084535 | 132084536 | Nonsense_Mutation | DNP | GG | AA | 24  | 27  | c.443_444GG>AA | c.(442-444)TGG>TAA   | p.W148*       |
| Pat_45 | Pre-Treatment | BRD3     | 8019   | 37 | 9 | 136915644 | 136915644 | Missense_Mutation | SNP | G  | A  | 4   | 51  | c.566C>T       | c.(565-567)ACC>ATC   | p.T189I       |
| Pat_45 | Pre-Treatment | C9orf142 | 286257 | 37 | 9 | 139887380 | 139887380 | Missense_Mutation | SNP | G  | A  | 4   | 99  | c.184G>A       | c.(184-186)GCC>ACC   | p.A62T        |
| Pat_45 | Pre-Treatment | ABCA2    | 20     | 37 | 9 | 139907164 | 139907164 | Missense_Mutation | SNP | C  | T  | 3   | 22  | c.5078G>A      | c.(5077-5079)CGG>CAG | p.R1693Q      |
| Pat_45 | Pre-Treatment | PLCXD1   | 55344  | 37 | X | 209850    | 209850    | Missense_Mutation | SNP | G  | A  | 4   | 66  | c.698G>A       | c.(697-699)CGA>CAA   | p.R233Q       |
| Pat_45 | Pre-Treatment | ARSF     | 416    | 37 | X | 3002349   | 3002349   | Missense_Mutation | SNP | G  | A  | 4   | 110 | c.472G>A       | c.(472-474)GGG>AGG   | p.G158R       |
| Pat_45 | Pre-Treatment | SHROOM2  | 357    | 37 | X | 9862984   | 9862984   | Missense_Mutation | SNP | G  | A  | 3   | 8   | c.1036G>A      | c.(1036-1038)GCA>ACA | p.A346T       |
| Pat_45 | Pre-Treatment | SH3KBP1  | 30011  | 37 | X | 19568187  | 19568187  | Missense_Mutation | SNP | C  | A  | 4   | 53  | c.1399G>T      | c.(1399-1401)GAC>TAC | p.D467Y       |
| Pat_45 | Pre-Treatment | KLHL34   | 257240 | 37 | X | 21675800  | 21675800  | Missense_Mutation | SNP | T  | C  | 2   | 5   | c.107A>G       | c.(106-108)GAG>GGG   | p.E36G        |

|        |                 |           |        |    |   |           |           |                   |     |   |   |    |     |               |                        |               |
|--------|-----------------|-----------|--------|----|---|-----------|-----------|-------------------|-----|---|---|----|-----|---------------|------------------------|---------------|
| Pat_45 | Pre-Treatment   | FAM47C    | 442444 | 37 | X | 37027957  | 37027957  | Missense_Mutation | SNP | G | A | 28 | 33  | c.1474G>A     | c.(1474-1476)GAC>AAC   | p.D492N       |
| Pat_45 | Pre-Treatment   | SYTL5     | 94122  | 37 | X | 37985840  | 37985840  | Splice_Site       | SNP | G | A | 17 | 15  | c.2051_splice | c.e18-1                | p.G684_splice |
| Pat_45 | Pre-Treatment   | DGKK      | 139189 | 37 | X | 50213400  | 50213400  | Missense_Mutation | SNP | G | A | 4  | 73  | c.278C>T      | c.(277-279)CCG>CTG     | p.P93L        |
| Pat_45 | Pre-Treatment   | GSPT2     | 23708  | 37 | X | 51487156  | 51487156  | Missense_Mutation | SNP | C | A | 3  | 11  | c.434C>A      | c.(433-435)GCC>GAC     | p.A145D       |
| Pat_45 | Pre-Treatment   | GPR173    | 54328  | 37 | X | 53106351  | 53106351  | Missense_Mutation | SNP | C | G | 2  | 10  | c.548C>G      | c.(547-549)GCC>GGC     | p.A183G       |
| Pat_45 | Pre-Treatment   | PFKFB1    | 5207   | 37 | X | 54960267  | 54960267  | Missense_Mutation | SNP | C | T | 3  | 26  | c.1343G>A     | c.(1342-1344)CGG>CAG   | p.R448Q       |
| Pat_45 | Pre-Treatment   | NONO      | 4841   | 37 | X | 70514153  | 70514153  | Missense_Mutation | SNP | G | A | 23 | 11  | c.425G>A      | c.(424-426)CGC>CAC     | p.R142H       |
| Pat_45 | Pre-Treatment   | P2RY10    | 27334  | 37 | X | 78216429  | 78216429  | Missense_Mutation | SNP | C | T | 33 | 39  | c.412C>T      | c.(412-414)CCC>TCC     | p.P138S       |
| Pat_45 | Pre-Treatment   | MUM1L1    | 139221 | 37 | X | 105451229 | 105451229 | Missense_Mutation | SNP | G | A | 4  | 28  | c.1804G>A     | c.(1804-1806)GAT>AAT   | p.D602N       |
| Pat_45 | Pre-Treatment   | RGAG1     | 57529  | 37 | X | 109697032 | 109697032 | Missense_Mutation | SNP | G | A | 3  | 38  | c.3187G>A     | c.(3187-3189)GCC>ACC   | p.A1063T      |
| Pat_45 | Pre-Treatment   | PGRMC1    | 10857  | 37 | X | 118370342 | 118370342 | Missense_Mutation | SNP | G | A | 4  | 25  | c.16G>A       | c.(16-18)GTG>ATG       | p.V6M         |
| Pat_45 | Pre-Treatment   | CDR1      | 1038   | 37 | X | 139866323 | 139866323 | Missense_Mutation | SNP | G | A | 4  | 67  | c.209C>T      | c.(208-210)TCG>TTG     | p.S70L        |
| Pat_45 | Pre-Treatment   | MAGEC1    | 9947   | 37 | X | 140994163 | 140994163 | Nonsense_Mutation | SNP | A | T | 4  | 109 | c.973A>T      | c.(973-975)AGA>TGA     | p.R325*       |
| Pat_45 | Pre-Treatment   | SLITRK4   | 139065 | 37 | X | 142716578 | 142716578 | Missense_Mutation | SNP | C | T | 49 | 39  | c.2347G>A     | c.(2347-2349)GAA>AAA   | p.E783K       |
| Pat_45 | Pre-Treatment   | CNGA2     | 1260   | 37 | X | 150912089 | 150912089 | Missense_Mutation | SNP | G | A | 29 | 34  | c.1114G>A     | c.(1114-1116)GGC>AGC   | p.G372S       |
| Pat_45 | Pre-Treatment   | GABRQ     | 55879  | 37 | X | 151820196 | 151820196 | Missense_Mutation | SNP | G | A | 20 | 16  | c.1109G>A     | c.(1108-1110)AGA>AAA   | p.R370K       |
| Pat_45 | Pre-Treatment   | PLXNB3    | 5365   | 37 | X | 153036336 | 153036336 | Nonsense_Mutation | SNP | C | T | 4  | 40  | c.2134C>T     | c.(2134-2136)CGA>TGA   | p.R712*       |
| Pat_45 | Pre-Treatment   | DKC1      | 1736   | 37 | X | 153997469 | 153997469 | Missense_Mutation | SNP | C | T | 6  | 172 | c.799C>T      | c.(799-801)CTT>TTT     | p.L267F       |
| Pat_45 | Pre-Treatment   | NLGN4Y    | 22829  | 37 | Y | 16734114  | 16734114  | Missense_Mutation | SNP | A | T | 4  | 89  | c.115A>T      | c.(115-117)ATT>TTT     | p.I39F        |
| Pat_45 | Post-Resistance | CPSF3L    | 54973  | 37 | 1 | 1249214   | 1249214   | Nonsense_Mutation | SNP | C | T | 11 | 153 | c.855G>A      | c.(853-855)TGG>TGA     | p.W285*       |
| Pat_45 | Post-Resistance | DVL1      | 1855   | 37 | 1 | 1273814   | 1273814   | Missense_Mutation | SNP | C | T | 15 | 87  | c.1267G>A     | c.(1267-1269)GCG>ACG   | p.A423T       |
| Pat_45 | Post-Resistance | NADK      | 65220  | 37 | 1 | 1688674   | 1688674   | Missense_Mutation | SNP | C | A | 56 | 208 | c.339G>T      | c.(337-339)ATG>ATT     | p.M113I       |
| Pat_45 | Post-Resistance | LRRRC47   | 57470  | 37 | 1 | 3703658   | 3703658   | Missense_Mutation | SNP | C | T | 11 | 85  | c.832G>A      | c.(832-834)GAA>AAA     | p.E278K       |
| Pat_45 | Post-Resistance | NPHP4     | 261734 | 37 | 1 | 5923966   | 5923966   | Missense_Mutation | SNP | C | T | 4  | 117 | c.4124G>A     | c.(4123-4125)AGA>AAA   | p.R1375K      |
| Pat_45 | Post-Resistance | CHD5      | 26038  | 37 | 1 | 6191691   | 6191691   | Missense_Mutation | SNP | C | T | 4  | 47  | c.3262G>A     | c.(3262-3264)GCC>ACC   | p.A1088T      |
| Pat_45 | Post-Resistance | ICMT      | 23463  | 37 | 1 | 6292105   | 6292105   | Missense_Mutation | SNP | C | T | 6  | 65  | c.529G>A      | c.(529-531)GCC>ACC     | p.A177T       |
| Pat_45 | Post-Resistance | CAMTA1    | 23261  | 37 | 1 | 7731074   | 7731074   | Missense_Mutation | SNP | G | A | 22 | 219 | c.2756G>A     | c.(2755-2757)GGG>GAG   | p.G919E       |
| Pat_45 | Post-Resistance | RERE      | 473    | 37 | 1 | 8418946   | 8418946   | Missense_Mutation | SNP | G | A | 15 | 111 | c.3649C>T     | c.(3649-3651)CTC>TTC   | p.L1217F      |
| Pat_45 | Post-Resistance | RERE      | 473    | 37 | 1 | 8425964   | 8425964   | Missense_Mutation | SNP | C | T | 8  | 171 | c.1355G>A     | c.(1354-1356)AGG>AAG   | p.R452K       |
| Pat_45 | Post-Resistance | SLC2A5    | 6518   | 37 | 1 | 9098084   | 9098084   | Splice_Site       | SNP | C | T | 4  | 50  | c.1175_splice | c.e11-1                | p.S392_splice |
| Pat_45 | Post-Resistance | EXOSC10   | 5394   | 37 | 1 | 11132159  | 11132159  | Missense_Mutation | SNP | C | T | 12 | 148 | c.2227G>A     | c.(2227-2229)GCA>ACA   | p.A743T       |
| Pat_45 | Post-Resistance | EXOSC10   | 5394   | 37 | 1 | 11155912  | 11155912  | Missense_Mutation | SNP | C | T | 33 | 352 | c.275G>A      | c.(274-276)GGG>GAG     | p.G92E        |
| Pat_45 | Post-Resistance | MTHFR     | 4524   | 37 | 1 | 11854785  | 11854785  | Splice_Site       | SNP | C | T | 47 | 465 | c.1166_splice | c.e7+1                 | p.W389_splice |
| Pat_45 | Post-Resistance | LOC440563 | 440563 | 37 | 1 | 13183290  | 13183290  | Missense_Mutation | SNP | C | T | 27 | 279 | c.583G>A      | c.(583-585)GAT>AAT     | p.D195N       |
| Pat_45 | Post-Resistance | PRDM2     | 7799   | 37 | 1 | 14107415  | 14107415  | Missense_Mutation | SNP | C | T | 13 | 118 | c.3125C>T     | c.(3124-3126)TCT>TTT   | p.S1042F      |
| Pat_45 | Post-Resistance | PRDM2     | 7799   | 37 | 1 | 14142945  | 14142945  | Missense_Mutation | SNP | G | A | 4  | 158 | c.5060G>A     | c.(5059-5061)CGA>CAA   | p.R1687Q      |
| Pat_45 | Post-Resistance | CELA2B    | 51032  | 37 | 1 | 15812407  | 15812407  | Missense_Mutation | SNP | C | T | 21 | 196 | c.505C>T      | c.(505-507)CTC>TTC     | p.L169F       |
| Pat_45 | Post-Resistance | SPEN      | 23013  | 37 | 1 | 16259910  | 16259910  | Missense_Mutation | SNP | C | T | 4  | 100 | c.7175C>T     | c.(7174-7176)TCC>TTC   | p.S2392F      |
| Pat_45 | Post-Resistance | RCC2      | 55920  | 37 | 1 | 17747230  | 17747230  | Missense_Mutation | SNP | C | T | 3  | 43  | c.839G>A      | c.(838-840)TGC>TAC     | p.C280Y       |
| Pat_45 | Post-Resistance | TAS1R2    | 80834  | 37 | 1 | 19166727  | 19166727  | Missense_Mutation | SNP | G | A | 9  | 142 | c.1886C>T     | c.(1885-1887)ACC>ATC   | p.T629I       |
| Pat_45 | Post-Resistance | UBR4      | 23352  | 37 | 1 | 19404519  | 19404519  | Missense_Mutation | SNP | G | A | 12 | 107 | c.15275C>T    | c.(15274-15276)TCT>TTT | p.S5092F      |
| Pat_45 | Post-Resistance | UBR4      | 23352  | 37 | 1 | 19488940  | 19488940  | Missense_Mutation | SNP | C | T | 22 | 270 | c.4930G>A     | c.(4930-4932)GAG>AAG   | p.E1644K      |
| Pat_45 | Post-Resistance | CAPZB     | 832    | 37 | 1 | 19810694  | 19810694  | Missense_Mutation | SNP | G | A | 12 | 35  | c.80C>T       | c.(79-81)CCC>CTC       | p.P27L        |
| Pat_45 | Post-Resistance | KIF17     | 57576  | 37 | 1 | 21014062  | 21014062  | Missense_Mutation | SNP | G | A | 3  | 30  | c.1757C>T     | c.(1756-1758)GCT>GTT   | p.A586V       |
| Pat_45 | Post-Resistance | ECE1      | 1889   | 37 | 1 | 21616607  | 21616607  | Missense_Mutation | SNP | C | T | 6  | 38  | c.94G>A       | c.(94-96)GTG>ATG       | p.V32M        |
| Pat_45 | Post-Resistance | HSPG2     | 3339   | 37 | 1 | 22161264  | 22161264  | Missense_Mutation | SNP | G | A | 9  | 133 | c.10628C>T    | c.(10627-10629)GCC>GTC | p.A3543V      |
| Pat_45 | Post-Resistance | HSPG2     | 3339   | 37 | 1 | 22176677  | 22176677  | Missense_Mutation | SNP | C | T | 13 | 178 | c.7303G>A     | c.(7303-7305)GTC>ATC   | p.V2435I      |

|        |                 |          |        |    |   |           |           |                   |     |   |   |    |     |               |                      |               |
|--------|-----------------|----------|--------|----|---|-----------|-----------|-------------------|-----|---|---|----|-----|---------------|----------------------|---------------|
| Pat_45 | Post-Resistance | AIM1L    | 55057  | 37 | 1 | 26663745  | 26663745  | Missense_Mutation | SNP | G | A | 13 | 150 | c.635C>T      | c.(634-636)ACG>ATG   | p.T212M       |
| Pat_45 | Post-Resistance | OPRD1    | 4985   | 37 | 1 | 29185675  | 29185675  | Missense_Mutation | SNP | G | A | 4  | 128 | c.437G>A      | c.(436-438)CGC>CAC   | p.R146H       |
| Pat_45 | Post-Resistance | SFRS4    | 6429   | 37 | 1 | 29475127  | 29475127  | Missense_Mutation | SNP | C | T | 36 | 530 | c.1280G>A     | c.(1279-1281)GGT>GAT | p.G427D       |
| Pat_45 | Post-Resistance | SDC3     | 9672   | 37 | 1 | 31347342  | 31347342  | Missense_Mutation | SNP | C | T | 25 | 295 | c.964G>A      | c.(964-966)GAA>AAA   | p.E322K       |
| Pat_45 | Post-Resistance | KPNA6    | 23633  | 37 | 1 | 32625032  | 32625032  | Missense_Mutation | SNP | C | T | 21 | 153 | c.458C>T      | c.(457-459)GCC>GTC   | p.A153V       |
| Pat_45 | Post-Resistance | RBBP4    | 5928   | 37 | 1 | 33138423  | 33138423  | Missense_Mutation | SNP | C | T | 3  | 65  | c.1133C>T     | c.(1132-1134)TCT>TTT | p.S378F       |
| Pat_45 | Post-Resistance | KIAA1522 | 57648  | 37 | 1 | 33236897  | 33236897  | Missense_Mutation | SNP | C | T | 16 | 182 | c.1940C>T     | c.(1939-1941)TCC>TTC | p.S647F       |
| Pat_45 | Post-Resistance | RNF19B   | 127544 | 37 | 1 | 33411136  | 33411136  | Missense_Mutation | SNP | C | T | 21 | 222 | c.1243G>A     | c.(1243-1245)GTT>ATT | p.V415I       |
| Pat_45 | Post-Resistance | PHC2     | 1912   | 37 | 1 | 33794740  | 33794740  | Missense_Mutation | SNP | C | T | 5  | 75  | c.2153G>A     | c.(2152-2154)GGC>GAC | p.G718D       |
| Pat_45 | Post-Resistance | PHC2     | 1912   | 37 | 1 | 33795814  | 33795814  | Splice_Site       | SNP | C | T | 10 | 117 | c.2004_splice | c.e12-1              | p.R668_splice |
| Pat_45 | Post-Resistance | EIF2C4   | 192670 | 37 | 1 | 36297685  | 36297685  | Missense_Mutation | SNP | C | T | 10 | 144 | c.1144C>T     | c.(1144-1146)CCT>TCT | p.P382S       |
| Pat_45 | Post-Resistance | EIF2C1   | 26523  | 37 | 1 | 36358825  | 36358825  | Missense_Mutation | SNP | C | T | 13 | 78  | c.458C>T      | c.(457-459)CCC>CTC   | p.P153L       |
| Pat_45 | Post-Resistance | THRAP3   | 9967   | 37 | 1 | 36755055  | 36755055  | Missense_Mutation | SNP | C | T | 5  | 68  | c.1435C>T     | c.(1435-1437)CCA>TCA | p.P479S       |
| Pat_45 | Post-Resistance | GNL2     | 29889  | 37 | 1 | 38033897  | 38033897  | Missense_Mutation | SNP | C | T | 4  | 70  | c.1930G>A     | c.(1930-1932)GAA>AAA | p.E644K       |
| Pat_45 | Post-Resistance | RRAGC    | 64121  | 37 | 1 | 39322646  | 39322646  | Missense_Mutation | SNP | C | T | 14 | 190 | c.346G>A      | c.(346-348)GAT>AAT   | p.D116N       |
| Pat_45 | Post-Resistance | ZMPSTE24 | 10269  | 37 | 1 | 40758286  | 40758286  | Missense_Mutation | SNP | C | T | 6  | 129 | c.1373C>T     | c.(1372-1374)TCT>TTT | p.S458F       |
| Pat_45 | Post-Resistance | KIAA0467 | 23334  | 37 | 1 | 43914296  | 43914296  | Missense_Mutation | SNP | C | T | 13 | 248 | c.7286C>T     | c.(7285-7287)TCC>TTC | p.S2429F      |
| Pat_45 | Post-Resistance | KDM4A    | 9682   | 37 | 1 | 44134971  | 44134971  | Splice_Site       | SNP | G | A | 16 | 188 | c.1363_splice | c.e10+1              | p.D455_splice |
| Pat_45 | Post-Resistance | ATP6V0B  | 533    | 37 | 1 | 44442463  | 44442463  | Missense_Mutation | SNP | C | T | 5  | 102 | c.367C>T      | c.(367-369)CCC>TCC   | p.P123S       |
| Pat_45 | Post-Resistance | PTCH2    | 8643   | 37 | 1 | 45288187  | 45288187  | Missense_Mutation | SNP | C | T | 5  | 48  | c.3512G>A     | c.(3511-3513)GGT>GAT | p.G1171D      |
| Pat_45 | Post-Resistance | TOE1     | 114034 | 37 | 1 | 45808589  | 45808589  | Missense_Mutation | SNP | G | A | 7  | 59  | c.827G>A      | c.(826-828)AGC>AAC   | p.S276N       |
| Pat_45 | Post-Resistance | POMGNT1  | 55624  | 37 | 1 | 46661548  | 46661548  | Missense_Mutation | SNP | C | T | 4  | 53  | c.469G>A      | c.(469-471)GAT>AAT   | p.D157N       |
| Pat_45 | Post-Resistance | NSUN4    | 387338 | 37 | 1 | 46810621  | 46810621  | Missense_Mutation | SNP | C | T | 11 | 92  | c.242C>T      | c.(241-243)GCT>GTT   | p.A81V        |
| Pat_45 | Post-Resistance | STIL     | 6491   | 37 | 1 | 47759130  | 47759130  | Missense_Mutation | SNP | C | T | 5  | 82  | c.872G>A      | c.(871-873)AGG>AAG   | p.R291K       |
| Pat_45 | Post-Resistance | PRPF38A  | 84950  | 37 | 1 | 52882346  | 52882346  | Missense_Mutation | SNP | G | A | 4  | 75  | c.923G>A      | c.(922-924)CGG>CAG   | p.R308Q       |
| Pat_45 | Post-Resistance | FAM159A  | 348378 | 37 | 1 | 53122707  | 53122707  | Missense_Mutation | SNP | C | T | 21 | 265 | c.568C>T      | c.(568-570)CCA>TCA   | p.P190S       |
| Pat_45 | Post-Resistance | C1orf175 | 374977 | 37 | 1 | 55158132  | 55158132  | Missense_Mutation | SNP | G | A | 9  | 93  | c.2747G>A     | c.(2746-2748)AGG>AAG | p.R916K       |
| Pat_45 | Post-Resistance | C1orf177 | 163747 | 37 | 1 | 55280672  | 55280672  | Missense_Mutation | SNP | G | A | 30 | 319 | c.1010G>A     | c.(1009-1011)GGG>GAG | p.G337E       |
| Pat_45 | Post-Resistance | C8B      | 732    | 37 | 1 | 57417785  | 57417785  | Missense_Mutation | SNP | G | A | 10 | 195 | c.602C>T      | c.(601-603)TCC>TTC   | p.S201F       |
| Pat_45 | Post-Resistance | OMA1     | 115209 | 37 | 1 | 58999681  | 58999681  | Missense_Mutation | SNP | G | A | 18 | 175 | c.955C>T      | c.(955-957)CAT>TAT   | p.H319Y       |
| Pat_45 | Post-Resistance | KANK4    | 163782 | 37 | 1 | 62740559  | 62740559  | Missense_Mutation | SNP | A | C | 16 | 236 | c.217T>G      | c.(217-219)TTC>GTC   | p.F73V        |
| Pat_45 | Post-Resistance | DOCK7    | 85440  | 37 | 1 | 63099209  | 63099209  | Missense_Mutation | SNP | G | A | 10 | 184 | c.1076C>T     | c.(1075-1077)GCA>GTA | p.A359V       |
| Pat_45 | Post-Resistance | CACHD1   | 57685  | 37 | 1 | 65141144  | 65141144  | Missense_Mutation | SNP | C | T | 10 | 206 | c.2635C>T     | c.(2635-2637)CCA>TCA | p.P879S       |
| Pat_45 | Post-Resistance | DNAJC6   | 9829   | 37 | 1 | 65851433  | 65851433  | Missense_Mutation | SNP | C | T | 13 | 130 | c.668C>T      | c.(667-669)CCC>CTC   | p.P223L       |
| Pat_45 | Post-Resistance | RPE65    | 6121   | 37 | 1 | 68897205  | 68897205  | Missense_Mutation | SNP | C | T | 5  | 57  | c.1192G>A     | c.(1192-1194)GAC>AAC | p.D398N       |
| Pat_45 | Post-Resistance | C1orf173 | 127254 | 37 | 1 | 75055372  | 75055372  | Missense_Mutation | SNP | C | T | 17 | 317 | c.2119G>A     | c.(2119-2121)GAA>AAA | p.E707K       |
| Pat_45 | Post-Resistance | RBMXL1   | 494115 | 37 | 1 | 89448975  | 89448975  | Missense_Mutation | SNP | C | T | 23 | 230 | c.535G>A      | c.(535-537)GGA>AGA   | p.G179R       |
| Pat_45 | Post-Resistance | RBMXL1   | 494115 | 37 | 1 | 89449215  | 89449215  | Missense_Mutation | SNP | G | A | 5  | 77  | c.295C>T      | c.(295-297)CCT>TCT   | p.P99S        |
| Pat_45 | Post-Resistance | GBP6     | 163351 | 37 | 1 | 89850898  | 89850898  | Missense_Mutation | SNP | C | T | 8  | 164 | c.1772C>T     | c.(1771-1773)CCC>CTC | p.P591L       |
| Pat_45 | Post-Resistance | LRRRC8D  | 55144  | 37 | 1 | 90401185  | 90401185  | Missense_Mutation | SNP | C | T | 7  | 71  | c.2558C>T     | c.(2557-2559)CCC>CTC | p.P853L       |
| Pat_45 | Post-Resistance | ZNF644   | 84146  | 37 | 1 | 91403554  | 91403554  | Missense_Mutation | SNP | C | T | 5  | 108 | c.3176G>A     | c.(3175-3177)GGC>GAC | p.G1059D      |
| Pat_45 | Post-Resistance | C1orf146 | 388649 | 37 | 1 | 92707815  | 92707815  | Missense_Mutation | SNP | G | A | 9  | 103 | c.113G>A      | c.(112-114)CGA>CAA   | p.R38Q        |
| Pat_45 | Post-Resistance | COL11A1  | 1301   | 37 | 1 | 103400666 | 103400666 | Missense_Mutation | SNP | G | A | 4  | 44  | c.3442C>T     | c.(3442-3444)CCT>TCT | p.P1148S      |
| Pat_45 | Post-Resistance | COL11A1  | 1301   | 37 | 1 | 103471401 | 103471401 | Missense_Mutation | SNP | C | G | 21 | 233 | c.1838G>C     | c.(1837-1839)GGT>GCT | p.G613A       |
| Pat_45 | Post-Resistance | CLCC1    | 23155  | 37 | 1 | 109486509 | 109486509 | Missense_Mutation | SNP | C | A | 6  | 85  | c.510G>T      | c.(508-510)TGG>TGT   | p.W170C       |
| Pat_45 | Post-Resistance | CYB561D1 | 284613 | 37 | 1 | 110038705 | 110038705 | Missense_Mutation | SNP | G | A | 15 | 229 | c.514G>A      | c.(514-516)GTG>ATG   | p.V172M       |
| Pat_45 | Post-Resistance | KCNA3    | 3738   | 37 | 1 | 111215826 | 111215826 | Missense_Mutation | SNP | C | T | 5  | 93  | c.1606G>A     | c.(1606-1608)GGT>AGT | p.G536S       |

|        |                 |          |        |    |   |           |           |                   |     |   |   |     |     |           |                      |          |
|--------|-----------------|----------|--------|----|---|-----------|-----------|-------------------|-----|---|---|-----|-----|-----------|----------------------|----------|
| Pat_45 | Post-Resistance | C1orf183 | 55924  | 37 | 1 | 112269948 | 112269948 | Missense_Mutation | SNP | C | T | 14  | 232 | c.536G>A  | c.(535-537)GGG>GAG   | p.G179E  |
| Pat_45 | Post-Resistance | ATP1A1   | 476    | 37 | 1 | 116932123 | 116932123 | Missense_Mutation | SNP | C | T | 18  | 262 | c.817C>T  | c.(817-819)CTT>TTT   | p.L273F  |
| Pat_45 | Post-Resistance | TRIM45   | 80263  | 37 | 1 | 117661336 | 117661336 | Missense_Mutation | SNP | C | T | 13  | 222 | c.542G>A  | c.(541-543)GGC>GAC   | p.G181D  |
| Pat_45 | Post-Resistance | VTCN1    | 79679  | 37 | 1 | 117690383 | 117690383 | Missense_Mutation | SNP | C | T | 10  | 146 | c.746G>A  | c.(745-747)AGT>AAT   | p.S249N  |
| Pat_45 | Post-Resistance | SPAG17   | 200162 | 37 | 1 | 118623853 | 118623853 | Missense_Mutation | SNP | G | A | 15  | 108 | c.2080C>T | c.(2080-2082)CCT>TCT | p.P694S  |
| Pat_45 | Post-Resistance | ANXA9    | 8416   | 37 | 1 | 150967749 | 150967749 | Missense_Mutation | SNP | G | A | 28  | 240 | c.989G>A  | c.(988-990)GGG>GAG   | p.G330E  |
| Pat_45 | Post-Resistance | PRUNE    | 58497  | 37 | 1 | 151001398 | 151001398 | Missense_Mutation | SNP | C | T | 3   | 81  | c.911C>T  | c.(910-912)CCC>CTC   | p.P304L  |
| Pat_45 | Post-Resistance | ZNF687   | 57592  | 37 | 1 | 151263588 | 151263588 | Missense_Mutation | SNP | G | A | 7   | 108 | c.3617G>A | c.(3616-3618)GGC>GAC | p.G1206D |
| Pat_45 | Post-Resistance | POGZ     | 23126  | 37 | 1 | 151400607 | 151400607 | Missense_Mutation | SNP | G | A | 11  | 178 | c.851C>T  | c.(850-852)CCC>CTC   | p.P284L  |
| Pat_45 | Post-Resistance | POGZ     | 23126  | 37 | 1 | 151414616 | 151414616 | Missense_Mutation | SNP | C | T | 3   | 46  | c.65G>A   | c.(64-66)AGT>AAT     | p.S22N   |
| Pat_45 | Post-Resistance | LINGO4   | 339398 | 37 | 1 | 151774244 | 151774244 | Missense_Mutation | SNP | T | G | 6   | 54  | c.937A>C  | c.(937-939)ACC>CCC   | p.T313P  |
| Pat_45 | Post-Resistance | TCHH     | 7062   | 37 | 1 | 152082827 | 152082827 | Missense_Mutation | SNP | G | A | 18  | 177 | c.2866C>T | c.(2866-2868)CGG>TGG | p.R956W  |
| Pat_45 | Post-Resistance | FLG      | 2312   | 37 | 1 | 152280643 | 152280643 | Missense_Mutation | SNP | C | T | 35  | 453 | c.6719G>A | c.(6718-6720)GGA>GAA | p.G2240E |
| Pat_45 | Post-Resistance | FLG2     | 388698 | 37 | 1 | 152323162 | 152323162 | Missense_Mutation | SNP | C | T | 22  | 131 | c.7100G>A | c.(7099-7101)AGC>AAC | p.S2367N |
| Pat_45 | Post-Resistance | JTB      | 10899  | 37 | 1 | 153948353 | 153948353 | Missense_Mutation | SNP | C | T | 6   | 103 | c.233G>A  | c.(232-234)GGA>GAA   | p.G78E   |
| Pat_45 | Post-Resistance | TPM3     | 7170   | 37 | 1 | 154148619 | 154148619 | Missense_Mutation | SNP | C | T | 9   | 123 | c.349G>A  | c.(349-351)GCT>ACT   | p.A117T  |
| Pat_45 | Post-Resistance | ATP8B2   | 57198  | 37 | 1 | 154317127 | 154317127 | Missense_Mutation | SNP | G | A | 8   | 204 | c.2251G>A | c.(2251-2253)GAG>AAG | p.E751K  |
| Pat_45 | Post-Resistance | ADAR     | 103    | 37 | 1 | 154574907 | 154574907 | Missense_Mutation | SNP | G | A | 18  | 142 | c.211C>T  | c.(211-213)CTC>TTC   | p.L71F   |
| Pat_45 | Post-Resistance | PYGO2    | 90780  | 37 | 1 | 154932226 | 154932226 | Missense_Mutation | SNP | C | T | 6   | 51  | c.250G>A  | c.(250-252)GCC>ACC   | p.A84T   |
| Pat_45 | Post-Resistance | TRIM46   | 80128  | 37 | 1 | 155156527 | 155156527 | Missense_Mutation | SNP | T | G | 3   | 69  | c.2141T>G | c.(2140-2142)TTG>TGG | p.L714W  |
| Pat_45 | Post-Resistance | THBS3    | 7059   | 37 | 1 | 155172189 | 155172189 | Missense_Mutation | SNP | C | T | 13  | 158 | c.961G>A  | c.(961-963)GCT>ACT   | p.A321T  |
| Pat_45 | Post-Resistance | SCAMP3   | 10067  | 37 | 1 | 155230154 | 155230154 | Missense_Mutation | SNP | C | T | 11  | 110 | c.355G>A  | c.(355-357)GAG>AAG   | p.E119K  |
| Pat_45 | Post-Resistance | SLC25A44 | 9673   | 37 | 1 | 156169645 | 156169645 | Missense_Mutation | SNP | G | A | 12  | 158 | c.7G>A    | c.(7-9)GAC>AAC       | p.D3N    |
| Pat_45 | Post-Resistance | SMG5     | 23381  | 37 | 1 | 156222745 | 156222745 | Missense_Mutation | SNP | G | A | 4   | 29  | c.2627C>T | c.(2626-2628)ACC>ATC | p.T876I  |
| Pat_45 | Post-Resistance | C1orf85  | 112770 | 37 | 1 | 156263853 | 156263853 | Missense_Mutation | SNP | C | T | 13  | 239 | c.754G>A  | c.(754-756)GAG>AAG   | p.E252K  |
| Pat_45 | Post-Resistance | GPATCH4  | 54865  | 37 | 1 | 156568241 | 156568241 | Missense_Mutation | SNP | C | T | 25  | 399 | c.140G>A  | c.(139-141)AGG>AAG   | p.R47K   |
| Pat_45 | Post-Resistance | FCRL1    | 115350 | 37 | 1 | 157776892 | 157776892 | Missense_Mutation | SNP | C | T | 29  | 114 | c.52G>A   | c.(52-54)GAG>AAG     | p.E18K   |
| Pat_45 | Post-Resistance | CD1D     | 912    | 37 | 1 | 158151334 | 158151334 | Missense_Mutation | SNP | G | A | 24  | 249 | c.151G>A  | c.(151-153)GGG>AGG   | p.G51R   |
| Pat_45 | Post-Resistance | CRP      | 1401   | 37 | 1 | 159683787 | 159683787 | Missense_Mutation | SNP | C | T | 13  | 133 | c.203G>A  | c.(202-204)AGT>AAT   | p.S68N   |
| Pat_45 | Post-Resistance | ATP1A2   | 477    | 37 | 1 | 160105688 | 160105688 | Missense_Mutation | SNP | C | T | 21  | 288 | c.2344C>T | c.(2344-2346)CCC>TCC | p.P782S  |
| Pat_45 | Post-Resistance | NCSTN    | 23385  | 37 | 1 | 160322963 | 160322963 | Missense_Mutation | SNP | C | T | 6   | 122 | c.1115C>T | c.(1114-1116)ACT>ATT | p.T372I  |
| Pat_45 | Post-Resistance | DEDD     | 9191   | 37 | 1 | 161093674 | 161093674 | Missense_Mutation | SNP | C | T | 16  | 125 | c.388G>A  | c.(388-390)GCC>ACC   | p.A130T  |
| Pat_45 | Post-Resistance | USP21    | 27005  | 37 | 1 | 161130993 | 161130993 | Missense_Mutation | SNP | C | T | 4   | 74  | c.563C>T  | c.(562-564)GCC>GTC   | p.A188V  |
| Pat_45 | Post-Resistance | PPOX     | 5498   | 37 | 1 | 161138303 | 161138303 | Missense_Mutation | SNP | C | T | 7   | 107 | c.553C>T  | c.(553-555)CCC>TCC   | p.P185S  |
| Pat_45 | Post-Resistance | RGS5     | 8490   | 37 | 1 | 163122354 | 163122354 | Missense_Mutation | SNP | C | T | 136 | 272 | c.370G>A  | c.(370-372)GAG>AAG   | p.E124K  |
| Pat_45 | Post-Resistance | ILDR2    | 387597 | 37 | 1 | 166927029 | 166927029 | Missense_Mutation | SNP | C | T | 14  | 107 | c.356G>A  | c.(355-357)GGC>GAC   | p.G119D  |
| Pat_45 | Post-Resistance | POU2F1   | 5451   | 37 | 1 | 167381247 | 167381247 | Missense_Mutation | SNP | C | T | 9   | 156 | c.1538C>T | c.(1537-1539)CCT>CTT | p.P513L  |
| Pat_45 | Post-Resistance | MPZL1    | 9019   | 37 | 1 | 167745386 | 167745386 | Missense_Mutation | SNP | C | T | 6   | 121 | c.691C>T  | c.(691-693)CCT>TCT   | p.P231S  |
| Pat_45 | Post-Resistance | F5       | 2153   | 37 | 1 | 169510571 | 169510571 | Missense_Mutation | SNP | G | A | 9   | 298 | c.3757C>T | c.(3757-3759)CTC>TTC | p.L1253F |
| Pat_45 | Post-Resistance | FMO1     | 2326   | 37 | 1 | 171251362 | 171251362 | Missense_Mutation | SNP | C | T | 3   | 81  | c.1073C>T | c.(1072-1074)CCT>CTT | p.P358L  |
| Pat_45 | Post-Resistance | METTL13  | 51603  | 37 | 1 | 171756938 | 171756938 | Missense_Mutation | SNP | C | T | 8   | 96  | c.1177C>T | c.(1177-1179)CCC>TCC | p.P393S  |
| Pat_45 | Post-Resistance | KLHL20   | 27252  | 37 | 1 | 173685205 | 173685205 | Missense_Mutation | SNP | G | A | 15  | 142 | c.23G>A   | c.(22-24)AGG>AAG     | p.R8K    |
| Pat_45 | Post-Resistance | RC3H1    | 149041 | 37 | 1 | 173931173 | 173931173 | Missense_Mutation | SNP | G | A | 6   | 72  | c.1892C>T | c.(1891-1893)GCT>GTT | p.A631V  |
| Pat_45 | Post-Resistance | TOR1AIP1 | 26092  | 37 | 1 | 179886668 | 179886668 | Missense_Mutation | SNP | C | T | 26  | 161 | c.1046C>T | c.(1045-1047)JCT>TTT | p.S349F  |
| Pat_45 | Post-Resistance | TOR1AIP1 | 26092  | 37 | 1 | 179887234 | 179887234 | Missense_Mutation | SNP | G | A | 13  | 106 | c.1612G>A | c.(1612-1614)GTC>ATC | p.V538I  |
| Pat_45 | Post-Resistance | CEP350   | 9857   | 37 | 1 | 180080214 | 180080214 | Missense_Mutation | SNP | G | A | 4   | 67  | c.9272G>A | c.(9271-9273)GGG>GAG | p.G3091E |
| Pat_45 | Post-Resistance | LAMC1    | 3915   | 37 | 1 | 183111888 | 183111888 | Missense_Mutation | SNP | C | T | 17  | 106 | c.4793C>T | c.(4792-4794)JCT>TTT | p.S1598F |

|        |                 |           |        |    |    |           |           |                   |     |   |   |    |     |              |                        |               |
|--------|-----------------|-----------|--------|----|----|-----------|-----------|-------------------|-----|---|---|----|-----|--------------|------------------------|---------------|
| Pat_45 | Post-Resistance | HMCN1     | 83872  | 37 | 1  | 186064584 | 186064584 | Missense_Mutation | SNP | G | A | 15 | 106 | c.10504G>A   | :(10504-10506)GGA>AG/  | p.G3502R      |
| Pat_45 | Post-Resistance | CAMSAP1L1 | 23271  | 37 | 1  | 200817176 | 200817176 | Missense_Mutation | SNP | G | A | 4  | 54  | c.1312G>A    | c.(1312-1314)GTA>ATA   | p.V438I       |
| Pat_45 | Post-Resistance | NAV1      | 89796  | 37 | 1  | 201786372 | 201786372 | Missense_Mutation | SNP | G | A | 4  | 84  | c.5488G>A    | c.(5488-5490)GTC>ATC   | p.V1830I      |
| Pat_45 | Post-Resistance | SHISA4    | 149345 | 37 | 1  | 201860675 | 201860675 | Missense_Mutation | SNP | C | T | 48 | 146 | c.526C>T     | c.(526-528)CCC>TCC     | p.P176S       |
| Pat_45 | Post-Resistance | TIMM17A   | 10440  | 37 | 1  | 201934587 | 201934587 | Missense_Mutation | SNP | G | A | 14 | 66  | c.346G>A     | c.(346-348)GCC>ACC     | p.A116T       |
| Pat_45 | Post-Resistance | RNPEP     | 6051   | 37 | 1  | 201958602 | 201958602 | Missense_Mutation | SNP | C | T | 12 | 166 | c.680C>T     | c.(679-681)CCC>CTC     | p.P227L       |
| Pat_45 | Post-Resistance | LGR6      | 59352  | 37 | 1  | 202278202 | 202278202 | Missense_Mutation | SNP | C | T | 19 | 138 | c.1304C>T    | c.(1303-1305)ACC>ATC   | p.T435I       |
| Pat_45 | Post-Resistance | ZC3H11A   | 9877   | 37 | 1  | 203821489 | 203821489 | Missense_Mutation | SNP | G | A | 4  | 65  | c.2395G>A    | c.(2395-2397)GAC>AAC   | p.D799N       |
| Pat_45 | Post-Resistance | LRRN2     | 10446  | 37 | 1  | 204587326 | 204587326 | Missense_Mutation | SNP | C | T | 6  | 30  | c.1795G>A    | c.(1795-1797)GTG>ATG   | p.V599M       |
| Pat_45 | Post-Resistance | DSTYK     | 25778  | 37 | 1  | 205156710 | 205156710 | Missense_Mutation | SNP | T | C | 5  | 64  | c.490A>G     | c.(490-492)AGC>GGC     | p.S164G       |
| Pat_45 | Post-Resistance | SLC26A9   | 115019 | 37 | 1  | 205890972 | 205890972 | Missense_Mutation | SNP | C | T | 4  | 45  | c.1777G>A    | c.(1777-1779)GTC>ATC   | p.V593I       |
| Pat_45 | Post-Resistance | CR1       | 1378   | 37 | 1  | 207758068 | 207758068 | Missense_Mutation | SNP | G | A | 8  | 149 | c.4027G>A    | c.(4027-4029)GGA>AGA   | p.G1343R      |
| Pat_45 | Post-Resistance | LAMB3     | 3914   | 37 | 1  | 209799042 | 209799042 | Missense_Mutation | SNP | C | T | 13 | 117 | c.1927G>A    | c.(1927-1929)GTC>ATC   | p.V643I       |
| Pat_45 | Post-Resistance | TRAF3IP3  | 80342  | 37 | 1  | 209954799 | 209954799 | Missense_Mutation | SNP | C | T | 7  | 101 | c.1559C>T    | c.(1558-1560)CCC>CTC   | p.P520L       |
| Pat_45 | Post-Resistance | RCOR3     | 55758  | 37 | 1  | 211487015 | 211487015 | Missense_Mutation | SNP | C | T | 16 | 195 | c.1393C>T    | c.(1393-1395)CGT>TGT   | p.R465C       |
| Pat_45 | Post-Resistance | DTL       | 51514  | 37 | 1  | 212238342 | 212238342 | Nonsense_Mutation | SNP | C | T | 11 | 131 | c.610C>T     | c.(610-612)CAG>TAG     | p.Q204*       |
| Pat_45 | Post-Resistance | BPNT1     | 10380  | 37 | 1  | 220236290 | 220236290 | Missense_Mutation | SNP | G | A | 9  | 91  | c.481C>T     | c.(481-483)CCA>TCA     | p.P161S       |
| Pat_45 | Post-Resistance | MARK1     | 4139   | 37 | 1  | 220805650 | 220805650 | Missense_Mutation | SNP | C | T | 4  | 54  | c.1117C>T    | c.(1117-1119)CCT>TCT   | p.P373S       |
| Pat_45 | Post-Resistance | AIDA      | 64853  | 37 | 1  | 222843496 | 222843496 | Missense_Mutation | SNP | G | A | 5  | 113 | c.803C>T     | c.(802-804)CCT>CTT     | p.P268L       |
| Pat_45 | Post-Resistance | DISP1     | 84976  | 37 | 1  | 223156444 | 223156444 | Missense_Mutation | SNP | C | T | 5  | 61  | c.532C>T     | c.(532-534)CCA>TCA     | p.P178S       |
| Pat_45 | Post-Resistance | NVL       | 4931   | 37 | 1  | 224505589 | 224505589 | Missense_Mutation | SNP | C | T | 3  | 57  | c.175G>A     | c.(175-177)GTA>ATA     | p.V59I        |
| Pat_45 | Post-Resistance | PYCR2     | 29920  | 37 | 1  | 226108178 | 226108178 | Missense_Mutation | SNP | C | T | 6  | 59  | c.940G>A     | c.(940-942)GCC>ACC     | p.A314T       |
| Pat_45 | Post-Resistance | LEFTY2    | 7044   | 37 | 1  | 226128594 | 226128594 | Nonsense_Mutation | SNP | G | A | 11 | 182 | c.247C>T     | c.(247-249)CGA>TGA     | p.R83*        |
| Pat_45 | Post-Resistance | ACBD3     | 64746  | 37 | 1  | 226340062 | 226340062 | Missense_Mutation | SNP | G | A | 37 | 294 | c.1349C>T    | c.(1348-1350)TCC>TTC   | p.S450F       |
| Pat_45 | Post-Resistance | JMJD4     | 65094  | 37 | 1  | 227921201 | 227921201 | Missense_Mutation | SNP | G | A | 13 | 63  | c.874C>T     | c.(874-876)CTT>TTT     | p.L292F       |
| Pat_45 | Post-Resistance | OBSCN     | 84033  | 37 | 1  | 228509232 | 228509232 | Missense_Mutation | SNP | G | A | 4  | 38  | c.14690G>A   | :(14689-14691)GGG>GAK  | p.G4897E      |
| Pat_45 | Post-Resistance | TRIM17    | 51127  | 37 | 1  | 228602724 | 228602724 | Missense_Mutation | SNP | G | A | 7  | 65  | c.50C>T      | c.(49-51)TCC>TTC       | p.S17F        |
| Pat_45 | Post-Resistance | URB2      | 9816   | 37 | 1  | 229772338 | 229772338 | Missense_Mutation | SNP | G | A | 14 | 346 | c.1978G>A    | c.(1978-1980)GAG>AAG   | p.E660K       |
| Pat_45 | Post-Resistance | C1orf124  | 83932  | 37 | 1  | 231487140 | 231487140 | Missense_Mutation | SNP | G | A | 3  | 46  | c.541G>A     | c.(541-543)GGC>AGC     | p.G181S       |
| Pat_45 | Post-Resistance | KIAA1383  | 54627  | 37 | 1  | 232942466 | 232942466 | Missense_Mutation | SNP | C | T | 4  | 58  | c.1697C>T    | c.(1696-1698)GCC>GTC   | p.A566V       |
| Pat_45 | Post-Resistance | PCNXL2    | 80003  | 37 | 1  | 233395048 | 233395048 | Missense_Mutation | SNP | G | A | 3  | 20  | c.560C>T     | c.(559-561)TCT>TTT     | p.S187F       |
| Pat_45 | Post-Resistance | RBM34     | 23029  | 37 | 1  | 235299373 | 235299373 | Missense_Mutation | SNP | C | T | 3  | 43  | c.865G>A     | c.(865-867)GTT>ATT     | p.V289I       |
| Pat_45 | Post-Resistance | ARID4B    | 51742  | 37 | 1  | 235416125 | 235416125 | Splice_Site       | SNP | C | T | 9  | 73  | c.275_splice | c.e6-1                 | p.V92_splice  |
| Pat_45 | Post-Resistance | LYST      | 1130   | 37 | 1  | 235972151 | 235972151 | Missense_Mutation | SNP | C | T | 6  | 48  | c.1967G>A    | c.(1966-1968)GGA>GAA   | p.G656E       |
| Pat_45 | Post-Resistance | LYST      | 1130   | 37 | 1  | 235993582 | 235993582 | Missense_Mutation | SNP | G | A | 14 | 113 | c.136C>T     | c.(136-138)CTT>TTT     | p.L46F        |
| Pat_45 | Post-Resistance | NID1      | 4811   | 37 | 1  | 236157029 | 236157029 | Missense_Mutation | SNP | C | T | 14 | 35  | c.2671G>A    | c.(2671-2673)GGC>AGC   | p.G891S       |
| Pat_45 | Post-Resistance | RYR2      | 6262   | 37 | 1  | 237897032 | 237897032 | Missense_Mutation | SNP | G | T | 3  | 34  | c.11067G>T   | c.(11065-11067)ATG>ATT | p.M3689I      |
| Pat_45 | Post-Resistance | FMN2      | 56776  | 37 | 1  | 240255995 | 240255995 | Missense_Mutation | SNP | C | T | 3  | 38  | c.586C>T     | c.(586-588)CTT>TTT     | p.L196F       |
| Pat_45 | Post-Resistance | SMYD3     | 64754  | 37 | 1  | 246490624 | 246490624 | Missense_Mutation | SNP | G | A | 4  | 17  | c.410C>T     | c.(409-411)ACT>ATT     | p.T137I       |
| Pat_45 | Post-Resistance | OR2T2     | 401992 | 37 | 1  | 248616438 | 248616438 | Missense_Mutation | SNP | T | C | 4  | 151 | c.340T>C     | c.(340-342)TTC>CTC     | p.F114L       |
| Pat_45 | Post-Resistance | OR2G6     | 391211 | 37 | 1  | 248684984 | 248684984 | Missense_Mutation | SNP | C | T | 30 | 114 | c.37C>T      | c.(37-39)CTT>TTT       | p.L13F        |
| Pat_45 | Post-Resistance | TUBAL3    | 79861  | 37 | 10 | 5437346   | 5437346   | Missense_Mutation | SNP | G | A | 61 | 266 | c.340C>T     | c.(340-342)CGT>TGT     | p.R114C       |
| Pat_45 | Post-Resistance | FAM107B   | 83641  | 37 | 10 | 14816530  | 14816530  | Missense_Mutation | SNP | C | T | 3  | 68  | c.133G>A     | c.(133-135)GTG>ATG     | p.V45M        |
| Pat_45 | Post-Resistance | SUV39H2   | 79723  | 37 | 10 | 14939349  | 14939349  | Missense_Mutation | SNP | G | A | 6  | 102 | c.502G>A     | c.(502-504)GAA>AAA     | p.E168K       |
| Pat_45 | Post-Resistance | PLXDC2    | 84898  | 37 | 10 | 20436832  | 20436832  | Splice_Site       | SNP | G | A | 5  | 48  | c.783_splice | c.e6+1                 | p.E261_splice |
| Pat_45 | Post-Resistance | PTCHD3    | 374308 | 37 | 10 | 27702690  | 27702690  | Missense_Mutation | SNP | C | T | 15 | 207 | c.490G>A     | c.(490-492)GAG>AAG     | p.E164K       |
| Pat_45 | Post-Resistance | ZNF438    | 220929 | 37 | 10 | 31138702  | 31138702  | Missense_Mutation | SNP | T | A | 4  | 51  | c.632A>T     | c.(631-633)CAT>CTT     | p.H211L       |



|        |                 |           |        |    |    |           |           |                   |     |   |   |    |     |              |                      |               |
|--------|-----------------|-----------|--------|----|----|-----------|-----------|-------------------|-----|---|---|----|-----|--------------|----------------------|---------------|
| Pat_45 | Post-Resistance | ANKRD30A  | 91074  | 37 | 10 | 37430754  | 37430754  | Missense_Mutation | SNP | T | C | 9  | 77  | c.761T>C     | c.(760-762)GTG>GCG   | p.V254A       |
| Pat_45 | Post-Resistance | BMS1      | 9790   | 37 | 10 | 43289384  | 43289384  | Missense_Mutation | SNP | G | A | 13 | 48  | c.1174G>A    | c.(1174-1176)GTG>ATG | p.V392M       |
| Pat_45 | Post-Resistance | RET       | 5979   | 37 | 10 | 43604641  | 43604641  | Missense_Mutation | SNP | C | T | 11 | 73  | c.1226C>T    | c.(1225-1227)TCC>TTC | p.S409F       |
| Pat_45 | Post-Resistance | NCOA4     | 8031   | 37 | 10 | 51582809  | 51582809  | Missense_Mutation | SNP | G | A | 5  | 55  | c.584G>A     | c.(583-585)GGT>GAT   | p.G195D       |
| Pat_45 | Post-Resistance | EGR2      | 1959   | 37 | 10 | 64575768  | 64575768  | Missense_Mutation | SNP | C | T | 66 | 453 | c.22G>A      | c.(22-24)GAC>AAC     | p.D8N         |
| Pat_45 | Post-Resistance | CTNNA3    | 29119  | 37 | 10 | 67829190  | 67829190  | Missense_Mutation | SNP | C | T | 9  | 69  | c.2035G>A    | c.(2035-2037)GAT>AAT | p.D679N       |
| Pat_45 | Post-Resistance | RUFY2     | 55680  | 37 | 10 | 70161376  | 70161376  | Splice_Site       | SNP | C | T | 13 | 127 | c.401_splice | c.e3+1               | p.K134_splice |
| Pat_45 | Post-Resistance | TET1      | 80312  | 37 | 10 | 70333230  | 70333230  | Missense_Mutation | SNP | C | T | 46 | 185 | c.1135C>T    | c.(1135-1137)CCT>TCT | p.P379S       |
| Pat_45 | Post-Resistance | DDX50     | 79009  | 37 | 10 | 70672975  | 70672975  | Missense_Mutation | SNP | G | A | 4  | 77  | c.697G>A     | c.(697-699)GAT>AAT   | p.D233N       |
| Pat_45 | Post-Resistance | VPS26A    | 9559   | 37 | 10 | 70892711  | 70892711  | Missense_Mutation | SNP | G | A | 8  | 47  | c.61G>A      | c.(61-63)GGG>AGG     | p.G21R        |
| Pat_45 | Post-Resistance | DDIT4     | 54541  | 37 | 10 | 74034141  | 74034141  | Missense_Mutation | SNP | C | T | 6  | 84  | c.167C>T     | c.(166-168)TCC>TTC   | p.S56F        |
| Pat_45 | Post-Resistance | USP54     | 159195 | 37 | 10 | 75276534  | 75276534  | Missense_Mutation | SNP | C | T | 9  | 183 | c.3650G>A    | c.(3649-3651)GGT>GAT | p.G1217D      |
| Pat_45 | Post-Resistance | DLG5      | 9231   | 37 | 10 | 79554698  | 79554698  | Missense_Mutation | SNP | C | T | 16 | 52  | c.5455G>A    | c.(5455-5457)GAC>AAC | p.D1819N      |
| Pat_45 | Post-Resistance | SFTPD     | 6441   | 37 | 10 | 81697744  | 81697744  | Missense_Mutation | SNP | G | A | 16 | 394 | c.992C>T     | c.(991-993)TCC>TTC   | p.S331F       |
| Pat_45 | Post-Resistance | HHEX      | 3087   | 37 | 10 | 94452275  | 94452275  | Missense_Mutation | SNP | C | T | 4  | 59  | c.512C>T     | c.(511-513)GCC>GTC   | p.A171V       |
| Pat_45 | Post-Resistance | CYP2C18   | 1562   | 37 | 10 | 96447632  | 96447632  | Missense_Mutation | SNP | G | A | 17 | 100 | c.274G>A     | c.(274-276)GAG>AAG   | p.E92K        |
| Pat_45 | Post-Resistance | CYP2C8    | 1558   | 37 | 10 | 96802652  | 96802652  | Missense_Mutation | SNP | G | A | 24 | 99  | c.1144C>T    | c.(1144-1146)CCC>TCC | p.P382S       |
| Pat_45 | Post-Resistance | RRP12     | 23223  | 37 | 10 | 99126308  | 99126308  | Missense_Mutation | SNP | C | T | 4  | 87  | c.3286G>A    | c.(3286-3288)GAG>AAG | p.E1096K      |
| Pat_45 | Post-Resistance | RRP12     | 23223  | 37 | 10 | 99139485  | 99139485  | Missense_Mutation | SNP | G | A | 16 | 89  | c.1576C>T    | c.(1576-1578)CCC>TCC | p.P526S       |
| Pat_45 | Post-Resistance | MMS19     | 64210  | 37 | 10 | 99222430  | 99222430  | Missense_Mutation | SNP | G | A | 3  | 47  | c.1922C>T    | c.(1921-1923)CCC>CTC | p.P641L       |
| Pat_45 | Post-Resistance | SEMA4G    | 57715  | 37 | 10 | 102740727 | 102740727 | Missense_Mutation | SNP | C | T | 14 | 115 | c.1616C>T    | c.(1615-1617)ACC>ATC | p.T539I       |
| Pat_45 | Post-Resistance | TRIM8     | 81603  | 37 | 10 | 104416851 | 104416851 | Missense_Mutation | SNP | C | T | 14 | 161 | c.1396C>T    | c.(1396-1398)CTC>TTC | p.L466F       |
| Pat_45 | Post-Resistance | SH3PXD2A  | 9644   | 37 | 10 | 105495501 | 105495501 | Missense_Mutation | SNP | C | T | 22 | 287 | c.295G>A     | c.(295-297)GAA>AAA   | p.E99K        |
| Pat_45 | Post-Resistance | SLK       | 9748   | 37 | 10 | 105761973 | 105761973 | Missense_Mutation | SNP | C | T | 13 | 112 | c.1037C>T    | c.(1036-1038)GCC>GTC | p.A346V       |
| Pat_45 | Post-Resistance | CCDC147   | 159686 | 37 | 10 | 106118145 | 106118145 | Missense_Mutation | SNP | T | C | 7  | 35  | c.56T>C      | c.(55-57)ATG>ACG     | p.M19T        |
| Pat_45 | Post-Resistance | BAG3      | 9531   | 37 | 10 | 121432104 | 121432104 | Missense_Mutation | SNP | G | A | 20 | 76  | c.845G>A     | c.(844-846)AGG>AAG   | p.R282K       |
| Pat_45 | Post-Resistance | INPP5F    | 22876  | 37 | 10 | 121586180 | 121586180 | Missense_Mutation | SNP | A | G | 9  | 114 | c.2287A>G    | c.(2287-2289)AGG>GGG | p.R763G       |
| Pat_45 | Post-Resistance | C10orf119 | 79892  | 37 | 10 | 121608956 | 121608956 | Missense_Mutation | SNP | C | T | 6  | 52  | c.707G>A     | c.(706-708)GGC>GAC   | p.G236D       |
| Pat_45 | Post-Resistance | DHX32     | 55760  | 37 | 10 | 127527686 | 127527686 | Missense_Mutation | SNP | C | T | 15 | 103 | c.1765G>A    | c.(1765-1767)GCT>ACT | p.A589T       |
| Pat_45 | Post-Resistance | ADAM12    | 8038   | 37 | 10 | 127727947 | 127727947 | Missense_Mutation | SNP | G | A | 6  | 104 | c.2165C>T    | c.(2164-2166)GCT>GTT | p.A722V       |
| Pat_45 | Post-Resistance | MKI67     | 4288   | 37 | 10 | 129907471 | 129907471 | Missense_Mutation | SNP | G | A | 19 | 258 | c.2633C>T    | c.(2632-2634)TCT>TTT | p.S878F       |
| Pat_45 | Post-Resistance | BNIP3     | 664    | 37 | 10 | 133786587 | 133786587 | Missense_Mutation | SNP | C | T | 37 | 250 | c.233G>A     | c.(232-234)AGG>AAG   | p.R78K        |
| Pat_45 | Post-Resistance | JAKMIP3   | 282973 | 37 | 10 | 133967314 | 133967314 | Missense_Mutation | SNP | G | A | 14 | 363 | c.2119G>A    | c.(2119-2121)GAT>AAT | p.D707N       |
| Pat_45 | Post-Resistance | JAKMIP3   | 282973 | 37 | 10 | 133967483 | 133967483 | Nonsense_Mutation | SNP | C | T | 9  | 129 | c.2203C>T    | c.(2203-2205)CAG>TAG | p.Q735*       |
| Pat_45 | Post-Resistance | PAOX      | 196743 | 37 | 10 | 135195101 | 135195101 | Missense_Mutation | SNP | C | T | 10 | 160 | c.806C>T     | c.(805-807)TCG>TTG   | p.S269L       |
| Pat_45 | Post-Resistance | PTDSS2    | 81490  | 37 | 11 | 460260    | 460260    | Missense_Mutation | SNP | C | T | 7  | 104 | c.256C>T     | c.(256-258)CCT>TCT   | p.P86S        |
| Pat_45 | Post-Resistance | MUC2      | 4583   | 37 | 11 | 1080524   | 1080524   | Missense_Mutation | SNP | G | T | 3  | 30  | c.1166G>T    | c.(1165-1167)GGC>GTC | p.G389V       |
| Pat_45 | Post-Resistance | MUC5B     | 727897 | 37 | 11 | 1162355   | 1162355   | Missense_Mutation | SNP | G | A | 6  | 58  | c.1864G>A    | c.(1864-1866)GAG>AAG | p.E622K       |
| Pat_45 | Post-Resistance | CD81      | 975    | 37 | 11 | 2398786   | 2398786   | Missense_Mutation | SNP | G | A | 3  | 15  | c.7G>A       | c.(7-9)GTG>ATG       | p.V3M         |
| Pat_45 | Post-Resistance | OR51T1    | 401665 | 37 | 11 | 4903401   | 4903401   | Missense_Mutation | SNP | C | T | 8  | 74  | c.353C>T     | c.(352-354)GCC>GTC   | p.A118V       |
| Pat_45 | Post-Resistance | OR51A7    | 119687 | 37 | 11 | 4929446   | 4929446   | Missense_Mutation | SNP | C | T | 13 | 124 | c.847C>T     | c.(847-849)CCG>TCG   | p.P283S       |
| Pat_45 | Post-Resistance | OR51M1    | 390059 | 37 | 11 | 5411211   | 5411211   | Missense_Mutation | SNP | G | A | 10 | 124 | c.583G>A     | c.(583-585)GAA>AAA   | p.E195K       |
| Pat_45 | Post-Resistance | OR52B2    | 255725 | 37 | 11 | 6191508   | 6191508   | Missense_Mutation | SNP | G | A | 10 | 33  | c.49C>T      | c.(49-51)CCT>TCT     | p.P17S        |
| Pat_45 | Post-Resistance | SBF2      | 81846  | 37 | 11 | 10052627  | 10052627  | Missense_Mutation | SNP | C | T | 19 | 159 | c.370G>A     | c.(370-372)GTA>ATA   | p.V124I       |
| Pat_45 | Post-Resistance | SLC5A12   | 159963 | 37 | 11 | 26692673  | 26692673  | Missense_Mutation | SNP | C | T | 10 | 174 | c.1833G>A    | c.(1831-1833)ATG>ATA | p.M611I       |
| Pat_45 | Post-Resistance | RCN1      | 5954   | 37 | 11 | 32119901  | 32119901  | Missense_Mutation | SNP | C | T | 7  | 64  | c.454C>T     | c.(454-456)CCC>TCC   | p.P152S       |
| Pat_45 | Post-Resistance | CRY2      | 1408   | 37 | 11 | 45882416  | 45882416  | Missense_Mutation | SNP | G | A | 7  | 132 | c.548G>A     | c.(547-549)GGG>GAG   | p.G183E       |

|        |                 |          |        |    |    |           |           |                   |     |    |    |    |     |                |                      |              |
|--------|-----------------|----------|--------|----|----|-----------|-----------|-------------------|-----|----|----|----|-----|----------------|----------------------|--------------|
| Pat_45 | Post-Resistance | KIAA0652 | 9776   | 37 | 11 | 46665911  | 46665911  | Splice_Site       | SNP | G  | A  | 8  | 142 | c.69_splice    | c.e3+1               | p.K23_splice |
| Pat_45 | Post-Resistance | MADD     | 8567   | 37 | 11 | 47303958  | 47303958  | Missense_Mutation | SNP | C  | T  | 9  | 145 | c.1496C>T      | c.(1495-1497)TCC>TTC | p.S499F      |
| Pat_45 | Post-Resistance | OR5M11   | 219487 | 37 | 11 | 56310465  | 56310465  | Missense_Mutation | SNP | G  | A  | 4  | 45  | c.269C>T       | c.(268-270)ACC>ATC   | p.T90I       |
| Pat_45 | Post-Resistance | UBE2L6   | 9246   | 37 | 11 | 57321972  | 57321972  | Missense_Mutation | SNP | C  | T  | 34 | 259 | c.248G>A       | c.(247-249)GGA>GAA   | p.G83E       |
| Pat_45 | Post-Resistance | CTNND1   | 1500   | 37 | 11 | 57564110  | 57564110  | Missense_Mutation | SNP | C  | T  | 19 | 226 | c.602C>T       | c.(601-603)ACC>ATC   | p.T201I      |
| Pat_45 | Post-Resistance | MS4A14   | 84689  | 37 | 11 | 60170449  | 60170449  | Missense_Mutation | SNP | C  | T  | 18 | 224 | c.383C>T       | c.(382-384)ACC>ATC   | p.T128I      |
| Pat_45 | Post-Resistance | MS4A1    | 931    | 37 | 11 | 60229888  | 60229888  | Missense_Mutation | SNP | C  | G  | 3  | 55  | c.41C>G        | c.(40-42)GCA>GGA     | p.A14G       |
| Pat_45 | Post-Resistance | CD6      | 923    | 37 | 11 | 60785844  | 60785844  | Missense_Mutation | SNP | G  | A  | 4  | 27  | c.1921G>A      | c.(1921-1923)GAG>AAG | p.E641K      |
| Pat_45 | Post-Resistance | AHNAK    | 79026  | 37 | 11 | 62292183  | 62292183  | Missense_Mutation | SNP | C  | T  | 4  | 48  | c.9706G>A      | c.(9706-9708)GAG>AAG | p.E3236K     |
| Pat_45 | Post-Resistance | MAP4K2   | 5871   | 37 | 11 | 64564631  | 64564631  | Missense_Mutation | SNP | C  | T  | 15 | 65  | c.1310G>A      | c.(1309-1311)AGC>AAC | p.S437N      |
| Pat_45 | Post-Resistance | CDCA5    | 113130 | 37 | 11 | 64846868  | 64846868  | Missense_Mutation | SNP | G  | A  | 17 | 110 | c.635C>T       | c.(634-636)CCC>CTC   | p.P212L      |
| Pat_45 | Post-Resistance | FRMD8    | 83786  | 37 | 11 | 65168298  | 65168298  | Missense_Mutation | SNP | G  | A  | 9  | 144 | c.1031G>A      | c.(1030-1032)GGC>GAC | p.G344D      |
| Pat_45 | Post-Resistance | KDM2A    | 22992  | 37 | 11 | 67020958  | 67020958  | Nonsense_Mutation | SNP | G  | A  | 26 | 262 | c.2967G>A      | c.(2965-2967)TGG>TGA | p.W989*      |
| Pat_45 | Post-Resistance | LRP5     | 4041   | 37 | 11 | 68216419  | 68216419  | Missense_Mutation | SNP | C  | T  | 14 | 135 | c.4729C>T      | c.(4729-4731)CCC>TCC | p.P1577S     |
| Pat_45 | Post-Resistance | SHANK2   | 22941  | 37 | 11 | 70319218  | 70319218  | Missense_Mutation | SNP | A  | T  | 25 | 107 | c.5306T>A      | c.(5305-5307)CTG>CAG | p.L1769Q     |
| Pat_45 | Post-Resistance | ARHGEF17 | 9828   | 37 | 11 | 73022424  | 73022424  | Missense_Mutation | SNP | C  | T  | 12 | 135 | c.2741C>T      | c.(2740-2742)TCC>TTC | p.S914F      |
| Pat_45 | Post-Resistance | RELT     | 84957  | 37 | 11 | 73101611  | 73101611  | Missense_Mutation | SNP | C  | T  | 68 | 221 | c.61C>T        | c.(61-63)CTC>TTC     | p.L21F       |
| Pat_45 | Post-Resistance | SLCO2B1  | 11309  | 37 | 11 | 74880368  | 74880368  | Missense_Mutation | SNP | G  | A  | 11 | 198 | c.599G>A       | c.(598-600)GGC>GAC   | p.G200D      |
| Pat_45 | Post-Resistance | INTS4    | 92105  | 37 | 11 | 77672136  | 77672136  | Missense_Mutation | SNP | G  | A  | 14 | 148 | c.520C>T       | c.(520-522)CTT>TTT   | p.L174F      |
| Pat_45 | Post-Resistance | PCF11    | 51585  | 37 | 11 | 82878306  | 82878306  | Missense_Mutation | SNP | C  | T  | 8  | 45  | c.1957C>T      | c.(1957-1959)CCT>TCT | p.P653S      |
| Pat_45 | Post-Resistance | PCF11    | 51585  | 37 | 11 | 82879547  | 82879547  | Missense_Mutation | SNP | C  | T  | 9  | 121 | c.2170C>T      | c.(2170-2172)CCA>TCA | p.P724S      |
| Pat_45 | Post-Resistance | PCF11    | 51585  | 37 | 11 | 82879997  | 82879997  | Missense_Mutation | SNP | G  | A  | 5  | 119 | c.2620G>A      | c.(2620-2622)GGT>AGT | p.G874S      |
| Pat_45 | Post-Resistance | C11orf73 | 51501  | 37 | 11 | 86055741  | 86055741  | Missense_Mutation | SNP | C  | T  | 19 | 133 | c.517C>T       | c.(517-519)CCG>TCG   | p.P173S      |
| Pat_45 | Post-Resistance | FAT3     | 120114 | 37 | 11 | 92495281  | 92495281  | Missense_Mutation | SNP | C  | T  | 4  | 68  | c.3929C>T      | c.(3928-3930)ACT>ATT | p.T1310I     |
| Pat_45 | Post-Resistance | FAT3     | 120114 | 37 | 11 | 92531755  | 92531755  | Missense_Mutation | SNP | C  | T  | 6  | 54  | c.5576C>T      | c.(5575-5577)CCC>CTC | p.P1859L     |
| Pat_45 | Post-Resistance | HEPHL1   | 341208 | 37 | 11 | 93800692  | 93800692  | Missense_Mutation | SNP | C  | T  | 23 | 117 | c.839C>T       | c.(838-840)CCG>CTG   | p.P280L      |
| Pat_45 | Post-Resistance | ENDOD1   | 23052  | 37 | 11 | 94862237  | 94862237  | Missense_Mutation | SNP | G  | A  | 3  | 22  | c.997G>A       | c.(997-999)GGC>AGC   | p.G333S      |
| Pat_45 | Post-Resistance | KIAA1826 | 84437  | 37 | 11 | 105881565 | 105881565 | Missense_Mutation | SNP | C  | T  | 3  | 59  | c.80G>A        | c.(79-81)AGG>AAG     | p.R27K       |
| Pat_45 | Post-Resistance | EXPH5    | 23086  | 37 | 11 | 108385480 | 108385480 | Missense_Mutation | SNP | G  | A  | 5  | 91  | c.754C>T       | c.(754-756)CAT>TAT   | p.H252Y      |
| Pat_45 | Post-Resistance | NCAM1    | 4684   | 37 | 11 | 113146084 | 113146084 | Missense_Mutation | SNP | C  | T  | 4  | 50  | c.257C>T       | c.(256-258)ACA>ATA   | p.T86I       |
| Pat_45 | Post-Resistance | MLL      | 4297   | 37 | 11 | 118343168 | 118343168 | Missense_Mutation | SNP | G  | A  | 11 | 160 | c.1294G>A      | c.(1294-1296)GAG>AAG | p.E432K      |
| Pat_45 | Post-Resistance | BCL9L    | 283149 | 37 | 11 | 118779096 | 118779096 | Missense_Mutation | SNP | C  | T  | 16 | 94  | c.295G>A       | c.(295-297)GCA>ACA   | p.A99T       |
| Pat_45 | Post-Resistance | TRAPPC4  | 51399  | 37 | 11 | 118892596 | 118892596 | Missense_Mutation | SNP | G  | A  | 5  | 97  | c.581G>A       | c.(580-582)AGG>AAG   | p.R194K      |
| Pat_45 | Post-Resistance | TRIM29   | 23650  | 37 | 11 | 119996597 | 119996597 | Missense_Mutation | SNP | C  | T  | 7  | 44  | c.1135G>A      | c.(1135-1137)GAA>AAA | p.E379K      |
| Pat_45 | Post-Resistance | TRIM29   | 23650  | 37 | 11 | 120008183 | 120008183 | Missense_Mutation | SNP | G  | A  | 3  | 35  | c.557C>T       | c.(556-558)TCC>TTC   | p.S186F      |
| Pat_45 | Post-Resistance | TECTA    | 7007   | 37 | 11 | 120996474 | 120996474 | Missense_Mutation | SNP | G  | A  | 15 | 118 | c.1667G>A      | c.(1666-1668)AGT>AAT | p.S556N      |
| Pat_45 | Post-Resistance | CCDC15   | 80071  | 37 | 11 | 124857828 | 124857828 | Missense_Mutation | SNP | T  | A  | 7  | 253 | c.1706T>A      | c.(1705-1707)GTT>GAT | p.V569D      |
| Pat_45 | Post-Resistance | CCDC15   | 80071  | 37 | 11 | 124857870 | 124857870 | Missense_Mutation | SNP | A  | G  | 6  | 182 | c.1748A>G      | c.(1747-1749)CAG>CGG | p.Q583R      |
| Pat_45 | Post-Resistance | VPS26B   | 112936 | 37 | 11 | 134095156 | 134095156 | Missense_Mutation | SNP | C  | T  | 17 | 186 | c.140C>T       | c.(139-141)TCC>TTC   | p.S47F       |
| Pat_45 | Post-Resistance | B4GALNT3 | 283358 | 37 | 12 | 663104    | 663104    | Missense_Mutation | SNP | A  | G  | 3  | 52  | c.2015A>G      | c.(2014-2016)GAG>GGG | p.E672G      |
| Pat_45 | Post-Resistance | RAD52    | 5893   | 37 | 12 | 1025632   | 1025632   | Missense_Mutation | SNP | G  | A  | 4  | 29  | c.743C>T       | c.(742-744)GCC>GTC   | p.A248V      |
| Pat_45 | Post-Resistance | CACNA2D4 | 93589  | 37 | 12 | 1910248   | 1910249   | Missense_Mutation | DNP | GG | TT | 7  | 90  | .2828_2829CC>A | c.(2827-2829)CCC>CAA | p.P943Q      |
| Pat_45 | Post-Resistance | TNFRSF1A | 7132   | 37 | 12 | 6442535   | 6442535   | Missense_Mutation | SNP | G  | A  | 3  | 29  | c.470C>T       | c.(469-471)TCC>TTC   | p.S157F      |
| Pat_45 | Post-Resistance | KLRC1    | 3821   | 37 | 12 | 10601919  | 10601919  | Missense_Mutation | SNP | C  | T  | 16 | 188 | c.406G>A       | c.(406-408)GAA>AAA   | p.E136K      |
| Pat_45 | Post-Resistance | PRB1     | 5542   | 37 | 12 | 11506208  | 11506208  | Missense_Mutation | SNP | G  | A  | 51 | 199 | c.829C>T       | c.(829-831)CCT>TCT   | p.P277S      |
| Pat_45 | Post-Resistance | LRP6     | 4040   | 37 | 12 | 12284989  | 12284989  | Missense_Mutation | SNP | G  | A  | 14 | 105 | c.3736C>T      | c.(3736-3738)CCT>TCT | p.P1246S     |
| Pat_45 | Post-Resistance | PKP2     | 5318   | 37 | 12 | 32955384  | 32955384  | Missense_Mutation | SNP | G  | A  | 65 | 250 | c.2252C>T      | c.(2251-2253)TCG>TTG | p.S751L      |

|        |                 |          |        |    |    |           |           |                   |     |   |   |    |     |           |                      |          |
|--------|-----------------|----------|--------|----|----|-----------|-----------|-------------------|-----|---|---|----|-----|-----------|----------------------|----------|
| Pat_45 | Post-Resistance | IRAK4    | 51135  | 37 | 12 | 44180314  | 44180314  | Missense_Mutation | SNP | G | A | 7  | 56  | c.1301G>A | c.(1300-1302)AGT>AAT | p.S434N  |
| Pat_45 | Post-Resistance | MLL2     | 8085   | 37 | 12 | 49440495  | 49440495  | Missense_Mutation | SNP | G | A | 12 | 77  | c.4315C>T | c.(4315-4317)CCC>TCC | p.P1439S |
| Pat_45 | Post-Resistance | TROAP    | 10024  | 37 | 12 | 49724304  | 49724304  | Missense_Mutation | SNP | G | A | 6  | 54  | c.1676G>A | c.(1675-1677)TGC>TAC | p.C559Y  |
| Pat_45 | Post-Resistance | TROAP    | 10024  | 37 | 12 | 49724313  | 49724313  | Missense_Mutation | SNP | G | T | 8  | 54  | c.1685G>T | c.(1684-1686)AGT>ATT | p.S562I  |
| Pat_45 | Post-Resistance | POU6F1   | 5463   | 37 | 12 | 51586223  | 51586223  | Missense_Mutation | SNP | G | A | 23 | 103 | c.281C>T  | c.(280-282)CCC>CTC   | p.P94L   |
| Pat_45 | Post-Resistance | NR4A1    | 3164   | 37 | 12 | 52448671  | 52448671  | Missense_Mutation | SNP | C | T | 13 | 95  | c.559C>T  | c.(559-561)CCA>TCA   | p.P187S  |
| Pat_45 | Post-Resistance | NCKAP1L  | 3071   | 37 | 12 | 54911672  | 54911672  | Missense_Mutation | SNP | C | T | 11 | 132 | c.1288C>T | c.(1288-1290)CTT>TTT | p.L430F  |
| Pat_45 | Post-Resistance | OR6C6    | 283365 | 37 | 12 | 55688542  | 55688542  | Missense_Mutation | SNP | C | T | 14 | 53  | c.475G>A  | c.(475-477)GTC>ATC   | p.V159I  |
| Pat_45 | Post-Resistance | DGKA     | 1606   | 37 | 12 | 56334729  | 56334729  | Missense_Mutation | SNP | G | A | 10 | 46  | c.1066G>A | c.(1066-1068)GAT>AAT | p.D356N  |
| Pat_45 | Post-Resistance | MYL6B    | 140465 | 37 | 12 | 56551482  | 56551482  | Missense_Mutation | SNP | C | T | 6  | 50  | c.599C>T  | c.(598-600)GCC>GTC   | p.A200V  |
| Pat_45 | Post-Resistance | MARS     | 4141   | 37 | 12 | 57906711  | 57906711  | Missense_Mutation | SNP | C | T | 19 | 191 | c.1931C>T | c.(1930-1932)TCT>TTT | p.S644F  |
| Pat_45 | Post-Resistance | PIP4K2C  | 79837  | 37 | 12 | 57995103  | 57995103  | Missense_Mutation | SNP | C | T | 6  | 49  | c.1157C>T | c.(1156-1158)GCT>GTT | p.A386V  |
| Pat_45 | Post-Resistance | RPSAP52  | 204010 | 37 | 12 | 66152134  | 66152134  | Missense_Mutation | SNP | G | A | 4  | 7   | c.389C>T  | c.(388-390)GCT>GTT   | p.A130V  |
| Pat_45 | Post-Resistance | SLC35E3  | 55508  | 37 | 12 | 69141800  | 69141800  | Missense_Mutation | SNP | G | A | 10 | 109 | c.493G>A  | c.(493-495)GTT>ATT   | p.V165I  |
| Pat_45 | Post-Resistance | KCNMB4   | 27345  | 37 | 12 | 70824296  | 70824296  | Missense_Mutation | SNP | G | A | 20 | 178 | c.496G>A  | c.(496-498)GAT>AAT   | p.D166N  |
| Pat_45 | Post-Resistance | NAV3     | 89795  | 37 | 12 | 78515772  | 78515772  | Missense_Mutation | SNP | G | A | 8  | 38  | c.3802G>A | c.(3802-3804)GGT>AGT | p.G1268S |
| Pat_45 | Post-Resistance | CCDC59   | 29080  | 37 | 12 | 82746994  | 82746994  | Missense_Mutation | SNP | T | C | 3  | 70  | c.662A>G  | c.(661-663)AAG>AGG   | p.K221R  |
| Pat_45 | Post-Resistance | DUSP6    | 1848   | 37 | 12 | 89745728  | 89745728  | Missense_Mutation | SNP | C | T | 3  | 45  | c.89G>A   | c.(88-90)GGC>GAC     | p.G30D   |
| Pat_45 | Post-Resistance | ELK3     | 2004   | 37 | 12 | 96617480  | 96617480  | Missense_Mutation | SNP | G | A | 6  | 52  | c.136G>A  | c.(136-138)GGA>AGA   | p.G46R   |
| Pat_45 | Post-Resistance | NFYB     | 4801   | 37 | 12 | 104520010 | 104520010 | Missense_Mutation | SNP | C | G | 2  | 4   | c.113G>C  | c.(112-114)AGC>ACC   | p.S38T   |
| Pat_45 | Post-Resistance | ACACB    | 32     | 37 | 12 | 109623454 | 109623454 | Missense_Mutation | SNP | T | G | 20 | 62  | c.1889T>G | c.(1888-1890)GTG>GGG | p.V630G  |
| Pat_45 | Post-Resistance | FBXW8    | 26259  | 37 | 12 | 117426471 | 117426471 | Nonsense_Mutation | SNP | C | T | 28 | 266 | c.1036C>T | c.(1036-1038)CAG>TAG | p.Q346*  |
| Pat_45 | Post-Resistance | NOS1     | 4842   | 37 | 12 | 117718614 | 117718614 | Nonsense_Mutation | SNP | C | T | 5  | 46  | c.1440G>A | c.(1438-1440)TGG>TGA | p.W480*  |
| Pat_45 | Post-Resistance | KSR2     | 283455 | 37 | 12 | 117977643 | 117977643 | Missense_Mutation | SNP | G | A | 15 | 121 | c.1481C>T | c.(1480-1482)TCC>TTC | p.S494F  |
| Pat_45 | Post-Resistance | EP400    | 57634  | 37 | 12 | 132466850 | 132466850 | Missense_Mutation | SNP | G | A | 17 | 136 | c.1756G>A | c.(1756-1758)GCC>ACC | p.A586T  |
| Pat_45 | Post-Resistance | POLE     | 5426   | 37 | 12 | 133226409 | 133226409 | Missense_Mutation | SNP | G | A | 6  | 34  | c.3649C>T | c.(3649-3651)CTC>TTC | p.L1217F |
| Pat_45 | Post-Resistance | POLR1D   | 51082  | 37 | 13 | 28239855  | 28239855  | Missense_Mutation | SNP | G | T | 4  | 43  | c.134G>T  | c.(133-135)AGA>ATA   | p.R45I   |
| Pat_45 | Post-Resistance | B3GALTL  | 145173 | 37 | 13 | 31835207  | 31835207  | Missense_Mutation | SNP | C | T | 5  | 55  | c.584C>T  | c.(583-585)CCA>CTA   | p.P195L  |
| Pat_45 | Post-Resistance | NBEA     | 26960  | 37 | 13 | 35632956  | 35632956  | Missense_Mutation | SNP | C | T | 3  | 36  | c.1195C>T | c.(1195-1197)CCA>TCA | p.P399S  |
| Pat_45 | Post-Resistance | CSNK1A1L | 122011 | 37 | 13 | 37678426  | 37678426  | Missense_Mutation | SNP | G | A | 16 | 165 | c.968C>T  | c.(967-969)ACA>ATA   | p.T323I  |
| Pat_45 | Post-Resistance | CSNK1A1L | 122011 | 37 | 13 | 37678453  | 37678453  | Missense_Mutation | SNP | C | T | 13 | 198 | c.941G>A  | c.(940-942)GGG>GAG   | p.G314E  |
| Pat_45 | Post-Resistance | FREM2    | 341640 | 37 | 13 | 39265691  | 39265691  | Missense_Mutation | SNP | C | T | 14 | 150 | c.4210C>T | c.(4210-4212)CCC>TCC | p.P1404S |
| Pat_45 | Post-Resistance | NAA16    | 79612  | 37 | 13 | 41932505  | 41932505  | Missense_Mutation | SNP | G | A | 11 | 131 | c.1153G>A | c.(1153-1155)GAT>AAT | p.D385N  |
| Pat_45 | Post-Resistance | EPST11   | 94240  | 37 | 13 | 43462438  | 43462438  | Missense_Mutation | SNP | G | A | 13 | 55  | c.1181C>T | c.(1180-1182)CCT>CTT | p.P394L  |
| Pat_45 | Post-Resistance | KIAA1704 | 55425  | 37 | 13 | 45602022  | 45602022  | Missense_Mutation | SNP | C | T | 5  | 66  | c.907C>T  | c.(907-909)CGT>TGT   | p.R303C  |
| Pat_45 | Post-Resistance | LPAR6    | 10161  | 37 | 13 | 48986500  | 48986500  | Nonsense_Mutation | SNP | A | T | 4  | 73  | c.60T>A   | c.(58-60)TAT>TAA     | p.Y20*   |
| Pat_45 | Post-Resistance | SETDB2   | 83852  | 37 | 13 | 50057041  | 50057041  | Missense_Mutation | SNP | C | T | 7  | 55  | c.1361C>T | c.(1360-1362)ACT>ATT | p.T454I  |
| Pat_45 | Post-Resistance | KCNRG    | 283518 | 37 | 13 | 50590158  | 50590158  | Missense_Mutation | SNP | G | A | 12 | 115 | c.529G>A  | c.(529-531)GTT>ATT   | p.V177I  |
| Pat_45 | Post-Resistance | CKAP2    | 26586  | 37 | 13 | 53049104  | 53049104  | Missense_Mutation | SNP | G | A | 9  | 56  | c.1880G>A | c.(1879-1881)CGT>CAT | p.R627H  |
| Pat_45 | Post-Resistance | DACH1    | 1602   | 37 | 13 | 72049279  | 72049279  | Missense_Mutation | SNP | T | C | 10 | 90  | c.2077A>G | c.(2077-2079)ATA>GTA | p.I693V  |
| Pat_45 | Post-Resistance | PIBF1    | 10464  | 37 | 13 | 73357692  | 73357692  | Missense_Mutation | SNP | G | A | 9  | 115 | c.85G>A   | c.(85-87)GTT>ATT     | p.V29I   |
| Pat_45 | Post-Resistance | TBC1D4   | 9882   | 37 | 13 | 75880586  | 75880586  | Missense_Mutation | SNP | G | A | 4  | 83  | c.2615C>T | c.(2614-2616)TCC>TTC | p.S872F  |
| Pat_45 | Post-Resistance | SCEL     | 8796   | 37 | 13 | 78178522  | 78178522  | Missense_Mutation | SNP | G | A | 6  | 103 | c.1129G>A | c.(1129-1131)GAT>AAT | p.D377N  |
| Pat_45 | Post-Resistance | SLITRK1  | 114798 | 37 | 13 | 84453844  | 84453844  | Missense_Mutation | SNP | G | A | 10 | 116 | c.1799C>T | c.(1798-1800)GCG>GTG | p.A600V  |
| Pat_45 | Post-Resistance | SLITRK6  | 84189  | 37 | 13 | 86368348  | 86368348  | Missense_Mutation | SNP | G | A | 7  | 81  | c.2296C>T | c.(2296-2298)CTT>TTT | p.L766F  |
| Pat_45 | Post-Resistance | GPC5     | 2262   | 37 | 13 | 92408617  | 92408617  | Missense_Mutation | SNP | A | G | 12 | 97  | c.1223A>G | c.(1222-1224)AAT>AGT | p.N408S  |
| Pat_45 | Post-Resistance | MBNL2    | 10150  | 37 | 13 | 97986545  | 97986545  | Missense_Mutation | SNP | G | A | 8  | 104 | c.190G>A  | c.(190-192)GAG>AAG   | p.E64K   |

|        |                 |           |        |    |    |           |           |                   |     |   |   |    |     |               |                      |               |
|--------|-----------------|-----------|--------|----|----|-----------|-----------|-------------------|-----|---|---|----|-----|---------------|----------------------|---------------|
| Pat_45 | Post-Resistance | SLC10A2   | 6555   | 37 | 13 | 103703661 | 103703661 | Missense_Mutation | SNP | G | A | 14 | 80  | c.707C>T      | c.(706-708)GCG>GTG   | p.A236V       |
| Pat_45 | Post-Resistance | SLC10A2   | 6555   | 37 | 13 | 103703743 | 103703743 | Missense_Mutation | SNP | C | T | 6  | 51  | c.625G>A      | c.(625-627)GCT>ACT   | p.A209T       |
| Pat_45 | Post-Resistance | GRK1      | 6011   | 37 | 13 | 114322374 | 114322374 | Missense_Mutation | SNP | C | T | 4  | 31  | c.673C>T      | c.(673-675)CGG>TGG   | p.R225W       |
| Pat_45 | Post-Resistance | OR4Q3     | 441669 | 37 | 14 | 20216025  | 20216025  | Missense_Mutation | SNP | C | T | 5  | 60  | c.439C>T      | c.(439-441)CTT>TTT   | p.L147F       |
| Pat_45 | Post-Resistance | TEP1      | 7011   | 37 | 14 | 20852822  | 20852822  | Missense_Mutation | SNP | G | A | 18 | 239 | c.3158C>T     | c.(3157-3159)GCC>GTC | p.A1053V      |
| Pat_45 | Post-Resistance | OR6S1     | 341799 | 37 | 14 | 21109394  | 21109394  | Missense_Mutation | SNP | C | T | 4  | 71  | c.457G>A      | c.(457-459)GGG>AGG   | p.G153R       |
| Pat_45 | Post-Resistance | CHD8      | 57680  | 37 | 14 | 21883732  | 21883732  | Splice_Site       | SNP | C | T | 6  | 66  | c.1131_splice | c.e7+1               | p.E377_splice |
| Pat_45 | Post-Resistance | TOX4      | 9878   | 37 | 14 | 21960767  | 21960767  | Nonsense_Mutation | SNP | C | A | 13 | 148 | c.992C>A      | c.(991-993)TCA>TAA   | p.S331*       |
| Pat_45 | Post-Resistance | DHRS2     | 10202  | 37 | 14 | 24108123  | 24108123  | Missense_Mutation | SNP | C | T | 10 | 160 | c.50C>T       | c.(49-51)GCT>GTT     | p.A17V        |
| Pat_45 | Post-Resistance | NFATC4    | 4776   | 37 | 14 | 24841655  | 24841655  | Missense_Mutation | SNP | C | T | 7  | 128 | c.1205C>T     | c.(1204-1206)GCC>GTC | p.A402V       |
| Pat_45 | Post-Resistance | ARHGAP5   | 394    | 37 | 14 | 32562267  | 32562267  | Missense_Mutation | SNP | C | T | 5  | 147 | c.2392C>T     | c.(2392-2394)CCC>TCC | p.P798S       |
| Pat_45 | Post-Resistance | FSCB      | 84075  | 37 | 14 | 44975115  | 44975115  | Missense_Mutation | SNP | G | T | 22 | 84  | c.1076C>A     | c.(1075-1077)CCT>CAT | p.P359H       |
| Pat_45 | Post-Resistance | FANCM     | 57697  | 37 | 14 | 45636294  | 45636294  | Missense_Mutation | SNP | C | T | 8  | 135 | c.1930C>T     | c.(1930-1932)CAT>TAT | p.H644Y       |
| Pat_45 | Post-Resistance | FANCM     | 57697  | 37 | 14 | 45658350  | 45658350  | Missense_Mutation | SNP | C | T | 22 | 244 | c.5125C>T     | c.(5125-5127)CCT>TCT | p.P1709S      |
| Pat_45 | Post-Resistance | POLE2     | 5427   | 37 | 14 | 50140909  | 50140909  | Missense_Mutation | SNP | G | A | 96 | 278 | c.349C>T      | c.(349-351)CCA>TCA   | p.P117S       |
| Pat_45 | Post-Resistance | KLHDC2    | 23588  | 37 | 14 | 50238352  | 50238352  | Missense_Mutation | SNP | G | A | 12 | 74  | c.194G>A      | c.(193-195)AGA>AAA   | p.R65K        |
| Pat_45 | Post-Resistance | ARF6      | 382    | 37 | 14 | 50360936  | 50360936  | Missense_Mutation | SNP | G | A | 6  | 62  | c.482G>A      | c.(481-483)GGA>GAA   | p.G161E       |
| Pat_45 | Post-Resistance | CDKL1     | 8814   | 37 | 14 | 50807897  | 50807897  | Missense_Mutation | SNP | G | A | 12 | 129 | c.2524C>T     | c.(2524-2526)CCT>TCT | p.P842S       |
| Pat_45 | Post-Resistance | NID2      | 22795  | 37 | 14 | 52493928  | 52493928  | Nonsense_Mutation | SNP | G | A | 5  | 45  | c.2665C>T     | c.(2665-2667)CAG>TAG | p.Q889*       |
| Pat_45 | Post-Resistance | TXNDC16   | 57544  | 37 | 14 | 52948991  | 52948991  | Missense_Mutation | SNP | C | T | 7  | 85  | c.1269G>A     | c.(1267-1269)ATG>ATA | p.M423I       |
| Pat_45 | Post-Resistance | RTN1      | 6252   | 37 | 14 | 60213121  | 60213121  | Missense_Mutation | SNP | G | A | 3  | 66  | c.320C>T      | c.(319-321)TCT>TTT   | p.S107F       |
| Pat_45 | Post-Resistance | TRMT5     | 57570  | 37 | 14 | 61446257  | 61446257  | Missense_Mutation | SNP | C | T | 17 | 198 | c.359G>A      | c.(358-360)CGC>CAC   | p.R120H       |
| Pat_45 | Post-Resistance | SYNE2     | 23224  | 37 | 14 | 64522818  | 64522818  | Missense_Mutation | SNP | G | A | 8  | 47  | c.9901G>A     | c.(9901-9903)GAG>AAG | p.E3301K      |
| Pat_45 | Post-Resistance | ZBTB25    | 7597   | 37 | 14 | 64957244  | 64957244  | Missense_Mutation | SNP | G | A | 8  | 171 | c.8C>T        | c.(7-9)ACT>ATT       | p.T3I         |
| Pat_45 | Post-Resistance | VTI1B     | 10490  | 37 | 14 | 68141101  | 68141101  | Missense_Mutation | SNP | C | T | 6  | 23  | c.106G>A      | c.(106-108)GCG>ACG   | p.A36T        |
| Pat_45 | Post-Resistance | ACOT4     | 122970 | 37 | 14 | 74062158  | 74062158  | Missense_Mutation | SNP | C | T | 10 | 97  | c.1066C>T     | c.(1066-1068)CCT>TCT | p.P356S       |
| Pat_45 | Post-Resistance | C14orf115 | 55237  | 37 | 14 | 74824727  | 74824727  | Missense_Mutation | SNP | C | T | 6  | 131 | c.1241C>T     | c.(1240-1242)TCC>TTC | p.S414F       |
| Pat_45 | Post-Resistance | MLH3      | 27030  | 37 | 14 | 75513393  | 75513393  | Missense_Mutation | SNP | C | T | 17 | 116 | c.2966G>A     | c.(2965-2967)AGA>AAA | p.R989K       |
| Pat_45 | Post-Resistance | FAM164C   | 79696  | 37 | 14 | 75537559  | 75537559  | Missense_Mutation | SNP | G | A | 29 | 288 | c.283G>A      | c.(283-285)GAT>AAT   | p.D95N        |
| Pat_45 | Post-Resistance | NEK9      | 91754  | 37 | 14 | 75553876  | 75553876  | Missense_Mutation | SNP | G | A | 8  | 129 | c.2662C>T     | c.(2662-2664)CCT>TCT | p.P888S       |
| Pat_45 | Post-Resistance | TMEM63C   | 57156  | 37 | 14 | 77715198  | 77715198  | Missense_Mutation | SNP | C | T | 9  | 210 | c.1853C>T     | c.(1852-1854)CCC>CTC | p.P618L       |
| Pat_45 | Post-Resistance | KCNK10    | 54207  | 37 | 14 | 88652225  | 88652225  | Missense_Mutation | SNP | C | T | 13 | 87  | c.1271G>A     | c.(1270-1272)CGC>CAC | p.R424H       |
| Pat_45 | Post-Resistance | C14orf159 | 80017  | 37 | 14 | 91639748  | 91639748  | Missense_Mutation | SNP | G | A | 3  | 39  | c.557G>A      | c.(556-558)GGT>GAT   | p.G186D       |
| Pat_45 | Post-Resistance | CATSPERB  | 79820  | 37 | 14 | 92157893  | 92157893  | Missense_Mutation | SNP | T | A | 7  | 111 | c.838A>T      | c.(838-840)AGG>TGG   | p.R280W       |
| Pat_45 | Post-Resistance | TRIP11    | 9321   | 37 | 14 | 92436129  | 92436129  | Missense_Mutation | SNP | G | A | 9  | 117 | c.5828C>T     | c.(5827-5829)CCC>CTC | p.P1943L      |
| Pat_45 | Post-Resistance | DDX24     | 57062  | 37 | 14 | 94528964  | 94528964  | Missense_Mutation | SNP | C | T | 19 | 105 | c.722G>A      | c.(721-723)AGT>AAT   | p.S241N       |
| Pat_45 | Post-Resistance | ATG2B     | 55102  | 37 | 14 | 96783538  | 96783538  | Missense_Mutation | SNP | G | A | 6  | 76  | c.3154C>T     | c.(3154-3156)CTC>TTC | p.L1052F      |
| Pat_45 | Post-Resistance | PPP2R5C   | 5527   | 37 | 14 | 102276373 | 102276373 | Missense_Mutation | SNP | G | A | 6  | 63  | c.94G>A       | c.(94-96)GAT>AAT     | p.D32N        |
| Pat_45 | Post-Resistance | DYNC1H1   | 1778   | 37 | 14 | 102482379 | 102482379 | Missense_Mutation | SNP | C | T | 3  | 46  | c.7429C>T     | c.(7429-7431)CCC>TCC | p.P2477S      |
| Pat_45 | Post-Resistance | RAGE      | 5891   | 37 | 14 | 102695823 | 102695823 | Missense_Mutation | SNP | G | A | 18 | 185 | c.1153C>T     | c.(1153-1155)CCC>TCC | p.P385S       |
| Pat_45 | Post-Resistance | PPP1R13B  | 23368  | 37 | 14 | 104206385 | 104206385 | Missense_Mutation | SNP | C | T | 16 | 127 | c.2368G>A     | c.(2368-2370)GAT>AAT | p.D790N       |
| Pat_45 | Post-Resistance | C15orf2   | 23742  | 37 | 15 | 24922887  | 24922887  | Missense_Mutation | SNP | C | T | 9  | 61  | c.1873C>T     | c.(1873-1875)CCA>TCA | p.P625S       |
| Pat_45 | Post-Resistance | HERC2     | 8924   | 37 | 15 | 28501415  | 28501415  | Missense_Mutation | SNP | C | T | 6  | 42  | c.2566G>A     | c.(2566-2568)GGT>AGT | p.G856S       |
| Pat_45 | Post-Resistance | RYR3      | 6263   | 37 | 15 | 34064312  | 34064312  | Missense_Mutation | SNP | C | T | 5  | 50  | c.9008C>T     | c.(9007-9009)TCC>TTC | p.S3003F      |
| Pat_45 | Post-Resistance | C15orf55  | 256646 | 37 | 15 | 34648760  | 34648760  | Missense_Mutation | SNP | G | A | 8  | 75  | c.2467G>A     | c.(2467-2469)GAA>AAA | p.E823K       |
| Pat_45 | Post-Resistance | RAD51     | 5888   | 37 | 15 | 40990990  | 40990990  | Missense_Mutation | SNP | G | A | 6  | 115 | c.34G>A       | c.(34-36)GAT>AAT     | p.D12N        |
| Pat_45 | Post-Resistance | VPS18     | 57617  | 37 | 15 | 41191546  | 41191546  | Missense_Mutation | SNP | G | A | 8  | 144 | c.530G>A      | c.(529-531)AGC>AAC   | p.S177N       |

|        |                 |           |        |    |    |           |           |                        |     |    |    |    |     |                |                        |          |
|--------|-----------------|-----------|--------|----|----|-----------|-----------|------------------------|-----|----|----|----|-----|----------------|------------------------|----------|
| Pat_45 | Post-Resistance | INO80     | 54617  | 37 | 15 | 41377602  | 41377602  | Missense_Mutation      | SNP | C  | T  | 23 | 125 | c.838G>A       | c.(838-840)GTA>ATA     | p.V280I  |
| Pat_45 | Post-Resistance | STRC      | 161497 | 37 | 15 | 43895526  | 43895526  | Missense_Mutation      | SNP | C  | T  | 7  | 55  | c.4459G>A      | c.(4459-4461)GAC>AAC   | p.D1487N |
| Pat_45 | Post-Resistance | SQRDL     | 58472  | 37 | 15 | 45983208  | 45983208  | Missense_Mutation      | SNP | T  | A  | 20 | 241 | c.1333T>A      | c.(1333-1335)TTT>ATT   | p.F445I  |
| Pat_45 | Post-Resistance | FBN1      | 2200   | 37 | 15 | 48707754  | 48707754  | Missense_Mutation      | SNP | C  | T  | 10 | 138 | c.8030G>A      | c.(8029-8031)GGT>GAT   | p.G2677D |
| Pat_45 | Post-Resistance | C15orf33  | 196951 | 37 | 15 | 49800512  | 49800512  | Nonsense_Mutation      | SNP | C  | T  | 5  | 57  | c.908G>A       | c.(907-909)TGG>TAG     | p.W303*  |
| Pat_45 | Post-Resistance | TMOD3     | 29766  | 37 | 15 | 52192472  | 52192472  | Missense_Mutation      | SNP | G  | A  | 7  | 52  | c.856G>A       | c.(856-858)GCA>ACA     | p.A286T  |
| Pat_45 | Post-Resistance | SLTM      | 79811  | 37 | 15 | 59179486  | 59179486  | Missense_Mutation      | SNP | G  | A  | 14 | 131 | c.2629C>T      | c.(2629-2631)CCT>TCT   | p.P877S  |
| Pat_45 | Post-Resistance | ANXA2     | 302    | 37 | 15 | 60674586  | 60674586  | Missense_Mutation      | SNP | C  | T  | 7  | 79  | c.103G>A       | c.(103-105)GCT>ACT     | p.A35T   |
| Pat_45 | Post-Resistance | USP3      | 9960   | 37 | 15 | 63862770  | 63862771  | Missense_Mutation      | DNP | GT | AA | 12 | 201 | c.900_901GT>AA | 898-903)AAGTGT>AAAAA   | p.C301S  |
| Pat_45 | Post-Resistance | CLPX      | 10845  | 37 | 15 | 65450171  | 65450171  | Nonsense_Mutation      | SNP | G  | A  | 6  | 116 | c.970C>T       | c.(970-972)CAG>TAG     | p.Q324*  |
| Pat_45 | Post-Resistance | CILP      | 8483   | 37 | 15 | 65490358  | 65490358  | Missense_Mutation      | SNP | C  | T  | 14 | 223 | c.2266G>A      | c.(2266-2268)GTG>ATG   | p.V756M  |
| Pat_45 | Post-Resistance | AAGAB     | 79719  | 37 | 15 | 67528320  | 67528320  | Missense_Mutation      | SNP | C  | T  | 12 | 154 | c.448G>A       | c.(448-450)GAT>AAT     | p.D150N  |
| Pat_45 | Post-Resistance | CALML4    | 91860  | 37 | 15 | 68497780  | 68497780  | Translation_Start_Site | SNP | C  | T  | 3  | 14  | c.-65G>A       | c.(-67--63)AGGTG>AGATG |          |
| Pat_45 | Post-Resistance | PARP6     | 56965  | 37 | 15 | 72559163  | 72559163  | Missense_Mutation      | SNP | C  | T  | 10 | 79  | c.4G>A         | c.(4-6)GAC>AAC         | p.D2N    |
| Pat_45 | Post-Resistance | CSK       | 1445   | 37 | 15 | 75094136  | 75094136  | Missense_Mutation      | SNP | G  | A  | 6  | 96  | c.988G>A       | c.(988-990)GTC>ATC     | p.V330I  |
| Pat_45 | Post-Resistance | CSK       | 1445   | 37 | 15 | 75094706  | 75094706  | Missense_Mutation      | SNP | G  | A  | 13 | 105 | c.1205G>A      | c.(1204-1206)GGC>GAC   | p.G402D  |
| Pat_45 | Post-Resistance | MAN2C1    | 4123   | 37 | 15 | 75654258  | 75654258  | Missense_Mutation      | SNP | C  | T  | 21 | 268 | c.1039G>A      | c.(1039-1041)GTG>ATG   | p.V347M  |
| Pat_45 | Post-Resistance | LOC645752 | 645752 | 37 | 15 | 78211546  | 78211546  | Missense_Mutation      | SNP | G  | A  | 19 | 218 | c.221C>T       | c.(220-222)TCC>TTC     | p.S74F   |
| Pat_45 | Post-Resistance | EFTUD1    | 79631  | 37 | 15 | 82532887  | 82532887  | Missense_Mutation      | SNP | C  | T  | 12 | 109 | c.388G>A       | c.(388-390)GTT>ATT     | p.V130I  |
| Pat_45 | Post-Resistance | BNC1      | 646    | 37 | 15 | 83932330  | 83932330  | Missense_Mutation      | SNP | C  | T  | 15 | 78  | c.1673G>A      | c.(1672-1674)AGA>AAA   | p.R558K  |
| Pat_45 | Post-Resistance | ADAMTSL3  | 57188  | 37 | 15 | 84566671  | 84566671  | Missense_Mutation      | SNP | G  | A  | 28 | 121 | c.1529G>A      | c.(1528-1530)GGA>GAA   | p.G510E  |
| Pat_45 | Post-Resistance | ACAN      | 176    | 37 | 15 | 89400555  | 89400555  | Missense_Mutation      | SNP | C  | T  | 4  | 45  | c.4739C>T      | c.(4738-4740)GCT>GTT   | p.A1580V |
| Pat_45 | Post-Resistance | MFGE8     | 4240   | 37 | 15 | 89444955  | 89444955  | Missense_Mutation      | SNP | G  | A  | 8  | 53  | c.697C>T       | c.(697-699)CCC>TCC     | p.P233S  |
| Pat_45 | Post-Resistance | MAN2A2    | 4122   | 37 | 15 | 91453374  | 91453374  | Missense_Mutation      | SNP | G  | A  | 11 | 178 | c.1429G>A      | c.(1429-1431)GTG>ATG   | p.V477M  |
| Pat_45 | Post-Resistance | CHD2      | 1106   | 37 | 15 | 93480792  | 93480792  | Missense_Mutation      | SNP | G  | A  | 5  | 54  | c.488G>A       | c.(487-489)GGC>GAC     | p.G163D  |
| Pat_45 | Post-Resistance | CHD2      | 1106   | 37 | 15 | 93528866  | 93528866  | Missense_Mutation      | SNP | G  | A  | 18 | 263 | c.3376G>A      | c.(3376-3378)GAC>AAC   | p.D1126N |
| Pat_45 | Post-Resistance | NR2F2     | 7026   | 37 | 15 | 96877589  | 96877589  | Missense_Mutation      | SNP | G  | A  | 19 | 191 | c.727G>A       | c.(727-729)GCC>ACC     | p.A243T  |
| Pat_45 | Post-Resistance | OR4F15    | 390649 | 37 | 15 | 102359125 | 102359125 | Missense_Mutation      | SNP | G  | A  | 20 | 208 | c.736G>A       | c.(736-738)GTG>ATG     | p.V246M  |
| Pat_45 | Post-Resistance | WASH3P    | 374666 | 37 | 15 | 102515299 | 102515299 | Missense_Mutation      | SNP | G  | A  | 5  | 58  | c.523G>A       | c.(523-525)GGC>AGC     | p.G175S  |
| Pat_45 | Post-Resistance | NUBP2     | 10101  | 37 | 16 | 1836628   | 1836628   | Missense_Mutation      | SNP | C  | T  | 7  | 99  | c.107C>T       | c.(106-108)GCC>GTC     | p.A36V   |
| Pat_45 | Post-Resistance | GFER      | 2671   | 37 | 16 | 2035982   | 2035982   | Missense_Mutation      | SNP | G  | A  | 15 | 177 | c.571G>A       | c.(571-573)GTG>ATG     | p.V191M  |
| Pat_45 | Post-Resistance | CCNF      | 899    | 37 | 16 | 2499328   | 2499328   | Missense_Mutation      | SNP | C  | T  | 9  | 88  | c.1264C>T      | c.(1264-1266)CCT>TCT   | p.P422S  |
| Pat_45 | Post-Resistance | CCNF      | 899    | 37 | 16 | 2503258   | 2503258   | Missense_Mutation      | SNP | C  | T  | 18 | 161 | c.1535C>T      | c.(1534-1536)GCC>GTC   | p.A512V  |
| Pat_45 | Post-Resistance | MEFV      | 4210   | 37 | 16 | 3298929   | 3298929   | Missense_Mutation      | SNP | C  | T  | 16 | 204 | c.1336G>A      | c.(1336-1338)GAG>AAG   | p.E446K  |
| Pat_45 | Post-Resistance | ZNF75A    | 7627   | 37 | 16 | 3367588   | 3367588   | Missense_Mutation      | SNP | C  | T  | 5  | 70  | c.610C>T       | c.(610-612)CTT>TTT     | p.L204F  |
| Pat_45 | Post-Resistance | PPL       | 5493   | 37 | 16 | 4934485   | 4934485   | Missense_Mutation      | SNP | G  | A  | 3  | 28  | c.4171C>T      | c.(4171-4173)CGG>TGG   | p.R1391W |
| Pat_45 | Post-Resistance | C16orf68  | 79091  | 37 | 16 | 8736343   | 8736343   | Missense_Mutation      | SNP | G  | A  | 64 | 618 | c.931G>A       | c.(931-933)GAT>AAT     | p.D311N  |
| Pat_45 | Post-Resistance | GRIN2A    | 2903   | 37 | 16 | 9857353   | 9857353   | Missense_Mutation      | SNP | C  | T  | 4  | 21  | c.4048G>A      | c.(4048-4050)GAC>AAC   | p.D1350N |
| Pat_45 | Post-Resistance | TEKT5     | 146279 | 37 | 16 | 10729774  | 10729774  | Missense_Mutation      | SNP | G  | A  | 20 | 264 | c.1088C>T      | c.(1087-1089)ACG>ATG   | p.T363M  |
| Pat_45 | Post-Resistance | MKL2      | 57496  | 37 | 16 | 14346301  | 14346301  | Missense_Mutation      | SNP | C  | T  | 8  | 107 | c.2645C>T      | c.(2644-2646)CCC>CTC   | p.P882L  |
| Pat_45 | Post-Resistance | XYLT1     | 64131  | 37 | 16 | 17352853  | 17352853  | Missense_Mutation      | SNP | G  | A  | 10 | 58  | c.905C>T       | c.(904-906)CCC>CTC     | p.P302L  |
| Pat_45 | Post-Resistance | TMC5      | 79838  | 37 | 16 | 19498639  | 19498639  | Missense_Mutation      | SNP | C  | T  | 8  | 85  | c.2564C>T      | c.(2563-2565)ACC>ATC   | p.T855I  |
| Pat_45 | Post-Resistance | TMC5      | 79838  | 37 | 16 | 19505632  | 19505632  | Missense_Mutation      | SNP | G  | A  | 16 | 181 | c.2875G>A      | c.(2875-2877)GAT>AAT   | p.D959N  |
| Pat_45 | Post-Resistance | ACSM1     | 116285 | 37 | 16 | 20651829  | 20651829  | Missense_Mutation      | SNP | C  | T  | 15 | 186 | c.1070G>A      | c.(1069-1071)AGA>AAA   | p.R357K  |
| Pat_45 | Post-Resistance | DNAH3     | 55567  | 37 | 16 | 21014460  | 21014460  | Missense_Mutation      | SNP | G  | A  | 11 | 138 | c.6092C>T      | c.(6091-6093)ACC>ATC   | p.T2031I |
| Pat_45 | Post-Resistance | ZKSCAN2   | 342357 | 37 | 16 | 25268154  | 25268154  | Missense_Mutation      | SNP | C  | T  | 7  | 124 | c.295G>A       | c.(295-297)GAG>AAG     | p.E99K   |
| Pat_45 | Post-Resistance | KIAA0556  | 23247  | 37 | 16 | 27640058  | 27640058  | Missense_Mutation      | SNP | G  | A  | 10 | 150 | c.217G>A       | c.(217-219)GTC>ATC     | p.V73I   |



|        |                 |          |        |    |    |          |          |                   |     |   |   |    |     |               |                      |               |
|--------|-----------------|----------|--------|----|----|----------|----------|-------------------|-----|---|---|----|-----|---------------|----------------------|---------------|
| Pat_45 | Post-Resistance | XPO6     | 23214  | 37 | 16 | 28118864 | 28118864 | Missense_Mutation | SNP | G | A | 7  | 120 | c.2476C>T     | c.(2476-2478)CCA>TCA | p.P826S       |
| Pat_45 | Post-Resistance | SULT1A1  | 6817   | 37 | 16 | 28617503 | 28617503 | Missense_Mutation | SNP | C | T | 5  | 74  | c.649G>A      | c.(649-651)GAG>AAG   | p.E217K       |
| Pat_45 | Post-Resistance | CORO1A   | 11151  | 37 | 16 | 30199809 | 30199809 | Missense_Mutation | SNP | C | T | 5  | 42  | c.1193C>T     | c.(1192-1194)CCC>CTC | p.P398L       |
| Pat_45 | Post-Resistance | SRCAP    | 10847  | 37 | 16 | 30749948 | 30749948 | Missense_Mutation | SNP | C | T | 8  | 67  | c.8587C>T     | c.(8587-8589)CCC>TCC | p.P2863S      |
| Pat_45 | Post-Resistance | SETD1A   | 9739   | 37 | 16 | 30991419 | 30991419 | Missense_Mutation | SNP | G | A | 10 | 96  | c.4312G>A     | c.(4312-4314)GAG>AAG | p.E1438K      |
| Pat_45 | Post-Resistance | ARMC5    | 79798  | 37 | 16 | 31473563 | 31473563 | Missense_Mutation | SNP | C | T | 5  | 70  | c.695C>T      | c.(694-696)GCC>GTC   | p.A232V       |
| Pat_45 | Post-Resistance | NETO2    | 81831  | 37 | 16 | 47162401 | 47162401 | Missense_Mutation | SNP | C | T | 39 | 237 | c.316G>A      | c.(316-318)GAA>AAA   | p.E106K       |
| Pat_45 | Post-Resistance | IRX6     | 79190  | 37 | 16 | 55361274 | 55361274 | Missense_Mutation | SNP | T | C | 4  | 42  | c.370T>C      | c.(370-372)TAT>CAT   | p.Y124H       |
| Pat_45 | Post-Resistance | CES7     | 221223 | 37 | 16 | 55886795 | 55886795 | Missense_Mutation | SNP | C | T | 9  | 89  | c.1271G>A     | c.(1270-1272)AGA>AAA | p.R424K       |
| Pat_45 | Post-Resistance | COQ9     | 57017  | 37 | 16 | 57485117 | 57485117 | Missense_Mutation | SNP | C | T | 7  | 131 | c.239C>T      | c.(238-240)CCC>CTC   | p.P80L        |
| Pat_45 | Post-Resistance | CCDC113  | 29070  | 37 | 16 | 58286740 | 58286740 | Missense_Mutation | SNP | G | A | 6  | 108 | c.211G>A      | c.(211-213)GCA>ACA   | p.A71T        |
| Pat_45 | Post-Resistance | NDRG4    | 65009  | 37 | 16 | 58540345 | 58540345 | Missense_Mutation | SNP | G | A | 27 | 387 | c.427G>A      | c.(427-429)GGC>AGC   | p.G143S       |
| Pat_45 | Post-Resistance | DYNC1L12 | 1783   | 37 | 16 | 66759746 | 66759746 | Missense_Mutation | SNP | T | A | 21 | 248 | c.1363A>T     | c.(1363-1365)ACA>TCA | p.T455S       |
| Pat_45 | Post-Resistance | DYNC1L12 | 1783   | 37 | 16 | 66764028 | 66764028 | Missense_Mutation | SNP | G | A | 9  | 61  | c.1028C>T     | c.(1027-1029)CCT>CTT | p.P343L       |
| Pat_45 | Post-Resistance | TPPP3    | 51673  | 37 | 16 | 67424207 | 67424207 | Missense_Mutation | SNP | G | A | 29 | 242 | c.401C>T      | c.(400-402)TCC>TTC   | p.S134F       |
| Pat_45 | Post-Resistance | TPPP3    | 51673  | 37 | 16 | 67424399 | 67424399 | Missense_Mutation | SNP | C | T | 20 | 93  | c.325G>A      | c.(325-327)GCC>ACC   | p.A109T       |
| Pat_45 | Post-Resistance | DUS2L    | 54920  | 37 | 16 | 68072032 | 68072032 | Missense_Mutation | SNP | G | A | 3  | 48  | c.106G>A      | c.(106-108)GCG>ACG   | p.A36T        |
| Pat_45 | Post-Resistance | PRMT7    | 54496  | 37 | 16 | 68358650 | 68358650 | Missense_Mutation | SNP | C | T | 11 | 103 | c.197C>T      | c.(196-198)GCC>GTC   | p.A66V        |
| Pat_45 | Post-Resistance | AARS     | 16     | 37 | 16 | 70289630 | 70289630 | Splice_Site       | SNP | C | T | 6  | 67  | c.2286_splice | c.e16+1              | p.K762_splice |
| Pat_45 | Post-Resistance | DHX38    | 9785   | 37 | 16 | 72134474 | 72134474 | Missense_Mutation | SNP | G | A | 7  | 104 | c.1256G>A     | c.(1255-1257)GGG>GAG | p.G419E       |
| Pat_45 | Post-Resistance | PKD1L2   | 114780 | 37 | 16 | 81232276 | 81232276 | Missense_Mutation | SNP | G | A | 4  | 50  | c.1534C>T     | c.(1534-1536)CCG>TCG | p.P512S       |
| Pat_45 | Post-Resistance | PKD1L2   | 114780 | 37 | 16 | 81236132 | 81236132 | Nonsense_Mutation | SNP | C | T | 23 | 169 | c.1116G>A     | c.(1114-1116)TGG>TGA | p.W372*       |
| Pat_45 | Post-Resistance | GAN      | 8139   | 37 | 16 | 81388232 | 81388232 | Missense_Mutation | SNP | G | A | 8  | 132 | c.505G>A      | c.(505-507)GAA>AAA   | p.E169K       |
| Pat_45 | Post-Resistance | CDH13    | 1012   | 37 | 16 | 83817005 | 83817005 | Missense_Mutation | SNP | G | A | 19 | 188 | c.2062G>A     | c.(2062-2064)GAC>AAC | p.D688N       |
| Pat_45 | Post-Resistance | KCNG4    | 93107  | 37 | 16 | 84270361 | 84270361 | Missense_Mutation | SNP | G | A | 7  | 64  | c.731C>T      | c.(730-732)CCC>CTC   | p.P244L       |
| Pat_45 | Post-Resistance | ZCCHC14  | 23174  | 37 | 16 | 87446222 | 87446222 | Missense_Mutation | SNP | G | A | 4  | 92  | c.1694C>T     | c.(1693-1695)GCG>GTG | p.A565V       |
| Pat_45 | Post-Resistance | BANP     | 54971  | 37 | 16 | 88039791 | 88039791 | Missense_Mutation | SNP | G | A | 25 | 267 | c.548G>A      | c.(547-549)AGC>AAC   | p.S183N       |
| Pat_45 | Post-Resistance | GALNS    | 2588   | 37 | 16 | 88904029 | 88904029 | Splice_Site       | SNP | C | T | 12 | 65  | c.566_splice  | c.e5+1               | p.R189_splice |
| Pat_45 | Post-Resistance | ANKRD11  | 29123  | 37 | 16 | 89351391 | 89351391 | Missense_Mutation | SNP | G | A | 11 | 72  | c.1559C>T     | c.(1558-1560)GCC>GTC | p.A520V       |
| Pat_45 | Post-Resistance | SPG7     | 6687   | 37 | 16 | 89590593 | 89590593 | Missense_Mutation | SNP | G | A | 41 | 438 | c.556G>A      | c.(556-558)GTG>ATG   | p.V186M       |
| Pat_45 | Post-Resistance | SPG7     | 6687   | 37 | 16 | 89592849 | 89592849 | Missense_Mutation | SNP | C | T | 14 | 204 | c.731C>T      | c.(730-732)TCC>TTC   | p.S244F       |
| Pat_45 | Post-Resistance | FANCA    | 2175   | 37 | 16 | 89846307 | 89846307 | Missense_Mutation | SNP | C | T | 5  | 108 | c.1685G>A     | c.(1684-1686)GGG>GAG | p.G562E       |
| Pat_45 | Post-Resistance | TUBB3    | 10381  | 37 | 16 | 89999944 | 89999944 | Missense_Mutation | SNP | G | A | 22 | 415 | c.235G>A      | c.(235-237)GGG>AGG   | p.G79R        |
| Pat_45 | Post-Resistance | VPS53    | 55275  | 37 | 17 | 463814   | 463814   | Splice_Site       | SNP | C | T | 5  | 90  | c.1557_splice | c.e15-1              | p.K519_splice |
| Pat_45 | Post-Resistance | FAM57A   | 79850  | 37 | 17 | 644578   | 644578   | Missense_Mutation | SNP | G | A | 5  | 118 | c.542G>A      | c.(541-543)GGA>GAA   | p.G181E       |
| Pat_45 | Post-Resistance | GLOD4    | 51031  | 37 | 17 | 680108   | 680108   | Missense_Mutation | SNP | C | T | 5  | 137 | c.306G>A      | c.(304-306)ATG>ATA   | p.M102I       |
| Pat_45 | Post-Resistance | NXN      | 64359  | 37 | 17 | 704256   | 704256   | Missense_Mutation | SNP | G | A | 11 | 91  | c.1241C>T     | c.(1240-1242)ACC>ATC | p.T414I       |
| Pat_45 | Post-Resistance | PITPNA   | 5306   | 37 | 17 | 1456434  | 1456434  | Missense_Mutation | SNP | C | T | 7  | 100 | c.61G>A       | c.(61-63)GGG>AGG     | p.G21R        |
| Pat_45 | Post-Resistance | SGSM2    | 9905   | 37 | 17 | 2267426  | 2267426  | Missense_Mutation | SNP | C | T | 9  | 78  | c.881C>T      | c.(880-882)ACC>ATC   | p.T294I       |
| Pat_45 | Post-Resistance | SGSM2    | 9905   | 37 | 17 | 2278882  | 2278882  | Missense_Mutation | SNP | G | A | 23 | 232 | c.2062G>A     | c.(2062-2064)GCG>AGC | p.G688S       |
| Pat_45 | Post-Resistance | ZNF232   | 7775   | 37 | 17 | 5009592  | 5009592  | Nonsense_Mutation | SNP | G | A | 9  | 122 | c.781C>T      | c.(781-783)CAG>TAG   | p.Q261*       |
| Pat_45 | Post-Resistance | SLC2A4   | 6517   | 37 | 17 | 7186892  | 7186892  | Missense_Mutation | SNP | C | T | 5  | 96  | c.251C>T      | c.(250-252)TCC>TTC   | p.S84F        |
| Pat_45 | Post-Resistance | ZBTB4    | 57659  | 37 | 17 | 7365485  | 7365485  | Missense_Mutation | SNP | C | T | 34 | 371 | c.2816G>A     | c.(2815-2817)AGT>AAT | p.S939N       |
| Pat_45 | Post-Resistance | DNAH2    | 146754 | 37 | 17 | 7708601  | 7708601  | Missense_Mutation | SNP | G | A | 4  | 78  | c.9332G>A     | c.(9331-9333)GGA>GAA | p.G3111E      |
| Pat_45 | Post-Resistance | CNTROB   | 116840 | 37 | 17 | 7836545  | 7836545  | Missense_Mutation | SNP | G | A | 12 | 88  | c.148G>A      | c.(148-150)GCC>ACC   | p.A50T        |
| Pat_45 | Post-Resistance | PFAS     | 5198   | 37 | 17 | 8167572  | 8167572  | Missense_Mutation | SNP | G | A | 7  | 100 | c.1834G>A     | c.(1834-1836)GGC>AGC | p.G612S       |
| Pat_45 | Post-Resistance | SLC25A35 | 399512 | 37 | 17 | 8194176  | 8194176  | Missense_Mutation | SNP | G | A | 15 | 206 | c.713C>T      | c.(712-714)ACA>ATA   | p.T238I       |

|        |                 |          |        |    |    |          |          |                   |     |   |   |    |     |               |                      |                |
|--------|-----------------|----------|--------|----|----|----------|----------|-------------------|-----|---|---|----|-----|---------------|----------------------|----------------|
| Pat_45 | Post-Resistance | MFSD6L   | 162387 | 37 | 17 | 8701883  | 8701883  | Missense_Mutation | SNP | G | A | 13 | 136 | c.556C>T      | c.(556-558)CTC>TTC   | p.L186F        |
| Pat_45 | Post-Resistance | MYH4     | 4622   | 37 | 17 | 10358931 | 10358931 | Missense_Mutation | SNP | C | T | 8  | 81  | c.2174G>A     | c.(2173-2175)AGA>AAA | p.R725K        |
| Pat_45 | Post-Resistance | MYH2     | 4620   | 37 | 17 | 10443351 | 10443351 | Missense_Mutation | SNP | T | G | 8  | 70  | c.1041A>C     | c.(1039-1041)GAA>GAC | p.E347D        |
| Pat_45 | Post-Resistance | PMP22    | 5376   | 37 | 17 | 15134286 | 15134286 | Missense_Mutation | SNP | G | A | 7  | 94  | c.431C>T      | c.(430-432)CCC>CTC   | p.P144L        |
| Pat_45 | Post-Resistance | NCOR1    | 9611   | 37 | 17 | 16062073 | 16062073 | Splice_Site       | SNP | C | T | 5  | 43  | c.732_splice  | c.e6+1               | p.R244_splice  |
| Pat_45 | Post-Resistance | RAI1     | 10743  | 37 | 17 | 17700796 | 17700796 | Missense_Mutation | SNP | G | A | 3  | 22  | c.4534G>A     | c.(4534-4536)GAG>AAG | p.E1512K       |
| Pat_45 | Post-Resistance | TOM1L2   | 146691 | 37 | 17 | 17783002 | 17783002 | Missense_Mutation | SNP | G | A | 22 | 183 | c.716C>T      | c.(715-717)TCT>TTT   | p.S239F        |
| Pat_45 | Post-Resistance | FAM83G   | 644815 | 37 | 17 | 18874838 | 18874838 | Missense_Mutation | SNP | G | A | 12 | 216 | c.2306C>T     | c.(2305-2307)CCC>CTC | p.P769L        |
| Pat_45 | Post-Resistance | TMEM11   | 8834   | 37 | 17 | 21101711 | 21101711 | Missense_Mutation | SNP | T | C | 28 | 255 | c.505A>G      | c.(505-507)AGA>GGA   | p.R169G        |
| Pat_45 | Post-Resistance | NOS2     | 4843   | 37 | 17 | 26089953 | 26089953 | Missense_Mutation | SNP | C | T | 4  | 9   | c.2671G>A     | c.(2671-2673)GTG>ATG | p.V891M        |
| Pat_45 | Post-Resistance | KIAA0100 | 9703   | 37 | 17 | 26948005 | 26948005 | Splice_Site       | SNP | C | T | 6  | 125 | c.5242_splice | c.e28+1              | p.G1748_splice |
| Pat_45 | Post-Resistance | CORO6    | 84940  | 37 | 17 | 27943988 | 27943988 | Missense_Mutation | SNP | G | A | 25 | 364 | c.826C>T      | c.(826-828)CCC>TCC   | p.P276S        |
| Pat_45 | Post-Resistance | CPD      | 1362   | 37 | 17 | 28782441 | 28782441 | Missense_Mutation | SNP | G | A | 5  | 81  | c.3290G>A     | c.(3289-3291)GGT>GAT | p.G1097D       |
| Pat_45 | Post-Resistance | SRCIN1   | 80725  | 37 | 17 | 36705372 | 36705372 | Missense_Mutation | SNP | A | G | 3  | 56  | c.3037T>C     | c.(3037-3039)TTC>CTC | p.F1013L       |
| Pat_45 | Post-Resistance | MLLT6    | 4302   | 37 | 17 | 36865819 | 36865819 | Missense_Mutation | SNP | C | A | 4  | 66  | c.543C>A      | c.(541-543)TTC>TTA   | p.F181L        |
| Pat_45 | Post-Resistance | STARD3   | 10948  | 37 | 17 | 37813294 | 37813294 | Missense_Mutation | SNP | G | A | 17 | 117 | c.253G>A      | c.(253-255)GAG>AAG   | p.E85K         |
| Pat_45 | Post-Resistance | GSDMB    | 55876  | 37 | 17 | 38073346 | 38073346 | Missense_Mutation | SNP | G | A | 4  | 55  | c.224C>T      | c.(223-225)TCT>TTT   | p.S75F         |
| Pat_45 | Post-Resistance | KRTAP4-8 | 728224 | 37 | 17 | 39254021 | 39254021 | Missense_Mutation | SNP | C | T | 5  | 108 | c.316G>A      | c.(316-318)GTG>ATG   | p.V106M        |
| Pat_45 | Post-Resistance | KRT33B   | 3884   | 37 | 17 | 39521507 | 39521507 | Nonsense_Mutation | SNP | G | A | 19 | 97  | c.796C>T      | c.(796-798)CAG>TAG   | p.Q266*        |
| Pat_45 | Post-Resistance | JUP      | 3728   | 37 | 17 | 39681184 | 39681184 | Missense_Mutation | SNP | C | T | 34 | 165 | c.1060G>A     | c.(1060-1062)GAT>AAT | p.D354N        |
| Pat_45 | Post-Resistance | KCNH4    | 23415  | 37 | 17 | 40330137 | 40330137 | Missense_Mutation | SNP | C | T | 21 | 109 | c.566G>A      | c.(565-567)GGA>GAA   | p.G189E        |
| Pat_45 | Post-Resistance | EZH1     | 2145   | 37 | 17 | 40857150 | 40857150 | Missense_Mutation | SNP | C | T | 7  | 97  | c.1891G>A     | c.(1891-1893)GAG>AAG | p.E631K        |
| Pat_45 | Post-Resistance | AOC2     | 314    | 37 | 17 | 41001247 | 41001247 | Missense_Mutation | SNP | C | T | 20 | 125 | c.1733C>T     | c.(1732-1734)CCC>CTC | p.P578L        |
| Pat_45 | Post-Resistance | TMUB2    | 79089  | 37 | 17 | 42268104 | 42268104 | Missense_Mutation | SNP | G | A | 18 | 126 | c.838G>A      | c.(838-840)GTG>ATG   | p.V280M        |
| Pat_45 | Post-Resistance | FZD2     | 2535   | 37 | 17 | 42635313 | 42635313 | Missense_Mutation | SNP | C | T | 22 | 143 | c.257C>T      | c.(256-258)CCC>CTC   | p.P86L         |
| Pat_45 | Post-Resistance | KIF18B   | 146909 | 37 | 17 | 43009061 | 43009061 | Missense_Mutation | SNP | C | T | 17 | 119 | c.1462G>A     | c.(1462-1464)GCA>ACA | p.A488T        |
| Pat_45 | Post-Resistance | COL1A1   | 1277   | 37 | 17 | 48265937 | 48265937 | Missense_Mutation | SNP | G | A | 9  | 78  | c.3161C>T     | c.(3160-3162)CCT>CTT | p.P1054L       |
| Pat_45 | Post-Resistance | ABCC3    | 8714   | 37 | 17 | 48738451 | 48738451 | Missense_Mutation | SNP | C | T | 3  | 50  | c.974C>T      | c.(973-975)TCC>TTC   | p.S325F        |
| Pat_45 | Post-Resistance | ABCC3    | 8714   | 37 | 17 | 48746761 | 48746761 | Missense_Mutation | SNP | C | T | 7  | 66  | c.2113C>T     | c.(2113-2115)CTT>TTT | p.L705F        |
| Pat_45 | Post-Resistance | CA10     | 56934  | 37 | 17 | 50235132 | 50235132 | Nonsense_Mutation | SNP | C | T | 16 | 185 | c.15G>A       | c.(13-15)TGG>TGA     | p.W5*          |
| Pat_45 | Post-Resistance | AKAP1    | 8165   | 37 | 17 | 55194225 | 55194225 | Missense_Mutation | SNP | G | A | 39 | 349 | c.2437G>A     | c.(2437-2439)GAC>AAC | p.D813N        |
| Pat_45 | Post-Resistance | CUEDC1   | 404093 | 37 | 17 | 55943873 | 55943873 | Missense_Mutation | SNP | G | A | 6  | 132 | c.1126C>T     | c.(1126-1128)CCC>TCC | p.P376S        |
| Pat_45 | Post-Resistance | EPX      | 8288   | 37 | 17 | 56280680 | 56280680 | Splice_Site       | SNP | G | A | 10 | 86  | c.1946_splice | c.e11+1              | p.R649_splice  |
| Pat_45 | Post-Resistance | MKS1     | 54903  | 37 | 17 | 56288382 | 56288382 | Missense_Mutation | SNP | G | A | 17 | 151 | c.917C>T      | c.(916-918)ACT>ATT   | p.T306I        |
| Pat_45 | Post-Resistance | 4-Sep    | 5414   | 37 | 17 | 56598662 | 56598662 | Missense_Mutation | SNP | C | T | 18 | 239 | c.1067G>A     | c.(1066-1068)AGA>AAA | p.R356K        |
| Pat_45 | Post-Resistance | TEX14    | 56155  | 37 | 17 | 56692603 | 56692603 | Missense_Mutation | SNP | C | T | 17 | 300 | c.889G>A      | c.(889-891)GAA>AAA   | p.E297K        |
| Pat_45 | Post-Resistance | BRIP1    | 83990  | 37 | 17 | 59886064 | 59886064 | Missense_Mutation | SNP | C | T | 5  | 97  | c.682G>A      | c.(682-684)GAG>AAG   | p.E228K        |
| Pat_45 | Post-Resistance | 10-Mar   | 162333 | 37 | 17 | 60837289 | 60837289 | Missense_Mutation | SNP | G | A | 19 | 122 | c.289C>T      | c.(289-291)CCA>TCA   | p.P97S         |
| Pat_45 | Post-Resistance | CYB561   | 1534   | 37 | 17 | 61511927 | 61511927 | Missense_Mutation | SNP | C | T | 10 | 104 | c.592G>A      | c.(592-594)GGT>AGT   | p.G198S        |
| Pat_45 | Post-Resistance | SMARCD2  | 6603   | 37 | 17 | 61910707 | 61910707 | Missense_Mutation | SNP | G | A | 8  | 91  | c.1391C>T     | c.(1390-1392)CCC>CTC | p.P464L        |
| Pat_45 | Post-Resistance | ERN1     | 2081   | 37 | 17 | 62141418 | 62141418 | Missense_Mutation | SNP | C | T | 7  | 101 | c.1015G>A     | c.(1015-1017)GAC>AAC | p.D339N        |
| Pat_45 | Post-Resistance | SMURF2   | 64750  | 37 | 17 | 62589678 | 62589678 | Missense_Mutation | SNP | A | G | 5  | 80  | c.214T>C      | c.(214-216)TCT>CCT   | p.S72P         |
| Pat_45 | Post-Resistance | BPTF     | 2186   | 37 | 17 | 65862656 | 65862656 | Missense_Mutation | SNP | G | A | 8  | 253 | c.1513G>A     | c.(1513-1515)GAC>AAC | p.D505N        |
| Pat_45 | Post-Resistance | BPTF     | 2186   | 37 | 17 | 65908567 | 65908567 | Missense_Mutation | SNP | C | T | 10 | 157 | c.4567C>T     | c.(4567-4569)CCA>TCA | p.P1523S       |
| Pat_45 | Post-Resistance | ABCA8    | 10351  | 37 | 17 | 66881375 | 66881375 | Missense_Mutation | SNP | G | T | 6  | 85  | c.3391C>A     | c.(3391-3393)CCT>ACT | p.P1131T       |
| Pat_45 | Post-Resistance | NAT9     | 26151  | 37 | 17 | 72768417 | 72768417 | Splice_Site       | SNP | C | T | 14 | 83  | c.335_splice  | c.e5-1               | p.E112_splice  |
| Pat_45 | Post-Resistance | UNC13D   | 201294 | 37 | 17 | 73836610 | 73836610 | Missense_Mutation | SNP | C | T | 13 | 225 | c.731G>A      | c.(730-732)GGG>GAG   | p.G244E        |

|        |                 |          |        |    |    |          |          |                   |     |   |   |    |     |               |                        |                |
|--------|-----------------|----------|--------|----|----|----------|----------|-------------------|-----|---|---|----|-----|---------------|------------------------|----------------|
| Pat_45 | Post-Resistance | SRP68    | 6730   | 37 | 17 | 74060188 | 74060188 | Missense_Mutation | SNP | C | T | 9  | 164 | c.430G>A      | c.(430-432)GAA>AAA     | p.E144K        |
| Pat_45 | Post-Resistance | MXRA7    | 439921 | 37 | 17 | 74673774 | 74673774 | Missense_Mutation | SNP | C | T | 7  | 92  | c.511G>A      | c.(511-513)GAA>AAA     | p.E171K        |
| Pat_45 | Post-Resistance | DNAH17   | 8632   | 37 | 17 | 76449428 | 76449428 | Missense_Mutation | SNP | C | T | 4  | 36  | c.1526G>A     | c.(1525-1527)GGA>GAA   | p.G509E        |
| Pat_45 | Post-Resistance | RNF213   | 57674  | 37 | 17 | 78350185 | 78350185 | Missense_Mutation | SNP | G | A | 36 | 289 | c.7489G>A     | c.(7489-7491)GAC>AAC   | p.D2497N       |
| Pat_45 | Post-Resistance | RPTOR    | 57521  | 37 | 17 | 78931423 | 78931423 | Splice_Site       | SNP | G | A | 14 | 137 | c.3371_splice | c.e29-1                | p.G1124_splice |
| Pat_45 | Post-Resistance | BAHCC1   | 57597  | 37 | 17 | 79429032 | 79429032 | Missense_Mutation | SNP | C | T | 5  | 45  | c.7343C>T     | c.(7342-7344)CCC>CTC   | p.P2448L       |
| Pat_45 | Post-Resistance | FASN     | 2194   | 37 | 17 | 80037376 | 80037376 | Missense_Mutation | SNP | C | T | 5  | 122 | c.7255G>A     | c.(7255-7257)GCG>ACG   | p.A2419T       |
| Pat_45 | Post-Resistance | FOXK2    | 3607   | 37 | 17 | 80521306 | 80521306 | Missense_Mutation | SNP | G | A | 5  | 59  | c.496G>A      | c.(496-498)GAG>AAG     | p.E166K        |
| Pat_45 | Post-Resistance | TBCD     | 6904   | 37 | 17 | 80758775 | 80758775 | Missense_Mutation | SNP | C | T | 6  | 161 | c.853C>T      | c.(853-855)CTC>TTC     | p.L285F        |
| Pat_45 | Post-Resistance | EPB41L3  | 23136  | 37 | 18 | 5424310  | 5424310  | Missense_Mutation | SNP | C | T | 44 | 204 | c.1114G>A     | c.(1114-1116)GCT>ACT   | p.A372T        |
| Pat_45 | Post-Resistance | LAMA3    | 3909   | 37 | 18 | 21293980 | 21293980 | Missense_Mutation | SNP | C | T | 12 | 98  | c.391C>T      | c.(391-393)CCC>TCC     | p.P131S        |
| Pat_45 | Post-Resistance | CABYR    | 26256  | 37 | 18 | 21736420 | 21736420 | Missense_Mutation | SNP | C | T | 3  | 37  | c.955C>T      | c.(955-957)CCT>TCT     | p.P319S        |
| Pat_45 | Post-Resistance | TAF4B    | 6875   | 37 | 18 | 23865876 | 23865876 | Missense_Mutation | SNP | C | T | 23 | 167 | c.1003C>T     | c.(1003-1005)CCT>TCT   | p.P335S        |
| Pat_45 | Post-Resistance | MAPRE2   | 10982  | 37 | 18 | 32706945 | 32706945 | Missense_Mutation | SNP | G | A | 13 | 112 | c.644G>A      | c.(643-645)GGA>GAA     | p.G215E        |
| Pat_45 | Post-Resistance | SETBP1   | 26040  | 37 | 18 | 42618459 | 42618459 | Missense_Mutation | SNP | G | A | 16 | 58  | c.4010G>A     | c.(4009-4011)AGT>AAT   | p.S1337N       |
| Pat_45 | Post-Resistance | ATP5A1   | 498    | 37 | 18 | 43666117 | 43666117 | Missense_Mutation | SNP | C | T | 13 | 145 | c.1391G>A     | c.(1390-1392)GGC>GAC   | p.G464D        |
| Pat_45 | Post-Resistance | MRO      | 83876  | 37 | 18 | 48331529 | 48331529 | Missense_Mutation | SNP | C | T | 8  | 49  | c.424G>A      | c.(424-426)GAT>AAT     | p.D142N        |
| Pat_45 | Post-Resistance | MEX3C    | 51320  | 37 | 18 | 48703571 | 48703571 | Missense_Mutation | SNP | G | A | 7  | 109 | c.1130C>T     | c.(1129-1131)CCT>CTT   | p.P377L        |
| Pat_45 | Post-Resistance | POLI     | 11201  | 37 | 18 | 51807109 | 51807109 | Missense_Mutation | SNP | C | T | 24 | 287 | c.632C>T      | c.(631-633)GCC>GTC     | p.A211V        |
| Pat_45 | Post-Resistance | ALPK2    | 115701 | 37 | 18 | 56247145 | 56247145 | Missense_Mutation | SNP | C | G | 12 | 28  | c.863G>C      | c.(862-864)AGT>ACT     | p.S288T        |
| Pat_45 | Post-Resistance | CBLN2    | 147381 | 37 | 18 | 70205419 | 70205419 | Missense_Mutation | SNP | G | A | 23 | 71  | c.667C>T      | c.(667-669)CCT>TCT     | p.P223S        |
| Pat_45 | Post-Resistance | POLRMT   | 5442   | 37 | 19 | 630154   | 630154   | Missense_Mutation | SNP | C | T | 20 | 199 | c.208G>A      | c.(208-210)GTG>ATG     | p.V70M         |
| Pat_45 | Post-Resistance | FSTL3    | 10272  | 37 | 19 | 677879   | 677879   | Missense_Mutation | SNP | C | T | 17 | 220 | c.191C>T      | c.(190-192)TCC>TTC     | p.S64F         |
| Pat_45 | Post-Resistance | AES      | 166    | 37 | 19 | 3061231  | 3061231  | Missense_Mutation | SNP | G | A | 24 | 210 | c.52C>T       | c.(52-54)CTC>TTC       | p.L18F         |
| Pat_45 | Post-Resistance | MAP2K2   | 5605   | 37 | 19 | 4117617  | 4117617  | Missense_Mutation | SNP | C | T | 5  | 80  | c.103G>A      | c.(103-105)GTG>ATG     | p.V35M         |
| Pat_45 | Post-Resistance | CHAF1A   | 10036  | 37 | 19 | 4409310  | 4409310  | Missense_Mutation | SNP | C | T | 23 | 91  | c.514C>T      | c.(514-516)CCT>TCT     | p.P172S        |
| Pat_45 | Post-Resistance | FEM1A    | 55527  | 37 | 19 | 4793832  | 4793832  | Missense_Mutation | SNP | G | A | 6  | 32  | c.1966G>A     | c.(1966-1968)GGC>AGC   | p.G656S        |
| Pat_45 | Post-Resistance | UHRF1    | 29128  | 37 | 19 | 4930828  | 4930828  | Missense_Mutation | SNP | G | A | 14 | 93  | c.509G>A      | c.(508-510)TGC>TAC     | p.C170Y        |
| Pat_45 | Post-Resistance | SAFB2    | 9667   | 37 | 19 | 5613531  | 5613531  | Missense_Mutation | SNP | C | T | 16 | 95  | c.551G>A      | c.(550-552)GGG>GAG     | p.G184E        |
| Pat_45 | Post-Resistance | DENND1C  | 79958  | 37 | 19 | 6468925  | 6468925  | Missense_Mutation | SNP | C | T | 6  | 26  | c.1447G>A     | c.(1447-1449)GCC>ACC   | p.A483T        |
| Pat_45 | Post-Resistance | TNFSF14  | 8740   | 37 | 19 | 6669966  | 6669966  | Missense_Mutation | SNP | C | T | 67 | 500 | c.115G>A      | c.(115-117)GGT>AGT     | p.G39S         |
| Pat_45 | Post-Resistance | EMR1     | 2015   | 37 | 19 | 6935082  | 6935082  | Missense_Mutation | SNP | G | A | 6  | 102 | c.2374G>A     | c.(2374-2376)GAC>AAC   | p.D792N        |
| Pat_45 | Post-Resistance | KIAA1543 | 57662  | 37 | 19 | 7676884  | 7676884  | Missense_Mutation | SNP | C | T | 14 | 108 | c.1505C>T     | c.(1504-1506)CCC>CTC   | p.P502L        |
| Pat_45 | Post-Resistance | CLEC4G   | 339390 | 37 | 19 | 7794279  | 7794279  | Nonsense_Mutation | SNP | C | T | 5  | 62  | c.855G>A      | c.(853-855)TGG>TGA     | p.W285*        |
| Pat_45 | Post-Resistance | CLEC4M   | 10332  | 37 | 19 | 7830868  | 7830868  | Missense_Mutation | SNP | C | G | 7  | 104 | c.490C>G      | c.(490-492)CGG>GGG     | p.R164G        |
| Pat_45 | Post-Resistance | FBN3     | 84467  | 37 | 19 | 8201157  | 8201157  | Missense_Mutation | SNP | C | T | 6  | 109 | c.1382G>A     | c.(1381-1383)GGT>GAT   | p.G461D        |
| Pat_45 | Post-Resistance | MYO1F    | 4542   | 37 | 19 | 8595223  | 8595223  | Missense_Mutation | SNP | C | T | 43 | 439 | c.2185G>A     | c.(2185-2187)GAG>AAG   | p.E729K        |
| Pat_45 | Post-Resistance | MBD3L1   | 85509  | 37 | 19 | 8953482  | 8953482  | Missense_Mutation | SNP | C | T | 8  | 69  | c.128C>T      | c.(127-129)ACA>ATA     | p.T43I         |
| Pat_45 | Post-Resistance | MUC16    | 94025  | 37 | 19 | 9047922  | 9047922  | Missense_Mutation | SNP | A | G | 9  | 29  | c.33709T>C    | c.(33709-33711)TCA>CCA | p.S11237P      |
| Pat_45 | Post-Resistance | MUC16    | 94025  | 37 | 19 | 9060132  | 9060132  | Missense_Mutation | SNP | C | T | 10 | 119 | c.27314G>A    | c.(27313-27315)GGG>GAC | p.G9105E       |
| Pat_45 | Post-Resistance | MUC16    | 94025  | 37 | 19 | 9060313  | 9060313  | Missense_Mutation | SNP | C | T | 3  | 50  | c.27133G>A    | c.(27133-27135)GGA>AG/ | p.G9045R       |
| Pat_45 | Post-Resistance | MUC16    | 94025  | 37 | 19 | 9065926  | 9065926  | Missense_Mutation | SNP | C | T | 16 | 133 | c.21520G>A    | c.(21520-21522)GCT>ACT | p.A7174T       |
| Pat_45 | Post-Resistance | MUC16    | 94025  | 37 | 19 | 9068846  | 9068846  | Missense_Mutation | SNP | C | T | 6  | 100 | c.18600G>A    | c.(18598-18600)ATG>ATA | p.M6200I       |
| Pat_45 | Post-Resistance | COL5A3   | 50509  | 37 | 19 | 10106275 | 10106275 | Missense_Mutation | SNP | C | T | 9  | 44  | c.1552G>A     | c.(1552-1554)GGA>AGA   | p.G518R        |
| Pat_45 | Post-Resistance | EIF3G    | 8666   | 37 | 19 | 10227834 | 10227834 | Missense_Mutation | SNP | C | A | 4  | 68  | c.331G>T      | c.(331-333)GAC>TAC     | p.D111Y        |
| Pat_45 | Post-Resistance | DOCK6    | 57572  | 37 | 19 | 11325258 | 11325258 | Missense_Mutation | SNP | C | T | 9  | 159 | c.4174G>A     | c.(4174-4176)GTT>ATT   | p.V1392I       |
| Pat_45 | Post-Resistance | ZNF627   | 199692 | 37 | 19 | 11728403 | 11728403 | Missense_Mutation | SNP | C | T | 9  | 137 | c.1085C>T     | c.(1084-1086)CCC>CTC   | p.P362L        |

|        |                 |           |        |    |    |          |          |                   |     |   |   |    |     |               |                      |               |
|--------|-----------------|-----------|--------|----|----|----------|----------|-------------------|-----|---|---|----|-----|---------------|----------------------|---------------|
| Pat_45 | Post-Resistance | ZNF433    | 163059 | 37 | 19 | 12127446 | 12127446 | Missense_Mutation | SNP | C | T | 8  | 41  | c.236G>A      | c.(235-237)GGT>GAT   | p.G79D        |
| Pat_45 | Post-Resistance | ZNF625    | 90589  | 37 | 19 | 12256929 | 12256929 | Missense_Mutation | SNP | G | A | 9  | 55  | c.104C>T      | c.(103-105)TCA>TTA   | p.S35L        |
| Pat_45 | Post-Resistance | HOOK2     | 29911  | 37 | 19 | 12876642 | 12876642 | Splice_Site       | SNP | C | T | 13 | 84  | c.1605_splice | c.e17+1              | p.I535_splice |
| Pat_45 | Post-Resistance | ZNF333    | 84449  | 37 | 19 | 14829206 | 14829206 | Missense_Mutation | SNP | C | T | 10 | 87  | c.1067C>T     | c.(1066-1068)CCC>CTC | p.P356L       |
| Pat_45 | Post-Resistance | HSH2D     | 84941  | 37 | 19 | 16263420 | 16263420 | Missense_Mutation | SNP | C | T | 4  | 27  | c.184C>T      | c.(184-186)CAC>TAC   | p.H62Y        |
| Pat_45 | Post-Resistance | FAM129C   | 199786 | 37 | 19 | 17653030 | 17653030 | Missense_Mutation | SNP | G | A | 22 | 286 | c.1349G>A     | c.(1348-1350)GGG>GAG | p.G450E       |
| Pat_45 | Post-Resistance | SLC5A5    | 6528   | 37 | 19 | 17985541 | 17985541 | Splice_Site       | SNP | G | A | 8  | 57  | c.543_splice  | c.e4+1               | p.V181_splice |
| Pat_45 | Post-Resistance | PDE4C     | 5143   | 37 | 19 | 18322645 | 18322645 | Missense_Mutation | SNP | C | T | 15 | 178 | c.1715G>A     | c.(1714-1716)GGA>GAA | p.G572E       |
| Pat_45 | Post-Resistance | NCAN      | 1463   | 37 | 19 | 19329961 | 19329961 | Missense_Mutation | SNP | C | G | 7  | 53  | c.311C>G      | c.(310-312)GCC>GGC   | p.A104G       |
| Pat_45 | Post-Resistance | KIAA0892  | 23383  | 37 | 19 | 19458167 | 19458167 | Missense_Mutation | SNP | C | A | 4  | 95  | c.1300C>A     | c.(1300-1302)CAA>AAA | p.Q434K       |
| Pat_45 | Post-Resistance | GMIP      | 51291  | 37 | 19 | 19745992 | 19745992 | Missense_Mutation | SNP | C | T | 3  | 17  | c.1591G>A     | c.(1591-1593)GAG>AAG | p.E531K       |
| Pat_45 | Post-Resistance | LOC284441 | 284441 | 37 | 19 | 20369281 | 20369281 | Missense_Mutation | SNP | G | A | 19 | 124 | c.74G>A       | c.(73-75)CGA>CAA     | p.R25Q        |
| Pat_45 | Post-Resistance | ZNF99     | 7652   | 37 | 19 | 22940567 | 22940567 | Missense_Mutation | SNP | C | T | 5  | 122 | c.1871G>A     | c.(1870-1872)AGC>AAC | p.S624N       |
| Pat_45 | Post-Resistance | ANKRD27   | 84079  | 37 | 19 | 33095326 | 33095326 | Missense_Mutation | SNP | C | T | 4  | 31  | c.2498G>A     | c.(2497-2499)GGG>GAG | p.G833E       |
| Pat_45 | Post-Resistance | WDR88     | 126248 | 37 | 19 | 33623100 | 33623100 | Missense_Mutation | SNP | C | T | 7  | 44  | c.25C>T       | c.(25-27)CCG>TCG     | p.P9S         |
| Pat_45 | Post-Resistance | ARHGAP33  | 115703 | 37 | 19 | 36278595 | 36278595 | Missense_Mutation | SNP | C | T | 10 | 138 | c.2645C>T     | c.(2644-2646)CCC>CTC | p.P882L       |
| Pat_45 | Post-Resistance | NPHS1     | 4868   | 37 | 19 | 36322248 | 36322248 | Missense_Mutation | SNP | C | T | 12 | 111 | c.3337G>A     | c.(3337-3339)GAA>AAA | p.E1113K      |
| Pat_45 | Post-Resistance | THAP8     | 199745 | 37 | 19 | 36530347 | 36530347 | Missense_Mutation | SNP | C | T | 4  | 6   | c.550G>A      | c.(550-552)GTG>ATG   | p.V184M       |
| Pat_45 | Post-Resistance | ZNF529    | 57711  | 37 | 19 | 37038249 | 37038249 | Missense_Mutation | SNP | C | T | 19 | 124 | c.1211G>A     | c.(1210-1212)AGA>AAA | p.R404K       |
| Pat_45 | Post-Resistance | DPF1      | 8193   | 37 | 19 | 38703019 | 38703019 | Missense_Mutation | SNP | C | T | 5  | 52  | c.973G>A      | c.(973-975)GCG>ACG   | p.A325T       |
| Pat_45 | Post-Resistance | ZFP36     | 7538   | 37 | 19 | 39899095 | 39899095 | Missense_Mutation | SNP | C | T | 6  | 105 | c.737C>T      | c.(736-738)ACC>ATC   | p.T246I       |
| Pat_45 | Post-Resistance | PRX       | 57716  | 37 | 19 | 40902065 | 40902065 | Missense_Mutation | SNP | C | T | 18 | 211 | c.2194G>A     | c.(2194-2196)GTG>ATG | p.V732M       |
| Pat_45 | Post-Resistance | BLVRB     | 645    | 37 | 19 | 40964341 | 40964341 | Missense_Mutation | SNP | G | A | 6  | 27  | c.191C>T      | c.(190-192)ACC>ATC   | p.T64I        |
| Pat_45 | Post-Resistance | EGLN2     | 112398 | 37 | 19 | 41307219 | 41307219 | Missense_Mutation | SNP | C | T | 9  | 50  | c.742C>T      | c.(742-744)CCA>TCA   | p.P248S       |
| Pat_45 | Post-Resistance | CYP2A7    | 1549   | 37 | 19 | 41387952 | 41387952 | Missense_Mutation | SNP | C | T | 4  | 61  | c.164G>A      | c.(163-165)TGT>TAT   | p.C55Y        |
| Pat_45 | Post-Resistance | CYP2S1    | 29785  | 37 | 19 | 41700570 | 41700570 | Missense_Mutation | SNP | G | A | 11 | 104 | c.299G>A      | c.(298-300)GGC>GAC   | p.G100D       |
| Pat_45 | Post-Resistance | ZNF526    | 116115 | 37 | 19 | 42729087 | 42729087 | Missense_Mutation | SNP | C | T | 19 | 247 | c.532C>T      | c.(532-534)CCT>TCT   | p.P178S       |
| Pat_45 | Post-Resistance | ERF       | 2077   | 37 | 19 | 42753810 | 42753810 | Missense_Mutation | SNP | C | T | 9  | 74  | c.454G>A      | c.(454-456)GTG>ATG   | p.V152M       |
| Pat_45 | Post-Resistance | ZNF223    | 7766   | 37 | 19 | 44570909 | 44570909 | Missense_Mutation | SNP | C | T | 17 | 139 | c.928C>T      | c.(928-930)CAC>TAC   | p.H310Y       |
| Pat_45 | Post-Resistance | ZNF285    | 26974  | 37 | 19 | 44891638 | 44891638 | Missense_Mutation | SNP | C | T | 10 | 93  | c.769G>A      | c.(769-771)GAA>AAA   | p.E257K       |
| Pat_45 | Post-Resistance | ZNF229    | 7772   | 37 | 19 | 44934304 | 44934304 | Missense_Mutation | SNP | C | T | 6  | 139 | c.652G>A      | c.(652-654)GAT>AAT   | p.D218N       |
| Pat_45 | Post-Resistance | PVRL2     | 5819   | 37 | 19 | 45377175 | 45377175 | Missense_Mutation | SNP | C | T | 31 | 256 | c.778C>T      | c.(778-780)CCT>TCT   | p.P260S       |
| Pat_45 | Post-Resistance | PPP1R13L  | 10848  | 37 | 19 | 45901355 | 45901355 | Missense_Mutation | SNP | C | T | 4  | 126 | c.106G>A      | c.(106-108)GCG>ACG   | p.A36T        |
| Pat_45 | Post-Resistance | SYMPK     | 8189   | 37 | 19 | 46345570 | 46345570 | Missense_Mutation | SNP | C | T | 18 | 174 | c.1025G>A     | c.(1024-1026)AGC>AAC | p.S342N       |
| Pat_45 | Post-Resistance | NANOS2    | 339345 | 37 | 19 | 46417719 | 46417719 | Nonsense_Mutation | SNP | G | C | 5  | 160 | c.233C>G      | c.(232-234)TCA>TGA   | p.S78*        |
| Pat_45 | Post-Resistance | NOVA2     | 4858   | 37 | 19 | 46457133 | 46457133 | Missense_Mutation | SNP | C | T | 12 | 194 | c.301G>A      | c.(301-303)GAG>AAG   | p.E101K       |
| Pat_45 | Post-Resistance | STRN4     | 29888  | 37 | 19 | 47234041 | 47234041 | Missense_Mutation | SNP | C | T | 17 | 215 | c.827G>A      | c.(826-828)AGC>AAC   | p.S276N       |
| Pat_45 | Post-Resistance | DHX34     | 9704   | 37 | 19 | 47884166 | 47884166 | Missense_Mutation | SNP | C | T | 20 | 185 | c.3076C>T     | c.(3076-3078)CTC>TTC | p.L1026F      |
| Pat_45 | Post-Resistance | NAPA      | 8775   | 37 | 19 | 47996392 | 47996392 | Missense_Mutation | SNP | C | T | 7  | 77  | c.460G>A      | c.(460-462)GGC>AGC   | p.G154S       |
| Pat_45 | Post-Resistance | LIG1      | 3978   | 37 | 19 | 48636316 | 48636316 | Missense_Mutation | SNP | C | T | 31 | 328 | c.1648G>A     | c.(1648-1650)GGC>AGC | p.G550S       |
| Pat_45 | Post-Resistance | IZUMO1    | 284359 | 37 | 19 | 49248930 | 49248930 | Missense_Mutation | SNP | C | T | 13 | 153 | c.187G>A      | c.(187-189)GAT>AAT   | p.D63N        |
| Pat_45 | Post-Resistance | SNRNP70   | 6625   | 37 | 19 | 49611533 | 49611533 | Missense_Mutation | SNP | C | T | 6  | 12  | c.1147C>T     | c.(1147-1149)CGG>TGG | p.R383W       |
| Pat_45 | Post-Resistance | PTH2      | 113091 | 37 | 19 | 49926533 | 49926533 | Missense_Mutation | SNP | G | C | 4  | 50  | c.64C>G       | c.(64-66)CTG>GTG     | p.L22V        |
| Pat_45 | Post-Resistance | PRR12     | 57479  | 37 | 19 | 50105048 | 50105048 | Missense_Mutation | SNP | C | T | 15 | 39  | c.4646C>T     | c.(4645-4647)GCC>GTC | p.A1549V      |
| Pat_45 | Post-Resistance | ZNF473    | 25888  | 37 | 19 | 50549141 | 50549141 | Missense_Mutation | SNP | C | A | 4  | 29  | c.1441C>A     | c.(1441-1443)CAC>AAC | p.H481N       |
| Pat_45 | Post-Resistance | HAS1      | 3036   | 37 | 19 | 52220383 | 52220383 | Missense_Mutation | SNP | C | T | 19 | 241 | c.766G>A      | c.(766-768)GAG>AAG   | p.E256K       |
| Pat_45 | Post-Resistance | ZNF649    | 65251  | 37 | 19 | 52394652 | 52394652 | Missense_Mutation | SNP | C | T | 5  | 124 | c.737G>A      | c.(736-738)AGG>AAG   | p.R246K       |

|        |                 |          |        |    |    |           |           |                        |     |    |    |    |     |              |                        |               |
|--------|-----------------|----------|--------|----|----|-----------|-----------|------------------------|-----|----|----|----|-----|--------------|------------------------|---------------|
| Pat_45 | Post-Resistance | ZNF160   | 90338  | 37 | 19 | 53589523  | 53589524  | Missense_Mutation      | DNP | GG | AA | 12 | 69  | c.6_7CC>TT   | c.(4-9)GCCCTT>GCTTTT   | p.L3F         |
| Pat_45 | Post-Resistance | NLRP12   | 91662  | 37 | 19 | 54327171  | 54327171  | Nonsense_Mutation      | SNP | C  | T  | 19 | 227 | c.258G>A     | c.(256-258)TGG>TGA     | p.W86*        |
| Pat_45 | Post-Resistance | PRPF31   | 26121  | 37 | 19 | 54626908  | 54626908  | Missense_Mutation      | SNP | G  | A  | 16 | 160 | c.496G>A     | c.(496-498)GTC>ATC     | p.V166I       |
| Pat_45 | Post-Resistance | LILRA1   | 11024  | 37 | 19 | 55106729  | 55106729  | Missense_Mutation      | SNP | C  | T  | 27 | 185 | c.523C>T     | c.(523-525)CAT>TAT     | p.H175Y       |
| Pat_45 | Post-Resistance | LILRB1   | 10859  | 37 | 19 | 55146735  | 55146735  | Missense_Mutation      | SNP | G  | A  | 31 | 98  | c.1585G>A    | c.(1585-1587)GAA>AAA   | p.E529K       |
| Pat_45 | Post-Resistance | KIR2DS4  | 3809   | 37 | 19 | 55354347  | 55354347  | Missense_Mutation      | SNP | C  | T  | 59 | 280 | c.689C>T     | c.(688-690)TCA>TTA     | p.S230L       |
| Pat_45 | Post-Resistance | NLRP2    | 55655  | 37 | 19 | 55493601  | 55493601  | Missense_Mutation      | SNP | A  | G  | 14 | 142 | c.535A>G     | c.(535-537)AGC>GGC     | p.S179G       |
| Pat_45 | Post-Resistance | RDH13    | 112724 | 37 | 19 | 55559706  | 55559706  | Missense_Mutation      | SNP | G  | A  | 3  | 63  | c.649C>T     | c.(649-651)CGG>TGG     | p.R217W       |
| Pat_45 | Post-Resistance | NLRP9    | 338321 | 37 | 19 | 56243836  | 56243836  | Missense_Mutation      | SNP | G  | A  | 25 | 217 | c.1361C>T    | c.(1360-1362)GCC>GTC   | p.A454V       |
| Pat_45 | Post-Resistance | NLRP4    | 147945 | 37 | 19 | 56363558  | 56363558  | Missense_Mutation      | SNP | G  | A  | 4  | 46  | c.112G>A     | c.(112-114)GAA>AAA     | p.E38K        |
| Pat_45 | Post-Resistance | ZSCAN5A  | 79149  | 37 | 19 | 56736364  | 56736364  | Missense_Mutation      | SNP | G  | A  | 6  | 92  | c.52C>T      | c.(52-54)CCT>TCT       | p.P18S        |
| Pat_45 | Post-Resistance | ZNF134   | 7693   | 37 | 19 | 58131554  | 58131554  | Missense_Mutation      | SNP | G  | A  | 12 | 75  | c.67G>A      | c.(67-69)GAG>AAG       | p.E23K        |
| Pat_45 | Post-Resistance | ZNF551   | 90233  | 37 | 19 | 58199447  | 58199447  | Missense_Mutation      | SNP | C  | T  | 11 | 198 | c.1756C>T    | c.(1756-1758)CTC>TTC   | p.L586F       |
| Pat_45 | Post-Resistance | ZNF606   | 80095  | 37 | 19 | 58499962  | 58499962  | Splice_Site            | SNP | C  | T  | 11 | 221 | c.304_splice | c.e5+1                 | p.G102_splice |
| Pat_45 | Post-Resistance | SH3YL1   | 26751  | 37 | 2  | 218899    | 218899    | Missense_Mutation      | SNP | G  | A  | 6  | 125 | c.941C>T     | c.(940-942)TCA>TTA     | p.S314L       |
| Pat_45 | Post-Resistance | SOX11    | 6664   | 37 | 2  | 5833455   | 5833455   | Missense_Mutation      | SNP | G  | A  | 7  | 83  | c.602G>A     | c.(601-603)GGC>GAC     | p.G201D       |
| Pat_45 | Post-Resistance | ADAM17   | 6868   | 37 | 2  | 9658100   | 9658100   | Missense_Mutation      | SNP | C  | T  | 4  | 77  | c.1121G>A    | c.(1120-1122)GGG>GAG   | p.G374E       |
| Pat_45 | Post-Resistance | GEN1     | 348654 | 37 | 2  | 17961301  | 17961301  | Missense_Mutation      | SNP | G  | A  | 4  | 35  | c.1321G>A    | c.(1321-1323)GAA>AAA   | p.E441K       |
| Pat_45 | Post-Resistance | APOB     | 338    | 37 | 2  | 21229484  | 21229484  | Missense_Mutation      | SNP | T  | G  | 23 | 194 | c.10256A>C   | c.(10255-10257)AAA>ACA | p.K3419T      |
| Pat_45 | Post-Resistance | GPR113   | 165082 | 37 | 2  | 26534707  | 26534707  | Missense_Mutation      | SNP | C  | A  | 4  | 32  | c.1889G>T    | c.(1888-1890)CGG>CTG   | p.R630L       |
| Pat_45 | Post-Resistance | ABHD1    | 84696  | 37 | 2  | 27351878  | 27351878  | Missense_Mutation      | SNP | G  | A  | 15 | 118 | c.341G>A     | c.(340-342)AGC>AAC     | p.S114N       |
| Pat_45 | Post-Resistance | C2orf16  | 84226  | 37 | 2  | 27803008  | 27803008  | Missense_Mutation      | SNP | G  | A  | 15 | 25  | c.3569G>A    | c.(3568-3570)CGG>CAG   | p.R1190Q      |
| Pat_45 | Post-Resistance | PPP1CB   | 5500   | 37 | 2  | 29006802  | 29006802  | Missense_Mutation      | SNP | C  | G  | 9  | 78  | c.550C>G     | c.(550-552)CAG>GAG     | p.Q184E       |
| Pat_45 | Post-Resistance | LCLAT1   | 253558 | 37 | 2  | 30863202  | 30863202  | Missense_Mutation      | SNP | G  | A  | 19 | 169 | c.962G>A     | c.(961-963)GGG>GAG     | p.G321E       |
| Pat_45 | Post-Resistance | NLRC4    | 58484  | 37 | 2  | 32477565  | 32477565  | Missense_Mutation      | SNP | C  | T  | 12 | 91  | c.185G>A     | c.(184-186)GGT>GAT     | p.G62D        |
| Pat_45 | Post-Resistance | STRN     | 6801   | 37 | 2  | 37105140  | 37105140  | Missense_Mutation      | SNP | C  | T  | 9  | 196 | c.1217G>A    | c.(1216-1218)GGA>GAA   | p.G406E       |
| Pat_45 | Post-Resistance | HEATR5B  | 54497  | 37 | 2  | 37229562  | 37229562  | Missense_Mutation      | SNP | G  | A  | 12 | 257 | c.5204C>T    | c.(5203-5205)TCA>TTA   | p.S1735L      |
| Pat_45 | Post-Resistance | HEATR5B  | 54497  | 37 | 2  | 37310493  | 37310493  | Missense_Mutation      | SNP | C  | T  | 8  | 107 | c.65G>A      | c.(64-66)AGA>AAA       | p.R22K        |
| Pat_45 | Post-Resistance | C2orf56  | 55471  | 37 | 2  | 37464930  | 37464930  | Missense_Mutation      | SNP | A  | G  | 3  | 74  | c.328A>G     | c.(328-330)ATG>GTG     | p.M110V       |
| Pat_45 | Post-Resistance | DHX57    | 90957  | 37 | 2  | 39095553  | 39095553  | Translation_Start_Site | SNP | C  | T  | 9  | 81  | c.-5G>A      | c.(-7--3)AGGTG>AGATG   |               |
| Pat_45 | Post-Resistance | SOS1     | 6654   | 37 | 2  | 39278325  | 39278325  | Missense_Mutation      | SNP | G  | A  | 9  | 53  | c.824C>T     | c.(823-825)CCC>CTC     | p.P275L       |
| Pat_45 | Post-Resistance | SLC8A1   | 6546   | 37 | 2  | 40342508  | 40342508  | Missense_Mutation      | SNP | T  | C  | 19 | 105 | c.2807A>G    | c.(2806-2808)GAG>GGG   | p.E936G       |
| Pat_45 | Post-Resistance | SRBD1    | 55133  | 37 | 2  | 45774743  | 45774743  | Missense_Mutation      | SNP | G  | A  | 4  | 52  | c.1684C>T    | c.(1684-1686)CTT>TTT   | p.L562F       |
| Pat_45 | Post-Resistance | FOXN2    | 3344   | 37 | 2  | 48602224  | 48602224  | Missense_Mutation      | SNP | G  | A  | 5  | 60  | c.938G>A     | c.(937-939)CGT>CAT     | p.R313H       |
| Pat_45 | Post-Resistance | KIAA1841 | 84542  | 37 | 2  | 61331003  | 61331003  | Missense_Mutation      | SNP | G  | A  | 9  | 55  | c.1381G>A    | c.(1381-1383)GAC>AAC   | p.D461N       |
| Pat_45 | Post-Resistance | VP54     | 51542  | 37 | 2  | 64208875  | 64208875  | Missense_Mutation      | SNP | C  | T  | 11 | 180 | c.283G>A     | c.(283-285)GGA>AGA     | p.G95R        |
| Pat_45 | Post-Resistance | CEP68    | 23177  | 37 | 2  | 65299512  | 65299512  | Missense_Mutation      | SNP | G  | A  | 8  | 46  | c.1282G>A    | c.(1282-1284)GGC>AGC   | p.G428S       |
| Pat_45 | Post-Resistance | AAK1     | 22848  | 37 | 2  | 69747977  | 69747977  | Missense_Mutation      | SNP | G  | A  | 29 | 400 | c.1199C>T    | c.(1198-1200)CCT>CTT   | p.P400L       |
| Pat_45 | Post-Resistance | LRRTM4   | 80059  | 37 | 2  | 77746529  | 77746529  | Missense_Mutation      | SNP | G  | T  | 4  | 38  | c.466C>A     | c.(466-468)CTT>ATT     | p.L156I       |
| Pat_45 | Post-Resistance | MITD1    | 129531 | 37 | 2  | 99786018  | 99786018  | Missense_Mutation      | SNP | G  | A  | 8  | 68  | c.649C>T     | c.(649-651)CCA>TCA     | p.P217S       |
| Pat_45 | Post-Resistance | EIF5B    | 9669   | 37 | 2  | 99992981  | 99992981  | Nonsense_Mutation      | SNP | C  | A  | 4  | 61  | c.1724C>A    | c.(1723-1725)TCA>TAA   | p.S575*       |
| Pat_45 | Post-Resistance | REV1     | 51455  | 37 | 2  | 100022421 | 100022421 | Missense_Mutation      | SNP | C  | T  | 20 | 133 | c.2762G>A    | c.(2761-2763)AGT>AAT   | p.S921N       |
| Pat_45 | Post-Resistance | REV1     | 51455  | 37 | 2  | 100027328 | 100027328 | Missense_Mutation      | SNP | G  | A  | 4  | 29  | c.2174C>T    | c.(2173-2175)CCA>CTA   | p.P725L       |
| Pat_45 | Post-Resistance | RGPD3    | 653489 | 37 | 2  | 107029693 | 107029693 | Missense_Mutation      | SNP | C  | T  | 13 | 166 | c.5113G>A    | c.(5113-5115)GTG>ATG   | p.V1705M      |
| Pat_45 | Post-Resistance | 10-Sep   | 151011 | 37 | 2  | 110322024 | 110322024 | Missense_Mutation      | SNP | G  | A  | 14 | 73  | c.947C>T     | c.(946-948)ACC>ATC     | p.T316I       |
| Pat_45 | Post-Resistance | POLR1B   | 84172  | 37 | 2  | 113325662 | 113325662 | Missense_Mutation      | SNP | C  | T  | 17 | 153 | c.1865C>T    | c.(1864-1866)CCT>CTT   | p.P622L       |
| Pat_45 | Post-Resistance | DPP10    | 57628  | 37 | 2  | 116548883 | 116548883 | Missense_Mutation      | SNP | C  | T  | 5  | 116 | c.1651C>T    | c.(1651-1653)CTT>TTT   | p.L551F       |



|        |                 |          |        |    |    |           |           |                   |     |    |    |    |     |                 |                        |               |
|--------|-----------------|----------|--------|----|----|-----------|-----------|-------------------|-----|----|----|----|-----|-----------------|------------------------|---------------|
| Pat_45 | Post-Resistance | TMEM37   | 140738 | 37 | 2  | 120194856 | 120194856 | Missense_Mutation | SNP | C  | T  | 22 | 221 | c.413C>T        | c.(412-414)TCC>TTC     | p.S138F       |
| Pat_45 | Post-Resistance | RALB     | 5899   | 37 | 2  | 121043609 | 121043609 | Missense_Mutation | SNP | G  | A  | 11 | 101 | c.274G>A        | c.(274-276)GTG>ATG     | p.V92M        |
| Pat_45 | Post-Resistance | RAB3GAP1 | 22930  | 37 | 2  | 135926254 | 135926254 | Missense_Mutation | SNP | C  | T  | 19 | 228 | c.2849C>T       | c.(2848-2850)CCC>CTC   | p.P950L       |
| Pat_45 | Post-Resistance | ZRANB3   | 84083  | 37 | 2  | 136033282 | 136033282 | Missense_Mutation | SNP | T  | C  | 3  | 43  | c.1010A>G       | c.(1009-1011)GAT>GGT   | p.D337G       |
| Pat_45 | Post-Resistance | LRP1B    | 53353  | 37 | 2  | 141274541 | 141274541 | Missense_Mutation | SNP | C  | T  | 8  | 83  | c.8066G>A       | c.(8065-8067)TGT>TAT   | p.C2689Y      |
| Pat_45 | Post-Resistance | STAM2    | 10254  | 37 | 2  | 153006704 | 153006704 | Missense_Mutation | SNP | C  | T  | 3  | 39  | c.80G>A         | c.(79-81)AGT>AAT       | p.S27N        |
| Pat_45 | Post-Resistance | TANC1    | 85461  | 37 | 2  | 160035675 | 160035675 | Splice_Site       | SNP | G  | A  | 13 | 87  | c.2510_splice   | c.e14+1                | p.R837_splice |
| Pat_45 | Post-Resistance | LY75     | 4065   | 37 | 2  | 160673338 | 160673338 | Nonsense_Mutation | SNP | C  | T  | 4  | 99  | c.4359G>A       | c.(4357-4359)TGG>TGA   | p.W1453*      |
| Pat_45 | Post-Resistance | NOSTRIN  | 115677 | 37 | 2  | 169716093 | 169716093 | Missense_Mutation | SNP | A  | C  | 45 | 115 | c.1125A>C       | c.(1123-1125)CAA>CAC   | p.Q375H       |
| Pat_45 | Post-Resistance | LRP2     | 4036   | 37 | 2  | 170115628 | 170115628 | Missense_Mutation | SNP | C  | T  | 28 | 224 | c.2420G>A       | c.(2419-2421)AGT>AAT   | p.S807N       |
| Pat_45 | Post-Resistance | GORASP2  | 26003  | 37 | 2  | 171806783 | 171806783 | Missense_Mutation | SNP | G  | A  | 9  | 100 | c.418G>A        | c.(418-420)GAT>AAT     | p.D140N       |
| Pat_45 | Post-Resistance | TLK1     | 9874   | 37 | 2  | 171902700 | 171902700 | Missense_Mutation | SNP | G  | A  | 18 | 208 | c.1153C>T       | c.(1153-1155)CCA>TCA   | p.P385S       |
| Pat_45 | Post-Resistance | OSBPL6   | 114880 | 37 | 2  | 179260211 | 179260211 | Nonsense_Mutation | SNP | G  | A  | 4  | 40  | c.2730G>A       | c.(2728-2730)TGG>TGA   | p.W910*       |
| Pat_45 | Post-Resistance | TTN      | 7273   | 37 | 2  | 179395254 | 179395254 | Missense_Mutation | SNP | C  | T  | 9  | 122 | c.98384G>A      | c.(98383-98385)GGT>GAT | p.G32795D     |
| Pat_45 | Post-Resistance | TTN      | 7273   | 37 | 2  | 179417575 | 179417575 | Missense_Mutation | SNP | G  | A  | 7  | 21  | c.82348C>T      | c.(82348-82350)CCC>TCC | p.P27450S     |
| Pat_45 | Post-Resistance | TTN      | 7273   | 37 | 2  | 179429729 | 179429729 | Nonsense_Mutation | SNP | G  | A  | 30 | 297 | c.73426C>T      | c.(73426-73428)CAG>TAG | p.Q24476*     |
| Pat_45 | Post-Resistance | TTN      | 7273   | 37 | 2  | 179430083 | 179430083 | Missense_Mutation | SNP | C  | T  | 20 | 196 | c.73072G>A      | c.(73072-73074)GTA>ATA | p.V24358I     |
| Pat_45 | Post-Resistance | TTN      | 7273   | 37 | 2  | 179460390 | 179460390 | Missense_Mutation | SNP | A  | T  | 3  | 24  | c.49987T>A      | c.(49987-49989)TGG>AGC | p.W16663R     |
| Pat_45 | Post-Resistance | TTN      | 7273   | 37 | 2  | 179614255 | 179614255 | Missense_Mutation | SNP | G  | A  | 6  | 53  | c.12872C>T      | c.(12871-12873)GCT>GTT | p.A4291V      |
| Pat_45 | Post-Resistance | CCDC141  | 285025 | 37 | 2  | 179720088 | 179720088 | Missense_Mutation | SNP | C  | T  | 13 | 133 | c.1321G>A       | c.(1321-1323)GAG>AAG   | p.E441K       |
| Pat_45 | Post-Resistance | UBE2E3   | 10477  | 37 | 2  | 181846938 | 181846938 | Missense_Mutation | SNP | G  | A  | 11 | 165 | c.169G>A        | c.(169-171)GCT>ACT     | p.A57T        |
| Pat_45 | Post-Resistance | STAT1    | 6772   | 37 | 2  | 191862613 | 191862613 | Missense_Mutation | SNP | G  | A  | 7  | 77  | c.754C>T        | c.(754-756)CCC>TCC     | p.P252S       |
| Pat_45 | Post-Resistance | STAT4    | 6775   | 37 | 2  | 191919238 | 191919238 | Missense_Mutation | SNP | C  | T  | 7  | 165 | c.1229G>A       | c.(1228-1230)AGT>AAT   | p.S410N       |
| Pat_45 | Post-Resistance | ANKRD44  | 91526  | 37 | 2  | 197873681 | 197873681 | Missense_Mutation | SNP | C  | T  | 41 | 336 | c.1924G>A       | c.(1924-1926)GAT>AAT   | p.D642N       |
| Pat_45 | Post-Resistance | AOX1     | 316    | 37 | 2  | 201527615 | 201527616 | Missense_Mutation | DNP | GG | AA | 54 | 134 | c.3466_3467GG>A | c.(3466-3468)GGC>AAC   | p.G1156N      |
| Pat_45 | Post-Resistance | CLK1     | 1195   | 37 | 2  | 201725959 | 201725959 | Splice_Site       | SNP | A  | C  | 21 | 156 | c.390_splice    | c.e3+1                 | p.G130_splice |
| Pat_45 | Post-Resistance | NOP58    | 51602  | 37 | 2  | 203149177 | 203149177 | Missense_Mutation | SNP | C  | T  | 13 | 189 | c.407C>T        | c.(406-408)GCA>GTA     | p.A136V       |
| Pat_45 | Post-Resistance | RAPH1    | 65059  | 37 | 2  | 204354593 | 204354593 | Missense_Mutation | SNP | G  | A  | 6  | 106 | c.446C>T        | c.(445-447)GCC>GTC     | p.A149V       |
| Pat_45 | Post-Resistance | ZDBF2    | 57683  | 37 | 2  | 207171504 | 207171504 | Missense_Mutation | SNP | C  | T  | 35 | 318 | c.2252C>T       | c.(2251-2253)ACT>ATT   | p.T751I       |
| Pat_45 | Post-Resistance | PIKFYVE  | 200576 | 37 | 2  | 209141477 | 209141477 | Missense_Mutation | SNP | C  | T  | 7  | 81  | c.364C>T        | c.(364-366)CCT>TCT     | p.P122S       |
| Pat_45 | Post-Resistance | PIKFYVE  | 200576 | 37 | 2  | 209192986 | 209192986 | Missense_Mutation | SNP | G  | A  | 14 | 189 | c.3701G>A       | c.(3700-3702)AGT>AAT   | p.S1234N      |
| Pat_45 | Post-Resistance | FN1      | 2335   | 37 | 2  | 216247040 | 216247040 | Missense_Mutation | SNP | C  | T  | 5  | 46  | c.5059G>A       | c.(5059-5061)GAA>AAA   | p.E1687K      |
| Pat_45 | Post-Resistance | C2orf62  | 375307 | 37 | 2  | 219232544 | 219232544 | Missense_Mutation | SNP | G  | A  | 5  | 87  | c.1021G>A       | c.(1021-1023)GAG>AAG   | p.E341K       |
| Pat_45 | Post-Resistance | CTDSP1   | 58190  | 37 | 2  | 219268087 | 219268087 | Missense_Mutation | SNP | G  | A  | 8  | 151 | c.604G>A        | c.(604-606)GTG>ATG     | p.V202M       |
| Pat_45 | Post-Resistance | IHH      | 3549   | 37 | 2  | 219922361 | 219922361 | Missense_Mutation | SNP | C  | T  | 13 | 234 | c.371G>A        | c.(370-372)GGT>GAT     | p.G124D       |
| Pat_45 | Post-Resistance | PAX3     | 5077   | 37 | 2  | 223158951 | 223158951 | Missense_Mutation | SNP | C  | T  | 6  | 143 | c.521G>A        | c.(520-522)AGG>AAG     | p.R174K       |
| Pat_45 | Post-Resistance | FARSB    | 10056  | 37 | 2  | 223489056 | 223489056 | Missense_Mutation | SNP | C  | T  | 7  | 100 | c.1105G>A       | c.(1105-1107)GCT>ACT   | p.A369T       |
| Pat_45 | Post-Resistance | IRS1     | 3667   | 37 | 2  | 227662737 | 227662737 | Missense_Mutation | SNP | C  | T  | 46 | 297 | c.718G>A        | c.(718-720)GTG>ATG     | p.V240M       |
| Pat_45 | Post-Resistance | TM4SF20  | 79853  | 37 | 2  | 228228469 | 228228469 | Missense_Mutation | SNP | C  | T  | 25 | 197 | c.661G>A        | c.(661-663)GTC>ATC     | p.V221I       |
| Pat_45 | Post-Resistance | TRIP12   | 9320   | 37 | 2  | 230723748 | 230723748 | Missense_Mutation | SNP | G  | A  | 5  | 66  | c.641C>T        | c.(640-642)TCC>TTC     | p.S214F       |
| Pat_45 | Post-Resistance | CHRNA1   | 1144   | 37 | 2  | 233392997 | 233392997 | Nonsense_Mutation | SNP | G  | A  | 9  | 130 | c.269G>A        | c.(268-270)TGG>TAG     | p.W90*        |
| Pat_45 | Post-Resistance | NGEF     | 25791  | 37 | 2  | 233839413 | 233839413 | Missense_Mutation | SNP | G  | A  | 13 | 207 | c.188C>T        | c.(187-189)TCC>TTC     | p.S63F        |
| Pat_45 | Post-Resistance | UGT1A4   | 54657  | 37 | 2  | 234628115 | 234628115 | Missense_Mutation | SNP | C  | T  | 15 | 149 | c.649C>T        | c.(649-651)CCT>TCT     | p.P217S       |
| Pat_45 | Post-Resistance | HDAC4    | 9759   | 37 | 2  | 240055965 | 240055965 | Missense_Mutation | SNP | G  | A  | 6  | 82  | c.1270C>T       | c.(1270-1272)CCG>TCG   | p.P424S       |
| Pat_45 | Post-Resistance | ANKMY1   | 51281  | 37 | 2  | 241465744 | 241465744 | Missense_Mutation | SNP | C  | T  | 4  | 69  | c.805G>A        | c.(805-807)GAA>AAA     | p.E269K       |
| Pat_45 | Post-Resistance | TRIB3    | 57761  | 37 | 20 | 372154    | 372155    | Missense_Mutation | DNP | AC | TT | 16 | 60  | c.515_516AC>TT  | c.(514-516)CAC>CTT     | p.H172L       |
| Pat_45 | Post-Resistance | PTPRA    | 5786   | 37 | 20 | 2945518   | 2945518   | Missense_Mutation | SNP | G  | A  | 7  | 83  | c.85G>A         | c.(85-87)GTA>ATA       | p.V29I        |

|        |                 |              |           |    |    |          |          |                   |     |   |   |     |     |           |                      |          |
|--------|-----------------|--------------|-----------|----|----|----------|----------|-------------------|-----|---|---|-----|-----|-----------|----------------------|----------|
| Pat_45 | Post-Resistance | CENPB        | 1059      | 37 | 20 | 3766517  | 3766517  | Missense_Mutation | SNP | G | A | 13  | 217 | c.614C>T  | c.(613-615)CCC>CTC   | p.P205L  |
| Pat_45 | Post-Resistance | PLCB4        | 5332      | 37 | 20 | 9388579  | 9388579  | Missense_Mutation | SNP | G | A | 17  | 99  | c.1627G>A | c.(1627-1629)GAA>AAA | p.E543K  |
| Pat_45 | Post-Resistance | PAK7         | 57144     | 37 | 20 | 9520162  | 9520162  | Missense_Mutation | SNP | C | T | 19  | 232 | c.2107G>A | c.(2107-2109)GCA>ACA | p.A703T  |
| Pat_45 | Post-Resistance | PCSK2        | 5126      | 37 | 20 | 17437086 | 17437086 | Missense_Mutation | SNP | G | A | 11  | 154 | c.1195G>A | c.(1195-1197)GAG>AAG | p.E399K  |
| Pat_45 | Post-Resistance | DSTN         | 11034     | 37 | 20 | 17581578 | 17581578 | Missense_Mutation | SNP | C | T | 5   | 148 | c.199C>T  | c.(199-201)CCT>TCT   | p.P67S   |
| Pat_45 | Post-Resistance | CSRP2BP      | 57325     | 37 | 20 | 18143302 | 18143302 | Missense_Mutation | SNP | C | T | 4   | 18  | c.1384C>T | c.(1384-1386)CCC>TCC | p.P462S  |
| Pat_45 | Post-Resistance | GGTLC1       | 92086     | 37 | 20 | 23967244 | 23967244 | Missense_Mutation | SNP | G | A | 9   | 190 | c.5C>T    | c.(4-6)ACC>ATC       | p.T2I    |
| Pat_45 | Post-Resistance | TM9SF4       | 9777      | 37 | 20 | 30720825 | 30720825 | Missense_Mutation | SNP | C | T | 7   | 82  | c.25C>T   | c.(25-27)CCG>TCG     | p.P9S    |
| Pat_45 | Post-Resistance | POFUT1       | 23509     | 37 | 20 | 30803181 | 30803181 | Missense_Mutation | SNP | C | T | 13  | 248 | c.356C>T  | c.(355-357)CCT>CTT   | p.P119L  |
| Pat_45 | Post-Resistance | KIF3B        | 9371      | 37 | 20 | 30897723 | 30897723 | Missense_Mutation | SNP | G | A | 16  | 111 | c.143G>A  | c.(142-144)GGG>GAG   | p.G48E   |
| Pat_45 | Post-Resistance | ASXL1        | 171023    | 37 | 20 | 31023018 | 31023018 | Missense_Mutation | SNP | C | T | 18  | 330 | c.2503C>T | c.(2503-2505)CCC>TCC | p.P835S  |
| Pat_45 | Post-Resistance | PLUNC        | 51297     | 37 | 20 | 31829222 | 31829222 | Missense_Mutation | SNP | G | A | 150 | 367 | c.613G>A  | c.(613-615)GAC>AAC   | p.D205N  |
| Pat_45 | Post-Resistance | ZNF341       | 84905     | 37 | 20 | 32354746 | 32354746 | Missense_Mutation | SNP | G | A | 32  | 486 | c.1312G>A | c.(1312-1314)GTG>ATG | p.V438M  |
| Pat_45 | Post-Resistance | CHMP4B       | 128866    | 37 | 20 | 32439895 | 32439895 | Missense_Mutation | SNP | G | A | 7   | 134 | c.496G>A  | c.(496-498)GCG>ACG   | p.A166T  |
| Pat_45 | Post-Resistance | ITCH         | 83737     | 37 | 20 | 32981665 | 32981665 | Missense_Mutation | SNP | G | A | 15  | 266 | c.48G>A   | c.(46-48)ATG>ATA     | p.M16I   |
| Pat_45 | Post-Resistance | MYH7B        | 57644     | 37 | 20 | 33582006 | 33582006 | Nonsense_Mutation | SNP | G | A | 21  | 251 | c.2628G>A | c.(2626-2628)TGG>TGA | p.W876*  |
| Pat_45 | Post-Resistance | TRPC4AP      | 26133     | 37 | 20 | 33590986 | 33590986 | Missense_Mutation | SNP | G | A | 11  | 104 | c.2357C>T | c.(2356-2358)CCC>CTC | p.P786L  |
| Pat_45 | Post-Resistance | PROCR        | 10544     | 37 | 20 | 33762622 | 33762622 | Missense_Mutation | SNP | C | T | 8   | 67  | c.188C>T  | c.(187-189)ACC>ATC   | p.T63I   |
| Pat_45 | Post-Resistance | SPAG4        | 6676      | 37 | 20 | 34207230 | 34207230 | Missense_Mutation | SNP | G | A | 11  | 132 | c.907G>A  | c.(907-909)GAG>AAG   | p.E303K  |
| Pat_45 | Post-Resistance | C20orf4      | 25980     | 37 | 20 | 34828112 | 34828112 | Missense_Mutation | SNP | G | A | 9   | 140 | c.322G>A  | c.(322-324)GTG>ATG   | p.V108M  |
| Pat_45 | Post-Resistance | RBL1         | 5933      | 37 | 20 | 35672611 | 35672611 | Missense_Mutation | SNP | C | T | 11  | 131 | c.1648G>A | c.(1648-1650)GAC>AAC | p.D550N  |
| Pat_45 | Post-Resistance | TGM2         | 7052      | 37 | 20 | 36766698 | 36766698 | Missense_Mutation | SNP | G | A | 4   | 79  | c.1432C>T | c.(1432-1434)CGT>TGT | p.R478C  |
| Pat_45 | Post-Resistance | KCNS1        | 3787      | 37 | 20 | 43723747 | 43723747 | Missense_Mutation | SNP | C | T | 5   | 84  | c.1345G>A | c.(1345-1347)GTA>ATA | p.V449I  |
| Pat_45 | Post-Resistance | CTSA         | 5476      | 37 | 20 | 44521067 | 44521067 | Missense_Mutation | SNP | G | A | 6   | 125 | c.388G>A  | c.(388-390)GCT>ACT   | p.A130T  |
| Pat_45 | Post-Resistance | ZNF335       | 63925     | 37 | 20 | 44582362 | 44582362 | Missense_Mutation | SNP | C | T | 11  | 96  | c.2668G>A | c.(2668-2670)GAG>AAG | p.E890K  |
| Pat_45 | Post-Resistance | LOC100131496 | 100131496 | 37 | 20 | 45947671 | 45947671 | Missense_Mutation | SNP | G | A | 4   | 15  | c.307G>A  | c.(307-309)GGA>AGA   | p.G103R  |
| Pat_45 | Post-Resistance | NCOA3        | 8202      | 37 | 20 | 46268767 | 46268767 | Missense_Mutation | SNP | G | A | 13  | 105 | c.3052G>A | c.(3052-3054)GAA>AAA | p.E1018K |
| Pat_45 | Post-Resistance | ZNFX1        | 57169     | 37 | 20 | 47865036 | 47865036 | Missense_Mutation | SNP | G | A | 5   | 117 | c.4525C>T | c.(4525-4527)CCC>TCC | p.P1509S |
| Pat_45 | Post-Resistance | SLC9A8       | 23315     | 37 | 20 | 48461621 | 48461621 | Missense_Mutation | SNP | C | T | 6   | 143 | c.397C>T  | c.(397-399)CCT>TCT   | p.P133S  |
| Pat_45 | Post-Resistance | PARD6B       | 84612     | 37 | 20 | 49354424 | 49354424 | Missense_Mutation | SNP | G | A | 9   | 94  | c.97G>A   | c.(97-99)GAA>AAA     | p.E33K   |
| Pat_45 | Post-Resistance | SALL4        | 57167     | 37 | 20 | 50401212 | 50401212 | Missense_Mutation | SNP | C | T | 8   | 146 | c.2754G>A | c.(2752-2754)ATG>ATA | p.M918I  |
| Pat_45 | Post-Resistance | TH1L         | 51497     | 37 | 20 | 57562780 | 57562780 | Missense_Mutation | SNP | G | A | 5   | 158 | c.331G>A  | c.(331-333)GTT>ATT   | p.V111I  |
| Pat_45 | Post-Resistance | PHACTR3      | 116154    | 37 | 20 | 58318169 | 58318169 | Missense_Mutation | SNP | G | A | 11  | 206 | c.126G>A  | c.(124-126)ATG>ATA   | p.M42I   |
| Pat_45 | Post-Resistance | PHACTR3      | 116154    | 37 | 20 | 58342267 | 58342267 | Missense_Mutation | SNP | G | A | 14  | 59  | c.568G>A  | c.(568-570)GAA>AAA   | p.E190K  |
| Pat_45 | Post-Resistance | DIDO1        | 11083     | 37 | 20 | 61511262 | 61511262 | Missense_Mutation | SNP | G | A | 7   | 93  | c.6046C>T | c.(6046-6048)CCG>TCG | p.P2016S |
| Pat_45 | Post-Resistance | SAMD10       | 140700    | 37 | 20 | 62607045 | 62607045 | Missense_Mutation | SNP | C | T | 17  | 334 | c.586G>A  | c.(586-588)GCT>ACT   | p.A196T  |
| Pat_45 | Post-Resistance | CXADR        | 1525      | 37 | 21 | 18924121 | 18924121 | Missense_Mutation | SNP | G | A | 3   | 35  | c.265G>A  | c.(265-267)GGC>AGC   | p.G89S   |
| Pat_45 | Post-Resistance | ADAMTS1      | 9510      | 37 | 21 | 28214939 | 28214939 | Missense_Mutation | SNP | C | T | 6   | 75  | c.796G>A  | c.(796-798)GCA>ACA   | p.A266T  |
| Pat_45 | Post-Resistance | RNF160       | 26046     | 37 | 21 | 30339429 | 30339429 | Missense_Mutation | SNP | C | T | 7   | 45  | c.1522G>A | c.(1522-1524)GAA>AAA | p.E508K  |
| Pat_45 | Post-Resistance | RNF160       | 26046     | 37 | 21 | 30359174 | 30359174 | Nonsense_Mutation | SNP | G | A | 7   | 106 | c.262C>T  | c.(262-264)CAG>TAG   | p.Q88*   |
| Pat_45 | Post-Resistance | KRTAP27-1    | 643812    | 37 | 21 | 31709754 | 31709754 | Missense_Mutation | SNP | C | T | 19  | 174 | c.233G>A  | c.(232-234)AGT>AAT   | p.S78N   |
| Pat_45 | Post-Resistance | KRTAP13-1    | 140258    | 37 | 21 | 31768730 | 31768730 | Missense_Mutation | SNP | C | T | 9   | 64  | c.326C>T  | c.(325-327)TCC>TTC   | p.S109F  |
| Pat_45 | Post-Resistance | TIAM1        | 7074      | 37 | 21 | 32595763 | 32595763 | Missense_Mutation | SNP | C | T | 24  | 148 | c.1954G>A | c.(1954-1956)GGC>AGC | p.G652S  |
| Pat_45 | Post-Resistance | ITSN1        | 6453      | 37 | 21 | 35093554 | 35093554 | Missense_Mutation | SNP | C | T | 6   | 80  | c.100C>T  | c.(100-102)CCA>TCA   | p.P34S   |
| Pat_45 | Post-Resistance | MORC3        | 23515     | 37 | 21 | 37705988 | 37705988 | Nonsense_Mutation | SNP | G | A | 15  | 140 | c.84G>A   | c.(82-84)TGG>TGA     | p.W28*   |
| Pat_45 | Post-Resistance | KCNJ6        | 3763      | 37 | 21 | 39086672 | 39086672 | Missense_Mutation | SNP | C | T | 17  | 197 | c.788G>A  | c.(787-789)GGG>GAG   | p.G263E  |
| Pat_45 | Post-Resistance | BRWD1        | 54014     | 37 | 21 | 40582064 | 40582064 | Missense_Mutation | SNP | C | T | 4   | 36  | c.4054G>A | c.(4054-4056)GAT>AAT | p.D1352N |

|        |                 |          |        |    |    |          |          |                   |     |   |   |    |     |               |                      |               |
|--------|-----------------|----------|--------|----|----|----------|----------|-------------------|-----|---|---|----|-----|---------------|----------------------|---------------|
| Pat_45 | Post-Resistance | DSCAM    | 1826   | 37 | 21 | 41434798 | 41434798 | Missense_Mutation | SNP | C | T | 4  | 66  | c.4917G>A     | c.(4915-4917)ATG>ATA | p.M1639I      |
| Pat_45 | Post-Resistance | TMPRSS3  | 64699  | 37 | 21 | 43795965 | 43795965 | Missense_Mutation | SNP | C | T | 12 | 298 | c.1207G>A     | c.(1207-1209)GGG>AGG | p.G403R       |
| Pat_45 | Post-Resistance | PFKL     | 5211   | 37 | 21 | 45741675 | 45741675 | Missense_Mutation | SNP | C | T | 4  | 146 | c.1255C>T     | c.(1255-1257)CGC>TGC | p.R419C       |
| Pat_45 | Post-Resistance | ITGB2    | 3689   | 37 | 21 | 46314884 | 46314884 | Splice_Site       | SNP | A | T | 4  | 35  | c.1083_splice | c.e8+1               | p.N361_splice |
| Pat_45 | Post-Resistance | MCM3AP   | 8888   | 37 | 21 | 47704228 | 47704228 | Nonsense_Mutation | SNP | G | A | 17 | 147 | c.973C>T      | c.(973-975)CGA>TGA   | p.R325*       |
| Pat_45 | Post-Resistance | IL17RA   | 23765  | 37 | 22 | 17581326 | 17581326 | Missense_Mutation | SNP | C | T | 15 | 171 | c.505C>T      | c.(505-507)CCT>TCT   | p.P169S       |
| Pat_45 | Post-Resistance | CECR5    | 27440  | 37 | 22 | 17624015 | 17624015 | Missense_Mutation | SNP | G | A | 30 | 66  | c.544C>T      | c.(544-546)CCG>TCG   | p.P182S       |
| Pat_45 | Post-Resistance | PEX26    | 55670  | 37 | 22 | 18568025 | 18568025 | Splice_Site       | SNP | G | A | 5  | 111 | c.814_splice  | c.e5+1               | p.A272_splice |
| Pat_45 | Post-Resistance | DGCR2    | 9993   | 37 | 22 | 19052491 | 19052491 | Missense_Mutation | SNP | C | T | 10 | 124 | c.418G>A      | c.(418-420)GAT>AAT   | p.D140N       |
| Pat_45 | Post-Resistance | TSSK2    | 23617  | 37 | 22 | 19119823 | 19119823 | Missense_Mutation | SNP | G | A | 10 | 148 | c.911G>A      | c.(910-912)GGC>GAC   | p.G304D       |
| Pat_45 | Post-Resistance | C22orf25 | 128989 | 37 | 22 | 20043498 | 20043498 | Missense_Mutation | SNP | G | A | 3  | 86  | c.413G>A      | c.(412-414)GGG>GAG   | p.G138E       |
| Pat_45 | Post-Resistance | DGCR6L   | 85359  | 37 | 22 | 20303659 | 20303659 | Nonsense_Mutation | SNP | G | A | 4  | 43  | c.355C>T      | c.(355-357)CAG>TAG   | p.Q119*       |
| Pat_45 | Post-Resistance | THAP7    | 80764  | 37 | 22 | 21354362 | 21354362 | Missense_Mutation | SNP | G | A | 9  | 27  | c.737C>T      | c.(736-738)GCA>GTA   | p.A246V       |
| Pat_45 | Post-Resistance | BCR      | 613    | 37 | 22 | 23631788 | 23631788 | Missense_Mutation | SNP | C | T | 7  | 82  | c.2687C>T     | c.(2686-2688)CCG>CTG | p.P896L       |
| Pat_45 | Post-Resistance | CABIN1   | 23523  | 37 | 22 | 24439465 | 24439465 | Missense_Mutation | SNP | G | A | 8  | 145 | c.445G>A      | c.(445-447)GAA>AAA   | p.E149K       |
| Pat_45 | Post-Resistance | MYO18B   | 84700  | 37 | 22 | 26400684 | 26400684 | Missense_Mutation | SNP | G | A | 14 | 44  | c.6333G>A     | c.(6331-6333)ATG>ATA | p.M2111I      |
| Pat_45 | Post-Resistance | EMID1    | 129080 | 37 | 22 | 29639435 | 29639435 | Missense_Mutation | SNP | G | A | 3  | 30  | c.1070G>A     | c.(1069-1071)GGG>GAG | p.G357E       |
| Pat_45 | Post-Resistance | AP1B1    | 162    | 37 | 22 | 29737718 | 29737718 | Missense_Mutation | SNP | C | T | 8  | 174 | c.1568G>A     | c.(1567-1569)GGC>GAC | p.G523D       |
| Pat_45 | Post-Resistance | PES1     | 23481  | 37 | 22 | 30977037 | 30977037 | Missense_Mutation | SNP | C | T | 15 | 161 | c.874G>A      | c.(874-876)GAG>AAG   | p.E292K       |
| Pat_45 | Post-Resistance | C22orf30 | 253143 | 37 | 22 | 32072839 | 32072839 | Nonsense_Mutation | SNP | C | T | 4  | 13  | c.5742G>A     | c.(5740-5742)TGG>TGA | p.W1914*      |
| Pat_45 | Post-Resistance | RFPL2    | 10739  | 37 | 22 | 32598380 | 32598380 | Missense_Mutation | SNP | A | T | 3  | 20  | c.59T>A       | c.(58-60)CTA>CAA     | p.L20Q        |
| Pat_45 | Post-Resistance | APOL3    | 80833  | 37 | 22 | 36537525 | 36537525 | Missense_Mutation | SNP | G | A | 7  | 53  | c.932C>T      | c.(931-933)ACC>ATC   | p.T311I       |
| Pat_45 | Post-Resistance | CYTH4    | 27128  | 37 | 22 | 37696979 | 37696979 | Missense_Mutation | SNP | G | A | 5  | 61  | c.466G>A      | c.(466-468)GAG>AAG   | p.E156K       |
| Pat_45 | Post-Resistance | ELFN2    | 114794 | 37 | 22 | 37770265 | 37770265 | Missense_Mutation | SNP | G | A | 18 | 193 | c.1310C>T     | c.(1309-1311)ACC>ATC | p.T437I       |
| Pat_45 | Post-Resistance | GCAT     | 23464  | 37 | 22 | 38212714 | 38212714 | Missense_Mutation | SNP | G | A | 7  | 107 | c.1249G>A     | c.(1249-1251)GCA>ACA | p.A417T       |
| Pat_45 | Post-Resistance | EIF3L    | 51386  | 37 | 22 | 38271944 | 38271944 | Missense_Mutation | SNP | G | A | 13 | 184 | c.1003G>A     | c.(1003-1005)GTC>ATC | p.V335I       |
| Pat_45 | Post-Resistance | CSNK1E   | 1454   | 37 | 22 | 38694940 | 38694940 | Splice_Site       | SNP | C | T | 10 | 191 | c.737_splice  | c.e7-1               | p.S246_splice |
| Pat_45 | Post-Resistance | TAB1     | 10454  | 37 | 22 | 39811633 | 39811633 | Missense_Mutation | SNP | C | T | 8  | 27  | c.299C>T      | c.(298-300)GCC>GTC   | p.A100V       |
| Pat_45 | Post-Resistance | EP300    | 2033   | 37 | 22 | 41551116 | 41551116 | Missense_Mutation | SNP | C | T | 19 | 303 | c.3260C>T     | c.(3259-3261)CCT>CTT | p.P1087L      |
| Pat_45 | Post-Resistance | EP300    | 2033   | 37 | 22 | 41568579 | 41568579 | Missense_Mutation | SNP | C | A | 4  | 71  | c.4529C>A     | c.(4528-4530)CCC>CAC | p.P1510H      |
| Pat_45 | Post-Resistance | TLL12    | 23170  | 37 | 22 | 43570251 | 43570251 | Missense_Mutation | SNP | G | A | 19 | 419 | c.1193C>T     | c.(1192-1194)CCC>CTC | p.P398L       |
| Pat_45 | Post-Resistance | SAMM50   | 25813  | 37 | 22 | 44371954 | 44371954 | Missense_Mutation | SNP | G | A | 10 | 51  | c.668G>A      | c.(667-669)AGC>AAC   | p.S223N       |
| Pat_45 | Post-Resistance | KIAA1644 | 85352  | 37 | 22 | 44681567 | 44681567 | Missense_Mutation | SNP | C | T | 28 | 494 | c.340G>A      | c.(340-342)GTT>ATT   | p.V114I       |
| Pat_45 | Post-Resistance | SMC1B    | 27127  | 37 | 22 | 45802707 | 45802707 | Missense_Mutation | SNP | C | T | 7  | 104 | c.338G>A      | c.(337-339)AGT>AAT   | p.S113N       |
| Pat_45 | Post-Resistance | PKDREJ   | 10343  | 37 | 22 | 46653096 | 46653096 | Missense_Mutation | SNP | C | T | 11 | 82  | c.6124G>A     | c.(6124-6126)GCA>ACA | p.A2042T      |
| Pat_45 | Post-Resistance | CELSR1   | 9620   | 37 | 22 | 46761158 | 46761158 | Missense_Mutation | SNP | C | T | 8  | 86  | c.8524G>A     | c.(8524-8526)GCC>ACC | p.A2842T      |
| Pat_45 | Post-Resistance | GRAMD4   | 23151  | 37 | 22 | 47059038 | 47059038 | Missense_Mutation | SNP | G | A | 10 | 273 | c.568G>A      | c.(568-570)GTG>ATG   | p.V190M       |
| Pat_45 | Post-Resistance | TBC1D22A | 25771  | 37 | 22 | 47189600 | 47189600 | Missense_Mutation | SNP | C | T | 3  | 34  | c.322C>T      | c.(322-324)CGG>TGG   | p.R108W       |
| Pat_45 | Post-Resistance | TBC1D22A | 25771  | 37 | 22 | 47433095 | 47433095 | Splice_Site       | SNP | G | A | 9  | 135 | c.1329_splice | c.e11+1              | p.Q443_splice |
| Pat_45 | Post-Resistance | SELO     | 83642  | 37 | 22 | 50655449 | 50655449 | Nonsense_Mutation | SNP | G | A | 5  | 48  | c.1737G>A     | c.(1735-1737)TGG>TGA | p.W579*       |
| Pat_45 | Post-Resistance | TUBGCP6  | 85378  | 37 | 22 | 50664784 | 50664784 | Missense_Mutation | SNP | C | T | 4  | 36  | c.1625G>A     | c.(1624-1626)AGC>AAC | p.S542N       |
| Pat_45 | Post-Resistance | SBF1     | 6305   | 37 | 22 | 50900379 | 50900379 | Missense_Mutation | SNP | G | A | 10 | 138 | c.2566C>T     | c.(2566-2568)CCA>TCA | p.P856S       |
| Pat_45 | Post-Resistance | NCAPH2   | 29781  | 37 | 22 | 50961482 | 50961482 | Missense_Mutation | SNP | G | A | 3  | 36  | c.1564G>A     | c.(1564-1566)GAC>AAC | p.D522N       |
| Pat_45 | Post-Resistance | KLHDC7B  | 113730 | 37 | 22 | 50988037 | 50988037 | Missense_Mutation | SNP | G | A | 14 | 242 | c.1442G>A     | c.(1441-1443)AGC>AAC | p.S481N       |
| Pat_45 | Post-Resistance | MAPK8IP2 | 23542  | 37 | 22 | 51040276 | 51040276 | Missense_Mutation | SNP | G | A | 15 | 165 | c.124G>A      | c.(124-126)GAT>AAT   | p.D42N        |
| Pat_45 | Post-Resistance | ARSA     | 410    | 37 | 22 | 51065175 | 51065175 | Missense_Mutation | SNP | G | A | 8  | 132 | c.692C>T      | c.(691-693)CCT>CTT   | p.P231L       |
| Pat_45 | Post-Resistance | JAGN1    | 84522  | 37 | 3  | 9934877  | 9934877  | Missense_Mutation | SNP | T | G | 42 | 105 | c.368T>G      | c.(367-369)TTC>TGC   | p.F123C       |

|        |                 |          |        |    |   |           |           |                   |     |    |    |    |     |                |                      |               |
|--------|-----------------|----------|--------|----|---|-----------|-----------|-------------------|-----|----|----|----|-----|----------------|----------------------|---------------|
| Pat_45 | Post-Resistance | IL17RE   | 132014 | 37 | 3 | 9955689   | 9955689   | Missense_Mutation | SNP | G  | A  | 25 | 144 | c.1277G>A      | c.(1276-1278)AGG>AAG | p.R426K       |
| Pat_45 | Post-Resistance | PRRT3    | 285368 | 37 | 3 | 9990456   | 9990456   | Missense_Mutation | SNP | C  | T  | 93 | 273 | c.1157G>A      | c.(1156-1158)GGG>GAG | p.G386E       |
| Pat_45 | Post-Resistance | SLC6A11  | 6538   | 37 | 3 | 10974933  | 10974933  | Missense_Mutation | SNP | G  | A  | 42 | 140 | c.1468G>A      | c.(1468-1470)GTG>ATG | p.V490M       |
| Pat_45 | Post-Resistance | NR2C2    | 7182   | 37 | 3 | 15071868  | 15071868  | Missense_Mutation | SNP | G  | A  | 21 | 131 | c.1019G>A      | c.(1018-1020)GGA>GAA | p.G340E       |
| Pat_45 | Post-Resistance | SATB1    | 6304   | 37 | 3 | 18390738  | 18390738  | Missense_Mutation | SNP | G  | A  | 17 | 119 | c.2216C>T      | c.(2215-2217)ACC>ATC | p.T739I       |
| Pat_45 | Post-Resistance | NR1D2    | 9975   | 37 | 3 | 24018876  | 24018876  | Missense_Mutation | SNP | C  | T  | 6  | 64  | c.1706C>T      | c.(1705-1707)TCT>TTT | p.S569F       |
| Pat_45 | Post-Resistance | ZNF860   | 344787 | 37 | 3 | 32030852  | 32030852  | Missense_Mutation | SNP | G  | A  | 6  | 67  | c.281G>A       | c.(280-282)AGT>AAT   | p.S94N        |
| Pat_45 | Post-Resistance | CCR4     | 1233   | 37 | 3 | 32995173  | 32995173  | Missense_Mutation | SNP | C  | T  | 15 | 138 | c.259C>T       | c.(259-261)CTC>TTC   | p.L87F        |
| Pat_45 | Post-Resistance | CCR4     | 1233   | 37 | 3 | 32995716  | 32995716  | Missense_Mutation | SNP | G  | A  | 5  | 29  | c.802G>A       | c.(802-804)GTG>ATG   | p.V268M       |
| Pat_45 | Post-Resistance | SUSD5    | 26032  | 37 | 3 | 33194245  | 33194245  | Missense_Mutation | SNP | C  | T  | 8  | 82  | c.1879G>A      | c.(1879-1881)GAG>AAG | p.E627K       |
| Pat_45 | Post-Resistance | TRAK1    | 22906  | 37 | 3 | 42167035  | 42167035  | Missense_Mutation | SNP | C  | T  | 9  | 165 | c.215C>T       | c.(214-216)ACA>ATA   | p.T72I        |
| Pat_45 | Post-Resistance | CCK      | 885    | 37 | 3 | 42304972  | 42304972  | Missense_Mutation | SNP | C  | T  | 10 | 84  | c.151G>A       | c.(151-153)GAT>AAT   | p.D51N        |
| Pat_45 | Post-Resistance | PRSS42   | 339906 | 37 | 3 | 46875079  | 46875080  | Missense_Mutation | DNP | CC | TT | 4  | 15  | c.301_302GG>AA | c.(301-303)GGC>AAC   | p.G101N       |
| Pat_45 | Post-Resistance | PTPN23   | 25930  | 37 | 3 | 47449932  | 47449932  | Missense_Mutation | SNP | C  | T  | 6  | 140 | c.1282C>T      | c.(1282-1284)CTC>TTC | p.L428F       |
| Pat_45 | Post-Resistance | ATRIP    | 84126  | 37 | 3 | 48506294  | 48506294  | Missense_Mutation | SNP | C  | T  | 6  | 92  | c.2120C>T      | c.(2119-2121)CCC>CTC | p.P707L       |
| Pat_45 | Post-Resistance | GPX1     | 2876   | 37 | 3 | 49395482  | 49395482  | Missense_Mutation | SNP | G  | C  | 8  | 52  | c.230C>G       | c.(229-231)CCG>CGG   | p.P77R        |
| Pat_45 | Post-Resistance | MST1R    | 4486   | 37 | 3 | 49940688  | 49940688  | Missense_Mutation | SNP | C  | T  | 18 | 201 | c.355G>A       | c.(355-357)GAC>AAC   | p.D119N       |
| Pat_45 | Post-Resistance | RBM6     | 10180  | 37 | 3 | 50091825  | 50091825  | Missense_Mutation | SNP | G  | A  | 50 | 280 | c.1690G>A      | c.(1690-1692)GAA>AAA | p.E564K       |
| Pat_45 | Post-Resistance | ZMYND10  | 51364  | 37 | 3 | 50380390  | 50380390  | Missense_Mutation | SNP | A  | C  | 17 | 69  | c.659T>G       | c.(658-660)GTG>GGG   | p.V220G       |
| Pat_45 | Post-Resistance | VPRBP    | 9730   | 37 | 3 | 51457233  | 51457233  | Missense_Mutation | SNP | C  | T  | 6  | 130 | c.3191G>A      | c.(3190-3192)GGA>GAA | p.G1064E      |
| Pat_45 | Post-Resistance | RRP9     | 9136   | 37 | 3 | 51975498  | 51975498  | Missense_Mutation | SNP | C  | T  | 14 | 172 | c.97G>A        | c.(97-99)GCG>ACG     | p.A33T        |
| Pat_45 | Post-Resistance | GLYCTK   | 132158 | 37 | 3 | 52327063  | 52327063  | Missense_Mutation | SNP | G  | A  | 4  | 69  | c.1493G>A      | c.(1492-1494)GGT>GAT | p.G498D       |
| Pat_45 | Post-Resistance | ITIH4    | 3700   | 37 | 3 | 52852164  | 52852164  | Missense_Mutation | SNP | C  | T  | 3  | 31  | c.2200G>A      | c.(2200-2202)GCC>ACC | p.A734T       |
| Pat_45 | Post-Resistance | ITIH4    | 3700   | 37 | 3 | 52858272  | 52858272  | Missense_Mutation | SNP | C  | T  | 25 | 147 | c.1105G>A      | c.(1105-1107)GAG>AAG | p.E369K       |
| Pat_45 | Post-Resistance | PDE12    | 201626 | 37 | 3 | 57542926  | 57542926  | Missense_Mutation | SNP | C  | T  | 13 | 180 | c.820C>T       | c.(820-822)CCT>TCT   | p.P274S       |
| Pat_45 | Post-Resistance | PRICKLE2 | 166336 | 37 | 3 | 64085592  | 64085592  | Missense_Mutation | SNP | G  | A  | 14 | 94  | c.1670C>T      | c.(1669-1671)GCT>GTT | p.A557V       |
| Pat_45 | Post-Resistance | SHQ1     | 55164  | 37 | 3 | 72799667  | 72799667  | Missense_Mutation | SNP | G  | A  | 26 | 140 | c.1502C>T      | c.(1501-1503)GCC>GTC | p.A501V       |
| Pat_45 | Post-Resistance | CRYBG3   | 131544 | 37 | 3 | 97605517  | 97605517  | Missense_Mutation | SNP | C  | T  | 7  | 159 | c.1351C>T      | c.(1351-1353)CCA>TCA | p.P451S       |
| Pat_45 | Post-Resistance | CRYBG3   | 131544 | 37 | 3 | 97618108  | 97618108  | Splice_Site       | SNP | G  | A  | 13 | 93  | c.2127_splice  | c.e11+1              | p.L709_splice |
| Pat_45 | Post-Resistance | ABI3BP   | 25890  | 37 | 3 | 100583726 | 100583726 | Missense_Mutation | SNP | G  | C  | 3  | 26  | c.1035C>G      | c.(1033-1035)AGC>AGG | p.S345R       |
| Pat_45 | Post-Resistance | ZBTB20   | 26137  | 37 | 3 | 114070071 | 114070071 | Missense_Mutation | SNP | G  | A  | 5  | 50  | c.854C>T       | c.(853-855)CCC>CTC   | p.P285L       |
| Pat_45 | Post-Resistance | UPK1B    | 7348   | 37 | 3 | 118906641 | 118906641 | Missense_Mutation | SNP | C  | T  | 7  | 246 | c.89C>T        | c.(88-90)ACT>ATT     | p.T30I        |
| Pat_45 | Post-Resistance | COL6A6   | 131873 | 37 | 3 | 130286992 | 130286992 | Missense_Mutation | SNP | G  | A  | 15 | 145 | c.1945G>A      | c.(1945-1947)GTG>ATG | p.V649M       |
| Pat_45 | Post-Resistance | PIK3CB   | 5291   | 37 | 3 | 138376531 | 138376531 | Splice_Site       | SNP | C  | T  | 5  | 153 | c.2942_splice  | c.e20+1              | p.R981_splice |
| Pat_45 | Post-Resistance | HPS3     | 84343  | 37 | 3 | 148858052 | 148858052 | Missense_Mutation | SNP | G  | A  | 6  | 148 | c.479G>A       | c.(478-480)AGT>AAT   | p.S160N       |
| Pat_45 | Post-Resistance | TSC22D2  | 9819   | 37 | 3 | 150128888 | 150128888 | Missense_Mutation | SNP | C  | T  | 8  | 252 | c.1751C>T      | c.(1750-1752)ACC>ATC | p.T584I       |
| Pat_45 | Post-Resistance | IFT80    | 57560  | 37 | 3 | 160083830 | 160083830 | Splice_Site       | SNP | C  | T  | 7  | 97  | c.549_splice   | c.e6+1               | p.Q183_splice |
| Pat_45 | Post-Resistance | FNDC3B   | 64778  | 37 | 3 | 172013211 | 172013211 | Missense_Mutation | SNP | C  | T  | 15 | 187 | c.908C>T       | c.(907-909)TCC>TTC   | p.S303F       |
| Pat_45 | Post-Resistance | FNDC3B   | 64778  | 37 | 3 | 172096107 | 172096107 | Missense_Mutation | SNP | G  | A  | 17 | 91  | c.3056G>A      | c.(3055-3057)AGA>AAA | p.R1019K      |
| Pat_45 | Post-Resistance | MFN1     | 55669  | 37 | 3 | 179093027 | 179093027 | Missense_Mutation | SNP | C  | T  | 4  | 32  | c.995C>T       | c.(994-996)GCA>GTA   | p.A332V       |
| Pat_45 | Post-Resistance | CDC39    | 339829 | 37 | 3 | 180397136 | 180397136 | Nonsense_Mutation | SNP | C  | T  | 48 | 322 | c.33G>A        | c.(31-33)TGG>TGA     | p.W11*        |
| Pat_45 | Post-Resistance | DVL3     | 1857   | 37 | 3 | 183888163 | 183888163 | Missense_Mutation | SNP | C  | T  | 4  | 36  | c.1771C>T      | c.(1771-1773)CCG>TCG | p.P591S       |
| Pat_45 | Post-Resistance | CHRD     | 8646   | 37 | 3 | 184101121 | 184101121 | Missense_Mutation | SNP | G  | A  | 15 | 138 | c.1235G>A      | c.(1234-1236)GGG>GAG | p.G412E       |
| Pat_45 | Post-Resistance | MAP3K13  | 9175   | 37 | 3 | 185146547 | 185146547 | Missense_Mutation | SNP | G  | A  | 3  | 69  | c.178G>A       | c.(178-180)GTG>ATG   | p.V60M        |
| Pat_45 | Post-Resistance | OPA1     | 4976   | 37 | 3 | 193372664 | 193372664 | Nonsense_Mutation | SNP | C  | T  | 5  | 38  | c.1861C>T      | c.(1861-1863)CAA>TAA | p.Q621*       |
| Pat_45 | Post-Resistance | CPN2     | 1370   | 37 | 3 | 194062028 | 194062028 | Nonsense_Mutation | SNP | C  | T  | 31 | 306 | c.1404G>A      | c.(1402-1404)TGG>TGA | p.W468*       |
| Pat_45 | Post-Resistance | GP5      | 2814   | 37 | 3 | 194118791 | 194118791 | Missense_Mutation | SNP | G  | A  | 40 | 115 | c.221C>T       | c.(220-222)ACC>ATC   | p.T74I        |

|        |                 |              |           |    |   |           |           |                   |     |   |   |    |     |              |                        |               |
|--------|-----------------|--------------|-----------|----|---|-----------|-----------|-------------------|-----|---|---|----|-----|--------------|------------------------|---------------|
| Pat_45 | Post-Resistance | ATP13A3      | 79572     | 37 | 3 | 194167679 | 194167679 | Missense_Mutation | SNP | G | A | 18 | 174 | c.1474C>T    | c.(1474-1476)CTC>TTC   | p.L492F       |
| Pat_45 | Post-Resistance | MUC4         | 4585      | 37 | 3 | 195510155 | 195510155 | Missense_Mutation | SNP | C | T | 4  | 4   | c.7912G>A    | c.(7912-7914)GCC>ACC   | p.A2638T      |
| Pat_45 | Post-Resistance | MUC4         | 4585      | 37 | 3 | 195510158 | 195510158 | Missense_Mutation | SNP | G | C | 4  | 4   | c.7909C>G    | c.(7909-7911)CAC>GAC   | p.H2637D      |
| Pat_45 | Post-Resistance | MUC4         | 4585      | 37 | 3 | 195512606 | 195512606 | Missense_Mutation | SNP | G | C | 2  | 7   | c.5845C>G    | c.(5845-5847)CAC>GAC   | p.H1949D      |
| Pat_45 | Post-Resistance | MUC4         | 4585      | 37 | 3 | 195513758 | 195513758 | Missense_Mutation | SNP | G | C | 2  | 1   | c.4693C>G    | c.(4693-4695)CAC>GAC   | p.H1565D      |
| Pat_45 | Post-Resistance | PCYT1A       | 5130      | 37 | 3 | 195965671 | 195965671 | Missense_Mutation | SNP | G | A | 7  | 25  | c.992C>T     | c.(991-993)TCC>TTC     | p.S331F       |
| Pat_45 | Post-Resistance | CRIPAK       | 285464    | 37 | 4 | 1389416   | 1389416   | Missense_Mutation | SNP | C | T | 58 | 623 | c.1117C>T    | c.(1117-1119)CCG>TCG   | p.P373S       |
| Pat_45 | Post-Resistance | FGFR3        | 2261      | 37 | 4 | 1805525   | 1805525   | Missense_Mutation | SNP | G | A | 13 | 111 | c.1037G>A    | c.(1036-1038)GGG>GAG   | p.G346E       |
| Pat_45 | Post-Resistance | POLN         | 353497    | 37 | 4 | 2158580   | 2158580   | Missense_Mutation | SNP | C | T | 13 | 65  | c.1666G>A    | c.(1666-1668)GGC>AGC   | p.G556S       |
| Pat_45 | Post-Resistance | MAN2B2       | 23324     | 37 | 4 | 6622960   | 6622960   | Missense_Mutation | SNP | C | T | 7  | 165 | c.2978C>T    | c.(2977-2979)ACC>ATC   | p.T993I       |
| Pat_45 | Post-Resistance | TAPT1        | 202018    | 37 | 4 | 16215429  | 16215429  | Missense_Mutation | SNP | C | T | 4  | 31  | c.292G>A     | c.(292-294)GTA>ATA     | p.V98I        |
| Pat_45 | Post-Resistance | GPR125       | 166647    | 37 | 4 | 22463390  | 22463390  | Missense_Mutation | SNP | G | A | 9  | 112 | c.371C>T     | c.(370-372)GCC>GTC     | p.A124V       |
| Pat_45 | Post-Resistance | PPARGC1A     | 10891     | 37 | 4 | 23815650  | 23815650  | Missense_Mutation | SNP | C | T | 15 | 213 | c.1456G>A    | c.(1456-1458)GAC>AAC   | p.D486N       |
| Pat_45 | Post-Resistance | ANAPC4       | 29945     | 37 | 4 | 25391808  | 25391808  | Missense_Mutation | SNP | C | T | 4  | 66  | c.566C>T     | c.(565-567)GCT>GTT     | p.A189V       |
| Pat_45 | Post-Resistance | TLR1         | 7096      | 37 | 4 | 38798346  | 38798346  | Nonsense_Mutation | SNP | G | A | 91 | 292 | c.2107C>T    | c.(2107-2109)CAG>TAG   | p.Q703*       |
| Pat_45 | Post-Resistance | KLB          | 152831    | 37 | 4 | 39448261  | 39448261  | Missense_Mutation | SNP | G | A | 18 | 221 | c.1915G>A    | c.(1915-1917)GTC>ATC   | p.V639I       |
| Pat_45 | Post-Resistance | SCFD2        | 152579    | 37 | 4 | 54231780  | 54231780  | Missense_Mutation | SNP | G | A | 3  | 58  | c.329C>T     | c.(328-330)GCT>GTT     | p.A110V       |
| Pat_45 | Post-Resistance | REST         | 5978      | 37 | 4 | 57777025  | 57777025  | Missense_Mutation | SNP | C | T | 9  | 95  | c.221C>T     | c.(220-222)GCA>GTA     | p.A74V        |
| Pat_45 | Post-Resistance | EPHA5        | 2044      | 37 | 4 | 66509128  | 66509128  | Missense_Mutation | SNP | G | A | 4  | 54  | c.199C>T     | c.(199-201)CCG>TGC     | p.R67C        |
| Pat_45 | Post-Resistance | ALB          | 213       | 37 | 4 | 74280829  | 74280829  | Missense_Mutation | SNP | C | T | 10 | 118 | c.1136C>T    | c.(1135-1137)ACC>ATC   | p.T379I       |
| Pat_45 | Post-Resistance | BMP2K        | 55589     | 37 | 4 | 79792088  | 79792088  | Missense_Mutation | SNP | G | C | 3  | 41  | c.1383G>C    | c.(1381-1383)CAG>CAC   | p.Q461H       |
| Pat_45 | Post-Resistance | CDS1         | 1040      | 37 | 4 | 85566381  | 85566381  | Missense_Mutation | SNP | G | T | 4  | 54  | c.1159G>T    | c.(1159-1161)GCA>TCA   | p.A387S       |
| Pat_45 | Post-Resistance | DDIT4L       | 115265    | 37 | 4 | 101108841 | 101108841 | Missense_Mutation | SNP | C | T | 5  | 24  | c.575G>A     | c.(574-576)GGG>GAG     | p.G192E       |
| Pat_45 | Post-Resistance | CENPE        | 1062      | 37 | 4 | 104059588 | 104059588 | Missense_Mutation | SNP | C | T | 9  | 161 | c.6223G>A    | c.(6223-6225)GTA>ATA   | p.V2075I      |
| Pat_45 | Post-Resistance | OSTC         | 58505     | 37 | 4 | 109571893 | 109571893 | Missense_Mutation | SNP | C | T | 10 | 97  | c.82C>T      | c.(82-84)CCG>TCG       | p.P28S        |
| Pat_45 | Post-Resistance | PCDH18       | 54510     | 37 | 4 | 138442490 | 138442490 | Missense_Mutation | SNP | G | A | 7  | 79  | c.3101C>T    | c.(3100-3102)TCC>TTC   | p.S1034F      |
| Pat_45 | Post-Resistance | ZNF827       | 152485    | 37 | 4 | 146813483 | 146813483 | Missense_Mutation | SNP | A | G | 3  | 56  | c.1178T>C    | c.(1177-1179)ATG>ACG   | p.M393T       |
| Pat_45 | Post-Resistance | GLRB         | 2743      | 37 | 4 | 158091830 | 158091830 | Missense_Mutation | SNP | C | T | 6  | 62  | c.1444C>T    | c.(1444-1446)CCT>TCT   | p.P482S       |
| Pat_45 | Post-Resistance | NPY5R        | 4889      | 37 | 4 | 164272176 | 164272176 | Missense_Mutation | SNP | G | A | 4  | 56  | c.751G>A     | c.(751-753)GAA>AAA     | p.E251K       |
| Pat_45 | Post-Resistance | WDR17        | 116966    | 37 | 4 | 177056421 | 177056421 | Missense_Mutation | SNP | G | A | 3  | 48  | c.1333G>A    | c.(1333-1335)GCT>ACT   | p.A445T       |
| Pat_45 | Post-Resistance | ACSL1        | 2180      | 37 | 4 | 185689574 | 185689574 | Missense_Mutation | SNP | C | T | 17 | 186 | c.1024G>A    | c.(1024-1026)GGA>AGA   | p.G342R       |
| Pat_45 | Post-Resistance | TERT         | 7015      | 37 | 5 | 1254567   | 1254567   | Nonsense_Mutation | SNP | G | A | 4  | 58  | c.3211C>T    | c.(3211-3213)CAG>TAG   | p.Q1071*      |
| Pat_45 | Post-Resistance | KIAA0947     | 23379     | 37 | 5 | 5461116   | 5461116   | Missense_Mutation | SNP | G | A | 19 | 170 | c.1669G>A    | c.(1669-1671)GGA>AGA   | p.G557R       |
| Pat_45 | Post-Resistance | FASTKD3      | 79072     | 37 | 5 | 7867464   | 7867464   | Missense_Mutation | SNP | C | T | 6  | 104 | c.733G>A     | c.(733-735)GGT>AGT     | p.G245S       |
| Pat_45 | Post-Resistance | SLC45A2      | 51151     | 37 | 5 | 33963920  | 33963920  | Missense_Mutation | SNP | G | A | 7  | 91  | c.764C>T     | c.(763-765)CCT>CTT     | p.P255L       |
| Pat_45 | Post-Resistance | DAB2         | 1601      | 37 | 5 | 39376959  | 39376959  | Missense_Mutation | SNP | C | T | 6  | 43  | c.1930G>A    | c.(1930-1932)GGG>AGG   | p.G644R       |
| Pat_45 | Post-Resistance | C6           | 729       | 37 | 5 | 41159253  | 41159253  | Missense_Mutation | SNP | C | T | 21 | 162 | c.1787G>A    | c.(1786-1788)CGA>CAA   | p.R596Q       |
| Pat_45 | Post-Resistance | PAIP1        | 10605     | 37 | 5 | 43547961  | 43547961  | Missense_Mutation | SNP | C | T | 7  | 53  | c.490G>A     | c.(490-492)GAT>AAT     | p.D164N       |
| Pat_45 | Post-Resistance | SNX18        | 112574    | 37 | 5 | 53815262  | 53815262  | Missense_Mutation | SNP | G | A | 3  | 37  | c.1480G>A    | c.(1480-1482)GCC>ACC   | p.A494T       |
| Pat_45 | Post-Resistance | MRPS27       | 23107     | 37 | 5 | 71519541  | 71519541  | Missense_Mutation | SNP | G | A | 15 | 174 | c.974C>T     | c.(973-975)TCC>TTC     | p.S325F       |
| Pat_45 | Post-Resistance | CMYA5        | 202333    | 37 | 5 | 79034609  | 79034609  | Missense_Mutation | SNP | C | T | 7  | 61  | c.10021C>T   | c.(10021-10023)CCA>TCA | p.P3341S      |
| Pat_45 | Post-Resistance | VCAN         | 1462      | 37 | 5 | 82815315  | 82815315  | Missense_Mutation | SNP | C | T | 21 | 176 | c.1190C>T    | c.(1189-1191)CCC>CTC   | p.P397L       |
| Pat_45 | Post-Resistance | EDIL3        | 10085     | 37 | 5 | 83402649  | 83402649  | Splice_Site       | SNP | C | T | 10 | 50  | c.470_splice | c.e6-1                 | p.K157_splice |
| Pat_45 | Post-Resistance | POLR3G       | 10622     | 37 | 5 | 89781490  | 89781490  | Missense_Mutation | SNP | C | T | 8  | 82  | c.106C>T     | c.(106-108)CCA>TCA     | p.P36S        |
| Pat_45 | Post-Resistance | CHD1         | 1105      | 37 | 5 | 98232902  | 98232902  | Nonsense_Mutation | SNP | C | T | 6  | 66  | c.1488G>A    | c.(1486-1488)TGG>TGA   | p.W496*       |
| Pat_45 | Post-Resistance | TMED7-TICAM2 | 100302736 | 37 | 5 | 114916719 | 114916719 | Missense_Mutation | SNP | G | A | 14 | 281 | c.235C>T     | c.(235-237)CTC>TTC     | p.L79F        |
| Pat_45 | Post-Resistance | DMXL1        | 1657      | 37 | 5 | 118556765 | 118556765 | Missense_Mutation | SNP | G | A | 4  | 6   | c.8203G>A    | c.(8203-8205)GGA>AGA   | p.G2735R      |



|        |                 |          |        |    |   |           |           |                   |     |    |    |    |     |                |                      |               |
|--------|-----------------|----------|--------|----|---|-----------|-----------|-------------------|-----|----|----|----|-----|----------------|----------------------|---------------|
| Pat_45 | Post-Resistance | ZNF608   | 57507  | 37 | 5 | 124079830 | 124079830 | Missense_Mutation | SNP | C  | T  | 13 | 207 | c.853G>A       | c.(853-855)GAA>AAA   | p.E285K       |
| Pat_45 | Post-Resistance | RAPGEF6  | 51735  | 37 | 5 | 130840357 | 130840357 | Missense_Mutation | SNP | C  | T  | 7  | 195 | c.1216G>A      | c.(1216-1218)GAC>AAC | p.D406N       |
| Pat_45 | Post-Resistance | SHROOM1  | 134549 | 37 | 5 | 132160884 | 132160884 | Missense_Mutation | SNP | C  | T  | 3  | 34  | c.949G>A       | c.(949-951)GGA>AGA   | p.G317R       |
| Pat_45 | Post-Resistance | PHF15    | 23338  | 37 | 5 | 133895593 | 133895593 | Missense_Mutation | SNP | C  | T  | 10 | 32  | c.385C>T       | c.(385-387)CCT>TCT   | p.P129S       |
| Pat_45 | Post-Resistance | SEC24A   | 10802  | 37 | 5 | 134022544 | 134022544 | Missense_Mutation | SNP | C  | T  | 11 | 129 | c.1556C>T      | c.(1555-1557)ACT>ATT | p.T519I       |
| Pat_45 | Post-Resistance | BRD8     | 10902  | 37 | 5 | 137503704 | 137503704 | Missense_Mutation | SNP | C  | T  | 11 | 173 | c.706G>A       | c.(706-708)GTA>ATA   | p.V236I       |
| Pat_45 | Post-Resistance | APBB3    | 10307  | 37 | 5 | 139943395 | 139943395 | Missense_Mutation | SNP | C  | T  | 5  | 65  | c.155G>A       | c.(154-156)GGT>GAT   | p.G52D        |
| Pat_45 | Post-Resistance | HARS     | 3035   | 37 | 5 | 140062774 | 140062774 | Missense_Mutation | SNP | C  | T  | 14 | 113 | c.211G>A       | c.(211-213)GCA>ACA   | p.A71T        |
| Pat_45 | Post-Resistance | PCDHGA1  | 56114  | 37 | 5 | 140712640 | 140712640 | Missense_Mutation | SNP | T  | A  | 31 | 73  | c.2389T>A      | c.(2389-2391)TTA>ATA | p.L797I       |
| Pat_45 | Post-Resistance | PCDHGA10 | 56106  | 37 | 5 | 140794780 | 140794780 | Missense_Mutation | SNP | G  | A  | 7  | 194 | c.2038G>A      | c.(2038-2040)GGC>AGC | p.G680S       |
| Pat_45 | Post-Resistance | PCDH1    | 5097   | 37 | 5 | 141242829 | 141242829 | Missense_Mutation | SNP | G  | A  | 29 | 114 | c.3067C>T      | c.(3067-3069)CGC>TGC | p.R1023C      |
| Pat_45 | Post-Resistance | LARS     | 51520  | 37 | 5 | 145543896 | 145543896 | Missense_Mutation | SNP | C  | T  | 9  | 96  | c.571G>A       | c.(571-573)GAT>AAT   | p.D191N       |
| Pat_45 | Post-Resistance | TCERG1   | 10915  | 37 | 5 | 145849230 | 145849230 | Missense_Mutation | SNP | C  | T  | 12 | 117 | c.1322C>T      | c.(1321-1323)GCA>GTA | p.A441V       |
| Pat_45 | Post-Resistance | DPYSL3   | 1809   | 37 | 5 | 146781115 | 146781115 | Missense_Mutation | SNP | G  | A  | 8  | 33  | c.956C>T       | c.(955-957)TCC>TTC   | p.S319F       |
| Pat_45 | Post-Resistance | AFAP1L1  | 134265 | 37 | 5 | 148689631 | 148689631 | Missense_Mutation | SNP | C  | T  | 6  | 87  | c.860C>T       | c.(859-861)ACC>ATC   | p.T287I       |
| Pat_45 | Post-Resistance | GRPEL2   | 134266 | 37 | 5 | 148727920 | 148727920 | Missense_Mutation | SNP | C  | T  | 10 | 131 | c.163C>T       | c.(163-165)CCC>TCC   | p.P55S        |
| Pat_45 | Post-Resistance | PDGFRB   | 5159   | 37 | 5 | 149509499 | 149509499 | Missense_Mutation | SNP | C  | T  | 15 | 211 | c.1400G>A      | c.(1399-1401)GGG>GAG | p.G467E       |
| Pat_45 | Post-Resistance | GRIA1    | 2890   | 37 | 5 | 153085424 | 153085424 | Nonsense_Mutation | SNP | G  | A  | 19 | 167 | c.1620G>A      | c.(1618-1620)TGG>TGA | p.W540*       |
| Pat_45 | Post-Resistance | LARP1    | 23367  | 37 | 5 | 154181715 | 154181715 | Missense_Mutation | SNP | C  | T  | 6  | 149 | c.1865C>T      | c.(1864-1866)ACC>ATC | p.T622I       |
| Pat_45 | Post-Resistance | ADAM19   | 8728   | 37 | 5 | 156929917 | 156929917 | Missense_Mutation | SNP | C  | T  | 14 | 158 | c.1202G>A      | c.(1201-1203)GGA>GAA | p.G401E       |
| Pat_45 | Post-Resistance | ODZ2     | 57451  | 37 | 5 | 167420127 | 167420127 | Missense_Mutation | SNP | G  | T  | 5  | 76  | c.1126G>T      | c.(1126-1128)GCT>TCT | p.A376S       |
| Pat_45 | Post-Resistance | DOCK2    | 1794   | 37 | 5 | 169116299 | 169116299 | Missense_Mutation | SNP | G  | A  | 21 | 102 | c.805G>A       | c.(805-807)GAG>AAG   | p.E269K       |
| Pat_45 | Post-Resistance | NKX2-5   | 1482   | 37 | 5 | 172659607 | 172659607 | Missense_Mutation | SNP | C  | T  | 5  | 106 | c.940G>A       | c.(940-942)GGA>AGA   | p.G314R       |
| Pat_45 | Post-Resistance | NOP16    | 51491  | 37 | 5 | 175811276 | 175811276 | Missense_Mutation | SNP | C  | T  | 6  | 51  | c.493G>A       | c.(493-495)GAC>AAC   | p.D165N       |
| Pat_45 | Post-Resistance | HK3      | 3101   | 37 | 5 | 176318460 | 176318460 | Missense_Mutation | SNP | C  | T  | 4  | 85  | c.188G>A       | c.(187-189)AGG>AAG   | p.R63K        |
| Pat_45 | Post-Resistance | N4BP3    | 23138  | 37 | 5 | 177547296 | 177547296 | Missense_Mutation | SNP | C  | T  | 4  | 22  | c.448C>T       | c.(448-450)CAC>TAC   | p.H150Y       |
| Pat_45 | Post-Resistance | ZNF454   | 285676 | 37 | 5 | 178392343 | 178392343 | Missense_Mutation | SNP | C  | T  | 9  | 42  | c.938C>T       | c.(937-939)GCA>GTA   | p.A313V       |
| Pat_45 | Post-Resistance | ADAMTS2  | 9509   | 37 | 5 | 178541068 | 178541068 | Missense_Mutation | SNP | C  | T  | 6  | 88  | c.3436G>A      | c.(3436-3438)GCC>ACC | p.A1146T      |
| Pat_45 | Post-Resistance | MAPK9    | 5601   | 37 | 5 | 179676072 | 179676072 | Missense_Mutation | SNP | C  | T  | 12 | 118 | c.517G>A       | c.(517-519)GCC>ACC   | p.A173T       |
| Pat_45 | Post-Resistance | GFPT2    | 9945   | 37 | 5 | 179729496 | 179729496 | Missense_Mutation | SNP | C  | T  | 11 | 85  | c.1931G>A      | c.(1930-1932)TGC>TAC | p.C644Y       |
| Pat_45 | Post-Resistance | WRNIP1   | 56897  | 37 | 6 | 2779496   | 2779496   | Splice_Site       | SNP | G  | A  | 9  | 103 | c.1257_splice  | c.e4-1               | p.E419_splice |
| Pat_45 | Post-Resistance | DSP      | 1832   | 37 | 6 | 7581491   | 7581491   | Missense_Mutation | SNP | G  | A  | 15 | 40  | c.5068G>A      | c.(5068-5070)GAA>AAA | p.E1690K      |
| Pat_45 | Post-Resistance | SLC35B3  | 51000  | 37 | 6 | 8415190   | 8415190   | Missense_Mutation | SNP | T  | C  | 5  | 63  | c.1006A>G      | c.(1006-1008)ATG>GTG | p.M336V       |
| Pat_45 | Post-Resistance | PHACTR1  | 221692 | 37 | 6 | 13230391  | 13230391  | Missense_Mutation | SNP | G  | A  | 6  | 30  | c.1357G>A      | c.(1357-1359)GAG>AAG | p.E453K       |
| Pat_45 | Post-Resistance | NOL7     | 51406  | 37 | 6 | 13618326  | 13618326  | Missense_Mutation | SNP | G  | A  | 3  | 49  | c.455G>A       | c.(454-456)GGA>GAA   | p.G152E       |
| Pat_45 | Post-Resistance | NUP153   | 9972   | 37 | 6 | 17665474  | 17665474  | Missense_Mutation | SNP | C  | T  | 3  | 48  | c.1211G>A      | c.(1210-1212)TGC>TAC | p.C404Y       |
| Pat_45 | Post-Resistance | KIF13A   | 63971  | 37 | 6 | 17764861  | 17764861  | Missense_Mutation | SNP | G  | A  | 3  | 69  | c.4898C>T      | c.(4897-4899)ACC>ATC | p.T1633I      |
| Pat_45 | Post-Resistance | KIF13A   | 63971  | 37 | 6 | 17796918  | 17796918  | Missense_Mutation | SNP | G  | A  | 68 | 313 | c.2924C>T      | c.(2923-2925)ACA>ATA | p.T975I       |
| Pat_45 | Post-Resistance | MBOAT1   | 154141 | 37 | 6 | 20144547  | 20144547  | Splice_Site       | SNP | C  | T  | 4  | 37  | c.324_splice   | c.e4-1               | p.R108_splice |
| Pat_45 | Post-Resistance | HIST1H3H | 8357   | 37 | 6 | 27777876  | 27777876  | Missense_Mutation | SNP | C  | T  | 24 | 150 | c.25C>T        | c.(25-27)CGC>TGC     | p.R9C         |
| Pat_45 | Post-Resistance | SCAND3   | 114821 | 37 | 6 | 28541481  | 28541481  | Missense_Mutation | SNP | C  | T  | 11 | 28  | c.2185G>A      | c.(2185-2187)GTT>ATT | p.V729I       |
| Pat_45 | Post-Resistance | OR12D2   | 26529  | 37 | 6 | 29365320  | 29365320  | Missense_Mutation | SNP | C  | T  | 16 | 182 | c.844C>T       | c.(844-846)CCT>TCT   | p.P282S       |
| Pat_45 | Post-Resistance | OR2H1    | 26716  | 37 | 6 | 29429587  | 29429587  | Missense_Mutation | SNP | G  | A  | 11 | 202 | c.41G>A        | c.(40-42)GGC>GAC     | p.G14D        |
| Pat_45 | Post-Resistance | ZFP57    | 346171 | 37 | 6 | 29641408  | 29641408  | Missense_Mutation | SNP | C  | T  | 4  | 83  | c.480G>A       | c.(478-480)ATG>ATA   | p.M160I       |
| Pat_45 | Post-Resistance | RNF39    | 80352  | 37 | 6 | 30039054  | 30039054  | Missense_Mutation | SNP | C  | T  | 4  | 34  | c.1097G>A      | c.(1096-1098)CGC>CAC | p.R366H       |
| Pat_45 | Post-Resistance | MDC1     | 9656   | 37 | 6 | 30673605  | 30673605  | Missense_Mutation | SNP | G  | A  | 15 | 169 | c.3355C>T      | c.(3355-3357)CCA>TCA | p.P1119S      |
| Pat_45 | Post-Resistance | DPCR1    | 135656 | 37 | 6 | 30919836  | 30919837  | Missense_Mutation | DNP | GG | AA | 25 | 161 | .3595_3596GG>A | c.(3595-3597)GGG>AAG | p.G1199K      |

|        |                 |          |        |    |   |           |           |                   |     |   |   |    |     |               |                        |               |
|--------|-----------------|----------|--------|----|---|-----------|-----------|-------------------|-----|---|---|----|-----|---------------|------------------------|---------------|
| Pat_45 | Post-Resistance | C6orf47  | 57827  | 37 | 6 | 31627519  | 31627519  | Missense_Mutation | SNP | G | A | 8  | 72  | c.206C>T      | c.(205-207)GCT>GTT     | p.A69V        |
| Pat_45 | Post-Resistance | SKIV2L   | 6499   | 37 | 6 | 31927814  | 31927814  | Missense_Mutation | SNP | C | T | 5  | 140 | c.154C>T      | c.(154-156)CCA>TCA     | p.P52S        |
| Pat_45 | Post-Resistance | EGFL8    | 80864  | 37 | 6 | 32134274  | 32134274  | Splice_Site       | SNP | G | A | 13 | 139 | c.102_splice  | c.e3-1                 | p.S34_splice  |
| Pat_45 | Post-Resistance | EGFL8    | 80864  | 37 | 6 | 32135002  | 32135002  | Missense_Mutation | SNP | C | T | 9  | 18  | c.569C>T      | c.(568-570)CCC>CTC     | p.P190L       |
| Pat_45 | Post-Resistance | COL11A2  | 1302   | 37 | 6 | 33131507  | 33131507  | Missense_Mutation | SNP | G | A | 3  | 81  | c.5159C>T     | c.(5158-5160)GCC>GTC   | p.A1720V      |
| Pat_45 | Post-Resistance | ITPR3    | 3710   | 37 | 6 | 33653432  | 33653432  | Missense_Mutation | SNP | C | T | 12 | 70  | c.5495C>T     | c.(5494-5496)TCC>TTC   | p.S1832F      |
| Pat_45 | Post-Resistance | SNRPC    | 6631   | 37 | 6 | 34741322  | 34741322  | Missense_Mutation | SNP | C | T | 18 | 122 | c.455C>T      | c.(454-456)CCC>CTC     | p.P152L       |
| Pat_45 | Post-Resistance | MAPK14   | 1432   | 37 | 6 | 36076195  | 36076195  | Missense_Mutation | SNP | C | T | 6  | 87  | c.1054C>T     | c.(1054-1056)CCC>TCC   | p.P352S       |
| Pat_45 | Post-Resistance | C6orf129 | 154467 | 37 | 6 | 37450997  | 37450997  | Missense_Mutation | SNP | G | A | 7  | 92  | c.259C>T      | c.(259-261)CTC>TTC     | p.L87F        |
| Pat_45 | Post-Resistance | FOXP4    | 116113 | 37 | 6 | 41562730  | 41562730  | Splice_Site       | SNP | G | A | 6  | 101 | c.1658_splice | c.e14+1                | p.G553_splice |
| Pat_45 | Post-Resistance | FRS3     | 10817  | 37 | 6 | 41740697  | 41740697  | Missense_Mutation | SNP | C | T | 6  | 56  | c.254G>A      | c.(253-255)GGA>GAA     | p.G85E        |
| Pat_45 | Post-Resistance | KIAA0240 | 23506  | 37 | 6 | 42832724  | 42832724  | Missense_Mutation | SNP | C | T | 11 | 41  | c.2780C>T     | c.(2779-2781)CCT>CTT   | p.P927L       |
| Pat_45 | Post-Resistance | MEA1     | 4201   | 37 | 6 | 42980663  | 42980663  | Splice_Site       | SNP | C | T | 10 | 119 | c.406_splice  | c.e3+1                 | p.E136_splice |
| Pat_45 | Post-Resistance | SLC22A7  | 10864  | 37 | 6 | 43270099  | 43270099  | Missense_Mutation | SNP | G | A | 3  | 36  | c.1223G>A     | c.(1222-1224)GGG>GAG   | p.G408E       |
| Pat_45 | Post-Resistance | POLH     | 5429   | 37 | 6 | 43581870  | 43581870  | Missense_Mutation | SNP | G | A | 27 | 169 | c.1718G>A     | c.(1717-1719)GGG>GAG   | p.G573E       |
| Pat_45 | Post-Resistance | SLC29A1  | 2030   | 37 | 6 | 44197670  | 44197670  | Missense_Mutation | SNP | G | A | 10 | 88  | c.341G>A      | c.(340-342)GGC>GAC     | p.G114D       |
| Pat_45 | Post-Resistance | SUPT3H   | 8464   | 37 | 6 | 44921114  | 44921114  | Missense_Mutation | SNP | G | A | 4  | 60  | c.767C>T      | c.(766-768)ACC>ATC     | p.T256I       |
| Pat_45 | Post-Resistance | DEFB114  | 245928 | 37 | 6 | 49928058  | 49928058  | Missense_Mutation | SNP | G | A | 9  | 54  | c.157C>T      | c.(157-159)CCA>TCA     | p.P53S        |
| Pat_45 | Post-Resistance | PKHD1    | 5314   | 37 | 6 | 51887733  | 51887733  | Missense_Mutation | SNP | C | T | 10 | 79  | c.5246G>A     | c.(5245-5247)GGT>GAT   | p.G1749D      |
| Pat_45 | Post-Resistance | PKHD1    | 5314   | 37 | 6 | 51915024  | 51915024  | Missense_Mutation | SNP | G | A | 29 | 113 | c.2210C>T     | c.(2209-2211)TCC>TTC   | p.S737F       |
| Pat_45 | Post-Resistance | BMP5     | 653    | 37 | 6 | 55739516  | 55739516  | Missense_Mutation | SNP | C | T | 10 | 135 | c.148G>A      | c.(148-150)GAA>AAA     | p.E50K        |
| Pat_45 | Post-Resistance | RAB23    | 51715  | 37 | 6 | 57061387  | 57061387  | Missense_Mutation | SNP | G | A | 9  | 26  | c.259C>T      | c.(259-261)CTC>TTC     | p.L87F        |
| Pat_45 | Post-Resistance | B3GAT2   | 135152 | 37 | 6 | 71665784  | 71665784  | Missense_Mutation | SNP | C | G | 4  | 37  | c.349G>C      | c.(349-351)GAG>CAG     | p.E117Q       |
| Pat_45 | Post-Resistance | DDX43    | 55510  | 37 | 6 | 74104827  | 74104827  | Missense_Mutation | SNP | G | A | 9  | 22  | c.199G>A      | c.(199-201)GAA>AAA     | p.E67K        |
| Pat_45 | Post-Resistance | MYO6     | 4646   | 37 | 6 | 76576283  | 76576283  | Missense_Mutation | SNP | G | A | 8  | 97  | c.1715G>A     | c.(1714-1716)AGA>AAA   | p.R572K       |
| Pat_45 | Post-Resistance | TBX18    | 9096   | 37 | 6 | 85470015  | 85470015  | Missense_Mutation | SNP | T | C | 6  | 36  | c.557A>G      | c.(556-558)TAC>TGC     | p.Y186C       |
| Pat_45 | Post-Resistance | SLC35A1  | 10559  | 37 | 6 | 88218174  | 88218174  | Missense_Mutation | SNP | C | T | 4  | 60  | c.611C>T      | c.(610-612)ACT>ATT     | p.T204I       |
| Pat_45 | Post-Resistance | MDN1     | 23195  | 37 | 6 | 90402676  | 90402676  | Missense_Mutation | SNP | C | T | 4  | 34  | c.10073G>A    | c.(10072-10074)GGG>GAC | p.G3358E      |
| Pat_45 | Post-Resistance | MDN1     | 23195  | 37 | 6 | 90442434  | 90442434  | Missense_Mutation | SNP | C | T | 11 | 219 | c.4784G>A     | c.(4783-4785)GGC>GAC   | p.G1595D      |
| Pat_45 | Post-Resistance | CASP8AP2 | 9994   | 37 | 6 | 90572776  | 90572776  | Missense_Mutation | SNP | G | A | 9  | 127 | c.1348G>A     | c.(1348-1350)GAA>AAA   | p.E450K       |
| Pat_45 | Post-Resistance | EPHA7    | 2045   | 37 | 6 | 94120359  | 94120359  | Missense_Mutation | SNP | C | T | 4  | 93  | c.692G>A      | c.(691-693)CGA>CAA     | p.R231Q       |
| Pat_45 | Post-Resistance | FUT9     | 10690  | 37 | 6 | 96651776  | 96651776  | Missense_Mutation | SNP | C | T | 5  | 9   | c.745C>T      | c.(745-747)CAC>TAC     | p.H249Y       |
| Pat_45 | Post-Resistance | MCHR2    | 84539  | 37 | 6 | 100368874 | 100368874 | Missense_Mutation | SNP | C | T | 9  | 139 | c.965G>A      | c.(964-966)AGA>AAA     | p.R322K       |
| Pat_45 | Post-Resistance | ZUFSP    | 221302 | 37 | 6 | 116973256 | 116973256 | Missense_Mutation | SNP | C | T | 12 | 183 | c.1061G>A     | c.(1060-1062)GGC>GAC   | p.G354D       |
| Pat_45 | Post-Resistance | RFX6     | 222546 | 37 | 6 | 117198650 | 117198650 | Missense_Mutation | SNP | C | G | 2  | 8   | c.212C>G      | c.(211-213)GCA>GGA     | p.A71G        |
| Pat_45 | Post-Resistance | ROS1     | 6098   | 37 | 6 | 117687247 | 117687247 | Missense_Mutation | SNP | G | A | 12 | 173 | c.2804C>T     | c.(2803-2805)CCC>CTC   | p.P935L       |
| Pat_45 | Post-Resistance | PTPRK    | 5796   | 37 | 6 | 128388705 | 128388705 | Missense_Mutation | SNP | C | T | 4  | 64  | c.2116G>A     | c.(2116-2118)GGA>AGA   | p.G706R       |
| Pat_45 | Post-Resistance | PTPRK    | 5796   | 37 | 6 | 128643216 | 128643216 | Missense_Mutation | SNP | C | T | 4  | 80  | c.463G>A      | c.(463-465)GCA>ACA     | p.A155T       |
| Pat_45 | Post-Resistance | LAMA2    | 3908   | 37 | 6 | 129748927 | 129748927 | Missense_Mutation | SNP | G | A | 14 | 151 | c.5896G>A     | c.(5896-5898)GAT>AAT   | p.D1966N      |
| Pat_45 | Post-Resistance | TMEM200A | 114801 | 37 | 6 | 130762616 | 130762616 | Missense_Mutation | SNP | C | T | 6  | 86  | c.1049C>T     | c.(1048-1050)TCC>TTC   | p.S350F       |
| Pat_45 | Post-Resistance | EPB41L2  | 2037   | 37 | 6 | 131216109 | 131216109 | Missense_Mutation | SNP | C | T | 9  | 114 | c.1387G>A     | c.(1387-1389)GAG>AAG   | p.E463K       |
| Pat_45 | Post-Resistance | MOXD1    | 26002  | 37 | 6 | 132645128 | 132645128 | Missense_Mutation | SNP | G | C | 9  | 109 | c.1055C>G     | c.(1054-1056)CCT>CGT   | p.P352R       |
| Pat_45 | Post-Resistance | SGK1     | 6446   | 37 | 6 | 134491980 | 134491980 | Missense_Mutation | SNP | G | A | 11 | 129 | c.1112C>T     | c.(1111-1113)CCT>CTT   | p.P371L       |
| Pat_45 | Post-Resistance | IFNGR1   | 3459   | 37 | 6 | 137527318 | 137527318 | Missense_Mutation | SNP | C | T | 8  | 220 | c.328G>A      | c.(328-330)GAA>AAA     | p.E110K       |
| Pat_45 | Post-Resistance | TNFAIP3  | 7128   | 37 | 6 | 138196132 | 138196132 | Missense_Mutation | SNP | C | T | 20 | 253 | c.446C>T      | c.(445-447)TCT>TTT     | p.S149F       |
| Pat_45 | Post-Resistance | HIVEP2   | 3097   | 37 | 6 | 143093718 | 143093718 | Missense_Mutation | SNP | G | A | 7  | 89  | c.2158C>T     | c.(2158-2160)CCT>TCT   | p.P720S       |
| Pat_45 | Post-Resistance | HIVEP2   | 3097   | 37 | 6 | 143094717 | 143094717 | Missense_Mutation | SNP | G | A | 14 | 205 | c.1159C>T     | c.(1159-1161)CTT>TTT   | p.L387F       |

|        |                 |          |        |    |   |           |           |                   |     |   |   |    |     |                |                        |                |
|--------|-----------------|----------|--------|----|---|-----------|-----------|-------------------|-----|---|---|----|-----|----------------|------------------------|----------------|
| Pat_45 | Post-Resistance | UTRN     | 7402   | 37 | 6 | 144750798 | 144750798 | Missense_Mutation | SNP | C | T | 10 | 80  | c.776C>T       | c.(775-777)ACC>ATC     | p.T259I        |
| Pat_45 | Post-Resistance | FBXO30   | 84085  | 37 | 6 | 146126061 | 146126061 | Missense_Mutation | SNP | C | T | 4  | 66  | c.1481G>A      | c.(1480-1482)AGT>AAT   | p.S494N        |
| Pat_45 | Post-Resistance | FBXO30   | 84085  | 37 | 6 | 146126272 | 146126272 | Missense_Mutation | SNP | C | T | 20 | 220 | c.1270G>A      | c.(1270-1272)GAT>AAT   | p.D424N        |
| Pat_45 | Post-Resistance | NUP43    | 348995 | 37 | 6 | 150048310 | 150048310 | Missense_Mutation | SNP | G | A | 4  | 22  | c.938C>T       | c.(937-939)TCT>TTT     | p.S313F        |
| Pat_45 | Post-Resistance | SYNE1    | 23345  | 37 | 6 | 152657990 | 152657990 | Missense_Mutation | SNP | C | T | 10 | 158 | c.12514G>A     | c.(12514-12516)GTT>ATT | p.V4172I       |
| Pat_45 | Post-Resistance | SYNE1    | 23345  | 37 | 6 | 152674397 | 152674397 | Splice_Site       | SNP | C | T | 17 | 302 | c.11253_splice | c.e69+1                | p.E3751_splice |
| Pat_45 | Post-Resistance | SYNE1    | 23345  | 37 | 6 | 152697944 | 152697944 | Missense_Mutation | SNP | C | T | 5  | 90  | c.9113G>A      | c.(9112-9114)GGA>GAA   | p.G3038E       |
| Pat_45 | Post-Resistance | SYNE1    | 23345  | 37 | 6 | 152706859 | 152706859 | Missense_Mutation | SNP | C | T | 27 | 167 | c.8602G>A      | c.(8602-8604)GAT>AAT   | p.D2868N       |
| Pat_45 | Post-Resistance | SYNE1    | 23345  | 37 | 6 | 152749434 | 152749434 | Missense_Mutation | SNP | C | T | 22 | 226 | c.4882G>A      | c.(4882-4884)GAG>AAG   | p.E1628K       |
| Pat_45 | Post-Resistance | TIAM2    | 26230  | 37 | 6 | 155450689 | 155450689 | Nonsense_Mutation | SNP | C | A | 4  | 56  | c.332C>A       | c.(331-333)TCA>TAA     | p.S111*        |
| Pat_45 | Post-Resistance | TULP4    | 56995  | 37 | 6 | 158923406 | 158923406 | Missense_Mutation | SNP | G | A | 28 | 327 | c.2711G>A      | c.(2710-2712)CGC>CAC   | p.R904H        |
| Pat_45 | Post-Resistance | RSPH3    | 83861  | 37 | 6 | 159414948 | 159414948 | Missense_Mutation | SNP | G | A | 3  | 18  | c.553C>T       | c.(553-555)CCT>TCT     | p.P185S        |
| Pat_45 | Post-Resistance | WTAP     | 9589   | 37 | 6 | 160176300 | 160176300 | Missense_Mutation | SNP | C | T | 10 | 78  | c.848C>T       | c.(847-849)TCC>TTC     | p.S283F        |
| Pat_45 | Post-Resistance | SLC22A3  | 6581   | 37 | 6 | 160769498 | 160769498 | Missense_Mutation | SNP | G | A | 6  | 64  | c.47G>A        | c.(46-48)CGC>CAC       | p.R16H         |
| Pat_45 | Post-Resistance | PLG      | 5340   | 37 | 6 | 161127530 | 161127530 | Missense_Mutation | SNP | A | C | 9  | 176 | c.141A>C       | c.(139-141)GAA>GAC     | p.E47D         |
| Pat_45 | Post-Resistance | MAP3K4   | 4216   | 37 | 6 | 161455329 | 161455329 | Missense_Mutation | SNP | C | T | 6  | 96  | c.191C>T       | c.(190-192)CCT>CTT     | p.P64L         |
| Pat_45 | Post-Resistance | RNASET2  | 8635   | 37 | 6 | 167366005 | 167366005 | Missense_Mutation | SNP | C | T | 26 | 88  | c.118G>A       | c.(118-120)GTT>ATT     | p.V40I         |
| Pat_45 | Post-Resistance | THBS2    | 7058   | 37 | 6 | 169637792 | 169637792 | Missense_Mutation | SNP | C | T | 15 | 211 | c.1228G>A      | c.(1228-1230)GTC>ATC   | p.V410I        |
| Pat_45 | Post-Resistance | FAM120B  | 84498  | 37 | 6 | 170627298 | 170627298 | Missense_Mutation | SNP | G | A | 5  | 64  | c.820G>A       | c.(820-822)GTT>ATT     | p.V274I        |
| Pat_45 | Post-Resistance | GPER     | 2852   | 37 | 7 | 1132472   | 1132472   | Missense_Mutation | SNP | A | G | 3  | 75  | c.1108A>G      | c.(1108-1110)AGG>GGG   | p.R370G        |
| Pat_45 | Post-Resistance | MICALL2  | 79778  | 37 | 7 | 1481914   | 1481914   | Missense_Mutation | SNP | G | A | 20 | 93  | c.1625C>T      | c.(1624-1626)TCC>TTC   | p.S542F        |
| Pat_45 | Post-Resistance | INTS1    | 26173  | 37 | 7 | 1542537   | 1542537   | Missense_Mutation | SNP | C | T | 41 | 243 | c.349G>A       | c.(349-351)GTG>ATG     | p.V117M        |
| Pat_45 | Post-Resistance | C7orf27  | 221927 | 37 | 7 | 2578065   | 2578065   | Missense_Mutation | SNP | C | T | 8  | 157 | c.2104G>A      | c.(2104-2106)GAC>AAC   | p.D702N        |
| Pat_45 | Post-Resistance | SDK1     | 221935 | 37 | 7 | 4089031   | 4089031   | Missense_Mutation | SNP | C | T | 21 | 185 | c.2654C>T      | c.(2653-2655)ACC>ATC   | p.T885I        |
| Pat_45 | Post-Resistance | TNRC18   | 84629  | 37 | 7 | 5399064   | 5399064   | Missense_Mutation | SNP | C | T | 32 | 429 | c.4798G>A      | c.(4798-4800)GAT>AAT   | p.D1600N       |
| Pat_45 | Post-Resistance | ACTB     | 60     | 37 | 7 | 5568970   | 5568970   | Missense_Mutation | SNP | C | T | 10 | 186 | c.185G>A       | c.(184-186)AGA>AAA     | p.R62K         |
| Pat_45 | Post-Resistance | C7orf70  | 84792  | 37 | 7 | 6370608   | 6370608   | Missense_Mutation | SNP | C | T | 9  | 95  | c.178G>A       | c.(178-180)GCA>ACA     | p.A60T         |
| Pat_45 | Post-Resistance | GLCC1    | 113263 | 37 | 7 | 8009030   | 8009030   | Missense_Mutation | SNP | C | T | 3  | 10  | c.49C>T        | c.(49-51)CAT>TAT       | p.H17Y         |
| Pat_45 | Post-Resistance | HDAC9    | 9734   | 37 | 7 | 18788643  | 18788643  | Missense_Mutation | SNP | C | T | 8  | 68  | c.1916C>T      | c.(1915-1917)CCC>CTC   | p.P639L        |
| Pat_45 | Post-Resistance | MACC1    | 346389 | 37 | 7 | 20199746  | 20199746  | Missense_Mutation | SNP | C | T | 7  | 97  | c.238G>A       | c.(238-240)GAC>AAC     | p.D80N         |
| Pat_45 | Post-Resistance | SP4      | 6671   | 37 | 7 | 21469306  | 21469306  | Missense_Mutation | SNP | G | A | 33 | 169 | c.523G>A       | c.(523-525)GAA>AAA     | p.E175K        |
| Pat_45 | Post-Resistance | SP4      | 6671   | 37 | 7 | 21469960  | 21469960  | Missense_Mutation | SNP | C | T | 5  | 87  | c.1177C>T      | c.(1177-1179)CTT>TTT   | p.L393F        |
| Pat_45 | Post-Resistance | DNAH11   | 8701   | 37 | 7 | 21934611  | 21934611  | Missense_Mutation | SNP | C | T | 5  | 75  | c.13064C>T     | c.(13063-13065)GCC>GTC | p.A4355V       |
| Pat_45 | Post-Resistance | NUPL2    | 11097  | 37 | 7 | 23240326  | 23240326  | Missense_Mutation | SNP | C | T | 4  | 74  | c.1234C>T      | c.(1234-1236)CCA>TCA   | p.P412S        |
| Pat_45 | Post-Resistance | TRA2A    | 29896  | 37 | 7 | 23552565  | 23552565  | Missense_Mutation | SNP | C | T | 50 | 144 | c.473G>A       | c.(472-474)CGA>CAA     | p.R158Q        |
| Pat_45 | Post-Resistance | OSBPL3   | 26031  | 37 | 7 | 24874119  | 24874119  | Missense_Mutation | SNP | G | A | 8  | 162 | c.1732C>T      | c.(1732-1734)CCC>TCC   | p.P578S        |
| Pat_45 | Post-Resistance | HOXA3    | 3200   | 37 | 7 | 27148306  | 27148306  | Missense_Mutation | SNP | C | T | 5  | 71  | c.560G>A       | c.(559-561)GGG>GAG     | p.G187E        |
| Pat_45 | Post-Resistance | CPVL     | 54504  | 37 | 7 | 29126138  | 29126138  | Missense_Mutation | SNP | G | A | 3  | 60  | c.571C>T       | c.(571-573)CCT>TCT     | p.P191S        |
| Pat_45 | Post-Resistance | PDE1C    | 5137   | 37 | 7 | 31876811  | 31876811  | Missense_Mutation | SNP | C | T | 4  | 100 | c.1186G>A      | c.(1186-1188)GAG>AAG   | p.E396K        |
| Pat_45 | Post-Resistance | DPY19L1  | 23333  | 37 | 7 | 34971314  | 34971314  | Nonsense_Mutation | SNP | C | T | 3  | 17  | c.1899G>A      | c.(1897-1899)TGG>TGA   | p.W633*        |
| Pat_45 | Post-Resistance | KIAA0895 | 23366  | 37 | 7 | 36370620  | 36370620  | Missense_Mutation | SNP | C | T | 7  | 161 | c.1375G>A      | c.(1375-1377)GAC>AAC   | p.D459N        |
| Pat_45 | Post-Resistance | ANLN     | 54443  | 37 | 7 | 36459802  | 36459802  | Missense_Mutation | SNP | G | A | 18 | 90  | c.1894G>A      | c.(1894-1896)GAA>AAA   | p.E632K        |
| Pat_45 | Post-Resistance | TARP     | 445347 | 37 | 7 | 38305096  | 38305096  | Missense_Mutation | SNP | G | A | 15 | 131 | c.611C>T       | c.(610-612)ACC>ATC     | p.T204I        |
| Pat_45 | Post-Resistance | TARP     | 445347 | 37 | 7 | 38305106  | 38305106  | Missense_Mutation | SNP | C | G | 15 | 136 | c.601G>C       | c.(601-603)GAG>CAG     | p.E201Q        |
| Pat_45 | Post-Resistance | AMPH     | 273    | 37 | 7 | 38424515  | 38424515  | Nonsense_Mutation | SNP | C | T | 9  | 92  | c.1992G>A      | c.(1990-1992)TGG>TGA   | p.W664*        |
| Pat_45 | Post-Resistance | MRPL32   | 64983  | 37 | 7 | 42974574  | 42974574  | Missense_Mutation | SNP | G | A | 7  | 142 | c.151G>A       | c.(151-153)GGC>AGC     | p.G51S         |
| Pat_45 | Post-Resistance | HECW1    | 23072  | 37 | 7 | 43508660  | 43508660  | Missense_Mutation | SNP | G | A | 33 | 499 | c.3055G>A      | c.(3055-3057)GAA>AAA   | p.E1019K       |

|        |                 |          |        |    |   |           |           |                   |     |   |   |    |     |               |                      |               |
|--------|-----------------|----------|--------|----|---|-----------|-----------|-------------------|-----|---|---|----|-----|---------------|----------------------|---------------|
| Pat_45 | Post-Resistance | BLVRA    | 644    | 37 | 7 | 43843320  | 43843320  | Missense_Mutation | SNP | G | A | 24 | 379 | c.506G>A      | c.(505-507)GGC>GAC   | p.G169D       |
| Pat_45 | Post-Resistance | YKT6     | 10652  | 37 | 7 | 44245993  | 44245993  | Missense_Mutation | SNP | G | T | 4  | 84  | c.197G>T      | c.(196-198)TGC>TTC   | p.C66F        |
| Pat_45 | Post-Resistance | NPC1L1   | 29881  | 37 | 7 | 44575965  | 44575965  | Missense_Mutation | SNP | C | T | 11 | 101 | c.1744G>A     | c.(1744-1746)GGG>AGG | p.G582R       |
| Pat_45 | Post-Resistance | OGDH     | 4967   | 37 | 7 | 44713485  | 44713485  | Nonsense_Mutation | SNP | C | T | 9  | 192 | c.733C>T      | c.(733-735)CAG>TAG   | p.Q245*       |
| Pat_45 | Post-Resistance | MYO1G    | 64005  | 37 | 7 | 45005743  | 45005743  | Missense_Mutation | SNP | G | A | 11 | 73  | c.2086C>T     | c.(2086-2088)CCC>TCC | p.P696S       |
| Pat_45 | Post-Resistance | MYO1G    | 64005  | 37 | 7 | 45005830  | 45005830  | Missense_Mutation | SNP | C | T | 3  | 26  | c.1999G>A     | c.(1999-2001)GAC>AAC | p.D667N       |
| Pat_45 | Post-Resistance | CCM2     | 83605  | 37 | 7 | 45078002  | 45078002  | Missense_Mutation | SNP | G | A | 22 | 252 | c.181G>A      | c.(181-183)GAC>AAC   | p.D61N        |
| Pat_45 | Post-Resistance | TBRG4    | 9238   | 37 | 7 | 45145221  | 45145221  | Missense_Mutation | SNP | G | A | 9  | 142 | c.554C>T      | c.(553-555)GCC>GTC   | p.A185V       |
| Pat_45 | Post-Resistance | IGFBP3   | 3486   | 37 | 7 | 45956840  | 45956840  | Missense_Mutation | SNP | G | A | 67 | 222 | c.602C>T      | c.(601-603)TCC>TTC   | p.S201F       |
| Pat_45 | Post-Resistance | POM121   | 9883   | 37 | 7 | 72398999  | 72398999  | Missense_Mutation | SNP | C | T | 6  | 120 | c.1099C>T     | c.(1099-1101)CCT>TCT | p.P367S       |
| Pat_45 | Post-Resistance | ELN      | 2006   | 37 | 7 | 73481094  | 73481094  | Missense_Mutation | SNP | C | T | 8  | 108 | c.2137C>T     | c.(2137-2139)CCC>TCC | p.P713S       |
| Pat_45 | Post-Resistance | UPK3B    | 80761  | 37 | 7 | 76143347  | 76143347  | Missense_Mutation | SNP | G | A | 16 | 120 | c.710G>A      | c.(709-711)GGC>GAC   | p.G237D       |
| Pat_45 | Post-Resistance | HGF      | 3082   | 37 | 7 | 81332055  | 81332055  | Missense_Mutation | SNP | G | A | 5  | 70  | c.2029C>T     | c.(2029-2031)CTT>TTT | p.L677F       |
| Pat_45 | Post-Resistance | PCLO     | 27445  | 37 | 7 | 82584325  | 82584325  | Missense_Mutation | SNP | C | T | 11 | 127 | c.5944G>A     | c.(5944-5946)GGA>AGA | p.G1982R      |
| Pat_45 | Post-Resistance | ZNF804B  | 219578 | 37 | 7 | 88964874  | 88964874  | Missense_Mutation | SNP | G | A | 4  | 54  | c.2578G>A     | c.(2578-2580)GAG>AAG | p.E860K       |
| Pat_45 | Post-Resistance | STEAP2   | 261729 | 37 | 7 | 89854678  | 89854678  | Missense_Mutation | SNP | C | G | 20 | 43  | c.282C>G      | c.(280-282)CAC>CAG   | p.H94Q        |
| Pat_45 | Post-Resistance | AKAP9    | 10142  | 37 | 7 | 91674350  | 91674350  | Missense_Mutation | SNP | C | T | 6  | 79  | c.5191C>T     | c.(5191-5193)CTT>TTT | p.L1731F      |
| Pat_45 | Post-Resistance | COL1A2   | 1278   | 37 | 7 | 94034535  | 94034535  | Missense_Mutation | SNP | C | T | 8  | 78  | c.457C>T      | c.(457-459)CCT>TCT   | p.P153S       |
| Pat_45 | Post-Resistance | COL1A2   | 1278   | 37 | 7 | 94054955  | 94054955  | Missense_Mutation | SNP | G | A | 12 | 141 | c.2815G>A     | c.(2815-2817)GAT>AAT | p.D939N       |
| Pat_45 | Post-Resistance | BAIAP2L1 | 55971  | 37 | 7 | 97946539  | 97946539  | Missense_Mutation | SNP | C | T | 28 | 208 | c.478G>A      | c.(478-480)GAA>AAA   | p.E160K       |
| Pat_45 | Post-Resistance | TRRAP    | 8295   | 37 | 7 | 98567775  | 98567775  | Missense_Mutation | SNP | C | T | 18 | 176 | c.7532C>T     | c.(7531-7533)ACC>ATC | p.T2511I      |
| Pat_45 | Post-Resistance | AP4M1    | 9179   | 37 | 7 | 99701259  | 99701259  | Missense_Mutation | SNP | A | G | 96 | 439 | c.487A>G      | c.(487-489)AAA>GAA   | p.K163E       |
| Pat_45 | Post-Resistance | GPC2     | 221914 | 37 | 7 | 99769443  | 99769443  | Missense_Mutation | SNP | C | T | 4  | 11  | c.1129G>A     | c.(1129-1131)GAG>AAG | p.E377K       |
| Pat_45 | Post-Resistance | STAG3    | 10734  | 37 | 7 | 99783872  | 99783872  | Missense_Mutation | SNP | G | A | 8  | 172 | c.386G>A      | c.(385-387)GGA>GAA   | p.G129E       |
| Pat_45 | Post-Resistance | EPHB4    | 2050   | 37 | 7 | 100417784 | 100417784 | Missense_Mutation | SNP | G | A | 6  | 157 | c.943C>T      | c.(943-945)CCC>TCC   | p.P315S       |
| Pat_45 | Post-Resistance | SRRT     | 51593  | 37 | 7 | 100484762 | 100484762 | Missense_Mutation | SNP | G | A | 31 | 331 | c.1916G>A     | c.(1915-1917)CGC>CAC | p.R639H       |
| Pat_45 | Post-Resistance | C7orf52  | 375607 | 37 | 7 | 100817952 | 100817952 | Missense_Mutation | SNP | G | A | 9  | 108 | c.137C>T      | c.(136-138)CCT>CTT   | p.P46L        |
| Pat_45 | Post-Resistance | FIS1     | 51024  | 37 | 7 | 100883103 | 100883103 | Missense_Mutation | SNP | G | A | 3  | 26  | c.443C>T      | c.(442-444)TCC>TTC   | p.S148F       |
| Pat_45 | Post-Resistance | DLD      | 1738   | 37 | 7 | 107556059 | 107556059 | Missense_Mutation | SNP | C | T | 10 | 55  | c.793C>T      | c.(793-795)CTT>TTT   | p.L265F       |
| Pat_45 | Post-Resistance | NRCAM    | 4897   | 37 | 7 | 107864205 | 107864205 | Missense_Mutation | SNP | C | T | 11 | 85  | c.854G>A      | c.(853-855)GGA>GAA   | p.G285E       |
| Pat_45 | Post-Resistance | GCC1     | 79571  | 37 | 7 | 127224651 | 127224651 | Missense_Mutation | SNP | C | T | 11 | 129 | c.586G>A      | c.(586-588)GAC>AAC   | p.D196N       |
| Pat_45 | Post-Resistance | SND1     | 27044  | 37 | 7 | 127528066 | 127528066 | Splice_Site       | SNP | G | A | 5  | 36  | c.1454_splice | c.e13+1              | p.R485_splice |
| Pat_45 | Post-Resistance | ZC3HC1   | 51530  | 37 | 7 | 129680862 | 129680862 | Missense_Mutation | SNP | T | C | 28 | 307 | c.338A>G      | c.(337-339)GAT>GGT   | p.D113G       |
| Pat_45 | Post-Resistance | MKLN1    | 4289   | 37 | 7 | 131012692 | 131012692 | Missense_Mutation | SNP | G | A | 8  | 61  | c.34G>A       | c.(34-36)GAG>AAG     | p.E12K        |
| Pat_45 | Post-Resistance | WDR91    | 29062  | 37 | 7 | 134894507 | 134894507 | Missense_Mutation | SNP | C | T | 11 | 111 | c.124G>A      | c.(124-126)GTG>ATG   | p.V42M        |
| Pat_45 | Post-Resistance | HIPK2    | 28996  | 37 | 7 | 139285224 | 139285224 | Missense_Mutation | SNP | G | A | 3  | 78  | c.2374C>T     | c.(2374-2376)CGG>TGG | p.R792W       |
| Pat_45 | Post-Resistance | SLC37A3  | 84255  | 37 | 7 | 140043279 | 140043279 | Missense_Mutation | SNP | C | T | 14 | 130 | c.1259G>A     | c.(1258-1260)AGT>AAT | p.S420N       |
| Pat_45 | Post-Resistance | BRAF     | 673    | 37 | 7 | 140453136 | 140453136 | Missense_Mutation | SNP | A | T | 22 | 126 | c.1799T>A     | c.(1798-1800)GTG>GAG | p.V600E       |
| Pat_45 | Post-Resistance | TAS2R39  | 259285 | 37 | 7 | 142880801 | 142880801 | Missense_Mutation | SNP | G | A | 7  | 73  | c.290G>A      | c.(289-291)AGC>AAC   | p.S97N        |
| Pat_45 | Post-Resistance | CNTNAP2  | 26047  | 37 | 7 | 146805370 | 146805370 | Missense_Mutation | SNP | G | A | 6  | 48  | c.682G>A      | c.(682-684)GGA>AGA   | p.G228R       |
| Pat_45 | Post-Resistance | ZNF398   | 57541  | 37 | 7 | 148875956 | 148875956 | Missense_Mutation | SNP | G | A | 34 | 351 | c.992G>A      | c.(991-993)AGC>AAC   | p.S331N       |
| Pat_45 | Post-Resistance | SLC4A2   | 6522   | 37 | 7 | 150772839 | 150772839 | Missense_Mutation | SNP | C | T | 12 | 136 | c.3448C>T     | c.(3448-3450)CCA>TCA | p.P1150S      |
| Pat_45 | Post-Resistance | FASTK    | 10922  | 37 | 7 | 150776776 | 150776776 | Missense_Mutation | SNP | G | A | 4  | 9   | c.316C>T      | c.(316-318)CCC>TCC   | p.P106S       |
| Pat_45 | Post-Resistance | SMARCD3  | 6604   | 37 | 7 | 150936564 | 150936564 | Missense_Mutation | SNP | C | T | 6  | 77  | c.1316G>A     | c.(1315-1317)GGC>GAC | p.G439D       |
| Pat_45 | Post-Resistance | MLL3     | 58508  | 37 | 7 | 151949172 | 151949172 | Nonsense_Mutation | SNP | C | T | 3  | 48  | c.1473G>A     | c.(1471-1473)TGG>TGA | p.W491*       |
| Pat_45 | Post-Resistance | RBM33    | 155435 | 37 | 7 | 155559213 | 155559213 | Missense_Mutation | SNP | G | A | 7  | 64  | c.3239G>A     | c.(3238-3240)CGC>CAC | p.R1080H      |
| Pat_45 | Post-Resistance | LMBR1    | 64327  | 37 | 7 | 156480739 | 156480739 | Missense_Mutation | SNP | G | A | 4  | 77  | c.1372C>T     | c.(1372-1374)CTT>TTT | p.L458F       |

|        |                 |           |        |    |   |           |           |                   |     |   |   |    |     |               |                        |               |
|--------|-----------------|-----------|--------|----|---|-----------|-----------|-------------------|-----|---|---|----|-----|---------------|------------------------|---------------|
| Pat_45 | Post-Resistance | WDR60     | 55112  | 37 | 7 | 158705727 | 158705727 | Missense_Mutation | SNP | G | A | 5  | 64  | c.1642G>A     | c.(1642-1644)GAA>AAA   | p.E548K       |
| Pat_45 | Post-Resistance | VIPR2     | 7434   | 37 | 7 | 158935207 | 158935207 | Missense_Mutation | SNP | G | A | 42 | 142 | c.82C>T       | c.(82-84)CAT>TAT       | p.H28Y        |
| Pat_45 | Post-Resistance | CSMD1     | 64478  | 37 | 8 | 3165990   | 3165990   | Missense_Mutation | SNP | G | A | 4  | 66  | c.3670C>T     | c.(3670-3672)CCT>TCT   | p.P1224S      |
| Pat_45 | Post-Resistance | SPAG11A   | 653423 | 37 | 8 | 7718227   | 7718227   | Missense_Mutation | SNP | C | T | 6  | 58  | c.406C>T      | c.(406-408)CTT>TTT     | p.L136F       |
| Pat_45 | Post-Resistance | MTMR9     | 66036  | 37 | 8 | 11172574  | 11172574  | Splice_Site       | SNP | G | A | 12 | 146 | c.1113_splice | c.e7+1                 | p.Q371_splice |
| Pat_45 | Post-Resistance | BLK       | 640    | 37 | 8 | 11412326  | 11412326  | Missense_Mutation | SNP | G | T | 3  | 35  | c.547G>T      | c.(547-549)GAT>TAT     | p.D183Y       |
| Pat_45 | Post-Resistance | KIAA1967  | 57805  | 37 | 8 | 22476205  | 22476205  | Missense_Mutation | SNP | G | A | 9  | 113 | c.2296G>A     | c.(2296-2298)GGC>AGC   | p.G766S       |
| Pat_45 | Post-Resistance | TNFRSF10C | 8794   | 37 | 8 | 22974339  | 22974339  | Missense_Mutation | SNP | C | T | 8  | 210 | c.575C>T      | c.(574-576)CCA>CTA     | p.P192L       |
| Pat_45 | Post-Resistance | LOXL2     | 4017   | 37 | 8 | 23159641  | 23159641  | Missense_Mutation | SNP | C | T | 18 | 74  | c.2032G>A     | c.(2032-2034)GAT>AAT   | p.D678N       |
| Pat_45 | Post-Resistance | INTS9     | 55756  | 37 | 8 | 28669866  | 28669866  | Missense_Mutation | SNP | G | A | 7  | 101 | c.722C>T      | c.(721-723)TCC>TTC     | p.S241F       |
| Pat_45 | Post-Resistance | RBPM5     | 11030  | 37 | 8 | 30336847  | 30336847  | Missense_Mutation | SNP | G | A | 7  | 83  | c.200G>A      | c.(199-201)AGT>AAT     | p.S67N        |
| Pat_45 | Post-Resistance | NRG1      | 3084   | 37 | 8 | 32621567  | 32621567  | Missense_Mutation | SNP | G | A | 9  | 43  | c.1570G>A     | c.(1570-1572)GAG>AAG   | p.E524K       |
| Pat_45 | Post-Resistance | KCNU1     | 157855 | 37 | 8 | 36698455  | 36698455  | Missense_Mutation | SNP | G | A | 8  | 60  | c.1637G>A     | c.(1636-1638)TGC>TAC   | p.C546Y       |
| Pat_45 | Post-Resistance | ST18      | 9705   | 37 | 8 | 53079523  | 53079523  | Missense_Mutation | SNP | C | T | 62 | 176 | c.1093G>A     | c.(1093-1095)GAG>AAG   | p.E365K       |
| Pat_45 | Post-Resistance | CYP7A1    | 1581   | 37 | 8 | 59412636  | 59412636  | Missense_Mutation | SNP | A | C | 15 | 130 | c.22T>G       | c.(22-24)TGG>GGG       | p.W8G         |
| Pat_45 | Post-Resistance | RRS1      | 23212  | 37 | 8 | 67341997  | 67341997  | Missense_Mutation | SNP | G | A | 4  | 54  | c.631G>A      | c.(631-633)GGA>AGA     | p.G211R       |
| Pat_45 | Post-Resistance | STAU2     | 27067  | 37 | 8 | 74516017  | 74516017  | Missense_Mutation | SNP | C | T | 6  | 124 | c.973G>A      | c.(973-975)GAT>AAT     | p.D325N       |
| Pat_45 | Post-Resistance | TPD52     | 7163   | 37 | 8 | 81083675  | 81083675  | Missense_Mutation | SNP | C | T | 14 | 100 | c.4G>A        | c.(4-6)GAC>AAC         | p.D2N         |
| Pat_45 | Post-Resistance | PAG1      | 55824  | 37 | 8 | 81897532  | 81897532  | Nonsense_Mutation | SNP | G | A | 4  | 49  | c.355C>T      | c.(355-357)CAG>TAG     | p.Q119*       |
| Pat_45 | Post-Resistance | CA2       | 760    | 37 | 8 | 86385937  | 86385937  | Missense_Mutation | SNP | C | T | 4  | 62  | c.248C>T      | c.(247-249)CCC>CTC     | p.P83L        |
| Pat_45 | Post-Resistance | SLC7A13   | 157724 | 37 | 8 | 87242161  | 87242161  | Missense_Mutation | SNP | C | A | 4  | 42  | c.346G>T      | c.(346-348)GCT>TCT     | p.A116S       |
| Pat_45 | Post-Resistance | WWP1      | 11059  | 37 | 8 | 87410658  | 87410658  | Missense_Mutation | SNP | G | A | 7  | 112 | c.422G>A      | c.(421-423)GGA>GAA     | p.G141E       |
| Pat_45 | Post-Resistance | WWP1      | 11059  | 37 | 8 | 87470245  | 87470245  | Nonsense_Mutation | SNP | G | A | 9  | 89  | c.2490G>A     | c.(2488-2490)TGG>TGA   | p.W830*       |
| Pat_45 | Post-Resistance | NBN       | 4683   | 37 | 8 | 90965603  | 90965603  | Missense_Mutation | SNP | G | A | 16 | 197 | c.1714C>T     | c.(1714-1716)CCA>TCA   | p.P572S       |
| Pat_45 | Post-Resistance | RAD54B    | 25788  | 37 | 8 | 95390536  | 95390536  | Missense_Mutation | SNP | G | A | 3  | 36  | c.2387C>T     | c.(2386-2388)ACC>ATC   | p.T796I       |
| Pat_45 | Post-Resistance | KIAA1429  | 25962  | 37 | 8 | 95524296  | 95524296  | Missense_Mutation | SNP | G | A | 6  | 70  | c.2773C>T     | c.(2773-2775)CCA>TCA   | p.P925S       |
| Pat_45 | Post-Resistance | PGCP      | 10404  | 37 | 8 | 97797264  | 97797264  | Missense_Mutation | SNP | G | T | 4  | 75  | c.139G>T      | c.(139-141)GCT>TCT     | p.A47S        |
| Pat_45 | Post-Resistance | VPS13B    | 157680 | 37 | 8 | 100847784 | 100847784 | Missense_Mutation | SNP | G | A | 9  | 83  | c.9835G>A     | c.(9835-9837)GTT>ATT   | p.V3279I      |
| Pat_45 | Post-Resistance | RGS22     | 26166  | 37 | 8 | 100994197 | 100994197 | Missense_Mutation | SNP | C | T | 67 | 212 | c.3328G>A     | c.(3328-3330)GAG>AAG   | p.E1110K      |
| Pat_45 | Post-Resistance | UBR5      | 51366  | 37 | 8 | 103299718 | 103299718 | Missense_Mutation | SNP | C | T | 4  | 63  | c.4900G>A     | c.(4900-4902)GAT>AAT   | p.D1634N      |
| Pat_45 | Post-Resistance | TRHR      | 7201   | 37 | 8 | 110100014 | 110100014 | Nonsense_Mutation | SNP | G | A | 8  | 84  | c.273G>A      | c.(271-273)TGG>TGA     | p.W91*        |
| Pat_45 | Post-Resistance | CSMD3     | 114788 | 37 | 8 | 113702210 | 113702210 | Missense_Mutation | SNP | G | A | 27 | 214 | c.2042C>T     | c.(2041-2043)TCT>TTT   | p.S681F       |
| Pat_45 | Post-Resistance | UTP23     | 84294  | 37 | 8 | 117783815 | 117783815 | Missense_Mutation | SNP | G | A | 16 | 97  | c.484G>A      | c.(484-486)GAG>AAG     | p.E162K       |
| Pat_45 | Post-Resistance | COLEC10   | 10584  | 37 | 8 | 120101985 | 120101985 | Missense_Mutation | SNP | C | A | 3  | 38  | c.215C>A      | c.(214-216)CCG>CAG     | p.P72Q        |
| Pat_45 | Post-Resistance | FER1L6    | 654463 | 37 | 8 | 125110043 | 125110043 | Missense_Mutation | SNP | C | T | 7  | 103 | c.4802C>T     | c.(4801-4803)ACC>ATC   | p.T1601I      |
| Pat_45 | Post-Resistance | MTSS1     | 9788   | 37 | 8 | 125565661 | 125565661 | Missense_Mutation | SNP | G | A | 5  | 82  | c.1840C>T     | c.(1840-1842)CCC>TCC   | p.P614S       |
| Pat_45 | Post-Resistance | ZNF572    | 137209 | 37 | 8 | 125988764 | 125988764 | Missense_Mutation | SNP | C | T | 29 | 61  | c.254C>T      | c.(253-255)TCC>TTC     | p.S85F        |
| Pat_45 | Post-Resistance | OC90      | 729330 | 37 | 8 | 133041415 | 133041415 | Missense_Mutation | SNP | G | T | 10 | 154 | c.1043C>A     | c.(1042-1044)TCC>TAC   | p.S348Y       |
| Pat_45 | Post-Resistance | TG        | 7038   | 37 | 8 | 133880359 | 133880359 | Splice_Site       | SNP | G | A | 11 | 101 | c.68_splice   | c.e2-1                 | p.E23_splice  |
| Pat_45 | Post-Resistance | TG        | 7038   | 37 | 8 | 133975250 | 133975250 | Missense_Mutation | SNP | G | A | 32 | 380 | c.5479G>A     | c.(5479-5481)GGG>AGG   | p.G1827R      |
| Pat_45 | Post-Resistance | WISP1     | 8840   | 37 | 8 | 134225378 | 134225378 | Missense_Mutation | SNP | T | C | 13 | 185 | c.341T>C      | c.(340-342)GTG>GCG     | p.V114A       |
| Pat_45 | Post-Resistance | PTK2      | 5747   | 37 | 8 | 141900685 | 141900685 | Missense_Mutation | SNP | G | A | 8  | 77  | c.152C>T      | c.(151-153)ACC>ATC     | p.T51I        |
| Pat_45 | Post-Resistance | PLEC      | 5339   | 37 | 8 | 144991270 | 144991270 | Missense_Mutation | SNP | G | A | 8  | 177 | c.13130C>T    | c.(13129-13131)GCC>GTC | p.A4377V      |
| Pat_45 | Post-Resistance | CYC1      | 1537   | 37 | 8 | 145152194 | 145152194 | Nonsense_Mutation | SNP | G | A | 6  | 161 | c.933G>A      | c.(931-933)TGG>TGA     | p.W311*       |
| Pat_45 | Post-Resistance | KIFC2     | 90990  | 37 | 8 | 145694125 | 145694125 | Missense_Mutation | SNP | G | A | 26 | 363 | c.1021G>A     | c.(1021-1023)GCC>ACC   | p.A341T       |
| Pat_45 | Post-Resistance | MFSD3     | 113655 | 37 | 8 | 145736051 | 145736051 | Missense_Mutation | SNP | G | A | 13 | 156 | c.901G>A      | c.(901-903)GTC>ATC     | p.V301I       |
| Pat_45 | Post-Resistance | SMARCA2   | 6595   | 37 | 9 | 2088558   | 2088558   | Missense_Mutation | SNP | G | A | 14 | 143 | c.2828G>A     | c.(2827-2829)AGA>AAA   | p.R943K       |



|        |                 |           |        |    |   |           |           |                   |     |    |    |     |     |                 |                      |          |
|--------|-----------------|-----------|--------|----|---|-----------|-----------|-------------------|-----|----|----|-----|-----|-----------------|----------------------|----------|
| Pat_45 | Post-Resistance | CDC37L1   | 55664  | 37 | 9 | 4685105   | 4685105   | Missense_Mutation | SNP | G  | A  | 11  | 206 | c.361G>A        | c.(361-363)GAG>AAG   | p.E121K  |
| Pat_45 | Post-Resistance | KDM4C     | 23081  | 37 | 9 | 7011727   | 7011727   | Missense_Mutation | SNP | G  | A  | 16  | 99  | c.1816G>A       | c.(1816-1818)GAA>AAA | p.E606K  |
| Pat_45 | Post-Resistance | CER1      | 9350   | 37 | 9 | 14722231  | 14722231  | Missense_Mutation | SNP | C  | T  | 48  | 38  | c.440G>A        | c.(439-441)GGG>GAG   | p.G147E  |
| Pat_45 | Post-Resistance | C9orf93   | 203238 | 37 | 9 | 15727867  | 15727867  | Missense_Mutation | SNP | G  | A  | 6   | 69  | c.1693G>A       | c.(1693-1695)GAG>AAG | p.E565K  |
| Pat_45 | Post-Resistance | CNTLN     | 54875  | 37 | 9 | 17394971  | 17394971  | Missense_Mutation | SNP | G  | A  | 8   | 160 | c.2519G>A       | c.(2518-2520)GGT>GAT | p.G840D  |
| Pat_45 | Post-Resistance | ADAMTSL1  | 92949  | 37 | 9 | 18680380  | 18680380  | Missense_Mutation | SNP | T  | C  | 4   | 128 | c.1207T>C       | c.(1207-1209)TGT>CGT | p.C403R  |
| Pat_45 | Post-Resistance | ADAMTSL1  | 92949  | 37 | 9 | 18887904  | 18887904  | Missense_Mutation | SNP | G  | A  | 8   | 107 | c.4325G>A       | c.(4324-4326)GGA>GAA | p.G1442E |
| Pat_45 | Post-Resistance | KIAA1797  | 54914  | 37 | 9 | 20874716  | 20874716  | Missense_Mutation | SNP | G  | A  | 24  | 155 | c.2227G>A       | c.(2227-2229)GAC>AAC | p.D743N  |
| Pat_45 | Post-Resistance | NFX1      | 4799   | 37 | 9 | 33294937  | 33294937  | Missense_Mutation | SNP | C  | A  | 6   | 133 | c.545C>A        | c.(544-546)CCA>CAA   | p.P182Q  |
| Pat_45 | Post-Resistance | PRSS3     | 5646   | 37 | 9 | 33799038  | 33799038  | Missense_Mutation | SNP | G  | A  | 32  | 203 | c.775G>A        | c.(775-777)GGC>AGC   | p.G259S  |
| Pat_45 | Post-Resistance | IL11RA    | 3590   | 37 | 9 | 34658567  | 34658567  | Missense_Mutation | SNP | C  | T  | 26  | 242 | c.697C>T        | c.(697-699)CCC>TCC   | p.P233S  |
| Pat_45 | Post-Resistance | C9orf131  | 138724 | 37 | 9 | 35043635  | 35043635  | Missense_Mutation | SNP | G  | A  | 102 | 570 | c.1009G>A       | c.(1009-1011)GAG>AAG | p.E337K  |
| Pat_45 | Post-Resistance | FANCG     | 2189   | 37 | 9 | 35074927  | 35074927  | Missense_Mutation | SNP | G  | A  | 9   | 155 | c.1633C>T       | c.(1633-1635)CCA>TCA | p.P545S  |
| Pat_45 | Post-Resistance | KIAA1539  | 80256  | 37 | 9 | 35105788  | 35105788  | Missense_Mutation | SNP | G  | A  | 6   | 123 | c.1354C>T       | c.(1354-1356)CCT>TCT | p.P452S  |
| Pat_45 | Post-Resistance | SIT1      | 27240  | 37 | 9 | 35650798  | 35650798  | Missense_Mutation | SNP | G  | A  | 16  | 69  | c.53C>T         | c.(52-54)TCT>TTT     | p.S18F   |
| Pat_45 | Post-Resistance | NPR2      | 4882   | 37 | 9 | 35809204  | 35809204  | Missense_Mutation | SNP | G  | A  | 32  | 239 | c.3038G>A       | c.(3037-3039)GGA>GAA | p.G1013E |
| Pat_45 | Post-Resistance | RG9MTD3   | 158234 | 37 | 9 | 37770711  | 37770711  | Missense_Mutation | SNP | G  | A  | 6   | 78  | c.695G>A        | c.(694-696)GGG>GAG   | p.G232E  |
| Pat_45 | Post-Resistance | FAM75A6   | 389730 | 37 | 9 | 43627693  | 43627693  | Missense_Mutation | SNP | C  | T  | 20  | 245 | c.994G>A        | c.(994-996)GTC>ATC   | p.V332I  |
| Pat_45 | Post-Resistance | PCSK5     | 5125   | 37 | 9 | 78710854  | 78710854  | Missense_Mutation | SNP | G  | A  | 12  | 124 | c.943G>A        | c.(943-945)GGA>AGA   | p.G315R  |
| Pat_45 | Post-Resistance | TLE4      | 7091   | 37 | 9 | 82335034  | 82335034  | Missense_Mutation | SNP | G  | A  | 9   | 92  | c.1739G>A       | c.(1738-1740)AGT>AAT | p.S580N  |
| Pat_45 | Post-Resistance | FLJ43859  | 389761 | 37 | 9 | 84547469  | 84547469  | Missense_Mutation | SNP | C  | T  | 19  | 43  | c.2393C>T       | c.(2392-2394)TCT>TTT | p.S798F  |
| Pat_45 | Post-Resistance | KIF27     | 55582  | 37 | 9 | 86482625  | 86482625  | Missense_Mutation | SNP | C  | T  | 3   | 12  | c.2908G>A       | c.(2908-2910)GAA>AAA | p.E970K  |
| Pat_45 | Post-Resistance | SLC28A3   | 64078  | 37 | 9 | 86905169  | 86905170  | Missense_Mutation | DNP | GG | AA | 13  | 36  | c.1048_1049CC>T | c.(1048-1050)CCA>TTA | p.P350L  |
| Pat_45 | Post-Resistance | ZCCHC6    | 79670  | 37 | 9 | 88943368  | 88943368  | Missense_Mutation | SNP | G  | A  | 16  | 136 | c.1495C>T       | c.(1495-1497)CTT>TTT | p.L499F  |
| Pat_45 | Post-Resistance | CTSL3     | 392360 | 37 | 9 | 90401734  | 90401734  | Missense_Mutation | SNP | G  | A  | 8   | 49  | c.586G>A        | c.(586-588)GAT>AAT   | p.D196N  |
| Pat_45 | Post-Resistance | FAM75C1   | 441452 | 37 | 9 | 90536719  | 90536719  | Missense_Mutation | SNP | G  | A  | 12  | 185 | c.1897G>A       | c.(1897-1899)GCC>ACC | p.A633T  |
| Pat_45 | Post-Resistance | SYK       | 6850   | 37 | 9 | 93606427  | 93606427  | Missense_Mutation | SNP | G  | A  | 6   | 115 | c.247G>A        | c.(247-249)GCC>ACC   | p.A83T   |
| Pat_45 | Post-Resistance | FANCC     | 2176   | 37 | 9 | 97934336  | 97934336  | Missense_Mutation | SNP | G  | A  | 4   | 23  | c.439C>T        | c.(439-441)CCT>TCT   | p.P147S  |
| Pat_45 | Post-Resistance | TBC1D2    | 55357  | 37 | 9 | 100995767 | 100995767 | Missense_Mutation | SNP | C  | T  | 17  | 175 | c.712G>A        | c.(712-714)GAA>AAA   | p.E238K  |
| Pat_45 | Post-Resistance | TEX10     | 54881  | 37 | 9 | 103064526 | 103064526 | Missense_Mutation | SNP | C  | T  | 4   | 163 | c.2737G>A       | c.(2737-2739)GTG>ATG | p.V913M  |
| Pat_45 | Post-Resistance | TEX10     | 54881  | 37 | 9 | 103109477 | 103109477 | Missense_Mutation | SNP | G  | A  | 4   | 115 | c.392C>T        | c.(391-393)GCT>GTT   | p.A131V  |
| Pat_45 | Post-Resistance | NIPSNAP3B | 55335  | 37 | 9 | 107535175 | 107535175 | Missense_Mutation | SNP | G  | A  | 4   | 9   | c.653G>A        | c.(652-654)AGA>AAA   | p.R218K  |
| Pat_45 | Post-Resistance | SLC44A1   | 23446  | 37 | 9 | 108123535 | 108123535 | Missense_Mutation | SNP | C  | T  | 11  | 58  | c.824C>T        | c.(823-825)ACT>ATT   | p.T275I  |
| Pat_45 | Post-Resistance | IKBKAP    | 8518   | 37 | 9 | 111681145 | 111681145 | Missense_Mutation | SNP | G  | A  | 24  | 208 | c.686C>T        | c.(685-687)GCT>GTT   | p.A229V  |
| Pat_45 | Post-Resistance | C9orf84   | 158401 | 37 | 9 | 114454022 | 114454022 | Missense_Mutation | SNP | C  | T  | 11  | 71  | c.4043G>A       | c.(4042-4044)AGT>AAT | p.S1348N |
| Pat_45 | Post-Resistance | PDCL      | 5082   | 37 | 9 | 125582773 | 125582773 | Missense_Mutation | SNP | C  | T  | 9   | 86  | c.497G>A        | c.(496-498)AGT>AAT   | p.S166N  |
| Pat_45 | Post-Resistance | RC3H2     | 54542  | 37 | 9 | 125616490 | 125616490 | Missense_Mutation | SNP | C  | T  | 12  | 136 | c.2956G>A       | c.(2956-2958)GAC>AAC | p.D986N  |
| Pat_45 | Post-Resistance | SCAI      | 286205 | 37 | 9 | 127715148 | 127715148 | Missense_Mutation | SNP | C  | T  | 18  | 48  | c.1759G>A       | c.(1759-1761)GAA>AAA | p.E587K  |
| Pat_45 | Post-Resistance | LMX1B     | 4010   | 37 | 9 | 129453302 | 129453302 | Missense_Mutation | SNP | G  | A  | 4   | 36  | c.445G>A        | c.(445-447)GAG>AAG   | p.E149K  |
| Pat_45 | Post-Resistance | LRRC8A    | 56262  | 37 | 9 | 131670351 | 131670351 | Missense_Mutation | SNP | C  | T  | 14  | 240 | c.908C>T        | c.(907-909)ACG>ATG   | p.T303M  |
| Pat_45 | Post-Resistance | LRRC8A    | 56262  | 37 | 9 | 131678465 | 131678465 | Missense_Mutation | SNP | G  | A  | 9   | 71  | c.2248G>A       | c.(2248-2250)GTG>ATG | p.V750M  |
| Pat_45 | Post-Resistance | PHYHD1    | 254295 | 37 | 9 | 131689422 | 131689422 | Missense_Mutation | SNP | C  | T  | 14  | 134 | c.139C>T        | c.(139-141)CTC>TTC   | p.L47F   |
| Pat_45 | Post-Resistance | C9orf106  | 414318 | 37 | 9 | 132084535 | 132084536 | Nonsense_Mutation | DNP | GG | AA | 12  | 68  | c.443_444GG>AA  | c.(442-444)TGG>TAA   | p.W148*  |
| Pat_45 | Post-Resistance | USP20     | 10868  | 37 | 9 | 132637729 | 132637729 | Missense_Mutation | SNP | C  | T  | 5   | 49  | c.2189C>T       | c.(2188-2190)ACC>ATC | p.T730I  |
| Pat_45 | Post-Resistance | QRFP      | 347148 | 37 | 9 | 133768837 | 133768837 | Missense_Mutation | SNP | C  | T  | 10  | 97  | c.389G>A        | c.(388-390)AGC>AAC   | p.S130N  |
| Pat_45 | Post-Resistance | UCK1      | 83549  | 37 | 9 | 134400446 | 134400446 | Missense_Mutation | SNP | G  | A  | 11  | 71  | c.815C>T        | c.(814-816)TCC>TTC   | p.S272F  |
| Pat_45 | Post-Resistance | RAPGEF1   | 2889   | 37 | 9 | 134504052 | 134504052 | Missense_Mutation | SNP | G  | A  | 13  | 165 | c.850C>T        | c.(850-852)CCA>TCA   | p.P284S  |

|        |                 |         |        |    |   |           |           |                   |     |   |   |    |     |               |                      |               |
|--------|-----------------|---------|--------|----|---|-----------|-----------|-------------------|-----|---|---|----|-----|---------------|----------------------|---------------|
| Pat_45 | Post-Resistance | COBRA1  | 25920  | 37 | 9 | 140166617 | 140166617 | Missense_Mutation | SNP | C | T | 7  | 93  | c.1430C>T     | c.(1429-1431)GCC>GTC | p.A477V       |
| Pat_45 | Post-Resistance | MXRA5   | 25878  | 37 | X | 3242864   | 3242864   | Missense_Mutation | SNP | T | C | 3  | 70  | c.862A>G      | c.(862-864)AGG>GGG   | p.R288G       |
| Pat_45 | Post-Resistance | FRMPD4  | 9758   | 37 | X | 12627905  | 12627905  | Missense_Mutation | SNP | C | T | 15 | 92  | c.224C>T      | c.(223-225)GCT>GTT   | p.A75V        |
| Pat_45 | Post-Resistance | TMSL3   | 7117   | 37 | X | 12994901  | 12994901  | Missense_Mutation | SNP | G | A | 13 | 66  | c.106G>A      | c.(106-108)GAA>AAA   | p.E36K        |
| Pat_45 | Post-Resistance | BMX     | 660    | 37 | X | 15548143  | 15548143  | Missense_Mutation | SNP | G | A | 8  | 47  | c.932G>A      | c.(931-933)AGA>AAA   | p.R311K       |
| Pat_45 | Post-Resistance | BEND2   | 139105 | 37 | X | 18220021  | 18220021  | Missense_Mutation | SNP | G | A | 6  | 62  | c.947C>T      | c.(946-948)ACT>ATT   | p.T316I       |
| Pat_45 | Post-Resistance | PHKA2   | 5256   | 37 | X | 18972475  | 18972475  | Missense_Mutation | SNP | C | T | 4  | 59  | c.134G>A      | c.(133-135)CGG>CAG   | p.R45Q        |
| Pat_45 | Post-Resistance | KLHL15  | 80311  | 37 | X | 24024119  | 24024119  | Missense_Mutation | SNP | C | T | 27 | 192 | c.692G>A      | c.(691-693)AGC>AAC   | p.S231N       |
| Pat_45 | Post-Resistance | ARX     | 170302 | 37 | X | 25025475  | 25025475  | Missense_Mutation | SNP | G | A | 4  | 2   | c.1201C>T     | c.(1201-1203)CCG>TCG | p.P401S       |
| Pat_45 | Post-Resistance | MAGEB4  | 4115   | 37 | X | 30260383  | 30260383  | Missense_Mutation | SNP | C | T | 3  | 9   | c.131C>T      | c.(130-132)TCT>TTT   | p.S44F        |
| Pat_45 | Post-Resistance | NR0B1   | 190    | 37 | X | 30327347  | 30327347  | Missense_Mutation | SNP | T | A | 4  | 28  | c.134A>T      | c.(133-135)GAT>GTT   | p.D45V        |
| Pat_45 | Post-Resistance | DMD     | 1756   | 37 | X | 32536238  | 32536238  | Missense_Mutation | SNP | C | T | 3  | 18  | c.2179G>A     | c.(2179-2181)GAT>AAT | p.D727N       |
| Pat_45 | Post-Resistance | FAM47C  | 442444 | 37 | X | 37027957  | 37027957  | Missense_Mutation | SNP | G | A | 33 | 93  | c.1474G>A     | c.(1474-1476)GAC>AAC | p.D492N       |
| Pat_45 | Post-Resistance | SYTL5   | 94122  | 37 | X | 37985840  | 37985840  | Splice_Site       | SNP | G | A | 4  | 21  | c.2051_splice | c.e18-1              | p.G684_splice |
| Pat_45 | Post-Resistance | ZNF630  | 57232  | 37 | X | 47919846  | 47919846  | Nonsense_Mutation | SNP | G | T | 4  | 67  | c.221C>A      | c.(220-222)TCA>TAA   | p.S74*        |
| Pat_45 | Post-Resistance | HDAC6   | 10013  | 37 | X | 48663864  | 48663864  | Missense_Mutation | SNP | C | T | 11 | 37  | c.331C>T      | c.(331-333)CGG>TGG   | p.R111W       |
| Pat_45 | Post-Resistance | CCNB3   | 85417  | 37 | X | 50052401  | 50052401  | Missense_Mutation | SNP | A | C | 6  | 31  | c.1232A>C     | c.(1231-1233)AAG>ACG | p.K411T       |
| Pat_45 | Post-Resistance | SMC1A   | 8243   | 37 | X | 53423146  | 53423146  | Splice_Site       | SNP | C | T | 13 | 110 | c.2862_splice | c.e18+1              | p.E954_splice |
| Pat_45 | Post-Resistance | SMC1A   | 8243   | 37 | X | 53432032  | 53432032  | Missense_Mutation | SNP | G | A | 3  | 10  | c.2108C>T     | c.(2107-2109)TCT>TTT | p.S703F       |
| Pat_45 | Post-Resistance | P2RY4   | 5030   | 37 | X | 69479234  | 69479234  | Missense_Mutation | SNP | C | T | 4  | 14  | c.241G>A      | c.(241-243)GAC>AAC   | p.D81N        |
| Pat_45 | Post-Resistance | ARR3    | 407    | 37 | X | 69500635  | 69500635  | Missense_Mutation | SNP | C | T | 21 | 76  | c.1033C>T     | c.(1033-1035)CCC>TCC | p.P345S       |
| Pat_45 | Post-Resistance | NONO    | 4841   | 37 | X | 70514153  | 70514153  | Missense_Mutation | SNP | G | A | 9  | 48  | c.425G>A      | c.(424-426)CGC>CAC   | p.R142H       |
| Pat_45 | Post-Resistance | MAGT1   | 84061  | 37 | X | 77130979  | 77130979  | Missense_Mutation | SNP | G | A | 42 | 219 | c.314C>T      | c.(313-315)TCC>TTC   | p.S105F       |
| Pat_45 | Post-Resistance | P2RY10  | 27334  | 37 | X | 78216429  | 78216429  | Missense_Mutation | SNP | C | T | 19 | 53  | c.412C>T      | c.(412-414)CCC>TCC   | p.P138S       |
| Pat_45 | Post-Resistance | PABPC5  | 140886 | 37 | X | 90691465  | 90691465  | Missense_Mutation | SNP | A | G | 3  | 3   | c.889A>G      | c.(889-891)AGT>GGT   | p.S297G       |
| Pat_45 | Post-Resistance | RPA4    | 29935  | 37 | X | 96139680  | 96139680  | Missense_Mutation | SNP | A | G | 11 | 54  | c.371A>G      | c.(370-372)TAT>TGT   | p.Y124C       |
| Pat_45 | Post-Resistance | TRMT2B  | 79979  | 37 | X | 100297070 | 100297070 | Missense_Mutation | SNP | G | T | 4  | 47  | c.209C>A      | c.(208-210)CCA>CAA   | p.P70Q        |
| Pat_45 | Post-Resistance | ARMCX3  | 51566  | 37 | X | 100880118 | 100880118 | Missense_Mutation | SNP | G | A | 12 | 83  | c.149G>A      | c.(148-150)GGG>GAG   | p.G50E        |
| Pat_45 | Post-Resistance | TSC22D3 | 1831   | 37 | X | 106957870 | 106957870 | Missense_Mutation | SNP | G | A | 31 | 153 | c.284C>T      | c.(283-285)ACC>ATC   | p.T95I        |
| Pat_45 | Post-Resistance | ALG13   | 79868  | 37 | X | 110951413 | 110951413 | Missense_Mutation | SNP | C | T | 5  | 56  | c.542C>T      | c.(541-543)ACC>ATC   | p.T181I       |
| Pat_45 | Post-Resistance | IL13RA2 | 3598   | 37 | X | 114248393 | 114248393 | Missense_Mutation | SNP | G | A | 8  | 25  | c.460C>T      | c.(460-462)CTC>TTC   | p.L154F       |
| Pat_45 | Post-Resistance | LONRF3  | 79836  | 37 | X | 118145821 | 118145821 | Missense_Mutation | SNP | C | T | 20 | 183 | c.1696C>T     | c.(1696-1698)CCC>TCC | p.P566S       |
| Pat_45 | Post-Resistance | GPR119  | 139760 | 37 | X | 129519028 | 129519028 | Missense_Mutation | SNP | C | T | 12 | 79  | c.394G>A      | c.(394-396)GTG>ATG   | p.V132M       |
| Pat_45 | Post-Resistance | ENOX2   | 10495  | 37 | X | 129822959 | 129822959 | Missense_Mutation | SNP | A | G | 5  | 25  | c.218T>C      | c.(217-219)ATT>ACT   | p.I73T        |
| Pat_45 | Post-Resistance | GPR101  | 83550  | 37 | X | 136113427 | 136113427 | Missense_Mutation | SNP | G | A | 4  | 28  | c.407C>T      | c.(406-408)CCT>CTT   | p.P136L       |
| Pat_45 | Post-Resistance | MAGEC3  | 139081 | 37 | X | 140985596 | 140985596 | Missense_Mutation | SNP | C | T | 6  | 65  | c.1910C>T     | c.(1909-1911)TCC>TTC | p.S637F       |
| Pat_45 | Post-Resistance | SLITRK4 | 139065 | 37 | X | 142716578 | 142716578 | Missense_Mutation | SNP | C | T | 16 | 53  | c.2347G>A     | c.(2347-2349)GAA>AAA | p.E783K       |
| Pat_45 | Post-Resistance | FMR1    | 2332   | 37 | X | 147024783 | 147024783 | Missense_Mutation | SNP | G | A | 6  | 81  | c.1408G>A     | c.(1408-1410)GGT>AGT | p.G470S       |
| Pat_45 | Post-Resistance | CNGA2   | 1260   | 37 | X | 150912089 | 150912089 | Missense_Mutation | SNP | G | A | 24 | 44  | c.1114G>A     | c.(1114-1116)GGC>AGC | p.G372S       |
| Pat_45 | Post-Resistance | GABRQ   | 55879  | 37 | X | 151820196 | 151820196 | Missense_Mutation | SNP | G | A | 17 | 35  | c.1109G>A     | c.(1108-1110)AGA>AAA | p.R370K       |
| Pat_45 | Post-Resistance | ZNF185  | 7739   | 37 | X | 152097165 | 152097165 | Missense_Mutation | SNP | G | A | 10 | 74  | c.874G>A      | c.(874-876)GCA>ACA   | p.A292T       |
| Pat_45 | Post-Resistance | HCFC1   | 3054   | 37 | X | 153221674 | 153221674 | Missense_Mutation | SNP | C | T | 19 | 88  | c.2824G>A     | c.(2824-2826)GGC>AGC | p.G942S       |
| Pat_45 | Post-Resistance | FAM3A   | 60343  | 37 | X | 153735805 | 153735805 | Missense_Mutation | SNP | C | A | 4  | 54  | c.402G>T      | c.(400-402)TTG>TTT   | p.L134F       |
| Pat_45 | Post-Resistance | G6PD    | 2539   | 37 | X | 153761790 | 153761790 | Splice_Site       | SNP | C | T | 7  | 82  | c.864_splice  | c.e8+1               | p.K288_splice |
| Pat_45 | Post-Resistance | IKBKG   | 8517   | 37 | X | 153780386 | 153780386 | Missense_Mutation | SNP | G | A | 3  | 15  | c.169G>A      | c.(169-171)GAG>AAG   | p.E57K        |
| Pat_45 | Post-Resistance | NLGN4Y  | 22829  | 37 | Y | 16734333  | 16734333  | Nonsense_Mutation | SNP | C | T | 3  | 56  | c.334C>T      | c.(334-336)CAG>TAG   | p.Q112*       |
| Pat_51 | Pre-Treatment   | HSPG2   | 3339   | 37 | 1 | 22191343  | 22191343  | Missense_Mutation | SNP | G | A | 9  | 0   | c.4619C>T     | c.(4618-4620)TCC>TTC | p.S1540F      |

|        |               |           |           |    |    |           |           |                   |     |    |    |     |     |                                     |                        |          |
|--------|---------------|-----------|-----------|----|----|-----------|-----------|-------------------|-----|----|----|-----|-----|-------------------------------------|------------------------|----------|
| Pat_51 | Pre-Treatment | GJB3      | 2707      | 37 | 1  | 35250527  | 35250527  | Missense_Mutation | SNP | C  | T  | 21  | 33  | c.164C>T                            | c.(163-165)ACC>ATC     | p.T55I   |
| Pat_51 | Pre-Treatment | NBPF10    | 100132406 | 37 | 1  | 145327548 | 145327548 | Missense_Mutation | SNP | A  | G  | 3   | 6   | c.4330A>G                           | c.(4330-4332)AAT>GAT   | p.N1444D |
| Pat_51 | Pre-Treatment | FLG       | 2312      | 37 | 1  | 152278987 | 152278987 | Missense_Mutation | SNP | G  | A  | 209 | 436 | c.8375C>T                           | c.(8374-8376)TCA>TTA   | p.S2792L |
| Pat_51 | Pre-Treatment | OR10J3    | 441911    | 37 | 1  | 159284407 | 159284407 | Missense_Mutation | SNP | C  | T  | 136 | 144 | c.43G>A                             | c.(43-45)GAA>AAA       | p.E15K   |
| Pat_51 | Pre-Treatment | PPOX      | 5498      | 37 | 1  | 161138337 | 161138337 | Missense_Mutation | SNP | C  | T  | 21  | 28  | c.587C>T                            | c.(586-588)TCC>TTC     | p.S196F  |
| Pat_51 | Pre-Treatment | RGS13     | 6003      | 37 | 1  | 192628516 | 192628516 | Missense_Mutation | SNP | G  | A  | 23  | 26  | c.343G>A                            | c.(343-345)GAA>AAA     | p.E115K  |
| Pat_51 | Pre-Treatment | IGFN1     | 91156     | 37 | 1  | 201190783 | 201190784 | Missense_Mutation | DNP | GG | AA | 19  | 28  | .1590_1591GG>A588-1593)GAGGGC>GAA/  |                        | p.G531S  |
| Pat_51 | Pre-Treatment | CR2       | 1380      | 37 | 1  | 207644114 | 207644115 | Missense_Mutation | DNP | GG | AA | 12  | 25  | .1255_1256GG>A.c.(1255-1257)GGG>AAG |                        | p.G419K  |
| Pat_51 | Pre-Treatment | OR11L1    | 391189    | 37 | 1  | 248004661 | 248004661 | Missense_Mutation | SNP | C  | T  | 56  | 81  | c.538G>A                            | c.(538-540)GAC>AAC     | p.D180N  |
| Pat_51 | Pre-Treatment | OR2M2     | 391194    | 37 | 1  | 248343390 | 248343390 | Missense_Mutation | SNP | T  | A  | 8   | 295 | c.103T>A                            | c.(103-105)TTT>ATT     | p.F35I   |
| Pat_51 | Pre-Treatment | KLF6      | 1316      | 37 | 10 | 3827122   | 3827122   | Nonsense_Mutation | SNP | C  | A  | 20  | 3   | c.85G>T                             | c.(85-87)GAG>TAG       | p.E29*   |
| Pat_51 | Pre-Treatment | OR56B4    | 196335    | 37 | 11 | 6129583   | 6129583   | Missense_Mutation | SNP | G  | A  | 61  | 75  | c.575G>A                            | c.(574-576)AGC>AAC     | p.S192N  |
| Pat_51 | Pre-Treatment | OR5AK2    | 390181    | 37 | 11 | 56756815  | 56756815  | Missense_Mutation | SNP | C  | T  | 56  | 61  | c.427C>T                            | c.(427-429)CGT>TGT     | p.R143C  |
| Pat_51 | Pre-Treatment | FAT3      | 120114    | 37 | 11 | 92525957  | 92525957  | Nonsense_Mutation | SNP | C  | T  | 55  | 63  | c.4636C>T                           | c.(4636-4638)CGA>TGA   | p.R1546* |
| Pat_51 | Pre-Treatment | CNTN5     | 53942     | 37 | 11 | 100169975 | 100169975 | Missense_Mutation | SNP | G  | A  | 7   | 21  | c.2467G>A                           | c.(2467-2469)GAA>AAA   | p.E823K  |
| Pat_51 | Pre-Treatment | HYOU1     | 10525     | 37 | 11 | 118918666 | 118918666 | Missense_Mutation | SNP | A  | G  | 14  | 14  | c.2503T>C                           | c.(2503-2505)TTC>CTC   | p.F835L  |
| Pat_51 | Pre-Treatment | KIRREL3   | 84623     | 37 | 11 | 126319042 | 126319042 | Missense_Mutation | SNP | G  | A  | 4   | 140 | c.859C>T                            | c.(859-861)CGG>TGG     | p.R287W  |
| Pat_51 | Pre-Treatment | KRT73     | 319101    | 37 | 12 | 53011971  | 53011971  | Missense_Mutation | SNP | A  | G  | 67  | 75  | c.338T>C                            | c.(337-339)CTC>CCC     | p.L113P  |
| Pat_51 | Pre-Treatment | CCDC38    | 120935    | 37 | 12 | 96284649  | 96284649  | Missense_Mutation | SNP | C  | T  | 18  | 28  | c.832G>A                            | c.(832-834)GTC>ATC     | p.V278I  |
| Pat_51 | Pre-Treatment | KIAA1033  | 23325     | 37 | 12 | 105531672 | 105531672 | Missense_Mutation | SNP | G  | C  | 13  | 23  | c.1335G>C                           | c.(1333-1335)TTG>TTC   | p.L445F  |
| Pat_51 | Pre-Treatment | FOXN4     | 121643    | 37 | 12 | 109717706 | 109717706 | Missense_Mutation | SNP | C  | T  | 17  | 21  | c.1324G>A                           | c.(1324-1326)GGA>AGA   | p.G442R  |
| Pat_51 | Pre-Treatment | MTUS2     | 23281     | 37 | 13 | 29855909  | 29855909  | Missense_Mutation | SNP | G  | A  | 24  | 24  | c.2743G>A                           | c.(2743-2745)GGG>AGG   | p.G915R  |
| Pat_51 | Pre-Treatment | PCDH9     | 5101      | 37 | 13 | 67800080  | 67800080  | Missense_Mutation | SNP | G  | C  | 73  | 66  | c.2493C>G                           | c.(2491-2493)TTC>TTG   | p.F831L  |
| Pat_51 | Pre-Treatment | TSHR      | 7253      | 37 | 14 | 81610614  | 81610614  | Missense_Mutation | SNP | G  | A  | 41  | 58  | c.2212G>A                           | c.(2212-2214)GTC>ATC   | p.V738I  |
| Pat_51 | Pre-Treatment | ACTC1     | 70        | 37 | 15 | 35083365  | 35083365  | Missense_Mutation | SNP | G  | A  | 122 | 152 | c.940C>T                            | c.(940-942)CGT>TGT     | p.R314C  |
| Pat_51 | Pre-Treatment | MAPKBP1   | 23005     | 37 | 15 | 42110235  | 42110235  | Missense_Mutation | SNP | A  | C  | 71  | 105 | c.1951A>C                           | c.(1951-1953)AAG>CAG   | p.K651Q  |
| Pat_51 | Pre-Treatment | TRPM7     | 54822     | 37 | 15 | 50904804  | 50904804  | Missense_Mutation | SNP | C  | T  | 37  | 48  | c.1993G>A                           | c.(1993-1995)GAA>AAA   | p.E665K  |
| Pat_51 | Pre-Treatment | SLTM      | 79811     | 37 | 15 | 59185100  | 59185100  | Nonsense_Mutation | SNP | G  | A  | 28  | 48  | c.1894C>T                           | c.(1894-1896)CGA>TGA   | p.R632*  |
| Pat_51 | Pre-Treatment | TLE3      | 7090      | 37 | 15 | 70351756  | 70351756  | Missense_Mutation | SNP | G  | A  | 5   | 9   | c.758C>T                            | c.(757-759)TCC>TTC     | p.S253F  |
| Pat_51 | Pre-Treatment | BNC1      | 646       | 37 | 15 | 83931721  | 83931721  | Missense_Mutation | SNP | G  | A  | 9   | 15  | c.2282C>T                           | c.(2281-2283)TCC>TTC   | p.S761F  |
| Pat_51 | Pre-Treatment | TSC2      | 7249      | 37 | 16 | 2126529   | 2126529   | Missense_Mutation | SNP | C  | T  | 29  | 40  | c.2780C>T                           | c.(2779-2781)ACC>ATC   | p.T927I  |
| Pat_51 | Pre-Treatment | ZNF213    | 7760      | 37 | 16 | 3187444   | 3187444   | Missense_Mutation | SNP | G  | A  | 26  | 33  | c.163G>A                            | c.(163-165)GAT>AAT     | p.D55N   |
| Pat_51 | Pre-Treatment | PALB2     | 79728     | 37 | 16 | 23641487  | 23641487  | Missense_Mutation | SNP | C  | T  | 57  | 68  | c.1988G>A                           | c.(1987-1989)CGC>CAC   | p.R663H  |
| Pat_51 | Pre-Treatment | SLC6A10P  | 386757    | 37 | 16 | 32890622  | 32890622  | Missense_Mutation | SNP | T  | G  | 4   | 30  | c.264A>C                            | c.(262-264)AAA>AAC     | p.K88N   |
| Pat_51 | Pre-Treatment | SPG7      | 6687      | 37 | 16 | 89620266  | 89620266  | Missense_Mutation | SNP | G  | A  | 27  | 32  | c.2001G>A                           | c.(1999-2001)ATG>ATA   | p.M667I  |
| Pat_51 | Pre-Treatment | OR1D2     | 4991      | 37 | 17 | 2995395   | 2995395   | Missense_Mutation | SNP | G  | A  | 41  | 59  | c.896C>T                            | c.(895-897)GCT>GTT     | p.A299V  |
| Pat_51 | Pre-Treatment | SPACA3    | 124912    | 37 | 17 | 31324480  | 31324480  | Missense_Mutation | SNP | C  | A  | 62  | 95  | c.520C>A                            | c.(520-522)CTC>ATC     | p.L174I  |
| Pat_51 | Pre-Treatment | KRTAP4-11 | 653240    | 37 | 17 | 39274150  | 39274150  | Missense_Mutation | SNP | T  | A  | 3   | 51  | c.418A>T                            | c.(418-420)AGC>TGC     | p.S140C  |
| Pat_51 | Pre-Treatment | SOST      | 50964     | 37 | 17 | 41836054  | 41836054  | Missense_Mutation | SNP | C  | T  | 45  | 53  | c.56G>A                             | c.(55-57)CGT>CAT       | p.R19H   |
| Pat_51 | Pre-Treatment | DCAF7     | 10238     | 37 | 17 | 61661011  | 61661011  | Missense_Mutation | SNP | C  | T  | 35  | 57  | c.676C>T                            | c.(676-678)CGC>TGC     | p.R226C  |
| Pat_51 | Pre-Treatment | GH2       | 2689      | 37 | 17 | 61959155  | 61959155  | Missense_Mutation | SNP | C  | T  | 4   | 70  | c.7G>A                              | c.(7-9)GCA>ACA         | p.A3T    |
| Pat_51 | Pre-Treatment | PIP5K1C   | 23396     | 37 | 19 | 3645974   | 3645974   | Missense_Mutation | SNP | G  | A  | 26  | 42  | c.1343C>T                           | c.(1342-1344)TCC>TTC   | p.S448F  |
| Pat_51 | Pre-Treatment | MUC16     | 94025     | 37 | 19 | 9066157   | 9066157   | Missense_Mutation | SNP | G  | A  | 31  | 32  | c.21289C>T                          | c.(21289-21291)CCT>TCT | p.P7097S |
| Pat_51 | Pre-Treatment | MUC16     | 94025     | 37 | 19 | 9072645   | 9072645   | Missense_Mutation | SNP | G  | A  | 54  | 52  | c.14801C>T                          | c.(14800-14802)TCC>TTC | p.S4934F |
| Pat_51 | Pre-Treatment | PLVAP     | 83483     | 37 | 19 | 17471613  | 17471613  | Missense_Mutation | SNP | G  | A  | 18  | 18  | c.1208C>T                           | c.(1207-1209)CCC>CTC   | p.P403L  |
| Pat_51 | Pre-Treatment | ZNF420    | 147923    | 37 | 19 | 37619143  | 37619143  | Missense_Mutation | SNP | A  | G  | 32  | 55  | c.1250A>G                           | c.(1249-1251)AAA>AGA   | p.K417R  |
| Pat_51 | Pre-Treatment | RASGRP4   | 115727    | 37 | 19 | 38910865  | 38910865  | Missense_Mutation | SNP | C  | T  | 7   | 5   | c.415G>A                            | c.(415-417)GAT>AAT     | p.D139N  |

|        |               |          |        |    |    |           |           |                   |     |   |   |     |     |           |                      |          |
|--------|---------------|----------|--------|----|----|-----------|-----------|-------------------|-----|---|---|-----|-----|-----------|----------------------|----------|
| Pat_51 | Pre-Treatment | ZNF180   | 7733   | 37 | 19 | 45004265  | 45004265  | Missense_Mutation | SNP | C | T | 80  | 126 | c.28G>A   | c.(28-30)GAA>AAA     | p.E10K   |
| Pat_51 | Pre-Treatment | PTH2     | 113091 | 37 | 19 | 49926533  | 49926533  | Missense_Mutation | SNP | G | C | 3   | 25  | c.64C>G   | c.(64-66)CTG>GTG     | p.L22V   |
| Pat_51 | Pre-Treatment | SIGLEC7  | 27036  | 37 | 19 | 51649293  | 51649293  | Missense_Mutation | SNP | T | G | 43  | 49  | c.942T>G  | c.(940-942)GAT>GAG   | p.D314E  |
| Pat_51 | Pre-Treatment | LILRA2   | 11027  | 37 | 19 | 55098770  | 55098770  | Missense_Mutation | SNP | C | T | 22  | 40  | c.1409C>T | c.(1408-1410)GCT>GTT | p.A470V  |
| Pat_51 | Pre-Treatment | ZSCAN4   | 201516 | 37 | 19 | 58189852  | 58189852  | Missense_Mutation | SNP | G | A | 39  | 45  | c.881G>A  | c.(880-882)GGA>GAA   | p.G294E  |
| Pat_51 | Pre-Treatment | ZNF512   | 84450  | 37 | 2  | 27822870  | 27822870  | Missense_Mutation | SNP | C | T | 15  | 23  | c.407C>T  | c.(406-408)CCC>CTC   | p.P136L  |
| Pat_51 | Pre-Treatment | LTBP1    | 4052   | 37 | 2  | 33447173  | 33447173  | Missense_Mutation | SNP | G | A | 25  | 34  | c.1831G>A | c.(1831-1833)GAA>AAA | p.E611K  |
| Pat_51 | Pre-Treatment | YSK4     | 80122  | 37 | 2  | 135738878 | 135738878 | Missense_Mutation | SNP | C | T | 41  | 49  | c.3433G>A | c.(3433-3435)GGT>AGT | p.G1145S |
| Pat_51 | Pre-Treatment | NGEF     | 25791  | 37 | 2  | 233834974 | 233834974 | Missense_Mutation | SNP | C | T | 22  | 35  | c.333G>A  | c.(331-333)ATG>ATA   | p.M111I  |
| Pat_51 | Pre-Treatment | ESF1     | 51575  | 37 | 20 | 13763660  | 13763660  | Missense_Mutation | SNP | G | A | 38  | 34  | c.127C>T  | c.(127-129)CAT>TAT   | p.H43Y   |
| Pat_51 | Pre-Treatment | FRG1B    | 284802 | 37 | 20 | 29625877  | 29625877  | Missense_Mutation | SNP | G | A | 3   | 83  | c.31G>A   | c.(31-33)GCC>ACC     | p.A11T   |
| Pat_51 | Pre-Treatment | TFF1     | 7031   | 37 | 21 | 43783499  | 43783499  | Missense_Mutation | SNP | G | A | 20  | 14  | c.103C>T  | c.(103-105)CCC>TCC   | p.P35S   |
| Pat_51 | Pre-Treatment | DAZL     | 1618   | 37 | 3  | 16640102  | 16640102  | Missense_Mutation | SNP | T | C | 3   | 143 | c.7A>G    | c.(7-9)ACT>GCT       | p.T3A    |
| Pat_51 | Pre-Treatment | KIAA2018 | 205717 | 37 | 3  | 113377321 | 113377321 | Missense_Mutation | SNP | C | A | 46  | 52  | c.3208G>T | c.(3208-3210)GAT>TAT | p.D1070Y |
| Pat_51 | Pre-Treatment | TMCC1    | 23023  | 37 | 3  | 129370592 | 129370592 | Missense_Mutation | SNP | T | A | 3   | 60  | c.1694A>T | c.(1693-1695)CAG>CTG | p.Q565L  |
| Pat_51 | Pre-Treatment | MED12L   | 116931 | 37 | 3  | 150911394 | 150911394 | Missense_Mutation | SNP | C | T | 27  | 52  | c.2086C>T | c.(2086-2088)CCA>TCA | p.P696S  |
| Pat_51 | Pre-Treatment | FAM193A  | 8603   | 37 | 4  | 2661349   | 2661349   | Missense_Mutation | SNP | C | T | 25  | 39  | c.581C>T  | c.(580-582)TCG>TTG   | p.S194L  |
| Pat_51 | Pre-Treatment | CPZ      | 8532   | 37 | 4  | 8621123   | 8621123   | Missense_Mutation | SNP | A | C | 13  | 27  | c.1738A>C | c.(1738-1740)ATT>CTT | p.I580L  |
| Pat_51 | Pre-Treatment | UGT2B4   | 7363   | 37 | 4  | 70360952  | 70360952  | Missense_Mutation | SNP | T | A | 20  | 45  | c.628A>T  | c.(628-630)AGG>TGG   | p.R210W  |
| Pat_51 | Pre-Treatment | FNIP2    | 57600  | 37 | 4  | 159789968 | 159789968 | Missense_Mutation | SNP | C | T | 36  | 65  | c.2180C>T | c.(2179-2181)CCA>CTA | p.P727L  |
| Pat_51 | Pre-Treatment | NEK1     | 4750   | 37 | 4  | 170429410 | 170429410 | Missense_Mutation | SNP | G | A | 5   | 10  | c.1738C>T | c.(1738-1740)CGT>TGT | p.R580C  |
| Pat_51 | Pre-Treatment | C7       | 730    | 37 | 5  | 40972649  | 40972649  | Missense_Mutation | SNP | G | A | 58  | 92  | c.2027G>A | c.(2026-2028)AGC>AAC | p.S676N  |
| Pat_51 | Pre-Treatment | SLCO6A1  | 133482 | 37 | 5  | 101709070 | 101709070 | Missense_Mutation | SNP | C | T | 22  | 27  | c.2146G>A | c.(2146-2148)GAA>AAA | p.E716K  |
| Pat_51 | Pre-Treatment | SNCAIP   | 9627   | 37 | 5  | 121786290 | 121786290 | Missense_Mutation | SNP | C | T | 96  | 91  | c.1748C>T | c.(1747-1749)TCT>TTT | p.S583F  |
| Pat_51 | Pre-Treatment | RBM24    | 221662 | 37 | 6  | 17283145  | 17283145  | Missense_Mutation | SNP | G | A | 20  | 25  | c.278G>A  | c.(277-279)AGG>AAG   | p.R93K   |
| Pat_51 | Pre-Treatment | BAT1     | 7919   | 37 | 6  | 31504459  | 31504459  | Missense_Mutation | SNP | A | C | 6   | 36  | c.434T>G  | c.(433-435)GTT>GGT   | p.V145G  |
| Pat_51 | Pre-Treatment | ZNF318   | 24149  | 37 | 6  | 43305131  | 43305131  | Missense_Mutation | SNP | G | A | 11  | 21  | c.6605C>T | c.(6604-6606)TCC>TTC | p.S2202F |
| Pat_51 | Pre-Treatment | RHAG     | 6005   | 37 | 6  | 49582513  | 49582513  | Missense_Mutation | SNP | G | A | 60  | 63  | c.694C>T  | c.(694-696)CCT>TCT   | p.P232S  |
| Pat_51 | Pre-Treatment | PRSS35   | 167681 | 37 | 6  | 84233578  | 84233578  | Missense_Mutation | SNP | A | G | 47  | 52  | c.418A>G  | c.(418-420)ACC>GCC   | p.T140A  |
| Pat_51 | Pre-Treatment | ESR1     | 2099   | 37 | 6  | 152201874 | 152201874 | Missense_Mutation | SNP | G | T | 22  | 28  | c.728G>T  | c.(727-729)CGC>CTC   | p.R243L  |
| Pat_51 | Pre-Treatment | MAP3K4   | 4216   | 37 | 6  | 161470424 | 161470424 | Missense_Mutation | SNP | C | G | 22  | 32  | c.1120C>G | c.(1120-1122)CTT>GTT | p.L374V  |
| Pat_51 | Pre-Treatment | MMD2     | 221938 | 37 | 7  | 4949648   | 4949648   | Missense_Mutation | SNP | C | T | 57  | 51  | c.473G>A  | c.(472-474)GGG>GAG   | p.G158E  |
| Pat_51 | Pre-Treatment | STAG3    | 10734  | 37 | 7  | 99798578  | 99798578  | Missense_Mutation | SNP | G | A | 28  | 48  | c.2047G>A | c.(2047-2049)GAA>AAA | p.E683K  |
| Pat_51 | Pre-Treatment | CREB3L2  | 64764  | 37 | 7  | 137586118 | 137586118 | Missense_Mutation | SNP | A | G | 15  | 15  | c.1025T>C | c.(1024-1026)GTT>GCT | p.V342A  |
| Pat_51 | Pre-Treatment | BRAF     | 673    | 37 | 7  | 140453136 | 140453136 | Missense_Mutation | SNP | A | T | 25  | 43  | c.1799T>A | c.(1798-1800)GTG>GAG | p.V600E  |
| Pat_51 | Pre-Treatment | RP1L1    | 94137  | 37 | 8  | 10469284  | 10469284  | Missense_Mutation | SNP | G | A | 40  | 27  | c.2324C>T | c.(2323-2325)CCC>CTC | p.P775L  |
| Pat_51 | Pre-Treatment | RP1      | 6101   | 37 | 8  | 55537629  | 55537629  | Missense_Mutation | SNP | G | A | 16  | 35  | c.1187G>A | c.(1186-1188)CGA>CAA | p.R396Q  |
| Pat_51 | Pre-Treatment | SDR16C5  | 195814 | 37 | 8  | 57218208  | 57218208  | Nonsense_Mutation | SNP | T | A | 16  | 21  | c.784A>T  | c.(784-786)AAA>TAA   | p.K262*  |
| Pat_51 | Pre-Treatment | WWP1     | 11059  | 37 | 8  | 87414307  | 87414307  | Missense_Mutation | SNP | A | G | 4   | 105 | c.599A>G  | c.(598-600)CAA>CGA   | p.Q200R  |
| Pat_51 | Pre-Treatment | UBR5     | 51366  | 37 | 8  | 103335705 | 103335705 | Missense_Mutation | SNP | G | A | 8   | 22  | c.1618C>T | c.(1618-1620)CCT>TCT | p.P540S  |
| Pat_51 | Pre-Treatment | TMEM2    | 23670  | 37 | 9  | 74349902  | 74349902  | Missense_Mutation | SNP | G | A | 21  | 41  | c.1213C>T | c.(1213-1215)CTT>TTT | p.L405F  |
| Pat_51 | Pre-Treatment | FLJ46321 | 389763 | 37 | 9  | 84606143  | 84606143  | Missense_Mutation | SNP | T | C | 180 | 182 | c.758T>C  | c.(757-759)ATT>ACT   | p.I253T  |
| Pat_51 | Pre-Treatment | GRIN3A   | 116443 | 37 | 9  | 104390553 | 104390553 | Missense_Mutation | SNP | C | T | 24  | 1   | c.2483G>A | c.(2482-2484)GGA>GAA | p.G828E  |
| Pat_51 | Pre-Treatment | GBGT1    | 26301  | 37 | 9  | 136029277 | 136029277 | Missense_Mutation | SNP | C | T | 32  | 44  | c.731G>A  | c.(730-732)AGG>AAG   | p.R244K  |
| Pat_51 | Pre-Treatment | CACNA1B  | 774    | 37 | 9  | 141016272 | 141016272 | Missense_Mutation | SNP | G | A | 36  | 35  | c.6841G>A | c.(6841-6843)GAG>AAG | p.E2281K |
| Pat_51 | Pre-Treatment | MXRA5    | 25878  | 37 | X  | 3239827   | 3239827   | Missense_Mutation | SNP | C | T | 37  | 1   | c.3899G>A | c.(3898-3900)AGA>AAA | p.R1300K |
| Pat_51 | Pre-Treatment | CCNB3    | 85417  | 37 | X  | 50028219  | 50028219  | Missense_Mutation | SNP | C | T | 35  | 3   | c.56C>T   | c.(55-57)TCC>TTC     | p.S19F   |

|        |               |           |        |    |    |           |           |                   |     |    |    |     |     |                 |                        |          |
|--------|---------------|-----------|--------|----|----|-----------|-----------|-------------------|-----|----|----|-----|-----|-----------------|------------------------|----------|
| Pat_51 | Pre-Treatment | NXF3      | 56000  | 37 | X  | 102334770 | 102334770 | Nonsense_Mutation | SNP | G  | A  | 51  | 4   | c.1081C>T       | c.(1081-1083)CGA>TGA   | p.R361*  |
| Pat_53 | Pre-Treatment | UBR4      | 23352  | 37 | 1  | 19403389  | 19403389  | Missense_Mutation | SNP | G  | A  | 16  | 132 | c.15332C>T      | c.(15331-15333)CCT>CTT | p.P5111L |
| Pat_53 | Pre-Treatment | KIF17     | 57576  | 37 | 1  | 20996934  | 20996934  | Missense_Mutation | SNP | C  | T  | 18  | 199 | c.2773G>A       | c.(2773-2775)GAC>AAC   | p.D925N  |
| Pat_53 | Pre-Treatment | NBPF9     | 400818 | 37 | 1  | 144220807 | 144220807 | Missense_Mutation | SNP | A  | C  | 57  | 521 | c.2180A>C       | c.(2179-2181)GAT>GCT   | p.D727A  |
| Pat_53 | Pre-Treatment | RFX5      | 5993   | 37 | 1  | 151315152 | 151315152 | Missense_Mutation | SNP | T  | C  | 79  | 736 | c.1361A>G       | c.(1360-1362)GAT>GGT   | p.D454G  |
| Pat_53 | Pre-Treatment | TCHH      | 7062   | 37 | 1  | 152082304 | 152082304 | Missense_Mutation | SNP | T  | G  | 6   | 251 | c.3389A>C       | c.(3388-3390)AAG>ACG   | p.K1130T |
| Pat_53 | Pre-Treatment | FLG2      | 388698 | 37 | 1  | 152326043 | 152326043 | Nonsense_Mutation | SNP | C  | A  | 7   | 454 | c.4219G>T       | c.(4219-4221)GGA>TGA   | p.G1407* |
| Pat_53 | Pre-Treatment | CRNN      | 49860  | 37 | 1  | 152382519 | 152382519 | Missense_Mutation | SNP | T  | C  | 5   | 314 | c.1039A>G       | c.(1039-1041)ACT>GCT   | p.T347A  |
| Pat_53 | Pre-Treatment | KLHDC8A   | 55220  | 37 | 1  | 205312401 | 205312401 | Missense_Mutation | SNP | C  | T  | 6   | 323 | c.332G>A        | c.(331-333)AGC>AAC     | p.S111N  |
| Pat_53 | Pre-Treatment | OR2M5     | 127059 | 37 | 1  | 248308943 | 248308943 | Missense_Mutation | SNP | C  | T  | 51  | 675 | c.494C>T        | c.(493-495)TCC>TTC     | p.S165F  |
| Pat_53 | Pre-Treatment | C10orf10  | 11067  | 37 | 10 | 45472884  | 45472884  | Missense_Mutation | SNP | G  | A  | 4   | 165 | c.595C>T        | c.(595-597)CTC>TTC     | p.L199F  |
| Pat_53 | Pre-Treatment | ADAM12    | 8038   | 37 | 10 | 127724774 | 127724774 | Missense_Mutation | SNP | G  | A  | 4   | 88  | c.2479C>T       | c.(2479-2481)CGT>TGT   | p.R827C  |
| Pat_53 | Pre-Treatment | MUC5B     | 727897 | 37 | 11 | 1272638   | 1272639   | Missense_Mutation | DNP | GG | AA | 45  | 231 | 15494_15495GG>A | c.(15493-15495)GGG>GAA | p.G5165E |
| Pat_53 | Pre-Treatment | KRTAP5-4  | 387267 | 37 | 11 | 1642989   | 1642989   | Missense_Mutation | SNP | C  | A  | 20  | 135 | c.473G>T        | c.(472-474)GGC>GTC     | p.G158V  |
| Pat_53 | Pre-Treatment | NAV2      | 89797  | 37 | 11 | 20122579  | 20122579  | Missense_Mutation | SNP | G  | A  | 6   | 340 | c.6287G>A       | c.(6286-6288)CGG>CAG   | p.R2096Q |
| Pat_53 | Pre-Treatment | MPEG1     | 219972 | 37 | 11 | 58980051  | 58980051  | Missense_Mutation | SNP | C  | T  | 43  | 286 | c.288G>A        | c.(286-288)ATG>ATA     | p.M96I   |
| Pat_53 | Pre-Treatment | FADS1     | 3992   | 37 | 11 | 61580759  | 61580759  | Nonsense_Mutation | SNP | C  | A  | 7   | 482 | c.442G>T        | c.(442-444)GGA>TGA     | p.G148*  |
| Pat_53 | Pre-Treatment | AHNAK     | 79026  | 37 | 11 | 62296070  | 62296070  | Missense_Mutation | SNP | A  | G  | 9   | 787 | c.5819T>C       | c.(5818-5820)GTG>GCG   | p.V1940A |
| Pat_53 | Pre-Treatment | RARRES3   | 5920   | 37 | 11 | 63312329  | 63312329  | Missense_Mutation | SNP | C  | A  | 8   | 649 | c.355C>A        | c.(355-357)CAG>AAG     | p.Q119K  |
| Pat_53 | Pre-Treatment | PRB2      | 653247 | 37 | 12 | 11546150  | 11546150  | Missense_Mutation | SNP | G  | C  | 8   | 402 | c.862C>G        | c.(862-864)CCA>GCA     | p.P288A  |
| Pat_53 | Pre-Treatment | GJB6      | 10804  | 37 | 13 | 20797589  | 20797589  | Missense_Mutation | SNP | C  | A  | 6   | 471 | c.31G>T         | c.(31-33)GGG>TGG       | p.G11W   |
| Pat_53 | Pre-Treatment | PABPC3    | 5042   | 37 | 13 | 25670736  | 25670736  | Missense_Mutation | SNP | G  | A  | 47  | 436 | c.400G>A        | c.(400-402)GAA>AAA     | p.E134K  |
| Pat_53 | Pre-Treatment | LOC220429 | 220429 | 37 | 13 | 50466749  | 50466749  | Missense_Mutation | SNP | C  | G  | 6   | 677 | c.2023C>G       | c.(2023-2025)CCT>GCT   | p.P675A  |
| Pat_53 | Pre-Treatment | TSSK4     | 283629 | 37 | 14 | 24675730  | 24675730  | Missense_Mutation | SNP | C  | T  | 6   | 228 | c.241C>T        | c.(241-243)CGG>TGG     | p.R81W   |
| Pat_53 | Pre-Treatment | SRP54     | 6729   | 37 | 14 | 35465931  | 35465931  | Missense_Mutation | SNP | C  | T  | 29  | 420 | c.16C>T         | c.(16-18)CTT>TTT       | p.L6F    |
| Pat_53 | Pre-Treatment | AHNAK2    | 113146 | 37 | 14 | 105413888 | 105413888 | Missense_Mutation | SNP | G  | T  | 7   | 481 | c.7900C>A       | c.(7900-7902)CTG>ATG   | p.L2634M |
| Pat_53 | Pre-Treatment | ADAM6     | 8755   | 37 | 14 | 106993798 | 106993798 | Splice_Site       | SNP | C  | T  | 23  | 609 | c.8648_splice   | c.e187+1               |          |
| Pat_53 | Pre-Treatment | OR4N3P    | 390539 | 37 | 15 | 22413810  | 22413810  | Missense_Mutation | SNP | G  | C  | 6   | 297 | c.109G>C        | c.(109-111)GTG>CTG     | p.V37L   |
| Pat_53 | Pre-Treatment | CYP1A2    | 1544   | 37 | 15 | 75042102  | 75042102  | Missense_Mutation | SNP | C  | T  | 78  | 368 | c.23C>T         | c.(22-24)CCC>CTC       | p.P8L    |
| Pat_53 | Pre-Treatment | CHRN4     | 1143   | 37 | 15 | 78921974  | 78921974  | Missense_Mutation | SNP | C  | T  | 29  | 136 | c.673G>A        | c.(673-675)GAC>AAC     | p.D225N  |
| Pat_53 | Pre-Treatment | ZNF267    | 10308  | 37 | 16 | 31927522  | 31927522  | Missense_Mutation | SNP | A  | G  | 7   | 375 | c.1952A>G       | c.(1951-1953)CAG>CGG   | p.Q651R  |
| Pat_53 | Pre-Treatment | NOD2      | 64127  | 37 | 16 | 50733419  | 50733419  | Missense_Mutation | SNP | G  | A  | 100 | 589 | c.94G>A         | c.(94-96)GAG>AAG       | p.E32K   |
| Pat_53 | Pre-Treatment | KRTAP9-8  | 83901  | 37 | 17 | 39394482  | 39394482  | Missense_Mutation | SNP | T  | C  | 7   | 174 | c.179T>C        | c.(178-180)ATC>ACC     | p.I60T   |
| Pat_53 | Pre-Treatment | STAT5B    | 6777   | 37 | 17 | 40370266  | 40370266  | Missense_Mutation | SNP | C  | T  | 6   | 211 | c.1072G>A       | c.(1072-1074)GGG>AGG   | p.G358R  |
| Pat_53 | Pre-Treatment | GOSR2     | 9570   | 37 | 17 | 45009435  | 45009435  | Missense_Mutation | SNP | G  | T  | 6   | 474 | c.206G>T        | c.(205-207)CGG>CTG     | p.R69L   |
| Pat_53 | Pre-Treatment | ZNF700    | 90592  | 37 | 19 | 12060571  | 12060571  | Missense_Mutation | SNP | C  | A  | 8   | 673 | c.1732C>A       | c.(1732-1734)CAC>AAC   | p.H578N  |
| Pat_53 | Pre-Treatment | ZNF844    | 284391 | 37 | 19 | 12187443  | 12187443  | Missense_Mutation | SNP | C  | G  | 8   | 378 | c.1508C>G       | c.(1507-1509)CCT>CGT   | p.P503R  |
| Pat_53 | Pre-Treatment | ZNF563    | 147837 | 37 | 19 | 12429554  | 12429554  | Missense_Mutation | SNP | C  | T  | 9   | 548 | c.1285G>A       | c.(1285-1287)GCG>ACG   | p.A429T  |
| Pat_53 | Pre-Treatment | ZNF563    | 147837 | 37 | 19 | 12429722  | 12429722  | Missense_Mutation | SNP | T  | C  | 11  | 619 | c.1117A>G       | c.(1117-1119)ACG>GCG   | p.T373A  |
| Pat_53 | Pre-Treatment | ZNF443    | 10224  | 37 | 19 | 12542283  | 12542283  | Missense_Mutation | SNP | A  | G  | 7   | 585 | c.703T>C        | c.(703-705)TCT>CCT     | p.S235P  |
| Pat_53 | Pre-Treatment | ZNF564    | 163050 | 37 | 19 | 12637723  | 12637723  | Missense_Mutation | SNP | C  | T  | 9   | 535 | c.1199G>A       | c.(1198-1200)AGA>AAA   | p.R400K  |
| Pat_53 | Pre-Treatment | ZNF93     | 81931  | 37 | 19 | 20045196  | 20045196  | Missense_Mutation | SNP | G  | A  | 7   | 582 | c.1432G>A       | c.(1432-1434)GAG>AAG   | p.E478K  |
| Pat_53 | Pre-Treatment | PRX       | 57716  | 37 | 19 | 40902620  | 40902620  | Missense_Mutation | SNP | G  | C  | 9   | 404 | c.1639C>G       | c.(1639-1641)CAG>GAG   | p.Q547E  |
| Pat_53 | Pre-Treatment | ZNF28     | 7576   | 37 | 19 | 53302985  | 53302985  | Missense_Mutation | SNP | T  | A  | 7   | 653 | c.2113A>T       | c.(2113-2115)AAC>TAC   | p.N705Y  |
| Pat_53 | Pre-Treatment | ZNF816A   | 125893 | 37 | 19 | 53453890  | 53453890  | Missense_Mutation | SNP | G  | C  | 8   | 744 | c.1138C>G       | c.(1138-1140)CAG>GAG   | p.Q380E  |
| Pat_53 | Pre-Treatment | ZNF845    | 91664  | 37 | 19 | 53855197  | 53855197  | Missense_Mutation | SNP | G  | A  | 11  | 647 | c.1269G>A       | c.(1267-1269)ATG>ATA   | p.M423I  |
| Pat_53 | Pre-Treatment | ZNF761    | 388561 | 37 | 19 | 53959137  | 53959137  | Missense_Mutation | SNP | G  | T  | 5   | 350 | c.1376G>T       | c.(1375-1377)CGT>CTT   | p.R459L  |



|        |                 |                 |        |    |    |           |           |                        |     |    |    |     |     |                |                        |               |
|--------|-----------------|-----------------|--------|----|----|-----------|-----------|------------------------|-----|----|----|-----|-----|----------------|------------------------|---------------|
| Pat_53 | Pre-Treatment   | FLJ40330        | 645784 | 37 | 2  | 89084114  | 89084114  | Splice_Site            | SNP | G  | A  | 17  | 368 | c.471_splice   | c.e5-1                 |               |
| Pat_53 | Pre-Treatment   | LRP2            | 4036   | 37 | 2  | 170065986 | 170065986 | Missense_Mutation      | SNP | C  | T  | 6   | 448 | c.6446G>A      | c.(6445-6447)GGT>GAT   | p.G2149D      |
| Pat_53 | Pre-Treatment   | FRG1B           | 284802 | 37 | 20 | 29628251  | 29628251  | Missense_Mutation      | SNP | A  | G  | 33  | 507 | c.163A>G       | c.(163-165)AAT>GAT     | p.N55D        |
| Pat_53 | Pre-Treatment   | FRG1B           | 284802 | 37 | 20 | 29628278  | 29628278  | Missense_Mutation      | SNP | G  | A  | 8   | 390 | c.190G>A       | c.(190-192)GCA>ACA     | p.A64T        |
| Pat_53 | Pre-Treatment   | FRG1B           | 284802 | 37 | 20 | 29628299  | 29628300  | Missense_Mutation      | DNP | AG | GA | 6   | 279 | c.211_212AG>GA | c.(211-213)AGT>GAT     | p.S71D        |
| Pat_53 | Pre-Treatment   | CRYZL1          | 9946   | 37 | 21 | 34963478  | 34963478  | Missense_Mutation      | SNP | C  | A  | 6   | 446 | c.940G>T       | c.(940-942)GGT>TGT     | p.G314C       |
| Pat_53 | Pre-Treatment   | ADORA2A         | 135    | 37 | 22 | 24836601  | 24836601  | Missense_Mutation      | SNP | G  | T  | 6   | 422 | c.383G>T       | c.(382-384)TGC>TTC     | p.C128F       |
| Pat_53 | Pre-Treatment   | NEFH            | 4744   | 37 | 22 | 29885739  | 29885739  | Missense_Mutation      | SNP | T  | A  | 8   | 351 | c.2110T>A      | c.(2110-2112)TCC>ACC   | p.S704T       |
| Pat_53 | Pre-Treatment   | TRIOBP          | 11078  | 37 | 22 | 38122252  | 38122252  | Missense_Mutation      | SNP | C  | A  | 5   | 200 | c.3689C>A      | c.(3688-3690)CCC>CAC   | p.P1230H      |
| Pat_53 | Pre-Treatment   | LHFPL4          | 375323 | 37 | 3  | 9547827   | 9547827   | Missense_Mutation      | SNP | C  | T  | 4   | 146 | c.467G>A       | c.(466-468)CGG>CAG     | p.R156Q       |
| Pat_53 | Pre-Treatment   | CELSR3          | 1951   | 37 | 3  | 48677168  | 48677168  | Missense_Mutation      | SNP | C  | A  | 6   | 176 | c.9850G>T      | c.(9850-9852)GGG>TGG   | p.G3284W      |
| Pat_53 | Pre-Treatment   | ACOX2           | 8309   | 37 | 3  | 58516196  | 58516196  | Missense_Mutation      | SNP | G  | A  | 25  | 130 | c.989C>T       | c.(988-990)CCC>CTC     | p.P330L       |
| Pat_53 | Pre-Treatment   | CLSTN2          | 64084  | 37 | 3  | 140275377 | 140275377 | Missense_Mutation      | SNP | C  | T  | 36  | 434 | c.1697C>T      | c.(1696-1698)TCC>TTC   | p.S566F       |
| Pat_53 | Pre-Treatment   | ZNF141          | 7700   | 37 | 4  | 367194    | 367194    | Missense_Mutation      | SNP | C  | T  | 8   | 534 | c.968C>T       | c.(967-969)TCC>TTC     | p.S323F       |
| Pat_53 | Pre-Treatment   | ZNF721          | 170960 | 37 | 4  | 435639    | 435639    | Missense_Mutation      | SNP | T  | C  | 5   | 290 | c.2617A>G      | c.(2617-2619)ACC>GCC   | p.T873A       |
| Pat_53 | Pre-Treatment   | MAB21L2         | 10586  | 37 | 4  | 151504675 | 151504675 | Missense_Mutation      | SNP | G  | A  | 6   | 263 | c.494G>A       | c.(493-495)CGC>CAC     | p.R165H       |
| Pat_53 | Pre-Treatment   | SPEF2           | 79925  | 37 | 5  | 35792480  | 35792480  | Missense_Mutation      | SNP | G  | A  | 6   | 345 | c.4486G>A      | c.(4486-4488)GAT>AAT   | p.D1496N      |
| Pat_53 | Pre-Treatment   | \NKHD1-EIF4EBP: | 404734 | 37 | 5  | 139887525 | 139887525 | Missense_Mutation      | SNP | G  | A  | 6   | 252 | c.3707G>A      | c.(3706-3708)CGA>CAA   | p.R1236Q      |
| Pat_53 | Pre-Treatment   | STK10           | 6793   | 37 | 5  | 171523561 | 171523561 | Missense_Mutation      | SNP | G  | A  | 57  | 344 | c.874C>T       | c.(874-876)CCC>TCC     | p.P292S       |
| Pat_53 | Pre-Treatment   | FLT4            | 2324   | 37 | 5  | 180057000 | 180057000 | Missense_Mutation      | SNP | C  | T  | 7   | 88  | c.619G>A       | c.(619-621)GAG>AAG     | p.E207K       |
| Pat_53 | Pre-Treatment   | MDC1            | 9656   | 37 | 6  | 30673208  | 30673208  | Missense_Mutation      | SNP | T  | C  | 7   | 541 | c.3752A>G      | c.(3751-3753)CAG>CGG   | p.Q1251R      |
| Pat_53 | Pre-Treatment   | BCLAF1          | 9774   | 37 | 6  | 136597052 | 136597052 | Missense_Mutation      | SNP | C  | T  | 60  | 639 | c.1611G>A      | c.(1609-1611)ATG>ATA   | p.M537I       |
| Pat_53 | Pre-Treatment   | HECW1           | 23072  | 37 | 7  | 43477632  | 43477632  | Missense_Mutation      | SNP | G  | A  | 7   | 480 | c.832G>A       | c.(832-834)GTG>ATG     | p.V278M       |
| Pat_53 | Pre-Treatment   | ZNF479          | 90827  | 37 | 7  | 57187809  | 57187809  | Missense_Mutation      | SNP | T  | G  | 10  | 228 | c.1313A>C      | c.(1312-1314)AAA>ACA   | p.K438T       |
| Pat_53 | Pre-Treatment   | SMURF1          | 57154  | 37 | 7  | 98652449  | 98652449  | Missense_Mutation      | SNP | G  | A  | 6   | 388 | c.443C>T       | c.(442-444)TCG>TTG     | p.S148L       |
| Pat_53 | Pre-Treatment   | FBXO24          | 26261  | 37 | 7  | 100187616 | 100187616 | Missense_Mutation      | SNP | C  | T  | 38  | 150 | c.56C>T        | c.(55-57)CCT>CTT       | p.P19L        |
| Pat_53 | Pre-Treatment   | ZAN             | 7455   | 37 | 7  | 100350361 | 100350361 | Missense_Mutation      | SNP | T  | C  | 7   | 577 | c.2633T>C      | c.(2632-2634)CTC>CCC   | p.L878P       |
| Pat_53 | Pre-Treatment   | MUC17           | 140453 | 37 | 7  | 100682094 | 100682094 | Missense_Mutation      | SNP | C  | T  | 10  | 884 | c.7397C>T      | c.(7396-7398)ACG>ATG   | p.T2466M      |
| Pat_53 | Pre-Treatment   | MUC17           | 140453 | 37 | 7  | 100682156 | 100682156 | Missense_Mutation      | SNP | A  | G  | 10  | 866 | c.7459A>G      | c.(7459-7461)ATG>GTG   | p.M2487V      |
| Pat_53 | Pre-Treatment   | MUC17           | 140453 | 37 | 7  | 100682158 | 100682158 | Missense_Mutation      | SNP | G  | C  | 9   | 868 | c.7461G>C      | c.(7459-7461)ATG>ATC   | p.M2487I      |
| Pat_53 | Pre-Treatment   | CPA1            | 1357   | 37 | 7  | 130027693 | 130027693 | Nonsense_Mutation      | SNP | G  | A  | 153 | 672 | c.1101G>A      | c.(1099-1101)TGG>TGA   | p.W367*       |
| Pat_53 | Pre-Treatment   | TRIM24          | 8805   | 37 | 7  | 138252271 | 138252271 | Missense_Mutation      | SNP | C  | T  | 70  | 411 | c.1576C>T      | c.(1576-1578)CCC>TCC   | p.P526S       |
| Pat_53 | Pre-Treatment   | MTMR7           | 9108   | 37 | 8  | 17157633  | 17157633  | Missense_Mutation      | SNP | C  | T  | 6   | 483 | c.1721G>A      | c.(1720-1722)AGC>AAC   | p.S574N       |
| Pat_53 | Pre-Treatment   | IFNA14          | 3448   | 37 | 9  | 21239652  | 21239652  | Missense_Mutation      | SNP | T  | C  | 6   | 232 | c.283A>G       | c.(283-285)AAC>GAC     | p.N95D        |
| Pat_53 | Pre-Treatment   | LOC442421       | 442421 | 37 | 9  | 66499794  | 66499795  | Missense_Mutation      | DNP | CG | TA | 8   | 168 | c.604_605CG>TA | c.(604-606)CGC>TAC     | p.R202Y       |
| Pat_53 | Pre-Treatment   | TMC1            | 117531 | 37 | 9  | 75407222  | 75407222  | Missense_Mutation      | SNP | C  | A  | 7   | 593 | c.1520C>A      | c.(1519-1521)CCT>CAT   | p.P507H       |
| Pat_53 | Pre-Treatment   | FRMPD4          | 9758   | 37 | X  | 12632978  | 12632978  | Missense_Mutation      | SNP | G  | A  | 61  | 73  | c.400G>A       | c.(400-402)GAG>AAG     | p.E134K       |
| Pat_53 | Post-Resistance | NADK            | 65220  | 37 | 1  | 1688735   | 1688735   | Missense_Mutation      | SNP | G  | A  | 4   | 225 | c.278C>T       | c.(277-279)CCC>CTC     | p.P93L        |
| Pat_53 | Post-Resistance | RERE            | 473    | 37 | 1  | 8716366   | 8716366   | Translation_Start_Site | SNP | C  | T  | 6   | 532 | c.-9G>A        | c.(-11--7)ACGTG>ACATG  |               |
| Pat_53 | Post-Resistance | PRDM2           | 7799   | 37 | 1  | 14106496  | 14106496  | Missense_Mutation      | SNP | C  | T  | 4   | 179 | c.2206C>T      | c.(2206-2208)CGG>TGG   | p.R736W       |
| Pat_53 | Post-Resistance | PRDM2           | 7799   | 37 | 1  | 14107241  | 14107241  | Missense_Mutation      | SNP | C  | T  | 4   | 158 | c.2951C>T      | c.(2950-2952)ACT>ATT   | p.T984I       |
| Pat_53 | Post-Resistance | PRDM2           | 7799   | 37 | 1  | 14108153  | 14108153  | Missense_Mutation      | SNP | G  | A  | 5   | 233 | c.3863G>A      | c.(3862-3864)CGA>CAA   | p.R1288Q      |
| Pat_53 | Post-Resistance | ZBTB17          | 7709   | 37 | 1  | 16269655  | 16269655  | Missense_Mutation      | SNP | G  | A  | 4   | 183 | c.1732C>T      | c.(1732-1734)CGC>TGC   | p.R578C       |
| Pat_53 | Post-Resistance | UBR4            | 23352  | 37 | 1  | 19403389  | 19403389  | Missense_Mutation      | SNP | G  | A  | 26  | 87  | c.15332C>T     | c.(15331-15333)CCT>CTT | p.P5111L      |
| Pat_53 | Post-Resistance | KIF17           | 57576  | 37 | 1  | 20996934  | 20996934  | Missense_Mutation      | SNP | C  | T  | 40  | 105 | c.2773G>A      | c.(2773-2775)GAC>AAC   | p.D925N       |
| Pat_53 | Post-Resistance | EPHB2           | 2048   | 37 | 1  | 23234492  | 23234492  | Missense_Mutation      | SNP | G  | A  | 4   | 262 | c.2183G>A      | c.(2182-2184)CGG>CAG   | p.R728Q       |
| Pat_53 | Post-Resistance | HMGCL           | 3155   | 37 | 1  | 24140679  | 24140679  | Splice_Site            | SNP | C  | T  | 4   | 166 | c.497_splice   | c.e5+1                 | p.G166_splice |

|        |                 |         |           |    |    |           |           |                   |     |   |   |     |     |            |                        |          |
|--------|-----------------|---------|-----------|----|----|-----------|-----------|-------------------|-----|---|---|-----|-----|------------|------------------------|----------|
| Pat_53 | Post-Resistance | AHDC1   | 27245     | 37 | 1  | 27878176  | 27878176  | Nonsense_Mutation | SNP | G | A | 4   | 144 | c.451C>T   | c.(451-453)CGA>TGA     | p.R151*  |
| Pat_53 | Post-Resistance | SES2    | 83667     | 37 | 1  | 28599131  | 28599131  | Missense_Mutation | SNP | G | A | 4   | 210 | c.577G>A   | c.(577-579)GAG>AAG     | p.E193K  |
| Pat_53 | Post-Resistance | RRAGC   | 64121     | 37 | 1  | 39321428  | 39321428  | Missense_Mutation | SNP | C | T | 4   | 313 | c.593G>A   | c.(592-594)AGG>AAG     | p.R198K  |
| Pat_53 | Post-Resistance | MACF1   | 23499     | 37 | 1  | 39929341  | 39929341  | Missense_Mutation | SNP | G | A | 4   | 192 | c.17065G>A | c.(17065-17067)GGA>AG/ | p.G5689R |
| Pat_53 | Post-Resistance | HEYL    | 26508     | 37 | 1  | 40095904  | 40095904  | Missense_Mutation | SNP | C | T | 4   | 171 | c.308G>A   | c.(307-309)GGG>GAG     | p.G103E  |
| Pat_53 | Post-Resistance | STIL    | 6491      | 37 | 1  | 47746263  | 47746263  | Missense_Mutation | SNP | C | T | 5   | 369 | c.1867G>A  | c.(1867-1869)GCA>ACA   | p.A623T  |
| Pat_53 | Post-Resistance | SPATA6  | 54558     | 37 | 1  | 48865097  | 48865097  | Missense_Mutation | SNP | G | A | 5   | 246 | c.706C>T   | c.(706-708)CGG>TGG     | p.R236W  |
| Pat_53 | Post-Resistance | ACADM   | 34        | 37 | 1  | 76190498  | 76190498  | Missense_Mutation | SNP | G | A | 4   | 144 | c.26G>A    | c.(25-27)TGC>TAC       | p.C9Y    |
| Pat_53 | Post-Resistance | DNAJB4  | 11080     | 37 | 1  | 78479056  | 78479056  | Missense_Mutation | SNP | G | A | 4   | 195 | c.533G>A   | c.(532-534)CGG>CAG     | p.R178Q  |
| Pat_53 | Post-Resistance | ZNF326  | 284695    | 37 | 1  | 90470571  | 90470571  | Missense_Mutation | SNP | G | A | 4   | 291 | c.71G>A    | c.(70-72)CGT>CAT       | p.R24H   |
| Pat_53 | Post-Resistance | VCAM1   | 7412      | 37 | 1  | 101198204 | 101198204 | Missense_Mutation | SNP | G | A | 5   | 356 | c.1756G>A  | c.(1756-1758)GGA>AGA   | p.G586R  |
| Pat_53 | Post-Resistance | AMIGO1  | 57463     | 37 | 1  | 110050069 | 110050069 | Missense_Mutation | SNP | G | A | 4   | 207 | c.1466C>T  | c.(1465-1467)ACG>ATG   | p.T489M  |
| Pat_53 | Post-Resistance | KCND3   | 3752      | 37 | 1  | 112319846 | 112319846 | Missense_Mutation | SNP | C | T | 4   | 139 | c.1568G>A  | c.(1567-1569)AGT>AAT   | p.S523N  |
| Pat_53 | Post-Resistance | MAGI3   | 260425    | 37 | 1  | 114184609 | 114184609 | Missense_Mutation | SNP | G | T | 4   | 144 | c.1437G>T  | c.(1435-1437)TTG>TTT   | p.L479F  |
| Pat_53 | Post-Resistance | AMPD1   | 270       | 37 | 1  | 115220030 | 115220030 | Missense_Mutation | SNP | C | A | 4   | 82  | c.1330G>T  | c.(1330-1332)GTC>TTC   | p.V444F  |
| Pat_53 | Post-Resistance | NBPF9   | 400818    | 37 | 1  | 144220807 | 144220807 | Missense_Mutation | SNP | A | C | 106 | 438 | c.2180A>C  | c.(2179-2181)GAT>GCT   | p.D727A  |
| Pat_53 | Post-Resistance | NBPF9   | 400818    | 37 | 1  | 144220816 | 144220816 | Missense_Mutation | SNP | A | G | 5   | 515 | c.2189A>G  | c.(2188-2190)GAG>GGG   | p.E730G  |
| Pat_53 | Post-Resistance | NBPF10  | 100132406 | 37 | 1  | 145299808 | 145299808 | Missense_Mutation | SNP | T | C | 25  | 365 | c.857T>C   | c.(856-858)ATG>ACG     | p.M286T  |
| Pat_53 | Post-Resistance | NBPF10  | 100132406 | 37 | 1  | 145311932 | 145311932 | Missense_Mutation | SNP | G | A | 4   | 249 | c.2000G>A  | c.(1999-2001)CGT>CAT   | p.R667H  |
| Pat_53 | Post-Resistance | BCL9    | 607       | 37 | 1  | 147086304 | 147086304 | Missense_Mutation | SNP | C | T | 4   | 172 | c.449C>T   | c.(448-450)GCC>GTC     | p.A150V  |
| Pat_53 | Post-Resistance | NBPF14  | 25832     | 37 | 1  | 148008610 | 148008610 | Missense_Mutation | SNP | G | T | 8   | 448 | c.1978C>A  | c.(1978-1980)CAA>AAA   | p.Q660K  |
| Pat_53 | Post-Resistance | ANP32E  | 81611     | 37 | 1  | 150193030 | 150193030 | Missense_Mutation | SNP | C | T | 5   | 558 | c.770G>A   | c.(769-771)CGA>CAA     | p.R257Q  |
| Pat_53 | Post-Resistance | C1orf51 | 148523    | 37 | 1  | 150255844 | 150255844 | Missense_Mutation | SNP | G | A | 4   | 316 | c.167G>A   | c.(166-168)CGG>CAG     | p.R56Q   |
| Pat_53 | Post-Resistance | RFX5    | 5993      | 37 | 1  | 151315152 | 151315152 | Missense_Mutation | SNP | T | C | 112 | 506 | c.1361A>G  | c.(1360-1362)GAT>GGT   | p.D454G  |
| Pat_53 | Post-Resistance | POGZ    | 23126     | 37 | 1  | 151403146 | 151403146 | Missense_Mutation | SNP | G | A | 9   | 679 | c.455C>T   | c.(454-456)ACG>ATG     | p.T152M  |
| Pat_53 | Post-Resistance | IL6R    | 3570      | 37 | 1  | 154437810 | 154437810 | Missense_Mutation | SNP | G | A | 4   | 205 | c.1361G>A  | c.(1360-1362)CGG>CAG   | p.R454Q  |
| Pat_53 | Post-Resistance | ADAR    | 103       | 37 | 1  | 154574328 | 154574328 | Missense_Mutation | SNP | T | C | 4   | 230 | c.790A>G   | c.(790-792)AGT>GGT     | p.S264G  |
| Pat_53 | Post-Resistance | SHC1    | 6464      | 37 | 1  | 154940681 | 154940681 | Missense_Mutation | SNP | G | A | 7   | 760 | c.803C>T   | c.(802-804)CCG>CTG     | p.P268L  |
| Pat_53 | Post-Resistance | SEMA4A  | 64218     | 37 | 1  | 156128201 | 156128201 | Missense_Mutation | SNP | G | A | 5   | 406 | c.386G>A   | c.(385-387)CGT>CAT     | p.R129H  |
| Pat_53 | Post-Resistance | CCT3    | 7203      | 37 | 1  | 156303425 | 156303425 | Nonsense_Mutation | SNP | G | A | 4   | 202 | c.217C>T   | c.(217-219)CAG>TAG     | p.Q73*   |
| Pat_53 | Post-Resistance | IQGAP3  | 128239    | 37 | 1  | 156534434 | 156534434 | Missense_Mutation | SNP | C | T | 4   | 251 | c.410G>A   | c.(409-411)CGG>CAG     | p.R137Q  |
| Pat_53 | Post-Resistance | DCAF8   | 50717     | 37 | 1  | 160209573 | 160209573 | Missense_Mutation | SNP | C | T | 4   | 134 | c.637G>A   | c.(637-639)GAT>AAT     | p.D213N  |
| Pat_53 | Post-Resistance | DUSP12  | 11266     | 37 | 1  | 161722902 | 161722902 | Missense_Mutation | SNP | C | T | 4   | 305 | c.712C>T   | c.(712-714)CGT>TGT     | p.R238C  |
| Pat_53 | Post-Resistance | KLHL20  | 27252     | 37 | 1  | 173726157 | 173726157 | Missense_Mutation | SNP | G | A | 4   | 187 | c.1010G>A  | c.(1009-1011)CGA>CAA   | p.R337Q  |
| Pat_53 | Post-Resistance | TNR     | 7143      | 37 | 1  | 175332855 | 175332855 | Missense_Mutation | SNP | C | T | 4   | 118 | c.2696G>A  | c.(2695-2697)CGA>CAA   | p.R899Q  |
| Pat_53 | Post-Resistance | PRG4    | 10216     | 37 | 1  | 186276044 | 186276044 | Missense_Mutation | SNP | C | A | 4   | 158 | c.1193C>A  | c.(1192-1194)CCC>CAC   | p.P398H  |
| Pat_53 | Post-Resistance | TNN1    | 7135      | 37 | 1  | 201382215 | 201382215 | Missense_Mutation | SNP | A | G | 4   | 409 | c.224T>C   | c.(223-225)GTG>GCG     | p.V75A   |
| Pat_53 | Post-Resistance | RNPEP   | 6051      | 37 | 1  | 201970811 | 201970811 | Nonsense_Mutation | SNP | C | T | 4   | 242 | c.1342C>T  | c.(1342-1344)CGA>TGA   | p.R448*  |
| Pat_53 | Post-Resistance | ELK4    | 2005      | 37 | 1  | 205589339 | 205589339 | Missense_Mutation | SNP | C | T | 5   | 311 | c.835G>A   | c.(835-837)GAC>AAC     | p.D279N  |
| Pat_53 | Post-Resistance | TP53BP2 | 7159      | 37 | 1  | 223989835 | 223989835 | Missense_Mutation | SNP | G | A | 4   | 161 | c.1208C>T  | c.(1207-1209)GCT>GTT   | p.A403V  |
| Pat_53 | Post-Resistance | WDR64   | 128025    | 37 | 1  | 241958569 | 241958569 | Missense_Mutation | SNP | G | A | 4   | 235 | c.1687G>A  | c.(1687-1689)GGC>AGC   | p.G563S  |
| Pat_53 | Post-Resistance | OR2M5   | 127059    | 37 | 1  | 248308943 | 248308943 | Missense_Mutation | SNP | C | T | 44  | 362 | c.494C>T   | c.(493-495)TCC>TTC     | p.S165F  |
| Pat_53 | Post-Resistance | PFKP    | 5214      | 37 | 10 | 3175465   | 3175465   | Missense_Mutation | SNP | G | A | 4   | 253 | c.1981G>A  | c.(1981-1983)GTG>ATG   | p.V661M  |
| Pat_53 | Post-Resistance | ATP5C1  | 509       | 37 | 10 | 7844778   | 7844778   | Missense_Mutation | SNP | C | A | 4   | 205 | c.851C>A   | c.(850-852)ACA>AAA     | p.T284K  |
| Pat_53 | Post-Resistance | BMI1    | 648       | 37 | 10 | 22615385  | 22615385  | Nonsense_Mutation | SNP | C | T | 4   | 255 | c.7C>T     | c.(7-9)CGA>TGA         | p.R3*    |
| Pat_53 | Post-Resistance | SVIL    | 6840      | 37 | 10 | 29813424  | 29813424  | Missense_Mutation | SNP | C | T | 4   | 177 | c.2563G>A  | c.(2563-2565)GTC>ATC   | p.V855I  |
| Pat_53 | Post-Resistance | EPC1    | 80314     | 37 | 10 | 32573670  | 32573670  | Missense_Mutation | SNP | C | T | 4   | 142 | c.1700G>A  | c.(1699-1701)AGT>AAT   | p.S567N  |

|        |                 |          |        |    |    |           |           |                   |     |    |    |    |     |                 |                        |               |
|--------|-----------------|----------|--------|----|----|-----------|-----------|-------------------|-----|----|----|----|-----|-----------------|------------------------|---------------|
| Pat_53 | Post-Resistance | ITGB1    | 3688   | 37 | 10 | 33200813  | 33200813  | Splice_Site       | SNP | C  | T  | 4  | 247 | c.1708_splice   | c.e12+1                | p.G570_splice |
| Pat_53 | Post-Resistance | TTC18    | 118491 | 37 | 10 | 75051010  | 75051010  | Missense_Mutation | SNP | G  | A  | 4  | 120 | c.2423C>T       | c.(2422-2424)ACA>ATA   | p.T808I       |
| Pat_53 | Post-Resistance | ZMIZ1    | 57178  | 37 | 10 | 81061895  | 81061895  | Missense_Mutation | SNP | G  | A  | 4  | 252 | c.2051G>A       | c.(2050-2052)CGG>CAG   | p.R684Q       |
| Pat_53 | Post-Resistance | AGAP11   | 119385 | 37 | 10 | 88761494  | 88761494  | Splice_Site       | SNP | G  | A  | 4  | 150 | c.14_splice     | c.e9+1                 | p.S5_splice   |
| Pat_53 | Post-Resistance | PI4K2A   | 55361  | 37 | 10 | 99433423  | 99433423  | Missense_Mutation | SNP | G  | A  | 5  | 265 | c.1364G>A       | c.(1363-1365)CGT>CAT   | p.R455H       |
| Pat_53 | Post-Resistance | ABLIM1   | 3983   | 37 | 10 | 116247739 | 116247739 | Missense_Mutation | SNP | G  | A  | 5  | 351 | c.1019C>T       | c.(1018-1020)ACG>ATG   | p.T340M       |
| Pat_53 | Post-Resistance | ABLIM1   | 3983   | 37 | 10 | 116331094 | 116331094 | Missense_Mutation | SNP | G  | A  | 4  | 85  | c.635C>T        | c.(634-636)CCG>CTG     | p.P212L       |
| Pat_53 | Post-Resistance | MKI67    | 4288   | 37 | 10 | 129905132 | 129905132 | Missense_Mutation | SNP | C  | T  | 4  | 256 | c.4972G>A       | c.(4972-4974)GAG>AAG   | p.E1658K      |
| Pat_53 | Post-Resistance | ATHL1    | 80162  | 37 | 11 | 294633    | 294633    | Missense_Mutation | SNP | G  | A  | 6  | 284 | c.2098G>A       | c.(2098-2100)GAG>AAG   | p.E700K       |
| Pat_53 | Post-Resistance | SLC25A22 | 79751  | 37 | 11 | 792330    | 792330    | Missense_Mutation | SNP | G  | A  | 4  | 138 | c.716C>T        | c.(715-717)GCC>GTC     | p.A239V       |
| Pat_53 | Post-Resistance | MUC6     | 4588   | 37 | 11 | 1017592   | 1017592   | Nonsense_Mutation | SNP | G  | A  | 6  | 538 | c.5209C>T       | c.(5209-5211)CGA>TGA   | p.R1737*      |
| Pat_53 | Post-Resistance | MUC5B    | 727897 | 37 | 11 | 1264181   | 1264181   | Missense_Mutation | SNP | C  | T  | 4  | 192 | c.8150C>T       | c.(8149-8151)ACC>ATC   | p.T2717I      |
| Pat_53 | Post-Resistance | MUC5B    | 727897 | 37 | 11 | 1272638   | 1272639   | Missense_Mutation | DNP | GG | AA | 25 | 117 | 15494_15495GG>A | c.(15493-15495)GGG>GAA | p.G5165E      |
| Pat_53 | Post-Resistance | KRTAP5-4 | 387267 | 37 | 11 | 1642989   | 1642989   | Missense_Mutation | SNP | C  | A  | 50 | 157 | c.473G>T        | c.(472-474)GGC>GTC     | p.G158V       |
| Pat_53 | Post-Resistance | TRIM5    | 85363  | 37 | 11 | 5686299   | 5686299   | Missense_Mutation | SNP | C  | T  | 4  | 242 | c.1222G>A       | c.(1222-1224)GTT>ATT   | p.V408I       |
| Pat_53 | Post-Resistance | ARFGAP2  | 84364  | 37 | 11 | 47192980  | 47192980  | Missense_Mutation | SNP | C  | T  | 4  | 230 | c.938G>A        | c.(937-939)CGA>CAA     | p.R313Q       |
| Pat_53 | Post-Resistance | OR8H3    | 390152 | 37 | 11 | 55890222  | 55890222  | Missense_Mutation | SNP | C  | T  | 4  | 170 | c.374C>T        | c.(373-375)GCG>GTG     | p.A125V       |
| Pat_53 | Post-Resistance | OR5M10   | 390167 | 37 | 11 | 56344321  | 56344321  | Missense_Mutation | SNP | G  | A  | 5  | 304 | c.877C>T        | c.(877-879)CGG>TGG     | p.R293W       |
| Pat_53 | Post-Resistance | ZDHC5    | 25921  | 37 | 11 | 57456099  | 57456099  | Nonsense_Mutation | SNP | C  | T  | 4  | 146 | c.346C>T        | c.(346-348)CGA>TGA     | p.R116*       |
| Pat_53 | Post-Resistance | MPEG1    | 219972 | 37 | 11 | 58980051  | 58980051  | Missense_Mutation | SNP | C  | T  | 46 | 144 | c.288G>A        | c.(286-288)ATG>ATA     | p.M96I        |
| Pat_53 | Post-Resistance | OR4D10   | 390197 | 37 | 11 | 59245656  | 59245656  | Missense_Mutation | SNP | G  | A  | 4  | 230 | c.754G>A        | c.(754-756)GTG>ATG     | p.V252M       |
| Pat_53 | Post-Resistance | SF1      | 7536   | 37 | 11 | 64534431  | 64534431  | Missense_Mutation | SNP | G  | A  | 4  | 199 | c.1523C>T       | c.(1522-1524)CCG>CTG   | p.P508L       |
| Pat_53 | Post-Resistance | MEN1     | 4221   | 37 | 11 | 64575113  | 64575113  | Missense_Mutation | SNP | G  | A  | 4  | 179 | c.709C>T        | c.(709-711)CGC>TGC     | p.R237C       |
| Pat_53 | Post-Resistance | POLA2    | 23649  | 37 | 11 | 65048467  | 65048467  | Missense_Mutation | SNP | C  | T  | 4  | 147 | c.749C>T        | c.(748-750)CCT>CTT     | p.P250L       |
| Pat_53 | Post-Resistance | RBM4B    | 83759  | 37 | 11 | 66444243  | 66444243  | Missense_Mutation | SNP | G  | A  | 5  | 467 | c.308C>T        | c.(307-309)CCG>CTG     | p.P103L       |
| Pat_53 | Post-Resistance | PPFIA1   | 8500   | 37 | 11 | 70221060  | 70221060  | Nonsense_Mutation | SNP | G  | A  | 4  | 118 | c.3176G>A       | c.(3175-3177)TGG>TAG   | p.W1059*      |
| Pat_53 | Post-Resistance | ATG16L2  | 89849  | 37 | 11 | 72539448  | 72539448  | Missense_Mutation | SNP | C  | T  | 6  | 159 | c.1517C>T       | c.(1516-1518)ACC>ATC   | p.T506I       |
| Pat_53 | Post-Resistance | HINFP    | 25988  | 37 | 11 | 119003254 | 119003254 | Missense_Mutation | SNP | G  | A  | 4  | 107 | c.725G>A        | c.(724-726)CGG>CAG     | p.R242Q       |
| Pat_53 | Post-Resistance | RNF26    | 79102  | 37 | 11 | 119206068 | 119206068 | Missense_Mutation | SNP | G  | A  | 4  | 206 | c.236G>A        | c.(235-237)GGC>GAC     | p.G79D        |
| Pat_53 | Post-Resistance | STT3A    | 3703   | 37 | 11 | 125476253 | 125476253 | Missense_Mutation | SNP | G  | A  | 4  | 222 | c.673G>A        | c.(673-675)GTG>ATG     | p.V225M       |
| Pat_53 | Post-Resistance | ST3GAL4  | 6484   | 37 | 11 | 126277530 | 126277530 | Splice_Site       | SNP | G  | A  | 7  | 261 | c.341_splice    | c.e6+1                 | p.S114_splice |
| Pat_53 | Post-Resistance | USP5     | 8078   | 37 | 12 | 6965951   | 6965951   | Missense_Mutation | SNP | G  | A  | 4  | 190 | c.665G>A        | c.(664-666)CGC>CAC     | p.R222H       |
| Pat_53 | Post-Resistance | USP5     | 8078   | 37 | 12 | 6973901   | 6973901   | Missense_Mutation | SNP | C  | T  | 4  | 154 | c.2260C>T       | c.(2260-2262)CGG>TGG   | p.R754W       |
| Pat_53 | Post-Resistance | C3AR1    | 719    | 37 | 12 | 8212381   | 8212381   | Missense_Mutation | SNP | C  | T  | 4  | 115 | c.401G>A        | c.(400-402)CGC>CAC     | p.R134H       |
| Pat_53 | Post-Resistance | PRB2     | 653247 | 37 | 12 | 11546150  | 11546150  | Missense_Mutation | SNP | G  | C  | 8  | 207 | c.862C>G        | c.(862-864)CCA>GCA     | p.P288A       |
| Pat_53 | Post-Resistance | PPFIBP1  | 8496   | 37 | 12 | 27832514  | 27832514  | Missense_Mutation | SNP | C  | T  | 5  | 347 | c.1726C>T       | c.(1726-1728)CCG>TCG   | p.P576S       |
| Pat_53 | Post-Resistance | IPO8     | 10526  | 37 | 12 | 30792654  | 30792654  | Missense_Mutation | SNP | C  | T  | 4  | 144 | c.2284G>A       | c.(2284-2286)GTT>ATT   | p.V762I       |
| Pat_53 | Post-Resistance | PPHLN1   | 51535  | 37 | 12 | 42836505  | 42836505  | Missense_Mutation | SNP | G  | A  | 5  | 428 | c.1087G>A       | c.(1087-1089)GGA>AGA   | p.G363R       |
| Pat_53 | Post-Resistance | SLC4A8   | 9498   | 37 | 12 | 51856106  | 51856106  | Missense_Mutation | SNP | G  | A  | 6  | 169 | c.1114G>A       | c.(1114-1116)GTA>ATA   | p.V372I       |
| Pat_53 | Post-Resistance | AAAS     | 8086   | 37 | 12 | 53702572  | 53702572  | Nonsense_Mutation | SNP | G  | A  | 4  | 308 | c.1024C>T       | c.(1024-1026)CGA>TGA   | p.R342*       |
| Pat_53 | Post-Resistance | HNRNPA1  | 3178   | 37 | 12 | 54675657  | 54675657  | Missense_Mutation | SNP | G  | A  | 4  | 180 | c.211G>A        | c.(211-213)GCT>ACT     | p.A71T        |
| Pat_53 | Post-Resistance | SUOX     | 6821   | 37 | 12 | 56398758  | 56398758  | Nonsense_Mutation | SNP | C  | T  | 7  | 414 | c.1585C>T       | c.(1585-1587)CGA>TGA   | p.R529*       |
| Pat_53 | Post-Resistance | ERBB3    | 2065   | 37 | 12 | 56480329  | 56480329  | Missense_Mutation | SNP | G  | A  | 4  | 199 | c.436G>A        | c.(436-438)GGT>AGT     | p.G146S       |
| Pat_53 | Post-Resistance | SMARCC2  | 6601   | 37 | 12 | 56567575  | 56567575  | Nonsense_Mutation | SNP | G  | A  | 4  | 175 | c.1555C>T       | c.(1555-1557)CGA>TGA   | p.R519*       |
| Pat_53 | Post-Resistance | CS       | 1431   | 37 | 12 | 56676220  | 56676220  | Missense_Mutation | SNP | C  | T  | 4  | 96  | c.572G>A        | c.(571-573)CGA>CAA     | p.R191Q       |
| Pat_53 | Post-Resistance | MARS     | 4141   | 37 | 12 | 57894139  | 57894139  | Missense_Mutation | SNP | G  | A  | 5  | 508 | c.1127G>A       | c.(1126-1128)CGA>CAA   | p.R376Q       |
| Pat_53 | Post-Resistance | AGAP2    | 116986 | 37 | 12 | 58124305  | 58124305  | Missense_Mutation | SNP | G  | A  | 4  | 306 | c.2401C>T       | c.(2401-2403)CGG>TGG   | p.R801W       |

|        |                 |           |        |    |    |           |           |                   |     |   |   |     |     |               |                        |          |
|--------|-----------------|-----------|--------|----|----|-----------|-----------|-------------------|-----|---|---|-----|-----|---------------|------------------------|----------|
| Pat_53 | Post-Resistance | MON2      | 23041  | 37 | 12 | 62861015  | 62861015  | Missense_Mutation | SNP | G | A | 4   | 227 | c.28G>A       | c.(28-30)GTG>ATG       | p.V10M   |
| Pat_53 | Post-Resistance | C12orf23  | 90488  | 37 | 12 | 107364940 | 107364940 | Missense_Mutation | SNP | G | A | 5   | 233 | c.122G>A      | c.(121-123)GGT>GAT     | p.G41D   |
| Pat_53 | Post-Resistance | ACACB     | 32     | 37 | 12 | 109577535 | 109577535 | Missense_Mutation | SNP | G | A | 4   | 262 | c.325G>A      | c.(325-327)GCA>ACA     | p.A109T  |
| Pat_53 | Post-Resistance | SH2B3     | 10019  | 37 | 12 | 111885287 | 111885287 | Missense_Mutation | SNP | G | A | 4   | 125 | c.1175G>A     | c.(1174-1176)CGG>CAG   | p.R392Q  |
| Pat_53 | Post-Resistance | C12orf51  | 283450 | 37 | 12 | 112690233 | 112690233 | Missense_Mutation | SNP | C | T | 4   | 167 | c.2281G>A     | c.(2281-2283)GCT>ACT   | p.A761T  |
| Pat_53 | Post-Resistance | GCN1L1    | 10985  | 37 | 12 | 120576584 | 120576584 | Missense_Mutation | SNP | G | A | 4   | 191 | c.6071C>T     | c.(6070-6072)GCG>GTG   | p.A2024V |
| Pat_53 | Post-Resistance | EP400     | 57634  | 37 | 12 | 132534880 | 132534880 | Missense_Mutation | SNP | C | T | 4   | 111 | c.7213C>T     | c.(7213-7215)CGT>TGT   | p.R2405C |
| Pat_53 | Post-Resistance | PABPC3    | 5042   | 37 | 13 | 25670736  | 25670736  | Missense_Mutation | SNP | G | A | 24  | 193 | c.400G>A      | c.(400-402)GAA>AAA     | p.E134K  |
| Pat_53 | Post-Resistance | FREM2     | 341640 | 37 | 13 | 39265178  | 39265178  | Missense_Mutation | SNP | C | T | 4   | 266 | c.3697C>T     | c.(3697-3699)CCC>TCC   | p.P1233S |
| Pat_53 | Post-Resistance | COG3      | 83548  | 37 | 13 | 46083902  | 46083902  | Missense_Mutation | SNP | C | T | 5   | 446 | c.1670C>T     | c.(1669-1671)ACG>ATG   | p.T557M  |
| Pat_53 | Post-Resistance | RB1       | 5925   | 37 | 13 | 49033845  | 49033845  | Missense_Mutation | SNP | G | A | 4   | 217 | c.1982G>A     | c.(1981-1983)CGG>CAG   | p.R661Q  |
| Pat_53 | Post-Resistance | MYCBP2    | 23077  | 37 | 13 | 77657273  | 77657273  | Missense_Mutation | SNP | C | T | 4   | 236 | c.10816G>A    | c.(10816-10818)GAA>AAA | p.E3606K |
| Pat_53 | Post-Resistance | ERCC5     | 2073   | 37 | 13 | 103518190 | 103518190 | Missense_Mutation | SNP | G | A | 4   | 89  | c.2128G>A     | c.(2128-2130)GTG>ATG   | p.V710M  |
| Pat_53 | Post-Resistance | TUBGCP3   | 10426  | 37 | 13 | 113223532 | 113223532 | Missense_Mutation | SNP | C | A | 4   | 124 | c.118G>T      | c.(118-120)GGC>TGC     | p.G40C   |
| Pat_53 | Post-Resistance | POTEG     | 404785 | 37 | 14 | 19553531  | 19553531  | Missense_Mutation | SNP | G | A | 6   | 190 | c.115G>A      | c.(115-117)GGC>AGC     | p.G39S   |
| Pat_53 | Post-Resistance | POTEG     | 404785 | 37 | 14 | 19553678  | 19553678  | Missense_Mutation | SNP | G | A | 4   | 180 | c.262G>A      | c.(262-264)GAC>AAC     | p.D88N   |
| Pat_53 | Post-Resistance | RNASE4    | 6038   | 37 | 14 | 21167919  | 21167919  | Missense_Mutation | SNP | G | A | 4   | 199 | c.389G>A      | c.(388-390)CGT>CAT     | p.R130H  |
| Pat_53 | Post-Resistance | RBM23     | 55147  | 37 | 14 | 23374630  | 23374630  | Missense_Mutation | SNP | C | T | 4   | 185 | c.488G>A      | c.(487-489)CGT>CAT     | p.R163H  |
| Pat_53 | Post-Resistance | CDH24     | 64403  | 37 | 14 | 23523420  | 23523420  | Missense_Mutation | SNP | C | T | 5   | 152 | c.902G>A      | c.(901-903)GGG>GAG     | p.G301E  |
| Pat_53 | Post-Resistance | SRP54     | 6729   | 37 | 14 | 35465931  | 35465931  | Missense_Mutation | SNP | C | T | 57  | 227 | c.16C>T       | c.(16-18)CTT>TTT       | p.L6F    |
| Pat_53 | Post-Resistance | FAM179B   | 23116  | 37 | 14 | 45475280  | 45475280  | Missense_Mutation | SNP | G | A | 4   | 197 | c.2714G>A     | c.(2713-2715)CGA>CAA   | p.R905Q  |
| Pat_53 | Post-Resistance | NID2      | 22795  | 37 | 14 | 52478368  | 52478368  | Missense_Mutation | SNP | G | A | 6   | 259 | c.3454C>T     | c.(3454-3456)CGG>TGG   | p.R1152W |
| Pat_53 | Post-Resistance | SAMD4A    | 23034  | 37 | 14 | 55226903  | 55226903  | Missense_Mutation | SNP | C | T | 4   | 344 | c.1198C>T     | c.(1198-1200)CGC>TGC   | p.R400C  |
| Pat_53 | Post-Resistance | DAAM1     | 23002  | 37 | 14 | 59791097  | 59791097  | Missense_Mutation | SNP | G | A | 4   | 179 | c.914G>A      | c.(913-915)CGC>CAC     | p.R305H  |
| Pat_53 | Post-Resistance | RDH12     | 145226 | 37 | 14 | 68195943  | 68195943  | Missense_Mutation | SNP | G | A | 4   | 184 | c.694G>A      | c.(694-696)GTC>ATC     | p.V232I  |
| Pat_53 | Post-Resistance | SLC39A9   | 55334  | 37 | 14 | 69925110  | 69925110  | Missense_Mutation | SNP | G | A | 4   | 338 | c.724G>A      | c.(724-726)GCC>ACC     | p.A242T  |
| Pat_53 | Post-Resistance | SMOC1     | 64093  | 37 | 14 | 70490078  | 70490078  | Missense_Mutation | SNP | G | A | 4   | 201 | c.1205G>A     | c.(1204-1206)CGG>CAG   | p.R402Q  |
| Pat_53 | Post-Resistance | LTBP2     | 4053   | 37 | 14 | 74968216  | 74968216  | Missense_Mutation | SNP | G | A | 4   | 111 | c.5248C>T     | c.(5248-5250)CGC>TGC   | p.R1750C |
| Pat_53 | Post-Resistance | C14orf179 | 112752 | 37 | 14 | 76548694  | 76548694  | Missense_Mutation | SNP | G | A | 5   | 260 | c.352G>A      | c.(352-354)GTG>ATG     | p.V118M  |
| Pat_53 | Post-Resistance | SNW1      | 22938  | 37 | 14 | 78187145  | 78187145  | Missense_Mutation | SNP | C | T | 4   | 139 | c.1157G>A     | c.(1156-1158)CGG>CAG   | p.R386Q  |
| Pat_53 | Post-Resistance | PSMC1     | 5700   | 37 | 14 | 90735856  | 90735856  | Nonsense_Mutation | SNP | C | T | 4   | 185 | c.997C>T      | c.(997-999)CGA>TGA     | p.R333*  |
| Pat_53 | Post-Resistance | OTUB2     | 78990  | 37 | 14 | 94510327  | 94510327  | Missense_Mutation | SNP | C | T | 4   | 291 | c.229C>T      | c.(229-231)CGC>TGC     | p.R77C   |
| Pat_53 | Post-Resistance | PAPOLA    | 10914  | 37 | 14 | 97009136  | 97009136  | Nonsense_Mutation | SNP | C | T | 4   | 337 | c.1195C>T     | c.(1195-1197)CGA>TGA   | p.R399*  |
| Pat_53 | Post-Resistance | AHNAK2    | 113146 | 37 | 14 | 105413410 | 105413410 | Missense_Mutation | SNP | G | A | 88  | 208 | c.8378C>T     | c.(8377-8379)GCG>GTG   | p.A2793V |
| Pat_53 | Post-Resistance | AHNAK2    | 113146 | 37 | 14 | 105420169 | 105420169 | Missense_Mutation | SNP | C | T | 4   | 160 | c.1619G>A     | c.(1618-1620)GGC>GAC   | p.G540D  |
| Pat_53 | Post-Resistance | ADAM6     | 8755   | 37 | 14 | 106993798 | 106993798 | Splice_Site       | SNP | C | T | 14  | 223 | c.8648_splice | c.e187+1               |          |
| Pat_53 | Post-Resistance | GABRB3    | 2562   | 37 | 15 | 26793203  | 26793203  | Missense_Mutation | SNP | C | T | 4   | 196 | c.1159G>A     | c.(1159-1161)GAT>AAT   | p.D387N  |
| Pat_53 | Post-Resistance | HERC2     | 8924   | 37 | 15 | 28386902  | 28386902  | Missense_Mutation | SNP | C | T | 5   | 452 | c.11791G>A    | c.(11791-11793)GAA>AAA | p.E3931K |
| Pat_53 | Post-Resistance | CHAC1     | 79094  | 37 | 15 | 41247791  | 41247791  | Missense_Mutation | SNP | C | T | 4   | 185 | c.614C>T      | c.(613-615)ACG>ATG     | p.T205M  |
| Pat_53 | Post-Resistance | TYRO3     | 7301   | 37 | 15 | 41864643  | 41864643  | Missense_Mutation | SNP | G | A | 5   | 265 | c.1756G>A     | c.(1756-1758)GTA>ATA   | p.V586I  |
| Pat_53 | Post-Resistance | WDR76     | 79968  | 37 | 15 | 44131850  | 44131850  | Missense_Mutation | SNP | G | A | 5   | 613 | c.656G>A      | c.(655-657)CGA>CAA     | p.R219Q  |
| Pat_53 | Post-Resistance | MYEF2     | 50804  | 37 | 15 | 48443760  | 48443760  | Missense_Mutation | SNP | G | A | 5   | 538 | c.1216C>T     | c.(1216-1218)CGT>TGT   | p.R406C  |
| Pat_53 | Post-Resistance | RFX7      | 64864  | 37 | 15 | 56386649  | 56386649  | Missense_Mutation | SNP | G | A | 5   | 170 | c.3277C>T     | c.(3277-3279)CGT>TGT   | p.R1093C |
| Pat_53 | Post-Resistance | SLTM      | 79811  | 37 | 15 | 59179507  | 59179507  | Missense_Mutation | SNP | G | A | 4   | 155 | c.2608C>T     | c.(2608-2610)CCT>TCT   | p.P870S  |
| Pat_53 | Post-Resistance | VPS13C    | 54832  | 37 | 15 | 62165483  | 62165483  | Nonsense_Mutation | SNP | C | A | 6   | 541 | c.10540G>T    | c.(10540-10542)GGA>TGA | p.G3514* |
| Pat_53 | Post-Resistance | NEO1      | 4756   | 37 | 15 | 73575382  | 73575382  | Missense_Mutation | SNP | G | A | 5   | 411 | c.3340G>A     | c.(3340-3342)GTC>ATC   | p.V1114I |
| Pat_53 | Post-Resistance | CYP1A2    | 1544   | 37 | 15 | 75042102  | 75042102  | Missense_Mutation | SNP | C | T | 112 | 228 | c.23C>T       | c.(22-24)CCC>CTC       | p.P8L    |

|        |                 |          |        |    |    |          |          |                   |     |   |   |     |     |               |                      |               |
|--------|-----------------|----------|--------|----|----|----------|----------|-------------------|-----|---|---|-----|-----|---------------|----------------------|---------------|
| Pat_53 | Post-Resistance | CHRN4    | 1143   | 37 | 15 | 78921974 | 78921974 | Missense_Mutation | SNP | C | T | 44  | 107 | c.673G>A      | c.(673-675)GAC>AAC   | p.D225N       |
| Pat_53 | Post-Resistance | STARD5   | 80765  | 37 | 15 | 81605677 | 81605677 | Missense_Mutation | SNP | C | T | 6   | 262 | c.562G>A      | c.(562-564)GTG>ATG   | p.V188M       |
| Pat_53 | Post-Resistance | WHAMM    | 123720 | 37 | 15 | 83499373 | 83499373 | Missense_Mutation | SNP | G | A | 5   | 560 | c.1664G>A     | c.(1663-1665)CGA>CAA | p.R555Q       |
| Pat_53 | Post-Resistance | AKAP13   | 11214  | 37 | 15 | 86122195 | 86122195 | Missense_Mutation | SNP | C | T | 4   | 353 | c.896C>T      | c.(895-897)CCC>CTC   | p.P299L       |
| Pat_53 | Post-Resistance | ZNF710   | 374655 | 37 | 15 | 90616474 | 90616474 | Missense_Mutation | SNP | G | A | 5   | 229 | c.1630G>A     | c.(1630-1632)GTG>ATG | p.V544M       |
| Pat_53 | Post-Resistance | TSC2     | 7249   | 37 | 16 | 2111902  | 2111902  | Missense_Mutation | SNP | G | A | 4   | 94  | c.1150G>A     | c.(1150-1152)GTC>ATC | p.V384I       |
| Pat_53 | Post-Resistance | ZNF205   | 7755   | 37 | 16 | 3170105  | 3170105  | Missense_Mutation | SNP | G | A | 4   | 240 | c.1444G>A     | c.(1444-1446)GGC>AGC | p.G482S       |
| Pat_53 | Post-Resistance | ALG1     | 56052  | 37 | 16 | 5125428  | 5125428  | Missense_Mutation | SNP | G | A | 4   | 302 | c.430G>A      | c.(430-432)GTG>ATG   | p.V144M       |
| Pat_53 | Post-Resistance | ALG1     | 56052  | 37 | 16 | 5127505  | 5127505  | Missense_Mutation | SNP | G | A | 4   | 192 | c.599G>A      | c.(598-600)CGA>CAA   | p.R200Q       |
| Pat_53 | Post-Resistance | C16orf62 | 57020  | 37 | 16 | 19639050 | 19639050 | Missense_Mutation | SNP | C | T | 4   | 213 | c.1306C>T     | c.(1306-1308)CGG>TGG | p.R436W       |
| Pat_53 | Post-Resistance | UBFD1    | 56061  | 37 | 16 | 23569565 | 23569565 | Missense_Mutation | SNP | G | A | 4   | 217 | c.320G>A      | c.(319-321)GGC>GAC   | p.G107D       |
| Pat_53 | Post-Resistance | DNAJA2   | 10294  | 37 | 16 | 47005303 | 47005303 | Missense_Mutation | SNP | C | T | 6   | 259 | c.320G>A      | c.(319-321)CGA>CAA   | p.R107Q       |
| Pat_53 | Post-Resistance | HEATR3   | 55027  | 37 | 16 | 50102702 | 50102702 | Missense_Mutation | SNP | C | T | 6   | 481 | c.323C>T      | c.(322-324)GCT>GTT   | p.A108V       |
| Pat_53 | Post-Resistance | NOD2     | 64127  | 37 | 16 | 50733419 | 50733419 | Missense_Mutation | SNP | G | A | 212 | 419 | c.94G>A       | c.(94-96)GAG>AAG     | p.E32K        |
| Pat_53 | Post-Resistance | KIFC3    | 3801   | 37 | 16 | 57805333 | 57805333 | Missense_Mutation | SNP | C | T | 4   | 246 | c.542G>A      | c.(541-543)CGT>CAT   | p.R181H       |
| Pat_53 | Post-Resistance | CDH5     | 1003   | 37 | 16 | 66426076 | 66426076 | Missense_Mutation | SNP | T | C | 4   | 301 | c.1007T>C     | c.(1006-1008)ATC>ACC | p.I336T       |
| Pat_53 | Post-Resistance | ZNF23    | 7571   | 37 | 16 | 71483003 | 71483003 | Missense_Mutation | SNP | C | T | 5   | 194 | c.925G>A      | c.(925-927)GAG>AAG   | p.E309K       |
| Pat_53 | Post-Resistance | ZNF19    | 7567   | 37 | 16 | 71509686 | 71509686 | Missense_Mutation | SNP | G | A | 4   | 312 | c.764C>T      | c.(763-765)ACG>ATG   | p.T255M       |
| Pat_53 | Post-Resistance | HSDL1    | 83693  | 37 | 16 | 84163719 | 84163719 | Missense_Mutation | SNP | C | T | 4   | 287 | c.538G>A      | c.(538-540)GCC>ACC   | p.A180T       |
| Pat_53 | Post-Resistance | CRISPLD2 | 83716  | 37 | 16 | 84922899 | 84922899 | Missense_Mutation | SNP | G | A | 5   | 366 | c.1369G>A     | c.(1369-1371)GTG>ATG | p.V457M       |
| Pat_53 | Post-Resistance | FANCA    | 2175   | 37 | 16 | 89818580 | 89818580 | Missense_Mutation | SNP | C | T | 6   | 573 | c.3032G>A     | c.(3031-3033)CGC>CAC | p.R1011H      |
| Pat_53 | Post-Resistance | VPS53    | 55275  | 37 | 17 | 456619   | 456619   | Splice_Site       | SNP | C | T | 4   | 163 | c.1787_splice | c.e16+1              | p.T596_splice |
| Pat_53 | Post-Resistance | INPP5K   | 51763  | 37 | 17 | 1401247  | 1401247  | Missense_Mutation | SNP | C | T | 4   | 264 | c.946G>A      | c.(946-948)GGC>AGC   | p.G316S       |
| Pat_53 | Post-Resistance | EIF4A1   | 1973   | 37 | 17 | 7481670  | 7481670  | Missense_Mutation | SNP | G | A | 6   | 536 | c.1087G>A     | c.(1087-1089)GGT>AGT | p.G363S       |
| Pat_53 | Post-Resistance | MPDU1    | 9526   | 37 | 17 | 7487199  | 7487199  | Missense_Mutation | SNP | G | A | 5   | 568 | c.19G>A       | c.(19-21)GGA>AGA     | p.G7R         |
| Pat_53 | Post-Resistance | CYB5D1   | 124637 | 37 | 17 | 7761979  | 7761979  | Missense_Mutation | SNP | G | A | 5   | 239 | c.293G>A      | c.(292-294)GGC>GAC   | p.G98D        |
| Pat_53 | Post-Resistance | CHD3     | 1107   | 37 | 17 | 7814172  | 7814172  | Missense_Mutation | SNP | C | T | 5   | 288 | c.5762C>T     | c.(5761-5763)CCG>CTG | p.P1921L      |
| Pat_53 | Post-Resistance | PMP22    | 5376   | 37 | 17 | 15134242 | 15134242 | Missense_Mutation | SNP | G | A | 4   | 179 | c.475C>T      | c.(475-477)CGC>TGC   | p.R159C       |
| Pat_53 | Post-Resistance | ADORA2B  | 136    | 37 | 17 | 15878627 | 15878627 | Missense_Mutation | SNP | G | A | 5   | 222 | c.970G>A      | c.(970-972)GTA>ATA   | p.V324I       |
| Pat_53 | Post-Resistance | DRG2     | 1819   | 37 | 17 | 18001674 | 18001674 | Splice_Site       | SNP | G | A | 5   | 186 | c.315_splice  | c.e3+1               | p.E105_splice |
| Pat_53 | Post-Resistance | MYO15A   | 51168  | 37 | 17 | 18054816 | 18054816 | Missense_Mutation | SNP | C | T | 4   | 159 | c.7762C>T     | c.(7762-7764)CGG>TGG | p.R2588W      |
| Pat_53 | Post-Resistance | KSR1     | 8844   | 37 | 17 | 25931710 | 25931710 | Missense_Mutation | SNP | G | A | 4   | 159 | c.1225G>A     | c.(1225-1227)GAT>AAT | p.D409N       |
| Pat_53 | Post-Resistance | GOSR1    | 9527   | 37 | 17 | 28849323 | 28849323 | Missense_Mutation | SNP | G | A | 5   | 471 | c.680G>A      | c.(679-681)CGG>CAG   | p.R227Q       |
| Pat_53 | Post-Resistance | C17orf79 | 55352  | 37 | 17 | 30179888 | 30179888 | Missense_Mutation | SNP | C | T | 4   | 315 | c.328G>A      | c.(328-330)GAT>AAT   | p.D110N       |
| Pat_53 | Post-Resistance | TAF15    | 8148   | 37 | 17 | 34171973 | 34171973 | Missense_Mutation | SNP | G | A | 4   | 161 | c.1670G>A     | c.(1669-1671)GGC>GAC | p.G557D       |
| Pat_53 | Post-Resistance | ACACA    | 31     | 37 | 17 | 35545405 | 35545405 | Missense_Mutation | SNP | G | A | 4   | 121 | c.4477C>T     | c.(4477-4479)CGG>TGG | p.R1493W      |
| Pat_53 | Post-Resistance | RPL19    | 6143   | 37 | 17 | 37360818 | 37360818 | Missense_Mutation | SNP | C | G | 4   | 222 | c.508C>G      | c.(508-510)CGC>GGC   | p.R170G       |
| Pat_53 | Post-Resistance | GRB7     | 2886   | 37 | 17 | 37898595 | 37898595 | Missense_Mutation | SNP | C | T | 10  | 202 | c.41C>T       | c.(40-42)CCG>CTG     | p.P14L        |
| Pat_53 | Post-Resistance | KRTAP4-1 | 85285  | 37 | 17 | 39340740 | 39340740 | Missense_Mutation | SNP | G | A | 4   | 153 | c.310C>T      | c.(310-312)CGT>TGT   | p.R104C       |
| Pat_53 | Post-Resistance | KRT17    | 3872   | 37 | 17 | 39777910 | 39777910 | Missense_Mutation | SNP | G | A | 4   | 128 | c.769C>T      | c.(769-771)CGT>TGT   | p.R257C       |
| Pat_53 | Post-Resistance | EIF1     | 10209  | 37 | 17 | 39846374 | 39846374 | Missense_Mutation | SNP | C | T | 4   | 313 | c.230C>T      | c.(229-231)CCG>CTG   | p.P77L        |
| Pat_53 | Post-Resistance | KAT2A    | 2648   | 37 | 17 | 40266944 | 40266944 | Missense_Mutation | SNP | G | A | 4   | 268 | c.1985C>T     | c.(1984-1986)ACG>ATG | p.T662M       |
| Pat_53 | Post-Resistance | WNK4     | 65266  | 37 | 17 | 40940169 | 40940169 | Missense_Mutation | SNP | C | T | 5   | 444 | c.1885C>T     | c.(1885-1887)CGT>TGT | p.R629C       |
| Pat_53 | Post-Resistance | AARSD1   | 80755  | 37 | 17 | 41131448 | 41131448 | Missense_Mutation | SNP | C | T | 5   | 644 | c.265G>A      | c.(265-267)GAT>AAT   | p.D89N        |
| Pat_53 | Post-Resistance | NMT1     | 4836   | 37 | 17 | 43181221 | 43181221 | Missense_Mutation | SNP | G | A | 6   | 363 | c.1309G>A     | c.(1309-1311)GAC>AAC | p.D437N       |
| Pat_53 | Post-Resistance | COL1A1   | 1277   | 37 | 17 | 48264166 | 48264166 | Missense_Mutation | SNP | G | A | 4   | 238 | c.3649C>T     | c.(3649-3651)CGG>TGG | p.R1217W      |
| Pat_53 | Post-Resistance | INTS2    | 57508  | 37 | 17 | 59989419 | 59989419 | Missense_Mutation | SNP | A | G | 5   | 375 | c.686T>C      | c.(685-687)CTG>CCG   | p.L229P       |



|        |                 |          |           |    |    |          |          |                   |     |   |   |   |     |           |                      |          |
|--------|-----------------|----------|-----------|----|----|----------|----------|-------------------|-----|---|---|---|-----|-----------|----------------------|----------|
| Pat_53 | Post-Resistance | SCN4A    | 6329      | 37 | 17 | 62034631 | 62034631 | Missense_Mutation | SNP | C | A | 4 | 125 | c.2267G>T | c.(2266-2268)CGC>CTC | p.R756L  |
| Pat_53 | Post-Resistance | BPTF     | 2186      | 37 | 17 | 65850575 | 65850575 | Missense_Mutation | SNP | G | A | 6 | 614 | c.1133G>A | c.(1132-1134)CGA>CAA | p.R378Q  |
| Pat_53 | Post-Resistance | RECQL5   | 9400      | 37 | 17 | 73659025 | 73659025 | Missense_Mutation | SNP | G | A | 5 | 467 | c.305C>T  | c.(304-306)TCG>TTG   | p.S102L  |
| Pat_53 | Post-Resistance | DNAH17   | 8632      | 37 | 17 | 76455237 | 76455237 | Missense_Mutation | SNP | G | A | 6 | 352 | c.707C>T  | c.(706-708)ACG>ATG   | p.T236M  |
| Pat_53 | Post-Resistance | METTL4   | 64863     | 37 | 18 | 2566965  | 2566965  | Missense_Mutation | SNP | C | T | 4 | 205 | c.251G>A  | c.(250-252)CGA>CAA   | p.R84Q   |
| Pat_53 | Post-Resistance | ANKRD12  | 23253     | 37 | 18 | 9258861  | 9258861  | Missense_Mutation | SNP | G | A | 4 | 201 | c.5596G>A | c.(5596-5598)GAA>AAA | p.E1866K |
| Pat_53 | Post-Resistance | TXNDC2   | 84203     | 37 | 18 | 9887461  | 9887461  | Missense_Mutation | SNP | A | C | 5 | 195 | c.985A>C  | c.(985-987)ATC>CTC   | p.I329L  |
| Pat_53 | Post-Resistance | MBD2     | 8932      | 37 | 18 | 51715341 | 51715341 | Missense_Mutation | SNP | G | A | 6 | 427 | c.743C>T  | c.(742-744)ACA>ATA   | p.T248I  |
| Pat_53 | Post-Resistance | ALPK2    | 115701    | 37 | 18 | 56171336 | 56171336 | Missense_Mutation | SNP | G | A | 4 | 230 | c.6074C>T | c.(6073-6075)CCG>CTG | p.P2025L |
| Pat_53 | Post-Resistance | ZNF532   | 55205     | 37 | 18 | 56586013 | 56586013 | Missense_Mutation | SNP | C | T | 4 | 216 | c.494C>T  | c.(493-495)ACG>ATG   | p.T165M  |
| Pat_53 | Post-Resistance | C19orf36 | 113177    | 37 | 19 | 2098101  | 2098101  | Missense_Mutation | SNP | G | A | 6 | 314 | c.448G>A  | c.(448-450)GTC>ATC   | p.V150I  |
| Pat_53 | Post-Resistance | NFIC     | 4782      | 37 | 19 | 3381836  | 3381836  | Missense_Mutation | SNP | G | A | 4 | 198 | c.157G>A  | c.(157-159)GAG>AAG   | p.E53K   |
| Pat_53 | Post-Resistance | KDM4B    | 23030     | 37 | 19 | 5032995  | 5032995  | Missense_Mutation | SNP | G | A | 4 | 122 | c.94G>A   | c.(94-96)GTG>ATG     | p.V32M   |
| Pat_53 | Post-Resistance | CD209    | 30835     | 37 | 19 | 7810766  | 7810766  | Missense_Mutation | SNP | C | T | 6 | 166 | c.386G>A  | c.(385-387)CCG>CAG   | p.R129Q  |
| Pat_53 | Post-Resistance | LPPR2    | 64748     | 37 | 19 | 11474862 | 11474862 | Nonsense_Mutation | SNP | C | T | 5 | 164 | c.973C>T  | c.(973-975)CGA>TGA   | p.R325*  |
| Pat_53 | Post-Resistance | ZNF440   | 126070    | 37 | 19 | 11943142 | 11943142 | Missense_Mutation | SNP | G | A | 4 | 153 | c.1151G>A | c.(1150-1152)CGA>CAA | p.R384Q  |
| Pat_53 | Post-Resistance | ZNF844   | 284391    | 37 | 19 | 12187475 | 12187475 | Missense_Mutation | SNP | C | G | 4 | 179 | c.1540C>G | c.(1540-1542)CAT>GAT | p.H514D  |
| Pat_53 | Post-Resistance | NFIX     | 4784      | 37 | 19 | 13183923 | 13183923 | Missense_Mutation | SNP | G | A | 4 | 183 | c.646G>A  | c.(646-648)GGG>AGG   | p.G216R  |
| Pat_53 | Post-Resistance | EMR3     | 84658     | 37 | 19 | 14765803 | 14765803 | Missense_Mutation | SNP | C | T | 4 | 117 | c.568G>A  | c.(568-570)GAT>AAT   | p.D190N  |
| Pat_53 | Post-Resistance | IL12RB1  | 3594      | 37 | 19 | 18186628 | 18186628 | Nonsense_Mutation | SNP | G | A | 4 | 88  | c.631C>T  | c.(631-633)CGA>TGA   | p.R211*  |
| Pat_53 | Post-Resistance | PDE4C    | 5143      | 37 | 19 | 18322649 | 18322649 | Missense_Mutation | SNP | G | T | 4 | 87  | c.1711C>A | c.(1711-1713)CAG>AAG | p.Q571K  |
| Pat_53 | Post-Resistance | ZNF737   | 100129842 | 37 | 19 | 20727799 | 20727799 | Missense_Mutation | SNP | C | T | 4 | 112 | c.1210G>A | c.(1210-1212)GAA>AAA | p.E404K  |
| Pat_53 | Post-Resistance | ZNF681   | 148213    | 37 | 19 | 23926839 | 23926839 | Missense_Mutation | SNP | A | G | 4 | 191 | c.1513T>C | c.(1513-1515)TCC>CCC | p.S505P  |
| Pat_53 | Post-Resistance | CD22     | 933       | 37 | 19 | 35831831 | 35831831 | Nonsense_Mutation | SNP | C | T | 4 | 101 | c.1297C>T | c.(1297-1299)CGA>TGA | p.R433*  |
| Pat_53 | Post-Resistance | GAPDHS   | 26330     | 37 | 19 | 36034584 | 36034584 | Missense_Mutation | SNP | C | T | 4 | 158 | c.911C>T  | c.(910-912)GCG>GTG   | p.A304V  |
| Pat_53 | Post-Resistance | ATP4A    | 495       | 37 | 19 | 36046487 | 36046487 | Missense_Mutation | SNP | G | A | 3 | 47  | c.2012C>T | c.(2011-2013)GCC>GTC | p.A671V  |
| Pat_53 | Post-Resistance | WDR62    | 284403    | 37 | 19 | 36583665 | 36583665 | Missense_Mutation | SNP | G | A | 5 | 152 | c.2285G>A | c.(2284-2286)CCG>CAG | p.R762Q  |
| Pat_53 | Post-Resistance | ZNF780A  | 284323    | 37 | 19 | 40580552 | 40580552 | Missense_Mutation | SNP | T | G | 4 | 212 | c.1797A>C | c.(1795-1797)CAA>CAC | p.Q599H  |
| Pat_53 | Post-Resistance | CEACAM1  | 634       | 37 | 19 | 43026222 | 43026222 | Missense_Mutation | SNP | G | A | 6 | 388 | c.557C>T  | c.(556-558)CCG>CTG   | p.P186L  |
| Pat_53 | Post-Resistance | XRCC1    | 7515      | 37 | 19 | 44047618 | 44047618 | Nonsense_Mutation | SNP | G | A | 4 | 136 | c.1828C>T | c.(1828-1830)CGA>TGA | p.R610*  |
| Pat_53 | Post-Resistance | GRIN2D   | 2906      | 37 | 19 | 48922505 | 48922505 | Missense_Mutation | SNP | G | A | 4 | 133 | c.1750G>A | c.(1750-1752)GCC>ACC | p.A584T  |
| Pat_53 | Post-Resistance | TEAD2    | 8463      | 37 | 19 | 49850484 | 49850484 | Missense_Mutation | SNP | C | T | 5 | 422 | c.872G>A  | c.(871-873)CGT>CAT   | p.R291H  |
| Pat_53 | Post-Resistance | POLD1    | 5424      | 37 | 19 | 50906786 | 50906786 | Missense_Mutation | SNP | G | A | 4 | 162 | c.1174G>A | c.(1174-1176)GTG>ATG | p.V392M  |
| Pat_53 | Post-Resistance | ZNF665   | 79788     | 37 | 19 | 53668482 | 53668482 | Nonsense_Mutation | SNP | G | A | 4 | 130 | c.1261C>T | c.(1261-1263)CGA>TGA | p.R421*  |
| Pat_53 | Post-Resistance | ZNF761   | 388561    | 37 | 19 | 53958879 | 53958879 | Missense_Mutation | SNP | A | G | 9 | 469 | c.1118A>G | c.(1117-1119)CAT>CGT | p.H373R  |
| Pat_53 | Post-Resistance | ZNF761   | 388561    | 37 | 19 | 53959275 | 53959275 | Missense_Mutation | SNP | G | A | 4 | 240 | c.1514G>A | c.(1513-1515)CGG>CAG | p.R505Q  |
| Pat_53 | Post-Resistance | LILRA4   | 23547     | 37 | 19 | 54848178 | 54848178 | Missense_Mutation | SNP | C | T | 4 | 221 | c.1189G>A | c.(1189-1191)GGC>AGC | p.G397S  |
| Pat_53 | Post-Resistance | ZNF419   | 79744     | 37 | 19 | 58005172 | 58005172 | Missense_Mutation | SNP | G | A | 4 | 196 | c.1247G>A | c.(1246-1248)AGA>AAA | p.R416K  |
| Pat_53 | Post-Resistance | PXDN     | 7837      | 37 | 2  | 1652010  | 1652010  | Missense_Mutation | SNP | G | A | 4 | 306 | c.3542C>T | c.(3541-3543)GCG>GTG | p.A1181V |
| Pat_53 | Post-Resistance | WDR35    | 57539     | 37 | 2  | 20138033 | 20138033 | Nonsense_Mutation | SNP | G | A | 4 | 214 | c.2089C>T | c.(2089-2091)CGA>TGA | p.R697*  |
| Pat_53 | Post-Resistance | CENPA    | 1058      | 37 | 2  | 27016113 | 27016113 | Missense_Mutation | SNP | G | A | 7 | 286 | c.389G>A  | c.(388-390)CCG>CAG   | p.R130Q  |
| Pat_53 | Post-Resistance | IFT172   | 26160     | 37 | 2  | 27672622 | 27672622 | Missense_Mutation | SNP | C | T | 4 | 219 | c.4096G>A | c.(4096-4098)GAT>AAT | p.D1366N |
| Pat_53 | Post-Resistance | MTA3     | 57504     | 37 | 2  | 42936069 | 42936069 | Missense_Mutation | SNP | G | A | 4 | 409 | c.1187G>A | c.(1186-1188)CGA>CAA | p.R396Q  |
| Pat_53 | Post-Resistance | PPM1B    | 5495      | 37 | 2  | 44428405 | 44428405 | Missense_Mutation | SNP | C | T | 5 | 318 | c.67C>T   | c.(67-69)CGT>TGT     | p.R23C   |
| Pat_53 | Post-Resistance | PAPOLG   | 64895     | 37 | 2  | 61021162 | 61021162 | Missense_Mutation | SNP | G | A | 6 | 253 | c.1825G>A | c.(1825-1827)GTA>ATA | p.V609I  |
| Pat_53 | Post-Resistance | ADD2     | 119       | 37 | 2  | 70890681 | 70890681 | Missense_Mutation | SNP | G | A | 4 | 297 | c.2057C>T | c.(2056-2058)TCG>TTG | p.S686L  |
| Pat_53 | Post-Resistance | LMAN2L   | 81562     | 37 | 2  | 97403690 | 97403690 | Missense_Mutation | SNP | C | T | 4 | 180 | c.302G>A  | c.(301-303)CCG>CAG   | p.R101Q  |

|        |                 |         |        |    |    |           |           |                   |     |    |    |    |     |                |                        |           |
|--------|-----------------|---------|--------|----|----|-----------|-----------|-------------------|-----|----|----|----|-----|----------------|------------------------|-----------|
| Pat_53 | Post-Resistance | CNGA3   | 1261   | 37 | 2  | 99012913  | 99012913  | Missense_Mutation | SNP | G  | A  | 4  | 69  | c.1280G>A      | c.(1279-1281)CGC>CAC   | p.R427H   |
| Pat_53 | Post-Resistance | C2orf29 | 55571  | 37 | 2  | 101881385 | 101881385 | Missense_Mutation | SNP | C  | T  | 6  | 184 | c.911C>T       | c.(910-912)ACG>ATG     | p.T304M   |
| Pat_53 | Post-Resistance | FHL2    | 2274   | 37 | 2  | 106002910 | 106002910 | Missense_Mutation | SNP | G  | A  | 4  | 134 | c.64C>T        | c.(64-66)CGG>TGG       | p.R22W    |
| Pat_53 | Post-Resistance | RGPD3   | 653489 | 37 | 2  | 107049425 | 107049425 | Missense_Mutation | SNP | A  | C  | 15 | 111 | c.2435T>G      | c.(2434-2436)CTG>CGG   | p.L812R   |
| Pat_53 | Post-Resistance | ST6GAL2 | 84620  | 37 | 2  | 107460025 | 107460025 | Nonsense_Mutation | SNP | G  | A  | 4  | 130 | c.409C>T       | c.(409-411)CAG>TAG     | p.Q137*   |
| Pat_53 | Post-Resistance | SULT1C2 | 6819   | 37 | 2  | 108910750 | 108910750 | Nonsense_Mutation | SNP | C  | T  | 4  | 173 | c.217C>T       | c.(217-219)CGA>TGA     | p.R73*    |
| Pat_53 | Post-Resistance | DARS    | 1615   | 37 | 2  | 136736874 | 136736874 | Missense_Mutation | SNP | G  | A  | 6  | 514 | c.187C>T       | c.(187-189)CGT>TGT     | p.R63C    |
| Pat_53 | Post-Resistance | SPOPL   | 339745 | 37 | 2  | 139322536 | 139322536 | Missense_Mutation | SNP | G  | A  | 4  | 150 | c.1007G>A      | c.(1006-1008)TGT>TAT   | p.C336Y   |
| Pat_53 | Post-Resistance | STAM2   | 10254  | 37 | 2  | 153001437 | 153001437 | Missense_Mutation | SNP | G  | A  | 5  | 287 | c.482C>T       | c.(481-483)TCG>TTG     | p.S161L   |
| Pat_53 | Post-Resistance | ITGB6   | 3694   | 37 | 2  | 160983112 | 160983112 | Missense_Mutation | SNP | C  | T  | 4  | 108 | c.1661G>A      | c.(1660-1662)GGT>GAT   | p.G554D   |
| Pat_53 | Post-Resistance | GAD1    | 2571   | 37 | 2  | 171686090 | 171686090 | Missense_Mutation | SNP | G  | A  | 4  | 232 | c.251G>A       | c.(250-252)CGG>CAG     | p.R84Q    |
| Pat_53 | Post-Resistance | GPR155  | 151556 | 37 | 2  | 175301062 | 175301062 | Missense_Mutation | SNP | G  | A  | 4  | 333 | c.2395C>T      | c.(2395-2397)CGT>TGT   | p.R799C   |
| Pat_53 | Post-Resistance | GPR155  | 151556 | 37 | 2  | 175301077 | 175301077 | Missense_Mutation | SNP | C  | T  | 4  | 281 | c.2380G>A      | c.(2380-2382)GGC>AGC   | p.G794S   |
| Pat_53 | Post-Resistance | ATF2    | 1386   | 37 | 2  | 175986196 | 175986196 | Missense_Mutation | SNP | G  | A  | 5  | 142 | c.175C>T       | c.(175-177)CGT>TGT     | p.R59C    |
| Pat_53 | Post-Resistance | TTN     | 7273   | 37 | 2  | 179422707 | 179422707 | Missense_Mutation | SNP | G  | A  | 5  | 208 | c.79670C>T     | c.(79669-79671)ACA>ATA | p.T26557I |
| Pat_53 | Post-Resistance | TTN     | 7273   | 37 | 2  | 179430305 | 179430305 | Missense_Mutation | SNP | G  | A  | 4  | 320 | c.72850C>T     | c.(72850-72852)CGT>TGT | p.R24284C |
| Pat_53 | Post-Resistance | TTN     | 7273   | 37 | 2  | 179481497 | 179481497 | Missense_Mutation | SNP | C  | T  | 4  | 300 | c.40415G>A     | c.(40414-40416)CGT>CAT | p.R13472H |
| Pat_53 | Post-Resistance | GULP1   | 51454  | 37 | 2  | 189342436 | 189342436 | Missense_Mutation | SNP | C  | T  | 4  | 327 | c.7C>T         | c.(7-9)CGT>TGT         | p.R3C     |
| Pat_53 | Post-Resistance | MAP2    | 4133   | 37 | 2  | 210545509 | 210545509 | Missense_Mutation | SNP | C  | T  | 7  | 626 | c.412C>T       | c.(412-414)CCC>TCC     | p.P138S   |
| Pat_53 | Post-Resistance | TLL4    | 9654   | 37 | 2  | 219617568 | 219617568 | Missense_Mutation | SNP | G  | A  | 4  | 265 | c.3059G>A      | c.(3058-3060)CGT>CAT   | p.R1020H  |
| Pat_53 | Post-Resistance | PTPRN   | 5798   | 37 | 2  | 220164074 | 220164074 | Missense_Mutation | SNP | C  | T  | 4  | 127 | c.1556G>A      | c.(1555-1557)CGG>CAG   | p.R519Q   |
| Pat_53 | Post-Resistance | EPHA4   | 2043   | 37 | 2  | 222428870 | 222428870 | Missense_Mutation | SNP | C  | T  | 4  | 170 | c.404G>A       | c.(403-405)CGT>CAT     | p.R135H   |
| Pat_53 | Post-Resistance | DGKD    | 8527   | 37 | 2  | 234365876 | 234365876 | Nonsense_Mutation | SNP | C  | T  | 4  | 165 | c.2482C>T      | c.(2482-2484)CGA>TGA   | p.R828*   |
| Pat_53 | Post-Resistance | CRNKL1  | 51340  | 37 | 20 | 20026049  | 20026049  | Missense_Mutation | SNP | C  | T  | 6  | 385 | c.1187G>A      | c.(1186-1188)CGG>CAG   | p.R396Q   |
| Pat_53 | Post-Resistance | ZNF337  | 26152  | 37 | 20 | 25657503  | 25657503  | Missense_Mutation | SNP | C  | T  | 5  | 386 | c.421G>A       | c.(421-423)GTA>ATA     | p.V141I   |
| Pat_53 | Post-Resistance | FRG1B   | 284802 | 37 | 20 | 29628243  | 29628243  | Missense_Mutation | SNP | T  | C  | 23 | 397 | c.155T>C       | c.(154-156)TTG>TCG     | p.L52S    |
| Pat_53 | Post-Resistance | FRG1B   | 284802 | 37 | 20 | 29628245  | 29628245  | Missense_Mutation | SNP | G  | A  | 24 | 398 | c.157G>A       | c.(157-159)GCC>ACC     | p.A53T    |
| Pat_53 | Post-Resistance | FRG1B   | 284802 | 37 | 20 | 29628251  | 29628251  | Missense_Mutation | SNP | A  | G  | 51 | 370 | c.163A>G       | c.(163-165)AAT>GAT     | p.N55D    |
| Pat_53 | Post-Resistance | FRG1B   | 284802 | 37 | 20 | 29628278  | 29628278  | Missense_Mutation | SNP | G  | A  | 9  | 296 | c.190G>A       | c.(190-192)GCA>ACA     | p.A64T    |
| Pat_53 | Post-Resistance | FRG1B   | 284802 | 37 | 20 | 29628299  | 29628300  | Missense_Mutation | DNP | AG | GA | 6  | 234 | c.211_212AG>GA | c.(211-213)AGT>GAT     | p.S71D    |
| Pat_53 | Post-Resistance | RBM12   | 10137  | 37 | 20 | 34241449  | 34241449  | Missense_Mutation | SNP | C  | T  | 5  | 426 | c.1796G>A      | c.(1795-1797)CGT>CAT   | p.R599H   |
| Pat_53 | Post-Resistance | PHF20   | 51230  | 37 | 20 | 34515765  | 34515765  | Missense_Mutation | SNP | G  | A  | 4  | 329 | c.2068G>A      | c.(2068-2070)GAG>AAG   | p.E690K   |
| Pat_53 | Post-Resistance | NPEPL1  | 79716  | 37 | 20 | 57273776  | 57273776  | Missense_Mutation | SNP | G  | A  | 4  | 176 | c.544G>A       | c.(544-546)GCC>ACC     | p.A182T   |
| Pat_53 | Post-Resistance | SYCP2   | 10388  | 37 | 20 | 58491593  | 58491593  | Missense_Mutation | SNP | C  | T  | 4  | 228 | c.461G>A       | c.(460-462)CGC>CAC     | p.R154H   |
| Pat_53 | Post-Resistance | SYNJ1   | 8867   | 37 | 21 | 34067441  | 34067441  | Nonsense_Mutation | SNP | G  | A  | 5  | 512 | c.748C>T       | c.(748-750)CGA>TGA     | p.R250*   |
| Pat_53 | Post-Resistance | GART    | 2618   | 37 | 21 | 34876757  | 34876757  | Missense_Mutation | SNP | C  | T  | 5  | 319 | c.2803G>A      | c.(2803-2805)GGA>AGA   | p.G935R   |
| Pat_53 | Post-Resistance | DOPEY2  | 9980   | 37 | 21 | 37623566  | 37623566  | Missense_Mutation | SNP | G  | A  | 5  | 251 | c.5105G>A      | c.(5104-5106)CGT>CAT   | p.R1702H  |
| Pat_53 | Post-Resistance | ZNF295  | 49854  | 37 | 21 | 43411870  | 43411870  | Missense_Mutation | SNP | C  | T  | 7  | 608 | c.2335G>A      | c.(2335-2337)GAG>AAG   | p.E779K   |
| Pat_53 | Post-Resistance | UMODL1  | 89766  | 37 | 21 | 43547924  | 43547924  | Missense_Mutation | SNP | G  | A  | 4  | 216 | c.3673G>A      | c.(3673-3675)GGA>AGA   | p.G1225R  |
| Pat_53 | Post-Resistance | COL6A2  | 1292   | 37 | 21 | 47546100  | 47546100  | Missense_Mutation | SNP | G  | A  | 5  | 524 | c.2371G>A      | c.(2371-2373)GAC>AAC   | p.D791N   |
| Pat_53 | Post-Resistance | PCNT    | 5116   | 37 | 21 | 47754470  | 47754470  | Missense_Mutation | SNP | C  | T  | 4  | 120 | c.427C>T       | c.(427-429)CGT>TGT     | p.R143C   |
| Pat_53 | Post-Resistance | CECR2   | 27443  | 37 | 22 | 17976569  | 17976569  | Missense_Mutation | SNP | G  | A  | 4  | 172 | c.230G>A       | c.(229-231)CGA>CAA     | p.R77Q    |
| Pat_53 | Post-Resistance | HIRA    | 7290   | 37 | 22 | 19363214  | 19363214  | Missense_Mutation | SNP | C  | T  | 4  | 174 | c.1715G>A      | c.(1714-1716)CGG>CAG   | p.R572Q   |
| Pat_53 | Post-Resistance | CABIN1  | 23523  | 37 | 22 | 24494110  | 24494110  | Missense_Mutation | SNP | G  | A  | 4  | 206 | c.4072G>A      | c.(4072-4074)GAT>AAT   | p.D1358N  |
| Pat_53 | Post-Resistance | NEFH    | 4744   | 37 | 22 | 29885686  | 29885686  | Missense_Mutation | SNP | C  | A  | 7  | 200 | c.2057C>A      | c.(2056-2058)GCA>GAA   | p.A686E   |
| Pat_53 | Post-Resistance | GAL3ST1 | 9514   | 37 | 22 | 30951785  | 30951785  | Missense_Mutation | SNP | G  | A  | 4  | 130 | c.427C>T       | c.(427-429)CGC>TGC     | p.R143C   |
| Pat_53 | Post-Resistance | ELFN2   | 114794 | 37 | 22 | 37769986  | 37769986  | Missense_Mutation | SNP | G  | A  | 4  | 139 | c.1589C>T      | c.(1588-1590)TCG>TTG   | p.S530L   |

|        |                 |          |        |    |    |           |           |                   |     |   |   |    |     |              |                        |               |
|--------|-----------------|----------|--------|----|----|-----------|-----------|-------------------|-----|---|---|----|-----|--------------|------------------------|---------------|
| Pat_53 | Post-Resistance | TRIOBP   | 11078  | 37 | 22 | 38120676  | 38120676  | Missense_Mutation | SNP | G | A | 4  | 246 | c.2113G>A    | c.(2113-2115)GAT>AAT   | p.D705N       |
| Pat_53 | Post-Resistance | TRIOBP   | 11078  | 37 | 22 | 38120707  | 38120707  | Missense_Mutation | SNP | C | T | 6  | 243 | c.2144C>T    | c.(2143-2145)ACC>ATC   | p.T715I       |
| Pat_53 | Post-Resistance | GTPBP1   | 9567   | 37 | 22 | 39122093  | 39122093  | Missense_Mutation | SNP | C | T | 4  | 210 | c.1156C>T    | c.(1156-1158)CGC>TGC   | p.R386C       |
| Pat_53 | Post-Resistance | SGSM3    | 27352  | 37 | 22 | 40803286  | 40803286  | Missense_Mutation | SNP | G | A | 4  | 102 | c.1322G>A    | c.(1321-1323)CGC>CAC   | p.R441H       |
| Pat_53 | Post-Resistance | ZFYVE20  | 64145  | 37 | 3  | 15115678  | 15115678  | Missense_Mutation | SNP | G | A | 4  | 193 | c.1966C>T    | c.(1966-1968)CGC>TGC   | p.R656C       |
| Pat_53 | Post-Resistance | GPD1L    | 23171  | 37 | 3  | 32200501  | 32200501  | Missense_Mutation | SNP | C | T | 4  | 168 | c.752C>T     | c.(751-753)ACA>ATA     | p.T251I       |
| Pat_53 | Post-Resistance | SLC25A38 | 54977  | 37 | 3  | 39437955  | 39437955  | Missense_Mutation | SNP | G | A | 4  | 270 | c.859G>A     | c.(859-861)GCA>ACA     | p.A287T       |
| Pat_53 | Post-Resistance | CELSR3   | 1951   | 37 | 3  | 48667109  | 48667109  | Missense_Mutation | SNP | G | A | 4  | 121 | c.11780C>T   | c.(11779-11781)ACG>ATG | p.T3927M      |
| Pat_53 | Post-Resistance | QARS     | 5859   | 37 | 3  | 49136550  | 49136550  | Missense_Mutation | SNP | G | A | 4  | 209 | c.1751C>T    | c.(1750-1752)GCT>GTT   | p.A584V       |
| Pat_53 | Post-Resistance | CCDC36   | 339834 | 37 | 3  | 49294693  | 49294693  | Missense_Mutation | SNP | G | A | 5  | 361 | c.1763G>A    | c.(1762-1764)AGC>AAC   | p.S588N       |
| Pat_53 | Post-Resistance | BSN      | 8927   | 37 | 3  | 49690290  | 49690290  | Missense_Mutation | SNP | G | A | 4  | 139 | c.3301G>A    | c.(3301-3303)GAG>AAG   | p.E1101K      |
| Pat_53 | Post-Resistance | RNF123   | 63891  | 37 | 3  | 49740085  | 49740085  | Missense_Mutation | SNP | C | T | 5  | 229 | c.1649C>T    | c.(1648-1650)CCC>CTC   | p.P550L       |
| Pat_53 | Post-Resistance | GNAI2    | 2771   | 37 | 3  | 50295019  | 50295019  | Missense_Mutation | SNP | C | T | 4  | 134 | c.965C>T     | c.(964-966)ACG>ATG     | p.T322M       |
| Pat_53 | Post-Resistance | ACOX2    | 8309   | 37 | 3  | 58516196  | 58516196  | Missense_Mutation | SNP | G | A | 55 | 66  | c.989C>T     | c.(988-990)CCC>CTC     | p.P330L       |
| Pat_53 | Post-Resistance | MINA     | 84864  | 37 | 3  | 97686164  | 97686164  | Missense_Mutation | SNP | G | A | 5  | 548 | c.274C>T     | c.(274-276)CGG>TGG     | p.R92W        |
| Pat_53 | Post-Resistance | BOC      | 91653  | 37 | 3  | 112991448 | 112991448 | Missense_Mutation | SNP | G | A | 5  | 119 | c.859G>A     | c.(859-861)GAC>AAC     | p.D287N       |
| Pat_53 | Post-Resistance | ILDR1    | 286676 | 37 | 3  | 121720591 | 121720591 | Splice_Site       | SNP | C | T | 4  | 306 | c.499_splice | c.e4+1                 | p.H167_splice |
| Pat_53 | Post-Resistance | TMCC1    | 23023  | 37 | 3  | 129370347 | 129370347 | Missense_Mutation | SNP | G | A | 4  | 242 | c.1939C>T    | c.(1939-1941)CGG>TGG   | p.R647W       |
| Pat_53 | Post-Resistance | TF       | 7018   | 37 | 3  | 133485208 | 133485208 | Missense_Mutation | SNP | G | A | 4  | 256 | c.1417G>A    | c.(1417-1419)GTT>ATT   | p.V473I       |
| Pat_53 | Post-Resistance | PIK3CB   | 5291   | 37 | 3  | 138409921 | 138409921 | Missense_Mutation | SNP | C | A | 5  | 364 | c.1957G>T    | c.(1957-1959)GAT>TAT   | p.D653Y       |
| Pat_53 | Post-Resistance | CLSTN2   | 64084  | 37 | 3  | 140275377 | 140275377 | Missense_Mutation | SNP | C | T | 37 | 181 | c.1697C>T    | c.(1696-1698)TCC>TTC   | p.S566F       |
| Pat_53 | Post-Resistance | SLC25A36 | 55186  | 37 | 3  | 140675488 | 140675488 | Missense_Mutation | SNP | C | T | 5  | 285 | c.161C>T     | c.(160-162)GCC>GTC     | p.A54V        |
| Pat_53 | Post-Resistance | GMPS     | 8833   | 37 | 3  | 155623981 | 155623981 | Missense_Mutation | SNP | C | T | 5  | 235 | c.455C>T     | c.(454-456)ACA>ATA     | p.T152I       |
| Pat_53 | Post-Resistance | CCNL1    | 57018  | 37 | 3  | 156869994 | 156869994 | Missense_Mutation | SNP | G | A | 5  | 444 | c.646C>T     | c.(646-648)CGT>TGT     | p.R216C       |
| Pat_53 | Post-Resistance | FNDC3B   | 64778  | 37 | 3  | 172061944 | 172061944 | Missense_Mutation | SNP | G | A | 5  | 332 | c.2146G>A    | c.(2146-2148)GTA>ATA   | p.V716I       |
| Pat_53 | Post-Resistance | EIF4G1   | 1981   | 37 | 3  | 184042052 | 184042052 | Nonsense_Mutation | SNP | C | T | 4  | 273 | c.2536C>T    | c.(2536-2538)CGA>TGA   | p.R846*       |
| Pat_53 | Post-Resistance | DGKG     | 1608   | 37 | 3  | 185906038 | 185906038 | Missense_Mutation | SNP | C | T | 6  | 198 | c.2048G>A    | c.(2047-2049)AGC>AAC   | p.S683N       |
| Pat_53 | Post-Resistance | DGKG     | 1608   | 37 | 3  | 186006595 | 186006595 | Missense_Mutation | SNP | G | A | 5  | 489 | c.448C>T     | c.(448-450)CGG>TGG     | p.R150W       |
| Pat_53 | Post-Resistance | EIF4A2   | 1974   | 37 | 3  | 186501409 | 186501409 | Missense_Mutation | SNP | G | T | 5  | 370 | c.10G>T      | c.(10-12)GGC>TGC       | p.G4C         |
| Pat_53 | Post-Resistance | RNF168   | 165918 | 37 | 3  | 196198977 | 196198977 | Missense_Mutation | SNP | G | A | 5  | 248 | c.1429C>T    | c.(1429-1431)CGC>TGC   | p.R477C       |
| Pat_53 | Post-Resistance | LMLN     | 89782  | 37 | 3  | 197717540 | 197717540 | Missense_Mutation | SNP | G | A | 4  | 228 | c.1040G>A    | c.(1039-1041)CGT>CAT   | p.R347H       |
| Pat_53 | Post-Resistance | ZNF721   | 170960 | 37 | 4  | 435653    | 435653    | Missense_Mutation | SNP | C | T | 8  | 176 | c.2603G>A    | c.(2602-2604)GGA>GAA   | p.G868E       |
| Pat_53 | Post-Resistance | LETM1    | 3954   | 37 | 4  | 1824831   | 1824831   | Missense_Mutation | SNP | C | T | 4  | 183 | c.1360G>A    | c.(1360-1362)GAG>AAG   | p.E454K       |
| Pat_53 | Post-Resistance | NOP14    | 8602   | 37 | 4  | 2940976   | 2940976   | Nonsense_Mutation | SNP | G | A | 5  | 349 | c.2413C>T    | c.(2413-2415)CGA>TGA   | p.R805*       |
| Pat_53 | Post-Resistance | HTT      | 3064   | 37 | 4  | 3148660   | 3148660   | Missense_Mutation | SNP | G | A | 6  | 692 | c.3286G>A    | c.(3286-3288)GGA>AGA   | p.G1096R      |
| Pat_53 | Post-Resistance | S100P    | 6286   | 37 | 4  | 6698758   | 6698758   | Missense_Mutation | SNP | G | A | 4  | 252 | c.277G>A     | c.(277-279)GGA>AGA     | p.G93R        |
| Pat_53 | Post-Resistance | CPEB2    | 132864 | 37 | 4  | 15063882  | 15063882  | Missense_Mutation | SNP | C | T | 5  | 507 | c.1540C>T    | c.(1540-1542)CGT>TGT   | p.R514C       |
| Pat_53 | Post-Resistance | SLIT2    | 9353   | 37 | 4  | 20490504  | 20490504  | Missense_Mutation | SNP | G | A | 4  | 362 | c.674G>A     | c.(673-675)CGC>CAC     | p.R225H       |
| Pat_53 | Post-Resistance | DHX15    | 1665   | 37 | 4  | 24534590  | 24534590  | Missense_Mutation | SNP | C | T | 6  | 507 | c.1997G>A    | c.(1996-1998)CGA>CAA   | p.R666Q       |
| Pat_53 | Post-Resistance | STIM2    | 57620  | 37 | 4  | 27019557  | 27019557  | Nonsense_Mutation | SNP | C | T | 6  | 669 | c.1999C>T    | c.(1999-2001)CGA>TGA   | p.R667*       |
| Pat_53 | Post-Resistance | TBC1D1   | 23216  | 37 | 4  | 38016194  | 38016194  | Missense_Mutation | SNP | G | A | 4  | 218 | c.482G>A     | c.(481-483)TGC>TAC     | p.C161Y       |
| Pat_53 | Post-Resistance | TLR6     | 10333  | 37 | 4  | 38829218  | 38829218  | Missense_Mutation | SNP | C | T | 5  | 239 | c.1877G>A    | c.(1876-1878)CGC>CAC   | p.R626H       |
| Pat_53 | Post-Resistance | CHRNA9   | 55584  | 37 | 4  | 40351405  | 40351405  | Missense_Mutation | SNP | C | T | 4  | 114 | c.872C>T     | c.(871-873)CCG>CTG     | p.P291L       |
| Pat_53 | Post-Resistance | NSUN7    | 79730  | 37 | 4  | 40752936  | 40752936  | Missense_Mutation | SNP | C | T | 4  | 109 | c.226C>T     | c.(226-228)CGG>TGG     | p.R76W        |
| Pat_53 | Post-Resistance | RUFY3    | 22902  | 37 | 4  | 71659525  | 71659525  | Missense_Mutation | SNP | G | A | 4  | 123 | c.1361G>A    | c.(1360-1362)CGC>CAC   | p.R454H       |
| Pat_53 | Post-Resistance | RASGEF1B | 153020 | 37 | 4  | 82380611  | 82380611  | Nonsense_Mutation | SNP | G | A | 4  | 94  | c.52C>T      | c.(52-54)CGA>TGA       | p.R18*        |
| Pat_53 | Post-Resistance | PTPN13   | 5783   | 37 | 4  | 87730992  | 87730992  | Missense_Mutation | SNP | C | T | 4  | 125 | c.7154C>T    | c.(7153-7155)CCA>CTA   | p.P2385L      |

|        |                 |         |        |    |   |           |           |                   |     |   |   |    |     |              |                        |              |
|--------|-----------------|---------|--------|----|---|-----------|-----------|-------------------|-----|---|---|----|-----|--------------|------------------------|--------------|
| Pat_53 | Post-Resistance | HPGDS   | 27306  | 37 | 4 | 95223361  | 95223361  | Missense_Mutation | SNP | G | A | 5  | 276 | c.371C>T     | c.(370-372)GCG>GTG     | p.A124V      |
| Pat_53 | Post-Resistance | C4orf17 | 84103  | 37 | 4 | 100434366 | 100434366 | Splice_Site       | SNP | G | A | 4  | 172 | c.127_splice | c.e2+1                 | p.G43_splice |
| Pat_53 | Post-Resistance | GLRA3   | 8001   | 37 | 4 | 175565136 | 175565136 | Missense_Mutation | SNP | G | A | 4  | 183 | c.1196C>T    | c.(1195-1197)ACT>ATT   | p.T399I      |
| Pat_53 | Post-Resistance | PAPD7   | 11044  | 37 | 5 | 6748658   | 6748658   | Missense_Mutation | SNP | C | T | 6  | 406 | c.791C>T     | c.(790-792)GCT>GTT     | p.A264V      |
| Pat_53 | Post-Resistance | 6-Mar   | 10299  | 37 | 5 | 10426548  | 10426548  | Missense_Mutation | SNP | G | A | 7  | 546 | c.2420G>A    | c.(2419-2421)CGT>CAT   | p.R807H      |
| Pat_53 | Post-Resistance | SLC30A5 | 64924  | 37 | 5 | 68423862  | 68423862  | Missense_Mutation | SNP | G | A | 5  | 307 | c.2030G>A    | c.(2029-2031)CGA>CAA   | p.R677Q      |
| Pat_53 | Post-Resistance | ZNF366  | 167465 | 37 | 5 | 71752332  | 71752332  | Missense_Mutation | SNP | G | A | 5  | 321 | c.1423C>T    | c.(1423-1425)CGC>TGC   | p.R475C      |
| Pat_53 | Post-Resistance | MCTP1   | 79772  | 37 | 5 | 94248663  | 94248663  | Missense_Mutation | SNP | G | A | 5  | 429 | c.1369C>T    | c.(1369-1371)CGC>TGC   | p.R457C      |
| Pat_53 | Post-Resistance | STARD4  | 134429 | 37 | 5 | 110835597 | 110835597 | Missense_Mutation | SNP | C | T | 4  | 230 | c.605G>A     | c.(604-606)CGA>CAA     | p.R202Q      |
| Pat_53 | Post-Resistance | PPP2CA  | 5515   | 37 | 5 | 133534796 | 133534796 | Missense_Mutation | SNP | C | T | 4  | 89  | c.838G>A     | c.(838-840)GAT>AAT     | p.D280N      |
| Pat_53 | Post-Resistance | PHF15   | 23338  | 37 | 5 | 133887748 | 133887748 | Missense_Mutation | SNP | C | T | 4  | 211 | c.160C>T     | c.(160-162)CGG>TGG     | p.R54W       |
| Pat_53 | Post-Resistance | UBE2D2  | 7322   | 37 | 5 | 138994515 | 138994515 | Nonsense_Mutation | SNP | C | T | 6  | 423 | c.268C>T     | c.(268-270)CGA>TGA     | p.R90*       |
| Pat_53 | Post-Resistance | PCDHB13 | 56123  | 37 | 5 | 140595178 | 140595178 | Missense_Mutation | SNP | G | A | 5  | 189 | c.1483G>A    | c.(1483-1485)GAC>AAC   | p.D495N      |
| Pat_53 | Post-Resistance | PCDHGB2 | 56103  | 37 | 5 | 140741032 | 140741032 | Missense_Mutation | SNP | G | A | 4  | 181 | c.1330G>A    | c.(1330-1332)GAC>AAC   | p.D444N      |
| Pat_53 | Post-Resistance | PCDHGA5 | 56110  | 37 | 5 | 140745615 | 140745615 | Missense_Mutation | SNP | C | T | 4  | 159 | c.1718C>T    | c.(1717-1719)ACG>ATG   | p.T573M      |
| Pat_53 | Post-Resistance | DIAPH1  | 1729   | 37 | 5 | 140960344 | 140960344 | Missense_Mutation | SNP | G | A | 5  | 243 | c.791C>T     | c.(790-792)TCT>TTT     | p.S264F      |
| Pat_53 | Post-Resistance | DIAPH1  | 1729   | 37 | 5 | 140966665 | 140966665 | Nonsense_Mutation | SNP | G | A | 5  | 215 | c.244C>T     | c.(244-246)CAG>TAG     | p.Q82*       |
| Pat_53 | Post-Resistance | FCHSD1  | 89848  | 37 | 5 | 141029015 | 141029015 | Missense_Mutation | SNP | G | A | 5  | 445 | c.322C>T     | c.(322-324)CGT>TGT     | p.R108C      |
| Pat_53 | Post-Resistance | RBM27   | 54439  | 37 | 5 | 145609417 | 145609417 | Missense_Mutation | SNP | G | A | 7  | 357 | c.533G>A     | c.(532-534)CGC>CAC     | p.R178H      |
| Pat_53 | Post-Resistance | TCERG1  | 10915  | 37 | 5 | 145843321 | 145843321 | Missense_Mutation | SNP | G | A | 5  | 367 | c.1100G>A    | c.(1099-1101)CGT>CAT   | p.R367H      |
| Pat_53 | Post-Resistance | JAKMP2  | 9832   | 37 | 5 | 147019206 | 147019206 | Nonsense_Mutation | SNP | G | A | 8  | 664 | c.1519C>T    | c.(1519-1521)CGA>TGA   | p.R507*      |
| Pat_53 | Post-Resistance | ADRB2   | 154    | 37 | 5 | 148206770 | 148206770 | Missense_Mutation | SNP | G | A | 4  | 280 | c.376G>A     | c.(376-378)GTG>ATG     | p.V126M      |
| Pat_53 | Post-Resistance | CSF1R   | 1436   | 37 | 5 | 149456998 | 149456998 | Missense_Mutation | SNP | G | A | 4  | 233 | c.730C>T     | c.(730-732)CTC>TTC     | p.L244F      |
| Pat_53 | Post-Resistance | FAT2    | 2196   | 37 | 5 | 150885392 | 150885392 | Missense_Mutation | SNP | G | A | 4  | 205 | c.12784C>T   | c.(12784-12786)CGC>TGC | p.R4262C     |
| Pat_53 | Post-Resistance | CYFIP2  | 26999  | 37 | 5 | 156746911 | 156746911 | Missense_Mutation | SNP | C | T | 4  | 329 | c.1498C>T    | c.(1498-1500)CGG>TGG   | p.R500W      |
| Pat_53 | Post-Resistance | ODZ2    | 57451  | 37 | 5 | 167645361 | 167645361 | Missense_Mutation | SNP | T | C | 4  | 158 | c.4438T>C    | c.(4438-4440)TAC>CAC   | p.Y1480H     |
| Pat_53 | Post-Resistance | ODZ2    | 57451  | 37 | 5 | 167645661 | 167645661 | Missense_Mutation | SNP | G | A | 4  | 207 | c.4738G>A    | c.(4738-4740)GGA>AGA   | p.G1580R     |
| Pat_53 | Post-Resistance | DOCK2   | 1794   | 37 | 5 | 169138991 | 169138991 | Missense_Mutation | SNP | G | A | 4  | 163 | c.1535G>A    | c.(1534-1536)CGA>CAA   | p.R512Q      |
| Pat_53 | Post-Resistance | DOCK2   | 1794   | 37 | 5 | 169138996 | 169138996 | Missense_Mutation | SNP | C | T | 4  | 163 | c.1540C>T    | c.(1540-1542)CGG>TGG   | p.R514W      |
| Pat_53 | Post-Resistance | STK10   | 6793   | 37 | 5 | 171523561 | 171523561 | Missense_Mutation | SNP | G | A | 89 | 254 | c.874C>T     | c.(874-876)CCC>TCC     | p.P292S      |
| Pat_53 | Post-Resistance | SFXN1   | 94081  | 37 | 5 | 174938494 | 174938494 | Missense_Mutation | SNP | G | A | 5  | 470 | c.475G>A     | c.(475-477)GTA>ATA     | p.V159I      |
| Pat_53 | Post-Resistance | MAML1   | 9794   | 37 | 5 | 179195951 | 179195951 | Missense_Mutation | SNP | A | G | 13 | 244 | c.1832A>G    | c.(1831-1833)TAT>TGT   | p.Y611C      |
| Pat_53 | Post-Resistance | MAML1   | 9794   | 37 | 5 | 179200916 | 179200916 | Missense_Mutation | SNP | G | A | 4  | 232 | c.2089G>A    | c.(2089-2091)GGC>AGC   | p.G697S      |
| Pat_53 | Post-Resistance | DSP     | 1832   | 37 | 6 | 7586049   | 7586049   | Missense_Mutation | SNP | G | A | 4  | 147 | c.8554G>A    | c.(8554-8556)GCC>ACC   | p.A2852T     |
| Pat_53 | Post-Resistance | TRIM10  | 10107  | 37 | 6 | 30126280  | 30126280  | Missense_Mutation | SNP | G | A | 6  | 595 | c.652C>T     | c.(652-654)CGG>TGG     | p.R218W      |
| Pat_53 | Post-Resistance | DDR1    | 780    | 37 | 6 | 30857068  | 30857068  | Missense_Mutation | SNP | G | A | 4  | 171 | c.278G>A     | c.(277-279)CGA>CAA     | p.R93Q       |
| Pat_53 | Post-Resistance | VAR52   | 57176  | 37 | 6 | 30886666  | 30886666  | Missense_Mutation | SNP | G | A | 4  | 170 | c.1048G>A    | c.(1048-1050)GTT>ATT   | p.V350I      |
| Pat_53 | Post-Resistance | VAR52   | 57176  | 37 | 6 | 30887548  | 30887548  | Missense_Mutation | SNP | G | A | 6  | 585 | c.1088G>A    | c.(1087-1089)CGA>CAA   | p.R363Q      |
| Pat_53 | Post-Resistance | C6orf27 | 80737  | 37 | 6 | 31735444  | 31735444  | Missense_Mutation | SNP | G | A | 6  | 365 | c.1591C>T    | c.(1591-1593)CGG>TGG   | p.R531W      |
| Pat_53 | Post-Resistance | HSPA1L  | 3305   | 37 | 6 | 31778194  | 31778194  | Missense_Mutation | SNP | C | T | 6  | 697 | c.1556G>A    | c.(1555-1557)CGC>CAC   | p.R519H      |
| Pat_53 | Post-Resistance | ATF6B   | 1388   | 37 | 6 | 32093933  | 32093933  | Missense_Mutation | SNP | C | T | 4  | 283 | c.439G>A     | c.(439-441)GTC>ATC     | p.V147I      |
| Pat_53 | Post-Resistance | BYSL    | 705    | 37 | 6 | 41900193  | 41900193  | Missense_Mutation | SNP | C | T | 4  | 206 | c.1063C>T    | c.(1063-1065)CGG>TGG   | p.R355W      |
| Pat_53 | Post-Resistance | TRERF1  | 55809  | 37 | 6 | 42236862  | 42236862  | Missense_Mutation | SNP | C | T | 4  | 350 | c.467G>A     | c.(466-468)CGA>CAA     | p.R156Q      |
| Pat_53 | Post-Resistance | TRERF1  | 55809  | 37 | 6 | 42236889  | 42236889  | Missense_Mutation | SNP | G | A | 6  | 416 | c.440C>T     | c.(439-441)ACC>ATC     | p.T147I      |
| Pat_53 | Post-Resistance | EFHC1   | 114327 | 37 | 6 | 52317558  | 52317558  | Nonsense_Mutation | SNP | C | T | 4  | 364 | c.646C>T     | c.(646-648)CGA>TGA     | p.R216*      |
| Pat_53 | Post-Resistance | MANEA   | 79694  | 37 | 6 | 96054018  | 96054018  | Nonsense_Mutation | SNP | C | T | 4  | 157 | c.1126C>T    | c.(1126-1128)CGA>TGA   | p.R376*      |
| Pat_53 | Post-Resistance | GJA1    | 2697   | 37 | 6 | 121768889 | 121768889 | Missense_Mutation | SNP | G | T | 4  | 120 | c.896G>T     | c.(895-897)CGC>CTC     | p.R299L      |

|        |                 |          |        |    |   |           |           |                   |     |    |    |     |     |                |                        |               |
|--------|-----------------|----------|--------|----|---|-----------|-----------|-------------------|-----|----|----|-----|-----|----------------|------------------------|---------------|
| Pat_53 | Post-Resistance | RNF217   | 154214 | 37 | 6 | 125397950 | 125397950 | Missense_Mutation | SNP | C  | T  | 4   | 201 | c.553C>T       | c.(553-555)CGC>TGC     | p.R185C       |
| Pat_53 | Post-Resistance | ARG1     | 383    | 37 | 6 | 131903856 | 131903856 | Splice_Site       | SNP | G  | A  | 4   | 108 | c.560_splice   | c.e5+1                 | p.H187_splice |
| Pat_53 | Post-Resistance | TAAR8    | 83551  | 37 | 6 | 132874313 | 132874313 | Missense_Mutation | SNP | C  | T  | 4   | 262 | c.482C>T       | c.(481-483)ACG>ATG     | p.T161M       |
| Pat_53 | Post-Resistance | BCLAF1   | 9774   | 37 | 6 | 136597052 | 136597052 | Missense_Mutation | SNP | C  | T  | 54  | 367 | c.1611G>A      | c.(1609-1611)ATG>ATA   | p.M537I       |
| Pat_53 | Post-Resistance | BCLAF1   | 9774   | 37 | 6 | 136599354 | 136599354 | Missense_Mutation | SNP | C  | T  | 4   | 268 | c.665G>A       | c.(664-666)AGT>AAT     | p.S222N       |
| Pat_53 | Post-Resistance | SYNE1    | 23345  | 37 | 6 | 152621904 | 152621904 | Missense_Mutation | SNP | G  | A  | 4   | 123 | c.17554C>T     | c.(17554-17556)CGC>TGC | p.R5852C      |
| Pat_53 | Post-Resistance | MAS1     | 4142   | 37 | 6 | 160328255 | 160328255 | Missense_Mutation | SNP | G  | A  | 5   | 231 | c.268G>A       | c.(268-270)GAC>AAC     | p.D90N        |
| Pat_53 | Post-Resistance | SLC22A2  | 6582   | 37 | 6 | 160664672 | 160664672 | Missense_Mutation | SNP | C  | T  | 4   | 153 | c.1211G>A      | c.(1210-1212)CGT>CAT   | p.R404H       |
| Pat_53 | Post-Resistance | AGPAT4   | 56895  | 37 | 6 | 161560486 | 161560486 | Missense_Mutation | SNP | G  | A  | 4   | 153 | c.1010C>T      | c.(1009-1011)ACG>ATG   | p.T337M       |
| Pat_53 | Post-Resistance | MLLT4    | 4301   | 37 | 6 | 168344148 | 168344148 | Missense_Mutation | SNP | C  | A  | 4   | 148 | c.3208C>A      | c.(3208-3210)CAG>AAG   | p.Q1070K      |
| Pat_53 | Post-Resistance | MIOS     | 54468  | 37 | 7 | 7625425   | 7625425   | Missense_Mutation | SNP | G  | A  | 5   | 515 | c.1807G>A      | c.(1807-1809)GAT>AAT   | p.D603N       |
| Pat_53 | Post-Resistance | PRPS1L1  | 221823 | 37 | 7 | 18067261  | 18067261  | Missense_Mutation | SNP | G  | A  | 5   | 629 | c.145C>T       | c.(145-147)CGT>TGT     | p.R49C        |
| Pat_53 | Post-Resistance | DNAH11   | 8701   | 37 | 7 | 21940631  | 21940631  | Missense_Mutation | SNP | G  | A  | 6   | 431 | c.13331G>A     | c.(13330-13332)CGC>CAC | p.R4444H      |
| Pat_53 | Post-Resistance | GLI3     | 2737   | 37 | 7 | 42088134  | 42088134  | Missense_Mutation | SNP | G  | A  | 4   | 270 | c.635C>T       | c.(634-636)TCG>TTG     | p.S212L       |
| Pat_53 | Post-Resistance | POLD2    | 5425   | 37 | 7 | 44157660  | 44157660  | Missense_Mutation | SNP | C  | T  | 4   | 94  | c.224G>A       | c.(223-225)AGT>AAT     | p.S75N        |
| Pat_53 | Post-Resistance | DDC      | 1644   | 37 | 7 | 50611650  | 50611650  | Missense_Mutation | SNP | G  | A  | 4   | 218 | c.134C>T       | c.(133-135)GCT>GTT     | p.A45V        |
| Pat_53 | Post-Resistance | COBL     | 23242  | 37 | 7 | 51096824  | 51096824  | Missense_Mutation | SNP | C  | T  | 4   | 225 | c.1969G>A      | c.(1969-1971)GGG>AGG   | p.G657R       |
| Pat_53 | Post-Resistance | ZNF479   | 90827  | 37 | 7 | 57187725  | 57187725  | Missense_Mutation | SNP | G  | T  | 11  | 357 | c.1397C>A      | c.(1396-1398)ACA>AAA   | p.T466K       |
| Pat_53 | Post-Resistance | ZNF92    | 168374 | 37 | 7 | 64863755  | 64863756  | Missense_Mutation | DNP | AT | CC | 9   | 479 | c.728_729AT>CC | c.(727-729)AAT>ACC     | p.N243T       |
| Pat_53 | Post-Resistance | ZNF92    | 168374 | 37 | 7 | 64863830  | 64863830  | Missense_Mutation | SNP | G  | A  | 6   | 570 | c.803G>A       | c.(802-804)CGG>CAG     | p.R268Q       |
| Pat_53 | Post-Resistance | RHBDD2   | 57414  | 37 | 7 | 75517395  | 75517395  | Missense_Mutation | SNP | G  | A  | 4   | 234 | c.823G>A       | c.(823-825)GCC>ACC     | p.A275T       |
| Pat_53 | Post-Resistance | ZNF804B  | 219578 | 37 | 7 | 88962859  | 88962859  | Missense_Mutation | SNP | G  | A  | 4   | 195 | c.563G>A       | c.(562-564)CGA>CAA     | p.R188Q       |
| Pat_53 | Post-Resistance | C7orf63  | 79846  | 37 | 7 | 89894641  | 89894641  | Missense_Mutation | SNP | C  | T  | 6   | 529 | c.383C>T       | c.(382-384)TCG>TTG     | p.S128L       |
| Pat_53 | Post-Resistance | PEX1     | 5189   | 37 | 7 | 92131236  | 92131236  | Missense_Mutation | SNP | C  | T  | 6   | 399 | c.2384G>A      | c.(2383-2385)CGA>CAA   | p.R795Q       |
| Pat_53 | Post-Resistance | DYNC111  | 1780   | 37 | 7 | 95665055  | 95665055  | Missense_Mutation | SNP | G  | A  | 6   | 487 | c.1406G>A      | c.(1405-1407)CGT>CAT   | p.R469H       |
| Pat_53 | Post-Resistance | PTCD1    | 26024  | 37 | 7 | 99021441  | 99021441  | Missense_Mutation | SNP | C  | T  | 5   | 382 | c.1877G>A      | c.(1876-1878)CGC>CAC   | p.R626H       |
| Pat_53 | Post-Resistance | PTCD1    | 26024  | 37 | 7 | 99032459  | 99032459  | Missense_Mutation | SNP | G  | A  | 5   | 482 | c.407C>T       | c.(406-408)CCG>CTG     | p.P136L       |
| Pat_53 | Post-Resistance | FBXO24   | 26261  | 37 | 7 | 100187616 | 100187616 | Missense_Mutation | SNP | C  | T  | 77  | 153 | c.56C>T        | c.(55-57)CCT>CTT       | p.P19L        |
| Pat_53 | Post-Resistance | GIGYF1   | 64599  | 37 | 7 | 100284665 | 100284665 | Missense_Mutation | SNP | C  | T  | 4   | 251 | c.487G>A       | c.(487-489)GAG>AAG     | p.E163K       |
| Pat_53 | Post-Resistance | ZAN      | 7455   | 37 | 7 | 100349878 | 100349878 | Missense_Mutation | SNP | C  | T  | 5   | 406 | c.2150C>T      | c.(2149-2151)CCC>CTC   | p.P717L       |
| Pat_53 | Post-Resistance | RBM28    | 55131  | 37 | 7 | 127950869 | 127950869 | Missense_Mutation | SNP | C  | T  | 5   | 288 | c.2261G>A      | c.(2260-2262)AGC>AAC   | p.S754N       |
| Pat_53 | Post-Resistance | AHCYL2   | 23382  | 37 | 7 | 129066314 | 129066314 | Missense_Mutation | SNP | C  | T  | 4   | 162 | c.1739C>T      | c.(1738-1740)ACC>ATC   | p.T580I       |
| Pat_53 | Post-Resistance | CPA1     | 1357   | 37 | 7 | 130027693 | 130027693 | Nonsense_Mutation | SNP | G  | A  | 288 | 401 | c.1101G>A      | c.(1099-1101)TGG>TGA   | p.W367*       |
| Pat_53 | Post-Resistance | MKLN1    | 4289   | 37 | 7 | 131122671 | 131122671 | Missense_Mutation | SNP | G  | A  | 6   | 529 | c.1088G>A      | c.(1087-1089)CGT>CAT   | p.R363H       |
| Pat_53 | Post-Resistance | PLXNA4   | 91584  | 37 | 7 | 131832704 | 131832704 | Missense_Mutation | SNP | C  | T  | 4   | 133 | c.4819G>A      | c.(4819-4821)GCA>ACA   | p.A1607T      |
| Pat_53 | Post-Resistance | NUP205   | 23165  | 37 | 7 | 135312771 | 135312771 | Missense_Mutation | SNP | G  | A  | 6   | 552 | c.4844G>A      | c.(4843-4845)CGC>CAC   | p.R1615H      |
| Pat_53 | Post-Resistance | SLC13A4  | 26266  | 37 | 7 | 135391022 | 135391022 | Missense_Mutation | SNP | G  | A  | 4   | 100 | c.392C>T       | c.(391-393)ACC>ATC     | p.T131I       |
| Pat_53 | Post-Resistance | TRIM24   | 8805   | 37 | 7 | 138252271 | 138252271 | Missense_Mutation | SNP | C  | T  | 203 | 269 | c.1576C>T      | c.(1576-1578)CCC>TCC   | p.P526S       |
| Pat_53 | Post-Resistance | DENND2A  | 27147  | 37 | 7 | 140287471 | 140287471 | Missense_Mutation | SNP | C  | T  | 4   | 275 | c.1105G>A      | c.(1105-1107)GTC>ATC   | p.V369I       |
| Pat_53 | Post-Resistance | UBE3C    | 9690   | 37 | 7 | 156974362 | 156974362 | Missense_Mutation | SNP | C  | T  | 5   | 330 | c.767C>T       | c.(766-768)GCG>GTG     | p.A256V       |
| Pat_53 | Post-Resistance | RP1L1    | 94137  | 37 | 8 | 10466059  | 10466059  | Missense_Mutation | SNP | C  | T  | 5   | 377 | c.5549G>A      | c.(5548-5550)GGT>GAT   | p.G1850D      |
| Pat_53 | Post-Resistance | FDFT1    | 2222   | 37 | 8 | 11687816  | 11687816  | Missense_Mutation | SNP | G  | A  | 4   | 275 | c.766G>A       | c.(766-768)GTG>ATG     | p.V256M       |
| Pat_53 | Post-Resistance | ENTPD4   | 9583   | 37 | 8 | 23306367  | 23306367  | Missense_Mutation | SNP | G  | A  | 5   | 412 | c.94C>T        | c.(94-96)CGC>TGC       | p.R32C        |
| Pat_53 | Post-Resistance | KCTD9    | 54793  | 37 | 8 | 25293759  | 25293759  | Nonsense_Mutation | SNP | G  | A  | 5   | 369 | c.655C>T       | c.(655-657)CGA>TGA     | p.R219*       |
| Pat_53 | Post-Resistance | EXTL3    | 2137   | 37 | 8 | 28595080  | 28595080  | Missense_Mutation | SNP | G  | A  | 4   | 226 | c.2321G>A      | c.(2320-2322)CGT>CAT   | p.R774H       |
| Pat_53 | Post-Resistance | FGFR1    | 2260   | 37 | 8 | 38272338  | 38272338  | Missense_Mutation | SNP | G  | A  | 4   | 166 | c.1936C>T      | c.(1936-1938)CGG>TGG   | p.R646W       |
| Pat_53 | Post-Resistance | ATP6V0D2 | 245972 | 37 | 8 | 87162459  | 87162459  | Missense_Mutation | SNP | G  | A  | 4   | 207 | c.758G>A       | c.(757-759)CGG>CAG     | p.R253Q       |



|        |                 |           |        |    |   |           |           |                   |     |    |    |    |     |                |                      |               |
|--------|-----------------|-----------|--------|----|---|-----------|-----------|-------------------|-----|----|----|----|-----|----------------|----------------------|---------------|
| Pat_53 | Post-Resistance | DCAF13    | 25879  | 37 | 8 | 104433227 | 104433227 | Missense_Mutation | SNP | C  | T  | 5  | 222 | c.751C>T       | c.(751-753)CGG>TGG   | p.R251W       |
| Pat_53 | Post-Resistance | OXR1      | 55074  | 37 | 8 | 107726086 | 107726086 | Missense_Mutation | SNP | G  | A  | 5  | 492 | c.1832G>A      | c.(1831-1833)AGT>AAT | p.S611N       |
| Pat_53 | Post-Resistance | EIF3E     | 3646   | 37 | 8 | 109226887 | 109226887 | Missense_Mutation | SNP | C  | T  | 4  | 278 | c.1010G>A      | c.(1009-1011)CGT>CAT | p.R337H       |
| Pat_53 | Post-Resistance | GSDMC     | 56169  | 37 | 8 | 130789733 | 130789733 | Missense_Mutation | SNP | C  | T  | 4  | 270 | c.101G>A       | c.(100-102)CGT>CAT   | p.R34H        |
| Pat_53 | Post-Resistance | PLEC      | 5339   | 37 | 8 | 145011179 | 145011179 | Missense_Mutation | SNP | C  | A  | 4  | 169 | c.814G>T       | c.(814-816)GGC>TGC   | p.G272C       |
| Pat_53 | Post-Resistance | GRINA     | 2907   | 37 | 8 | 145066134 | 145066134 | Missense_Mutation | SNP | G  | A  | 4  | 315 | c.581G>A       | c.(580-582)CGG>CAG   | p.R194Q       |
| Pat_53 | Post-Resistance | SPATC1    | 375686 | 37 | 8 | 145095844 | 145095844 | Missense_Mutation | SNP | G  | A  | 4  | 160 | c.1142G>A      | c.(1141-1143)TGT>TAT | p.C381Y       |
| Pat_53 | Post-Resistance | HSF1      | 3297   | 37 | 8 | 145532616 | 145532616 | Missense_Mutation | SNP | G  | A  | 4  | 182 | c.142G>A       | c.(142-144)GAC>AAC   | p.D48N        |
| Pat_53 | Post-Resistance | CPSF1     | 29894  | 37 | 8 | 145624179 | 145624179 | Missense_Mutation | SNP | C  | T  | 4  | 190 | c.1628G>A      | c.(1627-1629)CGT>CAT | p.R543H       |
| Pat_53 | Post-Resistance | ZNF250    | 58500  | 37 | 8 | 146112263 | 146112263 | Missense_Mutation | SNP | G  | A  | 4  | 223 | c.323C>T       | c.(322-324)ACA>ATA   | p.T108I       |
| Pat_53 | Post-Resistance | IFNA14    | 3448   | 37 | 9 | 21239652  | 21239652  | Missense_Mutation | SNP | T  | C  | 11 | 142 | c.283A>G       | c.(283-285)AAC>GAC   | p.N95D        |
| Pat_53 | Post-Resistance | IFNA2     | 3440   | 37 | 9 | 21384947  | 21384947  | Missense_Mutation | SNP | C  | T  | 5  | 172 | c.382G>A       | c.(382-384)GTG>ATG   | p.V128M       |
| Pat_53 | Post-Resistance | DCTN3     | 11258  | 37 | 9 | 34618733  | 34618733  | Missense_Mutation | SNP | G  | T  | 4  | 181 | c.121C>A       | c.(121-123)CAG>AAG   | p.Q41K        |
| Pat_53 | Post-Resistance | IL11RA    | 3590   | 37 | 9 | 34660865  | 34660865  | Missense_Mutation | SNP | G  | A  | 6  | 438 | c.1184G>A      | c.(1183-1185)CGG>CAG | p.R395Q       |
| Pat_53 | Post-Resistance | UNC13B    | 10497  | 37 | 9 | 35310546  | 35310546  | Missense_Mutation | SNP | G  | A  | 4  | 141 | c.844G>A       | c.(844-846)GAA>AAA   | p.E282K       |
| Pat_53 | Post-Resistance | CCDC107   | 203260 | 37 | 9 | 35660865  | 35660865  | Missense_Mutation | SNP | C  | T  | 5  | 509 | c.533C>T       | c.(532-534)TCG>TTG   | p.S178L       |
| Pat_53 | Post-Resistance | FBXO10    | 26267  | 37 | 9 | 37515899  | 37515899  | Splice_Site       | SNP | A  | C  | 5  | 198 | c.2696_splice  | c.e10+1              | p.K899_splice |
| Pat_53 | Post-Resistance | CNTNAP3   | 79937  | 37 | 9 | 39085766  | 39085766  | Missense_Mutation | SNP | C  | T  | 4  | 188 | c.3409G>A      | c.(3409-3411)GCC>ACC | p.A1137T      |
| Pat_53 | Post-Resistance | LOC442421 | 442421 | 37 | 9 | 66499794  | 66499795  | Missense_Mutation | DNP | CG | TA | 6  | 117 | c.604_605CG>TA | c.(604-606)CGC>TAC   | p.R202Y       |
| Pat_53 | Post-Resistance | APBA1     | 320    | 37 | 9 | 72082836  | 72082836  | Missense_Mutation | SNP | G  | A  | 4  | 249 | c.1385C>T      | c.(1384-1386)GCC>GTC | p.A462V       |
| Pat_53 | Post-Resistance | ZNF484    | 83744  | 37 | 9 | 95609456  | 95609456  | Missense_Mutation | SNP | C  | T  | 6  | 229 | c.1613G>A      | c.(1612-1614)CGG>CAG | p.R538Q       |
| Pat_53 | Post-Resistance | OR13C5    | 138799 | 37 | 9 | 107361252 | 107361252 | Missense_Mutation | SNP | G  | A  | 4  | 109 | c.443C>T       | c.(442-444)TCC>TTC   | p.S148F       |
| Pat_53 | Post-Resistance | OR13D1    | 286365 | 37 | 9 | 107457091 | 107457091 | Missense_Mutation | SNP | C  | T  | 4  | 147 | c.389C>T       | c.(388-390)GCT>GTT   | p.A130V       |
| Pat_53 | Post-Resistance | GPR21     | 2844   | 37 | 9 | 125797566 | 125797566 | Missense_Mutation | SNP | G  | A  | 4  | 213 | c.721G>A       | c.(721-723)GAA>AAA   | p.E241K       |
| Pat_53 | Post-Resistance | MAPKAP1   | 79109  | 37 | 9 | 128230280 | 128230280 | Missense_Mutation | SNP | G  | A  | 4  | 179 | c.1316C>T      | c.(1315-1317)GCC>GTC | p.A439V       |
| Pat_53 | Post-Resistance | GARNL3    | 84253  | 37 | 9 | 130094623 | 130094623 | Missense_Mutation | SNP | G  | A  | 6  | 222 | c.665G>A       | c.(664-666)AGC>AAC   | p.S222N       |
| Pat_53 | Post-Resistance | DNM1      | 1759   | 37 | 9 | 130980524 | 130980524 | Missense_Mutation | SNP | G  | A  | 6  | 433 | c.176G>A       | c.(175-177)CGA>CAA   | p.R59Q        |
| Pat_53 | Post-Resistance | DNM1      | 1759   | 37 | 9 | 130984516 | 130984516 | Missense_Mutation | SNP | G  | A  | 4  | 202 | c.890G>A       | c.(889-891)CGG>CAG   | p.R297Q       |
| Pat_53 | Post-Resistance | SPTAN1    | 6709   | 37 | 9 | 131345061 | 131345061 | Missense_Mutation | SNP | G  | A  | 4  | 180 | c.1739G>A      | c.(1738-1740)CGT>CAT | p.R580H       |
| Pat_53 | Post-Resistance | USP20     | 10868  | 37 | 9 | 132630419 | 132630419 | Missense_Mutation | SNP | C  | T  | 4  | 112 | c.826C>T       | c.(826-828)CGG>TGG   | p.R276W       |
| Pat_53 | Post-Resistance | GPR107    | 57720  | 37 | 9 | 132838709 | 132838709 | Missense_Mutation | SNP | C  | T  | 4  | 220 | c.274C>T       | c.(274-276)CGT>TGT   | p.R92C        |
| Pat_53 | Post-Resistance | BAT2L1    | 84726  | 37 | 9 | 134334625 | 134334625 | Missense_Mutation | SNP | G  | A  | 4  | 159 | c.1286G>A      | c.(1285-1287)CGA>CAA | p.R429Q       |
| Pat_53 | Post-Resistance | CSF2RA    | 1438   | 37 | X | 1413250   | 1413250   | Missense_Mutation | SNP | G  | A  | 5  | 362 | c.676G>A       | c.(676-678)GTA>ATA   | p.V226I       |
| Pat_53 | Post-Resistance | ZBED1     | 9189   | 37 | X | 2407302   | 2407302   | Missense_Mutation | SNP | C  | T  | 5  | 143 | c.1459G>A      | c.(1459-1461)GCC>ACC | p.A487T       |
| Pat_53 | Post-Resistance | FRMPD4    | 9758   | 37 | X | 12632978  | 12632978  | Missense_Mutation | SNP | G  | A  | 35 | 25  | c.400G>A       | c.(400-402)GAG>AAG   | p.E134K       |
| Pat_53 | Post-Resistance | PRPS2     | 5634   | 37 | X | 12840860  | 12840860  | Missense_Mutation | SNP | G  | A  | 5  | 108 | c.902G>A       | c.(901-903)CGA>CAA   | p.R301Q       |
| Pat_53 | Post-Resistance | RPGR      | 6103   | 37 | X | 38146316  | 38146316  | Missense_Mutation | SNP | C  | T  | 4  | 313 | c.1936G>A      | c.(1936-1938)GAA>AAA | p.E646K       |
| Pat_53 | Post-Resistance | GLA       | 2717   | 37 | X | 100656710 | 100656710 | Missense_Mutation | SNP | C  | T  | 4  | 166 | c.457G>A       | c.(457-459)GAC>AAC   | p.D153N       |
| Pat_53 | Post-Resistance | UTP14A    | 10813  | 37 | X | 129042648 | 129042648 | Missense_Mutation | SNP | G  | A  | 6  | 673 | c.176G>A       | c.(175-177)CGG>CAG   | p.R59Q        |
| Pat_53 | Post-Resistance | NSDHL     | 50814  | 37 | X | 152034456 | 152034456 | Missense_Mutation | SNP | C  | T  | 4  | 131 | c.637C>T       | c.(637-639)CCC>TCC   | p.P213S       |
| Pat_58 | Pre-Treatment   | TPRG1L    | 127262 | 37 | 1 | 3545096   | 3545096   | Missense_Mutation | SNP | G  | A  | 4  | 39  | c.748G>A       | c.(748-750)GGA>AGA   | p.G250R       |
| Pat_58 | Pre-Treatment   | ERRF1     | 54206  | 37 | 1 | 8073955   | 8073955   | Missense_Mutation | SNP | G  | C  | 3  | 12  | c.704C>G       | c.(703-705)CCA>CGA   | p.P235R       |
| Pat_58 | Pre-Treatment   | MTHFR     | 4524   | 37 | 1 | 11863105  | 11863105  | Missense_Mutation | SNP | A  | T  | 4  | 21  | c.69T>A        | c.(67-69)AGT>AGA     | p.S23R        |
| Pat_58 | Pre-Treatment   | KIAA2013  | 90231  | 37 | 1 | 11983420  | 11983420  | Missense_Mutation | SNP | C  | T  | 4  | 49  | c.1160G>A      | c.(1159-1161)CGA>CAA | p.R387Q       |
| Pat_58 | Pre-Treatment   | SPEN      | 23013  | 37 | 1 | 16262235  | 16262235  | Missense_Mutation | SNP | C  | T  | 4  | 61  | c.9500C>T      | c.(9499-9501)GCT>GTT | p.A3167V      |
| Pat_58 | Pre-Treatment   | ARHGEF10L | 55160  | 37 | 1 | 17965138  | 17965138  | Missense_Mutation | SNP | G  | A  | 3  | 29  | c.2125G>A      | c.(2125-2127)GCC>ACC | p.A709T       |
| Pat_58 | Pre-Treatment   | ASAP3     | 55616  | 37 | 1 | 23765242  | 23765242  | Missense_Mutation | SNP | G  | A  | 4  | 48  | c.1100C>T      | c.(1099-1101)ACC>ATC | p.T367I       |

|        |               |            |        |    |    |           |           |                   |     |   |   |    |     |           |                      |          |
|--------|---------------|------------|--------|----|----|-----------|-----------|-------------------|-----|---|---|----|-----|-----------|----------------------|----------|
| Pat_58 | Pre-Treatment | RPL11      | 6135   | 37 | 1  | 24021193  | 24021193  | Missense_Mutation | SNP | G | A | 23 | 63  | c.308G>A  | c.(307-309)GGA>GAA   | p.G103E  |
| Pat_58 | Pre-Treatment | SLC30A2    | 7780   | 37 | 1  | 26369919  | 26369919  | Missense_Mutation | SNP | G | A | 4  | 63  | c.395C>T  | c.(394-396)ACG>ATG   | p.T132M  |
| Pat_58 | Pre-Treatment | UBXN11     | 91544  | 37 | 1  | 26629332  | 26629332  | Missense_Mutation | SNP | G | A | 3  | 34  | c.43C>T   | c.(43-45)CCC>TCC     | p.P15S   |
| Pat_58 | Pre-Treatment | GPR3       | 2827   | 37 | 1  | 27720966  | 27720966  | Missense_Mutation | SNP | C | T | 4  | 62  | c.664C>T  | c.(664-666)CGC>TGC   | p.R222C  |
| Pat_58 | Pre-Treatment | GMEB1      | 10691  | 37 | 1  | 29041259  | 29041259  | Missense_Mutation | SNP | G | A | 4  | 76  | c.1696G>A | c.(1696-1698)GTG>ATG | p.V566M  |
| Pat_58 | Pre-Treatment | THRAP3     | 9967   | 37 | 1  | 36769491  | 36769491  | Missense_Mutation | SNP | G | A | 4  | 53  | c.2741G>A | c.(2740-2742)CGG>CAG | p.R914Q  |
| Pat_58 | Pre-Treatment | PTCH2      | 8643   | 37 | 1  | 45296653  | 45296653  | Missense_Mutation | SNP | G | A | 5  | 19  | c.680C>T  | c.(679-681)CCC>CTC   | p.P227L  |
| Pat_58 | Pre-Treatment | CYP4B1     | 1580   | 37 | 1  | 47279163  | 47279163  | Missense_Mutation | SNP | G | A | 14 | 40  | c.505G>A  | c.(505-507)GAA>AAA   | p.E169K  |
| Pat_58 | Pre-Treatment | C1orf175   | 374977 | 37 | 1  | 55119789  | 55119789  | Missense_Mutation | SNP | C | A | 4  | 10  | c.1190C>A | c.(1189-1191)CCC>CAC | p.P397H  |
| Pat_58 | Pre-Treatment | LRRIQ3     | 127255 | 37 | 1  | 74575152  | 74575152  | Missense_Mutation | SNP | C | T | 4  | 46  | c.793G>A  | c.(793-795)GAA>AAA   | p.E265K  |
| Pat_58 | Pre-Treatment | ST6GALNAC5 | 81849  | 37 | 1  | 77510003  | 77510003  | Missense_Mutation | SNP | G | A | 4  | 71  | c.376G>A  | c.(376-378)GCC>ACC   | p.A126T  |
| Pat_58 | Pre-Treatment | ZNF326     | 284695 | 37 | 1  | 90473211  | 90473211  | Missense_Mutation | SNP | C | T | 4  | 47  | c.517C>T  | c.(517-519)CGG>TGG   | p.R173W  |
| Pat_58 | Pre-Treatment | RTCD1      | 8634   | 37 | 1  | 100740418 | 100740418 | Missense_Mutation | SNP | G | A | 4  | 54  | c.512G>A  | c.(511-513)CGA>CAA   | p.R171Q  |
| Pat_58 | Pre-Treatment | SLC6A17    | 388662 | 37 | 1  | 110740704 | 110740704 | Nonsense_Mutation | SNP | G | T | 4  | 26  | c.1822G>T | c.(1822-1824)GAG>TAG | p.E608*  |
| Pat_58 | Pre-Treatment | MAGI3      | 260425 | 37 | 1  | 114133169 | 114133169 | Missense_Mutation | SNP | C | G | 3  | 33  | c.827C>G  | c.(826-828)ACA>AGA   | p.T276R  |
| Pat_58 | Pre-Treatment | S100A12    | 6283   | 37 | 1  | 153347041 | 153347041 | Missense_Mutation | SNP | C | T | 37 | 92  | c.28G>A   | c.(28-30)GGA>AGA     | p.G10R   |
| Pat_58 | Pre-Treatment | RAB25      | 57111  | 37 | 1  | 156038179 | 156038179 | Missense_Mutation | SNP | G | A | 4  | 69  | c.358G>A  | c.(358-360)GTC>ATC   | p.V120I  |
| Pat_58 | Pre-Treatment | DUSP27     | 92235  | 37 | 1  | 167095933 | 167095933 | Missense_Mutation | SNP | G | A | 21 | 69  | c.1565G>A | c.(1564-1566)AGC>AAC | p.S522N  |
| Pat_58 | Pre-Treatment | TNR        | 7143   | 37 | 1  | 175375489 | 175375489 | Missense_Mutation | SNP | G | A | 28 | 63  | c.362C>T  | c.(361-363)CCC>CTC   | p.P121L  |
| Pat_58 | Pre-Treatment | PAPPA2     | 60676  | 37 | 1  | 176525627 | 176525627 | Nonsense_Mutation | SNP | C | T | 36 | 26  | c.169C>T  | c.(169-171)CGA>TGA   | p.R57*   |
| Pat_58 | Pre-Treatment | ASTN1      | 460    | 37 | 1  | 176915173 | 176915173 | Missense_Mutation | SNP | C | T | 18 | 46  | c.2138G>A | c.(2137-2139)GGG>GAG | p.G713E  |
| Pat_58 | Pre-Treatment | CHI3L1     | 1116   | 37 | 1  | 203150331 | 203150331 | Nonsense_Mutation | SNP | G | A | 4  | 70  | c.670C>T  | c.(670-672)CGA>TGA   | p.R224*  |
| Pat_58 | Pre-Treatment | PIGR       | 5284   | 37 | 1  | 207112655 | 207112655 | Missense_Mutation | SNP | G | A | 5  | 28  | c.197C>T  | c.(196-198)ACC>ATC   | p.T66I   |
| Pat_58 | Pre-Treatment | USH2A      | 7399   | 37 | 1  | 216497021 | 216497021 | Missense_Mutation | SNP | G | A | 4  | 65  | c.1345C>T | c.(1345-1347)CGT>TGT | p.R449C  |
| Pat_58 | Pre-Treatment | PRSS38     | 339501 | 37 | 1  | 228005043 | 228005043 | Missense_Mutation | SNP | G | A | 4  | 60  | c.445G>A  | c.(445-447)GGT>AGT   | p.G149S  |
| Pat_58 | Pre-Treatment | KIAA1804   | 84451  | 37 | 1  | 233507802 | 233507802 | Missense_Mutation | SNP | C | T | 20 | 41  | c.1571C>T | c.(1570-1572)ACC>ATC | p.T524I  |
| Pat_58 | Pre-Treatment | GREM2      | 64388  | 37 | 1  | 240656324 | 240656324 | Missense_Mutation | SNP | T | C | 4  | 41  | c.452A>G  | c.(451-453)AAG>AGG   | p.K151R  |
| Pat_58 | Pre-Treatment | OR2W5      | 441932 | 37 | 1  | 247654805 | 247654805 | Missense_Mutation | SNP | G | A | 4  | 76  | c.376G>A  | c.(376-378)GTC>ATC   | p.V126I  |
| Pat_58 | Pre-Treatment | SPAG6      | 9576   | 37 | 10 | 22705595  | 22705595  | Missense_Mutation | SNP | G | A | 4  | 74  | c.1508G>A | c.(1507-1509)AGC>AAC | p.S503N  |
| Pat_58 | Pre-Treatment | PDSS1      | 23590  | 37 | 10 | 27024423  | 27024423  | Missense_Mutation | SNP | C | T | 4  | 55  | c.941C>T  | c.(940-942)TCG>TTG   | p.S314L  |
| Pat_58 | Pre-Treatment | PTCHD3     | 374308 | 37 | 10 | 27702446  | 27702446  | Missense_Mutation | SNP | T | C | 3  | 28  | c.734A>G  | c.(733-735)AAG>AGG   | p.K245R  |
| Pat_58 | Pre-Treatment | RET        | 5979   | 37 | 10 | 43597792  | 43597792  | Missense_Mutation | SNP | C | T | 17 | 30  | c.340C>T  | c.(340-342)CGC>TGC   | p.R114C  |
| Pat_58 | Pre-Treatment | ARHGAP22   | 58504  | 37 | 10 | 49687709  | 49687709  | Missense_Mutation | SNP | G | A | 3  | 18  | c.421C>T  | c.(421-423)CGC>TGC   | p.R141C  |
| Pat_58 | Pre-Treatment | NDST2      | 8509   | 37 | 10 | 75566525  | 75566525  | Missense_Mutation | SNP | G | A | 4  | 38  | c.1138C>T | c.(1138-1140)CGC>TGC | p.R380C  |
| Pat_58 | Pre-Treatment | PTEN       | 5728   | 37 | 10 | 89692899  | 89692899  | Missense_Mutation | SNP | A | C | 34 | 55  | c.383A>C  | c.(382-384)AAG>ACG   | p.K128T  |
| Pat_58 | Pre-Treatment | PLCE1      | 51196  | 37 | 10 | 95791173  | 95791173  | Missense_Mutation | SNP | G | A | 12 | 23  | c.370G>A  | c.(370-372)GAA>AAA   | p.E124K  |
| Pat_58 | Pre-Treatment | C10orf12   | 26148  | 37 | 10 | 98708864  | 98708864  | Missense_Mutation | SNP | G | A | 4  | 55  | c.50G>A   | c.(49-51)AGC>AAC     | p.S17N   |
| Pat_58 | Pre-Treatment | GBF1       | 8729   | 37 | 10 | 104140383 | 104140383 | Missense_Mutation | SNP | C | T | 7  | 248 | c.5110C>T | c.(5110-5112)CGC>TGC | p.R1704C |
| Pat_58 | Pre-Treatment | CDHR5      | 53841  | 37 | 11 | 618994    | 618994    | Missense_Mutation | SNP | G | A | 4  | 57  | c.1565C>T | c.(1564-1566)CCG>CTG | p.P522L  |
| Pat_58 | Pre-Treatment | MUC2       | 4583   | 37 | 11 | 1078526   | 1078526   | Missense_Mutation | SNP | C | T | 2  | 1   | c.734C>T  | c.(733-735)CCG>CTG   | p.P245L  |
| Pat_58 | Pre-Treatment | KRTAP5-5   | 439915 | 37 | 11 | 1651483   | 1651483   | Missense_Mutation | SNP | G | C | 4  | 50  | c.413G>C  | c.(412-414)GGC>GCC   | p.G138A  |
| Pat_58 | Pre-Treatment | OR52B2     | 255725 | 37 | 11 | 6191079   | 6191079   | Missense_Mutation | SNP | G | A | 12 | 37  | c.478C>T  | c.(478-480)CCA>TCA   | p.P160S  |
| Pat_58 | Pre-Treatment | PAMR1      | 25891  | 37 | 11 | 35456088  | 35456088  | Missense_Mutation | SNP | C | T | 4  | 80  | c.1598G>A | c.(1597-1599)CGG>CAG | p.R533Q  |
| Pat_58 | Pre-Treatment | OR5M8      | 219484 | 37 | 11 | 56258567  | 56258567  | Missense_Mutation | SNP | G | A | 32 | 71  | c.280C>T  | c.(280-282)CCT>TCT   | p.P94S   |
| Pat_58 | Pre-Treatment | TNKS1BP1   | 85456  | 37 | 11 | 57077669  | 57077669  | Missense_Mutation | SNP | G | C | 4  | 71  | c.2516C>G | c.(2515-2517)GCA>GGA | p.A839G  |
| Pat_58 | Pre-Treatment | P2RX3      | 5024   | 37 | 11 | 57137436  | 57137436  | Missense_Mutation | SNP | C | T | 10 | 43  | c.1160C>T | c.(1159-1161)TCC>TTC | p.S387F  |
| Pat_58 | Pre-Treatment | OR9Q2      | 219957 | 37 | 11 | 57958302  | 57958302  | Missense_Mutation | SNP | C | T | 44 | 85  | c.340C>T  | c.(340-342)CTT>TTT   | p.L114F  |

|        |               |          |        |    |    |           |           |                   |     |   |   |    |     |           |                      |          |
|--------|---------------|----------|--------|----|----|-----------|-----------|-------------------|-----|---|---|----|-----|-----------|----------------------|----------|
| Pat_58 | Pre-Treatment | OR5A1    | 219982 | 37 | 11 | 59211486  | 59211486  | Missense_Mutation | SNP | C | T | 30 | 89  | c.845C>T  | c.(844-846)TCA>TTA   | p.S282L  |
| Pat_58 | Pre-Treatment | AHNAK    | 79026  | 37 | 11 | 62295435  | 62295435  | Missense_Mutation | SNP | C | A | 7  | 242 | c.6454G>T | c.(6454-6456)GAT>TAT | p.D2152Y |
| Pat_58 | Pre-Treatment | IL18BP   | 10068  | 37 | 11 | 71711573  | 71711573  | Missense_Mutation | SNP | G | A | 4  | 62  | c.205G>A  | c.(205-207)GTG>ATG   | p.V69M   |
| Pat_58 | Pre-Treatment | HTR3A    | 3359   | 37 | 11 | 113857451 | 113857451 | Missense_Mutation | SNP | G | C | 13 | 56  | c.935G>C  | c.(934-936)GGT>GCT   | p.G312A  |
| Pat_58 | Pre-Treatment | TECTA    | 7007   | 37 | 11 | 121028919 | 121028919 | Missense_Mutation | SNP | C | T | 4  | 71  | c.4675C>T | c.(4675-4677)CGG>TGG | p.R1559W |
| Pat_58 | Pre-Treatment | SORL1    | 6653   | 37 | 11 | 121415957 | 121415957 | Missense_Mutation | SNP | C | T | 4  | 22  | c.1870C>T | c.(1870-1872)CCC>TCC | p.P624S  |
| Pat_58 | Pre-Treatment | LOH12CR1 | 118426 | 37 | 12 | 12514232  | 12514232  | Missense_Mutation | SNP | C | T | 32 | 104 | c.151C>T  | c.(151-153)CCC>TCC   | p.P51S   |
| Pat_58 | Pre-Treatment | PPFIBP1  | 8496   | 37 | 12 | 27802985  | 27802985  | Missense_Mutation | SNP | C | A | 13 | 25  | c.514C>A  | c.(514-516)CTG>ATG   | p.L172M  |
| Pat_58 | Pre-Treatment | BICD1    | 636    | 37 | 12 | 32480402  | 32480402  | Missense_Mutation | SNP | G | A | 4  | 67  | c.1013G>A | c.(1012-1014)CGG>CAG | p.R338Q  |
| Pat_58 | Pre-Treatment | CNTN1    | 1272   | 37 | 12 | 41410489  | 41410489  | Missense_Mutation | SNP | G | C | 7  | 17  | c.2190G>C | c.(2188-2190)TTG>TTC | p.L730F  |
| Pat_58 | Pre-Treatment | TMEM117  | 84216  | 37 | 12 | 44781917  | 44781917  | Missense_Mutation | SNP | C | T | 3  | 17  | c.1007C>T | c.(1006-1008)CCG>CTG | p.P336L  |
| Pat_58 | Pre-Treatment | CALCOCO1 | 57658  | 37 | 12 | 54107678  | 54107678  | Missense_Mutation | SNP | G | A | 3  | 18  | c.1598C>T | c.(1597-1599)CCG>CTG | p.P533L  |
| Pat_58 | Pre-Treatment | ZC3H10   | 84872  | 37 | 12 | 56515410  | 56515410  | Missense_Mutation | SNP | C | T | 4  | 66  | c.1064C>T | c.(1063-1065)CCC>CTC | p.P355L  |
| Pat_58 | Pre-Treatment | NUP107   | 57122  | 37 | 12 | 69107527  | 69107527  | Missense_Mutation | SNP | C | T | 13 | 76  | c.908C>T  | c.(907-909)ACC>ATC   | p.T303I  |
| Pat_58 | Pre-Treatment | NAA25    | 80018  | 37 | 12 | 112486232 | 112486232 | Missense_Mutation | SNP | T | C | 19 | 30  | c.1744A>G | c.(1744-1746)ATT>GTT | p.I582V  |
| Pat_58 | Pre-Treatment | GCN1L1   | 10985  | 37 | 12 | 120569047 | 120569047 | Missense_Mutation | SNP | G | A | 4  | 57  | c.7505C>T | c.(7504-7506)GCC>GTC | p.A2502V |
| Pat_58 | Pre-Treatment | MLXIP    | 22877  | 37 | 12 | 122622019 | 122622019 | Missense_Mutation | SNP | G | A | 3  | 25  | c.2036G>A | c.(2035-2037)CGG>CAG | p.R679Q  |
| Pat_58 | Pre-Treatment | GPR109A  | 338442 | 37 | 12 | 123187436 | 123187436 | Missense_Mutation | SNP | G | A | 7  | 134 | c.395C>T  | c.(394-396)CCC>CTC   | p.P132L  |
| Pat_58 | Pre-Treatment | GPR109B  | 8843   | 37 | 12 | 123200890 | 123200890 | Missense_Mutation | SNP | G | A | 28 | 79  | c.395C>T  | c.(394-396)CCC>CTC   | p.P132L  |
| Pat_58 | Pre-Treatment | EP400    | 57634  | 37 | 12 | 132504707 | 132504707 | Missense_Mutation | SNP | G | A | 5  | 73  | c.4391G>A | c.(4390-4392)GGC>GAC | p.G1464D |
| Pat_58 | Pre-Treatment | TUBA3C   | 7278   | 37 | 13 | 19753616  | 19753616  | Nonsense_Mutation | SNP | G | A | 42 | 107 | c.91C>T   | c.(91-93)CAG>TAG     | p.Q31*   |
| Pat_58 | Pre-Treatment | HS6ST3   | 266722 | 37 | 13 | 97485361  | 97485361  | Missense_Mutation | SNP | G | A | 14 | 34  | c.1325G>A | c.(1324-1326)CGA>CAA | p.R442Q  |
| Pat_58 | Pre-Treatment | ARHGEF7  | 8874   | 37 | 13 | 111767950 | 111767950 | Missense_Mutation | SNP | A | C | 4  | 11  | c.77A>C   | c.(76-78)GAC>GCC     | p.D26A   |
| Pat_58 | Pre-Treatment | FSCB     | 84075  | 37 | 14 | 44974563  | 44974563  | Missense_Mutation | SNP | T | C | 4  | 16  | c.1628A>G | c.(1627-1629)CAG>CGG | p.Q543R  |
| Pat_58 | Pre-Treatment | PRKCH    | 5583   | 37 | 14 | 61909931  | 61909931  | Missense_Mutation | SNP | C | T | 4  | 58  | c.530C>T  | c.(529-531)ACG>ATG   | p.T177M  |
| Pat_58 | Pre-Treatment | MTHFD1   | 4522   | 37 | 14 | 64891539  | 64891539  | Missense_Mutation | SNP | G | A | 3  | 19  | c.745G>A  | c.(745-747)GGG>AGG   | p.G249R  |
| Pat_58 | Pre-Treatment | PRIMA1   | 145270 | 37 | 14 | 94245528  | 94245528  | Missense_Mutation | SNP | C | T | 4  | 29  | c.223G>A  | c.(223-225)GCC>ACC   | p.A75T   |
| Pat_58 | Pre-Treatment | KIAA0284 | 283638 | 37 | 14 | 105349564 | 105349564 | Missense_Mutation | SNP | G | A | 10 | 187 | c.770G>A  | c.(769-771)GGC>GAC   | p.G257D  |
| Pat_58 | Pre-Treatment | CYFIP1   | 23191  | 37 | 15 | 22929751  | 22929751  | Missense_Mutation | SNP | G | A | 4  | 41  | c.425G>A  | c.(424-426)CGC>CAC   | p.R142H  |
| Pat_58 | Pre-Treatment | C15orf2  | 23742  | 37 | 15 | 24923547  | 24923547  | Missense_Mutation | SNP | G | A | 21 | 52  | c.2533G>A | c.(2533-2535)GAG>AAG | p.E845K  |
| Pat_58 | Pre-Treatment | PLA2G4D  | 283748 | 37 | 15 | 42361057  | 42361057  | Missense_Mutation | SNP | C | T | 8  | 10  | c.2313G>A | c.(2311-2313)ATG>ATA | p.M771I  |
| Pat_58 | Pre-Treatment | UBR1     | 197131 | 37 | 15 | 43352305  | 43352305  | Missense_Mutation | SNP | C | T | 4  | 75  | c.806G>A  | c.(805-807)CGG>CAG   | p.R269Q  |
| Pat_58 | Pre-Treatment | MAP1A    | 4130   | 37 | 15 | 43816483  | 43816483  | Missense_Mutation | SNP | G | A | 4  | 37  | c.2812G>A | c.(2812-2814)GTG>ATG | p.V938M  |
| Pat_58 | Pre-Treatment | CATSPER2 | 117155 | 37 | 15 | 43939572  | 43939572  | Missense_Mutation | SNP | G | A | 4  | 27  | c.239C>T  | c.(238-240)GCC>GTC   | p.A80V   |
| Pat_58 | Pre-Treatment | FRMD5    | 84978  | 37 | 15 | 44176935  | 44176935  | Missense_Mutation | SNP | C | T | 4  | 32  | c.1018G>A | c.(1018-1020)GAA>AAA | p.E340K  |
| Pat_58 | Pre-Treatment | SEMA6D   | 80031  | 37 | 15 | 48057123  | 48057123  | Missense_Mutation | SNP | T | A | 4  | 49  | c.1297T>A | c.(1297-1299)TAC>AAC | p.Y433N  |
| Pat_58 | Pre-Treatment | IGF1R    | 3480   | 37 | 15 | 99459313  | 99459313  | Missense_Mutation | SNP | G | A | 4  | 68  | c.1949G>A | c.(1948-1950)CGG>CAG | p.R650Q  |
| Pat_58 | Pre-Treatment | LINS1    | 55180  | 37 | 15 | 101109994 | 101109994 | Missense_Mutation | SNP | G | A | 3  | 35  | c.1723C>T | c.(1723-1725)CAT>TAT | p.H575Y  |
| Pat_58 | Pre-Treatment | PMM2     | 5373   | 37 | 16 | 8905531   | 8905531   | Missense_Mutation | SNP | C | T | 4  | 65  | c.484C>T  | c.(484-486)CGG>TGG   | p.R162W  |
| Pat_58 | Pre-Treatment | ABCC1    | 4363   | 37 | 16 | 16138401  | 16138401  | Missense_Mutation | SNP | G | A | 4  | 52  | c.904G>A  | c.(904-906)GTC>ATC   | p.V302I  |
| Pat_58 | Pre-Treatment | ACSM2B   | 348158 | 37 | 16 | 20570759  | 20570759  | Missense_Mutation | SNP | C | T | 4  | 14  | c.188G>A  | c.(187-189)CGA>CAA   | p.R63Q   |
| Pat_58 | Pre-Treatment | DNAH3    | 55567  | 37 | 16 | 21053420  | 21053420  | Missense_Mutation | SNP | G | A | 9  | 52  | c.4567C>T | c.(4567-4569)CCA>TCA | p.P1523S |
| Pat_58 | Pre-Treatment | RRN3P1   | 730092 | 37 | 16 | 21809167  | 21809167  | Missense_Mutation | SNP | G | A | 4  | 27  | c.533C>T  | c.(532-534)CCT>CTT   | p.P178L  |
| Pat_58 | Pre-Treatment | RABEP2   | 79874  | 37 | 16 | 28922461  | 28922461  | Missense_Mutation | SNP | C | T | 4  | 63  | c.934G>A  | c.(934-936)GAG>AAG   | p.E312K  |
| Pat_58 | Pre-Treatment | SETD1A   | 9739   | 37 | 16 | 30991353  | 30991353  | Missense_Mutation | SNP | G | A | 3  | 30  | c.4246G>A | c.(4246-4248)GAG>AAG | p.E1416K |
| Pat_58 | Pre-Treatment | ZNF267   | 10308  | 37 | 16 | 31927534  | 31927534  | Missense_Mutation | SNP | C | G | 5  | 128 | c.1964C>G | c.(1963-1965)ACT>AGT | p.T655S  |
| Pat_58 | Pre-Treatment | SIAH1    | 6477   | 37 | 16 | 48395954  | 48395954  | Missense_Mutation | SNP | G | A | 4  | 35  | c.386C>T  | c.(385-387)CCG>CTG   | p.P129L  |

|        |               |          |        |    |    |          |          |                   |     |   |   |    |     |            |                        |          |
|--------|---------------|----------|--------|----|----|----------|----------|-------------------|-----|---|---|----|-----|------------|------------------------|----------|
| Pat_58 | Pre-Treatment | NKD1     | 85407  | 37 | 16 | 50666209 | 50666209 | Missense_Mutation | SNP | G | A | 3  | 21  | c.713G>A   | c.(712-714)CGC>CAC     | p.R238H  |
| Pat_58 | Pre-Treatment | PKD1L2   | 114780 | 37 | 16 | 81181938 | 81181938 | Missense_Mutation | SNP | T | A | 8  | 22  | c.4778A>T  | c.(4777-4779)GAG>GTG   | p.E1593V |
| Pat_58 | Pre-Treatment | KIAA0513 | 9764   | 37 | 16 | 85112025 | 85112025 | Missense_Mutation | SNP | G | A | 8  | 32  | c.787G>A   | c.(787-789)GAC>AAC     | p.D263N  |
| Pat_58 | Pre-Treatment | SMYD4    | 114826 | 37 | 17 | 1690763  | 1690763  | Missense_Mutation | SNP | C | T | 2  | 1   | c.1673G>A  | c.(1672-1674)CGG>CAG   | p.R558Q  |
| Pat_58 | Pre-Treatment | SMG6     | 23293  | 37 | 17 | 2203361  | 2203361  | Missense_Mutation | SNP | G | T | 4  | 63  | c.686C>A   | c.(685-687)ACC>AAC     | p.T229N  |
| Pat_58 | Pre-Treatment | ZZEF1    | 23140  | 37 | 17 | 3954131  | 3954131  | Missense_Mutation | SNP | C | T | 4  | 66  | c.5807G>A  | c.(5806-5808)CGG>CAG   | p.R1936Q |
| Pat_58 | Pre-Treatment | SLC2A4   | 6517   | 37 | 17 | 7187929  | 7187929  | Missense_Mutation | SNP | C | T | 4  | 70  | c.853C>T   | c.(853-855)CGG>TGG     | p.R285W  |
| Pat_58 | Pre-Treatment | MYH4     | 4622   | 37 | 17 | 10348301 | 10348301 | Missense_Mutation | SNP | C | T | 14 | 39  | c.5458G>A  | c.(5458-5460)GAG>AAG   | p.E1820K |
| Pat_58 | Pre-Treatment | MYH2     | 4620   | 37 | 17 | 10432565 | 10432565 | Missense_Mutation | SNP | C | T | 10 | 25  | c.3268G>A  | c.(3268-3270)GAG>AAG   | p.E1090K |
| Pat_58 | Pre-Treatment | TEKT3    | 64518  | 37 | 17 | 15231338 | 15231338 | Missense_Mutation | SNP | G | A | 16 | 78  | c.634C>T   | c.(634-636)CAC>TAC     | p.H212Y  |
| Pat_58 | Pre-Treatment | ZNF624   | 57547  | 37 | 17 | 16526195 | 16526195 | Missense_Mutation | SNP | T | C | 4  | 55  | c.2005A>G  | c.(2005-2007)AAA>GAA   | p.K669E  |
| Pat_58 | Pre-Treatment | FBXW10   | 10517  | 37 | 17 | 18647940 | 18647940 | Missense_Mutation | SNP | G | A | 5  | 152 | c.383G>A   | c.(382-384)AGC>AAC     | p.S128N  |
| Pat_58 | Pre-Treatment | TAOK1    | 57551  | 37 | 17 | 27844579 | 27844579 | Nonsense_Mutation | SNP | C | T | 5  | 146 | c.1813C>T  | c.(1813-1815)CGA>TGA   | p.R605*  |
| Pat_58 | Pre-Treatment | GPR179   | 440435 | 37 | 17 | 36485350 | 36485350 | Missense_Mutation | SNP | G | A | 4  | 48  | c.4102C>T  | c.(4102-4104)CCA>TCA   | p.P1368S |
| Pat_58 | Pre-Treatment | PLXDC1   | 57125  | 37 | 17 | 37224186 | 37224186 | Missense_Mutation | SNP | C | T | 10 | 37  | c.1410G>A  | c.(1408-1410)ATG>ATA   | p.M470I  |
| Pat_58 | Pre-Treatment | KRTAP4-4 | 84616  | 37 | 17 | 39316834 | 39316834 | Missense_Mutation | SNP | C | T | 5  | 144 | c.110G>A   | c.(109-111)CGC>CAC     | p.R37H   |
| Pat_58 | Pre-Treatment | CACNA1G  | 8913   | 37 | 17 | 48669167 | 48669167 | Missense_Mutation | SNP | C | T | 4  | 72  | c.2707C>T  | c.(2707-2709)CGG>TGG   | p.R903W  |
| Pat_58 | Pre-Treatment | COIL     | 8161   | 37 | 17 | 55027593 | 55027593 | Missense_Mutation | SNP | G | A | 4  | 66  | c.1010C>T  | c.(1009-1011)GCT>GTT   | p.A337V  |
| Pat_58 | Pre-Treatment | KCNJ2    | 3759   | 37 | 17 | 68172154 | 68172154 | Missense_Mutation | SNP | G | A | 4  | 45  | c.974G>A   | c.(973-975)CGC>CAC     | p.R325H  |
| Pat_58 | Pre-Treatment | SOX9     | 6662   | 37 | 17 | 70120373 | 70120373 | Missense_Mutation | SNP | G | A | 36 | 110 | c.1375G>A  | c.(1375-1377)GGC>AGC   | p.G459S  |
| Pat_58 | Pre-Treatment | GGA3     | 23163  | 37 | 17 | 73242839 | 73242839 | Missense_Mutation | SNP | C | T | 7  | 30  | c.79G>A    | c.(79-81)GAA>AAA       | p.E27K   |
| Pat_58 | Pre-Treatment | KIAA0195 | 9772   | 37 | 17 | 73489139 | 73489139 | Missense_Mutation | SNP | C | T | 6  | 25  | c.2042C>T  | c.(2041-2043)CCC>CTC   | p.P681L  |
| Pat_58 | Pre-Treatment | UNK      | 85451  | 37 | 17 | 73808245 | 73808245 | Missense_Mutation | SNP | C | T | 6  | 86  | c.595C>T   | c.(595-597)CGT>TGT     | p.R199C  |
| Pat_58 | Pre-Treatment | FBF1     | 85302  | 37 | 17 | 73915951 | 73915951 | Missense_Mutation | SNP | G | A | 4  | 58  | c.1891C>T  | c.(1891-1893)CGC>TGC   | p.R631C  |
| Pat_58 | Pre-Treatment | PPP4R1   | 9989   | 37 | 18 | 9570494  | 9570494  | Missense_Mutation | SNP | A | G | 3  | 47  | c.1234T>C  | c.(1234-1236)TCA>CCA   | p.S412P  |
| Pat_58 | Pre-Treatment | ZNF521   | 25925  | 37 | 18 | 22804770 | 22804770 | Missense_Mutation | SNP | G | A | 14 | 36  | c.3112C>T  | c.(3112-3114)CAT>TAT   | p.H1038Y |
| Pat_58 | Pre-Treatment | DSC3     | 1825   | 37 | 18 | 28598204 | 28598204 | Missense_Mutation | SNP | C | T | 6  | 21  | c.1096G>A  | c.(1096-1098)GAA>AAA   | p.E366K  |
| Pat_58 | Pre-Treatment | DSG3     | 1830   | 37 | 18 | 29052688 | 29052688 | Missense_Mutation | SNP | G | A | 4  | 16  | c.2038G>A  | c.(2038-2040)GAA>AAA   | p.E680K  |
| Pat_58 | Pre-Treatment | ZNF271   | 10778  | 37 | 18 | 32886791 | 32886791 | Missense_Mutation | SNP | C | T | 9  | 35  | c.203C>T   | c.(202-204)TCC>TTC     | p.S68F   |
| Pat_58 | Pre-Treatment | NEDD4L   | 23327  | 37 | 18 | 56037691 | 56037691 | Missense_Mutation | SNP | G | A | 15 | 35  | c.2248G>A  | c.(2248-2250)GAA>AAA   | p.E750K  |
| Pat_58 | Pre-Treatment | CDH20    | 28316  | 37 | 18 | 59221482 | 59221482 | Missense_Mutation | SNP | G | A | 40 | 110 | c.1960G>A  | c.(1960-1962)GAC>AAC   | p.D654N  |
| Pat_58 | Pre-Treatment | ZCCHC2   | 54877  | 37 | 18 | 60241382 | 60241382 | Missense_Mutation | SNP | C | T | 5  | 98  | c.2068C>T  | c.(2068-2070)CCT>TCT   | p.P690S  |
| Pat_58 | Pre-Treatment | CDH7     | 1005   | 37 | 18 | 63511228 | 63511228 | Missense_Mutation | SNP | G | A | 11 | 61  | c.1162G>A  | c.(1162-1164)GAA>AAA   | p.E388K  |
| Pat_58 | Pre-Treatment | ZNF236   | 7776   | 37 | 18 | 74622104 | 74622104 | Missense_Mutation | SNP | G | A | 4  | 72  | c.2626G>A  | c.(2626-2628)GAA>AAA   | p.E876K  |
| Pat_58 | Pre-Treatment | CLPP     | 8192   | 37 | 19 | 6364549  | 6364549  | Missense_Mutation | SNP | G | A | 3  | 30  | c.454G>A   | c.(454-456)GCC>ACC     | p.A152T  |
| Pat_58 | Pre-Treatment | PNPLA6   | 10908  | 37 | 19 | 7605810  | 7605810  | Missense_Mutation | SNP | G | A | 4  | 40  | c.824G>A   | c.(823-825)GGT>GAT     | p.G275D  |
| Pat_58 | Pre-Treatment | MUC16    | 94025  | 37 | 19 | 9091708  | 9091708  | Missense_Mutation | SNP | C | T | 16 | 21  | c.107G>A   | c.(106-108)GGA>GAA     | p.G36E   |
| Pat_58 | Pre-Treatment | QTRT1    | 81890  | 37 | 19 | 10823637 | 10823637 | Missense_Mutation | SNP | G | A | 4  | 51  | c.980G>A   | c.(979-981)CGC>CAC     | p.R327H  |
| Pat_58 | Pre-Treatment | CYP4F12  | 66002  | 37 | 19 | 15807003 | 15807003 | Missense_Mutation | SNP | C | T | 29 | 62  | c.1282C>T  | c.(1282-1284)CAT>TAT   | p.H428Y  |
| Pat_58 | Pre-Treatment | MYO9B    | 4650   | 37 | 19 | 17283697 | 17283697 | Missense_Mutation | SNP | C | T | 4  | 43  | c.2065C>T  | c.(2065-2067)CGG>TGG   | p.R689W  |
| Pat_58 | Pre-Treatment | SLC5A5   | 6528   | 37 | 19 | 17992993 | 17992993 | Missense_Mutation | SNP | G | A | 4  | 72  | c.1207G>A  | c.(1207-1209)GCC>ACC   | p.A403T  |
| Pat_58 | Pre-Treatment | CCDC124  | 115098 | 37 | 19 | 18054360 | 18054360 | Missense_Mutation | SNP | C | T | 3  | 23  | c.508C>T   | c.(508-510)CGG>TGG     | p.R170W  |
| Pat_58 | Pre-Treatment | ZNF431   | 170959 | 37 | 19 | 21366366 | 21366366 | Missense_Mutation | SNP | G | A | 6  | 166 | c.1260G>A  | c.(1258-1260)ATG>ATA   | p.M420I  |
| Pat_58 | Pre-Treatment | ZNF208   | 7757   | 37 | 19 | 22154522 | 22154522 | Missense_Mutation | SNP | C | T | 32 | 129 | c.2930G>A  | c.(2929-2931)AGA>AAA   | p.R977K  |
| Pat_58 | Pre-Treatment | ZNF607   | 84775  | 37 | 19 | 38189447 | 38189447 | Missense_Mutation | SNP | C | T | 5  | 79  | c.1585G>A  | c.(1585-1587)GGT>AGT   | p.G529S  |
| Pat_58 | Pre-Treatment | RYR1     | 6261   | 37 | 19 | 39039016 | 39039016 | Missense_Mutation | SNP | G | A | 4  | 67  | c.12238G>A | c.(12238-12240)GTA>ATA | p.V4080I |
| Pat_58 | Pre-Treatment | IL28B    | 282617 | 37 | 19 | 39734321 | 39734321 | Missense_Mutation | SNP | A | G | 3  | 12  | c.542T>C   | c.(541-543)CTC>CCC     | p.L181P  |

|        |               |          |        |    |    |           |           |                   |     |   |   |    |     |              |                        |               |
|--------|---------------|----------|--------|----|----|-----------|-----------|-------------------|-----|---|---|----|-----|--------------|------------------------|---------------|
| Pat_58 | Pre-Treatment | CEACAM5  | 1048   | 37 | 19 | 42224958  | 42224958  | Missense_Mutation | SNP | A | G | 30 | 88  | c.1888A>G    | c.(1888-1890)AAT>GAT   | p.N630D       |
| Pat_58 | Pre-Treatment | ERF      | 2077   | 37 | 19 | 42753111  | 42753111  | Missense_Mutation | SNP | C | T | 5  | 91  | c.1153G>A    | c.(1153-1155)GGA>AGA   | p.G385R       |
| Pat_58 | Pre-Treatment | CIC      | 23152  | 37 | 19 | 42791880  | 42791880  | Splice_Site       | SNP | G | A | 4  | 54  | c.765_splice | c.e5+1                 | p.Q255_splice |
| Pat_58 | Pre-Treatment | LIPE     | 3991   | 37 | 19 | 42911939  | 42911939  | Missense_Mutation | SNP | A | T | 3  | 33  | c.1661T>A    | c.(1660-1662)CTG>CAG   | p.L554Q       |
| Pat_58 | Pre-Treatment | PSG6     | 5675   | 37 | 19 | 43411773  | 43411773  | Nonsense_Mutation | SNP | G | A | 6  | 137 | c.940C>T     | c.(940-942)CGA>TGA     | p.R314*       |
| Pat_58 | Pre-Treatment | PSG9     | 5678   | 37 | 19 | 43771986  | 43771986  | Missense_Mutation | SNP | C | T | 35 | 116 | c.380G>A     | c.(379-381)CGA>CAA     | p.R127Q       |
| Pat_58 | Pre-Treatment | NPAS1    | 4861   | 37 | 19 | 47548577  | 47548577  | Missense_Mutation | SNP | G | A | 17 | 41  | c.1441G>A    | c.(1441-1443)GAG>AAG   | p.E481K       |
| Pat_58 | Pre-Treatment | DHDH     | 27294  | 37 | 19 | 49445771  | 49445771  | Missense_Mutation | SNP | G | A | 4  | 70  | c.694G>A     | c.(694-696)GTG>ATG     | p.V232M       |
| Pat_58 | Pre-Treatment | DKKL1    | 27120  | 37 | 19 | 49868779  | 49868779  | Missense_Mutation | SNP | G | A | 4  | 38  | c.197G>A     | c.(196-198)CGG>CAG     | p.R66Q        |
| Pat_58 | Pre-Treatment | KLK15    | 55554  | 37 | 19 | 51330220  | 51330220  | Missense_Mutation | SNP | G | A | 5  | 24  | c.395C>T     | c.(394-396)CCC>CTC     | p.P132L       |
| Pat_58 | Pre-Treatment | TSEN34   | 79042  | 37 | 19 | 54696042  | 54696042  | Missense_Mutation | SNP | C | G | 19 | 84  | c.563C>G     | c.(562-564)GCC>GGC     | p.A188G       |
| Pat_58 | Pre-Treatment | KIR3DX1  | 90011  | 37 | 19 | 55048172  | 55048172  | Missense_Mutation | SNP | G | A | 12 | 36  | c.40G>A      | c.(40-42)GAA>AAA       | p.E14K        |
| Pat_58 | Pre-Treatment | C19orf51 | 352909 | 37 | 19 | 55677365  | 55677365  | Missense_Mutation | SNP | G | A | 5  | 46  | c.89C>T      | c.(88-90)CCT>CTT       | p.P30L        |
| Pat_58 | Pre-Treatment | PEG3     | 5178   | 37 | 19 | 57325129  | 57325129  | Missense_Mutation | SNP | C | T | 12 | 45  | c.4681G>A    | c.(4681-4683)GAG>AAG   | p.E1561K      |
| Pat_58 | Pre-Treatment | MATN3    | 4148   | 37 | 2  | 20202940  | 20202940  | Missense_Mutation | SNP | C | T | 4  | 64  | c.898G>A     | c.(898-900)GAC>AAC     | p.D300N       |
| Pat_58 | Pre-Treatment | GTF3C2   | 2976   | 37 | 2  | 27560826  | 27560826  | Missense_Mutation | SNP | G | A | 81 | 221 | c.917C>T     | c.(916-918)CCT>CTT     | p.P306L       |
| Pat_58 | Pre-Treatment | KCNG3    | 170850 | 37 | 2  | 42671595  | 42671595  | Missense_Mutation | SNP | G | A | 23 | 64  | c.790C>T     | c.(790-792)CCG>TCG     | p.P264S       |
| Pat_58 | Pre-Treatment | SRBD1    | 55133  | 37 | 2  | 45801772  | 45801772  | Missense_Mutation | SNP | C | T | 5  | 66  | c.1163G>A    | c.(1162-1164)CGG>CAG   | p.R388Q       |
| Pat_58 | Pre-Treatment | TET3     | 200424 | 37 | 2  | 74300721  | 74300721  | Missense_Mutation | SNP | G | A | 4  | 8   | c.2135G>A    | c.(2134-2136)GGA>GAA   | p.G712E       |
| Pat_58 | Pre-Treatment | SMYD1    | 150572 | 37 | 2  | 88383938  | 88383938  | Missense_Mutation | SNP | G | A | 16 | 53  | c.241G>A     | c.(241-243)GAT>AAT     | p.D81N        |
| Pat_58 | Pre-Treatment | GCC2     | 9648   | 37 | 2  | 109124081 | 109124081 | Nonsense_Mutation | SNP | C | T | 14 | 31  | c.5050C>T    | c.(5050-5052)CGA>TGA   | p.R1684*      |
| Pat_58 | Pre-Treatment | PAX8     | 7849   | 37 | 2  | 114000279 | 114000279 | Missense_Mutation | SNP | C | T | 5  | 126 | c.466G>A     | c.(466-468)GGA>AGA     | p.G156R       |
| Pat_58 | Pre-Treatment | CNTNAP5  | 129684 | 37 | 2  | 125547652 | 125547652 | Missense_Mutation | SNP | G | A | 8  | 27  | c.2923G>A    | c.(2923-2925)GAG>AAG   | p.E975K       |
| Pat_58 | Pre-Treatment | SCN2A    | 6326   | 37 | 2  | 166152377 | 166152377 | Missense_Mutation | SNP | G | A | 3  | 27  | c.44G>A      | c.(43-45)CGC>CAC       | p.R15H        |
| Pat_58 | Pre-Treatment | TTN      | 7273   | 37 | 2  | 179554591 | 179554591 | Missense_Mutation | SNP | C | T | 19 | 52  | c.28063G>A   | c.(28063-28065)GAA>AAA | p.E9355K      |
| Pat_58 | Pre-Treatment | TTN      | 7273   | 37 | 2  | 179611173 | 179611173 | Missense_Mutation | SNP | T | A | 8  | 27  | c.15954A>T   | c.(15952-15954)GAA>GAT | p.E5318D      |
| Pat_58 | Pre-Treatment | TTN      | 7273   | 37 | 2  | 179611175 | 179611175 | Missense_Mutation | SNP | C | T | 8  | 28  | c.15952G>A   | c.(15952-15954)GAA>AAA | p.E5318K      |
| Pat_58 | Pre-Treatment | TTN      | 7273   | 37 | 2  | 179616629 | 179616629 | Nonsense_Mutation | SNP | C | A | 22 | 63  | c.10498G>T   | c.(10498-10500)GAA>TAA | p.E3500*      |
| Pat_58 | Pre-Treatment | PDE1A    | 5136   | 37 | 2  | 183129116 | 183129116 | Missense_Mutation | SNP | C | T | 12 | 37  | c.127G>A     | c.(127-129)GAA>AAA     | p.E43K        |
| Pat_58 | Pre-Treatment | MYO1B    | 4430   | 37 | 2  | 192160877 | 192160877 | Missense_Mutation | SNP | G | A | 3  | 24  | c.176G>A     | c.(175-177)CGG>CAG     | p.R59Q        |
| Pat_58 | Pre-Treatment | NRP2     | 8828   | 37 | 2  | 206617576 | 206617576 | Missense_Mutation | SNP | C | T | 4  | 26  | c.1921C>T    | c.(1921-1923)CCT>TCT   | p.P641S       |
| Pat_58 | Pre-Treatment | EPHA4    | 2043   | 37 | 2  | 222433437 | 222433437 | Splice_Site       | SNP | C | G | 4  | 27  | c.159_splice | c.e2+1                 | p.G53_splice  |
| Pat_58 | Pre-Treatment | ECEL1    | 9427   | 37 | 2  | 233349183 | 233349183 | Missense_Mutation | SNP | G | A | 6  | 129 | c.1183C>T    | c.(1183-1185)CGG>TGG   | p.R395W       |
| Pat_58 | Pre-Treatment | DNAJB3   | 414061 | 37 | 2  | 234652194 | 234652194 | Missense_Mutation | SNP | C | G | 11 | 35  | c.369G>C     | c.(367-369)TTG>TTC     | p.L123F       |
| Pat_58 | Pre-Treatment | IQCA1    | 79781  | 37 | 2  | 237406078 | 237406078 | Missense_Mutation | SNP | C | T | 5  | 11  | c.64G>A      | c.(64-66)GAT>AAT       | p.D22N        |
| Pat_58 | Pre-Treatment | XRN2     | 22803  | 37 | 20 | 21309263  | 21309263  | Missense_Mutation | SNP | G | A | 4  | 56  | c.382G>A     | c.(382-384)GCA>ACA     | p.A128T       |
| Pat_58 | Pre-Treatment | MYBL2    | 4605   | 37 | 20 | 42315625  | 42315625  | Nonsense_Mutation | SNP | G | A | 3  | 31  | c.413G>A     | c.(412-414)TGG>TAG     | p.W138*       |
| Pat_58 | Pre-Treatment | ARFGAP1  | 55738  | 37 | 20 | 61919073  | 61919073  | Missense_Mutation | SNP | G | A | 3  | 18  | c.1069G>A    | c.(1069-1071)GAG>AAG   | p.E357K       |
| Pat_58 | Pre-Treatment | MX2      | 4600   | 37 | 21 | 42778797  | 42778797  | Nonsense_Mutation | SNP | C | T | 19 | 49  | c.1777C>T    | c.(1777-1779)CGA>TGA   | p.R593*       |
| Pat_58 | Pre-Treatment | RIPK4    | 54101  | 37 | 21 | 43187175  | 43187175  | Nonsense_Mutation | SNP | C | T | 4  | 5   | c.27G>A      | c.(25-27)TGG>TGA       | p.W9*         |
| Pat_58 | Pre-Treatment | PCNT     | 5116   | 37 | 21 | 47809213  | 47809213  | Missense_Mutation | SNP | G | A | 4  | 67  | c.3707G>A    | c.(3706-3708)AGC>AAC   | p.S1236N      |
| Pat_58 | Pre-Treatment | PI4KA    | 5297   | 37 | 22 | 21119177  | 21119177  | Missense_Mutation | SNP | G | A | 24 | 22  | c.2462C>T    | c.(2461-2463)TCC>TTC   | p.S821F       |
| Pat_58 | Pre-Treatment | UPB1     | 51733  | 37 | 22 | 24919664  | 24919664  | Missense_Mutation | SNP | C | T | 4  | 60  | c.994C>T     | c.(994-996)CGT>TGT     | p.R332C       |
| Pat_58 | Pre-Treatment | LARGE    | 9215   | 37 | 22 | 33673116  | 33673116  | Missense_Mutation | SNP | G | A | 4  | 57  | c.2003C>T    | c.(2002-2004)CCG>CTG   | p.P668L       |
| Pat_58 | Pre-Treatment | HMOX1    | 3162   | 37 | 22 | 35789529  | 35789529  | Nonsense_Mutation | SNP | C | T | 42 | 78  | c.805C>T     | c.(805-807)CGA>TGA     | p.R269*       |
| Pat_58 | Pre-Treatment | EFCAB6   | 64800  | 37 | 22 | 44178131  | 44178131  | Nonsense_Mutation | SNP | G | C | 4  | 41  | c.68C>G      | c.(67-69)TCA>TGA       | p.S23*        |
| Pat_58 | Pre-Treatment | CLASP2   | 23122  | 37 | 3  | 33650098  | 33650098  | Missense_Mutation | SNP | T | C | 3  | 28  | c.1409A>G    | c.(1408-1410)GAT>GGT   | p.D470G       |



|        |               |          |        |    |   |           |           |                   |     |    |    |    |     |                 |                      |          |
|--------|---------------|----------|--------|----|---|-----------|-----------|-------------------|-----|----|----|----|-----|-----------------|----------------------|----------|
| Pat_58 | Pre-Treatment | EXOG     | 9941   | 37 | 3 | 38565470  | 38565470  | Missense_Mutation | SNP | G  | A  | 4  | 51  | c.724G>A        | c.(724-726)GAA>AAA   | p.E242K  |
| Pat_58 | Pre-Treatment | EXOSC7   | 23016  | 37 | 3 | 45031134  | 45031134  | Missense_Mutation | SNP | C  | A  | 4  | 23  | c.252C>A        | c.(250-252)GAC>GAA   | p.D84E   |
| Pat_58 | Pre-Treatment | SETD2    | 29072  | 37 | 3 | 47164279  | 47164279  | Missense_Mutation | SNP | G  | A  | 3  | 22  | c.1847C>T       | c.(1846-1848)GCT>GTT | p.A616V  |
| Pat_58 | Pre-Treatment | COL7A1   | 1294   | 37 | 3 | 48629118  | 48629118  | Missense_Mutation | SNP | C  | T  | 4  | 42  | c.1495G>A       | c.(1495-1497)GTG>ATG | p.V499M  |
| Pat_58 | Pre-Treatment | GRM2     | 2912   | 37 | 3 | 51749930  | 51749930  | Missense_Mutation | SNP | G  | A  | 4  | 52  | c.2141G>A       | c.(2140-2142)CGG>CAG | p.R714Q  |
| Pat_58 | Pre-Treatment | ERC2     | 26059  | 37 | 3 | 56330265  | 56330265  | Missense_Mutation | SNP | C  | T  | 41 | 132 | c.856G>A        | c.(856-858)GAA>AAA   | p.E286K  |
| Pat_58 | Pre-Treatment | ADCY5    | 111    | 37 | 3 | 123019022 | 123019022 | Missense_Mutation | SNP | C  | T  | 4  | 51  | c.2845G>A       | c.(2845-2847)GTG>ATG | p.V949M  |
| Pat_58 | Pre-Treatment | KALRN    | 8997   | 37 | 3 | 124165073 | 124165073 | Missense_Mutation | SNP | C  | T  | 4  | 60  | c.3373C>T       | c.(3373-3375)CGG>TGG | p.R1125W |
| Pat_58 | Pre-Treatment | TRH      | 7200   | 37 | 3 | 129695731 | 129695731 | Missense_Mutation | SNP | G  | A  | 6  | 55  | c.401G>A        | c.(400-402)CGG>CAG   | p.R134Q  |
| Pat_58 | Pre-Treatment | PPM1L    | 151742 | 37 | 3 | 160783314 | 160783314 | Missense_Mutation | SNP | C  | T  | 19 | 53  | c.698C>T        | c.(697-699)CCT>CTT   | p.P233L  |
| Pat_58 | Pre-Treatment | B3GALNT1 | 8706   | 37 | 3 | 160804396 | 160804396 | Nonsense_Mutation | SNP | C  | T  | 4  | 58  | c.147G>A        | c.(145-147)TGG>TGA   | p.W49*   |
| Pat_58 | Pre-Treatment | MUC4     | 4585   | 37 | 3 | 195509909 | 195509909 | Missense_Mutation | SNP | G  | A  | 2  | 0   | c.8158C>T       | c.(8158-8160)CCT>TCT | p.P2720S |
| Pat_58 | Pre-Treatment | TM4SF19  | 116211 | 37 | 3 | 196053840 | 196053840 | Missense_Mutation | SNP | C  | T  | 4  | 40  | c.265G>A        | c.(265-267)GGG>AGG   | p.G89R   |
| Pat_58 | Pre-Treatment | ZNF721   | 170960 | 37 | 4 | 436043    | 436043    | Missense_Mutation | SNP | G  | T  | 10 | 28  | c.2213C>A       | c.(2212-2214)ACA>AAA | p.T738K  |
| Pat_58 | Pre-Treatment | LETM1    | 3954   | 37 | 4 | 1818548   | 1818548   | Nonsense_Mutation | SNP | G  | A  | 4  | 79  | c.1837C>T       | c.(1837-1839)CAG>TAG | p.Q613*  |
| Pat_58 | Pre-Treatment | HTT      | 3064   | 37 | 4 | 3215820   | 3215820   | Missense_Mutation | SNP | G  | A  | 3  | 29  | c.6916G>A       | c.(6916-6918)GCC>ACC | p.A2306T |
| Pat_58 | Pre-Treatment | GPR78    | 27201  | 37 | 4 | 8588947   | 8588947   | Missense_Mutation | SNP | C  | T  | 18 | 52  | c.949C>T        | c.(949-951)CCG>TCG   | p.P317S  |
| Pat_58 | Pre-Treatment | PI4K2B   | 55300  | 37 | 4 | 25253996  | 25253996  | Missense_Mutation | SNP | G  | A  | 4  | 65  | c.322G>A        | c.(322-324)GAT>AAT   | p.D108N  |
| Pat_58 | Pre-Treatment | CWH43    | 80157  | 37 | 4 | 49032922  | 49032922  | Missense_Mutation | SNP | G  | A  | 14 | 62  | c.1453G>A       | c.(1453-1455)GAA>AAA | p.E485K  |
| Pat_58 | Pre-Treatment | NKX6-1   | 4825   | 37 | 4 | 85419372  | 85419372  | Missense_Mutation | SNP | C  | T  | 3  | 16  | c.10G>A         | c.(10-12)GTG>ATG     | p.V4M    |
| Pat_58 | Pre-Treatment | EGF      | 1950   | 37 | 4 | 110932470 | 110932470 | Missense_Mutation | SNP | G  | A  | 15 | 51  | c.3483G>A       | c.(3481-3483)ATG>ATA | p.M1161I |
| Pat_58 | Pre-Treatment | BBS7     | 55212  | 37 | 4 | 122760836 | 122760836 | Missense_Mutation | SNP | G  | A  | 6  | 23  | c.1321C>T       | c.(1321-1323)CTT>TTT | p.L441F  |
| Pat_58 | Pre-Treatment | SETD7    | 80854  | 37 | 4 | 140439043 | 140439043 | Missense_Mutation | SNP | C  | T  | 5  | 96  | c.916G>A        | c.(916-918)GAT>AAT   | p.D306N  |
| Pat_58 | Pre-Treatment | TMEM184C | 55751  | 37 | 4 | 148555322 | 148555322 | Missense_Mutation | SNP | C  | T  | 3  | 21  | c.1054C>T       | c.(1054-1056)CGG>TGG | p.R352W  |
| Pat_58 | Pre-Treatment | MAP9     | 79884  | 37 | 4 | 156278607 | 156278607 | Missense_Mutation | SNP | G  | A  | 12 | 32  | c.1115C>T       | c.(1114-1116)TCT>TTT | p.S372F  |
| Pat_58 | Pre-Treatment | SPOCK3   | 50859  | 37 | 4 | 167658743 | 167658743 | Missense_Mutation | SNP | G  | A  | 20 | 99  | c.1016C>T       | c.(1015-1017)CCC>CTC | p.P339L  |
| Pat_58 | Pre-Treatment | PRDM9    | 56979  | 37 | 5 | 23527052  | 23527052  | Missense_Mutation | SNP | C  | T  | 5  | 105 | c.1855C>T       | c.(1855-1857)CGG>TGG | p.R619W  |
| Pat_58 | Pre-Treatment | ITGA2    | 3673   | 37 | 5 | 52347370  | 52347370  | Missense_Mutation | SNP | G  | A  | 4  | 77  | c.760G>A        | c.(760-762)GGA>AGA   | p.G254R  |
| Pat_58 | Pre-Treatment | DMGDH    | 29958  | 37 | 5 | 78338173  | 78338173  | Missense_Mutation | SNP | G  | A  | 4  | 37  | c.1126C>T       | c.(1126-1128)CCT>TCT | p.P376S  |
| Pat_58 | Pre-Treatment | JMY      | 133746 | 37 | 5 | 78596054  | 78596054  | Nonsense_Mutation | SNP | C  | T  | 29 | 80  | c.1606C>T       | c.(1606-1608)CAG>TAG | p.Q536*  |
| Pat_58 | Pre-Treatment | SNCAIP   | 9627   | 37 | 5 | 121780390 | 121780390 | Missense_Mutation | SNP | G  | A  | 4  | 50  | c.1555G>A       | c.(1555-1557)GCC>ACC | p.A519T  |
| Pat_58 | Pre-Treatment | PCDHA11  | 56138  | 37 | 5 | 140248752 | 140248752 | Missense_Mutation | SNP | G  | A  | 15 | 53  | c.64G>A         | c.(64-66)GAA>AAA     | p.E22K   |
| Pat_58 | Pre-Treatment | PCDHB4   | 56131  | 37 | 5 | 140503847 | 140503847 | Missense_Mutation | SNP | G  | A  | 27 | 77  | c.2267G>A       | c.(2266-2268)GGA>GAA | p.G756E  |
| Pat_58 | Pre-Treatment | PCDHB5   | 26167  | 37 | 5 | 140515773 | 140515773 | Missense_Mutation | SNP | G  | A  | 60 | 203 | c.757G>A        | c.(757-759)GAG>AAG   | p.E253K  |
| Pat_58 | Pre-Treatment | PCDHB5   | 26167  | 37 | 5 | 140516739 | 140516739 | Missense_Mutation | SNP | G  | A  | 5  | 68  | c.1723G>A       | c.(1723-1725)GTG>ATG | p.V575M  |
| Pat_58 | Pre-Treatment | PCDHB7   | 56129  | 37 | 5 | 140552652 | 140552652 | Missense_Mutation | SNP | C  | T  | 19 | 53  | c.236C>T        | c.(235-237)TCG>TTG   | p.S79L   |
| Pat_58 | Pre-Treatment | CAMK2A   | 815    | 37 | 5 | 149636182 | 149636182 | Missense_Mutation | SNP | G  | A  | 4  | 38  | c.365C>T        | c.(364-366)GCT>GTT   | p.A122V  |
| Pat_58 | Pre-Treatment | GEMIN5   | 25929  | 37 | 5 | 154275814 | 154275815 | Missense_Mutation | DNP | GT | AA | 3  | 29  | ..3434_3435AC>T | c.(3433-3435)TAC>TTT | p.Y1145F |
| Pat_58 | Pre-Treatment | KIF4B    | 285643 | 37 | 5 | 154394854 | 154394854 | Missense_Mutation | SNP | G  | A  | 24 | 57  | c.1435G>A       | c.(1435-1437)GAA>AAA | p.E479K  |
| Pat_58 | Pre-Treatment | C5orf40  | 408263 | 37 | 5 | 156770118 | 156770118 | Missense_Mutation | SNP | G  | A  | 10 | 28  | c.427C>T        | c.(427-429)CCG>TCG   | p.P143S  |
| Pat_58 | Pre-Treatment | ODZ2     | 57451  | 37 | 5 | 167379679 | 167379679 | Missense_Mutation | SNP | G  | A  | 4  | 47  | c.799G>A        | c.(799-801)GCC>ACC   | p.A267T  |
| Pat_58 | Pre-Treatment | OR2Y1    | 134083 | 37 | 5 | 180166481 | 180166481 | Missense_Mutation | SNP | C  | T  | 16 | 50  | c.578G>A        | c.(577-579)GGA>GAA   | p.G193E  |
| Pat_58 | Pre-Treatment | SYCP2L   | 221711 | 37 | 6 | 10935349  | 10935349  | Missense_Mutation | SNP | C  | T  | 9  | 35  | c.1742C>T       | c.(1741-1743)CCA>CTA | p.P581L  |
| Pat_58 | Pre-Treatment | DHX16    | 8449   | 37 | 6 | 30633288  | 30633288  | Missense_Mutation | SNP | G  | A  | 19 | 62  | c.889C>T        | c.(889-891)CGC>TGC   | p.R297C  |
| Pat_58 | Pre-Treatment | MUC21    | 394263 | 37 | 6 | 30954947  | 30954947  | Missense_Mutation | SNP | A  | C  | 12 | 589 | c.995A>C        | c.(994-996)AAC>ACC   | p.N332T  |
| Pat_58 | Pre-Treatment | MICA     | 4276   | 37 | 6 | 31378439  | 31378439  | Missense_Mutation | SNP | T  | C  | 4  | 30  | c.190T>C        | c.(190-192)TGC>CGC   | p.C64R   |
| Pat_58 | Pre-Treatment | TNXB     | 7148   | 37 | 6 | 32025954  | 32025955  | Missense_Mutation | DNP | CC | AA | 4  | 50  | ..7705_7706GG>T | c.(7705-7707)GGG>TTG | p.G2569L |

|        |               |          |        |    |   |           |           |                   |     |   |   |     |     |               |                        |               |
|--------|---------------|----------|--------|----|---|-----------|-----------|-------------------|-----|---|---|-----|-----|---------------|------------------------|---------------|
| Pat_58 | Pre-Treatment | DNAH8    | 1769   | 37 | 6 | 38840720  | 38840720  | Missense_Mutation | SNP | G | C | 10  | 17  | c.6625G>C     | c.(6625-6627)GCC>CCC   | p.A2209P      |
| Pat_58 | Pre-Treatment | TTBK1    | 84630  | 37 | 6 | 43230630  | 43230630  | Missense_Mutation | SNP | G | A | 3   | 23  | c.1528G>A     | c.(1528-1530)GGC>AGC   | p.G510S       |
| Pat_58 | Pre-Treatment | TDRD6    | 221400 | 37 | 6 | 46657437  | 46657437  | Nonsense_Mutation | SNP | T | A | 16  | 80  | c.1572T>A     | c.(1570-1572)TAT>TAA   | p.Y524*       |
| Pat_58 | Pre-Treatment | BCKDHB   | 594    | 37 | 6 | 80912831  | 80912831  | Nonsense_Mutation | SNP | C | T | 4   | 52  | c.853C>T      | c.(853-855)CGA>TGA     | p.R285*       |
| Pat_58 | Pre-Treatment | ZNF292   | 23036  | 37 | 6 | 87925717  | 87925717  | Nonsense_Mutation | SNP | C | T | 10  | 38  | c.265C>T      | c.(265-267)CGA>TGA     | p.R89*        |
| Pat_58 | Pre-Treatment | ZNF292   | 23036  | 37 | 6 | 87966906  | 87966906  | Missense_Mutation | SNP | G | A | 14  | 28  | c.3559G>A     | c.(3559-3561)GTC>ATC   | p.V1187I      |
| Pat_58 | Pre-Treatment | GRIK2    | 2898   | 37 | 6 | 102124506 | 102124506 | Missense_Mutation | SNP | C | T | 6   | 35  | c.550C>T      | c.(550-552)CGT>TGT     | p.R184C       |
| Pat_58 | Pre-Treatment | DCBLD1   | 285761 | 37 | 6 | 117859900 | 117859900 | Missense_Mutation | SNP | A | G | 3   | 30  | c.878A>G      | c.(877-879)CAG>CGG     | p.Q293R       |
| Pat_58 | Pre-Treatment | MYCT1    | 80177  | 37 | 6 | 153043051 | 153043051 | Missense_Mutation | SNP | G | A | 28  | 67  | c.371G>A      | c.(370-372)GGA>GAA     | p.G124E       |
| Pat_58 | Pre-Treatment | MAD1L1   | 8379   | 37 | 7 | 2054189   | 2054189   | Missense_Mutation | SNP | C | T | 4   | 30  | c.1307G>A     | c.(1306-1308)CGG>CAG   | p.R436Q       |
| Pat_58 | Pre-Treatment | CREB5    | 9586   | 37 | 7 | 28848934  | 28848934  | Missense_Mutation | SNP | G | A | 4   | 53  | c.1157G>A     | c.(1156-1158)CGG>CAG   | p.R386Q       |
| Pat_58 | Pre-Treatment | NEUROD6  | 63974  | 37 | 7 | 31378228  | 31378228  | Missense_Mutation | SNP | G | A | 11  | 32  | c.655C>T      | c.(655-657)CCC>TCC     | p.P219S       |
| Pat_58 | Pre-Treatment | PDE1C    | 5137   | 37 | 7 | 31862845  | 31862845  | Missense_Mutation | SNP | G | A | 9   | 30  | c.1424C>T     | c.(1423-1425)TCG>TTG   | p.S475L       |
| Pat_58 | Pre-Treatment | POLR2J4  | 84820  | 37 | 7 | 44005467  | 44005467  | Missense_Mutation | SNP | C | T | 4   | 32  | c.223G>A      | c.(223-225)GAG>AAG     | p.E75K        |
| Pat_58 | Pre-Treatment | PHKG1    | 5260   | 37 | 7 | 56155446  | 56155446  | Missense_Mutation | SNP | C | T | 19  | 27  | c.107G>A      | c.(106-108)CGA>CAA     | p.R36Q        |
| Pat_58 | Pre-Treatment | ZNF727   | 442319 | 37 | 7 | 63538806  | 63538806  | Missense_Mutation | SNP | C | G | 5   | 75  | c.1379C>G     | c.(1378-1380)ACC>AGC   | p.T460S       |
| Pat_58 | Pre-Treatment | ZNF727   | 442319 | 37 | 7 | 63538824  | 63538824  | Missense_Mutation | SNP | G | A | 5   | 55  | c.1397G>A     | c.(1396-1398)AGC>AAC   | p.S466N       |
| Pat_58 | Pre-Treatment | CDK6     | 1021   | 37 | 7 | 92462448  | 92462448  | Missense_Mutation | SNP | C | T | 3   | 20  | c.190G>A      | c.(190-192)GTG>ATG     | p.V64M        |
| Pat_58 | Pre-Treatment | DLX6     | 1750   | 37 | 7 | 96635571  | 96635571  | Missense_Mutation | SNP | C | G | 3   | 10  | c.198C>G      | c.(196-198)CAC>CAG     | p.H66Q        |
| Pat_58 | Pre-Treatment | ASNS     | 440    | 37 | 7 | 97488576  | 97488576  | Missense_Mutation | SNP | G | A | 5   | 108 | c.622C>T      | c.(622-624)CGG>TGG     | p.R208W       |
| Pat_58 | Pre-Treatment | LMTK2    | 22853  | 37 | 7 | 97821170  | 97821170  | Missense_Mutation | SNP | G | A | 4   | 66  | c.1393G>A     | c.(1393-1395)GTG>ATG   | p.V465M       |
| Pat_58 | Pre-Treatment | TRRAP    | 8295   | 37 | 7 | 98490140  | 98490140  | Missense_Mutation | SNP | C | T | 5   | 92  | c.355C>T      | c.(355-357)CGC>TGC     | p.R119C       |
| Pat_58 | Pre-Treatment | C7orf61  | 402573 | 37 | 7 | 100061137 | 100061137 | Missense_Mutation | SNP | G | A | 4   | 63  | c.236C>T      | c.(235-237)CCC>CTC     | p.P79L        |
| Pat_58 | Pre-Treatment | MUC17    | 140453 | 37 | 7 | 100683647 | 100683647 | Missense_Mutation | SNP | G | A | 130 | 582 | c.8950G>A     | c.(8950-8952)GAA>AAA   | p.E2984K      |
| Pat_58 | Pre-Treatment | SND1     | 27044  | 37 | 7 | 127343369 | 127343369 | Missense_Mutation | SNP | C | T | 4   | 63  | c.832C>T      | c.(832-834)CTT>TTT     | p.L278F       |
| Pat_58 | Pre-Treatment | ZC3HAV1  | 56829  | 37 | 7 | 138764620 | 138764620 | Missense_Mutation | SNP | G | A | 5   | 111 | c.1067C>T     | c.(1066-1068)GCC>GTC   | p.A356V       |
| Pat_58 | Pre-Treatment | BRAF     | 673    | 37 | 7 | 140453136 | 140453136 | Missense_Mutation | SNP | A | T | 48  | 30  | c.1799T>A     | c.(1798-1800)GTG>GAG   | p.V600E       |
| Pat_58 | Pre-Treatment | OR9A2    | 135924 | 37 | 7 | 142723927 | 142723927 | Missense_Mutation | SNP | G | A | 10  | 41  | c.293C>T      | c.(292-294)TCG>TTG     | p.S98L        |
| Pat_58 | Pre-Treatment | SSPO     | 23145  | 37 | 7 | 149523307 | 149523307 | Missense_Mutation | SNP | C | T | 4   | 38  | c.14390C>T    | c.(14389-14391)GCA>GTA | p.A4797V      |
| Pat_58 | Pre-Treatment | DLGAP2   | 9228   | 37 | 8 | 1616614   | 1616614   | Missense_Mutation | SNP | G | A | 3   | 8   | c.1690G>A     | c.(1690-1692)GAC>AAC   | p.D564N       |
| Pat_58 | Pre-Treatment | NAT2     | 10     | 37 | 8 | 18258201  | 18258201  | Missense_Mutation | SNP | G | A | 4   | 66  | c.688G>A      | c.(688-690)GGG>AGG     | p.G230R       |
| Pat_58 | Pre-Treatment | BMP1     | 649    | 37 | 8 | 22059345  | 22059345  | Missense_Mutation | SNP | G | A | 3   | 30  | c.2137G>A     | c.(2137-2139)GGC>AGC   | p.G713S       |
| Pat_58 | Pre-Treatment | EXTL3    | 2137   | 37 | 8 | 28574136  | 28574136  | Missense_Mutation | SNP | G | A | 5   | 78  | c.560G>A      | c.(559-561)CGT>CAT     | p.R187H       |
| Pat_58 | Pre-Treatment | POLB     | 5423   | 37 | 8 | 42229086  | 42229086  | Missense_Mutation | SNP | G | A | 3   | 17  | c.919G>A      | c.(919-921)GCA>ACA     | p.A307T       |
| Pat_58 | Pre-Treatment | TRIM55   | 84675  | 37 | 8 | 67086715  | 67086715  | Missense_Mutation | SNP | G | A | 24  | 59  | c.1534G>A     | c.(1534-1536)GAG>AAG   | p.E512K       |
| Pat_58 | Pre-Treatment | CA1      | 759    | 37 | 8 | 86253846  | 86253846  | Missense_Mutation | SNP | C | T | 12  | 36  | c.19G>A       | c.(19-21)GGA>AGA       | p.G7R         |
| Pat_58 | Pre-Treatment | FBXO10   | 26267  | 37 | 9 | 37521629  | 37521629  | Missense_Mutation | SNP | C | T | 11  | 19  | c.2137G>A     | c.(2137-2139)GAC>AAC   | p.D713N       |
| Pat_58 | Pre-Treatment | TLE1     | 7088   | 37 | 9 | 84268926  | 84268926  | Missense_Mutation | SNP | G | A | 4   | 45  | c.260C>T      | c.(259-261)ACG>ATG     | p.T87M        |
| Pat_58 | Pre-Treatment | SECISBP2 | 79048  | 37 | 9 | 91940568  | 91940568  | Missense_Mutation | SNP | C | A | 4   | 62  | c.409C>A      | c.(409-411)CAA>AAA     | p.Q137K       |
| Pat_58 | Pre-Treatment | IPPK     | 64768  | 37 | 9 | 95396667  | 95396667  | Splice_Site       | SNP | C | A | 4   | 39  | c.1170_splice | c.e11+1                | p.K390_splice |
| Pat_58 | Pre-Treatment | EPB41L4B | 54566  | 37 | 9 | 111954631 | 111954631 | Missense_Mutation | SNP | G | A | 8   | 39  | c.2228C>T     | c.(2227-2229)CCC>CTC   | p.P743L       |
| Pat_58 | Pre-Treatment | C9orf84  | 158401 | 37 | 9 | 114490105 | 114490105 | Missense_Mutation | SNP | C | T | 13  | 25  | c.1450G>A     | c.(1450-1452)GAT>AAT   | p.D484N       |
| Pat_58 | Pre-Treatment | PAPPA    | 5069   | 37 | 9 | 118997788 | 118997788 | Missense_Mutation | SNP | G | T | 3   | 14  | c.2604G>T     | c.(2602-2604)ATG>ATT   | p.M868I       |
| Pat_58 | Pre-Treatment | MAPKAP1  | 79109  | 37 | 9 | 128206856 | 128206856 | Missense_Mutation | SNP | G | A | 4   | 67  | c.1367C>T     | c.(1366-1368)ACG>ATG   | p.T456M       |
| Pat_58 | Pre-Treatment | ARSF     | 416    | 37 | X | 3030406   | 3030406   | Missense_Mutation | SNP | G | A | 25  | 58  | c.1582G>A     | c.(1582-1584)GAT>AAT   | p.D528N       |
| Pat_58 | Pre-Treatment | MXRA5    | 25878  | 37 | X | 3248289   | 3248289   | Missense_Mutation | SNP | C | T | 8   | 22  | c.479G>A      | c.(478-480)GGA>GAA     | p.G160E       |
| Pat_58 | Pre-Treatment | FAM47A   | 158724 | 37 | X | 34150139  | 34150139  | Missense_Mutation | SNP | G | A | 17  | 66  | c.257C>T      | c.(256-258)CCC>CTC     | p.P86L        |

|        |                 |              |        |    |    |           |           |                   |     |   |   |     |     |              |                      |          |
|--------|-----------------|--------------|--------|----|----|-----------|-----------|-------------------|-----|---|---|-----|-----|--------------|----------------------|----------|
| Pat_58 | Pre-Treatment   | SUV39H1      | 6839   | 37 | X  | 48564896  | 48564896  | Missense_Mutation | SNP | C | T | 3   | 3   | c.983C>T     | c.(982-984)CCC>CTC   | p.P328L  |
| Pat_58 | Pre-Treatment   | CACNA1F      | 778    | 37 | X  | 49076214  | 49076214  | Missense_Mutation | SNP | C | T | 3   | 13  | c.2455G>A    | c.(2455-2457)GAA>AAA | p.E819K  |
| Pat_58 | Pre-Treatment   | PAGE3        | 139793 | 37 | X  | 55287057  | 55287057  | Missense_Mutation | SNP | G | A | 3   | 39  | c.229C>T     | c.(229-231)CGG>TGG   | p.R77W   |
| Pat_58 | Pre-Treatment   | OGT          | 8473   | 37 | X  | 70781638  | 70781638  | Missense_Mutation | SNP | G | A | 4   | 12  | c.1865G>A    | c.(1864-1866)GGA>GAA | p.G622E  |
| Pat_58 | Pre-Treatment   | KIAA2022     | 340533 | 37 | X  | 73961331  | 73961331  | Missense_Mutation | SNP | C | T | 13  | 41  | c.3061G>A    | c.(3061-3063)GAT>AAT | p.D1021N |
| Pat_58 | Pre-Treatment   | LPAR4        | 2846   | 37 | X  | 78010751  | 78010751  | Missense_Mutation | SNP | C | T | 5   | 69  | c.385C>T     | c.(385-387)CTC>TTC   | p.L129F  |
| Pat_58 | Pre-Treatment   | CPXCR1       | 53336  | 37 | X  | 88009059  | 88009059  | Missense_Mutation | SNP | G | A | 7   | 28  | c.644G>A     | c.(643-645)GGA>GAA   | p.G215E  |
| Pat_58 | Pre-Treatment   | DOCK11       | 139818 | 37 | X  | 117773445 | 117773445 | Missense_Mutation | SNP | C | T | 16  | 78  | c.4049C>T    | c.(4048-4050)TCG>TTG | p.S1350L |
| Pat_58 | Pre-Treatment   | RHOXF2B      | 727940 | 37 | X  | 119210996 | 119210996 | Missense_Mutation | SNP | C | T | 8   | 18  | c.337G>A     | c.(337-339)GAA>AAA   | p.E113K  |
| Pat_58 | Pre-Treatment   | ZBTB33       | 10009  | 37 | X  | 119388238 | 119388238 | Missense_Mutation | SNP | G | A | 19  | 84  | c.968G>A     | c.(967-969)GGA>GAA   | p.G323E  |
| Pat_58 | Pre-Treatment   | ODZ1         | 10178  | 37 | X  | 123517777 | 123517777 | Missense_Mutation | SNP | C | T | 5   | 80  | c.6983G>A    | c.(6982-6984)AGC>AAC | p.S2328N |
| Pat_58 | Pre-Treatment   | GABRE        | 2564   | 37 | X  | 151123487 | 151123487 | Missense_Mutation | SNP | C | T | 7   | 11  | c.1207G>A    | c.(1207-1209)GAA>AAA | p.E403K  |
| Pat_58 | Pre-Treatment   | FAM58A       | 92002  | 37 | X  | 152858142 | 152858142 | Missense_Mutation | SNP | C | T | 4   | 28  | c.293G>A     | c.(292-294)AGC>AAC   | p.S98N   |
| Pat_58 | Pre-Treatment   | NAA10        | 8260   | 37 | X  | 153195562 | 153195562 | Missense_Mutation | SNP | C | T | 5   | 77  | c.586G>A     | c.(586-588)GAG>AAG   | p.E196K  |
| Pat_58 | Pre-Treatment   | MPP1         | 4354   | 37 | X  | 154013421 | 154013421 | Missense_Mutation | SNP | C | T | 3   | 22  | c.689G>A     | c.(688-690)AGT>AAT   | p.S230N  |
| Pat_58 | Post-Resistance | CA6          | 765    | 37 | 1  | 9027747   | 9027747   | Missense_Mutation | SNP | G | A | 4   | 318 | c.601G>A     | c.(601-603)GTT>ATT   | p.V201I  |
| Pat_58 | Post-Resistance | UBE4B        | 10277  | 37 | 1  | 10228311  | 10228311  | Nonsense_Mutation | SNP | A | T | 27  | 90  | c.3316A>T    | c.(3316-3318)AAG>TAG | p.K1106* |
| Pat_58 | Post-Resistance | LOC649330    | 649330 | 37 | 1  | 12907458  | 12907458  | Missense_Mutation | SNP | T | C | 6   | 224 | c.685A>G     | c.(685-687)ACG>GCG   | p.T229A  |
| Pat_58 | Post-Resistance | NBPF1        | 55672  | 37 | 1  | 16918653  | 16918653  | Splice_Site       | SNP | C | T | 4   | 160 | c.-35_splice | c.e6+1               |          |
| Pat_58 | Post-Resistance | MST1P9       | 11223  | 37 | 1  | 17085872  | 17085872  | Missense_Mutation | SNP | A | G | 6   | 73  | c.949T>C     | c.(949-951)TGG>CGG   | p.W317R  |
| Pat_58 | Post-Resistance | CROCC        | 9696   | 37 | 1  | 17272075  | 17272075  | Missense_Mutation | SNP | G | A | 5   | 31  | c.2110G>A    | c.(2110-2112)GCC>ACC | p.A704T  |
| Pat_58 | Post-Resistance | RPL11        | 6135   | 37 | 1  | 24021193  | 24021193  | Missense_Mutation | SNP | G | A | 93  | 209 | c.308G>A     | c.(307-309)GGA>GAA   | p.G103E  |
| Pat_58 | Post-Resistance | GALE         | 2582   | 37 | 1  | 24124707  | 24124707  | Missense_Mutation | SNP | G | A | 4   | 158 | c.251C>T     | c.(250-252)GCG>GTG   | p.A84V   |
| Pat_58 | Post-Resistance | PTCH2        | 8643   | 37 | 1  | 45296653  | 45296653  | Missense_Mutation | SNP | G | A | 26  | 50  | c.680C>T     | c.(679-681)CCC>CTC   | p.P227L  |
| Pat_58 | Post-Resistance | CYP4B1       | 1580   | 37 | 1  | 47279163  | 47279163  | Missense_Mutation | SNP | G | A | 45  | 100 | c.505G>A     | c.(505-507)GAA>AAA   | p.E169K  |
| Pat_58 | Post-Resistance | S100A12      | 6283   | 37 | 1  | 153347041 | 153347041 | Missense_Mutation | SNP | C | T | 146 | 337 | c.28G>A      | c.(28-30)GGA>AGA     | p.G10R   |
| Pat_58 | Post-Resistance | FDPS         | 2224   | 37 | 1  | 155282162 | 155282162 | Nonsense_Mutation | SNP | G | A | 14  | 59  | c.456G>A     | c.(454-456)TGG>TGA   | p.W152*  |
| Pat_58 | Post-Resistance | VSIG8        | 391123 | 37 | 1  | 159827563 | 159827563 | Missense_Mutation | SNP | C | G | 29  | 68  | c.624G>C     | c.(622-624)CAG>CAC   | p.Q208H  |
| Pat_58 | Post-Resistance | DUSP27       | 92235  | 37 | 1  | 167095933 | 167095933 | Missense_Mutation | SNP | G | A | 95  | 147 | c.1565G>A    | c.(1564-1566)AGC>AAC | p.S522N  |
| Pat_58 | Post-Resistance | TNR          | 7143   | 37 | 1  | 175375489 | 175375489 | Missense_Mutation | SNP | G | A | 88  | 211 | c.362C>T     | c.(361-363)CCC>CTC   | p.P121L  |
| Pat_58 | Post-Resistance | PAPPA2       | 60676  | 37 | 1  | 176525627 | 176525627 | Nonsense_Mutation | SNP | C | T | 219 | 80  | c.169C>T     | c.(169-171)CGA>TGA   | p.R57*   |
| Pat_58 | Post-Resistance | ASTN1        | 460    | 37 | 1  | 176915173 | 176915173 | Missense_Mutation | SNP | C | T | 78  | 152 | c.2138G>A    | c.(2137-2139)GGG>GAG | p.G713E  |
| Pat_58 | Post-Resistance | CEP350       | 9857   | 37 | 1  | 180044327 | 180044327 | Missense_Mutation | SNP | A | T | 25  | 42  | c.5738A>T    | c.(5737-5739)GAA>GTA | p.E1913V |
| Pat_58 | Post-Resistance | PIGR         | 5284   | 37 | 1  | 207112655 | 207112655 | Missense_Mutation | SNP | G | A | 36  | 77  | c.197C>T     | c.(196-198)ACC>ATC   | p.T66I   |
| Pat_58 | Post-Resistance | HIST3H3      | 8290   | 37 | 1  | 228612975 | 228612975 | Missense_Mutation | SNP | G | A | 6   | 188 | c.52C>T      | c.(52-54)CGC>TGC     | p.R18C   |
| Pat_58 | Post-Resistance | KIAA1804     | 84451  | 37 | 1  | 233507802 | 233507802 | Missense_Mutation | SNP | C | T | 97  | 176 | c.1571C>T    | c.(1570-1572)ACC>ATC | p.T524I  |
| Pat_58 | Post-Resistance | RET          | 5979   | 37 | 10 | 43597792  | 43597792  | Missense_Mutation | SNP | C | T | 79  | 48  | c.340C>T     | c.(340-342)CGC>TGC   | p.R114C  |
| Pat_58 | Post-Resistance | PSAP         | 5660   | 37 | 10 | 73587854  | 73587854  | Missense_Mutation | SNP | G | A | 4   | 179 | c.637C>T     | c.(637-639)CGG>TGG   | p.R213W  |
| Pat_58 | Post-Resistance | PTEN         | 5728   | 37 | 10 | 89692899  | 89692899  | Missense_Mutation | SNP | A | C | 184 | 133 | c.383A>C     | c.(382-384)AAG>ACG   | p.K128T  |
| Pat_58 | Post-Resistance | PLCE1        | 51196  | 37 | 10 | 95791173  | 95791173  | Missense_Mutation | SNP | G | A | 67  | 55  | c.370G>A     | c.(370-372)GAA>AAA   | p.E124K  |
| Pat_58 | Post-Resistance | OBFC1        | 79991  | 37 | 10 | 105642449 | 105642449 | Missense_Mutation | SNP | G | A | 4   | 211 | c.1100C>T    | c.(1099-1101)GCG>GTG | p.A367V  |
| Pat_58 | Post-Resistance | OR52E2       | 119678 | 37 | 11 | 5080082   | 5080082   | Missense_Mutation | SNP | G | A | 31  | 112 | c.776C>T     | c.(775-777)TCC>TTC   | p.S259F  |
| Pat_58 | Post-Resistance | TRIM6-TRIM34 | 445372 | 37 | 11 | 5624931   | 5624931   | Missense_Mutation | SNP | C | T | 5   | 191 | c.473C>T     | c.(472-474)ACG>ATG   | p.T158M  |
| Pat_58 | Post-Resistance | OR52B2       | 255725 | 37 | 11 | 6191079   | 6191079   | Missense_Mutation | SNP | G | A | 15  | 110 | c.478C>T     | c.(478-480)CCA>TCA   | p.P160S  |
| Pat_58 | Post-Resistance | OR10A6       | 390093 | 37 | 11 | 7949500   | 7949500   | Missense_Mutation | SNP | G | A | 32  | 126 | c.710C>T     | c.(709-711)GCC>GTC   | p.A237V  |
| Pat_58 | Post-Resistance | OR4A16       | 81327  | 37 | 11 | 55111552  | 55111552  | Missense_Mutation | SNP | G | A | 41  | 29  | c.876G>A     | c.(874-876)ATG>ATA   | p.M292I  |
| Pat_58 | Post-Resistance | OR5M8        | 219484 | 37 | 11 | 56258567  | 56258567  | Missense_Mutation | SNP | G | A | 122 | 150 | c.280C>T     | c.(280-282)CCT>TCT   | p.P94S   |

|        |                 |           |        |    |    |           |           |                        |     |    |    |     |     |                 |                        |          |
|--------|-----------------|-----------|--------|----|----|-----------|-----------|------------------------|-----|----|----|-----|-----|-----------------|------------------------|----------|
| Pat_58 | Post-Resistance | P2RX3     | 5024   | 37 | 11 | 57137436  | 57137436  | Missense_Mutation      | SNP | C  | T  | 52  | 41  | c.1160C>T       | c.(1159-1161)TCC>TTC   | p.S387F  |
| Pat_58 | Post-Resistance | OR9Q2     | 219957 | 37 | 11 | 57958302  | 57958302  | Missense_Mutation      | SNP | C  | T  | 81  | 283 | c.340C>T        | c.(340-342)CTT>TTT     | p.L114F  |
| Pat_58 | Post-Resistance | OR5A1     | 219982 | 37 | 11 | 59211486  | 59211486  | Missense_Mutation      | SNP | C  | T  | 193 | 215 | c.845C>T        | c.(844-846)TCA>TTA     | p.S282L  |
| Pat_58 | Post-Resistance | CDC42BPG  | 55561  | 37 | 11 | 64608092  | 64608092  | Missense_Mutation      | SNP | A  | C  | 5   | 223 | c.365T>G        | c.(364-366)GTG>GGG     | p.V122G  |
| Pat_58 | Post-Resistance | KAT5      | 10524  | 37 | 11 | 65482186  | 65482186  | Missense_Mutation      | SNP | G  | A  | 7   | 696 | c.812G>A        | c.(811-813)CGT>CAT     | p.R271H  |
| Pat_58 | Post-Resistance | CLCF1     | 23529  | 37 | 11 | 67132696  | 67132696  | Missense_Mutation      | SNP | G  | A  | 4   | 126 | c.589C>T        | c.(589-591)CGC>TGC     | p.R197C  |
| Pat_58 | Post-Resistance | FOLH1B    | 219595 | 37 | 11 | 89395322  | 89395322  | Translation_Start_Site | SNP | C  | T  | 4   | 97  | c.-93C>T        | c.(-95--91)TACGC>TATGC |          |
| Pat_58 | Post-Resistance | CNTN5     | 53942  | 37 | 11 | 99786792  | 99786792  | Missense_Mutation      | SNP | G  | A  | 17  | 20  | c.584G>A        | c.(583-585)GGA>GAA     | p.G195E  |
| Pat_58 | Post-Resistance | CNTN5     | 53942  | 37 | 11 | 100168359 | 100168360 | Missense_Mutation      | DNP | CC | TT | 20  | 40  | ..2317_2318CC>T | c.(2317-2319)CCG>TTG   | p.P773L  |
| Pat_58 | Post-Resistance | HTR3A     | 3359   | 37 | 11 | 113857451 | 113857451 | Missense_Mutation      | SNP | G  | C  | 55  | 157 | c.935G>C        | c.(934-936)GGT>GCT     | p.G312A  |
| Pat_58 | Post-Resistance | KCNJ1     | 3758   | 37 | 11 | 128709244 | 128709244 | Missense_Mutation      | SNP | C  | T  | 60  | 86  | c.952G>A        | c.(952-954)GAG>AAG     | p.E318K  |
| Pat_58 | Post-Resistance | CLEC9A    | 283420 | 37 | 12 | 10217331  | 10217331  | Missense_Mutation      | SNP | G  | T  | 120 | 254 | c.472G>T        | c.(472-474)GAT>TAT     | p.D158Y  |
| Pat_58 | Post-Resistance | PRB2      | 653247 | 37 | 12 | 11546009  | 11546009  | Missense_Mutation      | SNP | T  | G  | 5   | 445 | c.1003A>C       | c.(1003-1005)AAA>CAA   | p.K335Q  |
| Pat_58 | Post-Resistance | LOH12CR1  | 118426 | 37 | 12 | 12514232  | 12514232  | Missense_Mutation      | SNP | C  | T  | 141 | 244 | c.151C>T        | c.(151-153)CCC>TCC     | p.P51S   |
| Pat_58 | Post-Resistance | PPFIBP1   | 8496   | 37 | 12 | 27802985  | 27802985  | Missense_Mutation      | SNP | C  | A  | 50  | 117 | c.514C>A        | c.(514-516)CTG>ATG     | p.L172M  |
| Pat_58 | Post-Resistance | CNTN1     | 1272   | 37 | 12 | 41410489  | 41410489  | Missense_Mutation      | SNP | G  | C  | 34  | 71  | c.2190G>C       | c.(2188-2190)TTG>TTC   | p.L730F  |
| Pat_58 | Post-Resistance | NUP107    | 57122  | 37 | 12 | 69107527  | 69107527  | Missense_Mutation      | SNP | C  | T  | 126 | 208 | c.908C>T        | c.(907-909)ACC>ATC     | p.T303I  |
| Pat_58 | Post-Resistance | WSCD2     | 9671   | 37 | 12 | 108589739 | 108589739 | Missense_Mutation      | SNP | G  | A  | 5   | 357 | c.130G>A        | c.(130-132)GCT>ACT     | p.A44T   |
| Pat_58 | Post-Resistance | SVOP      | 55530  | 37 | 12 | 109316492 | 109316492 | Missense_Mutation      | SNP | A  | T  | 4   | 69  | c.1130T>A       | c.(1129-1131)CTG>CAG   | p.L377Q  |
| Pat_58 | Post-Resistance | NAA25     | 80018  | 37 | 12 | 112486232 | 112486232 | Missense_Mutation      | SNP | T  | C  | 104 | 131 | c.1744A>G       | c.(1744-1746)ATT>GTT   | p.I582V  |
| Pat_58 | Post-Resistance | GPR109B   | 8843   | 37 | 12 | 123200890 | 123200890 | Missense_Mutation      | SNP | G  | A  | 86  | 192 | c.395C>T        | c.(394-396)CCC>CTC     | p.P132L  |
| Pat_58 | Post-Resistance | TUBA3C    | 7278   | 37 | 13 | 19753616  | 19753616  | Nonsense_Mutation      | SNP | G  | A  | 173 | 261 | c.91C>T         | c.(91-93)CAG>TAG       | p.Q31*   |
| Pat_58 | Post-Resistance | HS6ST3    | 266722 | 37 | 13 | 97485361  | 97485361  | Missense_Mutation      | SNP | G  | A  | 86  | 128 | c.1325G>A       | c.(1324-1326)CGA>CAA   | p.R442Q  |
| Pat_58 | Post-Resistance | ARHGEF7   | 8874   | 37 | 13 | 111767950 | 111767950 | Missense_Mutation      | SNP | A  | C  | 27  | 39  | c.77A>C         | c.(76-78)GAC>GCC       | p.D26A   |
| Pat_58 | Post-Resistance | GMPR2     | 51292  | 37 | 14 | 24707523  | 24707523  | Nonsense_Mutation      | SNP | G  | T  | 4   | 141 | c.769G>T        | c.(769-771)GAG>TAG     | p.E257*  |
| Pat_58 | Post-Resistance | MAP3K9    | 4293   | 37 | 14 | 71205096  | 71205096  | Missense_Mutation      | SNP | G  | T  | 4   | 231 | c.1710C>A       | c.(1708-1710)AGC>AGA   | p.S570R  |
| Pat_58 | Post-Resistance | CCDC88C   | 440193 | 37 | 14 | 91779633  | 91779633  | Missense_Mutation      | SNP | G  | A  | 5   | 272 | c.2527C>T       | c.(2527-2529)CGG>TGG   | p.R843W  |
| Pat_58 | Post-Resistance | KLC1      | 3831   | 37 | 14 | 104123952 | 104123952 | Missense_Mutation      | SNP | C  | T  | 5   | 269 | c.331C>T        | c.(331-333)CGT>TGT     | p.R111C  |
| Pat_58 | Post-Resistance | C15orf2   | 23742  | 37 | 15 | 24923547  | 24923547  | Missense_Mutation      | SNP | G  | A  | 117 | 110 | c.2533G>A       | c.(2533-2535)GAG>AAG   | p.E845K  |
| Pat_58 | Post-Resistance | OTUD7A    | 161725 | 37 | 15 | 31776801  | 31776801  | Missense_Mutation      | SNP | C  | T  | 14  | 13  | c.1477G>A       | c.(1477-1479)GGC>AGC   | p.G493S  |
| Pat_58 | Post-Resistance | PLA2G4D   | 283748 | 37 | 15 | 42361057  | 42361057  | Missense_Mutation      | SNP | C  | T  | 23  | 17  | c.2313G>A       | c.(2311-2313)ATG>ATA   | p.M771I  |
| Pat_58 | Post-Resistance | CASKIN1   | 57524  | 37 | 16 | 2239282   | 2239282   | Missense_Mutation      | SNP | C  | G  | 12  | 68  | c.443G>C        | c.(442-444)GGG>GCG     | p.G148A  |
| Pat_58 | Post-Resistance | PAQR4     | 124222 | 37 | 16 | 3021902   | 3021902   | Missense_Mutation      | SNP | G  | A  | 4   | 120 | c.775G>A        | c.(775-777)GTG>ATG     | p.V259M  |
| Pat_58 | Post-Resistance | ACSM2A    | 123876 | 37 | 16 | 20476849  | 20476849  | Missense_Mutation      | SNP | G  | A  | 8   | 114 | c.188G>A        | c.(187-189)CGA>CAA     | p.R63Q   |
| Pat_58 | Post-Resistance | ACSM2B    | 348158 | 37 | 16 | 20570759  | 20570759  | Missense_Mutation      | SNP | C  | T  | 23  | 58  | c.188G>A        | c.(187-189)CGA>CAA     | p.R63Q   |
| Pat_58 | Post-Resistance | DNAH3     | 55567  | 37 | 16 | 21053420  | 21053420  | Missense_Mutation      | SNP | G  | A  | 87  | 154 | c.4567C>T       | c.(4567-4569)CCA>TCA   | p.P1523S |
| Pat_58 | Post-Resistance | RRN3P1    | 730092 | 37 | 16 | 21809167  | 21809167  | Missense_Mutation      | SNP | G  | A  | 5   | 50  | c.533C>T        | c.(532-534)CCT>CTT     | p.P178L  |
| Pat_58 | Post-Resistance | CD19      | 930    | 37 | 16 | 28948983  | 28948983  | Missense_Mutation      | SNP | C  | T  | 4   | 253 | c.1411C>T       | c.(1411-1413)CCG>TCG   | p.P471S  |
| Pat_58 | Post-Resistance | GNAO1     | 2775   | 37 | 16 | 56362666  | 56362666  | Missense_Mutation      | SNP | C  | T  | 4   | 253 | c.427C>T        | c.(427-429)CGG>TGG     | p.R143W  |
| Pat_58 | Post-Resistance | KIAA0895L | 653319 | 37 | 16 | 67214167  | 67214167  | Missense_Mutation      | SNP | G  | A  | 4   | 119 | c.347C>T        | c.(346-348)GCA>GTA     | p.A116V  |
| Pat_58 | Post-Resistance | PARD6A    | 50855  | 37 | 16 | 67696424  | 67696424  | Nonsense_Mutation      | SNP | G  | A  | 3   | 84  | c.915G>A        | c.(913-915)TGG>TGA     | p.W305*  |
| Pat_58 | Post-Resistance | TSNAXIP1  | 55815  | 37 | 16 | 67860947  | 67860947  | Missense_Mutation      | SNP | G  | A  | 43  | 179 | c.1474G>A       | c.(1474-1476)GAG>AAG   | p.E492K  |
| Pat_58 | Post-Resistance | COG8      | 84342  | 37 | 16 | 69373451  | 69373451  | Missense_Mutation      | SNP | G  | A  | 4   | 85  | c.5C>T          | c.(4-6)GCG>GTG         | p.A2V    |
| Pat_58 | Post-Resistance | CNTNAP4   | 85445  | 37 | 16 | 76501306  | 76501306  | Missense_Mutation      | SNP | G  | A  | 47  | 51  | c.1541G>A       | c.(1540-1542)GGA>GAA   | p.G514E  |
| Pat_58 | Post-Resistance | PKD1L2    | 114780 | 37 | 16 | 81181938  | 81181938  | Missense_Mutation      | SNP | T  | A  | 57  | 82  | c.4778A>T       | c.(4777-4779)GAG>GTG   | p.E1593V |
| Pat_58 | Post-Resistance | KIAA0513  | 9764   | 37 | 16 | 85112025  | 85112025  | Missense_Mutation      | SNP | G  | A  | 20  | 52  | c.787G>A        | c.(787-789)GAC>AAC     | p.D263N  |
| Pat_58 | Post-Resistance | PITPNM3   | 83394  | 37 | 17 | 6374648   | 6374648   | Missense_Mutation      | SNP | A  | G  | 10  | 17  | c.1457T>C       | c.(1456-1458)CTC>CCC   | p.L486P  |

|        |                 |          |           |    |    |          |          |                   |     |   |   |     |     |            |                        |          |
|--------|-----------------|----------|-----------|----|----|----------|----------|-------------------|-----|---|---|-----|-----|------------|------------------------|----------|
| Pat_58 | Post-Resistance | MYH4     | 4622      | 37 | 17 | 10348301 | 10348301 | Missense_Mutation | SNP | C | T | 112 | 195 | c.5458G>A  | c.(5458-5460)GAG>AAG   | p.E1820K |
| Pat_58 | Post-Resistance | MYH2     | 4620      | 37 | 17 | 10432565 | 10432565 | Missense_Mutation | SNP | C | T | 42  | 121 | c.3268G>A  | c.(3268-3270)GAG>AAG   | p.E1090K |
| Pat_58 | Post-Resistance | TEKT3    | 64518     | 37 | 17 | 15231338 | 15231338 | Missense_Mutation | SNP | G | A | 127 | 232 | c.634C>T   | c.(634-636)CAC>TAC     | p.H212Y  |
| Pat_58 | Post-Resistance | MAPK7    | 5598      | 37 | 17 | 19284463 | 19284463 | Missense_Mutation | SNP | C | A | 4   | 187 | c.941C>A   | c.(940-942)CCA>CAA     | p.P314Q  |
| Pat_58 | Post-Resistance | SLC6A4   | 6532      | 37 | 17 | 28530357 | 28530357 | Missense_Mutation | SNP | A | G | 41  | 174 | c.1651T>C  | c.(1651-1653)TTC>CTC   | p.F551L  |
| Pat_58 | Post-Resistance | PLXDC1   | 57125     | 37 | 17 | 37224186 | 37224186 | Missense_Mutation | SNP | C | T | 71  | 104 | c.1410G>A  | c.(1408-1410)ATG>ATA   | p.M470I  |
| Pat_58 | Post-Resistance | KRTAP4-4 | 84616     | 37 | 17 | 39316834 | 39316834 | Missense_Mutation | SNP | C | T | 6   | 363 | c.110G>A   | c.(109-111)CGC>CAC     | p.R37H   |
| Pat_58 | Post-Resistance | SOX9     | 6662      | 37 | 17 | 70120373 | 70120373 | Missense_Mutation | SNP | G | A | 131 | 249 | c.1375G>A  | c.(1375-1377)GGC>AGC   | p.G459S  |
| Pat_58 | Post-Resistance | GGA3     | 23163     | 37 | 17 | 73242839 | 73242839 | Missense_Mutation | SNP | C | T | 53  | 101 | c.79G>A    | c.(79-81)GAA>AAA       | p.E27K   |
| Pat_58 | Post-Resistance | KIAA0195 | 9772      | 37 | 17 | 73489139 | 73489139 | Missense_Mutation | SNP | C | T | 55  | 101 | c.2042C>T  | c.(2041-2043)CCC>CTC   | p.P681L  |
| Pat_58 | Post-Resistance | CDK3     | 1018      | 37 | 17 | 73998125 | 73998125 | Missense_Mutation | SNP | G | A | 22  | 115 | c.217G>A   | c.(217-219)GAG>AAG     | p.E73K   |
| Pat_58 | Post-Resistance | CBX2     | 84733     | 37 | 17 | 77758233 | 77758233 | Missense_Mutation | SNP | C | A | 3   | 30  | c.991C>A   | c.(991-993)CAT>AAT     | p.H331N  |
| Pat_58 | Post-Resistance | PTPRM    | 5797      | 37 | 18 | 8380385  | 8380385  | Missense_Mutation | SNP | G | A | 4   | 207 | c.3839G>A  | c.(3838-3840)TGC>TAC   | p.C1280Y |
| Pat_58 | Post-Resistance | POTEC    | 388468    | 37 | 18 | 14513663 | 14513663 | Missense_Mutation | SNP | C | T | 7   | 371 | c.1531G>A  | c.(1531-1533)GAG>AAG   | p.E511K  |
| Pat_58 | Post-Resistance | ZNF521   | 25925     | 37 | 18 | 22804770 | 22804770 | Missense_Mutation | SNP | G | A | 60  | 87  | c.3112C>T  | c.(3112-3114)CAT>TAT   | p.H1038Y |
| Pat_58 | Post-Resistance | DSC3     | 1825      | 37 | 18 | 28598204 | 28598204 | Missense_Mutation | SNP | C | T | 31  | 74  | c.1096G>A  | c.(1096-1098)GAA>AAA   | p.E366K  |
| Pat_58 | Post-Resistance | DSG3     | 1830      | 37 | 18 | 29052688 | 29052688 | Missense_Mutation | SNP | G | A | 28  | 59  | c.2038G>A  | c.(2038-2040)GAA>AAA   | p.E680K  |
| Pat_58 | Post-Resistance | ZNF271   | 10778     | 37 | 18 | 32886791 | 32886791 | Missense_Mutation | SNP | C | T | 60  | 131 | c.203C>T   | c.(202-204)TCC>TTC     | p.S68F   |
| Pat_58 | Post-Resistance | NEDD4L   | 23327     | 37 | 18 | 56037691 | 56037691 | Missense_Mutation | SNP | G | A | 68  | 102 | c.2248G>A  | c.(2248-2250)GAA>AAA   | p.E750K  |
| Pat_58 | Post-Resistance | CDH20    | 28316     | 37 | 18 | 59221482 | 59221482 | Missense_Mutation | SNP | G | A | 181 | 354 | c.1960G>A  | c.(1960-1962)GAC>AAC   | p.D654N  |
| Pat_58 | Post-Resistance | CDH7     | 1005      | 37 | 18 | 63511228 | 63511228 | Missense_Mutation | SNP | G | A | 139 | 219 | c.1162G>A  | c.(1162-1164)GAA>AAA   | p.E388K  |
| Pat_58 | Post-Resistance | ADAT3    | 113179    | 37 | 19 | 1912891  | 1912891  | Missense_Mutation | SNP | G | A | 4   | 89  | c.797G>A   | c.(796-798)CGT>CAT     | p.R266H  |
| Pat_58 | Post-Resistance | DOT1L    | 84444     | 37 | 19 | 2217801  | 2217801  | Missense_Mutation | SNP | G | A | 3   | 36  | c.2575G>A  | c.(2575-2577)GGG>AGG   | p.G859R  |
| Pat_58 | Post-Resistance | MUC16    | 94025     | 37 | 19 | 9075612  | 9075612  | Missense_Mutation | SNP | T | G | 21  | 39  | c.11834A>C | c.(11833-11835)CAC>CCC | p.H3945P |
| Pat_58 | Post-Resistance | MUC16    | 94025     | 37 | 19 | 9091708  | 9091708  | Missense_Mutation | SNP | C | T | 31  | 87  | c.107G>A   | c.(106-108)GGA>GAA     | p.G36E   |
| Pat_58 | Post-Resistance | OR7D4    | 125958    | 37 | 19 | 9325014  | 9325014  | Missense_Mutation | SNP | G | A | 4   | 297 | c.500C>T   | c.(499-501)ACC>ATC     | p.T167I  |
| Pat_58 | Post-Resistance | CYP4F12  | 66002     | 37 | 19 | 15807003 | 15807003 | Missense_Mutation | SNP | C | T | 113 | 281 | c.1282C>T  | c.(1282-1284)CAT>TAT   | p.H428Y  |
| Pat_58 | Post-Resistance | NXNL1    | 115861    | 37 | 19 | 17566497 | 17566497 | Missense_Mutation | SNP | C | T | 3   | 13  | c.598G>A   | c.(598-600)GGA>AGA     | p.G200R  |
| Pat_58 | Post-Resistance | ZNF90    | 7643      | 37 | 19 | 20229238 | 20229238 | Missense_Mutation | SNP | G | A | 5   | 282 | c.875G>A   | c.(874-876)AGA>AAA     | p.R292K  |
| Pat_58 | Post-Resistance | ZNF737   | 100129842 | 37 | 19 | 20727870 | 20727870 | Missense_Mutation | SNP | C | G | 7   | 800 | c.1139G>C  | c.(1138-1140)TGG>TCG   | p.W380S  |
| Pat_58 | Post-Resistance | ZNF208   | 7757      | 37 | 19 | 22154522 | 22154522 | Missense_Mutation | SNP | C | T | 295 | 372 | c.2930G>A  | c.(2929-2931)AGA>AAA   | p.R977K  |
| Pat_58 | Post-Resistance | CEACAM5  | 1048      | 37 | 19 | 42224958 | 42224958 | Missense_Mutation | SNP | A | G | 236 | 251 | c.1888A>G  | c.(1888-1890)AAT>GAT   | p.N630D  |
| Pat_58 | Post-Resistance | PSG9     | 5678      | 37 | 19 | 43771986 | 43771986 | Missense_Mutation | SNP | C | T | 361 | 426 | c.380G>A   | c.(379-381)CGA>CAA     | p.R127Q  |
| Pat_58 | Post-Resistance | NPAS1    | 4861      | 37 | 19 | 47548577 | 47548577 | Missense_Mutation | SNP | G | A | 52  | 108 | c.1441G>A  | c.(1441-1443)GAG>AAG   | p.E481K  |
| Pat_58 | Post-Resistance | CRX      | 1406      | 37 | 19 | 48339526 | 48339526 | Missense_Mutation | SNP | C | T | 4   | 194 | c.127C>T   | c.(127-129)CGC>TGC     | p.R43C   |
| Pat_58 | Post-Resistance | KLK15    | 5554      | 37 | 19 | 51330220 | 51330220 | Missense_Mutation | SNP | G | A | 26  | 61  | c.395C>T   | c.(394-396)CCC>CTC     | p.P132L  |
| Pat_58 | Post-Resistance | NLRP12   | 91662     | 37 | 19 | 54299142 | 54299142 | Missense_Mutation | SNP | G | T | 4   | 134 | c.3069C>A  | c.(3067-3069)AGC>AGA   | p.S1023R |
| Pat_58 | Post-Resistance | TSEN34   | 79042     | 37 | 19 | 54696042 | 54696042 | Missense_Mutation | SNP | C | G | 146 | 186 | c.563C>G   | c.(562-564)GCC>GGC     | p.A188G  |
| Pat_58 | Post-Resistance | KIR3DX1  | 90011     | 37 | 19 | 55048172 | 55048172 | Missense_Mutation | SNP | G | A | 48  | 142 | c.40G>A    | c.(40-42)GAA>AAA       | p.E14K   |
| Pat_58 | Post-Resistance | PEG3     | 5178      | 37 | 19 | 57325129 | 57325129 | Missense_Mutation | SNP | C | T | 114 | 129 | c.4681G>A  | c.(4681-4683)GAG>AAG   | p.E1561K |
| Pat_58 | Post-Resistance | ZNF749   | 388567    | 37 | 19 | 57955885 | 57955885 | Missense_Mutation | SNP | C | G | 5   | 379 | c.1369C>G  | c.(1369-1371)CAG>GAG   | p.Q457E  |
| Pat_58 | Post-Resistance | CYS1     | 192668    | 37 | 2  | 10206069 | 10206069 | Missense_Mutation | SNP | C | A | 4   | 169 | c.333G>T   | c.(331-333)CAG>CAT     | p.Q111H  |
| Pat_58 | Post-Resistance | ASXL2    | 55252     | 37 | 2  | 26101081 | 26101081 | Missense_Mutation | SNP | T | C | 6   | 608 | c.11A>G    | c.(10-12)AAG>AGG       | p.K4R    |
| Pat_58 | Post-Resistance | GTF3C2   | 2976      | 37 | 2  | 27560826 | 27560826 | Missense_Mutation | SNP | G | A | 238 | 593 | c.917C>T   | c.(916-918)CCT>CTT     | p.P306L  |
| Pat_58 | Post-Resistance | QPCT     | 25797     | 37 | 2  | 37571926 | 37571926 | Missense_Mutation | SNP | C | G | 3   | 55  | c.52C>G    | c.(52-54)CTG>GTG       | p.L18V   |
| Pat_58 | Post-Resistance | KCNG3    | 170850    | 37 | 2  | 42671595 | 42671595 | Missense_Mutation | SNP | G | A | 136 | 231 | c.790C>T   | c.(790-792)CCG>TCG     | p.P264S  |
| Pat_58 | Post-Resistance | TET3     | 200424    | 37 | 2  | 74300721 | 74300721 | Missense_Mutation | SNP | G | A | 18  | 46  | c.2135G>A  | c.(2134-2136)GGA>GAA   | p.G712E  |



|        |                 |          |        |    |    |           |           |                        |     |   |   |     |     |                |                        |                |
|--------|-----------------|----------|--------|----|----|-----------|-----------|------------------------|-----|---|---|-----|-----|----------------|------------------------|----------------|
| Pat_58 | Post-Resistance | C2orf65  | 130951 | 37 | 2  | 74803695  | 74803695  | Missense_Mutation      | SNP | C | A | 4   | 136 | c.820G>T       | c.(820-822)GCT>TCT     | p.A274S        |
| Pat_58 | Post-Resistance | SMYD1    | 150572 | 37 | 2  | 88383938  | 88383938  | Missense_Mutation      | SNP | G | A | 89  | 137 | c.241G>A       | c.(241-243)GAT>AAT     | p.D81N         |
| Pat_58 | Post-Resistance | SNRNP200 | 23020  | 37 | 2  | 96943407  | 96943407  | Missense_Mutation      | SNP | C | T | 4   | 282 | c.5801G>A      | c.(5800-5802)GGG>GAG   | p.G1934E       |
| Pat_58 | Post-Resistance | GCC2     | 9648   | 37 | 2  | 109124081 | 109124081 | Nonsense_Mutation      | SNP | C | T | 60  | 132 | c.5050C>T      | c.(5050-5052)CGA>TGA   | p.R1684*       |
| Pat_58 | Post-Resistance | CNTNAP5  | 129684 | 37 | 2  | 125547652 | 125547652 | Missense_Mutation      | SNP | G | A | 56  | 75  | c.2923G>A      | c.(2923-2925)GAG>AAG   | p.E975K        |
| Pat_58 | Post-Resistance | LRP1B    | 53353  | 37 | 2  | 141093183 | 141093183 | Splice_Site            | SNP | C | A | 26  | 197 | c.12116_splice | c.e78+1                | p.G4039_splice |
| Pat_58 | Post-Resistance | TTC21B   | 79809  | 37 | 2  | 166740494 | 166740494 | Missense_Mutation      | SNP | G | A | 4   | 200 | c.3494C>T      | c.(3493-3495)ACG>ATG   | p.T1165M       |
| Pat_58 | Post-Resistance | SCN9A    | 6335   | 37 | 2  | 167133791 | 167133791 | Missense_Mutation      | SNP | A | G | 64  | 292 | c.2543T>C      | c.(2542-2544)ATT>ACT   | p.I848T        |
| Pat_58 | Post-Resistance | TTN      | 7273   | 37 | 2  | 179554591 | 179554591 | Missense_Mutation      | SNP | C | T | 125 | 225 | c.28063G>A     | c.(28063-28065)GAA>AAA | p.E9355K       |
| Pat_58 | Post-Resistance | TTN      | 7273   | 37 | 2  | 179611173 | 179611173 | Missense_Mutation      | SNP | T | A | 29  | 84  | c.15954A>T     | c.(15952-15954)GAA>GAT | p.E5318D       |
| Pat_58 | Post-Resistance | TTN      | 7273   | 37 | 2  | 179611175 | 179611175 | Missense_Mutation      | SNP | C | T | 31  | 88  | c.15952G>A     | c.(15952-15954)GAA>AAA | p.E5318K       |
| Pat_58 | Post-Resistance | TTN      | 7273   | 37 | 2  | 179616629 | 179616629 | Nonsense_Mutation      | SNP | C | A | 150 | 298 | c.10498G>T     | c.(10498-10500)GAA>TAA | p.E3500*       |
| Pat_58 | Post-Resistance | PDE1A    | 5136   | 37 | 2  | 183129116 | 183129116 | Missense_Mutation      | SNP | C | T | 67  | 112 | c.127G>A       | c.(127-129)GAA>AAA     | p.E43K         |
| Pat_58 | Post-Resistance | NIF3L1   | 60491  | 37 | 2  | 201757983 | 201757983 | Missense_Mutation      | SNP | A | T | 75  | 133 | c.451A>T       | c.(451-453)AGG>TGG     | p.R151W        |
| Pat_58 | Post-Resistance | NRP2     | 8828   | 37 | 2  | 206617576 | 206617576 | Missense_Mutation      | SNP | C | T | 41  | 72  | c.1921C>T      | c.(1921-1923)CCT>TCT   | p.P641S        |
| Pat_58 | Post-Resistance | DNAJB3   | 414061 | 37 | 2  | 234652194 | 234652194 | Missense_Mutation      | SNP | C | G | 53  | 91  | c.369G>C       | c.(367-369)TTG>TTC     | p.L123F        |
| Pat_58 | Post-Resistance | IQCA1    | 79781  | 37 | 2  | 237406078 | 237406078 | Missense_Mutation      | SNP | C | T | 18  | 27  | c.64G>A        | c.(64-66)GAT>AAT       | p.D22N         |
| Pat_58 | Post-Resistance | SLA2     | 84174  | 37 | 20 | 35261091  | 35261091  | Nonsense_Mutation      | SNP | C | A | 3   | 61  | c.289G>T       | c.(289-291)GAG>TAG     | p.E97*         |
| Pat_58 | Post-Resistance | CHD6     | 84181  | 37 | 20 | 40102126  | 40102126  | Missense_Mutation      | SNP | G | A | 4   | 286 | c.2500C>T      | c.(2500-2502)CGG>TGG   | p.R834W        |
| Pat_58 | Post-Resistance | CHD6     | 84181  | 37 | 20 | 40162173  | 40162173  | Missense_Mutation      | SNP | A | G | 12  | 157 | c.70T>C        | c.(70-72)TCT>CCT       | p.S24P         |
| Pat_58 | Post-Resistance | BAGE2    | 85319  | 37 | 21 | 11098839  | 11098839  | Translation_Start_Site | SNP | C | T | 7   | 241 | c.-121G>A      | (-123--119)CCGTG>CCATG |                |
| Pat_58 | Post-Resistance | DSCAM    | 1826   | 37 | 21 | 41450612  | 41450612  | Splice_Site            | SNP | A | G | 17  | 96  | c.4711_splice  | c.e26+1                | p.S1571_splice |
| Pat_58 | Post-Resistance | MX2      | 4600   | 37 | 21 | 42778797  | 42778797  | Nonsense_Mutation      | SNP | C | T | 89  | 194 | c.1777C>T      | c.(1777-1779)CGA>TGA   | p.R593*        |
| Pat_58 | Post-Resistance | RIPK4    | 54101  | 37 | 21 | 43187175  | 43187175  | Nonsense_Mutation      | SNP | C | T | 19  | 33  | c.27G>A        | c.(25-27)TGG>TGA       | p.W9*          |
| Pat_58 | Post-Resistance | HIRA     | 7290   | 37 | 22 | 19375314  | 19375314  | Missense_Mutation      | SNP | C | A | 10  | 70  | c.1033G>T      | c.(1033-1035)GTA>TTA   | p.V345L        |
| Pat_58 | Post-Resistance | PI4KA    | 5297   | 37 | 22 | 21119177  | 21119177  | Missense_Mutation      | SNP | G | A | 108 | 43  | c.2462C>T      | c.(2461-2463)TCC>TTC   | p.S821F        |
| Pat_58 | Post-Resistance | CABIN1   | 23523  | 37 | 22 | 24483437  | 24483437  | Missense_Mutation      | SNP | G | A | 4   | 161 | c.3296G>A      | c.(3295-3297)CGG>CAG   | p.R1099Q       |
| Pat_58 | Post-Resistance | HMOX1    | 3162   | 37 | 22 | 35789529  | 35789529  | Nonsense_Mutation      | SNP | C | T | 378 | 143 | c.805C>T       | c.(805-807)CGA>TGA     | p.R269*        |
| Pat_58 | Post-Resistance | APOL2    | 23780  | 37 | 22 | 36624196  | 36624196  | Missense_Mutation      | SNP | T | C | 5   | 369 | c.268A>G       | c.(268-270)AGG>GGG     | p.R90G         |
| Pat_58 | Post-Resistance | MKL1     | 57591  | 37 | 22 | 40816901  | 40816901  | Missense_Mutation      | SNP | C | G | 9   | 231 | c.831G>C       | c.(829-831)CAG>CAC     | p.Q277H        |
| Pat_58 | Post-Resistance | PRRT3    | 285368 | 37 | 3  | 9991520   | 9991520   | Missense_Mutation      | SNP | G | T | 3   | 79  | c.280C>A       | c.(280-282)CCA>ACA     | p.P94T         |
| Pat_58 | Post-Resistance | SLC6A6   | 6533   | 37 | 3  | 14509693  | 14509693  | Missense_Mutation      | SNP | G | A | 4   | 130 | c.1069G>A      | c.(1069-1071)GTG>ATG   | p.V357M        |
| Pat_58 | Post-Resistance | HHATL    | 57467  | 37 | 3  | 42738595  | 42738595  | Missense_Mutation      | SNP | G | A | 3   | 75  | c.908C>T       | c.(907-909)GCG>GTG     | p.A303V        |
| Pat_58 | Post-Resistance | TDGF1    | 6997   | 37 | 3  | 46622673  | 46622673  | Missense_Mutation      | SNP | C | A | 4   | 118 | c.500C>A       | c.(499-501)CCA>CAA     | p.P167Q        |
| Pat_58 | Post-Resistance | ERC2     | 26059  | 37 | 3  | 56330265  | 56330265  | Missense_Mutation      | SNP | C | T | 708 | 240 | c.856G>A       | c.(856-858)GAA>AAA     | p.E286K        |
| Pat_58 | Post-Resistance | C3orf63  | 23272  | 37 | 3  | 56675420  | 56675420  | Missense_Mutation      | SNP | G | A | 4   | 283 | c.2576C>T      | c.(2575-2577)JCT>TTT   | p.S859F        |
| Pat_58 | Post-Resistance | PPM1L    | 151742 | 37 | 3  | 160783314 | 160783314 | Missense_Mutation      | SNP | C | T | 53  | 152 | c.698C>T       | c.(697-699)CCT>CTT     | p.P233L        |
| Pat_58 | Post-Resistance | MAP3K13  | 9175   | 37 | 3  | 185191197 | 185191197 | Missense_Mutation      | SNP | G | A | 4   | 233 | c.2078G>A      | c.(2077-2079)GGC>GAC   | p.G693D        |
| Pat_58 | Post-Resistance | ZNF721   | 170960 | 37 | 4  | 436043    | 436043    | Missense_Mutation      | SNP | G | T | 26  | 51  | c.2213C>A      | c.(2212-2214)ACA>AAA   | p.T738K        |
| Pat_58 | Post-Resistance | MFS10    | 10227  | 37 | 4  | 2934340   | 2934340   | Missense_Mutation      | SNP | C | T | 4   | 293 | c.518G>A       | c.(517-519)CGC>CAC     | p.R173H        |
| Pat_58 | Post-Resistance | MAN2B2   | 23324  | 37 | 4  | 6594922   | 6594922   | Missense_Mutation      | SNP | G | A | 4   | 126 | c.703G>A       | c.(703-705)GTG>ATG     | p.V235M        |
| Pat_58 | Post-Resistance | GRPEL1   | 80273  | 37 | 4  | 7062744   | 7062744   | Missense_Mutation      | SNP | C | T | 4   | 305 | c.499G>A       | c.(499-501)GGA>AGA     | p.G167R        |
| Pat_58 | Post-Resistance | GPR78    | 27201  | 37 | 4  | 8588947   | 8588947   | Missense_Mutation      | SNP | C | T | 70  | 136 | c.949C>T       | c.(949-951)CCG>TCG     | p.P317S        |
| Pat_58 | Post-Resistance | CWH43    | 80157  | 37 | 4  | 49032922  | 49032922  | Missense_Mutation      | SNP | G | A | 118 | 222 | c.1453G>A      | c.(1453-1455)GAA>AAA   | p.E485K        |
| Pat_58 | Post-Resistance | BMP2K    | 55589  | 37 | 4  | 79792085  | 79792085  | Missense_Mutation      | SNP | G | C | 7   | 183 | c.1380G>C      | c.(1378-1380)CAG>CAC   | p.Q460H        |
| Pat_58 | Post-Resistance | UNC5C    | 8633   | 37 | 4  | 96469943  | 96469943  | Missense_Mutation      | SNP | C | A | 4   | 276 | c.66G>T        | c.(64-66)ATG>ATT       | p.M22I         |
| Pat_58 | Post-Resistance | EGF      | 1950   | 37 | 4  | 110932470 | 110932470 | Missense_Mutation      | SNP | G | A | 77  | 141 | c.3483G>A      | c.(3481-3483)ATG>ATA   | p.M1161I       |

|        |                 |           |        |    |   |           |           |                   |     |   |   |     |     |           |                      |          |
|--------|-----------------|-----------|--------|----|---|-----------|-----------|-------------------|-----|---|---|-----|-----|-----------|----------------------|----------|
| Pat_58 | Post-Resistance | BBS7      | 55212  | 37 | 4 | 122760836 | 122760836 | Missense_Mutation | SNP | G | A | 48  | 97  | c.1321C>T | c.(1321-1323)CTT>TTT | p.L441F  |
| Pat_58 | Post-Resistance | MAP9      | 79884  | 37 | 4 | 156278607 | 156278607 | Missense_Mutation | SNP | G | A | 66  | 119 | c.1115C>T | c.(1114-1116)TCT>TTT | p.S372F  |
| Pat_58 | Post-Resistance | RAPGEF2   | 9693   | 37 | 4 | 160259495 | 160259495 | Missense_Mutation | SNP | G | A | 4   | 189 | c.1685G>A | c.(1684-1686)AGC>AAC | p.S562N  |
| Pat_58 | Post-Resistance | SPOCK3    | 50859  | 37 | 4 | 167658743 | 167658743 | Missense_Mutation | SNP | G | A | 147 | 260 | c.1016C>T | c.(1015-1017)CCC>CTC | p.P339L  |
| Pat_58 | Post-Resistance | THBS4     | 7060   | 37 | 5 | 79336049  | 79336049  | Missense_Mutation | SNP | T | C | 3   | 73  | c.238T>C  | c.(238-240)TCA>CCA   | p.S80P   |
| Pat_58 | Post-Resistance | PCDHA11   | 56138  | 37 | 5 | 140248752 | 140248752 | Missense_Mutation | SNP | G | A | 103 | 48  | c.64G>A   | c.(64-66)GAA>AAA     | p.E22K   |
| Pat_58 | Post-Resistance | PCDHB4    | 56131  | 37 | 5 | 140503847 | 140503847 | Missense_Mutation | SNP | G | A | 151 | 73  | c.2267G>A | c.(2266-2268)GGA>GAA | p.G756E  |
| Pat_58 | Post-Resistance | PCDHB7    | 56129  | 37 | 5 | 140552652 | 140552652 | Missense_Mutation | SNP | C | T | 107 | 54  | c.236C>T  | c.(235-237)TCG>TTG   | p.S79L   |
| Pat_58 | Post-Resistance | SYNPO     | 11346  | 37 | 5 | 150028744 | 150028744 | Nonsense_Mutation | SNP | C | T | 3   | 60  | c.1639C>T | c.(1639-1641)CGA>TGA | p.R547*  |
| Pat_58 | Post-Resistance | KIF4B     | 285643 | 37 | 5 | 154394854 | 154394854 | Missense_Mutation | SNP | G | A | 127 | 83  | c.1435G>A | c.(1435-1437)GAA>AAA | p.E479K  |
| Pat_58 | Post-Resistance | C5orf40   | 408263 | 37 | 5 | 156770118 | 156770118 | Missense_Mutation | SNP | G | A | 67  | 57  | c.427C>T  | c.(427-429)CCG>TCG   | p.P143S  |
| Pat_58 | Post-Resistance | OR2Y1     | 134083 | 37 | 5 | 180166481 | 180166481 | Missense_Mutation | SNP | C | T | 89  | 143 | c.578G>A  | c.(577-579)GGA>GAA   | p.G193E  |
| Pat_58 | Post-Resistance | SYCP2L    | 221711 | 37 | 6 | 10935349  | 10935349  | Missense_Mutation | SNP | C | T | 64  | 84  | c.1742C>T | c.(1741-1743)CCA>CTA | p.P581L  |
| Pat_58 | Post-Resistance | DHX16     | 8449   | 37 | 6 | 30633288  | 30633288  | Missense_Mutation | SNP | G | A | 89  | 141 | c.889C>T  | c.(889-891)CGC>TGC   | p.R297C  |
| Pat_58 | Post-Resistance | DNAH8     | 1769   | 37 | 6 | 38840720  | 38840720  | Missense_Mutation | SNP | G | C | 51  | 62  | c.6625G>C | c.(6625-6627)GCC>CCC | p.A2209P |
| Pat_58 | Post-Resistance | FOXP4     | 116113 | 37 | 6 | 41557786  | 41557786  | Missense_Mutation | SNP | C | T | 21  | 115 | c.1235C>T | c.(1234-1236)CCG>CTG | p.P412L  |
| Pat_58 | Post-Resistance | TDRD6     | 221400 | 37 | 6 | 46657437  | 46657437  | Nonsense_Mutation | SNP | T | A | 121 | 216 | c.1572T>A | c.(1570-1572)TAT>TAA | p.Y524*  |
| Pat_58 | Post-Resistance | ZNF292    | 23036  | 37 | 6 | 87925717  | 87925717  | Nonsense_Mutation | SNP | C | T | 19  | 125 | c.265C>T  | c.(265-267)CGA>TGA   | p.R89*   |
| Pat_58 | Post-Resistance | ZNF292    | 23036  | 37 | 6 | 87966906  | 87966906  | Missense_Mutation | SNP | G | A | 29  | 101 | c.3559G>A | c.(3559-3561)GTC>ATC | p.V1187I |
| Pat_58 | Post-Resistance | ZNF292    | 23036  | 37 | 6 | 87970071  | 87970071  | Missense_Mutation | SNP | G | A | 4   | 222 | c.6724G>A | c.(6724-6726)GGG>AGG | p.G2242R |
| Pat_58 | Post-Resistance | GRIK2     | 2898   | 37 | 6 | 102124506 | 102124506 | Missense_Mutation | SNP | C | T | 41  | 76  | c.550C>T  | c.(550-552)CGT>TGT   | p.R184C  |
| Pat_58 | Post-Resistance | MED23     | 9439   | 37 | 6 | 131944514 | 131944514 | Missense_Mutation | SNP | T | C | 81  | 274 | c.373A>G  | c.(373-375)ATA>GTA   | p.I125V  |
| Pat_58 | Post-Resistance | MYCT1     | 80177  | 37 | 6 | 153043051 | 153043051 | Missense_Mutation | SNP | G | A | 140 | 187 | c.371G>A  | c.(370-372)GGA>GAA   | p.G124E  |
| Pat_58 | Post-Resistance | MLLT4     | 4301   | 37 | 6 | 168316028 | 168316028 | Missense_Mutation | SNP | G | A | 4   | 103 | c.2456G>A | c.(2455-2457)CGT>CAT | p.R819H  |
| Pat_58 | Post-Resistance | SDK1      | 221935 | 37 | 7 | 4259872   | 4259872   | Missense_Mutation | SNP | C | A | 5   | 255 | c.5671C>A | c.(5671-5673)CAA>AAA | p.Q1891K |
| Pat_58 | Post-Resistance | HOXA6     | 3203   | 37 | 7 | 27187097  | 27187097  | Missense_Mutation | SNP | G | A | 4   | 129 | c.272C>T  | c.(271-273)TCG>TTG   | p.S91L   |
| Pat_58 | Post-Resistance | NEUROD6   | 63974  | 37 | 7 | 31378228  | 31378228  | Missense_Mutation | SNP | G | A | 76  | 135 | c.655C>T  | c.(655-657)CCC>TCC   | p.P219S  |
| Pat_58 | Post-Resistance | PDE1C     | 5137   | 37 | 7 | 31862845  | 31862845  | Missense_Mutation | SNP | G | A | 32  | 86  | c.1424C>T | c.(1423-1425)TCG>TTG | p.S475L  |
| Pat_58 | Post-Resistance | TXNDC3    | 51314  | 37 | 7 | 37936528  | 37936528  | Missense_Mutation | SNP | G | A | 4   | 217 | c.1601G>A | c.(1600-1602)CGA>CAA | p.R534Q  |
| Pat_58 | Post-Resistance | MRPS24    | 64951  | 37 | 7 | 43908607  | 43908607  | Missense_Mutation | SNP | G | A | 4   | 245 | c.175C>T  | c.(175-177)CCG>TCG   | p.P59S   |
| Pat_58 | Post-Resistance | CDC14C    | 168448 | 37 | 7 | 48965286  | 48965286  | Missense_Mutation | SNP | G | A | 13  | 294 | c.1018G>A | c.(1018-1020)GAA>AAA | p.E340K  |
| Pat_58 | Post-Resistance | PHKG1     | 5260   | 37 | 7 | 56155446  | 56155446  | Missense_Mutation | SNP | C | T | 53  | 114 | c.107G>A  | c.(106-108)CGA>CAA   | p.R36Q   |
| Pat_58 | Post-Resistance | ZNF727    | 442319 | 37 | 7 | 63538806  | 63538806  | Missense_Mutation | SNP | C | G | 10  | 319 | c.1379C>G | c.(1378-1380)ACC>AGC | p.T460S  |
| Pat_58 | Post-Resistance | ZNF727    | 442319 | 37 | 7 | 63538824  | 63538824  | Missense_Mutation | SNP | G | A | 7   | 277 | c.1397G>A | c.(1396-1398)AGC>AAC | p.S466N  |
| Pat_58 | Post-Resistance | DPY19L2P2 | 349152 | 37 | 7 | 102875158 | 102875158 | Missense_Mutation | SNP | G | A | 23  | 8   | c.499C>T  | c.(499-501)CCC>TCC   | p.P167S  |
| Pat_58 | Post-Resistance | PMPCB     | 9512   | 37 | 7 | 102937911 | 102937911 | Missense_Mutation | SNP | C | T | 4   | 119 | c.5C>T    | c.(4-6)GCG>GTG       | p.A2V    |
| Pat_58 | Post-Resistance | CDHR3     | 222256 | 37 | 7 | 105664915 | 105664915 | Nonsense_Mutation | SNP | T | A | 32  | 141 | c.2165T>A | c.(2164-2166)TTG>TAG | p.L722*  |
| Pat_58 | Post-Resistance | TMEM209   | 84928  | 37 | 7 | 129832466 | 129832466 | Missense_Mutation | SNP | C | G | 8   | 129 | c.771G>C  | c.(769-771)AAG>AAC   | p.K257N  |
| Pat_58 | Post-Resistance | CPA2      | 1358   | 37 | 7 | 129917718 | 129917718 | Missense_Mutation | SNP | G | A | 4   | 156 | c.749G>A  | c.(748-750)GGT>GAT   | p.G250D  |
| Pat_58 | Post-Resistance | HIPK2     | 28996  | 37 | 7 | 139299148 | 139299148 | Missense_Mutation | SNP | G | T | 4   | 91  | c.1874C>A | c.(1873-1875)GCA>GAA | p.A625E  |
| Pat_58 | Post-Resistance | BRAF      | 673    | 37 | 7 | 140453136 | 140453136 | Missense_Mutation | SNP | A | T | 300 | 55  | c.1799T>A | c.(1798-1800)GTG>GAG | p.V600E  |
| Pat_58 | Post-Resistance | DLGAP2    | 9228   | 37 | 8 | 1616614   | 1616614   | Missense_Mutation | SNP | G | A | 9   | 37  | c.1690G>A | c.(1690-1692)GAC>AAC | p.D564N  |
| Pat_58 | Post-Resistance | TNKS      | 8658   | 37 | 8 | 9623293   | 9623293   | Missense_Mutation | SNP | G | A | 5   | 261 | c.3539G>A | c.(3538-3540)CGC>CAC | p.R1180H |
| Pat_58 | Post-Resistance | TRIM55    | 84675  | 37 | 8 | 67086715  | 67086715  | Missense_Mutation | SNP | G | A | 115 | 174 | c.1534G>A | c.(1534-1536)GAG>AAG | p.E512K  |
| Pat_58 | Post-Resistance | CA1       | 759    | 37 | 8 | 86253846  | 86253846  | Missense_Mutation | SNP | C | T | 43  | 122 | c.19G>A   | c.(19-21)GGA>AGA     | p.G7R    |
| Pat_58 | Post-Resistance | NOV       | 4856   | 37 | 8 | 120430415 | 120430415 | Missense_Mutation | SNP | G | T | 4   | 210 | c.428G>T  | c.(427-429)CGC>CTC   | p.R143L  |
| Pat_58 | Post-Resistance | JAK2      | 3717   | 37 | 9 | 5029852   | 5029852   | Missense_Mutation | SNP | A | G | 62  | 170 | c.296A>G  | c.(295-297)AAC>AGC   | p.N99S   |

|        |                 |          |        |    |   |           |           |                   |     |   |   |     |     |               |                      |               |
|--------|-----------------|----------|--------|----|---|-----------|-----------|-------------------|-----|---|---|-----|-----|---------------|----------------------|---------------|
| Pat_58 | Post-Resistance | FBXO10   | 26267  | 37 | 9 | 37521629  | 37521629  | Missense_Mutation | SNP | C | T | 27  | 10  | c.2137G>A     | c.(2137-2139)GAC>AAC | p.D713N       |
| Pat_58 | Post-Resistance | C9orf135 | 138255 | 37 | 9 | 72472877  | 72472877  | Missense_Mutation | SNP | C | T | 55  | 49  | c.433C>T      | c.(433-435)CCG>TCG   | p.P145S       |
| Pat_58 | Post-Resistance | EPB41L4B | 54566  | 37 | 9 | 111954631 | 111954631 | Missense_Mutation | SNP | G | A | 95  | 63  | c.2228C>T     | c.(2227-2229)CCC>CTC | p.P743L       |
| Pat_58 | Post-Resistance | MUSK     | 4593   | 37 | 9 | 113563023 | 113563023 | Missense_Mutation | SNP | G | T | 4   | 110 | c.2365G>T     | c.(2365-2367)GGC>TGC | p.G789C       |
| Pat_58 | Post-Resistance | C9orf84  | 158401 | 37 | 9 | 114490105 | 114490105 | Missense_Mutation | SNP | C | T | 104 | 67  | c.1450G>A     | c.(1450-1452)GAT>AAT | p.D484N       |
| Pat_58 | Post-Resistance | ABL1     | 25     | 37 | 9 | 133760987 | 133760987 | Missense_Mutation | SNP | G | A | 4   | 80  | c.3310G>A     | c.(3310-3312)GCA>ACA | p.A1104T      |
| Pat_58 | Post-Resistance | FCN1     | 2219   | 37 | 9 | 137808285 | 137808285 | Missense_Mutation | SNP | C | A | 79  | 194 | c.126G>T      | c.(124-126)GAG>GAT   | p.E42D        |
| Pat_58 | Post-Resistance | ABCA2    | 20     | 37 | 9 | 139912771 | 139912771 | Missense_Mutation | SNP | G | A | 4   | 200 | c.1849C>T     | c.(1849-1851)CTC>TTC | p.L617F       |
| Pat_58 | Post-Resistance | ARSF     | 416    | 37 | X | 3030406   | 3030406   | Missense_Mutation | SNP | G | A | 130 | 201 | c.1582G>A     | c.(1582-1584)GAT>AAT | p.D528N       |
| Pat_58 | Post-Resistance | MXRA5    | 25878  | 37 | X | 3248289   | 3248289   | Missense_Mutation | SNP | C | T | 25  | 50  | c.479G>A      | c.(478-480)GGA>GAA   | p.G160E       |
| Pat_58 | Post-Resistance | KAL1     | 3730   | 37 | X | 8504853   | 8504853   | Missense_Mutation | SNP | T | C | 3   | 71  | c.1580A>G     | c.(1579-1581)AAG>AGG | p.K527R       |
| Pat_58 | Post-Resistance | SHROOM2  | 357    | 37 | X | 9900442   | 9900442   | Missense_Mutation | SNP | C | T | 14  | 24  | c.3119C>T     | c.(3118-3120)CCC>CTC | p.P1040L      |
| Pat_58 | Post-Resistance | FAM47A   | 158724 | 37 | X | 34150139  | 34150139  | Missense_Mutation | SNP | G | A | 129 | 227 | c.257C>T      | c.(256-258)CCC>CTC   | p.P86L        |
| Pat_58 | Post-Resistance | SUV39H1  | 6839   | 37 | X | 48564896  | 48564896  | Missense_Mutation | SNP | C | T | 8   | 21  | c.983C>T      | c.(982-984)CCC>CTC   | p.P328L       |
| Pat_58 | Post-Resistance | CCDC22   | 28952  | 37 | X | 49103295  | 49103295  | Missense_Mutation | SNP | G | A | 17  | 18  | c.818G>A      | c.(817-819)GGA>GAA   | p.G273E       |
| Pat_58 | Post-Resistance | CCNB3    | 85417  | 37 | X | 50053963  | 50053963  | Missense_Mutation | SNP | G | A | 4   | 273 | c.2794G>A     | c.(2794-2796)GCT>ACT | p.A932T       |
| Pat_58 | Post-Resistance | AR       | 367    | 37 | X | 66765244  | 66765244  | Missense_Mutation | SNP | C | A | 4   | 33  | c.256C>A      | c.(256-258)CAG>AAG   | p.Q86K        |
| Pat_58 | Post-Resistance | OGT      | 8473   | 37 | X | 70781638  | 70781638  | Missense_Mutation | SNP | G | A | 28  | 45  | c.1865G>A     | c.(1864-1866)GGA>GAA | p.G622E       |
| Pat_58 | Post-Resistance | KIAA2022 | 340533 | 37 | X | 73961331  | 73961331  | Missense_Mutation | SNP | C | T | 72  | 119 | c.3061G>A     | c.(3061-3063)GAT>AAT | p.D1021N      |
| Pat_58 | Post-Resistance | CPXCR1   | 53336  | 37 | X | 88009059  | 88009059  | Missense_Mutation | SNP | G | A | 33  | 66  | c.644G>A      | c.(643-645)GGA>GAA   | p.G215E       |
| Pat_58 | Post-Resistance | RNF128   | 79589  | 37 | X | 105970196 | 105970196 | Missense_Mutation | SNP | C | T | 7   | 7   | c.53C>T       | c.(52-54)TCC>TTC     | p.S18F        |
| Pat_58 | Post-Resistance | DOCK11   | 139818 | 37 | X | 117773445 | 117773445 | Missense_Mutation | SNP | C | T | 91  | 239 | c.4049C>T     | c.(4048-4050)TCG>TTG | p.S1350L      |
| Pat_58 | Post-Resistance | RHOXF2B  | 727940 | 37 | X | 119210996 | 119210996 | Missense_Mutation | SNP | C | T | 13  | 50  | c.337G>A      | c.(337-339)GAA>AAA   | p.E113K       |
| Pat_58 | Post-Resistance | ZBTB33   | 10009  | 37 | X | 119388238 | 119388238 | Missense_Mutation | SNP | G | A | 145 | 287 | c.968G>A      | c.(967-969)GGA>GAA   | p.G323E       |
| Pat_58 | Post-Resistance | GABRE    | 2564   | 37 | X | 151123487 | 151123487 | Missense_Mutation | SNP | C | T | 9   | 36  | c.1207G>A     | c.(1207-1209)GAA>AAA | p.E403K       |
| Pat_59 | Pre-Treatment   | PANK4    | 55229  | 37 | 1 | 2442805   | 2442805   | Missense_Mutation | SNP | G | A | 15  | 84  | c.1805C>T     | c.(1804-1806)TCC>TTC | p.S602F       |
| Pat_59 | Pre-Treatment   | CHD5     | 26038  | 37 | 1 | 6202505   | 6202505   | Missense_Mutation | SNP | G | A | 4   | 33  | c.2204C>T     | c.(2203-2205)ACC>ATC | p.T735I       |
| Pat_59 | Pre-Treatment   | DDI2     | 84301  | 37 | 1 | 15953236  | 15953236  | Missense_Mutation | SNP | G | A | 4   | 114 | c.211G>A      | c.(211-213)GTT>ATT   | p.V71I        |
| Pat_59 | Pre-Treatment   | SPEN     | 23013  | 37 | 1 | 16258763  | 16258763  | Missense_Mutation | SNP | C | T | 4   | 25  | c.6028C>T     | c.(6028-6030)CGT>TGT | p.R2010C      |
| Pat_59 | Pre-Treatment   | UBR4     | 23352  | 37 | 1 | 19455554  | 19455554  | Missense_Mutation | SNP | C | T | 3   | 42  | c.8921G>A     | c.(8920-8922)CGT>CAT | p.R2974H      |
| Pat_59 | Pre-Treatment   | SPOCD1   | 90853  | 37 | 1 | 32256539  | 32256539  | Missense_Mutation | SNP | G | A | 3   | 8   | c.3316C>T     | c.(3316-3318)CCT>TCT | p.P1106S      |
| Pat_59 | Pre-Treatment   | YARS     | 8565   | 37 | 1 | 33248080  | 33248080  | Missense_Mutation | SNP | G | A | 21  | 62  | c.967C>T      | c.(967-969)CCA>TCA   | p.P323S       |
| Pat_59 | Pre-Treatment   | PHC2     | 1912   | 37 | 1 | 33797065  | 33797065  | Splice_Site       | SNP | T | A | 5   | 140 | c.1889_splice | c.e11-1              | p.E630_splice |
| Pat_59 | Pre-Treatment   | CSMD2    | 114784 | 37 | 1 | 34164425  | 34164425  | Missense_Mutation | SNP | G | A | 4   | 109 | c.3733C>T     | c.(3733-3735)CGG>TGG | p.R1245W      |
| Pat_59 | Pre-Treatment   | CSMD2    | 114784 | 37 | 1 | 34312515  | 34312515  | Missense_Mutation | SNP | G | A | 4   | 72  | c.883C>T      | c.(883-885)CGG>TGG   | p.R295W       |
| Pat_59 | Pre-Treatment   | YBX1     | 4904   | 37 | 1 | 43162924  | 43162924  | Missense_Mutation | SNP | G | A | 4   | 88  | c.731G>A      | c.(730-732)CGA>CAA   | p.R244Q       |
| Pat_59 | Pre-Treatment   | IPO13    | 9670   | 37 | 1 | 44432666  | 44432666  | Missense_Mutation | SNP | G | A | 4   | 73  | c.2588G>A     | c.(2587-2589)CGT>CAT | p.R863H       |
| Pat_59 | Pre-Treatment   | FAAH     | 2166   | 37 | 1 | 46871918  | 46871918  | Missense_Mutation | SNP | C | T | 4   | 100 | c.829C>T      | c.(829-831)CGT>TGT   | p.R277C       |
| Pat_59 | Pre-Treatment   | CYP4A22  | 284541 | 37 | 1 | 47609541  | 47609541  | Missense_Mutation | SNP | C | T | 4   | 110 | c.743C>T      | c.(742-744)GCT>GTT   | p.A248V       |
| Pat_59 | Pre-Treatment   | FOXO3    | 27022  | 37 | 1 | 63789132  | 63789132  | Missense_Mutation | SNP | C | A | 4   | 56  | c.403C>A      | c.(403-405)CCC>ACC   | p.P135T       |
| Pat_59 | Pre-Treatment   | LEPR     | 3953   | 37 | 1 | 66036390  | 66036390  | Missense_Mutation | SNP | G | A | 4   | 76  | c.275G>A      | c.(274-276)CGG>CAG   | p.R92Q        |
| Pat_59 | Pre-Treatment   | SGIP1    | 84251  | 37 | 1 | 67000047  | 67000047  | Missense_Mutation | SNP | G | T | 4   | 102 | c.6G>T        | c.(4-6)ATG>ATT       | p.M2I         |
| Pat_59 | Pre-Treatment   | LRRC7    | 57554  | 37 | 1 | 70493873  | 70493873  | Missense_Mutation | SNP | G | A | 4   | 131 | c.1700G>A     | c.(1699-1701)CGA>CAA | p.R567Q       |
| Pat_59 | Pre-Treatment   | C1orf173 | 127254 | 37 | 1 | 75055719  | 75055719  | Missense_Mutation | SNP | G | A | 4   | 12  | c.1772C>T     | c.(1771-1773)TCT>TTT | p.S591F       |
| Pat_59 | Pre-Treatment   | SLC44A5  | 204962 | 37 | 1 | 75685021  | 75685021  | Missense_Mutation | SNP | G | A | 16  | 80  | c.1187C>T     | c.(1186-1188)GCG>GTG | p.A396V       |
| Pat_59 | Pre-Treatment   | ABCA4    | 24     | 37 | 1 | 94466627  | 94466627  | Missense_Mutation | SNP | C | T | 4   | 91  | c.6317G>A     | c.(6316-6318)CGC>CAC | p.R2106H      |
| Pat_59 | Pre-Treatment   | DENND2D  | 79961  | 37 | 1 | 111738609 | 111738609 | Nonsense_Mutation | SNP | G | A | 3   | 47  | c.574C>T      | c.(574-576)CGA>TGA   | p.R192*       |

|        |               |          |        |    |    |           |           |                   |     |    |    |    |     |                |                      |                |
|--------|---------------|----------|--------|----|----|-----------|-----------|-------------------|-----|----|----|----|-----|----------------|----------------------|----------------|
| Pat_59 | Pre-Treatment | PHTF1    | 10745  | 37 | 1  | 114248697 | 114248697 | Missense_Mutation | SNP | G  | A  | 18 | 72  | c.1486C>T      | c.(1486-1488)CTT>TTT | p.L496F        |
| Pat_59 | Pre-Treatment | PTPN22   | 26191  | 37 | 1  | 114362228 | 114362228 | Nonsense_Mutation | SNP | G  | T  | 4  | 97  | c.2330C>A      | c.(2329-2331)TCA>TAA | p.S777*        |
| Pat_59 | Pre-Treatment | VTCN1    | 79679  | 37 | 1  | 117753456 | 117753456 | Missense_Mutation | SNP | G  | A  | 25 | 70  | c.22C>T        | c.(22-24)CTC>TTC     | p.L8F          |
| Pat_59 | Pre-Treatment | HMGCS2   | 3158   | 37 | 1  | 120302556 | 120302556 | Missense_Mutation | SNP | G  | A  | 4  | 40  | c.616C>T       | c.(616-618)CGT>TGT   | p.R206C        |
| Pat_59 | Pre-Treatment | NOTCH2   | 4853   | 37 | 1  | 120468172 | 120468172 | Missense_Mutation | SNP | C  | T  | 4  | 91  | c.4267G>A      | c.(4267-4269)GCC>ACC | p.A1423T       |
| Pat_59 | Pre-Treatment | NBPF9    | 400818 | 37 | 1  | 144220816 | 144220816 | Missense_Mutation | SNP | A  | G  | 7  | 277 | c.2189A>G      | c.(2188-2190)GAG>GGG | p.E730G        |
| Pat_59 | Pre-Treatment | CELF3    | 11189  | 37 | 1  | 151678325 | 151678325 | Nonsense_Mutation | SNP | G  | A  | 3  | 40  | c.1243C>T      | c.(1243-1245)CGA>TGA | p.R415*        |
| Pat_59 | Pre-Treatment | TCHH     | 7062   | 37 | 1  | 152079997 | 152079997 | Missense_Mutation | SNP | C  | T  | 4  | 94  | c.5696G>A      | c.(5695-5697)GGG>GAG | p.G1899E       |
| Pat_59 | Pre-Treatment | RPTN     | 126638 | 37 | 1  | 152127891 | 152127891 | Missense_Mutation | SNP | T  | G  | 12 | 766 | c.1684A>C      | c.(1684-1686)ACA>CCA | p.T562P        |
| Pat_59 | Pre-Treatment | SPRR2D   | 6703   | 37 | 1  | 153012687 | 153012687 | Missense_Mutation | SNP | G  | A  | 50 | 191 | c.136C>T       | c.(136-138)CCA>TCA   | p.P46S         |
| Pat_59 | Pre-Treatment | ASH1L    | 55870  | 37 | 1  | 155348157 | 155348157 | Missense_Mutation | SNP | G  | A  | 31 | 82  | c.6262C>T      | c.(6262-6264)CTT>TTT | p.L2088F       |
| Pat_59 | Pre-Treatment | PIGM     | 93183  | 37 | 1  | 160000565 | 160000565 | Missense_Mutation | SNP | G  | A  | 19 | 52  | c.965C>T       | c.(964-966)TCC>TTC   | p.S322F        |
| Pat_59 | Pre-Treatment | KCNJ9    | 3765   | 37 | 1  | 160054056 | 160054056 | Nonsense_Mutation | SNP | G  | A  | 6  | 14  | c.236G>A       | c.(235-237)TGG>TAG   | p.W79*         |
| Pat_59 | Pre-Treatment | ITLN2    | 142683 | 37 | 1  | 160920381 | 160920381 | Missense_Mutation | SNP | G  | A  | 4  | 137 | c.562C>T       | c.(562-564)CTC>TTC   | p.L188F        |
| Pat_59 | Pre-Treatment | C1orf111 | 284680 | 37 | 1  | 162344248 | 162344248 | Missense_Mutation | SNP | A  | C  | 4  | 96  | c.376T>G       | c.(376-378)TGG>GGG   | p.W126G        |
| Pat_59 | Pre-Treatment | DCAF6    | 55827  | 37 | 1  | 167906186 | 167906186 | Missense_Mutation | SNP | G  | A  | 4  | 19  | c.37G>A        | c.(37-39)GAC>AAC     | p.D13N         |
| Pat_59 | Pre-Treatment | METTL13  | 51603  | 37 | 1  | 171751195 | 171751195 | Nonsense_Mutation | SNP | G  | T  | 4  | 62  | c.88G>T        | c.(88-90)GAG>TAG     | p.E30*         |
| Pat_59 | Pre-Treatment | C1orf125 | 126859 | 37 | 1  | 179462031 | 179462031 | Missense_Mutation | SNP | C  | T  | 4  | 89  | c.2333C>T      | c.(2332-2334)TCC>TTC | p.S778F        |
| Pat_59 | Pre-Treatment | XPR1     | 9213   | 37 | 1  | 180805775 | 180805775 | Missense_Mutation | SNP | C  | T  | 4  | 124 | c.1424C>T      | c.(1423-1425)CCT>CTT | p.P475L        |
| Pat_59 | Pre-Treatment | RNASL    | 6041   | 37 | 1  | 182555367 | 182555367 | Missense_Mutation | SNP | C  | T  | 7  | 44  | c.575G>A       | c.(574-576)GGG>GAG   | p.G192E        |
| Pat_59 | Pre-Treatment | GPR25    | 2848   | 37 | 1  | 200843160 | 200843160 | Missense_Mutation | SNP | G  | T  | 3  | 23  | c.995G>T       | c.(994-996)AGG>ATG   | p.R332M        |
| Pat_59 | Pre-Treatment | CHI3L1   | 1116   | 37 | 1  | 203154465 | 203154465 | Missense_Mutation | SNP | C  | T  | 4  | 69  | c.104G>A       | c.(103-105)CGG>CAG   | p.R35Q         |
| Pat_59 | Pre-Treatment | USH2A    | 7399   | 37 | 1  | 215933000 | 215933001 | Splice_Site       | DNP | AC | TT | 4  | 75  | c.11231_splice | c.e57+1              | p.R3744_splice |
| Pat_59 | Pre-Treatment | C1orf65  | 164127 | 37 | 1  | 223568189 | 223568189 | Missense_Mutation | SNP | C  | T  | 3  | 32  | c.1372C>T      | c.(1372-1374)CGG>TGG | p.R458W        |
| Pat_59 | Pre-Treatment | ZNF678   | 339500 | 37 | 1  | 227842427 | 227842427 | Missense_Mutation | SNP | G  | A  | 6  | 164 | c.476G>A       | c.(475-477)GGC>GAC   | p.G159D        |
| Pat_59 | Pre-Treatment | ZNF678   | 339500 | 37 | 1  | 227842544 | 227842544 | Missense_Mutation | SNP | G  | A  | 6  | 185 | c.593G>A       | c.(592-594)AGC>AAC   | p.S198N        |
| Pat_59 | Pre-Treatment | TAF5L    | 27097  | 37 | 1  | 229738455 | 229738455 | Missense_Mutation | SNP | G  | T  | 4  | 97  | c.459C>A       | c.(457-459)TTC>TTA   | p.F153L        |
| Pat_59 | Pre-Treatment | LYST     | 1130   | 37 | 1  | 235940443 | 235940443 | Missense_Mutation | SNP | G  | T  | 4  | 122 | c.5380C>A      | c.(5380-5382)CAA>AAA | p.Q1794K       |
| Pat_59 | Pre-Treatment | ZP4      | 57829  | 37 | 1  | 238053450 | 238053450 | Missense_Mutation | SNP | G  | T  | 5  | 98  | c.202C>A       | c.(202-204)CAG>AAG   | p.Q68K         |
| Pat_59 | Pre-Treatment | FH       | 2271   | 37 | 1  | 241665783 | 241665783 | Missense_Mutation | SNP | C  | T  | 4  | 48  | c.1196G>A      | c.(1195-1197)AGC>AAC | p.S399N        |
| Pat_59 | Pre-Treatment | KIF26B   | 55083  | 37 | 1  | 245849094 | 245849094 | Missense_Mutation | SNP | G  | A  | 4  | 20  | c.2809G>A      | c.(2809-2811)GAC>AAC | p.D937N        |
| Pat_59 | Pre-Treatment | SFMBT2   | 57713  | 37 | 10 | 7412280   | 7412280   | Missense_Mutation | SNP | G  | A  | 4  | 127 | c.158C>T       | c.(157-159)ACA>ATA   | p.T53I         |
| Pat_59 | Pre-Treatment | USP6NL   | 9712   | 37 | 10 | 11505381  | 11505381  | Missense_Mutation | SNP | C  | T  | 6  | 143 | c.1546G>A      | c.(1546-1548)GCA>ACA | p.A516T        |
| Pat_59 | Pre-Treatment | SPAG6    | 9576   | 37 | 10 | 22657466  | 22657466  | Missense_Mutation | SNP | G  | T  | 4  | 46  | c.331G>T       | c.(331-333)GGT>TGT   | p.G111C        |
| Pat_59 | Pre-Treatment | KIAA1217 | 56243  | 37 | 10 | 24809159  | 24809159  | Missense_Mutation | SNP | G  | A  | 47 | 121 | c.2285G>A      | c.(2284-2286)GGA>GAA | p.G762E        |
| Pat_59 | Pre-Treatment | ZWINT    | 11130  | 37 | 10 | 58118709  | 58118709  | Splice_Site       | SNP | C  | T  | 4  | 64  | c.481_splice   | c.e6-1               | p.E161_splice  |
| Pat_59 | Pre-Treatment | UBE2D1   | 7321   | 37 | 10 | 60121119  | 60121119  | Missense_Mutation | SNP | G  | A  | 4  | 111 | c.46G>A        | c.(46-48)GAT>AAT     | p.D16N         |
| Pat_59 | Pre-Treatment | SLC29A3  | 55315  | 37 | 10 | 73111447  | 73111447  | Missense_Mutation | SNP | G  | A  | 4  | 24  | c.512G>A       | c.(511-513)TGC>TAC   | p.C171Y        |
| Pat_59 | Pre-Treatment | DLG5     | 9231   | 37 | 10 | 79581535  | 79581535  | Missense_Mutation | SNP | G  | A  | 2  | 1   | c.2707C>T      | c.(2707-2709)CGT>TGT | p.R903C        |
| Pat_59 | Pre-Treatment | LRIT2    | 340745 | 37 | 10 | 85984231  | 85984231  | Nonsense_Mutation | SNP | G  | T  | 4  | 83  | c.750C>A       | c.(748-750)TGC>TGA   | p.C250*        |
| Pat_59 | Pre-Treatment | AGAP11   | 119385 | 37 | 10 | 88768668  | 88768668  | Missense_Mutation | SNP | G  | A  | 3  | 50  | c.659G>A       | c.(658-660)GGT>GAT   | p.G220D        |
| Pat_59 | Pre-Treatment | IFIT1B   | 439996 | 37 | 10 | 91143693  | 91143693  | Missense_Mutation | SNP | G  | A  | 6  | 323 | c.623G>A       | c.(622-624)CGA>CAA   | p.R208Q        |
| Pat_59 | Pre-Treatment | PIPSL    | 266971 | 37 | 10 | 95721032  | 95721032  | Missense_Mutation | SNP | G  | A  | 4  | 50  | c.122C>T       | c.(121-123)ACC>ATC   | p.T41I         |
| Pat_59 | Pre-Treatment | SORBS1   | 10580  | 37 | 10 | 97194451  | 97194451  | Missense_Mutation | SNP | G  | A  | 4  | 83  | c.100C>T       | c.(100-102)CGC>TGC   | p.R34C         |
| Pat_59 | Pre-Treatment | TLL2     | 7093   | 37 | 10 | 98188425  | 98188425  | Missense_Mutation | SNP | C  | T  | 19 | 39  | c.601G>A       | c.(601-603)GAG>AAG   | p.E201K        |
| Pat_59 | Pre-Treatment | PPRC1    | 23082  | 37 | 10 | 103899362 | 103899362 | Missense_Mutation | SNP | G  | A  | 4  | 117 | c.1097G>A      | c.(1096-1098)CGA>CAA | p.R366Q        |
| Pat_59 | Pre-Treatment | RPL13AP6 | 644511 | 37 | 10 | 112696573 | 112696573 | Missense_Mutation | SNP | T  | C  | 4  | 12  | c.419A>G       | c.(418-420)CAC>CGC   | p.H140R        |

|        |               |           |        |    |    |           |           |                        |     |   |   |    |     |               |                      |                |
|--------|---------------|-----------|--------|----|----|-----------|-----------|------------------------|-----|---|---|----|-----|---------------|----------------------|----------------|
| Pat_59 | Pre-Treatment | PNLIP     | 5406   | 37 | 10 | 118321098 | 118321098 | Missense_Mutation      | SNP | A | T | 4  | 94  | c.1284A>T     | c.(1282-1284)TTA>TTT | p.L428F        |
| Pat_59 | Pre-Treatment | PNLIPRP1  | 5407   | 37 | 10 | 118351397 | 118351397 | Missense_Mutation      | SNP | G | A | 4  | 134 | c.164G>A      | c.(163-165)CGC>CAC   | p.R55H         |
| Pat_59 | Pre-Treatment | SFXN4     | 119559 | 37 | 10 | 120905783 | 120905783 | Missense_Mutation      | SNP | G | A | 4  | 110 | c.901C>T      | c.(901-903)CCA>TCA   | p.P301S        |
| Pat_59 | Pre-Treatment | INPP5F    | 22876  | 37 | 10 | 121571342 | 121571342 | Missense_Mutation      | SNP | G | T | 4  | 76  | c.1761G>T     | c.(1759-1761)TTG>TTT | p.L587F        |
| Pat_59 | Pre-Treatment | CPXM2     | 119587 | 37 | 10 | 125528119 | 125528119 | Missense_Mutation      | SNP | C | T | 4  | 81  | c.1222G>A     | c.(1222-1224)GTC>ATC | p.V408I        |
| Pat_59 | Pre-Treatment | PHRF1     | 57661  | 37 | 11 | 597554    | 597554    | Missense_Mutation      | SNP | C | T | 3  | 25  | c.878C>T      | c.(877-879)ACG>ATG   | p.T293M        |
| Pat_59 | Pre-Treatment | MUC6      | 4588   | 37 | 11 | 1026073   | 1026073   | Missense_Mutation      | SNP | C | T | 2  | 1   | c.2615G>A     | c.(2614-2616)GGG>GAG | p.G872E        |
| Pat_59 | Pre-Treatment | OR51E2    | 81285  | 37 | 11 | 4703396   | 4703396   | Missense_Mutation      | SNP | A | T | 4  | 71  | c.546T>A      | c.(544-546)GAT>GAA   | p.D182E        |
| Pat_59 | Pre-Treatment | CCKBR     | 887    | 37 | 11 | 6292621   | 6292621   | Missense_Mutation      | SNP | C | T | 4  | 94  | c.1192C>T     | c.(1192-1194)CGC>TGC | p.R398C        |
| Pat_59 | Pre-Treatment | NAV2      | 89797  | 37 | 11 | 20005744  | 20005744  | Missense_Mutation      | SNP | C | T | 5  | 65  | c.2788C>T     | c.(2788-2790)CGG>TGG | p.R930W        |
| Pat_59 | Pre-Treatment | LGR4      | 55366  | 37 | 11 | 27389784  | 27389784  | Missense_Mutation      | SNP | G | A | 6  | 334 | c.2486C>T     | c.(2485-2487)TCC>TTC | p.S829F        |
| Pat_59 | Pre-Treatment | NAT10     | 55226  | 37 | 11 | 34153015  | 34153015  | Missense_Mutation      | SNP | G | A | 4  | 108 | c.1457G>A     | c.(1456-1458)TGC>TAC | p.C486Y        |
| Pat_59 | Pre-Treatment | LRP4      | 4038   | 37 | 11 | 46917450  | 46917450  | Missense_Mutation      | SNP | C | T | 3  | 38  | c.1168G>A     | c.(1168-1170)GGG>AGG | p.G390R        |
| Pat_59 | Pre-Treatment | PRG3      | 10394  | 37 | 11 | 57147199  | 57147199  | Missense_Mutation      | SNP | C | T | 15 | 42  | c.143G>A      | c.(142-144)AGA>AAA   | p.R48K         |
| Pat_59 | Pre-Treatment | CLP1      | 10978  | 37 | 11 | 57427043  | 57427043  | Missense_Mutation      | SNP | C | T | 4  | 64  | c.95C>T       | c.(94-96)TCA>TTA     | p.S32L         |
| Pat_59 | Pre-Treatment | ZP1       | 22917  | 37 | 11 | 60640871  | 60640871  | Missense_Mutation      | SNP | G | T | 4  | 64  | c.1264G>T     | c.(1264-1266)GGG>TGG | p.G422W        |
| Pat_59 | Pre-Treatment | KDM2A     | 22992  | 37 | 11 | 66999219  | 66999219  | Missense_Mutation      | SNP | G | A | 3  | 29  | c.1267G>A     | c.(1267-1269)GGG>AGG | p.G423R        |
| Pat_59 | Pre-Treatment | SHANK2    | 22941  | 37 | 11 | 70333148  | 70333148  | Missense_Mutation      | SNP | C | T | 4  | 49  | c.3250G>A     | c.(3250-3252)GGA>AGA | p.G1084R       |
| Pat_59 | Pre-Treatment | KRTAP5-10 | 387273 | 37 | 11 | 71276971  | 71276971  | Missense_Mutation      | SNP | G | A | 6  | 196 | c.338G>A      | c.(337-339)GGC>GAC   | p.G113D        |
| Pat_59 | Pre-Treatment | UVRAG     | 7405   | 37 | 11 | 75851867  | 75851867  | Nonsense_Mutation      | SNP | C | T | 4  | 91  | c.1510C>T     | c.(1510-1512)CGA>TGA | p.R504*        |
| Pat_59 | Pre-Treatment | FOLH1B    | 219595 | 37 | 11 | 89395322  | 89395322  | Translation_Start_Site | SNP | C | T | 5  | 31  | c.-93C>T      | c.(95-91)TACGC>TATGC |                |
| Pat_59 | Pre-Treatment | NAALAD2   | 10003  | 37 | 11 | 89896741  | 89896741  | Missense_Mutation      | SNP | G | A | 20 | 110 | c.1234G>A     | c.(1234-1236)GAT>AAT | p.D412N        |
| Pat_59 | Pre-Treatment | PIWIL4    | 143689 | 37 | 11 | 94326796  | 94326796  | Missense_Mutation      | SNP | G | A | 4  | 75  | c.1139G>A     | c.(1138-1140)TGC>TAC | p.C380Y        |
| Pat_59 | Pre-Treatment | MTMR2     | 8898   | 37 | 11 | 95568474  | 95568474  | Missense_Mutation      | SNP | G | A | 4  | 44  | c.1912C>T     | c.(1912-1914)CCT>TCT | p.P638S        |
| Pat_59 | Pre-Treatment | ATM       | 472    | 37 | 11 | 108164118 | 108164118 | Missense_Mutation      | SNP | C | T | 4  | 110 | c.4690C>T     | c.(4690-4692)CCT>TCT | p.P1564S       |
| Pat_59 | Pre-Treatment | PHLDB1    | 23187  | 37 | 11 | 118498387 | 118498387 | Missense_Mutation      | SNP | C | T | 4  | 103 | c.848C>T      | c.(847-849)CCG>CTG   | p.P283L        |
| Pat_59 | Pre-Treatment | TRIM29    | 23650  | 37 | 11 | 119993662 | 119993662 | Missense_Mutation      | SNP | C | A | 17 | 55  | c.1435G>T     | c.(1435-1437)GGT>TGT | p.G479C        |
| Pat_59 | Pre-Treatment | SORL1     | 6653   | 37 | 11 | 121440980 | 121440980 | Splice_Site            | SNP | G | A | 4  | 76  | c.3337_splice | c.e23+1              | p.P1113_splice |
| Pat_59 | Pre-Treatment | ZNF202    | 7753   | 37 | 11 | 123598943 | 123598943 | Missense_Mutation      | SNP | C | T | 5  | 105 | c.730G>A      | c.(730-732)GTA>ATA   | p.V244I        |
| Pat_59 | Pre-Treatment | RPUSD4    | 84881  | 37 | 11 | 126073501 | 126073501 | Missense_Mutation      | SNP | G | A | 3  | 40  | c.946C>T      | c.(946-948)CGC>TGC   | p.R316C        |
| Pat_59 | Pre-Treatment | APLP2     | 334    | 37 | 11 | 129999957 | 129999957 | Missense_Mutation      | SNP | C | T | 5  | 181 | c.1480C>T     | c.(1480-1482)CGG>TGG | p.R494W        |
| Pat_59 | Pre-Treatment | FGF6      | 2251   | 37 | 12 | 4554555   | 4554555   | Missense_Mutation      | SNP | G | A | 4  | 126 | c.182C>T      | c.(181-183)TCT>TTT   | p.S61F         |
| Pat_59 | Pre-Treatment | PHC1      | 1911   | 37 | 12 | 9091927   | 9091927   | Missense_Mutation      | SNP | C | T | 4  | 136 | c.2887C>T     | c.(2887-2889)CGC>TGC | p.R963C        |
| Pat_59 | Pre-Treatment | LRP6      | 4040   | 37 | 12 | 12397415  | 12397415  | Missense_Mutation      | SNP | C | T | 4  | 88  | c.230G>A      | c.(229-231)CGA>CAA   | p.R77Q         |
| Pat_59 | Pre-Treatment | ETNK1     | 55500  | 37 | 12 | 22778224  | 22778224  | Missense_Mutation      | SNP | G | C | 3  | 16  | c.127G>C      | c.(127-129)GCT>CCT   | p.A43P         |
| Pat_59 | Pre-Treatment | TMTC1     | 83857  | 37 | 12 | 29908735  | 29908735  | Missense_Mutation      | SNP | G | A | 6  | 210 | c.314C>T      | c.(313-315)ACC>ATC   | p.T105I        |
| Pat_59 | Pre-Treatment | IPO8      | 10526  | 37 | 12 | 30783838  | 30783838  | Missense_Mutation      | SNP | C | T | 5  | 101 | c.3070G>A     | c.(3070-3072)GTC>ATC | p.V1024I       |
| Pat_59 | Pre-Treatment | HDAC7     | 51564  | 37 | 12 | 48190835  | 48190835  | Missense_Mutation      | SNP | G | A | 4  | 32  | c.551C>T      | c.(550-552)CCC>CTC   | p.P184L        |
| Pat_59 | Pre-Treatment | ADCY6     | 112    | 37 | 12 | 49170283  | 49170283  | Missense_Mutation      | SNP | C | T | 4  | 96  | c.1463G>A     | c.(1462-1464)CGG>CAG | p.R488Q        |
| Pat_59 | Pre-Treatment | FMNL3     | 91010  | 37 | 12 | 50048010  | 50048010  | Missense_Mutation      | SNP | C | T | 4  | 41  | c.1036G>A     | c.(1036-1038)GAG>AAG | p.E346K        |
| Pat_59 | Pre-Treatment | METTL7A   | 25840  | 37 | 12 | 51318910  | 51318910  | Nonsense_Mutation      | SNP | G | A | 4  | 123 | c.89G>A       | c.(88-90)TGG>TAG     | p.W30*         |
| Pat_59 | Pre-Treatment | KRT74     | 121391 | 37 | 12 | 52966349  | 52966349  | Nonsense_Mutation      | SNP | C | A | 4  | 76  | c.574G>T      | c.(574-576)GAG>TAG   | p.E192*        |
| Pat_59 | Pre-Treatment | WIBG      | 84305  | 37 | 12 | 56295763  | 56295763  | Missense_Mutation      | SNP | G | A | 6  | 266 | c.508C>T      | c.(508-510)CGG>TGG   | p.R170W        |
| Pat_59 | Pre-Treatment | LRP1      | 4035   | 37 | 12 | 57552253  | 57552253  | Missense_Mutation      | SNP | G | A | 4  | 26  | c.1630G>A     | c.(1630-1632)GGG>AGG | p.G544R        |
| Pat_59 | Pre-Treatment | THAP2     | 83591  | 37 | 12 | 72068033  | 72068033  | Missense_Mutation      | SNP | G | A | 4  | 83  | c.122G>A      | c.(121-123)CGC>CAC   | p.R41H         |
| Pat_59 | Pre-Treatment | NR2C1     | 7181   | 37 | 12 | 95456346  | 95456346  | Missense_Mutation      | SNP | C | T | 6  | 19  | c.223G>A      | c.(223-225)GAT>AAT   | p.D75N         |
| Pat_59 | Pre-Treatment | NT5DC3    | 51559  | 37 | 12 | 104208761 | 104208761 | Missense_Mutation      | SNP | G | A | 6  | 190 | c.347C>T      | c.(346-348)ACG>ATG   | p.T116M        |



|        |               |           |        |    |    |           |           |                   |     |    |    |    |     |                                                |
|--------|---------------|-----------|--------|----|----|-----------|-----------|-------------------|-----|----|----|----|-----|------------------------------------------------|
| Pat_59 | Pre-Treatment | TCP11L2   | 255394 | 37 | 12 | 106712125 | 106712126 | Missense_Mutation | DNP | GG | TT | 6  | 168 | c.297_298GG>TT(295-300)TTGGCT>TTTTG.99_100LA>F |
| Pat_59 | Pre-Treatment | UBE3B     | 89910  | 37 | 12 | 109958962 | 109958962 | Missense_Mutation | SNP | G  | A  | 4  | 82  | c.2086G>A c.(2086-2088)GAG>AAG p.E696K         |
| Pat_59 | Pre-Treatment | KNTC1     | 9735   | 37 | 12 | 123055642 | 123055642 | Missense_Mutation | SNP | G  | A  | 4  | 123 | c.1988G>A c.(1987-1989)GGA>GAA p.G663E         |
| Pat_59 | Pre-Treatment | DNAH10    | 196385 | 37 | 12 | 124297766 | 124297766 | Missense_Mutation | SNP | A  | G  | 3  | 53  | c.2846A>G c.(2845-2847)GAG>GGG p.E949G         |
| Pat_59 | Pre-Treatment | PXMP2     | 5827   | 37 | 12 | 133266955 | 133266955 | Missense_Mutation | SNP | G  | A  | 4  | 43  | c.229G>A c.(229-231)GTT>ATT p.V77I             |
| Pat_59 | Pre-Treatment | SLC7A1    | 6541   | 37 | 13 | 30110279  | 30110279  | Missense_Mutation | SNP | C  | T  | 4  | 115 | c.47G>A c.(46-48)CGG>CAG p.R16Q                |
| Pat_59 | Pre-Treatment | STAR13    | 90627  | 37 | 13 | 33859634  | 33859634  | Missense_Mutation | SNP | G  | T  | 4  | 136 | c.142C>A c.(142-144)CAT>AAT p.H48N             |
| Pat_59 | Pre-Treatment | KBTBD7    | 84078  | 37 | 13 | 41766827  | 41766827  | Missense_Mutation | SNP | C  | A  | 4  | 82  | c.1567G>T c.(1567-1569)GAT>TAT p.D523Y         |
| Pat_59 | Pre-Treatment | NAA16     | 79612  | 37 | 13 | 41933006  | 41933006  | Missense_Mutation | SNP | G  | A  | 5  | 112 | c.1318G>A c.(1318-1320)GCT>ACT p.A440T         |
| Pat_59 | Pre-Treatment | CAB39L    | 81617  | 37 | 13 | 49885003  | 49885003  | Missense_Mutation | SNP | C  | T  | 5  | 186 | c.961G>A c.(961-963)GAG>AAG p.E321K            |
| Pat_59 | Pre-Treatment | SETDB2    | 83852  | 37 | 13 | 50059853  | 50059853  | Missense_Mutation | SNP | G  | A  | 4  | 110 | c.1606G>A c.(1606-1608)GCA>ACA p.A536T         |
| Pat_59 | Pre-Treatment | GPC6      | 10082  | 37 | 13 | 95034764  | 95034764  | Missense_Mutation | SNP | T  | C  | 4  | 177 | c.1249T>C c.(1249-1251)TCC>CCC p.S417P         |
| Pat_59 | Pre-Treatment | LAMP1     | 3916   | 37 | 13 | 113973906 | 113973906 | Missense_Mutation | SNP | G  | A  | 4  | 68  | c.685G>A c.(685-687)GGG>AGG p.G229R            |
| Pat_59 | Pre-Treatment | P704P     | 641455 | 37 | 14 | 20020013  | 20020013  | Missense_Mutation | SNP | G  | C  | 7  | 325 | c.208C>G c.(208-210)CCC>GCC p.P70A             |
| Pat_59 | Pre-Treatment | SLC39A2   | 29986  | 37 | 14 | 21468284  | 21468284  | Missense_Mutation | SNP | G  | A  | 4  | 80  | c.256G>A c.(256-258)GCA>ACA p.A86T             |
| Pat_59 | Pre-Treatment | CDH24     | 64403  | 37 | 14 | 23524775  | 23524775  | Missense_Mutation | SNP | T  | G  | 3  | 27  | c.168A>C c.(166-168)GAA>GAC p.E56D             |
| Pat_59 | Pre-Treatment | HOMEZ     | 57594  | 37 | 14 | 23745910  | 23745910  | Missense_Mutation | SNP | G  | A  | 4  | 115 | c.527C>T c.(526-528)ACC>ATC p.T176I            |
| Pat_59 | Pre-Treatment | LRRC16B   | 90668  | 37 | 14 | 24528168  | 24528168  | Missense_Mutation | SNP | T  | G  | 3  | 50  | c.1544T>G c.(1543-1545)TTG>TGG p.L515W         |
| Pat_59 | Pre-Treatment | IPO4      | 79711  | 37 | 14 | 24650985  | 24650985  | Missense_Mutation | SNP | G  | A  | 4  | 62  | c.2872C>T c.(2872-2874)CGT>TGT p.R958C         |
| Pat_59 | Pre-Treatment | SOS2      | 6655   | 37 | 14 | 50628237  | 50628237  | Nonsense_Mutation | SNP | G  | A  | 4  | 95  | c.1159C>T c.(1159-1161)CGA>TGA p.R387*         |
| Pat_59 | Pre-Treatment | SYNE2     | 23224  | 37 | 14 | 64522809  | 64522809  | Nonsense_Mutation | SNP | C  | T  | 4  | 67  | c.9892C>T c.(9892-9894)CGA>TGA p.R3298*        |
| Pat_59 | Pre-Treatment | SPTB      | 6710   | 37 | 14 | 65249027  | 65249027  | Missense_Mutation | SNP | C  | T  | 26 | 143 | c.4247G>A c.(4246-4248)CGG>CAG p.R1416Q        |
| Pat_59 | Pre-Treatment | ZFYVE26   | 23503  | 37 | 14 | 68233122  | 68233122  | Missense_Mutation | SNP | G  | A  | 4  | 121 | c.5833C>T c.(5833-5835)CGG>TGG p.R1945W        |
| Pat_59 | Pre-Treatment | PCNX      | 22990  | 37 | 14 | 71444184  | 71444184  | Missense_Mutation | SNP | G  | A  | 4  | 136 | c.1130G>A c.(1129-1131)CGG>CAG p.R377Q         |
| Pat_59 | Pre-Treatment | LTBP2     | 4053   | 37 | 14 | 74975412  | 74975412  | Missense_Mutation | SNP | C  | T  | 6  | 45  | c.3547G>A c.(3547-3549)GAG>AAG p.E1183K        |
| Pat_59 | Pre-Treatment | LTBP2     | 4053   | 37 | 14 | 75022207  | 75022207  | Nonsense_Mutation | SNP | C  | T  | 19 | 146 | c.1020G>A c.(1018-1020)TGG>TGA p.W340*         |
| Pat_59 | Pre-Treatment | EIF2B2    | 8892   | 37 | 14 | 75475781  | 75475781  | Missense_Mutation | SNP | G  | A  | 6  | 314 | c.946G>A c.(946-948)GTT>ATT p.V316I            |
| Pat_59 | Pre-Treatment | TLL5      | 23093  | 37 | 14 | 76156623  | 76156623  | Missense_Mutation | SNP | C  | T  | 4  | 117 | c.460C>T c.(460-462)CCC>TCC p.P154S            |
| Pat_59 | Pre-Treatment | TLL5      | 23093  | 37 | 14 | 76173393  | 76173393  | Missense_Mutation | SNP | G  | T  | 6  | 260 | c.618G>T c.(616-618)TTG>TTT p.L206F            |
| Pat_59 | Pre-Treatment | NRXN3     | 9369   | 37 | 14 | 80164260  | 80164260  | Missense_Mutation | SNP | C  | T  | 41 | 45  | c.2785C>T c.(2785-2787)CGC>TGC p.R929C         |
| Pat_59 | Pre-Treatment | GTF2A1    | 2957   | 37 | 14 | 81667978  | 81667978  | Missense_Mutation | SNP | G  | A  | 4  | 105 | c.362C>T c.(361-363)CCA>CTA p.P121L            |
| Pat_59 | Pre-Treatment | C14orf143 | 90141  | 37 | 14 | 90398906  | 90398906  | Missense_Mutation | SNP | C  | T  | 25 | 70  | c.283G>A c.(283-285)GAA>AAA p.E95K             |
| Pat_59 | Pre-Treatment | YY1       | 7528   | 37 | 14 | 100705725 | 100705725 | Missense_Mutation | SNP | C  | G  | 3  | 33  | c.144C>G c.(142-144)GAC>GAG p.D48E             |
| Pat_59 | Pre-Treatment | CDCA4     | 55038  | 37 | 14 | 105477953 | 105477953 | Missense_Mutation | SNP | G  | A  | 3  | 55  | c.314C>T c.(313-315)GCG>GTG p.A105V            |
| Pat_59 | Pre-Treatment | CYFIP1    | 23191  | 37 | 15 | 22955212  | 22955212  | Missense_Mutation | SNP | G  | A  | 4  | 91  | c.1606G>A c.(1606-1608)GAG>AAG p.E536K         |
| Pat_59 | Pre-Treatment | HERC2P2   | 400322 | 37 | 15 | 23330108  | 23330108  | Missense_Mutation | SNP | C  | A  | 4  | 54  | c.970G>T c.(970-972)GTC>TTC p.V324F            |
| Pat_59 | Pre-Treatment | RYR3      | 6263   | 37 | 15 | 34093018  | 34093018  | Missense_Mutation | SNP | G  | A  | 4  | 117 | c.9878G>A c.(9877-9879)CGC>CAC p.R3293H        |
| Pat_59 | Pre-Treatment | GPR176    | 11245  | 37 | 15 | 40093401  | 40093401  | Missense_Mutation | SNP | C  | T  | 25 | 114 | c.1480G>A c.(1480-1482)GTA>ATA p.V494I         |
| Pat_59 | Pre-Treatment | PLCB2     | 5330   | 37 | 15 | 40584590  | 40584590  | Missense_Mutation | SNP | G  | A  | 3  | 38  | c.2381C>T c.(2380-2382)GCG>GTG p.A794V         |
| Pat_59 | Pre-Treatment | SLC30A4   | 7782   | 37 | 15 | 45781209  | 45781209  | Missense_Mutation | SNP | G  | A  | 3  | 54  | c.724C>T c.(724-726)CGT>TGT p.R242C            |
| Pat_59 | Pre-Treatment | MYO5A     | 4644   | 37 | 15 | 52646103  | 52646104  | Missense_Mutation | DNP | GG | AA | 14 | 118 | ..3531_3532CC>T529-3534)GACCGC>GAT p.R1178C    |
| Pat_59 | Pre-Treatment | VPS13C    | 54832  | 37 | 15 | 62155710  | 62155710  | Missense_Mutation | SNP | C  | A  | 4  | 90  | c.10881G>T c.(10879-10881)TTG>TTT p.L3627F     |
| Pat_59 | Pre-Treatment | ZNF609    | 23060  | 37 | 15 | 64972468  | 64972468  | Missense_Mutation | SNP | G  | A  | 4  | 110 | c.3854G>A c.(3853-3855)AGC>AAC p.S1285N        |
| Pat_59 | Pre-Treatment | PIAS1     | 8554   | 37 | 15 | 68434663  | 68434663  | Missense_Mutation | SNP | A  | G  | 4  | 36  | c.590A>G c.(589-591)CAG>CGG p.Q197R            |
| Pat_59 | Pre-Treatment | THSD4     | 79875  | 37 | 15 | 72030223  | 72030223  | Missense_Mutation | SNP | G  | A  | 12 | 67  | c.1783G>A c.(1783-1785)GAC>AAC p.D595N         |
| Pat_59 | Pre-Treatment | GRAMD2    | 196996 | 37 | 15 | 72460139  | 72460139  | Missense_Mutation | SNP | G  | A  | 4  | 100 | c.310C>T c.(310-312)CGG>TGG p.R104W            |
| Pat_59 | Pre-Treatment | CSPG4     | 1464   | 37 | 15 | 75968345  | 75968345  | Missense_Mutation | SNP | C  | T  | 2  | 2   | c.6515G>A c.(6514-6516)AGC>AAC p.S2172N        |

|        |               |           |        |    |    |          |          |                        |     |   |   |    |     |              |                        |               |
|--------|---------------|-----------|--------|----|----|----------|----------|------------------------|-----|---|---|----|-----|--------------|------------------------|---------------|
| Pat_59 | Pre-Treatment | WDR61     | 80349  | 37 | 15 | 78582055 | 78582055 | Splice_Site            | SNP | C | T | 4  | 63  | c.469_splice | c.e7-1                 | p.S157_splice |
| Pat_59 | Pre-Treatment | MORF4L1   | 10933  | 37 | 15 | 79184656 | 79184656 | Splice_Site            | SNP | G | A | 4  | 133 | c.657_splice | c.e9+1                 | p.Q219_splice |
| Pat_59 | Pre-Treatment | MESP2     | 145873 | 37 | 15 | 90321312 | 90321312 | Missense_Mutation      | SNP | C | G | 3  | 39  | c.941C>G     | c.(940-942)CCA>CGA     | p.P314R       |
| Pat_59 | Pre-Treatment | PRC1      | 9055   | 37 | 15 | 91523550 | 91523550 | Nonsense_Mutation      | SNP | G | A | 4  | 121 | c.892C>T     | c.(892-894)CGA>TGA     | p.R298*       |
| Pat_59 | Pre-Treatment | WDR90     | 197335 | 37 | 16 | 716591   | 716591   | Missense_Mutation      | SNP | C | T | 4  | 22  | c.4877C>T    | c.(4876-4878)ACC>ATC   | p.T1626I      |
| Pat_59 | Pre-Treatment | CCDC78    | 124093 | 37 | 16 | 772979   | 772979   | Nonsense_Mutation      | SNP | G | A | 4  | 50  | c.1240C>T    | c.(1240-1242)CGA>TGA   | p.R414*       |
| Pat_59 | Pre-Treatment | C16orf91  | 283951 | 37 | 16 | 1479216  | 1479216  | Nonsense_Mutation      | SNP | G | A | 4  | 89  | c.130C>T     | c.(130-132)CGA>TGA     | p.R44*        |
| Pat_59 | Pre-Treatment | ZNF174    | 7727   | 37 | 16 | 3452216  | 3452216  | Missense_Mutation      | SNP | G | T | 4  | 60  | c.212G>T     | c.(211-213)TGC>TTC     | p.C71F        |
| Pat_59 | Pre-Treatment | ADCY9     | 115    | 37 | 16 | 4164488  | 4164488  | Missense_Mutation      | SNP | T | C | 3  | 107 | c.956A>G     | c.(955-957)CAC>CGC     | p.H319R       |
| Pat_59 | Pre-Treatment | KIAA0430  | 9665   | 37 | 16 | 15716888 | 15716888 | Missense_Mutation      | SNP | G | T | 4  | 60  | c.2363C>A    | c.(2362-2364)GCA>GAA   | p.A788E       |
| Pat_59 | Pre-Treatment | MYH11     | 4629   | 37 | 16 | 15844047 | 15844047 | Missense_Mutation      | SNP | C | T | 4  | 58  | c.2006G>A    | c.(2005-2007)CGC>CAC   | p.R669H       |
| Pat_59 | Pre-Treatment | GGA2      | 23062  | 37 | 16 | 23499931 | 23499931 | Missense_Mutation      | SNP | G | A | 35 | 124 | c.575C>T     | c.(574-576)TCC>TTC     | p.S192F       |
| Pat_59 | Pre-Treatment | SEZ6L2    | 26470  | 37 | 16 | 29899971 | 29899971 | Missense_Mutation      | SNP | C | T | 4  | 29  | c.929G>A     | c.(928-930)GGC>GAC     | p.G310D       |
| Pat_59 | Pre-Treatment | 1-Sep     | 1731   | 37 | 16 | 30393163 | 30393163 | Missense_Mutation      | SNP | C | T | 6  | 273 | c.223G>A     | c.(223-225)GAG>AAG     | p.E75K        |
| Pat_59 | Pre-Treatment | SRCAP     | 10847  | 37 | 16 | 30731568 | 30731568 | Missense_Mutation      | SNP | G | A | 6  | 247 | c.2903G>A    | c.(2902-2904)CGC>CAC   | p.R968H       |
| Pat_59 | Pre-Treatment | HSD3B7    | 80270  | 37 | 16 | 30998167 | 30998167 | Missense_Mutation      | SNP | G | T | 4  | 66  | c.538G>T     | c.(538-540)GGG>TGG     | p.G180W       |
| Pat_59 | Pre-Treatment | ITGAD     | 3681   | 37 | 16 | 31414878 | 31414878 | Missense_Mutation      | SNP | C | T | 4  | 98  | c.616C>T     | c.(616-618)CGG>TGG     | p.R206W       |
| Pat_59 | Pre-Treatment | CMTM2     | 146225 | 37 | 16 | 66614052 | 66614052 | Missense_Mutation      | SNP | C | T | 4  | 82  | c.409C>T     | c.(409-411)CAT>TAT     | p.H137Y       |
| Pat_59 | Pre-Treatment | CES2      | 8824   | 37 | 16 | 66975461 | 66975461 | Missense_Mutation      | SNP | C | T | 4  | 59  | c.1160C>T    | c.(1159-1161)CCC>CTC   | p.P387L       |
| Pat_59 | Pre-Treatment | SLC9A5    | 6553   | 37 | 16 | 67288998 | 67288998 | Missense_Mutation      | SNP | G | A | 4  | 54  | c.565G>A     | c.(565-567)GTG>ATG     | p.V189M       |
| Pat_59 | Pre-Treatment | NFATC3    | 4775   | 37 | 16 | 68160397 | 68160397 | Nonsense_Mutation      | SNP | G | T | 4  | 72  | c.1285G>T    | c.(1285-1287)GGA>TGA   | p.G429*       |
| Pat_59 | Pre-Treatment | TMED6     | 146456 | 37 | 16 | 69377432 | 69377432 | Missense_Mutation      | SNP | C | T | 4  | 133 | c.601G>A     | c.(601-603)GTG>ATG     | p.V201M       |
| Pat_59 | Pre-Treatment | FTSJD1    | 55783  | 37 | 16 | 71318625 | 71318625 | Missense_Mutation      | SNP | G | A | 4  | 39  | c.1199C>T    | c.(1198-1200)GCT>GTT   | p.A400V       |
| Pat_59 | Pre-Treatment | ZNF23     | 7571   | 37 | 16 | 71488051 | 71488051 | Translation_Start_Site | SNP | G | A | 4  | 99  | c.-72C>T     | c.(-74--70)GACGT>GATGT |               |
| Pat_59 | Pre-Treatment | PMFBP1    | 83449  | 37 | 16 | 72162606 | 72162606 | Missense_Mutation      | SNP | G | A | 4  | 55  | c.2053C>T    | c.(2053-2055)CTC>TTC   | p.L685F       |
| Pat_59 | Pre-Treatment | ZFP1      | 162239 | 37 | 16 | 75186852 | 75186852 | Missense_Mutation      | SNP | G | A | 5  | 161 | c.3G>A       | c.(1-3)ATG>ATA         | p.M1I         |
| Pat_59 | Pre-Treatment | PLCG2     | 5336   | 37 | 16 | 81925134 | 81925134 | Missense_Mutation      | SNP | G | A | 4  | 52  | c.925G>A     | c.(925-927)GTG>ATG     | p.V309M       |
| Pat_59 | Pre-Treatment | LRRC50    | 123872 | 37 | 16 | 84203819 | 84203819 | Missense_Mutation      | SNP | A | G | 5  | 88  | c.1385A>G    | c.(1384-1386)CAA>CGA   | p.Q462R       |
| Pat_59 | Pre-Treatment | KLHDC4    | 54758  | 37 | 16 | 87745037 | 87745037 | Missense_Mutation      | SNP | C | A | 4  | 30  | c.848G>T     | c.(847-849)TGG>TTG     | p.W283L       |
| Pat_59 | Pre-Treatment | CDT1      | 81620  | 37 | 16 | 88873490 | 88873490 | Missense_Mutation      | SNP | G | A | 4  | 123 | c.1154G>A    | c.(1153-1155)CGC>CAC   | p.R385H       |
| Pat_59 | Pre-Treatment | ANKRD11   | 29123  | 37 | 16 | 89351391 | 89351391 | Missense_Mutation      | SNP | G | A | 4  | 64  | c.1559C>T    | c.(1558-1560)GCC>GTC   | p.A520V       |
| Pat_59 | Pre-Treatment | TUBB3     | 10381  | 37 | 16 | 90001344 | 90001344 | Missense_Mutation      | SNP | G | T | 4  | 114 | c.485G>T     | c.(484-486)CGC>CTC     | p.R162L       |
| Pat_59 | Pre-Treatment | PRPF8     | 10594  | 37 | 17 | 1554459  | 1554459  | Missense_Mutation      | SNP | G | A | 4  | 82  | c.6796C>T    | c.(6796-6798)CGT>TGT   | p.R2266C      |
| Pat_59 | Pre-Treatment | PAFAH1B1  | 5048   | 37 | 17 | 2573488  | 2573488  | Missense_Mutation      | SNP | G | A | 6  | 269 | c.431G>A     | c.(430-432)CGA>CAA     | p.R144Q       |
| Pat_59 | Pre-Treatment | OR3A1     | 4994   | 37 | 17 | 3195798  | 3195798  | Nonsense_Mutation      | SNP | G | A | 4  | 132 | c.79C>T      | c.(79-81)CAG>TAG       | p.Q27*        |
| Pat_59 | Pre-Treatment | ZZEF1     | 23140  | 37 | 17 | 3959530  | 3959530  | Missense_Mutation      | SNP | C | T | 4  | 116 | c.5275G>A    | c.(5275-5277)GAT>AAT   | p.D1759N      |
| Pat_59 | Pre-Treatment | ARRB2     | 409    | 37 | 17 | 4619328  | 4619328  | Missense_Mutation      | SNP | G | A | 4  | 113 | c.115G>A     | c.(115-117)GAT>AAT     | p.D39N        |
| Pat_59 | Pre-Treatment | CAMTA2    | 23125  | 37 | 17 | 4875601  | 4875601  | Missense_Mutation      | SNP | C | A | 4  | 34  | c.2734G>T    | c.(2734-2736)GCC>TCC   | p.A912S       |
| Pat_59 | Pre-Treatment | CHRN1     | 1140   | 37 | 17 | 7350418  | 7350418  | Missense_Mutation      | SNP | G | A | 5  | 82  | c.410G>A     | c.(409-411)GGC>GAC     | p.G137D       |
| Pat_59 | Pre-Treatment | TMEM88    | 92162  | 37 | 17 | 7758835  | 7758835  | Missense_Mutation      | SNP | G | A | 4  | 115 | c.283G>A     | c.(283-285)GGA>AGA     | p.G95R        |
| Pat_59 | Pre-Treatment | ARHGEF15  | 22899  | 37 | 17 | 8224273  | 8224273  | Nonsense_Mutation      | SNP | G | T | 4  | 109 | c.2488G>T    | c.(2488-2490)GGA>TGA   | p.G830*       |
| Pat_59 | Pre-Treatment | DNAH9     | 1770   | 37 | 17 | 11737985 | 11737985 | Missense_Mutation      | SNP | C | A | 4  | 44  | c.9277C>A    | c.(9277-9279)CAG>AAG   | p.Q3093K      |
| Pat_59 | Pre-Treatment | TNFRSF13B | 23495  | 37 | 17 | 16855777 | 16855777 | Missense_Mutation      | SNP | G | A | 4  | 35  | c.182C>T     | c.(181-183)ACC>ATC     | p.T61I        |
| Pat_59 | Pre-Treatment | MPRIP     | 23164  | 37 | 17 | 17062245 | 17062245 | Missense_Mutation      | SNP | G | A | 3  | 33  | c.1975G>A    | c.(1975-1977)GTC>ATC   | p.V659I       |
| Pat_59 | Pre-Treatment | BLMH      | 642    | 37 | 17 | 28576167 | 28576167 | Missense_Mutation      | SNP | A | T | 4  | 80  | c.1236T>A    | c.(1234-1236)GAT>GAA   | p.D412E       |
| Pat_59 | Pre-Treatment | OMG       | 4974   | 37 | 17 | 29622581 | 29622581 | Missense_Mutation      | SNP | G | T | 4  | 82  | c.769C>A     | c.(769-771)CAA>AAA     | p.Q257K       |
| Pat_59 | Pre-Treatment | LIG3      | 3980   | 37 | 17 | 33324765 | 33324765 | Missense_Mutation      | SNP | G | A | 4  | 111 | c.1832G>A    | c.(1831-1833)TGT>TAT   | p.C611Y       |

|        |               |           |        |    |    |          |          |                   |     |   |   |    |     |           |                      |         |
|--------|---------------|-----------|--------|----|----|----------|----------|-------------------|-----|---|---|----|-----|-----------|----------------------|---------|
| Pat_59 | Pre-Treatment | UNC45B    | 146862 | 37 | 17 | 33507597 | 33507597 | Missense_Mutation | SNP | A | G | 3  | 68  | c.2281A>G | c.(2281-2283)AGG>GGG | p.R761G |
| Pat_59 | Pre-Treatment | ERBB2     | 2064   | 37 | 17 | 37868249 | 37868249 | Missense_Mutation | SNP | G | A | 4  | 133 | c.970G>A  | c.(970-972)GCA>ACA   | p.A324T |
| Pat_59 | Pre-Treatment | KRT24     | 192666 | 37 | 17 | 38856585 | 38856585 | Missense_Mutation | SNP | C | T | 96 | 273 | c.906G>A  | c.(904-906)ATG>ATA   | p.M302I |
| Pat_59 | Pre-Treatment | KRT28     | 162605 | 37 | 17 | 38954550 | 38954550 | Missense_Mutation | SNP | G | C | 4  | 67  | c.627C>G  | c.(625-627)GAC>GAG   | p.D209E |
| Pat_59 | Pre-Treatment | KRTAP4-12 | 83755  | 37 | 17 | 39280026 | 39280026 | Missense_Mutation | SNP | G | A | 4  | 103 | c.349C>T  | c.(349-351)CGC>TGC   | p.R117C |
| Pat_59 | Pre-Treatment | KRT32     | 3882   | 37 | 17 | 39623519 | 39623519 | Missense_Mutation | SNP | C | T | 3  | 44  | c.59G>A   | c.(58-60)CGG>CAG     | p.R20Q  |
| Pat_59 | Pre-Treatment | JUP       | 3728   | 37 | 17 | 39919530 | 39919530 | Missense_Mutation | SNP | C | T | 4  | 89  | c.1202G>A | c.(1201-1203)AGT>AAT | p.S401N |
| Pat_59 | Pre-Treatment | ACLY      | 47     | 37 | 17 | 40052894 | 40052894 | Missense_Mutation | SNP | G | A | 4  | 128 | c.1438C>T | c.(1438-1440)CCA>TCA | p.P480S |
| Pat_59 | Pre-Treatment | EZH1      | 2145   | 37 | 17 | 40865352 | 40865352 | Missense_Mutation | SNP | C | T | 4  | 114 | c.1079G>A | c.(1078-1080)CGT>CAT | p.R360H |
| Pat_59 | Pre-Treatment | G6PC      | 2538   | 37 | 17 | 41062969 | 41062969 | Missense_Mutation | SNP | C | A | 4  | 52  | c.600C>A  | c.(598-600)AGC>AGA   | p.S200R |
| Pat_59 | Pre-Treatment | DCAKD     | 79877  | 37 | 17 | 43111583 | 43111583 | Missense_Mutation | SNP | C | T | 4  | 51  | c.288G>A  | c.(286-288)ATG>ATA   | p.M96I  |
| Pat_59 | Pre-Treatment | TBKBP1    | 9755   | 37 | 17 | 45776832 | 45776832 | Missense_Mutation | SNP | C | A | 2  | 0   | c.781C>A  | c.(781-783)CTG>ATG   | p.L261M |
| Pat_59 | Pre-Treatment | LUC7L3    | 51747  | 37 | 17 | 48818566 | 48818566 | Missense_Mutation | SNP | C | A | 4  | 53  | c.310C>A  | c.(310-312)CAT>AAT   | p.H104N |
| Pat_59 | Pre-Treatment | C17orf82  | 388407 | 37 | 17 | 59489494 | 59489494 | Missense_Mutation | SNP | G | A | 4  | 30  | c.158G>A  | c.(157-159)GGA>GAA   | p.G53E  |
| Pat_59 | Pre-Treatment | TANC2     | 26115  | 37 | 17 | 61432525 | 61432525 | Missense_Mutation | SNP | G | A | 3  | 53  | c.2134G>A | c.(2134-2136)GTG>ATG | p.V712M |
| Pat_59 | Pre-Treatment | ICAM2     | 3384   | 37 | 17 | 62081169 | 62081169 | Missense_Mutation | SNP | C | T | 3  | 54  | c.484G>A  | c.(484-486)GGG>AGG   | p.G162R |
| Pat_59 | Pre-Treatment | PLEKHM1P  | 440456 | 37 | 17 | 62796727 | 62796727 | Missense_Mutation | SNP | G | T | 4  | 29  | c.313C>A  | c.(313-315)CAG>AAG   | p.Q105K |
| Pat_59 | Pre-Treatment | RGS9      | 8787   | 37 | 17 | 63193265 | 63193265 | Missense_Mutation | SNP | G | A | 4  | 50  | c.882G>A  | c.(880-882)ATG>ATA   | p.M294I |
| Pat_59 | Pre-Treatment | TMEM104   | 54868  | 37 | 17 | 72832443 | 72832443 | Missense_Mutation | SNP | C | T | 26 | 152 | c.1108C>T | c.(1108-1110)CCC>TCC | p.P370S |
| Pat_59 | Pre-Treatment | QRICH2    | 84074  | 37 | 17 | 74289376 | 74289376 | Missense_Mutation | SNP | G | A | 4  | 71  | c.934C>T  | c.(934-936)CCT>TCT   | p.P312S |
| Pat_59 | Pre-Treatment | TNRC6C    | 57690  | 37 | 17 | 76046324 | 76046324 | Missense_Mutation | SNP | C | T | 3  | 37  | c.1181C>T | c.(1180-1182)ACA>ATA | p.T394I |
| Pat_59 | Pre-Treatment | SYNGR2    | 9144   | 37 | 17 | 76166904 | 76166904 | Missense_Mutation | SNP | G | A | 5  | 226 | c.106G>A  | c.(106-108)GCC>ACC   | p.A36T  |
| Pat_59 | Pre-Treatment | METTL4    | 64863  | 37 | 18 | 2554890  | 2554890  | Missense_Mutation | SNP | C | T | 4  | 70  | c.607G>A  | c.(607-609)GAA>AAA   | p.E203K |
| Pat_59 | Pre-Treatment | CEP76     | 79959  | 37 | 18 | 12674535 | 12674535 | Missense_Mutation | SNP | C | T | 4  | 69  | c.1841G>A | c.(1840-1842)CGA>CAA | p.R614Q |
| Pat_59 | Pre-Treatment | POTEC     | 388468 | 37 | 18 | 14543019 | 14543019 | Missense_Mutation | SNP | T | C | 7  | 184 | c.127A>G  | c.(127-129)ATG>GTG   | p.M43V  |
| Pat_59 | Pre-Treatment | ZNF396    | 252884 | 37 | 18 | 32954172 | 32954172 | Missense_Mutation | SNP | C | T | 4  | 50  | c.85G>A   | c.(85-87)GAG>AAG     | p.E29K  |
| Pat_59 | Pre-Treatment | KATNAL2   | 83473  | 37 | 18 | 44585946 | 44585946 | Missense_Mutation | SNP | G | A | 5  | 262 | c.254G>A  | c.(253-255)CGC>CAC   | p.R85H  |
| Pat_59 | Pre-Treatment | MEX3C     | 51320  | 37 | 18 | 48703430 | 48703430 | Missense_Mutation | SNP | G | A | 4  | 42  | c.1271C>T | c.(1270-1272)GCG>GTG | p.A424V |
| Pat_59 | Pre-Treatment | DCC       | 1630   | 37 | 18 | 50432623 | 50432623 | Missense_Mutation | SNP | G | A | 16 | 82  | c.622G>A  | c.(622-624)GGA>AGA   | p.G208R |
| Pat_59 | Pre-Treatment | CDH19     | 28513  | 37 | 18 | 64235688 | 64235688 | Missense_Mutation | SNP | G | A | 34 | 74  | c.455C>T  | c.(454-456)CCT>CTT   | p.P152L |
| Pat_59 | Pre-Treatment | ZNF407    | 55628  | 37 | 18 | 72344482 | 72344482 | Nonsense_Mutation | SNP | C | T | 8  | 34  | c.1507C>T | c.(1507-1509)CAG>TAG | p.Q503* |
| Pat_59 | Pre-Treatment | SALL3     | 27164  | 37 | 18 | 76753670 | 76753670 | Missense_Mutation | SNP | C | T | 4  | 8   | c.1679C>T | c.(1678-1680)TCC>TTC | p.S560F |
| Pat_59 | Pre-Treatment | SLC39A3   | 29985  | 37 | 19 | 2737141  | 2737141  | Missense_Mutation | SNP | G | A | 4  | 50  | c.115C>T  | c.(115-117)CGC>TGC   | p.R39C  |
| Pat_59 | Pre-Treatment | DPP9      | 91039  | 37 | 19 | 4704265  | 4704265  | Missense_Mutation | SNP | G | A | 4  | 98  | c.478C>T  | c.(478-480)CGG>TGG   | p.R160W |
| Pat_59 | Pre-Treatment | GTF2F1    | 2962   | 37 | 19 | 6380596  | 6380596  | Missense_Mutation | SNP | G | A | 4  | 99  | c.1337C>T | c.(1336-1338)ACA>ATA | p.T446I |
| Pat_59 | Pre-Treatment | EVI5L     | 115704 | 37 | 19 | 7914907  | 7914907  | Missense_Mutation | SNP | G | T | 3  | 3   | c.652G>T  | c.(652-654)GTG>TTG   | p.V218L |
| Pat_59 | Pre-Treatment | ICAM1     | 3383   | 37 | 19 | 10395132 | 10395132 | Missense_Mutation | SNP | G | A | 4  | 108 | c.979G>A  | c.(979-981)GAG>AAG   | p.E327K |
| Pat_59 | Pre-Treatment | ZNF700    | 90592  | 37 | 19 | 12060645 | 12060645 | Missense_Mutation | SNP | T | A | 6  | 235 | c.1806T>A | c.(1804-1806)AGT>AGA | p.S602R |
| Pat_59 | Pre-Treatment | ZNF700    | 90592  | 37 | 19 | 12060647 | 12060647 | Missense_Mutation | SNP | G | C | 6  | 231 | c.1808G>C | c.(1807-1809)TGT>TCT | p.C603S |
| Pat_59 | Pre-Treatment | ZSWIM4    | 65249  | 37 | 19 | 13919996 | 13919996 | Missense_Mutation | SNP | G | A | 4  | 50  | c.974G>A  | c.(973-975)GGC>GAC   | p.G325D |
| Pat_59 | Pre-Treatment | DCAF15    | 90379  | 37 | 19 | 14070060 | 14070060 | Missense_Mutation | SNP | C | T | 4  | 42  | c.988C>T  | c.(988-990)CGG>TGG   | p.R330W |
| Pat_59 | Pre-Treatment | EPS15L1   | 58513  | 37 | 19 | 16524625 | 16524625 | Missense_Mutation | SNP | C | T | 3  | 62  | c.1225G>A | c.(1225-1227)GAA>AAA | p.E409K |
| Pat_59 | Pre-Treatment | SLC5A5    | 6528   | 37 | 19 | 17988895 | 17988895 | Missense_Mutation | SNP | C | A | 4  | 46  | c.962C>A  | c.(961-963)CCA>CAA   | p.P321Q |
| Pat_59 | Pre-Treatment | GMIP      | 51291  | 37 | 19 | 19747563 | 19747563 | Missense_Mutation | SNP | C | T | 4  | 98  | c.1280G>A | c.(1279-1281)GGT>GAT | p.G427D |
| Pat_59 | Pre-Treatment | ZNF93     | 81931  | 37 | 19 | 20045361 | 20045361 | Missense_Mutation | SNP | A | G | 5  | 124 | c.1597A>G | c.(1597-1599)AGA>GGA | p.R533G |
| Pat_59 | Pre-Treatment | ZNF708    | 7562   | 37 | 19 | 21476519 | 21476519 | Missense_Mutation | SNP | T | C | 5  | 63  | c.1249A>G | c.(1249-1251)AAG>GAG | p.K417E |
| Pat_59 | Pre-Treatment | ZNF429    | 353088 | 37 | 19 | 21720411 | 21720411 | Missense_Mutation | SNP | T | A | 6  | 136 | c.1556T>A | c.(1555-1557)ATC>AAC | p.I519N |

|        |               |          |        |    |    |          |          |                   |     |    |    |    |     |                                                |                      |               |
|--------|---------------|----------|--------|----|----|----------|----------|-------------------|-----|----|----|----|-----|------------------------------------------------|----------------------|---------------|
| Pat_59 | Pre-Treatment | ZNF257   | 113835 | 37 | 19 | 22271961 | 22271961 | Missense_Mutation | SNP | A  | G  | 10 | 120 | c.1409A>G                                      | c.(1408-1410)CAG>CGG | p.Q470R       |
| Pat_59 | Pre-Treatment | ZNF676   | 163223 | 37 | 19 | 22362924 | 22362924 | Missense_Mutation | SNP | G  | C  | 5  | 187 | c.1595C>G                                      | c.(1594-1596)CCC>CGC | p.P532R       |
| Pat_59 | Pre-Treatment | ZNF99    | 7652   | 37 | 19 | 22939472 | 22939472 | Missense_Mutation | SNP | A  | G  | 3  | 73  | c.2699T>C                                      | c.(2698-2700)TTC>TCC | p.F900S       |
| Pat_59 | Pre-Treatment | ZNF91    | 7644   | 37 | 19 | 23544867 | 23544867 | Missense_Mutation | SNP | T  | C  | 8  | 208 | c.914A>G                                       | c.(913-915)CAT>CGT   | p.H305R       |
| Pat_59 | Pre-Treatment | ZNF681   | 148213 | 37 | 19 | 23926839 | 23926839 | Missense_Mutation | SNP | A  | G  | 4  | 160 | c.1513T>C                                      | c.(1513-1515)TCC>CCC | p.S505P       |
| Pat_59 | Pre-Treatment | C19orf2  | 8725   | 37 | 19 | 30433557 | 30433557 | Missense_Mutation | SNP | G  | A  | 3  | 18  | c.103G>A                                       | c.(103-105)GAG>AAG   | p.E35K        |
| Pat_59 | Pre-Treatment | TSHZ3    | 57616  | 37 | 19 | 31768189 | 31768189 | Missense_Mutation | SNP | G  | A  | 4  | 95  | c.2510C>T                                      | c.(2509-2511)TCG>TTG | p.S837L       |
| Pat_59 | Pre-Treatment | SLC7A10  | 56301  | 37 | 19 | 33716540 | 33716540 | Missense_Mutation | SNP | G  | A  | 2  | 2   | c.70C>T                                        | c.(70-72)CCA>TCA     | p.P24S        |
| Pat_59 | Pre-Treatment | LSM14A   | 26065  | 37 | 19 | 34699912 | 34699912 | Missense_Mutation | SNP | C  | T  | 4  | 93  | c.494C>T                                       | c.(493-495)GCC>GTC   | p.A165V       |
| Pat_59 | Pre-Treatment | GRAMD1A  | 57655  | 37 | 19 | 35512651 | 35512651 | Missense_Mutation | SNP | C  | T  | 3  | 29  | c.1636C>T                                      | c.(1636-1638)CGG>TGG | p.R546W       |
| Pat_59 | Pre-Treatment | SIPA1L3  | 23094  | 37 | 19 | 38572272 | 38572272 | Missense_Mutation | SNP | G  | A  | 4  | 27  | c.67G>A                                        | c.(67-69)GGC>AGC     | p.G23S        |
| Pat_59 | Pre-Treatment | PSG5     | 5673   | 37 | 19 | 43688976 | 43688976 | Missense_Mutation | SNP | T  | C  | 10 | 239 | c.388A>G                                       | c.(388-390)AGG>GGG   | p.R130G       |
| Pat_59 | Pre-Treatment | IRGQ     | 126298 | 37 | 19 | 44096735 | 44096735 | Missense_Mutation | SNP | G  | A  | 4  | 34  | c.1315C>T                                      | c.(1315-1317)CTC>TTC | p.L439F       |
| Pat_59 | Pre-Treatment | C19orf61 | 56006  | 37 | 19 | 44251899 | 44251899 | Missense_Mutation | SNP | G  | A  | 4  | 7   | c.376C>T                                       | c.(376-378)CCC>TCC   | p.P126S       |
| Pat_59 | Pre-Treatment | ZNF225   | 7768   | 37 | 19 | 44636272 | 44636272 | Missense_Mutation | SNP | A  | T  | 4  | 72  | c.1505A>T                                      | c.(1504-1506)CAT>CTT | p.H502L       |
| Pat_59 | Pre-Treatment | ZNF234   | 10780  | 37 | 19 | 44660847 | 44660847 | Missense_Mutation | SNP | C  | A  | 4  | 121 | c.678C>A                                       | c.(676-678)CAC>CAA   | p.H226Q       |
| Pat_59 | Pre-Treatment | CCDC8    | 83987  | 37 | 19 | 46915017 | 46915018 | Missense_Mutation | DNP | CC | GG | 5  | 129 | c.1050_1051GG>C348-1053)GAGGAG>GAC(350_351EE>D |                      |               |
| Pat_59 | Pre-Treatment | CRX      | 1406   | 37 | 19 | 48339604 | 48339604 | Missense_Mutation | SNP | C  | T  | 17 | 49  | c.205C>T                                       | c.(205-207)CGT>TGT   | p.R69C        |
| Pat_59 | Pre-Treatment | GRIN2D   | 2906   | 37 | 19 | 48945427 | 48945427 | Missense_Mutation | SNP | C  | T  | 4  | 116 | c.2461C>T                                      | c.(2461-2463)CGG>TGG | p.R821W       |
| Pat_59 | Pre-Treatment | FAM83E   | 54854  | 37 | 19 | 49107049 | 49107049 | Missense_Mutation | SNP | G  | A  | 6  | 31  | c.878C>T                                       | c.(877-879)CCT>CTT   | p.P293L       |
| Pat_59 | Pre-Treatment | RASIP1   | 54922  | 37 | 19 | 49227650 | 49227650 | Missense_Mutation | SNP | G  | A  | 4  | 87  | c.2488C>T                                      | c.(2488-2490)CGG>TGG | p.R830W       |
| Pat_59 | Pre-Treatment | RUVBL2   | 10856  | 37 | 19 | 49507652 | 49507652 | Missense_Mutation | SNP | C  | T  | 4  | 95  | c.242C>T                                       | c.(241-243)ACG>ATG   | p.T81M        |
| Pat_59 | Pre-Treatment | PIH1D1   | 55011  | 37 | 19 | 49952855 | 49952855 | Missense_Mutation | SNP | A  | G  | 3  | 95  | c.214T>C                                       | c.(214-216)TCC>CCC   | p.S72P        |
| Pat_59 | Pre-Treatment | SIGLECP3 | 284367 | 37 | 19 | 51671363 | 51671363 | Missense_Mutation | SNP | G  | A  | 4  | 58  | c.502G>A                                       | c.(502-504)GAC>AAC   | p.D168N       |
| Pat_59 | Pre-Treatment | ZNF432   | 9668   | 37 | 19 | 52537431 | 52537431 | Missense_Mutation | SNP | T  | A  | 3  | 33  | c.1501A>T                                      | c.(1501-1503)ATG>TTG | p.M501L       |
| Pat_59 | Pre-Treatment | ZNF578   | 147660 | 37 | 19 | 53014635 | 53014635 | Missense_Mutation | SNP | A  | G  | 7  | 100 | c.1001A>G                                      | c.(1000-1002)CAT>CGT | p.H334R       |
| Pat_59 | Pre-Treatment | ZNF845   | 91664  | 37 | 19 | 53856360 | 53856360 | Missense_Mutation | SNP | A  | C  | 6  | 121 | c.2432A>C                                      | c.(2431-2433)AAC>ACC | p.N811T       |
| Pat_59 | Pre-Treatment | ZNF154   | 7710   | 37 | 19 | 58216322 | 58216322 | Missense_Mutation | SNP | G  | A  | 36 | 155 | c.59C>T                                        | c.(58-60)GCC>GTC     | p.A20V        |
| Pat_59 | Pre-Treatment | ZNF606   | 80095  | 37 | 19 | 58499587 | 58499587 | Missense_Mutation | SNP | G  | A  | 4  | 41  | c.388C>T                                       | c.(388-390)CGC>TGC   | p.R130C       |
| Pat_59 | Pre-Treatment | SNTG2    | 54221  | 37 | 2  | 1161233  | 1161233  | Splice_Site       | SNP | G  | A  | 6  | 15  | c.412_splice                                   | c.e7-1               | p.V138_splice |
| Pat_59 | Pre-Treatment | RSAD2    | 91543  | 37 | 2  | 7018212  | 7018213  | Missense_Mutation | DNP | CC | AA | 4  | 70  | c.281_282CC>AA                                 | c.(280-282)GCC>GAA   | p.A94E        |
| Pat_59 | Pre-Treatment | KLF11    | 8462   | 37 | 2  | 10187784 | 10187784 | Missense_Mutation | SNP | C  | T  | 4  | 65  | c.320C>T                                       | c.(319-321)ACT>ATT   | p.T107I       |
| Pat_59 | Pre-Treatment | GREB1    | 9687   | 37 | 2  | 11738813 | 11738813 | Missense_Mutation | SNP | G  | T  | 6  | 205 | c.2160G>T                                      | c.(2158-2160)TTG>TTT | p.L720F       |
| Pat_59 | Pre-Treatment | APOB     | 338    | 37 | 2  | 21260070 | 21260070 | Missense_Mutation | SNP | C  | T  | 3  | 38  | c.595G>A                                       | c.(595-597)GTG>ATG   | p.V199M       |
| Pat_59 | Pre-Treatment | C2orf44  | 80304  | 37 | 2  | 24260988 | 24260988 | Missense_Mutation | SNP | A  | T  | 4  | 93  | c.1377T>A                                      | c.(1375-1377)AAT>AAA | p.N459K       |
| Pat_59 | Pre-Treatment | CGREF1   | 10669  | 37 | 2  | 27324405 | 27324405 | Missense_Mutation | SNP | T  | C  | 7  | 195 | c.694A>G                                       | c.(694-696)AAA>GAA   | p.K232E       |
| Pat_59 | Pre-Treatment | C2orf16  | 84226  | 37 | 2  | 27804718 | 27804718 | Missense_Mutation | SNP | G  | A  | 6  | 284 | c.5279G>A                                      | c.(5278-5280)AGT>AAT | p.S1760N      |
| Pat_59 | Pre-Treatment | PLB1     | 151056 | 37 | 2  | 28843826 | 28843826 | Missense_Mutation | SNP | G  | A  | 4  | 112 | c.3508G>A                                      | c.(3508-3510)GCG>ACG | p.A1170T      |
| Pat_59 | Pre-Treatment | XDH      | 7498   | 37 | 2  | 31606627 | 31606627 | Missense_Mutation | SNP | G  | A  | 5  | 21  | c.880C>T                                       | c.(880-882)CCC>TCC   | p.P294S       |
| Pat_59 | Pre-Treatment | PRKD3    | 23683  | 37 | 2  | 37516501 | 37516501 | Missense_Mutation | SNP | C  | T  | 4  | 67  | c.715G>A                                       | c.(715-717)GAG>AAG   | p.E239K       |
| Pat_59 | Pre-Treatment | THADA    | 63892  | 37 | 2  | 43519999 | 43519999 | Missense_Mutation | SNP | C  | T  | 4  | 65  | c.4792G>A                                      | c.(4792-4794)GAA>AAA | p.E1598K      |
| Pat_59 | Pre-Treatment | TSPYL6   | 388951 | 37 | 2  | 54483191 | 54483191 | Missense_Mutation | SNP | G  | T  | 4  | 81  | c.98C>A                                        | c.(97-99)ACA>AAA     | p.T33K        |
| Pat_59 | Pre-Treatment | ETAA1    | 54465  | 37 | 2  | 67631483 | 67631483 | Missense_Mutation | SNP | G  | A  | 4  | 79  | c.1669G>A                                      | c.(1669-1671)GGC>AGC | p.G557S       |
| Pat_59 | Pre-Treatment | EXOC6B   | 23233  | 37 | 2  | 72707789 | 72707789 | Nonsense_Mutation | SNP | C  | A  | 3  | 4   | c.1756G>T                                      | c.(1756-1758)GAG>TAG | p.E586*       |
| Pat_59 | Pre-Treatment | C2orf78  | 388960 | 37 | 2  | 74040645 | 74040645 | Missense_Mutation | SNP | C  | T  | 3  | 21  | c.139C>T                                       | c.(139-141)CGG>TGG   | p.R47W        |
| Pat_59 | Pre-Treatment | RTKN     | 6242   | 37 | 2  | 74668867 | 74668867 | Missense_Mutation | SNP | C  | T  | 4  | 21  | c.77G>A                                        | c.(76-78)CGC>CAC     | p.R26H        |
| Pat_59 | Pre-Treatment | CTNNA2   | 1496   | 37 | 2  | 80808879 | 80808879 | Missense_Mutation | SNP | G  | T  | 4  | 91  | c.1942G>T                                      | c.(1942-1944)GAT>TAT | p.D648Y       |

|        |               |          |        |    |    |           |           |                   |     |    |    |    |     |                                   |                        |               |
|--------|---------------|----------|--------|----|----|-----------|-----------|-------------------|-----|----|----|----|-----|-----------------------------------|------------------------|---------------|
| Pat_59 | Pre-Treatment | ACTR1B   | 10120  | 37 | 2  | 98274433  | 98274433  | Missense_Mutation | SNP | G  | A  | 4  | 110 | c.898C>T                          | c.(898-900)CTC>TTC     | p.L300F       |
| Pat_59 | Pre-Treatment | LYG2     | 254773 | 37 | 2  | 99860491  | 99860491  | Missense_Mutation | SNP | G  | A  | 4  | 105 | c.491C>T                          | c.(490-492)CCC>CTC     | p.P164L       |
| Pat_59 | Pre-Treatment | SH3RF3   | 344558 | 37 | 2  | 109964230 | 109964230 | Missense_Mutation | SNP | G  | A  | 3  | 31  | c.674G>A                          | c.(673-675)CGC>CAC     | p.R225H       |
| Pat_59 | Pre-Treatment | PSD4     | 23550  | 37 | 2  | 113942609 | 113942609 | Missense_Mutation | SNP | G  | A  | 4  | 92  | c.1132G>A                         | c.(1132-1134)GGA>AGA   | p.G378R       |
| Pat_59 | Pre-Treatment | CLASP1   | 23332  | 37 | 2  | 122122785 | 122122785 | Missense_Mutation | SNP | C  | T  | 4  | 21  | c.3962G>A                         | c.(3961-3963)CGG>CAG   | p.R1321Q      |
| Pat_59 | Pre-Treatment | POTEF    | 728378 | 37 | 2  | 130877782 | 130877782 | Missense_Mutation | SNP | A  | G  | 5  | 193 | c.307T>C                          | c.(307-309)TGC>CGC     | p.C103R       |
| Pat_59 | Pre-Treatment | ACVR1    | 90     | 37 | 2  | 158595058 | 158595058 | Missense_Mutation | SNP | G  | A  | 4  | 125 | c.1289C>T                         | c.(1288-1290)CCG>CTG   | p.P430L       |
| Pat_59 | Pre-Treatment | TTC21B   | 79809  | 37 | 2  | 166740465 | 166740465 | Nonsense_Mutation | SNP | G  | A  | 4  | 80  | c.3523C>T                         | c.(3523-3525)CGA>TGA   | p.R1175*      |
| Pat_59 | Pre-Treatment | SCN9A    | 6335   | 37 | 2  | 167055671 | 167055671 | Missense_Mutation | SNP | C  | T  | 29 | 91  | c.5445G>A                         | c.(5443-5445)ATG>ATA   | p.M1815I      |
| Pat_59 | Pre-Treatment | LRP2     | 4036   | 37 | 2  | 170011107 | 170011107 | Missense_Mutation | SNP | G  | A  | 4  | 128 | c.12158C>T                        | c.(12157-12159)TCT>TTT | p.S4053F      |
| Pat_59 | Pre-Treatment | LRP2     | 4036   | 37 | 2  | 170050348 | 170050348 | Missense_Mutation | SNP | C  | T  | 4  | 113 | c.8753G>A                         | c.(8752-8754)TGC>TAC   | p.C2918Y      |
| Pat_59 | Pre-Treatment | MYO3B    | 140469 | 37 | 2  | 171399445 | 171399445 | Missense_Mutation | SNP | G  | A  | 19 | 117 | c.3605G>A                         | c.(3604-3606)GGG>GAG   | p.G1202E      |
| Pat_59 | Pre-Treatment | GORASP2  | 26003  | 37 | 2  | 171811261 | 171811261 | Missense_Mutation | SNP | C  | A  | 3  | 28  | c.668C>A                          | c.(667-669)CCT>CAT     | p.P223H       |
| Pat_59 | Pre-Treatment | CCDC141  | 285025 | 37 | 2  | 179718182 | 179718182 | Missense_Mutation | SNP | G  | A  | 4  | 108 | c.1505C>T                         | c.(1504-1506)GCT>GTT   | p.A502V       |
| Pat_59 | Pre-Treatment | CWC22    | 57703  | 37 | 2  | 180835497 | 180835497 | Missense_Mutation | SNP | G  | A  | 4  | 83  | c.1027C>T                         | c.(1027-1029)CGG>TGG   | p.R343W       |
| Pat_59 | Pre-Treatment | NEUROD1  | 4760   | 37 | 2  | 182542780 | 182542780 | Missense_Mutation | SNP | C  | A  | 5  | 135 | c.808G>T                          | c.(808-810)GAT>TAT     | p.D270Y       |
| Pat_59 | Pre-Treatment | PMS1     | 5378   | 37 | 2  | 190742010 | 190742010 | Missense_Mutation | SNP | C  | T  | 3  | 54  | c.2647C>T                         | c.(2647-2649)CGT>TGT   | p.R883C       |
| Pat_59 | Pre-Treatment | HIBCH    | 26275  | 37 | 2  | 191109629 | 191109629 | Missense_Mutation | SNP | G  | A  | 4  | 137 | c.875C>T                          | c.(874-876)GCC>GTC     | p.A292V       |
| Pat_59 | Pre-Treatment | DNAH7    | 56171  | 37 | 2  | 196740512 | 196740512 | Missense_Mutation | SNP | G  | A  | 4  | 51  | c.6173C>T                         | c.(6172-6174)CCT>CTT   | p.P2058L      |
| Pat_59 | Pre-Treatment | HECW2    | 57520  | 37 | 2  | 197172663 | 197172663 | Missense_Mutation | SNP | G  | A  | 4  | 115 | c.2581C>T                         | c.(2581-2583)CGG>TGG   | p.R861W       |
| Pat_59 | Pre-Treatment | COQ10B   | 80219  | 37 | 2  | 198327295 | 198327295 | Missense_Mutation | SNP | C  | T  | 4  | 68  | c.287C>T                          | c.(286-288)TCG>TTG     | p.S96L        |
| Pat_59 | Pre-Treatment | PARD3B   | 117583 | 37 | 2  | 206480196 | 206480196 | Missense_Mutation | SNP | C  | T  | 17 | 120 | c.3277C>T                         | c.(3277-3279)CCT>TCT   | p.P1093S      |
| Pat_59 | Pre-Treatment | TMEM169  | 92691  | 37 | 2  | 216960853 | 216960853 | Missense_Mutation | SNP | G  | A  | 3  | 61  | c.167G>A                          | c.(166-168)CGC>CAC     | p.R56H        |
| Pat_59 | Pre-Treatment | TUBA4A   | 7277   | 37 | 2  | 220115571 | 220115571 | Missense_Mutation | SNP | C  | T  | 4  | 76  | c.850G>A                          | c.(850-852)GAG>AAG     | p.E284K       |
| Pat_59 | Pre-Treatment | KCNE4    | 23704  | 37 | 2  | 223917622 | 223917622 | Missense_Mutation | SNP | C  | T  | 3  | 45  | c.74C>T                           | c.(73-75)GCG>GTG       | p.A25V        |
| Pat_59 | Pre-Treatment | HTR2B    | 3357   | 37 | 2  | 231973844 | 231973844 | Missense_Mutation | SNP | G  | A  | 4  | 126 | c.833C>T                          | c.(832-834)CCG>CTG     | p.P278L       |
| Pat_59 | Pre-Treatment | DIS3L2   | 129563 | 37 | 2  | 233164770 | 233164771 | Missense_Mutation | DNP | GG | CT | 4  | 52  | .1680_1681GG>C678-1683)CTGGAC>CTC |                        | p.D561Y       |
| Pat_59 | Pre-Treatment | CAPN10   | 11132  | 37 | 2  | 241537456 | 241537456 | Missense_Mutation | SNP | C  | T  | 8  | 48  | c.1895C>T                         | c.(1894-1896)CCG>CTG   | p.P632L       |
| Pat_59 | Pre-Treatment | FAM110A  | 83541  | 37 | 20 | 826310    | 826310    | Missense_Mutation | SNP | G  | A  | 3  | 47  | c.863G>A                          | c.(862-864)CGG>CAG     | p.R288Q       |
| Pat_59 | Pre-Treatment | CHGB     | 1114   | 37 | 20 | 5903172   | 5903172   | Missense_Mutation | SNP | G  | A  | 3  | 12  | c.382G>A                          | c.(382-384)GGG>AGG     | p.G128R       |
| Pat_59 | Pre-Treatment | C20orf12 | 55184  | 37 | 20 | 18445989  | 18445989  | Nonsense_Mutation | SNP | G  | T  | 3  | 32  | c.14C>A                           | c.(13-15)TCA>TAA       | p.S5*         |
| Pat_59 | Pre-Treatment | C20orf26 | 26074  | 37 | 20 | 20258004  | 20258004  | Missense_Mutation | SNP | G  | A  | 12 | 96  | c.2698G>A                         | c.(2698-2700)GAT>AAT   | p.D900N       |
| Pat_59 | Pre-Treatment | SUN5     | 140732 | 37 | 20 | 31573627  | 31573627  | Missense_Mutation | SNP | A  | G  | 3  | 40  | c.812T>C                          | c.(811-813)CTG>CCG     | p.L271P       |
| Pat_59 | Pre-Treatment | SUN5     | 140732 | 37 | 20 | 31584157  | 31584157  | Missense_Mutation | SNP | C  | T  | 4  | 47  | c.398G>A                          | c.(397-399)AGC>AAC     | p.S133N       |
| Pat_59 | Pre-Treatment | ITCH     | 83737  | 37 | 20 | 33069013  | 33069013  | Splice_Site       | SNP | T  | A  | 4  | 86  | c.2216_splice                     | c.e21+2                | p.R739_splice |
| Pat_59 | Pre-Treatment | SPAG4    | 6676   | 37 | 20 | 34207500  | 34207500  | Splice_Site       | SNP | G  | A  | 3  | 53  | c.910_splice                      | c.e10-1                | p.P304_splice |
| Pat_59 | Pre-Treatment | CTNBL1   | 56259  | 37 | 20 | 36500360  | 36500360  | Missense_Mutation | SNP | C  | T  | 4  | 107 | c.1637C>T                         | c.(1636-1638)CCG>CTG   | p.P546L       |
| Pat_59 | Pre-Treatment | KIAA0406 | 9675   | 37 | 20 | 36640607  | 36640607  | Missense_Mutation | SNP | C  | T  | 4  | 98  | c.1612G>A                         | c.(1612-1614)GTT>ATT   | p.V538I       |
| Pat_59 | Pre-Treatment | PLCG1    | 5335   | 37 | 20 | 39788769  | 39788769  | Missense_Mutation | SNP | C  | T  | 4  | 60  | c.488C>T                          | c.(487-489)TCA>TTA     | p.S163L       |
| Pat_59 | Pre-Treatment | PLCG1    | 5335   | 37 | 20 | 39795392  | 39795392  | Missense_Mutation | SNP | G  | A  | 4  | 103 | c.2194G>A                         | c.(2194-2196)GAC>AAC   | p.D732N       |
| Pat_59 | Pre-Treatment | CHD6     | 84181  | 37 | 20 | 40049366  | 40049366  | Missense_Mutation | SNP | C  | T  | 5  | 237 | c.5909G>A                         | c.(5908-5910)AGT>AAT   | p.S1970N      |
| Pat_59 | Pre-Treatment | HNF4A    | 3172   | 37 | 20 | 43034836  | 43034836  | Missense_Mutation | SNP | G  | A  | 3  | 49  | c.254G>A                          | c.(253-255)CGG>CAG     | p.R85Q        |
| Pat_59 | Pre-Treatment | CTSZ     | 1522   | 37 | 20 | 57581530  | 57581530  | Missense_Mutation | SNP | G  | A  | 4  | 90  | c.154C>T                          | c.(154-156)CGG>TGG     | p.R52W        |
| Pat_59 | Pre-Treatment | CDH26    | 60437  | 37 | 20 | 58559728  | 58559728  | Missense_Mutation | SNP | G  | T  | 4  | 110 | c.576G>T                          | c.(574-576)TTG>TTT     | p.L192F       |
| Pat_59 | Pre-Treatment | COL9A3   | 1299   | 37 | 20 | 61467644  | 61467644  | Missense_Mutation | SNP | G  | A  | 4  | 70  | c.1507G>A                         | c.(1507-1509)GTC>ATC   | p.V503I       |
| Pat_59 | Pre-Treatment | DIDO1    | 11083  | 37 | 20 | 61511181  | 61511182  | Missense_Mutation | DNP | CC | TT | 9  | 12  | .6126_6127GG>A124-6129)GAGGAG>GAA |                        | p.E2043K      |
| Pat_59 | Pre-Treatment | MYT1     | 4661   | 37 | 20 | 62844906  | 62844906  | Missense_Mutation | SNP | G  | T  | 4  | 93  | c.1537G>T                         | c.(1537-1539)GCT>TCT   | p.A513S       |



|        |               |          |        |    |    |           |           |                   |     |   |   |    |     |           |                      |          |
|--------|---------------|----------|--------|----|----|-----------|-----------|-------------------|-----|---|---|----|-----|-----------|----------------------|----------|
| Pat_59 | Pre-Treatment | ADAMTS1  | 9510   | 37 | 21 | 28210903  | 28210903  | Missense_Mutation | SNP | A | T | 4  | 58  | c.2059T>A | c.(2059-2061)TCC>ACC | p.S687T  |
| Pat_59 | Pre-Treatment | ADAMTS1  | 9510   | 37 | 21 | 28216622  | 28216622  | Missense_Mutation | SNP | C | T | 4  | 10  | c.652G>A  | c.(652-654)GAA>AAA   | p.E218K  |
| Pat_59 | Pre-Treatment | LRRC3    | 81543  | 37 | 21 | 45877068  | 45877068  | Missense_Mutation | SNP | G | T | 4  | 47  | c.541G>T  | c.(541-543)GTG>TTG   | p.V181L  |
| Pat_59 | Pre-Treatment | COL6A1   | 1291   | 37 | 21 | 47404383  | 47404383  | Missense_Mutation | SNP | G | A | 3  | 35  | c.428G>A  | c.(427-429)GGG>GAG   | p.G143E  |
| Pat_59 | Pre-Treatment | NEFH     | 4744   | 37 | 22 | 29885313  | 29885313  | Missense_Mutation | SNP | C | G | 5  | 161 | c.1684C>G | c.(1684-1686)CCT>GCT | p.P562A  |
| Pat_59 | Pre-Treatment | SEC14L2  | 23541  | 37 | 22 | 30818389  | 30818389  | Missense_Mutation | SNP | C | T | 4  | 127 | c.1205C>T | c.(1204-1206)CCG>CTG | p.P402L  |
| Pat_59 | Pre-Treatment | RRP7A    | 27341  | 37 | 22 | 42908975  | 42908975  | Missense_Mutation | SNP | C | T | 4  | 36  | c.784G>A  | c.(784-786)GAG>AAG   | p.E262K  |
| Pat_59 | Pre-Treatment | CELSR1   | 9620   | 37 | 22 | 46930231  | 46930231  | Missense_Mutation | SNP | G | A | 4  | 60  | c.2837C>T | c.(2836-2838)ACG>ATG | p.T946M  |
| Pat_59 | Pre-Treatment | TBC1D22A | 25771  | 37 | 22 | 47193409  | 47193409  | Missense_Mutation | SNP | G | A | 4  | 79  | c.529G>A  | c.(529-531)GGT>AGT   | p.G177S  |
| Pat_59 | Pre-Treatment | TLL8     | 164714 | 37 | 22 | 50470341  | 50470341  | Missense_Mutation | SNP | G | A | 3  | 15  | c.1481C>T | c.(1480-1482)GCC>GTC | p.A494V  |
| Pat_59 | Pre-Treatment | MAPK11   | 5600   | 37 | 22 | 50705408  | 50705408  | Missense_Mutation | SNP | G | A | 4  | 66  | c.565C>T  | c.(565-567)CGG>TGG   | p.R189W  |
| Pat_59 | Pre-Treatment | CPT1B    | 1375   | 37 | 22 | 51016211  | 51016211  | Missense_Mutation | SNP | C | T | 4  | 60  | c.134G>A  | c.(133-135)CGC>CAC   | p.R45H   |
| Pat_59 | Pre-Treatment | TLL3     | 26140  | 37 | 3  | 9871045   | 9871045   | Missense_Mutation | SNP | G | A | 4  | 104 | c.1520G>A | c.(1519-1521)TGT>TAT | p.C507Y  |
| Pat_59 | Pre-Treatment | ATP2B2   | 491    | 37 | 3  | 10491077  | 10491077  | Missense_Mutation | SNP | C | T | 6  | 19  | c.151G>A  | c.(151-153)GGG>AGG   | p.G51R   |
| Pat_59 | Pre-Treatment | NUP210   | 23225  | 37 | 3  | 13415268  | 13415268  | Missense_Mutation | SNP | C | A | 4  | 34  | c.1537G>T | c.(1537-1539)GTG>TTG | p.V513L  |
| Pat_59 | Pre-Treatment | NR2C2    | 7182   | 37 | 3  | 15080734  | 15080734  | Missense_Mutation | SNP | G | A | 3  | 24  | c.1616G>A | c.(1615-1617)CGA>CAA | p.R539Q  |
| Pat_59 | Pre-Treatment | ZFYVE20  | 64145  | 37 | 3  | 15131987  | 15131987  | Nonsense_Mutation | SNP | G | A | 4  | 110 | c.208C>T  | c.(208-210)CGA>TGA   | p.R70*   |
| Pat_59 | Pre-Treatment | STAC     | 6769   | 37 | 3  | 36485003  | 36485003  | Missense_Mutation | SNP | C | T | 24 | 37  | c.259C>T  | c.(259-261)CCT>TCT   | p.P87S   |
| Pat_59 | Pre-Treatment | ENTPD3   | 956    | 37 | 3  | 40465357  | 40465357  | Missense_Mutation | SNP | G | A | 4  | 102 | c.1256G>A | c.(1255-1257)CGC>CAC | p.R419H  |
| Pat_59 | Pre-Treatment | CCDC13   | 152206 | 37 | 3  | 42777260  | 42777260  | Missense_Mutation | SNP | A | G | 22 | 45  | c.1310T>C | c.(1309-1311)GTA>GCA | p.V437A  |
| Pat_59 | Pre-Treatment | CYP8B1   | 1582   | 37 | 3  | 42916093  | 42916093  | Missense_Mutation | SNP | C | T | 41 | 103 | c.1216G>A | c.(1216-1218)GAT>AAT | p.D406N  |
| Pat_59 | Pre-Treatment | EXOSC7   | 23016  | 37 | 3  | 45038656  | 45038656  | Missense_Mutation | SNP | G | A | 4  | 109 | c.332G>A  | c.(331-333)CGG>CAG   | p.R111Q  |
| Pat_59 | Pre-Treatment | AMT      | 275    | 37 | 3  | 49455301  | 49455301  | Missense_Mutation | SNP | G | A | 3  | 42  | c.983C>T  | c.(982-984)GCC>GTC   | p.A328V  |
| Pat_59 | Pre-Treatment | GRM2     | 2912   | 37 | 3  | 51743318  | 51743318  | Missense_Mutation | SNP | C | T | 3  | 44  | c.319C>T  | c.(319-321)CGT>TGT   | p.R107C  |
| Pat_59 | Pre-Treatment | TNNC1    | 7134   | 37 | 3  | 52488022  | 52488022  | Missense_Mutation | SNP | T | G | 2  | 1   | c.10A>C   | c.(10-12)ATC>CTC     | p.I4L    |
| Pat_59 | Pre-Treatment | ITIH3    | 3699   | 37 | 3  | 52840374  | 52840374  | Missense_Mutation | SNP | G | A | 3  | 53  | c.2008G>A | c.(2008-2010)GAT>AAT | p.D670N  |
| Pat_59 | Pre-Treatment | ERC2     | 26059  | 37 | 3  | 56026137  | 56026137  | Missense_Mutation | SNP | C | T | 52 | 142 | c.2203G>A | c.(2203-2205)GAG>AAG | p.E735K  |
| Pat_59 | Pre-Treatment | PTPRG    | 5793   | 37 | 3  | 62257109  | 62257109  | Missense_Mutation | SNP | T | C | 3  | 44  | c.3061T>C | c.(3061-3063)TAT>CAT | p.Y1021H |
| Pat_59 | Pre-Treatment | CADPS    | 8618   | 37 | 3  | 62578418  | 62578418  | Missense_Mutation | SNP | C | A | 3  | 27  | c.1331G>T | c.(1330-1332)GGC>GTC | p.G444V  |
| Pat_59 | Pre-Treatment | SUCLG2   | 8801   | 37 | 3  | 67546238  | 67546238  | Missense_Mutation | SNP | A | G | 4  | 73  | c.1046T>C | c.(1045-1047)CTC>CCC | p.L349P  |
| Pat_59 | Pre-Treatment | FAM86D   | 692099 | 37 | 3  | 75472158  | 75472158  | Missense_Mutation | SNP | G | A | 4  | 105 | c.692C>T  | c.(691-693)CCC>CTC   | p.P231L  |
| Pat_59 | Pre-Treatment | FAM55C   | 91775  | 37 | 3  | 101520758 | 101520758 | Missense_Mutation | SNP | G | A | 4  | 77  | c.773G>A  | c.(772-774)AGC>AAC   | p.S258N  |
| Pat_59 | Pre-Treatment | GSK3B    | 2932   | 37 | 3  | 119666143 | 119666143 | Missense_Mutation | SNP | C | T | 5  | 152 | c.338G>A  | c.(337-339)CGT>CAT   | p.R113H  |
| Pat_59 | Pre-Treatment | OSBPL11  | 114885 | 37 | 3  | 125271280 | 125271280 | Missense_Mutation | SNP | C | T | 4  | 22  | c.1399G>A | c.(1399-1401)GAG>AAG | p.E467K  |
| Pat_59 | Pre-Treatment | TRH      | 7200   | 37 | 3  | 129695650 | 129695650 | Missense_Mutation | SNP | C | A | 3  | 35  | c.320C>A  | c.(319-321)GCT>GAT   | p.A107D  |
| Pat_59 | Pre-Treatment | AMOTL2   | 51421  | 37 | 3  | 134086505 | 134086505 | Missense_Mutation | SNP | G | A | 3  | 19  | c.1049C>T | c.(1048-1050)GCT>GTT | p.A350V  |
| Pat_59 | Pre-Treatment | XRN1     | 54464  | 37 | 3  | 142133050 | 142133050 | Missense_Mutation | SNP | G | C | 20 | 52  | c.1520C>G | c.(1519-1521)CCT>CGT | p.P507R  |
| Pat_59 | Pre-Treatment | ZIC1     | 7545   | 37 | 3  | 147128782 | 147128782 | Missense_Mutation | SNP | G | A | 4  | 108 | c.883G>A  | c.(883-885)GTG>ATG   | p.V295M  |
| Pat_59 | Pre-Treatment | MECOM    | 2122   | 37 | 3  | 169099202 | 169099202 | Missense_Mutation | SNP | C | T | 3  | 22  | c.148G>A  | c.(148-150)GCC>ACC   | p.A50T   |
| Pat_59 | Pre-Treatment | FXR1     | 8087   | 37 | 3  | 180669215 | 180669215 | Nonsense_Mutation | SNP | G | T | 4  | 66  | c.760G>T  | c.(760-762)GAG>TAG   | p.E254*  |
| Pat_59 | Pre-Treatment | CLCN2    | 1181   | 37 | 3  | 184071570 | 184071570 | Missense_Mutation | SNP | G | A | 2  | 1   | c.1735C>T | c.(1735-1737)CGT>TGT | p.R579C  |
| Pat_59 | Pre-Treatment | ETV5     | 2119   | 37 | 3  | 185769911 | 185769911 | Missense_Mutation | SNP | G | A | 4  | 80  | c.1219C>T | c.(1219-1221)CGC>TGC | p.R407C  |
| Pat_59 | Pre-Treatment | ZNF595   | 152687 | 37 | 4  | 86222     | 86222     | Missense_Mutation | SNP | A | T | 4  | 120 | c.828A>T  | c.(826-828)AAA>AAT   | p.K276N  |
| Pat_59 | Pre-Treatment | ZNF141   | 7700   | 37 | 4  | 367245    | 367245    | Missense_Mutation | SNP | C | A | 5  | 150 | c.1019C>A | c.(1018-1020)ACA>AAA | p.T340K  |
| Pat_59 | Pre-Treatment | GAK      | 2580   | 37 | 4  | 887682    | 887682    | Missense_Mutation | SNP | G | A | 5  | 33  | c.857C>T  | c.(856-858)ACG>ATG   | p.T286M  |
| Pat_59 | Pre-Treatment | PPP2R2C  | 5522   | 37 | 4  | 6374336   | 6374336   | Missense_Mutation | SNP | G | A | 22 | 63  | c.539C>T  | c.(538-540)TCC>TTC   | p.S180F  |
| Pat_59 | Pre-Treatment | MAN2B2   | 23324  | 37 | 4  | 6612825   | 6612825   | Missense_Mutation | SNP | C | T | 3  | 47  | c.2383C>T | c.(2383-2385)CGG>TGG | p.R795W  |

|        |               |          |        |    |   |           |           |                   |     |    |    |    |     |                |                      |                |
|--------|---------------|----------|--------|----|---|-----------|-----------|-------------------|-----|----|----|----|-----|----------------|----------------------|----------------|
| Pat_59 | Pre-Treatment | QDPR     | 5860   | 37 | 4 | 17488827  | 17488827  | Missense_Mutation | SNP | C  | T  | 4  | 103 | c.662G>A       | c.(661-663)CGA>CAA   | p.R221Q        |
| Pat_59 | Pre-Treatment | LGI2     | 55203  | 37 | 4 | 25028514  | 25028514  | Missense_Mutation | SNP | G  | A  | 4  | 103 | c.317C>T       | c.(316-318)GCT>GTT   | p.A106V        |
| Pat_59 | Pre-Treatment | ANAPC4   | 29945  | 37 | 4 | 25382008  | 25382008  | Nonsense_Mutation | SNP | C  | T  | 4  | 79  | c.142C>T       | c.(142-144)CGA>TGA   | p.R48*         |
| Pat_59 | Pre-Treatment | GABRG1   | 2565   | 37 | 4 | 46043129  | 46043129  | Missense_Mutation | SNP | C  | T  | 18 | 92  | c.1274G>A      | c.(1273-1275)GGA>GAA | p.G425E        |
| Pat_59 | Pre-Treatment | ATP10D   | 57205  | 37 | 4 | 47560135  | 47560135  | Missense_Mutation | SNP | G  | T  | 4  | 50  | c.2279G>T      | c.(2278-2280)GGA>GTA | p.G760V        |
| Pat_59 | Pre-Treatment | LRRC66   | 339977 | 37 | 4 | 52860897  | 52860897  | Missense_Mutation | SNP | C  | T  | 4  | 73  | c.2291G>A      | c.(2290-2292)GGG>GAG | p.G764E        |
| Pat_59 | Pre-Treatment | GSX2     | 170825 | 37 | 4 | 54968000  | 54968000  | Missense_Mutation | SNP | G  | A  | 3  | 45  | c.826G>A       | c.(826-828)GGG>AGG   | p.G276R        |
| Pat_59 | Pre-Treatment | ADAMTS3  | 9508   | 37 | 4 | 73175150  | 73175150  | Missense_Mutation | SNP | C  | T  | 4  | 116 | c.2143G>A      | c.(2143-2145)GTG>ATG | p.V715M        |
| Pat_59 | Pre-Treatment | FRAS1    | 80144  | 37 | 4 | 79428649  | 79428649  | Missense_Mutation | SNP | G  | C  | 6  | 23  | c.9391G>C      | c.(9391-9393)GTC>CTC | p.V3131L       |
| Pat_59 | Pre-Treatment | EMCN     | 51705  | 37 | 4 | 101342534 | 101342534 | Missense_Mutation | SNP | C  | T  | 19 | 29  | c.569G>A       | c.(568-570)AGT>AAT   | p.S190N        |
| Pat_59 | Pre-Treatment | EMCN     | 51705  | 37 | 4 | 101386624 | 101386624 | Missense_Mutation | SNP | G  | A  | 4  | 54  | c.332C>T       | c.(331-333)ACA>ATA   | p.T111I        |
| Pat_59 | Pre-Treatment | CCRN4L   | 25819  | 37 | 4 | 139964386 | 139964386 | Missense_Mutation | SNP | G  | A  | 3  | 54  | c.349G>A       | c.(349-351)GTC>ATC   | p.V117I        |
| Pat_59 | Pre-Treatment | TLR2     | 7097   | 37 | 4 | 154625222 | 154625222 | Missense_Mutation | SNP | C  | T  | 12 | 63  | c.1163C>T      | c.(1162-1164)TCT>TTT | p.S388F        |
| Pat_59 | Pre-Treatment | FGB      | 2244   | 37 | 4 | 155490797 | 155490797 | Missense_Mutation | SNP | G  | A  | 24 | 52  | c.1090G>A      | c.(1090-1092)GAA>AAA | p.E364K        |
| Pat_59 | Pre-Treatment | RXFP1    | 59350  | 37 | 4 | 159569854 | 159569854 | Nonsense_Mutation | SNP | C  | T  | 6  | 30  | c.1960C>T      | c.(1960-1962)CAG>TAG | p.Q654*        |
| Pat_59 | Pre-Treatment | ADAM29   | 11086  | 37 | 4 | 175898987 | 175898987 | Missense_Mutation | SNP | C  | T  | 5  | 184 | c.2311C>T      | c.(2311-2313)CGG>TGG | p.R771W        |
| Pat_59 | Pre-Treatment | NSUN2    | 54888  | 37 | 5 | 6611904   | 6611904   | Missense_Mutation | SNP | C  | A  | 4  | 39  | c.1029G>T      | c.(1027-1029)TTG>TTT | p.L343F        |
| Pat_59 | Pre-Treatment | TARS     | 6897   | 37 | 5 | 33467737  | 33467737  | Missense_Mutation | SNP | G  | A  | 4  | 98  | c.2096G>A      | c.(2095-2097)CGC>CAC | p.R699H        |
| Pat_59 | Pre-Treatment | C5orf42  | 65250  | 37 | 5 | 37173856  | 37173856  | Splice_Site       | SNP | C  | T  | 4  | 77  | c.6171_splice  | c.e32+1              | p.Q2057_splice |
| Pat_59 | Pre-Treatment | RICTOR   | 253260 | 37 | 5 | 38947452  | 38947452  | Missense_Mutation | SNP | G  | A  | 4  | 100 | c.4228C>T      | c.(4228-4230)CGG>TGG | p.R1410W       |
| Pat_59 | Pre-Treatment | RICTOR   | 253260 | 37 | 5 | 38955743  | 38955743  | Missense_Mutation | SNP | G  | A  | 5  | 174 | c.2563C>T      | c.(2563-2565)CGG>TGG | p.R855W        |
| Pat_59 | Pre-Treatment | DAB2     | 1601   | 37 | 5 | 39383049  | 39383049  | Missense_Mutation | SNP | C  | T  | 4  | 104 | c.1012G>A      | c.(1012-1014)GGT>AGT | p.G338S        |
| Pat_59 | Pre-Treatment | C5orf39  | 389289 | 37 | 5 | 43039674  | 43039674  | Missense_Mutation | SNP | G  | A  | 4  | 104 | c.475C>T       | c.(475-477)CTC>TTC   | p.L159F        |
| Pat_59 | Pre-Treatment | POC5     | 134359 | 37 | 5 | 74988292  | 74988292  | Missense_Mutation | SNP | G  | T  | 4  | 138 | c.724C>A       | c.(724-726)CAA>AAA   | p.Q242K        |
| Pat_59 | Pre-Treatment | CMYA5    | 202333 | 37 | 5 | 79033184  | 79033184  | Missense_Mutation | SNP | G  | A  | 4  | 89  | c.8596G>A      | c.(8596-8598)GTT>ATT | p.V2866I       |
| Pat_59 | Pre-Treatment | SPZ1     | 84654  | 37 | 5 | 79616465  | 79616465  | Missense_Mutation | SNP | T  | A  | 4  | 115 | c.431T>A       | c.(430-432)ATG>AAG   | p.M144K        |
| Pat_59 | Pre-Treatment | ATP6AP1L | 92270  | 37 | 5 | 81613868  | 81613868  | Missense_Mutation | SNP | G  | A  | 4  | 62  | c.424G>A       | c.(424-426)GCC>ACC   | p.A142T        |
| Pat_59 | Pre-Treatment | HAPLN1   | 1404   | 37 | 5 | 82940241  | 82940242  | Missense_Mutation | DNP | CC | TT | 13 | 50  | c.715_716GG>AA | c.(715-717)GGA>AAA   | p.G239K        |
| Pat_59 | Pre-Treatment | ARRDC3   | 57561  | 37 | 5 | 90678845  | 90678845  | Missense_Mutation | SNP | G  | A  | 4  | 111 | c.65C>T        | c.(64-66)CCT>CTT     | p.P22L         |
| Pat_59 | Pre-Treatment | TTC37    | 9652   | 37 | 5 | 94876500  | 94876500  | Missense_Mutation | SNP | C  | T  | 6  | 135 | c.437G>A       | c.(436-438)CGG>CAG   | p.R146Q        |
| Pat_59 | Pre-Treatment | PCSK1    | 5122   | 37 | 5 | 95746489  | 95746489  | Missense_Mutation | SNP | C  | T  | 27 | 61  | c.1084G>A      | c.(1084-1086)GAC>AAC | p.D362N        |
| Pat_59 | Pre-Treatment | SNCAIP   | 9627   | 37 | 5 | 121759064 | 121759064 | Missense_Mutation | SNP | C  | T  | 4  | 95  | c.632C>T       | c.(631-633)TCT>TTT   | p.S211F        |
| Pat_59 | Pre-Treatment | 8-Sep    | 23176  | 37 | 5 | 132099937 | 132099937 | Missense_Mutation | SNP | T  | C  | 4  | 45  | c.326A>G       | c.(325-327)GAT>GGT   | p.D109G        |
| Pat_59 | Pre-Treatment | LRRTM2   | 26045  | 37 | 5 | 138209228 | 138209228 | Missense_Mutation | SNP | C  | T  | 16 | 44  | c.1022G>A      | c.(1021-1023)AGT>AAT | p.S341N        |
| Pat_59 | Pre-Treatment | CTNNA1   | 1495   | 37 | 5 | 138260295 | 138260295 | Missense_Mutation | SNP | G  | A  | 3  | 37  | c.1643G>A      | c.(1642-1644)CGG>CAG | p.R548Q        |
| Pat_59 | Pre-Treatment | PCDHB5   | 26167  | 37 | 5 | 140517195 | 140517195 | Missense_Mutation | SNP | C  | T  | 4  | 120 | c.2179C>T      | c.(2179-2181)CCC>TCC | p.P727S        |
| Pat_59 | Pre-Treatment | PCDHB16  | 57717  | 37 | 5 | 140563894 | 140563894 | Missense_Mutation | SNP | C  | T  | 4  | 133 | c.1760C>T      | c.(1759-1761)ACC>ATC | p.T587I        |
| Pat_59 | Pre-Treatment | PCDHGB1  | 56104  | 37 | 5 | 140732184 | 140732184 | Missense_Mutation | SNP | G  | A  | 2  | 1   | c.2357G>A      | c.(2356-2358)JGT>TAT | p.C786Y        |
| Pat_59 | Pre-Treatment | PPARGC1B | 133522 | 37 | 5 | 149212865 | 149212865 | Missense_Mutation | SNP | G  | A  | 4  | 50  | c.1229G>A      | c.(1228-1230)CGC>CAC | p.R410H        |
| Pat_59 | Pre-Treatment | PDE6A    | 5145   | 37 | 5 | 149323816 | 149323816 | Missense_Mutation | SNP | C  | T  | 4  | 112 | c.421G>A       | c.(421-423)GTG>ATG   | p.V141M        |
| Pat_59 | Pre-Treatment | WWC1     | 23286  | 37 | 5 | 167882526 | 167882526 | Splice_Site       | SNP | G  | A  | 4  | 77  | c.2823_splice  | c.e19+1              | p.R941_splice  |
| Pat_59 | Pre-Treatment | FGF18    | 8817   | 37 | 5 | 170883681 | 170883681 | Missense_Mutation | SNP | C  | T  | 4  | 124 | c.496C>T       | c.(496-498)CGG>TGG   | p.R166W        |
| Pat_59 | Pre-Treatment | SNCB     | 6620   | 37 | 5 | 176048231 | 176048231 | Missense_Mutation | SNP | T  | A  | 2  | 3   | c.356A>T       | c.(355-357)TAT>TTT   | p.Y119F        |
| Pat_59 | Pre-Treatment | HK3      | 3101   | 37 | 5 | 176316669 | 176316669 | Missense_Mutation | SNP | G  | A  | 14 | 42  | c.707C>T       | c.(706-708)CCG>CTG   | p.P236L        |
| Pat_59 | Pre-Treatment | EXOC2    | 55770  | 37 | 6 | 633105    | 633105    | Missense_Mutation | SNP | C  | A  | 4  | 66  | c.131G>T       | c.(130-132)TGT>TTT   | p.C44F         |
| Pat_59 | Pre-Treatment | LY86     | 9450   | 37 | 6 | 6626622   | 6626623   | Missense_Mutation | DNP | CC | TT | 19 | 58  | c.320_321CC>TT | c.(319-321)CCC>CTT   | p.P107L        |
| Pat_59 | Pre-Treatment | ATXN1    | 6310   | 37 | 6 | 16327968  | 16327968  | Missense_Mutation | SNP | C  | T  | 3  | 22  | c.574G>A       | c.(574-576)GGA>AGA   | p.G192R        |

|        |               |           |        |    |   |           |           |                   |     |    |    |    |     |                |                      |                |
|--------|---------------|-----------|--------|----|---|-----------|-----------|-------------------|-----|----|----|----|-----|----------------|----------------------|----------------|
| Pat_59 | Pre-Treatment | CAP2      | 10486  | 37 | 6 | 17507884  | 17507884  | Missense_Mutation | SNP | G  | T  | 4  | 119 | c.457G>T       | c.(457-459)GGT>TGT   | p.G153C        |
| Pat_59 | Pre-Treatment | KDM1B     | 221656 | 37 | 6 | 18222197  | 18222197  | Missense_Mutation | SNP | G  | A  | 5  | 246 | c.1834G>A      | c.(1834-1836)GAA>AAA | p.E612K        |
| Pat_59 | Pre-Treatment | HIST1H2AB | 8335   | 37 | 6 | 26033484  | 26033484  | Missense_Mutation | SNP | G  | T  | 4  | 109 | c.313C>A       | c.(313-315)CAG>AAG   | p.Q105K        |
| Pat_59 | Pre-Treatment | BTN2A1    | 11120  | 37 | 6 | 26465619  | 26465619  | Missense_Mutation | SNP | G  | A  | 4  | 86  | c.919G>A       | c.(919-921)GAA>AAA   | p.E307K        |
| Pat_59 | Pre-Treatment | ZKSCAN3   | 80317  | 37 | 6 | 28333529  | 28333529  | Missense_Mutation | SNP | A  | G  | 3  | 62  | c.1084A>G      | c.(1084-1086)AGA>GGA | p.R362G        |
| Pat_59 | Pre-Treatment | SKIV2L    | 6499   | 37 | 6 | 31936780  | 31936780  | Missense_Mutation | SNP | C  | T  | 3  | 28  | c.3313C>T      | c.(3313-3315)CCT>TCT | p.P1105S       |
| Pat_59 | Pre-Treatment | TNXB      | 7148   | 37 | 6 | 32029967  | 32029967  | Missense_Mutation | SNP | G  | A  | 4  | 43  | c.7135C>T      | c.(7135-7137)CGT>TGT | p.R2379C       |
| Pat_59 | Pre-Treatment | WDR46     | 9277   | 37 | 6 | 33248598  | 33248598  | Missense_Mutation | SNP | C  | T  | 4  | 40  | c.1282G>A      | c.(1282-1284)GGG>AGG | p.G428R        |
| Pat_59 | Pre-Treatment | PHF1      | 5252   | 37 | 6 | 33383066  | 33383066  | Missense_Mutation | SNP | G  | A  | 6  | 372 | c.1294G>A      | c.(1294-1296)GGC>AGC | p.G432S        |
| Pat_59 | Pre-Treatment | C6orf129  | 154467 | 37 | 6 | 37451045  | 37451045  | Missense_Mutation | SNP | G  | A  | 4  | 74  | c.211C>T       | c.(211-213)CGG>TGG   | p.R71W         |
| Pat_59 | Pre-Treatment | ZNF318    | 24149  | 37 | 6 | 43309855  | 43309855  | Missense_Mutation | SNP | G  | T  | 4  | 80  | c.3371C>A      | c.(3370-3372)GCA>GAA | p.A1124E       |
| Pat_59 | Pre-Treatment | KHDRBS2   | 202559 | 37 | 6 | 62611258  | 62611258  | Missense_Mutation | SNP | G  | A  | 13 | 53  | c.502C>T       | c.(502-504)CGT>TGT   | p.R168C        |
| Pat_59 | Pre-Treatment | LCA5      | 167691 | 37 | 6 | 80196800  | 80196800  | Nonsense_Mutation | SNP | A  | T  | 4  | 73  | c.2015T>A      | c.(2014-2016)TTA>TAA | p.L672*        |
| Pat_59 | Pre-Treatment | DOPEY1    | 23033  | 37 | 6 | 83818692  | 83818692  | Missense_Mutation | SNP | G  | T  | 4  | 124 | c.384G>T       | c.(382-384)TTG>TTT   | p.L128F        |
| Pat_59 | Pre-Treatment | MDN1      | 23195  | 37 | 6 | 90420481  | 90420481  | Missense_Mutation | SNP | C  | A  | 4  | 68  | c.7684G>T      | c.(7684-7686)GCA>TCA | p.A2562S       |
| Pat_59 | Pre-Treatment | BACH2     | 60468  | 37 | 6 | 90660099  | 90660099  | Missense_Mutation | SNP | G  | A  | 4  | 70  | c.1726C>T      | c.(1726-1728)CGG>TGG | p.R576W        |
| Pat_59 | Pre-Treatment | C6orf167  | 253714 | 37 | 6 | 97702558  | 97702558  | Missense_Mutation | SNP | T  | C  | 3  | 73  | c.994A>G       | c.(994-996)AGT>GGT   | p.S332G        |
| Pat_59 | Pre-Treatment | HACE1     | 57531  | 37 | 6 | 105280946 | 105280946 | Missense_Mutation | SNP | G  | A  | 4  | 79  | c.505C>T       | c.(505-507)CAT>TAT   | p.H169Y        |
| Pat_59 | Pre-Treatment | BEND3     | 57673  | 37 | 6 | 107390266 | 107390266 | Missense_Mutation | SNP | G  | A  | 4  | 91  | c.2129C>T      | c.(2128-2130)TCG>TTG | p.S710L        |
| Pat_59 | Pre-Treatment | SMPD2     | 6610   | 37 | 6 | 109763242 | 109763242 | Missense_Mutation | SNP | T  | C  | 73 | 158 | c.290T>C       | c.(289-291)ATC>ACC   | p.I97T         |
| Pat_59 | Pre-Treatment | TAAR6     | 319100 | 37 | 6 | 132892037 | 132892037 | Missense_Mutation | SNP | G  | A  | 4  | 85  | c.577G>A       | c.(577-579)GTT>ATT   | p.V193I        |
| Pat_59 | Pre-Treatment | ALDH8A1   | 64577  | 37 | 6 | 135263615 | 135263615 | Missense_Mutation | SNP | G  | A  | 4  | 28  | c.374C>T       | c.(373-375)ACG>ATG   | p.T125M        |
| Pat_59 | Pre-Treatment | PBOV1     | 59351  | 37 | 6 | 138539325 | 138539325 | Missense_Mutation | SNP | C  | A  | 4  | 70  | c.208G>T       | c.(208-210)GAT>TAT   | p.D70Y         |
| Pat_59 | Pre-Treatment | ZBTB2     | 57621  | 37 | 6 | 151687722 | 151687722 | Missense_Mutation | SNP | C  | T  | 4  | 73  | c.479G>A       | c.(478-480)CGG>CAG   | p.R160Q        |
| Pat_59 | Pre-Treatment | ESR1      | 2099   | 37 | 6 | 152382233 | 152382233 | Missense_Mutation | SNP | T  | C  | 4  | 65  | c.1343T>C      | c.(1342-1344)CTC>CCC | p.L448P        |
| Pat_59 | Pre-Treatment | FAM120B   | 84498  | 37 | 6 | 170627722 | 170627723 | Missense_Mutation | DNP | TG | CA | 7  | 361 | .1244_1245TG>C | c.(1243-1245)ATG>ACA | p.M415T        |
| Pat_59 | Pre-Treatment | MICALL2   | 79778  | 37 | 7 | 1480281   | 1480281   | Missense_Mutation | SNP | G  | A  | 4  | 57  | c.1751C>T      | c.(1750-1752)CCG>CTG | p.P584L        |
| Pat_59 | Pre-Treatment | CARD11    | 84433  | 37 | 7 | 2969705   | 2969705   | Missense_Mutation | SNP | T  | C  | 3  | 10  | c.1574A>G      | c.(1573-1575)AAG>AGG | p.K525R        |
| Pat_59 | Pre-Treatment | FOXK1     | 221937 | 37 | 7 | 4794907   | 4794907   | Missense_Mutation | SNP | G  | A  | 4  | 41  | c.943G>A       | c.(943-945)GTG>ATG   | p.V315M        |
| Pat_59 | Pre-Treatment | CYTH3     | 9265   | 37 | 7 | 6205183   | 6205183   | Missense_Mutation | SNP | C  | T  | 4  | 95  | c.965G>A       | c.(964-966)CGG>CAG   | p.R322Q        |
| Pat_59 | Pre-Treatment | RAC1      | 5879   | 37 | 7 | 6441553   | 6441553   | Missense_Mutation | SNP | A  | G  | 3  | 62  | c.343A>G       | c.(343-345)ACT>GCT   | p.T115A        |
| Pat_59 | Pre-Treatment | AGR2      | 10551  | 37 | 7 | 16841300  | 16841300  | Missense_Mutation | SNP | G  | A  | 5  | 175 | c.121C>T       | c.(121-123)CCC>TCC   | p.P41S         |
| Pat_59 | Pre-Treatment | CCDC129   | 223075 | 37 | 7 | 31617722  | 31617722  | Missense_Mutation | SNP | G  | A  | 4  | 5   | c.844G>A       | c.(844-846)GAA>AAA   | p.E282K        |
| Pat_59 | Pre-Treatment | CCDC129   | 223075 | 37 | 7 | 31692421  | 31692421  | Missense_Mutation | SNP | A  | G  | 4  | 99  | c.3113A>G      | c.(3112-3114)AAG>AGG | p.K1038R       |
| Pat_59 | Pre-Treatment | TXNDC3    | 51314  | 37 | 7 | 37916531  | 37916531  | Missense_Mutation | SNP | G  | A  | 9  | 26  | c.916G>A       | c.(916-918)GAT>AAT   | p.D306N        |
| Pat_59 | Pre-Treatment | AEBP1     | 165    | 37 | 7 | 44153237  | 44153237  | Missense_Mutation | SNP | C  | T  | 4  | 126 | c.2854C>T      | c.(2854-2856)CGC>TGC | p.R952C        |
| Pat_59 | Pre-Treatment | ABCA13    | 154664 | 37 | 7 | 48314320  | 48314320  | Missense_Mutation | SNP | G  | A  | 4  | 111 | c.5057G>A      | c.(5056-5058)AGT>AAT | p.S1686N       |
| Pat_59 | Pre-Treatment | SPDYE5    | 442590 | 37 | 7 | 75130942  | 75130942  | Missense_Mutation | SNP | C  | T  | 7  | 297 | c.817C>T       | c.(817-819)CGG>TGG   | p.R273W        |
| Pat_59 | Pre-Treatment | SPDYE5    | 442590 | 37 | 7 | 75130958  | 75130958  | Missense_Mutation | SNP | G  | A  | 7  | 237 | c.833G>A       | c.(832-834)CGT>CAT   | p.R278H        |
| Pat_59 | Pre-Treatment | DTX2      | 113878 | 37 | 7 | 76112200  | 76112200  | Missense_Mutation | SNP | G  | A  | 5  | 196 | c.644G>A       | c.(643-645)CGC>CAC   | p.R215H        |
| Pat_59 | Pre-Treatment | SEMA3C    | 10512  | 37 | 7 | 80374233  | 80374233  | Missense_Mutation | SNP | T  | C  | 4  | 133 | c.2233A>G      | c.(2233-2235)AGG>GGG | p.R745G        |
| Pat_59 | Pre-Treatment | KIAA1324L | 222223 | 37 | 7 | 86542393  | 86542393  | Missense_Mutation | SNP | G  | A  | 18 | 51  | c.1859C>T      | c.(1858-1860)CCC>CTC | p.P620L        |
| Pat_59 | Pre-Treatment | DBF4      | 10926  | 37 | 7 | 87507538  | 87507538  | Missense_Mutation | SNP | G  | A  | 4  | 93  | c.217G>A       | c.(217-219)GGG>AGG   | p.G73R         |
| Pat_59 | Pre-Treatment | CYP51A1   | 1595   | 37 | 7 | 91753148  | 91753148  | Missense_Mutation | SNP | G  | A  | 3  | 54  | c.790C>T       | c.(790-792)CGG>TGG   | p.R264W        |
| Pat_59 | Pre-Treatment | CALCR     | 799    | 37 | 7 | 93101770  | 93101770  | Missense_Mutation | SNP | C  | T  | 36 | 130 | c.400G>A       | c.(400-402)GGT>AGT   | p.G134S        |
| Pat_59 | Pre-Treatment | COL1A2    | 1278   | 37 | 7 | 94056318  | 94056318  | Splice_Site       | SNP | A  | G  | 3  | 56  | c.3106_splice  | c.e47-2              | p.G1036_splice |
| Pat_59 | Pre-Treatment | ZAN       | 7455   | 37 | 7 | 100349941 | 100349941 | Missense_Mutation | SNP | C  | T  | 8  | 256 | c.2213C>T      | c.(2212-2214)CCC>CTC | p.P738L        |

|        |               |          |           |    |   |           |           |                   |     |    |    |    |     |                |                      |               |
|--------|---------------|----------|-----------|----|---|-----------|-----------|-------------------|-----|----|----|----|-----|----------------|----------------------|---------------|
| Pat_59 | Pre-Treatment | MUC17    | 140453    | 37 | 7 | 100674946 | 100674946 | Missense_Mutation | SNP | G  | T  | 4  | 74  | c.249G>T       | c.(247-249)TTG>TTT   | p.L83F        |
| Pat_59 | Pre-Treatment | LRRRC17  | 10234     | 37 | 7 | 102580006 | 102580006 | Missense_Mutation | SNP | G  | A  | 4  | 136 | c.902G>A       | c.(901-903)AGC>AAC   | p.S301N       |
| Pat_59 | Pre-Treatment | SLC26A5  | 375611    | 37 | 7 | 103038448 | 103038448 | Missense_Mutation | SNP | G  | A  | 5  | 153 | c.902C>T       | c.(901-903)ACT>ATT   | p.T301I       |
| Pat_59 | Pre-Treatment | CFTR     | 1080      | 37 | 7 | 117232649 | 117232650 | Missense_Mutation | DNP | AG | GA | 14 | 36  | .2428_2429AG>G | c.(2428-2430)AGA>GAA | p.R810E       |
| Pat_59 | Pre-Treatment | RBM28    | 55131     | 37 | 7 | 127953323 | 127953323 | Missense_Mutation | SNP | G  | A  | 5  | 114 | c.2050C>T      | c.(2050-2052)CGG>TGG | p.R684W       |
| Pat_59 | Pre-Treatment | MEST     | 4232      | 37 | 7 | 130142537 | 130142537 | Missense_Mutation | SNP | G  | A  | 4  | 89  | c.802G>A       | c.(802-804)GCT>ACT   | p.A268T       |
| Pat_59 | Pre-Treatment | BRAF     | 673       | 37 | 7 | 140453136 | 140453136 | Missense_Mutation | SNP | A  | T  | 23 | 83  | c.1799T>A      | c.(1798-1800)GTG>GAG | p.V600E       |
| Pat_59 | Pre-Treatment | GBX1     | 2636      | 37 | 7 | 150864214 | 150864214 | Missense_Mutation | SNP | C  | T  | 3  | 17  | c.422G>A       | c.(421-423)GGC>GAC   | p.G141D       |
| Pat_59 | Pre-Treatment | NOM1     | 64434     | 37 | 7 | 156743173 | 156743173 | Missense_Mutation | SNP | G  | A  | 4  | 91  | c.742G>A       | c.(742-744)GAA>AAA   | p.E248K       |
| Pat_59 | Pre-Treatment | DLGAP2   | 9228      | 37 | 8 | 1645447   | 1645447   | Missense_Mutation | SNP | G  | A  | 4  | 109 | c.2691G>A      | c.(2689-2691)ATG>ATA | p.M897I       |
| Pat_59 | Pre-Treatment | PHYHIP   | 9796      | 37 | 8 | 22084462  | 22084462  | Missense_Mutation | SNP | C  | T  | 4  | 61  | c.242G>A       | c.(241-243)CGC>CAC   | p.R81H        |
| Pat_59 | Pre-Treatment | BIN3     | 55909     | 37 | 8 | 22481537  | 22481537  | Missense_Mutation | SNP | C  | T  | 3  | 35  | c.506G>A       | c.(505-507)CGG>CAG   | p.R169Q       |
| Pat_59 | Pre-Treatment | PTK2B    | 2185      | 37 | 8 | 27293298  | 27293298  | Nonsense_Mutation | SNP | C  | T  | 5  | 170 | c.1231C>T      | c.(1231-1233)CGA>TGA | p.R411*       |
| Pat_59 | Pre-Treatment | RB1CC1   | 9821      | 37 | 8 | 53573822  | 53573822  | Missense_Mutation | SNP | G  | A  | 4  | 46  | c.1378C>T      | c.(1378-1380)CTT>TTT | p.L460F       |
| Pat_59 | Pre-Treatment | C8orf34  | 116328    | 37 | 8 | 69688655  | 69688655  | Missense_Mutation | SNP | G  | A  | 5  | 56  | c.1168G>A      | c.(1168-1170)GGA>AGA | p.G390R       |
| Pat_59 | Pre-Treatment | ZFHX4    | 79776     | 37 | 8 | 77616870  | 77616870  | Missense_Mutation | SNP | G  | T  | 4  | 35  | c.547G>T       | c.(547-549)GCA>TCA   | p.A183S       |
| Pat_59 | Pre-Treatment | SNTB1    | 6641      | 37 | 8 | 121823555 | 121823555 | Missense_Mutation | SNP | C  | T  | 5  | 194 | c.529G>A       | c.(529-531)GTG>ATG   | p.V177M       |
| Pat_59 | Pre-Treatment | PHF20L1  | 51105     | 37 | 8 | 133848943 | 133848943 | Missense_Mutation | SNP | G  | A  | 4  | 76  | c.2068G>A      | c.(2068-2070)GAG>AAG | p.E690K       |
| Pat_59 | Pre-Treatment | SLC39A4  | 55630     | 37 | 8 | 145640420 | 145640420 | Missense_Mutation | SNP | C  | T  | 4  | 42  | c.742G>A       | c.(742-744)GCC>ACC   | p.A248T       |
| Pat_59 | Pre-Treatment | PPP1R16A | 84988     | 37 | 8 | 145726954 | 145726954 | Missense_Mutation | SNP | C  | T  | 2  | 0   | c.1255C>T      | c.(1255-1257)CCA>TCA | p.P419S       |
| Pat_59 | Pre-Treatment | RECQL4   | 9401      | 37 | 8 | 145741409 | 145741409 | Missense_Mutation | SNP | C  | T  | 3  | 23  | c.1094G>A      | c.(1093-1095)CGG>CAG | p.R365Q       |
| Pat_59 | Pre-Treatment | VLDLR    | 7436      | 37 | 9 | 2650433   | 2650433   | Missense_Mutation | SNP | C  | A  | 4  | 57  | c.2168C>A      | c.(2167-2169)CCA>CAA | p.P723Q       |
| Pat_59 | Pre-Treatment | GLIS3    | 169792    | 37 | 9 | 4117892   | 4117892   | Missense_Mutation | SNP | C  | T  | 4  | 55  | c.1121G>A      | c.(1120-1122)CGC>CAC | p.R374H       |
| Pat_59 | Pre-Treatment | PTPRD    | 5789      | 37 | 9 | 8517925   | 8517925   | Missense_Mutation | SNP | G  | A  | 22 | 62  | c.1466C>T      | c.(1465-1467)TCT>TTT | p.S489F       |
| Pat_59 | Pre-Treatment | ADAMTSL1 | 92949     | 37 | 9 | 18905865  | 18905865  | Nonsense_Mutation | SNP | C  | A  | 4  | 15  | c.4937C>A      | c.(4936-4938)TCA>TAA | p.S1646*      |
| Pat_59 | Pre-Treatment | SLC24A2  | 25769     | 37 | 9 | 19786503  | 19786503  | Missense_Mutation | SNP | G  | T  | 20 | 55  | c.362C>A       | c.(361-363)CCG>CAG   | p.P121Q       |
| Pat_59 | Pre-Treatment | TAF1L    | 138474    | 37 | 9 | 32632916  | 32632916  | Missense_Mutation | SNP | G  | A  | 5  | 137 | c.2662C>T      | c.(2662-2664)CGT>TGT | p.R888C       |
| Pat_59 | Pre-Treatment | NFX1     | 4799      | 37 | 9 | 33318740  | 33318740  | Missense_Mutation | SNP | G  | A  | 5  | 200 | c.1600G>A      | c.(1600-1602)GGC>AGC | p.G534S       |
| Pat_59 | Pre-Treatment | KIAA1045 | 23349     | 37 | 9 | 34977113  | 34977113  | Missense_Mutation | SNP | C  | T  | 3  | 37  | c.883C>T       | c.(883-885)CGG>TGG   | p.R295W       |
| Pat_59 | Pre-Treatment | TLN1     | 7094      | 37 | 9 | 35706812  | 35706812  | Missense_Mutation | SNP | C  | T  | 4  | 72  | c.5041G>A      | c.(5041-5043)GCT>ACT | p.A1681T      |
| Pat_59 | Pre-Treatment | APBA1    | 320       | 37 | 9 | 72067109  | 72067109  | Missense_Mutation | SNP | C  | A  | 4  | 87  | c.1897G>T      | c.(1897-1899)GAC>TAC | p.D633Y       |
| Pat_59 | Pre-Treatment | CDC14B   | 8555      | 37 | 9 | 99296748  | 99296748  | Missense_Mutation | SNP | C  | T  | 4  | 48  | c.704G>A       | c.(703-705)AGA>AAA   | p.R235K       |
| Pat_59 | Pre-Treatment | SMC2     | 10592     | 37 | 9 | 106880657 | 106880657 | Splice_Site       | SNP | G  | A  | 4  | 45  | c.1996_splice  | c.e15+1              | p.G666_splice |
| Pat_59 | Pre-Treatment | ACTL7B   | 10880     | 37 | 9 | 111617958 | 111617958 | Missense_Mutation | SNP | C  | T  | 4  | 72  | c.253G>A       | c.(253-255)GAG>AAG   | p.E85K        |
| Pat_59 | Pre-Treatment | TNC      | 3371      | 37 | 9 | 117825309 | 117825309 | Missense_Mutation | SNP | C  | T  | 3  | 20  | c.3920G>A      | c.(3919-3921)AGC>AAC | p.S1307N      |
| Pat_59 | Pre-Treatment | LHX6     | 26468     | 37 | 9 | 124976570 | 124976570 | Nonsense_Mutation | SNP | G  | A  | 3  | 18  | c.688C>T       | c.(688-690)CAG>TAG   | p.Q230*       |
| Pat_59 | Pre-Treatment | OR1B1    | 347169    | 37 | 9 | 125391515 | 125391515 | Missense_Mutation | SNP | C  | A  | 3  | 32  | c.300G>T       | c.(298-300)TTG>TTT   | p.L100F       |
| Pat_59 | Pre-Treatment | GTF3C5   | 9328      | 37 | 9 | 135929329 | 135929329 | Missense_Mutation | SNP | G  | A  | 3  | 48  | c.988G>A       | c.(988-990)GGT>AGT   | p.G330S       |
| Pat_59 | Pre-Treatment | SURF1    | 6834      | 37 | 9 | 136221717 | 136221717 | Missense_Mutation | SNP | G  | A  | 4  | 104 | c.202C>T       | c.(202-204)CTC>TTC   | p.L68F        |
| Pat_59 | Pre-Treatment | COL5A1   | 1289      | 37 | 9 | 137658300 | 137658300 | Missense_Mutation | SNP | G  | A  | 10 | 36  | c.2089G>A      | c.(2089-2091)GGT>AGT | p.G697S       |
| Pat_59 | Pre-Treatment | ZBED1    | 9189      | 37 | X | 2408758   | 2408758   | Missense_Mutation | SNP | C  | T  | 4  | 116 | c.3G>A         | c.(1-3)ATG>ATA       | p.M1I         |
| Pat_59 | Pre-Treatment | SYAP1    | 94056     | 37 | X | 16753433  | 16753433  | Missense_Mutation | SNP | G  | A  | 3  | 43  | c.259G>A       | c.(259-261)GTA>ATA   | p.V87I        |
| Pat_59 | Pre-Treatment | RBBP7    | 5931      | 37 | X | 16870242  | 16870242  | Missense_Mutation | SNP | G  | A  | 4  | 122 | c.967C>T       | c.(967-969)CAC>TAC   | p.H323Y       |
| Pat_59 | Pre-Treatment | ZFX      | 7543      | 37 | X | 24229038  | 24229038  | Missense_Mutation | SNP | G  | A  | 4  | 66  | c.1963G>A      | c.(1963-1965)GTT>ATT | p.V655I       |
| Pat_59 | Pre-Treatment | FAM48B1  | 100130302 | 37 | X | 24382867  | 24382867  | Missense_Mutation | SNP | C  | A  | 3  | 35  | c.1990C>A      | c.(1990-1992)CAG>AAG | p.Q664K       |
| Pat_59 | Pre-Treatment | USP11    | 8237      | 37 | X | 47092360  | 47092360  | Missense_Mutation | SNP | G  | A  | 4  | 69  | c.47G>A        | c.(46-48)CGG>CAG     | p.R16Q        |
| Pat_59 | Pre-Treatment | TAF1     | 6872      | 37 | X | 70612758  | 70612758  | Missense_Mutation | SNP | G  | A  | 4  | 103 | c.2962G>A      | c.(2962-2964)GTG>ATG | p.V988M       |

|        |                 |          |        |    |   |           |           |                   |     |    |    |    |     |                |                        |                |
|--------|-----------------|----------|--------|----|---|-----------|-----------|-------------------|-----|----|----|----|-----|----------------|------------------------|----------------|
| Pat_59 | Pre-Treatment   | ACRC     | 93953  | 37 | X | 70823930  | 70823931  | Missense_Mutation | DNP | GC | AG | 7  | 97  | c.803_804GC>AG | c.(802-804)AGC>AAG     | p.S268K        |
| Pat_59 | Pre-Treatment   | ATRX     | 546    | 37 | X | 76890195  | 76890196  | Splice_Site       | DNP | CT | AA | 6  | 126 | c.4700_splice  | c.e17-1                | p.G1567_splice |
| Pat_59 | Pre-Treatment   | BTK      | 695    | 37 | X | 100624998 | 100624998 | Missense_Mutation | SNP | G  | T  | 4  | 46  | c.379C>A       | c.(379-381)CAG>AAG     | p.Q127K        |
| Pat_59 | Pre-Treatment   | COL4A6   | 1288   | 37 | X | 107462945 | 107462945 | Missense_Mutation | SNP | C  | A  | 4  | 136 | c.310G>T       | c.(310-312)GGC>TGC     | p.G104C        |
| Pat_59 | Pre-Treatment   | MAGEC1   | 9947   | 37 | X | 140993747 | 140993747 | Missense_Mutation | SNP | C  | T  | 4  | 129 | c.557C>T       | c.(556-558)ACT>ATT     | p.T186I        |
| Pat_59 | Pre-Treatment   | IDS      | 3423   | 37 | X | 148564603 | 148564603 | Nonsense_Mutation | SNP | G  | A  | 4  | 67  | c.1327C>T      | c.(1327-1329)CGA>TGA   | p.R443*        |
| Pat_59 | Pre-Treatment   | IDS      | 3423   | 37 | X | 148577978 | 148577978 | Missense_Mutation | SNP | G  | A  | 4  | 132 | c.778C>T       | c.(778-780)CCC>TCC     | p.P260S        |
| Pat_59 | Pre-Treatment   | TREX2    | 11219  | 37 | X | 152710323 | 152710323 | Nonsense_Mutation | SNP | G  | T  | 2  | 0   | c.692C>A       | c.(691-693)TCA>TAA     | p.S231*        |
| Pat_59 | Pre-Treatment   | OPN1LW   | 5956   | 37 | X | 153418523 | 153418523 | Missense_Mutation | SNP | G  | T  | 4  | 57  | c.520G>T       | c.(520-522)GCC>TCC     | p.A174S        |
| Pat_59 | Pre-Treatment   | LAGE3    | 8270   | 37 | X | 153706299 | 153706299 | Missense_Mutation | SNP | G  | A  | 26 | 30  | c.416C>T       | c.(415-417)CCC>CTC     | p.P139L        |
| Pat_59 | Pre-Treatment   | ZFY      | 7544   | 37 | Y | 2847907   | 2847907   | Missense_Mutation | SNP | G  | A  | 4  | 104 | c.2279G>A      | c.(2278-2280)CGG>CAG   | p.R760Q        |
| Pat_59 | Post-Resistance | CPSF3L   | 54973  | 37 | 1 | 1254829   | 1254829   | Missense_Mutation | SNP | C  | A  | 4  | 66  | c.276G>T       | c.(274-276)ATG>ATT     | p.M92I         |
| Pat_59 | Post-Resistance | GNB1     | 2782   | 37 | 1 | 1721893   | 1721893   | Nonsense_Mutation | SNP | G  | A  | 4  | 133 | c.640C>T       | c.(640-642)CGA>TGA     | p.R214*        |
| Pat_59 | Post-Resistance | PANK4    | 55229  | 37 | 1 | 2442805   | 2442805   | Missense_Mutation | SNP | G  | A  | 21 | 32  | c.1805C>T      | c.(1804-1806)TCC>TTC   | p.S602F        |
| Pat_59 | Post-Resistance | KIAA0562 | 9731   | 37 | 1 | 3768955   | 3768955   | Missense_Mutation | SNP | C  | T  | 10 | 56  | c.17G>A        | c.(16-18)GGA>GAA       | p.G6E          |
| Pat_59 | Post-Resistance | ACOT7    | 11332  | 37 | 1 | 6387452   | 6387452   | Missense_Mutation | SNP | C  | T  | 6  | 33  | c.562G>A       | c.(562-564)GAG>AAG     | p.E188K        |
| Pat_59 | Post-Resistance | H6PD     | 9563   | 37 | 1 | 9305201   | 9305201   | Missense_Mutation | SNP | C  | T  | 3  | 26  | c.208C>T       | c.(208-210)CCC>TCC     | p.P70S         |
| Pat_59 | Post-Resistance | KIF1B    | 23095  | 37 | 1 | 10434405  | 10434405  | Missense_Mutation | SNP | C  | T  | 45 | 214 | c.4978C>T      | c.(4978-4980)CCC>TCC   | p.P1660S       |
| Pat_59 | Post-Resistance | CASP9    | 842    | 37 | 1 | 15844737  | 15844737  | Missense_Mutation | SNP | C  | T  | 13 | 46  | c.286G>A       | c.(286-288)GCA>ACA     | p.A96T         |
| Pat_59 | Post-Resistance | PINK1    | 65018  | 37 | 1 | 20975090  | 20975090  | Missense_Mutation | SNP | G  | A  | 6  | 28  | c.1216G>A      | c.(1216-1218)GAT>AAT   | p.D406N        |
| Pat_59 | Post-Resistance | USP48    | 84196  | 37 | 1 | 22021632  | 22021632  | Missense_Mutation | SNP | C  | T  | 4  | 106 | c.2810G>A      | c.(2809-2811)CGA>CAA   | p.R937Q        |
| Pat_59 | Post-Resistance | SRRM1    | 10250  | 37 | 1 | 24996715  | 24996715  | Missense_Mutation | SNP | C  | T  | 21 | 217 | c.2309C>T      | c.(2308-2310)CCC>CTC   | p.P770L        |
| Pat_59 | Post-Resistance | SYF2     | 25949  | 37 | 1 | 25555539  | 25555539  | Missense_Mutation | SNP | C  | T  | 16 | 133 | c.208G>A       | c.(208-210)GCC>ACC     | p.A70T         |
| Pat_59 | Post-Resistance | SEPN1    | 57190  | 37 | 1 | 26135586  | 26135586  | Missense_Mutation | SNP | G  | A  | 14 | 155 | c.817G>A       | c.(817-819)GGA>AGA     | p.G273R        |
| Pat_59 | Post-Resistance | NR0B2    | 8431   | 37 | 1 | 27238482  | 27238482  | Missense_Mutation | SNP | C  | T  | 5  | 54  | c.628G>A       | c.(628-630)GCC>ACC     | p.A210T        |
| Pat_59 | Post-Resistance | YTHDF2   | 51441  | 37 | 1 | 29069585  | 29069585  | Missense_Mutation | SNP | C  | T  | 5  | 168 | c.803C>T       | c.(802-804)CCG>CTG     | p.P268L        |
| Pat_59 | Post-Resistance | COL16A1  | 1307   | 37 | 1 | 32145259  | 32145259  | Missense_Mutation | SNP | C  | T  | 4  | 82  | c.2746G>A      | c.(2746-2748)GGC>AGC   | p.G916S        |
| Pat_59 | Post-Resistance | DCDC2B   | 149069 | 37 | 1 | 32677721  | 32677721  | Missense_Mutation | SNP | C  | T  | 13 | 53  | c.446C>T       | c.(445-447)TCC>TTC     | p.S149F        |
| Pat_59 | Post-Resistance | KIAA1522 | 57648  | 37 | 1 | 33236474  | 33236474  | Missense_Mutation | SNP | G  | A  | 5  | 17  | c.1517G>A      | c.(1516-1518)GGT>GAT   | p.G506D        |
| Pat_59 | Post-Resistance | YARS     | 8565   | 37 | 1 | 33248080  | 33248080  | Missense_Mutation | SNP | G  | A  | 17 | 69  | c.967C>T       | c.(967-969)CCA>TCA     | p.P323S        |
| Pat_59 | Post-Resistance | NCDN     | 23154  | 37 | 1 | 36030828  | 36030828  | Missense_Mutation | SNP | C  | T  | 4  | 123 | c.1754C>T      | c.(1753-1755)GCT>GTT   | p.A585V        |
| Pat_59 | Post-Resistance | MTF1     | 4520   | 37 | 1 | 38288344  | 38288344  | Missense_Mutation | SNP | C  | T  | 20 | 89  | c.1216G>A      | c.(1216-1218)GAT>AAT   | p.D406N        |
| Pat_59 | Post-Resistance | RRAGC    | 64121  | 37 | 1 | 39322712  | 39322712  | Missense_Mutation | SNP | C  | T  | 11 | 125 | c.280G>A       | c.(280-282)GAA>AAA     | p.E94K         |
| Pat_59 | Post-Resistance | MACF1    | 23499  | 37 | 1 | 39895717  | 39895717  | Missense_Mutation | SNP | C  | T  | 6  | 56  | c.12427C>T     | c.(12427-12429)CCC>TCC | p.P4143S       |
| Pat_59 | Post-Resistance | TRIT1    | 54802  | 37 | 1 | 40315926  | 40315926  | Nonsense_Mutation | SNP | G  | A  | 5  | 43  | c.568C>T       | c.(568-570)CAA>TAA     | p.Q190*        |
| Pat_59 | Post-Resistance | HIVEP3   | 59269  | 37 | 1 | 41978888  | 41978888  | Missense_Mutation | SNP | C  | T  | 5  | 55  | c.6004G>A      | c.(6004-6006)GAA>AAA   | p.E2002K       |
| Pat_59 | Post-Resistance | FOXJ3    | 22887  | 37 | 1 | 42671440  | 42671440  | Missense_Mutation | SNP | G  | A  | 7  | 113 | c.623C>T       | c.(622-624)ACT>ATT     | p.T208I        |
| Pat_59 | Post-Resistance | PPIH     | 10465  | 37 | 1 | 43124913  | 43124913  | Missense_Mutation | SNP | G  | A  | 54 | 399 | c.146G>A       | c.(145-147)GGA>GAA     | p.G49E         |
| Pat_59 | Post-Resistance | MAST2    | 23139  | 37 | 1 | 46473997  | 46473997  | Missense_Mutation | SNP | G  | A  | 10 | 32  | c.932G>A       | c.(931-933)AGT>AAT     | p.S311N        |
| Pat_59 | Post-Resistance | TAL1     | 6886   | 37 | 1 | 47685450  | 47685450  | Missense_Mutation | SNP | G  | A  | 4  | 37  | c.938C>T       | c.(937-939)ACG>ATG     | p.T313M        |
| Pat_59 | Post-Resistance | NRD1     | 4898   | 37 | 1 | 52279762  | 52279762  | Splice_Site       | SNP | C  | T  | 8  | 61  | c.1824_splice  | c.e16-1                | p.R608_splice  |
| Pat_59 | Post-Resistance | ORC1L    | 4998   | 37 | 1 | 52838991  | 52838991  | Missense_Mutation | SNP | C  | T  | 11 | 51  | c.2448G>A      | c.(2446-2448)ATG>ATA   | p.M816I        |
| Pat_59 | Post-Resistance | ZCCHC11  | 23318  | 37 | 1 | 52991465  | 52991465  | Missense_Mutation | SNP | C  | T  | 9  | 197 | c.488G>A       | c.(487-489)GGA>GAA     | p.G163E        |
| Pat_59 | Post-Resistance | CPT2     | 1376   | 37 | 1 | 53675977  | 53675977  | Missense_Mutation | SNP | C  | T  | 15 | 92  | c.631C>T       | c.(631-633)CCC>TCC     | p.P211S        |
| Pat_59 | Post-Resistance | YIPF1    | 54432  | 37 | 1 | 54343997  | 54343997  | Missense_Mutation | SNP | C  | T  | 47 | 323 | c.355G>A       | c.(355-357)GAT>AAT     | p.D119N        |
| Pat_59 | Post-Resistance | C1orf177 | 163747 | 37 | 1 | 55282783  | 55282783  | Missense_Mutation | SNP | A  | G  | 3  | 40  | c.1172A>G      | c.(1171-1173)GAC>GGC   | p.D391G        |
| Pat_59 | Post-Resistance | USP24    | 23358  | 37 | 1 | 55562632  | 55562632  | Missense_Mutation | SNP | C  | T  | 4  | 29  | c.5449G>A      | c.(5449-5451)GAC>AAC   | p.D1817N       |



|        |                 |          |        |    |   |           |           |                   |     |   |   |    |     |              |                      |              |
|--------|-----------------|----------|--------|----|---|-----------|-----------|-------------------|-----|---|---|----|-----|--------------|----------------------|--------------|
| Pat_59 | Post-Resistance | C8B      | 732    | 37 | 1 | 57399008  | 57399008  | Missense_Mutation | SNP | C | T | 9  | 84  | c.1552G>A    | c.(1552-1554)GGA>AGA | p.G518R      |
| Pat_59 | Post-Resistance | OMA1     | 115209 | 37 | 1 | 59004511  | 59004511  | Missense_Mutation | SNP | C | T | 56 | 327 | c.456G>A     | c.(454-456)ATG>ATA   | p.M152I      |
| Pat_59 | Post-Resistance | ATG4C    | 84938  | 37 | 1 | 63282440  | 63282440  | Missense_Mutation | SNP | C | T | 14 | 34  | c.355C>T     | c.(355-357)CTC>TTC   | p.L119F      |
| Pat_59 | Post-Resistance | ALG6     | 29929  | 37 | 1 | 63862269  | 63862269  | Splice_Site       | SNP | G | A | 8  | 78  | c.167_splice | c.e3+1               | p.W56_splice |
| Pat_59 | Post-Resistance | C1orf173 | 127254 | 37 | 1 | 75055719  | 75055719  | Missense_Mutation | SNP | G | A | 5  | 15  | c.1772C>T    | c.(1771-1773)TCT>TTT | p.S591F      |
| Pat_59 | Post-Resistance | LHX8     | 431707 | 37 | 1 | 75626504  | 75626504  | Missense_Mutation | SNP | C | T | 26 | 195 | c.995C>T     | c.(994-996)GCT>GTT   | p.A332V      |
| Pat_59 | Post-Resistance | SLC44A5  | 204962 | 37 | 1 | 75685021  | 75685021  | Missense_Mutation | SNP | G | A | 47 | 95  | c.1187C>T    | c.(1186-1188)GCG>GTG | p.A396V      |
| Pat_59 | Post-Resistance | LPHN2    | 23266  | 37 | 1 | 82408751  | 82408751  | Missense_Mutation | SNP | G | A | 13 | 77  | c.496G>A     | c.(496-498)GCT>ACT   | p.A166T      |
| Pat_59 | Post-Resistance | ZNF644   | 84146  | 37 | 1 | 91403293  | 91403293  | Missense_Mutation | SNP | C | T | 37 | 304 | c.3437G>A    | c.(3436-3438)GGG>GAG | p.G1146E     |
| Pat_59 | Post-Resistance | CDC7     | 8317   | 37 | 1 | 91989627  | 91989627  | Missense_Mutation | SNP | C | T | 12 | 66  | c.1360C>T    | c.(1360-1362)CCA>TCA | p.P454S      |
| Pat_59 | Post-Resistance | TGFBR3   | 7049   | 37 | 1 | 92193265  | 92193265  | Missense_Mutation | SNP | A | G | 9  | 125 | c.836T>C     | c.(835-837)GTC>GCC   | p.V279A      |
| Pat_59 | Post-Resistance | BCAR3    | 8412   | 37 | 1 | 94054952  | 94054952  | Missense_Mutation | SNP | C | T | 6  | 32  | c.511G>A     | c.(511-513)GAT>AAT   | p.D171N      |
| Pat_59 | Post-Resistance | RTCD1    | 8634   | 37 | 1 | 100736150 | 100736150 | Missense_Mutation | SNP | G | A | 36 | 227 | c.328G>A     | c.(328-330)GTT>ATT   | p.V110I      |
| Pat_59 | Post-Resistance | COL11A1  | 1301   | 37 | 1 | 103354313 | 103354313 | Missense_Mutation | SNP | C | T | 11 | 49  | c.4520G>A    | c.(4519-4521)GGT>GAT | p.G1507D     |
| Pat_59 | Post-Resistance | PHTF1    | 10745  | 37 | 1 | 114248697 | 114248697 | Missense_Mutation | SNP | G | A | 38 | 75  | c.1486C>T    | c.(1486-1488)CTT>TTT | p.L496F      |
| Pat_59 | Post-Resistance | VTCN1    | 79679  | 37 | 1 | 117753456 | 117753456 | Missense_Mutation | SNP | G | A | 35 | 46  | c.22C>T      | c.(22-24)CTC>TTC     | p.L8F        |
| Pat_59 | Post-Resistance | WARS2    | 10352  | 37 | 1 | 119619172 | 119619172 | Missense_Mutation | SNP | C | T | 41 | 301 | c.149G>A     | c.(148-150)GGC>GAC   | p.G50D       |
| Pat_59 | Post-Resistance | ITGA10   | 8515   | 37 | 1 | 145532152 | 145532152 | Missense_Mutation | SNP | G | A | 14 | 116 | c.796G>A     | c.(796-798)GAG>AAG   | p.E266K      |
| Pat_59 | Post-Resistance | ARNT     | 405    | 37 | 1 | 150808813 | 150808813 | Missense_Mutation | SNP | G | A | 12 | 112 | c.643C>T     | c.(643-645)CCA>TCA   | p.P215S      |
| Pat_59 | Post-Resistance | CELF3    | 11189  | 37 | 1 | 151681746 | 151681746 | Missense_Mutation | SNP | C | T | 19 | 119 | c.356G>A     | c.(355-357)GGG>GAG   | p.G119E      |
| Pat_59 | Post-Resistance | THEM4    | 117145 | 37 | 1 | 151860798 | 151860798 | Missense_Mutation | SNP | T | C | 27 | 173 | c.508A>G     | c.(508-510)ATG>GTG   | p.M170V      |
| Pat_59 | Post-Resistance | SPRR2D   | 6703   | 37 | 1 | 153012687 | 153012687 | Missense_Mutation | SNP | G | A | 50 | 188 | c.136C>T     | c.(136-138)CCA>TCA   | p.P46S       |
| Pat_59 | Post-Resistance | UBAP2L   | 9898   | 37 | 1 | 154233541 | 154233541 | Missense_Mutation | SNP | C | T | 9  | 50  | c.2752C>T    | c.(2752-2754)CCG>TCG | p.P918S      |
| Pat_59 | Post-Resistance | AQP10    | 89872  | 37 | 1 | 154296128 | 154296128 | Missense_Mutation | SNP | G | A | 12 | 103 | c.553G>A     | c.(553-555)GTC>ATC   | p.V185I      |
| Pat_59 | Post-Resistance | KCNN3    | 3782   | 37 | 1 | 154680622 | 154680622 | Missense_Mutation | SNP | G | A | 4  | 67  | c.2026C>T    | c.(2026-2028)CTC>TTC | p.L676F      |
| Pat_59 | Post-Resistance | RAG1AP1  | 55974  | 37 | 1 | 155108460 | 155108460 | Missense_Mutation | SNP | G | A | 8  | 35  | c.73G>A      | c.(73-75)GCC>ACC     | p.A25T       |
| Pat_59 | Post-Resistance | ASH1L    | 55870  | 37 | 1 | 155313444 | 155313444 | Nonsense_Mutation | SNP | G | A | 3  | 77  | c.8086C>T    | c.(8086-8088)CGA>TGA | p.R2696*     |
| Pat_59 | Post-Resistance | ASH1L    | 55870  | 37 | 1 | 155348157 | 155348157 | Missense_Mutation | SNP | G | A | 42 | 120 | c.6262C>T    | c.(6262-6264)CTT>TTT | p.L2088F     |
| Pat_59 | Post-Resistance | GON4L    | 54856  | 37 | 1 | 155796738 | 155796738 | Missense_Mutation | SNP | C | T | 18 | 85  | c.587G>A     | c.(586-588)AGG>AAG   | p.R196K      |
| Pat_59 | Post-Resistance | SMG5     | 23381  | 37 | 1 | 156233190 | 156233190 | Missense_Mutation | SNP | G | A | 26 | 139 | c.2027C>T    | c.(2026-2028)GCG>GTG | p.A676V      |
| Pat_59 | Post-Resistance | FCRL3    | 115352 | 37 | 1 | 157667544 | 157667544 | Missense_Mutation | SNP | G | T | 16 | 147 | c.464C>A     | c.(463-465)TCC>TAC   | p.S155Y      |
| Pat_59 | Post-Resistance | DARC     | 2532   | 37 | 1 | 159175875 | 159175875 | Missense_Mutation | SNP | G | A | 4  | 19  | c.646G>A     | c.(646-648)GCC>ACC   | p.A216T      |
| Pat_59 | Post-Resistance | PIGM     | 93183  | 37 | 1 | 160000565 | 160000565 | Missense_Mutation | SNP | G | A | 23 | 47  | c.965C>T     | c.(964-966)TCC>TTC   | p.S322F      |
| Pat_59 | Post-Resistance | KCNJ9    | 3765   | 37 | 1 | 160054056 | 160054056 | Nonsense_Mutation | SNP | G | A | 5  | 5   | c.236G>A     | c.(235-237)TGG>TAG   | p.W79*       |
| Pat_59 | Post-Resistance | VANGL2   | 57216  | 37 | 1 | 160394935 | 160394935 | Missense_Mutation | SNP | G | A | 4  | 45  | c.1333G>A    | c.(1333-1335)GGA>AGA | p.G445R      |
| Pat_59 | Post-Resistance | ITLN2    | 142683 | 37 | 1 | 160920963 | 160920963 | Missense_Mutation | SNP | C | T | 19 | 146 | c.311G>A     | c.(310-312)GGG>GAG   | p.G104E      |
| Pat_59 | Post-Resistance | KLHDC9   | 126823 | 37 | 1 | 161069991 | 161069991 | Missense_Mutation | SNP | G | A | 34 | 152 | c.1027G>A    | c.(1027-1029)GTT>ATT | p.V343I      |
| Pat_59 | Post-Resistance | ALDH9A1  | 223    | 37 | 1 | 165649773 | 165649773 | Missense_Mutation | SNP | G | A | 42 | 237 | c.740C>T     | c.(739-741)CCC>CTC   | p.P247L      |
| Pat_59 | Post-Resistance | POGK     | 57645  | 37 | 1 | 166810212 | 166810212 | Missense_Mutation | SNP | C | T | 34 | 173 | c.19C>T      | c.(19-21)CCT>TCT     | p.P7S        |
| Pat_59 | Post-Resistance | F5       | 2153   | 37 | 1 | 169492544 | 169492544 | Missense_Mutation | SNP | C | T | 27 | 84  | c.5939G>A    | c.(5938-5940)GGT>GAT | p.G1980D     |
| Pat_59 | Post-Resistance | F5       | 2153   | 37 | 1 | 169495164 | 169495164 | Missense_Mutation | SNP | T | G | 44 | 278 | c.5691A>C    | c.(5689-5691)CAA>CAC | p.Q1897H     |
| Pat_59 | Post-Resistance | FMO3     | 2328   | 37 | 1 | 171072938 | 171072938 | Missense_Mutation | SNP | G | A | 27 | 232 | c.145G>A     | c.(145-147)GAG>AAG   | p.E49K       |
| Pat_59 | Post-Resistance | FMO2     | 2327   | 37 | 1 | 171173122 | 171173122 | Missense_Mutation | SNP | G | A | 5  | 134 | c.746G>A     | c.(745-747)CGA>CAA   | p.R249Q      |
| Pat_59 | Post-Resistance | C1orf9   | 51430  | 37 | 1 | 172558514 | 172558514 | Missense_Mutation | SNP | G | A | 23 | 188 | c.2273G>A    | c.(2272-2274)GGA>GAA | p.G758E      |
| Pat_59 | Post-Resistance | SLC9A11  | 284525 | 37 | 1 | 173486836 | 173486836 | Missense_Mutation | SNP | C | T | 15 | 75  | c.2747G>A    | c.(2746-2748)AGT>AAT | p.S916N      |
| Pat_59 | Post-Resistance | RASAL2   | 9462   | 37 | 1 | 178421618 | 178421618 | Nonsense_Mutation | SNP | C | T | 17 | 161 | c.1396C>T    | c.(1396-1398)CAA>TAA | p.Q466*      |
| Pat_59 | Post-Resistance | CACNA1E  | 777    | 37 | 1 | 181548282 | 181548282 | Missense_Mutation | SNP | G | T | 5  | 105 | c.691G>T     | c.(691-693)GCC>TCC   | p.A231S      |

|        |                 |          |        |    |    |           |           |                   |     |   |   |    |     |           |                      |          |
|--------|-----------------|----------|--------|----|----|-----------|-----------|-------------------|-----|---|---|----|-----|-----------|----------------------|----------|
| Pat_59 | Post-Resistance | RNASEL   | 6041   | 37 | 1  | 182555367 | 182555367 | Missense_Mutation | SNP | C | T | 10 | 21  | c.575G>A  | c.(574-576)GGG>GAG   | p.G192E  |
| Pat_59 | Post-Resistance | NMNAT2   | 23057  | 37 | 1  | 183253914 | 183253914 | Missense_Mutation | SNP | C | T | 5  | 100 | c.460G>A  | c.(460-462)GGG>AGG   | p.G154R  |
| Pat_59 | Post-Resistance | RNF2     | 6045   | 37 | 1  | 185067424 | 185067424 | Missense_Mutation | SNP | G | A | 8  | 142 | c.685G>A  | c.(685-687)GTA>ATA   | p.V229I  |
| Pat_59 | Post-Resistance | PRG4     | 10216  | 37 | 1  | 186276260 | 186276260 | Missense_Mutation | SNP | C | T | 13 | 64  | c.1409C>T | c.(1408-1410)ACC>ATC | p.T470I  |
| Pat_59 | Post-Resistance | CFHR4    | 10877  | 37 | 1  | 196887342 | 196887342 | Missense_Mutation | SNP | C | T | 11 | 25  | c.802C>T  | c.(802-804)CCA>TCA   | p.P268S  |
| Pat_59 | Post-Resistance | CFHR5    | 81494  | 37 | 1  | 196946838 | 196946838 | Missense_Mutation | SNP | C | T | 36 | 226 | c.44C>T   | c.(43-45)ACT>ATT     | p.T15I   |
| Pat_59 | Post-Resistance | CRB1     | 23418  | 37 | 1  | 197398703 | 197398703 | Missense_Mutation | SNP | C | T | 15 | 53  | c.2801C>T | c.(2800-2802)CCT>CTT | p.P934L  |
| Pat_59 | Post-Resistance | CRB1     | 23418  | 37 | 1  | 197446894 | 197446894 | Missense_Mutation | SNP | C | G | 9  | 38  | c.4106C>G | c.(4105-4107)ACC>AGC | p.T1369S |
| Pat_59 | Post-Resistance | KDM5B    | 10765  | 37 | 1  | 202702600 | 202702600 | Missense_Mutation | SNP | C | T | 4  | 112 | c.3838G>A | c.(3838-3840)GAT>AAT | p.D1280N |
| Pat_59 | Post-Resistance | ELK4     | 2005   | 37 | 1  | 205585691 | 205585691 | Missense_Mutation | SNP | C | T | 10 | 91  | c.1279G>A | c.(1279-1281)GAC>AAC | p.D427N  |
| Pat_59 | Post-Resistance | FCAMR    | 83953  | 37 | 1  | 207139119 | 207139119 | Missense_Mutation | SNP | G | A | 4  | 15  | c.254C>T  | c.(253-255)GCC>GTC   | p.A85V   |
| Pat_59 | Post-Resistance | IRF6     | 3664   | 37 | 1  | 209968653 | 209968653 | Missense_Mutation | SNP | G | A | 26 | 128 | c.490C>T  | c.(490-492)CCC>TCC   | p.P164S  |
| Pat_59 | Post-Resistance | TRAF5    | 7188   | 37 | 1  | 211529764 | 211529764 | Missense_Mutation | SNP | G | A | 4  | 134 | c.332G>A  | c.(331-333)AGC>AAC   | p.S111N  |
| Pat_59 | Post-Resistance | PTPN14   | 5784   | 37 | 1  | 214556719 | 214556719 | Missense_Mutation | SNP | C | T | 8  | 86  | c.2479G>A | c.(2479-2481)GAG>AAG | p.E827K  |
| Pat_59 | Post-Resistance | USH2A    | 7399   | 37 | 1  | 216243481 | 216243481 | Missense_Mutation | SNP | G | A | 22 | 122 | c.6011C>T | c.(6010-6012)TCT>TTT | p.S2004F |
| Pat_59 | Post-Resistance | USH2A    | 7399   | 37 | 1  | 216348812 | 216348812 | Missense_Mutation | SNP | A | G | 4  | 54  | c.4409T>C | c.(4408-4410)CTG>CCG | p.L1470P |
| Pat_59 | Post-Resistance | RAB3GAP2 | 25782  | 37 | 1  | 220326699 | 220326699 | Missense_Mutation | SNP | G | A | 18 | 141 | c.3695C>T | c.(3694-3696)ACA>ATA | p.T1232I |
| Pat_59 | Post-Resistance | ITPKB    | 3707   | 37 | 1  | 226923503 | 226923503 | Missense_Mutation | SNP | C | T | 5  | 28  | c.1657G>A | c.(1657-1659)GAC>AAC | p.D553N  |
| Pat_59 | Post-Resistance | ZNF678   | 339500 | 37 | 1  | 227842427 | 227842427 | Missense_Mutation | SNP | G | A | 6  | 219 | c.476G>A  | c.(475-477)GGC>GAC   | p.G159D  |
| Pat_59 | Post-Resistance | ZNF678   | 339500 | 37 | 1  | 227842544 | 227842544 | Missense_Mutation | SNP | G | A | 9  | 327 | c.593G>A  | c.(592-594)AGC>AAC   | p.S198N  |
| Pat_59 | Post-Resistance | SNAP47   | 116841 | 37 | 1  | 227946773 | 227946773 | Missense_Mutation | SNP | C | T | 21 | 140 | c.710C>T  | c.(709-711)CCC>CTC   | p.P237L  |
| Pat_59 | Post-Resistance | HIST3H3  | 8290   | 37 | 1  | 228612641 | 228612641 | Missense_Mutation | SNP | C | T | 4  | 121 | c.386G>A  | c.(385-387)CGC>CAC   | p.R129H  |
| Pat_59 | Post-Resistance | LYST     | 1130   | 37 | 1  | 235922785 | 235922785 | Missense_Mutation | SNP | C | T | 27 | 219 | c.6368G>A | c.(6367-6369)GGA>GAA | p.G2123E |
| Pat_59 | Post-Resistance | MTR      | 4548   | 37 | 1  | 236959034 | 236959034 | Missense_Mutation | SNP | C | T | 21 | 105 | c.31C>T   | c.(31-33)CCC>TCC     | p.P11S   |
| Pat_59 | Post-Resistance | OR2L2    | 26246  | 37 | 1  | 248201894 | 248201894 | Missense_Mutation | SNP | G | A | 9  | 87  | c.325G>A  | c.(325-327)GCA>ACA   | p.A109T  |
| Pat_59 | Post-Resistance | FRMD4A   | 55691  | 37 | 10 | 13698668  | 13698668  | Missense_Mutation | SNP | G | A | 4  | 3   | c.2921C>T | c.(2920-2922)ACC>ATC | p.T974I  |
| Pat_59 | Post-Resistance | RSU1     | 6251   | 37 | 10 | 16794558  | 16794558  | Missense_Mutation | SNP | G | A | 14 | 73  | c.578C>T  | c.(577-579)ACC>ATC   | p.T193I  |
| Pat_59 | Post-Resistance | CUBN     | 8029   | 37 | 10 | 16975122  | 16975122  | Nonsense_Mutation | SNP | G | A | 4  | 123 | c.6088C>T | c.(6088-6090)CGA>TGA | p.R2030* |
| Pat_59 | Post-Resistance | MSRB2    | 22921  | 37 | 10 | 23399204  | 23399204  | Missense_Mutation | SNP | G | A | 40 | 91  | c.253G>A  | c.(253-255)GCA>ACA   | p.A85T   |
| Pat_59 | Post-Resistance | KIAA1217 | 56243  | 37 | 10 | 24508644  | 24508644  | Missense_Mutation | SNP | G | T | 3  | 22  | c.160G>T  | c.(160-162)GGT>TGT   | p.G54C   |
| Pat_59 | Post-Resistance | KIAA1217 | 56243  | 37 | 10 | 24809159  | 24809159  | Missense_Mutation | SNP | G | A | 45 | 64  | c.2285G>A | c.(2284-2286)GGA>GAA | p.G762E  |
| Pat_59 | Post-Resistance | KIAA1217 | 56243  | 37 | 10 | 24820833  | 24820833  | Missense_Mutation | SNP | C | T | 4  | 67  | c.3157C>T | c.(3157-3159)CGT>TGT | p.R1053C |
| Pat_59 | Post-Resistance | MTPAP    | 55149  | 37 | 10 | 30625845  | 30625845  | Missense_Mutation | SNP | G | A | 44 | 144 | c.667C>T  | c.(667-669)CCA>TCA   | p.P223S  |
| Pat_59 | Post-Resistance | KIF5B    | 3799   | 37 | 10 | 32307059  | 32307059  | Missense_Mutation | SNP | G | A | 36 | 64  | c.2465C>T | c.(2464-2466)ACC>ATC | p.T822I  |
| Pat_59 | Post-Resistance | BMS1     | 9790   | 37 | 10 | 43289313  | 43289313  | Missense_Mutation | SNP | C | T | 30 | 67  | c.1103C>T | c.(1102-1104)CCC>CTC | p.P368L  |
| Pat_59 | Post-Resistance | RBP3     | 5949   | 37 | 10 | 48388900  | 48388900  | Missense_Mutation | SNP | T | C | 2  | 2   | c.1978A>G | c.(1978-1980)ACC>GCC | p.T660A  |
| Pat_59 | Post-Resistance | ZWINT    | 11130  | 37 | 10 | 58119898  | 58119898  | Missense_Mutation | SNP | G | A | 3  | 18  | c.137C>T  | c.(136-138)TCT>TTT   | p.S46F   |
| Pat_59 | Post-Resistance | RUFY2    | 55680  | 37 | 10 | 70156634  | 70156634  | Missense_Mutation | SNP | G | A | 14 | 28  | c.406C>T  | c.(406-408)CCT>TCT   | p.P136S  |
| Pat_59 | Post-Resistance | C10orf27 | 219793 | 37 | 10 | 72531206  | 72531206  | Missense_Mutation | SNP | C | T | 3  | 26  | c.982G>A  | c.(982-984)GAA>AAA   | p.E328K  |
| Pat_59 | Post-Resistance | HECTD2   | 143279 | 37 | 10 | 93242749  | 93242749  | Missense_Mutation | SNP | C | T | 4  | 80  | c.737C>T  | c.(736-738)ACG>ATG   | p.T246M  |
| Pat_59 | Post-Resistance | PIPSL    | 266971 | 37 | 10 | 95719566  | 95719566  | Missense_Mutation | SNP | G | A | 5  | 43  | c.1588C>T | c.(1588-1590)CCT>TCT | p.P530S  |
| Pat_59 | Post-Resistance | TLL2     | 7093   | 37 | 10 | 98188425  | 98188425  | Missense_Mutation | SNP | C | T | 15 | 36  | c.601G>A  | c.(601-603)GAG>AAG   | p.E201K  |
| Pat_59 | Post-Resistance | DHDPSL   | 112817 | 37 | 10 | 99359537  | 99359537  | Missense_Mutation | SNP | C | T | 3  | 30  | c.569C>T  | c.(568-570)CCG>CTG   | p.P190L  |
| Pat_59 | Post-Resistance | C10orf2  | 56652  | 37 | 10 | 102750720 | 102750720 | Missense_Mutation | SNP | G | A | 23 | 64  | c.1687G>A | c.(1687-1689)GAT>AAT | p.D563N  |
| Pat_59 | Post-Resistance | POLL     | 27343  | 37 | 10 | 103347107 | 103347107 | Missense_Mutation | SNP | C | T | 13 | 59  | c.11G>A   | c.(10-12)AGG>AAG     | p.R4K    |
| Pat_59 | Post-Resistance | TAF5     | 6877   | 37 | 10 | 105147086 | 105147086 | Missense_Mutation | SNP | G | T | 4  | 100 | c.1984G>T | c.(1984-1986)GTA>TTA | p.V662L  |
| Pat_59 | Post-Resistance | CTBP2    | 1488   | 37 | 10 | 126678107 | 126678107 | Missense_Mutation | SNP | C | T | 46 | 180 | c.1318G>A | c.(1318-1320)GAG>AAG | p.E440K  |

|        |                 |          |        |    |    |           |           |                        |     |   |   |    |     |            |                        |          |
|--------|-----------------|----------|--------|----|----|-----------|-----------|------------------------|-----|---|---|----|-----|------------|------------------------|----------|
| Pat_59 | Post-Resistance | DOCK1    | 1793   | 37 | 10 | 128817004 | 128817004 | Missense_Mutation      | SNP | G | A | 6  | 28  | c.1169G>A  | c.(1168-1170)GGA>GAA   | p.G390E  |
| Pat_59 | Post-Resistance | FAM196A  | 642938 | 37 | 10 | 128974017 | 128974017 | Missense_Mutation      | SNP | G | A | 3  | 4   | c.643C>T   | c.(643-645)CCT>TCT     | p.P215S  |
| Pat_59 | Post-Resistance | INPP5A   | 3632   | 37 | 10 | 134579283 | 134579283 | Missense_Mutation      | SNP | G | A | 8  | 12  | c.910G>A   | c.(910-912)GAG>AAG     | p.E304K  |
| Pat_59 | Post-Resistance | AP2A2    | 161    | 37 | 11 | 988657    | 988657    | Missense_Mutation      | SNP | G | A | 8  | 43  | c.1237G>A  | c.(1237-1239)GAG>AAG   | p.E413K  |
| Pat_59 | Post-Resistance | MUC5B    | 727897 | 37 | 11 | 1271471   | 1271471   | Missense_Mutation      | SNP | G | C | 3  | 41  | c.14780G>C | c.(14779-14781)AGC>ACC | p.S4927T |
| Pat_59 | Post-Resistance | MUC5B    | 727897 | 37 | 11 | 1271474   | 1271474   | Missense_Mutation      | SNP | C | T | 10 | 31  | c.14783C>T | c.(14782-14784)ACT>ATT | p.T4928I |
| Pat_59 | Post-Resistance | KRTAP5-4 | 387267 | 37 | 11 | 1642992   | 1642992   | Missense_Mutation      | SNP | C | T | 4  | 53  | c.470G>A   | c.(469-471)TGT>TAT     | p.C157Y  |
| Pat_59 | Post-Resistance | TRIM68   | 55128  | 37 | 11 | 4621621   | 4621621   | Missense_Mutation      | SNP | G | A | 5  | 35  | c.1343C>T  | c.(1342-1344)ACT>ATT   | p.T448I  |
| Pat_59 | Post-Resistance | OR51L1   | 119682 | 37 | 11 | 5020900   | 5020900   | Missense_Mutation      | SNP | A | G | 3  | 84  | c.688A>G   | c.(688-690)ATT>GTT     | p.I230V  |
| Pat_59 | Post-Resistance | OR51Q1   | 390061 | 37 | 11 | 5443576   | 5443576   | Missense_Mutation      | SNP | C | T | 31 | 211 | c.146C>T   | c.(145-147)ACT>ATT     | p.T49I   |
| Pat_59 | Post-Resistance | ARNTL    | 406    | 37 | 11 | 13402785  | 13402785  | Missense_Mutation      | SNP | C | T | 18 | 112 | c.1601C>T  | c.(1600-1602)TCT>TTT   | p.S534F  |
| Pat_59 | Post-Resistance | BBOX1    | 8424   | 37 | 11 | 27137043  | 27137043  | Missense_Mutation      | SNP | C | T | 29 | 146 | c.578C>T   | c.(577-579)GCT>GTT     | p.A193V  |
| Pat_59 | Post-Resistance | CKAP5    | 9793   | 37 | 11 | 46792348  | 46792348  | Missense_Mutation      | SNP | C | T | 3  | 28  | c.3176G>A  | c.(3175-3177)GGG>GAG   | p.G1059E |
| Pat_59 | Post-Resistance | PSMC3    | 5702   | 37 | 11 | 47444392  | 47444392  | Missense_Mutation      | SNP | C | T | 6  | 172 | c.724G>A   | c.(724-726)GCA>ACA     | p.A242T  |
| Pat_59 | Post-Resistance | OR4C46   | 119749 | 37 | 11 | 51515699  | 51515699  | Missense_Mutation      | SNP | G | A | 21 | 179 | c.418G>A   | c.(418-420)GCC>ACC     | p.A140T  |
| Pat_59 | Post-Resistance | OR4A16   | 81327  | 37 | 11 | 55110828  | 55110828  | Missense_Mutation      | SNP | C | T | 14 | 80  | c.152C>T   | c.(151-153)CCC>CTC     | p.P51L   |
| Pat_59 | Post-Resistance | OR8H2    | 390151 | 37 | 11 | 55873186  | 55873186  | Missense_Mutation      | SNP | T | C | 4  | 117 | c.668T>C   | c.(667-669)TTT>TCT     | p.F223S  |
| Pat_59 | Post-Resistance | OR5M1    | 390168 | 37 | 11 | 56380086  | 56380086  | Missense_Mutation      | SNP | A | G | 36 | 269 | c.893T>C   | c.(892-894)ATC>ACC     | p.I298T  |
| Pat_59 | Post-Resistance | PRG3     | 10394  | 37 | 11 | 57147199  | 57147199  | Missense_Mutation      | SNP | C | T | 12 | 31  | c.143G>A   | c.(142-144)AGA>AAA     | p.R48K   |
| Pat_59 | Post-Resistance | SLC43A3  | 29015  | 37 | 11 | 57182201  | 57182201  | Missense_Mutation      | SNP | C | T | 43 | 242 | c.947G>A   | c.(946-948)AGC>AAC     | p.S316N  |
| Pat_59 | Post-Resistance | OR5A2    | 219981 | 37 | 11 | 59189855  | 59189855  | Missense_Mutation      | SNP | G | A | 10 | 57  | c.572C>T   | c.(571-573)TCT>TTT     | p.S191F  |
| Pat_59 | Post-Resistance | MTA2     | 9219   | 37 | 11 | 62361511  | 62361511  | Missense_Mutation      | SNP | C | T | 4  | 62  | c.1843G>A  | c.(1843-1845)GCC>ACC   | p.A615T  |
| Pat_59 | Post-Resistance | MTA2     | 9219   | 37 | 11 | 62363982  | 62363982  | Missense_Mutation      | SNP | C | T | 7  | 32  | c.905G>A   | c.(904-906)AGC>AAC     | p.S302N  |
| Pat_59 | Post-Resistance | GANAB    | 23193  | 37 | 11 | 62397390  | 62397390  | Missense_Mutation      | SNP | C | T | 4  | 103 | c.1633G>A  | c.(1633-1635)GAA>AAA   | p.E545K  |
| Pat_59 | Post-Resistance | C11orf48 | 79081  | 37 | 11 | 62435196  | 62435196  | Missense_Mutation      | SNP | G | A | 31 | 174 | c.337C>T   | c.(337-339)CCT>TCT     | p.P113S  |
| Pat_59 | Post-Resistance | TAF6L    | 10629  | 37 | 11 | 62554695  | 62554695  | Missense_Mutation      | SNP | C | T | 3  | 28  | c.1796C>T  | c.(1795-1797)CCC>CTC   | p.P599L  |
| Pat_59 | Post-Resistance | MACROD1  | 28992  | 37 | 11 | 63919836  | 63919836  | Missense_Mutation      | SNP | G | A | 4  | 116 | c.328C>T   | c.(328-330)CGG>TGG     | p.R110W  |
| Pat_59 | Post-Resistance | NUDT22   | 84304  | 37 | 11 | 63994167  | 63994167  | Missense_Mutation      | SNP | G | A | 3  | 30  | c.43G>A    | c.(43-45)GGC>AGC       | p.G15S   |
| Pat_59 | Post-Resistance | PPP2R5B  | 5526   | 37 | 11 | 64699040  | 64699040  | Missense_Mutation      | SNP | G | A | 4  | 24  | c.955G>A   | c.(955-957)GGG>AGG     | p.G319R  |
| Pat_59 | Post-Resistance | SLC25A45 | 283130 | 37 | 11 | 65144469  | 65144469  | Missense_Mutation      | SNP | G | A | 5  | 15  | c.418C>T   | c.(418-420)CCC>TCC     | p.P140S  |
| Pat_59 | Post-Resistance | SIPA1    | 6494   | 37 | 11 | 65413818  | 65413818  | Missense_Mutation      | SNP | C | T | 8  | 39  | c.1390C>T  | c.(1390-1392)CAC>TAC   | p.H464Y  |
| Pat_59 | Post-Resistance | CFL1     | 1072   | 37 | 11 | 65622848  | 65622848  | Missense_Mutation      | SNP | C | T | 9  | 50  | c.460G>A   | c.(460-462)GGG>AGG     | p.G154R  |
| Pat_59 | Post-Resistance | EFEMP2   | 30008  | 37 | 11 | 65637616  | 65637616  | Missense_Mutation      | SNP | C | T | 7  | 19  | c.583G>A   | c.(583-585)GGG>AGG     | p.G195R  |
| Pat_59 | Post-Resistance | FOSL1    | 8061   | 37 | 11 | 65660406  | 65660406  | Missense_Mutation      | SNP | C | T | 7  | 35  | c.767G>A   | c.(766-768)GGA>GAA     | p.G256E  |
| Pat_59 | Post-Resistance | SPTBN2   | 6712   | 37 | 11 | 66456591  | 66456591  | Missense_Mutation      | SNP | C | T | 3  | 10  | c.6010G>A  | c.(6010-6012)GAG>AAG   | p.E2004K |
| Pat_59 | Post-Resistance | GPR152   | 390212 | 37 | 11 | 67219036  | 67219036  | Missense_Mutation      | SNP | G | A | 4  | 28  | c.1160C>T  | c.(1159-1161)ACA>ATA   | p.T387I  |
| Pat_59 | Post-Resistance | C11orf51 | 25906  | 37 | 11 | 71822279  | 71822279  | Missense_Mutation      | SNP | G | A | 42 | 240 | c.44C>T    | c.(43-45)ACT>ATT       | p.T15I   |
| Pat_59 | Post-Resistance | PGM2L1   | 283209 | 37 | 11 | 74085531  | 74085531  | Missense_Mutation      | SNP | C | T | 4  | 106 | c.208G>A   | c.(208-210)GCA>ACA     | p.A70T   |
| Pat_59 | Post-Resistance | OR2AT4   | 341152 | 37 | 11 | 74799953  | 74799953  | Missense_Mutation      | SNP | G | A | 23 | 75  | c.806C>T   | c.(805-807)GCT>GTT     | p.A269V  |
| Pat_59 | Post-Resistance | PICALM   | 8301   | 37 | 11 | 85779847  | 85779847  | Translation_Start_Site | SNP | C | T | 4  | 18  | c.-24G>A   | c.(-26--22)GGGTG>GGATG |          |
| Pat_59 | Post-Resistance | NAALAD2  | 10003  | 37 | 11 | 89896741  | 89896741  | Missense_Mutation      | SNP | G | A | 26 | 61  | c.1234G>A  | c.(1234-1236)GAT>AAT   | p.D412N  |
| Pat_59 | Post-Resistance | PPP2R1B  | 5519   | 37 | 11 | 111624172 | 111624172 | Missense_Mutation      | SNP | C | T | 8  | 61  | c.1159G>A  | c.(1159-1161)GAT>AAT   | p.D387N  |
| Pat_59 | Post-Resistance | PHLDB1   | 23187  | 37 | 11 | 118498446 | 118498446 | Missense_Mutation      | SNP | C | T | 13 | 60  | c.907C>T   | c.(907-909)CCA>TCA     | p.P303S  |
| Pat_59 | Post-Resistance | TRIM29   | 23650  | 37 | 11 | 119993662 | 119993662 | Missense_Mutation      | SNP | C | A | 23 | 53  | c.1435G>T  | c.(1435-1437)GGT>TGT   | p.G479C  |
| Pat_59 | Post-Resistance | OR6X1    | 390260 | 37 | 11 | 123624496 | 123624496 | Missense_Mutation      | SNP | G | A | 14 | 47  | c.731C>T   | c.(730-732)ACA>ATA     | p.T244I  |
| Pat_59 | Post-Resistance | OR10G8   | 219869 | 37 | 11 | 123901131 | 123901131 | Missense_Mutation      | SNP | G | A | 9  | 63  | c.802G>A   | c.(802-804)GAT>AAT     | p.D268N  |
| Pat_59 | Post-Resistance | CCDC15   | 80071  | 37 | 11 | 124857828 | 124857828 | Missense_Mutation      | SNP | T | A | 8  | 309 | c.1706T>A  | c.(1705-1707)GTT>GAT   | p.V569D  |

|        |                 |          |        |    |    |           |           |                   |     |   |   |    |     |               |                      |                |
|--------|-----------------|----------|--------|----|----|-----------|-----------|-------------------|-----|---|---|----|-----|---------------|----------------------|----------------|
| Pat_59 | Post-Resistance | ARHGAP32 | 9743   | 37 | 11 | 129062003 | 129062003 | Missense_Mutation | SNP | C | T | 42 | 246 | c.91G>A       | c.(91-93)GAG>AAG     | p.E31K         |
| Pat_59 | Post-Resistance | SNX19    | 399979 | 37 | 11 | 130748328 | 130748328 | Missense_Mutation | SNP | C | T | 4  | 116 | c.2968G>A     | c.(2968-2970)GTC>ATC | p.V990I        |
| Pat_59 | Post-Resistance | KDM5A    | 5927   | 37 | 12 | 416913    | 416913    | Missense_Mutation | SNP | G | A | 8  | 47  | c.3637C>T     | c.(3637-3639)CCT>TCT | p.P1213S       |
| Pat_59 | Post-Resistance | WNK1     | 65125  | 37 | 12 | 995177    | 995177    | Missense_Mutation | SNP | C | T | 33 | 271 | c.5207C>T     | c.(5206-5208)ACC>ATC | p.T1736I       |
| Pat_59 | Post-Resistance | SCNN1A   | 6337   | 37 | 12 | 6457175   | 6457175   | Missense_Mutation | SNP | G | A | 3  | 2   | c.1874C>T     | c.(1873-1875)TCC>TTC | p.S625F        |
| Pat_59 | Post-Resistance | CD4      | 920    | 37 | 12 | 6927638   | 6927638   | Missense_Mutation | SNP | G | A | 8  | 37  | c.1208G>A     | c.(1207-1209)GGG>GAG | p.G403E        |
| Pat_59 | Post-Resistance | PEX5     | 5830   | 37 | 12 | 7354862   | 7354862   | Missense_Mutation | SNP | G | A | 14 | 137 | c.668G>A      | c.(667-669)GGC>GAC   | p.G223D        |
| Pat_59 | Post-Resistance | CD163    | 9332   | 37 | 12 | 7632577   | 7632577   | Missense_Mutation | SNP | G | A | 5  | 49  | c.3359C>T     | c.(3358-3360)TCA>TTA | p.S1120L       |
| Pat_59 | Post-Resistance | CD163    | 9332   | 37 | 12 | 7639184   | 7639184   | Missense_Mutation | SNP | C | T | 21 | 201 | c.2369G>A     | c.(2368-2370)GGA>GAA | p.G790E        |
| Pat_59 | Post-Resistance | DUSP16   | 80824  | 37 | 12 | 12633232  | 12633232  | Missense_Mutation | SNP | C | T | 26 | 144 | c.740G>A      | c.(739-741)GGG>GAG   | p.G247E        |
| Pat_59 | Post-Resistance | PDE6H    | 5149   | 37 | 12 | 15131013  | 15131013  | Missense_Mutation | SNP | C | T | 5  | 68  | c.67C>T       | c.(67-69)CCT>TCT     | p.P23S         |
| Pat_59 | Post-Resistance | PLEKHA5  | 54477  | 37 | 12 | 19501339  | 19501339  | Missense_Mutation | SNP | G | A | 9  | 92  | c.2407G>A     | c.(2407-2409)GAT>AAT | p.D803N        |
| Pat_59 | Post-Resistance | IPO8     | 10526  | 37 | 12 | 30790023  | 30790023  | Missense_Mutation | SNP | G | A | 21 | 155 | c.2588C>T     | c.(2587-2589)CCC>CTC | p.P863L        |
| Pat_59 | Post-Resistance | IPO8     | 10526  | 37 | 12 | 30815347  | 30815347  | Missense_Mutation | SNP | C | A | 4  | 78  | c.1669G>T     | c.(1669-1671)GAT>TAT | p.D557Y        |
| Pat_59 | Post-Resistance | DDX11    | 1663   | 37 | 12 | 31256617  | 31256617  | Missense_Mutation | SNP | T | C | 3  | 95  | c.2638T>C     | c.(2638-2640)TGT>CGT | p.C880R        |
| Pat_59 | Post-Resistance | SFRS2IP  | 9169   | 37 | 12 | 46320935  | 46320935  | Missense_Mutation | SNP | G | A | 18 | 121 | c.2549C>T     | c.(2548-2550)TCC>TTC | p.S850F        |
| Pat_59 | Post-Resistance | PFKM     | 5213   | 37 | 12 | 48516628  | 48516628  | Missense_Mutation | SNP | G | A | 8  | 56  | c.71G>A       | c.(70-72)GGT>GAT     | p.G24D         |
| Pat_59 | Post-Resistance | TROAP    | 10024  | 37 | 12 | 49724304  | 49724304  | Missense_Mutation | SNP | G | A | 7  | 30  | c.1676G>A     | c.(1675-1677)TGC>TAC | p.C559Y        |
| Pat_59 | Post-Resistance | FMNL3    | 91010  | 37 | 12 | 50048767  | 50048767  | Missense_Mutation | SNP | C | T | 13 | 92  | c.886G>A      | c.(886-888)GTA>ATA   | p.V296I        |
| Pat_59 | Post-Resistance | TMBIM6   | 7009   | 37 | 12 | 50152016  | 50152016  | Missense_Mutation | SNP | G | A | 23 | 141 | c.293G>A      | c.(292-294)GGC>GAC   | p.G98D         |
| Pat_59 | Post-Resistance | SLC4A8   | 9498   | 37 | 12 | 51890821  | 51890821  | Missense_Mutation | SNP | G | T | 13 | 57  | c.2994G>T     | c.(2992-2994)AAG>AAT | p.K998N        |
| Pat_59 | Post-Resistance | MFSD5    | 84975  | 37 | 12 | 53647883  | 53647883  | Missense_Mutation | SNP | G | A | 7  | 64  | c.1264G>A     | c.(1264-1266)GCA>ACA | p.A422T        |
| Pat_59 | Post-Resistance | AAAS     | 8086   | 37 | 12 | 53701392  | 53701392  | Missense_Mutation | SNP | C | T | 9  | 79  | c.1522G>A     | c.(1522-1524)GGT>AGT | p.G508S        |
| Pat_59 | Post-Resistance | KIAA0748 | 9840   | 37 | 12 | 55356244  | 55356244  | Nonsense_Mutation | SNP | G | A | 6  | 257 | c.1438C>T     | c.(1438-1440)CAG>TAG | p.Q480*        |
| Pat_59 | Post-Resistance | OR6C74   | 254783 | 37 | 12 | 55641912  | 55641912  | Missense_Mutation | SNP | C | T | 16 | 69  | c.841C>T      | c.(841-843)CCC>TCC   | p.P281S        |
| Pat_59 | Post-Resistance | SLC39A5  | 283375 | 37 | 12 | 56628983  | 56628983  | Missense_Mutation | SNP | C | T | 25 | 128 | c.677C>T      | c.(676-678)CCT>CTT   | p.P226L        |
| Pat_59 | Post-Resistance | NXPH4    | 11247  | 37 | 12 | 57619094  | 57619094  | Missense_Mutation | SNP | G | A | 32 | 166 | c.491G>A      | c.(490-492)GGA>GAA   | p.G164E        |
| Pat_59 | Post-Resistance | TSPAN8   | 7103   | 37 | 12 | 71537987  | 71537987  | Missense_Mutation | SNP | C | A | 4  | 57  | c.67G>T       | c.(67-69)GGT>TGT     | p.G23C         |
| Pat_59 | Post-Resistance | E2F7     | 144455 | 37 | 12 | 77440021  | 77440021  | Nonsense_Mutation | SNP | C | T | 4  | 54  | c.626G>A      | c.(625-627)TGG>TAG   | p.W209*        |
| Pat_59 | Post-Resistance | E2F7     | 144455 | 37 | 12 | 77444361  | 77444361  | Missense_Mutation | SNP | C | A | 23 | 206 | c.533G>T      | c.(532-534)AGT>ATT   | p.S178I        |
| Pat_59 | Post-Resistance | NR2C1    | 7181   | 37 | 12 | 95456346  | 95456346  | Missense_Mutation | SNP | C | T | 11 | 15  | c.223G>A      | c.(223-225)GAT>AAT   | p.D75N         |
| Pat_59 | Post-Resistance | NEDD1    | 121441 | 37 | 12 | 97334304  | 97334304  | Missense_Mutation | SNP | C | T | 20 | 111 | c.1235C>T     | c.(1234-1236)CCT>CTT | p.P412L        |
| Pat_59 | Post-Resistance | UTP20    | 27340  | 37 | 12 | 101723079 | 101723079 | Missense_Mutation | SNP | C | T | 22 | 147 | c.3269C>T     | c.(3268-3270)CCT>CTT | p.P1090L       |
| Pat_59 | Post-Resistance | STAB2    | 55576  | 37 | 12 | 104031826 | 104031826 | Missense_Mutation | SNP | C | T | 29 | 215 | c.742C>T      | c.(742-744)CCT>TCT   | p.P248S        |
| Pat_59 | Post-Resistance | HSP90B1  | 7184   | 37 | 12 | 104326111 | 104326111 | Missense_Mutation | SNP | G | A | 16 | 79  | c.209G>A      | c.(208-210)AGA>AAA   | p.R70K         |
| Pat_59 | Post-Resistance | SSH1     | 54434  | 37 | 12 | 109186090 | 109186090 | Missense_Mutation | SNP | C | T | 4  | 73  | c.1865G>A     | c.(1864-1866)AGC>AAC | p.S622N        |
| Pat_59 | Post-Resistance | CUX2     | 23316  | 37 | 12 | 111758218 | 111758218 | Missense_Mutation | SNP | C | T | 6  | 38  | c.2405C>T     | c.(2404-2406)TCC>TTC | p.S802F        |
| Pat_59 | Post-Resistance | C12orf51 | 283450 | 37 | 12 | 112699205 | 112699205 | Missense_Mutation | SNP | G | A | 21 | 110 | c.1481C>T     | c.(1480-1482)GCC>GTC | p.A494V        |
| Pat_59 | Post-Resistance | DDX54    | 79039  | 37 | 12 | 113596795 | 113596795 | Missense_Mutation | SNP | C | T | 8  | 12  | c.2533G>A     | c.(2533-2535)GGT>AGT | p.G845S        |
| Pat_59 | Post-Resistance | TAOK3    | 51347  | 37 | 12 | 118682769 | 118682769 | Missense_Mutation | SNP | G | A | 4  | 89  | c.122C>T      | c.(121-123)GCT>GTT   | p.A41V         |
| Pat_59 | Post-Resistance | DNAH10   | 196385 | 37 | 12 | 124323225 | 124323225 | Missense_Mutation | SNP | C | T | 7  | 72  | c.4771C>T     | c.(4771-4773)CAC>TAC | p.H1591Y       |
| Pat_59 | Post-Resistance | EP400    | 57634  | 37 | 12 | 132535158 | 132535158 | Missense_Mutation | SNP | C | T | 27 | 173 | c.7352C>T     | c.(7351-7353)CCC>CTC | p.P2451L       |
| Pat_59 | Post-Resistance | CHFR     | 55743  | 37 | 12 | 133454140 | 133454140 | Splice_Site       | SNP | C | T | 8  | 40  | c.233_splice  | c.e3+1               | p.S78_splice   |
| Pat_59 | Post-Resistance | ZMYM2    | 7750   | 37 | 13 | 20567697  | 20567697  | Missense_Mutation | SNP | G | A | 30 | 140 | c.485G>A      | c.(484-486)AGA>AAA   | p.R162K        |
| Pat_59 | Post-Resistance | SACS     | 26278  | 37 | 13 | 23914203  | 23914203  | Missense_Mutation | SNP | C | T | 7  | 41  | c.3812G>A     | c.(3811-3813)AGA>AAA | p.R1271K       |
| Pat_59 | Post-Resistance | CENPJ    | 55835  | 37 | 13 | 25458298  | 25458298  | Splice_Site       | SNP | C | T | 22 | 59  | c.3703_splice | c.e15+1              | p.E1235_splice |
| Pat_59 | Post-Resistance | FAM123A  | 219287 | 37 | 13 | 25744557  | 25744557  | Missense_Mutation | SNP | G | A | 8  | 28  | c.1201C>T     | c.(1201-1203)CCC>TCC | p.P401S        |

|        |                 |           |        |    |    |           |           |                   |     |   |   |    |     |           |                      |          |
|--------|-----------------|-----------|--------|----|----|-----------|-----------|-------------------|-----|---|---|----|-----|-----------|----------------------|----------|
| Pat_59 | Post-Resistance | NUPL1     | 9818   | 37 | 13 | 25882051  | 25882051  | Missense_Mutation | SNP | C | T | 30 | 128 | c.215C>T  | c.(214-216)CCT>CTT   | p.P72L   |
| Pat_59 | Post-Resistance | FLT1      | 2321   | 37 | 13 | 28877458  | 28877458  | Missense_Mutation | SNP | C | T | 8  | 40  | c.3863G>A | c.(3862-3864)AGC>AAC | p.S1288N |
| Pat_59 | Post-Resistance | MTUS2     | 23281  | 37 | 13 | 29933465  | 29933465  | Missense_Mutation | SNP | G | C | 4  | 5   | c.3002G>C | c.(3001-3003)CGT>CCT | p.R1001P |
| Pat_59 | Post-Resistance | RXFP2     | 122042 | 37 | 13 | 32363320  | 32363320  | Missense_Mutation | SNP | C | T | 13 | 59  | c.1135C>T | c.(1135-1137)CTT>TTT | p.L379F  |
| Pat_59 | Post-Resistance | FRY       | 10129  | 37 | 13 | 32698760  | 32698760  | Missense_Mutation | SNP | G | A | 7  | 37  | c.577G>A  | c.(577-579)GAC>AAC   | p.D193N  |
| Pat_59 | Post-Resistance | FRY       | 10129  | 37 | 13 | 32759129  | 32759129  | Missense_Mutation | SNP | G | A | 39 | 225 | c.3163G>A | c.(3163-3165)GAG>AAG | p.E1055K |
| Pat_59 | Post-Resistance | BRCA2     | 675    | 37 | 13 | 32912789  | 32912789  | Missense_Mutation | SNP | G | A | 12 | 110 | c.4297G>A | c.(4297-4299)GGG>AGG | p.G1433R |
| Pat_59 | Post-Resistance | STARD13   | 90627  | 37 | 13 | 33704299  | 33704299  | Missense_Mutation | SNP | G | A | 3  | 43  | c.515C>T  | c.(514-516)CCG>CTG   | p.P172L  |
| Pat_59 | Post-Resistance | SPG20     | 23111  | 37 | 13 | 36903605  | 36903605  | Missense_Mutation | SNP | C | T | 15 | 97  | c.1058G>A | c.(1057-1059)AGA>AAA | p.R353K  |
| Pat_59 | Post-Resistance | LRCH1     | 23143  | 37 | 13 | 47303045  | 47303045  | Missense_Mutation | SNP | G | A | 16 | 88  | c.1828G>A | c.(1828-1830)GTC>ATC | p.V610I  |
| Pat_59 | Post-Resistance | HTR2A     | 3356   | 37 | 13 | 47469692  | 47469692  | Missense_Mutation | SNP | G | A | 13 | 56  | c.350C>T  | c.(349-351)GCC>GTC   | p.A117V  |
| Pat_59 | Post-Resistance | WDFY2     | 115825 | 37 | 13 | 52325544  | 52325544  | Missense_Mutation | SNP | G | A | 4  | 73  | c.824G>A  | c.(823-825)AGG>AAG   | p.R275K  |
| Pat_59 | Post-Resistance | ATP7B     | 540    | 37 | 13 | 52511718  | 52511718  | Missense_Mutation | SNP | C | T | 7  | 43  | c.3797G>A | c.(3796-3798)GGG>GAG | p.G1266E |
| Pat_59 | Post-Resistance | PCDH17    | 27253  | 37 | 13 | 58299207  | 58299207  | Missense_Mutation | SNP | G | A | 15 | 92  | c.3259G>A | c.(3259-3261)GAC>AAC | p.D1087N |
| Pat_59 | Post-Resistance | DACH1     | 1602   | 37 | 13 | 72440354  | 72440354  | Missense_Mutation | SNP | G | A | 3  | 9   | c.548C>T  | c.(547-549)CCT>CTT   | p.P183L  |
| Pat_59 | Post-Resistance | SCEL      | 8796   | 37 | 13 | 78133998  | 78133998  | Missense_Mutation | SNP | G | A | 5  | 246 | c.221G>A  | c.(220-222)AGG>AAG   | p.R74K   |
| Pat_59 | Post-Resistance | DOCK9     | 23348  | 37 | 13 | 99550478  | 99550478  | Missense_Mutation | SNP | C | T | 4  | 15  | c.1544G>A | c.(1543-1545)TGC>TAC | p.C515Y  |
| Pat_59 | Post-Resistance | COL4A1    | 1282   | 37 | 13 | 110821984 | 110821984 | Missense_Mutation | SNP | C | T | 12 | 38  | c.3868G>A | c.(3868-3870)GGC>AGC | p.G1290S |
| Pat_59 | Post-Resistance | TUBGCP3   | 10426  | 37 | 13 | 113210420 | 113210420 | Missense_Mutation | SNP | G | A | 11 | 89  | c.667C>T  | c.(667-669)CCC>TCC   | p.P223S  |
| Pat_59 | Post-Resistance | RASA3     | 22821  | 37 | 13 | 114784340 | 114784340 | Missense_Mutation | SNP | C | T | 9  | 30  | c.841G>A  | c.(841-843)GGC>AGC   | p.G281S  |
| Pat_59 | Post-Resistance | RASA3     | 22821  | 37 | 13 | 114817551 | 114817551 | Missense_Mutation | SNP | C | T | 3  | 33  | c.253G>A  | c.(253-255)GTT>ATT   | p.V85I   |
| Pat_59 | Post-Resistance | P704P     | 641455 | 37 | 14 | 20020013  | 20020013  | Missense_Mutation | SNP | G | C | 4  | 218 | c.208C>G  | c.(208-210)CCC>GCC   | p.P70A   |
| Pat_59 | Post-Resistance | SLC7A8    | 23428  | 37 | 14 | 23612350  | 23612350  | Missense_Mutation | SNP | G | A | 5  | 119 | c.572C>T  | c.(571-573)ACA>ATA   | p.T191I  |
| Pat_59 | Post-Resistance | MYH6      | 4624   | 37 | 14 | 23855623  | 23855623  | Missense_Mutation | SNP | C | T | 3  | 35  | c.4860G>A | c.(4858-4860)ATG>ATA | p.M1620I |
| Pat_59 | Post-Resistance | TSSK4     | 283629 | 37 | 14 | 24677242  | 24677242  | Missense_Mutation | SNP | G | A | 18 | 50  | c.877G>A  | c.(877-879)GTG>ATG   | p.V293M  |
| Pat_59 | Post-Resistance | G2E3      | 55632  | 37 | 14 | 31061584  | 31061584  | Missense_Mutation | SNP | G | A | 30 | 112 | c.293G>A  | c.(292-294)TGT>TAT   | p.C98Y   |
| Pat_59 | Post-Resistance | CDKL1     | 8814   | 37 | 14 | 50845006  | 50845006  | Missense_Mutation | SNP | G | A | 6  | 22  | c.1243C>T | c.(1243-1245)CCT>TCT | p.P415S  |
| Pat_59 | Post-Resistance | ATL1      | 51062  | 37 | 14 | 51087425  | 51087425  | Missense_Mutation | SNP | G | A | 37 | 152 | c.971G>A  | c.(970-972)GGT>GAT   | p.G324D  |
| Pat_59 | Post-Resistance | GPR137C   | 283554 | 37 | 14 | 53100365  | 53100365  | Nonsense_Mutation | SNP | C | T | 5  | 74  | c.985C>T  | c.(985-987)CAG>TAG   | p.Q329*  |
| Pat_59 | Post-Resistance | SAMD4A    | 23034  | 37 | 14 | 55169263  | 55169263  | Missense_Mutation | SNP | C | T | 26 | 258 | c.677C>T  | c.(676-678)ACC>ATC   | p.T226I  |
| Pat_59 | Post-Resistance | WDHD1     | 11169  | 37 | 14 | 55474076  | 55474076  | Nonsense_Mutation | SNP | C | T | 22 | 163 | c.522G>A  | c.(520-522)TGG>TGA   | p.W174*  |
| Pat_59 | Post-Resistance | SGPP1     | 81537  | 37 | 14 | 64194218  | 64194218  | Missense_Mutation | SNP | G | A | 15 | 110 | c.445C>T  | c.(445-447)CCC>TCC   | p.P149S  |
| Pat_59 | Post-Resistance | SYNE2     | 23224  | 37 | 14 | 64486728  | 64486728  | Missense_Mutation | SNP | G | A | 16 | 135 | c.5068G>A | c.(5068-5070)GAA>AAA | p.E1690K |
| Pat_59 | Post-Resistance | PLEKHG3   | 26030  | 37 | 14 | 65198131  | 65198131  | Missense_Mutation | SNP | G | A | 13 | 89  | c.902G>A  | c.(901-903)GGG>GAG   | p.G301E  |
| Pat_59 | Post-Resistance | SPTB      | 6710   | 37 | 14 | 65249027  | 65249027  | Missense_Mutation | SNP | C | T | 25 | 179 | c.4247G>A | c.(4246-4248)CGG>CAG | p.R1416Q |
| Pat_59 | Post-Resistance | PLEKHH1   | 57475  | 37 | 14 | 68026391  | 68026391  | Missense_Mutation | SNP | A | G | 4  | 19  | c.406A>G  | c.(406-408)ACA>GCA   | p.T136A  |
| Pat_59 | Post-Resistance | SLC8A3    | 6547   | 37 | 14 | 70633821  | 70633821  | Missense_Mutation | SNP | G | A | 13 | 109 | c.1319C>T | c.(1318-1320)GCC>GTC | p.A440V  |
| Pat_59 | Post-Resistance | ZFYVE1    | 53349  | 37 | 14 | 73445585  | 73445585  | Missense_Mutation | SNP | C | T | 15 | 130 | c.1403G>A | c.(1402-1404)CGA>CAA | p.R468Q  |
| Pat_59 | Post-Resistance | LTBP2     | 4053   | 37 | 14 | 74975412  | 74975412  | Missense_Mutation | SNP | C | T | 16 | 51  | c.3547G>A | c.(3547-3549)GAG>AAG | p.E1183K |
| Pat_59 | Post-Resistance | LTBP2     | 4053   | 37 | 14 | 75022207  | 75022207  | Nonsense_Mutation | SNP | C | T | 10 | 83  | c.1020G>A | c.(1018-1020)TGG>TGA | p.W340*  |
| Pat_59 | Post-Resistance | KIAA0317  | 9870   | 37 | 14 | 75138173  | 75138173  | Missense_Mutation | SNP | G | A | 5  | 70  | c.1436C>T | c.(1435-1437)ACT>ATT | p.T479I  |
| Pat_59 | Post-Resistance | C14orf179 | 112752 | 37 | 14 | 76525686  | 76525686  | Nonsense_Mutation | SNP | C | T | 12 | 143 | c.265C>T  | c.(265-267)CAG>TAG   | p.Q89*   |
| Pat_59 | Post-Resistance | ADCK1     | 57143  | 37 | 14 | 78392296  | 78392296  | Missense_Mutation | SNP | G | A | 4  | 126 | c.1198G>A | c.(1198-1200)GCC>ACC | p.A400T  |
| Pat_59 | Post-Resistance | NRXN3     | 9369   | 37 | 14 | 80164260  | 80164260  | Missense_Mutation | SNP | C | T | 54 | 72  | c.2785C>T | c.(2785-2787)CGC>TGC | p.R929C  |
| Pat_59 | Post-Resistance | C14orf143 | 90141  | 37 | 14 | 90398906  | 90398906  | Missense_Mutation | SNP | C | T | 54 | 75  | c.283G>A  | c.(283-285)GAA>AAA   | p.E95K   |
| Pat_59 | Post-Resistance | C14orf159 | 80017  | 37 | 14 | 91655259  | 91655259  | Missense_Mutation | SNP | C | T | 3  | 40  | c.925C>T  | c.(925-927)CGG>TGG   | p.R309W  |
| Pat_59 | Post-Resistance | CATSPERB  | 79820  | 37 | 14 | 92159568  | 92159568  | Missense_Mutation | SNP | C | T | 24 | 153 | c.733G>A  | c.(733-735)GTG>ATG   | p.V245M  |



|        |                 |           |        |    |    |           |           |                        |     |    |    |    |     |                                     |                        |                |
|--------|-----------------|-----------|--------|----|----|-----------|-----------|------------------------|-----|----|----|----|-----|-------------------------------------|------------------------|----------------|
| Pat_59 | Post-Resistance | SLC24A4   | 123041 | 37 | 14 | 92900255  | 92900255  | Splice_Site            | SNP | G  | A  | 18 | 119 | c.191_splice                        | c.e3-1                 | p.A64_splice   |
| Pat_59 | Post-Resistance | C14orf142 | 84520  | 37 | 14 | 93673425  | 93673425  | Translation_Start_Site | SNP | C  | T  | 10 | 31  | c.-42G>A                            | :(-44--40)GGGTG>GGATG  |                |
| Pat_59 | Post-Resistance | DYNC1H1   | 1778   | 37 | 14 | 102466357 | 102466357 | Missense_Mutation      | SNP | C  | T  | 9  | 75  | c.3836C>T                           | c.(3835-3837)GCT>GTT   | p.A1279V       |
| Pat_59 | Post-Resistance | DYNC1H1   | 1778   | 37 | 14 | 102508839 | 102508839 | Missense_Mutation      | SNP | C  | T  | 6  | 53  | c.12394C>T                          | :(12394-12396)CCC>TCC  | p.P4132S       |
| Pat_59 | Post-Resistance | ADSSL1    | 122622 | 37 | 14 | 105204721 | 105204721 | Missense_Mutation      | SNP | G  | A  | 11 | 79  | c.304G>A                            | c.(304-306)GTG>ATG     | p.V102M        |
| Pat_59 | Post-Resistance | AHNAK2    | 113146 | 37 | 14 | 105408943 | 105408943 | Missense_Mutation      | SNP | C  | T  | 26 | 265 | c.12845G>A                          | c.(12844-12846)GGT>GAT | p.G4282D       |
| Pat_59 | Post-Resistance | AHNAK2    | 113146 | 37 | 14 | 105412732 | 105412732 | Missense_Mutation      | SNP | C  | T  | 10 | 129 | c.9056G>A                           | c.(9055-9057)GGG>GAG   | p.G3019E       |
| Pat_59 | Post-Resistance | BTBD6     | 90135  | 37 | 14 | 105716894 | 105716894 | Missense_Mutation      | SNP | G  | A  | 15 | 165 | c.1343G>A                           | c.(1342-1344)GGG>GAG   | p.G448E        |
| Pat_59 | Post-Resistance | GPR176    | 11245  | 37 | 15 | 40093401  | 40093401  | Missense_Mutation      | SNP | C  | T  | 26 | 89  | c.1480G>A                           | c.(1480-1482)GTA>ATA   | p.V494I        |
| Pat_59 | Post-Resistance | SRP14     | 6727   | 37 | 15 | 40328590  | 40328590  | Missense_Mutation      | SNP | C  | T  | 3  | 37  | c.355G>A                            | c.(355-357)GCA>ACA     | p.A119T        |
| Pat_59 | Post-Resistance | RPAP1     | 26015  | 37 | 15 | 41813218  | 41813218  | Missense_Mutation      | SNP | G  | A  | 3  | 35  | c.3166C>T                           | c.(3166-3168)CGC>TGC   | p.R1056C       |
| Pat_59 | Post-Resistance | MAPKBP1   | 23005  | 37 | 15 | 42116238  | 42116238  | Missense_Mutation      | SNP | G  | A  | 4  | 113 | c.4210G>A                           | c.(4210-4212)GCA>ACA   | p.A1404T       |
| Pat_59 | Post-Resistance | ZSCAN29   | 146050 | 37 | 15 | 43658361  | 43658361  | Missense_Mutation      | SNP | G  | A  | 10 | 46  | c.1169C>T                           | c.(1168-1170)GCG>GTG   | p.A390V        |
| Pat_59 | Post-Resistance | PDIA3     | 2923   | 37 | 15 | 44063358  | 44063358  | Missense_Mutation      | SNP | C  | T  | 8  | 32  | c.1460C>T                           | c.(1459-1461)CCC>CTC   | p.P487L        |
| Pat_59 | Post-Resistance | C15orf63  | 25764  | 37 | 15 | 44092830  | 44092830  | Missense_Mutation      | SNP | G  | A  | 3  | 16  | c.34G>A                             | c.(34-36)GAG>AAG       | p.E12K         |
| Pat_59 | Post-Resistance | DUOX1     | 53905  | 37 | 15 | 45433199  | 45433199  | Missense_Mutation      | SNP | C  | T  | 16 | 64  | c.1496C>T                           | c.(1495-1497)ACC>ATC   | p.T499I        |
| Pat_59 | Post-Resistance | MYO5A     | 4644   | 37 | 15 | 52646103  | 52646104  | Missense_Mutation      | DNP | GG | AA | 19 | 138 | :.3531_3532CC>T529-3534)GACCGC>GAT1 |                        | p.R1178C       |
| Pat_59 | Post-Resistance | CGNL1     | 84952  | 37 | 15 | 57820934  | 57820934  | Missense_Mutation      | SNP | C  | T  | 14 | 36  | c.3122C>T                           | c.(3121-3123)ACG>ATG   | p.T1041M       |
| Pat_59 | Post-Resistance | HSP90AB4P | 664618 | 37 | 15 | 58983364  | 58983364  | Missense_Mutation      | SNP | C  | T  | 5  | 19  | c.1456G>A                           | c.(1456-1458)GTG>ATG   | p.V486M        |
| Pat_59 | Post-Resistance | MYO1E     | 4643   | 37 | 15 | 59516907  | 59516907  | Missense_Mutation      | SNP | C  | T  | 8  | 50  | c.758G>A                            | c.(757-759)CGG>CAG     | p.R253Q        |
| Pat_59 | Post-Resistance | TLN2      | 83660  | 37 | 15 | 63004262  | 63004262  | Missense_Mutation      | SNP | G  | A  | 4  | 32  | c.2620G>A                           | c.(2620-2622)GTG>ATG   | p.V874M        |
| Pat_59 | Post-Resistance | THSD4     | 79875  | 37 | 15 | 72030223  | 72030223  | Missense_Mutation      | SNP | G  | A  | 19 | 91  | c.1783G>A                           | c.(1783-1785)GAC>AAC   | p.D595N        |
| Pat_59 | Post-Resistance | CYP1A1    | 1543   | 37 | 15 | 75013377  | 75013377  | Missense_Mutation      | SNP | C  | T  | 11 | 39  | c.1184G>A                           | c.(1183-1185)AGT>AAT   | p.S395N        |
| Pat_59 | Post-Resistance | CHRNA3    | 1136   | 37 | 15 | 78893612  | 78893612  | Nonsense_Mutation      | SNP | G  | A  | 17 | 76  | c.1372C>T                           | c.(1372-1374)CAA>TAA   | p.Q458*        |
| Pat_59 | Post-Resistance | AGBL1     | 123624 | 37 | 15 | 87217645  | 87217645  | Missense_Mutation      | SNP | G  | A  | 3  | 31  | c.3061G>A                           | c.(3061-3063)GCT>ACT   | p.A1021T       |
| Pat_59 | Post-Resistance | POLG      | 5428   | 37 | 15 | 89867337  | 89867337  | Splice_Site            | SNP | C  | T  | 5  | 50  | c.2070_splice                       | c.e11+1                | p.T690_splice  |
| Pat_59 | Post-Resistance | IQGAP1    | 8826   | 37 | 15 | 90991828  | 90991828  | Missense_Mutation      | SNP | G  | A  | 4  | 75  | c.937G>A                            | c.(937-939)GAC>AAC     | p.D313N        |
| Pat_59 | Post-Resistance | UNC45A    | 55898  | 37 | 15 | 91488142  | 91488142  | Missense_Mutation      | SNP | G  | A  | 7  | 26  | c.1048G>A                           | c.(1048-1050)GTG>ATG   | p.V350M        |
| Pat_59 | Post-Resistance | IGF1R     | 3480   | 37 | 15 | 99251019  | 99251019  | Missense_Mutation      | SNP | G  | A  | 7  | 12  | c.323G>A                            | c.(322-324)GGC>GAC     | p.G108D        |
| Pat_59 | Post-Resistance | AXIN1     | 8312   | 37 | 16 | 396560    | 396560    | Missense_Mutation      | SNP | C  | T  | 5  | 74  | c.466G>A                            | c.(466-468)GTG>ATG     | p.V156M        |
| Pat_59 | Post-Resistance | NOXO1     | 124056 | 37 | 16 | 2031176   | 2031176   | Missense_Mutation      | SNP | G  | A  | 6  | 18  | c.5C>T                              | c.(4-6)GCA>GTA         | p.A2V          |
| Pat_59 | Post-Resistance | PKD1      | 5310   | 37 | 16 | 2158498   | 2158498   | Missense_Mutation      | SNP | G  | A  | 3  | 29  | c.6670C>T                           | c.(6670-6672)CCT>TCT   | p.P2224S       |
| Pat_59 | Post-Resistance | CCDC64B   | 146439 | 37 | 16 | 3080452   | 3080452   | Missense_Mutation      | SNP | C  | T  | 5  | 14  | c.760G>A                            | c.(760-762)GAG>AAG     | p.E254K        |
| Pat_59 | Post-Resistance | ZNF205    | 7755   | 37 | 16 | 3170064   | 3170064   | Missense_Mutation      | SNP | G  | A  | 4  | 133 | c.1403G>A                           | c.(1402-1404)CGC>CAC   | p.R468H        |
| Pat_59 | Post-Resistance | ADCY9     | 115    | 37 | 16 | 4163814   | 4163814   | Missense_Mutation      | SNP | C  | T  | 4  | 108 | c.1630G>A                           | c.(1630-1632)GAA>AAA   | p.E544K        |
| Pat_59 | Post-Resistance | ATF7IP2   | 80063  | 37 | 16 | 10525273  | 10525273  | Missense_Mutation      | SNP | G  | A  | 20 | 81  | c.796G>A                            | c.(796-798)GAC>AAC     | p.D266N        |
| Pat_59 | Post-Resistance | TNP2      | 7142   | 37 | 16 | 11362962  | 11362962  | Missense_Mutation      | SNP | G  | A  | 17 | 81  | c.158C>T                            | c.(157-159)CCG>CTG     | p.P53L         |
| Pat_59 | Post-Resistance | SMG1      | 23049  | 37 | 16 | 18851019  | 18851019  | Splice_Site            | SNP | C  | T  | 33 | 145 | c.6945_splice                       | c.e42+1                | p.Q2315_splice |
| Pat_59 | Post-Resistance | GGA2      | 23062  | 37 | 16 | 23499931  | 23499931  | Missense_Mutation      | SNP | G  | A  | 28 | 77  | c.575C>T                            | c.(574-576)TCC>TTC     | p.S192F        |
| Pat_59 | Post-Resistance | PALB2     | 79728  | 37 | 16 | 23635397  | 23635397  | Missense_Mutation      | SNP | C  | T  | 16 | 40  | c.2767G>A                           | c.(2767-2769)GTT>ATT   | p.V923I        |
| Pat_59 | Post-Resistance | TNRC6A    | 27327  | 37 | 16 | 24802729  | 24802729  | Nonsense_Mutation      | SNP | G  | A  | 12 | 51  | c.2766G>A                           | c.(2764-2766)TGG>TGA   | p.W922*        |
| Pat_59 | Post-Resistance | ORAI3     | 93129  | 37 | 16 | 30964658  | 30964658  | Missense_Mutation      | SNP | C  | A  | 5  | 123 | c.381C>A                            | c.(379-381)AGC>AGA     | p.S127R        |
| Pat_59 | Post-Resistance | CNOT1     | 23019  | 37 | 16 | 58562399  | 58562399  | Missense_Mutation      | SNP | G  | A  | 24 | 111 | c.6433C>T                           | c.(6433-6435)CCA>TCA   | p.P2145S       |
| Pat_59 | Post-Resistance | CNOT1     | 23019  | 37 | 16 | 58565911  | 58565911  | Missense_Mutation      | SNP | G  | A  | 18 | 76  | c.6128C>T                           | c.(6127-6129)TCC>TTC   | p.S2043F       |
| Pat_59 | Post-Resistance | ZFP90     | 146198 | 37 | 16 | 68597523  | 68597523  | Missense_Mutation      | SNP | G  | A  | 24 | 96  | c.833G>A                            | c.(832-834)GGG>GAG     | p.G278E        |
| Pat_59 | Post-Resistance | PDF       | 64146  | 37 | 16 | 69362936  | 69362936  | Missense_Mutation      | SNP | C  | T  | 29 | 202 | c.721G>A                            | c.(721-723)GTG>ATG     | p.V241M        |
| Pat_59 | Post-Resistance | DHX38     | 9785   | 37 | 16 | 72139037  | 72139037  | Splice_Site            | SNP | G  | A  | 3  | 28  | c.2262_splice                       | c.e16+1                | p.E754_splice  |

|        |                 |           |        |    |    |          |          |                   |     |   |   |    |     |              |                      |               |
|--------|-----------------|-----------|--------|----|----|----------|----------|-------------------|-----|---|---|----|-----|--------------|----------------------|---------------|
| Pat_59 | Post-Resistance | LRRRC50   | 123872 | 37 | 16 | 84203819 | 84203819 | Missense_Mutation | SNP | A | G | 4  | 38  | c.1385A>G    | c.(1384-1386)CAA>CGA | p.Q462R       |
| Pat_59 | Post-Resistance | KIAA0513  | 9764   | 37 | 16 | 85111216 | 85111216 | Missense_Mutation | SNP | G | A | 3  | 15  | c.760G>A     | c.(760-762)GGG>AGG   | p.G254R       |
| Pat_59 | Post-Resistance | CPNE7     | 27132  | 37 | 16 | 89645271 | 89645271 | Nonsense_Mutation | SNP | C | T | 11 | 26  | c.364C>T     | c.(364-366)CAA>TAA   | p.Q122*       |
| Pat_59 | Post-Resistance | SLC43A2   | 124935 | 37 | 17 | 1494587  | 1494587  | Missense_Mutation | SNP | C | T | 7  | 64  | c.907G>A     | c.(907-909)GTG>ATG   | p.V303M       |
| Pat_59 | Post-Resistance | MNT       | 4335   | 37 | 17 | 2298284  | 2298284  | Missense_Mutation | SNP | G | A | 6  | 6   | c.538C>T     | c.(538-540)CCT>TCT   | p.P180S       |
| Pat_59 | Post-Resistance | GSG2      | 83903  | 37 | 17 | 3627912  | 3627912  | Missense_Mutation | SNP | C | T | 19 | 71  | c.683C>T     | c.(682-684)GCC>GTC   | p.A228V       |
| Pat_59 | Post-Resistance | ANKFY1    | 51479  | 37 | 17 | 4088208  | 4088208  | Missense_Mutation | SNP | G | A | 5  | 50  | c.1604C>T    | c.(1603-1605)ACC>ATC | p.T535I       |
| Pat_59 | Post-Resistance | MYBBP1A   | 10514  | 37 | 17 | 4444804  | 4444804  | Missense_Mutation | SNP | G | A | 11 | 123 | c.3251C>T    | c.(3250-3252)TCC>TTC | p.S1084F      |
| Pat_59 | Post-Resistance | POLR2A    | 5430   | 37 | 17 | 7414585  | 7414585  | Missense_Mutation | SNP | G | A | 4  | 74  | c.3865G>A    | c.(3865-3867)GAG>AAG | p.E1289K      |
| Pat_59 | Post-Resistance | CYB5D1    | 124637 | 37 | 17 | 7761721  | 7761721  | Missense_Mutation | SNP | G | A | 9  | 45  | c.161G>A     | c.(160-162)GGG>GAG   | p.G54E        |
| Pat_59 | Post-Resistance | TRIM16    | 10626  | 37 | 17 | 15539579 | 15539579 | Missense_Mutation | SNP | G | A | 4  | 81  | c.620C>T     | c.(619-621)TCG>TTG   | p.S207L       |
| Pat_59 | Post-Resistance | NCOR1     | 9611   | 37 | 17 | 15976764 | 15976764 | Missense_Mutation | SNP | G | A | 24 | 131 | c.3790C>T    | c.(3790-3792)CCT>TCT | p.P1264S      |
| Pat_59 | Post-Resistance | MED9      | 55090  | 37 | 17 | 17394799 | 17394799 | Missense_Mutation | SNP | C | T | 3  | 32  | c.431C>T     | c.(430-432)CCC>CTC   | p.P144L       |
| Pat_59 | Post-Resistance | TOP3A     | 7156   | 37 | 17 | 18196077 | 18196077 | Missense_Mutation | SNP | C | T | 15 | 69  | c.1163G>A    | c.(1162-1164)CGC>CAC | p.R388H       |
| Pat_59 | Post-Resistance | AKAP10    | 11216  | 37 | 17 | 19866227 | 19866227 | Missense_Mutation | SNP | G | A | 18 | 121 | c.245C>T     | c.(244-246)TCC>TTC   | p.S82F        |
| Pat_59 | Post-Resistance | CCDC55    | 84081  | 37 | 17 | 28512114 | 28512114 | Missense_Mutation | SNP | G | A | 7  | 19  | c.1099G>A    | c.(1099-1101)GCG>ACG | p.A367T       |
| Pat_59 | Post-Resistance | AMAC1     | 146861 | 37 | 17 | 33520491 | 33520491 | Missense_Mutation | SNP | G | A | 8  | 91  | c.836C>T     | c.(835-837)CCT>CTT   | p.P279L       |
| Pat_59 | Post-Resistance | DHRS11    | 79154  | 37 | 17 | 34955432 | 34955432 | Missense_Mutation | SNP | G | A | 22 | 50  | c.535G>A     | c.(535-537)GGA>AGA   | p.G179R       |
| Pat_59 | Post-Resistance | AATF      | 26574  | 37 | 17 | 35311157 | 35311157 | Missense_Mutation | SNP | C | T | 6  | 78  | c.782C>T     | c.(781-783)CCA>CTA   | p.P261L       |
| Pat_59 | Post-Resistance | TBC1D3    | 729873 | 37 | 17 | 36288264 | 36288264 | Missense_Mutation | SNP | C | T | 7  | 498 | c.350C>T     | c.(349-351)ACT>ATT   | p.T117I       |
| Pat_59 | Post-Resistance | MED1      | 5469   | 37 | 17 | 37564696 | 37564696 | Missense_Mutation | SNP | G | A | 9  | 61  | c.3778C>T    | c.(3778-3780)CCC>TCC | p.P1260S      |
| Pat_59 | Post-Resistance | MED1      | 5469   | 37 | 17 | 37564779 | 37564779 | Missense_Mutation | SNP | G | A | 7  | 50  | c.3695C>T    | c.(3694-3696)TCT>TTT | p.S1232F      |
| Pat_59 | Post-Resistance | TOP2A     | 7153   | 37 | 17 | 38557184 | 38557184 | Missense_Mutation | SNP | G | A | 88 | 530 | c.2582C>T    | c.(2581-2583)TCC>TTC | p.S861F       |
| Pat_59 | Post-Resistance | KRT24     | 192666 | 37 | 17 | 38856585 | 38856585 | Missense_Mutation | SNP | C | T | 88 | 266 | c.906G>A     | c.(904-906)ATG>ATA   | p.M302I       |
| Pat_59 | Post-Resistance | ACLY      | 47     | 37 | 17 | 40028028 | 40028028 | Missense_Mutation | SNP | C | T | 5  | 54  | c.2851G>A    | c.(2851-2853)GAC>AAC | p.D951N       |
| Pat_59 | Post-Resistance | GOSR2     | 9570   | 37 | 17 | 45012470 | 45012470 | Missense_Mutation | SNP | G | A | 31 | 136 | c.412G>A     | c.(412-414)GAT>AAT   | p.D138N       |
| Pat_59 | Post-Resistance | SPAG9     | 9043   | 37 | 17 | 49064546 | 49064546 | Missense_Mutation | SNP | C | T | 15 | 93  | c.2866G>A    | c.(2866-2868)GAC>AAC | p.D956N       |
| Pat_59 | Post-Resistance | MMD       | 23531  | 37 | 17 | 53478855 | 53478855 | Missense_Mutation | SNP | G | A | 9  | 71  | c.491C>T     | c.(490-492)TCT>TTT   | p.S164F       |
| Pat_59 | Post-Resistance | LOC653653 | 653653 | 37 | 17 | 58179963 | 58179963 | Missense_Mutation | SNP | G | A | 11 | 66  | c.202C>T     | c.(202-204)CCA>TCA   | p.P68S        |
| Pat_59 | Post-Resistance | BCAS3     | 54828  | 37 | 17 | 58767122 | 58767122 | Missense_Mutation | SNP | G | A | 4  | 66  | c.214G>A     | c.(214-216)GAT>AAT   | p.D72N        |
| Pat_59 | Post-Resistance | BCAS3     | 54828  | 37 | 17 | 58786687 | 58786687 | Splice_Site       | SNP | G | A | 9  | 63  | c.321_splice | c.e5+1               | p.P107_splice |
| Pat_59 | Post-Resistance | MED13     | 9969   | 37 | 17 | 60030432 | 60030432 | Missense_Mutation | SNP | C | T | 13 | 57  | c.6011G>A    | c.(6010-6012)GGA>GAA | p.G2004E      |
| Pat_59 | Post-Resistance | DCAF7     | 10238  | 37 | 17 | 61666446 | 61666446 | Missense_Mutation | SNP | G | A | 11 | 77  | c.941G>A     | c.(940-942)GGA>GAA   | p.G314E       |
| Pat_59 | Post-Resistance | TMEM104   | 54868  | 37 | 17 | 72832443 | 72832443 | Missense_Mutation | SNP | C | T | 34 | 93  | c.1108C>T    | c.(1108-1110)CCC>TCC | p.P370S       |
| Pat_59 | Post-Resistance | UBE2O     | 63893  | 37 | 17 | 74387046 | 74387046 | Missense_Mutation | SNP | G | A | 4  | 113 | c.3857C>T    | c.(3856-3858)CCG>CTG | p.P1286L      |
| Pat_59 | Post-Resistance | EIF4A3    | 9775   | 37 | 17 | 78111270 | 78111270 | Missense_Mutation | SNP | C | T | 4  | 21  | c.898G>A     | c.(898-900)GCC>ACC   | p.A300T       |
| Pat_59 | Post-Resistance | SLC26A11  | 284129 | 37 | 17 | 78211376 | 78211376 | Missense_Mutation | SNP | C | T | 4  | 6   | c.968C>T     | c.(967-969)GCG>GTG   | p.A323V       |
| Pat_59 | Post-Resistance | C17orf62  | 79415  | 37 | 17 | 80402356 | 80402356 | Missense_Mutation | SNP | G | A | 4  | 38  | c.410C>T     | c.(409-411)CCC>CTC   | p.P137L       |
| Pat_59 | Post-Resistance | FN3KRP    | 79672  | 37 | 17 | 80680740 | 80680740 | Missense_Mutation | SNP | C | T | 6  | 63  | c.446C>T     | c.(445-447)ACG>ATG   | p.T149M       |
| Pat_59 | Post-Resistance | EMILIN2   | 84034  | 37 | 18 | 2891017  | 2891017  | Nonsense_Mutation | SNP | C | T | 4  | 117 | c.892C>T     | c.(892-894)CAG>TAG   | p.Q298*       |
| Pat_59 | Post-Resistance | LAMA1     | 284217 | 37 | 18 | 7013887  | 7013887  | Missense_Mutation | SNP | G | A | 3  | 23  | c.3290C>T    | c.(3289-3291)ACG>ATG | p.T1097M      |
| Pat_59 | Post-Resistance | KIAA0802  | 23255  | 37 | 18 | 8784078  | 8784078  | Missense_Mutation | SNP | G | A | 6  | 40  | c.968G>A     | c.(967-969)GGT>GAT   | p.G323D       |
| Pat_59 | Post-Resistance | TXNDC2    | 84203  | 37 | 18 | 9887188  | 9887188  | Missense_Mutation | SNP | G | T | 6  | 157 | c.712G>T     | c.(712-714)GAT>TAT   | p.D238Y       |
| Pat_59 | Post-Resistance | MPPE1     | 65258  | 37 | 18 | 11886514 | 11886514 | Missense_Mutation | SNP | C | T | 4  | 125 | c.851G>A     | c.(850-852)CGG>CAG   | p.R284Q       |
| Pat_59 | Post-Resistance | AFG3L2    | 10939  | 37 | 18 | 12329697 | 12329697 | Missense_Mutation | SNP | G | A | 15 | 59  | c.2261C>T    | c.(2260-2262)TCT>TTT | p.S754F       |
| Pat_59 | Post-Resistance | ABHD3     | 171586 | 37 | 18 | 19231694 | 19231694 | Missense_Mutation | SNP | G | A | 16 | 87  | c.1088C>T    | c.(1087-1089)CCT>CTT | p.P363L       |
| Pat_59 | Post-Resistance | CABYR     | 26256  | 37 | 18 | 21736775 | 21736775 | Missense_Mutation | SNP | G | A | 5  | 44  | c.1310G>A    | c.(1309-1311)GGG>GAG | p.G437E       |

|        |                 |          |           |    |    |          |          |                   |     |    |    |    |     |                                    |                      |               |
|--------|-----------------|----------|-----------|----|----|----------|----------|-------------------|-----|----|----|----|-----|------------------------------------|----------------------|---------------|
| Pat_59 | Post-Resistance | OSBPL1A  | 114876    | 37 | 18 | 21897136 | 21897136 | Missense_Mutation | SNP | G  | A  | 26 | 149 | c.847C>T                           | c.(847-849)CAC>TAC   | p.H283Y       |
| Pat_59 | Post-Resistance | TAF4B    | 6875      | 37 | 18 | 23807205 | 23807205 | Missense_Mutation | SNP | C  | T  | 30 | 171 | c.308C>T                           | c.(307-309)ACA>ATA   | p.T103I       |
| Pat_59 | Post-Resistance | DSG1     | 1828      | 37 | 18 | 28918358 | 28918358 | Missense_Mutation | SNP | C  | T  | 13 | 155 | c.1346C>T                          | c.(1345-1347)ACC>ATC | p.T449I       |
| Pat_59 | Post-Resistance | DSG3     | 1830      | 37 | 18 | 29054122 | 29054122 | Missense_Mutation | SNP | G  | A  | 22 | 163 | c.2140G>A                          | c.(2140-2142)GAA>AAA | p.E714K       |
| Pat_59 | Post-Resistance | MEP1B    | 4225      | 37 | 18 | 29793207 | 29793207 | Missense_Mutation | SNP | C  | T  | 7  | 60  | c.1264C>T                          | c.(1264-1266)CTT>TTT | p.L422F       |
| Pat_59 | Post-Resistance | C18orf34 | 374864    | 37 | 18 | 30806765 | 30806765 | Missense_Mutation | SNP | C  | T  | 13 | 125 | c.1648G>A                          | c.(1648-1650)GTG>ATG | p.V550M       |
| Pat_59 | Post-Resistance | ZNF397OS | 100101467 | 37 | 18 | 32833785 | 32833785 | Missense_Mutation | SNP | G  | A  | 6  | 146 | c.1114C>T                          | c.(1114-1116)CTC>TTC | p.L372F       |
| Pat_59 | Post-Resistance | ELP2     | 55250     | 37 | 18 | 33724961 | 33724961 | Missense_Mutation | SNP | G  | A  | 44 | 244 | c.856G>A                           | c.(856-858)GTA>ATA   | p.V286I       |
| Pat_59 | Post-Resistance | DCC      | 1630      | 37 | 18 | 50432623 | 50432623 | Missense_Mutation | SNP | G  | A  | 40 | 98  | c.622G>A                           | c.(622-624)GGA>AGA   | p.G208R       |
| Pat_59 | Post-Resistance | NARS     | 4677      | 37 | 18 | 55273171 | 55273171 | Missense_Mutation | SNP | C  | T  | 4  | 78  | c.1169G>A                          | c.(1168-1170)CGG>CAG | p.R390Q       |
| Pat_59 | Post-Resistance | CDH20    | 28316     | 37 | 18 | 59206278 | 59206278 | Missense_Mutation | SNP | G  | A  | 16 | 129 | c.1430G>A                          | c.(1429-1431)AGT>AAT | p.S477N       |
| Pat_59 | Post-Resistance | CDH19    | 28513     | 37 | 18 | 64235688 | 64235688 | Missense_Mutation | SNP | G  | A  | 50 | 162 | c.455C>T                           | c.(454-456)CCT>CTT   | p.P152L       |
| Pat_59 | Post-Resistance | CCDC102B | 79839     | 37 | 18 | 66506096 | 66506096 | Missense_Mutation | SNP | G  | A  | 15 | 109 | c.760G>A                           | c.(760-762)GTA>ATA   | p.V254I       |
| Pat_59 | Post-Resistance | ZNF407   | 55628     | 37 | 18 | 72344482 | 72344482 | Nonsense_Mutation | SNP | C  | T  | 10 | 36  | c.1507C>T                          | c.(1507-1509)CAG>TAG | p.Q503*       |
| Pat_59 | Post-Resistance | MBP      | 4155      | 37 | 18 | 74696756 | 74696756 | Missense_Mutation | SNP | C  | T  | 6  | 45  | c.845G>A                           | c.(844-846)GGC>GAC   | p.G282D       |
| Pat_59 | Post-Resistance | HMHA1    | 23526     | 37 | 19 | 1080267  | 1080267  | Missense_Mutation | SNP | C  | T  | 4  | 121 | c.1717C>T                          | c.(1717-1719)CGT>TGT | p.R573C       |
| Pat_59 | Post-Resistance | ATP8B3   | 148229    | 37 | 19 | 1807187  | 1807187  | Missense_Mutation | SNP | G  | A  | 18 | 60  | c.595C>T                           | c.(595-597)CGG>TGG   | p.R199W       |
| Pat_59 | Post-Resistance | ZNF555   | 148254    | 37 | 19 | 2853202  | 2853202  | Missense_Mutation | SNP | C  | T  | 4  | 62  | c.1139C>T                          | c.(1138-1140)CCC>CTC | p.P380L       |
| Pat_59 | Post-Resistance | ZNF555   | 148254    | 37 | 19 | 2853369  | 2853369  | Missense_Mutation | SNP | C  | T  | 12 | 40  | c.1306C>T                          | c.(1306-1308)CCC>TCC | p.P436S       |
| Pat_59 | Post-Resistance | NCLN     | 56926     | 37 | 19 | 3186212  | 3186212  | Missense_Mutation | SNP | G  | A  | 2  | 0   | c.184G>A                           | c.(184-186)GGC>AGC   | p.G62S        |
| Pat_59 | Post-Resistance | TBXA2R   | 6915      | 37 | 19 | 3600565  | 3600565  | Missense_Mutation | SNP | C  | T  | 3  | 13  | c.68G>A                            | c.(67-69)CGG>CAG     | p.R23Q        |
| Pat_59 | Post-Resistance | EEF2     | 1938      | 37 | 19 | 3984195  | 3984195  | Missense_Mutation | SNP | C  | T  | 26 | 102 | c.157G>A                           | c.(157-159)GAG>AAG   | p.E53K        |
| Pat_59 | Post-Resistance | CHAF1A   | 10036     | 37 | 19 | 4433196  | 4433196  | Missense_Mutation | SNP | C  | T  | 17 | 83  | c.2333C>T                          | c.(2332-2334)ACC>ATC | p.T778I       |
| Pat_59 | Post-Resistance | FEM1A    | 55527     | 37 | 19 | 4793374  | 4793374  | Missense_Mutation | SNP | A  | C  | 3  | 99  | c.1508A>C                          | c.(1507-1509)TAC>TCC | p.Y503S       |
| Pat_59 | Post-Resistance | ZNF557   | 79230     | 37 | 19 | 7083178  | 7083178  | Missense_Mutation | SNP | G  | A  | 6  | 125 | c.695G>A                           | c.(694-696)AGT>AAT   | p.S232N       |
| Pat_59 | Post-Resistance | CD209    | 30835     | 37 | 19 | 7810560  | 7810561  | Missense_Mutation | DNP | GG | AA | 4  | 56  | c.591_592CC>TT589-594)ACCCGG>ACTT( |                      | p.R198W       |
| Pat_59 | Post-Resistance | SNAPC2   | 6618      | 37 | 19 | 7986659  | 7986659  | Splice_Site       | SNP | G  | A  | 3  | 17  | c.372_splice                       | c.e3+1               | p.Q124_splice |
| Pat_59 | Post-Resistance | FBN3     | 84467     | 37 | 19 | 8175804  | 8175804  | Missense_Mutation | SNP | C  | T  | 8  | 53  | c.4258G>A                          | c.(4258-4260)GAG>AAG | p.E1420K      |
| Pat_59 | Post-Resistance | MUC16    | 94025     | 37 | 19 | 9089557  | 9089557  | Missense_Mutation | SNP | G  | A  | 8  | 49  | c.2258C>T                          | c.(2257-2259)ACC>ATC | p.T753I       |
| Pat_59 | Post-Resistance | S1PR5    | 53637     | 37 | 19 | 10625665 | 10625665 | Missense_Mutation | SNP | G  | A  | 3  | 43  | c.23C>T                            | c.(22-24)CCG>CTG     | p.P8L         |
| Pat_59 | Post-Resistance | DNM2     | 1785      | 37 | 19 | 10887845 | 10887845 | Missense_Mutation | SNP | C  | T  | 4  | 32  | c.641C>T                           | c.(640-642)ACC>ATC   | p.T214I       |
| Pat_59 | Post-Resistance | ZNF700   | 90592     | 37 | 19 | 12060645 | 12060645 | Missense_Mutation | SNP | T  | A  | 6  | 272 | c.1806T>A                          | c.(1804-1806)AGT>AGA | p.S602R       |
| Pat_59 | Post-Resistance | ZNF700   | 90592     | 37 | 19 | 12060647 | 12060647 | Missense_Mutation | SNP | G  | C  | 6  | 270 | c.1808G>C                          | c.(1807-1809)TGT>TCT | p.C603S       |
| Pat_59 | Post-Resistance | ZNF799   | 90576     | 37 | 19 | 12502214 | 12502214 | Missense_Mutation | SNP | C  | T  | 24 | 210 | c.998G>A                           | c.(997-999)AGA>AAA   | p.R333K       |
| Pat_59 | Post-Resistance | ZNF791   | 163049    | 37 | 19 | 12739470 | 12739470 | Missense_Mutation | SNP | G  | A  | 14 | 96  | c.1127G>A                          | c.(1126-1128)AGG>AAG | p.R376K       |
| Pat_59 | Post-Resistance | RNASEH2A | 10535     | 37 | 19 | 12920945 | 12920945 | Missense_Mutation | SNP | C  | T  | 48 | 85  | c.472C>T                           | c.(472-474)CCC>TCC   | p.P158S       |
| Pat_59 | Post-Resistance | DNASE2   | 1777      | 37 | 19 | 12986905 | 12986905 | Missense_Mutation | SNP | C  | T  | 4  | 55  | c.982G>A                           | c.(982-984)GCC>ACC   | p.A328T       |
| Pat_59 | Post-Resistance | CD97     | 976       | 37 | 19 | 14499527 | 14499527 | Nonsense_Mutation | SNP | G  | A  | 31 | 146 | c.87G>A                            | c.(85-87)TGG>TGA     | p.W29*        |
| Pat_59 | Post-Resistance | EMR2     | 30817     | 37 | 19 | 14854549 | 14854549 | Missense_Mutation | SNP | G  | A  | 4  | 97  | c.2231C>T                          | c.(2230-2232)ACG>ATG | p.T744M       |
| Pat_59 | Post-Resistance | EMR2     | 30817     | 37 | 19 | 14867095 | 14867095 | Missense_Mutation | SNP | C  | T  | 4  | 113 | c.1147G>A                          | c.(1147-1149)GTG>ATG | p.V383M       |
| Pat_59 | Post-Resistance | MED26    | 9441      | 37 | 19 | 16686939 | 16686939 | Missense_Mutation | SNP | C  | T  | 21 | 95  | c.1702G>A                          | c.(1702-1704)GAC>AAC | p.D568N       |
| Pat_59 | Post-Resistance | GTPBP3   | 84705     | 37 | 19 | 17452408 | 17452408 | Missense_Mutation | SNP | G  | A  | 6  | 14  | c.1375G>A                          | c.(1375-1377)GAG>AAG | p.E459K       |
| Pat_59 | Post-Resistance | FAM129C  | 199786    | 37 | 19 | 17641597 | 17641597 | Missense_Mutation | SNP | C  | T  | 4  | 12  | c.182C>T                           | c.(181-183)CCT>CTT   | p.P61L        |
| Pat_59 | Post-Resistance | UPF1     | 5976      | 37 | 19 | 18971213 | 18971213 | Missense_Mutation | SNP | G  | A  | 15 | 90  | c.2299G>A                          | c.(2299-2301)GAG>AAG | p.E767K       |
| Pat_59 | Post-Resistance | KIAA0892 | 23383     | 37 | 19 | 19454651 | 19454651 | Missense_Mutation | SNP | G  | A  | 31 | 128 | c.979G>A                           | c.(979-981)GAC>AAC   | p.D327N       |
| Pat_59 | Post-Resistance | CILP2    | 148113    | 37 | 19 | 19655636 | 19655636 | Missense_Mutation | SNP | C  | T  | 3  | 18  | c.2282C>T                          | c.(2281-2283)ACG>ATG | p.T761M       |
| Pat_59 | Post-Resistance | ZNF93    | 81931     | 37 | 19 | 20045254 | 20045254 | Missense_Mutation | SNP | C  | T  | 6  | 235 | c.1490C>T                          | c.(1489-1491)ACT>ATT | p.T497I       |

|        |                 |          |           |    |    |          |          |                   |     |   |   |    |     |              |                      |               |
|--------|-----------------|----------|-----------|----|----|----------|----------|-------------------|-----|---|---|----|-----|--------------|----------------------|---------------|
| Pat_59 | Post-Resistance | ZNF93    | 81931     | 37 | 19 | 20045361 | 20045361 | Missense_Mutation | SNP | A | G | 5  | 177 | c.1597A>G    | c.(1597-1599)AGA>GGA | p.R533G       |
| Pat_59 | Post-Resistance | ZNF737   | 100129842 | 37 | 19 | 20727516 | 20727516 | Missense_Mutation | SNP | C | G | 5  | 125 | c.1493G>C    | c.(1492-1494)AGA>ACA | p.R498T       |
| Pat_59 | Post-Resistance | ZNF708   | 7562      | 37 | 19 | 21476519 | 21476519 | Missense_Mutation | SNP | T | C | 8  | 152 | c.1249A>G    | c.(1249-1251)AAG>GAG | p.K417E       |
| Pat_59 | Post-Resistance | ZNF429   | 353088    | 37 | 19 | 21720411 | 21720411 | Missense_Mutation | SNP | T | A | 6  | 160 | c.1556T>A    | c.(1555-1557)ATC>AAC | p.I519N       |
| Pat_59 | Post-Resistance | ZNF429   | 353088    | 37 | 19 | 21720414 | 21720414 | Missense_Mutation | SNP | T | G | 6  | 160 | c.1559T>G    | c.(1558-1560)CTG>CGG | p.L520R       |
| Pat_59 | Post-Resistance | ZNF100   | 163227    | 37 | 19 | 21909734 | 21909734 | Missense_Mutation | SNP | G | C | 11 | 336 | c.1380C>G    | c.(1378-1380)GAC>GAG | p.D460E       |
| Pat_59 | Post-Resistance | ZNF208   | 7757      | 37 | 19 | 22155896 | 22155896 | Missense_Mutation | SNP | A | C | 8  | 174 | c.1640T>G    | c.(1639-1641)ATT>AGT | p.I547S       |
| Pat_59 | Post-Resistance | ZNF208   | 7757      | 37 | 19 | 22157223 | 22157223 | Missense_Mutation | SNP | C | T | 13 | 103 | c.613G>A     | c.(613-615)GAA>AAA   | p.E205K       |
| Pat_59 | Post-Resistance | ZNF257   | 113835    | 37 | 19 | 22271961 | 22271961 | Missense_Mutation | SNP | A | G | 21 | 164 | c.1409A>G    | c.(1408-1410)CAG>CGG | p.Q470R       |
| Pat_59 | Post-Resistance | ZNF676   | 163223    | 37 | 19 | 22362924 | 22362924 | Missense_Mutation | SNP | G | C | 7  | 266 | c.1595C>G    | c.(1594-1596)CCC>CGC | p.P532R       |
| Pat_59 | Post-Resistance | ZNF99    | 7652      | 37 | 19 | 22939472 | 22939472 | Missense_Mutation | SNP | A | G | 5  | 148 | c.2699T>C    | c.(2698-2700)TTC>TCC | p.F900S       |
| Pat_59 | Post-Resistance | ZNF91    | 7644      | 37 | 19 | 23544867 | 23544867 | Missense_Mutation | SNP | T | C | 18 | 301 | c.914A>G     | c.(913-915)CAT>CGT   | p.H305R       |
| Pat_59 | Post-Resistance | ZNF507   | 22847     | 37 | 19 | 32845283 | 32845283 | Missense_Mutation | SNP | G | A | 5  | 59  | c.1547G>A    | c.(1546-1548)GGG>GAG | p.G516E       |
| Pat_59 | Post-Resistance | ZNF507   | 22847     | 37 | 19 | 32845291 | 32845291 | Nonsense_Mutation | SNP | G | T | 4  | 65  | c.1555G>T    | c.(1555-1557)GGA>TGA | p.G519*       |
| Pat_59 | Post-Resistance | KIAA0355 | 9710      | 37 | 19 | 34832814 | 34832814 | Missense_Mutation | SNP | G | A | 10 | 83  | c.1975G>A    | c.(1975-1977)GGC>AGC | p.G659S       |
| Pat_59 | Post-Resistance | UBA2     | 10054     | 37 | 19 | 34943026 | 34943026 | Missense_Mutation | SNP | G | A | 25 | 182 | c.1012G>A    | c.(1012-1014)GAT>AAT | p.D338N       |
| Pat_59 | Post-Resistance | SCN1B    | 6324      | 37 | 19 | 35524436 | 35524436 | Missense_Mutation | SNP | G | A | 24 | 77  | c.241G>A     | c.(241-243)GAG>AAG   | p.E81K        |
| Pat_59 | Post-Resistance | ZNF568   | 374900    | 37 | 19 | 37488413 | 37488413 | Missense_Mutation | SNP | C | T | 8  | 41  | c.1778C>T    | c.(1777-1779)ACA>ATA | p.T593I       |
| Pat_59 | Post-Resistance | ZNF585A  | 199704    | 37 | 19 | 37644133 | 37644133 | Missense_Mutation | SNP | A | T | 8  | 36  | c.668T>A     | c.(667-669)TTC>TAC   | p.F223Y       |
| Pat_59 | Post-Resistance | SIPA1L3  | 23094     | 37 | 19 | 38610163 | 38610163 | Missense_Mutation | SNP | C | T | 4  | 25  | c.2509C>T    | c.(2509-2511)CCC>TCC | p.P837S       |
| Pat_59 | Post-Resistance | ZFP36    | 7538      | 37 | 19 | 39899296 | 39899296 | Missense_Mutation | SNP | C | T | 7  | 97  | c.938C>T     | c.(937-939)CCC>CTC   | p.P313L       |
| Pat_59 | Post-Resistance | SHKBP1   | 92799     | 37 | 19 | 41088274 | 41088274 | Missense_Mutation | SNP | G | A | 11 | 59  | c.862G>A     | c.(862-864)GTG>ATG   | p.V288M       |
| Pat_59 | Post-Resistance | CYP2A13  | 1553      | 37 | 19 | 41599629 | 41599629 | Missense_Mutation | SNP | C | T | 6  | 46  | c.926C>T     | c.(925-927)ACC>ATC   | p.T309I       |
| Pat_59 | Post-Resistance | PRR19    | 284338    | 37 | 19 | 42814570 | 42814570 | Missense_Mutation | SNP | C | T | 6  | 153 | c.749C>T     | c.(748-750)GCG>GTG   | p.A250V       |
| Pat_59 | Post-Resistance | PSG5     | 5673      | 37 | 19 | 43688976 | 43688976 | Missense_Mutation | SNP | T | C | 9  | 331 | c.388A>G     | c.(388-390)AGG>GGG   | p.R130G       |
| Pat_59 | Post-Resistance | IRGQ     | 126298    | 37 | 19 | 44097414 | 44097414 | Nonsense_Mutation | SNP | C | T | 3  | 21  | c.636G>A     | c.(634-636)TGG>TGA   | p.W212*       |
| Pat_59 | Post-Resistance | C19orf61 | 56006     | 37 | 19 | 44251899 | 44251899 | Missense_Mutation | SNP | G | A | 3  | 6   | c.376C>T     | c.(376-378)CCC>TCC   | p.P126S       |
| Pat_59 | Post-Resistance | KCNN4    | 3783      | 37 | 19 | 44280742 | 44280742 | Missense_Mutation | SNP | G | A | 6  | 59  | c.206C>T     | c.(205-207)ACC>ATC   | p.T69I        |
| Pat_59 | Post-Resistance | ZNF45    | 7596      | 37 | 19 | 44417693 | 44417693 | Missense_Mutation | SNP | C | T | 7  | 114 | c.1895G>A    | c.(1894-1896)AGA>AAA | p.R632K       |
| Pat_59 | Post-Resistance | ZNF155   | 7711      | 37 | 19 | 44500775 | 44500775 | Missense_Mutation | SNP | G | A | 5  | 194 | c.766G>A     | c.(766-768)GGA>AGA   | p.G256R       |
| Pat_59 | Post-Resistance | KLC3     | 147700    | 37 | 19 | 45849946 | 45849946 | Missense_Mutation | SNP | G | A | 2  | 1   | c.403G>A     | c.(403-405)GAG>AAG   | p.E135K       |
| Pat_59 | Post-Resistance | SAE1     | 10055     | 37 | 19 | 47706998 | 47706998 | Splice_Site       | SNP | G | A | 26 | 88  | c.948_splice | c.e8+1               | p.K316_splice |
| Pat_59 | Post-Resistance | CRX      | 1406      | 37 | 19 | 48339604 | 48339604 | Missense_Mutation | SNP | C | T | 10 | 13  | c.205C>T     | c.(205-207)CGT>TGT   | p.R69C        |
| Pat_59 | Post-Resistance | FAM83E   | 54854     | 37 | 19 | 49107049 | 49107049 | Missense_Mutation | SNP | G | A | 5  | 11  | c.878C>T     | c.(877-879)CCT>CTT   | p.P293L       |
| Pat_59 | Post-Resistance | GYS1     | 2997      | 37 | 19 | 49494602 | 49494602 | Missense_Mutation | SNP | G | A | 22 | 106 | c.257C>T     | c.(256-258)GCC>GTC   | p.A86V        |
| Pat_59 | Post-Resistance | LHB      | 3972      | 37 | 19 | 49519435 | 49519435 | Missense_Mutation | SNP | G | A | 16 | 51  | c.316C>T     | c.(316-318)CTC>TTC   | p.L106F       |
| Pat_59 | Post-Resistance | NAPSA    | 9476      | 37 | 19 | 50865493 | 50865493 | Missense_Mutation | SNP | G | A | 8  | 20  | c.161C>T     | c.(160-162)CCC>CTC   | p.P54L        |
| Pat_59 | Post-Resistance | SIGLEC6  | 946       | 37 | 19 | 52033208 | 52033208 | Missense_Mutation | SNP | G | A | 4  | 18  | c.782C>T     | c.(781-783)TCC>TTC   | p.S261F       |
| Pat_59 | Post-Resistance | ZNF534   | 147658    | 37 | 19 | 52942507 | 52942507 | Missense_Mutation | SNP | A | T | 3  | 16  | c.1833A>T    | c.(1831-1833)AAA>AAT | p.K611N       |
| Pat_59 | Post-Resistance | ZNF578   | 147660    | 37 | 19 | 53014635 | 53014635 | Missense_Mutation | SNP | A | G | 6  | 193 | c.1001A>G    | c.(1000-1002)CAT>CGT | p.H334R       |
| Pat_59 | Post-Resistance | ZNF611   | 81856     | 37 | 19 | 53208542 | 53208542 | Missense_Mutation | SNP | C | T | 51 | 398 | c.1766G>A    | c.(1765-1767)AGT>AAT | p.S589N       |
| Pat_59 | Post-Resistance | ZNF415   | 55786     | 37 | 19 | 53612312 | 53612312 | Missense_Mutation | SNP | G | C | 3  | 81  | c.1130C>G    | c.(1129-1131)ACA>AGA | p.T377R       |
| Pat_59 | Post-Resistance | ZNF845   | 91664     | 37 | 19 | 53848804 | 53848804 | Missense_Mutation | SNP | G | A | 32 | 135 | c.61G>A      | c.(61-63)GAG>AAG     | p.E21K        |
| Pat_59 | Post-Resistance | TTYH1    | 57348     | 37 | 19 | 54946722 | 54946722 | Missense_Mutation | SNP | G | A | 11 | 34  | c.1126G>A    | c.(1126-1128)GAC>AAC | p.D376N       |
| Pat_59 | Post-Resistance | LILRA2   | 11027     | 37 | 19 | 55087469 | 55087469 | Missense_Mutation | SNP | G | A | 4  | 79  | c.1148G>A    | c.(1147-1149)GGT>GAT | p.G383D       |
| Pat_59 | Post-Resistance | C19orf51 | 352909    | 37 | 19 | 55672660 | 55672660 | Splice_Site       | SNP | C | T | 2  | 1   | c.789_splice | c.e7+1               | p.Y263_splice |
| Pat_59 | Post-Resistance | ZNF581   | 51545     | 37 | 19 | 56156428 | 56156428 | Missense_Mutation | SNP | G | A | 30 | 185 | c.491G>A     | c.(490-492)AGC>AAC   | p.S164N       |

|        |                 |         |        |    |    |           |           |                   |     |   |   |    |     |               |                      |                |
|--------|-----------------|---------|--------|----|----|-----------|-----------|-------------------|-----|---|---|----|-----|---------------|----------------------|----------------|
| Pat_59 | Post-Resistance | ZNF787  | 126208 | 37 | 19 | 56600421  | 56600421  | Missense_Mutation | SNP | C | A | 2  | 0   | c.120G>T      | c.(118-120)TGG>TGT   | p.W40C         |
| Pat_59 | Post-Resistance | ZNF787  | 126208 | 37 | 19 | 56600432  | 56600432  | Missense_Mutation | SNP | C | G | 2  | 1   | c.109G>C      | c.(109-111)GTC>CTC   | p.V37L         |
| Pat_59 | Post-Resistance | ZNF805  | 390980 | 37 | 19 | 57765443  | 57765443  | Missense_Mutation | SNP | G | A | 3  | 50  | c.1256G>A     | c.(1255-1257)CGG>CAG | p.R419Q        |
| Pat_59 | Post-Resistance | ZNF549  | 256051 | 37 | 19 | 58049465  | 58049465  | Missense_Mutation | SNP | G | A | 7  | 75  | c.1093G>A     | c.(1093-1095)GAA>AAA | p.E365K        |
| Pat_59 | Post-Resistance | ZNF154  | 7710   | 37 | 19 | 58216322  | 58216322  | Missense_Mutation | SNP | G | A | 37 | 113 | c.59C>T       | c.(58-60)GCC>GTC     | p.A20V         |
| Pat_59 | Post-Resistance | SNTG2   | 54221  | 37 | 2  | 1161233   | 1161233   | Splice_Site       | SNP | G | A | 9  | 22  | c.412_splice  | c.e7-1               | p.V138_splice  |
| Pat_59 | Post-Resistance | SNTG2   | 54221  | 37 | 2  | 1204796   | 1204796   | Missense_Mutation | SNP | C | T | 3  | 19  | c.599C>T      | c.(598-600)TCG>TTG   | p.S200L        |
| Pat_59 | Post-Resistance | LPIN1   | 23175  | 37 | 2  | 11960601  | 11960601  | Missense_Mutation | SNP | G | A | 10 | 103 | c.2474G>A     | c.(2473-2475)GGA>GAA | p.G825E        |
| Pat_59 | Post-Resistance | WDR35   | 57539  | 37 | 2  | 20145615  | 20145615  | Missense_Mutation | SNP | C | T | 71 | 333 | c.1810G>A     | c.(1810-1812)GAT>AAT | p.D604N        |
| Pat_59 | Post-Resistance | ITSN2   | 50618  | 37 | 2  | 24431115  | 24431115  | Missense_Mutation | SNP | C | T | 14 | 57  | c.4669G>A     | c.(4669-4671)GCT>ACT | p.A1557T       |
| Pat_59 | Post-Resistance | ITSN2   | 50618  | 37 | 2  | 24435559  | 24435559  | Missense_Mutation | SNP | G | A | 37 | 157 | c.4049C>T     | c.(4048-4050)CCC>CTC | p.P1350L       |
| Pat_59 | Post-Resistance | OTOF    | 9381   | 37 | 2  | 26750740  | 26750740  | Missense_Mutation | SNP | C | T | 12 | 35  | c.187G>A      | c.(187-189)GAG>AAG   | p.E63K         |
| Pat_59 | Post-Resistance | XDH     | 7498   | 37 | 2  | 31606627  | 31606627  | Missense_Mutation | SNP | G | A | 10 | 20  | c.880C>T      | c.(880-882)CCC>TCC   | p.P294S        |
| Pat_59 | Post-Resistance | MEMO1   | 51072  | 37 | 2  | 32094987  | 32094987  | Missense_Mutation | SNP | G | A | 6  | 26  | c.692C>T      | c.(691-693)TCT>TTT   | p.S231F        |
| Pat_59 | Post-Resistance | BIRC6   | 57448  | 37 | 2  | 32725065  | 32725065  | Nonsense_Mutation | SNP | C | T | 17 | 99  | c.8920C>T     | c.(8920-8922)CAA>TAA | p.Q2974*       |
| Pat_59 | Post-Resistance | LTBP1   | 4052   | 37 | 2  | 33484664  | 33484664  | Missense_Mutation | SNP | C | T | 17 | 110 | c.2405C>T     | c.(2404-2406)GCA>GTA | p.A802V        |
| Pat_59 | Post-Resistance | THADA   | 63892  | 37 | 2  | 43800132  | 43800132  | Splice_Site       | SNP | C | T | 16 | 44  | c.1730_splice | c.e12-1              | p.G577_splice  |
| Pat_59 | Post-Resistance | MSH6    | 2956   | 37 | 2  | 48027571  | 48027571  | Missense_Mutation | SNP | G | A | 4  | 18  | c.2449G>A     | c.(2449-2451)GAT>AAT | p.D817N        |
| Pat_59 | Post-Resistance | SPTBN1  | 6711   | 37 | 2  | 54858426  | 54858426  | Missense_Mutation | SNP | C | T | 3  | 33  | c.3242C>T     | c.(3241-3243)ACC>ATC | p.T1081I       |
| Pat_59 | Post-Resistance | RTN4    | 57142  | 37 | 2  | 55254397  | 55254397  | Missense_Mutation | SNP | C | T | 14 | 120 | c.838G>A      | c.(838-840)GCA>ACA   | p.A280T        |
| Pat_59 | Post-Resistance | CCT4    | 10575  | 37 | 2  | 62099431  | 62099431  | Missense_Mutation | SNP | C | T | 7  | 38  | c.1277G>A     | c.(1276-1278)GGT>GAT | p.G426D        |
| Pat_59 | Post-Resistance | UGP2    | 7360   | 37 | 2  | 64112875  | 64112875  | Missense_Mutation | SNP | G | A | 13 | 116 | c.728G>A      | c.(727-729)GGC>GAC   | p.G243D        |
| Pat_59 | Post-Resistance | SLC1A4  | 6509   | 37 | 2  | 65231139  | 65231139  | Missense_Mutation | SNP | C | T | 4  | 42  | c.623C>T      | c.(622-624)ACC>ATC   | p.T208I        |
| Pat_59 | Post-Resistance | SMYD5   | 10322  | 37 | 2  | 73452033  | 73452033  | Missense_Mutation | SNP | C | T | 16 | 101 | c.980C>T      | c.(979-981)CCA>CTA   | p.P327L        |
| Pat_59 | Post-Resistance | ALMS1   | 7840   | 37 | 2  | 73653650  | 73653650  | Missense_Mutation | SNP | G | A | 4  | 135 | c.1310G>A     | c.(1309-1311)TGC>TAC | p.C437Y        |
| Pat_59 | Post-Resistance | SLC4A5  | 57835  | 37 | 2  | 74466532  | 74466532  | Missense_Mutation | SNP | A | G | 3  | 46  | c.2249T>C     | c.(2248-2250)CTT>CCT | p.L750P        |
| Pat_59 | Post-Resistance | POLR1A  | 25885  | 37 | 2  | 86267551  | 86267551  | Missense_Mutation | SNP | C | T | 3  | 35  | c.3704G>A     | c.(3703-3705)GGC>GAC | p.G1235D       |
| Pat_59 | Post-Resistance | EIF2AK3 | 9451   | 37 | 2  | 88890467  | 88890467  | Missense_Mutation | SNP | C | T | 16 | 84  | c.871G>A      | c.(871-873)GAG>AAG   | p.E291K        |
| Pat_59 | Post-Resistance | PROM2   | 150696 | 37 | 2  | 95954721  | 95954721  | Missense_Mutation | SNP | C | T | 3  | 59  | c.2482C>T     | c.(2482-2484)CGG>TGG | p.R828W        |
| Pat_59 | Post-Resistance | TMEM131 | 23505  | 37 | 2  | 98413354  | 98413354  | Missense_Mutation | SNP | G | A | 7  | 62  | c.2966C>T     | c.(2965-2967)TCC>TTC | p.S989F        |
| Pat_59 | Post-Resistance | EIF5B   | 9669   | 37 | 2  | 99978149  | 99978149  | Missense_Mutation | SNP | G | A | 17 | 106 | c.785G>A      | c.(784-786)GGT>GAT   | p.G262D        |
| Pat_59 | Post-Resistance | MFSB9   | 84804  | 37 | 2  | 103335286 | 103335286 | Missense_Mutation | SNP | C | T | 5  | 60  | c.1018G>A     | c.(1018-1020)GGG>AGG | p.G340R        |
| Pat_59 | Post-Resistance | RGPD3   | 653489 | 37 | 2  | 107029692 | 107029692 | Missense_Mutation | SNP | A | T | 4  | 131 | c.5114T>A     | c.(5113-5115)GTG>GAG | p.V1705E       |
| Pat_59 | Post-Resistance | GCC2    | 9648   | 37 | 2  | 109098908 | 109098908 | Splice_Site       | SNP | G | A | 6  | 39  | c.3345_splice | c.e11+1              | p.K1115_splice |
| Pat_59 | Post-Resistance | RANBP2  | 5903   | 37 | 2  | 109383792 | 109383792 | Missense_Mutation | SNP | G | A | 75 | 472 | c.6797G>A     | c.(6796-6798)GGA>GAA | p.G2266E       |
| Pat_59 | Post-Resistance | MERTK   | 10461  | 37 | 2  | 112751940 | 112751940 | Missense_Mutation | SNP | G | A | 29 | 190 | c.1409G>A     | c.(1408-1410)GGG>GAG | p.G470E        |
| Pat_59 | Post-Resistance | POLR1B  | 84172  | 37 | 2  | 113300088 | 113300088 | Missense_Mutation | SNP | G | A | 4  | 112 | c.17G>A       | c.(16-18)CGG>CAG     | p.R6Q          |
| Pat_59 | Post-Resistance | POLR1B  | 84172  | 37 | 2  | 113333260 | 113333260 | Missense_Mutation | SNP | C | T | 46 | 233 | c.3362C>T     | c.(3361-3363)GCT>GTT | p.A1121V       |
| Pat_59 | Post-Resistance | SLC35F5 | 80255  | 37 | 2  | 114493356 | 114493356 | Missense_Mutation | SNP | G | A | 8  | 58  | c.830C>T      | c.(829-831)TCC>TTC   | p.S277F        |
| Pat_59 | Post-Resistance | MARCO   | 8685   | 37 | 2  | 119750708 | 119750708 | Missense_Mutation | SNP | T | C | 13 | 68  | c.1261T>C     | c.(1261-1263)TCA>CCA | p.S421P        |
| Pat_59 | Post-Resistance | POTEF   | 728378 | 37 | 2  | 130877782 | 130877782 | Missense_Mutation | SNP | A | G | 7  | 196 | c.307T>C      | c.(307-309)TGC>CGC   | p.C103R        |
| Pat_59 | Post-Resistance | ACMSD   | 130013 | 37 | 2  | 135621025 | 135621025 | Missense_Mutation | SNP | G | A | 4  | 94  | c.310G>A      | c.(310-312)GTT>ATT   | p.V104I        |
| Pat_59 | Post-Resistance | LRP1B   | 53353  | 37 | 2  | 141609326 | 141609326 | Missense_Mutation | SNP | C | A | 18 | 90  | c.4606G>T     | c.(4606-4608)GGC>TGC | p.G1536C       |
| Pat_59 | Post-Resistance | ZEB2    | 9839   | 37 | 2  | 145155876 | 145155876 | Missense_Mutation | SNP | C | T | 5  | 65  | c.2878G>A     | c.(2878-2880)GGA>AGA | p.G960R        |
| Pat_59 | Post-Resistance | KIF5C   | 3800   | 37 | 2  | 149798469 | 149798469 | Missense_Mutation | SNP | G | T | 4  | 88  | c.466G>T      | c.(466-468)GTT>TTT   | p.V156F        |
| Pat_59 | Post-Resistance | KIF5C   | 3800   | 37 | 2  | 149835481 | 149835481 | Nonsense_Mutation | SNP | C | T | 10 | 83  | c.1339C>T     | c.(1339-1341)CAA>TAA | p.Q447*        |
| Pat_59 | Post-Resistance | LYPD6   | 130574 | 37 | 2  | 150327306 | 150327306 | Missense_Mutation | SNP | C | T | 16 | 107 | c.458C>T      | c.(457-459)CCA>CTA   | p.P153L        |



|        |                 |          |        |    |    |           |           |                   |     |   |   |    |     |               |                        |               |
|--------|-----------------|----------|--------|----|----|-----------|-----------|-------------------|-----|---|---|----|-----|---------------|------------------------|---------------|
| Pat_59 | Post-Resistance | TANC1    | 85461  | 37 | 2  | 160053131 | 160053131 | Missense_Mutation | SNP | G | A | 8  | 65  | c.2992G>A     | c.(2992-2994)GAT>AAT   | p.D998N       |
| Pat_59 | Post-Resistance | TBR1     | 10716  | 37 | 2  | 162274810 | 162274810 | Missense_Mutation | SNP | G | A | 3  | 45  | c.946G>A      | c.(946-948)GGA>AGA     | p.G316R       |
| Pat_59 | Post-Resistance | SCN9A    | 6335   | 37 | 2  | 167055671 | 167055671 | Missense_Mutation | SNP | C | T | 85 | 118 | c.5445G>A     | c.(5443-5445)ATG>ATA   | p.M1815I      |
| Pat_59 | Post-Resistance | XIRP2    | 129446 | 37 | 2  | 168101965 | 168101965 | Missense_Mutation | SNP | G | A | 5  | 78  | c.4063G>A     | c.(4063-4065)GAA>AAA   | p.E1355K      |
| Pat_59 | Post-Resistance | KBTBD10  | 10324  | 37 | 2  | 170366969 | 170366969 | Missense_Mutation | SNP | G | A | 10 | 101 | c.681G>A      | c.(679-681)ATG>ATA     | p.M227I       |
| Pat_59 | Post-Resistance | METTL5   | 29081  | 37 | 2  | 170678459 | 170678459 | Missense_Mutation | SNP | C | T | 16 | 235 | c.218G>A      | c.(217-219)GGA>GAA     | p.G73E        |
| Pat_59 | Post-Resistance | UBR3     | 130507 | 37 | 2  | 170857821 | 170857821 | Missense_Mutation | SNP | G | A | 14 | 108 | c.3926G>A     | c.(3925-3927)TGT>TAT   | p.C1309Y      |
| Pat_59 | Post-Resistance | MYO3B    | 140469 | 37 | 2  | 171055725 | 171055725 | Missense_Mutation | SNP | C | G | 7  | 85  | c.10C>G       | c.(10-12)CTG>GTG       | p.L4V         |
| Pat_59 | Post-Resistance | MYO3B    | 140469 | 37 | 2  | 171056786 | 171056786 | Missense_Mutation | SNP | G | A | 8  | 49  | c.313G>A      | c.(313-315)GTC>ATC     | p.V105I       |
| Pat_59 | Post-Resistance | MYO3B    | 140469 | 37 | 2  | 171399445 | 171399445 | Missense_Mutation | SNP | G | A | 50 | 157 | c.3605G>A     | c.(3604-3606)GGG>GAG   | p.G1202E      |
| Pat_59 | Post-Resistance | SLC25A12 | 8604   | 37 | 2  | 172671640 | 172671640 | Missense_Mutation | SNP | C | T | 28 | 192 | c.1003G>A     | c.(1003-1005)GTT>ATT   | p.V335I       |
| Pat_59 | Post-Resistance | ITGA6    | 3655   | 37 | 2  | 173355994 | 173355994 | Missense_Mutation | SNP | C | T | 10 | 179 | c.2824C>T     | c.(2824-2826)CGG>TGG   | p.R942W       |
| Pat_59 | Post-Resistance | HNRNPA3  | 220988 | 37 | 2  | 178081499 | 178081499 | Missense_Mutation | SNP | G | A | 48 | 348 | c.739G>A      | c.(739-741)GGA>AGA     | p.G247R       |
| Pat_59 | Post-Resistance | TTN      | 7273   | 37 | 2  | 179560121 | 179560121 | Missense_Mutation | SNP | T | A | 10 | 77  | c.27492A>T    | c.(27490-27492)AAA>AAT | p.K9164N      |
| Pat_59 | Post-Resistance | TTN      | 7273   | 37 | 2  | 179596038 | 179596038 | Missense_Mutation | SNP | C | T | 80 | 537 | c.13723G>A    | c.(13723-13725)GTA>ATA | p.V4575I      |
| Pat_59 | Post-Resistance | TTN      | 7273   | 37 | 2  | 179639078 | 179639078 | Missense_Mutation | SNP | C | T | 20 | 158 | c.6913G>A     | c.(6913-6915)GAG>AAG   | p.E2305K      |
| Pat_59 | Post-Resistance | DUSP19   | 142679 | 37 | 2  | 183960196 | 183960196 | Missense_Mutation | SNP | C | T | 25 | 146 | c.464C>T      | c.(463-465)TCC>TTC     | p.S155F       |
| Pat_59 | Post-Resistance | STAT1    | 6772   | 37 | 2  | 191873711 | 191873711 | Missense_Mutation | SNP | C | T | 3  | 41  | c.251G>A      | c.(250-252)AGG>AAG     | p.R84K        |
| Pat_59 | Post-Resistance | MPP4     | 58538  | 37 | 2  | 202510121 | 202510121 | Missense_Mutation | SNP | C | T | 6  | 66  | c.1726G>A     | c.(1726-1728)GAC>AAC   | p.D576N       |
| Pat_59 | Post-Resistance | MPP4     | 58538  | 37 | 2  | 202520939 | 202520939 | Missense_Mutation | SNP | G | A | 3  | 15  | c.1282C>T     | c.(1282-1284)CGC>TGC   | p.R428C       |
| Pat_59 | Post-Resistance | PARD3B   | 117583 | 37 | 2  | 206480196 | 206480196 | Missense_Mutation | SNP | C | T | 9  | 79  | c.3277C>T     | c.(3277-3279)CCT>TCT   | p.P1093S      |
| Pat_59 | Post-Resistance | MDH1B    | 130752 | 37 | 2  | 207604380 | 207604380 | Missense_Mutation | SNP | C | T | 7  | 63  | c.1465G>A     | c.(1465-1467)GAG>AAG   | p.E489K       |
| Pat_59 | Post-Resistance | FZD5     | 7855   | 37 | 2  | 208632587 | 208632587 | Missense_Mutation | SNP | G | A | 2  | 0   | c.877C>T      | c.(877-879)CAT>TAT     | p.H293Y       |
| Pat_59 | Post-Resistance | PIKFYVE  | 200576 | 37 | 2  | 209207373 | 209207373 | Missense_Mutation | SNP | G | A | 25 | 158 | c.5027G>A     | c.(5026-5028)AGT>AAT   | p.S1676N      |
| Pat_59 | Post-Resistance | MYL1     | 4632   | 37 | 2  | 211163201 | 211163201 | Missense_Mutation | SNP | C | A | 4  | 132 | c.247G>T      | c.(247-249)GGC>TGC     | p.G83C        |
| Pat_59 | Post-Resistance | VIL1     | 7429   | 37 | 2  | 219296591 | 219296591 | Nonsense_Mutation | SNP | C | T | 5  | 12  | c.1114C>T     | c.(1114-1116)CAG>TAG   | p.Q372*       |
| Pat_59 | Post-Resistance | ALPPL2   | 251    | 37 | 2  | 233274467 | 233274467 | Missense_Mutation | SNP | T | C | 3  | 11  | c.1484T>C     | c.(1483-1485)CTG>CCG   | p.L495P       |
| Pat_59 | Post-Resistance | DGKD     | 8527   | 37 | 2  | 234343547 | 234343547 | Missense_Mutation | SNP | G | A | 24 | 124 | c.586G>A      | c.(586-588)GTG>ATG     | p.V196M       |
| Pat_59 | Post-Resistance | SH3BP4   | 23677  | 37 | 2  | 235951118 | 235951118 | Missense_Mutation | SNP | G | A | 8  | 41  | c.1705G>A     | c.(1705-1707)GTG>ATG   | p.V569M       |
| Pat_59 | Post-Resistance | COPS8    | 10920  | 37 | 2  | 238005479 | 238005479 | Missense_Mutation | SNP | G | A | 9  | 44  | c.517G>A      | c.(517-519)GAT>AAT     | p.D173N       |
| Pat_59 | Post-Resistance | COL6A3   | 1293   | 37 | 2  | 238253406 | 238253406 | Missense_Mutation | SNP | C | T | 4  | 134 | c.7255G>A     | c.(7255-7257)GGC>AGC   | p.G2419S      |
| Pat_59 | Post-Resistance | MLPH     | 79083  | 37 | 2  | 238434382 | 238434382 | Missense_Mutation | SNP | G | A | 5  | 22  | c.814G>A      | c.(814-816)GCC>ACC     | p.A272T       |
| Pat_59 | Post-Resistance | CAPN10   | 11132  | 37 | 2  | 241537456 | 241537456 | Missense_Mutation | SNP | C | T | 15 | 13  | c.1895C>T     | c.(1894-1896)CCG>CTG   | p.P632L       |
| Pat_59 | Post-Resistance | NSFL1C   | 55968  | 37 | 20 | 1433177   | 1433177   | Missense_Mutation | SNP | G | A | 30 | 126 | c.746C>T      | c.(745-747)GCC>GTC     | p.A249V       |
| Pat_59 | Post-Resistance | TMC2     | 117532 | 37 | 20 | 2593950   | 2593950   | Nonsense_Mutation | SNP | G | A | 8  | 95  | c.1854G>A     | c.(1852-1854)TGG>TGA   | p.W618*       |
| Pat_59 | Post-Resistance | SMOX     | 54498  | 37 | 20 | 4163099   | 4163099   | Missense_Mutation | SNP | G | A | 17 | 90  | c.973G>A      | c.(973-975)GCG>ACG     | p.A325T       |
| Pat_59 | Post-Resistance | PRNP     | 5621   | 37 | 20 | 4680494   | 4680494   | Missense_Mutation | SNP | G | A | 12 | 94  | c.628G>A      | c.(628-630)GTT>ATT     | p.V210I       |
| Pat_59 | Post-Resistance | BTBD3    | 22903  | 37 | 20 | 11899224  | 11899224  | Missense_Mutation | SNP | G | A | 30 | 171 | c.301G>A      | c.(301-303)GGT>AGT     | p.G101S       |
| Pat_59 | Post-Resistance | BTBD3    | 22903  | 37 | 20 | 11903679  | 11903679  | Missense_Mutation | SNP | G | A | 15 | 110 | c.934G>A      | c.(934-936)GTT>ATT     | p.V312I       |
| Pat_59 | Post-Resistance | BFSP1    | 631    | 37 | 20 | 17475036  | 17475036  | Nonsense_Mutation | SNP | C | A | 20 | 103 | c.1681G>T     | c.(1681-1683)GAG>TAG   | p.E561*       |
| Pat_59 | Post-Resistance | BFSP1    | 631    | 37 | 20 | 17475159  | 17475159  | Missense_Mutation | SNP | G | A | 4  | 30  | c.1558C>T     | c.(1558-1560)CCT>TCT   | p.P520S       |
| Pat_59 | Post-Resistance | RIN2     | 54453  | 37 | 20 | 19955744  | 19955744  | Missense_Mutation | SNP | C | T | 18 | 93  | c.1075C>T     | c.(1075-1077)CCC>TCC   | p.P359S       |
| Pat_59 | Post-Resistance | C20orf26 | 26074  | 37 | 20 | 20258004  | 20258004  | Missense_Mutation | SNP | G | A | 33 | 55  | c.2698G>A     | c.(2698-2700)GAT>AAT   | p.D900N       |
| Pat_59 | Post-Resistance | TPX2     | 22974  | 37 | 20 | 30366668  | 30366668  | Missense_Mutation | SNP | G | A | 25 | 149 | c.935G>A      | c.(934-936)GGA>GAA     | p.G312E       |
| Pat_59 | Post-Resistance | ASXL1    | 171023 | 37 | 20 | 31021379  | 31021379  | Missense_Mutation | SNP | G | A | 21 | 105 | c.1378G>A     | c.(1378-1380)GGG>AGG   | p.G460R       |
| Pat_59 | Post-Resistance | ZNF341   | 84905  | 37 | 20 | 32379180  | 32379180  | Missense_Mutation | SNP | G | A | 10 | 34  | c.2422G>A     | c.(2422-2424)GCG>ACG   | p.A808T       |
| Pat_59 | Post-Resistance | ITCH     | 83737  | 37 | 20 | 33059321  | 33059321  | Splice_Site       | SNP | G | A | 14 | 77  | c.1692_splice | c.e17+1                | p.Q564_splice |

|        |                 |           |        |    |    |          |          |                   |     |    |    |    |     |                                    |                      |               |
|--------|-----------------|-----------|--------|----|----|----------|----------|-------------------|-----|----|----|----|-----|------------------------------------|----------------------|---------------|
| Pat_59 | Post-Resistance | NCOA6     | 23054  | 37 | 20 | 33330330 | 33330330 | Missense_Mutation | SNP | G  | A  | 24 | 111 | c.3730C>T                          | c.(3730-3732)CTC>TTC | p.L1244F      |
| Pat_59 | Post-Resistance | RALGAPB   | 57148  | 37 | 20 | 37198592 | 37198592 | Missense_Mutation | SNP | C  | T  | 10 | 47  | c.4016C>T                          | c.(4015-4017)CCT>CTT | p.P1339L      |
| Pat_59 | Post-Resistance | SLC32A1   | 140679 | 37 | 20 | 37356239 | 37356239 | Missense_Mutation | SNP | G  | A  | 3  | 25  | c.535G>A                           | c.(535-537)GTG>ATG   | p.V179M       |
| Pat_59 | Post-Resistance | NCOA3     | 8202   | 37 | 20 | 46256433 | 46256433 | Missense_Mutation | SNP | T  | C  | 7  | 84  | c.661T>C                           | c.(661-663)TAT>CAT   | p.Y221H       |
| Pat_59 | Post-Resistance | SLC9A8    | 23315  | 37 | 20 | 48503433 | 48503433 | Missense_Mutation | SNP | G  | A  | 6  | 45  | c.1636G>A                          | c.(1636-1638)GAG>AAG | p.E546K       |
| Pat_59 | Post-Resistance | DPM1      | 8813   | 37 | 20 | 49551698 | 49551698 | Missense_Mutation | SNP | C  | T  | 28 | 200 | c.754G>A                           | c.(754-756)GGA>AGA   | p.G252R       |
| Pat_59 | Post-Resistance | TFAP2C    | 7022   | 37 | 20 | 55212921 | 55212921 | Missense_Mutation | SNP | G  | A  | 31 | 189 | c.1205G>A                          | c.(1204-1206)AGC>AAC | p.S402N       |
| Pat_59 | Post-Resistance | PMEPA1    | 56937  | 37 | 20 | 56228109 | 56228109 | Missense_Mutation | SNP | A  | G  | 2  | 8   | c.298T>C                           | c.(298-300)TCA>CCA   | p.S100P       |
| Pat_59 | Post-Resistance | CDH4      | 1002   | 37 | 20 | 60427882 | 60427882 | Missense_Mutation | SNP | G  | A  | 10 | 61  | c.805G>A                           | c.(805-807)GAC>AAC   | p.D269N       |
| Pat_59 | Post-Resistance | CDH4      | 1002   | 37 | 20 | 60448813 | 60448813 | Missense_Mutation | SNP | G  | A  | 14 | 56  | c.907G>A                           | c.(907-909)GAT>AAT   | p.D303N       |
| Pat_59 | Post-Resistance | TCFL5     | 10732  | 37 | 20 | 61492833 | 61492833 | Missense_Mutation | SNP | G  | T  | 4  | 79  | c.190C>A                           | c.(190-192)CAC>AAC   | p.H64N        |
| Pat_59 | Post-Resistance | DIDO1     | 11083  | 37 | 20 | 61511181 | 61511182 | Missense_Mutation | DNP | CC | TT | 7  | 17  | .6126_6127GG>A124-6129)GAGGAG>GAA/ |                      | p.E2043K      |
| Pat_59 | Post-Resistance | USP16     | 10600  | 37 | 21 | 30426414 | 30426414 | Nonsense_Mutation | SNP | G  | A  | 18 | 109 | c.2378G>A                          | c.(2377-2379)TGG>TAG | p.W793*       |
| Pat_59 | Post-Resistance | TIAM1     | 7074   | 37 | 21 | 32638927 | 32638927 | Missense_Mutation | SNP | G  | A  | 4  | 55  | c.362C>T                           | c.(361-363)GCC>GTC   | p.A121V       |
| Pat_59 | Post-Resistance | RCAN1     | 1827   | 37 | 21 | 35893877 | 35893877 | Missense_Mutation | SNP | G  | A  | 11 | 22  | c.506C>T                           | c.(505-507)CCA>CTA   | p.P169L       |
| Pat_59 | Post-Resistance | KCNJ6     | 3763   | 37 | 21 | 39087081 | 39087081 | Missense_Mutation | SNP | G  | A  | 14 | 70  | c.379C>T                           | c.(379-381)CCC>TCC   | p.P127S       |
| Pat_59 | Post-Resistance | DSCAM     | 1826   | 37 | 21 | 41459109 | 41459109 | Missense_Mutation | SNP | C  | G  | 4  | 100 | c.3956G>C                          | c.(3955-3957)TGG>TCG | p.W1319S      |
| Pat_59 | Post-Resistance | PCNT      | 5116   | 37 | 21 | 47754392 | 47754392 | Missense_Mutation | SNP | T  | C  | 3  | 60  | c.349T>C                           | c.(349-351)TGT>CGT   | p.C117R       |
| Pat_59 | Post-Resistance | IL17RA    | 23765  | 37 | 22 | 17581362 | 17581362 | Missense_Mutation | SNP | C  | T  | 12 | 54  | c.541C>T                           | c.(541-543)CTT>TTT   | p.L181F       |
| Pat_59 | Post-Resistance | MICAL3    | 57553  | 37 | 22 | 18387536 | 18387536 | Missense_Mutation | SNP | C  | T  | 13 | 82  | c.334G>A                           | c.(334-336)GTG>ATG   | p.V112M       |
| Pat_59 | Post-Resistance | MYO18B    | 84700  | 37 | 22 | 26159261 | 26159261 | Missense_Mutation | SNP | G  | A  | 3  | 6   | c.103G>A                           | c.(103-105)GGG>AGG   | p.G35R        |
| Pat_59 | Post-Resistance | NEFH      | 4744   | 37 | 22 | 29885313 | 29885313 | Missense_Mutation | SNP | C  | G  | 3  | 65  | c.1684C>G                          | c.(1684-1686)CCT>GCT | p.P562A       |
| Pat_59 | Post-Resistance | SEC14L3   | 266629 | 37 | 22 | 30866231 | 30866231 | Missense_Mutation | SNP | C  | T  | 3  | 11  | c.142G>A                           | c.(142-144)GAC>AAC   | p.D48N        |
| Pat_59 | Post-Resistance | LIMK2     | 3985   | 37 | 22 | 31656000 | 31656000 | Missense_Mutation | SNP | G  | A  | 4  | 120 | c.488G>A                           | c.(487-489)CGG>CAG   | p.R163Q       |
| Pat_59 | Post-Resistance | EIF4ENIF1 | 56478  | 37 | 22 | 31884687 | 31884687 | Missense_Mutation | SNP | C  | T  | 8  | 31  | c.18G>A                            | c.(16-18)ATG>ATA     | p.M6I         |
| Pat_59 | Post-Resistance | DEPDC5    | 9681   | 37 | 22 | 32215053 | 32215053 | Missense_Mutation | SNP | C  | T  | 12 | 130 | c.1712C>T                          | c.(1711-1713)GCA>GTA | p.A571V       |
| Pat_59 | Post-Resistance | ISX       | 91464  | 37 | 22 | 35478537 | 35478537 | Missense_Mutation | SNP | C  | T  | 31 | 64  | c.256C>T                           | c.(256-258)CGT>TGT   | p.R86C        |
| Pat_59 | Post-Resistance | DDX17     | 10521  | 37 | 22 | 38882386 | 38882386 | Missense_Mutation | SNP | C  | T  | 8  | 70  | c.1750G>A                          | c.(1750-1752)GAT>AAT | p.D584N       |
| Pat_59 | Post-Resistance | SUN2      | 25777  | 37 | 22 | 39138464 | 39138464 | Missense_Mutation | SNP | G  | A  | 3  | 16  | c.910C>T                           | c.(910-912)CGG>TGG   | p.R304W       |
| Pat_59 | Post-Resistance | EP300     | 2033   | 37 | 22 | 41572507 | 41572507 | Missense_Mutation | SNP | C  | T  | 9  | 53  | c.5036C>T                          | c.(5035-5037)ACA>ATA | p.T1679I      |
| Pat_59 | Post-Resistance | CSDC2     | 27254  | 37 | 22 | 41970862 | 41970862 | Missense_Mutation | SNP | C  | T  | 4  | 5   | c.425C>T                           | c.(424-426)CCC>CTC   | p.P142L       |
| Pat_59 | Post-Resistance | NAGA      | 4668   | 37 | 22 | 42458969 | 42458969 | Nonsense_Mutation | SNP | C  | T  | 7  | 26  | c.819G>A                           | c.(817-819)TGG>TGA   | p.W273*       |
| Pat_59 | Post-Resistance | NDUFA6    | 4700   | 37 | 22 | 42483096 | 42483096 | Missense_Mutation | SNP | C  | T  | 59 | 410 | c.301G>A                           | c.(301-303)GAC>AAC   | p.D101N       |
| Pat_59 | Post-Resistance | EFCAB6    | 64800  | 37 | 22 | 44027996 | 44027996 | Missense_Mutation | SNP | C  | T  | 7  | 57  | c.2221G>A                          | c.(2221-2223)GAG>AAG | p.E741K       |
| Pat_59 | Post-Resistance | IL17REL   | 400935 | 37 | 22 | 50435806 | 50435806 | Missense_Mutation | SNP | C  | T  | 3  | 13  | c.917G>A                           | c.(916-918)AGT>AAT   | p.S306N       |
| Pat_59 | Post-Resistance | MOV10L1   | 54456  | 37 | 22 | 50580557 | 50580557 | Missense_Mutation | SNP | G  | T  | 17 | 67  | c.2118G>T                          | c.(2116-2118)AGG>AGT | p.R706S       |
| Pat_59 | Post-Resistance | CNTN4     | 152330 | 37 | 3  | 2787298  | 2787298  | Missense_Mutation | SNP | C  | T  | 19 | 73  | c.275C>T                           | c.(274-276)ACC>ATC   | p.T92I        |
| Pat_59 | Post-Resistance | STAC      | 6769   | 37 | 3  | 36485003 | 36485003 | Missense_Mutation | SNP | C  | T  | 23 | 27  | c.259C>T                           | c.(259-261)CCT>TCT   | p.P87S        |
| Pat_59 | Post-Resistance | TRANK1    | 9881   | 37 | 3  | 36884166 | 36884166 | Missense_Mutation | SNP | G  | A  | 9  | 35  | c.3445C>T                          | c.(3445-3447)CCT>TCT | p.P1149S      |
| Pat_59 | Post-Resistance | CDC13     | 152206 | 37 | 3  | 42777260 | 42777260 | Missense_Mutation | SNP | A  | G  | 32 | 29  | c.1310T>C                          | c.(1309-1311)GTA>GCA | p.V437A       |
| Pat_59 | Post-Resistance | CYP8B1    | 1582   | 37 | 3  | 42916093 | 42916093 | Missense_Mutation | SNP | C  | T  | 45 | 54  | c.1216G>A                          | c.(1216-1218)GAT>AAT | p.D406N       |
| Pat_59 | Post-Resistance | C3orf71   | 646450 | 37 | 3  | 48956104 | 48956104 | Missense_Mutation | SNP | G  | A  | 10 | 23  | c.479C>T                           | c.(478-480)ACT>ATT   | p.T160I       |
| Pat_59 | Post-Resistance | WDR6      | 11180  | 37 | 3  | 49050379 | 49050379 | Missense_Mutation | SNP | C  | T  | 11 | 19  | c.1502C>T                          | c.(1501-1503)CCC>CTC | p.P501L       |
| Pat_59 | Post-Resistance | USP4      | 7375   | 37 | 3  | 49362451 | 49362451 | Missense_Mutation | SNP | C  | T  | 4  | 84  | c.509G>A                           | c.(508-510)CGG>CAG   | p.R170Q       |
| Pat_59 | Post-Resistance | RNF123    | 63891  | 37 | 3  | 49735373 | 49735373 | Splice_Site       | SNP | G  | A  | 33 | 116 | c.397_splice                       | c.e6+1               | p.G133_splice |
| Pat_59 | Post-Resistance | MST1R     | 4486   | 37 | 3  | 49928076 | 49928076 | Missense_Mutation | SNP | C  | T  | 4  | 28  | c.3652G>A                          | c.(3652-3654)GAG>AAG | p.E1218K      |
| Pat_59 | Post-Resistance | ERC2      | 26059  | 37 | 3  | 56026137 | 56026137 | Missense_Mutation | SNP | C  | T  | 68 | 79  | c.2203G>A                          | c.(2203-2205)GAG>AAG | p.E735K       |

|        |                 |           |        |    |   |           |           |                   |     |   |   |    |     |               |                        |                |
|--------|-----------------|-----------|--------|----|---|-----------|-----------|-------------------|-----|---|---|----|-----|---------------|------------------------|----------------|
| Pat_59 | Post-Resistance | C3orf67   | 200844 | 37 | 3 | 58849294  | 58849294  | Missense_Mutation | SNP | C | T | 4  | 13  | c.1208G>A     | c.(1207-1209)AGC>AAC   | p.S403N        |
| Pat_59 | Post-Resistance | PTPRG     | 5793   | 37 | 3 | 62268462  | 62268462  | Missense_Mutation | SNP | C | T | 22 | 129 | c.3973C>T     | c.(3973-3975)CCC>TCC   | p.P1325S       |
| Pat_59 | Post-Resistance | GBE1      | 2632   | 37 | 3 | 81584371  | 81584371  | Nonsense_Mutation | SNP | G | A | 3  | 45  | c.1909C>T     | c.(1909-1911)CGA>TGA   | p.R637*        |
| Pat_59 | Post-Resistance | IMPG2     | 50939  | 37 | 3 | 100949985 | 100949985 | Missense_Mutation | SNP | G | A | 5  | 216 | c.3238C>T     | c.(3238-3240)CGG>TGG   | p.R1080W       |
| Pat_59 | Post-Resistance | WDR52     | 55779  | 37 | 3 | 113152469 | 113152469 | Missense_Mutation | SNP | C | T | 25 | 97  | c.43G>A       | c.(43-45)GTT>ATT       | p.V15I         |
| Pat_59 | Post-Resistance | PLA1A     | 51365  | 37 | 3 | 119325823 | 119325823 | Splice_Site       | SNP | G | A | 4  | 54  | c.275_splice  | c.e2+1                 | p.R92_splice   |
| Pat_59 | Post-Resistance | TXNRD3IT1 | 645840 | 37 | 3 | 126291268 | 126291268 | Missense_Mutation | SNP | G | A | 4  | 26  | c.119C>T      | c.(118-120)ACC>ATC     | p.T40I         |
| Pat_59 | Post-Resistance | RPN1      | 6184   | 37 | 3 | 128341114 | 128341114 | Missense_Mutation | SNP | G | A | 3  | 31  | c.1534C>T     | c.(1534-1536)CTC>TTC   | p.L512F        |
| Pat_59 | Post-Resistance | DNAJC13   | 23317  | 37 | 3 | 132218155 | 132218155 | Splice_Site       | SNP | G | A | 11 | 60  | c.4341_splice | c.e37+1                | p.E1447_splice |
| Pat_59 | Post-Resistance | AMOTL2    | 51421  | 37 | 3 | 134080433 | 134080433 | Missense_Mutation | SNP | G | A | 3  | 28  | c.1670C>T     | c.(1669-1671)GCC>GTC   | p.A557V        |
| Pat_59 | Post-Resistance | SLC25A36  | 55186  | 37 | 3 | 140689814 | 140689814 | Missense_Mutation | SNP | C | T | 14 | 50  | c.431C>T      | c.(430-432)ACT>ATT     | p.T144I        |
| Pat_59 | Post-Resistance | ZIC1      | 7545   | 37 | 3 | 147131190 | 147131190 | Missense_Mutation | SNP | C | T | 16 | 45  | c.1196C>T     | c.(1195-1197)TCT>TTT   | p.S399F        |
| Pat_59 | Post-Resistance | TIPARP    | 25976  | 37 | 3 | 156422730 | 156422730 | Missense_Mutation | SNP | G | A | 16 | 76  | c.1784G>A     | c.(1783-1785)AGA>AAA   | p.R595K        |
| Pat_59 | Post-Resistance | CHRD      | 8646   | 37 | 3 | 184100191 | 184100191 | Nonsense_Mutation | SNP | G | A | 33 | 74  | c.714G>A      | c.(712-714)TGG>TGA     | p.W238*        |
| Pat_59 | Post-Resistance | HRG       | 3273   | 37 | 3 | 186394903 | 186394903 | Missense_Mutation | SNP | G | C | 4  | 70  | c.809G>C      | c.(808-810)CGT>CCT     | p.R270P        |
| Pat_59 | Post-Resistance | RFC4      | 5984   | 37 | 3 | 186522423 | 186522423 | Missense_Mutation | SNP | C | T | 32 | 150 | c.80G>A       | c.(79-81)GGA>GAA       | p.G27E         |
| Pat_59 | Post-Resistance | MUC4      | 4585   | 37 | 3 | 195487886 | 195487886 | Missense_Mutation | SNP | G | A | 6  | 24  | c.14333C>T    | c.(14332-14334)GCT>GTT | p.A4778V       |
| Pat_59 | Post-Resistance | MUC4      | 4585   | 37 | 3 | 195488993 | 195488993 | Missense_Mutation | SNP | G | A | 2  | 2   | c.14093C>T    | c.(14092-14094)CCG>CTC | p.P4698L       |
| Pat_59 | Post-Resistance | DLG1      | 1739   | 37 | 3 | 196888525 | 196888525 | Missense_Mutation | SNP | G | A | 3  | 27  | c.568C>T      | c.(568-570)CCC>TCC     | p.P190S        |
| Pat_59 | Post-Resistance | PIGG      | 54872  | 37 | 4 | 527682    | 527682    | Missense_Mutation | SNP | G | A | 5  | 18  | c.2647G>A     | c.(2647-2649)GCC>ACC   | p.A883T        |
| Pat_59 | Post-Resistance | SLBP      | 7884   | 37 | 4 | 1701784   | 1701784   | Missense_Mutation | SNP | G | A | 12 | 33  | c.295C>T      | c.(295-297)CTC>TTC     | p.L99F         |
| Pat_59 | Post-Resistance | SH3BP2    | 6452   | 37 | 4 | 2831592   | 2831592   | Missense_Mutation | SNP | C | T | 6  | 64  | c.959C>T      | c.(958-960)GCT>GTT     | p.A320V        |
| Pat_59 | Post-Resistance | PPP2R2C   | 5522   | 37 | 4 | 6374336   | 6374336   | Missense_Mutation | SNP | G | A | 26 | 60  | c.539C>T      | c.(538-540)TCC>TTC     | p.S180F        |
| Pat_59 | Post-Resistance | MAN2B2    | 23324  | 37 | 4 | 6606902   | 6606902   | Missense_Mutation | SNP | G | A | 6  | 20  | c.1660G>A     | c.(1660-1662)GAG>AAG   | p.E554K        |
| Pat_59 | Post-Resistance | SH3TC1    | 54436  | 37 | 4 | 8230054   | 8230054   | Missense_Mutation | SNP | G | A | 13 | 31  | c.2633G>A     | c.(2632-2634)CGG>CAG   | p.R878Q        |
| Pat_59 | Post-Resistance | ARAP2     | 116984 | 37 | 4 | 36121331  | 36121331  | Missense_Mutation | SNP | C | T | 28 | 136 | c.3904G>A     | c.(3904-3906)GAT>AAT   | p.D1302N       |
| Pat_59 | Post-Resistance | GABRG1    | 2565   | 37 | 4 | 46043129  | 46043129  | Missense_Mutation | SNP | C | T | 15 | 86  | c.1274G>A     | c.(1273-1275)GGA>GAA   | p.G425E        |
| Pat_59 | Post-Resistance | CWH43     | 80157  | 37 | 4 | 49034690  | 49034690  | Missense_Mutation | SNP | G | A | 13 | 111 | c.1616G>A     | c.(1615-1617)GGC>GAC   | p.G539D        |
| Pat_59 | Post-Resistance | LRRC66    | 339977 | 37 | 4 | 52861695  | 52861695  | Missense_Mutation | SNP | C | T | 9  | 74  | c.1493G>A     | c.(1492-1494)GGA>GAA   | p.G498E        |
| Pat_59 | Post-Resistance | SULT1E1   | 6783   | 37 | 4 | 70709896  | 70709896  | Missense_Mutation | SNP | G | A | 50 | 204 | c.755C>T      | c.(754-756)TCG>TTG     | p.S252L        |
| Pat_59 | Post-Resistance | RUFY3     | 22902  | 37 | 4 | 71640910  | 71640910  | Missense_Mutation | SNP | G | A | 34 | 145 | c.784G>A      | c.(784-786)GAC>AAC     | p.D262N        |
| Pat_59 | Post-Resistance | SLC4A4    | 8671   | 37 | 4 | 72412246  | 72412246  | Splice_Site       | SNP | G | A | 3  | 24  | c.2621_splice | c.e19+1                | p.R874_splice  |
| Pat_59 | Post-Resistance | SHROOM3   | 57619  | 37 | 4 | 77676326  | 77676326  | Missense_Mutation | SNP | C | T | 7  | 16  | c.4690C>T     | c.(4690-4692)CCC>TCC   | p.P1564S       |
| Pat_59 | Post-Resistance | FRAS1     | 80144  | 37 | 4 | 79428649  | 79428649  | Missense_Mutation | SNP | G | C | 12 | 36  | c.9391G>C     | c.(9391-9393)GTC>CTC   | p.V3131L       |
| Pat_59 | Post-Resistance | BMP2K     | 55589  | 37 | 4 | 79832960  | 79832960  | Missense_Mutation | SNP | G | A | 15 | 56  | c.3259G>A     | c.(3259-3261)GGC>AGC   | p.G1087S       |
| Pat_59 | Post-Resistance | ENOPH1    | 58478  | 37 | 4 | 83369128  | 83369128  | Missense_Mutation | SNP | G | T | 4  | 64  | c.140G>T      | c.(139-141)TGG>TTG     | p.W47L         |
| Pat_59 | Post-Resistance | SEC31A    | 22872  | 37 | 4 | 83791548  | 83791548  | Missense_Mutation | SNP | G | A | 36 | 110 | c.812C>T      | c.(811-813)GCA>GTA     | p.A271V        |
| Pat_59 | Post-Resistance | FAM175A   | 84142  | 37 | 4 | 84383690  | 84383690  | Missense_Mutation | SNP | G | A | 40 | 152 | c.1162C>T     | c.(1162-1164)CCA>TCA   | p.P388S        |
| Pat_59 | Post-Resistance | WDFY3     | 23001  | 37 | 4 | 85612936  | 85612936  | Missense_Mutation | SNP | G | A | 3  | 21  | c.9052C>T     | c.(9052-9054)CTC>TTC   | p.L3018F       |
| Pat_59 | Post-Resistance | TSPAN5    | 10098  | 37 | 4 | 99408002  | 99408002  | Missense_Mutation | SNP | G | A | 20 | 153 | c.166C>T      | c.(166-168)CTC>TTC     | p.L56F         |
| Pat_59 | Post-Resistance | EMCN      | 51705  | 37 | 4 | 101342534 | 101342534 | Missense_Mutation | SNP | C | T | 11 | 79  | c.569G>A      | c.(568-570)AGT>AAT     | p.S190N        |
| Pat_59 | Post-Resistance | ANK2      | 287    | 37 | 4 | 114277533 | 114277533 | Missense_Mutation | SNP | G | A | 12 | 64  | c.7759G>A     | c.(7759-7761)GAG>AAG   | p.E2587K       |
| Pat_59 | Post-Resistance | PRSS12    | 8492   | 37 | 4 | 119256783 | 119256783 | Missense_Mutation | SNP | G | A | 29 | 148 | c.665C>T      | c.(664-666)ACC>ATC     | p.T222I        |
| Pat_59 | Post-Resistance | KIAA1109  | 84162  | 37 | 4 | 123140495 | 123140495 | Missense_Mutation | SNP | G | A | 16 | 70  | c.2248G>A     | c.(2248-2250)GAA>AAA   | p.E750K        |
| Pat_59 | Post-Resistance | DCLK2     | 166614 | 37 | 4 | 151119157 | 151119157 | Missense_Mutation | SNP | G | A | 8  | 30  | c.863G>A      | c.(862-864)TGT>TAT     | p.C288Y        |
| Pat_59 | Post-Resistance | KIAA0922  | 23240  | 37 | 4 | 154502713 | 154502713 | Splice_Site       | SNP | G | A | 13 | 58  | c.892_splice  | c.e9+1                 | p.D298_splice  |
| Pat_59 | Post-Resistance | TLR2      | 7097   | 37 | 4 | 154625222 | 154625222 | Missense_Mutation | SNP | C | T | 17 | 40  | c.1163C>T     | c.(1162-1164)TCT>TTT   | p.S388F        |

|        |                 |           |        |    |   |           |           |                   |     |    |    |    |     |                |                      |               |
|--------|-----------------|-----------|--------|----|---|-----------|-----------|-------------------|-----|----|----|----|-----|----------------|----------------------|---------------|
| Pat_59 | Post-Resistance | FGB       | 2244   | 37 | 4 | 155490797 | 155490797 | Missense_Mutation | SNP | G  | A  | 13 | 47  | c.1090G>A      | c.(1090-1092)GAA>AAA | p.E364K       |
| Pat_59 | Post-Resistance | RXFP1     | 59350  | 37 | 4 | 159569854 | 159569854 | Nonsense_Mutation | SNP | C  | T  | 6  | 29  | c.1960C>T      | c.(1960-1962)CAG>TAG | p.Q654*       |
| Pat_59 | Post-Resistance | NAF1      | 92345  | 37 | 4 | 164085478 | 164085478 | Missense_Mutation | SNP | G  | A  | 7  | 36  | c.431C>T       | c.(430-432)TCC>TTC   | p.S144F       |
| Pat_59 | Post-Resistance | TMEM192   | 201931 | 37 | 4 | 166009740 | 166009740 | Missense_Mutation | SNP | G  | A  | 3  | 24  | c.454C>T       | c.(454-456)CTC>TTC   | p.L152F       |
| Pat_59 | Post-Resistance | TLL1      | 7092   | 37 | 4 | 166964438 | 166964438 | Missense_Mutation | SNP | G  | A  | 32 | 184 | c.1391G>A      | c.(1390-1392)GGT>GAT | p.G464D       |
| Pat_59 | Post-Resistance | WDR17     | 116966 | 37 | 4 | 177100701 | 177100701 | Missense_Mutation | SNP | G  | C  | 24 | 131 | c.3940G>C      | c.(3940-3942)GGG>CGG | p.G1314R      |
| Pat_59 | Post-Resistance | KLKB1     | 3818   | 37 | 4 | 187175919 | 187175919 | Splice_Site       | SNP | T  | C  | 6  | 29  | c.1489_splice  | c.e12+2              | p.E497_splice |
| Pat_59 | Post-Resistance | F11       | 2160   | 37 | 4 | 187195347 | 187195347 | Missense_Mutation | SNP | G  | A  | 14 | 83  | c.403G>A       | c.(403-405)GAA>AAA   | p.E135K       |
| Pat_59 | Post-Resistance | NIPBL     | 25836  | 37 | 5 | 37008777  | 37008777  | Missense_Mutation | SNP | C  | T  | 39 | 150 | c.4373C>T      | c.(4372-4374)ACT>ATT | p.T1458I      |
| Pat_59 | Post-Resistance | PRKAA1    | 5562   | 37 | 5 | 40764960  | 40764960  | Missense_Mutation | SNP | C  | T  | 12 | 33  | c.1202G>A      | c.(1201-1203)GGT>GAT | p.G401D       |
| Pat_59 | Post-Resistance | CARD6     | 84674  | 37 | 5 | 40853842  | 40853842  | Missense_Mutation | SNP | C  | T  | 69 | 213 | c.2408C>T      | c.(2407-2409)TCC>TTC | p.S803F       |
| Pat_59 | Post-Resistance | TNPO1     | 3842   | 37 | 5 | 72201170  | 72201170  | Nonsense_Mutation | SNP | G  | A  | 31 | 103 | c.2630G>A      | c.(2629-2631)TGG>TAG | p.W877*       |
| Pat_59 | Post-Resistance | HMGCR     | 3156   | 37 | 5 | 74647425  | 74647425  | Missense_Mutation | SNP | G  | A  | 16 | 49  | c.1366G>A      | c.(1366-1368)GAG>AAG | p.E456K       |
| Pat_59 | Post-Resistance | SPZ1      | 84654  | 37 | 5 | 79616081  | 79616081  | Missense_Mutation | SNP | C  | T  | 38 | 141 | c.47C>T        | c.(46-48)ACC>ATC     | p.T16I        |
| Pat_59 | Post-Resistance | HAPLN1    | 1404   | 37 | 5 | 82940241  | 82940242  | Missense_Mutation | DNP | CC | TT | 21 | 39  | c.715_716GG>AA | c.(715-717)GGA>AAA   | p.G239K       |
| Pat_59 | Post-Resistance | PCSK1     | 5122   | 37 | 5 | 95746489  | 95746489  | Missense_Mutation | SNP | C  | T  | 41 | 44  | c.1084G>A      | c.(1084-1086)GAC>AAC | p.D362N       |
| Pat_59 | Post-Resistance | GIN1      | 54826  | 37 | 5 | 102433155 | 102433155 | Nonsense_Mutation | SNP | G  | A  | 4  | 125 | c.871C>T       | c.(871-873)CGA>TGA   | p.R291*       |
| Pat_59 | Post-Resistance | WDR36     | 134430 | 37 | 5 | 110445948 | 110445948 | Missense_Mutation | SNP | G  | A  | 37 | 121 | c.1555G>A      | c.(1555-1557)GAT>AAT | p.D519N       |
| Pat_59 | Post-Resistance | CAMK4     | 814    | 37 | 5 | 110782463 | 110782463 | Missense_Mutation | SNP | C  | A  | 5  | 114 | c.539C>A       | c.(538-540)CCA>CAA   | p.P180Q       |
| Pat_59 | Post-Resistance | APC       | 324    | 37 | 5 | 112175228 | 112175228 | Missense_Mutation | SNP | A  | G  | 11 | 27  | c.3937A>G      | c.(3937-3939)ACT>GCT | p.T1313A      |
| Pat_59 | Post-Resistance | CCDC112   | 153733 | 37 | 5 | 114611031 | 114611031 | Missense_Mutation | SNP | C  | T  | 25 | 71  | c.551G>A       | c.(550-552)GGG>GAG   | p.G184E       |
| Pat_59 | Post-Resistance | COMMD10   | 51397  | 37 | 5 | 115423238 | 115423238 | Missense_Mutation | SNP | G  | A  | 28 | 87  | c.86G>A        | c.(85-87)AGA>AAA     | p.R29K        |
| Pat_59 | Post-Resistance | SNCAIP    | 9627   | 37 | 5 | 121759351 | 121759351 | Nonsense_Mutation | SNP | C  | T  | 14 | 67  | c.919C>T       | c.(919-921)CAA>TAA   | p.Q307*       |
| Pat_59 | Post-Resistance | CEP120    | 153241 | 37 | 5 | 122734882 | 122734882 | Missense_Mutation | SNP | G  | A  | 4  | 91  | c.560C>T       | c.(559-561)ACT>ATT   | p.T187I       |
| Pat_59 | Post-Resistance | ZNF608    | 57507  | 37 | 5 | 123979209 | 123979209 | Missense_Mutation | SNP | G  | A  | 11 | 40  | c.4291C>T      | c.(4291-4293)CCT>TCT | p.P1431S      |
| Pat_59 | Post-Resistance | ALDH7A1   | 501    | 37 | 5 | 125930766 | 125930766 | Missense_Mutation | SNP | A  | G  | 2  | 5   | c.125T>C       | c.(124-126)CTG>CCG   | p.L42P        |
| Pat_59 | Post-Resistance | SEC24A    | 10802  | 37 | 5 | 134010449 | 134010449 | Missense_Mutation | SNP | C  | A  | 5  | 35  | c.962C>A       | c.(961-963)CCA>CAA   | p.P321Q       |
| Pat_59 | Post-Resistance | HNRNPA0   | 10949  | 37 | 5 | 137089511 | 137089511 | Missense_Mutation | SNP | G  | A  | 4  | 76  | c.245C>T       | c.(244-246)GCG>GTG   | p.A82V        |
| Pat_59 | Post-Resistance | LRRTM2    | 26045  | 37 | 5 | 138209228 | 138209228 | Missense_Mutation | SNP | C  | T  | 26 | 32  | c.1022G>A      | c.(1021-1023)AGT>AAT | p.S341N       |
| Pat_59 | Post-Resistance | PCDHA9    | 9752   | 37 | 5 | 140229062 | 140229062 | Missense_Mutation | SNP | C  | T  | 4  | 11  | c.982C>T       | c.(982-984)CCA>TCA   | p.P328S       |
| Pat_59 | Post-Resistance | ARAP3     | 64411  | 37 | 5 | 141041635 | 141041635 | Missense_Mutation | SNP | C  | A  | 4  | 109 | c.2988G>T      | c.(2986-2988)TTG>TTT | p.L996F       |
| Pat_59 | Post-Resistance | POU4F3    | 5459   | 37 | 5 | 145719837 | 145719837 | Missense_Mutation | SNP | G  | A  | 3  | 18  | c.847G>A       | c.(847-849)GCG>ACG   | p.A283T       |
| Pat_59 | Post-Resistance | FOXI1     | 2299   | 37 | 5 | 169533194 | 169533194 | Missense_Mutation | SNP | G  | A  | 2  | 2   | c.233G>A       | c.(232-234)GGC>GAC   | p.G78D        |
| Pat_59 | Post-Resistance | HK3       | 3101   | 37 | 5 | 176316669 | 176316669 | Missense_Mutation | SNP | G  | A  | 24 | 43  | c.707C>T       | c.(706-708)CCG>CTG   | p.P236L       |
| Pat_59 | Post-Resistance | NSD1      | 64324  | 37 | 5 | 176722305 | 176722305 | Missense_Mutation | SNP | G  | A  | 15 | 59  | c.7936G>A      | c.(7936-7938)GCA>ACA | p.A2646T      |
| Pat_59 | Post-Resistance | WRNIP1    | 56897  | 37 | 6 | 2766533   | 2766533   | Missense_Mutation | SNP | C  | T  | 6  | 28  | c.677C>T       | c.(676-678)CCG>CTG   | p.P226L       |
| Pat_59 | Post-Resistance | RIPK1     | 8737   | 37 | 6 | 3106127   | 3106127   | Missense_Mutation | SNP | G  | A  | 7  | 39  | c.1418G>A      | c.(1417-1419)GGC>GAC | p.G473D       |
| Pat_59 | Post-Resistance | TUBB2B    | 347733 | 37 | 6 | 3225034   | 3225034   | Missense_Mutation | SNP | G  | A  | 5  | 57  | c.1289C>T      | c.(1288-1290)GCC>GTC | p.A430V       |
| Pat_59 | Post-Resistance | LY86      | 9450   | 37 | 6 | 6626622   | 6626623   | Missense_Mutation | DNP | CC | TT | 10 | 32  | c.320_321CC>TT | c.(319-321)CCC>CTT   | p.P107L       |
| Pat_59 | Post-Resistance | DSP       | 1832   | 37 | 6 | 7559602   | 7559602   | Missense_Mutation | SNP | G  | A  | 4  | 67  | c.566G>A       | c.(565-567)AGT>AAT   | p.S189N       |
| Pat_59 | Post-Resistance | SYCP2L    | 221711 | 37 | 6 | 10959016  | 10959016  | Splice_Site       | SNP | G  | A  | 3  | 46  | c.2164_splice  | c.e26-1              | p.L722_splice |
| Pat_59 | Post-Resistance | PHACTR1   | 221692 | 37 | 6 | 13206259  | 13206259  | Missense_Mutation | SNP | G  | A  | 4  | 43  | c.877G>A       | c.(877-879)GGC>AGC   | p.G293S       |
| Pat_59 | Post-Resistance | FAM8A1    | 51439  | 37 | 6 | 17602924  | 17602924  | Missense_Mutation | SNP | G  | A  | 25 | 121 | c.816G>A       | c.(814-816)ATG>ATA   | p.M272I       |
| Pat_59 | Post-Resistance | LRRC16A   | 55604  | 37 | 6 | 25610371  | 25610371  | Missense_Mutation | SNP | G  | A  | 19 | 70  | c.3941G>A      | c.(3940-3942)AGT>AAT | p.S1314N      |
| Pat_59 | Post-Resistance | HIST1H2BG | 8339   | 37 | 6 | 26216561  | 26216561  | Missense_Mutation | SNP | G  | A  | 57 | 284 | c.311C>T       | c.(310-312)CCC>CTC   | p.P104L       |
| Pat_59 | Post-Resistance | BTN2A3    | 54718  | 37 | 6 | 26431550  | 26431550  | Missense_Mutation | SNP | G  | A  | 17 | 51  | c.1468G>A      | c.(1468-1470)GGG>AGG | p.G490R       |
| Pat_59 | Post-Resistance | HIST1H2AJ | 8331   | 37 | 6 | 27782454  | 27782454  | Missense_Mutation | SNP | G  | A  | 16 | 96  | c.65C>T        | c.(64-66)GCC>GTC     | p.A22V        |

|        |                 |         |        |    |   |           |           |                   |     |   |   |    |     |               |                      |               |
|--------|-----------------|---------|--------|----|---|-----------|-----------|-------------------|-----|---|---|----|-----|---------------|----------------------|---------------|
| Pat_59 | Post-Resistance | MUC21   | 394263 | 37 | 6 | 30955295  | 30955295  | Missense_Mutation | SNP | G | A | 12 | 93  | c.1343G>A     | c.(1342-1344)GGA>GAA | p.G448E       |
| Pat_59 | Post-Resistance | HLA-DRA | 3122   | 37 | 6 | 32411211  | 32411211  | Nonsense_Mutation | SNP | G | A | 5  | 65  | c.578G>A      | c.(577-579)TGG>TAG   | p.W193*       |
| Pat_59 | Post-Resistance | BRPF3   | 27154  | 37 | 6 | 36196724  | 36196724  | Missense_Mutation | SNP | G | A | 4  | 58  | c.3325G>A     | c.(3325-3327)GTT>ATT | p.V1109I      |
| Pat_59 | Post-Resistance | DAAM2   | 23500  | 37 | 6 | 39869077  | 39869077  | Splice_Site       | SNP | G | A | 57 | 237 | c.2812_splice | c.e24-1              | p.F938_splice |
| Pat_59 | Post-Resistance | TREM1   | 54210  | 37 | 6 | 41250277  | 41250277  | Missense_Mutation | SNP | C | T | 7  | 36  | c.262G>A      | c.(262-264)GAA>AAA   | p.E88K        |
| Pat_59 | Post-Resistance | FRS3    | 10817  | 37 | 6 | 41738497  | 41738497  | Missense_Mutation | SNP | G | A | 16 | 64  | c.1339C>T     | c.(1339-1341)CAC>TAC | p.H447Y       |
| Pat_59 | Post-Resistance | POLH    | 5429   | 37 | 6 | 43582212  | 43582212  | Missense_Mutation | SNP | G | A | 35 | 201 | c.2060G>A     | c.(2059-2061)AGC>AAC | p.S687N       |
| Pat_59 | Post-Resistance | TMEM63B | 55362  | 37 | 6 | 44116284  | 44116284  | Missense_Mutation | SNP | G | A | 11 | 71  | c.1156G>A     | c.(1156-1158)GGC>AGC | p.G386S       |
| Pat_59 | Post-Resistance | CAPN11  | 11131  | 37 | 6 | 44147779  | 44147779  | Missense_Mutation | SNP | G | A | 20 | 128 | c.1519G>A     | c.(1519-1521)GAG>AAG | p.E507K       |
| Pat_59 | Post-Resistance | GPR110  | 266977 | 37 | 6 | 46976856  | 46976856  | Missense_Mutation | SNP | G | A | 15 | 49  | c.2315C>T     | c.(2314-2316)CCG>CTG | p.P772L       |
| Pat_59 | Post-Resistance | GPR110  | 266977 | 37 | 6 | 46984373  | 46984373  | Missense_Mutation | SNP | G | A | 5  | 60  | c.743C>T      | c.(742-744)TCT>TTT   | p.S248F       |
| Pat_59 | Post-Resistance | LRRC1   | 55227  | 37 | 6 | 53660160  | 53660160  | Missense_Mutation | SNP | C | T | 3  | 42  | c.106C>T      | c.(106-108)CCG>TGG   | p.R36W        |
| Pat_59 | Post-Resistance | KHDRBS2 | 202559 | 37 | 6 | 62611258  | 62611258  | Missense_Mutation | SNP | G | A | 32 | 94  | c.502C>T      | c.(502-504)CGT>TGT   | p.R168C       |
| Pat_59 | Post-Resistance | IMPG1   | 3617   | 37 | 6 | 76713604  | 76713604  | Missense_Mutation | SNP | G | A | 13 | 90  | c.1199C>T     | c.(1198-1200)GCT>GTT | p.A400V       |
| Pat_59 | Post-Resistance | BCKDHB  | 594    | 37 | 6 | 80912903  | 80912903  | Missense_Mutation | SNP | C | T | 20 | 118 | c.925C>T      | c.(925-927)CCT>TCT   | p.P309S       |
| Pat_59 | Post-Resistance | SYNCRIP | 10492  | 37 | 6 | 86346837  | 86346837  | Missense_Mutation | SNP | C | T | 6  | 39  | c.514G>A      | c.(514-516)GAT>AAT   | p.D172N       |
| Pat_59 | Post-Resistance | ORC3L   | 23595  | 37 | 6 | 88362837  | 88362837  | Missense_Mutation | SNP | G | A | 35 | 209 | c.1386G>A     | c.(1384-1386)ATG>ATA | p.M462I       |
| Pat_59 | Post-Resistance | USP45   | 85015  | 37 | 6 | 99885263  | 99885263  | Missense_Mutation | SNP | C | T | 6  | 36  | c.2173G>A     | c.(2173-2175)GGA>AGA | p.G725R       |
| Pat_59 | Post-Resistance | SMPD2   | 6610   | 37 | 6 | 109763242 | 109763242 | Missense_Mutation | SNP | T | C | 98 | 167 | c.290T>C      | c.(289-291)ATC>ACC   | p.I97T        |
| Pat_59 | Post-Resistance | FIG4    | 9896   | 37 | 6 | 110059614 | 110059614 | Missense_Mutation | SNP | G | A | 15 | 99  | c.733G>A      | c.(733-735)GAC>AAC   | p.D245N       |
| Pat_59 | Post-Resistance | NUS1    | 116150 | 37 | 6 | 118024809 | 118024809 | Missense_Mutation | SNP | G | A | 39 | 203 | c.733G>A      | c.(733-735)GGT>AGT   | p.G245S       |
| Pat_59 | Post-Resistance | ASF1A   | 25842  | 37 | 6 | 119226836 | 119226836 | Missense_Mutation | SNP | G | A | 46 | 295 | c.245G>A      | c.(244-246)GGA>GAA   | p.G82E        |
| Pat_59 | Post-Resistance | TRDN    | 10345  | 37 | 6 | 123673726 | 123673726 | Missense_Mutation | SNP | G | A | 8  | 56  | c.1327C>T     | c.(1327-1329)CCT>TCT | p.P443S       |
| Pat_59 | Post-Resistance | TNFAIP3 | 7128   | 37 | 6 | 138200429 | 138200429 | Missense_Mutation | SNP | G | A | 10 | 110 | c.1847G>A     | c.(1846-1848)GGG>GAG | p.G616E       |
| Pat_59 | Post-Resistance | TNFAIP3 | 7128   | 37 | 6 | 138202343 | 138202343 | Missense_Mutation | SNP | C | T | 41 | 135 | c.2260C>T     | c.(2260-2262)CCC>TCC | p.P754S       |
| Pat_59 | Post-Resistance | GPR126  | 57211  | 37 | 6 | 142724989 | 142724989 | Missense_Mutation | SNP | C | T | 15 | 79  | c.2006C>T     | c.(2005-2007)ACA>ATA | p.T669I       |
| Pat_59 | Post-Resistance | ZBTB2   | 57621  | 37 | 6 | 151687915 | 151687915 | Missense_Mutation | SNP | C | T | 28 | 107 | c.286G>A      | c.(286-288)GAA>AAA   | p.E96K        |
| Pat_59 | Post-Resistance | RBM16   | 22828  | 37 | 6 | 155153855 | 155153855 | Missense_Mutation | SNP | G | A | 10 | 59  | c.3142G>A     | c.(3142-3144)GGT>AGT | p.G1048S      |
| Pat_59 | Post-Resistance | MLLT4   | 4301   | 37 | 6 | 168319484 | 168319484 | Missense_Mutation | SNP | G | A | 11 | 70  | c.2755G>A     | c.(2755-2757)GAA>AAA | p.E919K       |
| Pat_59 | Post-Resistance | MLLT4   | 4301   | 37 | 6 | 168352185 | 168352185 | Missense_Mutation | SNP | G | A | 30 | 197 | c.4127G>A     | c.(4126-4128)GGT>GAT | p.G1376D      |
| Pat_59 | Post-Resistance | DLL1    | 28514  | 37 | 6 | 170592964 | 170592964 | Missense_Mutation | SNP | G | A | 3  | 17  | c.1403C>T     | c.(1402-1404)ACC>ATC | p.T468I       |
| Pat_59 | Post-Resistance | HEATR2  | 54919  | 37 | 7 | 794252    | 794252    | Missense_Mutation | SNP | G | A | 30 | 133 | c.1051G>A     | c.(1051-1053)GAG>AAG | p.E351K       |
| Pat_59 | Post-Resistance | C7orf27 | 221927 | 37 | 7 | 2578169   | 2578169   | Missense_Mutation | SNP | C | T | 3  | 3   | c.2000G>A     | c.(1999-2001)GGG>GAG | p.G667E       |
| Pat_59 | Post-Resistance | PMS2    | 5395   | 37 | 7 | 6027053   | 6027053   | Missense_Mutation | SNP | C | T | 10 | 36  | c.1343G>A     | c.(1342-1344)GGA>GAA | p.G448E       |
| Pat_59 | Post-Resistance | PMS2    | 5395   | 37 | 7 | 6043602   | 6043602   | Splice_Site       | SNP | C | T | 26 | 195 | c.250_splice  | c.e3+1               | p.T84_splice  |
| Pat_59 | Post-Resistance | DAGLB   | 221955 | 37 | 7 | 6487441   | 6487441   | Nonsense_Mutation | SNP | C | T | 4  | 18  | c.33G>A       | c.(31-33)TGG>TGA     | p.W11*        |
| Pat_59 | Post-Resistance | ZNF12   | 7559   | 37 | 7 | 6732287   | 6732287   | Missense_Mutation | SNP | C | T | 28 | 161 | c.286G>A      | c.(286-288)GAA>AAA   | p.E96K        |
| Pat_59 | Post-Resistance | ABCB5   | 340273 | 37 | 7 | 20725446  | 20725446  | Missense_Mutation | SNP | C | T | 7  | 61  | c.662C>T      | c.(661-663)ACC>ATC   | p.T221I       |
| Pat_59 | Post-Resistance | OSBPL3  | 26031  | 37 | 7 | 24905787  | 24905787  | Missense_Mutation | SNP | C | T | 26 | 93  | c.451G>A      | c.(451-453)GAA>AAA   | p.E151K       |
| Pat_59 | Post-Resistance | CCDC129 | 223075 | 37 | 7 | 31617722  | 31617722  | Missense_Mutation | SNP | G | A | 13 | 14  | c.844G>A      | c.(844-846)GAA>AAA   | p.E282K       |
| Pat_59 | Post-Resistance | HERPUD2 | 64224  | 37 | 7 | 35707173  | 35707173  | Missense_Mutation | SNP | G | A | 4  | 93  | c.365C>T      | c.(364-366)ACT>ATT   | p.T122I       |
| Pat_59 | Post-Resistance | ELMO1   | 9844   | 37 | 7 | 37264560  | 37264560  | Missense_Mutation | SNP | C | T | 5  | 37  | c.625G>A      | c.(625-627)GTG>ATG   | p.V209M       |
| Pat_59 | Post-Resistance | TXNDC3  | 51314  | 37 | 7 | 37916531  | 37916531  | Missense_Mutation | SNP | G | A | 10 | 22  | c.916G>A      | c.(916-918)GAT>AAT   | p.D306N       |
| Pat_59 | Post-Resistance | VPS41   | 27072  | 37 | 7 | 38835078  | 38835078  | Missense_Mutation | SNP | C | T | 11 | 118 | c.704G>A      | c.(703-705)GGG>GAG   | p.G235E       |
| Pat_59 | Post-Resistance | TNS3    | 64759  | 37 | 7 | 47408363  | 47408363  | Missense_Mutation | SNP | G | A | 6  | 27  | c.1880C>T     | c.(1879-1881)CCC>CTC | p.P627L       |
| Pat_59 | Post-Resistance | ABCA13  | 154664 | 37 | 7 | 48285548  | 48285548  | Missense_Mutation | SNP | G | A | 13 | 51  | c.1580G>A     | c.(1579-1581)GGT>GAT | p.G527D       |
| Pat_59 | Post-Resistance | 14-Sep  | 346288 | 37 | 7 | 55914284  | 55914284  | Missense_Mutation | SNP | C | T | 18 | 120 | c.101G>A      | c.(100-102)GGT>GAT   | p.G34D        |



|        |                 |           |        |    |   |           |           |                   |     |    |    |     |     |               |                      |               |
|--------|-----------------|-----------|--------|----|---|-----------|-----------|-------------------|-----|----|----|-----|-----|---------------|----------------------|---------------|
| Pat_59 | Post-Resistance | ZNF479    | 90827  | 37 | 7 | 57187795  | 57187795  | Missense_Mutation | SNP | C  | A  | 4   | 127 | c.1327G>T     | c.(1327-1329)GGC>TGC | p.G443C       |
| Pat_59 | Post-Resistance | SPDYE5    | 442590 | 37 | 7 | 75130942  | 75130942  | Missense_Mutation | SNP | C  | T  | 7   | 350 | c.817C>T      | c.(817-819)CGG>TGG   | p.R273W       |
| Pat_59 | Post-Resistance | SPDYE5    | 442590 | 37 | 7 | 75130958  | 75130958  | Missense_Mutation | SNP | G  | A  | 9   | 292 | c.833G>A      | c.(832-834)CGT>CAT   | p.R278H       |
| Pat_59 | Post-Resistance | PION      | 54103  | 37 | 7 | 76940695  | 76940695  | Missense_Mutation | SNP | C  | T  | 5   | 161 | c.2545G>A     | c.(2545-2547)GCG>ACG | p.A849T       |
| Pat_59 | Post-Resistance | SEMA3C    | 10512  | 37 | 7 | 80374401  | 80374401  | Missense_Mutation | SNP | G  | A  | 23  | 174 | c.2065C>T     | c.(2065-2067)CAC>TAC | p.H689Y       |
| Pat_59 | Post-Resistance | PCLO      | 27445  | 37 | 7 | 82582822  | 82582822  | Missense_Mutation | SNP | G  | A  | 10  | 73  | c.7447C>T     | c.(7447-7449)CCT>TCT | p.P2483S      |
| Pat_59 | Post-Resistance | KIAA1324L | 222223 | 37 | 7 | 86542393  | 86542393  | Missense_Mutation | SNP | G  | A  | 15  | 64  | c.1859C>T     | c.(1858-1860)CCC>CTC | p.P620L       |
| Pat_59 | Post-Resistance | DBF4      | 10926  | 37 | 7 | 87537185  | 87537185  | Missense_Mutation | SNP | G  | A  | 15  | 119 | c.1732G>A     | c.(1732-1734)GTG>ATG | p.V578M       |
| Pat_59 | Post-Resistance | FAM133B   | 257415 | 37 | 7 | 92210819  | 92210819  | Splice_Site       | SNP | C  | T  | 8   | 72  | c.122_splice  | c.e2+1               | p.W41_splice  |
| Pat_59 | Post-Resistance | CALCR     | 799    | 37 | 7 | 93101770  | 93101770  | Missense_Mutation | SNP | C  | T  | 151 | 152 | c.400G>A      | c.(400-402)GGT>AGT   | p.G134S       |
| Pat_59 | Post-Resistance | COL1A2    | 1278   | 37 | 7 | 94039582  | 94039582  | Missense_Mutation | SNP | G  | A  | 8   | 84  | c.1064G>A     | c.(1063-1065)GGA>GAA | p.G355E       |
| Pat_59 | Post-Resistance | BAIAP2L1  | 55971  | 37 | 7 | 97923410  | 97923410  | Missense_Mutation | SNP | C  | T  | 10  | 74  | c.1436G>A     | c.(1435-1437)GGG>GAG | p.G479E       |
| Pat_59 | Post-Resistance | TRRAP     | 8295   | 37 | 7 | 98550857  | 98550857  | Missense_Mutation | SNP | C  | T  | 4   | 65  | c.5510C>T     | c.(5509-5511)ACG>ATG | p.T1837M      |
| Pat_59 | Post-Resistance | ZKSCAN5   | 23660  | 37 | 7 | 99128994  | 99128994  | Missense_Mutation | SNP | C  | T  | 5   | 59  | c.1642C>T     | c.(1642-1644)CCA>TCA | p.P548S       |
| Pat_59 | Post-Resistance | ZAN       | 7455   | 37 | 7 | 100349941 | 100349941 | Missense_Mutation | SNP | C  | T  | 7   | 143 | c.2213C>T     | c.(2212-2214)CCC>CTC | p.P738L       |
| Pat_59 | Post-Resistance | SRRT      | 51593  | 37 | 7 | 100485432 | 100485432 | Missense_Mutation | SNP | C  | T  | 13  | 93  | c.2278C>T     | c.(2278-2280)CCA>TCA | p.P760S       |
| Pat_59 | Post-Resistance | UFSP1     | 402682 | 37 | 7 | 100486757 | 100486757 | Missense_Mutation | SNP | C  | T  | 17  | 74  | c.136G>A      | c.(136-138)GAG>AAG   | p.E46K        |
| Pat_59 | Post-Resistance | CUX1      | 1523   | 37 | 7 | 101845411 | 101845411 | Missense_Mutation | SNP | C  | T  | 17  | 150 | c.2834C>T     | c.(2833-2835)ACC>ATC | p.T945I       |
| Pat_59 | Post-Resistance | MLL5      | 55904  | 37 | 7 | 104753005 | 104753005 | Missense_Mutation | SNP | G  | A  | 16  | 225 | c.4802G>A     | c.(4801-4803)GGA>GAA | p.G1601E      |
| Pat_59 | Post-Resistance | COG5      | 10466  | 37 | 7 | 107002483 | 107002483 | Missense_Mutation | SNP | C  | T  | 7   | 23  | c.1114G>A     | c.(1114-1116)GTT>ATT | p.V372I       |
| Pat_59 | Post-Resistance | LAMB4     | 22798  | 37 | 7 | 107706245 | 107706245 | Missense_Mutation | SNP | C  | T  | 6   | 236 | c.2798G>A     | c.(2797-2799)AGC>AAC | p.S933N       |
| Pat_59 | Post-Resistance | ASZ1      | 136991 | 37 | 7 | 117025852 | 117025852 | Missense_Mutation | SNP | G  | A  | 4   | 108 | c.452C>T      | c.(451-453)ACC>ATC   | p.T151I       |
| Pat_59 | Post-Resistance | CFTR      | 1080   | 37 | 7 | 117232649 | 117232650 | Missense_Mutation | DNP | AG | GA | 41  | 47  | 2428_2429AG>G | c.(2428-2430)AGA>GAA | p.R810E       |
| Pat_59 | Post-Resistance | CFTR      | 1080   | 37 | 7 | 117307025 | 117307025 | Missense_Mutation | SNP | C  | T  | 10  | 36  | c.4306C>T     | c.(4306-4308)CTC>TTC | p.L1436F      |
| Pat_59 | Post-Resistance | GCC1      | 79571  | 37 | 7 | 127222640 | 127222640 | Missense_Mutation | SNP | G  | A  | 4   | 33  | c.1756C>T     | c.(1756-1758)CAC>TAC | p.H586Y       |
| Pat_59 | Post-Resistance | SND1      | 27044  | 37 | 7 | 127334887 | 127334887 | Nonsense_Mutation | SNP | G  | A  | 26  | 161 | c.234G>A      | c.(232-234)TGG>TGA   | p.W78*        |
| Pat_59 | Post-Resistance | FLNC      | 2318   | 37 | 7 | 128475434 | 128475434 | Missense_Mutation | SNP | C  | T  | 4   | 116 | c.407C>T      | c.(406-408)ACG>ATG   | p.T136M       |
| Pat_59 | Post-Resistance | SMO       | 6608   | 37 | 7 | 128851597 | 128851597 | Missense_Mutation | SNP | C  | T  | 21  | 47  | c.1922C>T     | c.(1921-1923)CCT>CTT | p.P641L       |
| Pat_59 | Post-Resistance | CPA5      | 93979  | 37 | 7 | 130007413 | 130007413 | Splice_Site       | SNP | G  | A  | 8   | 82  | c.1038_splice | c.e12+1              | p.L346_splice |
| Pat_59 | Post-Resistance | PODXL     | 5420   | 37 | 7 | 131194182 | 131194182 | Missense_Mutation | SNP | G  | A  | 18  | 77  | c.965C>T      | c.(964-966)TCA>TTA   | p.S322L       |
| Pat_59 | Post-Resistance | CALD1     | 800    | 37 | 7 | 134617909 | 134617909 | Missense_Mutation | SNP | T  | C  | 4   | 51  | c.389T>C      | c.(388-390)CTG>CCG   | p.L130P       |
| Pat_59 | Post-Resistance | ZC3HAV1   | 56829  | 37 | 7 | 138732506 | 138732506 | Missense_Mutation | SNP | C  | T  | 21  | 146 | c.2543G>A     | c.(2542-2544)GGA>GAA | p.G848E       |
| Pat_59 | Post-Resistance | BRAF      | 673    | 37 | 7 | 140453136 | 140453136 | Missense_Mutation | SNP | A  | T  | 67  | 84  | c.1799T>A     | c.(1798-1800)GTG>GAG | p.V600E       |
| Pat_59 | Post-Resistance | BRAF      | 673    | 37 | 7 | 140477794 | 140477794 | Missense_Mutation | SNP | A  | T  | 15  | 95  | c.1514T>A     | c.(1513-1515)CTC>CAC | p.L505H       |
| Pat_59 | Post-Resistance | AGK       | 55750  | 37 | 7 | 141296362 | 141296362 | Missense_Mutation | SNP | G  | A  | 10  | 155 | c.142G>A      | c.(142-144)GTG>ATG   | p.V48M        |
| Pat_59 | Post-Resistance | EPHB6     | 2051   | 37 | 7 | 142568007 | 142568007 | Missense_Mutation | SNP | C  | T  | 45  | 349 | c.2648C>T     | c.(2647-2649)CCT>CTT | p.P883L       |
| Pat_59 | Post-Resistance | CASP2     | 835    | 37 | 7 | 142997052 | 142997052 | Missense_Mutation | SNP | C  | T  | 10  | 76  | c.784C>T      | c.(784-786)CCT>TCT   | p.P262S       |
| Pat_59 | Post-Resistance | ZNF746    | 155061 | 37 | 7 | 149171719 | 149171719 | Missense_Mutation | SNP | C  | T  | 3   | 20  | c.1691G>A     | c.(1690-1692)CGG>CAG | p.R564Q       |
| Pat_59 | Post-Resistance | AGAP3     | 116988 | 37 | 7 | 150837123 | 150837123 | Missense_Mutation | SNP | C  | T  | 7   | 19  | c.1724C>T     | c.(1723-1725)CCC>CTC | p.P575L       |
| Pat_59 | Post-Resistance | CRYGN     | 155051 | 37 | 7 | 151133333 | 151133333 | Missense_Mutation | SNP | G  | A  | 11  | 51  | c.349C>T      | c.(349-351)CCC>TCC   | p.P117S       |
| Pat_59 | Post-Resistance | MLL3      | 58508  | 37 | 7 | 151945629 | 151945629 | Missense_Mutation | SNP | C  | T  | 18  | 118 | c.1890G>A     | c.(1888-1890)ATG>ATA | p.M630I       |
| Pat_59 | Post-Resistance | UBE3C     | 9690   | 37 | 7 | 157009660 | 157009660 | Missense_Mutation | SNP | G  | A  | 5   | 77  | c.1909G>A     | c.(1909-1911)GAT>AAT | p.D637N       |
| Pat_59 | Post-Resistance | CSMD1     | 64478  | 37 | 8 | 3216739   | 3216739   | Missense_Mutation | SNP | G  | A  | 24  | 98  | c.3242C>T     | c.(3241-3243)GCC>GTC | p.A1081V      |
| Pat_59 | Post-Resistance | PRSS55    | 203074 | 37 | 8 | 10388830  | 10388830  | Missense_Mutation | SNP | G  | A  | 21  | 113 | c.373G>A      | c.(373-375)GGG>AGG   | p.G125R       |
| Pat_59 | Post-Resistance | XKR6      | 286046 | 37 | 8 | 11058244  | 11058244  | Missense_Mutation | SNP | C  | T  | 2   | 0   | c.605G>A      | c.(604-606)CGG>CAG   | p.R202Q       |
| Pat_59 | Post-Resistance | MTUS1     | 57509  | 37 | 8 | 17611888  | 17611888  | Missense_Mutation | SNP | G  | A  | 73  | 281 | c.1429C>T     | c.(1429-1431)CCC>TCC | p.P477S       |
| Pat_59 | Post-Resistance | KIAA1967  | 57805  | 37 | 8 | 22471697  | 22471697  | Missense_Mutation | SNP | C  | T  | 10  | 62  | c.797C>T      | c.(796-798)GCC>GTC   | p.A266V       |

|        |                 |           |        |    |   |           |           |                   |     |   |   |    |     |            |                        |          |
|--------|-----------------|-----------|--------|----|---|-----------|-----------|-------------------|-----|---|---|----|-----|------------|------------------------|----------|
| Pat_59 | Post-Resistance | TNFRSF10A | 8797   | 37 | 8 | 23054717  | 23054717  | Missense_Mutation | SNP | C | T | 12 | 84  | c.1015G>A  | c.(1015-1017)GGA>AGA   | p.G339R  |
| Pat_59 | Post-Resistance | ENTPD4    | 9583   | 37 | 8 | 23290620  | 23290620  | Missense_Mutation | SNP | C | T | 9  | 46  | c.1670G>A  | c.(1669-1671)GGC>GAC   | p.G557D  |
| Pat_59 | Post-Resistance | PBK       | 55872  | 37 | 8 | 27679862  | 27679862  | Missense_Mutation | SNP | C | T | 19 | 63  | c.439G>A   | c.(439-441)GCT>ACT     | p.A147T  |
| Pat_59 | Post-Resistance | TEX15     | 56154  | 37 | 8 | 30702303  | 30702303  | Missense_Mutation | SNP | C | T | 15 | 122 | c.4231G>A  | c.(4231-4233)GAT>AAT   | p.D1411N |
| Pat_59 | Post-Resistance | ERLIN2    | 11160  | 37 | 8 | 37597963  | 37597963  | Missense_Mutation | SNP | A | G | 39 | 169 | c.188A>G   | c.(187-189)CAG>CGG     | p.Q63R   |
| Pat_59 | Post-Resistance | RAB11FIP1 | 80223  | 37 | 8 | 37732693  | 37732693  | Missense_Mutation | SNP | C | T | 32 | 225 | c.962G>A   | c.(961-963)GGG>GAG     | p.G321E  |
| Pat_59 | Post-Resistance | BAG4      | 9530   | 37 | 8 | 38050222  | 38050222  | Missense_Mutation | SNP | C | T | 11 | 63  | c.287C>T   | c.(286-288)CCT>CTT     | p.P96L   |
| Pat_59 | Post-Resistance | IDO1      | 3620   | 37 | 8 | 39780144  | 39780144  | Missense_Mutation | SNP | G | A | 6  | 33  | c.511G>A   | c.(511-513)GAA>AAA     | p.E171K  |
| Pat_59 | Post-Resistance | ANK1      | 286    | 37 | 8 | 41573366  | 41573366  | Missense_Mutation | SNP | T | C | 3  | 12  | c.1406A>G  | c.(1405-1407)GAT>GGT   | p.D469G  |
| Pat_59 | Post-Resistance | HOOK3     | 84376  | 37 | 8 | 42868500  | 42868500  | Missense_Mutation | SNP | G | A | 17 | 137 | c.1973G>A  | c.(1972-1974)AGA>AAA   | p.R658K  |
| Pat_59 | Post-Resistance | HGSNAT    | 138050 | 37 | 8 | 43002133  | 43002133  | Missense_Mutation | SNP | C | T | 9  | 50  | c.161C>T   | c.(160-162)GCT>GTT     | p.A54V   |
| Pat_59 | Post-Resistance | PRKDC     | 5591   | 37 | 8 | 48690250  | 48690250  | Nonsense_Mutation | SNP | C | T | 22 | 114 | c.12039G>A | c.(12037-12039)TGG>TGA | p.W4013* |
| Pat_59 | Post-Resistance | MCM4      | 4173   | 37 | 8 | 48878860  | 48878860  | Missense_Mutation | SNP | G | A | 37 | 45  | c.946G>A   | c.(946-948)GAG>AAG     | p.E316K  |
| Pat_59 | Post-Resistance | GGH       | 8836   | 37 | 8 | 63930157  | 63930157  | Missense_Mutation | SNP | G | A | 39 | 166 | c.730C>T   | c.(730-732)CAT>TAT     | p.H244Y  |
| Pat_59 | Post-Resistance | SGK3      | 23678  | 37 | 8 | 67726150  | 67726150  | Missense_Mutation | SNP | G | A | 9  | 91  | c.316G>A   | c.(316-318)GAA>AAA     | p.E106K  |
| Pat_59 | Post-Resistance | C8orf34   | 116328 | 37 | 8 | 69688655  | 69688655  | Missense_Mutation | SNP | G | A | 21 | 46  | c.1168G>A  | c.(1168-1170)GGA>AGA   | p.G390R  |
| Pat_59 | Post-Resistance | JPH1      | 56704  | 37 | 8 | 75227730  | 75227730  | Missense_Mutation | SNP | C | G | 2  | 6   | c.505G>C   | c.(505-507)GAG>CAG     | p.E169Q  |
| Pat_59 | Post-Resistance | WWP1      | 11059  | 37 | 8 | 87410597  | 87410597  | Missense_Mutation | SNP | C | T | 18 | 121 | c.361C>T   | c.(361-363)CTT>TTT     | p.L121F  |
| Pat_59 | Post-Resistance | TMEM67    | 91147  | 37 | 8 | 94776088  | 94776088  | Missense_Mutation | SNP | G | A | 16 | 74  | c.425G>A   | c.(424-426)GGA>GAA     | p.G142E  |
| Pat_59 | Post-Resistance | KIAA1429  | 25962  | 37 | 8 | 95501065  | 95501065  | Missense_Mutation | SNP | G | A | 4  | 84  | c.5308C>T  | c.(5308-5310)CGT>TGT   | p.R1770C |
| Pat_59 | Post-Resistance | TP53INP1  | 94241  | 37 | 8 | 95952419  | 95952419  | Missense_Mutation | SNP | C | T | 9  | 62  | c.142G>A   | c.(142-144)GAA>AAA     | p.E48K   |
| Pat_59 | Post-Resistance | UBR5      | 51366  | 37 | 8 | 103266598 | 103266598 | Missense_Mutation | SNP | A | G | 12 | 73  | c.8332T>C  | c.(8332-8334)TCC>CCC   | p.S2778P |
| Pat_59 | Post-Resistance | RIMS2     | 9699   | 37 | 8 | 104897844 | 104897844 | Missense_Mutation | SNP | G | T | 4  | 63  | c.351G>T   | c.(349-351)TTG>TTT     | p.L117F  |
| Pat_59 | Post-Resistance | EIF3E     | 3646   | 37 | 8 | 109240542 | 109240542 | Missense_Mutation | SNP | G | A | 54 | 236 | c.676C>T   | c.(676-678)CCC>TCC     | p.P226S  |
| Pat_59 | Post-Resistance | TNFRSF11B | 4982   | 37 | 8 | 119945383 | 119945383 | Missense_Mutation | SNP | C | T | 7  | 252 | c.187G>A   | c.(187-189)GCC>ACC     | p.A63T   |
| Pat_59 | Post-Resistance | NOV       | 4856   | 37 | 8 | 120431490 | 120431490 | Missense_Mutation | SNP | G | A | 29 | 164 | c.682G>A   | c.(682-684)GTC>ATC     | p.V228I  |
| Pat_59 | Post-Resistance | TAF2      | 6873   | 37 | 8 | 120816157 | 120816157 | Missense_Mutation | SNP | C | T | 32 | 198 | c.521G>A   | c.(520-522)GGT>GAT     | p.G174D  |
| Pat_59 | Post-Resistance | FAM91A1   | 157769 | 37 | 8 | 124786341 | 124786341 | Missense_Mutation | SNP | G | A | 63 | 296 | c.94G>A    | c.(94-96)GAA>AAA       | p.E32K   |
| Pat_59 | Post-Resistance | CPSF1     | 29894  | 37 | 8 | 145623221 | 145623221 | Missense_Mutation | SNP | G | A | 5  | 29  | c.2021C>T  | c.(2020-2022)TCC>TTC   | p.S674F  |
| Pat_59 | Post-Resistance | PTPRD     | 5789   | 37 | 9 | 8517925   | 8517925   | Missense_Mutation | SNP | G | A | 23 | 30  | c.1466C>T  | c.(1465-1467)TCT>TTT   | p.S489F  |
| Pat_59 | Post-Resistance | KIAA1161  | 57462  | 37 | 9 | 34371053  | 34371053  | Missense_Mutation | SNP | C | T | 4  | 11  | c.1889G>A  | c.(1888-1890)GGT>GAT   | p.G630D  |
| Pat_59 | Post-Resistance | TLN1      | 7094   | 37 | 9 | 35705994  | 35705994  | Missense_Mutation | SNP | C | T | 7  | 46  | c.5476G>A  | c.(5476-5478)GGC>AGC   | p.G1826S |
| Pat_59 | Post-Resistance | ZNF484    | 83744  | 37 | 9 | 95610681  | 95610681  | Missense_Mutation | SNP | C | T | 4  | 109 | c.388G>A   | c.(388-390)GAA>AAA     | p.E130K  |
| Pat_59 | Post-Resistance | WNK2      | 65268  | 37 | 9 | 96018690  | 96018690  | Missense_Mutation | SNP | C | T | 2  | 0   | c.2144C>T  | c.(2143-2145)ACC>ATC   | p.T715I  |
| Pat_59 | Post-Resistance | NIPSNAP3A | 25934  | 37 | 9 | 107513363 | 107513363 | Missense_Mutation | SNP | C | T | 65 | 194 | c.187C>T   | c.(187-189)CGG>TGG     | p.R63W   |
| Pat_59 | Post-Resistance | C9orf43   | 257169 | 37 | 9 | 116185685 | 116185685 | Missense_Mutation | SNP | C | T | 4  | 66  | c.563C>T   | c.(562-564)CCC>CTC     | p.P188L  |
| Pat_59 | Post-Resistance | TNC       | 3371   | 37 | 9 | 117848440 | 117848440 | Missense_Mutation | SNP | C | T | 3  | 41  | c.1570G>A  | c.(1570-1572)GGC>AGC   | p.G524S  |
| Pat_59 | Post-Resistance | OR1J2     | 26740  | 37 | 9 | 125273133 | 125273133 | Missense_Mutation | SNP | C | T | 31 | 89  | c.53C>T    | c.(52-54)CCC>CTC       | p.P18L   |
| Pat_59 | Post-Resistance | RABGAP1   | 23637  | 37 | 9 | 125838940 | 125838940 | Missense_Mutation | SNP | G | A | 17 | 68  | c.2323G>A  | c.(2323-2325)GAC>AAC   | p.D775N  |
| Pat_59 | Post-Resistance | NUP188    | 23511  | 37 | 9 | 131761524 | 131761524 | Missense_Mutation | SNP | C | A | 4  | 27  | c.3589C>A  | c.(3589-3591)CAA>AAA   | p.Q1197K |
| Pat_59 | Post-Resistance | CRAT      | 1384   | 37 | 9 | 131860351 | 131860351 | Missense_Mutation | SNP | G | A | 5  | 116 | c.1405C>T  | c.(1405-1407)CGC>TGC   | p.R469C  |
| Pat_59 | Post-Resistance | SETX      | 23064  | 37 | 9 | 135206812 | 135206812 | Missense_Mutation | SNP | G | A | 13 | 45  | c.862C>T   | c.(862-864)CCA>TCA     | p.P288S  |
| Pat_59 | Post-Resistance | COL5A1    | 1289   | 37 | 9 | 137658300 | 137658300 | Missense_Mutation | SNP | G | A | 4  | 13  | c.2089G>A  | c.(2089-2091)GGT>AGT   | p.G697S  |
| Pat_59 | Post-Resistance | LHX3      | 8022   | 37 | 9 | 139090825 | 139090825 | Missense_Mutation | SNP | A | G | 2  | 3   | c.535T>C   | c.(535-537)TCG>CCG     | p.S179P  |
| Pat_59 | Post-Resistance | SNAPC4    | 6621   | 37 | 9 | 139270839 | 139270839 | Missense_Mutation | SNP | C | T | 9  | 53  | c.4379G>A  | c.(4378-4380)AGG>AAG   | p.R1460K |
| Pat_59 | Post-Resistance | WDR85     | 92715  | 37 | 9 | 140459568 | 140459568 | Missense_Mutation | SNP | C | T | 8  | 16  | c.679G>A   | c.(679-681)GTA>ATA     | p.V227I  |
| Pat_59 | Post-Resistance | EHMT1     | 79813  | 37 | 9 | 140637972 | 140637972 | Missense_Mutation | SNP | G | A | 8  | 65  | c.973G>A   | c.(973-975)GGT>AGT     | p.G325S  |

|        |                 |          |        |    |    |           |           |                   |     |   |   |    |     |           |                      |          |
|--------|-----------------|----------|--------|----|----|-----------|-----------|-------------------|-----|---|---|----|-----|-----------|----------------------|----------|
| Pat_59 | Post-Resistance | PPP2R3B  | 28227  | 37 | X  | 322229    | 322229    | Missense_Mutation | SNP | C | T | 3  | 27  | c.421G>A  | c.(421-423)GTG>ATG   | p.V141M  |
| Pat_59 | Post-Resistance | MXRA5    | 25878  | 37 | X  | 3241189   | 3241189   | Missense_Mutation | SNP | G | A | 5  | 20  | c.2537C>T | c.(2536-2538)CCT>CTT | p.P846L  |
| Pat_59 | Post-Resistance | KAL1     | 3730   | 37 | X  | 8553352   | 8553352   | Missense_Mutation | SNP | G | A | 10 | 12  | c.812C>T  | c.(811-813)ACT>ATT   | p.T271I  |
| Pat_59 | Post-Resistance | BMX      | 660    | 37 | X  | 15555409  | 15555409  | Nonsense_Mutation | SNP | C | T | 4  | 27  | c.1375C>T | c.(1375-1377)CAG>TAG | p.Q459*  |
| Pat_59 | Post-Resistance | TXLNG    | 55787  | 37 | X  | 16858016  | 16858016  | Missense_Mutation | SNP | G | A | 30 | 90  | c.1225G>A | c.(1225-1227)GCA>ACA | p.A409T  |
| Pat_59 | Post-Resistance | PTCHD1   | 139411 | 37 | X  | 23353248  | 23353248  | Missense_Mutation | SNP | G | A | 5  | 9   | c.256G>A  | c.(256-258)GAC>AAC   | p.D86N   |
| Pat_59 | Post-Resistance | FAM47C   | 442444 | 37 | X  | 37028134  | 37028134  | Missense_Mutation | SNP | C | T | 5  | 57  | c.1651C>T | c.(1651-1653)CCT>TCT | p.P551S  |
| Pat_59 | Post-Resistance | CXorf38  | 159013 | 37 | X  | 40496279  | 40496279  | Missense_Mutation | SNP | C | T | 4  | 87  | c.601G>A  | c.(601-603)GTA>ATA   | p.V201I  |
| Pat_59 | Post-Resistance | KDM6A    | 7403   | 37 | X  | 44937658  | 44937658  | Missense_Mutation | SNP | G | T | 4  | 86  | c.2846G>T | c.(2845-2847)CGT>CTT | p.R949L  |
| Pat_59 | Post-Resistance | PHF16    | 9767   | 37 | X  | 46893044  | 46893044  | Missense_Mutation | SNP | G | A | 10 | 19  | c.709G>A  | c.(709-711)GTC>ATC   | p.V237I  |
| Pat_59 | Post-Resistance | GPKOW    | 27238  | 37 | X  | 48979089  | 48979089  | Missense_Mutation | SNP | G | A | 6  | 9   | c.214C>T  | c.(214-216)CCT>TCT   | p.P72S   |
| Pat_59 | Post-Resistance | CACNA1F  | 778    | 37 | X  | 49084859  | 49084859  | Missense_Mutation | SNP | G | A | 2  | 2   | c.868C>T  | c.(868-870)CGT>TGT   | p.R290C  |
| Pat_59 | Post-Resistance | CCNB3    | 85417  | 37 | X  | 50053081  | 50053081  | Missense_Mutation | SNP | G | A | 11 | 5   | c.1912G>A | c.(1912-1914)GAA>AAA | p.E638K  |
| Pat_59 | Post-Resistance | FAM120C  | 54954  | 37 | X  | 54117785  | 54117785  | Missense_Mutation | SNP | G | A | 4  | 38  | c.2387C>T | c.(2386-2388)TCT>TTT | p.S796F  |
| Pat_59 | Post-Resistance | OPHN1    | 4983   | 37 | X  | 67283948  | 67283948  | Missense_Mutation | SNP | G | A | 18 | 65  | c.1906C>T | c.(1906-1908)CCC>TCC | p.P636S  |
| Pat_59 | Post-Resistance | CHM      | 1121   | 37 | X  | 85149271  | 85149271  | Missense_Mutation | SNP | G | A | 18 | 61  | c.1432C>T | c.(1432-1434)CCA>TCA | p.P478S  |
| Pat_59 | Post-Resistance | PCDH11X  | 27328  | 37 | X  | 91091018  | 91091018  | Missense_Mutation | SNP | G | A | 25 | 41  | c.515G>A  | c.(514-516)GGA>GAA   | p.G172E  |
| Pat_59 | Post-Resistance | IL1RAPL2 | 26280  | 37 | X  | 104984597 | 104984597 | Missense_Mutation | SNP | G | A | 21 | 62  | c.961G>A  | c.(961-963)GTT>ATT   | p.V321I  |
| Pat_59 | Post-Resistance | ATG4A    | 115201 | 37 | X  | 107369381 | 107369381 | Missense_Mutation | SNP | G | A | 10 | 29  | c.85G>A   | c.(85-87)GTA>ATA     | p.V29I   |
| Pat_59 | Post-Resistance | ALG13    | 79868  | 37 | X  | 110968271 | 110968271 | Missense_Mutation | SNP | G | A | 15 | 28  | c.1711G>A | c.(1711-1713)GGT>AGT | p.G571S  |
| Pat_59 | Post-Resistance | AMOT     | 154796 | 37 | X  | 112024161 | 112024161 | Missense_Mutation | SNP | G | A | 17 | 39  | c.2426C>T | c.(2425-2427)CCC>CTC | p.P809L  |
| Pat_59 | Post-Resistance | IL13RA1  | 3597   | 37 | X  | 117892047 | 117892047 | Missense_Mutation | SNP | G | A | 14 | 48  | c.518G>A  | c.(517-519)TGT>TAT   | p.C173Y  |
| Pat_59 | Post-Resistance | IGSF1    | 3547   | 37 | X  | 130409559 | 130409559 | Missense_Mutation | SNP | G | A | 14 | 23  | c.3077C>T | c.(3076-3078)ACC>ATC | p.T1026I |
| Pat_59 | Post-Resistance | LAGE3    | 8270   | 37 | X  | 153706299 | 153706299 | Missense_Mutation | SNP | G | A | 28 | 9   | c.416C>T  | c.(415-417)CCC>CTC   | p.P139L  |
| Pat_59 | Post-Resistance | RAB39B   | 116442 | 37 | X  | 154490477 | 154490477 | Missense_Mutation | SNP | C | A | 5  | 197 | c.253G>T  | c.(253-255)GGT>TGT   | p.G85C   |
| Pat_63 | Pre-Treatment   | HNRNPCL1 | 343069 | 37 | 1  | 12907456  | 12907456  | Missense_Mutation | SNP | C | T | 3  | 19  | c.687G>A  | c.(685-687)ATG>ATA   | p.M229I  |
| Pat_63 | Pre-Treatment   | ARHGEF19 | 128272 | 37 | 1  | 16534505  | 16534505  | Missense_Mutation | SNP | G | A | 3  | 17  | c.628C>T  | c.(628-630)CGC>TGC   | p.R210C  |
| Pat_63 | Pre-Treatment   | UBR4     | 23352  | 37 | 1  | 19505624  | 19505624  | Missense_Mutation | SNP | G | A | 4  | 44  | c.2275C>T | c.(2275-2277)CGC>TGC | p.R759C  |
| Pat_63 | Pre-Treatment   | FAM46B   | 115572 | 37 | 1  | 27332715  | 27332715  | Missense_Mutation | SNP | C | T | 3  | 6   | c.998G>A  | c.(997-999)GGG>GAG   | p.G333E  |
| Pat_63 | Pre-Treatment   | PTPRU    | 10076  | 37 | 1  | 29587254  | 29587254  | Missense_Mutation | SNP | G | A | 3  | 18  | c.983G>A  | c.(982-984)CGC>CAC   | p.R328H  |
| Pat_63 | Pre-Treatment   | MTF1     | 4520   | 37 | 1  | 38288269  | 38288269  | Missense_Mutation | SNP | G | A | 4  | 19  | c.1291C>T | c.(1291-1293)CCC>TCC | p.P431S  |
| Pat_63 | Pre-Treatment   | PTPRF    | 5792   | 37 | 1  | 44069142  | 44069142  | Missense_Mutation | SNP | C | T | 4  | 36  | c.2396C>T | c.(2395-2397)GCC>GTC | p.A799V  |
| Pat_63 | Pre-Treatment   | CCDC163P | 126661 | 37 | 1  | 45965037  | 45965037  | Missense_Mutation | SNP | A | G | 3  | 27  | c.157T>C  | c.(157-159)TTC>CTC   | p.F53L   |
| Pat_63 | Pre-Treatment   | RAD54L   | 8438   | 37 | 1  | 46740370  | 46740370  | Missense_Mutation | SNP | A | C | 17 | 31  | c.1850A>C | c.(1849-1851)TAT>TCT | p.Y617S  |
| Pat_63 | Pre-Treatment   | WLS      | 79971  | 37 | 1  | 68564415  | 68564415  | Missense_Mutation | SNP | G | A | 4  | 15  | c.1532C>T | c.(1531-1533)TCG>TTG | p.S511L  |
| Pat_63 | Pre-Treatment   | CELSR2   | 1952   | 37 | 1  | 109803687 | 109803687 | Missense_Mutation | SNP | C | T | 5  | 67  | c.3982C>T | c.(3982-3984)CGC>TGC | p.R1328C |
| Pat_63 | Pre-Treatment   | CYB561D1 | 284613 | 37 | 1  | 110038645 | 110038645 | Missense_Mutation | SNP | C | T | 3  | 28  | c.454C>T  | c.(454-456)CGG>TGG   | p.R152W  |
| Pat_63 | Pre-Treatment   | PTGFRN   | 5738   | 37 | 1  | 117492182 | 117492182 | Missense_Mutation | SNP | G | A | 4  | 27  | c.1201G>A | c.(1201-1203)GTG>ATG | p.V401M  |
| Pat_63 | Pre-Treatment   | ADAMTSL4 | 54507  | 37 | 1  | 150530003 | 150530003 | Missense_Mutation | SNP | G | A | 4  | 16  | c.2081G>A | c.(2080-2082)CGT>CAT | p.R694H  |
| Pat_63 | Pre-Treatment   | ZBTB7B   | 51043  | 37 | 1  | 154987384 | 154987384 | Missense_Mutation | SNP | G | A | 4  | 17  | c.248G>A  | c.(247-249)GGA>GAA   | p.G83E   |
| Pat_63 | Pre-Treatment   | IGSF8    | 93185  | 37 | 1  | 160062851 | 160062851 | Missense_Mutation | SNP | C | T | 4  | 28  | c.1175G>A | c.(1174-1176)CGG>CAG | p.R392Q  |
| Pat_63 | Pre-Treatment   | IGFN1    | 91156  | 37 | 1  | 201195234 | 201195234 | Missense_Mutation | SNP | G | A | 3  | 18  | c.2249G>A | c.(2248-2250)TGC>TAC | p.C750Y  |
| Pat_63 | Pre-Treatment   | RNPEP    | 6051   | 37 | 1  | 201969032 | 201969032 | Missense_Mutation | SNP | G | A | 4  | 35  | c.1093G>A | c.(1093-1095)GCT>ACT | p.A365T  |
| Pat_63 | Pre-Treatment   | PIK3C2B  | 5287   | 37 | 1  | 204415126 | 204415126 | Missense_Mutation | SNP | G | A | 5  | 60  | c.2636C>T | c.(2635-2637)ACC>ATC | p.T879I  |
| Pat_63 | Pre-Treatment   | TRIM11   | 81559  | 37 | 1  | 228582888 | 228582888 | Missense_Mutation | SNP | C | T | 2  | 0   | c.925G>A  | c.(925-927)GTG>ATG   | p.V309M  |
| Pat_63 | Pre-Treatment   | PGBD5    | 79605  | 37 | 1  | 230472904 | 230472904 | Missense_Mutation | SNP | G | A | 6  | 39  | c.818C>T  | c.(817-819)ACG>ATG   | p.T273M  |
| Pat_63 | Pre-Treatment   | C10orf18 | 54906  | 37 | 10 | 5790629   | 5790629   | Missense_Mutation | SNP | G | A | 3  | 23  | c.5245G>A | c.(5245-5247)GTT>ATT | p.V1749I |

|        |               |           |        |    |    |           |           |                   |     |   |   |   |     |            |                        |          |
|--------|---------------|-----------|--------|----|----|-----------|-----------|-------------------|-----|---|---|---|-----|------------|------------------------|----------|
| Pat_63 | Pre-Treatment | DNA2      | 1763   | 37 | 10 | 70225551  | 70225551  | Missense_Mutation | SNP | G | A | 3 | 18  | c.718C>T   | c.(718-720)CGC>TGC     | p.R240C  |
| Pat_63 | Pre-Treatment | CDH23     | 64072  | 37 | 10 | 73453934  | 73453934  | Missense_Mutation | SNP | G | A | 4 | 43  | c.2207G>A  | c.(2206-2208)CGA>CAA   | p.R736Q  |
| Pat_63 | Pre-Treatment | HELLS     | 3070   | 37 | 10 | 96334363  | 96334363  | Missense_Mutation | SNP | G | A | 6 | 94  | c.758G>A   | c.(757-759)GGT>GAT     | p.G253D  |
| Pat_63 | Pre-Treatment | SORBS1    | 10580  | 37 | 10 | 97096979  | 97096979  | Missense_Mutation | SNP | C | T | 3 | 22  | c.2938G>A  | c.(2938-2940)GAG>AAG   | p.E980K  |
| Pat_63 | Pre-Treatment | ALDH18A1  | 5832   | 37 | 10 | 97402832  | 97402832  | Missense_Mutation | SNP | C | T | 4 | 33  | c.220G>A   | c.(220-222)GTG>ATG     | p.V74M   |
| Pat_63 | Pre-Treatment | LRRC27    | 80313  | 37 | 10 | 134161853 | 134161853 | Missense_Mutation | SNP | G | T | 8 | 39  | c.919G>T   | c.(919-921)GTT>TTT     | p.V307F  |
| Pat_63 | Pre-Treatment | IRF7      | 3665   | 37 | 11 | 613827    | 613827    | Missense_Mutation | SNP | G | C | 2 | 3   | c.805C>G   | c.(805-807)CCG>GCG     | p.P269A  |
| Pat_63 | Pre-Treatment | MUC2      | 4583   | 37 | 11 | 1093298   | 1093298   | Missense_Mutation | SNP | C | T | 5 | 2   | c.12203C>T | c.(12202-12204)ACG>ATG | p.T4068M |
| Pat_63 | Pre-Treatment | MUC5B     | 727897 | 37 | 11 | 1271471   | 1271471   | Missense_Mutation | SNP | G | C | 3 | 37  | c.14780G>C | c.(14779-14781)AGC>ACC | p.S4927T |
| Pat_63 | Pre-Treatment | OSBPL5    | 114879 | 37 | 11 | 3141794   | 3141794   | Missense_Mutation | SNP | G | A | 5 | 74  | c.463C>T   | c.(463-465)CTC>TTC     | p.L155F  |
| Pat_63 | Pre-Treatment | NAV2      | 89797  | 37 | 11 | 19970395  | 19970395  | Missense_Mutation | SNP | C | T | 4 | 27  | c.2483C>T  | c.(2482-2484)CCC>CTC   | p.P828L  |
| Pat_63 | Pre-Treatment | NAV2      | 89797  | 37 | 11 | 19970454  | 19970454  | Missense_Mutation | SNP | G | A | 5 | 60  | c.2542G>A  | c.(2542-2544)GCC>ACC   | p.A848T  |
| Pat_63 | Pre-Treatment | NAV2      | 89797  | 37 | 11 | 20065746  | 20065746  | Missense_Mutation | SNP | G | A | 3 | 28  | c.3196G>A  | c.(3196-3198)GCT>ACT   | p.A1066T |
| Pat_63 | Pre-Treatment | ELF5      | 2001   | 37 | 11 | 34502397  | 34502397  | Missense_Mutation | SNP | G | A | 5 | 75  | c.623C>T   | c.(622-624)TCG>TTG     | p.S208L  |
| Pat_63 | Pre-Treatment | NAALADL1  | 10004  | 37 | 11 | 64820791  | 64820791  | Missense_Mutation | SNP | C | T | 2 | 1   | c.1097G>A  | c.(1096-1098)GGG>GAG   | p.G366E  |
| Pat_63 | Pre-Treatment | RELA      | 5970   | 37 | 11 | 65426287  | 65426287  | Missense_Mutation | SNP | G | A | 4 | 43  | c.566C>T   | c.(565-567)CCC>CTC     | p.P189L  |
| Pat_63 | Pre-Treatment | PACS1     | 55690  | 37 | 11 | 65983993  | 65983993  | Missense_Mutation | SNP | C | T | 4 | 43  | c.808C>T   | c.(808-810)CGT>TGT     | p.R270C  |
| Pat_63 | Pre-Treatment | ACTN3     | 89     | 37 | 11 | 66322644  | 66322644  | Missense_Mutation | SNP | C | T | 4 | 43  | c.601C>T   | c.(601-603)CGC>TGC     | p.R201C  |
| Pat_63 | Pre-Treatment | PITPNM1   | 9600   | 37 | 11 | 67266289  | 67266289  | Missense_Mutation | SNP | G | A | 5 | 22  | c.1262C>T  | c.(1261-1263)GCT>GTT   | p.A421V  |
| Pat_63 | Pre-Treatment | PPFIA1    | 8500   | 37 | 11 | 70184504  | 70184504  | Missense_Mutation | SNP | G | A | 5 | 85  | c.1516G>A  | c.(1516-1518)GCA>ACA   | p.A506T  |
| Pat_63 | Pre-Treatment | C2CD3     | 26005  | 37 | 11 | 73843994  | 73843994  | Missense_Mutation | SNP | C | T | 3 | 35  | c.1112G>A  | c.(1111-1113)CGG>CAG   | p.R371Q  |
| Pat_63 | Pre-Treatment | DSCAML1   | 57453  | 37 | 11 | 117352788 | 117352788 | Missense_Mutation | SNP | G | A | 4 | 33  | c.2629C>T  | c.(2629-2631)CCC>TCC   | p.P877S  |
| Pat_63 | Pre-Treatment | BCL9L     | 283149 | 37 | 11 | 118773233 | 118773233 | Missense_Mutation | SNP | G | A | 3 | 21  | c.1219C>T  | c.(1219-1221)CGG>TGG   | p.R407W  |
| Pat_63 | Pre-Treatment | PRDM10    | 56980  | 37 | 11 | 129814712 | 129814712 | Missense_Mutation | SNP | G | A | 3 | 23  | c.716C>T   | c.(715-717)CCT>CTT     | p.P239L  |
| Pat_63 | Pre-Treatment | SPATS2    | 65244  | 37 | 12 | 49919751  | 49919751  | Missense_Mutation | SNP | G | A | 3 | 33  | c.1351G>A  | c.(1351-1353)GGA>AGA   | p.G451R  |
| Pat_63 | Pre-Treatment | DIP2B     | 57609  | 37 | 12 | 51112597  | 51112597  | Missense_Mutation | SNP | G | A | 3 | 20  | c.2957G>A  | c.(2956-2958)AGG>AAG   | p.R986K  |
| Pat_63 | Pre-Treatment | AAAS      | 8086   | 37 | 12 | 53703435  | 53703435  | Missense_Mutation | SNP | G | A | 2 | 0   | c.760C>T   | c.(760-762)CCC>TCC     | p.P254S  |
| Pat_63 | Pre-Treatment | ATF7      | 11016  | 37 | 12 | 53994775  | 53994775  | Missense_Mutation | SNP | C | T | 3 | 19  | c.10G>A    | c.(10-12)GAC>AAC       | p.D4N    |
| Pat_63 | Pre-Treatment | WIBG      | 84305  | 37 | 12 | 56295898  | 56295898  | Missense_Mutation | SNP | G | A | 4 | 46  | c.373C>T   | c.(373-375)CCC>TCC     | p.P125S  |
| Pat_63 | Pre-Treatment | ZFC3H1    | 196441 | 37 | 12 | 72024472  | 72024472  | Missense_Mutation | SNP | C | T | 4 | 40  | c.3632G>A  | c.(3631-3633)CGA>CAA   | p.R1211Q |
| Pat_63 | Pre-Treatment | OSBPL8    | 114882 | 37 | 12 | 76793703  | 76793703  | Missense_Mutation | SNP | G | A | 4 | 35  | c.418C>T   | c.(418-420)CTC>TTC     | p.L140F  |
| Pat_63 | Pre-Treatment | MYO1H     | 283446 | 37 | 12 | 109882246 | 109882246 | Missense_Mutation | SNP | G | A | 3 | 29  | c.430G>A   | c.(430-432)GTT>ATT     | p.V144I  |
| Pat_63 | Pre-Treatment | PTPN11    | 5781   | 37 | 12 | 112924333 | 112924333 | Missense_Mutation | SNP | G | A | 3 | 25  | c.1279G>A  | c.(1279-1281)GGC>AGC   | p.G427S  |
| Pat_63 | Pre-Treatment | FBXO21    | 23014  | 37 | 12 | 117628044 | 117628044 | Nonsense_Mutation | SNP | C | T | 4 | 9   | c.218G>A   | c.(217-219)TGG>TAG     | p.W73*   |
| Pat_63 | Pre-Treatment | DNAH10    | 196385 | 37 | 12 | 124419300 | 124419300 | Missense_Mutation | SNP | G | A | 3 | 18  | c.13256G>A | c.(13255-13257)CGC>CAC | p.R4419H |
| Pat_63 | Pre-Treatment | POLE      | 5426   | 37 | 12 | 133219907 | 133219907 | Missense_Mutation | SNP | C | T | 4 | 42  | c.4454G>A  | c.(4453-4455)CGC>CAC   | p.R1485H |
| Pat_63 | Pre-Treatment | LNX2      | 222484 | 37 | 13 | 28136594  | 28136594  | Missense_Mutation | SNP | C | T | 6 | 104 | c.1180G>A  | c.(1180-1182)GAC>AAC   | p.D394N  |
| Pat_63 | Pre-Treatment | FREM2     | 341640 | 37 | 13 | 39261821  | 39261821  | Missense_Mutation | SNP | G | A | 3 | 10  | c.340G>A   | c.(340-342)GCA>ACA     | p.A114T  |
| Pat_63 | Pre-Treatment | THSD1     | 55901  | 37 | 13 | 52952189  | 52952189  | Missense_Mutation | SNP | G | A | 3 | 17  | c.1916C>T  | c.(1915-1917)CCG>CTG   | p.P639L  |
| Pat_63 | Pre-Treatment | RNF113B   | 140432 | 37 | 13 | 98829075  | 98829075  | Missense_Mutation | SNP | C | T | 3 | 18  | c.416G>A   | c.(415-417)CGG>CAG     | p.R139Q  |
| Pat_63 | Pre-Treatment | EFNB2     | 1948   | 37 | 13 | 107145449 | 107145449 | Missense_Mutation | SNP | G | A | 3 | 23  | c.941C>T   | c.(940-942)CCG>CTG     | p.P314L  |
| Pat_63 | Pre-Treatment | TEP1      | 7011   | 37 | 14 | 20876400  | 20876400  | Missense_Mutation | SNP | A | G | 3 | 35  | c.199T>C   | c.(199-201)TAT>CAT     | p.Y67H   |
| Pat_63 | Pre-Treatment | MYH7      | 4625   | 37 | 14 | 23890202  | 23890202  | Missense_Mutation | SNP | C | T | 3 | 20  | c.3301G>A  | c.(3301-3303)GGC>AGC   | p.G1101S |
| Pat_63 | Pre-Treatment | PSME1     | 5720   | 37 | 14 | 24607758  | 24607758  | Missense_Mutation | SNP | C | T | 4 | 61  | c.658C>T   | c.(658-660)CGC>TGC     | p.R220C  |
| Pat_63 | Pre-Treatment | NKX2-1    | 7080   | 37 | 14 | 36988240  | 36988240  | Missense_Mutation | SNP | G | A | 2 | 0   | c.323C>T   | c.(322-324)GCC>GTC     | p.A108V  |
| Pat_63 | Pre-Treatment | SLC8A3    | 6547   | 37 | 14 | 70512783  | 70512783  | Missense_Mutation | SNP | C | T | 2 | 1   | c.2665G>A  | c.(2665-2667)GGG>AGG   | p.G889R  |
| Pat_63 | Pre-Treatment | C14orf169 | 79697  | 37 | 14 | 73958995  | 73958995  | Missense_Mutation | SNP | G | A | 5 | 59  | c.1274G>A  | c.(1273-1275)CGC>CAC   | p.R425H  |

|        |               |           |           |    |    |           |           |                   |     |   |   |    |     |               |                      |               |
|--------|---------------|-----------|-----------|----|----|-----------|-----------|-------------------|-----|---|---|----|-----|---------------|----------------------|---------------|
| Pat_63 | Pre-Treatment | PGF       | 5228      | 37 | 14 | 75416185  | 75416185  | Missense_Mutation | SNP | C | T | 3  | 18  | c.190G>A      | c.(190-192)GAG>AAG   | p.E64K        |
| Pat_63 | Pre-Treatment | WDR25     | 79446     | 37 | 14 | 100995510 | 100995510 | Missense_Mutation | SNP | C | T | 3  | 21  | c.1378C>T     | c.(1378-1380)CGG>TGG | p.R460W       |
| Pat_63 | Pre-Treatment | RTL1      | 388015    | 37 | 14 | 101348862 | 101348862 | Missense_Mutation | SNP | C | T | 2  | 0   | c.2264G>A     | c.(2263-2265)CGC>CAC | p.R755H       |
| Pat_63 | Pre-Treatment | JAG2      | 3714      | 37 | 14 | 105612100 | 105612100 | Missense_Mutation | SNP | T | A | 2  | 0   | c.2920A>T     | c.(2920-2922)ACC>TCC | p.T974S       |
| Pat_63 | Pre-Treatment | JAG2      | 3714      | 37 | 14 | 105622309 | 105622309 | Nonsense_Mutation | SNP | G | A | 3  | 11  | c.493C>T      | c.(493-495)CGA>TGA   | p.R165*       |
| Pat_63 | Pre-Treatment | TRPM1     | 4308      | 37 | 15 | 31295058  | 31295058  | Missense_Mutation | SNP | C | T | 4  | 50  | c.3779G>A     | c.(3778-3780)CGG>CAG | p.R1260Q      |
| Pat_63 | Pre-Treatment | SLC12A6   | 9990      | 37 | 15 | 34536188  | 34536188  | Missense_Mutation | SNP | G | A | 7  | 128 | c.2029C>T     | c.(2029-2031)CGC>TGC | p.R677C       |
| Pat_63 | Pre-Treatment | PPIP5K1   | 9677      | 37 | 15 | 43827510  | 43827510  | Missense_Mutation | SNP | C | T | 4  | 28  | c.3664G>A     | c.(3664-3666)GCA>ACA | p.A1222T      |
| Pat_63 | Pre-Treatment | GABPB1    | 2553      | 37 | 15 | 50601929  | 50601929  | Missense_Mutation | SNP | G | A | 6  | 131 | c.67C>T       | c.(67-69)CGT>TGT     | p.R23C        |
| Pat_63 | Pre-Treatment | ITGA11    | 22801     | 37 | 15 | 68624780  | 68624780  | Missense_Mutation | SNP | C | G | 2  | 6   | c.1462G>C     | c.(1462-1464)GAC>CAC | p.D488H       |
| Pat_63 | Pre-Treatment | CORO2B    | 10391     | 37 | 15 | 68937563  | 68937563  | Missense_Mutation | SNP | G | A | 4  | 27  | c.80G>A       | c.(79-81)CGG>CAG     | p.R27Q        |
| Pat_63 | Pre-Treatment | MYO9A     | 4649      | 37 | 15 | 72192220  | 72192220  | Missense_Mutation | SNP | C | T | 4  | 33  | c.3278G>A     | c.(3277-3279)CGG>CAG | p.R1093Q      |
| Pat_63 | Pre-Treatment | MAN2C1    | 4123      | 37 | 15 | 75648353  | 75648353  | Missense_Mutation | SNP | G | A | 2  | 1   | c.3017C>T     | c.(3016-3018)CCA>CTA | p.P1006L      |
| Pat_63 | Pre-Treatment | MAN2C1    | 4123      | 37 | 15 | 75656939  | 75656939  | Missense_Mutation | SNP | C | T | 3  | 14  | c.490G>A      | c.(490-492)GCC>ACC   | p.A164T       |
| Pat_63 | Pre-Treatment | ASB7      | 140460    | 37 | 15 | 101169992 | 101169992 | Missense_Mutation | SNP | G | A | 3  | 28  | c.562G>A      | c.(562-564)GTG>ATG   | p.V188M       |
| Pat_63 | Pre-Treatment | MSLNL     | 401827    | 37 | 16 | 830540    | 830540    | Missense_Mutation | SNP | G | A | 6  | 113 | c.461C>T      | c.(460-462)CCG>CTG   | p.P154L       |
| Pat_63 | Pre-Treatment | PTX4      | 390667    | 37 | 16 | 1536044   | 1536044   | Missense_Mutation | SNP | C | T | 3  | 27  | c.1318G>A     | c.(1318-1320)GGG>AGG | p.G440R       |
| Pat_63 | Pre-Treatment | IFT140    | 9742      | 37 | 16 | 1618271   | 1618271   | Missense_Mutation | SNP | C | T | 3  | 7   | c.1717G>A     | c.(1717-1719)GCT>ACT | p.A573T       |
| Pat_63 | Pre-Treatment | MYH11     | 4629      | 37 | 16 | 15835393  | 15835393  | Missense_Mutation | SNP | G | A | 3  | 29  | c.2786C>T     | c.(2785-2787)GCC>GTC | p.A929V       |
| Pat_63 | Pre-Treatment | ERN2      | 10595     | 37 | 16 | 23706364  | 23706364  | Missense_Mutation | SNP | C | G | 2  | 2   | c.2020G>C     | c.(2020-2022)GCC>CCC | p.A674P       |
| Pat_63 | Pre-Treatment | AMFR      | 267       | 37 | 16 | 56436976  | 56436976  | Missense_Mutation | SNP | G | A | 4  | 44  | c.895C>T      | c.(895-897)CGT>TGT   | p.R299C       |
| Pat_63 | Pre-Treatment | CPNE2     | 221184    | 37 | 16 | 57147257  | 57147257  | Missense_Mutation | SNP | G | A | 4  | 53  | c.238G>A      | c.(238-240)GTG>ATG   | p.V80M        |
| Pat_63 | Pre-Treatment | CALB2     | 794       | 37 | 16 | 71416647  | 71416647  | Missense_Mutation | SNP | G | A | 5  | 92  | c.368G>A      | c.(367-369)AGG>AAG   | p.R123K       |
| Pat_63 | Pre-Treatment | DHX38     | 9785      | 37 | 16 | 72139983  | 72139983  | Missense_Mutation | SNP | G | A | 4  | 51  | c.2567G>A     | c.(2566-2568)CGA>CAA | p.R856Q       |
| Pat_63 | Pre-Treatment | ZNRF1     | 84937     | 37 | 16 | 75033969  | 75033969  | Missense_Mutation | SNP | C | T | 3  | 17  | c.400C>T      | c.(400-402)CCC>TCC   | p.P134S       |
| Pat_63 | Pre-Treatment | HIC1      | 3090      | 37 | 17 | 1961455   | 1961455   | Missense_Mutation | SNP | G | A | 6  | 13  | c.1528G>A     | c.(1528-1530)GCG>ACG | p.A510T       |
| Pat_63 | Pre-Treatment | SMTNL2    | 342527    | 37 | 17 | 4496341   | 4496341   | Missense_Mutation | SNP | G | A | 4  | 36  | c.605G>A      | c.(604-606)CGA>CAA   | p.R202Q       |
| Pat_63 | Pre-Treatment | DNAH2     | 146754    | 37 | 17 | 7660485   | 7660485   | Missense_Mutation | SNP | G | A | 6  | 136 | c.1981G>A     | c.(1981-1983)GTA>ATA | p.V661I       |
| Pat_63 | Pre-Treatment | PFAS      | 5198      | 37 | 17 | 8168720   | 8168720   | Missense_Mutation | SNP | G | A | 4  | 35  | c.2395G>A     | c.(2395-2397)GTG>ATG | p.V799M       |
| Pat_63 | Pre-Treatment | EPN2      | 22905     | 37 | 17 | 19215459  | 19215459  | Splice_Site       | SNP | T | A | 4  | 35  | c.972_splice  | c.e6+2               | p.E324_splice |
| Pat_63 | Pre-Treatment | ABHD15    | 116236    | 37 | 17 | 27889821  | 27889821  | Missense_Mutation | SNP | C | T | 3  | 23  | c.1165G>A     | c.(1165-1167)GGA>AGA | p.G389R       |
| Pat_63 | Pre-Treatment | KRTAP4-9  | 100132386 | 37 | 17 | 39261879  | 39261879  | Missense_Mutation | SNP | A | G | 6  | 27  | c.239A>G      | c.(238-240)TAC>TGC   | p.Y80C        |
| Pat_63 | Pre-Treatment | KRTAP4-12 | 83755     | 37 | 17 | 39279809  | 39279809  | Missense_Mutation | SNP | G | C | 3  | 19  | c.566C>G      | c.(565-567)ACC>AGC   | p.T189S       |
| Pat_63 | Pre-Treatment | KRT9      | 3857      | 37 | 17 | 39724804  | 39724804  | Missense_Mutation | SNP | C | T | 7  | 169 | c.1126G>A     | c.(1126-1128)GGT>AGT | p.G376S       |
| Pat_63 | Pre-Treatment | STAT5A    | 6776      | 37 | 17 | 40456361  | 40456361  | Missense_Mutation | SNP | G | A | 4  | 21  | c.1171G>A     | c.(1171-1173)GAG>AAG | p.E391K       |
| Pat_63 | Pre-Treatment | FZD2      | 2535      | 37 | 17 | 42635990  | 42635990  | Missense_Mutation | SNP | G | A | 3  | 9   | c.934G>A      | c.(934-936)GAG>AAG   | p.E312K       |
| Pat_63 | Pre-Treatment | ABI3      | 51225     | 37 | 17 | 47299482  | 47299482  | Missense_Mutation | SNP | C | T | 5  | 48  | c.832C>T      | c.(832-834)CCT>TCT   | p.P278S       |
| Pat_63 | Pre-Treatment | MSI2      | 124540    | 37 | 17 | 55478802  | 55478802  | Missense_Mutation | SNP | T | G | 36 | 50  | c.375T>G      | c.(373-375)GAT>GAG   | p.D125E       |
| Pat_63 | Pre-Treatment | TRIM37    | 4591      | 37 | 17 | 57168662  | 57168662  | Missense_Mutation | SNP | G | A | 5  | 91  | c.163C>T      | c.(163-165)CGT>TGT   | p.R55C        |
| Pat_63 | Pre-Treatment | ABCA10    | 10349     | 37 | 17 | 67186498  | 67186498  | Splice_Site       | SNP | C | G | 5  | 57  | c.2131_splice | c.e19+1              | p.D711_splice |
| Pat_63 | Pre-Treatment | ITGB4     | 3691      | 37 | 17 | 73723311  | 73723311  | Missense_Mutation | SNP | C | T | 3  | 32  | c.116C>T      | c.(115-117)ACG>ATG   | p.T39M        |
| Pat_63 | Pre-Treatment | UBE2O     | 63893     | 37 | 17 | 74387592  | 74387592  | Missense_Mutation | SNP | G | A | 4  | 53  | c.3311C>T     | c.(3310-3312)GCG>GTG | p.A1104V      |
| Pat_63 | Pre-Treatment | GAA       | 2548      | 37 | 17 | 78092074  | 78092074  | Missense_Mutation | SNP | G | A | 4  | 22  | c.2564G>A     | c.(2563-2565)GGG>GAG | p.G855E       |
| Pat_63 | Pre-Treatment | TXNDC2    | 84203     | 37 | 18 | 9887452   | 9887452   | Missense_Mutation | SNP | G | A | 6  | 79  | c.976G>A      | c.(976-978)GAG>AAG   | p.E326K       |
| Pat_63 | Pre-Treatment | MIB1      | 57534     | 37 | 18 | 19427017  | 19427017  | Missense_Mutation | SNP | C | T | 4  | 32  | c.2324C>T     | c.(2323-2325)TCG>TTG | p.S775L       |
| Pat_63 | Pre-Treatment | CABYR     | 26256     | 37 | 18 | 21736603  | 21736603  | Missense_Mutation | SNP | G | A | 4  | 46  | c.1138G>A     | c.(1138-1140)GAG>AAG | p.E380K       |
| Pat_63 | Pre-Treatment | B4GALT6   | 9331      | 37 | 18 | 29218696  | 29218696  | Missense_Mutation | SNP | G | A | 5  | 62  | c.499C>T      | c.(499-501)CGC>TGC   | p.R167C       |



|        |               |          |           |    |    |           |           |                   |     |   |   |    |     |           |                      |          |
|--------|---------------|----------|-----------|----|----|-----------|-----------|-------------------|-----|---|---|----|-----|-----------|----------------------|----------|
| Pat_63 | Pre-Treatment | FECH     | 2235      | 37 | 18 | 55222096  | 55222096  | Missense_Mutation | SNP | C | T | 4  | 40  | c.893G>A  | c.(892-894)CGA>CAA   | p.R298Q  |
| Pat_63 | Pre-Treatment | FAM69C   | 125704    | 37 | 18 | 72109259  | 72109259  | Missense_Mutation | SNP | G | C | 6  | 22  | c.969C>G  | c.(967-969)TTC>TTG   | p.F323L  |
| Pat_63 | Pre-Treatment | PTBP1    | 5725      | 37 | 19 | 808413    | 808413    | Missense_Mutation | SNP | G | A | 3  | 7   | c.1129G>A | c.(1129-1131)GCC>ACC | p.A377T  |
| Pat_63 | Pre-Treatment | REXO1    | 57455     | 37 | 19 | 1828489   | 1828489   | Missense_Mutation | SNP | C | T | 3  | 12  | c.299G>A  | c.(298-300)AGT>AAT   | p.S100N  |
| Pat_63 | Pre-Treatment | ZNF555   | 148254    | 37 | 19 | 2853202   | 2853202   | Missense_Mutation | SNP | C | T | 4  | 25  | c.1139C>T | c.(1138-1140)CCC>CTC | p.P380L  |
| Pat_63 | Pre-Treatment | CELF5    | 60680     | 37 | 19 | 3285958   | 3285958   | Missense_Mutation | SNP | C | T | 3  | 29  | c.1121C>T | c.(1120-1122)GCC>GTC | p.A374V  |
| Pat_63 | Pre-Treatment | CREB3L3  | 84699     | 37 | 19 | 4171826   | 4171826   | Missense_Mutation | SNP | G | A | 3  | 13  | c.1246G>A | c.(1246-1248)GAG>AAG | p.E416K  |
| Pat_63 | Pre-Treatment | KANK3    | 256949    | 37 | 19 | 8389954   | 8389954   | Nonsense_Mutation | SNP | G | A | 4  | 23  | c.1963C>T | c.(1963-1965)CGA>TGA | p.R655*  |
| Pat_63 | Pre-Treatment | ACTL9    | 284382    | 37 | 19 | 8808484   | 8808484   | Missense_Mutation | SNP | G | A | 4  | 30  | c.568C>T  | c.(568-570)CGT>TGT   | p.R190C  |
| Pat_63 | Pre-Treatment | KRI1     | 65095     | 37 | 19 | 10668269  | 10668269  | Missense_Mutation | SNP | G | A | 3  | 33  | c.1594C>T | c.(1594-1596)CGC>TGC | p.R532C  |
| Pat_63 | Pre-Treatment | ZNF700   | 90592     | 37 | 19 | 12060645  | 12060645  | Missense_Mutation | SNP | T | A | 8  | 192 | c.1806T>A | c.(1804-1806)AGT>AGA | p.S602R  |
| Pat_63 | Pre-Treatment | NANOS3   | 342977    | 37 | 19 | 13988235  | 13988235  | Missense_Mutation | SNP | C | T | 3  | 17  | c.173C>T  | c.(172-174)CCG>CTG   | p.P58L   |
| Pat_63 | Pre-Treatment | TECR     | 9524      | 37 | 19 | 14675918  | 14675918  | Missense_Mutation | SNP | G | A | 4  | 35  | c.647G>A  | c.(646-648)CGG>CAG   | p.R216Q  |
| Pat_63 | Pre-Treatment | RASAL3   | 64926     | 37 | 19 | 15567457  | 15567457  | Missense_Mutation | SNP | C | G | 3  | 8   | c.1432G>C | c.(1432-1434)GCG>CCG | p.A478P  |
| Pat_63 | Pre-Treatment | AP1M1    | 8907      | 37 | 19 | 16338969  | 16338969  | Missense_Mutation | SNP | G | A | 3  | 24  | c.838G>A  | c.(838-840)GAG>AAG   | p.E280K  |
| Pat_63 | Pre-Treatment | MYO9B    | 4650      | 37 | 19 | 17322713  | 17322713  | Missense_Mutation | SNP | C | T | 4  | 13  | c.6068C>T | c.(6067-6069)GCG>GTG | p.A2023V |
| Pat_63 | Pre-Treatment | ZNF737   | 100129842 | 37 | 19 | 20728254  | 20728254  | Missense_Mutation | SNP | C | G | 5  | 60  | c.755G>C  | c.(754-756)AGT>ACT   | p.S252T  |
| Pat_63 | Pre-Treatment | ZNF708   | 7562      | 37 | 19 | 21476982  | 21476982  | Missense_Mutation | SNP | G | T | 7  | 137 | c.786C>A  | c.(784-786)AAC>AAA   | p.N262K  |
| Pat_63 | Pre-Treatment | ZNF493   | 284443    | 37 | 19 | 21606960  | 21606960  | Missense_Mutation | SNP | A | G | 4  | 73  | c.1115A>G | c.(1114-1116)CAA>CGA | p.Q372R  |
| Pat_63 | Pre-Treatment | ZNF429   | 353088    | 37 | 19 | 21720411  | 21720411  | Missense_Mutation | SNP | T | A | 6  | 62  | c.1556T>A | c.(1555-1557)ATC>AAC | p.I519N  |
| Pat_63 | Pre-Treatment | ZNF429   | 353088    | 37 | 19 | 21720414  | 21720414  | Missense_Mutation | SNP | T | G | 5  | 63  | c.1559T>G | c.(1558-1560)CTG>CGG | p.L520R  |
| Pat_63 | Pre-Treatment | ZNF676   | 163223    | 37 | 19 | 22363143  | 22363143  | Missense_Mutation | SNP | G | C | 6  | 137 | c.1376C>G | c.(1375-1377)ACC>AGC | p.T459S  |
| Pat_63 | Pre-Treatment | ZNF492   | 57615     | 37 | 19 | 22847625  | 22847625  | Missense_Mutation | SNP | G | T | 9  | 84  | c.1154G>T | c.(1153-1155)AGA>ATA | p.R385I  |
| Pat_63 | Pre-Treatment | ZNF792   | 126375    | 37 | 19 | 35449270  | 35449270  | Missense_Mutation | SNP | G | A | 4  | 27  | c.1489C>T | c.(1489-1491)CGG>TGG | p.R497W  |
| Pat_63 | Pre-Treatment | FFAR2    | 2867      | 37 | 19 | 35941154  | 35941154  | Missense_Mutation | SNP | C | T | 7  | 72  | c.538C>T  | c.(538-540)CGG>TGG   | p.R180W  |
| Pat_63 | Pre-Treatment | MLL4     | 9757      | 37 | 19 | 36212077  | 36212077  | Missense_Mutation | SNP | C | T | 3  | 4   | c.1828C>T | c.(1828-1830)CGC>TGC | p.R610C  |
| Pat_63 | Pre-Treatment | CD79A    | 973       | 37 | 19 | 42383300  | 42383300  | Missense_Mutation | SNP | G | A | 4  | 32  | c.320G>A  | c.(319-321)CGG>CAG   | p.R107Q  |
| Pat_63 | Pre-Treatment | CNFN     | 84518     | 37 | 19 | 42893090  | 42893090  | Missense_Mutation | SNP | C | T | 5  | 33  | c.100G>A  | c.(100-102)GAC>AAC   | p.D34N   |
| Pat_63 | Pre-Treatment | CCDC8    | 83987     | 37 | 19 | 46914959  | 46914959  | Missense_Mutation | SNP | T | C | 5  | 77  | c.1109A>G | c.(1108-1110)GAG>GGG | p.E370G  |
| Pat_63 | Pre-Treatment | SIGLEC10 | 89790     | 37 | 19 | 51920150  | 51920150  | Missense_Mutation | SNP | G | A | 4  | 41  | c.476C>T  | c.(475-477)CCG>CTG   | p.P159L  |
| Pat_63 | Pre-Treatment | ZNF649   | 65251     | 37 | 19 | 52394652  | 52394652  | Missense_Mutation | SNP | C | T | 6  | 53  | c.737G>A  | c.(736-738)AGG>AAG   | p.R246K  |
| Pat_63 | Pre-Treatment | ZNF350   | 59348     | 37 | 19 | 52469149  | 52469149  | Missense_Mutation | SNP | C | T | 5  | 93  | c.557G>A  | c.(556-558)AGC>AAC   | p.S186N  |
| Pat_63 | Pre-Treatment | ZNF28    | 7576      | 37 | 19 | 53303026  | 53303026  | Missense_Mutation | SNP | T | C | 8  | 216 | c.2072A>G | c.(2071-2073)TAC>TGC | p.Y691C  |
| Pat_63 | Pre-Treatment | ZNF845   | 91664     | 37 | 19 | 53856360  | 53856360  | Missense_Mutation | SNP | A | C | 5  | 84  | c.2432A>C | c.(2431-2433)AAC>ACC | p.N811T  |
| Pat_63 | Pre-Treatment | ZNF761   | 388561    | 37 | 19 | 53959854  | 53959854  | Missense_Mutation | SNP | A | C | 10 | 117 | c.2093A>C | c.(2092-2094)AAC>ACC | p.N698T  |
| Pat_63 | Pre-Treatment | ZNF71    | 58491     | 37 | 19 | 57133527  | 57133527  | Missense_Mutation | SNP | C | T | 4  | 48  | c.872C>T  | c.(871-873)ACC>ATG   | p.T291M  |
| Pat_63 | Pre-Treatment | ZSCAN1   | 284312    | 37 | 19 | 58564806  | 58564806  | Missense_Mutation | SNP | C | T | 3  | 29  | c.614C>T  | c.(613-615)GCC>GTC   | p.A205V  |
| Pat_63 | Pre-Treatment | CPSF3    | 51692     | 37 | 2  | 9597148   | 9597148   | Missense_Mutation | SNP | G | A | 3  | 20  | c.1690G>A | c.(1690-1692)GTA>ATA | p.V564I  |
| Pat_63 | Pre-Treatment | ITSN2    | 50618     | 37 | 2  | 24433800  | 24433800  | Missense_Mutation | SNP | G | A | 3  | 26  | c.4106C>T | c.(4105-4107)CCG>CTG | p.P1369L |
| Pat_63 | Pre-Treatment | ZNF513   | 130557    | 37 | 2  | 27601843  | 27601843  | Missense_Mutation | SNP | G | A | 5  | 36  | c.290C>T  | c.(289-291)GCG>GTG   | p.A97V   |
| Pat_63 | Pre-Treatment | C2orf16  | 84226     | 37 | 2  | 27804426  | 27804426  | Missense_Mutation | SNP | C | T | 7  | 139 | c.4987C>T | c.(4987-4989)CGC>TGC | p.R1663C |
| Pat_63 | Pre-Treatment | FOSL2    | 2355      | 37 | 2  | 28631659  | 28631659  | Missense_Mutation | SNP | C | T | 3  | 29  | c.388C>T  | c.(388-390)CGG>TGG   | p.R130W  |
| Pat_63 | Pre-Treatment | CYP26B1  | 56603     | 37 | 2  | 72371194  | 72371194  | Missense_Mutation | SNP | G | A | 4  | 27  | c.353C>T  | c.(352-354)CCT>CTT   | p.P118L  |
| Pat_63 | Pre-Treatment | TEKT4    | 150483    | 37 | 2  | 95539335  | 95539335  | Missense_Mutation | SNP | G | A | 3  | 15  | c.569G>A  | c.(568-570)CGA>CAA   | p.R190Q  |
| Pat_63 | Pre-Treatment | WDR33    | 55339     | 37 | 2  | 128477325 | 128477325 | Missense_Mutation | SNP | G | C | 2  | 2   | c.2274C>G | c.(2272-2274)ATC>ATG | p.I758M  |
| Pat_63 | Pre-Treatment | UGGT1    | 56886     | 37 | 2  | 128930154 | 128930154 | Missense_Mutation | SNP | C | T | 3  | 32  | c.3112C>T | c.(3112-3114)CGT>TGT | p.R1038C |
| Pat_63 | Pre-Treatment | POTEF    | 728378    | 37 | 2  | 130877802 | 130877802 | Missense_Mutation | SNP | T | C | 6  | 107 | c.287A>G  | c.(286-288)AAC>AGC   | p.N96S   |

|        |               |           |        |    |    |           |           |                   |     |   |   |    |     |               |                        |               |
|--------|---------------|-----------|--------|----|----|-----------|-----------|-------------------|-----|---|---|----|-----|---------------|------------------------|---------------|
| Pat_63 | Pre-Treatment | XIRP2     | 129446 | 37 | 2  | 168107791 | 168107791 | Missense_Mutation | SNP | C | T | 6  | 142 | c.9889C>T     | c.(9889-9891)CGC>TGC   | p.R3297C      |
| Pat_63 | Pre-Treatment | TTN       | 7273   | 37 | 2  | 179477533 | 179477533 | Missense_Mutation | SNP | G | A | 3  | 22  | c.42211C>T    | c.(42211-42213)CCC>TCC | p.P14071S     |
| Pat_63 | Pre-Treatment | NEU2      | 4759   | 37 | 2  | 233899565 | 233899565 | Missense_Mutation | SNP | G | A | 4  | 32  | c.941G>A      | c.(940-942)CGA>CAA     | p.R314Q       |
| Pat_63 | Pre-Treatment | COL6A3    | 1293   | 37 | 2  | 238258843 | 238258843 | Missense_Mutation | SNP | C | T | 4  | 22  | c.6826G>A     | c.(6826-6828)GGA>AGA   | p.G2276R      |
| Pat_63 | Pre-Treatment | NEU4      | 129807 | 37 | 2  | 242755688 | 242755688 | Missense_Mutation | SNP | G | A | 3  | 22  | c.7G>A        | c.(7-9)GTC>ATC         | p.V3I         |
| Pat_63 | Pre-Treatment | C20orf103 | 24141  | 37 | 20 | 9496943   | 9496943   | Missense_Mutation | SNP | G | A | 4  | 41  | c.410G>A      | c.(409-411)AGG>AAG     | p.R137K       |
| Pat_63 | Pre-Treatment | DTD1      | 92675  | 37 | 20 | 18724886  | 18724886  | Missense_Mutation | SNP | G | A | 3  | 17  | c.620G>A      | c.(619-621)CGG>CAG     | p.R207Q       |
| Pat_63 | Pre-Treatment | LPIN3     | 64900  | 37 | 20 | 39974625  | 39974625  | Missense_Mutation | SNP | G | A | 3  | 23  | c.182G>A      | c.(181-183)CGG>CAG     | p.R61Q        |
| Pat_63 | Pre-Treatment | CHD6      | 84181  | 37 | 20 | 40033870  | 40033870  | Missense_Mutation | SNP | G | A | 3  | 24  | c.7511C>T     | c.(7510-7512)ACG>ATG   | p.T2504M      |
| Pat_63 | Pre-Treatment | TOX2      | 84969  | 37 | 20 | 42679986  | 42679986  | Missense_Mutation | SNP | C | T | 3  | 14  | c.479C>T      | c.(478-480)TCG>TTG     | p.S160L       |
| Pat_63 | Pre-Treatment | ATP9A     | 10079  | 37 | 20 | 50329565  | 50329565  | Nonsense_Mutation | SNP | G | A | 4  | 10  | c.376C>T      | c.(376-378)CGA>TGA     | p.R126*       |
| Pat_63 | Pre-Treatment | C20orf108 | 116151 | 37 | 20 | 54941182  | 54941182  | Nonsense_Mutation | SNP | C | T | 5  | 36  | c.418C>T      | c.(418-420)CAG>TAG     | p.Q140*       |
| Pat_63 | Pre-Treatment | POTED     | 317754 | 37 | 21 | 14983063  | 14983063  | Missense_Mutation | SNP | G | C | 3  | 36  | c.514G>C      | c.(514-516)GAA>CAA     | p.E172Q       |
| Pat_63 | Pre-Treatment | TPRSS2    | 7113   | 37 | 21 | 42861441  | 42861441  | Nonsense_Mutation | SNP | C | T | 5  | 27  | c.318G>A      | c.(316-318)TGG>TGA     | p.W106*       |
| Pat_63 | Pre-Treatment | PCNT      | 5116   | 37 | 21 | 47783785  | 47783785  | Missense_Mutation | SNP | G | A | 4  | 30  | c.2545G>A     | c.(2545-2547)GGG>AGG   | p.G849R       |
| Pat_63 | Pre-Treatment | MED15     | 51586  | 37 | 22 | 20938665  | 20938665  | Nonsense_Mutation | SNP | C | T | 8  | 66  | c.1756C>T     | c.(1756-1758)CAA>TAA   | p.Q586*       |
| Pat_63 | Pre-Treatment | CCDC116   | 164592 | 37 | 22 | 21991085  | 21991085  | Missense_Mutation | SNP | C | T | 4  | 32  | c.1568C>T     | c.(1567-1569)ACA>ATA   | p.T523I       |
| Pat_63 | Pre-Treatment | LIF       | 3976   | 37 | 22 | 30639788  | 30639788  | Missense_Mutation | SNP | C | T | 3  | 18  | c.461G>A      | c.(460-462)CGC>CAC     | p.R154H       |
| Pat_63 | Pre-Treatment | NCF4      | 4689   | 37 | 22 | 37263493  | 37263493  | Missense_Mutation | SNP | G | A | 3  | 17  | c.331G>A      | c.(331-333)GCC>ACC     | p.A111T       |
| Pat_63 | Pre-Treatment | RIBC2     | 26150  | 37 | 22 | 45826846  | 45826846  | Missense_Mutation | SNP | G | A | 4  | 16  | c.955G>A      | c.(955-957)GCC>ACC     | p.A319T       |
| Pat_63 | Pre-Treatment | CELSR1    | 9620   | 37 | 22 | 46787620  | 46787620  | Missense_Mutation | SNP | C | T | 3  | 7   | c.6058G>A     | c.(6058-6060)GGG>AGG   | p.G2020R      |
| Pat_63 | Pre-Treatment | TUBGCP6   | 85378  | 37 | 22 | 50659000  | 50659000  | Missense_Mutation | SNP | C | T | 4  | 31  | c.3788G>A     | c.(3787-3789)CGG>CAG   | p.R1263Q      |
| Pat_63 | Pre-Treatment | TLL3      | 26140  | 37 | 3  | 9870700   | 9870700   | Missense_Mutation | SNP | G | A | 3  | 26  | c.1175G>A     | c.(1174-1176)CGG>CAG   | p.R392Q       |
| Pat_63 | Pre-Treatment | TATDN2    | 9797   | 37 | 3  | 10302032  | 10302032  | Missense_Mutation | SNP | G | A | 3  | 28  | c.626G>A      | c.(625-627)CGG>CAG     | p.R209Q       |
| Pat_63 | Pre-Treatment | NR2C2     | 7182   | 37 | 3  | 15070226  | 15070226  | Missense_Mutation | SNP | G | A | 3  | 22  | c.932G>A      | c.(931-933)CGG>CAG     | p.R311Q       |
| Pat_63 | Pre-Treatment | ZBTB47    | 92999  | 37 | 3  | 42701013  | 42701013  | Missense_Mutation | SNP | G | A | 2  | 0   | c.38G>A       | c.(37-39)GGT>GAT       | p.G13D        |
| Pat_63 | Pre-Treatment | FYCO1     | 79443  | 37 | 3  | 46008656  | 46008656  | Missense_Mutation | SNP | C | T | 5  | 30  | c.2170G>A     | c.(2170-2172)GAA>AAA   | p.E724K       |
| Pat_63 | Pre-Treatment | PRKAR2A   | 5576   | 37 | 3  | 48820418  | 48820418  | Splice_Site       | SNP | C | T | 3  | 29  | c.542_splice  | c.e5+1                 | p.R181_splice |
| Pat_63 | Pre-Treatment | AMT       | 275    | 37 | 3  | 49455290  | 49455290  | Missense_Mutation | SNP | C | T | 4  | 49  | c.994G>A      | c.(994-996)GCA>ACA     | p.A332T       |
| Pat_63 | Pre-Treatment | APEH      | 327    | 37 | 3  | 49714393  | 49714393  | Missense_Mutation | SNP | G | A | 4  | 46  | c.935G>A      | c.(934-936)TGT>TAT     | p.C312Y       |
| Pat_63 | Pre-Treatment | UBA7      | 7318   | 37 | 3  | 49849859  | 49849859  | Missense_Mutation | SNP | G | A | 4  | 38  | c.676C>T      | c.(676-678)CGG>TGG     | p.R226W       |
| Pat_63 | Pre-Treatment | SLC38A3   | 10991  | 37 | 3  | 50255803  | 50255803  | Splice_Site       | SNP | G | A | 4  | 25  | c.1036_splice | c.e12+1                | p.N346_splice |
| Pat_63 | Pre-Treatment | COL8A1    | 1295   | 37 | 3  | 99514900  | 99514900  | Missense_Mutation | SNP | C | T | 3  | 22  | c.2155C>T     | c.(2155-2157)CCC>TCC   | p.P719S       |
| Pat_63 | Pre-Treatment | ABTB1     | 80325  | 37 | 3  | 127396014 | 127396014 | Missense_Mutation | SNP | C | T | 3  | 3   | c.647C>T      | c.(646-648)GCG>GTG     | p.A216V       |
| Pat_63 | Pre-Treatment | ASTE1     | 28990  | 37 | 3  | 130743388 | 130743388 | Nonsense_Mutation | SNP | G | A | 4  | 21  | c.763C>T      | c.(763-765)CGA>TGA     | p.R255*       |
| Pat_63 | Pre-Treatment | MRAS      | 22808  | 37 | 3  | 138091790 | 138091790 | Missense_Mutation | SNP | G | A | 4  | 27  | c.65G>A       | c.(64-66)GGG>GAG       | p.G22E        |
| Pat_63 | Pre-Treatment | TRIM42    | 287015 | 37 | 3  | 140401581 | 140401581 | Missense_Mutation | SNP | G | A | 4  | 33  | c.619G>A      | c.(619-621)GAG>AAG     | p.E207K       |
| Pat_63 | Pre-Treatment | B3GALNT1  | 8706   | 37 | 3  | 160803765 | 160803765 | Missense_Mutation | SNP | C | T | 4  | 36  | c.778G>A      | c.(778-780)GTA>ATA     | p.V260I       |
| Pat_63 | Pre-Treatment | EPHB3     | 2049   | 37 | 3  | 184295757 | 184295757 | Missense_Mutation | SNP | G | A | 4  | 31  | c.1711G>A     | c.(1711-1713)GTG>ATG   | p.V571M       |
| Pat_63 | Pre-Treatment | ZNF721    | 170960 | 37 | 4  | 437235    | 437235    | Missense_Mutation | SNP | T | C | 11 | 126 | c.1021A>G     | c.(1021-1023)ACC>GCC   | p.T341A       |
| Pat_63 | Pre-Treatment | ZNF721    | 170960 | 37 | 4  | 437249    | 437249    | Missense_Mutation | SNP | C | T | 8  | 124 | c.1007G>A     | c.(1006-1008)GGA>GAA   | p.G336E       |
| Pat_63 | Pre-Treatment | WHSC1     | 7468   | 37 | 4  | 1961355   | 1961355   | Missense_Mutation | SNP | C | T | 4  | 46  | c.3143C>T     | c.(3142-3144)GCG>GTG   | p.A1048V      |
| Pat_63 | Pre-Treatment | HTT       | 3064   | 37 | 4  | 3149738   | 3149738   | Missense_Mutation | SNP | C | T | 4  | 13  | c.3308C>T     | c.(3307-3309)GCT>GTT   | p.A1103V      |
| Pat_63 | Pre-Treatment | LDB2      | 9079   | 37 | 4  | 16597493  | 16597493  | Missense_Mutation | SNP | C | T | 4  | 54  | c.241G>A      | c.(241-243)GGC>AGC     | p.G81S        |
| Pat_63 | Pre-Treatment | MED28     | 80306  | 37 | 4  | 17625344  | 17625344  | Missense_Mutation | SNP | G | A | 4  | 16  | c.460G>A      | c.(460-462)GCC>ACC     | p.A154T       |
| Pat_63 | Pre-Treatment | SLC34A2   | 10568  | 37 | 4  | 25665862  | 25665862  | Missense_Mutation | SNP | G | A | 4  | 40  | c.289G>A      | c.(289-291)GGG>AGG     | p.G97R        |
| Pat_63 | Pre-Treatment | NFXL1     | 152518 | 37 | 4  | 47888005  | 47888005  | Missense_Mutation | SNP | G | A | 5  | 94  | c.1555C>T     | c.(1555-1557)CCC>TCC   | p.P519S       |

|        |               |          |        |    |   |           |           |                   |     |   |   |    |     |           |                      |          |
|--------|---------------|----------|--------|----|---|-----------|-----------|-------------------|-----|---|---|----|-----|-----------|----------------------|----------|
| Pat_63 | Pre-Treatment | FRYL     | 285527 | 37 | 4 | 48548277  | 48548277  | Missense_Mutation | SNP | C | T | 3  | 25  | c.5086G>A | c.(5086-5088)GAT>AAT | p.D1696N |
| Pat_63 | Pre-Treatment | GRID2    | 2895   | 37 | 4 | 94316843  | 94316843  | Missense_Mutation | SNP | G | A | 6  | 115 | c.1331G>A | c.(1330-1332)CGT>CAT | p.R444H  |
| Pat_63 | Pre-Treatment | SORBS2   | 8470   | 37 | 4 | 186545297 | 186545297 | Missense_Mutation | SNP | G | A | 3  | 20  | c.1274C>T | c.(1273-1275)CCC>CTC | p.P425L  |
| Pat_63 | Pre-Treatment | ADAMTS16 | 170690 | 37 | 5 | 5209331   | 5209331   | Missense_Mutation | SNP | C | A | 21 | 65  | c.1577C>A | c.(1576-1578)GCC>GAC | p.A526D  |
| Pat_63 | Pre-Treatment | FBXL7    | 23194  | 37 | 5 | 15936699  | 15936699  | Missense_Mutation | SNP | G | A | 3  | 22  | c.880G>A  | c.(880-882)GCG>ACG   | p.A294T  |
| Pat_63 | Pre-Treatment | C5orf34  | 375444 | 37 | 5 | 43487184  | 43487184  | Nonsense_Mutation | SNP | G | A | 4  | 34  | c.1750C>T | c.(1750-1752)CAG>TAG | p.Q584*  |
| Pat_63 | Pre-Treatment | SV2C     | 22987  | 37 | 5 | 75505613  | 75505613  | Missense_Mutation | SNP | C | T | 4  | 45  | c.814C>T  | c.(814-816)CGG>TGG   | p.R272W  |
| Pat_63 | Pre-Treatment | PITX1    | 5307   | 37 | 5 | 134369492 | 134369492 | Missense_Mutation | SNP | A | G | 2  | 2   | c.80T>C   | c.(79-81)ATG>ACG     | p.M27T   |
| Pat_63 | Pre-Treatment | PSD2     | 84249  | 37 | 5 | 139193880 | 139193880 | Missense_Mutation | SNP | G | A | 3  | 6   | c.947G>A  | c.(946-948)CGG>CAG   | p.R316Q  |
| Pat_63 | Pre-Treatment | PCDHB11  | 56125  | 37 | 5 | 140581277 | 140581277 | Missense_Mutation | SNP | G | A | 3  | 8   | c.1930G>A | c.(1930-1932)GTC>ATC | p.V644I  |
| Pat_63 | Pre-Treatment | PCDHB12  | 56124  | 37 | 5 | 140590170 | 140590170 | Missense_Mutation | SNP | C | T | 3  | 14  | c.1691C>T | c.(1690-1692)CCG>CTG | p.P564L  |
| Pat_63 | Pre-Treatment | PCDHGA3  | 56112  | 37 | 5 | 140724294 | 140724294 | Missense_Mutation | SNP | G | A | 4  | 25  | c.694G>A  | c.(694-696)GTC>ATC   | p.V232I  |
| Pat_63 | Pre-Treatment | C5orf41  | 153222 | 37 | 5 | 172517654 | 172517654 | Missense_Mutation | SNP | G | A | 4  | 39  | c.472G>A  | c.(472-474)GAT>AAT   | p.D158N  |
| Pat_63 | Pre-Treatment | BOD1     | 91272  | 37 | 5 | 173036279 | 173036279 | Missense_Mutation | SNP | C | A | 4  | 26  | c.521G>T  | c.(520-522)GGC>GTC   | p.G174V  |
| Pat_63 | Pre-Treatment | KIAA0319 | 9856   | 37 | 6 | 24556884  | 24556884  | Nonsense_Mutation | SNP | C | T | 4  | 18  | c.2808G>A | c.(2806-2808)TGG>TGA | p.W936*  |
| Pat_63 | Pre-Treatment | PBX2     | 5089   | 37 | 6 | 32156093  | 32156093  | Missense_Mutation | SNP | G | A | 6  | 91  | c.484C>T  | c.(484-486)CGC>TGC   | p.R162C  |
| Pat_63 | Pre-Treatment | MOCS1    | 4337   | 37 | 6 | 39880033  | 39880033  | Missense_Mutation | SNP | C | T | 4  | 45  | c.956G>A  | c.(955-957)CGA>CAA   | p.R319Q  |
| Pat_63 | Pre-Treatment | MRPS18A  | 55168  | 37 | 6 | 43639515  | 43639515  | Missense_Mutation | SNP | C | A | 4  | 35  | c.575G>T  | c.(574-576)TGG>TTG   | p.W192L  |
| Pat_63 | Pre-Treatment | COL19A1  | 1310   | 37 | 6 | 70856581  | 70856581  | Missense_Mutation | SNP | C | T | 4  | 30  | c.1801C>T | c.(1801-1803)CCA>TCA | p.P601S  |
| Pat_63 | Pre-Treatment | SNAP91   | 9892   | 37 | 6 | 84270583  | 84270583  | Missense_Mutation | SNP | C | T | 4  | 31  | c.2526G>A | c.(2524-2526)ATG>ATA | p.M842I  |
| Pat_63 | Pre-Treatment | NT5E     | 4907   | 37 | 6 | 86200375  | 86200375  | Missense_Mutation | SNP | G | A | 4  | 28  | c.1360G>A | c.(1360-1362)GGA>AGA | p.G454R  |
| Pat_63 | Pre-Treatment | GABRR1   | 2569   | 37 | 6 | 89891645  | 89891645  | Missense_Mutation | SNP | C | T | 35 | 37  | c.928G>A  | c.(928-930)GTG>ATG   | p.V310M  |
| Pat_63 | Pre-Treatment | SLC16A10 | 117247 | 37 | 6 | 111498461 | 111498461 | Missense_Mutation | SNP | G | A | 4  | 45  | c.535G>A  | c.(535-537)GGC>AGC   | p.G179S  |
| Pat_63 | Pre-Treatment | STXBP5   | 134957 | 37 | 6 | 147525711 | 147525711 | Missense_Mutation | SNP | G | A | 4  | 31  | c.43G>A   | c.(43-45)GCC>ACC     | p.A15T   |
| Pat_63 | Pre-Treatment | ULBP1    | 80329  | 37 | 6 | 150285193 | 150285193 | Missense_Mutation | SNP | C | T | 3  | 13  | c.8C>T    | c.(7-9)GCG>GTG       | p.A3V    |
| Pat_63 | Pre-Treatment | RPS6KA2  | 6196   | 37 | 6 | 166862280 | 166862280 | Missense_Mutation | SNP | C | T | 3  | 21  | c.1264G>A | c.(1264-1266)GGG>AGG | p.G422R  |
| Pat_63 | Pre-Treatment | ABCB5    | 340273 | 37 | 7 | 20782554  | 20782554  | Missense_Mutation | SNP | C | T | 3  | 24  | c.1744C>T | c.(1744-1746)CGC>TGC | p.R582C  |
| Pat_63 | Pre-Treatment | ZNF479   | 90827  | 37 | 7 | 57187809  | 57187809  | Missense_Mutation | SNP | T | G | 10 | 43  | c.1313A>C | c.(1312-1314)AAA>ACA | p.K438T  |
| Pat_63 | Pre-Treatment | GUSB     | 2990   | 37 | 7 | 65432843  | 65432843  | Missense_Mutation | SNP | C | T | 5  | 56  | c.1528G>A | c.(1528-1530)GAC>AAC | p.D510N  |
| Pat_63 | Pre-Treatment | WBSCR17  | 64409  | 37 | 7 | 71130457  | 71130457  | Missense_Mutation | SNP | G | A | 4  | 17  | c.1142G>A | c.(1141-1143)CGG>CAG | p.R381Q  |
| Pat_63 | Pre-Treatment | SPDYE5   | 442590 | 37 | 7 | 75130883  | 75130883  | Missense_Mutation | SNP | G | A | 31 | 165 | c.758G>A  | c.(757-759)CGT>CAT   | p.R253H  |
| Pat_63 | Pre-Treatment | BRAF     | 673    | 37 | 7 | 140453136 | 140453136 | Missense_Mutation | SNP | A | T | 40 | 77  | c.1799T>A | c.(1798-1800)GTG>GAG | p.V600E  |
| Pat_63 | Pre-Treatment | ZNF425   | 155054 | 37 | 7 | 148801329 | 148801329 | Missense_Mutation | SNP | G | A | 3  | 6   | c.1634C>T | c.(1633-1635)ACG>ATG | p.T545M  |
| Pat_63 | Pre-Treatment | NUB1     | 51667  | 37 | 7 | 151065935 | 151065935 | Missense_Mutation | SNP | G | A | 3  | 25  | c.1282G>A | c.(1282-1284)GTG>ATG | p.V428M  |
| Pat_63 | Pre-Treatment | ZFHX4    | 79776  | 37 | 8 | 77618490  | 77618490  | Missense_Mutation | SNP | C | T | 6  | 23  | c.2167C>T | c.(2167-2169)CAC>TAC | p.H723Y  |
| Pat_63 | Pre-Treatment | GRINA    | 2907   | 37 | 8 | 145066699 | 145066699 | Missense_Mutation | SNP | G | A | 3  | 23  | c.889G>A  | c.(889-891)GCC>ACC   | p.A297T  |
| Pat_63 | Pre-Treatment | VPS28    | 51160  | 37 | 8 | 145650159 | 145650159 | Missense_Mutation | SNP | G | A | 4  | 42  | c.344C>T  | c.(343-345)CCC>CTC   | p.P115L  |
| Pat_63 | Pre-Treatment | TMEM215  | 401498 | 37 | 9 | 32784491  | 32784491  | Missense_Mutation | SNP | G | A | 4  | 29  | c.310G>A  | c.(310-312)GGC>AGC   | p.G104S  |
| Pat_63 | Pre-Treatment | TESK1    | 7016   | 37 | 9 | 35609156  | 35609156  | Missense_Mutation | SNP | G | A | 4  | 34  | c.1298G>A | c.(1297-1299)CGC>CAC | p.R433H  |
| Pat_63 | Pre-Treatment | PTGS1    | 5742   | 37 | 9 | 125143686 | 125143686 | Missense_Mutation | SNP | G | A | 3  | 12  | c.533G>A  | c.(532-534)CGC>CAC   | p.R178H  |
| Pat_63 | Pre-Treatment | PTGES2   | 80142  | 37 | 9 | 130886024 | 130886024 | Missense_Mutation | SNP | C | T | 6  | 55  | c.643G>A  | c.(643-645)GAG>AAG   | p.E215K  |
| Pat_63 | Pre-Treatment | SPTAN1   | 6709   | 37 | 9 | 131370209 | 131370209 | Missense_Mutation | SNP | G | A | 4  | 31  | c.4225G>A | c.(4225-4227)GGA>AGA | p.G1409R |
| Pat_63 | Pre-Treatment | ZBED1    | 9189   | 37 | X | 2406981   | 2406981   | Missense_Mutation | SNP | G | A | 4  | 37  | c.1780C>T | c.(1780-1782)CGC>TGC | p.R594C  |
| Pat_63 | Pre-Treatment | SHROOM4  | 57477  | 37 | X | 50350478  | 50350478  | Missense_Mutation | SNP | G | A | 4  | 50  | c.3664C>T | c.(3664-3666)CAC>TAC | p.H1222Y |
| Pat_63 | Pre-Treatment | ZCCHC18  | 644353 | 37 | X | 103359558 | 103359558 | Missense_Mutation | SNP | G | C | 2  | 3   | c.756G>C  | c.(754-756)CAG>CAC   | p.Q252H  |
| Pat_63 | Pre-Treatment | MAGEC1   | 9947   | 37 | X | 140994583 | 140994583 | Nonsense_Mutation | SNP | A | T | 6  | 90  | c.1393A>T | c.(1393-1395)AGA>TGA | p.R465*  |
| Pat_63 | Pre-Treatment | MAGEC1   | 9947   | 37 | X | 140994923 | 140994923 | Missense_Mutation | SNP | A | T | 8  | 191 | c.1733A>T | c.(1732-1734)CAC>CTC | p.H578L  |

|        |                 |          |        |    |   |           |           |                        |     |   |   |    |     |               |                        |               |
|--------|-----------------|----------|--------|----|---|-----------|-----------|------------------------|-----|---|---|----|-----|---------------|------------------------|---------------|
| Pat_63 | Post-Resistance | CPSF3L   | 54973  | 37 | 1 | 1256438   | 1256438   | Missense_Mutation      | SNP | C | T | 39 | 236 | c.64G>A       | c.(64-66)GTC>ATC       | p.V22I        |
| Pat_63 | Post-Resistance | SSU72    | 29101  | 37 | 1 | 1480242   | 1480242   | Splice_Site            | SNP | C | T | 17 | 96  | c.364_splice  | c.e3+1                 | p.D122_splice |
| Pat_63 | Post-Resistance | TNFRSF25 | 8718   | 37 | 1 | 6522132   | 6522132   | Missense_Mutation      | SNP | G | A | 13 | 55  | c.847C>T      | c.(847-849)CCT>TCT     | p.P283S       |
| Pat_63 | Post-Resistance | PLEKHG5  | 57449  | 37 | 1 | 6531547   | 6531547   | Splice_Site            | SNP | C | T | 8  | 12  | c.1449_splice | c.e13+1                | p.M483_splice |
| Pat_63 | Post-Resistance | SLC45A1  | 50651  | 37 | 1 | 8399720   | 8399720   | Missense_Mutation      | SNP | C | T | 20 | 161 | c.1942C>T     | c.(1942-1944)CCT>TCT   | p.P648S       |
| Pat_63 | Post-Resistance | CASZ1    | 54897  | 37 | 1 | 10699867  | 10699867  | Missense_Mutation      | SNP | C | T | 3  | 14  | c.4412G>A     | c.(4411-4413)CGC>CAC   | p.R1471H      |
| Pat_63 | Post-Resistance | MTOR     | 2475   | 37 | 1 | 11199652  | 11199652  | Missense_Mutation      | SNP | G | A | 7  | 167 | c.4936C>T     | c.(4936-4938)CCT>TCT   | p.P1646S      |
| Pat_63 | Post-Resistance | NECAP2   | 55707  | 37 | 1 | 16767238  | 16767238  | Translation_Start_Site | SNP | G | A | 4  | 42  | c.-18G>A      | c.(-20--16)CGGTG>CGATG |               |
| Pat_63 | Post-Resistance | PADI6    | 353238 | 37 | 1 | 17715324  | 17715324  | Missense_Mutation      | SNP | C | T | 6  | 30  | c.911C>T      | c.(910-912)CCC>CTC     | p.P304L       |
| Pat_63 | Post-Resistance | RCC2     | 55920  | 37 | 1 | 17747291  | 17747291  | Missense_Mutation      | SNP | C | T | 10 | 39  | c.778G>A      | c.(778-780)GCC>ACC     | p.A260T       |
| Pat_63 | Post-Resistance | PINK1    | 65018  | 37 | 1 | 20971071  | 20971071  | Missense_Mutation      | SNP | C | T | 20 | 102 | c.865C>T      | c.(865-867)CCA>TCA     | p.P289S       |
| Pat_63 | Post-Resistance | EPHA8    | 2046   | 37 | 1 | 22921777  | 22921777  | Missense_Mutation      | SNP | G | A | 5  | 17  | c.1658G>A     | c.(1657-1659)GGC>GAC   | p.G553D       |
| Pat_63 | Post-Resistance | HNRNPR   | 10236  | 37 | 1 | 23637215  | 23637215  | Missense_Mutation      | SNP | C | T | 21 | 60  | c.1634G>A     | c.(1633-1635)GGC>GAC   | p.G545D       |
| Pat_63 | Post-Resistance | NIPAL3   | 57185  | 37 | 1 | 24785392  | 24785392  | Missense_Mutation      | SNP | C | T | 9  | 59  | c.788C>T      | c.(787-789)GCC>GTC     | p.A263V       |
| Pat_63 | Post-Resistance | SRRM1    | 10250  | 37 | 1 | 24989228  | 24989228  | Missense_Mutation      | SNP | C | T | 4  | 94  | c.1561C>T     | c.(1561-1563)CGG>TGG   | p.R521W       |
| Pat_63 | Post-Resistance | CNKSR1   | 10256  | 37 | 1 | 26510976  | 26510976  | Missense_Mutation      | SNP | G | A | 5  | 8   | c.1106G>A     | c.(1105-1107)GGG>GAG   | p.G369E       |
| Pat_63 | Post-Resistance | PIGV     | 55650  | 37 | 1 | 27120994  | 27120994  | Missense_Mutation      | SNP | C | T | 7  | 53  | c.469C>T      | c.(469-471)CTC>TTC     | p.L157F       |
| Pat_63 | Post-Resistance | SLC9A1   | 6548   | 37 | 1 | 27427003  | 27427003  | Missense_Mutation      | SNP | G | A | 6  | 248 | c.2243C>T     | c.(2242-2244)CCT>CTT   | p.P748L       |
| Pat_63 | Post-Resistance | TINAGL1  | 64129  | 37 | 1 | 32050631  | 32050631  | Missense_Mutation      | SNP | G | A | 10 | 61  | c.851G>A      | c.(850-852)CGC>CAC     | p.R284H       |
| Pat_63 | Post-Resistance | YARS     | 8565   | 37 | 1 | 33256825  | 33256825  | Missense_Mutation      | SNP | C | T | 42 | 175 | c.622G>A      | c.(622-624)GTC>ATC     | p.V208I       |
| Pat_63 | Post-Resistance | PHC2     | 1912   | 37 | 1 | 33799821  | 33799821  | Missense_Mutation      | SNP | G | A | 19 | 112 | c.1628C>T     | c.(1627-1629)TCT>TTT   | p.S543F       |
| Pat_63 | Post-Resistance | ZSCAN20  | 7579   | 37 | 1 | 33956792  | 33956792  | Missense_Mutation      | SNP | T | C | 9  | 47  | c.934T>C      | c.(934-936)TAC>CAC     | p.Y312H       |
| Pat_63 | Post-Resistance | CLSPN    | 63967  | 37 | 1 | 36215390  | 36215390  | Missense_Mutation      | SNP | C | T | 6  | 29  | c.2051G>A     | c.(2050-2052)AGT>AAT   | p.S684N       |
| Pat_63 | Post-Resistance | AKIRIN1  | 79647  | 37 | 1 | 39466775  | 39466775  | Missense_Mutation      | SNP | G | A | 25 | 122 | c.493G>A      | c.(493-495)GCA>ACA     | p.A165T       |
| Pat_63 | Post-Resistance | MACF1    | 23499  | 37 | 1 | 39798102  | 39798102  | Missense_Mutation      | SNP | T | A | 5  | 98  | c.1162T>A     | c.(1162-1164)TGC>AGC   | p.C388S       |
| Pat_63 | Post-Resistance | RLF      | 6018   | 37 | 1 | 40704086  | 40704086  | Missense_Mutation      | SNP | A | G | 14 | 61  | c.3712A>G     | c.(3712-3714)AAC>GAC   | p.N1238D      |
| Pat_63 | Post-Resistance | KDM4A    | 9682   | 37 | 1 | 44132742  | 44132742  | Missense_Mutation      | SNP | T | C | 12 | 99  | c.895T>C      | c.(895-897)TAC>CAC     | p.Y299H       |
| Pat_63 | Post-Resistance | KIF2C    | 11004  | 37 | 1 | 45232786  | 45232786  | Missense_Mutation      | SNP | C | T | 4  | 105 | c.2113C>T     | c.(2113-2115)CGC>TGC   | p.R705C       |
| Pat_63 | Post-Resistance | MAST2    | 23139  | 37 | 1 | 46498314  | 46498314  | Missense_Mutation      | SNP | G | A | 7  | 50  | c.3461G>A     | c.(3460-3462)GGT>GAT   | p.G1154D      |
| Pat_63 | Post-Resistance | RAD54L   | 8438   | 37 | 1 | 46740370  | 46740370  | Missense_Mutation      | SNP | A | C | 46 | 65  | c.1850A>C     | c.(1849-1851)TAT>TCT   | p.Y617S       |
| Pat_63 | Post-Resistance | SPATA6   | 54558  | 37 | 1 | 48764500  | 48764500  | Missense_Mutation      | SNP | G | A | 20 | 111 | c.1352C>T     | c.(1351-1353)GCC>GTC   | p.A451V       |
| Pat_63 | Post-Resistance | ORC1L    | 4998   | 37 | 1 | 52859296  | 52859296  | Missense_Mutation      | SNP | G | A | 21 | 80  | c.901C>T      | c.(901-903)CTC>TTC     | p.L301F       |
| Pat_63 | Post-Resistance | USP24    | 23358  | 37 | 1 | 55545272  | 55545272  | Missense_Mutation      | SNP | G | A | 29 | 144 | c.6659C>T     | c.(6658-6660)CCC>CTC   | p.P2220L      |
| Pat_63 | Post-Resistance | JUN      | 3725   | 37 | 1 | 59248463  | 59248463  | Missense_Mutation      | SNP | G | A | 44 | 270 | c.280C>T      | c.(280-282)CCC>TCC     | p.P94S        |
| Pat_63 | Post-Resistance | MIER1    | 57708  | 37 | 1 | 67423844  | 67423844  | Missense_Mutation      | SNP | G | A | 26 | 110 | c.442G>A      | c.(442-444)GGT>AGT     | p.G148S       |
| Pat_63 | Post-Resistance | WLS      | 79971  | 37 | 1 | 68591955  | 68591955  | Missense_Mutation      | SNP | C | T | 26 | 97  | c.1580G>A     | c.(1579-1581)GGA>GAA   | p.G527E       |
| Pat_63 | Post-Resistance | CLCA1    | 1179   | 37 | 1 | 86951234  | 86951234  | Missense_Mutation      | SNP | G | A | 42 | 191 | c.944G>A      | c.(943-945)GGA>GAA     | p.G315E       |
| Pat_63 | Post-Resistance | VCAM1    | 7412   | 37 | 1 | 101190275 | 101190275 | Missense_Mutation      | SNP | G | A | 14 | 24  | c.757G>A      | c.(757-759)GCT>ACT     | p.A253T       |
| Pat_63 | Post-Resistance | OLFM3    | 118427 | 37 | 1 | 102269985 | 102269985 | Missense_Mutation      | SNP | C | T | 40 | 199 | c.1246G>A     | c.(1246-1248)GTG>ATG   | p.V416M       |
| Pat_63 | Post-Resistance | OLFM3    | 118427 | 37 | 1 | 102462324 | 102462324 | Missense_Mutation      | SNP | C | T | 16 | 114 | c.49G>A       | c.(49-51)GCC>ACC       | p.A17T        |
| Pat_63 | Post-Resistance | COL11A1  | 1301   | 37 | 1 | 103491783 | 103491783 | Missense_Mutation      | SNP | C | T | 15 | 116 | c.886G>A      | c.(886-888)GCA>ACA     | p.A296T       |
| Pat_63 | Post-Resistance | AMY2B    | 280    | 37 | 1 | 104122112 | 104122112 | Missense_Mutation      | SNP | C | T | 20 | 296 | c.1526C>T     | c.(1525-1527)TCT>TTT   | p.S509F       |
| Pat_63 | Post-Resistance | KIAA1324 | 57535  | 37 | 1 | 109734455 | 109734455 | Nonsense_Mutation      | SNP | G | A | 39 | 203 | c.1653G>A     | c.(1651-1653)TGG>TGA   | p.W551*       |
| Pat_63 | Post-Resistance | LRIG2    | 9860   | 37 | 1 | 113650322 | 113650322 | Missense_Mutation      | SNP | C | T | 23 | 129 | c.1420C>T     | c.(1420-1422)CCT>TCT   | p.P474S       |
| Pat_63 | Post-Resistance | ADAM30   | 11085  | 37 | 1 | 120437464 | 120437464 | Missense_Mutation      | SNP | C | T | 6  | 35  | c.1496G>A     | c.(1495-1497)GGG>GAG   | p.G499E       |
| Pat_63 | Post-Resistance | VPS45    | 11311  | 37 | 1 | 150039942 | 150039942 | Missense_Mutation      | SNP | T | C | 51 | 230 | c.28T>C       | c.(28-30)TAC>CAC       | p.Y10H        |
| Pat_63 | Post-Resistance | C1orf54  | 79630  | 37 | 1 | 150249023 | 150249023 | Missense_Mutation      | SNP | C | T | 20 | 131 | c.283C>T      | c.(283-285)CCA>TCA     | p.P95S        |

|        |                 |           |        |    |   |           |           |                   |     |   |   |    |     |               |                      |                |
|--------|-----------------|-----------|--------|----|---|-----------|-----------|-------------------|-----|---|---|----|-----|---------------|----------------------|----------------|
| Pat_63 | Post-Resistance | MCL1      | 4170   | 37 | 1 | 150550844 | 150550844 | Missense_Mutation | SNP | C | T | 14 | 128 | c.812G>A      | c.(811-813)GGT>GAT   | p.G271D        |
| Pat_63 | Post-Resistance | CTSK      | 1513   | 37 | 1 | 150772043 | 150772043 | Missense_Mutation | SNP | G | A | 17 | 108 | c.761C>T      | c.(760-762)ACC>ATC   | p.T254I        |
| Pat_63 | Post-Resistance | PRUNE     | 58497  | 37 | 1 | 150990336 | 150990336 | Missense_Mutation | SNP | G | A | 5  | 99  | c.88G>A       | c.(88-90)GAC>AAC     | p.D30N         |
| Pat_63 | Post-Resistance | POGZ      | 23126  | 37 | 1 | 151413403 | 151413403 | Splice_Site       | SNP | C | T | 29 | 170 | c.283_splice  | c.e3+1               | p.A95_splice   |
| Pat_63 | Post-Resistance | HRNR      | 388697 | 37 | 1 | 152191227 | 152191227 | Missense_Mutation | SNP | G | A | 10 | 443 | c.2878C>T     | c.(2878-2880)CAC>TAC | p.H960Y        |
| Pat_63 | Post-Resistance | FLG       | 2312   | 37 | 1 | 152285655 | 152285655 | Missense_Mutation | SNP | T | A | 79 | 442 | c.1707A>T     | c.(1705-1707)AGA>AGT | p.R569S        |
| Pat_63 | Post-Resistance | ILF2      | 3608   | 37 | 1 | 153640049 | 153640049 | Missense_Mutation | SNP | G | A | 88 | 683 | c.376C>T      | c.(376-378)CTC>TTC   | p.L126F        |
| Pat_63 | Post-Resistance | SLC27A3   | 11000  | 37 | 1 | 153748460 | 153748460 | Missense_Mutation | SNP | C | T | 4  | 14  | c.628C>T      | c.(628-630)CCT>TCT   | p.P210S        |
| Pat_63 | Post-Resistance | PBXIP1    | 57326  | 37 | 1 | 154923773 | 154923773 | Missense_Mutation | SNP | C | T | 4  | 40  | c.344G>A      | c.(343-345)GGA>GAA   | p.G115E        |
| Pat_63 | Post-Resistance | PYGO2     | 90780  | 37 | 1 | 154931322 | 154931322 | Missense_Mutation | SNP | G | A | 19 | 111 | c.1154C>T     | c.(1153-1155)ACC>ATC | p.T385I        |
| Pat_63 | Post-Resistance | ADAM15    | 8751   | 37 | 1 | 155030907 | 155030907 | Missense_Mutation | SNP | G | A | 15 | 53  | c.1907G>A     | c.(1906-1908)GGC>GAC | p.G636D        |
| Pat_63 | Post-Resistance | TRIM46    | 80128  | 37 | 1 | 155156442 | 155156442 | Missense_Mutation | SNP | C | T | 10 | 50  | c.2056C>T     | c.(2056-2058)CCC>TCC | p.P686S        |
| Pat_63 | Post-Resistance | MEF2D     | 4209   | 37 | 1 | 156437844 | 156437844 | Missense_Mutation | SNP | G | A | 18 | 56  | c.1495C>T     | c.(1495-1497)CCA>TCA | p.P499S        |
| Pat_63 | Post-Resistance | HAPLN2    | 60484  | 37 | 1 | 156593883 | 156593883 | Missense_Mutation | SNP | G | A | 14 | 50  | c.370G>A      | c.(370-372)GGC>AGC   | p.G124S        |
| Pat_63 | Post-Resistance | NES       | 10763  | 37 | 1 | 156640757 | 156640757 | Missense_Mutation | SNP | C | T | 13 | 66  | c.3223G>A     | c.(3223-3225)GGT>AGT | p.G1075S       |
| Pat_63 | Post-Resistance | FCER1G    | 2207   | 37 | 1 | 161187838 | 161187838 | Missense_Mutation | SNP | G | A | 52 | 373 | c.112G>A      | c.(112-114)GTC>ATC   | p.V38I         |
| Pat_63 | Post-Resistance | C1orf111  | 284680 | 37 | 1 | 162345157 | 162345157 | Missense_Mutation | SNP | C | T | 15 | 157 | c.140G>A      | c.(139-141)AGC>AAC   | p.S47N         |
| Pat_63 | Post-Resistance | LRRCS2    | 440699 | 37 | 1 | 165532853 | 165532853 | Missense_Mutation | SNP | A | G | 10 | 41  | c.734A>G      | c.(733-735)TAC>TGC   | p.Y245C        |
| Pat_63 | Post-Resistance | FAM78B    | 149297 | 37 | 1 | 166039944 | 166039944 | Missense_Mutation | SNP | G | A | 10 | 78  | c.320C>T      | c.(319-321)TCA>TTA   | p.S107L        |
| Pat_63 | Post-Resistance | F5        | 2153   | 37 | 1 | 169498889 | 169498889 | Nonsense_Mutation | SNP | C | T | 12 | 68  | c.5376G>A     | c.(5374-5376)TGG>TGA | p.W1792*       |
| Pat_63 | Post-Resistance | BAT2L2    | 23215  | 37 | 1 | 171553238 | 171553238 | Missense_Mutation | SNP | C | T | 39 | 426 | c.7547C>T     | c.(7546-7548)ACT>ATT | p.T2516I       |
| Pat_63 | Post-Resistance | KLHL20    | 27252  | 37 | 1 | 173735353 | 173735353 | Missense_Mutation | SNP | G | A | 23 | 207 | c.1220G>A     | c.(1219-1221)GGT>GAT | p.G407D        |
| Pat_63 | Post-Resistance | CACNA1E   | 777    | 37 | 1 | 181695261 | 181695261 | Missense_Mutation | SNP | G | A | 12 | 53  | c.2203G>A     | c.(2203-2205)GTC>ATC | p.V735I        |
| Pat_63 | Post-Resistance | CACNA1E   | 777    | 37 | 1 | 181741281 | 181741281 | Missense_Mutation | SNP | C | T | 24 | 238 | c.5053C>T     | c.(5053-5055)CCA>TCA | p.P1685S       |
| Pat_63 | Post-Resistance | DHX9      | 1660   | 37 | 1 | 182827344 | 182827344 | Missense_Mutation | SNP | C | T | 12 | 115 | c.779C>T      | c.(778-780)TCC>TTC   | p.S260F        |
| Pat_63 | Post-Resistance | HMCN1     | 83872  | 37 | 1 | 185966567 | 185966567 | Missense_Mutation | SNP | C | T | 9  | 99  | c.3785C>T     | c.(3784-3786)CCC>CTC | p.P1262L       |
| Pat_63 | Post-Resistance | TROVE2    | 6738   | 37 | 1 | 193046127 | 193046127 | Missense_Mutation | SNP | C | T | 7  | 78  | c.1033C>T     | c.(1033-1035)CCT>TCT | p.P345S        |
| Pat_63 | Post-Resistance | TROVE2    | 6738   | 37 | 1 | 193051364 | 193051364 | Missense_Mutation | SNP | G | A | 19 | 237 | c.1252G>A     | c.(1252-1254)GAA>AAA | p.E418K        |
| Pat_63 | Post-Resistance | CFH       | 3075   | 37 | 1 | 196684819 | 196684819 | Missense_Mutation | SNP | G | A | 49 | 500 | c.1616G>A     | c.(1615-1617)GGT>GAT | p.G539D        |
| Pat_63 | Post-Resistance | CFHR5     | 81494  | 37 | 1 | 196971669 | 196971669 | Missense_Mutation | SNP | C | T | 5  | 137 | c.1205C>T     | c.(1204-1206)ACA>ATA | p.T402I        |
| Pat_63 | Post-Resistance | CRB1      | 23418  | 37 | 1 | 197391087 | 197391087 | Splice_Site       | SNP | G | A | 5  | 58  | c.2128_splice | c.e6+1               | p.E710_splice  |
| Pat_63 | Post-Resistance | CAMSAP1L1 | 23271  | 37 | 1 | 200813939 | 200813939 | Missense_Mutation | SNP | C | T | 15 | 167 | c.1084C>T     | c.(1084-1086)CCT>TCT | p.P362S        |
| Pat_63 | Post-Resistance | CSRP1     | 1465   | 37 | 1 | 201454498 | 201454498 | Missense_Mutation | SNP | G | A | 8  | 164 | c.418C>T      | c.(418-420)CAT>TAT   | p.H140Y        |
| Pat_63 | Post-Resistance | RNPEP     | 6051   | 37 | 1 | 201958551 | 201958551 | Nonsense_Mutation | SNP | G | A | 13 | 129 | c.629G>A      | c.(628-630)TGG>TAG   | p.W210*        |
| Pat_63 | Post-Resistance | FMOD      | 2331   | 37 | 1 | 203317046 | 203317046 | Missense_Mutation | SNP | G | A | 4  | 52  | c.353C>T      | c.(352-354)ACC>ATC   | p.T118I        |
| Pat_63 | Post-Resistance | PRELP     | 5549   | 37 | 1 | 203453159 | 203453159 | Missense_Mutation | SNP | C | T | 30 | 216 | c.847C>T      | c.(847-849)CTC>TTC   | p.L283F        |
| Pat_63 | Post-Resistance | SOX13     | 9580   | 37 | 1 | 204082042 | 204082042 | Splice_Site       | SNP | G | A | 5  | 55  | c.0_splice    | c.e2-1               |                |
| Pat_63 | Post-Resistance | PPP1R15B  | 84919  | 37 | 1 | 204375346 | 204375346 | Missense_Mutation | SNP | G | T | 5  | 209 | c.2016C>A     | c.(2014-2016)TTC>TTA | p.F672L        |
| Pat_63 | Post-Resistance | PIK3C2B   | 5287   | 37 | 1 | 204410598 | 204410598 | Splice_Site       | SNP | C | T | 15 | 101 | c.3249_splice | c.e22+1              | p.K1083_splice |
| Pat_63 | Post-Resistance | DSTYK     | 25778  | 37 | 1 | 205131210 | 205131210 | Missense_Mutation | SNP | G | A | 5  | 89  | c.1772C>T     | c.(1771-1773)ACT>ATT | p.T591I        |
| Pat_63 | Post-Resistance | ELK4      | 2005   | 37 | 1 | 205589507 | 205589507 | Missense_Mutation | SNP | G | T | 5  | 95  | c.667C>A      | c.(667-669)CAA>AAA   | p.Q223K        |
| Pat_63 | Post-Resistance | C1orf186  | 440712 | 37 | 1 | 206240153 | 206240153 | Missense_Mutation | SNP | C | T | 6  | 302 | c.299G>A      | c.(298-300)AGT>AAT   | p.S100N        |
| Pat_63 | Post-Resistance | PIGR      | 5284   | 37 | 1 | 207112463 | 207112463 | Splice_Site       | SNP | C | T | 7  | 62  | c.388_splice  | c.e3+1               | p.G130_splice  |
| Pat_63 | Post-Resistance | FCAMR     | 83953  | 37 | 1 | 207139134 | 207139134 | Missense_Mutation | SNP | C | T | 5  | 37  | c.239G>A      | c.(238-240)AGG>AAG   | p.R80K         |
| Pat_63 | Post-Resistance | C4BPA     | 722    | 37 | 1 | 207317325 | 207317325 | Missense_Mutation | SNP | C | T | 9  | 111 | c.1607C>T     | c.(1606-1608)CCC>CTC | p.P536L        |
| Pat_63 | Post-Resistance | CAMK1G    | 57172  | 37 | 1 | 209783243 | 209783243 | Missense_Mutation | SNP | T | C | 23 | 197 | c.796T>C      | c.(796-798)TAC>CAC   | p.Y266H        |
| Pat_63 | Post-Resistance | RCOR3     | 55758  | 37 | 1 | 211451577 | 211451577 | Missense_Mutation | SNP | G | A | 44 | 458 | c.461G>A      | c.(460-462)GGT>GAT   | p.G154D        |



|        |                 |           |        |    |    |           |           |                   |     |   |   |    |     |                |                        |                |
|--------|-----------------|-----------|--------|----|----|-----------|-----------|-------------------|-----|---|---|----|-----|----------------|------------------------|----------------|
| Pat_63 | Post-Resistance | LPGAT1    | 9926   | 37 | 1  | 211956814 | 211956814 | Missense_Mutation | SNP | G | A | 14 | 176 | c.484C>T       | c.(484-486)CTT>TTT     | p.L162F        |
| Pat_63 | Post-Resistance | TP53BP2   | 7159   | 37 | 1  | 223983921 | 223983921 | Missense_Mutation | SNP | G | A | 27 | 222 | c.2320C>T      | c.(2320-2322)CCA>TCA   | p.P774S        |
| Pat_63 | Post-Resistance | TMEM63A   | 9725   | 37 | 1  | 226048620 | 226048620 | Missense_Mutation | SNP | C | T | 22 | 254 | c.1163G>A      | c.(1162-1164)AGG>AAG   | p.R388K        |
| Pat_63 | Post-Resistance | ITPKB     | 3707   | 37 | 1  | 226924475 | 226924475 | Nonsense_Mutation | SNP | G | A | 12 | 154 | c.685C>T       | c.(685-687)CAG>TAG     | p.Q229*        |
| Pat_63 | Post-Resistance | ITPKB     | 3707   | 37 | 1  | 226924849 | 226924849 | Missense_Mutation | SNP | C | T | 4  | 13  | c.311G>A       | c.(310-312)GGT>GAT     | p.G104D        |
| Pat_63 | Post-Resistance | OBSCN     | 84033  | 37 | 1  | 228462389 | 228462389 | Missense_Mutation | SNP | G | A | 5  | 28  | c.5800G>A      | c.(5800-5802)GAC>AAC   | p.D1934N       |
| Pat_63 | Post-Resistance | OBSCN     | 84033  | 37 | 1  | 228494809 | 228494809 | Missense_Mutation | SNP | C | T | 5  | 68  | c.12134C>T     | c.(12133-12135)GCG>GTC | p.A4045V       |
| Pat_63 | Post-Resistance | SIPA1L2   | 57568  | 37 | 1  | 232649767 | 232649767 | Missense_Mutation | SNP | C | T | 14 | 206 | c.1319G>A      | c.(1318-1320)TGC>TAC   | p.C440Y        |
| Pat_63 | Post-Resistance | IRF2BP2   | 359948 | 37 | 1  | 234745135 | 234745135 | Missense_Mutation | SNP | C | T | 4  | 115 | c.106G>A       | c.(106-108)GTC>ATC     | p.V36I         |
| Pat_63 | Post-Resistance | TBCE      | 6905   | 37 | 1  | 235605152 | 235605152 | Missense_Mutation | SNP | G | A | 10 | 95  | c.1294G>A      | c.(1294-1296)GAA>AAA   | p.E432K        |
| Pat_63 | Post-Resistance | MTR       | 4548   | 37 | 1  | 237026793 | 237026793 | Missense_Mutation | SNP | G | A | 11 | 140 | c.2344G>A      | c.(2344-2346)GGC>AGC   | p.G782S        |
| Pat_63 | Post-Resistance | OPN3      | 23596  | 37 | 1  | 241761158 | 241761158 | Missense_Mutation | SNP | C | T | 8  | 431 | c.835G>A       | c.(835-837)GTT>ATT     | p.V279I        |
| Pat_63 | Post-Resistance | C1orf101  | 257044 | 37 | 1  | 244627218 | 244627218 | Missense_Mutation | SNP | C | T | 38 | 277 | c.74C>T        | c.(73-75)ACT>ATT       | p.T25I         |
| Pat_63 | Post-Resistance | TFB2M     | 64216  | 37 | 1  | 246707935 | 246707935 | Missense_Mutation | SNP | G | A | 4  | 65  | c.907C>T       | c.(907-909)CCT>TCT     | p.P303S        |
| Pat_63 | Post-Resistance | AHCTF1    | 25909  | 37 | 1  | 247013364 | 247013364 | Missense_Mutation | SNP | G | A | 10 | 141 | c.5944C>T      | c.(5944-5946)CCA>TCA   | p.P1982S       |
| Pat_63 | Post-Resistance | OR11L1    | 391189 | 37 | 1  | 248004661 | 248004661 | Missense_Mutation | SNP | C | T | 26 | 186 | c.538G>A       | c.(538-540)GAC>AAC     | p.D180N        |
| Pat_63 | Post-Resistance | OR2L1P    | 26247  | 37 | 1  | 248154363 | 248154363 | Missense_Mutation | SNP | G | A | 30 | 177 | c.551G>A       | c.(550-552)CGA>CAA     | p.R184Q        |
| Pat_63 | Post-Resistance | SH3BP5L   | 80851  | 37 | 1  | 249110735 | 249110735 | Missense_Mutation | SNP | C | T | 14 | 124 | c.373G>A       | c.(373-375)GAG>AAG     | p.E125K        |
| Pat_63 | Post-Resistance | NET1      | 10276  | 37 | 10 | 5494819   | 5494819   | Splice_Site       | SNP | A | G | 6  | 120 | c.532_splice   | c.e6-2                 | p.A178_splice  |
| Pat_63 | Post-Resistance | PHYH      | 5264   | 37 | 10 | 13320333  | 13320333  | Nonsense_Mutation | SNP | G | A | 17 | 42  | c.985C>T       | c.(985-987)CGA>TGA     | p.R329*        |
| Pat_63 | Post-Resistance | CUBN      | 8029   | 37 | 10 | 16877012  | 16877012  | Splice_Site       | SNP | C | T | 12 | 39  | c.10362_splice | c.e64+1                | p.E3454_splice |
| Pat_63 | Post-Resistance | TRDMT1    | 1787   | 37 | 10 | 17210859  | 17210859  | Missense_Mutation | SNP | G | A | 13 | 34  | c.232C>T       | c.(232-234)CCC>TCC     | p.P78S         |
| Pat_63 | Post-Resistance | VIM       | 7431   | 37 | 10 | 17279238  | 17279238  | Missense_Mutation | SNP | G | A | 11 | 32  | c.1369G>A      | c.(1369-1371)GAA>AAA   | p.E457K        |
| Pat_63 | Post-Resistance | GPR158    | 57512  | 37 | 10 | 25464645  | 25464645  | Missense_Mutation | SNP | G | A | 16 | 38  | c.296G>A       | c.(295-297)TGC>TAC     | p.C99Y         |
| Pat_63 | Post-Resistance | KIF5B     | 3799   | 37 | 10 | 32326235  | 32326235  | Missense_Mutation | SNP | C | T | 8  | 51  | c.658G>A       | c.(658-660)GAA>AAA     | p.E220K        |
| Pat_63 | Post-Resistance | ANKRD30A  | 91074  | 37 | 10 | 37430754  | 37430754  | Missense_Mutation | SNP | T | C | 5  | 25  | c.761T>C       | c.(760-762)GTG>GCG     | p.V254A        |
| Pat_63 | Post-Resistance | EGR2      | 1959   | 37 | 10 | 64573491  | 64573491  | Missense_Mutation | SNP | C | T | 3  | 18  | c.907G>A       | c.(907-909)GCA>ACA     | p.A303T        |
| Pat_63 | Post-Resistance | PPP3CB    | 5532   | 37 | 10 | 75255581  | 75255581  | Missense_Mutation | SNP | C | T | 12 | 19  | c.67G>A        | c.(67-69)GCT>ACT       | p.A23T         |
| Pat_63 | Post-Resistance | SFTPA2    | 729238 | 37 | 10 | 81317129  | 81317129  | Missense_Mutation | SNP | G | A | 24 | 93  | c.583C>T       | c.(583-585)CCT>TCT     | p.P195S        |
| Pat_63 | Post-Resistance | GHITM     | 27069  | 37 | 10 | 85912061  | 85912061  | Missense_Mutation | SNP | G | A | 8  | 41  | c.995G>A       | c.(994-996)CGA>CAA     | p.R332Q        |
| Pat_63 | Post-Resistance | PI4K2A    | 55361  | 37 | 10 | 99344579  | 99344579  | Missense_Mutation | SNP | C | T | 4  | 84  | c.119C>T       | c.(118-120)CCC>CTC     | p.P40L         |
| Pat_63 | Post-Resistance | SEMA4G    | 57715  | 37 | 10 | 102739693 | 102739693 | Missense_Mutation | SNP | G | A | 33 | 93  | c.1072G>A      | c.(1072-1074)GGT>AGT   | p.G358S        |
| Pat_63 | Post-Resistance | GBF1      | 8729   | 37 | 10 | 104130485 | 104130485 | Nonsense_Mutation | SNP | G | A | 32 | 140 | c.3525G>A      | c.(3523-3525)TGG>TGA   | p.W1175*       |
| Pat_63 | Post-Resistance | NT5C2     | 22978  | 37 | 10 | 104857092 | 104857092 | Missense_Mutation | SNP | C | T | 29 | 117 | c.727G>A       | c.(727-729)GGG>AGG     | p.G243R        |
| Pat_63 | Post-Resistance | MXI1      | 4601   | 37 | 10 | 111987992 | 111987992 | Missense_Mutation | SNP | C | T | 8  | 115 | c.119C>T       | c.(118-120)CCC>CTC     | p.P40L         |
| Pat_63 | Post-Resistance | SMC3      | 9126   | 37 | 10 | 112337630 | 112337630 | Missense_Mutation | SNP | G | A | 5  | 41  | c.308G>A       | c.(307-309)GGT>GAT     | p.G103D        |
| Pat_63 | Post-Resistance | FAM160B1  | 57700  | 37 | 10 | 116602881 | 116602881 | Missense_Mutation | SNP | A | G | 34 | 90  | c.712A>G       | c.(712-714)AGC>GGC     | p.S238G        |
| Pat_63 | Post-Resistance | PRDX3     | 10935  | 37 | 10 | 120933248 | 120933248 | Splice_Site       | SNP | C | T | 29 | 72  | c.447_splice   | c.e4+1                 | p.K149_splice  |
| Pat_63 | Post-Resistance | SEC23IP   | 11196  | 37 | 10 | 121663758 | 121663758 | Missense_Mutation | SNP | C | T | 5  | 36  | c.1070C>T      | c.(1069-1071)CCC>CTC   | p.P357L        |
| Pat_63 | Post-Resistance | ZRANB1    | 54764  | 37 | 10 | 126631551 | 126631551 | Nonsense_Mutation | SNP | G | A | 12 | 74  | c.489G>A       | c.(487-489)TGG>TGA     | p.W163*        |
| Pat_63 | Post-Resistance | MGMT      | 4255   | 37 | 10 | 131334559 | 131334559 | Missense_Mutation | SNP | C | T | 12 | 46  | c.136C>T       | c.(136-138)CCT>TCT     | p.P46S         |
| Pat_63 | Post-Resistance | LRDD      | 55367  | 37 | 11 | 799383    | 799383    | Missense_Mutation | SNP | C | T | 6  | 125 | c.2657G>A      | c.(2656-2658)CGC>CAC   | p.R886H        |
| Pat_63 | Post-Resistance | LOC338651 | 338651 | 37 | 11 | 1619077   | 1619077   | Nonsense_Mutation | SNP | G | A | 67 | 347 | c.177G>A       | c.(175-177)TGG>TGA     | p.W59*         |
| Pat_63 | Post-Resistance | TSSC4     | 10078  | 37 | 11 | 2424477   | 2424477   | Missense_Mutation | SNP | C | T | 21 | 102 | c.614C>T       | c.(613-615)CCC>CTC     | p.P205L        |
| Pat_63 | Post-Resistance | OSBPL5    | 114879 | 37 | 11 | 3147774   | 3147774   | Missense_Mutation | SNP | C | T | 4  | 15  | c.148G>A       | c.(148-150)GAG>AAG     | p.E50K         |
| Pat_63 | Post-Resistance | OR5211    | 390037 | 37 | 11 | 4616214   | 4616214   | Missense_Mutation | SNP | C | T | 21 | 129 | c.946C>T       | c.(946-948)CTC>TTC     | p.L316F        |
| Pat_63 | Post-Resistance | OR52E4    | 390081 | 37 | 11 | 5906196   | 5906196   | Missense_Mutation | SNP | C | T | 17 | 181 | c.674C>T       | c.(673-675)GCT>GTT     | p.A225V        |

|        |                 |          |        |    |    |           |           |                   |     |   |   |    |     |           |                      |          |
|--------|-----------------|----------|--------|----|----|-----------|-----------|-------------------|-----|---|---|----|-----|-----------|----------------------|----------|
| Pat_63 | Post-Resistance | OR2D3    | 120775 | 37 | 11 | 6942752   | 6942752   | Missense_Mutation | SNP | G | A | 9  | 63  | c.520G>A  | c.(520-522)GTA>ATA   | p.V174I  |
| Pat_63 | Post-Resistance | NLRP14   | 338323 | 37 | 11 | 7060086   | 7060086   | Missense_Mutation | SNP | G | A | 8  | 40  | c.269G>A  | c.(268-270)AGA>AAA   | p.R90K   |
| Pat_63 | Post-Resistance | SCUBE2   | 57758  | 37 | 11 | 9051436   | 9051436   | Missense_Mutation | SNP | C | T | 26 | 136 | c.2411G>A | c.(2410-2412)JGT>TAT | p.C804Y  |
| Pat_63 | Post-Resistance | COPB1    | 1315   | 37 | 11 | 14480232  | 14480232  | Missense_Mutation | SNP | G | A | 18 | 111 | c.2648C>T | c.(2647-2649)GCC>GTC | p.A883V  |
| Pat_63 | Post-Resistance | PIK3C2A  | 5286   | 37 | 11 | 17121459  | 17121459  | Missense_Mutation | SNP | C | T | 22 | 77  | c.4066G>A | c.(4066-4068)GAT>AAT | p.D1356N |
| Pat_63 | Post-Resistance | LDHC     | 3948   | 37 | 11 | 18456416  | 18456416  | Missense_Mutation | SNP | C | T | 29 | 121 | c.548C>T  | c.(547-549)ACA>ATA   | p.T183I  |
| Pat_63 | Post-Resistance | DEPDC7   | 91614  | 37 | 11 | 33047402  | 33047402  | Missense_Mutation | SNP | C | T | 22 | 93  | c.271C>T  | c.(271-273)CCT>TCT   | p.P91S   |
| Pat_63 | Post-Resistance | HIPK3    | 10114  | 37 | 11 | 33375055  | 33375055  | Missense_Mutation | SNP | C | T | 52 | 222 | c.3589C>T | c.(3589-3591)CCT>TCT | p.P1197S |
| Pat_63 | Post-Resistance | ABTB2    | 25841  | 37 | 11 | 34378434  | 34378434  | Missense_Mutation | SNP | C | T | 8  | 20  | c.139G>A  | c.(139-141)GCC>ACC   | p.A47T   |
| Pat_63 | Post-Resistance | PRDM11   | 56981  | 37 | 11 | 45204465  | 45204465  | Missense_Mutation | SNP | C | T | 9  | 57  | c.379C>T  | c.(379-381)CCG>TCG   | p.P127S  |
| Pat_63 | Post-Resistance | PRDM11   | 56981  | 37 | 11 | 45204546  | 45204546  | Missense_Mutation | SNP | G | A | 14 | 47  | c.460G>A  | c.(460-462)GTC>ATC   | p.V154I  |
| Pat_63 | Post-Resistance | CRY2     | 1408   | 37 | 11 | 45892480  | 45892480  | Missense_Mutation | SNP | G | A | 3  | 27  | c.1700G>A | c.(1699-1701)AGT>AAT | p.S567N  |
| Pat_63 | Post-Resistance | ZNF408   | 79797  | 37 | 11 | 46726859  | 46726859  | Missense_Mutation | SNP | C | T | 12 | 40  | c.1609C>T | c.(1609-1611)CCT>TCT | p.P537S  |
| Pat_63 | Post-Resistance | LRP4     | 4038   | 37 | 11 | 46921498  | 46921498  | Missense_Mutation | SNP | G | A | 18 | 107 | c.346C>T  | c.(346-348)CCC>TCC   | p.P116S  |
| Pat_63 | Post-Resistance | ACP2     | 53     | 37 | 11 | 47269238  | 47269238  | Missense_Mutation | SNP | C | T | 20 | 105 | c.251G>A  | c.(250-252)CGG>CAG   | p.R84Q   |
| Pat_63 | Post-Resistance | MADD     | 8567   | 37 | 11 | 47297562  | 47297562  | Missense_Mutation | SNP | C | T | 5  | 48  | c.772C>T  | c.(772-774)CCA>TCA   | p.P258S  |
| Pat_63 | Post-Resistance | P2RX3    | 5024   | 37 | 11 | 57116162  | 57116162  | Missense_Mutation | SNP | C | T | 11 | 76  | c.547C>T  | c.(547-549)CTC>TTC   | p.L183F  |
| Pat_63 | Post-Resistance | SLC43A1  | 8501   | 37 | 11 | 57263580  | 57263580  | Missense_Mutation | SNP | C | T | 16 | 87  | c.616G>A  | c.(616-618)GCC>ACC   | p.A206T  |
| Pat_63 | Post-Resistance | OR5A2    | 219981 | 37 | 11 | 59189727  | 59189727  | Missense_Mutation | SNP | C | T | 20 | 37  | c.700G>A  | c.(700-702)GGT>AGT   | p.G234S  |
| Pat_63 | Post-Resistance | DAK      | 26007  | 37 | 11 | 61113947  | 61113947  | Missense_Mutation | SNP | G | A | 42 | 166 | c.1700G>A | c.(1699-1701)CGG>CAG | p.R567Q  |
| Pat_63 | Post-Resistance | UBXN1    | 51035  | 37 | 11 | 62446073  | 62446073  | Nonsense_Mutation | SNP | C | T | 15 | 67  | c.114G>A  | c.(112-114)TGG>TGA   | p.W38*   |
| Pat_63 | Post-Resistance | FLRT1    | 23769  | 37 | 11 | 63884605  | 63884605  | Missense_Mutation | SNP | C | T | 3  | 21  | c.866C>T  | c.(865-867)ACG>ATG   | p.T289M  |
| Pat_63 | Post-Resistance | ATG2A    | 23130  | 37 | 11 | 64678631  | 64678631  | Missense_Mutation | SNP | G | A | 7  | 44  | c.1345C>T | c.(1345-1347)CCT>TCT | p.P449S  |
| Pat_63 | Post-Resistance | SIPA1    | 6494   | 37 | 11 | 65408909  | 65408909  | Missense_Mutation | SNP | G | A | 20 | 64  | c.517G>A  | c.(517-519)GGT>AGT   | p.G173S  |
| Pat_63 | Post-Resistance | RELA     | 5970   | 37 | 11 | 65422003  | 65422003  | Missense_Mutation | SNP | G | A | 15 | 79  | c.1502C>T | c.(1501-1503)ACT>ATT | p.T501I  |
| Pat_63 | Post-Resistance | TMEM151A | 256472 | 37 | 11 | 66062037  | 66062037  | Missense_Mutation | SNP | C | T | 14 | 49  | c.320C>T  | c.(319-321)TCC>TTC   | p.S107F  |
| Pat_63 | Post-Resistance | ZDHHC24  | 254359 | 37 | 11 | 66311411  | 66311411  | Missense_Mutation | SNP | C | T | 4  | 92  | c.323G>A  | c.(322-324)GGA>GAA   | p.G108E  |
| Pat_63 | Post-Resistance | LRP5     | 4041   | 37 | 11 | 68115540  | 68115540  | Missense_Mutation | SNP | G | A | 33 | 121 | c.317G>A  | c.(316-318)GGC>GAC   | p.G106D  |
| Pat_63 | Post-Resistance | ANO1     | 55107  | 37 | 11 | 69933975  | 69933975  | Missense_Mutation | SNP | A | G | 3  | 14  | c.226A>G  | c.(226-228)AAC>GAC   | p.N76D   |
| Pat_63 | Post-Resistance | FADD     | 8772   | 37 | 11 | 70049812  | 70049812  | Missense_Mutation | SNP | G | A | 6  | 22  | c.247G>A  | c.(247-249)GAG>AAG   | p.E83K   |
| Pat_63 | Post-Resistance | DEFB108B | 245911 | 37 | 11 | 71548594  | 71548594  | Missense_Mutation | SNP | C | T | 16 | 98  | c.208C>T  | c.(208-210)CCC>TCC   | p.P70S   |
| Pat_63 | Post-Resistance | SLCO2B1  | 11309  | 37 | 11 | 74911414  | 74911414  | Missense_Mutation | SNP | C | T | 29 | 167 | c.1745C>T | c.(1744-1746)TCC>TTC | p.S582F  |
| Pat_63 | Post-Resistance | KLHL35   | 283212 | 37 | 11 | 75134816  | 75134816  | Missense_Mutation | SNP | C | T | 23 | 204 | c.823G>A  | c.(823-825)GGG>AGG   | p.G275R  |
| Pat_63 | Post-Resistance | TAF1D    | 79101  | 37 | 11 | 93471381  | 93471381  | Missense_Mutation | SNP | G | A | 17 | 120 | c.353C>T  | c.(352-354)TCA>TTA   | p.S118L  |
| Pat_63 | Post-Resistance | CASP1    | 834    | 37 | 11 | 104899988 | 104899988 | Missense_Mutation | SNP | G | C | 13 | 43  | c.869C>G  | c.(868-870)CCT>CGT   | p.P290R  |
| Pat_63 | Post-Resistance | ARHGAP20 | 57569  | 37 | 11 | 110450849 | 110450849 | Missense_Mutation | SNP | G | A | 4  | 102 | c.2821C>T | c.(2821-2823)CCA>TCA | p.P941S  |
| Pat_63 | Post-Resistance | C11orf53 | 341032 | 37 | 11 | 111156756 | 111156756 | Missense_Mutation | SNP | T | C | 16 | 66  | c.688T>C  | c.(688-690)TAT>CAT   | p.Y230H  |
| Pat_63 | Post-Resistance | DLAT     | 1737   | 37 | 11 | 111931864 | 111931864 | Missense_Mutation | SNP | G | A | 5  | 69  | c.1780G>A | c.(1780-1782)GAG>AAG | p.E594K  |
| Pat_63 | Post-Resistance | ZW10     | 9183   | 37 | 11 | 113644382 | 113644382 | Missense_Mutation | SNP | A | G | 16 | 54  | c.7T>C    | c.(7-9)TCG>CCG       | p.S3P    |
| Pat_63 | Post-Resistance | APOA4    | 337    | 37 | 11 | 116692023 | 116692023 | Missense_Mutation | SNP | C | T | 5  | 25  | c.751G>A  | c.(751-753)GAG>AAG   | p.E251K  |
| Pat_63 | Post-Resistance | ABCG4    | 64137  | 37 | 11 | 119025271 | 119025271 | Missense_Mutation | SNP | G | A | 3  | 15  | c.526G>A  | c.(526-528)GTG>ATG   | p.V176M  |
| Pat_63 | Post-Resistance | HSPA8    | 3312   | 37 | 11 | 122929825 | 122929825 | Missense_Mutation | SNP | G | A | 64 | 277 | c.1265C>T | c.(1264-1266)ACC>ATC | p.T422I  |
| Pat_63 | Post-Resistance | WNK1     | 65125  | 37 | 12 | 988814    | 988814    | Missense_Mutation | SNP | C | T | 15 | 258 | c.2449C>T | c.(2449-2451)CCA>TCA | p.P817S  |
| Pat_63 | Post-Resistance | WNK1     | 65125  | 37 | 12 | 994754    | 994754    | Missense_Mutation | SNP | C | T | 33 | 504 | c.4784C>T | c.(4783-4785)CCC>CTC | p.P1595L |
| Pat_63 | Post-Resistance | WNK1     | 65125  | 37 | 12 | 1003764   | 1003764   | Missense_Mutation | SNP | G | A | 11 | 219 | c.5546G>A | c.(5545-5547)AGT>AAT | p.S1849N |
| Pat_63 | Post-Resistance | ERC1     | 23085  | 37 | 12 | 1345990   | 1345990   | Missense_Mutation | SNP | G | A | 4  | 71  | c.2407G>A | c.(2407-2409)GAA>AAA | p.E803K  |
| Pat_63 | Post-Resistance | ITFG2    | 55846  | 37 | 12 | 2930008   | 2930008   | Missense_Mutation | SNP | C | T | 9  | 138 | c.665C>T  | c.(664-666)CCT>CTT   | p.P222L  |

|        |                 |          |        |    |    |           |           |                   |     |    |    |     |     |                |                        |                |
|--------|-----------------|----------|--------|----|----|-----------|-----------|-------------------|-----|----|----|-----|-----|----------------|------------------------|----------------|
| Pat_63 | Post-Resistance | FOXM1    | 2305   | 37 | 12 | 2977814   | 2977814   | Missense_Mutation | SNP | C  | T  | 30  | 412 | c.761G>A       | c.(760-762)AGG>AAG     | p.R254K        |
| Pat_63 | Post-Resistance | VWF      | 7450   | 37 | 12 | 6100984   | 6100984   | Splice_Site       | SNP | C  | T  | 7   | 103 | c.6798_splice  | c.e38+1                | p.Q2266_splice |
| Pat_63 | Post-Resistance | VWF      | 7450   | 37 | 12 | 6161827   | 6161827   | Missense_Mutation | SNP | G  | A  | 13  | 139 | c.2068C>T      | c.(2068-2070)CCC>TCC   | p.P690S        |
| Pat_63 | Post-Resistance | TAPBPL   | 55080  | 37 | 12 | 6566703   | 6566703   | Missense_Mutation | SNP | G  | A  | 15  | 122 | c.697G>A       | c.(697-699)GGC>AGC     | p.G233S        |
| Pat_63 | Post-Resistance | ACRBP    | 84519  | 37 | 12 | 6753756   | 6753756   | Missense_Mutation | SNP | G  | A  | 9   | 53  | c.491C>T       | c.(490-492)ACC>ATC     | p.T164I        |
| Pat_63 | Post-Resistance | ATN1     | 1822   | 37 | 12 | 7048025   | 7048025   | Missense_Mutation | SNP | G  | A  | 17  | 73  | c.2899G>A      | c.(2899-2901)GGC>AGC   | p.G967S        |
| Pat_63 | Post-Resistance | CD163L1  | 283316 | 37 | 12 | 7522160   | 7522160   | Missense_Mutation | SNP | C  | T  | 21  | 135 | c.3832G>A      | c.(3832-3834)GCC>ACC   | p.A1278T       |
| Pat_63 | Post-Resistance | MFAP5    | 8076   | 37 | 12 | 8800727   | 8800727   | Missense_Mutation | SNP | G  | A  | 6   | 58  | c.482C>T       | c.(481-483)CCC>CTC     | p.P161L        |
| Pat_63 | Post-Resistance | A2ML1    | 144568 | 37 | 12 | 9010549   | 9010549   | Missense_Mutation | SNP | G  | A  | 6   | 191 | c.3115G>A      | c.(3115-3117)GCG>ACG   | p.A1039T       |
| Pat_63 | Post-Resistance | CD69     | 969    | 37 | 12 | 9907229   | 9907229   | Missense_Mutation | SNP | G  | A  | 54  | 316 | c.445C>T       | c.(445-447)CCT>TCT     | p.P149S        |
| Pat_63 | Post-Resistance | TAS2R31  | 259290 | 37 | 12 | 11183789  | 11183789  | Missense_Mutation | SNP | G  | A  | 20  | 167 | c.146C>T       | c.(145-147)ACT>ATT     | p.T49I         |
| Pat_63 | Post-Resistance | PRB2     | 653247 | 37 | 12 | 11546300  | 11546300  | Missense_Mutation | SNP | G  | A  | 32  | 284 | c.712C>T       | c.(712-714)CCT>TCT     | p.P238S        |
| Pat_63 | Post-Resistance | SLCO1C1  | 53919  | 37 | 12 | 20903666  | 20903666  | Nonsense_Mutation | SNP | G  | A  | 14  | 100 | c.1856G>A      | c.(1855-1857)TGG>TAG   | p.W619*        |
| Pat_63 | Post-Resistance | LDHB     | 3945   | 37 | 12 | 21788541  | 21788541  | Missense_Mutation | SNP | C  | T  | 11  | 153 | c.940G>A       | c.(940-942)GTT>ATT     | p.V314I        |
| Pat_63 | Post-Resistance | KCNJ8    | 3764   | 37 | 12 | 21926460  | 21926460  | Missense_Mutation | SNP | G  | A  | 10  | 41  | c.91C>T        | c.(91-93)CTC>TTC       | p.L31F         |
| Pat_63 | Post-Resistance | SOX5     | 6660   | 37 | 12 | 23728637  | 23728637  | Missense_Mutation | SNP | G  | A  | 25  | 128 | c.1300C>T      | c.(1300-1302)CCA>TCA   | p.P434S        |
| Pat_63 | Post-Resistance | RASSF8   | 11228  | 37 | 12 | 26220590  | 26220590  | Missense_Mutation | SNP | C  | T  | 4   | 116 | c.1082C>T      | c.(1081-1083)ACC>ATC   | p.T361I        |
| Pat_63 | Post-Resistance | ITPR2    | 3709   | 37 | 12 | 26540435  | 26540435  | Missense_Mutation | SNP | C  | T  | 5   | 129 | c.7789G>A      | c.(7789-7791)GTC>ATC   | p.V2597I       |
| Pat_63 | Post-Resistance | ITPR2    | 3709   | 37 | 12 | 26553089  | 26553089  | Missense_Mutation | SNP | C  | T  | 9   | 394 | c.7502G>A      | c.(7501-7503)GGG>GAG   | p.G2501E       |
| Pat_63 | Post-Resistance | C12orf35 | 55196  | 37 | 12 | 32137253  | 32137253  | Missense_Mutation | SNP | G  | A  | 10  | 61  | c.3364G>A      | c.(3364-3366)GAT>AAT   | p.D1122N       |
| Pat_63 | Post-Resistance | SYT10    | 341359 | 37 | 12 | 33592329  | 33592330  | Missense_Mutation | DNP | GC | AT | 7   | 97  | c.128_129GC>AT | c.(127-129)GGC>GAT     | p.G43D         |
| Pat_63 | Post-Resistance | PDZRN4   | 29951  | 37 | 12 | 41966989  | 41966989  | Missense_Mutation | SNP | G  | A  | 37  | 129 | c.1811G>A      | c.(1810-1812)AGC>AAC   | p.S604N        |
| Pat_63 | Post-Resistance | MLL2     | 8085   | 37 | 12 | 49415914  | 49415914  | Missense_Mutation | SNP | G  | A  | 15  | 377 | c.16433C>T     | c.(16432-16434)GCC>GTC | p.A5478V       |
| Pat_63 | Post-Resistance | TROAP    | 10024  | 37 | 12 | 49724535  | 49724535  | Missense_Mutation | SNP | G  | A  | 6   | 29  | c.1907G>A      | c.(1906-1908)TGC>TAC   | p.C636Y        |
| Pat_63 | Post-Resistance | KRT6A    | 3853   | 37 | 12 | 52881586  | 52881586  | Missense_Mutation | SNP | C  | T  | 8   | 40  | c.1613G>A      | c.(1612-1614)GGC>GAC   | p.G538D        |
| Pat_63 | Post-Resistance | KRT3     | 3850   | 37 | 12 | 53185132  | 53185132  | Nonsense_Mutation | SNP | G  | A  | 10  | 36  | c.1393C>T      | c.(1393-1395)CAA>TAA   | p.Q465*        |
| Pat_63 | Post-Resistance | SOAT2    | 8435   | 37 | 12 | 53499774  | 53499774  | Missense_Mutation | SNP | C  | T  | 37  | 49  | c.419C>T       | c.(418-420)GCC>GTC     | p.A140V        |
| Pat_63 | Post-Resistance | AAAS     | 8086   | 37 | 12 | 53709555  | 53709555  | Missense_Mutation | SNP | C  | T  | 9   | 18  | c.263G>A       | c.(262-264)GGC>GAC     | p.G88D         |
| Pat_63 | Post-Resistance | AMHR2    | 269    | 37 | 12 | 53819671  | 53819671  | Missense_Mutation | SNP | G  | A  | 6   | 32  | c.820G>A       | c.(820-822)GGG>AGG     | p.G274R        |
| Pat_63 | Post-Resistance | TARBP2   | 6895   | 37 | 12 | 53899601  | 53899601  | Missense_Mutation | SNP | G  | A  | 18  | 32  | c.910G>A       | c.(910-912)GAG>AAG     | p.E304K        |
| Pat_63 | Post-Resistance | CALCOCO1 | 57658  | 37 | 12 | 54115369  | 54115369  | Missense_Mutation | SNP | C  | T  | 125 | 299 | c.640G>A       | c.(640-642)GAA>AAA     | p.E214K        |
| Pat_63 | Post-Resistance | HOXC13   | 3229   | 37 | 12 | 54332778  | 54332778  | Missense_Mutation | SNP | G  | A  | 2   | 3   | c.88G>A        | c.(88-90)GGC>AGC       | p.G30S         |
| Pat_63 | Post-Resistance | ERBB3    | 2065   | 37 | 12 | 56492545  | 56492545  | Missense_Mutation | SNP | G  | A  | 9   | 243 | c.2695G>A      | c.(2695-2697)GTG>ATG   | p.V899M        |
| Pat_63 | Post-Resistance | MIP      | 4284   | 37 | 12 | 56846917  | 56846917  | Missense_Mutation | SNP | C  | T  | 17  | 50  | c.545G>A       | c.(544-546)GGC>GAC     | p.G182D        |
| Pat_63 | Post-Resistance | STAC3    | 246329 | 37 | 12 | 57642515  | 57642515  | Missense_Mutation | SNP | C  | T  | 15  | 660 | c.406G>A       | c.(406-408)GAA>AAA     | p.E136K        |
| Pat_63 | Post-Resistance | C12orf26 | 84190  | 37 | 12 | 82796774  | 82796774  | Missense_Mutation | SNP | G  | A  | 11  | 35  | c.1144G>A      | c.(1144-1146)GTG>ATG   | p.V382M        |
| Pat_63 | Post-Resistance | APAF1    | 317    | 37 | 12 | 99119296  | 99119296  | Missense_Mutation | SNP | G  | A  | 28  | 147 | c.3434G>A      | c.(3433-3435)GGA>GAA   | p.G1145E       |
| Pat_63 | Post-Resistance | UTP20    | 27340  | 37 | 12 | 101750455 | 101750455 | Nonsense_Mutation | SNP | G  | T  | 6   | 21  | c.5518G>T      | c.(5518-5520)GAA>TAA   | p.E1840*       |
| Pat_63 | Post-Resistance | PWP1     | 11137  | 37 | 12 | 108082571 | 108082571 | Missense_Mutation | SNP | G  | A  | 4   | 19  | c.311G>A       | c.(310-312)GGT>GAT     | p.G104D        |
| Pat_63 | Post-Resistance | SELPLG   | 6404   | 37 | 12 | 109017693 | 109017693 | Missense_Mutation | SNP | C  | T  | 7   | 121 | c.391G>A       | c.(391-393)GCA>ACA     | p.A131T        |
| Pat_63 | Post-Resistance | RAD9B    | 144715 | 37 | 12 | 110960110 | 110960110 | Missense_Mutation | SNP | A  | T  | 6   | 18  | c.1019A>T      | c.(1018-1020)AAC>ATC   | p.N340I        |
| Pat_63 | Post-Resistance | PPP1CC   | 5501   | 37 | 12 | 111159983 | 111159983 | Missense_Mutation | SNP | C  | T  | 11  | 83  | c.839G>A       | c.(838-840)GGT>GAT     | p.G280D        |
| Pat_63 | Post-Resistance | OAS1     | 4938   | 37 | 12 | 113346593 | 113346593 | Missense_Mutation | SNP | G  | A  | 29  | 84  | c.433G>A       | c.(433-435)GTG>ATG     | p.V145M        |
| Pat_63 | Post-Resistance | CAMKK2   | 10645  | 37 | 12 | 121698149 | 121698149 | Missense_Mutation | SNP | C  | T  | 3   | 10  | c.769G>A       | c.(769-771)GAC>AAC     | p.D257N        |
| Pat_63 | Post-Resistance | RIMBP2   | 23504  | 37 | 12 | 130884256 | 130884256 | Nonsense_Mutation | SNP | G  | A  | 4   | 78  | c.3100C>T      | c.(3100-3102)CAA>TAA   | p.Q1034*       |
| Pat_63 | Post-Resistance | RIMBP2   | 23504  | 37 | 12 | 130929756 | 130929756 | Missense_Mutation | SNP | C  | T  | 9   | 38  | c.589G>A       | c.(589-591)GGA>AGA     | p.G197R        |
| Pat_63 | Post-Resistance | EFHA1    | 221154 | 37 | 13 | 22141013  | 22141013  | Missense_Mutation | SNP | G  | A  | 4   | 35  | c.281C>T       | c.(280-282)TCT>TTT     | p.S94F         |

|        |                 |           |        |    |    |           |           |                   |     |    |    |    |     |                |                        |               |
|--------|-----------------|-----------|--------|----|----|-----------|-----------|-------------------|-----|----|----|----|-----|----------------|------------------------|---------------|
| Pat_63 | Post-Resistance | SACS      | 26278  | 37 | 13 | 23930068  | 23930068  | Missense_Mutation | SNP | C  | T  | 14 | 58  | c.683G>A       | c.(682-684)GCG>GAC     | p.G228D       |
| Pat_63 | Post-Resistance | STARD13   | 90627  | 37 | 13 | 33692388  | 33692388  | Missense_Mutation | SNP | G  | A  | 21 | 129 | c.2095C>T      | c.(2095-2097)CGC>TGC   | p.R699C       |
| Pat_63 | Post-Resistance | KBTBD7    | 84078  | 37 | 13 | 41766524  | 41766524  | Missense_Mutation | SNP | C  | T  | 7  | 261 | c.1870G>A      | c.(1870-1872)GAA>AAA   | p.E624K       |
| Pat_63 | Post-Resistance | AKAP11    | 11215  | 37 | 13 | 42872909  | 42872909  | Missense_Mutation | SNP | G  | A  | 8  | 100 | c.592G>A       | c.(592-594)GAG>AAG     | p.E198K       |
| Pat_63 | Post-Resistance | NUFIP1    | 26747  | 37 | 13 | 45533675  | 45533675  | Missense_Mutation | SNP | C  | T  | 23 | 188 | c.862G>A       | c.(862-864)GCA>ACA     | p.A288T       |
| Pat_63 | Post-Resistance | ZC3H13    | 23091  | 37 | 13 | 46544092  | 46544092  | Missense_Mutation | SNP | G  | A  | 4  | 82  | c.2587C>T      | c.(2587-2589)CTC>TTC   | p.L863F       |
| Pat_63 | Post-Resistance | ZC3H13    | 23091  | 37 | 13 | 46619557  | 46619557  | Missense_Mutation | SNP | C  | T  | 70 | 389 | c.86G>A        | c.(85-87)AGG>AAG       | p.R29K        |
| Pat_63 | Post-Resistance | ITM2B     | 9445   | 37 | 13 | 48830352  | 48830352  | Missense_Mutation | SNP | G  | A  | 14 | 80  | c.286G>A       | c.(286-288)GAT>AAT     | p.D96N        |
| Pat_63 | Post-Resistance | PIBF1     | 10464  | 37 | 13 | 73369696  | 73369696  | Splice_Site       | SNP | G  | A  | 6  | 53  | c.552_splice   | c.e4+1                 | p.S184_splice |
| Pat_63 | Post-Resistance | MYCBP2    | 23077  | 37 | 13 | 77671760  | 77671760  | Missense_Mutation | SNP | C  | T  | 14 | 63  | c.9415G>A      | c.(9415-9417)GCT>ACT   | p.A3139T      |
| Pat_63 | Post-Resistance | MYCBP2    | 23077  | 37 | 13 | 77699555  | 77699555  | Missense_Mutation | SNP | C  | T  | 63 | 450 | c.7819G>A      | c.(7819-7821)GTA>ATA   | p.V2607I      |
| Pat_63 | Post-Resistance | ZIC5      | 85416  | 37 | 13 | 100617916 | 100617916 | Missense_Mutation | SNP | C  | A  | 7  | 192 | c.1707G>T      | c.(1705-1707)AGG>AGT   | p.R569S       |
| Pat_63 | Post-Resistance | ATP11A    | 23250  | 37 | 13 | 113473682 | 113473682 | Missense_Mutation | SNP | C  | T  | 32 | 142 | c.635C>T       | c.(634-636)GCC>GTC     | p.A212V       |
| Pat_63 | Post-Resistance | OR11H4    | 390442 | 37 | 14 | 20711678  | 20711678  | Missense_Mutation | SNP | G  | A  | 42 | 201 | c.728G>A       | c.(727-729)GGT>GAT     | p.G243D       |
| Pat_63 | Post-Resistance | PARP2     | 10038  | 37 | 14 | 20819205  | 20819205  | Splice_Site       | SNP | G  | A  | 6  | 58  | c.461_splice   | c.e6-1                 | p.V154_splice |
| Pat_63 | Post-Resistance | APEX1     | 328    | 37 | 14 | 20924219  | 20924219  | Missense_Mutation | SNP | G  | C  | 3  | 106 | c.205G>C       | c.(205-207)GTG>CTG     | p.V69L        |
| Pat_63 | Post-Resistance | HNRNPC    | 3183   | 37 | 14 | 21699216  | 21699216  | Missense_Mutation | SNP | G  | A  | 4  | 116 | c.257C>T       | c.(256-258)GCA>GTA     | p.A86V        |
| Pat_63 | Post-Resistance | MYH7      | 4625   | 37 | 14 | 23893358  | 23893358  | Missense_Mutation | SNP | C  | T  | 5  | 37  | c.2680G>A      | c.(2680-2682)GAA>AAA   | p.E894K       |
| Pat_63 | Post-Resistance | MYH7      | 4625   | 37 | 14 | 23898454  | 23898454  | Missense_Mutation | SNP | C  | T  | 41 | 220 | c.1241G>A      | c.(1240-1242)GGG>GAG   | p.G414E       |
| Pat_63 | Post-Resistance | FITM1     | 161247 | 37 | 14 | 24601766  | 24601766  | Missense_Mutation | SNP | G  | A  | 3  | 60  | c.613G>A       | c.(613-615)GCC>ACC     | p.A205T       |
| Pat_63 | Post-Resistance | PSME2     | 5721   | 37 | 14 | 24614646  | 24614646  | Missense_Mutation | SNP | G  | A  | 38 | 198 | c.173C>T       | c.(172-174)ACT>ATT     | p.T58I        |
| Pat_63 | Post-Resistance | RNF31     | 55072  | 37 | 14 | 24621031  | 24621031  | Missense_Mutation | SNP | C  | T  | 48 | 126 | c.1960C>T      | c.(1960-1962)CCC>TCC   | p.P654S       |
| Pat_63 | Post-Resistance | GMPR2     | 51292  | 37 | 14 | 24706276  | 24706276  | Splice_Site       | SNP | G  | A  | 32 | 174 | c.466_splice   | c.e6-1                 | p.A156_splice |
| Pat_63 | Post-Resistance | CIDEB     | 27141  | 37 | 14 | 24775705  | 24775705  | Missense_Mutation | SNP | C  | T  | 63 | 246 | c.211G>A       | c.(211-213)GGA>AGA     | p.G71R        |
| Pat_63 | Post-Resistance | LTB4R2    | 56413  | 37 | 14 | 24779980  | 24779980  | Missense_Mutation | SNP | G  | A  | 8  | 38  | c.203G>A       | c.(202-204)GGC>GAC     | p.G68D        |
| Pat_63 | Post-Resistance | SCFD1     | 23256  | 37 | 14 | 31169402  | 31169402  | Missense_Mutation | SNP | C  | T  | 15 | 97  | c.1348C>T      | c.(1348-1350)CCA>TCA   | p.P450S       |
| Pat_63 | Post-Resistance | HEATR5A   | 25938  | 37 | 14 | 31782186  | 31782186  | Missense_Mutation | SNP | G  | A  | 6  | 14  | c.3550C>T      | c.(3550-3552)CTT>TTT   | p.L1184F      |
| Pat_63 | Post-Resistance | SEC23A    | 10484  | 37 | 14 | 39565220  | 39565220  | Missense_Mutation | SNP | C  | T  | 27 | 199 | c.103G>A       | c.(103-105)GTT>ATT     | p.V35I        |
| Pat_63 | Post-Resistance | PNN       | 5411   | 37 | 14 | 39645283  | 39645283  | Missense_Mutation | SNP | C  | T  | 8  | 58  | c.115C>T       | c.(115-117)CCC>TCC     | p.P39S        |
| Pat_63 | Post-Resistance | FSCB      | 84075  | 37 | 14 | 44975229  | 44975229  | Missense_Mutation | SNP | G  | A  | 6  | 28  | c.962C>T       | c.(961-963)GCT>GTT     | p.A321V       |
| Pat_63 | Post-Resistance | RPL10L    | 140801 | 37 | 14 | 47120617  | 47120617  | Missense_Mutation | SNP | G  | A  | 17 | 81  | c.323C>T       | c.(322-324)GCT>GTT     | p.A108V       |
| Pat_63 | Post-Resistance | CDKL1     | 8814   | 37 | 14 | 50802857  | 50802857  | Missense_Mutation | SNP | C  | T  | 4  | 26  | c.2836G>A      | c.(2836-2838)GTA>ATA   | p.V946I       |
| Pat_63 | Post-Resistance | KTN1      | 3895   | 37 | 14 | 56146298  | 56146298  | Missense_Mutation | SNP | G  | A  | 8  | 54  | c.3964G>A      | c.(3964-3966)GAG>AAG   | p.E1322K      |
| Pat_63 | Post-Resistance | KIAA0586  | 9786   | 37 | 14 | 58934459  | 58934459  | Missense_Mutation | SNP | C  | T  | 11 | 310 | c.2033C>T      | c.(2032-2034)ACC>ATC   | p.T678I       |
| Pat_63 | Post-Resistance | DAAM1     | 23002  | 37 | 14 | 59798636  | 59798636  | Nonsense_Mutation | SNP | C  | T  | 13 | 85  | c.1966C>T      | c.(1966-1968)CAG>TAG   | p.Q656*       |
| Pat_63 | Post-Resistance | PPP2R5E   | 5529   | 37 | 14 | 63856340  | 63856340  | Missense_Mutation | SNP | G  | A  | 4  | 41  | c.1064C>T      | c.(1063-1065)CCC>CTC   | p.P355L       |
| Pat_63 | Post-Resistance | SYNE2     | 23224  | 37 | 14 | 64493369  | 64493369  | Missense_Mutation | SNP | G  | A  | 8  | 26  | c.6325G>A      | c.(6325-6327)GCC>ACC   | p.A2109T      |
| Pat_63 | Post-Resistance | SYNE2     | 23224  | 37 | 14 | 64686082  | 64686082  | Missense_Mutation | SNP | C  | T  | 9  | 54  | c.19745C>T     | c.(19744-19746)CCT>CTT | p.P6582L      |
| Pat_63 | Post-Resistance | AKAP5     | 9495   | 37 | 14 | 64935848  | 64935848  | Nonsense_Mutation | SNP | C  | T  | 36 | 205 | c.736C>T       | c.(736-738)CAA>TAA     | p.Q246*       |
| Pat_63 | Post-Resistance | EXD2      | 55218  | 37 | 14 | 69707693  | 69707693  | Missense_Mutation | SNP | G  | A  | 4  | 41  | c.1367G>A      | c.(1366-1368)CGC>CAC   | p.R456H       |
| Pat_63 | Post-Resistance | ACOT2     | 10965  | 37 | 14 | 74040241  | 74040241  | Missense_Mutation | SNP | C  | T  | 26 | 97  | c.793C>T       | c.(793-795)CTC>TTC     | p.L265F       |
| Pat_63 | Post-Resistance | ZNF410    | 57862  | 37 | 14 | 74390131  | 74390131  | Missense_Mutation | SNP | C  | T  | 13 | 78  | c.1304C>T      | c.(1303-1305)TCT>TTT   | p.S435F       |
| Pat_63 | Post-Resistance | FLVCR2    | 55640  | 37 | 14 | 76091096  | 76091096  | Splice_Site       | SNP | G  | A  | 6  | 51  | c.952_splice   | c.e3+1                 | p.G318_splice |
| Pat_63 | Post-Resistance | C14orf118 | 55668  | 37 | 14 | 76668051  | 76668051  | Nonsense_Mutation | SNP | G  | T  | 21 | 61  | c.1306G>T      | c.(1306-1308)GAG>TAG   | p.E436*       |
| Pat_63 | Post-Resistance | SNW1      | 22938  | 37 | 14 | 78217816  | 78217817  | Missense_Mutation | DNP | CC | AA | 3  | 27  | c.175_176GG>TT | c.(175-177)GGA>TTA     | p.G59L        |
| Pat_63 | Post-Resistance | ADCK1     | 57143  | 37 | 14 | 78365567  | 78365567  | Missense_Mutation | SNP | T  | C  | 17 | 80  | c.707T>C       | c.(706-708)GTG>GCG     | p.V236A       |
| Pat_63 | Post-Resistance | NRXN3     | 9369   | 37 | 14 | 79933620  | 79933620  | Missense_Mutation | SNP | G  | A  | 12 | 79  | c.2200G>A      | c.(2200-2202)GCC>ACC   | p.A734T       |

|        |                 |           |        |    |    |           |           |                   |     |   |   |    |     |               |                      |               |
|--------|-----------------|-----------|--------|----|----|-----------|-----------|-------------------|-----|---|---|----|-----|---------------|----------------------|---------------|
| Pat_63 | Post-Resistance | C14orf145 | 145508 | 37 | 14 | 81380683  | 81380683  | Missense_Mutation | SNP | C | T | 24 | 155 | c.217G>A      | c.(217-219)GCG>ACG   | p.A73T        |
| Pat_63 | Post-Resistance | FLRT2     | 23768  | 37 | 14 | 86089009  | 86089009  | Missense_Mutation | SNP | C | T | 32 | 178 | c.1151C>T     | c.(1150-1152)CCC>CTC | p.P384L       |
| Pat_63 | Post-Resistance | GALC      | 2581   | 37 | 14 | 88414137  | 88414137  | Missense_Mutation | SNP | C | T | 19 | 131 | c.1424G>A     | c.(1423-1425)GGC>GAC | p.G475D       |
| Pat_63 | Post-Resistance | PTPN21    | 11099  | 37 | 14 | 88946502  | 88946502  | Missense_Mutation | SNP | C | T | 6  | 33  | c.1273G>A     | c.(1273-1275)GAC>AAC | p.D425N       |
| Pat_63 | Post-Resistance | PTPN21    | 11099  | 37 | 14 | 88963546  | 88963546  | Splice_Site       | SNP | C | T | 4  | 45  | c.852_splice  | c.e9+1               | p.T284_splice |
| Pat_63 | Post-Resistance | TTC7B     | 145567 | 37 | 14 | 91110419  | 91110419  | Missense_Mutation | SNP | G | A | 36 | 256 | c.1724C>T     | c.(1723-1725)GCC>GTC | p.A575V       |
| Pat_63 | Post-Resistance | SERPINA12 | 145264 | 37 | 14 | 94964729  | 94964729  | Missense_Mutation | SNP | G | T | 13 | 54  | c.6C>A        | c.(4-6)AAC>AAA       | p.N2K         |
| Pat_63 | Post-Resistance | AK7       | 122481 | 37 | 14 | 96953362  | 96953362  | Missense_Mutation | SNP | A | G | 14 | 83  | c.2102A>G     | c.(2101-2103)AAC>AGC | p.N701S       |
| Pat_63 | Post-Resistance | MARK3     | 4140   | 37 | 14 | 103931956 | 103931956 | Missense_Mutation | SNP | T | A | 18 | 87  | c.603T>A      | c.(601-603)AAT>AAA   | p.N201K       |
| Pat_63 | Post-Resistance | KLC1      | 3831   | 37 | 14 | 104129134 | 104129134 | Missense_Mutation | SNP | T | C | 4  | 19  | c.667T>C      | c.(667-669)TAC>CAC   | p.Y223H       |
| Pat_63 | Post-Resistance | CRIP2     | 1397   | 37 | 14 | 105945540 | 105945540 | Missense_Mutation | SNP | C | T | 24 | 64  | c.485C>T      | c.(484-486)CCC>CTC   | p.P162L       |
| Pat_63 | Post-Resistance | NIPA1     | 123606 | 37 | 15 | 23052593  | 23052593  | Splice_Site       | SNP | A | G | 9  | 233 | c.478_splice  | c.e4+1               | p.V160_splice |
| Pat_63 | Post-Resistance | MTMR10    | 54893  | 37 | 15 | 31283658  | 31283658  | Missense_Mutation | SNP | G | A | 13 | 72  | c.52C>T       | c.(52-54)CCG>TCG     | p.P18S        |
| Pat_63 | Post-Resistance | OTUD7A    | 161725 | 37 | 15 | 31795984  | 31795984  | Missense_Mutation | SNP | C | T | 8  | 71  | c.910G>A      | c.(910-912)GAA>AAA   | p.E304K       |
| Pat_63 | Post-Resistance | BAHD1     | 22893  | 37 | 15 | 40751819  | 40751819  | Missense_Mutation | SNP | G | A | 9  | 100 | c.1156G>A     | c.(1156-1158)GAG>AAG | p.E386K       |
| Pat_63 | Post-Resistance | BAHD1     | 22893  | 37 | 15 | 40758235  | 40758235  | Missense_Mutation | SNP | G | A | 33 | 297 | c.2249G>A     | c.(2248-2250)CGC>CAC | p.R750H       |
| Pat_63 | Post-Resistance | MGA       | 23269  | 37 | 15 | 41961589  | 41961589  | Missense_Mutation | SNP | G | A | 60 | 372 | c.497G>A      | c.(496-498)GGT>GAT   | p.G166D       |
| Pat_63 | Post-Resistance | EHD4      | 30844  | 37 | 15 | 42211781  | 42211781  | Missense_Mutation | SNP | C | T | 17 | 147 | c.551G>A      | c.(550-552)AGG>AAG   | p.R184K       |
| Pat_63 | Post-Resistance | TRPM7     | 54822  | 37 | 15 | 50866603  | 50866603  | Missense_Mutation | SNP | C | T | 7  | 45  | c.5176G>A     | c.(5176-5178)GAA>AAA | p.E1726K      |
| Pat_63 | Post-Resistance | CYP19A1   | 1588   | 37 | 15 | 51519975  | 51519975  | Splice_Site       | SNP | C | T | 14 | 79  | c.451_splice  | c.e5+1               | p.A151_splice |
| Pat_63 | Post-Resistance | LEO1      | 123169 | 37 | 15 | 52245461  | 52245461  | Splice_Site       | SNP | C | T | 10 | 72  | c.1341_splice | c.e8-1               | p.S447_splice |
| Pat_63 | Post-Resistance | FAM63B    | 54629  | 37 | 15 | 59102428  | 59102428  | Splice_Site       | SNP | G | A | 24 | 149 | c.964_splice  | c.e4-1               | p.N322_splice |
| Pat_63 | Post-Resistance | SLTM      | 79811  | 37 | 15 | 59179448  | 59179448  | Missense_Mutation | SNP | C | T | 13 | 99  | c.2667G>A     | c.(2665-2667)ATG>ATA | p.M889I       |
| Pat_63 | Post-Resistance | MYO1E     | 4643   | 37 | 15 | 59430537  | 59430537  | Missense_Mutation | SNP | G | A | 24 | 142 | c.3110C>T     | c.(3109-3111)CCC>CTC | p.P1037L      |
| Pat_63 | Post-Resistance | SNX1      | 6642   | 37 | 15 | 64418401  | 64418401  | Missense_Mutation | SNP | C | T | 15 | 88  | c.634C>T      | c.(634-636)CCG>TCG   | p.P212S       |
| Pat_63 | Post-Resistance | CILP      | 8483   | 37 | 15 | 65490577  | 65490577  | Missense_Mutation | SNP | C | T | 21 | 89  | c.2047G>A     | c.(2047-2049)GAC>AAC | p.D683N       |
| Pat_63 | Post-Resistance | C15orf44  | 81556  | 37 | 15 | 65892267  | 65892267  | Missense_Mutation | SNP | C | T | 15 | 58  | c.331G>A      | c.(331-333)GTT>ATT   | p.V111I       |
| Pat_63 | Post-Resistance | SMAD6     | 4091   | 37 | 15 | 67073470  | 67073470  | Missense_Mutation | SNP | G | A | 7  | 17  | c.1088G>A     | c.(1087-1089)GGC>GAC | p.G363D       |
| Pat_63 | Post-Resistance | LBXCOR1   | 390598 | 37 | 15 | 68119394  | 68119394  | Missense_Mutation | SNP | G | A | 6  | 28  | c.1096G>A     | c.(1096-1098)GAC>AAC | p.D366N       |
| Pat_63 | Post-Resistance | FEM1B     | 10116  | 37 | 15 | 68582046  | 68582046  | Missense_Mutation | SNP | C | T | 17 | 135 | c.350C>T      | c.(349-351)ACC>ATC   | p.T117I       |
| Pat_63 | Post-Resistance | MYO9A     | 4649   | 37 | 15 | 72142435  | 72142435  | Missense_Mutation | SNP | G | A | 28 | 177 | c.6655C>T     | c.(6655-6657)CGC>TGC | p.R2219C      |
| Pat_63 | Post-Resistance | PARP6     | 56965  | 37 | 15 | 72543552  | 72543552  | Missense_Mutation | SNP | C | T | 12 | 128 | c.1304G>A     | c.(1303-1305)AGC>AAC | p.S435N       |
| Pat_63 | Post-Resistance | CCDC33    | 80125  | 37 | 15 | 74623340  | 74623340  | Missense_Mutation | SNP | G | A | 3  | 14  | c.1564G>A     | c.(1564-1566)GAG>AAG | p.E522K       |
| Pat_63 | Post-Resistance | ARID3B    | 10620  | 37 | 15 | 74887991  | 74887991  | Missense_Mutation | SNP | C | T | 9  | 27  | c.1562C>T     | c.(1561-1563)ACG>ATG | p.T521M       |
| Pat_63 | Post-Resistance | EDC3      | 80153  | 37 | 15 | 74967464  | 74967464  | Missense_Mutation | SNP | A | C | 88 | 470 | c.2T>G        | c.(1-3)ATG>AGG       | p.M1R         |
| Pat_63 | Post-Resistance | COX5A     | 9377   | 37 | 15 | 75216038  | 75216038  | Missense_Mutation | SNP | C | T | 7  | 47  | c.413G>A      | c.(412-414)GGA>GAA   | p.G138E       |
| Pat_63 | Post-Resistance | NEIL1     | 79661  | 37 | 15 | 75647142  | 75647142  | Missense_Mutation | SNP | G | A | 4  | 44  | c.1085G>A     | c.(1084-1086)GGG>GAG | p.G362E       |
| Pat_63 | Post-Resistance | MAN2C1    | 4123   | 37 | 15 | 75654757  | 75654757  | Missense_Mutation | SNP | C | T | 11 | 56  | c.935G>A      | c.(934-936)GGC>GAC   | p.G312D       |
| Pat_63 | Post-Resistance | SCAPER    | 49855  | 37 | 15 | 76726500  | 76726500  | Missense_Mutation | SNP | G | A | 4  | 85  | c.3230C>T     | c.(3229-3231)ACC>ATC | p.T1077I      |
| Pat_63 | Post-Resistance | CIB2      | 10518  | 37 | 15 | 78398202  | 78398202  | Missense_Mutation | SNP | C | T | 24 | 89  | c.421G>A      | c.(421-423)GAT>AAT   | p.D141N       |
| Pat_63 | Post-Resistance | RASGRF1   | 5923   | 37 | 15 | 79272981  | 79272981  | Missense_Mutation | SNP | G | A | 12 | 50  | c.3523C>T     | c.(3523-3525)CTC>TTC | p.L1175F      |
| Pat_63 | Post-Resistance | FAH       | 2184   | 37 | 15 | 80460462  | 80460462  | Missense_Mutation | SNP | G | A | 15 | 58  | c.524G>A      | c.(523-525)AGG>AAG   | p.R175K       |
| Pat_63 | Post-Resistance | MESDC2    | 23184  | 37 | 15 | 81274441  | 81274441  | Missense_Mutation | SNP | C | T | 16 | 140 | c.296G>A      | c.(295-297)AGC>AAC   | p.S99N        |
| Pat_63 | Post-Resistance | ZSCAN2    | 54993  | 37 | 15 | 85164576  | 85164576  | Missense_Mutation | SNP | C | T | 36 | 295 | c.1150C>T     | c.(1150-1152)CAC>TAC | p.H384Y       |
| Pat_63 | Post-Resistance | ALPK3     | 57538  | 37 | 15 | 85411661  | 85411661  | Missense_Mutation | SNP | G | A | 5  | 23  | c.5698G>A     | c.(5698-5700)GGC>AGC | p.G1900S      |
| Pat_63 | Post-Resistance | SLC28A1   | 9154   | 37 | 15 | 85478378  | 85478378  | Missense_Mutation | SNP | C | T | 16 | 100 | c.1336C>T     | c.(1336-1338)CTC>TTC | p.L446F       |
| Pat_63 | Post-Resistance | C15orf42  | 90381  | 37 | 15 | 90126050  | 90126050  | Missense_Mutation | SNP | G | A | 36 | 180 | c.788G>A      | c.(787-789)GGA>GAA   | p.G263E       |



|        |                 |           |        |    |    |           |           |                   |     |   |   |    |     |           |                      |          |
|--------|-----------------|-----------|--------|----|----|-----------|-----------|-------------------|-----|---|---|----|-----|-----------|----------------------|----------|
| Pat_63 | Post-Resistance | TLL13     | 440307 | 37 | 15 | 90794074  | 90794074  | Missense_Mutation | SNP | C | T | 28 | 167 | c.212C>T  | c.(211-213)ACA>ATA   | p.T71I   |
| Pat_63 | Post-Resistance | SNRPA1    | 6627   | 37 | 15 | 101825189 | 101825189 | Missense_Mutation | SNP | C | T | 49 | 489 | c.692G>A  | c.(691-693)GGC>GAC   | p.G231D  |
| Pat_63 | Post-Resistance | OR4F4     | 26682  | 37 | 15 | 102462385 | 102462385 | Missense_Mutation | SNP | C | T | 9  | 668 | c.878G>A  | c.(877-879)CGG>CAG   | p.R293Q  |
| Pat_63 | Post-Resistance | RHBDF1    | 64285  | 37 | 16 | 113745    | 113745    | Nonsense_Mutation | SNP | C | T | 12 | 49  | c.302G>A  | c.(301-303)TGG>TAG   | p.W101*  |
| Pat_63 | Post-Resistance | WDR90     | 197335 | 37 | 16 | 716231    | 716231    | Missense_Mutation | SNP | C | T | 22 | 72  | c.4621C>T | c.(4621-4623)CTC>TTC | p.L1541F |
| Pat_63 | Post-Resistance | MSLNL     | 401827 | 37 | 16 | 824854    | 824854    | Missense_Mutation | SNP | C | T | 3  | 34  | c.1718G>A | c.(1717-1719)GGT>GAT | p.G573D  |
| Pat_63 | Post-Resistance | MAPK8IP3  | 23162  | 37 | 16 | 1817641   | 1817641   | Missense_Mutation | SNP | C | T | 19 | 63  | c.3311C>T | c.(3310-3312)TCC>TTC | p.S1104F |
| Pat_63 | Post-Resistance | SRRM2     | 23524  | 37 | 16 | 2817385   | 2817385   | Missense_Mutation | SNP | G | A | 32 | 147 | c.6856G>A | c.(6856-6858)GAC>AAC | p.D2286N |
| Pat_63 | Post-Resistance | TNFRSF12A | 51330  | 37 | 16 | 3070478   | 3070478   | Missense_Mutation | SNP | G | A | 8  | 53  | c.80G>A   | c.(79-81)GGG>GAG     | p.G27E   |
| Pat_63 | Post-Resistance | HMOX2     | 3163   | 37 | 16 | 4558095   | 4558095   | Nonsense_Mutation | SNP | C | T | 3  | 28  | c.586C>T  | c.(586-588)CAG>TAG   | p.Q196*  |
| Pat_63 | Post-Resistance | PPL       | 5493   | 37 | 16 | 4933859   | 4933859   | Missense_Mutation | SNP | C | T | 7  | 107 | c.4797G>A | c.(4795-4797)ATG>ATA | p.M1599I |
| Pat_63 | Post-Resistance | CIITA     | 4261   | 37 | 16 | 10996560  | 10996560  | Missense_Mutation | SNP | G | A | 3  | 47  | c.674G>A  | c.(673-675)GGA>GAA   | p.G225E  |
| Pat_63 | Post-Resistance | MKL2      | 57496  | 37 | 16 | 14355272  | 14355272  | Missense_Mutation | SNP | C | T | 33 | 136 | c.3271C>T | c.(3271-3273)CCA>TCA | p.P1091S |
| Pat_63 | Post-Resistance | KIAA0430  | 9665   | 37 | 16 | 15692725  | 15692725  | Missense_Mutation | SNP | G | A | 6  | 35  | c.4970C>T | c.(4969-4971)CCT>CTT | p.P1657L |
| Pat_63 | Post-Resistance | KIAA0430  | 9665   | 37 | 16 | 15715746  | 15715746  | Missense_Mutation | SNP | G | A | 12 | 59  | c.2483C>T | c.(2482-2484)CCC>CTC | p.P828L  |
| Pat_63 | Post-Resistance | KIAA0430  | 9665   | 37 | 16 | 15718895  | 15718895  | Missense_Mutation | SNP | G | A | 31 | 118 | c.2089C>T | c.(2089-2091)CCC>TCC | p.P697S  |
| Pat_63 | Post-Resistance | SCNN1G    | 6340   | 37 | 16 | 23224000  | 23224000  | Missense_Mutation | SNP | G | A | 8  | 82  | c.1296G>A | c.(1294-1296)ATG>ATA | p.M432I  |
| Pat_63 | Post-Resistance | GGA2      | 23062  | 37 | 16 | 23478972  | 23478972  | Missense_Mutation | SNP | G | A | 9  | 31  | c.1781C>T | c.(1780-1782)CCT>CTT | p.P594L  |
| Pat_63 | Post-Resistance | PALB2     | 79728  | 37 | 16 | 23641289  | 23641289  | Missense_Mutation | SNP | G | A | 7  | 49  | c.2186C>T | c.(2185-2187)CCC>CTC | p.P729L  |
| Pat_63 | Post-Resistance | TAOK2     | 9344   | 37 | 16 | 29997130  | 29997130  | Missense_Mutation | SNP | A | G | 4  | 19  | c.1940A>G | c.(1939-1941)AAG>AGG | p.K647R  |
| Pat_63 | Post-Resistance | HIRIP3    | 8479   | 37 | 16 | 30005798  | 30005798  | Missense_Mutation | SNP | C | T | 5  | 174 | c.668G>A  | c.(667-669)AGT>AAT   | p.S223N  |
| Pat_63 | Post-Resistance | CD2BP2    | 10421  | 37 | 16 | 30365960  | 30365960  | Missense_Mutation | SNP | C | T | 13 | 443 | c.43G>A   | c.(43-45)GAG>AAG     | p.E15K   |
| Pat_63 | Post-Resistance | ITGAL     | 3683   | 37 | 16 | 30500639  | 30500639  | Missense_Mutation | SNP | C | T | 3  | 44  | c.1145C>T | c.(1144-1146)GCA>GTA | p.A382V  |
| Pat_63 | Post-Resistance | ZNF668    | 79759  | 37 | 16 | 31072808  | 31072808  | Missense_Mutation | SNP | C | T | 4  | 111 | c.1441G>A | c.(1441-1443)GTG>ATG | p.V481M  |
| Pat_63 | Post-Resistance | NOD2      | 64127  | 37 | 16 | 50756549  | 50756549  | Missense_Mutation | SNP | G | A | 67 | 339 | c.2731G>A | c.(2731-2733)GTG>ATG | p.V911M  |
| Pat_63 | Post-Resistance | AKTIP     | 64400  | 37 | 16 | 53532337  | 53532337  | Missense_Mutation | SNP | G | A | 35 | 165 | c.214C>T  | c.(214-216)CCC>TCC   | p.P72S   |
| Pat_63 | Post-Resistance | MMP2      | 4313   | 37 | 16 | 55519659  | 55519659  | Missense_Mutation | SNP | G | A | 28 | 152 | c.802G>A  | c.(802-804)GAT>AAT   | p.D268N  |
| Pat_63 | Post-Resistance | CNGB1     | 1258   | 37 | 16 | 57996948  | 57996948  | Missense_Mutation | SNP | G | A | 22 | 61  | c.311C>T  | c.(310-312)ACC>ATC   | p.T104I  |
| Pat_63 | Post-Resistance | TPPP3     | 51673  | 37 | 16 | 67424473  | 67424473  | Missense_Mutation | SNP | G | A | 39 | 173 | c.251C>T  | c.(250-252)ACC>ATC   | p.T84I   |
| Pat_63 | Post-Resistance | LCAT      | 3931   | 37 | 16 | 67976778  | 67976778  | Missense_Mutation | SNP | C | T | 3  | 88  | c.413G>A  | c.(412-414)AGC>AAC   | p.S138N  |
| Pat_63 | Post-Resistance | ESRP2     | 80004  | 37 | 16 | 68265252  | 68265252  | Nonsense_Mutation | SNP | G | A | 13 | 44  | c.1570C>T | c.(1570-1572)CAG>TAG | p.Q524*  |
| Pat_63 | Post-Resistance | SMPD3     | 55512  | 37 | 16 | 68395176  | 68395176  | Missense_Mutation | SNP | G | A | 12 | 28  | c.1901C>T | c.(1900-1902)TCC>TTC | p.S634F  |
| Pat_63 | Post-Resistance | VPS4A     | 27183  | 37 | 16 | 69350133  | 69350133  | Missense_Mutation | SNP | G | A | 14 | 63  | c.139G>A  | c.(139-141)GCC>ACC   | p.A47T   |
| Pat_63 | Post-Resistance | FUK       | 197258 | 37 | 16 | 70502848  | 70502848  | Missense_Mutation | SNP | G | T | 12 | 37  | c.760G>T  | c.(760-762)GAC>TAC   | p.D254Y  |
| Pat_63 | Post-Resistance | CHST4     | 10164  | 37 | 16 | 71571554  | 71571554  | Missense_Mutation | SNP | G | A | 3  | 23  | c.974G>A  | c.(973-975)AGG>AAG   | p.R325K  |
| Pat_63 | Post-Resistance | DHODH     | 1723   | 37 | 16 | 72046022  | 72046022  | Missense_Mutation | SNP | G | A | 25 | 131 | c.95G>A   | c.(94-96)GGA>GAA     | p.G32E   |
| Pat_63 | Post-Resistance | ZFH3      | 463    | 37 | 16 | 72829896  | 72829896  | Missense_Mutation | SNP | G | A | 23 | 78  | c.6685C>T | c.(6685-6687)CCT>TCT | p.P2229S |
| Pat_63 | Post-Resistance | CHST6     | 4166   | 37 | 16 | 75512550  | 75512550  | Missense_Mutation | SNP | G | A | 17 | 54  | c.1177C>T | c.(1177-1179)CCC>TCC | p.P393S  |
| Pat_63 | Post-Resistance | KLHL36    | 79786  | 37 | 16 | 84690751  | 84690751  | Missense_Mutation | SNP | G | A | 4  | 47  | c.338G>A  | c.(337-339)GGC>GAC   | p.G113D  |
| Pat_63 | Post-Resistance | CDH15     | 1013   | 37 | 16 | 89258152  | 89258152  | Missense_Mutation | SNP | G | A | 5  | 9   | c.1465G>A | c.(1465-1467)GGC>AGC | p.G489S  |
| Pat_63 | Post-Resistance | CDH15     | 1013   | 37 | 16 | 89260199  | 89260199  | Missense_Mutation | SNP | G | A | 5  | 12  | c.2029G>A | c.(2029-2031)GCG>ACG | p.A677T  |
| Pat_63 | Post-Resistance | OR3A1     | 4994   | 37 | 17 | 3195759   | 3195759   | Missense_Mutation | SNP | C | T | 8  | 48  | c.118G>A  | c.(118-120)GTC>ATC   | p.V40I   |
| Pat_63 | Post-Resistance | MYBBP1A   | 10514  | 37 | 17 | 4457563   | 4457563   | Missense_Mutation | SNP | G | A | 6  | 48  | c.305C>T  | c.(304-306)TCT>TTT   | p.S102F  |
| Pat_63 | Post-Resistance | SMTNL2    | 342527 | 37 | 17 | 4498522   | 4498522   | Missense_Mutation | SNP | C | T | 18 | 27  | c.889C>T  | c.(889-891)CGC>TGC   | p.R297C  |
| Pat_63 | Post-Resistance | SLC13A5   | 284111 | 37 | 17 | 6606361   | 6606361   | Missense_Mutation | SNP | G | A | 8  | 78  | c.644C>T  | c.(643-645)GCG>GTG   | p.A215V  |
| Pat_63 | Post-Resistance | PHF23     | 79142  | 37 | 17 | 7139108   | 7139108   | Missense_Mutation | SNP | C | T | 19 | 422 | c.1049G>A | c.(1048-1050)GGG>GAG | p.G350E  |
| Pat_63 | Post-Resistance | EFNB3     | 1949   | 37 | 17 | 7612602   | 7612602   | Missense_Mutation | SNP | G | A | 3  | 9   | c.731G>A  | c.(730-732)GGG>GAG   | p.G244E  |

|        |                 |           |           |    |    |          |          |                        |     |   |   |    |     |              |                        |               |
|--------|-----------------|-----------|-----------|----|----|----------|----------|------------------------|-----|---|---|----|-----|--------------|------------------------|---------------|
| Pat_63 | Post-Resistance | CHD3      | 1107      | 37 | 17 | 7807277  | 7807277  | Missense_Mutation      | SNP | G | A | 21 | 67  | c.3862G>A    | c.(3862-3864)GTG>ATG   | p.V1288M      |
| Pat_63 | Post-Resistance | C17orf68  | 80169     | 37 | 17 | 8146340  | 8146340  | Missense_Mutation      | SNP | C | T | 5  | 21  | c.160G>A     | c.(160-162)GGA>AGA     | p.G54R        |
| Pat_63 | Post-Resistance | ARHGEF15  | 22899     | 37 | 17 | 8218775  | 8218775  | Missense_Mutation      | SNP | C | T | 4  | 67  | c.1304C>T    | c.(1303-1305)TCC>TTC   | p.S435F       |
| Pat_63 | Post-Resistance | MYH4      | 4622      | 37 | 17 | 10366873 | 10366873 | Missense_Mutation      | SNP | G | A | 11 | 64  | c.736C>T     | c.(736-738)CGC>TGC     | p.R246C       |
| Pat_63 | Post-Resistance | DNAH9     | 1770      | 37 | 17 | 11835441 | 11835441 | Nonsense_Mutation      | SNP | G | A | 8  | 45  | c.12216G>A   | c.(12214-12216)TGG>TGA | p.W4072*      |
| Pat_63 | Post-Resistance | CCDC144A  | 9720      | 37 | 17 | 16594059 | 16594059 | Splice_Site            | SNP | G | A | 11 | 117 | c.344_splice | c.e1+1                 | p.S115_splice |
| Pat_63 | Post-Resistance | TOP3A     | 7156      | 37 | 17 | 18193994 | 18193994 | Missense_Mutation      | SNP | G | A | 7  | 28  | c.1474C>T    | c.(1474-1476)CCT>TCT   | p.P492S       |
| Pat_63 | Post-Resistance | FBXW10    | 10517     | 37 | 17 | 18653160 | 18653160 | Missense_Mutation      | SNP | G | A | 10 | 98  | c.796G>A     | c.(796-798)GAC>AAC     | p.D266N       |
| Pat_63 | Post-Resistance | FAM18B    | 51030     | 37 | 17 | 18702245 | 18702245 | Missense_Mutation      | SNP | G | A | 36 | 263 | c.451G>A     | c.(451-453)GTA>ATA     | p.V151I       |
| Pat_63 | Post-Resistance | WSB1      | 26118     | 37 | 17 | 25628852 | 25628852 | Missense_Mutation      | SNP | G | A | 36 | 204 | c.79G>A      | c.(79-81)GCT>ACT       | p.A27T        |
| Pat_63 | Post-Resistance | SLC13A2   | 9058      | 37 | 17 | 26817804 | 26817804 | Missense_Mutation      | SNP | G | A | 4  | 103 | c.454G>A     | c.(454-456)GCA>ACA     | p.A152T       |
| Pat_63 | Post-Resistance | C17orf63  | 55731     | 37 | 17 | 27086229 | 27086229 | Missense_Mutation      | SNP | G | A | 11 | 30  | c.748C>T     | c.(748-750)CCC>TCC     | p.P250S       |
| Pat_63 | Post-Resistance | ADAP2     | 55803     | 37 | 17 | 29250074 | 29250074 | Missense_Mutation      | SNP | G | A | 47 | 153 | c.211G>A     | c.(211-213)GAC>AAC     | p.D71N        |
| Pat_63 | Post-Resistance | UNC45B    | 146862    | 37 | 17 | 33503031 | 33503031 | Missense_Mutation      | SNP | T | C | 11 | 70  | c.2009T>C    | c.(2008-2010)ATT>ACT   | p.I670T       |
| Pat_63 | Post-Resistance | SLFN12    | 55106     | 37 | 17 | 33749797 | 33749797 | Missense_Mutation      | SNP | C | T | 13 | 59  | c.251G>A     | c.(250-252)AGT>AAT     | p.S84N        |
| Pat_63 | Post-Resistance | GPR179    | 440435    | 37 | 17 | 36483786 | 36483786 | Missense_Mutation      | SNP | G | T | 7  | 98  | c.5666C>A    | c.(5665-5667)CCC>CAC   | p.P1889H      |
| Pat_63 | Post-Resistance | PPP1R1B   | 84152     | 37 | 17 | 37791880 | 37791880 | Missense_Mutation      | SNP | G | A | 5  | 124 | c.466G>A     | c.(466-468)GGC>AGC     | p.G156S       |
| Pat_63 | Post-Resistance | GSDMA     | 284110    | 37 | 17 | 38130084 | 38130084 | Splice_Site            | SNP | G | A | 3  | 34  | c.751_splice | c.e8+1                 | p.G251_splice |
| Pat_63 | Post-Resistance | MED24     | 9862      | 37 | 17 | 38185143 | 38185143 | Missense_Mutation      | SNP | C | T | 9  | 60  | c.1345G>A    | c.(1345-1347)GAC>AAC   | p.D449N       |
| Pat_63 | Post-Resistance | RARA      | 5914      | 37 | 17 | 38487404 | 38487404 | Translation_Start_Site | SNP | G | A | 12 | 22  | c.-66G>A     | c.(-68--64)GGGTG>GGATG |               |
| Pat_63 | Post-Resistance | SMARCE1   | 6605      | 37 | 17 | 38785156 | 38785156 | Missense_Mutation      | SNP | C | T | 6  | 180 | c.1117G>A    | c.(1117-1119)GGG>AGG   | p.G373R       |
| Pat_63 | Post-Resistance | KRT23     | 25984     | 37 | 17 | 39092786 | 39092786 | Missense_Mutation      | SNP | G | A | 5  | 22  | c.70C>T      | c.(70-72)CGG>TGG       | p.R24W        |
| Pat_63 | Post-Resistance | KRT39     | 390792    | 37 | 17 | 39123083 | 39123083 | Missense_Mutation      | SNP | G | A | 39 | 206 | c.26C>T      | c.(25-27)ACC>ATC       | p.T9I         |
| Pat_63 | Post-Resistance | KRTAP4-7  | 100132476 | 37 | 17 | 39240729 | 39240729 | Missense_Mutation      | SNP | A | G | 4  | 99  | c.271A>G     | c.(271-273)ATG>GTG     | p.M91V        |
| Pat_63 | Post-Resistance | KRTAP4-4  | 84616     | 37 | 17 | 39316834 | 39316834 | Missense_Mutation      | SNP | C | T | 5  | 153 | c.110G>A     | c.(109-111)CGC>CAC     | p.R37H        |
| Pat_63 | Post-Resistance | PLEKHH3   | 79990     | 37 | 17 | 40828421 | 40828421 | Missense_Mutation      | SNP | C | T | 9  | 60  | c.161G>A     | c.(160-162)AGG>AAG     | p.R54K        |
| Pat_63 | Post-Resistance | CNTNAP1   | 8506      | 37 | 17 | 40842765 | 40842765 | Missense_Mutation      | SNP | G | A | 43 | 173 | c.1864G>A    | c.(1864-1866)GCG>ACG   | p.A622T       |
| Pat_63 | Post-Resistance | BRCA1     | 672       | 37 | 17 | 41245156 | 41245156 | Missense_Mutation      | SNP | G | A | 10 | 374 | c.2392C>T    | c.(2392-2394)CCA>TCA   | p.P798S       |
| Pat_63 | Post-Resistance | DHX8      | 1659      | 37 | 17 | 41561547 | 41561547 | Missense_Mutation      | SNP | G | A | 24 | 158 | c.142G>A     | c.(142-144)GAC>AAC     | p.D48N        |
| Pat_63 | Post-Resistance | DHX8      | 1659      | 37 | 17 | 41585006 | 41585006 | Missense_Mutation      | SNP | G | A | 42 | 188 | c.2059G>A    | c.(2059-2061)GCA>ACA   | p.A687T       |
| Pat_63 | Post-Resistance | ETV4      | 2118      | 37 | 17 | 41622343 | 41622343 | Missense_Mutation      | SNP | C | T | 15 | 50  | c.202G>A     | c.(202-204)GCT>ACT     | p.A68T        |
| Pat_63 | Post-Resistance | C17orf104 | 284071    | 37 | 17 | 42744625 | 42744625 | Missense_Mutation      | SNP | C | T | 22 | 226 | c.1346C>T    | c.(1345-1347)CCC>CTC   | p.P449L       |
| Pat_63 | Post-Resistance | C17orf57  | 124989    | 37 | 17 | 45468892 | 45468892 | Missense_Mutation      | SNP | A | G | 8  | 39  | c.1672A>G    | c.(1672-1674)ATT>GTT   | p.I558V       |
| Pat_63 | Post-Resistance | KPNB1     | 3837      | 37 | 17 | 45755759 | 45755759 | Missense_Mutation      | SNP | G | A | 3  | 64  | c.2333G>A    | c.(2332-2334)GGG>GAG   | p.G778E       |
| Pat_63 | Post-Resistance | XYLT2     | 64132     | 37 | 17 | 48433566 | 48433566 | Missense_Mutation      | SNP | G | A | 15 | 121 | c.1426G>A    | c.(1426-1428)GAC>AAC   | p.D476N       |
| Pat_63 | Post-Resistance | MSI2      | 124540    | 37 | 17 | 55478802 | 55478802 | Missense_Mutation      | SNP | T | G | 73 | 95  | c.375T>G     | c.(373-375)GAT>GAG     | p.D125E       |
| Pat_63 | Post-Resistance | TEX14     | 56155     | 37 | 17 | 56694940 | 56694940 | Missense_Mutation      | SNP | C | T | 25 | 104 | c.595G>A     | c.(595-597)GTC>ATC     | p.V199I       |
| Pat_63 | Post-Resistance | PPM1E     | 22843     | 37 | 17 | 57058253 | 57058253 | Missense_Mutation      | SNP | G | A | 10 | 64  | c.2129G>A    | c.(2128-2130)AGT>AAT   | p.S710N       |
| Pat_63 | Post-Resistance | USP32     | 84669     | 37 | 17 | 58313509 | 58313509 | Missense_Mutation      | SNP | T | C | 51 | 270 | c.1229A>G    | c.(1228-1230)TAT>TGT   | p.Y410C       |
| Pat_63 | Post-Resistance | MED13     | 9969      | 37 | 17 | 60088457 | 60088457 | Missense_Mutation      | SNP | G | A | 10 | 15  | c.1421C>T    | c.(1420-1422)ACT>ATT   | p.T474I       |
| Pat_63 | Post-Resistance | ERN1      | 2081      | 37 | 17 | 62130186 | 62130186 | Missense_Mutation      | SNP | C | T | 3  | 41  | c.2207G>A    | c.(2206-2208)GGC>GAC   | p.G736D       |
| Pat_63 | Post-Resistance | HELZ      | 9931      | 37 | 17 | 65116610 | 65116610 | Missense_Mutation      | SNP | G | A | 14 | 66  | c.3752C>T    | c.(3751-3753)CCT>CTT   | p.P1251L      |
| Pat_63 | Post-Resistance | KCNJ2     | 3759      | 37 | 17 | 68171383 | 68171383 | Missense_Mutation      | SNP | A | G | 13 | 74  | c.203A>G     | c.(202-204)TAC>TGC     | p.Y68C        |
| Pat_63 | Post-Resistance | TTYH2     | 94015     | 37 | 17 | 72256320 | 72256320 | Missense_Mutation      | SNP | G | A | 42 | 163 | c.1577G>A    | c.(1576-1578)AGG>AAG   | p.R526K       |
| Pat_63 | Post-Resistance | TMEM104   | 54868     | 37 | 17 | 72787136 | 72787136 | Missense_Mutation      | SNP | G | A | 8  | 50  | c.388G>A     | c.(388-390)GTG>ATG     | p.V130M       |
| Pat_63 | Post-Resistance | OTOP2     | 92736     | 37 | 17 | 72929576 | 72929576 | Missense_Mutation      | SNP | C | T | 5  | 72  | c.1625C>T    | c.(1624-1626)CCT>CTT   | p.P542L       |
| Pat_63 | Post-Resistance | ATP5H     | 10476     | 37 | 17 | 73035097 | 73035097 | Missense_Mutation      | SNP | G | T | 3  | 58  | c.416C>A     | c.(415-417)GCT>GAT     | p.A139D       |

|        |                 |          |        |    |    |          |          |                   |     |    |    |    |     |                |                        |               |
|--------|-----------------|----------|--------|----|----|----------|----------|-------------------|-----|----|----|----|-----|----------------|------------------------|---------------|
| Pat_63 | Post-Resistance | RECQL5   | 9400   | 37 | 17 | 73625837 | 73625837 | Missense_Mutation | SNP | G  | A  | 12 | 72  | c.1898C>T      | c.(1897-1899)CCC>CTC   | p.P633L       |
| Pat_63 | Post-Resistance | QRICH2   | 84074  | 37 | 17 | 74288506 | 74288506 | Nonsense_Mutation | SNP | G  | A  | 8  | 190 | c.1804C>T      | c.(1804-1806)CAG>TAG   | p.Q602*       |
| Pat_63 | Post-Resistance | MGAT5B   | 146664 | 37 | 17 | 74936506 | 74936506 | Missense_Mutation | SNP | C  | T  | 19 | 62  | c.1634C>T      | c.(1633-1635)CCC>CTC   | p.P545L       |
| Pat_63 | Post-Resistance | SEC14L1  | 6397   | 37 | 17 | 75192314 | 75192314 | Missense_Mutation | SNP | A  | G  | 12 | 56  | c.740A>G       | c.(739-741)TAC>TGC     | p.Y247C       |
| Pat_63 | Post-Resistance | USP36    | 57602  | 37 | 17 | 76800019 | 76800019 | Missense_Mutation | SNP | G  | A  | 6  | 30  | c.2258C>T      | c.(2257-2259)CCC>CTC   | p.P753L       |
| Pat_63 | Post-Resistance | CARD14   | 79092  | 37 | 17 | 78156562 | 78156562 | Missense_Mutation | SNP | C  | T  | 7  | 36  | c.322C>T       | c.(322-324)CCT>TCT     | p.P108S       |
| Pat_63 | Post-Resistance | PDE6G    | 5148   | 37 | 17 | 79620323 | 79620323 | Missense_Mutation | SNP | G  | A  | 8  | 26  | c.13C>T        | c.(13-15)CCG>TCG       | p.P5S         |
| Pat_63 | Post-Resistance | P4HB     | 5034   | 37 | 17 | 79803565 | 79803565 | Missense_Mutation | SNP | C  | T  | 5  | 46  | c.1231G>A      | c.(1231-1233)GGA>AGA   | p.G411R       |
| Pat_63 | Post-Resistance | C17orf62 | 79415  | 37 | 17 | 80403811 | 80403811 | Missense_Mutation | SNP | C  | T  | 7  | 22  | c.227G>A       | c.(226-228)GGG>GAG     | p.G76E        |
| Pat_63 | Post-Resistance | MYOM1    | 8736   | 37 | 18 | 3173945  | 3173945  | Missense_Mutation | SNP | G  | A  | 6  | 32  | c.1165C>T      | c.(1165-1167)CCC>TCC   | p.P389S       |
| Pat_63 | Post-Resistance | TXNDC2   | 84203  | 37 | 18 | 9887006  | 9887006  | Missense_Mutation | SNP | G  | A  | 17 | 161 | c.530G>A       | c.(529-531)GGT>GAT     | p.G177D       |
| Pat_63 | Post-Resistance | VAPA     | 9218   | 37 | 18 | 9954188  | 9954189  | Nonsense_Mutation | DNP | CT | TA | 28 | 185 | c.730_731CT>TA | c.(730-732)CTA>TAA     | p.L244*       |
| Pat_63 | Post-Resistance | LAMA3    | 3909   | 37 | 18 | 21293981 | 21293981 | Missense_Mutation | SNP | C  | T  | 13 | 58  | c.392C>T       | c.(391-393)CCC>CTC     | p.P131L       |
| Pat_63 | Post-Resistance | LAMA3    | 3909   | 37 | 18 | 21426373 | 21426373 | Missense_Mutation | SNP | T  | C  | 15 | 46  | c.3832T>C      | c.(3832-3834)TGC>CGC   | p.C1278R      |
| Pat_63 | Post-Resistance | KLHL14   | 57565  | 37 | 18 | 30350079 | 30350079 | Missense_Mutation | SNP | G  | A  | 7  | 91  | c.476C>T       | c.(475-477)TCG>TTG     | p.S159L       |
| Pat_63 | Post-Resistance | DTNA     | 1837   | 37 | 18 | 32455318 | 32455318 | Missense_Mutation | SNP | C  | T  | 13 | 78  | c.1778C>T      | c.(1777-1779)TCC>TTC   | p.S593F       |
| Pat_63 | Post-Resistance | NARS     | 4677   | 37 | 18 | 55283091 | 55283091 | Nonsense_Mutation | SNP | C  | T  | 26 | 104 | c.210G>A       | c.(208-210)TGG>TGA     | p.W70*        |
| Pat_63 | Post-Resistance | ALPK2    | 115701 | 37 | 18 | 56247520 | 56247520 | Missense_Mutation | SNP | G  | A  | 6  | 242 | c.488C>T       | c.(487-489)TCC>TTC     | p.S163F       |
| Pat_63 | Post-Resistance | ZCCHC2   | 54877  | 37 | 18 | 60241332 | 60241332 | Missense_Mutation | SNP | C  | T  | 13 | 44  | c.2018C>T      | c.(2017-2019)ACT>ATT   | p.T673I       |
| Pat_63 | Post-Resistance | ZCCHC2   | 54877  | 37 | 18 | 60242373 | 60242373 | Missense_Mutation | SNP | G  | A  | 7  | 38  | c.3059G>A      | c.(3058-3060)AGC>AAC   | p.S1020N      |
| Pat_63 | Post-Resistance | RTTN     | 25914  | 37 | 18 | 67812931 | 67812931 | Missense_Mutation | SNP | C  | T  | 14 | 69  | c.2398G>A      | c.(2398-2400)GTT>ATT   | p.V800I       |
| Pat_63 | Post-Resistance | FAM69C   | 125704 | 37 | 18 | 72109259 | 72109259 | Missense_Mutation | SNP | G  | C  | 18 | 58  | c.969C>G       | c.(967-969)TTC>TTG     | p.F323L       |
| Pat_63 | Post-Resistance | TXNL4A   | 10907  | 37 | 18 | 77733749 | 77733749 | Missense_Mutation | SNP | C  | T  | 6  | 189 | c.365G>A       | c.(364-366)GGG>GAG     | p.G122E       |
| Pat_63 | Post-Resistance | ADNP2    | 22850  | 37 | 18 | 77893724 | 77893724 | Missense_Mutation | SNP | G  | A  | 4  | 75  | c.428G>A       | c.(427-429)GGT>GAT     | p.G143D       |
| Pat_63 | Post-Resistance | PTBP1    | 5725   | 37 | 19 | 804083   | 804083   | Missense_Mutation | SNP | G  | A  | 9  | 63  | c.163G>A       | c.(163-165)GGC>AGC     | p.G55S        |
| Pat_63 | Post-Resistance | TCF3     | 6929   | 37 | 19 | 1619170  | 1619170  | Missense_Mutation | SNP | C  | T  | 4  | 55  | c.1390G>A      | c.(1390-1392)GCC>ACC   | p.A464T       |
| Pat_63 | Post-Resistance | REXO1    | 57455  | 37 | 19 | 1820395  | 1820395  | Splice_Site       | SNP | C  | T  | 8  | 49  | c.2395_splice  | c.e6-1                 | p.S799_splice |
| Pat_63 | Post-Resistance | THOP1    | 7064   | 37 | 19 | 2805172  | 2805172  | Missense_Mutation | SNP | G  | A  | 3  | 20  | c.748G>A       | c.(748-750)GAG>AAG     | p.E250K       |
| Pat_63 | Post-Resistance | CELF5    | 60680  | 37 | 19 | 3281320  | 3281320  | Missense_Mutation | SNP | C  | T  | 8  | 156 | c.727C>T       | c.(727-729)CCC>TCC     | p.P243S       |
| Pat_63 | Post-Resistance | PIP5K1C  | 23396  | 37 | 19 | 3661915  | 3661915  | Missense_Mutation | SNP | C  | T  | 3  | 32  | c.304G>A       | c.(304-306)GTG>ATG     | p.V102M       |
| Pat_63 | Post-Resistance | MAP2K2   | 5605   | 37 | 19 | 4110584  | 4110584  | Missense_Mutation | SNP | A  | T  | 7  | 89  | c.373T>A       | c.(373-375)TGC>AGC     | p.C125S       |
| Pat_63 | Post-Resistance | SIRT6    | 51548  | 37 | 19 | 4175140  | 4175140  | Missense_Mutation | SNP | T  | C  | 3  | 11  | c.623A>G       | c.(622-624)GAC>GGC     | p.D208G       |
| Pat_63 | Post-Resistance | CCDC94   | 55702  | 37 | 19 | 4251074  | 4251074  | Missense_Mutation | SNP | G  | A  | 4  | 66  | c.176G>A       | c.(175-177)CGG>CAG     | p.R59Q        |
| Pat_63 | Post-Resistance | SHD      | 56961  | 37 | 19 | 4290454  | 4290454  | Missense_Mutation | SNP | G  | A  | 13 | 72  | c.847G>A       | c.(847-849)GGC>AGC     | p.G283S       |
| Pat_63 | Post-Resistance | STAP2    | 55620  | 37 | 19 | 4327312  | 4327312  | Splice_Site       | SNP | C  | T  | 7  | 101 | c.660_splice   | c.e7+1                 | p.P220_splice |
| Pat_63 | Post-Resistance | TICAM1   | 148022 | 37 | 19 | 4818206  | 4818206  | Missense_Mutation | SNP | C  | T  | 3  | 23  | c.184G>A       | c.(184-186)GAG>AAG     | p.E62K        |
| Pat_63 | Post-Resistance | DUS3L    | 56931  | 37 | 19 | 5787710  | 5787710  | Missense_Mutation | SNP | C  | T  | 37 | 324 | c.1102G>A      | c.(1102-1104)GGC>AGC   | p.G368S       |
| Pat_63 | Post-Resistance | C3       | 718    | 37 | 19 | 6697713  | 6697713  | Missense_Mutation | SNP | C  | T  | 8  | 58  | c.2533G>A      | c.(2533-2535)GTG>ATG   | p.V845M       |
| Pat_63 | Post-Resistance | ZNF557   | 79230  | 37 | 19 | 7083283  | 7083283  | Missense_Mutation | SNP | G  | A  | 7  | 208 | c.800G>A       | c.(799-801)CGC>CAC     | p.R267H       |
| Pat_63 | Post-Resistance | MCOLN1   | 57192  | 37 | 19 | 7594599  | 7594599  | Splice_Site       | SNP | G  | A  | 7  | 403 | c.1359_splice  | c.e11+1                | p.K453_splice |
| Pat_63 | Post-Resistance | MCOLN1   | 57192  | 37 | 19 | 7598655  | 7598655  | Missense_Mutation | SNP | G  | A  | 9  | 85  | c.1717G>A      | c.(1717-1719)GAG>AAG   | p.E573K       |
| Pat_63 | Post-Resistance | HNRNPM   | 4670   | 37 | 19 | 8536233  | 8536233  | Missense_Mutation | SNP | G  | A  | 4  | 62  | c.919G>A       | c.(919-921)GGG>AGG     | p.G307R       |
| Pat_63 | Post-Resistance | MYO1F    | 4542   | 37 | 19 | 8601252  | 8601252  | Missense_Mutation | SNP | G  | A  | 3  | 27  | c.1927C>T      | c.(1927-1929)CCG>TCG   | p.P643S       |
| Pat_63 | Post-Resistance | MYO1F    | 4542   | 37 | 19 | 8619416  | 8619416  | Missense_Mutation | SNP | C  | T  | 21 | 223 | c.271G>A       | c.(271-273)GAC>AAC     | p.D91N        |
| Pat_63 | Post-Resistance | MUC16    | 94025  | 37 | 19 | 9067711  | 9067711  | Missense_Mutation | SNP | C  | T  | 5  | 51  | c.19735G>A     | c.(19735-19737)GAC>AAC | p.D6579N      |
| Pat_63 | Post-Resistance | ZNF846   | 162993 | 37 | 19 | 9868257  | 9868257  | Missense_Mutation | SNP | G  | A  | 15 | 138 | c.1496C>T      | c.(1495-1497)ACT>ATT   | p.T499I       |
| Pat_63 | Post-Resistance | COL5A3   | 50509  | 37 | 19 | 10080559 | 10080559 | Missense_Mutation | SNP | C  | T  | 11 | 123 | c.3976G>A      | c.(3976-3978)GAG>AAG   | p.E1326K      |

|        |                 |         |           |    |    |          |          |                   |     |   |   |    |     |               |                      |               |
|--------|-----------------|---------|-----------|----|----|----------|----------|-------------------|-----|---|---|----|-----|---------------|----------------------|---------------|
| Pat_63 | Post-Resistance | COL5A3  | 50509     | 37 | 19 | 10088126 | 10088126 | Missense_Mutation | SNP | G | A | 6  | 30  | c.3149C>T     | c.(3148-3150)CCC>CTC | p.P1050L      |
| Pat_63 | Post-Resistance | RDH8    | 50700     | 37 | 19 | 10132038 | 10132038 | Missense_Mutation | SNP | A | G | 33 | 154 | c.644A>G      | c.(643-645)TAC>TGC   | p.Y215C       |
| Pat_63 | Post-Resistance | ICAM5   | 7087      | 37 | 19 | 10402201 | 10402201 | Missense_Mutation | SNP | C | T | 42 | 246 | c.389C>T      | c.(388-390)CCC>CTC   | p.P130L       |
| Pat_63 | Post-Resistance | CDC37   | 11140     | 37 | 19 | 10506171 | 10506171 | Missense_Mutation | SNP | C | T | 9  | 594 | c.427G>A      | c.(427-429)GTG>ATG   | p.V143M       |
| Pat_63 | Post-Resistance | DNM2    | 1785      | 37 | 19 | 10886583 | 10886583 | Splice_Site       | SNP | G | A | 5  | 32  | c.589_splice  | c.e4+1               | p.G197_splice |
| Pat_63 | Post-Resistance | TMED1   | 11018     | 37 | 19 | 10945771 | 10945771 | Missense_Mutation | SNP | C | T | 31 | 196 | c.304G>A      | c.(304-306)GAC>AAC   | p.D102N       |
| Pat_63 | Post-Resistance | ZNF441  | 126068    | 37 | 19 | 11891424 | 11891424 | Missense_Mutation | SNP | G | A | 13 | 122 | c.785G>A      | c.(784-786)AGT>AAT   | p.S262N       |
| Pat_63 | Post-Resistance | FARSA   | 2193      | 37 | 19 | 13035584 | 13035584 | Missense_Mutation | SNP | C | T | 31 | 250 | c.1064G>A     | c.(1063-1065)CGC>CAC | p.R355H       |
| Pat_63 | Post-Resistance | PODNL1  | 79883     | 37 | 19 | 14047243 | 14047243 | Missense_Mutation | SNP | C | T | 7  | 93  | c.277G>A      | c.(277-279)GAG>AAG   | p.E93K        |
| Pat_63 | Post-Resistance | PKN1    | 5585      | 37 | 19 | 14574479 | 14574479 | Missense_Mutation | SNP | G | A | 13 | 81  | c.1420G>A     | c.(1420-1422)GTC>ATC | p.V474I       |
| Pat_63 | Post-Resistance | EMR3    | 84658     | 37 | 19 | 14749080 | 14749080 | Missense_Mutation | SNP | C | T | 13 | 94  | c.1321G>A     | c.(1321-1323)GGT>AGT | p.G441S       |
| Pat_63 | Post-Resistance | CYP4F12 | 66002     | 37 | 19 | 15806746 | 15806746 | Nonsense_Mutation | SNP | G | A | 11 | 85  | c.1116G>A     | c.(1114-1116)TGG>TGA | p.W372*       |
| Pat_63 | Post-Resistance | SLC27A1 | 376497    | 37 | 19 | 17611442 | 17611442 | Splice_Site       | SNP | G | A | 6  | 40  | c.1471_splice | c.e9+1               | p.G491_splice |
| Pat_63 | Post-Resistance | ARRDC2  | 27106     | 37 | 19 | 18120831 | 18120831 | Missense_Mutation | SNP | G | A | 27 | 180 | c.832G>A      | c.(832-834)GTG>ATG   | p.V278M       |
| Pat_63 | Post-Resistance | IL12RB1 | 3594      | 37 | 19 | 18184374 | 18184374 | Missense_Mutation | SNP | C | T | 8  | 75  | c.736G>A      | c.(736-738)GAG>AAG   | p.E246K       |
| Pat_63 | Post-Resistance | ZNF737  | 100129842 | 37 | 19 | 20728254 | 20728254 | Missense_Mutation | SNP | C | G | 8  | 122 | c.755G>C      | c.(754-756)AGT>ACT   | p.S252T       |
| Pat_63 | Post-Resistance | ZNF626  | 199777    | 37 | 19 | 20807353 | 20807353 | Missense_Mutation | SNP | T | C | 6  | 232 | c.1330A>G     | c.(1330-1332)AGG>GGG | p.R444G       |
| Pat_63 | Post-Resistance | ZNF208  | 7757      | 37 | 19 | 22155962 | 22155962 | Missense_Mutation | SNP | G | A | 6  | 232 | c.1574C>T     | c.(1573-1575)ACT>ATT | p.T525I       |
| Pat_63 | Post-Resistance | ZNF208  | 7757      | 37 | 19 | 22156590 | 22156590 | Missense_Mutation | SNP | C | T | 6  | 227 | c.1246G>A     | c.(1246-1248)GAG>AAG | p.E416K       |
| Pat_63 | Post-Resistance | ZNF676  | 163223    | 37 | 19 | 22364334 | 22364334 | Missense_Mutation | SNP | G | A | 7  | 45  | c.185C>T      | c.(184-186)TCT>TTT   | p.S62F        |
| Pat_63 | Post-Resistance | ZNF99   | 7652      | 37 | 19 | 22939400 | 22939400 | Missense_Mutation | SNP | G | C | 4  | 65  | c.2771C>G     | c.(2770-2772)GCT>GGT | p.A924G       |
| Pat_63 | Post-Resistance | ZNF99   | 7652      | 37 | 19 | 22941533 | 22941533 | Missense_Mutation | SNP | C | T | 18 | 136 | c.905G>A      | c.(904-906)GGA>GAA   | p.G302E       |
| Pat_63 | Post-Resistance | ZNF536  | 9745      | 37 | 19 | 31040196 | 31040196 | Missense_Mutation | SNP | C | T | 8  | 38  | c.3670C>T     | c.(3670-3672)CCT>TCT | p.P1224S      |
| Pat_63 | Post-Resistance | ZNF507  | 22847     | 37 | 19 | 32845720 | 32845720 | Missense_Mutation | SNP | G | A | 17 | 175 | c.1984G>A     | c.(1984-1986)GTC>ATC | p.V662I       |
| Pat_63 | Post-Resistance | GPATCH1 | 55094     | 37 | 19 | 33587204 | 33587204 | Missense_Mutation | SNP | G | A | 19 | 202 | c.704G>A      | c.(703-705)GGT>GAT   | p.G235D       |
| Pat_63 | Post-Resistance | ZNF30   | 90075     | 37 | 19 | 35434639 | 35434639 | Missense_Mutation | SNP | G | A | 6  | 20  | c.769G>A      | c.(769-771)GAA>AAA   | p.E257K       |
| Pat_63 | Post-Resistance | ZNF30   | 90075     | 37 | 19 | 35434793 | 35434793 | Missense_Mutation | SNP | G | C | 40 | 127 | c.923G>C      | c.(922-924)AGA>ACA   | p.R308T       |
| Pat_63 | Post-Resistance | MAG     | 4099      | 37 | 19 | 35801492 | 35801492 | Missense_Mutation | SNP | T | G | 5  | 28  | c.1562T>G     | c.(1561-1563)GTC>GGC | p.V521G       |
| Pat_63 | Post-Resistance | GAPDHS  | 26330     | 37 | 19 | 36034682 | 36034682 | Missense_Mutation | SNP | G | A | 3  | 13  | c.1009G>A     | c.(1009-1011)GCA>ACA | p.A337T       |
| Pat_63 | Post-Resistance | LRFN3   | 79414     | 37 | 19 | 36431187 | 36431187 | Missense_Mutation | SNP | G | A | 3  | 11  | c.860G>A      | c.(859-861)GGC>GAC   | p.G287D       |
| Pat_63 | Post-Resistance | ZNF829  | 374899    | 37 | 19 | 37382776 | 37382776 | Missense_Mutation | SNP | G | A | 7  | 83  | c.917C>T      | c.(916-918)ACT>ATT   | p.T306I       |
| Pat_63 | Post-Resistance | ZNF573  | 126231    | 37 | 19 | 38262218 | 38262218 | Missense_Mutation | SNP | T | C | 7  | 67  | c.188A>G      | c.(187-189)AAC>AGC   | p.N63S        |
| Pat_63 | Post-Resistance | SIPA1L3 | 23094     | 37 | 19 | 38573508 | 38573508 | Missense_Mutation | SNP | G | A | 3  | 48  | c.1303G>A     | c.(1303-1305)GGG>AGG | p.G435R       |
| Pat_63 | Post-Resistance | SIPA1L3 | 23094     | 37 | 19 | 38682823 | 38682823 | Missense_Mutation | SNP | C | T | 3  | 48  | c.4469C>T     | c.(4468-4470)CCG>CTG | p.P1490L      |
| Pat_63 | Post-Resistance | NFKBIB  | 4793      | 37 | 19 | 39396007 | 39396007 | Missense_Mutation | SNP | C | T | 3  | 14  | c.451C>T      | c.(451-453)CCC>TCC   | p.P151S       |
| Pat_63 | Post-Resistance | IL29    | 282618    | 37 | 19 | 39788715 | 39788715 | Missense_Mutation | SNP | C | A | 14 | 56  | c.361C>A      | c.(361-363)CTG>ATG   | p.L121M       |
| Pat_63 | Post-Resistance | SUPT5H  | 6829      | 37 | 19 | 39936537 | 39936537 | Missense_Mutation | SNP | G | A | 14 | 49  | c.7G>A        | c.(7-9)GAC>AAC       | p.D3N         |
| Pat_63 | Post-Resistance | AKT2    | 208       | 37 | 19 | 40746017 | 40746017 | Missense_Mutation | SNP | C | T | 8  | 343 | c.574G>A      | c.(574-576)GAT>AAT   | p.D192N       |
| Pat_63 | Post-Resistance | PRX     | 57716     | 37 | 19 | 40902800 | 40902800 | Missense_Mutation | SNP | G | A | 54 | 161 | c.1459C>T     | c.(1459-1461)CCG>TCG | p.P487S       |
| Pat_63 | Post-Resistance | LTBP4   | 8425      | 37 | 19 | 41103210 | 41103210 | Missense_Mutation | SNP | G | A | 2  | 0   | c.70G>A       | c.(70-72)GCC>ACC     | p.A24T        |
| Pat_63 | Post-Resistance | ITPKC   | 80271     | 37 | 19 | 41223735 | 41223735 | Missense_Mutation | SNP | G | A | 10 | 19  | c.695G>A      | c.(694-696)AGG>AAG   | p.R232K       |
| Pat_63 | Post-Resistance | MEGF8   | 1954      | 37 | 19 | 42830535 | 42830535 | Missense_Mutation | SNP | G | A | 3  | 11  | c.140G>A      | c.(139-141)GGT>GAT   | p.G47D        |
| Pat_63 | Post-Resistance | ZNF227  | 7770      | 37 | 19 | 44738971 | 44738971 | Missense_Mutation | SNP | T | C | 14 | 84  | c.388T>C      | c.(388-390)TGT>CGT   | p.C130R       |
| Pat_63 | Post-Resistance | CLPTM1  | 1209      | 37 | 19 | 45480666 | 45480666 | Missense_Mutation | SNP | C | T | 24 | 154 | c.535C>T      | c.(535-537)CCC>TCC   | p.P179S       |
| Pat_63 | Post-Resistance | QPCTL   | 54814     | 37 | 19 | 46206162 | 46206162 | Missense_Mutation | SNP | G | A | 6  | 143 | c.1004G>A     | c.(1003-1005)GGG>GAG | p.G335E       |
| Pat_63 | Post-Resistance | DMWD    | 1762      | 37 | 19 | 46294251 | 46294251 | Missense_Mutation | SNP | G | A | 5  | 226 | c.536C>T      | c.(535-537)ACC>ATC   | p.T179I       |
| Pat_63 | Post-Resistance | ELSPBP1 | 64100     | 37 | 19 | 48519155 | 48519155 | Missense_Mutation | SNP | C | T | 3  | 38  | c.214C>T      | c.(214-216)CCA>TCA   | p.P72S        |

|        |                 |               |        |    |    |           |           |                   |     |   |   |    |     |               |                        |                |
|--------|-----------------|---------------|--------|----|----|-----------|-----------|-------------------|-----|---|---|----|-----|---------------|------------------------|----------------|
| Pat_63 | Post-Resistance | FUT2          | 2524   | 37 | 19 | 49206665  | 49206665  | Missense_Mutation | SNP | C | T | 24 | 96  | c.452C>T      | c.(451-453)CCC>CTC     | p.P151L        |
| Pat_63 | Post-Resistance | FUZ           | 80199  | 37 | 19 | 50314928  | 50314928  | Missense_Mutation | SNP | G | A | 8  | 594 | c.347C>T      | c.(346-348)ACC>ATC     | p.T116I        |
| Pat_63 | Post-Resistance | IL4I1         | 259307 | 37 | 19 | 50393094  | 50393094  | Missense_Mutation | SNP | C | T | 13 | 28  | c.1537G>A     | c.(1537-1539)GAC>AAC   | p.D513N        |
| Pat_63 | Post-Resistance | KLK6          | 5653   | 37 | 19 | 51471321  | 51471321  | Missense_Mutation | SNP | C | T | 21 | 91  | c.40G>A       | c.(40-42)GCC>ACC       | p.A14T         |
| Pat_63 | Post-Resistance | FPR3          | 2359   | 37 | 19 | 52327542  | 52327542  | Missense_Mutation | SNP | G | A | 35 | 229 | c.541G>A      | c.(541-543)GCA>ACA     | p.A181T        |
| Pat_63 | Post-Resistance | ZNF808        | 388558 | 37 | 19 | 53058088  | 53058088  | Missense_Mutation | SNP | G | A | 4  | 81  | c.1919G>A     | c.(1918-1920)CGA>CAA   | p.R640Q        |
| Pat_63 | Post-Resistance | ZNF600        | 162966 | 37 | 19 | 53269276  | 53269276  | Missense_Mutation | SNP | C | T | 42 | 281 | c.1733G>A     | c.(1732-1734)GGA>GAA   | p.G578E        |
| Pat_63 | Post-Resistance | ZNF468        | 90333  | 37 | 19 | 53345171  | 53345171  | Missense_Mutation | SNP | G | A | 55 | 201 | c.376C>T      | c.(376-378)CAT>TAT     | p.H126Y        |
| Pat_63 | Post-Resistance | LILRB1        | 10859  | 37 | 19 | 55144064  | 55144064  | Missense_Mutation | SNP | G | A | 8  | 57  | c.811G>A      | c.(811-813)GCA>ACA     | p.A271T        |
| Pat_63 | Post-Resistance | NLRP9         | 338321 | 37 | 19 | 56249610  | 56249610  | Missense_Mutation | SNP | C | A | 33 | 187 | c.131G>T      | c.(130-132)TGG>TTG     | p.W44L         |
| Pat_63 | Post-Resistance | ZNF549        | 256051 | 37 | 19 | 58050030  | 58050030  | Missense_Mutation | SNP | G | A | 20 | 96  | c.1658G>A     | c.(1657-1659)GGC>GAC   | p.G553D        |
| Pat_63 | Post-Resistance | ZNF550        | 162972 | 37 | 19 | 58059242  | 58059242  | Missense_Mutation | SNP | C | T | 32 | 170 | c.247G>A      | c.(247-249)GGG>AGG     | p.G83R         |
| Pat_63 | Post-Resistance | ZNF776        | 284309 | 37 | 19 | 58265876  | 58265876  | Missense_Mutation | SNP | C | T | 8  | 166 | c.1378C>T     | c.(1378-1380)CAT>TAT   | p.H460Y        |
| Pat_63 | Post-Resistance | ASAP2         | 8853   | 37 | 2  | 9490958   | 9490958   | Missense_Mutation | SNP | C | T | 14 | 36  | c.1045C>T     | c.(1045-1047)CTC>TTC   | p.L349F        |
| Pat_63 | Post-Resistance | PUM2          | 23369  | 37 | 2  | 20455102  | 20455102  | Missense_Mutation | SNP | C | T | 17 | 62  | c.2623G>A     | c.(2623-2625)GTA>ATA   | p.V875I        |
| Pat_63 | Post-Resistance | GCKR          | 2646   | 37 | 2  | 27728604  | 27728604  | Missense_Mutation | SNP | C | T | 10 | 40  | c.770C>T      | c.(769-771)TCC>TTC     | p.S257F        |
| Pat_63 | Post-Resistance | PLB1          | 151056 | 37 | 2  | 28748137  | 28748137  | Missense_Mutation | SNP | C | T | 3  | 26  | c.247C>T      | c.(247-249)CCA>TCA     | p.P83S         |
| Pat_63 | Post-Resistance | C2orf71       | 388939 | 37 | 2  | 29293881  | 29293881  | Missense_Mutation | SNP | G | A | 5  | 81  | c.3247C>T     | c.(3247-3249)CCT>TCT   | p.P1083S       |
| Pat_63 | Post-Resistance | NLRC4         | 58484  | 37 | 2  | 32460470  | 32460470  | Missense_Mutation | SNP | C | T | 26 | 81  | c.2782G>A     | c.(2782-2784)GGT>AGT   | p.G928S        |
| Pat_63 | Post-Resistance | HEATR5B       | 54497  | 37 | 2  | 37208682  | 37208682  | Missense_Mutation | SNP | G | A | 3  | 39  | c.6167C>T     | c.(6166-6168)CCC>CTC   | p.P2056L       |
| Pat_63 | Post-Resistance | C2orf56       | 55471  | 37 | 2  | 37468875  | 37468875  | Missense_Mutation | SNP | G | A | 19 | 62  | c.563G>A      | c.(562-564)GGT>GAT     | p.G188D        |
| Pat_63 | Post-Resistance | THUMPD2       | 80745  | 37 | 2  | 39983069  | 39983069  | Missense_Mutation | SNP | C | T | 16 | 61  | c.923G>A      | c.(922-924)GGA>GAA     | p.G308E        |
| Pat_63 | Post-Resistance | THADA         | 63892  | 37 | 2  | 43787403  | 43787403  | Missense_Mutation | SNP | C | T | 7  | 15  | c.2433G>A     | c.(2431-2433)ATG>ATA   | p.M811I        |
| Pat_63 | Post-Resistance | LRPPRC        | 10128  | 37 | 2  | 44117016  | 44117016  | Splice_Site       | SNP | C | T | 16 | 56  | c.3986_splice | c.e37-1                | p.V1329_splice |
| Pat_63 | Post-Resistance | PREPL         | 9581   | 37 | 2  | 44565611  | 44565611  | Missense_Mutation | SNP | C | T | 7  | 25  | c.1034G>A     | c.(1033-1035)AGA>AAA   | p.R345K        |
| Pat_63 | Post-Resistance | MSH6          | 2956   | 37 | 2  | 48018231  | 48018231  | Nonsense_Mutation | SNP | G | A | 6  | 54  | c.426G>A      | c.(424-426)TGG>TGA     | p.W142*        |
| Pat_63 | Post-Resistance | MSH6          | 2956   | 37 | 2  | 48026684  | 48026684  | Missense_Mutation | SNP | C | T | 4  | 51  | c.1562C>T     | c.(1561-1563)ACA>ATA   | p.T521I        |
| Pat_63 | Post-Resistance | MSH6          | 2956   | 37 | 2  | 48027316  | 48027316  | Nonsense_Mutation | SNP | C | T | 17 | 91  | c.2194C>T     | c.(2194-2196)CGA>TGA   | p.R732*        |
| Pat_63 | Post-Resistance | MSH6          | 2956   | 37 | 2  | 48033352  | 48033352  | Missense_Mutation | SNP | C | T | 7  | 42  | c.3656C>T     | c.(3655-3657)ACT>ATT   | p.T1219I       |
| Pat_63 | Post-Resistance | STON1-GTF2A1L | 286749 | 37 | 2  | 48808478  | 48808478  | Missense_Mutation | SNP | C | T | 29 | 68  | c.706C>T      | c.(706-708)CTC>TTC     | p.L236F        |
| Pat_63 | Post-Resistance | ERLEC1        | 27248  | 37 | 2  | 54045093  | 54045093  | Missense_Mutation | SNP | C | T | 14 | 30  | c.1439C>T     | c.(1438-1440)TCT>TTT   | p.S480F        |
| Pat_63 | Post-Resistance | USP34         | 9736   | 37 | 2  | 61415817  | 61415817  | Missense_Mutation | SNP | C | T | 15 | 44  | c.10061G>A    | c.(10060-10062)AGG>AAC | p.R3354K       |
| Pat_63 | Post-Resistance | FAM161A       | 84140  | 37 | 2  | 62067070  | 62067070  | Missense_Mutation | SNP | C | T | 22 | 62  | c.1069G>A     | c.(1069-1071)GCC>ACC   | p.A357T        |
| Pat_63 | Post-Resistance | RAB11FIP5     | 26056  | 37 | 2  | 73315377  | 73315377  | Missense_Mutation | SNP | C | T | 21 | 48  | c.1369G>A     | c.(1369-1371)GAA>AAA   | p.E457K        |
| Pat_63 | Post-Resistance | CCT7          | 10574  | 37 | 2  | 73477537  | 73477537  | Missense_Mutation | SNP | G | T | 19 | 65  | c.1174G>T     | c.(1174-1176)GCC>TCC   | p.A392S        |
| Pat_63 | Post-Resistance | GGCX          | 2677   | 37 | 2  | 85778617  | 85778617  | Missense_Mutation | SNP | C | T | 22 | 115 | c.1726G>A     | c.(1726-1728)GGA>AGA   | p.G576R        |
| Pat_63 | Post-Resistance | RNF103        | 7844   | 37 | 2  | 86831783  | 86831783  | Missense_Mutation | SNP | G | C | 3  | 53  | c.1241C>G     | c.(1240-1242)TCT>TGT   | p.S414C        |
| Pat_63 | Post-Resistance | SNRNP200      | 23020  | 37 | 2  | 96944087  | 96944087  | Missense_Mutation | SNP | C | T | 7  | 66  | c.5498G>A     | c.(5497-5499)AGC>AAC   | p.S1833N       |
| Pat_63 | Post-Resistance | CNGA3         | 1261   | 37 | 2  | 99012353  | 99012353  | Nonsense_Mutation | SNP | G | A | 23 | 141 | c.720G>A      | c.(718-720)TGG>TGA     | p.W240*        |
| Pat_63 | Post-Resistance | MRPL30        | 51263  | 37 | 2  | 99812055  | 99812055  | Missense_Mutation | SNP | C | T | 37 | 279 | c.373C>T      | c.(373-375)CCA>TCA     | p.P125S        |
| Pat_63 | Post-Resistance | MAP4K4        | 9448   | 37 | 2  | 102456309 | 102456309 | Missense_Mutation | SNP | G | A | 4  | 17  | c.802G>A      | c.(802-804)GGG>AGG     | p.G268R        |
| Pat_63 | Post-Resistance | PSD4          | 23550  | 37 | 2  | 113955150 | 113955150 | Missense_Mutation | SNP | G | A | 10 | 45  | c.2396G>A     | c.(2395-2397)GGC>GAC   | p.G799D        |
| Pat_63 | Post-Resistance | EPB41L5       | 57669  | 37 | 2  | 120776803 | 120776803 | Missense_Mutation | SNP | C | T | 75 | 367 | c.143C>T      | c.(142-144)TCC>TTC     | p.S48F         |
| Pat_63 | Post-Resistance | LRP1B         | 53353  | 37 | 2  | 141092120 | 141092120 | Missense_Mutation | SNP | T | C | 22 | 115 | c.12125A>G    | c.(12124-12126)TAC>TGC | p.Y4042C       |
| Pat_63 | Post-Resistance | GALNT5        | 11227  | 37 | 2  | 158116023 | 158116023 | Missense_Mutation | SNP | G | A | 9  | 86  | c.1429G>A     | c.(1429-1431)GCC>ACC   | p.A477T        |
| Pat_63 | Post-Resistance | PKP4          | 8502   | 37 | 2  | 159519886 | 159519886 | Missense_Mutation | SNP | G | A | 4  | 59  | c.2506G>A     | c.(2506-2508)GAA>AAA   | p.E836K        |
| Pat_63 | Post-Resistance | PLA2R1        | 22925  | 37 | 2  | 160884757 | 160884757 | Nonsense_Mutation | SNP | A | T | 13 | 68  | c.1071T>A     | c.(1069-1071)TAT>TAA   | p.Y357*        |



|        |                 |          |        |    |    |           |           |                   |     |   |   |    |     |               |                        |               |
|--------|-----------------|----------|--------|----|----|-----------|-----------|-------------------|-----|---|---|----|-----|---------------|------------------------|---------------|
| Pat_63 | Post-Resistance | SCN2A    | 6326   | 37 | 2  | 166231217 | 166231217 | Missense_Mutation | SNP | G | A | 22 | 123 | c.3995G>A     | c.(3994-3996)GGA>GAA   | p.G1332E      |
| Pat_63 | Post-Resistance | STK39    | 27347  | 37 | 2  | 169020352 | 169020352 | Missense_Mutation | SNP | C | T | 13 | 73  | c.469G>A      | c.(469-471)GGA>AGA     | p.G157R       |
| Pat_63 | Post-Resistance | LRP2     | 4036   | 37 | 2  | 170031804 | 170031804 | Missense_Mutation | SNP | C | T | 23 | 75  | c.10667G>A    | c.(10666-10668)GGA>GAA | p.G3556E      |
| Pat_63 | Post-Resistance | LRP2     | 4036   | 37 | 2  | 170147435 | 170147435 | Missense_Mutation | SNP | G | A | 18 | 46  | c.842C>T      | c.(841-843)TCC>TTC     | p.S281F       |
| Pat_63 | Post-Resistance | PHOSPHO2 | 493911 | 37 | 2  | 170557605 | 170557605 | Missense_Mutation | SNP | G | A | 4  | 89  | c.124G>A      | c.(124-126)GGA>AGA     | p.G42R        |
| Pat_63 | Post-Resistance | TTN      | 7273   | 37 | 2  | 179442563 | 179442563 | Missense_Mutation | SNP | C | T | 6  | 39  | c.60886G>A    | c.(60886-60888)GAA>AAA | p.E20296K     |
| Pat_63 | Post-Resistance | TTN      | 7273   | 37 | 2  | 179480455 | 179480455 | Missense_Mutation | SNP | A | G | 19 | 66  | c.40669T>C    | c.(40669-40671)TAC>CAC | p.Y13557H     |
| Pat_63 | Post-Resistance | TTN      | 7273   | 37 | 2  | 179611855 | 179611855 | Missense_Mutation | SNP | G | A | 15 | 68  | c.15272C>T    | c.(15271-15273)ACT>ATT | p.T5091I      |
| Pat_63 | Post-Resistance | TTN      | 7273   | 37 | 2  | 179611942 | 179611942 | Missense_Mutation | SNP | T | C | 6  | 45  | c.15185A>G    | c.(15184-15186)TAC>TGC | p.Y5062C      |
| Pat_63 | Post-Resistance | DNAJC10  | 54431  | 37 | 2  | 183594666 | 183594666 | Missense_Mutation | SNP | C | T | 17 | 109 | c.725C>T      | c.(724-726)ACA>ATA     | p.T242I       |
| Pat_63 | Post-Resistance | ANKAR    | 150709 | 37 | 2  | 190571704 | 190571704 | Missense_Mutation | SNP | G | A | 31 | 108 | c.1738G>A     | c.(1738-1740)GCA>ACA   | p.A580T       |
| Pat_63 | Post-Resistance | PMS1     | 5378   | 37 | 2  | 190728749 | 190728749 | Nonsense_Mutation | SNP | C | T | 4  | 95  | c.2137C>T     | c.(2137-2139)CAA>TAA   | p.Q713*       |
| Pat_63 | Post-Resistance | STAT1    | 6772   | 37 | 2  | 191849115 | 191849115 | Missense_Mutation | SNP | G | A | 5  | 35  | c.1268C>T     | c.(1267-1269)CCT>CTT   | p.P423L       |
| Pat_63 | Post-Resistance | DNAH7    | 56171  | 37 | 2  | 196729348 | 196729348 | Missense_Mutation | SNP | C | T | 11 | 56  | c.7031G>A     | c.(7030-7032)GGG>GAG   | p.G2344E      |
| Pat_63 | Post-Resistance | HSPE1    | 3336   | 37 | 2  | 198367933 | 198367933 | Missense_Mutation | SNP | G | A | 7  | 135 | c.259G>A      | c.(259-261)GAT>AAT     | p.D87N        |
| Pat_63 | Post-Resistance | PPIL3    | 53938  | 37 | 2  | 201741652 | 201741652 | Missense_Mutation | SNP | C | T | 29 | 117 | c.349G>A      | c.(349-351)GTA>ATA     | p.V117I       |
| Pat_63 | Post-Resistance | CASP8    | 841    | 37 | 2  | 202136343 | 202136343 | Missense_Mutation | SNP | T | A | 10 | 24  | c.410T>A      | c.(409-411)ATG>AAG     | p.M137K       |
| Pat_63 | Post-Resistance | CASP8    | 841    | 37 | 2  | 202141584 | 202141584 | Missense_Mutation | SNP | C | T | 9  | 82  | c.695C>T      | c.(694-696)CCT>CTT     | p.P232L       |
| Pat_63 | Post-Resistance | CPS1     | 1373   | 37 | 2  | 211456650 | 211456650 | Missense_Mutation | SNP | G | A | 12 | 68  | c.1043G>A     | c.(1042-1044)GGC>GAC   | p.G348D       |
| Pat_63 | Post-Resistance | SPAG16   | 79582  | 37 | 2  | 214794858 | 214794858 | Nonsense_Mutation | SNP | G | A | 16 | 73  | c.1389G>A     | c.(1387-1389)TGG>TGA   | p.W463*       |
| Pat_63 | Post-Resistance | FN1      | 2335   | 37 | 2  | 216236937 | 216236937 | Missense_Mutation | SNP | C | T | 11 | 67  | c.6409G>A     | c.(6409-6411)GTT>ATT   | p.V2137I      |
| Pat_63 | Post-Resistance | FN1      | 2335   | 37 | 2  | 216248086 | 216248086 | Missense_Mutation | SNP | C | T | 15 | 81  | c.5015G>A     | c.(5014-5016)GGA>GAA   | p.G1672E      |
| Pat_63 | Post-Resistance | FN1      | 2335   | 37 | 2  | 216262405 | 216262405 | Missense_Mutation | SNP | G | A | 5  | 160 | c.3515C>T     | c.(3514-3516)ACA>ATA   | p.T1172I      |
| Pat_63 | Post-Resistance | RNF25    | 64320  | 37 | 2  | 219529597 | 219529597 | Splice_Site       | SNP | C | T | 4  | 25  | c.667_splice  | c.e9-1                 | p.E223_splice |
| Pat_63 | Post-Resistance | PRKAG3   | 53632  | 37 | 2  | 219692297 | 219692297 | Splice_Site       | SNP | C | T | 18 | 97  | c.875_splice  | c.e8+1                 | p.S292_splice |
| Pat_63 | Post-Resistance | GLB1L    | 79411  | 37 | 2  | 220102547 | 220102547 | Splice_Site       | SNP | C | T | 30 | 97  | c.1473_splice | c.e15+1                | p.K491_splice |
| Pat_63 | Post-Resistance | TUBA4A   | 7277   | 37 | 2  | 220116021 | 220116021 | Missense_Mutation | SNP | C | T | 11 | 79  | c.400G>A      | c.(400-402)GGC>AGC     | p.G134S       |
| Pat_63 | Post-Resistance | PTPRN    | 5798   | 37 | 2  | 220166328 | 220166328 | Missense_Mutation | SNP | C | T | 7  | 150 | c.1108G>A     | c.(1108-1110)GGT>AGT   | p.G370S       |
| Pat_63 | Post-Resistance | STK11IP  | 114790 | 37 | 2  | 220476373 | 220476373 | Missense_Mutation | SNP | C | T | 47 | 155 | c.2185C>T     | c.(2185-2187)CTC>TTC   | p.L729F       |
| Pat_63 | Post-Resistance | PSMD1    | 5707   | 37 | 2  | 232028416 | 232028416 | Missense_Mutation | SNP | T | C | 22 | 91  | c.2456T>C     | c.(2455-2457)GTA>GCA   | p.V819A       |
| Pat_63 | Post-Resistance | COL6A3   | 1293   | 37 | 2  | 238274532 | 238274532 | Missense_Mutation | SNP | G | A | 20 | 101 | c.5647C>T     | c.(5647-5649)CCC>TCC   | p.P1883S      |
| Pat_63 | Post-Resistance | LRRFIP1  | 9208   | 37 | 2  | 238671548 | 238671548 | Missense_Mutation | SNP | G | A | 19 | 180 | c.1192G>A     | c.(1192-1194)GAT>AAT   | p.D398N       |
| Pat_63 | Post-Resistance | ANKMY1   | 51281  | 37 | 2  | 241492372 | 241492372 | Missense_Mutation | SNP | C | T | 4  | 97  | c.172G>A      | c.(172-174)GAA>AAA     | p.E58K        |
| Pat_63 | Post-Resistance | AGXT     | 189    | 37 | 2  | 241817455 | 241817455 | Missense_Mutation | SNP | C | T | 6  | 16  | c.959C>T      | c.(958-960)ACA>ATA     | p.T320I       |
| Pat_63 | Post-Resistance | PASK     | 23178  | 37 | 2  | 242066820 | 242066820 | Missense_Mutation | SNP | C | T | 15 | 64  | c.1510G>A     | c.(1510-1512)GCG>ACG   | p.A504T       |
| Pat_63 | Post-Resistance | PASK     | 23178  | 37 | 2  | 242076571 | 242076571 | Missense_Mutation | SNP | C | T | 7  | 36  | c.985G>A      | c.(985-987)GCG>ACG     | p.A329T       |
| Pat_63 | Post-Resistance | HDLBP    | 3069   | 37 | 2  | 242186214 | 242186214 | Missense_Mutation | SNP | T | A | 23 | 113 | c.1903A>T     | c.(1903-1905)AAC>TAC   | p.N635Y       |
| Pat_63 | Post-Resistance | C20orf54 | 113278 | 37 | 20 | 746336    | 746336    | Missense_Mutation | SNP | G | A | 9  | 36  | c.83C>T       | c.(82-84)CCC>CTC       | p.P28L        |
| Pat_63 | Post-Resistance | STK35    | 140901 | 37 | 20 | 2097573   | 2097573   | Missense_Mutation | SNP | G | A | 10 | 53  | c.1154G>A     | c.(1153-1155)AGC>AAC   | p.S385N       |
| Pat_63 | Post-Resistance | TMC2     | 117532 | 37 | 20 | 2596792   | 2596792   | Missense_Mutation | SNP | G | A | 8  | 67  | c.1882G>A     | c.(1882-1884)GCT>ACT   | p.A628T       |
| Pat_63 | Post-Resistance | SIGLEC1  | 6614   | 37 | 20 | 3684715   | 3684715   | Missense_Mutation | SNP | G | A | 22 | 89  | c.730C>T      | c.(730-732)CTC>TTC     | p.L244F       |
| Pat_63 | Post-Resistance | CHD6     | 84181  | 37 | 20 | 40033310  | 40033310  | Missense_Mutation | SNP | G | A | 35 | 133 | c.8071C>T     | c.(8071-8073)CCT>TCT   | p.P2691S      |
| Pat_63 | Post-Resistance | CHD6     | 84181  | 37 | 20 | 40040803  | 40040803  | Missense_Mutation | SNP | G | A | 7  | 42  | c.7232C>T     | c.(7231-7233)CCC>CTC   | p.P2411L      |
| Pat_63 | Post-Resistance | TP53TG5  | 27296  | 37 | 20 | 44004130  | 44004130  | Missense_Mutation | SNP | G | A | 10 | 52  | c.317C>T      | c.(316-318)TCC>TTC     | p.S106F       |
| Pat_63 | Post-Resistance | KCNB1    | 3745   | 37 | 20 | 47989713  | 47989713  | Missense_Mutation | SNP | T | C | 32 | 153 | c.2384A>G     | c.(2383-2385)AAC>AGC   | p.N795S       |
| Pat_63 | Post-Resistance | CASS4    | 57091  | 37 | 20 | 55033445  | 55033445  | Missense_Mutation | SNP | G | A | 9  | 63  | c.2003G>A     | c.(2002-2004)AGG>AAG   | p.R668K       |
| Pat_63 | Post-Resistance | BMP7     | 655    | 37 | 20 | 55777639  | 55777639  | Missense_Mutation | SNP | C | T | 16 | 53  | c.652G>A      | c.(652-654)GCC>ACC     | p.A218T       |

|        |                 |           |        |    |    |          |          |                   |     |   |   |    |     |                |                      |          |
|--------|-----------------|-----------|--------|----|----|----------|----------|-------------------|-----|---|---|----|-----|----------------|----------------------|----------|
| Pat_63 | Post-Resistance | SS18L1    | 26039  | 37 | 20 | 60738610 | 60738610 | Missense_Mutation | SNP | G | A | 3  | 24  | c.653G>A       | c.(652-654)GGG>GAG   | p.G218E  |
| Pat_63 | Post-Resistance | C20orf166 | 128826 | 37 | 20 | 61167687 | 61167687 | Missense_Mutation | SNP | G | A | 3  | 10  | c.157G>A       | c.(157-159)GAA>AAA   | p.E53K   |
| Pat_63 | Post-Resistance | CXADR     | 1525   | 37 | 21 | 18919438 | 18919438 | Missense_Mutation | SNP | G | A | 21 | 48  | c.137G>A       | c.(136-138)AGT>AAT   | p.S46N   |
| Pat_63 | Post-Resistance | CXADR     | 1525   | 37 | 21 | 18924137 | 18924137 | Missense_Mutation | SNP | C | A | 3  | 60  | c.281C>A       | c.(280-282)ACG>AAG   | p.T94K   |
| Pat_63 | Post-Resistance | ADAMTS1   | 9510   | 37 | 21 | 28214249 | 28214249 | Missense_Mutation | SNP | C | T | 22 | 71  | c.1138G>A      | c.(1138-1140)GAT>AAT | p.D380N  |
| Pat_63 | Post-Resistance | USP16     | 10600  | 37 | 21 | 30419545 | 30419545 | Nonsense_Mutation | SNP | T | G | 46 | 143 | c.1914T>G      | c.(1912-1914)TAT>TAG | p.Y638*  |
| Pat_63 | Post-Resistance | SOD1      | 6647   | 37 | 21 | 33040842 | 33040842 | Missense_Mutation | SNP | G | A | 15 | 90  | c.416G>A       | c.(415-417)GGA>GAA   | p.G139E  |
| Pat_63 | Post-Resistance | TRAPPC10  | 7109   | 37 | 21 | 45497586 | 45497586 | Missense_Mutation | SNP | G | A | 6  | 106 | c.1390G>A      | c.(1390-1392)GCC>ACC | p.A464T  |
| Pat_63 | Post-Resistance | CLTCL1    | 8218   | 37 | 22 | 19223266 | 19223266 | Missense_Mutation | SNP | G | A | 13 | 256 | c.922C>T       | c.(922-924)CCA>TCA   | p.P308S  |
| Pat_63 | Post-Resistance | C22orf29  | 79680  | 37 | 22 | 19838985 | 19838985 | Missense_Mutation | SNP | G | A | 7  | 54  | c.800C>T       | c.(799-801)CCC>CTC   | p.P267L  |
| Pat_63 | Post-Resistance | TXNRD2    | 10587  | 37 | 22 | 19864728 | 19864728 | Missense_Mutation | SNP | C | T | 4  | 114 | c.1475G>A      | c.(1474-1476)CGG>CAG | p.R492Q  |
| Pat_63 | Post-Resistance | DGCR8     | 54487  | 37 | 22 | 20073988 | 20073988 | Missense_Mutation | SNP | G | A | 9  | 328 | c.502G>A       | c.(502-504)GTT>ATT   | p.V168I  |
| Pat_63 | Post-Resistance | TRMT2A    | 27037  | 37 | 22 | 20103660 | 20103660 | Missense_Mutation | SNP | C | T | 5  | 163 | c.500G>A       | c.(499-501)CGA>CAA   | p.R167Q  |
| Pat_63 | Post-Resistance | TRMT2A    | 27037  | 37 | 22 | 20103990 | 20103990 | Missense_Mutation | SNP | G | A | 4  | 47  | c.170C>T       | c.(169-171)CCC>CTC   | p.P57L   |
| Pat_63 | Post-Resistance | ZNF74     | 7625   | 37 | 22 | 20759874 | 20759874 | Missense_Mutation | SNP | C | T | 3  | 12  | c.551C>T       | c.(550-552)CCC>CTC   | p.P184L  |
| Pat_63 | Post-Resistance | SLC7A4    | 6545   | 37 | 22 | 21384515 | 21384515 | Missense_Mutation | SNP | C | T | 6  | 58  | c.1108G>A      | c.(1108-1110)GGC>AGC | p.G370S  |
| Pat_63 | Post-Resistance | ZNF280A   | 129025 | 37 | 22 | 22869329 | 22869329 | Missense_Mutation | SNP | G | A | 23 | 204 | c.626C>T       | c.(625-627)CCC>CTC   | p.P209L  |
| Pat_63 | Post-Resistance | LOC96610  | 96610  | 37 | 22 | 23241849 | 23241849 | Splice_Site       | SNP | C | T | 7  | 72  | c.15463_splice | c.e366+2             |          |
| Pat_63 | Post-Resistance | GGT5      | 2687   | 37 | 22 | 24622691 | 24622691 | Missense_Mutation | SNP | C | T | 9  | 92  | c.946G>A       | c.(946-948)GTG>ATG   | p.V316M  |
| Pat_63 | Post-Resistance | GGT1      | 2678   | 37 | 22 | 25019077 | 25019077 | Missense_Mutation | SNP | G | A | 10 | 70  | c.737G>A       | c.(736-738)GGC>GAC   | p.G246D  |
| Pat_63 | Post-Resistance | HPS4      | 89781  | 37 | 22 | 26875274 | 26875274 | Missense_Mutation | SNP | C | T | 10 | 229 | c.89G>A        | c.(88-90)GGC>GAC     | p.G30D   |
| Pat_63 | Post-Resistance | TFIP11    | 24144  | 37 | 22 | 26899709 | 26899709 | Missense_Mutation | SNP | C | T | 8  | 402 | c.571G>A       | c.(571-573)GGG>AGG   | p.G191R  |
| Pat_63 | Post-Resistance | SEC14L3   | 266629 | 37 | 22 | 30864589 | 30864589 | Missense_Mutation | SNP | C | T | 14 | 101 | c.329G>A       | c.(328-330)GGG>GAG   | p.G110E  |
| Pat_63 | Post-Resistance | LIMK2     | 3985   | 37 | 22 | 31674419 | 31674419 | Missense_Mutation | SNP | C | T | 25 | 536 | c.1909C>T      | c.(1909-1911)CCT>TCT | p.P637S  |
| Pat_63 | Post-Resistance | PIK3IP1   | 113791 | 37 | 22 | 31679107 | 31679107 | Missense_Mutation | SNP | G | A | 4  | 71  | c.755C>T       | c.(754-756)ACC>ATC   | p.T252I  |
| Pat_63 | Post-Resistance | PATZ1     | 23598  | 37 | 22 | 31740613 | 31740613 | Missense_Mutation | SNP | G | A | 5  | 197 | c.976C>T       | c.(976-978)CTT>TTT   | p.L326F  |
| Pat_63 | Post-Resistance | FOXRED2   | 80020  | 37 | 22 | 36900157 | 36900157 | Missense_Mutation | SNP | G | A | 10 | 83  | c.1037C>T      | c.(1036-1038)TCC>TTC | p.S346F  |
| Pat_63 | Post-Resistance | GGA1      | 26088  | 37 | 22 | 38026050 | 38026050 | Missense_Mutation | SNP | C | T | 27 | 128 | c.1204C>T      | c.(1204-1206)CCC>TCC | p.P402S  |
| Pat_63 | Post-Resistance | TRIOBP    | 11078  | 37 | 22 | 38131242 | 38131242 | Nonsense_Mutation | SNP | G | A | 28 | 98  | c.4899G>A      | c.(4897-4899)TGG>TGA | p.W1633* |
| Pat_63 | Post-Resistance | PICK1     | 9463   | 37 | 22 | 38453850 | 38453850 | Missense_Mutation | SNP | G | A | 15 | 376 | c.34G>A        | c.(34-36)GAT>AAT     | p.D12N   |
| Pat_63 | Post-Resistance | CSNK1E    | 1454   | 37 | 22 | 38695921 | 38695921 | Missense_Mutation | SNP | C | T | 22 | 589 | c.715G>A       | c.(715-717)GTC>ATC   | p.V239I  |
| Pat_63 | Post-Resistance | KCNJ4     | 3761   | 37 | 22 | 38823404 | 38823404 | Missense_Mutation | SNP | C | T | 7  | 241 | c.734G>A       | c.(733-735)GGC>GAC   | p.G245D  |
| Pat_63 | Post-Resistance | DDX17     | 10521  | 37 | 22 | 38882193 | 38882193 | Missense_Mutation | SNP | C | T | 17 | 339 | c.1943G>A      | c.(1942-1944)GGC>GAC | p.G648D  |
| Pat_63 | Post-Resistance | GTPBP1    | 9567   | 37 | 22 | 39104916 | 39104916 | Missense_Mutation | SNP | G | A | 30 | 185 | c.259G>A       | c.(259-261)GAC>AAC   | p.D87N   |
| Pat_63 | Post-Resistance | APOBEC3C  | 27350  | 37 | 22 | 39413792 | 39413792 | Missense_Mutation | SNP | C | T | 47 | 262 | c.196C>T       | c.(196-198)CAT>TAT   | p.H66Y   |
| Pat_63 | Post-Resistance | RPS19BP1  | 91582  | 37 | 22 | 39928436 | 39928436 | Missense_Mutation | SNP | T | C | 14 | 122 | c.145A>G       | c.(145-147)AAC>GAC   | p.N49D   |
| Pat_63 | Post-Resistance | SGSM3     | 27352  | 37 | 22 | 40801813 | 40801813 | Missense_Mutation | SNP | C | T | 16 | 110 | c.779C>T       | c.(778-780)CCT>CTT   | p.P260L  |
| Pat_63 | Post-Resistance | XPNPEP3   | 63929  | 37 | 22 | 41320405 | 41320405 | Missense_Mutation | SNP | C | T | 17 | 843 | c.1276C>T      | c.(1276-1278)CTC>TTC | p.L426F  |
| Pat_63 | Post-Resistance | EP300     | 2033   | 37 | 22 | 41513598 | 41513598 | Missense_Mutation | SNP | G | A | 14 | 332 | c.502G>A       | c.(502-504)GGG>AGG   | p.G168R  |
| Pat_63 | Post-Resistance | EP300     | 2033   | 37 | 22 | 41545924 | 41545924 | Missense_Mutation | SNP | C | T | 14 | 192 | c.2539C>T      | c.(2539-2541)CCA>TCA | p.P847S  |
| Pat_63 | Post-Resistance | POLR3H    | 171568 | 37 | 22 | 41940058 | 41940058 | Nonsense_Mutation | SNP | C | T | 9  | 236 | c.48G>A        | c.(46-48)TGG>TGA     | p.W16*   |
| Pat_63 | Post-Resistance | XRCC6     | 2547   | 37 | 22 | 42046754 | 42046754 | Missense_Mutation | SNP | G | A | 15 | 323 | c.988G>A       | c.(988-990)GAG>AAG   | p.E330K  |
| Pat_63 | Post-Resistance | XRCC6     | 2547   | 37 | 22 | 42054305 | 42054305 | Missense_Mutation | SNP | G | A | 18 | 243 | c.1471G>A      | c.(1471-1473)GAG>AAG | p.E491K  |
| Pat_63 | Post-Resistance | MEI1      | 150365 | 37 | 22 | 42139163 | 42139163 | Missense_Mutation | SNP | G | A | 10 | 149 | c.1411G>A      | c.(1411-1413)GAG>AAG | p.E471K  |
| Pat_63 | Post-Resistance | TCF20     | 6942   | 37 | 22 | 42606013 | 42606013 | Missense_Mutation | SNP | C | T | 14 | 359 | c.5299G>A      | c.(5299-5301)GAG>AAG | p.E1767K |
| Pat_63 | Post-Resistance | TCF20     | 6942   | 37 | 22 | 42607668 | 42607668 | Missense_Mutation | SNP | G | A | 10 | 209 | c.3644C>T      | c.(3643-3645)CCC>CTC | p.P1215L |
| Pat_63 | Post-Resistance | TCF20     | 6942   | 37 | 22 | 42609099 | 42609099 | Missense_Mutation | SNP | C | T | 15 | 633 | c.2213G>A      | c.(2212-2214)GGC>GAC | p.G738D  |

|        |                 |          |        |    |    |          |          |                   |     |   |   |    |     |               |                      |               |
|--------|-----------------|----------|--------|----|----|----------|----------|-------------------|-----|---|---|----|-----|---------------|----------------------|---------------|
| Pat_63 | Post-Resistance | NFAM1    | 150372 | 37 | 22 | 42793898 | 42793898 | Missense_Mutation | SNP | C | T | 8  | 317 | c.629G>A      | c.(628-630)AGC>AAC   | p.S210N       |
| Pat_63 | Post-Resistance | RRP7A    | 27341  | 37 | 22 | 42911232 | 42911232 | Missense_Mutation | SNP | C | T | 6  | 172 | c.385G>A      | c.(385-387)GTG>ATG   | p.V129M       |
| Pat_63 | Post-Resistance | FAM118A  | 55007  | 37 | 22 | 45723730 | 45723730 | Missense_Mutation | SNP | G | A | 11 | 459 | c.308G>A      | c.(307-309)GGC>GAC   | p.G103D       |
| Pat_63 | Post-Resistance | SMC1B    | 27127  | 37 | 22 | 45782851 | 45782851 | Missense_Mutation | SNP | G | A | 14 | 716 | c.1807C>T     | c.(1807-1809)CCT>TCT | p.P603S       |
| Pat_63 | Post-Resistance | FBLN1    | 2192   | 37 | 22 | 45923757 | 45923757 | Missense_Mutation | SNP | G | A | 11 | 514 | c.352G>A      | c.(352-354)GCG>ACG   | p.A118T       |
| Pat_63 | Post-Resistance | PKDREJ   | 10343  | 37 | 22 | 46657298 | 46657298 | Missense_Mutation | SNP | C | T | 22 | 754 | c.1922G>A     | c.(1921-1923)AGT>AAT | p.S641N       |
| Pat_63 | Post-Resistance | SHANK3   | 85358  | 37 | 22 | 51154142 | 51154142 | Missense_Mutation | SNP | G | A | 8  | 144 | c.2359G>A     | c.(2359-2361)GGC>AGC | p.G787S       |
| Pat_63 | Post-Resistance | ACR      | 49     | 37 | 22 | 51182491 | 51182491 | Missense_Mutation | SNP | C | T | 5  | 168 | c.568C>T      | c.(568-570)CCC>TCC   | p.P190S       |
| Pat_63 | Post-Resistance | CNTN4    | 152330 | 37 | 3  | 3081863  | 3081863  | Missense_Mutation | SNP | C | T | 19 | 82  | c.2306C>T     | c.(2305-2307)CCC>CTC | p.P769L       |
| Pat_63 | Post-Resistance | EDEM1    | 9695   | 37 | 3  | 5248941  | 5248941  | Missense_Mutation | SNP | T | C | 3  | 115 | c.1321T>C     | c.(1321-1323)TTT>CTT | p.F441L       |
| Pat_63 | Post-Resistance | SETD5    | 55209  | 37 | 3  | 9512495  | 9512495  | Missense_Mutation | SNP | C | T | 5  | 27  | c.3077C>T     | c.(3076-3078)TCC>TTC | p.S1026F      |
| Pat_63 | Post-Resistance | TLL3     | 26140  | 37 | 3  | 9877103  | 9877103  | Missense_Mutation | SNP | C | T | 8  | 224 | c.2249C>T     | c.(2248-2250)TCC>TTC | p.S750F       |
| Pat_63 | Post-Resistance | IL17RC   | 84818  | 37 | 3  | 9970108  | 9970108  | Missense_Mutation | SNP | C | T | 7  | 40  | c.1210C>T     | c.(1210-1212)CCG>TCG | p.P404S       |
| Pat_63 | Post-Resistance | IL17RC   | 84818  | 37 | 3  | 9975138  | 9975138  | Missense_Mutation | SNP | G | A | 5  | 23  | c.2237G>A     | c.(2236-2238)GGG>GAG | p.G746E       |
| Pat_63 | Post-Resistance | TMEM111  | 55831  | 37 | 3  | 10015370 | 10015370 | Missense_Mutation | SNP | G | A | 27 | 138 | c.436C>T      | c.(436-438)CTC>TTC   | p.L146F       |
| Pat_63 | Post-Resistance | ATG7     | 10533  | 37 | 3  | 11374463 | 11374463 | Missense_Mutation | SNP | C | T | 4  | 16  | c.785C>T      | c.(784-786)TCT>TTT   | p.S262F       |
| Pat_63 | Post-Resistance | ZFYVE20  | 64145  | 37 | 3  | 15115302 | 15115302 | Missense_Mutation | SNP | C | T | 13 | 144 | c.2342G>A     | c.(2341-2343)GGG>GAG | p.G781E       |
| Pat_63 | Post-Resistance | SH3BP5   | 9467   | 37 | 3  | 15311221 | 15311221 | Missense_Mutation | SNP | C | T | 26 | 185 | c.494G>A      | c.(493-495)AGG>AAG   | p.R165K       |
| Pat_63 | Post-Resistance | PLCL2    | 23228  | 37 | 3  | 17131267 | 17131267 | Missense_Mutation | SNP | G | A | 15 | 114 | c.3223G>A     | c.(3223-3225)GAG>AAG | p.E1075K      |
| Pat_63 | Post-Resistance | OSBPL10  | 114884 | 37 | 3  | 31725509 | 31725509 | Missense_Mutation | SNP | C | T | 23 | 85  | c.1343G>A     | c.(1342-1344)GGG>GAG | p.G448E       |
| Pat_63 | Post-Resistance | ZNF860   | 344787 | 37 | 3  | 32031628 | 32031628 | Missense_Mutation | SNP | C | T | 14 | 136 | c.1057C>T     | c.(1057-1059)CGT>TGT | p.R353C       |
| Pat_63 | Post-Resistance | CNOT10   | 25904  | 37 | 3  | 32746399 | 32746399 | Missense_Mutation | SNP | T | C | 18 | 90  | c.214T>C      | c.(214-216)TTT>CTT   | p.F72L        |
| Pat_63 | Post-Resistance | LRRFIP2  | 9209   | 37 | 3  | 37163148 | 37163148 | Missense_Mutation | SNP | G | A | 16 | 142 | c.263C>T      | c.(262-264)TCC>TTC   | p.S88F        |
| Pat_63 | Post-Resistance | GOLGA4   | 2803   | 37 | 3  | 37367692 | 37367692 | Missense_Mutation | SNP | T | C | 14 | 139 | c.4315T>C     | c.(4315-4317)TCC>CCC | p.S1439P      |
| Pat_63 | Post-Resistance | GOLGA4   | 2803   | 37 | 3  | 37369306 | 37369306 | Missense_Mutation | SNP | G | A | 10 | 62  | c.5929G>A     | c.(5929-5931)GAG>AAG | p.E1977K      |
| Pat_63 | Post-Resistance | ITGA9    | 3680   | 37 | 3  | 37860433 | 37860433 | Missense_Mutation | SNP | C | T | 7  | 75  | c.3061C>T     | c.(3061-3063)CGG>TGG | p.R1021W      |
| Pat_63 | Post-Resistance | VILL     | 50853  | 37 | 3  | 38048063 | 38048063 | Missense_Mutation | SNP | G | A | 13 | 51  | c.2329G>A     | c.(2329-2331)GCT>ACT | p.A777T       |
| Pat_63 | Post-Resistance | ACAA1    | 30     | 37 | 3  | 38173470 | 38173470 | Missense_Mutation | SNP | G | A | 27 | 142 | c.350C>T      | c.(349-351)TCC>TTC   | p.S117F       |
| Pat_63 | Post-Resistance | MYRIP    | 25924  | 37 | 3  | 40275349 | 40275349 | Splice_Site       | SNP | G | A | 13 | 95  | c.1906_splice | c.e12-1              | p.K636_splice |
| Pat_63 | Post-Resistance | CTNNB1   | 1499   | 37 | 3  | 41275723 | 41275723 | Missense_Mutation | SNP | C | T | 8  | 191 | c.1618C>T     | c.(1618-1620)CTT>TTT | p.L540F       |
| Pat_63 | Post-Resistance | LRRRC2   | 79442  | 37 | 3  | 46586699 | 46586699 | Missense_Mutation | SNP | C | T | 6  | 52  | c.170G>A      | c.(169-171)GGC>GAC   | p.G57D        |
| Pat_63 | Post-Resistance | PTH1R    | 5745   | 37 | 3  | 46942562 | 46942562 | Missense_Mutation | SNP | C | A | 4  | 18  | c.1036C>A     | c.(1036-1038)CTG>ATG | p.L346M       |
| Pat_63 | Post-Resistance | SETD2    | 29072  | 37 | 3  | 47125260 | 47125260 | Missense_Mutation | SNP | C | T | 26 | 198 | c.6010G>A     | c.(6010-6012)GAT>AAT | p.D2004N      |
| Pat_63 | Post-Resistance | CSPG5    | 10675  | 37 | 3  | 47614179 | 47614179 | Missense_Mutation | SNP | G | A | 9  | 108 | c.1379C>T     | c.(1378-1380)ACC>ATC | p.T460I       |
| Pat_63 | Post-Resistance | COL7A1   | 1294   | 37 | 3  | 48623812 | 48623812 | Missense_Mutation | SNP | G | A | 8  | 290 | c.3503C>T     | c.(3502-3504)CCC>CTC | p.P1168L      |
| Pat_63 | Post-Resistance | IP6K2    | 51447  | 37 | 3  | 48730580 | 48730580 | Missense_Mutation | SNP | C | T | 6  | 116 | c.235G>A      | c.(235-237)GAC>AAC   | p.D79N        |
| Pat_63 | Post-Resistance | AMT      | 275    | 37 | 3  | 49455124 | 49455124 | Missense_Mutation | SNP | G | A | 36 | 203 | c.1061C>T     | c.(1060-1062)CCC>CTC | p.P354L       |
| Pat_63 | Post-Resistance | CACNA2D2 | 9254   | 37 | 3  | 50404913 | 50404913 | Nonsense_Mutation | SNP | C | T | 8  | 39  | c.2334G>A     | c.(2332-2334)TGG>TGA | p.W778*       |
| Pat_63 | Post-Resistance | RAD54L2  | 23132  | 37 | 3  | 51667777 | 51667777 | Splice_Site       | SNP | T | C | 17 | 49  | c.1008_splice | c.e7+2               | p.P336_splice |
| Pat_63 | Post-Resistance | ACY1     | 95     | 37 | 3  | 52019904 | 52019904 | Missense_Mutation | SNP | G | A | 10 | 62  | c.301G>A      | c.(301-303)GAT>AAT   | p.D101N       |
| Pat_63 | Post-Resistance | GLYCTK   | 132158 | 37 | 3  | 52326454 | 52326454 | Missense_Mutation | SNP | C | T | 4  | 75  | c.884C>T      | c.(883-885)CCC>CTC   | p.P295L       |
| Pat_63 | Post-Resistance | SFMBT1   | 51460  | 37 | 3  | 52950168 | 52950168 | Missense_Mutation | SNP | G | A | 11 | 94  | c.1478C>T     | c.(1477-1479)TCA>TTA | p.S493L       |
| Pat_63 | Post-Resistance | CDC66    | 285331 | 37 | 3  | 56601063 | 56601063 | Nonsense_Mutation | SNP | C | T | 8  | 97  | c.796C>T      | c.(796-798)CAG>TAG   | p.Q266*       |
| Pat_63 | Post-Resistance | C3orf63  | 23272  | 37 | 3  | 56680684 | 56680684 | Missense_Mutation | SNP | C | T | 12 | 105 | c.2081G>A     | c.(2080-2082)AGT>AAT | p.S694N       |
| Pat_63 | Post-Resistance | SPATA12  | 353324 | 37 | 3  | 57108015 | 57108015 | Missense_Mutation | SNP | A | C | 4  | 119 | c.293A>C      | c.(292-294)CAA>CCA   | p.Q98P        |
| Pat_63 | Post-Resistance | IL17RD   | 54756  | 37 | 3  | 57130531 | 57130531 | Missense_Mutation | SNP | C | T | 20 | 90  | c.2110G>A     | c.(2110-2112)GAG>AAG | p.E704K       |
| Pat_63 | Post-Resistance | PRICKLE2 | 166336 | 37 | 3  | 64133348 | 64133348 | Missense_Mutation | SNP | C | T | 20 | 108 | c.818G>A      | c.(817-819)GGC>GAC   | p.G273D       |

|        |                 |          |        |    |   |           |           |                   |     |   |   |    |     |              |                      |               |
|--------|-----------------|----------|--------|----|---|-----------|-----------|-------------------|-----|---|---|----|-----|--------------|----------------------|---------------|
| Pat_63 | Post-Resistance | ADAMTS9  | 56999  | 37 | 3 | 64617589  | 64617589  | Missense_Mutation | SNP | C | T | 5  | 48  | c.2188G>A    | c.(2188-2190)GAT>AAT | p.D730N       |
| Pat_63 | Post-Resistance | FAM19A1  | 407738 | 37 | 3 | 68055858  | 68055858  | Missense_Mutation | SNP | C | T | 23 | 161 | c.89C>T      | c.(88-90)ACT>ATT     | p.T30I        |
| Pat_63 | Post-Resistance | PPP4R2   | 151987 | 37 | 3 | 73114008  | 73114008  | Missense_Mutation | SNP | C | T | 7  | 132 | c.644C>T     | c.(643-645)TCT>TTT   | p.S215F       |
| Pat_63 | Post-Resistance | ROBO1    | 6091   | 37 | 3 | 78649402  | 78649402  | Missense_Mutation | SNP | G | A | 9  | 96  | c.4802C>T    | c.(4801-4803)CCC>CTC | p.P1601L      |
| Pat_63 | Post-Resistance | ROBO1    | 6091   | 37 | 3 | 78710408  | 78710408  | Missense_Mutation | SNP | C | T | 5  | 21  | c.2092G>A    | c.(2092-2094)GAT>AAT | p.D698N       |
| Pat_63 | Post-Resistance | EPHA6    | 285220 | 37 | 3 | 96945179  | 96945179  | Missense_Mutation | SNP | A | T | 29 | 61  | c.1186A>T    | c.(1186-1188)ACA>TCA | p.T396S       |
| Pat_63 | Post-Resistance | TOMM70A  | 9868   | 37 | 3 | 100105188 | 100105188 | Nonsense_Mutation | SNP | G | A | 7  | 18  | c.499C>T     | c.(499-501)CAA>TAA   | p.Q167*       |
| Pat_63 | Post-Resistance | IMPG2    | 50939  | 37 | 3 | 100972586 | 100972586 | Missense_Mutation | SNP | C | A | 8  | 21  | c.1193G>T    | c.(1192-1194)TGG>TTG | p.W398L       |
| Pat_63 | Post-Resistance | SENP7    | 57337  | 37 | 3 | 101044800 | 101044800 | Missense_Mutation | SNP | C | T | 5  | 165 | c.3140G>A    | c.(3139-3141)GGC>GAC | p.G1047D      |
| Pat_63 | Post-Resistance | IFT57    | 55081  | 37 | 3 | 107925531 | 107925531 | Missense_Mutation | SNP | C | T | 6  | 22  | c.598G>A     | c.(598-600)GAT>AAT   | p.D200N       |
| Pat_63 | Post-Resistance | KIAA1524 | 57650  | 37 | 3 | 108279513 | 108279513 | Missense_Mutation | SNP | G | A | 29 | 105 | c.1810C>T    | c.(1810-1812)CTT>TTT | p.L604F       |
| Pat_63 | Post-Resistance | BTLA     | 151888 | 37 | 3 | 112218193 | 112218193 | Missense_Mutation | SNP | G | A | 8  | 38  | c.13C>T      | c.(13-15)CCT>TCT     | p.P5S         |
| Pat_63 | Post-Resistance | CCDC52   | 152185 | 37 | 3 | 113169336 | 113169336 | Missense_Mutation | SNP | G | A | 15 | 32  | c.2170C>T    | c.(2170-2172)CCA>TCA | p.P724S       |
| Pat_63 | Post-Resistance | GRAMD1C  | 54762  | 37 | 3 | 113655179 | 113655179 | Missense_Mutation | SNP | G | A | 8  | 59  | c.1523G>A    | c.(1522-1524)GGC>GAC | p.G508D       |
| Pat_63 | Post-Resistance | PARP14   | 54625  | 37 | 3 | 122418732 | 122418732 | Missense_Mutation | SNP | G | A | 19 | 68  | c.1331G>A    | c.(1330-1332)AGC>AAC | p.S444N       |
| Pat_63 | Post-Resistance | KALRN    | 8997   | 37 | 3 | 123983478 | 123983478 | Missense_Mutation | SNP | C | T | 3  | 38  | c.391C>T     | c.(391-393)CCC>TCC   | p.P131S       |
| Pat_63 | Post-Resistance | ALG1L2   | 644974 | 37 | 3 | 129814925 | 129814925 | Missense_Mutation | SNP | C | T | 3  | 48  | c.458C>T     | c.(457-459)TCC>TTC   | p.S153F       |
| Pat_63 | Post-Resistance | DNAJC13  | 23317  | 37 | 3 | 132207280 | 132207280 | Missense_Mutation | SNP | G | A | 22 | 50  | c.3406G>A    | c.(3406-3408)GTG>ATG | p.V1136M      |
| Pat_63 | Post-Resistance | TF       | 7018   | 37 | 3 | 133494435 | 133494435 | Missense_Mutation | SNP | G | A | 43 | 81  | c.1846G>A    | c.(1846-1848)GTC>ATC | p.V616I       |
| Pat_63 | Post-Resistance | PCOLCE2  | 26577  | 37 | 3 | 142539881 | 142539881 | Missense_Mutation | SNP | G | A | 4  | 79  | c.956C>T     | c.(955-957)GCC>GTC   | p.A319V       |
| Pat_63 | Post-Resistance | PLSCR1   | 5359   | 37 | 3 | 146251283 | 146251283 | Missense_Mutation | SNP | G | A | 5  | 179 | c.68C>T      | c.(67-69)CCT>CTT     | p.P23L        |
| Pat_63 | Post-Resistance | IGSF10   | 285313 | 37 | 3 | 151161004 | 151161004 | Missense_Mutation | SNP | C | T | 11 | 47  | c.5731G>A    | c.(5731-5733)GAC>AAC | p.D1911N      |
| Pat_63 | Post-Resistance | TMEM14E  | 645843 | 37 | 3 | 152058383 | 152058383 | Missense_Mutation | SNP | C | T | 6  | 123 | c.311G>A     | c.(310-312)GGA>GAA   | p.G104E       |
| Pat_63 | Post-Resistance | ZBBX     | 79740  | 37 | 3 | 167068207 | 167068207 | Splice_Site       | SNP | C | T | 32 | 208 | c.528_splice | c.e9+1               | p.Q176_splice |
| Pat_63 | Post-Resistance | MECOM    | 2122   | 37 | 3 | 169099115 | 169099115 | Missense_Mutation | SNP | C | T | 26 | 111 | c.235G>A     | c.(235-237)GAG>AAG   | p.E79K        |
| Pat_63 | Post-Resistance | LRRIQ4   | 344657 | 37 | 3 | 169548377 | 169548377 | Missense_Mutation | SNP | A | C | 7  | 20  | c.1292A>C    | c.(1291-1293)AAT>ACT | p.N431T       |
| Pat_63 | Post-Resistance | PIK3CA   | 5290   | 37 | 3 | 178942525 | 178942525 | Missense_Mutation | SNP | C | T | 18 | 73  | c.2332C>T    | c.(2332-2334)CCA>TCA | p.P778S       |
| Pat_63 | Post-Resistance | EIF2B5   | 8893   | 37 | 3 | 183860884 | 183860884 | Missense_Mutation | SNP | G | A | 10 | 47  | c.1699G>A    | c.(1699-1701)GAG>AAG | p.E567K       |
| Pat_63 | Post-Resistance | DVL3     | 1857   | 37 | 3 | 183883938 | 183883938 | Missense_Mutation | SNP | C | T | 14 | 95  | c.788C>T     | c.(787-789)TCC>TTC   | p.S263F       |
| Pat_63 | Post-Resistance | LPP      | 4026   | 37 | 3 | 188327028 | 188327028 | Missense_Mutation | SNP | C | T | 73 | 492 | c.509C>T     | c.(508-510)CCC>CTC   | p.P170L       |
| Pat_63 | Post-Resistance | CLDN1    | 9076   | 37 | 3 | 190026151 | 190026151 | Missense_Mutation | SNP | C | T | 10 | 54  | c.551G>A     | c.(550-552)TGT>TAT   | p.C184Y       |
| Pat_63 | Post-Resistance | TFRC     | 7037   | 37 | 3 | 195794997 | 195794997 | Missense_Mutation | SNP | G | A | 3  | 48  | c.806C>T     | c.(805-807)GCA>GTA   | p.A269V       |
| Pat_63 | Post-Resistance | DLG1     | 1739   | 37 | 3 | 196792287 | 196792287 | Missense_Mutation | SNP | C | T | 10 | 82  | c.2266G>A    | c.(2266-2268)GAT>AAT | p.D756N       |
| Pat_63 | Post-Resistance | ZNF595   | 152687 | 37 | 4 | 195420    | 195420    | Splice_Site       | SNP | G | A | 5  | 13  | c.514_splice | c.e5-1               |               |
| Pat_63 | Post-Resistance | ZNF721   | 170960 | 37 | 4 | 435649    | 435649    | Missense_Mutation | SNP | T | G | 7  | 173 | c.2607A>C    | c.(2605-2607)GAA>GAC | p.E869D       |
| Pat_63 | Post-Resistance | ZNF721   | 170960 | 37 | 4 | 436574    | 436574    | Missense_Mutation | SNP | T | A | 9  | 301 | c.1682A>T    | c.(1681-1683)GAA>GTA | p.E561V       |
| Pat_63 | Post-Resistance | SLBP     | 7884   | 37 | 4 | 1705407   | 1705407   | Missense_Mutation | SNP | G | A | 5  | 199 | c.197C>T     | c.(196-198)CCT>CTT   | p.P66L        |
| Pat_63 | Post-Resistance | ADD1     | 118    | 37 | 4 | 2900208   | 2900208   | Missense_Mutation | SNP | G | A | 18 | 142 | c.934G>A     | c.(934-936)GAG>AAG   | p.E312K       |
| Pat_63 | Post-Resistance | HTT      | 3064   | 37 | 4 | 3142380   | 3142380   | Missense_Mutation | SNP | C | T | 19 | 88  | c.2948C>T    | c.(2947-2949)ACC>ATC | p.T983I       |
| Pat_63 | Post-Resistance | DOK7     | 285489 | 37 | 4 | 3478120   | 3478120   | Missense_Mutation | SNP | C | T | 15 | 154 | c.383C>T     | c.(382-384)CCG>CTG   | p.P128L       |
| Pat_63 | Post-Resistance | EVC      | 2121   | 37 | 4 | 5806463   | 5806463   | Missense_Mutation | SNP | G | A | 7  | 56  | c.2456G>A    | c.(2455-2457)AGG>AAG | p.R819K       |
| Pat_63 | Post-Resistance | ABLIM2   | 84448  | 37 | 4 | 8062694   | 8062694   | Missense_Mutation | SNP | C | T | 5  | 16  | c.763G>A     | c.(763-765)GGT>AGT   | p.G255S       |
| Pat_63 | Post-Resistance | SH3TC1   | 54436  | 37 | 4 | 8216266   | 8216266   | Missense_Mutation | SNP | C | T | 13 | 63  | c.440C>T     | c.(439-441)ACT>ATT   | p.T147I       |
| Pat_63 | Post-Resistance | SLC2A9   | 56606  | 37 | 4 | 10022908  | 10022908  | Missense_Mutation | SNP | C | T | 17 | 136 | c.146G>A     | c.(145-147)AGA>AAA   | p.R49K        |
| Pat_63 | Post-Resistance | CLNK     | 116449 | 37 | 4 | 10542163  | 10542163  | Missense_Mutation | SNP | G | A | 17 | 101 | c.557C>T     | c.(556-558)CCT>CTT   | p.P186L       |
| Pat_63 | Post-Resistance | CC2D2A   | 57545  | 37 | 4 | 15538544  | 15538544  | Missense_Mutation | SNP | G | A | 5  | 34  | c.1609G>A    | c.(1609-1611)GAA>AAA | p.E537K       |
| Pat_63 | Post-Resistance | DCAF16   | 54876  | 37 | 4 | 17805665  | 17805665  | Missense_Mutation | SNP | C | T | 12 | 59  | c.100G>A     | c.(100-102)GAT>AAT   | p.D34N        |

|        |                 |          |        |    |   |           |           |                   |     |   |   |    |     |               |                      |               |
|--------|-----------------|----------|--------|----|---|-----------|-----------|-------------------|-----|---|---|----|-----|---------------|----------------------|---------------|
| Pat_63 | Post-Resistance | GPR125   | 166647 | 37 | 4 | 22414900  | 22414900  | Missense_Mutation | SNP | C | T | 81 | 405 | c.2137G>A     | c.(2137-2139)GGA>AGA | p.G713R       |
| Pat_63 | Post-Resistance | DHX15    | 1665   | 37 | 4 | 24534486  | 24534486  | Splice_Site       | SNP | C | T | 41 | 324 | c.2100_splice | c.e12+1              | p.Q700_splice |
| Pat_63 | Post-Resistance | PGM2     | 55276  | 37 | 4 | 37848592  | 37848592  | Missense_Mutation | SNP | C | T | 8  | 84  | c.1048C>T     | c.(1048-1050)CTC>TTC | p.L350F       |
| Pat_63 | Post-Resistance | KLF3     | 51274  | 37 | 4 | 38690239  | 38690239  | Missense_Mutation | SNP | C | T | 11 | 72  | c.91C>T       | c.(91-93)CCT>TCT     | p.P31S        |
| Pat_63 | Post-Resistance | TLR10    | 81793  | 37 | 4 | 38777133  | 38777133  | Missense_Mutation | SNP | C | T | 10 | 77  | c.79G>A       | c.(79-81)GAA>AAA     | p.E27K        |
| Pat_63 | Post-Resistance | FRYL     | 285527 | 37 | 4 | 48581249  | 48581249  | Missense_Mutation | SNP | G | A | 12 | 69  | c.2269C>T     | c.(2269-2271)CTC>TTC | p.L757F       |
| Pat_63 | Post-Resistance | SCFD2    | 152579 | 37 | 4 | 53740170  | 53740170  | Missense_Mutation | SNP | G | A | 18 | 104 | c.2021C>T     | c.(2020-2022)GCA>GTA | p.A674V       |
| Pat_63 | Post-Resistance | KDR      | 3791   | 37 | 4 | 55968084  | 55968084  | Missense_Mutation | SNP | T | C | 5  | 48  | c.2246A>G     | c.(2245-2247)GAG>GGG | p.E749G       |
| Pat_63 | Post-Resistance | EXOC1    | 55763  | 37 | 4 | 56744084  | 56744084  | Missense_Mutation | SNP | G | A | 28 | 80  | c.1076G>A     | c.(1075-1077)GGT>GAT | p.G359D       |
| Pat_63 | Post-Resistance | CEP135   | 9662   | 37 | 4 | 56878056  | 56878056  | Missense_Mutation | SNP | G | A | 8  | 71  | c.2707G>A     | c.(2707-2709)GAA>AAA | p.E903K       |
| Pat_63 | Post-Resistance | LPHN3    | 23284  | 37 | 4 | 62813882  | 62813882  | Missense_Mutation | SNP | G | A | 7  | 31  | c.2489G>A     | c.(2488-2490)GGT>GAT | p.G830D       |
| Pat_63 | Post-Resistance | PAQR3    | 152559 | 37 | 4 | 79841809  | 79841809  | Missense_Mutation | SNP | G | A | 18 | 56  | c.820C>T      | c.(820-822)CAC>TAC   | p.H274Y       |
| Pat_63 | Post-Resistance | TMEM150C | 441027 | 37 | 4 | 83417348  | 83417348  | Missense_Mutation | SNP | G | A | 15 | 63  | c.236C>T      | c.(235-237)GCC>GTC   | p.A79V        |
| Pat_63 | Post-Resistance | COQ2     | 27235  | 37 | 4 | 84194688  | 84194688  | Missense_Mutation | SNP | G | A | 23 | 67  | c.542C>T      | c.(541-543)ACC>ATC   | p.T181I       |
| Pat_63 | Post-Resistance | C4orf36  | 132989 | 37 | 4 | 87809031  | 87809031  | Missense_Mutation | SNP | C | T | 4  | 42  | c.236G>A      | c.(235-237)AGG>AAG   | p.R79K        |
| Pat_63 | Post-Resistance | EMCN     | 51705  | 37 | 4 | 101331503 | 101331503 | Missense_Mutation | SNP | G | A | 12 | 74  | c.761C>T      | c.(760-762)TCT>TTT   | p.S254F       |
| Pat_63 | Post-Resistance | SLC39A8  | 64116  | 37 | 4 | 103225556 | 103225556 | Missense_Mutation | SNP | C | T | 4  | 101 | c.758G>A      | c.(757-759)GGT>GAT   | p.G253D       |
| Pat_63 | Post-Resistance | NUDT6    | 11162  | 37 | 4 | 123833743 | 123833743 | Missense_Mutation | SNP | C | T | 7  | 46  | c.478G>A      | c.(478-480)GTT>ATT   | p.V160I       |
| Pat_63 | Post-Resistance | PCDH10   | 57575  | 37 | 4 | 134073651 | 134073651 | Missense_Mutation | SNP | G | A | 4  | 10  | c.2356G>A     | c.(2356-2358)GAC>AAC | p.D786N       |
| Pat_63 | Post-Resistance | MAML3    | 55534  | 37 | 4 | 140811424 | 140811424 | Missense_Mutation | SNP | G | C | 27 | 43  | c.1166C>G     | c.(1165-1167)TCC>TGC | p.S389C       |
| Pat_63 | Post-Resistance | ANAPC10  | 10393  | 37 | 4 | 146017140 | 146017140 | Missense_Mutation | SNP | G | A | 54 | 221 | c.112C>T      | c.(112-114)CCA>TCA   | p.P38S        |
| Pat_63 | Post-Resistance | SH3D19   | 152503 | 37 | 4 | 152065124 | 152065124 | Missense_Mutation | SNP | C | T | 17 | 105 | c.1390G>A     | c.(1390-1392)GTT>ATT | p.V464I       |
| Pat_63 | Post-Resistance | FNIP2    | 57600  | 37 | 4 | 159790277 | 159790277 | Missense_Mutation | SNP | G | A | 10 | 42  | c.2489G>A     | c.(2488-2490)GGA>GAA | p.G830E       |
| Pat_63 | Post-Resistance | RAPGEF2  | 9693   | 37 | 4 | 160253806 | 160253806 | Missense_Mutation | SNP | C | T | 13 | 37  | c.1609C>T     | c.(1609-1611)CTC>TTC | p.L537F       |
| Pat_63 | Post-Resistance | TLL1     | 7092   | 37 | 4 | 166929191 | 166929191 | Missense_Mutation | SNP | C | T | 12 | 84  | c.908C>T      | c.(907-909)ACC>ATC   | p.T303I       |
| Pat_63 | Post-Resistance | TLL1     | 7092   | 37 | 4 | 166981197 | 166981197 | Missense_Mutation | SNP | C | T | 6  | 36  | c.1864C>T     | c.(1864-1866)CTT>TTT | p.L622F       |
| Pat_63 | Post-Resistance | EXOC3    | 11336  | 37 | 5 | 466843    | 466843    | Missense_Mutation | SNP | G | A | 9  | 65  | c.2068G>A     | c.(2068-2070)GAT>AAT | p.D690N       |
| Pat_63 | Post-Resistance | ZDHHC11  | 79844  | 37 | 5 | 819674    | 819674    | Missense_Mutation | SNP | G | A | 11 | 184 | c.1112C>T     | c.(1111-1113)ACT>ATT | p.T371I       |
| Pat_63 | Post-Resistance | ADAMTS16 | 170690 | 37 | 5 | 5209331   | 5209331   | Missense_Mutation | SNP | C | A | 45 | 148 | c.1577C>A     | c.(1576-1578)GCC>GAC | p.A526D       |
| Pat_63 | Post-Resistance | KIAA0947 | 23379  | 37 | 5 | 5460861   | 5460861   | Missense_Mutation | SNP | A | G | 13 | 73  | c.1414A>G     | c.(1414-1416)AGT>GGT | p.S472G       |
| Pat_63 | Post-Resistance | ZNF622   | 90441  | 37 | 5 | 16465657  | 16465657  | Missense_Mutation | SNP | C | T | 6  | 60  | c.118G>A      | c.(118-120)GCC>ACC   | p.A40T        |
| Pat_63 | Post-Resistance | RNASEN   | 29102  | 37 | 5 | 31515175  | 31515175  | Missense_Mutation | SNP | C | T | 19 | 132 | c.1210G>A     | c.(1210-1212)GAA>AAA | p.E404K       |
| Pat_63 | Post-Resistance | RXFP3    | 51289  | 37 | 5 | 33937023  | 33937023  | Missense_Mutation | SNP | G | A | 17 | 91  | c.178G>A      | c.(178-180)GCG>ACG   | p.A60T        |
| Pat_63 | Post-Resistance | SPEF2    | 79925  | 37 | 5 | 35659175  | 35659175  | Missense_Mutation | SNP | G | A | 10 | 89  | c.1033G>A     | c.(1033-1035)GAG>AAG | p.E345K       |
| Pat_63 | Post-Resistance | NIPBL    | 25836  | 37 | 5 | 36985446  | 36985446  | Missense_Mutation | SNP | C | T | 27 | 147 | c.2164C>T     | c.(2164-2166)CCT>TCT | p.P722S       |
| Pat_63 | Post-Resistance | NIPBL    | 25836  | 37 | 5 | 37006491  | 37006491  | Nonsense_Mutation | SNP | G | A | 16 | 135 | c.3888G>A     | c.(3886-3888)TGG>TGA | p.W1296*      |
| Pat_63 | Post-Resistance | C5orf42  | 65250  | 37 | 5 | 37179515  | 37179515  | Missense_Mutation | SNP | C | T | 15 | 162 | c.5768G>A     | c.(5767-5769)AGA>AAA | p.R1923K      |
| Pat_63 | Post-Resistance | FYB      | 2533   | 37 | 5 | 39202085  | 39202085  | Nonsense_Mutation | SNP | C | T | 10 | 78  | c.978G>A      | c.(976-978)TGG>TGA   | p.W326*       |
| Pat_63 | Post-Resistance | PRKAA1   | 5562   | 37 | 5 | 40763122  | 40763122  | Missense_Mutation | SNP | C | T | 19 | 79  | c.1438G>A     | c.(1438-1440)GAA>AAA | p.E480K       |
| Pat_63 | Post-Resistance | NNT      | 23530  | 37 | 5 | 43700235  | 43700235  | Missense_Mutation | SNP | C | A | 6  | 279 | c.2891C>A     | c.(2890-2892)CCA>CAA | p.P964Q       |
| Pat_63 | Post-Resistance | DHX29    | 54505  | 37 | 5 | 54566436  | 54566436  | Missense_Mutation | SNP | C | T | 30 | 174 | c.2963G>A     | c.(2962-2964)GGC>GAC | p.G988D       |
| Pat_63 | Post-Resistance | PPAP2A   | 8611   | 37 | 5 | 54721131  | 54721131  | Missense_Mutation | SNP | C | T | 7  | 44  | c.758G>A      | c.(757-759)AGA>AAA   | p.R253K       |
| Pat_63 | Post-Resistance | DEPDC1B  | 55789  | 37 | 5 | 59983011  | 59983011  | Missense_Mutation | SNP | C | T | 19 | 147 | c.92G>A       | c.(91-93)CGG>CAG     | p.R31Q        |
| Pat_63 | Post-Resistance | ZNF366   | 167465 | 37 | 5 | 71740091  | 71740091  | Missense_Mutation | SNP | G | A | 16 | 65  | c.1727C>T     | c.(1726-1728)GCA>GTA | p.A576V       |
| Pat_63 | Post-Resistance | COL4A3BP | 10087  | 37 | 5 | 74698883  | 74698883  | Missense_Mutation | SNP | C | T | 19 | 109 | c.931G>A      | c.(931-933)GAA>AAA   | p.E311K       |
| Pat_63 | Post-Resistance | MSH3     | 4437   | 37 | 5 | 80160657  | 80160657  | Missense_Mutation | SNP | C | T | 9  | 94  | c.3026C>T     | c.(3025-3027)ACC>ATC | p.T1009I      |
| Pat_63 | Post-Resistance | ATG10    | 83734  | 37 | 5 | 81460326  | 81460326  | Missense_Mutation | SNP | C | T | 10 | 99  | c.325C>T      | c.(325-327)CCT>TCT   | p.P109S       |



|        |                 |          |        |    |   |           |           |                   |     |   |   |     |     |              |                        |               |
|--------|-----------------|----------|--------|----|---|-----------|-----------|-------------------|-----|---|---|-----|-----|--------------|------------------------|---------------|
| Pat_63 | Post-Resistance | VCAN     | 1462   | 37 | 5 | 82836672  | 82836672  | Missense_Mutation | SNP | C | T | 14  | 82  | c.7850C>T    | c.(7849-7851)ACT>ATT   | p.T2617I      |
| Pat_63 | Post-Resistance | EDIL3    | 10085  | 37 | 5 | 83680131  | 83680131  | Missense_Mutation | SNP | C | T | 8   | 90  | c.62G>A      | c.(61-63)GGC>GAC       | p.G21D        |
| Pat_63 | Post-Resistance | GPR98    | 84059  | 37 | 5 | 90049488  | 90049488  | Missense_Mutation | SNP | C | T | 27  | 102 | c.11219C>T   | c.(11218-11220)ACC>ATC | p.T3740I      |
| Pat_63 | Post-Resistance | TTC37    | 9652   | 37 | 5 | 94852234  | 94852234  | Nonsense_Mutation | SNP | G | A | 5   | 149 | c.2572C>T    | c.(2572-2574)CAA>TAA   | p.Q858*       |
| Pat_63 | Post-Resistance | ERAP1    | 51752  | 37 | 5 | 96117545  | 96117545  | Missense_Mutation | SNP | C | T | 12  | 109 | c.2299G>A    | c.(2299-2301)GTG>ATG   | p.V767M       |
| Pat_63 | Post-Resistance | CHD1     | 1105   | 37 | 5 | 98207772  | 98207772  | Missense_Mutation | SNP | G | A | 24  | 192 | c.3844C>T    | c.(3844-3846)CTC>TTC   | p.L1282F      |
| Pat_63 | Post-Resistance | SLCO6A1  | 133482 | 37 | 5 | 101794120 | 101794120 | Missense_Mutation | SNP | C | T | 9   | 87  | c.1097G>A    | c.(1096-1098)GGA>GAA   | p.G366E       |
| Pat_63 | Post-Resistance | PIIP5K2  | 23262  | 37 | 5 | 102490435 | 102490435 | Missense_Mutation | SNP | C | T | 11  | 61  | c.1279C>T    | c.(1279-1281)CCA>TCA   | p.P427S       |
| Pat_63 | Post-Resistance | WDR36    | 134430 | 37 | 5 | 110445970 | 110445970 | Missense_Mutation | SNP | G | A | 30  | 232 | c.1577G>A    | c.(1576-1578)GGC>GAC   | p.G526D       |
| Pat_63 | Post-Resistance | DMXL1    | 1657   | 37 | 5 | 118513931 | 118513931 | Missense_Mutation | SNP | C | T | 20  | 87  | c.7127C>T    | c.(7126-7128)ACT>ATT   | p.T2376I      |
| Pat_63 | Post-Resistance | PPIC     | 5480   | 37 | 5 | 122359574 | 122359574 | Nonsense_Mutation | SNP | C | T | 8   | 385 | c.635G>A     | c.(634-636)TGG>TAG     | p.W212*       |
| Pat_63 | Post-Resistance | CSNK1G3  | 1456   | 37 | 5 | 122940502 | 122940502 | Missense_Mutation | SNP | G | A | 7   | 59  | c.1267G>A    | c.(1267-1269)GTA>ATA   | p.V423I       |
| Pat_63 | Post-Resistance | ZNF608   | 57507  | 37 | 5 | 124080204 | 124080204 | Missense_Mutation | SNP | C | T | 16  | 88  | c.479G>A     | c.(478-480)GGC>GAC     | p.G160D       |
| Pat_63 | Post-Resistance | MEGF10   | 84466  | 37 | 5 | 126778801 | 126778801 | Missense_Mutation | SNP | G | A | 23  | 128 | c.2474G>A    | c.(2473-2475)GGA>GAA   | p.G825E       |
| Pat_63 | Post-Resistance | PRRC1    | 133619 | 37 | 5 | 126887399 | 126887399 | Missense_Mutation | SNP | G | A | 4   | 88  | c.1129G>A    | c.(1129-1131)GCT>ACT   | p.A377T       |
| Pat_63 | Post-Resistance | SLC12A2  | 6558   | 37 | 5 | 127466804 | 127466804 | Missense_Mutation | SNP | G | A | 31  | 157 | c.1094G>A    | c.(1093-1095)GGT>GAT   | p.G365D       |
| Pat_63 | Post-Resistance | P4HA2    | 8974   | 37 | 5 | 131531158 | 131531158 | Missense_Mutation | SNP | C | T | 8   | 59  | c.1387G>A    | c.(1387-1389)GCT>ACT   | p.A463T       |
| Pat_63 | Post-Resistance | ZMAT2    | 153527 | 37 | 5 | 140081653 | 140081653 | Missense_Mutation | SNP | G | A | 28  | 158 | c.175G>A     | c.(175-177)GAA>AAA     | p.E59K        |
| Pat_63 | Post-Resistance | PCDHB5   | 26167  | 37 | 5 | 140515560 | 140515560 | Missense_Mutation | SNP | A | G | 24  | 166 | c.544A>G     | c.(544-546)ACG>GCG     | p.T182A       |
| Pat_63 | Post-Resistance | PCDHGA11 | 56105  | 37 | 5 | 140801801 | 140801801 | Missense_Mutation | SNP | T | C | 3   | 42  | c.1007T>C    | c.(1006-1008)ATC>ACC   | p.I336T       |
| Pat_63 | Post-Resistance | PCDH12   | 51294  | 37 | 5 | 141336753 | 141336753 | Missense_Mutation | SNP | G | A | 17  | 87  | c.664C>T     | c.(664-666)CCC>TCC     | p.P222S       |
| Pat_63 | Post-Resistance | SPINK5   | 11005  | 37 | 5 | 147480133 | 147480133 | Missense_Mutation | SNP | T | G | 44  | 75  | c.1209T>G    | c.(1207-1209)TGT>TGG   | p.C403W       |
| Pat_63 | Post-Resistance | SH3TC2   | 79628  | 37 | 5 | 148384306 | 148384306 | Missense_Mutation | SNP | G | A | 6   | 40  | c.3835C>T    | c.(3835-3837)CGG>TGG   | p.R1279W      |
| Pat_63 | Post-Resistance | SH3TC2   | 79628  | 37 | 5 | 148384423 | 148384423 | Missense_Mutation | SNP | C | T | 16  | 90  | c.3718G>A    | c.(3718-3720)GCA>ACA   | p.A1240T      |
| Pat_63 | Post-Resistance | SLC26A2  | 1836   | 37 | 5 | 149360196 | 149360196 | Missense_Mutation | SNP | C | T | 13  | 64  | c.1040C>T    | c.(1039-1041)TCT>TTT   | p.S347F       |
| Pat_63 | Post-Resistance | CAMK2A   | 815    | 37 | 5 | 149669130 | 149669130 | Missense_Mutation | SNP | C | T | 13  | 105 | c.59G>A      | c.(58-60)GGC>GAC       | p.G20D        |
| Pat_63 | Post-Resistance | TCOF1    | 6949   | 37 | 5 | 149773019 | 149773019 | Missense_Mutation | SNP | C | T | 8   | 64  | c.3685C>T    | c.(3685-3687)CCC>TCC   | p.P1229S      |
| Pat_63 | Post-Resistance | DCTN4    | 51164  | 37 | 5 | 150110243 | 150110243 | Missense_Mutation | SNP | G | A | 10  | 586 | c.784C>T     | c.(784-786)CTC>TTC     | p.L262F       |
| Pat_63 | Post-Resistance | ZNF300   | 91975  | 37 | 5 | 150275557 | 150275557 | Missense_Mutation | SNP | C | T | 6   | 57  | c.1244G>A    | c.(1243-1245)GGG>GAG   | p.G415E       |
| Pat_63 | Post-Resistance | SLC36A2  | 153201 | 37 | 5 | 150712784 | 150712784 | Splice_Site       | SNP | C | T | 11  | 71  | c.843_splice | c.e7+1                 | p.V281_splice |
| Pat_63 | Post-Resistance | FAT2     | 2196   | 37 | 5 | 150946040 | 150946040 | Missense_Mutation | SNP | G | A | 14  | 79  | c.2453C>T    | c.(2452-2454)CCC>CTC   | p.P818L       |
| Pat_63 | Post-Resistance | CYFIP2   | 26999  | 37 | 5 | 156757803 | 156757803 | Missense_Mutation | SNP | T | C | 10  | 123 | c.2210T>C    | c.(2209-2211)ATT>ACT   | p.I737T       |
| Pat_63 | Post-Resistance | PTTG1    | 9232   | 37 | 5 | 159849859 | 159849859 | Missense_Mutation | SNP | G | A | 9   | 243 | c.235G>A     | c.(235-237)GGA>AGA     | p.G79R        |
| Pat_63 | Post-Resistance | SLIT3    | 6586   | 37 | 5 | 168216587 | 168216587 | Missense_Mutation | SNP | C | A | 18  | 39  | c.1057G>T    | c.(1057-1059)GGC>TGC   | p.G353C       |
| Pat_63 | Post-Resistance | DOCK2    | 1794   | 37 | 5 | 169506061 | 169506061 | Missense_Mutation | SNP | G | A | 16  | 95  | c.5077G>A    | c.(5077-5079)GTC>ATC   | p.V1693I      |
| Pat_63 | Post-Resistance | BOD1     | 91272  | 37 | 5 | 173036279 | 173036279 | Missense_Mutation | SNP | C | A | 12  | 80  | c.521G>T     | c.(520-522)GGC>GTC     | p.G174V       |
| Pat_63 | Post-Resistance | CPEB4    | 80315  | 37 | 5 | 173316758 | 173316758 | Missense_Mutation | SNP | G | A | 148 | 656 | c.22G>A      | c.(22-24)GTG>ATG       | p.V8M         |
| Pat_63 | Post-Resistance | GRK6     | 2870   | 37 | 5 | 176867825 | 176867825 | Missense_Mutation | SNP | C | T | 15  | 121 | c.1529C>T    | c.(1528-1530)CCC>CTC   | p.P510L       |
| Pat_63 | Post-Resistance | MAML1    | 9794   | 37 | 5 | 179201706 | 179201706 | Missense_Mutation | SNP | C | T | 5   | 22  | c.2879C>T    | c.(2878-2880)GCC>GTC   | p.A960V       |
| Pat_63 | Post-Resistance | MGAT4B   | 11282  | 37 | 5 | 179225929 | 179225929 | Missense_Mutation | SNP | G | A | 3   | 50  | c.1342C>T    | c.(1342-1344)CGG>TGG   | p.R448W       |
| Pat_63 | Post-Resistance | FARS2    | 10667  | 37 | 6 | 5431351   | 5431351   | Missense_Mutation | SNP | G | A | 17  | 238 | c.850G>A     | c.(850-852)GAA>AAA     | p.E284K       |
| Pat_63 | Post-Resistance | PIP5K1P1 | 206426 | 37 | 6 | 7987026   | 7987026   | Missense_Mutation | SNP | G | A | 29  | 185 | c.257G>A     | c.(256-258)AGC>AAC     | p.S86N        |
| Pat_63 | Post-Resistance | PIP5K1P1 | 206426 | 37 | 6 | 7987143   | 7987143   | Missense_Mutation | SNP | G | A | 15  | 185 | c.374G>A     | c.(373-375)CGT>CAT     | p.R125H       |
| Pat_63 | Post-Resistance | EDN1     | 1906   | 37 | 6 | 12294193  | 12294193  | Missense_Mutation | SNP | C | T | 5   | 65  | c.253C>T     | c.(253-255)CTT>TTT     | p.L85F        |
| Pat_63 | Post-Resistance | SIRT5    | 23408  | 37 | 6 | 13601162  | 13601162  | Missense_Mutation | SNP | C | T | 6   | 100 | c.838C>T     | c.(838-840)CCA>TCA     | p.P280S       |
| Pat_63 | Post-Resistance | RNF182   | 221687 | 37 | 6 | 13977987  | 13977987  | Missense_Mutation | SNP | G | A | 29  | 235 | c.637G>A     | c.(637-639)GTC>ATC     | p.V213I       |
| Pat_63 | Post-Resistance | LRRC16A  | 55604  | 37 | 6 | 25540227  | 25540227  | Missense_Mutation | SNP | G | A | 7   | 38  | c.2249G>A    | c.(2248-2250)GGC>GAC   | p.G750D       |

|        |                 |           |        |    |   |           |           |                   |     |   |   |    |     |               |                      |               |
|--------|-----------------|-----------|--------|----|---|-----------|-----------|-------------------|-----|---|---|----|-----|---------------|----------------------|---------------|
| Pat_63 | Post-Resistance | HIST1H2BN | 8341   | 37 | 6 | 27806783  | 27806783  | Missense_Mutation | SNP | G | A | 51 | 347 | c.344G>A      | c.(343-345)GGC>GAC   | p.G115D       |
| Pat_63 | Post-Resistance | HIST1H2BO | 8348   | 37 | 6 | 27861284  | 27861284  | Missense_Mutation | SNP | C | T | 19 | 169 | c.44C>T       | c.(43-45)TCC>TTC     | p.S15F        |
| Pat_63 | Post-Resistance | OR2B2     | 81697  | 37 | 6 | 27879509  | 27879509  | Missense_Mutation | SNP | C | T | 21 | 294 | c.589G>A      | c.(589-591)GCT>ACT   | p.A197T       |
| Pat_63 | Post-Resistance | SCAND3    | 114821 | 37 | 6 | 28554209  | 28554209  | Missense_Mutation | SNP | C | T | 19 | 235 | c.286G>A      | c.(286-288)GTG>ATG   | p.V96M        |
| Pat_63 | Post-Resistance | MRPS18B   | 28973  | 37 | 6 | 30590648  | 30590648  | Missense_Mutation | SNP | G | A | 22 | 199 | c.394G>A      | c.(394-396)GGT>AGT   | p.G132S       |
| Pat_63 | Post-Resistance | DHX16     | 8449   | 37 | 6 | 30633255  | 30633255  | Splice_Site       | SNP | C | T | 13 | 134 | c.921_splice  | c.e5+1               | p.Q307_splice |
| Pat_63 | Post-Resistance | TUBB      | 203068 | 37 | 6 | 30692136  | 30692136  | Missense_Mutation | SNP | G | A | 18 | 206 | c.1297G>A     | c.(1297-1299)GAG>AAG | p.E433K       |
| Pat_63 | Post-Resistance | FLOT1     | 10211  | 37 | 6 | 30709624  | 30709624  | Missense_Mutation | SNP | C | T | 18 | 145 | c.64G>A       | c.(64-66)GTC>ATC     | p.V22I        |
| Pat_63 | Post-Resistance | MICA      | 4276   | 37 | 6 | 31378439  | 31378439  | Missense_Mutation | SNP | T | C | 3  | 46  | c.190T>C      | c.(190-192)TGC>CGC   | p.C64R        |
| Pat_63 | Post-Resistance | BAT2      | 7916   | 37 | 6 | 31591556  | 31591556  | Missense_Mutation | SNP | C | T | 14 | 188 | c.160C>T      | c.(160-162)CCG>TGG   | p.R54W        |
| Pat_63 | Post-Resistance | BAT2      | 7916   | 37 | 6 | 31597360  | 31597360  | Nonsense_Mutation | SNP | G | A | 36 | 323 | c.1992G>A     | c.(1990-1992)TGG>TGA | p.W664*       |
| Pat_63 | Post-Resistance | C6orf27   | 80737  | 37 | 6 | 31743973  | 31743973  | Missense_Mutation | SNP | G | A | 20 | 203 | c.281C>T      | c.(280-282)CCT>CTT   | p.P94L        |
| Pat_63 | Post-Resistance | SKIV2L    | 6499   | 37 | 6 | 31937457  | 31937457  | Missense_Mutation | SNP | G | A | 6  | 224 | c.3706G>A     | c.(3706-3708)GAC>AAC | p.D1236N      |
| Pat_63 | Post-Resistance | DOM3Z     | 1797   | 37 | 6 | 31938234  | 31938234  | Nonsense_Mutation | SNP | C | T | 5  | 194 | c.834G>A      | c.(832-834)TGG>TGA   | p.W278*       |
| Pat_63 | Post-Resistance | DOM3Z     | 1797   | 37 | 6 | 31939187  | 31939187  | Missense_Mutation | SNP | G | A | 6  | 94  | c.266C>T      | c.(265-267)CCG>CTG   | p.P89L        |
| Pat_63 | Post-Resistance | TNXB      | 7148   | 37 | 6 | 32021195  | 32021195  | Missense_Mutation | SNP | C | T | 6  | 79  | c.8755G>A     | c.(8755-8757)GTG>ATG | p.V2919M      |
| Pat_63 | Post-Resistance | TNXB      | 7148   | 37 | 6 | 32023823  | 32023823  | Missense_Mutation | SNP | T | C | 5  | 151 | c.8272A>G     | c.(8272-8274)ATC>GTC | p.I2758V      |
| Pat_63 | Post-Resistance | TNXB      | 7148   | 37 | 6 | 32053632  | 32053632  | Missense_Mutation | SNP | C | T | 7  | 71  | c.3043G>A     | c.(3043-3045)GCT>ACT | p.A1015T      |
| Pat_63 | Post-Resistance | NOTCH4    | 4855   | 37 | 6 | 32185774  | 32185774  | Missense_Mutation | SNP | G | A | 7  | 65  | c.1622C>T     | c.(1621-1623)CCT>CTT | p.P541L       |
| Pat_63 | Post-Resistance | HLA-DMB   | 3109   | 37 | 6 | 32906742  | 32906742  | Missense_Mutation | SNP | C | T | 23 | 317 | c.56G>A       | c.(55-57)GGT>GAT     | p.G19D        |
| Pat_63 | Post-Resistance | RING1     | 6015   | 37 | 6 | 33179637  | 33179637  | Missense_Mutation | SNP | C | T | 8  | 48  | c.977C>T      | c.(976-978)ACC>ATC   | p.T326I       |
| Pat_63 | Post-Resistance | DAXX      | 1616   | 37 | 6 | 33287218  | 33287218  | Missense_Mutation | SNP | G | A | 38 | 339 | c.1879C>T     | c.(1879-1881)CCC>TCC | p.P627S       |
| Pat_63 | Post-Resistance | SYNGAP1   | 8831   | 37 | 6 | 33403311  | 33403311  | Missense_Mutation | SNP | C | T | 11 | 686 | c.683C>T      | c.(682-684)ACA>ATA   | p.T228I       |
| Pat_63 | Post-Resistance | UHRF1BP1  | 54887  | 37 | 6 | 34823481  | 34823481  | Splice_Site       | SNP | G | A | 12 | 117 | c.1120_splice | c.e9+1               | p.G374_splice |
| Pat_63 | Post-Resistance | MTCH1     | 23787  | 37 | 6 | 36946333  | 36946333  | Missense_Mutation | SNP | G | A | 33 | 440 | c.461C>T      | c.(460-462)CCC>CTC   | p.P154L       |
| Pat_63 | Post-Resistance | PIM1      | 5292   | 37 | 6 | 37138398  | 37138398  | Missense_Mutation | SNP | C | T | 9  | 158 | c.47C>T       | c.(46-48)CCC>CTC     | p.P16L        |
| Pat_63 | Post-Resistance | DNAH8     | 1769   | 37 | 6 | 38816485  | 38816485  | Missense_Mutation | SNP | G | A | 4  | 102 | c.4456G>A     | c.(4456-4458)GAT>AAT | p.D1486N      |
| Pat_63 | Post-Resistance | DNAH8     | 1769   | 37 | 6 | 38830213  | 38830213  | Missense_Mutation | SNP | G | A | 15 | 176 | c.5638G>A     | c.(5638-5640)GGC>AGC | p.G1880S      |
| Pat_63 | Post-Resistance | PTCRA     | 171558 | 37 | 6 | 42890779  | 42890779  | Missense_Mutation | SNP | C | T | 19 | 154 | c.73C>T       | c.(73-75)CCC>TCC     | p.P25S        |
| Pat_63 | Post-Resistance | CUL9      | 23113  | 37 | 6 | 43164471  | 43164471  | Missense_Mutation | SNP | G | A | 20 | 191 | c.2674G>A     | c.(2674-2676)GAG>AAG | p.E892K       |
| Pat_63 | Post-Resistance | XPO5      | 57510  | 37 | 6 | 43491635  | 43491635  | Missense_Mutation | SNP | C | T | 6  | 236 | c.3586G>A     | c.(3586-3588)GGT>AGT | p.G1196S      |
| Pat_63 | Post-Resistance | POLH      | 5429   | 37 | 6 | 43571691  | 43571691  | Missense_Mutation | SNP | G | A | 17 | 116 | c.827G>A      | c.(826-828)GGT>GAT   | p.G276D       |
| Pat_63 | Post-Resistance | HSP90AB1  | 3326   | 37 | 6 | 44219940  | 44219940  | Missense_Mutation | SNP | G | A | 20 | 131 | c.1667G>A     | c.(1666-1668)AGC>AAC | p.S556N       |
| Pat_63 | Post-Resistance | PKHD1     | 5314   | 37 | 6 | 51923135  | 51923135  | Missense_Mutation | SNP | G | A | 10 | 136 | c.1498C>T     | c.(1498-1500)CTT>TTT | p.L500F       |
| Pat_63 | Post-Resistance | PAQR8     | 85315  | 37 | 6 | 52268097  | 52268097  | Missense_Mutation | SNP | G | A | 4  | 28  | c.86G>A       | c.(85-87)GGG>GAG     | p.G29E        |
| Pat_63 | Post-Resistance | EFHC1     | 114327 | 37 | 6 | 52288858  | 52288858  | Missense_Mutation | SNP | G | A | 36 | 450 | c.178G>A      | c.(178-180)GCT>ACT   | p.A60T        |
| Pat_63 | Post-Resistance | COL19A1   | 1310   | 37 | 6 | 70859743  | 70859743  | Missense_Mutation | SNP | G | A | 7  | 43  | c.1930G>A     | c.(1930-1932)GGT>AGT | p.G644S       |
| Pat_63 | Post-Resistance | IRAK1BP1  | 134728 | 37 | 6 | 79607677  | 79607677  | Splice_Site       | SNP | G | A | 18 | 81  | c.512_splice  | c.e3+1               | p.R171_splice |
| Pat_63 | Post-Resistance | ZNF292    | 23036  | 37 | 6 | 87966111  | 87966111  | Missense_Mutation | SNP | G | A | 14 | 48  | c.2764G>A     | c.(2764-2766)GAA>AAA | p.E922K       |
| Pat_63 | Post-Resistance | GABRR1    | 2569   | 37 | 6 | 89891645  | 89891645  | Missense_Mutation | SNP | C | T | 21 | 57  | c.928G>A      | c.(928-930)GTG>ATG   | p.V310M       |
| Pat_63 | Post-Resistance | KLHL32    | 114792 | 37 | 6 | 97489450  | 97489450  | Missense_Mutation | SNP | C | T | 28 | 48  | c.287C>T      | c.(286-288)GCT>GTT   | p.A96V        |
| Pat_63 | Post-Resistance | ASCC3     | 10973  | 37 | 6 | 101054871 | 101054871 | Missense_Mutation | SNP | C | A | 24 | 52  | c.4879G>T     | c.(4879-4881)GAC>TAC | p.D1627Y      |
| Pat_63 | Post-Resistance | ASCC3     | 10973  | 37 | 6 | 101054918 | 101054918 | Missense_Mutation | SNP | G | A | 23 | 80  | c.4832C>T     | c.(4831-4833)ACC>ATC | p.T1611I      |
| Pat_63 | Post-Resistance | AKD1      | 221264 | 37 | 6 | 109815288 | 109815288 | Missense_Mutation | SNP | G | A | 5  | 33  | c.5429C>T     | c.(5428-5430)ACT>ATT | p.T1810I      |
| Pat_63 | Post-Resistance | GPR6      | 2830   | 37 | 6 | 110300722 | 110300722 | Missense_Mutation | SNP | C | T | 5  | 120 | c.407C>T      | c.(406-408)CCC>CTC   | p.P136L       |
| Pat_63 | Post-Resistance | TRMT11    | 60487  | 37 | 6 | 126320759 | 126320759 | Missense_Mutation | SNP | G | A | 14 | 58  | c.679G>A      | c.(679-681)GGT>AGT   | p.G227S       |
| Pat_63 | Post-Resistance | ECHDC1    | 55862  | 37 | 6 | 127611270 | 127611270 | Missense_Mutation | SNP | G | A | 21 | 72  | c.668C>T      | c.(667-669)GCT>GTT   | p.A223V       |

|        |                 |         |        |    |   |           |           |                   |     |   |   |    |     |               |                        |                |
|--------|-----------------|---------|--------|----|---|-----------|-----------|-------------------|-----|---|---|----|-----|---------------|------------------------|----------------|
| Pat_63 | Post-Resistance | EPB41L2 | 2037   | 37 | 6 | 131186708 | 131186708 | Missense_Mutation | SNP | C | T | 6  | 157 | c.2797G>A     | c.(2797-2799)GTG>ATG   | p.V933M        |
| Pat_63 | Post-Resistance | MAP7    | 9053   | 37 | 6 | 136667213 | 136667213 | Missense_Mutation | SNP | G | A | 8  | 26  | c.2020C>T     | c.(2020-2022)CCC>TCC   | p.P674S        |
| Pat_63 | Post-Resistance | UTRN    | 7402   | 37 | 6 | 145051492 | 145051492 | Splice_Site       | SNP | G | A | 6  | 159 | c.7810_splice | c.e53-1                | p.A2604_splice |
| Pat_63 | Post-Resistance | LATS1   | 9113   | 37 | 6 | 150023066 | 150023066 | Missense_Mutation | SNP | C | T | 27 | 104 | c.197G>A      | c.(196-198)AGA>AAA     | p.R66K         |
| Pat_63 | Post-Resistance | AKAP12  | 9590   | 37 | 6 | 151673112 | 151673112 | Missense_Mutation | SNP | G | A | 30 | 75  | c.3586G>A     | c.(3586-3588)GAG>AAG   | p.E1196K       |
| Pat_63 | Post-Resistance | TIAM2   | 26230  | 37 | 6 | 155572097 | 155572097 | Nonsense_Mutation | SNP | G | A | 28 | 86  | c.4002G>A     | c.(4000-4002)TGG>TGA   | p.W1334*       |
| Pat_63 | Post-Resistance | MAP3K4  | 4216   | 37 | 6 | 161505621 | 161505621 | Missense_Mutation | SNP | G | A | 14 | 33  | c.2344G>A     | c.(2344-2346)GAT>AAT   | p.D782N        |
| Pat_63 | Post-Resistance | HEATR2  | 54919  | 37 | 7 | 796510    | 796510    | Missense_Mutation | SNP | C | T | 7  | 56  | c.1349C>T     | c.(1348-1350)GCC>GTC   | p.A450V        |
| Pat_63 | Post-Resistance | SUN1    | 23353  | 37 | 7 | 901071    | 901071    | Missense_Mutation | SNP | G | A | 23 | 172 | c.1834G>A     | c.(1834-1836)GGG>AGG   | p.G612R        |
| Pat_63 | Post-Resistance | AMZ1    | 155185 | 37 | 7 | 2748798   | 2748798   | Missense_Mutation | SNP | G | A | 4  | 10  | c.691G>A      | c.(691-693)GCA>ACA     | p.A231T        |
| Pat_63 | Post-Resistance | SKAP2   | 8935   | 37 | 7 | 26765115  | 26765115  | Missense_Mutation | SNP | G | A | 23 | 118 | c.728C>T      | c.(727-729)CCT>CTT     | p.P243L        |
| Pat_63 | Post-Resistance | HOXA10  | 3206   | 37 | 7 | 27213870  | 27213870  | Missense_Mutation | SNP | G | A | 18 | 171 | c.56C>T       | c.(55-57)TCA>TTA       | p.S19L         |
| Pat_63 | Post-Resistance | GHRHR   | 2692   | 37 | 7 | 31013666  | 31013666  | Missense_Mutation | SNP | G | A | 20 | 152 | c.664G>A      | c.(664-666)GCA>ACA     | p.A222T        |
| Pat_63 | Post-Resistance | AVL9    | 23080  | 37 | 7 | 32582849  | 32582849  | Missense_Mutation | SNP | G | A | 24 | 289 | c.190G>A      | c.(190-192)GAT>AAT     | p.D64N         |
| Pat_63 | Post-Resistance | RP9     | 6100   | 37 | 7 | 33138976  | 33138976  | Missense_Mutation | SNP | G | A | 27 | 144 | c.256C>T      | c.(256-258)CAT>TAT     | p.H86Y         |
| Pat_63 | Post-Resistance | BMPER   | 168667 | 37 | 7 | 33946430  | 33946430  | Missense_Mutation | SNP | G | A | 19 | 117 | c.134G>A      | c.(133-135)GGT>GAT     | p.G45D         |
| Pat_63 | Post-Resistance | ANLN    | 54443  | 37 | 7 | 36446023  | 36446023  | Missense_Mutation | SNP | G | A | 16 | 131 | c.721G>A      | c.(721-723)GCA>ACA     | p.A241T        |
| Pat_63 | Post-Resistance | CDK13   | 8621   | 37 | 7 | 40127849  | 40127849  | Missense_Mutation | SNP | G | A | 9  | 94  | c.3154G>A     | c.(3154-3156)GAT>AAT   | p.D1052N       |
| Pat_63 | Post-Resistance | NSUN5P2 | 260294 | 37 | 7 | 72420385  | 72420385  | Missense_Mutation | SNP | C | T | 18 | 82  | c.203G>A      | c.(202-204)GGG>GAG     | p.G68E         |
| Pat_63 | Post-Resistance | MAGI2   | 9863   | 37 | 7 | 77797274  | 77797274  | Missense_Mutation | SNP | C | T | 10 | 427 | c.2555G>A     | c.(2554-2556)GGG>GAG   | p.G852E        |
| Pat_63 | Post-Resistance | AKAP9   | 10142  | 37 | 7 | 91711873  | 91711873  | Missense_Mutation | SNP | G | A | 17 | 95  | c.8057G>A     | c.(8056-8058)GGA>GAA   | p.G2686E       |
| Pat_63 | Post-Resistance | KRIT1   | 889    | 37 | 7 | 91842696  | 91842696  | Missense_Mutation | SNP | C | T | 10 | 48  | c.1838G>A     | c.(1837-1839)GGT>GAT   | p.G613D        |
| Pat_63 | Post-Resistance | ANKIB1  | 54467  | 37 | 7 | 91981943  | 91981943  | Missense_Mutation | SNP | C | T | 43 | 374 | c.1384C>T     | c.(1384-1386)CAC>TAC   | p.H462Y        |
| Pat_63 | Post-Resistance | CALCR   | 799    | 37 | 7 | 93106879  | 93106879  | Missense_Mutation | SNP | C | T | 4  | 67  | c.361G>A      | c.(361-363)GAT>AAT     | p.D121N        |
| Pat_63 | Post-Resistance | AZGP1   | 563    | 37 | 7 | 99564904  | 99564904  | Missense_Mutation | SNP | G | A | 6  | 14  | c.619C>T      | c.(619-621)CCC>TCC     | p.P207S        |
| Pat_63 | Post-Resistance | STAG3   | 10734  | 37 | 7 | 99778267  | 99778267  | Missense_Mutation | SNP | G | A | 6  | 283 | c.88G>A       | c.(88-90)GAC>AAC       | p.D30N         |
| Pat_63 | Post-Resistance | STAG3   | 10734  | 37 | 7 | 99811421  | 99811421  | Missense_Mutation | SNP | G | A | 18 | 119 | c.3661G>A     | c.(3661-3663)GAT>AAT   | p.D1221N       |
| Pat_63 | Post-Resistance | EPHB4   | 2050   | 37 | 7 | 100404168 | 100404168 | Nonsense_Mutation | SNP | C | T | 23 | 146 | c.2358G>A     | c.(2356-2358)TGG>TGA   | p.W786*        |
| Pat_63 | Post-Resistance | MUC17   | 140453 | 37 | 7 | 100695239 | 100695239 | Missense_Mutation | SNP | T | C | 15 | 117 | c.13099T>C    | c.(13099-13101)TGC>CGC | p.C4367R       |
| Pat_63 | Post-Resistance | MLL5    | 55904  | 37 | 7 | 104752768 | 104752768 | Missense_Mutation | SNP | C | T | 6  | 182 | c.4565C>T     | c.(4564-4566)ACA>ATA   | p.T1522I       |
| Pat_63 | Post-Resistance | PRKAR2B | 5577   | 37 | 7 | 106786821 | 106786821 | Missense_Mutation | SNP | G | A | 15 | 171 | c.656G>A      | c.(655-657)GGG>GAG     | p.G219E        |
| Pat_63 | Post-Resistance | COG5    | 10466  | 37 | 7 | 107188753 | 107188753 | Missense_Mutation | SNP | C | T | 8  | 314 | c.410G>A      | c.(409-411)AGA>AAA     | p.R137K        |
| Pat_63 | Post-Resistance | THAP5   | 168451 | 37 | 7 | 108204994 | 108204994 | Missense_Mutation | SNP | G | A | 14 | 126 | c.829C>T      | c.(829-831)CCT>TCT     | p.P277S        |
| Pat_63 | Post-Resistance | LRRN3   | 54674  | 37 | 7 | 110764615 | 110764615 | Missense_Mutation | SNP | C | T | 15 | 59  | c.1787C>T     | c.(1786-1788)CCC>CTC   | p.P596L        |
| Pat_63 | Post-Resistance | PPP1R3A | 5506   | 37 | 7 | 113518385 | 113518385 | Missense_Mutation | SNP | G | A | 25 | 174 | c.2762C>T     | c.(2761-2763)ACT>ATT   | p.T921I        |
| Pat_63 | Post-Resistance | WNT2    | 7472   | 37 | 7 | 116918397 | 116918397 | Missense_Mutation | SNP | G | A | 4  | 74  | c.895C>T      | c.(895-897)CGG>TGG     | p.R299W        |
| Pat_63 | Post-Resistance | PTPRZ1  | 5803   | 37 | 7 | 121652897 | 121652897 | Missense_Mutation | SNP | G | A | 23 | 138 | c.3797G>A     | c.(3796-3798)AGT>AAT   | p.S1266N       |
| Pat_63 | Post-Resistance | WASL    | 8976   | 37 | 7 | 123332919 | 123332919 | Missense_Mutation | SNP | G | A | 20 | 143 | c.829C>T      | c.(829-831)CCA>TCA     | p.P277S        |
| Pat_63 | Post-Resistance | NRF1    | 4899   | 37 | 7 | 129348961 | 129348961 | Missense_Mutation | SNP | G | A | 36 | 334 | c.653G>A      | c.(652-654)GGT>GAT     | p.G218D        |
| Pat_63 | Post-Resistance | TMEM209 | 84928  | 37 | 7 | 129813752 | 129813752 | Missense_Mutation | SNP | G | A | 9  | 322 | c.1372C>T     | c.(1372-1374)CTT>TTT   | p.L458F        |
| Pat_63 | Post-Resistance | EXOC4   | 60412  | 37 | 7 | 133749105 | 133749105 | Missense_Mutation | SNP | G | A | 10 | 52  | c.2749G>A     | c.(2749-2751)GGT>AGT   | p.G917S        |
| Pat_63 | Post-Resistance | NUP205  | 23165  | 37 | 7 | 135282881 | 135282881 | Missense_Mutation | SNP | C | T | 46 | 365 | c.2200C>T     | c.(2200-2202)CCT>TCT   | p.P734S        |
| Pat_63 | Post-Resistance | TBXAS1  | 6916   | 37 | 7 | 139719873 | 139719873 | Missense_Mutation | SNP | G | A | 8  | 58  | c.1717G>A     | c.(1717-1719)GTC>ATC   | p.V573I        |
| Pat_63 | Post-Resistance | BRAF    | 673    | 37 | 7 | 140453136 | 140453136 | Missense_Mutation | SNP | A | T | 51 | 60  | c.1799T>A     | c.(1798-1800)GTG>GAG   | p.V600E        |
| Pat_63 | Post-Resistance | WEE2    | 494551 | 37 | 7 | 141420800 | 141420800 | Missense_Mutation | SNP | A | G | 6  | 278 | c.824A>G      | c.(823-825)TAC>TGC     | p.Y275C        |
| Pat_63 | Post-Resistance | CNTNAP2 | 26047  | 37 | 7 | 147964124 | 147964124 | Splice_Site       | SNP | G | A | 19 | 142 | c.3382_splice | c.e21-1                | p.L1128_splice |
| Pat_63 | Post-Resistance | SSPO    | 23145  | 37 | 7 | 149493684 | 149493684 | Missense_Mutation | SNP | G | A | 4  | 23  | c.6680G>A     | c.(6679-6681)GGG>GAG   | p.G2227E       |

|        |                 |          |        |    |   |           |           |                   |     |   |   |    |     |               |                        |               |
|--------|-----------------|----------|--------|----|---|-----------|-----------|-------------------|-----|---|---|----|-----|---------------|------------------------|---------------|
| Pat_63 | Post-Resistance | MLL3     | 58508  | 37 | 7 | 151835942 | 151835942 | Missense_Mutation | SNP | G | A | 31 | 241 | c.14582C>T    | c.(14581-14583)ACT>ATT | p.T4861I      |
| Pat_63 | Post-Resistance | MLL3     | 58508  | 37 | 7 | 151878443 | 151878443 | Missense_Mutation | SNP | G | A | 15 | 109 | c.6502C>T     | c.(6502-6504)CCT>TCT   | p.P2168S      |
| Pat_63 | Post-Resistance | MLL3     | 58508  | 37 | 7 | 151896417 | 151896417 | Missense_Mutation | SNP | G | A | 7  | 64  | c.4220C>T     | c.(4219-4221)TCC>TTC   | p.S1407F      |
| Pat_63 | Post-Resistance | RNF32    | 140545 | 37 | 7 | 156450822 | 156450822 | Missense_Mutation | SNP | G | A | 11 | 73  | c.451G>A      | c.(451-453)GCA>ACA     | p.A151T       |
| Pat_63 | Post-Resistance | NOM1     | 64434  | 37 | 7 | 156759691 | 156759691 | Missense_Mutation | SNP | G | A | 12 | 108 | c.2203G>A     | c.(2203-2205)GAC>AAC   | p.D735N       |
| Pat_63 | Post-Resistance | CSMD1    | 64478  | 37 | 8 | 3565960   | 3565960   | Missense_Mutation | SNP | C | T | 4  | 30  | c.985G>A      | c.(985-987)GAT>AAT     | p.D329N       |
| Pat_63 | Post-Resistance | VPS37A   | 137492 | 37 | 8 | 17132312  | 17132312  | Missense_Mutation | SNP | C | T | 9  | 67  | c.487C>T      | c.(487-489)CCA>TCA     | p.P163S       |
| Pat_63 | Post-Resistance | PIWIL2   | 55124  | 37 | 8 | 22175766  | 22175766  | Missense_Mutation | SNP | G | A | 9  | 56  | c.2381G>A     | c.(2380-2382)GGC>GAC   | p.G794D       |
| Pat_63 | Post-Resistance | SLC39A14 | 23516  | 37 | 8 | 22273459  | 22273459  | Missense_Mutation | SNP | C | T | 14 | 69  | c.928C>T      | c.(928-930)CTC>TTC     | p.L310F       |
| Pat_63 | Post-Resistance | SORBS3   | 10174  | 37 | 8 | 22428736  | 22428736  | Splice_Site       | SNP | T | G | 6  | 48  | c.1743_splice | c.e18+2                | p.Q581_splice |
| Pat_63 | Post-Resistance | NEFM     | 4741   | 37 | 8 | 24773163  | 24773163  | Missense_Mutation | SNP | G | A | 9  | 70  | c.1126G>A     | c.(1126-1128)GAA>AAA   | p.E376K       |
| Pat_63 | Post-Resistance | CHRNA2   | 1135   | 37 | 8 | 27320857  | 27320857  | Missense_Mutation | SNP | C | T | 11 | 32  | c.1103G>A     | c.(1102-1104)GGG>GAG   | p.G368E       |
| Pat_63 | Post-Resistance | TEX15    | 56154  | 37 | 8 | 30705879  | 30705879  | Missense_Mutation | SNP | C | T | 11 | 41  | c.655G>A      | c.(655-657)GTT>ATT     | p.V219I       |
| Pat_63 | Post-Resistance | WHSC1L1  | 54904  | 37 | 8 | 38133364  | 38133364  | Missense_Mutation | SNP | C | T | 9  | 36  | c.4109G>A     | c.(4108-4110)TGC>TAC   | p.C1370Y      |
| Pat_63 | Post-Resistance | AP3M2    | 10947  | 37 | 8 | 42022650  | 42022650  | Missense_Mutation | SNP | G | A | 18 | 74  | c.645G>A      | c.(643-645)ATG>ATA     | p.M215I       |
| Pat_63 | Post-Resistance | POLB     | 5423   | 37 | 8 | 42227386  | 42227386  | Missense_Mutation | SNP | T | C | 3  | 39  | c.793T>C      | c.(793-795)TAT>CAT     | p.Y265H       |
| Pat_63 | Post-Resistance | SLC20A2  | 6575   | 37 | 8 | 42294934  | 42294934  | Missense_Mutation | SNP | C | T | 16 | 70  | c.1096G>A     | c.(1096-1098)GGC>AGC   | p.G366S       |
| Pat_63 | Post-Resistance | MCM4     | 4173   | 37 | 8 | 48874219  | 48874219  | Missense_Mutation | SNP | C | T | 18 | 45  | c.214C>T      | c.(214-216)CCT>TCT     | p.P72S        |
| Pat_63 | Post-Resistance | SNTG1    | 54212  | 37 | 8 | 51664561  | 51664561  | Missense_Mutation | SNP | G | A | 15 | 329 | c.1285G>A     | c.(1285-1287)GCT>ACT   | p.A429T       |
| Pat_63 | Post-Resistance | PXDNL    | 137902 | 37 | 8 | 52359705  | 52359705  | Missense_Mutation | SNP | C | T | 9  | 397 | c.1384G>A     | c.(1384-1386)GAA>AAA   | p.E462K       |
| Pat_63 | Post-Resistance | ARMC1    | 55156  | 37 | 8 | 66517689  | 66517689  | Missense_Mutation | SNP | C | T | 12 | 442 | c.550G>A      | c.(550-552)GTG>ATG     | p.V184M       |
| Pat_63 | Post-Resistance | PDE7A    | 5150   | 37 | 8 | 66631580  | 66631580  | Missense_Mutation | SNP | T | C | 9  | 594 | c.1394A>G     | c.(1393-1395)GAT>GGT   | p.D465G       |
| Pat_63 | Post-Resistance | RRS1     | 23212  | 37 | 8 | 67341991  | 67341991  | Missense_Mutation | SNP | C | T | 9  | 54  | c.625C>T      | c.(625-627)CCT>TCT     | p.P209S       |
| Pat_63 | Post-Resistance | ZFHX4    | 79776  | 37 | 8 | 77618490  | 77618490  | Missense_Mutation | SNP | C | T | 23 | 76  | c.2167C>T     | c.(2167-2169)CAC>TAC   | p.H723Y       |
| Pat_63 | Post-Resistance | ZFHX4    | 79776  | 37 | 8 | 77618514  | 77618514  | Missense_Mutation | SNP | C | A | 12 | 43  | c.2191C>A     | c.(2191-2193)CAA>AAA   | p.Q731K       |
| Pat_63 | Post-Resistance | OSGIN2   | 734    | 37 | 8 | 90937083  | 90937083  | Missense_Mutation | SNP | G | A | 18 | 110 | c.841G>A      | c.(841-843)GTG>ATG     | p.V281M       |
| Pat_63 | Post-Resistance | RAD54B   | 25788  | 37 | 8 | 95479704  | 95479704  | Missense_Mutation | SNP | G | A | 21 | 80  | c.64C>T       | c.(64-66)CCT>TCT       | p.P22S        |
| Pat_63 | Post-Resistance | KIAA1429 | 25962  | 37 | 8 | 95541537  | 95541537  | Missense_Mutation | SNP | C | T | 11 | 61  | c.641G>A      | c.(640-642)AGA>AAA     | p.R214K       |
| Pat_63 | Post-Resistance | UQCRB    | 7381   | 37 | 8 | 97244030  | 97244030  | Missense_Mutation | SNP | G | A | 26 | 197 | c.230C>T      | c.(229-231)CCT>CTT     | p.P77L        |
| Pat_63 | Post-Resistance | MTDH     | 92140  | 37 | 8 | 98712051  | 98712051  | Missense_Mutation | SNP | C | T | 19 | 219 | c.1118C>T     | c.(1117-1119)CCC>CTC   | p.P373L       |
| Pat_63 | Post-Resistance | MTDH     | 92140  | 37 | 8 | 98731413  | 98731413  | Missense_Mutation | SNP | G | A | 14 | 104 | c.1517G>A     | c.(1516-1518)AGC>AAC   | p.S506N       |
| Pat_63 | Post-Resistance | POP1     | 10940  | 37 | 8 | 99146837  | 99146837  | Missense_Mutation | SNP | C | T | 7  | 184 | c.961C>T      | c.(961-963)CCT>TCT     | p.P321S       |
| Pat_63 | Post-Resistance | POP1     | 10940  | 37 | 8 | 99161211  | 99161211  | Missense_Mutation | SNP | G | A | 6  | 49  | c.1879G>A     | c.(1879-1881)GGC>AGC   | p.G627S       |
| Pat_63 | Post-Resistance | FBXO43   | 286151 | 37 | 8 | 101153317 | 101153317 | Missense_Mutation | SNP | C | T | 12 | 87  | c.1165G>A     | c.(1165-1167)GAA>AAA   | p.E389K       |
| Pat_63 | Post-Resistance | ATP6V1C1 | 528    | 37 | 8 | 104075277 | 104075277 | Splice_Site       | SNP | T | C | 3  | 111 | c.734_splice  | c.e9+2                 | p.K245_splice |
| Pat_63 | Post-Resistance | RIMS2    | 9699   | 37 | 8 | 104927751 | 104927751 | Missense_Mutation | SNP | G | A | 11 | 110 | c.1175G>A     | c.(1174-1176)GGT>GAT   | p.G392D       |
| Pat_63 | Post-Resistance | PKHD1L1  | 93035  | 37 | 8 | 110471939 | 110471939 | Missense_Mutation | SNP | C | T | 8  | 76  | c.7120C>T     | c.(7120-7122)CCT>TCT   | p.P2374S      |
| Pat_63 | Post-Resistance | ENPP2    | 5168   | 37 | 8 | 120602792 | 120602792 | Missense_Mutation | SNP | G | A | 8  | 261 | c.1160C>T     | c.(1159-1161)CCT>CTT   | p.P387L       |
| Pat_63 | Post-Resistance | TAF2     | 6873   | 37 | 8 | 120754852 | 120754852 | Missense_Mutation | SNP | G | A | 14 | 328 | c.3259C>T     | c.(3259-3261)CCC>TCC   | p.P1087S      |
| Pat_63 | Post-Resistance | MTBP     | 27085  | 37 | 8 | 121458724 | 121458724 | Missense_Mutation | SNP | C | T | 30 | 750 | c.170C>T      | c.(169-171)TCA>TTA     | p.S57L        |
| Pat_63 | Post-Resistance | MTBP     | 27085  | 37 | 8 | 121502783 | 121502783 | Nonsense_Mutation | SNP | C | T | 7  | 254 | c.1420C>T     | c.(1420-1422)CAA>TAA   | p.Q474*       |
| Pat_63 | Post-Resistance | WDR67    | 93594  | 37 | 8 | 124142446 | 124142446 | Missense_Mutation | SNP | C | T | 13 | 201 | c.2279C>T     | c.(2278-2280)GCT>GTT   | p.A760V       |
| Pat_63 | Post-Resistance | ATAD2    | 29028  | 37 | 8 | 124340756 | 124340756 | Missense_Mutation | SNP | C | T | 12 | 496 | c.3542G>A     | c.(3541-3543)AGG>AAG   | p.R1181K      |
| Pat_63 | Post-Resistance | FAM91A1  | 157769 | 37 | 8 | 124824837 | 124824837 | Missense_Mutation | SNP | G | A | 12 | 489 | c.2410G>A     | c.(2410-2412)GGT>AGT   | p.G804S       |
| Pat_63 | Post-Resistance | MTSS1    | 9788   | 37 | 8 | 125565387 | 125565387 | Missense_Mutation | SNP | G | A | 23 | 829 | c.2114C>T     | c.(2113-2115)GCC>GTC   | p.A705V       |
| Pat_63 | Post-Resistance | MYC      | 4609   | 37 | 8 | 128750635 | 128750635 | Missense_Mutation | SNP | C | T | 6  | 229 | c.127C>T      | c.(127-129)CCG>TCG     | p.P43S        |
| Pat_63 | Post-Resistance | TG       | 7038   | 37 | 8 | 134025851 | 134025851 | Missense_Mutation | SNP | C | T | 32 | 162 | c.6404C>T     | c.(6403-6405)TCC>TTC   | p.S2135F      |

|        |                 |          |        |    |   |           |           |                   |     |   |   |    |     |              |                      |               |
|--------|-----------------|----------|--------|----|---|-----------|-----------|-------------------|-----|---|---|----|-----|--------------|----------------------|---------------|
| Pat_63 | Post-Resistance | COL22A1  | 169044 | 37 | 8 | 139603742 | 139603742 | Missense_Mutation | SNP | C | T | 5  | 26  | c.4618G>A    | c.(4618-4620)GAG>AAG | p.E1540K      |
| Pat_63 | Post-Resistance | PTK2     | 5747   | 37 | 8 | 141874410 | 141874410 | Splice_Site       | SNP | C | T | 15 | 424 | c.450_splice | c.e5+1               | p.Q150_splice |
| Pat_63 | Post-Resistance | PTP4A3   | 11156  | 37 | 8 | 142437067 | 142437067 | Missense_Mutation | SNP | C | T | 23 | 154 | c.227C>T     | c.(226-228)CCG>CTG   | p.P76L        |
| Pat_63 | Post-Resistance | SCRIB    | 23513  | 37 | 8 | 144891113 | 144891113 | Missense_Mutation | SNP | G | A | 9  | 36  | c.1781C>T    | c.(1780-1782)ACC>ATC | p.T594I       |
| Pat_63 | Post-Resistance | ARHGAP39 | 80728  | 37 | 8 | 145756120 | 145756120 | Missense_Mutation | SNP | C | T | 4  | 74  | c.3023G>A    | c.(3022-3024)CGC>CAC | p.R1008H      |
| Pat_63 | Post-Resistance | RFX3     | 5991   | 37 | 9 | 3248135   | 3248135   | Missense_Mutation | SNP | G | A | 16 | 40  | c.1865C>T    | c.(1864-1866)TCC>TTC | p.S622F       |
| Pat_63 | Post-Resistance | SLC24A2  | 25769  | 37 | 9 | 19622282  | 19622282  | Missense_Mutation | SNP | C | T | 5  | 31  | c.946G>A     | c.(946-948)GAC>AAC   | p.D316N       |
| Pat_63 | Post-Resistance | KLHL9    | 55958  | 37 | 9 | 21333058  | 21333058  | Missense_Mutation | SNP | G | A | 10 | 50  | c.1801C>T    | c.(1801-1803)CCT>TCT | p.P601S       |
| Pat_63 | Post-Resistance | MTAP     | 4507   | 37 | 9 | 21818104  | 21818104  | Missense_Mutation | SNP | G | A | 15 | 38  | c.250G>A     | c.(250-252)GAG>AAG   | p.E84K        |
| Pat_63 | Post-Resistance | BAG1     | 573    | 37 | 9 | 33264285  | 33264285  | Missense_Mutation | SNP | G | A | 3  | 9   | c.388C>T     | c.(388-390)CGG>TGG   | p.R130W       |
| Pat_63 | Post-Resistance | NFX1     | 4799   | 37 | 9 | 33295050  | 33295050  | Missense_Mutation | SNP | G | A | 25 | 76  | c.658G>A     | c.(658-660)GAG>AAG   | p.E220K       |
| Pat_63 | Post-Resistance | NOL6     | 65083  | 37 | 9 | 33468864  | 33468864  | Missense_Mutation | SNP | C | T | 9  | 172 | c.1033G>A    | c.(1033-1035)GGT>AGT | p.G345S       |
| Pat_63 | Post-Resistance | TLN1     | 7094   | 37 | 9 | 35711286  | 35711286  | Missense_Mutation | SNP | G | A | 6  | 11  | c.3985C>T    | c.(3985-3987)CCT>TCT | p.P1329S      |
| Pat_63 | Post-Resistance | ZNF658   | 26149  | 37 | 9 | 40774061  | 40774061  | Missense_Mutation | SNP | G | A | 35 | 179 | c.1214C>T    | c.(1213-1215)CCC>CTC | p.P405L       |
| Pat_63 | Post-Resistance | PIP5K1B  | 8395   | 37 | 9 | 71606060  | 71606060  | Missense_Mutation | SNP | G | A | 12 | 43  | c.1507G>A    | c.(1507-1509)GGG>AGG | p.G503R       |
| Pat_63 | Post-Resistance | C9orf135 | 138255 | 37 | 9 | 72435874  | 72435874  | Missense_Mutation | SNP | G | A | 14 | 53  | c.79G>A      | c.(79-81)GTG>ATG     | p.V27M        |
| Pat_63 | Post-Resistance | FAM108B1 | 51104  | 37 | 9 | 74489770  | 74489770  | Missense_Mutation | SNP | C | T | 31 | 159 | c.227G>A     | c.(226-228)GGC>GAC   | p.G76D        |
| Pat_63 | Post-Resistance | PCSK5    | 5125   | 37 | 9 | 78773924  | 78773924  | Missense_Mutation | SNP | C | T | 7  | 299 | c.1456C>T    | c.(1456-1458)CGC>TGC | p.R486C       |
| Pat_63 | Post-Resistance | SECISBP2 | 79048  | 37 | 9 | 91940421  | 91940421  | Missense_Mutation | SNP | C | G | 7  | 245 | c.262C>G     | c.(262-264)CAT>GAT   | p.H88D        |
| Pat_63 | Post-Resistance | SPTLC1   | 10558  | 37 | 9 | 94809917  | 94809917  | Missense_Mutation | SNP | C | T | 9  | 34  | c.962G>A     | c.(961-963)AGG>AAG   | p.R321K       |
| Pat_63 | Post-Resistance | OGN      | 4969   | 37 | 9 | 95152213  | 95152213  | Missense_Mutation | SNP | G | A | 9  | 70  | c.553C>T     | c.(553-555)CTT>TTT   | p.L185F       |
| Pat_63 | Post-Resistance | FGD3     | 89846  | 37 | 9 | 95778065  | 95778065  | Missense_Mutation | SNP | G | A | 22 | 98  | c.1229G>A    | c.(1228-1230)GGC>GAC | p.G410D       |
| Pat_63 | Post-Resistance | NINJ1    | 4814   | 37 | 9 | 95887279  | 95887279  | Missense_Mutation | SNP | C | T | 14 | 53  | c.370G>A     | c.(370-372)GGC>AGC   | p.G124S       |
| Pat_63 | Post-Resistance | KIAA1529 | 57653  | 37 | 9 | 100105731 | 100105731 | Missense_Mutation | SNP | A | G | 17 | 48  | c.2933A>G    | c.(2932-2934)CAT>CGT | p.H978R       |
| Pat_63 | Post-Resistance | ABCA1    | 19     | 37 | 9 | 107594920 | 107594920 | Missense_Mutation | SNP | A | T | 8  | 91  | c.1444T>A    | c.(1444-1446)TAC>AAC | p.Y482N       |
| Pat_63 | Post-Resistance | TXN      | 7295   | 37 | 9 | 113007065 | 113007065 | Missense_Mutation | SNP | C | T | 5  | 228 | c.248G>A     | c.(247-249)GGA>GAA   | p.G83E        |
| Pat_63 | Post-Resistance | CEP110   | 11064  | 37 | 9 | 123904456 | 123904456 | Missense_Mutation | SNP | G | A | 8  | 30  | c.2779G>A    | c.(2779-2781)GAG>AAG | p.E927K       |
| Pat_63 | Post-Resistance | OLFML2A  | 169611 | 37 | 9 | 127572430 | 127572430 | Nonsense_Mutation | SNP | G | A | 13 | 40  | c.1698G>A    | c.(1696-1698)TGG>TGA | p.W566*       |
| Pat_63 | Post-Resistance | MAPKAP1  | 79109  | 37 | 9 | 128322074 | 128322074 | Missense_Mutation | SNP | G | A | 4  | 74  | c.686C>T     | c.(685-687)GCC>GTC   | p.A229V       |
| Pat_63 | Post-Resistance | ZBTB43   | 23099  | 37 | 9 | 129594792 | 129594792 | Missense_Mutation | SNP | G | A | 9  | 30  | c.4G>A       | c.(4-6)GAG>AAG       | p.E2K         |
| Pat_63 | Post-Resistance | TRUB2    | 26995  | 37 | 9 | 131079482 | 131079482 | Missense_Mutation | SNP | G | A | 4  | 19  | c.265C>T     | c.(265-267)CTC>TTC   | p.L89F        |
| Pat_63 | Post-Resistance | TOR1B    | 27348  | 37 | 9 | 132571192 | 132571192 | Missense_Mutation | SNP | G | A | 5  | 72  | c.650G>A     | c.(649-651)GGC>GAC   | p.G217D       |
| Pat_63 | Post-Resistance | NUP214   | 8021   | 37 | 9 | 134003727 | 134003727 | Missense_Mutation | SNP | G | A | 17 | 109 | c.250G>A     | c.(250-252)GTC>ATC   | p.V84I        |
| Pat_63 | Post-Resistance | BAT2L1   | 84726  | 37 | 9 | 134308174 | 134308174 | Missense_Mutation | SNP | C | T | 14 | 50  | c.286C>T     | c.(286-288)CCA>TCA   | p.P96S        |
| Pat_63 | Post-Resistance | BAT2L1   | 84726  | 37 | 9 | 134346214 | 134346214 | Missense_Mutation | SNP | C | T | 3  | 49  | c.1951C>T    | c.(1951-1953)CCC>TCC | p.P651S       |
| Pat_63 | Post-Resistance | GTF3C4   | 9329   | 37 | 9 | 135553960 | 135553960 | Nonsense_Mutation | SNP | G | A | 5  | 104 | c.954G>A     | c.(952-954)TGG>TGA   | p.W318*       |
| Pat_63 | Post-Resistance | UBAC1    | 10422  | 37 | 9 | 138831520 | 138831520 | Missense_Mutation | SNP | G | A | 28 | 85  | c.962C>T     | c.(961-963)GCC>GTG   | p.A321V       |
| Pat_63 | Post-Resistance | WDR85    | 92715  | 37 | 9 | 140449923 | 140449923 | Missense_Mutation | SNP | G | A | 21 | 114 | c.1127C>T    | c.(1126-1128)CCC>CTC | p.P376L       |
| Pat_63 | Post-Resistance | CACNA1B  | 774    | 37 | 9 | 140953033 | 140953033 | Missense_Mutation | SNP | G | A | 6  | 33  | c.4321G>A    | c.(4321-4323)GAC>AAC | p.D1441N      |
| Pat_63 | Post-Resistance | CSF2RA   | 1438   | 37 | X | 1422893   | 1422893   | Missense_Mutation | SNP | C | T | 20 | 112 | c.1024C>T    | c.(1024-1026)CTC>TTC | p.L342F       |
| Pat_63 | Post-Resistance | ARSH     | 347527 | 37 | X | 2945417   | 2945417   | Missense_Mutation | SNP | C | T | 7  | 74  | c.1100C>T    | c.(1099-1101)TCA>TTA | p.S367L       |
| Pat_63 | Post-Resistance | PHKA2    | 5256   | 37 | X | 18958136  | 18958136  | Missense_Mutation | SNP | C | T | 25 | 162 | c.895G>A     | c.(895-897)GAT>AAT   | p.D299N       |
| Pat_63 | Post-Resistance | CNKSR2   | 22866  | 37 | X | 21450818  | 21450818  | Missense_Mutation | SNP | G | A | 5  | 235 | c.317G>A     | c.(316-318)AGG>AAG   | p.R106K       |
| Pat_63 | Post-Resistance | FAM47B   | 170062 | 37 | X | 34961429  | 34961429  | Missense_Mutation | SNP | G | A | 4  | 7   | c.481G>A     | c.(481-483)GAC>AAC   | p.D161N       |
| Pat_63 | Post-Resistance | ZNF673   | 55634  | 37 | X | 46322309  | 46322309  | Missense_Mutation | SNP | G | A | 15 | 95  | c.142G>A     | c.(142-144)GGG>AGG   | p.G48R        |
| Pat_63 | Post-Resistance | CACNA1F  | 778    | 37 | X | 49062134  | 49062134  | Missense_Mutation | SNP | C | T | 10 | 20  | c.5645G>A    | c.(5644-5646)GGA>GAA | p.G1882E      |
| Pat_63 | Post-Resistance | CACNA1F  | 778    | 37 | X | 49079239  | 49079239  | Missense_Mutation | SNP | C | T | 20 | 59  | c.2177G>A    | c.(2176-2178)GGC>GAC | p.G726D       |



|        |                 |          |           |    |   |           |           |                   |     |   |   |     |     |           |                      |          |
|--------|-----------------|----------|-----------|----|---|-----------|-----------|-------------------|-----|---|---|-----|-----|-----------|----------------------|----------|
| Pat_63 | Post-Resistance | CACNA1F  | 778       | 37 | X | 49088215  | 49088215  | Missense_Mutation | SNP | C | A | 3   | 48  | c.200G>T  | c.(199-201)CGG>CTG   | p.R67L   |
| Pat_63 | Post-Resistance | SHROOM4  | 57477     | 37 | X | 50438894  | 50438894  | Missense_Mutation | SNP | G | A | 28  | 83  | c.161C>T  | c.(160-162)ACT>ATT   | p.T54I   |
| Pat_63 | Post-Resistance | FGD1     | 2245      | 37 | X | 54473754  | 54473754  | Missense_Mutation | SNP | C | T | 10  | 22  | c.2570G>A | c.(2569-2571)GGA>GAA | p.G857E  |
| Pat_63 | Post-Resistance | GNL3L    | 54552     | 37 | X | 54585062  | 54585062  | Missense_Mutation | SNP | A | T | 4   | 4   | c.1640A>T | c.(1639-1641)AAT>ATT | p.N547I  |
| Pat_63 | Post-Resistance | FAM123B  | 139285    | 37 | X | 63410558  | 63410558  | Missense_Mutation | SNP | G | A | 7   | 11  | c.2609C>T | c.(2608-2610)CCT>CTT | p.P870L  |
| Pat_63 | Post-Resistance | ZC3H12B  | 340554    | 37 | X | 64722868  | 64722868  | Missense_Mutation | SNP | G | A | 4   | 95  | c.2257G>A | c.(2257-2259)GTG>ATG | p.V753M  |
| Pat_63 | Post-Resistance | OPHN1    | 4983      | 37 | X | 67283921  | 67283921  | Missense_Mutation | SNP | C | T | 12  | 132 | c.1933G>A | c.(1933-1935)GAA>AAA | p.E645K  |
| Pat_63 | Post-Resistance | EFNB1    | 1947      | 37 | X | 68060316  | 68060316  | Missense_Mutation | SNP | G | A | 3   | 34  | c.860G>A  | c.(859-861)AGT>AAT   | p.S287N  |
| Pat_63 | Post-Resistance | MED12    | 9968      | 37 | X | 70354669  | 70354669  | Missense_Mutation | SNP | G | A | 19  | 65  | c.4834G>A | c.(4834-4836)GCA>ACA | p.A1612T |
| Pat_63 | Post-Resistance | PIN4     | 5303      | 37 | X | 71416691  | 71416691  | Missense_Mutation | SNP | A | T | 9   | 44  | c.249A>T  | c.(247-249)TTA>TTT   | p.L83F   |
| Pat_63 | Post-Resistance | ATRX     | 546       | 37 | X | 76937029  | 76937029  | Missense_Mutation | SNP | C | T | 25  | 191 | c.3719G>A | c.(3718-3720)GGA>GAA | p.G1240E |
| Pat_63 | Post-Resistance | PGAM4    | 441531    | 37 | X | 77224423  | 77224423  | Missense_Mutation | SNP | G | A | 22  | 65  | c.713C>T  | c.(712-714)ACG>ATG   | p.T238M  |
| Pat_63 | Post-Resistance | PGK1     | 5230      | 37 | X | 77369261  | 77369261  | Missense_Mutation | SNP | G | A | 5   | 29  | c.137G>A  | c.(136-138)AGC>AAC   | p.S46N   |
| Pat_63 | Post-Resistance | HDX      | 139324    | 37 | X | 83581197  | 83581197  | Missense_Mutation | SNP | C | T | 13  | 87  | c.1936G>A | c.(1936-1938)GAA>AAA | p.E646K  |
| Pat_63 | Post-Resistance | TSC22D3  | 1831      | 37 | X | 106959974 | 106959974 | Missense_Mutation | SNP | G | A | 23  | 87  | c.68C>T   | c.(67-69)TCC>TTC     | p.S23F   |
| Pat_63 | Post-Resistance | GUCY2F   | 2986      | 37 | X | 108638689 | 108638689 | Missense_Mutation | SNP | G | A | 26  | 161 | c.2305C>T | c.(2305-2307)CCT>TCT | p.P769S  |
| Pat_63 | Post-Resistance | PAK3     | 5063      | 37 | X | 110385414 | 110385414 | Missense_Mutation | SNP | G | A | 5   | 168 | c.266G>A  | c.(265-267)GGG>GAG   | p.G89E   |
| Pat_63 | Post-Resistance | DOCK11   | 139818    | 37 | X | 117733129 | 117733129 | Missense_Mutation | SNP | C | T | 19  | 117 | c.2500C>T | c.(2500-2502)CAT>TAT | p.H834Y  |
| Pat_63 | Post-Resistance | RHOXF1   | 158800    | 37 | X | 119249625 | 119249625 | Missense_Mutation | SNP | G | A | 6   | 71  | c.148C>T  | c.(148-150)CCT>TCT   | p.P50S   |
| Pat_63 | Post-Resistance | XPNPEP2  | 7512      | 37 | X | 128893157 | 128893157 | Missense_Mutation | SNP | G | A | 22  | 114 | c.1369G>A | c.(1369-1371)GAC>AAC | p.D457N  |
| Pat_63 | Post-Resistance | XPNPEP2  | 7512      | 37 | X | 128901586 | 128901586 | Missense_Mutation | SNP | G | A | 18  | 91  | c.1748G>A | c.(1747-1749)GGG>GAG | p.G583E  |
| Pat_63 | Post-Resistance | FRMD7    | 90167     | 37 | X | 131212022 | 131212022 | Missense_Mutation | SNP | C | T | 22  | 81  | c.2023G>A | c.(2023-2025)GCC>ACC | p.A675T  |
| Pat_63 | Post-Resistance | SLITRK4  | 139065    | 37 | X | 142717099 | 142717099 | Missense_Mutation | SNP | C | T | 5   | 84  | c.1826G>A | c.(1825-1827)AGT>AAT | p.S609N  |
| Pat_63 | Post-Resistance | SLITRK2  | 84631     | 37 | X | 144904916 | 144904916 | Missense_Mutation | SNP | G | A | 20  | 68  | c.973G>A  | c.(973-975)GGA>AGA   | p.G325R  |
| Pat_63 | Post-Resistance | SLITRK2  | 84631     | 37 | X | 144906224 | 144906224 | Missense_Mutation | SNP | G | A | 6   | 235 | c.2281G>A | c.(2281-2283)GAG>AAG | p.E761K  |
| Pat_63 | Post-Resistance | HCFC1    | 3054      | 37 | X | 153216856 | 153216856 | Missense_Mutation | SNP | G | A | 9   | 356 | c.5462C>T | c.(5461-5463)ACC>ATC | p.T1821I |
| Pat_70 | Pre-Treatment   | UBE4B    | 10277     | 37 | 1 | 10228227  | 10228227  | Nonsense_Mutation | SNP | C | T | 4   | 74  | c.3232C>T | c.(3232-3234)CAG>TAG | p.Q1078* |
| Pat_70 | Pre-Treatment   | NBPF3    | 84224     | 37 | 1 | 21798107  | 21798107  | Missense_Mutation | SNP | G | C | 6   | 417 | c.492G>C  | c.(490-492)CAG>CAC   | p.Q164H  |
| Pat_70 | Pre-Treatment   | HSPG2    | 3339      | 37 | 1 | 22179521  | 22179521  | Missense_Mutation | SNP | G | A | 60  | 94  | c.6482C>T | c.(6481-6483)TCA>TTA | p.S2161L |
| Pat_70 | Pre-Treatment   | EPHB2    | 2048      | 37 | 1 | 23191418  | 23191418  | Missense_Mutation | SNP | C | T | 66  | 153 | c.1016C>T | c.(1015-1017)TCC>TTC | p.S339F  |
| Pat_70 | Pre-Treatment   | CSMD2    | 114784    | 37 | 1 | 34192148  | 34192148  | Missense_Mutation | SNP | C | T | 33  | 79  | c.2387G>A | c.(2386-2388)AGA>AAA | p.R796K  |
| Pat_70 | Pre-Treatment   | HIVEP3   | 59269     | 37 | 1 | 42041246  | 42041246  | Missense_Mutation | SNP | C | T | 134 | 281 | c.5176G>A | c.(5176-5178)GAG>AAG | p.E1726K |
| Pat_70 | Pre-Treatment   | CYP4Z1   | 199974    | 37 | 1 | 47564769  | 47564769  | Missense_Mutation | SNP | G | A | 40  | 107 | c.880G>A  | c.(880-882)GAA>AAA   | p.E294K  |
| Pat_70 | Pre-Treatment   | C1orf175 | 374977    | 37 | 1 | 55118930  | 55118930  | Missense_Mutation | SNP | G | A | 44  | 129 | c.331G>A  | c.(331-333)GAT>AAT   | p.D111N  |
| Pat_70 | Pre-Treatment   | SLC44A5  | 204962    | 37 | 1 | 75704267  | 75704267  | Missense_Mutation | SNP | C | T | 48  | 104 | c.587G>A  | c.(586-588)GGA>GAA   | p.G196E  |
| Pat_70 | Pre-Treatment   | CLCA2    | 9635      | 37 | 1 | 86919106  | 86919106  | Missense_Mutation | SNP | G | A | 32  | 93  | c.2210G>A | c.(2209-2211)CGA>CAA | p.R737Q  |
| Pat_70 | Pre-Treatment   | SLC44A3  | 126969    | 37 | 1 | 95303356  | 95303356  | Missense_Mutation | SNP | C | T | 151 | 241 | c.599C>T  | c.(598-600)ACC>ATC   | p.T200I  |
| Pat_70 | Pre-Treatment   | SPAG17   | 200162    | 37 | 1 | 118548138 | 118548138 | Missense_Mutation | SNP | G | A | 28  | 72  | c.4675C>T | c.(4675-4677)CCT>TCT | p.P1559S |
| Pat_70 | Pre-Treatment   | HSD3B1   | 3283      | 37 | 1 | 120057006 | 120057006 | Missense_Mutation | SNP | C | T | 35  | 80  | c.860C>T  | c.(859-861)CCT>CTT   | p.P287L  |
| Pat_70 | Pre-Treatment   | NBPF9    | 400818    | 37 | 1 | 144815953 | 144815953 | Missense_Mutation | SNP | A | G | 13  | 372 | c.1324A>G | c.(1324-1326)AAT>GAT | p.N442D  |
| Pat_70 | Pre-Treatment   | NBPF10   | 100132406 | 37 | 1 | 145360608 | 145360608 | Missense_Mutation | SNP | T | A | 30  | 47  | c.9458T>A | c.(9457-9459)CTG>CAG | p.L3153Q |
| Pat_70 | Pre-Treatment   | TCHH     | 7062      | 37 | 1 | 152082320 | 152082320 | Missense_Mutation | SNP | T | C | 4   | 221 | c.3373A>G | c.(3373-3375)AGA>GGA | p.R1125G |
| Pat_70 | Pre-Treatment   | CRNN     | 49860     | 37 | 1 | 152382749 | 152382749 | Missense_Mutation | SNP | G | A | 6   | 323 | c.809C>T  | c.(808-810)ACC>ATC   | p.T270I  |
| Pat_70 | Pre-Treatment   | ATP8B2   | 57198     | 37 | 1 | 154313359 | 154313359 | Missense_Mutation | SNP | A | T | 40  | 143 | c.1163A>T | c.(1162-1164)TAC>TTC | p.Y388F  |
| Pat_70 | Pre-Treatment   | ADAR     | 103       | 37 | 1 | 154574460 | 154574460 | Missense_Mutation | SNP | C | A | 4   | 104 | c.658G>T  | c.(658-660)GCC>TCC   | p.A220S  |
| Pat_70 | Pre-Treatment   | ADAR     | 103       | 37 | 1 | 154574475 | 154574475 | Missense_Mutation | SNP | C | T | 4   | 111 | c.643G>A  | c.(643-645)GGT>AGT   | p.G215S  |
| Pat_70 | Pre-Treatment   | DCST2    | 127579    | 37 | 1 | 154999135 | 154999135 | Missense_Mutation | SNP | G | A | 30  | 81  | c.1399C>T | c.(1399-1401)CGT>TGT | p.R467C  |

|        |               |          |        |    |    |           |           |                   |     |   |   |     |     |              |                      |              |
|--------|---------------|----------|--------|----|----|-----------|-----------|-------------------|-----|---|---|-----|-----|--------------|----------------------|--------------|
| Pat_70 | Pre-Treatment | OR10K2   | 391107 | 37 | 1  | 158390397 | 158390397 | Missense_Mutation | SNP | G | A | 55  | 112 | c.260C>T     | c.(259-261)TCC>TTC   | p.S87F       |
| Pat_70 | Pre-Treatment | RCS1     | 92241  | 37 | 1  | 167654698 | 167654698 | Missense_Mutation | SNP | C | T | 39  | 142 | c.149C>T     | c.(148-150)TCC>TTC   | p.S50F       |
| Pat_70 | Pre-Treatment | CACNA1E  | 777    | 37 | 1  | 181741296 | 181741296 | Missense_Mutation | SNP | G | A | 35  | 156 | c.5068G>A    | c.(5068-5070)GAG>AAG | p.E1690K     |
| Pat_70 | Pre-Treatment | KCNT2    | 343450 | 37 | 1  | 196436849 | 196436849 | Missense_Mutation | SNP | G | A | 17  | 58  | c.527C>T     | c.(526-528)GCC>GTC   | p.A176V      |
| Pat_70 | Pre-Treatment | CFHR2    | 3080   | 37 | 1  | 196927146 | 196927146 | Missense_Mutation | SNP | G | A | 54  | 165 | c.556G>A     | c.(556-558)GGT>AGT   | p.G186S      |
| Pat_70 | Pre-Treatment | CFHR5    | 81494  | 37 | 1  | 196977679 | 196977679 | Missense_Mutation | SNP | G | A | 20  | 41  | c.1576G>A    | c.(1576-1578)GAT>AAT | p.D526N      |
| Pat_70 | Pre-Treatment | CRB1     | 23418  | 37 | 1  | 197390318 | 197390318 | Missense_Mutation | SNP | G | A | 21  | 65  | c.1360G>A    | c.(1360-1362)GGA>AGA | p.G454R      |
| Pat_70 | Pre-Treatment | PRELP    | 5549   | 37 | 1  | 203452937 | 203452937 | Missense_Mutation | SNP | G | A | 5   | 214 | c.625G>A     | c.(625-627)GAC>AAC   | p.D209N      |
| Pat_70 | Pre-Treatment | CNST     | 163882 | 37 | 1  | 246797858 | 246797858 | Missense_Mutation | SNP | C | T | 4   | 211 | c.787C>T     | c.(787-789)CGG>TGG   | p.R263W      |
| Pat_70 | Pre-Treatment | MBL2     | 4153   | 37 | 10 | 54530495  | 54530495  | Missense_Mutation | SNP | C | T | 33  | 22  | c.239G>A     | c.(238-240)GGA>GAA   | p.G80E       |
| Pat_70 | Pre-Treatment | CTNNA3   | 29119  | 37 | 10 | 68535278  | 68535278  | Missense_Mutation | SNP | C | T | 47  | 53  | c.1052G>A    | c.(1051-1053)GGA>GAA | p.G351E      |
| Pat_70 | Pre-Treatment | CTNNA3   | 29119  | 37 | 10 | 68979585  | 68979585  | Missense_Mutation | SNP | C | T | 24  | 24  | c.623G>A     | c.(622-624)CGA>CAA   | p.R208Q      |
| Pat_70 | Pre-Treatment | C10orf27 | 219793 | 37 | 10 | 72541712  | 72541712  | Missense_Mutation | SNP | A | T | 44  | 53  | c.122T>A     | c.(121-123)CTG>CAG   | p.L41Q       |
| Pat_70 | Pre-Treatment | PCGF5    | 84333  | 37 | 10 | 93008318  | 93008318  | Splice_Site       | SNP | G | A | 4   | 95  | c.265_splice | c.e4+1               | p.Q89_splice |
| Pat_70 | Pre-Treatment | BTBD16   | 118663 | 37 | 10 | 124045710 | 124045710 | Missense_Mutation | SNP | C | T | 36  | 54  | c.332C>T     | c.(331-333)GCC>GTC   | p.A111V      |
| Pat_70 | Pre-Treatment | CDHR5    | 53841  | 37 | 11 | 618833    | 618833    | Missense_Mutation | SNP | G | C | 5   | 165 | c.1726C>G    | c.(1726-1728)CCA>GCA | p.P576A      |
| Pat_70 | Pre-Treatment | NLRP10   | 338322 | 37 | 11 | 7981691   | 7981691   | Missense_Mutation | SNP | C | T | 30  | 70  | c.1468G>A    | c.(1468-1470)GAG>AAG | p.E490K      |
| Pat_70 | Pre-Treatment | STK33    | 65975  | 37 | 11 | 8494797   | 8494797   | Missense_Mutation | SNP | T | G | 26  | 67  | c.252A>C     | c.(250-252)AGA>AGC   | p.R84S       |
| Pat_70 | Pre-Treatment | RAG2     | 5897   | 37 | 11 | 36615559  | 36615559  | Missense_Mutation | SNP | G | A | 55  | 84  | c.160C>T     | c.(160-162)CAT>TAT   | p.H54Y       |
| Pat_70 | Pre-Treatment | LRP4     | 4038   | 37 | 11 | 46911963  | 46911963  | Missense_Mutation | SNP | C | T | 22  | 69  | c.1780G>A    | c.(1780-1782)GAT>AAT | p.D594N      |
| Pat_70 | Pre-Treatment | MYBPC3   | 4607   | 37 | 11 | 47374188  | 47374188  | Missense_Mutation | SNP | G | A | 4   | 240 | c.11C>T      | c.(10-12)CCG>CTG     | p.P4L        |
| Pat_70 | Pre-Treatment | AHNAK    | 79026  | 37 | 11 | 62295321  | 62295321  | Missense_Mutation | SNP | T | C | 8   | 667 | c.6568A>G    | c.(6568-6570)AAC>GAC | p.N2190D     |
| Pat_70 | Pre-Treatment | AHNAK    | 79026  | 37 | 11 | 62295516  | 62295516  | Missense_Mutation | SNP | G | T | 9   | 679 | c.6373C>A    | c.(6373-6375)CAC>AAC | p.H2125N     |
| Pat_70 | Pre-Treatment | AHNAK    | 79026  | 37 | 11 | 62295549  | 62295549  | Missense_Mutation | SNP | C | T | 8   | 582 | c.6340G>A    | c.(6340-6342)GCC>ACC | p.A2114T     |
| Pat_70 | Pre-Treatment | INTS4    | 92105  | 37 | 11 | 77614645  | 77614645  | Missense_Mutation | SNP | T | G | 3   | 49  | c.2038A>C    | c.(2038-2040)AAT>CAT | p.N680H      |
| Pat_70 | Pre-Treatment | TRPC6    | 7225   | 37 | 11 | 101375149 | 101375149 | Missense_Mutation | SNP | G | A | 4   | 87  | c.551C>T     | c.(550-552)CCG>CTG   | p.P184L      |
| Pat_70 | Pre-Treatment | GRIA4    | 2893   | 37 | 11 | 105797546 | 105797546 | Missense_Mutation | SNP | G | A | 4   | 213 | c.1927G>A    | c.(1927-1929)GCT>ACT | p.A643T      |
| Pat_70 | Pre-Treatment | OR6T1    | 219874 | 37 | 11 | 123813604 | 123813604 | Missense_Mutation | SNP | C | T | 39  | 117 | c.942G>A     | c.(940-942)ATG>ATA   | p.M314I      |
| Pat_70 | Pre-Treatment | CCDC15   | 80071  | 37 | 11 | 124857495 | 124857495 | Missense_Mutation | SNP | A | C | 5   | 257 | c.1373A>C    | c.(1372-1374)CAC>CCC | p.H458P      |
| Pat_70 | Pre-Treatment | NCAPD3   | 23310  | 37 | 11 | 134079064 | 134079064 | Missense_Mutation | SNP | G | A | 121 | 283 | c.769C>T     | c.(769-771)CAT>TAT   | p.H257Y      |
| Pat_70 | Pre-Treatment | ERC1     | 23085  | 37 | 12 | 1553842   | 1553842   | Missense_Mutation | SNP | C | T | 82  | 93  | c.3139C>T    | c.(3139-3141)CCA>TCA | p.P1047S     |
| Pat_70 | Pre-Treatment | CACNA1C  | 775    | 37 | 12 | 2602410   | 2602410   | Missense_Mutation | SNP | G | A | 4   | 205 | c.971G>A     | c.(970-972)CGG>CAG   | p.R324Q      |
| Pat_70 | Pre-Treatment | KLHDC5   | 57542  | 37 | 12 | 27944688  | 27944688  | Missense_Mutation | SNP | G | A | 132 | 252 | c.920G>A     | c.(919-921)GGA>GAA   | p.G307E      |
| Pat_70 | Pre-Treatment | KRT5     | 3852   | 37 | 12 | 52913539  | 52913539  | Missense_Mutation | SNP | G | A | 93  | 235 | c.542C>T     | c.(541-543)TCC>TTC   | p.S181F      |
| Pat_70 | Pre-Treatment | KRT73    | 319101 | 37 | 12 | 53011993  | 53011993  | Nonsense_Mutation | SNP | G | A | 46  | 148 | c.316C>T     | c.(316-318)CAG>TAG   | p.Q106*      |
| Pat_70 | Pre-Treatment | NAV3     | 89795  | 37 | 12 | 78443859  | 78443859  | Missense_Mutation | SNP | C | T | 15  | 41  | c.2110C>T    | c.(2110-2112)CGT>TGT | p.R704C      |
| Pat_70 | Pre-Treatment | SYT1     | 6857   | 37 | 12 | 79693212  | 79693212  | Missense_Mutation | SNP | G | A | 49  | 128 | c.691G>A     | c.(691-693)GAT>AAT   | p.D231N      |
| Pat_70 | Pre-Treatment | FAM71C   | 196472 | 37 | 12 | 100042134 | 100042134 | Missense_Mutation | SNP | A | G | 48  | 106 | c.182A>G     | c.(181-183)GAC>GGC   | p.D61G       |
| Pat_70 | Pre-Treatment | STAB2    | 55576  | 37 | 12 | 104100576 | 104100576 | Missense_Mutation | SNP | G | A | 18  | 74  | c.4003G>A    | c.(4003-4005)GAA>AAA | p.E1335K     |
| Pat_70 | Pre-Treatment | PWP1     | 11137  | 37 | 12 | 108098465 | 108098465 | Nonsense_Mutation | SNP | C | T | 4   | 221 | c.1018C>T    | c.(1018-1020)CGA>TGA | p.R340*      |
| Pat_70 | Pre-Treatment | RPH3A    | 22895  | 37 | 12 | 113307722 | 113307722 | Missense_Mutation | SNP | G | A | 36  | 99  | c.674G>A     | c.(673-675)GGG>GAG   | p.G225E      |
| Pat_70 | Pre-Treatment | RIMBP2   | 23504  | 37 | 12 | 130926895 | 130926895 | Nonsense_Mutation | SNP | C | T | 28  | 81  | c.951G>A     | c.(949-951)TGG>TGA   | p.W317*      |
| Pat_70 | Pre-Treatment | MIPEP    | 4285   | 37 | 13 | 24453425  | 24453425  | Missense_Mutation | SNP | G | A | 109 | 281 | c.521C>T     | c.(520-522)TCC>TTC   | p.S174F      |
| Pat_70 | Pre-Treatment | HS6ST3   | 266722 | 37 | 13 | 97485024  | 97485024  | Missense_Mutation | SNP | G | A | 20  | 78  | c.988G>A     | c.(988-990)GAG>AAG   | p.E330K      |
| Pat_70 | Pre-Treatment | OR4M1    | 441670 | 37 | 14 | 20249284  | 20249284  | Missense_Mutation | SNP | C | T | 41  | 153 | c.803C>T     | c.(802-804)TCC>TTC   | p.S268F      |
| Pat_70 | Pre-Treatment | OR4N2    | 390429 | 37 | 14 | 20296056  | 20296056  | Missense_Mutation | SNP | T | C | 66  | 275 | c.449T>C     | c.(448-450)CTT>CCT   | p.L150P      |
| Pat_70 | Pre-Treatment | C14orf93 | 60686  | 37 | 14 | 23467809  | 23467809  | Missense_Mutation | SNP | C | T | 16  | 56  | c.424G>A     | c.(424-426)GAA>AAA   | p.E142K      |

|        |               |           |        |    |    |          |          |                   |     |   |   |     |     |            |                        |           |
|--------|---------------|-----------|--------|----|----|----------|----------|-------------------|-----|---|---|-----|-----|------------|------------------------|-----------|
| Pat_70 | Pre-Treatment | NUBPL     | 80224  | 37 | 14 | 32068535 | 32068535 | Missense_Mutation | SNP | C | T | 34  | 72  | c.332C>T   | c.(331-333)CCT>CTT     | p.P111L   |
| Pat_70 | Pre-Treatment | SOCS4     | 122809 | 37 | 14 | 55510090 | 55510090 | Missense_Mutation | SNP | C | T | 51  | 118 | c.331C>T   | c.(331-333)CGG>TGG     | p.R111W   |
| Pat_70 | Pre-Treatment | MAP3K9    | 4293   | 37 | 14 | 71216698 | 71216698 | Missense_Mutation | SNP | G | A | 29  | 100 | c.1102C>T  | c.(1102-1104)CTT>TTT   | p.L368F   |
| Pat_70 | Pre-Treatment | FOXN3     | 1112   | 37 | 14 | 89628855 | 89628855 | Missense_Mutation | SNP | G | A | 28  | 79  | c.1376C>T  | c.(1375-1377)TCC>TTC   | p.S459F   |
| Pat_70 | Pre-Treatment | OR4N3P    | 390539 | 37 | 15 | 22413825 | 22413825 | Missense_Mutation | SNP | C | T | 73  | 280 | c.124C>T   | c.(124-126)CGC>TGC     | p.R42C    |
| Pat_70 | Pre-Treatment | SPTBN5    | 51332  | 37 | 15 | 42160775 | 42160775 | Missense_Mutation | SNP | C | T | 18  | 54  | c.5773G>A  | c.(5773-5775)GCC>ACC   | p.A1925T  |
| Pat_70 | Pre-Treatment | CKMT1A    | 548596 | 37 | 15 | 43991226 | 43991226 | Missense_Mutation | SNP | G | A | 4   | 209 | c.1193G>A  | c.(1192-1194)CGG>CAG   | p.R398Q   |
| Pat_70 | Pre-Treatment | DTWD1     | 56986  | 37 | 15 | 49924411 | 49924411 | Missense_Mutation | SNP | C | T | 37  | 76  | c.320C>T   | c.(319-321)ACT>ATT     | p.T107I   |
| Pat_70 | Pre-Treatment | SLC27A2   | 11001  | 37 | 15 | 50515227 | 50515227 | Nonsense_Mutation | SNP | G | A | 48  | 117 | c.1038G>A  | c.(1036-1038)TGG>TGA   | p.W346*   |
| Pat_70 | Pre-Treatment | CYP19A1   | 1588   | 37 | 15 | 51503047 | 51503047 | Missense_Mutation | SNP | C | T | 46  | 129 | c.1470G>A  | c.(1468-1470)ATG>ATA   | p.M490I   |
| Pat_70 | Pre-Treatment | HERC1     | 8925   | 37 | 15 | 63932386 | 63932386 | Nonsense_Mutation | SNP | C | A | 47  | 75  | c.11866G>T | c.(11866-11868)GAA>TAA | p.E3956*  |
| Pat_70 | Pre-Treatment | AGBL1     | 123624 | 37 | 15 | 87066090 | 87066090 | Missense_Mutation | SNP | C | T | 55  | 128 | c.2467C>T  | c.(2467-2469)CCC>TCC   | p.P823S   |
| Pat_70 | Pre-Treatment | GRIN2A    | 2903   | 37 | 16 | 9923396  | 9923396  | Missense_Mutation | SNP | C | T | 29  | 67  | c.1891G>A  | c.(1891-1893)GTA>ATA   | p.V631I   |
| Pat_70 | Pre-Treatment | SNN       | 8303   | 37 | 16 | 11770033 | 11770033 | Missense_Mutation | SNP | C | T | 3   | 67  | c.118C>T   | c.(118-120)CGC>TGC     | p.R40C    |
| Pat_70 | Pre-Treatment | TMC7      | 79905  | 37 | 16 | 19041577 | 19041577 | Missense_Mutation | SNP | G | A | 18  | 57  | c.743G>A   | c.(742-744)GGA>GAA     | p.G248E   |
| Pat_70 | Pre-Treatment | USP31     | 57478  | 37 | 16 | 23116791 | 23116791 | Missense_Mutation | SNP | A | T | 35  | 81  | c.1060T>A  | c.(1060-1062)TCT>ACT   | p.S354T   |
| Pat_70 | Pre-Treatment | ABCC12    | 94160  | 37 | 16 | 48119553 | 48119553 | Missense_Mutation | SNP | C | T | 53  | 119 | c.3779G>A  | c.(3778-3780)GGG>GAG   | p.G1260E  |
| Pat_70 | Pre-Treatment | GPR114    | 221188 | 37 | 16 | 57608779 | 57608779 | Missense_Mutation | SNP | G | A | 14  | 73  | c.1261G>A  | c.(1261-1263)GGC>AGC   | p.G421S   |
| Pat_70 | Pre-Treatment | ATMIN     | 23300  | 37 | 16 | 81078133 | 81078133 | Missense_Mutation | SNP | T | C | 61  | 122 | c.2030T>C  | c.(2029-2031)TTA>TCA   | p.L677S   |
| Pat_70 | Pre-Treatment | PKD1L2    | 114780 | 37 | 16 | 81253771 | 81253771 | Missense_Mutation | SNP | C | T | 33  | 75  | c.205G>A   | c.(205-207)GAA>AAA     | p.E69K    |
| Pat_70 | Pre-Treatment | KLHL36    | 79786  | 37 | 16 | 84690846 | 84690846 | Missense_Mutation | SNP | G | A | 4   | 136 | c.433G>A   | c.(433-435)GAG>AAG     | p.E145K   |
| Pat_70 | Pre-Treatment | GALNS     | 2588   | 37 | 16 | 88904094 | 88904094 | Nonsense_Mutation | SNP | C | A | 21  | 95  | c.502G>T   | c.(502-504)GGA>TGA     | p.G168*   |
| Pat_70 | Pre-Treatment | TRPV3     | 162514 | 37 | 17 | 3446887  | 3446887  | Missense_Mutation | SNP | T | C | 3   | 127 | c.347A>G   | c.(346-348)AAG>AGG     | p.K116R   |
| Pat_70 | Pre-Treatment | C17orf85  | 55421  | 37 | 17 | 3717742  | 3717742  | Missense_Mutation | SNP | G | A | 15  | 29  | c.1501C>T  | c.(1501-1503)CCG>TCG   | p.P501S   |
| Pat_70 | Pre-Treatment | UBE2G1    | 7326   | 37 | 17 | 4192683  | 4192683  | Missense_Mutation | SNP | A | G | 55  | 130 | c.268T>C   | c.(268-270)TGC>CGC     | p.C90R    |
| Pat_70 | Pre-Treatment | ALOX15    | 246    | 37 | 17 | 4536765  | 4536765  | Missense_Mutation | SNP | C | T | 43  | 124 | c.1192G>A  | c.(1192-1194)GAA>AAA   | p.E398K   |
| Pat_70 | Pre-Treatment | USP6      | 9098   | 37 | 17 | 5066291  | 5066291  | Nonsense_Mutation | SNP | C | T | 63  | 181 | c.3028C>T  | c.(3028-3030)CAG>TAG   | p.Q1010*  |
| Pat_70 | Pre-Treatment | MYH2      | 4620   | 37 | 17 | 10442646 | 10442646 | Missense_Mutation | SNP | G | A | 71  | 248 | c.1292C>T  | c.(1291-1293)GCC>GTC   | p.A431V   |
| Pat_70 | Pre-Treatment | CCDC144A  | 9720   | 37 | 17 | 16631054 | 16631054 | Missense_Mutation | SNP | G | A | 9   | 29  | c.2105G>A  | c.(2104-2106)AGA>AAA   | p.R702K   |
| Pat_70 | Pre-Treatment | RAB11FIP4 | 84440  | 37 | 17 | 29850600 | 29850600 | Missense_Mutation | SNP | G | A | 120 | 228 | c.1000G>A  | c.(1000-1002)GAC>AAC   | p.D334N   |
| Pat_70 | Pre-Treatment | SLFN13    | 146857 | 37 | 17 | 33769266 | 33769266 | Nonsense_Mutation | SNP | C | T | 39  | 47  | c.1238G>A  | c.(1237-1239)TGG>TAG   | p.W413*   |
| Pat_70 | Pre-Treatment | CDK12     | 51755  | 37 | 17 | 37618868 | 37618868 | Missense_Mutation | SNP | G | A | 41  | 63  | c.544G>A   | c.(544-546)GAG>AAG     | p.E182K   |
| Pat_70 | Pre-Treatment | KRTAP4-11 | 653240 | 37 | 17 | 39274424 | 39274424 | Missense_Mutation | SNP | G | C | 14  | 179 | c.144C>G   | c.(142-144)AGC>AGG     | p.S48R    |
| Pat_70 | Pre-Treatment | KRTAP4-12 | 83755  | 37 | 17 | 39279998 | 39279998 | Missense_Mutation | SNP | C | A | 6   | 244 | c.377G>T   | c.(376-378)TGC>TTC     | p.C126F   |
| Pat_70 | Pre-Treatment | SLC26A11  | 284129 | 37 | 17 | 78226478 | 78226478 | Missense_Mutation | SNP | C | T | 25  | 53  | c.1784C>T  | c.(1783-1785)TCC>TTC   | p.S595F   |
| Pat_70 | Pre-Treatment | CLUL1     | 27098  | 37 | 18 | 618042   | 618042   | Nonsense_Mutation | SNP | G | A | 40  | 103 | c.42G>A    | c.(40-42)TGG>TGA       | p.W14*    |
| Pat_70 | Pre-Treatment | TXNDC2    | 84203  | 37 | 18 | 9887155  | 9887155  | Missense_Mutation | SNP | A | G | 5   | 334 | c.679A>G   | c.(679-681)ACC>GCC     | p.T227A   |
| Pat_70 | Pre-Treatment | MEX3C     | 51320  | 37 | 18 | 48703064 | 48703064 | Missense_Mutation | SNP | G | A | 22  | 77  | c.1637C>T  | c.(1636-1638)CCT>CTT   | p.P546L   |
| Pat_70 | Pre-Treatment | DCC       | 1630   | 37 | 18 | 50832089 | 50832089 | Missense_Mutation | SNP | G | A | 32  | 62  | c.2053G>A  | c.(2053-2055)GGA>AGA   | p.G685R   |
| Pat_70 | Pre-Treatment | SERPINB5  | 5268   | 37 | 18 | 61156661 | 61156661 | Missense_Mutation | SNP | G | A | 30  | 45  | c.388G>A   | c.(388-390)GGT>AGT     | p.G130S   |
| Pat_70 | Pre-Treatment | ARRDC5    | 645432 | 37 | 19 | 4896825  | 4896825  | Missense_Mutation | SNP | G | A | 29  | 98  | c.359C>T   | c.(358-360)CCT>CTT     | p.P120L   |
| Pat_70 | Pre-Treatment | C3        | 718    | 37 | 19 | 6702545  | 6702545  | Missense_Mutation | SNP | C | T | 36  | 95  | c.2291G>A  | c.(2290-2292)CGA>CAA   | p.R764Q   |
| Pat_70 | Pre-Treatment | MUC16     | 94025  | 37 | 19 | 9048764  | 9048764  | Missense_Mutation | SNP | A | G | 6   | 156 | c.32867T>C | c.(32866-32868)CTT>CCT | p.L10956P |
| Pat_70 | Pre-Treatment | MUC16     | 94025  | 37 | 19 | 9048771  | 9048771  | Missense_Mutation | SNP | A | G | 6   | 147 | c.32860T>C | c.(32860-32862)TTT>CTT | p.F10954L |
| Pat_70 | Pre-Treatment | MUC16     | 94025  | 37 | 19 | 9073848  | 9073848  | Missense_Mutation | SNP | G | A | 16  | 75  | c.13598C>T | c.(13597-13599)CCT>CTT | p.P4533L  |
| Pat_70 | Pre-Treatment | ZNF560    | 147741 | 37 | 19 | 9577542  | 9577542  | Missense_Mutation | SNP | C | T | 51  | 99  | c.2081G>A  | c.(2080-2082)CGA>CAA   | p.R694Q   |
| Pat_70 | Pre-Treatment | ZNF844    | 284391 | 37 | 19 | 12187307 | 12187307 | Missense_Mutation | SNP | G | C | 8   | 323 | c.1372G>C  | c.(1372-1374)GAT>CAT   | p.D458H   |

|        |               |           |        |    |    |           |           |                   |     |    |    |     |     |                |                        |          |
|--------|---------------|-----------|--------|----|----|-----------|-----------|-------------------|-----|----|----|-----|-----|----------------|------------------------|----------|
| Pat_70 | Pre-Treatment | CD97      | 976    | 37 | 19 | 14499612  | 14499612  | Missense_Mutation | SNP | C  | T  | 93  | 224 | c.172C>T       | c.(172-174)CCG>TCG     | p.P58S   |
| Pat_70 | Pre-Treatment | CYP4F12   | 66002  | 37 | 19 | 15789078  | 15789078  | Missense_Mutation | SNP | C  | T  | 47  | 116 | c.206C>T       | c.(205-207)CCT>CTT     | p.P69L   |
| Pat_70 | Pre-Treatment | OR10H2    | 26538  | 37 | 19 | 15839002  | 15839002  | Nonsense_Mutation | SNP | G  | A  | 39  | 104 | c.149G>A       | c.(148-150)TGG>TAG     | p.W50*   |
| Pat_70 | Pre-Treatment | ZNF208    | 7757   | 37 | 19 | 22154417  | 22154417  | Missense_Mutation | SNP | G  | A  | 5   | 174 | c.3035C>T      | c.(3034-3036)CCC>CTC   | p.P1012L |
| Pat_70 | Pre-Treatment | ZNF98     | 148198 | 37 | 19 | 22585641  | 22585641  | Missense_Mutation | SNP | C  | T  | 59  | 143 | c.203G>A       | c.(202-204)GGA>GAA     | p.G68E   |
| Pat_70 | Pre-Treatment | ZNF681    | 148213 | 37 | 19 | 23926533  | 23926533  | Missense_Mutation | SNP | C  | T  | 4   | 99  | c.1819G>A      | c.(1819-1821)GGA>AGA   | p.G607R  |
| Pat_70 | Pre-Treatment | LSM14A    | 26065  | 37 | 19 | 34706032  | 34706032  | Missense_Mutation | SNP | G  | A  | 4   | 113 | c.542G>A       | c.(541-543)CGC>CAC     | p.R181H  |
| Pat_70 | Pre-Treatment | KIRREL2   | 84063  | 37 | 19 | 36349734  | 36349734  | Missense_Mutation | SNP | G  | A  | 29  | 85  | c.490G>A       | c.(490-492)GGG>AGG     | p.G164R  |
| Pat_70 | Pre-Treatment | PRX       | 57716  | 37 | 19 | 40902620  | 40902620  | Missense_Mutation | SNP | G  | C  | 7   | 275 | c.1639C>G      | c.(1639-1641)CAG>GAG   | p.Q547E  |
| Pat_70 | Pre-Treatment | AXL       | 558    | 37 | 19 | 41743885  | 41743885  | Missense_Mutation | SNP | G  | A  | 17  | 79  | c.820G>A       | c.(820-822)GGA>AGA     | p.G274R  |
| Pat_70 | Pre-Treatment | MARK4     | 57787  | 37 | 19 | 45797680  | 45797680  | Missense_Mutation | SNP | C  | T  | 22  | 54  | c.1568C>T      | c.(1567-1569)CCG>CTG   | p.P523L  |
| Pat_70 | Pre-Treatment | ZNF836    | 162962 | 37 | 19 | 52659056  | 52659056  | Missense_Mutation | SNP | T  | A  | 8   | 202 | c.1880A>T      | c.(1879-1881)AAT>ATT   | p.N627I  |
| Pat_70 | Pre-Treatment | ZNF836    | 162962 | 37 | 19 | 52659243  | 52659243  | Missense_Mutation | SNP | A  | C  | 5   | 291 | c.1693T>G      | c.(1693-1695)TAC>GAC   | p.Y565D  |
| Pat_70 | Pre-Treatment | ZNF816A   | 125893 | 37 | 19 | 53453890  | 53453890  | Missense_Mutation | SNP | G  | C  | 6   | 548 | c.1138C>G      | c.(1138-1140)CAG>GAG   | p.Q380E  |
| Pat_70 | Pre-Treatment | ZNF845    | 91664  | 37 | 19 | 53855197  | 53855197  | Missense_Mutation | SNP | G  | A  | 8   | 382 | c.1269G>A      | c.(1267-1269)ATG>ATA   | p.M423I  |
| Pat_70 | Pre-Treatment | ZNF845    | 91664  | 37 | 19 | 53856761  | 53856761  | Missense_Mutation | SNP | T  | C  | 5   | 129 | c.2833T>C      | c.(2833-2835)TGT>CGT   | p.C945R  |
| Pat_70 | Pre-Treatment | ZNF761    | 388561 | 37 | 19 | 53959137  | 53959137  | Missense_Mutation | SNP | G  | T  | 5   | 262 | c.1376G>T      | c.(1375-1377)CGT>CTT   | p.R459L  |
| Pat_70 | Pre-Treatment | ZNF761    | 388561 | 37 | 19 | 53959151  | 53959151  | Missense_Mutation | SNP | C  | A  | 7   | 232 | c.1390C>A      | c.(1390-1392)CAA>AAA   | p.Q464K  |
| Pat_70 | Pre-Treatment | SBK2      | 646643 | 37 | 19 | 56041171  | 56041171  | Missense_Mutation | SNP | C  | T  | 11  | 26  | c.976G>A       | c.(976-978)GGG>AGG     | p.G326R  |
| Pat_70 | Pre-Treatment | ZNF776    | 284309 | 37 | 19 | 58265885  | 58265885  | Missense_Mutation | SNP | G  | A  | 4   | 213 | c.1387G>A      | c.(1387-1389)GGA>AGA   | p.G463R  |
| Pat_70 | Pre-Treatment | ZNF776    | 284309 | 37 | 19 | 58265928  | 58265928  | Missense_Mutation | SNP | G  | A  | 5   | 208 | c.1430G>A      | c.(1429-1431)CGA>CAA   | p.R477Q  |
| Pat_70 | Pre-Treatment | PXDN      | 7837   | 37 | 2  | 1651966   | 1651966   | Missense_Mutation | SNP | C  | T  | 87  | 193 | c.3586G>A      | c.(3586-3588)GAG>AAG   | p.E1196K |
| Pat_70 | Pre-Treatment | NT5C1B    | 93034  | 37 | 2  | 18768282  | 18768282  | Missense_Mutation | SNP | C  | T  | 53  | 90  | c.278G>A       | c.(277-279)GGC>GAC     | p.G93D   |
| Pat_70 | Pre-Treatment | CGREF1    | 10669  | 37 | 2  | 27324405  | 27324405  | Missense_Mutation | SNP | T  | C  | 6   | 243 | c.694A>G       | c.(694-696)AAA>GAA     | p.K232E  |
| Pat_70 | Pre-Treatment | C2orf16   | 84226  | 37 | 2  | 27804634  | 27804634  | Missense_Mutation | SNP | G  | A  | 9   | 706 | c.5195G>A      | c.(5194-5196)AGA>AAA   | p.R1732K |
| Pat_70 | Pre-Treatment | XDH       | 7498   | 37 | 2  | 31571779  | 31571779  | Missense_Mutation | SNP | G  | A  | 7   | 37  | c.3037C>T      | c.(3037-3039)CCT>TCT   | p.P1013S |
| Pat_70 | Pre-Treatment | RPL23AP32 | 56969  | 37 | 2  | 54756736  | 54756737  | Missense_Mutation | DNP | TT | CC | 8   | 150 | c.254_255TT>CC | c.(253-255)TTT>TCC     | p.F85S   |
| Pat_70 | Pre-Treatment | C2orf86   | 51057  | 37 | 2  | 63631776  | 63631776  | Missense_Mutation | SNP | C  | T  | 4   | 188 | c.842G>A       | c.(841-843)CGC>CAC     | p.R281H  |
| Pat_70 | Pre-Treatment | STARD7    | 56910  | 37 | 2  | 96858127  | 96858127  | Missense_Mutation | SNP | G  | A  | 75  | 178 | c.823C>T       | c.(823-825)CCC>TCC     | p.P275S  |
| Pat_70 | Pre-Treatment | SLC9A2    | 6549   | 37 | 2  | 103324769 | 103324769 | Missense_Mutation | SNP | G  | A  | 70  | 155 | c.2260G>A      | c.(2260-2262)GAA>AAA   | p.E754K  |
| Pat_70 | Pre-Treatment | WASH2P    | 375260 | 37 | 2  | 114355129 | 114355129 | Missense_Mutation | SNP | G  | A  | 4   | 56  | c.506G>A       | c.(505-507)CGC>CAC     | p.R169H  |
| Pat_70 | Pre-Treatment | CNTNAP5   | 129684 | 37 | 2  | 125504925 | 125504925 | Nonsense_Mutation | SNP | C  | T  | 97  | 181 | c.2194C>T      | c.(2194-2196)CAG>TAG   | p.Q732*  |
| Pat_70 | Pre-Treatment | CACNB4    | 785    | 37 | 2  | 152739821 | 152739821 | Missense_Mutation | SNP | C  | T  | 66  | 186 | c.211G>A       | c.(211-213)GAA>AAA     | p.E71K   |
| Pat_70 | Pre-Treatment | GRB14     | 2888   | 37 | 2  | 165353583 | 165353583 | Nonsense_Mutation | SNP | C  | T  | 18  | 47  | c.1317G>A      | c.(1315-1317)TGG>TGA   | p.W439*  |
| Pat_70 | Pre-Treatment | LRP2      | 4036   | 37 | 2  | 170028534 | 170028534 | Missense_Mutation | SNP | C  | T  | 53  | 120 | c.11254G>A     | c.(11254-11256)GAA>AAA | p.E3752K |
| Pat_70 | Pre-Treatment | TTN       | 7273   | 37 | 2  | 179613368 | 179613368 | Missense_Mutation | SNP | C  | T  | 45  | 133 | c.13759G>A     | c.(13759-13761)GAT>AAT | p.D4587N |
| Pat_70 | Pre-Treatment | COL5A2    | 1290   | 37 | 2  | 189917518 | 189917518 | Missense_Mutation | SNP | C  | T  | 19  | 48  | c.2672G>A      | c.(2671-2673)GGT>GAT   | p.G891D  |
| Pat_70 | Pre-Treatment | CRYGA     | 1418   | 37 | 2  | 209027960 | 209027960 | Missense_Mutation | SNP | C  | T  | 35  | 79  | c.220G>A       | c.(220-222)GAC>AAC     | p.D74N   |
| Pat_70 | Pre-Treatment | CPS1      | 1373   | 37 | 2  | 211457670 | 211457670 | Missense_Mutation | SNP | T  | C  | 5   | 188 | c.1154T>C      | c.(1153-1155)ATA>ACA   | p.I385T  |
| Pat_70 | Pre-Treatment | IKZF2     | 22807  | 37 | 2  | 213878586 | 213878586 | Missense_Mutation | SNP | C  | T  | 31  | 91  | c.785G>A       | c.(784-786)AGA>AAA     | p.R262K  |
| Pat_70 | Pre-Treatment | IRS1      | 3667   | 37 | 2  | 227662115 | 227662115 | Missense_Mutation | SNP | G  | A  | 4   | 195 | c.1340C>T      | c.(1339-1341)CCG>CTG   | p.P447L  |
| Pat_70 | Pre-Treatment | HJURP     | 55355  | 37 | 2  | 234750117 | 234750117 | Nonsense_Mutation | SNP | G  | A  | 70  | 160 | c.1309C>T      | c.(1309-1311)CGA>TGA   | p.R437*  |
| Pat_70 | Pre-Treatment | TRPM8     | 79054  | 37 | 2  | 234879017 | 234879017 | Missense_Mutation | SNP | G  | A  | 254 | 345 | c.2302G>A      | c.(2302-2304)GAG>AAG   | p.E768K  |
| Pat_70 | Pre-Treatment | COL6A3    | 1293   | 37 | 2  | 238245090 | 238245090 | Missense_Mutation | SNP | T  | G  | 77  | 163 | c.8653A>C      | c.(8653-8655)ACC>CCC   | p.T2885P |
| Pat_70 | Pre-Treatment | ZNF343    | 79175  | 37 | 20 | 2463928   | 2463928   | Missense_Mutation | SNP | C  | T  | 4   | 200 | c.1679G>A      | c.(1678-1680)CGG>CAG   | p.R560Q  |
| Pat_70 | Pre-Treatment | C20orf194 | 25943  | 37 | 20 | 3305557   | 3305557   | Missense_Mutation | SNP | G  | A  | 55  | 141 | c.1247C>T      | c.(1246-1248)CCG>CTG   | p.P416L  |
| Pat_70 | Pre-Treatment | SIGLEC1   | 6614   | 37 | 20 | 3673529   | 3673529   | Missense_Mutation | SNP | G  | A  | 17  | 31  | c.3758C>T      | c.(3757-3759)TCC>TTC   | p.S1253F |

|        |               |          |        |    |    |           |           |                   |     |    |    |     |     |                  |                          |          |
|--------|---------------|----------|--------|----|----|-----------|-----------|-------------------|-----|----|----|-----|-----|------------------|--------------------------|----------|
| Pat_70 | Pre-Treatment | MAVS     | 57506  | 37 | 20 | 3845347   | 3845347   | Missense_Mutation | SNP | G  | A  | 4   | 232 | c.1070G>A        | c.(1069-1071)GGC>GAC     | p.G357D  |
| Pat_70 | Pre-Treatment | PLCB4    | 5332   | 37 | 20 | 9404500   | 9404500   | Nonsense_Mutation | SNP | C  | T  | 30  | 47  | c.2389C>T        | c.(2389-2391)CGA>TGA     | p.R797*  |
| Pat_70 | Pre-Treatment | FRG1B    | 284802 | 37 | 20 | 29625934  | 29625934  | Missense_Mutation | SNP | C  | T  | 13  | 158 | c.88C>T          | c.(88-90)CAT>TAT         | p.H30Y   |
| Pat_70 | Pre-Treatment | FRG1B    | 284802 | 37 | 20 | 29625941  | 29625941  | Missense_Mutation | SNP | A  | T  | 9   | 180 | c.95A>T          | c.(94-96)GAT>GTT         | p.D32V   |
| Pat_70 | Pre-Treatment | FRG1B    | 284802 | 37 | 20 | 29625947  | 29625947  | Missense_Mutation | SNP | T  | C  | 11  | 184 | c.101T>C         | c.(100-102)ATT>ACT       | p.I34T   |
| Pat_70 | Pre-Treatment | FRG1B    | 284802 | 37 | 20 | 29625956  | 29625956  | Missense_Mutation | SNP | G  | A  | 7   | 187 | c.110G>A         | c.(109-111)AGA>AAA       | p.R37K   |
| Pat_70 | Pre-Treatment | FRG1B    | 284802 | 37 | 20 | 29628243  | 29628243  | Missense_Mutation | SNP | T  | C  | 6   | 286 | c.155T>C         | c.(154-156)TTG>TCG       | p.L52S   |
| Pat_70 | Pre-Treatment | FRG1B    | 284802 | 37 | 20 | 29628245  | 29628245  | Missense_Mutation | SNP | G  | A  | 6   | 285 | c.157G>A         | c.(157-159)GCC>ACC       | p.A53T   |
| Pat_70 | Pre-Treatment | FRG1B    | 284802 | 37 | 20 | 29628296  | 29628296  | Nonsense_Mutation | SNP | A  | T  | 5   | 159 | c.208A>T         | c.(208-210)AAA>TAA       | p.K70*   |
| Pat_70 | Pre-Treatment | PPP1R16B | 26051  | 37 | 20 | 37546839  | 37546839  | Missense_Mutation | SNP | C  | T  | 83  | 203 | c.1234C>T        | c.(1234-1236)CCT>TCT     | p.P412S  |
| Pat_70 | Pre-Treatment | BAGE2    | 85319  | 37 | 21 | 11049621  | 11049621  | Nonsense_Mutation | SNP | G  | A  | 10  | 230 | c.280C>T         | c.(280-282)CGA>TGA       | p.R94*   |
| Pat_70 | Pre-Treatment | NCAM2    | 4685   | 37 | 21 | 22656657  | 22656657  | Missense_Mutation | SNP | C  | T  | 22  | 65  | c.274C>T         | c.(274-276)CGT>TGT       | p.R92C   |
| Pat_70 | Pre-Treatment | TRAPPC10 | 7109   | 37 | 21 | 45518395  | 45518395  | Missense_Mutation | SNP | C  | T  | 39  | 107 | c.3326C>T        | c.(3325-3327)TCG>TTG     | p.S1109L |
| Pat_70 | Pre-Treatment | CCT8L2   | 150160 | 37 | 22 | 17071886  | 17071886  | Missense_Mutation | SNP | C  | T  | 41  | 67  | c.1555G>A        | c.(1555-1557)GAA>AAA     | p.E519K  |
| Pat_70 | Pre-Treatment | MED15    | 51586  | 37 | 22 | 20938666  | 20938666  | Missense_Mutation | SNP | A  | C  | 3   | 195 | c.1757A>C        | c.(1756-1758)CAA>CCA     | p.Q586P  |
| Pat_70 | Pre-Treatment | ZNF280A  | 129025 | 37 | 22 | 22868747  | 22868747  | Missense_Mutation | SNP | G  | A  | 47  | 189 | c.1208C>T        | c.(1207-1209)TCG>TTG     | p.S403L  |
| Pat_70 | Pre-Treatment | GNAZ     | 2781   | 37 | 22 | 23465487  | 23465487  | Missense_Mutation | SNP | C  | T  | 27  | 74  | c.937C>T         | c.(937-939)CGC>TGC       | p.R313C  |
| Pat_70 | Pre-Treatment | CHEK2    | 11200  | 37 | 22 | 29091840  | 29091841  | Missense_Mutation | DNP | TG | CA | 9   | 63  | c.1116_1117CA>TC | c.(1114-1119)TCCAAG>TCTG | p.K373E  |
| Pat_70 | Pre-Treatment | SERHL2   | 253190 | 37 | 22 | 42952530  | 42952530  | Missense_Mutation | SNP | C  | T  | 45  | 245 | c.359C>T         | c.(358-360)ACC>ATC       | p.T120I  |
| Pat_70 | Pre-Treatment | PACSIN2  | 11252  | 37 | 22 | 43267422  | 43267422  | Missense_Mutation | SNP | G  | A  | 4   | 207 | c.1402C>T        | c.(1402-1404)CGC>TGC     | p.R468C  |
| Pat_70 | Pre-Treatment | ATG7     | 10533  | 37 | 3  | 11406161  | 11406161  | Missense_Mutation | SNP | G  | T  | 107 | 212 | c.1828G>T        | c.(1828-1830)GAT>TAT     | p.D610Y  |
| Pat_70 | Pre-Treatment | IQSEC1   | 9922   | 37 | 3  | 12977694  | 12977694  | Missense_Mutation | SNP | C  | T  | 38  | 122 | c.864G>A         | c.(862-864)ATG>ATA       | p.M288I  |
| Pat_70 | Pre-Treatment | SCN11A   | 11280  | 37 | 3  | 38936214  | 38936214  | Missense_Mutation | SNP | G  | A  | 25  | 71  | c.2645C>T        | c.(2644-2646)CCC>CTC     | p.P882L  |
| Pat_70 | Pre-Treatment | CCR1     | 1230   | 37 | 3  | 46245516  | 46245516  | Missense_Mutation | SNP | C  | T  | 43  | 161 | c.289G>A         | c.(289-291)GAT>AAT       | p.D97N   |
| Pat_70 | Pre-Treatment | COL7A1   | 1294   | 37 | 3  | 48610780  | 48610780  | Missense_Mutation | SNP | C  | T  | 27  | 98  | c.6620G>A        | c.(6619-6621)GGG>GAG     | p.G2207E |
| Pat_70 | Pre-Treatment | ZMYND10  | 51364  | 37 | 3  | 50378896  | 50378896  | Nonsense_Mutation | SNP | C  | T  | 26  | 138 | c.1268G>A        | c.(1267-1269)TGG>TAG     | p.W423*  |
| Pat_70 | Pre-Treatment | TKT      | 7086   | 37 | 3  | 53269119  | 53269119  | Missense_Mutation | SNP | G  | A  | 4   | 237 | c.509C>T         | c.(508-510)GCC>GTC       | p.A170V  |
| Pat_70 | Pre-Treatment | ERC2     | 26059  | 37 | 3  | 55922574  | 55922574  | Missense_Mutation | SNP | C  | T  | 55  | 98  | c.2407G>A        | c.(2407-2409)GAG>AAG     | p.E803K  |
| Pat_70 | Pre-Treatment | THOC7    | 80145  | 37 | 3  | 63825432  | 63825432  | Missense_Mutation | SNP | G  | A  | 3   | 49  | c.37C>T          | c.(37-39)CGT>TGT         | p.R13C   |
| Pat_70 | Pre-Treatment | ROBO2    | 6092   | 37 | 3  | 77645802  | 77645802  | Missense_Mutation | SNP | C  | T  | 43  | 107 | c.2755C>T        | c.(2755-2757)CCC>TCC     | p.P919S  |
| Pat_70 | Pre-Treatment | RG9MTD1  | 54931  | 37 | 3  | 101284175 | 101284175 | Missense_Mutation | SNP | G  | A  | 47  | 134 | c.550G>A         | c.(550-552)GAT>AAT       | p.D184N  |
| Pat_70 | Pre-Treatment | PHLDB2   | 90102  | 37 | 3  | 111638006 | 111638006 | Missense_Mutation | SNP | G  | A  | 51  | 129 | c.1807G>A        | c.(1807-1809)GAA>AAA     | p.E603K  |
| Pat_70 | Pre-Treatment | FBXO40   | 51725  | 37 | 3  | 121342006 | 121342006 | Missense_Mutation | SNP | C  | T  | 40  | 62  | c.1730C>T        | c.(1729-1731)CCC>CTC     | p.P577L  |
| Pat_70 | Pre-Treatment | CPNE4    | 131034 | 37 | 3  | 131261456 | 131261456 | Missense_Mutation | SNP | C  | T  | 31  | 87  | c.1484G>A        | c.(1483-1485)GGA>GAA     | p.G495E  |
| Pat_70 | Pre-Treatment | IGSF10   | 285313 | 37 | 3  | 151154847 | 151154847 | Missense_Mutation | SNP | C  | T  | 43  | 90  | c.7502G>A        | c.(7501-7503)AGA>AAA     | p.R2501K |
| Pat_70 | Pre-Treatment | PIK3CA   | 5290   | 37 | 3  | 178943827 | 178943827 | Nonsense_Mutation | SNP | C  | T  | 3   | 94  | c.2494C>T        | c.(2494-2496)CGA>TGA     | p.R832*  |
| Pat_70 | Pre-Treatment | USP13    | 8975   | 37 | 3  | 179481949 | 179481949 | Missense_Mutation | SNP | G  | A  | 4   | 190 | c.2252G>A        | c.(2251-2253)CGA>CAA     | p.R751Q  |
| Pat_70 | Pre-Treatment | LIPH     | 200879 | 37 | 3  | 185251431 | 185251431 | Missense_Mutation | SNP | C  | T  | 48  | 120 | c.454G>A         | c.(454-456)GGA>AGA       | p.G152R  |
| Pat_70 | Pre-Treatment | SDHAP2   | 727956 | 37 | 3  | 195404650 | 195404650 | Missense_Mutation | SNP | T  | A  | 17  | 77  | c.207T>A         | c.(205-207)AAT>AAA       | p.N69K   |
| Pat_70 | Pre-Treatment | ZNF732   | 654254 | 37 | 4  | 265307    | 265307    | Missense_Mutation | SNP | T  | C  | 5   | 129 | c.1336A>G        | c.(1336-1338)AAA>GAA     | p.K446E  |
| Pat_70 | Pre-Treatment | DRD5     | 1816   | 37 | 4  | 9784887   | 9784887   | Missense_Mutation | SNP | C  | T  | 15  | 84  | c.1234C>T        | c.(1234-1236)CAC>TAC     | p.H412Y  |
| Pat_70 | Pre-Treatment | APBB2    | 323    | 37 | 4  | 40818158  | 40818158  | Missense_Mutation | SNP | G  | A  | 100 | 208 | c.2228C>T        | c.(2227-2229)TCC>TTC     | p.S743F  |
| Pat_70 | Pre-Treatment | AMBN     | 258    | 37 | 4  | 71468527  | 71468527  | Missense_Mutation | SNP | G  | A  | 22  | 48  | c.583G>A         | c.(583-585)GAT>AAT       | p.D195N  |
| Pat_70 | Pre-Treatment | RASSF6   | 166824 | 37 | 4  | 74451034  | 74451034  | Missense_Mutation | SNP | C  | T  | 37  | 78  | c.526G>A         | c.(526-528)GAA>AAA       | p.E176K  |
| Pat_70 | Pre-Treatment | GK2      | 2712   | 37 | 4  | 80329231  | 80329231  | Missense_Mutation | SNP | C  | T  | 43  | 67  | c.124G>A         | c.(124-126)GAA>AAA       | p.E42K   |
| Pat_70 | Pre-Treatment | AFF1     | 4299   | 37 | 4  | 88048208  | 88048208  | Missense_Mutation | SNP | C  | T  | 51  | 143 | c.2821C>T        | c.(2821-2823)CCA>TCA     | p.P941S  |
| Pat_70 | Pre-Treatment | COL25A1  | 84570  | 37 | 4  | 109745338 | 109745338 | Missense_Mutation | SNP | C  | T  | 24  | 96  | c.1837G>A        | c.(1837-1839)GGA>AGA     | p.G613R  |



|        |               |          |        |    |   |           |           |                   |     |    |    |     |     |                |                        |               |
|--------|---------------|----------|--------|----|---|-----------|-----------|-------------------|-----|----|----|-----|-----|----------------|------------------------|---------------|
| Pat_70 | Pre-Treatment | PDCD6    | 10016  | 37 | 5 | 314553    | 314553    | Missense_Mutation | SNP | C  | T  | 4   | 144 | c.499C>T       | c.(499-501)CGT>TGT     | p.R167C       |
| Pat_70 | Pre-Treatment | CMYA5    | 202333 | 37 | 5 | 79024953  | 79024953  | Missense_Mutation | SNP | C  | T  | 34  | 91  | c.365C>T       | c.(364-366)TCC>TTC     | p.S122F       |
| Pat_70 | Pre-Treatment | FBXL17   | 64839  | 37 | 5 | 107216866 | 107216866 | Missense_Mutation | SNP | C  | A  | 4   | 164 | c.1837G>T      | c.(1837-1839)GGG>TGG   | p.G613W       |
| Pat_70 | Pre-Treatment | ADAMTS19 | 171019 | 37 | 5 | 128956432 | 128956432 | Missense_Mutation | SNP | G  | A  | 105 | 237 | c.1582G>A      | c.(1582-1584)GAT>AAT   | p.D528N       |
| Pat_70 | Pre-Treatment | FAM53C   | 51307  | 37 | 5 | 137680684 | 137680684 | Missense_Mutation | SNP | C  | T  | 51  | 79  | c.307C>T       | c.(307-309)CCA>TCA     | p.P103S       |
| Pat_70 | Pre-Treatment | KDM3B    | 51780  | 37 | 5 | 137722215 | 137722215 | Missense_Mutation | SNP | T  | G  | 28  | 69  | c.1285T>G      | c.(1285-1287)TCC>GCC   | p.S429A       |
| Pat_70 | Pre-Treatment | PCDHA1   | 56147  | 37 | 5 | 140166227 | 140166227 | Missense_Mutation | SNP | C  | T  | 31  | 76  | c.352C>T       | c.(352-354)CAT>TAT     | p.H118Y       |
| Pat_70 | Pre-Treatment | SH3RF2   | 153769 | 37 | 5 | 145393506 | 145393506 | Missense_Mutation | SNP | C  | T  | 77  | 157 | c.941C>T       | c.(940-942)TCT>TTT     | p.S314F       |
| Pat_70 | Pre-Treatment | PPARGC1B | 133522 | 37 | 5 | 149215849 | 149215849 | Missense_Mutation | SNP | C  | T  | 96  | 303 | c.1831C>T      | c.(1831-1833)CCG>TCG   | p.P611S       |
| Pat_70 | Pre-Treatment | SLC6A7   | 6534   | 37 | 5 | 149581944 | 149581944 | Missense_Mutation | SNP | C  | T  | 39  | 86  | c.893C>T       | c.(892-894)TCC>TTC     | p.S298F       |
| Pat_70 | Pre-Treatment | G3BP1    | 10146  | 37 | 5 | 151183497 | 151183497 | Nonsense_Mutation | SNP | C  | T  | 35  | 91  | c.1246C>T      | c.(1246-1248)CGA>TGA   | p.R416*       |
| Pat_70 | Pre-Treatment | CYFIP2   | 26999  | 37 | 5 | 156766230 | 156766230 | Missense_Mutation | SNP | C  | G  | 89  | 167 | c.2551C>G      | c.(2551-2553)CTC>GTC   | p.L851V       |
| Pat_70 | Pre-Treatment | COL23A1  | 91522  | 37 | 5 | 177686748 | 177686748 | Missense_Mutation | SNP | C  | T  | 44  | 123 | c.703G>A       | c.(703-705)GGT>AGT     | p.G235S       |
| Pat_70 | Pre-Treatment | BMP6     | 654    | 37 | 6 | 7861833   | 7861833   | Splice_Site       | SNP | G  | A  | 44  | 197 | c.1006_splice  | c.e3+1                 | p.G336_splice |
| Pat_70 | Pre-Treatment | SYCP2L   | 221711 | 37 | 6 | 10959052  | 10959052  | Missense_Mutation | SNP | T  | G  | 28  | 85  | c.2199T>G      | c.(2197-2199)AAT>AAG   | p.N733K       |
| Pat_70 | Pre-Treatment | OR2W1    | 26692  | 37 | 6 | 29012220  | 29012220  | Missense_Mutation | SNP | G  | A  | 88  | 117 | c.733C>T       | c.(733-735)CTT>TTT     | p.L245F       |
| Pat_70 | Pre-Treatment | LRFN2    | 57497  | 37 | 6 | 40400182  | 40400182  | Missense_Mutation | SNP | G  | A  | 24  | 54  | c.671C>T       | c.(670-672)TCG>TTG     | p.S224L       |
| Pat_70 | Pre-Treatment | TREM1    | 54210  | 37 | 6 | 41250375  | 41250375  | Nonsense_Mutation | SNP | C  | T  | 56  | 197 | c.164G>A       | c.(163-165)TGG>TAG     | p.W55*        |
| Pat_70 | Pre-Treatment | BMP5     | 653    | 37 | 6 | 55620459  | 55620459  | Missense_Mutation | SNP | G  | T  | 24  | 145 | c.1237C>A      | c.(1237-1239)CAC>AAC   | p.H413N       |
| Pat_70 | Pre-Treatment | FILIP1   | 27145  | 37 | 6 | 76063346  | 76063346  | Missense_Mutation | SNP | C  | T  | 4   | 167 | c.538G>A       | c.(538-540)GTA>ATA     | p.V180I       |
| Pat_70 | Pre-Treatment | C6orf182 | 285753 | 37 | 6 | 109468047 | 109468047 | Missense_Mutation | SNP | C  | T  | 18  | 58  | c.247C>T       | c.(247-249)CTT>TTT     | p.L83F        |
| Pat_70 | Pre-Treatment | LAMA2    | 3908   | 37 | 6 | 129837370 | 129837370 | Missense_Mutation | SNP | C  | T  | 132 | 292 | c.9247C>T      | c.(9247-9249)CCG>TCG   | p.P3083S      |
| Pat_70 | Pre-Treatment | VNN1     | 8876   | 37 | 6 | 133013664 | 133013664 | Missense_Mutation | SNP | C  | T  | 20  | 47  | c.886G>A       | c.(886-888)GAG>AAG     | p.E296K       |
| Pat_70 | Pre-Treatment | SYNE1    | 23345  | 37 | 6 | 152529226 | 152529226 | Missense_Mutation | SNP | T  | C  | 3   | 184 | c.22705A>G     | c.(22705-22707)AGG>GGC | p.R7569G      |
| Pat_70 | Pre-Treatment | C6orf118 | 168090 | 37 | 6 | 165715360 | 165715360 | Missense_Mutation | SNP | C  | T  | 32  | 65  | c.451G>A       | c.(451-453)GCT>ACT     | p.A151T       |
| Pat_70 | Pre-Treatment | TLL2     | 83887  | 37 | 6 | 167755036 | 167755036 | Missense_Mutation | SNP | G  | A  | 31  | 94  | c.1648G>A      | c.(1648-1650)GAT>AAT   | p.D550N       |
| Pat_70 | Pre-Treatment | FRMD1    | 79981  | 37 | 6 | 168464403 | 168464403 | Missense_Mutation | SNP | G  | A  | 3   | 86  | c.682C>T       | c.(682-684)CCG>TGG     | p.R228W       |
| Pat_70 | Pre-Treatment | DNAH11   | 8701   | 37 | 7 | 21913039  | 21913039  | Missense_Mutation | SNP | G  | A  | 31  | 62  | c.12136G>A     | c.(12136-12138)GAA>AAA | p.E4046K      |
| Pat_70 | Pre-Treatment | STK31    | 56164  | 37 | 7 | 23808674  | 23808674  | Missense_Mutation | SNP | G  | A  | 38  | 75  | c.1477G>A      | c.(1477-1479)GAA>AAA   | p.E493K       |
| Pat_70 | Pre-Treatment | ADCY1    | 107    | 37 | 7 | 45717567  | 45717567  | Missense_Mutation | SNP | A  | T  | 49  | 88  | c.1705A>T      | c.(1705-1707)ATC>TTC   | p.I569F       |
| Pat_70 | Pre-Treatment | TNS3     | 64759  | 37 | 7 | 47333423  | 47333423  | Missense_Mutation | SNP | C  | T  | 49  | 92  | c.3680G>A      | c.(3679-3681)GGA>GAA   | p.G1227E      |
| Pat_70 | Pre-Treatment | ZNF727   | 442319 | 37 | 7 | 63538758  | 63538758  | Missense_Mutation | SNP | G  | A  | 23  | 38  | c.1331G>A      | c.(1330-1332)AGA>AAA   | p.R444K       |
| Pat_70 | Pre-Treatment | CCL24    | 6369   | 37 | 7 | 75442699  | 75442699  | Missense_Mutation | SNP | G  | A  | 18  | 59  | c.116C>T       | c.(115-117)TCC>TTC     | p.S39F        |
| Pat_70 | Pre-Treatment | ZAN      | 7455   | 37 | 7 | 100349878 | 100349878 | Missense_Mutation | SNP | C  | T  | 6   | 245 | c.2150C>T      | c.(2149-2151)CCC>CTC   | p.P717L       |
| Pat_70 | Pre-Treatment | MUC17    | 140453 | 37 | 7 | 100680525 | 100680525 | Missense_Mutation | SNP | T  | C  | 8   | 758 | c.5828T>C      | c.(5827-5829)ATC>ACC   | p.I1943T      |
| Pat_70 | Pre-Treatment | MUC17    | 140453 | 37 | 7 | 100682156 | 100682156 | Missense_Mutation | SNP | A  | G  | 7   | 823 | c.7459A>G      | c.(7459-7461)ATG>GTG   | p.M2487V      |
| Pat_70 | Pre-Treatment | CADPS2   | 93664  | 37 | 7 | 121985672 | 121985672 | Nonsense_Mutation | SNP | G  | A  | 32  | 59  | c.3568C>T      | c.(3568-3570)CGA>TGA   | p.R1190*      |
| Pat_70 | Pre-Treatment | JHDM1D   | 80853  | 37 | 7 | 139793899 | 139793899 | Missense_Mutation | SNP | G  | A  | 46  | 134 | c.2414C>T      | c.(2413-2415)TCC>TTC   | p.S805F       |
| Pat_70 | Pre-Treatment | BRAF     | 673    | 37 | 7 | 140453136 | 140453136 | Missense_Mutation | SNP | A  | T  | 39  | 85  | c.1799T>A      | c.(1798-1800)GTG>GAG   | p.V600E       |
| Pat_70 | Pre-Treatment | ZYX      | 7791   | 37 | 7 | 143085653 | 143085653 | Missense_Mutation | SNP | C  | T  | 33  | 113 | c.1216C>T      | c.(1216-1218)CAC>TAC   | p.H406Y       |
| Pat_70 | Pre-Treatment | GALNTL5  | 168391 | 37 | 7 | 151711870 | 151711870 | Missense_Mutation | SNP | G  | A  | 29  | 73  | c.1168G>A      | c.(1168-1170)GAA>AAA   | p.E390K       |
| Pat_70 | Pre-Treatment | ADAMDEC1 | 27299  | 37 | 8 | 24249837  | 24249837  | Missense_Mutation | SNP | C  | T  | 26  | 52  | c.151C>T       | c.(151-153)CAC>TAC     | p.H51Y        |
| Pat_70 | Pre-Treatment | PXDNL    | 137902 | 37 | 8 | 52384783  | 52384783  | Missense_Mutation | SNP | C  | T  | 51  | 128 | c.776G>A       | c.(775-777)GGA>GAA     | p.G259E       |
| Pat_70 | Pre-Treatment | PCMTD1   | 115294 | 37 | 8 | 52733185  | 52733186  | Missense_Mutation | DNP | CC | TT | 7   | 234 | c.799_800GG>AA | c.(799-801)GGG>AAG     | p.G267K       |
| Pat_70 | Pre-Treatment | VPS13B   | 157680 | 37 | 8 | 100733271 | 100733271 | Missense_Mutation | SNP | T  | A  | 5   | 256 | c.7121T>A      | c.(7120-7122)CTA>CAA   | p.L2374Q      |
| Pat_70 | Pre-Treatment | DCAF13   | 25879  | 37 | 8 | 104452461 | 104452461 | Missense_Mutation | SNP | C  | T  | 5   | 282 | c.1504C>T      | c.(1504-1506)CGC>TGC   | p.R502C       |
| Pat_70 | Pre-Treatment | PKHD1L1  | 93035  | 37 | 8 | 110520058 | 110520058 | Missense_Mutation | SNP | C  | T  | 50  | 87  | c.11161C>T     | c.(11161-11163)CCT>TCT | p.P3721S      |

|        |                 |          |           |    |   |           |           |                   |     |    |    |     |     |                |                      |          |
|--------|-----------------|----------|-----------|----|---|-----------|-----------|-------------------|-----|----|----|-----|-----|----------------|----------------------|----------|
| Pat_70 | Pre-Treatment   | FER1L6   | 654463    | 37 | 8 | 125107259 | 125107259 | Missense_Mutation | SNP | G  | A  | 23  | 91  | c.4675G>A      | c.(4675-4677)GAT>AAT | p.D1559N |
| Pat_70 | Pre-Treatment   | ST3GAL1  | 6482      | 37 | 8 | 134472126 | 134472126 | Missense_Mutation | SNP | C  | T  | 144 | 307 | c.904G>A       | c.(904-906)GAG>AAG   | p.E302K  |
| Pat_70 | Pre-Treatment   | FAM135B  | 51059     | 37 | 8 | 139164898 | 139164898 | Missense_Mutation | SNP | G  | A  | 66  | 146 | c.1820C>T      | c.(1819-1821)TCA>TTA | p.S607L  |
| Pat_70 | Pre-Treatment   | MAPK15   | 225689    | 37 | 8 | 144803941 | 144803941 | Missense_Mutation | SNP | G  | A  | 34  | 88  | c.1349G>A      | c.(1348-1350)GGA>GAA | p.G450E  |
| Pat_70 | Pre-Treatment   | CNTLN    | 54875     | 37 | 9 | 17330685  | 17330685  | Missense_Mutation | SNP | C  | T  | 92  | 254 | c.1397C>T      | c.(1396-1398)TCT>TTT | p.S466F  |
| Pat_70 | Pre-Treatment   | TAF1L    | 138474    | 37 | 9 | 32632655  | 32632655  | Missense_Mutation | SNP | G  | A  | 53  | 129 | c.2923C>T      | c.(2923-2925)CCC>TCC | p.P975S  |
| Pat_70 | Pre-Treatment   | RNF20    | 56254     | 37 | 9 | 104302572 | 104302572 | Missense_Mutation | SNP | C  | T  | 104 | 184 | c.217C>T       | c.(217-219)CGT>TGT   | p.R73C   |
| Pat_70 | Pre-Treatment   | OR13F1   | 138805    | 37 | 9 | 107266613 | 107266613 | Nonsense_Mutation | SNP | C  | T  | 36  | 67  | c.70C>T        | c.(70-72)CAG>TAG     | p.Q24*   |
| Pat_70 | Pre-Treatment   | OR13C9   | 286362    | 37 | 9 | 107380230 | 107380230 | Missense_Mutation | SNP | G  | A  | 25  | 84  | c.256C>T       | c.(256-258)CTT>TTT   | p.L86F   |
| Pat_70 | Pre-Treatment   | TXNDC8   | 255220    | 37 | 9 | 113096507 | 113096507 | Missense_Mutation | SNP | G  | A  | 20  | 55  | c.118C>T       | c.(118-120)CCT>TCT   | p.P40S   |
| Pat_70 | Pre-Treatment   | DBC1     | 1620      | 37 | 9 | 121929721 | 121929721 | Missense_Mutation | SNP | G  | A  | 47  | 146 | c.1927C>T      | c.(1927-1929)CCC>TCC | p.P643S  |
| Pat_70 | Pre-Treatment   | C9orf119 | 375757    | 37 | 9 | 131038446 | 131038446 | Missense_Mutation | SNP | G  | A  | 32  | 108 | c.22G>A        | c.(22-24)GAC>AAC     | p.D8N    |
| Pat_70 | Pre-Treatment   | COL5A1   | 1289      | 37 | 9 | 137715280 | 137715280 | Missense_Mutation | SNP | G  | A  | 45  | 119 | c.4663G>A      | c.(4663-4665)GGT>AGT | p.G1555S |
| Pat_70 | Pre-Treatment   | CACNA1B  | 774       | 37 | 9 | 140948299 | 140948299 | Missense_Mutation | SNP | C  | T  | 179 | 384 | c.3809C>T      | c.(3808-3810)GCT>GTT | p.A1270V |
| Pat_70 | Pre-Treatment   | NLGN4X   | 57502     | 37 | X | 6069369   | 6069369   | Missense_Mutation | SNP | C  | T  | 34  | 104 | c.139G>A       | c.(139-141)GTT>ATT   | p.V47I   |
| Pat_70 | Pre-Treatment   | TBL1X    | 6907      | 37 | X | 9673050   | 9673050   | Missense_Mutation | SNP | G  | A  | 73  | 181 | c.1132G>A      | c.(1132-1134)GAC>AAC | p.D378N  |
| Pat_70 | Pre-Treatment   | FRMPD4   | 9758      | 37 | X | 12734739  | 12734739  | Missense_Mutation | SNP | G  | A  | 90  | 191 | c.2161G>A      | c.(2161-2163)GAT>AAT | p.D721N  |
| Pat_70 | Pre-Treatment   | FANCB    | 2187      | 37 | X | 14882788  | 14882789  | Missense_Mutation | DNP | CC | TT | 60  | 133 | c.844_845GG>AA | c.(844-846)GGA>AAA   | p.G282K  |
| Pat_70 | Pre-Treatment   | FANCB    | 2187      | 37 | X | 14883544  | 14883544  | Missense_Mutation | SNP | C  | T  | 52  | 110 | c.89G>A        | c.(88-90)GGA>GAA     | p.G30E   |
| Pat_70 | Pre-Treatment   | ASB9     | 140462    | 37 | X | 15262747  | 15262747  | Missense_Mutation | SNP | G  | A  | 39  | 122 | c.766C>T       | c.(766-768)CCT>TCT   | p.P256S  |
| Pat_70 | Pre-Treatment   | EIF1AX   | 1964      | 37 | X | 20156735  | 20156735  | Missense_Mutation | SNP | C  | T  | 87  | 133 | c.22G>A        | c.(22-24)GGA>AGA     | p.G8R    |
| Pat_70 | Pre-Treatment   | DMD      | 1756      | 37 | X | 32466644  | 32466644  | Missense_Mutation | SNP | C  | T  | 13  | 74  | c.3715G>A      | c.(3715-3717)GAA>AAA | p.E1239K |
| Pat_70 | Pre-Treatment   | ATP6AP2  | 10159     | 37 | X | 40456507  | 40456507  | Missense_Mutation | SNP | C  | T  | 17  | 72  | c.307C>T       | c.(307-309)CCT>TCT   | p.P103S  |
| Pat_70 | Pre-Treatment   | TEX11    | 56159     | 37 | X | 69849480  | 69849480  | Missense_Mutation | SNP | G  | A  | 52  | 103 | c.1634C>T      | c.(1633-1635)GCT>GTT | p.A545V  |
| Pat_70 | Pre-Treatment   | SERPINA7 | 6906      | 37 | X | 105280609 | 105280609 | Missense_Mutation | SNP | C  | A  | 67  | 186 | c.441G>T       | c.(439-441)TTG>TTT   | p.L147F  |
| Pat_70 | Pre-Treatment   | RNF128   | 79589     | 37 | X | 106016347 | 106016347 | Missense_Mutation | SNP | C  | T  | 46  | 80  | c.689C>T       | c.(688-690)TCT>TTT   | p.S230F  |
| Pat_70 | Pre-Treatment   | ODZ1     | 10178     | 37 | X | 123554529 | 123554529 | Missense_Mutation | SNP | C  | T  | 45  | 106 | c.4593G>A      | c.(4591-4593)ATG>ATA | p.M1531I |
| Pat_70 | Pre-Treatment   | ODZ1     | 10178     | 37 | X | 124028163 | 124028163 | Nonsense_Mutation | SNP | G  | A  | 49  | 89  | c.517C>T       | c.(517-519)CAA>TAA   | p.Q173*  |
| Pat_70 | Pre-Treatment   | BCORL1   | 63035     | 37 | X | 129185837 | 129185837 | Missense_Mutation | SNP | G  | A  | 77  | 275 | c.4699G>A      | c.(4699-4701)GAA>AAA | p.E1567K |
| Pat_70 | Pre-Treatment   | MCF2     | 4168      | 37 | X | 138708412 | 138708412 | Missense_Mutation | SNP | T  | A  | 34  | 97  | c.627A>T       | c.(625-627)AAA>AAT   | p.K209N  |
| Pat_70 | Pre-Treatment   | CNGA2    | 1260      | 37 | X | 150912105 | 150912105 | Missense_Mutation | SNP | A  | G  | 36  | 80  | c.1130A>G      | c.(1129-1131)AAC>AGC | p.N377S  |
| Pat_70 | Pre-Treatment   | GABRE    | 2564      | 37 | X | 151131042 | 151131042 | Missense_Mutation | SNP | G  | A  | 61  | 147 | c.416C>T       | c.(415-417)TCT>TTT   | p.S139F  |
| Pat_70 | Pre-Treatment   | CSAG1    | 158511    | 37 | X | 151908796 | 151908796 | Missense_Mutation | SNP | C  | T  | 88  | 196 | c.35C>T        | c.(34-36)ACT>ATT     | p.T12I   |
| Pat_70 | Pre-Treatment   | IDH3G    | 3421      | 37 | X | 153052393 | 153052393 | Missense_Mutation | SNP | G  | A  | 4   | 231 | c.787C>T       | c.(787-789)CGG>TGG   | p.R263W  |
| Pat_70 | Post-Resistance | HSPG2    | 3339      | 37 | 1 | 22179521  | 22179521  | Missense_Mutation | SNP | G  | A  | 26  | 225 | c.6482C>T      | c.(6481-6483)TCA>TTA | p.S2161L |
| Pat_70 | Post-Resistance | EPHB2    | 2048      | 37 | 1 | 23191418  | 23191418  | Missense_Mutation | SNP | C  | T  | 78  | 438 | c.1016C>T      | c.(1015-1017)TCC>TTC | p.S339F  |
| Pat_70 | Post-Resistance | CSMD2    | 114784    | 37 | 1 | 34192148  | 34192148  | Missense_Mutation | SNP | C  | T  | 47  | 264 | c.2387G>A      | c.(2386-2388)AGA>AAA | p.R796K  |
| Pat_70 | Post-Resistance | SLC44A5  | 204962    | 37 | 1 | 75704267  | 75704267  | Missense_Mutation | SNP | C  | T  | 48  | 332 | c.587G>A       | c.(586-588)GGA>GAA   | p.G196E  |
| Pat_70 | Post-Resistance | CLCA2    | 9635      | 37 | 1 | 86919106  | 86919106  | Missense_Mutation | SNP | G  | A  | 42  | 215 | c.2210G>A      | c.(2209-2211)CGA>CAA | p.R737Q  |
| Pat_70 | Post-Resistance | NRAS     | 4893      | 37 | 1 | 115256528 | 115256528 | Missense_Mutation | SNP | T  | G  | 68  | 682 | c.183A>C       | c.(181-183)CAA>CAC   | p.Q61H   |
| Pat_70 | Post-Resistance | SPAG17   | 200162    | 37 | 1 | 118548138 | 118548138 | Missense_Mutation | SNP | G  | A  | 36  | 273 | c.4675C>T      | c.(4675-4677)CCT>TCT | p.P1559S |
| Pat_70 | Post-Resistance | HSD3B1   | 3283      | 37 | 1 | 120057006 | 120057006 | Missense_Mutation | SNP | C  | T  | 44  | 284 | c.860C>T       | c.(859-861)CCT>CTT   | p.P287L  |
| Pat_70 | Post-Resistance | NBPF10   | 100132406 | 37 | 1 | 145359049 | 145359049 | Missense_Mutation | SNP | A  | G  | 4   | 29  | c.9214A>G      | c.(9214-9216)AAA>GAA | p.K3072E |
| Pat_70 | Post-Resistance | ATP8B2   | 57198     | 37 | 1 | 154313359 | 154313359 | Missense_Mutation | SNP | A  | T  | 36  | 372 | c.1163A>T      | c.(1162-1164)TAC>TTC | p.Y388F  |
| Pat_70 | Post-Resistance | ADAR     | 103       | 37 | 1 | 154574460 | 154574460 | Missense_Mutation | SNP | C  | A  | 6   | 262 | c.658G>T       | c.(658-660)GCC>TCC   | p.A220S  |
| Pat_70 | Post-Resistance | ADAR     | 103       | 37 | 1 | 154574475 | 154574475 | Missense_Mutation | SNP | C  | T  | 6   | 270 | c.643G>A       | c.(643-645)GGT>AGT   | p.G215S  |
| Pat_70 | Post-Resistance | DCST2    | 127579    | 37 | 1 | 154999135 | 154999135 | Missense_Mutation | SNP | G  | A  | 55  | 189 | c.1399C>T      | c.(1399-1401)CGT>TGT | p.R467C  |

|        |                 |          |        |    |    |           |           |                   |     |   |   |     |     |           |                      |          |
|--------|-----------------|----------|--------|----|----|-----------|-----------|-------------------|-----|---|---|-----|-----|-----------|----------------------|----------|
| Pat_70 | Post-Resistance | OR10K2   | 391107 | 37 | 1  | 158390397 | 158390397 | Missense_Mutation | SNP | G | A | 146 | 500 | c.260C>T  | c.(259-261)TCC>TTC   | p.S87F   |
| Pat_70 | Post-Resistance | RCS1     | 92241  | 37 | 1  | 167654698 | 167654698 | Missense_Mutation | SNP | C | T | 71  | 309 | c.149C>T  | c.(148-150)TCC>TTC   | p.S50F   |
| Pat_70 | Post-Resistance | CACNA1E  | 777    | 37 | 1  | 181741296 | 181741296 | Missense_Mutation | SNP | G | A | 128 | 527 | c.5068G>A | c.(5068-5070)GAG>AAG | p.E1690K |
| Pat_70 | Post-Resistance | SMG7     | 9887   | 37 | 1  | 183495876 | 183495876 | Missense_Mutation | SNP | A | G | 11  | 790 | c.458A>G  | c.(457-459)CAC>CGC   | p.H153R  |
| Pat_70 | Post-Resistance | HMCN1    | 83872  | 37 | 1  | 185969302 | 185969302 | Missense_Mutation | SNP | G | A | 67  | 416 | c.4000G>A | c.(4000-4002)GGG>AGG | p.G1334R |
| Pat_70 | Post-Resistance | KCNT2    | 343450 | 37 | 1  | 196436849 | 196436849 | Missense_Mutation | SNP | G | A | 21  | 263 | c.527C>T  | c.(526-528)GCC>GTC   | p.A176V  |
| Pat_70 | Post-Resistance | CFHR2    | 3080   | 37 | 1  | 196927146 | 196927146 | Missense_Mutation | SNP | G | A | 69  | 638 | c.556G>A  | c.(556-558)GGT>AGT   | p.G186S  |
| Pat_70 | Post-Resistance | CRB1     | 23418  | 37 | 1  | 197390318 | 197390318 | Missense_Mutation | SNP | G | A | 51  | 203 | c.1360G>A | c.(1360-1362)GGA>AGA | p.G454R  |
| Pat_70 | Post-Resistance | MBL2     | 4153   | 37 | 10 | 54530495  | 54530495  | Missense_Mutation | SNP | C | T | 31  | 126 | c.239G>A  | c.(238-240)GGA>GAA   | p.G80E   |
| Pat_70 | Post-Resistance | CTNNA3   | 29119  | 37 | 10 | 68535278  | 68535278  | Missense_Mutation | SNP | C | T | 44  | 325 | c.1052G>A | c.(1051-1053)GGA>GAA | p.G351E  |
| Pat_70 | Post-Resistance | CTNNA3   | 29119  | 37 | 10 | 68979585  | 68979585  | Missense_Mutation | SNP | C | T | 37  | 149 | c.623G>A  | c.(622-624)CGA>CAA   | p.R208Q  |
| Pat_70 | Post-Resistance | C10orf27 | 219793 | 37 | 10 | 72541712  | 72541712  | Missense_Mutation | SNP | A | T | 51  | 236 | c.122T>A  | c.(121-123)CTG>CAG   | p.L41Q   |
| Pat_70 | Post-Resistance | PTEN     | 5728   | 37 | 10 | 89717672  | 89717672  | Nonsense_Mutation | SNP | C | T | 76  | 431 | c.697C>T  | c.(697-699)CGA>TGA   | p.R233*  |
| Pat_70 | Post-Resistance | C10orf79 | 80217  | 37 | 10 | 105945872 | 105945872 | Missense_Mutation | SNP | C | T | 6   | 271 | c.1870G>A | c.(1870-1872)GGT>AGT | p.G624S  |
| Pat_70 | Post-Resistance | BTBD16   | 118663 | 37 | 10 | 124045710 | 124045710 | Missense_Mutation | SNP | C | T | 54  | 223 | c.332C>T  | c.(331-333)GCC>GTC   | p.A111V  |
| Pat_70 | Post-Resistance | CDHR5    | 53841  | 37 | 11 | 618833    | 618833    | Missense_Mutation | SNP | G | C | 8   | 363 | c.1726C>G | c.(1726-1728)CCA>GCA | p.P576A  |
| Pat_70 | Post-Resistance | OR10A5   | 144124 | 37 | 11 | 6867706   | 6867706   | Missense_Mutation | SNP | T | A | 100 | 555 | c.793T>A  | c.(793-795)TCA>ACA   | p.S265T  |
| Pat_70 | Post-Resistance | NLRP10   | 338322 | 37 | 11 | 7981691   | 7981691   | Missense_Mutation | SNP | C | T | 45  | 268 | c.1468G>A | c.(1468-1470)GAG>AAG | p.E490K  |
| Pat_70 | Post-Resistance | STK33    | 65975  | 37 | 11 | 8494797   | 8494797   | Missense_Mutation | SNP | T | G | 41  | 271 | c.252A>C  | c.(250-252)AGA>AGC   | p.R84S   |
| Pat_70 | Post-Resistance | RAG2     | 5897   | 37 | 11 | 36615559  | 36615559  | Missense_Mutation | SNP | G | A | 33  | 282 | c.160C>T  | c.(160-162)CAT>TAT   | p.H54Y   |
| Pat_70 | Post-Resistance | LRP4     | 4038   | 37 | 11 | 46911963  | 46911963  | Missense_Mutation | SNP | C | T | 20  | 138 | c.1780G>A | c.(1780-1782)GAT>AAT | p.D594N  |
| Pat_70 | Post-Resistance | C11orf88 | 399949 | 37 | 11 | 111386256 | 111386256 | Missense_Mutation | SNP | T | G | 24  | 322 | c.247T>G  | c.(247-249)TCT>GCT   | p.S83A   |
| Pat_70 | Post-Resistance | OR6T1    | 219874 | 37 | 11 | 123813604 | 123813604 | Missense_Mutation | SNP | C | T | 43  | 376 | c.942G>A  | c.(940-942)ATG>ATA   | p.M314I  |
| Pat_70 | Post-Resistance | OR10G9   | 219870 | 37 | 11 | 123893738 | 123893738 | Missense_Mutation | SNP | G | C | 10  | 634 | c.19G>C   | c.(19-21)GTG>CTG     | p.V7L    |
| Pat_70 | Post-Resistance | CCDC15   | 80071  | 37 | 11 | 124857495 | 124857495 | Missense_Mutation | SNP | A | C | 7   | 564 | c.1373A>C | c.(1372-1374)CAC>CCC | p.H458P  |
| Pat_70 | Post-Resistance | CCDC15   | 80071  | 37 | 11 | 124857585 | 124857585 | Missense_Mutation | SNP | C | A | 8   | 564 | c.1463C>A | c.(1462-1464)CCC>CAC | p.P488H  |
| Pat_70 | Post-Resistance | NCAPD3   | 23310  | 37 | 11 | 134079064 | 134079064 | Missense_Mutation | SNP | G | A | 58  | 508 | c.769C>T  | c.(769-771)CAT>TAT   | p.H257Y  |
| Pat_70 | Post-Resistance | ERC1     | 23085  | 37 | 12 | 1553842   | 1553842   | Missense_Mutation | SNP | C | T | 72  | 422 | c.3139C>T | c.(3139-3141)CCA>TCA | p.P1047S |
| Pat_70 | Post-Resistance | KLHDC5   | 57542  | 37 | 12 | 27944688  | 27944688  | Missense_Mutation | SNP | G | A | 126 | 658 | c.920G>A  | c.(919-921)GGA>GAA   | p.G307E  |
| Pat_70 | Post-Resistance | TROAP    | 10024  | 37 | 12 | 49724313  | 49724313  | Missense_Mutation | SNP | G | T | 7   | 173 | c.1685G>T | c.(1684-1686)AGT>ATT | p.S562I  |
| Pat_70 | Post-Resistance | KRT5     | 3852   | 37 | 12 | 52913539  | 52913539  | Missense_Mutation | SNP | G | A | 86  | 661 | c.542C>T  | c.(541-543)TCC>TTC   | p.S181F  |
| Pat_70 | Post-Resistance | KRT73    | 319101 | 37 | 12 | 53011993  | 53011993  | Nonsense_Mutation | SNP | G | A | 55  | 414 | c.316C>T  | c.(316-318)CAG>TAG   | p.Q106*  |
| Pat_70 | Post-Resistance | SYT1     | 6857   | 37 | 12 | 79693212  | 79693212  | Missense_Mutation | SNP | G | A | 66  | 465 | c.691G>A  | c.(691-693)GAT>AAT   | p.D231N  |
| Pat_70 | Post-Resistance | FAM71C   | 196472 | 37 | 12 | 100042134 | 100042134 | Missense_Mutation | SNP | A | G | 63  | 343 | c.182A>G  | c.(181-183)GAC>GGC   | p.D61G   |
| Pat_70 | Post-Resistance | STAB2    | 55576  | 37 | 12 | 104100576 | 104100576 | Missense_Mutation | SNP | G | A | 33  | 271 | c.4003G>A | c.(4003-4005)GAA>AAA | p.E1335K |
| Pat_70 | Post-Resistance | RPH3A    | 22895  | 37 | 12 | 113307722 | 113307722 | Missense_Mutation | SNP | G | A | 36  | 311 | c.674G>A  | c.(673-675)GGG>GAG   | p.G225E  |
| Pat_70 | Post-Resistance | RIMBP2   | 23504  | 37 | 12 | 130926895 | 130926895 | Nonsense_Mutation | SNP | C | T | 46  | 373 | c.951G>A  | c.(949-951)TGG>TGA   | p.W317*  |
| Pat_70 | Post-Resistance | MIPEP    | 4285   | 37 | 13 | 24453425  | 24453425  | Missense_Mutation | SNP | G | A | 93  | 600 | c.521C>T  | c.(520-522)TCC>TTC   | p.S174F  |
| Pat_70 | Post-Resistance | HS6ST3   | 266722 | 37 | 13 | 97485024  | 97485024  | Missense_Mutation | SNP | G | A | 38  | 263 | c.988G>A  | c.(988-990)GAG>AAG   | p.E330K  |
| Pat_70 | Post-Resistance | OR4M1    | 441670 | 37 | 14 | 20249284  | 20249284  | Missense_Mutation | SNP | C | T | 49  | 490 | c.803C>T  | c.(802-804)TCC>TTC   | p.S268F  |
| Pat_70 | Post-Resistance | OR4N2    | 390429 | 37 | 14 | 20296056  | 20296056  | Missense_Mutation | SNP | T | C | 61  | 593 | c.449T>C  | c.(448-450)CTT>CCT   | p.L150P  |
| Pat_70 | Post-Resistance | C14orf93 | 60686  | 37 | 14 | 23467809  | 23467809  | Missense_Mutation | SNP | C | T | 21  | 123 | c.424G>A  | c.(424-426)GAA>AAA   | p.E142K  |
| Pat_70 | Post-Resistance | PRKD1    | 5587   | 37 | 14 | 30095710  | 30095710  | Missense_Mutation | SNP | T | C | 44  | 234 | c.1778A>G | c.(1777-1779)CAG>CGG | p.Q593R  |
| Pat_70 | Post-Resistance | NUBPL    | 80224  | 37 | 14 | 32068535  | 32068535  | Missense_Mutation | SNP | C | T | 37  | 300 | c.332C>T  | c.(331-333)CCT>CTT   | p.P111L  |
| Pat_70 | Post-Resistance | SOCS4    | 122809 | 37 | 14 | 55510090  | 55510090  | Missense_Mutation | SNP | C | T | 44  | 296 | c.331C>T  | c.(331-333)CGG>TGG   | p.R111W  |
| Pat_70 | Post-Resistance | MAP3K9   | 4293   | 37 | 14 | 71216698  | 71216698  | Missense_Mutation | SNP | G | A | 49  | 333 | c.1102C>T | c.(1102-1104)CTT>TTT | p.L368F  |
| Pat_70 | Post-Resistance | FOXN3    | 1112   | 37 | 14 | 89628855  | 89628855  | Missense_Mutation | SNP | G | A | 30  | 140 | c.1376C>T | c.(1375-1377)TCC>TTC | p.S459F  |

|        |                 |           |           |    |    |           |           |                   |     |   |   |     |     |            |                        |          |
|--------|-----------------|-----------|-----------|----|----|-----------|-----------|-------------------|-----|---|---|-----|-----|------------|------------------------|----------|
| Pat_70 | Post-Resistance | KIAA0284  | 283638    | 37 | 14 | 105349558 | 105349558 | Missense_Mutation | SNP | G | A | 15  | 765 | c.764G>A   | c.(763-765)GGT>GAT     | p.G255D  |
| Pat_70 | Post-Resistance | OR4N3P    | 390539    | 37 | 15 | 22413825  | 22413825  | Missense_Mutation | SNP | C | T | 129 | 645 | c.124C>T   | c.(124-126)CGC>TGC     | p.R42C   |
| Pat_70 | Post-Resistance | SPTBN5    | 51332     | 37 | 15 | 42160775  | 42160775  | Missense_Mutation | SNP | C | T | 31  | 145 | c.5773G>A  | c.(5773-5775)GCC>ACC   | p.A1925T |
| Pat_70 | Post-Resistance | DTWD1     | 56986     | 37 | 15 | 49924411  | 49924411  | Missense_Mutation | SNP | C | T | 31  | 220 | c.320C>T   | c.(319-321)ACT>ATT     | p.T107I  |
| Pat_70 | Post-Resistance | SLC27A2   | 11001     | 37 | 15 | 50515227  | 50515227  | Nonsense_Mutation | SNP | G | A | 45  | 406 | c.1038G>A  | c.(1036-1038)TGG>TGA   | p.W346*  |
| Pat_70 | Post-Resistance | CYP19A1   | 1588      | 37 | 15 | 51503047  | 51503047  | Missense_Mutation | SNP | C | T | 61  | 479 | c.1470G>A  | c.(1468-1470)ATG>ATA   | p.M490I  |
| Pat_70 | Post-Resistance | HERC1     | 8925      | 37 | 15 | 63932386  | 63932386  | Nonsense_Mutation | SNP | C | A | 43  | 279 | c.11866G>T | c.(11866-11868)GAA>TAA | p.E3956* |
| Pat_70 | Post-Resistance | AGBL1     | 123624    | 37 | 15 | 87066090  | 87066090  | Missense_Mutation | SNP | C | T | 44  | 363 | c.2467C>T  | c.(2467-2469)CCC>TCC   | p.P823S  |
| Pat_70 | Post-Resistance | GRIN2A    | 2903      | 37 | 16 | 9923396   | 9923396   | Missense_Mutation | SNP | C | T | 48  | 281 | c.1891G>A  | c.(1891-1893)GTA>ATA   | p.V631I  |
| Pat_70 | Post-Resistance | TMC7      | 79905     | 37 | 16 | 19041577  | 19041577  | Missense_Mutation | SNP | G | A | 33  | 257 | c.743G>A   | c.(742-744)GGA>GAA     | p.G248E  |
| Pat_70 | Post-Resistance | ACSM2A    | 123876    | 37 | 16 | 20492021  | 20492021  | Missense_Mutation | SNP | G | C | 16  | 91  | c.1408G>C  | c.(1408-1410)GGG>CGG   | p.G470R  |
| Pat_70 | Post-Resistance | ACSM2B    | 348158    | 37 | 16 | 20554458  | 20554458  | Missense_Mutation | SNP | C | G | 44  | 762 | c.1408G>C  | c.(1408-1410)GGG>CGG   | p.G470R  |
| Pat_70 | Post-Resistance | USP31     | 57478     | 37 | 16 | 23116791  | 23116791  | Missense_Mutation | SNP | A | T | 36  | 272 | c.1060T>A  | c.(1060-1062)TCT>ACT   | p.S354T  |
| Pat_70 | Post-Resistance | ABCC12    | 94160     | 37 | 16 | 48119553  | 48119553  | Missense_Mutation | SNP | C | T | 60  | 364 | c.3779G>A  | c.(3778-3780)GGG>GAG   | p.G1260E |
| Pat_70 | Post-Resistance | GPR114    | 221188    | 37 | 16 | 57608779  | 57608779  | Missense_Mutation | SNP | G | A | 20  | 166 | c.1261G>A  | c.(1261-1263)GGC>AGC   | p.G421S  |
| Pat_70 | Post-Resistance | ATMIN     | 23300     | 37 | 16 | 81078133  | 81078133  | Missense_Mutation | SNP | T | C | 97  | 433 | c.2030T>C  | c.(2029-2031)TTA>TCA   | p.L677S  |
| Pat_70 | Post-Resistance | PKD1L2    | 114780    | 37 | 16 | 81253771  | 81253771  | Missense_Mutation | SNP | C | T | 52  | 305 | c.205G>A   | c.(205-207)GAA>AAA     | p.E69K   |
| Pat_70 | Post-Resistance | GALNS     | 2588      | 37 | 16 | 88904094  | 88904094  | Nonsense_Mutation | SNP | C | A | 29  | 208 | c.502G>T   | c.(502-504)GGA>TGA     | p.G168*  |
| Pat_70 | Post-Resistance | C17orf85  | 55421     | 37 | 17 | 3717742   | 3717742   | Missense_Mutation | SNP | G | A | 13  | 100 | c.1501C>T  | c.(1501-1503)CCG>TCG   | p.P501S  |
| Pat_70 | Post-Resistance | UBE2G1    | 7326      | 37 | 17 | 4192683   | 4192683   | Missense_Mutation | SNP | A | G | 62  | 415 | c.268T>C   | c.(268-270)TGC>CGC     | p.C90R   |
| Pat_70 | Post-Resistance | ALOX15    | 246       | 37 | 17 | 4536765   | 4536765   | Missense_Mutation | SNP | C | T | 48  | 363 | c.1192G>A  | c.(1192-1194)GAA>AAA   | p.E398K  |
| Pat_70 | Post-Resistance | USP6      | 9098      | 37 | 17 | 5066291   | 5066291   | Nonsense_Mutation | SNP | C | T | 52  | 477 | c.3028C>T  | c.(3028-3030)CAG>TAG   | p.Q1010* |
| Pat_70 | Post-Resistance | KDM6B     | 23135     | 37 | 17 | 7751702   | 7751702   | Missense_Mutation | SNP | T | G | 71  | 629 | c.2096T>G  | c.(2095-2097)ATG>AGG   | p.M699R  |
| Pat_70 | Post-Resistance | MYH2      | 4620      | 37 | 17 | 10442646  | 10442646  | Missense_Mutation | SNP | G | A | 100 | 586 | c.1292C>T  | c.(1291-1293)GCC>GTC   | p.A431V  |
| Pat_70 | Post-Resistance | CCDC144A  | 9720      | 37 | 17 | 16631054  | 16631054  | Missense_Mutation | SNP | G | A | 7   | 58  | c.2105G>A  | c.(2104-2106)AGA>AAA   | p.R702K  |
| Pat_70 | Post-Resistance | LGALS9B   | 284194    | 37 | 17 | 20363690  | 20363690  | Missense_Mutation | SNP | C | T | 5   | 310 | c.106G>A   | c.(106-108)GCC>ACC     | p.A36T   |
| Pat_70 | Post-Resistance | SLFN13    | 146857    | 37 | 17 | 33769266  | 33769266  | Nonsense_Mutation | SNP | C | T | 30  | 168 | c.1238G>A  | c.(1237-1239)TGG>TAG   | p.W413*  |
| Pat_70 | Post-Resistance | CDK12     | 51755     | 37 | 17 | 37618868  | 37618868  | Missense_Mutation | SNP | G | A | 20  | 155 | c.544G>A   | c.(544-546)GAG>AAG     | p.E182K  |
| Pat_70 | Post-Resistance | KRTAP4-11 | 653240    | 37 | 17 | 39274214  | 39274214  | Missense_Mutation | SNP | G | C | 19  | 336 | c.354C>G   | c.(352-354)AGC>AGG     | p.S118R  |
| Pat_70 | Post-Resistance | KRTAP4-11 | 653240    | 37 | 17 | 39274424  | 39274424  | Missense_Mutation | SNP | G | C | 24  | 474 | c.144C>G   | c.(142-144)AGC>AGG     | p.S48R   |
| Pat_70 | Post-Resistance | SLC26A11  | 284129    | 37 | 17 | 78226478  | 78226478  | Missense_Mutation | SNP | C | T | 28  | 174 | c.1784C>T  | c.(1783-1785)TCC>TTC   | p.S595F  |
| Pat_70 | Post-Resistance | CLUL1     | 27098     | 37 | 18 | 618042    | 618042    | Nonsense_Mutation | SNP | G | A | 19  | 303 | c.42G>A    | c.(40-42)TGG>TGA       | p.W14*   |
| Pat_70 | Post-Resistance | MEX3C     | 51320     | 37 | 18 | 48703064  | 48703064  | Missense_Mutation | SNP | G | A | 34  | 205 | c.1637C>T  | c.(1636-1638)CCT>CTT   | p.P546L  |
| Pat_70 | Post-Resistance | DCC       | 1630      | 37 | 18 | 50832089  | 50832089  | Missense_Mutation | SNP | G | A | 52  | 295 | c.2053G>A  | c.(2053-2055)GGA>AGA   | p.G685R  |
| Pat_70 | Post-Resistance | SERPINB5  | 5268      | 37 | 18 | 61156661  | 61156661  | Missense_Mutation | SNP | G | A | 17  | 182 | c.388G>A   | c.(388-390)GGT>AGT     | p.G130S  |
| Pat_70 | Post-Resistance | MOBK12A   | 126308    | 37 | 19 | 2078392   | 2078392   | Missense_Mutation | SNP | G | T | 43  | 272 | c.168C>A   | c.(166-168)GAC>GAA     | p.D56E   |
| Pat_70 | Post-Resistance | ARRDC5    | 645432    | 37 | 19 | 4896825   | 4896825   | Missense_Mutation | SNP | G | A | 23  | 289 | c.359C>T   | c.(358-360)CCT>CTT     | p.P120L  |
| Pat_70 | Post-Resistance | C3        | 718       | 37 | 19 | 6702545   | 6702545   | Missense_Mutation | SNP | C | T | 61  | 369 | c.2291G>A  | c.(2290-2292)CGA>CAA   | p.R764Q  |
| Pat_70 | Post-Resistance | CD209     | 30835     | 37 | 19 | 7810560   | 7810560   | Missense_Mutation | SNP | G | A | 7   | 310 | c.592C>T   | c.(592-594)CGG>TGG     | p.R198W  |
| Pat_70 | Post-Resistance | MUC16     | 94025     | 37 | 19 | 9073848   | 9073848   | Missense_Mutation | SNP | G | A | 28  | 250 | c.13598C>T | c.(13597-13599)CCT>CTT | p.P4533L |
| Pat_70 | Post-Resistance | ZNF560    | 147741    | 37 | 19 | 9577542   | 9577542   | Missense_Mutation | SNP | C | T | 70  | 435 | c.2081G>A  | c.(2080-2082)CGA>CAA   | p.R694Q  |
| Pat_70 | Post-Resistance | ZNF844    | 284391    | 37 | 19 | 12187443  | 12187443  | Missense_Mutation | SNP | C | G | 6   | 462 | c.1508C>G  | c.(1507-1509)CCT>CGT   | p.P503R  |
| Pat_70 | Post-Resistance | CD97      | 976       | 37 | 19 | 14499612  | 14499612  | Missense_Mutation | SNP | C | T | 94  | 626 | c.172C>T   | c.(172-174)CCG>TCG     | p.P58S   |
| Pat_70 | Post-Resistance | CYP4F12   | 66002     | 37 | 19 | 15789078  | 15789078  | Missense_Mutation | SNP | C | T | 59  | 376 | c.206C>T   | c.(205-207)CCT>CTT     | p.P69L   |
| Pat_70 | Post-Resistance | OR10H2    | 26538     | 37 | 19 | 15839002  | 15839002  | Nonsense_Mutation | SNP | G | A | 55  | 397 | c.149G>A   | c.(148-150)TGG>TAG     | p.W50*   |
| Pat_70 | Post-Resistance | ZNF737    | 100129842 | 37 | 19 | 20728254  | 20728254  | Missense_Mutation | SNP | C | G | 6   | 265 | c.755G>C   | c.(754-756)AGT>ACT     | p.S252T  |
| Pat_70 | Post-Resistance | ZNF98     | 148198    | 37 | 19 | 22585641  | 22585641  | Missense_Mutation | SNP | C | T | 60  | 458 | c.203G>A   | c.(202-204)GGA>GAA     | p.G68E   |

|        |                 |           |        |    |    |           |           |                   |     |    |    |     |     |                                                |                        |              |
|--------|-----------------|-----------|--------|----|----|-----------|-----------|-------------------|-----|----|----|-----|-----|------------------------------------------------|------------------------|--------------|
| Pat_70 | Post-Resistance | ZNF254    | 9534   | 37 | 19 | 24309919  | 24309919  | Missense_Mutation | SNP | A  | G  | 11  | 382 | c.1117A>G                                      | c.(1117-1119)ACT>GCT   | p.T373A      |
| Pat_70 | Post-Resistance | KIRREL2   | 84063  | 37 | 19 | 36349734  | 36349734  | Missense_Mutation | SNP | G  | A  | 61  | 351 | c.490G>A                                       | c.(490-492)GGG>AGG     | p.G164R      |
| Pat_70 | Post-Resistance | ZNF573    | 126231 | 37 | 19 | 38230883  | 38230884  | Missense_Mutation | DNP | TC | AA | 39  | 381 | c.507_508GA>TT(505-510)AAGAAC>AATT#169_170KN>N |                        |              |
| Pat_70 | Post-Resistance | AXL       | 558    | 37 | 19 | 41743885  | 41743885  | Missense_Mutation | SNP | G  | A  | 33  | 191 | c.820G>A                                       | c.(820-822)GGA>AGA     | p.G274R      |
| Pat_70 | Post-Resistance | MARK4     | 57787  | 37 | 19 | 45797680  | 45797680  | Missense_Mutation | SNP | C  | T  | 39  | 233 | c.1568C>T                                      | c.(1567-1569)CCG>CTG   | p.P523L      |
| Pat_70 | Post-Resistance | ZNF649    | 65251  | 37 | 19 | 52394619  | 52394619  | Missense_Mutation | SNP | T  | C  | 7   | 355 | c.770A>G                                       | c.(769-771)AAA>AGA     | p.K257R      |
| Pat_70 | Post-Resistance | ZNF845    | 91664  | 37 | 19 | 53856761  | 53856761  | Missense_Mutation | SNP | T  | C  | 5   | 261 | c.2833T>C                                      | c.(2833-2835)TGT>CGT   | p.C945R      |
| Pat_70 | Post-Resistance | SBK2      | 646643 | 37 | 19 | 56041171  | 56041171  | Missense_Mutation | SNP | C  | T  | 16  | 101 | c.976G>A                                       | c.(976-978)GGG>AGG     | p.G326R      |
| Pat_70 | Post-Resistance | NT5C1B    | 93034  | 37 | 2  | 18736522  | 18736522  | Missense_Mutation | SNP | T  | C  | 6   | 491 | c.1888A>G                                      | c.(1888-1890)ATG>GTG   | p.M630V      |
| Pat_70 | Post-Resistance | NT5C1B    | 93034  | 37 | 2  | 18768282  | 18768282  | Missense_Mutation | SNP | C  | T  | 57  | 268 | c.278G>A                                       | c.(277-279)GGC>GAC     | p.G93D       |
| Pat_70 | Post-Resistance | RPL23AP32 | 56969  | 37 | 2  | 54756736  | 54756737  | Missense_Mutation | DNP | TT | CC | 8   | 270 | c.254_255TT>CC                                 | c.(253-255)TTT>TCC     | p.F85S       |
| Pat_70 | Post-Resistance | STARD7    | 56910  | 37 | 2  | 96858127  | 96858127  | Missense_Mutation | SNP | G  | A  | 56  | 496 | c.823C>T                                       | c.(823-825)CCC>TCC     | p.P275S      |
| Pat_70 | Post-Resistance | SLC9A2    | 6549   | 37 | 2  | 103324769 | 103324769 | Missense_Mutation | SNP | G  | A  | 62  | 505 | c.2260G>A                                      | c.(2260-2262)GAA>AAA   | p.E754K      |
| Pat_70 | Post-Resistance | WASH2P    | 375260 | 37 | 2  | 114355129 | 114355129 | Missense_Mutation | SNP | G  | A  | 5   | 136 | c.506G>A                                       | c.(505-507)CGC>CAC     | p.R169H      |
| Pat_70 | Post-Resistance | CLASP1    | 23332  | 37 | 2  | 122125364 | 122125364 | Missense_Mutation | SNP | C  | G  | 5   | 172 | c.3686G>C                                      | c.(3685-3687)CGG>CCG   | p.R1229P     |
| Pat_70 | Post-Resistance | CNTNAP5   | 129684 | 37 | 2  | 125504925 | 125504925 | Nonsense_Mutation | SNP | C  | T  | 80  | 454 | c.2194C>T                                      | c.(2194-2196)CAG>TAG   | p.Q732*      |
| Pat_70 | Post-Resistance | CACNB4    | 785    | 37 | 2  | 152739821 | 152739821 | Missense_Mutation | SNP | C  | T  | 89  | 542 | c.211G>A                                       | c.(211-213)GAA>AAA     | p.E71K       |
| Pat_70 | Post-Resistance | GRB14     | 2888   | 37 | 2  | 165353583 | 165353583 | Nonsense_Mutation | SNP | C  | T  | 32  | 199 | c.1317G>A                                      | c.(1315-1317)TGG>TGA   | p.W439*      |
| Pat_70 | Post-Resistance | LRP2      | 4036   | 37 | 2  | 170028534 | 170028534 | Missense_Mutation | SNP | C  | T  | 61  | 387 | c.11254G>A                                     | c.(11254-11256)GAA>AAA | p.E3752K     |
| Pat_70 | Post-Resistance | TTN       | 7273   | 37 | 2  | 179613368 | 179613368 | Missense_Mutation | SNP | C  | T  | 80  | 522 | c.13759G>A                                     | c.(13759-13761)GAT>AAT | p.D4587N     |
| Pat_70 | Post-Resistance | COL5A2    | 1290   | 37 | 2  | 189917518 | 189917518 | Missense_Mutation | SNP | C  | T  | 35  | 177 | c.2672G>A                                      | c.(2671-2673)GGT>GAT   | p.G891D      |
| Pat_70 | Post-Resistance | EEF1B2    | 1933   | 37 | 2  | 207025358 | 207025358 | Missense_Mutation | SNP | A  | G  | 15  | 542 | c.127A>G                                       | c.(127-129)AGC>GGC     | p.S43G       |
| Pat_70 | Post-Resistance | CRYGA     | 1418   | 37 | 2  | 209027960 | 209027960 | Missense_Mutation | SNP | C  | T  | 45  | 374 | c.220G>A                                       | c.(220-222)GAC>AAC     | p.D74N       |
| Pat_70 | Post-Resistance | IKZF2     | 22807  | 37 | 2  | 213878586 | 213878586 | Missense_Mutation | SNP | C  | T  | 46  | 226 | c.785G>A                                       | c.(784-786)AGA>AAA     | p.R262K      |
| Pat_70 | Post-Resistance | HJURP     | 55355  | 37 | 2  | 234750117 | 234750117 | Nonsense_Mutation | SNP | G  | A  | 74  | 491 | c.1309C>T                                      | c.(1309-1311)CGA>TGA   | p.R437*      |
| Pat_70 | Post-Resistance | TRPM8     | 79054  | 37 | 2  | 234879017 | 234879017 | Missense_Mutation | SNP | G  | A  | 126 | 675 | c.2302G>A                                      | c.(2302-2304)GAG>AAG   | p.E768K      |
| Pat_70 | Post-Resistance | COL6A3    | 1293   | 37 | 2  | 238245090 | 238245090 | Missense_Mutation | SNP | T  | G  | 55  | 462 | c.8653A>C                                      | c.(8653-8655)ACC>CCC   | p.T2885P     |
| Pat_70 | Post-Resistance | C20orf194 | 25943  | 37 | 20 | 3305557   | 3305557   | Missense_Mutation | SNP | G  | A  | 47  | 371 | c.1247C>T                                      | c.(1246-1248)CCG>CTG   | p.P416L      |
| Pat_70 | Post-Resistance | SIGLEC1   | 6614   | 37 | 20 | 3673529   | 3673529   | Missense_Mutation | SNP | G  | A  | 13  | 106 | c.3758C>T                                      | c.(3757-3759)TCC>TTC   | p.S1253F     |
| Pat_70 | Post-Resistance | PLCB4     | 5332   | 37 | 20 | 9404500   | 9404500   | Nonsense_Mutation | SNP | C  | T  | 20  | 172 | c.2389C>T                                      | c.(2389-2391)CGA>TGA   | p.R797*      |
| Pat_70 | Post-Resistance | FRG1B     | 284802 | 37 | 20 | 29625934  | 29625934  | Missense_Mutation | SNP | C  | T  | 10  | 364 | c.88C>T                                        | c.(88-90)CAT>TAT       | p.H30Y       |
| Pat_70 | Post-Resistance | FRG1B     | 284802 | 37 | 20 | 29625941  | 29625941  | Missense_Mutation | SNP | A  | T  | 17  | 390 | c.95A>T                                        | c.(94-96)GAT>GTT       | p.D32V       |
| Pat_70 | Post-Resistance | FRG1B     | 284802 | 37 | 20 | 29625947  | 29625947  | Missense_Mutation | SNP | T  | C  | 13  | 414 | c.101T>C                                       | c.(100-102)ATT>ACT     | p.I34T       |
| Pat_70 | Post-Resistance | FRG1B     | 284802 | 37 | 20 | 29628243  | 29628243  | Missense_Mutation | SNP | T  | C  | 13  | 608 | c.155T>C                                       | c.(154-156)TTG>TCG     | p.L52S       |
| Pat_70 | Post-Resistance | FRG1B     | 284802 | 37 | 20 | 29628245  | 29628245  | Missense_Mutation | SNP | G  | A  | 13  | 602 | c.157G>A                                       | c.(157-159)GCC>ACC     | p.A53T       |
| Pat_70 | Post-Resistance | PPP1R16B  | 26051  | 37 | 20 | 37546839  | 37546839  | Missense_Mutation | SNP | C  | T  | 108 | 638 | c.1234C>T                                      | c.(1234-1236)CCT>TCT   | p.P412S      |
| Pat_70 | Post-Resistance | BAGE2     | 85319  | 37 | 21 | 11049621  | 11049621  | Nonsense_Mutation | SNP | G  | A  | 37  | 663 | c.280C>T                                       | c.(280-282)CGA>TGA     | p.R94*       |
| Pat_70 | Post-Resistance | BAGE2     | 85319  | 37 | 21 | 11049623  | 11049623  | Splice_Site       | SNP | T  | C  | 40  | 665 | c.280_splice                                   | c.e4-1                 | p.R94_splice |
| Pat_70 | Post-Resistance | BAGE2     | 85319  | 37 | 21 | 11097573  | 11097573  | Missense_Mutation | SNP | C  | T  | 14  | 391 | c.89G>A                                        | c.(88-90)AGG>AAG       | p.R30K       |
| Pat_70 | Post-Resistance | NCAM2     | 4685   | 37 | 21 | 22656657  | 22656657  | Missense_Mutation | SNP | C  | T  | 43  | 261 | c.274C>T                                       | c.(274-276)CGT>TGT     | p.R92C       |
| Pat_70 | Post-Resistance | TRAPPC10  | 7109   | 37 | 21 | 45518395  | 45518395  | Missense_Mutation | SNP | C  | T  | 40  | 289 | c.3326C>T                                      | c.(3325-3327)TCG>TTG   | p.S1109L     |
| Pat_70 | Post-Resistance | GNAZ      | 2781   | 37 | 22 | 23465487  | 23465487  | Missense_Mutation | SNP | C  | T  | 33  | 225 | c.937C>T                                       | c.(937-939)CGC>TGC     | p.R313C      |
| Pat_70 | Post-Resistance | CHEK2     | 11200  | 37 | 22 | 29091840  | 29091841  | Missense_Mutation | DNP | TG | CA | 38  | 176 | c.1116_1117CA>TC(114-1119)TCCAAG>TCTG          |                        | p.K373E      |
| Pat_70 | Post-Resistance | SERHL2    | 253190 | 37 | 22 | 42952530  | 42952530  | Missense_Mutation | SNP | C  | T  | 28  | 478 | c.359C>T                                       | c.(358-360)ACC>ATC     | p.T120I      |
| Pat_70 | Post-Resistance | ATG7      | 10533  | 37 | 3  | 11406161  | 11406161  | Missense_Mutation | SNP | G  | T  | 73  | 589 | c.1828G>T                                      | c.(1828-1830)GAT>TAT   | p.D610Y      |
| Pat_70 | Post-Resistance | IQSEC1    | 9922   | 37 | 3  | 12977694  | 12977694  | Missense_Mutation | SNP | C  | T  | 40  | 266 | c.864G>A                                       | c.(862-864)ATG>ATA     | p.M288I      |
| Pat_70 | Post-Resistance | SCN11A    | 11280  | 37 | 3  | 38936214  | 38936214  | Missense_Mutation | SNP | G  | A  | 43  | 235 | c.2645C>T                                      | c.(2644-2646)CCC>CTC   | p.P882L      |



|        |                 |          |        |    |   |           |           |                   |     |   |   |     |     |               |                      |               |
|--------|-----------------|----------|--------|----|---|-----------|-----------|-------------------|-----|---|---|-----|-----|---------------|----------------------|---------------|
| Pat_70 | Post-Resistance | CCR1     | 1230   | 37 | 3 | 46245516  | 46245516  | Missense_Mutation | SNP | C | T | 48  | 391 | c.289G>A      | c.(289-291)GAT>AAT   | p.D97N        |
| Pat_70 | Post-Resistance | COL7A1   | 1294   | 37 | 3 | 48610780  | 48610780  | Missense_Mutation | SNP | C | T | 31  | 235 | c.6620G>A     | c.(6619-6621)GGG>GAG | p.G2207E      |
| Pat_70 | Post-Resistance | ZMYND10  | 51364  | 37 | 3 | 50378896  | 50378896  | Nonsense_Mutation | SNP | C | T | 33  | 266 | c.1268G>A     | c.(1267-1269)TGG>TAG | p.W423*       |
| Pat_70 | Post-Resistance | ERC2     | 26059  | 37 | 3 | 55922574  | 55922574  | Missense_Mutation | SNP | C | T | 60  | 416 | c.2407G>A     | c.(2407-2409)GAG>AAG | p.E803K       |
| Pat_70 | Post-Resistance | ROBO2    | 6092   | 37 | 3 | 77645802  | 77645802  | Missense_Mutation | SNP | C | T | 57  | 322 | c.2755C>T     | c.(2755-2757)CCC>TCC | p.P919S       |
| Pat_70 | Post-Resistance | RG9MTD1  | 54931  | 37 | 3 | 101284175 | 101284175 | Missense_Mutation | SNP | G | A | 52  | 318 | c.550G>A      | c.(550-552)GAT>AAT   | p.D184N       |
| Pat_70 | Post-Resistance | HHLA2    | 11148  | 37 | 3 | 108070664 | 108070664 | Missense_Mutation | SNP | A | G | 20  | 142 | c.4A>G        | c.(4-6)AAG>GAG       | p.K2E         |
| Pat_70 | Post-Resistance | PHLDB2   | 90102  | 37 | 3 | 111638006 | 111638006 | Missense_Mutation | SNP | G | A | 60  | 417 | c.1807G>A     | c.(1807-1809)GAA>AAA | p.E603K       |
| Pat_70 | Post-Resistance | BOC      | 91653  | 37 | 3 | 112991278 | 112991278 | Missense_Mutation | SNP | G | A | 8   | 625 | c.689G>A      | c.(688-690)CGC>CAC   | p.R230H       |
| Pat_70 | Post-Resistance | FBXO40   | 51725  | 37 | 3 | 121342006 | 121342006 | Missense_Mutation | SNP | C | T | 31  | 278 | c.1730C>T     | c.(1729-1731)CCC>CTC | p.P577L       |
| Pat_70 | Post-Resistance | CPNE4    | 131034 | 37 | 3 | 131261456 | 131261456 | Missense_Mutation | SNP | C | T | 22  | 228 | c.1484G>A     | c.(1483-1485)GGA>GAA | p.G495E       |
| Pat_70 | Post-Resistance | IGSF10   | 285313 | 37 | 3 | 151154847 | 151154847 | Missense_Mutation | SNP | C | T | 35  | 328 | c.7502G>A     | c.(7501-7503)AGA>AAA | p.R2501K      |
| Pat_70 | Post-Resistance | LIPH     | 200879 | 37 | 3 | 185251431 | 185251431 | Missense_Mutation | SNP | C | T | 41  | 296 | c.454G>A      | c.(454-456)GGA>AGA   | p.G152R       |
| Pat_70 | Post-Resistance | PYDC2    | 152138 | 37 | 3 | 191179070 | 191179070 | Missense_Mutation | SNP | A | T | 37  | 418 | c.119A>T      | c.(118-120)CAG>CTG   | p.Q40L        |
| Pat_70 | Post-Resistance | SDHAP2   | 727956 | 37 | 3 | 195404650 | 195404650 | Missense_Mutation | SNP | T | A | 36  | 256 | c.207T>A      | c.(205-207)AAT>AAA   | p.N69K        |
| Pat_70 | Post-Resistance | DRD5     | 1816   | 37 | 4 | 9784887   | 9784887   | Missense_Mutation | SNP | C | T | 18  | 218 | c.1234C>T     | c.(1234-1236)CAC>TAC | p.H412Y       |
| Pat_70 | Post-Resistance | APBB2    | 323    | 37 | 4 | 40818158  | 40818158  | Missense_Mutation | SNP | G | A | 83  | 519 | c.2228C>T     | c.(2227-2229)TCC>TTC | p.S743F       |
| Pat_70 | Post-Resistance | AMBN     | 258    | 37 | 4 | 71468527  | 71468527  | Missense_Mutation | SNP | G | A | 21  | 123 | c.583G>A      | c.(583-585)GAT>AAT   | p.D195N       |
| Pat_70 | Post-Resistance | RASSF6   | 166824 | 37 | 4 | 74451034  | 74451034  | Missense_Mutation | SNP | C | T | 36  | 272 | c.526G>A      | c.(526-528)GAA>AAA   | p.E176K       |
| Pat_70 | Post-Resistance | NAAA     | 27163  | 37 | 4 | 76842263  | 76842263  | Missense_Mutation | SNP | G | A | 4   | 119 | c.680C>T      | c.(679-681)TCG>TTG   | p.S227L       |
| Pat_70 | Post-Resistance | GK2      | 2712   | 37 | 4 | 80329231  | 80329231  | Missense_Mutation | SNP | C | T | 40  | 337 | c.124G>A      | c.(124-126)GAA>AAA   | p.E42K        |
| Pat_70 | Post-Resistance | AFF1     | 4299   | 37 | 4 | 88048208  | 88048208  | Missense_Mutation | SNP | C | T | 58  | 411 | c.2821C>T     | c.(2821-2823)CCA>TCA | p.P941S       |
| Pat_70 | Post-Resistance | COL25A1  | 84570  | 37 | 4 | 109745338 | 109745338 | Missense_Mutation | SNP | C | T | 49  | 286 | c.1837G>A     | c.(1837-1839)GGA>AGA | p.G613R       |
| Pat_70 | Post-Resistance | CMYA5    | 202333 | 37 | 5 | 79024953  | 79024953  | Missense_Mutation | SNP | C | T | 76  | 320 | c.365C>T      | c.(364-366)TCC>TTC   | p.S122F       |
| Pat_70 | Post-Resistance | ADAMTS19 | 171019 | 37 | 5 | 128956432 | 128956432 | Missense_Mutation | SNP | G | A | 96  | 651 | c.1582G>A     | c.(1582-1584)GAT>AAT | p.D528N       |
| Pat_70 | Post-Resistance | FAM53C   | 51307  | 37 | 5 | 137680684 | 137680684 | Missense_Mutation | SNP | C | T | 29  | 265 | c.307C>T      | c.(307-309)CCA>TCA   | p.P103S       |
| Pat_70 | Post-Resistance | KDM3B    | 51780  | 37 | 5 | 137722215 | 137722215 | Missense_Mutation | SNP | T | G | 34  | 262 | c.1285T>G     | c.(1285-1287)TCC>GCC | p.S429A       |
| Pat_70 | Post-Resistance | PCDHA1   | 56147  | 37 | 5 | 140166227 | 140166227 | Missense_Mutation | SNP | C | T | 44  | 314 | c.352C>T      | c.(352-354)CAT>TAT   | p.H118Y       |
| Pat_70 | Post-Resistance | SH3RF2   | 153769 | 37 | 5 | 145393506 | 145393506 | Missense_Mutation | SNP | C | T | 62  | 451 | c.941C>T      | c.(940-942)TCT>TTT   | p.S314F       |
| Pat_70 | Post-Resistance | PPARGC1B | 133522 | 37 | 5 | 149215849 | 149215849 | Missense_Mutation | SNP | C | T | 83  | 602 | c.1831C>T     | c.(1831-1833)CCG>TCG | p.P611S       |
| Pat_70 | Post-Resistance | SLC6A7   | 6534   | 37 | 5 | 149581944 | 149581944 | Missense_Mutation | SNP | C | T | 50  | 360 | c.893C>T      | c.(892-894)TCC>TTC   | p.S298F       |
| Pat_70 | Post-Resistance | G3BP1    | 10146  | 37 | 5 | 151183497 | 151183497 | Nonsense_Mutation | SNP | C | T | 26  | 269 | c.1246C>T     | c.(1246-1248)CGA>TGA | p.R416*       |
| Pat_70 | Post-Resistance | CYFIP2   | 26999  | 37 | 5 | 156766230 | 156766230 | Missense_Mutation | SNP | C | G | 72  | 461 | c.2551C>G     | c.(2551-2553)CTC>GTC | p.L851V       |
| Pat_70 | Post-Resistance | COL23A1  | 91522  | 37 | 5 | 177686748 | 177686748 | Missense_Mutation | SNP | C | T | 74  | 427 | c.703G>A      | c.(703-705)GGT>AGT   | p.G235S       |
| Pat_70 | Post-Resistance | BMP6     | 654    | 37 | 6 | 7861833   | 7861833   | Splice_Site       | SNP | G | A | 51  | 393 | c.1006_splice | c.e3+1               | p.G336_splice |
| Pat_70 | Post-Resistance | SYCP2L   | 221711 | 37 | 6 | 10959052  | 10959052  | Missense_Mutation | SNP | T | G | 29  | 212 | c.2199T>G     | c.(2197-2199)AAT>AAG | p.N733K       |
| Pat_70 | Post-Resistance | OR2W1    | 26692  | 37 | 6 | 29012220  | 29012220  | Missense_Mutation | SNP | G | A | 152 | 540 | c.733C>T      | c.(733-735)CTT>TTT   | p.L245F       |
| Pat_70 | Post-Resistance | ITPR3    | 3710   | 37 | 6 | 33643512  | 33643512  | Missense_Mutation | SNP | T | C | 5   | 228 | c.3161T>C     | c.(3160-3162)ATG>ACG | p.M1054T      |
| Pat_70 | Post-Resistance | LRFN2    | 57497  | 37 | 6 | 40400182  | 40400182  | Missense_Mutation | SNP | G | A | 21  | 147 | c.671C>T      | c.(670-672)TCG>TTG   | p.S224L       |
| Pat_70 | Post-Resistance | TREM1    | 54210  | 37 | 6 | 41250375  | 41250375  | Nonsense_Mutation | SNP | C | T | 61  | 433 | c.164G>A      | c.(163-165)TGG>TAG   | p.W55*        |
| Pat_70 | Post-Resistance | BMP5     | 653    | 37 | 6 | 55620459  | 55620459  | Missense_Mutation | SNP | G | T | 56  | 382 | c.1237C>A     | c.(1237-1239)CAC>AAC | p.H413N       |
| Pat_70 | Post-Resistance | C6orf182 | 285753 | 37 | 6 | 109468047 | 109468047 | Missense_Mutation | SNP | C | T | 19  | 174 | c.247C>T      | c.(247-249)CTT>TTT   | p.L83F        |
| Pat_70 | Post-Resistance | LAMA2    | 3908   | 37 | 6 | 129837370 | 129837370 | Missense_Mutation | SNP | C | T | 78  | 471 | c.9247C>T     | c.(9247-9249)CCG>TCG | p.P3083S      |
| Pat_70 | Post-Resistance | VNN1     | 8876   | 37 | 6 | 133013664 | 133013664 | Missense_Mutation | SNP | C | T | 19  | 103 | c.886G>A      | c.(886-888)GAG>AAG   | p.E296K       |
| Pat_70 | Post-Resistance | HECA     | 51696  | 37 | 6 | 139488245 | 139488245 | Missense_Mutation | SNP | G | A | 5   | 259 | c.1096G>A     | c.(1096-1098)GTG>ATG | p.V366M       |
| Pat_70 | Post-Resistance | C6orf118 | 168090 | 37 | 6 | 165715360 | 165715360 | Missense_Mutation | SNP | C | T | 26  | 228 | c.451G>A      | c.(451-453)GCT>ACT   | p.A151T       |
| Pat_70 | Post-Resistance | TLL2     | 83887  | 37 | 6 | 167755036 | 167755036 | Missense_Mutation | SNP | G | A | 55  | 278 | c.1648G>A     | c.(1648-1650)GAT>AAT | p.D550N       |

|        |                 |          |        |    |   |           |           |                   |     |    |    |     |     |                |                        |          |
|--------|-----------------|----------|--------|----|---|-----------|-----------|-------------------|-----|----|----|-----|-----|----------------|------------------------|----------|
| Pat_70 | Post-Resistance | DNAH11   | 8701   | 37 | 7 | 21913039  | 21913039  | Missense_Mutation | SNP | G  | A  | 79  | 199 | c.12136G>A     | c.(12136-12138)GAA>AAA | p.E4046K |
| Pat_70 | Post-Resistance | STK31    | 56164  | 37 | 7 | 23808674  | 23808674  | Missense_Mutation | SNP | G  | A  | 34  | 363 | c.1477G>A      | c.(1477-1479)GAA>AAA   | p.E493K  |
| Pat_70 | Post-Resistance | ADCY1    | 107    | 37 | 7 | 45717567  | 45717567  | Missense_Mutation | SNP | A  | T  | 128 | 376 | c.1705A>T      | c.(1705-1707)ATC>TTC   | p.I569F  |
| Pat_70 | Post-Resistance | TNS3     | 64759  | 37 | 7 | 47333423  | 47333423  | Missense_Mutation | SNP | C  | T  | 42  | 284 | c.3680G>A      | c.(3679-3681)GGA>GAA   | p.G1227E |
| Pat_70 | Post-Resistance | ZNF727   | 442319 | 37 | 7 | 63538758  | 63538758  | Missense_Mutation | SNP | G  | A  | 40  | 141 | c.1331G>A      | c.(1330-1332)AGA>AAA   | p.R444K  |
| Pat_70 | Post-Resistance | CCL24    | 6369   | 37 | 7 | 75442699  | 75442699  | Missense_Mutation | SNP | G  | A  | 23  | 230 | c.116C>T       | c.(115-117)TCC>TTC     | p.S39F   |
| Pat_70 | Post-Resistance | ZAN      | 7455   | 37 | 7 | 100349878 | 100349878 | Missense_Mutation | SNP | C  | T  | 6   | 466 | c.2150C>T      | c.(2149-2151)CCC>CTC   | p.P717L  |
| Pat_70 | Post-Resistance | CADPS2   | 93664  | 37 | 7 | 121985672 | 121985672 | Nonsense_Mutation | SNP | G  | A  | 29  | 335 | c.3568C>T      | c.(3568-3570)CGA>TGA   | p.R1190* |
| Pat_70 | Post-Resistance | JHDM1D   | 80853  | 37 | 7 | 139793899 | 139793899 | Missense_Mutation | SNP | G  | A  | 109 | 442 | c.2414C>T      | c.(2413-2415)TCC>TTC   | p.S805F  |
| Pat_70 | Post-Resistance | BRAF     | 673    | 37 | 7 | 140453136 | 140453136 | Missense_Mutation | SNP | A  | T  | 87  | 312 | c.1799T>A      | c.(1798-1800)GTG>GAG   | p.V600E  |
| Pat_70 | Post-Resistance | ZYX      | 7791   | 37 | 7 | 143085653 | 143085653 | Missense_Mutation | SNP | C  | T  | 37  | 305 | c.1216C>T      | c.(1216-1218)CAC>TAC   | p.H406Y  |
| Pat_70 | Post-Resistance | GALNTL5  | 168391 | 37 | 7 | 151711870 | 151711870 | Missense_Mutation | SNP | G  | A  | 33  | 304 | c.1168G>A      | c.(1168-1170)GAA>AAA   | p.E390K  |
| Pat_70 | Post-Resistance | ADAMDEC1 | 27299  | 37 | 8 | 24249837  | 24249837  | Missense_Mutation | SNP | C  | T  | 31  | 225 | c.151C>T       | c.(151-153)CAC>TAC     | p.H51Y   |
| Pat_70 | Post-Resistance | PXDNL    | 137902 | 37 | 8 | 52384783  | 52384783  | Missense_Mutation | SNP | C  | T  | 75  | 446 | c.776G>A       | c.(775-777)GGA>GAA     | p.G259E  |
| Pat_70 | Post-Resistance | PCMTD1   | 115294 | 37 | 8 | 52733185  | 52733186  | Missense_Mutation | DNP | CC | TT | 7   | 535 | c.799_800GG>AA | c.(799-801)GGG>AAG     | p.G267K  |
| Pat_70 | Post-Resistance | PKHD1L1  | 93035  | 37 | 8 | 110520058 | 110520058 | Missense_Mutation | SNP | C  | T  | 62  | 363 | c.11161C>T     | c.(11161-11163)CCT>TCT | p.P3721S |
| Pat_70 | Post-Resistance | CSMD3    | 114788 | 37 | 8 | 114185984 | 114185984 | Missense_Mutation | SNP | C  | T  | 65  | 611 | c.676G>A       | c.(676-678)GCT>ACT     | p.A226T  |
| Pat_70 | Post-Resistance | FER1L6   | 654463 | 37 | 8 | 125107259 | 125107259 | Missense_Mutation | SNP | G  | A  | 30  | 237 | c.4675G>A      | c.(4675-4677)GAT>AAT   | p.D1559N |
| Pat_70 | Post-Resistance | FAM135B  | 51059  | 37 | 8 | 139164898 | 139164898 | Missense_Mutation | SNP | G  | A  | 60  | 467 | c.1820C>T      | c.(1819-1821)TCA>TTA   | p.S607L  |
| Pat_70 | Post-Resistance | MAPK15   | 225689 | 37 | 8 | 144803941 | 144803941 | Missense_Mutation | SNP | G  | A  | 18  | 128 | c.1349G>A      | c.(1348-1350)GGA>GAA   | p.G450E  |
| Pat_70 | Post-Resistance | CNTLN    | 54875  | 37 | 9 | 17330685  | 17330685  | Missense_Mutation | SNP | C  | T  | 79  | 611 | c.1397C>T      | c.(1396-1398)TCT>TTT   | p.S466F  |
| Pat_70 | Post-Resistance | TAF1L    | 138474 | 37 | 9 | 32632655  | 32632655  | Missense_Mutation | SNP | G  | A  | 58  | 352 | c.2923C>T      | c.(2923-2925)CCC>TCC   | p.P975S  |
| Pat_70 | Post-Resistance | RNF20    | 56254  | 37 | 9 | 104302572 | 104302572 | Missense_Mutation | SNP | C  | T  | 76  | 578 | c.217C>T       | c.(217-219)CGT>TGT     | p.R73C   |
| Pat_70 | Post-Resistance | OR13F1   | 138805 | 37 | 9 | 107266613 | 107266613 | Nonsense_Mutation | SNP | C  | T  | 36  | 238 | c.70C>T        | c.(70-72)CAG>TAG       | p.Q24*   |
| Pat_70 | Post-Resistance | OR13C9   | 286362 | 37 | 9 | 107380230 | 107380230 | Missense_Mutation | SNP | G  | A  | 55  | 380 | c.256C>T       | c.(256-258)CTT>TTT     | p.L86F   |
| Pat_70 | Post-Resistance | TXNDC8   | 255220 | 37 | 9 | 113096507 | 113096507 | Missense_Mutation | SNP | G  | A  | 32  | 219 | c.118C>T       | c.(118-120)CCT>TCT     | p.P40S   |
| Pat_70 | Post-Resistance | DBC1     | 1620   | 37 | 9 | 121929721 | 121929721 | Missense_Mutation | SNP | G  | A  | 95  | 568 | c.1927C>T      | c.(1927-1929)CCC>TCC   | p.P643S  |
| Pat_70 | Post-Resistance | C9orf119 | 375757 | 37 | 9 | 131038446 | 131038446 | Missense_Mutation | SNP | G  | A  | 35  | 200 | c.22G>A        | c.(22-24)GAC>AAC       | p.D8N    |
| Pat_70 | Post-Resistance | COL5A1   | 1289   | 37 | 9 | 137715280 | 137715280 | Missense_Mutation | SNP | G  | A  | 56  | 356 | c.4663G>A      | c.(4663-4665)GGT>AGT   | p.G1555S |
| Pat_70 | Post-Resistance | CACNA1B  | 774    | 37 | 9 | 140948299 | 140948299 | Missense_Mutation | SNP | C  | T  | 113 | 662 | c.3809C>T      | c.(3808-3810)GCT>GTT   | p.A1270V |
| Pat_70 | Post-Resistance | NLGN4X   | 57502  | 37 | X | 6069369   | 6069369   | Missense_Mutation | SNP | C  | T  | 69  | 407 | c.139G>A       | c.(139-141)GTT>ATT     | p.V47I   |
| Pat_70 | Post-Resistance | TBL1X    | 6907   | 37 | X | 9673050   | 9673050   | Missense_Mutation | SNP | G  | A  | 89  | 501 | c.1132G>A      | c.(1132-1134)GAC>AAC   | p.D378N  |
| Pat_70 | Post-Resistance | FRMPD4   | 9758   | 37 | X | 12734739  | 12734739  | Missense_Mutation | SNP | G  | A  | 71  | 523 | c.2161G>A      | c.(2161-2163)GAT>AAT   | p.D721N  |
| Pat_70 | Post-Resistance | FANCB    | 2187   | 37 | X | 14882788  | 14882789  | Missense_Mutation | DNP | CC | TT | 57  | 333 | c.844_845GG>AA | c.(844-846)GGA>AAA     | p.G282K  |
| Pat_70 | Post-Resistance | FANCB    | 2187   | 37 | X | 14883544  | 14883544  | Missense_Mutation | SNP | C  | T  | 40  | 273 | c.89G>A        | c.(88-90)GGA>GAA       | p.G30E   |
| Pat_70 | Post-Resistance | ASB9     | 140462 | 37 | X | 15262747  | 15262747  | Missense_Mutation | SNP | G  | A  | 50  | 244 | c.766C>T       | c.(766-768)CCT>TCT     | p.P256S  |
| Pat_70 | Post-Resistance | EIF1AX   | 1964   | 37 | X | 20156735  | 20156735  | Missense_Mutation | SNP | C  | T  | 62  | 357 | c.22G>A        | c.(22-24)GGA>AGA       | p.G8R    |
| Pat_70 | Post-Resistance | DMD      | 1756   | 37 | X | 32466644  | 32466644  | Missense_Mutation | SNP | C  | T  | 40  | 232 | c.3715G>A      | c.(3715-3717)GAA>AAA   | p.E1239K |
| Pat_70 | Post-Resistance | FAM47C   | 442444 | 37 | X | 37028425  | 37028425  | Missense_Mutation | SNP | A  | G  | 9   | 661 | c.1942A>G      | c.(1942-1944)AAT>GAT   | p.N648D  |
| Pat_70 | Post-Resistance | ATP6AP2  | 10159  | 37 | X | 40456507  | 40456507  | Missense_Mutation | SNP | C  | T  | 26  | 247 | c.307C>T       | c.(307-309)CCT>TCT     | p.P103S  |
| Pat_70 | Post-Resistance | TEX11    | 56159  | 37 | X | 69849480  | 69849480  | Missense_Mutation | SNP | G  | A  | 45  | 453 | c.1634C>T      | c.(1633-1635)GCT>GTT   | p.A545V  |
| Pat_70 | Post-Resistance | SERPINA7 | 6906   | 37 | X | 105280609 | 105280609 | Missense_Mutation | SNP | C  | A  | 104 | 644 | c.441G>T       | c.(439-441)TTG>TTT     | p.L147F  |
| Pat_70 | Post-Resistance | RNF128   | 79589  | 37 | X | 106016347 | 106016347 | Missense_Mutation | SNP | C  | T  | 33  | 196 | c.689C>T       | c.(688-690)TCT>TTT     | p.S230F  |
| Pat_70 | Post-Resistance | ODZ1     | 10178  | 37 | X | 123554529 | 123554529 | Missense_Mutation | SNP | C  | T  | 63  | 349 | c.4593G>A      | c.(4591-4593)ATG>ATA   | p.M1531I |
| Pat_70 | Post-Resistance | ODZ1     | 10178  | 37 | X | 124028163 | 124028163 | Nonsense_Mutation | SNP | G  | A  | 52  | 362 | c.517C>T       | c.(517-519)CAA>TAA     | p.Q173*  |
| Pat_70 | Post-Resistance | BCORL1   | 63035  | 37 | X | 129185837 | 129185837 | Missense_Mutation | SNP | G  | A  | 62  | 615 | c.4699G>A      | c.(4699-4701)GAA>AAA   | p.E1567K |
| Pat_70 | Post-Resistance | MAGEC1   | 9947   | 37 | X | 140994583 | 140994583 | Nonsense_Mutation | SNP | A  | T  | 9   | 575 | c.1393A>T      | c.(1393-1395)AGA>TGA   | p.R465*  |

|        |                 |          |           |    |    |           |           |                   |     |    |    |     |     |                                      |                      |          |
|--------|-----------------|----------|-----------|----|----|-----------|-----------|-------------------|-----|----|----|-----|-----|--------------------------------------|----------------------|----------|
| Pat_70 | Post-Resistance | CNGA2    | 1260      | 37 | X  | 150912105 | 150912105 | Missense_Mutation | SNP | A  | G  | 42  | 356 | c.1130A>G                            | c.(1129-1131)AAC>AGC | p.N377S  |
| Pat_70 | Post-Resistance | GABRE    | 2564      | 37 | X  | 151131042 | 151131042 | Missense_Mutation | SNP | G  | A  | 65  | 494 | c.416C>T                             | c.(415-417)TCT>TTT   | p.S139F  |
| Pat_70 | Post-Resistance | CSAG1    | 158511    | 37 | X  | 151908796 | 151908796 | Missense_Mutation | SNP | C  | T  | 86  | 520 | c.35C>T                              | c.(34-36)ACT>ATT     | p.T12I   |
| Pat_73 | Pre-Treatment   | PGD      | 5226      | 37 | 1  | 10477446  | 10477446  | Missense_Mutation | SNP | C  | T  | 156 | 265 | c.989C>T                             | c.(988-990)TCC>TTC   | p.S330F  |
| Pat_73 | Pre-Treatment   | CASZ1    | 54897     | 37 | 1  | 10713493  | 10713493  | Missense_Mutation | SNP | G  | A  | 27  | 30  | c.2621C>T                            | c.(2620-2622)TCG>TTG | p.S874L  |
| Pat_73 | Pre-Treatment   | SPEN     | 23013     | 37 | 1  | 16256981  | 16256981  | Missense_Mutation | SNP | C  | T  | 10  | 88  | c.4246C>T                            | c.(4246-4248)CGT>TGT | p.R1416C |
| Pat_73 | Pre-Treatment   | MRTO4    | 51154     | 37 | 1  | 19582478  | 19582478  | Missense_Mutation | SNP | A  | G  | 54  | 69  | c.124A>G                             | c.(124-126)ATC>GTC   | p.I42V   |
| Pat_73 | Pre-Treatment   | RPS6KA1  | 6195      | 37 | 1  | 26883501  | 26883501  | Missense_Mutation | SNP | C  | T  | 71  | 113 | c.994C>T                             | c.(994-996)CGT>TGT   | p.R332C  |
| Pat_73 | Pre-Treatment   | HIVEP3   | 59269     | 37 | 1  | 41976579  | 41976579  | Missense_Mutation | SNP | G  | A  | 4   | 96  | c.6764C>T                            | c.(6763-6765)TCG>TTG | p.S2255L |
| Pat_73 | Pre-Treatment   | KIAA0467 | 23334     | 37 | 1  | 43911909  | 43911910  | Missense_Mutation | DNP | CC | TT | 141 | 307 | :.6279_6280CC>T3277-6282)ATCCTC>ATTT |                      | p.L2094F |
| Pat_73 | Pre-Treatment   | CYP4X1   | 260293    | 37 | 1  | 47505108  | 47505108  | Missense_Mutation | SNP | C  | T  | 90  | 100 | c.977C>T                             | c.(976-978)TCC>TTC   | p.S326F  |
| Pat_73 | Pre-Treatment   | CC2D1B   | 200014    | 37 | 1  | 52823465  | 52823465  | Missense_Mutation | SNP | G  | A  | 25  | 23  | c.1585C>T                            | c.(1585-1587)CCG>TCG | p.P529S  |
| Pat_73 | Pre-Treatment   | C1orf177 | 163747    | 37 | 1  | 55282732  | 55282732  | Missense_Mutation | SNP | G  | A  | 53  | 55  | c.1121G>A                            | c.(1120-1122)CGA>CAA | p.R374Q  |
| Pat_73 | Pre-Treatment   | DHCR24   | 1718      | 37 | 1  | 55337259  | 55337259  | Missense_Mutation | SNP | C  | T  | 4   | 104 | c.640G>A                             | c.(640-642)GTA>ATA   | p.V214I  |
| Pat_73 | Pre-Treatment   | RAVER2   | 55225     | 37 | 1  | 65243395  | 65243395  | Nonsense_Mutation | SNP | C  | T  | 51  | 91  | c.406C>T                             | c.(406-408)CAG>TAG   | p.Q136*  |
| Pat_73 | Pre-Treatment   | C1orf173 | 127254    | 37 | 1  | 75038267  | 75038267  | Missense_Mutation | SNP | C  | T  | 88  | 151 | c.3127G>A                            | c.(3127-3129)GAA>AAA | p.E1043K |
| Pat_73 | Pre-Treatment   | BCAR3    | 8412      | 37 | 1  | 94140384  | 94140384  | Missense_Mutation | SNP | C  | T  | 4   | 60  | c.103G>A                             | c.(103-105)GCT>ACT   | p.A35T   |
| Pat_73 | Pre-Treatment   | CD53     | 963       | 37 | 1  | 111440482 | 111440482 | Missense_Mutation | SNP | G  | A  | 77  | 135 | c.556G>A                             | c.(556-558)GGA>AGA   | p.G186R  |
| Pat_73 | Pre-Treatment   | NBPF9    | 400818    | 37 | 1  | 144617177 | 144617177 | Missense_Mutation | SNP | G  | A  | 10  | 580 | c.203G>A                             | c.(202-204)AGA>AAA   | p.R68K   |
| Pat_73 | Pre-Treatment   | NBPF9    | 400818    | 37 | 1  | 144815953 | 144815953 | Missense_Mutation | SNP | A  | G  | 19  | 432 | c.1324A>G                            | c.(1324-1326)AAT>GAT | p.N442D  |
| Pat_73 | Pre-Treatment   | NBPF10   | 100132406 | 37 | 1  | 145360584 | 145360584 | Missense_Mutation | SNP | G  | A  | 8   | 53  | c.9434G>A                            | c.(9433-9435)GGG>GAG | p.G3145E |
| Pat_73 | Pre-Treatment   | TCHH     | 7062      | 37 | 1  | 152082710 | 152082710 | Missense_Mutation | SNP | C  | G  | 5   | 202 | c.2983G>C                            | c.(2983-2985)GAG>CAG | p.E995Q  |
| Pat_73 | Pre-Treatment   | HRNR     | 388697    | 37 | 1  | 152188460 | 152188460 | Missense_Mutation | SNP | G  | A  | 73  | 842 | c.5645C>T                            | c.(5644-5646)TCT>TTT | p.S1882F |
| Pat_73 | Pre-Treatment   | FLG      | 2312      | 37 | 1  | 152279804 | 152279804 | Missense_Mutation | SNP | C  | T  | 304 | 411 | c.7558G>A                            | c.(7558-7560)GAT>AAT | p.D2520N |
| Pat_73 | Pre-Treatment   | CRNN     | 49860     | 37 | 1  | 152382749 | 152382749 | Missense_Mutation | SNP | G  | A  | 9   | 520 | c.809C>T                             | c.(808-810)ACC>ATC   | p.T270I  |
| Pat_73 | Pre-Treatment   | ADAR     | 103       | 37 | 1  | 154574460 | 154574460 | Missense_Mutation | SNP | C  | A  | 4   | 115 | c.658G>T                             | c.(658-660)GCC>TCC   | p.A220S  |
| Pat_73 | Pre-Treatment   | ADAR     | 103       | 37 | 1  | 154574475 | 154574475 | Missense_Mutation | SNP | C  | T  | 5   | 133 | c.643G>A                             | c.(643-645)GGT>AGT   | p.G215S  |
| Pat_73 | Pre-Treatment   | GON4L    | 54856     | 37 | 1  | 155774924 | 155774924 | Missense_Mutation | SNP | A  | C  | 54  | 63  | c.1461T>G                            | c.(1459-1461)GAT>GAG | p.D487E  |
| Pat_73 | Pre-Treatment   | MAEL     | 84944     | 37 | 1  | 166959004 | 166959004 | Missense_Mutation | SNP | G  | A  | 27  | 36  | c.163G>A                             | c.(163-165)GCA>ACA   | p.A55T   |
| Pat_73 | Pre-Treatment   | MAEL     | 84944     | 37 | 1  | 166990989 | 166990989 | Missense_Mutation | SNP | C  | T  | 73  | 88  | c.1202C>T                            | c.(1201-1203)TCC>TTC | p.S401F  |
| Pat_73 | Pre-Treatment   | SLC9A11  | 284525    | 37 | 1  | 173526564 | 173526564 | Missense_Mutation | SNP | C  | G  | 103 | 172 | c.1130G>C                            | c.(1129-1131)TGG>TCG | p.W377S  |
| Pat_73 | Pre-Treatment   | RNPEP    | 6051      | 37 | 1  | 201969084 | 201969084 | Missense_Mutation | SNP | A  | G  | 39  | 47  | c.1145A>G                            | c.(1144-1146)CAC>CGC | p.H382R  |
| Pat_73 | Pre-Treatment   | PLXNA2   | 5362      | 37 | 1  | 208201419 | 208201419 | Missense_Mutation | SNP | C  | T  | 6   | 398 | c.5524G>A                            | c.(5524-5526)GTG>ATG | p.V1842M |
| Pat_73 | Pre-Treatment   | PLXNA2   | 5362      | 37 | 1  | 208216471 | 208216471 | Missense_Mutation | SNP | G  | A  | 4   | 163 | c.3952C>T                            | c.(3952-3954)CGT>TGT | p.R1318C |
| Pat_73 | Pre-Treatment   | LAMB3    | 3914      | 37 | 1  | 209804019 | 209804019 | Missense_Mutation | SNP | G  | A  | 36  | 28  | c.884C>T                             | c.(883-885)CCC>CTC   | p.P295L  |
| Pat_73 | Pre-Treatment   | SUSD4    | 55061     | 37 | 1  | 223465964 | 223465964 | Missense_Mutation | SNP | G  | A  | 5   | 127 | c.178A>T                             | c.(178-180)CCC>TCC   | p.P60S   |
| Pat_73 | Pre-Treatment   | OR2M1P   | 388762    | 37 | 1  | 248285776 | 248285776 | Missense_Mutation | SNP | A  | C  | 5   | 378 | c.339A>C                             | c.(337-339)TTA>TTC   | p.L113F  |
| Pat_73 | Pre-Treatment   | OR2T10   | 127069    | 37 | 1  | 248756578 | 248756578 | Missense_Mutation | SNP | C  | T  | 85  | 8   | c.492G>A                             | c.(490-492)ATG>ATA   | p.M164I  |
| Pat_73 | Pre-Treatment   | DHTKD1   | 55526     | 37 | 10 | 12129565  | 12129565  | Missense_Mutation | SNP | C  | T  | 4   | 87  | c.554C>T                             | c.(553-555)TCG>TTG   | p.S185L  |
| Pat_73 | Pre-Treatment   | LYZL1    | 84569     | 37 | 10 | 29578087  | 29578087  | Nonsense_Mutation | SNP | G  | A  | 39  | 16  | c.41G>A                              | c.(40-42)TGG>TAG     | p.W14*   |
| Pat_73 | Pre-Treatment   | ZNF248   | 57209     | 37 | 10 | 38121877  | 38121877  | Missense_Mutation | SNP | G  | A  | 17  | 4   | c.406C>T                             | c.(406-408)CCC>TCC   | p.P136S  |
| Pat_73 | Pre-Treatment   | SYT15    | 83849     | 37 | 10 | 46968629  | 46968629  | Missense_Mutation | SNP | G  | A  | 10  | 5   | c.307C>T                             | c.(307-309)CCC>TCC   | p.P103S  |
| Pat_73 | Pre-Treatment   | ZWINT    | 11130     | 37 | 10 | 58118208  | 58118208  | Missense_Mutation | SNP | G  | T  | 8   | 77  | c.805C>A                             | c.(805-807)CAA>AAA   | p.Q269K  |
| Pat_73 | Pre-Treatment   | CYP2C9   | 1559      | 37 | 10 | 96702071  | 96702071  | Missense_Mutation | SNP | C  | T  | 88  | 21  | c.454C>T                             | c.(454-456)CTT>TTT   | p.L152F  |
| Pat_73 | Pre-Treatment   | CYP2C8   | 1558      | 37 | 10 | 96797060  | 96797060  | Missense_Mutation | SNP | C  | T  | 17  | 9   | c.1298G>A                            | c.(1297-1299)CGA>CAA | p.R433Q  |
| Pat_73 | Pre-Treatment   | LBX1     | 10660     | 37 | 10 | 102987272 | 102987272 | Missense_Mutation | SNP | C  | T  | 3   | 48  | c.601G>A                             | c.(601-603)GGG>AGG   | p.G201R  |
| Pat_73 | Pre-Treatment   | C10orf79 | 80217     | 37 | 10 | 105920914 | 105920914 | Missense_Mutation | SNP | G  | A  | 25  | 13  | c.3421C>T                            | c.(3421-3423)CCT>TCT | p.P1141S |

|        |               |          |        |    |    |           |           |                   |     |    |    |     |     |                |                        |               |
|--------|---------------|----------|--------|----|----|-----------|-----------|-------------------|-----|----|----|-----|-----|----------------|------------------------|---------------|
| Pat_73 | Pre-Treatment | HBE1     | 3046   | 37 | 11 | 5290788   | 5290788   | Missense_Mutation | SNP | A  | T  | 65  | 109 | c.211T>A       | c.(211-213)TCC>ACC     | p.S71T        |
| Pat_73 | Pre-Treatment | CCKBR    | 887    | 37 | 11 | 6281307   | 6281307   | Missense_Mutation | SNP | G  | A  | 22  | 31  | c.149G>A       | c.(148-150)CGA>CAA     | p.R50Q        |
| Pat_73 | Pre-Treatment | OR4C13   | 283092 | 37 | 11 | 49974138  | 49974138  | Missense_Mutation | SNP | C  | T  | 249 | 340 | c.164C>T       | c.(163-165)TCC>TTC     | p.S55F        |
| Pat_73 | Pre-Treatment | TMEM109  | 79073  | 37 | 11 | 60689470  | 60689470  | Missense_Mutation | SNP | C  | T  | 5   | 135 | c.565C>T       | c.(565-567)CTC>TTC     | p.L189F       |
| Pat_73 | Pre-Treatment | AHNAK    | 79026  | 37 | 11 | 62295522  | 62295522  | Missense_Mutation | SNP | C  | T  | 10  | 728 | c.6367G>A      | c.(6367-6369)GAC>AAC   | p.D2123N      |
| Pat_73 | Pre-Treatment | AHNAK    | 79026  | 37 | 11 | 62295549  | 62295549  | Missense_Mutation | SNP | C  | T  | 8   | 625 | c.6340G>A      | c.(6340-6342)GCC>ACC   | p.A2114T      |
| Pat_73 | Pre-Treatment | AHNAK    | 79026  | 37 | 11 | 62296070  | 62296070  | Missense_Mutation | SNP | A  | G  | 11  | 668 | c.5819T>C      | c.(5818-5820)GTG>GCG   | p.V1940A      |
| Pat_73 | Pre-Treatment | AHNAK    | 79026  | 37 | 11 | 62296147  | 62296147  | Missense_Mutation | SNP | G  | C  | 8   | 545 | c.5742C>G      | c.(5740-5742)GAC>GAG   | p.D1914E      |
| Pat_73 | Pre-Treatment | SF1      | 7536   | 37 | 11 | 64535657  | 64535657  | Missense_Mutation | SNP | C  | T  | 4   | 101 | c.989G>A       | c.(988-990)GGC>GAC     | p.G330D       |
| Pat_73 | Pre-Treatment | RPS6KB2  | 6199   | 37 | 11 | 67197022  | 67197022  | Missense_Mutation | SNP | G  | A  | 3   | 53  | c.265G>A       | c.(265-267)GGC>AGC     | p.G89S        |
| Pat_73 | Pre-Treatment | ATM      | 472    | 37 | 11 | 108218025 | 108218026 | Missense_Mutation | DNP | TG | CT | 56  | 14  | .8604_8605TG>C | 602-8607)CTTGGT>CTC1   | p.G2869C      |
| Pat_73 | Pre-Treatment | TMEM25   | 84866  | 37 | 11 | 118404984 | 118404984 | Missense_Mutation | SNP | T  | C  | 37  | 45  | c.941T>C       | c.(940-942)GTG>GCG     | p.V314A       |
| Pat_73 | Pre-Treatment | SORL1    | 6653   | 37 | 11 | 121461820 | 121461820 | Nonsense_Mutation | SNP | C  | T  | 4   | 181 | c.4324C>T      | c.(4324-4326)CGA>TGA   | p.R1442*      |
| Pat_73 | Pre-Treatment | ST3GAL4  | 6484   | 37 | 11 | 126279224 | 126279224 | Missense_Mutation | SNP | G  | A  | 4   | 176 | c.689G>A       | c.(688-690)CGG>CAG     | p.R230Q       |
| Pat_73 | Pre-Treatment | ANO2     | 57101  | 37 | 12 | 5963247   | 5963247   | Missense_Mutation | SNP | C  | T  | 173 | 236 | c.583G>A       | c.(583-585)GAG>AAG     | p.E195K       |
| Pat_73 | Pre-Treatment | CD163    | 9332   | 37 | 12 | 7640125   | 7640125   | Missense_Mutation | SNP | C  | T  | 89  | 103 | c.1880G>A      | c.(1879-1881)GGA>GAA   | p.G627E       |
| Pat_73 | Pre-Treatment | CD163    | 9332   | 37 | 12 | 7640497   | 7640497   | Missense_Mutation | SNP | C  | T  | 58  | 91  | c.1607G>A      | c.(1606-1608)GGA>GAA   | p.G536E       |
| Pat_73 | Pre-Treatment | PLCZ1    | 89869  | 37 | 12 | 18876451  | 18876451  | Missense_Mutation | SNP | C  | T  | 43  | 67  | c.161G>A       | c.(160-162)AGA>AAA     | p.R54K        |
| Pat_73 | Pre-Treatment | ABCC9    | 10060  | 37 | 12 | 21954063  | 21954063  | Missense_Mutation | SNP | C  | T  | 51  | 83  | c.4565G>A      | c.(4564-4566)GGA>GAA   | p.G1522E      |
| Pat_73 | Pre-Treatment | FAM113B  | 91523  | 37 | 12 | 47629931  | 47629931  | Missense_Mutation | SNP | C  | T  | 108 | 136 | c.1085C>T      | c.(1084-1086)TCA>TTA   | p.S362L       |
| Pat_73 | Pre-Treatment | MLL2     | 8085   | 37 | 12 | 49433006  | 49433006  | Missense_Mutation | SNP | G  | A  | 17  | 142 | c.8365C>T      | c.(8365-8367)CGG>TGG   | p.R2789W      |
| Pat_73 | Pre-Treatment | CPM      | 1368   | 37 | 12 | 69279577  | 69279577  | Missense_Mutation | SNP | C  | T  | 4   | 242 | c.253G>A       | c.(253-255)GAT>AAT     | p.D85N        |
| Pat_73 | Pre-Treatment | STAB2    | 55576  | 37 | 12 | 104049246 | 104049246 | Missense_Mutation | SNP | G  | A  | 41  | 64  | c.1621G>A      | c.(1621-1623)GGA>AGA   | p.G541R       |
| Pat_73 | Pre-Treatment | GLT8D2   | 83468  | 37 | 12 | 104388192 | 104388192 | Missense_Mutation | SNP | C  | A  | 15  | 87  | c.688G>T       | c.(688-690)GTG>TTG     | p.V230L       |
| Pat_73 | Pre-Treatment | POLR3B   | 55703  | 37 | 12 | 106850963 | 106850963 | Nonsense_Mutation | SNP | C  | T  | 4   | 177 | c.2341C>T      | c.(2341-2343)CGA>TGA   | p.R781*       |
| Pat_73 | Pre-Treatment | C12orf51 | 283450 | 37 | 12 | 112605243 | 112605243 | Missense_Mutation | SNP | G  | A  | 31  | 29  | c.11146C>T     | c.(11146-11148)CCG>TCG | p.P3716S      |
| Pat_73 | Pre-Treatment | GCN1L1   | 10985  | 37 | 12 | 120592781 | 120592781 | Missense_Mutation | SNP | C  | T  | 4   | 164 | c.3694G>A      | c.(3694-3696)GAA>AAA   | p.E1232K      |
| Pat_73 | Pre-Treatment | ACADS    | 35     | 37 | 12 | 121176225 | 121176225 | Missense_Mutation | SNP | A  | G  | 37  | 49  | c.767A>G       | c.(766-768)GAG>GGG     | p.E256G       |
| Pat_73 | Pre-Treatment | MLXIP    | 22877  | 37 | 12 | 122614641 | 122614641 | Missense_Mutation | SNP | C  | T  | 19  | 18  | c.892C>T       | c.(892-894)CCC>TCC     | p.P298S       |
| Pat_73 | Pre-Treatment | SACS     | 26278  | 37 | 13 | 23907979  | 23907979  | Missense_Mutation | SNP | G  | A  | 50  | 100 | c.10036C>T     | c.(10036-10038)CCT>TCT | p.P3346S      |
| Pat_73 | Pre-Treatment | RNF6     | 6049   | 37 | 13 | 26788626  | 26788626  | Missense_Mutation | SNP | G  | A  | 4   | 224 | c.1393C>T      | c.(1393-1395)CGT>TGT   | p.R465C       |
| Pat_73 | Pre-Treatment | DZIP1    | 22873  | 37 | 13 | 96239844  | 96239844  | Missense_Mutation | SNP | C  | T  | 5   | 402 | c.2167G>A      | c.(2167-2169)GGG>AGG   | p.G723R       |
| Pat_73 | Pre-Treatment | RIPK3    | 11035  | 37 | 14 | 24809028  | 24809028  | Missense_Mutation | SNP | G  | A  | 5   | 223 | c.5C>T         | c.(4-6)TCG>TTG         | p.S2L         |
| Pat_73 | Pre-Treatment | CDKL1    | 8814   | 37 | 14 | 50845005  | 50845005  | Missense_Mutation | SNP | G  | A  | 23  | 34  | c.1244C>T      | c.(1243-1245)CCT>CTT   | p.P415L       |
| Pat_73 | Pre-Treatment | SNAPC1   | 6617   | 37 | 14 | 62248986  | 62248986  | Missense_Mutation | SNP | C  | T  | 4   | 156 | c.847C>T       | c.(847-849)CGT>TGT     | p.R283C       |
| Pat_73 | Pre-Treatment | RDH11    | 51109  | 37 | 14 | 68159310  | 68159310  | Missense_Mutation | SNP | C  | T  | 70  | 182 | c.194G>A       | c.(193-195)GGA>GAA     | p.G65E        |
| Pat_73 | Pre-Treatment | ADAM21P1 | 145241 | 37 | 14 | 70713206  | 70713206  | Missense_Mutation | SNP | C  | T  | 60  | 117 | c.662G>A       | c.(661-663)GGA>GAA     | p.G221E       |
| Pat_73 | Pre-Treatment | TMEM63C  | 57156  | 37 | 14 | 77709269  | 77709269  | Missense_Mutation | SNP | T  | A  | 54  | 57  | c.1211T>A      | c.(1210-1212)TTC>TAC   | p.F404Y       |
| Pat_73 | Pre-Treatment | ATXN3    | 4287   | 37 | 14 | 92548769  | 92548769  | Missense_Mutation | SNP | T  | C  | 75  | 97  | c.650A>G       | c.(649-651)GAT>GGT     | p.D217G       |
| Pat_73 | Pre-Treatment | CPSF2    | 53981  | 37 | 14 | 92621668  | 92621668  | Splice_Site       | SNP | G  | A  | 26  | 30  | c.1442_splice  | c.e11+1                | p.K481_splice |
| Pat_73 | Pre-Treatment | BRF1     | 2972   | 37 | 14 | 105693018 | 105693018 | Missense_Mutation | SNP | C  | T  | 4   | 162 | c.868G>A       | c.(868-870)GAC>AAC     | p.D290N       |
| Pat_73 | Pre-Treatment | RYR3     | 6263   | 37 | 15 | 33945019  | 33945019  | Missense_Mutation | SNP | G  | A  | 4   | 137 | c.4243G>A      | c.(4243-4245)GTG>ATG   | p.V1415M      |
| Pat_73 | Pre-Treatment | FBN1     | 2200   | 37 | 15 | 48812948  | 48812948  | Missense_Mutation | SNP | G  | A  | 55  | 53  | c.1055C>T      | c.(1054-1056)TCC>TTC   | p.S352F       |
| Pat_73 | Pre-Treatment | TMOD3    | 29766  | 37 | 15 | 52161474  | 52161474  | Missense_Mutation | SNP | C  | T  | 5   | 156 | c.187C>T       | c.(187-189)CCA>TCA     | p.P63S        |
| Pat_73 | Pre-Treatment | UNC13C   | 440279 | 37 | 15 | 54847703  | 54847703  | Missense_Mutation | SNP | C  | T  | 4   | 45  | c.5951C>T      | c.(5950-5952)ACC>ATC   | p.T1984I      |
| Pat_73 | Pre-Treatment | FAM81A   | 145773 | 37 | 15 | 59809020  | 59809020  | Missense_Mutation | SNP | G  | A  | 10  | 17  | c.963G>A       | c.(961-963)ATG>ATA     | p.M321I       |
| Pat_73 | Pre-Treatment | PPIB     | 5479   | 37 | 15 | 64449091  | 64449091  | Missense_Mutation | SNP | C  | G  | 4   | 71  | c.361G>C       | c.(361-363)GAG>CAG     | p.E121Q       |

|        |               |          |        |    |    |          |          |                   |     |   |   |     |     |              |                      |               |
|--------|---------------|----------|--------|----|----|----------|----------|-------------------|-----|---|---|-----|-----|--------------|----------------------|---------------|
| Pat_73 | Pre-Treatment | ACAN     | 176    | 37 | 15 | 89400834 | 89400834 | Missense_Mutation | SNP | C | T | 107 | 175 | c.5018C>T    | c.(5017-5019)TCC>TTC | p.S1673F      |
| Pat_73 | Pre-Treatment | C15orf58 | 390637 | 37 | 15 | 90785020 | 90785020 | Missense_Mutation | SNP | G | A | 81  | 113 | c.880G>A     | c.(880-882)GGA>AGA   | p.G294R       |
| Pat_73 | Pre-Treatment | SOLH     | 6650   | 37 | 16 | 601520   | 601520   | Missense_Mutation | SNP | G | A | 4   | 213 | c.2201G>A    | c.(2200-2202)CGG>CAG | p.R734Q       |
| Pat_73 | Pre-Treatment | CCNF     | 899    | 37 | 16 | 2498959  | 2498959  | Missense_Mutation | SNP | G | A | 4   | 176 | c.1198G>A    | c.(1198-1200)GCC>ACC | p.A400T       |
| Pat_73 | Pre-Treatment | PRSS33   | 260429 | 37 | 16 | 2836101  | 2836101  | Missense_Mutation | SNP | C | T | 23  | 41  | c.68G>A      | c.(67-69)AGG>AAG     | p.R23K        |
| Pat_73 | Pre-Treatment | SYT17    | 51760  | 37 | 16 | 19236068 | 19236068 | Missense_Mutation | SNP | T | C | 54  | 68  | c.1136T>C    | c.(1135-1137)TTC>TCC | p.F379S       |
| Pat_73 | Pre-Treatment | UMOD     | 7369   | 37 | 16 | 20360534 | 20360534 | Missense_Mutation | SNP | C | T | 17  | 39  | c.89G>A      | c.(88-90)AGA>AAA     | p.R30K        |
| Pat_73 | Pre-Treatment | ACSM1    | 116285 | 37 | 16 | 20681298 | 20681298 | Missense_Mutation | SNP | G | A | 3   | 42  | c.763C>T     | c.(763-765)CGG>TGG   | p.R255W       |
| Pat_73 | Pre-Treatment | OTOA     | 146183 | 37 | 16 | 21739697 | 21739697 | Missense_Mutation | SNP | G | A | 41  | 83  | c.2152G>A    | c.(2152-2154)GAC>AAC | p.D718N       |
| Pat_73 | Pre-Treatment | GTF3C1   | 2975   | 37 | 16 | 27472727 | 27472727 | Missense_Mutation | SNP | G | A | 4   | 126 | c.6274C>T    | c.(6274-6276)CGG>TGG | p.R2092W      |
| Pat_73 | Pre-Treatment | RABEP2   | 79874  | 37 | 16 | 28935769 | 28935769 | Missense_Mutation | SNP | G | A | 5   | 237 | c.229C>T     | c.(229-231)CGG>TGG   | p.R77W        |
| Pat_73 | Pre-Treatment | ARMC5    | 79798  | 37 | 16 | 31473871 | 31473871 | Missense_Mutation | SNP | C | T | 3   | 56  | c.1003C>T    | c.(1003-1005)CGG>TGG | p.R335W       |
| Pat_73 | Pre-Treatment | ZNF267   | 10308  | 37 | 16 | 31927690 | 31927690 | Missense_Mutation | SNP | G | A | 6   | 200 | c.2120G>A    | c.(2119-2121)CGG>CAG | p.R707Q       |
| Pat_73 | Pre-Treatment | VPS35    | 55737  | 37 | 16 | 46714582 | 46714582 | Splice_Site       | SNP | C | A | 13  | 4   | c.506_splice | c.e5+1               | p.D169_splice |
| Pat_73 | Pre-Treatment | MMP2     | 4313   | 37 | 16 | 55516945 | 55516945 | Missense_Mutation | SNP | C | T | 121 | 43  | c.278C>T     | c.(277-279)ACC>ATC   | p.T93I        |
| Pat_73 | Pre-Treatment | GOT2     | 2806   | 37 | 16 | 58752490 | 58752490 | Missense_Mutation | SNP | G | A | 4   | 126 | c.538C>T     | c.(538-540)CGG>TGG   | p.R180W       |
| Pat_73 | Pre-Treatment | GLG1     | 2734   | 37 | 16 | 74502864 | 74502864 | Missense_Mutation | SNP | G | A | 45  | 113 | c.2416C>T    | c.(2416-2418)CGT>TGT | p.R806C       |
| Pat_73 | Pre-Treatment | CHST6    | 4166   | 37 | 16 | 75513534 | 75513534 | Missense_Mutation | SNP | C | T | 4   | 79  | c.193G>A     | c.(193-195)GAC>AAC   | p.D65N        |
| Pat_73 | Pre-Treatment | ANKRD11  | 29123  | 37 | 16 | 89349010 | 89349010 | Missense_Mutation | SNP | C | T | 27  | 29  | c.3940G>A    | c.(3940-3942)GAG>AAG | p.E1314K      |
| Pat_73 | Pre-Treatment | OR3A2    | 4995   | 37 | 17 | 3181634  | 3181634  | Missense_Mutation | SNP | G | A | 66  | 91  | c.596C>T     | c.(595-597)TCC>TTC   | p.S199F       |
| Pat_73 | Pre-Treatment | NLRP1    | 22861  | 37 | 17 | 5462968  | 5462968  | Missense_Mutation | SNP | C | T | 95  | 143 | c.1048G>A    | c.(1048-1050)GCC>ACC | p.A350T       |
| Pat_73 | Pre-Treatment | DNAH2    | 146754 | 37 | 17 | 7679354  | 7679354  | Missense_Mutation | SNP | G | A | 6   | 325 | c.4834G>A    | c.(4834-4836)GAT>AAT | p.D1612N      |
| Pat_73 | Pre-Treatment | C17orf68 | 80169  | 37 | 17 | 8135746  | 8135746  | Missense_Mutation | SNP | C | T | 6   | 341 | c.1993G>A    | c.(1993-1995)GTG>ATG | p.V665M       |
| Pat_73 | Pre-Treatment | MFSD6L   | 162387 | 37 | 17 | 8702230  | 8702230  | Missense_Mutation | SNP | G | A | 29  | 39  | c.209C>T     | c.(208-210)GCC>GTC   | p.A70V        |
| Pat_73 | Pre-Treatment | MYH2     | 4620   | 37 | 17 | 10440996 | 10440996 | Missense_Mutation | SNP | C | T | 180 | 277 | c.1573G>A    | c.(1573-1575)GAG>AAG | p.E525K       |
| Pat_73 | Pre-Treatment | DNAH9    | 1770   | 37 | 17 | 11666863 | 11666863 | Missense_Mutation | SNP | G | A | 52  | 71  | c.7102G>A    | c.(7102-7104)GAA>AAA | p.E2368K      |
| Pat_73 | Pre-Treatment | NCOR1    | 9611   | 37 | 17 | 16012114 | 16012114 | Missense_Mutation | SNP | G | A | 50  | 66  | c.2168C>T    | c.(2167-2169)CCA>CTA | p.P723L       |
| Pat_73 | Pre-Treatment | CCDC144B | 284047 | 37 | 17 | 18528735 | 18528735 | Missense_Mutation | SNP | C | T | 5   | 16  | c.26G>A      | c.(25-27)CGG>CAG     | p.R9Q         |
| Pat_73 | Pre-Treatment | NOS2     | 4843   | 37 | 17 | 26091035 | 26091035 | Missense_Mutation | SNP | T | C | 3   | 51  | c.2564A>G    | c.(2563-2565)GAG>GGG | p.E855G       |
| Pat_73 | Pre-Treatment | MYO18A   | 399687 | 37 | 17 | 27413553 | 27413553 | Nonsense_Mutation | SNP | G | A | 3   | 26  | c.5755C>T    | c.(5755-5757)CAG>TAG | p.Q1919*      |
| Pat_73 | Pre-Treatment | TAOK1    | 57551  | 37 | 17 | 27805316 | 27805316 | Missense_Mutation | SNP | G | T | 4   | 199 | c.400G>T     | c.(400-402)GGT>TGT   | p.G134C       |
| Pat_73 | Pre-Treatment | CPD      | 1362   | 37 | 17 | 28789461 | 28789461 | Missense_Mutation | SNP | C | A | 4   | 167 | c.3890C>A    | c.(3889-3891)CCA>CAA | p.P1297Q      |
| Pat_73 | Pre-Treatment | GPR179   | 440435 | 37 | 17 | 36485284 | 36485284 | Missense_Mutation | SNP | C | T | 4   | 159 | c.4168G>A    | c.(4168-4170)GAG>AAG | p.E1390K      |
| Pat_73 | Pre-Treatment | CNTNAP1  | 8506   | 37 | 17 | 40837258 | 40837258 | Missense_Mutation | SNP | G | A | 4   | 182 | c.535G>A     | c.(535-537)GGC>AGC   | p.G179S       |
| Pat_73 | Pre-Treatment | GPATCH8  | 23131  | 37 | 17 | 42541860 | 42541860 | Missense_Mutation | SNP | C | T | 461 | 63  | c.173G>A     | c.(172-174)GGA>GAA   | p.G58E        |
| Pat_73 | Pre-Treatment | RGS9     | 8787   | 37 | 17 | 63185416 | 63185416 | Missense_Mutation | SNP | G | A | 4   | 94  | c.667G>A     | c.(667-669)GTT>ATT   | p.V223I       |
| Pat_73 | Pre-Treatment | CBLN2    | 147381 | 37 | 18 | 70205419 | 70205419 | Missense_Mutation | SNP | G | A | 41  | 10  | c.667C>T     | c.(667-669)CCT>TCT   | p.P223S       |
| Pat_73 | Pre-Treatment | MIER2    | 54531  | 37 | 19 | 313536   | 313536   | Missense_Mutation | SNP | C | T | 5   | 227 | c.763G>A     | c.(763-765)GGG>AGG   | p.G255R       |
| Pat_73 | Pre-Treatment | TMPRSS9  | 360200 | 37 | 19 | 2425938  | 2425938  | Missense_Mutation | SNP | G | A | 5   | 116 | c.3032G>A    | c.(3031-3033)GGA>GAA | p.G1011E      |
| Pat_73 | Pre-Treatment | ZNF57    | 126295 | 37 | 19 | 2917807  | 2917807  | Missense_Mutation | SNP | A | C | 7   | 117 | c.1188A>C    | c.(1186-1188)CAA>CAC | p.Q396H       |
| Pat_73 | Pre-Treatment | ZNF57    | 126295 | 37 | 19 | 2917842  | 2917842  | Missense_Mutation | SNP | G | A | 11  | 119 | c.1223G>A    | c.(1222-1224)CGA>CAA | p.R408Q       |
| Pat_73 | Pre-Treatment | ZNF57    | 126295 | 37 | 19 | 2917857  | 2917857  | Missense_Mutation | SNP | C | T | 5   | 116 | c.1238C>T    | c.(1237-1239)ACG>ATG | p.T413M       |
| Pat_73 | Pre-Treatment | STAP2    | 55620  | 37 | 19 | 4329977  | 4329977  | Missense_Mutation | SNP | G | C | 25  | 49  | c.436C>G     | c.(436-438)CGT>GGT   | p.R146G       |
| Pat_73 | Pre-Treatment | FEM1A    | 55527  | 37 | 19 | 4792725  | 4792725  | Missense_Mutation | SNP | G | A | 4   | 128 | c.859G>A     | c.(859-861)GAA>AAA   | p.E287K       |
| Pat_73 | Pre-Treatment | PTPRS    | 5802   | 37 | 19 | 5212259  | 5212259  | Missense_Mutation | SNP | G | A | 4   | 203 | c.4772C>T    | c.(4771-4773)GCC>GTC | p.A1591V      |
| Pat_73 | Pre-Treatment | SLC25A41 | 284427 | 37 | 19 | 6427485  | 6427485  | Missense_Mutation | SNP | G | A | 3   | 27  | c.652C>T     | c.(652-654)CGG>TGG   | p.R218W       |
| Pat_73 | Pre-Treatment | C3       | 718    | 37 | 19 | 6678278  | 6678278  | Missense_Mutation | SNP | C | T | 40  | 43  | c.4735G>A    | c.(4735-4737)GGA>AGA | p.G1579R      |



|        |               |          |        |    |    |          |          |                   |     |    |    |     |     |                  |                         |          |
|--------|---------------|----------|--------|----|----|----------|----------|-------------------|-----|----|----|-----|-----|------------------|-------------------------|----------|
| Pat_73 | Pre-Treatment | EMR1     | 2015   | 37 | 19 | 6935050  | 6935050  | Missense_Mutation | SNP | C  | T  | 62  | 107 | c.2342C>T        | c.(2341-2343)TCC>TTC    | p.S781F  |
| Pat_73 | Pre-Treatment | MUC16    | 94025  | 37 | 19 | 9069279  | 9069279  | Missense_Mutation | SNP | G  | A  | 53  | 93  | c.18167C>T       | c.(18166-18168)TCA>TTA  | p.S6056L |
| Pat_73 | Pre-Treatment | MUC16    | 94025  | 37 | 19 | 9069999  | 9069999  | Missense_Mutation | SNP | C  | T  | 41  | 73  | c.17447G>A       | c.(17446-17448)AGG>AAC  | p.R5816K |
| Pat_73 | Pre-Treatment | MUC16    | 94025  | 37 | 19 | 9083927  | 9083927  | Missense_Mutation | SNP | G  | A  | 19  | 25  | c.7888C>T        | c.(7888-7890)CCA>TCA    | p.P2630S |
| Pat_73 | Pre-Treatment | LDLR     | 3949   | 37 | 19 | 11215925 | 11215925 | Missense_Mutation | SNP | C  | T  | 187 | 247 | c.343C>T         | c.(343-345)CGC>TGC      | p.R115C  |
| Pat_73 | Pre-Treatment | ZNF653   | 115950 | 37 | 19 | 11596534 | 11596534 | Missense_Mutation | SNP | G  | A  | 61  | 143 | c.1507C>T        | c.(1507-1509)CCT>TCT    | p.P503S  |
| Pat_73 | Pre-Treatment | ZNF627   | 199692 | 37 | 19 | 11728410 | 11728410 | Missense_Mutation | SNP | T  | A  | 5   | 283 | c.1092T>A        | c.(1090-1092)GAT>GAA    | p.D364E  |
| Pat_73 | Pre-Treatment | ZNF844   | 284391 | 37 | 19 | 12186819 | 12186819 | Missense_Mutation | SNP | C  | T  | 13  | 26  | c.884C>T         | c.(883-885)TCC>TTC      | p.S295F  |
| Pat_73 | Pre-Treatment | ZNF844   | 284391 | 37 | 19 | 12187443 | 12187443 | Missense_Mutation | SNP | C  | G  | 9   | 315 | c.1508C>G        | c.(1507-1509)CCT>CGT    | p.P503R  |
| Pat_73 | Pre-Treatment | ZNF443   | 10224  | 37 | 19 | 12541802 | 12541802 | Missense_Mutation | SNP | C  | A  | 146 | 245 | c.1184G>T        | c.(1183-1185)TGC>TTC    | p.C395F  |
| Pat_73 | Pre-Treatment | ZNF564   | 163050 | 37 | 19 | 12637723 | 12637723 | Missense_Mutation | SNP | C  | T  | 8   | 420 | c.1199G>A        | c.(1198-1200)AGA>AAA    | p.R400K  |
| Pat_73 | Pre-Treatment | MAST1    | 22983  | 37 | 19 | 12951329 | 12951330 | Missense_Mutation | DNP | CC | TT | 36  | 67  | c.153_154CC>TT   | c.(151-156)TCCCGG>TCTTC | p.P52S   |
| Pat_73 | Pre-Treatment | ZNF333   | 84449  | 37 | 19 | 14829711 | 14829711 | Missense_Mutation | SNP | C  | A  | 4   | 187 | c.1572C>A        | c.(1570-1572)CAC>CAA    | p.H524Q  |
| Pat_73 | Pre-Treatment | SLC1A6   | 6511   | 37 | 19 | 15067330 | 15067331 | Missense_Mutation | DNP | CC | TT | 10  | 22  | c.1126_1127GG>AA | c.(1126-1128)GGC>AAC    | p.G376N  |
| Pat_73 | Pre-Treatment | PGLYRP2  | 114770 | 37 | 19 | 15587233 | 15587233 | Missense_Mutation | SNP | G  | A  | 43  | 35  | c.248C>T         | c.(247-249)CCC>CTC      | p.P83L   |
| Pat_73 | Pre-Treatment | CYP4F2   | 8529   | 37 | 19 | 15996816 | 15996816 | Missense_Mutation | SNP | C  | A  | 6   | 113 | c.1033G>T        | c.(1033-1035)GCA>TCA    | p.A345S  |
| Pat_73 | Pre-Treatment | CYP4F2   | 8529   | 37 | 19 | 15996840 | 15996840 | Missense_Mutation | SNP | G  | A  | 50  | 60  | c.1009C>T        | c.(1009-1011)CTC>TTC    | p.L337F  |
| Pat_73 | Pre-Treatment | RAB8A    | 4218   | 37 | 19 | 16232580 | 16232580 | Missense_Mutation | SNP | G  | A  | 8   | 171 | c.206G>A         | c.(205-207)CGG>CAG      | p.R69Q   |
| Pat_73 | Pre-Treatment | SIN3B    | 23309  | 37 | 19 | 16973254 | 16973254 | Missense_Mutation | SNP | G  | A  | 4   | 168 | c.1150G>A        | c.(1150-1152)GGG>AGG    | p.G384R  |
| Pat_73 | Pre-Treatment | ZNF486   | 90649  | 37 | 19 | 20308465 | 20308465 | Missense_Mutation | SNP | C  | T  | 36  | 54  | c.946C>T         | c.(946-948)CAT>TAT      | p.H316Y  |
| Pat_73 | Pre-Treatment | ZNF626   | 199777 | 37 | 19 | 20807353 | 20807353 | Missense_Mutation | SNP | T  | C  | 5   | 307 | c.1330A>G        | c.(1330-1332)AGG>GGG    | p.R444G  |
| Pat_73 | Pre-Treatment | ZNF99    | 7652   | 37 | 19 | 22939459 | 22939459 | Missense_Mutation | SNP | C  | T  | 71  | 82  | c.2712G>A        | c.(2710-2712)ATG>ATA    | p.M904I  |
| Pat_73 | Pre-Treatment | ZNF99    | 7652   | 37 | 19 | 22941749 | 22941749 | Missense_Mutation | SNP | G  | A  | 102 | 186 | c.689C>T         | c.(688-690)GCT>GTT      | p.A230V  |
| Pat_73 | Pre-Treatment | LSM14A   | 26065  | 37 | 19 | 34685419 | 34685419 | Missense_Mutation | SNP | G  | A  | 6   | 426 | c.158G>A         | c.(157-159)CGT>CAT      | p.R53H   |
| Pat_73 | Pre-Treatment | MAP4K1   | 11184  | 37 | 19 | 39100299 | 39100299 | Missense_Mutation | SNP | G  | A  | 21  | 23  | c.943C>T         | c.(943-945)CCT>TCT      | p.P315S  |
| Pat_73 | Pre-Treatment | CYP2B6   | 1555   | 37 | 19 | 41512879 | 41512879 | Missense_Mutation | SNP | G  | A  | 33  | 51  | c.554G>A         | c.(553-555)GGA>GAA      | p.G185E  |
| Pat_73 | Pre-Treatment | AXL      | 558    | 37 | 19 | 41748820 | 41748820 | Missense_Mutation | SNP | C  | T  | 69  | 110 | c.1345C>T        | c.(1345-1347)CCC>TCC    | p.P449S  |
| Pat_73 | Pre-Treatment | ETHE1    | 23474  | 37 | 19 | 44011031 | 44011031 | Missense_Mutation | SNP | G  | A  | 5   | 178 | c.736C>T         | c.(736-738)CGC>TGC      | p.R246C  |
| Pat_73 | Pre-Treatment | CEACAM20 | 125931 | 37 | 19 | 45033505 | 45033505 | Missense_Mutation | SNP | G  | A  | 63  | 50  | c.28C>T          | c.(28-30)CAC>TAC        | p.H10Y   |
| Pat_73 | Pre-Treatment | CD3EAP   | 10849  | 37 | 19 | 45911467 | 45911467 | Nonsense_Mutation | SNP | C  | T  | 6   | 282 | c.241C>T         | c.(241-243)CGA>TGA      | p.R81*   |
| Pat_73 | Pre-Treatment | ERCC1    | 2067   | 37 | 19 | 45918162 | 45918162 | Missense_Mutation | SNP | G  | A  | 5   | 92  | c.659C>T         | c.(658-660)GCG>GTG      | p.A220V  |
| Pat_73 | Pre-Treatment | ZNF836   | 162962 | 37 | 19 | 52659224 | 52659224 | Missense_Mutation | SNP | A  | T  | 6   | 362 | c.1712T>A        | c.(1711-1713)ATT>AAT    | p.I571N  |
| Pat_73 | Pre-Treatment | ZNF836   | 162962 | 37 | 19 | 52659243 | 52659243 | Missense_Mutation | SNP | A  | C  | 8   | 338 | c.1693T>G        | c.(1693-1695)TAC>GAC    | p.Y565D  |
| Pat_73 | Pre-Treatment | ZNF28    | 7576   | 37 | 19 | 53302985 | 53302985 | Missense_Mutation | SNP | T  | A  | 7   | 556 | c.2113A>T        | c.(2113-2115)AAC>TAC    | p.N705Y  |
| Pat_73 | Pre-Treatment | ZNF816A  | 125893 | 37 | 19 | 53453890 | 53453890 | Missense_Mutation | SNP | G  | C  | 9   | 616 | c.1138C>G        | c.(1138-1140)CAG>GAG    | p.Q380E  |
| Pat_73 | Pre-Treatment | ZNF761   | 388561 | 37 | 19 | 53958969 | 53958969 | Missense_Mutation | SNP | T  | G  | 7   | 563 | c.1208T>G        | c.(1207-1209)CTT>CGT    | p.L403R  |
| Pat_73 | Pre-Treatment | ZNF761   | 388561 | 37 | 19 | 53958983 | 53958983 | Missense_Mutation | SNP | A  | C  | 7   | 479 | c.1222A>C        | c.(1222-1224)AAA>CAA    | p.K408Q  |
| Pat_73 | Pre-Treatment | ZNF761   | 388561 | 37 | 19 | 53959214 | 53959214 | Missense_Mutation | SNP | A  | T  | 116 | 153 | c.1453A>T        | c.(1453-1455)AGG>TGG    | p.R485W  |
| Pat_73 | Pre-Treatment | NCR1     | 9437   | 37 | 19 | 55420727 | 55420727 | Missense_Mutation | SNP | G  | A  | 70  | 86  | c.479G>A         | c.(478-480)AGA>AAA      | p.R160K  |
| Pat_73 | Pre-Treatment | NLRP2    | 55655  | 37 | 19 | 55496441 | 55496441 | Missense_Mutation | SNP | C  | T  | 86  | 117 | c.2057C>T        | c.(2056-2058)CCT>CTT    | p.P686L  |
| Pat_73 | Pre-Treatment | PTPRH    | 5794   | 37 | 19 | 55713474 | 55713474 | Missense_Mutation | SNP | A  | T  | 76  | 135 | c.1103T>A        | c.(1102-1104)GTG>GAG    | p.V368E  |
| Pat_73 | Pre-Treatment | NLRP11   | 204801 | 37 | 19 | 56312966 | 56312966 | Missense_Mutation | SNP | C  | T  | 120 | 150 | c.2143G>A        | c.(2143-2145)GAG>AAG    | p.E715K  |
| Pat_73 | Pre-Treatment | ALK      | 238    | 37 | 2  | 29551311 | 29551311 | Missense_Mutation | SNP | G  | A  | 46  | 68  | c.1319C>T        | c.(1318-1320)TCC>TTC    | p.S440F  |
| Pat_73 | Pre-Treatment | DHX57    | 90957  | 37 | 2  | 39029964 | 39029964 | Missense_Mutation | SNP | G  | A  | 6   | 516 | c.3910C>T        | c.(3910-3912)CCG>TCG    | p.P1304S |
| Pat_73 | Pre-Treatment | OXER1    | 165140 | 37 | 2  | 42990881 | 42990881 | Missense_Mutation | SNP | G  | A  | 3   | 59  | c.439C>T         | c.(439-441)CTC>TTC      | p.L147F  |
| Pat_73 | Pre-Treatment | NRXN1    | 9378   | 37 | 2  | 50692660 | 50692660 | Missense_Mutation | SNP | T  | C  | 32  | 43  | c.3404A>G        | c.(3403-3405)CAA>CGA    | p.Q1135R |
| Pat_73 | Pre-Treatment | AFTPH    | 54812  | 37 | 2  | 64778646 | 64778646 | Missense_Mutation | SNP | C  | T  | 4   | 240 | c.38C>T          | c.(37-39)CCA>CTA        | p.P13L   |

|        |               |          |        |    |    |           |           |                   |     |    |    |     |     |                 |                        |           |
|--------|---------------|----------|--------|----|----|-----------|-----------|-------------------|-----|----|----|-----|-----|-----------------|------------------------|-----------|
| Pat_73 | Pre-Treatment | TET3     | 200424 | 37 | 2  | 74275280  | 74275280  | Nonsense_Mutation | SNP | G  | T  | 3   | 39  | c.1831G>T       | c.(1831-1833)GAG>TAG   | p.E611*   |
| Pat_73 | Pre-Treatment | LOXL3    | 84695  | 37 | 2  | 74762824  | 74762824  | Missense_Mutation | SNP | C  | T  | 40  | 56  | c.1307G>A       | c.(1306-1308)GGA>GAA   | p.G436E   |
| Pat_73 | Pre-Treatment | REG3G    | 130120 | 37 | 2  | 79255008  | 79255008  | Missense_Mutation | SNP | C  | T  | 99  | 126 | c.409C>T        | c.(409-411)CCC>TCC     | p.P137S   |
| Pat_73 | Pre-Treatment | SH2D6    | 284948 | 37 | 2  | 85662149  | 85662149  | Missense_Mutation | SNP | A  | C  | 4   | 13  | c.71A>C         | c.(70-72)CAC>CCC       | p.H24P    |
| Pat_73 | Pre-Treatment | TEKT4    | 150483 | 37 | 2  | 95542459  | 95542459  | Missense_Mutation | SNP | G  | A  | 4   | 122 | c.1253G>A       | c.(1252-1254)TGC>TAC   | p.C418Y   |
| Pat_73 | Pre-Treatment | ANKRD23  | 200539 | 37 | 2  | 97505471  | 97505471  | Missense_Mutation | SNP | C  | T  | 3   | 53  | c.815G>A        | c.(814-816)CGG>CAG     | p.R272Q   |
| Pat_73 | Pre-Treatment | C2orf55  | 343990 | 37 | 2  | 99411032  | 99411032  | Missense_Mutation | SNP | G  | A  | 106 | 117 | c.2852C>T       | c.(2851-2853)TCT>TTT   | p.S951F   |
| Pat_73 | Pre-Treatment | IL18RAP  | 8807   | 37 | 2  | 103040858 | 103040858 | Missense_Mutation | SNP | C  | T  | 4   | 171 | c.563C>T        | c.(562-564)GCG>GTG     | p.A188V   |
| Pat_73 | Pre-Treatment | RGPD4    | 285190 | 37 | 2  | 108476236 | 108476236 | Missense_Mutation | SNP | G  | A  | 89  | 104 | c.1693G>A       | c.(1693-1695)GCC>ACC   | p.A565T   |
| Pat_73 | Pre-Treatment | MGAT5    | 4249   | 37 | 2  | 135027998 | 135027998 | Nonsense_Mutation | SNP | C  | T  | 4   | 155 | c.283C>T        | c.(283-285)CAG>TAG     | p.Q95*    |
| Pat_73 | Pre-Treatment | LY75     | 4065   | 37 | 2  | 160741758 | 160741758 | Missense_Mutation | SNP | C  | T  | 85  | 149 | c.960G>A        | c.(958-960)ATG>ATA     | p.M320I   |
| Pat_73 | Pre-Treatment | DLX1     | 1745   | 37 | 2  | 172952920 | 172952920 | Missense_Mutation | SNP | C  | T  | 131 | 224 | c.703C>T        | c.(703-705)CCC>TCC     | p.P235S   |
| Pat_73 | Pre-Treatment | TTN      | 7273   | 37 | 2  | 179430392 | 179430392 | Missense_Mutation | SNP | C  | T  | 103 | 153 | c.72763G>A      | c.(72763-72765)GGA>AG/ | p.G24255R |
| Pat_73 | Pre-Treatment | TTN      | 7273   | 37 | 2  | 179445147 | 179445147 | Missense_Mutation | SNP | C  | A  | 4   | 171 | c.59255G>T      | c.(59254-59256)CGC>CTC | p.R19752L |
| Pat_73 | Pre-Treatment | TTN      | 7273   | 37 | 2  | 179480140 | 179480140 | Missense_Mutation | SNP | G  | A  | 163 | 187 | c.40828C>T      | c.(40828-40830)CCA>TCA | p.P13610S |
| Pat_73 | Pre-Treatment | TTN      | 7273   | 37 | 2  | 179614327 | 179614327 | Missense_Mutation | SNP | C  | T  | 40  | 38  | c.12800G>A      | c.(12799-12801)GGA>GA/ | p.G4267E  |
| Pat_73 | Pre-Treatment | BMPR2    | 659    | 37 | 2  | 203407087 | 203407087 | Missense_Mutation | SNP | C  | T  | 48  | 65  | c.1330C>T       | c.(1330-1332)CCC>TCC   | p.P444S   |
| Pat_73 | Pre-Treatment | EEF1B2   | 1933   | 37 | 2  | 207025358 | 207025358 | Missense_Mutation | SNP | A  | G  | 12  | 310 | c.127A>G        | c.(127-129)AGC>GGC     | p.S43G    |
| Pat_73 | Pre-Treatment | GIGYF2   | 26058  | 37 | 2  | 233620981 | 233620981 | Missense_Mutation | SNP | G  | A  | 3   | 59  | c.316G>A        | c.(316-318)GGA>AGA     | p.G106R   |
| Pat_73 | Pre-Treatment | ADAM33   | 80332  | 37 | 20 | 3654919   | 3654919   | Missense_Mutation | SNP | C  | T  | 4   | 157 | c.613G>A        | c.(613-615)GCG>ACG     | p.A205T   |
| Pat_73 | Pre-Treatment | C20orf27 | 54976  | 37 | 20 | 3736134   | 3736134   | Missense_Mutation | SNP | C  | T  | 4   | 107 | c.283G>A        | c.(283-285)GTG>ATG     | p.V95M    |
| Pat_73 | Pre-Treatment | GPCPD1   | 56261  | 37 | 20 | 5560721   | 5560721   | Missense_Mutation | SNP | G  | A  | 4   | 77  | c.406C>T        | c.(406-408)CGT>TGT     | p.R136C   |
| Pat_73 | Pre-Treatment | PLCB4    | 5332   | 37 | 20 | 9402034   | 9402034   | Missense_Mutation | SNP | G  | A  | 85  | 79  | c.2209G>A       | c.(2209-2211)GAA>AAA   | p.E737K   |
| Pat_73 | Pre-Treatment | MKKS     | 8195   | 37 | 20 | 10393901  | 10393901  | Missense_Mutation | SNP | A  | G  | 65  | 86  | c.262T>C        | c.(262-264)TTC>CTC     | p.F88L    |
| Pat_73 | Pre-Treatment | BTBD3    | 22903  | 37 | 20 | 11904102  | 11904102  | Missense_Mutation | SNP | G  | A  | 4   | 215 | c.1357G>A       | c.(1357-1359)GTA>ATA   | p.V453I   |
| Pat_73 | Pre-Treatment | ESF1     | 51575  | 37 | 20 | 13714427  | 13714427  | Missense_Mutation | SNP | G  | A  | 73  | 96  | c.1891C>T       | c.(1891-1893)CCT>TCT   | p.P631S   |
| Pat_73 | Pre-Treatment | FRG1B    | 284802 | 37 | 20 | 29625877  | 29625877  | Missense_Mutation | SNP | G  | A  | 6   | 141 | c.31G>A         | c.(31-33)GCC>ACC       | p.A11T    |
| Pat_73 | Pre-Treatment | GDF5     | 8200   | 37 | 20 | 34021784  | 34021784  | Missense_Mutation | SNP | G  | C  | 56  | 66  | c.1429C>G       | c.(1429-1431)CTC>GTC   | p.L477V   |
| Pat_73 | Pre-Treatment | PHF20    | 51230  | 37 | 20 | 34526957  | 34526957  | Missense_Mutation | SNP | C  | T  | 62  | 96  | c.2639C>T       | c.(2638-2640)TCC>TTC   | p.S880F   |
| Pat_73 | Pre-Treatment | TGM2     | 7052   | 37 | 20 | 36779358  | 36779358  | Missense_Mutation | SNP | G  | A  | 127 | 194 | c.535C>T        | c.(535-537)CCT>TCT     | p.P179S   |
| Pat_73 | Pre-Treatment | SLC2A10  | 81031  | 37 | 20 | 45354042  | 45354042  | Missense_Mutation | SNP | G  | A  | 4   | 207 | c.367G>A        | c.(367-369)GTG>ATG     | p.V123M   |
| Pat_73 | Pre-Treatment | ZMYND8   | 23613  | 37 | 20 | 45867870  | 45867870  | Missense_Mutation | SNP | G  | A  | 4   | 216 | c.2237C>T       | c.(2236-2238)ACT>ATT   | p.T746I   |
| Pat_73 | Pre-Treatment | NCOA3    | 8202   | 37 | 20 | 46276009  | 46276009  | Missense_Mutation | SNP | C  | T  | 78  | 81  | c.3445C>T       | c.(3445-3447)CCT>TCT   | p.P1149S  |
| Pat_73 | Pre-Treatment | ARFGAP1  | 55738  | 37 | 20 | 61919190  | 61919190  | Missense_Mutation | SNP | C  | T  | 3   | 23  | c.1186C>T       | c.(1186-1188)CCC>TCC   | p.P396S   |
| Pat_73 | Pre-Treatment | BTG3     | 10950  | 37 | 21 | 18966581  | 18966581  | Nonsense_Mutation | SNP | G  | A  | 45  | 50  | c.589C>T        | c.(589-591)CGA>TGA     | p.R197*   |
| Pat_73 | Pre-Treatment | CLIC6    | 54102  | 37 | 21 | 36079677  | 36079677  | Missense_Mutation | SNP | G  | A  | 31  | 35  | c.1528G>A       | c.(1528-1530)GAC>AAC   | p.D510N   |
| Pat_73 | Pre-Treatment | MX2      | 4600   | 37 | 21 | 42749759  | 42749759  | Missense_Mutation | SNP | G  | A  | 4   | 205 | c.293G>A        | c.(292-294)CGC>CAC     | p.R98H    |
| Pat_73 | Pre-Treatment | PDE9A    | 5152   | 37 | 21 | 44192595  | 44192595  | Missense_Mutation | SNP | C  | T  | 19  | 24  | c.1733C>T       | c.(1732-1734)TCC>TTC   | p.S578F   |
| Pat_73 | Pre-Treatment | CCT8L2   | 150160 | 37 | 22 | 17073380  | 17073380  | Missense_Mutation | SNP | C  | T  | 35  | 50  | c.61G>A         | c.(61-63)GAG>AAG       | p.E21K    |
| Pat_73 | Pre-Treatment | CECR2    | 27443  | 37 | 22 | 18028128  | 18028128  | Missense_Mutation | SNP | G  | A  | 4   | 70  | c.3085G>A       | c.(3085-3087)GCT>ACT   | p.A1029T  |
| Pat_73 | Pre-Treatment | SLC7A4   | 6545   | 37 | 22 | 21384097  | 21384097  | Missense_Mutation | SNP | C  | T  | 4   | 93  | c.1526G>A       | c.(1525-1527)GGT>GAT   | p.G509D   |
| Pat_73 | Pre-Treatment | MYO18B   | 84700  | 37 | 22 | 26423319  | 26423319  | Missense_Mutation | SNP | C  | T  | 90  | 119 | c.7379C>T       | c.(7378-7380)TCA>TTA   | p.S2460L  |
| Pat_73 | Pre-Treatment | PATZ1    | 23598  | 37 | 22 | 31740540  | 31740540  | Missense_Mutation | SNP | C  | T  | 4   | 107 | c.1049G>A       | c.(1048-1050)CGG>CAG   | p.R350Q   |
| Pat_73 | Pre-Treatment | TPRSS6   | 164656 | 37 | 22 | 37462141  | 37462141  | Nonsense_Mutation | SNP | C  | T  | 57  | 71  | c.2415G>A       | c.(2413-2415)TGG>TGA   | p.W805*   |
| Pat_73 | Pre-Treatment | CACNA1I  | 8911   | 37 | 22 | 40045817  | 40045817  | Missense_Mutation | SNP | C  | T  | 5   | 62  | c.1879C>T       | c.(1879-1881)CGG>TGG   | p.R627W   |
| Pat_73 | Pre-Treatment | TNRC6B   | 23112  | 37 | 22 | 40662077  | 40662078  | Missense_Mutation | DNP | CC | TT | 99  | 125 | c.1843_1844CC>T | c.(1843-1845)CCC>TTC   | p.P615F   |
| Pat_73 | Pre-Treatment | WBP2NL   | 164684 | 37 | 22 | 42423028  | 42423028  | Missense_Mutation | SNP | G  | A  | 276 | 338 | c.773G>A        | c.(772-774)GGA>GAA     | p.G258E   |

|        |               |          |        |    |    |           |           |                   |     |    |    |     |     |                                    |                      |               |
|--------|---------------|----------|--------|----|----|-----------|-----------|-------------------|-----|----|----|-----|-----|------------------------------------|----------------------|---------------|
| Pat_73 | Pre-Treatment | TBC1D22A | 25771  | 37 | 22 | 47433074  | 47433074  | Missense_Mutation | SNP | C  | T  | 5   | 245 | c.1309C>T                          | c.(1309-1311)CGC>TGC | p.R437C       |
| Pat_73 | Pre-Treatment | STAC     | 6769   | 37 | 3  | 36527634  | 36527634  | Missense_Mutation | SNP | A  | G  | 36  | 368 | c.580A>G                           | c.(580-582)AAT>GAT   | p.N194D       |
| Pat_73 | Pre-Treatment | STAC     | 6769   | 37 | 3  | 36587734  | 36587734  | Missense_Mutation | SNP | G  | A  | 43  | 73  | c.1162G>A                          | c.(1162-1164)GGA>AGA | p.G388R       |
| Pat_73 | Pre-Treatment | SLC22A14 | 9389   | 37 | 3  | 38358003  | 38358004  | Missense_Mutation | DNP | CC | TT | 16  | 41  | .:1721_1722CC>T                    | c.(1720-1722)TCC>TTT | p.S574F       |
| Pat_73 | Pre-Treatment | TTC21A   | 199223 | 37 | 3  | 39156117  | 39156118  | Missense_Mutation | DNP | GG | AA | 138 | 193 | c.600_601GG>AA598-603)CTGGAG>CTAA/ |                      | p.E201K       |
| Pat_73 | Pre-Treatment | CYP8B1   | 1582   | 37 | 3  | 42916798  | 42916798  | Missense_Mutation | SNP | G  | A  | 55  | 78  | c.511C>T                           | c.(511-513)CGC>TGC   | p.R171C       |
| Pat_73 | Pre-Treatment | P4HTM    | 54681  | 37 | 3  | 49027982  | 49027982  | Missense_Mutation | SNP | G  | A  | 4   | 36  | c.293G>A                           | c.(292-294)CGT>CAT   | p.R98H        |
| Pat_73 | Pre-Treatment | RNF123   | 63891  | 37 | 3  | 49734631  | 49734631  | Missense_Mutation | SNP | G  | T  | 4   | 67  | c.223G>T                           | c.(223-225)GAC>TAC   | p.D75Y        |
| Pat_73 | Pre-Treatment | MAG11    | 9223   | 37 | 3  | 65364955  | 65364956  | Missense_Mutation | DNP | GG | AA | 19  | 21  | .:2975_2976CC>T                    | c.(2974-2976)CCC>CTT | p.P992L       |
| Pat_73 | Pre-Treatment | FAM55C   | 91775  | 37 | 3  | 101520410 | 101520410 | Missense_Mutation | SNP | A  | T  | 46  | 57  | c.425A>T                           | c.(424-426)GAC>GTC   | p.D142V       |
| Pat_73 | Pre-Treatment | POLQ     | 10721  | 37 | 3  | 121238889 | 121238889 | Missense_Mutation | SNP | G  | A  | 61  | 109 | c.1297C>T                          | c.(1297-1299)CGT>TGT | p.R433C       |
| Pat_73 | Pre-Treatment | KALRN    | 8997   | 37 | 3  | 124281865 | 124281865 | Missense_Mutation | SNP | C  | T  | 79  | 96  | c.5105C>T                          | c.(5104-5106)CCC>CTC | p.P1702L      |
| Pat_73 | Pre-Treatment | SLCO2A1  | 6578   | 37 | 3  | 133673911 | 133673911 | Missense_Mutation | SNP | A  | G  | 51  | 67  | c.524T>C                           | c.(523-525)GTT>GCT   | p.V175A       |
| Pat_73 | Pre-Treatment | B3GALNT1 | 8706   | 37 | 3  | 160803948 | 160803948 | Missense_Mutation | SNP | G  | A  | 20  | 33  | c.595C>T                           | c.(595-597)CAC>TAC   | p.H199Y       |
| Pat_73 | Pre-Treatment | WDR49    | 151790 | 37 | 3  | 167246950 | 167246950 | Missense_Mutation | SNP | C  | T  | 20  | 54  | c.1240G>A                          | c.(1240-1242)GAA>AAA | p.E414K       |
| Pat_73 | Pre-Treatment | NCEH1    | 57552  | 37 | 3  | 172351720 | 172351720 | Missense_Mutation | SNP | C  | T  | 6   | 226 | c.892G>A                           | c.(892-894)GGC>AGC   | p.G298S       |
| Pat_73 | Pre-Treatment | THPO     | 7066   | 37 | 3  | 184090780 | 184090780 | Missense_Mutation | SNP | G  | A  | 4   | 150 | c.583C>T                           | c.(583-585)CTC>TTC   | p.L195F       |
| Pat_73 | Pre-Treatment | ATP13A4  | 84239  | 37 | 3  | 193132506 | 193132506 | Missense_Mutation | SNP | G  | A  | 107 | 64  | c.2876C>T                          | c.(2875-2877)CCT>CTT | p.P959L       |
| Pat_73 | Pre-Treatment | MUC4     | 4585   | 37 | 3  | 195511822 | 195511822 | Missense_Mutation | SNP | G  | T  | 6   | 25  | c.6629C>A                          | c.(6628-6630)CCT>CAT | p.P2210H      |
| Pat_73 | Pre-Treatment | MUC4     | 4585   | 37 | 3  | 195511937 | 195511937 | Missense_Mutation | SNP | C  | T  | 5   | 19  | c.6514G>A                          | c.(6514-6516)GGT>AGT | p.G2172S      |
| Pat_73 | Pre-Treatment | MUC4     | 4585   | 37 | 3  | 195513468 | 195513468 | Missense_Mutation | SNP | G  | C  | 3   | 43  | c.4983C>G                          | c.(4981-4983)CAC>CAG | p.H1661Q      |
| Pat_73 | Pre-Treatment | PPARGC1A | 10891  | 37 | 4  | 23815677  | 23815677  | Missense_Mutation | SNP | C  | T  | 4   | 200 | c.1429G>A                          | c.(1429-1431)GAA>AAA | p.E477K       |
| Pat_73 | Pre-Treatment | STAP1    | 26228  | 37 | 4  | 68424640  | 68424640  | Missense_Mutation | SNP | G  | A  | 86  | 15  | c.113G>A                           | c.(112-114)GGA>GAA   | p.G38E        |
| Pat_73 | Pre-Treatment | ANKRD17  | 26057  | 37 | 4  | 73943169  | 73943169  | Missense_Mutation | SNP | T  | C  | 169 | 50  | c.7490A>G                          | c.(7489-7491)CAT>CGT | p.H2497R      |
| Pat_73 | Pre-Treatment | AIMP1    | 9255   | 37 | 4  | 107258186 | 107258187 | Missense_Mutation | DNP | CT | TG | 45  | 81  | c.764_765CT>TG                     | c.(763-765)GCT>GTG   | p.A255V       |
| Pat_73 | Pre-Treatment | ENPEP    | 2028   | 37 | 4  | 111412207 | 111412207 | Missense_Mutation | SNP | G  | A  | 61  | 79  | c.805G>A                           | c.(805-807)GAT>AAT   | p.D269N       |
| Pat_73 | Pre-Treatment | KIAA1109 | 84162  | 37 | 4  | 123161332 | 123161332 | Missense_Mutation | SNP | G  | A  | 4   | 184 | c.4495G>A                          | c.(4495-4497)GTG>ATG | p.V1499M      |
| Pat_73 | Pre-Treatment | ZNF827   | 152485 | 37 | 4  | 146823374 | 146823374 | Missense_Mutation | SNP | A  | G  | 3   | 65  | c.1037T>C                          | c.(1036-1038)CTG>CCG | p.L346P       |
| Pat_73 | Pre-Treatment | TLL1     | 7092   | 37 | 4  | 166910623 | 166910623 | Missense_Mutation | SNP | G  | A  | 80  | 100 | c.260G>A                           | c.(259-261)GGA>GAA   | p.G87E        |
| Pat_73 | Pre-Treatment | F11      | 2160   | 37 | 4  | 187201532 | 187201532 | Missense_Mutation | SNP | G  | A  | 4   | 205 | c.1021G>A                          | c.(1021-1023)GAA>AAA | p.E341K       |
| Pat_73 | Pre-Treatment | ADAMTS16 | 170690 | 37 | 5  | 5242274   | 5242274   | Missense_Mutation | SNP | C  | T  | 4   | 103 | c.2632C>T                          | c.(2632-2634)CGC>TGC | p.R878C       |
| Pat_73 | Pre-Treatment | SPEF2    | 79925  | 37 | 5  | 35800155  | 35800155  | Missense_Mutation | SNP | C  | G  | 176 | 293 | c.4916C>G                          | c.(4915-4917)CCA>CGA | p.P1639R      |
| Pat_73 | Pre-Treatment | HEATR7B2 | 133558 | 37 | 5  | 41064585  | 41064585  | Missense_Mutation | SNP | G  | A  | 16  | 24  | c.449C>T                           | c.(448-450)ACT>ATT   | p.T150I       |
| Pat_73 | Pre-Treatment | SNX18    | 112574 | 37 | 5  | 53815644  | 53815644  | Missense_Mutation | SNP | C  | T  | 28  | 66  | c.1862C>T                          | c.(1861-1863)CCT>CTT | p.P621L       |
| Pat_73 | Pre-Treatment | GPBP1    | 65056  | 37 | 5  | 56531860  | 56531860  | Splice_Site       | SNP | G  | A  | 4   | 86  | c.478_splice                       | c.e6+1               | p.E160_splice |
| Pat_73 | Pre-Treatment | FBXL21   | 26223  | 37 | 5  | 135276266 | 135276266 | Missense_Mutation | SNP | C  | T  | 23  | 48  | c.578C>T                           | c.(577-579)CCT>CTT   | p.P193L       |
| Pat_73 | Pre-Treatment | PCDHA1   | 56147  | 37 | 5  | 140167553 | 140167553 | Missense_Mutation | SNP | G  | A  | 77  | 119 | c.1678G>A                          | c.(1678-1680)GAC>AAC | p.D560N       |
| Pat_73 | Pre-Treatment | PCDHB9   | 56127  | 37 | 5  | 140568836 | 140568836 | Missense_Mutation | SNP | G  | A  | 5   | 100 | c.1945G>A                          | c.(1945-1947)GAG>AAG | p.E649K       |
| Pat_73 | Pre-Treatment | PCDHB12  | 56124  | 37 | 5  | 140588687 | 140588687 | Missense_Mutation | SNP | G  | A  | 62  | 72  | c.208G>A                           | c.(208-210)GAT>AAT   | p.D70N        |
| Pat_73 | Pre-Treatment | PCDHGB4  | 8641   | 37 | 5  | 140769667 | 140769667 | Missense_Mutation | SNP | C  | T  | 203 | 288 | c.2216C>T                          | c.(2215-2217)CCC>CTC | p.P739L       |
| Pat_73 | Pre-Treatment | GRM6     | 2916   | 37 | 5  | 178416382 | 178416382 | Missense_Mutation | SNP | C  | T  | 125 | 186 | c.1037G>A                          | c.(1036-1038)CGA>CAA | p.R346Q       |
| Pat_73 | Pre-Treatment | SYCP2L   | 221711 | 37 | 6  | 10907857  | 10907857  | Nonsense_Mutation | SNP | G  | A  | 237 | 158 | c.759G>A                           | c.(757-759)TGG>TGA   | p.W253*       |
| Pat_73 | Pre-Treatment | EDN1     | 1906   | 37 | 6  | 12294510  | 12294510  | Missense_Mutation | SNP | G  | A  | 134 | 92  | c.406G>A                           | c.(406-408)GAG>AAG   | p.E136K       |
| Pat_73 | Pre-Treatment | MOG      | 4340   | 37 | 6  | 29635693  | 29635693  | Missense_Mutation | SNP | G  | A  | 5   | 391 | c.584G>A                           | c.(583-585)CGG>CAG   | p.R195Q       |
| Pat_73 | Pre-Treatment | VARS2    | 57176  | 37 | 6  | 30889704  | 30889704  | Missense_Mutation | SNP | C  | T  | 108 | 303 | c.1738C>T                          | c.(1738-1740)CCT>TCT | p.P580S       |
| Pat_73 | Pre-Treatment | CLIC1    | 1192   | 37 | 6  | 31698735  | 31698735  | Missense_Mutation | SNP | G  | A  | 4   | 145 | c.610C>T                           | c.(610-612)CGG>TGG   | p.R204W       |
| Pat_73 | Pre-Treatment | ITPR3    | 3710   | 37 | 6  | 33650397  | 33650397  | Missense_Mutation | SNP | T  | C  | 4   | 217 | c.4573T>C                          | c.(4573-4575)TGC>CGC | p.C1525R      |

|        |               |          |        |    |   |           |           |                   |     |   |   |     |     |            |                        |          |
|--------|---------------|----------|--------|----|---|-----------|-----------|-------------------|-----|---|---|-----|-----|------------|------------------------|----------|
| Pat_73 | Pre-Treatment | C6orf106 | 64771  | 37 | 6 | 34574375  | 34574375  | Missense_Mutation | SNP | G | A | 114 | 298 | c.818C>T   | c.(817-819)CCC>CTC     | p.P273L  |
| Pat_73 | Pre-Treatment | UHRF1BP1 | 54887  | 37 | 6 | 34826790  | 34826790  | Missense_Mutation | SNP | C | T | 84  | 212 | c.2657C>T  | c.(2656-2658)CCT>CTT   | p.P886L  |
| Pat_73 | Pre-Treatment | KCNK5    | 8645   | 37 | 6 | 39159028  | 39159028  | Missense_Mutation | SNP | C | T | 104 | 65  | c.1138G>A  | c.(1138-1140)GCC>ACC   | p.A380T  |
| Pat_73 | Pre-Treatment | PGC      | 5225   | 37 | 6 | 41710082  | 41710082  | Missense_Mutation | SNP | C | T | 257 | 174 | c.593G>A   | c.(592-594)GGC>GAC     | p.G198D  |
| Pat_73 | Pre-Treatment | KLC4     | 89953  | 37 | 6 | 43029158  | 43029158  | Missense_Mutation | SNP | G | A | 100 | 51  | c.85G>A    | c.(85-87)GTC>ATC       | p.V29I   |
| Pat_73 | Pre-Treatment | ZNF318   | 24149  | 37 | 6 | 43323487  | 43323487  | Missense_Mutation | SNP | G | A | 269 | 613 | c.1585C>T  | c.(1585-1587)CCC>TCC   | p.P529S  |
| Pat_73 | Pre-Treatment | MDN1     | 23195  | 37 | 6 | 90499512  | 90499512  | Missense_Mutation | SNP | G | A | 5   | 164 | c.1217C>T  | c.(1216-1218)GCC>GTC   | p.A406V  |
| Pat_73 | Pre-Treatment | OLIG3    | 167826 | 37 | 6 | 137815225 | 137815225 | Missense_Mutation | SNP | C | T | 6   | 145 | c.83G>A    | c.(82-84)CGC>CAC       | p.R28H   |
| Pat_73 | Pre-Treatment | GNA12    | 2768   | 37 | 7 | 2834734   | 2834734   | Missense_Mutation | SNP | G | A | 160 | 185 | c.353C>T   | c.(352-354)CCT>CTT     | p.P118L  |
| Pat_73 | Pre-Treatment | TMEM195  | 392636 | 37 | 7 | 15584403  | 15584403  | Missense_Mutation | SNP | C | T | 117 | 227 | c.403G>A   | c.(403-405)GCT>ACT     | p.A135T  |
| Pat_73 | Pre-Treatment | NPVF     | 64111  | 37 | 7 | 25266503  | 25266503  | Missense_Mutation | SNP | C | T | 110 | 163 | c.281G>A   | c.(280-282)AGG>AAG     | p.R94K   |
| Pat_73 | Pre-Treatment | INHBA    | 3624   | 37 | 7 | 41729438  | 41729438  | Missense_Mutation | SNP | G | A | 83  | 126 | c.1091C>T  | c.(1090-1092)TCC>TTC   | p.S364F  |
| Pat_73 | Pre-Treatment | VWC2     | 375567 | 37 | 7 | 49842374  | 49842374  | Missense_Mutation | SNP | C | T | 94  | 107 | c.764C>T   | c.(763-765)CCC>CTC     | p.P255L  |
| Pat_73 | Pre-Treatment | ZNF713   | 349075 | 37 | 7 | 55990882  | 55990882  | Missense_Mutation | SNP | G | A | 4   | 187 | c.76G>A    | c.(76-78)GTG>ATG       | p.V26M   |
| Pat_73 | Pre-Treatment | ZNF680   | 340252 | 37 | 7 | 63982110  | 63982110  | Missense_Mutation | SNP | T | A | 6   | 193 | c.1022A>T  | c.(1021-1023)AAG>ATG   | p.K341M  |
| Pat_73 | Pre-Treatment | ZNF680   | 340252 | 37 | 7 | 63982117  | 63982117  | Missense_Mutation | SNP | T | C | 4   | 188 | c.1015A>G  | c.(1015-1017)AAA>GAA   | p.K339E  |
| Pat_73 | Pre-Treatment | ZNF498   | 221785 | 37 | 7 | 99217435  | 99217435  | Missense_Mutation | SNP | G | A | 4   | 184 | c.206G>A   | c.(205-207)CGG>CAG     | p.R69Q   |
| Pat_73 | Pre-Treatment | MUC17    | 140453 | 37 | 7 | 100676537 | 100676537 | Missense_Mutation | SNP | G | C | 11  | 811 | c.1840G>C  | c.(1840-1842)GCT>CCT   | p.A614P  |
| Pat_73 | Pre-Treatment | MUC17    | 140453 | 37 | 7 | 100682124 | 100682124 | Missense_Mutation | SNP | T | A | 11  | 826 | c.7427T>A  | c.(7426-7428)CTT>CAT   | p.L2476H |
| Pat_73 | Pre-Treatment | MUC17    | 140453 | 37 | 7 | 100684076 | 100684076 | Missense_Mutation | SNP | A | G | 8   | 880 | c.9379A>G  | c.(9379-9381)ACA>GCA   | p.T3127A |
| Pat_73 | Pre-Treatment | MUC17    | 140453 | 37 | 7 | 100684302 | 100684302 | Missense_Mutation | SNP | C | A | 11  | 817 | c.9605C>A  | c.(9604-9606)ACT>AAT   | p.T3202N |
| Pat_73 | Pre-Treatment | MET      | 4233   | 37 | 7 | 116380979 | 116380979 | Missense_Mutation | SNP | C | T | 288 | 26  | c.1601C>T  | c.(1600-1602)CCC>CTC   | p.P534L  |
| Pat_73 | Pre-Treatment | BRAF     | 673    | 37 | 7 | 140453136 | 140453136 | Missense_Mutation | SNP | A | T | 102 | 12  | c.1799T>A  | c.(1798-1800)GTG>GAG   | p.V600E  |
| Pat_73 | Pre-Treatment | MLL3     | 58508  | 37 | 7 | 151845580 | 151845580 | Nonsense_Mutation | SNP | G | A | 30  | 189 | c.13432C>T | c.(13432-13434)CGA>TGA | p.R4478* |
| Pat_73 | Pre-Treatment | CSMD1    | 64478  | 37 | 8 | 2976008   | 2976008   | Missense_Mutation | SNP | G | A | 80  | 111 | c.6346C>T  | c.(6346-6348)CCT>TCT   | p.P2116S |
| Pat_73 | Pre-Treatment | SGK223   | 157285 | 37 | 8 | 8175867   | 8175867   | Missense_Mutation | SNP | C | T | 143 | 169 | c.4018G>A  | c.(4018-4020)GAG>AAG   | p.E1340K |
| Pat_73 | Pre-Treatment | XKR6     | 286046 | 37 | 8 | 10755518  | 10755518  | Nonsense_Mutation | SNP | G | A | 88  | 124 | c.1870C>T  | c.(1870-1872)CGA>TGA   | p.R624*  |
| Pat_73 | Pre-Treatment | AMAC1L2  | 83650  | 37 | 8 | 11188842  | 11188842  | Missense_Mutation | SNP | G | A | 6   | 340 | c.227G>A   | c.(226-228)CGA>CAA     | p.R76Q   |
| Pat_73 | Pre-Treatment | SLC7A2   | 6542   | 37 | 8 | 17417899  | 17417899  | Missense_Mutation | SNP | C | T | 62  | 64  | c.1361C>T  | c.(1360-1362)TCG>TTG   | p.S454L  |
| Pat_73 | Pre-Treatment | REEP4    | 80346  | 37 | 8 | 21997703  | 21997703  | Missense_Mutation | SNP | G | C | 55  | 80  | c.164C>G   | c.(163-165)ACA>AGA     | p.T55R   |
| Pat_73 | Pre-Treatment | ADAMDEC1 | 27299  | 37 | 8 | 24253266  | 24253266  | Missense_Mutation | SNP | G | A | 21  | 43  | c.397G>A   | c.(397-399)GAA>AAA     | p.E133K  |
| Pat_73 | Pre-Treatment | DOCK5    | 80005  | 37 | 8 | 25149601  | 25149601  | Missense_Mutation | SNP | G | A | 3   | 29  | c.383G>A   | c.(382-384)CGG>CAG     | p.R128Q  |
| Pat_73 | Pre-Treatment | NRG1     | 3084   | 37 | 8 | 32453417  | 32453417  | Missense_Mutation | SNP | G | A | 109 | 147 | c.172G>A   | c.(172-174)GAA>AAA     | p.E58K   |
| Pat_73 | Pre-Treatment | ADAM2    | 2515   | 37 | 8 | 39645680  | 39645680  | Missense_Mutation | SNP | C | T | 38  | 57  | c.733G>A   | c.(733-735)GAG>AAG     | p.E245K  |
| Pat_73 | Pre-Treatment | RB1CC1   | 9821   | 37 | 8 | 53589075  | 53589075  | Missense_Mutation | SNP | A | T | 4   | 136 | c.426T>A   | c.(424-426)GAT>GAA     | p.D142E  |
| Pat_73 | Pre-Treatment | PREX2    | 80243  | 37 | 8 | 68981348  | 68981348  | Missense_Mutation | SNP | G | A | 45  | 44  | c.1420G>A  | c.(1420-1422)GAG>AAG   | p.E474K  |
| Pat_73 | Pre-Treatment | HNF4G    | 3174   | 37 | 8 | 76471119  | 76471119  | Missense_Mutation | SNP | C | T | 79  | 224 | c.829C>T   | c.(829-831)CGG>TGG     | p.R277W  |
| Pat_73 | Pre-Treatment | RIMS2    | 9699   | 37 | 8 | 105263362 | 105263362 | Missense_Mutation | SNP | G | A | 14  | 9   | c.3856G>A  | c.(3856-3858)GAA>AAA   | p.E1286K |
| Pat_73 | Pre-Treatment | ARC      | 23237  | 37 | 8 | 143695299 | 143695299 | Missense_Mutation | SNP | C | T | 16  | 12  | c.334G>A   | c.(334-336)GAG>AAG     | p.E112K  |
| Pat_73 | Pre-Treatment | ZC3H3    | 23144  | 37 | 8 | 144621256 | 144621256 | Missense_Mutation | SNP | G | A | 4   | 205 | c.281C>T   | c.(280-282)CCG>CTG     | p.P94L   |
| Pat_73 | Pre-Treatment | FAM75A6  | 389730 | 37 | 9 | 43627629  | 43627629  | Missense_Mutation | SNP | T | C | 7   | 213 | c.1058A>G  | c.(1057-1059)CAA>CGA   | p.Q353R  |
| Pat_73 | Pre-Treatment | FAM75A6  | 389730 | 37 | 9 | 43627633  | 43627633  | Missense_Mutation | SNP | T | C | 7   | 212 | c.1054A>G  | c.(1054-1056)AAT>GAT   | p.N352D  |
| Pat_73 | Pre-Treatment | WNK2     | 65268  | 37 | 9 | 95997149  | 95997149  | Missense_Mutation | SNP | G | A | 3   | 49  | c.1135G>A  | c.(1135-1137)GTC>ATC   | p.V379I  |
| Pat_73 | Pre-Treatment | KIAA1529 | 57653  | 37 | 9 | 100093033 | 100093033 | Missense_Mutation | SNP | G | C | 3   | 59  | c.2807G>C  | c.(2806-2808)AGT>ACT   | p.S936T  |
| Pat_73 | Pre-Treatment | OR13C8   | 138802 | 37 | 9 | 107332146 | 107332146 | Missense_Mutation | SNP | G | A | 47  | 50  | c.698G>A   | c.(697-699)GGA>GAA     | p.G233E  |
| Pat_73 | Pre-Treatment | OR13C9   | 286362 | 37 | 9 | 107380371 | 107380371 | Missense_Mutation | SNP | G | A | 94  | 75  | c.115C>T   | c.(115-117)CTT>TTT     | p.L39F   |
| Pat_73 | Pre-Treatment | TNC      | 3371   | 37 | 9 | 117852964 | 117852964 | Missense_Mutation | SNP | C | T | 239 | 585 | c.334G>A   | c.(334-336)GGC>AGC     | p.G112S  |

|        |                 |          |           |    |    |           |           |                   |     |    |    |     |     |                          |                      |               |
|--------|-----------------|----------|-----------|----|----|-----------|-----------|-------------------|-----|----|----|-----|-----|--------------------------|----------------------|---------------|
| Pat_73 | Pre-Treatment   | GSN      | 2934      | 37 | 9  | 124094754 | 124094754 | Missense_Mutation | SNP | G  | A  | 5   | 377 | c.2222G>A                | c.(2221-2223)CGG>CAG | p.R741Q       |
| Pat_73 | Pre-Treatment   | SLC27A4  | 10999     | 37 | 9  | 131117820 | 131117820 | Missense_Mutation | SNP | G  | A  | 6   | 147 | c.1606G>A                | c.(1606-1608)GTG>ATG | p.V536M       |
| Pat_73 | Pre-Treatment   | FAM78A   | 286336    | 37 | 9  | 134151461 | 134151461 | Missense_Mutation | SNP | C  | G  | 46  | 7   | c.106G>C                 | c.(106-108)GAA>CAA   | p.E36Q        |
| Pat_73 | Pre-Treatment   | REXO4    | 57109     | 37 | 9  | 136279788 | 136279788 | Missense_Mutation | SNP | G  | C  | 4   | 196 | c.569C>G                 | c.(568-570)ACC>AGC   | p.T190S       |
| Pat_73 | Pre-Treatment   | PDHA1    | 5160      | 37 | X  | 19371203  | 19371203  | Missense_Mutation | SNP | G  | A  | 4   | 226 | c.422G>A                 | c.(421-423)CGA>CAA   | p.R141Q       |
| Pat_73 | Pre-Treatment   | YY2      | 404281    | 37 | X  | 21861388  | 21861388  | Missense_Mutation | SNP | G  | A  | 4   | 159 | c.176G>A                 | c.(175-177)CGT>CAT   | p.R59H        |
| Pat_73 | Pre-Treatment   | ZC4H2    | 55906     | 37 | X  | 64137703  | 64137703  | Missense_Mutation | SNP | G  | A  | 16  | 2   | c.635C>T                 | c.(634-636)TCC>TTC   | p.S212F       |
| Pat_73 | Pre-Treatment   | ARR3     | 407       | 37 | X  | 69495968  | 69495968  | Missense_Mutation | SNP | G  | A  | 4   | 90  | c.182G>A                 | c.(181-183)CGT>CAT   | p.R61H        |
| Pat_73 | Pre-Treatment   | ZCCHC5   | 203430    | 37 | X  | 77913110  | 77913110  | Missense_Mutation | SNP | G  | A  | 13  | 0   | c.808C>T                 | c.(808-810)CCC>TCC   | p.P270S       |
| Pat_73 | Pre-Treatment   | GPRASP1  | 9737      | 37 | X  | 101909266 | 101909266 | Missense_Mutation | SNP | T  | G  | 94  | 14  | c.425T>G                 | c.(424-426)GTT>GGT   | p.V142G       |
| Pat_73 | Pre-Treatment   | MAGEA10  | 4109      | 37 | X  | 151303681 | 151303681 | Missense_Mutation | SNP | C  | T  | 103 | 12  | c.412G>A                 | c.(412-414)GTG>ATG   | p.V138M       |
| Pat_73 | Pre-Treatment   | TMEM187  | 8269      | 37 | X  | 153247847 | 153247847 | Missense_Mutation | SNP | G  | A  | 2   | 1   | c.334G>A                 | c.(334-336)GCG>ACG   | p.A112T       |
| Pat_73 | Post-Resistance | PGD      | 5226      | 37 | 1  | 10477446  | 10477446  | Missense_Mutation | SNP | C  | T  | 131 | 167 | c.989C>T                 | c.(988-990)TCC>TTC   | p.S330F       |
| Pat_73 | Post-Resistance | CASZ1    | 54897     | 37 | 1  | 10713493  | 10713493  | Missense_Mutation | SNP | G  | A  | 16  | 21  | c.2621C>T                | c.(2620-2622)TCG>TTG | p.S874L       |
| Pat_73 | Post-Resistance | NBPF1    | 55672     | 37 | 1  | 16918653  | 16918653  | Splice_Site       | SNP | C  | T  | 4   | 74  | c.-35_splice             | c.e6+1               |               |
| Pat_73 | Post-Resistance | MRTO4    | 51154     | 37 | 1  | 19582478  | 19582478  | Missense_Mutation | SNP | A  | G  | 23  | 41  | c.124A>G                 | c.(124-126)ATC>GTC   | p.I42V        |
| Pat_73 | Post-Resistance | RPS6KA1  | 6195      | 37 | 1  | 26883501  | 26883501  | Missense_Mutation | SNP | C  | T  | 42  | 64  | c.994C>T                 | c.(994-996)CGT>TGT   | p.R332C       |
| Pat_73 | Post-Resistance | KIAA0467 | 23334     | 37 | 1  | 43911909  | 43911910  | Missense_Mutation | DNP | CC | TT | 112 | 149 | c.6279_6280CC>T3277-6282 | ATCCTC>ATTT          | p.L2094F      |
| Pat_73 | Post-Resistance | CYP4X1   | 260293    | 37 | 1  | 47505108  | 47505108  | Missense_Mutation | SNP | C  | T  | 37  | 63  | c.977C>T                 | c.(976-978)TCC>TTC   | p.S326F       |
| Pat_73 | Post-Resistance | CC2D1B   | 200014    | 37 | 1  | 52823465  | 52823465  | Missense_Mutation | SNP | G  | A  | 11  | 16  | c.1585C>T                | c.(1585-1587)CCG>TCG | p.P529S       |
| Pat_73 | Post-Resistance | C1orf177 | 163747    | 37 | 1  | 55282732  | 55282732  | Missense_Mutation | SNP | G  | A  | 34  | 14  | c.1121G>A                | c.(1120-1122)CGA>CAA | p.R374Q       |
| Pat_73 | Post-Resistance | RAVER2   | 55225     | 37 | 1  | 65243395  | 65243395  | Nonsense_Mutation | SNP | C  | T  | 12  | 79  | c.406C>T                 | c.(406-408)CAG>TAG   | p.Q136*       |
| Pat_73 | Post-Resistance | C1orf173 | 127254    | 37 | 1  | 75038267  | 75038267  | Missense_Mutation | SNP | C  | T  | 42  | 35  | c.3127G>A                | c.(3127-3129)GAA>AAA | p.E1043K      |
| Pat_73 | Post-Resistance | CD53     | 963       | 37 | 1  | 111440482 | 111440482 | Missense_Mutation | SNP | G  | A  | 27  | 99  | c.556G>A                 | c.(556-558)GGA>AGA   | p.G186R       |
| Pat_73 | Post-Resistance | NRAS     | 4893      | 37 | 1  | 115256529 | 115256530 | Missense_Mutation | DNP | TG | CT | 54  | 146 | c.181_182CA>AG           | c.(181-183)CAA>AGA   | p.Q61R        |
| Pat_73 | Post-Resistance | NBPF9    | 400818    | 37 | 1  | 144615237 | 144615237 | Missense_Mutation | SNP | T  | G  | 8   | 264 | c.107T>G                 | c.(106-108)GTA>GGA   | p.V36G        |
| Pat_73 | Post-Resistance | NBPF10   | 100132406 | 37 | 1  | 145297661 | 145297661 | Missense_Mutation | SNP | C  | A  | 18  | 479 | c.536C>A                 | c.(535-537)GCT>GAT   | p.A179D       |
| Pat_73 | Post-Resistance | HRNR     | 388697    | 37 | 1  | 152188460 | 152188460 | Missense_Mutation | SNP | G  | A  | 80  | 800 | c.5645C>T                | c.(5644-5646)TCT>TTT | p.S1882F      |
| Pat_73 | Post-Resistance | FLG      | 2312      | 37 | 1  | 152279804 | 152279804 | Missense_Mutation | SNP | C  | T  | 192 | 274 | c.7558G>A                | c.(7558-7560)GAT>AAT | p.D2520N      |
| Pat_73 | Post-Resistance | GON4L    | 54856     | 37 | 1  | 155746233 | 155746233 | Missense_Mutation | SNP | A  | G  | 3   | 48  | c.2131T>C                | c.(2131-2133)TGC>CGC | p.C711R       |
| Pat_73 | Post-Resistance | GON4L    | 54856     | 37 | 1  | 155774924 | 155774924 | Missense_Mutation | SNP | A  | C  | 23  | 39  | c.1461T>G                | c.(1459-1461)GAT>GAG | p.D487E       |
| Pat_73 | Post-Resistance | MAEL     | 84944     | 37 | 1  | 166959004 | 166959004 | Missense_Mutation | SNP | G  | A  | 11  | 24  | c.163G>A                 | c.(163-165)GCA>ACA   | p.A55T        |
| Pat_73 | Post-Resistance | MAEL     | 84944     | 37 | 1  | 166990989 | 166990989 | Missense_Mutation | SNP | C  | T  | 47  | 75  | c.1202C>T                | c.(1201-1203)TCC>TTC | p.S401F       |
| Pat_73 | Post-Resistance | SLC9A11  | 284525    | 37 | 1  | 173526564 | 173526564 | Missense_Mutation | SNP | C  | G  | 67  | 116 | c.1130G>C                | c.(1129-1131)TGG>TCG | p.W377S       |
| Pat_73 | Post-Resistance | CEP350   | 9857      | 37 | 1  | 180022975 | 180022975 | Missense_Mutation | SNP | A  | G  | 26  | 81  | c.5080A>G                | c.(5080-5082)AGG>GGG | p.R1694G      |
| Pat_73 | Post-Resistance | RNPEP    | 6051      | 37 | 1  | 201969084 | 201969084 | Missense_Mutation | SNP | A  | G  | 21  | 35  | c.1145A>G                | c.(1144-1146)CAC>CGC | p.H382R       |
| Pat_73 | Post-Resistance | LAMB3    | 3914      | 37 | 1  | 209804019 | 209804019 | Missense_Mutation | SNP | G  | A  | 23  | 27  | c.884C>T                 | c.(883-885)CCC>CTC   | p.P295L       |
| Pat_73 | Post-Resistance | OR2T10   | 127069    | 37 | 1  | 248756578 | 248756578 | Missense_Mutation | SNP | C  | T  | 69  | 11  | c.492G>A                 | c.(490-492)ATG>ATA   | p.M164I       |
| Pat_73 | Post-Resistance | LYZL1    | 84569     | 37 | 10 | 29578087  | 29578087  | Nonsense_Mutation | SNP | G  | A  | 12  | 9   | c.41G>A                  | c.(40-42)TGG>TAG     | p.W14*        |
| Pat_73 | Post-Resistance | ZNF248   | 57209     | 37 | 10 | 38121877  | 38121877  | Missense_Mutation | SNP | G  | A  | 18  | 9   | c.406C>T                 | c.(406-408)CCC>TCC   | p.P136S       |
| Pat_73 | Post-Resistance | CYP2C9   | 1559      | 37 | 10 | 96702071  | 96702071  | Missense_Mutation | SNP | C  | T  | 48  | 43  | c.454C>T                 | c.(454-456)CTT>TTT   | p.L152F       |
| Pat_73 | Post-Resistance | CYP2C8   | 1558      | 37 | 10 | 96797060  | 96797060  | Missense_Mutation | SNP | C  | T  | 15  | 6   | c.1298G>A                | c.(1297-1299)CGA>CAA | p.R433Q       |
| Pat_73 | Post-Resistance | C10orf76 | 79591     | 37 | 10 | 103769782 | 103769782 | Splice_Site       | SNP | T  | A  | 3   | 46  | c.832_splice             | c.e12-1              | p.V278_splice |
| Pat_73 | Post-Resistance | C10orf79 | 80217     | 37 | 10 | 105920914 | 105920914 | Missense_Mutation | SNP | G  | A  | 13  | 7   | c.3421C>T                | c.(3421-3423)CCT>TCT | p.P1141S      |
| Pat_73 | Post-Resistance | HBE1     | 3046      | 37 | 11 | 5290788   | 5290788   | Missense_Mutation | SNP | A  | T  | 37  | 61  | c.211T>A                 | c.(211-213)TCC>ACC   | p.S71T        |
| Pat_73 | Post-Resistance | CCKBR    | 887       | 37 | 11 | 6281307   | 6281307   | Missense_Mutation | SNP | G  | A  | 17  | 26  | c.149G>A                 | c.(148-150)CGA>CAA   | p.R50Q        |
| Pat_73 | Post-Resistance | PEX16    | 9409      | 37 | 11 | 45935923  | 45935923  | Missense_Mutation | SNP | A  | G  | 3   | 56  | c.638T>C                 | c.(637-639)CTG>CCG   | p.L213P       |



|        |                 |           |        |    |    |           |           |                   |     |    |    |     |     |                |                        |               |
|--------|-----------------|-----------|--------|----|----|-----------|-----------|-------------------|-----|----|----|-----|-----|----------------|------------------------|---------------|
| Pat_73 | Post-Resistance | OR4C13    | 283092 | 37 | 11 | 49974138  | 49974138  | Missense_Mutation | SNP | C  | T  | 157 | 222 | c.164C>T       | c.(163-165)TCC>TTC     | p.S55F        |
| Pat_73 | Post-Resistance | ATM       | 472    | 37 | 11 | 108218025 | 108218026 | Missense_Mutation | DNP | TG | CT | 26  | 15  | .8604_8605TG>C | 602-8607)CTTGGT>CTCT   | p.G2869C      |
| Pat_73 | Post-Resistance | ANO2      | 57101  | 37 | 12 | 5963247   | 5963247   | Missense_Mutation | SNP | C  | T  | 109 | 142 | c.583G>A       | c.(583-585)GAG>AAG     | p.E195K       |
| Pat_73 | Post-Resistance | CD163     | 9332   | 37 | 12 | 7640125   | 7640125   | Missense_Mutation | SNP | C  | T  | 53  | 87  | c.1880G>A      | c.(1879-1881)GGA>GAA   | p.G627E       |
| Pat_73 | Post-Resistance | CD163     | 9332   | 37 | 12 | 7640497   | 7640497   | Missense_Mutation | SNP | C  | T  | 37  | 46  | c.1607G>A      | c.(1606-1608)GGA>GAA   | p.G536E       |
| Pat_73 | Post-Resistance | PLCZ1     | 89869  | 37 | 12 | 18876451  | 18876451  | Missense_Mutation | SNP | C  | T  | 27  | 51  | c.161G>A       | c.(160-162)AGA>AAA     | p.R54K        |
| Pat_73 | Post-Resistance | ABCC9     | 10060  | 37 | 12 | 21954063  | 21954063  | Missense_Mutation | SNP | C  | T  | 31  | 48  | c.4565G>A      | c.(4564-4566)GGA>GAA   | p.G1522E      |
| Pat_73 | Post-Resistance | FAM113B   | 91523  | 37 | 12 | 47629931  | 47629931  | Missense_Mutation | SNP | C  | T  | 66  | 105 | c.1085C>T      | c.(1084-1086)TCA>TTA   | p.S362L       |
| Pat_73 | Post-Resistance | STAB2     | 55576  | 37 | 12 | 104049246 | 104049246 | Missense_Mutation | SNP | G  | A  | 24  | 35  | c.1621G>A      | c.(1621-1623)GGA>AGA   | p.G541R       |
| Pat_73 | Post-Resistance | C12orf34  | 84915  | 37 | 12 | 110206294 | 110206294 | Missense_Mutation | SNP | G  | T  | 3   | 53  | c.560G>T       | c.(559-561)CGG>CTG     | p.R187L       |
| Pat_73 | Post-Resistance | C12orf51  | 283450 | 37 | 12 | 112605243 | 112605243 | Missense_Mutation | SNP | G  | A  | 16  | 29  | c.11146C>T     | c.(11146-11148)CCG>TCG | p.P3716S      |
| Pat_73 | Post-Resistance | ACADS     | 35     | 37 | 12 | 121176225 | 121176225 | Missense_Mutation | SNP | A  | G  | 10  | 24  | c.767A>G       | c.(766-768)GAG>GGG     | p.E256G       |
| Pat_73 | Post-Resistance | MLXIP     | 22877  | 37 | 12 | 122614641 | 122614641 | Missense_Mutation | SNP | C  | T  | 5   | 28  | c.892C>T       | c.(892-894)CCC>TCC     | p.P298S       |
| Pat_73 | Post-Resistance | SACS      | 26278  | 37 | 13 | 23907979  | 23907979  | Missense_Mutation | SNP | G  | A  | 39  | 97  | c.10036C>T     | c.(10036-10038)CCT>TCT | p.P3346S      |
| Pat_73 | Post-Resistance | HNRNPA1L2 | 144983 | 37 | 13 | 53217102  | 53217102  | Missense_Mutation | SNP | G  | A  | 17  | 166 | c.475G>A       | c.(475-477)GTG>ATG     | p.V159M       |
| Pat_73 | Post-Resistance | DHRS4     | 10901  | 37 | 14 | 24424420  | 24424420  | Missense_Mutation | SNP | C  | T  | 3   | 26  | c.305C>T       | c.(304-306)ACG>ATG     | p.T102M       |
| Pat_73 | Post-Resistance | CDKL1     | 8814   | 37 | 14 | 50845005  | 50845005  | Missense_Mutation | SNP | G  | A  | 13  | 23  | c.1244C>T      | c.(1243-1245)CCT>CTT   | p.P415L       |
| Pat_73 | Post-Resistance | RDH11     | 51109  | 37 | 14 | 68159310  | 68159310  | Missense_Mutation | SNP | C  | T  | 96  | 125 | c.194G>A       | c.(193-195)GGA>GAA     | p.G65E        |
| Pat_73 | Post-Resistance | ADAM21P1  | 145241 | 37 | 14 | 70713206  | 70713206  | Missense_Mutation | SNP | C  | T  | 41  | 74  | c.662G>A       | c.(661-663)GGA>GAA     | p.G221E       |
| Pat_73 | Post-Resistance | TMEM63C   | 57156  | 37 | 14 | 77709269  | 77709269  | Missense_Mutation | SNP | T  | A  | 33  | 36  | c.1211T>A      | c.(1210-1212)TTC>TAC   | p.F404Y       |
| Pat_73 | Post-Resistance | ATXN3     | 4287   | 37 | 14 | 92548769  | 92548769  | Missense_Mutation | SNP | T  | C  | 38  | 69  | c.650A>G       | c.(649-651)GAT>GGT     | p.D217G       |
| Pat_73 | Post-Resistance | CPSF2     | 53981  | 37 | 14 | 92621668  | 92621668  | Splice_Site       | SNP | G  | A  | 14  | 26  | c.1442_splice  | c.e11+1                | p.K481_splice |
| Pat_73 | Post-Resistance | ADAM6     | 8755   | 37 | 14 | 107087201 | 107087201 | Splice_Site       | SNP | G  | A  | 9   | 100 | c.5152_splice  | c.e111+1               |               |
| Pat_73 | Post-Resistance | FBN1      | 2200   | 37 | 15 | 48812948  | 48812948  | Missense_Mutation | SNP | G  | A  | 29  | 51  | c.1055C>T      | c.(1054-1056)TCC>TTC   | p.S352F       |
| Pat_73 | Post-Resistance | ACAN      | 176    | 37 | 15 | 89400834  | 89400834  | Missense_Mutation | SNP | C  | T  | 79  | 156 | c.5018C>T      | c.(5017-5019)TCC>TTC   | p.S1673F      |
| Pat_73 | Post-Resistance | C15orf58  | 390637 | 37 | 15 | 90785020  | 90785020  | Missense_Mutation | SNP | G  | A  | 30  | 85  | c.880G>A       | c.(880-882)GGA>AGA     | p.G294R       |
| Pat_73 | Post-Resistance | PRSS33    | 260429 | 37 | 16 | 2836101   | 2836101   | Missense_Mutation | SNP | C  | T  | 15  | 14  | c.68G>A        | c.(67-69)AGG>AAG       | p.R23K        |
| Pat_73 | Post-Resistance | SYT17     | 51760  | 37 | 16 | 19236068  | 19236068  | Missense_Mutation | SNP | T  | C  | 42  | 61  | c.1136T>C      | c.(1135-1137)TTC>TCC   | p.F379S       |
| Pat_73 | Post-Resistance | UMOD      | 7369   | 37 | 16 | 20360534  | 20360534  | Missense_Mutation | SNP | C  | T  | 16  | 12  | c.89G>A        | c.(88-90)AGA>AAA       | p.R30K        |
| Pat_73 | Post-Resistance | OTOA      | 146183 | 37 | 16 | 21739697  | 21739697  | Missense_Mutation | SNP | G  | A  | 24  | 57  | c.2152G>A      | c.(2152-2154)GAC>AAC   | p.D718N       |
| Pat_73 | Post-Resistance | ZNF646    | 9726   | 37 | 16 | 31091621  | 31091621  | Missense_Mutation | SNP | T  | C  | 13  | 29  | c.3976T>C      | c.(3976-3978)TAC>CAC   | p.Y1326H      |
| Pat_73 | Post-Resistance | VPS35     | 55737  | 37 | 16 | 46714582  | 46714582  | Splice_Site       | SNP | C  | A  | 17  | 4   | c.506_splice   | c.e5+1                 | p.D169_splice |
| Pat_73 | Post-Resistance | MMP2      | 4313   | 37 | 16 | 55516945  | 55516945  | Missense_Mutation | SNP | C  | T  | 62  | 38  | c.278C>T       | c.(277-279)ACC>ATC     | p.T93I        |
| Pat_73 | Post-Resistance | CTCF      | 10664  | 37 | 16 | 67644968  | 67644968  | Missense_Mutation | SNP | T  | C  | 11  | 105 | c.233T>C       | c.(232-234)ATG>ACG     | p.M78T        |
| Pat_73 | Post-Resistance | GLG1      | 2734   | 37 | 16 | 74502864  | 74502864  | Missense_Mutation | SNP | G  | A  | 20  | 64  | c.2416C>T      | c.(2416-2418)CGT>TGT   | p.R806C       |
| Pat_73 | Post-Resistance | ANKRD11   | 29123  | 37 | 16 | 89349010  | 89349010  | Missense_Mutation | SNP | C  | T  | 8   | 20  | c.3940G>A      | c.(3940-3942)GAG>AAG   | p.E1314K      |
| Pat_73 | Post-Resistance | OR3A2     | 4995   | 37 | 17 | 3181634   | 3181634   | Missense_Mutation | SNP | G  | A  | 36  | 58  | c.596C>T       | c.(595-597)TCC>TTC     | p.S199F       |
| Pat_73 | Post-Resistance | NLRP1     | 22861  | 37 | 17 | 5462968   | 5462968   | Missense_Mutation | SNP | C  | T  | 56  | 83  | c.1048G>A      | c.(1048-1050)GCC>ACC   | p.A350T       |
| Pat_73 | Post-Resistance | MFSD6L    | 162387 | 37 | 17 | 8702230   | 8702230   | Missense_Mutation | SNP | G  | A  | 12  | 18  | c.209C>T       | c.(208-210)GCC>GTC     | p.A70V        |
| Pat_73 | Post-Resistance | MYH2      | 4620   | 37 | 17 | 10440996  | 10440996  | Missense_Mutation | SNP | C  | T  | 115 | 173 | c.1573G>A      | c.(1573-1575)GAG>AAG   | p.E525K       |
| Pat_73 | Post-Resistance | DNAH9     | 1770   | 37 | 17 | 11666863  | 11666863  | Missense_Mutation | SNP | G  | A  | 38  | 65  | c.7102G>A      | c.(7102-7104)GAA>AAA   | p.E2368K      |
| Pat_73 | Post-Resistance | NCOR1     | 9611   | 37 | 17 | 16012114  | 16012114  | Missense_Mutation | SNP | G  | A  | 30  | 54  | c.2168C>T      | c.(2167-2169)CCA>CTA   | p.P723L       |
| Pat_73 | Post-Resistance | KRTAP4-11 | 653240 | 37 | 17 | 39274206  | 39274206  | Missense_Mutation | SNP | C  | T  | 5   | 99  | c.362G>A       | c.(361-363)AGA>AAA     | p.R121K       |
| Pat_73 | Post-Resistance | KRTAP4-5  | 85289  | 37 | 17 | 39305619  | 39305619  | Missense_Mutation | SNP | G  | T  | 5   | 56  | c.401C>A       | c.(400-402)TCT>TAT     | p.S134Y       |
| Pat_73 | Post-Resistance | GPATCH8   | 23131  | 37 | 17 | 42541860  | 42541860  | Missense_Mutation | SNP | C  | T  | 130 | 215 | c.173G>A       | c.(172-174)GGA>GAA     | p.G58E        |
| Pat_73 | Post-Resistance | EIF4A3    | 9775   | 37 | 17 | 78115177  | 78115177  | Missense_Mutation | SNP | G  | A  | 25  | 38  | c.313C>T       | c.(313-315)CGT>TGT     | p.R105C       |
| Pat_73 | Post-Resistance | SLC38A10  | 124565 | 37 | 17 | 79256004  | 79256005  | Missense_Mutation | DNP | GG | AA | 29  | 87  | c.485_486CC>TT | c.(484-486)ACC>ATT     | p.T162I       |

|        |                 |          |           |    |    |           |           |                   |     |    |    |     |     |                  |                          |           |
|--------|-----------------|----------|-----------|----|----|-----------|-----------|-------------------|-----|----|----|-----|-----|------------------|--------------------------|-----------|
| Pat_73 | Post-Resistance | HGS      | 9146      | 37 | 17 | 79655770  | 79655770  | Missense_Mutation | SNP | T  | A  | 19  | 15  | c.328T>A         | c.(328-330)TAC>AAC       | p.Y110N   |
| Pat_73 | Post-Resistance | CBLN2    | 147381    | 37 | 18 | 70205419  | 70205419  | Missense_Mutation | SNP | G  | A  | 29  | 11  | c.667C>T         | c.(667-669)CCT>TCT       | p.P223S   |
| Pat_73 | Post-Resistance | STAP2    | 55620     | 37 | 19 | 4329977   | 4329977   | Missense_Mutation | SNP | G  | C  | 10  | 26  | c.436C>G         | c.(436-438)CGT>GGT       | p.R146G   |
| Pat_73 | Post-Resistance | C3       | 718       | 37 | 19 | 6678278   | 6678278   | Missense_Mutation | SNP | C  | T  | 22  | 29  | c.4735G>A        | c.(4735-4737)GGA>AGA     | p.G1579R  |
| Pat_73 | Post-Resistance | EMR1     | 2015      | 37 | 19 | 6935050   | 6935050   | Missense_Mutation | SNP | C  | T  | 44  | 61  | c.2342C>T        | c.(2341-2343)TCC>TTC     | p.S781F   |
| Pat_73 | Post-Resistance | MUC16    | 94025     | 37 | 19 | 9069279   | 9069279   | Missense_Mutation | SNP | G  | A  | 48  | 79  | c.18167C>T       | c.(18166-18168)TCA>TTA   | p.S6056L  |
| Pat_73 | Post-Resistance | MUC16    | 94025     | 37 | 19 | 9069999   | 9069999   | Missense_Mutation | SNP | C  | T  | 42  | 51  | c.17447G>A       | c.(17446-17448)AGG>AAC   | p.R5816K  |
| Pat_73 | Post-Resistance | MUC16    | 94025     | 37 | 19 | 9083927   | 9083927   | Missense_Mutation | SNP | G  | A  | 10  | 27  | c.7888C>T        | c.(7888-7890)CCA>TCA     | p.P2630S  |
| Pat_73 | Post-Resistance | LDLR     | 3949      | 37 | 19 | 11215925  | 11215925  | Missense_Mutation | SNP | C  | T  | 120 | 143 | c.343C>T         | c.(343-345)CGC>TGC       | p.R115C   |
| Pat_73 | Post-Resistance | ZNF653   | 115950    | 37 | 19 | 11596534  | 11596534  | Missense_Mutation | SNP | G  | A  | 38  | 81  | c.1507C>T        | c.(1507-1509)CCT>TCT     | p.P503S   |
| Pat_73 | Post-Resistance | ZNF844   | 284391    | 37 | 19 | 12186819  | 12186819  | Missense_Mutation | SNP | C  | T  | 11  | 20  | c.884C>T         | c.(883-885)TCC>TTC       | p.S295F   |
| Pat_73 | Post-Resistance | ZNF563   | 147837    | 37 | 19 | 12429554  | 12429554  | Missense_Mutation | SNP | C  | T  | 10  | 344 | c.1285G>A        | c.(1285-1287)GCG>ACG     | p.A429T   |
| Pat_73 | Post-Resistance | ZNF443   | 10224     | 37 | 19 | 12541802  | 12541802  | Missense_Mutation | SNP | C  | A  | 166 | 279 | c.1184G>T        | c.(1183-1185)TGC>TTC     | p.C395F   |
| Pat_73 | Post-Resistance | MAST1    | 22983     | 37 | 19 | 12951329  | 12951330  | Missense_Mutation | DNP | CC | TT | 10  | 27  | c.153_154CC>TT   | c.(151-156)TCCCGG>TCTTC  | p.P52S    |
| Pat_73 | Post-Resistance | SLC1A6   | 6511      | 37 | 19 | 15067330  | 15067331  | Missense_Mutation | DNP | CC | TT | 17  | 18  | c.1126_1127GG>AA | c.(1126-1128)GGC>AAC     | p.G376N   |
| Pat_73 | Post-Resistance | PGLYRP2  | 114770    | 37 | 19 | 15587233  | 15587233  | Missense_Mutation | SNP | G  | A  | 23  | 32  | c.248C>T         | c.(247-249)CCC>CTC       | p.P83L    |
| Pat_73 | Post-Resistance | CYP4F2   | 8529      | 37 | 19 | 15996840  | 15996840  | Missense_Mutation | SNP | G  | A  | 35  | 45  | c.1009C>T        | c.(1009-1011)CTC>TTC     | p.L337F   |
| Pat_73 | Post-Resistance | ZNF486   | 90649     | 37 | 19 | 20308465  | 20308465  | Missense_Mutation | SNP | C  | T  | 39  | 52  | c.946C>T         | c.(946-948)CAT>TAT       | p.H316Y   |
| Pat_73 | Post-Resistance | ZNF737   | 100129842 | 37 | 19 | 20727870  | 20727870  | Missense_Mutation | SNP | C  | G  | 10  | 251 | c.1139G>C        | c.(1138-1140)TGG>TCG     | p.W380S   |
| Pat_73 | Post-Resistance | ZNF208   | 7757      | 37 | 19 | 22155282  | 22155282  | Missense_Mutation | SNP | T  | C  | 7   | 170 | c.2254A>G        | c.(2254-2256)AAG>GAG     | p.K752E   |
| Pat_73 | Post-Resistance | ZNF99    | 7652      | 37 | 19 | 22939459  | 22939459  | Missense_Mutation | SNP | C  | T  | 51  | 71  | c.2712G>A        | c.(2710-2712)ATG>ATA     | p.M904I   |
| Pat_73 | Post-Resistance | ZNF99    | 7652      | 37 | 19 | 22941749  | 22941749  | Missense_Mutation | SNP | G  | A  | 78  | 132 | c.689C>T         | c.(688-690)GCT>GTT       | p.A230V   |
| Pat_73 | Post-Resistance | MAP4K1   | 11184     | 37 | 19 | 39100299  | 39100299  | Missense_Mutation | SNP | G  | A  | 14  | 17  | c.943C>T         | c.(943-945)CCT>TCT       | p.P315S   |
| Pat_73 | Post-Resistance | CYP2B6   | 1555      | 37 | 19 | 41512879  | 41512879  | Missense_Mutation | SNP | G  | A  | 32  | 43  | c.554G>A         | c.(553-555)GGA>GAA       | p.G185E   |
| Pat_73 | Post-Resistance | AXL      | 558       | 37 | 19 | 41748820  | 41748820  | Missense_Mutation | SNP | C  | T  | 33  | 68  | c.1345C>T        | c.(1345-1347)CCC>TCC     | p.P449S   |
| Pat_73 | Post-Resistance | CEACAM20 | 125931    | 37 | 19 | 45033505  | 45033505  | Missense_Mutation | SNP | G  | A  | 27  | 18  | c.28C>T          | c.(28-30)CAC>TAC         | p.H10Y    |
| Pat_73 | Post-Resistance | ZNF761   | 388561    | 37 | 19 | 53959214  | 53959214  | Missense_Mutation | SNP | A  | T  | 101 | 138 | c.1453A>T        | c.(1453-1455)AGG>TGG     | p.R485W   |
| Pat_73 | Post-Resistance | NCR1     | 9437      | 37 | 19 | 55420727  | 55420727  | Missense_Mutation | SNP | G  | A  | 46  | 68  | c.479G>A         | c.(478-480)AGA>AAA       | p.R160K   |
| Pat_73 | Post-Resistance | NLRP2    | 55655     | 37 | 19 | 55496441  | 55496441  | Missense_Mutation | SNP | C  | T  | 51  | 74  | c.2057C>T        | c.(2056-2058)CCT>CTT     | p.P686L   |
| Pat_73 | Post-Resistance | PTPRH    | 5794      | 37 | 19 | 55713474  | 55713474  | Missense_Mutation | SNP | A  | T  | 58  | 89  | c.1103T>A        | c.(1102-1104)GTG>GAG     | p.V368E   |
| Pat_73 | Post-Resistance | NLRP11   | 204801    | 37 | 19 | 56312966  | 56312966  | Missense_Mutation | SNP | C  | T  | 72  | 87  | c.2143G>A        | c.(2143-2145)GAG>AAG     | p.E715K   |
| Pat_73 | Post-Resistance | ZNF749   | 388567    | 37 | 19 | 57956103  | 57956104  | Missense_Mutation | DNP | TG | CC | 6   | 117 | c.1587_1588TG>C  | c.(1585-1590)CATGAG>CACG | p.E530Q   |
| Pat_73 | Post-Resistance | ZNF814   | 730051    | 37 | 19 | 58385546  | 58385546  | Missense_Mutation | SNP | G  | T  | 4   | 45  | c.1212C>A        | c.(1210-1212)GAC>GAA     | p.D404E   |
| Pat_73 | Post-Resistance | ALK      | 238       | 37 | 2  | 29551311  | 29551311  | Missense_Mutation | SNP | G  | A  | 36  | 35  | c.1319C>T        | c.(1318-1320)TCC>TTC     | p.S440F   |
| Pat_73 | Post-Resistance | NRXN1    | 9378      | 37 | 2  | 50692660  | 50692660  | Missense_Mutation | SNP | T  | C  | 19  | 29  | c.3404A>G        | c.(3403-3405)CAA>CGA     | p.Q1135R  |
| Pat_73 | Post-Resistance | LOXL3    | 84695     | 37 | 2  | 74762824  | 74762824  | Missense_Mutation | SNP | C  | T  | 41  | 30  | c.1307G>A        | c.(1306-1308)GGA>GAA     | p.G436E   |
| Pat_73 | Post-Resistance | REG3G    | 130120    | 37 | 2  | 79255008  | 79255008  | Missense_Mutation | SNP | C  | T  | 65  | 130 | c.409C>T         | c.(409-411)CCC>TCC       | p.P137S   |
| Pat_73 | Post-Resistance | C2orf55  | 343990    | 37 | 2  | 99411032  | 99411032  | Missense_Mutation | SNP | G  | A  | 38  | 72  | c.2852C>T        | c.(2851-2853)TCT>TTT     | p.S951F   |
| Pat_73 | Post-Resistance | RGPD4    | 285190    | 37 | 2  | 108476236 | 108476236 | Missense_Mutation | SNP | G  | A  | 76  | 78  | c.1693G>A        | c.(1693-1695)GCC>ACC     | p.A565T   |
| Pat_73 | Post-Resistance | DDX11L2  | 84771     | 37 | 2  | 114357557 | 114357557 | Nonstop_Mutation  | SNP | A  | G  | 4   | 45  | c.382T>C         | c.(382-384)TAG>CAG       | p.*128Q   |
| Pat_73 | Post-Resistance | LY75     | 4065      | 37 | 2  | 160741758 | 160741758 | Missense_Mutation | SNP | C  | T  | 55  | 96  | c.960G>A         | c.(958-960)ATG>ATA       | p.M320I   |
| Pat_73 | Post-Resistance | DLX1     | 1745      | 37 | 2  | 172952920 | 172952920 | Missense_Mutation | SNP | C  | T  | 57  | 82  | c.703C>T         | c.(703-705)CCC>TCC       | p.P235S   |
| Pat_73 | Post-Resistance | TTN      | 7273      | 37 | 2  | 179430392 | 179430392 | Missense_Mutation | SNP | C  | T  | 73  | 124 | c.72763G>A       | c.(72763-72765)GGA>AG/   | p.G24255R |
| Pat_73 | Post-Resistance | TTN      | 7273      | 37 | 2  | 179480140 | 179480140 | Missense_Mutation | SNP | G  | A  | 83  | 139 | c.40828C>T       | c.(40828-40830)CCA>TCA   | p.P13610S |
| Pat_73 | Post-Resistance | TTN      | 7273      | 37 | 2  | 179614327 | 179614327 | Missense_Mutation | SNP | C  | T  | 17  | 30  | c.12800G>A       | c.(12799-12801)GGA>GA/   | p.G4267E  |
| Pat_73 | Post-Resistance | BMPR2    | 659       | 37 | 2  | 203407087 | 203407087 | Missense_Mutation | SNP | C  | T  | 28  | 47  | c.1330C>T        | c.(1330-1332)CCC>TCC     | p.P444S   |
| Pat_73 | Post-Resistance | PLCB4    | 5332      | 37 | 20 | 9402034   | 9402034   | Missense_Mutation | SNP | G  | A  | 33  | 59  | c.2209G>A        | c.(2209-2211)GAA>AAA     | p.E737K   |

|        |                 |          |        |    |    |           |           |                   |     |    |    |     |     |                                    |                      |          |
|--------|-----------------|----------|--------|----|----|-----------|-----------|-------------------|-----|----|----|-----|-----|------------------------------------|----------------------|----------|
| Pat_73 | Post-Resistance | MKKS     | 8195   | 37 | 20 | 10393901  | 10393901  | Missense_Mutation | SNP | A  | G  | 37  | 66  | c.262T>C                           | c.(262-264)TTC>CTC   | p.F88L   |
| Pat_73 | Post-Resistance | ESF1     | 51575  | 37 | 20 | 13714427  | 13714427  | Missense_Mutation | SNP | G  | A  | 43  | 67  | c.1891C>T                          | c.(1891-1893)CCT>TCT | p.P631S  |
| Pat_73 | Post-Resistance | FRG1B    | 284802 | 37 | 20 | 29625877  | 29625877  | Missense_Mutation | SNP | G  | A  | 9   | 144 | c.31G>A                            | c.(31-33)GCC>ACC     | p.A11T   |
| Pat_73 | Post-Resistance | GDF5     | 8200   | 37 | 20 | 34021784  | 34021784  | Missense_Mutation | SNP | G  | C  | 21  | 32  | c.1429C>G                          | c.(1429-1431)CTC>GTC | p.L477V  |
| Pat_73 | Post-Resistance | PHF20    | 51230  | 37 | 20 | 34526957  | 34526957  | Missense_Mutation | SNP | C  | T  | 36  | 47  | c.2639C>T                          | c.(2638-2640)TCC>TTC | p.S880F  |
| Pat_73 | Post-Resistance | TGM2     | 7052   | 37 | 20 | 36779358  | 36779358  | Missense_Mutation | SNP | G  | A  | 51  | 89  | c.535C>T                           | c.(535-537)CCT>TCT   | p.P179S  |
| Pat_73 | Post-Resistance | NCOA3    | 8202   | 37 | 20 | 46276009  | 46276009  | Missense_Mutation | SNP | C  | T  | 38  | 66  | c.3445C>T                          | c.(3445-3447)CCT>TCT | p.P1149S |
| Pat_73 | Post-Resistance | BTG3     | 10950  | 37 | 21 | 18966581  | 18966581  | Nonsense_Mutation | SNP | G  | A  | 38  | 37  | c.589C>T                           | c.(589-591)CGA>TGA   | p.R197*  |
| Pat_73 | Post-Resistance | CLIC6    | 54102  | 37 | 21 | 36079677  | 36079677  | Missense_Mutation | SNP | G  | A  | 18  | 18  | c.1528G>A                          | c.(1528-1530)GAC>AAC | p.D510N  |
| Pat_73 | Post-Resistance | PDE9A    | 5152   | 37 | 21 | 44192595  | 44192595  | Missense_Mutation | SNP | C  | T  | 9   | 20  | c.1733C>T                          | c.(1732-1734)TCC>TTC | p.S578F  |
| Pat_73 | Post-Resistance | CCT8L2   | 150160 | 37 | 22 | 17073380  | 17073380  | Missense_Mutation | SNP | C  | T  | 12  | 24  | c.61G>A                            | c.(61-63)GAG>AAG     | p.E21K   |
| Pat_73 | Post-Resistance | MYO18B   | 84700  | 37 | 22 | 26423319  | 26423319  | Missense_Mutation | SNP | C  | T  | 53  | 86  | c.7379C>T                          | c.(7378-7380)TCA>TTA | p.S2460L |
| Pat_73 | Post-Resistance | TMPRSS6  | 164656 | 37 | 22 | 37462141  | 37462141  | Nonsense_Mutation | SNP | C  | T  | 26  | 26  | c.2415G>A                          | c.(2413-2415)TGG>TGA | p.W805*  |
| Pat_73 | Post-Resistance | TNRC6B   | 23112  | 37 | 22 | 40662077  | 40662078  | Missense_Mutation | DNP | CC | TT | 54  | 99  | :.1843_1844CC>T                    | c.(1843-1845)CCC>TTC | p.P615F  |
| Pat_73 | Post-Resistance | WBP2NL   | 164684 | 37 | 22 | 42423028  | 42423028  | Missense_Mutation | SNP | G  | A  | 125 | 186 | c.773G>A                           | c.(772-774)GGA>GAA   | p.G258E  |
| Pat_73 | Post-Resistance | ITPR1    | 3708   | 37 | 3  | 4715034   | 4715034   | Missense_Mutation | SNP | C  | T  | 5   | 101 | c.2419C>T                          | c.(2419-2421)CTC>TTC | p.L807F  |
| Pat_73 | Post-Resistance | STAC     | 6769   | 37 | 3  | 36587734  | 36587734  | Missense_Mutation | SNP | G  | A  | 33  | 52  | c.1162G>A                          | c.(1162-1164)GGA>AGA | p.G388R  |
| Pat_73 | Post-Resistance | SLC22A14 | 9389   | 37 | 3  | 38358003  | 38358004  | Missense_Mutation | DNP | CC | TT | 9   | 35  | :.1721_1722CC>T                    | c.(1720-1722)TCC>TTT | p.S574F  |
| Pat_73 | Post-Resistance | TTC21A   | 199223 | 37 | 3  | 39156117  | 39156118  | Missense_Mutation | DNP | GG | AA | 79  | 154 | c.600_601GG>AA598-603)CTGGAG>CTAA/ |                      | p.E201K  |
| Pat_73 | Post-Resistance | CYP8B1   | 1582   | 37 | 3  | 42916798  | 42916798  | Missense_Mutation | SNP | G  | A  | 49  | 65  | c.511C>T                           | c.(511-513)CGC>TGC   | p.R171C  |
| Pat_73 | Post-Resistance | MAG1     | 9223   | 37 | 3  | 65364955  | 65364956  | Missense_Mutation | DNP | GG | AA | 7   | 16  | :.2975_2976CC>T                    | c.(2974-2976)CCC>CTT | p.P992L  |
| Pat_73 | Post-Resistance | FAM55C   | 91775  | 37 | 3  | 101520410 | 101520410 | Missense_Mutation | SNP | A  | T  | 20  | 30  | c.425A>T                           | c.(424-426)GAC>GTC   | p.D142V  |
| Pat_73 | Post-Resistance | POLQ     | 10721  | 37 | 3  | 121238889 | 121238889 | Missense_Mutation | SNP | G  | A  | 55  | 71  | c.1297C>T                          | c.(1297-1299)CGT>TGT | p.R433C  |
| Pat_73 | Post-Resistance | KALRN    | 8997   | 37 | 3  | 124281865 | 124281865 | Missense_Mutation | SNP | C  | T  | 38  | 59  | c.5105C>T                          | c.(5104-5106)CCC>CTC | p.P1702L |
| Pat_73 | Post-Resistance | SLCO2A1  | 6578   | 37 | 3  | 133673911 | 133673911 | Missense_Mutation | SNP | A  | G  | 23  | 22  | c.524T>C                           | c.(523-525)GTT>GCT   | p.V175A  |
| Pat_73 | Post-Resistance | B3GALNT1 | 8706   | 37 | 3  | 160803948 | 160803948 | Missense_Mutation | SNP | G  | A  | 19  | 30  | c.595C>T                           | c.(595-597)CAC>TAC   | p.H199Y  |
| Pat_73 | Post-Resistance | WDR49    | 151790 | 37 | 3  | 167246950 | 167246950 | Missense_Mutation | SNP | C  | T  | 15  | 31  | c.1240G>A                          | c.(1240-1242)GAA>AAA | p.E414K  |
| Pat_73 | Post-Resistance | ATP13A4  | 84239  | 37 | 3  | 193132506 | 193132506 | Missense_Mutation | SNP | G  | A  | 51  | 39  | c.2876C>T                          | c.(2875-2877)CCT>CTT | p.P959L  |
| Pat_73 | Post-Resistance | MUC4     | 4585   | 37 | 3  | 195511937 | 195511937 | Missense_Mutation | SNP | C  | T  | 7   | 11  | c.6514G>A                          | c.(6514-6516)GGT>AGT | p.G2172S |
| Pat_73 | Post-Resistance | STAP1    | 26228  | 37 | 4  | 68424640  | 68424640  | Missense_Mutation | SNP | G  | A  | 51  | 25  | c.113G>A                           | c.(112-114)GGA>GAA   | p.G38E   |
| Pat_73 | Post-Resistance | ANKRD17  | 26057  | 37 | 4  | 73943169  | 73943169  | Missense_Mutation | SNP | T  | C  | 120 | 65  | c.7490A>G                          | c.(7489-7491)CAT>CGT | p.H2497R |
| Pat_73 | Post-Resistance | AIMP1    | 9255   | 37 | 4  | 107258186 | 107258187 | Missense_Mutation | DNP | CT | TG | 44  | 67  | c.764_765CT>TG                     | c.(763-765)GCT>GTG   | p.A255V  |
| Pat_73 | Post-Resistance | ENPEP    | 2028   | 37 | 4  | 111412207 | 111412207 | Missense_Mutation | SNP | G  | A  | 40  | 71  | c.805G>A                           | c.(805-807)GAT>AAT   | p.D269N  |
| Pat_73 | Post-Resistance | TLL1     | 7092   | 37 | 4  | 166910623 | 166910623 | Missense_Mutation | SNP | G  | A  | 38  | 56  | c.260G>A                           | c.(259-261)GGA>GAA   | p.G87E   |
| Pat_73 | Post-Resistance | SPEF2    | 79925  | 37 | 5  | 35800155  | 35800155  | Missense_Mutation | SNP | C  | G  | 114 | 174 | c.4916C>G                          | c.(4915-4917)CCA>CGA | p.P1639R |
| Pat_73 | Post-Resistance | HEATR7B2 | 133558 | 37 | 5  | 41064585  | 41064585  | Missense_Mutation | SNP | G  | A  | 9   | 25  | c.449C>T                           | c.(448-450)ACT>ATT   | p.T150I  |
| Pat_73 | Post-Resistance | SNX18    | 112574 | 37 | 5  | 53815644  | 53815644  | Missense_Mutation | SNP | C  | T  | 19  | 27  | c.1862C>T                          | c.(1861-1863)CCT>CTT | p.P621L  |
| Pat_73 | Post-Resistance | THBS4    | 7060   | 37 | 5  | 79372734  | 79372734  | Missense_Mutation | SNP | C  | T  | 105 | 271 | c.1949C>T                          | c.(1948-1950)GCC>GTC | p.A650V  |
| Pat_73 | Post-Resistance | FBXL21   | 26223  | 37 | 5  | 135276266 | 135276266 | Missense_Mutation | SNP | C  | T  | 7   | 26  | c.578C>T                           | c.(577-579)CCT>CTT   | p.P193L  |
| Pat_73 | Post-Resistance | PCDHA1   | 56147  | 37 | 5  | 140167553 | 140167553 | Missense_Mutation | SNP | G  | A  | 48  | 64  | c.1678G>A                          | c.(1678-1680)GAC>AAC | p.D560N  |
| Pat_73 | Post-Resistance | PCDHB12  | 56124  | 37 | 5  | 140588687 | 140588687 | Missense_Mutation | SNP | G  | A  | 37  | 69  | c.208G>A                           | c.(208-210)GAT>AAT   | p.D70N   |
| Pat_73 | Post-Resistance | PCDHGB4  | 8641   | 37 | 5  | 140769667 | 140769667 | Missense_Mutation | SNP | C  | T  | 109 | 211 | c.2216C>T                          | c.(2215-2217)CCC>CTC | p.P739L  |
| Pat_73 | Post-Resistance | DPYSL3   | 1809   | 37 | 5  | 146785188 | 146785188 | Nonsense_Mutation | SNP | G  | A  | 29  | 286 | c.796C>T                           | c.(796-798)CAA>TAA   | p.Q266*  |
| Pat_73 | Post-Resistance | GRM6     | 2916   | 37 | 5  | 178416382 | 178416382 | Missense_Mutation | SNP | C  | T  | 59  | 95  | c.1037G>A                          | c.(1036-1038)CGA>CAA | p.R346Q  |
| Pat_73 | Post-Resistance | SYCP2L   | 221711 | 37 | 6  | 10907857  | 10907857  | Nonsense_Mutation | SNP | G  | A  | 146 | 57  | c.759G>A                           | c.(757-759)TGG>TGA   | p.W253*  |
| Pat_73 | Post-Resistance | EDN1     | 1906   | 37 | 6  | 12294510  | 12294510  | Missense_Mutation | SNP | G  | A  | 99  | 28  | c.406G>A                           | c.(406-408)GAG>AAG   | p.E136K  |
| Pat_73 | Post-Resistance | VAR52    | 57176  | 37 | 6  | 30889704  | 30889704  | Missense_Mutation | SNP | C  | T  | 35  | 188 | c.1738C>T                          | c.(1738-1740)CCT>TCT | p.P580S  |

|        |                 |          |           |    |   |           |           |                   |     |   |   |     |     |           |                      |          |
|--------|-----------------|----------|-----------|----|---|-----------|-----------|-------------------|-----|---|---|-----|-----|-----------|----------------------|----------|
| Pat_73 | Post-Resistance | C6orf106 | 64771     | 37 | 6 | 34574375  | 34574375  | Missense_Mutation | SNP | G | A | 35  | 159 | c.818C>T  | c.(817-819)CCC>CTC   | p.P273L  |
| Pat_73 | Post-Resistance | UHRF1BP1 | 54887     | 37 | 6 | 34826790  | 34826790  | Missense_Mutation | SNP | C | T | 25  | 149 | c.2657C>T | c.(2656-2658)CCT>CTT | p.P886L  |
| Pat_73 | Post-Resistance | KCNK5    | 8645      | 37 | 6 | 39159028  | 39159028  | Missense_Mutation | SNP | C | T | 61  | 18  | c.1138G>A | c.(1138-1140)GCC>ACC | p.A380T  |
| Pat_73 | Post-Resistance | PGC      | 5225      | 37 | 6 | 41710082  | 41710082  | Missense_Mutation | SNP | C | T | 124 | 30  | c.593G>A  | c.(592-594)GGC>GAC   | p.G198D  |
| Pat_73 | Post-Resistance | KLC4     | 89953     | 37 | 6 | 43029158  | 43029158  | Missense_Mutation | SNP | G | A | 73  | 15  | c.85G>A   | c.(85-87)GTC>ATC     | p.V29I   |
| Pat_73 | Post-Resistance | ZNF318   | 24149     | 37 | 6 | 43323487  | 43323487  | Missense_Mutation | SNP | G | A | 124 | 749 | c.1585C>T | c.(1585-1587)CCC>TCC | p.P529S  |
| Pat_73 | Post-Resistance | GNA12    | 2768      | 37 | 7 | 2834734   | 2834734   | Missense_Mutation | SNP | G | A | 80  | 133 | c.353C>T  | c.(352-354)CCT>CTT   | p.P118L  |
| Pat_73 | Post-Resistance | TMEM195  | 392636    | 37 | 7 | 15584403  | 15584403  | Missense_Mutation | SNP | C | T | 65  | 123 | c.403G>A  | c.(403-405)GCT>ACT   | p.A135T  |
| Pat_73 | Post-Resistance | NPVF     | 64111     | 37 | 7 | 25266503  | 25266503  | Missense_Mutation | SNP | C | T | 69  | 123 | c.281G>A  | c.(280-282)AGG>AAG   | p.R94K   |
| Pat_73 | Post-Resistance | INHBA    | 3624      | 37 | 7 | 41729438  | 41729438  | Missense_Mutation | SNP | G | A | 58  | 83  | c.1091C>T | c.(1090-1092)TCC>TTC | p.S364F  |
| Pat_73 | Post-Resistance | VWC2     | 375567    | 37 | 7 | 49842374  | 49842374  | Missense_Mutation | SNP | C | T | 68  | 85  | c.764C>T  | c.(763-765)CCC>CTC   | p.P255L  |
| Pat_73 | Post-Resistance | MET      | 4233      | 37 | 7 | 116380979 | 116380979 | Missense_Mutation | SNP | C | T | 153 | 39  | c.1601C>T | c.(1600-1602)CCC>CTC | p.P534L  |
| Pat_73 | Post-Resistance | BRAF     | 673       | 37 | 7 | 140453136 | 140453136 | Missense_Mutation | SNP | A | T | 69  | 17  | c.1799T>A | c.(1798-1800)GTG>GAG | p.V600E  |
| Pat_73 | Post-Resistance | CSMD1    | 64478     | 37 | 8 | 2976008   | 2976008   | Missense_Mutation | SNP | G | A | 64  | 50  | c.6346C>T | c.(6346-6348)CCT>TCT | p.P2116S |
| Pat_73 | Post-Resistance | SGK223   | 157285    | 37 | 8 | 8175867   | 8175867   | Missense_Mutation | SNP | C | T | 39  | 108 | c.4018G>A | c.(4018-4020)GAG>AAG | p.E1340K |
| Pat_73 | Post-Resistance | XKR6     | 286046    | 37 | 8 | 10755518  | 10755518  | Nonsense_Mutation | SNP | G | A | 29  | 58  | c.1870C>T | c.(1870-1872)CGA>TGA | p.R624*  |
| Pat_73 | Post-Resistance | SLC7A2   | 6542      | 37 | 8 | 17417899  | 17417899  | Missense_Mutation | SNP | C | T | 36  | 56  | c.1361C>T | c.(1360-1362)TCG>TTG | p.S454L  |
| Pat_73 | Post-Resistance | REEP4    | 80346     | 37 | 8 | 21997703  | 21997703  | Missense_Mutation | SNP | G | C | 18  | 55  | c.164C>G  | c.(163-165)ACA>AGA   | p.T55R   |
| Pat_73 | Post-Resistance | ADAMDEC1 | 27299     | 37 | 8 | 24253266  | 24253266  | Missense_Mutation | SNP | G | A | 21  | 27  | c.397G>A  | c.(397-399)GAA>AAA   | p.E133K  |
| Pat_73 | Post-Resistance | NRG1     | 3084      | 37 | 8 | 32453417  | 32453417  | Missense_Mutation | SNP | G | A | 77  | 104 | c.172G>A  | c.(172-174)GAA>AAA   | p.E58K   |
| Pat_73 | Post-Resistance | ADAM2    | 2515      | 37 | 8 | 39645680  | 39645680  | Missense_Mutation | SNP | C | T | 41  | 53  | c.733G>A  | c.(733-735)GAG>AAG   | p.E245K  |
| Pat_73 | Post-Resistance | PREX2    | 80243     | 37 | 8 | 68981348  | 68981348  | Missense_Mutation | SNP | G | A | 44  | 25  | c.1420G>A | c.(1420-1422)GAG>AAG | p.E474K  |
| Pat_73 | Post-Resistance | HNF4G    | 3174      | 37 | 8 | 76471119  | 76471119  | Missense_Mutation | SNP | C | T | 72  | 152 | c.829C>T  | c.(829-831)CGG>TGG   | p.R277W  |
| Pat_73 | Post-Resistance | RIMS2    | 9699      | 37 | 8 | 105263362 | 105263362 | Missense_Mutation | SNP | G | A | 19  | 16  | c.3856G>A | c.(3856-3858)GAA>AAA | p.E1286K |
| Pat_73 | Post-Resistance | ARC      | 23237     | 37 | 8 | 143695299 | 143695299 | Missense_Mutation | SNP | C | T | 11  | 4   | c.334G>A  | c.(334-336)GAG>AAG   | p.E112K  |
| Pat_73 | Post-Resistance | OR13C8   | 138802    | 37 | 9 | 107332146 | 107332146 | Missense_Mutation | SNP | G | A | 23  | 49  | c.698G>A  | c.(697-699)GGA>GAA   | p.G233E  |
| Pat_73 | Post-Resistance | OR13C9   | 286362    | 37 | 9 | 107380371 | 107380371 | Missense_Mutation | SNP | G | A | 74  | 96  | c.115C>T  | c.(115-117)CTT>TTT   | p.L39F   |
| Pat_73 | Post-Resistance | TNC      | 3371      | 37 | 9 | 117852964 | 117852964 | Missense_Mutation | SNP | C | T | 194 | 409 | c.334G>A  | c.(334-336)GGC>AGC   | p.G112S  |
| Pat_73 | Post-Resistance | USP20    | 10868     | 37 | 9 | 132641906 | 132641906 | Missense_Mutation | SNP | A | G | 8   | 64  | c.2567A>G | c.(2566-2568)CAT>CGT | p.H856R  |
| Pat_73 | Post-Resistance | FAM78A   | 286336    | 37 | 9 | 134151461 | 134151461 | Missense_Mutation | SNP | C | G | 31  | 3   | c.106G>C  | c.(106-108)GAA>CAA   | p.E36Q   |
| Pat_73 | Post-Resistance | TUBBP5   | 643224    | 37 | 9 | 141071420 | 141071420 | Missense_Mutation | SNP | G | A | 6   | 85  | c.823G>A  | c.(823-825)GAC>AAC   | p.D275N  |
| Pat_73 | Post-Resistance | ZC4H2    | 55906     | 37 | X | 64137703  | 64137703  | Missense_Mutation | SNP | G | A | 8   | 1   | c.635C>T  | c.(634-636)TCC>TTC   | p.S212F  |
| Pat_73 | Post-Resistance | ZCCHC5   | 203430    | 37 | X | 77913110  | 77913110  | Missense_Mutation | SNP | G | A | 9   | 1   | c.808C>T  | c.(808-810)CCC>TCC   | p.P270S  |
| Pat_73 | Post-Resistance | GPRASP1  | 9737      | 37 | X | 101909266 | 101909266 | Missense_Mutation | SNP | T | G | 64  | 12  | c.425T>G  | c.(424-426)GTT>GGT   | p.V142G  |
| Pat_73 | Post-Resistance | MAGEA10  | 4109      | 37 | X | 151303681 | 151303681 | Missense_Mutation | SNP | C | T | 77  | 17  | c.412G>A  | c.(412-414)GTG>ATG   | p.V138M  |
| Pat_74 | Pre-Treatment   | CASP9    | 842       | 37 | 1 | 15844799  | 15844799  | Missense_Mutation | SNP | G | A | 33  | 58  | c.224C>T  | c.(223-225)TCC>TTC   | p.S75F   |
| Pat_74 | Pre-Treatment   | ATP13A2  | 23400     | 37 | 1 | 17330867  | 17330867  | Missense_Mutation | SNP | A | G | 22  | 33  | c.517T>C  | c.(517-519)TAT>CAT   | p.Y173H  |
| Pat_74 | Pre-Treatment   | CSMD2    | 114784    | 37 | 1 | 34191090  | 34191090  | Missense_Mutation | SNP | C | T | 29  | 49  | c.2435G>A | c.(2434-2436)CGG>CAG | p.R812Q  |
| Pat_74 | Pre-Treatment   | DHCR24   | 1718      | 37 | 1 | 55337202  | 55337202  | Missense_Mutation | SNP | G | A | 37  | 43  | c.697C>T  | c.(697-699)CCT>TCT   | p.P233S  |
| Pat_74 | Pre-Treatment   | LEPR     | 3953      | 37 | 1 | 66058389  | 66058389  | Nonsense_Mutation | SNP | C | T | 41  | 69  | c.544C>T  | c.(544-546)CAG>TAG   | p.Q182*  |
| Pat_74 | Pre-Treatment   | C1orf173 | 127254    | 37 | 1 | 75038497  | 75038497  | Missense_Mutation | SNP | C | T | 32  | 39  | c.2897G>A | c.(2896-2898)AGA>AAA | p.R966K  |
| Pat_74 | Pre-Treatment   | AK5      | 26289     | 37 | 1 | 77949003  | 77949003  | Missense_Mutation | SNP | G | A | 24  | 42  | c.1061G>A | c.(1060-1062)GGT>GAT | p.G354D  |
| Pat_74 | Pre-Treatment   | KIAA1324 | 57535     | 37 | 1 | 109742693 | 109742693 | Missense_Mutation | SNP | G | T | 3   | 59  | c.2641G>T | c.(2641-2643)GTG>TTG | p.V881L  |
| Pat_74 | Pre-Treatment   | SLC16A1  | 6566      | 37 | 1 | 113471717 | 113471717 | Missense_Mutation | SNP | C | T | 12  | 27  | c.214G>A  | c.(214-216)GGA>AGA   | p.G72R   |
| Pat_74 | Pre-Treatment   | NBPF10   | 100132406 | 37 | 1 | 145327548 | 145327548 | Missense_Mutation | SNP | A | G | 3   | 15  | c.4330A>G | c.(4330-4332)AAT>GAT | p.N1444D |
| Pat_74 | Pre-Treatment   | NBPF10   | 100132406 | 37 | 1 | 146398425 | 146398425 | Missense_Mutation | SNP | C | A | 6   | 254 | c.1224C>A | c.(1222-1224)GAC>GAA | p.D408E  |
| Pat_74 | Pre-Treatment   | TCHHL1   | 126637    | 37 | 1 | 152059823 | 152059823 | Missense_Mutation | SNP | A | C | 67  | 80  | c.335T>G  | c.(334-336)GTT>GGT   | p.V112G  |

|        |               |           |        |    |    |           |           |                        |     |    |    |     |     |                |                          |          |
|--------|---------------|-----------|--------|----|----|-----------|-----------|------------------------|-----|----|----|-----|-----|----------------|--------------------------|----------|
| Pat_74 | Pre-Treatment | ASH1L     | 55870  | 37 | 1  | 155313160 | 155313161 | Missense_Mutation      | DNP | GG | AA | 42  | 93  | .8252_8253CC>T | c.(8251-8253)CCC>CTT     | p.P2751L |
| Pat_74 | Pre-Treatment | SPTA1     | 6708   | 37 | 1  | 158596788 | 158596788 | Missense_Mutation      | SNP | C  | T  | 33  | 58  | c.5674G>A      | c.(5674-5676)GAG>AAG     | p.E1892K |
| Pat_74 | Pre-Treatment | REN       | 5972   | 37 | 1  | 204128651 | 204128651 | Missense_Mutation      | SNP | C  | T  | 4   | 93  | c.565G>A       | c.(565-567)GAG>AAG       | p.E189K  |
| Pat_74 | Pre-Treatment | WDR26     | 80232  | 37 | 1  | 224592184 | 224592184 | Missense_Mutation      | SNP | A  | G  | 67  | 97  | c.806T>C       | c.(805-807)CTT>CCT       | p.L269P  |
| Pat_74 | Pre-Treatment | NEBL      | 10529  | 37 | 10 | 21134266  | 21134266  | Missense_Mutation      | SNP | A  | T  | 21  | 20  | c.1148T>A      | c.(1147-1149)ATT>AAT     | p.I383N  |
| Pat_74 | Pre-Treatment | SGMS1     | 259230 | 37 | 10 | 52103520  | 52103520  | Missense_Mutation      | SNP | G  | A  | 24  | 23  | c.355C>T       | c.(355-357)CCC>TCC       | p.P119S  |
| Pat_74 | Pre-Treatment | LOC729020 | 729020 | 37 | 10 | 105005787 | 105005787 | Missense_Mutation      | SNP | C  | T  | 12  | 13  | c.34C>T        | c.(34-36)CTC>TTC         | p.L12F   |
| Pat_74 | Pre-Treatment | PHRF1     | 57661  | 37 | 11 | 607875    | 607875    | Nonsense_Mutation      | SNP | G  | T  | 16  | 37  | c.2419G>T      | c.(2419-2421)GAG>TAG     | p.E807*  |
| Pat_74 | Pre-Treatment | MUC6      | 4588   | 37 | 11 | 1017526   | 1017526   | Missense_Mutation      | SNP | G  | C  | 9   | 508 | c.5275C>G      | c.(5275-5277)CCT>GCT     | p.P1759A |
| Pat_74 | Pre-Treatment | MUC5B     | 727897 | 37 | 11 | 1271468   | 1271468   | Missense_Mutation      | SNP | C  | T  | 6   | 101 | c.14777C>T     | c.(14776-14778)CCG>CTC   | p.P4926L |
| Pat_74 | Pre-Treatment | OR51G2    | 81282  | 37 | 11 | 4936406   | 4936406   | Missense_Mutation      | SNP | G  | A  | 23  | 41  | c.488C>T       | c.(487-489)CCA>CTA       | p.P163L  |
| Pat_74 | Pre-Treatment | NAV2      | 89797  | 37 | 11 | 19970400  | 19970400  | Nonsense_Mutation      | SNP | C  | T  | 38  | 53  | c.2488C>T      | c.(2488-2490)CGA>TGA     | p.R830*  |
| Pat_74 | Pre-Treatment | DGKZ      | 8525   | 37 | 11 | 46400602  | 46400602  | Missense_Mutation      | SNP | T  | C  | 11  | 8   | c.3044T>C      | c.(3043-3045)CTC>CCC     | p.L1015P |
| Pat_74 | Pre-Treatment | ANKRD13D  | 338692 | 37 | 11 | 67067552  | 67067552  | Missense_Mutation      | SNP | G  | A  | 4   | 154 | c.770G>A       | c.(769-771)CGG>CAG       | p.R257Q  |
| Pat_74 | Pre-Treatment | BCO2      | 83875  | 37 | 11 | 112084481 | 112084481 | Missense_Mutation      | SNP | G  | A  | 124 | 202 | c.1229G>A      | c.(1228-1230)AGG>AAG     | p.R410K  |
| Pat_74 | Pre-Treatment | KIRREL3   | 84623  | 37 | 11 | 126294608 | 126294608 | Missense_Mutation      | SNP | C  | T  | 4   | 142 | c.2204G>A      | c.(2203-2205)GGC>GAC     | p.G735D  |
| Pat_74 | Pre-Treatment | FLI1      | 2313   | 37 | 11 | 128680651 | 128680651 | Missense_Mutation      | SNP | C  | T  | 49  | 38  | c.1127C>T      | c.(1126-1128)TCG>TTG     | p.S376L  |
| Pat_74 | Pre-Treatment | FOXM1     | 2305   | 37 | 12 | 2981324   | 2981324   | Missense_Mutation      | SNP | G  | A  | 98  | 172 | c.592C>T       | c.(592-594)CGC>TGC       | p.R198C  |
| Pat_74 | Pre-Treatment | PRB2      | 653247 | 37 | 12 | 11546771  | 11546771  | Missense_Mutation      | SNP | G  | C  | 5   | 242 | c.241C>G       | c.(241-243)CCA>GCA       | p.P81A   |
| Pat_74 | Pre-Treatment | PTPRO     | 5800   | 37 | 12 | 15677831  | 15677831  | Missense_Mutation      | SNP | G  | A  | 37  | 52  | c.1975G>A      | c.(1975-1977)GAC>AAC     | p.D659N  |
| Pat_74 | Pre-Treatment | PLCZ1     | 89869  | 37 | 12 | 18876359  | 18876359  | Missense_Mutation      | SNP | T  | C  | 28  | 37  | c.253A>G       | c.(253-255)AAA>GAA       | p.K85E   |
| Pat_74 | Pre-Treatment | SFRS2IP   | 9169   | 37 | 12 | 46320119  | 46320119  | Missense_Mutation      | SNP | G  | A  | 37  | 98  | c.3365C>T      | c.(3364-3366)TCC>TTC     | p.S1122F |
| Pat_74 | Pre-Treatment | MIP       | 4284   | 37 | 12 | 56848247  | 56848247  | Missense_Mutation      | SNP | C  | T  | 30  | 64  | c.151G>A       | c.(151-153)GCC>ACC       | p.A51T   |
| Pat_74 | Pre-Treatment | GEFT      | 115557 | 37 | 12 | 58010217  | 58010217  | Missense_Mutation      | SNP | C  | T  | 23  | 33  | c.1571C>T      | c.(1570-1572)CCC>CTC     | p.P524L  |
| Pat_74 | Pre-Treatment | ZFC3H1    | 196441 | 37 | 12 | 72050857  | 72050857  | Missense_Mutation      | SNP | C  | T  | 33  | 69  | c.823G>A       | c.(823-825)GTC>ATC       | p.V275I  |
| Pat_74 | Pre-Treatment | POLR3B    | 55703  | 37 | 12 | 106889920 | 106889921 | Missense_Mutation      | DNP | TC | AT | 93  | 133 | .2801_2802TC>A | c.(2800-2802)TTC>TAT     | p.F934Y  |
| Pat_74 | Pre-Treatment | RFX4      | 5992   | 37 | 12 | 107113748 | 107113748 | Missense_Mutation      | SNP | G  | C  | 29  | 58  | c.1149G>C      | c.(1147-1149)GAG>GAC     | p.E383D  |
| Pat_74 | Pre-Treatment | TRPC4     | 7223   | 37 | 13 | 38225514  | 38225515  | Missense_Mutation      | DNP | GG | AA | 29  | 82  | .1966_1967CC>T | c.(1966-1968)CCC>TTC     | p.P656F  |
| Pat_74 | Pre-Treatment | ARHGAP5   | 394    | 37 | 14 | 32562120  | 32562120  | Missense_Mutation      | SNP | G  | A  | 50  | 82  | c.2245G>A      | c.(2245-2247)GCT>ACT     | p.A749T  |
| Pat_74 | Pre-Treatment | AKAP6     | 9472   | 37 | 14 | 33292789  | 33292789  | Missense_Mutation      | SNP | G  | A  | 26  | 42  | c.5770G>A      | c.(5770-5772)GGG>AGG     | p.G1924R |
| Pat_74 | Pre-Treatment | RTN1      | 6252   | 37 | 14 | 60213112  | 60213112  | Missense_Mutation      | SNP | G  | A  | 25  | 25  | c.329C>T       | c.(328-330)TCT>TTT       | p.S110F  |
| Pat_74 | Pre-Treatment | C14orf43  | 91748  | 37 | 14 | 74206609  | 74206609  | Missense_Mutation      | SNP | G  | A  | 40  | 59  | c.103C>T       | c.(103-105)CCC>TCC       | p.P35S   |
| Pat_74 | Pre-Treatment | C14orf109 | 26175  | 37 | 14 | 93652819  | 93652819  | Missense_Mutation      | SNP | C  | T  | 31  | 46  | c.313C>T       | c.(313-315)CCT>TCT       | p.P105S  |
| Pat_74 | Pre-Treatment | PPP4R4    | 57718  | 37 | 14 | 94733340  | 94733340  | Missense_Mutation      | SNP | G  | A  | 25  | 33  | c.2423G>A      | c.(2422-2424)GGA>GAA     | p.G808E  |
| Pat_74 | Pre-Treatment | EML1      | 2009   | 37 | 14 | 100344907 | 100344907 | Missense_Mutation      | SNP | C  | T  | 69  | 116 | c.469C>T       | c.(469-471)CGC>TGC       | p.R157C  |
| Pat_74 | Pre-Treatment | OR4N4     | 283694 | 37 | 15 | 22332432  | 22332432  | Translation_Start_Site | SNP | C  | T  | 7   | 155 | c.-742C>T      | c.(-744--740)AACGT>AATGT |          |
| Pat_74 | Pre-Treatment | C15orf2   | 23742  | 37 | 15 | 24922585  | 24922585  | Missense_Mutation      | SNP | C  | T  | 76  | 163 | c.1571C>T      | c.(1570-1572)CCT>CTT     | p.P524L  |
| Pat_74 | Pre-Treatment | VPS39     | 23339  | 37 | 15 | 42476789  | 42476789  | Missense_Mutation      | SNP | G  | A  | 101 | 220 | c.677C>T       | c.(676-678)ACC>ATC       | p.T226I  |
| Pat_74 | Pre-Treatment | CDAN1     | 146059 | 37 | 15 | 43022848  | 43022848  | Missense_Mutation      | SNP | G  | A  | 4   | 51  | c.2122C>T      | c.(2122-2124)CCC>TCC     | p.P708S  |
| Pat_74 | Pre-Treatment | TNFAIP8L3 | 388121 | 37 | 15 | 51350497  | 51350497  | Missense_Mutation      | SNP | C  | T  | 64  | 102 | c.460G>A       | c.(460-462)GAG>AAG       | p.E154K  |
| Pat_74 | Pre-Treatment | UNC13C    | 440279 | 37 | 15 | 54306599  | 54306599  | Missense_Mutation      | SNP | G  | A  | 18  | 26  | c.1499G>A      | c.(1498-1500)AGA>AAA     | p.R500K  |
| Pat_74 | Pre-Treatment | IL21R     | 50615  | 37 | 16 | 27460591  | 27460591  | Missense_Mutation      | SNP | C  | T  | 4   | 46  | c.1604C>T      | c.(1603-1605)CCC>CTC     | p.P535L  |
| Pat_74 | Pre-Treatment | CSNK2A2   | 1459   | 37 | 16 | 58199491  | 58199491  | Missense_Mutation      | SNP | T  | C  | 35  | 53  | c.949A>G       | c.(949-951)AAA>GAA       | p.K317E  |
| Pat_74 | Pre-Treatment | SPNS2     | 124976 | 37 | 17 | 4428405   | 4428405   | Missense_Mutation      | SNP | C  | T  | 4   | 75  | c.490C>T       | c.(490-492)CGC>TGC       | p.R164C  |
| Pat_74 | Pre-Treatment | SMTNL2    | 342527 | 37 | 17 | 4496274   | 4496274   | Missense_Mutation      | SNP | C  | T  | 12  | 23  | c.538C>T       | c.(538-540)CCC>TCC       | p.P180S  |
| Pat_74 | Pre-Treatment | DNAH2     | 146754 | 37 | 17 | 7636433   | 7636433   | Missense_Mutation      | SNP | G  | A  | 4   | 130 | c.428G>A       | c.(427-429)CGC>CAC       | p.R143H  |
| Pat_74 | Pre-Treatment | LLGL1     | 3996   | 37 | 17 | 18138206  | 18138206  | Missense_Mutation      | SNP | G  | A  | 3   | 43  | c.959G>A       | c.(958-960)CGC>CAC       | p.R320H  |



|        |               |          |        |    |    |           |           |                   |     |   |   |    |     |              |                      |               |
|--------|---------------|----------|--------|----|----|-----------|-----------|-------------------|-----|---|---|----|-----|--------------|----------------------|---------------|
| Pat_74 | Pre-Treatment | TBC1D3   | 729873 | 37 | 17 | 36288302  | 36288302  | Splice_Site       | SNP | G | A | 38 | 309 | c.387_splice | c.e6+1               | p.Q129_splice |
| Pat_74 | Pre-Treatment | KRTAP1-3 | 81850  | 37 | 17 | 39190779  | 39190779  | Missense_Mutation | SNP | T | C | 5  | 22  | c.295A>G     | c.(295-297)AGT>GGT   | p.S99G        |
| Pat_74 | Pre-Treatment | KRTAP4-8 | 728224 | 37 | 17 | 39253960  | 39253960  | Missense_Mutation | SNP | C | T | 5  | 14  | c.377G>A     | c.(376-378)CGC>CAC   | p.R126H       |
| Pat_74 | Pre-Treatment | EFTUD2   | 9343   | 37 | 17 | 42936476  | 42936476  | Missense_Mutation | SNP | C | T | 4  | 118 | c.1934G>A    | c.(1933-1935)CGG>CAG | p.R645Q       |
| Pat_74 | Pre-Treatment | WNT9B    | 7484   | 37 | 17 | 44952593  | 44952593  | Missense_Mutation | SNP | G | A | 6  | 18  | c.461G>A     | c.(460-462)CGG>CAG   | p.R154Q       |
| Pat_74 | Pre-Treatment | HLF      | 3131   | 37 | 17 | 53345135  | 53345135  | Missense_Mutation | SNP | G | A | 18 | 34  | c.139G>A     | c.(139-141)GAA>AAA   | p.E47K        |
| Pat_74 | Pre-Treatment | MKS1     | 54903  | 37 | 17 | 56291149  | 56291149  | Missense_Mutation | SNP | G | T | 4  | 89  | c.726C>A     | c.(724-726)TTC>TTA   | p.F242L       |
| Pat_74 | Pre-Treatment | TRIM37   | 4591   | 37 | 17 | 57153057  | 57153057  | Missense_Mutation | SNP | G | C | 26 | 33  | c.635C>G     | c.(634-636)ACC>AGC   | p.T212S       |
| Pat_74 | Pre-Treatment | QRICH2   | 84074  | 37 | 17 | 74288358  | 74288358  | Missense_Mutation | SNP | A | T | 6  | 254 | c.1952T>A    | c.(1951-1953)GTT>GAT | p.V651D       |
| Pat_74 | Pre-Treatment | CCDC40   | 55036  | 37 | 17 | 78063636  | 78063636  | Missense_Mutation | SNP | G | A | 3  | 64  | c.2785G>A    | c.(2785-2787)GGC>AGC | p.G929S       |
| Pat_74 | Pre-Treatment | CSNK1D   | 1453   | 37 | 17 | 80206800  | 80206800  | Missense_Mutation | SNP | G | A | 3  | 9   | c.1148C>T    | c.(1147-1149)TCG>TTG | p.S383L       |
| Pat_74 | Pre-Treatment | TXNDC2   | 84203  | 37 | 18 | 9887155   | 9887155   | Missense_Mutation | SNP | A | G | 5  | 228 | c.679A>G     | c.(679-681)ACC>GCC   | p.T227A       |
| Pat_74 | Pre-Treatment | KLHL14   | 57565  | 37 | 18 | 30260407  | 30260407  | Missense_Mutation | SNP | G | A | 82 | 133 | c.1394C>T    | c.(1393-1395)GCG>GTG | p.A465V       |
| Pat_74 | Pre-Treatment | ZNF57    | 126295 | 37 | 19 | 2917793   | 2917793   | Missense_Mutation | SNP | T | C | 5  | 67  | c.1174T>C    | c.(1174-1176)TAT>CAT | p.Y392H       |
| Pat_74 | Pre-Treatment | ZNF57    | 126295 | 37 | 19 | 2917807   | 2917807   | Missense_Mutation | SNP | A | C | 4  | 61  | c.1188A>C    | c.(1186-1188)CAA>CAC | p.Q396H       |
| Pat_74 | Pre-Treatment | ZNF57    | 126295 | 37 | 19 | 2917842   | 2917842   | Missense_Mutation | SNP | G | A | 4  | 57  | c.1223G>A    | c.(1222-1224)CGA>CAA | p.R408Q       |
| Pat_74 | Pre-Treatment | ZNF57    | 126295 | 37 | 19 | 2917857   | 2917857   | Missense_Mutation | SNP | C | T | 5  | 64  | c.1238C>T    | c.(1237-1239)ACG>ATG | p.T413M       |
| Pat_74 | Pre-Treatment | TLE6     | 79816  | 37 | 19 | 2991857   | 2991857   | Missense_Mutation | SNP | C | T | 10 | 23  | c.892C>T     | c.(892-894)CCT>TCT   | p.P298S       |
| Pat_74 | Pre-Treatment | SHD      | 56961  | 37 | 19 | 4290560   | 4290560   | Missense_Mutation | SNP | C | T | 25 | 70  | c.953C>T     | c.(952-954)TCA>TTA   | p.S318L       |
| Pat_74 | Pre-Treatment | ZNF844   | 284391 | 37 | 19 | 12187307  | 12187307  | Missense_Mutation | SNP | G | C | 6  | 189 | c.1372G>C    | c.(1372-1374)GAT>CAT | p.D458H       |
| Pat_74 | Pre-Treatment | ZNF563   | 147837 | 37 | 19 | 12429554  | 12429554  | Missense_Mutation | SNP | C | T | 8  | 277 | c.1285G>A    | c.(1285-1287)GCG>ACG | p.A429T       |
| Pat_74 | Pre-Treatment | ZNF563   | 147837 | 37 | 19 | 12429722  | 12429722  | Missense_Mutation | SNP | T | C | 9  | 317 | c.1117A>G    | c.(1117-1119)ACG>GCG | p.T373A       |
| Pat_74 | Pre-Treatment | ZNF564   | 163050 | 37 | 19 | 12637723  | 12637723  | Missense_Mutation | SNP | C | T | 6  | 234 | c.1199G>A    | c.(1198-1200)AGA>AAA | p.R400K       |
| Pat_74 | Pre-Treatment | RFX1     | 5989   | 37 | 19 | 14104424  | 14104424  | Missense_Mutation | SNP | G | A | 4  | 39  | c.232C>T     | c.(232-234)CTC>TTC   | p.L78F        |
| Pat_74 | Pre-Treatment | SYDE1    | 85360  | 37 | 19 | 15224562  | 15224562  | Missense_Mutation | SNP | G | A | 58 | 77  | c.1996G>A    | c.(1996-1998)GGG>AGG | p.G666R       |
| Pat_74 | Pre-Treatment | CYP4F12  | 66002  | 37 | 19 | 15807289  | 15807289  | Missense_Mutation | SNP | C | T | 68 | 114 | c.1364C>T    | c.(1363-1365)CCT>CTT | p.P455L       |
| Pat_74 | Pre-Treatment | DDX49    | 54555  | 37 | 19 | 19035761  | 19035761  | Missense_Mutation | SNP | C | A | 4  | 64  | c.1000C>A    | c.(1000-1002)CAC>AAC | p.H334N       |
| Pat_74 | Pre-Treatment | LPAR2    | 9170   | 37 | 19 | 19737765  | 19737765  | Nonsense_Mutation | SNP | A | T | 9  | 13  | c.329T>A     | c.(328-330)TTG>TAG   | p.L110*       |
| Pat_74 | Pre-Treatment | ZNF493   | 284443 | 37 | 19 | 21606614  | 21606614  | Missense_Mutation | SNP | G | A | 5  | 139 | c.769G>A     | c.(769-771)GCC>ACC   | p.A257T       |
| Pat_74 | Pre-Treatment | ZNF208   | 7757   | 37 | 19 | 22156652  | 22156652  | Missense_Mutation | SNP | T | G | 8  | 117 | c.1184A>C    | c.(1183-1185)AAA>ACA | p.K395T       |
| Pat_74 | Pre-Treatment | ZNF681   | 148213 | 37 | 19 | 23927307  | 23927307  | Missense_Mutation | SNP | G | T | 7  | 319 | c.1045C>A    | c.(1045-1047)CAG>AAG | p.Q349K       |
| Pat_74 | Pre-Treatment | CD22     | 933    | 37 | 19 | 35828922  | 35828922  | Missense_Mutation | SNP | A | T | 7  | 11  | c.983A>T     | c.(982-984)CAG>CTG   | p.Q328L       |
| Pat_74 | Pre-Treatment | RYR1     | 6261   | 37 | 19 | 38985160  | 38985160  | Missense_Mutation | SNP | C | T | 23 | 25  | c.6443C>T    | c.(6442-6444)TCC>TTC | p.S2148F      |
| Pat_74 | Pre-Treatment | PRX      | 57716  | 37 | 19 | 40902620  | 40902620  | Missense_Mutation | SNP | G | C | 5  | 172 | c.1639C>G    | c.(1639-1641)CAG>GAG | p.Q547E       |
| Pat_74 | Pre-Treatment | RPL18    | 6141   | 37 | 19 | 49119422  | 49119422  | Missense_Mutation | SNP | C | T | 4  | 66  | c.335G>A     | c.(334-336)CGC>CAC   | p.R112H       |
| Pat_74 | Pre-Treatment | ZNF845   | 91664  | 37 | 19 | 53855364  | 53855364  | Missense_Mutation | SNP | C | T | 13 | 234 | c.1436C>T    | c.(1435-1437)ACA>ATA | p.T479I       |
| Pat_74 | Pre-Treatment | LILRA3   | 11026  | 37 | 19 | 54802527  | 54802527  | Missense_Mutation | SNP | G | A | 25 | 63  | c.914C>T     | c.(913-915)TCC>TTC   | p.S305F       |
| Pat_74 | Pre-Treatment | ZIK1     | 284307 | 37 | 19 | 58102412  | 58102412  | Missense_Mutation | SNP | C | A | 4  | 110 | c.1233C>A    | c.(1231-1233)GAC>GAA | p.D411E       |
| Pat_74 | Pre-Treatment | ZIK1     | 284307 | 37 | 19 | 58102421  | 58102421  | Missense_Mutation | SNP | A | T | 4  | 101 | c.1242A>T    | c.(1240-1242)AAA>AAT | p.K414N       |
| Pat_74 | Pre-Treatment | C2orf16  | 84226  | 37 | 2  | 27804634  | 27804634  | Missense_Mutation | SNP | G | A | 8  | 505 | c.5195G>A    | c.(5194-5196)AGA>AAA | p.R1732K      |
| Pat_74 | Pre-Treatment | EXOC6B   | 23233  | 37 | 2  | 72786608  | 72786608  | Nonsense_Mutation | SNP | G | A | 21 | 34  | c.889C>T     | c.(889-891)CGA>TGA   | p.R297*       |
| Pat_74 | Pre-Treatment | TET3     | 200424 | 37 | 2  | 74320773  | 74320773  | Missense_Mutation | SNP | C | T | 27 | 59  | c.2842C>T    | c.(2842-2844)CTC>TTC | p.L948F       |
| Pat_74 | Pre-Treatment | TGOLN2   | 10618  | 37 | 2  | 85554362  | 85554362  | Missense_Mutation | SNP | G | T | 10 | 696 | c.493C>A     | c.(493-495)CCT>ACT   | p.P165T       |
| Pat_74 | Pre-Treatment | CNNM4    | 26504  | 37 | 2  | 97464908  | 97464908  | Missense_Mutation | SNP | G | A | 4  | 91  | c.1796G>A    | c.(1795-1797)CGC>CAC | p.R599H       |
| Pat_74 | Pre-Treatment | ANKRD36B | 57730  | 37 | 2  | 98201772  | 98201772  | Missense_Mutation | SNP | C | T | 3  | 14  | c.251G>A     | c.(250-252)CGT>CAT   | p.R84H        |
| Pat_74 | Pre-Treatment | LY75     | 4065   | 37 | 2  | 160746866 | 160746866 | Nonsense_Mutation | SNP | C | T | 21 | 48  | c.660G>A     | c.(658-660)TGG>TGA   | p.W220*       |
| Pat_74 | Pre-Treatment | XIRP2    | 129446 | 37 | 2  | 168102458 | 168102458 | Missense_Mutation | SNP | C | T | 44 | 62  | c.4556C>T    | c.(4555-4557)CCT>CTT | p.P1519L      |

|        |               |          |        |    |    |           |           |                        |     |    |    |     |     |                                       |                        |               |
|--------|---------------|----------|--------|----|----|-----------|-----------|------------------------|-----|----|----|-----|-----|---------------------------------------|------------------------|---------------|
| Pat_74 | Pre-Treatment | TTN      | 7273   | 37 | 2  | 179396519 | 179396520 | Missense_Mutation      | DNP | GG | TA | 29  | 47  | 97118_97119CC>>c.(97117-97119)GCC>GTA | p.A32373V              |               |
| Pat_74 | Pre-Treatment | DNAH7    | 56171  | 37 | 2  | 196728992 | 196728992 | Missense_Mutation      | SNP | C  | T  | 42  | 83  | c.7387G>A                             | c.(7387-7389)GAT>AAT   | p.D2463N      |
| Pat_74 | Pre-Treatment | PARD3B   | 117583 | 37 | 2  | 206050515 | 206050515 | Missense_Mutation      | SNP | C  | T  | 66  | 123 | c.1952C>T                             | c.(1951-1953)GCC>GTC   | p.A651V       |
| Pat_74 | Pre-Treatment | KIAA1486 | 57624  | 37 | 2  | 226378119 | 226378119 | Missense_Mutation      | SNP | G  | A  | 28  | 44  | c.254G>A                              | c.(253-255)GGA>GAA     | p.G85E        |
| Pat_74 | Pre-Treatment | COL4A3   | 1285   | 37 | 2  | 228128587 | 228128587 | Missense_Mutation      | SNP | G  | A  | 13  | 19  | c.1242G>A                             | c.(1240-1242)ATG>ATA   | p.M414I       |
| Pat_74 | Pre-Treatment | FRG1B    | 284802 | 37 | 20 | 29625875  | 29625875  | Missense_Mutation      | SNP | T  | C  | 6   | 86  | c.29T>C                               | c.(28-30)ATC>ACC       | p.I10T        |
| Pat_74 | Pre-Treatment | RBM12    | 10137  | 37 | 20 | 34242439  | 34242439  | Missense_Mutation      | SNP | T  | C  | 4   | 87  | c.806A>G                              | c.(805-807)AAC>AGC     | p.N269S       |
| Pat_74 | Pre-Treatment | TOX2     | 84969  | 37 | 20 | 42694670  | 42694670  | Missense_Mutation      | SNP | C  | A  | 24  | 20  | c.1225C>A                             | c.(1225-1227)CCC>ACC   | p.P409T       |
| Pat_74 | Pre-Treatment | RTEL1    | 51750  | 37 | 20 | 62305428  | 62305428  | Missense_Mutation      | SNP | G  | A  | 3   | 37  | c.901G>A                              | c.(901-903)GCG>ACG     | p.A301T       |
| Pat_74 | Pre-Treatment | DOPEY2   | 9980   | 37 | 21 | 37636074  | 37636074  | Missense_Mutation      | SNP | C  | T  | 107 | 184 | c.5449C>T                             | c.(5449-5451)CCC>TCC   | p.P1817S      |
| Pat_74 | Pre-Treatment | DSCAM    | 1826   | 37 | 21 | 41452217  | 41452217  | Missense_Mutation      | SNP | G  | A  | 21  | 39  | c.4282C>T                             | c.(4282-4284)CCA>TCA   | p.P1428S      |
| Pat_74 | Pre-Treatment | TRIOBP   | 11078  | 37 | 22 | 38086744  | 38086744  | Translation_Start_Site | SNP | C  | T  | 4   | 144 | c.-556C>T                             | (-558--554)CACGG>CATGG |               |
| Pat_74 | Pre-Treatment | TRIOBP   | 11078  | 37 | 22 | 38120695  | 38120695  | Missense_Mutation      | SNP | C  | T  | 41  | 63  | c.2132C>T                             | c.(2131-2133)CCT>CTT   | p.P711L       |
| Pat_74 | Pre-Treatment | CCR8     | 1237   | 37 | 3  | 39374063  | 39374063  | Missense_Mutation      | SNP | G  | A  | 80  | 114 | c.241G>A                              | c.(241-243)GAC>AAC     | p.D81N        |
| Pat_74 | Pre-Treatment | CSPG5    | 10675  | 37 | 3  | 47618466  | 47618466  | Missense_Mutation      | SNP | C  | A  | 4   | 47  | c.1050G>T                             | c.(1048-1050)TTG>TTT   | p.L350F       |
| Pat_74 | Pre-Treatment | ARIH2    | 10425  | 37 | 3  | 48999097  | 48999097  | Missense_Mutation      | SNP | C  | T  | 23  | 30  | c.308C>T                              | c.(307-309)TCA>TTA     | p.S103L       |
| Pat_74 | Pre-Treatment | BSN      | 8927   | 37 | 3  | 49694583  | 49694583  | Missense_Mutation      | SNP | C  | T  | 20  | 23  | c.7594C>T                             | c.(7594-7596)CCC>TCC   | p.P2532S      |
| Pat_74 | Pre-Treatment | OR5H2    | 79310  | 37 | 3  | 98002110  | 98002110  | Missense_Mutation      | SNP | C  | T  | 35  | 49  | c.379C>T                              | c.(379-381)CGC>TGC     | p.R127C       |
| Pat_74 | Pre-Treatment | NIT2     | 56954  | 37 | 3  | 100058695 | 100058695 | Missense_Mutation      | SNP | C  | T  | 14  | 24  | c.163C>T                              | c.(163-165)CCT>TCT     | p.P55S        |
| Pat_74 | Pre-Treatment | ARHGAP31 | 57514  | 37 | 3  | 119112312 | 119112312 | Splice_Site            | SNP | A  | G  | 53  | 76  | c.882_splice                          | c.e8-2                 | p.K294_splice |
| Pat_74 | Pre-Treatment | ILDR1    | 286676 | 37 | 3  | 121712140 | 121712140 | Missense_Mutation      | SNP | C  | T  | 7   | 11  | c.1456G>A                             | c.(1456-1458)GAG>AAG   | p.E486K       |
| Pat_74 | Pre-Treatment | LEKR1    | 389170 | 37 | 3  | 156742621 | 156742622 | Missense_Mutation      | DNP | GA | AC | 19  | 25  | c.364_365GA>AC                        | c.(364-366)GAA>ACA     | p.E122T       |
| Pat_74 | Pre-Treatment | LRRC34   | 151827 | 37 | 3  | 169511487 | 169511487 | Missense_Mutation      | SNP | C  | T  | 38  | 61  | c.1196G>A                             | c.(1195-1197)GGA>GAA   | p.G399E       |
| Pat_74 | Pre-Treatment | SAMD7    | 344658 | 37 | 3  | 169639115 | 169639115 | Missense_Mutation      | SNP | G  | T  | 50  | 94  | c.200G>T                              | c.(199-201)CGG>CTG     | p.R67L        |
| Pat_74 | Pre-Treatment | TPRG1    | 285386 | 37 | 3  | 189038465 | 189038465 | Missense_Mutation      | SNP | G  | C  | 19  | 40  | c.684G>C                              | c.(682-684)AAG>AAC     | p.K228N       |
| Pat_74 | Pre-Treatment | TP63     | 8626   | 37 | 3  | 189607246 | 189607246 | Missense_Mutation      | SNP | C  | T  | 90  | 127 | c.1625C>T                             | c.(1624-1626)CCG>CTG   | p.P542L       |
| Pat_74 | Pre-Treatment | LEPREL1  | 55214  | 37 | 3  | 189690698 | 189690698 | Missense_Mutation      | SNP | G  | A  | 44  | 71  | c.1664C>T                             | c.(1663-1665)TCC>TTC   | p.S555F       |
| Pat_74 | Pre-Treatment | UBXN7    | 26043  | 37 | 3  | 196089400 | 196089401 | Missense_Mutation      | DNP | GG | AA | 37  | 71  | c.992_993CC>TT                        | c.(991-993)TCC>TTT     | p.S331F       |
| Pat_74 | Pre-Treatment | RNF168   | 165918 | 37 | 3  | 196229915 | 196229915 | Missense_Mutation      | SNP | C  | T  | 5   | 186 | c.130G>A                              | c.(130-132)GTC>ATC     | p.V44I        |
| Pat_74 | Pre-Treatment | ZNF141   | 7700   | 37 | 4  | 367026    | 367026    | Missense_Mutation      | SNP | T  | C  | 4   | 101 | c.800T>C                              | c.(799-801)TTC>TCC     | p.F267S       |
| Pat_74 | Pre-Treatment | CCDC158  | 339965 | 37 | 4  | 77247121  | 77247121  | Missense_Mutation      | SNP | G  | A  | 64  | 128 | c.3046C>T                             | c.(3046-3048)CCT>TCT   | p.P1016S      |
| Pat_74 | Pre-Treatment | CFI      | 3426   | 37 | 4  | 110663728 | 110663728 | Nonsense_Mutation      | SNP | G  | A  | 26  | 50  | c.1453C>T                             | c.(1453-1455)CAG>TAG   | p.Q485*       |
| Pat_74 | Pre-Treatment | INTU     | 27152  | 37 | 4  | 128564983 | 128564983 | Missense_Mutation      | SNP | G  | A  | 50  | 56  | c.454G>A                              | c.(454-456)GTC>ATC     | p.V152I       |
| Pat_74 | Pre-Treatment | PCDH10   | 57575  | 37 | 4  | 134073358 | 134073358 | Missense_Mutation      | SNP | G  | T  | 3   | 14  | c.2063G>T                             | c.(2062-2064)GGG>GTG   | p.G688V       |
| Pat_74 | Pre-Treatment | PCDH18   | 54510  | 37 | 4  | 138451640 | 138451640 | Missense_Mutation      | SNP | G  | A  | 45  | 59  | c.1603C>T                             | c.(1603-1605)CAT>TAT   | p.H535Y       |
| Pat_74 | Pre-Treatment | MRPL36   | 64979  | 37 | 5  | 1798790   | 1798790   | Missense_Mutation      | SNP | C  | T  | 4   | 103 | c.260G>A                              | c.(259-261)CGG>CAG     | p.R87Q        |
| Pat_74 | Pre-Treatment | DNAH5    | 1767   | 37 | 5  | 13864741  | 13864741  | Missense_Mutation      | SNP | C  | T  | 22  | 40  | c.4361G>A                             | c.(4360-4362)CGA>CAA   | p.R1454Q      |
| Pat_74 | Pre-Treatment | SPZ1     | 84654  | 37 | 5  | 79616461  | 79616461  | Missense_Mutation      | SNP | G  | C  | 6   | 146 | c.427G>C                              | c.(427-429)GAG>CAG     | p.E143Q       |
| Pat_74 | Pre-Treatment | SPZ1     | 84654  | 37 | 5  | 79616605  | 79616605  | Missense_Mutation      | SNP | C  | G  | 3   | 94  | c.571C>G                              | c.(571-573)CAG>GAG     | p.Q191E       |
| Pat_74 | Pre-Treatment | MBLAC2   | 153364 | 37 | 5  | 89757100  | 89757100  | Nonsense_Mutation      | SNP | G  | A  | 43  | 59  | c.724C>T                              | c.(724-726)CGA>TGA     | p.R242*       |
| Pat_74 | Pre-Treatment | EPB41L4A | 64097  | 37 | 5  | 111601990 | 111601990 | Nonsense_Mutation      | SNP | G  | A  | 7   | 12  | c.373C>T                              | c.(373-375)CAG>TAG     | p.Q125*       |
| Pat_74 | Pre-Treatment | ADAM19   | 8728   | 37 | 5  | 156924013 | 156924013 | Missense_Mutation      | SNP | G  | A  | 19  | 12  | c.1483C>T                             | c.(1483-1485)CCT>TCT   | p.P495S       |
| Pat_74 | Pre-Treatment | HIVEP1   | 3096   | 37 | 6  | 12163562  | 12163562  | Missense_Mutation      | SNP | C  | T  | 136 | 187 | c.7025C>T                             | c.(7024-7026)CCC>CTC   | p.P2342L      |
| Pat_74 | Pre-Treatment | VARS     | 7407   | 37 | 6  | 31745399  | 31745399  | Missense_Mutation      | SNP | G  | A  | 11  | 14  | c.3767C>T                             | c.(3766-3768)GCC>GTC   | p.A1256V      |
| Pat_74 | Pre-Treatment | PKHD1    | 5314   | 37 | 6  | 51890422  | 51890422  | Missense_Mutation      | SNP | G  | A  | 62  | 85  | c.4186C>T                             | c.(4186-4188)CCA>TCA   | p.P1396S      |
| Pat_74 | Pre-Treatment | STXBPS   | 134957 | 37 | 6  | 147646094 | 147646094 | Splice_Site            | SNP | G  | A  | 16  | 33  | c.1803_splice                         | c.e17-1                | p.K601_splice |
| Pat_74 | Pre-Treatment | PACRG    | 135138 | 37 | 6  | 163735909 | 163735909 | Missense_Mutation      | SNP | G  | T  | 22  | 57  | c.781G>T                              | c.(781-783)GGG>TGG     | p.G261W       |

|        |                 |          |           |    |   |           |           |                   |     |    |    |     |     |                |                      |          |
|--------|-----------------|----------|-----------|----|---|-----------|-----------|-------------------|-----|----|----|-----|-----|----------------|----------------------|----------|
| Pat_74 | Pre-Treatment   | TLL2     | 83887     | 37 | 6 | 167754658 | 167754658 | Missense_Mutation | SNP | G  | T  | 26  | 33  | c.1270G>T      | c.(1270-1272)GGG>TGG | p.G424W  |
| Pat_74 | Pre-Treatment   | IL6      | 3569      | 37 | 7 | 22771151  | 22771151  | Missense_Mutation | SNP | G  | A  | 12  | 21  | c.598G>A       | c.(598-600)GAG>AAG   | p.E200K  |
| Pat_74 | Pre-Treatment   | ZNF727   | 442319    | 37 | 7 | 63538568  | 63538568  | Missense_Mutation | SNP | T  | C  | 4   | 71  | c.1141T>C      | c.(1141-1143)TCA>CCA | p.S381P  |
| Pat_74 | Pre-Treatment   | ZNF727   | 442319    | 37 | 7 | 63538638  | 63538638  | Missense_Mutation | SNP | G  | C  | 4   | 104 | c.1211G>C      | c.(1210-1212)AGC>ACC | p.S404T  |
| Pat_74 | Pre-Treatment   | ZNF727   | 442319    | 37 | 7 | 63538736  | 63538736  | Missense_Mutation | SNP | C  | T  | 3   | 52  | c.1309C>T      | c.(1309-1311)CCA>TCA | p.P437S  |
| Pat_74 | Pre-Treatment   | ZNF727   | 442319    | 37 | 7 | 63538806  | 63538806  | Missense_Mutation | SNP | C  | G  | 4   | 65  | c.1379C>G      | c.(1378-1380)ACC>AGC | p.T460S  |
| Pat_74 | Pre-Treatment   | NSUN5    | 55695     | 37 | 7 | 72717601  | 72717601  | Missense_Mutation | SNP | G  | A  | 37  | 51  | c.1282C>T      | c.(1282-1284)CCA>TCA | p.P428S  |
| Pat_74 | Pre-Treatment   | ZAN      | 7455      | 37 | 7 | 100349878 | 100349878 | Missense_Mutation | SNP | C  | T  | 4   | 142 | c.2150C>T      | c.(2149-2151)CCC>CTC | p.P717L  |
| Pat_74 | Pre-Treatment   | ZAN      | 7455      | 37 | 7 | 100350466 | 100350466 | Missense_Mutation | SNP | C  | T  | 11  | 182 | c.2738C>T      | c.(2737-2739)CCC>CTC | p.P913L  |
| Pat_74 | Pre-Treatment   | ZAN      | 7455      | 37 | 7 | 100350474 | 100350474 | Missense_Mutation | SNP | T  | C  | 12  | 184 | c.2746T>C      | c.(2746-2748)TCC>CCC | p.S916P  |
| Pat_74 | Pre-Treatment   | MUC17    | 140453    | 37 | 7 | 100676667 | 100676667 | Missense_Mutation | SNP | A  | G  | 10  | 791 | c.1970A>G      | c.(1969-1971)AAC>AGC | p.N657S  |
| Pat_74 | Pre-Treatment   | MUC17    | 140453    | 37 | 7 | 100681421 | 100681421 | Missense_Mutation | SNP | G  | A  | 11  | 756 | c.6724G>A      | c.(6724-6726)GCA>ACA | p.A2242T |
| Pat_74 | Pre-Treatment   | MUC17    | 140453    | 37 | 7 | 100681455 | 100681455 | Missense_Mutation | SNP | C  | A  | 10  | 678 | c.6758C>A      | c.(6757-6759)ACT>AAT | p.T2253N |
| Pat_74 | Pre-Treatment   | MUC17    | 140453    | 37 | 7 | 100682124 | 100682124 | Missense_Mutation | SNP | T  | A  | 10  | 781 | c.7427T>A      | c.(7426-7428)CTT>CAT | p.L2476H |
| Pat_74 | Pre-Treatment   | MUC17    | 140453    | 37 | 7 | 100684301 | 100684302 | Missense_Mutation | DNP | AC | CA | 10  | 726 | .9604_9605AC>C | c.(9604-9606)ACT>CAT | p.T3202H |
| Pat_74 | Pre-Treatment   | C7orf66  | 154907    | 37 | 7 | 108524203 | 108524203 | Missense_Mutation | SNP | T  | C  | 77  | 122 | c.209A>G       | c.(208-210)TAT>TGT   | p.Y70C   |
| Pat_74 | Pre-Treatment   | WNT2     | 7472      | 37 | 7 | 116960755 | 116960755 | Missense_Mutation | SNP | G  | A  | 4   | 20  | c.176C>T       | c.(175-177)CCA>CTA   | p.P59L   |
| Pat_74 | Pre-Treatment   | BRAF     | 673       | 37 | 7 | 140453136 | 140453136 | Missense_Mutation | SNP | A  | T  | 70  | 63  | c.1799T>A      | c.(1798-1800)GTG>GAG | p.V600E  |
| Pat_74 | Pre-Treatment   | ATG9B    | 285973    | 37 | 7 | 150720253 | 150720253 | Nonsense_Mutation | SNP | G  | A  | 175 | 465 | c.700C>T       | c.(700-702)CGA>TGA   | p.R234*  |
| Pat_74 | Pre-Treatment   | DKK4     | 27121     | 37 | 8 | 42232353  | 42232353  | Missense_Mutation | SNP | C  | T  | 75  | 105 | c.341G>A       | c.(340-342)GGA>GAA   | p.G114E  |
| Pat_74 | Pre-Treatment   | SLCO5A1  | 81796     | 37 | 8 | 70673984  | 70673984  | Missense_Mutation | SNP | C  | T  | 18  | 34  | c.1034G>A      | c.(1033-1035)GGA>GAA | p.G345E  |
| Pat_74 | Pre-Treatment   | FREM1    | 158326    | 37 | 9 | 14846015  | 14846015  | Missense_Mutation | SNP | C  | A  | 3   | 27  | c.1336G>T      | c.(1336-1338)GGT>TGT | p.G446C  |
| Pat_74 | Pre-Treatment   | APBA1    | 320       | 37 | 9 | 72064588  | 72064588  | Missense_Mutation | SNP | C  | T  | 65  | 79  | c.2093G>A      | c.(2092-2094)GGG>GAG | p.G698E  |
| Pat_74 | Pre-Treatment   | OR13D1   | 286365    | 37 | 9 | 107457507 | 107457507 | Missense_Mutation | SNP | G  | A  | 16  | 57  | c.805G>A       | c.(805-807)GCC>ACC   | p.A269T  |
| Pat_74 | Pre-Treatment   | OR13D1   | 286365    | 37 | 9 | 107457565 | 107457565 | Missense_Mutation | SNP | T  | C  | 3   | 85  | c.863T>C       | c.(862-864)CTT>CCT   | p.L288P  |
| Pat_74 | Pre-Treatment   | SLC44A1  | 23446     | 37 | 9 | 108128643 | 108128643 | Missense_Mutation | SNP | G  | A  | 4   | 77  | c.1427G>A      | c.(1426-1428)CGA>CAA | p.R476Q  |
| Pat_74 | Pre-Treatment   | PTGS1    | 5742      | 37 | 9 | 125154609 | 125154609 | Missense_Mutation | SNP | C  | T  | 28  | 37  | c.1586C>T      | c.(1585-1587)TCC>TTC | p.S529F  |
| Pat_74 | Pre-Treatment   | WDR34    | 89891     | 37 | 9 | 131403107 | 131403107 | Missense_Mutation | SNP | G  | A  | 31  | 32  | c.298C>T       | c.(298-300)CCG>TCG   | p.P100S  |
| Pat_74 | Pre-Treatment   | SEC16A   | 9919      | 37 | 9 | 139341390 | 139341390 | Missense_Mutation | SNP | G  | A  | 22  | 58  | c.6709C>T      | c.(6709-6711)CCA>TCA | p.P2237S |
| Pat_74 | Pre-Treatment   | TUBBP5   | 643224    | 37 | 9 | 141071195 | 141071195 | Missense_Mutation | SNP | C  | T  | 11  | 49  | c.598C>T       | c.(598-600)CCA>TCA   | p.P200S  |
| Pat_74 | Pre-Treatment   | EIF1AX   | 1964      | 37 | X | 20156734  | 20156734  | Missense_Mutation | SNP | C  | A  | 60  | 14  | c.23G>T        | c.(22-24)GGA>GTA     | p.G8V    |
| Pat_74 | Pre-Treatment   | UBA1     | 7317      | 37 | X | 47070301  | 47070301  | Missense_Mutation | SNP | T  | C  | 2   | 6   | c.2260T>C      | c.(2260-2262)TTT>CTT | p.F754L  |
| Pat_74 | Pre-Treatment   | FAM123B  | 139285    | 37 | X | 63411254  | 63411254  | Missense_Mutation | SNP | G  | A  | 5   | 5   | c.1913C>T      | c.(1912-1914)ACT>ATT | p.T638I  |
| Pat_74 | Pre-Treatment   | TEX11    | 56159     | 37 | X | 69825286  | 69825286  | Missense_Mutation | SNP | C  | T  | 35  | 10  | c.2077G>A      | c.(2077-2079)GAG>AAG | p.E693K  |
| Pat_74 | Pre-Treatment   | MAGEC1   | 9947      | 37 | X | 140993455 | 140993455 | Missense_Mutation | SNP | G  | A  | 4   | 51  | c.265G>A       | c.(265-267)GGC>AGC   | p.G89S   |
| Pat_74 | Pre-Treatment   | MAGEC1   | 9947      | 37 | X | 140993468 | 140993468 | Missense_Mutation | SNP | A  | T  | 4   | 56  | c.278A>T       | c.(277-279)CAG>CTG   | p.Q93L   |
| Pat_74 | Post-Resistance | CASP9    | 842       | 37 | 1 | 15844799  | 15844799  | Missense_Mutation | SNP | G  | A  | 24  | 53  | c.224C>T       | c.(223-225)TCC>TTC   | p.S75F   |
| Pat_74 | Post-Resistance | ATP13A2  | 23400     | 37 | 1 | 17330867  | 17330867  | Missense_Mutation | SNP | A  | G  | 16  | 15  | c.517T>C       | c.(517-519)TAT>CAT   | p.Y173H  |
| Pat_74 | Post-Resistance | CSMD2    | 114784    | 37 | 1 | 34191090  | 34191090  | Missense_Mutation | SNP | C  | T  | 17  | 30  | c.2435G>A      | c.(2434-2436)CGG>CAG | p.R812Q  |
| Pat_74 | Post-Resistance | DHCR24   | 1718      | 37 | 1 | 55337202  | 55337202  | Missense_Mutation | SNP | G  | A  | 18  | 41  | c.697C>T       | c.(697-699)CCT>TCT   | p.P233S  |
| Pat_74 | Post-Resistance | LEPR     | 3953      | 37 | 1 | 66058389  | 66058389  | Nonsense_Mutation | SNP | C  | T  | 44  | 49  | c.544C>T       | c.(544-546)CAG>TAG   | p.Q182*  |
| Pat_74 | Post-Resistance | C1orf173 | 127254    | 37 | 1 | 75038497  | 75038497  | Missense_Mutation | SNP | C  | T  | 18  | 40  | c.2897G>A      | c.(2896-2898)AGA>AAA | p.R966K  |
| Pat_74 | Post-Resistance | AK5      | 26289     | 37 | 1 | 77949003  | 77949003  | Missense_Mutation | SNP | G  | A  | 16  | 29  | c.1061G>A      | c.(1060-1062)GGT>GAT | p.G354D  |
| Pat_74 | Post-Resistance | SLC16A1  | 6566      | 37 | 1 | 113471717 | 113471717 | Missense_Mutation | SNP | C  | T  | 12  | 10  | c.214G>A       | c.(214-216)GGA>AGA   | p.G72R   |
| Pat_74 | Post-Resistance | NRAS     | 4893      | 37 | 1 | 115256529 | 115256529 | Missense_Mutation | SNP | T  | C  | 78  | 94  | c.182A>G       | c.(181-183)CAA>CGA   | p.Q61R   |
| Pat_74 | Post-Resistance | NBPF9    | 400818    | 37 | 1 | 144619903 | 144619903 | Missense_Mutation | SNP | T  | A  | 5   | 118 | c.587T>A       | c.(586-588)GTG>GAG   | p.V196E  |
| Pat_74 | Post-Resistance | NBPF10   | 100132406 | 37 | 1 | 145296448 | 145296448 | Missense_Mutation | SNP | T  | A  | 10  | 296 | c.370T>A       | c.(370-372)TAT>AAT   | p.Y124N  |

|        |                 |           |           |    |    |           |           |                   |     |    |    |    |     |                 |                      |               |
|--------|-----------------|-----------|-----------|----|----|-----------|-----------|-------------------|-----|----|----|----|-----|-----------------|----------------------|---------------|
| Pat_74 | Post-Resistance | NBPF10    | 100132406 | 37 | 1  | 145303970 | 145303970 | Missense_Mutation | SNP | C  | T  | 73 | 295 | c.1367C>T       | c.(1366-1368)TCA>TTA | p.S456L       |
| Pat_74 | Post-Resistance | TCHHL1    | 126637    | 37 | 1  | 152059823 | 152059823 | Missense_Mutation | SNP | A  | C  | 36 | 46  | c.335T>G        | c.(334-336)GTT>GGT   | p.V112G       |
| Pat_74 | Post-Resistance | ASH1L     | 55870     | 37 | 1  | 155313160 | 155313161 | Missense_Mutation | DNP | GG | AA | 31 | 40  | .:8252_8253CC>T | c.(8251-8253)CCC>CTT | p.P2751L      |
| Pat_74 | Post-Resistance | SPTA1     | 6708      | 37 | 1  | 158596788 | 158596788 | Missense_Mutation | SNP | C  | T  | 46 | 61  | c.5674G>A       | c.(5674-5676)GAG>AAG | p.E1892K      |
| Pat_74 | Post-Resistance | WDR26     | 80232     | 37 | 1  | 224592184 | 224592184 | Missense_Mutation | SNP | A  | G  | 32 | 52  | c.806T>C        | c.(805-807)CTT>CCT   | p.L269P       |
| Pat_74 | Post-Resistance | NEBL      | 10529     | 37 | 10 | 21134266  | 21134266  | Missense_Mutation | SNP | A  | T  | 12 | 11  | c.1148T>A       | c.(1147-1149)ATT>AAT | p.I383N       |
| Pat_74 | Post-Resistance | HSD17B7P2 | 158160    | 37 | 10 | 38654432  | 38654432  | Missense_Mutation | SNP | A  | G  | 3  | 44  | c.524A>G        | c.(523-525)AAT>AGT   | p.N175S       |
| Pat_74 | Post-Resistance | SGMS1     | 259230    | 37 | 10 | 52103520  | 52103520  | Missense_Mutation | SNP | G  | A  | 25 | 10  | c.355C>T        | c.(355-357)CCC>TCC   | p.P119S       |
| Pat_74 | Post-Resistance | LOC729020 | 729020    | 37 | 10 | 105005787 | 105005787 | Missense_Mutation | SNP | C  | T  | 22 | 8   | c.34C>T         | c.(34-36)CTC>TTC     | p.L12F        |
| Pat_74 | Post-Resistance | SORCS3    | 22986     | 37 | 10 | 106982964 | 106982964 | Missense_Mutation | SNP | T  | A  | 78 | 21  | c.2825T>A       | c.(2824-2826)CTG>CAG | p.L942Q       |
| Pat_74 | Post-Resistance | RPL13AP6  | 644511    | 37 | 10 | 112696573 | 112696573 | Missense_Mutation | SNP | T  | C  | 2  | 2   | c.419A>G        | c.(418-420)CAC>CGC   | p.H140R       |
| Pat_74 | Post-Resistance | PHRF1     | 57661     | 37 | 11 | 607875    | 607875    | Nonsense_Mutation | SNP | G  | T  | 29 | 43  | c.2419G>T       | c.(2419-2421)GAG>TAG | p.E807*       |
| Pat_74 | Post-Resistance | OR51G2    | 81282     | 37 | 11 | 4936406   | 4936406   | Missense_Mutation | SNP | G  | A  | 12 | 24  | c.488C>T        | c.(487-489)CCA>CTA   | p.P163L       |
| Pat_74 | Post-Resistance | SERGEF    | 26297     | 37 | 11 | 17809858  | 17809858  | Missense_Mutation | SNP | G  | A  | 9  | 13  | c.1151C>T       | c.(1150-1152)TCG>TTG | p.S384L       |
| Pat_74 | Post-Resistance | NAV2      | 89797     | 37 | 11 | 19970400  | 19970400  | Nonsense_Mutation | SNP | C  | T  | 25 | 37  | c.2488C>T       | c.(2488-2490)CGA>TGA | p.R830*       |
| Pat_74 | Post-Resistance | DGKZ      | 8525      | 37 | 11 | 46400602  | 46400602  | Missense_Mutation | SNP | T  | C  | 3  | 4   | c.3044T>C       | c.(3043-3045)CTC>CCC | p.L1015P      |
| Pat_74 | Post-Resistance | BCO2      | 83875     | 37 | 11 | 112084481 | 112084481 | Missense_Mutation | SNP | G  | A  | 99 | 148 | c.1229G>A       | c.(1228-1230)AGG>AAG | p.R410K       |
| Pat_74 | Post-Resistance | FLI1      | 2313      | 37 | 11 | 128680651 | 128680651 | Missense_Mutation | SNP | C  | T  | 17 | 29  | c.1127C>T       | c.(1126-1128)TCG>TTG | p.S376L       |
| Pat_74 | Post-Resistance | FOXM1     | 2305      | 37 | 12 | 2981324   | 2981324   | Missense_Mutation | SNP | G  | A  | 87 | 146 | c.592C>T        | c.(592-594)CGC>TGC   | p.R198C       |
| Pat_74 | Post-Resistance | PTPRO     | 5800      | 37 | 12 | 15677831  | 15677831  | Missense_Mutation | SNP | G  | A  | 28 | 40  | c.1975G>A       | c.(1975-1977)GAC>AAC | p.D659N       |
| Pat_74 | Post-Resistance | PLCZ1     | 89869     | 37 | 12 | 18876359  | 18876359  | Missense_Mutation | SNP | T  | C  | 24 | 30  | c.253A>G        | c.(253-255)AAA>GAA   | p.K85E        |
| Pat_74 | Post-Resistance | SFRS2IP   | 9169      | 37 | 12 | 46320119  | 46320119  | Missense_Mutation | SNP | G  | A  | 30 | 51  | c.3365C>T       | c.(3364-3366)TCC>TTC | p.S1122F      |
| Pat_74 | Post-Resistance | MIP       | 4284      | 37 | 12 | 56848247  | 56848247  | Missense_Mutation | SNP | C  | T  | 32 | 42  | c.151G>A        | c.(151-153)GCC>ACC   | p.A51T        |
| Pat_74 | Post-Resistance | GEFT      | 115557    | 37 | 12 | 58010217  | 58010217  | Missense_Mutation | SNP | C  | T  | 12 | 31  | c.1571C>T       | c.(1570-1572)CCC>CTC | p.P524L       |
| Pat_74 | Post-Resistance | ZFC3H1    | 196441    | 37 | 12 | 72050857  | 72050857  | Missense_Mutation | SNP | C  | T  | 21 | 38  | c.823G>A        | c.(823-825)GTC>ATC   | p.V275I       |
| Pat_74 | Post-Resistance | POLR3B    | 55703     | 37 | 12 | 106889920 | 106889921 | Missense_Mutation | DNP | TC | AT | 47 | 58  | .:2801_2802TC>A | c.(2800-2802)TTC>TAT | p.F934Y       |
| Pat_74 | Post-Resistance | RFX4      | 5992      | 37 | 12 | 107113748 | 107113748 | Missense_Mutation | SNP | G  | C  | 17 | 24  | c.1149G>C       | c.(1147-1149)GAG>GAC | p.E383D       |
| Pat_74 | Post-Resistance | TRPC4     | 7223      | 37 | 13 | 38225514  | 38225515  | Missense_Mutation | DNP | GG | AA | 34 | 44  | .:1966_1967CC>T | c.(1966-1968)CCC>TTC | p.P656F       |
| Pat_74 | Post-Resistance | ARHGAP5   | 394       | 37 | 14 | 32562120  | 32562120  | Missense_Mutation | SNP | G  | A  | 34 | 65  | c.2245G>A       | c.(2245-2247)GCT>ACT | p.A749T       |
| Pat_74 | Post-Resistance | AKAP6     | 9472      | 37 | 14 | 33292789  | 33292789  | Missense_Mutation | SNP | G  | A  | 17 | 33  | c.5770G>A       | c.(5770-5772)GGG>AGG | p.G1924R      |
| Pat_74 | Post-Resistance | RTN1      | 6252      | 37 | 14 | 60213112  | 60213112  | Missense_Mutation | SNP | G  | A  | 22 | 23  | c.329C>T        | c.(328-330)TCT>TTT   | p.S110F       |
| Pat_74 | Post-Resistance | C14orf43  | 91748     | 37 | 14 | 74206609  | 74206609  | Missense_Mutation | SNP | G  | A  | 27 | 38  | c.103C>T        | c.(103-105)CCC>TCC   | p.P35S        |
| Pat_74 | Post-Resistance | C14orf109 | 26175     | 37 | 14 | 93652819  | 93652819  | Missense_Mutation | SNP | C  | T  | 35 | 32  | c.313C>T        | c.(313-315)CCT>TCT   | p.P105S       |
| Pat_74 | Post-Resistance | PPP4R4    | 57718     | 37 | 14 | 94733340  | 94733340  | Missense_Mutation | SNP | G  | A  | 15 | 22  | c.2423G>A       | c.(2422-2424)GGA>GAA | p.G808E       |
| Pat_74 | Post-Resistance | EML1      | 2009      | 37 | 14 | 100344907 | 100344907 | Missense_Mutation | SNP | C  | T  | 54 | 63  | c.469C>T        | c.(469-471)CGC>TGC   | p.R157C       |
| Pat_74 | Post-Resistance | C15orf2   | 23742     | 37 | 15 | 24922585  | 24922585  | Missense_Mutation | SNP | C  | T  | 74 | 122 | c.1571C>T       | c.(1570-1572)CCT>CTT | p.P524L       |
| Pat_74 | Post-Resistance | VPS39     | 23339     | 37 | 15 | 42476789  | 42476789  | Missense_Mutation | SNP | G  | A  | 64 | 121 | c.677C>T        | c.(676-678)ACC>ATC   | p.T226I       |
| Pat_74 | Post-Resistance | TNFAIP8L3 | 388121    | 37 | 15 | 51350497  | 51350497  | Missense_Mutation | SNP | C  | T  | 60 | 88  | c.460G>A        | c.(460-462)GAG>AAG   | p.E154K       |
| Pat_74 | Post-Resistance | UNC13C    | 440279    | 37 | 15 | 54306599  | 54306599  | Missense_Mutation | SNP | G  | A  | 15 | 29  | c.1499G>A       | c.(1498-1500)AGA>AAA | p.R500K       |
| Pat_74 | Post-Resistance | LOC645752 | 645752    | 37 | 15 | 78208916  | 78208916  | Missense_Mutation | SNP | C  | G  | 3  | 52  | c.817G>C        | c.(817-819)GAA>CAA   | p.E273Q       |
| Pat_74 | Post-Resistance | CSNK2A2   | 1459      | 37 | 16 | 58199491  | 58199491  | Missense_Mutation | SNP | T  | C  | 26 | 26  | c.949A>G        | c.(949-951)AAA>GAA   | p.K317E       |
| Pat_74 | Post-Resistance | SMTNL2    | 342527    | 37 | 17 | 4496274   | 4496274   | Missense_Mutation | SNP | C  | T  | 16 | 21  | c.538C>T        | c.(538-540)CCC>TCC   | p.P180S       |
| Pat_74 | Post-Resistance | TBC1D3    | 729873    | 37 | 17 | 36288302  | 36288302  | Splice_Site       | SNP | G  | A  | 42 | 306 | c.387_splice    | c.e6+1               | p.Q129_splice |
| Pat_74 | Post-Resistance | KRTAP4-11 | 653240    | 37 | 17 | 39274150  | 39274150  | Missense_Mutation | SNP | T  | A  | 4  | 29  | c.418A>T        | c.(418-420)AGC>TGC   | p.S140C       |
| Pat_74 | Post-Resistance | WNT9B     | 7484      | 37 | 17 | 44952593  | 44952593  | Missense_Mutation | SNP | G  | A  | 19 | 16  | c.461G>A        | c.(460-462)CGG>CAG   | p.R154Q       |
| Pat_74 | Post-Resistance | HLF       | 3131      | 37 | 17 | 53345135  | 53345135  | Missense_Mutation | SNP | G  | A  | 12 | 32  | c.139G>A        | c.(139-141)GAA>AAA   | p.E47K        |
| Pat_74 | Post-Resistance | TRIM37    | 4591      | 37 | 17 | 57153057  | 57153057  | Missense_Mutation | SNP | G  | C  | 14 | 27  | c.635C>G        | c.(634-636)ACC>AGC   | p.T212S       |

|        |                 |          |        |    |    |           |           |                        |     |    |    |    |     |                |                      |               |
|--------|-----------------|----------|--------|----|----|-----------|-----------|------------------------|-----|----|----|----|-----|----------------|----------------------|---------------|
| Pat_74 | Post-Resistance | CSNK1D   | 1453   | 37 | 17 | 80206800  | 80206800  | Missense_Mutation      | SNP | G  | A  | 7  | 2   | c.1148C>T      | c.(1147-1149)TCG>TTG | p.S383L       |
| Pat_74 | Post-Resistance | KLHL14   | 57565  | 37 | 18 | 30260407  | 30260407  | Missense_Mutation      | SNP | G  | A  | 45 | 69  | c.1394C>T      | c.(1393-1395)GCG>GTG | p.A465V       |
| Pat_74 | Post-Resistance | TLE6     | 79816  | 37 | 19 | 2991857   | 2991857   | Missense_Mutation      | SNP | C  | T  | 12 | 21  | c.892C>T       | c.(892-894)CCT>TCT   | p.P298S       |
| Pat_74 | Post-Resistance | SHD      | 56961  | 37 | 19 | 4290560   | 4290560   | Missense_Mutation      | SNP | C  | T  | 21 | 32  | c.953C>T       | c.(952-954)TCA>TTA   | p.S318L       |
| Pat_74 | Post-Resistance | SYDE1    | 85360  | 37 | 19 | 15224562  | 15224562  | Missense_Mutation      | SNP | G  | A  | 24 | 39  | c.1996G>A      | c.(1996-1998)GGG>AGG | p.G666R       |
| Pat_74 | Post-Resistance | CYP4F12  | 66002  | 37 | 19 | 15807289  | 15807289  | Missense_Mutation      | SNP | C  | T  | 63 | 109 | c.1364C>T      | c.(1363-1365)CCT>CTT | p.P455L       |
| Pat_74 | Post-Resistance | LPAR2    | 9170   | 37 | 19 | 19737765  | 19737765  | Nonsense_Mutation      | SNP | A  | T  | 4  | 10  | c.329T>A       | c.(328-330)TTG>TAG   | p.L110*       |
| Pat_74 | Post-Resistance | CD22     | 933    | 37 | 19 | 35828922  | 35828922  | Missense_Mutation      | SNP | A  | T  | 7  | 12  | c.983A>T       | c.(982-984)CAG>CTG   | p.Q328L       |
| Pat_74 | Post-Resistance | RYR1     | 6261   | 37 | 19 | 38985160  | 38985160  | Missense_Mutation      | SNP | C  | T  | 16 | 23  | c.6443C>T      | c.(6442-6444)TCC>TTC | p.S2148F      |
| Pat_74 | Post-Resistance | LILRA3   | 11026  | 37 | 19 | 54802527  | 54802527  | Missense_Mutation      | SNP | G  | A  | 13 | 34  | c.914C>T       | c.(913-915)TCC>TTC   | p.S305F       |
| Pat_74 | Post-Resistance | EXOC6B   | 23233  | 37 | 2  | 72786608  | 72786608  | Nonsense_Mutation      | SNP | G  | A  | 14 | 17  | c.889C>T       | c.(889-891)CGA>TGA   | p.R297*       |
| Pat_74 | Post-Resistance | TET3     | 200424 | 37 | 2  | 74320773  | 74320773  | Missense_Mutation      | SNP | C  | T  | 22 | 24  | c.2842C>T      | c.(2842-2844)CTC>TTC | p.L948F       |
| Pat_74 | Post-Resistance | LY75     | 4065   | 37 | 2  | 160746866 | 160746866 | Nonsense_Mutation      | SNP | C  | T  | 26 | 31  | c.660G>A       | c.(658-660)TGG>TGA   | p.W220*       |
| Pat_74 | Post-Resistance | XIRP2    | 129446 | 37 | 2  | 168102458 | 168102458 | Missense_Mutation      | SNP | C  | T  | 38 | 49  | c.4556C>T      | c.(4555-4557)CCT>CTT | p.P1519L      |
| Pat_74 | Post-Resistance | DNAH7    | 56171  | 37 | 2  | 196728992 | 196728992 | Missense_Mutation      | SNP | C  | T  | 28 | 38  | c.7387G>A      | c.(7387-7389)GAT>AAT | p.D2463N      |
| Pat_74 | Post-Resistance | PARD3B   | 117583 | 37 | 2  | 206050515 | 206050515 | Missense_Mutation      | SNP | C  | T  | 30 | 55  | c.1952C>T      | c.(1951-1953)GCC>GTC | p.A651V       |
| Pat_74 | Post-Resistance | KIAA1486 | 57624  | 37 | 2  | 226378119 | 226378119 | Missense_Mutation      | SNP | G  | A  | 18 | 26  | c.254G>A       | c.(253-255)GGA>GAA   | p.G85E        |
| Pat_74 | Post-Resistance | COL4A3   | 1285   | 37 | 2  | 228128587 | 228128587 | Missense_Mutation      | SNP | G  | A  | 23 | 15  | c.1242G>A      | c.(1240-1242)ATG>ATA | p.M414I       |
| Pat_74 | Post-Resistance | GGTLC1   | 92086  | 37 | 20 | 23967157  | 23967157  | Missense_Mutation      | SNP | A  | G  | 4  | 57  | c.92T>C        | c.(91-93)ATG>ACG     | p.M31T        |
| Pat_74 | Post-Resistance | FRG1B    | 284802 | 37 | 20 | 29625875  | 29625875  | Missense_Mutation      | SNP | T  | C  | 3  | 69  | c.29T>C        | c.(28-30)ATC>ACC     | p.I10T        |
| Pat_74 | Post-Resistance | TOX2     | 84969  | 37 | 20 | 42694670  | 42694670  | Missense_Mutation      | SNP | C  | A  | 8  | 21  | c.1225C>A      | c.(1225-1227)CCC>ACC | p.P409T       |
| Pat_74 | Post-Resistance | DOPEY2   | 9980   | 37 | 21 | 37636074  | 37636074  | Missense_Mutation      | SNP | C  | T  | 91 | 166 | c.5449C>T      | c.(5449-5451)CCC>TCC | p.P1817S      |
| Pat_74 | Post-Resistance | DSCAM    | 1826   | 37 | 21 | 41452217  | 41452217  | Missense_Mutation      | SNP | G  | A  | 27 | 28  | c.4282C>T      | c.(4282-4284)CCA>TCA | p.P1428S      |
| Pat_74 | Post-Resistance | RIMBP3   | 85376  | 37 | 22 | 20457350  | 20457350  | Missense_Mutation      | SNP | C  | T  | 2  | 3   | c.3952G>A      | c.(3952-3954)GGC>AGC | p.G1318S      |
| Pat_74 | Post-Resistance | RFPL3    | 10738  | 37 | 22 | 32756614  | 32756614  | Missense_Mutation      | SNP | A  | G  | 3  | 65  | c.749A>G       | c.(748-750)GAT>GGT   | p.D250G       |
| Pat_74 | Post-Resistance | TRIOBP   | 11078  | 37 | 22 | 38120695  | 38120695  | Missense_Mutation      | SNP | C  | T  | 37 | 65  | c.2132C>T      | c.(2131-2133)CCT>CTT | p.P711L       |
| Pat_74 | Post-Resistance | CCR8     | 1237   | 37 | 3  | 39374063  | 39374063  | Missense_Mutation      | SNP | G  | A  | 49 | 76  | c.241G>A       | c.(241-243)GAC>AAC   | p.D81N        |
| Pat_74 | Post-Resistance | ARIH2    | 10425  | 37 | 3  | 48999097  | 48999097  | Missense_Mutation      | SNP | C  | T  | 20 | 36  | c.308C>T       | c.(307-309)TCA>TTA   | p.S103L       |
| Pat_74 | Post-Resistance | BSN      | 8927   | 37 | 3  | 49694583  | 49694583  | Missense_Mutation      | SNP | C  | T  | 16 | 20  | c.7594C>T      | c.(7594-7596)CCC>TCC | p.P2532S      |
| Pat_74 | Post-Resistance | OR5H2    | 79310  | 37 | 3  | 98002110  | 98002110  | Missense_Mutation      | SNP | C  | T  | 27 | 37  | c.379C>T       | c.(379-381)CGC>TGC   | p.R127C       |
| Pat_74 | Post-Resistance | NIT2     | 56954  | 37 | 3  | 100058695 | 100058695 | Missense_Mutation      | SNP | C  | T  | 14 | 24  | c.163C>T       | c.(163-165)CCT>TCT   | p.P55S        |
| Pat_74 | Post-Resistance | ARHGAP31 | 57514  | 37 | 3  | 119112312 | 119112312 | Splice_Site            | SNP | A  | G  | 51 | 58  | c.882_splice   | c.e8-2               | p.K294_splice |
| Pat_74 | Post-Resistance | ILDR1    | 286676 | 37 | 3  | 121712140 | 121712140 | Missense_Mutation      | SNP | C  | T  | 5  | 10  | c.1456G>A      | c.(1456-1458)GAG>AAG | p.E486K       |
| Pat_74 | Post-Resistance | LEKR1    | 389170 | 37 | 3  | 156742621 | 156742622 | Missense_Mutation      | DNP | GA | AC | 21 | 25  | c.364_365GA>AC | c.(364-366)GAA>ACA   | p.E122T       |
| Pat_74 | Post-Resistance | LRRRC34  | 151827 | 37 | 3  | 169511487 | 169511487 | Missense_Mutation      | SNP | C  | T  | 27 | 49  | c.1196G>A      | c.(1195-1197)GGA>GAA | p.G399E       |
| Pat_74 | Post-Resistance | SAMD7    | 344658 | 37 | 3  | 169639115 | 169639115 | Missense_Mutation      | SNP | G  | T  | 39 | 32  | c.200G>T       | c.(199-201)CGG>CTG   | p.R67L        |
| Pat_74 | Post-Resistance | TPRG1    | 285386 | 37 | 3  | 189038465 | 189038465 | Missense_Mutation      | SNP | G  | C  | 23 | 19  | c.684G>C       | c.(682-684)AAG>AAC   | p.K228N       |
| Pat_74 | Post-Resistance | TP63     | 8626   | 37 | 3  | 189607246 | 189607246 | Missense_Mutation      | SNP | C  | T  | 26 | 46  | c.1625C>T      | c.(1624-1626)CCG>CTG | p.P542L       |
| Pat_74 | Post-Resistance | LEPREL1  | 55214  | 37 | 3  | 189690698 | 189690698 | Missense_Mutation      | SNP | G  | A  | 30 | 50  | c.1664C>T      | c.(1663-1665)TCC>TTC | p.S555F       |
| Pat_74 | Post-Resistance | UBXN7    | 26043  | 37 | 3  | 196089400 | 196089401 | Missense_Mutation      | DNP | GG | AA | 35 | 51  | c.992_993CC>TT | c.(991-993)TCC>TTT   | p.S331F       |
| Pat_74 | Post-Resistance | CCDC158  | 339965 | 37 | 4  | 77247121  | 77247121  | Missense_Mutation      | SNP | G  | A  | 62 | 84  | c.3046C>T      | c.(3046-3048)CCT>TCT | p.P1016S      |
| Pat_74 | Post-Resistance | CFI      | 3426   | 37 | 4  | 110663728 | 110663728 | Nonsense_Mutation      | SNP | G  | A  | 19 | 23  | c.1453C>T      | c.(1453-1455)CAG>TAG | p.Q485*       |
| Pat_74 | Post-Resistance | INTU     | 27152  | 37 | 4  | 128564983 | 128564983 | Missense_Mutation      | SNP | G  | A  | 35 | 38  | c.454G>A       | c.(454-456)GTC>ATC   | p.V152I       |
| Pat_74 | Post-Resistance | PCDH10   | 57575  | 37 | 4  | 134073358 | 134073358 | Missense_Mutation      | SNP | G  | T  | 11 | 11  | c.2063G>T      | c.(2062-2064)GGG>GTG | p.G688V       |
| Pat_74 | Post-Resistance | PCDH18   | 54510  | 37 | 4  | 138451640 | 138451640 | Missense_Mutation      | SNP | G  | A  | 34 | 56  | c.1603C>T      | c.(1603-1605)CAT>TAT | p.H535Y       |
| Pat_74 | Post-Resistance | GYPE     | 2996   | 37 | 4  | 144826671 | 144826671 | Translation_Start_Site | SNP | C  | T  | 6  | 48  | c.-10G>A       | c.(-12-8)TCGTG>TCATG |               |
| Pat_74 | Post-Resistance | DNAH5    | 1767   | 37 | 5  | 13864741  | 13864741  | Missense_Mutation      | SNP | C  | T  | 16 | 23  | c.4361G>A      | c.(4360-4362)CGA>CAA | p.R1454Q      |



|        |                 |           |        |    |   |           |           |                   |     |   |   |     |     |               |                      |               |
|--------|-----------------|-----------|--------|----|---|-----------|-----------|-------------------|-----|---|---|-----|-----|---------------|----------------------|---------------|
| Pat_74 | Post-Resistance | MBLAC2    | 153364 | 37 | 5 | 89757100  | 89757100  | Nonsense_Mutation | SNP | G | A | 26  | 57  | c.724C>T      | c.(724-726)CGA>TGA   | p.R242*       |
| Pat_74 | Post-Resistance | ADAM19    | 8728   | 37 | 5 | 156924013 | 156924013 | Missense_Mutation | SNP | G | A | 4   | 14  | c.1483C>T     | c.(1483-1485)CCT>TCT | p.P495S       |
| Pat_74 | Post-Resistance | HIVEP1    | 3096   | 37 | 6 | 12163562  | 12163562  | Missense_Mutation | SNP | C | T | 80  | 130 | c.7025C>T     | c.(7024-7026)CCC>CTC | p.P2342L      |
| Pat_74 | Post-Resistance | VARS      | 7407   | 37 | 6 | 31745399  | 31745399  | Missense_Mutation | SNP | G | A | 11  | 11  | c.3767C>T     | c.(3766-3768)GCC>GTC | p.A1256V      |
| Pat_74 | Post-Resistance | PKHD1     | 5314   | 37 | 6 | 51890422  | 51890422  | Missense_Mutation | SNP | G | A | 50  | 74  | c.4186C>T     | c.(4186-4188)CCA>TCA | p.P1396S      |
| Pat_74 | Post-Resistance | COL12A1   | 1303   | 37 | 6 | 75865396  | 75865396  | Missense_Mutation | SNP | A | G | 4   | 134 | c.3425T>C     | c.(3424-3426)GTT>GCT | p.V1142A      |
| Pat_74 | Post-Resistance | STXBP5    | 134957 | 37 | 6 | 147646094 | 147646094 | Splice_Site       | SNP | G | A | 8   | 30  | c.1803_splice | c.e17-1              | p.K601_splice |
| Pat_74 | Post-Resistance | PACRG     | 135138 | 37 | 6 | 163735909 | 163735909 | Missense_Mutation | SNP | G | T | 21  | 33  | c.781G>T      | c.(781-783)GGG>TGG   | p.G261W       |
| Pat_74 | Post-Resistance | TLL2      | 83887  | 37 | 6 | 167754658 | 167754658 | Missense_Mutation | SNP | G | T | 23  | 20  | c.1270G>T     | c.(1270-1272)GGG>TGG | p.G424W       |
| Pat_74 | Post-Resistance | IL6       | 3569   | 37 | 7 | 22771151  | 22771151  | Missense_Mutation | SNP | G | A | 20  | 18  | c.598G>A      | c.(598-600)GAG>AAG   | p.E200K       |
| Pat_74 | Post-Resistance | NSUN5     | 55695  | 37 | 7 | 72717601  | 72717601  | Missense_Mutation | SNP | G | A | 30  | 33  | c.1282C>T     | c.(1282-1284)CCA>TCA | p.P428S       |
| Pat_74 | Post-Resistance | C7orf66   | 154907 | 37 | 7 | 108524203 | 108524203 | Missense_Mutation | SNP | T | C | 43  | 74  | c.209A>G      | c.(208-210)TAT>TGT   | p.Y70C        |
| Pat_74 | Post-Resistance | ST7       | 7982   | 37 | 7 | 116869938 | 116869938 | Missense_Mutation | SNP | A | C | 6   | 23  | c.1465A>C     | c.(1465-1467)ACC>CCC | p.T489P       |
| Pat_74 | Post-Resistance | WNT2      | 7472   | 37 | 7 | 116960755 | 116960755 | Missense_Mutation | SNP | G | A | 15  | 16  | c.176C>T      | c.(175-177)CCA>CTA   | p.P59L        |
| Pat_74 | Post-Resistance | CPA1      | 1357   | 37 | 7 | 130023310 | 130023310 | Missense_Mutation | SNP | A | G | 3   | 20  | c.562A>G      | c.(562-564)AGT>GGT   | p.S188G       |
| Pat_74 | Post-Resistance | BRAF      | 673    | 37 | 7 | 140453136 | 140453136 | Missense_Mutation | SNP | A | T | 61  | 55  | c.1799T>A     | c.(1798-1800)GTG>GAG | p.V600E       |
| Pat_74 | Post-Resistance | ATG9B     | 285973 | 37 | 7 | 150720253 | 150720253 | Nonsense_Mutation | SNP | G | A | 100 | 252 | c.700C>T      | c.(700-702)CGA>TGA   | p.R234*       |
| Pat_74 | Post-Resistance | DKK4      | 27121  | 37 | 8 | 42232353  | 42232353  | Missense_Mutation | SNP | C | T | 77  | 90  | c.341G>A      | c.(340-342)GGA>GAA   | p.G114E       |
| Pat_74 | Post-Resistance | SLCO5A1   | 81796  | 37 | 8 | 70673984  | 70673984  | Missense_Mutation | SNP | C | T | 16  | 33  | c.1034G>A     | c.(1033-1035)GGA>GAA | p.G345E       |
| Pat_74 | Post-Resistance | APBA1     | 320    | 37 | 9 | 72064588  | 72064588  | Missense_Mutation | SNP | C | T | 50  | 62  | c.2093G>A     | c.(2092-2094)GGG>GAG | p.G698E       |
| Pat_74 | Post-Resistance | OR13D1    | 286365 | 37 | 9 | 107457507 | 107457507 | Missense_Mutation | SNP | G | A | 26  | 37  | c.805G>A      | c.(805-807)GCC>ACC   | p.A269T       |
| Pat_74 | Post-Resistance | PTGS1     | 5742   | 37 | 9 | 125154609 | 125154609 | Missense_Mutation | SNP | C | T | 33  | 39  | c.1586C>T     | c.(1585-1587)TCC>TTC | p.S529F       |
| Pat_74 | Post-Resistance | WDR34     | 89891  | 37 | 9 | 131403107 | 131403107 | Missense_Mutation | SNP | G | A | 13  | 26  | c.298C>T      | c.(298-300)CCG>TCG   | p.P100S       |
| Pat_74 | Post-Resistance | SEC16A    | 9919   | 37 | 9 | 139341390 | 139341390 | Missense_Mutation | SNP | G | A | 20  | 36  | c.6709C>T     | c.(6709-6711)CCA>TCA | p.P2237S      |
| Pat_74 | Post-Resistance | EIF1AX    | 1964   | 37 | X | 20156734  | 20156734  | Missense_Mutation | SNP | C | A | 60  | 6   | c.23G>T       | c.(22-24)GGA>GTA     | p.G8V         |
| Pat_74 | Post-Resistance | FAM123B   | 139285 | 37 | X | 63411254  | 63411254  | Missense_Mutation | SNP | G | A | 10  | 1   | c.1913C>T     | c.(1912-1914)ACT>ATT | p.T638I       |
| Pat_74 | Post-Resistance | TEX11     | 56159  | 37 | X | 69825286  | 69825286  | Missense_Mutation | SNP | C | T | 40  | 5   | c.2077G>A     | c.(2077-2079)GAG>AAG | p.E693K       |
| Pat_76 | Pre-Treatment   | AGRN      | 375790 | 37 | 1 | 984754    | 984754    | Missense_Mutation | SNP | G | C | 20  | 28  | c.4437G>C     | c.(4435-4437)GAG>GAC | p.E1479D      |
| Pat_76 | Pre-Treatment   | PUSL1     | 126789 | 37 | 1 | 1246733   | 1246733   | Missense_Mutation | SNP | G | A | 8   | 8   | c.886G>A      | c.(886-888)GGG>AGG   | p.G296R       |
| Pat_76 | Pre-Treatment   | CHD5      | 26038  | 37 | 1 | 6169939   | 6169939   | Missense_Mutation | SNP | C | T | 15  | 31  | c.5494G>A     | c.(5494-5496)GTG>ATG | p.V1832M      |
| Pat_76 | Pre-Treatment   | TNFRSF9   | 3604   | 37 | 1 | 7995073   | 7995073   | Missense_Mutation | SNP | C | T | 4   | 70  | c.544G>A      | c.(544-546)GGA>AGA   | p.G182R       |
| Pat_76 | Pre-Treatment   | SLC2A7    | 155184 | 37 | 1 | 9063467   | 9063467   | Missense_Mutation | SNP | T | C | 28  | 34  | c.1431A>G     | c.(1429-1431)ATA>ATG | p.I477M       |
| Pat_76 | Pre-Treatment   | KIF1B     | 23095  | 37 | 1 | 10405979  | 10405979  | Nonsense_Mutation | SNP | G | A | 17  | 32  | c.3765G>A     | c.(3763-3765)TGG>TGA | p.W1255*      |
| Pat_76 | Pre-Treatment   | C1orf127  | 148345 | 37 | 1 | 11017690  | 11017690  | Missense_Mutation | SNP | G | A | 7   | 31  | c.229C>T      | c.(229-231)CTT>TTT   | p.L77F        |
| Pat_76 | Pre-Treatment   | PTCHD2    | 57540  | 37 | 1 | 11579548  | 11579548  | Missense_Mutation | SNP | G | A | 35  | 69  | c.2026G>A     | c.(2026-2028)GAG>AAG | p.E676K       |
| Pat_76 | Pre-Treatment   | NPPA      | 4878   | 37 | 1 | 11907322  | 11907322  | Missense_Mutation | SNP | C | T | 14  | 10  | c.298G>A      | c.(298-300)GGC>AGC   | p.G100S       |
| Pat_76 | Pre-Treatment   | PRAMEF12  | 390999 | 37 | 1 | 12835290  | 12835290  | Missense_Mutation | SNP | C | T | 62  | 66  | c.280C>T      | c.(280-282)CGC>TGC   | p.R94C        |
| Pat_76 | Pre-Treatment   | LOC649330 | 649330 | 37 | 1 | 12907921  | 12907921  | Missense_Mutation | SNP | C | T | 10  | 114 | c.222G>A      | c.(220-222)ATG>ATA   | p.M74I        |
| Pat_76 | Pre-Treatment   | CELA2A    | 63036  | 37 | 1 | 15794002  | 15794002  | Missense_Mutation | SNP | G | A | 4   | 109 | c.761G>A      | c.(760-762)CGG>CAG   | p.R254Q       |
| Pat_76 | Pre-Treatment   | DNAJC16   | 23341  | 37 | 1 | 15890790  | 15890790  | Nonsense_Mutation | SNP | C | T | 43  | 81  | c.1534C>T     | c.(1534-1536)CGA>TGA | p.R512*       |
| Pat_76 | Pre-Treatment   | KLHDC7A   | 127707 | 37 | 1 | 18807831  | 18807831  | Missense_Mutation | SNP | G | A | 16  | 25  | c.356G>A      | c.(355-357)AGA>AAA   | p.R119K       |
| Pat_76 | Pre-Treatment   | KLHDC7A   | 127707 | 37 | 1 | 18808730  | 18808730  | Missense_Mutation | SNP | C | T | 19  | 25  | c.1255C>T     | c.(1255-1257)CCG>TCG | p.P419S       |
| Pat_76 | Pre-Treatment   | PLA2G2D   | 26279  | 37 | 1 | 20442911  | 20442911  | Missense_Mutation | SNP | C | G | 13  | 22  | c.100G>C      | c.(100-102)GGG>CGG   | p.G34R        |
| Pat_76 | Pre-Treatment   | MUL1      | 79594  | 37 | 1 | 20827445  | 20827445  | Missense_Mutation | SNP | C | T | 3   | 50  | c.797G>A      | c.(796-798)CGG>CAG   | p.R266Q       |
| Pat_76 | Pre-Treatment   | ECE1      | 1889   | 37 | 1 | 21582571  | 21582571  | Nonsense_Mutation | SNP | C | A | 29  | 31  | c.889G>T      | c.(889-891)GAG>TAG   | p.E297*       |
| Pat_76 | Pre-Treatment   | RAP1GAP   | 5909   | 37 | 1 | 21936111  | 21936111  | Missense_Mutation | SNP | G | A | 32  | 93  | c.1028C>T     | c.(1027-1029)CCC>CTC | p.P343L       |
| Pat_76 | Pre-Treatment   | EPHB2     | 2048   | 37 | 1 | 23232566  | 23232566  | Missense_Mutation | SNP | A | T | 35  | 32  | c.1852A>T     | c.(1852-1854)ATC>TTC | p.I618F       |

|        |               |          |        |    |   |          |          |                   |     |    |    |    |     |                 |                         |          |
|--------|---------------|----------|--------|----|---|----------|----------|-------------------|-----|----|----|----|-----|-----------------|-------------------------|----------|
| Pat_76 | Pre-Treatment | GRHL3    | 57822  | 37 | 1 | 24669215 | 24669215 | Missense_Mutation | SNP | G  | A  | 55 | 91  | c.1253G>A       | c.(1252-1254)CGG>CAG    | p.R418Q  |
| Pat_76 | Pre-Treatment | MAN1C1   | 57134  | 37 | 1 | 26013027 | 26013027 | Missense_Mutation | SNP | G  | A  | 4  | 127 | c.637G>A        | c.(637-639)GGA>AGA      | p.G213R  |
| Pat_76 | Pre-Treatment | MAP3K6   | 9064   | 37 | 1 | 27683527 | 27683527 | Missense_Mutation | SNP | G  | A  | 4  | 139 | c.3337C>T       | c.(3337-3339)CGG>TGG    | p.R1113W |
| Pat_76 | Pre-Treatment | MAP3K6   | 9064   | 37 | 1 | 27686450 | 27686450 | Missense_Mutation | SNP | G  | A  | 50 | 82  | c.2218C>T       | c.(2218-2220)CCC>TCC    | p.P740S  |
| Pat_76 | Pre-Treatment | CD164L2  | 388611 | 37 | 1 | 27709119 | 27709119 | Missense_Mutation | SNP | G  | A  | 23 | 33  | c.127C>T        | c.(127-129)CGC>TGC      | p.R43C   |
| Pat_76 | Pre-Treatment | SFRS4    | 6429   | 37 | 1 | 29475177 | 29475178 | Missense_Mutation | DNP | GG | AA | 93 | 144 | c.1229_1230CC>T | c.(1228-1230)TCC>TTT    | p.S410F  |
| Pat_76 | Pre-Treatment | PTPRU    | 10076  | 37 | 1 | 29652156 | 29652156 | Missense_Mutation | SNP | G  | A  | 51 | 52  | c.4324G>A       | c.(4324-4326)GGG>AGG    | p.G1442R |
| Pat_76 | Pre-Treatment | SNRNP40  | 9410   | 37 | 1 | 31769519 | 31769519 | Missense_Mutation | SNP | C  | T  | 4  | 91  | c.80G>A         | c.(79-81)GGA>GAA        | p.G27E   |
| Pat_76 | Pre-Treatment | BAI2     | 576    | 37 | 1 | 32222263 | 32222263 | Missense_Mutation | SNP | G  | A  | 7  | 15  | c.175C>T        | c.(175-177)CCT>TCT      | p.P59S   |
| Pat_76 | Pre-Treatment | SPOCD1   | 90853  | 37 | 1 | 32280093 | 32280093 | Missense_Mutation | SNP | C  | T  | 13 | 11  | c.842G>A        | c.(841-843)GGG>GAG      | p.G281E  |
| Pat_76 | Pre-Treatment | LCK      | 3932   | 37 | 1 | 32751189 | 32751189 | Missense_Mutation | SNP | G  | A  | 37 | 78  | c.1402G>A       | c.(1402-1404)GAG>AAG    | p.E468K  |
| Pat_76 | Pre-Treatment | CSMD2    | 114784 | 37 | 1 | 34383699 | 34383699 | Missense_Mutation | SNP | G  | A  | 10 | 24  | c.796C>T        | c.(796-798)CTC>TTC      | p.L266F  |
| Pat_76 | Pre-Treatment | CSMD2    | 114784 | 37 | 1 | 34554741 | 34554741 | Missense_Mutation | SNP | C  | T  | 15 | 18  | c.121G>A        | c.(121-123)GGG>AGG      | p.G41R   |
| Pat_76 | Pre-Treatment | EIF2C1   | 26523  | 37 | 1 | 36359345 | 36359345 | Missense_Mutation | SNP | G  | A  | 27 | 52  | c.583G>A        | c.(583-585)GAG>AAG      | p.E195K  |
| Pat_76 | Pre-Treatment | C1orf109 | 54955  | 37 | 1 | 38149083 | 38149083 | Missense_Mutation | SNP | G  | A  | 34 | 46  | c.482C>T        | c.(481-483)TCG>TTG      | p.S161L  |
| Pat_76 | Pre-Treatment | FHL3     | 2275   | 37 | 1 | 38464940 | 38464940 | Missense_Mutation | SNP | G  | T  | 4  | 125 | c.145C>A        | c.(145-147)CAT>AAT      | p.H49N   |
| Pat_76 | Pre-Treatment | KIAA0754 | 643314 | 37 | 1 | 39878887 | 39878887 | Missense_Mutation | SNP | C  | T  | 14 | 16  | c.2950C>T       | c.(2950-2952)CCA>TCA    | p.P984S  |
| Pat_76 | Pre-Treatment | NT5C1A   | 84618  | 37 | 1 | 40131779 | 40131779 | Missense_Mutation | SNP | C  | T  | 25 | 63  | c.265G>A        | c.(265-267)GAA>AAA      | p.E89K   |
| Pat_76 | Pre-Treatment | HPCAL4   | 51440  | 37 | 1 | 40149802 | 40149802 | Missense_Mutation | SNP | G  | A  | 8  | 21  | c.185C>T        | c.(184-186)TCC>TTC      | p.S62F   |
| Pat_76 | Pre-Treatment | PPIE     | 10450  | 37 | 1 | 40218614 | 40218614 | Missense_Mutation | SNP | A  | G  | 25 | 65  | c.727A>G        | c.(727-729)ACC>GCC      | p.T243A  |
| Pat_76 | Pre-Treatment | NFYC     | 4802   | 37 | 1 | 41218908 | 41218908 | Missense_Mutation | SNP | C  | T  | 15 | 45  | c.377C>T        | c.(376-378)CCA>CTA      | p.P126L  |
| Pat_76 | Pre-Treatment | HIVEP3   | 59269  | 37 | 1 | 42041243 | 42041243 | Missense_Mutation | SNP | G  | A  | 5  | 224 | c.5179C>T       | c.(5179-5181)CCG>TCG    | p.P1727S |
| Pat_76 | Pre-Treatment | SLC2A1   | 6513   | 37 | 1 | 43393356 | 43393356 | Missense_Mutation | SNP | G  | A  | 4  | 62  | c.1198C>T       | c.(1198-1200)CGT>TGT    | p.R400C  |
| Pat_76 | Pre-Treatment | TIE1     | 7075   | 37 | 1 | 43778895 | 43778895 | Missense_Mutation | SNP | C  | T  | 9  | 17  | c.2017C>T       | c.(2017-2019)CCA>TCA    | p.P673S  |
| Pat_76 | Pre-Treatment | PTPRF    | 5792   | 37 | 1 | 44058256 | 44058257 | Missense_Mutation | DNP | CC | TT | 7  | 19  | c.1797_1798CC>T | c.(1795-1800)GCCCGC>GCT | p.R600C  |
| Pat_76 | Pre-Treatment | DMAP1    | 55929  | 37 | 1 | 44684863 | 44684863 | Missense_Mutation | SNP | C  | T  | 21 | 43  | c.856C>T        | c.(856-858)CGC>TGC      | p.R286C  |
| Pat_76 | Pre-Treatment | RNF220   | 55182  | 37 | 1 | 45110737 | 45110737 | Missense_Mutation | SNP | C  | T  | 18 | 29  | c.1294C>T       | c.(1294-1296)CGG>TGG    | p.R432W  |
| Pat_76 | Pre-Treatment | IPP      | 3652   | 37 | 1 | 46211794 | 46211794 | Missense_Mutation | SNP | G  | A  | 4  | 75  | c.290C>T        | c.(289-291)ACA>ATA      | p.T97I   |
| Pat_76 | Pre-Treatment | FAAH     | 2166   | 37 | 1 | 46871441 | 46871441 | Missense_Mutation | SNP | C  | T  | 10 | 16  | c.760C>T        | c.(760-762)CTC>TTC      | p.L254F  |
| Pat_76 | Pre-Treatment | CYP4A11  | 1579   | 37 | 1 | 47402978 | 47402978 | Nonsense_Mutation | SNP | C  | T  | 21 | 29  | c.378G>A        | c.(376-378)TGG>TGA      | p.W126*  |
| Pat_76 | Pre-Treatment | SLC5A9   | 200010 | 37 | 1 | 48697728 | 48697728 | Missense_Mutation | SNP | C  | T  | 59 | 68  | c.802C>T        | c.(802-804)CAC>TAC      | p.H268Y  |
| Pat_76 | Pre-Treatment | SPATA6   | 54558  | 37 | 1 | 48877245 | 48877245 | Missense_Mutation | SNP | G  | A  | 13 | 25  | c.296C>T        | c.(295-297)TCT>TTT      | p.S99F   |
| Pat_76 | Pre-Treatment | GLIS1    | 148979 | 37 | 1 | 54060335 | 54060335 | Missense_Mutation | SNP | A  | C  | 13 | 21  | c.241T>G        | c.(241-243)TGT>GGT      | p.C81G   |
| Pat_76 | Pre-Treatment | YIPF1    | 54432  | 37 | 1 | 54332025 | 54332025 | Missense_Mutation | SNP | G  | A  | 28 | 23  | c.679C>T        | c.(679-681)CGT>TGT      | p.R227C  |
| Pat_76 | Pre-Treatment | PRKAA2   | 5563   | 37 | 1 | 57159444 | 57159444 | Missense_Mutation | SNP | C  | T  | 34 | 45  | c.482C>T        | c.(481-483)TCT>TTT      | p.S161F  |
| Pat_76 | Pre-Treatment | C1orf168 | 199920 | 37 | 1 | 57257735 | 57257735 | Missense_Mutation | SNP | C  | T  | 4  | 142 | c.751G>A        | c.(751-753)GCC>ACC      | p.A251T  |
| Pat_76 | Pre-Treatment | C1orf168 | 199920 | 37 | 1 | 57257821 | 57257821 | Missense_Mutation | SNP | C  | T  | 23 | 46  | c.665G>A        | c.(664-666)AGA>AAA      | p.R222K  |
| Pat_76 | Pre-Treatment | C8A      | 731    | 37 | 1 | 57341861 | 57341861 | Missense_Mutation | SNP | G  | A  | 13 | 66  | c.443G>A        | c.(442-444)GGA>GAA      | p.G148E  |
| Pat_76 | Pre-Treatment | C8B      | 732    | 37 | 1 | 57397515 | 57397515 | Missense_Mutation | SNP | T  | C  | 44 | 48  | c.1589A>G       | c.(1588-1590)CAA>CGA    | p.Q530R  |
| Pat_76 | Pre-Treatment | C8B      | 732    | 37 | 1 | 57425723 | 57425723 | Nonsense_Mutation | SNP | C  | T  | 20 | 8   | c.219G>A        | c.(217-219)TGG>TGA      | p.W73*   |
| Pat_76 | Pre-Treatment | DAB1     | 1600   | 37 | 1 | 57481054 | 57481054 | Missense_Mutation | SNP | G  | A  | 13 | 12  | c.946C>T        | c.(946-948)CTC>TTC      | p.L316F  |
| Pat_76 | Pre-Treatment | ROR1     | 4919   | 37 | 1 | 64624732 | 64624733 | Missense_Mutation | DNP | CC | TT | 32 | 57  | c.1243_1244CC>T | c.(1243-1245)CCC>TTC    | p.P415F  |
| Pat_76 | Pre-Treatment | ROR1     | 4919   | 37 | 1 | 64644411 | 64644411 | Missense_Mutation | SNP | G  | A  | 11 | 24  | c.2687G>A       | c.(2686-2688)GGA>GAA    | p.G896E  |
| Pat_76 | Pre-Treatment | LEPR     | 3953   | 37 | 1 | 66036476 | 66036476 | Nonsense_Mutation | SNP | C  | T  | 7  | 27  | c.361C>T        | c.(361-363)CAA>TAA      | p.Q121*  |
| Pat_76 | Pre-Treatment | PTGFR    | 5737   | 37 | 1 | 79002109 | 79002109 | Missense_Mutation | SNP | G  | A  | 35 | 47  | c.817G>A        | c.(817-819)GGA>AGA      | p.G273R  |
| Pat_76 | Pre-Treatment | LPHN2    | 23266  | 37 | 1 | 82417677 | 82417677 | Missense_Mutation | SNP | G  | A  | 32 | 45  | c.1633G>A       | c.(1633-1635)GAA>AAA    | p.E545K  |
| Pat_76 | Pre-Treatment | LPHN2    | 23266  | 37 | 1 | 82435018 | 82435018 | Missense_Mutation | SNP | C  | T  | 31 | 47  | c.2629C>T       | c.(2629-2631)CTT>TTT    | p.L877F  |

|        |               |          |        |    |   |           |           |                   |     |    |    |     |     |                                       |                      |               |
|--------|---------------|----------|--------|----|---|-----------|-----------|-------------------|-----|----|----|-----|-----|---------------------------------------|----------------------|---------------|
| Pat_76 | Pre-Treatment | COL24A1  | 255631 | 37 | 1 | 86578285  | 86578285  | Missense_Mutation | SNP | C  | T  | 33  | 44  | c.1564G>A                             | c.(1564-1566)GGA>AGA | p.G522R       |
| Pat_76 | Pre-Treatment | HS2ST1   | 9653   | 37 | 1 | 87570300  | 87570300  | Missense_Mutation | SNP | C  | T  | 19  | 35  | c.992C>T                              | c.(991-993)GCC>GTC   | p.A331V       |
| Pat_76 | Pre-Treatment | RBMXL1   | 494115 | 37 | 1 | 89448465  | 89448465  | Missense_Mutation | SNP | G  | A  | 131 | 124 | c.1045C>T                             | c.(1045-1047)CCC>TCC | p.P349S       |
| Pat_76 | Pre-Treatment | GBP6     | 163351 | 37 | 1 | 89834206  | 89834206  | Missense_Mutation | SNP | A  | T  | 37  | 51  | c.96A>T                               | c.(94-96)GAA>GAT     | p.E32D        |
| Pat_76 | Pre-Treatment | GBP6     | 163351 | 37 | 1 | 89835213  | 89835213  | Missense_Mutation | SNP | G  | A  | 29  | 27  | c.299G>A                              | c.(298-300)GGT>GAT   | p.G100D       |
| Pat_76 | Pre-Treatment | ZNF644   | 84146  | 37 | 1 | 91404798  | 91404798  | Missense_Mutation | SNP | G  | A  | 23  | 38  | c.2113C>T                             | c.(2113-2115)CCT>TCT | p.P705S       |
| Pat_76 | Pre-Treatment | CDC7     | 8317   | 37 | 1 | 91977357  | 91977357  | Missense_Mutation | SNP | C  | T  | 10  | 11  | c.449C>T                              | c.(448-450)TCC>TTC   | p.S150F       |
| Pat_76 | Pre-Treatment | EPHX4    | 253152 | 37 | 1 | 92528636  | 92528636  | Missense_Mutation | SNP | G  | A  | 53  | 60  | c.882G>A                              | c.(880-882)ATG>ATA   | p.M294I       |
| Pat_76 | Pre-Treatment | EVI5     | 7813   | 37 | 1 | 92979352  | 92979352  | Missense_Mutation | SNP | G  | A  | 53  | 54  | c.2294C>T                             | c.(2293-2295)TCG>TTG | p.S765L       |
| Pat_76 | Pre-Treatment | ABCA4    | 24     | 37 | 1 | 94546093  | 94546093  | Missense_Mutation | SNP | G  | A  | 51  | 67  | c.1040C>T                             | c.(1039-1041)GCC>GTC | p.A347V       |
| Pat_76 | Pre-Treatment | ABCA4    | 24     | 37 | 1 | 94568678  | 94568678  | Missense_Mutation | SNP | C  | T  | 83  | 137 | c.463G>A                              | c.(463-465)GAT>AAT   | p.D155N       |
| Pat_76 | Pre-Treatment | ARHGAP29 | 9411   | 37 | 1 | 94655515  | 94655515  | Missense_Mutation | SNP | G  | C  | 15  | 32  | c.1406C>G                             | c.(1405-1407)GCC>GGC | p.A469G       |
| Pat_76 | Pre-Treatment | DPYD     | 1806   | 37 | 1 | 98187170  | 98187170  | Missense_Mutation | SNP | C  | T  | 33  | 53  | c.379G>A                              | c.(379-381)GGA>AGA   | p.G127R       |
| Pat_76 | Pre-Treatment | HIAT1    | 64645  | 37 | 1 | 100534098 | 100534099 | Missense_Mutation | DNP | CC | AT | 62  | 77  | c.775_776CC>AT                        | c.(775-777)CCG>ATG   | p.P259M       |
| Pat_76 | Pre-Treatment | COL11A1  | 1301   | 37 | 1 | 103471817 | 103471817 | Splice_Site       | SNP | C  | T  | 27  | 73  | c.1737_splice                         | c.e16+1              | p.R579_splice |
| Pat_76 | Pre-Treatment | COL11A1  | 1301   | 37 | 1 | 103488306 | 103488306 | Missense_Mutation | SNP | C  | T  | 45  | 68  | c.1237G>A                             | c.(1237-1239)GAA>AAA | p.E413K       |
| Pat_76 | Pre-Treatment | GPSM2    | 29899  | 37 | 1 | 109441582 | 109441582 | Missense_Mutation | SNP | C  | T  | 4   | 63  | c.763C>T                              | c.(763-765)CTT>TTT   | p.L255F       |
| Pat_76 | Pre-Treatment | CELSR2   | 1952   | 37 | 1 | 109793338 | 109793338 | Missense_Mutation | SNP | G  | A  | 5   | 136 | c.637G>A                              | c.(637-639)GCA>ACA   | p.A213T       |
| Pat_76 | Pre-Treatment | ATXN7L2  | 127002 | 37 | 1 | 110033872 | 110033872 | Missense_Mutation | SNP | G  | T  | 27  | 58  | c.1687G>T                             | c.(1687-1689)GTG>TTG | p.V563L       |
| Pat_76 | Pre-Treatment | GPR61    | 83873  | 37 | 1 | 110086284 | 110086284 | Missense_Mutation | SNP | G  | A  | 4   | 150 | c.640G>A                              | c.(640-642)GTC>ATC   | p.V214I       |
| Pat_76 | Pre-Treatment | KCNC4    | 3749   | 37 | 1 | 110766382 | 110766382 | Missense_Mutation | SNP | G  | A  | 4   | 120 | c.1475G>A                             | c.(1474-1476)CGG>CAG | p.R492Q       |
| Pat_76 | Pre-Treatment | RBM15    | 64783  | 37 | 1 | 110883778 | 110883778 | Missense_Mutation | SNP | C  | T  | 16  | 27  | c.1751C>T                             | c.(1750-1752)TCT>TTT | p.S584F       |
| Pat_76 | Pre-Treatment | OVGP1    | 5016   | 37 | 1 | 111957747 | 111957747 | Missense_Mutation | SNP | G  | A  | 26  | 30  | c.1376C>T                             | c.(1375-1377)TCC>TTC | p.S459F       |
| Pat_76 | Pre-Treatment | KCND3    | 3752   | 37 | 1 | 112525258 | 112525258 | Missense_Mutation | SNP | G  | A  | 7   | 10  | c.91C>T                               | c.(91-93)CCG>TCG     | p.P31S        |
| Pat_76 | Pre-Treatment | TSPAN2   | 10100  | 37 | 1 | 115601575 | 115601575 | Missense_Mutation | SNP | C  | T  | 54  | 102 | c.373G>A                              | c.(373-375)GAA>AAA   | p.E125K       |
| Pat_76 | Pre-Treatment | MAN1A2   | 10905  | 37 | 1 | 118039386 | 118039386 | Missense_Mutation | SNP | C  | T  | 14  | 29  | c.1286C>T                             | c.(1285-1287)GCT>GTT | p.A429V       |
| Pat_76 | Pre-Treatment | GDAP2    | 54834  | 37 | 1 | 118426126 | 118426126 | Missense_Mutation | SNP | C  | T  | 35  | 40  | c.1231G>A                             | c.(1231-1233)GAT>AAT | p.D411N       |
| Pat_76 | Pre-Treatment | SPAG17   | 200162 | 37 | 1 | 118598459 | 118598459 | Missense_Mutation | SNP | C  | T  | 16  | 35  | c.2619G>A                             | c.(2617-2619)ATG>ATA | p.M873I       |
| Pat_76 | Pre-Treatment | HAO2     | 51179  | 37 | 1 | 119929246 | 119929246 | Missense_Mutation | SNP | G  | A  | 21  | 25  | c.563G>A                              | c.(562-564)GGA>GAA   | p.G188E       |
| Pat_76 | Pre-Treatment | NBPF9    | 400818 | 37 | 1 | 144220816 | 144220816 | Missense_Mutation | SNP | A  | G  | 9   | 495 | c.2189A>G                             | c.(2188-2190)GAG>GGG | p.E730G       |
| Pat_76 | Pre-Treatment | BCL9     | 607    | 37 | 1 | 147096566 | 147096566 | Missense_Mutation | SNP | C  | T  | 29  | 13  | c.4087C>T                             | c.(4087-4089)CGG>TGG | p.R1363W      |
| Pat_76 | Pre-Treatment | NBPF16   | 728936 | 37 | 1 | 148753328 | 148753328 | Missense_Mutation | SNP | G  | A  | 239 | 185 | c.1345G>A                             | c.(1345-1347)GAT>AAT | p.D449N       |
| Pat_76 | Pre-Treatment | SEMA6C   | 10500  | 37 | 1 | 151105565 | 151105566 | Missense_Mutation | DNP | CC | TT | 12  | 29  | .2187_2188GG>A.185-2190)AAGGAG>AAA/   |                      | p.E730K       |
| Pat_76 | Pre-Treatment | RPTN     | 126638 | 37 | 1 | 152129435 | 152129435 | Missense_Mutation | SNP | C  | T  | 102 | 40  | c.140G>A                              | c.(139-141)AGA>AAA   | p.R47K        |
| Pat_76 | Pre-Treatment | FLG      | 2312   | 37 | 1 | 152279041 | 152279041 | Missense_Mutation | SNP | G  | A  | 193 | 627 | c.8321C>T                             | c.(8320-8322)TCC>TTC | p.S2774F      |
| Pat_76 | Pre-Treatment | FLG      | 2312   | 37 | 1 | 152284783 | 152284783 | Missense_Mutation | SNP | G  | A  | 125 | 555 | c.2579C>T                             | c.(2578-2580)TCG>TTG | p.S860L       |
| Pat_76 | Pre-Treatment | FLG2     | 388698 | 37 | 1 | 152326351 | 152326351 | Missense_Mutation | SNP | C  | T  | 470 | 234 | c.3911G>A                             | c.(3910-3912)GGA>GAA | p.G1304E      |
| Pat_76 | Pre-Treatment | KPRP     | 448834 | 37 | 1 | 152732181 | 152732182 | Missense_Mutation | DNP | CC | TG | 42  | 168 | c.117_118CC>TG.115-120)GCCCCCT>GCTG/  |                      | p.P40A        |
| Pat_76 | Pre-Treatment | IVL      | 3713   | 37 | 1 | 152882308 | 152882308 | Missense_Mutation | SNP | C  | T  | 94  | 44  | c.35C>T                               | c.(34-36)TCC>TTC     | p.S12F        |
| Pat_76 | Pre-Treatment | S100A2   | 6273   | 37 | 1 | 153536245 | 153536245 | Missense_Mutation | SNP | C  | T  | 144 | 66  | c.106G>A                              | c.(106-108)GAA>AAA   | p.E36K        |
| Pat_76 | Pre-Treatment | ATP8B2   | 57198  | 37 | 1 | 154318798 | 154318798 | Missense_Mutation | SNP | G  | T  | 4   | 139 | c.2969G>T                             | c.(2968-2970)TGC>TTC | p.C990F       |
| Pat_76 | Pre-Treatment | KCNN3    | 3782   | 37 | 1 | 154794606 | 154794606 | Missense_Mutation | SNP | G  | A  | 71  | 41  | c.988C>T                              | c.(988-990)CTT>TTT   | p.L330F       |
| Pat_76 | Pre-Treatment | DCST1    | 149095 | 37 | 1 | 155014087 | 155014087 | Missense_Mutation | SNP | C  | G  | 4   | 146 | c.746C>G                              | c.(745-747)TCC>TGC   | p.S249C       |
| Pat_76 | Pre-Treatment | DCST1    | 149095 | 37 | 1 | 155023142 | 155023142 | Missense_Mutation | SNP | G  | A  | 3   | 16  | c.1919G>A                             | c.(1918-1920)CGC>CAC | p.R640H       |
| Pat_76 | Pre-Treatment | RUSC1    | 23623  | 37 | 1 | 155297963 | 155297964 | Missense_Mutation | DNP | CC | AT | 226 | 139 | ..2437_2438CC>A' c.(2437-2439)CCG>ATG |                      | p.P813M       |
| Pat_76 | Pre-Treatment | ASH1L    | 55870  | 37 | 1 | 155448540 | 155448540 | Missense_Mutation | SNP | G  | A  | 19  | 47  | c.4121C>T                             | c.(4120-4122)TCT>TTT | p.S1374F      |
| Pat_76 | Pre-Treatment | PRCC     | 5546   | 37 | 1 | 156756532 | 156756532 | Missense_Mutation | SNP | C  | T  | 117 | 64  | c.649C>T                              | c.(649-651)CCC>TCC   | p.P217S       |

|        |               |          |        |    |   |           |           |                        |     |    |    |     |     |                |                       |               |
|--------|---------------|----------|--------|----|---|-----------|-----------|------------------------|-----|----|----|-----|-----|----------------|-----------------------|---------------|
| Pat_76 | Pre-Treatment | NTRK1    | 4914   | 37 | 1 | 156844761 | 156844761 | Missense_Mutation      | SNP | C  | T  | 5   | 307 | c.1315C>T      | c.(1315-1317)CTC>TTC  | p.L439F       |
| Pat_76 | Pre-Treatment | PEAR1    | 375033 | 37 | 1 | 156883182 | 156883182 | Splice_Site            | SNP | G  | A  | 79  | 41  | c.2512_splice  | c.e20-1               | p.V838_splice |
| Pat_76 | Pre-Treatment | CD1C     | 911    | 37 | 1 | 158261016 | 158261016 | Missense_Mutation      | SNP | G  | A  | 96  | 66  | c.154G>A       | c.(154-156)GAG>AAG    | p.E52K        |
| Pat_76 | Pre-Treatment | OR6K2    | 81448  | 37 | 1 | 158669934 | 158669934 | Missense_Mutation      | SNP | G  | A  | 26  | 116 | c.509C>T       | c.(508-510)TCG>TTG    | p.S170L       |
| Pat_76 | Pre-Treatment | OR6K2    | 81448  | 37 | 1 | 158670321 | 158670321 | Missense_Mutation      | SNP | C  | T  | 87  | 28  | c.122G>A       | c.(121-123)GGA>GAA    | p.G41E        |
| Pat_76 | Pre-Treatment | PYHIN1   | 149628 | 37 | 1 | 158909027 | 158909027 | Missense_Mutation      | SNP | C  | T  | 50  | 230 | c.569C>T       | c.(568-570)TCC>TTC    | p.S190F       |
| Pat_76 | Pre-Treatment | OR10J1   | 26476  | 37 | 1 | 159409697 | 159409697 | Nonsense_Mutation      | SNP | T  | G  | 98  | 316 | c.149T>G       | c.(148-150)TTA>TGA    | p.L50*        |
| Pat_76 | Pre-Treatment | OR10J1   | 26476  | 37 | 1 | 159410116 | 159410116 | Missense_Mutation      | SNP | G  | A  | 56  | 240 | c.568G>A       | c.(568-570)GAC>AAC    | p.D190N       |
| Pat_76 | Pre-Treatment | FCRL6    | 343413 | 37 | 1 | 159785251 | 159785251 | Splice_Site            | SNP | T  | G  | 14  | 71  | c.1179_splice  | c.e9+2                | p.K393_splice |
| Pat_76 | Pre-Treatment | ATP1A2   | 477    | 37 | 1 | 160105225 | 160105225 | Missense_Mutation      | SNP | G  | A  | 61  | 50  | c.2117G>A      | c.(2116-2118)GGA>GAA  | p.G706E       |
| Pat_76 | Pre-Treatment | ATP1A4   | 480    | 37 | 1 | 160129209 | 160129209 | Missense_Mutation      | SNP | C  | T  | 120 | 59  | c.671C>T       | c.(670-672)TCA>TTA    | p.S224L       |
| Pat_76 | Pre-Treatment | VANGL2   | 57216  | 37 | 1 | 160388964 | 160388964 | Missense_Mutation      | SNP | C  | T  | 4   | 79  | c.365C>T       | c.(364-366)ACG>ATG    | p.T122M       |
| Pat_76 | Pre-Treatment | NDUFS2   | 4720   | 37 | 1 | 161182173 | 161182173 | Missense_Mutation      | SNP | C  | T  | 38  | 111 | c.1019C>T      | c.(1018-1020)TCC>TTC  | p.S340F       |
| Pat_76 | Pre-Treatment | PBX1     | 5087   | 37 | 1 | 164815831 | 164815831 | Missense_Mutation      | SNP | G  | A  | 138 | 49  | c.1211G>A      | c.(1210-1212)GGT>GAT  | p.G404D       |
| Pat_76 | Pre-Treatment | ALDH9A1  | 223    | 37 | 1 | 165634269 | 165634269 | Missense_Mutation      | SNP | C  | T  | 75  | 25  | c.1448G>A      | c.(1447-1449)GGA>GAA  | p.G483E       |
| Pat_76 | Pre-Treatment | ADCY10   | 55811  | 37 | 1 | 167817683 | 167817683 | Missense_Mutation      | SNP | G  | A  | 62  | 45  | c.2353C>T      | c.(2353-2355)CAT>TAT  | p.H785Y       |
| Pat_76 | Pre-Treatment | F5       | 2153   | 37 | 1 | 169511239 | 169511239 | Missense_Mutation      | SNP | C  | T  | 308 | 154 | c.3089G>A      | c.(3088-3090)CGA>CAA  | p.R1030Q      |
| Pat_76 | Pre-Treatment | SELP     | 6403   | 37 | 1 | 169562902 | 169562902 | Missense_Mutation      | SNP | A  | C  | 71  | 31  | c.2348T>G      | c.(2347-2349)ATA>AGA  | p.I783R       |
| Pat_76 | Pre-Treatment | C1orf156 | 92342  | 37 | 1 | 169762716 | 169762716 | Missense_Mutation      | SNP | C  | T  | 230 | 117 | c.121G>A       | c.(121-123)GGA>AGA    | p.G41R        |
| Pat_76 | Pre-Treatment | FMO3     | 2328   | 37 | 1 | 171079999 | 171079999 | Missense_Mutation      | SNP | C  | T  | 82  | 277 | c.688C>T       | c.(688-690)CCT>TCT    | p.P230S       |
| Pat_76 | Pre-Treatment | VAMP4    | 8674   | 37 | 1 | 171673654 | 171673654 | Missense_Mutation      | SNP | G  | A  | 4   | 69  | c.418C>T       | c.(418-420)CGT>TGT    | p.R140C       |
| Pat_76 | Pre-Treatment | TNR      | 7143   | 37 | 1 | 175372639 | 175372640 | Missense_Mutation      | DNP | GG | AA | 100 | 326 | c.612_613CC>TT | 610-615)TGCCCC>TGTTT  | p.P205S       |
| Pat_76 | Pre-Treatment | TNR      | 7143   | 37 | 1 | 175375835 | 175375835 | Missense_Mutation      | SNP | C  | T  | 121 | 51  | c.16G>A        | c.(16-18)GAA>AAA      | p.E6K         |
| Pat_76 | Pre-Treatment | PAPPA2   | 60676  | 37 | 1 | 176668460 | 176668460 | Missense_Mutation      | SNP | A  | G  | 112 | 366 | c.2971A>G      | c.(2971-2973)AAG>GAG  | p.K991E       |
| Pat_76 | Pre-Treatment | C1orf125 | 126859 | 37 | 1 | 179460729 | 179460729 | Missense_Mutation      | SNP | G  | A  | 33  | 131 | c.2148G>A      | c.(2146-2148)ATG>ATA  | p.M716I       |
| Pat_76 | Pre-Treatment | CEP350   | 9857   | 37 | 1 | 180023013 | 180023013 | Missense_Mutation      | SNP | A  | C  | 99  | 36  | c.5118A>C      | c.(5116-5118)GAA>GAC  | p.E1706D      |
| Pat_76 | Pre-Treatment | XPR1     | 9213   | 37 | 1 | 180849418 | 180849418 | Missense_Mutation      | SNP | C  | T  | 106 | 82  | c.2015C>T      | c.(2014-2016)CCT>CTT  | p.P672L       |
| Pat_76 | Pre-Treatment | CACNA1E  | 777    | 37 | 1 | 181695216 | 181695216 | Missense_Mutation      | SNP | G  | A  | 33  | 18  | c.2158G>A      | c.(2158-2160)GAA>AAA  | p.E720K       |
| Pat_76 | Pre-Treatment | LAMC2    | 3918   | 37 | 1 | 183192278 | 183192278 | Missense_Mutation      | SNP | C  | T  | 63  | 23  | c.772C>T       | c.(772-774)CTT>TTT    | p.L258F       |
| Pat_76 | Pre-Treatment | LAMC2    | 3918   | 37 | 1 | 183192310 | 183192310 | Missense_Mutation      | SNP | C  | G  | 20  | 86  | c.804C>G       | c.(802-804)AGC>AGG    | p.S268R       |
| Pat_76 | Pre-Treatment | APOBEC4  | 403314 | 37 | 1 | 183616917 | 183616917 | Missense_Mutation      | SNP | C  | T  | 131 | 71  | c.1000G>A      | c.(1000-1002)GGA>AGA  | p.G334R       |
| Pat_76 | Pre-Treatment | FAM129A  | 116496 | 37 | 1 | 184792330 | 184792330 | Nonsense_Mutation      | SNP | G  | C  | 49  | 146 | c.956C>G       | c.(955-957)TCA>TGA    | p.S319*       |
| Pat_76 | Pre-Treatment | FAM129A  | 116496 | 37 | 1 | 184863341 | 184863341 | Splice_Site            | SNP | C  | T  | 7   | 32  | c.187_splice   | c.e3-1                | p.P63_splice  |
| Pat_76 | Pre-Treatment | PRG4     | 10216  | 37 | 1 | 186276274 | 186276274 | Missense_Mutation      | SNP | G  | T  | 5   | 160 | c.1423G>T      | c.(1423-1425)GCA>TCA  | p.A475S       |
| Pat_76 | Pre-Treatment | PLA2G4A  | 5321   | 37 | 1 | 186934540 | 186934540 | Splice_Site            | SNP | G  | A  | 18  | 10  | c.1580_splice  | c.e15-1               | p.D527_splice |
| Pat_76 | Pre-Treatment | FAM5C    | 339479 | 37 | 1 | 190195350 | 190195350 | Missense_Mutation      | SNP | C  | T  | 79  | 37  | c.823G>A       | c.(823-825)GAA>AAA    | p.E275K       |
| Pat_76 | Pre-Treatment | CFH      | 3075   | 37 | 1 | 196654365 | 196654365 | Missense_Mutation      | SNP | C  | T  | 53  | 247 | c.962C>T       | c.(961-963)ACC>ATC    | p.T321I       |
| Pat_76 | Pre-Treatment | CRB1     | 23418  | 37 | 1 | 197396935 | 197396935 | Missense_Mutation      | SNP | G  | A  | 61  | 27  | c.2480G>A      | c.(2479-2481)GGA>GAA  | p.G827E       |
| Pat_76 | Pre-Treatment | KIF14    | 9928   | 37 | 1 | 200586846 | 200586846 | Missense_Mutation      | SNP | G  | T  | 37  | 150 | c.1006C>A      | c.(1006-1008)CCC>ACC  | p.P336T       |
| Pat_76 | Pre-Treatment | KIF14    | 9928   | 37 | 1 | 200586848 | 200586848 | Missense_Mutation      | SNP | A  | G  | 37  | 151 | c.1004T>C      | c.(1003-1005)CTT>CCT  | p.L335P       |
| Pat_76 | Pre-Treatment | CACNA1S  | 779    | 37 | 1 | 201056982 | 201056983 | Missense_Mutation      | DNP | GG | AA | 33  | 41  | c.975_976CC>TT | (973-978)ATCCTC>ATTTT | p.L326F       |
| Pat_76 | Pre-Treatment | TNNI1    | 7135   | 37 | 1 | 201383752 | 201383752 | Missense_Mutation      | SNP | T  | G  | 23  | 83  | c.83A>C        | c.(82-84)GAA>GCA      | p.E28A        |
| Pat_76 | Pre-Treatment | TNNI1    | 7135   | 37 | 1 | 201386940 | 201386940 | Translation_Start_Site | SNP | C  | T  | 11  | 48  | c.-18G>A       | c.(-20-16)AGGTG>AGATG |               |
| Pat_76 | Pre-Treatment | NAV1     | 89796  | 37 | 1 | 201762969 | 201762969 | Missense_Mutation      | SNP | G  | A  | 4   | 153 | c.3371G>A      | c.(3370-3372)CGC>CAC  | p.R1124H      |
| Pat_76 | Pre-Treatment | IPO9     | 55705  | 37 | 1 | 201843467 | 201843467 | Missense_Mutation      | SNP | G  | A  | 4   | 137 | c.2800G>A      | c.(2800-2802)GCT>ACT  | p.A934T       |
| Pat_76 | Pre-Treatment | LGR6     | 59352  | 37 | 1 | 202283992 | 202283992 | Nonsense_Mutation      | SNP | C  | T  | 15  | 81  | c.1630C>T      | c.(1630-1632)CAG>TAG  | p.Q544*       |
| Pat_76 | Pre-Treatment | PPP1R12B | 4660   | 37 | 1 | 202464748 | 202464748 | Nonsense_Mutation      | SNP | C  | T  | 54  | 143 | c.2386C>T      | c.(2386-2388)CGA>TGA  | p.R796*       |

|        |               |          |        |    |    |           |           |                   |     |    |    |     |     |                 |                          |                |
|--------|---------------|----------|--------|----|----|-----------|-----------|-------------------|-----|----|----|-----|-----|-----------------|--------------------------|----------------|
| Pat_76 | Pre-Treatment | CHI3L1   | 1116   | 37 | 1  | 203153717 | 203153717 | Missense_Mutation | SNP | A  | T  | 128 | 57  | c.301T>A        | c.(301-303)TTT>ATT       | p.F101I        |
| Pat_76 | Pre-Treatment | ZC3H11A  | 9877   | 37 | 1  | 203819077 | 203819077 | Missense_Mutation | SNP | A  | G  | 4   | 145 | c.1862A>G       | c.(1861-1863)GAG>GGG     | p.E621G        |
| Pat_76 | Pre-Treatment | TMCC2    | 9911   | 37 | 1  | 205211131 | 205211131 | Missense_Mutation | SNP | G  | A  | 4   | 113 | c.706G>A        | c.(706-708)GTG>ATG       | p.V236M        |
| Pat_76 | Pre-Treatment | C4BPB    | 725    | 37 | 1  | 207265145 | 207265145 | Missense_Mutation | SNP | C  | T  | 17  | 21  | c.389C>T        | c.(388-390)CCC>CTC       | p.P130L        |
| Pat_76 | Pre-Treatment | HSD11B1  | 3290   | 37 | 1  | 209879168 | 209879168 | Missense_Mutation | SNP | G  | A  | 12  | 84  | c.101G>A        | c.(100-102)GGA>GAA       | p.G34E         |
| Pat_76 | Pre-Treatment | KCNH1    | 3756   | 37 | 1  | 210977434 | 210977435 | Missense_Mutation | DNP | GG | AA | 30  | 16  | c.1536_1537CC>T | c.(1534-1539)TACCAT>TATT | p.H513Y        |
| Pat_76 | Pre-Treatment | PTPN14   | 5784   | 37 | 1  | 214556797 | 214556797 | Missense_Mutation | SNP | C  | T  | 5   | 246 | c.2401G>A       | c.(2401-2403)GGG>AGG     | p.G801R        |
| Pat_76 | Pre-Treatment | USH2A    | 7399   | 37 | 1  | 215813963 | 215813963 | Missense_Mutation | SNP | C  | T  | 4   | 108 | c.14905G>A      | c.(14905-14907)GGA>AGT   | p.G4969R       |
| Pat_76 | Pre-Treatment | USH2A    | 7399   | 37 | 1  | 215848169 | 215848169 | Missense_Mutation | SNP | G  | A  | 15  | 51  | c.13084C>T      | c.(13084-13086)CCA>TCA   | p.P4362S       |
| Pat_76 | Pre-Treatment | EPRS     | 2058   | 37 | 1  | 220152958 | 220152958 | Splice_Site       | SNP | C  | T  | 24  | 53  | c.3712_splice   | c.e27-1                  | p.G1238_splice |
| Pat_76 | Pre-Treatment | MIA3     | 375056 | 37 | 1  | 222801532 | 222801532 | Missense_Mutation | SNP | G  | A  | 91  | 43  | c.970G>A        | c.(970-972)GAC>AAC       | p.D324N        |
| Pat_76 | Pre-Treatment | DISP1    | 84976  | 37 | 1  | 223177395 | 223177395 | Missense_Mutation | SNP | T  | A  | 37  | 98  | c.2656T>A       | c.(2656-2658)TTT>ATT     | p.F886I        |
| Pat_76 | Pre-Treatment | SUSD4    | 55061  | 37 | 1  | 223465897 | 223465897 | Missense_Mutation | SNP | C  | T  | 49  | 185 | c.245G>A        | c.(244-246)CGA>CAA       | p.R82Q         |
| Pat_76 | Pre-Treatment | ENAH     | 55740  | 37 | 1  | 225707053 | 225707053 | Missense_Mutation | SNP | C  | T  | 34  | 89  | c.649G>A        | c.(649-651)GAG>AAG       | p.E217K        |
| Pat_76 | Pre-Treatment | CDC42BPA | 8476   | 37 | 1  | 227203785 | 227203785 | Missense_Mutation | SNP | G  | A  | 147 | 43  | c.4748C>T       | c.(4747-4749)CCC>CTC     | p.P1583L       |
| Pat_76 | Pre-Treatment | OBSCN    | 84033  | 37 | 1  | 228479646 | 228479646 | Missense_Mutation | SNP | G  | A  | 32  | 23  | c.10387G>A      | c.(10387-10389)GAA>AAA   | p.E3463K       |
| Pat_76 | Pre-Treatment | SIPA1L2  | 57568  | 37 | 1  | 232600998 | 232600998 | Missense_Mutation | SNP | C  | T  | 5   | 323 | c.2408G>A       | c.(2407-2409)CGA>CAA     | p.R803Q        |
| Pat_76 | Pre-Treatment | SIPA1L2  | 57568  | 37 | 1  | 232601113 | 232601113 | Missense_Mutation | SNP | G  | A  | 52  | 197 | c.2293C>T       | c.(2293-2295)CCC>TCC     | p.P765S        |
| Pat_76 | Pre-Treatment | KIAA1804 | 84451  | 37 | 1  | 233482322 | 233482322 | Missense_Mutation | SNP | G  | A  | 44  | 28  | c.940G>A        | c.(940-942)GAA>AAA       | p.E314K        |
| Pat_76 | Pre-Treatment | NID1     | 4811   | 37 | 1  | 236205285 | 236205285 | Missense_Mutation | SNP | G  | T  | 4   | 82  | c.1060C>A       | c.(1060-1062)CAG>AAG     | p.Q354K        |
| Pat_76 | Pre-Treatment | FMN2     | 56776  | 37 | 1  | 240371077 | 240371077 | Missense_Mutation | SNP | C  | T  | 43  | 106 | c.2965C>T       | c.(2965-2967)CCT>TCT     | p.P989S        |
| Pat_76 | Pre-Treatment | FMN2     | 56776  | 37 | 1  | 240371209 | 240371209 | Missense_Mutation | SNP | C  | T  | 6   | 76  | c.3097C>T       | c.(3097-3099)CCG>TCG     | p.P1033S       |
| Pat_76 | Pre-Treatment | AKT3     | 10000  | 37 | 1  | 243777040 | 243777040 | Missense_Mutation | SNP | G  | A  | 23  | 30  | c.629C>T        | c.(628-630)TCC>TTC       | p.S210F        |
| Pat_76 | Pre-Treatment | C1orf100 | 200159 | 37 | 1  | 244528007 | 244528007 | Missense_Mutation | SNP | C  | T  | 4   | 85  | c.5C>T          | c.(4-6)ACT>ATT           | p.T2I          |
| Pat_76 | Pre-Treatment | ZNF669   | 79862  | 37 | 1  | 247264023 | 247264023 | Missense_Mutation | SNP | G  | A  | 55  | 45  | c.1048C>T       | c.(1048-1050)CGT>TGT     | p.R350C        |
| Pat_76 | Pre-Treatment | OR2W5    | 441932 | 37 | 1  | 247655213 | 247655213 | Missense_Mutation | SNP | G  | A  | 41  | 63  | c.784G>A        | c.(784-786)GCC>ACC       | p.A262T        |
| Pat_76 | Pre-Treatment | OR2W3    | 343171 | 37 | 1  | 248059042 | 248059042 | Missense_Mutation | SNP | G  | A  | 170 | 247 | c.154G>A        | c.(154-156)GAC>AAC       | p.D52N         |
| Pat_76 | Pre-Treatment | OR2L2    | 26246  | 37 | 1  | 248201597 | 248201597 | Missense_Mutation | SNP | G  | A  | 46  | 75  | c.28G>A         | c.(28-30)GAT>AAT         | p.D10N         |
| Pat_76 | Pre-Treatment | OR2M3    | 127062 | 37 | 1  | 248366888 | 248366888 | Missense_Mutation | SNP | A  | C  | 119 | 175 | c.519A>C        | c.(517-519)GAA>GAC       | p.E173D        |
| Pat_76 | Pre-Treatment | OR2T33   | 391195 | 37 | 1  | 248436332 | 248436332 | Missense_Mutation | SNP | G  | A  | 34  | 40  | c.785C>T        | c.(784-786)TCC>TTC       | p.S262F        |
| Pat_76 | Pre-Treatment | OR2T33   | 391195 | 37 | 1  | 248436951 | 248436951 | Missense_Mutation | SNP | G  | A  | 41  | 58  | c.166C>T        | c.(166-168)CCC>TCC       | p.P56S         |
| Pat_76 | Pre-Treatment | OR1411   | 401994 | 37 | 1  | 248845470 | 248845470 | Missense_Mutation | SNP | C  | T  | 8   | 27  | c.136G>A        | c.(136-138)GTC>ATC       | p.V46I         |
| Pat_76 | Pre-Treatment | GTPBP4   | 23560  | 37 | 10 | 1055472   | 1055472   | Nonsense_Mutation | SNP | C  | T  | 52  | 82  | c.1195C>T       | c.(1195-1197)CGA>TGA     | p.R399*        |
| Pat_76 | Pre-Treatment | NET1     | 10276  | 37 | 10 | 5468628   | 5468628   | Missense_Mutation | SNP | C  | T  | 4   | 77  | c.139C>T        | c.(139-141)CGG>TGG       | p.R47W         |
| Pat_76 | Pre-Treatment | C10orf18 | 54906  | 37 | 10 | 5769069   | 5769069   | Missense_Mutation | SNP | G  | A  | 4   | 137 | c.470G>A        | c.(469-471)CGT>CAT       | p.R157H        |
| Pat_76 | Pre-Treatment | C10orf18 | 54906  | 37 | 10 | 5789058   | 5789058   | Missense_Mutation | SNP | C  | T  | 49  | 55  | c.3674C>T       | c.(3673-3675)TCG>TTG     | p.S1225L       |
| Pat_76 | Pre-Treatment | IL2RA    | 3559   | 37 | 10 | 6067847   | 6067847   | Missense_Mutation | SNP | C  | T  | 28  | 51  | c.206G>A        | c.(205-207)GGA>GAA       | p.G69E         |
| Pat_76 | Pre-Treatment | ITIH2    | 3698   | 37 | 10 | 7751024   | 7751024   | Nonsense_Mutation | SNP | C  | T  | 44  | 103 | c.232C>T        | c.(232-234)CAG>TAG       | p.Q78*         |
| Pat_76 | Pre-Treatment | ATP5C1   | 509    | 37 | 10 | 7842001   | 7842001   | Missense_Mutation | SNP | C  | T  | 20  | 60  | c.584C>T        | c.(583-585)TCC>TTC       | p.S195F        |
| Pat_76 | Pre-Treatment | NMT2     | 9397   | 37 | 10 | 15154841  | 15154841  | Missense_Mutation | SNP | G  | A  | 4   | 114 | c.1292C>T       | c.(1291-1293)ACG>ATG     | p.T431M        |
| Pat_76 | Pre-Treatment | CUBN     | 8029   | 37 | 10 | 16962022  | 16962022  | Missense_Mutation | SNP | G  | A  | 37  | 33  | c.6761C>T       | c.(6760-6762)CCA>CTA     | p.P2254L       |
| Pat_76 | Pre-Treatment | PLXDC2   | 84898  | 37 | 10 | 20432253  | 20432253  | Nonsense_Mutation | SNP | C  | T  | 42  | 78  | c.571C>T        | c.(571-573)CGA>TGA       | p.R191*        |
| Pat_76 | Pre-Treatment | NEBL     | 10529  | 37 | 10 | 21250695  | 21250695  | Missense_Mutation | SNP | C  | G  | 58  | 47  | c.263G>C        | c.(262-264)AGA>ACA       | p.R88T         |
| Pat_76 | Pre-Treatment | KIAA1217 | 56243  | 37 | 10 | 24813643  | 24813643  | Missense_Mutation | SNP | A  | C  | 3   | 61  | c.2848A>C       | c.(2848-2850)ATT>CTT     | p.I950L        |
| Pat_76 | Pre-Treatment | KIAA1217 | 56243  | 37 | 10 | 24834776  | 24834776  | Missense_Mutation | SNP | A  | T  | 38  | 37  | c.5355A>T       | c.(5353-5355)AAA>AAT     | p.K1785N       |
| Pat_76 | Pre-Treatment | ARHGAP21 | 57584  | 37 | 10 | 24896817  | 24896817  | Missense_Mutation | SNP | G  | A  | 29  | 50  | c.2438C>T       | c.(2437-2439)CCT>CTT     | p.P813L        |
| Pat_76 | Pre-Treatment | THNSL1   | 79896  | 37 | 10 | 25314107  | 25314107  | Missense_Mutation | SNP | G  | A  | 49  | 51  | c.1955G>A       | c.(1954-1956)AGG>AAG     | p.R652K        |



|        |               |          |        |    |    |          |          |                   |     |    |    |    |     |                |                                     |               |
|--------|---------------|----------|--------|----|----|----------|----------|-------------------|-----|----|----|----|-----|----------------|-------------------------------------|---------------|
| Pat_76 | Pre-Treatment | GAD2     | 2572   | 37 | 10 | 26562608 | 26562608 | Nonsense_Mutation | SNP | G  | A  | 53 | 57  | c.1136G>A      | c.(1135-1137)TGG>TAG                | p.W379*       |
| Pat_76 | Pre-Treatment | GAD2     | 2572   | 37 | 10 | 26589747 | 26589747 | Missense_Mutation | SNP | G  | A  | 32 | 75  | c.1615G>A      | c.(1615-1617)GAG>AAG                | p.E539K       |
| Pat_76 | Pre-Treatment | PTCHD3   | 374308 | 37 | 10 | 27702980 | 27702981 | Missense_Mutation | DNP | GG | AA | 25 | 20  | c.199_200CC>TT | c.(199-201)CCC>TTC                  | p.P67F        |
| Pat_76 | Pre-Treatment | EPC1     | 80314  | 37 | 10 | 32576138 | 32576138 | Missense_Mutation | SNP | G  | A  | 4  | 116 | c.1040C>T      | c.(1039-1041)TCG>TTG                | p.S347L       |
| Pat_76 | Pre-Treatment | C10orf68 | 79741  | 37 | 10 | 33018265 | 33018266 | Missense_Mutation | DNP | CC | TT | 30 | 37  | c.706_707CC>TT | c.(706-708)CCT>TTT                  | p.P236F       |
| Pat_76 | Pre-Treatment | ANKRD30A | 91074  | 37 | 10 | 37490199 | 37490199 | Missense_Mutation | SNP | G  | A  | 5  | 111 | c.2647G>A      | c.(2647-2649)GTA>ATA                | p.V883I       |
| Pat_76 | Pre-Treatment | ZNF33B   | 7582   | 37 | 10 | 43088374 | 43088374 | Missense_Mutation | SNP | C  | A  | 39 | 80  | c.2024G>T      | c.(2023-2025)TGT>TTT                | p.C675F       |
| Pat_76 | Pre-Treatment | BMS1     | 9790   | 37 | 10 | 43316137 | 43316137 | Splice_Site       | SNP | G  | A  | 4  | 62  | c.2950_splice  | c.e17+1                             | p.G984_splice |
| Pat_76 | Pre-Treatment | RASGEF1A | 221002 | 37 | 10 | 43692445 | 43692445 | Missense_Mutation | SNP | C  | T  | 13 | 9   | c.1327G>A      | c.(1327-1329)GCG>ACG                | p.A443T       |
| Pat_76 | Pre-Treatment | RASGEF1A | 221002 | 37 | 10 | 43694453 | 43694453 | Missense_Mutation | SNP | C  | T  | 50 | 34  | c.960G>A       | c.(958-960)ATG>ATA                  | p.M320I       |
| Pat_76 | Pre-Treatment | HNRNPF   | 3185   | 37 | 10 | 43882129 | 43882129 | Missense_Mutation | SNP | C  | T  | 5  | 179 | c.1204G>A      | c.(1204-1206)GGG>AGG                | p.G402R       |
| Pat_76 | Pre-Treatment | ANUBL1   | 93550  | 37 | 10 | 46121802 | 46121802 | Missense_Mutation | SNP | G  | T  | 4  | 94  | c.1469C>A      | c.(1468-1470)CCA>CAA                | p.P490Q       |
| Pat_76 | Pre-Treatment | SYT15    | 83849  | 37 | 10 | 46965788 | 46965789 | Missense_Mutation | DNP | GG | AA | 4  | 30  | c.748_749CC>TT | c.(748-750)CCC>TTC                  | p.P250F       |
| Pat_76 | Pre-Treatment | FRMPD2   | 143162 | 37 | 10 | 49395274 | 49395274 | Missense_Mutation | SNP | C  | T  | 13 | 19  | c.2227G>A      | c.(2227-2229)GAC>AAC                | p.D743N       |
| Pat_76 | Pre-Treatment | DRGX     | 644168 | 37 | 10 | 50574211 | 50574211 | Missense_Mutation | SNP | C  | T  | 21 | 45  | c.757G>A       | c.(757-759)GAA>AAA                  | p.E253K       |
| Pat_76 | Pre-Treatment | SLC18A3  | 6572   | 37 | 10 | 50819762 | 50819762 | Missense_Mutation | SNP | G  | A  | 28 | 50  | c.976G>A       | c.(976-978)GAG>AAG                  | p.E326K       |
| Pat_76 | Pre-Treatment | C10orf53 | 282966 | 37 | 10 | 50902584 | 50902584 | Missense_Mutation | SNP | G  | A  | 18 | 56  | c.218G>A       | c.(217-219)GGA>GAA                  | p.G73E        |
| Pat_76 | Pre-Treatment | AGAP6    | 414189 | 37 | 10 | 51748552 | 51748552 | Missense_Mutation | SNP | C  | T  | 34 | 54  | c.77C>T        | c.(76-78)CCC>CTC                    | p.P26L        |
| Pat_76 | Pre-Treatment | ASAH2    | 56624  | 37 | 10 | 52005142 | 52005142 | Missense_Mutation | SNP | G  | A  | 14 | 9   | c.200C>T       | c.(199-201)TCC>TTC                  | p.S67F        |
| Pat_76 | Pre-Treatment | ASAH2    | 56624  | 37 | 10 | 52005163 | 52005163 | Missense_Mutation | SNP | C  | T  | 7  | 7   | c.179G>A       | c.(178-180)GGC>GAC                  | p.G60D        |
| Pat_76 | Pre-Treatment | CSTF2T   | 23283  | 37 | 10 | 53458427 | 53458427 | Missense_Mutation | SNP | C  | T  | 48 | 67  | c.883G>A       | c.(883-885)GTT>ATT                  | p.V295I       |
| Pat_76 | Pre-Treatment | PCDH15   | 65217  | 37 | 10 | 55626547 | 55626547 | Missense_Mutation | SNP | C  | T  | 33 | 44  | c.3572G>A      | c.(3571-3573)GGA>GAA                | p.G1191E      |
| Pat_76 | Pre-Treatment | ANK3     | 288    | 37 | 10 | 61941095 | 61941095 | Missense_Mutation | SNP | G  | T  | 69 | 90  | c.2176C>A      | c.(2176-2178)CAG>AAG                | p.Q726K       |
| Pat_76 | Pre-Treatment | ARID5B   | 84159  | 37 | 10 | 63851357 | 63851357 | Missense_Mutation | SNP | C  | T  | 31 | 45  | c.2135C>T      | c.(2134-2136)TCC>TTC                | p.S712F       |
| Pat_76 | Pre-Treatment | LRRTM3   | 347731 | 37 | 10 | 68687186 | 68687186 | Missense_Mutation | SNP | C  | T  | 37 | 55  | c.512C>T       | c.(511-513)ACC>ATC                  | p.T171I       |
| Pat_76 | Pre-Treatment | CTNNA3   | 29119  | 37 | 10 | 68940116 | 68940116 | Missense_Mutation | SNP | G  | A  | 35 | 42  | c.1006C>T      | c.(1006-1008)CGC>TGC                | p.R336C       |
| Pat_76 | Pre-Treatment | PBLD     | 64081  | 37 | 10 | 70056043 | 70056043 | Missense_Mutation | SNP | G  | A  | 4  | 56  | c.263C>T       | c.(262-264)GCT>GTT                  | p.A88V        |
| Pat_76 | Pre-Treatment | SLC25A16 | 8034   | 37 | 10 | 70266454 | 70266454 | Missense_Mutation | SNP | G  | A  | 3  | 24  | c.245C>T       | c.(244-246)GCT>GTT                  | p.A82V        |
| Pat_76 | Pre-Treatment | UNC5B    | 219699 | 37 | 10 | 73046531 | 73046531 | Missense_Mutation | SNP | G  | A  | 5  | 264 | c.638G>A       | c.(637-639)CGC>CAC                  | p.R213H       |
| Pat_76 | Pre-Treatment | UNC5B    | 219699 | 37 | 10 | 73051446 | 73051446 | Missense_Mutation | SNP | G  | C  | 25 | 25  | c.1552G>C      | c.(1552-1554)GAC>CAC                | p.D518H       |
| Pat_76 | Pre-Treatment | CCDC109A | 90550  | 37 | 10 | 74644024 | 74644024 | Missense_Mutation | SNP | G  | A  | 29 | 41  | c.862G>A       | c.(862-864)GAA>AAA                  | p.E288K       |
| Pat_76 | Pre-Treatment | PLA2G12B | 84647  | 37 | 10 | 74714398 | 74714398 | Missense_Mutation | SNP | C  | T  | 20 | 40  | c.46G>A        | c.(46-48)GGT>AGT                    | p.G16S        |
| Pat_76 | Pre-Treatment | TTC18    | 118491 | 37 | 10 | 75038089 | 75038089 | Missense_Mutation | SNP | C  | T  | 8  | 12  | c.2456G>A      | c.(2455-2457)GGA>GAA                | p.G819E       |
| Pat_76 | Pre-Treatment | USP54    | 159195 | 37 | 10 | 75276315 | 75276315 | Missense_Mutation | SNP | G  | A  | 57 | 57  | c.3869C>T      | c.(3868-3870)TCC>TTC                | p.S1290F      |
| Pat_76 | Pre-Treatment | DLG5     | 9231   | 37 | 10 | 79589166 | 79589166 | Missense_Mutation | SNP | G  | A  | 54 | 92  | c.2132C>T      | c.(2131-2133)TCC>TTC                | p.S711F       |
| Pat_76 | Pre-Treatment | SFTPD    | 6441   | 37 | 10 | 81697757 | 81697757 | Missense_Mutation | SNP | G  | A  | 90 | 111 | c.979C>T       | c.(979-981)CCC>TCC                  | p.P327S       |
| Pat_76 | Pre-Treatment | MMRN2    | 79812  | 37 | 10 | 88703241 | 88703241 | Missense_Mutation | SNP | C  | T  | 26 | 27  | c.1300G>A      | c.(1300-1302)GAG>AAG                | p.E434K       |
| Pat_76 | Pre-Treatment | BTAF1    | 9044   | 37 | 10 | 93711222 | 93711222 | Missense_Mutation | SNP | C  | T  | 17 | 45  | c.463C>T       | c.(463-465)CTT>TTT                  | p.L155F       |
| Pat_76 | Pre-Treatment | MYOF     | 26509  | 37 | 10 | 95119690 | 95119690 | Missense_Mutation | SNP | G  | A  | 66 | 67  | c.3020C>T      | c.(3019-3021)TCC>TTC                | p.S1007F      |
| Pat_76 | Pre-Treatment | CEP55    | 55165  | 37 | 10 | 95276697 | 95276697 | Missense_Mutation | SNP | C  | T  | 33 | 36  | c.685C>T       | c.(685-687)CTT>TTT                  | p.L229F       |
| Pat_76 | Pre-Treatment | LGI1     | 9211   | 37 | 10 | 95557173 | 95557173 | Missense_Mutation | SNP | G  | A  | 48 | 63  | c.1287G>A      | c.(1285-1287)ATG>ATA                | p.M429I       |
| Pat_76 | Pre-Treatment | PIPSL    | 266971 | 37 | 10 | 95720163 | 95720164 | Missense_Mutation | DNP | CC | TT | 24 | 25  | c.990_991GG>AA | c.(988-993)ATGGGT>ATAAC.330_331MG>I |               |
| Pat_76 | Pre-Treatment | ALDH18A1 | 5832   | 37 | 10 | 97402832 | 97402832 | Missense_Mutation | SNP | C  | T  | 4  | 75  | c.220G>A       | c.(220-222)GTG>ATG                  | p.V74M        |
| Pat_76 | Pre-Treatment | TCTN3    | 26123  | 37 | 10 | 97442505 | 97442505 | Missense_Mutation | SNP | C  | T  | 83 | 130 | c.1355G>A      | c.(1354-1356)GGA>GAA                | p.G452E       |
| Pat_76 | Pre-Treatment | TLL2     | 7093   | 37 | 10 | 98145849 | 98145849 | Missense_Mutation | SNP | G  | A  | 15 | 19  | c.1976C>T      | c.(1975-1977)TCC>TTC                | p.S659F       |
| Pat_76 | Pre-Treatment | TLL2     | 7093   | 37 | 10 | 98145910 | 98145910 | Missense_Mutation | SNP | C  | T  | 46 | 48  | c.1915G>A      | c.(1915-1917)GAG>AAG                | p.E639K       |
| Pat_76 | Pre-Treatment | ARHGAP19 | 84986  | 37 | 10 | 99023320 | 99023320 | Missense_Mutation | SNP | G  | A  | 4  | 159 | c.470C>T       | c.(469-471)GCT>GTT                  | p.A157V       |

|        |               |          |        |    |    |           |           |                   |     |    |    |     |     |                                     |                      |                |
|--------|---------------|----------|--------|----|----|-----------|-----------|-------------------|-----|----|----|-----|-----|-------------------------------------|----------------------|----------------|
| Pat_76 | Pre-Treatment | FAM178A  | 55719  | 37 | 10 | 102672889 | 102672889 | Missense_Mutation | SNP | G  | A  | 4   | 51  | c.22G>A                             | c.(22-24)GCT>ACT     | p.A8T          |
| Pat_76 | Pre-Treatment | PSD      | 5662   | 37 | 10 | 104171563 | 104171564 | Missense_Mutation | DNP | CC | TT | 6   | 9   | .1842_1843GG>A.840-1845)AAGGAG>AAA/ |                      | p.E615K        |
| Pat_76 | Pre-Treatment | TRIM8    | 81603  | 37 | 10 | 104416885 | 104416885 | Missense_Mutation | SNP | C  | T  | 27  | 40  | c.1430C>T                           | c.(1429-1431)TCC>TTC | p.S477F        |
| Pat_76 | Pre-Treatment | SH3PXD2A | 9644   | 37 | 10 | 105362751 | 105362751 | Missense_Mutation | SNP | C  | A  | 4   | 105 | c.2140G>T                           | c.(2140-2142)GCG>TCG | p.A714S        |
| Pat_76 | Pre-Treatment | HABP2    | 3026   | 37 | 10 | 115342983 | 115342983 | Missense_Mutation | SNP | C  | T  | 14  | 24  | c.1103C>T                           | c.(1102-1104)ACC>ATC | p.T368I        |
| Pat_76 | Pre-Treatment | C10orf81 | 79949  | 37 | 10 | 115526170 | 115526170 | Missense_Mutation | SNP | G  | A  | 12  | 17  | c.11G>A                             | c.(10-12)GGC>GAC     | p.G4D          |
| Pat_76 | Pre-Treatment | ATRNL1   | 26033  | 37 | 10 | 116889240 | 116889240 | Missense_Mutation | SNP | C  | T  | 44  | 49  | c.772C>T                            | c.(772-774)CAC>TAC   | p.H258Y        |
| Pat_76 | Pre-Treatment | ATRNL1   | 26033  | 37 | 10 | 117154237 | 117154238 | Missense_Mutation | DNP | GG | AA | 21  | 61  | .3244_3245GG>A.                     | c.(3244-3246)GGA>AAA | p.G1082K       |
| Pat_76 | Pre-Treatment | PNLIPRP3 | 119548 | 37 | 10 | 118236307 | 118236307 | Missense_Mutation | SNP | A  | T  | 21  | 27  | c.1316A>T                           | c.(1315-1317)AAT>ATT | p.N439I        |
| Pat_76 | Pre-Treatment | EIF3A    | 8661   | 37 | 10 | 120801695 | 120801695 | Missense_Mutation | SNP | A  | T  | 6   | 228 | c.3337T>A                           | c.(3337-3339)TTG>ATG | p.L1113M       |
| Pat_76 | Pre-Treatment | FGFR2    | 2263   | 37 | 10 | 123325216 | 123325216 | Missense_Mutation | SNP | G  | A  | 4   | 49  | c.112C>T                            | c.(112-114)CCA>TCA   | p.P38S         |
| Pat_76 | Pre-Treatment | TACC2    | 10579  | 37 | 10 | 123989936 | 123989936 | Missense_Mutation | SNP | G  | A  | 4   | 61  | c.8108G>A                           | c.(8107-8109)CGC>CAC | p.R2703H       |
| Pat_76 | Pre-Treatment | DMBT1    | 1755   | 37 | 10 | 124351944 | 124351944 | Nonsense_Mutation | SNP | G  | A  | 6   | 244 | c.2333G>A                           | c.(2332-2334)TGG>TAG | p.W778*        |
| Pat_76 | Pre-Treatment | DMBT1    | 1755   | 37 | 10 | 124399555 | 124399555 | Splice_Site       | SNP | G  | A  | 12  | 17  | c.6556_splice                       | c.e52-1              | p.A2186_splice |
| Pat_76 | Pre-Treatment | CUZD1    | 50624  | 37 | 10 | 124593415 | 124593415 | Missense_Mutation | SNP | C  | T  | 24  | 23  | c.1424G>A                           | c.(1423-1425)GGA>GAA | p.G475E        |
| Pat_76 | Pre-Treatment | CHST15   | 51363  | 37 | 10 | 125798085 | 125798085 | Missense_Mutation | SNP | T  | A  | 23  | 33  | c.1136A>T                           | c.(1135-1137)CAC>CTC | p.H379L        |
| Pat_76 | Pre-Treatment | CHST15   | 51363  | 37 | 10 | 125805533 | 125805533 | Missense_Mutation | SNP | C  | T  | 30  | 31  | c.196G>A                            | c.(196-198)GAA>AAA   | p.E66K         |
| Pat_76 | Pre-Treatment | DOCK1    | 1793   | 37 | 10 | 128851048 | 128851048 | Missense_Mutation | SNP | T  | C  | 6   | 11  | c.2242T>C                           | c.(2242-2244)TTC>CTC | p.F748L        |
| Pat_76 | Pre-Treatment | DOCK1    | 1793   | 37 | 10 | 128851054 | 128851054 | Missense_Mutation | SNP | G  | A  | 4   | 8   | c.2248G>A                           | c.(2248-2250)GTG>ATG | p.V750M        |
| Pat_76 | Pre-Treatment | KRTAP5-1 | 387264 | 37 | 11 | 1606443   | 1606443   | Missense_Mutation | SNP | T  | C  | 4   | 149 | c.37A>G                             | c.(37-39)AGC>GGC     | p.S13G         |
| Pat_76 | Pre-Treatment | TNNT3    | 7140   | 37 | 11 | 1959716   | 1959716   | Nonsense_Mutation | SNP | G  | A  | 14  | 17  | c.771G>A                            | c.(769-771)TGG>TGA   | p.W257*        |
| Pat_76 | Pre-Treatment | TSSC4    | 10078  | 37 | 11 | 2424103   | 2424104   | Missense_Mutation | DNP | CC | TT | 20  | 24  | c.240_241CC>TT.                     | (238-243)TTCAT>TTTTA | p.H81Y         |
| Pat_76 | Pre-Treatment | TRPM5    | 29850  | 37 | 11 | 2428471   | 2428471   | Missense_Mutation | SNP | T  | C  | 10  | 18  | c.2996A>G                           | c.(2995-2997)AAC>AGC | p.N999S        |
| Pat_76 | Pre-Treatment | ZNF195   | 7748   | 37 | 11 | 3380508   | 3380508   | Missense_Mutation | SNP | G  | A  | 29  | 69  | c.1730C>T                           | c.(1729-1731)CCC>CTC | p.P577L        |
| Pat_76 | Pre-Treatment | OR52K2   | 119774 | 37 | 11 | 4471488   | 4471489   | Missense_Mutation | DNP | GG | AA | 36  | 43  | c.919_920GG>AA                      | c.(919-921)GGA>AAA   | p.G307K        |
| Pat_76 | Pre-Treatment | OR51E1   | 143503 | 37 | 11 | 4674277   | 4674277   | Missense_Mutation | SNP | C  | T  | 74  | 118 | c.521C>T                            | c.(520-522)TCC>TTC   | p.S174F        |
| Pat_76 | Pre-Treatment | OR51E1   | 143503 | 37 | 11 | 4674409   | 4674409   | Missense_Mutation | SNP | C  | T  | 19  | 27  | c.653C>T                            | c.(652-654)TCC>TTC   | p.S218F        |
| Pat_76 | Pre-Treatment | OR51E2   | 81285  | 37 | 11 | 4703277   | 4703277   | Missense_Mutation | SNP | C  | T  | 21  | 30  | c.665G>A                            | c.(664-666)CGA>CAA   | p.R222Q        |
| Pat_76 | Pre-Treatment | OR51E2   | 81285  | 37 | 11 | 4703632   | 4703632   | Missense_Mutation | SNP | G  | A  | 8   | 26  | c.310C>T                            | c.(310-312)CAT>TAT   | p.H104Y        |
| Pat_76 | Pre-Treatment | OR52R1   | 119695 | 37 | 11 | 4824685   | 4824685   | Missense_Mutation | SNP | C  | T  | 14  | 33  | c.1163G>A                           | c.(1162-1164)GGA>GAA | p.G388E        |
| Pat_76 | Pre-Treatment | OR51F2   | 119694 | 37 | 11 | 4843021   | 4843021   | Missense_Mutation | SNP | C  | T  | 63  | 122 | c.406C>T                            | c.(406-408)CGT>TGT   | p.R136C        |
| Pat_76 | Pre-Treatment | OR52J3   | 119679 | 37 | 11 | 5068233   | 5068233   | Missense_Mutation | SNP | C  | T  | 20  | 42  | c.478C>T                            | c.(478-480)CCC>TCC   | p.P160S        |
| Pat_76 | Pre-Treatment | HBG2     | 3048   | 37 | 11 | 5275625   | 5275625   | Missense_Mutation | SNP | G  | A  | 25  | 153 | c.212C>T                            | c.(211-213)TCC>TTC   | p.S71F         |
| Pat_76 | Pre-Treatment | OR51B5   | 282763 | 37 | 11 | 5363977   | 5363977   | Missense_Mutation | SNP | G  | A  | 22  | 33  | c.778C>T                            | c.(778-780)CAT>TAT   | p.H260Y        |
| Pat_76 | Pre-Treatment | OR52N1   | 79473  | 37 | 11 | 5809139   | 5809139   | Missense_Mutation | SNP | C  | T  | 4   | 105 | c.908G>A                            | c.(907-909)CGA>CAA   | p.R303Q        |
| Pat_76 | Pre-Treatment | OR52N1   | 79473  | 37 | 11 | 5809289   | 5809289   | Missense_Mutation | SNP | G  | A  | 43  | 77  | c.758C>T                            | c.(757-759)ACC>ATC   | p.T253I        |
| Pat_76 | Pre-Treatment | OR52B2   | 255725 | 37 | 11 | 6190872   | 6190872   | Missense_Mutation | SNP | G  | A  | 21  | 8   | c.685C>T                            | c.(685-687)CGT>TGT   | p.R229C        |
| Pat_76 | Pre-Treatment | OR2AG2   | 338755 | 37 | 11 | 6790164   | 6790164   | Missense_Mutation | SNP | C  | T  | 9   | 30  | c.25G>A                             | c.(25-27)GGA>AGA     | p.G9R          |
| Pat_76 | Pre-Treatment | NLRP14   | 338323 | 37 | 11 | 7079624   | 7079624   | Missense_Mutation | SNP | G  | A  | 58  | 92  | c.2576G>A                           | c.(2575-2577)GGA>GAA | p.G859E        |
| Pat_76 | Pre-Treatment | NLRP14   | 338323 | 37 | 11 | 7081264   | 7081264   | Missense_Mutation | SNP | C  | T  | 127 | 147 | c.2773C>T                           | c.(2773-2775)CGG>TGG | p.R925W        |
| Pat_76 | Pre-Treatment | PLEKHA7  | 144100 | 37 | 11 | 16872806  | 16872806  | Missense_Mutation | SNP | G  | A  | 37  | 50  | c.628C>T                            | c.(628-630)CCC>TCC   | p.P210S        |
| Pat_76 | Pre-Treatment | KCNJ11   | 3767   | 37 | 11 | 17409602  | 17409602  | Missense_Mutation | SNP | C  | T  | 4   | 83  | c.37G>A                             | c.(37-39)GTG>ATG     | p.V13M         |
| Pat_76 | Pre-Treatment | ABCC8    | 6833   | 37 | 11 | 17483319  | 17483319  | Missense_Mutation | SNP | T  | G  | 14  | 16  | c.633A>C                            | c.(631-633)CAA>CAC   | p.Q211H        |
| Pat_76 | Pre-Treatment | MRGPRX2  | 117194 | 37 | 11 | 19077339  | 19077339  | Missense_Mutation | SNP | G  | A  | 6   | 27  | c.611C>T                            | c.(610-612)GCC>GTC   | p.A204V        |
| Pat_76 | Pre-Treatment | NAV2     | 89797  | 37 | 11 | 20070338  | 20070338  | Missense_Mutation | SNP | G  | A  | 51  | 55  | c.4036G>A                           | c.(4036-4038)GTG>ATG | p.V1346M       |
| Pat_76 | Pre-Treatment | ANO3     | 63982  | 37 | 11 | 26620469  | 26620469  | Missense_Mutation | SNP | G  | A  | 20  | 39  | c.1595G>A                           | c.(1594-1596)GGA>GAA | p.G532E        |
| Pat_76 | Pre-Treatment | BDNF     | 627    | 37 | 11 | 27679666  | 27679666  | Missense_Mutation | SNP | G  | A  | 5   | 245 | c.446C>T                            | c.(445-447)ACG>ATG   | p.T149M        |

|        |               |          |        |    |    |          |          |                   |     |    |    |     |     |                 |                      |               |
|--------|---------------|----------|--------|----|----|----------|----------|-------------------|-----|----|----|-----|-----|-----------------|----------------------|---------------|
| Pat_76 | Pre-Treatment | KIF18A   | 81930  | 37 | 11 | 28058011 | 28058011 | Missense_Mutation | SNP | G  | A  | 37  | 44  | c.2149C>T       | c.(2149-2151)CCG>TCG | p.P717S       |
| Pat_76 | Pre-Treatment | QSER1    | 79832  | 37 | 11 | 32953540 | 32953540 | Missense_Mutation | SNP | C  | T  | 5   | 149 | c.349C>T        | c.(349-351)CGC>TGC   | p.R117C       |
| Pat_76 | Pre-Treatment | HIPK3    | 10114  | 37 | 11 | 33370279 | 33370279 | Missense_Mutation | SNP | G  | A  | 5   | 133 | c.2581G>A       | c.(2581-2583)GAC>AAC | p.D861N       |
| Pat_76 | Pre-Treatment | ABTB2    | 25841  | 37 | 11 | 34182562 | 34182562 | Missense_Mutation | SNP | G  | A  | 3   | 23  | c.1727C>T       | c.(1726-1728)TCG>TTG | p.S576L       |
| Pat_76 | Pre-Treatment | ELF5     | 2001   | 37 | 11 | 34502425 | 34502425 | Missense_Mutation | SNP | C  | T  | 38  | 59  | c.595G>A        | c.(595-597)GAA>AAA   | p.E199K       |
| Pat_76 | Pre-Treatment | PRR5L    | 79899  | 37 | 11 | 36484009 | 36484010 | Missense_Mutation | DNP | GG | AA | 22  | 41  | c.830_831GG>AA  | c.(829-831)GGG>GAA   | p.G277E       |
| Pat_76 | Pre-Treatment | PRR5L    | 79899  | 37 | 11 | 36484116 | 36484116 | Missense_Mutation | SNP | G  | A  | 24  | 18  | c.937G>A        | c.(937-939)GGG>AGG   | p.G313R       |
| Pat_76 | Pre-Treatment | RAG1     | 5896   | 37 | 11 | 36595839 | 36595839 | Missense_Mutation | SNP | C  | T  | 35  | 31  | c.985C>T        | c.(985-987)CCC>TCC   | p.P329S       |
| Pat_76 | Pre-Treatment | TSPAN18  | 90139  | 37 | 11 | 44950719 | 44950719 | Missense_Mutation | SNP | G  | A  | 40  | 59  | c.737G>A        | c.(736-738)GGC>GAC   | p.G246D       |
| Pat_76 | Pre-Treatment | PRDM11   | 56981  | 37 | 11 | 45246341 | 45246341 | Missense_Mutation | SNP | C  | T  | 43  | 34  | c.1418C>T       | c.(1417-1419)CCC>CTC | p.P473L       |
| Pat_76 | Pre-Treatment | SYT13    | 57586  | 37 | 11 | 45277376 | 45277376 | Missense_Mutation | SNP | C  | T  | 26  | 34  | c.250G>A        | c.(250-252)GGA>AGA   | p.G84R        |
| Pat_76 | Pre-Treatment | GYLTL1B  | 120071 | 37 | 11 | 45948403 | 45948403 | Missense_Mutation | SNP | G  | A  | 17  | 26  | c.1306G>A       | c.(1306-1308)GCC>ACC | p.A436T       |
| Pat_76 | Pre-Treatment | MADD     | 8567   | 37 | 11 | 47303185 | 47303185 | Missense_Mutation | SNP | G  | T  | 4   | 72  | c.1350G>T       | c.(1348-1350)GAG>GAT | p.E450D       |
| Pat_76 | Pre-Treatment | MADD     | 8567   | 37 | 11 | 47304035 | 47304035 | Missense_Mutation | SNP | G  | A  | 46  | 30  | c.1573G>A       | c.(1573-1575)GCT>ACT | p.A525T       |
| Pat_76 | Pre-Treatment | AGBL2    | 79841  | 37 | 11 | 47707594 | 47707594 | Missense_Mutation | SNP | C  | T  | 14  | 34  | c.1639G>A       | c.(1639-1641)GAA>AAA | p.E547K       |
| Pat_76 | Pre-Treatment | PTPRJ    | 5795   | 37 | 11 | 48134319 | 48134319 | Missense_Mutation | SNP | C  | T  | 47  | 72  | c.136C>T        | c.(136-138)CCT>TCT   | p.P46S        |
| Pat_76 | Pre-Treatment | OR4X1    | 390113 | 37 | 11 | 48285932 | 48285932 | Missense_Mutation | SNP | C  | T  | 16  | 15  | c.520C>T        | c.(520-522)CAC>TAC   | p.H174Y       |
| Pat_76 | Pre-Treatment | OR4C3    | 256144 | 37 | 11 | 48346737 | 48346737 | Missense_Mutation | SNP | C  | T  | 5   | 25  | c.245C>T        | c.(244-246)TCC>TTC   | p.S82F        |
| Pat_76 | Pre-Treatment | OR4A5    | 81318  | 37 | 11 | 51412038 | 51412038 | Missense_Mutation | SNP | G  | A  | 51  | 42  | c.358C>T        | c.(358-360)CGC>TGC   | p.R120C       |
| Pat_76 | Pre-Treatment | OR4C46   | 119749 | 37 | 11 | 51515827 | 51515827 | Missense_Mutation | SNP | G  | T  | 4   | 119 | c.546G>T        | c.(544-546)TTG>TTT   | p.L182F       |
| Pat_76 | Pre-Treatment | OR4C11   | 219429 | 37 | 11 | 55371006 | 55371006 | Missense_Mutation | SNP | G  | A  | 27  | 2   | c.844C>T        | c.(844-846)CCA>TCA   | p.P282S       |
| Pat_76 | Pre-Treatment | OR5D14   | 219436 | 37 | 11 | 55563687 | 55563687 | Missense_Mutation | SNP | C  | T  | 85  | 112 | c.656C>T        | c.(655-657)TCC>TTC   | p.S219F       |
| Pat_76 | Pre-Treatment | OR8H2    | 390151 | 37 | 11 | 55873063 | 55873063 | Missense_Mutation | SNP | C  | T  | 148 | 248 | c.545C>T        | c.(544-546)TCC>TTC   | p.S182F       |
| Pat_76 | Pre-Treatment | OR8H2    | 390151 | 37 | 11 | 55873104 | 55873104 | Missense_Mutation | SNP | G  | A  | 119 | 180 | c.586G>A        | c.(586-588)GAA>AAA   | p.E196K       |
| Pat_76 | Pre-Treatment | OR8H1    | 219469 | 37 | 11 | 56057772 | 56057772 | Missense_Mutation | SNP | A  | T  | 14  | 25  | c.767T>A        | c.(766-768)TTT>TAT   | p.F256Y       |
| Pat_76 | Pre-Treatment | OR8K3    | 219473 | 37 | 11 | 56086579 | 56086579 | Missense_Mutation | SNP | C  | T  | 20  | 28  | c.797C>T        | c.(796-798)TCC>TTC   | p.S266F       |
| Pat_76 | Pre-Treatment | OR5AR1   | 219493 | 37 | 11 | 56431525 | 56431525 | Missense_Mutation | SNP | C  | T  | 53  | 80  | c.364C>T        | c.(364-366)CGT>TGT   | p.R122C       |
| Pat_76 | Pre-Treatment | SSRP1    | 6749   | 37 | 11 | 57100229 | 57100229 | Missense_Mutation | SNP | C  | T  | 4   | 86  | c.638G>A        | c.(637-639)CGT>CAT   | p.R213H       |
| Pat_76 | Pre-Treatment | OR1S1    | 219959 | 37 | 11 | 57983114 | 57983114 | Missense_Mutation | SNP | C  | T  | 58  | 65  | c.898C>T        | c.(898-900)CCC>TCC   | p.P300S       |
| Pat_76 | Pre-Treatment | GLYATL2  | 219970 | 37 | 11 | 58604580 | 58604580 | Missense_Mutation | SNP | C  | T  | 35  | 40  | c.384G>A        | c.(382-384)ATG>ATA   | p.M128I       |
| Pat_76 | Pre-Treatment | OR4D10   | 390197 | 37 | 11 | 59245249 | 59245249 | Missense_Mutation | SNP | C  | T  | 3   | 55  | c.347C>T        | c.(346-348)TCG>TTG   | p.S116L       |
| Pat_76 | Pre-Treatment | SCGB2A2  | 4250   | 37 | 11 | 62037719 | 62037719 | Missense_Mutation | SNP | G  | A  | 4   | 155 | c.31G>A         | c.(31-33)GCC>ACC     | p.A11T        |
| Pat_76 | Pre-Treatment | POLR2G   | 5436   | 37 | 11 | 62530448 | 62530448 | Missense_Mutation | SNP | C  | T  | 4   | 119 | c.232C>T        | c.(232-234)CGG>TGG   | p.R78W        |
| Pat_76 | Pre-Treatment | CHRM1    | 1128   | 37 | 11 | 62678196 | 62678196 | Missense_Mutation | SNP | G  | A  | 19  | 29  | c.377C>T        | c.(376-378)TCC>TTC   | p.S126F       |
| Pat_76 | Pre-Treatment | SLC22A9  | 114571 | 37 | 11 | 63149648 | 63149648 | Missense_Mutation | SNP | G  | A  | 37  | 62  | c.972G>A        | c.(970-972)ATG>ATA   | p.M324I       |
| Pat_76 | Pre-Treatment | SLC22A9  | 114571 | 37 | 11 | 63176246 | 63176246 | Nonsense_Mutation | SNP | G  | A  | 28  | 35  | c.1496G>A       | c.(1495-1497)TGG>TAG | p.W499*       |
| Pat_76 | Pre-Treatment | FAU      | 2197   | 37 | 11 | 64889011 | 64889011 | Missense_Mutation | SNP | C  | T  | 4   | 90  | c.181G>A        | c.(181-183)GCC>ACC   | p.A61T        |
| Pat_76 | Pre-Treatment | CDC42EP2 | 10435  | 37 | 11 | 65088994 | 65088994 | Missense_Mutation | SNP | C  | T  | 10  | 25  | c.625C>T        | c.(625-627)CCC>TCC   | p.P209S       |
| Pat_76 | Pre-Treatment | MAP3K11  | 4296   | 37 | 11 | 65374985 | 65374985 | Splice_Site       | SNP | C  | T  | 4   | 56  | c.1246_splice   | c.e5-1               | p.E416_splice |
| Pat_76 | Pre-Treatment | SART1    | 9092   | 37 | 11 | 65732631 | 65732631 | Missense_Mutation | SNP | G  | A  | 11  | 21  | c.496G>A        | c.(496-498)GAG>AAG   | p.E166K       |
| Pat_76 | Pre-Treatment | SF3B2    | 10992  | 37 | 11 | 65829443 | 65829443 | Missense_Mutation | SNP | C  | T  | 14  | 20  | c.1951C>T       | c.(1951-1953)CCT>TCT | p.P651S       |
| Pat_76 | Pre-Treatment | SPTBN2   | 6712   | 37 | 11 | 66468435 | 66468436 | Missense_Mutation | DNP | GG | AA | 17  | 15  | .:3134_3135CC>T | c.(3133-3135)ACC>ATT | p.T1045I      |
| Pat_76 | Pre-Treatment | TBX10    | 347853 | 37 | 11 | 67402517 | 67402517 | Nonsense_Mutation | SNP | C  | T  | 18  | 19  | c.225G>A        | c.(223-225)TGG>TGA   | p.W75*        |
| Pat_76 | Pre-Treatment | CPT1A    | 1374   | 37 | 11 | 68542821 | 68542822 | Missense_Mutation | DNP | GG | AA | 30  | 57  | .:1537_1538CC>T | c.(1537-1539)CCG>TTG | p.P513L       |
| Pat_76 | Pre-Treatment | MRPL21   | 219927 | 37 | 11 | 68671259 | 68671259 | Missense_Mutation | SNP | G  | A  | 5   | 115 | c.20C>T         | c.(19-21)ACG>ATG     | p.T77M        |
| Pat_76 | Pre-Treatment | KRTAP5-9 | 3846   | 37 | 11 | 71259749 | 71259750 | Missense_Mutation | DNP | GG | AA | 43  | 74  | c.46_47GG>AA    | c.(46-48)GGC>AAC     | p.G16N        |
| Pat_76 | Pre-Treatment | UCP2     | 7351   | 37 | 11 | 73689327 | 73689327 | Missense_Mutation | SNP | G  | A  | 24  | 37  | c.97C>T         | c.(97-99)CCT>TCT     | p.P33S        |

|        |               |          |        |    |    |           |           |                   |     |    |    |     |     |                |                        |               |
|--------|---------------|----------|--------|----|----|-----------|-----------|-------------------|-----|----|----|-----|-----|----------------|------------------------|---------------|
| Pat_76 | Pre-Treatment | PGM2L1   | 283209 | 37 | 11 | 74054392  | 74054392  | Missense_Mutation | SNP | G  | A  | 21  | 34  | c.1288C>T      | c.(1288-1290)CTT>TTT   | p.L430F       |
| Pat_76 | Pre-Treatment | KLHL35   | 283212 | 37 | 11 | 75133763  | 75133763  | Missense_Mutation | SNP | C  | T  | 36  | 78  | c.953G>A       | c.(952-954)GGG>GAG     | p.G318E       |
| Pat_76 | Pre-Treatment | OMP      | 4975   | 37 | 11 | 76814355  | 76814356  | Missense_Mutation | DNP | CC | TT | 15  | 46  | c.470_471CC>TT | c.(469-471)TCC>TTT     | p.S157F       |
| Pat_76 | Pre-Treatment | PCF11    | 51585  | 37 | 11 | 82877453  | 82877453  | Missense_Mutation | SNP | G  | A  | 4   | 109 | c.1514G>A      | c.(1513-1515)CGA>CAA   | p.R505Q       |
| Pat_76 | Pre-Treatment | DLG2     | 1740   | 37 | 11 | 83344290  | 83344290  | Missense_Mutation | SNP | G  | A  | 12  | 48  | c.1589C>T      | c.(1588-1590)TCC>TTC   | p.S530F       |
| Pat_76 | Pre-Treatment | GRM5     | 2915   | 37 | 11 | 88386431  | 88386431  | Missense_Mutation | SNP | C  | T  | 35  | 48  | c.1052G>A      | c.(1051-1053)CGA>CAA   | p.R351Q       |
| Pat_76 | Pre-Treatment | FAT3     | 120114 | 37 | 11 | 92085960  | 92085960  | Missense_Mutation | SNP | G  | A  | 55  | 78  | c.682G>A       | c.(682-684)GAT>AAT     | p.D228N       |
| Pat_76 | Pre-Treatment | FAT3     | 120114 | 37 | 11 | 92086786  | 92086786  | Missense_Mutation | SNP | A  | T  | 15  | 23  | c.1508A>T      | c.(1507-1509)GAA>GTA   | p.E503V       |
| Pat_76 | Pre-Treatment | FAT3     | 120114 | 37 | 11 | 92569781  | 92569781  | Missense_Mutation | SNP | C  | T  | 51  | 69  | c.10136C>T     | c.(10135-10137)TCC>TTC | p.S3379F      |
| Pat_76 | Pre-Treatment | CNTN5    | 53942  | 37 | 11 | 99690347  | 99690347  | Missense_Mutation | SNP | C  | T  | 29  | 96  | c.128C>T       | c.(127-129)TCA>TTA     | p.S43L        |
| Pat_76 | Pre-Treatment | KIAA1377 | 57562  | 37 | 11 | 101828898 | 101828898 | Splice_Site       | SNP | G  | A  | 201 | 314 | c.507_splice   | c.e5-1                 | p.R169_splice |
| Pat_76 | Pre-Treatment | KIAA1377 | 57562  | 37 | 11 | 101833571 | 101833571 | Missense_Mutation | SNP | G  | A  | 19  | 33  | c.1805G>A      | c.(1804-1806)GGA>GAA   | p.G602E       |
| Pat_76 | Pre-Treatment | MMP1     | 4312   | 37 | 11 | 102667484 | 102667484 | Missense_Mutation | SNP | C  | T  | 35  | 46  | c.536G>A       | c.(535-537)GGA>GAA     | p.G179E       |
| Pat_76 | Pre-Treatment | MMP13    | 4322   | 37 | 11 | 102826045 | 102826045 | Missense_Mutation | SNP | C  | T  | 55  | 87  | c.298G>A       | c.(298-300)GAT>AAT     | p.D100N       |
| Pat_76 | Pre-Treatment | DYNC2H1  | 79659  | 37 | 11 | 103027319 | 103027319 | Missense_Mutation | SNP | C  | T  | 17  | 10  | c.3947C>T      | c.(3946-3948)CCT>CTT   | p.P1316L      |
| Pat_76 | Pre-Treatment | PDGFD    | 80310  | 37 | 11 | 103780454 | 103780454 | Missense_Mutation | SNP | C  | T  | 43  | 71  | c.1081G>A      | c.(1081-1083)GAT>AAT   | p.D361N       |
| Pat_76 | Pre-Treatment | DDI1     | 414301 | 37 | 11 | 103907873 | 103907873 | Missense_Mutation | SNP | G  | A  | 4   | 79  | c.323G>A       | c.(322-324)CGT>CAT     | p.R108H       |
| Pat_76 | Pre-Treatment | EXPH5    | 23086  | 37 | 11 | 108382062 | 108382062 | Missense_Mutation | SNP | C  | T  | 20  | 40  | c.4172G>A      | c.(4171-4173)AGT>AAT   | p.S1391N      |
| Pat_76 | Pre-Treatment | DDX10    | 1662   | 37 | 11 | 108722931 | 108722931 | Missense_Mutation | SNP | G  | A  | 4   | 56  | c.2299G>A      | c.(2299-2301)GCA>ACA   | p.A767T       |
| Pat_76 | Pre-Treatment | HSPB2    | 3316   | 37 | 11 | 111784324 | 111784324 | Missense_Mutation | SNP | C  | T  | 51  | 83  | c.254C>T       | c.(253-255)CCA>CTA     | p.P85L        |
| Pat_76 | Pre-Treatment | SIDT2    | 51092  | 37 | 11 | 117059884 | 117059884 | Splice_Site       | SNP | G  | C  | 4   | 122 | c.1279_splice  | c.e14-1                | p.Q427_splice |
| Pat_76 | Pre-Treatment | RNF214   | 257160 | 37 | 11 | 117109598 | 117109598 | Missense_Mutation | SNP | C  | T  | 29  | 31  | c.389C>T       | c.(388-390)CCA>CTA     | p.P130L       |
| Pat_76 | Pre-Treatment | DSCAML1  | 57453  | 37 | 11 | 117301743 | 117301743 | Missense_Mutation | SNP | C  | T  | 36  | 41  | c.5561G>A      | c.(5560-5562)GGA>GAA   | p.G1854E      |
| Pat_76 | Pre-Treatment | TMPRSS4  | 56649  | 37 | 11 | 117982593 | 117982593 | Missense_Mutation | SNP | C  | T  | 29  | 59  | c.721C>T       | c.(721-723)CTC>TTC     | p.L241F       |
| Pat_76 | Pre-Treatment | MLL      | 4297   | 37 | 11 | 118352637 | 118352637 | Missense_Mutation | SNP | C  | T  | 42  | 56  | c.3842C>T      | c.(3841-3843)CCT>CTT   | p.P1281L      |
| Pat_76 | Pre-Treatment | PHLDB1   | 23187  | 37 | 11 | 118498401 | 118498401 | Missense_Mutation | SNP | C  | T  | 39  | 58  | c.862C>T       | c.(862-864)CGT>TGT     | p.R288C       |
| Pat_76 | Pre-Treatment | PHLDB1   | 23187  | 37 | 11 | 118498923 | 118498923 | Missense_Mutation | SNP | C  | T  | 78  | 106 | c.1384C>T      | c.(1384-1386)CCA>TCA   | p.P462S       |
| Pat_76 | Pre-Treatment | CXCR5    | 643    | 37 | 11 | 118764491 | 118764491 | Missense_Mutation | SNP | C  | T  | 4   | 145 | c.238C>T       | c.(238-240)CGG>TGG     | p.R80W        |
| Pat_76 | Pre-Treatment | TECTA    | 7007   | 37 | 11 | 120998886 | 120998886 | Missense_Mutation | SNP | G  | A  | 33  | 67  | c.2200G>A      | c.(2200-2202)GAG>AAG   | p.E734K       |
| Pat_76 | Pre-Treatment | TECTA    | 7007   | 37 | 11 | 121000408 | 121000408 | Missense_Mutation | SNP | G  | A  | 59  | 80  | c.2429G>A      | c.(2428-2430)CGA>CAA   | p.R810Q       |
| Pat_76 | Pre-Treatment | TECTA    | 7007   | 37 | 11 | 121036027 | 121036027 | Missense_Mutation | SNP | G  | A  | 4   | 5   | c.5318G>A      | c.(5317-5319)CGA>CAA   | p.R1773Q      |
| Pat_76 | Pre-Treatment | SORL1    | 6653   | 37 | 11 | 121492874 | 121492874 | Missense_Mutation | SNP | C  | T  | 30  | 39  | c.6068C>T      | c.(6067-6069)TCA>TTA   | p.S2023L      |
| Pat_76 | Pre-Treatment | HSPA8    | 3312   | 37 | 11 | 122928489 | 122928489 | Missense_Mutation | SNP | G  | A  | 56  | 68  | c.1894C>T      | c.(1894-1896)CCC>TCC   | p.P632S       |
| Pat_76 | Pre-Treatment | GRAMD1B  | 57476  | 37 | 11 | 123477467 | 123477467 | Missense_Mutation | SNP | C  | T  | 4   | 22  | c.1045C>T      | c.(1045-1047)CCC>TCC   | p.P349S       |
| Pat_76 | Pre-Treatment | OR6X1    | 390260 | 37 | 11 | 123624328 | 123624328 | Missense_Mutation | SNP | C  | T  | 89  | 90  | c.899G>A       | c.(898-900)AGA>AAA     | p.R300K       |
| Pat_76 | Pre-Treatment | OR4D5    | 219875 | 37 | 11 | 123810370 | 123810370 | Missense_Mutation | SNP | G  | A  | 44  | 64  | c.47G>A        | c.(46-48)GGG>GAG       | p.G16E        |
| Pat_76 | Pre-Treatment | OR4D5    | 219875 | 37 | 11 | 123810409 | 123810409 | Missense_Mutation | SNP | C  | T  | 36  | 47  | c.86C>T        | c.(85-87)ACT>ATT       | p.T29I        |
| Pat_76 | Pre-Treatment | VWA5A    | 4013   | 37 | 11 | 123988246 | 123988246 | Missense_Mutation | SNP | C  | T  | 46  | 59  | c.28C>T        | c.(28-30)CTC>TTC       | p.L10F        |
| Pat_76 | Pre-Treatment | VWA5A    | 4013   | 37 | 11 | 124016007 | 124016007 | Missense_Mutation | SNP | G  | A  | 22  | 36  | c.2218G>A      | c.(2218-2220)GAC>AAC   | p.D740N       |
| Pat_76 | Pre-Treatment | OR8D1    | 283159 | 37 | 11 | 124180653 | 124180653 | Missense_Mutation | SNP | C  | T  | 16  | 48  | c.10G>A        | c.(10-12)GAA>AAA       | p.E4K         |
| Pat_76 | Pre-Treatment | OR8B12   | 219858 | 37 | 11 | 124413016 | 124413016 | Missense_Mutation | SNP | C  | A  | 5   | 128 | c.535G>T       | c.(535-537)GAC>TAC     | p.D179Y       |
| Pat_76 | Pre-Treatment | SPA17    | 53340  | 37 | 11 | 124564231 | 124564232 | Missense_Mutation | DNP | GG | AA | 40  | 62  | c.345_346GG>AA | c.(343-348)GAGGTT>GAAA | p.V116I       |
| Pat_76 | Pre-Treatment | SLC37A2  | 219855 | 37 | 11 | 124954748 | 124954748 | Missense_Mutation | SNP | G  | A  | 14  | 12  | c.1153G>A      | c.(1153-1155)GAC>AAC   | p.D385N       |
| Pat_76 | Pre-Treatment | NTM      | 50863  | 37 | 11 | 132204942 | 132204942 | Missense_Mutation | SNP | C  | T  | 72  | 136 | c.937C>T       | c.(937-939)CCA>TCA     | p.P313S       |
| Pat_76 | Pre-Treatment | SPATA19  | 219938 | 37 | 11 | 133715271 | 133715271 | Missense_Mutation | SNP | G  | A  | 26  | 49  | c.71C>T        | c.(70-72)ACC>ATC       | p.T24I        |
| Pat_76 | Pre-Treatment | SLC6A12  | 6539   | 37 | 12 | 306618    | 306618    | Missense_Mutation | SNP | C  | T  | 30  | 37  | c.1000G>A      | c.(1000-1002)GGG>AGG   | p.G334R       |
| Pat_76 | Pre-Treatment | LRTM2    | 654429 | 37 | 12 | 1943433   | 1943434   | Missense_Mutation | DNP | GG | AA | 15  | 26  | c.659_660GG>AA | c.(658-660)GGG>GAA     | p.G220E       |

|        |               |           |        |    |    |          |          |                   |     |    |    |     |     |                |                        |               |
|--------|---------------|-----------|--------|----|----|----------|----------|-------------------|-----|----|----|-----|-----|----------------|------------------------|---------------|
| Pat_76 | Pre-Treatment | CACNA1C   | 775    | 37 | 12 | 2602383  | 2602383  | Missense_Mutation | SNP | C  | T  | 4   | 69  | c.944C>T       | c.(943-945)CCT>CTT     | p.P315L       |
| Pat_76 | Pre-Treatment | CACNA1C   | 775    | 37 | 12 | 2614028  | 2614028  | Missense_Mutation | SNP | G  | C  | 6   | 13  | c.1134G>C      | c.(1132-1134)AGG>AGC   | p.R378S       |
| Pat_76 | Pre-Treatment | C12orf32  | 83695  | 37 | 12 | 2994574  | 2994575  | Missense_Mutation | DNP | CC | TT | 28  | 45  | c.42_43CC>TT   | (40-45)GCCCCG>GCTTC    | p.P15S        |
| Pat_76 | Pre-Treatment | DYRK4     | 8798   | 37 | 12 | 4702179  | 4702179  | Missense_Mutation | SNP | C  | T  | 21  | 49  | c.130C>T       | c.(130-132)CTT>TTT     | p.L44F        |
| Pat_76 | Pre-Treatment | KCNA6     | 3742   | 37 | 12 | 4919724  | 4919724  | Missense_Mutation | SNP | G  | A  | 18  | 32  | c.517G>A       | c.(517-519)GCC>ACC     | p.A173T       |
| Pat_76 | Pre-Treatment | NTF3      | 4908   | 37 | 12 | 5603912  | 5603912  | Missense_Mutation | SNP | G  | A  | 30  | 45  | c.532G>A       | c.(532-534)GAG>AAG     | p.E178K       |
| Pat_76 | Pre-Treatment | ANO2      | 57101  | 37 | 12 | 5708727  | 5708727  | Missense_Mutation | SNP | G  | A  | 51  | 53  | c.2156C>T      | c.(2155-2157)TCG>TTG   | p.S719L       |
| Pat_76 | Pre-Treatment | FAM90A1   | 55138  | 37 | 12 | 8376706  | 8376706  | Missense_Mutation | SNP | C  | T  | 32  | 55  | c.229G>A       | c.(229-231)GAA>AAA     | p.E77K        |
| Pat_76 | Pre-Treatment | PZP       | 5858   | 37 | 12 | 9311134  | 9311134  | Missense_Mutation | SNP | C  | T  | 33  | 30  | c.3176G>A      | c.(3175-3177)CGA>CAA   | p.R1059Q      |
| Pat_76 | Pre-Treatment | TAS2R7    | 50837  | 37 | 12 | 10954661 | 10954661 | Nonsense_Mutation | SNP | C  | T  | 19  | 21  | c.509G>A       | c.(508-510)TGG>TAG     | p.W170*       |
| Pat_76 | Pre-Treatment | PRB1      | 5542   | 37 | 12 | 11506789 | 11506789 | Missense_Mutation | SNP | T  | G  | 117 | 171 | c.248A>C       | c.(247-249)CAA>CCA     | p.Q83P        |
| Pat_76 | Pre-Treatment | RPL13AP20 | 387841 | 37 | 12 | 13028826 | 13028826 | Missense_Mutation | SNP | G  | A  | 4   | 28  | c.394G>A       | c.(394-396)GCA>ACA     | p.A132T       |
| Pat_76 | Pre-Treatment | GRIN2B    | 2904   | 37 | 12 | 13715992 | 13715992 | Missense_Mutation | SNP | C  | T  | 11  | 29  | c.4180G>A      | c.(4180-4182)GAC>AAC   | p.D1394N      |
| Pat_76 | Pre-Treatment | GRIN2B    | 2904   | 37 | 12 | 13764762 | 13764762 | Nonsense_Mutation | SNP | C  | T  | 34  | 74  | c.1677G>A      | c.(1675-1677)TGG>TGA   | p.W559*       |
| Pat_76 | Pre-Treatment | SLCO1A2   | 6579   | 37 | 12 | 21428352 | 21428352 | Missense_Mutation | SNP | C  | T  | 5   | 9   | c.1617G>A      | c.(1615-1617)ATG>ATA   | p.M539I       |
| Pat_76 | Pre-Treatment | SLCO1A2   | 6579   | 37 | 12 | 21457408 | 21457408 | Missense_Mutation | SNP | G  | A  | 32  | 30  | c.542C>T       | c.(541-543)TCC>TTC     | p.S181F       |
| Pat_76 | Pre-Treatment | OVCH1     | 341350 | 37 | 12 | 29644050 | 29644050 | Missense_Mutation | SNP | C  | T  | 27  | 55  | c.530G>A       | c.(529-531)GGA>GAA     | p.G177E       |
| Pat_76 | Pre-Treatment | CAPRN2    | 65981  | 37 | 12 | 30877346 | 30877346 | Missense_Mutation | SNP | G  | A  | 54  | 58  | c.1945C>T      | c.(1945-1947)CCA>TCA   | p.P649S       |
| Pat_76 | Pre-Treatment | ADAMTS20  | 80070  | 37 | 12 | 43822049 | 43822049 | Missense_Mutation | SNP | C  | T  | 31  | 48  | c.3940G>A      | c.(3940-3942)GGA>AGA   | p.G1314R      |
| Pat_76 | Pre-Treatment | DBX2      | 440097 | 37 | 12 | 45410133 | 45410134 | Missense_Mutation | DNP | CC | TT | 25  | 31  | c.955_956GG>AA | c.(955-957)GGT>AAT     | p.G319N       |
| Pat_76 | Pre-Treatment | SLC38A1   | 81539  | 37 | 12 | 46601362 | 46601362 | Missense_Mutation | SNP | G  | A  | 56  | 70  | c.431C>T       | c.(430-432)ACC>ATC     | p.T144I       |
| Pat_76 | Pre-Treatment | FAM113B   | 91523  | 37 | 12 | 47628868 | 47628868 | Missense_Mutation | SNP | G  | A  | 12  | 40  | c.22G>A        | c.(22-24)GAA>AAA       | p.E8K         |
| Pat_76 | Pre-Treatment | FAM113B   | 91523  | 37 | 12 | 47629243 | 47629243 | Missense_Mutation | SNP | C  | T  | 45  | 34  | c.397C>T       | c.(397-399)CCG>TCG     | p.P133S       |
| Pat_76 | Pre-Treatment | FAM113B   | 91523  | 37 | 12 | 47629508 | 47629508 | Missense_Mutation | SNP | C  | T  | 3   | 29  | c.662C>T       | c.(661-663)GCG>GTG     | p.A221V       |
| Pat_76 | Pre-Treatment | RPAP3     | 79657  | 37 | 12 | 48062776 | 48062776 | Missense_Mutation | SNP | G  | C  | 48  | 83  | c.1636C>G      | c.(1636-1638)CCT>GCT   | p.P546A       |
| Pat_76 | Pre-Treatment | RAPGEF3   | 10411  | 37 | 12 | 48132959 | 48132959 | Missense_Mutation | SNP | G  | A  | 12  | 32  | c.2302C>T      | c.(2302-2304)CCT>TCT   | p.P768S       |
| Pat_76 | Pre-Treatment | COL2A1    | 1280   | 37 | 12 | 48367222 | 48367222 | Missense_Mutation | SNP | C  | T  | 49  | 86  | c.4432G>A      | c.(4432-4434)GGT>AGT   | p.G1478S      |
| Pat_76 | Pre-Treatment | ZNF641    | 121274 | 37 | 12 | 48736968 | 48736968 | Missense_Mutation | SNP | G  | A  | 28  | 28  | c.1105C>T      | c.(1105-1107)CCA>TCA   | p.P369S       |
| Pat_76 | Pre-Treatment | ADCY6     | 112    | 37 | 12 | 49170953 | 49170953 | Missense_Mutation | SNP | G  | A  | 82  | 90  | c.1310C>T      | c.(1309-1311)CCG>CTG   | p.P437L       |
| Pat_76 | Pre-Treatment | MLL2      | 8085   | 37 | 12 | 49420129 | 49420129 | Missense_Mutation | SNP | G  | A  | 8   | 19  | c.15620C>T     | :(15619-15621)CCC>CTC  | p.P5207L      |
| Pat_76 | Pre-Treatment | MLL2      | 8085   | 37 | 12 | 49420391 | 49420391 | Missense_Mutation | SNP | G  | A  | 4   | 146 | c.15358C>T     | c.(15358-15360)CGT>TGT | p.R5120C      |
| Pat_76 | Pre-Treatment | MLL2      | 8085   | 37 | 12 | 49438054 | 49438054 | Missense_Mutation | SNP | G  | A  | 17  | 31  | c.5117C>T      | c.(5116-5118)TCC>TTC   | p.S1706F      |
| Pat_76 | Pre-Treatment | SPATS2    | 65244  | 37 | 12 | 49890769 | 49890769 | Missense_Mutation | SNP | C  | T  | 23  | 29  | c.680C>T       | c.(679-681)CCC>CTC     | p.P227L       |
| Pat_76 | Pre-Treatment | CSRNP2    | 81566  | 37 | 12 | 51467709 | 51467709 | Missense_Mutation | SNP | C  | G  | 45  | 54  | c.308G>C       | c.(307-309)CGG>CCG     | p.R103P       |
| Pat_76 | Pre-Treatment | SLC4A8    | 9498   | 37 | 12 | 51856194 | 51856194 | Nonsense_Mutation | SNP | G  | A  | 34  | 24  | c.1202G>A      | c.(1201-1203)TGG>TAG   | p.W401*       |
| Pat_76 | Pre-Treatment | NR4A1     | 3164   | 37 | 12 | 52451204 | 52451204 | Missense_Mutation | SNP | G  | A  | 4   | 102 | c.1430G>A      | c.(1429-1431)CGT>CAT   | p.R477H       |
| Pat_76 | Pre-Treatment | KRT84     | 3890   | 37 | 12 | 52774147 | 52774147 | Missense_Mutation | SNP | C  | T  | 4   | 61  | c.1424G>A      | c.(1423-1425)CGG>CAG   | p.R475Q       |
| Pat_76 | Pre-Treatment | KRT6B     | 3854   | 37 | 12 | 52844360 | 52844360 | Nonsense_Mutation | SNP | C  | T  | 22  | 64  | c.585G>A       | c.(583-585)TGG>TGA     | p.W195*       |
| Pat_76 | Pre-Treatment | KRT6B     | 3854   | 37 | 12 | 52845837 | 52845837 | Missense_Mutation | SNP | C  | G  | 10  | 4   | c.26G>C        | c.(25-27)AGG>ACG       | p.R9T         |
| Pat_76 | Pre-Treatment | KRT78     | 196374 | 37 | 12 | 53239983 | 53239983 | Missense_Mutation | SNP | C  | T  | 14  | 13  | c.754G>A       | c.(754-756)GAA>AAA     | p.E252K       |
| Pat_76 | Pre-Treatment | SOAT2     | 8435   | 37 | 12 | 53512193 | 53512193 | Missense_Mutation | SNP | C  | T  | 51  | 65  | c.838C>T       | c.(838-840)CTC>TTC     | p.L280F       |
| Pat_76 | Pre-Treatment | NCKAP1L   | 3071   | 37 | 12 | 54930826 | 54930826 | Missense_Mutation | SNP | G  | A  | 24  | 49  | c.3172G>A      | c.(3172-3174)GAA>AAA   | p.E1058K      |
| Pat_76 | Pre-Treatment | OR6C70    | 390327 | 37 | 12 | 55863739 | 55863739 | Missense_Mutation | SNP | G  | A  | 26  | 36  | c.184C>T       | c.(184-186)CGT>TGT     | p.R62C        |
| Pat_76 | Pre-Treatment | DNAJC14   | 85406  | 37 | 12 | 56221745 | 56221745 | Missense_Mutation | SNP | C  | T  | 5   | 80  | c.698G>A       | c.(697-699)CGC>CAC     | p.R233H       |
| Pat_76 | Pre-Treatment | STAT6     | 6778   | 37 | 12 | 57492287 | 57492287 | Splice_Site       | SNP | C  | T  | 4   | 148 | c.2159_splice  | c.e19+1                | p.E720_splice |
| Pat_76 | Pre-Treatment | ARHGAP9   | 64333  | 37 | 12 | 57871402 | 57871402 | Missense_Mutation | SNP | C  | T  | 15  | 37  | c.809G>A       | c.(808-810)CGC>CAC     | p.R270H       |
| Pat_76 | Pre-Treatment | DYRK2     | 8445   | 37 | 12 | 68050955 | 68050955 | Missense_Mutation | SNP | G  | C  | 66  | 57  | c.268G>C       | c.(268-270)GTT>CTT     | p.V90L        |



|        |               |           |        |    |    |           |           |                   |     |    |    |     |     |                  |                        |          |
|--------|---------------|-----------|--------|----|----|-----------|-----------|-------------------|-----|----|----|-----|-----|------------------|------------------------|----------|
| Pat_76 | Pre-Treatment | KCNMB4    | 27345  | 37 | 12 | 70794016  | 70794016  | Missense_Mutation | SNP | G  | A  | 34  | 60  | c.364G>A         | c.(364-366)GAA>AAA     | p.E122K  |
| Pat_76 | Pre-Treatment | CAPS2     | 84698  | 37 | 12 | 75685579  | 75685579  | Missense_Mutation | SNP | C  | A  | 31  | 54  | c.1242G>T        | c.(1240-1242)GAG>GAT   | p.E414D  |
| Pat_76 | Pre-Treatment | EPYC      | 1833   | 37 | 12 | 91358003  | 91358003  | Missense_Mutation | SNP | G  | A  | 30  | 68  | c.899C>T         | c.(898-900)CCT>CTT     | p.P300L  |
| Pat_76 | Pre-Treatment | CLU10S    | 574016 | 37 | 12 | 92814859  | 92814859  | Missense_Mutation | SNP | T  | C  | 158 | 221 | c.233A>G         | c.(232-234)AAT>AGT     | p.N78S   |
| Pat_76 | Pre-Treatment | ANKS1B    | 56899  | 37 | 12 | 100175830 | 100175830 | Missense_Mutation | SNP | C  | T  | 12  | 6   | c.715G>A         | c.(715-717)GTG>ATG     | p.V239M  |
| Pat_76 | Pre-Treatment | UHRF1BP1L | 23074  | 37 | 12 | 100444092 | 100444092 | Missense_Mutation | SNP | G  | A  | 16  | 27  | c.3572C>T        | c.(3571-3573)TCC>TTC   | p.S1191F |
| Pat_76 | Pre-Treatment | KIAA1033  | 23325  | 37 | 12 | 105546125 | 105546125 | Missense_Mutation | SNP | C  | T  | 26  | 29  | c.2654C>T        | c.(2653-2655)CCT>CTT   | p.P885L  |
| Pat_76 | Pre-Treatment | PRDM4     | 11108  | 37 | 12 | 108134795 | 108134795 | Missense_Mutation | SNP | G  | A  | 49  | 68  | c.1852C>T        | c.(1852-1854)CAC>TAC   | p.H618Y  |
| Pat_76 | Pre-Treatment | WSCD2     | 9671   | 37 | 12 | 108604011 | 108604011 | Missense_Mutation | SNP | G  | A  | 4   | 15  | c.611G>A         | c.(610-612)GGC>GAC     | p.G204D  |
| Pat_76 | Pre-Treatment | TMEM119   | 338773 | 37 | 12 | 108985355 | 108985355 | Missense_Mutation | SNP | G  | A  | 33  | 38  | c.805C>T         | c.(805-807)CCC>TCC     | p.P269S  |
| Pat_76 | Pre-Treatment | MYO1H     | 283446 | 37 | 12 | 109865367 | 109865367 | Missense_Mutation | SNP | G  | A  | 123 | 245 | c.1877G>A        | c.(1876-1878)AGG>AAG   | p.R626K  |
| Pat_76 | Pre-Treatment | CCDC63    | 160762 | 37 | 12 | 111336846 | 111336846 | Missense_Mutation | SNP | A  | G  | 27  | 29  | c.1259A>G        | c.(1258-1260)AAG>AGG   | p.K420R  |
| Pat_76 | Pre-Treatment | CUX2      | 23316  | 37 | 12 | 111749945 | 111749945 | Missense_Mutation | SNP | G  | A  | 20  | 16  | c.1942G>A        | c.(1942-1944)GAC>AAC   | p.D648N  |
| Pat_76 | Pre-Treatment | C12orf51  | 283450 | 37 | 12 | 112690345 | 112690346 | Missense_Mutation | DNP | GG | AA | 23  | 37  | ..2168_2169CC>T  | c.(2167-2169)TCC>TTT   | p.S723F  |
| Pat_76 | Pre-Treatment | RPH3A     | 22895  | 37 | 12 | 113328699 | 113328699 | Missense_Mutation | SNP | G  | T  | 9   | 14  | c.1666G>T        | c.(1666-1668)GTC>TTC   | p.V556F  |
| Pat_76 | Pre-Treatment | TPCN1     | 53373  | 37 | 12 | 113664698 | 113664699 | Missense_Mutation | DNP | CC | TT | 32  | 36  | c.41_42CC>TT     | c.(40-42)ACC>ATT       | p.T14I   |
| Pat_76 | Pre-Treatment | NOS1      | 4842   | 37 | 12 | 117680432 | 117680432 | Missense_Mutation | SNP | C  | T  | 25  | 47  | c.3041G>A        | c.(3040-3042)AGT>AAT   | p.S1014N |
| Pat_76 | Pre-Treatment | NOS1      | 4842   | 37 | 12 | 117768373 | 117768373 | Missense_Mutation | SNP | C  | T  | 26  | 22  | c.502G>A         | c.(502-504)GAG>AAG     | p.E168K  |
| Pat_76 | Pre-Treatment | PITPNM2   | 57605  | 37 | 12 | 123498444 | 123498444 | Missense_Mutation | SNP | G  | A  | 18  | 32  | c.224C>T         | c.(223-225)TCC>TTC     | p.S75F   |
| Pat_76 | Pre-Treatment | SNRNP35   | 11066  | 37 | 12 | 123950688 | 123950688 | Nonsense_Mutation | SNP | C  | T  | 4   | 58  | c.601C>T         | c.(601-603)CGA>TGA     | p.R201*  |
| Pat_76 | Pre-Treatment | TCTN2     | 79867  | 37 | 12 | 124172608 | 124172608 | Nonsense_Mutation | SNP | C  | T  | 72  | 85  | c.775C>T         | c.(775-777)CAG>TAG     | p.Q259*  |
| Pat_76 | Pre-Treatment | DNAH10    | 196385 | 37 | 12 | 124354974 | 124354974 | Nonsense_Mutation | SNP | G  | A  | 26  | 13  | c.7227G>A        | c.(7225-7227)TGG>TGA   | p.W2409* |
| Pat_76 | Pre-Treatment | TMEM132D  | 121256 | 37 | 12 | 130015712 | 130015712 | Missense_Mutation | SNP | C  | T  | 18  | 26  | c.1007G>A        | c.(1006-1008)CGA>CAA   | p.R336Q  |
| Pat_76 | Pre-Treatment | GPR133    | 283383 | 37 | 12 | 131593273 | 131593273 | Missense_Mutation | SNP | C  | T  | 73  | 157 | c.1892C>T        | c.(1891-1893)CCC>CTC   | p.P631L  |
| Pat_76 | Pre-Treatment | TPTE2     | 93492  | 37 | 13 | 20025323  | 20025323  | Nonsense_Mutation | SNP | G  | A  | 19  | 48  | c.784C>T         | c.(784-786)CGA>TGA     | p.R262*  |
| Pat_76 | Pre-Treatment | MPHOSPH8  | 54737  | 37 | 13 | 20221066  | 20221066  | Missense_Mutation | SNP | G  | A  | 5   | 238 | c.853G>A         | c.(853-855)GAC>AAC     | p.D285N  |
| Pat_76 | Pre-Treatment | PARP4     | 143    | 37 | 13 | 25066708  | 25066708  | Missense_Mutation | SNP | G  | A  | 96  | 130 | c.904C>T         | c.(904-906)CTT>TTT     | p.L302F  |
| Pat_76 | Pre-Treatment | RNF17     | 56163  | 37 | 13 | 25378548  | 25378548  | Missense_Mutation | SNP | G  | A  | 13  | 8   | c.2072G>A        | c.(2071-2073)GGA>GAA   | p.G691E  |
| Pat_76 | Pre-Treatment | FAM123A   | 219287 | 37 | 13 | 25744499  | 25744499  | Missense_Mutation | SNP | C  | T  | 15  | 28  | c.1259G>A        | c.(1258-1260)GGA>GAA   | p.G420E  |
| Pat_76 | Pre-Treatment | MTUS2     | 23281  | 37 | 13 | 29600115  | 29600115  | Missense_Mutation | SNP | C  | T  | 3   | 22  | c.1310C>T        | c.(1309-1311)TCC>TTC   | p.S437F  |
| Pat_76 | Pre-Treatment | RXFP2     | 122042 | 37 | 13 | 32371390  | 32371390  | Missense_Mutation | SNP | C  | A  | 65  | 73  | c.1839C>A        | c.(1837-1839)TTC>TTA   | p.F613L  |
| Pat_76 | Pre-Treatment | FRY       | 10129  | 37 | 13 | 32869444  | 32869444  | Nonsense_Mutation | SNP | T  | A  | 39  | 49  | c.8889T>A        | c.(8887-8889)TAT>TAA   | p.Y2963* |
| Pat_76 | Pre-Treatment | BRCA2     | 675    | 37 | 13 | 32910983  | 32910983  | Missense_Mutation | SNP | G  | A  | 4   | 51  | c.2491G>A        | c.(2491-2493)GTT>ATT   | p.V831I  |
| Pat_76 | Pre-Treatment | FREM2     | 341640 | 37 | 13 | 39265494  | 39265494  | Missense_Mutation | SNP | C  | T  | 16  | 29  | c.4013C>T        | c.(4012-4014)TCT>TTT   | p.S1338F |
| Pat_76 | Pre-Treatment | KIAA0564  | 23078  | 37 | 13 | 42442530  | 42442531  | Missense_Mutation | DNP | GG | CA | 24  | 59  | ..1163_1164CC>TC | c.(1162-1164)TCC>TTG   | p.S388L  |
| Pat_76 | Pre-Treatment | SLC25A30  | 253512 | 37 | 13 | 45980108  | 45980108  | Missense_Mutation | SNP | C  | A  | 4   | 45  | c.217G>T         | c.(217-219)GCC>TCC     | p.A73S   |
| Pat_76 | Pre-Treatment | CYSLTR2   | 57105  | 37 | 13 | 49281332  | 49281332  | Missense_Mutation | SNP | T  | C  | 74  | 88  | c.379T>C         | c.(379-381)TAT>CAT     | p.Y127H  |
| Pat_76 | Pre-Treatment | ATP7B     | 540    | 37 | 13 | 52524208  | 52524209  | Missense_Mutation | DNP | GG | AA | 39  | 53  | ..2664_2665CC>T  | c.662-2667)ACCCAC>ACTT | p.H889Y  |
| Pat_76 | Pre-Treatment | OLFM4     | 10562  | 37 | 13 | 53624121  | 53624121  | Missense_Mutation | SNP | G  | A  | 54  | 53  | c.748G>A         | c.(748-750)GGT>AGT     | p.G250S  |
| Pat_76 | Pre-Treatment | DACH1     | 1602   | 37 | 13 | 72133952  | 72133952  | Missense_Mutation | SNP | G  | A  | 17  | 28  | c.1435C>T        | c.(1435-1437)CCG>TCG   | p.P479S  |
| Pat_76 | Pre-Treatment | DIS3      | 22894  | 37 | 13 | 73340162  | 73340162  | Missense_Mutation | SNP | G  | A  | 18  | 27  | c.1918C>T        | c.(1918-1920)CAC>TAC   | p.H640Y  |
| Pat_76 | Pre-Treatment | SLITRK1   | 114798 | 37 | 13 | 84454754  | 84454754  | Missense_Mutation | SNP | C  | T  | 10  | 17  | c.889G>A         | c.(889-891)GAT>AAT     | p.D297N  |
| Pat_76 | Pre-Treatment | SLITRK6   | 84189  | 37 | 13 | 86368213  | 86368213  | Missense_Mutation | SNP | C  | T  | 26  | 46  | c.2431G>A        | c.(2431-2433)GTA>ATA   | p.V811I  |
| Pat_76 | Pre-Treatment | SLITRK5   | 26050  | 37 | 13 | 88329952  | 88329952  | Missense_Mutation | SNP | G  | A  | 44  | 94  | c.2309G>A        | c.(2308-2310)GGC>GAC   | p.G770D  |
| Pat_76 | Pre-Treatment | GPC5      | 2262   | 37 | 13 | 92345753  | 92345753  | Missense_Mutation | SNP | G  | A  | 14  | 22  | c.638G>A         | c.(637-639)GGA>GAA     | p.G213E  |
| Pat_76 | Pre-Treatment | ABCC4     | 10257  | 37 | 13 | 95830266  | 95830266  | Missense_Mutation | SNP | C  | T  | 56  | 88  | c.1625G>A        | c.(1624-1626)CGG>CAG   | p.R542Q  |
| Pat_76 | Pre-Treatment | PCCA      | 5095   | 37 | 13 | 100953723 | 100953723 | Missense_Mutation | SNP | C  | T  | 45  | 57  | c.1075C>T        | c.(1075-1077)CCT>TCT   | p.P359S  |

|        |               |          |        |    |    |           |           |                   |     |    |    |    |     |                 |                        |          |
|--------|---------------|----------|--------|----|----|-----------|-----------|-------------------|-----|----|----|----|-----|-----------------|------------------------|----------|
| Pat_76 | Pre-Treatment | COL4A1   | 1282   | 37 | 13 | 110826832 | 110826832 | Missense_Mutation | SNP | G  | A  | 23 | 27  | c.3367C>T       | c.(3367-3369)CCA>TCA   | p.P1123S |
| Pat_76 | Pre-Treatment | COL4A2   | 1284   | 37 | 13 | 111154075 | 111154075 | Missense_Mutation | SNP | C  | T  | 15 | 27  | c.3821C>T       | c.(3820-3822)TCC>TTC   | p.S1274F |
| Pat_76 | Pre-Treatment | ARHGEF7  | 8874   | 37 | 13 | 111944497 | 111944497 | Missense_Mutation | SNP | G  | A  | 4  | 61  | c.2230G>A       | c.(2230-2232)GTC>ATC   | p.V744I  |
| Pat_76 | Pre-Treatment | PROZ     | 8858   | 37 | 13 | 113825991 | 113825991 | Missense_Mutation | SNP | G  | A  | 41 | 65  | c.775G>A        | c.(775-777)GAG>AAG     | p.E259K  |
| Pat_76 | Pre-Treatment | TMCO3    | 55002  | 37 | 13 | 114203801 | 114203801 | Missense_Mutation | SNP | G  | A  | 18 | 49  | c.1982G>A       | c.(1981-1983)AGA>AAA   | p.R661K  |
| Pat_76 | Pre-Treatment | GAS6     | 2621   | 37 | 13 | 114541134 | 114541134 | Missense_Mutation | SNP | C  | T  | 4  | 107 | c.497G>A        | c.(496-498)GGC>GAC     | p.G166D  |
| Pat_76 | Pre-Treatment | OR4K5    | 79317  | 37 | 14 | 20389108  | 20389108  | Missense_Mutation | SNP | C  | G  | 50 | 137 | c.343C>G        | c.(343-345)CTT>GTT     | p.L115V  |
| Pat_76 | Pre-Treatment | OR4K1    | 79544  | 37 | 14 | 20404475  | 20404475  | Missense_Mutation | SNP | C  | T  | 11 | 38  | c.650C>T        | c.(649-651)TCC>TTC     | p.S217F  |
| Pat_76 | Pre-Treatment | HNRNPC   | 3183   | 37 | 14 | 21679680  | 21679680  | Missense_Mutation | SNP | G  | A  | 22 | 36  | c.722C>T        | c.(721-723)TCC>TTC     | p.S241F  |
| Pat_76 | Pre-Treatment | OR10G3   | 26533  | 37 | 14 | 22038638  | 22038638  | Missense_Mutation | SNP | G  | A  | 11 | 26  | c.238C>T        | c.(238-240)CCT>TCT     | p.P80S   |
| Pat_76 | Pre-Treatment | MMP14    | 4323   | 37 | 14 | 23313059  | 23313059  | Missense_Mutation | SNP | G  | A  | 56 | 75  | c.991G>A        | c.(991-993)GGG>AGG     | p.G331R  |
| Pat_76 | Pre-Treatment | JPH4     | 84502  | 37 | 14 | 24040266  | 24040267  | Missense_Mutation | DNP | GG | AA | 19 | 28  | c.1673_1674CC>T | c.(1672-1674)GCC>GTT   | p.A558V  |
| Pat_76 | Pre-Treatment | FITM1    | 161247 | 37 | 14 | 24601613  | 24601613  | Missense_Mutation | SNP | G  | A  | 32 | 26  | c.460G>A        | c.(460-462)GAG>AAG     | p.E154K  |
| Pat_76 | Pre-Treatment | RNF31    | 55072  | 37 | 14 | 24620080  | 24620080  | Missense_Mutation | SNP | C  | A  | 4  | 101 | c.1471C>A       | c.(1471-1473)CTA>ATA   | p.L491I  |
| Pat_76 | Pre-Treatment | GZMH     | 2999   | 37 | 14 | 25076419  | 25076419  | Missense_Mutation | SNP | C  | T  | 5  | 315 | c.533G>A        | c.(532-534)GGC>GAC     | p.G178D  |
| Pat_76 | Pre-Treatment | GZMB     | 3002   | 37 | 14 | 25100338  | 25100338  | Missense_Mutation | SNP | C  | T  | 51 | 95  | c.683G>A        | c.(682-684)CGA>CAA     | p.R228Q  |
| Pat_76 | Pre-Treatment | COCH     | 1690   | 37 | 14 | 31355240  | 31355240  | Missense_Mutation | SNP | C  | T  | 4  | 70  | c.1199C>T       | c.(1198-1200)TCG>TTG   | p.S400L  |
| Pat_76 | Pre-Treatment | ARHGAP5  | 394    | 37 | 14 | 32621634  | 32621634  | Missense_Mutation | SNP | C  | T  | 15 | 51  | c.4081C>T       | c.(4081-4083)CCG>TCG   | p.P1361S |
| Pat_76 | Pre-Treatment | AKAP6    | 9472   | 37 | 14 | 33291332  | 33291332  | Missense_Mutation | SNP | G  | A  | 10 | 21  | c.4313G>A       | c.(4312-4314)GGA>GAA   | p.G1438E |
| Pat_76 | Pre-Treatment | RALGAPA1 | 253959 | 37 | 14 | 36041828  | 36041828  | Missense_Mutation | SNP | G  | A  | 14 | 24  | c.5788C>T       | c.(5788-5790)CTT>TTT   | p.L1930F |
| Pat_76 | Pre-Treatment | LRFN5    | 145581 | 37 | 14 | 42368131  | 42368131  | Missense_Mutation | SNP | A  | C  | 61 | 73  | c.2110A>C       | c.(2110-2112)ACT>CCT   | p.T704P  |
| Pat_76 | Pre-Treatment | FAM179B  | 23116  | 37 | 14 | 45481251  | 45481251  | Missense_Mutation | SNP | C  | T  | 31 | 37  | c.3211C>T       | c.(3211-3213)CAT>TAT   | p.H1071Y |
| Pat_76 | Pre-Treatment | RPL10L   | 140801 | 37 | 14 | 47120861  | 47120861  | Missense_Mutation | SNP | G  | A  | 63 | 95  | c.79C>T         | c.(79-81)CCT>TCT       | p.P27S   |
| Pat_76 | Pre-Treatment | PYGL     | 5836   | 37 | 14 | 51378987  | 51378987  | Missense_Mutation | SNP | G  | A  | 6  | 321 | c.1655C>T       | c.(1654-1656)ACG>ATG   | p.T552M  |
| Pat_76 | Pre-Treatment | PTGER2   | 5732   | 37 | 14 | 52793975  | 52793975  | Missense_Mutation | SNP | G  | A  | 6  | 22  | c.880G>A        | c.(880-882)GAA>AAA     | p.E294K  |
| Pat_76 | Pre-Treatment | EXOC5    | 10640  | 37 | 14 | 57676775  | 57676775  | Missense_Mutation | SNP | A  | T  | 6  | 6   | c.1618T>A       | c.(1618-1620)TTA>ATA   | p.L540I  |
| Pat_76 | Pre-Treatment | RTN1     | 6252   | 37 | 14 | 60212705  | 60212705  | Missense_Mutation | SNP | C  | T  | 67 | 93  | c.736G>A        | c.(736-738)GAG>AAG     | p.E246K  |
| Pat_76 | Pre-Treatment | KCNH5    | 27133  | 37 | 14 | 63175092  | 63175092  | Missense_Mutation | SNP | G  | A  | 61 | 86  | c.2101C>T       | c.(2101-2103)CCC>TCC   | p.P701S  |
| Pat_76 | Pre-Treatment | KCNH5    | 27133  | 37 | 14 | 63468171  | 63468171  | Missense_Mutation | SNP | G  | A  | 16 | 39  | c.311C>T        | c.(310-312)CCT>CTT     | p.P104L  |
| Pat_76 | Pre-Treatment | SYNE2    | 23224  | 37 | 14 | 64469684  | 64469684  | Missense_Mutation | SNP | C  | T  | 26 | 38  | c.4033C>T       | c.(4033-4035)CTT>TTT   | p.L1345F |
| Pat_76 | Pre-Treatment | SYNE2    | 23224  | 37 | 14 | 64691206  | 64691206  | Missense_Mutation | SNP | G  | A  | 6  | 223 | c.20341G>A      | c.(20341-20343)GAC>AAC | p.D6781N |
| Pat_76 | Pre-Treatment | MTHFD1   | 4522   | 37 | 14 | 64892903  | 64892903  | Missense_Mutation | SNP | G  | A  | 5  | 117 | c.1120G>A       | c.(1120-1122)GTG>ATG   | p.V374M  |
| Pat_76 | Pre-Treatment | ZBTB25   | 7597   | 37 | 14 | 64954009  | 64954009  | Missense_Mutation | SNP | G  | A  | 57 | 73  | c.940C>T        | c.(940-942)CGG>TGG     | p.R314W  |
| Pat_76 | Pre-Treatment | SPTB     | 6710   | 37 | 14 | 65253757  | 65253757  | Missense_Mutation | SNP | C  | T  | 11 | 27  | c.2926G>A       | c.(2926-2928)GTA>ATA   | p.V976I  |
| Pat_76 | Pre-Treatment | ZFYVE26  | 23503  | 37 | 14 | 68234443  | 68234443  | Missense_Mutation | SNP | C  | T  | 5  | 161 | c.5768G>A       | c.(5767-5769)CGG>CAG   | p.R1923Q |
| Pat_76 | Pre-Treatment | SLC8A3   | 6547   | 37 | 14 | 70633384  | 70633384  | Missense_Mutation | SNP | C  | T  | 16 | 46  | c.1756G>A       | c.(1756-1758)GAG>AAG   | p.E586K  |
| Pat_76 | Pre-Treatment | SYNJ2BP  | 55333  | 37 | 14 | 70855188  | 70855188  | Missense_Mutation | SNP | G  | A  | 12 | 20  | c.200C>T        | c.(199-201)TCG>TTG     | p.S67L   |
| Pat_76 | Pre-Treatment | PSEN1    | 5663   | 37 | 14 | 73685912  | 73685912  | Missense_Mutation | SNP | C  | T  | 69 | 87  | c.1319C>T       | c.(1318-1320)ACC>ATC   | p.T440I  |
| Pat_76 | Pre-Treatment | LTBP2    | 4053   | 37 | 14 | 74970727  | 74970727  | Missense_Mutation | SNP | C  | T  | 9  | 17  | c.4484G>A       | c.(4483-4485)GGT>GAT   | p.G1495D |
| Pat_76 | Pre-Treatment | YLPM1    | 56252  | 37 | 14 | 75264383  | 75264383  | Missense_Mutation | SNP | C  | T  | 9  | 11  | c.2383C>T       | c.(2383-2385)CCC>TCC   | p.P795S  |
| Pat_76 | Pre-Treatment | ESRRB    | 2103   | 37 | 14 | 76905817  | 76905817  | Missense_Mutation | SNP | G  | A  | 3  | 22  | c.121G>A        | c.(121-123)GCC>ACC     | p.A41T   |
| Pat_76 | Pre-Treatment | ISM2     | 145501 | 37 | 14 | 77948827  | 77948827  | Missense_Mutation | SNP | C  | T  | 13 | 16  | c.811G>A        | c.(811-813)GAA>AAA     | p.E271K  |
| Pat_76 | Pre-Treatment | FLRT2    | 23768  | 37 | 14 | 86089260  | 86089260  | Missense_Mutation | SNP | G  | A  | 36 | 69  | c.1402G>A       | c.(1402-1404)GAG>AAG   | p.E468K  |
| Pat_76 | Pre-Treatment | EML5     | 161436 | 37 | 14 | 89082505  | 89082505  | Missense_Mutation | SNP | C  | A  | 6  | 226 | c.5878G>T       | c.(5878-5880)GCT>TCT   | p.A1960S |
| Pat_76 | Pre-Treatment | CCDC88C  | 440193 | 37 | 14 | 91773417  | 91773417  | Nonsense_Mutation | SNP | G  | A  | 3  | 7   | c.3160C>T       | c.(3160-3162)CGA>TGA   | p.R1054* |
| Pat_76 | Pre-Treatment | CCDC88C  | 440193 | 37 | 14 | 91791263  | 91791263  | Missense_Mutation | SNP | C  | A  | 4  | 59  | c.1202G>T       | c.(1201-1203)CGG>CTG   | p.R401L  |
| Pat_76 | Pre-Treatment | FBLN5    | 10516  | 37 | 14 | 92343937  | 92343937  | Missense_Mutation | SNP | G  | A  | 22 | 80  | c.1079C>T       | c.(1078-1080)TCC>TTC   | p.S360F  |

|        |               |           |        |    |    |           |           |                   |     |    |    |    |     |                                       |                      |               |
|--------|---------------|-----------|--------|----|----|-----------|-----------|-------------------|-----|----|----|----|-----|---------------------------------------|----------------------|---------------|
| Pat_76 | Pre-Treatment | GOLGA5    | 9950   | 37 | 14 | 93303772  | 93303772  | Missense_Mutation | SNP | G  | A  | 5  | 323 | c.2093G>A                             | c.(2092-2094)CGA>CAA | p.R698Q       |
| Pat_76 | Pre-Treatment | BTBD7     | 55727  | 37 | 14 | 93709119  | 93709119  | Missense_Mutation | SNP | G  | A  | 28 | 52  | c.2899C>T                             | c.(2899-2901)CCT>TCT | p.P967S       |
| Pat_76 | Pre-Treatment | KIAA1409  | 57578  | 37 | 14 | 94158197  | 94158197  | Nonsense_Mutation | SNP | C  | T  | 24 | 57  | c.7027C>T                             | c.(7027-7029)CAG>TAG | p.Q2343*      |
| Pat_76 | Pre-Treatment | DDX24     | 57062  | 37 | 14 | 94545446  | 94545446  | Missense_Mutation | SNP | G  | A  | 4  | 154 | c.643C>T                              | c.(643-645)CCC>TCC   | p.P215S       |
| Pat_76 | Pre-Treatment | SERPINA1  | 5265   | 37 | 14 | 94844814  | 94844814  | Missense_Mutation | SNP | C  | T  | 28 | 56  | c.1229G>A                             | c.(1228-1230)GGA>GAA | p.G410E       |
| Pat_76 | Pre-Treatment | SERPINA9  | 327657 | 37 | 14 | 94933701  | 94933701  | Missense_Mutation | SNP | A  | C  | 23 | 43  | c.701T>G                              | c.(700-702)TTT>TGT   | p.F234C       |
| Pat_76 | Pre-Treatment | SERPINA3  | 12     | 37 | 14 | 95088794  | 95088794  | Missense_Mutation | SNP | G  | A  | 16 | 20  | c.1034G>A                             | c.(1033-1035)GGG>GAG | p.G345E       |
| Pat_76 | Pre-Treatment | SERPINA13 | 388007 | 37 | 14 | 95108179  | 95108179  | Nonsense_Mutation | SNP | G  | A  | 61 | 104 | c.696G>A                              | c.(694-696)TGG>TGA   | p.W232*       |
| Pat_76 | Pre-Treatment | DICER1    | 23405  | 37 | 14 | 95562323  | 95562323  | Missense_Mutation | SNP | G  | A  | 69 | 110 | c.4934C>T                             | c.(4933-4935)CCA>CTA | p.P1645L      |
| Pat_76 | Pre-Treatment | BDKRB2    | 624    | 37 | 14 | 96707210  | 96707210  | Nonsense_Mutation | SNP | G  | A  | 12 | 28  | c.545G>A                              | c.(544-546)TGG>TAG   | p.W182*       |
| Pat_76 | Pre-Treatment | PAPOLA    | 10914  | 37 | 14 | 97002295  | 97002295  | Missense_Mutation | SNP | C  | T  | 30 | 42  | c.989C>T                              | c.(988-990)TCC>TTC   | p.S330F       |
| Pat_76 | Pre-Treatment | SLC25A29  | 123096 | 37 | 14 | 100759668 | 100759668 | Missense_Mutation | SNP | G  | A  | 4  | 79  | c.125C>T                              | c.(124-126)ACG>ATG   | p.T42M        |
| Pat_76 | Pre-Treatment | DYNC1H1   | 1778   | 37 | 14 | 102482801 | 102482801 | Missense_Mutation | SNP | C  | T  | 4  | 152 | c.7589C>T                             | c.(7588-7590)CCC>CTC | p.P2530L      |
| Pat_76 | Pre-Treatment | CDC42BPB  | 9578   | 37 | 14 | 103440469 | 103440469 | Nonsense_Mutation | SNP | G  | A  | 19 | 23  | c.1525C>T                             | c.(1525-1527)CGA>TGA | p.R509*       |
| Pat_76 | Pre-Treatment | KIF26A    | 26153  | 37 | 14 | 104641939 | 104641940 | Missense_Mutation | DNP | GG | AA | 8  | 17  | .2814_2815GG>A.812-2817)AAGGCT>AAA/   |                      | p.A939T       |
| Pat_76 | Pre-Treatment | PLD4      | 122618 | 37 | 14 | 105398187 | 105398187 | Missense_Mutation | SNP | G  | A  | 3  | 11  | c.1021G>A                             | c.(1021-1023)GAG>AAG | p.E341K       |
| Pat_76 | Pre-Treatment | ADAM6     | 8755   | 37 | 14 | 106350754 | 106350754 | Splice_Site       | SNP | G  | A  | 16 | 30  | c.49979_splice                        | c.e3164-1            |               |
| Pat_76 | Pre-Treatment | TUBGCP5   | 114791 | 37 | 15 | 22846940  | 22846940  | Missense_Mutation | SNP | G  | A  | 4  | 63  | c.815G>A                              | c.(814-816)CGG>CAG   | p.R272Q       |
| Pat_76 | Pre-Treatment | NIPA1     | 123606 | 37 | 15 | 23052675  | 23052675  | Missense_Mutation | SNP | G  | A  | 51 | 129 | c.398C>T                              | c.(397-399)TCC>TTC   | p.S133F       |
| Pat_76 | Pre-Treatment | C15orf2   | 23742  | 37 | 15 | 24922816  | 24922816  | Missense_Mutation | SNP | C  | A  | 36 | 61  | c.1802C>A                             | c.(1801-1803)CCA>CAA | p.P601Q       |
| Pat_76 | Pre-Treatment | NDNL2     | 56160  | 37 | 15 | 29561539  | 29561539  | Missense_Mutation | SNP | G  | A  | 58 | 166 | c.371C>T                              | c.(370-372)CCC>CTC   | p.P124L       |
| Pat_76 | Pre-Treatment | TJP1      | 7082   | 37 | 15 | 30011099  | 30011099  | Missense_Mutation | SNP | G  | A  | 86 | 57  | c.3247C>T                             | c.(3247-3249)CGC>TGC | p.R1083C      |
| Pat_76 | Pre-Treatment | TJP1      | 7082   | 37 | 15 | 30024841  | 30024841  | Nonsense_Mutation | SNP | G  | A  | 5  | 168 | c.1915C>T                             | c.(1915-1917)CGA>TGA | p.R639*       |
| Pat_76 | Pre-Treatment | CHRFAM7A  | 89832  | 37 | 15 | 30659708  | 30659708  | Missense_Mutation | SNP | C  | T  | 38 | 104 | c.633G>A                              | c.(631-633)ATG>ATA   | p.M211I       |
| Pat_76 | Pre-Treatment | CHRNA7    | 1139   | 37 | 15 | 32460295  | 32460295  | Missense_Mutation | SNP | G  | A  | 3  | 23  | c.1145G>A                             | c.(1144-1146)GGG>GAG | p.G382E       |
| Pat_76 | Pre-Treatment | CHRM5     | 1133   | 37 | 15 | 34355031  | 34355031  | Missense_Mutation | SNP | C  | T  | 6  | 135 | c.113C>T                              | c.(112-114)GCT>GTT   | p.A38V        |
| Pat_76 | Pre-Treatment | AQR       | 9716   | 37 | 15 | 35166887  | 35166887  | Missense_Mutation | SNP | G  | C  | 34 | 110 | c.3416C>G                             | c.(3415-3417)GCC>GGC | p.A1139G      |
| Pat_76 | Pre-Treatment | THBS1     | 7057   | 37 | 15 | 39886338  | 39886338  | Nonsense_Mutation | SNP | G  | A  | 26 | 21  | c.3306G>A                             | c.(3304-3306)TGG>TGA | p.W1102*      |
| Pat_76 | Pre-Treatment | BAHD1     | 22893  | 37 | 15 | 40754233  | 40754233  | Missense_Mutation | SNP | C  | T  | 19 | 75  | c.1555C>T                             | c.(1555-1557)CCC>TCC | p.P519S       |
| Pat_76 | Pre-Treatment | BAHD1     | 22893  | 37 | 15 | 40756138  | 40756138  | Missense_Mutation | SNP | G  | A  | 4  | 133 | c.1894G>A                             | c.(1894-1896)GTC>ATC | p.V632I       |
| Pat_76 | Pre-Treatment | RPUSD2    | 27079  | 37 | 15 | 40866242  | 40866242  | Missense_Mutation | SNP | G  | A  | 71 | 45  | c.1420G>A                             | c.(1420-1422)GAG>AAG | p.E474K       |
| Pat_76 | Pre-Treatment | INO80     | 54617  | 37 | 15 | 41313319  | 41313319  | Missense_Mutation | SNP | G  | A  | 4  | 126 | c.3053C>T                             | c.(3052-3054)ACC>ATC | p.T1018I      |
| Pat_76 | Pre-Treatment | MAPKBP1   | 23005  | 37 | 15 | 42105883  | 42105883  | Missense_Mutation | SNP | C  | T  | 98 | 222 | c.902C>T                              | c.(901-903)ACC>ATC   | p.T301I       |
| Pat_76 | Pre-Treatment | SPTBN5    | 51332  | 37 | 15 | 42185575  | 42185575  | Missense_Mutation | SNP | C  | T  | 22 | 26  | c.16G>A                               | c.(16-18)GAG>AAG     | p.E6K         |
| Pat_76 | Pre-Treatment | PLA2G4D   | 283748 | 37 | 15 | 42363971  | 42363971  | Splice_Site       | SNP | C  | T  | 66 | 61  | c.1573_splice                         | c.e15+1              | p.A525_splice |
| Pat_76 | Pre-Treatment | ZFP106    | 64397  | 37 | 15 | 42743482  | 42743482  | Missense_Mutation | SNP | G  | A  | 32 | 66  | c.919C>T                              | c.(919-921)CCT>TCT   | p.P307S       |
| Pat_76 | Pre-Treatment | ZFP106    | 64397  | 37 | 15 | 42743832  | 42743832  | Missense_Mutation | SNP | C  | T  | 88 | 65  | c.569G>A                              | c.(568-570)GGA>GAA   | p.G190E       |
| Pat_76 | Pre-Treatment | TTBK2     | 146057 | 37 | 15 | 43086989  | 43086989  | Missense_Mutation | SNP | G  | A  | 14 | 7   | c.833C>T                              | c.(832-834)TCC>TTC   | p.S278F       |
| Pat_76 | Pre-Treatment | TP53BP1   | 7158   | 37 | 15 | 43748861  | 43748861  | Nonsense_Mutation | SNP | G  | A  | 33 | 113 | c.1930C>T                             | c.(1930-1932)CAG>TAG | p.Q644*       |
| Pat_76 | Pre-Treatment | DUOX1     | 53905  | 37 | 15 | 45433506  | 45433506  | Missense_Mutation | SNP | G  | A  | 71 | 51  | c.1582G>A                             | c.(1582-1584)GAG>AAG | p.E528K       |
| Pat_76 | Pre-Treatment | SLC28A2   | 9153   | 37 | 15 | 45545694  | 45545694  | Missense_Mutation | SNP | G  | A  | 21 | 64  | c.146G>A                              | c.(145-147)GGA>GAA   | p.G49E        |
| Pat_76 | Pre-Treatment | WDR72     | 256764 | 37 | 15 | 53908113  | 53908113  | Missense_Mutation | SNP | C  | T  | 27 | 53  | c.2290G>A                             | c.(2290-2292)GAT>AAT | p.D764N       |
| Pat_76 | Pre-Treatment | UNC13C    | 440279 | 37 | 15 | 54556584  | 54556584  | Missense_Mutation | SNP | A  | C  | 6  | 19  | c.3667A>C                             | c.(3667-3669)ACC>CCC | p.T1223P      |
| Pat_76 | Pre-Treatment | UNC13C    | 440279 | 37 | 15 | 54919174  | 54919174  | Missense_Mutation | SNP | C  | T  | 32 | 60  | c.6508C>T                             | c.(6508-6510)CCT>TCT | p.P2170S      |
| Pat_76 | Pre-Treatment | MYO1E     | 4643   | 37 | 15 | 59519723  | 59519724  | Missense_Mutation | DNP | GG | AA | 61 | 51  | c.576_577CC>TT (574-579)TTCCTT>TTTTI  |                      | p.L193F       |
| Pat_76 | Pre-Treatment | VPS13C    | 54832  | 37 | 15 | 62160931  | 62160932  | Missense_Mutation | DNP | GG | AA | 14 | 61  | 10789_10790CC>>c.(10789-10791)CCT>TTT |                      | p.P3597F      |
| Pat_76 | Pre-Treatment | USP3      | 9960   | 37 | 15 | 63796976  | 63796976  | Missense_Mutation | SNP | C  | T  | 4  | 71  | c.38C>T                               | c.(37-39)GCT>GTT     | p.A13V        |

|        |               |          |        |    |    |           |           |                   |     |    |    |     |     |                 |                      |               |
|--------|---------------|----------|--------|----|----|-----------|-----------|-------------------|-----|----|----|-----|-----|-----------------|----------------------|---------------|
| Pat_76 | Pre-Treatment | HERC1    | 8925   | 37 | 15 | 63984706  | 63984706  | Missense_Mutation | SNP | G  | A  | 9   | 16  | c.5734C>T       | c.(5734-5736)CGC>TGC | p.R1912C      |
| Pat_76 | Pre-Treatment | ZNF609   | 23060  | 37 | 15 | 64972957  | 64972957  | Missense_Mutation | SNP | G  | A  | 6   | 290 | c.4058G>A       | c.(4057-4059)CGG>CAG | p.R1353Q      |
| Pat_76 | Pre-Treatment | CLPX     | 10845  | 37 | 15 | 65448131  | 65448132  | Missense_Mutation | DNP | GG | AA | 56  | 153 | .:1209_1210CC>T | 207-1212)CTCCGT>CTTT | p.R404C       |
| Pat_76 | Pre-Treatment | CILP     | 8483   | 37 | 15 | 65490345  | 65490345  | Missense_Mutation | SNP | C  | T  | 5   | 210 | c.2279G>A       | c.(2278-2280)CGG>CAG | p.R760Q       |
| Pat_76 | Pre-Treatment | CILP     | 8483   | 37 | 15 | 65490642  | 65490642  | Missense_Mutation | SNP | G  | A  | 29  | 68  | c.1982C>T       | c.(1981-1983)TCT>TTT | p.S661F       |
| Pat_76 | Pre-Treatment | DENND4A  | 10260  | 37 | 15 | 65983030  | 65983030  | Missense_Mutation | SNP | G  | A  | 15  | 77  | c.3770C>T       | c.(3769-3771)CCT>CTT | p.P1257L      |
| Pat_76 | Pre-Treatment | MEGF11   | 84465  | 37 | 15 | 66250017  | 66250018  | Nonsense_Mutation | DNP | CC | TT | 37  | 32  | .:1154_1155GG>A | c.(1153-1155)TGG>TAA | p.W385*       |
| Pat_76 | Pre-Treatment | MAP2K5   | 5607   | 37 | 15 | 67995693  | 67995693  | Missense_Mutation | SNP | G  | A  | 29  | 68  | c.991G>A        | c.(991-993)GAG>AAG   | p.E331K       |
| Pat_76 | Pre-Treatment | SPESP1   | 246777 | 37 | 15 | 69238085  | 69238085  | Missense_Mutation | SNP | G  | A  | 29  | 84  | c.212G>A        | c.(211-213)GGA>GAA   | p.G71E        |
| Pat_76 | Pre-Treatment | NOX5     | 79400  | 37 | 15 | 69347817  | 69347817  | Missense_Mutation | SNP | C  | T  | 4   | 95  | c.2143C>T       | c.(2143-2145)CCT>TCT | p.P715S       |
| Pat_76 | Pre-Treatment | LRRC49   | 54839  | 37 | 15 | 71197052  | 71197052  | Missense_Mutation | SNP | C  | T  | 118 | 237 | c.458C>T        | c.(457-459)TCG>TTG   | p.S153L       |
| Pat_76 | Pre-Treatment | ISL2     | 64843  | 37 | 15 | 76630250  | 76630250  | Missense_Mutation | SNP | G  | A  | 4   | 153 | c.190G>A        | c.(190-192)GAG>AAG   | p.E64K        |
| Pat_76 | Pre-Treatment | TSPAN3   | 10099  | 37 | 15 | 77348512  | 77348512  | Missense_Mutation | SNP | G  | A  | 4   | 160 | c.149C>T        | c.(148-150)ACG>ATG   | p.T50M        |
| Pat_76 | Pre-Treatment | ACSBG1   | 23205  | 37 | 15 | 78474348  | 78474348  | Missense_Mutation | SNP | C  | T  | 58  | 39  | c.1034G>A       | c.(1033-1035)GGG>GAG | p.G345E       |
| Pat_76 | Pre-Treatment | FAH      | 2184   | 37 | 15 | 80460459  | 80460459  | Missense_Mutation | SNP | G  | A  | 4   | 70  | c.521G>A        | c.(520-522)CGA>CAA   | p.R174Q       |
| Pat_76 | Pre-Treatment | KIAA1199 | 57214  | 37 | 15 | 81199043  | 81199043  | Missense_Mutation | SNP | G  | A  | 89  | 74  | c.1451G>A       | c.(1450-1452)GGC>GAC | p.G484D       |
| Pat_76 | Pre-Treatment | C15orf40 | 123207 | 37 | 15 | 83677352  | 83677352  | Missense_Mutation | SNP | C  | T  | 82  | 59  | c.314G>A        | c.(313-315)CGG>CAG   | p.R105Q       |
| Pat_76 | Pre-Treatment | SLC28A1  | 9154   | 37 | 15 | 85447408  | 85447408  | Missense_Mutation | SNP | C  | T  | 98  | 60  | c.542C>T        | c.(541-543)TCC>TTC   | p.S181F       |
| Pat_76 | Pre-Treatment | AKAP13   | 11214  | 37 | 15 | 86122597  | 86122597  | Missense_Mutation | SNP | C  | T  | 41  | 25  | c.1298C>T       | c.(1297-1299)CCC>CTC | p.P433L       |
| Pat_76 | Pre-Treatment | AKAP13   | 11214  | 37 | 15 | 86125080  | 86125080  | Missense_Mutation | SNP | G  | A  | 15  | 44  | c.3781G>A       | c.(3781-3783)GAA>AAA | p.E1261K      |
| Pat_76 | Pre-Treatment | KLHL25   | 64410  | 37 | 15 | 86311780  | 86311780  | Missense_Mutation | SNP | G  | A  | 40  | 26  | c.1262C>T       | c.(1261-1263)GCC>GTC | p.A421V       |
| Pat_76 | Pre-Treatment | NTRK3    | 4916   | 37 | 15 | 88420209  | 88420209  | Missense_Mutation | SNP | G  | A  | 4   | 103 | c.2477C>T       | c.(2476-2478)GCT>GTT | p.A826V       |
| Pat_76 | Pre-Treatment | DET1     | 55070  | 37 | 15 | 89073951  | 89073951  | Missense_Mutation | SNP | A  | T  | 5   | 14  | c.986T>A        | c.(985-987)CTG>CAG   | p.L329Q       |
| Pat_76 | Pre-Treatment | C15orf58 | 390637 | 37 | 15 | 90784313  | 90784313  | Missense_Mutation | SNP | C  | T  | 166 | 100 | c.173C>T        | c.(172-174)CCC>CTC   | p.P58L        |
| Pat_76 | Pre-Treatment | ST8SIA2  | 8128   | 37 | 15 | 92988160  | 92988160  | Splice_Site       | SNP | G  | A  | 48  | 125 | c.842_splice    | c.e5+1               | p.G281_splice |
| Pat_76 | Pre-Treatment | FAM174B  | 400451 | 37 | 15 | 93173525  | 93173525  | Missense_Mutation | SNP | G  | A  | 15  | 27  | c.395C>T        | c.(394-396)CCA>CTA   | p.P132L       |
| Pat_76 | Pre-Treatment | SPATA8   | 145946 | 37 | 15 | 97328244  | 97328244  | Missense_Mutation | SNP | G  | A  | 183 | 164 | c.215G>A        | c.(214-216)GGA>GAA   | p.G72E        |
| Pat_76 | Pre-Treatment | ADAMTS17 | 170691 | 37 | 15 | 100594150 | 100594150 | Nonsense_Mutation | SNP | C  | T  | 195 | 353 | c.2247G>A       | c.(2245-2247)TGG>TGA | p.W749*       |
| Pat_76 | Pre-Treatment | LINS1    | 55180  | 37 | 15 | 101120947 | 101120947 | Missense_Mutation | SNP | G  | A  | 36  | 34  | c.101C>T        | c.(100-102)CCA>CTA   | p.P34L        |
| Pat_76 | Pre-Treatment | PDIA2    | 64714  | 37 | 16 | 333275    | 333275    | Missense_Mutation | SNP | G  | A  | 5   | 10  | c.106G>A        | c.(106-108)GAG>AAG   | p.E36K        |
| Pat_76 | Pre-Treatment | TMEM8A   | 58986  | 37 | 16 | 427448    | 427448    | Missense_Mutation | SNP | G  | A  | 14  | 26  | c.437C>T        | c.(436-438)TCC>TTC   | p.S146F       |
| Pat_76 | Pre-Treatment | WDR24    | 84219  | 37 | 16 | 737222    | 737222    | Missense_Mutation | SNP | C  | T  | 4   | 111 | c.854G>A        | c.(853-855)CGG>CAG   | p.R285Q       |
| Pat_76 | Pre-Treatment | BAIAP3   | 8938   | 37 | 16 | 1391412   | 1391412   | Missense_Mutation | SNP | C  | T  | 56  | 82  | c.758C>T        | c.(757-759)CCC>CTC   | p.P253L       |
| Pat_76 | Pre-Treatment | HS3ST6   | 64711  | 37 | 16 | 1961872   | 1961873   | Missense_Mutation | DNP | CC | TT | 47  | 49  | c.654_655GG>AA  | 352-657)GGGGAG>GGAA  | p.E219K       |
| Pat_76 | Pre-Treatment | PKD1     | 5310   | 37 | 16 | 2159592   | 2159592   | Missense_Mutation | SNP | G  | A  | 3   | 17  | c.5576C>T       | c.(5575-5577)GCT>GTT | p.A1859V      |
| Pat_76 | Pre-Treatment | SRRM2    | 23524  | 37 | 16 | 2809662   | 2809662   | Missense_Mutation | SNP | G  | A  | 4   | 129 | c.833G>A        | c.(832-834)CGG>CAG   | p.R278Q       |
| Pat_76 | Pre-Treatment | SRRM2    | 23524  | 37 | 16 | 2815330   | 2815330   | Missense_Mutation | SNP | T  | C  | 3   | 119 | c.4801T>C       | c.(4801-4803)TCC>CCC | p.S1601P      |
| Pat_76 | Pre-Treatment | PRSS22   | 64063  | 37 | 16 | 2903913   | 2903913   | Missense_Mutation | SNP | C  | T  | 28  | 44  | c.670G>A        | c.(670-672)GAC>AAC   | p.D224N       |
| Pat_76 | Pre-Treatment | CLDN6    | 9074   | 37 | 16 | 3065689   | 3065689   | Missense_Mutation | SNP | C  | T  | 29  | 25  | c.334G>A        | c.(334-336)GAT>AAT   | p.D112N       |
| Pat_76 | Pre-Treatment | ZSCAN10  | 84891  | 37 | 16 | 3139460   | 3139460   | Missense_Mutation | SNP | C  | T  | 10  | 23  | c.1810G>A       | c.(1810-1812)GAG>AAG | p.E604K       |
| Pat_76 | Pre-Treatment | MEFV     | 4210   | 37 | 16 | 3293401   | 3293401   | Missense_Mutation | SNP | C  | T  | 14  | 45  | c.2086G>A       | c.(2086-2088)GAA>AAA | p.E696K       |
| Pat_76 | Pre-Treatment | NLRC3    | 197358 | 37 | 16 | 3607625   | 3607625   | Missense_Mutation | SNP | G  | A  | 15  | 9   | c.2068C>T       | c.(2068-2070)CTC>TTC | p.L690F       |
| Pat_76 | Pre-Treatment | CREBBP   | 1387   | 37 | 16 | 3823918   | 3823919   | Missense_Mutation | DNP | GG | AA | 27  | 64  | .:2296_2297CC>T | c.(2296-2298)CCT>TTT | p.P766F       |
| Pat_76 | Pre-Treatment | 12-Sep   | 124404 | 37 | 16 | 4829778   | 4829778   | Missense_Mutation | SNP | G  | A  | 38  | 42  | c.736C>T        | c.(736-738)CCT>TCT   | p.P246S       |
| Pat_76 | Pre-Treatment | PPL      | 5493   | 37 | 16 | 4934443   | 4934443   | Missense_Mutation | SNP | C  | T  | 4   | 7   | c.4213G>A       | c.(4213-4215)GAG>AAG | p.E1405K      |
| Pat_76 | Pre-Treatment | PMM2     | 5373   | 37 | 16 | 8906922   | 8906922   | Missense_Mutation | SNP | G  | A  | 5   | 238 | c.598G>A        | c.(598-600)GGT>AGT   | p.G200S       |
| Pat_76 | Pre-Treatment | GRIN2A   | 2903   | 37 | 16 | 9858255   | 9858255   | Missense_Mutation | SNP | G  | A  | 39  | 83  | c.3146C>T       | c.(3145-3147)CCT>CTT | p.P1049L      |

|        |               |          |        |    |    |          |          |                   |     |    |    |    |     |                                                  |                        |          |
|--------|---------------|----------|--------|----|----|----------|----------|-------------------|-----|----|----|----|-----|--------------------------------------------------|------------------------|----------|
| Pat_76 | Pre-Treatment | GRIN2A   | 2903   | 37 | 16 | 9923297  | 9923297  | Missense_Mutation | SNP | C  | T  | 37 | 34  | c.1990G>A                                        | c.(1990-1992)GGC>AGC   | p.G664S  |
| Pat_76 | Pre-Treatment | TNFRSF17 | 608    | 37 | 16 | 12061606 | 12061606 | Missense_Mutation | SNP | G  | A  | 5  | 67  | c.457G>A                                         | c.(457-459)GCA>ACA     | p.A153T  |
| Pat_76 | Pre-Treatment | ERCC4    | 2072   | 37 | 16 | 14029042 | 14029042 | Missense_Mutation | SNP | C  | T  | 45 | 95  | c.1253C>T                                        | c.(1252-1254)TCC>TTC   | p.S418F  |
| Pat_76 | Pre-Treatment | PDXDC1   | 23042  | 37 | 16 | 15128324 | 15128324 | Missense_Mutation | SNP | G  | A  | 4  | 158 | c.1916G>A                                        | c.(1915-1917)CGG>CAG   | p.R639Q  |
| Pat_76 | Pre-Treatment | MYH11    | 4629   | 37 | 16 | 15813531 | 15813531 | Missense_Mutation | SNP | G  | A  | 4  | 116 | c.4993C>T                                        | c.(4993-4995)CGT>TGT   | p.R1665C |
| Pat_76 | Pre-Treatment | C16orf88 | 400506 | 37 | 16 | 19718383 | 19718383 | Missense_Mutation | SNP | G  | A  | 26 | 37  | c.1226C>T                                        | c.(1225-1227)GCT>GTT   | p.A409V  |
| Pat_76 | Pre-Treatment | PDILT    | 204474 | 37 | 16 | 20384348 | 20384348 | Missense_Mutation | SNP | C  | T  | 80 | 106 | c.778G>A                                         | c.(778-780)GAA>AAA     | p.E260K  |
| Pat_76 | Pre-Treatment | ACSM2B   | 348158 | 37 | 16 | 20570640 | 20570641 | Missense_Mutation | DNP | GG | CA | 10 | 18  | c.306_307CC>TG304-309)GGCCTG>GGTG                |                        | p.L103V  |
| Pat_76 | Pre-Treatment | ACSM2B   | 348158 | 37 | 16 | 20576154 | 20576154 | Missense_Mutation | SNP | C  | T  | 16 | 35  | c.14G>A                                          | c.(13-15)CGA>CAA       | p.R5Q    |
| Pat_76 | Pre-Treatment | ACSM1    | 116285 | 37 | 16 | 20648710 | 20648710 | Missense_Mutation | SNP | G  | A  | 27 | 52  | c.1180C>T                                        | c.(1180-1182)CCA>TCA   | p.P394S  |
| Pat_76 | Pre-Treatment | ACSM1    | 116285 | 37 | 16 | 20696554 | 20696554 | Missense_Mutation | SNP | G  | A  | 29 | 72  | c.364C>T                                         | c.(364-366)CCT>TCT     | p.P122S  |
| Pat_76 | Pre-Treatment | DNAH3    | 55567  | 37 | 16 | 20944667 | 20944667 | Missense_Mutation | SNP | C  | A  | 4  | 125 | c.12160G>T                                       | c.(12160-12162)GGG>TGC | p.G4054W |
| Pat_76 | Pre-Treatment | OTOA     | 146183 | 37 | 16 | 21696638 | 21696638 | Missense_Mutation | SNP | C  | T  | 16 | 18  | c.355C>T                                         | c.(355-357)CGC>TGC     | p.R119C  |
| Pat_76 | Pre-Treatment | VWA3A    | 146177 | 37 | 16 | 22166979 | 22166979 | Missense_Mutation | SNP | C  | T  | 24 | 48  | c.3497C>T                                        | c.(3496-3498)TCC>TTC   | p.S1166F |
| Pat_76 | Pre-Treatment | EEF2K    | 29904  | 37 | 16 | 22268602 | 22268602 | Missense_Mutation | SNP | C  | T  | 51 | 66  | c.797C>T                                         | c.(796-798)TCC>TTC     | p.S266F  |
| Pat_76 | Pre-Treatment | RBBP6    | 5930   | 37 | 16 | 24567014 | 24567014 | Missense_Mutation | SNP | G  | A  | 4  | 106 | c.427G>A                                         | c.(427-429)GAC>AAC     | p.D143N  |
| Pat_76 | Pre-Treatment | RBBP6    | 5930   | 37 | 16 | 24578597 | 24578597 | Missense_Mutation | SNP | C  | T  | 83 | 109 | c.1723C>T                                        | c.(1723-1725)CCT>TCT   | p.P575S  |
| Pat_76 | Pre-Treatment | IL4R     | 3566   | 37 | 16 | 27363946 | 27363946 | Missense_Mutation | SNP | G  | A  | 5  | 204 | c.599G>A                                         | c.(598-600)CGG>CAG     | p.R200Q  |
| Pat_76 | Pre-Treatment | XPO6     | 23214  | 37 | 16 | 28167780 | 28167780 | Missense_Mutation | SNP | G  | A  | 57 | 104 | c.712C>T                                         | c.(712-714)CTT>TTT     | p.L238F  |
| Pat_76 | Pre-Treatment | SH2B1    | 25970  | 37 | 16 | 28883678 | 28883678 | Missense_Mutation | SNP | C  | T  | 4  | 79  | c.1681C>T                                        | c.(1681-1683)CGG>TGG   | p.R561W  |
| Pat_76 | Pre-Treatment | LAT      | 27040  | 37 | 16 | 28997467 | 28997467 | Missense_Mutation | SNP | C  | T  | 97 | 148 | c.175C>T                                         | c.(175-177)CCC>TCC     | p.P59S   |
| Pat_76 | Pre-Treatment | KIF22    | 3835   | 37 | 16 | 29810772 | 29810772 | Missense_Mutation | SNP | C  | T  | 33 | 67  | c.947C>T                                         | c.(946-948)CCT>CTT     | p.P316L  |
| Pat_76 | Pre-Treatment | C16orf92 | 146378 | 37 | 16 | 30034984 | 30034984 | Missense_Mutation | SNP | C  | T  | 13 | 18  | c.67C>T                                          | c.(67-69)CCG>TCG       | p.P23S   |
| Pat_76 | Pre-Treatment | ITGAL    | 3683   | 37 | 16 | 30500437 | 30500438 | Missense_Mutation | DNP | GG | AA | 26 | 52  | c.1041_1042GG>A 039-1044)ATGGAG>ATAA_347_348ME>I |                        |          |
| Pat_76 | Pre-Treatment | SETD1A   | 9739   | 37 | 16 | 30991074 | 30991074 | Missense_Mutation | SNP | G  | A  | 3  | 5   | c.3967G>A                                        | c.(3967-3969)GCA>ACA   | p.A1323T |
| Pat_76 | Pre-Treatment | STX1B    | 112755 | 37 | 16 | 31004706 | 31004706 | Missense_Mutation | SNP | C  | T  | 23 | 38  | c.637G>A                                         | c.(637-639)GAT>AAT     | p.D213N  |
| Pat_76 | Pre-Treatment | STX4     | 6810   | 37 | 16 | 31046302 | 31046302 | Nonsense_Mutation | SNP | C  | T  | 60 | 119 | c.319C>T                                         | c.(319-321)CAG>TAG     | p.Q107*  |
| Pat_76 | Pre-Treatment | ZNF668   | 79759  | 37 | 16 | 31072586 | 31072586 | Missense_Mutation | SNP | C  | T  | 28 | 46  | c.1663G>A                                        | c.(1663-1665)GAC>AAC   | p.D555N  |
| Pat_76 | Pre-Treatment | PRSS36   | 146547 | 37 | 16 | 31150517 | 31150517 | Missense_Mutation | SNP | G  | A  | 18 | 29  | c.2510C>T                                        | c.(2509-2511)TCG>TTG   | p.S837L  |
| Pat_76 | Pre-Treatment | FUS      | 2521   | 37 | 16 | 31202331 | 31202331 | Nonsense_Mutation | SNP | C  | T  | 32 | 91  | c.1441C>T                                        | c.(1441-1443)CGA>TGA   | p.R481*  |
| Pat_76 | Pre-Treatment | ITGAX    | 3687   | 37 | 16 | 31374263 | 31374263 | Missense_Mutation | SNP | C  | T  | 32 | 44  | c.1367C>T                                        | c.(1366-1368)TCC>TTC   | p.S456F  |
| Pat_76 | Pre-Treatment | ITGAX    | 3687   | 37 | 16 | 31383723 | 31383723 | Missense_Mutation | SNP | C  | T  | 19 | 52  | c.2185C>T                                        | c.(2185-2187)CCC>TCC   | p.P729S  |
| Pat_76 | Pre-Treatment | ABCC12   | 94160  | 37 | 16 | 48138242 | 48138242 | Missense_Mutation | SNP | G  | A  | 47 | 68  | c.2711C>T                                        | c.(2710-2712)CCC>CTC   | p.P904L  |
| Pat_76 | Pre-Treatment | HEATR3   | 55027  | 37 | 16 | 50112773 | 50112773 | Missense_Mutation | SNP | G  | A  | 17 | 27  | c.885G>A                                         | c.(883-885)ATG>ATA     | p.M295I  |
| Pat_76 | Pre-Treatment | TOX3     | 27324  | 37 | 16 | 52473862 | 52473862 | Missense_Mutation | SNP | C  | T  | 15 | 8   | c.1006G>A                                        | c.(1006-1008)GAA>AAA   | p.E336K  |
| Pat_76 | Pre-Treatment | CES1     | 1066   | 37 | 16 | 55857576 | 55857576 | Missense_Mutation | SNP | C  | T  | 14 | 37  | c.422G>A                                         | c.(421-423)GGA>GAA     | p.G141E  |
| Pat_76 | Pre-Treatment | BBS2     | 583    | 37 | 16 | 56531684 | 56531684 | Missense_Mutation | SNP | A  | T  | 73 | 85  | c.1768T>A                                        | c.(1768-1770)TTT>ATT   | p.F590I  |
| Pat_76 | Pre-Treatment | CPNE2    | 221184 | 37 | 16 | 57153117 | 57153117 | Missense_Mutation | SNP | G  | A  | 28 | 49  | c.518G>A                                         | c.(517-519)GGG>GAG     | p.G173E  |
| Pat_76 | Pre-Treatment | CSNK2A2  | 1459   | 37 | 16 | 58199576 | 58199576 | Missense_Mutation | SNP | A  | C  | 24 | 29  | c.864T>G                                         | c.(862-864)AGT>AGG     | p.S288R  |
| Pat_76 | Pre-Treatment | CDH5     | 1003   | 37 | 16 | 66413316 | 66413316 | Missense_Mutation | SNP | G  | A  | 46 | 45  | c.76G>A                                          | c.(76-78)GCA>ACA       | p.A26T   |
| Pat_76 | Pre-Treatment | CA7      | 766    | 37 | 16 | 66885408 | 66885408 | Missense_Mutation | SNP | G  | A  | 98 | 151 | c.400G>A                                         | c.(400-402)GGG>AGG     | p.G134R  |
| Pat_76 | Pre-Treatment | HSD11B2  | 3291   | 37 | 16 | 67470217 | 67470217 | Missense_Mutation | SNP | G  | A  | 67 | 125 | c.730G>A                                         | c.(730-732)GAC>AAC     | p.D244N  |
| Pat_76 | Pre-Treatment | DPEP3    | 64180  | 37 | 16 | 68014081 | 68014081 | Missense_Mutation | SNP | C  | T  | 17 | 26  | c.278G>A                                         | c.(277-279)GGC>GAC     | p.G93D   |
| Pat_76 | Pre-Treatment | ESRP2    | 80004  | 37 | 16 | 68266371 | 68266371 | Missense_Mutation | SNP | C  | T  | 3  | 39  | c.887G>A                                         | c.(886-888)CGC>CAC     | p.R296H  |
| Pat_76 | Pre-Treatment | HYDIN    | 54768  | 37 | 16 | 70871640 | 70871640 | Missense_Mutation | SNP | G  | A  | 19 | 38  | c.13192C>T                                       | c.(13192-13194)CTC>TTC | p.L4398F |
| Pat_76 | Pre-Treatment | HYDIN    | 54768  | 37 | 16 | 71218881 | 71218881 | Missense_Mutation | SNP | C  | T  | 17 | 24  | c.148G>A                                         | c.(148-150)GAG>AAG     | p.E50K   |
| Pat_76 | Pre-Treatment | ADAMTS18 | 170692 | 37 | 16 | 77353954 | 77353954 | Missense_Mutation | SNP | C  | T  | 19 | 18  | c.2324G>A                                        | c.(2323-2325)CGA>CAA   | p.R775Q  |



|        |               |          |           |    |    |          |          |                   |     |    |    |     |     |                |                        |          |
|--------|---------------|----------|-----------|----|----|----------|----------|-------------------|-----|----|----|-----|-----|----------------|------------------------|----------|
| Pat_76 | Pre-Treatment | ADAMTS18 | 170692    | 37 | 16 | 77355084 | 77355084 | Missense_Mutation | SNP | G  | A  | 24  | 37  | c.2179C>T      | c.(2179-2181)CAT>TAT   | p.H727Y  |
| Pat_76 | Pre-Treatment | VAT1L    | 57687     | 37 | 16 | 77918574 | 77918574 | Missense_Mutation | SNP | C  | T  | 12  | 19  | c.952C>T       | c.(952-954)CTT>TTT     | p.L318F  |
| Pat_76 | Pre-Treatment | CDYL2    | 124359    | 37 | 16 | 80718508 | 80718508 | Missense_Mutation | SNP | C  | A  | 4   | 69  | c.543G>T       | c.(541-543)TTG>TTT     | p.L181F  |
| Pat_76 | Pre-Treatment | BCMO1    | 53630     | 37 | 16 | 81295883 | 81295883 | Missense_Mutation | SNP | G  | A  | 33  | 28  | c.466G>A       | c.(466-468)GAG>AAG     | p.E156K  |
| Pat_76 | Pre-Treatment | GAN      | 8139      | 37 | 16 | 81391420 | 81391420 | Missense_Mutation | SNP | G  | A  | 6   | 250 | c.857G>A       | c.(856-858)CGG>CAG     | p.R286Q  |
| Pat_76 | Pre-Treatment | PLCG2    | 5336      | 37 | 16 | 81965224 | 81965224 | Missense_Mutation | SNP | A  | T  | 33  | 66  | c.2704A>T      | c.(2704-2706)AGC>TGC   | p.S902C  |
| Pat_76 | Pre-Treatment | MBTPS1   | 8720      | 37 | 16 | 84088064 | 84088064 | Missense_Mutation | SNP | G  | A  | 10  | 19  | c.3149C>T      | c.(3148-3150)CCT>CTT   | p.P1050L |
| Pat_76 | Pre-Treatment | MBTPS1   | 8720      | 37 | 16 | 84127376 | 84127376 | Missense_Mutation | SNP | G  | A  | 37  | 39  | c.676C>T       | c.(676-678)CCC>TCC     | p.P226S  |
| Pat_76 | Pre-Treatment | ADAD2    | 161931    | 37 | 16 | 84229876 | 84229876 | Missense_Mutation | SNP | G  | A  | 49  | 69  | c.1426G>A      | c.(1426-1428)GAA>AAA   | p.E476K  |
| Pat_76 | Pre-Treatment | ATP2C2   | 9914      | 37 | 16 | 84456002 | 84456002 | Missense_Mutation | SNP | G  | A  | 22  | 25  | c.631G>A       | c.(631-633)GAC>AAC     | p.D211N  |
| Pat_76 | Pre-Treatment | KIAA0182 | 23199     | 37 | 16 | 85688001 | 85688001 | Missense_Mutation | SNP | C  | T  | 42  | 63  | c.544C>T       | c.(544-546)CCC>TCC     | p.P182S  |
| Pat_76 | Pre-Treatment | CDT1     | 81620     | 37 | 16 | 88873867 | 88873867 | Missense_Mutation | SNP | G  | A  | 4   | 49  | c.1454G>A      | c.(1453-1455)AGC>AAC   | p.S485N  |
| Pat_76 | Pre-Treatment | DPEP1    | 1800      | 37 | 16 | 89696855 | 89696855 | Missense_Mutation | SNP | G  | A  | 4   | 82  | c.37G>A        | c.(37-39)GTC>ATC       | p.V13I   |
| Pat_76 | Pre-Treatment | NXN      | 64359     | 37 | 17 | 722732   | 722733   | Missense_Mutation | DNP | GG | AA | 37  | 46  | c.766_767CC>TT | c.(766-768)CCC>TTC     | p.P256F  |
| Pat_76 | Pre-Treatment | MYO1C    | 4641      | 37 | 17 | 1380826  | 1380826  | Missense_Mutation | SNP | G  | A  | 4   | 68  | c.1547C>T      | c.(1546-1548)ACT>ATT   | p.T516I  |
| Pat_76 | Pre-Treatment | OR1E1    | 8387      | 37 | 17 | 3300846  | 3300846  | Missense_Mutation | SNP | G  | A  | 54  | 62  | c.859C>T       | c.(859-861)CCC>TCC     | p.P287S  |
| Pat_76 | Pre-Treatment | RABEP1   | 9135      | 37 | 17 | 5281522  | 5281522  | Missense_Mutation | SNP | G  | A  | 28  | 59  | c.2266G>A      | c.(2266-2268)GGA>AGA   | p.G756R  |
| Pat_76 | Pre-Treatment | ALOX12   | 239       | 37 | 17 | 6909842  | 6909842  | Missense_Mutation | SNP | G  | A  | 26  | 63  | c.1456G>A      | c.(1456-1458)GAT>AAT   | p.D486N  |
| Pat_76 | Pre-Treatment | C17orf74 | 201243    | 37 | 17 | 7329674  | 7329674  | Missense_Mutation | SNP | C  | T  | 62  | 61  | c.364C>T       | c.(364-366)CGC>TGC     | p.R122C  |
| Pat_76 | Pre-Treatment | MYH10    | 4628      | 37 | 17 | 8379226  | 8379226  | Missense_Mutation | SNP | G  | A  | 4   | 90  | c.5827C>T      | c.(5827-5829)CGG>TGG   | p.R1943W |
| Pat_76 | Pre-Treatment | MYH13    | 8735      | 37 | 17 | 10248630 | 10248630 | Missense_Mutation | SNP | G  | T  | 88  | 148 | c.1473C>A      | c.(1471-1473)TTC>TTA   | p.F491L  |
| Pat_76 | Pre-Treatment | MYH1     | 4619      | 37 | 17 | 10398328 | 10398328 | Missense_Mutation | SNP | C  | T  | 52  | 76  | c.5386G>A      | c.(5386-5388)GAC>AAC   | p.D1796N |
| Pat_76 | Pre-Treatment | MYH2     | 4620      | 37 | 17 | 10432559 | 10432559 | Missense_Mutation | SNP | C  | T  | 19  | 33  | c.3274G>A      | c.(3274-3276)GAA>AAA   | p.E1092K |
| Pat_76 | Pre-Treatment | DNAH9    | 1770      | 37 | 17 | 11572873 | 11572873 | Missense_Mutation | SNP | G  | A  | 36  | 57  | c.3115G>A      | c.(3115-3117)GAA>AAA   | p.E1039K |
| Pat_76 | Pre-Treatment | TRIM16   | 10626     | 37 | 17 | 15535907 | 15535907 | Missense_Mutation | SNP | G  | A  | 37  | 38  | c.931C>T       | c.(931-933)CGC>TGC     | p.R311C  |
| Pat_76 | Pre-Treatment | CCDC144A | 9720      | 37 | 17 | 16635945 | 16635945 | Missense_Mutation | SNP | G  | A  | 7   | 7   | c.2383G>A      | c.(2383-2385)GAA>AAA   | p.E795K  |
| Pat_76 | Pre-Treatment | MYO15A   | 51168     | 37 | 17 | 18082167 | 18082167 | Missense_Mutation | SNP | G  | A  | 28  | 45  | c.10576G>A     | c.(10576-10578)GAG>AAC | p.E3526K |
| Pat_76 | Pre-Treatment | FAM83G   | 644815    | 37 | 17 | 18907240 | 18907240 | Missense_Mutation | SNP | C  | T  | 26  | 24  | c.115G>A       | c.(115-117)GTG>ATG     | p.V39M   |
| Pat_76 | Pre-Treatment | RNF112   | 7732      | 37 | 17 | 19318195 | 19318195 | Missense_Mutation | SNP | C  | T  | 13  | 19  | c.1121C>T      | c.(1120-1122)CCT>CTT   | p.P374L  |
| Pat_76 | Pre-Treatment | LGALS9B  | 284194    | 37 | 17 | 20363726 | 20363726 | Missense_Mutation | SNP | C  | T  | 40  | 69  | c.70G>A        | c.(70-72)GGT>AGT       | p.G24S   |
| Pat_76 | Pre-Treatment | SUPT6H   | 6830      | 37 | 17 | 27002156 | 27002156 | Missense_Mutation | SNP | G  | A  | 20  | 25  | c.514G>A       | c.(514-516)GAG>AAG     | p.E172K  |
| Pat_76 | Pre-Treatment | THRA     | 7067      | 37 | 17 | 38244573 | 38244573 | Missense_Mutation | SNP | G  | A  | 85  | 5   | c.802G>A       | c.(802-804)GAC>AAC     | p.D268N  |
| Pat_76 | Pre-Treatment | KRT39    | 390792    | 37 | 17 | 39122844 | 39122844 | Missense_Mutation | SNP | C  | T  | 164 | 17  | c.265G>A       | c.(265-267)GGT>AGT     | p.G89S   |
| Pat_76 | Pre-Treatment | KRTAP4-9 | 100132386 | 37 | 17 | 39261929 | 39261929 | Missense_Mutation | SNP | C  | T  | 4   | 16  | c.289C>T       | c.(289-291)CCT>TCT     | p.P97S   |
| Pat_76 | Pre-Treatment | KRTAP4-4 | 84616     | 37 | 17 | 39316620 | 39316621 | Missense_Mutation | DNP | GG | AT | 69  | 12  | c.323_324CC>AT | c.(322-324)CCC>CAT     | p.P108H  |
| Pat_76 | Pre-Treatment | KRT13    | 3860      | 37 | 17 | 39661585 | 39661585 | Missense_Mutation | SNP | T  | A  | 3   | 23  | c.218A>T       | c.(217-219)TAT>TTT     | p.Y73F   |
| Pat_76 | Pre-Treatment | KRT14    | 3861      | 37 | 17 | 39741234 | 39741234 | Missense_Mutation | SNP | G  | A  | 57  | 58  | c.601C>T       | c.(601-603)CGC>TGC     | p.R201C  |
| Pat_76 | Pre-Treatment | TTC25    | 83538     | 37 | 17 | 40117275 | 40117275 | Missense_Mutation | SNP | G  | A  | 8   | 7   | c.1793G>A      | c.(1792-1794)AGG>AAG   | p.R598K  |
| Pat_76 | Pre-Treatment | WNK4     | 65266     | 37 | 17 | 40946862 | 40946862 | Missense_Mutation | SNP | G  | A  | 89  | 11  | c.2423G>A      | c.(2422-2424)GGA>GAA   | p.G808E  |
| Pat_76 | Pre-Treatment | AOC2     | 314       | 37 | 17 | 41002225 | 41002225 | Missense_Mutation | SNP | C  | T  | 63  | 99  | c.2131C>T      | c.(2131-2133)CCC>TCC   | p.P711S  |
| Pat_76 | Pre-Treatment | TMUB2    | 79089     | 37 | 17 | 42266818 | 42266818 | Missense_Mutation | SNP | C  | G  | 4   | 152 | c.464C>G       | c.(463-465)CCA>CGA     | p.P155R  |
| Pat_76 | Pre-Treatment | PLEKHM1  | 9842      | 37 | 17 | 43531155 | 43531155 | Missense_Mutation | SNP | G  | A  | 47  | 8   | c.2063C>T      | c.(2062-2064)TCC>TTC   | p.S688F  |
| Pat_76 | Pre-Treatment | GOSR2    | 9570      | 37 | 17 | 45009497 | 45009497 | Missense_Mutation | SNP | C  | T  | 114 | 149 | c.268C>T       | c.(268-270)CGG>TGG     | p.R90W   |
| Pat_76 | Pre-Treatment | SCRN2    | 90507     | 37 | 17 | 45916364 | 45916364 | Missense_Mutation | SNP | G  | A  | 4   | 83  | c.565C>T       | c.(565-567)CGC>TGC     | p.R189C  |
| Pat_76 | Pre-Treatment | HOXB3    | 3213      | 37 | 17 | 46629484 | 46629484 | Missense_Mutation | SNP | C  | T  | 7   | 288 | c.353G>A       | c.(352-354)GGT>GAT     | p.G118D  |
| Pat_76 | Pre-Treatment | CACNA1G  | 8913      | 37 | 17 | 48673939 | 48673939 | Missense_Mutation | SNP | C  | T  | 36  | 10  | c.2996C>T      | c.(2995-2997)TCC>TTC   | p.S999F  |
| Pat_76 | Pre-Treatment | ABCC3    | 8714      | 37 | 17 | 48762122 | 48762122 | Missense_Mutation | SNP | G  | A  | 101 | 16  | c.4166G>A      | c.(4165-4167)AGC>AAC   | p.S1389N |

|        |               |           |        |    |    |          |          |                   |     |    |    |     |     |                        |                      |                |
|--------|---------------|-----------|--------|----|----|----------|----------|-------------------|-----|----|----|-----|-----|------------------------|----------------------|----------------|
| Pat_76 | Pre-Treatment | AKAP1     | 8165   | 37 | 17 | 55193565 | 55193565 | Missense_Mutation | SNP | G  | A  | 5   | 89  | c.2375G>A              | c.(2374-2376)CGA>CAA | p.R792Q        |
| Pat_76 | Pre-Treatment | BCAS3     | 54828  | 37 | 17 | 59112041 | 59112041 | Missense_Mutation | SNP | C  | T  | 4   | 63  | c.1697C>T              | c.(1696-1698)CCT>CTT | p.P566L        |
| Pat_76 | Pre-Treatment | EFCAB3    | 146779 | 37 | 17 | 60493646 | 60493646 | Missense_Mutation | SNP | G  | A  | 83  | 15  | c.1273G>A              | c.(1273-1275)GGA>AGA | p.G425R        |
| Pat_76 | Pre-Treatment | 10-Mar    | 162333 | 37 | 17 | 60814149 | 60814149 | Missense_Mutation | SNP | C  | T  | 71  | 10  | c.1080G>A              | c.(1078-1080)ATG>ATA | p.M360I        |
| Pat_76 | Pre-Treatment | NOL11     | 25926  | 37 | 17 | 65734057 | 65734057 | Missense_Mutation | SNP | G  | A  | 80  | 23  | c.1498G>A              | c.(1498-1500)GTC>ATC | p.V500I        |
| Pat_76 | Pre-Treatment | ABCA9     | 10350  | 37 | 17 | 67008196 | 67008196 | Missense_Mutation | SNP | C  | T  | 59  | 16  | c.3068G>A              | c.(3067-3069)CGA>CAA | p.R1023Q       |
| Pat_76 | Pre-Treatment | ABCA9     | 10350  | 37 | 17 | 67014656 | 67014656 | Nonsense_Mutation | SNP | G  | A  | 300 | 53  | c.2665C>T              | c.(2665-2667)CAG>TAG | p.Q889*        |
| Pat_76 | Pre-Treatment | ABCA9     | 10350  | 37 | 17 | 67047281 | 67047281 | Splice_Site       | SNP | C  | T  | 34  | 1   | c.-12_splice           | c.e2-1               |                |
| Pat_76 | Pre-Treatment | C17orf80  | 55028  | 37 | 17 | 71232451 | 71232451 | Missense_Mutation | SNP | C  | T  | 15  | 3   | c.830C>T               | c.(829-831)TCC>TTC   | p.S277F        |
| Pat_76 | Pre-Treatment | GPRC5C    | 55890  | 37 | 17 | 72436177 | 72436177 | Missense_Mutation | SNP | G  | A  | 18  | 4   | c.262G>A               | c.(262-264)GGG>AGG   | p.G88R         |
| Pat_76 | Pre-Treatment | CD300E    | 342510 | 37 | 17 | 72610074 | 72610074 | Missense_Mutation | SNP | G  | T  | 3   | 15  | c.487C>A               | c.(487-489)CAA>AAA   | p.Q163K        |
| Pat_76 | Pre-Treatment | NUP85     | 79902  | 37 | 17 | 73222241 | 73222241 | Missense_Mutation | SNP | C  | G  | 4   | 96  | c.1083C>G              | c.(1081-1083)ATC>ATG | p.I361M        |
| Pat_76 | Pre-Treatment | SLC38A10  | 124565 | 37 | 17 | 79226403 | 79226403 | Missense_Mutation | SNP | C  | T  | 73  | 20  | c.1537G>A              | c.(1537-1539)GAC>AAC | p.D513N        |
| Pat_76 | Pre-Treatment | LRRC45    | 201255 | 37 | 17 | 79983359 | 79983360 | Missense_Mutation | DNP | CC | TT | 40  | 3   | c.637_638CC>TT         | c.(637-639)CCT>TTT   | p.P213F        |
| Pat_76 | Pre-Treatment | LPIN2     | 9663   | 37 | 18 | 2960660  | 2960660  | Missense_Mutation | SNP | G  | A  | 76  | 113 | c.179C>T               | c.(178-180)TCC>TTC   | p.S60F         |
| Pat_76 | Pre-Treatment | ZFP161    | 7541   | 37 | 18 | 5291174  | 5291174  | Missense_Mutation | SNP | C  | T  | 25  | 71  | c.1033G>A              | c.(1033-1035)GCC>ACC | p.A345T        |
| Pat_76 | Pre-Treatment | TMEM200C  | 645369 | 37 | 18 | 5890387  | 5890387  | Missense_Mutation | SNP | C  | T  | 18  | 25  | c.1676G>A              | c.(1675-1677)CGA>CAA | p.R559Q        |
| Pat_76 | Pre-Treatment | TXNDC2    | 84203  | 37 | 18 | 9887689  | 9887689  | Missense_Mutation | SNP | C  | T  | 59  | 55  | c.1213C>T              | c.(1213-1215)CCC>TCC | p.P405S        |
| Pat_76 | Pre-Treatment | ZNF519    | 162655 | 37 | 18 | 14106150 | 14106150 | Missense_Mutation | SNP | A  | C  | 12  | 20  | c.389T>G               | c.(388-390)TTT>TGT   | p.F130C        |
| Pat_76 | Pre-Treatment | POTEC     | 388468 | 37 | 18 | 14542728 | 14542728 | Missense_Mutation | SNP | G  | T  | 4   | 61  | c.418C>A               | c.(418-420)CTG>ATG   | p.L140M        |
| Pat_76 | Pre-Treatment | ANKRD30B  | 374860 | 37 | 18 | 14851568 | 14851568 | Missense_Mutation | SNP | G  | A  | 13  | 27  | c.3268G>A              | c.(3268-3270)GAA>AAA | p.E1090K       |
| Pat_76 | Pre-Treatment | LAMA3     | 3909   | 37 | 18 | 21494505 | 21494505 | Missense_Mutation | SNP | G  | A  | 14  | 17  | c.7461G>A              | c.(7459-7461)ATG>ATA | p.M2487I       |
| Pat_76 | Pre-Treatment | OSBPL1A   | 114876 | 37 | 18 | 21946860 | 21946860 | Missense_Mutation | SNP | C  | T  | 4   | 139 | c.278G>A               | c.(277-279)CGA>CAA   | p.R93Q         |
| Pat_76 | Pre-Treatment | ZNF521    | 25925  | 37 | 18 | 22669428 | 22669428 | Splice_Site       | SNP | C  | G  | 25  | 30  | c.3906_splice          | c.e7+1               | p.Q1302_splice |
| Pat_76 | Pre-Treatment | SS18      | 6760   | 37 | 18 | 23619273 | 23619273 | Missense_Mutation | SNP | G  | A  | 81  | 105 | c.755C>T               | c.(754-756)CCC>CTC   | p.P252L        |
| Pat_76 | Pre-Treatment | AQP4      | 361    | 37 | 18 | 24436207 | 24436207 | Missense_Mutation | SNP | C  | T  | 90  | 119 | c.940G>A               | c.(940-942)GAC>AAC   | p.D314N        |
| Pat_76 | Pre-Treatment | CDH2      | 1000   | 37 | 18 | 25565092 | 25565092 | Missense_Mutation | SNP | G  | A  | 29  | 27  | c.2081C>T              | c.(2080-2082)TCC>TTC | p.S694F        |
| Pat_76 | Pre-Treatment | DSC1      | 1823   | 37 | 18 | 28719770 | 28719770 | Missense_Mutation | SNP | C  | T  | 8   | 16  | c.1604G>A              | c.(1603-1605)AGA>AAA | p.R535K        |
| Pat_76 | Pre-Treatment | MCART2    | 147407 | 37 | 18 | 29339957 | 29339957 | Missense_Mutation | SNP | G  | A  | 20  | 46  | c.668C>T               | c.(667-669)GCC>GTC   | p.A223V        |
| Pat_76 | Pre-Treatment | ZNF24     | 7572   | 37 | 18 | 32919934 | 32919934 | Missense_Mutation | SNP | G  | A  | 44  | 65  | c.427C>T               | c.(427-429)CTC>TTC   | p.L143F        |
| Pat_76 | Pre-Treatment | SETBP1    | 26040  | 37 | 18 | 42529852 | 42529852 | Missense_Mutation | SNP | G  | A  | 9   | 19  | c.547G>A               | c.(547-549)GAG>AAG   | p.E183K        |
| Pat_76 | Pre-Treatment | ZBTB7C    | 201501 | 37 | 18 | 45566863 | 45566864 | Missense_Mutation | DNP | CC | TT | 19  | 26  | c.615_616GG>AA613-618) | AGGGAC>AGAA          | p.D206N        |
| Pat_76 | Pre-Treatment | MAPK4     | 5596   | 37 | 18 | 48190519 | 48190519 | Missense_Mutation | SNP | G  | A  | 21  | 25  | c.191G>A               | c.(190-192)CGA>CAA   | p.R64Q         |
| Pat_76 | Pre-Treatment | DCC       | 1630   | 37 | 18 | 50936948 | 50936948 | Missense_Mutation | SNP | G  | A  | 47  | 56  | c.3062G>A              | c.(3061-3063)CGA>CAA | p.R1021Q       |
| Pat_76 | Pre-Treatment | ATP8B1    | 5205   | 37 | 18 | 55335733 | 55335733 | Missense_Mutation | SNP | C  | T  | 38  | 63  | c.2137G>A              | c.(2137-2139)GGA>AGA | p.G713R        |
| Pat_76 | Pre-Treatment | TNFRSF11A | 8792   | 37 | 18 | 60015422 | 60015422 | Missense_Mutation | SNP | C  | T  | 33  | 46  | c.97C>T                | c.(97-99)CCA>TCA     | p.P33S         |
| Pat_76 | Pre-Treatment | SERPINB4  | 6318   | 37 | 18 | 61324207 | 61324207 | Missense_Mutation | SNP | G  | A  | 7   | 12  | c.626C>T               | c.(625-627)TCC>TTC   | p.S209F        |
| Pat_76 | Pre-Treatment | SERPINB2  | 5055   | 37 | 18 | 61569055 | 61569055 | Missense_Mutation | SNP | G  | A  | 28  | 42  | c.617G>A               | c.(616-618)GGA>GAA   | p.G206E        |
| Pat_76 | Pre-Treatment | CDH7      | 1005   | 37 | 18 | 63547911 | 63547911 | Missense_Mutation | SNP | A  | T  | 29  | 56  | c.2139A>T              | c.(2137-2139)GAA>GAT | p.E713D        |
| Pat_76 | Pre-Treatment | CD226     | 10666  | 37 | 18 | 67540447 | 67540447 | Missense_Mutation | SNP | C  | T  | 60  | 106 | c.763G>A               | c.(763-765)GGA>AGA   | p.G255R        |
| Pat_76 | Pre-Treatment | CNDP1     | 84735  | 37 | 18 | 72251769 | 72251769 | Missense_Mutation | SNP | T  | C  | 3   | 74  | c.1495T>C              | c.(1495-1497)TTT>CTT | p.F499L        |
| Pat_76 | Pre-Treatment | SALL3     | 27164  | 37 | 18 | 76753711 | 76753711 | Missense_Mutation | SNP | G  | A  | 10  | 13  | c.1720G>A              | c.(1720-1722)GAG>AAG | p.E574K        |
| Pat_76 | Pre-Treatment | ATP9B     | 374868 | 37 | 18 | 76856595 | 76856595 | Missense_Mutation | SNP | G  | A  | 12  | 17  | c.239G>A               | c.(238-240)AGG>AAG   | p.R80K         |
| Pat_76 | Pre-Treatment | ADNP2     | 22850  | 37 | 18 | 77875472 | 77875472 | Missense_Mutation | SNP | G  | A  | 36  | 52  | c.47G>A                | c.(46-48)CGA>CAA     | p.R16Q         |
| Pat_76 | Pre-Treatment | MBD3      | 53615  | 37 | 19 | 1584657  | 1584657  | Missense_Mutation | SNP | G  | A  | 3   | 43  | c.290C>T               | c.(289-291)ACG>ATG   | p.T97M         |
| Pat_76 | Pre-Treatment | TMPRSS9   | 360200 | 37 | 19 | 2399117  | 2399118  | Missense_Mutation | DNP | GG | AA | 5   | 2   | c.338_339GG>AA         | c.(337-339)GGG>GAA   | p.G113E        |
| Pat_76 | Pre-Treatment | DIRAS1    | 148252 | 37 | 19 | 2717729  | 2717729  | Missense_Mutation | SNP | G  | C  | 41  | 55  | c.76C>G                | c.(76-78)CGC>GGC     | p.R26G         |

|        |               |         |        |    |    |          |          |                   |     |    |    |     |     |                                    |                        |               |
|--------|---------------|---------|--------|----|----|----------|----------|-------------------|-----|----|----|-----|-----|------------------------------------|------------------------|---------------|
| Pat_76 | Pre-Treatment | PIP5K1C | 23396  | 37 | 19 | 3661008  | 3661008  | Missense_Mutation | SNP | G  | A  | 5   | 233 | c.424C>T                           | c.(424-426)CGC>TGC     | p.R142C       |
| Pat_76 | Pre-Treatment | PIAS4   | 51588  | 37 | 19 | 4013123  | 4013123  | Missense_Mutation | SNP | C  | T  | 4   | 49  | c.230C>T                           | c.(229-231)CCG>CTG     | p.P77L        |
| Pat_76 | Pre-Treatment | CREB3L3 | 84699  | 37 | 19 | 4171734  | 4171734  | Missense_Mutation | SNP | G  | A  | 4   | 114 | c.1154G>A                          | c.(1153-1155)CGA>CAA   | p.R385Q       |
| Pat_76 | Pre-Treatment | ANKRD24 | 170961 | 37 | 19 | 4217073  | 4217073  | Missense_Mutation | SNP | G  | A  | 10  | 20  | c.1916G>A                          | c.(1915-1917)GGG>GAG   | p.G639E       |
| Pat_76 | Pre-Treatment | ANKRD24 | 170961 | 37 | 19 | 4219676  | 4219676  | Missense_Mutation | SNP | G  | A  | 4   | 62  | c.3092G>A                          | c.(3091-3093)CGG>CAG   | p.R1031Q      |
| Pat_76 | Pre-Treatment | CCDC94  | 55702  | 37 | 19 | 4249233  | 4249233  | Nonsense_Mutation | SNP | C  | A  | 8   | 22  | c.33C>A                            | c.(31-33)TAC>TAA       | p.Y11*        |
| Pat_76 | Pre-Treatment | TMIGD2  | 126259 | 37 | 19 | 4298151  | 4298151  | Missense_Mutation | SNP | C  | T  | 10  | 21  | c.238G>A                           | c.(238-240)GTC>ATC     | p.V80I        |
| Pat_76 | Pre-Treatment | CHAF1A  | 10036  | 37 | 19 | 4409220  | 4409221  | Missense_Mutation | DNP | CC | TT | 74  | 121 | c.424_425CC>TT                     | c.(424-426)CCC>TTC     | p.P142F       |
| Pat_76 | Pre-Treatment | TNFSF14 | 8740   | 37 | 19 | 6665025  | 6665025  | Missense_Mutation | SNP | C  | T  | 21  | 43  | c.635G>A                           | c.(634-636)GGG>GAG     | p.G212E       |
| Pat_76 | Pre-Treatment | VAV1    | 7409   | 37 | 19 | 6854037  | 6854038  | Missense_Mutation | DNP | GG | AA | 30  | 66  | .2412_2413GG>A410-2415)AAGGAG>AAA/ |                        | p.E805K       |
| Pat_76 | Pre-Treatment | EMR1    | 2015   | 37 | 19 | 6935005  | 6935005  | Missense_Mutation | SNP | C  | T  | 25  | 79  | c.2297C>T                          | c.(2296-2298)TCC>TTC   | p.S766F       |
| Pat_76 | Pre-Treatment | ZNF557  | 79230  | 37 | 19 | 7083192  | 7083192  | Missense_Mutation | SNP | A  | T  | 33  | 61  | c.709A>T                           | c.(709-711)ACC>TCC     | p.T237S       |
| Pat_76 | Pre-Treatment | LASS4   | 79603  | 37 | 19 | 8321133  | 8321133  | Nonsense_Mutation | SNP | G  | A  | 19  | 15  | c.482G>A                           | c.(481-483)TGG>TAG     | p.W161*       |
| Pat_76 | Pre-Treatment | 2-Mar   | 51257  | 37 | 19 | 8491561  | 8491561  | Missense_Mutation | SNP | G  | A  | 4   | 63  | c.245G>A                           | c.(244-246)TGC>TAC     | p.C82Y        |
| Pat_76 | Pre-Treatment | ZNF414  | 84330  | 37 | 19 | 8577487  | 8577487  | Splice_Site       | SNP | C  | T  | 4   | 12  | c.424_splice                       | c.e3+1                 | p.G142_splice |
| Pat_76 | Pre-Treatment | MUC16   | 94025  | 37 | 19 | 8996484  | 8996484  | Missense_Mutation | SNP | C  | G  | 7   | 18  | c.41088G>C                         | c.(41086-41088)AAG>AAC | p.K13696N     |
| Pat_76 | Pre-Treatment | MUC16   | 94025  | 37 | 19 | 9020005  | 9020005  | Missense_Mutation | SNP | C  | T  | 141 | 189 | c.37490G>A                         | c.(37489-37491)AGG>AAC | p.R12497K     |
| Pat_76 | Pre-Treatment | MUC16   | 94025  | 37 | 19 | 9054252  | 9054252  | Missense_Mutation | SNP | G  | A  | 10  | 14  | c.31370C>T                         | c.(31369-31371)TCG>TTC | p.S10457L     |
| Pat_76 | Pre-Treatment | MUC16   | 94025  | 37 | 19 | 9058282  | 9058282  | Missense_Mutation | SNP | C  | T  | 3   | 9   | c.29164G>A                         | c.(29164-29166)GAA>AAA | p.E9722K      |
| Pat_76 | Pre-Treatment | MUC16   | 94025  | 37 | 19 | 9061096  | 9061096  | Missense_Mutation | SNP | C  | T  | 26  | 27  | c.26350G>A                         | c.(26350-26352)GAA>AAA | p.E8784K      |
| Pat_76 | Pre-Treatment | MUC16   | 94025  | 37 | 19 | 9064315  | 9064315  | Missense_Mutation | SNP | G  | A  | 35  | 45  | c.23131C>T                         | c.(23131-23133)CCC>TCC | p.P7711S      |
| Pat_76 | Pre-Treatment | MUC16   | 94025  | 37 | 19 | 9068557  | 9068557  | Missense_Mutation | SNP | G  | A  | 45  | 52  | c.18889C>T                         | c.(18889-18891)CCT>TCT | p.P6297S      |
| Pat_76 | Pre-Treatment | MUC16   | 94025  | 37 | 19 | 9076162  | 9076162  | Missense_Mutation | SNP | C  | T  | 20  | 42  | c.11284G>A                         | c.(11284-11286)GAA>AAA | p.E3762K      |
| Pat_76 | Pre-Treatment | MUC16   | 94025  | 37 | 19 | 9083768  | 9083768  | Missense_Mutation | SNP | C  | T  | 8   | 12  | c.8047G>A                          | c.(8047-8049)GAG>AAG   | p.E2683K      |
| Pat_76 | Pre-Treatment | OR1M1   | 125963 | 37 | 19 | 9204171  | 9204171  | Missense_Mutation | SNP | G  | A  | 4   | 64  | c.251G>A                           | c.(250-252)AGC>AAC     | p.S84N        |
| Pat_76 | Pre-Treatment | OR7G1   | 125962 | 37 | 19 | 9226282  | 9226282  | Missense_Mutation | SNP | G  | A  | 66  | 102 | c.158C>T                           | c.(157-159)TCC>TTC     | p.S53F        |
| Pat_76 | Pre-Treatment | OR7D2   | 162998 | 37 | 19 | 9297226  | 9297226  | Missense_Mutation | SNP | G  | A  | 31  | 37  | c.769G>A                           | c.(769-771)GGG>AGG     | p.G257R       |
| Pat_76 | Pre-Treatment | OR7E24  | 26648  | 37 | 19 | 9362051  | 9362051  | Missense_Mutation | SNP | C  | T  | 23  | 32  | c.332C>T                           | c.(331-333)TCC>TTC     | p.S111F       |
| Pat_76 | Pre-Treatment | ZNF560  | 147741 | 37 | 19 | 9578557  | 9578557  | Missense_Mutation | SNP | C  | T  | 23  | 49  | c.1066G>A                          | c.(1066-1068)GAT>AAT   | p.D356N       |
| Pat_76 | Pre-Treatment | ZNF560  | 147741 | 37 | 19 | 9580356  | 9580356  | Missense_Mutation | SNP | G  | A  | 33  | 45  | c.479C>T                           | c.(478-480)TCT>TTT     | p.S160F       |
| Pat_76 | Pre-Treatment | LPPR2   | 64748  | 37 | 19 | 11472097 | 11472097 | Missense_Mutation | SNP | C  | G  | 13  | 18  | c.596C>G                           | c.(595-597)GCC>GGC     | p.A199G       |
| Pat_76 | Pre-Treatment | ZNF442  | 79973  | 37 | 19 | 12462077 | 12462077 | Missense_Mutation | SNP | C  | T  | 24  | 47  | c.322G>A                           | c.(322-324)GAA>AAA     | p.E108K       |
| Pat_76 | Pre-Treatment | FARSA   | 2193   | 37 | 19 | 13039457 | 13039457 | Missense_Mutation | SNP | G  | A  | 4   | 1   | c.617C>T                           | c.(616-618)CCC>CTC     | p.P206L       |
| Pat_76 | Pre-Treatment | DAND5   | 199699 | 37 | 19 | 13080638 | 13080638 | Missense_Mutation | SNP | C  | T  | 15  | 18  | c.164C>T                           | c.(163-165)TCT>TTT     | p.S55F        |
| Pat_76 | Pre-Treatment | CCDC105 | 126402 | 37 | 19 | 15131365 | 15131366 | Nonsense_Mutation | DNP | GG | AT | 14  | 16  | c.768_769GG>AT766-771)CTGGAG>CTAT/ |                        | p.E257*       |
| Pat_76 | Pre-Treatment | AKAP8L  | 26993  | 37 | 19 | 15491342 | 15491342 | Missense_Mutation | SNP | C  | T  | 21  | 30  | c.1618G>A                          | c.(1618-1620)GAG>AAG   | p.E540K       |
| Pat_76 | Pre-Treatment | CYP4F3  | 4051   | 37 | 19 | 15752308 | 15752308 | Missense_Mutation | SNP | C  | T  | 21  | 38  | c.83C>T                            | c.(82-84)TCC>TTC       | p.S28F        |
| Pat_76 | Pre-Treatment | CYP4F12 | 66002  | 37 | 19 | 15795640 | 15795641 | Missense_Mutation | DNP | GG | AA | 30  | 68  | c.933_934GG>AA931-936)AAGGCA>AAAA( |                        | p.A312T       |
| Pat_76 | Pre-Treatment | OR10H2  | 26538  | 37 | 19 | 15838861 | 15838861 | Missense_Mutation | SNP | G  | A  | 42  | 77  | c.8G>A                             | c.(7-9)GGG>GAG         | p.G3E         |
| Pat_76 | Pre-Treatment | CHERP   | 10523  | 37 | 19 | 16641445 | 16641445 | Missense_Mutation | SNP | G  | A  | 58  | 96  | c.827C>T                           | c.(826-828)TCC>TTC     | p.S276F       |
| Pat_76 | Pre-Treatment | TMEM38A | 79041  | 37 | 19 | 16799166 | 16799166 | Missense_Mutation | SNP | C  | G  | 8   | 6   | c.884C>G                           | c.(883-885)GCC>GGC     | p.A295G       |
| Pat_76 | Pre-Treatment | CPAMD8  | 27151  | 37 | 19 | 17056424 | 17056424 | Missense_Mutation | SNP | C  | T  | 21  | 33  | c.2869G>A                          | c.(2869-2871)GAG>AAG   | p.E957K       |
| Pat_76 | Pre-Treatment | CPAMD8  | 27151  | 37 | 19 | 17086839 | 17086839 | Missense_Mutation | SNP | C  | A  | 3   | 21  | c.2022G>T                          | c.(2020-2022)AGG>AGT   | p.R674S       |
| Pat_76 | Pre-Treatment | CPAMD8  | 27151  | 37 | 19 | 17107943 | 17107943 | Missense_Mutation | SNP | G  | A  | 3   | 23  | c.1214C>T                          | c.(1213-1215)CCG>CTG   | p.P405L       |
| Pat_76 | Pre-Treatment | MYO9B   | 4650   | 37 | 19 | 17322521 | 17322521 | Missense_Mutation | SNP | C  | T  | 4   | 88  | c.5996C>T                          | c.(5995-5997)TCG>TTG   | p.S1999L      |
| Pat_76 | Pre-Treatment | NXNL1   | 115861 | 37 | 19 | 17571671 | 17571671 | Missense_Mutation | SNP | G  | A  | 21  | 16  | c.8C>T                             | c.(7-9)TCC>TTC         | p.S3F         |
| Pat_76 | Pre-Treatment | UNC13A  | 23025  | 37 | 19 | 17783267 | 17783267 | Missense_Mutation | SNP | C  | T  | 9   | 23  | c.454G>A                           | c.(454-456)GTG>ATG     | p.V152M       |

|        |               |         |        |    |    |          |          |                   |     |    |    |     |     |                                     |                        |          |
|--------|---------------|---------|--------|----|----|----------|----------|-------------------|-----|----|----|-----|-----|-------------------------------------|------------------------|----------|
| Pat_76 | Pre-Treatment | COMP    | 1311   | 37 | 19 | 18899298 | 18899298 | Missense_Mutation | SNP | C  | T  | 7   | 9   | c.788G>A                            | c.(787-789)GGG>GAG     | p.G263E  |
| Pat_76 | Pre-Treatment | SFRS14  | 10147  | 37 | 19 | 19121069 | 19121069 | Nonsense_Mutation | SNP | G  | A  | 5   | 302 | c.1933C>T                           | c.(1933-1935)CGA>TGA   | p.R645*  |
| Pat_76 | Pre-Treatment | ZNF14   | 7561   | 37 | 19 | 19822792 | 19822792 | Missense_Mutation | SNP | G  | A  | 56  | 78  | c.1298C>T                           | c.(1297-1299)TCC>TTC   | p.S433F  |
| Pat_76 | Pre-Treatment | ZNF682  | 91120  | 37 | 19 | 20116872 | 20116872 | Missense_Mutation | SNP | G  | A  | 19  | 29  | c.1439C>T                           | c.(1438-1440)TCC>TTC   | p.S480F  |
| Pat_76 | Pre-Treatment | ZNF90   | 7643   | 37 | 19 | 20216075 | 20216075 | Missense_Mutation | SNP | G  | A  | 77  | 101 | c.176G>A                            | c.(175-177)GGA>GAA     | p.G59E   |
| Pat_76 | Pre-Treatment | ZNF90   | 7643   | 37 | 19 | 20228748 | 20228748 | Missense_Mutation | SNP | G  | A  | 12  | 15  | c.385G>A                            | c.(385-387)GGT>AGT     | p.G129S  |
| Pat_76 | Pre-Treatment | ZNF626  | 199777 | 37 | 19 | 20807233 | 20807233 | Missense_Mutation | SNP | C  | T  | 6   | 4   | c.1450G>A                           | c.(1450-1452)GAA>AAA   | p.E484K  |
| Pat_76 | Pre-Treatment | ZNF626  | 199777 | 37 | 19 | 20807401 | 20807401 | Missense_Mutation | SNP | C  | T  | 54  | 92  | c.1282G>A                           | c.(1282-1284)GAA>AAA   | p.E428K  |
| Pat_76 | Pre-Treatment | ZNF676  | 163223 | 37 | 19 | 22362756 | 22362756 | Missense_Mutation | SNP | G  | A  | 20  | 25  | c.1763C>T                           | c.(1762-1764)CCC>CTC   | p.P588L  |
| Pat_76 | Pre-Treatment | ZNF99   | 7652   | 37 | 19 | 22940472 | 22940472 | Missense_Mutation | SNP | T  | G  | 28  | 36  | c.1966A>C                           | c.(1966-1968)AAA>CAA   | p.K656Q  |
| Pat_76 | Pre-Treatment | ZNF536  | 9745   | 37 | 19 | 31038889 | 31038889 | Missense_Mutation | SNP | G  | A  | 4   | 108 | c.2363G>A                           | c.(2362-2364)GGC>GAC   | p.G788D  |
| Pat_76 | Pre-Treatment | ZNF536  | 9745   | 37 | 19 | 31040082 | 31040082 | Missense_Mutation | SNP | G  | A  | 39  | 63  | c.3556G>A                           | c.(3556-3558)GAA>AAA   | p.E1186K |
| Pat_76 | Pre-Treatment | RHPN2   | 85415  | 37 | 19 | 33512485 | 33512485 | Missense_Mutation | SNP | C  | T  | 3   | 45  | c.382G>A                            | c.(382-384)GTC>ATC     | p.V128I  |
| Pat_76 | Pre-Treatment | RBM42   | 79171  | 37 | 19 | 36122302 | 36122302 | Missense_Mutation | SNP | G  | A  | 4   | 76  | c.437G>A                            | c.(436-438)CGG>CAG     | p.R146Q  |
| Pat_76 | Pre-Treatment | UPK1A   | 11045  | 37 | 19 | 36164422 | 36164422 | Missense_Mutation | SNP | G  | A  | 3   | 9   | c.443G>A                            | c.(442-444)CGC>CAC     | p.R148H  |
| Pat_76 | Pre-Treatment | NPHS1   | 4868   | 37 | 19 | 36321798 | 36321798 | Missense_Mutation | SNP | C  | T  | 39  | 46  | c.3542G>A                           | c.(3541-3543)AGA>AAA   | p.R1181K |
| Pat_76 | Pre-Treatment | ZNF793  | 390927 | 37 | 19 | 38028549 | 38028549 | Missense_Mutation | SNP | G  | A  | 12  | 22  | c.989G>A                            | c.(988-990)CGA>CAA     | p.R330Q  |
| Pat_76 | Pre-Treatment | ZNF540  | 163255 | 37 | 19 | 38102515 | 38102515 | Missense_Mutation | SNP | C  | T  | 62  | 98  | c.334C>T                            | c.(334-336)CGT>TGT     | p.R112C  |
| Pat_76 | Pre-Treatment | ZNF607  | 84775  | 37 | 19 | 38189410 | 38189410 | Missense_Mutation | SNP | G  | A  | 24  | 34  | c.1622C>T                           | c.(1621-1623)TCT>TTT   | p.S541F  |
| Pat_76 | Pre-Treatment | RYR1    | 6261   | 37 | 19 | 38995971 | 38995971 | Missense_Mutation | SNP | G  | A  | 4   | 31  | c.8333G>A                           | c.(8332-8334)GGA>GAA   | p.G2778E |
| Pat_76 | Pre-Treatment | RYR1    | 6261   | 37 | 19 | 39018297 | 39018297 | Missense_Mutation | SNP | C  | T  | 7   | 15  | c.10697C>T                          | c.(10696-10698)TCC>TTC | p.S3566F |
| Pat_76 | Pre-Treatment | RYR1    | 6261   | 37 | 19 | 39038941 | 39038941 | Missense_Mutation | SNP | G  | A  | 21  | 35  | c.12163G>A                          | c.(12163-12165)GAG>AAC | p.E4055K |
| Pat_76 | Pre-Treatment | MRPS12  | 6183   | 37 | 19 | 39422990 | 39422990 | Missense_Mutation | SNP | C  | T  | 5   | 101 | c.67C>T                             | c.(67-69)CGG>TGG       | p.R23W   |
| Pat_76 | Pre-Treatment | FCGBP   | 8857   | 37 | 19 | 40419983 | 40419983 | Missense_Mutation | SNP | C  | T  | 23  | 31  | c.3011G>A                           | c.(3010-3012)GGG>GAG   | p.G1004E |
| Pat_76 | Pre-Treatment | ZNF780A | 284323 | 37 | 19 | 40581648 | 40581648 | Missense_Mutation | SNP | G  | A  | 4   | 88  | c.701C>T                            | c.(700-702)ACC>ATC     | p.T234I  |
| Pat_76 | Pre-Treatment | SPTBN4  | 57731  | 37 | 19 | 41025980 | 41025981 | Missense_Mutation | DNP | GG | AA | 12  | 21  | c.3576_3577GG>A574-3579)AGGGAG>AGA/ |                        | p.E1193K |
| Pat_76 | Pre-Treatment | LTBP4   | 8425   | 37 | 19 | 41117276 | 41117276 | Nonsense_Mutation | SNP | C  | T  | 4   | 64  | c.2230C>T                           | c.(2230-2232)CGA>TGA   | p.R744*  |
| Pat_76 | Pre-Treatment | ERF     | 2077   | 37 | 19 | 42754607 | 42754607 | Missense_Mutation | SNP | C  | T  | 4   | 116 | c.133G>A                            | c.(133-135)GTC>ATC     | p.V45I   |
| Pat_76 | Pre-Treatment | MEGF8   | 1954   | 37 | 19 | 42880163 | 42880163 | Missense_Mutation | SNP | G  | A  | 4   | 128 | c.7573G>A                           | c.(7573-7575)GTG>ATG   | p.V2525M |
| Pat_76 | Pre-Treatment | PSG3    | 5671   | 37 | 19 | 43237041 | 43237041 | Missense_Mutation | SNP | G  | A  | 120 | 219 | c.604C>T                            | c.(604-606)CTC>TTC     | p.L202F  |
| Pat_76 | Pre-Treatment | PSG8    | 440533 | 37 | 19 | 43262276 | 43262276 | Missense_Mutation | SNP | G  | A  | 173 | 210 | c.587C>T                            | c.(586-588)TCT>TTT     | p.S196F  |
| Pat_76 | Pre-Treatment | PSG1    | 5669   | 37 | 19 | 43373139 | 43373140 | Missense_Mutation | DNP | CC | TT | 110 | 172 | c.756_757GG>AA754-759)AGGGAG>AGAA   |                        | p.E253K  |
| Pat_76 | Pre-Treatment | PSG1    | 5669   | 37 | 19 | 43382107 | 43382107 | Missense_Mutation | SNP | C  | T  | 76  | 131 | c.388G>A                            | c.(388-390)GGG>AGG     | p.G130R  |
| Pat_76 | Pre-Treatment | PSG6    | 5675   | 37 | 19 | 43411960 | 43411961 | Missense_Mutation | DNP | CC | GT | 83  | 195 | c.752_753GG>AC                      | c.(751-753)AGG>AAC     | p.R251N  |
| Pat_76 | Pre-Treatment | ZNF226  | 7769   | 37 | 19 | 44681760 | 44681760 | Missense_Mutation | SNP | C  | T  | 8   | 15  | c.2345C>T                           | c.(2344-2346)TCC>TTC   | p.S782F  |
| Pat_76 | Pre-Treatment | ZNF285  | 26974  | 37 | 19 | 44891610 | 44891610 | Missense_Mutation | SNP | C  | T  | 37  | 43  | c.797G>A                            | c.(796-798)GGA>GAA     | p.G266E  |
| Pat_76 | Pre-Treatment | ZNF285  | 26974  | 37 | 19 | 44891787 | 44891787 | Missense_Mutation | SNP | G  | A  | 19  | 22  | c.620C>T                            | c.(619-621)CCC>CTC     | p.P207L  |
| Pat_76 | Pre-Treatment | BCAM    | 4059   | 37 | 19 | 45317445 | 45317445 | Missense_Mutation | SNP | C  | T  | 4   | 101 | c.821C>T                            | c.(820-822)CCG>CTG     | p.P274L  |
| Pat_76 | Pre-Treatment | PVRL2   | 5819   | 37 | 19 | 45389243 | 45389243 | Missense_Mutation | SNP | G  | A  | 51  | 123 | c.1246G>A                           | c.(1246-1248)GAG>AAG   | p.E416K  |
| Pat_76 | Pre-Treatment | RELB    | 5971   | 37 | 19 | 45536001 | 45536001 | Missense_Mutation | SNP | G  | A  | 7   | 8   | c.1201G>A                           | c.(1201-1203)GAC>AAC   | p.D401N  |
| Pat_76 | Pre-Treatment | SFRS16  | 11129  | 37 | 19 | 45556053 | 45556053 | Missense_Mutation | SNP | C  | T  | 28  | 49  | c.202C>T                            | c.(202-204)CCC>TCC     | p.P68S   |
| Pat_76 | Pre-Treatment | RTN2    | 6253   | 37 | 19 | 45998057 | 45998057 | Missense_Mutation | SNP | G  | A  | 7   | 13  | c.286C>T                            | c.(286-288)CCA>TCA     | p.P96S   |
| Pat_76 | Pre-Treatment | IGFL2   | 147920 | 37 | 19 | 46664003 | 46664003 | Missense_Mutation | SNP | C  | T  | 81  | 149 | c.206C>T                            | c.(205-207)CCC>CTC     | p.P69L   |
| Pat_76 | Pre-Treatment | PNMAL1  | 55228  | 37 | 19 | 46973649 | 46973649 | Missense_Mutation | SNP | G  | A  | 17  | 12  | c.644C>T                            | c.(643-645)CCC>CTC     | p.P215L  |
| Pat_76 | Pre-Treatment | PTGIR   | 5739   | 37 | 19 | 47124731 | 47124731 | Missense_Mutation | SNP | G  | A  | 23  | 37  | c.967C>T                            | c.(967-969)CTT>TTT     | p.L323F  |
| Pat_76 | Pre-Treatment | GRLF1   | 2909   | 37 | 19 | 47503857 | 47503857 | Missense_Mutation | SNP | C  | T  | 23  | 22  | c.4412C>T                           | c.(4411-4413)CCG>CTG   | p.P1471L |
| Pat_76 | Pre-Treatment | ZC3H4   | 23211  | 37 | 19 | 47588399 | 47588399 | Missense_Mutation | SNP | G  | A  | 62  | 79  | c.1021C>T                           | c.(1021-1023)CGG>TGG   | p.R341W  |

|        |               |          |        |    |    |          |          |                   |     |    |    |     |     |                                   |                      |               |
|--------|---------------|----------|--------|----|----|----------|----------|-------------------|-----|----|----|-----|-----|-----------------------------------|----------------------|---------------|
| Pat_76 | Pre-Treatment | ELSPBP1  | 64100  | 37 | 19 | 48519260 | 48519260 | Missense_Mutation | SNP | G  | A  | 35  | 43  | c.319G>A                          | c.(319-321)GAT>AAT   | p.D107N       |
| Pat_76 | Pre-Treatment | GRIN2D   | 2906   | 37 | 19 | 48922977 | 48922977 | Missense_Mutation | SNP | C  | T  | 63  | 133 | c.1997C>T                         | c.(1996-1998)GCC>GTC | p.A666V       |
| Pat_76 | Pre-Treatment | LMTK3    | 114783 | 37 | 19 | 49013354 | 49013354 | Missense_Mutation | SNP | G  | A  | 3   | 19  | c.374C>T                          | c.(373-375)TCG>TTG   | p.S125L       |
| Pat_76 | Pre-Treatment | SULT2B1  | 6820   | 37 | 19 | 49079332 | 49079333 | Missense_Mutation | DNP | CC | TT | 50  | 92  | c.206_207CC>TT                    | c.(205-207)CCC>CTT   | p.P69L        |
| Pat_76 | Pre-Treatment | FGF21    | 26291  | 37 | 19 | 49261406 | 49261406 | Missense_Mutation | SNP | G  | A  | 8   | 21  | c.559G>A                          | c.(559-561)GAT>AAT   | p.D187N       |
| Pat_76 | Pre-Treatment | CGB2     | 114336 | 37 | 19 | 49536425 | 49536425 | Missense_Mutation | SNP | C  | T  | 28  | 44  | c.439C>T                          | c.(439-441)CCA>TCA   | p.P147S       |
| Pat_76 | Pre-Treatment | SLC6A16  | 28968  | 37 | 19 | 49813080 | 49813080 | Missense_Mutation | SNP | G  | A  | 22  | 13  | c.704C>T                          | c.(703-705)CCT>CTT   | p.P235L       |
| Pat_76 | Pre-Treatment | TBC1D17  | 79735  | 37 | 19 | 50385521 | 50385521 | Missense_Mutation | SNP | C  | T  | 48  | 88  | c.662C>T                          | c.(661-663)TCC>TTC   | p.S221F       |
| Pat_76 | Pre-Treatment | IL4I1    | 259307 | 37 | 19 | 50399286 | 50399286 | Missense_Mutation | SNP | G  | A  | 8   | 7   | c.38C>T                           | c.(37-39)CCC>CTC     | p.P13L        |
| Pat_76 | Pre-Treatment | ZNF473   | 25888  | 37 | 19 | 50549595 | 50549595 | Missense_Mutation | SNP | C  | T  | 14  | 31  | c.1895C>T                         | c.(1894-1896)TCC>TTC | p.S632F       |
| Pat_76 | Pre-Treatment | C19orf41 | 126123 | 37 | 19 | 50655885 | 50655885 | Missense_Mutation | SNP | C  | T  | 171 | 205 | c.647G>A                          | c.(646-648)CGA>CAA   | p.R216Q       |
| Pat_76 | Pre-Treatment | C19orf41 | 126123 | 37 | 19 | 50666268 | 50666268 | Missense_Mutation | SNP | C  | T  | 19  | 38  | c.184G>A                          | c.(184-186)GGG>AGG   | p.G62R        |
| Pat_76 | Pre-Treatment | MYH14    | 79784  | 37 | 19 | 50753023 | 50753023 | Missense_Mutation | SNP | G  | C  | 51  | 51  | c.1575G>C                         | c.(1573-1575)TGG>TGC | p.W525C       |
| Pat_76 | Pre-Treatment | MYH14    | 79784  | 37 | 19 | 50779268 | 50779268 | Missense_Mutation | SNP | C  | T  | 17  | 16  | c.3365C>T                         | c.(3364-3366)GCC>GTC | p.A1122V      |
| Pat_76 | Pre-Treatment | KLK15    | 55554  | 37 | 19 | 51330397 | 51330397 | Missense_Mutation | SNP | C  | T  | 16  | 33  | c.218G>A                          | c.(217-219)GGA>GAA   | p.G73E        |
| Pat_76 | Pre-Treatment | FPR1     | 2357   | 37 | 19 | 52249742 | 52249742 | Missense_Mutation | SNP | C  | T  | 29  | 38  | c.506G>A                          | c.(505-507)GGT>GAT   | p.G169D       |
| Pat_76 | Pre-Treatment | ZNF613   | 79898  | 37 | 19 | 52448416 | 52448416 | Missense_Mutation | SNP | C  | T  | 19  | 47  | c.1280C>T                         | c.(1279-1281)CCC>CTC | p.P427L       |
| Pat_76 | Pre-Treatment | ZNF701   | 55762  | 37 | 19 | 53085781 | 53085781 | Missense_Mutation | SNP | G  | A  | 67  | 71  | c.469G>A                          | c.(469-471)GAA>AAA   | p.E157K       |
| Pat_76 | Pre-Treatment | ZNF701   | 55762  | 37 | 19 | 53086538 | 53086538 | Missense_Mutation | SNP | G  | C  | 3   | 39  | c.1226G>C                         | c.(1225-1227)CGT>CCT | p.R409P       |
| Pat_76 | Pre-Treatment | ZNF347   | 84671  | 37 | 19 | 53644928 | 53644928 | Missense_Mutation | SNP | G  | A  | 54  | 91  | c.1153C>T                         | c.(1153-1155)CGT>TGT | p.R385C       |
| Pat_76 | Pre-Treatment | CACNG8   | 59283  | 37 | 19 | 54483187 | 54483187 | Missense_Mutation | SNP | G  | A  | 3   | 19  | c.431G>A                          | c.(430-432)TGC>TAC   | p.C144Y       |
| Pat_76 | Pre-Treatment | LILRB2   | 10288  | 37 | 19 | 54783794 | 54783794 | Nonsense_Mutation | SNP | C  | T  | 45  | 78  | c.207G>A                          | c.(205-207)TGG>TGA   | p.W69*        |
| Pat_76 | Pre-Treatment | LILRA1   | 11024  | 37 | 19 | 55107653 | 55107653 | Splice_Site       | SNP | G  | A  | 19  | 35  | c.959_splice                      | c.e7-1               | p.G320_splice |
| Pat_76 | Pre-Treatment | LILRB1   | 10859  | 37 | 19 | 55148297 | 55148297 | Missense_Mutation | SNP | C  | T  | 26  | 29  | c.1921C>T                         | c.(1921-1923)CCC>TCC | p.P641S       |
| Pat_76 | Pre-Treatment | NLRP7    | 199713 | 37 | 19 | 55450725 | 55450726 | Missense_Mutation | DNP | CC | TT | 5   | 20  | .1461_1462GG>A159-1464)GGGGAG>GGA |                      | p.E488K       |
| Pat_76 | Pre-Treatment | SYT5     | 6861   | 37 | 19 | 55689725 | 55689725 | Missense_Mutation | SNP | C  | T  | 18  | 14  | c.91G>A                           | c.(91-93)GCC>ACC     | p.A31T        |
| Pat_76 | Pre-Treatment | PTPRH    | 5794   | 37 | 19 | 55716882 | 55716882 | Missense_Mutation | SNP | C  | T  | 35  | 73  | c.431G>A                          | c.(430-432)GGC>GAC   | p.G144D       |
| Pat_76 | Pre-Treatment | NLRP9    | 338321 | 37 | 19 | 56244864 | 56244864 | Nonsense_Mutation | SNP | C  | T  | 31  | 58  | c.333G>A                          | c.(331-333)TGG>TGA   | p.W111*       |
| Pat_76 | Pre-Treatment | NLRP5    | 126206 | 37 | 19 | 56530714 | 56530714 | Missense_Mutation | SNP | C  | T  | 33  | 33  | c.572C>T                          | c.(571-573)TCA>TTA   | p.S191L       |
| Pat_76 | Pre-Treatment | ZNF543   | 125919 | 37 | 19 | 57840542 | 57840542 | Missense_Mutation | SNP | C  | T  | 41  | 42  | c.1712C>T                         | c.(1711-1713)CCT>CTT | p.P571L       |
| Pat_76 | Pre-Treatment | ZNF304   | 57343  | 37 | 19 | 57868658 | 57868658 | Missense_Mutation | SNP | C  | T  | 59  | 187 | c.1421C>T                         | c.(1420-1422)CCT>CTT | p.P474L       |
| Pat_76 | Pre-Treatment | ZSCAN4   | 201516 | 37 | 19 | 58187859 | 58187859 | Missense_Mutation | SNP | G  | A  | 39  | 42  | c.346G>A                          | c.(346-348)GAG>AAG   | p.E116K       |
| Pat_76 | Pre-Treatment | ZSCAN4   | 201516 | 37 | 19 | 58190127 | 58190127 | Missense_Mutation | SNP | C  | T  | 56  | 84  | c.1156C>T                         | c.(1156-1158)CAT>TAT | p.H386Y       |
| Pat_76 | Pre-Treatment | RPS5     | 6193   | 37 | 19 | 58904521 | 58904521 | Missense_Mutation | SNP | C  | T  | 22  | 51  | c.287C>T                          | c.(286-288)GCC>GTC   | p.A96V        |
| Pat_76 | Pre-Treatment | TSSC1    | 7260   | 37 | 2  | 3341881  | 3341881  | Missense_Mutation | SNP | T  | G  | 9   | 24  | c.166A>C                          | c.(166-168)AAT>CAT   | p.N56H        |
| Pat_76 | Pre-Treatment | ASAP2    | 8853   | 37 | 2  | 9474929  | 9474929  | Missense_Mutation | SNP | C  | T  | 4   | 124 | c.749C>T                          | c.(748-750)ACG>ATG   | p.T250M       |
| Pat_76 | Pre-Treatment | CPSF3    | 51692  | 37 | 2  | 9613133  | 9613133  | Missense_Mutation | SNP | C  | T  | 5   | 86  | c.2042C>T                         | c.(2041-2043)ACG>ATG | p.T681M       |
| Pat_76 | Pre-Treatment | GREB1    | 9687   | 37 | 2  | 11752710 | 11752710 | Missense_Mutation | SNP | G  | A  | 4   | 75  | c.3096G>A                         | c.(3094-3096)ATG>ATA | p.M1032I      |
| Pat_76 | Pre-Treatment | PUM2     | 23369  | 37 | 2  | 20460196 | 20460196 | Missense_Mutation | SNP | G  | A  | 28  | 43  | c.2257C>T                         | c.(2257-2259)CCA>TCA | p.P753S       |
| Pat_76 | Pre-Treatment | APOB     | 338    | 37 | 2  | 21231860 | 21231860 | Missense_Mutation | SNP | G  | A  | 25  | 44  | c.7880C>T                         | c.(7879-7881)CCA>CTA | p.P2627L      |
| Pat_76 | Pre-Treatment | APOB     | 338    | 37 | 2  | 21233066 | 21233066 | Missense_Mutation | SNP | G  | T  | 9   | 17  | c.6674C>A                         | c.(6673-6675)ACA>AAA | p.T2225K      |
| Pat_76 | Pre-Treatment | APOB     | 338    | 37 | 2  | 21235356 | 21235356 | Missense_Mutation | SNP | C  | T  | 15  | 43  | c.4384G>A                         | c.(4384-4386)GGA>AGA | p.G1462R      |
| Pat_76 | Pre-Treatment | DPYSL5   | 56896  | 37 | 2  | 27167566 | 27167566 | Missense_Mutation | SNP | G  | A  | 38  | 40  | c.1483G>A                         | c.(1483-1485)GAT>AAT | p.D495N       |
| Pat_76 | Pre-Treatment | C2orf53  | 339779 | 37 | 2  | 27361072 | 27361072 | Missense_Mutation | SNP | C  | A  | 6   | 4   | c.126G>T                          | c.(124-126)CAG>CAT   | p.Q42H        |
| Pat_76 | Pre-Treatment | SLC30A3  | 7781   | 37 | 2  | 27478226 | 27478226 | Missense_Mutation | SNP | G  | A  | 3   | 47  | c.1121C>T                         | c.(1120-1122)CCG>CTG | p.P374L       |
| Pat_76 | Pre-Treatment | PPM1G    | 5496   | 37 | 2  | 27604584 | 27604584 | Missense_Mutation | SNP | C  | T  | 4   | 155 | c.1523G>A                         | c.(1522-1524)CGA>CAA | p.R508Q       |
| Pat_76 | Pre-Treatment | PLB1     | 151056 | 37 | 2  | 28812377 | 28812377 | Missense_Mutation | SNP | G  | C  | 57  | 93  | c.1876G>C                         | c.(1876-1878)GTT>CTT | p.V626L       |



|        |               |          |        |    |   |           |           |                   |     |    |    |     |     |                 |                      |               |
|--------|---------------|----------|--------|----|---|-----------|-----------|-------------------|-----|----|----|-----|-----|-----------------|----------------------|---------------|
| Pat_76 | Pre-Treatment | FAM179A  | 165186 | 37 | 2 | 29247101  | 29247101  | Missense_Mutation | SNP | G  | A  | 13  | 21  | c.1714G>A       | c.(1714-1716)GAG>AAG | p.E572K       |
| Pat_76 | Pre-Treatment | ALK      | 238    | 37 | 2 | 29543713  | 29543713  | Missense_Mutation | SNP | C  | T  | 41  | 46  | c.1450G>A       | c.(1450-1452)GAT>AAT | p.D484N       |
| Pat_76 | Pre-Treatment | XDH      | 7498   | 37 | 2 | 31558835  | 31558835  | Missense_Mutation | SNP | C  | A  | 34  | 64  | c.3991G>T       | c.(3991-3993)GTG>TTG | p.V1331L      |
| Pat_76 | Pre-Treatment | SLC30A6  | 55676  | 37 | 2 | 32434592  | 32434592  | Nonsense_Mutation | SNP | C  | T  | 4   | 124 | c.847C>T        | c.(847-849)CGA>TGA   | p.R283*       |
| Pat_76 | Pre-Treatment | FAM98A   | 25940  | 37 | 2 | 33810710  | 33810710  | Missense_Mutation | SNP | G  | A  | 75  | 112 | c.775C>T        | c.(775-777)CCT>TCT   | p.P259S       |
| Pat_76 | Pre-Treatment | MAP4K3   | 8491   | 37 | 2 | 39487761  | 39487761  | Nonsense_Mutation | SNP | C  | T  | 15  | 17  | c.2294G>A       | c.(2293-2295)TGG>TAG | p.W765*       |
| Pat_76 | Pre-Treatment | SLC8A1   | 6546   | 37 | 2 | 40405536  | 40405536  | Missense_Mutation | SNP | C  | T  | 71  | 112 | c.1906G>A       | c.(1906-1908)GAG>AAG | p.E636K       |
| Pat_76 | Pre-Treatment | ABCG8    | 64241  | 37 | 2 | 44078738  | 44078738  | Missense_Mutation | SNP | C  | T  | 22  | 13  | c.338C>T        | c.(337-339)TCC>TTC   | p.S113F       |
| Pat_76 | Pre-Treatment | PREPL    | 9581   | 37 | 2 | 44559788  | 44559789  | Missense_Mutation | DNP | GG | AA | 12  | 18  | c.1162_1163CC>T | c.(1162-1164)CCT>TTT | p.P388F       |
| Pat_76 | Pre-Treatment | FOXN2    | 3344   | 37 | 2 | 48573793  | 48573793  | Missense_Mutation | SNP | C  | T  | 61  | 102 | c.440C>T        | c.(439-441)CCA>CTA   | p.P147L       |
| Pat_76 | Pre-Treatment | PSME4    | 23198  | 37 | 2 | 54131220  | 54131220  | Missense_Mutation | SNP | G  | A  | 55  | 78  | c.3017C>T       | c.(3016-3018)CCC>CTC | p.P1006L      |
| Pat_76 | Pre-Treatment | C2orf63  | 130162 | 37 | 2 | 55445106  | 55445106  | Missense_Mutation | SNP | G  | A  | 11  | 37  | c.206C>T        | c.(205-207)TCC>TTC   | p.S69F        |
| Pat_76 | Pre-Treatment | EFEMP1   | 2202   | 37 | 2 | 56094269  | 56094269  | Missense_Mutation | SNP | C  | T  | 47  | 71  | c.1421G>A       | c.(1420-1422)GGG>GAG | p.G474E       |
| Pat_76 | Pre-Treatment | CCDC85A  | 114800 | 37 | 2 | 56611435  | 56611435  | Missense_Mutation | SNP | C  | T  | 37  | 35  | c.1607C>T       | c.(1606-1608)TCG>TTG | p.S536L       |
| Pat_76 | Pre-Treatment | PUS10    | 150962 | 37 | 2 | 61236063  | 61236063  | Nonsense_Mutation | SNP | G  | A  | 4   | 15  | c.214C>T        | c.(214-216)CGA>TGA   | p.R72*        |
| Pat_76 | Pre-Treatment | PLEK     | 5341   | 37 | 2 | 68607955  | 68607955  | Missense_Mutation | SNP | T  | A  | 71  | 93  | c.299T>A        | c.(298-300)ATT>AAT   | p.I100N       |
| Pat_76 | Pre-Treatment | FBXO48   | 554251 | 37 | 2 | 68691389  | 68691389  | Missense_Mutation | SNP | C  | T  | 136 | 227 | c.420G>A        | c.(418-420)ATG>ATA   | p.M140I       |
| Pat_76 | Pre-Treatment | GFPT1    | 2673   | 37 | 2 | 69597165  | 69597165  | Missense_Mutation | SNP | C  | T  | 39  | 51  | c.191G>A        | c.(190-192)GGA>GAA   | p.G64E        |
| Pat_76 | Pre-Treatment | C2orf42  | 54980  | 37 | 2 | 70377634  | 70377634  | Missense_Mutation | SNP | G  | A  | 19  | 39  | c.1579C>T       | c.(1579-1581)CTT>TTT | p.L527F       |
| Pat_76 | Pre-Treatment | PCYOX1   | 51449  | 37 | 2 | 70502156  | 70502156  | Missense_Mutation | SNP | G  | A  | 42  | 70  | c.560G>A        | c.(559-561)GGA>GAA   | p.G187E       |
| Pat_76 | Pre-Treatment | ATP6V1B1 | 525    | 37 | 2 | 71191923  | 71191923  | Missense_Mutation | SNP | G  | A  | 12  | 14  | c.1306G>A       | c.(1306-1308)GAG>AAG | p.E436K       |
| Pat_76 | Pre-Treatment | C2orf78  | 388960 | 37 | 2 | 74042413  | 74042413  | Missense_Mutation | SNP | G  | A  | 8   | 8   | c.1063G>A       | c.(1063-1065)GAA>AAA | p.E355K       |
| Pat_76 | Pre-Treatment | SEMA4F   | 10505  | 37 | 2 | 74906855  | 74906855  | Missense_Mutation | SNP | G  | A  | 3   | 41  | c.1832G>A       | c.(1831-1833)CGG>CAG | p.R611Q       |
| Pat_76 | Pre-Treatment | HK2      | 3099   | 37 | 2 | 75108931  | 75108931  | Missense_Mutation | SNP | T  | G  | 23  | 27  | c.1664T>G       | c.(1663-1665)ATG>AGG | p.M555R       |
| Pat_76 | Pre-Treatment | CTNNA2   | 1496   | 37 | 2 | 80808840  | 80808840  | Missense_Mutation | SNP | G  | A  | 21  | 26  | c.1903G>A       | c.(1903-1905)GAA>AAA | p.E635K       |
| Pat_76 | Pre-Treatment | THNSL2   | 55258  | 37 | 2 | 88484883  | 88484883  | Missense_Mutation | SNP | G  | A  | 29  | 33  | c.1114G>A       | c.(1114-1116)GAA>AAA | p.E372K       |
| Pat_76 | Pre-Treatment | ZNF2     | 7549   | 37 | 2 | 95847717  | 95847717  | Missense_Mutation | SNP | C  | T  | 4   | 137 | c.1141C>T       | c.(1141-1143)CGG>TGG | p.R381W       |
| Pat_76 | Pre-Treatment | TMEM131  | 23505  | 37 | 2 | 98475846  | 98475846  | Missense_Mutation | SNP | G  | A  | 8   | 28  | c.404C>T        | c.(403-405)CCT>CTT   | p.P135L       |
| Pat_76 | Pre-Treatment | LYG2     | 254773 | 37 | 2 | 99861748  | 99861748  | Missense_Mutation | SNP | C  | T  | 22  | 62  | c.358G>A        | c.(358-360)GGA>AGA   | p.G120R       |
| Pat_76 | Pre-Treatment | NPAS2    | 4862   | 37 | 2 | 101565879 | 101565879 | Missense_Mutation | SNP | C  | T  | 21  | 64  | c.535C>T        | c.(535-537)CCA>TCA   | p.P179S       |
| Pat_76 | Pre-Treatment | CREG2    | 200407 | 37 | 2 | 102000157 | 102000158 | Missense_Mutation | DNP | CC | TT | 35  | 111 | c.448_449GG>AA  | c.(448-450)GGA>AAA   | p.G150K       |
| Pat_76 | Pre-Treatment | IL18R1   | 8809   | 37 | 2 | 103013029 | 103013029 | Missense_Mutation | SNP | C  | G  | 18  | 58  | c.1309C>G       | c.(1309-1311)CGA>GGA | p.R437G       |
| Pat_76 | Pre-Treatment | TGFBRAP1 | 9392   | 37 | 2 | 105912941 | 105912941 | Missense_Mutation | SNP | C  | T  | 31  | 122 | c.910G>A        | c.(910-912)GGA>AGA   | p.G304R       |
| Pat_76 | Pre-Treatment | RGPD3    | 653489 | 37 | 2 | 107049684 | 107049684 | Missense_Mutation | SNP | C  | T  | 143 | 375 | c.2263G>A       | c.(2263-2265)GAA>AAA | p.E755K       |
| Pat_76 | Pre-Treatment | SULT1C3  | 442038 | 37 | 2 | 108881461 | 108881461 | Missense_Mutation | SNP | G  | A  | 71  | 52  | c.802G>A        | c.(802-804)GGG>AGG   | p.G268R       |
| Pat_76 | Pre-Treatment | RGPD5    | 84220  | 37 | 2 | 113147135 | 113147135 | Nonsense_Mutation | SNP | C  | T  | 45  | 308 | c.3387G>A       | c.(3385-3387)TGG>TGA | p.W1129*      |
| Pat_76 | Pre-Treatment | POLR1B   | 84172  | 37 | 2 | 113322062 | 113322062 | Missense_Mutation | SNP | C  | T  | 75  | 97  | c.1732C>T       | c.(1732-1734)CTT>TTT | p.L578F       |
| Pat_76 | Pre-Treatment | IL1F6    | 27179  | 37 | 2 | 113764178 | 113764178 | Missense_Mutation | SNP | C  | T  | 163 | 253 | c.128C>T        | c.(127-129)ACT>ATT   | p.T43I        |
| Pat_76 | Pre-Treatment | PSD4     | 23550  | 37 | 2 | 113953840 | 113953840 | Missense_Mutation | SNP | G  | A  | 17  | 23  | c.2342G>A       | c.(2341-2343)GGC>GAC | p.G781D       |
| Pat_76 | Pre-Treatment | DPP10    | 57628  | 37 | 2 | 116066815 | 116066815 | Missense_Mutation | SNP | G  | A  | 13  | 20  | c.61G>A         | c.(61-63)GAA>AAA     | p.E21K        |
| Pat_76 | Pre-Treatment | DPP10    | 57628  | 37 | 2 | 116572369 | 116572369 | Missense_Mutation | SNP | G  | A  | 29  | 49  | c.1701G>A       | c.(1699-1701)ATG>ATA | p.M567I       |
| Pat_76 | Pre-Treatment | PCDP1    | 200373 | 37 | 2 | 120373196 | 120373196 | Missense_Mutation | SNP | G  | A  | 8   | 18  | c.463G>A        | c.(463-465)GAA>AAA   | p.E155K       |
| Pat_76 | Pre-Treatment | TMEM177  | 80775  | 37 | 2 | 120438910 | 120438911 | Nonsense_Mutation | DNP | CT | TA | 17  | 40  | c.481_482CT>TA  | c.(481-483)CTG>TAG   | p.L161*       |
| Pat_76 | Pre-Treatment | GLI2     | 2736   | 37 | 2 | 121748199 | 121748199 | Missense_Mutation | SNP | C  | T  | 40  | 55  | c.4709C>T       | c.(4708-4710)TCC>TTC | p.S1570F      |
| Pat_76 | Pre-Treatment | TFCP2L1  | 29842  | 37 | 2 | 121997133 | 121997133 | Splice_Site       | SNP | C  | T  | 26  | 28  | c.860_splice    | c.e8+1               | p.G287_splice |
| Pat_76 | Pre-Treatment | MKI67IP  | 84365  | 37 | 2 | 122493301 | 122493301 | Missense_Mutation | SNP | G  | T  | 21  | 35  | c.131C>A        | c.(130-132)CCT>CAT   | p.P44H        |
| Pat_76 | Pre-Treatment | CNTNAP5  | 129684 | 37 | 2 | 125204447 | 125204447 | Missense_Mutation | SNP | C  | T  | 4   | 137 | c.851C>T        | c.(850-852)ACG>ATG   | p.T284M       |

|        |               |           |        |    |   |           |           |                   |     |    |    |     |     |                 |                         |           |
|--------|---------------|-----------|--------|----|---|-----------|-----------|-------------------|-----|----|----|-----|-----|-----------------|-------------------------|-----------|
| Pat_76 | Pre-Treatment | MYO7B     | 4648   | 37 | 2 | 128341852 | 128341852 | Missense_Mutation | SNP | C  | T  | 29  | 54  | c.1499C>T       | c.(1498-1500)GCC>GTC    | p.A500V   |
| Pat_76 | Pre-Treatment | MYO7B     | 4648   | 37 | 2 | 128346086 | 128346086 | Missense_Mutation | SNP | C  | T  | 24  | 35  | c.1810C>T       | c.(1810-1812)CAT>TAT    | p.H604Y   |
| Pat_76 | Pre-Treatment | LOC401010 | 401010 | 37 | 2 | 132200417 | 132200417 | Missense_Mutation | SNP | C  | T  | 6   | 5   | c.1585G>A       | c.(1585-1587)GAA>AAA    | p.E529K   |
| Pat_76 | Pre-Treatment | YSK4      | 80122  | 37 | 2 | 135744766 | 135744766 | Missense_Mutation | SNP | G  | A  | 28  | 35  | c.1676C>T       | c.(1675-1677)CCC>CTC    | p.P559L   |
| Pat_76 | Pre-Treatment | LCT       | 3938   | 37 | 2 | 136566810 | 136566810 | Missense_Mutation | SNP | G  | A  | 25  | 33  | c.3107C>T       | c.(3106-3108)CCT>CTT    | p.P1036L  |
| Pat_76 | Pre-Treatment | HNMT      | 3176   | 37 | 2 | 138762777 | 138762777 | Missense_Mutation | SNP | C  | T  | 55  | 90  | c.505C>T        | c.(505-507)CTC>TTC      | p.L169F   |
| Pat_76 | Pre-Treatment | LRP1B     | 53353  | 37 | 2 | 141232728 | 141232728 | Missense_Mutation | SNP | C  | T  | 30  | 36  | c.9604G>A       | c.(9604-9606)GAT>AAT    | p.D3202N  |
| Pat_76 | Pre-Treatment | LRP1B     | 53353  | 37 | 2 | 141986902 | 141986902 | Missense_Mutation | SNP | C  | T  | 8   | 13  | c.700G>A        | c.(700-702)GAA>AAA      | p.E234K   |
| Pat_76 | Pre-Treatment | KYNU      | 8942   | 37 | 2 | 143643012 | 143643012 | Missense_Mutation | SNP | G  | A  | 24  | 33  | c.76G>A         | c.(76-78)GAT>AAT        | p.D26N    |
| Pat_76 | Pre-Treatment | KYNU      | 8942   | 37 | 2 | 143718310 | 143718310 | Missense_Mutation | SNP | C  | T  | 54  | 73  | c.700C>T        | c.(700-702)CCT>TCT      | p.P234S   |
| Pat_76 | Pre-Treatment | ARHGAP15  | 55843  | 37 | 2 | 143913139 | 143913139 | Missense_Mutation | SNP | G  | A  | 28  | 26  | c.80G>A         | c.(79-81)AGA>AAA        | p.R27K    |
| Pat_76 | Pre-Treatment | KIF5C     | 3800   | 37 | 2 | 149864490 | 149864490 | Missense_Mutation | SNP | A  | G  | 31  | 58  | c.2459A>G       | c.(2458-2460)GAC>GGC    | p.D820G   |
| Pat_76 | Pre-Treatment | GALNT5    | 11227  | 37 | 2 | 158140927 | 158140927 | Missense_Mutation | SNP | G  | A  | 27  | 34  | c.1588G>A       | c.(1588-1590)GAG>AAG    | p.E530K   |
| Pat_76 | Pre-Treatment | SLC4A10   | 57282  | 37 | 2 | 162807236 | 162807236 | Missense_Mutation | SNP | G  | A  | 2   | 1   | c.2419G>A       | c.(2419-2421)GGT>AGT    | p.G807S   |
| Pat_76 | Pre-Treatment | SCN3A     | 6328   | 37 | 2 | 165997216 | 165997216 | Missense_Mutation | SNP | G  | A  | 30  | 68  | c.1964C>T       | c.(1963-1965)TCC>TTC    | p.S655F   |
| Pat_76 | Pre-Treatment | SCN9A     | 6335   | 37 | 2 | 167060726 | 167060726 | Nonsense_Mutation | SNP | G  | A  | 25  | 25  | c.4480C>T       | c.(4480-4482)CAA>TAA    | p.Q1494*  |
| Pat_76 | Pre-Treatment | SCN7A     | 6332   | 37 | 2 | 167297955 | 167297955 | Missense_Mutation | SNP | G  | A  | 25  | 39  | c.2108C>T       | c.(2107-2109)TCC>TTC    | p.S703F   |
| Pat_76 | Pre-Treatment | XIRP2     | 129446 | 37 | 2 | 168099884 | 168099884 | Missense_Mutation | SNP | G  | A  | 38  | 45  | c.1982G>A       | c.(1981-1983)AGG>AAG    | p.R661K   |
| Pat_76 | Pre-Treatment | XIRP2     | 129446 | 37 | 2 | 168106418 | 168106418 | Missense_Mutation | SNP | G  | A  | 32  | 54  | c.8516G>A       | c.(8515-8517)AGA>AAA    | p.R2839K  |
| Pat_76 | Pre-Treatment | ITGA6     | 3655   | 37 | 2 | 173355997 | 173355997 | Missense_Mutation | SNP | G  | A  | 64  | 126 | c.2827G>A       | c.(2827-2829)GGG>AGG    | p.G943R   |
| Pat_76 | Pre-Treatment | CDCA7     | 83879  | 37 | 2 | 174232372 | 174232372 | Nonsense_Mutation | SNP | G  | T  | 111 | 113 | c.1096G>T       | c.(1096-1098)GAA>TAA    | p.E366*   |
| Pat_76 | Pre-Treatment | CDCA7     | 83879  | 37 | 2 | 174232374 | 174232374 | Missense_Mutation | SNP | A  | T  | 112 | 116 | c.1098A>T       | c.(1096-1098)GAA>GAT    | p.E366D   |
| Pat_76 | Pre-Treatment | CHN1      | 1123   | 37 | 2 | 175666528 | 175666528 | Missense_Mutation | SNP | G  | A  | 4   | 137 | c.1115C>T       | c.(1114-1116)CCG>CTG    | p.P372L   |
| Pat_76 | Pre-Treatment | TTN       | 7273   | 37 | 2 | 179416869 | 179416870 | Missense_Mutation | DNP | CC | TT | 51  | 83  | 33053_83054GG>A | c.(83053-83055)GGA>AAA  | p.G27685K |
| Pat_76 | Pre-Treatment | TTN       | 7273   | 37 | 2 | 179417904 | 179417904 | Missense_Mutation | SNP | C  | T  | 40  | 49  | c.82019G>A      | c.(82018-82020)GGA>GAA  | p.G27340E |
| Pat_76 | Pre-Treatment | TTN       | 7273   | 37 | 2 | 179431781 | 179431781 | Missense_Mutation | SNP | G  | A  | 60  | 100 | c.71374C>T      | c.(71374-71376)CGT>TGT  | p.R23792C |
| Pat_76 | Pre-Treatment | TTN       | 7273   | 37 | 2 | 179432002 | 179432002 | Missense_Mutation | SNP | C  | T  | 49  | 107 | c.71153G>A      | c.(71152-71154)AGA>AAA  | p.R23718K |
| Pat_76 | Pre-Treatment | TTN       | 7273   | 37 | 2 | 179483389 | 179483389 | Missense_Mutation | SNP | C  | T  | 34  | 49  | c.39184G>A      | c.(39184-39186)GGA>AGG  | p.G13062R |
| Pat_76 | Pre-Treatment | TTN       | 7273   | 37 | 2 | 179552911 | 179552911 | Missense_Mutation | SNP | T  | G  | 44  | 71  | c.28506A>C      | c.(28504-28506)GAA>GAC  | p.E9502D  |
| Pat_76 | Pre-Treatment | TTN       | 7273   | 37 | 2 | 179552940 | 179552940 | Missense_Mutation | SNP | C  | T  | 31  | 43  | c.28477G>A      | c.(28477-28479)GAG>AAC  | p.E9493K  |
| Pat_76 | Pre-Treatment | TTN       | 7273   | 37 | 2 | 179584053 | 179584053 | Missense_Mutation | SNP | C  | T  | 65  | 85  | c.20332G>A      | c.(20332-20334)GGA>AGG  | p.G6778R  |
| Pat_76 | Pre-Treatment | TTN       | 7273   | 37 | 2 | 179587255 | 179587255 | Missense_Mutation | SNP | G  | A  | 87  | 106 | c.18527C>T      | c.(18526-18528)TCT>TTT  | p.S6176F  |
| Pat_76 | Pre-Treatment | TTN       | 7273   | 37 | 2 | 179590750 | 179590750 | Missense_Mutation | SNP | G  | A  | 20  | 24  | c.16567C>T      | c.(16567-16569)CCT>TCT  | p.P5523S  |
| Pat_76 | Pre-Treatment | TTN       | 7273   | 37 | 2 | 179594203 | 179594203 | Missense_Mutation | SNP | G  | A  | 28  | 58  | c.14948C>T      | c.(14947-14949)CCG>CTC  | p.P4983L  |
| Pat_76 | Pre-Treatment | TTN       | 7273   | 37 | 2 | 179605785 | 179605786 | Missense_Mutation | DNP | CC | TT | 80  | 99  | 11661_11662GG>A | c.(659-11664)AAGGGT>AAA | p.G3888S  |
| Pat_76 | Pre-Treatment | TTN       | 7273   | 37 | 2 | 179614199 | 179614199 | Nonsense_Mutation | SNP | G  | A  | 18  | 29  | c.12928C>T      | c.(12928-12930)CAA>TAA  | p.Q4310*  |
| Pat_76 | Pre-Treatment | TTN       | 7273   | 37 | 2 | 179638813 | 179638813 | Missense_Mutation | SNP | C  | T  | 52  | 77  | c.7082G>A       | c.(7081-7083)GGA>GAA    | p.G2361E  |
| Pat_76 | Pre-Treatment | TTN       | 7273   | 37 | 2 | 179647791 | 179647791 | Missense_Mutation | SNP | C  | T  | 11  | 15  | c.2842G>A       | c.(2842-2844)GGC>AGC    | p.G948S   |
| Pat_76 | Pre-Treatment | CCDC141   | 285025 | 37 | 2 | 179701823 | 179701823 | Nonsense_Mutation | SNP | G  | A  | 7   | 20  | c.2398C>T       | c.(2398-2400)CAA>TAA    | p.Q800*   |
| Pat_76 | Pre-Treatment | PDE1A     | 5136   | 37 | 2 | 183070682 | 183070682 | Missense_Mutation | SNP | G  | A  | 14  | 29  | c.935C>T        | c.(934-936)TCC>TTC      | p.S312F   |
| Pat_76 | Pre-Treatment | ZNF804A   | 91752  | 37 | 2 | 185798352 | 185798353 | Missense_Mutation | DNP | GG | AA | 24  | 49  | c.278_279GG>AA  | c.(277-279)AGG>AAA      | p.R93K    |
| Pat_76 | Pre-Treatment | ZNF804A   | 91752  | 37 | 2 | 185800683 | 185800683 | Missense_Mutation | SNP | C  | A  | 17  | 27  | c.560C>A        | c.(559-561)CCA>CAA      | p.P187Q   |
| Pat_76 | Pre-Treatment | ZSWIM2    | 151112 | 37 | 2 | 187702046 | 187702046 | Missense_Mutation | SNP | C  | T  | 35  | 47  | c.730G>A        | c.(730-732)GGG>AGG      | p.G244R   |
| Pat_76 | Pre-Treatment | ZSWIM2    | 151112 | 37 | 2 | 187702277 | 187702277 | Missense_Mutation | SNP | C  | T  | 16  | 68  | c.499G>A        | c.(499-501)GGC>AGC      | p.G167S   |
| Pat_76 | Pre-Treatment | COL3A1    | 1281   | 37 | 2 | 189854823 | 189854823 | Missense_Mutation | SNP | G  | A  | 31  | 50  | c.692G>A        | c.(691-693)GGA>GAA      | p.G231E   |
| Pat_76 | Pre-Treatment | MYO1B     | 4430   | 37 | 2 | 192265124 | 192265124 | Missense_Mutation | SNP | G  | A  | 50  | 106 | c.2312G>A       | c.(2311-2313)CGG>CAG    | p.R771Q   |
| Pat_76 | Pre-Treatment | DNAH7     | 56171  | 37 | 2 | 196723464 | 196723464 | Nonsense_Mutation | SNP | G  | A  | 72  | 114 | c.7801C>T       | c.(7801-7803)CAA>TAA    | p.Q2601*  |

|        |               |           |        |    |    |           |           |                   |     |    |    |     |     |                 |                      |               |
|--------|---------------|-----------|--------|----|----|-----------|-----------|-------------------|-----|----|----|-----|-----|-----------------|----------------------|---------------|
| Pat_76 | Pre-Treatment | DNAH7     | 56171  | 37 | 2  | 196729497 | 196729497 | Missense_Mutation | SNP | C  | T  | 102 | 167 | c.6882G>A       | c.(6880-6882)ATG>ATA | p.M2294I      |
| Pat_76 | Pre-Treatment | DNAH7     | 56171  | 37 | 2  | 196756414 | 196756414 | Missense_Mutation | SNP | G  | A  | 32  | 76  | c.5011C>T       | c.(5011-5013)CTT>TTT | p.L1671F      |
| Pat_76 | Pre-Treatment | HECW2     | 57520  | 37 | 2  | 197092934 | 197092934 | Missense_Mutation | SNP | G  | A  | 15  | 45  | c.3809C>T       | c.(3808-3810)TCC>TTC | p.S1270F      |
| Pat_76 | Pre-Treatment | RAPH1     | 65059  | 37 | 2  | 204306082 | 204306082 | Missense_Mutation | SNP | G  | A  | 7   | 15  | c.1831C>T       | c.(1831-1833)CCG>TCG | p.P611S       |
| Pat_76 | Pre-Treatment | ZDBF2     | 57683  | 37 | 2  | 207173096 | 207173096 | Missense_Mutation | SNP | G  | A  | 9   | 16  | c.3844G>A       | c.(3844-3846)GAT>AAT | p.D1282N      |
| Pat_76 | Pre-Treatment | PTH2R     | 5746   | 37 | 2  | 209307123 | 209307123 | Missense_Mutation | SNP | C  | T  | 80  | 123 | c.446C>T        | c.(445-447)ACC>ATC   | p.T149I       |
| Pat_76 | Pre-Treatment | CPS1      | 1373   | 37 | 2  | 211454911 | 211454911 | Missense_Mutation | SNP | C  | T  | 160 | 320 | c.793C>T        | c.(793-795)CCG>TCG   | p.P265S       |
| Pat_76 | Pre-Treatment | ABCA12    | 26154  | 37 | 2  | 215843664 | 215843665 | Missense_Mutation | DNP | CC | TT | 26  | 37  | .4840_4841GG>A  | c.(4840-4842)GGA>AAA | p.G1614K      |
| Pat_76 | Pre-Treatment | CXCR1     | 3577   | 37 | 2  | 219029255 | 219029255 | Missense_Mutation | SNP | C  | T  | 4   | 143 | c.680G>A        | c.(679-681)CGT>CAT   | p.R227H       |
| Pat_76 | Pre-Treatment | SERPINE2  | 5270   | 37 | 2  | 224842266 | 224842266 | Missense_Mutation | SNP | G  | A  | 47  | 76  | c.1154C>T       | c.(1153-1155)CCT>CTT | p.P385L       |
| Pat_76 | Pre-Treatment | IRS1      | 3667   | 37 | 2  | 227662817 | 227662817 | Missense_Mutation | SNP | C  | A  | 4   | 122 | c.638G>T        | c.(637-639)CGC>CTC   | p.R213L       |
| Pat_76 | Pre-Treatment | COL4A4    | 1286   | 37 | 2  | 227872874 | 227872874 | Missense_Mutation | SNP | C  | T  | 22  | 23  | c.4669G>A       | c.(4669-4671)GAG>AAG | p.E1557K      |
| Pat_76 | Pre-Treatment | COL4A3    | 1285   | 37 | 2  | 228155552 | 228155552 | Missense_Mutation | SNP | G  | A  | 22  | 16  | c.3160G>A       | c.(3160-3162)GGA>AGA | p.G1054R      |
| Pat_76 | Pre-Treatment | SP100     | 6672   | 37 | 2  | 231404082 | 231404083 | Missense_Mutation | DNP | CC | TT | 12  | 40  | ..2195_2196CC>T | c.(2194-2196)TCC>TTT | p.S732F       |
| Pat_76 | Pre-Treatment | UGT1A6    | 54578  | 37 | 2  | 234601885 | 234601885 | Missense_Mutation | SNP | C  | T  | 24  | 44  | c.235C>T        | c.(235-237)CCA>TCA   | p.P79S        |
| Pat_76 | Pre-Treatment | ASB18     | 401036 | 37 | 2  | 237149963 | 237149963 | Missense_Mutation | SNP | C  | T  | 32  | 44  | c.288G>A        | c.(286-288)ATG>ATA   | p.M96I        |
| Pat_76 | Pre-Treatment | RBM44     | 375316 | 37 | 2  | 238738134 | 238738134 | Missense_Mutation | SNP | C  | T  | 75  | 106 | c.2878C>T       | c.(2878-2880)CCT>TCT | p.P960S       |
| Pat_76 | Pre-Treatment | HDAC4     | 9759   | 37 | 2  | 240036829 | 240036829 | Missense_Mutation | SNP | C  | T  | 4   | 54  | c.1696G>A       | c.(1696-1698)GAT>AAT | p.D566N       |
| Pat_76 | Pre-Treatment | PRR21     | 643905 | 37 | 2  | 240981477 | 240981477 | Missense_Mutation | SNP | G  | A  | 5   | 67  | c.923C>T        | c.(922-924)ACC>ATC   | p.T308I       |
| Pat_76 | Pre-Treatment | RNPEPL1   | 57140  | 37 | 2  | 241514551 | 241514551 | Missense_Mutation | SNP | T  | A  | 42  | 59  | c.700T>A        | c.(700-702)TTT>ATT   | p.F234I       |
| Pat_76 | Pre-Treatment | SNED1     | 25992  | 37 | 2  | 241989314 | 241989314 | Missense_Mutation | SNP | T  | C  | 39  | 43  | c.1699T>C       | c.(1699-1701)TGC>CGC | p.C567R       |
| Pat_76 | Pre-Treatment | CPXM1     | 56265  | 37 | 20 | 2774842   | 2774842   | Missense_Mutation | SNP | C  | G  | 58  | 37  | c.2199G>C       | c.(2197-2199)AAG>AAC | p.K733N       |
| Pat_76 | Pre-Treatment | CPXM1     | 56265  | 37 | 20 | 2777701   | 2777701   | Missense_Mutation | SNP | G  | A  | 14  | 28  | c.872C>T        | c.(871-873)TCC>TTC   | p.S291F       |
| Pat_76 | Pre-Treatment | SLC4A11   | 83959  | 37 | 20 | 3209023   | 3209023   | Missense_Mutation | SNP | G  | A  | 59  | 78  | c.2488C>T       | c.(2488-2490)CAC>TAC | p.H830Y       |
| Pat_76 | Pre-Treatment | SIGLEC1   | 6614   | 37 | 20 | 3674127   | 3674127   | Missense_Mutation | SNP | G  | A  | 3   | 51  | c.3475C>T       | c.(3475-3477)CGC>TGC | p.R1159C      |
| Pat_76 | Pre-Treatment | GPCPD1    | 56261  | 37 | 20 | 5539440   | 5539440   | Missense_Mutation | SNP | G  | A  | 14  | 32  | c.1558C>T       | c.(1558-1560)CCG>TCG | p.P520S       |
| Pat_76 | Pre-Treatment | PLCB1     | 23236  | 37 | 20 | 8130959   | 8130959   | Missense_Mutation | SNP | C  | T  | 24  | 22  | c.118C>T        | c.(118-120)CCA>TCA   | p.P40S        |
| Pat_76 | Pre-Treatment | PLCB1     | 23236  | 37 | 20 | 8626748   | 8626748   | Splice_Site       | SNP | G  | A  | 29  | 42  | c.385_splice    | c.e5-1               | p.E129_splice |
| Pat_76 | Pre-Treatment | C20orf103 | 24141  | 37 | 20 | 9498795   | 9498795   | Missense_Mutation | SNP | C  | T  | 5   | 72  | c.584C>T        | c.(583-585)CCG>CTG   | p.P195L       |
| Pat_76 | Pre-Treatment | PAK7      | 57144  | 37 | 20 | 9561234   | 9561234   | Missense_Mutation | SNP | G  | A  | 106 | 92  | c.548C>T        | c.(547-549)TCT>TTT   | p.S183F       |
| Pat_76 | Pre-Treatment | SNAP25    | 6616   | 37 | 20 | 10256176  | 10256176  | Missense_Mutation | SNP | G  | A  | 21  | 8   | c.37G>A         | c.(37-39)GAG>AAG     | p.E13K        |
| Pat_76 | Pre-Treatment | SEL1L2    | 80343  | 37 | 20 | 13839970  | 13839970  | Missense_Mutation | SNP | G  | A  | 28  | 29  | c.1756C>T       | c.(1756-1758)CAC>TAC | p.H586Y       |
| Pat_76 | Pre-Treatment | SEC23B    | 10483  | 37 | 20 | 18491484  | 18491484  | Missense_Mutation | SNP | C  | T  | 4   | 75  | c.5C>T          | c.(4-6)GCC>GTG       | p.A2V         |
| Pat_76 | Pre-Treatment | C20orf26  | 26074  | 37 | 20 | 20257987  | 20257987  | Missense_Mutation | SNP | G  | A  | 64  | 34  | c.2681G>A       | c.(2680-2682)GGA>GAA | p.G894E       |
| Pat_76 | Pre-Treatment | XRN2      | 22803  | 37 | 20 | 21362668  | 21362668  | Missense_Mutation | SNP | C  | T  | 23  | 70  | c.2621C>T       | c.(2620-2622)CCC>CTC | p.P874L       |
| Pat_76 | Pre-Treatment | FOXA2     | 3170   | 37 | 20 | 22563239  | 22563239  | Missense_Mutation | SNP | C  | T  | 36  | 58  | c.623G>A        | c.(622-624)CGC>CAC   | p.R208H       |
| Pat_76 | Pre-Treatment | HM13      | 81502  | 37 | 20 | 30142599  | 30142599  | Missense_Mutation | SNP | G  | T  | 4   | 136 | c.775G>T        | c.(775-777)GCC>TCC   | p.A259S       |
| Pat_76 | Pre-Treatment | MYLK2     | 85366  | 37 | 20 | 30409442  | 30409442  | Missense_Mutation | SNP | C  | T  | 118 | 74  | c.674C>T        | c.(673-675)TCG>TTG   | p.S225L       |
| Pat_76 | Pre-Treatment | TTL9      | 164395 | 37 | 20 | 30507671  | 30507671  | Missense_Mutation | SNP | C  | T  | 72  | 61  | c.509C>T        | c.(508-510)GCC>GTC   | p.A170V       |
| Pat_76 | Pre-Treatment | HCK       | 3055   | 37 | 20 | 30674527  | 30674527  | Missense_Mutation | SNP | C  | T  | 3   | 36  | c.932C>T        | c.(931-933)ACT>ATT   | p.T311I       |
| Pat_76 | Pre-Treatment | ZNF341    | 84905  | 37 | 20 | 32377334  | 32377334  | Missense_Mutation | SNP | G  | A  | 25  | 93  | c.1975G>A       | c.(1975-1977)GGC>AGC | p.G659S       |
| Pat_76 | Pre-Treatment | AHCY      | 191    | 37 | 20 | 32878645  | 32878645  | Missense_Mutation | SNP | C  | T  | 4   | 75  | c.658G>A        | c.(658-660)GGC>AGC   | p.G220S       |
| Pat_76 | Pre-Treatment | ITCH      | 83737  | 37 | 20 | 33059310  | 33059310  | Missense_Mutation | SNP | C  | T  | 49  | 47  | c.1682C>T       | c.(1681-1683)TCC>TTC | p.S561F       |
| Pat_76 | Pre-Treatment | GSS       | 2937   | 37 | 20 | 33529540  | 33529540  | Missense_Mutation | SNP | G  | A  | 38  | 27  | c.584C>T        | c.(583-585)GCC>GTC   | p.A195V       |
| Pat_76 | Pre-Treatment | FAM83C    | 128876 | 37 | 20 | 33875149  | 33875149  | Missense_Mutation | SNP | G  | A  | 25  | 35  | c.1433C>T       | c.(1432-1434)CCC>CTC | p.P478L       |
| Pat_76 | Pre-Treatment | MANBAL    | 63905  | 37 | 20 | 35929694  | 35929694  | Missense_Mutation | SNP | C  | T  | 9   | 15  | c.28C>T         | c.(28-30)CCG>TCG     | p.P10S        |
| Pat_76 | Pre-Treatment | TGM2      | 7052   | 37 | 20 | 36760777  | 36760777  | Missense_Mutation | SNP | C  | T  | 53  | 113 | c.1741G>A       | c.(1741-1743)GAC>AAC | p.D581N       |

|        |               |           |        |    |    |          |          |                   |     |    |    |     |     |                                      |                      |          |
|--------|---------------|-----------|--------|----|----|----------|----------|-------------------|-----|----|----|-----|-----|--------------------------------------|----------------------|----------|
| Pat_76 | Pre-Treatment | TOX2      | 84969  | 37 | 20 | 42680074 | 42680074 | Missense_Mutation | SNP | G  | T  | 14  | 20  | c.567G>T                             | c.(565-567)ATG>ATT   | p.M189I  |
| Pat_76 | Pre-Treatment | JPH2      | 57158  | 37 | 20 | 42788428 | 42788428 | Missense_Mutation | SNP | G  | T  | 12  | 32  | c.999C>A                             | c.(997-999)GAC>GAA   | p.D333E  |
| Pat_76 | Pre-Treatment | JPH2      | 57158  | 37 | 20 | 42788430 | 42788430 | Missense_Mutation | SNP | C  | T  | 11  | 31  | c.997G>A                             | c.(997-999)GAC>AAC   | p.D333N  |
| Pat_76 | Pre-Treatment | HNF4A     | 3172   | 37 | 20 | 43056995 | 43056995 | Missense_Mutation | SNP | C  | T  | 78  | 54  | c.1150C>T                            | c.(1150-1152)CAT>TAT | p.H384Y  |
| Pat_76 | Pre-Treatment | SEMG2     | 6407   | 37 | 20 | 43850643 | 43850643 | Missense_Mutation | SNP | C  | T  | 45  | 25  | c.370C>T                             | c.(370-372)CAC>TAC   | p.H124Y  |
| Pat_76 | Pre-Treatment | C20orf165 | 128497 | 37 | 20 | 44516192 | 44516192 | Missense_Mutation | SNP | G  | A  | 4   | 118 | c.38C>T                              | c.(37-39)CCT>CTT     | p.P13L   |
| Pat_76 | Pre-Treatment | MMP9      | 4318   | 37 | 20 | 44641179 | 44641179 | Missense_Mutation | SNP | C  | T  | 50  | 39  | c.1288C>T                            | c.(1288-1290)CCC>TCC | p.P430S  |
| Pat_76 | Pre-Treatment | ZNF334    | 55713  | 37 | 20 | 45130345 | 45130345 | Missense_Mutation | SNP | C  | T  | 65  | 134 | c.1633G>A                            | c.(1633-1635)GAA>AAA | p.E545K  |
| Pat_76 | Pre-Treatment | ZNF334    | 55713  | 37 | 20 | 45130930 | 45130930 | Missense_Mutation | SNP | C  | T  | 69  | 161 | c.1048G>A                            | c.(1048-1050)GAA>AAA | p.E350K  |
| Pat_76 | Pre-Treatment | ARFGEF2   | 10564  | 37 | 20 | 47635499 | 47635499 | Missense_Mutation | SNP | C  | T  | 18  | 15  | c.4588C>T                            | c.(4588-4590)CCA>TCA | p.P1530S |
| Pat_76 | Pre-Treatment | SALL4     | 57167  | 37 | 20 | 50408016 | 50408016 | Missense_Mutation | SNP | G  | A  | 17  | 19  | c.1006C>T                            | c.(1006-1008)CCT>TCT | p.P336S  |
| Pat_76 | Pre-Treatment | SALL4     | 57167  | 37 | 20 | 50408730 | 50408730 | Missense_Mutation | SNP | G  | A  | 31  | 22  | c.292C>T                             | c.(292-294)CCA>TCA   | p.P98S   |
| Pat_76 | Pre-Treatment | CBLN4     | 140689 | 37 | 20 | 54575833 | 54575833 | Missense_Mutation | SNP | C  | T  | 109 | 100 | c.362G>A                             | c.(361-363)AGT>AAT   | p.S121N  |
| Pat_76 | Pre-Treatment | MC3R      | 4159   | 37 | 20 | 54824619 | 54824620 | Missense_Mutation | DNP | GG | AA | 31  | 22  | c.720_721GG>AA718-723)GGGGCA>GGAA    |                      | p.A241T  |
| Pat_76 | Pre-Treatment | CSTF1     | 1477   | 37 | 20 | 54974146 | 54974146 | Missense_Mutation | SNP | C  | T  | 123 | 270 | c.769C>T                             | c.(769-771)CCT>TCT   | p.P257S  |
| Pat_76 | Pre-Treatment | CASS4     | 57091  | 37 | 20 | 55027514 | 55027514 | Missense_Mutation | SNP | G  | A  | 12  | 12  | c.1282G>A                            | c.(1282-1284)GAG>AAG | p.E428K  |
| Pat_76 | Pre-Treatment | GNAS      | 2778   | 37 | 20 | 57484421 | 57484421 | Missense_Mutation | SNP | G  | A  | 24  | 80  | c.2531G>A                            | c.(2530-2532)CGT>CAT | p.R844H  |
| Pat_76 | Pre-Treatment | ZNF831    | 128611 | 37 | 20 | 57768785 | 57768785 | Missense_Mutation | SNP | C  | T  | 29  | 25  | c.2711C>T                            | c.(2710-2712)ACC>ATC | p.T904I  |
| Pat_76 | Pre-Treatment | ZNF831    | 128611 | 37 | 20 | 57769723 | 57769723 | Nonsense_Mutation | SNP | C  | T  | 12  | 10  | c.3649C>T                            | c.(3649-3651)CGA>TGA | p.R1217* |
| Pat_76 | Pre-Treatment | ZNF831    | 128611 | 37 | 20 | 57770945 | 57770945 | Missense_Mutation | SNP | G  | A  | 89  | 227 | c.3760G>A                            | c.(3760-3762)GGG>AGG | p.G1254R |
| Pat_76 | Pre-Treatment | SYCP2     | 10388  | 37 | 20 | 58495521 | 58495521 | Missense_Mutation | SNP | G  | A  | 18  | 18  | c.190C>T                             | c.(190-192)CAC>TAC   | p.H64Y   |
| Pat_76 | Pre-Treatment | CDH4      | 1002   | 37 | 20 | 60448856 | 60448856 | Missense_Mutation | SNP | G  | A  | 4   | 146 | c.950G>A                             | c.(949-951)CGG>CAG   | p.R317Q  |
| Pat_76 | Pre-Treatment | DIDO1     | 11083  | 37 | 20 | 61513427 | 61513427 | Missense_Mutation | SNP | G  | A  | 5   | 242 | c.3881C>T                            | c.(3880-3882)GCG>GTG | p.A1294V |
| Pat_76 | Pre-Treatment | SRMS      | 6725   | 37 | 20 | 62178665 | 62178666 | Missense_Mutation | DNP | GG | AA | 4   | 13  | c.151_152CC>TT                       | c.(151-153)CCC>TTC   | p.P51F   |
| Pat_76 | Pre-Treatment | RTEL1     | 51750  | 37 | 20 | 62292799 | 62292799 | Missense_Mutation | SNP | G  | A  | 3   | 43  | c.251G>A                             | c.(250-252)CGG>CAG   | p.R84Q   |
| Pat_76 | Pre-Treatment | RTEL1     | 51750  | 37 | 20 | 62320927 | 62320927 | Missense_Mutation | SNP | C  | T  | 4   | 61  | c.1951C>T                            | c.(1951-1953)CGC>TGC | p.R651C  |
| Pat_76 | Pre-Treatment | TPTE      | 7179   | 37 | 21 | 10908889 | 10908889 | Missense_Mutation | SNP | G  | A  | 6   | 24  | c.1456C>T                            | c.(1456-1458)CCT>TCT | p.P486S  |
| Pat_76 | Pre-Treatment | TPTE      | 7179   | 37 | 21 | 10920116 | 10920116 | Missense_Mutation | SNP | C  | T  | 24  | 100 | c.1138G>A                            | c.(1138-1140)GAA>AAA | p.E380K  |
| Pat_76 | Pre-Treatment | RBM11     | 54033  | 37 | 21 | 15599544 | 15599544 | Missense_Mutation | SNP | G  | A  | 4   | 81  | c.776G>A                             | c.(775-777)AGC>AAC   | p.S259N  |
| Pat_76 | Pre-Treatment | BTG3      | 10950  | 37 | 21 | 18966605 | 18966605 | Missense_Mutation | SNP | G  | A  | 45  | 45  | c.565C>T                             | c.(565-567)CCC>TCC   | p.P189S  |
| Pat_76 | Pre-Treatment | NCAM2     | 4685   | 37 | 21 | 22656657 | 22656657 | Missense_Mutation | SNP | C  | T  | 21  | 51  | c.274C>T                             | c.(274-276)CGT>TGT   | p.R92C   |
| Pat_76 | Pre-Treatment | JAM2      | 58494  | 37 | 21 | 27066190 | 27066190 | Missense_Mutation | SNP | G  | A  | 76  | 117 | c.364G>A                             | c.(364-366)GAA>AAA   | p.E122K  |
| Pat_76 | Pre-Treatment | HUNK      | 30811  | 37 | 21 | 33370917 | 33370917 | Missense_Mutation | SNP | C  | T  | 32  | 61  | c.1565C>T                            | c.(1564-1566)CCC>CTC | p.P522L  |
| Pat_76 | Pre-Treatment | C21orf59  | 56683  | 37 | 21 | 33976521 | 33976521 | Missense_Mutation | SNP | C  | T  | 26  | 64  | c.448G>A                             | c.(448-450)GTG>ATG   | p.V150M  |
| Pat_76 | Pre-Treatment | DNAJC28   | 54943  | 37 | 21 | 34861059 | 34861059 | Missense_Mutation | SNP | T  | G  | 91  | 107 | c.642A>C                             | c.(640-642)AAA>AAC   | p.K214N  |
| Pat_76 | Pre-Treatment | SLC5A3    | 6526   | 37 | 21 | 35467832 | 35467832 | Missense_Mutation | SNP | A  | G  | 76  | 165 | c.335A>G                             | c.(334-336)TAC>TGC   | p.Y112C  |
| Pat_76 | Pre-Treatment | SLC5A3    | 6526   | 37 | 21 | 35467859 | 35467859 | Missense_Mutation | SNP | G  | A  | 99  | 177 | c.362G>A                             | c.(361-363)AGG>AAG   | p.R121K  |
| Pat_76 | Pre-Treatment | SETD4     | 54093  | 37 | 21 | 37420683 | 37420683 | Missense_Mutation | SNP | C  | T  | 105 | 170 | c.219G>A                             | c.(217-219)ATG>ATA   | p.M73I   |
| Pat_76 | Pre-Treatment | DOPEY2    | 9980   | 37 | 21 | 37597961 | 37597961 | Missense_Mutation | SNP | C  | T  | 7   | 26  | c.1469C>T                            | c.(1468-1470)CCT>CTT | p.P490L  |
| Pat_76 | Pre-Treatment | TTC3      | 7267   | 37 | 21 | 38462544 | 38462545 | Missense_Mutation | DNP | CC | TT | 15  | 35  | c.438_439CC>TT (436-441)TTCCTT>TTTTT |                      | p.L147F  |
| Pat_76 | Pre-Treatment | TTC3      | 7267   | 37 | 21 | 38539906 | 38539906 | Missense_Mutation | SNP | C  | T  | 36  | 40  | c.4451C>T                            | c.(4450-4452)CCT>CTT | p.P1484L |
| Pat_76 | Pre-Treatment | DSCR4     | 10281  | 37 | 21 | 39426981 | 39426981 | Missense_Mutation | SNP | C  | T  | 12  | 47  | c.325G>A                             | c.(325-327)GAC>AAC   | p.D109N  |
| Pat_76 | Pre-Treatment | DSCAM     | 1826   | 37 | 21 | 41450781 | 41450781 | Missense_Mutation | SNP | G  | A  | 14  | 19  | c.4544C>T                            | c.(4543-4545)CCC>CTC | p.P1515L |
| Pat_76 | Pre-Treatment | DSCAM     | 1826   | 37 | 21 | 41455916 | 41455916 | Missense_Mutation | SNP | G  | A  | 20  | 32  | c.4150C>T                            | c.(4150-4152)CGG>TGG | p.R1384W |
| Pat_76 | Pre-Treatment | FAM3B     | 54097  | 37 | 21 | 42694883 | 42694883 | Missense_Mutation | SNP | C  | T  | 26  | 46  | c.53C>T                              | c.(52-54)TCC>TTC     | p.S18F   |
| Pat_76 | Pre-Treatment | PRDM15    | 63977  | 37 | 21 | 43279315 | 43279315 | Missense_Mutation | SNP | C  | T  | 3   | 63  | c.1054G>A                            | c.(1054-1056)GTG>ATG | p.V352M  |
| Pat_76 | Pre-Treatment | PRDM15    | 63977  | 37 | 21 | 43299455 | 43299455 | Missense_Mutation | SNP | G  | A  | 15  | 25  | c.26C>T                              | c.(25-27)TCC>TTC     | p.S9F    |

|        |               |           |        |    |    |          |          |                   |     |    |    |    |     |                |                      |                |
|--------|---------------|-----------|--------|----|----|----------|----------|-------------------|-----|----|----|----|-----|----------------|----------------------|----------------|
| Pat_76 | Pre-Treatment | CBS       | 875    | 37 | 21 | 44483104 | 44483104 | Missense_Mutation | SNP | C  | T  | 4  | 124 | c.913G>A       | c.(913-915)GGG>AGG   | p.G305R        |
| Pat_76 | Pre-Treatment | CRYAA     | 1409   | 37 | 21 | 44590730 | 44590730 | Missense_Mutation | SNP | G  | A  | 40 | 50  | c.293G>A       | c.(292-294)GGA>GAA   | p.G98E         |
| Pat_76 | Pre-Treatment | SIK1      | 150094 | 37 | 21 | 44838191 | 44838191 | Missense_Mutation | SNP | G  | A  | 29 | 28  | c.1693C>T      | c.(1693-1695)CCT>TCT | p.P565S        |
| Pat_76 | Pre-Treatment | RRP1      | 8568   | 37 | 21 | 45217545 | 45217546 | Missense_Mutation | DNP | CC | TT | 41 | 98  | c.586_587CC>TT | c.(586-588)CCC>TTC   | p.P196F        |
| Pat_76 | Pre-Treatment | C21orf29  | 54084  | 37 | 21 | 45987779 | 45987779 | Missense_Mutation | SNP | C  | T  | 20 | 31  | c.193G>A       | c.(193-195)GCC>ACC   | p.A65T         |
| Pat_76 | Pre-Treatment | KRTAP10-4 | 386672 | 37 | 21 | 45994771 | 45994771 | Missense_Mutation | SNP | C  | T  | 33 | 53  | c.1136C>T      | c.(1135-1137)TCC>TTC | p.S379F        |
| Pat_76 | Pre-Treatment | COL6A1    | 1291   | 37 | 21 | 47418068 | 47418069 | Missense_Mutation | DNP | GG | AA | 11 | 16  | .1558_1559GG>A | c.(1558-1560)GGC>AAC | p.G520N        |
| Pat_76 | Pre-Treatment | COL6A1    | 1291   | 37 | 21 | 47421963 | 47421963 | Missense_Mutation | SNP | G  | A  | 4  | 15  | c.2045G>A      | c.(2044-2046)CGG>CAG | p.R682Q        |
| Pat_76 | Pre-Treatment | COL6A2    | 1292   | 37 | 21 | 47532283 | 47532283 | Missense_Mutation | SNP | C  | T  | 8  | 12  | c.506C>T       | c.(505-507)CCC>CTC   | p.P169L        |
| Pat_76 | Pre-Treatment | LSS       | 4047   | 37 | 21 | 47633739 | 47633739 | Missense_Mutation | SNP | G  | A  | 14 | 19  | c.1022C>T      | c.(1021-1023)ACC>ATC | p.T341I        |
| Pat_76 | Pre-Treatment | PCNT      | 5116   | 37 | 21 | 47769597 | 47769598 | Splice_Site       | DNP | GG | AA | 28 | 53  | c.1208_splice  | c.e8-1               | p.R403_splice  |
| Pat_76 | Pre-Treatment | PCNT      | 5116   | 37 | 21 | 47817270 | 47817270 | Missense_Mutation | SNP | G  | A  | 11 | 32  | c.4308G>A      | c.(4306-4308)ATG>ATA | p.M1436I       |
| Pat_76 | Pre-Treatment | DIP2A     | 23181  | 37 | 21 | 47981665 | 47981665 | Missense_Mutation | SNP | C  | T  | 91 | 168 | c.4036C>T      | c.(4036-4038)CGT>TGT | p.R1346C       |
| Pat_76 | Pre-Treatment | POTEH     | 23784  | 37 | 22 | 16267070 | 16267070 | Missense_Mutation | SNP | C  | T  | 48 | 456 | c.1379G>A      | c.(1378-1380)GGA>GAA | p.G460E        |
| Pat_76 | Pre-Treatment | POTEH     | 23784  | 37 | 22 | 16279222 | 16279222 | Missense_Mutation | SNP | T  | A  | 50 | 483 | c.1001A>T      | c.(1000-1002)AAT>ATT | p.N334I        |
| Pat_76 | Pre-Treatment | OR11H1    | 81061  | 37 | 22 | 16449102 | 16449102 | Missense_Mutation | SNP | G  | A  | 71 | 111 | c.703C>T       | c.(703-705)CTT>TTT   | p.L235F        |
| Pat_76 | Pre-Treatment | RTDR1     | 27156  | 37 | 22 | 23401774 | 23401774 | Missense_Mutation | SNP | C  | T  | 45 | 16  | c.913G>A       | c.(913-915)GGC>AGC   | p.G305S        |
| Pat_76 | Pre-Treatment | RAB36     | 9609   | 37 | 22 | 23495309 | 23495309 | Missense_Mutation | SNP | A  | T  | 71 | 75  | c.515A>T       | c.(514-516)TAT>TTT   | p.Y172F        |
| Pat_76 | Pre-Treatment | MMP11     | 4320   | 37 | 22 | 24124425 | 24124425 | Nonsense_Mutation | SNP | G  | A  | 43 | 69  | c.1088G>A      | c.(1087-1089)TGG>TAG | p.W363*        |
| Pat_76 | Pre-Treatment | GGT1      | 2678   | 37 | 22 | 25023398 | 25023398 | Splice_Site       | SNP | G  | A  | 25 | 40  | c.1021_splice  | c.e12-1              | p.V341_splice  |
| Pat_76 | Pre-Treatment | MYO18B    | 84700  | 37 | 22 | 26351183 | 26351183 | Missense_Mutation | SNP | G  | A  | 6  | 7   | c.6009G>A      | c.(6007-6009)ATG>ATA | p.M2003I       |
| Pat_76 | Pre-Treatment | RFPL1     | 5988   | 37 | 22 | 29837650 | 29837650 | Missense_Mutation | SNP | G  | A  | 4  | 104 | c.493G>A       | c.(493-495)GTG>ATG   | p.V165M        |
| Pat_76 | Pre-Treatment | CABP7     | 164633 | 37 | 22 | 30125183 | 30125183 | Missense_Mutation | SNP | C  | T  | 4  | 4   | c.506C>T       | c.(505-507)CCC>CTC   | p.P169L        |
| Pat_76 | Pre-Treatment | SEC14L3   | 266629 | 37 | 22 | 30863013 | 30863013 | Missense_Mutation | SNP | C  | T  | 53 | 98  | c.475G>A       | c.(475-477)GGA>AGA   | p.G159R        |
| Pat_76 | Pre-Treatment | NCF4      | 4689   | 37 | 22 | 37261013 | 37261013 | Missense_Mutation | SNP | G  | A  | 24 | 46  | c.170G>A       | c.(169-171)CGC>CAC   | p.R57H         |
| Pat_76 | Pre-Treatment | TMPRSS6   | 164656 | 37 | 22 | 37499418 | 37499418 | Missense_Mutation | SNP | C  | T  | 43 | 55  | c.67G>A        | c.(67-69)GGG>AGG     | p.G23R         |
| Pat_76 | Pre-Treatment | TRIOBP    | 11078  | 37 | 22 | 38120224 | 38120224 | Missense_Mutation | SNP | C  | T  | 60 | 164 | c.1661C>T      | c.(1660-1662)GCC>GTC | p.A554V        |
| Pat_76 | Pre-Treatment | TRIOBP    | 11078  | 37 | 22 | 38131325 | 38131326 | Missense_Mutation | DNP | CC | TT | 10 | 17  | .4982_4983CC>T | c.(4981-4983)TCC>TTT | p.S1661F       |
| Pat_76 | Pre-Treatment | TAB1      | 10454  | 37 | 22 | 39822888 | 39822888 | Missense_Mutation | SNP | C  | T  | 22 | 33  | c.1102C>T      | c.(1102-1104)CCG>TCG | p.P368S        |
| Pat_76 | Pre-Treatment | CACNA1I   | 8911   | 37 | 22 | 40069069 | 40069069 | Missense_Mutation | SNP | G  | A  | 44 | 84  | c.4765G>A      | c.(4765-4767)GTT>ATT | p.V1589I       |
| Pat_76 | Pre-Treatment | EP300     | 2033   | 37 | 22 | 41556727 | 41556727 | Splice_Site       | SNP | G  | A  | 4  | 62  | c.3671_splice  | c.e20+1              | p.T1224_splice |
| Pat_76 | Pre-Treatment | ACO2      | 50     | 37 | 22 | 41923334 | 41923334 | Missense_Mutation | SNP | G  | A  | 4  | 32  | c.1996G>A      | c.(1996-1998)GGC>AGC | p.G666S        |
| Pat_76 | Pre-Treatment | XRCC6     | 2547   | 37 | 22 | 42053023 | 42053023 | Missense_Mutation | SNP | C  | T  | 8  | 17  | c.1408C>T      | c.(1408-1410)CGC>TGC | p.R470C        |
| Pat_76 | Pre-Treatment | WNT7B     | 7477   | 37 | 22 | 46345835 | 46345835 | Missense_Mutation | SNP | C  | T  | 24 | 27  | c.263G>A       | c.(262-264)GGC>GAC   | p.G88D         |
| Pat_76 | Pre-Treatment | SAPS2     | 9701   | 37 | 22 | 50875947 | 50875947 | Missense_Mutation | SNP | T  | C  | 3  | 48  | c.1696T>C      | c.(1696-1698)TAC>CAC | p.Y566H        |
| Pat_76 | Pre-Treatment | CNTN4     | 152330 | 37 | 3  | 3081778  | 3081778  | Missense_Mutation | SNP | C  | T  | 28 | 65  | c.2221C>T      | c.(2221-2223)CCC>TCC | p.P741S        |
| Pat_76 | Pre-Treatment | IL5RA     | 3568   | 37 | 3  | 3139668  | 3139668  | Missense_Mutation | SNP | G  | A  | 35 | 78  | c.595C>T       | c.(595-597)CCC>TCC   | p.P199S        |
| Pat_76 | Pre-Treatment | ITPR1     | 3708   | 37 | 3  | 4735393  | 4735393  | Missense_Mutation | SNP | C  | T  | 11 | 32  | c.4222C>T      | c.(4222-4224)CGC>TGC | p.R1408C       |
| Pat_76 | Pre-Treatment | EDEM1     | 9695   | 37 | 3  | 5229995  | 5229995  | Missense_Mutation | SNP | G  | A  | 12 | 20  | c.505G>A       | c.(505-507)GAC>AAC   | p.D169N        |
| Pat_76 | Pre-Treatment | CAMK1     | 8536   | 37 | 3  | 9803367  | 9803367  | Missense_Mutation | SNP | C  | T  | 64 | 36  | c.504G>A       | c.(502-504)ATG>ATA   | p.M168I        |
| Pat_76 | Pre-Treatment | RPUSD3    | 285367 | 37 | 3  | 9883915  | 9883915  | Missense_Mutation | SNP | G  | A  | 8  | 435 | c.275C>T       | c.(274-276)ACG>ATG   | p.T92M         |
| Pat_76 | Pre-Treatment | PPARG     | 5468   | 37 | 3  | 12458228 | 12458228 | Missense_Mutation | SNP | C  | T  | 17 | 28  | c.845C>T       | c.(844-846)TCC>TTC   | p.S282F        |
| Pat_76 | Pre-Treatment | NUP210    | 23225  | 37 | 3  | 13378363 | 13378363 | Missense_Mutation | SNP | T  | C  | 38 | 106 | c.3608A>G      | c.(3607-3609)AAT>AGT | p.N1203S       |
| Pat_76 | Pre-Treatment | GRIP2     | 80852  | 37 | 3  | 14561732 | 14561732 | Missense_Mutation | SNP | C  | T  | 24 | 10  | c.1206G>A      | c.(1204-1206)ATG>ATA | p.M402I        |
| Pat_76 | Pre-Treatment | FGD5      | 152273 | 37 | 3  | 14861563 | 14861563 | Missense_Mutation | SNP | C  | T  | 9  | 61  | c.985C>T       | c.(985-987)CCT>TCT   | p.P329S        |
| Pat_76 | Pre-Treatment | PLCL2     | 23228  | 37 | 3  | 17051292 | 17051292 | Missense_Mutation | SNP | G  | A  | 32 | 24  | c.430G>A       | c.(430-432)GTT>ATT   | p.V144I        |
| Pat_76 | Pre-Treatment | EFHB      | 151651 | 37 | 3  | 19974997 | 19974997 | Missense_Mutation | SNP | C  | T  | 82 | 51  | c.514G>A       | c.(514-516)GAA>AAA   | p.E172K        |



|        |               |          |        |    |   |           |           |                   |     |    |    |     |     |                 |                      |          |
|--------|---------------|----------|--------|----|---|-----------|-----------|-------------------|-----|----|----|-----|-----|-----------------|----------------------|----------|
| Pat_76 | Pre-Treatment | TOP2B    | 7155   | 37 | 3 | 25639883  | 25639883  | Missense_Mutation | SNP | C  | T  | 4   | 137 | c.4781G>A       | c.(4780-4782)CGA>CAA | p.R1594Q |
| Pat_76 | Pre-Treatment | SLC4A7   | 9497   | 37 | 3 | 27475470  | 27475470  | Missense_Mutation | SNP | G  | A  | 127 | 104 | c.688C>T        | c.(688-690)CTT>TTT   | p.L230F  |
| Pat_76 | Pre-Treatment | OSBPL10  | 114884 | 37 | 3 | 31725572  | 31725572  | Missense_Mutation | SNP | G  | C  | 41  | 32  | c.1280C>G       | c.(1279-1281)TCT>TGT | p.S427C  |
| Pat_76 | Pre-Treatment | CNOT10   | 25904  | 37 | 3 | 32776347  | 32776347  | Missense_Mutation | SNP | C  | T  | 108 | 299 | c.1393C>T       | c.(1393-1395)CTC>TTC | p.L465F  |
| Pat_76 | Pre-Treatment | GLB1     | 2720   | 37 | 3 | 33109736  | 33109736  | Missense_Mutation | SNP | C  | T  | 4   | 140 | c.443G>A        | c.(442-444)CGC>CAC   | p.R148H  |
| Pat_76 | Pre-Treatment | ARPP21   | 10777  | 37 | 3 | 35730819  | 35730819  | Missense_Mutation | SNP | G  | A  | 73  | 40  | c.427G>A        | c.(427-429)GAT>AAT   | p.D143N  |
| Pat_76 | Pre-Treatment | ITGA9    | 3680   | 37 | 3 | 37783285  | 37783285  | Missense_Mutation | SNP | C  | T  | 17  | 27  | c.2299C>T       | c.(2299-2301)CAC>TAC | p.H767Y  |
| Pat_76 | Pre-Treatment | DLEC1    | 9940   | 37 | 3 | 38150967  | 38150967  | Missense_Mutation | SNP | G  | A  | 20  | 96  | c.3174G>A       | c.(3172-3174)ATG>ATA | p.M1058I |
| Pat_76 | Pre-Treatment | SCN5A    | 6331   | 37 | 3 | 38592468  | 38592468  | Missense_Mutation | SNP | C  | T  | 32  | 18  | c.5395G>A       | c.(5395-5397)GAG>AAG | p.E1799K |
| Pat_76 | Pre-Treatment | SCN10A   | 6336   | 37 | 3 | 38739493  | 38739493  | Missense_Mutation | SNP | C  | T  | 55  | 25  | c.5218G>A       | c.(5218-5220)GAC>AAC | p.D1740N |
| Pat_76 | Pre-Treatment | CSRNP1   | 64651  | 37 | 3 | 39185196  | 39185196  | Missense_Mutation | SNP | G  | A  | 13  | 31  | c.1120C>T       | c.(1120-1122)CAC>TAC | p.H374Y  |
| Pat_76 | Pre-Treatment | CCR8     | 1237   | 37 | 3 | 39374813  | 39374813  | Missense_Mutation | SNP | C  | G  | 5   | 115 | c.991C>G        | c.(991-993)CCT>GCT   | p.P331A  |
| Pat_76 | Pre-Treatment | LYZL4    | 131375 | 37 | 3 | 42448635  | 42448635  | Missense_Mutation | SNP | C  | T  | 9   | 36  | c.109G>A        | c.(109-111)GAT>AAT   | p.D37N   |
| Pat_76 | Pre-Treatment | KBTD5    | 131377 | 37 | 3 | 42727237  | 42727237  | Missense_Mutation | SNP | G  | A  | 4   | 63  | c.127G>A        | c.(127-129)GAG>AAG   | p.E43K   |
| Pat_76 | Pre-Treatment | HHATL    | 57467  | 37 | 3 | 42735116  | 42735116  | Missense_Mutation | SNP | C  | T  | 22  | 8   | c.1241G>A       | c.(1240-1242)CGA>CAA | p.R414Q  |
| Pat_76 | Pre-Treatment | SNRK     | 54861  | 37 | 3 | 43389492  | 43389492  | Missense_Mutation | SNP | G  | A  | 4   | 134 | c.1741G>A       | c.(1741-1743)GGG>AGG | p.G581R  |
| Pat_76 | Pre-Treatment | LIMD1    | 8994   | 37 | 3 | 45636586  | 45636586  | Missense_Mutation | SNP | G  | A  | 3   | 32  | c.215G>A        | c.(214-216)AGG>AAG   | p.R72K   |
| Pat_76 | Pre-Treatment | SACM1L   | 22908  | 37 | 3 | 45780142  | 45780142  | Missense_Mutation | SNP | C  | A  | 14  | 43  | c.1455C>A       | c.(1453-1455)AAC>AAA | p.N485K  |
| Pat_76 | Pre-Treatment | SACM1L   | 22908  | 37 | 3 | 45780147  | 45780148  | Missense_Mutation | DNP | CC | TT | 12  | 43  | :.1460_1461CC>T | c.(1459-1461)TCC>TTT | p.S487F  |
| Pat_76 | Pre-Treatment | LTF      | 4057   | 37 | 3 | 46485049  | 46485049  | Missense_Mutation | SNP | G  | A  | 6   | 197 | c.1538C>T       | c.(1537-1539)GCC>GTC | p.A513V  |
| Pat_76 | Pre-Treatment | LRRC2    | 79442  | 37 | 3 | 46592991  | 46592991  | Missense_Mutation | SNP | C  | T  | 76  | 58  | c.91G>A         | c.(91-93)GAG>AAG     | p.E31K   |
| Pat_76 | Pre-Treatment | PLXNB1   | 5364   | 37 | 3 | 48456394  | 48456395  | Missense_Mutation | DNP | GG | AA | 71  | 57  | :.4022_4023CC>T | c.(4021-4023)GCC>GTT | p.A1341V |
| Pat_76 | Pre-Treatment | CCDC51   | 79714  | 37 | 3 | 48474195  | 48474195  | Missense_Mutation | SNP | C  | T  | 47  | 125 | c.859G>A        | c.(859-861)GGT>AGT   | p.G287S  |
| Pat_76 | Pre-Treatment | CELSR3   | 1951   | 37 | 3 | 48677662  | 48677662  | Missense_Mutation | SNP | C  | T  | 5   | 67  | c.9356G>A       | c.(9355-9357)AGC>AAC | p.S3119N |
| Pat_76 | Pre-Treatment | QARS     | 5859   | 37 | 3 | 49135820  | 49135820  | Missense_Mutation | SNP | G  | A  | 42  | 111 | c.2050C>T       | c.(2050-2052)CCT>TCT | p.P684S  |
| Pat_76 | Pre-Treatment | QARS     | 5859   | 37 | 3 | 49136632  | 49136632  | Missense_Mutation | SNP | C  | A  | 4   | 97  | c.1669G>T       | c.(1669-1671)GTG>TTG | p.V557L  |
| Pat_76 | Pre-Treatment | BSN      | 8927   | 37 | 3 | 49698400  | 49698400  | Missense_Mutation | SNP | C  | T  | 4   | 58  | c.9122C>T       | c.(9121-9123)GCT>GTT | p.A3041V |
| Pat_76 | Pre-Treatment | UBA7     | 7318   | 37 | 3 | 49845201  | 49845201  | Missense_Mutation | SNP | G  | A  | 4   | 67  | c.2683C>T       | c.(2683-2685)CGC>TGC | p.R895C  |
| Pat_76 | Pre-Treatment | DOCK3    | 1795   | 37 | 3 | 51297699  | 51297699  | Missense_Mutation | SNP | C  | T  | 4   | 47  | c.2297C>T       | c.(2296-2298)TCC>TTC | p.S766F  |
| Pat_76 | Pre-Treatment | TNNC1    | 7134   | 37 | 3 | 52485442  | 52485442  | Missense_Mutation | SNP | C  | T  | 42  | 23  | c.419G>A        | c.(418-420)GGA>GAA   | p.G140E  |
| Pat_76 | Pre-Treatment | CACNA1D  | 776    | 37 | 3 | 53699804  | 53699804  | Missense_Mutation | SNP | G  | A  | 16  | 37  | c.884G>A        | c.(883-885)GGA>GAA   | p.G295E  |
| Pat_76 | Pre-Treatment | CACNA1D  | 776    | 37 | 3 | 53835242  | 53835242  | Missense_Mutation | SNP | G  | A  | 49  | 33  | c.5198G>A       | c.(5197-5199)GGA>GAA | p.G1733E |
| Pat_76 | Pre-Treatment | CACNA2D3 | 55799  | 37 | 3 | 54925456  | 54925456  | Missense_Mutation | SNP | G  | A  | 4   | 110 | c.2225G>A       | c.(2224-2226)GGG>GAG | p.G742E  |
| Pat_76 | Pre-Treatment | ERC2     | 26059  | 37 | 3 | 55768858  | 55768858  | Missense_Mutation | SNP | C  | T  | 11  | 34  | c.2653G>A       | c.(2653-2655)GAA>AAA | p.E885K  |
| Pat_76 | Pre-Treatment | ERC2     | 26059  | 37 | 3 | 55984533  | 55984533  | Missense_Mutation | SNP | C  | T  | 16  | 65  | c.2323G>A       | c.(2323-2325)GAA>AAA | p.E775K  |
| Pat_76 | Pre-Treatment | CCDC66   | 285331 | 37 | 3 | 56627597  | 56627597  | Nonsense_Mutation | SNP | C  | T  | 32  | 32  | c.1147C>T       | c.(1147-1149)CAG>TAG | p.Q383*  |
| Pat_76 | Pre-Treatment | HESX1    | 8820   | 37 | 3 | 57232472  | 57232472  | Missense_Mutation | SNP | C  | T  | 36  | 35  | c.406G>A        | c.(406-408)GAT>AAT   | p.D136N  |
| Pat_76 | Pre-Treatment | FLNB     | 2317   | 37 | 3 | 58109342  | 58109342  | Missense_Mutation | SNP | C  | T  | 90  | 47  | c.3649C>T       | c.(3649-3651)CCC>TCC | p.P1217S |
| Pat_76 | Pre-Treatment | DNASE1L3 | 1776   | 37 | 3 | 58191217  | 58191217  | Nonsense_Mutation | SNP | G  | A  | 75  | 77  | c.301C>T        | c.(301-303)CAA>TAA   | p.Q101*  |
| Pat_76 | Pre-Treatment | LMOD3    | 56203  | 37 | 3 | 69168079  | 69168079  | Missense_Mutation | SNP | G  | A  | 4   | 78  | c.1427C>T       | c.(1426-1428)CCG>CTG | p.P476L  |
| Pat_76 | Pre-Treatment | EPHA3    | 2042   | 37 | 3 | 89499331  | 89499331  | Missense_Mutation | SNP | T  | G  | 19  | 41  | c.2501T>G       | c.(2500-2502)ATT>AGT | p.I834S  |
| Pat_76 | Pre-Treatment | PROS1    | 5627   | 37 | 3 | 93646102  | 93646102  | Missense_Mutation | SNP | G  | A  | 48  | 120 | c.226C>T        | c.(226-228)CCG>TCG   | p.P76S   |
| Pat_76 | Pre-Treatment | OR5H14   | 403273 | 37 | 3 | 97868560  | 97868560  | Missense_Mutation | SNP | G  | A  | 91  | 283 | c.331G>A        | c.(331-333)GAA>AAA   | p.E111K  |
| Pat_76 | Pre-Treatment | OR5H15   | 403274 | 37 | 3 | 97888271  | 97888271  | Missense_Mutation | SNP | C  | G  | 46  | 54  | c.728C>G        | c.(727-729)GCC>GGC   | p.A243G  |
| Pat_76 | Pre-Treatment | GPR128   | 84873  | 37 | 3 | 100349614 | 100349614 | Missense_Mutation | SNP | G  | A  | 52  | 27  | c.295G>A        | c.(295-297)GGA>AGA   | p.G99R   |
| Pat_76 | Pre-Treatment | IMPG2    | 50939  | 37 | 3 | 101038529 | 101038529 | Missense_Mutation | SNP | C  | T  | 51  | 148 | c.233G>A        | c.(232-234)AGA>AAA   | p.R78K   |
| Pat_76 | Pre-Treatment | ZPLD1    | 131368 | 37 | 3 | 102187971 | 102187971 | Missense_Mutation | SNP | C  | T  | 66  | 117 | c.925C>T        | c.(925-927)CTT>TTT   | p.L309F  |

|        |               |          |        |    |   |           |           |                   |     |    |    |     |     |                 |                      |                |
|--------|---------------|----------|--------|----|---|-----------|-----------|-------------------|-----|----|----|-----|-----|-----------------|----------------------|----------------|
| Pat_76 | Pre-Treatment | CCDC54   | 84692  | 37 | 3 | 107096863 | 107096864 | Missense_Mutation | DNP | GG | AA | 49  | 32  | c.429_430GG>AA  | 427-432)CTGGAA>CTAA  | p.E144K        |
| Pat_76 | Pre-Treatment | MYH15    | 22989  | 37 | 3 | 108110641 | 108110641 | Missense_Mutation | SNP | C  | T  | 139 | 105 | c.5456G>A       | c.(5455-5457)GGG>GAG | p.G1819E       |
| Pat_76 | Pre-Treatment | MYH15    | 22989  | 37 | 3 | 108149702 | 108149702 | Nonsense_Mutation | SNP | G  | A  | 41  | 58  | c.3349C>T       | c.(3349-3351)CAG>TAG | p.Q1117*       |
| Pat_76 | Pre-Treatment | MYH15    | 22989  | 37 | 3 | 108218318 | 108218318 | Nonsense_Mutation | SNP | G  | A  | 42  | 47  | c.568C>T        | c.(568-570)CAG>TAG   | p.Q190*        |
| Pat_76 | Pre-Treatment | CD96     | 10225  | 37 | 3 | 111263955 | 111263955 | Missense_Mutation | SNP | A  | C  | 56  | 118 | c.124A>C        | c.(124-126)AAC>CAC   | p.N42H         |
| Pat_76 | Pre-Treatment | TMPRSS7  | 344805 | 37 | 3 | 111793194 | 111793194 | Missense_Mutation | SNP | G  | A  | 110 | 51  | c.1340G>A       | c.(1339-1341)AGG>AAG | p.R447K        |
| Pat_76 | Pre-Treatment | CCDC80   | 151887 | 37 | 3 | 112357513 | 112357513 | Missense_Mutation | SNP | G  | A  | 33  | 94  | c.1240C>T       | c.(1240-1242)CTT>TTT | p.L414F        |
| Pat_76 | Pre-Treatment | ZNF80    | 7634   | 37 | 3 | 113955513 | 113955513 | Missense_Mutation | SNP | C  | T  | 24  | 56  | c.409G>A        | c.(409-411)GAG>AAG   | p.E137K        |
| Pat_76 | Pre-Treatment | HGD      | 3081   | 37 | 3 | 120371486 | 120371486 | Missense_Mutation | SNP | G  | A  | 12  | 28  | c.295C>T        | c.(295-297)CCA>TCA   | p.P99S         |
| Pat_76 | Pre-Treatment | RABL3    | 285282 | 37 | 3 | 120449568 | 120449568 | Missense_Mutation | SNP | G  | A  | 73  | 72  | c.113C>T        | c.(112-114)ACT>ATT   | p.T38I         |
| Pat_76 | Pre-Treatment | GOLGB1   | 2804   | 37 | 3 | 121409852 | 121409852 | Missense_Mutation | SNP | C  | T  | 24  | 62  | c.8344G>A       | c.(8344-8346)GAT>AAT | p.D2782N       |
| Pat_76 | Pre-Treatment | PARP15   | 165631 | 37 | 3 | 122336009 | 122336009 | Missense_Mutation | SNP | C  | T  | 46  | 126 | c.998C>T        | c.(997-999)TCA>TTA   | p.S333L        |
| Pat_76 | Pre-Treatment | MYLK     | 4638   | 37 | 3 | 123452812 | 123452812 | Missense_Mutation | SNP | G  | A  | 37  | 82  | c.1031C>T       | c.(1030-1032)TCC>TTC | p.S344F        |
| Pat_76 | Pre-Treatment | KALRN    | 8997   | 37 | 3 | 124053179 | 124053179 | Missense_Mutation | SNP | C  | T  | 41  | 138 | c.1478C>T       | c.(1477-1479)TCC>TTC | p.S493F        |
| Pat_76 | Pre-Treatment | SLC12A8  | 84561  | 37 | 3 | 124909340 | 124909340 | Nonsense_Mutation | SNP | C  | T  | 85  | 251 | c.77G>A         | c.(76-78)TGG>TAG     | p.W26*         |
| Pat_76 | Pre-Treatment | MCM2     | 4171   | 37 | 3 | 127336204 | 127336205 | Missense_Mutation | DNP | CC | TT | 40  | 21  | .:1856_1857CC>T | c.(1855-1857)TCC>TTT | p.S619F        |
| Pat_76 | Pre-Treatment | DNAJB8   | 165721 | 37 | 3 | 128181833 | 128181833 | Missense_Mutation | SNP | G  | A  | 19  | 60  | c.256C>T        | c.(256-258)CCC>TCC   | p.P86S         |
| Pat_76 | Pre-Treatment | TOPBP1   | 11073  | 37 | 3 | 133358805 | 133358806 | Missense_Mutation | DNP | TC | AT | 16  | 60  | .:2230_2231GA>A | c.(2230-2232)GAA>ATA | p.E744I        |
| Pat_76 | Pre-Treatment | KY       | 339855 | 37 | 3 | 134366318 | 134366318 | Missense_Mutation | SNP | C  | T  | 13  | 23  | c.158G>A        | c.(157-159)GGA>GAA   | p.G53E         |
| Pat_76 | Pre-Treatment | EPHB1    | 2047   | 37 | 3 | 134670519 | 134670519 | Missense_Mutation | SNP | G  | A  | 49  | 107 | c.430G>A        | c.(430-432)GAG>AAG   | p.E144K        |
| Pat_76 | Pre-Treatment | PPP2R3A  | 5523   | 37 | 3 | 135720516 | 135720516 | Missense_Mutation | SNP | C  | T  | 25  | 22  | c.176C>T        | c.(175-177)CCT>CTT   | p.P59L         |
| Pat_76 | Pre-Treatment | NCK1     | 4690   | 37 | 3 | 136664562 | 136664562 | Missense_Mutation | SNP | G  | A  | 135 | 77  | c.364G>A        | c.(364-366)GAG>AAG   | p.E122K        |
| Pat_76 | Pre-Treatment | COPB2    | 9276   | 37 | 3 | 139097898 | 139097898 | Missense_Mutation | SNP | T  | C  | 57  | 129 | c.346A>G        | c.(346-348)ACT>GCT   | p.T116A        |
| Pat_76 | Pre-Treatment | TRIM42   | 287015 | 37 | 3 | 140401461 | 140401461 | Missense_Mutation | SNP | G  | A  | 51  | 139 | c.499G>A        | c.(499-501)GAG>AAG   | p.E167K        |
| Pat_76 | Pre-Treatment | TRIM42   | 287015 | 37 | 3 | 140406746 | 140406746 | Missense_Mutation | SNP | G  | A  | 71  | 37  | c.1222G>A       | c.(1222-1224)GAA>AAA | p.E408K        |
| Pat_76 | Pre-Treatment | ATR      | 545    | 37 | 3 | 142254048 | 142254048 | Splice_Site       | SNP | C  | T  | 41  | 24  | c.3820_splice   | c.e21-1              | p.E1274_splice |
| Pat_76 | Pre-Treatment | PLS1     | 5357   | 37 | 3 | 142388285 | 142388285 | Missense_Mutation | SNP | G  | A  | 52  | 133 | c.124G>A        | c.(124-126)GAA>AAA   | p.E42K         |
| Pat_76 | Pre-Treatment | TRPC1    | 7220   | 37 | 3 | 142521065 | 142521065 | Missense_Mutation | SNP | C  | T  | 38  | 41  | c.1636C>T       | c.(1636-1638)CTT>TTT | p.L546F        |
| Pat_76 | Pre-Treatment | MED12L   | 116931 | 37 | 3 | 151067889 | 151067889 | Missense_Mutation | SNP | C  | T  | 158 | 398 | c.2188C>T       | c.(2188-2190)CTC>TTC | p.L730F        |
| Pat_76 | Pre-Treatment | IGSF10   | 285313 | 37 | 3 | 151161477 | 151161477 | Missense_Mutation | SNP | T  | G  | 38  | 64  | c.5258A>C       | c.(5257-5259)AAA>ACA | p.K1753T       |
| Pat_76 | Pre-Treatment | PLCH1    | 23007  | 37 | 3 | 155267673 | 155267673 | Missense_Mutation | SNP | C  | T  | 58  | 41  | c.1229G>A       | c.(1228-1230)GGA>GAA | p.G410E        |
| Pat_76 | Pre-Treatment | C3orf33  | 285315 | 37 | 3 | 155485353 | 155485353 | Missense_Mutation | SNP | A  | T  | 20  | 12  | c.299T>A        | c.(298-300)TTC>TAC   | p.F100Y        |
| Pat_76 | Pre-Treatment | SLC33A1  | 9197   | 37 | 3 | 155571045 | 155571045 | Nonsense_Mutation | SNP | G  | A  | 54  | 30  | c.742C>T        | c.(742-744)CAG>TAG   | p.Q248*        |
| Pat_76 | Pre-Treatment | OTOL1    | 131149 | 37 | 3 | 161221642 | 161221642 | Nonsense_Mutation | SNP | G  | A  | 19  | 54  | c.1346G>A       | c.(1345-1347)TGG>TAG | p.W449*        |
| Pat_76 | Pre-Treatment | SERPINI2 | 5276   | 37 | 3 | 167189461 | 167189461 | Missense_Mutation | SNP | C  | A  | 4   | 82  | c.162G>T        | c.(160-162)TTG>TTT   | p.L54F         |
| Pat_76 | Pre-Treatment | MECOM    | 2122   | 37 | 3 | 168834150 | 168834150 | Missense_Mutation | SNP | G  | A  | 50  | 46  | c.946C>T        | c.(946-948)CCT>TCT   | p.P316S        |
| Pat_76 | Pre-Treatment | MECOM    | 2122   | 37 | 3 | 168834203 | 168834203 | Missense_Mutation | SNP | C  | G  | 55  | 42  | c.893G>C        | c.(892-894)GGA>GCA   | p.G298A        |
| Pat_76 | Pre-Treatment | MECOM    | 2122   | 37 | 3 | 169098985 | 169098985 | Missense_Mutation | SNP | T  | A  | 33  | 36  | c.365A>T        | c.(364-366)TAT>TTT   | p.Y122F        |
| Pat_76 | Pre-Treatment | SKIL     | 6498   | 37 | 3 | 170078829 | 170078829 | Missense_Mutation | SNP | G  | A  | 74  | 51  | c.710G>A        | c.(709-711)CGA>CAA   | p.R237Q        |
| Pat_76 | Pre-Treatment | TNIK     | 23043  | 37 | 3 | 170912402 | 170912402 | Missense_Mutation | SNP | G  | A  | 6   | 307 | c.329C>T        | c.(328-330)GCT>GTT   | p.A110V        |
| Pat_76 | Pre-Treatment | FNDC3B   | 64778  | 37 | 3 | 172061986 | 172061986 | Missense_Mutation | SNP | G  | A  | 6   | 308 | c.2188G>A       | c.(2188-2190)GTC>ATC | p.V730I        |
| Pat_76 | Pre-Treatment | MFN1     | 55669  | 37 | 3 | 179093044 | 179093044 | Missense_Mutation | SNP | G  | A  | 4   | 76  | c.1012G>A       | c.(1012-1014)GAA>AAA | p.E338K        |
| Pat_76 | Pre-Treatment | YEATS2   | 55689  | 37 | 3 | 183469945 | 183469945 | Missense_Mutation | SNP | C  | T  | 128 | 90  | c.1054C>T       | c.(1054-1056)CCT>TCT | p.P352S        |
| Pat_76 | Pre-Treatment | CLCN2    | 1181   | 37 | 3 | 184069842 | 184069842 | Missense_Mutation | SNP | G  | A  | 90  | 243 | c.2374C>T       | c.(2374-2376)CCT>TCT | p.P792S        |
| Pat_76 | Pre-Treatment | MASP1    | 5648   | 37 | 3 | 186961374 | 186961374 | Missense_Mutation | SNP | C  | T  | 87  | 60  | c.1126G>A       | c.(1126-1128)GGG>AGG | p.G376R        |
| Pat_76 | Pre-Treatment | LEPREL1  | 55214  | 37 | 3 | 189706753 | 189706753 | Missense_Mutation | SNP | G  | A  | 71  | 46  | c.898C>T        | c.(898-900)CCC>TCC   | p.P300S        |
| Pat_76 | Pre-Treatment | ATP13A4  | 84239  | 37 | 3 | 193120506 | 193120506 | Missense_Mutation | SNP | G  | A  | 51  | 105 | c.3526C>T       | c.(3526-3528)CCG>TCG | p.P1176S       |

|        |               |          |        |    |   |           |           |                   |     |    |    |     |     |                |                        |               |
|--------|---------------|----------|--------|----|---|-----------|-----------|-------------------|-----|----|----|-----|-----|----------------|------------------------|---------------|
| Pat_76 | Pre-Treatment | ATP13A4  | 84239  | 37 | 3 | 193158390 | 193158390 | Missense_Mutation | SNP | G  | A  | 50  | 47  | c.2476C>T      | c.(2476-2478)CCT>TCT   | p.P826S       |
| Pat_76 | Pre-Treatment | SDHAP1   | 255812 | 37 | 3 | 195701278 | 195701278 | Missense_Mutation | SNP | C  | T  | 4   | 79  | c.586G>A       | c.(586-588)GTG>ATG     | p.V196M       |
| Pat_76 | Pre-Treatment | OSTalpha | 200931 | 37 | 3 | 195943586 | 195943586 | Missense_Mutation | SNP | G  | A  | 9   | 4   | c.3G>A         | c.(1-3)ATG>ATA         | p.M11         |
| Pat_76 | Pre-Treatment | PDE6B    | 5158   | 37 | 4 | 654259    | 654259    | Missense_Mutation | SNP | G  | A  | 9   | 16  | c.1471G>A      | c.(1471-1473)GAG>AAG   | p.E491K       |
| Pat_76 | Pre-Treatment | TMEM175  | 84286  | 37 | 4 | 946167    | 946167    | Missense_Mutation | SNP | G  | A  | 39  | 74  | c.391G>A       | c.(391-393)GTG>ATG     | p.V131M       |
| Pat_76 | Pre-Treatment | WHSC2    | 7469   | 37 | 4 | 1991456   | 1991456   | Missense_Mutation | SNP | G  | A  | 5   | 315 | c.556C>T       | c.(556-558)CGG>TGG     | p.R186W       |
| Pat_76 | Pre-Treatment | ADD1     | 118    | 37 | 4 | 2901008   | 2901008   | Missense_Mutation | SNP | G  | A  | 4   | 97  | c.1007G>A      | c.(1006-1008)GGA>GAA   | p.G336E       |
| Pat_76 | Pre-Treatment | OTOP1    | 133060 | 37 | 4 | 4207848   | 4207848   | Missense_Mutation | SNP | G  | A  | 12  | 29  | c.550C>T       | c.(550-552)CTT>TTT     | p.L184F       |
| Pat_76 | Pre-Treatment | MAN2B2   | 23324  | 37 | 4 | 6590881   | 6590881   | Missense_Mutation | SNP | C  | T  | 20  | 39  | c.674C>T       | c.(673-675)TCC>TTC     | p.S225F       |
| Pat_76 | Pre-Treatment | AFAP1    | 60312  | 37 | 4 | 7776536   | 7776537   | Missense_Mutation | DNP | GG | CT | 30  | 25  | .1739_1740CC>A | c.(1738-1740)GCC>GAG   | p.A580E       |
| Pat_76 | Pre-Treatment | BOD1L    | 259282 | 37 | 4 | 13601911  | 13601911  | Missense_Mutation | SNP | G  | A  | 15  | 14  | c.6613C>T      | c.(6613-6615)CTT>TTT   | p.L2205F      |
| Pat_76 | Pre-Treatment | SLIT2    | 9353   | 37 | 4 | 20620619  | 20620619  | Missense_Mutation | SNP | G  | A  | 35  | 55  | c.4577G>A      | c.(4576-4578)AGG>AAG   | p.R1526K      |
| Pat_76 | Pre-Treatment | PPARGC1A | 10891  | 37 | 4 | 23814447  | 23814447  | Missense_Mutation | SNP | C  | T  | 72  | 115 | c.1942G>A      | c.(1942-1944)GAA>AAA   | p.E648K       |
| Pat_76 | Pre-Treatment | DHX15    | 1665   | 37 | 4 | 24542469  | 24542469  | Missense_Mutation | SNP | G  | A  | 16  | 11  | c.1588C>T      | c.(1588-1590)CCA>TCA   | p.P530S       |
| Pat_76 | Pre-Treatment | SEL1L3   | 23231  | 37 | 4 | 25849106  | 25849106  | Nonsense_Mutation | SNP | G  | T  | 4   | 53  | c.543C>A       | c.(541-543)TAC>TAA     | p.Y181*       |
| Pat_76 | Pre-Treatment | ARAP2    | 116984 | 37 | 4 | 36149359  | 36149359  | Missense_Mutation | SNP | G  | A  | 5   | 12  | c.3010C>T      | c.(3010-3012)CCC>TCC   | p.P1004S      |
| Pat_76 | Pre-Treatment | KLF3     | 51274  | 37 | 4 | 38690651  | 38690651  | Missense_Mutation | SNP | C  | T  | 4   | 64  | c.503C>T       | c.(502-504)TCC>TTC     | p.S168F       |
| Pat_76 | Pre-Treatment | RBM47    | 54502  | 37 | 4 | 40439863  | 40439863  | Missense_Mutation | SNP | C  | T  | 19  | 32  | c.1048G>A      | c.(1048-1050)GAC>AAC   | p.D350N       |
| Pat_76 | Pre-Treatment | BEND4    | 389206 | 37 | 4 | 42119560  | 42119560  | Missense_Mutation | SNP | C  | T  | 4   | 6   | c.1580G>A      | c.(1579-1581)AGT>AAT   | p.S527N       |
| Pat_76 | Pre-Treatment | ATP8A1   | 10396  | 37 | 4 | 42577653  | 42577653  | Missense_Mutation | SNP | C  | T  | 86  | 149 | c.1192G>A      | c.(1192-1194)GAG>AAG   | p.E398K       |
| Pat_76 | Pre-Treatment | GABRA2   | 2555   | 37 | 4 | 46314655  | 46314655  | Nonsense_Mutation | SNP | G  | A  | 12  | 15  | c.334C>T       | c.(334-336)CGA>TGA     | p.R112*       |
| Pat_76 | Pre-Treatment | GABRB1   | 2560   | 37 | 4 | 47405358  | 47405358  | Missense_Mutation | SNP | G  | A  | 24  | 60  | c.568G>A       | c.(568-570)GAA>AAA     | p.E190K       |
| Pat_76 | Pre-Treatment | REST     | 5978   | 37 | 4 | 57797533  | 57797533  | Missense_Mutation | SNP | C  | T  | 48  | 80  | c.2509C>T      | c.(2509-2511)CTT>TTT   | p.L837F       |
| Pat_76 | Pre-Treatment | UGT2A3   | 79799  | 37 | 4 | 69796394  | 69796394  | Missense_Mutation | SNP | G  | A  | 41  | 33  | c.1174C>T      | c.(1174-1176)CCC>TCC   | p.P392S       |
| Pat_76 | Pre-Treatment | UGT2B11  | 10720  | 37 | 4 | 70079869  | 70079869  | Missense_Mutation | SNP | G  | A  | 25  | 40  | c.572C>T       | c.(571-573)CCT>CTT     | p.P191L       |
| Pat_76 | Pre-Treatment | UGT2B11  | 10720  | 37 | 4 | 70080370  | 70080370  | Missense_Mutation | SNP | C  | T  | 143 | 255 | c.71G>A        | c.(70-72)GGA>GAA       | p.G24E        |
| Pat_76 | Pre-Treatment | UGT2A1   | 10941  | 37 | 4 | 70455112  | 70455112  | Missense_Mutation | SNP | C  | T  | 7   | 11  | c.1562G>A      | c.(1561-1563)GGA>GAA   | p.G521E       |
| Pat_76 | Pre-Treatment | SLC4A4   | 8671   | 37 | 4 | 72215790  | 72215790  | Splice_Site       | SNP | G  | A  | 4   | 76  | c.550_splice   | c.e5+1                 | p.E184_splice |
| Pat_76 | Pre-Treatment | ADAMTS3  | 9508   | 37 | 4 | 73414436  | 73414436  | Missense_Mutation | SNP | C  | T  | 23  | 42  | c.263G>A       | c.(262-264)GGA>GAA     | p.G88E        |
| Pat_76 | Pre-Treatment | ANKRD17  | 26057  | 37 | 4 | 73956389  | 73956389  | Missense_Mutation | SNP | G  | A  | 35  | 70  | c.6956C>T      | c.(6955-6957)CCC>CTC   | p.P2319L      |
| Pat_76 | Pre-Treatment | PPEF2    | 5470   | 37 | 4 | 76811183  | 76811183  | Missense_Mutation | SNP | G  | A  | 6   | 176 | c.344C>T       | c.(343-345)ACG>ATG     | p.T115M       |
| Pat_76 | Pre-Treatment | RASGEF1B | 153020 | 37 | 4 | 82377830  | 82377830  | Missense_Mutation | SNP | G  | A  | 9   | 10  | c.413C>T       | c.(412-414)GCT>GTT     | p.A138V       |
| Pat_76 | Pre-Treatment | AGPAT9   | 84803  | 37 | 4 | 84502813  | 84502813  | Missense_Mutation | SNP | G  | A  | 42  | 68  | c.307G>A       | c.(307-309)GGA>AGA     | p.G103R       |
| Pat_76 | Pre-Treatment | FAM13A   | 10144  | 37 | 4 | 89679958  | 89679958  | Missense_Mutation | SNP | G  | A  | 31  | 40  | c.1673C>T      | c.(1672-1674)TCC>TTC   | p.S558F       |
| Pat_76 | Pre-Treatment | MMRN1    | 22915  | 37 | 4 | 90856152  | 90856152  | Missense_Mutation | SNP | C  | A  | 5   | 149 | c.1321C>A      | c.(1321-1323)CAA>AAA   | p.Q441K       |
| Pat_76 | Pre-Treatment | BMPR1B   | 658    | 37 | 4 | 96052444  | 96052444  | Missense_Mutation | SNP | C  | T  | 14  | 21  | c.857C>T       | c.(856-858)TCC>TTC     | p.S286F       |
| Pat_76 | Pre-Treatment | UBE2D3   | 7323   | 37 | 4 | 103720648 | 103720648 | Missense_Mutation | SNP | G  | A  | 31  | 43  | c.314C>T       | c.(313-315)TCC>TTC     | p.S105F       |
| Pat_76 | Pre-Treatment | TET2     | 54790  | 37 | 4 | 106156166 | 106156166 | Missense_Mutation | SNP | C  | T  | 25  | 32  | c.1067C>T      | c.(1066-1068)TCC>TTC   | p.S356F       |
| Pat_76 | Pre-Treatment | TET2     | 54790  | 37 | 4 | 106157650 | 106157650 | Missense_Mutation | SNP | C  | T  | 18  | 22  | c.2551C>T      | c.(2551-2553)CCT>TCT   | p.P851S       |
| Pat_76 | Pre-Treatment | NPNT     | 255743 | 37 | 4 | 106888470 | 106888470 | Missense_Mutation | SNP | G  | A  | 3   | 16  | c.1471G>A      | c.(1471-1473)GGG>AGG   | p.G491R       |
| Pat_76 | Pre-Treatment | AGXT2L1  | 64850  | 37 | 4 | 109667970 | 109667970 | Missense_Mutation | SNP | C  | T  | 60  | 99  | c.1120G>A      | c.(1120-1122)GAC>AAC   | p.D374N       |
| Pat_76 | Pre-Treatment | ENPEP    | 2028   | 37 | 4 | 111397920 | 111397920 | Missense_Mutation | SNP | G  | A  | 4   | 138 | c.350G>A       | c.(349-351)GGC>GAC     | p.G117D       |
| Pat_76 | Pre-Treatment | ANK2     | 287    | 37 | 4 | 114257821 | 114257821 | Missense_Mutation | SNP | G  | A  | 12  | 52  | c.3680G>A      | c.(3679-3681)AGA>AAA   | p.R1227K      |
| Pat_76 | Pre-Treatment | C4orf31  | 79625  | 37 | 4 | 121957496 | 121957496 | Missense_Mutation | SNP | C  | T  | 57  | 66  | c.1630G>A      | c.(1630-1632)GAT>AAT   | p.D544N       |
| Pat_76 | Pre-Treatment | KIAA1109 | 84162  | 37 | 4 | 123237921 | 123237921 | Missense_Mutation | SNP | C  | T  | 36  | 45  | c.10574C>T     | c.(10573-10575)GCT>GTT | p.A3525V      |
| Pat_76 | Pre-Treatment | FAT4     | 79633  | 37 | 4 | 126240894 | 126240894 | Missense_Mutation | SNP | G  | A  | 55  | 84  | c.3328G>A      | c.(3328-3330)GAA>AAA   | p.E1110K      |
| Pat_76 | Pre-Treatment | FAT4     | 79633  | 37 | 4 | 126328272 | 126328272 | Missense_Mutation | SNP | G  | A  | 73  | 104 | c.5545G>A      | c.(5545-5547)GAC>AAC   | p.D1849N      |

|        |               |          |        |    |   |           |           |                   |     |    |    |     |     |                 |                        |                 |
|--------|---------------|----------|--------|----|---|-----------|-----------|-------------------|-----|----|----|-----|-----|-----------------|------------------------|-----------------|
| Pat_76 | Pre-Treatment | FAT4     | 79633  | 37 | 4 | 126329641 | 126329641 | Missense_Mutation | SNP | G  | A  | 54  | 82  | c.5612G>A       | c.(5611-5613)GGT>GAT   | p.G1871D        |
| Pat_76 | Pre-Treatment | PLK4     | 10733  | 37 | 4 | 128814932 | 128814933 | Missense_Mutation | DNP | CC | TT | 72  | 122 | .:2458_2459CC>T | c.(2458-2460)CCT>TTT   | p.P820F         |
| Pat_76 | Pre-Treatment | NAA15    | 80155  | 37 | 4 | 140291541 | 140291541 | Missense_Mutation | SNP | C  | T  | 4   | 45  | c.1930C>T       | c.(1930-1932)CCA>TCA   | p.P644S         |
| Pat_76 | Pre-Treatment | TBC1D9   | 23158  | 37 | 4 | 141578759 | 141578759 | Missense_Mutation | SNP | G  | A  | 80  | 120 | c.2129C>T       | c.(2128-2130)GCC>GTC   | p.A710V         |
| Pat_76 | Pre-Treatment | HHIP     | 64399  | 37 | 4 | 145573802 | 145573802 | Missense_Mutation | SNP | G  | A  | 39  | 68  | c.325G>A        | c.(325-327)GAA>AAA     | p.E109K         |
| Pat_76 | Pre-Treatment | C4orf51  | 646603 | 37 | 4 | 146650373 | 146650373 | Missense_Mutation | SNP | G  | A  | 8   | 17  | c.419G>A        | c.(418-420)GGA>GAA     | p.G140E         |
| Pat_76 | Pre-Treatment | FBXW7    | 55294  | 37 | 4 | 153245446 | 153245446 | Missense_Mutation | SNP | G  | A  | 3   | 29  | c.1745C>T       | c.(1744-1746)TCG>TTG   | p.S582L         |
| Pat_76 | Pre-Treatment | ARFIP1   | 27236  | 37 | 4 | 153809337 | 153809337 | Missense_Mutation | SNP | C  | T  | 4   | 157 | c.844C>T        | c.(844-846)CGT>TGT     | p.R282C         |
| Pat_76 | Pre-Treatment | FHDC1    | 85462  | 37 | 4 | 153897274 | 153897274 | Missense_Mutation | SNP | C  | T  | 6   | 20  | c.2831C>T       | c.(2830-2832)TCC>TTC   | p.S944F         |
| Pat_76 | Pre-Treatment | KIAA0922 | 23240  | 37 | 4 | 154556617 | 154556617 | Missense_Mutation | SNP | C  | T  | 4   | 158 | c.4448C>T       | c.(4447-4449)CCT>CTT   | p.P1483L        |
| Pat_76 | Pre-Treatment | DCHS2    | 54798  | 37 | 4 | 155298497 | 155298497 | Missense_Mutation | SNP | C  | T  | 46  | 38  | c.334G>A        | c.(334-336)GAC>AAC     | p.D112N         |
| Pat_76 | Pre-Treatment | GUCY1A3  | 2982   | 37 | 4 | 156651237 | 156651237 | Missense_Mutation | SNP | C  | T  | 33  | 76  | c.1927C>T       | c.(1927-1929)CCA>TCA   | p.P643S         |
| Pat_76 | Pre-Treatment | GUCY1B3  | 2983   | 37 | 4 | 156725790 | 156725791 | Missense_Mutation | DNP | GG | AA | 31  | 86  | .1600_1601GG>A  | c.(1600-1602)GGA>AAA   | p.G534K         |
| Pat_76 | Pre-Treatment | GLRB     | 2743   | 37 | 4 | 158041814 | 158041814 | Missense_Mutation | SNP | G  | A  | 24  | 45  | c.229G>A        | c.(229-231)GGC>AGC     | p.G77S          |
| Pat_76 | Pre-Treatment | GLRB     | 2743   | 37 | 4 | 158057831 | 158057831 | Missense_Mutation | SNP | G  | A  | 48  | 69  | c.508G>A        | c.(508-510)GAT>AAT     | p.D170N         |
| Pat_76 | Pre-Treatment | DDX60    | 55601  | 37 | 4 | 169146695 | 169146696 | Missense_Mutation | DNP | GG | AA | 30  | 56  | .:4665_4666CC>T | .:663-4668)CTCCA>CTTT  | p.P1556S        |
| Pat_76 | Pre-Treatment | DDX60    | 55601  | 37 | 4 | 169223519 | 169223519 | Missense_Mutation | SNP | C  | T  | 12  | 14  | c.655G>A        | c.(655-657)GAA>AAA     | p.E219K         |
| Pat_76 | Pre-Treatment | DDX60L   | 91351  | 37 | 4 | 169348376 | 169348376 | Missense_Mutation | SNP | G  | A  | 8   | 16  | c.1775C>T       | c.(1774-1776)TCT>TTT   | p.S592F         |
| Pat_76 | Pre-Treatment | MORF4    | 10934  | 37 | 4 | 174537317 | 174537317 | Missense_Mutation | SNP | C  | T  | 87  | 96  | c.478G>A        | c.(478-480)GAT>AAT     | p.D160N         |
| Pat_76 | Pre-Treatment | MORF4    | 10934  | 37 | 4 | 174537505 | 174537505 | Missense_Mutation | SNP | G  | A  | 103 | 137 | c.290C>T        | c.(289-291)CCT>CTT     | p.P97L          |
| Pat_76 | Pre-Treatment | ADAM29   | 11086  | 37 | 4 | 175896821 | 175896821 | Missense_Mutation | SNP | C  | T  | 11  | 26  | c.145C>T        | c.(145-147)CCA>TCA     | p.P49S          |
| Pat_76 | Pre-Treatment | ODZ3     | 55714  | 37 | 4 | 183600893 | 183600893 | Missense_Mutation | SNP | A  | T  | 46  | 49  | c.1401A>T       | c.(1399-1401)AGA>AGT   | p.R467S         |
| Pat_76 | Pre-Treatment | ODZ3     | 55714  | 37 | 4 | 183714966 | 183714966 | Missense_Mutation | SNP | C  | T  | 12  | 13  | c.7141C>T       | c.(7141-7143)CCT>TCT   | p.P2381S        |
| Pat_76 | Pre-Treatment | ZFP42    | 132625 | 37 | 4 | 188924469 | 188924469 | Missense_Mutation | SNP | G  | A  | 53  | 117 | c.508G>A        | c.(508-510)GAA>AAA     | p.E170K         |
| Pat_76 | Pre-Treatment | TRIML1   | 339976 | 37 | 4 | 189061047 | 189061047 | Missense_Mutation | SNP | G  | A  | 11  | 19  | c.335G>A        | c.(334-336)GGA>GAA     | p.G112E         |
| Pat_76 | Pre-Treatment | SDHA     | 6389   | 37 | 5 | 225600    | 225600    | Missense_Mutation | SNP | G  | A  | 4   | 88  | c.379G>A        | c.(379-381)GTG>ATG     | p.V127M         |
| Pat_76 | Pre-Treatment | BRD9     | 65980  | 37 | 5 | 865586    | 865586    | Missense_Mutation | SNP | G  | A  | 37  | 41  | c.1636C>T       | c.(1636-1638)CCG>TCG   | p.P546S         |
| Pat_76 | Pre-Treatment | DNAH5    | 1767   | 37 | 5 | 13719036  | 13719036  | Missense_Mutation | SNP | C  | T  | 31  | 66  | c.12454G>A      | c.(12454-12456)GAT>AAT | p.D4152N        |
| Pat_76 | Pre-Treatment | DNAH5    | 1767   | 37 | 5 | 13901602  | 13901602  | Missense_Mutation | SNP | G  | A  | 22  | 17  | c.1811C>T       | c.(1810-1812)TCA>TTA   | p.S604L         |
| Pat_76 | Pre-Treatment | TRIO     | 7204   | 37 | 5 | 14497016  | 14497016  | Missense_Mutation | SNP | C  | T  | 26  | 34  | c.7909C>T       | c.(7909-7911)CGT>TGT   | p.R2637C        |
| Pat_76 | Pre-Treatment | CDH18    | 1016   | 37 | 5 | 19838894  | 19838895  | Missense_Mutation | DNP | CC | TT | 8   | 13  | c.201_202GG>AA  | .:199-204)ATGGGA>ATAA  | p.Gp.67_68MG>IF |
| Pat_76 | Pre-Treatment | GUSBP1   | 728411 | 37 | 5 | 21491451  | 21491451  | Missense_Mutation | SNP | C  | T  | 5   | 83  | c.197C>T        | c.(196-198)TCC>TTC     | p.S66F          |
| Pat_76 | Pre-Treatment | CDH6     | 1004   | 37 | 5 | 31294126  | 31294126  | Missense_Mutation | SNP | G  | A  | 21  | 41  | c.286G>A        | c.(286-288)GGA>AGA     | p.G96R          |
| Pat_76 | Pre-Treatment | RAD1     | 5810   | 37 | 5 | 34911678  | 34911678  | Missense_Mutation | SNP | G  | A  | 50  | 79  | c.547C>T        | c.(547-549)CCT>TCT     | p.P183S         |
| Pat_76 | Pre-Treatment | PRLR     | 5618   | 37 | 5 | 35065850  | 35065850  | Missense_Mutation | SNP | G  | A  | 62  | 98  | c.1210C>T       | c.(1210-1212)CCC>TCC   | p.P404S         |
| Pat_76 | Pre-Treatment | PRLR     | 5618   | 37 | 5 | 35065883  | 35065883  | Missense_Mutation | SNP | C  | T  | 34  | 36  | c.1177G>A       | c.(1177-1179)GAC>AAC   | p.D393N         |
| Pat_76 | Pre-Treatment | SPEF2    | 79925  | 37 | 5 | 35667216  | 35667216  | Missense_Mutation | SNP | C  | T  | 5   | 25  | c.1210C>T       | c.(1210-1212)CCT>TTT   | p.L404F         |
| Pat_76 | Pre-Treatment | IL7R     | 3575   | 37 | 5 | 35876456  | 35876457  | Missense_Mutation | DNP | CC | TT | 24  | 45  | .:1248_1249CC>T | .:246-1251)CCCCCT>CCT  | p.P417S         |
| Pat_76 | Pre-Treatment | UGT3A2   | 167127 | 37 | 5 | 36064452  | 36064453  | Splice_Site       | DNP | CC | TT | 23  | 26  | c.95_splice     | c.e2-1                 | p.G32_splice    |
| Pat_76 | Pre-Treatment | EGFLAM   | 133584 | 37 | 5 | 38406257  | 38406257  | Missense_Mutation | SNP | G  | A  | 19  | 30  | c.742G>A        | c.(742-744)GGA>AGA     | p.G248R         |
| Pat_76 | Pre-Treatment | PTGER4   | 5734   | 37 | 5 | 40681235  | 40681235  | Missense_Mutation | SNP | A  | T  | 54  | 59  | c.140A>T        | c.(139-141)AAG>ATG     | p.K47M          |
| Pat_76 | Pre-Treatment | C7       | 730    | 37 | 5 | 40934512  | 40934512  | Missense_Mutation | SNP | C  | T  | 36  | 83  | c.224C>T        | c.(223-225)CCT>CTT     | p.P75L          |
| Pat_76 | Pre-Treatment | HEATR7B2 | 133558 | 37 | 5 | 41000395  | 41000395  | Missense_Mutation | SNP | C  | T  | 14  | 21  | c.4409G>A       | c.(4408-4410)GGG>GAG   | p.G1470E        |
| Pat_76 | Pre-Treatment | C6       | 729    | 37 | 5 | 41149409  | 41149409  | Missense_Mutation | SNP | A  | G  | 65  | 98  | c.2557T>C       | c.(2557-2559)TCA>CCA   | p.S853P         |
| Pat_76 | Pre-Treatment | PARP8    | 79668  | 37 | 5 | 50090751  | 50090751  | Missense_Mutation | SNP | G  | A  | 26  | 54  | c.928G>A        | c.(928-930)GGA>AGA     | p.G310R         |
| Pat_76 | Pre-Treatment | SNX18    | 112574 | 37 | 5 | 53815304  | 53815304  | Missense_Mutation | SNP | G  | A  | 4   | 121 | c.1522G>A       | c.(1522-1524)GCG>ACG   | p.A508T         |
| Pat_76 | Pre-Treatment | KIF2A    | 3796   | 37 | 5 | 61650989  | 61650989  | Missense_Mutation | SNP | G  | A  | 4   | 66  | c.562G>A        | c.(562-564)GTT>ATT     | p.V188I         |

|        |               |          |        |    |   |           |           |                   |     |    |    |     |     |                |                        |            |
|--------|---------------|----------|--------|----|---|-----------|-----------|-------------------|-----|----|----|-----|-----|----------------|------------------------|------------|
| Pat_76 | Pre-Treatment | ADAMTS6  | 11174  | 37 | 5 | 64511271  | 64511271  | Nonsense_Mutation | SNP | C  | T  | 18  | 27  | c.2316G>A      | c.(2314-2316)TGG>TGA   | p.W772*    |
| Pat_76 | Pre-Treatment | ADAMTS6  | 11174  | 37 | 5 | 64522007  | 64522008  | Missense_Mutation | DNP | CC | TT | 33  | 47  | .1972_1973GG>A | c.(1972-1974)GGT>AAT   | p.G658N    |
| Pat_76 | Pre-Treatment | IQGAP2   | 10788  | 37 | 5 | 75858277  | 75858277  | Missense_Mutation | SNP | G  | A  | 26  | 43  | c.203G>A       | c.(202-204)GGG>GAG     | p.G68E     |
| Pat_76 | Pre-Treatment | GPR98    | 84059  | 37 | 5 | 89940541  | 89940541  | Missense_Mutation | SNP | G  | A  | 91  | 134 | c.2753G>A      | c.(2752-2754)AGA>AAA   | p.R918K    |
| Pat_76 | Pre-Treatment | GPR98    | 84059  | 37 | 5 | 90106784  | 90106784  | Missense_Mutation | SNP | G  | A  | 31  | 39  | c.15707G>A     | c.(15706-15708)GGC>GAC | p.G5236D   |
| Pat_76 | Pre-Treatment | PCSK1    | 5122   | 37 | 5 | 95733081  | 95733081  | Missense_Mutation | SNP | C  | T  | 13  | 28  | c.1681G>A      | c.(1681-1683)GAG>AAG   | p.E561K    |
| Pat_76 | Pre-Treatment | RIOK2    | 55781  | 37 | 5 | 96514819  | 96514819  | Missense_Mutation | SNP | A  | T  | 33  | 36  | c.145T>A       | c.(145-147)TGT>AGT     | p.C49S     |
| Pat_76 | Pre-Treatment | SLCO4C1  | 353189 | 37 | 5 | 101585427 | 101585427 | Missense_Mutation | SNP | T  | A  | 25  | 34  | c.1535A>T      | c.(1534-1536)TAT>TTT   | p.Y512F    |
| Pat_76 | Pre-Treatment | CAMK4    | 814    | 37 | 5 | 110818528 | 110818528 | Missense_Mutation | SNP | T  | A  | 76  | 95  | c.874T>A       | c.(874-876)TTT>ATT     | p.F292I    |
| Pat_76 | Pre-Treatment | FEM1C    | 56929  | 37 | 5 | 114860426 | 114860426 | Missense_Mutation | SNP | C  | T  | 88  | 87  | c.1433G>A      | c.(1432-1434)AGG>AAG   | p.R478K    |
| Pat_76 | Pre-Treatment | FAM170A  | 340069 | 37 | 5 | 118969718 | 118969718 | Missense_Mutation | SNP | G  | A  | 37  | 38  | c.275G>A       | c.(274-276)CGA>CAA     | p.R92Q     |
| Pat_76 | Pre-Treatment | FTMT     | 94033  | 37 | 5 | 121188022 | 121188022 | Missense_Mutation | SNP | G  | A  | 11  | 30  | c.364G>A       | c.(364-366)GAG>AAG     | p.E122K    |
| Pat_76 | Pre-Treatment | SNCAIP   | 9627   | 37 | 5 | 121758806 | 121758806 | Missense_Mutation | SNP | G  | A  | 7   | 2   | c.374G>A       | c.(373-375)GGA>GAA     | p.G125E    |
| Pat_76 | Pre-Treatment | SNCAIP   | 9627   | 37 | 5 | 121761092 | 121761092 | Missense_Mutation | SNP | G  | A  | 61  | 93  | c.1048G>A      | c.(1048-1050)GGA>AGA   | p.G350R    |
| Pat_76 | Pre-Treatment | SNCAIP   | 9627   | 37 | 5 | 121761194 | 121761194 | Missense_Mutation | SNP | G  | A  | 26  | 33  | c.1150G>A      | c.(1150-1152)GAG>AAG   | p.E384K    |
| Pat_76 | Pre-Treatment | PRRC1    | 133619 | 37 | 5 | 126874759 | 126874759 | Missense_Mutation | SNP | C  | T  | 4   | 144 | c.949C>T       | c.(949-951)CGT>TGT     | p.R317C    |
| Pat_76 | Pre-Treatment | FBN2     | 2201   | 37 | 5 | 127626457 | 127626457 | Missense_Mutation | SNP | C  | T  | 38  | 58  | c.6412G>A      | c.(6412-6414)GAC>AAC   | p.D2138N   |
| Pat_76 | Pre-Treatment | DDX46    | 9879   | 37 | 5 | 134131837 | 134131837 | Missense_Mutation | SNP | G  | A  | 22  | 48  | c.1951G>A      | c.(1951-1953)GGA>AGA   | p.G651R    |
| Pat_76 | Pre-Treatment | TGFBI    | 7045   | 37 | 5 | 135388802 | 135388802 | Missense_Mutation | SNP | G  | A  | 7   | 11  | c.1120G>A      | c.(1120-1122)GAC>AAC   | p.D374N    |
| Pat_76 | Pre-Treatment | TGFBI    | 7045   | 37 | 5 | 135394880 | 135394881 | Missense_Mutation | DNP | GG | AA | 3   | 8   | .1780_1781GG>A | c.(1780-1782)GGT>AAT   | p.G594N    |
| Pat_76 | Pre-Treatment | KLHL3    | 26249  | 37 | 5 | 137028094 | 137028094 | Missense_Mutation | SNP | G  | A  | 13  | 28  | c.406C>T       | c.(406-408)CGG>TGG     | p.R136W    |
| Pat_76 | Pre-Treatment | LRRTM2   | 26045  | 37 | 5 | 138209183 | 138209183 | Missense_Mutation | SNP | C  | T  | 12  | 22  | c.1067G>A      | c.(1066-1068)GGA>GAA   | p.G356E    |
| Pat_76 | Pre-Treatment | NRG2     | 9542   | 37 | 5 | 139260461 | 139260461 | Missense_Mutation | SNP | C  | T  | 4   | 83  | c.971G>A       | c.(970-972)GGC>GAC     | p.G324D    |
| Pat_76 | Pre-Treatment | SLC4A9   | 83697  | 37 | 5 | 139751845 | 139751845 | Missense_Mutation | SNP | G  | A  | 7   | 5   | c.2761G>A      | c.(2761-2763)GTC>ATC   | p.V921I    |
| Pat_76 | Pre-Treatment | PCDHA4   | 56144  | 37 | 5 | 140186787 | 140186788 | Nonsense_Mutation | DNP | GG | AA | 55  | 84  | c.15_16GG>AA   | c.(13-18)TGGGGA>TGAAG  | p.5_6WG>*R |
| Pat_76 | Pre-Treatment | PCDHA4   | 56144  | 37 | 5 | 140188520 | 140188520 | Nonsense_Mutation | SNP | G  | A  | 33  | 40  | c.1748G>A      | c.(1747-1749)TGG>TAG   | p.W583*    |
| Pat_76 | Pre-Treatment | PCDHA7   | 56141  | 37 | 5 | 140214158 | 140214158 | Missense_Mutation | SNP | T  | A  | 100 | 100 | c.190T>A       | c.(190-192)TTC>ATC     | p.F64I     |
| Pat_76 | Pre-Treatment | PCDHA8   | 56140  | 37 | 5 | 140222893 | 140222893 | Missense_Mutation | SNP | G  | A  | 45  | 35  | c.1987G>A      | c.(1987-1989)GCC>ACC   | p.A663T    |
| Pat_76 | Pre-Treatment | PCDHA10  | 56139  | 37 | 5 | 140237626 | 140237626 | Missense_Mutation | SNP | C  | T  | 7   | 11  | c.1993C>T      | c.(1993-1995)CTT>TTT   | p.L665F    |
| Pat_76 | Pre-Treatment | PCDHAC2  | 56134  | 37 | 5 | 140347871 | 140347871 | Missense_Mutation | SNP | C  | T  | 25  | 38  | c.1520C>T      | c.(1519-1521)TCC>TTC   | p.S507F    |
| Pat_76 | Pre-Treatment | PCDHB2   | 56133  | 37 | 5 | 140474589 | 140474589 | Missense_Mutation | SNP | G  | A  | 26  | 42  | c.215G>A       | c.(214-216)GGA>GAA     | p.G72E     |
| Pat_76 | Pre-Treatment | PCDHB3   | 56132  | 37 | 5 | 140481729 | 140481729 | Missense_Mutation | SNP | C  | T  | 60  | 94  | c.1496C>T      | c.(1495-1497)CCC>CTC   | p.P499L    |
| Pat_76 | Pre-Treatment | PCDHB6   | 56130  | 37 | 5 | 140530292 | 140530292 | Missense_Mutation | SNP | C  | T  | 77  | 149 | c.454C>T       | c.(454-456)CCT>TCT     | p.P152S    |
| Pat_76 | Pre-Treatment | PCDHB6   | 56130  | 37 | 5 | 140532002 | 140532002 | Missense_Mutation | SNP | C  | T  | 91  | 114 | c.2164C>T      | c.(2164-2166)CGC>TGC   | p.R722C    |
| Pat_76 | Pre-Treatment | PCDHB7   | 56129  | 37 | 5 | 140554046 | 140554046 | Missense_Mutation | SNP | G  | A  | 13  | 40  | c.1630G>A      | c.(1630-1632)GAG>AAG   | p.E544K    |
| Pat_76 | Pre-Treatment | PCDHB16  | 57717  | 37 | 5 | 140562564 | 140562564 | Missense_Mutation | SNP | G  | A  | 12  | 18  | c.430G>A       | c.(430-432)GAA>AAA     | p.E144K    |
| Pat_76 | Pre-Treatment | PCDHB16  | 57717  | 37 | 5 | 140562910 | 140562910 | Missense_Mutation | SNP | C  | T  | 20  | 45  | c.776C>T       | c.(775-777)TCC>TTC     | p.S259F    |
| Pat_76 | Pre-Treatment | PCDHB10  | 56126  | 37 | 5 | 140572462 | 140572462 | Missense_Mutation | SNP | C  | T  | 17  | 27  | c.337C>T       | c.(337-339)CCC>TCC     | p.P113S    |
| Pat_76 | Pre-Treatment | PCDHGA1  | 56114  | 37 | 5 | 140712307 | 140712307 | Missense_Mutation | SNP | G  | A  | 68  | 110 | c.2056G>A      | c.(2056-2058)GAT>AAT   | p.D686N    |
| Pat_76 | Pre-Treatment | PCDHGA2  | 56113  | 37 | 5 | 140719019 | 140719019 | Missense_Mutation | SNP | G  | A  | 39  | 58  | c.481G>A       | c.(481-483)GAC>AAC     | p.D161N    |
| Pat_76 | Pre-Treatment | PCDHGA9  | 56107  | 37 | 5 | 140782892 | 140782892 | Missense_Mutation | SNP | G  | A  | 57  | 75  | c.373G>A       | c.(373-375)GAT>AAT     | p.D125N    |
| Pat_76 | Pre-Treatment | ARAP3    | 64411  | 37 | 5 | 141041799 | 141041799 | Missense_Mutation | SNP | G  | A  | 4   | 137 | c.2824C>T      | c.(2824-2826)CGG>TGG   | p.R942W    |
| Pat_76 | Pre-Treatment | PPARGC1B | 133522 | 37 | 5 | 149212825 | 149212825 | Missense_Mutation | SNP | G  | A  | 4   | 95  | c.1189G>A      | c.(1189-1191)GCA>ACA   | p.A397T    |
| Pat_76 | Pre-Treatment | PDGFRB   | 5159   | 37 | 5 | 149499118 | 149499118 | Missense_Mutation | SNP | A  | C  | 35  | 52  | c.2710T>G      | c.(2710-2712)TAC>GAC   | p.Y904D    |
| Pat_76 | Pre-Treatment | GLRA1    | 2741   | 37 | 5 | 151271938 | 151271938 | Missense_Mutation | SNP | C  | T  | 33  | 36  | c.118G>A       | c.(118-120)GAT>AAT     | p.D40N     |
| Pat_76 | Pre-Treatment | KIF4B    | 285643 | 37 | 5 | 154393439 | 154393439 | Missense_Mutation | SNP | G  | A  | 55  | 69  | c.20G>A        | c.(19-21)GGA>GAA       | p.G7E      |
| Pat_76 | Pre-Treatment | KIF4B    | 285643 | 37 | 5 | 154396219 | 154396219 | Missense_Mutation | SNP | C  | T  | 9   | 23  | c.2800C>T      | c.(2800-2802)CTT>TTT   | p.L934F    |



|        |               |          |        |    |   |           |           |                   |     |    |    |     |     |                 |                                    |          |
|--------|---------------|----------|--------|----|---|-----------|-----------|-------------------|-----|----|----|-----|-----|-----------------|------------------------------------|----------|
| Pat_76 | Pre-Treatment | CYFIP2   | 26999  | 37 | 5 | 156819926 | 156819926 | Missense_Mutation | SNP | C  | T  | 37  | 29  | c.3680C>T       | c.(3679-3681)TCC>TTC               | p.S1227F |
| Pat_76 | Pre-Treatment | GABRB2   | 2561   | 37 | 5 | 160721303 | 160721303 | Missense_Mutation | SNP | G  | A  | 17  | 17  | c.1324C>T       | c.(1324-1326)CGG>TGG               | p.R442W  |
| Pat_76 | Pre-Treatment | ODZ2     | 57451  | 37 | 5 | 167420012 | 167420013 | Missense_Mutation | DNP | CC | TT | 47  | 89  | c.1011_1012CC>T | c.1009-1014)TACCC>TATT             | p.P338S  |
| Pat_76 | Pre-Treatment | CPLX2    | 10814  | 37 | 5 | 175306947 | 175306947 | Missense_Mutation | SNP | C  | T  | 6   | 18  | c.304C>T        | c.(304-306)CCT>TCT                 | p.P102S  |
| Pat_76 | Pre-Treatment | MXD3     | 83463  | 37 | 5 | 176734669 | 176734669 | Missense_Mutation | SNP | C  | T  | 23  | 89  | c.541G>A        | c.(541-543)GGG>AGG                 | p.G181R  |
| Pat_76 | Pre-Treatment | ZNF454   | 285676 | 37 | 5 | 178392376 | 178392376 | Missense_Mutation | SNP | G  | A  | 20  | 50  | c.971G>A        | c.(970-972)GGA>GAA                 | p.G324E  |
| Pat_76 | Pre-Treatment | RUFY1    | 80230  | 37 | 5 | 179025788 | 179025788 | Missense_Mutation | SNP | G  | A  | 48  | 104 | c.1727G>A       | c.(1726-1728)AGG>AAG               | p.R576K  |
| Pat_76 | Pre-Treatment | TBC1D9B  | 23061  | 37 | 5 | 179292874 | 179292874 | Missense_Mutation | SNP | C  | T  | 55  | 72  | c.2929G>A       | c.(2929-2931)GAA>AAA               | p.E977K  |
| Pat_76 | Pre-Treatment | RASGEF1C | 255426 | 37 | 5 | 179545807 | 179545807 | Missense_Mutation | SNP | C  | T  | 25  | 39  | c.967G>A        | c.(967-969)GCC>ACC                 | p.A323T  |
| Pat_76 | Pre-Treatment | DSP      | 1832   | 37 | 6 | 7558389   | 7558389   | Missense_Mutation | SNP | G  | A  | 4   | 148 | c.314G>A        | c.(313-315)CGA>CAA                 | p.R105Q  |
| Pat_76 | Pre-Treatment | DSP      | 1832   | 37 | 6 | 7569516   | 7569516   | Missense_Mutation | SNP | C  | T  | 39  | 56  | c.1517C>T       | c.(1516-1518)CCC>CTC               | p.P506L  |
| Pat_76 | Pre-Treatment | MAK      | 4117   | 37 | 6 | 10764812  | 10764812  | Missense_Mutation | SNP | C  | T  | 4   | 131 | c.1745G>A       | c.(1744-1746)CGG>CAG               | p.R582Q  |
| Pat_76 | Pre-Treatment | CAP2     | 10486  | 37 | 6 | 17556621  | 17556621  | Missense_Mutation | SNP | C  | T  | 4   | 80  | c.1382C>T       | c.(1381-1383)ACA>ATA               | p.T461I  |
| Pat_76 | Pre-Treatment | HDGFL1   | 154150 | 37 | 6 | 22569943  | 22569943  | Missense_Mutation | SNP | G  | A  | 15  | 19  | c.139G>A        | c.(139-141)GAG>AAG                 | p.E47K   |
| Pat_76 | Pre-Treatment | BTN3A3   | 10384  | 37 | 6 | 26452269  | 26452269  | Missense_Mutation | SNP | G  | A  | 30  | 58  | c.1385G>A       | c.(1384-1386)GGG>GAG               | p.G462E  |
| Pat_76 | Pre-Treatment | SCAND3   | 114821 | 37 | 6 | 28543719  | 28543719  | Missense_Mutation | SNP | C  | T  | 34  | 57  | c.763G>A        | c.(763-765)GAA>AAA                 | p.E255K  |
| Pat_76 | Pre-Treatment | OR2J2    | 26707  | 37 | 6 | 29142001  | 29142001  | Missense_Mutation | SNP | G  | A  | 17  | 42  | c.589G>A        | c.(589-591)GAG>AAG                 | p.E197K  |
| Pat_76 | Pre-Treatment | OR2H1    | 26716  | 37 | 6 | 29429955  | 29429955  | Missense_Mutation | SNP | C  | T  | 72  | 121 | c.409C>T        | c.(409-411)CGC>TGC                 | p.R137C  |
| Pat_76 | Pre-Treatment | HLA-L    | 3139   | 37 | 6 | 30231076  | 30231076  | Missense_Mutation | SNP | G  | A  | 97  | 179 | c.520G>A        | c.(520-522)GGT>AGT                 | p.G174S  |
| Pat_76 | Pre-Treatment | KIAA1949 | 170954 | 37 | 6 | 30645059  | 30645059  | Missense_Mutation | SNP | G  | A  | 56  | 68  | c.1829C>T       | c.(1828-1830)TCC>TTC               | p.S610F  |
| Pat_76 | Pre-Treatment | C6orf15  | 29113  | 37 | 6 | 31079874  | 31079874  | Missense_Mutation | SNP | G  | A  | 12  | 30  | c.262C>T        | c.(262-264)CCA>TCA                 | p.P88S   |
| Pat_76 | Pre-Treatment | BAT2     | 7916   | 37 | 6 | 31599967  | 31599967  | Missense_Mutation | SNP | G  | C  | 17  | 14  | c.3517G>C       | c.(3517-3519)GGA>CGA               | p.G1173R |
| Pat_76 | Pre-Treatment | LY6G6F   | 259215 | 37 | 6 | 31675497  | 31675498  | Missense_Mutation | DNP | GT | TA | 12  | 22  | c.315_316GT>TA  | c.313-318)TGGTGC>TGTA(105_106WC>C  |          |
| Pat_76 | Pre-Treatment | NEU1     | 4758   | 37 | 6 | 31827660  | 31827660  | Nonsense_Mutation | SNP | G  | A  | 59  | 67  | c.1084C>T       | c.(1084-1086)CAG>TAG               | p.Q362*  |
| Pat_76 | Pre-Treatment | SKIV2L   | 6499   | 37 | 6 | 31935813  | 31935813  | Nonsense_Mutation | SNP | G  | T  | 14  | 22  | c.2812G>T       | c.(2812-2814)GAG>TAG               | p.E938*  |
| Pat_76 | Pre-Treatment | C4A      | 720    | 37 | 6 | 31996291  | 31996291  | Missense_Mutation | SNP | C  | T  | 19  | 52  | c.3212C>T       | c.(3211-3213)TCA>TTA               | p.S1071L |
| Pat_76 | Pre-Treatment | NOTCH4   | 4855   | 37 | 6 | 32180981  | 32180981  | Missense_Mutation | SNP | G  | A  | 19  | 22  | c.2369C>T       | c.(2368-2370)TCC>TTC               | p.S790F  |
| Pat_76 | Pre-Treatment | C6orf10  | 10665  | 37 | 6 | 32260979  | 32260979  | Missense_Mutation | SNP | C  | T  | 43  | 68  | c.1471G>A       | c.(1471-1473)GAG>AAG               | p.E491K  |
| Pat_76 | Pre-Treatment | BTNL2    | 56244  | 37 | 6 | 32370964  | 32370965  | Missense_Mutation | DNP | CC | TT | 5   | 7   | c.456_457GG>AA  | c.454-459)ATGGAG>ATAAA(152_153ME>I |          |
| Pat_76 | Pre-Treatment | HLA-DRB1 | 3123   | 37 | 6 | 32548562  | 32548562  | Missense_Mutation | SNP | G  | A  | 39  | 205 | c.724C>T        | c.(724-726)CTT>TTT                 | p.L242F  |
| Pat_76 | Pre-Treatment | COL11A2  | 1302   | 37 | 6 | 33138658  | 33138658  | Missense_Mutation | SNP | C  | T  | 36  | 60  | c.3403G>A       | c.(3403-3405)GGA>AGA               | p.G1135R |
| Pat_76 | Pre-Treatment | DAXX     | 1616   | 37 | 6 | 33287202  | 33287202  | Missense_Mutation | SNP | G  | A  | 142 | 224 | c.1895C>T       | c.(1894-1896)TCT>TTT               | p.S632F  |
| Pat_76 | Pre-Treatment | ITPR3    | 3710   | 37 | 6 | 33623635  | 33623635  | Missense_Mutation | SNP | G  | A  | 4   | 64  | c.253G>A        | c.(253-255)GCT>ACT                 | p.A85T   |
| Pat_76 | Pre-Treatment | ITPR3    | 3710   | 37 | 6 | 33656459  | 33656459  | Missense_Mutation | SNP | C  | T  | 3   | 34  | c.6595C>T       | c.(6595-6597)CGC>TGC               | p.R2199C |
| Pat_76 | Pre-Treatment | TULP1    | 7287   | 37 | 6 | 35477652  | 35477652  | Missense_Mutation | SNP | C  | T  | 41  | 63  | c.553G>A        | c.(553-555)GAA>AAA                 | p.E185K  |
| Pat_76 | Pre-Treatment | DNAH8    | 1769   | 37 | 6 | 38905837  | 38905837  | Missense_Mutation | SNP | C  | A  | 18  | 24  | c.11000C>A      | c.(10999-11001)GCT>GAT             | p.A3667D |
| Pat_76 | Pre-Treatment | GLP1R    | 2740   | 37 | 6 | 39040780  | 39040780  | Missense_Mutation | SNP | C  | T  | 14  | 37  | c.652C>T        | c.(652-654)CTC>TTC                 | p.L218F  |
| Pat_76 | Pre-Treatment | TREM2    | 54209  | 37 | 6 | 41126761  | 41126762  | Missense_Mutation | DNP | GG | AA | 4   | 6   | c.525_526CC>TT  | c.(523-528)ATCCTT>ATTTT            | p.L176F  |
| Pat_76 | Pre-Treatment | TREML2   | 79865  | 37 | 6 | 41162514  | 41162514  | Missense_Mutation | SNP | C  | T  | 21  | 38  | c.434G>A        | c.(433-435)GGA>GAA                 | p.G145E  |
| Pat_76 | Pre-Treatment | PPP2R5D  | 5528   | 37 | 6 | 42974367  | 42974367  | Missense_Mutation | SNP | G  | A  | 4   | 107 | c.272G>A        | c.(271-273)CGC>CAC                 | p.R91H   |
| Pat_76 | Pre-Treatment | C6orf153 | 88745  | 37 | 6 | 42994986  | 42994986  | Missense_Mutation | SNP | G  | A  | 4   | 103 | c.521G>A        | c.(520-522)CGA>CAA                 | p.R174Q  |
| Pat_76 | Pre-Treatment | CUL7     | 9820   | 37 | 6 | 43019496  | 43019496  | Missense_Mutation | SNP | G  | A  | 5   | 208 | c.586C>T        | c.(586-588)CGG>TGG                 | p.R196W  |
| Pat_76 | Pre-Treatment | TTBK1    | 84630  | 37 | 6 | 43250765  | 43250765  | Missense_Mutation | SNP | G  | A  | 15  | 13  | c.2287G>A       | c.(2287-2289)GAG>AAG               | p.E763K  |
| Pat_76 | Pre-Treatment | ZNF318   | 24149  | 37 | 6 | 43325084  | 43325084  | Missense_Mutation | SNP | C  | T  | 3   | 32  | c.968G>A        | c.(967-969)CGA>CAA                 | p.R323Q  |
| Pat_76 | Pre-Treatment | HSP90AB1 | 3326   | 37 | 6 | 44218846  | 44218846  | Missense_Mutation | SNP | C  | T  | 84  | 139 | c.1019C>T       | c.(1018-1020)CCC>CTC               | p.P340L  |
| Pat_76 | Pre-Treatment | TCTE1    | 202500 | 37 | 6 | 44247992  | 44247992  | Missense_Mutation | SNP | G  | A  | 4   | 92  | c.1432C>T       | c.(1432-1434)CGC>TGC               | p.R478C  |
| Pat_76 | Pre-Treatment | RCAN2    | 10231  | 37 | 6 | 46216620  | 46216620  | Missense_Mutation | SNP | C  | T  | 15  | 28  | c.101G>A        | c.(100-102)GGA>GAA                 | p.G34E   |

|        |               |          |        |    |   |           |           |                   |     |    |    |     |     |                 |                        |               |
|--------|---------------|----------|--------|----|---|-----------|-----------|-------------------|-----|----|----|-----|-----|-----------------|------------------------|---------------|
| Pat_76 | Pre-Treatment | GPR116   | 221395 | 37 | 6 | 46849828  | 46849828  | Missense_Mutation | SNP | C  | T  | 136 | 144 | c.629G>A        | c.(628-630)GGA>GAA     | p.G210E       |
| Pat_76 | Pre-Treatment | GPR111   | 222611 | 37 | 6 | 47648023  | 47648023  | Missense_Mutation | SNP | G  | A  | 42  | 64  | c.688G>A        | c.(688-690)GAT>AAT     | p.D230N       |
| Pat_76 | Pre-Treatment | GPR111   | 222611 | 37 | 6 | 47649928  | 47649928  | Missense_Mutation | SNP | T  | G  | 23  | 25  | c.1633T>G       | c.(1633-1635)TAT>GAT   | p.Y545D       |
| Pat_76 | Pre-Treatment | GPR115   | 221393 | 37 | 6 | 47684567  | 47684567  | Missense_Mutation | SNP | C  | T  | 43  | 88  | c.1958C>T       | c.(1957-1959)ACC>ATC   | p.T653I       |
| Pat_76 | Pre-Treatment | OPN5     | 221391 | 37 | 6 | 47754269  | 47754269  | Missense_Mutation | SNP | G  | A  | 19  | 27  | c.149G>A        | c.(148-150)GGA>GAA     | p.G50E        |
| Pat_76 | Pre-Treatment | PKHD1    | 5314   | 37 | 6 | 51524392  | 51524393  | Missense_Mutation | DNP | CC | TT | 12  | 18  | 10531_10532GG>A | c.(10531-10533)GGG>AAC | p.G3511K      |
| Pat_76 | Pre-Treatment | HMGCLL1  | 54511  | 37 | 6 | 55406878  | 55406879  | Missense_Mutation | DNP | CC | TT | 21  | 22  | c.258_259GG>AA  | c.(256-261)AGGGAT>AGAA | p.D87N        |
| Pat_76 | Pre-Treatment | COL21A1  | 81578  | 37 | 6 | 56035908  | 56035908  | Missense_Mutation | SNP | C  | T  | 46  | 61  | c.659G>A        | c.(658-660)CGA>CAA     | p.R220Q       |
| Pat_76 | Pre-Treatment | KIAA1586 | 57691  | 37 | 6 | 56915578  | 56915578  | Missense_Mutation | SNP | C  | T  | 4   | 61  | c.112C>T        | c.(112-114)CCA>TCA     | p.P38S        |
| Pat_76 | Pre-Treatment | BAI3     | 577    | 37 | 6 | 69646453  | 69646453  | Missense_Mutation | SNP | C  | T  | 14  | 18  | c.911C>T        | c.(910-912)TCG>TTG     | p.S304L       |
| Pat_76 | Pre-Treatment | BAI3     | 577    | 37 | 6 | 69723975  | 69723975  | Missense_Mutation | SNP | G  | A  | 17  | 42  | c.1975G>A       | c.(1975-1977)GAA>AAA   | p.E659K       |
| Pat_76 | Pre-Treatment | COL9A1   | 1297   | 37 | 6 | 70984444  | 70984444  | Missense_Mutation | SNP | G  | A  | 30  | 28  | c.1007C>T       | c.(1006-1008)TCC>TTC   | p.S336F       |
| Pat_76 | Pre-Treatment | IMPG1    | 3617   | 37 | 6 | 76731904  | 76731904  | Missense_Mutation | SNP | G  | A  | 35  | 48  | c.595C>T        | c.(595-597)CTC>TTC     | p.L199F       |
| Pat_76 | Pre-Treatment | ME1      | 4199   | 37 | 6 | 83933652  | 83933652  | Missense_Mutation | SNP | C  | T  | 7   | 22  | c.1276G>A       | c.(1276-1278)GGA>AGA   | p.G426R       |
| Pat_76 | Pre-Treatment | TBX18    | 9096   | 37 | 6 | 85466491  | 85466492  | Missense_Mutation | DNP | CC | TT | 20  | 24  | c.695_696GG>AA  | c.(694-696)GGG>GAA     | p.G232E       |
| Pat_76 | Pre-Treatment | NT5E     | 4907   | 37 | 6 | 86180955  | 86180955  | Missense_Mutation | SNP | G  | A  | 5   | 15  | c.563G>A        | c.(562-564)GGG>GAG     | p.G188E       |
| Pat_76 | Pre-Treatment | EPHA7    | 2045   | 37 | 6 | 93955105  | 93955105  | Nonsense_Mutation | SNP | C  | T  | 39  | 53  | c.2793G>A       | c.(2791-2793)TGG>TGA   | p.W931*       |
| Pat_76 | Pre-Treatment | EPHA7    | 2045   | 37 | 6 | 93956552  | 93956552  | Missense_Mutation | SNP | C  | T  | 47  | 55  | c.2684G>A       | c.(2683-2685)CGA>CAA   | p.R895Q       |
| Pat_76 | Pre-Treatment | KIAA0776 | 23376  | 37 | 6 | 97000533  | 97000533  | Missense_Mutation | SNP | C  | T  | 8   | 22  | c.2161C>T       | c.(2161-2163)CCA>TCA   | p.P721S       |
| Pat_76 | Pre-Treatment | C6orf167 | 253714 | 37 | 6 | 97676827  | 97676827  | Missense_Mutation | SNP | C  | T  | 4   | 118 | c.1982G>A       | c.(1981-1983)CGA>CAA   | p.R661Q       |
| Pat_76 | Pre-Treatment | GRIK2    | 2898   | 37 | 6 | 102307279 | 102307279 | Missense_Mutation | SNP | G  | A  | 17  | 20  | c.1435G>A       | c.(1435-1437)GAA>AAA   | p.E479K       |
| Pat_76 | Pre-Treatment | GRIK2    | 2898   | 37 | 6 | 102372501 | 102372501 | Missense_Mutation | SNP | C  | T  | 52  | 59  | c.1774C>T       | c.(1774-1776)CCA>TCA   | p.P592S       |
| Pat_76 | Pre-Treatment | PRDM1    | 639    | 37 | 6 | 106547368 | 106547368 | Missense_Mutation | SNP | G  | T  | 4   | 95  | c.605G>T        | c.(604-606)CGG>CTG     | p.R202L       |
| Pat_76 | Pre-Treatment | SOBP     | 55084  | 37 | 6 | 107827494 | 107827494 | Missense_Mutation | SNP | C  | T  | 63  | 65  | c.284C>T        | c.(283-285)CCA>CTA     | p.P95L        |
| Pat_76 | Pre-Treatment | ARMC2    | 84071  | 37 | 6 | 109220963 | 109220963 | Missense_Mutation | SNP | G  | A  | 19  | 28  | c.815G>A        | c.(814-816)AGG>AAG     | p.R272K       |
| Pat_76 | Pre-Treatment | FRK      | 2444   | 37 | 6 | 116263590 | 116263590 | Missense_Mutation | SNP | T  | C  | 35  | 53  | c.1505A>G       | c.(1504-1506)AAC>AGC   | p.N502S       |
| Pat_76 | Pre-Treatment | DSE      | 29940  | 37 | 6 | 116758336 | 116758336 | Missense_Mutation | SNP | G  | A  | 14  | 36  | c.2705G>A       | c.(2704-2706)AGG>AAG   | p.R902K       |
| Pat_76 | Pre-Treatment | RFX6     | 222546 | 37 | 6 | 117240459 | 117240460 | Splice_Site       | DNP | GG | AA | 31  | 62  | c.1182_splice   | c.e11+1                | p.Q394_splice |
| Pat_76 | Pre-Treatment | RFX6     | 222546 | 37 | 6 | 117248514 | 117248514 | Missense_Mutation | SNP | G  | C  | 27  | 44  | c.2210G>C       | c.(2209-2211)AGA>ACA   | p.R737T       |
| Pat_76 | Pre-Treatment | MAN1A1   | 4121   | 37 | 6 | 119623184 | 119623184 | Missense_Mutation | SNP | G  | A  | 13  | 15  | c.785C>T        | c.(784-786)TCA>TTA     | p.S262L       |
| Pat_76 | Pre-Treatment | C6orf170 | 221322 | 37 | 6 | 121481215 | 121481215 | Missense_Mutation | SNP | G  | A  | 42  | 69  | c.2714C>T       | c.(2713-2715)TCA>TTA   | p.S905L       |
| Pat_76 | Pre-Treatment | C6orf58  | 352999 | 37 | 6 | 127912754 | 127912754 | Missense_Mutation | SNP | G  | A  | 14  | 26  | c.980G>A        | c.(979-981)GGA>GAA     | p.G327E       |
| Pat_76 | Pre-Treatment | PTPRK    | 5796   | 37 | 6 | 128304508 | 128304508 | Missense_Mutation | SNP | C  | T  | 67  | 108 | c.3263G>A       | c.(3262-3264)CGA>CAA   | p.R1088Q      |
| Pat_76 | Pre-Treatment | LAMA2    | 3908   | 37 | 6 | 129802517 | 129802517 | Missense_Mutation | SNP | G  | A  | 80  | 104 | c.7682G>A       | c.(7681-7683)GGC>GAC   | p.G2561D      |
| Pat_76 | Pre-Treatment | C6orf191 | 253582 | 37 | 6 | 130166939 | 130166939 | Missense_Mutation | SNP | G  | A  | 43  | 66  | c.92C>T         | c.(91-93)TCC>TTC       | p.S31F        |
| Pat_76 | Pre-Treatment | ENPP3    | 5169   | 37 | 6 | 131973708 | 131973708 | Missense_Mutation | SNP | C  | T  | 101 | 119 | c.304C>T        | c.(304-306)CGT>TGT     | p.R102C       |
| Pat_76 | Pre-Treatment | ENPP3    | 5169   | 37 | 6 | 131995347 | 131995347 | Missense_Mutation | SNP | G  | A  | 16  | 18  | c.688G>A        | c.(688-690)GAT>AAT     | p.D230N       |
| Pat_76 | Pre-Treatment | TAAR8    | 83551  | 37 | 6 | 132874774 | 132874774 | Missense_Mutation | SNP | C  | T  | 25  | 59  | c.943C>T        | c.(943-945)CCT>TCT     | p.P315S       |
| Pat_76 | Pre-Treatment | AHI1     | 54806  | 37 | 6 | 135754272 | 135754272 | Missense_Mutation | SNP | G  | A  | 47  | 56  | c.2159C>T       | c.(2158-2160)TCC>TTC   | p.S720F       |
| Pat_76 | Pre-Treatment | BCLAF1   | 9774   | 37 | 6 | 136599690 | 136599690 | Missense_Mutation | SNP | G  | A  | 28  | 170 | c.329C>T        | c.(328-330)TCA>TTA     | p.S110L       |
| Pat_76 | Pre-Treatment | MAP7     | 9053   | 37 | 6 | 136680963 | 136680963 | Missense_Mutation | SNP | C  | T  | 93  | 152 | c.1907G>A       | c.(1906-1908)GGA>GAA   | p.G636E       |
| Pat_76 | Pre-Treatment | MAP7     | 9053   | 37 | 6 | 136681842 | 136681842 | Missense_Mutation | SNP | C  | T  | 255 | 352 | c.1796G>A       | c.(1795-1797)AGA>AAA   | p.R599K       |
| Pat_76 | Pre-Treatment | KIAA1244 | 57221  | 37 | 6 | 138619758 | 138619758 | Missense_Mutation | SNP | G  | A  | 10  | 6   | c.3664G>A       | c.(3664-3666)GAA>AAA   | p.E1222K      |
| Pat_76 | Pre-Treatment | HIVEP2   | 3097   | 37 | 6 | 143081070 | 143081070 | Missense_Mutation | SNP | G  | T  | 3   | 14  | c.6355C>A       | c.(6355-6357)CCT>ACT   | p.P2119T      |
| Pat_76 | Pre-Treatment | PLAGL1   | 5325   | 37 | 6 | 144263084 | 144263084 | Missense_Mutation | SNP | G  | A  | 16  | 36  | c.869C>T        | c.(868-870)TCC>TTC     | p.S290F       |
| Pat_76 | Pre-Treatment | UTRN     | 7402   | 37 | 6 | 145156938 | 145156938 | Nonsense_Mutation | SNP | C  | T  | 129 | 190 | c.9688C>T       | c.(9688-9690)CAG>TAG   | p.Q3230*      |
| Pat_76 | Pre-Treatment | FBXL18   | 80028  | 37 | 7 | 5540167   | 5540167   | Missense_Mutation | SNP | G  | A  | 4   | 102 | c.1733C>T       | c.(1732-1734)CCC>CTC   | p.P578L       |

|        |               |         |        |    |   |           |           |                   |     |    |    |     |     |              |                        |          |
|--------|---------------|---------|--------|----|---|-----------|-----------|-------------------|-----|----|----|-----|-----|--------------|------------------------|----------|
| Pat_76 | Pre-Treatment | FBXL18  | 80028  | 37 | 7 | 5540452   | 5540452   | Missense_Mutation | SNP | G  | T  | 17  | 46  | c.1448C>A    | c.(1447-1449)CCC>CAC   | p.P483H  |
| Pat_76 | Pre-Treatment | C7orf26 | 79034  | 37 | 7 | 6639796   | 6639796   | Missense_Mutation | SNP | C  | T  | 15  | 15  | c.917C>T     | c.(916-918)ACC>ATC     | p.T306I  |
| Pat_76 | Pre-Treatment | COL28A1 | 340267 | 37 | 7 | 7457519   | 7457519   | Missense_Mutation | SNP | G  | A  | 40  | 94  | c.2107C>T    | c.(2107-2109)CCC>TCC   | p.P703S  |
| Pat_76 | Pre-Treatment | ETV1    | 2115   | 37 | 7 | 13971333  | 13971333  | Missense_Mutation | SNP | G  | A  | 15  | 74  | c.596C>T     | c.(595-597)CCT>CTT     | p.P199L  |
| Pat_76 | Pre-Treatment | HDAC9   | 9734   | 37 | 7 | 18975562  | 18975562  | Missense_Mutation | SNP | T  | G  | 72  | 46  | c.2925T>G    | c.(2923-2925)AAT>AAG   | p.N975K  |
| Pat_76 | Pre-Treatment | TWISTNB | 221830 | 37 | 7 | 19748518  | 19748518  | Missense_Mutation | SNP | A  | C  | 25  | 18  | c.122T>G     | c.(121-123)GTG>GGG     | p.V41G   |
| Pat_76 | Pre-Treatment | DNAH11  | 8701   | 37 | 7 | 21639612  | 21639612  | Missense_Mutation | SNP | C  | T  | 12  | 29  | c.2875C>T    | c.(2875-2877)CCT>TCT   | p.P959S  |
| Pat_76 | Pre-Treatment | DNAH11  | 8701   | 37 | 7 | 21760451  | 21760451  | Missense_Mutation | SNP | G  | A  | 11  | 26  | c.7264G>A    | c.(7264-7266)GGA>AGA   | p.G2422R |
| Pat_76 | Pre-Treatment | TRA2A   | 29896  | 37 | 7 | 23556110  | 23556110  | Nonsense_Mutation | SNP | G  | A  | 4   | 151 | c.208C>T     | c.(208-210)CGA>TGA     | p.R70*   |
| Pat_76 | Pre-Treatment | STK31   | 56164  | 37 | 7 | 23827672  | 23827672  | Missense_Mutation | SNP | C  | T  | 49  | 114 | c.2561C>T    | c.(2560-2562)TCA>TTA   | p.S854L  |
| Pat_76 | Pre-Treatment | BMPER   | 168667 | 37 | 7 | 34118765  | 34118765  | Missense_Mutation | SNP | G  | A  | 27  | 110 | c.1375G>A    | c.(1375-1377)GAT>AAT   | p.D459N  |
| Pat_76 | Pre-Treatment | POU6F2  | 11281  | 37 | 7 | 39446295  | 39446295  | Missense_Mutation | SNP | C  | T  | 49  | 31  | c.982C>T     | c.(982-984)CTT>TTT     | p.L328F  |
| Pat_76 | Pre-Treatment | C7orf36 | 57002  | 37 | 7 | 39612174  | 39612174  | Missense_Mutation | SNP | G  | A  | 46  | 99  | c.550G>A     | c.(550-552)GAA>AAA     | p.E184K  |
| Pat_76 | Pre-Treatment | GLI3    | 2737   | 37 | 7 | 42065985  | 42065985  | Missense_Mutation | SNP | G  | A  | 14  | 31  | c.1055C>T    | c.(1054-1056)TCC>TTC   | p.S352F  |
| Pat_76 | Pre-Treatment | C7orf44 | 55744  | 37 | 7 | 43687203  | 43687203  | Missense_Mutation | SNP | C  | T  | 12  | 105 | c.46G>A      | c.(46-48)GGA>AGA       | p.G16R   |
| Pat_76 | Pre-Treatment | PGAM2   | 5224   | 37 | 7 | 44105164  | 44105164  | Splice_Site       | SNP | G  | A  | 52  | 43  | c.-34_splice | c.e1-1                 |          |
| Pat_76 | Pre-Treatment | NPC1L1  | 29881  | 37 | 7 | 44579071  | 44579071  | Missense_Mutation | SNP | G  | A  | 42  | 69  | c.925C>T     | c.(925-927)CCC>TCC     | p.P309S  |
| Pat_76 | Pre-Treatment | PKD1L1  | 168507 | 37 | 7 | 47917146  | 47917146  | Missense_Mutation | SNP | G  | A  | 112 | 74  | c.3604C>T    | c.(3604-3606)CCC>TCC   | p.P1202S |
| Pat_76 | Pre-Treatment | UPP1    | 7378   | 37 | 7 | 48139273  | 48139274  | Missense_Mutation | DNP | CC | TT | 30  | 65  | c.51_52CC>TT | .(49-54)TGCCCC>TGTTCC  | p.P18S   |
| Pat_76 | Pre-Treatment | ABCA13  | 154664 | 37 | 7 | 48312960  | 48312960  | Missense_Mutation | SNP | G  | A  | 14  | 37  | c.3697G>A    | c.(3697-3699)GAT>AAT   | p.D1233N |
| Pat_76 | Pre-Treatment | ABCA13  | 154664 | 37 | 7 | 48338080  | 48338080  | Missense_Mutation | SNP | C  | T  | 16  | 37  | c.9317C>T    | c.(9316-9318)TCC>TTC   | p.S3106F |
| Pat_76 | Pre-Treatment | ZBPB    | 11055  | 37 | 7 | 50022979  | 50022979  | Missense_Mutation | SNP | C  | T  | 27  | 45  | c.920G>A     | c.(919-921)GGA>GAA     | p.G307E  |
| Pat_76 | Pre-Treatment | ZNF713  | 349075 | 37 | 7 | 56007625  | 56007625  | Missense_Mutation | SNP | C  | T  | 49  | 44  | c.1219C>T    | c.(1219-1221)CAT>TAT   | p.H407Y  |
| Pat_76 | Pre-Treatment | ZNF479  | 90827  | 37 | 7 | 57187752  | 57187752  | Missense_Mutation | SNP | C  | T  | 79  | 211 | c.1370G>A    | c.(1369-1371)AGA>AAA   | p.R457K  |
| Pat_76 | Pre-Treatment | ZNF727  | 442319 | 37 | 7 | 63538454  | 63538454  | Missense_Mutation | SNP | G  | A  | 27  | 70  | c.1027G>A    | c.(1027-1029)GAA>AAA   | p.E343K  |
| Pat_76 | Pre-Treatment | ZNF107  | 51427  | 37 | 7 | 64167977  | 64167977  | Missense_Mutation | SNP | A  | T  | 4   | 102 | c.1295A>T    | c.(1294-1296)AAA>ATA   | p.K432I  |
| Pat_76 | Pre-Treatment | CALN1   | 83698  | 37 | 7 | 71275372  | 71275372  | Missense_Mutation | SNP | C  | T  | 25  | 85  | c.481G>A     | c.(481-483)GAA>AAA     | p.E161K  |
| Pat_76 | Pre-Treatment | POR     | 5447   | 37 | 7 | 75583414  | 75583414  | Missense_Mutation | SNP | C  | T  | 10  | 29  | c.104C>T     | c.(103-105)TCG>TTG     | p.S35L   |
| Pat_76 | Pre-Treatment | MAGI2   | 9863   | 37 | 7 | 77885584  | 77885584  | Missense_Mutation | SNP | C  | T  | 8   | 43  | c.1723G>A    | c.(1723-1725)GAT>AAT   | p.D575N  |
| Pat_76 | Pre-Treatment | PCLO    | 27445  | 37 | 7 | 82451858  | 82451858  | Missense_Mutation | SNP | G  | C  | 76  | 179 | c.14744C>G   | .(14743-14745)GCC>GGC  | p.A4915G |
| Pat_76 | Pre-Treatment | PCLO    | 27445  | 37 | 7 | 82546104  | 82546104  | Missense_Mutation | SNP | G  | A  | 44  | 93  | c.11198C>T   | c.(11197-11199)TCC>TTC | p.S3733F |
| Pat_76 | Pre-Treatment | PCLO    | 27445  | 37 | 7 | 82586071  | 82586071  | Missense_Mutation | SNP | C  | T  | 6   | 42  | c.4198G>A    | c.(4198-4200)GAA>AAA   | p.E1400K |
| Pat_76 | Pre-Treatment | PCLO    | 27445  | 37 | 7 | 82764102  | 82764102  | Missense_Mutation | SNP | T  | G  | 16  | 34  | c.2764A>C    | c.(2764-2766)ACT>CCT   | p.T922P  |
| Pat_76 | Pre-Treatment | PCLO    | 27445  | 37 | 7 | 82764708  | 82764708  | Missense_Mutation | SNP | C  | T  | 11  | 45  | c.2158G>A    | c.(2158-2160)GCC>ACC   | p.A720T  |
| Pat_76 | Pre-Treatment | PCLO    | 27445  | 37 | 7 | 82785182  | 82785182  | Nonsense_Mutation | SNP | G  | A  | 25  | 59  | c.775C>T     | c.(775-777)CAG>TAG     | p.Q259*  |
| Pat_76 | Pre-Treatment | ABCB1   | 5243   | 37 | 7 | 87133609  | 87133609  | Missense_Mutation | SNP | C  | T  | 99  | 94  | c.3793G>A    | c.(3793-3795)GGC>AGC   | p.G1265S |
| Pat_76 | Pre-Treatment | STEAP4  | 79689  | 37 | 7 | 87913456  | 87913456  | Nonsense_Mutation | SNP | A  | C  | 27  | 72  | c.129T>G     | c.(127-129)TAT>TAG     | p.Y43*   |
| Pat_76 | Pre-Treatment | SAMD9L  | 219285 | 37 | 7 | 92762118  | 92762118  | Missense_Mutation | SNP | G  | A  | 26  | 61  | c.3167C>T    | c.(3166-3168)TCC>TTC   | p.S1056F |
| Pat_76 | Pre-Treatment | COL1A2  | 1278   | 37 | 7 | 94039582  | 94039582  | Missense_Mutation | SNP | G  | A  | 41  | 83  | c.1064G>A    | c.(1063-1065)GGA>GAA   | p.G355E  |
| Pat_76 | Pre-Treatment | CASD1   | 64921  | 37 | 7 | 94173748  | 94173748  | Missense_Mutation | SNP | G  | A  | 5   | 255 | c.1382G>A    | c.(1381-1383)CGA>CAA   | p.R461Q  |
| Pat_76 | Pre-Treatment | NPTX2   | 4885   | 37 | 7 | 98254473  | 98254473  | Missense_Mutation | SNP | G  | A  | 17  | 46  | c.883G>A     | c.(883-885)GAC>AAC     | p.D295N  |
| Pat_76 | Pre-Treatment | CYP3A4  | 1576   | 37 | 7 | 99359664  | 99359664  | Missense_Mutation | SNP | C  | T  | 73  | 46  | c.1253G>A    | c.(1252-1254)AGA>AAA   | p.R418K  |
| Pat_76 | Pre-Treatment | ZCWPW1  | 55063  | 37 | 7 | 100017342 | 100017342 | Missense_Mutation | SNP | C  | T  | 9   | 39  | c.193G>A     | c.(193-195)GAA>AAA     | p.E65K   |
| Pat_76 | Pre-Treatment | ZAN     | 7455   | 37 | 7 | 100348419 | 100348419 | Missense_Mutation | SNP | G  | A  | 7   | 6   | c.1421G>A    | c.(1420-1422)GGG>GAG   | p.G474E  |
| Pat_76 | Pre-Treatment | MUC17   | 140453 | 37 | 7 | 100678919 | 100678919 | Missense_Mutation | SNP | G  | A  | 228 | 552 | c.4222G>A    | c.(4222-4224)GTA>ATA   | p.V1408I |
| Pat_76 | Pre-Treatment | MUC17   | 140453 | 37 | 7 | 100683798 | 100683798 | Missense_Mutation | SNP | C  | T  | 213 | 537 | c.9101C>T    | c.(9100-9102)ACC>ATC   | p.T3034I |
| Pat_76 | Pre-Treatment | MUC17   | 140453 | 37 | 7 | 100686761 | 100686761 | Missense_Mutation | SNP | A  | C  | 49  | 175 | c.12064A>C   | c.(12064-12066)ACT>CCT | p.T4022P |

|        |               |          |        |    |   |           |           |                   |     |    |    |     |     |                                                  |                      |               |
|--------|---------------|----------|--------|----|---|-----------|-----------|-------------------|-----|----|----|-----|-----|--------------------------------------------------|----------------------|---------------|
| Pat_76 | Pre-Treatment | CUX1     | 1523   | 37 | 7 | 101918517 | 101918517 | Splice_Site       | SNP | G  | A  | 41  | 107 | c.1451_splice                                    | c.e17-1              | p.G484_splice |
| Pat_76 | Pre-Treatment | SLC26A5  | 375611 | 37 | 7 | 103048336 | 103048336 | Missense_Mutation | SNP | C  | T  | 32  | 69  | c.850G>A                                         | c.(850-852)GAG>AAG   | p.E284K       |
| Pat_76 | Pre-Treatment | RELN     | 5649   | 37 | 7 | 103185660 | 103185660 | Missense_Mutation | SNP | C  | T  | 57  | 37  | c.6434G>A                                        | c.(6433-6435)GGA>GAA | p.G2145E      |
| Pat_76 | Pre-Treatment | RELN     | 5649   | 37 | 7 | 103294623 | 103294623 | Missense_Mutation | SNP | C  | T  | 28  | 59  | c.1471G>A                                        | c.(1471-1473)GAA>AAA | p.E491K       |
| Pat_76 | Pre-Treatment | RELN     | 5649   | 37 | 7 | 103341421 | 103341421 | Missense_Mutation | SNP | G  | A  | 38  | 111 | c.838C>T                                         | c.(838-840)CCC>TCC   | p.P280S       |
| Pat_76 | Pre-Treatment | DOCK4    | 9732   | 37 | 7 | 111423941 | 111423941 | Missense_Mutation | SNP | G  | A  | 7   | 32  | c.3469C>T                                        | c.(3469-3471)CGT>TGT | p.R1157C      |
| Pat_76 | Pre-Treatment | IFRD1    | 3475   | 37 | 7 | 112096120 | 112096120 | Missense_Mutation | SNP | T  | G  | 52  | 71  | c.263T>G                                         | c.(262-264)ATT>AGT   | p.I88S        |
| Pat_76 | Pre-Treatment | PPP1R3A  | 5506   | 37 | 7 | 113518127 | 113518127 | Missense_Mutation | SNP | G  | A  | 32  | 107 | c.3020C>T                                        | c.(3019-3021)TCT>TTT | p.S1007F      |
| Pat_76 | Pre-Treatment | FOXP2    | 93986  | 37 | 7 | 114329931 | 114329931 | Missense_Mutation | SNP | G  | A  | 55  | 192 | c.2098G>A                                        | c.(2098-2100)GAA>AAA | p.E700K       |
| Pat_76 | Pre-Treatment | MET      | 4233   | 37 | 7 | 116371883 | 116371884 | Missense_Mutation | DNP | TC | AT | 132 | 51  | :.1362_1363TC>A1360-1365)AATCTT>AAAT.454_455NL>K |                      |               |
| Pat_76 | Pre-Treatment | WNT2     | 7472   | 37 | 7 | 116918241 | 116918241 | Missense_Mutation | SNP | G  | A  | 26  | 108 | c.1051C>T                                        | c.(1051-1053)CCC>TCC | p.P351S       |
| Pat_76 | Pre-Treatment | CFTR     | 1080   | 37 | 7 | 117232163 | 117232163 | Missense_Mutation | SNP | G  | A  | 120 | 61  | c.1942G>A                                        | c.(1942-1944)GAT>AAT | p.D648N       |
| Pat_76 | Pre-Treatment | CFTR     | 1080   | 37 | 7 | 117307052 | 117307052 | Missense_Mutation | SNP | G  | A  | 18  | 81  | c.4333G>A                                        | c.(4333-4335)GAC>AAC | p.D1445N      |
| Pat_76 | Pre-Treatment | TSPAN12  | 23554  | 37 | 7 | 120428929 | 120428929 | Missense_Mutation | SNP | G  | A  | 29  | 109 | c.635C>T                                         | c.(634-636)TCC>TTC   | p.S212F       |
| Pat_76 | Pre-Treatment | RNF148   | 378925 | 37 | 7 | 122342384 | 122342384 | Missense_Mutation | SNP | G  | A  | 156 | 432 | c.421C>T                                         | c.(421-423)CCC>TCC   | p.P141S       |
| Pat_76 | Pre-Treatment | IQUB     | 154865 | 37 | 7 | 123136870 | 123136870 | Missense_Mutation | SNP | C  | T  | 45  | 24  | c.1114G>A                                        | c.(1114-1116)GAA>AAA | p.E372K       |
| Pat_76 | Pre-Treatment | FSCN3    | 29999  | 37 | 7 | 127236496 | 127236496 | Missense_Mutation | SNP | C  | T  | 153 | 75  | c.956C>T                                         | c.(955-957)TCC>TTC   | p.S319F       |
| Pat_76 | Pre-Treatment | SND1     | 27044  | 37 | 7 | 127326763 | 127326763 | Missense_Mutation | SNP | C  | T  | 44  | 124 | c.175C>T                                         | c.(175-177)CTT>TTT   | p.L59F        |
| Pat_76 | Pre-Treatment | METTL2B  | 55798  | 37 | 7 | 128119521 | 128119521 | Missense_Mutation | SNP | G  | A  | 16  | 69  | c.512G>A                                         | c.(511-513)TGT>TAT   | p.C171Y       |
| Pat_76 | Pre-Treatment | FLNC     | 2318   | 37 | 7 | 128484752 | 128484752 | Missense_Mutation | SNP | G  | A  | 13  | 79  | c.3233G>A                                        | c.(3232-3234)GGC>GAC | p.G1078D      |
| Pat_76 | Pre-Treatment | FLNC     | 2318   | 37 | 7 | 128485144 | 128485144 | Missense_Mutation | SNP | G  | A  | 19  | 79  | c.3625G>A                                        | c.(3625-3627)GAT>AAT | p.D1209N      |
| Pat_76 | Pre-Treatment | FLNC     | 2318   | 37 | 7 | 128493532 | 128493532 | Missense_Mutation | SNP | G  | A  | 39  | 11  | c.6218G>A                                        | c.(6217-6219)GGC>GAC | p.G2073D      |
| Pat_76 | Pre-Treatment | PLXNA4   | 91584  | 37 | 7 | 131831452 | 131831452 | Missense_Mutation | SNP | C  | T  | 50  | 209 | c.4872G>A                                        | c.(4870-4872)ATG>ATA | p.M1624I      |
| Pat_76 | Pre-Treatment | PLXNA4   | 91584  | 37 | 7 | 131853205 | 131853205 | Missense_Mutation | SNP | C  | T  | 19  | 71  | c.4144G>A                                        | c.(4144-4146)GAC>AAC | p.D1382N      |
| Pat_76 | Pre-Treatment | PLXNA4   | 91584  | 37 | 7 | 131853241 | 131853241 | Missense_Mutation | SNP | G  | A  | 12  | 83  | c.4108C>T                                        | c.(4108-4110)CGC>TGC | p.R1370C      |
| Pat_76 | Pre-Treatment | PLXNA4   | 91584  | 37 | 7 | 132192864 | 132192864 | Missense_Mutation | SNP | G  | A  | 35  | 129 | c.589C>T                                         | c.(589-591)CCC>TCC   | p.P197S       |
| Pat_76 | Pre-Treatment | CHRM2    | 1129   | 37 | 7 | 136700405 | 136700405 | Missense_Mutation | SNP | G  | A  | 44  | 60  | c.793G>A                                         | c.(793-795)GCC>ACC   | p.A265T       |
| Pat_76 | Pre-Treatment | DGKI     | 9162   | 37 | 7 | 137304634 | 137304634 | Missense_Mutation | SNP | G  | A  | 182 | 91  | c.929C>T                                         | c.(928-930)TCC>TTC   | p.S310F       |
| Pat_76 | Pre-Treatment | KIAA1549 | 57670  | 37 | 7 | 138552834 | 138552835 | Nonsense_Mutation | DNP | GG | AA | 20  | 22  | :.4815_4816CC>T813-4818)CACCAG>CATT              |                      | p.Q1606*      |
| Pat_76 | Pre-Treatment | ZC3HAV1  | 56829  | 37 | 7 | 138758745 | 138758745 | Missense_Mutation | SNP | G  | A  | 5   | 158 | c.1729C>T                                        | c.(1729-1731)CGG>TGG | p.R577W       |
| Pat_76 | Pre-Treatment | HIPK2    | 28996  | 37 | 7 | 139416178 | 139416178 | Missense_Mutation | SNP | C  | T  | 4   | 146 | c.656G>A                                         | c.(655-657)CGG>CAG   | p.R219Q       |
| Pat_76 | Pre-Treatment | RAB19    | 401409 | 37 | 7 | 140107597 | 140107597 | Missense_Mutation | SNP | G  | A  | 32  | 137 | c.151G>A                                         | c.(151-153)GGA>AGA   | p.G51R        |
| Pat_76 | Pre-Treatment | RAB19    | 401409 | 37 | 7 | 140111792 | 140111792 | Missense_Mutation | SNP | C  | T  | 44  | 204 | c.320C>T                                         | c.(319-321)TCC>TTC   | p.S107F       |
| Pat_76 | Pre-Treatment | DENND2A  | 27147  | 37 | 7 | 140301773 | 140301773 | Missense_Mutation | SNP | C  | A  | 54  | 233 | c.425G>T                                         | c.(424-426)GGC>GTC   | p.G142V       |
| Pat_76 | Pre-Treatment | ADCK2    | 90956  | 37 | 7 | 140373899 | 140373899 | Missense_Mutation | SNP | C  | T  | 54  | 26  | c.769C>T                                         | c.(769-771)CTT>TTT   | p.L257F       |
| Pat_76 | Pre-Treatment | BRAF     | 673    | 37 | 7 | 140453136 | 140453136 | Missense_Mutation | SNP | A  | T  | 114 | 43  | c.1799T>A                                        | c.(1798-1800)GTG>GAG | p.V600E       |
| Pat_76 | Pre-Treatment | BRAF     | 673    | 37 | 7 | 140481408 | 140481408 | Missense_Mutation | SNP | G  | A  | 50  | 268 | c.1400C>T                                        | c.(1399-1401)TCA>TTA | p.S467L       |
| Pat_76 | Pre-Treatment | WEE2     | 494551 | 37 | 7 | 141408728 | 141408728 | Nonsense_Mutation | SNP | G  | A  | 197 | 99  | c.170G>A                                         | c.(169-171)TGG>TAG   | p.W57*        |
| Pat_76 | Pre-Treatment | MGAM     | 8972   | 37 | 7 | 141759301 | 141759301 | Missense_Mutation | SNP | G  | A  | 7   | 8   | c.3849G>A                                        | c.(3847-3849)ATG>ATA | p.M1283I      |
| Pat_76 | Pre-Treatment | TRPV6    | 55503  | 37 | 7 | 142574981 | 142574981 | Missense_Mutation | SNP | C  | T  | 30  | 179 | c.401G>A                                         | c.(400-402)CGA>CAA   | p.R134Q       |
| Pat_76 | Pre-Treatment | TRPV5    | 56302  | 37 | 7 | 142622769 | 142622769 | Missense_Mutation | SNP | C  | T  | 4   | 104 | c.977G>A                                         | c.(976-978)CGG>CAG   | p.R326Q       |
| Pat_76 | Pre-Treatment | TRPV5    | 56302  | 37 | 7 | 142625878 | 142625878 | Missense_Mutation | SNP | C  | T  | 51  | 136 | c.670G>A                                         | c.(670-672)GGA>AGA   | p.G224R       |
| Pat_76 | Pre-Treatment | TAS2R39  | 259285 | 37 | 7 | 142880593 | 142880593 | Missense_Mutation | SNP | G  | A  | 8   | 52  | c.82G>A                                          | c.(82-84)GAA>AAA     | p.E28K        |
| Pat_76 | Pre-Treatment | TAS2R39  | 259285 | 37 | 7 | 142881212 | 142881212 | Missense_Mutation | SNP | C  | T  | 209 | 70  | c.701C>T                                         | c.(700-702)TCT>TTT   | p.S234F       |
| Pat_76 | Pre-Treatment | CLCN1    | 1180   | 37 | 7 | 143044013 | 143044013 | Missense_Mutation | SNP | G  | A  | 38  | 155 | c.2374G>A                                        | c.(2374-2376)GAT>AAT | p.D792N       |
| Pat_76 | Pre-Treatment | EPHA1    | 2041   | 37 | 7 | 143096756 | 143096756 | Missense_Mutation | SNP | C  | T  | 33  | 181 | c.823G>A                                         | c.(823-825)GAA>AAA   | p.E275K       |
| Pat_76 | Pre-Treatment | TAS2R41  | 259287 | 37 | 7 | 143175540 | 143175540 | Missense_Mutation | SNP | C  | T  | 36  | 53  | c.575C>T                                         | c.(574-576)CCT>CTT   | p.P192L       |

|        |               |          |        |    |   |           |           |                   |     |    |    |     |     |                 |                          |               |
|--------|---------------|----------|--------|----|---|-----------|-----------|-------------------|-----|----|----|-----|-----|-----------------|--------------------------|---------------|
| Pat_76 | Pre-Treatment | OR2F1    | 26211  | 37 | 7 | 143657369 | 143657369 | Missense_Mutation | SNP | T  | A  | 68  | 219 | c.306T>A        | c.(304-306)TTT>TTA       | p.F102L       |
| Pat_76 | Pre-Treatment | OR2A2    | 442361 | 37 | 7 | 143807452 | 143807452 | Missense_Mutation | SNP | G  | A  | 158 | 104 | c.777G>A        | c.(775-777)ATG>ATA       | p.M259I       |
| Pat_76 | Pre-Treatment | ARHGEF5  | 7984   | 37 | 7 | 144060324 | 144060324 | Missense_Mutation | SNP | G  | A  | 46  | 121 | c.562G>A        | c.(562-564)GAG>AAG       | p.E188K       |
| Pat_76 | Pre-Treatment | ARHGEF5  | 7984   | 37 | 7 | 144062290 | 144062290 | Missense_Mutation | SNP | C  | T  | 12  | 241 | c.2528C>T       | c.(2527-2529)CCC>CTC     | p.P843L       |
| Pat_76 | Pre-Treatment | CNTNAP2  | 26047  | 37 | 7 | 146825794 | 146825794 | Missense_Mutation | SNP | G  | A  | 29  | 105 | c.949G>A        | c.(949-951)GGA>AGA       | p.G317R       |
| Pat_76 | Pre-Treatment | C7orf33  | 202865 | 37 | 7 | 148311169 | 148311169 | Missense_Mutation | SNP | G  | A  | 91  | 368 | c.240G>A        | c.(238-240)ATG>ATA       | p.M80I        |
| Pat_76 | Pre-Treatment | ZNF786   | 136051 | 37 | 7 | 148768291 | 148768292 | Missense_Mutation | DNP | GG | AA | 26  | 32  | c.1572_1573CC>T | c.(1570-1575)CTCCGT>CTTT | p.R525C       |
| Pat_76 | Pre-Treatment | ZNF398   | 57541  | 37 | 7 | 148876126 | 148876126 | Missense_Mutation | SNP | A  | G  | 74  | 254 | c.1162A>G       | c.(1162-1164)ACC>GCC     | p.T388A       |
| Pat_76 | Pre-Treatment | ZNF777   | 27153  | 37 | 7 | 149152767 | 149152767 | Missense_Mutation | SNP | G  | A  | 100 | 51  | c.347C>T        | c.(346-348)TCC>TTC       | p.S116F       |
| Pat_76 | Pre-Treatment | SSPO     | 23145  | 37 | 7 | 149473161 | 149473161 | Missense_Mutation | SNP | G  | A  | 6   | 45  | c.31G>A         | c.(31-33)GCG>ACG         | p.A11T        |
| Pat_76 | Pre-Treatment | SSPO     | 23145  | 37 | 7 | 149492413 | 149492413 | Missense_Mutation | SNP | G  | A  | 3   | 18  | c.6302G>A       | c.(6301-6303)GGG>GAG     | p.G2101E      |
| Pat_76 | Pre-Treatment | REPIN1   | 29803  | 37 | 7 | 150068839 | 150068839 | Missense_Mutation | SNP | C  | T  | 15  | 90  | c.509C>T        | c.(508-510)CCC>CTC       | p.P170L       |
| Pat_76 | Pre-Treatment | GIMAP8   | 155038 | 37 | 7 | 150174179 | 150174179 | Splice_Site       | SNP | G  | A  | 119 | 67  | c.1310_splice   | c.e5-1                   | p.E437_splice |
| Pat_76 | Pre-Treatment | GIMAP8   | 155038 | 37 | 7 | 150174386 | 150174386 | Missense_Mutation | SNP | G  | A  | 51  | 37  | c.1516G>A       | c.(1516-1518)GAC>AAC     | p.D506N       |
| Pat_76 | Pre-Treatment | TMEM176A | 55365  | 37 | 7 | 150499346 | 150499346 | Missense_Mutation | SNP | G  | A  | 27  | 102 | c.218G>A        | c.(217-219)GGA>GAA       | p.G73E        |
| Pat_76 | Pre-Treatment | MLL3     | 58508  | 37 | 7 | 151945102 | 151945102 | Missense_Mutation | SNP | G  | A  | 31  | 737 | c.2417C>T       | c.(2416-2418)TCC>TTC     | p.S806F       |
| Pat_76 | Pre-Treatment | MLL3     | 58508  | 37 | 7 | 152027710 | 152027710 | Missense_Mutation | SNP | G  | A  | 56  | 188 | c.365C>T        | c.(364-366)TCT>TTT       | p.S122F       |
| Pat_76 | Pre-Treatment | MLL3     | 58508  | 37 | 7 | 152027728 | 152027728 | Missense_Mutation | SNP | G  | A  | 5   | 210 | c.347C>T        | c.(346-348)TCG>TTG       | p.S116L       |
| Pat_76 | Pre-Treatment | HTR5A    | 3361   | 37 | 7 | 154862632 | 154862632 | Missense_Mutation | SNP | C  | T  | 54  | 278 | c.23C>T         | c.(22-24)ACC>ATC         | p.T8I         |
| Pat_76 | Pre-Treatment | HTR5A    | 3361   | 37 | 7 | 154876022 | 154876022 | Missense_Mutation | SNP | C  | T  | 45  | 140 | c.899C>T        | c.(898-900)CCC>CTC       | p.P300L       |
| Pat_76 | Pre-Treatment | ERICH1   | 157697 | 37 | 8 | 623397    | 623398    | Missense_Mutation | DNP | CC | TT | 81  | 106 | c.954_955GG>AA  | c.(952-957)GGGGAG>GGAA   | p.E319K       |
| Pat_76 | Pre-Treatment | CSMD1    | 64478  | 37 | 8 | 2806873   | 2806873   | Missense_Mutation | SNP | A  | C  | 19  | 30  | c.10353T>G      | c.(10351-10353)TTT>TTG   | p.F3451L      |
| Pat_76 | Pre-Treatment | SGK223   | 157285 | 37 | 8 | 8235065   | 8235065   | Missense_Mutation | SNP | G  | A  | 10  | 4   | c.854C>T        | c.(853-855)TCA>TTA       | p.S285L       |
| Pat_76 | Pre-Treatment | RP1L1    | 94137  | 37 | 8 | 10467667  | 10467668  | Missense_Mutation | DNP | CC | TT | 17  | 37  | c.3940_3941GG>A | c.(3940-3942)GGG>AAG     | p.G1314K      |
| Pat_76 | Pre-Treatment | FAM167A  | 83648  | 37 | 8 | 11281901  | 11281901  | Missense_Mutation | SNP | C  | T  | 49  | 72  | c.626G>A        | c.(625-627)CGG>CAG       | p.R209Q       |
| Pat_76 | Pre-Treatment | SGCZ     | 137868 | 37 | 8 | 13959889  | 13959889  | Missense_Mutation | SNP | C  | T  | 38  | 66  | c.740G>A        | c.(739-741)GGG>GAG       | p.G247E       |
| Pat_76 | Pre-Treatment | MTMR7    | 9108   | 37 | 8 | 17159783  | 17159783  | Nonsense_Mutation | SNP | C  | T  | 28  | 23  | c.1500G>A       | c.(1498-1500)TGG>TGA     | p.W500*       |
| Pat_76 | Pre-Treatment | XPO7     | 23039  | 37 | 8 | 21834014  | 21834014  | Missense_Mutation | SNP | C  | T  | 32  | 40  | c.745C>T        | c.(745-747)CCC>TCC       | p.P249S       |
| Pat_76 | Pre-Treatment | LOXL2    | 4017   | 37 | 8 | 23225624  | 23225624  | Missense_Mutation | SNP | C  | T  | 23  | 56  | c.241G>A        | c.(241-243)GGC>AGC       | p.G81S        |
| Pat_76 | Pre-Treatment | ADAM28   | 10863  | 37 | 8 | 24187543  | 24187543  | Missense_Mutation | SNP | G  | A  | 35  | 55  | c.1018G>A       | c.(1018-1020)GAA>AAA     | p.E340K       |
| Pat_76 | Pre-Treatment | ADAM7    | 8756   | 37 | 8 | 24324376  | 24324376  | Missense_Mutation | SNP | G  | C  | 31  | 48  | c.454G>C        | c.(454-456)GAA>CAA       | p.E152Q       |
| Pat_76 | Pre-Treatment | CDCA2    | 157313 | 37 | 8 | 25361000  | 25361000  | Missense_Mutation | SNP | G  | A  | 4   | 132 | c.1783G>A       | c.(1783-1785)GAG>AAG     | p.E595K       |
| Pat_76 | Pre-Treatment | EBF2     | 64641  | 37 | 8 | 25718576  | 25718576  | Missense_Mutation | SNP | C  | T  | 55  | 81  | c.1331G>A       | c.(1330-1332)GGA>GAA     | p.G444E       |
| Pat_76 | Pre-Treatment | DPYSL2   | 1808   | 37 | 8 | 26513185  | 26513185  | Missense_Mutation | SNP | C  | T  | 56  | 90  | c.1682C>T       | c.(1681-1683)CCC>CTC     | p.P561L       |
| Pat_76 | Pre-Treatment | C8orf80  | 389643 | 37 | 8 | 27884555  | 27884555  | Missense_Mutation | SNP | C  | A  | 5   | 141 | c.2169G>T       | c.(2167-2169)GAG>GAT     | p.E723D       |
| Pat_76 | Pre-Treatment | C8orf80  | 389643 | 37 | 8 | 27931885  | 27931885  | Missense_Mutation | SNP | C  | T  | 24  | 24  | c.43G>A         | c.(43-45)GTT>ATT         | p.V15I        |
| Pat_76 | Pre-Treatment | TEX15    | 56154  | 37 | 8 | 30695198  | 30695198  | Missense_Mutation | SNP | G  | A  | 43  | 77  | c.7453C>T       | c.(7453-7455)CCA>TCA     | p.P2485S      |
| Pat_76 | Pre-Treatment | WRN      | 7486   | 37 | 8 | 30946405  | 30946405  | Splice_Site       | SNP | G  | A  | 6   | 13  | c.1577_splice   | c.e13-1                  | p.D526_splice |
| Pat_76 | Pre-Treatment | WRN      | 7486   | 37 | 8 | 31015013  | 31015013  | Missense_Mutation | SNP | G  | T  | 4   | 34  | c.3949G>T       | c.(3949-3951)GCT>TCT     | p.A1317S      |
| Pat_76 | Pre-Treatment | ASH2L    | 9070   | 37 | 8 | 37978665  | 37978665  | Missense_Mutation | SNP | G  | A  | 4   | 71  | c.1163G>A       | c.(1162-1164)CGA>CAA     | p.R388Q       |
| Pat_76 | Pre-Treatment | IDO1     | 3620   | 37 | 8 | 39771457  | 39771457  | Missense_Mutation | SNP | G  | A  | 3   | 6   | c.16G>A         | c.(16-18)GAA>AAA         | p.E6K         |
| Pat_76 | Pre-Treatment | ZMAT4    | 79698  | 37 | 8 | 40625228  | 40625228  | Missense_Mutation | SNP | C  | T  | 21  | 25  | c.124G>A        | c.(124-126)GTC>ATC       | p.V42I        |
| Pat_76 | Pre-Treatment | AGPAT6   | 137964 | 37 | 8 | 41470462  | 41470463  | Missense_Mutation | DNP | CC | TT | 27  | 25  | c.894_895CC>TT  | c.(892-897)CGCCAC>CGTT   | p.H299Y       |
| Pat_76 | Pre-Treatment | ANK1     | 286    | 37 | 8 | 41551487  | 41551487  | Missense_Mutation | SNP | G  | A  | 13  | 17  | c.3461C>T       | c.(3460-3462)TCC>TTC     | p.S1154F      |
| Pat_76 | Pre-Treatment | POTEA    | 340441 | 37 | 8 | 43152483  | 43152483  | Missense_Mutation | SNP | G  | A  | 43  | 75  | c.469G>A        | c.(469-471)GAT>AAT       | p.D157N       |
| Pat_76 | Pre-Treatment | MCM4     | 4173   | 37 | 8 | 48882577  | 48882577  | Missense_Mutation | SNP | C  | T  | 58  | 77  | c.1394C>T       | c.(1393-1395)GCC>GTC     | p.A465V       |
| Pat_76 | Pre-Treatment | C8orf22  | 492307 | 37 | 8 | 49986883  | 49986883  | Missense_Mutation | SNP | C  | T  | 17  | 31  | c.224C>T        | c.(223-225)TCT>TTT       | p.S75F        |



|        |               |           |        |    |   |           |           |                   |     |    |    |     |     |                |                        |               |
|--------|---------------|-----------|--------|----|---|-----------|-----------|-------------------|-----|----|----|-----|-----|----------------|------------------------|---------------|
| Pat_76 | Pre-Treatment | PCMTD1    | 115294 | 37 | 8 | 52733146  | 52733146  | Missense_Mutation | SNP | C  | T  | 6   | 386 | c.839G>A       | c.(838-840)AGA>AAA     | p.R280K       |
| Pat_76 | Pre-Treatment | RP1       | 6101   | 37 | 8 | 55541492  | 55541492  | Missense_Mutation | SNP | G  | A  | 48  | 75  | c.5050G>A      | c.(5050-5052)GAA>AAA   | p.E1684K      |
| Pat_76 | Pre-Treatment | RP1       | 6101   | 37 | 8 | 55541652  | 55541652  | Missense_Mutation | SNP | A  | G  | 26  | 28  | c.5210A>G      | c.(5209-5211)GAA>GGA   | p.E1737G      |
| Pat_76 | Pre-Treatment | XKR4      | 114786 | 37 | 8 | 56436719  | 56436719  | Missense_Mutation | SNP | C  | T  | 23  | 35  | c.1886C>T      | c.(1885-1887)CCT>CTT   | p.P629L       |
| Pat_76 | Pre-Treatment | PLAG1     | 5324   | 37 | 8 | 57079014  | 57079014  | Missense_Mutation | SNP | G  | A  | 8   | 19  | c.1291C>T      | c.(1291-1293)CCC>TCC   | p.P431S       |
| Pat_76 | Pre-Treatment | CYP7A1    | 1581   | 37 | 8 | 59409562  | 59409563  | Missense_Mutation | DNP | CC | TT | 64  | 89  | c.508_509GG>AA | c.(508-510)GGG>AAG     | p.G170K       |
| Pat_76 | Pre-Treatment | PREX2     | 80243  | 37 | 8 | 69028113  | 69028113  | Missense_Mutation | SNP | G  | A  | 73  | 116 | c.3272G>A      | c.(3271-3273)GGA>GAA   | p.G1091E      |
| Pat_76 | Pre-Treatment | C8orf34   | 116328 | 37 | 8 | 69434163  | 69434163  | Missense_Mutation | SNP | G  | T  | 4   | 78  | c.637G>T       | c.(637-639)GAC>TAC     | p.D213Y       |
| Pat_76 | Pre-Treatment | CRISPLD1  | 83690  | 37 | 8 | 75925132  | 75925132  | Missense_Mutation | SNP | C  | T  | 30  | 55  | c.385C>T       | c.(385-387)CCC>TCC     | p.P129S       |
| Pat_76 | Pre-Treatment | PAG1      | 55824  | 37 | 8 | 81899700  | 81899700  | Missense_Mutation | SNP | G  | A  | 36  | 57  | c.179C>T       | c.(178-180)CCT>CTT     | p.P60L        |
| Pat_76 | Pre-Treatment | WWP1      | 11059  | 37 | 8 | 87393063  | 87393064  | Missense_Mutation | DNP | CT | TC | 27  | 37  | c.179_180CT>TC | c.(178-180)TCT>TTC     | p.S60F        |
| Pat_76 | Pre-Treatment | CNGB3     | 54714  | 37 | 8 | 87656094  | 87656094  | Nonsense_Mutation | SNP | G  | A  | 27  | 48  | c.1063C>T      | c.(1063-1065)CGA>TGA   | p.R355*       |
| Pat_76 | Pre-Treatment | SLC26A7   | 115111 | 37 | 8 | 92352666  | 92352666  | Missense_Mutation | SNP | C  | T  | 70  | 91  | c.913C>T       | c.(913-915)CTC>TTC     | p.L305F       |
| Pat_76 | Pre-Treatment | POP1      | 10940  | 37 | 8 | 99140736  | 99140736  | Missense_Mutation | SNP | C  | T  | 29  | 29  | c.454C>T       | c.(454-456)CCC>TCC     | p.P152S       |
| Pat_76 | Pre-Treatment | POP1      | 10940  | 37 | 8 | 99161210  | 99161210  | Nonsense_Mutation | SNP | G  | A  | 13  | 12  | c.1878G>A      | c.(1876-1878)TGG>TGA   | p.W626*       |
| Pat_76 | Pre-Treatment | OSR2      | 116039 | 37 | 8 | 99961245  | 99961245  | Missense_Mutation | SNP | C  | T  | 20  | 34  | c.65C>T        | c.(64-66)TCC>TTC       | p.S22F        |
| Pat_76 | Pre-Treatment | RGS22     | 26166  | 37 | 8 | 101092508 | 101092508 | Missense_Mutation | SNP | C  | T  | 5   | 10  | c.193G>A       | c.(193-195)GAA>AAA     | p.E65K        |
| Pat_76 | Pre-Treatment | UBR5      | 51366  | 37 | 8 | 103326127 | 103326127 | Missense_Mutation | SNP | G  | A  | 47  | 65  | c.1912C>T      | c.(1912-1914)CCT>TCT   | p.P638S       |
| Pat_76 | Pre-Treatment | RIMS2     | 9699   | 37 | 8 | 104778681 | 104778681 | Missense_Mutation | SNP | G  | A  | 19  | 48  | c.614G>A       | c.(613-615)CGA>CAA     | p.R205Q       |
| Pat_76 | Pre-Treatment | RIMS2     | 9699   | 37 | 8 | 105257255 | 105257255 | Missense_Mutation | SNP | G  | A  | 69  | 119 | c.3500G>A      | c.(3499-3501)GGT>GAT   | p.G1167D      |
| Pat_76 | Pre-Treatment | ZFPM2     | 23414  | 37 | 8 | 106813565 | 106813565 | Missense_Mutation | SNP | G  | A  | 18  | 33  | c.1255G>A      | c.(1255-1257)GAA>AAA   | p.E419K       |
| Pat_76 | Pre-Treatment | ANGPT1    | 284    | 37 | 8 | 108306214 | 108306214 | Missense_Mutation | SNP | G  | A  | 80  | 95  | c.988C>T       | c.(988-990)CGT>TGT     | p.R330C       |
| Pat_76 | Pre-Treatment | TRHR      | 7201   | 37 | 8 | 110131469 | 110131469 | Missense_Mutation | SNP | C  | A  | 124 | 164 | c.982C>A       | c.(982-984)CGT>AGT     | p.R328S       |
| Pat_76 | Pre-Treatment | PKHD1L1   | 93035  | 37 | 8 | 110457809 | 110457809 | Missense_Mutation | SNP | C  | T  | 4   | 3   | c.5711C>T      | c.(5710-5712)CCA>CTA   | p.P1904L      |
| Pat_76 | Pre-Treatment | PKHD1L1   | 93035  | 37 | 8 | 110477198 | 110477198 | Missense_Mutation | SNP | C  | T  | 34  | 43  | c.8137C>T      | c.(8137-8139)CTT>TTT   | p.L2713F      |
| Pat_76 | Pre-Treatment | CSMD3     | 114788 | 37 | 8 | 113243822 | 113243822 | Missense_Mutation | SNP | C  | T  | 65  | 102 | c.10780G>A     | c.(10780-10782)GGA>AGG | p.G3594R      |
| Pat_76 | Pre-Treatment | CSMD3     | 114788 | 37 | 8 | 113519002 | 113519002 | Missense_Mutation | SNP | G  | A  | 24  | 37  | c.4813C>T      | c.(4813-4815)CCT>TCT   | p.P1605S      |
| Pat_76 | Pre-Treatment | CSMD3     | 114788 | 37 | 8 | 113966963 | 113966963 | Missense_Mutation | SNP | C  | T  | 16  | 28  | c.1370G>A      | c.(1369-1371)AGA>AAA   | p.R457K       |
| Pat_76 | Pre-Treatment | ENPP2     | 5168   | 37 | 8 | 120629774 | 120629774 | Missense_Mutation | SNP | G  | A  | 20  | 39  | c.509C>T       | c.(508-510)TCC>TTC     | p.S170F       |
| Pat_76 | Pre-Treatment | DEPDC6    | 64798  | 37 | 8 | 120942126 | 120942126 | Missense_Mutation | SNP | C  | T  | 36  | 63  | c.373C>T       | c.(373-375)CCA>TCA     | p.P125S       |
| Pat_76 | Pre-Treatment | FER1L6    | 654463 | 37 | 8 | 124989687 | 124989687 | Missense_Mutation | SNP | G  | A  | 75  | 116 | c.901G>A       | c.(901-903)GAT>AAT     | p.D301N       |
| Pat_76 | Pre-Treatment | FER1L6    | 654463 | 37 | 8 | 125083819 | 125083819 | Missense_Mutation | SNP | G  | A  | 14  | 36  | c.4039G>A      | c.(4039-4041)GGG>AGG   | p.G1347R      |
| Pat_76 | Pre-Treatment | FAM135B   | 51059  | 37 | 8 | 139164961 | 139164961 | Missense_Mutation | SNP | C  | T  | 56  | 93  | c.1757G>A      | c.(1756-1758)GGA>GAA   | p.G586E       |
| Pat_76 | Pre-Treatment | DENND3    | 22898  | 37 | 8 | 142161766 | 142161766 | Missense_Mutation | SNP | G  | A  | 47  | 88  | c.664G>A       | c.(664-666)GAC>AAC     | p.D222N       |
| Pat_76 | Pre-Treatment | LY6K      | 54742  | 37 | 8 | 143784711 | 143784711 | Missense_Mutation | SNP | G  | A  | 13  | 36  | c.420G>A       | c.(418-420)ATG>ATA     | p.M140I       |
| Pat_76 | Pre-Treatment | SPATC1    | 375686 | 37 | 8 | 145095631 | 145095632 | Missense_Mutation | DNP | CC | TT | 7   | 36  | c.929_930CC>TT | c.(928-930)CCC>CTT     | p.P310L       |
| Pat_76 | Pre-Treatment | ERMP1     | 79956  | 37 | 9 | 5810087   | 5810087   | Missense_Mutation | SNP | G  | A  | 42  | 87  | c.1472C>T      | c.(1471-1473)TCC>TTC   | p.S491F       |
| Pat_76 | Pre-Treatment | PTPRD     | 5789   | 37 | 9 | 8518132   | 8518132   | Missense_Mutation | SNP | G  | A  | 72  | 98  | c.1259C>T      | c.(1258-1260)GCC>GTC   | p.A420V       |
| Pat_76 | Pre-Treatment | MPDZ      | 8777   | 37 | 9 | 13188823  | 13188823  | Missense_Mutation | SNP | G  | A  | 6   | 340 | c.2324C>T      | c.(2323-2325)CCG>CTG   | p.P775L       |
| Pat_76 | Pre-Treatment | SH3GL2    | 6456   | 37 | 9 | 17761434  | 17761434  | Splice_Site       | SNP | G  | A  | 28  | 3   | c.115_splice   | c.e3-1                 | p.K39_splice  |
| Pat_76 | Pre-Treatment | HAUS6     | 54801  | 37 | 9 | 19063041  | 19063041  | Missense_Mutation | SNP | G  | A  | 64  | 127 | c.1594C>T      | c.(1594-1596)CCA>TCA   | p.P532S       |
| Pat_76 | Pre-Treatment | DENND4C   | 55667  | 37 | 9 | 19346035  | 19346035  | Missense_Mutation | SNP | C  | T  | 39  | 49  | c.2413C>T      | c.(2413-2415)CCT>TCT   | p.P805S       |
| Pat_76 | Pre-Treatment | TAF1L     | 138474 | 37 | 9 | 32630273  | 32630273  | Missense_Mutation | SNP | C  | T  | 60  | 62  | c.5305G>A      | c.(5305-5307)GGA>AGA   | p.G1769R      |
| Pat_76 | Pre-Treatment | DNAI1     | 27019  | 37 | 9 | 34491492  | 34491492  | Splice_Site       | SNP | G  | A  | 20  | 26  | c.622_splice   | c.e8-1                 | p.D208_splice |
| Pat_76 | Pre-Treatment | SHB       | 6461   | 37 | 9 | 37955901  | 37955901  | Missense_Mutation | SNP | G  | A  | 12  | 18  | c.1205C>T      | c.(1204-1206)GCC>GTC   | p.A402V       |
| Pat_76 | Pre-Treatment | LOC442421 | 442421 | 37 | 9 | 66499716  | 66499716  | Missense_Mutation | SNP | A  | G  | 10  | 80  | c.526A>G       | c.(526-528)AAT>GAT     | p.N176D       |
| Pat_76 | Pre-Treatment | PGM5      | 5239   | 37 | 9 | 70993145  | 70993145  | Missense_Mutation | SNP | A  | G  | 4   | 69  | c.292A>G       | c.(292-294)ATC>GTC     | p.I98V        |

|        |               |          |        |    |   |           |           |                   |     |    |    |     |     |                                   |                      |               |
|--------|---------------|----------|--------|----|---|-----------|-----------|-------------------|-----|----|----|-----|-----|-----------------------------------|----------------------|---------------|
| Pat_76 | Pre-Treatment | PIP5K1B  | 8395   | 37 | 9 | 71509555  | 71509555  | Splice_Site       | SNP | G  | A  | 4   | 149 | c.771_splice                      | c.e8+1               | p.R257_splice |
| Pat_76 | Pre-Treatment | PCSK5    | 5125   | 37 | 9 | 78749077  | 78749077  | Missense_Mutation | SNP | G  | T  | 33  | 67  | c.1261G>T                         | c.(1261-1263)GCG>TCG | p.A421S       |
| Pat_76 | Pre-Treatment | PCSK5    | 5125   | 37 | 9 | 78804120  | 78804121  | Missense_Mutation | DNP | GG | AA | 16  | 45  | .2491_2492GG>A                    | c.(2491-2493)GGA>AAA | p.G831K       |
| Pat_76 | Pre-Treatment | GCNT1    | 2650   | 37 | 9 | 79118124  | 79118124  | Missense_Mutation | SNP | C  | T  | 28  | 58  | c.827C>T                          | c.(826-828)CCT>CTT   | p.P276L       |
| Pat_76 | Pre-Treatment | PRUNE2   | 158471 | 37 | 9 | 79323229  | 79323229  | Missense_Mutation | SNP | C  | T  | 14  | 12  | c.3961G>A                         | c.(3961-3963)GAT>AAT | p.D1321N      |
| Pat_76 | Pre-Treatment | PRUNE2   | 158471 | 37 | 9 | 79441589  | 79441589  | Missense_Mutation | SNP | C  | T  | 23  | 34  | c.568G>A                          | c.(568-570)GAA>AAA   | p.E190K       |
| Pat_76 | Pre-Treatment | VPS13A   | 23230  | 37 | 9 | 79827939  | 79827939  | Missense_Mutation | SNP | C  | T  | 24  | 42  | c.610C>T                          | c.(610-612)CGT>TGT   | p.R204C       |
| Pat_76 | Pre-Treatment | FRMD3    | 257019 | 37 | 9 | 85950537  | 85950537  | Missense_Mutation | SNP | C  | T  | 10  | 15  | c.490G>A                          | c.(490-492)GAT>AAT   | p.D164N       |
| Pat_76 | Pre-Treatment | UBQLN1   | 29979  | 37 | 9 | 86280051  | 86280051  | Missense_Mutation | SNP | G  | A  | 4   | 92  | c.1342C>T                         | c.(1342-1344)CCT>TCT | p.P448S       |
| Pat_76 | Pre-Treatment | HNRNPK   | 3190   | 37 | 9 | 86590392  | 86590392  | Missense_Mutation | SNP | C  | T  | 4   | 121 | c.242G>A                          | c.(241-243)AGC>AAC   | p.S81N        |
| Pat_76 | Pre-Treatment | PHF2     | 5253   | 37 | 9 | 96428104  | 96428104  | Missense_Mutation | SNP | C  | T  | 51  | 109 | c.2074C>T                         | c.(2074-2076)CCC>TCC | p.P692S       |
| Pat_76 | Pre-Treatment | HSD17B3  | 3293   | 37 | 9 | 99064356  | 99064356  | Missense_Mutation | SNP | G  | A  | 27  | 36  | c.31C>T                           | c.(31-33)CTC>TTC     | p.L11F        |
| Pat_76 | Pre-Treatment | CTSL2    | 1515   | 37 | 9 | 99800270  | 99800271  | Missense_Mutation | DNP | GG | AA | 51  | 63  | c.55_56CC>TT                      | c.(55-57)CCA>TTA     | p.P19L        |
| Pat_76 | Pre-Treatment | FOXE1    | 2304   | 37 | 9 | 100616596 | 100616596 | Missense_Mutation | SNP | G  | A  | 25  | 28  | c.400G>A                          | c.(400-402)GAG>AAG   | p.E134K       |
| Pat_76 | Pre-Treatment | TRIM14   | 9830   | 37 | 9 | 100857249 | 100857250 | Missense_Mutation | DNP | GG | AA | 18  | 53  | c.599_600CC>TT                    | c.(598-600)CCC>CTT   | p.P200L       |
| Pat_76 | Pre-Treatment | LPPR1    | 54886  | 37 | 9 | 104079716 | 104079716 | Missense_Mutation | SNP | C  | T  | 62  | 72  | c.883C>T                          | c.(883-885)CGT>TGT   | p.R295C       |
| Pat_76 | Pre-Treatment | GRIN3A   | 116443 | 37 | 9 | 104449092 | 104449092 | Missense_Mutation | SNP | C  | T  | 11  | 32  | c.1090G>A                         | c.(1090-1092)GAA>AAA | p.E364K       |
| Pat_76 | Pre-Treatment | CYLC2    | 1539   | 37 | 9 | 105767050 | 105767050 | Missense_Mutation | SNP | C  | T  | 15  | 14  | c.254C>T                          | c.(253-255)TCT>TTT   | p.S85F        |
| Pat_76 | Pre-Treatment | CYLC2    | 1539   | 37 | 9 | 105767487 | 105767487 | Missense_Mutation | SNP | G  | A  | 11  | 25  | c.574G>A                          | c.(574-576)GAT>AAT   | p.D192N       |
| Pat_76 | Pre-Treatment | OR13F1   | 138805 | 37 | 9 | 107267121 | 107267121 | Missense_Mutation | SNP | C  | T  | 82  | 130 | c.578C>T                          | c.(577-579)TCC>TTC   | p.S193F       |
| Pat_76 | Pre-Treatment | OR13C9   | 286362 | 37 | 9 | 107379644 | 107379644 | Missense_Mutation | SNP | G  | A  | 32  | 42  | c.842C>T                          | c.(841-843)TCC>TTC   | p.S281F       |
| Pat_76 | Pre-Treatment | IKBKAP   | 8518   | 37 | 9 | 111668727 | 111668727 | Missense_Mutation | SNP | G  | A  | 4   | 109 | c.1499C>T                         | c.(1498-1500)CCG>CTG | p.P500L       |
| Pat_76 | Pre-Treatment | TXNDC8   | 255220 | 37 | 9 | 113096507 | 113096507 | Missense_Mutation | SNP | G  | A  | 24  | 53  | c.118C>T                          | c.(118-120)CCT>TCT   | p.P40S        |
| Pat_76 | Pre-Treatment | PTGR1    | 22949  | 37 | 9 | 114356512 | 114356512 | Missense_Mutation | SNP | G  | A  | 18  | 24  | c.142C>T                          | c.(142-144)CCC>TCC   | p.P48S        |
| Pat_76 | Pre-Treatment | ALAD     | 210    | 37 | 9 | 116154406 | 116154406 | Missense_Mutation | SNP | C  | T  | 3   | 16  | c.157G>A                          | c.(157-159)GTG>ATG   | p.V53M        |
| Pat_76 | Pre-Treatment | AKNA     | 80709  | 37 | 9 | 117118393 | 117118393 | Missense_Mutation | SNP | G  | A  | 27  | 42  | c.2870C>T                         | c.(2869-2871)CCC>CTC | p.P957L       |
| Pat_76 | Pre-Treatment | TNC      | 3371   | 37 | 9 | 117819506 | 117819506 | Missense_Mutation | SNP | G  | A  | 23  | 38  | c.4505C>T                         | c.(4504-4506)ACT>ATT | p.T1502I      |
| Pat_76 | Pre-Treatment | ASTN2    | 23245  | 37 | 9 | 119738438 | 119738438 | Missense_Mutation | SNP | C  | T  | 18  | 20  | c.1706G>A                         | c.(1705-1707)GGC>GAC | p.G569D       |
| Pat_76 | Pre-Treatment | TRAF1    | 7185   | 37 | 9 | 123667467 | 123667467 | Missense_Mutation | SNP | G  | A  | 5   | 20  | c.1082C>T                         | c.(1081-1083)GCC>GTC | p.A361V       |
| Pat_76 | Pre-Treatment | TRAF1    | 7185   | 37 | 9 | 123675765 | 123675765 | Missense_Mutation | SNP | C  | T  | 18  | 21  | c.546G>A                          | c.(544-546)ATG>ATA   | p.M182I       |
| Pat_76 | Pre-Treatment | OR1N1    | 138883 | 37 | 9 | 125289062 | 125289063 | Missense_Mutation | DNP | CC | TT | 17  | 22  | c.510_511GG>AA508-513)GGGGAA>GGAA |                      | p.E171K       |
| Pat_76 | Pre-Treatment | RABGAP1  | 23637  | 37 | 9 | 125832695 | 125832695 | Missense_Mutation | SNP | C  | T  | 105 | 130 | c.1975C>T                         | c.(1975-1977)CTT>TTT | p.L659F       |
| Pat_76 | Pre-Treatment | LMX1B    | 4010   | 37 | 9 | 129453221 | 129453221 | Missense_Mutation | SNP | G  | A  | 4   | 35  | c.364G>A                          | c.(364-366)GTG>ATG   | p.V122M       |
| Pat_76 | Pre-Treatment | LAMC3    | 10319  | 37 | 9 | 133901843 | 133901843 | Missense_Mutation | SNP | G  | A  | 9   | 10  | c.545G>A                          | c.(544-546)GGC>GAC   | p.G182D       |
| Pat_76 | Pre-Treatment | NTNG2    | 84628  | 37 | 9 | 135042312 | 135042312 | Missense_Mutation | SNP | C  | T  | 28  | 37  | c.94C>T                           | c.(94-96)CCC>TCC     | p.P32S        |
| Pat_76 | Pre-Treatment | SETX     | 23064  | 37 | 9 | 135204652 | 135204652 | Missense_Mutation | SNP | C  | T  | 27  | 34  | c.2333G>A                         | c.(2332-2334)CGA>CAA | p.R778Q       |
| Pat_76 | Pre-Treatment | ADAMTS13 | 11093  | 37 | 9 | 136323188 | 136323189 | Missense_Mutation | DNP | CC | TT | 8   | 23  | .4049_4050CC>T                    | c.(4048-4050)ACC>ATT | p.T1350I      |
| Pat_76 | Pre-Treatment | DBH      | 1621   | 37 | 9 | 136518122 | 136518122 | Splice_Site       | SNP | G  | A  | 18  | 31  | c.1434_splice                     | c.e9+1               | p.V478_splice |
| Pat_76 | Pre-Treatment | COL5A1   | 1289   | 37 | 9 | 137688695 | 137688695 | Missense_Mutation | SNP | G  | A  | 14  | 38  | c.2846G>A                         | c.(2845-2847)GGA>GAA | p.G949E       |
| Pat_76 | Pre-Treatment | CAMSAP1  | 157922 | 37 | 9 | 138707828 | 138707828 | Missense_Mutation | SNP | G  | A  | 11  | 43  | c.4295C>T                         | c.(4294-4296)CCC>CTC | p.P1432L      |
| Pat_76 | Pre-Treatment | SEC16A   | 9919   | 37 | 9 | 139371934 | 139371934 | Missense_Mutation | SNP | G  | A  | 20  | 34  | c.134C>T                          | c.(133-135)ACT>ATT   | p.T45I        |
| Pat_76 | Pre-Treatment | NOTCH1   | 4851   | 37 | 9 | 139391227 | 139391227 | Missense_Mutation | SNP | G  | T  | 4   | 96  | c.6964C>A                         | c.(6964-6966)CAA>AAA | p.Q2322K      |
| Pat_76 | Pre-Treatment | ANAPC2   | 29882  | 37 | 9 | 140069793 | 140069793 | Missense_Mutation | SNP | C  | T  | 9   | 12  | c.2152G>A                         | c.(2152-2154)GAG>AAG | p.E718K       |
| Pat_76 | Pre-Treatment | ANAPC2   | 29882  | 37 | 9 | 140077628 | 140077628 | Missense_Mutation | SNP | G  | A  | 45  | 116 | c.1235C>T                         | c.(1234-1236)CCT>CTT | p.P412L       |
| Pat_76 | Pre-Treatment | NDOR1    | 27158  | 37 | 9 | 140109131 | 140109131 | Missense_Mutation | SNP | C  | T  | 4   | 57  | c.832C>T                          | c.(832-834)CCG>TCG   | p.P278S       |
| Pat_76 | Pre-Treatment | ENTPD8   | 377841 | 37 | 9 | 140330184 | 140330184 | Missense_Mutation | SNP | C  | T  | 17  | 21  | c.1148G>A                         | c.(1147-1149)AGG>AAG | p.R383K       |
| Pat_76 | Pre-Treatment | SHOX     | 6473   | 37 | X | 591723    | 591723    | Missense_Mutation | SNP | G  | A  | 73  | 95  | c.91G>A                           | c.(91-93)GAT>AAT     | p.D31N        |

|        |               |          |        |    |   |          |          |                   |     |    |    |     |     |                |                      |          |
|--------|---------------|----------|--------|----|---|----------|----------|-------------------|-----|----|----|-----|-----|----------------|----------------------|----------|
| Pat_76 | Pre-Treatment | ASMT     | 438    | 37 | X | 1742197  | 1742197  | Missense_Mutation | SNP | G  | A  | 9   | 16  | c.235G>A       | c.(235-237)GGA>AGA   | p.G79R   |
| Pat_76 | Pre-Treatment | ASMT     | 438    | 37 | X | 1748718  | 1748718  | Missense_Mutation | SNP | G  | A  | 71  | 139 | c.448G>A       | c.(448-450)GAG>AAG   | p.E150K  |
| Pat_76 | Pre-Treatment | ARSD     | 414    | 37 | X | 2836227  | 2836227  | Missense_Mutation | SNP | G  | A  | 7   | 5   | c.481C>T       | c.(481-483)CAC>TAC   | p.H161Y  |
| Pat_76 | Pre-Treatment | MXRA5    | 25878  | 37 | X | 3240077  | 3240077  | Missense_Mutation | SNP | C  | T  | 39  | 40  | c.3649G>A      | c.(3649-3651)GAA>AAA | p.E1217K |
| Pat_76 | Pre-Treatment | NLGN4X   | 57502  | 37 | X | 6069266  | 6069266  | Missense_Mutation | SNP | G  | A  | 19  | 31  | c.242C>T       | c.(241-243)CCC>CTC   | p.P81L   |
| Pat_76 | Pre-Treatment | VCX      | 26609  | 37 | X | 7811971  | 7811971  | Missense_Mutation | SNP | G  | A  | 130 | 321 | c.535G>A       | c.(535-537)GAG>AAG   | p.E179K  |
| Pat_76 | Pre-Treatment | SHROOM2  | 357    | 37 | X | 9863495  | 9863495  | Missense_Mutation | SNP | C  | T  | 6   | 7   | c.1547C>T      | c.(1546-1548)CCA>CTA | p.P516L  |
| Pat_76 | Pre-Treatment | TLR8     | 51311  | 37 | X | 12938573 | 12938573 | Missense_Mutation | SNP | C  | T  | 21  | 64  | c.1414C>T      | c.(1414-1416)CGT>TGT | p.R472C  |
| Pat_76 | Pre-Treatment | TLR8     | 51311  | 37 | X | 12939914 | 12939914 | Missense_Mutation | SNP | G  | A  | 34  | 48  | c.2755G>A      | c.(2755-2757)GAG>AAG | p.E919K  |
| Pat_76 | Pre-Treatment | EGFL6    | 25975  | 37 | X | 13621532 | 13621532 | Missense_Mutation | SNP | C  | T  | 11  | 19  | c.497C>T       | c.(496-498)GCC>GTC   | p.A166V  |
| Pat_76 | Pre-Treatment | PHEX     | 5251   | 37 | X | 22117199 | 22117199 | Missense_Mutation | SNP | G  | A  | 73  | 132 | c.1009G>A      | c.(1009-1011)GAG>AAG | p.E337K  |
| Pat_76 | Pre-Treatment | PHEX     | 5251   | 37 | X | 22237170 | 22237170 | Missense_Mutation | SNP | C  | T  | 28  | 43  | c.1718C>T      | c.(1717-1719)GCT>GTT | p.A573V  |
| Pat_76 | Pre-Treatment | PDK3     | 5165   | 37 | X | 24521608 | 24521608 | Missense_Mutation | SNP | G  | A  | 4   | 88  | c.485G>A       | c.(484-486)CGC>CAC   | p.R162H  |
| Pat_76 | Pre-Treatment | POLA1    | 5422   | 37 | X | 24721395 | 24721395 | Missense_Mutation | SNP | G  | A  | 13  | 39  | c.178G>A       | c.(178-180)GAA>AAA   | p.E60K   |
| Pat_76 | Pre-Treatment | CXorf21  | 80231  | 37 | X | 30578039 | 30578039 | Missense_Mutation | SNP | G  | A  | 14  | 30  | c.434C>T       | c.(433-435)CCC>CTC   | p.P145L  |
| Pat_76 | Pre-Treatment | FAM47A   | 158724 | 37 | X | 34148687 | 34148687 | Missense_Mutation | SNP | G  | A  | 11  | 23  | c.1709C>T      | c.(1708-1710)TCG>TTG | p.S570L  |
| Pat_76 | Pre-Treatment | CXorf59  | 286464 | 37 | X | 36117969 | 36117969 | Nonsense_Mutation | SNP | G  | A  | 25  | 68  | c.825G>A       | c.(823-825)TGG>TGA   | p.W275*  |
| Pat_76 | Pre-Treatment | SRPX     | 8406   | 37 | X | 38031196 | 38031196 | Missense_Mutation | SNP | C  | T  | 23  | 68  | c.464G>A       | c.(463-465)GGG>GAG   | p.G155E  |
| Pat_76 | Pre-Treatment | RPGR     | 6103   | 37 | X | 38129006 | 38129006 | Missense_Mutation | SNP | G  | A  | 19  | 41  | c.2321C>T      | c.(2320-2322)TCC>TTC | p.S774F  |
| Pat_76 | Pre-Treatment | MED14    | 9282   | 37 | X | 40551551 | 40551551 | Missense_Mutation | SNP | G  | A  | 16  | 30  | c.1864C>T      | c.(1864-1866)CCA>TCA | p.P622S  |
| Pat_76 | Pre-Treatment | GPR34    | 2857   | 37 | X | 41555789 | 41555789 | Nonsense_Mutation | SNP | G  | A  | 20  | 21  | c.903G>A       | c.(901-903)TGG>TGA   | p.W301*  |
| Pat_76 | Pre-Treatment | CCDC120  | 90060  | 37 | X | 48925184 | 48925184 | Missense_Mutation | SNP | C  | T  | 7   | 16  | c.1429C>T      | c.(1429-1431)CGC>TGC | p.R477C  |
| Pat_76 | Pre-Treatment | GPKOW    | 27238  | 37 | X | 48976140 | 48976140 | Missense_Mutation | SNP | C  | A  | 9   | 27  | c.484G>T       | c.(484-486)GTC>TTC   | p.V162F  |
| Pat_76 | Pre-Treatment | PRICKLE3 | 4007   | 37 | X | 49032516 | 49032516 | Missense_Mutation | SNP | C  | T  | 7   | 19  | c.1354G>A      | c.(1354-1356)GAG>AAG | p.E452K  |
| Pat_76 | Pre-Treatment | DGKK     | 139189 | 37 | X | 50119787 | 50119787 | Nonsense_Mutation | SNP | A  | C  | 18  | 18  | c.3242T>G      | c.(3241-3243)TTA>TGA | p.L1081* |
| Pat_76 | Pre-Treatment | PHF8     | 23133  | 37 | X | 54069119 | 54069119 | Missense_Mutation | SNP | C  | T  | 23  | 52  | c.151G>A       | c.(151-153)GAT>AAT   | p.D51N   |
| Pat_76 | Pre-Treatment | FAAH2    | 158584 | 37 | X | 57313331 | 57313331 | Missense_Mutation | SNP | G  | A  | 5   | 7   | c.73G>A        | c.(73-75)GGC>AGC     | p.G25S   |
| Pat_76 | Pre-Treatment | FAAH2    | 158584 | 37 | X | 57405092 | 57405092 | Missense_Mutation | SNP | C  | T  | 4   | 127 | c.751C>T       | c.(751-753)CCC>TCC   | p.P251S  |
| Pat_76 | Pre-Treatment | MTMR8    | 55613  | 37 | X | 63564991 | 63564991 | Missense_Mutation | SNP | G  | A  | 27  | 45  | c.799C>T       | c.(799-801)CGC>TGC   | p.R267C  |
| Pat_76 | Pre-Treatment | ZC4H2    | 55906  | 37 | X | 64137694 | 64137694 | Missense_Mutation | SNP | G  | A  | 10  | 18  | c.644C>T       | c.(643-645)CCC>CTC   | p.P215L  |
| Pat_76 | Pre-Treatment | LAS1L    | 81887  | 37 | X | 64738050 | 64738050 | Missense_Mutation | SNP | C  | T  | 23  | 43  | c.1744G>A      | c.(1744-1746)GAG>AAG | p.E582K  |
| Pat_76 | Pre-Treatment | MSN      | 4478   | 37 | X | 64936728 | 64936728 | Nonsense_Mutation | SNP | C  | T  | 74  | 61  | c.61C>T        | c.(61-63)CAG>TAG     | p.Q21*   |
| Pat_76 | Pre-Treatment | HEPH     | 9843   | 37 | X | 65476115 | 65476115 | Missense_Mutation | SNP | G  | A  | 40  | 47  | c.2848G>A      | c.(2848-2850)GAT>AAT | p.D950N  |
| Pat_76 | Pre-Treatment | AR       | 367    | 37 | X | 66905918 | 66905918 | Missense_Mutation | SNP | G  | T  | 25  | 32  | c.1835G>T      | c.(1834-1836)TGT>TTT | p.C612F  |
| Pat_76 | Pre-Treatment | OTUD6A   | 139562 | 37 | X | 69283186 | 69283187 | Missense_Mutation | DNP | CC | TT | 12  | 9   | c.812_813CC>TT | c.(811-813)TCC>TTT   | p.S271F  |
| Pat_76 | Pre-Treatment | DGAT2L6  | 347516 | 37 | X | 69419701 | 69419701 | Nonsense_Mutation | SNP | G  | A  | 20  | 32  | c.236G>A       | c.(235-237)TGG>TAG   | p.W79*   |
| Pat_76 | Pre-Treatment | P2RY4    | 5030   | 37 | X | 69478907 | 69478907 | Missense_Mutation | SNP | G  | A  | 12  | 25  | c.568C>T       | c.(568-570)CGG>TGG   | p.R190W  |
| Pat_76 | Pre-Treatment | MED12    | 9968   | 37 | X | 70344131 | 70344131 | Missense_Mutation | SNP | G  | A  | 17  | 30  | c.1867G>A      | c.(1867-1869)GAC>AAC | p.D623N  |
| Pat_76 | Pre-Treatment | MED12    | 9968   | 37 | X | 70345913 | 70345913 | Missense_Mutation | SNP | G  | A  | 6   | 272 | c.2450G>A      | c.(2449-2451)CGC>CAC | p.R817H  |
| Pat_76 | Pre-Treatment | TAF1     | 6872   | 37 | X | 70586306 | 70586306 | Missense_Mutation | SNP | G  | A  | 5   | 29  | c.142G>A       | c.(142-144)GGA>AGA   | p.G48R   |
| Pat_76 | Pre-Treatment | TAF1     | 6872   | 37 | X | 70597668 | 70597668 | Missense_Mutation | SNP | T  | G  | 15  | 9   | c.927T>G       | c.(925-927)GAT>GAG   | p.D309E  |
| Pat_76 | Pre-Treatment | RGAG4    | 340526 | 37 | X | 71350547 | 71350547 | Missense_Mutation | SNP | C  | T  | 60  | 113 | c.844G>A       | c.(844-846)GAA>AAA   | p.E282K  |
| Pat_76 | Pre-Treatment | PHKA1    | 5255   | 37 | X | 71830949 | 71830949 | Missense_Mutation | SNP | C  | T  | 33  | 41  | c.2455G>A      | c.(2455-2457)GAA>AAA | p.E819K  |
| Pat_76 | Pre-Treatment | PHKA1    | 5255   | 37 | X | 71838692 | 71838692 | Missense_Mutation | SNP | G  | A  | 36  | 63  | c.2237C>T      | c.(2236-2238)TCT>TTT | p.S746F  |
| Pat_76 | Pre-Treatment | PHKA1    | 5255   | 37 | X | 71838696 | 71838696 | Missense_Mutation | SNP | G  | A  | 35  | 61  | c.2233C>T      | c.(2233-2235)CCC>TCC | p.P745S  |
| Pat_76 | Pre-Treatment | CHIC1    | 53344  | 37 | X | 72804260 | 72804260 | Missense_Mutation | SNP | C  | A  | 6   | 8   | c.359C>A       | c.(358-360)CCA>CAA   | p.P120Q  |
| Pat_76 | Pre-Treatment | ZCCHC13  | 389874 | 37 | X | 73524355 | 73524355 | Missense_Mutation | SNP | G  | A  | 35  | 50  | c.254G>A       | c.(253-255)CGA>CAA   | p.R85Q   |

|        |               |          |        |    |   |           |           |                   |     |    |    |     |     |                |                      |          |
|--------|---------------|----------|--------|----|---|-----------|-----------|-------------------|-----|----|----|-----|-----|----------------|----------------------|----------|
| Pat_76 | Pre-Treatment | ATRX     | 546    | 37 | X | 76939192  | 76939192  | Missense_Mutation | SNP | G  | A  | 161 | 339 | c.1556C>T      | c.(1555-1557)TCT>TTT | p.S519F  |
| Pat_76 | Pre-Treatment | ATP7A    | 538    | 37 | X | 77254089  | 77254089  | Missense_Mutation | SNP | G  | A  | 44  | 85  | c.1451G>A      | c.(1450-1452)GGA>GAA | p.G484E  |
| Pat_76 | Pre-Treatment | FAM46D   | 169966 | 37 | X | 79698084  | 79698084  | Missense_Mutation | SNP | A  | C  | 10  | 27  | c.46A>C        | c.(46-48)ACA>CCA     | p.T16P   |
| Pat_76 | Pre-Treatment | BRWD3    | 254065 | 37 | X | 79945476  | 79945476  | Nonsense_Mutation | SNP | G  | A  | 11  | 35  | c.3718C>T      | c.(3718-3720)CGA>TGA | p.R1240* |
| Pat_76 | Pre-Treatment | RPS6KA6  | 27330  | 37 | X | 83357077  | 83357077  | Missense_Mutation | SNP | G  | A  | 20  | 29  | c.1744C>T      | c.(1744-1746)CCA>TCA | p.P582S  |
| Pat_76 | Pre-Treatment | PCDH19   | 57526  | 37 | X | 99663156  | 99663156  | Missense_Mutation | SNP | C  | T  | 5   | 148 | c.440G>A       | c.(439-441)CGC>CAC   | p.R147H  |
| Pat_76 | Pre-Treatment | TSPAN6   | 7105   | 37 | X | 99885830  | 99885830  | Missense_Mutation | SNP | G  | A  | 24  | 27  | c.703C>T       | c.(703-705)CGT>TGT   | p.R235C  |
| Pat_76 | Pre-Treatment | DRP2     | 1821   | 37 | X | 100492690 | 100492690 | Missense_Mutation | SNP | G  | A  | 51  | 91  | c.364G>A       | c.(364-366)GAT>AAT   | p.D122N  |
| Pat_76 | Pre-Treatment | ZMAT1    | 84460  | 37 | X | 101139567 | 101139567 | Missense_Mutation | SNP | G  | A  | 4   | 97  | c.319C>T       | c.(319-321)CGG>TGG   | p.R107W  |
| Pat_76 | Pre-Treatment | NXF2B    | 728343 | 37 | X | 101623758 | 101623758 | Missense_Mutation | SNP | G  | A  | 21  | 75  | c.604C>T       | c.(604-606)CCC>TCC   | p.P202S  |
| Pat_76 | Pre-Treatment | GPRASP1  | 9737   | 37 | X | 101911210 | 101911210 | Missense_Mutation | SNP | G  | A  | 41  | 84  | c.2369G>A      | c.(2368-2370)AGA>AAA | p.R790K  |
| Pat_76 | Pre-Treatment | GPRASP2  | 114928 | 37 | X | 101971581 | 101971581 | Missense_Mutation | SNP | C  | T  | 29  | 53  | c.1784C>T      | c.(1783-1785)TCT>TTT | p.S595F  |
| Pat_76 | Pre-Treatment | ESX1     | 80712  | 37 | X | 103499043 | 103499043 | Missense_Mutation | SNP | C  | T  | 22  | 62  | c.298G>A       | c.(298-300)GAG>AAG   | p.E100K  |
| Pat_76 | Pre-Treatment | ESX1     | 80712  | 37 | X | 103499180 | 103499181 | Missense_Mutation | DNP | CC | TT | 70  | 130 | c.160_161GG>AA | c.(160-162)GGA>AAA   | p.G54K   |
| Pat_76 | Pre-Treatment | NRK      | 203447 | 37 | X | 105183928 | 105183928 | Missense_Mutation | SNP | G  | A  | 7   | 16  | c.3862G>A      | c.(3862-3864)GAT>AAT | p.D1288N |
| Pat_76 | Pre-Treatment | MUM1L1   | 139221 | 37 | X | 105451179 | 105451179 | Missense_Mutation | SNP | C  | T  | 3   | 8   | c.1754C>T      | c.(1753-1755)TCA>TTA | p.S585L  |
| Pat_76 | Pre-Treatment | MORC4    | 79710  | 37 | X | 106185285 | 106185285 | Missense_Mutation | SNP | C  | T  | 52  | 50  | c.2543G>A      | c.(2542-2544)AGA>AAA | p.R848K  |
| Pat_76 | Pre-Treatment | VSIG1    | 340547 | 37 | X | 107315967 | 107315967 | Missense_Mutation | SNP | C  | T  | 83  | 167 | c.473C>T       | c.(472-474)TCC>TTC   | p.S158F  |
| Pat_76 | Pre-Treatment | VSIG1    | 340547 | 37 | X | 107320451 | 107320451 | Missense_Mutation | SNP | G  | A  | 14  | 6   | c.1004G>A      | c.(1003-1005)GGA>GAA | p.G335E  |
| Pat_76 | Pre-Treatment | COL4A6   | 1288   | 37 | X | 107413919 | 107413919 | Missense_Mutation | SNP | C  | T  | 40  | 91  | c.3416G>A      | c.(3415-3417)GGA>GAA | p.G1139E |
| Pat_76 | Pre-Treatment | COL4A6   | 1288   | 37 | X | 107430407 | 107430407 | Missense_Mutation | SNP | C  | T  | 77  | 83  | c.1873G>A      | c.(1873-1875)GGA>AGA | p.G625R  |
| Pat_76 | Pre-Treatment | COL4A6   | 1288   | 37 | X | 107431160 | 107431160 | Missense_Mutation | SNP | G  | A  | 52  | 68  | c.1688C>T      | c.(1687-1689)TCT>TTT | p.S563F  |
| Pat_76 | Pre-Treatment | COL4A5   | 1287   | 37 | X | 107814644 | 107814644 | Missense_Mutation | SNP | G  | A  | 47  | 74  | c.386G>A       | c.(385-387)GGA>GAA   | p.G129E  |
| Pat_76 | Pre-Treatment | COL4A5   | 1287   | 37 | X | 107865965 | 107865965 | Nonsense_Mutation | SNP | A  | T  | 22  | 25  | c.2827A>T      | c.(2827-2829)AAA>TAA | p.K943*  |
| Pat_76 | Pre-Treatment | GUCY2F   | 2986   | 37 | X | 108697082 | 108697082 | Missense_Mutation | SNP | G  | A  | 10  | 9   | c.1039C>T      | c.(1039-1041)CCG>TCG | p.P347S  |
| Pat_76 | Pre-Treatment | DCX      | 1641   | 37 | X | 110576334 | 110576335 | Missense_Mutation | DNP | GG | AA | 16  | 25  | c.995_996CC>TT | c.(994-996)GCC>GTT   | p.A332V  |
| Pat_76 | Pre-Treatment | KLHL13   | 90293  | 37 | X | 117079486 | 117079486 | Missense_Mutation | SNP | C  | T  | 13  | 37  | c.151G>A       | c.(151-153)GAA>AAA   | p.E51K   |
| Pat_76 | Pre-Treatment | WDR44    | 54521  | 37 | X | 117577623 | 117577623 | Missense_Mutation | SNP | C  | T  | 39  | 56  | c.2485C>T      | c.(2485-2487)CGT>TGT | p.R829C  |
| Pat_76 | Pre-Treatment | DOCK11   | 139818 | 37 | X | 117676792 | 117676792 | Missense_Mutation | SNP | G  | A  | 61  | 135 | c.207G>A       | c.(205-207)ATG>ATA   | p.M69I   |
| Pat_76 | Pre-Treatment | DOCK11   | 139818 | 37 | X | 117744362 | 117744362 | Missense_Mutation | SNP | G  | A  | 30  | 40  | c.3077G>A      | c.(3076-3078)AGT>AAT | p.S1026N |
| Pat_76 | Pre-Treatment | LONRF3   | 79836  | 37 | X | 118123461 | 118123461 | Missense_Mutation | SNP | G  | A  | 18  | 25  | c.1150G>A      | c.(1150-1152)GGG>AGG | p.G384R  |
| Pat_76 | Pre-Treatment | UPF3B    | 65109  | 37 | X | 118985459 | 118985459 | Missense_Mutation | SNP | T  | G  | 9   | 30  | c.369A>C       | c.(367-369)AAA>AAC   | p.K123N  |
| Pat_76 | Pre-Treatment | ODZ1     | 10178  | 37 | X | 123699255 | 123699255 | Missense_Mutation | SNP | G  | A  | 15  | 15  | c.2233C>T      | c.(2233-2235)CCT>TCT | p.P745S  |
| Pat_76 | Pre-Treatment | ACTRT1   | 139741 | 37 | X | 127185537 | 127185537 | Missense_Mutation | SNP | C  | T  | 74  | 93  | c.649G>A       | c.(649-651)GAG>AAG   | p.E217K  |
| Pat_76 | Pre-Treatment | OCRL     | 4952   | 37 | X | 128703368 | 128703368 | Missense_Mutation | SNP | C  | T  | 76  | 130 | c.1594C>T      | c.(1594-1596)CAT>TAT | p.H532Y  |
| Pat_76 | Pre-Treatment | ZDHHC9   | 51114  | 37 | X | 128957792 | 128957792 | Missense_Mutation | SNP | G  | A  | 116 | 124 | c.350C>T       | c.(349-351)CCC>CTC   | p.P117L  |
| Pat_76 | Pre-Treatment | ELF4     | 2000   | 37 | X | 129203363 | 129203363 | Missense_Mutation | SNP | C  | T  | 33  | 55  | c.1099G>A      | c.(1099-1101)GGA>AGA | p.G367R  |
| Pat_76 | Pre-Treatment | ARHGAP36 | 158763 | 37 | X | 130218339 | 130218339 | Missense_Mutation | SNP | C  | T  | 3   | 18  | c.706C>T       | c.(706-708)CCC>TCC   | p.P236S  |
| Pat_76 | Pre-Treatment | IGSF1    | 3547   | 37 | X | 130409467 | 130409467 | Missense_Mutation | SNP | C  | T  | 55  | 97  | c.3169G>A      | c.(3169-3171)GAA>AAA | p.E1057K |
| Pat_76 | Pre-Treatment | MBNL3    | 55796  | 37 | X | 131573612 | 131573612 | Missense_Mutation | SNP | G  | A  | 111 | 137 | c.28C>T        | c.(28-30)CGT>TGT     | p.R10C   |
| Pat_76 | Pre-Treatment | USP26    | 83844  | 37 | X | 132160571 | 132160571 | Missense_Mutation | SNP | G  | A  | 12  | 28  | c.1678C>T      | c.(1678-1680)CCC>TCC | p.P560S  |
| Pat_76 | Pre-Treatment | MMGT1    | 93380  | 37 | X | 135047268 | 135047268 | Missense_Mutation | SNP | G  | A  | 104 | 163 | c.311C>T       | c.(310-312)TCG>TTG   | p.S104L  |
| Pat_76 | Pre-Treatment | CD40LG   | 959    | 37 | X | 135732446 | 135732446 | Missense_Mutation | SNP | C  | G  | 4   | 106 | c.178C>G       | c.(178-180)CAT>GAT   | p.H60D   |
| Pat_76 | Pre-Treatment | MAGEC1   | 9947   | 37 | X | 140993320 | 140993320 | Missense_Mutation | SNP | A  | G  | 7   | 141 | c.130A>G       | c.(130-132)AGC>GGC   | p.S44G   |
| Pat_76 | Pre-Treatment | MAGEC1   | 9947   | 37 | X | 140993818 | 140993818 | Missense_Mutation | SNP | T  | G  | 54  | 502 | c.628T>G       | c.(628-630)TTA>GTA   | p.L210V  |
| Pat_76 | Pre-Treatment | MAGEC1   | 9947   | 37 | X | 140994421 | 140994421 | Missense_Mutation | SNP | C  | T  | 111 | 141 | c.1231C>T      | c.(1231-1233)CCT>TCT | p.P411S  |
| Pat_76 | Pre-Treatment | MAGEC1   | 9947   | 37 | X | 140994923 | 140994923 | Missense_Mutation | SNP | A  | T  | 12  | 470 | c.1733A>T      | c.(1732-1734)CAC>CTC | p.H578L  |

|        |                 |           |        |    |   |           |           |                   |     |    |    |     |     |                |                      |          |
|--------|-----------------|-----------|--------|----|---|-----------|-----------|-------------------|-----|----|----|-----|-----|----------------|----------------------|----------|
| Pat_76 | Pre-Treatment   | MAGEA11   | 4110   | 37 | X | 148797442 | 148797442 | Missense_Mutation | SNP | C  | T  | 48  | 63  | c.296C>T       | c.(295-297)CCC>CTC   | p.P99L   |
| Pat_76 | Pre-Treatment   | MAGEA11   | 4110   | 37 | X | 148798372 | 148798373 | Missense_Mutation | DNP | GG | AA | 66  | 74  | .1226_1227GG>A | c.(1225-1227)AGG>AAA | p.R409K  |
| Pat_76 | Pre-Treatment   | GPR50     | 9248   | 37 | X | 150348908 | 150348908 | Missense_Mutation | SNP | T  | G  | 44  | 69  | c.853T>G       | c.(853-855)TTC>GTC   | p.F285V  |
| Pat_76 | Pre-Treatment   | MAGEA10   | 4109   | 37 | X | 151303507 | 151303507 | Missense_Mutation | SNP | G  | A  | 27  | 53  | c.586C>T       | c.(586-588)CCC>TCC   | p.P196S  |
| Pat_76 | Pre-Treatment   | GABRQ     | 55879  | 37 | X | 151821313 | 151821314 | Missense_Mutation | DNP | GG | AA | 76  | 62  | .1468_1469GG>A | c.(1468-1470)GGC>AAC | p.G490N  |
| Pat_76 | Pre-Treatment   | MAGEA6    | 4105   | 37 | X | 151869683 | 151869683 | Nonsense_Mutation | SNP | C  | T  | 139 | 83  | c.373C>T       | c.(373-375)CGA>TGA   | p.R125*  |
| Pat_76 | Pre-Treatment   | MAGEA12   | 4111   | 37 | X | 151900098 | 151900098 | Missense_Mutation | SNP | C  | T  | 103 | 120 | c.703G>A       | c.(703-705)GAG>AAG   | p.E235K  |
| Pat_76 | Pre-Treatment   | CETN2     | 1069   | 37 | X | 151996420 | 151996420 | Missense_Mutation | SNP | A  | G  | 40  | 106 | c.484T>C       | c.(484-486)TTC>CTC   | p.F162L  |
| Pat_76 | Pre-Treatment   | HAUS7     | 55559  | 37 | X | 152735942 | 152735942 | Missense_Mutation | SNP | G  | A  | 11  | 13  | c.104C>T       | c.(103-105)TCC>TTC   | p.S35F   |
| Pat_76 | Pre-Treatment   | HCFC1     | 3054   | 37 | X | 153217050 | 153217050 | Missense_Mutation | SNP | G  | A  | 46  | 85  | c.5369C>T      | c.(5368-5370)TCC>TTC | p.S1790F |
| Pat_76 | Pre-Treatment   | HCFC1     | 3054   | 37 | X | 153224937 | 153224937 | Missense_Mutation | SNP | G  | A  | 18  | 16  | c.1450C>T      | c.(1450-1452)CCT>TCT | p.P484S  |
| Pat_76 | Pre-Treatment   | FLNA      | 2316   | 37 | X | 153594560 | 153594560 | Nonsense_Mutation | SNP | G  | A  | 20  | 43  | c.1261C>T      | c.(1261-1263)CAG>TAG | p.Q421*  |
| Pat_76 | Pre-Treatment   | PLXNA3    | 55558  | 37 | X | 153691999 | 153691999 | Missense_Mutation | SNP | G  | A  | 12  | 16  | c.1513G>A      | c.(1513-1515)GAC>AAC | p.D505N  |
| Pat_76 | Pre-Treatment   | PLXNA3    | 55558  | 37 | X | 153693191 | 153693191 | Missense_Mutation | SNP | G  | A  | 11  | 18  | c.2023G>A      | c.(2023-2025)GGC>AGC | p.G675S  |
| Pat_76 | Pre-Treatment   | PLXNA3    | 55558  | 37 | X | 153696206 | 153696206 | Missense_Mutation | SNP | G  | C  | 17  | 40  | c.3682G>C      | c.(3682-3684)GGT>CGT | p.G1228R |
| Pat_76 | Post-Resistance | AGRN      | 375790 | 37 | 1 | 984754    | 984754    | Missense_Mutation | SNP | G  | C  | 8   | 24  | c.4437G>C      | c.(4435-4437)GAG>GAC | p.E1479D |
| Pat_76 | Post-Resistance | NADK      | 65220  | 37 | 1 | 1685561   | 1685561   | Missense_Mutation | SNP | T  | C  | 16  | 94  | c.1030A>G      | c.(1030-1032)ATG>GTG | p.M344V  |
| Pat_76 | Post-Resistance | CHD5      | 26038  | 37 | 1 | 6169939   | 6169939   | Missense_Mutation | SNP | C  | T  | 14  | 48  | c.5494G>A      | c.(5494-5496)GTG>ATG | p.V1832M |
| Pat_76 | Post-Resistance | SLC2A7    | 155184 | 37 | 1 | 9063467   | 9063467   | Missense_Mutation | SNP | T  | C  | 18  | 27  | c.1431A>G      | c.(1429-1431)ATA>ATG | p.I477M  |
| Pat_76 | Post-Resistance | KIF1B     | 23095  | 37 | 1 | 10405979  | 10405979  | Nonsense_Mutation | SNP | G  | A  | 11  | 24  | c.3765G>A      | c.(3763-3765)TGG>TGA | p.W1255* |
| Pat_76 | Post-Resistance | C1orf127  | 148345 | 37 | 1 | 11017690  | 11017690  | Missense_Mutation | SNP | G  | A  | 6   | 13  | c.229C>T       | c.(229-231)CTT>TTT   | p.L77F   |
| Pat_76 | Post-Resistance | PTCHD2    | 57540  | 37 | 1 | 11579548  | 11579548  | Missense_Mutation | SNP | G  | A  | 31  | 95  | c.2026G>A      | c.(2026-2028)GAG>AAG | p.E676K  |
| Pat_76 | Post-Resistance | NPPA      | 4878   | 37 | 1 | 11907322  | 11907322  | Missense_Mutation | SNP | C  | T  | 7   | 10  | c.298G>A       | c.(298-300)GGC>AGC   | p.G100S  |
| Pat_76 | Post-Resistance | PRAMEF12  | 390999 | 37 | 1 | 12835290  | 12835290  | Missense_Mutation | SNP | C  | T  | 23  | 49  | c.280C>T       | c.(280-282)CGC>TGC   | p.R94C   |
| Pat_76 | Post-Resistance | LOC649330 | 649330 | 37 | 1 | 12907921  | 12907921  | Missense_Mutation | SNP | C  | T  | 7   | 68  | c.222G>A       | c.(220-222)ATG>ATA   | p.M74I   |
| Pat_76 | Post-Resistance | DNAJC16   | 23341  | 37 | 1 | 15890790  | 15890790  | Nonsense_Mutation | SNP | C  | T  | 11  | 36  | c.1534C>T      | c.(1534-1536)CGA>TGA | p.R512*  |
| Pat_76 | Post-Resistance | MST1P9    | 11223  | 37 | 1 | 17086053  | 17086053  | Missense_Mutation | SNP | G  | A  | 5   | 19  | c.844C>T       | c.(844-846)CAC>TAC   | p.H282Y  |
| Pat_76 | Post-Resistance | KLHDC7A   | 127707 | 37 | 1 | 18807831  | 18807831  | Missense_Mutation | SNP | G  | A  | 3   | 8   | c.356G>A       | c.(355-357)AGA>AAA   | p.R119K  |
| Pat_76 | Post-Resistance | KLHDC7A   | 127707 | 37 | 1 | 18808730  | 18808730  | Missense_Mutation | SNP | C  | T  | 17  | 39  | c.1255C>T      | c.(1255-1257)CCG>TCG | p.P419S  |
| Pat_76 | Post-Resistance | PLA2G2D   | 26279  | 37 | 1 | 20442911  | 20442911  | Missense_Mutation | SNP | C  | G  | 16  | 29  | c.100G>C       | c.(100-102)GGG>CGG   | p.G34R   |
| Pat_76 | Post-Resistance | ECE1      | 1889   | 37 | 1 | 21582571  | 21582571  | Nonsense_Mutation | SNP | C  | A  | 12  | 43  | c.889G>T       | c.(889-891)GAG>TAG   | p.E297*  |
| Pat_76 | Post-Resistance | RAP1GAP   | 5909   | 37 | 1 | 21936111  | 21936111  | Missense_Mutation | SNP | G  | A  | 24  | 64  | c.1028C>T      | c.(1027-1029)CCC>CTC | p.P343L  |
| Pat_76 | Post-Resistance | EPHB2     | 2048   | 37 | 1 | 23232566  | 23232566  | Missense_Mutation | SNP | A  | T  | 20  | 44  | c.1852A>T      | c.(1852-1854)ATC>TTC | p.I618F  |
| Pat_76 | Post-Resistance | GRHL3     | 57822  | 37 | 1 | 24669215  | 24669215  | Missense_Mutation | SNP | G  | A  | 22  | 73  | c.1253G>A      | c.(1252-1254)CGG>CAG | p.R418Q  |
| Pat_76 | Post-Resistance | ARID1A    | 8289   | 37 | 1 | 27106876  | 27106876  | Missense_Mutation | SNP | T  | C  | 8   | 63  | c.6487T>C      | c.(6487-6489)TGC>CGC | p.C2163R |
| Pat_76 | Post-Resistance | MAP3K6    | 9064   | 37 | 1 | 27686450  | 27686450  | Missense_Mutation | SNP | G  | A  | 37  | 58  | c.2218C>T      | c.(2218-2220)CCC>TCC | p.P740S  |
| Pat_76 | Post-Resistance | CD164L2   | 388611 | 37 | 1 | 27709119  | 27709119  | Missense_Mutation | SNP | G  | A  | 13  | 17  | c.127C>T       | c.(127-129)CGC>TGC   | p.R43C   |
| Pat_76 | Post-Resistance | SFRS4     | 6429   | 37 | 1 | 29475177  | 29475178  | Missense_Mutation | DNP | GG | AA | 82  | 133 | .1229_1230CC>T | c.(1228-1230)TCC>TTT | p.S410F  |
| Pat_76 | Post-Resistance | PTPRU     | 10076  | 37 | 1 | 29585233  | 29585233  | Missense_Mutation | SNP | G  | A  | 3   | 33  | c.422G>A       | c.(421-423)CGT>CAT   | p.R141H  |
| Pat_76 | Post-Resistance | PTPRU     | 10076  | 37 | 1 | 29652156  | 29652156  | Missense_Mutation | SNP | G  | A  | 20  | 70  | c.4324G>A      | c.(4324-4326)GGG>AGG | p.G1442R |
| Pat_76 | Post-Resistance | SPOCD1    | 90853  | 37 | 1 | 32280093  | 32280093  | Missense_Mutation | SNP | C  | T  | 8   | 15  | c.842G>A       | c.(841-843)GGG>GAG   | p.G281E  |
| Pat_76 | Post-Resistance | LCK       | 3932   | 37 | 1 | 32751189  | 32751189  | Missense_Mutation | SNP | G  | A  | 28  | 36  | c.1402G>A      | c.(1402-1404)GAG>AAG | p.E468K  |
| Pat_76 | Post-Resistance | CSMD2     | 114784 | 37 | 1 | 34383699  | 34383699  | Missense_Mutation | SNP | G  | A  | 8   | 15  | c.796C>T       | c.(796-798)CTC>TTC   | p.L266F  |
| Pat_76 | Post-Resistance | CSMD2     | 114784 | 37 | 1 | 34554741  | 34554741  | Missense_Mutation | SNP | C  | T  | 5   | 15  | c.121G>A       | c.(121-123)GGG>AGG   | p.G41R   |
| Pat_76 | Post-Resistance | EIF2C1    | 26523  | 37 | 1 | 36359345  | 36359345  | Missense_Mutation | SNP | G  | A  | 17  | 47  | c.583G>A       | c.(583-585)GAG>AAG   | p.E195K  |
| Pat_76 | Post-Resistance | C1orf109  | 54955  | 37 | 1 | 38149083  | 38149083  | Missense_Mutation | SNP | G  | A  | 8   | 17  | c.482C>T       | c.(481-483)TCG>TTG   | p.S161L  |
| Pat_76 | Post-Resistance | KIAA0754  | 643314 | 37 | 1 | 39878887  | 39878887  | Missense_Mutation | SNP | C  | T  | 4   | 9   | c.2950C>T      | c.(2950-2952)CCA>TCA | p.P984S  |



|        |                 |          |        |    |   |           |           |                   |     |    |    |    |     |                                    |                      |               |
|--------|-----------------|----------|--------|----|---|-----------|-----------|-------------------|-----|----|----|----|-----|------------------------------------|----------------------|---------------|
| Pat_76 | Post-Resistance | NT5C1A   | 84618  | 37 | 1 | 40131779  | 40131779  | Missense_Mutation | SNP | C  | T  | 31 | 65  | c.265G>A                           | c.(265-267)GAA>AAA   | p.E89K        |
| Pat_76 | Post-Resistance | HPCAL4   | 51440  | 37 | 1 | 40149802  | 40149802  | Missense_Mutation | SNP | G  | A  | 10 | 11  | c.185C>T                           | c.(184-186)TCC>TTC   | p.S62F        |
| Pat_76 | Post-Resistance | PPIE     | 10450  | 37 | 1 | 40218614  | 40218614  | Missense_Mutation | SNP | A  | G  | 18 | 52  | c.727A>G                           | c.(727-729)ACC>GCC   | p.T243A       |
| Pat_76 | Post-Resistance | NFYC     | 4802   | 37 | 1 | 41218908  | 41218908  | Missense_Mutation | SNP | C  | T  | 5  | 28  | c.377C>T                           | c.(376-378)CCA>CTA   | p.P126L       |
| Pat_76 | Post-Resistance | TIE1     | 7075   | 37 | 1 | 43778895  | 43778895  | Missense_Mutation | SNP | C  | T  | 15 | 27  | c.2017C>T                          | c.(2017-2019)CCA>TCA | p.P673S       |
| Pat_76 | Post-Resistance | PTPRF    | 5792   | 37 | 1 | 44058256  | 44058257  | Missense_Mutation | DNP | CC | TT | 9  | 15  | c.1797_1798CC>T795-1800)GCCCGC>GCT |                      | p.R600C       |
| Pat_76 | Post-Resistance | DMAP1    | 55929  | 37 | 1 | 44684863  | 44684863  | Missense_Mutation | SNP | C  | T  | 13 | 14  | c.856C>T                           | c.(856-858)CGC>TGC   | p.R286C       |
| Pat_76 | Post-Resistance | RNF220   | 55182  | 37 | 1 | 45110737  | 45110737  | Missense_Mutation | SNP | C  | T  | 9  | 12  | c.1294C>T                          | c.(1294-1296)CGG>TGG | p.R432W       |
| Pat_76 | Post-Resistance | FAAH     | 2166   | 37 | 1 | 46871441  | 46871441  | Missense_Mutation | SNP | C  | T  | 13 | 13  | c.760C>T                           | c.(760-762)CTC>TTC   | p.L254F       |
| Pat_76 | Post-Resistance | CYP4A11  | 1579   | 37 | 1 | 47402978  | 47402978  | Nonsense_Mutation | SNP | C  | T  | 16 | 20  | c.378G>A                           | c.(376-378)TGG>TGA   | p.W126*       |
| Pat_76 | Post-Resistance | CYP4Z1   | 199974 | 37 | 1 | 47548123  | 47548123  | Missense_Mutation | SNP | G  | A  | 7  | 70  | c.482G>A                           | c.(481-483)CGG>CAG   | p.R161Q       |
| Pat_76 | Post-Resistance | SLC5A9   | 200010 | 37 | 1 | 48697728  | 48697728  | Missense_Mutation | SNP | C  | T  | 32 | 66  | c.802C>T                           | c.(802-804)CAC>TAC   | p.H268Y       |
| Pat_76 | Post-Resistance | SPATA6   | 54558  | 37 | 1 | 48877245  | 48877245  | Missense_Mutation | SNP | G  | A  | 5  | 8   | c.296C>T                           | c.(295-297)TCT>TTT   | p.S99F        |
| Pat_76 | Post-Resistance | GLIS1    | 148979 | 37 | 1 | 54060335  | 54060335  | Missense_Mutation | SNP | A  | C  | 6  | 14  | c.241T>G                           | c.(241-243)TGT>GGT   | p.C81G        |
| Pat_76 | Post-Resistance | YIPF1    | 54432  | 37 | 1 | 54332025  | 54332025  | Missense_Mutation | SNP | G  | A  | 8  | 21  | c.679C>T                           | c.(679-681)CGT>TGT   | p.R227C       |
| Pat_76 | Post-Resistance | PRKAA2   | 5563   | 37 | 1 | 57159444  | 57159444  | Missense_Mutation | SNP | C  | T  | 6  | 18  | c.482C>T                           | c.(481-483)TCT>TTT   | p.S161F       |
| Pat_76 | Post-Resistance | C1orf168 | 199920 | 37 | 1 | 57257821  | 57257821  | Missense_Mutation | SNP | C  | T  | 4  | 24  | c.665G>A                           | c.(664-666)AGA>AAA   | p.R222K       |
| Pat_76 | Post-Resistance | C8A      | 731    | 37 | 1 | 57341861  | 57341861  | Missense_Mutation | SNP | G  | A  | 10 | 28  | c.443G>A                           | c.(442-444)GGA>GAA   | p.G148E       |
| Pat_76 | Post-Resistance | C8B      | 732    | 37 | 1 | 57397515  | 57397515  | Missense_Mutation | SNP | T  | C  | 13 | 31  | c.1589A>G                          | c.(1588-1590)CAA>CGA | p.Q530R       |
| Pat_76 | Post-Resistance | C8B      | 732    | 37 | 1 | 57425723  | 57425723  | Nonsense_Mutation | SNP | C  | T  | 11 | 11  | c.219G>A                           | c.(217-219)TGG>TGA   | p.W73*        |
| Pat_76 | Post-Resistance | DAB1     | 1600   | 37 | 1 | 57481054  | 57481054  | Missense_Mutation | SNP | G  | A  | 6  | 11  | c.946C>T                           | c.(946-948)CTC>TTC   | p.L316F       |
| Pat_76 | Post-Resistance | CYP2J2   | 1573   | 37 | 1 | 60359466  | 60359466  | Missense_Mutation | SNP | T  | C  | 11 | 131 | c.1366A>G                          | c.(1366-1368)ACT>GCT | p.T456A       |
| Pat_76 | Post-Resistance | ROR1     | 4919   | 37 | 1 | 64624732  | 64624733  | Missense_Mutation | DNP | CC | TT | 15 | 30  | c.1243_1244CC>T                    | c.(1243-1245)CCC>TTC | p.P415F       |
| Pat_76 | Post-Resistance | ROR1     | 4919   | 37 | 1 | 64644411  | 64644411  | Missense_Mutation | SNP | G  | A  | 5  | 16  | c.2687G>A                          | c.(2686-2688)GGA>GAA | p.G896E       |
| Pat_76 | Post-Resistance | PTGFR    | 5737   | 37 | 1 | 79002109  | 79002109  | Missense_Mutation | SNP | G  | A  | 10 | 33  | c.817G>A                           | c.(817-819)GGA>AGA   | p.G273R       |
| Pat_76 | Post-Resistance | LPHN2    | 23266  | 37 | 1 | 82417677  | 82417677  | Missense_Mutation | SNP | G  | A  | 10 | 24  | c.1633G>A                          | c.(1633-1635)GAA>AAA | p.E545K       |
| Pat_76 | Post-Resistance | LPHN2    | 23266  | 37 | 1 | 82435018  | 82435018  | Missense_Mutation | SNP | C  | T  | 9  | 26  | c.2629C>T                          | c.(2629-2631)CTT>TTT | p.L877F       |
| Pat_76 | Post-Resistance | COL24A1  | 255631 | 37 | 1 | 86578285  | 86578285  | Missense_Mutation | SNP | C  | T  | 13 | 30  | c.1564G>A                          | c.(1564-1566)GGA>AGA | p.G522R       |
| Pat_76 | Post-Resistance | HS2ST1   | 9653   | 37 | 1 | 87570300  | 87570300  | Missense_Mutation | SNP | C  | T  | 8  | 5   | c.992C>T                           | c.(991-993)GCC>GTC   | p.A331V       |
| Pat_76 | Post-Resistance | RBMXL1   | 494115 | 37 | 1 | 89448465  | 89448465  | Missense_Mutation | SNP | G  | A  | 30 | 60  | c.1045C>T                          | c.(1045-1047)CCC>TCC | p.P349S       |
| Pat_76 | Post-Resistance | GBP6     | 163351 | 37 | 1 | 89835213  | 89835213  | Missense_Mutation | SNP | G  | A  | 8  | 19  | c.299G>A                           | c.(298-300)GGT>GAT   | p.G100D       |
| Pat_76 | Post-Resistance | ZNF644   | 84146  | 37 | 1 | 91404798  | 91404798  | Missense_Mutation | SNP | G  | A  | 9  | 17  | c.2113C>T                          | c.(2113-2115)CCT>TCT | p.P705S       |
| Pat_76 | Post-Resistance | CDC7     | 8317   | 37 | 1 | 91977357  | 91977357  | Missense_Mutation | SNP | C  | T  | 3  | 10  | c.449C>T                           | c.(448-450)TCC>TTC   | p.S150F       |
| Pat_76 | Post-Resistance | EPHX4    | 253152 | 37 | 1 | 92528636  | 92528636  | Missense_Mutation | SNP | G  | A  | 23 | 53  | c.882G>A                           | c.(880-882)ATG>ATA   | p.M294I       |
| Pat_76 | Post-Resistance | EVI5     | 7813   | 37 | 1 | 92979352  | 92979352  | Missense_Mutation | SNP | G  | A  | 6  | 36  | c.2294C>T                          | c.(2293-2295)TCG>TTG | p.S765L       |
| Pat_76 | Post-Resistance | ABCA4    | 24     | 37 | 1 | 94546093  | 94546093  | Missense_Mutation | SNP | G  | A  | 9  | 29  | c.1040C>T                          | c.(1039-1041)GCC>GTC | p.A347V       |
| Pat_76 | Post-Resistance | ABCA4    | 24     | 37 | 1 | 94568678  | 94568678  | Missense_Mutation | SNP | C  | T  | 36 | 89  | c.463G>A                           | c.(463-465)GAT>AAT   | p.D155N       |
| Pat_76 | Post-Resistance | ARHGAP29 | 9411   | 37 | 1 | 94655515  | 94655515  | Missense_Mutation | SNP | G  | C  | 3  | 18  | c.1406C>G                          | c.(1405-1407)GCC>GGC | p.A469G       |
| Pat_76 | Post-Resistance | DPYD     | 1806   | 37 | 1 | 98187170  | 98187170  | Missense_Mutation | SNP | C  | T  | 16 | 31  | c.379G>A                           | c.(379-381)GGA>AGA   | p.G127R       |
| Pat_76 | Post-Resistance | HIAT1    | 64645  | 37 | 1 | 100534098 | 100534099 | Missense_Mutation | DNP | CC | AT | 13 | 34  | c.775_776CC>AT                     | c.(775-777)CCG>ATG   | p.P259M       |
| Pat_76 | Post-Resistance | COL11A1  | 1301   | 37 | 1 | 103471817 | 103471817 | Splice_Site       | SNP | C  | T  | 9  | 11  | c.1737_splice                      | c.e16+1              | p.R579_splice |
| Pat_76 | Post-Resistance | COL11A1  | 1301   | 37 | 1 | 103488306 | 103488306 | Missense_Mutation | SNP | C  | T  | 10 | 25  | c.1237G>A                          | c.(1237-1239)GAA>AAA | p.E413K       |
| Pat_76 | Post-Resistance | ATXN7L2  | 127002 | 37 | 1 | 110033872 | 110033872 | Missense_Mutation | SNP | G  | T  | 9  | 19  | c.1687G>T                          | c.(1687-1689)GTG>TTG | p.V563L       |
| Pat_76 | Post-Resistance | RBM15    | 64783  | 37 | 1 | 110883778 | 110883778 | Missense_Mutation | SNP | C  | T  | 7  | 22  | c.1751C>T                          | c.(1750-1752)TCT>TTT | p.S584F       |
| Pat_76 | Post-Resistance | OVGP1    | 5016   | 37 | 1 | 111957747 | 111957747 | Missense_Mutation | SNP | G  | A  | 13 | 15  | c.1376C>T                          | c.(1375-1377)TCC>TTC | p.S459F       |
| Pat_76 | Post-Resistance | KCND3    | 3752   | 37 | 1 | 112525258 | 112525258 | Missense_Mutation | SNP | G  | A  | 15 | 23  | c.91C>T                            | c.(91-93)CCG>TCG     | p.P31S        |
| Pat_76 | Post-Resistance | TSPAN2   | 10100  | 37 | 1 | 115601575 | 115601575 | Missense_Mutation | SNP | C  | T  | 17 | 71  | c.373G>A                           | c.(373-375)GAA>AAA   | p.E125K       |

|        |                 |          |        |    |   |           |           |                   |     |    |    |     |     |                |                      |               |
|--------|-----------------|----------|--------|----|---|-----------|-----------|-------------------|-----|----|----|-----|-----|----------------|----------------------|---------------|
| Pat_76 | Post-Resistance | MAN1A2   | 10905  | 37 | 1 | 118039386 | 118039386 | Missense_Mutation | SNP | C  | T  | 3   | 13  | c.1286C>T      | c.(1285-1287)GCT>GTT | p.A429V       |
| Pat_76 | Post-Resistance | SPAG17   | 200162 | 37 | 1 | 118598459 | 118598459 | Missense_Mutation | SNP | C  | T  | 4   | 12  | c.2619G>A      | c.(2617-2619)ATG>ATA | p.M873I       |
| Pat_76 | Post-Resistance | HAO2     | 51179  | 37 | 1 | 119929246 | 119929246 | Missense_Mutation | SNP | G  | A  | 10  | 13  | c.563G>A       | c.(562-564)GGA>GAA   | p.G188E       |
| Pat_76 | Post-Resistance | BCL9     | 607    | 37 | 1 | 147096566 | 147096566 | Missense_Mutation | SNP | C  | T  | 33  | 23  | c.4087C>T      | c.(4087-4089)CGG>TGG | p.R1363W      |
| Pat_76 | Post-Resistance | ACP6     | 51205  | 37 | 1 | 147126371 | 147126371 | Missense_Mutation | SNP | C  | T  | 8   | 125 | c.718G>A       | c.(718-720)GGC>AGC   | p.G240S       |
| Pat_76 | Post-Resistance | NBPF16   | 728936 | 37 | 1 | 148753328 | 148753328 | Missense_Mutation | SNP | G  | A  | 89  | 105 | c.1345G>A      | c.(1345-1347)GAT>AAT | p.D449N       |
| Pat_76 | Post-Resistance | SEMA6C   | 10500  | 37 | 1 | 151105565 | 151105565 | Missense_Mutation | DNP | CC | TT | 6   | 24  | .2187_2188GG>A | 185-2190)AAGGAG>AAA/ | p.E730K       |
| Pat_76 | Post-Resistance | RPTN     | 126638 | 37 | 1 | 152129435 | 152129435 | Missense_Mutation | SNP | C  | T  | 25  | 30  | c.140G>A       | c.(139-141)AGA>AAA   | p.R47K        |
| Pat_76 | Post-Resistance | FLG      | 2312   | 37 | 1 | 152279041 | 152279041 | Missense_Mutation | SNP | G  | A  | 174 | 620 | c.8321C>T      | c.(8320-8322)TCC>TTC | p.S2774F      |
| Pat_76 | Post-Resistance | FLG      | 2312   | 37 | 1 | 152284783 | 152284783 | Missense_Mutation | SNP | G  | A  | 94  | 586 | c.2579C>T      | c.(2578-2580)TCG>TTG | p.S860L       |
| Pat_76 | Post-Resistance | FLG2     | 388698 | 37 | 1 | 152326351 | 152326351 | Missense_Mutation | SNP | C  | T  | 251 | 186 | c.3911G>A      | c.(3910-3912)GGA>GAA | p.G1304E      |
| Pat_76 | Post-Resistance | KPRP     | 448834 | 37 | 1 | 152732181 | 152732182 | Missense_Mutation | DNP | CC | TG | 46  | 168 | c.117_118CC>TG | 115-120)GCCCT>GCTG/  | p.P40A        |
| Pat_76 | Post-Resistance | IVL      | 3713   | 37 | 1 | 152882308 | 152882308 | Missense_Mutation | SNP | C  | T  | 41  | 34  | c.35C>T        | c.(34-36)TCC>TTC     | p.S12F        |
| Pat_76 | Post-Resistance | S100A2   | 6273   | 37 | 1 | 153536245 | 153536245 | Missense_Mutation | SNP | C  | T  | 46  | 37  | c.106G>A       | c.(106-108)GAA>AAA   | p.E36K        |
| Pat_76 | Post-Resistance | KCNN3    | 3782   | 37 | 1 | 154794606 | 154794606 | Missense_Mutation | SNP | G  | A  | 53  | 34  | c.988C>T       | c.(988-990)CTT>TTT   | p.L330F       |
| Pat_76 | Post-Resistance | RUSC1    | 23623  | 37 | 1 | 155297963 | 155297964 | Missense_Mutation | DNP | CC | AT | 133 | 89  | .2437_2438CC>A | c.(2437-2439)CCG>ATG | p.P813M       |
| Pat_76 | Post-Resistance | ASH1L    | 55870  | 37 | 1 | 155448540 | 155448540 | Missense_Mutation | SNP | G  | A  | 8   | 25  | c.4121C>T      | c.(4120-4122)TCT>TTT | p.S1374F      |
| Pat_76 | Post-Resistance | SYT11    | 23208  | 37 | 1 | 155838247 | 155838247 | Missense_Mutation | SNP | G  | A  | 7   | 58  | c.526G>A       | c.(526-528)GTG>ATG   | p.V176M       |
| Pat_76 | Post-Resistance | RXFP4    | 339403 | 37 | 1 | 155912047 | 155912047 | Missense_Mutation | SNP | G  | A  | 17  | 108 | c.547G>A       | c.(547-549)GGT>AGT   | p.G183S       |
| Pat_76 | Post-Resistance | IQGAP3   | 128239 | 37 | 1 | 156513781 | 156513781 | Missense_Mutation | SNP | C  | A  | 6   | 162 | c.2522G>T      | c.(2521-2523)AGG>ATG | p.R841M       |
| Pat_76 | Post-Resistance | PRCC     | 5546   | 37 | 1 | 156756532 | 156756532 | Missense_Mutation | SNP | C  | T  | 80  | 51  | c.649C>T       | c.(649-651)CCC>TCC   | p.P217S       |
| Pat_76 | Post-Resistance | PEAR1    | 375033 | 37 | 1 | 156883182 | 156883182 | Splice_Site       | SNP | G  | A  | 63  | 43  | c.2512_splice  | c.e20-1              | p.V838_splice |
| Pat_76 | Post-Resistance | FCRL1    | 115350 | 37 | 1 | 157771783 | 157771783 | Missense_Mutation | SNP | G  | A  | 10  | 60  | c.808C>T       | c.(808-810)CAT>TAT   | p.H270Y       |
| Pat_76 | Post-Resistance | CD1C     | 911    | 37 | 1 | 158261016 | 158261016 | Missense_Mutation | SNP | G  | A  | 50  | 36  | c.154G>A       | c.(154-156)GAG>AAG   | p.E52K        |
| Pat_76 | Post-Resistance | OR6K2    | 81448  | 37 | 1 | 158669934 | 158669934 | Missense_Mutation | SNP | G  | A  | 13  | 94  | c.509C>T       | c.(508-510)TCG>TTG   | p.S170L       |
| Pat_76 | Post-Resistance | OR6K2    | 81448  | 37 | 1 | 158670321 | 158670321 | Missense_Mutation | SNP | C  | T  | 34  | 18  | c.122G>A       | c.(121-123)GGA>GAA   | p.G41E        |
| Pat_76 | Post-Resistance | OR6K6    | 128371 | 37 | 1 | 158725629 | 158725630 | Missense_Mutation | DNP | GG | AA | 15  | 13  | .1024_1025GG>A | c.(1024-1026)GGG>AAG | p.G342K       |
| Pat_76 | Post-Resistance | PYHIN1   | 149628 | 37 | 1 | 158909027 | 158909027 | Missense_Mutation | SNP | C  | T  | 20  | 80  | c.569C>T       | c.(568-570)TCC>TTC   | p.S190F       |
| Pat_76 | Post-Resistance | IFI16    | 3428   | 37 | 1 | 158986447 | 158986447 | Missense_Mutation | SNP | C  | T  | 8   | 52  | c.506C>T       | c.(505-507)CCC>CTC   | p.P169L       |
| Pat_76 | Post-Resistance | OR10J1   | 26476  | 37 | 1 | 159409697 | 159409697 | Nonsense_Mutation | SNP | T  | G  | 58  | 159 | c.149T>G       | c.(148-150)TTA>TGA   | p.L50*        |
| Pat_76 | Post-Resistance | OR10J1   | 26476  | 37 | 1 | 159410116 | 159410116 | Missense_Mutation | SNP | G  | A  | 28  | 147 | c.568G>A       | c.(568-570)GAC>AAC   | p.D190N       |
| Pat_76 | Post-Resistance | FCRL6    | 343413 | 37 | 1 | 159785251 | 159785251 | Splice_Site       | SNP | T  | G  | 8   | 45  | c.1179_splice  | c.e9+2               | p.K393_splice |
| Pat_76 | Post-Resistance | ATP1A2   | 477    | 37 | 1 | 160105225 | 160105225 | Missense_Mutation | SNP | G  | A  | 44  | 45  | c.2117G>A      | c.(2116-2118)GGA>GAA | p.G706E       |
| Pat_76 | Post-Resistance | ATP1A4   | 480    | 37 | 1 | 160129209 | 160129209 | Missense_Mutation | SNP | C  | T  | 58  | 48  | c.671C>T       | c.(670-672)TCA>TTA   | p.S224L       |
| Pat_76 | Post-Resistance | NDUFS2   | 4720   | 37 | 1 | 161182173 | 161182173 | Missense_Mutation | SNP | C  | T  | 7   | 61  | c.1019C>T      | c.(1018-1020)TCC>TTC | p.S340F       |
| Pat_76 | Post-Resistance | PBX1     | 5087   | 37 | 1 | 164815831 | 164815831 | Missense_Mutation | SNP | G  | A  | 68  | 59  | c.1211G>A      | c.(1210-1212)GGT>GAT | p.G404D       |
| Pat_76 | Post-Resistance | ALDH9A1  | 223    | 37 | 1 | 165634269 | 165634269 | Missense_Mutation | SNP | C  | T  | 25  | 16  | c.1448G>A      | c.(1447-1449)GGA>GAA | p.G483E       |
| Pat_76 | Post-Resistance | POU2F1   | 5451   | 37 | 1 | 167334719 | 167334719 | Missense_Mutation | SNP | G  | A  | 5   | 51  | c.74G>A        | c.(73-75)GGT>GAT     | p.G25D        |
| Pat_76 | Post-Resistance | ADCY10   | 55811  | 37 | 1 | 167817683 | 167817683 | Missense_Mutation | SNP | G  | A  | 32  | 23  | c.2353C>T      | c.(2353-2355)CAT>TAT | p.H785Y       |
| Pat_76 | Post-Resistance | F5       | 2153   | 37 | 1 | 169511239 | 169511239 | Missense_Mutation | SNP | C  | T  | 44  | 44  | c.3089G>A      | c.(3088-3090)CGA>CAA | p.R1030Q      |
| Pat_76 | Post-Resistance | SELP     | 6403   | 37 | 1 | 169562902 | 169562902 | Missense_Mutation | SNP | A  | C  | 10  | 7   | c.2348T>G      | c.(2347-2349)ATA>AGA | p.I783R       |
| Pat_76 | Post-Resistance | C1orf156 | 92342  | 37 | 1 | 169762716 | 169762716 | Missense_Mutation | SNP | C  | T  | 50  | 43  | c.121G>A       | c.(121-123)GGA>AGA   | p.G41R        |
| Pat_76 | Post-Resistance | FMO3     | 2328   | 37 | 1 | 171079999 | 171079999 | Missense_Mutation | SNP | C  | T  | 38  | 166 | c.688C>T       | c.(688-690)CCT>TCT   | p.P230S       |
| Pat_76 | Post-Resistance | TNR      | 7143   | 37 | 1 | 175372639 | 175372640 | Missense_Mutation | DNP | GG | AA | 63  | 247 | c.612_613CC>TT | 610-615)TGCCCG>TGTT( | p.P205S       |
| Pat_76 | Post-Resistance | TNR      | 7143   | 37 | 1 | 175375835 | 175375835 | Missense_Mutation | SNP | C  | T  | 77  | 45  | c.16G>A        | c.(16-18)GAA>AAA     | p.E6K         |
| Pat_76 | Post-Resistance | PAPPA2   | 60676  | 37 | 1 | 176668460 | 176668460 | Missense_Mutation | SNP | A  | G  | 58  | 207 | c.2971A>G      | c.(2971-2973)AAG>GAG | p.K991E       |
| Pat_76 | Post-Resistance | C1orf125 | 126859 | 37 | 1 | 179460729 | 179460729 | Missense_Mutation | SNP | G  | A  | 7   | 59  | c.2148G>A      | c.(2146-2148)ATG>ATA | p.M716I       |

|        |                 |          |        |    |    |           |           |                        |     |    |    |    |     |                 |                        |                |
|--------|-----------------|----------|--------|----|----|-----------|-----------|------------------------|-----|----|----|----|-----|-----------------|------------------------|----------------|
| Pat_76 | Post-Resistance | CEP350   | 9857   | 37 | 1  | 180023013 | 180023013 | Missense_Mutation      | SNP | A  | C  | 27 | 29  | c.5118A>C       | c.(5116-5118)GAA>GAC   | p.E1706D       |
| Pat_76 | Post-Resistance | XPR1     | 9213   | 37 | 1  | 180849418 | 180849418 | Missense_Mutation      | SNP | C  | T  | 51 | 40  | c.2015C>T       | c.(2014-2016)CCT>CTT   | p.P672L        |
| Pat_76 | Post-Resistance | CACNA1E  | 777    | 37 | 1  | 181695216 | 181695216 | Missense_Mutation      | SNP | G  | A  | 8  | 11  | c.2158G>A       | c.(2158-2160)GAA>AAA   | p.E720K        |
| Pat_76 | Post-Resistance | LAMC2    | 3918   | 37 | 1  | 183192278 | 183192278 | Missense_Mutation      | SNP | C  | T  | 23 | 16  | c.772C>T        | c.(772-774)CTT>TTT     | p.L258F        |
| Pat_76 | Post-Resistance | LAMC2    | 3918   | 37 | 1  | 183192310 | 183192310 | Missense_Mutation      | SNP | C  | G  | 11 | 47  | c.804C>G        | c.(802-804)AGC>AGG     | p.S268R        |
| Pat_76 | Post-Resistance | APOBEC4  | 403314 | 37 | 1  | 183616917 | 183616917 | Missense_Mutation      | SNP | C  | T  | 39 | 24  | c.1000G>A       | c.(1000-1002)GGA>AGA   | p.G334R        |
| Pat_76 | Post-Resistance | FAM129A  | 116496 | 37 | 1  | 184792330 | 184792330 | Nonsense_Mutation      | SNP | G  | C  | 17 | 67  | c.956C>G        | c.(955-957)TCA>TGA     | p.S319*        |
| Pat_76 | Post-Resistance | FAM129A  | 116496 | 37 | 1  | 184863341 | 184863341 | Splice_Site            | SNP | C  | T  | 5  | 19  | c.187_splice    | c.e3-1                 | p.P63_splice   |
| Pat_76 | Post-Resistance | PLA2G4A  | 5321   | 37 | 1  | 186934540 | 186934540 | Splice_Site            | SNP | G  | A  | 3  | 3   | c.1580_splice   | c.e15-1                | p.D527_splice  |
| Pat_76 | Post-Resistance | FAM5C    | 339479 | 37 | 1  | 190195350 | 190195350 | Missense_Mutation      | SNP | C  | T  | 23 | 33  | c.823G>A        | c.(823-825)GAA>AAA     | p.E275K        |
| Pat_76 | Post-Resistance | CFH      | 3075   | 37 | 1  | 196654365 | 196654365 | Missense_Mutation      | SNP | C  | T  | 31 | 83  | c.962C>T        | c.(961-963)ACC>ATC     | p.T321I        |
| Pat_76 | Post-Resistance | CFHR1    | 3078   | 37 | 1  | 196794779 | 196794779 | Nonsense_Mutation      | SNP | G  | A  | 15 | 84  | c.231G>A        | c.(229-231)TGG>TGA     | p.W77*         |
| Pat_76 | Post-Resistance | CRB1     | 23418  | 37 | 1  | 197396935 | 197396935 | Missense_Mutation      | SNP | G  | A  | 16 | 15  | c.2480G>A       | c.(2479-2481)GGA>GAA   | p.G827E        |
| Pat_76 | Post-Resistance | KIF14    | 9928   | 37 | 1  | 200586846 | 200586846 | Missense_Mutation      | SNP | G  | T  | 9  | 43  | c.1006C>A       | c.(1006-1008)CCC>ACC   | p.P336T        |
| Pat_76 | Post-Resistance | KIF14    | 9928   | 37 | 1  | 200586848 | 200586848 | Missense_Mutation      | SNP | A  | G  | 10 | 39  | c.1004T>C       | c.(1003-1005)CTT>CCT   | p.L335P        |
| Pat_76 | Post-Resistance | CACNA1S  | 779    | 37 | 1  | 201056982 | 201056983 | Missense_Mutation      | DNP | GG | AA | 20 | 28  | c.975_976CC>TT  | (973-978)ATCCTC>ATTTT  | p.L326F        |
| Pat_76 | Post-Resistance | TNNI1    | 7135   | 37 | 1  | 201383752 | 201383752 | Missense_Mutation      | SNP | T  | G  | 27 | 65  | c.83A>C         | c.(82-84)GAA>GCA       | p.E28A         |
| Pat_76 | Post-Resistance | TNNI1    | 7135   | 37 | 1  | 201386940 | 201386940 | Translation_Start_Site | SNP | C  | T  | 7  | 32  | c.-18G>A        | c.(-20--16)AGGTG>AGATG |                |
| Pat_76 | Post-Resistance | LGR6     | 59352  | 37 | 1  | 202283992 | 202283992 | Nonsense_Mutation      | SNP | C  | T  | 15 | 62  | c.1630C>T       | c.(1630-1632)CAG>TAG   | p.Q544*        |
| Pat_76 | Post-Resistance | PPP1R12B | 4660   | 37 | 1  | 202464748 | 202464748 | Nonsense_Mutation      | SNP | C  | T  | 9  | 37  | c.2386C>T       | c.(2386-2388)CGA>TGA   | p.R796*        |
| Pat_76 | Post-Resistance | CHI3L1   | 1116   | 37 | 1  | 203153717 | 203153717 | Missense_Mutation      | SNP | A  | T  | 50 | 34  | c.301T>A        | c.(301-303)TTT>ATT     | p.F101I        |
| Pat_76 | Post-Resistance | PFKFB2   | 5208   | 37 | 1  | 207252327 | 207252327 | Missense_Mutation      | SNP | G  | T  | 22 | 102 | c.1379G>T       | c.(1378-1380)AGA>ATA   | p.R460I        |
| Pat_76 | Post-Resistance | C4BPB    | 725    | 37 | 1  | 207265145 | 207265145 | Missense_Mutation      | SNP | C  | T  | 6  | 12  | c.389C>T        | c.(388-390)CCC>CTC     | p.P130L        |
| Pat_76 | Post-Resistance | HSD11B1  | 3290   | 37 | 1  | 209879168 | 209879168 | Missense_Mutation      | SNP | G  | A  | 10 | 58  | c.101G>A        | c.(100-102)GGA>GAA     | p.G34E         |
| Pat_76 | Post-Resistance | KCNH1    | 3756   | 37 | 1  | 210977434 | 210977435 | Missense_Mutation      | DNP | GG | AA | 20 | 19  | c.1536_1537CC>T | (1534-1539)TACCAT>TATT | p.H513Y        |
| Pat_76 | Post-Resistance | KCTD3    | 51133  | 37 | 1  | 215753284 | 215753284 | Missense_Mutation      | SNP | G  | A  | 9  | 88  | c.568G>A        | c.(568-570)GTA>ATA     | p.V190I        |
| Pat_76 | Post-Resistance | USH2A    | 7399   | 37 | 1  | 215848169 | 215848169 | Missense_Mutation      | SNP | G  | A  | 8  | 26  | c.13084C>T      | c.(13084-13086)CCA>TCA | p.P4362S       |
| Pat_76 | Post-Resistance | EPRS     | 2058   | 37 | 1  | 220152958 | 220152958 | Splice_Site            | SNP | C  | T  | 8  | 22  | c.3712_splice   | c.e27-1                | p.G1238_splice |
| Pat_76 | Post-Resistance | TAF1A    | 9015   | 37 | 1  | 222743989 | 222743989 | Missense_Mutation      | SNP | T  | C  | 10 | 90  | c.623A>G        | c.(622-624)TAC>TGC     | p.Y208C        |
| Pat_76 | Post-Resistance | MIA3     | 375056 | 37 | 1  | 222801532 | 222801532 | Missense_Mutation      | SNP | G  | A  | 19 | 16  | c.970G>A        | c.(970-972)GAC>AAC     | p.D324N        |
| Pat_76 | Post-Resistance | DISP1    | 84976  | 37 | 1  | 223177395 | 223177395 | Missense_Mutation      | SNP | T  | A  | 11 | 40  | c.2656T>A       | c.(2656-2658)TTT>ATT   | p.F886I        |
| Pat_76 | Post-Resistance | SUSD4    | 55061  | 37 | 1  | 223465897 | 223465897 | Missense_Mutation      | SNP | C  | T  | 30 | 93  | c.245G>A        | c.(244-246)CGA>CAA     | p.R82Q         |
| Pat_76 | Post-Resistance | CDC42BPA | 8476   | 37 | 1  | 227203785 | 227203785 | Missense_Mutation      | SNP | G  | A  | 42 | 33  | c.4748C>T       | c.(4747-4749)CCC>CTC   | p.P1583L       |
| Pat_76 | Post-Resistance | OBSCN    | 84033  | 37 | 1  | 228479646 | 228479646 | Missense_Mutation      | SNP | G  | A  | 20 | 18  | c.10387G>A      | c.(10387-10389)GAA>AAA | p.E3463K       |
| Pat_76 | Post-Resistance | SIPA1L2  | 57568  | 37 | 1  | 232601113 | 232601113 | Missense_Mutation      | SNP | G  | A  | 9  | 44  | c.2293C>T       | c.(2293-2295)CCC>TCC   | p.P765S        |
| Pat_76 | Post-Resistance | KIAA1804 | 84451  | 37 | 1  | 233482322 | 233482322 | Missense_Mutation      | SNP | G  | A  | 7  | 13  | c.940G>A        | c.(940-942)GAA>AAA     | p.E314K        |
| Pat_76 | Post-Resistance | HEATR1   | 55127  | 37 | 1  | 236759297 | 236759297 | Missense_Mutation      | SNP | T  | C  | 15 | 37  | c.792A>G        | c.(790-792)ATA>ATG     | p.I264M        |
| Pat_76 | Post-Resistance | FMN2     | 56776  | 37 | 1  | 240371077 | 240371077 | Missense_Mutation      | SNP | C  | T  | 77 | 148 | c.2965C>T       | c.(2965-2967)CCT>TCT   | p.P989S        |
| Pat_76 | Post-Resistance | ZNF669   | 79862  | 37 | 1  | 247264023 | 247264023 | Missense_Mutation      | SNP | G  | A  | 20 | 31  | c.1048C>T       | c.(1048-1050)CGT>TGT   | p.R350C        |
| Pat_76 | Post-Resistance | OR2W5    | 441932 | 37 | 1  | 247655213 | 247655213 | Missense_Mutation      | SNP | G  | A  | 19 | 45  | c.784G>A        | c.(784-786)GCC>ACC     | p.A262T        |
| Pat_76 | Post-Resistance | OR2W3    | 343171 | 37 | 1  | 248059042 | 248059042 | Missense_Mutation      | SNP | G  | A  | 99 | 234 | c.154G>A        | c.(154-156)GAC>AAC     | p.D52N         |
| Pat_76 | Post-Resistance | OR2L2    | 26246  | 37 | 1  | 248201597 | 248201597 | Missense_Mutation      | SNP | G  | A  | 15 | 44  | c.28G>A         | c.(28-30)GAT>AAT       | p.D10N         |
| Pat_76 | Post-Resistance | OR2M3    | 127062 | 37 | 1  | 248366888 | 248366888 | Missense_Mutation      | SNP | A  | C  | 50 | 81  | c.519A>C        | c.(517-519)GAA>GAC     | p.E173D        |
| Pat_76 | Post-Resistance | OR2T33   | 391195 | 37 | 1  | 248436332 | 248436332 | Missense_Mutation      | SNP | G  | A  | 17 | 40  | c.785C>T        | c.(784-786)TCC>TTC     | p.S262F        |
| Pat_76 | Post-Resistance | OR2T33   | 391195 | 37 | 1  | 248436951 | 248436951 | Missense_Mutation      | SNP | G  | A  | 18 | 51  | c.166C>T        | c.(166-168)CCC>TCC     | p.P56S         |
| Pat_76 | Post-Resistance | OR1411   | 401994 | 37 | 1  | 248845470 | 248845470 | Missense_Mutation      | SNP | C  | T  | 3  | 25  | c.136G>A        | c.(136-138)GTC>ATC     | p.V46I         |
| Pat_76 | Post-Resistance | GTPBP4   | 23560  | 37 | 10 | 1055472   | 1055472   | Nonsense_Mutation      | SNP | C  | T  | 13 | 37  | c.1195C>T       | c.(1195-1197)CGA>TGA   | p.R399*        |

|        |                 |          |        |    |    |          |          |                   |     |    |    |    |     |                                                 |                      |               |
|--------|-----------------|----------|--------|----|----|----------|----------|-------------------|-----|----|----|----|-----|-------------------------------------------------|----------------------|---------------|
| Pat_76 | Post-Resistance | AKR1C2   | 1646   | 37 | 10 | 5038059  | 5038059  | Splice_Site       | SNP | T  | C  | 4  | 9   | c.571_splice                                    | c.e6-1               | p.V191_splice |
| Pat_76 | Post-Resistance | C10orf18 | 54906  | 37 | 10 | 5789058  | 5789058  | Missense_Mutation | SNP | C  | T  | 20 | 40  | c.3674C>T                                       | c.(3673-3675)TCG>TTG | p.S1225L      |
| Pat_76 | Post-Resistance | IL2RA    | 3559   | 37 | 10 | 6067847  | 6067847  | Missense_Mutation | SNP | C  | T  | 6  | 34  | c.206G>A                                        | c.(205-207)GGA>GAA   | p.G69E        |
| Pat_76 | Post-Resistance | ITIH2    | 3698   | 37 | 10 | 7751024  | 7751024  | Nonsense_Mutation | SNP | C  | T  | 14 | 64  | c.232C>T                                        | c.(232-234)CAG>TAG   | p.Q78*        |
| Pat_76 | Post-Resistance | ATP5C1   | 509    | 37 | 10 | 7842001  | 7842001  | Missense_Mutation | SNP | C  | T  | 8  | 16  | c.584C>T                                        | c.(583-585)TCC>TTC   | p.S195F       |
| Pat_76 | Post-Resistance | CUBN     | 8029   | 37 | 10 | 16962022 | 16962022 | Missense_Mutation | SNP | G  | A  | 16 | 32  | c.6761C>T                                       | c.(6760-6762)CCA>CTA | p.P2254L      |
| Pat_76 | Post-Resistance | PLXDC2   | 84898  | 37 | 10 | 20432253 | 20432253 | Nonsense_Mutation | SNP | C  | T  | 27 | 56  | c.571C>T                                        | c.(571-573)CGA>TGA   | p.R191*       |
| Pat_76 | Post-Resistance | NEBL     | 10529  | 37 | 10 | 21250695 | 21250695 | Missense_Mutation | SNP | C  | G  | 14 | 23  | c.263G>C                                        | c.(262-264)AGA>ACA   | p.R88T        |
| Pat_76 | Post-Resistance | KIAA1217 | 56243  | 37 | 10 | 24834776 | 24834776 | Missense_Mutation | SNP | A  | T  | 17 | 29  | c.5355A>T                                       | c.(5353-5355)AAA>AAT | p.K1785N      |
| Pat_76 | Post-Resistance | ARHGAP21 | 57584  | 37 | 10 | 24896817 | 24896817 | Missense_Mutation | SNP | G  | A  | 7  | 22  | c.2438C>T                                       | c.(2437-2439)CCT>CTT | p.P813L       |
| Pat_76 | Post-Resistance | THNSL1   | 79896  | 37 | 10 | 25314107 | 25314107 | Missense_Mutation | SNP | G  | A  | 11 | 35  | c.1955G>A                                       | c.(1954-1956)AGG>AAG | p.R652K       |
| Pat_76 | Post-Resistance | GAD2     | 2572   | 37 | 10 | 26589747 | 26589747 | Missense_Mutation | SNP | G  | A  | 31 | 83  | c.1615G>A                                       | c.(1615-1617)GAG>AAG | p.E539K       |
| Pat_76 | Post-Resistance | PTCHD3   | 374308 | 37 | 10 | 27702980 | 27702981 | Missense_Mutation | DNP | GG | AA | 7  | 27  | c.199_200CC>TT                                  | c.(199-201)CCC>TTC   | p.P67F        |
| Pat_76 | Post-Resistance | ARMC4    | 55130  | 37 | 10 | 28149594 | 28149594 | Missense_Mutation | SNP | G  | A  | 6  | 24  | c.2981C>T                                       | c.(2980-2982)GCC>GTC | p.A994V       |
| Pat_76 | Post-Resistance | C10orf68 | 79741  | 37 | 10 | 33018265 | 33018266 | Missense_Mutation | DNP | CC | TT | 5  | 10  | c.706_707CC>TT                                  | c.(706-708)CCT>TTT   | p.P236F       |
| Pat_76 | Post-Resistance | ZNF33A   | 7581   | 37 | 10 | 38343746 | 38343746 | Missense_Mutation | SNP | G  | A  | 4  | 29  | c.691G>A                                        | c.(691-693)GCA>ACA   | p.A231T       |
| Pat_76 | Post-Resistance | ZNF33B   | 7582   | 37 | 10 | 43088374 | 43088374 | Missense_Mutation | SNP | C  | A  | 11 | 22  | c.2024G>T                                       | c.(2023-2025)TGT>TTT | p.C675F       |
| Pat_76 | Post-Resistance | RASGEF1A | 221002 | 37 | 10 | 43692445 | 43692445 | Missense_Mutation | SNP | C  | T  | 6  | 10  | c.1327G>A                                       | c.(1327-1329)GCG>ACG | p.A443T       |
| Pat_76 | Post-Resistance | RASGEF1A | 221002 | 37 | 10 | 43694453 | 43694453 | Missense_Mutation | SNP | C  | T  | 28 | 41  | c.960G>A                                        | c.(958-960)ATG>ATA   | p.M320I       |
| Pat_76 | Post-Resistance | SYT15    | 83849  | 37 | 10 | 46965788 | 46965789 | Missense_Mutation | DNP | GG | AA | 5  | 8   | c.748_749CC>TT                                  | c.(748-750)CCC>TTC   | p.P250F       |
| Pat_76 | Post-Resistance | FRMPD2   | 143162 | 37 | 10 | 49395274 | 49395274 | Missense_Mutation | SNP | C  | T  | 8  | 27  | c.2227G>A                                       | c.(2227-2229)GAC>AAC | p.D743N       |
| Pat_76 | Post-Resistance | DRGX     | 644168 | 37 | 10 | 50574211 | 50574211 | Missense_Mutation | SNP | C  | T  | 9  | 22  | c.757G>A                                        | c.(757-759)GAA>AAA   | p.E253K       |
| Pat_76 | Post-Resistance | SLC18A3  | 6572   | 37 | 10 | 50819762 | 50819762 | Missense_Mutation | SNP | G  | A  | 32 | 76  | c.976G>A                                        | c.(976-978)GAG>AAG   | p.E326K       |
| Pat_76 | Post-Resistance | C10orf53 | 282966 | 37 | 10 | 50902584 | 50902584 | Missense_Mutation | SNP | G  | A  | 12 | 21  | c.218G>A                                        | c.(217-219)GGA>GAA   | p.G73E        |
| Pat_76 | Post-Resistance | AGAP6    | 414189 | 37 | 10 | 51748552 | 51748552 | Missense_Mutation | SNP | C  | T  | 26 | 53  | c.77C>T                                         | c.(76-78)CCC>CTC     | p.P26L        |
| Pat_76 | Post-Resistance | ASAH2    | 56624  | 37 | 10 | 52005142 | 52005142 | Missense_Mutation | SNP | G  | A  | 7  | 5   | c.200C>T                                        | c.(199-201)TCC>TTC   | p.S67F        |
| Pat_76 | Post-Resistance | CSTF2T   | 23283  | 37 | 10 | 53458427 | 53458427 | Missense_Mutation | SNP | C  | T  | 16 | 45  | c.883G>A                                        | c.(883-885)GTT>ATT   | p.V295I       |
| Pat_76 | Post-Resistance | PCDH15   | 65217  | 37 | 10 | 55626547 | 55626547 | Missense_Mutation | SNP | C  | T  | 5  | 23  | c.3572G>A                                       | c.(3571-3573)GGA>GAA | p.G1191E      |
| Pat_76 | Post-Resistance | ANK3     | 288    | 37 | 10 | 61941095 | 61941095 | Missense_Mutation | SNP | G  | T  | 19 | 39  | c.2176C>A                                       | c.(2176-2178)CAG>AAG | p.Q726K       |
| Pat_76 | Post-Resistance | ARID5B   | 84159  | 37 | 10 | 63851357 | 63851357 | Missense_Mutation | SNP | C  | T  | 18 | 40  | c.2135C>T                                       | c.(2134-2136)TCC>TTC | p.S712F       |
| Pat_76 | Post-Resistance | LRRTM3   | 347731 | 37 | 10 | 68687186 | 68687186 | Missense_Mutation | SNP | C  | T  | 12 | 33  | c.512C>T                                        | c.(511-513)ACC>ATC   | p.T171I       |
| Pat_76 | Post-Resistance | CTNNA3   | 29119  | 37 | 10 | 68940116 | 68940116 | Missense_Mutation | SNP | G  | A  | 13 | 15  | c.1006C>T                                       | c.(1006-1008)CGC>TGC | p.R336C       |
| Pat_76 | Post-Resistance | UNC5B    | 219699 | 37 | 10 | 73051446 | 73051446 | Missense_Mutation | SNP | G  | C  | 12 | 51  | c.1552G>C                                       | c.(1552-1554)GAC>CAC | p.D518H       |
| Pat_76 | Post-Resistance | CCDC109A | 90550  | 37 | 10 | 74644024 | 74644024 | Missense_Mutation | SNP | G  | A  | 4  | 12  | c.862G>A                                        | c.(862-864)GAA>AAA   | p.E288K       |
| Pat_76 | Post-Resistance | USP54    | 159195 | 37 | 10 | 75276315 | 75276315 | Missense_Mutation | SNP | G  | A  | 18 | 42  | c.3869C>T                                       | c.(3868-3870)TCC>TTC | p.S1290F      |
| Pat_76 | Post-Resistance | DLG5     | 9231   | 37 | 10 | 79589166 | 79589166 | Missense_Mutation | SNP | G  | A  | 52 | 100 | c.2132C>T                                       | c.(2131-2133)TCC>TTC | p.S711F       |
| Pat_76 | Post-Resistance | SFTPD    | 6441   | 37 | 10 | 81697757 | 81697757 | Missense_Mutation | SNP | G  | A  | 50 | 107 | c.979C>T                                        | c.(979-981)CCC>TCC   | p.P327S       |
| Pat_76 | Post-Resistance | MAT1A    | 4143   | 37 | 10 | 82039945 | 82039945 | Missense_Mutation | SNP | G  | A  | 16 | 25  | c.533C>T                                        | c.(532-534)CCT>CTT   | p.P178L       |
| Pat_76 | Post-Resistance | C10orf58 | 84293  | 37 | 10 | 82182205 | 82182205 | Missense_Mutation | SNP | G  | A  | 3  | 32  | c.211G>A                                        | c.(211-213)GAA>AAA   | p.E71K        |
| Pat_76 | Post-Resistance | MMRN2    | 79812  | 37 | 10 | 88703241 | 88703241 | Missense_Mutation | SNP | C  | T  | 17 | 40  | c.1300G>A                                       | c.(1300-1302)GAG>AAG | p.E434K       |
| Pat_76 | Post-Resistance | BTAF1    | 9044   | 37 | 10 | 93711222 | 93711222 | Missense_Mutation | SNP | C  | T  | 3  | 14  | c.463C>T                                        | c.(463-465)CTT>TTT   | p.L155F       |
| Pat_76 | Post-Resistance | MYOF     | 26509  | 37 | 10 | 95119690 | 95119690 | Missense_Mutation | SNP | G  | A  | 17 | 52  | c.3020C>T                                       | c.(3019-3021)TCC>TTC | p.S1007F      |
| Pat_76 | Post-Resistance | CEP55    | 55165  | 37 | 10 | 95276697 | 95276697 | Missense_Mutation | SNP | C  | T  | 10 | 14  | c.685C>T                                        | c.(685-687)CTT>TTT   | p.L229F       |
| Pat_76 | Post-Resistance | LGI1     | 9211   | 37 | 10 | 95557173 | 95557173 | Missense_Mutation | SNP | G  | A  | 27 | 51  | c.1287G>A                                       | c.(1285-1287)ATG>ATA | p.M429I       |
| Pat_76 | Post-Resistance | PIPSL    | 266971 | 37 | 10 | 95720163 | 95720164 | Missense_Mutation | DNP | CC | TT | 15 | 21  | c.990_991GG>AA\988-993)ATGGGT>ATAAC.330_331MG>I |                      |               |
| Pat_76 | Post-Resistance | TCTN3    | 26123  | 37 | 10 | 97442505 | 97442505 | Missense_Mutation | SNP | C  | T  | 45 | 101 | c.1355G>A                                       | c.(1354-1356)GGA>GAA | p.G452E       |
| Pat_76 | Post-Resistance | TLL2     | 7093   | 37 | 10 | 98145849 | 98145849 | Missense_Mutation | SNP | G  | A  | 10 | 22  | c.1976C>T                                       | c.(1975-1977)TCC>TTC | p.S659F       |

|        |                 |          |        |    |    |           |           |                   |     |    |    |    |     |                |                      |                |
|--------|-----------------|----------|--------|----|----|-----------|-----------|-------------------|-----|----|----|----|-----|----------------|----------------------|----------------|
| Pat_76 | Post-Resistance | TLL2     | 7093   | 37 | 10 | 98145910  | 98145910  | Missense_Mutation | SNP | C  | T  | 19 | 51  | c.1915G>A      | c.(1915-1917)GAG>AAG | p.E639K        |
| Pat_76 | Post-Resistance | C10orf2  | 56652  | 37 | 10 | 102750284 | 102750284 | Nonsense_Mutation | SNP | C  | T  | 36 | 128 | c.1576C>T      | c.(1576-1578)CAG>TAG | p.Q526*        |
| Pat_76 | Post-Resistance | TRIM8    | 81603  | 37 | 10 | 104416885 | 104416885 | Missense_Mutation | SNP | C  | T  | 26 | 34  | c.1430C>T      | c.(1429-1431)TCC>TTC | p.S477F        |
| Pat_76 | Post-Resistance | HABP2    | 3026   | 37 | 10 | 115342983 | 115342983 | Missense_Mutation | SNP | C  | T  | 11 | 18  | c.1103C>T      | c.(1102-1104)ACC>ATC | p.T368I        |
| Pat_76 | Post-Resistance | ATRNL1   | 26033  | 37 | 10 | 116889240 | 116889240 | Missense_Mutation | SNP | C  | T  | 18 | 29  | c.772C>T       | c.(772-774)CAC>TAC   | p.H258Y        |
| Pat_76 | Post-Resistance | ATRNL1   | 26033  | 37 | 10 | 117154237 | 117154238 | Missense_Mutation | DNP | GG | AA | 6  | 16  | .3244_3245GG>A | c.(3244-3246)GGA>AAA | p.G1082K       |
| Pat_76 | Post-Resistance | PNLIPRP3 | 119548 | 37 | 10 | 118236307 | 118236307 | Missense_Mutation | SNP | A  | T  | 11 | 19  | c.1316A>T      | c.(1315-1317)AAT>ATT | p.N439I        |
| Pat_76 | Post-Resistance | TACC2    | 10579  | 37 | 10 | 123847218 | 123847218 | Missense_Mutation | SNP | G  | A  | 9  | 8   | c.5203G>A      | c.(5203-5205)GTT>ATT | p.V1735I       |
| Pat_76 | Post-Resistance | DMBT1    | 1755   | 37 | 10 | 124399555 | 124399555 | Splice_Site       | SNP | G  | A  | 12 | 18  | c.6556_splice  | c.e52-1              | p.A2186_splice |
| Pat_76 | Post-Resistance | CUZD1    | 50624  | 37 | 10 | 124593415 | 124593415 | Missense_Mutation | SNP | C  | T  | 10 | 21  | c.1424G>A      | c.(1423-1425)GGA>GAA | p.G475E        |
| Pat_76 | Post-Resistance | CHST15   | 51363  | 37 | 10 | 125798085 | 125798085 | Missense_Mutation | SNP | T  | A  | 21 | 36  | c.1136A>T      | c.(1135-1137)CAC>CTC | p.H379L        |
| Pat_76 | Post-Resistance | CHST15   | 51363  | 37 | 10 | 125805533 | 125805533 | Missense_Mutation | SNP | C  | T  | 12 | 20  | c.196G>A       | c.(196-198)GAA>AAA   | p.E66K         |
| Pat_76 | Post-Resistance | ZNF511   | 118472 | 37 | 10 | 135123381 | 135123381 | Missense_Mutation | SNP | C  | T  | 14 | 31  | c.329C>T       | c.(328-330)TCC>TTC   | p.S110F        |
| Pat_76 | Post-Resistance | TNNT3    | 7140   | 37 | 11 | 1959716   | 1959716   | Nonsense_Mutation | SNP | G  | A  | 8  | 11  | c.771G>A       | c.(769-771)TGG>TGA   | p.W257*        |
| Pat_76 | Post-Resistance | TRPM5    | 29850  | 37 | 11 | 2428471   | 2428471   | Missense_Mutation | SNP | T  | C  | 8  | 20  | c.2996A>G      | c.(2995-2997)AAC>AGC | p.N999S        |
| Pat_76 | Post-Resistance | ZNF195   | 7748   | 37 | 11 | 3380508   | 3380508   | Missense_Mutation | SNP | G  | A  | 11 | 31  | c.1730C>T      | c.(1729-1731)CCC>CTC | p.P577L        |
| Pat_76 | Post-Resistance | TRIM21   | 6737   | 37 | 11 | 4407081   | 4407081   | Missense_Mutation | SNP | G  | A  | 5  | 17  | c.862C>T       | c.(862-864)CAC>TAC   | p.H288Y        |
| Pat_76 | Post-Resistance | OR52K2   | 119774 | 37 | 11 | 4471488   | 4471489   | Missense_Mutation | DNP | GG | AA | 13 | 18  | c.919_920GG>AA | c.(919-921)GGA>AAA   | p.G307K        |
| Pat_76 | Post-Resistance | OR51E1   | 143503 | 37 | 11 | 4674277   | 4674277   | Missense_Mutation | SNP | C  | T  | 43 | 105 | c.521C>T       | c.(520-522)TCC>TTC   | p.S174F        |
| Pat_76 | Post-Resistance | OR51E1   | 143503 | 37 | 11 | 4674409   | 4674409   | Missense_Mutation | SNP | C  | T  | 6  | 18  | c.653C>T       | c.(652-654)TCC>TTC   | p.S218F        |
| Pat_76 | Post-Resistance | OR51E2   | 81285  | 37 | 11 | 4703277   | 4703277   | Missense_Mutation | SNP | C  | T  | 7  | 20  | c.665G>A       | c.(664-666)CGA>CAA   | p.R222Q        |
| Pat_76 | Post-Resistance | OR51E2   | 81285  | 37 | 11 | 4703632   | 4703632   | Missense_Mutation | SNP | G  | A  | 10 | 16  | c.310C>T       | c.(310-312)CAT>TAT   | p.H104Y        |
| Pat_76 | Post-Resistance | OR52R1   | 119695 | 37 | 11 | 4824685   | 4824685   | Missense_Mutation | SNP | C  | T  | 15 | 26  | c.1163G>A      | c.(1162-1164)GGA>GAA | p.G388E        |
| Pat_76 | Post-Resistance | OR51F2   | 119694 | 37 | 11 | 4843021   | 4843021   | Missense_Mutation | SNP | C  | T  | 20 | 52  | c.406C>T       | c.(406-408)CGT>TGT   | p.R136C        |
| Pat_76 | Post-Resistance | OR52J3   | 119679 | 37 | 11 | 5068233   | 5068233   | Missense_Mutation | SNP | C  | T  | 7  | 16  | c.478C>T       | c.(478-480)CCC>TCC   | p.P160S        |
| Pat_76 | Post-Resistance | HBG2     | 3048   | 37 | 11 | 5275625   | 5275625   | Missense_Mutation | SNP | G  | A  | 15 | 96  | c.212C>T       | c.(211-213)TCC>TTC   | p.S71F         |
| Pat_76 | Post-Resistance | OR51B5   | 282763 | 37 | 11 | 5363977   | 5363977   | Missense_Mutation | SNP | G  | A  | 6  | 22  | c.778C>T       | c.(778-780)CAT>TAT   | p.H260Y        |
| Pat_76 | Post-Resistance | OR52N1   | 79473  | 37 | 11 | 5809289   | 5809289   | Missense_Mutation | SNP | G  | A  | 15 | 49  | c.758C>T       | c.(757-759)ACC>ATC   | p.T253I        |
| Pat_76 | Post-Resistance | OR52B2   | 255725 | 37 | 11 | 6190872   | 6190872   | Missense_Mutation | SNP | G  | A  | 9  | 23  | c.685C>T       | c.(685-687)CGT>TGT   | p.R229C        |
| Pat_76 | Post-Resistance | OR2AG2   | 338755 | 37 | 11 | 6790164   | 6790164   | Missense_Mutation | SNP | C  | T  | 9  | 8   | c.25G>A        | c.(25-27)GGA>AGA     | p.G9R          |
| Pat_76 | Post-Resistance | NLRP14   | 338323 | 37 | 11 | 7079624   | 7079624   | Missense_Mutation | SNP | G  | A  | 28 | 60  | c.2576G>A      | c.(2575-2577)GGA>GAA | p.G859E        |
| Pat_76 | Post-Resistance | NLRP14   | 338323 | 37 | 11 | 7081264   | 7081264   | Missense_Mutation | SNP | C  | T  | 33 | 56  | c.2773C>T      | c.(2773-2775)CGG>TGG | p.R925W        |
| Pat_76 | Post-Resistance | EIF4G2   | 1982   | 37 | 11 | 10821847  | 10821847  | Missense_Mutation | SNP | G  | A  | 5  | 39  | c.1909C>T      | c.(1909-1911)CCT>TCT | p.P637S        |
| Pat_76 | Post-Resistance | PLEKHA7  | 144100 | 37 | 11 | 16872806  | 16872806  | Missense_Mutation | SNP | G  | A  | 8  | 32  | c.628C>T       | c.(628-630)CCC>TCC   | p.P210S        |
| Pat_76 | Post-Resistance | ABCC8    | 6833   | 37 | 11 | 17483319  | 17483319  | Missense_Mutation | SNP | T  | G  | 16 | 26  | c.633A>C       | c.(631-633)CAA>CAC   | p.Q211H        |
| Pat_76 | Post-Resistance | MRGPRX2  | 117194 | 37 | 11 | 19077339  | 19077339  | Missense_Mutation | SNP | G  | A  | 12 | 10  | c.611C>T       | c.(610-612)GCC>GTC   | p.A204V        |
| Pat_76 | Post-Resistance | NAV2     | 89797  | 37 | 11 | 20070338  | 20070338  | Missense_Mutation | SNP | G  | A  | 23 | 39  | c.4036G>A      | c.(4036-4038)GTG>ATG | p.V1346M       |
| Pat_76 | Post-Resistance | ANO3     | 63982  | 37 | 11 | 26620469  | 26620469  | Missense_Mutation | SNP | G  | A  | 6  | 14  | c.1595G>A      | c.(1594-1596)GGA>GAA | p.G532E        |
| Pat_76 | Post-Resistance | ELF5     | 2001   | 37 | 11 | 34502425  | 34502425  | Missense_Mutation | SNP | C  | T  | 13 | 27  | c.595G>A       | c.(595-597)GAA>AAA   | p.E199K        |
| Pat_76 | Post-Resistance | PRR5L    | 79899  | 37 | 11 | 36484009  | 36484010  | Missense_Mutation | DNP | GG | AA | 18 | 34  | c.830_831GG>AA | c.(829-831)GGG>GAA   | p.G277E        |
| Pat_76 | Post-Resistance | PRR5L    | 79899  | 37 | 11 | 36484116  | 36484116  | Missense_Mutation | SNP | G  | A  | 15 | 18  | c.937G>A       | c.(937-939)GGG>AGG   | p.G313R        |
| Pat_76 | Post-Resistance | RAG1     | 5896   | 37 | 11 | 36595839  | 36595839  | Missense_Mutation | SNP | C  | T  | 13 | 32  | c.985C>T       | c.(985-987)CCC>TCC   | p.P329S        |
| Pat_76 | Post-Resistance | TSPAN18  | 90139  | 37 | 11 | 44950719  | 44950719  | Missense_Mutation | SNP | G  | A  | 12 | 37  | c.737G>A       | c.(736-738)GGC>GAC   | p.G246D        |
| Pat_76 | Post-Resistance | PRDM11   | 56981  | 37 | 11 | 45246341  | 45246341  | Missense_Mutation | SNP | C  | T  | 26 | 48  | c.1418C>T      | c.(1417-1419)CCC>CTC | p.P473L        |
| Pat_76 | Post-Resistance | SYT13    | 57586  | 37 | 11 | 45277376  | 45277376  | Missense_Mutation | SNP | C  | T  | 18 | 28  | c.250G>A       | c.(250-252)GGA>AGA   | p.G84R         |
| Pat_76 | Post-Resistance | GYLTL1B  | 120071 | 37 | 11 | 45948403  | 45948403  | Missense_Mutation | SNP | G  | A  | 15 | 35  | c.1306G>A      | c.(1306-1308)GCC>ACC | p.A436T        |
| Pat_76 | Post-Resistance | MADD     | 8567   | 37 | 11 | 47304035  | 47304035  | Missense_Mutation | SNP | G  | A  | 11 | 22  | c.1573G>A      | c.(1573-1575)GCT>ACT | p.A525T        |



|        |                 |          |        |    |    |           |           |                   |     |    |    |    |     |                 |                        |               |
|--------|-----------------|----------|--------|----|----|-----------|-----------|-------------------|-----|----|----|----|-----|-----------------|------------------------|---------------|
| Pat_76 | Post-Resistance | AGBL2    | 79841  | 37 | 11 | 47681829  | 47681829  | Missense_Mutation | SNP | G  | C  | 5  | 29  | c.2605C>G       | c.(2605-2607)CCA>GCA   | p.P869A       |
| Pat_76 | Post-Resistance | AGBL2    | 79841  | 37 | 11 | 47707594  | 47707594  | Missense_Mutation | SNP | C  | T  | 10 | 12  | c.1639G>A       | c.(1639-1641)GAA>AAA   | p.E547K       |
| Pat_76 | Post-Resistance | PTPRJ    | 5795   | 37 | 11 | 48134319  | 48134319  | Missense_Mutation | SNP | C  | T  | 14 | 48  | c.136C>T        | c.(136-138)CCT>TCT     | p.P46S        |
| Pat_76 | Post-Resistance | OR4X1    | 390113 | 37 | 11 | 48285932  | 48285932  | Missense_Mutation | SNP | C  | T  | 7  | 25  | c.520C>T        | c.(520-522)CAC>TAC     | p.H174Y       |
| Pat_76 | Post-Resistance | OR4A5    | 81318  | 37 | 11 | 51412038  | 51412038  | Missense_Mutation | SNP | G  | A  | 13 | 31  | c.358C>T        | c.(358-360)CGC>TGC     | p.R120C       |
| Pat_76 | Post-Resistance | OR4C11   | 219429 | 37 | 11 | 55371006  | 55371006  | Missense_Mutation | SNP | G  | A  | 10 | 6   | c.844C>T        | c.(844-846)CCA>TCA     | p.P282S       |
| Pat_76 | Post-Resistance | OR5D14   | 219436 | 37 | 11 | 55563687  | 55563687  | Missense_Mutation | SNP | C  | T  | 27 | 57  | c.656C>T        | c.(655-657)TCC>TTC     | p.S219F       |
| Pat_76 | Post-Resistance | OR5AS1   | 219447 | 37 | 11 | 55798717  | 55798717  | Missense_Mutation | SNP | G  | A  | 3  | 11  | c.823G>A        | c.(823-825)GCA>ACA     | p.A275T       |
| Pat_76 | Post-Resistance | OR8H2    | 390151 | 37 | 11 | 55873063  | 55873063  | Missense_Mutation | SNP | C  | T  | 41 | 147 | c.545C>T        | c.(544-546)TCC>TTC     | p.S182F       |
| Pat_76 | Post-Resistance | OR8H2    | 390151 | 37 | 11 | 55873104  | 55873104  | Missense_Mutation | SNP | G  | A  | 31 | 97  | c.586G>A        | c.(586-588)GAA>AAA     | p.E196K       |
| Pat_76 | Post-Resistance | OR8H1    | 219469 | 37 | 11 | 56057772  | 56057772  | Missense_Mutation | SNP | A  | T  | 6  | 8   | c.767T>A        | c.(766-768)TTT>TAT     | p.F256Y       |
| Pat_76 | Post-Resistance | OR8K3    | 219473 | 37 | 11 | 56086579  | 56086579  | Missense_Mutation | SNP | C  | T  | 4  | 18  | c.797C>T        | c.(796-798)TCC>TTC     | p.S266F       |
| Pat_76 | Post-Resistance | OR5AR1   | 219493 | 37 | 11 | 56431525  | 56431525  | Missense_Mutation | SNP | C  | T  | 21 | 43  | c.364C>T        | c.(364-366)CGT>TGT     | p.R122C       |
| Pat_76 | Post-Resistance | OR1S1    | 219959 | 37 | 11 | 57983114  | 57983114  | Missense_Mutation | SNP | C  | T  | 5  | 28  | c.898C>T        | c.(898-900)CCC>TCC     | p.P300S       |
| Pat_76 | Post-Resistance | GLYATL2  | 219970 | 37 | 11 | 58604580  | 58604580  | Missense_Mutation | SNP | C  | T  | 5  | 33  | c.384G>A        | c.(382-384)ATG>ATA     | p.M128I       |
| Pat_76 | Post-Resistance | CHRM1    | 1128   | 37 | 11 | 62678196  | 62678196  | Missense_Mutation | SNP | G  | A  | 12 | 34  | c.377C>T        | c.(376-378)TCC>TTC     | p.S126F       |
| Pat_76 | Post-Resistance | SLC22A9  | 114571 | 37 | 11 | 63176246  | 63176246  | Nonsense_Mutation | SNP | G  | A  | 13 | 28  | c.1496G>A       | c.(1495-1497)TGG>TAG   | p.W499*       |
| Pat_76 | Post-Resistance | CDC42EP2 | 10435  | 37 | 11 | 65088994  | 65088994  | Missense_Mutation | SNP | C  | T  | 14 | 50  | c.625C>T        | c.(625-627)CCC>TCC     | p.P209S       |
| Pat_76 | Post-Resistance | SF3B2    | 10992  | 37 | 11 | 65829443  | 65829443  | Missense_Mutation | SNP | C  | T  | 10 | 24  | c.1951C>T       | c.(1951-1953)CCT>TCT   | p.P651S       |
| Pat_76 | Post-Resistance | SPTBN2   | 6712   | 37 | 11 | 66468435  | 66468436  | Missense_Mutation | DNP | GG | AA | 19 | 17  | .:3134_3135CC>T | c.(3133-3135)ACC>ATT   | p.T1045I      |
| Pat_76 | Post-Resistance | TBX10    | 347853 | 37 | 11 | 67402517  | 67402517  | Nonsense_Mutation | SNP | C  | T  | 14 | 38  | c.225G>A        | c.(223-225)TGG>TGA     | p.W75*        |
| Pat_76 | Post-Resistance | CPT1A    | 1374   | 37 | 11 | 68542821  | 68542822  | Missense_Mutation | DNP | GG | AA | 34 | 134 | .:1537_1538CC>T | c.(1537-1539)CCG>TTG   | p.P513L       |
| Pat_76 | Post-Resistance | KRTAP5-9 | 3846   | 37 | 11 | 71259749  | 71259750  | Missense_Mutation | DNP | GG | AA | 32 | 85  | c.46_47GG>AA    | c.(46-48)GGC>AAC       | p.G16N        |
| Pat_76 | Post-Resistance | UCP2     | 7351   | 37 | 11 | 73689327  | 73689327  | Missense_Mutation | SNP | G  | A  | 14 | 27  | c.97C>T         | c.(97-99)CCT>TCT       | p.P33S        |
| Pat_76 | Post-Resistance | PGM2L1   | 283209 | 37 | 11 | 74054392  | 74054392  | Missense_Mutation | SNP | G  | A  | 7  | 19  | c.1288C>T       | c.(1288-1290)CTT>TTT   | p.L430F       |
| Pat_76 | Post-Resistance | KLHL35   | 283212 | 37 | 11 | 75133763  | 75133763  | Missense_Mutation | SNP | C  | T  | 24 | 68  | c.953G>A        | c.(952-954)GGG>GAG     | p.G318E       |
| Pat_76 | Post-Resistance | OMP      | 4975   | 37 | 11 | 76814355  | 76814356  | Missense_Mutation | DNP | CC | TT | 19 | 46  | c.470_471CC>TT  | c.(469-471)TCC>TTT     | p.S157F       |
| Pat_76 | Post-Resistance | MYO7A    | 4647   | 37 | 11 | 76905531  | 76905531  | Missense_Mutation | SNP | G  | A  | 5  | 9   | c.4285G>A       | c.(4285-4287)GAG>AAG   | p.E1429K      |
| Pat_76 | Post-Resistance | DLG2     | 1740   | 37 | 11 | 83344290  | 83344290  | Missense_Mutation | SNP | G  | A  | 13 | 21  | c.1589C>T       | c.(1588-1590)TCC>TTC   | p.S530F       |
| Pat_76 | Post-Resistance | GRM5     | 2915   | 37 | 11 | 88386431  | 88386431  | Missense_Mutation | SNP | C  | T  | 6  | 13  | c.1052G>A       | c.(1051-1053)CGA>CAA   | p.R351Q       |
| Pat_76 | Post-Resistance | FAT3     | 120114 | 37 | 11 | 92085960  | 92085960  | Missense_Mutation | SNP | G  | A  | 14 | 30  | c.682G>A        | c.(682-684)GAT>AAT     | p.D228N       |
| Pat_76 | Post-Resistance | FAT3     | 120114 | 37 | 11 | 92086786  | 92086786  | Missense_Mutation | SNP | A  | T  | 8  | 11  | c.1508A>T       | c.(1507-1509)GAA>GTA   | p.E503V       |
| Pat_76 | Post-Resistance | FAT3     | 120114 | 37 | 11 | 92569781  | 92569781  | Missense_Mutation | SNP | C  | T  | 8  | 32  | c.10136C>T      | c.(10135-10137)TCC>TTC | p.S3379F      |
| Pat_76 | Post-Resistance | CNTN5    | 53942  | 37 | 11 | 99690347  | 99690347  | Missense_Mutation | SNP | C  | T  | 10 | 46  | c.128C>T        | c.(127-129)TCA>TTA     | p.S43L        |
| Pat_76 | Post-Resistance | KIAA1377 | 57562  | 37 | 11 | 101828898 | 101828898 | Splice_Site       | SNP | G  | A  | 53 | 132 | c.507_splice    | c.e5-1                 | p.R169_splice |
| Pat_76 | Post-Resistance | KIAA1377 | 57562  | 37 | 11 | 101833571 | 101833571 | Missense_Mutation | SNP | G  | A  | 8  | 10  | c.1805G>A       | c.(1804-1806)GGA>GAA   | p.G602E       |
| Pat_76 | Post-Resistance | MMP1     | 4312   | 37 | 11 | 102667484 | 102667484 | Missense_Mutation | SNP | C  | T  | 9  | 16  | c.536G>A        | c.(535-537)GGA>GAA     | p.G179E       |
| Pat_76 | Post-Resistance | MMP13    | 4322   | 37 | 11 | 102826045 | 102826045 | Missense_Mutation | SNP | C  | T  | 25 | 37  | c.298G>A        | c.(298-300)GAT>AAT     | p.D100N       |
| Pat_76 | Post-Resistance | DYNC2H1  | 79659  | 37 | 11 | 103027319 | 103027319 | Missense_Mutation | SNP | C  | T  | 4  | 7   | c.3947C>T       | c.(3946-3948)CCT>CTT   | p.P1316L      |
| Pat_76 | Post-Resistance | PDGFD    | 80310  | 37 | 11 | 103780454 | 103780454 | Missense_Mutation | SNP | C  | T  | 34 | 52  | c.1081G>A       | c.(1081-1083)GAT>AAT   | p.D361N       |
| Pat_76 | Post-Resistance | EXPH5    | 23086  | 37 | 11 | 108382062 | 108382062 | Missense_Mutation | SNP | C  | T  | 8  | 14  | c.4172G>A       | c.(4171-4173)AGT>AAT   | p.S1391N      |
| Pat_76 | Post-Resistance | HSPB2    | 3316   | 37 | 11 | 111784324 | 111784324 | Missense_Mutation | SNP | C  | T  | 11 | 60  | c.254C>T        | c.(253-255)CCA>CTA     | p.P85L        |
| Pat_76 | Post-Resistance | RNF214   | 257160 | 37 | 11 | 117109598 | 117109598 | Missense_Mutation | SNP | C  | T  | 7  | 12  | c.389C>T        | c.(388-390)CCA>CTA     | p.P130L       |
| Pat_76 | Post-Resistance | DSCAML1  | 57453  | 37 | 11 | 117301743 | 117301743 | Missense_Mutation | SNP | C  | T  | 22 | 49  | c.5561G>A       | c.(5560-5562)GGA>GAA   | p.G1854E      |
| Pat_76 | Post-Resistance | TMPRSS4  | 56649  | 37 | 11 | 117982593 | 117982593 | Missense_Mutation | SNP | C  | T  | 35 | 51  | c.721C>T        | c.(721-723)CTC>TTC     | p.L241F       |
| Pat_76 | Post-Resistance | MLL      | 4297   | 37 | 11 | 118352637 | 118352637 | Missense_Mutation | SNP | C  | T  | 19 | 38  | c.3842C>T       | c.(3841-3843)CCT>CTT   | p.P1281L      |
| Pat_76 | Post-Resistance | PHLDB1   | 23187  | 37 | 11 | 118498401 | 118498401 | Missense_Mutation | SNP | C  | T  | 31 | 52  | c.862C>T        | c.(862-864)CGT>TGT     | p.R288C       |

|        |                 |          |        |    |    |           |           |                   |     |    |    |     |    |                |                        |          |
|--------|-----------------|----------|--------|----|----|-----------|-----------|-------------------|-----|----|----|-----|----|----------------|------------------------|----------|
| Pat_76 | Post-Resistance | PHLDB1   | 23187  | 37 | 11 | 118498923 | 118498923 | Missense_Mutation | SNP | C  | T  | 30  | 74 | c.1384C>T      | c.(1384-1386)CCA>TCA   | p.P462S  |
| Pat_76 | Post-Resistance | TECTA    | 7007   | 37 | 11 | 120998886 | 120998886 | Missense_Mutation | SNP | G  | A  | 21  | 43 | c.2200G>A      | c.(2200-2202)GAG>AAG   | p.E734K  |
| Pat_76 | Post-Resistance | TECTA    | 7007   | 37 | 11 | 121000408 | 121000408 | Missense_Mutation | SNP | G  | A  | 21  | 45 | c.2429G>A      | c.(2428-2430)CGA>CAA   | p.R810Q  |
| Pat_76 | Post-Resistance | SORL1    | 6653   | 37 | 11 | 121492874 | 121492874 | Missense_Mutation | SNP | C  | T  | 4   | 16 | c.6068C>T      | c.(6067-6069)TCA>TTA   | p.S2023L |
| Pat_76 | Post-Resistance | HSPA8    | 3312   | 37 | 11 | 122928489 | 122928489 | Missense_Mutation | SNP | G  | A  | 13  | 34 | c.1894C>T      | c.(1894-1896)CCC>TCC   | p.P632S  |
| Pat_76 | Post-Resistance | GRAMD1B  | 57476  | 37 | 11 | 123477467 | 123477467 | Missense_Mutation | SNP | C  | T  | 7   | 22 | c.1045C>T      | c.(1045-1047)CCC>TCC   | p.P349S  |
| Pat_76 | Post-Resistance | OR6X1    | 390260 | 37 | 11 | 123624328 | 123624328 | Missense_Mutation | SNP | C  | T  | 16  | 52 | c.899G>A       | c.(898-900)AGA>AAA     | p.R300K  |
| Pat_76 | Post-Resistance | OR4D5    | 219875 | 37 | 11 | 123810370 | 123810370 | Missense_Mutation | SNP | G  | A  | 17  | 26 | c.47G>A        | c.(46-48)GGG>GAG       | p.G16E   |
| Pat_76 | Post-Resistance | OR4D5    | 219875 | 37 | 11 | 123810409 | 123810409 | Missense_Mutation | SNP | C  | T  | 6   | 15 | c.86C>T        | c.(85-87)ACT>ATT       | p.T29I   |
| Pat_76 | Post-Resistance | VWA5A    | 4013   | 37 | 11 | 123988246 | 123988246 | Missense_Mutation | SNP | C  | T  | 14  | 33 | c.28C>T        | c.(28-30)CTC>TTC       | p.L10F   |
| Pat_76 | Post-Resistance | VWA5A    | 4013   | 37 | 11 | 124016007 | 124016007 | Missense_Mutation | SNP | G  | A  | 8   | 17 | c.2218G>A      | c.(2218-2220)GAC>AAC   | p.D740N  |
| Pat_76 | Post-Resistance | OR8D1    | 283159 | 37 | 11 | 124180653 | 124180653 | Missense_Mutation | SNP | C  | T  | 15  | 22 | c.10G>A        | c.(10-12)GAA>AAA       | p.E4K    |
| Pat_76 | Post-Resistance | SPA17    | 53340  | 37 | 11 | 124564231 | 124564232 | Missense_Mutation | DNP | GG | AA | 6   | 28 | c.345_346GG>AA | c.343-348)GAGGTT>GAAA  | p.V116I  |
| Pat_76 | Post-Resistance | SLC37A2  | 219855 | 37 | 11 | 124954748 | 124954748 | Missense_Mutation | SNP | G  | A  | 8   | 22 | c.1153G>A      | c.(1153-1155)GAC>AAC   | p.D385N  |
| Pat_76 | Post-Resistance | NTM      | 50863  | 37 | 11 | 132204942 | 132204942 | Missense_Mutation | SNP | C  | T  | 21  | 53 | c.937C>T       | c.(937-939)CCA>TCA     | p.P313S  |
| Pat_76 | Post-Resistance | SPATA19  | 219938 | 37 | 11 | 133715271 | 133715271 | Missense_Mutation | SNP | G  | A  | 26  | 25 | c.71C>T        | c.(70-72)ACC>ATC       | p.T24I   |
| Pat_76 | Post-Resistance | SLC6A12  | 6539   | 37 | 12 | 306618    | 306618    | Missense_Mutation | SNP | C  | T  | 10  | 21 | c.1000G>A      | c.(1000-1002)GGG>AGG   | p.G334R  |
| Pat_76 | Post-Resistance | LRTM2    | 654429 | 37 | 12 | 1943433   | 1943434   | Missense_Mutation | DNP | GG | AA | 4   | 17 | c.659_660GG>AA | c.(658-660)GGG>GAA     | p.G220E  |
| Pat_76 | Post-Resistance | CACNA1C  | 775    | 37 | 12 | 2614028   | 2614028   | Missense_Mutation | SNP | G  | C  | 4   | 10 | c.1134G>C      | c.(1132-1134)AGG>AGC   | p.R378S  |
| Pat_76 | Post-Resistance | C12orf32 | 83695  | 37 | 12 | 2994574   | 2994575   | Missense_Mutation | DNP | CC | TT | 6   | 28 | c.42_43CC>TT   | (40-45)GCCCG>GCTTC     | p.P15S   |
| Pat_76 | Post-Resistance | DYRK4    | 8798   | 37 | 12 | 4702179   | 4702179   | Missense_Mutation | SNP | C  | T  | 7   | 27 | c.130C>T       | c.(130-132)CTT>TTT     | p.L44F   |
| Pat_76 | Post-Resistance | KCNA6    | 3742   | 37 | 12 | 4919724   | 4919724   | Missense_Mutation | SNP | G  | A  | 3   | 18 | c.517G>A       | c.(517-519)GCC>ACC     | p.A173T  |
| Pat_76 | Post-Resistance | NTF3     | 4908   | 37 | 12 | 5603912   | 5603912   | Missense_Mutation | SNP | G  | A  | 17  | 47 | c.532G>A       | c.(532-534)GAG>AAG     | p.E178K  |
| Pat_76 | Post-Resistance | ANO2     | 57101  | 37 | 12 | 5708727   | 5708727   | Missense_Mutation | SNP | G  | A  | 22  | 38 | c.2156C>T      | c.(2155-2157)TCG>TTG   | p.S719L  |
| Pat_76 | Post-Resistance | GPR162   | 27239  | 37 | 12 | 6933764   | 6933764   | Missense_Mutation | SNP | G  | A  | 7   | 32 | c.700G>A       | c.(700-702)GGT>AGT     | p.G234S  |
| Pat_76 | Post-Resistance | C1R      | 715    | 37 | 12 | 7188488   | 7188488   | Missense_Mutation | SNP | C  | T  | 4   | 5  | c.1466G>A      | c.(1465-1467)GGG>GAG   | p.G489E  |
| Pat_76 | Post-Resistance | FAM90A1  | 55138  | 37 | 12 | 8376706   | 8376706   | Missense_Mutation | SNP | C  | T  | 15  | 25 | c.229G>A       | c.(229-231)GAA>AAA     | p.E77K   |
| Pat_76 | Post-Resistance | PZP      | 5858   | 37 | 12 | 9311134   | 9311134   | Missense_Mutation | SNP | C  | T  | 15  | 22 | c.3176G>A      | c.(3175-3177)CGA>CAA   | p.R1059Q |
| Pat_76 | Post-Resistance | TAS2R7   | 50837  | 37 | 12 | 10954661  | 10954661  | Nonsense_Mutation | SNP | C  | T  | 3   | 13 | c.509G>A       | c.(508-510)TGG>TAG     | p.W170*  |
| Pat_76 | Post-Resistance | PRB3     | 5544   | 37 | 12 | 11420151  | 11420151  | Missense_Mutation | SNP | G  | A  | 17  | 49 | c.905C>T       | c.(904-906)CCT>CTT     | p.P302L  |
| Pat_76 | Post-Resistance | PRB1     | 5542   | 37 | 12 | 11506789  | 11506789  | Missense_Mutation | SNP | T  | G  | 29  | 81 | c.248A>C       | c.(247-249)CAA>CCA     | p.Q83P   |
| Pat_76 | Post-Resistance | GPRC5A   | 9052   | 37 | 12 | 13061589  | 13061589  | Missense_Mutation | SNP | G  | A  | 17  | 84 | c.406G>A       | c.(406-408)GGT>AGT     | p.G136S  |
| Pat_76 | Post-Resistance | GRIN2B   | 2904   | 37 | 12 | 13715992  | 13715992  | Missense_Mutation | SNP | C  | T  | 9   | 18 | c.4180G>A      | c.(4180-4182)GAC>AAC   | p.D1394N |
| Pat_76 | Post-Resistance | GRIN2B   | 2904   | 37 | 12 | 13764762  | 13764762  | Nonsense_Mutation | SNP | C  | T  | 21  | 70 | c.1677G>A      | c.(1675-1677)TGG>TGA   | p.W559*  |
| Pat_76 | Post-Resistance | SLCO1A2  | 6579   | 37 | 12 | 21457408  | 21457408  | Missense_Mutation | SNP | G  | A  | 8   | 15 | c.542C>T       | c.(541-543)TCC>TTC     | p.S181F  |
| Pat_76 | Post-Resistance | CAPRIN2  | 65981  | 37 | 12 | 30877346  | 30877346  | Missense_Mutation | SNP | G  | A  | 14  | 18 | c.1945C>T      | c.(1945-1947)CCA>TCA   | p.P649S  |
| Pat_76 | Post-Resistance | DBX2     | 440097 | 37 | 12 | 45410133  | 45410134  | Missense_Mutation | DNP | CC | TT | 30  | 22 | c.955_956GG>AA | c.(955-957)GGT>AAT     | p.G319N  |
| Pat_76 | Post-Resistance | SLC38A1  | 81539  | 37 | 12 | 46601362  | 46601362  | Missense_Mutation | SNP | G  | A  | 33  | 13 | c.431C>T       | c.(430-432)ACC>ATC     | p.T144I  |
| Pat_76 | Post-Resistance | FAM113B  | 91523  | 37 | 12 | 47628868  | 47628868  | Missense_Mutation | SNP | G  | A  | 9   | 40 | c.22G>A        | c.(22-24)GAA>AAA       | p.E8K    |
| Pat_76 | Post-Resistance | FAM113B  | 91523  | 37 | 12 | 47629243  | 47629243  | Missense_Mutation | SNP | C  | T  | 59  | 42 | c.397C>T       | c.(397-399)CCG>TCG     | p.P133S  |
| Pat_76 | Post-Resistance | RPAP3    | 79657  | 37 | 12 | 48062776  | 48062776  | Missense_Mutation | SNP | G  | C  | 25  | 80 | c.1636C>G      | c.(1636-1638)CCT>GCT   | p.P546A  |
| Pat_76 | Post-Resistance | RAPGEF3  | 10411  | 37 | 12 | 48132959  | 48132959  | Missense_Mutation | SNP | G  | A  | 29  | 15 | c.2302C>T      | c.(2302-2304)CCT>TCT   | p.P768S  |
| Pat_76 | Post-Resistance | COL2A1   | 1280   | 37 | 12 | 48367222  | 48367222  | Missense_Mutation | SNP | C  | T  | 66  | 68 | c.4432G>A      | c.(4432-4434)GGT>AGT   | p.G1478S |
| Pat_76 | Post-Resistance | ZNF641   | 121274 | 37 | 12 | 48736968  | 48736968  | Missense_Mutation | SNP | G  | A  | 15  | 62 | c.1105C>T      | c.(1105-1107)CCA>TCA   | p.P369S  |
| Pat_76 | Post-Resistance | ADCY6    | 112    | 37 | 12 | 49170953  | 49170953  | Missense_Mutation | SNP | G  | A  | 131 | 91 | c.1310C>T      | c.(1309-1311)CCG>CTG   | p.P437L  |
| Pat_76 | Post-Resistance | MLL2     | 8085   | 37 | 12 | 49420129  | 49420129  | Missense_Mutation | SNP | G  | A  | 25  | 14 | c.15620C>T     | c.(15619-15621)CCC>CTC | p.P5207L |
| Pat_76 | Post-Resistance | MLL2     | 8085   | 37 | 12 | 49438054  | 49438054  | Missense_Mutation | SNP | G  | A  | 8   | 24 | c.5117C>T      | c.(5116-5118)TCC>TTC   | p.S1706F |

|        |                 |           |        |    |    |           |           |                   |     |    |    |     |     |                 |                      |          |
|--------|-----------------|-----------|--------|----|----|-----------|-----------|-------------------|-----|----|----|-----|-----|-----------------|----------------------|----------|
| Pat_76 | Post-Resistance | SPATS2    | 65244  | 37 | 12 | 49890769  | 49890769  | Missense_Mutation | SNP | C  | T  | 30  | 27  | c.680C>T        | c.(679-681)CCC>CTC   | p.P227L  |
| Pat_76 | Post-Resistance | NCKAP5L   | 57701  | 37 | 12 | 50190132  | 50190132  | Missense_Mutation | SNP | C  | T  | 6   | 7   | c.1511G>A       | c.(1510-1512)AGG>AAG | p.R504K  |
| Pat_76 | Post-Resistance | CSRNP2    | 81566  | 37 | 12 | 51467709  | 51467709  | Missense_Mutation | SNP | C  | G  | 46  | 38  | c.308G>C        | c.(307-309)CGG>CCG   | p.R103P  |
| Pat_76 | Post-Resistance | SLC4A8    | 9498   | 37 | 12 | 51856194  | 51856194  | Nonsense_Mutation | SNP | G  | A  | 39  | 40  | c.1202G>A       | c.(1201-1203)TGG>TAG | p.W401*  |
| Pat_76 | Post-Resistance | SLC4A8    | 9498   | 37 | 12 | 51882536  | 51882536  | Nonsense_Mutation | SNP | G  | A  | 14  | 106 | c.2340G>A       | c.(2338-2340)TGG>TGA | p.W780*  |
| Pat_76 | Post-Resistance | KRT6B     | 3854   | 37 | 12 | 52844360  | 52844360  | Nonsense_Mutation | SNP | C  | T  | 48  | 41  | c.585G>A        | c.(583-585)TGG>TGA   | p.W195*  |
| Pat_76 | Post-Resistance | KRT6B     | 3854   | 37 | 12 | 52845837  | 52845837  | Missense_Mutation | SNP | C  | G  | 12  | 12  | c.26G>C         | c.(25-27)AGG>ACG     | p.R9T    |
| Pat_76 | Post-Resistance | KRT76     | 51350  | 37 | 12 | 53170654  | 53170654  | Missense_Mutation | SNP | C  | T  | 6   | 3   | c.422G>A        | c.(421-423)GGT>GAT   | p.G141D  |
| Pat_76 | Post-Resistance | KRT78     | 196374 | 37 | 12 | 53239983  | 53239983  | Missense_Mutation | SNP | C  | T  | 15  | 15  | c.754G>A        | c.(754-756)GAA>AAA   | p.E252K  |
| Pat_76 | Post-Resistance | SOAT2     | 8435   | 37 | 12 | 53512193  | 53512193  | Missense_Mutation | SNP | C  | T  | 36  | 43  | c.838C>T        | c.(838-840)CTC>TTC   | p.L280F  |
| Pat_76 | Post-Resistance | NCKAP1L   | 3071   | 37 | 12 | 54930826  | 54930826  | Missense_Mutation | SNP | G  | A  | 11  | 55  | c.3172G>A       | c.(3172-3174)GAA>AAA | p.E1058K |
| Pat_76 | Post-Resistance | OR6C70    | 390327 | 37 | 12 | 55863739  | 55863739  | Missense_Mutation | SNP | G  | A  | 27  | 16  | c.184C>T        | c.(184-186)CGT>TGT   | p.R62C   |
| Pat_76 | Post-Resistance | ARHGAP9   | 64333  | 37 | 12 | 57871402  | 57871402  | Missense_Mutation | SNP | C  | T  | 28  | 19  | c.809G>A        | c.(808-810)CGC>CAC   | p.R270H  |
| Pat_76 | Post-Resistance | IRAK3     | 11213  | 37 | 12 | 66620573  | 66620573  | Missense_Mutation | SNP | C  | T  | 37  | 22  | c.724C>T        | c.(724-726)CCA>TCA   | p.P242S  |
| Pat_76 | Post-Resistance | DYRK2     | 8445   | 37 | 12 | 68050955  | 68050955  | Missense_Mutation | SNP | G  | C  | 70  | 51  | c.268G>C        | c.(268-270)GTT>CTT   | p.V90L   |
| Pat_76 | Post-Resistance | LYZ       | 4069   | 37 | 12 | 69742273  | 69742273  | Missense_Mutation | SNP | A  | G  | 3   | 52  | c.85A>G         | c.(85-87)ACT>GCT     | p.T29A   |
| Pat_76 | Post-Resistance | KCNMB4    | 27345  | 37 | 12 | 70794016  | 70794016  | Missense_Mutation | SNP | G  | A  | 16  | 73  | c.364G>A        | c.(364-366)GAA>AAA   | p.E122K  |
| Pat_76 | Post-Resistance | CAPS2     | 84698  | 37 | 12 | 75685579  | 75685579  | Missense_Mutation | SNP | C  | A  | 16  | 23  | c.1242G>T       | c.(1240-1242)GAG>GAT | p.E414D  |
| Pat_76 | Post-Resistance | EPYC      | 1833   | 37 | 12 | 91358003  | 91358003  | Missense_Mutation | SNP | G  | A  | 39  | 18  | c.899C>T        | c.(898-900)CCT>CTT   | p.P300L  |
| Pat_76 | Post-Resistance | CLLU1OS   | 574016 | 37 | 12 | 92814859  | 92814859  | Missense_Mutation | SNP | T  | C  | 118 | 84  | c.233A>G        | c.(232-234)AAT>AGT   | p.N78S   |
| Pat_76 | Post-Resistance | UHRF1BP1L | 23074  | 37 | 12 | 100444092 | 100444092 | Missense_Mutation | SNP | G  | A  | 20  | 16  | c.3572C>T       | c.(3571-3573)TCC>TTC | p.S1191F |
| Pat_76 | Post-Resistance | KIAA1033  | 23325  | 37 | 12 | 105546125 | 105546125 | Missense_Mutation | SNP | C  | T  | 4   | 12  | c.2654C>T       | c.(2653-2655)CCT>CTT | p.P885L  |
| Pat_76 | Post-Resistance | PRDM4     | 11108  | 37 | 12 | 108134795 | 108134795 | Missense_Mutation | SNP | G  | A  | 58  | 36  | c.1852C>T       | c.(1852-1854)CAC>TAC | p.H618Y  |
| Pat_76 | Post-Resistance | WSCD2     | 9671   | 37 | 12 | 108604011 | 108604011 | Missense_Mutation | SNP | G  | A  | 5   | 22  | c.611G>A        | c.(610-612)GGC>GAC   | p.G204D  |
| Pat_76 | Post-Resistance | TMEM119   | 338773 | 37 | 12 | 108985355 | 108985355 | Missense_Mutation | SNP | G  | A  | 55  | 31  | c.805C>T        | c.(805-807)CCC>TCC   | p.P269S  |
| Pat_76 | Post-Resistance | MYO1H     | 283446 | 37 | 12 | 109865367 | 109865367 | Missense_Mutation | SNP | G  | A  | 48  | 276 | c.1877G>A       | c.(1876-1878)AGG>AAG | p.R626K  |
| Pat_76 | Post-Resistance | CCDC63    | 160762 | 37 | 12 | 111336846 | 111336846 | Missense_Mutation | SNP | A  | G  | 11  | 38  | c.1259A>G       | c.(1258-1260)AAG>AGG | p.K420R  |
| Pat_76 | Post-Resistance | CUX2      | 23316  | 37 | 12 | 111749945 | 111749945 | Missense_Mutation | SNP | G  | A  | 30  | 14  | c.1942G>A       | c.(1942-1944)GAC>AAC | p.D648N  |
| Pat_76 | Post-Resistance | C12orf51  | 283450 | 37 | 12 | 112690345 | 112690346 | Missense_Mutation | DNP | GG | AA | 5   | 28  | .:2168_2169CC>T | c.(2167-2169)TCC>TTT | p.S723F  |
| Pat_76 | Post-Resistance | TPCN1     | 53373  | 37 | 12 | 113664698 | 113664699 | Missense_Mutation | DNP | CC | TT | 37  | 28  | c.41_42CC>TT    | c.(40-42)ACC>ATT     | p.T14I   |
| Pat_76 | Post-Resistance | NOS1      | 4842   | 37 | 12 | 117680432 | 117680432 | Missense_Mutation | SNP | C  | T  | 17  | 23  | c.3041G>A       | c.(3040-3042)AGT>AAT | p.S1014N |
| Pat_76 | Post-Resistance | NOS1      | 4842   | 37 | 12 | 117768373 | 117768373 | Missense_Mutation | SNP | C  | T  | 18  | 50  | c.502G>A        | c.(502-504)GAG>AAG   | p.E168K  |
| Pat_76 | Post-Resistance | CIT       | 11113  | 37 | 12 | 120156650 | 120156650 | Missense_Mutation | SNP | C  | T  | 6   | 21  | c.3731G>A       | c.(3730-3732)CGG>CAG | p.R1244Q |
| Pat_76 | Post-Resistance | OGFOD2    | 79676  | 37 | 12 | 123463861 | 123463861 | Missense_Mutation | SNP | C  | T  | 11  | 63  | c.1021C>T       | c.(1021-1023)CCC>TCC | p.P341S  |
| Pat_76 | Post-Resistance | PITPNM2   | 57605  | 37 | 12 | 123498444 | 123498444 | Missense_Mutation | SNP | G  | A  | 10  | 71  | c.224C>T        | c.(223-225)TCC>TTC   | p.S75F   |
| Pat_76 | Post-Resistance | TCTN2     | 79867  | 37 | 12 | 124172608 | 124172608 | Nonsense_Mutation | SNP | C  | T  | 53  | 34  | c.775C>T        | c.(775-777)CAG>TAG   | p.Q259*  |
| Pat_76 | Post-Resistance | DNAH10    | 196385 | 37 | 12 | 124354974 | 124354974 | Nonsense_Mutation | SNP | G  | A  | 24  | 23  | c.7227G>A       | c.(7225-7227)TGG>TGA | p.W2409* |
| Pat_76 | Post-Resistance | TMEM132D  | 121256 | 37 | 12 | 130015712 | 130015712 | Missense_Mutation | SNP | C  | T  | 22  | 46  | c.1007G>A       | c.(1006-1008)CGA>CAA | p.R336Q  |
| Pat_76 | Post-Resistance | GPR133    | 283383 | 37 | 12 | 131593273 | 131593273 | Missense_Mutation | SNP | C  | T  | 53  | 348 | c.1892C>T       | c.(1891-1893)CCC>CTC | p.P631L  |
| Pat_76 | Post-Resistance | ZNF268    | 10795  | 37 | 12 | 133768563 | 133768563 | Missense_Mutation | SNP | C  | T  | 7   | 114 | c.431C>T        | c.(430-432)GCC>GTC   | p.A144V  |
| Pat_76 | Post-Resistance | PARP4     | 143    | 37 | 13 | 25066708  | 25066708  | Missense_Mutation | SNP | G  | A  | 20  | 62  | c.904C>T        | c.(904-906)CTT>TTT   | p.L302F  |
| Pat_76 | Post-Resistance | FAM123A   | 219287 | 37 | 13 | 25744499  | 25744499  | Missense_Mutation | SNP | C  | T  | 9   | 14  | c.1259G>A       | c.(1258-1260)GGA>GAA | p.G420E  |
| Pat_76 | Post-Resistance | MTUS2     | 23281  | 37 | 13 | 29600115  | 29600115  | Missense_Mutation | SNP | C  | T  | 4   | 17  | c.1310C>T       | c.(1309-1311)TCC>TTC | p.S437F  |
| Pat_76 | Post-Resistance | RXFP2     | 122042 | 37 | 13 | 32371390  | 32371390  | Missense_Mutation | SNP | C  | A  | 14  | 29  | c.1839C>A       | c.(1837-1839)TTC>TTA | p.F613L  |
| Pat_76 | Post-Resistance | FRY       | 10129  | 37 | 13 | 32869444  | 32869444  | Nonsense_Mutation | SNP | T  | A  | 15  | 35  | c.8889T>A       | c.(8887-8889)TAT>TAA | p.Y2963* |
| Pat_76 | Post-Resistance | FREM2     | 341640 | 37 | 13 | 39265494  | 39265494  | Missense_Mutation | SNP | C  | T  | 9   | 16  | c.4013C>T       | c.(4012-4014)TCT>TTT | p.S1338F |
| Pat_76 | Post-Resistance | KIAA0564  | 23078  | 37 | 13 | 42442530  | 42442531  | Missense_Mutation | DNP | GG | CA | 9   | 26  | .:1163_1164CC>T | c.(1162-1164)TCC>TTG | p.S388L  |

|        |                 |          |        |    |    |           |           |                   |     |    |    |    |     |                                     |                      |          |
|--------|-----------------|----------|--------|----|----|-----------|-----------|-------------------|-----|----|----|----|-----|-------------------------------------|----------------------|----------|
| Pat_76 | Post-Resistance | CYSLTR2  | 57105  | 37 | 13 | 49281332  | 49281332  | Missense_Mutation | SNP | T  | C  | 52 | 75  | c.379T>C                            | c.(379-381)TAT>CAT   | p.Y127H  |
| Pat_76 | Post-Resistance | ATP7B    | 540    | 37 | 13 | 52524208  | 52524209  | Missense_Mutation | DNP | GG | AA | 13 | 23  | ..2664_2665CC>T:662-2667)ACCCAC>ACT |                      | p.H889Y  |
| Pat_76 | Post-Resistance | OLFM4    | 10562  | 37 | 13 | 53624121  | 53624121  | Missense_Mutation | SNP | G  | A  | 8  | 21  | c.748G>A                            | c.(748-750)GGT>AGT   | p.G250S  |
| Pat_76 | Post-Resistance | DACH1    | 1602   | 37 | 13 | 72133952  | 72133952  | Missense_Mutation | SNP | G  | A  | 9  | 17  | c.1435C>T                           | c.(1435-1437)CCG>TCG | p.P479S  |
| Pat_76 | Post-Resistance | DIS3     | 22894  | 37 | 13 | 73340162  | 73340162  | Missense_Mutation | SNP | G  | A  | 9  | 3   | c.1918C>T                           | c.(1918-1920)CAC>TAC | p.H640Y  |
| Pat_76 | Post-Resistance | SLITRK1  | 114798 | 37 | 13 | 84454754  | 84454754  | Missense_Mutation | SNP | C  | T  | 8  | 5   | c.889G>A                            | c.(889-891)GAT>AAT   | p.D297N  |
| Pat_76 | Post-Resistance | SLITRK6  | 84189  | 37 | 13 | 86368213  | 86368213  | Missense_Mutation | SNP | C  | T  | 5  | 23  | c.2431G>A                           | c.(2431-2433)GTA>ATA | p.V811I  |
| Pat_76 | Post-Resistance | SLITRK5  | 26050  | 37 | 13 | 88329952  | 88329952  | Missense_Mutation | SNP | G  | A  | 34 | 76  | c.2309G>A                           | c.(2308-2310)GGC>GAC | p.G770D  |
| Pat_76 | Post-Resistance | GPC5     | 2262   | 37 | 13 | 92345753  | 92345753  | Missense_Mutation | SNP | G  | A  | 9  | 19  | c.638G>A                            | c.(637-639)GGA>GAA   | p.G213E  |
| Pat_76 | Post-Resistance | ABCC4    | 10257  | 37 | 13 | 95830266  | 95830266  | Missense_Mutation | SNP | C  | T  | 29 | 71  | c.1625G>A                           | c.(1624-1626)CGG>CAG | p.R542Q  |
| Pat_76 | Post-Resistance | DZIP1    | 22873  | 37 | 13 | 96277078  | 96277078  | Missense_Mutation | SNP | C  | T  | 3  | 7   | c.916G>A                            | c.(916-918)GAG>AAG   | p.E306K  |
| Pat_76 | Post-Resistance | PCCA     | 5095   | 37 | 13 | 100953723 | 100953723 | Missense_Mutation | SNP | C  | T  | 16 | 50  | c.1075C>T                           | c.(1075-1077)CCT>TCT | p.P359S  |
| Pat_76 | Post-Resistance | COL4A1   | 1282   | 37 | 13 | 110826832 | 110826832 | Missense_Mutation | SNP | G  | A  | 6  | 14  | c.3367C>T                           | c.(3367-3369)CCA>TCA | p.P1123S |
| Pat_76 | Post-Resistance | PROZ     | 8858   | 37 | 13 | 113825991 | 113825991 | Missense_Mutation | SNP | G  | A  | 13 | 58  | c.775G>A                            | c.(775-777)GAG>AAG   | p.E259K  |
| Pat_76 | Post-Resistance | TMCO3    | 55002  | 37 | 13 | 114203801 | 114203801 | Missense_Mutation | SNP | G  | A  | 25 | 35  | c.1982G>A                           | c.(1981-1983)AGA>AAA | p.R661K  |
| Pat_76 | Post-Resistance | OR4K5    | 79317  | 37 | 14 | 20389108  | 20389108  | Missense_Mutation | SNP | C  | G  | 15 | 80  | c.343C>G                            | c.(343-345)CTT>GTT   | p.L115V  |
| Pat_76 | Post-Resistance | OR4K1    | 79544  | 37 | 14 | 20404475  | 20404475  | Missense_Mutation | SNP | C  | T  | 6  | 11  | c.650C>T                            | c.(649-651)TCC>TTC   | p.S217F  |
| Pat_76 | Post-Resistance | OR11H4   | 390442 | 37 | 14 | 20711345  | 20711345  | Missense_Mutation | SNP | G  | A  | 9  | 25  | c.395G>A                            | c.(394-396)CGA>CAA   | p.R132Q  |
| Pat_76 | Post-Resistance | HNRNPC   | 3183   | 37 | 14 | 21679680  | 21679680  | Missense_Mutation | SNP | G  | A  | 10 | 16  | c.722C>T                            | c.(721-723)TCC>TTC   | p.S241F  |
| Pat_76 | Post-Resistance | METTL3   | 56339  | 37 | 14 | 21972004  | 21972004  | Missense_Mutation | SNP | C  | T  | 7  | 32  | c.121G>A                            | c.(121-123)GCA>ACA   | p.A41T   |
| Pat_76 | Post-Resistance | OR10G3   | 26533  | 37 | 14 | 22038638  | 22038638  | Missense_Mutation | SNP | G  | A  | 7  | 23  | c.238C>T                            | c.(238-240)CCT>TCT   | p.P80S   |
| Pat_76 | Post-Resistance | MMP14    | 4323   | 37 | 14 | 23313059  | 23313059  | Missense_Mutation | SNP | G  | A  | 19 | 43  | c.991G>A                            | c.(991-993)GGG>AGG   | p.G331R  |
| Pat_76 | Post-Resistance | JPH4     | 84502  | 37 | 14 | 24040266  | 24040267  | Missense_Mutation | DNP | GG | AA | 6  | 19  | ..1673_1674CC>T                     | c.(1672-1674)GCC>GTT | p.A558V  |
| Pat_76 | Post-Resistance | FITM1    | 161247 | 37 | 14 | 24601613  | 24601613  | Missense_Mutation | SNP | G  | A  | 12 | 28  | c.460G>A                            | c.(460-462)GAG>AAG   | p.E154K  |
| Pat_76 | Post-Resistance | GMPR2    | 51292  | 37 | 14 | 24707971  | 24707971  | Missense_Mutation | SNP | G  | A  | 7  | 40  | c.1034G>A                           | c.(1033-1035)AGT>AAT | p.S345N  |
| Pat_76 | Post-Resistance | C14orf21 | 161424 | 37 | 14 | 24769776  | 24769776  | Missense_Mutation | SNP | C  | T  | 26 | 185 | c.410C>T                            | c.(409-411)GCC>GTC   | p.A137V  |
| Pat_76 | Post-Resistance | GZMB     | 3002   | 37 | 14 | 25100338  | 25100338  | Missense_Mutation | SNP | C  | T  | 10 | 37  | c.683G>A                            | c.(682-684)CGA>CAA   | p.R228Q  |
| Pat_76 | Post-Resistance | ARHGAP5  | 394    | 37 | 14 | 32586491  | 32586491  | Missense_Mutation | SNP | C  | T  | 5  | 19  | c.3863C>T                           | c.(3862-3864)ACA>ATA | p.T1288I |
| Pat_76 | Post-Resistance | AKAP6    | 9472   | 37 | 14 | 33291332  | 33291332  | Missense_Mutation | SNP | G  | A  | 4  | 14  | c.4313G>A                           | c.(4312-4314)GGA>GAA | p.G1438E |
| Pat_76 | Post-Resistance | RALGAPA1 | 253959 | 37 | 14 | 36041828  | 36041828  | Missense_Mutation | SNP | G  | A  | 5  | 17  | c.5788C>T                           | c.(5788-5790)CTT>TTT | p.L1930F |
| Pat_76 | Post-Resistance | LRFN5    | 145581 | 37 | 14 | 42368131  | 42368131  | Missense_Mutation | SNP | A  | C  | 17 | 38  | c.2110A>C                           | c.(2110-2112)ACT>CCT | p.T704P  |
| Pat_76 | Post-Resistance | FAM179B  | 23116  | 37 | 14 | 45481251  | 45481251  | Missense_Mutation | SNP | C  | T  | 4  | 8   | c.3211C>T                           | c.(3211-3213)CAT>TAT | p.H1071Y |
| Pat_76 | Post-Resistance | RPL10L   | 140801 | 37 | 14 | 47120861  | 47120861  | Missense_Mutation | SNP | G  | A  | 16 | 55  | c.79C>T                             | c.(79-81)CCT>TCT     | p.P27S   |
| Pat_76 | Post-Resistance | RTN1     | 6252   | 37 | 14 | 60212705  | 60212705  | Missense_Mutation | SNP | C  | T  | 11 | 46  | c.736G>A                            | c.(736-738)GAG>AAG   | p.E246K  |
| Pat_76 | Post-Resistance | KCNH5    | 27133  | 37 | 14 | 63175092  | 63175092  | Missense_Mutation | SNP | G  | A  | 20 | 40  | c.2101C>T                           | c.(2101-2103)CCC>TCC | p.P701S  |
| Pat_76 | Post-Resistance | KCNH5    | 27133  | 37 | 14 | 63468171  | 63468171  | Missense_Mutation | SNP | G  | A  | 5  | 14  | c.311C>T                            | c.(310-312)CCT>CTT   | p.P104L  |
| Pat_76 | Post-Resistance | SYNE2    | 23224  | 37 | 14 | 64469684  | 64469684  | Missense_Mutation | SNP | C  | T  | 8  | 22  | c.4033C>T                           | c.(4033-4035)CTT>TTT | p.L1345F |
| Pat_76 | Post-Resistance | ZBTB25   | 7597   | 37 | 14 | 64954009  | 64954009  | Missense_Mutation | SNP | G  | A  | 17 | 29  | c.940C>T                            | c.(940-942)CGG>TGG   | p.R314W  |
| Pat_76 | Post-Resistance | SPTB     | 6710   | 37 | 14 | 65253757  | 65253757  | Missense_Mutation | SNP | C  | T  | 5  | 20  | c.2926G>A                           | c.(2926-2928)GTA>ATA | p.V976I  |
| Pat_76 | Post-Resistance | SLC8A3   | 6547   | 37 | 14 | 70633384  | 70633384  | Missense_Mutation | SNP | C  | T  | 12 | 27  | c.1756G>A                           | c.(1756-1758)GAG>AAG | p.E586K  |
| Pat_76 | Post-Resistance | SYNU2BP  | 55333  | 37 | 14 | 70855188  | 70855188  | Missense_Mutation | SNP | G  | A  | 8  | 13  | c.200C>T                            | c.(199-201)TCG>TTG   | p.S67L   |
| Pat_76 | Post-Resistance | PSEN1    | 5663   | 37 | 14 | 73685912  | 73685912  | Missense_Mutation | SNP | C  | T  | 24 | 57  | c.1319C>T                           | c.(1318-1320)ACC>ATC | p.T440I  |
| Pat_76 | Post-Resistance | LTBP2    | 4053   | 37 | 14 | 74970727  | 74970727  | Missense_Mutation | SNP | C  | T  | 14 | 21  | c.4484G>A                           | c.(4483-4485)GGT>GAT | p.G1495D |
| Pat_76 | Post-Resistance | YLFM1    | 56252  | 37 | 14 | 75264383  | 75264383  | Missense_Mutation | SNP | C  | T  | 7  | 6   | c.2383C>T                           | c.(2383-2385)CCC>TCC | p.P795S  |
| Pat_76 | Post-Resistance | ISM2     | 145501 | 37 | 14 | 77948827  | 77948827  | Missense_Mutation | SNP | C  | T  | 5  | 9   | c.811G>A                            | c.(811-813)GAA>AAA   | p.E271K  |
| Pat_76 | Post-Resistance | FLRT2    | 23768  | 37 | 14 | 86089260  | 86089260  | Missense_Mutation | SNP | G  | A  | 21 | 43  | c.1402G>A                           | c.(1402-1404)GAG>AAG | p.E468K  |
| Pat_76 | Post-Resistance | CCDC88C  | 440193 | 37 | 14 | 91773417  | 91773417  | Nonsense_Mutation | SNP | G  | A  | 6  | 6   | c.3160C>T                           | c.(3160-3162)CGA>TGA | p.R1054* |

|        |                 |           |        |    |    |           |           |                   |     |    |    |    |     |                 |                       |               |
|--------|-----------------|-----------|--------|----|----|-----------|-----------|-------------------|-----|----|----|----|-----|-----------------|-----------------------|---------------|
| Pat_76 | Post-Resistance | FBLN5     | 10516  | 37 | 14 | 92343937  | 92343937  | Missense_Mutation | SNP | G  | A  | 24 | 68  | c.1079C>T       | c.(1078-1080)TCC>TTC  | p.S360F       |
| Pat_76 | Post-Resistance | UBR7      | 55148  | 37 | 14 | 93684899  | 93684899  | Missense_Mutation | SNP | G  | A  | 5  | 36  | c.628G>A        | c.(628-630)GGA>AGA    | p.G210R       |
| Pat_76 | Post-Resistance | BTBD7     | 55727  | 37 | 14 | 93709119  | 93709119  | Missense_Mutation | SNP | G  | A  | 12 | 28  | c.2899C>T       | c.(2899-2901)CCT>TCT  | p.P967S       |
| Pat_76 | Post-Resistance | KIAA1409  | 57578  | 37 | 14 | 94158197  | 94158197  | Nonsense_Mutation | SNP | C  | T  | 19 | 46  | c.7027C>T       | c.(7027-7029)CAG>TAG  | p.Q2343*      |
| Pat_76 | Post-Resistance | SERPINA1  | 5265   | 37 | 14 | 94844814  | 94844814  | Missense_Mutation | SNP | C  | T  | 7  | 21  | c.1229G>A       | c.(1228-1230)GGA>GAA  | p.G410E       |
| Pat_76 | Post-Resistance | SERPINA9  | 327657 | 37 | 14 | 94933701  | 94933701  | Missense_Mutation | SNP | A  | C  | 8  | 16  | c.701T>G        | c.(700-702)TTT>TGT    | p.F234C       |
| Pat_76 | Post-Resistance | SERPINA3  | 12     | 37 | 14 | 95088794  | 95088794  | Missense_Mutation | SNP | G  | A  | 6  | 12  | c.1034G>A       | c.(1033-1035)GGG>GAG  | p.G345E       |
| Pat_76 | Post-Resistance | SERPINA13 | 388007 | 37 | 14 | 95108179  | 95108179  | Nonsense_Mutation | SNP | G  | A  | 28 | 48  | c.696G>A        | c.(694-696)TGG>TGA    | p.W232*       |
| Pat_76 | Post-Resistance | DICER1    | 23405  | 37 | 14 | 95562323  | 95562323  | Missense_Mutation | SNP | G  | A  | 30 | 57  | c.4934C>T       | c.(4933-4935)CCA>CTA  | p.P1645L      |
| Pat_76 | Post-Resistance | BDKRB2    | 624    | 37 | 14 | 96707210  | 96707210  | Nonsense_Mutation | SNP | G  | A  | 14 | 41  | c.545G>A        | c.(544-546)TGG>TAG    | p.W182*       |
| Pat_76 | Post-Resistance | PAPOLA    | 10914  | 37 | 14 | 97002295  | 97002295  | Missense_Mutation | SNP | C  | T  | 25 | 41  | c.989C>T        | c.(988-990)TCC>TTC    | p.S330F       |
| Pat_76 | Post-Resistance | CDC42BPB  | 9578   | 37 | 14 | 103440469 | 103440469 | Nonsense_Mutation | SNP | G  | A  | 7  | 12  | c.1525C>T       | c.(1525-1527)CGA>TGA  | p.R509*       |
| Pat_76 | Post-Resistance | ADAM6     | 8755   | 37 | 14 | 106350754 | 106350754 | Splice_Site       | SNP | G  | A  | 14 | 33  | c.49979_splice  | c.e3164-1             |               |
| Pat_76 | Post-Resistance | NIPA1     | 123606 | 37 | 15 | 23052675  | 23052675  | Missense_Mutation | SNP | G  | A  | 15 | 91  | c.398C>T        | c.(397-399)TCC>TTC    | p.S133F       |
| Pat_76 | Post-Resistance | C15orf2   | 23742  | 37 | 15 | 24922816  | 24922816  | Missense_Mutation | SNP | C  | A  | 8  | 35  | c.1802C>A       | c.(1801-1803)CCA>CAA  | p.P601Q       |
| Pat_76 | Post-Resistance | NDNL2     | 56160  | 37 | 15 | 29561539  | 29561539  | Missense_Mutation | SNP | G  | A  | 22 | 64  | c.371C>T        | c.(370-372)CCC>CTC    | p.P124L       |
| Pat_76 | Post-Resistance | TJP1      | 7082   | 37 | 15 | 30011099  | 30011099  | Missense_Mutation | SNP | G  | A  | 44 | 40  | c.3247C>T       | c.(3247-3249)CGC>TGC  | p.R1083C      |
| Pat_76 | Post-Resistance | CHRFAM7A  | 89832  | 37 | 15 | 30659708  | 30659708  | Missense_Mutation | SNP | C  | T  | 34 | 136 | c.633G>A        | c.(631-633)ATG>ATA    | p.M211I       |
| Pat_76 | Post-Resistance | AQR       | 9716   | 37 | 15 | 35166887  | 35166887  | Missense_Mutation | SNP | G  | C  | 13 | 34  | c.3416C>G       | c.(3415-3417)GCC>GGC  | p.A1139G      |
| Pat_76 | Post-Resistance | THBS1     | 7057   | 37 | 15 | 39886338  | 39886338  | Nonsense_Mutation | SNP | G  | A  | 8  | 11  | c.3306G>A       | c.(3304-3306)TGG>TGA  | p.W1102*      |
| Pat_76 | Post-Resistance | BAHD1     | 22893  | 37 | 15 | 40754233  | 40754233  | Missense_Mutation | SNP | C  | T  | 19 | 44  | c.1555C>T       | c.(1555-1557)CCC>TCC  | p.P519S       |
| Pat_76 | Post-Resistance | RPUSD2    | 27079  | 37 | 15 | 40866242  | 40866242  | Missense_Mutation | SNP | G  | A  | 25 | 32  | c.1420G>A       | c.(1420-1422)GAG>AAG  | p.E474K       |
| Pat_76 | Post-Resistance | MAPKBP1   | 23005  | 37 | 15 | 42105883  | 42105883  | Missense_Mutation | SNP | C  | T  | 63 | 210 | c.902C>T        | c.(901-903)ACC>ATC    | p.T301I       |
| Pat_76 | Post-Resistance | SPTBN5    | 51332  | 37 | 15 | 42185575  | 42185575  | Missense_Mutation | SNP | C  | T  | 22 | 32  | c.16G>A         | c.(16-18)GAG>AAG      | p.E6K         |
| Pat_76 | Post-Resistance | PLA2G4D   | 283748 | 37 | 15 | 42363971  | 42363971  | Splice_Site       | SNP | C  | T  | 25 | 39  | c.1573_splice   | c.e15+1               | p.A525_splice |
| Pat_76 | Post-Resistance | ZFP106    | 64397  | 37 | 15 | 42743482  | 42743482  | Missense_Mutation | SNP | G  | A  | 6  | 20  | c.919C>T        | c.(919-921)CCT>TCT    | p.P307S       |
| Pat_76 | Post-Resistance | ZFP106    | 64397  | 37 | 15 | 42743832  | 42743832  | Missense_Mutation | SNP | C  | T  | 40 | 38  | c.569G>A        | c.(568-570)GGA>GAA    | p.G190E       |
| Pat_76 | Post-Resistance | TTBK2     | 146057 | 37 | 15 | 43086989  | 43086989  | Missense_Mutation | SNP | G  | A  | 10 | 10  | c.833C>T        | c.(832-834)TCC>TTC    | p.S278F       |
| Pat_76 | Post-Resistance | TP53BP1   | 7158   | 37 | 15 | 43748861  | 43748861  | Nonsense_Mutation | SNP | G  | A  | 19 | 55  | c.1930C>T       | c.(1930-1932)CAG>TAG  | p.Q644*       |
| Pat_76 | Post-Resistance | C15orf43  | 145645 | 37 | 15 | 45250689  | 45250689  | Missense_Mutation | SNP | C  | T  | 6  | 3   | c.265C>T        | c.(265-267)CCT>TCT    | p.P89S        |
| Pat_76 | Post-Resistance | DUOX1     | 53905  | 37 | 15 | 45433506  | 45433506  | Missense_Mutation | SNP | G  | A  | 32 | 49  | c.1582G>A       | c.(1582-1584)GAG>AAG  | p.E528K       |
| Pat_76 | Post-Resistance | SLC28A2   | 9153   | 37 | 15 | 45545694  | 45545694  | Missense_Mutation | SNP | G  | A  | 6  | 22  | c.146G>A        | c.(145-147)GGA>GAA    | p.G49E        |
| Pat_76 | Post-Resistance | HDC       | 3067   | 37 | 15 | 50535413  | 50535413  | Missense_Mutation | SNP | G  | A  | 3  | 26  | c.1169C>T       | c.(1168-1170)TCT>TTT  | p.S390F       |
| Pat_76 | Post-Resistance | WDR72     | 256764 | 37 | 15 | 53908113  | 53908113  | Missense_Mutation | SNP | C  | T  | 5  | 12  | c.2290G>A       | c.(2290-2292)GAT>AAT  | p.D764N       |
| Pat_76 | Post-Resistance | UNC13C    | 440279 | 37 | 15 | 54919174  | 54919174  | Missense_Mutation | SNP | C  | T  | 6  | 25  | c.6508C>T       | c.(6508-6510)CCT>TCT  | p.P2170S      |
| Pat_76 | Post-Resistance | MYO1E     | 4643   | 37 | 15 | 59519723  | 59519724  | Missense_Mutation | DNP | GG | AA | 12 | 21  | c.576_577CC>TT  | (574-579)TTCCTT>TTTTT | p.L193F       |
| Pat_76 | Post-Resistance | HERC1     | 8925   | 37 | 15 | 63984706  | 63984706  | Missense_Mutation | SNP | G  | A  | 3  | 11  | c.5734C>T       | c.(5734-5736)CGC>TGC  | p.R1912C      |
| Pat_76 | Post-Resistance | CLPX      | 10845  | 37 | 15 | 65448131  | 65448132  | Missense_Mutation | DNP | GG | AA | 13 | 50  | c.1209_1210CC>T | 207-1212)CTCCGT>CTTT  | p.R404C       |
| Pat_76 | Post-Resistance | CILP      | 8483   | 37 | 15 | 65490642  | 65490642  | Missense_Mutation | SNP | G  | A  | 12 | 41  | c.1982C>T       | c.(1981-1983)TCT>TTT  | p.S661F       |
| Pat_76 | Post-Resistance | DENND4A   | 10260  | 37 | 15 | 65983030  | 65983030  | Missense_Mutation | SNP | G  | A  | 7  | 31  | c.3770C>T       | c.(3769-3771)CCT>CTT  | p.P1257L      |
| Pat_76 | Post-Resistance | MEGF11    | 84465  | 37 | 15 | 66250017  | 66250018  | Nonsense_Mutation | DNP | CC | TT | 22 | 29  | c.1154_1155GG>A | c.(1153-1155)TGG>TAA  | p.W385*       |
| Pat_76 | Post-Resistance | MAP2K5    | 5607   | 37 | 15 | 67995693  | 67995693  | Missense_Mutation | SNP | G  | A  | 5  | 29  | c.991G>A        | c.(991-993)GAG>AAG    | p.E331K       |
| Pat_76 | Post-Resistance | LRRRC49   | 54839  | 37 | 15 | 71197052  | 71197052  | Missense_Mutation | SNP | C  | T  | 18 | 71  | c.458C>T        | c.(457-459)TCG>TTG    | p.S153L       |
| Pat_76 | Post-Resistance | CIB2      | 10518  | 37 | 15 | 78401697  | 78401697  | Missense_Mutation | SNP | C  | T  | 7  | 37  | c.226G>A        | c.(226-228)GCG>ACG    | p.A76T        |
| Pat_76 | Post-Resistance | ACSBG1    | 23205  | 37 | 15 | 78474348  | 78474348  | Missense_Mutation | SNP | C  | T  | 45 | 30  | c.1034G>A       | c.(1033-1035)GGG>GAG  | p.G345E       |
| Pat_76 | Post-Resistance | KIAA1199  | 57214  | 37 | 15 | 81199043  | 81199043  | Missense_Mutation | SNP | G  | A  | 42 | 50  | c.1451G>A       | c.(1450-1452)GGC>GAC  | p.G484D       |
| Pat_76 | Post-Resistance | C15orf40  | 123207 | 37 | 15 | 83677352  | 83677352  | Missense_Mutation | SNP | C  | T  | 22 | 31  | c.314G>A        | c.(313-315)CGG>CAG    | p.R105Q       |



|        |                 |          |        |    |    |           |           |                   |     |    |    |     |     |                 |                                  |                |
|--------|-----------------|----------|--------|----|----|-----------|-----------|-------------------|-----|----|----|-----|-----|-----------------|----------------------------------|----------------|
| Pat_76 | Post-Resistance | SLC28A1  | 9154   | 37 | 15 | 85447408  | 85447408  | Missense_Mutation | SNP | C  | T  | 48  | 60  | c.542C>T        | c.(541-543)TCC>TTC               | p.S181F        |
| Pat_76 | Post-Resistance | AKAP13   | 11214  | 37 | 15 | 86122597  | 86122597  | Missense_Mutation | SNP | C  | T  | 7   | 20  | c.1298C>T       | c.(1297-1299)CCC>CTC             | p.P433L        |
| Pat_76 | Post-Resistance | KLHL25   | 64410  | 37 | 15 | 86311780  | 86311780  | Missense_Mutation | SNP | G  | A  | 19  | 18  | c.1262C>T       | c.(1261-1263)GCC>GTC             | p.A421V        |
| Pat_76 | Post-Resistance | DET1     | 55070  | 37 | 15 | 89073951  | 89073951  | Missense_Mutation | SNP | A  | T  | 5   | 12  | c.986T>A        | c.(985-987)CTG>CAG               | p.L329Q        |
| Pat_76 | Post-Resistance | ACAN     | 176    | 37 | 15 | 89400288  | 89400288  | Missense_Mutation | SNP | C  | T  | 6   | 47  | c.4472C>T       | c.(4471-4473)CCT>CTT             | p.P1491L       |
| Pat_76 | Post-Resistance | ZNF710   | 374655 | 37 | 15 | 90610437  | 90610437  | Missense_Mutation | SNP | C  | T  | 5   | 16  | c.68C>T         | c.(67-69)GCC>GTC                 | p.A23V         |
| Pat_76 | Post-Resistance | C15orf58 | 390637 | 37 | 15 | 90784313  | 90784313  | Missense_Mutation | SNP | C  | T  | 122 | 100 | c.173C>T        | c.(172-174)CCC>CTC               | p.P58L         |
| Pat_76 | Post-Resistance | IQGAP1   | 8826   | 37 | 15 | 91009306  | 91009306  | Missense_Mutation | SNP | C  | T  | 9   | 66  | c.1850C>T       | c.(1849-1851)ACC>ATC             | p.T617I        |
| Pat_76 | Post-Resistance | ST8SIA2  | 8128   | 37 | 15 | 92988160  | 92988160  | Splice_Site       | SNP | G  | A  | 35  | 108 | c.842_splice    | c.e5+1                           | p.G281_splice  |
| Pat_76 | Post-Resistance | FAM174B  | 400451 | 37 | 15 | 93173525  | 93173525  | Missense_Mutation | SNP | G  | A  | 7   | 18  | c.395C>T        | c.(394-396)CCA>CTA               | p.P132L        |
| Pat_76 | Post-Resistance | SPATA8   | 145946 | 37 | 15 | 97328244  | 97328244  | Missense_Mutation | SNP | G  | A  | 46  | 54  | c.215G>A        | c.(214-216)GGA>GAA               | p.G72E         |
| Pat_76 | Post-Resistance | ADAMTS17 | 170691 | 37 | 15 | 100594150 | 100594150 | Nonsense_Mutation | SNP | C  | T  | 165 | 377 | c.2247G>A       | c.(2245-2247)TGG>TGA             | p.W749*        |
| Pat_76 | Post-Resistance | LINS1    | 55180  | 37 | 15 | 101120947 | 101120947 | Missense_Mutation | SNP | G  | A  | 9   | 11  | c.101C>T        | c.(100-102)CCA>CTA               | p.P34L         |
| Pat_76 | Post-Resistance | TMEM8A   | 58986  | 37 | 16 | 427448    | 427448    | Missense_Mutation | SNP | G  | A  | 14  | 21  | c.437C>T        | c.(436-438)TCC>TTC               | p.S146F        |
| Pat_76 | Post-Resistance | BAIAP3   | 8938   | 37 | 16 | 1391412   | 1391412   | Missense_Mutation | SNP | C  | T  | 42  | 79  | c.758C>T        | c.(757-759)CCC>CTC               | p.P253L        |
| Pat_76 | Post-Resistance | GNPTG    | 84572  | 37 | 16 | 1412108   | 1412109   | Missense_Mutation | DNP | CC | TT | 3   | 7   | c.387_388CC>TT  | 385-390)TGCCGT>TGTT(             | p.R130C        |
| Pat_76 | Post-Resistance | EME2     | 197342 | 37 | 16 | 1825965   | 1825965   | Missense_Mutation | SNP | C  | T  | 6   | 7   | c.1142C>T       | c.(1141-1143)CCC>CTC             | p.P381L        |
| Pat_76 | Post-Resistance | HS3ST6   | 64711  | 37 | 16 | 1961872   | 1961873   | Missense_Mutation | DNP | CC | TT | 29  | 57  | c.654_655GG>AA  | 352-657)GGGGAG>GGAA              | p.E219K        |
| Pat_76 | Post-Resistance | PRSS22   | 64063  | 37 | 16 | 2903913   | 2903913   | Missense_Mutation | SNP | C  | T  | 16  | 48  | c.670G>A        | c.(670-672)GAC>AAC               | p.D224N        |
| Pat_76 | Post-Resistance | CLDN6    | 9074   | 37 | 16 | 3065689   | 3065689   | Missense_Mutation | SNP | C  | T  | 13  | 24  | c.334G>A        | c.(334-336)GAT>AAT               | p.D112N        |
| Pat_76 | Post-Resistance | ZSCAN10  | 84891  | 37 | 16 | 3139460   | 3139460   | Missense_Mutation | SNP | C  | T  | 8   | 18  | c.1810G>A       | c.(1810-1812)GAG>AAG             | p.E604K        |
| Pat_76 | Post-Resistance | MEFV     | 4210   | 37 | 16 | 3293401   | 3293401   | Missense_Mutation | SNP | C  | T  | 13  | 26  | c.2086G>A       | c.(2086-2088)GAA>AAA             | p.E696K        |
| Pat_76 | Post-Resistance | NLRC3    | 197358 | 37 | 16 | 3607625   | 3607625   | Missense_Mutation | SNP | G  | A  | 5   | 6   | c.2068C>T       | c.(2068-2070)CTC>TTC             | p.L690F        |
| Pat_76 | Post-Resistance | CREBBP   | 1387   | 37 | 16 | 3823918   | 3823919   | Missense_Mutation | DNP | GG | AA | 17  | 60  | .:2296_2297CC>T | c.(2296-2298)CCT>TTT             | p.P766F        |
| Pat_76 | Post-Resistance | 12-Sep   | 124404 | 37 | 16 | 4829778   | 4829778   | Missense_Mutation | SNP | G  | A  | 26  | 39  | c.736C>T        | c.(736-738)CCT>TCT               | p.P246S        |
| Pat_76 | Post-Resistance | PPL      | 5493   | 37 | 16 | 4934443   | 4934443   | Missense_Mutation | SNP | C  | T  | 6   | 9   | c.4213G>A       | c.(4213-4215)GAG>AAG             | p.E1405K       |
| Pat_76 | Post-Resistance | GRIN2A   | 2903   | 37 | 16 | 9858255   | 9858255   | Missense_Mutation | SNP | G  | A  | 15  | 47  | c.3146C>T       | c.(3145-3147)CCT>CTT             | p.P1049L       |
| Pat_76 | Post-Resistance | GRIN2A   | 2903   | 37 | 16 | 9923297   | 9923297   | Missense_Mutation | SNP | C  | T  | 14  | 26  | c.1990G>A       | c.(1990-1992)GGC>AGC             | p.G664S        |
| Pat_76 | Post-Resistance | CIITA    | 4261   | 37 | 16 | 11001309  | 11001309  | Missense_Mutation | SNP | C  | T  | 3   | 9   | c.1960C>T       | c.(1960-1962)CCC>TCC             | p.P654S        |
| Pat_76 | Post-Resistance | ERCC4    | 2072   | 37 | 16 | 14029042  | 14029042  | Missense_Mutation | SNP | C  | T  | 15  | 37  | c.1253C>T       | c.(1252-1254)TCC>TTC             | p.S418F        |
| Pat_76 | Post-Resistance | C16orf88 | 400506 | 37 | 16 | 19718383  | 19718383  | Missense_Mutation | SNP | G  | A  | 15  | 36  | c.1226C>T       | c.(1225-1227)GCT>GTT             | p.A409V        |
| Pat_76 | Post-Resistance | PDILT    | 204474 | 37 | 16 | 20384348  | 20384348  | Missense_Mutation | SNP | C  | T  | 25  | 54  | c.778G>A        | c.(778-780)GAA>AAA               | p.E260K        |
| Pat_76 | Post-Resistance | ACSM2A   | 123876 | 37 | 16 | 20476967  | 20476968  | Missense_Mutation | DNP | CC | TG | 4   | 49  | c.306_307CC>TG  | 304-309)GGCCTG>GGTG              | p.L103V        |
| Pat_76 | Post-Resistance | ACSM2B   | 348158 | 37 | 16 | 20570640  | 20570641  | Missense_Mutation | DNP | GG | CA | 6   | 16  | c.306_307CC>TG  | 304-309)GGCCTG>GGTG              | p.L103V        |
| Pat_76 | Post-Resistance | ACSM1    | 116285 | 37 | 16 | 20648710  | 20648710  | Missense_Mutation | SNP | G  | A  | 29  | 42  | c.1180C>T       | c.(1180-1182)CCA>TCA             | p.P394S        |
| Pat_76 | Post-Resistance | ACSM1    | 116285 | 37 | 16 | 20696554  | 20696554  | Missense_Mutation | SNP | G  | A  | 24  | 87  | c.364C>T        | c.(364-366)CCT>TCT               | p.P122S        |
| Pat_76 | Post-Resistance | OTOA     | 146183 | 37 | 16 | 21696638  | 21696638  | Missense_Mutation | SNP | C  | T  | 4   | 13  | c.355C>T        | c.(355-357)CGC>TGC               | p.R119C        |
| Pat_76 | Post-Resistance | VWA3A    | 146177 | 37 | 16 | 22161253  | 22161253  | Splice_Site       | SNP | G  | A  | 33  | 111 | c.3129_splice   | c.e29+1                          | p.L1043_splice |
| Pat_76 | Post-Resistance | VWA3A    | 146177 | 37 | 16 | 22166979  | 22166979  | Missense_Mutation | SNP | C  | T  | 7   | 33  | c.3497C>T       | c.(3496-3498)TCC>TTC             | p.S1166F       |
| Pat_76 | Post-Resistance | EEF2K    | 29904  | 37 | 16 | 22268602  | 22268602  | Missense_Mutation | SNP | C  | T  | 29  | 50  | c.797C>T        | c.(796-798)TCC>TTC               | p.S266F        |
| Pat_76 | Post-Resistance | RBBP6    | 5930   | 37 | 16 | 24578597  | 24578597  | Missense_Mutation | SNP | C  | T  | 37  | 94  | c.1723C>T       | c.(1723-1725)CCT>TCT             | p.P575S        |
| Pat_76 | Post-Resistance | XPO6     | 23214  | 37 | 16 | 28167780  | 28167780  | Missense_Mutation | SNP | G  | A  | 30  | 57  | c.712C>T        | c.(712-714)CTT>TTT               | p.L238F        |
| Pat_76 | Post-Resistance | LAT      | 27040  | 37 | 16 | 28997467  | 28997467  | Missense_Mutation | SNP | C  | T  | 70  | 171 | c.175C>T        | c.(175-177)CCC>TCC               | p.P59S         |
| Pat_76 | Post-Resistance | KIF22    | 3835   | 37 | 16 | 29810772  | 29810772  | Missense_Mutation | SNP | C  | T  | 22  | 47  | c.947C>T        | c.(946-948)CCT>CTT               | p.P316L        |
| Pat_76 | Post-Resistance | ITGAL    | 3683   | 37 | 16 | 30500437  | 30500438  | Missense_Mutation | DNP | GG | AA | 27  | 65  | .1041_1042GG>A  | 039-1044)ATGGAG>ATAA.347_348ME>I |                |
| Pat_76 | Post-Resistance | STX1B    | 112755 | 37 | 16 | 31004706  | 31004706  | Missense_Mutation | SNP | C  | T  | 13  | 31  | c.637G>A        | c.(637-639)GAT>AAT               | p.D213N        |
| Pat_76 | Post-Resistance | STX4     | 6810   | 37 | 16 | 31046302  | 31046302  | Nonsense_Mutation | SNP | C  | T  | 19  | 65  | c.319C>T        | c.(319-321)CAG>TAG               | p.Q107*        |

|        |                 |          |        |    |    |          |          |                   |     |    |    |    |     |                |                        |          |
|--------|-----------------|----------|--------|----|----|----------|----------|-------------------|-----|----|----|----|-----|----------------|------------------------|----------|
| Pat_76 | Post-Resistance | ZNF668   | 79759  | 37 | 16 | 31072586 | 31072586 | Missense_Mutation | SNP | C  | T  | 11 | 34  | c.1663G>A      | c.(1663-1665)GAC>AAC   | p.D555N  |
| Pat_76 | Post-Resistance | PRSS36   | 146547 | 37 | 16 | 31150517 | 31150517 | Missense_Mutation | SNP | G  | A  | 8  | 19  | c.2510C>T      | c.(2509-2511)TCG>TTG   | p.S837L  |
| Pat_76 | Post-Resistance | FUS      | 2521   | 37 | 16 | 31202331 | 31202331 | Nonsense_Mutation | SNP | C  | T  | 14 | 25  | c.1441C>T      | c.(1441-1443)CGA>TGA   | p.R481*  |
| Pat_76 | Post-Resistance | ITGAX    | 3687   | 37 | 16 | 31374263 | 31374263 | Missense_Mutation | SNP | C  | T  | 9  | 42  | c.1367C>T      | c.(1366-1368)TCC>TTC   | p.S456F  |
| Pat_76 | Post-Resistance | ITGAX    | 3687   | 37 | 16 | 31383723 | 31383723 | Missense_Mutation | SNP | C  | T  | 11 | 49  | c.2185C>T      | c.(2185-2187)CCC>TCC   | p.P729S  |
| Pat_76 | Post-Resistance | ABCC12   | 94160  | 37 | 16 | 48138242 | 48138242 | Missense_Mutation | SNP | G  | A  | 21 | 65  | c.2711C>T      | c.(2710-2712)CCC>CTC   | p.P904L  |
| Pat_76 | Post-Resistance | HEATR3   | 55027  | 37 | 16 | 50112773 | 50112773 | Missense_Mutation | SNP | G  | A  | 11 | 13  | c.885G>A       | c.(883-885)ATG>ATA     | p.M295I  |
| Pat_76 | Post-Resistance | CES1     | 1066   | 37 | 16 | 55857576 | 55857576 | Missense_Mutation | SNP | C  | T  | 11 | 52  | c.422G>A       | c.(421-423)GGA>GAA     | p.G141E  |
| Pat_76 | Post-Resistance | CES1     | 1066   | 37 | 16 | 55862715 | 55862715 | Nonsense_Mutation | SNP | C  | T  | 12 | 52  | c.221G>A       | c.(220-222)TGG>TAG     | p.W74*   |
| Pat_76 | Post-Resistance | BBS2     | 583    | 37 | 16 | 56531684 | 56531684 | Missense_Mutation | SNP | A  | T  | 17 | 46  | c.1768T>A      | c.(1768-1770)TTT>ATT   | p.F590I  |
| Pat_76 | Post-Resistance | CPNE2    | 221184 | 37 | 16 | 57153117 | 57153117 | Missense_Mutation | SNP | G  | A  | 21 | 48  | c.518G>A       | c.(517-519)GGG>GAG     | p.G173E  |
| Pat_76 | Post-Resistance | CSNK2A2  | 1459   | 37 | 16 | 58199576 | 58199576 | Missense_Mutation | SNP | A  | C  | 6  | 13  | c.864T>G       | c.(862-864)AGT>AGG     | p.S288R  |
| Pat_76 | Post-Resistance | CDH5     | 1003   | 37 | 16 | 66413316 | 66413316 | Missense_Mutation | SNP | G  | A  | 16 | 39  | c.76G>A        | c.(76-78)GCA>ACA       | p.A26T   |
| Pat_76 | Post-Resistance | CA7      | 766    | 37 | 16 | 66885408 | 66885408 | Missense_Mutation | SNP | G  | A  | 40 | 90  | c.400G>A       | c.(400-402)GGG>AGG     | p.G134R  |
| Pat_76 | Post-Resistance | ZDHHC1   | 29800  | 37 | 16 | 67432155 | 67432155 | Missense_Mutation | SNP | C  | T  | 25 | 125 | c.887G>A       | c.(886-888)AGG>AAG     | p.R296K  |
| Pat_76 | Post-Resistance | HSD11B2  | 3291   | 37 | 16 | 67470217 | 67470217 | Missense_Mutation | SNP | G  | A  | 67 | 147 | c.730G>A       | c.(730-732)GAC>AAC     | p.D244N  |
| Pat_76 | Post-Resistance | DPEP3    | 64180  | 37 | 16 | 68014081 | 68014081 | Missense_Mutation | SNP | C  | T  | 7  | 17  | c.278G>A       | c.(277-279)GGC>GAC     | p.G93D   |
| Pat_76 | Post-Resistance | HYDIN    | 54768  | 37 | 16 | 70871640 | 70871640 | Missense_Mutation | SNP | G  | A  | 6  | 31  | c.13192C>T     | c.(13192-13194)CTC>TTC | p.L4398F |
| Pat_76 | Post-Resistance | HYDIN    | 54768  | 37 | 16 | 71218881 | 71218881 | Missense_Mutation | SNP | C  | T  | 4  | 12  | c.148G>A       | c.(148-150)GAG>AAG     | p.E50K   |
| Pat_76 | Post-Resistance | ADAMTS18 | 170692 | 37 | 16 | 77353954 | 77353954 | Missense_Mutation | SNP | C  | T  | 6  | 17  | c.2324G>A      | c.(2323-2325)CGA>CAA   | p.R775Q  |
| Pat_76 | Post-Resistance | VAT1L    | 57687  | 37 | 16 | 77918574 | 77918574 | Missense_Mutation | SNP | C  | T  | 7  | 9   | c.952C>T       | c.(952-954)CTT>TTT     | p.L318F  |
| Pat_76 | Post-Resistance | BCMO1    | 53630  | 37 | 16 | 81295883 | 81295883 | Missense_Mutation | SNP | G  | A  | 15 | 24  | c.466G>A       | c.(466-468)GAG>AAG     | p.E156K  |
| Pat_76 | Post-Resistance | PLCG2    | 5336   | 37 | 16 | 81965224 | 81965224 | Missense_Mutation | SNP | A  | T  | 24 | 47  | c.2704A>T      | c.(2704-2706)AGC>TGC   | p.S902C  |
| Pat_76 | Post-Resistance | MBTPS1   | 8720   | 37 | 16 | 84088064 | 84088064 | Missense_Mutation | SNP | G  | A  | 4  | 9   | c.3149C>T      | c.(3148-3150)CCT>CTT   | p.P1050L |
| Pat_76 | Post-Resistance | MBTPS1   | 8720   | 37 | 16 | 84127376 | 84127376 | Missense_Mutation | SNP | G  | A  | 12 | 26  | c.676C>T       | c.(676-678)CCC>TCC     | p.P226S  |
| Pat_76 | Post-Resistance | ADAD2    | 161931 | 37 | 16 | 84229876 | 84229876 | Missense_Mutation | SNP | G  | A  | 16 | 36  | c.1426G>A      | c.(1426-1428)GAA>AAA   | p.E476K  |
| Pat_76 | Post-Resistance | ATP2C2   | 9914   | 37 | 16 | 84456002 | 84456002 | Missense_Mutation | SNP | G  | A  | 20 | 30  | c.631G>A       | c.(631-633)GAC>AAC     | p.D211N  |
| Pat_76 | Post-Resistance | KIAA0182 | 23199  | 37 | 16 | 85688001 | 85688001 | Missense_Mutation | SNP | C  | T  | 49 | 108 | c.544C>T       | c.(544-546)CCC>TCC     | p.P182S  |
| Pat_76 | Post-Resistance | NXN      | 64359  | 37 | 17 | 722732   | 722733   | Missense_Mutation | DNP | GG | AA | 18 | 66  | c.766_767CC>TT | c.(766-768)CCC>TTC     | p.P256F  |
| Pat_76 | Post-Resistance | OR1E1    | 8387   | 37 | 17 | 3300846  | 3300846  | Missense_Mutation | SNP | G  | A  | 20 | 88  | c.859C>T       | c.(859-861)CCC>TCC     | p.P287S  |
| Pat_76 | Post-Resistance | RABEP1   | 9135   | 37 | 17 | 5281522  | 5281522  | Missense_Mutation | SNP | G  | A  | 6  | 20  | c.2266G>A      | c.(2266-2268)GGA>AGA   | p.G756R  |
| Pat_76 | Post-Resistance | ALOX12   | 239    | 37 | 17 | 6909842  | 6909842  | Missense_Mutation | SNP | G  | A  | 13 | 39  | c.1456G>A      | c.(1456-1458)GAT>AAT   | p.D486N  |
| Pat_76 | Post-Resistance | NEURL4   | 84461  | 37 | 17 | 7227274  | 7227274  | Missense_Mutation | SNP | G  | A  | 7  | 18  | c.2120C>T      | c.(2119-2121)TCT>TTT   | p.S707F  |
| Pat_76 | Post-Resistance | C17orf74 | 201243 | 37 | 17 | 7329674  | 7329674  | Missense_Mutation | SNP | C  | T  | 34 | 77  | c.364C>T       | c.(364-366)CGC>TGC     | p.R122C  |
| Pat_76 | Post-Resistance | PFAS     | 5198   | 37 | 17 | 8172012  | 8172012  | Missense_Mutation | SNP | G  | A  | 6  | 17  | c.3544G>A      | c.(3544-3546)GGC>AGC   | p.G1182S |
| Pat_76 | Post-Resistance | MYH13    | 8735   | 37 | 17 | 10248630 | 10248630 | Missense_Mutation | SNP | G  | T  | 36 | 133 | c.1473C>A      | c.(1471-1473)TTC>TTA   | p.F491L  |
| Pat_76 | Post-Resistance | MYH13    | 8735   | 37 | 17 | 10265482 | 10265482 | Missense_Mutation | SNP | G  | A  | 19 | 124 | c.458C>T       | c.(457-459)CCC>CTC     | p.P153L  |
| Pat_76 | Post-Resistance | MYH1     | 4619   | 37 | 17 | 10398328 | 10398328 | Missense_Mutation | SNP | C  | T  | 29 | 48  | c.5386G>A      | c.(5386-5388)GAC>AAC   | p.D1796N |
| Pat_76 | Post-Resistance | MYH2     | 4620   | 37 | 17 | 10432559 | 10432559 | Missense_Mutation | SNP | C  | T  | 6  | 19  | c.3274G>A      | c.(3274-3276)GAA>AAA   | p.E1092K |
| Pat_76 | Post-Resistance | MYH3     | 4621   | 37 | 17 | 10543521 | 10543521 | Missense_Mutation | SNP | A  | G  | 3  | 40  | c.2474T>C      | c.(2473-2475)GTC>GCC   | p.V825A  |
| Pat_76 | Post-Resistance | DNAH9    | 1770   | 37 | 17 | 11572873 | 11572873 | Missense_Mutation | SNP | G  | A  | 6  | 35  | c.3115G>A      | c.(3115-3117)GAA>AAA   | p.E1039K |
| Pat_76 | Post-Resistance | DNAH9    | 1770   | 37 | 17 | 11593270 | 11593270 | Missense_Mutation | SNP | G  | C  | 5  | 10  | c.4131G>C      | c.(4129-4131)CAG>CAC   | p.Q1377H |
| Pat_76 | Post-Resistance | TRIM16   | 10626  | 37 | 17 | 15535907 | 15535907 | Missense_Mutation | SNP | G  | A  | 16 | 40  | c.931C>T       | c.(931-933)CGC>TGC     | p.R311C  |
| Pat_76 | Post-Resistance | MYO15A   | 51168  | 37 | 17 | 18082167 | 18082167 | Missense_Mutation | SNP | G  | A  | 26 | 39  | c.10576G>A     | c.(10576-10578)GAG>AAC | p.E3526K |
| Pat_76 | Post-Resistance | FAM83G   | 644815 | 37 | 17 | 18907240 | 18907240 | Missense_Mutation | SNP | C  | T  | 12 | 17  | c.115G>A       | c.(115-117)GTG>ATG     | p.V39M   |
| Pat_76 | Post-Resistance | RNF112   | 7732   | 37 | 17 | 19318195 | 19318195 | Missense_Mutation | SNP | C  | T  | 15 | 27  | c.1121C>T      | c.(1120-1122)CCT>CTT   | p.P374L  |
| Pat_76 | Post-Resistance | LGALS9B  | 284194 | 37 | 17 | 20363726 | 20363726 | Missense_Mutation | SNP | C  | T  | 23 | 56  | c.70G>A        | c.(70-72)GGT>AGT       | p.G24S   |

|        |                 |           |        |    |    |          |          |                   |     |    |    |     |     |                                   |                      |                |
|--------|-----------------|-----------|--------|----|----|----------|----------|-------------------|-----|----|----|-----|-----|-----------------------------------|----------------------|----------------|
| Pat_76 | Post-Resistance | SUPT6H    | 6830   | 37 | 17 | 27002156 | 27002156 | Missense_Mutation | SNP | G  | A  | 4   | 17  | c.514G>A                          | c.(514-516)GAG>AAG   | p.E172K        |
| Pat_76 | Post-Resistance | HNF1B     | 6928   | 37 | 17 | 36104814 | 36104814 | Missense_Mutation | SNP | A  | G  | 8   | 43  | c.62T>C                           | c.(61-63)GTC>GCC     | p.V21A         |
| Pat_76 | Post-Resistance | THRA      | 7067   | 37 | 17 | 38244573 | 38244573 | Missense_Mutation | SNP | G  | A  | 29  | 26  | c.802G>A                          | c.(802-804)GAC>AAC   | p.D268N        |
| Pat_76 | Post-Resistance | KRT39     | 390792 | 37 | 17 | 39122844 | 39122844 | Missense_Mutation | SNP | C  | T  | 67  | 35  | c.265G>A                          | c.(265-267)GGT>AGT   | p.G89S         |
| Pat_76 | Post-Resistance | KRTAP4-4  | 84616  | 37 | 17 | 39316620 | 39316621 | Missense_Mutation | DNP | GG | AT | 74  | 38  | c.323_324CC>AT                    | c.(322-324)CCC>CAT   | p.P108H        |
| Pat_76 | Post-Resistance | KRT14     | 3861   | 37 | 17 | 39741234 | 39741234 | Missense_Mutation | SNP | G  | A  | 51  | 93  | c.601C>T                          | c.(601-603)CGC>TGC   | p.R201C        |
| Pat_76 | Post-Resistance | WNK4      | 65266  | 37 | 17 | 40946862 | 40946862 | Missense_Mutation | SNP | G  | A  | 19  | 18  | c.2423G>A                         | c.(2422-2424)GGA>GAA | p.G808E        |
| Pat_76 | Post-Resistance | AOC2      | 314    | 37 | 17 | 41002225 | 41002225 | Missense_Mutation | SNP | C  | T  | 39  | 120 | c.2131C>T                         | c.(2131-2133)CCC>TCC | p.P711S        |
| Pat_76 | Post-Resistance | PLEKHM1   | 9842   | 37 | 17 | 43531155 | 43531155 | Missense_Mutation | SNP | G  | A  | 33  | 20  | c.2063C>T                         | c.(2062-2064)TCC>TTC | p.S688F        |
| Pat_76 | Post-Resistance | GOSR2     | 9570   | 37 | 17 | 45009497 | 45009497 | Missense_Mutation | SNP | C  | T  | 46  | 112 | c.268C>T                          | c.(268-270)CGG>TGG   | p.R90W         |
| Pat_76 | Post-Resistance | CACNA1G   | 8913   | 37 | 17 | 48673939 | 48673939 | Missense_Mutation | SNP | C  | T  | 42  | 21  | c.2996C>T                         | c.(2995-2997)TCC>TTC | p.S999F        |
| Pat_76 | Post-Resistance | ABCC3     | 8714   | 37 | 17 | 48762122 | 48762122 | Missense_Mutation | SNP | G  | A  | 59  | 37  | c.4166G>A                         | c.(4165-4167)AGC>AAC | p.S1389N       |
| Pat_76 | Post-Resistance | EFCAB3    | 146779 | 37 | 17 | 60493646 | 60493646 | Missense_Mutation | SNP | G  | A  | 30  | 17  | c.1273G>A                         | c.(1273-1275)GGA>AGA | p.G425R        |
| Pat_76 | Post-Resistance | 10-Mar    | 162333 | 37 | 17 | 60814149 | 60814149 | Missense_Mutation | SNP | C  | T  | 41  | 23  | c.1080G>A                         | c.(1078-1080)ATG>ATA | p.M360I        |
| Pat_76 | Post-Resistance | NOL11     | 25926  | 37 | 17 | 65734057 | 65734057 | Missense_Mutation | SNP | G  | A  | 21  | 15  | c.1498G>A                         | c.(1498-1500)GTC>ATC | p.V500I        |
| Pat_76 | Post-Resistance | ABCA9     | 10350  | 37 | 17 | 67008196 | 67008196 | Missense_Mutation | SNP | C  | T  | 28  | 18  | c.3068G>A                         | c.(3067-3069)CGA>CAA | p.R1023Q       |
| Pat_76 | Post-Resistance | ABCA9     | 10350  | 37 | 17 | 67014656 | 67014656 | Nonsense_Mutation | SNP | G  | A  | 110 | 67  | c.2665C>T                         | c.(2665-2667)CAG>TAG | p.Q889*        |
| Pat_76 | Post-Resistance | ABCA9     | 10350  | 37 | 17 | 67047281 | 67047281 | Splice_Site       | SNP | C  | T  | 4   | 6   | c.-12_splice                      | c.e2-1               |                |
| Pat_76 | Post-Resistance | C17orf80  | 55028  | 37 | 17 | 71232451 | 71232451 | Missense_Mutation | SNP | C  | T  | 12  | 5   | c.830C>T                          | c.(829-831)TCC>TTC   | p.S277F        |
| Pat_76 | Post-Resistance | GPRC5C    | 55890  | 37 | 17 | 72436177 | 72436177 | Missense_Mutation | SNP | G  | A  | 15  | 7   | c.262G>A                          | c.(262-264)GGG>AGG   | p.G88R         |
| Pat_76 | Post-Resistance | SLC38A10  | 124565 | 37 | 17 | 79226403 | 79226403 | Missense_Mutation | SNP | C  | T  | 23  | 16  | c.1537G>A                         | c.(1537-1539)GAC>AAC | p.D513N        |
| Pat_76 | Post-Resistance | LRRC45    | 201255 | 37 | 17 | 79983359 | 79983360 | Missense_Mutation | DNP | CC | TT | 27  | 11  | c.637_638CC>TT                    | c.(637-639)CCT>TTT   | p.P213F        |
| Pat_76 | Post-Resistance | COLEC12   | 81035  | 37 | 18 | 335059   | 335059   | Missense_Mutation | SNP | C  | T  | 4   | 6   | c.1499G>A                         | c.(1498-1500)GGA>GAA | p.G500E        |
| Pat_76 | Post-Resistance | LPIN2     | 9663   | 37 | 18 | 2960660  | 2960660  | Missense_Mutation | SNP | G  | A  | 24  | 37  | c.179C>T                          | c.(178-180)TCC>TTC   | p.S60F         |
| Pat_76 | Post-Resistance | ZFP161    | 7541   | 37 | 18 | 5291174  | 5291174  | Missense_Mutation | SNP | C  | T  | 12  | 22  | c.1033G>A                         | c.(1033-1035)GCC>ACC | p.A345T        |
| Pat_76 | Post-Resistance | TMEM200C  | 645369 | 37 | 18 | 5890387  | 5890387  | Missense_Mutation | SNP | C  | T  | 12  | 16  | c.1676G>A                         | c.(1675-1677)CGA>CAA | p.R559Q        |
| Pat_76 | Post-Resistance | TXNDC2    | 84203  | 37 | 18 | 9887689  | 9887689  | Missense_Mutation | SNP | C  | T  | 23  | 59  | c.1213C>T                         | c.(1213-1215)CCC>TCC | p.P405S        |
| Pat_76 | Post-Resistance | ZNF519    | 162655 | 37 | 18 | 14106150 | 14106150 | Missense_Mutation | SNP | A  | C  | 4   | 11  | c.389T>G                          | c.(388-390)TTT>TGT   | p.F130C        |
| Pat_76 | Post-Resistance | ANKRD30B  | 374860 | 37 | 18 | 14851568 | 14851568 | Missense_Mutation | SNP | G  | A  | 4   | 9   | c.3268G>A                         | c.(3268-3270)GAA>AAA | p.E1090K       |
| Pat_76 | Post-Resistance | LAMA3     | 3909   | 37 | 18 | 21494505 | 21494505 | Missense_Mutation | SNP | G  | A  | 12  | 18  | c.7461G>A                         | c.(7459-7461)ATG>ATA | p.M2487I       |
| Pat_76 | Post-Resistance | ZNF521    | 25925  | 37 | 18 | 22669428 | 22669428 | Splice_Site       | SNP | C  | G  | 6   | 12  | c.3906_splice                     | c.e7+1               | p.Q1302_splice |
| Pat_76 | Post-Resistance | SS18      | 6760   | 37 | 18 | 23619273 | 23619273 | Missense_Mutation | SNP | G  | A  | 25  | 58  | c.755C>T                          | c.(754-756)CCC>CTC   | p.P252L        |
| Pat_76 | Post-Resistance | AQP4      | 361    | 37 | 18 | 24436207 | 24436207 | Missense_Mutation | SNP | C  | T  | 21  | 73  | c.940G>A                          | c.(940-942)GAC>AAC   | p.D314N        |
| Pat_76 | Post-Resistance | CDH2      | 1000   | 37 | 18 | 25565092 | 25565092 | Missense_Mutation | SNP | G  | A  | 11  | 23  | c.2081C>T                         | c.(2080-2082)TCC>TTC | p.S694F        |
| Pat_76 | Post-Resistance | DSC1      | 1823   | 37 | 18 | 28719770 | 28719770 | Missense_Mutation | SNP | C  | T  | 3   | 5   | c.1604G>A                         | c.(1603-1605)AGA>AAA | p.R535K        |
| Pat_76 | Post-Resistance | ZNF24     | 7572   | 37 | 18 | 32919934 | 32919934 | Missense_Mutation | SNP | G  | A  | 6   | 19  | c.427C>T                          | c.(427-429)CTC>TTC   | p.L143F        |
| Pat_76 | Post-Resistance | SETBP1    | 26040  | 37 | 18 | 42529852 | 42529852 | Missense_Mutation | SNP | G  | A  | 4   | 21  | c.547G>A                          | c.(547-549)GAG>AAG   | p.E183K        |
| Pat_76 | Post-Resistance | ZBTB7C    | 201501 | 37 | 18 | 45566863 | 45566864 | Missense_Mutation | DNP | CC | TT | 9   | 24  | c.615_616GG>AA613-618)AGGGAC>AGAA |                      | p.D206N        |
| Pat_76 | Post-Resistance | MAPK4     | 5596   | 37 | 18 | 48190519 | 48190519 | Missense_Mutation | SNP | G  | A  | 11  | 24  | c.191G>A                          | c.(190-192)CGA>CAA   | p.R64Q         |
| Pat_76 | Post-Resistance | DCC       | 1630   | 37 | 18 | 50936948 | 50936948 | Missense_Mutation | SNP | G  | A  | 12  | 30  | c.3062G>A                         | c.(3061-3063)CGA>CAA | p.R1021Q       |
| Pat_76 | Post-Resistance | ATP8B1    | 5205   | 37 | 18 | 55335733 | 55335733 | Missense_Mutation | SNP | C  | T  | 11  | 11  | c.2137G>A                         | c.(2137-2139)GGA>AGA | p.G713R        |
| Pat_76 | Post-Resistance | TNFRSF11A | 8792   | 37 | 18 | 60015422 | 60015422 | Missense_Mutation | SNP | C  | T  | 24  | 52  | c.97C>T                           | c.(97-99)CCA>TCA     | p.P33S         |
| Pat_76 | Post-Resistance | SERPIN4   | 6318   | 37 | 18 | 61324207 | 61324207 | Missense_Mutation | SNP | G  | A  | 3   | 13  | c.626C>T                          | c.(625-627)TCC>TTC   | p.S209F        |
| Pat_76 | Post-Resistance | SERPIN2   | 5055   | 37 | 18 | 61569055 | 61569055 | Missense_Mutation | SNP | G  | A  | 15  | 14  | c.617G>A                          | c.(616-618)GGA>GAA   | p.G206E        |
| Pat_76 | Post-Resistance | CDH7      | 1005   | 37 | 18 | 63547911 | 63547911 | Missense_Mutation | SNP | A  | T  | 8   | 26  | c.2139A>T                         | c.(2137-2139)GAA>GAT | p.E713D        |
| Pat_76 | Post-Resistance | CD226     | 10666  | 37 | 18 | 67540447 | 67540447 | Missense_Mutation | SNP | C  | T  | 27  | 51  | c.763G>A                          | c.(763-765)GGA>AGA   | p.G255R        |
| Pat_76 | Post-Resistance | ADNP2     | 22850  | 37 | 18 | 77875472 | 77875472 | Missense_Mutation | SNP | G  | A  | 10  | 15  | c.47G>A                           | c.(46-48)CGA>CAA     | p.R16Q         |

|        |                 |         |        |    |    |          |          |                   |     |    |    |    |     |                                    |                        |           |
|--------|-----------------|---------|--------|----|----|----------|----------|-------------------|-----|----|----|----|-----|------------------------------------|------------------------|-----------|
| Pat_76 | Post-Resistance | DIRAS1  | 148252 | 37 | 19 | 2717729  | 2717729  | Missense_Mutation | SNP | G  | C  | 28 | 63  | c.76C>G                            | c.(76-78)CGC>GGC       | p.R26G    |
| Pat_76 | Post-Resistance | MAP2K2  | 5605   | 37 | 19 | 4110581  | 4110581  | Missense_Mutation | SNP | T  | C  | 7  | 60  | c.376A>G                           | c.(376-378)AAC>GAC     | p.N126D   |
| Pat_76 | Post-Resistance | ANKRD24 | 170961 | 37 | 19 | 4217073  | 4217073  | Missense_Mutation | SNP | G  | A  | 9  | 19  | c.1916G>A                          | c.(1915-1917)GGG>GAG   | p.G639E   |
| Pat_76 | Post-Resistance | CCDC94  | 55702  | 37 | 19 | 4249233  | 4249233  | Nonsense_Mutation | SNP | C  | A  | 5  | 20  | c.33C>A                            | c.(31-33)TAC>TAA       | p.Y11*    |
| Pat_76 | Post-Resistance | TMIGD2  | 126259 | 37 | 19 | 4298151  | 4298151  | Missense_Mutation | SNP | C  | T  | 10 | 20  | c.238G>A                           | c.(238-240)GTC>ATC     | p.V80I    |
| Pat_76 | Post-Resistance | CHAF1A  | 10036  | 37 | 19 | 4409220  | 4409221  | Missense_Mutation | DNP | CC | TT | 37 | 50  | c.424_425CC>TT                     | c.(424-426)CCC>TTC     | p.P142F   |
| Pat_76 | Post-Resistance | PTPRS   | 5802   | 37 | 19 | 5220119  | 5220119  | Missense_Mutation | SNP | G  | A  | 8  | 12  | c.3596C>T                          | c.(3595-3597)TCG>TTG   | p.S1199L  |
| Pat_76 | Post-Resistance | SAFB    | 6294   | 37 | 19 | 5667169  | 5667169  | Missense_Mutation | SNP | C  | T  | 4  | 7   | c.2447C>T                          | c.(2446-2448)CCC>CTC   | p.P816L   |
| Pat_76 | Post-Resistance | TNFSF14 | 8740   | 37 | 19 | 6665025  | 6665025  | Missense_Mutation | SNP | C  | T  | 30 | 43  | c.635G>A                           | c.(634-636)GGG>GAG     | p.G212E   |
| Pat_76 | Post-Resistance | VAV1    | 7409   | 37 | 19 | 6854037  | 6854038  | Missense_Mutation | DNP | GG | AA | 23 | 54  | .2412_2413GG>A410-2415)AAGGAG>AAA/ |                        | p.E805K   |
| Pat_76 | Post-Resistance | EMR1    | 2015   | 37 | 19 | 6935005  | 6935005  | Missense_Mutation | SNP | C  | T  | 26 | 52  | c.2297C>T                          | c.(2296-2298)TCC>TTC   | p.S766F   |
| Pat_76 | Post-Resistance | ZNF557  | 79230  | 37 | 19 | 7083192  | 7083192  | Missense_Mutation | SNP | A  | T  | 23 | 44  | c.709A>T                           | c.(709-711)ACC>TCC     | p.T237S   |
| Pat_76 | Post-Resistance | LASS4   | 79603  | 37 | 19 | 8321133  | 8321133  | Nonsense_Mutation | SNP | G  | A  | 7  | 26  | c.482G>A                           | c.(481-483)TGG>TAG     | p.W161*   |
| Pat_76 | Post-Resistance | MYO1F   | 4542   | 37 | 19 | 8619449  | 8619449  | Missense_Mutation | SNP | A  | G  | 15 | 114 | c.238T>C                           | c.(238-240)TAT>CAT     | p.Y80H    |
| Pat_76 | Post-Resistance | MUC16   | 94025  | 37 | 19 | 8996484  | 8996484  | Missense_Mutation | SNP | C  | G  | 13 | 17  | c.41088G>C                         | c.(41086-41088)AAG>AAC | p.K13696N |
| Pat_76 | Post-Resistance | MUC16   | 94025  | 37 | 19 | 9020005  | 9020005  | Missense_Mutation | SNP | C  | T  | 62 | 139 | c.37490G>A                         | c.(37489-37491)AGG>AAC | p.R12497K |
| Pat_76 | Post-Resistance | MUC16   | 94025  | 37 | 19 | 9054252  | 9054252  | Missense_Mutation | SNP | G  | A  | 6  | 9   | c.31370C>T                         | c.(31369-31371)TCG>TTC | p.S10457L |
| Pat_76 | Post-Resistance | MUC16   | 94025  | 37 | 19 | 9058282  | 9058282  | Missense_Mutation | SNP | C  | T  | 6  | 7   | c.29164G>A                         | c.(29164-29166)GAA>AAA | p.E9722K  |
| Pat_76 | Post-Resistance | MUC16   | 94025  | 37 | 19 | 9061096  | 9061096  | Missense_Mutation | SNP | C  | T  | 12 | 25  | c.26350G>A                         | c.(26350-26352)GAA>AAA | p.E8784K  |
| Pat_76 | Post-Resistance | MUC16   | 94025  | 37 | 19 | 9064315  | 9064315  | Missense_Mutation | SNP | G  | A  | 16 | 49  | c.23131C>T                         | c.(23131-23133)CCC>TCC | p.P7711S  |
| Pat_76 | Post-Resistance | MUC16   | 94025  | 37 | 19 | 9068557  | 9068557  | Missense_Mutation | SNP | G  | A  | 14 | 35  | c.18889C>T                         | c.(18889-18891)CCT>TCT | p.P6297S  |
| Pat_76 | Post-Resistance | MUC16   | 94025  | 37 | 19 | 9076162  | 9076162  | Missense_Mutation | SNP | C  | T  | 15 | 36  | c.11284G>A                         | c.(11284-11286)GAA>AAA | p.E3762K  |
| Pat_76 | Post-Resistance | MUC16   | 94025  | 37 | 19 | 9083768  | 9083768  | Missense_Mutation | SNP | C  | T  | 9  | 20  | c.8047G>A                          | c.(8047-8049)GAG>AAG   | p.E2683K  |
| Pat_76 | Post-Resistance | OR7G1   | 125962 | 37 | 19 | 9226282  | 9226282  | Missense_Mutation | SNP | G  | A  | 31 | 85  | c.158C>T                           | c.(157-159)TCC>TTC     | p.S53F    |
| Pat_76 | Post-Resistance | OR7D2   | 162998 | 37 | 19 | 9297226  | 9297226  | Missense_Mutation | SNP | G  | A  | 10 | 29  | c.769G>A                           | c.(769-771)GGG>AGG     | p.G257R   |
| Pat_76 | Post-Resistance | OR7E24  | 26648  | 37 | 19 | 9362051  | 9362051  | Missense_Mutation | SNP | C  | T  | 10 | 25  | c.332C>T                           | c.(331-333)TCC>TTC     | p.S111F   |
| Pat_76 | Post-Resistance | ZNF560  | 147741 | 37 | 19 | 9578557  | 9578557  | Missense_Mutation | SNP | C  | T  | 12 | 21  | c.1066G>A                          | c.(1066-1068)GAT>AAT   | p.D356N   |
| Pat_76 | Post-Resistance | ZNF560  | 147741 | 37 | 19 | 9580356  | 9580356  | Missense_Mutation | SNP | G  | A  | 16 | 48  | c.479C>T                           | c.(478-480)TCT>TTT     | p.S160F   |
| Pat_76 | Post-Resistance | LPPR2   | 64748  | 37 | 19 | 11472097 | 11472097 | Missense_Mutation | SNP | C  | G  | 8  | 22  | c.596C>G                           | c.(595-597)GCC>GGC     | p.A199G   |
| Pat_76 | Post-Resistance | ZNF442  | 79973  | 37 | 19 | 12462077 | 12462077 | Missense_Mutation | SNP | C  | T  | 12 | 22  | c.322G>A                           | c.(322-324)GAA>AAA     | p.E108K   |
| Pat_76 | Post-Resistance | DAND5   | 199699 | 37 | 19 | 13080638 | 13080638 | Missense_Mutation | SNP | C  | T  | 11 | 19  | c.164C>T                           | c.(163-165)TCT>TTT     | p.S55F    |
| Pat_76 | Post-Resistance | MRI1    | 84245  | 37 | 19 | 13876782 | 13876782 | Missense_Mutation | SNP | C  | T  | 6  | 77  | c.386C>T                           | c.(385-387)ACC>ATC     | p.T129I   |
| Pat_76 | Post-Resistance | CCDC105 | 126402 | 37 | 19 | 15131365 | 15131366 | Nonsense_Mutation | DNP | GG | AT | 5  | 12  | c.768_769GG>AT766-771)CTGGAG>CTAT/ |                        | p.E257*   |
| Pat_76 | Post-Resistance | CYP4F3  | 4051   | 37 | 19 | 15752308 | 15752308 | Missense_Mutation | SNP | C  | T  | 21 | 37  | c.83C>T                            | c.(82-84)TCC>TTC       | p.S28F    |
| Pat_76 | Post-Resistance | CYP4F12 | 66002  | 37 | 19 | 15795640 | 15795641 | Missense_Mutation | DNP | GG | AA | 20 | 49  | c.933_934GG>AA931-936)AAGGCA>AAAA( |                        | p.A312T   |
| Pat_76 | Post-Resistance | OR10H2  | 26538  | 37 | 19 | 15838861 | 15838861 | Missense_Mutation | SNP | G  | A  | 57 | 75  | c.8G>A                             | c.(7-9)GGG>GAG         | p.G3E     |
| Pat_76 | Post-Resistance | CHERP   | 10523  | 37 | 19 | 16641445 | 16641445 | Missense_Mutation | SNP | G  | A  | 22 | 75  | c.827C>T                           | c.(826-828)TCC>TTC     | p.S276F   |
| Pat_76 | Post-Resistance | CPAMD8  | 27151  | 37 | 19 | 17056424 | 17056424 | Missense_Mutation | SNP | C  | T  | 18 | 52  | c.2869G>A                          | c.(2869-2871)GAG>AAG   | p.E957K   |
| Pat_76 | Post-Resistance | NXNL1   | 115861 | 37 | 19 | 17571671 | 17571671 | Missense_Mutation | SNP | G  | A  | 18 | 28  | c.8C>T                             | c.(7-9)TCC>TTC         | p.S3F     |
| Pat_76 | Post-Resistance | UNC13A  | 23025  | 37 | 19 | 17783267 | 17783267 | Missense_Mutation | SNP | C  | T  | 12 | 45  | c.454G>A                           | c.(454-456)GTG>ATG     | p.V152M   |
| Pat_76 | Post-Resistance | COMP    | 1311   | 37 | 19 | 18899298 | 18899298 | Missense_Mutation | SNP | C  | T  | 8  | 8   | c.788G>A                           | c.(787-789)GGG>GAG     | p.G263E   |
| Pat_76 | Post-Resistance | SFRS14  | 10147  | 37 | 19 | 19136391 | 19136391 | Missense_Mutation | SNP | G  | A  | 15 | 50  | c.766C>T                           | c.(766-768)CCC>TCC     | p.P256S   |
| Pat_76 | Post-Resistance | ZNF14   | 7561   | 37 | 19 | 19822792 | 19822792 | Missense_Mutation | SNP | G  | A  | 18 | 29  | c.1298C>T                          | c.(1297-1299)TCC>TTC   | p.S433F   |
| Pat_76 | Post-Resistance | ZNF682  | 91120  | 37 | 19 | 20116872 | 20116872 | Missense_Mutation | SNP | G  | A  | 7  | 15  | c.1439C>T                          | c.(1438-1440)TCC>TTC   | p.S480F   |
| Pat_76 | Post-Resistance | ZNF90   | 7643   | 37 | 19 | 20216075 | 20216075 | Missense_Mutation | SNP | G  | A  | 24 | 69  | c.176G>A                           | c.(175-177)GGA>GAA     | p.G59E    |
| Pat_76 | Post-Resistance | ZNF626  | 199777 | 37 | 19 | 20807233 | 20807233 | Missense_Mutation | SNP | C  | T  | 3  | 3   | c.1450G>A                          | c.(1450-1452)GAA>AAA   | p.E484K   |
| Pat_76 | Post-Resistance | ZNF626  | 199777 | 37 | 19 | 20807401 | 20807401 | Missense_Mutation | SNP | C  | T  | 17 | 64  | c.1282G>A                          | c.(1282-1284)GAA>AAA   | p.E428K   |

|        |                 |          |        |    |    |          |          |                   |     |    |    |    |     |                                   |                        |          |
|--------|-----------------|----------|--------|----|----|----------|----------|-------------------|-----|----|----|----|-----|-----------------------------------|------------------------|----------|
| Pat_76 | Post-Resistance | ZNF676   | 163223 | 37 | 19 | 22362756 | 22362756 | Missense_Mutation | SNP | G  | A  | 7  | 21  | c.1763C>T                         | c.(1762-1764)CCC>CTC   | p.P588L  |
| Pat_76 | Post-Resistance | ZNF99    | 7652   | 37 | 19 | 22940472 | 22940472 | Missense_Mutation | SNP | T  | G  | 8  | 28  | c.1966A>C                         | c.(1966-1968)AAA>CAA   | p.K656Q  |
| Pat_76 | Post-Resistance | ZNF536   | 9745   | 37 | 19 | 31040082 | 31040082 | Missense_Mutation | SNP | G  | A  | 21 | 58  | c.3556G>A                         | c.(3556-3558)GAA>AAA   | p.E1186K |
| Pat_76 | Post-Resistance | NPHS1    | 4868   | 37 | 19 | 36321798 | 36321798 | Missense_Mutation | SNP | C  | T  | 9  | 47  | c.3542G>A                         | c.(3541-3543)AGA>AAA   | p.R1181K |
| Pat_76 | Post-Resistance | ZNF793   | 390927 | 37 | 19 | 38028549 | 38028549 | Missense_Mutation | SNP | G  | A  | 3  | 21  | c.989G>A                          | c.(988-990)CGA>CAA     | p.R330Q  |
| Pat_76 | Post-Resistance | ZNF540   | 163255 | 37 | 19 | 38102515 | 38102515 | Missense_Mutation | SNP | C  | T  | 15 | 40  | c.334C>T                          | c.(334-336)CGT>TGT     | p.R112C  |
| Pat_76 | Post-Resistance | ZNF607   | 84775  | 37 | 19 | 38189410 | 38189410 | Missense_Mutation | SNP | G  | A  | 9  | 18  | c.1622C>T                         | c.(1621-1623)TCT>TTT   | p.S541F  |
| Pat_76 | Post-Resistance | RYR1     | 6261   | 37 | 19 | 38995971 | 38995971 | Missense_Mutation | SNP | G  | A  | 7  | 13  | c.8333G>A                         | c.(8332-8334)GGA>GAA   | p.G2778E |
| Pat_76 | Post-Resistance | RYR1     | 6261   | 37 | 19 | 39018297 | 39018297 | Missense_Mutation | SNP | C  | T  | 3  | 7   | c.10697C>T                        | c.(10696-10698)TCC>TTC | p.S3566F |
| Pat_76 | Post-Resistance | RYR1     | 6261   | 37 | 19 | 39038941 | 39038941 | Missense_Mutation | SNP | G  | A  | 24 | 49  | c.12163G>A                        | c.(12163-12165)GAG>AAC | p.E4055K |
| Pat_76 | Post-Resistance | FCGBP    | 8857   | 37 | 19 | 40419983 | 40419983 | Missense_Mutation | SNP | C  | T  | 16 | 36  | c.3011G>A                         | c.(3010-3012)GGG>GAG   | p.G1004E |
| Pat_76 | Post-Resistance | ADCK4    | 79934  | 37 | 19 | 41220263 | 41220263 | Missense_Mutation | SNP | C  | T  | 7  | 49  | c.142G>A                          | c.(142-144)GAT>AAT     | p.D48N   |
| Pat_76 | Post-Resistance | GRIK5    | 2901   | 37 | 19 | 42566913 | 42566913 | Missense_Mutation | SNP | C  | A  | 27 | 39  | c.339G>T                          | c.(337-339)AAG>AAT     | p.K113N  |
| Pat_76 | Post-Resistance | PSG3     | 5671   | 37 | 19 | 43237041 | 43237041 | Missense_Mutation | SNP | G  | A  | 44 | 117 | c.604C>T                          | c.(604-606)CTC>TTC     | p.L202F  |
| Pat_76 | Post-Resistance | PSG8     | 440533 | 37 | 19 | 43262276 | 43262276 | Missense_Mutation | SNP | G  | A  | 76 | 151 | c.587C>T                          | c.(586-588)TCT>TTT     | p.S196F  |
| Pat_76 | Post-Resistance | PSG1     | 5669   | 37 | 19 | 43373139 | 43373140 | Missense_Mutation | DNP | CC | TT | 29 | 107 | c.756_757GG>AA754-759)AGGGAG>AGAA |                        | p.E253K  |
| Pat_76 | Post-Resistance | PSG1     | 5669   | 37 | 19 | 43382107 | 43382107 | Missense_Mutation | SNP | C  | T  | 75 | 163 | c.388G>A                          | c.(388-390)GGG>AGG     | p.G130R  |
| Pat_76 | Post-Resistance | PSG6     | 5675   | 37 | 19 | 43411960 | 43411961 | Missense_Mutation | DNP | CC | GT | 44 | 121 | c.752_753GG>AC                    | c.(751-753)AGG>AAC     | p.R251N  |
| Pat_76 | Post-Resistance | ZNF226   | 7769   | 37 | 19 | 44681760 | 44681760 | Missense_Mutation | SNP | C  | T  | 8  | 14  | c.2345C>T                         | c.(2344-2346)TCC>TTC   | p.S782F  |
| Pat_76 | Post-Resistance | ZNF285   | 26974  | 37 | 19 | 44891610 | 44891610 | Missense_Mutation | SNP | C  | T  | 11 | 36  | c.797G>A                          | c.(796-798)GGA>GAA     | p.G266E  |
| Pat_76 | Post-Resistance | ZNF285   | 26974  | 37 | 19 | 44891787 | 44891787 | Missense_Mutation | SNP | G  | A  | 7  | 24  | c.620C>T                          | c.(619-621)CCC>CTC     | p.P207L  |
| Pat_76 | Post-Resistance | CEACAM20 | 125931 | 37 | 19 | 45016954 | 45016954 | Missense_Mutation | SNP | C  | A  | 6  | 20  | c.1485G>T                         | c.(1483-1485)AAG>AAT   | p.K495N  |
| Pat_76 | Post-Resistance | PVRL2    | 5819   | 37 | 19 | 45389243 | 45389243 | Missense_Mutation | SNP | G  | A  | 24 | 55  | c.1246G>A                         | c.(1246-1248)GAG>AAG   | p.E416K  |
| Pat_76 | Post-Resistance | RELB     | 5971   | 37 | 19 | 45536001 | 45536001 | Missense_Mutation | SNP | G  | A  | 7  | 8   | c.1201G>A                         | c.(1201-1203)GAC>AAC   | p.D401N  |
| Pat_76 | Post-Resistance | SFRS16   | 11129  | 37 | 19 | 45556053 | 45556053 | Missense_Mutation | SNP | C  | T  | 22 | 67  | c.202C>T                          | c.(202-204)CCC>TCC     | p.P68S   |
| Pat_76 | Post-Resistance | IGFL2    | 147920 | 37 | 19 | 46664003 | 46664003 | Missense_Mutation | SNP | C  | T  | 63 | 164 | c.206C>T                          | c.(205-207)CCC>CTC     | p.P69L   |
| Pat_76 | Post-Resistance | PNMAL1   | 55228  | 37 | 19 | 46973649 | 46973649 | Missense_Mutation | SNP | G  | A  | 6  | 15  | c.644C>T                          | c.(643-645)CCC>CTC     | p.P215L  |
| Pat_76 | Post-Resistance | PTGIR    | 5739   | 37 | 19 | 47124731 | 47124731 | Missense_Mutation | SNP | G  | A  | 12 | 31  | c.967C>T                          | c.(967-969)CTT>TTT     | p.L323F  |
| Pat_76 | Post-Resistance | GRLF1    | 2909   | 37 | 19 | 47503857 | 47503857 | Missense_Mutation | SNP | C  | T  | 14 | 12  | c.4412C>T                         | c.(4411-4413)CCG>CTG   | p.P1471L |
| Pat_76 | Post-Resistance | ZC3H4    | 23211  | 37 | 19 | 47588399 | 47588399 | Missense_Mutation | SNP | G  | A  | 37 | 75  | c.1021C>T                         | c.(1021-1023)CGG>TGG   | p.R341W  |
| Pat_76 | Post-Resistance | ELSPBP1  | 64100  | 37 | 19 | 48519260 | 48519260 | Missense_Mutation | SNP | G  | A  | 17 | 60  | c.319G>A                          | c.(319-321)GAT>AAT     | p.D107N  |
| Pat_76 | Post-Resistance | CABP5    | 56344  | 37 | 19 | 48537511 | 48537511 | Missense_Mutation | SNP | C  | T  | 8  | 30  | c.457G>A                          | c.(457-459)GAG>AAG     | p.E153K  |
| Pat_76 | Post-Resistance | GRIN2D   | 2906   | 37 | 19 | 48922977 | 48922977 | Missense_Mutation | SNP | C  | T  | 51 | 140 | c.1997C>T                         | c.(1996-1998)GCC>GTC   | p.A666V  |
| Pat_76 | Post-Resistance | SULT2B1  | 6820   | 37 | 19 | 49079332 | 49079333 | Missense_Mutation | DNP | CC | TT | 24 | 98  | c.206_207CC>TT                    | c.(205-207)CCC>CTT     | p.P69L   |
| Pat_76 | Post-Resistance | CGB2     | 114336 | 37 | 19 | 49536425 | 49536425 | Missense_Mutation | SNP | C  | T  | 20 | 35  | c.439C>T                          | c.(439-441)CCA>TCA     | p.P147S  |
| Pat_76 | Post-Resistance | SLC6A16  | 28968  | 37 | 19 | 49813080 | 49813080 | Missense_Mutation | SNP | G  | A  | 6  | 18  | c.704C>T                          | c.(703-705)CCT>CTT     | p.P235L  |
| Pat_76 | Post-Resistance | TBC1D17  | 79735  | 37 | 19 | 50385521 | 50385521 | Missense_Mutation | SNP | C  | T  | 19 | 62  | c.662C>T                          | c.(661-663)TCC>TTC     | p.S221F  |
| Pat_76 | Post-Resistance | IL4I1    | 259307 | 37 | 19 | 50399286 | 50399286 | Missense_Mutation | SNP | G  | A  | 12 | 23  | c.38C>T                           | c.(37-39)CCC>CTC       | p.P13L   |
| Pat_76 | Post-Resistance | ZNF473   | 25888  | 37 | 19 | 50549595 | 50549595 | Missense_Mutation | SNP | C  | T  | 11 | 22  | c.1895C>T                         | c.(1894-1896)TCC>TTC   | p.S632F  |
| Pat_76 | Post-Resistance | C19orf41 | 126123 | 37 | 19 | 50655885 | 50655885 | Missense_Mutation | SNP | C  | T  | 39 | 101 | c.647G>A                          | c.(646-648)CGA>CAA     | p.R216Q  |
| Pat_76 | Post-Resistance | C19orf41 | 126123 | 37 | 19 | 50666268 | 50666268 | Missense_Mutation | SNP | C  | T  | 9  | 41  | c.184G>A                          | c.(184-186)GGG>AGG     | p.G62R   |
| Pat_76 | Post-Resistance | MYH14    | 79784  | 37 | 19 | 50753023 | 50753023 | Missense_Mutation | SNP | G  | C  | 35 | 97  | c.1575G>C                         | c.(1573-1575)TGG>TGC   | p.W525C  |
| Pat_76 | Post-Resistance | MYH14    | 79784  | 37 | 19 | 50779268 | 50779268 | Missense_Mutation | SNP | C  | T  | 5  | 10  | c.3365C>T                         | c.(3364-3366)GCC>GTC   | p.A1122V |
| Pat_76 | Post-Resistance | SPIB     | 6689   | 37 | 19 | 50923210 | 50923210 | Missense_Mutation | SNP | G  | C  | 9  | 13  | c.31G>C                           | c.(31-33)GGG>CGG       | p.G11R   |
| Pat_76 | Post-Resistance | KLK15    | 55554  | 37 | 19 | 51330397 | 51330397 | Missense_Mutation | SNP | C  | T  | 21 | 56  | c.218G>A                          | c.(217-219)GGA>GAA     | p.G73E   |
| Pat_76 | Post-Resistance | FPR1     | 2357   | 37 | 19 | 52249742 | 52249742 | Missense_Mutation | SNP | C  | T  | 18 | 30  | c.506G>A                          | c.(505-507)GGT>GAT     | p.G169D  |
| Pat_76 | Post-Resistance | ZNF613   | 79898  | 37 | 19 | 52448416 | 52448416 | Missense_Mutation | SNP | C  | T  | 8  | 42  | c.1280C>T                         | c.(1279-1281)CCC>CTC   | p.P427L  |



|        |                 |           |        |    |    |          |          |                   |     |    |    |    |     |                |                      |               |
|--------|-----------------|-----------|--------|----|----|----------|----------|-------------------|-----|----|----|----|-----|----------------|----------------------|---------------|
| Pat_76 | Post-Resistance | ZNF701    | 55762  | 37 | 19 | 53085781 | 53085781 | Missense_Mutation | SNP | G  | A  | 22 | 70  | c.469G>A       | c.(469-471)GAA>AAA   | p.E157K       |
| Pat_76 | Post-Resistance | ZNF347    | 84671  | 37 | 19 | 53644928 | 53644928 | Missense_Mutation | SNP | G  | A  | 20 | 58  | c.1153C>T      | c.(1153-1155)CGT>TGT | p.R385C       |
| Pat_76 | Post-Resistance | CACNG6    | 59285  | 37 | 19 | 54503025 | 54503025 | Missense_Mutation | SNP | G  | T  | 6  | 22  | c.544G>T       | c.(544-546)GGC>TGC   | p.G182C       |
| Pat_76 | Post-Resistance | LILRB2    | 10288  | 37 | 19 | 54783794 | 54783794 | Nonsense_Mutation | SNP | C  | T  | 35 | 80  | c.207G>A       | c.(205-207)TGG>TGA   | p.W69*        |
| Pat_76 | Post-Resistance | LILRA1    | 11024  | 37 | 19 | 55107653 | 55107653 | Splice_Site       | SNP | G  | A  | 8  | 37  | c.959_splice   | c.e7-1               | p.G320_splice |
| Pat_76 | Post-Resistance | LILRB1    | 10859  | 37 | 19 | 55148297 | 55148297 | Missense_Mutation | SNP | C  | T  | 23 | 42  | c.1921C>T      | c.(1921-1923)CCC>TCC | p.P641S       |
| Pat_76 | Post-Resistance | NLRP7     | 199713 | 37 | 19 | 55450725 | 55450726 | Missense_Mutation | DNP | CC | TT | 9  | 33  | .1461_1462GG>A | 159-1464)GGGGAG>GGA  | p.E488K       |
| Pat_76 | Post-Resistance | SYT5      | 6861   | 37 | 19 | 55689725 | 55689725 | Missense_Mutation | SNP | C  | T  | 7  | 13  | c.91G>A        | c.(91-93)GCC>ACC     | p.A31T        |
| Pat_76 | Post-Resistance | PTPRH     | 5794   | 37 | 19 | 55716882 | 55716882 | Missense_Mutation | SNP | C  | T  | 18 | 40  | c.431G>A       | c.(430-432)GGC>GAC   | p.G144D       |
| Pat_76 | Post-Resistance | NLRP9     | 338321 | 37 | 19 | 56244864 | 56244864 | Nonsense_Mutation | SNP | C  | T  | 12 | 17  | c.333G>A       | c.(331-333)TGG>TGA   | p.W111*       |
| Pat_76 | Post-Resistance | NLRP5     | 126206 | 37 | 19 | 56530714 | 56530714 | Missense_Mutation | SNP | C  | T  | 4  | 17  | c.572C>T       | c.(571-573)TCA>TTA   | p.S191L       |
| Pat_76 | Post-Resistance | PEG3      | 5178   | 37 | 19 | 57325941 | 57325941 | Missense_Mutation | SNP | G  | A  | 12 | 20  | c.3869C>T      | c.(3868-3870)TCT>TTT | p.S1290F      |
| Pat_76 | Post-Resistance | ZNF543    | 125919 | 37 | 19 | 57840542 | 57840542 | Missense_Mutation | SNP | C  | T  | 12 | 36  | c.1712C>T      | c.(1711-1713)CCT>CTT | p.P571L       |
| Pat_76 | Post-Resistance | ZNF304    | 57343  | 37 | 19 | 57868658 | 57868658 | Missense_Mutation | SNP | C  | T  | 27 | 126 | c.1421C>T      | c.(1420-1422)CCT>CTT | p.P474L       |
| Pat_76 | Post-Resistance | ZSCAN4    | 201516 | 37 | 19 | 58187859 | 58187859 | Missense_Mutation | SNP | G  | A  | 9  | 22  | c.346G>A       | c.(346-348)GAG>AAG   | p.E116K       |
| Pat_76 | Post-Resistance | ZSCAN4    | 201516 | 37 | 19 | 58190127 | 58190127 | Missense_Mutation | SNP | C  | T  | 33 | 67  | c.1156C>T      | c.(1156-1158)CAT>TAT | p.H386Y       |
| Pat_76 | Post-Resistance | RPS5      | 6193   | 37 | 19 | 58904521 | 58904521 | Missense_Mutation | SNP | C  | T  | 23 | 47  | c.287C>T       | c.(286-288)GCC>GTC   | p.A96V        |
| Pat_76 | Post-Resistance | TSSC1     | 7260   | 37 | 2  | 3341881  | 3341881  | Missense_Mutation | SNP | T  | G  | 3  | 13  | c.166A>C       | c.(166-168)AAT>CAT   | p.N56H        |
| Pat_76 | Post-Resistance | RSAD2     | 91543  | 37 | 2  | 7035946  | 7035946  | Missense_Mutation | SNP | C  | T  | 6  | 16  | c.959C>T       | c.(958-960)CCT>CTT   | p.P320L       |
| Pat_76 | Post-Resistance | GRHL1     | 29841  | 37 | 2  | 10104169 | 10104169 | Nonsense_Mutation | SNP | C  | T  | 13 | 35  | c.901C>T       | c.(901-903)CGA>TGA   | p.R301*       |
| Pat_76 | Post-Resistance | RRM2      | 6241   | 37 | 2  | 10269026 | 10269026 | Missense_Mutation | SNP | C  | T  | 7  | 29  | c.850C>T       | c.(850-852)CCA>TCA   | p.P284S       |
| Pat_76 | Post-Resistance | ATP6V1C2  | 245973 | 37 | 2  | 10914963 | 10914963 | Nonsense_Mutation | SNP | C  | T  | 23 | 58  | c.688C>T       | c.(688-690)CGA>TGA   | p.R230*       |
| Pat_76 | Post-Resistance | PUM2      | 23369  | 37 | 2  | 20460196 | 20460196 | Missense_Mutation | SNP | G  | A  | 7  | 26  | c.2257C>T      | c.(2257-2259)CCA>TCA | p.P753S       |
| Pat_76 | Post-Resistance | APOB      | 338    | 37 | 2  | 21231860 | 21231860 | Missense_Mutation | SNP | G  | A  | 7  | 15  | c.7880C>T      | c.(7879-7881)CCA>CTA | p.P2627L      |
| Pat_76 | Post-Resistance | APOB      | 338    | 37 | 2  | 21235356 | 21235356 | Missense_Mutation | SNP | C  | T  | 12 | 23  | c.4384G>A      | c.(4384-4386)GGA>AGA | p.G1462R      |
| Pat_76 | Post-Resistance | DPYSL5    | 56896  | 37 | 2  | 27167566 | 27167566 | Missense_Mutation | SNP | G  | A  | 19 | 40  | c.1483G>A      | c.(1483-1485)GAT>AAT | p.D495N       |
| Pat_76 | Post-Resistance | ZNF513    | 130557 | 37 | 2  | 27601169 | 27601169 | Missense_Mutation | SNP | C  | T  | 8  | 48  | c.869G>A       | c.(868-870)GGG>GAG   | p.G290E       |
| Pat_76 | Post-Resistance | PLB1      | 151056 | 37 | 2  | 28812377 | 28812377 | Missense_Mutation | SNP | G  | C  | 22 | 47  | c.1876G>C      | c.(1876-1878)GTT>CTT | p.V626L       |
| Pat_76 | Post-Resistance | FAM179A   | 165186 | 37 | 2  | 29247101 | 29247101 | Missense_Mutation | SNP | G  | A  | 5  | 11  | c.1714G>A      | c.(1714-1716)GAG>AAG | p.E572K       |
| Pat_76 | Post-Resistance | ALK       | 238    | 37 | 2  | 29543713 | 29543713 | Missense_Mutation | SNP | C  | T  | 21 | 44  | c.1450G>A      | c.(1450-1452)GAT>AAT | p.D484N       |
| Pat_76 | Post-Resistance | XDH       | 7498   | 37 | 2  | 31558835 | 31558835 | Missense_Mutation | SNP | C  | A  | 14 | 32  | c.3991G>T      | c.(3991-3993)GTG>TTG | p.V1331L      |
| Pat_76 | Post-Resistance | FAM98A    | 25940  | 37 | 2  | 33810710 | 33810710 | Missense_Mutation | SNP | G  | A  | 7  | 38  | c.775C>T       | c.(775-777)CCT>TCT   | p.P259S       |
| Pat_76 | Post-Resistance | MAP4K3    | 8491   | 37 | 2  | 39487761 | 39487761 | Nonsense_Mutation | SNP | C  | T  | 3  | 14  | c.2294G>A      | c.(2293-2295)TGG>TAG | p.W765*       |
| Pat_76 | Post-Resistance | SLC8A1    | 6546   | 37 | 2  | 40405536 | 40405536 | Missense_Mutation | SNP | C  | T  | 30 | 59  | c.1906G>A      | c.(1906-1908)GAG>AAG | p.E636K       |
| Pat_76 | Post-Resistance | LOC728819 | 728819 | 37 | 2  | 43903146 | 43903146 | Missense_Mutation | SNP | C  | T  | 5  | 26  | c.316G>A       | c.(316-318)GAT>AAT   | p.D106N       |
| Pat_76 | Post-Resistance | ABCG8     | 64241  | 37 | 2  | 44078738 | 44078738 | Missense_Mutation | SNP | C  | T  | 14 | 27  | c.338C>T       | c.(337-339)TCC>TTC   | p.S113F       |
| Pat_76 | Post-Resistance | PREPL     | 9581   | 37 | 2  | 44559788 | 44559789 | Missense_Mutation | DNP | GG | AA | 4  | 11  | .1162_1163CC>T | c.(1162-1164)CCT>TTT | p.P388F       |
| Pat_76 | Post-Resistance | FOXN2     | 3344   | 37 | 2  | 48573793 | 48573793 | Missense_Mutation | SNP | C  | T  | 14 | 27  | c.440C>T       | c.(439-441)CCA>CTA   | p.P147L       |
| Pat_76 | Post-Resistance | PSME4     | 23198  | 37 | 2  | 54131220 | 54131220 | Missense_Mutation | SNP | G  | A  | 5  | 33  | c.3017C>T      | c.(3016-3018)CCC>CTC | p.P1006L      |
| Pat_76 | Post-Resistance | C2orf63   | 130162 | 37 | 2  | 55445106 | 55445106 | Missense_Mutation | SNP | G  | A  | 6  | 10  | c.206C>T       | c.(205-207)TCC>TTC   | p.S69F        |
| Pat_76 | Post-Resistance | EFEMP1    | 2202   | 37 | 2  | 56094269 | 56094269 | Missense_Mutation | SNP | C  | T  | 22 | 20  | c.1421G>A      | c.(1420-1422)GGG>GAG | p.G474E       |
| Pat_76 | Post-Resistance | CCDC85A   | 114800 | 37 | 2  | 56611435 | 56611435 | Missense_Mutation | SNP | C  | T  | 8  | 22  | c.1607C>T      | c.(1606-1608)TCG>TTG | p.S536L       |
| Pat_76 | Post-Resistance | PLEK      | 5341   | 37 | 2  | 68607955 | 68607955 | Missense_Mutation | SNP | T  | A  | 32 | 56  | c.299T>A       | c.(298-300)ATT>AAT   | p.I100N       |
| Pat_76 | Post-Resistance | FBXO48    | 554251 | 37 | 2  | 68691389 | 68691389 | Missense_Mutation | SNP | C  | T  | 42 | 89  | c.420G>A       | c.(418-420)ATG>ATA   | p.M140I       |
| Pat_76 | Post-Resistance | GFPT1     | 2673   | 37 | 2  | 69597165 | 69597165 | Missense_Mutation | SNP | C  | T  | 3  | 12  | c.191G>A       | c.(190-192)GGA>GAA   | p.G64E        |
| Pat_76 | Post-Resistance | C2orf42   | 54980  | 37 | 2  | 70377634 | 70377634 | Missense_Mutation | SNP | G  | A  | 8  | 30  | c.1579C>T      | c.(1579-1581)CTT>TTT | p.L527F       |
| Pat_76 | Post-Resistance | PCYOX1    | 51449  | 37 | 2  | 70502156 | 70502156 | Missense_Mutation | SNP | G  | A  | 14 | 38  | c.560G>A       | c.(559-561)GGA>GAA   | p.G187E       |

|        |                 |          |        |    |   |           |           |                   |     |    |    |    |     |                                    |                      |               |
|--------|-----------------|----------|--------|----|---|-----------|-----------|-------------------|-----|----|----|----|-----|------------------------------------|----------------------|---------------|
| Pat_76 | Post-Resistance | ATP6V1B1 | 525    | 37 | 2 | 71191923  | 71191923  | Missense_Mutation | SNP | G  | A  | 8  | 23  | c.1306G>A                          | c.(1306-1308)GAG>AAG | p.E436K       |
| Pat_76 | Post-Resistance | C2orf78  | 388960 | 37 | 2 | 74043815  | 74043815  | Missense_Mutation | SNP | C  | T  | 3  | 23  | c.2465C>T                          | c.(2464-2466)TCT>TTT | p.S822F       |
| Pat_76 | Post-Resistance | DOK1     | 1796   | 37 | 2 | 74782764  | 74782765  | Missense_Mutation | DNP | GG | AC | 9  | 14  | c.423_424GG>AC421-426)CTGGAG>CTAC) |                      | p.E142Q       |
| Pat_76 | Post-Resistance | DOK1     | 1796   | 37 | 2 | 74783648  | 74783648  | Missense_Mutation | SNP | C  | T  | 11 | 39  | c.853C>T                           | c.(853-855)CCC>TCC   | p.P285S       |
| Pat_76 | Post-Resistance | HK2      | 3099   | 37 | 2 | 75108931  | 75108931  | Missense_Mutation | SNP | T  | G  | 16 | 27  | c.1664T>G                          | c.(1663-1665)ATG>AGG | p.M555R       |
| Pat_76 | Post-Resistance | CTNNA2   | 1496   | 37 | 2 | 80808840  | 80808840  | Missense_Mutation | SNP | G  | A  | 6  | 22  | c.1903G>A                          | c.(1903-1905)GAA>AAA | p.E635K       |
| Pat_76 | Post-Resistance | THNSL2   | 55258  | 37 | 2 | 88484883  | 88484883  | Missense_Mutation | SNP | G  | A  | 20 | 34  | c.1114G>A                          | c.(1114-1116)GAA>AAA | p.E372K       |
| Pat_76 | Post-Resistance | TMEM131  | 23505  | 37 | 2 | 98475846  | 98475846  | Missense_Mutation | SNP | G  | A  | 6  | 13  | c.404C>T                           | c.(403-405)CCT>CTT   | p.P135L       |
| Pat_76 | Post-Resistance | MRPL30   | 51263  | 37 | 2 | 99812220  | 99812220  | Splice_Site       | SNP | G  | A  | 6  | 10  | c.537_splice                       | c.e6+1               |               |
| Pat_76 | Post-Resistance | LYG2     | 254773 | 37 | 2 | 99861748  | 99861748  | Missense_Mutation | SNP | C  | T  | 14 | 64  | c.358G>A                           | c.(358-360)GGA>AGA   | p.G120R       |
| Pat_76 | Post-Resistance | NPAS2    | 4862   | 37 | 2 | 101565879 | 101565879 | Missense_Mutation | SNP | C  | T  | 10 | 25  | c.535C>T                           | c.(535-537)CCA>TCA   | p.P179S       |
| Pat_76 | Post-Resistance | CREG2    | 200407 | 37 | 2 | 102000157 | 102000158 | Missense_Mutation | DNP | CC | TT | 5  | 49  | c.448_449GG>AA                     | c.(448-450)GGA>AAA   | p.G150K       |
| Pat_76 | Post-Resistance | IL18R1   | 8809   | 37 | 2 | 103013029 | 103013029 | Missense_Mutation | SNP | C  | G  | 7  | 20  | c.1309C>G                          | c.(1309-1311)CGA>GGA | p.R437G       |
| Pat_76 | Post-Resistance | TGFBRAP1 | 9392   | 37 | 2 | 105912941 | 105912941 | Missense_Mutation | SNP | C  | T  | 4  | 29  | c.910G>A                           | c.(910-912)GGA>AGA   | p.G304R       |
| Pat_76 | Post-Resistance | RGPD3    | 653489 | 37 | 2 | 107049684 | 107049684 | Missense_Mutation | SNP | C  | T  | 42 | 132 | c.2263G>A                          | c.(2263-2265)GAA>AAA | p.E755K       |
| Pat_76 | Post-Resistance | SULT1C3  | 442038 | 37 | 2 | 108881461 | 108881461 | Missense_Mutation | SNP | G  | A  | 24 | 31  | c.802G>A                           | c.(802-804)GGG>AGG   | p.G268R       |
| Pat_76 | Post-Resistance | RGPD5    | 84220  | 37 | 2 | 113147135 | 113147135 | Nonsense_Mutation | SNP | C  | T  | 27 | 166 | c.3387G>A                          | c.(3385-3387)TGG>TGA | p.W1129*      |
| Pat_76 | Post-Resistance | POLR1B   | 84172  | 37 | 2 | 113322062 | 113322062 | Missense_Mutation | SNP | C  | T  | 15 | 33  | c.1732C>T                          | c.(1732-1734)CTT>TTT | p.L578F       |
| Pat_76 | Post-Resistance | IL1F6    | 27179  | 37 | 2 | 113764178 | 113764178 | Missense_Mutation | SNP | C  | T  | 99 | 211 | c.128C>T                           | c.(127-129)ACT>ATT   | p.T43I        |
| Pat_76 | Post-Resistance | PSD4     | 23550  | 37 | 2 | 113953840 | 113953840 | Missense_Mutation | SNP | G  | A  | 17 | 14  | c.2342G>A                          | c.(2341-2343)GGC>GAC | p.G781D       |
| Pat_76 | Post-Resistance | DPP10    | 57628  | 37 | 2 | 116066815 | 116066815 | Missense_Mutation | SNP | G  | A  | 5  | 7   | c.61G>A                            | c.(61-63)GAA>AAA     | p.E21K        |
| Pat_76 | Post-Resistance | DPP10    | 57628  | 37 | 2 | 116572369 | 116572369 | Missense_Mutation | SNP | G  | A  | 12 | 17  | c.1701G>A                          | c.(1699-1701)ATG>ATA | p.M567I       |
| Pat_76 | Post-Resistance | GLI2     | 2736   | 37 | 2 | 121748199 | 121748199 | Missense_Mutation | SNP | C  | T  | 28 | 69  | c.4709C>T                          | c.(4708-4710)TCC>TTC | p.S1570F      |
| Pat_76 | Post-Resistance | TFCP2L1  | 29842  | 37 | 2 | 121992851 | 121992851 | Missense_Mutation | SNP | A  | G  | 6  | 72  | c.1040T>C                          | c.(1039-1041)GTC>GCC | p.V347A       |
| Pat_76 | Post-Resistance | TFCP2L1  | 29842  | 37 | 2 | 121997133 | 121997133 | Splice_Site       | SNP | C  | T  | 6  | 21  | c.860_splice                       | c.e8+1               | p.G287_splice |
| Pat_76 | Post-Resistance | MKI67IP  | 84365  | 37 | 2 | 122493301 | 122493301 | Missense_Mutation | SNP | G  | T  | 11 | 12  | c.131C>A                           | c.(130-132)CCT>CAT   | p.P44H        |
| Pat_76 | Post-Resistance | MYO7B    | 4648   | 37 | 2 | 128341852 | 128341852 | Missense_Mutation | SNP | C  | T  | 24 | 65  | c.1499C>T                          | c.(1498-1500)GCC>GTC | p.A500V       |
| Pat_76 | Post-Resistance | MYO7B    | 4648   | 37 | 2 | 128346086 | 128346086 | Missense_Mutation | SNP | C  | T  | 10 | 29  | c.1810C>T                          | c.(1810-1812)CAT>TAT | p.H604Y       |
| Pat_76 | Post-Resistance | YSK4     | 80122  | 37 | 2 | 135744766 | 135744766 | Missense_Mutation | SNP | G  | A  | 9  | 12  | c.1676C>T                          | c.(1675-1677)CCC>CTC | p.P559L       |
| Pat_76 | Post-Resistance | LCT      | 3938   | 37 | 2 | 136566810 | 136566810 | Missense_Mutation | SNP | G  | A  | 11 | 27  | c.3107C>T                          | c.(3106-3108)CCT>CTT | p.P1036L      |
| Pat_76 | Post-Resistance | HNMT     | 3176   | 37 | 2 | 138762777 | 138762777 | Missense_Mutation | SNP | C  | T  | 13 | 34  | c.505C>T                           | c.(505-507)CTC>TTC   | p.L169F       |
| Pat_76 | Post-Resistance | LRP1B    | 53353  | 37 | 2 | 141232728 | 141232728 | Missense_Mutation | SNP | C  | T  | 15 | 29  | c.9604G>A                          | c.(9604-9606)GAT>AAT | p.D3202N      |
| Pat_76 | Post-Resistance | KYNU     | 8942   | 37 | 2 | 143643012 | 143643012 | Missense_Mutation | SNP | G  | A  | 10 | 20  | c.76G>A                            | c.(76-78)GAT>AAT     | p.D26N        |
| Pat_76 | Post-Resistance | KYNU     | 8942   | 37 | 2 | 143718310 | 143718310 | Missense_Mutation | SNP | C  | T  | 23 | 37  | c.700C>T                           | c.(700-702)CCT>TCT   | p.P234S       |
| Pat_76 | Post-Resistance | ARHGAP15 | 55843  | 37 | 2 | 143913139 | 143913139 | Missense_Mutation | SNP | G  | A  | 5  | 19  | c.80G>A                            | c.(79-81)AGA>AAA     | p.R27K        |
| Pat_76 | Post-Resistance | KIF5C    | 3800   | 37 | 2 | 149864490 | 149864490 | Missense_Mutation | SNP | A  | G  | 22 | 47  | c.2459A>G                          | c.(2458-2460)GAC>GGC | p.D820G       |
| Pat_76 | Post-Resistance | GALNT5   | 11227  | 37 | 2 | 158140927 | 158140927 | Missense_Mutation | SNP | G  | A  | 5  | 14  | c.1588G>A                          | c.(1588-1590)GAG>AAG | p.E530K       |
| Pat_76 | Post-Resistance | RBMS1    | 5937   | 37 | 2 | 161349804 | 161349804 | Missense_Mutation | SNP | G  | A  | 7  | 19  | c.71C>T                            | c.(70-72)GCC>GTC     | p.A24V        |
| Pat_76 | Post-Resistance | SCN3A    | 6328   | 37 | 2 | 165997216 | 165997216 | Missense_Mutation | SNP | G  | A  | 13 | 51  | c.1964C>T                          | c.(1963-1965)TCC>TTC | p.S655F       |
| Pat_76 | Post-Resistance | SCN2A    | 6326   | 37 | 2 | 166188065 | 166188065 | Missense_Mutation | SNP | C  | T  | 4  | 15  | c.2375C>T                          | c.(2374-2376)TCT>TTT | p.S792F       |
| Pat_76 | Post-Resistance | SCN9A    | 6335   | 37 | 2 | 167060726 | 167060726 | Nonsense_Mutation | SNP | G  | A  | 6  | 9   | c.4480C>T                          | c.(4480-4482)CAA>TAA | p.Q1494*      |
| Pat_76 | Post-Resistance | SCN9A    | 6335   | 37 | 2 | 167134772 | 167134772 | Missense_Mutation | SNP | C  | T  | 3  | 12  | c.2362G>A                          | c.(2362-2364)GAT>AAT | p.D788N       |
| Pat_76 | Post-Resistance | SCN7A    | 6332   | 37 | 2 | 167297955 | 167297955 | Missense_Mutation | SNP | G  | A  | 10 | 25  | c.2108C>T                          | c.(2107-2109)TCC>TTC | p.S703F       |
| Pat_76 | Post-Resistance | XIRP2    | 129446 | 37 | 2 | 168099884 | 168099884 | Missense_Mutation | SNP | G  | A  | 12 | 30  | c.1982G>A                          | c.(1981-1983)AGG>AAG | p.R661K       |
| Pat_76 | Post-Resistance | XIRP2    | 129446 | 37 | 2 | 168106418 | 168106418 | Missense_Mutation | SNP | G  | A  | 8  | 25  | c.8516G>A                          | c.(8515-8517)AGA>AAA | p.R2839K      |
| Pat_76 | Post-Resistance | ITGA6    | 3655   | 37 | 2 | 173355997 | 173355997 | Missense_Mutation | SNP | G  | A  | 29 | 53  | c.2827G>A                          | c.(2827-2829)GGG>AGG | p.G943R       |
| Pat_76 | Post-Resistance | CDCA7    | 83879  | 37 | 2 | 174232372 | 174232372 | Nonsense_Mutation | SNP | G  | T  | 19 | 49  | c.1096G>T                          | c.(1096-1098)GAA>TAA | p.E366*       |

|        |                 |          |        |    |    |           |           |                   |     |    |    |    |     |                 |                           |               |
|--------|-----------------|----------|--------|----|----|-----------|-----------|-------------------|-----|----|----|----|-----|-----------------|---------------------------|---------------|
| Pat_76 | Post-Resistance | CDCA7    | 83879  | 37 | 2  | 174232374 | 174232374 | Missense_Mutation | SNP | A  | T  | 18 | 49  | c.1098A>T       | c.(1096-1098)GAA>GAT      | p.E366D       |
| Pat_76 | Post-Resistance | TTN      | 7273   | 37 | 2  | 179416869 | 179416870 | Missense_Mutation | DNP | CC | TT | 17 | 72  | 33053_83054GG>A | c.(83053-83055)GGA>AAA    | p.G27685K     |
| Pat_76 | Post-Resistance | TTN      | 7273   | 37 | 2  | 179417904 | 179417904 | Missense_Mutation | SNP | C  | T  | 14 | 29  | c.82019G>A      | c.(82018-82020)GGA>GAA    | p.G27340E     |
| Pat_76 | Post-Resistance | TTN      | 7273   | 37 | 2  | 179431781 | 179431781 | Missense_Mutation | SNP | G  | A  | 12 | 51  | c.71374C>T      | c.(71374-71376)CGT>TGT    | p.R23792C     |
| Pat_76 | Post-Resistance | TTN      | 7273   | 37 | 2  | 179432002 | 179432002 | Missense_Mutation | SNP | C  | T  | 19 | 54  | c.71153G>A      | c.(71152-71154)AGA>AAA    | p.R23718K     |
| Pat_76 | Post-Resistance | TTN      | 7273   | 37 | 2  | 179483389 | 179483389 | Missense_Mutation | SNP | C  | T  | 9  | 25  | c.39184G>A      | c.(39184-39186)GGA>AGT    | p.G13062R     |
| Pat_76 | Post-Resistance | TTN      | 7273   | 37 | 2  | 179552940 | 179552940 | Missense_Mutation | SNP | C  | T  | 4  | 24  | c.28477G>A      | c.(28477-28479)GAG>AAC    | p.E9493K      |
| Pat_76 | Post-Resistance | TTN      | 7273   | 37 | 2  | 179584053 | 179584053 | Missense_Mutation | SNP | C  | T  | 30 | 87  | c.20332G>A      | c.(20332-20334)GGA>AGT    | p.G6778R      |
| Pat_76 | Post-Resistance | TTN      | 7273   | 37 | 2  | 179587255 | 179587255 | Missense_Mutation | SNP | G  | A  | 12 | 40  | c.18527C>T      | c.(18526-18528)TCT>TTT    | p.S6176F      |
| Pat_76 | Post-Resistance | TTN      | 7273   | 37 | 2  | 179590750 | 179590750 | Missense_Mutation | SNP | G  | A  | 4  | 9   | c.16567C>T      | c.(16567-16569)CCT>TCT    | p.P5523S      |
| Pat_76 | Post-Resistance | TTN      | 7273   | 37 | 2  | 179594203 | 179594203 | Missense_Mutation | SNP | G  | A  | 18 | 41  | c.14948C>T      | c.(14947-14949)CCG>CTC    | p.P4983L      |
| Pat_76 | Post-Resistance | TTN      | 7273   | 37 | 2  | 179605785 | 179605786 | Missense_Mutation | DNP | CC | TT | 26 | 52  | 11661_11662GG>A | c.(11661-11664)AAGGGT>AAA | p.G3888S      |
| Pat_76 | Post-Resistance | TTN      | 7273   | 37 | 2  | 179614199 | 179614199 | Nonsense_Mutation | SNP | G  | A  | 4  | 15  | c.12928C>T      | c.(12928-12930)CAA>TAA    | p.Q4310*      |
| Pat_76 | Post-Resistance | TTN      | 7273   | 37 | 2  | 179638813 | 179638813 | Missense_Mutation | SNP | C  | T  | 11 | 30  | c.7082G>A       | c.(7081-7083)GGA>GAA      | p.G2361E      |
| Pat_76 | Post-Resistance | CCDC141  | 285025 | 37 | 2  | 179701823 | 179701823 | Nonsense_Mutation | SNP | G  | A  | 4  | 8   | c.2398C>T       | c.(2398-2400)CAA>TAA      | p.Q800*       |
| Pat_76 | Post-Resistance | ZNF804A  | 91752  | 37 | 2  | 185798352 | 185798353 | Missense_Mutation | DNP | GG | AA | 6  | 12  | c.278_279GG>AA  | c.(277-279)AGG>AAA        | p.R93K        |
| Pat_76 | Post-Resistance | ZSWIM2   | 151112 | 37 | 2  | 187702046 | 187702046 | Missense_Mutation | SNP | C  | T  | 7  | 24  | c.730G>A        | c.(730-732)GGG>AGG        | p.G244R       |
| Pat_76 | Post-Resistance | ZSWIM2   | 151112 | 37 | 2  | 187702277 | 187702277 | Missense_Mutation | SNP | C  | T  | 8  | 25  | c.499G>A        | c.(499-501)GGC>AGC        | p.G167S       |
| Pat_76 | Post-Resistance | COL3A1   | 1281   | 37 | 2  | 189854823 | 189854823 | Missense_Mutation | SNP | G  | A  | 9  | 16  | c.692G>A        | c.(691-693)GGA>GAA        | p.G231E       |
| Pat_76 | Post-Resistance | MYO1B    | 4430   | 37 | 2  | 192265124 | 192265124 | Missense_Mutation | SNP | G  | A  | 25 | 63  | c.2312G>A       | c.(2311-2313)CGG>CAG      | p.R771Q       |
| Pat_76 | Post-Resistance | DNAH7    | 56171  | 37 | 2  | 196723464 | 196723464 | Nonsense_Mutation | SNP | G  | A  | 14 | 40  | c.7801C>T       | c.(7801-7803)CAA>TAA      | p.Q2601*      |
| Pat_76 | Post-Resistance | DNAH7    | 56171  | 37 | 2  | 196729497 | 196729497 | Missense_Mutation | SNP | C  | T  | 21 | 61  | c.6882G>A       | c.(6880-6882)ATG>ATA      | p.M2294I      |
| Pat_76 | Post-Resistance | DNAH7    | 56171  | 37 | 2  | 196756414 | 196756414 | Missense_Mutation | SNP | G  | A  | 13 | 29  | c.5011C>T       | c.(5011-5013)CTT>TTT      | p.L1671F      |
| Pat_76 | Post-Resistance | HECW2    | 57520  | 37 | 2  | 197092934 | 197092934 | Missense_Mutation | SNP | G  | A  | 6  | 14  | c.3809C>T       | c.(3808-3810)TCC>TTC      | p.S1270F      |
| Pat_76 | Post-Resistance | SPATS2L  | 26010  | 37 | 2  | 201342632 | 201342632 | Missense_Mutation | SNP | G  | A  | 9  | 6   | c.1555G>A       | c.(1555-1557)GAG>AAG      | p.E519K       |
| Pat_76 | Post-Resistance | RAPH1    | 65059  | 37 | 2  | 204306082 | 204306083 | Missense_Mutation | DNP | GG | AA | 4  | 29  | 1830_1831CC>T   | c.(1828-1833)TCCCCG>TCTT  | p.P611S       |
| Pat_76 | Post-Resistance | ZDBF2    | 57683  | 37 | 2  | 207173096 | 207173096 | Missense_Mutation | SNP | G  | A  | 4  | 12  | c.3844G>A       | c.(3844-3846)GAT>AAT      | p.D1282N      |
| Pat_76 | Post-Resistance | PTH2R    | 5746   | 37 | 2  | 209307123 | 209307123 | Missense_Mutation | SNP | C  | T  | 24 | 56  | c.446C>T        | c.(445-447)ACC>ATC        | p.T149I       |
| Pat_76 | Post-Resistance | CPS1     | 1373   | 37 | 2  | 211454911 | 211454911 | Missense_Mutation | SNP | C  | T  | 60 | 172 | c.793C>T        | c.(793-795)CCG>TCG        | p.P265S       |
| Pat_76 | Post-Resistance | ABCA12   | 26154  | 37 | 2  | 215843664 | 215843665 | Missense_Mutation | DNP | CC | TT | 10 | 18  | 4840_4841GG>A   | c.(4840-4842)GGA>AAA      | p.G1614K      |
| Pat_76 | Post-Resistance | SERPINE2 | 5270   | 37 | 2  | 224842266 | 224842266 | Missense_Mutation | SNP | G  | A  | 14 | 42  | c.1154C>T       | c.(1153-1155)CCT>CTT      | p.P385L       |
| Pat_76 | Post-Resistance | COL4A4   | 1286   | 37 | 2  | 227872874 | 227872874 | Missense_Mutation | SNP | C  | T  | 7  | 17  | c.4669G>A       | c.(4669-4671)GAG>AAG      | p.E1557K      |
| Pat_76 | Post-Resistance | COL4A3   | 1285   | 37 | 2  | 228155552 | 228155552 | Missense_Mutation | SNP | G  | A  | 3  | 8   | c.3160G>A       | c.(3160-3162)GGA>AGA      | p.G1054R      |
| Pat_76 | Post-Resistance | SP100    | 6672   | 37 | 2  | 231404082 | 231404082 | Missense_Mutation | SNP | C  | T  | 19 | 22  | c.2195C>T       | c.(2194-2196)TCC>TTC      | p.S732F       |
| Pat_76 | Post-Resistance | UGT1A6   | 54578  | 37 | 2  | 234601885 | 234601885 | Missense_Mutation | SNP | C  | T  | 10 | 23  | c.235C>T        | c.(235-237)CCA>TCA        | p.P79S        |
| Pat_76 | Post-Resistance | ASB18    | 401036 | 37 | 2  | 237149963 | 237149963 | Missense_Mutation | SNP | C  | T  | 24 | 33  | c.288G>A        | c.(286-288)ATG>ATA        | p.M96I        |
| Pat_76 | Post-Resistance | RBM44    | 375316 | 37 | 2  | 238738134 | 238738134 | Missense_Mutation | SNP | C  | T  | 16 | 54  | c.2878C>T       | c.(2878-2880)CCT>TCT      | p.P960S       |
| Pat_76 | Post-Resistance | RNPEPL1  | 57140  | 37 | 2  | 241514551 | 241514551 | Missense_Mutation | SNP | T  | A  | 33 | 54  | c.700T>A        | c.(700-702)TTT>ATT        | p.F234I       |
| Pat_76 | Post-Resistance | SNED1    | 25992  | 37 | 2  | 241989314 | 241989314 | Missense_Mutation | SNP | T  | C  | 13 | 38  | c.1699T>C       | c.(1699-1701)TGC>CGC      | p.C567R       |
| Pat_76 | Post-Resistance | CPXM1    | 56265  | 37 | 20 | 2774842   | 2774842   | Missense_Mutation | SNP | C  | G  | 16 | 32  | c.2199G>C       | c.(2197-2199)AAG>AAC      | p.K733N       |
| Pat_76 | Post-Resistance | CPXM1    | 56265  | 37 | 20 | 2777701   | 2777701   | Missense_Mutation | SNP | G  | A  | 4  | 15  | c.872C>T        | c.(871-873)TCC>TTC        | p.S291F       |
| Pat_76 | Post-Resistance | SLC4A11  | 83959  | 37 | 20 | 3209023   | 3209023   | Missense_Mutation | SNP | G  | A  | 29 | 83  | c.2488C>T       | c.(2488-2490)CAC>TAC      | p.H830Y       |
| Pat_76 | Post-Resistance | GPCPD1   | 56261  | 37 | 20 | 5539440   | 5539440   | Missense_Mutation | SNP | G  | A  | 3  | 13  | c.1558C>T       | c.(1558-1560)CCG>TCG      | p.P520S       |
| Pat_76 | Post-Resistance | PLCB1    | 23236  | 37 | 20 | 8130959   | 8130959   | Missense_Mutation | SNP | C  | T  | 4  | 5   | c.118C>T        | c.(118-120)CCA>TCA        | p.P40S        |
| Pat_76 | Post-Resistance | PLCB1    | 23236  | 37 | 20 | 8626748   | 8626748   | Splice_Site       | SNP | G  | A  | 5  | 21  | c.385_splice    | c.e5-1                    | p.E129_splice |
| Pat_76 | Post-Resistance | PAK7     | 57144  | 37 | 20 | 9561234   | 9561234   | Missense_Mutation | SNP | G  | A  | 19 | 37  | c.548C>T        | c.(547-549)TCT>TTT        | p.S183F       |
| Pat_76 | Post-Resistance | SNAP25   | 6616   | 37 | 20 | 10256176  | 10256176  | Missense_Mutation | SNP | G  | A  | 4  | 13  | c.37G>A         | c.(37-39)GAG>AAG          | p.E13K        |

|        |                 |          |        |    |    |          |          |                   |     |    |    |    |     |                                      |                      |          |
|--------|-----------------|----------|--------|----|----|----------|----------|-------------------|-----|----|----|----|-----|--------------------------------------|----------------------|----------|
| Pat_76 | Post-Resistance | SEL1L2   | 80343  | 37 | 20 | 13839970 | 13839970 | Missense_Mutation | SNP | G  | A  | 9  | 23  | c.1756C>T                            | c.(1756-1758)CAC>TAC | p.H586Y  |
| Pat_76 | Post-Resistance | KIF16B   | 55614  | 37 | 20 | 16360462 | 16360462 | Missense_Mutation | SNP | C  | T  | 5  | 28  | c.2185G>A                            | c.(2185-2187)GAA>AAA | p.E729K  |
| Pat_76 | Post-Resistance | C20orf26 | 26074  | 37 | 20 | 20257987 | 20257987 | Missense_Mutation | SNP | G  | A  | 29 | 29  | c.2681G>A                            | c.(2680-2682)GGA>GAA | p.G894E  |
| Pat_76 | Post-Resistance | INSM1    | 3642   | 37 | 20 | 20350319 | 20350319 | Missense_Mutation | SNP | C  | T  | 7  | 20  | c.1408C>T                            | c.(1408-1410)CCC>TCC | p.P470S  |
| Pat_76 | Post-Resistance | XRN2     | 22803  | 37 | 20 | 21362668 | 21362668 | Missense_Mutation | SNP | C  | T  | 3  | 18  | c.2621C>T                            | c.(2620-2622)CCC>CTC | p.P874L  |
| Pat_76 | Post-Resistance | FOXA2    | 3170   | 37 | 20 | 22563239 | 22563239 | Missense_Mutation | SNP | C  | T  | 33 | 39  | c.623G>A                             | c.(622-624)CGC>CAC   | p.R208H  |
| Pat_76 | Post-Resistance | MYLK2    | 85366  | 37 | 20 | 30409442 | 30409442 | Missense_Mutation | SNP | C  | T  | 77 | 87  | c.674C>T                             | c.(673-675)TCG>TTG   | p.S225L  |
| Pat_76 | Post-Resistance | TTL9     | 164395 | 37 | 20 | 30507671 | 30507671 | Missense_Mutation | SNP | C  | T  | 35 | 35  | c.509C>T                             | c.(508-510)GCC>GTC   | p.A170V  |
| Pat_76 | Post-Resistance | ZNF341   | 84905  | 37 | 20 | 32377334 | 32377334 | Missense_Mutation | SNP | G  | A  | 20 | 82  | c.1975G>A                            | c.(1975-1977)GGC>AGC | p.G659S  |
| Pat_76 | Post-Resistance | ITCH     | 83737  | 37 | 20 | 33059310 | 33059310 | Missense_Mutation | SNP | C  | T  | 18 | 16  | c.1682C>T                            | c.(1681-1683)TCC>TTC | p.S561F  |
| Pat_76 | Post-Resistance | GSS      | 2937   | 37 | 20 | 33529540 | 33529540 | Missense_Mutation | SNP | G  | A  | 17 | 16  | c.584C>T                             | c.(583-585)GCC>GTC   | p.A195V  |
| Pat_76 | Post-Resistance | FAM83C   | 128876 | 37 | 20 | 33875149 | 33875149 | Missense_Mutation | SNP | G  | A  | 3  | 15  | c.1433C>T                            | c.(1432-1434)CCC>CTC | p.P478L  |
| Pat_76 | Post-Resistance | MANBAL   | 63905  | 37 | 20 | 35929694 | 35929694 | Missense_Mutation | SNP | C  | T  | 3  | 7   | c.28C>T                              | c.(28-30)CCG>TCG     | p.P10S   |
| Pat_76 | Post-Resistance | TGM2     | 7052   | 37 | 20 | 36760777 | 36760777 | Missense_Mutation | SNP | C  | T  | 29 | 90  | c.1741G>A                            | c.(1741-1743)GAC>AAC | p.D581N  |
| Pat_76 | Post-Resistance | L3MBTL   | 26013  | 37 | 20 | 42143326 | 42143326 | Missense_Mutation | SNP | C  | T  | 3  | 8   | c.346C>T                             | c.(346-348)CCG>TCG   | p.P116S  |
| Pat_76 | Post-Resistance | TOX2     | 84969  | 37 | 20 | 42680074 | 42680074 | Missense_Mutation | SNP | G  | T  | 16 | 15  | c.567G>T                             | c.(565-567)ATG>ATT   | p.M189I  |
| Pat_76 | Post-Resistance | JPH2     | 57158  | 37 | 20 | 42788428 | 42788428 | Missense_Mutation | SNP | G  | T  | 15 | 52  | c.999C>A                             | c.(997-999)GAC>GAA   | p.D333E  |
| Pat_76 | Post-Resistance | JPH2     | 57158  | 37 | 20 | 42788430 | 42788430 | Missense_Mutation | SNP | C  | T  | 15 | 51  | c.997G>A                             | c.(997-999)GAC>AAC   | p.D333N  |
| Pat_76 | Post-Resistance | HNF4A    | 3172   | 37 | 20 | 43056995 | 43056995 | Missense_Mutation | SNP | C  | T  | 48 | 62  | c.1150C>T                            | c.(1150-1152)CAT>TAT | p.H384Y  |
| Pat_76 | Post-Resistance | SEMG2    | 6407   | 37 | 20 | 43850643 | 43850643 | Missense_Mutation | SNP | C  | T  | 19 | 16  | c.370C>T                             | c.(370-372)CAC>TAC   | p.H124Y  |
| Pat_76 | Post-Resistance | MMP9     | 4318   | 37 | 20 | 44641179 | 44641179 | Missense_Mutation | SNP | C  | T  | 27 | 24  | c.1288C>T                            | c.(1288-1290)CCC>TCC | p.P430S  |
| Pat_76 | Post-Resistance | ZNF334   | 55713  | 37 | 20 | 45130345 | 45130345 | Missense_Mutation | SNP | C  | T  | 37 | 90  | c.1633G>A                            | c.(1633-1635)GAA>AAA | p.E545K  |
| Pat_76 | Post-Resistance | ZNF334   | 55713  | 37 | 20 | 45130930 | 45130930 | Missense_Mutation | SNP | C  | T  | 23 | 129 | c.1048G>A                            | c.(1048-1050)GAA>AAA | p.E350K  |
| Pat_76 | Post-Resistance | ARFGEF2  | 10564  | 37 | 20 | 47635499 | 47635499 | Missense_Mutation | SNP | C  | T  | 8  | 8   | c.4588C>T                            | c.(4588-4590)CCA>TCA | p.P1530S |
| Pat_76 | Post-Resistance | SALL4    | 57167  | 37 | 20 | 50408016 | 50408016 | Missense_Mutation | SNP | G  | A  | 6  | 10  | c.1006C>T                            | c.(1006-1008)CCT>TCT | p.P336S  |
| Pat_76 | Post-Resistance | SALL4    | 57167  | 37 | 20 | 50408730 | 50408730 | Missense_Mutation | SNP | G  | A  | 19 | 20  | c.292C>T                             | c.(292-294)CCA>TCA   | p.P98S   |
| Pat_76 | Post-Resistance | CBLN4    | 140689 | 37 | 20 | 54575833 | 54575833 | Missense_Mutation | SNP | C  | T  | 25 | 38  | c.362G>A                             | c.(361-363)AGT>AAT   | p.S121N  |
| Pat_76 | Post-Resistance | MC3R     | 4159   | 37 | 20 | 54824619 | 54824620 | Missense_Mutation | DNP | GG | AA | 23 | 21  | c.720_721GG>AA718-723)GGGGCA>GGAA    |                      | p.A241T  |
| Pat_76 | Post-Resistance | CSTF1    | 1477   | 37 | 20 | 54974146 | 54974146 | Missense_Mutation | SNP | C  | T  | 40 | 135 | c.769C>T                             | c.(769-771)CCT>TCT   | p.P257S  |
| Pat_76 | Post-Resistance | CASS4    | 57091  | 37 | 20 | 55027514 | 55027514 | Missense_Mutation | SNP | G  | A  | 11 | 10  | c.1282G>A                            | c.(1282-1284)GAG>AAG | p.E428K  |
| Pat_76 | Post-Resistance | GNAS     | 2778   | 37 | 20 | 57484421 | 57484421 | Missense_Mutation | SNP | G  | A  | 7  | 25  | c.2531G>A                            | c.(2530-2532)CGT>CAT | p.R844H  |
| Pat_76 | Post-Resistance | ZNF831   | 128611 | 37 | 20 | 57768785 | 57768785 | Missense_Mutation | SNP | C  | T  | 28 | 16  | c.2711C>T                            | c.(2710-2712)ACC>ATC | p.T904I  |
| Pat_76 | Post-Resistance | ZNF831   | 128611 | 37 | 20 | 57769723 | 57769723 | Nonsense_Mutation | SNP | C  | T  | 5  | 13  | c.3649C>T                            | c.(3649-3651)CGA>TGA | p.R1217* |
| Pat_76 | Post-Resistance | ZNF831   | 128611 | 37 | 20 | 57770945 | 57770945 | Missense_Mutation | SNP | G  | A  | 48 | 167 | c.3760G>A                            | c.(3760-3762)GGG>AGG | p.G1254R |
| Pat_76 | Post-Resistance | SYCP2    | 10388  | 37 | 20 | 58495521 | 58495521 | Missense_Mutation | SNP | G  | A  | 9  | 6   | c.190C>T                             | c.(190-192)CAC>TAC   | p.H64Y   |
| Pat_76 | Post-Resistance | SRMS     | 6725   | 37 | 20 | 62178665 | 62178666 | Missense_Mutation | DNP | GG | AA | 4  | 13  | c.151_152CC>TT                       | c.(151-153)CCC>TTC   | p.P51F   |
| Pat_76 | Post-Resistance | NCAM2    | 4685   | 37 | 21 | 22656657 | 22656657 | Missense_Mutation | SNP | C  | T  | 7  | 21  | c.274C>T                             | c.(274-276)CGT>TGT   | p.R92C   |
| Pat_76 | Post-Resistance | JAM2     | 58494  | 37 | 21 | 27066190 | 27066190 | Missense_Mutation | SNP | G  | A  | 50 | 85  | c.364G>A                             | c.(364-366)GAA>AAA   | p.E122K  |
| Pat_76 | Post-Resistance | SFRS15   | 57466  | 37 | 21 | 33067289 | 33067289 | Missense_Mutation | SNP | G  | A  | 8  | 11  | c.1073C>T                            | c.(1072-1074)CCA>CTA | p.P358L  |
| Pat_76 | Post-Resistance | HUNK     | 30811  | 37 | 21 | 33370917 | 33370917 | Missense_Mutation | SNP | C  | T  | 15 | 31  | c.1565C>T                            | c.(1564-1566)CCC>CTC | p.P522L  |
| Pat_76 | Post-Resistance | C21orf59 | 56683  | 37 | 21 | 33976521 | 33976521 | Missense_Mutation | SNP | C  | T  | 14 | 42  | c.448G>A                             | c.(448-450)GTG>ATG   | p.V150M  |
| Pat_76 | Post-Resistance | DNAJC28  | 54943  | 37 | 21 | 34861059 | 34861059 | Missense_Mutation | SNP | T  | G  | 19 | 24  | c.642A>C                             | c.(640-642)AAA>AAC   | p.K214N  |
| Pat_76 | Post-Resistance | SLC5A3   | 6526   | 37 | 21 | 35467832 | 35467832 | Missense_Mutation | SNP | A  | G  | 38 | 86  | c.335A>G                             | c.(334-336)TAC>TGC   | p.Y112C  |
| Pat_76 | Post-Resistance | SLC5A3   | 6526   | 37 | 21 | 35467859 | 35467859 | Missense_Mutation | SNP | G  | A  | 39 | 83  | c.362G>A                             | c.(361-363)AGG>AAG   | p.R121K  |
| Pat_76 | Post-Resistance | SETD4    | 54093  | 37 | 21 | 37420683 | 37420683 | Missense_Mutation | SNP | C  | T  | 68 | 158 | c.219G>A                             | c.(217-219)ATG>ATA   | p.M73I   |
| Pat_76 | Post-Resistance | DOPEY2   | 9980   | 37 | 21 | 37597961 | 37597961 | Missense_Mutation | SNP | C  | T  | 8  | 13  | c.1469C>T                            | c.(1468-1470)CCT>CTT | p.P490L  |
| Pat_76 | Post-Resistance | TTC3     | 7267   | 37 | 21 | 38462544 | 38462545 | Missense_Mutation | DNP | CC | TT | 4  | 24  | c.438_439CC>TT (436-441)TTCCTT>TTTTI |                      | p.L147F  |

|        |                 |           |        |    |    |          |          |                   |     |    |    |    |     |                 |                      |               |
|--------|-----------------|-----------|--------|----|----|----------|----------|-------------------|-----|----|----|----|-----|-----------------|----------------------|---------------|
| Pat_76 | Post-Resistance | TTC3      | 7267   | 37 | 21 | 38539906 | 38539906 | Missense_Mutation | SNP | C  | T  | 6  | 10  | c.4451C>T       | c.(4450-4452)CCT>CTT | p.P1484L      |
| Pat_76 | Post-Resistance | DSCR4     | 10281  | 37 | 21 | 39426981 | 39426981 | Missense_Mutation | SNP | C  | T  | 6  | 27  | c.325G>A        | c.(325-327)GAC>AAC   | p.D109N       |
| Pat_76 | Post-Resistance | DSCAM     | 1826   | 37 | 21 | 41450781 | 41450781 | Missense_Mutation | SNP | G  | A  | 5  | 11  | c.4544C>T       | c.(4543-4545)CCC>CTC | p.P1515L      |
| Pat_76 | Post-Resistance | DSCAM     | 1826   | 37 | 21 | 41455916 | 41455916 | Missense_Mutation | SNP | G  | A  | 5  | 15  | c.4150C>T       | c.(4150-4152)CGG>TGG | p.R1384W      |
| Pat_76 | Post-Resistance | FAM3B     | 54097  | 37 | 21 | 42694883 | 42694883 | Missense_Mutation | SNP | C  | T  | 16 | 35  | c.53C>T         | c.(52-54)TCC>TTC     | p.S18F        |
| Pat_76 | Post-Resistance | PRDM15    | 63977  | 37 | 21 | 43299455 | 43299455 | Missense_Mutation | SNP | G  | A  | 6  | 15  | c.26C>T         | c.(25-27)TCC>TTC     | p.S9F         |
| Pat_76 | Post-Resistance | CRYAA     | 1409   | 37 | 21 | 44590730 | 44590730 | Missense_Mutation | SNP | G  | A  | 11 | 25  | c.293G>A        | c.(292-294)GGA>GAA   | p.G98E        |
| Pat_76 | Post-Resistance | SIK1      | 150094 | 37 | 21 | 44838191 | 44838191 | Missense_Mutation | SNP | G  | A  | 9  | 29  | c.1693C>T       | c.(1693-1695)CCT>TCT | p.P565S       |
| Pat_76 | Post-Resistance | RRP1      | 8568   | 37 | 21 | 45217545 | 45217546 | Missense_Mutation | DNP | CC | TT | 18 | 79  | c.586_587CC>TT  | c.(586-588)CCC>TTC   | p.P196F       |
| Pat_76 | Post-Resistance | C21orf29  | 54084  | 37 | 21 | 45987779 | 45987779 | Missense_Mutation | SNP | C  | T  | 10 | 25  | c.193G>A        | c.(193-195)GCC>ACC   | p.A65T        |
| Pat_76 | Post-Resistance | KRTAP10-4 | 386672 | 37 | 21 | 45994771 | 45994771 | Missense_Mutation | SNP | C  | T  | 49 | 96  | c.1136C>T       | c.(1135-1137)TCC>TTC | p.S379F       |
| Pat_76 | Post-Resistance | COL6A1    | 1291   | 37 | 21 | 47418068 | 47418069 | Missense_Mutation | DNP | GG | AA | 7  | 11  | .1558_1559GG>A  | c.(1558-1560)GGC>AAC | p.G520N       |
| Pat_76 | Post-Resistance | COL6A2    | 1292   | 37 | 21 | 47532283 | 47532283 | Missense_Mutation | SNP | C  | T  | 4  | 4   | c.506C>T        | c.(505-507)CCC>CTC   | p.P169L       |
| Pat_76 | Post-Resistance | LSS       | 4047   | 37 | 21 | 47633739 | 47633739 | Missense_Mutation | SNP | G  | A  | 9  | 25  | c.1022C>T       | c.(1021-1023)ACC>ATC | p.T341I       |
| Pat_76 | Post-Resistance | PCNT      | 5116   | 37 | 21 | 47769597 | 47769598 | Splice_Site       | DNP | GG | AA | 11 | 31  | c.1208_splice   | c.e8-1               | p.R403_splice |
| Pat_76 | Post-Resistance | PCNT      | 5116   | 37 | 21 | 47817270 | 47817270 | Missense_Mutation | SNP | G  | A  | 10 | 17  | c.4308G>A       | c.(4306-4308)ATG>ATA | p.M1436I      |
| Pat_76 | Post-Resistance | DIP2A     | 23181  | 37 | 21 | 47981665 | 47981665 | Missense_Mutation | SNP | C  | T  | 34 | 67  | c.4036C>T       | c.(4036-4038)CGT>TGT | p.R1346C      |
| Pat_76 | Post-Resistance | POTEH     | 23784  | 37 | 22 | 16267070 | 16267070 | Missense_Mutation | SNP | C  | T  | 15 | 202 | c.1379G>A       | c.(1378-1380)GGA>GAA | p.G460E       |
| Pat_76 | Post-Resistance | POTEH     | 23784  | 37 | 22 | 16279222 | 16279222 | Missense_Mutation | SNP | T  | A  | 13 | 182 | c.1001A>T       | c.(1000-1002)AAT>ATT | p.N334I       |
| Pat_76 | Post-Resistance | OR11H1    | 81061  | 37 | 22 | 16449102 | 16449102 | Missense_Mutation | SNP | G  | A  | 34 | 36  | c.703C>T        | c.(703-705)CTT>TTT   | p.L235F       |
| Pat_76 | Post-Resistance | RTDR1     | 27156  | 37 | 22 | 23401774 | 23401774 | Missense_Mutation | SNP | C  | T  | 23 | 22  | c.913G>A        | c.(913-915)GGC>AGC   | p.G305S       |
| Pat_76 | Post-Resistance | RAB36     | 9609   | 37 | 22 | 23495309 | 23495309 | Missense_Mutation | SNP | A  | T  | 32 | 49  | c.515A>T        | c.(514-516)TAT>TTT   | p.Y172F       |
| Pat_76 | Post-Resistance | MMP11     | 4320   | 37 | 22 | 24124425 | 24124425 | Nonsense_Mutation | SNP | G  | A  | 33 | 68  | c.1088G>A       | c.(1087-1089)TGG>TAG | p.W363*       |
| Pat_76 | Post-Resistance | CABIN1    | 23523  | 37 | 22 | 24481098 | 24481099 | Missense_Mutation | DNP | CC | TT | 8  | 27  | .:3257_3258CC>T | c.(3256-3258)CCC>CTT | p.P1086L      |
| Pat_76 | Post-Resistance | GGT1      | 2678   | 37 | 22 | 25023398 | 25023398 | Splice_Site       | SNP | G  | A  | 25 | 44  | c.1021_splice   | c.e12-1              | p.V341_splice |
| Pat_76 | Post-Resistance | MYO18B    | 84700  | 37 | 22 | 26351183 | 26351183 | Missense_Mutation | SNP | G  | A  | 4  | 14  | c.6009G>A       | c.(6007-6009)ATG>ATA | p.M2003I      |
| Pat_76 | Post-Resistance | CABP7     | 164633 | 37 | 22 | 30125183 | 30125183 | Missense_Mutation | SNP | C  | T  | 4  | 12  | c.506C>T        | c.(505-507)CCC>CTC   | p.P169L       |
| Pat_76 | Post-Resistance | SEC14L3   | 266629 | 37 | 22 | 30863013 | 30863013 | Missense_Mutation | SNP | C  | T  | 32 | 60  | c.475G>A        | c.(475-477)GGA>AGA   | p.G159R       |
| Pat_76 | Post-Resistance | NCF4      | 4689   | 37 | 22 | 37261013 | 37261013 | Missense_Mutation | SNP | G  | A  | 27 | 44  | c.170G>A        | c.(169-171)CGC>CAC   | p.R57H        |
| Pat_76 | Post-Resistance | TMPRSS6   | 164656 | 37 | 22 | 37499418 | 37499418 | Missense_Mutation | SNP | C  | T  | 32 | 52  | c.67G>A         | c.(67-69)GGG>AGG     | p.G23R        |
| Pat_76 | Post-Resistance | TRIOBP    | 11078  | 37 | 22 | 38120224 | 38120224 | Missense_Mutation | SNP | C  | T  | 51 | 157 | c.1661C>T       | c.(1660-1662)GCC>GTC | p.A554V       |
| Pat_76 | Post-Resistance | TRIOBP    | 11078  | 37 | 22 | 38131325 | 38131326 | Missense_Mutation | DNP | CC | TT | 6  | 17  | .:4982_4983CC>T | c.(4981-4983)TCC>TTT | p.S1661F      |
| Pat_76 | Post-Resistance | TAB1      | 10454  | 37 | 22 | 39822888 | 39822888 | Missense_Mutation | SNP | C  | T  | 23 | 57  | c.1102C>T       | c.(1102-1104)CCG>TCG | p.P368S       |
| Pat_76 | Post-Resistance | CACNA1I   | 8911   | 37 | 22 | 40069069 | 40069069 | Missense_Mutation | SNP | G  | A  | 60 | 108 | c.4765G>A       | c.(4765-4767)GTT>ATT | p.V1589I      |
| Pat_76 | Post-Resistance | XRCC6     | 2547   | 37 | 22 | 42053023 | 42053023 | Missense_Mutation | SNP | C  | T  | 7  | 16  | c.1408C>T       | c.(1408-1410)CGC>TGC | p.R470C       |
| Pat_76 | Post-Resistance | WNT7B     | 7477   | 37 | 22 | 46345835 | 46345835 | Missense_Mutation | SNP | C  | T  | 14 | 38  | c.263G>A        | c.(262-264)GGC>GAC   | p.G88D        |
| Pat_76 | Post-Resistance | CNTN4     | 152330 | 37 | 3  | 3081778  | 3081778  | Missense_Mutation | SNP | C  | T  | 12 | 19  | c.2221C>T       | c.(2221-2223)CCC>TCC | p.P741S       |
| Pat_76 | Post-Resistance | IL5RA     | 3568   | 37 | 3  | 3139668  | 3139668  | Missense_Mutation | SNP | G  | A  | 22 | 32  | c.595C>T        | c.(595-597)CCC>TCC   | p.P199S       |
| Pat_76 | Post-Resistance | ITPR1     | 3708   | 37 | 3  | 4735393  | 4735393  | Missense_Mutation | SNP | C  | T  | 11 | 10  | c.4222C>T       | c.(4222-4224)CGC>TGC | p.R1408C      |
| Pat_76 | Post-Resistance | C3orf31   | 132001 | 37 | 3  | 11871271 | 11871271 | Missense_Mutation | SNP | G  | A  | 10 | 38  | c.479C>T        | c.(478-480)GCT>GTT   | p.A160V       |
| Pat_76 | Post-Resistance | PPARG     | 5468   | 37 | 3  | 12458228 | 12458228 | Missense_Mutation | SNP | C  | T  | 9  | 13  | c.845C>T        | c.(844-846)TCC>TTC   | p.S282F       |
| Pat_76 | Post-Resistance | NUP210    | 23225  | 37 | 3  | 13378363 | 13378363 | Missense_Mutation | SNP | T  | C  | 25 | 64  | c.3608A>G       | c.(3607-3609)AAT>AGT | p.N1203S      |
| Pat_76 | Post-Resistance | GRIP2     | 80852  | 37 | 3  | 14561732 | 14561732 | Missense_Mutation | SNP | C  | T  | 16 | 19  | c.1206G>A       | c.(1204-1206)ATG>ATA | p.M402I       |
| Pat_76 | Post-Resistance | FGD5      | 152273 | 37 | 3  | 14861563 | 14861563 | Missense_Mutation | SNP | C  | T  | 9  | 20  | c.985C>T        | c.(985-987)CCT>TCT   | p.P329S       |
| Pat_76 | Post-Resistance | PLCL2     | 23228  | 37 | 3  | 17051292 | 17051292 | Missense_Mutation | SNP | G  | A  | 4  | 14  | c.430G>A        | c.(430-432)GTT>ATT   | p.V144I       |
| Pat_76 | Post-Resistance | EFHB      | 151651 | 37 | 3  | 19974997 | 19974997 | Missense_Mutation | SNP | C  | T  | 11 | 23  | c.514G>A        | c.(514-516)GAA>AAA   | p.E172K       |
| Pat_76 | Post-Resistance | SLC4A7    | 9497   | 37 | 3  | 27475470 | 27475470 | Missense_Mutation | SNP | G  | A  | 16 | 21  | c.688C>T        | c.(688-690)CTT>TTT   | p.L230F       |



|        |                 |          |        |    |   |           |           |                   |     |    |    |    |     |                 |                       |          |
|--------|-----------------|----------|--------|----|---|-----------|-----------|-------------------|-----|----|----|----|-----|-----------------|-----------------------|----------|
| Pat_76 | Post-Resistance | OSBPL10  | 114884 | 37 | 3 | 31725572  | 31725572  | Missense_Mutation | SNP | G  | C  | 16 | 31  | c.1280C>G       | c.(1279-1281)TCT>TGT  | p.S427C  |
| Pat_76 | Post-Resistance | CNOT10   | 25904  | 37 | 3 | 32776347  | 32776347  | Missense_Mutation | SNP | C  | T  | 42 | 122 | c.1393C>T       | c.(1393-1395)CTC>TTC  | p.L465F  |
| Pat_76 | Post-Resistance | ARPP21   | 10777  | 37 | 3 | 35730819  | 35730819  | Missense_Mutation | SNP | G  | A  | 14 | 36  | c.427G>A        | c.(427-429)GAT>AAT    | p.D143N  |
| Pat_76 | Post-Resistance | ITGA9    | 3680   | 37 | 3 | 37783285  | 37783285  | Missense_Mutation | SNP | C  | T  | 7  | 23  | c.2299C>T       | c.(2299-2301)CAC>TAC  | p.H767Y  |
| Pat_76 | Post-Resistance | DLEC1    | 9940   | 37 | 3 | 38150967  | 38150967  | Missense_Mutation | SNP | G  | A  | 18 | 29  | c.3174G>A       | c.(3172-3174)ATG>ATA  | p.M1058I |
| Pat_76 | Post-Resistance | SCN5A    | 6331   | 37 | 3 | 38592468  | 38592468  | Missense_Mutation | SNP | C  | T  | 10 | 19  | c.5395G>A       | c.(5395-5397)GAG>AAG  | p.E1799K |
| Pat_76 | Post-Resistance | SCN10A   | 6336   | 37 | 3 | 38739493  | 38739493  | Missense_Mutation | SNP | C  | T  | 17 | 44  | c.5218G>A       | c.(5218-5220)GAC>AAC  | p.D1740N |
| Pat_76 | Post-Resistance | CSRNP1   | 64651  | 37 | 3 | 39185196  | 39185196  | Missense_Mutation | SNP | G  | A  | 13 | 14  | c.1120C>T       | c.(1120-1122)CAC>TAC  | p.H374Y  |
| Pat_76 | Post-Resistance | SACM1L   | 22908  | 37 | 3 | 45780142  | 45780142  | Missense_Mutation | SNP | C  | A  | 3  | 18  | c.1455C>A       | c.(1453-1455)AAC>AAA  | p.N485K  |
| Pat_76 | Post-Resistance | SACM1L   | 22908  | 37 | 3 | 45780147  | 45780148  | Missense_Mutation | DNP | CC | TT | 3  | 18  | c.1460_1461CC>T | c.(1459-1461)TCC>TTT  | p.S487F  |
| Pat_76 | Post-Resistance | LRRC2    | 79442  | 37 | 3 | 46592991  | 46592991  | Missense_Mutation | SNP | C  | T  | 10 | 39  | c.91G>A         | c.(91-93)GAG>AAG      | p.E31K   |
| Pat_76 | Post-Resistance | PLXNB1   | 5364   | 37 | 3 | 48456394  | 48456395  | Missense_Mutation | DNP | GG | AA | 21 | 48  | c.4022_4023CC>T | c.(4021-4023)GCC>GTT  | p.A1341V |
| Pat_76 | Post-Resistance | CCDC51   | 79714  | 37 | 3 | 48474195  | 48474195  | Missense_Mutation | SNP | C  | T  | 15 | 49  | c.859G>A        | c.(859-861)GGT>AGT    | p.G287S  |
| Pat_76 | Post-Resistance | QARS     | 5859   | 37 | 3 | 49135820  | 49135820  | Missense_Mutation | SNP | G  | A  | 21 | 48  | c.2050C>T       | c.(2050-2052)CCT>TCT  | p.P684S  |
| Pat_76 | Post-Resistance | TNNC1    | 7134   | 37 | 3 | 52485442  | 52485442  | Missense_Mutation | SNP | C  | T  | 8  | 18  | c.419G>A        | c.(418-420)GGA>GAA    | p.G140E  |
| Pat_76 | Post-Resistance | PBRM1    | 55193  | 37 | 3 | 52682442  | 52682442  | Missense_Mutation | SNP | C  | T  | 3  | 16  | c.731G>A        | c.(730-732)AGT>AAT    | p.S244N  |
| Pat_76 | Post-Resistance | CACNA1D  | 776    | 37 | 3 | 53835242  | 53835242  | Missense_Mutation | SNP | G  | A  | 13 | 33  | c.5198G>A       | c.(5197-5199)GGA>GAA  | p.G1733E |
| Pat_76 | Post-Resistance | ERC2     | 26059  | 37 | 3 | 55984533  | 55984533  | Missense_Mutation | SNP | C  | T  | 3  | 19  | c.2323G>A       | c.(2323-2325)GAA>AAA  | p.E775K  |
| Pat_76 | Post-Resistance | CCDC66   | 285331 | 37 | 3 | 56627597  | 56627597  | Nonsense_Mutation | SNP | C  | T  | 13 | 18  | c.1147C>T       | c.(1147-1149)CAG>TAG  | p.Q383*  |
| Pat_76 | Post-Resistance | FLNB     | 2317   | 37 | 3 | 58109342  | 58109342  | Missense_Mutation | SNP | C  | T  | 20 | 54  | c.3649C>T       | c.(3649-3651)CCC>TCC  | p.P1217S |
| Pat_76 | Post-Resistance | DNASE1L3 | 1776   | 37 | 3 | 58191217  | 58191217  | Nonsense_Mutation | SNP | G  | A  | 23 | 49  | c.301C>T        | c.(301-303)CAA>TAA    | p.Q101*  |
| Pat_76 | Post-Resistance | ROBO1    | 6091   | 37 | 3 | 78683100  | 78683100  | Missense_Mutation | SNP | C  | T  | 5  | 39  | c.3466G>A       | c.(3466-3468)GGC>AGC  | p.G1156S |
| Pat_76 | Post-Resistance | EPHA3    | 2042   | 37 | 3 | 89499331  | 89499331  | Missense_Mutation | SNP | T  | G  | 6  | 20  | c.2501T>G       | c.(2500-2502)ATT>AGT  | p.I834S  |
| Pat_76 | Post-Resistance | PROS1    | 5627   | 37 | 3 | 93646102  | 93646102  | Missense_Mutation | SNP | G  | A  | 13 | 18  | c.226C>T        | c.(226-228)CCG>TCG    | p.P76S   |
| Pat_76 | Post-Resistance | OR5H14   | 403273 | 37 | 3 | 97868560  | 97868560  | Missense_Mutation | SNP | G  | A  | 29 | 76  | c.331G>A        | c.(331-333)GAA>AAA    | p.E111K  |
| Pat_76 | Post-Resistance | OR5H15   | 403274 | 37 | 3 | 97888271  | 97888271  | Missense_Mutation | SNP | C  | G  | 3  | 18  | c.728C>G        | c.(727-729)GCC>GGC    | p.A243G  |
| Pat_76 | Post-Resistance | GPR128   | 84873  | 37 | 3 | 100349614 | 100349614 | Missense_Mutation | SNP | G  | A  | 12 | 26  | c.295G>A        | c.(295-297)GGA>AGA    | p.G99R   |
| Pat_76 | Post-Resistance | IMPG2    | 50939  | 37 | 3 | 101038529 | 101038529 | Missense_Mutation | SNP | C  | T  | 10 | 27  | c.233G>A        | c.(232-234)AGA>AAA    | p.R78K   |
| Pat_76 | Post-Resistance | ZPLD1    | 131368 | 37 | 3 | 102187971 | 102187971 | Missense_Mutation | SNP | C  | T  | 14 | 39  | c.925C>T        | c.(925-927)CTT>TTT    | p.L309F  |
| Pat_76 | Post-Resistance | CCDC54   | 84692  | 37 | 3 | 107096863 | 107096864 | Missense_Mutation | DNP | GG | AA | 6  | 13  | c.429_430GG>AA  | c.427-432)CTGGAA>CTAA | p.E144K  |
| Pat_76 | Post-Resistance | MYH15    | 22989  | 37 | 3 | 108110641 | 108110641 | Missense_Mutation | SNP | C  | T  | 13 | 44  | c.5456G>A       | c.(5455-5457)GGG>GAG  | p.G1819E |
| Pat_76 | Post-Resistance | MYH15    | 22989  | 37 | 3 | 108149702 | 108149702 | Nonsense_Mutation | SNP | G  | A  | 4  | 8   | c.3349C>T       | c.(3349-3351)CAG>TAG  | p.Q1117* |
| Pat_76 | Post-Resistance | MYH15    | 22989  | 37 | 3 | 108218318 | 108218318 | Nonsense_Mutation | SNP | G  | A  | 9  | 9   | c.568C>T        | c.(568-570)CAG>TAG    | p.Q190*  |
| Pat_76 | Post-Resistance | CD96     | 10225  | 37 | 3 | 111263955 | 111263955 | Missense_Mutation | SNP | A  | C  | 16 | 44  | c.124A>C        | c.(124-126)AAC>CAC    | p.N42H   |
| Pat_76 | Post-Resistance | TMPRSS7  | 344805 | 37 | 3 | 111793194 | 111793194 | Missense_Mutation | SNP | G  | A  | 13 | 25  | c.1340G>A       | c.(1339-1341)AGG>AAG  | p.R447K  |
| Pat_76 | Post-Resistance | CCDC80   | 151887 | 37 | 3 | 112357513 | 112357513 | Missense_Mutation | SNP | G  | A  | 11 | 20  | c.1240C>T       | c.(1240-1242)CTT>TTT  | p.L414F  |
| Pat_76 | Post-Resistance | ZNF80    | 7634   | 37 | 3 | 113955513 | 113955513 | Missense_Mutation | SNP | C  | T  | 16 | 44  | c.409G>A        | c.(409-411)GAG>AAG    | p.E137K  |
| Pat_76 | Post-Resistance | RABL3    | 285282 | 37 | 3 | 120449568 | 120449568 | Missense_Mutation | SNP | G  | A  | 14 | 37  | c.113C>T        | c.(112-114)ACT>ATT    | p.T38I   |
| Pat_76 | Post-Resistance | GOLGB1   | 2804   | 37 | 3 | 121409852 | 121409852 | Missense_Mutation | SNP | C  | T  | 12 | 13  | c.8344G>A       | c.(8344-8346)GAT>AAT  | p.D2782N |
| Pat_76 | Post-Resistance | PARP15   | 165631 | 37 | 3 | 122336009 | 122336009 | Missense_Mutation | SNP | C  | T  | 13 | 33  | c.998C>T        | c.(997-999)TCA>TTA    | p.S333L  |
| Pat_76 | Post-Resistance | MYLK     | 4638   | 37 | 3 | 123452812 | 123452812 | Missense_Mutation | SNP | G  | A  | 18 | 33  | c.1031C>T       | c.(1030-1032)TCC>TTC  | p.S344F  |
| Pat_76 | Post-Resistance | KALRN    | 8997   | 37 | 3 | 124053179 | 124053179 | Missense_Mutation | SNP | C  | T  | 24 | 69  | c.1478C>T       | c.(1477-1479)TCC>TTC  | p.S493F  |
| Pat_76 | Post-Resistance | SLC12A8  | 84561  | 37 | 3 | 124909340 | 124909340 | Nonsense_Mutation | SNP | C  | T  | 48 | 91  | c.77G>A         | c.(76-78)TGG>TAG      | p.W26*   |
| Pat_76 | Post-Resistance | MCM2     | 4171   | 37 | 3 | 127336204 | 127336205 | Missense_Mutation | DNP | CC | TT | 5  | 25  | c.1856_1857CC>T | c.(1855-1857)TCC>TTT  | p.S619F  |
| Pat_76 | Post-Resistance | DNAJB8   | 165721 | 37 | 3 | 128181833 | 128181833 | Missense_Mutation | SNP | G  | A  | 19 | 39  | c.256C>T        | c.(256-258)CCC>TCC    | p.P86S   |
| Pat_76 | Post-Resistance | TOPBP1   | 11073  | 37 | 3 | 133358805 | 133358806 | Missense_Mutation | DNP | TC | AT | 5  | 8   | c.2230_2231GA>A | c.(2230-2232)GAA>ATA  | p.E744I  |
| Pat_76 | Post-Resistance | KY       | 339855 | 37 | 3 | 134366318 | 134366318 | Missense_Mutation | SNP | C  | T  | 5  | 6   | c.158G>A        | c.(157-159)GGA>GAA    | p.G53E   |

|        |                 |          |        |    |   |           |           |                   |     |    |    |    |     |                |                      |          |
|--------|-----------------|----------|--------|----|---|-----------|-----------|-------------------|-----|----|----|----|-----|----------------|----------------------|----------|
| Pat_76 | Post-Resistance | EPHB1    | 2047   | 37 | 3 | 134670519 | 134670519 | Missense_Mutation | SNP | G  | A  | 15 | 54  | c.430G>A       | c.(430-432)GAG>AAG   | p.E144K  |
| Pat_76 | Post-Resistance | PPP2R3A  | 5523   | 37 | 3 | 135720516 | 135720516 | Missense_Mutation | SNP | C  | T  | 10 | 16  | c.176C>T       | c.(175-177)CCT>CTT   | p.P59L   |
| Pat_76 | Post-Resistance | NCK1     | 4690   | 37 | 3 | 136664562 | 136664562 | Missense_Mutation | SNP | G  | A  | 22 | 38  | c.364G>A       | c.(364-366)GAG>AAG   | p.E122K  |
| Pat_76 | Post-Resistance | COPB2    | 9276   | 37 | 3 | 139097898 | 139097898 | Missense_Mutation | SNP | T  | C  | 12 | 23  | c.346A>G       | c.(346-348)ACT>GCT   | p.T116A  |
| Pat_76 | Post-Resistance | TRIM42   | 287015 | 37 | 3 | 140401461 | 140401461 | Missense_Mutation | SNP | G  | A  | 21 | 59  | c.499G>A       | c.(499-501)GAG>AAG   | p.E167K  |
| Pat_76 | Post-Resistance | TRIM42   | 287015 | 37 | 3 | 140406746 | 140406746 | Missense_Mutation | SNP | G  | A  | 6  | 16  | c.1222G>A      | c.(1222-1224)GAA>AAA | p.E408K  |
| Pat_76 | Post-Resistance | PLS1     | 5357   | 37 | 3 | 142388285 | 142388285 | Missense_Mutation | SNP | G  | A  | 25 | 47  | c.124G>A       | c.(124-126)GAA>AAA   | p.E42K   |
| Pat_76 | Post-Resistance | TRPC1    | 7220   | 37 | 3 | 142521065 | 142521065 | Missense_Mutation | SNP | C  | T  | 6  | 16  | c.1636C>T      | c.(1636-1638)CTT>TTT | p.L546F  |
| Pat_76 | Post-Resistance | MED12L   | 116931 | 37 | 3 | 151067889 | 151067889 | Missense_Mutation | SNP | C  | T  | 69 | 163 | c.2188C>T      | c.(2188-2190)CTC>TTC | p.L730F  |
| Pat_76 | Post-Resistance | IGSF10   | 285313 | 37 | 3 | 151161477 | 151161477 | Missense_Mutation | SNP | T  | G  | 11 | 34  | c.5258A>C      | c.(5257-5259)AAA>ACA | p.K1753T |
| Pat_76 | Post-Resistance | PLCH1    | 23007  | 37 | 3 | 155267673 | 155267673 | Missense_Mutation | SNP | C  | T  | 12 | 28  | c.1229G>A      | c.(1228-1230)GGA>GAA | p.G410E  |
| Pat_76 | Post-Resistance | SLC33A1  | 9197   | 37 | 3 | 155571045 | 155571045 | Nonsense_Mutation | SNP | G  | A  | 9  | 15  | c.742C>T       | c.(742-744)CAG>TAG   | p.Q248*  |
| Pat_76 | Post-Resistance | OTOL1    | 131149 | 37 | 3 | 161221642 | 161221642 | Nonsense_Mutation | SNP | G  | A  | 4  | 15  | c.1346G>A      | c.(1345-1347)TGG>TAG | p.W449*  |
| Pat_76 | Post-Resistance | MECOM    | 2122   | 37 | 3 | 168834150 | 168834150 | Missense_Mutation | SNP | G  | A  | 7  | 20  | c.946C>T       | c.(946-948)CCT>TCT   | p.P316S  |
| Pat_76 | Post-Resistance | MECOM    | 2122   | 37 | 3 | 168834203 | 168834203 | Missense_Mutation | SNP | C  | G  | 5  | 26  | c.893G>C       | c.(892-894)GGA>GCA   | p.G298A  |
| Pat_76 | Post-Resistance | MECOM    | 2122   | 37 | 3 | 169098985 | 169098985 | Missense_Mutation | SNP | T  | A  | 9  | 15  | c.365A>T       | c.(364-366)TAT>TTT   | p.Y122F  |
| Pat_76 | Post-Resistance | SKIL     | 6498   | 37 | 3 | 170078829 | 170078829 | Missense_Mutation | SNP | G  | A  | 17 | 32  | c.710G>A       | c.(709-711)CGA>CAA   | p.R237Q  |
| Pat_76 | Post-Resistance | YEATS2   | 55689  | 37 | 3 | 183469945 | 183469945 | Missense_Mutation | SNP | C  | T  | 20 | 53  | c.1054C>T      | c.(1054-1056)CCT>TCT | p.P352S  |
| Pat_76 | Post-Resistance | CLCN2    | 1181   | 37 | 3 | 184069842 | 184069842 | Missense_Mutation | SNP | G  | A  | 58 | 97  | c.2374C>T      | c.(2374-2376)CCT>TCT | p.P792S  |
| Pat_76 | Post-Resistance | MASP1    | 5648   | 37 | 3 | 186961374 | 186961374 | Missense_Mutation | SNP | C  | T  | 14 | 44  | c.1126G>A      | c.(1126-1128)GGG>AGG | p.G376R  |
| Pat_76 | Post-Resistance | LEPREL1  | 55214  | 37 | 3 | 189706753 | 189706753 | Missense_Mutation | SNP | G  | A  | 9  | 37  | c.898C>T       | c.(898-900)CCC>TCC   | p.P300S  |
| Pat_76 | Post-Resistance | ATP13A4  | 84239  | 37 | 3 | 193120506 | 193120506 | Missense_Mutation | SNP | G  | A  | 33 | 54  | c.3526C>T      | c.(3526-3528)CCG>TCG | p.P1176S |
| Pat_76 | Post-Resistance | ATP13A4  | 84239  | 37 | 3 | 193158390 | 193158390 | Missense_Mutation | SNP | G  | A  | 7  | 28  | c.2476C>T      | c.(2476-2478)CCT>TCT | p.P826S  |
| Pat_76 | Post-Resistance | PDE6B    | 5158   | 37 | 4 | 654259    | 654259    | Missense_Mutation | SNP | G  | A  | 3  | 26  | c.1471G>A      | c.(1471-1473)GAG>AAG | p.E491K  |
| Pat_76 | Post-Resistance | TMEM175  | 84286  | 37 | 4 | 946167    | 946167    | Missense_Mutation | SNP | G  | A  | 21 | 35  | c.391G>A       | c.(391-393)GTG>ATG   | p.V131M  |
| Pat_76 | Post-Resistance | OTOP1    | 133060 | 37 | 4 | 4207848   | 4207848   | Missense_Mutation | SNP | G  | A  | 4  | 13  | c.550C>T       | c.(550-552)CTT>TTT   | p.L184F  |
| Pat_76 | Post-Resistance | MAN2B2   | 23324  | 37 | 4 | 6590881   | 6590881   | Missense_Mutation | SNP | C  | T  | 23 | 43  | c.674C>T       | c.(673-675)TCC>TTC   | p.S225F  |
| Pat_76 | Post-Resistance | AFAP1    | 60312  | 37 | 4 | 7776536   | 7776537   | Missense_Mutation | DNP | GG | CT | 12 | 22  | .1739_1740CC>A | c.(1738-1740)GCC>GAG | p.A580E  |
| Pat_76 | Post-Resistance | BOD1L    | 259282 | 37 | 4 | 13601911  | 13601911  | Missense_Mutation | SNP | G  | A  | 4  | 17  | c.6613C>T      | c.(6613-6615)CTT>TTT | p.L2205F |
| Pat_76 | Post-Resistance | SLIT2    | 9353   | 37 | 4 | 20620619  | 20620619  | Missense_Mutation | SNP | G  | A  | 6  | 22  | c.4577G>A      | c.(4576-4578)AGG>AAG | p.R1526K |
| Pat_76 | Post-Resistance | PPARGC1A | 10891  | 37 | 4 | 23814447  | 23814447  | Missense_Mutation | SNP | C  | T  | 19 | 69  | c.1942G>A      | c.(1942-1944)GAA>AAA | p.E648K  |
| Pat_76 | Post-Resistance | ARAP2    | 116984 | 37 | 4 | 36149359  | 36149359  | Missense_Mutation | SNP | G  | A  | 3  | 7   | c.3010C>T      | c.(3010-3012)CCC>TCC | p.P1004S |
| Pat_76 | Post-Resistance | PGM2     | 55276  | 37 | 4 | 37846170  | 37846170  | Missense_Mutation | SNP | T  | C  | 8  | 18  | c.905T>C       | c.(904-906)GTC>GCC   | p.V302A  |
| Pat_76 | Post-Resistance | RBM47    | 54502  | 37 | 4 | 40439863  | 40439863  | Missense_Mutation | SNP | C  | T  | 12 | 27  | c.1048G>A      | c.(1048-1050)GAC>AAC | p.D350N  |
| Pat_76 | Post-Resistance | BEND4    | 389206 | 37 | 4 | 42119560  | 42119560  | Missense_Mutation | SNP | C  | T  | 3  | 5   | c.1580G>A      | c.(1579-1581)AGT>AAT | p.S527N  |
| Pat_76 | Post-Resistance | GABRA2   | 2555   | 37 | 4 | 46314655  | 46314655  | Nonsense_Mutation | SNP | G  | A  | 4  | 14  | c.334C>T       | c.(334-336)CGA>TGA   | p.R112*  |
| Pat_76 | Post-Resistance | GABRB1   | 2560   | 37 | 4 | 47405358  | 47405358  | Missense_Mutation | SNP | G  | A  | 8  | 23  | c.568G>A       | c.(568-570)GAA>AAA   | p.E190K  |
| Pat_76 | Post-Resistance | REST     | 5978   | 37 | 4 | 57797533  | 57797533  | Missense_Mutation | SNP | C  | T  | 16 | 69  | c.2509C>T      | c.(2509-2511)CTT>TTT | p.L837F  |
| Pat_76 | Post-Resistance | UGT2A3   | 79799  | 37 | 4 | 69796394  | 69796394  | Missense_Mutation | SNP | G  | A  | 8  | 24  | c.1174C>T      | c.(1174-1176)CCC>TCC | p.P392S  |
| Pat_76 | Post-Resistance | UGT2B11  | 10720  | 37 | 4 | 70079869  | 70079869  | Missense_Mutation | SNP | G  | A  | 11 | 26  | c.572C>T       | c.(571-573)CCT>CTT   | p.P191L  |
| Pat_76 | Post-Resistance | UGT2B11  | 10720  | 37 | 4 | 70080370  | 70080370  | Missense_Mutation | SNP | C  | T  | 66 | 145 | c.71G>A        | c.(70-72)GGA>GAA     | p.G24E   |
| Pat_76 | Post-Resistance | UGT2A1   | 10941  | 37 | 4 | 70455112  | 70455112  | Missense_Mutation | SNP | C  | T  | 7  | 8   | c.1562G>A      | c.(1561-1563)GGA>GAA | p.G521E  |
| Pat_76 | Post-Resistance | ADAMTS3  | 9508   | 37 | 4 | 73414436  | 73414436  | Missense_Mutation | SNP | C  | T  | 8  | 16  | c.263G>A       | c.(262-264)GGA>GAA   | p.G88E   |
| Pat_76 | Post-Resistance | ANKRD17  | 26057  | 37 | 4 | 73956389  | 73956389  | Missense_Mutation | SNP | G  | A  | 3  | 19  | c.6956C>T      | c.(6955-6957)CCC>CTC | p.P2319L |
| Pat_76 | Post-Resistance | RASGEF1B | 153020 | 37 | 4 | 82377830  | 82377830  | Missense_Mutation | SNP | G  | A  | 7  | 13  | c.413C>T       | c.(412-414)GCT>GTT   | p.A138V  |
| Pat_76 | Post-Resistance | AGPAT9   | 84803  | 37 | 4 | 84502813  | 84502813  | Missense_Mutation | SNP | G  | A  | 11 | 41  | c.307G>A       | c.(307-309)GGA>AGA   | p.G103R  |
| Pat_76 | Post-Resistance | FAM13A   | 10144  | 37 | 4 | 89679958  | 89679958  | Missense_Mutation | SNP | G  | A  | 16 | 29  | c.1673C>T      | c.(1672-1674)TCC>TTC | p.S558F  |

|        |                 |          |        |    |   |           |           |                   |     |    |    |    |     |                 |                          |               |
|--------|-----------------|----------|--------|----|---|-----------|-----------|-------------------|-----|----|----|----|-----|-----------------|--------------------------|---------------|
| Pat_76 | Post-Resistance | BMPR1B   | 658    | 37 | 4 | 96052444  | 96052444  | Missense_Mutation | SNP | C  | T  | 5  | 21  | c.857C>T        | c.(856-858)TCC>TTC       | p.S286F       |
| Pat_76 | Post-Resistance | UBE2D3   | 7323   | 37 | 4 | 103720648 | 103720648 | Missense_Mutation | SNP | G  | A  | 9  | 18  | c.314C>T        | c.(313-315)TCC>TTC       | p.S105F       |
| Pat_76 | Post-Resistance | TET2     | 54790  | 37 | 4 | 106156166 | 106156166 | Missense_Mutation | SNP | C  | T  | 10 | 12  | c.1067C>T       | c.(1066-1068)TCC>TTC     | p.S356F       |
| Pat_76 | Post-Resistance | TET2     | 54790  | 37 | 4 | 106157650 | 106157650 | Missense_Mutation | SNP | C  | T  | 15 | 16  | c.2551C>T       | c.(2551-2553)CCT>TCT     | p.P851S       |
| Pat_76 | Post-Resistance | NPNT     | 255743 | 37 | 4 | 106888470 | 106888470 | Missense_Mutation | SNP | G  | A  | 9  | 9   | c.1471G>A       | c.(1471-1473)GGG>AGG     | p.G491R       |
| Pat_76 | Post-Resistance | AGXT2L1  | 64850  | 37 | 4 | 109667970 | 109667970 | Missense_Mutation | SNP | C  | T  | 14 | 56  | c.1120G>A       | c.(1120-1122)GAC>AAC     | p.D374N       |
| Pat_76 | Post-Resistance | ANK2     | 287    | 37 | 4 | 114257821 | 114257821 | Missense_Mutation | SNP | G  | A  | 10 | 16  | c.3680G>A       | c.(3679-3681)AGA>AAA     | p.R1227K      |
| Pat_76 | Post-Resistance | C4orf31  | 79625  | 37 | 4 | 121957496 | 121957496 | Missense_Mutation | SNP | C  | T  | 22 | 24  | c.1630G>A       | c.(1630-1632)GAT>AAT     | p.D544N       |
| Pat_76 | Post-Resistance | KIAA1109 | 84162  | 37 | 4 | 123237921 | 123237921 | Missense_Mutation | SNP | C  | T  | 8  | 30  | c.10574C>T      | c.(10573-10575)GCT>GTT   | p.A3525V      |
| Pat_76 | Post-Resistance | FAT4     | 79633  | 37 | 4 | 126240894 | 126240894 | Missense_Mutation | SNP | G  | A  | 15 | 22  | c.3328G>A       | c.(3328-3330)GAA>AAA     | p.E1110K      |
| Pat_76 | Post-Resistance | FAT4     | 79633  | 37 | 4 | 126328272 | 126328272 | Missense_Mutation | SNP | G  | A  | 21 | 50  | c.5545G>A       | c.(5545-5547)GAC>AAC     | p.D1849N      |
| Pat_76 | Post-Resistance | FAT4     | 79633  | 37 | 4 | 126329641 | 126329641 | Missense_Mutation | SNP | G  | A  | 19 | 40  | c.5612G>A       | c.(5611-5613)GGT>GAT     | p.G1871D      |
| Pat_76 | Post-Resistance | PLK4     | 10733  | 37 | 4 | 128814932 | 128814933 | Missense_Mutation | DNP | CC | TT | 23 | 71  | ..2458_2459CC>T | c.(2458-2460)CCT>TTT     | p.P820F       |
| Pat_76 | Post-Resistance | TBC1D9   | 23158  | 37 | 4 | 141578759 | 141578759 | Missense_Mutation | SNP | G  | A  | 41 | 107 | c.2129C>T       | c.(2128-2130)GCC>GTC     | p.A710V       |
| Pat_76 | Post-Resistance | HHIP     | 64399  | 37 | 4 | 145573802 | 145573802 | Missense_Mutation | SNP | G  | A  | 14 | 31  | c.325G>A        | c.(325-327)GAA>AAA       | p.E109K       |
| Pat_76 | Post-Resistance | FHDC1    | 85462  | 37 | 4 | 153897274 | 153897274 | Missense_Mutation | SNP | C  | T  | 5  | 15  | c.2831C>T       | c.(2830-2832)TCC>TTC     | p.S944F       |
| Pat_76 | Post-Resistance | DCHS2    | 54798  | 37 | 4 | 155298497 | 155298497 | Missense_Mutation | SNP | C  | T  | 14 | 26  | c.334G>A        | c.(334-336)GAC>AAC       | p.D112N       |
| Pat_76 | Post-Resistance | GUCY1A3  | 2982   | 37 | 4 | 156651237 | 156651237 | Missense_Mutation | SNP | C  | T  | 9  | 41  | c.1927C>T       | c.(1927-1929)CCA>TCA     | p.P643S       |
| Pat_76 | Post-Resistance | GUCY1B3  | 2983   | 37 | 4 | 156725790 | 156725791 | Missense_Mutation | DNP | GG | AA | 12 | 23  | .1600_1601GG>A  | c.(1600-1602)GGA>AAA     | p.G534K       |
| Pat_76 | Post-Resistance | GLRB     | 2743   | 37 | 4 | 158041814 | 158041814 | Missense_Mutation | SNP | G  | A  | 7  | 15  | c.229G>A        | c.(229-231)GGC>AGC       | p.G77S        |
| Pat_76 | Post-Resistance | GLRB     | 2743   | 37 | 4 | 158057831 | 158057831 | Missense_Mutation | SNP | G  | A  | 8  | 23  | c.508G>A        | c.(508-510)GAT>AAT       | p.D170N       |
| Pat_76 | Post-Resistance | DDX60    | 55601  | 37 | 4 | 169146695 | 169146696 | Missense_Mutation | DNP | GG | AA | 5  | 20  | ..4665_4666CC>T | c.(4663-4668)CTCCA>CTTT  | p.P1556S      |
| Pat_76 | Post-Resistance | MORF4    | 10934  | 37 | 4 | 174537317 | 174537317 | Missense_Mutation | SNP | C  | T  | 31 | 70  | c.478G>A        | c.(478-480)GAT>AAT       | p.D160N       |
| Pat_76 | Post-Resistance | MORF4    | 10934  | 37 | 4 | 174537505 | 174537505 | Missense_Mutation | SNP | G  | A  | 28 | 73  | c.290C>T        | c.(289-291)CCT>CTT       | p.P97L        |
| Pat_76 | Post-Resistance | ADAM29   | 11086  | 37 | 4 | 175896821 | 175896821 | Missense_Mutation | SNP | C  | T  | 5  | 17  | c.145C>T        | c.(145-147)CCA>TCA       | p.P49S        |
| Pat_76 | Post-Resistance | ODZ3     | 55714  | 37 | 4 | 183600893 | 183600893 | Missense_Mutation | SNP | A  | T  | 17 | 18  | c.1401A>T       | c.(1399-1401)AGA>AGT     | p.R467S       |
| Pat_76 | Post-Resistance | ODZ3     | 55714  | 37 | 4 | 183714966 | 183714966 | Missense_Mutation | SNP | C  | T  | 5  | 7   | c.7141C>T       | c.(7141-7143)CCT>TCT     | p.P2381S      |
| Pat_76 | Post-Resistance | C4orf41  | 60684  | 37 | 4 | 184600505 | 184600505 | Splice_Site       | SNP | G  | A  | 8  | 13  | c.832_splice    | c.e9-1                   | p.I278_splice |
| Pat_76 | Post-Resistance | ZFP42    | 132625 | 37 | 4 | 188924469 | 188924469 | Missense_Mutation | SNP | G  | A  | 13 | 58  | c.508G>A        | c.(508-510)GAA>AAA       | p.E170K       |
| Pat_76 | Post-Resistance | TRIML1   | 339976 | 37 | 4 | 189061047 | 189061047 | Missense_Mutation | SNP | G  | A  | 8  | 15  | c.335G>A        | c.(334-336)GGA>GAA       | p.G112E       |
| Pat_76 | Post-Resistance | PLEKHG4B | 153478 | 37 | 5 | 151653    | 151653    | Missense_Mutation | SNP | G  | A  | 7  | 25  | c.863G>A        | c.(862-864)AGT>AAT       | p.S288N       |
| Pat_76 | Post-Resistance | BRD9     | 65980  | 37 | 5 | 865586    | 865586    | Missense_Mutation | SNP | G  | A  | 15 | 34  | c.1636C>T       | c.(1636-1638)CCG>TCG     | p.P546S       |
| Pat_76 | Post-Resistance | DNAH5    | 1767   | 37 | 5 | 13719036  | 13719036  | Missense_Mutation | SNP | C  | T  | 15 | 48  | c.12454G>A      | c.(12454-12456)GAT>AAT   | p.D4152N      |
| Pat_76 | Post-Resistance | DNAH5    | 1767   | 37 | 5 | 13901602  | 13901602  | Missense_Mutation | SNP | G  | A  | 6  | 8   | c.1811C>T       | c.(1810-1812)TCA>TTA     | p.S604L       |
| Pat_76 | Post-Resistance | TRIO     | 7204   | 37 | 5 | 14497016  | 14497016  | Missense_Mutation | SNP | C  | T  | 17 | 28  | c.7909C>T       | c.(7909-7911)CGT>TGT     | p.R2637C      |
| Pat_76 | Post-Resistance | CDH6     | 1004   | 37 | 5 | 31294126  | 31294126  | Missense_Mutation | SNP | G  | A  | 5  | 12  | c.286G>A        | c.(286-288)GGA>AGA       | p.G96R        |
| Pat_76 | Post-Resistance | RAD1     | 5810   | 37 | 5 | 34911678  | 34911678  | Missense_Mutation | SNP | G  | A  | 19 | 41  | c.547C>T        | c.(547-549)CCT>TCT       | p.P183S       |
| Pat_76 | Post-Resistance | PRLR     | 5618   | 37 | 5 | 35065850  | 35065850  | Missense_Mutation | SNP | G  | A  | 19 | 58  | c.1210C>T       | c.(1210-1212)CCC>TCC     | p.P404S       |
| Pat_76 | Post-Resistance | PRLR     | 5618   | 37 | 5 | 35065883  | 35065883  | Missense_Mutation | SNP | C  | T  | 16 | 28  | c.1177G>A       | c.(1177-1179)GAC>AAC     | p.D393N       |
| Pat_76 | Post-Resistance | SPEF2    | 79925  | 37 | 5 | 35667216  | 35667216  | Missense_Mutation | SNP | C  | T  | 7  | 7   | c.1210C>T       | c.(1210-1212)CTT>TTT     | p.L404F       |
| Pat_76 | Post-Resistance | IL7R     | 3575   | 37 | 5 | 35876456  | 35876457  | Missense_Mutation | DNP | CC | TT | 9  | 22  | ..1248_1249CC>T | c.(1246-1251)CCCCCT>CCTT | p.P417S       |
| Pat_76 | Post-Resistance | UGT3A2   | 167127 | 37 | 5 | 36064452  | 36064453  | Splice_Site       | DNP | CC | TT | 4  | 14  | c.95_splice     | c.e2-1                   | p.G32_splice  |
| Pat_76 | Post-Resistance | EGFLAM   | 133584 | 37 | 5 | 38406257  | 38406257  | Missense_Mutation | SNP | G  | A  | 12 | 13  | c.742G>A        | c.(742-744)GGA>AGA       | p.G248R       |
| Pat_76 | Post-Resistance | PTGER4   | 5734   | 37 | 5 | 40681235  | 40681235  | Missense_Mutation | SNP | A  | T  | 24 | 45  | c.140A>T        | c.(139-141)AAG>ATG       | p.K47M        |
| Pat_76 | Post-Resistance | C7       | 730    | 37 | 5 | 40934512  | 40934512  | Missense_Mutation | SNP | C  | T  | 14 | 49  | c.224C>T        | c.(223-225)CCT>CTT       | p.P75L        |
| Pat_76 | Post-Resistance | HEATR7B2 | 133558 | 37 | 5 | 41000395  | 41000395  | Missense_Mutation | SNP | C  | T  | 9  | 17  | c.4409G>A       | c.(4408-4410)GGG>GAG     | p.G1470E      |
| Pat_76 | Post-Resistance | C6       | 729    | 37 | 5 | 41149409  | 41149409  | Missense_Mutation | SNP | A  | G  | 27 | 59  | c.2557T>C       | c.(2557-2559)TCA>CCA     | p.S853P       |

|        |                 |         |        |    |   |           |           |                   |     |    |    |    |     |                |                        |            |
|--------|-----------------|---------|--------|----|---|-----------|-----------|-------------------|-----|----|----|----|-----|----------------|------------------------|------------|
| Pat_76 | Post-Resistance | PARP8   | 79668  | 37 | 5 | 50090751  | 50090751  | Missense_Mutation | SNP | G  | A  | 13 | 24  | c.928G>A       | c.(928-930)GGA>AGA     | p.G310R    |
| Pat_76 | Post-Resistance | ADAMTS6 | 11174  | 37 | 5 | 64511271  | 64511271  | Nonsense_Mutation | SNP | C  | T  | 9  | 14  | c.2316G>A      | c.(2314-2316)TGG>TGA   | p.W772*    |
| Pat_76 | Post-Resistance | ADAMTS6 | 11174  | 37 | 5 | 64522007  | 64522008  | Missense_Mutation | DNP | CC | TT | 10 | 29  | .1972_1973GG>A | c.(1972-1974)GGT>AAT   | p.G658N    |
| Pat_76 | Post-Resistance | IQGAP2  | 10788  | 37 | 5 | 75858277  | 75858277  | Missense_Mutation | SNP | G  | A  | 9  | 28  | c.203G>A       | c.(202-204)GGG>GAG     | p.G68E     |
| Pat_76 | Post-Resistance | GPR98   | 84059  | 37 | 5 | 90106784  | 90106784  | Missense_Mutation | SNP | G  | A  | 15 | 14  | c.15707G>A     | c.(15706-15708)GGC>GAC | p.G5236D   |
| Pat_76 | Post-Resistance | PCSK1   | 5122   | 37 | 5 | 95733081  | 95733081  | Missense_Mutation | SNP | C  | T  | 3  | 18  | c.1681G>A      | c.(1681-1683)GAG>AAG   | p.E561K    |
| Pat_76 | Post-Resistance | RIOK2   | 55781  | 37 | 5 | 96514819  | 96514819  | Missense_Mutation | SNP | A  | T  | 8  | 11  | c.145T>A       | c.(145-147)TGT>AGT     | p.C49S     |
| Pat_76 | Post-Resistance | SLCO4C1 | 353189 | 37 | 5 | 101585427 | 101585427 | Missense_Mutation | SNP | T  | A  | 9  | 22  | c.1535A>T      | c.(1534-1536)TAT>TTT   | p.Y512F    |
| Pat_76 | Post-Resistance | CAMK4   | 814    | 37 | 5 | 110818528 | 110818528 | Missense_Mutation | SNP | T  | A  | 19 | 26  | c.874T>A       | c.(874-876)TTT>ATT     | p.F292I    |
| Pat_76 | Post-Resistance | FEM1C   | 56929  | 37 | 5 | 114860426 | 114860426 | Missense_Mutation | SNP | C  | T  | 15 | 40  | c.1433G>A      | c.(1432-1434)AGG>AAG   | p.R478K    |
| Pat_76 | Post-Resistance | SEMA6A  | 57556  | 37 | 5 | 115783483 | 115783483 | Missense_Mutation | SNP | T  | G  | 3  | 10  | c.1919A>C      | c.(1918-1920)AAA>ACA   | p.K640T    |
| Pat_76 | Post-Resistance | FAM170A | 340069 | 37 | 5 | 118969718 | 118969718 | Missense_Mutation | SNP | G  | A  | 10 | 28  | c.275G>A       | c.(274-276)CGA>CAA     | p.R92Q     |
| Pat_76 | Post-Resistance | FTMT    | 94033  | 37 | 5 | 121188022 | 121188022 | Missense_Mutation | SNP | G  | A  | 4  | 16  | c.364G>A       | c.(364-366)GAG>AAG     | p.E122K    |
| Pat_76 | Post-Resistance | SNCAIP  | 9627   | 37 | 5 | 121758806 | 121758806 | Missense_Mutation | SNP | G  | A  | 4  | 6   | c.374G>A       | c.(373-375)GGA>GAA     | p.G125E    |
| Pat_76 | Post-Resistance | SNCAIP  | 9627   | 37 | 5 | 121761092 | 121761092 | Missense_Mutation | SNP | G  | A  | 20 | 48  | c.1048G>A      | c.(1048-1050)GGA>AGA   | p.G350R    |
| Pat_76 | Post-Resistance | SNCAIP  | 9627   | 37 | 5 | 121761194 | 121761194 | Missense_Mutation | SNP | G  | A  | 18 | 39  | c.1150G>A      | c.(1150-1152)GAG>AAG   | p.E384K    |
| Pat_76 | Post-Resistance | FBN2    | 2201   | 37 | 5 | 127626457 | 127626457 | Missense_Mutation | SNP | C  | T  | 17 | 36  | c.6412G>A      | c.(6412-6414)GAC>AAC   | p.D2138N   |
| Pat_76 | Post-Resistance | DDX46   | 9879   | 37 | 5 | 134131837 | 134131837 | Missense_Mutation | SNP | G  | A  | 4  | 17  | c.1951G>A      | c.(1951-1953)GGA>AGA   | p.G651R    |
| Pat_76 | Post-Resistance | TGFB1   | 7045   | 37 | 5 | 135388802 | 135388802 | Missense_Mutation | SNP | G  | A  | 6  | 15  | c.1120G>A      | c.(1120-1122)GAC>AAC   | p.D374N    |
| Pat_76 | Post-Resistance | KLHL3   | 26249  | 37 | 5 | 137028094 | 137028094 | Missense_Mutation | SNP | G  | A  | 14 | 26  | c.406C>T       | c.(406-408)CGG>TGG     | p.R136W    |
| Pat_76 | Post-Resistance | LRRTM2  | 26045  | 37 | 5 | 138209183 | 138209183 | Missense_Mutation | SNP | C  | T  | 10 | 24  | c.1067G>A      | c.(1066-1068)GGA>GAA   | p.G356E    |
| Pat_76 | Post-Resistance | IK      | 3550   | 37 | 5 | 140032614 | 140032614 | Missense_Mutation | SNP | G  | A  | 9  | 27  | c.289G>A       | c.(289-291)GAG>AAG     | p.E97K     |
| Pat_76 | Post-Resistance | PCDHA4  | 56144  | 37 | 5 | 140186787 | 140186788 | Nonsense_Mutation | DNP | GG | AA | 11 | 45  | c.15_16GG>AA   | c.(13-18)TGGGGA>TGAAG  | p.5_6WG>*R |
| Pat_76 | Post-Resistance | PCDHA4  | 56144  | 37 | 5 | 140188520 | 140188520 | Nonsense_Mutation | SNP | G  | A  | 17 | 35  | c.1748G>A      | c.(1747-1749)TGG>TAG   | p.W583*    |
| Pat_76 | Post-Resistance | PCDHA7  | 56141  | 37 | 5 | 140214158 | 140214158 | Missense_Mutation | SNP | T  | A  | 56 | 123 | c.190T>A       | c.(190-192)TTC>ATC     | p.F64I     |
| Pat_76 | Post-Resistance | PCDHA8  | 56140  | 37 | 5 | 140222893 | 140222893 | Missense_Mutation | SNP | G  | A  | 30 | 57  | c.1987G>A      | c.(1987-1989)GCC>ACC   | p.A663T    |
| Pat_76 | Post-Resistance | PCDHA10 | 56139  | 37 | 5 | 140237626 | 140237626 | Missense_Mutation | SNP | C  | T  | 9  | 17  | c.1993C>T      | c.(1993-1995)CTT>TTT   | p.L665F    |
| Pat_76 | Post-Resistance | PCDHAC2 | 56134  | 37 | 5 | 140347871 | 140347871 | Missense_Mutation | SNP | C  | T  | 26 | 31  | c.1520C>T      | c.(1519-1521)TCC>TTC   | p.S507F    |
| Pat_76 | Post-Resistance | PCDHB1  | 29930  | 37 | 5 | 140431731 | 140431731 | Missense_Mutation | SNP | G  | A  | 3  | 3   | c.676G>A       | c.(676-678)GCT>ACT     | p.A226T    |
| Pat_76 | Post-Resistance | PCDHB1  | 29930  | 37 | 5 | 140432475 | 140432475 | Missense_Mutation | SNP | G  | A  | 5  | 26  | c.1420G>A      | c.(1420-1422)GTC>ATC   | p.V474I    |
| Pat_76 | Post-Resistance | PCDHB2  | 56133  | 37 | 5 | 140474589 | 140474589 | Missense_Mutation | SNP | G  | A  | 10 | 16  | c.215G>A       | c.(214-216)GGA>GAA     | p.G72E     |
| Pat_76 | Post-Resistance | PCDHB3  | 56132  | 37 | 5 | 140481729 | 140481729 | Missense_Mutation | SNP | C  | T  | 23 | 83  | c.1496C>T      | c.(1495-1497)CCC>CTC   | p.P499L    |
| Pat_76 | Post-Resistance | PCDHB6  | 56130  | 37 | 5 | 140530292 | 140530292 | Missense_Mutation | SNP | C  | T  | 44 | 100 | c.454C>T       | c.(454-456)CCT>TCT     | p.P152S    |
| Pat_76 | Post-Resistance | PCDHB6  | 56130  | 37 | 5 | 140532002 | 140532002 | Missense_Mutation | SNP | C  | T  | 43 | 95  | c.2164C>T      | c.(2164-2166)CGC>TGC   | p.R722C    |
| Pat_76 | Post-Resistance | PCDHB7  | 56129  | 37 | 5 | 140554046 | 140554046 | Missense_Mutation | SNP | G  | A  | 10 | 21  | c.1630G>A      | c.(1630-1632)GAG>AAG   | p.E544K    |
| Pat_76 | Post-Resistance | PCDHB16 | 57717  | 37 | 5 | 140562564 | 140562564 | Missense_Mutation | SNP | G  | A  | 7  | 9   | c.430G>A       | c.(430-432)GAA>AAA     | p.E144K    |
| Pat_76 | Post-Resistance | PCDHB16 | 57717  | 37 | 5 | 140562910 | 140562910 | Missense_Mutation | SNP | C  | T  | 19 | 29  | c.776C>T       | c.(775-777)TCC>TTC     | p.S259F    |
| Pat_76 | Post-Resistance | PCDHB9  | 56127  | 37 | 5 | 140567229 | 140567229 | Missense_Mutation | SNP | C  | T  | 3  | 31  | c.337C>T       | c.(337-339)CCC>TCC     | p.P113S    |
| Pat_76 | Post-Resistance | PCDHB9  | 56127  | 37 | 5 | 140568021 | 140568021 | Missense_Mutation | SNP | G  | A  | 5  | 2   | c.1129G>A      | c.(1129-1131)GAA>AAA   | p.E377K    |
| Pat_76 | Post-Resistance | PCDHB10 | 56126  | 37 | 5 | 140572462 | 140572462 | Missense_Mutation | SNP | C  | T  | 8  | 23  | c.337C>T       | c.(337-339)CCC>TCC     | p.P113S    |
| Pat_76 | Post-Resistance | PCDHGA1 | 56114  | 37 | 5 | 140712307 | 140712307 | Missense_Mutation | SNP | G  | A  | 44 | 78  | c.2056G>A      | c.(2056-2058)GAT>AAT   | p.D686N    |
| Pat_76 | Post-Resistance | PCDHGA2 | 56113  | 37 | 5 | 140719019 | 140719019 | Missense_Mutation | SNP | G  | A  | 28 | 41  | c.481G>A       | c.(481-483)GAC>AAC     | p.D161N    |
| Pat_76 | Post-Resistance | PCDHGA9 | 56107  | 37 | 5 | 140782892 | 140782892 | Missense_Mutation | SNP | G  | A  | 14 | 42  | c.373G>A       | c.(373-375)GAT>AAT     | p.D125N    |
| Pat_76 | Post-Resistance | SH3RF2  | 153769 | 37 | 5 | 145379890 | 145379890 | Missense_Mutation | SNP | G  | T  | 3  | 13  | c.648G>T       | c.(646-648)AAG>AAT     | p.K216N    |
| Pat_76 | Post-Resistance | PDGFRB  | 5159   | 37 | 5 | 149499118 | 149499118 | Missense_Mutation | SNP | A  | C  | 25 | 44  | c.2710T>G      | c.(2710-2712)TAC>GAC   | p.Y904D    |
| Pat_76 | Post-Resistance | GLRA1   | 2741   | 37 | 5 | 151271938 | 151271938 | Missense_Mutation | SNP | C  | T  | 8  | 21  | c.118G>A       | c.(118-120)GAT>AAT     | p.D40N     |
| Pat_76 | Post-Resistance | GALNT10 | 55568  | 37 | 5 | 153709295 | 153709295 | Nonsense_Mutation | SNP | C  | T  | 5  | 20  | c.565C>T       | c.(565-567)CGA>TGA     | p.R189*    |

|        |                 |          |        |    |   |           |           |                   |     |    |    |    |     |                 |                                 |          |
|--------|-----------------|----------|--------|----|---|-----------|-----------|-------------------|-----|----|----|----|-----|-----------------|---------------------------------|----------|
| Pat_76 | Post-Resistance | KIF4B    | 285643 | 37 | 5 | 154393439 | 154393439 | Missense_Mutation | SNP | G  | A  | 25 | 78  | c.20G>A         | c.(19-21)GGA>GAA                | p.G7E    |
| Pat_76 | Post-Resistance | KIF4B    | 285643 | 37 | 5 | 154396219 | 154396219 | Missense_Mutation | SNP | C  | T  | 10 | 26  | c.2800C>T       | c.(2800-2802)CTT>TTT            | p.L934F  |
| Pat_76 | Post-Resistance | CYFIP2   | 26999  | 37 | 5 | 156819926 | 156819926 | Missense_Mutation | SNP | C  | T  | 29 | 44  | c.3680C>T       | c.(3679-3681)TCC>TTC            | p.S1227F |
| Pat_76 | Post-Resistance | GABRB2   | 2561   | 37 | 5 | 160721303 | 160721303 | Missense_Mutation | SNP | G  | A  | 11 | 19  | c.1324C>T       | c.(1324-1326)CGG>TGG            | p.R442W  |
| Pat_76 | Post-Resistance | ODZ2     | 57451  | 37 | 5 | 167420012 | 167420013 | Missense_Mutation | DNP | CC | TT | 28 | 49  | :.1011_1012CC>T | 1009-1014)TACCCT>TATT           | p.P338S  |
| Pat_76 | Post-Resistance | CPLX2    | 10814  | 37 | 5 | 175306947 | 175306947 | Missense_Mutation | SNP | C  | T  | 11 | 13  | c.304C>T        | c.(304-306)CCT>TCT              | p.P102S  |
| Pat_76 | Post-Resistance | MXD3     | 83463  | 37 | 5 | 176734669 | 176734669 | Missense_Mutation | SNP | C  | T  | 25 | 44  | c.541G>A        | c.(541-543)GGG>AGG              | p.G181R  |
| Pat_76 | Post-Resistance | ZNF454   | 285676 | 37 | 5 | 178392376 | 178392376 | Missense_Mutation | SNP | G  | A  | 4  | 22  | c.971G>A        | c.(970-972)GGA>GAA              | p.G324E  |
| Pat_76 | Post-Resistance | RUFY1    | 80230  | 37 | 5 | 179025788 | 179025788 | Missense_Mutation | SNP | G  | A  | 28 | 79  | c.1727G>A       | c.(1726-1728)AGG>AAG            | p.R576K  |
| Pat_76 | Post-Resistance | TBC1D9B  | 23061  | 37 | 5 | 179292874 | 179292874 | Missense_Mutation | SNP | C  | T  | 25 | 41  | c.2929G>A       | c.(2929-2931)GAA>AAA            | p.E977K  |
| Pat_76 | Post-Resistance | RASGEF1C | 255426 | 37 | 5 | 179545807 | 179545807 | Missense_Mutation | SNP | C  | T  | 10 | 27  | c.967G>A        | c.(967-969)GCC>ACC              | p.A323T  |
| Pat_76 | Post-Resistance | DSP      | 1832   | 37 | 6 | 7569516   | 7569516   | Missense_Mutation | SNP | C  | T  | 25 | 45  | c.1517C>T       | c.(1516-1518)CCC>CTC            | p.P506L  |
| Pat_76 | Post-Resistance | HDGFL1   | 154150 | 37 | 6 | 22569943  | 22569943  | Missense_Mutation | SNP | G  | A  | 9  | 35  | c.139G>A        | c.(139-141)GAG>AAG              | p.E47K   |
| Pat_76 | Post-Resistance | HIST1H1D | 3007   | 37 | 6 | 26234911  | 26234911  | Missense_Mutation | SNP | C  | T  | 7  | 36  | c.251G>A        | c.(250-252)GGC>GAC              | p.G84D   |
| Pat_76 | Post-Resistance | BTN3A3   | 10384  | 37 | 6 | 26452269  | 26452269  | Missense_Mutation | SNP | G  | A  | 11 | 26  | c.1385G>A       | c.(1384-1386)GGG>GAG            | p.G462E  |
| Pat_76 | Post-Resistance | SCAND3   | 114821 | 37 | 6 | 28543719  | 28543719  | Missense_Mutation | SNP | C  | T  | 4  | 20  | c.763G>A        | c.(763-765)GAA>AAA              | p.E255K  |
| Pat_76 | Post-Resistance | OR2J2    | 26707  | 37 | 6 | 29142001  | 29142001  | Missense_Mutation | SNP | G  | A  | 18 | 28  | c.589G>A        | c.(589-591)GAG>AAG              | p.E197K  |
| Pat_76 | Post-Resistance | OR2H1    | 26716  | 37 | 6 | 29429955  | 29429955  | Missense_Mutation | SNP | C  | T  | 52 | 144 | c.409C>T        | c.(409-411)CGC>TGC              | p.R137C  |
| Pat_76 | Post-Resistance | HLA-L    | 3139   | 37 | 6 | 30231076  | 30231076  | Missense_Mutation | SNP | G  | A  | 29 | 89  | c.520G>A        | c.(520-522)GGT>AGT              | p.G174S  |
| Pat_76 | Post-Resistance | KIAA1949 | 170954 | 37 | 6 | 30645059  | 30645059  | Missense_Mutation | SNP | G  | A  | 25 | 48  | c.1829C>T       | c.(1828-1830)TCC>TTC            | p.S610F  |
| Pat_76 | Post-Resistance | C6orf15  | 29113  | 37 | 6 | 31079874  | 31079874  | Missense_Mutation | SNP | G  | A  | 7  | 17  | c.262C>T        | c.(262-264)CCA>TCA              | p.P88S   |
| Pat_76 | Post-Resistance | LY6G6F   | 259215 | 37 | 6 | 31675497  | 31675498  | Missense_Mutation | DNP | GT | TA | 4  | 18  | c.315_316GT>TA  | 313-318)TGGTGC>TGTA(105_106WC>C |          |
| Pat_76 | Post-Resistance | NEU1     | 4758   | 37 | 6 | 31827660  | 31827660  | Nonsense_Mutation | SNP | G  | A  | 43 | 80  | c.1084C>T       | c.(1084-1086)CAG>TAG            | p.Q362*  |
| Pat_76 | Post-Resistance | SKIV2L   | 6499   | 37 | 6 | 31935813  | 31935813  | Nonsense_Mutation | SNP | G  | T  | 3  | 18  | c.2812G>T       | c.(2812-2814)GAG>TAG            | p.E938*  |
| Pat_76 | Post-Resistance | C4A      | 720    | 37 | 6 | 31996291  | 31996291  | Missense_Mutation | SNP | C  | T  | 28 | 68  | c.3212C>T       | c.(3211-3213)TCA>TTA            | p.S1071L |
| Pat_76 | Post-Resistance | NOTCH4   | 4855   | 37 | 6 | 32180981  | 32180981  | Missense_Mutation | SNP | G  | A  | 9  | 14  | c.2369C>T       | c.(2368-2370)TCC>TTC            | p.S790F  |
| Pat_76 | Post-Resistance | C6orf10  | 10665  | 37 | 6 | 32260979  | 32260979  | Missense_Mutation | SNP | C  | T  | 13 | 25  | c.1471G>A       | c.(1471-1473)GAG>AAG            | p.E491K  |
| Pat_76 | Post-Resistance | C6orf10  | 10665  | 37 | 6 | 32261012  | 32261012  | Missense_Mutation | SNP | C  | T  | 13 | 60  | c.1438G>A       | c.(1438-1440)GTA>ATA            | p.V480I  |
| Pat_76 | Post-Resistance | C6orf10  | 10665  | 37 | 6 | 32261248  | 32261248  | Missense_Mutation | SNP | C  | T  | 10 | 37  | c.1202G>A       | c.(1201-1203)AGG>AAG            | p.R401K  |
| Pat_76 | Post-Resistance | HLA-DRB1 | 3123   | 37 | 6 | 32548562  | 32548562  | Missense_Mutation | SNP | G  | A  | 9  | 59  | c.724C>T        | c.(724-726)CTT>TTT              | p.L242F  |
| Pat_76 | Post-Resistance | COL11A2  | 1302   | 37 | 6 | 33138658  | 33138658  | Missense_Mutation | SNP | C  | T  | 22 | 35  | c.3403G>A       | c.(3403-3405)GGA>AGA            | p.G1135R |
| Pat_76 | Post-Resistance | DAXX     | 1616   | 37 | 6 | 33287202  | 33287202  | Missense_Mutation | SNP | G  | A  | 28 | 65  | c.1895C>T       | c.(1894-1896)TCT>TTT            | p.S632F  |
| Pat_76 | Post-Resistance | TULP1    | 7287   | 37 | 6 | 35477652  | 35477652  | Missense_Mutation | SNP | C  | T  | 17 | 31  | c.553G>A        | c.(553-555)GAA>AAA              | p.E185K  |
| Pat_76 | Post-Resistance | DNAH8    | 1769   | 37 | 6 | 38905837  | 38905837  | Missense_Mutation | SNP | C  | A  | 12 | 23  | c.11000C>A      | c.(10999-11001)GCT>GAT          | p.A3667D |
| Pat_76 | Post-Resistance | DNAH8    | 1769   | 37 | 6 | 38906638  | 38906638  | Missense_Mutation | SNP | G  | A  | 3  | 12  | c.11230G>A      | c.(11230-11232)GTT>ATT          | p.V3744I |
| Pat_76 | Post-Resistance | DNAH8    | 1769   | 37 | 6 | 38998080  | 38998080  | Missense_Mutation | SNP | C  | T  | 12 | 46  | c.13385C>T      | c.(13384-13386)ACC>ATC          | p.T4462I |
| Pat_76 | Post-Resistance | GLP1R    | 2740   | 37 | 6 | 39040780  | 39040780  | Missense_Mutation | SNP | C  | T  | 12 | 32  | c.652C>T        | c.(652-654)CTC>TTC              | p.L218F  |
| Pat_76 | Post-Resistance | TREM2    | 54209  | 37 | 6 | 41126761  | 41126762  | Missense_Mutation | DNP | GG | AA | 5  | 6   | c.525_526CC>TT  | (523-528)ATCCTT>ATTTT           | p.L176F  |
| Pat_76 | Post-Resistance | TREML2   | 79865  | 37 | 6 | 41162514  | 41162514  | Missense_Mutation | SNP | C  | T  | 10 | 30  | c.434G>A        | c.(433-435)GGA>GAA              | p.G145E  |
| Pat_76 | Post-Resistance | TTBK1    | 84630  | 37 | 6 | 43250765  | 43250765  | Missense_Mutation | SNP | G  | A  | 3  | 9   | c.2287G>A       | c.(2287-2289)GAG>AAG            | p.E763K  |
| Pat_76 | Post-Resistance | HSP90AB1 | 3326   | 37 | 6 | 44218846  | 44218846  | Missense_Mutation | SNP | C  | T  | 20 | 49  | c.1019C>T       | c.(1018-1020)CCC>CTC            | p.P340L  |
| Pat_76 | Post-Resistance | GPR116   | 221395 | 37 | 6 | 46849828  | 46849828  | Missense_Mutation | SNP | C  | T  | 22 | 59  | c.629G>A        | c.(628-630)GGA>GAA              | p.G210E  |
| Pat_76 | Post-Resistance | GPR111   | 222611 | 37 | 6 | 47648023  | 47648023  | Missense_Mutation | SNP | G  | A  | 22 | 49  | c.688G>A        | c.(688-690)GAT>AAT              | p.D230N  |
| Pat_76 | Post-Resistance | GPR111   | 222611 | 37 | 6 | 47649928  | 47649928  | Missense_Mutation | SNP | T  | G  | 5  | 10  | c.1633T>G       | c.(1633-1635)TAT>GAT            | p.Y545D  |
| Pat_76 | Post-Resistance | GPR115   | 221393 | 37 | 6 | 47684567  | 47684567  | Missense_Mutation | SNP | C  | T  | 6  | 29  | c.1958C>T       | c.(1957-1959)ACC>ATC            | p.T653I  |
| Pat_76 | Post-Resistance | PKHD1    | 5314   | 37 | 6 | 51524392  | 51524393  | Missense_Mutation | DNP | CC | TT | 6  | 13  | 10531_10532GG>A | :(10531-10533)GGG>AAC           | p.G3511K |
| Pat_76 | Post-Resistance | BAI3     | 577    | 37 | 6 | 69646453  | 69646453  | Missense_Mutation | SNP | C  | T  | 4  | 17  | c.911C>T        | c.(910-912)TCG>TTG              | p.S304L  |



|        |                 |          |        |    |   |           |           |                   |     |    |    |    |     |                |                      |               |
|--------|-----------------|----------|--------|----|---|-----------|-----------|-------------------|-----|----|----|----|-----|----------------|----------------------|---------------|
| Pat_76 | Post-Resistance | COL9A1   | 1297   | 37 | 6 | 70984444  | 70984444  | Missense_Mutation | SNP | G  | A  | 9  | 14  | c.1007C>T      | c.(1006-1008)TCC>TTC | p.S336F       |
| Pat_76 | Post-Resistance | COL9A1   | 1297   | 37 | 6 | 70991139  | 70991139  | Missense_Mutation | SNP | G  | A  | 3  | 12  | c.830C>T       | c.(829-831)CCC>CTC   | p.P277L       |
| Pat_76 | Post-Resistance | IMPG1    | 3617   | 37 | 6 | 76731904  | 76731904  | Missense_Mutation | SNP | G  | A  | 5  | 25  | c.595C>T       | c.(595-597)CTC>TTC   | p.L199F       |
| Pat_76 | Post-Resistance | HTR1B    | 3351   | 37 | 6 | 78173077  | 78173077  | Missense_Mutation | SNP | C  | T  | 6  | 28  | c.44G>A        | c.(43-45)GGC>GAC     | p.G15D        |
| Pat_76 | Post-Resistance | ME1      | 4199   | 37 | 6 | 83933652  | 83933652  | Missense_Mutation | SNP | C  | T  | 5  | 16  | c.1276G>A      | c.(1276-1278)GGA>AGA | p.G426R       |
| Pat_76 | Post-Resistance | TBX18    | 9096   | 37 | 6 | 85466491  | 85466492  | Missense_Mutation | DNP | CC | TT | 6  | 30  | c.695_696GG>AA | c.(694-696)GGG>GAA   | p.G232E       |
| Pat_76 | Post-Resistance | NT5E     | 4907   | 37 | 6 | 86180955  | 86180955  | Missense_Mutation | SNP | G  | A  | 3  | 4   | c.563G>A       | c.(562-564)GGG>GAG   | p.G188E       |
| Pat_76 | Post-Resistance | EPHA7    | 2045   | 37 | 6 | 93955105  | 93955105  | Nonsense_Mutation | SNP | C  | T  | 8  | 18  | c.2793G>A      | c.(2791-2793)TGG>TGA | p.W931*       |
| Pat_76 | Post-Resistance | EPHA7    | 2045   | 37 | 6 | 93956552  | 93956552  | Missense_Mutation | SNP | C  | T  | 9  | 22  | c.2684G>A      | c.(2683-2685)CGA>CAA | p.R895Q       |
| Pat_76 | Post-Resistance | KIAA0776 | 23376  | 37 | 6 | 97000533  | 97000533  | Missense_Mutation | SNP | C  | T  | 4  | 12  | c.2161C>T      | c.(2161-2163)CCA>TCA | p.P721S       |
| Pat_76 | Post-Resistance | GRIK2    | 2898   | 37 | 6 | 102307279 | 102307279 | Missense_Mutation | SNP | G  | A  | 3  | 19  | c.1435G>A      | c.(1435-1437)GAA>AAA | p.E479K       |
| Pat_76 | Post-Resistance | GRIK2    | 2898   | 37 | 6 | 102372501 | 102372501 | Missense_Mutation | SNP | C  | T  | 17 | 30  | c.1774C>T      | c.(1774-1776)CCA>TCA | p.P592S       |
| Pat_76 | Post-Resistance | SOBP     | 55084  | 37 | 6 | 107827494 | 107827494 | Missense_Mutation | SNP | C  | T  | 22 | 70  | c.284C>T       | c.(283-285)CCA>CTA   | p.P95L        |
| Pat_76 | Post-Resistance | SEC63    | 11231  | 37 | 6 | 108279182 | 108279182 | Missense_Mutation | SNP | C  | T  | 27 | 115 | c.32G>A        | c.(31-33)AGT>AAT     | p.S11N        |
| Pat_76 | Post-Resistance | ARMC2    | 84071  | 37 | 6 | 109220963 | 109220963 | Missense_Mutation | SNP | G  | A  | 4  | 14  | c.815G>A       | c.(814-816)AGG>AAG   | p.R272K       |
| Pat_76 | Post-Resistance | HDAC2    | 3066   | 37 | 6 | 114274532 | 114274532 | Missense_Mutation | SNP | C  | T  | 4  | 26  | c.830G>A       | c.(829-831)GGT>GAT   | p.G277D       |
| Pat_76 | Post-Resistance | FRK      | 2444   | 37 | 6 | 116263590 | 116263590 | Missense_Mutation | SNP | T  | C  | 13 | 23  | c.1505A>G      | c.(1504-1506)AAC>AGC | p.N502S       |
| Pat_76 | Post-Resistance | DSE      | 29940  | 37 | 6 | 116758336 | 116758336 | Missense_Mutation | SNP | G  | A  | 3  | 28  | c.2705G>A      | c.(2704-2706)AGG>AAG | p.R902K       |
| Pat_76 | Post-Resistance | RFX6     | 222546 | 37 | 6 | 117240459 | 117240460 | Splice_Site       | DNP | GG | AA | 11 | 17  | c.1182_splice  | c.e11+1              | p.Q394_splice |
| Pat_76 | Post-Resistance | RFX6     | 222546 | 37 | 6 | 117248514 | 117248514 | Missense_Mutation | SNP | G  | C  | 7  | 30  | c.2210G>C      | c.(2209-2211)AGA>ACA | p.R737T       |
| Pat_76 | Post-Resistance | C6orf170 | 221322 | 37 | 6 | 121481215 | 121481215 | Missense_Mutation | SNP | G  | A  | 14 | 32  | c.2714C>T      | c.(2713-2715)TCA>TTA | p.S905L       |
| Pat_76 | Post-Resistance | C6orf58  | 352999 | 37 | 6 | 127898569 | 127898569 | Missense_Mutation | SNP | C  | T  | 8  | 72  | c.239C>T       | c.(238-240)CCA>CTA   | p.P80L        |
| Pat_76 | Post-Resistance | PTPRK    | 5796   | 37 | 6 | 128304508 | 128304508 | Missense_Mutation | SNP | C  | T  | 16 | 37  | c.3263G>A      | c.(3262-3264)CGA>CAA | p.R1088Q      |
| Pat_76 | Post-Resistance | LAMA2    | 3908   | 37 | 6 | 129802517 | 129802517 | Missense_Mutation | SNP | G  | A  | 26 | 58  | c.7682G>A      | c.(7681-7683)GGC>GAC | p.G2561D      |
| Pat_76 | Post-Resistance | C6orf191 | 253582 | 37 | 6 | 130166939 | 130166939 | Missense_Mutation | SNP | G  | A  | 22 | 53  | c.92C>T        | c.(91-93)TCC>TTC     | p.S31F        |
| Pat_76 | Post-Resistance | ENPP3    | 5169   | 37 | 6 | 131973708 | 131973708 | Missense_Mutation | SNP | C  | T  | 31 | 67  | c.304C>T       | c.(304-306)CGT>TGT   | p.R102C       |
| Pat_76 | Post-Resistance | ENPP3    | 5169   | 37 | 6 | 131995347 | 131995347 | Missense_Mutation | SNP | G  | A  | 13 | 12  | c.688G>A       | c.(688-690)GAT>AAT   | p.D230N       |
| Pat_76 | Post-Resistance | TAAR8    | 83551  | 37 | 6 | 132874774 | 132874774 | Missense_Mutation | SNP | C  | T  | 6  | 25  | c.943C>T       | c.(943-945)CCT>TCT   | p.P315S       |
| Pat_76 | Post-Resistance | AHI1     | 54806  | 37 | 6 | 135754272 | 135754272 | Missense_Mutation | SNP | G  | A  | 17 | 31  | c.2159C>T      | c.(2158-2160)TCC>TTC | p.S720F       |
| Pat_76 | Post-Resistance | BCLAF1   | 9774   | 37 | 6 | 136599690 | 136599690 | Missense_Mutation | SNP | G  | A  | 7  | 45  | c.329C>T       | c.(328-330)TCA>TTA   | p.S110L       |
| Pat_76 | Post-Resistance | MAP7     | 9053   | 37 | 6 | 136680963 | 136680963 | Missense_Mutation | SNP | C  | T  | 26 | 66  | c.1907G>A      | c.(1906-1908)GGA>GAA | p.G636E       |
| Pat_76 | Post-Resistance | MAP7     | 9053   | 37 | 6 | 136681842 | 136681842 | Missense_Mutation | SNP | C  | T  | 64 | 125 | c.1796G>A      | c.(1795-1797)AGA>AAA | p.R599K       |
| Pat_76 | Post-Resistance | KIAA1244 | 57221  | 37 | 6 | 138619758 | 138619758 | Missense_Mutation | SNP | G  | A  | 7  | 7   | c.3664G>A      | c.(3664-3666)GAA>AAA | p.E1222K      |
| Pat_76 | Post-Resistance | PLAGL1   | 5325   | 37 | 6 | 144263084 | 144263084 | Missense_Mutation | SNP | G  | A  | 11 | 27  | c.869C>T       | c.(868-870)TCC>TTC   | p.S290F       |
| Pat_76 | Post-Resistance | UTRN     | 7402   | 37 | 6 | 145156938 | 145156938 | Nonsense_Mutation | SNP | C  | T  | 52 | 134 | c.9688C>T      | c.(9688-9690)CAG>TAG | p.Q3230*      |
| Pat_76 | Post-Resistance | FBXL18   | 80028  | 37 | 7 | 5540452   | 5540452   | Missense_Mutation | SNP | G  | T  | 9  | 33  | c.1448C>A      | c.(1447-1449)CCC>CAC | p.P483H       |
| Pat_76 | Post-Resistance | C7orf26  | 79034  | 37 | 7 | 6639796   | 6639796   | Missense_Mutation | SNP | C  | T  | 13 | 16  | c.917C>T       | c.(916-918)ACC>ATC   | p.T306I       |
| Pat_76 | Post-Resistance | COL28A1  | 340267 | 37 | 7 | 7457519   | 7457519   | Missense_Mutation | SNP | G  | A  | 22 | 34  | c.2107C>T      | c.(2107-2109)CCC>TCC | p.P703S       |
| Pat_76 | Post-Resistance | ETV1     | 2115   | 37 | 7 | 13971333  | 13971333  | Missense_Mutation | SNP | G  | A  | 9  | 21  | c.596C>T       | c.(595-597)CCT>CTT   | p.P199L       |
| Pat_76 | Post-Resistance | AHR      | 196    | 37 | 7 | 17349748  | 17349748  | Splice_Site       | SNP | G  | A  | 3  | 16  | c.253_splice   | c.e2+1               | p.V85_splice  |
| Pat_76 | Post-Resistance | HDAC9    | 9734   | 37 | 7 | 18975562  | 18975562  | Missense_Mutation | SNP | T  | G  | 23 | 21  | c.2925T>G      | c.(2923-2925)AAT>AAG | p.N975K       |
| Pat_76 | Post-Resistance | TWISTNB  | 221830 | 37 | 7 | 19748518  | 19748518  | Missense_Mutation | SNP | A  | C  | 15 | 13  | c.122T>G       | c.(121-123)GTG>GGG   | p.V41G        |
| Pat_76 | Post-Resistance | DNAH11   | 8701   | 37 | 7 | 21639612  | 21639612  | Missense_Mutation | SNP | C  | T  | 3  | 19  | c.2875C>T      | c.(2875-2877)CCT>TCT | p.P959S       |
| Pat_76 | Post-Resistance | STK31    | 56164  | 37 | 7 | 23827672  | 23827672  | Missense_Mutation | SNP | C  | T  | 16 | 54  | c.2561C>T      | c.(2560-2562)TCA>TTA | p.S854L       |
| Pat_76 | Post-Resistance | GARS     | 2617   | 37 | 7 | 30656730  | 30656730  | Missense_Mutation | SNP | G  | A  | 10 | 89  | c.1195G>A      | c.(1195-1197)GGT>AGT | p.G399S       |
| Pat_76 | Post-Resistance | BMPER    | 168667 | 37 | 7 | 34118765  | 34118765  | Missense_Mutation | SNP | G  | A  | 22 | 94  | c.1375G>A      | c.(1375-1377)GAT>AAT | p.D459N       |
| Pat_76 | Post-Resistance | POU6F2   | 11281  | 37 | 7 | 39446295  | 39446295  | Missense_Mutation | SNP | C  | T  | 23 | 25  | c.982C>T       | c.(982-984)CTT>TTT   | p.L328F       |

|        |                 |         |        |    |   |           |           |                   |     |    |    |     |     |                                                  |                        |               |
|--------|-----------------|---------|--------|----|---|-----------|-----------|-------------------|-----|----|----|-----|-----|--------------------------------------------------|------------------------|---------------|
| Pat_76 | Post-Resistance | C7orf36 | 57002  | 37 | 7 | 39612174  | 39612174  | Missense_Mutation | SNP | G  | A  | 13  | 55  | c.550G>A                                         | c.(550-552)GAA>AAA     | p.E184K       |
| Pat_76 | Post-Resistance | GLI3    | 2737   | 37 | 7 | 42065985  | 42065985  | Missense_Mutation | SNP | G  | A  | 5   | 20  | c.1055C>T                                        | c.(1054-1056)TCC>TTC   | p.S352F       |
| Pat_76 | Post-Resistance | C7orf44 | 55744  | 37 | 7 | 43687203  | 43687203  | Missense_Mutation | SNP | C  | T  | 7   | 34  | c.46G>A                                          | c.(46-48)GGA>AGA       | p.G16R        |
| Pat_76 | Post-Resistance | PGAM2   | 5224   | 37 | 7 | 44105164  | 44105164  | Splice_Site       | SNP | G  | A  | 30  | 26  | c.-34_splice                                     | c.e1-1                 |               |
| Pat_76 | Post-Resistance | NPC1L1  | 29881  | 37 | 7 | 44579071  | 44579071  | Missense_Mutation | SNP | G  | A  | 28  | 76  | c.925C>T                                         | c.(925-927)CCC>TCC     | p.P309S       |
| Pat_76 | Post-Resistance | PKD1L1  | 168507 | 37 | 7 | 47917146  | 47917146  | Missense_Mutation | SNP | G  | A  | 79  | 78  | c.3604C>T                                        | c.(3604-3606)CCC>TCC   | p.P1202S      |
| Pat_76 | Post-Resistance | UPP1    | 7378   | 37 | 7 | 48139273  | 48139274  | Missense_Mutation | DNP | CC | TT | 10  | 21  | c.51_52CC>TT                                     | .(49-54)TGCCCC>TGTTCC  | p.P18S        |
| Pat_76 | Post-Resistance | ABCA13  | 154664 | 37 | 7 | 48311987  | 48311987  | Missense_Mutation | SNP | G  | T  | 7   | 24  | c.2724G>T                                        | c.(2722-2724)TTG>TTT   | p.L908F       |
| Pat_76 | Post-Resistance | ABCA13  | 154664 | 37 | 7 | 48338080  | 48338080  | Missense_Mutation | SNP | C  | T  | 8   | 20  | c.9317C>T                                        | c.(9316-9318)TCC>TTC   | p.S3106F      |
| Pat_76 | Post-Resistance | ZBPB    | 11055  | 37 | 7 | 50022979  | 50022979  | Missense_Mutation | SNP | C  | T  | 8   | 29  | c.920G>A                                         | c.(919-921)GGA>GAA     | p.G307E       |
| Pat_76 | Post-Resistance | ZNF713  | 349075 | 37 | 7 | 56007625  | 56007625  | Missense_Mutation | SNP | C  | T  | 21  | 33  | c.1219C>T                                        | c.(1219-1221)CAT>TAT   | p.H407Y       |
| Pat_76 | Post-Resistance | ZNF479  | 90827  | 37 | 7 | 57187752  | 57187752  | Missense_Mutation | SNP | C  | T  | 23  | 113 | c.1370G>A                                        | c.(1369-1371)AGA>AAA   | p.R457K       |
| Pat_76 | Post-Resistance | ZNF727  | 442319 | 37 | 7 | 63538454  | 63538454  | Missense_Mutation | SNP | G  | A  | 9   | 43  | c.1027G>A                                        | c.(1027-1029)GAA>AAA   | p.E343K       |
| Pat_76 | Post-Resistance | CALN1   | 83698  | 37 | 7 | 71275372  | 71275372  | Missense_Mutation | SNP | C  | T  | 14  | 63  | c.481G>A                                         | c.(481-483)GAA>AAA     | p.E161K       |
| Pat_76 | Post-Resistance | POR     | 5447   | 37 | 7 | 75583414  | 75583414  | Missense_Mutation | SNP | C  | T  | 5   | 14  | c.104C>T                                         | c.(103-105)TCG>TTG     | p.S35L        |
| Pat_76 | Post-Resistance | MAGI2   | 9863   | 37 | 7 | 77885584  | 77885584  | Missense_Mutation | SNP | C  | T  | 10  | 51  | c.1723G>A                                        | c.(1723-1725)GAT>AAT   | p.D575N       |
| Pat_76 | Post-Resistance | PCLO    | 27445  | 37 | 7 | 82451858  | 82451858  | Missense_Mutation | SNP | G  | C  | 31  | 85  | c.14744C>G                                       | .(14743-14745)GCC>GGC  | p.A4915G      |
| Pat_76 | Post-Resistance | PCLO    | 27445  | 37 | 7 | 82546104  | 82546104  | Missense_Mutation | SNP | G  | A  | 15  | 28  | c.11198C>T                                       | c.(11197-11199)TCC>TTC | p.S3733F      |
| Pat_76 | Post-Resistance | PCLO    | 27445  | 37 | 7 | 82764102  | 82764102  | Missense_Mutation | SNP | T  | G  | 4   | 9   | c.2764A>C                                        | c.(2764-2766)ACT>CCT   | p.T922P       |
| Pat_76 | Post-Resistance | PCLO    | 27445  | 37 | 7 | 82764708  | 82764708  | Missense_Mutation | SNP | C  | T  | 5   | 15  | c.2158G>A                                        | c.(2158-2160)GCC>ACC   | p.A720T       |
| Pat_76 | Post-Resistance | PCLO    | 27445  | 37 | 7 | 82785182  | 82785182  | Nonsense_Mutation | SNP | G  | A  | 4   | 16  | c.775C>T                                         | c.(775-777)CAG>TAG     | p.Q259*       |
| Pat_76 | Post-Resistance | SEMA3A  | 10371  | 37 | 7 | 83636707  | 83636707  | Missense_Mutation | SNP | G  | A  | 7   | 52  | c.1102C>T                                        | c.(1102-1104)CCT>TCT   | p.P368S       |
| Pat_76 | Post-Resistance | ABCB1   | 5243   | 37 | 7 | 87133609  | 87133609  | Missense_Mutation | SNP | C  | T  | 42  | 49  | c.3793G>A                                        | c.(3793-3795)GGC>AGC   | p.G1265S      |
| Pat_76 | Post-Resistance | RUND3B  | 154661 | 37 | 7 | 87407136  | 87407136  | Missense_Mutation | SNP | G  | A  | 5   | 14  | c.872G>A                                         | c.(871-873)CGA>CAA     | p.R291Q       |
| Pat_76 | Post-Resistance | STEAP4  | 79689  | 37 | 7 | 87913456  | 87913456  | Nonsense_Mutation | SNP | A  | C  | 13  | 38  | c.129T>G                                         | c.(127-129)TAT>TAG     | p.Y43*        |
| Pat_76 | Post-Resistance | PEX1    | 5189   | 37 | 7 | 92119180  | 92119180  | Missense_Mutation | SNP | G  | A  | 3   | 26  | c.3484C>T                                        | c.(3484-3486)CCT>TCT   | p.P1162S      |
| Pat_76 | Post-Resistance | SAMD9L  | 219285 | 37 | 7 | 92762118  | 92762118  | Missense_Mutation | SNP | G  | A  | 10  | 48  | c.3167C>T                                        | c.(3166-3168)TCC>TTC   | p.S1056F      |
| Pat_76 | Post-Resistance | COL1A2  | 1278   | 37 | 7 | 94039582  | 94039582  | Missense_Mutation | SNP | G  | A  | 9   | 29  | c.1064G>A                                        | c.(1063-1065)GGA>GAA   | p.G355E       |
| Pat_76 | Post-Resistance | NPTX2   | 4885   | 37 | 7 | 98254473  | 98254473  | Missense_Mutation | SNP | G  | A  | 15  | 76  | c.883G>A                                         | c.(883-885)GAC>AAC     | p.D295N       |
| Pat_76 | Post-Resistance | CYP3A4  | 1576   | 37 | 7 | 99359664  | 99359664  | Missense_Mutation | SNP | C  | T  | 32  | 43  | c.1253G>A                                        | c.(1252-1254)AGA>AAA   | p.R418K       |
| Pat_76 | Post-Resistance | ZAN     | 7455   | 37 | 7 | 100348419 | 100348419 | Missense_Mutation | SNP | G  | A  | 8   | 10  | c.1421G>A                                        | c.(1420-1422)GGG>GAG   | p.G474E       |
| Pat_76 | Post-Resistance | MUC17   | 140453 | 37 | 7 | 100678919 | 100678919 | Missense_Mutation | SNP | G  | A  | 258 | 544 | c.4222G>A                                        | c.(4222-4224)GTA>ATA   | p.V1408I      |
| Pat_76 | Post-Resistance | MUC17   | 140453 | 37 | 7 | 100683798 | 100683798 | Missense_Mutation | SNP | C  | T  | 188 | 594 | c.9101C>T                                        | c.(9100-9102)ACC>ATC   | p.T3034I      |
| Pat_76 | Post-Resistance | MUC17   | 140453 | 37 | 7 | 100686761 | 100686761 | Missense_Mutation | SNP | A  | C  | 41  | 127 | c.12064A>C                                       | c.(12064-12066)ACT>CCT | p.T4022P      |
| Pat_76 | Post-Resistance | ZNHIT1  | 10467  | 37 | 7 | 100867093 | 100867093 | Missense_Mutation | SNP | T  | C  | 22  | 110 | c.413T>C                                         | c.(412-414)GTG>GCG     | p.V138A       |
| Pat_76 | Post-Resistance | CUX1    | 1523   | 37 | 7 | 101918517 | 101918517 | Splice_Site       | SNP | G  | A  | 38  | 83  | c.1451_splice                                    | c.e17-1                | p.G484_splice |
| Pat_76 | Post-Resistance | SLC26A5 | 375611 | 37 | 7 | 103048336 | 103048336 | Missense_Mutation | SNP | C  | T  | 6   | 34  | c.850G>A                                         | c.(850-852)GAG>AAG     | p.E284K       |
| Pat_76 | Post-Resistance | RELN    | 5649   | 37 | 7 | 103185660 | 103185660 | Missense_Mutation | SNP | C  | T  | 37  | 32  | c.6434G>A                                        | c.(6433-6435)GGA>GAA   | p.G2145E      |
| Pat_76 | Post-Resistance | RELN    | 5649   | 37 | 7 | 103294623 | 103294623 | Missense_Mutation | SNP | C  | T  | 8   | 27  | c.1471G>A                                        | c.(1471-1473)GAA>AAA   | p.E491K       |
| Pat_76 | Post-Resistance | RELN    | 5649   | 37 | 7 | 103341421 | 103341421 | Missense_Mutation | SNP | G  | A  | 32  | 61  | c.838C>T                                         | c.(838-840)CCC>TCC     | p.P280S       |
| Pat_76 | Post-Resistance | IFRD1   | 3475   | 37 | 7 | 112096120 | 112096120 | Missense_Mutation | SNP | T  | G  | 15  | 11  | c.263T>G                                         | c.(262-264)ATT>AGT     | p.I88S        |
| Pat_76 | Post-Resistance | PPP1R3A | 5506   | 37 | 7 | 113518127 | 113518127 | Missense_Mutation | SNP | G  | A  | 10  | 38  | c.3020C>T                                        | c.(3019-3021)TCT>TTT   | p.S1007F      |
| Pat_76 | Post-Resistance | PPP1R3A | 5506   | 37 | 7 | 113558273 | 113558273 | Missense_Mutation | SNP | G  | A  | 8   | 35  | c.779C>T                                         | c.(778-780)TCA>TTA     | p.S260L       |
| Pat_76 | Post-Resistance | FOXP2   | 93986  | 37 | 7 | 114329931 | 114329931 | Missense_Mutation | SNP | G  | A  | 13  | 53  | c.2098G>A                                        | c.(2098-2100)GAA>AAA   | p.E700K       |
| Pat_76 | Post-Resistance | MET     | 4233   | 37 | 7 | 116371883 | 116371884 | Missense_Mutation | DNP | TC | AT | 24  | 15  | ..1362_1363TC>A1360-1365)AATCTT>AAAT.454_455NL>K |                        |               |
| Pat_76 | Post-Resistance | WNT2    | 7472   | 37 | 7 | 116918241 | 116918241 | Missense_Mutation | SNP | G  | A  | 19  | 80  | c.1051C>T                                        | c.(1051-1053)CCC>TCC   | p.P351S       |
| Pat_76 | Post-Resistance | CFTR    | 1080   | 37 | 7 | 117232163 | 117232163 | Missense_Mutation | SNP | G  | A  | 26  | 18  | c.1942G>A                                        | c.(1942-1944)GAT>AAT   | p.D648N       |

|        |                 |          |        |    |   |           |           |                   |     |    |    |     |     |                                     |                      |               |
|--------|-----------------|----------|--------|----|---|-----------|-----------|-------------------|-----|----|----|-----|-----|-------------------------------------|----------------------|---------------|
| Pat_76 | Post-Resistance | CFTR     | 1080   | 37 | 7 | 117307052 | 117307052 | Missense_Mutation | SNP | G  | A  | 7   | 51  | c.4333G>A                           | c.(4333-4335)GAC>AAC | p.D1445N      |
| Pat_76 | Post-Resistance | TSPAN12  | 23554  | 37 | 7 | 120428929 | 120428929 | Missense_Mutation | SNP | G  | A  | 5   | 30  | c.635C>T                            | c.(634-636)TCC>TTC   | p.S212F       |
| Pat_76 | Post-Resistance | RNF148   | 378925 | 37 | 7 | 122342384 | 122342384 | Missense_Mutation | SNP | G  | A  | 64  | 310 | c.421C>T                            | c.(421-423)CCC>TCC   | p.P141S       |
| Pat_76 | Post-Resistance | IQUB     | 154865 | 37 | 7 | 123136870 | 123136870 | Missense_Mutation | SNP | C  | T  | 19  | 11  | c.1114G>A                           | c.(1114-1116)GAA>AAA | p.E372K       |
| Pat_76 | Post-Resistance | FSCN3    | 29999  | 37 | 7 | 127236496 | 127236496 | Missense_Mutation | SNP | C  | T  | 123 | 50  | c.956C>T                            | c.(955-957)TCC>TTC   | p.S319F       |
| Pat_76 | Post-Resistance | SND1     | 27044  | 37 | 7 | 127326763 | 127326763 | Missense_Mutation | SNP | C  | T  | 16  | 116 | c.175C>T                            | c.(175-177)CTT>TTT   | p.L59F        |
| Pat_76 | Post-Resistance | FLNC     | 2318   | 37 | 7 | 128484752 | 128484752 | Missense_Mutation | SNP | G  | A  | 15  | 73  | c.3233G>A                           | c.(3232-3234)GGC>GAC | p.G1078D      |
| Pat_76 | Post-Resistance | FLNC     | 2318   | 37 | 7 | 128485144 | 128485144 | Missense_Mutation | SNP | G  | A  | 55  | 186 | c.3625G>A                           | c.(3625-3627)GAT>AAT | p.D1209N      |
| Pat_76 | Post-Resistance | FLNC     | 2318   | 37 | 7 | 128493532 | 128493532 | Missense_Mutation | SNP | G  | A  | 29  | 15  | c.6218G>A                           | c.(6217-6219)GGC>GAC | p.G2073D      |
| Pat_76 | Post-Resistance | PLXNA4   | 91584  | 37 | 7 | 131831452 | 131831452 | Missense_Mutation | SNP | C  | T  | 39  | 149 | c.4872G>A                           | c.(4870-4872)ATG>ATA | p.M1624I      |
| Pat_76 | Post-Resistance | PLXNA4   | 91584  | 37 | 7 | 131853205 | 131853205 | Missense_Mutation | SNP | C  | T  | 30  | 79  | c.4144G>A                           | c.(4144-4146)GAC>AAC | p.D1382N      |
| Pat_76 | Post-Resistance | PLXNA4   | 91584  | 37 | 7 | 131853241 | 131853241 | Missense_Mutation | SNP | G  | A  | 21  | 89  | c.4108C>T                           | c.(4108-4110)CGC>TGC | p.R1370C      |
| Pat_76 | Post-Resistance | PLXNA4   | 91584  | 37 | 7 | 132192864 | 132192864 | Missense_Mutation | SNP | G  | A  | 31  | 128 | c.589C>T                            | c.(589-591)CCC>TCC   | p.P197S       |
| Pat_76 | Post-Resistance | CHRM2    | 1129   | 37 | 7 | 136700405 | 136700405 | Missense_Mutation | SNP | G  | A  | 15  | 27  | c.793G>A                            | c.(793-795)GCC>ACC   | p.A265T       |
| Pat_76 | Post-Resistance | DGKI     | 9162   | 37 | 7 | 137304634 | 137304634 | Missense_Mutation | SNP | G  | A  | 73  | 40  | c.929C>T                            | c.(928-930)TCC>TTC   | p.S310F       |
| Pat_76 | Post-Resistance | KIAA1549 | 57670  | 37 | 7 | 138552834 | 138552835 | Nonsense_Mutation | DNP | GG | AA | 6   | 18  | .:4815_4816CC>T813-4818)CACCAG>CATT |                      | p.Q1606*      |
| Pat_76 | Post-Resistance | RAB19    | 401409 | 37 | 7 | 140107597 | 140107597 | Missense_Mutation | SNP | G  | A  | 10  | 79  | c.151G>A                            | c.(151-153)GGA>AGA   | p.G51R        |
| Pat_76 | Post-Resistance | RAB19    | 401409 | 37 | 7 | 140111792 | 140111792 | Missense_Mutation | SNP | C  | T  | 34  | 164 | c.320C>T                            | c.(319-321)TCC>TTC   | p.S107F       |
| Pat_76 | Post-Resistance | DENND2A  | 27147  | 37 | 7 | 140301773 | 140301773 | Missense_Mutation | SNP | C  | A  | 43  | 161 | c.425G>T                            | c.(424-426)GGC>GTC   | p.G142V       |
| Pat_76 | Post-Resistance | ADCK2    | 90956  | 37 | 7 | 140373899 | 140373899 | Missense_Mutation | SNP | C  | T  | 39  | 25  | c.769C>T                            | c.(769-771)CTT>TTT   | p.L257F       |
| Pat_76 | Post-Resistance | BRAF     | 673    | 37 | 7 | 140453136 | 140453136 | Missense_Mutation | SNP | A  | T  | 28  | 23  | c.1799T>A                           | c.(1798-1800)GTG>GAG | p.V600E       |
| Pat_76 | Post-Resistance | BRAF     | 673    | 37 | 7 | 140481408 | 140481408 | Missense_Mutation | SNP | G  | A  | 27  | 184 | c.1400C>T                           | c.(1399-1401)TCA>TTA | p.S467L       |
| Pat_76 | Post-Resistance | WEE2     | 494551 | 37 | 7 | 141408728 | 141408728 | Nonsense_Mutation | SNP | G  | A  | 124 | 66  | c.170G>A                            | c.(169-171)TGG>TAG   | p.W57*        |
| Pat_76 | Post-Resistance | MGAM     | 8972   | 37 | 7 | 141759301 | 141759301 | Missense_Mutation | SNP | G  | A  | 7   | 9   | c.3849G>A                           | c.(3847-3849)ATG>ATA | p.M1283I      |
| Pat_76 | Post-Resistance | TRPV6    | 55503  | 37 | 7 | 142574981 | 142574981 | Missense_Mutation | SNP | C  | T  | 40  | 141 | c.401G>A                            | c.(400-402)CGA>CAA   | p.R134Q       |
| Pat_76 | Post-Resistance | TRPV5    | 56302  | 37 | 7 | 142625878 | 142625878 | Missense_Mutation | SNP | C  | T  | 19  | 83  | c.670G>A                            | c.(670-672)GGA>AGA   | p.G224R       |
| Pat_76 | Post-Resistance | TAS2R39  | 259285 | 37 | 7 | 142880593 | 142880593 | Missense_Mutation | SNP | G  | A  | 8   | 25  | c.82G>A                             | c.(82-84)GAA>AAA     | p.E28K        |
| Pat_76 | Post-Resistance | TAS2R39  | 259285 | 37 | 7 | 142881212 | 142881212 | Missense_Mutation | SNP | C  | T  | 106 | 61  | c.701C>T                            | c.(700-702)TCT>TTT   | p.S234F       |
| Pat_76 | Post-Resistance | CLCN1    | 1180   | 37 | 7 | 143044013 | 143044013 | Missense_Mutation | SNP | G  | A  | 17  | 58  | c.2374G>A                           | c.(2374-2376)GAT>AAT | p.D792N       |
| Pat_76 | Post-Resistance | EPHA1    | 2041   | 37 | 7 | 143096756 | 143096756 | Missense_Mutation | SNP | C  | T  | 60  | 190 | c.823G>A                            | c.(823-825)GAA>AAA   | p.E275K       |
| Pat_76 | Post-Resistance | TAS2R41  | 259287 | 37 | 7 | 143175540 | 143175540 | Missense_Mutation | SNP | C  | T  | 8   | 23  | c.575C>T                            | c.(574-576)CCT>CTT   | p.P192L       |
| Pat_76 | Post-Resistance | OR2F1    | 26211  | 37 | 7 | 143657369 | 143657369 | Missense_Mutation | SNP | T  | A  | 35  | 90  | c.306T>A                            | c.(304-306)TTT>TTA   | p.F102L       |
| Pat_76 | Post-Resistance | OR2A2    | 442361 | 37 | 7 | 143807452 | 143807452 | Missense_Mutation | SNP | G  | A  | 102 | 91  | c.777G>A                            | c.(775-777)ATG>ATA   | p.M259I       |
| Pat_76 | Post-Resistance | ARHGEF5  | 7984   | 37 | 7 | 144060324 | 144060324 | Missense_Mutation | SNP | G  | A  | 31  | 96  | c.562G>A                            | c.(562-564)GAG>AAG   | p.E188K       |
| Pat_76 | Post-Resistance | ARHGEF5  | 7984   | 37 | 7 | 144062290 | 144062290 | Missense_Mutation | SNP | C  | T  | 8   | 137 | c.2528C>T                           | c.(2527-2529)CCC>CTC | p.P843L       |
| Pat_76 | Post-Resistance | ARHGEF5  | 7984   | 37 | 7 | 144068336 | 144068336 | Missense_Mutation | SNP | C  | T  | 6   | 150 | c.3614C>T                           | c.(3613-3615)TCA>TTA | p.S1205L      |
| Pat_76 | Post-Resistance | CNTNAP2  | 26047  | 37 | 7 | 146825794 | 146825794 | Missense_Mutation | SNP | G  | A  | 7   | 46  | c.949G>A                            | c.(949-951)GGA>AGA   | p.G317R       |
| Pat_76 | Post-Resistance | C7orf33  | 202865 | 37 | 7 | 148311169 | 148311169 | Missense_Mutation | SNP | G  | A  | 43  | 133 | c.240G>A                            | c.(238-240)ATG>ATA   | p.M80I        |
| Pat_76 | Post-Resistance | ZNF786   | 136051 | 37 | 7 | 148768291 | 148768292 | Missense_Mutation | DNP | GG | AA | 18  | 22  | .:1572_1573CC>T570-1575)CTCCGT>CTTI |                      | p.R525C       |
| Pat_76 | Post-Resistance | ZNF398   | 57541  | 37 | 7 | 148876126 | 148876126 | Missense_Mutation | SNP | A  | G  | 27  | 192 | c.1162A>G                           | c.(1162-1164)ACC>GCC | p.T388A       |
| Pat_76 | Post-Resistance | ZNF777   | 27153  | 37 | 7 | 149152767 | 149152767 | Missense_Mutation | SNP | G  | A  | 45  | 22  | c.347C>T                            | c.(346-348)TCC>TTC   | p.S116F       |
| Pat_76 | Post-Resistance | KRBA1    | 84626  | 37 | 7 | 149422535 | 149422535 | Missense_Mutation | SNP | G  | A  | 3   | 29  | c.1256G>A                           | c.(1255-1257)AGG>AAG | p.R419K       |
| Pat_76 | Post-Resistance | SSPO     | 23145  | 37 | 7 | 149473161 | 149473161 | Missense_Mutation | SNP | G  | A  | 5   | 31  | c.31G>A                             | c.(31-33)GCG>ACG     | p.A11T        |
| Pat_76 | Post-Resistance | SSPO     | 23145  | 37 | 7 | 149492413 | 149492413 | Missense_Mutation | SNP | G  | A  | 9   | 34  | c.6302G>A                           | c.(6301-6303)GGG>GAG | p.G2101E      |
| Pat_76 | Post-Resistance | REPIN1   | 29803  | 37 | 7 | 150068839 | 150068839 | Missense_Mutation | SNP | C  | T  | 6   | 42  | c.509C>T                            | c.(508-510)CCC>CTC   | p.P170L       |
| Pat_76 | Post-Resistance | GIMAP8   | 155038 | 37 | 7 | 150174179 | 150174179 | Splice_Site       | SNP | G  | A  | 46  | 43  | c.1310_splice                       | c.e5-1               | p.E437_splice |
| Pat_76 | Post-Resistance | GIMAP8   | 155038 | 37 | 7 | 150174386 | 150174386 | Missense_Mutation | SNP | G  | A  | 28  | 22  | c.1516G>A                           | c.(1516-1518)GAC>AAC | p.D506N       |

|        |                 |          |        |    |   |           |           |                   |     |    |    |    |     |                |                        |          |
|--------|-----------------|----------|--------|----|---|-----------|-----------|-------------------|-----|----|----|----|-----|----------------|------------------------|----------|
| Pat_76 | Post-Resistance | TMEM176A | 55365  | 37 | 7 | 150499346 | 150499346 | Missense_Mutation | SNP | G  | A  | 17 | 81  | c.218G>A       | c.(217-219)GGA>GAA     | p.G73E   |
| Pat_76 | Post-Resistance | NOS3     | 4846   | 37 | 7 | 150696324 | 150696324 | Missense_Mutation | SNP | G  | A  | 20 | 144 | c.1003G>A      | c.(1003-1005)GCA>ACA   | p.A335T  |
| Pat_76 | Post-Resistance | MLL3     | 58508  | 37 | 7 | 152027710 | 152027710 | Missense_Mutation | SNP | G  | A  | 17 | 94  | c.365C>T       | c.(364-366)TCT>TTT     | p.S122F  |
| Pat_76 | Post-Resistance | HTR5A    | 3361   | 37 | 7 | 154862632 | 154862632 | Missense_Mutation | SNP | C  | T  | 33 | 197 | c.23C>T        | c.(22-24)ACC>ATC       | p.T8I    |
| Pat_76 | Post-Resistance | HTR5A    | 3361   | 37 | 7 | 154876022 | 154876022 | Missense_Mutation | SNP | C  | T  | 22 | 97  | c.899C>T       | c.(898-900)CCC>CTC     | p.P300L  |
| Pat_76 | Post-Resistance | RNF32    | 140545 | 37 | 7 | 156437211 | 156437211 | Missense_Mutation | SNP | G  | A  | 3  | 38  | c.34G>A        | c.(34-36)GAT>AAT       | p.D12N   |
| Pat_76 | Post-Resistance | ERICH1   | 157697 | 37 | 8 | 623397    | 623398    | Missense_Mutation | DNP | CC | TT | 30 | 82  | c.954_955GG>AA | c.952-957)GGGGAG>GGAA  | p.E319K  |
| Pat_76 | Post-Resistance | CSMD1    | 64478  | 37 | 8 | 2806873   | 2806873   | Missense_Mutation | SNP | A  | C  | 4  | 7   | c.10353T>G     | c.(10351-10353)TTT>TTG | p.F3451L |
| Pat_76 | Post-Resistance | CSMD1    | 64478  | 37 | 8 | 3253899   | 3253899   | Nonsense_Mutation | SNP | G  | A  | 3  | 5   | c.2413C>T      | c.(2413-2415)CAG>TAG   | p.Q805*  |
| Pat_76 | Post-Resistance | SGK223   | 157285 | 37 | 8 | 8235065   | 8235065   | Missense_Mutation | SNP | G  | A  | 10 | 18  | c.854C>T       | c.(853-855)TCA>TTA     | p.S285L  |
| Pat_76 | Post-Resistance | FAM167A  | 83648  | 37 | 8 | 11281901  | 11281901  | Missense_Mutation | SNP | C  | T  | 19 | 48  | c.626G>A       | c.(625-627)CGG>CAG     | p.R209Q  |
| Pat_76 | Post-Resistance | SGCZ     | 137868 | 37 | 8 | 13959889  | 13959889  | Missense_Mutation | SNP | C  | T  | 8  | 28  | c.740G>A       | c.(739-741)GGG>GAG     | p.G247E  |
| Pat_76 | Post-Resistance | TUSC3    | 7991   | 37 | 8 | 15531307  | 15531307  | Missense_Mutation | SNP | C  | T  | 10 | 32  | c.760C>T       | c.(760-762)CCT>TCT     | p.P254S  |
| Pat_76 | Post-Resistance | MTMR7    | 9108   | 37 | 8 | 17159783  | 17159783  | Nonsense_Mutation | SNP | C  | T  | 9  | 26  | c.1500G>A      | c.(1498-1500)TGG>TGA   | p.W500*  |
| Pat_76 | Post-Resistance | XPO7     | 23039  | 37 | 8 | 21834014  | 21834014  | Missense_Mutation | SNP | C  | T  | 20 | 36  | c.745C>T       | c.(745-747)CCC>TCC     | p.P249S  |
| Pat_76 | Post-Resistance | LOXL2    | 4017   | 37 | 8 | 23225624  | 23225624  | Missense_Mutation | SNP | C  | T  | 22 | 49  | c.241G>A       | c.(241-243)GGC>AGC     | p.G81S   |
| Pat_76 | Post-Resistance | ADAM28   | 10863  | 37 | 8 | 24187543  | 24187543  | Missense_Mutation | SNP | G  | A  | 13 | 25  | c.1018G>A      | c.(1018-1020)GAA>AAA   | p.E340K  |
| Pat_76 | Post-Resistance | ADAM7    | 8756   | 37 | 8 | 24324376  | 24324376  | Missense_Mutation | SNP | G  | C  | 21 | 31  | c.454G>C       | c.(454-456)GAA>CAA     | p.E152Q  |
| Pat_76 | Post-Resistance | EBF2     | 64641  | 37 | 8 | 25718576  | 25718576  | Missense_Mutation | SNP | C  | T  | 15 | 46  | c.1331G>A      | c.(1330-1332)GGA>GAA   | p.G444E  |
| Pat_76 | Post-Resistance | DPYSL2   | 1808   | 37 | 8 | 26513185  | 26513185  | Missense_Mutation | SNP | C  | T  | 27 | 99  | c.1682C>T      | c.(1681-1683)CCC>CTC   | p.P561L  |
| Pat_76 | Post-Resistance | C8orf80  | 389643 | 37 | 8 | 27931885  | 27931885  | Missense_Mutation | SNP | C  | T  | 5  | 12  | c.43G>A        | c.(43-45)GTT>ATT       | p.V15I   |
| Pat_76 | Post-Resistance | TEX15    | 56154  | 37 | 8 | 30695198  | 30695198  | Missense_Mutation | SNP | G  | A  | 10 | 25  | c.7453C>T      | c.(7453-7455)CCA>TCA   | p.P2485S |
| Pat_76 | Post-Resistance | ZMAT4    | 79698  | 37 | 8 | 40625228  | 40625228  | Missense_Mutation | SNP | C  | T  | 5  | 17  | c.124G>A       | c.(124-126)GTC>ATC     | p.V42I   |
| Pat_76 | Post-Resistance | AGPAT6   | 137964 | 37 | 8 | 41470462  | 41470463  | Missense_Mutation | DNP | CC | TT | 12 | 31  | c.894_895CC>TT | c.892-897)CGCCAC>CGTT  | p.H299Y  |
| Pat_76 | Post-Resistance | ANK1     | 286    | 37 | 8 | 41551487  | 41551487  | Missense_Mutation | SNP | G  | A  | 7  | 16  | c.3461C>T      | c.(3460-3462)TCC>TTC   | p.S1154F |
| Pat_76 | Post-Resistance | POTEA    | 340441 | 37 | 8 | 43152483  | 43152483  | Missense_Mutation | SNP | G  | A  | 32 | 78  | c.469G>A       | c.(469-471)GAT>AAT     | p.D157N  |
| Pat_76 | Post-Resistance | MCM4     | 4173   | 37 | 8 | 48882577  | 48882577  | Missense_Mutation | SNP | C  | T  | 12 | 37  | c.1394C>T      | c.(1393-1395)GCC>GTC   | p.A465V  |
| Pat_76 | Post-Resistance | C8orf22  | 492307 | 37 | 8 | 49986883  | 49986883  | Missense_Mutation | SNP | C  | T  | 4  | 14  | c.224C>T       | c.(223-225)TCT>TTT     | p.S75F   |
| Pat_76 | Post-Resistance | RP1      | 6101   | 37 | 8 | 55541492  | 55541492  | Missense_Mutation | SNP | G  | A  | 15 | 34  | c.5050G>A      | c.(5050-5052)GAA>AAA   | p.E1684K |
| Pat_76 | Post-Resistance | RP1      | 6101   | 37 | 8 | 55541652  | 55541652  | Missense_Mutation | SNP | A  | G  | 8  | 22  | c.5210A>G      | c.(5209-5211)GAA>GGA   | p.E1737G |
| Pat_76 | Post-Resistance | XKR4     | 114786 | 37 | 8 | 56436719  | 56436719  | Missense_Mutation | SNP | C  | T  | 15 | 23  | c.1886C>T      | c.(1885-1887)CCT>CTT   | p.P629L  |
| Pat_76 | Post-Resistance | PLAG1    | 5324   | 37 | 8 | 57079014  | 57079014  | Missense_Mutation | SNP | G  | A  | 4  | 11  | c.1291C>T      | c.(1291-1293)CCC>TCC   | p.P431S  |
| Pat_76 | Post-Resistance | CYP7A1   | 1581   | 37 | 8 | 59409562  | 59409563  | Missense_Mutation | DNP | CC | TT | 14 | 53  | c.508_509GG>AA | c.(508-510)GGG>AAG     | p.G170K  |
| Pat_76 | Post-Resistance | PREX2    | 80243  | 37 | 8 | 69028113  | 69028113  | Missense_Mutation | SNP | G  | A  | 23 | 44  | c.3272G>A      | c.(3271-3273)GGA>GAA   | p.G1091E |
| Pat_76 | Post-Resistance | CRISPLD1 | 83690  | 37 | 8 | 75925132  | 75925132  | Missense_Mutation | SNP | C  | T  | 11 | 13  | c.385C>T       | c.(385-387)CCC>TCC     | p.P129S  |
| Pat_76 | Post-Resistance | ZFHX4    | 79776  | 37 | 8 | 77763658  | 77763658  | Missense_Mutation | SNP | C  | T  | 3  | 22  | c.4366C>T      | c.(4366-4368)CCT>TCT   | p.P1456S |
| Pat_76 | Post-Resistance | PAG1     | 55824  | 37 | 8 | 81899700  | 81899700  | Missense_Mutation | SNP | G  | A  | 16 | 32  | c.179C>T       | c.(178-180)CCT>CTT     | p.P60L   |
| Pat_76 | Post-Resistance | WWP1     | 11059  | 37 | 8 | 87393063  | 87393064  | Missense_Mutation | DNP | CT | TC | 10 | 8   | c.179_180CT>TC | c.(178-180)TCT>TTC     | p.S60F   |
| Pat_76 | Post-Resistance | CNGB3    | 54714  | 37 | 8 | 87656094  | 87656094  | Nonsense_Mutation | SNP | G  | A  | 9  | 33  | c.1063C>T      | c.(1063-1065)CGA>TGA   | p.R355*  |
| Pat_76 | Post-Resistance | SLC26A7  | 115111 | 37 | 8 | 92352666  | 92352666  | Missense_Mutation | SNP | C  | T  | 22 | 40  | c.913C>T       | c.(913-915)CTC>TTC     | p.L305F  |
| Pat_76 | Post-Resistance | POP1     | 10940  | 37 | 8 | 99140736  | 99140736  | Missense_Mutation | SNP | C  | T  | 7  | 11  | c.454C>T       | c.(454-456)CCC>TCC     | p.P152S  |
| Pat_76 | Post-Resistance | POP1     | 10940  | 37 | 8 | 99161210  | 99161210  | Nonsense_Mutation | SNP | G  | A  | 6  | 6   | c.1878G>A      | c.(1876-1878)TGG>TGA   | p.W626*  |
| Pat_76 | Post-Resistance | OSR2     | 116039 | 37 | 8 | 99961245  | 99961245  | Missense_Mutation | SNP | C  | T  | 17 | 32  | c.65C>T        | c.(64-66)TCC>TTC       | p.S22F   |
| Pat_76 | Post-Resistance | UBR5     | 51366  | 37 | 8 | 103326127 | 103326127 | Missense_Mutation | SNP | G  | A  | 8  | 21  | c.1912C>T      | c.(1912-1914)CCT>TCT   | p.P638S  |
| Pat_76 | Post-Resistance | RIMS2    | 9699   | 37 | 8 | 104778681 | 104778681 | Missense_Mutation | SNP | G  | A  | 10 | 20  | c.614G>A       | c.(613-615)CGA>CAA     | p.R205Q  |
| Pat_76 | Post-Resistance | RIMS2    | 9699   | 37 | 8 | 105257255 | 105257255 | Missense_Mutation | SNP | G  | A  | 37 | 70  | c.3500G>A      | c.(3499-3501)GGT>GAT   | p.G1167D |
| Pat_76 | Post-Resistance | ZFPM2    | 23414  | 37 | 8 | 106813565 | 106813565 | Missense_Mutation | SNP | G  | A  | 6  | 28  | c.1255G>A      | c.(1255-1257)GAA>AAA   | p.E419K  |

|        |                 |           |        |    |   |           |           |                   |     |    |    |    |     |                 |                        |               |
|--------|-----------------|-----------|--------|----|---|-----------|-----------|-------------------|-----|----|----|----|-----|-----------------|------------------------|---------------|
| Pat_76 | Post-Resistance | ANGPT1    | 284    | 37 | 8 | 108306214 | 108306214 | Missense_Mutation | SNP | G  | A  | 26 | 45  | c.988C>T        | c.(988-990)CGT>TGT     | p.R330C       |
| Pat_76 | Post-Resistance | TRHR      | 7201   | 37 | 8 | 110131469 | 110131469 | Missense_Mutation | SNP | C  | A  | 33 | 78  | c.982C>A        | c.(982-984)CGT>AGT     | p.R328S       |
| Pat_76 | Post-Resistance | PKHD1L1   | 93035  | 37 | 8 | 110477198 | 110477198 | Missense_Mutation | SNP | C  | T  | 16 | 41  | c.8137C>T       | c.(8137-8139)CTT>TTT   | p.L2713F      |
| Pat_76 | Post-Resistance | CSMD3     | 114788 | 37 | 8 | 113243822 | 113243822 | Missense_Mutation | SNP | C  | T  | 18 | 18  | c.10780G>A      | c.(10780-10782)GGA>AG/ | p.G3594R      |
| Pat_76 | Post-Resistance | CSMD3     | 114788 | 37 | 8 | 113519002 | 113519002 | Missense_Mutation | SNP | G  | A  | 7  | 25  | c.4813C>T       | c.(4813-4815)CCT>TCT   | p.P1605S      |
| Pat_76 | Post-Resistance | CSMD3     | 114788 | 37 | 8 | 113966963 | 113966963 | Missense_Mutation | SNP | C  | T  | 4  | 10  | c.1370G>A       | c.(1369-1371)AGA>AAA   | p.R457K       |
| Pat_76 | Post-Resistance | ENPP2     | 5168   | 37 | 8 | 120629774 | 120629774 | Missense_Mutation | SNP | G  | A  | 3  | 14  | c.509C>T        | c.(508-510)TCC>TTC     | p.S170F       |
| Pat_76 | Post-Resistance | DEPDC6    | 64798  | 37 | 8 | 120942126 | 120942126 | Missense_Mutation | SNP | C  | T  | 14 | 30  | c.373C>T        | c.(373-375)CCA>TCA     | p.P125S       |
| Pat_76 | Post-Resistance | FER1L6    | 654463 | 37 | 8 | 124989687 | 124989687 | Missense_Mutation | SNP | G  | A  | 41 | 107 | c.901G>A        | c.(901-903)GAT>AAT     | p.D301N       |
| Pat_76 | Post-Resistance | FER1L6    | 654463 | 37 | 8 | 125083819 | 125083819 | Missense_Mutation | SNP | G  | A  | 14 | 49  | c.4039G>A       | c.(4039-4041)GGG>AGG   | p.G1347R      |
| Pat_76 | Post-Resistance | FAM135B   | 51059  | 37 | 8 | 139164961 | 139164961 | Missense_Mutation | SNP | C  | T  | 21 | 59  | c.1757G>A       | c.(1756-1758)GGA>GAA   | p.G586E       |
| Pat_76 | Post-Resistance | DENND3    | 22898  | 37 | 8 | 142161766 | 142161766 | Missense_Mutation | SNP | G  | A  | 25 | 68  | c.664G>A        | c.(664-666)GAC>AAC     | p.D222N       |
| Pat_76 | Post-Resistance | LY6K      | 54742  | 37 | 8 | 143784711 | 143784711 | Missense_Mutation | SNP | G  | A  | 11 | 24  | c.420G>A        | c.(418-420)ATG>ATA     | p.M140I       |
| Pat_76 | Post-Resistance | SPATC1    | 375686 | 37 | 8 | 145095631 | 145095632 | Missense_Mutation | DNP | CC | TT | 16 | 28  | c.929_930CC>TT  | c.(928-930)CCC>CTT     | p.P310L       |
| Pat_76 | Post-Resistance | ERMP1     | 79956  | 37 | 9 | 5810087   | 5810087   | Missense_Mutation | SNP | G  | A  | 17 | 28  | c.1472C>T       | c.(1471-1473)TCC>TTC   | p.S491F       |
| Pat_76 | Post-Resistance | PTPRD     | 5789   | 37 | 9 | 8518132   | 8518132   | Missense_Mutation | SNP | G  | A  | 26 | 73  | c.1259C>T       | c.(1258-1260)GCC>GTC   | p.A420V       |
| Pat_76 | Post-Resistance | BNC2      | 54796  | 37 | 9 | 16436831  | 16436831  | Missense_Mutation | SNP | C  | T  | 12 | 39  | c.1361G>A       | c.(1360-1362)GGT>GAT   | p.G454D       |
| Pat_76 | Post-Resistance | SH3GL2    | 6456   | 37 | 9 | 17761434  | 17761434  | Splice_Site       | SNP | G  | A  | 10 | 9   | c.115_splice    | c.e3-1                 | p.K39_splice  |
| Pat_76 | Post-Resistance | HAUS6     | 54801  | 37 | 9 | 19063041  | 19063041  | Missense_Mutation | SNP | G  | A  | 17 | 41  | c.1594C>T       | c.(1594-1596)CCA>TCA   | p.P532S       |
| Pat_76 | Post-Resistance | DENND4C   | 55667  | 37 | 9 | 19346035  | 19346035  | Missense_Mutation | SNP | C  | T  | 9  | 19  | c.2413C>T       | c.(2413-2415)CCT>TCT   | p.P805S       |
| Pat_76 | Post-Resistance | TAF1L     | 138474 | 37 | 9 | 32630273  | 32630273  | Missense_Mutation | SNP | C  | T  | 17 | 40  | c.5305G>A       | c.(5305-5307)GGA>AGA   | p.G1769R      |
| Pat_76 | Post-Resistance | DNAI1     | 27019  | 37 | 9 | 34491492  | 34491492  | Splice_Site       | SNP | G  | A  | 15 | 18  | c.622_splice    | c.e8-1                 | p.D208_splice |
| Pat_76 | Post-Resistance | SHB       | 6461   | 37 | 9 | 37955901  | 37955901  | Missense_Mutation | SNP | G  | A  | 3  | 7   | c.1205C>T       | c.(1204-1206)GCC>GTC   | p.A402V       |
| Pat_76 | Post-Resistance | LOC442421 | 442421 | 37 | 9 | 66499716  | 66499716  | Missense_Mutation | SNP | A  | G  | 9  | 43  | c.526A>G        | c.(526-528)AAT>GAT     | p.N176D       |
| Pat_76 | Post-Resistance | PCSK5     | 5125   | 37 | 9 | 78749077  | 78749077  | Missense_Mutation | SNP | G  | T  | 16 | 45  | c.1261G>T       | c.(1261-1263)GCG>TCG   | p.A421S       |
| Pat_76 | Post-Resistance | PCSK5     | 5125   | 37 | 9 | 78790033  | 78790033  | Missense_Mutation | SNP | G  | A  | 3  | 32  | c.1888G>A       | c.(1888-1890)GAG>AAG   | p.E630K       |
| Pat_76 | Post-Resistance | PCSK5     | 5125   | 37 | 9 | 78804120  | 78804121  | Missense_Mutation | DNP | GG | AA | 9  | 27  | c.2491_2492GG>A | c.(2491-2493)GGA>AAA   | p.G831K       |
| Pat_76 | Post-Resistance | GCNT1     | 2650   | 37 | 9 | 79118124  | 79118124  | Missense_Mutation | SNP | C  | T  | 11 | 26  | c.827C>T        | c.(826-828)CCT>CTT     | p.P276L       |
| Pat_76 | Post-Resistance | PRUNE2    | 158471 | 37 | 9 | 79323229  | 79323229  | Missense_Mutation | SNP | C  | T  | 9  | 14  | c.3961G>A       | c.(3961-3963)GAT>AAT   | p.D1321N      |
| Pat_76 | Post-Resistance | PRUNE2    | 158471 | 37 | 9 | 79441589  | 79441589  | Missense_Mutation | SNP | C  | T  | 12 | 18  | c.568G>A        | c.(568-570)GAA>AAA     | p.E190K       |
| Pat_76 | Post-Resistance | VPS13A    | 23230  | 37 | 9 | 79827939  | 79827939  | Missense_Mutation | SNP | C  | T  | 6  | 13  | c.610C>T        | c.(610-612)CGT>TGT     | p.R204C       |
| Pat_76 | Post-Resistance | FRMD3     | 257019 | 37 | 9 | 85950537  | 85950537  | Missense_Mutation | SNP | C  | T  | 10 | 17  | c.490G>A        | c.(490-492)GAT>AAT     | p.D164N       |
| Pat_76 | Post-Resistance | KIF27     | 55582  | 37 | 9 | 86518174  | 86518174  | Missense_Mutation | SNP | G  | A  | 4  | 20  | c.1259C>T       | c.(1258-1260)ACC>ATC   | p.T420I       |
| Pat_76 | Post-Resistance | PHF2      | 5253   | 37 | 9 | 96428104  | 96428104  | Missense_Mutation | SNP | C  | T  | 39 | 98  | c.2074C>T       | c.(2074-2076)CCC>TCC   | p.P692S       |
| Pat_76 | Post-Resistance | HSD17B3   | 3293   | 37 | 9 | 99064356  | 99064356  | Missense_Mutation | SNP | G  | A  | 16 | 45  | c.31C>T         | c.(31-33)CTC>TTC       | p.L11F        |
| Pat_76 | Post-Resistance | CTSL2     | 1515   | 37 | 9 | 99800270  | 99800271  | Missense_Mutation | DNP | GG | AA | 8  | 37  | c.55_56CC>TT    | c.(55-57)CCA>TTA       | p.P19L        |
| Pat_76 | Post-Resistance | FOXE1     | 2304   | 37 | 9 | 100616596 | 100616596 | Missense_Mutation | SNP | G  | A  | 14 | 28  | c.400G>A        | c.(400-402)GAG>AAG     | p.E134K       |
| Pat_76 | Post-Resistance | TRIM14    | 9830   | 37 | 9 | 100857249 | 100857250 | Missense_Mutation | DNP | GG | AA | 12 | 36  | c.599_600CC>TT  | c.(598-600)CCC>CTT     | p.P200L       |
| Pat_76 | Post-Resistance | LPPR1     | 54886  | 37 | 9 | 104079716 | 104079716 | Missense_Mutation | SNP | C  | T  | 15 | 43  | c.883C>T        | c.(883-885)CGT>TGT     | p.R295C       |
| Pat_76 | Post-Resistance | GRIN3A    | 116443 | 37 | 9 | 104449092 | 104449092 | Missense_Mutation | SNP | C  | T  | 7  | 21  | c.1090G>A       | c.(1090-1092)GAA>AAA   | p.E364K       |
| Pat_76 | Post-Resistance | CYLC2     | 1539   | 37 | 9 | 105767050 | 105767050 | Missense_Mutation | SNP | C  | T  | 5  | 6   | c.254C>T        | c.(253-255)TCT>TTT     | p.S85F        |
| Pat_76 | Post-Resistance | OR13F1    | 138805 | 37 | 9 | 107267121 | 107267121 | Missense_Mutation | SNP | C  | T  | 51 | 105 | c.578C>T        | c.(577-579)TCC>TTC     | p.S193F       |
| Pat_76 | Post-Resistance | OR13C9    | 286362 | 37 | 9 | 107379644 | 107379644 | Missense_Mutation | SNP | G  | A  | 11 | 30  | c.842C>T        | c.(841-843)TCC>TTC     | p.S281F       |
| Pat_76 | Post-Resistance | TXNDC8    | 255220 | 37 | 9 | 113096507 | 113096507 | Missense_Mutation | SNP | G  | A  | 6  | 20  | c.118C>T        | c.(118-120)CCT>TCT     | p.P40S        |
| Pat_76 | Post-Resistance | ZNF618    | 114991 | 37 | 9 | 116795009 | 116795009 | Splice_Site       | SNP | G  | A  | 18 | 107 | c.1168_splice   | c.e12+1                | p.E390_splice |
| Pat_76 | Post-Resistance | AKNA      | 80709  | 37 | 9 | 117118393 | 117118393 | Missense_Mutation | SNP | G  | A  | 7  | 25  | c.2870C>T       | c.(2869-2871)CCC>CTC   | p.P957L       |
| Pat_76 | Post-Resistance | TNC       | 3371   | 37 | 9 | 117819506 | 117819506 | Missense_Mutation | SNP | G  | A  | 11 | 35  | c.4505C>T       | c.(4504-4506)ACT>ATT   | p.T1502I      |



|        |                 |          |        |    |   |           |           |                   |     |    |    |    |     |                                   |                      |               |
|--------|-----------------|----------|--------|----|---|-----------|-----------|-------------------|-----|----|----|----|-----|-----------------------------------|----------------------|---------------|
| Pat_76 | Post-Resistance | ASTN2    | 23245  | 37 | 9 | 119738438 | 119738438 | Missense_Mutation | SNP | C  | T  | 13 | 14  | c.1706G>A                         | c.(1705-1707)GGC>GAC | p.G569D       |
| Pat_76 | Post-Resistance | TRAF1    | 7185   | 37 | 9 | 123667467 | 123667467 | Missense_Mutation | SNP | G  | A  | 5  | 15  | c.1082C>T                         | c.(1081-1083)GCC>GTC | p.A361V       |
| Pat_76 | Post-Resistance | TRAF1    | 7185   | 37 | 9 | 123675765 | 123675765 | Missense_Mutation | SNP | C  | T  | 5  | 20  | c.546G>A                          | c.(544-546)ATG>ATA   | p.M182I       |
| Pat_76 | Post-Resistance | OR1N1    | 138883 | 37 | 9 | 125289062 | 125289063 | Missense_Mutation | DNP | CC | TT | 6  | 15  | c.510_511GG>AA508-513)GGGGAA>GGAA |                      | p.E171K       |
| Pat_76 | Post-Resistance | RABGAP1  | 23637  | 37 | 9 | 125832695 | 125832695 | Missense_Mutation | SNP | C  | T  | 22 | 47  | c.1975C>T                         | c.(1975-1977)CTT>TTT | p.L659F       |
| Pat_76 | Post-Resistance | SPTAN1   | 6709   | 37 | 9 | 131394511 | 131394511 | Missense_Mutation | SNP | C  | T  | 4  | 18  | c.6853C>T                         | c.(6853-6855)CAC>TAC | p.H2285Y      |
| Pat_76 | Post-Resistance | LAMC3    | 10319  | 37 | 9 | 133901843 | 133901843 | Missense_Mutation | SNP | G  | A  | 8  | 13  | c.545G>A                          | c.(544-546)GGC>GAC   | p.G182D       |
| Pat_76 | Post-Resistance | NTNG2    | 84628  | 37 | 9 | 135042312 | 135042312 | Missense_Mutation | SNP | C  | T  | 20 | 31  | c.94C>T                           | c.(94-96)CCC>TCC     | p.P32S        |
| Pat_76 | Post-Resistance | SETX     | 23064  | 37 | 9 | 135204652 | 135204652 | Missense_Mutation | SNP | C  | T  | 5  | 20  | c.2333G>A                         | c.(2332-2334)CGA>CAA | p.R778Q       |
| Pat_76 | Post-Resistance | ADAMTS13 | 11093  | 37 | 9 | 136323188 | 136323189 | Missense_Mutation | DNP | CC | TT | 4  | 7   | c.4049_4050CC>T                   | c.(4048-4050)ACC>ATT | p.T1350I      |
| Pat_76 | Post-Resistance | DBH      | 1621   | 37 | 9 | 136518122 | 136518122 | Splice_Site       | SNP | G  | A  | 16 | 52  | c.1434_splice                     | c.e9+1               | p.V478_splice |
| Pat_76 | Post-Resistance | CAMSAP1  | 157922 | 37 | 9 | 138707828 | 138707828 | Missense_Mutation | SNP | G  | A  | 17 | 36  | c.4295C>T                         | c.(4294-4296)CCC>CTC | p.P1432L      |
| Pat_76 | Post-Resistance | SEC16A   | 9919   | 37 | 9 | 139371934 | 139371934 | Missense_Mutation | SNP | G  | A  | 6  | 24  | c.134C>T                          | c.(133-135)ACT>ATT   | p.T45I        |
| Pat_76 | Post-Resistance | ANAPC2   | 29882  | 37 | 9 | 140069793 | 140069793 | Missense_Mutation | SNP | C  | T  | 8  | 10  | c.2152G>A                         | c.(2152-2154)GAG>AAG | p.E718K       |
| Pat_76 | Post-Resistance | ANAPC2   | 29882  | 37 | 9 | 140077628 | 140077628 | Missense_Mutation | SNP | G  | A  | 45 | 83  | c.1235C>T                         | c.(1234-1236)CCT>CTT | p.P412L       |
| Pat_76 | Post-Resistance | ENTPD8   | 377841 | 37 | 9 | 140330184 | 140330184 | Missense_Mutation | SNP | C  | T  | 12 | 10  | c.1148G>A                         | c.(1147-1149)AGG>AAG | p.R383K       |
| Pat_76 | Post-Resistance | SHOX     | 6473   | 37 | X | 591723    | 591723    | Missense_Mutation | SNP | G  | A  | 41 | 75  | c.91G>A                           | c.(91-93)GAT>AAT     | p.D31N        |
| Pat_76 | Post-Resistance | ASMT     | 438    | 37 | X | 1742197   | 1742197   | Missense_Mutation | SNP | G  | A  | 6  | 14  | c.235G>A                          | c.(235-237)GGA>AGA   | p.G79R        |
| Pat_76 | Post-Resistance | ASMT     | 438    | 37 | X | 1748718   | 1748718   | Missense_Mutation | SNP | G  | A  | 47 | 133 | c.448G>A                          | c.(448-450)GAG>AAG   | p.E150K       |
| Pat_76 | Post-Resistance | ARSD     | 414    | 37 | X | 2836227   | 2836227   | Missense_Mutation | SNP | G  | A  | 3  | 10  | c.481C>T                          | c.(481-483)CAC>TAC   | p.H161Y       |
| Pat_76 | Post-Resistance | MXRA5    | 25878  | 37 | X | 3240077   | 3240077   | Missense_Mutation | SNP | C  | T  | 11 | 20  | c.3649G>A                         | c.(3649-3651)GAA>AAA | p.E1217K      |
| Pat_76 | Post-Resistance | NLGN4X   | 57502  | 37 | X | 6069266   | 6069266   | Missense_Mutation | SNP | G  | A  | 17 | 22  | c.242C>T                          | c.(241-243)CCC>CTC   | p.P81L        |
| Pat_76 | Post-Resistance | VCX      | 26609  | 37 | X | 7811971   | 7811971   | Missense_Mutation | SNP | G  | A  | 75 | 248 | c.535G>A                          | c.(535-537)GAG>AAG   | p.E179K       |
| Pat_76 | Post-Resistance | SHROOM2  | 357    | 37 | X | 9863495   | 9863495   | Missense_Mutation | SNP | C  | T  | 4  | 12  | c.1547C>T                         | c.(1546-1548)CCA>CTA | p.P516L       |
| Pat_76 | Post-Resistance | TLR8     | 51311  | 37 | X | 12938573  | 12938573  | Missense_Mutation | SNP | C  | T  | 11 | 33  | c.1414C>T                         | c.(1414-1416)CGT>TGT | p.R472C       |
| Pat_76 | Post-Resistance | TLR8     | 51311  | 37 | X | 12939914  | 12939914  | Missense_Mutation | SNP | G  | A  | 11 | 34  | c.2755G>A                         | c.(2755-2757)GAG>AAG | p.E919K       |
| Pat_76 | Post-Resistance | EGFL6    | 25975  | 37 | X | 13621532  | 13621532  | Missense_Mutation | SNP | C  | T  | 10 | 28  | c.497C>T                          | c.(496-498)GCC>GTC   | p.A166V       |
| Pat_76 | Post-Resistance | PHEX     | 5251   | 37 | X | 22117199  | 22117199  | Missense_Mutation | SNP | G  | A  | 37 | 57  | c.1009G>A                         | c.(1009-1011)GAG>AAG | p.E337K       |
| Pat_76 | Post-Resistance | PHEX     | 5251   | 37 | X | 22237170  | 22237170  | Missense_Mutation | SNP | C  | T  | 13 | 43  | c.1718C>T                         | c.(1717-1719)GCT>GTT | p.A573V       |
| Pat_76 | Post-Resistance | POLA1    | 5422   | 37 | X | 24721395  | 24721395  | Missense_Mutation | SNP | G  | A  | 11 | 10  | c.178G>A                          | c.(178-180)GAA>AAA   | p.E60K        |
| Pat_76 | Post-Resistance | CXorf21  | 80231  | 37 | X | 30578039  | 30578039  | Missense_Mutation | SNP | G  | A  | 7  | 27  | c.434C>T                          | c.(433-435)CCC>CTC   | p.P145L       |
| Pat_76 | Post-Resistance | FAM47A   | 158724 | 37 | X | 34148687  | 34148687  | Missense_Mutation | SNP | G  | A  | 5  | 12  | c.1709C>T                         | c.(1708-1710)TCG>TTG | p.S570L       |
| Pat_76 | Post-Resistance | CXorf59  | 286464 | 37 | X | 36117969  | 36117969  | Nonsense_Mutation | SNP | G  | A  | 14 | 24  | c.825G>A                          | c.(823-825)TGG>TGA   | p.W275*       |
| Pat_76 | Post-Resistance | SRPX     | 8406   | 37 | X | 38031196  | 38031196  | Missense_Mutation | SNP | C  | T  | 19 | 35  | c.464G>A                          | c.(463-465)GGG>GAG   | p.G155E       |
| Pat_76 | Post-Resistance | RPGR     | 6103   | 37 | X | 38129006  | 38129006  | Missense_Mutation | SNP | G  | A  | 7  | 21  | c.2321C>T                         | c.(2320-2322)TCC>TTC | p.S774F       |
| Pat_76 | Post-Resistance | GPR34    | 2857   | 37 | X | 41555789  | 41555789  | Nonsense_Mutation | SNP | G  | A  | 7  | 18  | c.903G>A                          | c.(901-903)TGG>TGA   | p.W301*       |
| Pat_76 | Post-Resistance | GRIPAP1  | 56850  | 37 | X | 48844287  | 48844287  | Missense_Mutation | SNP | G  | A  | 3  | 9   | c.953C>T                          | c.(952-954)TCC>TTC   | p.S318F       |
| Pat_76 | Post-Resistance | TFE3     | 7030   | 37 | X | 48895543  | 48895543  | Missense_Mutation | SNP | G  | A  | 3  | 10  | c.877C>T                          | c.(877-879)CCC>TCC   | p.P293S       |
| Pat_76 | Post-Resistance | CCDC120  | 90060  | 37 | X | 48925184  | 48925184  | Missense_Mutation | SNP | C  | T  | 10 | 20  | c.1429C>T                         | c.(1429-1431)CGC>TGC | p.R477C       |
| Pat_76 | Post-Resistance | GPKOW    | 27238  | 37 | X | 48976140  | 48976140  | Missense_Mutation | SNP | C  | A  | 6  | 15  | c.484G>T                          | c.(484-486)GTC>TTC   | p.V162F       |
| Pat_76 | Post-Resistance | PRICKLE3 | 4007   | 37 | X | 49032516  | 49032516  | Missense_Mutation | SNP | C  | T  | 3  | 6   | c.1354G>A                         | c.(1354-1356)GAG>AAG | p.E452K       |
| Pat_76 | Post-Resistance | DGKK     | 139189 | 37 | X | 50119787  | 50119787  | Nonsense_Mutation | SNP | A  | C  | 10 | 19  | c.3242T>G                         | c.(3241-3243)TTA>TGA | p.L1081*      |
| Pat_76 | Post-Resistance | PHF8     | 23133  | 37 | X | 54069119  | 54069119  | Missense_Mutation | SNP | C  | T  | 27 | 51  | c.151G>A                          | c.(151-153)GAT>AAT   | p.D51N        |
| Pat_76 | Post-Resistance | FAAH2    | 158584 | 37 | X | 57313331  | 57313331  | Missense_Mutation | SNP | G  | A  | 4  | 5   | c.73G>A                           | c.(73-75)GGC>AGC     | p.G25S        |
| Pat_76 | Post-Resistance | MTMR8    | 55613  | 37 | X | 63564991  | 63564991  | Missense_Mutation | SNP | G  | A  | 15 | 42  | c.799C>T                          | c.(799-801)CGC>TGC   | p.R267C       |
| Pat_76 | Post-Resistance | LAS1L    | 81887  | 37 | X | 64738050  | 64738050  | Missense_Mutation | SNP | C  | T  | 13 | 26  | c.1744G>A                         | c.(1744-1746)GAG>AAG | p.E582K       |
| Pat_76 | Post-Resistance | MSN      | 4478   | 37 | X | 64936728  | 64936728  | Nonsense_Mutation | SNP | C  | T  | 26 | 61  | c.61C>T                           | c.(61-63)CAG>TAG     | p.Q21*        |

|        |                 |         |        |    |   |           |           |                   |     |    |    |    |     |                |                      |          |
|--------|-----------------|---------|--------|----|---|-----------|-----------|-------------------|-----|----|----|----|-----|----------------|----------------------|----------|
| Pat_76 | Post-Resistance | HEPH    | 9843   | 37 | X | 65476115  | 65476115  | Missense_Mutation | SNP | G  | A  | 13 | 23  | c.2848G>A      | c.(2848-2850)GAT>AAT | p.D950N  |
| Pat_76 | Post-Resistance | AR      | 367    | 37 | X | 66905918  | 66905918  | Missense_Mutation | SNP | G  | T  | 4  | 15  | c.1835G>T      | c.(1834-1836)TGT>TTT | p.C612F  |
| Pat_76 | Post-Resistance | OTUD6A  | 139562 | 37 | X | 69283186  | 69283187  | Missense_Mutation | DNP | CC | TT | 5  | 22  | c.812_813CC>TT | c.(811-813)TCC>TTT   | p.S271F  |
| Pat_76 | Post-Resistance | DGAT2L6 | 347516 | 37 | X | 69419701  | 69419701  | Nonsense_Mutation | SNP | G  | A  | 9  | 20  | c.236G>A       | c.(235-237)TGG>TAG   | p.W79*   |
| Pat_76 | Post-Resistance | P2RY4   | 5030   | 37 | X | 69478907  | 69478907  | Missense_Mutation | SNP | G  | A  | 9  | 27  | c.568C>T       | c.(568-570)CGG>TGG   | p.R190W  |
| Pat_76 | Post-Resistance | MED12   | 9968   | 37 | X | 70344131  | 70344131  | Missense_Mutation | SNP | G  | A  | 11 | 24  | c.1867G>A      | c.(1867-1869)GAC>AAC | p.D623N  |
| Pat_76 | Post-Resistance | TAF1    | 6872   | 37 | X | 70586306  | 70586306  | Missense_Mutation | SNP | G  | A  | 4  | 14  | c.142G>A       | c.(142-144)GGA>AGA   | p.G48R   |
| Pat_76 | Post-Resistance | TAF1    | 6872   | 37 | X | 70597668  | 70597668  | Missense_Mutation | SNP | T  | G  | 5  | 23  | c.927T>G       | c.(925-927)GAT>GAG   | p.D309E  |
| Pat_76 | Post-Resistance | ACRC    | 93953  | 37 | X | 70823696  | 70823696  | Missense_Mutation | SNP | A  | G  | 88 | 353 | c.569A>G       | c.(568-570)GAC>GGC   | p.D190G  |
| Pat_76 | Post-Resistance | RGAG4   | 340526 | 37 | X | 71350547  | 71350547  | Missense_Mutation | SNP | C  | T  | 28 | 72  | c.844G>A       | c.(844-846)GAA>AAA   | p.E282K  |
| Pat_76 | Post-Resistance | PHKA1   | 5255   | 37 | X | 71830949  | 71830949  | Missense_Mutation | SNP | C  | T  | 11 | 22  | c.2455G>A      | c.(2455-2457)GAA>AAA | p.E819K  |
| Pat_76 | Post-Resistance | PHKA1   | 5255   | 37 | X | 71838692  | 71838692  | Missense_Mutation | SNP | G  | A  | 7  | 29  | c.2237C>T      | c.(2236-2238)TCT>TTT | p.S746F  |
| Pat_76 | Post-Resistance | PHKA1   | 5255   | 37 | X | 71838696  | 71838696  | Missense_Mutation | SNP | G  | A  | 7  | 29  | c.2233C>T      | c.(2233-2235)CCC>TCC | p.P745S  |
| Pat_76 | Post-Resistance | ZCCHC13 | 389874 | 37 | X | 73524355  | 73524355  | Missense_Mutation | SNP | G  | A  | 11 | 36  | c.254G>A       | c.(253-255)CGA>CAA   | p.R85Q   |
| Pat_76 | Post-Resistance | ATRX    | 546    | 37 | X | 76939192  | 76939192  | Missense_Mutation | SNP | G  | A  | 37 | 92  | c.1556C>T      | c.(1555-1557)TCT>TTT | p.S519F  |
| Pat_76 | Post-Resistance | ATP7A   | 538    | 37 | X | 77254089  | 77254089  | Missense_Mutation | SNP | G  | A  | 19 | 72  | c.1451G>A      | c.(1450-1452)GGA>GAA | p.G484E  |
| Pat_76 | Post-Resistance | FAM46D  | 169966 | 37 | X | 79698084  | 79698084  | Missense_Mutation | SNP | A  | C  | 6  | 12  | c.46A>C        | c.(46-48)ACA>CCA     | p.T16P   |
| Pat_76 | Post-Resistance | RPS6KA6 | 27330  | 37 | X | 83357077  | 83357077  | Missense_Mutation | SNP | G  | A  | 4  | 21  | c.1744C>T      | c.(1744-1746)CCA>TCA | p.P582S  |
| Pat_76 | Post-Resistance | TSPAN6  | 7105   | 37 | X | 99885830  | 99885830  | Missense_Mutation | SNP | G  | A  | 7  | 26  | c.703C>T       | c.(703-705)CGT>TGT   | p.R235C  |
| Pat_76 | Post-Resistance | DRP2    | 1821   | 37 | X | 100492690 | 100492690 | Missense_Mutation | SNP | G  | A  | 22 | 78  | c.364G>A       | c.(364-366)GAT>AAT   | p.D122N  |
| Pat_76 | Post-Resistance | NXF2B   | 728343 | 37 | X | 101623758 | 101623758 | Missense_Mutation | SNP | G  | A  | 10 | 54  | c.604C>T       | c.(604-606)CCC>TCC   | p.P202S  |
| Pat_76 | Post-Resistance | GPRASP1 | 9737   | 37 | X | 101911210 | 101911210 | Missense_Mutation | SNP | G  | A  | 22 | 42  | c.2369G>A      | c.(2368-2370)AGA>AAA | p.R790K  |
| Pat_76 | Post-Resistance | GPRASP2 | 114928 | 37 | X | 101971581 | 101971581 | Missense_Mutation | SNP | C  | T  | 11 | 34  | c.1784C>T      | c.(1783-1785)TCT>TTT | p.S595F  |
| Pat_76 | Post-Resistance | RAB40AL | 282808 | 37 | X | 102192944 | 102192944 | Missense_Mutation | SNP | C  | T  | 25 | 102 | c.698C>T       | c.(697-699)GCC>GTC   | p.A233V  |
| Pat_76 | Post-Resistance | ESX1    | 80712  | 37 | X | 103499043 | 103499043 | Missense_Mutation | SNP | C  | T  | 22 | 28  | c.298G>A       | c.(298-300)GAG>AAG   | p.E100K  |
| Pat_76 | Post-Resistance | ESX1    | 80712  | 37 | X | 103499180 | 103499181 | Missense_Mutation | DNP | CC | TT | 54 | 163 | c.160_161GG>AA | c.(160-162)GGA>AAA   | p.G54K   |
| Pat_76 | Post-Resistance | MORC4   | 79710  | 37 | X | 106185285 | 106185285 | Missense_Mutation | SNP | C  | T  | 8  | 25  | c.2543G>A      | c.(2542-2544)AGA>AAA | p.R848K  |
| Pat_76 | Post-Resistance | VSIG1   | 340547 | 37 | X | 107315967 | 107315967 | Missense_Mutation | SNP | C  | T  | 35 | 66  | c.473C>T       | c.(472-474)TCC>TTC   | p.S158F  |
| Pat_76 | Post-Resistance | VSIG1   | 340547 | 37 | X | 107320451 | 107320451 | Missense_Mutation | SNP | G  | A  | 4  | 13  | c.1004G>A      | c.(1003-1005)GGA>GAA | p.G335E  |
| Pat_76 | Post-Resistance | COL4A6  | 1288   | 37 | X | 107413919 | 107413919 | Missense_Mutation | SNP | C  | T  | 36 | 52  | c.3416G>A      | c.(3415-3417)GGA>GAA | p.G1139E |
| Pat_76 | Post-Resistance | COL4A6  | 1288   | 37 | X | 107430407 | 107430407 | Missense_Mutation | SNP | C  | T  | 52 | 99  | c.1873G>A      | c.(1873-1875)GGA>AGA | p.G625R  |
| Pat_76 | Post-Resistance | COL4A6  | 1288   | 37 | X | 107431160 | 107431160 | Missense_Mutation | SNP | G  | A  | 29 | 54  | c.1688C>T      | c.(1687-1689)TCT>TTT | p.S563F  |
| Pat_76 | Post-Resistance | COL4A5  | 1287   | 37 | X | 107814644 | 107814644 | Missense_Mutation | SNP | G  | A  | 11 | 35  | c.386G>A       | c.(385-387)GGA>GAA   | p.G129E  |
| Pat_76 | Post-Resistance | COL4A5  | 1287   | 37 | X | 107865965 | 107865965 | Nonsense_Mutation | SNP | A  | T  | 12 | 21  | c.2827A>T      | c.(2827-2829)AAA>TAA | p.K943*  |
| Pat_76 | Post-Resistance | GUCY2F  | 2986   | 37 | X | 108697082 | 108697082 | Missense_Mutation | SNP | G  | A  | 5  | 7   | c.1039C>T      | c.(1039-1041)CCG>TCG | p.P347S  |
| Pat_76 | Post-Resistance | DCX     | 1641   | 37 | X | 110576334 | 110576335 | Missense_Mutation | DNP | GG | AA | 6  | 19  | c.995_996CC>TT | c.(994-996)GCC>GTT   | p.A332V  |
| Pat_76 | Post-Resistance | SLC6A14 | 11254  | 37 | X | 115590014 | 115590014 | Missense_Mutation | SNP | C  | A  | 6  | 49  | c.1822C>A      | c.(1822-1824)CCA>ACA | p.P608T  |
| Pat_76 | Post-Resistance | KLHL13  | 90293  | 37 | X | 117079486 | 117079486 | Missense_Mutation | SNP | C  | T  | 7  | 23  | c.151G>A       | c.(151-153)GAA>AAA   | p.E51K   |
| Pat_76 | Post-Resistance | WDR44   | 54521  | 37 | X | 117577623 | 117577623 | Missense_Mutation | SNP | C  | T  | 22 | 32  | c.2485C>T      | c.(2485-2487)CGT>TGT | p.R829C  |
| Pat_76 | Post-Resistance | DOCK11  | 139818 | 37 | X | 117676792 | 117676792 | Missense_Mutation | SNP | G  | A  | 23 | 54  | c.207G>A       | c.(205-207)ATG>ATA   | p.M69I   |
| Pat_76 | Post-Resistance | DOCK11  | 139818 | 37 | X | 117744362 | 117744362 | Missense_Mutation | SNP | G  | A  | 10 | 32  | c.3077G>A      | c.(3076-3078)AGT>AAT | p.S1026N |
| Pat_76 | Post-Resistance | LONRF3  | 79836  | 37 | X | 118123461 | 118123461 | Missense_Mutation | SNP | G  | A  | 7  | 28  | c.1150G>A      | c.(1150-1152)GGG>AGG | p.G384R  |
| Pat_76 | Post-Resistance | UPF3B   | 65109  | 37 | X | 118985459 | 118985459 | Missense_Mutation | SNP | T  | G  | 4  | 15  | c.369A>C       | c.(367-369)AAA>AAC   | p.K123N  |
| Pat_76 | Post-Resistance | AKAP14  | 158798 | 37 | X | 119037548 | 119037548 | Missense_Mutation | SNP | C  | T  | 5  | 12  | c.260C>T       | c.(259-261)TCG>TTG   | p.S87L   |
| Pat_76 | Post-Resistance | ODZ1    | 10178  | 37 | X | 123699255 | 123699255 | Missense_Mutation | SNP | G  | A  | 21 | 28  | c.2233C>T      | c.(2233-2235)CCT>TCT | p.P745S  |
| Pat_76 | Post-Resistance | ACTRT1  | 139741 | 37 | X | 127185537 | 127185537 | Missense_Mutation | SNP | C  | T  | 27 | 65  | c.649G>A       | c.(649-651)GAG>AAG   | p.E217K  |
| Pat_76 | Post-Resistance | OCRL    | 4952   | 37 | X | 128703368 | 128703368 | Missense_Mutation | SNP | C  | T  | 16 | 79  | c.1594C>T      | c.(1594-1596)CAT>TAT | p.H532Y  |

|        |                 |           |        |    |    |           |           |                   |     |          |    |     |      |                   |                                    |               |
|--------|-----------------|-----------|--------|----|----|-----------|-----------|-------------------|-----|----------|----|-----|------|-------------------|------------------------------------|---------------|
| Pat_76 | Post-Resistance | ZDHC9     | 51114  | 37 | X  | 128957792 | 128957792 | Missense_Mutation | SNP | G        | A  | 27  | 46   | c.350C>T          | c.(349-351)CCC>CTC                 | p.P117L       |
| Pat_76 | Post-Resistance | ELF4      | 2000   | 37 | X  | 129203363 | 129203363 | Missense_Mutation | SNP | C        | T  | 24  | 86   | c.1099G>A         | c.(1099-1101)GGA>AGA               | p.G367R       |
| Pat_76 | Post-Resistance | ARHGAP36  | 158763 | 37 | X  | 130218339 | 130218339 | Missense_Mutation | SNP | C        | T  | 10  | 21   | c.706C>T          | c.(706-708)CCC>TCC                 | p.P236S       |
| Pat_76 | Post-Resistance | IGSF1     | 3547   | 37 | X  | 130409467 | 130409467 | Missense_Mutation | SNP | C        | T  | 30  | 80   | c.3169G>A         | c.(3169-3171)GAA>AAA               | p.E1057K      |
| Pat_76 | Post-Resistance | MBNL3     | 55796  | 37 | X  | 131573612 | 131573612 | Missense_Mutation | SNP | G        | A  | 49  | 116  | c.28C>T           | c.(28-30)CGT>TGT                   | p.R10C        |
| Pat_76 | Post-Resistance | USP26     | 83844  | 37 | X  | 132160571 | 132160571 | Missense_Mutation | SNP | G        | A  | 3   | 18   | c.1678C>T         | c.(1678-1680)CCC>TCC               | p.P560S       |
| Pat_76 | Post-Resistance | MMGT1     | 93380  | 37 | X  | 135047268 | 135047268 | Missense_Mutation | SNP | G        | A  | 42  | 93   | c.311C>T          | c.(310-312)TCG>TTG                 | p.S104L       |
| Pat_76 | Post-Resistance | GPR112    | 139378 | 37 | X  | 135431671 | 135431671 | Missense_Mutation | SNP | G        | A  | 7   | 37   | c.5806G>A         | c.(5806-5808)GCA>ACA               | p.A1936T      |
| Pat_76 | Post-Resistance | MAGEC1    | 9947   | 37 | X  | 140993818 | 140993818 | Missense_Mutation | SNP | T        | G  | 18  | 196  | c.628T>G          | c.(628-630)TTA>GTA                 | p.L210V       |
| Pat_76 | Post-Resistance | MAGEC1    | 9947   | 37 | X  | 140994421 | 140994421 | Missense_Mutation | SNP | C        | T  | 35  | 61   | c.1231C>T         | c.(1231-1233)CCT>TCT               | p.P411S       |
| Pat_76 | Post-Resistance | MAGEA11   | 4110   | 37 | X  | 148797442 | 148797442 | Missense_Mutation | SNP | C        | T  | 23  | 58   | c.296C>T          | c.(295-297)CCC>CTC                 | p.P99L        |
| Pat_76 | Post-Resistance | MAGEA11   | 4110   | 37 | X  | 148798372 | 148798373 | Missense_Mutation | DNP | GG       | AA | 45  | 78   | .1226_1227GG>A    | c.(1225-1227)AGG>AAA               | p.R409K       |
| Pat_76 | Post-Resistance | GPR50     | 9248   | 37 | X  | 150348908 | 150348908 | Missense_Mutation | SNP | T        | G  | 30  | 52   | c.853T>G          | c.(853-855)TTC>GTC                 | p.F285V       |
| Pat_76 | Post-Resistance | MAGEA10   | 4109   | 37 | X  | 151303507 | 151303507 | Missense_Mutation | SNP | G        | A  | 16  | 37   | c.586C>T          | c.(586-588)CCC>TCC                 | p.P196S       |
| Pat_76 | Post-Resistance | GABRQ     | 55879  | 37 | X  | 151821313 | 151821314 | Missense_Mutation | DNP | GG       | AA | 20  | 55   | .1468_1469GG>A    | c.(1468-1470)GGC>AAC               | p.G490N       |
| Pat_76 | Post-Resistance | MAGEA6    | 4105   | 37 | X  | 151869683 | 151869683 | Nonsense_Mutation | SNP | C        | T  | 76  | 90   | c.373C>T          | c.(373-375)CGA>TGA                 | p.R125*       |
| Pat_76 | Post-Resistance | MAGEA12   | 4111   | 37 | X  | 151900098 | 151900098 | Missense_Mutation | SNP | C        | T  | 42  | 110  | c.703G>A          | c.(703-705)GAG>AAG                 | p.E235K       |
| Pat_76 | Post-Resistance | CETN2     | 1069   | 37 | X  | 151996420 | 151996420 | Missense_Mutation | SNP | A        | G  | 13  | 57   | c.484T>C          | c.(484-486)TTC>CTC                 | p.F162L       |
| Pat_76 | Post-Resistance | HCFC1     | 3054   | 37 | X  | 153217050 | 153217050 | Missense_Mutation | SNP | G        | A  | 33  | 62   | c.5369C>T         | c.(5368-5370)TCC>TTC               | p.S1790F      |
| Pat_76 | Post-Resistance | HCFC1     | 3054   | 37 | X  | 153224937 | 153224937 | Missense_Mutation | SNP | G        | A  | 10  | 22   | c.1450C>T         | c.(1450-1452)CCT>TCT               | p.P484S       |
| Pat_76 | Post-Resistance | FLNA      | 2316   | 37 | X  | 153594560 | 153594560 | Nonsense_Mutation | SNP | G        | A  | 26  | 34   | c.1261C>T         | c.(1261-1263)CAG>TAG               | p.Q421*       |
| Pat_76 | Post-Resistance | PLXNA3    | 55558  | 37 | X  | 153691999 | 153691999 | Missense_Mutation | SNP | G        | A  | 4   | 14   | c.1513G>A         | c.(1513-1515)GAC>AAC               | p.D505N       |
| Pat_76 | Post-Resistance | PLXNA3    | 55558  | 37 | X  | 153693191 | 153693191 | Missense_Mutation | SNP | G        | A  | 11  | 14   | c.2023G>A         | c.(2023-2025)GGC>AGC               | p.G675S       |
| Pat_76 | Post-Resistance | PLXNA3    | 55558  | 37 | X  | 153696206 | 153696206 | Missense_Mutation | SNP | G        | C  | 23  | 33   | c.3682G>C         | c.(3682-3684)GGT>CGT               | p.G1228R      |
| Pat_01 | Pre-Treatment   | RERE      | 473    | 37 | 1  | 8557555   | 8557555   | Frame_Shift_Del   | DEL | G        | -  | 8   | 585  | c.914delC         | c.(913-915)CCAfs                   | p.P305fs      |
| Pat_01 | Pre-Treatment   | PABPC4    | 8761   | 37 | 1  | 40028016  | 40028016  | Frame_Shift_Del   | DEL | G        | -  | 7   | 491  | c.1693delC        | c.(1693-1695)CAGfs                 | p.Q565fs      |
| Pat_01 | Pre-Treatment   | TMCO2     | 127391 | 37 | 1  | 40713708  | 40713709  | Frame_Shift_Del   | DEL | TC       | -  | 14  | 732  | c.43_44delTC      | c.(43-45)TCTfs                     | p.S15fs       |
| Pat_01 | Pre-Treatment   | SV2A      | 9900   | 37 | 1  | 149885223 | 149885225 | In_Frame_Del      | DEL | TCA      | -  | 7   | 429  | c.168_170delITGAc | c.(166-171)GATGAC>GACp             | p.56_57DD>D   |
| Pat_01 | Pre-Treatment   | LCE1F     | 353137 | 37 | 1  | 152749003 | 152749008 | In_Frame_Del      | DEL | TGGCTC   | -  | 8   | 305  | 156_161delTGGC    | c.(1154-162)TGTGGCTCC>T            | p.GS53del     |
| Pat_01 | Pre-Treatment   | CCT3      | 7203   | 37 | 1  | 156290648 | 156290648 | Frame_Shift_Del   | DEL | T        | -  | 9   | 706  | c.591delA         | c.(589-591)AAAfs                   | p.K197fs      |
| Pat_01 | Pre-Treatment   | OR10Z1    | 128368 | 37 | 1  | 158576487 | 158576487 | Frame_Shift_Del   | DEL | G        | -  | 9   | 1448 | c.259delG         | c.(259-261)GGGfs                   | p.G87fs       |
| Pat_01 | Pre-Treatment   | NOS1AP    | 9722   | 37 | 1  | 162326888 | 162326890 | In_Frame_Del      | DEL | CAG      | -  | 8   | 112  | c.901_903delCAG   | c.(901-903)CAGdel                  | p.Q306del     |
| Pat_01 | Pre-Treatment   | LOC642587 | 642587 | 37 | 1  | 209605637 | 209605648 | In_Frame_Del      | DEL | CAGCAGCA | -  | 13  | 60   | 263delAGCAGCA     | c.(264)GTAGCAGCAGCAGC              | p.AAAA93del   |
| Pat_01 | Pre-Treatment   | DIP2C     | 22982  | 37 | 10 | 412274    | 412275    | Frame_Shift_Del   | DEL | CA       | -  | 9   | 171  | c.2208_2209delITC | c.(2206-2211)TGTGCAfs              | p.C736fs      |
| Pat_01 | Pre-Treatment   | NUP98     | 4928   | 37 | 11 | 3720389   | 3720389   | Frame_Shift_Del   | DEL | T        | -  | 7   | 756  | c.3932delA        | c.(3931-3933)AACfs                 | p.N1311fs     |
| Pat_01 | Pre-Treatment   | DENND5A   | 23258  | 37 | 11 | 9199797   | 9199799   | In_Frame_Del      | DEL | ATC      | -  | 8   | 430  | .1786_1788delGA'  | c.(1786-1788)GATdel                | p.D596del     |
| Pat_01 | Pre-Treatment   | AMPD3     | 272    | 37 | 11 | 10508911  | 10508915  | Splice_Site       | DEL | GGTGC    | -  | 118 | 473  | c.939_splice      | c.e6+1                             | p.K313_splice |
| Pat_01 | Pre-Treatment   | NDUFV1    | 4723   | 37 | 11 | 67376193  | 67376194  | Splice_Site       | INS | -        | GT | 8   | 493  | c.326_splice      | c.e3+1                             | p.R109_splice |
| Pat_01 | Pre-Treatment   | PAK1      | 5058   | 37 | 11 | 77069990  | 77069992  | In_Frame_Del      | DEL | CAT      | -  | 8   | 691  | c.548_550delATG   | c.(547-552)GATGCT>GCT              | p.D183del     |
| Pat_01 | Pre-Treatment   | CHD4      | 1108   | 37 | 12 | 6711207   | 6711209   | In_Frame_Del      | DEL | CTT      | -  | 7   | 62   | c.355_357delAAG   | c.(355-357)AAGdel                  | p.K119del     |
| Pat_01 | Pre-Treatment   | SFRS2IP   | 9169   | 37 | 12 | 46318575  | 46318577  | In_Frame_Del      | DEL | GGT      | -  | 7   | 938  | .3840_3842delACI  | c.(3838-3843)CCACCC>CC1280_1281PP: |               |
| Pat_01 | Pre-Treatment   | C12orf42  | 374470 | 37 | 12 | 103695960 | 103695960 | Frame_Shift_Del   | DEL | G        | -  | 7   | 694  | c.1009delC        | c.(1009-1011)CGCfs                 | p.R337fs      |
| Pat_01 | Pre-Treatment   | KIAA1704  | 55425  | 37 | 13 | 45580365  | 45580367  | In_Frame_Del      | DEL | GAT      | -  | 18  | 1000 | c.250_252delGAT   | c.(250-252)GATdel                  | p.D88del      |
| Pat_01 | Pre-Treatment   | ZC3H13    | 23091  | 37 | 13 | 46542016  | 46542017  | Frame_Shift_Del   | DEL | CT       | -  | 8   | 300  | .3943_3944delAC   | c.(3943-3945)AGGfs                 | p.R1315fs     |
| Pat_01 | Pre-Treatment   | DZIP1     | 22873  | 37 | 13 | 96237096  | 96237096  | Frame_Shift_Del   | DEL | T        | -  | 8   | 196  | c.2418delA        | c.(2416-2418)AAAfs                 | p.K806fs      |
| Pat_01 | Pre-Treatment   | KIAA0391  | 9692   | 37 | 14 | 35592700  | 35592700  | Frame_Shift_Del   | DEL | T        | -  | 9   | 197  | c.249delT         | c.(247-249)CATfs                   | p.H83fs       |
| Pat_01 | Pre-Treatment   | ARID4A    | 5926   | 37 | 14 | 58831996  | 58831997  | Frame_Shift_Del   | DEL | AG       | -  | 9   | 354  | .3189_3190delAC   | c.(3187-3192)CAAGAGfs              | p.Q1063fs     |

|        |               |           |        |    |    |           |           |                 |     |     |          |     |      |                                                   |
|--------|---------------|-----------|--------|----|----|-----------|-----------|-----------------|-----|-----|----------|-----|------|---------------------------------------------------|
| Pat_01 | Pre-Treatment | AMN       | 81693  | 37 | 14 | 103396993 | 103396994 | In_Frame_Ins    | INS | -   | GCCGGG   | 12  | 26   | i38_1339insGCCGc.(1336-1341)insGCCGGG.448_449insA |
| Pat_01 | Pre-Treatment | WDR72     | 256764 | 37 | 15 | 53992038  | 53992038  | Frame_Shift_Del | DEL | A   | -        | 12  | 1076 | c.1674delT c.(1672-1674)TTTTfs p.F558fs           |
| Pat_01 | Pre-Treatment | FEM1B     | 10116  | 37 | 15 | 68583340  | 68583340  | Frame_Shift_Del | DEL | T   | -        | 8   | 851  | c.1644delT c.(1642-1644)GATfs p.D548fs            |
| Pat_01 | Pre-Treatment | CPLX3     | 594855 | 37 | 15 | 75122558  | 75122560  | In_Frame_Del    | DEL | GAG | -        | 7   | 564  | c.340_342delGAG c.(340-342)GAGdel p.E118del       |
| Pat_01 | Pre-Treatment | UBN1      | 29855  | 37 | 16 | 4910691   | 4910693   | In_Frame_Del    | DEL | AGA | -        | 11  | 1032 | c.698_700delAGA:(697-702)GAGAAG>GAC p.K238del     |
| Pat_01 | Pre-Treatment | C16orf70  | 80262  | 37 | 16 | 67180989  | 67180989  | Frame_Shift_Del | DEL | C   | -        | 7   | 915  | c.1224delC c.(1222-1224)GGCfs p.G408fs            |
| Pat_01 | Pre-Treatment | FANCA     | 2175   | 37 | 16 | 89869675  | 89869675  | Frame_Shift_Del | DEL | T   | -        | 7   | 448  | c.784delA c.(784-786)ATGfs p.M262fs               |
| Pat_01 | Pre-Treatment | FXR2      | 9513   | 37 | 17 | 7495872   | 7495874   | In_Frame_Del    | DEL | CGG | -        | 14  | 1160 | .1773_1775delCC(1771-1776)CGCCGT>CG.591_592RR>I   |
| Pat_01 | Pre-Treatment | MYOCD     | 93649  | 37 | 17 | 12647692  | 12647694  | In_Frame_Del    | DEL | CAG | -        | 7   | 131  | c.910_912delCAG c.(910-912)CAGdel p.Q310del       |
| Pat_01 | Pre-Treatment | CXXC1     | 30827  | 37 | 18 | 47812275  | 47812277  | In_Frame_Del    | DEL | CTG | -        | 7   | 170  | c.481_483delCAG c.(481-483)CAGdel p.Q161del       |
| Pat_01 | Pre-Treatment | CRTC1     | 23373  | 37 | 19 | 18887993  | 18887993  | Frame_Shift_Del | DEL | C   | -        | 7   | 371  | c.1706delC c.(1705-1707)TCCfs p.S569fs            |
| Pat_01 | Pre-Treatment | FFAR2     | 2867   | 37 | 19 | 35940788  | 35940790  | In_Frame_Del    | DEL | CTG | -        | 8   | 175  | c.172_174delCTG c.(172-174)CTGdel p.L62del        |
| Pat_01 | Pre-Treatment | CCDC97    | 90324  | 37 | 19 | 41825698  | 41825700  | In_Frame_Del    | DEL | AGG | -        | 7   | 92   | c.722_724delAGG:(721-726)CAGGAG>CAC p.E245del     |
| Pat_01 | Pre-Treatment | FLT3LG    | 2323   | 37 | 19 | 49978960  | 49978962  | In_Frame_Del    | DEL | CTG | -        | 8   | 450  | c.46_48delCTG c.(46-48)CTGdel p.L20del            |
| Pat_01 | Pre-Treatment | HS1BP3    | 64342  | 37 | 2  | 20840864  | 20840864  | Frame_Shift_Del | DEL | G   | -        | 9   | 1311 | c.275delC c.(274-276)CCAfs p.P92fs                |
| Pat_01 | Pre-Treatment | AGBL5     | 60509  | 37 | 2  | 27278900  | 27278901  | Frame_Shift_Ins | INS | -   | C        | 8   | 1065 | c.1259_1260insC c.(1258-1260)ATCfs p.I420fs       |
| Pat_01 | Pre-Treatment | ZNF831    | 128611 | 37 | 20 | 57766219  | 57766220  | Frame_Shift_Ins | INS | -   | C        | 10  | 163  | c.145_146insC c.(145-147)GCCfs p.A49fs            |
| Pat_01 | Pre-Treatment | CCT8      | 10694  | 37 | 21 | 30445903  | 30445903  | Frame_Shift_Del | DEL | A   | -        | 83  | 282  | c.9delT c.(7-9)CTTfs p.L3fs                       |
| Pat_01 | Pre-Treatment | KRTAP10-6 | 386674 | 37 | 21 | 46012219  | 46012220  | In_Frame_Ins    | INS | -   | iCGCAGCA | 11  | 227  | 7insCAGCTGCTG')CCG>CCCAGCTGCTGCI9_49P>PSCC        |
| Pat_01 | Pre-Treatment | TCF20     | 6942   | 37 | 22 | 42610948  | 42610948  | Frame_Shift_Del | DEL | G   | -        | 7   | 590  | c.364delC c.(364-366)CAGfs p.Q122fs               |
| Pat_01 | Pre-Treatment | ATRIP     | 84126  | 37 | 3  | 48501288  | 48501288  | Frame_Shift_Del | DEL | C   | -        | 9   | 803  | c.1028delC c.(1027-1029)ACCfs p.T343fs            |
| Pat_01 | Pre-Treatment | FOXP1     | 27086  | 37 | 3  | 71247357  | 71247359  | In_Frame_Del    | DEL | TGC | -        | 9   | 494  | c.174_176delGCAC.(172-177)CAGCAA>CAAp.58_59QQ>Q   |
| Pat_01 | Pre-Treatment | VEPH1     | 79674  | 37 | 3  | 157081226 | 157081227 | Frame_Shift_Ins | INS | -   | T        | 9   | 334  | c.1661_1662insA c.(1660-1662)AACfs p.N554fs       |
| Pat_01 | Pre-Treatment | EIF4A2    | 1974   | 37 | 3  | 186504426 | 186504427 | Frame_Shift_Del | DEL | GA  | -        | 131 | 285  | c.763_764delGA c.(763-765)GAGfs p.E255fs          |
| Pat_01 | Pre-Treatment | FGFRL1    | 53834  | 37 | 4  | 1019055   | 1019056   | Frame_Shift_Del | DEL | CA  | -        | 9   | 47   | c.1435_1436delCA c.(1435-1437)CACfs p.H479fs      |
| Pat_01 | Pre-Treatment | FGF5      | 2250   | 37 | 4  | 81187992  | 81187994  | In_Frame_Del    | DEL | TCC | -        | 9   | 324  | c.14_16delTCC c.(13-18)TTCCTC>TTC p.L9del         |
| Pat_01 | Pre-Treatment | ZFR       | 51663  | 37 | 5  | 32419951  | 32419953  | In_Frame_Del    | DEL | GGT | -        | 8   | 930  | c.393_395delACC:(391-396)CCACCC>CCC.131_132PP>I   |
| Pat_01 | Pre-Treatment | THBS4     | 7060   | 37 | 5  | 79372774  | 79372776  | In_Frame_Del    | DEL | TGA | -        | 7   | 1219 | .1989_1991delTG.(1987-1992)TGTGAT>TG p.D668del    |
| Pat_01 | Pre-Treatment | H2AFY     | 9555   | 37 | 5  | 134724672 | 134724673 | Frame_Shift_Ins | INS | -   | G        | 107 | 216  | c.111_112insC c.(109-114)CCCAAGfs p.P37fs         |
| Pat_01 | Pre-Treatment | IK        | 3550   | 37 | 5  | 140032593 | 140032594 | Frame_Shift_Del | DEL | GA  | -        | 8   | 153  | c.268_269delGA c.(268-270)GAGfs p.E90fs           |
| Pat_01 | Pre-Treatment | NUP153    | 9972   | 37 | 6  | 17633077  | 17633078  | Splice_Site     | INS | -   | AA       | 10  | 54   | c.2465_splice c.e17-1 p.G822_splice               |
| Pat_01 | Pre-Treatment | BTN2A2    | 10385  | 37 | 6  | 26384091  | 26384093  | In_Frame_Del    | DEL | CCT | -        | 17  | 850  | c.42_44delCCT c.(40-45)TCCCTC>TCC p.L24del        |
| Pat_01 | Pre-Treatment | PBX2      | 5089   | 37 | 6  | 32156158  | 32156160  | In_Frame_Del    | DEL | GCT | -        | 8   | 468  | c.417_419delAGCc.(415-420)GCAGCT>GCTb.139_140AA>/ |
| Pat_01 | Pre-Treatment | FOXP4     | 116113 | 37 | 6  | 41555085  | 41555085  | Frame_Shift_Del | DEL | C   | -        | 7   | 931  | c.707delC c.(706-708)GCCfs p.A236fs               |
| Pat_01 | Pre-Treatment | OLIG3     | 167826 | 37 | 6  | 137815210 | 137815212 | In_Frame_Del    | DEL | TGG | -        | 7   | 277  | c.96_98delCCA c.(94-99)CACCAG>CAG p.H32del        |
| Pat_01 | Pre-Treatment | PARK2     | 5071   | 37 | 6  | 161781122 | 161781122 | Frame_Shift_Del | DEL | T   | -        | 8   | 660  | c.1283delA c.(1282-1284)AATfs p.N428fs            |
| Pat_01 | Pre-Treatment | CCDC126   | 90693  | 37 | 7  | 23651156  | 23651156  | Frame_Shift_Del | DEL | T   | -        | 308 | 363  | c.222delT c.(220-222)GCTfs p.A74fs                |
| Pat_01 | Pre-Treatment | HOXA10    | 3206   | 37 | 7  | 27213229  | 27213231  | In_Frame_Del    | DEL | CGC | -        | 2   | 4    | c.695_697delGCG:(694-699)GGCGCG>GCC p.G232del     |
| Pat_01 | Pre-Treatment | INHBA     | 3624   | 37 | 7  | 41729741  | 41729743  | In_Frame_Del    | DEL | TTC | -        | 8   | 115  | c.786_788delGAAc.(784-789)AAGAAA>AAA.262_263KK>I  |
| Pat_01 | Pre-Treatment | PEX1      | 5189   | 37 | 7  | 92146721  | 92146721  | Frame_Shift_Del | DEL | T   | -        | 7   | 254  | c.1108delA c.(1108-1110)ATTfs p.I370fs            |
| Pat_01 | Pre-Treatment | KIAA1147  | 57189  | 37 | 7  | 141365101 | 141365103 | In_Frame_Del    | DEL | AGC | -        | 7   | 329  | c.836_838delGCTc.(835-840)TGCTTG>TTG p.C279del    |
| Pat_01 | Pre-Treatment | OR9A4     | 130075 | 37 | 7  | 141619203 | 141619203 | Frame_Shift_Del | DEL | T   | -        | 12  | 1014 | c.528delT c.(526-528)AATfs p.N176fs               |
| Pat_01 | Pre-Treatment | EPHA1     | 2041   | 37 | 7  | 143095836 | 143095836 | Frame_Shift_Del | DEL | C   | -        | 7   | 460  | c.1194delG c.(1192-1194)GGGfs p.G398fs            |
| Pat_01 | Pre-Treatment | ZNF777    | 27153  | 37 | 7  | 149152747 | 149152747 | Frame_Shift_Del | DEL | G   | -        | 7   | 943  | c.367delC c.(367-369)CACfs p.H123fs               |
| Pat_01 | Pre-Treatment | ABCA1     | 19     | 37 | 9  | 107593323 | 107593323 | Frame_Shift_Del | DEL | C   | -        | 7   | 296  | c.1775delG c.(1774-1776)GGCfs p.G592fs            |
| Pat_01 | Pre-Treatment | ENG       | 2022   | 37 | 9  | 130587583 | 130587584 | Frame_Shift_Ins | INS | -   | A        | 25  | 231  | c.742_743insT c.(742-744)GATfs p.D248fs           |
| Pat_01 | Pre-Treatment | ARMCX3    | 51566  | 37 | X  | 100880152 | 100880154 | In_Frame_Del    | DEL | TGA | -        | 7   | 699  | c.183_185delTGA c.(181-186)TCTGAT>TCT p.D66del    |

|        |                 |           |        |    |    |           |           |                 |     |          |        |    |      |                     |                                   |               |               |
|--------|-----------------|-----------|--------|----|----|-----------|-----------|-----------------|-----|----------|--------|----|------|---------------------|-----------------------------------|---------------|---------------|
| Pat_01 | Post-Resistance | ZBTB8A    | 653121 | 37 | 1  | 33065979  | 33065981  | In_Frame_Del    | DEL | GAA      | -      | 7  | 369  | .1285_1287delGA     | c.(1285-1287)GAA                  | del           | p.E433del     |
| Pat_01 | Post-Resistance | RHBDL2    | 54933  | 37 | 1  | 39384834  | 39384834  | Frame_Shift_Del | DEL | C        | -      | 7  | 356  | c.51delG            | c.(49-51)GGG                      | fs            | p.G17fs       |
| Pat_01 | Post-Resistance | MFSD2A    | 84879  | 37 | 1  | 40424435  | 40424435  | Frame_Shift_Del | DEL | C        | -      | 7  | 968  | c.330delC           | c.(328-330)GAC                    | fs            | p.D110fs      |
| Pat_01 | Post-Resistance | TMCO2     | 127391 | 37 | 1  | 40713708  | 40713709  | Frame_Shift_Del | DEL | TC       | -      | 7  | 809  | c.43_44delTC        | c.(43-45)TCT                      | fs            | p.S15fs       |
| Pat_01 | Post-Resistance | KDM4A     | 9682   | 37 | 1  | 44157180  | 44157180  | Frame_Shift_Del | DEL | C        | -      | 7  | 642  | c.2256delC          | c.(2254-2256)GTC                  | fs            | p.V752fs      |
| Pat_01 | Post-Resistance | MAST2     | 23139  | 37 | 1  | 46494559  | 46494559  | Frame_Shift_Del | DEL | T        | -      | 8  | 793  | c.2172delT          | c.(2170-2172)CCT                  | fs            | p.P724fs      |
| Pat_01 | Post-Resistance | DOCK7     | 85440  | 37 | 1  | 63128738  | 63128738  | Frame_Shift_Del | DEL | G        | -      | 7  | 1409 | c.102delC           | c.(100-102)CTC                    | fs            | p.L34fs       |
| Pat_01 | Post-Resistance | WDR78     | 79819  | 37 | 1  | 67390426  | 67390426  | Frame_Shift_Del | DEL | T        | -      | 7  | 597  | c.89delA            | c.(88-90)AAG                      | fs            | p.K30fs       |
| Pat_01 | Post-Resistance | LPAR3     | 23566  | 37 | 1  | 85331664  | 85331665  | Frame_Shift_Ins | INS | -        | A      | 8  | 288  | c.139_140insT       | c.(139-141)TCT                    | fs            | p.S47fs       |
| Pat_01 | Post-Resistance | TCHH      | 7062   | 37 | 1  | 152082211 | 152082213 | In_Frame_Del    | DEL | CTC      | -      | 10 | 209  | .3480_3482delGA     | c.(3478-3483)AAGAGA>AA            |               | p.R1163del    |
| Pat_01 | Post-Resistance | TCHH      | 7062   | 37 | 1  | 152084580 | 152084582 | In_Frame_Del    | DEL | CTC      | -      | 12 | 188  | :.1111_1113delGA    | c.(1111-1113)GAG                  | del           | p.E371del     |
| Pat_01 | Post-Resistance | PRCC      | 5546   | 37 | 1  | 156761535 | 156761536 | Frame_Shift_Ins | INS | -        | C      | 14 | 765  | c.1130_1131insC     | c.(1129-1131)GTC                  | fs            | p.V377fs      |
| Pat_01 | Post-Resistance | NOS1AP    | 9722   | 37 | 1  | 162326758 | 162326758 | Frame_Shift_Del | DEL | C        | -      | 9  | 1331 | c.771delC           | c.(769-771)CAC                    | fs            | p.H257fs      |
| Pat_01 | Post-Resistance | TNR       | 7143   | 37 | 1  | 175372615 | 175372615 | Frame_Shift_Del | DEL | C        | -      | 10 | 1438 | c.637delG           | c.(637-639)GTG                    | fs            | p.V213fs      |
| Pat_01 | Post-Resistance | DHX9      | 1660   | 37 | 1  | 182845333 | 182845333 | Frame_Shift_Del | DEL | T        | -      | 7  | 1233 | c.1964delT          | c.(1963-1965)GTT                  | fs            | p.V655fs      |
| Pat_01 | Post-Resistance | CFH       | 3075   | 37 | 1  | 196646766 | 196646766 | Frame_Shift_Del | DEL | T        | -      | 8  | 1559 | c.588delT           | c.(586-588)GGT                    | fs            | p.G196fs      |
| Pat_01 | Post-Resistance | LOC642587 | 642587 | 37 | 1  | 209605637 | 209605648 | In_Frame_Del    | DEL | CAGCAGCA | -      | 11 | 55   | .263delAGCAGCA(264) | GTAGCAGCAGCAGC                    | p.AAAA93del   |               |
| Pat_01 | Post-Resistance | TMEM206   | 55248  | 37 | 1  | 212548597 | 212548597 | Frame_Shift_Del | DEL | T        | -      | 7  | 870  | c.829delA           | c.(829-831)AGT                    | fs            | p.S277fs      |
| Pat_01 | Post-Resistance | PTPN14    | 5784   | 37 | 1  | 214588042 | 214588042 | Frame_Shift_Del | DEL | T        | -      | 9  | 1572 | c.372delA           | c.(370-372)AAA                    | fs            | p.K124fs      |
| Pat_01 | Post-Resistance | OBSCN     | 84033  | 37 | 1  | 228467013 | 228467013 | Frame_Shift_Del | DEL | G        | -      | 7  | 656  | c.7264delG          | c.(7264-7266)GGG                  | fs            | p.G2422fs     |
| Pat_01 | Post-Resistance | SLC16A9   | 220963 | 37 | 10 | 61414180  | 61414180  | Frame_Shift_Del | DEL | T        | -      | 8  | 278  | c.604delA           | c.(604-606)ATA                    | fs            | p.I202fs      |
| Pat_01 | Post-Resistance | ANAPC16   | 119504 | 37 | 10 | 73983786  | 73983786  | Frame_Shift_Del | DEL | C        | -      | 7  | 557  | c.114delC           | c.(112-114)TAC                    | fs            | p.Y38fs       |
| Pat_01 | Post-Resistance | APBB1     | 322    | 37 | 11 | 6423808   | 6423808   | Frame_Shift_Del | DEL | C        | -      | 9  | 504  | c.1252delG          | c.(1252-1254)GAA                  | fs            | p.E418fs      |
| Pat_01 | Post-Resistance | AMPD3     | 272    | 37 | 11 | 10508911  | 10508915  | Splice_Site     | DEL | GGTGC    | -      | 49 | 644  | c.939_splice        | c.e6+1                            |               | p.K313_splice |
| Pat_01 | Post-Resistance | PSMA1     | 5682   | 37 | 11 | 14529252  | 14529254  | In_Frame_Del    | DEL | CAT      | -      | 8  | 681  | c.683_685delATG     | c.(682-687)GATGTG>GTC             |               | p.D228del     |
| Pat_01 | Post-Resistance | C11orf46  | 120534 | 37 | 11 | 30352754  | 30352754  | Frame_Shift_Del | DEL | A        | -      | 17 | 635  | c.259delA           | c.(259-261)AAA                    | fs            | p.K87fs       |
| Pat_01 | Post-Resistance | PRRG4     | 79056  | 37 | 11 | 32874997  | 32874999  | In_Frame_Del    | DEL | CAC      | -      | 9  | 685  | c.605_607delCAC     | c.(604-609)TCACCA>TCA             |               | p.P206del     |
| Pat_01 | Post-Resistance | OR8H3     | 390152 | 37 | 11 | 55890089  | 55890089  | Frame_Shift_Del | DEL | A        | -      | 7  | 1904 | c.241delA           | c.(241-243)AAA                    | fs            | p.K81fs       |
| Pat_01 | Post-Resistance | FADS2     | 9415   | 37 | 11 | 61615748  | 61615748  | Frame_Shift_Del | DEL | C        | -      | 7  | 699  | c.736delC           | c.(736-738)CCC                    | fs            | p.P246fs      |
| Pat_01 | Post-Resistance | RARRES3   | 5920   | 37 | 11 | 63313709  | 63313709  | Frame_Shift_Del | DEL | A        | -      | 9  | 297  | c.476delA           | c.(475-477)CAA                    | fs            | p.Q159fs      |
| Pat_01 | Post-Resistance | DRAP1     | 10589  | 37 | 11 | 65688853  | 65688853  | Frame_Shift_Del | DEL | C        | -      | 8  | 797  | c.565delC           | c.(565-567)CCC                    | fs            | p.P189fs      |
| Pat_01 | Post-Resistance | PRDM10    | 56980  | 37 | 11 | 129772249 | 129772251 | In_Frame_Del    | DEL | TGG      | -      | 8  | 1025 | .3440_3442delCC     | c.(3439-3444)ACCAAC>AA            |               | p.T1147del    |
| Pat_01 | Post-Resistance | ZCRB1     | 85437  | 37 | 12 | 42706971  | 42706971  | Frame_Shift_Del | DEL | T        | -      | 7  | 111  | c.552delA           | c.(550-552)AAA                    | fs            | p.K184fs      |
| Pat_01 | Post-Resistance | SFRS2IP   | 9169   | 37 | 12 | 46318575  | 46318577  | In_Frame_Del    | DEL | GGT      | -      | 10 | 1216 | .3840_3842delAC     | c.(3838-3843)CCACCC>CC1280_1281PP |               |               |
| Pat_01 | Post-Resistance | MLL2      | 8085   | 37 | 12 | 49442512  | 49442514  | In_Frame_Del    | DEL | TCC      | -      | 7  | 1216 | .4059_4061delGG     | c.(4057-4062)GAGGAA>GA1353_1354EE |               |               |
| Pat_01 | Post-Resistance | PRPF40B   | 25766  | 37 | 12 | 50025258  | 50025258  | Frame_Shift_Del | DEL | C        | -      | 10 | 676  | c.93delC            | c.(91-93)ATC                      | fs            | p.I31fs       |
| Pat_01 | Post-Resistance | SUOX      | 6821   | 37 | 12 | 56397930  | 56397930  | Frame_Shift_Del | DEL | T        | -      | 7  | 616  | c.757delT           | c.(757-759)TTT                    | fs            | p.F253fs      |
| Pat_01 | Post-Resistance | ACACB     | 32     | 37 | 12 | 109604774 | 109604775 | Frame_Shift_Ins | INS | -        | G      | 7  | 474  | c.762_763insG       | c.(760-765)TTTGGG                 | fs            | p.F254fs      |
| Pat_01 | Post-Resistance | KIAA1704  | 55425  | 37 | 13 | 45580365  | 45580367  | In_Frame_Del    | DEL | GAT      | -      | 13 | 1122 | c.250_252delGAT     | c.(250-252)GAT                    | del           | p.D88del      |
| Pat_01 | Post-Resistance | LRCH1     | 23143  | 37 | 13 | 47243183  | 47243186  | Frame_Shift_Del | DEL | CCTG     | -      | 16 | 1460 | :.471_474delCCTC    | c.(469-474)GCCCTG                 | fs            | p.A157fs      |
| Pat_01 | Post-Resistance | IRF9      | 10379  | 37 | 14 | 24633132  | 24633134  | In_Frame_Del    | DEL | AGC      | -      | 10 | 270  | c.541_543delAGC     | c.(541-543)AGC                    | del           | p.S187del     |
| Pat_01 | Post-Resistance | IPO4      | 79711  | 37 | 14 | 24655611  | 24655611  | Frame_Shift_Del | DEL | A        | -      | 7  | 748  | c.887delT           | c.(886-888)TTC                    | fs            | p.F296fs      |
| Pat_01 | Post-Resistance | KIAA0391  | 9692   | 37 | 14 | 35592700  | 35592700  | Frame_Shift_Del | DEL | T        | -      | 8  | 234  | c.249delT           | c.(247-249)CAT                    | fs            | p.H83fs       |
| Pat_01 | Post-Resistance | ARID4A    | 5926   | 37 | 14 | 58831996  | 58831997  | Frame_Shift_Del | DEL | AG       | -      | 10 | 392  | :.3189_3190delAC    | c.(3187-3192)CAAGAG               | fs            | p.Q1063fs     |
| Pat_01 | Post-Resistance | DDX24     | 57062  | 37 | 14 | 94545821  | 94545823  | In_Frame_Del    | DEL | CCT      | -      | 16 | 549  | c.266_268delAGG     | c.(265-270)GAGGGA>GG/             |               | p.E89del      |
| Pat_01 | Post-Resistance | HSP90AA1  | 3320   | 37 | 14 | 102552130 | 102552130 | Frame_Shift_Del | DEL | G        | -      | 8  | 743  | c.494delC           | c.(493-495)TCA                    | fs            | p.S165fs      |
| Pat_01 | Post-Resistance | AMN       | 81693  | 37 | 14 | 103396993 | 103396994 | In_Frame_Ins    | INS | -        | GCCGGG | 14 | 12   | .138_139insGCC      | c.(1336-1341)insGCCGGG            | .448_449insAC |               |



|        |                 |          |        |    |    |           |           |                 |     |          |   |    |      |                        |                         |               |
|--------|-----------------|----------|--------|----|----|-----------|-----------|-----------------|-----|----------|---|----|------|------------------------|-------------------------|---------------|
| Pat_01 | Post-Resistance | NIPA1    | 123606 | 37 | 15 | 23086365  | 23086367  | In_Frame_Del    | DEL | GCC      | - | 4  | 9    | c.45_47delGGC          | c.(43-48)CGGGCC>GCC     | p.15_16AA>A   |
| Pat_01 | Post-Resistance | PIGB     | 9488   | 37 | 15 | 55621922  | 55621922  | Frame_Shift_Del | DEL | T        | - | 8  | 914  | c.523delT              | c.(523-525)TTTfs        | p.F175fs      |
| Pat_01 | Post-Resistance | RNF111   | 54778  | 37 | 15 | 59359142  | 59359144  | In_Frame_Del    | DEL | CAC      | - | 7  | 974  | .1546_1548delCAI       | c.(1546-1548)CACdel     | p.H520del     |
| Pat_01 | Post-Resistance | PPIB     | 5479   | 37 | 15 | 64454280  | 64454280  | Frame_Shift_Del | DEL | G        | - | 10 | 2889 | c.209delC              | c.(208-210)CCAfs        | p.P70fs       |
| Pat_01 | Post-Resistance | KIAA1199 | 57214  | 37 | 15 | 81173394  | 81173394  | Frame_Shift_Del | DEL | T        | - | 7  | 580  | c.534delT              | c.(532-534)TATfs        | p.Y178fs      |
| Pat_01 | Post-Resistance | MKL2     | 57496  | 37 | 16 | 14334253  | 14334255  | In_Frame_Del    | DEL | CAG      | - | 10 | 686  | c.991_993delCAG        | c.(991-993)CAGdel       | p.Q334del     |
| Pat_01 | Post-Resistance | IL4R     | 3566   | 37 | 16 | 27373787  | 27373789  | In_Frame_Del    | DEL | GAG      | - | 9  | 115  | .1114_1116delGAC       | c.(1114-1116)GAGdel     | p.E376del     |
| Pat_01 | Post-Resistance | IL21R    | 50615  | 37 | 16 | 27460530  | 27460530  | Frame_Shift_Del | DEL | C        | - | 8  | 293  | c.1543delC             | c.(1543-1545)CCCfs      | p.P515fs      |
| Pat_01 | Post-Resistance | CD2BP2   | 10421  | 37 | 16 | 30365545  | 30365545  | Frame_Shift_Del | DEL | C        | - | 8  | 1078 | c.177delG              | c.(175-177)GGGfs        | p.G59fs       |
| Pat_01 | Post-Resistance | LRRC36   | 55282  | 37 | 16 | 67409201  | 67409201  | Frame_Shift_Del | DEL | C        | - | 7  | 1807 | c.1546delC             | c.(1546-1548)CCCfs      | p.P516fs      |
| Pat_01 | Post-Resistance | WWP2     | 11060  | 37 | 16 | 69959337  | 69959338  | Frame_Shift_Ins | INS | -        | T | 8  | 2315 | c.1184_1185insT        | c.(1183-1185)TCGfs      | p.S395fs      |
| Pat_01 | Post-Resistance | FXR2     | 9513   | 37 | 17 | 7495872   | 7495874   | In_Frame_Del    | DEL | CGG      | - | 19 | 1162 | .1773_1775delCC        | c.(1771-1776)CGCCGT>CGA | p.591_592RR>I |
| Pat_01 | Post-Resistance | KDM6B    | 23135  | 37 | 17 | 7750576   | 7750576   | Frame_Shift_Del | DEL | C        | - | 7  | 805  | c.1063delC             | c.(1063-1065)CCCfs      | p.P355fs      |
| Pat_01 | Post-Resistance | MYH10    | 4628   | 37 | 17 | 8415820   | 8415822   | In_Frame_Del    | DEL | TTC      | - | 11 | 101  | .2806_2808delGA        | c.(2806-2808)GAAdel     | p.E936del     |
| Pat_01 | Post-Resistance | NUFIP2   | 57532  | 37 | 17 | 27620932  | 27620934  | In_Frame_Del    | DEL | TGG      | - | 13 | 858  | c.144_146delCCA        | c.(142-147)CACCAT>CAT   | p.48_49HH>H   |
| Pat_01 | Post-Resistance | TLL6     | 284076 | 37 | 17 | 46863643  | 46863643  | Frame_Shift_Del | DEL | C        | - | 7  | 1537 | c.1644delG             | c.(1642-1644)AAGfs      | p.K548fs      |
| Pat_01 | Post-Resistance | VEZF1    | 7716   | 37 | 17 | 56056605  | 56056607  | In_Frame_Del    | DEL | TGC      | - | 7  | 813  | .1044_1046delGC        | c.(1042-1047)CAGCAA>CA  | p.348_349QQ>I |
| Pat_01 | Post-Resistance | TEX2     | 55852  | 37 | 17 | 62291438  | 62291440  | In_Frame_Del    | DEL | TCC      | - | 7  | 216  | c.138_140delGGA        | c.(136-141)GAGGAA>GAA   | p.46_47EE>E   |
| Pat_01 | Post-Resistance | C18orf19 | 125228 | 37 | 18 | 13681751  | 13681751  | Frame_Shift_Del | DEL | T        | - | 7  | 603  | c.326delA              | c.(325-327)AAGfs        | p.K109fs      |
| Pat_01 | Post-Resistance | C18orf8  | 29919  | 37 | 18 | 21110531  | 21110531  | Frame_Shift_Del | DEL | G        | - | 7  | 507  | c.1849delG             | c.(1849-1851)GAAfs      | p.E617fs      |
| Pat_01 | Post-Resistance | CXXC1    | 30827  | 37 | 18 | 47812275  | 47812277  | In_Frame_Del    | DEL | CTG      | - | 10 | 147  | c.481_483delCAG        | c.(481-483)CAGdel       | p.Q161del     |
| Pat_01 | Post-Resistance | STK11    | 6794   | 37 | 19 | 1207156   | 1207156   | Frame_Shift_Del | DEL | A        | - | 11 | 22   | c.244delA              | c.(244-246)AAGfs        | p.K82fs       |
| Pat_01 | Post-Resistance | FFAR2    | 2867   | 37 | 19 | 35940788  | 35940790  | In_Frame_Del    | DEL | CTG      | - | 7  | 161  | c.172_174delCTG        | c.(172-174)CTGdel       | p.L62del      |
| Pat_01 | Post-Resistance | PLEKHG2  | 64857  | 37 | 19 | 39913725  | 39913725  | Frame_Shift_Del | DEL | C        | - | 7  | 952  | c.2031delC             | c.(2029-2031)GTCfs      | p.V677fs      |
| Pat_01 | Post-Resistance | CD3EAP   | 10849  | 37 | 19 | 45910372  | 45910372  | Frame_Shift_Del | DEL | C        | - | 8  | 896  | c.43delC               | c.(43-45)CCCfs          | p.P15fs       |
| Pat_01 | Post-Resistance | PLEKHA4  | 57664  | 37 | 19 | 49340723  | 49340723  | Frame_Shift_Del | DEL | G        | - | 7  | 575  | c.2163delC             | c.(2161-2163)CCCfs      | p.P721fs      |
| Pat_01 | Post-Resistance | ZNF816A  | 125893 | 37 | 19 | 53454172  | 53454173  | Frame_Shift_Del | DEL | TG       | - | 11 | 618  | c.855_856delCA         | c.(853-858)TACAAGfs     | p.Y285fs      |
| Pat_01 | Post-Resistance | SMC6     | 79677  | 37 | 2  | 17898126  | 17898126  | Frame_Shift_Del | DEL | T        | - | 7  | 101  | c.1228delA             | c.(1228-1230)ATAfs      | p.I410fs      |
| Pat_01 | Post-Resistance | FOXN2    | 3344   | 37 | 2  | 48573666  | 48573667  | Frame_Shift_Ins | INS | -        | A | 7  | 401  | c.313_314insA          | c.(313-315)GAAfs        | p.E105fs      |
| Pat_01 | Post-Resistance | EHBP1    | 23301  | 37 | 2  | 63101604  | 63101604  | Frame_Shift_Del | DEL | A        | - | 7  | 653  | c.1227delA             | c.(1225-1227)CCAfs      | p.P409fs      |
| Pat_01 | Post-Resistance | AFTPH    | 54812  | 37 | 2  | 64778672  | 64778674  | In_Frame_Del    | DEL | GAT      | - | 9  | 900  | c.64_66delGAT          | c.(64-66)GATdel         | p.D26del      |
| Pat_01 | Post-Resistance | REV1     | 51455  | 37 | 2  | 100055102 | 100055102 | Frame_Shift_Del | DEL | T        | - | 8  | 537  | c.1174delA             | c.(1174-1176)ATGfs      | p.M392fs      |
| Pat_01 | Post-Resistance | SULT1C3  | 442038 | 37 | 2  | 108863685 | 108863685 | Frame_Shift_Del | DEL | A        | - | 7  | 361  | c.35delA               | c.(34-36)GAAfs          | p.E12fs       |
| Pat_01 | Post-Resistance | TNFAIP6  | 7130   | 37 | 2  | 152226673 | 152226673 | Frame_Shift_Del | DEL | A        | - | 7  | 814  | c.534delA              | c.(532-534)TTAfs        | p.L178fs      |
| Pat_01 | Post-Resistance | WIPF1    | 7456   | 37 | 2  | 175436671 | 175436673 | In_Frame_Del    | DEL | GAG      | - | 7  | 141  | c.860_862delCTC        | c.(859-864)CCTCAG>CAG   | p.P287del     |
| Pat_01 | Post-Resistance | PPP1R1C  | 151242 | 37 | 2  | 182852619 | 182852619 | Frame_Shift_Del | DEL | C        | - | 7  | 1341 | c.135delC              | c.(133-135)AACfs        | p.N45fs       |
| Pat_01 | Post-Resistance | SGOL2    | 151246 | 37 | 2  | 201437003 | 201437004 | Frame_Shift_Ins | INS | -        | T | 8  | 347  | c.1934_1935insT        | c.(1933-1935)AATfs      | p.N645fs      |
| Pat_01 | Post-Resistance | C2orf67  | 151050 | 37 | 2  | 210887680 | 210887680 | Frame_Shift_Del | DEL | T        | - | 8  | 123  | c.2957delA             | c.(2956-2958)AATfs      | p.N986fs      |
| Pat_01 | Post-Resistance | RQCD1    | 9125   | 37 | 2  | 219449364 | 219449364 | Frame_Shift_Del | DEL | T        | - | 9  | 1803 | c.350delT              | c.(349-351)CTTfs        | p.L117fs      |
| Pat_01 | Post-Resistance | GIGYF2   | 26058  | 37 | 2  | 233676006 | 233676008 | In_Frame_Del    | DEL | CAG      | - | 10 | 648  | .1951_1953delCAI       | c.(1951-1953)CAGdel     | p.Q655del     |
| Pat_01 | Post-Resistance | HDLBP    | 3069   | 37 | 2  | 242186208 | 242186208 | Frame_Shift_Del | DEL | C        | - | 8  | 561  | c.1909delG             | c.(1909-1911)GAAfs      | p.E637fs      |
| Pat_01 | Post-Resistance | CST4     | 1472   | 37 | 20 | 23667825  | 23667826  | Frame_Shift_Ins | INS | -        | C | 7  | 851  | c.241_242insG          | c.(241-243)GTGfs        | p.V81fs       |
| Pat_01 | Post-Resistance | CCT8     | 10694  | 37 | 21 | 30445903  | 30445903  | Frame_Shift_Del | DEL | A        | - | 88 | 427  | c.9delT                | c.(7-9)CTTfs            | p.L3fs        |
| Pat_01 | Post-Resistance | PWP2     | 5822   | 37 | 21 | 45535692  | 45535694  | In_Frame_Del    | DEL | GAG      | - | 7  | 99   | c.727_729delGAG        | c.(727-729)GAGdel       | p.E247del     |
| Pat_01 | Post-Resistance | TBC1D10A | 83874  | 37 | 22 | 30691732  | 30691732  | Frame_Shift_Del | DEL | C        | - | 8  | 292  | c.518delG              | c.(517-519)GGCfs        | p.G173fs      |
| Pat_01 | Post-Resistance | CDC42EP1 | 11135  | 37 | 22 | 37964409  | 37964429  | In_Frame_Del    | DEL | CTGCTGCA | - | 7  | 152  | .AGCGCTGCTGAGCGCCTGCTG | c.AAACA(CA)AANPS254c    |               |
| Pat_01 | Post-Resistance | GRM7     | 2917   | 37 | 3  | 7621013   | 7621013   | Frame_Shift_Del | DEL | T        | - | 7  | 158  | c.2420delT             | c.(2419-2421)ATTfs      | p.I807fs      |

|        |                 |          |        |    |   |           |           |                 |     |     |    |     |      |                  |                        |               |
|--------|-----------------|----------|--------|----|---|-----------|-----------|-----------------|-----|-----|----|-----|------|------------------|------------------------|---------------|
| Pat_01 | Post-Resistance | MAG11    | 9223   | 37 | 3 | 65342666  | 65342666  | Frame_Shift_Del | DEL | T   | -  | 7   | 1008 | c.3776delA       | c.(3775-3777)AAGfs     | p.K1259fs     |
| Pat_01 | Post-Resistance | LRIG1    | 26018  | 37 | 3 | 66436625  | 66436627  | In_Frame_Del    | DEL | GCT | -  | 10  | 1499 | .1567_1569delAG  | c.(1567-1569)AGCdel    | p.S524del     |
| Pat_01 | Post-Resistance | FOXP1    | 27086  | 37 | 3 | 71247357  | 71247359  | In_Frame_Del    | DEL | TGC | -  | 16  | 457  | c.174_176delGCAC | c.(172-177)CAGCAA>CAA  | p.58_59QQ>Q   |
| Pat_01 | Post-Resistance | CCDC80   | 151887 | 37 | 3 | 112326049 | 112326049 | Frame_Shift_Del | DEL | C   | -  | 8   | 597  | c.2480delG       | c.(2479-2481)GGAfs     | p.G827fs      |
| Pat_01 | Post-Resistance | KALRN    | 8997   | 37 | 3 | 123946891 | 123946891 | Frame_Shift_Del | DEL | A   | -  | 8   | 726  | c.122delA        | c.(121-123)GAAfs       | p.E41fs       |
| Pat_01 | Post-Resistance | TMEM108  | 66000  | 37 | 3 | 133098606 | 133098606 | Frame_Shift_Del | DEL | G   | -  | 8   | 1430 | c.51delG         | c.(49-51)CTGfs         | p.L17fs       |
| Pat_01 | Post-Resistance | VEPH1    | 79674  | 37 | 3 | 157081227 | 157081227 | Frame_Shift_Del | DEL | T   | -  | 8   | 440  | c.1661delA       | c.(1660-1662)AACfs     | p.N554fs      |
| Pat_01 | Post-Resistance | PSMD2    | 5708   | 37 | 3 | 184024574 | 184024574 | Frame_Shift_Del | DEL | G   | -  | 7   | 1137 | c.1986delG       | c.(1984-1986)ATGfs     | p.M662fs      |
| Pat_01 | Post-Resistance | MUC4     | 4585   | 37 | 3 | 195517485 | 195517486 | Frame_Shift_Del | DEL | AG  | -  | 7   | 556  | c.965_966delCT   | c.(964-966)TCTfs       | p.S322fs      |
| Pat_01 | Post-Resistance | UBXN7    | 26043  | 37 | 3 | 196088753 | 196088753 | Frame_Shift_Del | DEL | T   | -  | 7   | 423  | c.1270delA       | c.(1270-1272)AGGfs     | p.R424fs      |
| Pat_01 | Post-Resistance | PDE6B    | 5158   | 37 | 4 | 661763    | 661765    | In_Frame_Del    | DEL | AGG | -  | 9   | 324  | .2471_2473delAG  | c.(2470-2475)AAGGAG>AA | p.E828del     |
| Pat_01 | Post-Resistance | CRIPAK   | 285464 | 37 | 4 | 1389057   | 1389058   | Frame_Shift_Ins | INS | -   | AT | 7   | 1017 | c.758_759insAT   | c.(757-759)ACGfs       | p.T253fs      |
| Pat_01 | Post-Resistance | CRIPAK   | 285464 | 37 | 4 | 1389287   | 1389287   | Frame_Shift_Del | DEL | C   | -  | 7   | 1193 | c.988delC        | c.(988-990)CCCfs       | p.P330fs      |
| Pat_01 | Post-Resistance | GRPEL1   | 80273  | 37 | 4 | 7062606   | 7062606   | Frame_Shift_Del | DEL | C   | -  | 8   | 1743 | c.637delG        | c.(637-639)GTGfs       | p.V213fs      |
| Pat_01 | Post-Resistance | FRYL     | 285527 | 37 | 4 | 48622661  | 48622662  | Frame_Shift_Del | DEL | AG  | -  | 7   | 1270 | c.308_309delCT   | c.(307-309)TCTfs       | p.S103fs      |
| Pat_01 | Post-Resistance | PKD2     | 5311   | 37 | 4 | 88986559  | 88986559  | Frame_Shift_Del | DEL | A   | -  | 9   | 422  | c.2152delA       | c.(2152-2154)AAAfs     | p.K718fs      |
| Pat_01 | Post-Resistance | ANK2     | 287    | 37 | 4 | 114214679 | 114214681 | In_Frame_Del    | DEL | CAC | -  | 8   | 381  | .2460_2462delCA  | c.(2458-2463)GTCACC>GT | p.T826del     |
| Pat_01 | Post-Resistance | INTU     | 27152  | 37 | 4 | 128608872 | 128608872 | Frame_Shift_Del | DEL | T   | -  | 7   | 699  | c.1299delT       | c.(1297-1299)CATfs     | p.H433fs      |
| Pat_01 | Post-Resistance | ODZ3     | 55714  | 37 | 4 | 183652245 | 183652245 | Frame_Shift_Del | DEL | T   | -  | 7   | 234  | c.2920delT       | c.(2920-2922)TTTfs     | p.F974fs      |
| Pat_01 | Post-Resistance | MYO10    | 4651   | 37 | 5 | 16694605  | 16694606  | Frame_Shift_Ins | INS | -   | C  | 8   | 411  | c.3674_3675insG  | c.(3673-3675)GGCfs     | p.G1225fs     |
| Pat_01 | Post-Resistance | NIPBL    | 25836  | 37 | 5 | 37063925  | 37063927  | In_Frame_Del    | DEL | GAA | -  | 8   | 134  | .7894_7896delGA  | c.(7894-7896)GAA       | p.E2636del    |
| Pat_01 | Post-Resistance | GZMK     | 3003   | 37 | 5 | 54326347  | 54326347  | Frame_Shift_Del | DEL | A   | -  | 7   | 358  | c.298delA        | c.(298-300)AAAfs       | p.K100fs      |
| Pat_01 | Post-Resistance | BDP1     | 55814  | 37 | 5 | 70797445  | 70797446  | Frame_Shift_Del | DEL | AG  | -  | 7   | 542  | .2013_2014delAC  | c.(2011-2016)ACAGAGfs  | p.T671fs      |
| Pat_01 | Post-Resistance | THBS4    | 7060   | 37 | 5 | 79372774  | 79372776  | In_Frame_Del    | DEL | TGA | -  | 15  | 1138 | .1989_1991delTG  | c.(1987-1992)TGTGAT>TG | p.D668del     |
| Pat_01 | Post-Resistance | H2AFY    | 9555   | 37 | 5 | 134724672 | 134724673 | Frame_Shift_Ins | INS | -   | G  | 52  | 268  | c.111_112insC    | c.(109-114)CCCAAGfs    | p.P37fs       |
| Pat_01 | Post-Resistance | CDC25C   | 995    | 37 | 5 | 137627690 | 137627690 | Frame_Shift_Del | DEL | T   | -  | 7   | 299  | c.731delA        | c.(730-732)AAGfs       | p.K244fs      |
| Pat_01 | Post-Resistance | BTN2A2   | 10385  | 37 | 6 | 26384091  | 26384093  | In_Frame_Del    | DEL | CCT | -  | 38  | 1097 | c.42_44delCCT    | c.(40-45)TCCCTC>TCC    | p.L24del      |
| Pat_01 | Post-Resistance | MAS1L    | 116511 | 37 | 6 | 29455156  | 29455157  | Frame_Shift_Del | DEL | AC  | -  | 7   | 553  | c.523_524delGT   | c.(523-525)GTCfs       | p.V175fs      |
| Pat_01 | Post-Resistance | PPP1R10  | 5514   | 37 | 6 | 30569334  | 30569334  | Frame_Shift_Del | DEL | G   | -  | 8   | 440  | c.2815delC       | c.(2815-2817)CTGfs     | p.L939fs      |
| Pat_01 | Post-Resistance | TUBB     | 203068 | 37 | 6 | 30688336  | 30688336  | Frame_Shift_Del | DEL | C   | -  | 7   | 857  | c.53delC         | c.(52-54)GCCfs         | p.A18fs       |
| Pat_01 | Post-Resistance | BAT3     | 7917   | 37 | 6 | 31612806  | 31612806  | Frame_Shift_Del | DEL | G   | -  | 7   | 734  | c.1304delC       | c.(1303-1305)CCGfs     | p.P435fs      |
| Pat_01 | Post-Resistance | PHF3     | 23469  | 37 | 6 | 64422954  | 64422954  | Frame_Shift_Del | DEL | C   | -  | 8   | 1165 | c.5470delC       | c.(5470-5472)CCCfs     | p.P1824fs     |
| Pat_01 | Post-Resistance | CCDC126  | 90693  | 37 | 7 | 23651156  | 23651156  | Frame_Shift_Del | DEL | T   | -  | 252 | 557  | c.222delT        | c.(220-222)GCTfs       | p.A74fs       |
| Pat_01 | Post-Resistance | NRF1     | 4899   | 37 | 7 | 129311286 | 129311288 | In_Frame_Del    | DEL | GCT | -  | 8   | 302  | c.241_243delGCT  | c.(241-243)GCTdel      | p.A84del      |
| Pat_01 | Post-Resistance | ATG9B    | 285973 | 37 | 7 | 150721484 | 150721484 | Frame_Shift_Del | DEL | C   | -  | 10  | 61   | c.27delG         | c.(25-27)GGGfs         | p.G9fs        |
| Pat_01 | Post-Resistance | ADAM9    | 8754   | 37 | 8 | 38880792  | 38880793  | Frame_Shift_Ins | INS | -   | G  | 9   | 788  | c.862_863insG    | c.(862-864)CGGfs       | p.R288fs      |
| Pat_01 | Post-Resistance | PREX2    | 80243  | 37 | 8 | 68942851  | 68942852  | Frame_Shift_Del | DEL | AG  | -  | 9   | 668  | c.663_664delAG   | c.(661-666)TTAGAAfs    | p.L221fs      |
| Pat_01 | Post-Resistance | HNF4G    | 3174   | 37 | 8 | 76471135  | 76471135  | Frame_Shift_Del | DEL | G   | -  | 7   | 921  | c.845delG        | c.(844-846)CGGfs       | p.R282fs      |
| Pat_01 | Post-Resistance | PDP1     | 54704  | 37 | 8 | 94934712  | 94934712  | Frame_Shift_Del | DEL | T   | -  | 7   | 546  | c.425delT        | c.(424-426)GTTfs       | p.V142fs      |
| Pat_01 | Post-Resistance | RANBP6   | 26953  | 37 | 9 | 6012690   | 6012690   | Frame_Shift_Del | DEL | T   | -  | 7   | 258  | c.2918delA       | c.(2917-2919)AATfs     | p.N973fs      |
| Pat_01 | Post-Resistance | HNRNPK   | 3190   | 37 | 9 | 86586806  | 86586808  | In_Frame_Del    | DEL | GGT | -  | 9   | 463  | c.942_944delACC  | c.(940-945)CCACCT>CCT  | p.314_315PP>I |
| Pat_01 | Post-Resistance | KIAA1529 | 57653  | 37 | 9 | 100137790 | 100137790 | Frame_Shift_Del | DEL | C   | -  | 9   | 413  | c.5310delC       | c.(5308-5310)CTCfs     | p.L1770fs     |
| Pat_01 | Post-Resistance | CRB2     | 286204 | 37 | 9 | 126139182 | 126139184 | In_Frame_Del    | DEL | CCT | -  | 11  | 45   | .3699_3701delCC  | c.(3697-3702)TGCCCT>TG | p.L1239del    |
| Pat_01 | Post-Resistance | DDX3X    | 1654   | 37 | X | 41205517  | 41205517  | Frame_Shift_Del | DEL | A   | -  | 7   | 612  | c.1351delA       | c.(1351-1353)AAAfs     | p.K451fs      |
| Pat_01 | Post-Resistance | ARMCX3   | 51566  | 37 | X | 100880152 | 100880154 | In_Frame_Del    | DEL | TGA | -  | 8   | 746  | c.183_185delTGA  | c.(181-186)TCTGAT>TCT  | p.D66del      |
| Pat_01 | Post-Resistance | MAP7D3   | 79649  | 37 | X | 135314194 | 135314194 | Frame_Shift_Del | DEL | G   | -  | 9   | 751  | c.922delC        | c.(922-924)CAGfs       | p.Q308fs      |
| Pat_01 | Post-Resistance | ZNF185   | 7739   | 37 | X | 152087570 | 152087572 | In_Frame_Del    | DEL | GAG | -  | 9   | 92   | c.475_477delGAG  | c.(475-477)GAGdel      | p.E165del     |

|        |                 |          |        |    |    |           |           |                 |     |          |   |     |      |                   |                                   |            |
|--------|-----------------|----------|--------|----|----|-----------|-----------|-----------------|-----|----------|---|-----|------|-------------------|-----------------------------------|------------|
| Pat_02 | Post-Resistance | FAM43B   | 163933 | 37 | 1  | 20880268  | 20880270  | In_Frame_Del    | DEL | GAG      | - | 4   | 5    | c.802_804delGAG   | c.(802-804)GAGdel                 | p.E272del  |
| Pat_02 | Post-Resistance | ANKRD13C | 81573  | 37 | 1  | 70740447  | 70740448  | Frame_Shift_Del | DEL | TT       | - | 7   | 237  | c.1349_1350delAA  | c.(1348-1350)AAafs                | p.K450fs   |
| Pat_02 | Post-Resistance | TNNI3K   | 51086  | 37 | 1  | 74957824  | 74957826  | In_Frame_Del    | DEL | CTT      | - | 12  | 449  | .2225_2227delCT   | .(2224-2229)CCTTCT>CC             | p.S746del  |
| Pat_02 | Post-Resistance | NOTCH2   | 4853   | 37 | 1  | 120468185 | 120468185 | Frame_Shift_Del | DEL | G        | - | 8   | 291  | c.4254delC        | c.(4252-4254)CCCfs                | p.P1418fs  |
| Pat_02 | Post-Resistance | PRG4     | 10216  | 37 | 1  | 186276524 | 186276526 | In_Frame_Del    | DEL | AGG      | - | 7   | 217  | .1673_1675delAG   | .(1672-1677)AAGGAG>AA             | p.E559del  |
| Pat_02 | Post-Resistance | SFMBT2   | 57713  | 37 | 10 | 7212995   | 7212997   | In_Frame_Del    | DEL | CTC      | - | 9   | 436  | .2437_2439delGA   | c.(2437-2439)GAGdel               | p.E813del  |
| Pat_02 | Post-Resistance | SMARCC2  | 6601   | 37 | 12 | 56559113  | 56559113  | Frame_Shift_Del | DEL | G        | - | 8   | 245  | c.3128delC        | c.(3127-3129)CCTfs                | p.P1043fs  |
| Pat_02 | Post-Resistance | SFRS8    | 6433   | 37 | 12 | 132281734 | 132281736 | In_Frame_Del    | DEL | AGA      | - | 7   | 266  | .2546_2548delAG   | .(2545-2550)GAGAAG>GA             | p.K853del  |
| Pat_02 | Post-Resistance | LRCH1    | 23143  | 37 | 13 | 47243183  | 47243186  | Frame_Shift_Del | DEL | CCTG     | - | 16  | 682  | :.471_474delCCTC  | c.(469-474)GCCCTGfs               | p.A157fs   |
| Pat_02 | Post-Resistance | LMO7     | 4008   | 37 | 13 | 76415307  | 76415308  | Frame_Shift_Del | DEL | AG       | - | 7   | 289  | :.2946_2947delAC  | c.(2944-2949)GCAGAGfs             | p.A982fs   |
| Pat_02 | Post-Resistance | C15orf24 | 56851  | 37 | 15 | 34393991  | 34393993  | In_Frame_Del    | DEL | AGC      | - | 13  | 332  | c.48_50delGCT     | c.(46-51)CTGCTA>CTA               | p.L17LL>L  |
| Pat_02 | Post-Resistance | B2M      | 567    | 37 | 15 | 45003781  | 45003782  | Frame_Shift_Del | DEL | CT       | - | 78  | 105  | c.37_38delCT      | c.(37-39)CTCfs                    | p.L13fs    |
| Pat_02 | Post-Resistance | ZNF609   | 23060  | 37 | 15 | 64972995  | 64972997  | In_Frame_Del    | DEL | CAC      | - | 8   | 531  | .4096_4098delCA   | c.(4096-4098)CACdel               | p.H1371del |
| Pat_02 | Post-Resistance | PPL      | 5493   | 37 | 16 | 4934835   | 4934835   | Frame_Shift_Del | DEL | T        | - | 7   | 313  | c.3821delA        | c.(3820-3822)AAGfs                | p.K1274fs  |
| Pat_02 | Post-Resistance | MKS1     | 54903  | 37 | 17 | 56290367  | 56290369  | In_Frame_Del    | DEL | CTC      | - | 7   | 374  | c.832_834delGAG   | c.(832-834)GAGdel                 | p.E278del  |
| Pat_02 | Post-Resistance | TPMRSS9  | 360200 | 37 | 19 | 2422242   | 2422242   | Frame_Shift_Del | DEL | C        | - | 10  | 280  | c.2443delC        | c.(2443-2445)CCAfs                | p.P815fs   |
| Pat_02 | Post-Resistance | ECSIT    | 51295  | 37 | 19 | 11618821  | 11618821  | Frame_Shift_Del | DEL | G        | - | 7   | 334  | c.781delC         | c.(781-783)CAGfs                  | p.Q261fs   |
| Pat_02 | Post-Resistance | GRAMD1A  | 57655  | 37 | 19 | 35510312  | 35510312  | Frame_Shift_Del | DEL | C        | - | 7   | 264  | c.1350delC        | c.(1348-1350)GCGfs                | p.G450fs   |
| Pat_02 | Post-Resistance | RYR1     | 6261   | 37 | 19 | 38948159  | 38948160  | Frame_Shift_Del | DEL | TG       | - | 9   | 498  | c.1814_1815delITC | c.(1813-1815)CTGfs                | p.L605fs   |
| Pat_02 | Post-Resistance | ANKRD23  | 200539 | 37 | 2  | 97507821  | 97507821  | Frame_Shift_Del | DEL | G        | - | 7   | 268  | c.276delC         | c.(274-276)CCCfs                  | p.P92fs    |
| Pat_02 | Post-Resistance | GZF1     | 64412  | 37 | 20 | 23345921  | 23345923  | In_Frame_Del    | DEL | GAG      | - | 8   | 186  | c.901_903delGAG   | c.(901-903)GAGdel                 | p.E306del  |
| Pat_02 | Post-Resistance | GINS1    | 9837   | 37 | 20 | 25422397  | 25422397  | Frame_Shift_Del | DEL | A        | - | 8   | 146  | c.507delA         | c.(505-507)TTAfs                  | p.L169fs   |
| Pat_02 | Post-Resistance | NCOA6    | 23054  | 37 | 20 | 33330968  | 33330970  | In_Frame_Del    | DEL | TGC      | - | 12  | 333  | .3090_3092delGC   | .(3088-3093)CAGCAA>CAI030_1031QQ: |            |
| Pat_02 | Post-Resistance | LAMA5    | 3911   | 37 | 20 | 60889865  | 60889866  | Frame_Shift_Ins | INS | -        | C | 7   | 361  | c.8185_8186insG   | c.(8185-8187)GCTfs                | p.A2729fs  |
| Pat_02 | Post-Resistance | C22orf32 | 91689  | 37 | 22 | 42478046  | 42478048  | In_Frame_Del    | DEL | GAT      | - | 9   | 392  | c.304_306delGAT   | c.(304-306)GATdel                 | p.D107del  |
| Pat_02 | Post-Resistance | SHANK3   | 85358  | 37 | 22 | 51159909  | 51159909  | Frame_Shift_Del | DEL | C        | - | 2   | 4    | c.3696delC        | c.(3694-3696)AGCfs                | p.S1232fs  |
| Pat_02 | Post-Resistance | WWTR1    | 25937  | 37 | 3  | 149260194 | 149260196 | In_Frame_Del    | DEL | CTG      | - | 7   | 142  | c.697_699delCAG   | c.(697-699)CAGdel                 | p.Q233del  |
| Pat_02 | Post-Resistance | CRIPAK   | 285464 | 37 | 4  | 1389147   | 1389148   | Frame_Shift_Del | DEL | AT       | - | 8   | 536  | c.848_849delIAT   | c.(847-849)CATfs                  | p.H283fs   |
| Pat_02 | Post-Resistance | YTHDC1   | 91746  | 37 | 4  | 69202891  | 69202893  | In_Frame_Del    | DEL | TCC      | - | 8   | 80   | c.735_737delGGA   | :(733-738)GAGGAA>GA,245_246EE>I   |            |
| Pat_02 | Post-Resistance | BMP2K    | 55589  | 37 | 4  | 79792164  | 79792166  | In_Frame_Del    | DEL | CAC      | - | 7   | 59   | .1459_1461delCA   | c.(1459-1461)CACdel               | p.H494del  |
| Pat_02 | Post-Resistance | ZNF827   | 152485 | 37 | 4  | 146823381 | 146823383 | In_Frame_Del    | DEL | GTG      | - | 7   | 184  | .1028_1030delCA   | .(1027-1032)CCACAA>CA             | p.P343del  |
| Pat_02 | Post-Resistance | SH3D19   | 152503 | 37 | 4  | 152095944 | 152095944 | Frame_Shift_Del | DEL | G        | - | 7   | 1808 | c.572delC         | c.(571-573)CCAfs                  | p.P191fs   |
| Pat_02 | Post-Resistance | SH3RF1   | 57630  | 37 | 4  | 170043324 | 170043326 | In_Frame_Del    | DEL | CAG      | - | 10  | 279  | .1271_1273delCT   | .(1270-1275)GCTGGA>GC             | p.A424del  |
| Pat_02 | Post-Resistance | PLEKHG4B | 153478 | 37 | 5  | 163098    | 163098    | Frame_Shift_Del | DEL | G        | - | 3   | 3    | c.1843delG        | c.(1843-1845)GCCfs                | p.A615fs   |
| Pat_02 | Post-Resistance | C5orf51  | 285636 | 37 | 5  | 41909932  | 41909939  | Frame_Shift_Del | DEL | GAGCTGAT | - | 18  | 18   | l2_299delGAGCT    | c.(292-300)GAGCTGATfs             | p.E98fs    |
| Pat_02 | Post-Resistance | NNT      | 23530  | 37 | 5  | 43651893  | 43651893  | Frame_Shift_Del | DEL | C        | - | 7   | 490  | c.1770delC        | c.(1768-1770)GACfs                | p.D590fs   |
| Pat_02 | Post-Resistance | SLC12A2  | 6558   | 37 | 5  | 127420207 | 127420209 | In_Frame_Del    | DEL | CGG      | - | 7   | 94   | c.561_563delCGG   | :(559-564)TCGGC>TCC               | p.G192del  |
| Pat_02 | Post-Resistance | STK19    | 8859   | 37 | 6  | 31939829  | 31939830  | Frame_Shift_Ins | INS | -        | A | 12  | 624  | c.56_57insA       | c.(55-57)GCAfs                    | p.A19fs    |
| Pat_02 | Post-Resistance | DAXX     | 1616   | 37 | 6  | 33287898  | 33287900  | In_Frame_Del    | DEL | TCC      | - | 8   | 151  | .1353_1355delIGG  | (1351-1356)GAGGAA>GA,451_452EE>I  |            |
| Pat_02 | Post-Resistance | UHRF1BP1 | 54887  | 37 | 6  | 34839369  | 34839369  | Frame_Shift_Del | DEL | C        | - | 11  | 439  | c.3990delC        | c.(3988-3990)ATCfs                | p.I1330fs  |
| Pat_02 | Post-Resistance | ZNF318   | 24149  | 37 | 6  | 43323502  | 43323502  | Frame_Shift_Del | DEL | T        | - | 13  | 722  | c.1570delA        | c.(1570-1572)AGGfs                | p.R524fs   |
| Pat_02 | Post-Resistance | DST      | 667    | 37 | 6  | 56501426  | 56501426  | Frame_Shift_Del | DEL | G        | - | 197 | 421  | c.2890delC        | c.(2890-2892)CAGfs                | p.Q964fs   |
| Pat_02 | Post-Resistance | IFNGR1   | 3459   | 37 | 6  | 137519505 | 137519506 | Frame_Shift_Del | DEL | CT       | - | 7   | 281  | c.1132_1133delAG  | c.(1132-1134)AGTfs                | p.S378fs   |
| Pat_02 | Post-Resistance | TMEM60   | 85025  | 37 | 7  | 77423460  | 77423460  | Frame_Shift_Del | DEL | T        | - | 7   | 257  | c.231delA         | c.(229-231)AAAfs                  | p.K77fs    |
| Pat_02 | Post-Resistance | DYNC111  | 1780   | 37 | 7  | 95614249  | 95614249  | Frame_Shift_Del | DEL | T        | - | 9   | 476  | c.754delT         | c.(754-756)TTTfs                  | p.F252fs   |
| Pat_02 | Post-Resistance | ZKSCAN5  | 23660  | 37 | 7  | 99103706  | 99103706  | Frame_Shift_Del | DEL | C        | - | 7   | 692  | c.39delC          | c.(37-39)GACfs                    | p.D13fs    |
| Pat_02 | Post-Resistance | WNT2     | 7472   | 37 | 7  | 116955171 | 116955175 | Frame_Shift_Del | DEL | TCCTT    | - | 7   | 316  | 538_542delAAGG    | c.(538-543)AAGGATfs               | p.K180fs   |

|        |                 |           |           |    |    |           |           |                 |     |     |     |    |      |                  |                                   |               |
|--------|-----------------|-----------|-----------|----|----|-----------|-----------|-----------------|-----|-----|-----|----|------|------------------|-----------------------------------|---------------|
| Pat_02 | Post-Resistance | TNPO3     | 23534     | 37 | 7  | 128610259 | 128610259 | Frame_Shift_Del | DEL | G   | -   | 10 | 1212 | c.2541delC       | c.(2539-2541)CCCfs                | p.P847fs      |
| Pat_02 | Post-Resistance | ZNF398    | 57541     | 37 | 7  | 148876153 | 148876153 | Frame_Shift_Del | DEL | C   | -   | 7  | 697  | c.1189delC       | c.(1189-1191)CCCfs                | p.P397fs      |
| Pat_02 | Post-Resistance | NOM1      | 64434     | 37 | 7  | 156743209 | 156743211 | In_Frame_Del    | DEL | GAG | -   | 7  | 164  | c.778_780delGAG  | c.(778-780)GAGdel                 | p.E264del     |
| Pat_02 | Post-Resistance | RAB11FIP1 | 80223     | 37 | 8  | 37732235  | 37732235  | Frame_Shift_Del | DEL | C   | -   | 9  | 601  | c.1420delG       | c.(1420-1422)GAGfs                | p.E474fs      |
| Pat_02 | Post-Resistance | ESRP1     | 54845     | 37 | 8  | 95686610  | 95686611  | Frame_Shift_Ins | INS | -   | A   | 7  | 268  | c.1527_1528insA  | c.(1525-1530)CATAAAfs             | p.H509fs      |
| Pat_02 | Post-Resistance | CSMD3     | 114788    | 37 | 8  | 114448928 | 114448928 | Frame_Shift_Del | DEL | T   | -   | 9  | 870  | c.156delA        | c.(154-156)TTAfs                  | p.L52fs       |
| Pat_02 | Post-Resistance | MYC       | 4609      | 37 | 8  | 128750605 | 128750607 | In_Frame_Del    | DEL | CAG | -   | 9  | 382  | c.97_99delCAG    | c.(97-99)CAGdel                   | p.Q37del      |
| Pat_02 | Post-Resistance | FOXB2     | 442425    | 37 | 9  | 79635081  | 79635083  | In_Frame_Del    | DEL | CCG | -   | 7  | 38   | c.511_513delCCG  | c.(511-513)CCGdel                 | p.P174del     |
| Pat_02 | Post-Resistance | AKNA      | 80709     | 37 | 9  | 117124014 | 117124014 | Frame_Shift_Del | DEL | G   | -   | 7  | 830  | c.2094delC       | c.(2092-2094)CCCfs                | p.P698fs      |
| Pat_02 | Post-Resistance | TNC       | 3371      | 37 | 9  | 117797539 | 117797539 | Frame_Shift_Del | DEL | G   | -   | 8  | 437  | c.5731delC       | c.(5731-5733)CGGfs                | p.R1911fs     |
| Pat_02 | Post-Resistance | FAM157B   | 100132403 | 37 | 9  | 141107536 | 141107537 | In_Frame_Ins    | INS | -   | GCA | 5  | 10   | c.218_219insGCA  | c.(217-219)CGG>CGGCAC             | p.85_86insQ   |
| Pat_02 | Post-Resistance | ARMCX3    | 51566     | 37 | X  | 100880152 | 100880154 | In_Frame_Del    | DEL | TGA | -   | 8  | 511  | c.183_185delTGA  | c.(181-186)TCTGAT>TCT             | p.D66del      |
| Pat_02 | Post-Resistance | MAMLD1    | 10046     | 37 | X  | 149639633 | 149639635 | In_Frame_Del    | DEL | GCA | -   | 10 | 243  | c.1788_1790delGC | c.(1786-1791)CTGCAG>CT            | p.Q606del     |
| Pat_02 | Post-Resistance | CD99L2    | 83692     | 37 | X  | 149984524 | 149984526 | In_Frame_Del    | DEL | GTG | -   | 10 | 466  | c.156_158delCAC  | c.(154-159)ACCACA>ACA             | p.52_53TT>T   |
| Pat_05 | Pre-Treatment   | TNFRSF9   | 3604      | 37 | 1  | 7980912   | 7980914   | In_Frame_Del    | DEL | CTT | -   | 10 | 506  | c.749_751delAAG  | c.(748-753)GAAGGA>GG/             | p.E250del     |
| Pat_05 | Pre-Treatment   | C1orf201  | 90529     | 37 | 1  | 24696167  | 24696168  | Frame_Shift_Del | DEL | AA  | -   | 32 | 192  | c.733_734delTT   | c.(733-735)TTCfs                  | p.F245fs      |
| Pat_05 | Pre-Treatment   | EYA3      | 2140      | 37 | 1  | 28343685  | 28343687  | In_Frame_Del    | DEL | CTG | -   | 7  | 1393 | c.563_565delCAG  | c.(562-567)GCAGTA>GTA             | p.A188del     |
| Pat_05 | Pre-Treatment   | DLGAP3    | 58512     | 37 | 1  | 35370281  | 35370283  | In_Frame_Del    | DEL | TGG | -   | 8  | 260  | c.702_704delCCA  | c.(700-705)CACCAG>CAC             | p.H234del     |
| Pat_05 | Pre-Treatment   | HIAT1     | 64645     | 37 | 1  | 100534121 | 100534122 | Frame_Shift_Ins | INS | -   | T   | 9  | 290  | c.798_799insT    | c.(796-801)AGCTTTfs               | p.S266fs      |
| Pat_05 | Pre-Treatment   | BCL9      | 607       | 37 | 1  | 147091501 | 147091501 | Frame_Shift_Del | DEL | C   | -   | 13 | 585  | c.1540delC       | c.(1540-1542)CCCfs                | p.P514fs      |
| Pat_05 | Pre-Treatment   | BCL9      | 607       | 37 | 1  | 147092681 | 147092681 | Frame_Shift_Del | DEL | C   | -   | 8  | 845  | c.2720delC       | c.(2719-2721)TCCfs                | p.S907fs      |
| Pat_05 | Pre-Treatment   | PBXIP1    | 57326     | 37 | 1  | 154917508 | 154917510 | In_Frame_Del    | DEL | GGT | -   | 9  | 512  | c.2186_2188delAC | c.(2185-2190)CACC GG>CG           | p.H729del     |
| Pat_05 | Pre-Treatment   | ISG20L2   | 81875     | 37 | 1  | 156694023 | 156694023 | Frame_Shift_Del | DEL | G   | -   | 11 | 712  | c.865delC        | c.(865-867)CTCfs                  | p.L289fs      |
| Pat_05 | Pre-Treatment   | PVRL4     | 81607     | 37 | 1  | 161059028 | 161059030 | In_Frame_Del    | DEL | AGC | -   | 8  | 710  | c.57_59delGCT    | c.(55-60)CTGCTA>CTA               | p.19_20LL>L   |
| Pat_05 | Pre-Treatment   | APOBEC4   | 403314    | 37 | 1  | 183616826 | 183616828 | In_Frame_Del    | DEL | TTC | -   | 8  | 806  | c.1089_1091delGA | c.(1087-1092)AAGAAA>AA            | p.363_364KK>I |
| Pat_05 | Pre-Treatment   | REN       | 5972      | 37 | 1  | 204135375 | 204135377 | In_Frame_Del    | DEL | AGC | -   | 7  | 593  | c.45_47delGCT    | c.(43-48)CTGCTC>CTC               | p.15_16LL>L   |
| Pat_05 | Pre-Treatment   | PPP1R15B  | 84919     | 37 | 1  | 204380466 | 204380466 | Frame_Shift_Del | DEL | A   | -   | 7  | 486  | c.74delT         | c.(73-75)TTCfs                    | p.F25fs       |
| Pat_05 | Pre-Treatment   | TMEM206   | 55248     | 37 | 1  | 212583815 | 212583815 | Frame_Shift_Del | DEL | C   | -   | 7  | 2185 | c.85delG         | c.(85-87)GAGfs                    | p.E29fs       |
| Pat_05 | Pre-Treatment   | HEATR1    | 55127     | 37 | 1  | 236719429 | 236719429 | Frame_Shift_Del | DEL | T   | -   | 9  | 775  | c.5485delA       | c.(5485-5487)ACTfs                | p.T1829fs     |
| Pat_05 | Pre-Treatment   | JMJD1C    | 221037    | 37 | 10 | 64952699  | 64952699  | Frame_Shift_Del | DEL | T   | -   | 10 | 336  | c.6075delA       | c.(6073-6075)AAAfs                | p.K2025fs     |
| Pat_05 | Pre-Treatment   | IDE       | 3416      | 37 | 10 | 94274688  | 94274689  | Frame_Shift_Del | DEL | AC  | -   | 90 | 210  | c.772_773delGT   | c.(772-774)GTTfs                  | p.V258fs      |
| Pat_05 | Pre-Treatment   | HPSE2     | 60495     | 37 | 10 | 100401606 | 100401607 | Frame_Shift_Del | DEL | TC  | -   | 8  | 998  | c.1095_1096delG  | c.(1093-1098)CAGAAAfs             | p.Q365fs      |
| Pat_05 | Pre-Treatment   | CNNM2     | 54805     | 37 | 10 | 104678768 | 104678768 | Frame_Shift_Del | DEL | C   | -   | 8  | 810  | c.531delC        | c.(529-531)ATCfs                  | p.I177fs      |
| Pat_05 | Pre-Treatment   | SORCS3    | 22986     | 37 | 10 | 107005314 | 107005314 | Frame_Shift_Del | DEL | G   | -   | 8  | 606  | c.2883delG       | c.(2881-2883)TTGfs                | p.L961fs      |
| Pat_05 | Pre-Treatment   | FAM45A    | 404636    | 37 | 10 | 120871369 | 120871369 | Frame_Shift_Del | DEL | T   | -   | 7  | 474  | c.261delT        | c.(259-261)CATfs                  | p.H87fs       |
| Pat_05 | Pre-Treatment   | EML3      | 256364    | 37 | 11 | 62369967  | 62369967  | Frame_Shift_Del | DEL | C   | -   | 4  | 2    | c.2671delG       | c.(2671-2673)GCCfs                | p.A891fs      |
| Pat_05 | Pre-Treatment   | PTS       | 5805      | 37 | 11 | 112101391 | 112101391 | Frame_Shift_Del | DEL | A   | -   | 7  | 500  | c.229delA        | c.(229-231)AAAfs                  | p.K77fs       |
| Pat_05 | Pre-Treatment   | PRDM10    | 56980     | 37 | 11 | 129772249 | 129772251 | In_Frame_Del    | DEL | TGG | -   | 10 | 912  | c.3440_3442delCC | c.(3439-3444)ACCAAC>AA            | p.T1147del    |
| Pat_05 | Pre-Treatment   | PRB2      | 653247    | 37 | 12 | 11546788  | 11546790  | In_Frame_Del    | DEL | GGA | -   | 7  | 323  | c.222_224delTCC  | c.(220-225)CCTCCA>CCA             | p.74_75PP>P   |
| Pat_05 | Pre-Treatment   | NR4A1     | 3164      | 37 | 12 | 52448766  | 52448766  | Frame_Shift_Del | DEL | G   | -   | 8  | 1039 | c.654delG        | c.(652-654)CTGfs                  | p.L218fs      |
| Pat_05 | Pre-Treatment   | OR6C75    | 390323    | 37 | 12 | 55759486  | 55759486  | Frame_Shift_Del | DEL | T   | -   | 7  | 264  | c.592delT        | c.(592-594)TTTfs                  | p.F198fs      |
| Pat_05 | Pre-Treatment   | RFC3      | 5983      | 37 | 13 | 34398062  | 34398063  | Frame_Shift_Ins | INS | -   | A   | 8  | 133  | c.234_235insA    | c.(232-237)TCTAAAFs               | p.S78fs       |
| Pat_05 | Pre-Treatment   | ZC3H13    | 23091     | 37 | 13 | 46542016  | 46542017  | Frame_Shift_Del | DEL | CT  | -   | 10 | 237  | c.3943_3944delAC | c.(3943-3945)AGGfs                | p.R1315fs     |
| Pat_05 | Pre-Treatment   | SLAIN1    | 122060    | 37 | 13 | 78320722  | 78320722  | Frame_Shift_Del | DEL | A   | -   | 8  | 222  | c.498delA        | c.(496-498)GGAFs                  | p.G166fs      |
| Pat_05 | Pre-Treatment   | LIG4      | 3981      | 37 | 13 | 108861736 | 108861737 | Frame_Shift_Ins | INS | -   | T   | 7  | 199  | c.1880_1881insA  | c.(1879-1881)AAGfs                | p.K627fs      |
| Pat_05 | Pre-Treatment   | COL4A1    | 1282      | 37 | 13 | 110857850 | 110857850 | Frame_Shift_Del | DEL | T   | -   | 7  | 705  | c.894delA        | c.(892-894)AAAfs                  | p.K298fs      |
| Pat_05 | Pre-Treatment   | ACIN1     | 22985     | 37 | 14 | 23528607  | 23528609  | In_Frame_Del    | DEL | TCT | -   | 9  | 135  | c.3774_3776delAG | c.(3772-3777)GAAGAG>GA1258_1259EE |               |

|        |               |            |        |    |    |           |           |                 |     |     |      |    |      |                   |                       |             |
|--------|---------------|------------|--------|----|----|-----------|-----------|-----------------|-----|-----|------|----|------|-------------------|-----------------------|-------------|
| Pat_05 | Pre-Treatment | RGS6       | 9628   | 37 | 14 | 73002904  | 73002905  | Frame_Shift_Del | DEL | AC  | -    | 8  | 534  | c.1289_1290delAC  | c.(1288-1290)TACfs    | p.Y430fs    |
| Pat_05 | Pre-Treatment | MGA        | 23269  | 37 | 15 | 42003383  | 42003385  | In_Frame_Del    | DEL | CAG | -    | 9  | 366  | .2920_2922delCA   | c.(2920-2922)CAGdel   | p.Q981del   |
| Pat_05 | Pre-Treatment | C15orf17   | 57184  | 37 | 15 | 75197009  | 75197011  | In_Frame_Del    | DEL | GCA | -    | 7  | 1131 | c.423_425delTGCc. | (421-426)TCTGCA>TCA   | p.A142del   |
| Pat_05 | Pre-Treatment | SLC5A11    | 115584 | 37 | 16 | 24921737  | 24921739  | In_Frame_Del    | DEL | CAG | -    | 8  | 111  | .1761_1763delCA   | (1759-1764)GCCAGC>GC  | p.S592del   |
| Pat_05 | Pre-Treatment | CTNS       | 1497   | 37 | 17 | 3543532   | 3543532   | Frame_Shift_Del | DEL | T   | -    | 7  | 885  | c.32delT          | c.(31-33)CTTfs        | p.L11fs     |
| Pat_05 | Pre-Treatment | ZNF207     | 7756   | 37 | 17 | 30677314  | 30677316  | In_Frame_Del    | DEL | AAG | -    | 9  | 1245 | c.10_12delAAG     | c.(10-12)AAGdel       | p.K7del     |
| Pat_05 | Pre-Treatment | GADD45GIP1 | 90480  | 37 | 19 | 13065273  | 13065275  | In_Frame_Del    | DEL | GCT | -    | 8  | 484  | c.416_418delAGC.  | (415-420)CAGCGG>CGC   | p.Q139del   |
| Pat_05 | Pre-Treatment | LSM14A     | 26065  | 37 | 19 | 34710340  | 34710340  | Frame_Shift_Del | DEL | C   | -    | 8  | 722  | c.826delC         | c.(826-828)CGGfs      | p.R276fs    |
| Pat_05 | Pre-Treatment | CAPNS1     | 826    | 37 | 19 | 36632024  | 36632025  | In_Frame_Ins    | INS | -   | GGC  | 5  | 11   | c.111_112insGGC   | c.(109-114)insGGC     | p.56_57insG |
| Pat_05 | Pre-Treatment | KIF3C      | 3797   | 37 | 2  | 26203790  | 26203791  | Frame_Shift_Ins | INS | -   | C    | 7  | 191  | c.996_997insG     | c.(994-999)GGGAATfs   | p.G332fs    |
| Pat_05 | Pre-Treatment | ZNF514     | 84874  | 37 | 2  | 95815034  | 95815035  | Frame_Shift_Ins | INS | -   | T    | 11 | 309  | c.1195_1196insA   | c.(1195-1197)ACCfs    | p.T399fs    |
| Pat_05 | Pre-Treatment | AAMP       | 14     | 37 | 2  | 219134766 | 219134766 | Frame_Shift_Del | DEL | G   | -    | 10 | 1446 | c.44delC          | c.(43-45)CCAFs        | p.P15fs     |
| Pat_05 | Pre-Treatment | DOCK10     | 55619  | 37 | 2  | 225750871 | 225750871 | Frame_Shift_Del | DEL | C   | -    | 7  | 984  | c.521delG         | c.(520-522)GGTfs      | p.G174fs    |
| Pat_05 | Pre-Treatment | CHRNA1     | 1146   | 37 | 2  | 233404488 | 233404490 | In_Frame_Del    | DEL | CTG | -    | 7  | 552  | c.31_33delCTG     | c.(31-33)CTGdel       | p.L14del    |
| Pat_05 | Pre-Treatment | GIGYF2     | 26058  | 37 | 2  | 233676006 | 233676008 | In_Frame_Del    | DEL | CAG | -    | 8  | 509  | .1951_1953delCA   | c.(1951-1953)CAGdel   | p.Q655del   |
| Pat_05 | Pre-Treatment | TP53RK     | 112858 | 37 | 20 | 45315634  | 45315634  | Frame_Shift_Del | DEL | G   | -    | 7  | 729  | c.520delC         | c.(520-522)CTGfs      | p.L174fs    |
| Pat_05 | Pre-Treatment | TFIP11     | 24144  | 37 | 22 | 26906183  | 26906185  | In_Frame_Del    | DEL | TCA | -    | 8  | 424  | c.54_56delTGA     | c.(52-57)GATGAC>GAC   | p.18_19DD>D |
| Pat_05 | Pre-Treatment | DDX17      | 10521  | 37 | 22 | 38881965  | 38881967  | In_Frame_Del    | DEL | GGA | -    | 11 | 744  | .2169_2171delTC   | (2167-2172)CCTCCC>CC. | 723_724PP>I |
| Pat_05 | Pre-Treatment | TNRC6B     | 23112  | 37 | 22 | 40708591  | 40708591  | Frame_Shift_Del | DEL | G   | -    | 9  | 1192 | c.4518delG        | c.(4516-4518)CTGfs    | p.L1506fs   |
| Pat_05 | Pre-Treatment | KCTD6      | 200845 | 37 | 3  | 58486772  | 58486772  | Frame_Shift_Del | DEL | G   | -    | 11 | 684  | c.127delG         | c.(127-129)GGGfs      | p.G43fs     |
| Pat_05 | Pre-Treatment | LRIG1      | 26018  | 37 | 3  | 66436625  | 66436627  | In_Frame_Del    | DEL | GCT | -    | 12 | 1043 | .1567_1569delAG   | c.(1567-1569)AGCdel   | p.S524del   |
| Pat_05 | Pre-Treatment | CPOX       | 1371   | 37 | 3  | 98304319  | 98304319  | Frame_Shift_Del | DEL | G   | -    | 7  | 1856 | c.1138delC        | c.(1138-1140)CAGfs    | p.Q380fs    |
| Pat_05 | Pre-Treatment | LNP1       | 348801 | 37 | 3  | 100148586 | 100148588 | In_Frame_Del    | DEL | GAT | -    | 9  | 1320 | c.13_15delGAT     | c.(13-15)GATdel       | p.D10del    |
| Pat_05 | Pre-Treatment | BBX        | 56987  | 37 | 3  | 107497244 | 107497244 | Frame_Shift_Del | DEL | A   | -    | 8  | 502  | c.2081delA        | c.(2080-2082)GAAfs    | p.E694fs    |
| Pat_05 | Pre-Treatment | ACAD11     | 84129  | 37 | 3  | 132297681 | 132297681 | Frame_Shift_Del | DEL | C   | -    | 8  | 748  | c.1733delG        | c.(1732-1734)GGAfs    | p.G578fs    |
| Pat_05 | Pre-Treatment | XRN1       | 54464  | 37 | 3  | 142144319 | 142144319 | Frame_Shift_Del | DEL | G   | -    | 7  | 221  | c.468delC         | c.(466-468)TCCfs      | p.S156fs    |
| Pat_05 | Pre-Treatment | THPO       | 7066   | 37 | 3  | 184093760 | 184093761 | Frame_Shift_Ins | INS | -   | GTTA | 17 | 163  | c.56_57insTAAC    | c.(55-57)ACGfs        | p.T19fs     |
| Pat_05 | Pre-Treatment | UTP3       | 57050  | 37 | 4  | 71554620  | 71554622  | In_Frame_Del    | DEL | GAG | -    | 7  | 165  | c.226_228delGAG   | c.(226-228)GAGdel     | p.E81del    |
| Pat_05 | Pre-Treatment | CDKL2      | 8999   | 37 | 4  | 76539579  | 76539580  | Frame_Shift_Ins | INS | -   | T    | 7  | 164  | c.222_223insA     | c.(220-225)AAACGAFs   | p.K74fs     |
| Pat_05 | Pre-Treatment | PTPN13     | 5783   | 37 | 4  | 87622849  | 87622849  | Frame_Shift_Del | DEL | C   | -    | 9  | 450  | c.1090delC        | c.(1090-1092)CACfs    | p.H364fs    |
| Pat_05 | Pre-Treatment | EXOSC9     | 5393   | 37 | 4  | 122723894 | 122723894 | Frame_Shift_Del | DEL | T   | -    | 15 | 514  | c.227delT         | c.(226-228)CTTfs      | p.L76fs     |
| Pat_05 | Pre-Treatment | SCLT1      | 132320 | 37 | 4  | 129864163 | 129864163 | Frame_Shift_Del | DEL | T   | -    | 7  | 336  | c.1620delA        | c.(1618-1620)AAAfs    | p.K540fs    |
| Pat_05 | Pre-Treatment | CDH10      | 1008   | 37 | 5  | 24492973  | 24492973  | Frame_Shift_Del | DEL | A   | -    | 7  | 822  | c.1577delT        | c.(1576-1578)TTCfs    | p.F526fs    |
| Pat_05 | Pre-Treatment | ISOC1      | 51015  | 37 | 5  | 128440739 | 128440739 | Frame_Shift_Del | DEL | G   | -    | 7  | 837  | c.400delG         | c.(400-402)GGGfs      | p.G134fs    |
| Pat_05 | Pre-Treatment | SLC22A4    | 6583   | 37 | 5  | 131676327 | 131676327 | Frame_Shift_Del | DEL | T   | -    | 12 | 605  | c.1514delT        | c.(1513-1515)CTTfs    | p.L505fs    |
| Pat_05 | Pre-Treatment | CTNNA1     | 1495   | 37 | 5  | 138160447 | 138160449 | In_Frame_Del    | DEL | GGA | -    | 7  | 970  | c.817_819delGGA   | c.(817-819)GGAAdel    | p.G276del   |
| Pat_05 | Pre-Treatment | TMEM14C    | 51522  | 37 | 6  | 10725219  | 10725219  | Frame_Shift_Del | DEL | G   | -    | 7  | 2443 | c.46delG          | c.(46-48)GGCfs        | p.G16fs     |
| Pat_05 | Pre-Treatment | RANBP9     | 10048  | 37 | 6  | 13632610  | 13632610  | Frame_Shift_Del | DEL | T   | -    | 8  | 820  | c.1939delA        | c.(1939-1941)ATGfs    | p.M647fs    |
| Pat_05 | Pre-Treatment | FAM65B     | 9750   | 37 | 6  | 24873931  | 24873931  | Frame_Shift_Del | DEL | G   | -    | 8  | 293  | c.198delC         | c.(196-198)CCCfs      | p.P66fs     |
| Pat_05 | Pre-Treatment | HIST1H2BJ  | 8970   | 37 | 6  | 27100400  | 27100401  | Frame_Shift_Del | DEL | TG  | -    | 7  | 2128 | c.129_130delCA    | c.(127-132)TACAAGfs   | p.Y43fs     |
| Pat_05 | Pre-Treatment | NFKBIL1    | 4795   | 37 | 6  | 31525882  | 31525884  | In_Frame_Del    | DEL | CAG | -    | 9  | 205  | c.640_642delCAG   | c.(640-642)CAGdel     | p.Q217del   |
| Pat_05 | Pre-Treatment | KIAA1009   | 22832  | 37 | 6  | 84896233  | 84896233  | Frame_Shift_Del | DEL | A   | -    | 7  | 237  | c.1218delT        | c.(1216-1218)TTTfs    | p.F406fs    |
| Pat_05 | Pre-Treatment | NOX3       | 50508  | 37 | 6  | 155743925 | 155743926 | Frame_Shift_Del | DEL | CA  | -    | 8  | 739  | c.1210_1211delTG  | c.(1210-1212)TGCfs    | p.C404fs    |
| Pat_05 | Pre-Treatment | TWISTNB    | 221830 | 37 | 7  | 19738111  | 19738113  | In_Frame_Del    | DEL | TTC | -    | 9  | 1498 | c.843_845delGAAc. | (841-846)AAGAAA>AAA.  | 281_282KK>I |
| Pat_05 | Pre-Treatment | ITGB8      | 3696   | 37 | 7  | 20444381  | 20444382  | Frame_Shift_Del | DEL | GT  | -    | 10 | 900  | .1818_1819delGT   | c.(1816-1821)ACGTGTfs | p.T606fs    |
| Pat_05 | Pre-Treatment | ZNRF2      | 223082 | 37 | 7  | 30395358  | 30395359  | Frame_Shift_Del | DEL | AA  | -    | 8  | 880  | c.580_581delAA    | c.(580-582)AAAFs      | p.K194fs    |
| Pat_05 | Pre-Treatment | PSPH       | 5723   | 37 | 7  | 56082719  | 56082721  | In_Frame_Del    | DEL | AGG | -    | 35 | 441  | c.565_567delCCT   | c.(565-567)CCTdel     | p.P189del   |



|        |                 |           |        |    |    |           |           |                 |     |      |   |     |      |                  |                         |              |
|--------|-----------------|-----------|--------|----|----|-----------|-----------|-----------------|-----|------|---|-----|------|------------------|-------------------------|--------------|
| Pat_05 | Pre-Treatment   | STX1A     | 6804   | 37 | 7  | 73123425  | 73123427  | In_Frame_Del    | DEL | CAT  | - | 12  | 808  | c.56_58delATG    | c.(55-60)GATGTC>GTC     | p.D19del     |
| Pat_05 | Pre-Treatment   | GPC2      | 221914 | 37 | 7  | 99771554  | 99771554  | Frame_Shift_Del | DEL | C    | - | 10  | 713  | c.796delG        | c.(796-798)GTCfs        | p.V266fs     |
| Pat_05 | Pre-Treatment   | SRRT      | 51593  | 37 | 7  | 100479332 | 100479332 | Frame_Shift_Del | DEL | G    | - | 12  | 251  | c.304delG        | c.(304-306)GGGfs        | p.G102fs     |
| Pat_05 | Pre-Treatment   | RAB11FIP1 | 80223  | 37 | 8  | 37728963  | 37728966  | Frame_Shift_Del | DEL | GTGA | - | 102 | 374  | 3354_3357delTCA  | c.(3352-3357)ACTCACfs   | p.T1118fs    |
| Pat_05 | Pre-Treatment   | NSMAF     | 8439   | 37 | 8  | 59510031  | 59510031  | Frame_Shift_Del | DEL | C    | - | 9   | 1728 | c.1707delG       | c.(1705-1707)GTGfs      | p.V569fs     |
| Pat_05 | Pre-Treatment   | TOX       | 9760   | 37 | 8  | 59750796  | 59750798  | In_Frame_Del    | DEL | CTT  | - | 11  | 669  | c.766_768delAAG  | c.(766-768)AAGdel       | p.K256del    |
| Pat_05 | Pre-Treatment   | COPS5     | 10987  | 37 | 8  | 67974094  | 67974095  | Frame_Shift_Del | DEL | AG   | - | 7   | 1274 | c.137_138delCT   | c.(136-138)ACTfs        | p.T46fs      |
| Pat_05 | Pre-Treatment   | SULF1     | 23213  | 37 | 8  | 70514026  | 70514026  | Frame_Shift_Del | DEL | T    | - | 11  | 1341 | c.1023delT       | c.(1021-1023)CCTfs      | p.P341fs     |
| Pat_05 | Pre-Treatment   | EIF2C2    | 27161  | 37 | 8  | 141554344 | 141554345 | Frame_Shift_Ins | INS | -    | G | 7   | 1015 | c.1806_1807insC  | c.(1804-1809)CCCGCCfs   | p.P602fs     |
| Pat_05 | Pre-Treatment   | PUF60     | 22827  | 37 | 8  | 144906520 | 144906522 | In_Frame_Del    | DEL | GCC  | - | 10  | 302  | c.72_74delGGC    | c.(70-75)GCGGCA>GCA     | p.24_25AA>A  |
| Pat_05 | Pre-Treatment   | C9orf98   | 158067 | 37 | 9  | 135753607 | 135753607 | Frame_Shift_Del | DEL | G    | - | 9   | 214  | c.36delC         | c.(34-36)CCCfs          | p.P12fs      |
| Pat_05 | Pre-Treatment   | TXLNG     | 55787  | 37 | X  | 16850849  | 16850850  | Frame_Shift_Del | DEL | AG   | - | 9   | 163  | c.968_969delIAG  | c.(967-969)CAGfs        | p.Q323fs     |
| Pat_05 | Pre-Treatment   | CNKS2     | 22866  | 37 | X  | 21627678  | 21627680  | In_Frame_Del    | DEL | GAG  | - | 8   | 126  | .2635_2637delGAI | c.(2635-2637)GAGdel     | p.E886del    |
| Pat_05 | Post-Resistance | BCL9      | 607    | 37 | 1  | 147091501 | 147091501 | Frame_Shift_Del | DEL | C    | - | 17  | 792  | c.1540delC       | c.(1540-1542)CCCfs      | p.P514fs     |
| Pat_05 | Post-Resistance | TCHH      | 7062   | 37 | 1  | 152082211 | 152082213 | In_Frame_Del    | DEL | CTC  | - | 8   | 231  | .3480_3482delGAI | c.(3478-3483)AAGAGA>AA  | p.R1163del   |
| Pat_05 | Post-Resistance | KPRP      | 448834 | 37 | 1  | 152732678 | 152732678 | Frame_Shift_Del | DEL | C    | - | 8   | 1055 | c.614delC        | c.(613-615)ACCfs        | p.T205fs     |
| Pat_05 | Post-Resistance | GON4L     | 54856  | 37 | 1  | 155735138 | 155735141 | Frame_Shift_Del | DEL | CTGT | - | 27  | 1052 | 4123_4126delACA  | c.(4123-4128)ACAGTCfs   | p.T1375fs    |
| Pat_05 | Post-Resistance | ISG20L2   | 81875  | 37 | 1  | 156694023 | 156694023 | Frame_Shift_Del | DEL | G    | - | 15  | 713  | c.865delC        | c.(865-867)CTCfs        | p.L289fs     |
| Pat_05 | Post-Resistance | CALCOCO1  | 57658  | 37 | 12 | 54115378  | 54115378  | Frame_Shift_Del | DEL | C    | - | 8   | 1470 | c.631delG        | c.(631-633)GAGfs        | p.E211fs     |
| Pat_05 | Post-Resistance | LRP1      | 4035   | 37 | 12 | 57605740  | 57605742  | In_Frame_Del    | DEL | TGC  | - | 7   | 742  | 13289_13291delIT | c.(13288-13293)TTGCTG>T | 4430_4431LL> |
| Pat_05 | Post-Resistance | GLI1      | 2735   | 37 | 12 | 57865177  | 57865177  | Frame_Shift_Del | DEL | C    | - | 8   | 564  | c.2654delC       | c.(2653-2655)TCCfs      | p.S885fs     |
| Pat_05 | Post-Resistance | NCOR2     | 9612   | 37 | 12 | 124848228 | 124848228 | Frame_Shift_Del | DEL | G    | - | 7   | 964  | c.2925delC       | c.(2923-2925)CCCfs      | p.P975fs     |
| Pat_05 | Post-Resistance | TPSD1     | 23430  | 37 | 16 | 1306312   | 1306314   | In_Frame_Del    | DEL | CTG  | - | 7   | 413  | c.31_33delCTG    | c.(31-33)CTGdel         | p.L14del     |
| Pat_05 | Post-Resistance | SETD1A    | 9739   | 37 | 16 | 30982809  | 30982811  | In_Frame_Del    | DEL | TCC  | - | 7   | 152  | .3127_3129delITC | c.(3127-3129)TCCdel     | p.S1058del   |
| Pat_05 | Post-Resistance | KDM6B     | 23135  | 37 | 17 | 7751859   | 7751861   | In_Frame_Del    | DEL | CAC  | - | 7   | 94   | .2253_2255delCAI | c.(2251-2256)GTCACC>GT  | p.T762del    |
| Pat_05 | Post-Resistance | NEK8      | 284086 | 37 | 17 | 27064841  | 27064841  | Frame_Shift_Del | DEL | C    | - | 8   | 1384 | c.894delC        | c.(892-894)ATCfs        | p.I298fs     |
| Pat_05 | Post-Resistance | AP2B1     | 163    | 37 | 17 | 33953803  | 33953803  | Frame_Shift_Del | DEL | G    | - | 8   | 1360 | c.880delG        | c.(880-882)GGGfs        | p.G294fs     |
| Pat_05 | Post-Resistance | RAB11FIP5 | 26056  | 37 | 2  | 73315337  | 73315339  | In_Frame_Del    | DEL | TGG  | - | 7   | 449  | .1407_1409delCC  | c.(1405-1410)CACCAA>CA  | p.H469del    |
| Pat_05 | Post-Resistance | GINS1     | 9837   | 37 | 20 | 25422397  | 25422397  | Frame_Shift_Del | DEL | A    | - | 7   | 136  | c.507delA        | c.(505-507)TTAfs        | p.L169fs     |
| Pat_05 | Post-Resistance | DIDO1     | 11083  | 37 | 20 | 61512380  | 61512381  | Frame_Shift_Ins | INS | -    | G | 12  | 141  | c.4927_4928insC  | c.(4927-4929)CGCfs      | p.R1643fs    |
| Pat_05 | Post-Resistance | CCDC116   | 164592 | 37 | 22 | 21990728  | 21990730  | In_Frame_Del    | DEL | GCA  | - | 10  | 196  | .1211_1213delIGC | c.(1210-1215)TGCAGC>TG  | p.S407del    |
| Pat_05 | Post-Resistance | C22orf43  | 51233  | 37 | 22 | 23959767  | 23959769  | In_Frame_Del    | DEL | CAT  | - | 14  | 276  | c.512_514delATG  | c.(511-516)GATGCC>GCC   | p.D171del    |
| Pat_05 | Post-Resistance | MYH9      | 4627   | 37 | 22 | 36689419  | 36689421  | In_Frame_Del    | DEL | CCT  | - | 10  | 427  | .4049_4051delIAG | c.(4048-4053)GAGGCC>GC  | p.E1350del   |
| Pat_05 | Post-Resistance | LIMD1     | 8994   | 37 | 3  | 45636543  | 45636545  | In_Frame_Del    | DEL | CAG  | - | 9   | 80   | c.172_174delCAG  | c.(172-174)CAGdel       | p.Q63del     |
| Pat_05 | Post-Resistance | QRICH1    | 54870  | 37 | 3  | 49094314  | 49094316  | In_Frame_Del    | DEL | TGC  | - | 8   | 203  | .1317_1319delIGC | c.(1315-1320)CAGCAA>CA  | 439_440QQ>I  |
| Pat_05 | Post-Resistance | LNP1      | 348801 | 37 | 3  | 100148586 | 100148588 | In_Frame_Del    | DEL | GAT  | - | 7   | 1303 | c.13_15delGAT    | c.(13-15)GATdel         | p.D10del     |
| Pat_05 | Post-Resistance | GOLGB1    | 2804   | 37 | 3  | 121413503 | 121413503 | Frame_Shift_Del | DEL | T    | - | 7   | 435  | c.5852delA       | c.(5851-5853)AATfs      | p.N1951fs    |
| Pat_05 | Post-Resistance | UTP3      | 57050  | 37 | 4  | 71554620  | 71554622  | In_Frame_Del    | DEL | GAG  | - | 8   | 152  | c.226_228delGAG  | c.(226-228)GAGdel       | p.E81del     |
| Pat_05 | Post-Resistance | SLC1A3    | 6507   | 37 | 5  | 36679799  | 36679799  | Frame_Shift_Del | DEL | G    | - | 8   | 1552 | c.931delG        | c.(931-933)GGGfs        | p.G311fs     |
| Pat_05 | Post-Resistance | LARP1     | 23367  | 37 | 5  | 154181822 | 154181822 | Frame_Shift_Del | DEL | G    | - | 7   | 357  | c.1972delG       | c.(1972-1974)GGGfs      | p.G658fs     |
| Pat_05 | Post-Resistance | TULP1     | 7287   | 37 | 6  | 35478775  | 35478777  | In_Frame_Del    | DEL | TCC  | - | 7   | 360  | c.360_362delGGA  | c.(358-363)GAGGAA>GAA   | 120_121EE>I  |
| Pat_05 | Post-Resistance | KIAA1009  | 22832  | 37 | 6  | 84896233  | 84896233  | Frame_Shift_Del | DEL | A    | - | 7   | 171  | c.1218delT       | c.(1216-1218)TTTfs      | p.F406fs     |
| Pat_05 | Post-Resistance | ABCB4     | 5244   | 37 | 7  | 87053264  | 87053264  | Frame_Shift_Del | DEL | C    | - | 7   | 906  | c.2169delG       | c.(2167-2169)GGGfs      | p.G723fs     |
| Pat_05 | Post-Resistance | TAF6      | 6878   | 37 | 7  | 99705124  | 99705124  | Frame_Shift_Del | DEL | G    | - | 8   | 1360 | c.1779delC       | c.(1777-1779)CCCfs      | p.P593fs     |
| Pat_05 | Post-Resistance | SLC12A9   | 56996  | 37 | 7  | 100463628 | 100463628 | Frame_Shift_Del | DEL | G    | - | 7   | 877  | c.2146delG       | c.(2146-2148)GGGfs      | p.G716fs     |
| Pat_05 | Post-Resistance | WNT16     | 51384  | 37 | 7  | 120971879 | 120971879 | Frame_Shift_Del | DEL | G    | - | 9   | 569  | c.494delG        | c.(493-495)TGGfs        | p.W165fs     |
| Pat_05 | Post-Resistance | RAB11FIP1 | 80223  | 37 | 8  | 37728963  | 37728966  | Frame_Shift_Del | DEL | GTGA | - | 104 | 258  | 3354_3357delTCA  | c.(3352-3357)ACTCACfs   | p.T1118fs    |

|        |                 |          |        |    |    |           |           |                        |     |     |     |    |      |                  |                                 |               |
|--------|-----------------|----------|--------|----|----|-----------|-----------|------------------------|-----|-----|-----|----|------|------------------|---------------------------------|---------------|
| Pat_05 | Post-Resistance | BLHE22   | 27319  | 37 | 8  | 65493617  | 65493618  | In_Frame_Ins           | INS | -   | GGC | 10 | 16   | c.270_271insGGC  | c.(268-273)insGGC               | p.97_98insG   |
| Pat_05 | Post-Resistance | IKBKAP   | 8518   | 37 | 9  | 111693425 | 111693427 | Translation_Start_Site | DEL | ATG | -   | 48 | 192  |                  |                                 |               |
| Pat_06 | Pre-Treatment   | CAMTA1   | 23261  | 37 | 1  | 7811329   | 7811329   | Frame_Shift_Del        | DEL | A   | -   | 7  | 1129 | c.4760delA       | c.(4759-4761)CAAfs              | p.Q1587fs     |
| Pat_06 | Pre-Treatment   | CLSTN1   | 22883  | 37 | 1  | 9790640   | 9790642   | In_Frame_Del           | DEL | CCT | -   | 7  | 499  | .2870_2872delAG  | (2869-2874)GAGGGG>GC            | p.E957del     |
| Pat_06 | Pre-Treatment   | FBLIM1   | 54751  | 37 | 1  | 16103673  | 16103673  | Frame_Shift_Del        | DEL | C   | -   | 7  | 1304 | c.899delC        | c.(898-900)GCCfs                | p.A300fs      |
| Pat_06 | Pre-Treatment   | MST1P9   | 11223  | 37 | 1  | 17086003  | 17086003  | Frame_Shift_Del        | DEL | G   | -   | 7  | 1135 | c.894delC        | c.(892-894)GCCfs                | p.G298fs      |
| Pat_06 | Pre-Treatment   | TSSK3    | 81629  | 37 | 1  | 32828389  | 32828390  | Frame_Shift_Ins        | INS | -   | A   | 8  | 1113 | c.87_88insA      | c.(85-90)TCCAAAFs               | p.S29fs       |
| Pat_06 | Pre-Treatment   | EIF2C4   | 192670 | 37 | 1  | 36307305  | 36307305  | Frame_Shift_Del        | DEL | A   | -   | 11 | 1084 | c.2129delA       | c.(2128-2130)CAAfs              | p.Q710fs      |
| Pat_06 | Pre-Treatment   | MACF1    | 23499  | 37 | 1  | 39788668  | 39788670  | In_Frame_Del           | DEL | GGA | -   | 8  | 986  | .4239_4241delGG  | (4237-4242)CTGGAG>CT            | p.E1417del    |
| Pat_06 | Pre-Treatment   | MPL      | 4352   | 37 | 1  | 43814993  | 43814995  | In_Frame_Del           | DEL | CTG | -   | 8  | 893  | .1528_1530delCT  | c.(1528-1530)CTGdel             | p.L513del     |
| Pat_06 | Pre-Treatment   | IPO13    | 9670   | 37 | 1  | 44425920  | 44425922  | Splice_Site            | DEL | GGT | -   | 10 | 2459 | c.2029_splice    | c.e12-1                         | p.V677_splice |
| Pat_06 | Pre-Treatment   | EIF2B3   | 8891   | 37 | 1  | 45407182  | 45407182  | Frame_Shift_Del        | DEL | T   | -   | 21 | 626  | c.450delA        | c.(448-450)AAAFs                | p.K150fs      |
| Pat_06 | Pre-Treatment   | MAST2    | 23139  | 37 | 1  | 46494559  | 46494559  | Frame_Shift_Del        | DEL | T   | -   | 9  | 1448 | c.2172delT       | c.(2170-2172)CCTfs              | p.P724fs      |
| Pat_06 | Pre-Treatment   | PCSK9    | 255738 | 37 | 1  | 55505552  | 55505553  | In_Frame_Ins           | INS | -   | CTG | 5  | 9    | c.42_43insCTG    | c.(40-45)insCTG                 | p.23_24insL   |
| Pat_06 | Pre-Treatment   | JUN      | 3725   | 37 | 1  | 59248443  | 59248443  | Frame_Shift_Del        | DEL | G   | -   | 8  | 1536 | c.300delC        | c.(298-300)CCCfs                | p.P100fs      |
| Pat_06 | Pre-Treatment   | SGIP1    | 84251  | 37 | 1  | 67147814  | 67147814  | Frame_Shift_Del        | DEL | C   | -   | 7  | 1129 | c.1077delC       | c.(1075-1077)GGCfs              | p.G359fs      |
| Pat_06 | Pre-Treatment   | WDR78    | 79819  | 37 | 1  | 67390426  | 67390426  | Frame_Shift_Del        | DEL | T   | -   | 9  | 754  | c.89delA         | c.(88-90)AAGfs                  | p.K30fs       |
| Pat_06 | Pre-Treatment   | LRRIQ3   | 127255 | 37 | 1  | 74575212  | 74575213  | Frame_Shift_Ins        | INS | -   | T   | 27 | 573  | c.732_733insA    | c.(730-735)AAACAGfs             | p.K244fs      |
| Pat_06 | Pre-Treatment   | LRRIQ3   | 127255 | 37 | 1  | 74648381  | 74648381  | Frame_Shift_Del        | DEL | T   | -   | 8  | 1269 | c.414delA        | c.(412-414)AAAFs                | p.K138fs      |
| Pat_06 | Pre-Treatment   | TNNI3K   | 51086  | 37 | 1  | 74957824  | 74957826  | In_Frame_Del           | DEL | CTT | -   | 36 | 1808 | .2225_2227delCT  | (.2224-2229)CCTTCT>CC           | p.S746del     |
| Pat_06 | Pre-Treatment   | CDC7     | 8317   | 37 | 1  | 91967356  | 91967357  | Frame_Shift_Ins        | INS | -   | A   | 17 | 497  | c.83_84insA      | c.(82-84)TTAFs                  | p.L28fs       |
| Pat_06 | Pre-Treatment   | SLC44A3  | 126969 | 37 | 1  | 95357932  | 95357932  | Frame_Shift_Del        | DEL | T   | -   | 8  | 933  | c.1716delT       | c.(1714-1716)GCTfs              | p.A572fs      |
| Pat_06 | Pre-Treatment   | AMY2B    | 280    | 37 | 1  | 104115838 | 104115838 | Frame_Shift_Del        | DEL | A   | -   | 9  | 2770 | c.469delA        | c.(469-471)AAAFs                | p.K157fs      |
| Pat_06 | Pre-Treatment   | WNT2B    | 7482   | 37 | 1  | 113052023 | 113052025 | In_Frame_Del           | DEL | CTG | -   | 12 | 303  | c.139_141delCTG  | c.(139-141)CTGdel               | p.L50del      |
| Pat_06 | Pre-Treatment   | TSPAN2   | 10100  | 37 | 1  | 115601537 | 115601537 | Frame_Shift_Del        | DEL | T   | -   | 7  | 1456 | c.411delA        | c.(409-411)AAAFs                | p.K137fs      |
| Pat_06 | Pre-Treatment   | PSMB4    | 5692   | 37 | 1  | 151372073 | 151372073 | Frame_Shift_Del        | DEL | T   | -   | 7  | 682  | c.10delT         | c.(10-12)TTTfs                  | p.F4fs        |
| Pat_06 | Pre-Treatment   | SPRR4    | 163778 | 37 | 1  | 152944376 | 152944378 | In_Frame_Del           | DEL | CAG | -   | 7  | 660  | c.10_12delCAG    | c.(10-12)CAGdel                 | p.Q7del       |
| Pat_06 | Pre-Treatment   | SPRR2G   | 6706   | 37 | 1  | 153122566 | 153122568 | In_Frame_Del           | DEL | CTG | -   | 12 | 1072 | c.19_21delCAG    | c.(19-21)CAGdel                 | p.Q7del       |
| Pat_06 | Pre-Treatment   | S100A8   | 6279   | 37 | 1  | 153362715 | 153362715 | Frame_Shift_Del        | DEL | T   | -   | 7  | 1013 | c.146delA        | c.(145-147)AAGfs                | p.K49fs       |
| Pat_06 | Pre-Treatment   | KCNN3    | 3782   | 37 | 1  | 154842331 | 154842333 | In_Frame_Del           | DEL | TGC | -   | 14 | 74   | c.108_110delGCAc | (.106-111)CAGCAA>CAAp.36_37QQ>Q |               |
| Pat_06 | Pre-Treatment   | GPATCH4  | 54865  | 37 | 1  | 156565504 | 156565504 | Frame_Shift_Del        | DEL | T   | -   | 8  | 265  | c.629delA        | c.(628-630)AAGfs                | p.K210fs      |
| Pat_06 | Pre-Treatment   | NES      | 10763  | 37 | 1  | 156642804 | 156642804 | Frame_Shift_Del        | DEL | G   | -   | 20 | 1720 | c.1176delC       | c.(1174-1176)CCCfs              | p.P392fs      |
| Pat_06 | Pre-Treatment   | PVRL4    | 81607  | 37 | 1  | 161044057 | 161044059 | In_Frame_Del           | DEL | CAC | -   | 13 | 723  | .1105_1107delGT  | c.(1105-1107)GTGdel             | p.V369del     |
| Pat_06 | Pre-Treatment   | PCP4L1   | 654790 | 37 | 1  | 161254154 | 161254156 | In_Frame_Del           | DEL | GGA | -   | 11 | 740  | c.90_92delGGA    | c.(88-93)GCGGAG>GCG             | p.E35del      |
| Pat_06 | Pre-Treatment   | SLC9A11  | 284525 | 37 | 1  | 173552687 | 173552688 | Frame_Shift_Ins        | INS | -   | A   | 7  | 399  | c.597_598insT    | c.(595-600)TTTGAfs              | p.F199fs      |
| Pat_06 | Pre-Treatment   | DHX9     | 1660   | 37 | 1  | 182845333 | 182845333 | Frame_Shift_Del        | DEL | T   | -   | 11 | 1493 | c.1964delT       | c.(1963-1965)GTTfs              | p.V655fs      |
| Pat_06 | Pre-Treatment   | IPO9     | 55705  | 37 | 1  | 201843998 | 201844000 | In_Frame_Del           | DEL | GAG | -   | 12 | 542  | .2872_2874delGA  | c.(2872-2874)GAGdel             | p.E962del     |
| Pat_06 | Pre-Treatment   | ZC3H11A  | 9877   | 37 | 1  | 203786224 | 203786225 | Frame_Shift_Ins        | INS | -   | T   | 25 | 640  | c.26_27insT      | c.(25-27)TATfs                  | p.Y9fs        |
| Pat_06 | Pre-Treatment   | PIK3C2B  | 5287   | 37 | 1  | 204434363 | 204434363 | Frame_Shift_Del        | DEL | A   | -   | 7  | 1515 | c.1018delT       | c.(1018-1020)TGCfs              | p.C340fs      |
| Pat_06 | Pre-Treatment   | CR1L     | 1379   | 37 | 1  | 207867814 | 207867814 | Frame_Shift_Del        | DEL | A   | -   | 7  | 1447 | c.580delA        | c.(580-582)AAAFs                | p.K194fs      |
| Pat_06 | Pre-Treatment   | KCTD3    | 51133  | 37 | 1  | 215747171 | 215747171 | Frame_Shift_Del        | DEL | T   | -   | 7  | 799  | c.126delT        | c.(124-126)TCTfs                | p.S42fs       |
| Pat_06 | Pre-Treatment   | TP53BP2  | 7159   | 37 | 1  | 223991931 | 223991931 | Frame_Shift_Del        | DEL | T   | -   | 7  | 1343 | c.594delA        | c.(592-594)AAAFs                | p.K198fs      |
| Pat_06 | Pre-Treatment   | OBSCN    | 84033  | 37 | 1  | 228467013 | 228467013 | Frame_Shift_Del        | DEL | G   | -   | 7  | 885  | c.7264delG       | c.(7264-7266)GGGfs              | p.G2422fs     |
| Pat_06 | Pre-Treatment   | RHOU     | 58480  | 37 | 1  | 228879414 | 228879414 | Frame_Shift_Del        | DEL | C   | -   | 7  | 651  | c.704delC        | c.(703-705)TCTfs                | p.S235fs      |
| Pat_06 | Pre-Treatment   | C10orf18 | 54906  | 37 | 10 | 5788554   | 5788554   | Frame_Shift_Del        | DEL | A   | -   | 8  | 566  | c.3170delA       | c.(3169-3171)GAAfs              | p.E1057fs     |
| Pat_06 | Pre-Treatment   | ITIH2    | 3698   | 37 | 10 | 7791225   | 7791225   | Frame_Shift_Del        | DEL | A   | -   | 9  | 1605 | c.2769delA       | c.(2767-2769)GGAfs              | p.G923fs      |
| Pat_06 | Pre-Treatment   | NEBL     | 10529  | 37 | 10 | 21124517  | 21124517  | Frame_Shift_Del        | DEL | T   | -   | 9  | 1578 | c.1374delA       | c.(1372-1374)AAAFs              | p.K458fs      |

|        |               |          |        |    |    |           |           |                 |     |     |   |    |      |                   |                                  |               |
|--------|---------------|----------|--------|----|----|-----------|-----------|-----------------|-----|-----|---|----|------|-------------------|----------------------------------|---------------|
| Pat_06 | Pre-Treatment | MPP7     | 143098 | 37 | 10 | 28347455  | 28347455  | Frame_Shift_Del | DEL | T   | - | 9  | 2255 | c.1376delA        | c.(1375-1377)AACfs               | p.N459fs      |
| Pat_06 | Pre-Treatment | FRMPD2   | 143162 | 37 | 10 | 49409420  | 49409420  | Frame_Shift_Del | DEL | T   | - | 7  | 2068 | c.1805delA        | c.(1804-1806)AAGfs               | p.K602fs      |
| Pat_06 | Pre-Treatment | A1CF     | 29974  | 37 | 10 | 52569667  | 52569669  | In_Frame_Del    | DEL | AGC | - | 9  | 528  | .1618_1620delGC   | c.(1618-1620)GCTdel              | p.A540del     |
| Pat_06 | Pre-Treatment | ARID5B   | 84159  | 37 | 10 | 63852298  | 63852298  | Frame_Shift_Del | DEL | A   | - | 7  | 728  | c.3076delA        | c.(3076-3078)AAAfs               | p.K1026fs     |
| Pat_06 | Pre-Treatment | ZMIZ1    | 57178  | 37 | 10 | 81050829  | 81050831  | In_Frame_Del    | DEL | GCA | - | 9  | 895  | c.654_656delGCA:  | (652-657)GGGCAG>GGC              | p.Q222del     |
| Pat_06 | Pre-Treatment | ZMIZ1    | 57178  | 37 | 10 | 81066062  | 81066062  | Frame_Shift_Del | DEL | C   | - | 8  | 546  | c.2629delC        | c.(2629-2631)CCCfs               | p.P877fs      |
| Pat_06 | Pre-Treatment | STAMBPL1 | 57559  | 37 | 10 | 90682146  | 90682146  | Frame_Shift_Del | DEL | A   | - | 17 | 539  | c.1207delA        | c.(1207-1209)AAAfs               | p.K403fs      |
| Pat_06 | Pre-Treatment | FAS      | 355    | 37 | 10 | 90768708  | 90768708  | Frame_Shift_Del | DEL | T   | - | 7  | 4111 | c.397delT         | c.(397-399)TTTfs                 | p.F133fs      |
| Pat_06 | Pre-Treatment | HECTD2   | 143279 | 37 | 10 | 93247481  | 93247481  | Frame_Shift_Del | DEL | A   | - | 7  | 1115 | c.1137delA        | c.(1135-1137)GCAfs               | p.A379fs      |
| Pat_06 | Pre-Treatment | TACC2    | 10579  | 37 | 10 | 123970380 | 123970380 | Frame_Shift_Del | DEL | C   | - | 9  | 876  | c.6440delC        | c.(6439-6441)ACCfs               | p.T2147fs     |
| Pat_06 | Pre-Treatment | DMBT1    | 1755   | 37 | 10 | 124345598 | 124345599 | Frame_Shift_Del | DEL | GA  | - | 7  | 2750 | c.1482_1483delGA  | c.(1480-1485)CTGAGGfs            | p.L494fs      |
| Pat_06 | Pre-Treatment | DOCK1    | 1793   | 37 | 10 | 129231579 | 129231579 | Frame_Shift_Del | DEL | C   | - | 7  | 1232 | c.4884delC        | c.(4882-4884)CGCfs               | p.R1628fs     |
| Pat_06 | Pre-Treatment | PHRF1    | 57661  | 37 | 11 | 592586    | 592588    | In_Frame_Del    | DEL | GAG | - | 8  | 1189 | c.532_534delGAG   | c.(532-534)GAGdel                | p.E181del     |
| Pat_06 | Pre-Treatment | OR51B6   | 390058 | 37 | 11 | 5373220   | 5373220   | Frame_Shift_Del | DEL | A   | - | 7  | 1251 | c.483delA         | c.(481-483)CTAfs                 | p.L161fs      |
| Pat_06 | Pre-Treatment | PSMA1    | 5682   | 37 | 11 | 14529252  | 14529254  | In_Frame_Del    | DEL | CAT | - | 8  | 904  | c.683_685delATGc: | (682-687)GATGTG>GTG              | p.D228del     |
| Pat_06 | Pre-Treatment | PAMR1    | 25891  | 37 | 11 | 35513670  | 35513670  | Frame_Shift_Del | DEL | C   | - | 7  | 1999 | c.302delG         | c.(301-303)GGTfs                 | p.G101fs      |
| Pat_06 | Pre-Treatment | ARHGAP1  | 392    | 37 | 11 | 46702224  | 46702224  | Frame_Shift_Del | DEL | G   | - | 8  | 848  | c.709delC         | c.(709-711)CTGfs                 | p.L237fs      |
| Pat_06 | Pre-Treatment | FNBP4    | 23360  | 37 | 11 | 47744589  | 47744591  | In_Frame_Del    | DEL | GGA | - | 8  | 33   | .2742_2744delTC:  | (2740-2745)CCTCCA>CC:.           | 914_915PP>I   |
| Pat_06 | Pre-Treatment | FNBP4    | 23360  | 37 | 11 | 47746087  | 47746087  | Frame_Shift_Del | DEL | G   | - | 8  | 1730 | c.2252delC        | c.(2251-2253)CCTfs               | p.P751fs      |
| Pat_06 | Pre-Treatment | SERPING1 | 710    | 37 | 11 | 57365774  | 57365776  | In_Frame_Del    | DEL | CTG | - | 14 | 66   | c.31_33delCTG     | c.(31-33)CTGdel                  | p.L15del      |
| Pat_06 | Pre-Treatment | UBXN1    | 51035  | 37 | 11 | 62444384  | 62444384  | Frame_Shift_Del | DEL | C   | - | 7  | 826  | c.745delG         | c.(745-747)GAGfs                 | p.E249fs      |
| Pat_06 | Pre-Treatment | SF1      | 7536   | 37 | 11 | 64534435  | 64534437  | In_Frame_Del    | DEL | GCT | - | 10 | 1552 | .1517_1519delAG:  | (1516-1521)CAGCCT>CC             | p.Q506del     |
| Pat_06 | Pre-Treatment | EHBP1L1  | 254102 | 37 | 11 | 65351726  | 65351726  | Frame_Shift_Del | DEL | G   | - | 8  | 1520 | c.3108delG        | c.(3106-3108)CTGfs               | p.L1036fs     |
| Pat_06 | Pre-Treatment | SNX32    | 254122 | 37 | 11 | 65617623  | 65617623  | Frame_Shift_Del | DEL | C   | - | 10 | 812  | c.255delC         | c.(253-255)ATCfs                 | p.I85fs       |
| Pat_06 | Pre-Treatment | NUMA1    | 4926   | 37 | 11 | 71724190  | 71724190  | Frame_Shift_Del | DEL | C   | - | 7  | 1146 | c.4359delG        | c.(4357-4359)GGGfs               | p.G1453fs     |
| Pat_06 | Pre-Treatment | DGAT2    | 84649  | 37 | 11 | 75509300  | 75509300  | Frame_Shift_Del | DEL | G   | - | 7  | 1490 | c.838delG         | c.(838-840)GGAfs                 | p.G280fs      |
| Pat_06 | Pre-Treatment | PAK1     | 5058   | 37 | 11 | 77069990  | 77069992  | In_Frame_Del    | DEL | CAT | - | 9  | 632  | c.548_550delATGc: | (547-552)GATGCT>GCT              | p.D183del     |
| Pat_06 | Pre-Treatment | USP35    | 57558  | 37 | 11 | 77920720  | 77920722  | In_Frame_Del    | DEL | CGC | - | 7  | 687  | .1819_1821delCG   | c.(1819-1821)CGCdel              | p.R610del     |
| Pat_06 | Pre-Treatment | FAT3     | 120114 | 37 | 11 | 92531072  | 92531074  | In_Frame_Del    | DEL | GAC | - | 9  | 1070 | .4893_4895delGA:  | (4891-4896)ATGACG>AT:            | p.T1633del    |
| Pat_06 | Pre-Treatment | C11orf54 | 28970  | 37 | 11 | 93494710  | 93494710  | Frame_Shift_Del | DEL | T   | - | 9  | 1672 | c.804delT         | c.(802-804)CATfs                 | p.H268fs      |
| Pat_06 | Pre-Treatment | MRE11A   | 4361   | 37 | 11 | 94153333  | 94153335  | In_Frame_Del    | DEL | ATC | - | 8  | 514  | .2083_2085delGA'  | c.(2083-2085)GATdel              | p.D695del     |
| Pat_06 | Pre-Treatment | BARX2    | 8538   | 37 | 11 | 129246064 | 129246064 | Frame_Shift_Del | DEL | A   | - | 8  | 1086 | c.134delA         | c.(133-135)TACfs                 | p.Y45fs       |
| Pat_06 | Pre-Treatment | GUCY2C   | 2984   | 37 | 12 | 14766135  | 14766135  | Frame_Shift_Del | DEL | T   | - | 8  | 1653 | c.3138delA        | c.(3136-3138)AAAfs               | p.K1046fs     |
| Pat_06 | Pre-Treatment | NELL2    | 4753   | 37 | 12 | 44917102  | 44917102  | Frame_Shift_Del | DEL | T   | - | 7  | 1866 | c.1970delA        | c.(1969-1971)AATfs               | p.N657fs      |
| Pat_06 | Pre-Treatment | SFRS2IP  | 9169   | 37 | 12 | 46318575  | 46318577  | In_Frame_Del    | DEL | GGT | - | 26 | 1702 | .3840_3842delAC:  | (3838-3843)CCACCC>CC1280_1281PP: |               |
| Pat_06 | Pre-Treatment | SFRS2IP  | 9169   | 37 | 12 | 46320707  | 46320708  | Frame_Shift_Del | DEL | TC  | - | 10 | 970  | c.2776_2777delGA' | c.(2776-2778)GAAfs               | p.E926fs      |
| Pat_06 | Pre-Treatment | PRPF40B  | 25766  | 37 | 12 | 50025258  | 50025258  | Frame_Shift_Del | DEL | C   | - | 7  | 1108 | c.93delC          | c.(91-93)ATCfs                   | p.I31fs       |
| Pat_06 | Pre-Treatment | OR6C75   | 390323 | 37 | 12 | 55759192  | 55759192  | Frame_Shift_Del | DEL | T   | - | 13 | 836  | c.298delT         | c.(298-300)TTTfs                 | p.F100fs      |
| Pat_06 | Pre-Treatment | ESYT1    | 23344  | 37 | 12 | 56537395  | 56537395  | Frame_Shift_Del | DEL | C   | - | 9  | 1528 | c.3257delC        | c.(3256-3258)TCCfs               | p.S1086fs     |
| Pat_06 | Pre-Treatment | KIF5A    | 3798   | 37 | 12 | 57972048  | 57972048  | Frame_Shift_Del | DEL | G   | - | 7  | 943  | c.2461delG        | c.(2461-2463)GGGfs               | p.G821fs      |
| Pat_06 | Pre-Treatment | B4GALNT1 | 2583   | 37 | 12 | 58025102  | 58025103  | Frame_Shift_Ins | INS | -   | C | 10 | 737  | c.263_264insG     | c.(262-264)GGCfs                 | p.G88fs       |
| Pat_06 | Pre-Treatment | CEP290   | 80184  | 37 | 12 | 88524078  | 88524079  | Frame_Shift_Ins | INS | -   | T | 15 | 1077 | c.635_636insA     | c.(634-636)AACfs                 | p.N212fs      |
| Pat_06 | Pre-Treatment | CDC63    | 160762 | 37 | 12 | 111311658 | 111311659 | Frame_Shift_Ins | INS | -   | A | 11 | 337  | c.382_383insA     | c.(382-384)GAAfs                 | p.E128fs      |
| Pat_06 | Pre-Treatment | C12orf51 | 283450 | 37 | 12 | 112605648 | 112605650 | In_Frame_Del    | DEL | CAG | - | 13 | 541  | 11014_11016delCT  | c.(11014-11016)CTGdel            | p.L3672del    |
| Pat_06 | Pre-Treatment | KSR2     | 283455 | 37 | 12 | 117977605 | 117977605 | Frame_Shift_Del | DEL | G   | - | 11 | 638  | c.1519delC        | c.(1519-1521)CTCfs               | p.L507fs      |
| Pat_06 | Pre-Treatment | MLEC     | 9761   | 37 | 12 | 121134166 | 121134168 | In_Frame_Del    | DEL | GAA | - | 8  | 542  | c.697_699delGAA   | c.(697-699)GAAdel                | p.E238del     |
| Pat_06 | Pre-Treatment | WASF3    | 10810  | 37 | 13 | 27250862  | 27250863  | Splice_Site     | DEL | GT  | - | 7  | 949  | c.716_splice      | c.e7+1                           | p.R239_splice |

|        |               |           |        |    |    |           |           |                 |     |     |   |    |      |                  |                         |               |
|--------|---------------|-----------|--------|----|----|-----------|-----------|-----------------|-----|-----|---|----|------|------------------|-------------------------|---------------|
| Pat_06 | Pre-Treatment | WASF3     | 10810  | 37 | 13 | 27259836  | 27259836  | Frame_Shift_Del | DEL | A   | - | 8  | 685  | c.1363delA       | c.(1363-1365)AAAFs      | p.K455fs      |
| Pat_06 | Pre-Treatment | CKAP2     | 26586  | 37 | 13 | 53049034  | 53049034  | Frame_Shift_Del | DEL | A   | - | 7  | 233  | c.1810delA       | c.(1810-1812)AAAFs      | p.K604fs      |
| Pat_06 | Pre-Treatment | FBXL3     | 26224  | 37 | 13 | 77581683  | 77581683  | Frame_Shift_Del | DEL | A   | - | 8  | 306  | c.884delT        | c.(883-885)TTAFs        | p.L295fs      |
| Pat_06 | Pre-Treatment | MYCBP2    | 23077  | 37 | 13 | 77748553  | 77748553  | Frame_Shift_Del | DEL | G   | - | 7  | 951  | c.5430delC       | c.(5428-5430)ACCfs      | p.T1810fs     |
| Pat_06 | Pre-Treatment | SLITRK5   | 26050  | 37 | 13 | 88328374  | 88328375  | Frame_Shift_Del | DEL | TC  | - | 7  | 1061 | c.731_732delTC   | c.(730-732)ATCfs        | p.I244fs      |
| Pat_06 | Pre-Treatment | UBAC2     | 337867 | 37 | 13 | 99966405  | 99966405  | Frame_Shift_Del | DEL | C   | - | 7  | 1206 | c.444delC        | c.(442-444)GTCfs        | p.V148fs      |
| Pat_06 | Pre-Treatment | SALL2     | 6297   | 37 | 14 | 21991334  | 21991336  | In_Frame_Del    | DEL | GGT | - | 11 | 551  | .2526_2528delAC  | c.(2524-2529)CCACCT>CC  | p.842_843PP>I |
| Pat_06 | Pre-Treatment | RBM23     | 55147  | 37 | 14 | 23371030  | 23371030  | Frame_Shift_Del | DEL | G   | - | 9  | 1133 | c.1309delC       | c.(1309-1311)CAGfs      | p.Q437fs      |
| Pat_06 | Pre-Treatment | CPNE6     | 9362   | 37 | 14 | 24545608  | 24545608  | Frame_Shift_Del | DEL | C   | - | 7  | 1081 | c.1098delC       | c.(1096-1098)ATCfs      | p.I366fs      |
| Pat_06 | Pre-Treatment | TINF2     | 26277  | 37 | 14 | 24710268  | 24710268  | Frame_Shift_Del | DEL | C   | - | 7  | 2120 | c.562delG        | c.(562-564)GCCfs        | p.A188fs      |
| Pat_06 | Pre-Treatment | FERMT2    | 10979  | 37 | 14 | 53360081  | 53360082  | Frame_Shift_Ins | INS | -   | T | 9  | 267  | c.455_456insA    | c.(454-456)AAGfs        | p.K152fs      |
| Pat_06 | Pre-Treatment | C14orf39  | 317761 | 37 | 14 | 60903565  | 60903565  | Frame_Shift_Del | DEL | A   | - | 14 | 581  | c.1762delT       | c.(1762-1764)TGAfs      | p.*588fs      |
| Pat_06 | Pre-Treatment | ZBTB1     | 22890  | 37 | 14 | 64989787  | 64989787  | Frame_Shift_Del | DEL | A   | - | 7  | 1373 | c.1565delA       | c.(1564-1566)CAAfs      | p.Q522fs      |
| Pat_06 | Pre-Treatment | C14orf115 | 55237  | 37 | 14 | 74824463  | 74824463  | Frame_Shift_Del | DEL | G   | - | 14 | 903  | c.977delG        | c.(976-978)CGGfs        | p.R326fs      |
| Pat_06 | Pre-Treatment | GALC      | 2581   | 37 | 14 | 88406276  | 88406276  | Frame_Shift_Del | DEL | T   | - | 10 | 2322 | c.1884delA       | c.(1882-1884)AAAFs      | p.K628fs      |
| Pat_06 | Pre-Treatment | ATXN3     | 4287   | 37 | 14 | 92537355  | 92537357  | In_Frame_Del    | DEL | CTG | - | 7  | 517  | c.913_915delCAG  | c.(913-915)CAGdel       | p.Q305del     |
| Pat_06 | Pre-Treatment | RIN3      | 79890  | 37 | 14 | 93125641  | 93125643  | In_Frame_Del    | DEL | CCA | - | 7  | 537  | .2162_2164delCC  | c.(2161-2166)GCCACC>GC  | p.T725del     |
| Pat_06 | Pre-Treatment | CHGA      | 1113   | 37 | 14 | 93398009  | 93398009  | Frame_Shift_Del | DEL | A   | - | 8  | 696  | c.770delA        | c.(769-771)CACfs        | p.H257fs      |
| Pat_06 | Pre-Treatment | BTBD7     | 55727  | 37 | 14 | 93720048  | 93720048  | Frame_Shift_Del | DEL | T   | - | 9  | 1323 | c.1697delA       | c.(1696-1698)AATfs      | p.N566fs      |
| Pat_06 | Pre-Treatment | DICER1    | 23405  | 37 | 14 | 95562455  | 95562455  | Frame_Shift_Del | DEL | T   | - | 10 | 2394 | c.4802delA       | c.(4801-4803)AAGfs      | p.K1601fs     |
| Pat_06 | Pre-Treatment | DYNC1H1   | 1778   | 37 | 14 | 102476702 | 102476703 | Frame_Shift_Del | DEL | AG  | - | 8  | 481  | .6311_6312delAC  | c.(6310-6312)AAGfs      | p.K2104fs     |
| Pat_06 | Pre-Treatment | EIF5      | 1983   | 37 | 14 | 103803136 | 103803137 | Frame_Shift_Ins | INS | -   | T | 9  | 725  | c.277_278insT    | c.(277-279)ATTfs        | p.I93fs       |
| Pat_06 | Pre-Treatment | AKT1      | 207    | 37 | 14 | 105242073 | 105242075 | In_Frame_Del    | DEL | CTC | - | 13 | 532  | c.349_351delGAG  | c.(349-351)GAGdel       | p.E117del     |
| Pat_06 | Pre-Treatment | ATP10A    | 57194  | 37 | 15 | 25963499  | 25963501  | In_Frame_Del    | DEL | CCT | - | 8  | 106  | .1409_1411delAG  | c.(1408-1413)GAGGTG>GT  | p.E470del     |
| Pat_06 | Pre-Treatment | MTMR10    | 54893  | 37 | 15 | 31239358  | 31239358  | Frame_Shift_Del | DEL | G   | - | 7  | 2035 | c.1523delC       | c.(1522-1524)CCTfs      | p.P508fs      |
| Pat_06 | Pre-Treatment | SLC12A6   | 9990   | 37 | 15 | 34628626  | 34628626  | Frame_Shift_Del | DEL | G   | - | 7  | 556  | c.256delC        | c.(256-258)CAGfs        | p.Q86fs       |
| Pat_06 | Pre-Treatment | PAK6      | 56924  | 37 | 15 | 40566360  | 40566360  | Frame_Shift_Del | DEL | G   | - | 8  | 796  | c.1761delG       | c.(1759-1761)CTGfs      | p.L587fs      |
| Pat_06 | Pre-Treatment | TP53BP1   | 7158   | 37 | 15 | 43748493  | 43748494  | Frame_Shift_Del | DEL | GG  | - | 7  | 297  | .2297_2298delCC  | c.(2296-2298)CCCfs      | p.P766fs      |
| Pat_06 | Pre-Treatment | TRIM69    | 140691 | 37 | 15 | 45059455  | 45059455  | Frame_Shift_Del | DEL | A   | - | 7  | 778  | c.988delA        | c.(988-990)AAAFs        | p.K330fs      |
| Pat_06 | Pre-Treatment | SLC28A2   | 9153   | 37 | 15 | 45567679  | 45567680  | Frame_Shift_Del | DEL | TG  | - | 7  | 2237 | .1945_1946delITC | c.(1945-1947)TGTfs      | p.C649fs      |
| Pat_06 | Pre-Treatment | ONECUT1   | 3175   | 37 | 15 | 53049972  | 53049972  | Frame_Shift_Del | DEL | G   | - | 8  | 1414 | c.1178delC       | c.(1177-1179)ACAfs      | p.T393fs      |
| Pat_06 | Pre-Treatment | ZNF280D   | 54816  | 37 | 15 | 56970872  | 56970873  | Frame_Shift_Ins | INS | -   | T | 7  | 1070 | c.1151_1152insA  | c.(1150-1152)CATfs      | p.H384fs      |
| Pat_06 | Pre-Treatment | SNAPC5    | 10302  | 37 | 15 | 66786799  | 66786801  | In_Frame_Del    | DEL | TCC | - | 7  | 721  | c.270_272delGGA  | c.(268-273)GAGGAA>GAA   | p.90_91EE>E   |
| Pat_06 | Pre-Treatment | SPESP1    | 246777 | 37 | 15 | 69238674  | 69238676  | In_Frame_Del    | DEL | AGC | - | 9  | 467  | c.801_803delAGC  | c.(799-804)CTAGCA>CTA   | p.A271del     |
| Pat_06 | Pre-Treatment | IQGAP1    | 8826   | 37 | 15 | 91019925  | 91019925  | Frame_Shift_Del | DEL | A   | - | 7  | 563  | c.2815delA       | c.(2815-2817)AAAFs      | p.K939fs      |
| Pat_06 | Pre-Treatment | BLM       | 641    | 37 | 15 | 91304286  | 91304288  | In_Frame_Del    | DEL | TGA | - | 8  | 649  | .1683_1685delTG  | c.:(1681-1686)TTTGAT>TT | p.D566del     |
| Pat_06 | Pre-Treatment | VPS33B    | 26276  | 37 | 15 | 91550236  | 91550238  | In_Frame_Del    | DEL | TCC | - | 15 | 1581 | c.642_644delGGAc | c.(640-645)GAGGAT>GAT   | p.E214del     |
| Pat_06 | Pre-Treatment | TPSD1     | 23430  | 37 | 16 | 1306312   | 1306314   | In_Frame_Del    | DEL | CTG | - | 9  | 805  | c.31_33delCTG    | c.(31-33)CTGdel         | p.L14del      |
| Pat_06 | Pre-Treatment | ABCA3     | 21     | 37 | 16 | 2373622   | 2373622   | Frame_Shift_Del | DEL | A   | - | 7  | 2325 | c.515delT        | c.(514-516)TTCfs        | p.F172fs      |
| Pat_06 | Pre-Treatment | TIGD7     | 91151  | 37 | 16 | 3350471   | 3350472   | Frame_Shift_Ins | INS | -   | T | 7  | 477  | c.143_144insA    | c.(142-144)AATfs        | p.N48fs       |
| Pat_06 | Pre-Treatment | C16orf62  | 57020  | 37 | 16 | 19580800  | 19580802  | In_Frame_Del    | DEL | TCC | - | 14 | 566  | c.172_174delTCC  | c.(172-174)TCCdel       | p.S64del      |
| Pat_06 | Pre-Treatment | ATXN2L    | 11273  | 37 | 16 | 28847350  | 28847350  | Frame_Shift_Del | DEL | G   | - | 7  | 684  | c.2992delG       | c.(2992-2994)GGGfs      | p.G998fs      |
| Pat_06 | Pre-Treatment | SRCAP     | 10847  | 37 | 16 | 30724910  | 30724910  | Frame_Shift_Del | DEL | T   | - | 7  | 1006 | c.2371delT       | c.(2371-2373)TTTfs      | p.F791fs      |
| Pat_06 | Pre-Treatment | RSPRY1    | 89970  | 37 | 16 | 57255221  | 57255222  | Frame_Shift_Del | DEL | GC  | - | 7  | 1198 | .1055_1056delGC  | c.(1054-1056)TGCfs      | p.C352fs      |
| Pat_06 | Pre-Treatment | FHOD1     | 29109  | 37 | 16 | 67267852  | 67267852  | Frame_Shift_Del | DEL | G   | - | 8  | 329  | c.1754delC       | c.(1753-1755)CCTfs      | p.P585fs      |
| Pat_06 | Pre-Treatment | ACD       | 65057  | 37 | 16 | 67693646  | 67693648  | In_Frame_Del    | DEL | GCA | - | 13 | 1230 | c.551_553delTGC  | c.:(550-555)CTGCAG>CAG  | p.L184del     |
| Pat_06 | Pre-Treatment | EDC4      | 23644  | 37 | 16 | 67913767  | 67913769  | In_Frame_Del    | DEL | CAG | - | 7  | 241  | .1836_1838delCAI | c.(1834-1839)CCCAGC>CC  | p.S617del     |

|        |               |          |        |    |    |          |          |                 |     |     |   |    |      |                  |                                  |               |
|--------|---------------|----------|--------|----|----|----------|----------|-----------------|-----|-----|---|----|------|------------------|----------------------------------|---------------|
| Pat_06 | Pre-Treatment | CDH3     | 1001   | 37 | 16 | 68718504 | 68718504 | Frame_Shift_Del | DEL | A   | - | 7  | 1486 | c.1201delA       | c.(1201-1203)AAAFs               | p.K401fs      |
| Pat_06 | Pre-Treatment | TERF2IP  | 54386  | 37 | 16 | 75690204 | 75690206 | In_Frame_Del    | DEL | GAA | - | 9  | 237  | c.895_897delGAA  | c.(895-897)GAAAdel               | p.E304del     |
| Pat_06 | Pre-Treatment | CNTNAP4  | 85445  | 37 | 16 | 76389351 | 76389351 | Frame_Shift_Del | DEL | G   | - | 7  | 1214 | c.333delG        | c.(331-333)CTGfs                 | p.L111fs      |
| Pat_06 | Pre-Treatment | MNT      | 4335   | 37 | 17 | 2290831  | 2290831  | Frame_Shift_Del | DEL | G   | - | 12 | 1592 | c.1113delC       | c.(1111-1113)CCCfs               | p.P371fs      |
| Pat_06 | Pre-Treatment | ZNF232   | 7775   | 37 | 17 | 5012755  | 5012756  | Frame_Shift_Del | DEL | AG  | - | 7  | 1556 | c.350_351delCT   | c.(349-351)CCTfs                 | p.P117fs      |
| Pat_06 | Pre-Treatment | DHX33    | 56919  | 37 | 17 | 5372037  | 5372039  | In_Frame_Del    | DEL | CCT | - | 8  | 245  | c.141_143delAGG  | c.(139-144)GGAGGC>GG(p.47_48GG>G |               |
| Pat_06 | Pre-Treatment | BCL6B    | 255877 | 37 | 17 | 6927858  | 6927858  | Frame_Shift_Del | DEL | C   | - | 7  | 1159 | c.540delC        | c.(538-540)GGCfs                 | p.G180fs      |
| Pat_06 | Pre-Treatment | PLSCR3   | 57048  | 37 | 17 | 7294059  | 7294059  | Frame_Shift_Del | DEL | C   | - | 8  | 1323 | c.725delG        | c.(724-726)GGCfs                 | p.G242fs      |
| Pat_06 | Pre-Treatment | PER1     | 5187   | 37 | 17 | 8049759  | 8049761  | In_Frame_Del    | DEL | AGG | - | 8  | 311  | .1967_1969delCC  | c.(1966-1971)TCCTAT>TA           | p.S656del     |
| Pat_06 | Pre-Treatment | NDEL1    | 81565  | 37 | 17 | 8370271  | 8370273  | In_Frame_Del    | DEL | CTC | - | 10 | 927  | c.968_970delCTC  | c.(967-972)GCTCCT>GCT            | p.P327del     |
| Pat_06 | Pre-Treatment | USP43    | 124739 | 37 | 17 | 9578264  | 9578265  | Frame_Shift_Del | DEL | TG  | - | 7  | 2721 | c.797_798delTG   | c.(796-798)CTGfs                 | p.L266fs      |
| Pat_06 | Pre-Treatment | SUPT6H   | 6830   | 37 | 17 | 27002006 | 27002006 | Frame_Shift_Del | DEL | A   | - | 9  | 323  | c.364delA        | c.(364-366)AAAFs                 | p.K122fs      |
| Pat_06 | Pre-Treatment | RHOT1    | 55288  | 37 | 17 | 30525994 | 30525994 | Frame_Shift_Del | DEL | G   | - | 7  | 1108 | c.898delG        | c.(898-900)GAAfs                 | p.E300fs      |
| Pat_06 | Pre-Treatment | ZNF207   | 7756   | 37 | 17 | 30677314 | 30677316 | In_Frame_Del    | DEL | AAG | - | 9  | 1413 | c.10_12delAAG    | c.(10-12)AAGdel                  | p.K7del       |
| Pat_06 | Pre-Treatment | CCL23    | 6368   | 37 | 17 | 34340806 | 34340806 | Frame_Shift_Del | DEL | C   | - | 8  | 615  | c.229delG        | c.(229-231)GAGfs                 | p.E77fs       |
| Pat_06 | Pre-Treatment | STARD3   | 10948  | 37 | 17 | 37815015 | 37815015 | Frame_Shift_Del | DEL | G   | - | 7  | 1280 | c.588delG        | c.(586-588)CTGfs                 | p.L196fs      |
| Pat_06 | Pre-Treatment | STAT5A   | 6776   | 37 | 17 | 40453398 | 40453399 | Frame_Shift_Ins | INS | -   | C | 7  | 419  | c.1095_1096insC  | c.(1093-1098)AATCCCfs            | p.N365fs      |
| Pat_06 | Pre-Treatment | HDAC5    | 10014  | 37 | 17 | 42157800 | 42157801 | Frame_Shift_Ins | INS | -   | G | 7  | 598  | c.2793_2794insC  | c.(2791-2796)CCCATTfs            | p.P931fs      |
| Pat_06 | Pre-Treatment | CCDC103  | 388389 | 37 | 17 | 42980014 | 42980015 | Frame_Shift_Del | DEL | AG  | - | 10 | 328  | c.558_559delAG   | c.(556-561)GCAGAGfs              | p.A186fs      |
| Pat_06 | Pre-Treatment | BRIP1    | 83990  | 37 | 17 | 59878722 | 59878722 | Frame_Shift_Del | DEL | C   | - | 8  | 1226 | c.1032delG       | c.(1030-1032)GGGfs               | p.G344fs      |
| Pat_06 | Pre-Treatment | DCAF7    | 10238  | 37 | 17 | 61661029 | 61661029 | Frame_Shift_Del | DEL | C   | - | 8  | 445  | c.694delC        | c.(694-696)CAGfs                 | p.Q232fs      |
| Pat_06 | Pre-Treatment | FTSJ3    | 117246 | 37 | 17 | 61901516 | 61901518 | In_Frame_Del    | DEL | TCC | - | 8  | 1232 | .1080_1082delGG  | c.(1078-1083)GAGGAA>GA           | p.360_361EE>I |
| Pat_06 | Pre-Treatment | COG1     | 9382   | 37 | 17 | 71204457 | 71204458 | Frame_Shift_Ins | INS | -   | C | 7  | 682  | c.2810_2811insC  | c.(2809-2811)GTCfs               | p.V937fs      |
| Pat_06 | Pre-Treatment | SLC26A11 | 284129 | 37 | 17 | 78201649 | 78201651 | In_Frame_Del    | DEL | TGC | - | 14 | 1016 | c.626_628delTGC  | c.(625-630)ATGCTG>ATG            | p.L213del     |
| Pat_06 | Pre-Treatment | FAM38B   | 63895  | 37 | 18 | 10689722 | 10689723 | Frame_Shift_Del | DEL | GG  | - | 7  | 787  | c.959_960delCC   | c.(958-960)TCCfs                 | p.S320fs      |
| Pat_06 | Pre-Treatment | ESCO1    | 114799 | 37 | 18 | 19153983 | 19153984 | Frame_Shift_Del | DEL | TG  | - | 8  | 1212 | c.821_822delCA   | c.(820-822)ACAfs                 | p.T274fs      |
| Pat_06 | Pre-Treatment | HAUS1    | 115106 | 37 | 18 | 43685174 | 43685174 | Frame_Shift_Del | DEL | A   | - | 9  | 241  | c.45delA         | c.(43-45)TTAFs                   | p.L15fs       |
| Pat_06 | Pre-Treatment | MBD2     | 8932   | 37 | 18 | 51750459 | 51750459 | Frame_Shift_Del | DEL | G   | - | 7  | 405  | c.471delC        | c.(469-471)CCCfs                 | p.P157fs      |
| Pat_06 | Pre-Treatment | WDR7     | 23335  | 37 | 18 | 54358513 | 54358513 | Frame_Shift_Del | DEL | G   | - | 11 | 980  | c.784delG        | c.(784-786)GGGfs                 | p.G262fs      |
| Pat_06 | Pre-Treatment | DSEL     | 92126  | 37 | 18 | 65180521 | 65180521 | Frame_Shift_Del | DEL | C   | - | 7  | 712  | c.1355delG       | c.(1354-1356)GGAfs               | p.G452fs      |
| Pat_06 | Pre-Treatment | GTF2F1   | 2962   | 37 | 19 | 6381791  | 6381793  | In_Frame_Del    | DEL | CTT | - | 7  | 129  | c.751_753delAAG  | c.(751-753)AAGdel                | p.K251del     |
| Pat_06 | Pre-Treatment | ZNF442   | 79973  | 37 | 19 | 12461740 | 12461741 | Frame_Shift_Ins | INS | -   | A | 7  | 638  | c.658_659insT    | c.(658-660)TGGfs                 | p.W220fs      |
| Pat_06 | Pre-Treatment | NWD1     | 284434 | 37 | 19 | 16908642 | 16908642 | Frame_Shift_Del | DEL | T   | - | 9  | 1920 | c.3404delT       | c.(3403-3405)GTTfs               | p.V1135fs     |
| Pat_06 | Pre-Treatment | ZNF43    | 7594   | 37 | 19 | 22002025 | 22002026 | Splice_Site     | INS | -   | A | 7  | 459  | c.4_splice       | c.e2-1                           | p.G2_splice   |
| Pat_06 | Pre-Treatment | WDR88    | 126248 | 37 | 19 | 33666419 | 33666421 | In_Frame_Del    | DEL | TCA | - | 16 | 865  | .1360_1362delTC  | c.(1360-1362)TCAdel              | p.S458del     |
| Pat_06 | Pre-Treatment | FFAR2    | 2867   | 37 | 19 | 35940788 | 35940790 | In_Frame_Del    | DEL | CTG | - | 7  | 335  | c.172_174delCTG  | c.(172-174)CTGdel                | p.L62del      |
| Pat_06 | Pre-Treatment | CAPN12   | 147968 | 37 | 19 | 39224369 | 39224371 | In_Frame_Del    | DEL | TCG | - | 7  | 472  | .1929_1931delCG  | c.(1927-1932)TACGAG>TAB          | p.643_644YE>  |
| Pat_06 | Pre-Treatment | CAPN12   | 147968 | 37 | 19 | 39228931 | 39228931 | Frame_Shift_Del | DEL | T   | - | 12 | 517  | c.947delA        | c.(946-948)AAGfs                 | p.K316fs      |
| Pat_06 | Pre-Treatment | PAF1     | 54623  | 37 | 19 | 39879780 | 39879780 | Frame_Shift_Del | DEL | T   | - | 9  | 1503 | c.520delA        | c.(520-522)AGCfs                 | p.S174fs      |
| Pat_06 | Pre-Treatment | CEACAM5  | 1048   | 37 | 19 | 42224866 | 42224866 | Frame_Shift_Del | DEL | C   | - | 7  | 1910 | c.1796delC       | c.(1795-1797)TCCfs               | p.S599fs      |
| Pat_06 | Pre-Treatment | CD3EAP   | 10849  | 37 | 19 | 45911859 | 45911861 | In_Frame_Del    | DEL | GAA | - | 7  | 441  | c.633_635delGAA  | c.(631-636)CGGAAG>CGC            | p.K217del     |
| Pat_06 | Pre-Treatment | SAE1     | 10055  | 37 | 19 | 47712448 | 47712450 | In_Frame_Del    | DEL | CTT | - | 7  | 877  | c.981_983delCTT  | c.(979-984)AACTTC>AAC            | p.F331del     |
| Pat_06 | Pre-Treatment | TEAD2    | 8463   | 37 | 19 | 49850472 | 49850473 | Frame_Shift_Ins | INS | -   | G | 14 | 1369 | c.883_884insC    | c.(883-885)CATfs                 | p.H295fs      |
| Pat_06 | Pre-Treatment | FUZ      | 80199  | 37 | 19 | 50310483 | 50310485 | In_Frame_Del    | DEL | CAG | - | 15 | 398  | .1180_1182delCTC | c.(1180-1182)CTGdel              | p.L394del     |
| Pat_06 | Pre-Treatment | ATF5     | 22809  | 37 | 19 | 50435750 | 50435750 | Frame_Shift_Del | DEL | C   | - | 7  | 667  | c.250delC        | c.(250-252)CCCfs                 | p.P84fs       |
| Pat_06 | Pre-Treatment | ZNF649   | 65251  | 37 | 19 | 52393999 | 52393999 | Frame_Shift_Del | DEL | C   | - | 8  | 2696 | c.1390delG       | c.(1390-1392)GAAfs               | p.E464fs      |
| Pat_06 | Pre-Treatment | LENG1    | 79165  | 37 | 19 | 54660660 | 54660660 | Frame_Shift_Del | DEL | C   | - | 7  | 645  | c.416delG        | c.(415-417)GGCfs                 | p.G139fs      |



|        |               |          |        |    |    |           |           |                 |     |     |   |    |      |                   |                       |               |
|--------|---------------|----------|--------|----|----|-----------|-----------|-----------------|-----|-----|---|----|------|-------------------|-----------------------|---------------|
| Pat_06 | Pre-Treatment | SOX11    | 6664   | 37 | 2  | 5833526   | 5833528   | In_Frame_Del    | DEL | GAC | - | 10 | 181  | c.673_675delGAC   | c.(673-675)GACdel     | p.D233del     |
| Pat_06 | Pre-Treatment | GREB1    | 9687   | 37 | 2  | 11738052  | 11738053  | Frame_Shift_Ins | INS | -   | C | 7  | 2274 | c.2100_2101insC   | c.(2098-2103)ATTCCCfs | p.L700fs      |
| Pat_06 | Pre-Treatment | GREB1    | 9687   | 37 | 2  | 11750934  | 11750934  | Frame_Shift_Del | DEL | G   | - | 9  | 430  | c.2787delG        | c.(2785-2787)CTGfs    | p.L929fs      |
| Pat_06 | Pre-Treatment | PUM2     | 23369  | 37 | 2  | 20482977  | 20482979  | In_Frame_Del    | DEL | GCT | - | 10 | 801  | .1449_1451delAG(  | (1447-1452)GCAGCT>GC  | .483_484AA>   |
| Pat_06 | Pre-Treatment | OTOF     | 9381   | 37 | 2  | 26693554  | 26693556  | In_Frame_Del    | DEL | CTT | - | 7  | 340  | .3928_3930delAA   | c.(3928-3930)AAGdel   | p.K1310del    |
| Pat_06 | Pre-Treatment | RTN4     | 57142  | 37 | 2  | 55253745  | 55253746  | Frame_Shift_Ins | INS | -   | T | 11 | 269  | c.1489_1490insA   | c.(1489-1491)ATAfs    | p.I497fs      |
| Pat_06 | Pre-Treatment | AFTPH    | 54812  | 37 | 2  | 64778672  | 64778674  | In_Frame_Del    | DEL | GAT | - | 13 | 1383 | c.64_66delGAT     | c.(64-66)GATdel       | p.D26del      |
| Pat_06 | Pre-Treatment | HK2      | 3099   | 37 | 2  | 75104378  | 75104378  | Frame_Shift_Del | DEL | G   | - | 7  | 1466 | c.961delG         | c.(961-963)GGGfs      | p.G321fs      |
| Pat_06 | Pre-Treatment | GGCX     | 2677   | 37 | 2  | 85778065  | 85778065  | Frame_Shift_Del | DEL | T   | - | 8  | 1375 | c.1871delA        | c.(1870-1872)AAGfs    | p.K624fs      |
| Pat_06 | Pre-Treatment | SLC9A4   | 389015 | 37 | 2  | 103124586 | 103124587 | Frame_Shift_Del | DEL | TC  | - | 7  | 1348 | c.1247_1248delITC | c.(1246-1248)TTCfs    | p.F416fs      |
| Pat_06 | Pre-Treatment | MRPS9    | 64965  | 37 | 2  | 105708963 | 105708963 | Frame_Shift_Del | DEL | A   | - | 7  | 915  | c.756delA         | c.(754-756)TCAfs      | p.S252fs      |
| Pat_06 | Pre-Treatment | SULT1C4  | 27233  | 37 | 2  | 108998938 | 108998938 | Frame_Shift_Del | DEL | G   | - | 8  | 902  | c.393delG         | c.(391-393)AAGfs      | p.K131fs      |
| Pat_06 | Pre-Treatment | GCC2     | 9648   | 37 | 2  | 109087883 | 109087884 | Frame_Shift_Ins | INS | -   | A | 11 | 999  | c.2098_2099insA   | c.(2098-2100)GAAfs    | p.E700fs      |
| Pat_06 | Pre-Treatment | POLR1B   | 84172  | 37 | 2  | 113331367 | 113331367 | Frame_Shift_Del | DEL | G   | - | 8  | 1265 | c.2500delG        | c.(2500-2502)GGGfs    | p.G834fs      |
| Pat_06 | Pre-Treatment | SCN9A    | 6335   | 37 | 2  | 167141131 | 167141131 | Frame_Shift_Del | DEL | G   | - | 8  | 794  | c.1806delC        | c.(1804-1806)ATCfs    | p.I602fs      |
| Pat_06 | Pre-Treatment | LRP2     | 4036   | 37 | 2  | 170012800 | 170012800 | Frame_Shift_Del | DEL | T   | - | 8  | 1351 | c.12135delA       | c.(12133-12135)AAAFs  | p.K4045fs     |
| Pat_06 | Pre-Treatment | CDCA7    | 83879  | 37 | 2  | 174229648 | 174229650 | In_Frame_Del    | DEL | GGA | - | 10 | 347  | c.588_590delGGAc. | (586-591)ATGGAG>ATG   | p.E202del     |
| Pat_06 | Pre-Treatment | TTN      | 7273   | 37 | 2  | 179422872 | 179422872 | Frame_Shift_Del | DEL | C   | - | 8  | 459  | c.79505delG       | c.(79504-79506)GGAfs  | p.G26502fs    |
| Pat_06 | Pre-Treatment | ALS2CR11 | 151254 | 37 | 2  | 202352352 | 202352352 | Frame_Shift_Del | DEL | T   | - | 7  | 290  | c.1855delA        | c.(1855-1857)ATTfs    | p.I619fs      |
| Pat_06 | Pre-Treatment | ATIC     | 471    | 37 | 2  | 216214333 | 216214333 | Frame_Shift_Del | DEL | G   | - | 7  | 1187 | c.1734delG        | c.(1732-1734)CTGfs    | p.L578fs      |
| Pat_06 | Pre-Treatment | ALPI     | 248    | 37 | 2  | 233320926 | 233320928 | In_Frame_Del    | DEL | TGC | - | 10 | 225  | c.17_19delITGC    | c.(16-21)GTGCTG>GTG   | p.L10del      |
| Pat_06 | Pre-Treatment | DEFB118  | 117285 | 37 | 20 | 29960672  | 29960672  | Frame_Shift_Del | DEL | A   | - | 7  | 179  | c.71delA          | c.(70-72)GAAfs        | p.E24fs       |
| Pat_06 | Pre-Treatment | ROMO1    | 140823 | 37 | 20 | 34287672  | 34287672  | Frame_Shift_Del | DEL | T   | - | 9  | 1140 | c.118delT         | c.(118-120)TTTfs      | p.F40fs       |
| Pat_06 | Pre-Treatment | SFRS6    | 6431   | 37 | 20 | 42089162  | 42089163  | Frame_Shift_Del | DEL | TC  | - | 7  | 848  | c.598_599delITC   | c.(598-600)TCTfs      | p.S200fs      |
| Pat_06 | Pre-Treatment | SLC9A8   | 23315  | 37 | 20 | 48466159  | 48466159  | Frame_Shift_Del | DEL | T   | - | 8  | 557  | c.476delT         | c.(475-477)GTTfs      | p.V159fs      |
| Pat_06 | Pre-Treatment | SALL4    | 57167  | 37 | 20 | 50408526  | 50408526  | Frame_Shift_Del | DEL | G   | - | 7  | 1330 | c.496delC         | c.(496-498)CAGfs      | p.Q166fs      |
| Pat_06 | Pre-Treatment | SYCP2    | 10388  | 37 | 20 | 58452518  | 58452519  | Frame_Shift_Ins | INS | -   | T | 9  | 270  | c.3071_3072insA   | c.(3070-3072)AACfs    | p.N1024fs     |
| Pat_06 | Pre-Treatment | RTEL1    | 51750  | 37 | 20 | 62292822  | 62292824  | In_Frame_Del    | DEL | GCT | - | 9  | 218  | c.274_276delGCT   | c.(274-276)GCTdel     | p.A96del      |
| Pat_06 | Pre-Treatment | LCA5L    | 150082 | 37 | 21 | 40794907  | 40794907  | Frame_Shift_Del | DEL | T   | - | 7  | 691  | c.832delA         | c.(832-834)ATAfs      | p.I278fs      |
| Pat_06 | Pre-Treatment | ZNF295   | 49854  | 37 | 21 | 43412376  | 43412376  | Frame_Shift_Del | DEL | G   | - | 9  | 1056 | c.1829delC        | c.(1828-1830)TCAfs    | p.S610fs      |
| Pat_06 | Pre-Treatment | PKNOX1   | 5316   | 37 | 21 | 44450072  | 44450072  | Frame_Shift_Del | DEL | C   | - | 7  | 1174 | c.1172delC        | c.(1171-1173)GCCfs    | p.A391fs      |
| Pat_06 | Pre-Treatment | MED15    | 51586  | 37 | 22 | 20918916  | 20918918  | In_Frame_Del    | DEL | CAG | - | 36 | 439  | c.631_633delCAG   | c.(631-633)CAGdel     | p.Q218del     |
| Pat_06 | Pre-Treatment | MED15    | 51586  | 37 | 22 | 20922855  | 20922857  | In_Frame_Del    | DEL | GCA | - | 12 | 1334 | .1089_1091delGC.  | (1087-1092)GTGCAG>GT  | p.Q367del     |
| Pat_06 | Pre-Treatment | RAB36    | 9609   | 37 | 22 | 23494663  | 23494665  | In_Frame_Del    | DEL | GGT | - | 10 | 1105 | c.375_377delGGTc. | (373-378)AAGGTG>AAC   | p.V129del     |
| Pat_06 | Pre-Treatment | SF3A1    | 10291  | 37 | 22 | 30742328  | 30742330  | In_Frame_Del    | DEL | CTG | - | 26 | 884  | c.364_366delCAG   | c.(364-366)CAGdel     | p.Q122del     |
| Pat_06 | Pre-Treatment | SMCR7L   | 54471  | 37 | 22 | 39910089  | 39910090  | Frame_Shift_Del | DEL | CT  | - | 9  | 555  | c.1153_1154delCT  | c.(1153-1155)CTAfs    | p.L385fs      |
| Pat_06 | Pre-Treatment | NAGA     | 4668   | 37 | 22 | 42463133  | 42463133  | Frame_Shift_Del | DEL | G   | - | 7  | 2154 | c.486delC         | c.(484-486)CCCfs      | p.P162fs      |
| Pat_06 | Pre-Treatment | FANCD2   | 2177   | 37 | 3  | 10116273  | 10116274  | Frame_Shift_Del | DEL | CC  | - | 9  | 416  | .2775_2776delCC   | c.(2773-2778)TTCCGAFs | p.F925fs      |
| Pat_06 | Pre-Treatment | DYNC11L1 | 51143  | 37 | 3  | 32571050  | 32571050  | Frame_Shift_Del | DEL | T   | - | 7  | 212  | c.1288delA        | c.(1288-1290)ATTfs    | p.I430fs      |
| Pat_06 | Pre-Treatment | DLEC1    | 9940   | 37 | 3  | 38127767  | 38127767  | Frame_Shift_Del | DEL | G   | - | 7  | 1412 | c.1471delG        | c.(1471-1473)GGGfs    | p.G491fs      |
| Pat_06 | Pre-Treatment | NKTR     | 4820   | 37 | 3  | 42680269  | 42680271  | In_Frame_Del    | DEL | GAG | - | 10 | 596  | .3073_3075delGAI  | c.(3073-3075)GAGdel   | p.E1029del    |
| Pat_06 | Pre-Treatment | HHATL    | 57467  | 37 | 3  | 42740315  | 42740317  | In_Frame_Del    | DEL | AGC | - | 9  | 398  | c.366_368delGCTc. | (364-369)CTGCTT>CTT   | c.122_123LL>L |
| Pat_06 | Pre-Treatment | ZNF167   | 55888  | 37 | 3  | 44612159  | 44612159  | Frame_Shift_Del | DEL | T   | - | 7  | 1272 | c.1557delT        | c.(1555-1557)GGTfs    | p.G519fs      |
| Pat_06 | Pre-Treatment | CACNA2D2 | 9254   | 37 | 3  | 50418529  | 50418529  | Frame_Shift_Del | DEL | C   | - | 8  | 2041 | c.681delG         | c.(679-681)TGGfs      | p.W227fs      |
| Pat_06 | Pre-Treatment | NT5DC2   | 64943  | 37 | 3  | 52568595  | 52568595  | Frame_Shift_Del | DEL | G   | - | 8  | 1136 | c.75delC          | c.(73-75)ACCfs        | p.T25fs       |
| Pat_06 | Pre-Treatment | ROBO2    | 6092   | 37 | 3  | 77657038  | 77657038  | Frame_Shift_Del | DEL | C   | - | 9  | 654  | c.3226delC        | c.(3226-3228)CCCfs    | p.P1076fs     |
| Pat_06 | Pre-Treatment | DPPA4    | 55211  | 37 | 3  | 109049606 | 109049606 | Frame_Shift_Del | DEL | T   | - | 9  | 467  | c.444delA         | c.(442-444)AAAFs      | p.K148fs      |

|        |               |                |        |    |   |           |           |                 |     |      |     |    |      |                  |                                    |             |
|--------|---------------|----------------|--------|----|---|-----------|-----------|-----------------|-----|------|-----|----|------|------------------|------------------------------------|-------------|
| Pat_06 | Pre-Treatment | KIAA2018       | 205717 | 37 | 3 | 113380090 | 113380090 | Frame_Shift_Del | DEL | T    | -   | 19 | 463  | c.439delA        | c.(439-441)ATTfs                   | p.1147fs    |
| Pat_06 | Pre-Treatment | DIRC2          | 84925  | 37 | 3 | 122514097 | 122514097 | Frame_Shift_Del | DEL | G    | -   | 2  | 4    | c.58delG         | c.(58-60)GGGfs                     | p.G20fs     |
| Pat_06 | Pre-Treatment | ABTB1          | 80325  | 37 | 3 | 127393289 | 127393290 | Frame_Shift_Ins | INS | -    | C   | 9  | 269  | c.112_113insC    | c.(112-114)ACCfs                   | p.T38fs     |
| Pat_06 | Pre-Treatment | NEK11          | 79858  | 37 | 3 | 130748696 | 130748696 | Frame_Shift_Del | DEL | C    | -   | 7  | 819  | c.144delC        | c.(142-144)GACfs                   | p.D48fs     |
| Pat_06 | Pre-Treatment | EIF2A          | 83939  | 37 | 3 | 150280427 | 150280427 | Frame_Shift_Del | DEL | C    | -   | 9  | 249  | c.272delC        | c.(271-273)GCAfs                   | p.A91fs     |
| Pat_06 | Pre-Treatment | ATP11B         | 23200  | 37 | 3 | 182602674 | 182602674 | Frame_Shift_Del | DEL | T    | -   | 8  | 305  | c.2643delT       | c.(2641-2643)TATfs                 | p.Y881fs    |
| Pat_06 | Pre-Treatment | EIF4G1         | 1981   | 37 | 3 | 184039744 | 184039746 | In_Frame_Del    | DEL | GAA  | -   | 11 | 304  | .1372_1374delGA  | c.(1372-1374)GAAdel                | p.E465del   |
| Pat_06 | Pre-Treatment | TRA2B          | 6434   | 37 | 3 | 185637260 | 185637262 | In_Frame_Del    | DEL | TCC  | -   | 9  | 585  | c.745_747delGGA  | c.(745-747)GGAdel                  | p.G249del   |
| Pat_06 | Pre-Treatment | KLF3           | 51274  | 37 | 4 | 38690460  | 38690460  | Frame_Shift_Del | DEL | A    | -   | 7  | 945  | c.312delA        | c.(310-312)ATAfs                   | p.1104fs    |
| Pat_06 | Pre-Treatment | GABRG1         | 2565   | 37 | 4 | 46060358  | 46060358  | Frame_Shift_Del | DEL | A    | -   | 17 | 563  | c.792delT        | c.(790-792)TTTfs                   | p.F264fs    |
| Pat_06 | Pre-Treatment | CSN3           | 1448   | 37 | 4 | 71114987  | 71114987  | Frame_Shift_Del | DEL | C    | -   | 7  | 1269 | c.360delC        | c.(358-360)ATCfs                   | p.1120fs    |
| Pat_06 | Pre-Treatment | NUP54          | 53371  | 37 | 4 | 77065307  | 77065309  | In_Frame_Del    | DEL | TGC  | -   | 8  | 1781 | c.288_290delGCAC | c.(286-291)CAGCAA>CAAp.96_97QQ>Q   |             |
| Pat_06 | Pre-Treatment | PRDM8          | 56978  | 37 | 4 | 81123250  | 81123252  | In_Frame_Del    | DEL | CAG  | -   | 8  | 132  | c.634_636delCAG  | c.(634-636)CAGdel                  | p.Q217del   |
| Pat_06 | Pre-Treatment | SEC31A         | 22872  | 37 | 4 | 83785675  | 83785677  | In_Frame_Del    | DEL | TGC  | -   | 7  | 906  | .1272_1274delGC  | c.(1270-1275)CAGCAC>CA             | p.Q424del   |
| Pat_06 | Pre-Treatment | CDS1           | 1040   | 37 | 4 | 85556475  | 85556475  | Frame_Shift_Del | DEL | T    | -   | 30 | 534  | c.781delT        | c.(781-783)TTTfs                   | p.F261fs    |
| Pat_06 | Pre-Treatment | SPARCL1        | 8404   | 37 | 4 | 88403670  | 88403671  | Frame_Shift_Del | DEL | AG   | -   | 9  | 548  | c.1573_1574delCT | c.(1573-1575)CTAfs                 | p.L525fs    |
| Pat_06 | Pre-Treatment | NAP1L5         | 266812 | 37 | 4 | 89618484  | 89618486  | In_Frame_Del    | DEL | TCC  | -   | 9  | 305  | c.420_422delGGA  | c.(418-423)GAGGAA>GAAp.140_141EE>I |             |
| Pat_06 | Pre-Treatment | NPNT           | 255743 | 37 | 4 | 106863682 | 106863684 | In_Frame_Del    | DEL | CCA  | -   | 13 | 594  | c.982_984delCCA  | c.(982-984)CCAdel                  | p.P333del   |
| Pat_06 | Pre-Treatment | SEC24B         | 10427  | 37 | 4 | 110402913 | 110402915 | In_Frame_Del    | DEL | GAG  | -   | 9  | 1342 | .1141_1143delGAC | c.(1141-1143)GAGdel                | p.E384del   |
| Pat_06 | Pre-Treatment | KIAA1109       | 84162  | 37 | 4 | 123178593 | 123178593 | Frame_Shift_Del | DEL | G    | -   | 7  | 1926 | c.6562delG       | c.(6562-6564)GGGfs                 | p.G2188fs   |
| Pat_06 | Pre-Treatment | POU4F2         | 5458   | 37 | 4 | 147560457 | 147560458 | In_Frame_Ins    | INS | -    | GGC | 26 | 33   | c.165_166insGGC  | c.(163-168)insGGC                  | p.68_69insG |
| Pat_06 | Pre-Treatment | LRBA           | 987    | 37 | 4 | 151842374 | 151842374 | Frame_Shift_Del | DEL | A    | -   | 7  | 1478 | c.621delT        | c.(619-621)TTTfs                   | p.F207fs    |
| Pat_06 | Pre-Treatment | CPE            | 1363   | 37 | 4 | 166405613 | 166405613 | Frame_Shift_Del | DEL | T    | -   | 7  | 2322 | c.830delT        | c.(829-831)ATTfs                   | p.I277fs    |
| Pat_06 | Pre-Treatment | DNAH5          | 1767   | 37 | 5 | 13919383  | 13919383  | Frame_Shift_Del | DEL | T    | -   | 15 | 1377 | c.877delA        | c.(877-879)AGAfs                   | p.R293fs    |
| Pat_06 | Pre-Treatment | PDZD2          | 23037  | 37 | 5 | 31799656  | 31799657  | Frame_Shift_Ins | INS | -    | G   | 7  | 625  | c.301_302insG    | c.(301-303)AGGfs                   | p.R101fs    |
| Pat_06 | Pre-Treatment | NIPBL          | 25836  | 37 | 5 | 37063925  | 37063927  | In_Frame_Del    | DEL | GAA  | -   | 7  | 237  | .7894_7896delGA  | c.(7894-7896)GAAdel                | p.E2636del  |
| Pat_06 | Pre-Treatment | EMB            | 133418 | 37 | 5 | 49707099  | 49707099  | Frame_Shift_Del | DEL | T    | -   | 7  | 1018 | c.315delA        | c.(313-315)AAAfs                   | p.K105fs    |
| Pat_06 | Pre-Treatment | ADAMTS6        | 11174  | 37 | 5 | 64569175  | 64569175  | Frame_Shift_Del | DEL | C    | -   | 9  | 2410 | c.1612delG       | c.(1612-1614)GAAfs                 | p.E538fs    |
| Pat_06 | Pre-Treatment | THBS4          | 7060   | 37 | 5 | 79355567  | 79355567  | Frame_Shift_Del | DEL | C    | -   | 7  | 1706 | c.826delC        | c.(826-828)CCCfs                   | p.P276fs    |
| Pat_06 | Pre-Treatment | VCAN           | 1462   | 37 | 5 | 82816057  | 82816057  | Frame_Shift_Del | DEL | T    | -   | 7  | 1261 | c.1932delT       | c.(1930-1932)CCTfs                 | p.P644fs    |
| Pat_06 | Pre-Treatment | PAM            | 5066   | 37 | 5 | 102296908 | 102296910 | In_Frame_Del    | DEL | AGA  | -   | 8  | 1183 | .1137_1139delAG  | c.(1135-1140)CGAGAA>CG             | p.E383del   |
| Pat_06 | Pre-Treatment | AP3S1          | 1176   | 37 | 5 | 115202418 | 115202421 | Frame_Shift_Del | DEL | AAGA | -   | 16 | 634  | .121_124delAAG/  | c.(121-126)AAGAGAs                 | p.K41fs     |
| Pat_06 | Pre-Treatment | ZNF608         | 57507  | 37 | 5 | 124079813 | 124079815 | In_Frame_Del    | DEL | CTC  | -   | 11 | 1431 | c.868_870delGAG  | c.(868-870)GAGdel                  | p.E290del   |
| Pat_06 | Pre-Treatment | LMNB1          | 4001   | 37 | 5 | 126168434 | 126168436 | In_Frame_Del    | DEL | GAG  | -   | 7  | 882  | .1660_1662delGAI | c.(1660-1662)GAGdel                | p.E559del   |
| Pat_06 | Pre-Treatment | RAD50          | 10111  | 37 | 5 | 131944382 | 131944382 | Frame_Shift_Del | DEL | A    | -   | 7  | 141  | c.2794delA       | c.(2794-2796)AAAfs                 | p.K932fs    |
| Pat_06 | Pre-Treatment | IL9            | 3578   | 37 | 5 | 135229787 | 135229787 | Frame_Shift_Del | DEL | G    | -   | 10 | 518  | c.237delC        | c.(235-237)ACCfs                   | p.T79fs     |
| Pat_06 | Pre-Treatment | ANKHD1-EIF4EBP | 404734 | 37 | 5 | 139885350 | 139885350 | Frame_Shift_Del | DEL | G    | -   | 12 | 1529 | c.3304delG       | c.(3304-3306)GGAfs                 | p.G1102fs   |
| Pat_06 | Pre-Treatment | PCDHA2         | 56146  | 37 | 5 | 140176837 | 140176838 | Frame_Shift_Ins | INS | -    | C   | 8  | 467  | c.2288_2289insC  | c.(2287-2289)GACfs                 | p.D763fs    |
| Pat_06 | Pre-Treatment | PCDHB10        | 56126  | 37 | 5 | 140574324 | 140574324 | Frame_Shift_Del | DEL | T    | -   | 7  | 955  | c.2199delT       | c.(2197-2199)CCTfs                 | p.P733fs    |
| Pat_06 | Pre-Treatment | PCDHGC3        | 5098   | 37 | 5 | 140857742 | 140857742 | Frame_Shift_Del | DEL | A    | -   | 9  | 940  | c.2059delA       | c.(2059-2061)AAAfs                 | p.K687fs    |
| Pat_06 | Pre-Treatment | DIAPH1         | 1729   | 37 | 5 | 140953309 | 140953309 | Frame_Shift_Del | DEL | G    | -   | 7  | 149  | c.2108delC       | c.(2107-2109)CCAs                  | p.P703fs    |
| Pat_06 | Pre-Treatment | LARP1          | 23367  | 37 | 5 | 154181822 | 154181822 | Frame_Shift_Del | DEL | G    | -   | 11 | 882  | c.1972delG       | c.(1972-1974)GGGfs                 | p.G658fs    |
| Pat_06 | Pre-Treatment | RNF145         | 153830 | 37 | 5 | 158603761 | 158603761 | Frame_Shift_Del | DEL | G    | -   | 9  | 394  | c.500delC        | c.(499-501)ACAfs                   | p.T167fs    |
| Pat_06 | Pre-Treatment | HNRNP11        | 3187   | 37 | 5 | 179050112 | 179050112 | Frame_Shift_Del | DEL | C    | -   | 9  | 713  | c.23delG         | c.(22-24)GGAs                      | p.G8fs      |
| Pat_06 | Pre-Treatment | TUBB2A         | 7280   | 37 | 6 | 3154114   | 3154116   | In_Frame_Del    | DEL | CCT  | -   | 7  | 846  | .1319_1321delAG  | c.(1318-1323)GAGGGC>GC             | p.E440del   |
| Pat_06 | Pre-Treatment | CDYL           | 9425   | 37 | 6 | 4892244   | 4892244   | Frame_Shift_Del | DEL | A    | -   | 8  | 806  | c.484delA        | c.(484-486)AAAfs                   | p.K162fs    |
| Pat_06 | Pre-Treatment | RANBP9         | 10048  | 37 | 6 | 13632610  | 13632610  | Frame_Shift_Del | DEL | T    | -   | 7  | 1283 | c.1939delA       | c.(1939-1941)ATGfs                 | p.M647fs    |

|        |               |         |        |    |   |           |           |                 |     |        |   |    |      |                  |                                     |             |
|--------|---------------|---------|--------|----|---|-----------|-----------|-----------------|-----|--------|---|----|------|------------------|-------------------------------------|-------------|
| Pat_06 | Pre-Treatment | KIF13A  | 63971  | 37 | 6 | 17780984  | 17780984  | Frame_Shift_Del | DEL | C      | - | 7  | 611  | c.3823delG       | c.(3823-3825)GCAfs                  | p.A1275fs   |
| Pat_06 | Pre-Treatment | KDM1B   | 221656 | 37 | 6 | 18213941  | 18213941  | Frame_Shift_Del | DEL | T      | - | 7  | 2021 | c.1429delT       | c.(1429-1431)TTTfs                  | p.F477fs    |
| Pat_06 | Pre-Treatment | SLC17A1 | 6568   | 37 | 6 | 25830753  | 25830753  | Frame_Shift_Del | DEL | T      | - | 7  | 1710 | c.33delA         | c.(31-33)AAafs                      | p.K11fs     |
| Pat_06 | Pre-Treatment | GABBR1  | 2550   | 37 | 6 | 29599254  | 29599254  | Frame_Shift_Del | DEL | C      | - | 10 | 1706 | c.208delG        | c.(208-210)GAGfs                    | p.E70fs     |
| Pat_06 | Pre-Treatment | TRIM26  | 7726   | 37 | 6 | 30157254  | 30157254  | Frame_Shift_Del | DEL | T      | - | 17 | 1006 | c.845delA        | c.(844-846)AAGfs                    | p.K282fs    |
| Pat_06 | Pre-Treatment | PPP1R10 | 5514   | 37 | 6 | 30569334  | 30569334  | Frame_Shift_Del | DEL | G      | - | 8  | 570  | c.2815delC       | c.(2815-2817)CTGfs                  | p.L939fs    |
| Pat_06 | Pre-Treatment | PPP1R10 | 5514   | 37 | 6 | 30570264  | 30570266  | In_Frame_Del    | DEL | GGA    | - | 7  | 202  | .2160_2162delTC  | c.(2158-2163)CCTCCA>CC).720_721PP>I |             |
| Pat_06 | Pre-Treatment | DDR1    | 780    | 37 | 6 | 30863251  | 30863251  | Frame_Shift_Del | DEL | C      | - | 7  | 2055 | c.1584delC       | c.(1582-1584)GGCfs                  | p.G528fs    |
| Pat_06 | Pre-Treatment | BAT1    | 7919   | 37 | 6 | 31504446  | 31504446  | Frame_Shift_Del | DEL | A      | - | 10 | 494  | c.447delT        | c.(445-447)TTTfs                    | p.F149fs    |
| Pat_06 | Pre-Treatment | BAT3    | 7917   | 37 | 6 | 31608162  | 31608163  | Frame_Shift_Ins | INS | -      | G | 8  | 1860 | c.3047_3048insC  | c.(3046-3048)CCAfs                  | p.P1016fs   |
| Pat_06 | Pre-Treatment | HSPA1L  | 3305   | 37 | 6 | 31778562  | 31778564  | In_Frame_Del    | DEL | CAG    | - | 8  | 920  | .1186_1188delICT | c.(1186-1188)CTGdel                 | p.L396del   |
| Pat_06 | Pre-Treatment | SCUBE3  | 222663 | 37 | 6 | 35205699  | 35205699  | Frame_Shift_Del | DEL | G      | - | 8  | 1306 | c.733delG        | c.(733-735)GGGfs                    | p.G245fs    |
| Pat_06 | Pre-Treatment | ZNF318  | 24149  | 37 | 6 | 43323502  | 43323502  | Frame_Shift_Del | DEL | T      | - | 9  | 1140 | c.1570delA       | c.(1570-1572)AGGfs                  | p.R524fs    |
| Pat_06 | Pre-Treatment | MUT     | 4594   | 37 | 6 | 49409649  | 49409649  | Frame_Shift_Del | DEL | T      | - | 7  | 1944 | c.1712delA       | c.(1711-1713)AAGfs                  | p.K571fs    |
| Pat_06 | Pre-Treatment | HCRT2   | 3062   | 37 | 6 | 55039411  | 55039411  | Frame_Shift_Del | DEL | C      | - | 11 | 696  | c.26delC         | c.(25-27)TCCfs                      | p.S9fs      |
| Pat_06 | Pre-Treatment | DST     | 667    | 37 | 6 | 56362804  | 56362804  | Frame_Shift_Del | DEL | A      | - | 7  | 1028 | c.13587delT      | c.(13585-13587)GTTfs                | p.V4529fs   |
| Pat_06 | Pre-Treatment | PHF3    | 23469  | 37 | 6 | 64408371  | 64408371  | Frame_Shift_Del | DEL | A      | - | 10 | 1635 | c.2858delA       | c.(2857-2859)GAAfs                  | p.E953fs    |
| Pat_06 | Pre-Treatment | PHF3    | 23469  | 37 | 6 | 64415953  | 64415953  | Frame_Shift_Del | DEL | A      | - | 11 | 1784 | c.3402delA       | c.(3400-3402)CCAfs                  | p.P1134fs   |
| Pat_06 | Pre-Treatment | MAP3K7  | 6885   | 37 | 6 | 91296568  | 91296570  | In_Frame_Del    | DEL | GAG    | - | 15 | 214  | c.33_35delCTC    | c.(31-36)TCCTCG>TCG                 | p.11_12SS>S |
| Pat_06 | Pre-Treatment | MARCKS  | 4082   | 37 | 6 | 114181209 | 114181210 | Frame_Shift_Ins | INS | -      | A | 10 | 48   | c.453_454insA    | c.(451-456)CCGAAafs                 | p.P151fs    |
| Pat_06 | Pre-Treatment | SLC2A12 | 154091 | 37 | 6 | 134350115 | 134350115 | Frame_Shift_Del | DEL | A      | - | 8  | 479  | c.848delT        | c.(847-849)CTAfs                    | p.L283fs    |
| Pat_06 | Pre-Treatment | IFNGR1  | 3459   | 37 | 6 | 137519505 | 137519506 | Frame_Shift_Del | DEL | CT     | - | 12 | 926  | c.1132_1133delAG | c.(1132-1134)AGTfs                  | p.S378fs    |
| Pat_06 | Pre-Treatment | REPS1   | 85021  | 37 | 6 | 139266690 | 139266690 | Frame_Shift_Del | DEL | T      | - | 15 | 1625 | c.422delA        | c.(421-423)AAGfs                    | p.K141fs    |
| Pat_06 | Pre-Treatment | TIAM2   | 26230  | 37 | 6 | 155450474 | 155450474 | Frame_Shift_Del | DEL | G      | - | 7  | 405  | c.117delG        | c.(115-117)GAGfs                    | p.E39fs     |
| Pat_06 | Pre-Treatment | PRKAR1B | 5575   | 37 | 7 | 720281    | 720281    | Frame_Shift_Del | DEL | G      | - | 12 | 639  | c.260delC        | c.(259-261)CCGfs                    | p.P87fs     |
| Pat_06 | Pre-Treatment | PHF14   | 9678   | 37 | 7 | 11075380  | 11075381  | Frame_Shift_Del | DEL | AG     | - | 16 | 1542 | .1569_1570delAC  | c.(1567-1572)CAAGAGfs               | p.Q523fs    |
| Pat_06 | Pre-Treatment | TWISTNB | 221830 | 37 | 7 | 19738111  | 19738113  | In_Frame_Del    | DEL | TTC    | - | 9  | 2401 | c.843_845delGAA  | c.(841-846)AAGAAA>AAA).281_282KK>I  |             |
| Pat_06 | Pre-Treatment | POU6F2  | 11281  | 37 | 7 | 39379288  | 39379290  | In_Frame_Del    | DEL | CAG    | - | 9  | 237  | c.559_561delCAG  | c.(559-561)CAGdel                   | p.Q196del   |
| Pat_06 | Pre-Treatment | H2AFV   | 94239  | 37 | 7 | 44874102  | 44874102  | Frame_Shift_Del | DEL | A      | - | 8  | 431  | c.385delT        | c.(385-387)TAGfs                    | p.*129fs    |
| Pat_06 | Pre-Treatment | EGFR    | 1956   | 37 | 7 | 55240694  | 55240695  | Frame_Shift_Del | DEL | CG     | - | 7  | 829  | .1938_1939delCC  | c.(1936-1941)ATCGCCfs               | p.I646fs    |
| Pat_06 | Pre-Treatment | STX1A   | 6804   | 37 | 7 | 73123425  | 73123427  | In_Frame_Del    | DEL | CAT    | - | 7  | 958  | c.56_58delATG    | c.(55-60)GATGTG>GTC                 | p.D19del    |
| Pat_06 | Pre-Treatment | TMEM60  | 85025  | 37 | 7 | 77423460  | 77423460  | Frame_Shift_Del | DEL | T      | - | 14 | 574  | c.231delA        | c.(229-231)AAAfs                    | p.K77fs     |
| Pat_06 | Pre-Treatment | PHTF2   | 57157  | 37 | 7 | 77569580  | 77569581  | Frame_Shift_Ins | INS | -      | T | 8  | 776  | c.1701_1702insT  | c.(1699-1704)TTCTTTfs               | p.F567fs    |
| Pat_06 | Pre-Treatment | PCLO    | 27445  | 37 | 7 | 82390055  | 82390055  | Frame_Shift_Del | DEL | T      | - | 7  | 156  | c.15188delA      | c.(15187-15189)AAGfs                | p.K5063fs   |
| Pat_06 | Pre-Treatment | PCLO    | 27445  | 37 | 7 | 82578907  | 82578907  | Frame_Shift_Del | DEL | G      | - | 7  | 1546 | c.10997delC      | c.(10996-10998)CCAfs                | p.P3666fs   |
| Pat_06 | Pre-Treatment | AKAP9   | 10142  | 37 | 7 | 91671392  | 91671393  | Frame_Shift_Del | DEL | AG     | - | 8  | 304  | .4950_4951delAC  | c.(4948-4953)TCAGAGfs               | p.S1650fs   |
| Pat_06 | Pre-Treatment | TAF6    | 6878   | 37 | 7 | 99705124  | 99705124  | Frame_Shift_Del | DEL | G      | - | 8  | 1473 | c.1779delC       | c.(1777-1779)CCCfs                  | p.P593fs    |
| Pat_06 | Pre-Treatment | ACHE    | 43     | 37 | 7 | 100491788 | 100491790 | In_Frame_Del    | DEL | GAG    | - | 8  | 108  | c.64_66delCTC    | c.(64-66)CTCdel                     | p.L22del    |
| Pat_06 | Pre-Treatment | RELN    | 5649   | 37 | 7 | 103270544 | 103270545 | Frame_Shift_Del | DEL | GG     | - | 8  | 1501 | .2544_2545delCC  | c.(2542-2547)TCCCAGfs               | p.S848fs    |
| Pat_06 | Pre-Treatment | EXOC4   | 60412  | 37 | 7 | 133682285 | 133682285 | Frame_Shift_Del | DEL | C      | - | 7  | 779  | c.2247delC       | c.(2245-2247)CTCfs                  | p.L749fs    |
| Pat_06 | Pre-Treatment | MLL3    | 58508  | 37 | 7 | 151856009 | 151856009 | Frame_Shift_Del | DEL | T      | - | 8  | 1439 | c.11609delA      | c.(11608-11610)AAGfs                | p.K3870fs   |
| Pat_06 | Pre-Treatment | XRCC2   | 7516   | 37 | 7 | 152346220 | 152346220 | Frame_Shift_Del | DEL | A      | - | 17 | 604  | c.350delT        | c.(349-351)TTGfs                    | p.L117fs    |
| Pat_06 | Pre-Treatment | C8orf42 | 157695 | 37 | 8 | 494659    | 494664    | In_Frame_Del    | DEL | GGCGGC | - | 12 | 30   | .94_99delGCCGC   | c.(94-99)GCCGCCdel                  | p.AA32del   |
| Pat_06 | Pre-Treatment | SFTPC   | 6440   | 37 | 8 | 22020159  | 22020161  | In_Frame_Del    | DEL | GTG    | - | 20 | 818  | c.115_117delGTG  | c.(115-117)GTGdel                   | p.V44del    |
| Pat_06 | Pre-Treatment | WRN     | 7486   | 37 | 8 | 30945377  | 30945379  | In_Frame_Del    | DEL | AAG    | - | 15 | 336  | .1517_1519delAA  | c.(1516-1521)AAAGAA>AA              | p.E510del   |
| Pat_06 | Pre-Treatment | UNC5D   | 137970 | 37 | 8 | 35608248  | 35608248  | Frame_Shift_Del | DEL | T      | - | 12 | 1572 | c.2084delT       | c.(2083-2085)GTTfs                  | p.V695fs    |
| Pat_06 | Pre-Treatment | MYST3   | 7994   | 37 | 8 | 41798420  | 41798422  | In_Frame_Del    | DEL | CTC    | - | 10 | 711  | .2977_2979delGAI | c.(2977-2979)GAGdel                 | p.E993del   |

|        |                 |          |        |    |   |           |           |                 |     |     |     |    |      |                   |                                  |             |
|--------|-----------------|----------|--------|----|---|-----------|-----------|-----------------|-----|-----|-----|----|------|-------------------|----------------------------------|-------------|
| Pat_06 | Pre-Treatment   | TOX      | 9760   | 37 | 8 | 59750796  | 59750798  | In_Frame_Del    | DEL | CTT | -   | 8  | 699  | c.766_768delAAG   | c.(766-768)AAGdel                | p.K256del   |
| Pat_06 | Pre-Treatment   | MYBL1    | 4603   | 37 | 8 | 67488452  | 67488453  | Frame_Shift_Ins | INS | -   | T   | 7  | 1127 | c.1259_1260insA   | c.(1258-1260)AACfs               | p.N420fs    |
| Pat_06 | Pre-Treatment   | ARFGEF1  | 10565  | 37 | 8 | 68128855  | 68128856  | Frame_Shift_Ins | INS | -   | G   | 7  | 805  | c.4655_4656insC   | c.(4654-4656)CCAfs               | p.P1552fs   |
| Pat_06 | Pre-Treatment   | LRRCC1   | 85444  | 37 | 8 | 86038947  | 86038948  | Frame_Shift_Del | DEL | AG  | -   | 10 | 374  | c.1296_1297delAC  | c.(1294-1299)CAAGAGfs            | p.Q432fs    |
| Pat_06 | Pre-Treatment   | MMP16    | 4325   | 37 | 8 | 89086959  | 89086959  | Frame_Shift_Del | DEL | A   | -   | 8  | 1634 | c.1096delT        | c.(1096-1098)TGGfs               | p.W366fs    |
| Pat_06 | Pre-Treatment   | MMP16    | 4325   | 37 | 8 | 89128860  | 89128860  | Frame_Shift_Del | DEL | T   | -   | 7  | 1829 | c.959delA         | c.(958-960)AATfs                 | p.N320fs    |
| Pat_06 | Pre-Treatment   | NBN      | 4683   | 37 | 8 | 90965666  | 90965666  | Frame_Shift_Del | DEL | T   | -   | 12 | 1073 | c.1651delA        | c.(1651-1653)AGGfs               | p.R551fs    |
| Pat_06 | Pre-Treatment   | RUNX1T1  | 862    | 37 | 8 | 92998419  | 92998419  | Frame_Shift_Del | DEL | T   | -   | 8  | 839  | c.1212delA        | c.(1210-1212)AAAfs               | p.K404fs    |
| Pat_06 | Pre-Treatment   | UBR5     | 51366  | 37 | 8 | 103289348 | 103289349 | Frame_Shift_Ins | INS | -   | T   | 8  | 729  | c.6360_6361insA   | c.(6358-6363)AAAGAAfs            | p.K2120fs   |
| Pat_06 | Pre-Treatment   | LRP12    | 29967  | 37 | 8 | 105503633 | 105503633 | Frame_Shift_Del | DEL | C   | -   | 7  | 609  | c.1848delG        | c.(1846-1848)GGGfs               | p.G616fs    |
| Pat_06 | Pre-Treatment   | TSNARE1  | 203062 | 37 | 8 | 143310866 | 143310868 | In_Frame_Del    | DEL | GAT | -   | 11 | 705  | c.1519_1521delATC | c.(1519-1521)ATCdel              | p.I507del   |
| Pat_06 | Pre-Treatment   | ZC3H3    | 23144  | 37 | 8 | 144621235 | 144621235 | Frame_Shift_Del | DEL | C   | -   | 7  | 536  | c.302delG         | c.(301-303)GGCfs                 | p.G101fs    |
| Pat_06 | Pre-Treatment   | ZNF251   | 90987  | 37 | 8 | 145947867 | 145947867 | Frame_Shift_Del | DEL | A   | -   | 7  | 890  | c.1178delT        | c.(1177-1179)TTCfs               | p.F393fs    |
| Pat_06 | Pre-Treatment   | KIAA0020 | 9933   | 37 | 9 | 2837296   | 2837296   | Frame_Shift_Del | DEL | T   | -   | 10 | 1106 | c.188delA         | c.(187-189)AAGfs                 | p.K63fs     |
| Pat_06 | Pre-Treatment   | C9orf46  | 55848  | 37 | 9 | 5361787   | 5361787   | Frame_Shift_Del | DEL | A   | -   | 7  | 341  | c.183delT         | c.(181-183)TTTfs                 | p.F61fs     |
| Pat_06 | Pre-Treatment   | KIAA1045 | 23349  | 37 | 9 | 34977582  | 34977584  | In_Frame_Del    | DEL | CAG | -   | 7  | 175  | c.1050_1052delCA  | c.(1048-1053)GCCAGC>GC           | p.S354del   |
| Pat_06 | Pre-Treatment   | VCP      | 7415   | 37 | 9 | 35062983  | 35062985  | In_Frame_Del    | DEL | AAG | -   | 13 | 988  | c.801_803delCTT   | c.(799-804)TTCTTG>TTG            | p.F267del   |
| Pat_06 | Pre-Treatment   | KLF9     | 687    | 37 | 9 | 73002714  | 73002714  | Frame_Shift_Del | DEL | T   | -   | 8  | 700  | c.713delA         | c.(712-714)AAGfs                 | p.K238fs    |
| Pat_06 | Pre-Treatment   | GOLGA2   | 2801   | 37 | 9 | 131019390 | 131019390 | Frame_Shift_Del | DEL | A   | -   | 12 | 754  | c.2965delT        | c.(2965-2967)TACfs               | p.Y989fs    |
| Pat_06 | Pre-Treatment   | CEL      | 1056   | 37 | 9 | 135941982 | 135941982 | Frame_Shift_Del | DEL | G   | -   | 12 | 1121 | c.613delG         | c.(613-615)GGGfs                 | p.G205fs    |
| Pat_06 | Pre-Treatment   | RALGDS   | 5900   | 37 | 9 | 135975698 | 135975700 | In_Frame_Del    | DEL | CTC | -   | 7  | 2126 | c.2524_2526delGAT | c.(2524-2526)GAGdel              | p.E842del   |
| Pat_06 | Pre-Treatment   | WDR5     | 11091  | 37 | 9 | 137019598 | 137019598 | Frame_Shift_Del | DEL | C   | -   | 12 | 2800 | c.642delC         | c.(640-642)AACfs                 | p.N214fs    |
| Pat_06 | Pre-Treatment   | YY2      | 404281 | 37 | X | 21857869  | 21857871  | In_Frame_Del    | DEL | TGG | -   | 7  | 124  | c.17_19delTTGG    | c.(16-21)CTGGTG>CTG              | p.V11del    |
| Pat_06 | Pre-Treatment   | GNL3L    | 54552  | 37 | X | 54578339  | 54578341  | In_Frame_Del    | DEL | GAA | -   | 9  | 351  | c.1113_1115delGAA | c.(1111-1116)GGGAAG>GG           | p.K375del   |
| Pat_06 | Pre-Treatment   | TAF1     | 6872   | 37 | X | 70603000  | 70603000  | Frame_Shift_Del | DEL | A   | -   | 7  | 439  | c.1930delA        | c.(1930-1932)AAAfs               | p.K644fs    |
| Pat_06 | Pre-Treatment   | KIAA2022 | 340533 | 37 | X | 73960934  | 73960934  | Frame_Shift_Del | DEL | T   | -   | 7  | 1158 | c.3458delA        | c.(3457-3459)AACfs               | p.N1153fs   |
| Pat_06 | Pre-Treatment   | BRWD3    | 254065 | 37 | X | 79932487  | 79932487  | Frame_Shift_Del | DEL | C   | -   | 8  | 2050 | c.5030delG        | c.(5029-5031)GGAfs               | p.G1677fs   |
| Pat_06 | Pre-Treatment   | TAF7L    | 54457  | 37 | X | 100536709 | 100536709 | Frame_Shift_Del | DEL | T   | -   | 9  | 1119 | c.719delA         | c.(718-720)AAGfs                 | p.K240fs    |
| Pat_06 | Pre-Treatment   | FAM199X  | 139231 | 37 | X | 103432837 | 103432839 | In_Frame_Del    | DEL | CAG | -   | 8  | 998  | c.846_848delCAG   | c.(844-849)GCCAGC>GCC            | p.S286del   |
| Pat_06 | Pre-Treatment   | PAK3     | 5063   | 37 | X | 110406206 | 110406208 | In_Frame_Del    | DEL | GAA | -   | 10 | 596  | c.577_579delGAA   | c.(577-579)GAAdel                | p.E197del   |
| Pat_06 | Pre-Treatment   | SLC6A14  | 11254  | 37 | X | 115584256 | 115584256 | Frame_Shift_Del | DEL | T   | -   | 8  | 529  | c.1234delT        | c.(1234-1236)TTTfs               | p.F412fs    |
| Pat_06 | Pre-Treatment   | NKAP     | 79576  | 37 | X | 119072752 | 119072753 | Frame_Shift_Del | DEL | TC  | -   | 11 | 973  | c.407_408delGAG   | c.(406-408)AGAfs                 | p.R136fs    |
| Pat_06 | Pre-Treatment   | PLAC1    | 10761  | 37 | X | 133700524 | 133700525 | Frame_Shift_Ins | INS | -   | G   | 8  | 1803 | c.188_189insC     | c.(187-189)CCAfs                 | p.P63fs     |
| Pat_06 | Pre-Treatment   | SLC9A6   | 10479  | 37 | X | 135106581 | 135106581 | Frame_Shift_Del | DEL | T   | -   | 7  | 1820 | c.1459delT        | c.(1459-1461)TTTfs               | p.F487fs    |
| Pat_06 | Pre-Treatment   | BRS3     | 680    | 37 | X | 135574250 | 135574250 | Frame_Shift_Del | DEL | G   | -   | 8  | 3201 | c.916delG         | c.(916-918)GCCfs                 | p.A306fs    |
| Pat_06 | Pre-Treatment   | HTATSF1  | 27336  | 37 | X | 135585048 | 135585050 | In_Frame_Del    | DEL | AAG | -   | 21 | 737  | c.682_684delAAG   | c.(682-684)AAGdel                | p.K232del   |
| Pat_06 | Pre-Treatment   | CD99L2   | 83692  | 37 | X | 149937526 | 149937528 | In_Frame_Del    | DEL | GGC | -   | 13 | 1668 | c.768_770delGCC   | c.(766-771)CCGCC>CCG.256_257PP>I |             |
| Pat_06 | Post-Resistance | CLSTN1   | 22883  | 37 | 1 | 9790640   | 9790642   | In_Frame_Del    | DEL | CCT | -   | 11 | 509  | c.2870_2872delAG  | c.(2869-2874)GAGGGG>GG           | p.E957del   |
| Pat_06 | Post-Resistance | EXOSC10  | 5394   | 37 | 1 | 11128120  | 11128120  | Frame_Shift_Del | DEL | T   | -   | 7  | 453  | c.2572delA        | c.(2572-2574)ATTfs               | p.I858fs    |
| Pat_06 | Post-Resistance | SPEN     | 23013  | 37 | 1 | 16262680  | 16262680  | Frame_Shift_Del | DEL | C   | -   | 10 | 1174 | c.9945delC        | c.(9943-9945)CACfs               | p.H3315fs   |
| Pat_06 | Post-Resistance | MST1P9   | 11223  | 37 | 1 | 17086003  | 17086003  | Frame_Shift_Del | DEL | G   | -   | 11 | 1323 | c.894delC         | c.(892-894)GGCfs                 | p.G298fs    |
| Pat_06 | Post-Resistance | IGSF21   | 84966  | 37 | 1 | 18554420  | 18554420  | Frame_Shift_Del | DEL | C   | -   | 12 | 1242 | c.99delC          | c.(97-99)CTCfs                   | p.L33fs     |
| Pat_06 | Post-Resistance | USP48    | 84196  | 37 | 1 | 22083040  | 22083040  | Frame_Shift_Del | DEL | T   | -   | 7  | 1307 | c.411delA         | c.(409-411)AAAfs                 | p.K137fs    |
| Pat_06 | Post-Resistance | PEF1     | 553115 | 37 | 1 | 32100885  | 32100885  | Frame_Shift_Del | DEL | C   | -   | 7  | 491  | c.263delG         | c.(262-264)GGCfs                 | p.G88fs     |
| Pat_06 | Post-Resistance | PHC2     | 1912   | 37 | 1 | 33799792  | 33799792  | Frame_Shift_Del | DEL | G   | -   | 7  | 1565 | c.1657delC        | c.(1657-1659)CAGfs               | p.Q553fs    |
| Pat_06 | Post-Resistance | EIF2B3   | 8891   | 37 | 1 | 45407182  | 45407182  | Frame_Shift_Del | DEL | T   | -   | 12 | 339  | c.450delA         | c.(448-450)AAAfs                 | p.K150fs    |
| Pat_06 | Post-Resistance | PCSK9    | 255738 | 37 | 1 | 55505552  | 55505553  | In_Frame_Ins    | INS | -   | CTG | 10 | 18   | c.42_43insCTG     | c.(40-45)insCTG                  | p.23_24insL |

|        |                 |           |        |    |    |           |           |                 |     |      |     |    |      |                  |                       |                |
|--------|-----------------|-----------|--------|----|----|-----------|-----------|-----------------|-----|------|-----|----|------|------------------|-----------------------|----------------|
| Pat_06 | Post-Resistance | FGGY      | 55277  | 37 | 1  | 59812017  | 59812017  | Frame_Shift_Del | DEL | G    | -   | 8  | 540  | c.412delG        | c.(412-414)GGGfs      | p.G138fs       |
| Pat_06 | Post-Resistance | LRRIQ3    | 127255 | 37 | 1  | 74575212  | 74575213  | Frame_Shift_Ins | INS | -    | T   | 20 | 410  | c.732_733insA    | c.(730-735)AACAGfs    | p.K244fs       |
| Pat_06 | Post-Resistance | TNNI3K    | 51086  | 37 | 1  | 74957824  | 74957826  | In_Frame_Del    | DEL | CTT  | -   | 20 | 1936 | .2225_2227delCT  | .(2224-2229)CCTTCT>CC | p.S746del      |
| Pat_06 | Post-Resistance | TRIM33    | 51592  | 37 | 1  | 114968116 | 114968118 | In_Frame_Del    | DEL | TGT  | -   | 10 | 2370 | .1648_1650delIAC | c.(1648-1650)ACAdel   | p.T550del      |
| Pat_06 | Post-Resistance | PTGFRN    | 5738   | 37 | 1  | 117527425 | 117527426 | Frame_Shift_Del | DEL | GC   | -   | 7  | 1086 | :.2291_2292delGC | c.(2290-2292)AGCfs    | p.S764fs       |
| Pat_06 | Post-Resistance | FMO5      | 2330   | 37 | 1  | 146684955 | 146684955 | Frame_Shift_Del | DEL | T    | -   | 8  | 2762 | c.407delA        | c.(406-408)AAGfs      | p.K136fs       |
| Pat_06 | Post-Resistance | RFX5      | 5993   | 37 | 1  | 151318741 | 151318741 | Frame_Shift_Del | DEL | G    | -   | 7  | 756  | c.56delC         | c.(55-57)CCAFs        | p.P19fs        |
| Pat_06 | Post-Resistance | TCHH      | 7062   | 37 | 1  | 152082211 | 152082213 | In_Frame_Del    | DEL | CTC  | -   | 13 | 313  | .3480_3482delGAI | .(3478-3483)AAGAGA>AA | p.R1163del     |
| Pat_06 | Post-Resistance | TCHH      | 7062   | 37 | 1  | 152084657 | 152084658 | In_Frame_Ins    | INS | -    | CTC | 9  | 614  | .1035_1036insGAI | c.(1033-1038)insGAG   | p.345_346insE  |
| Pat_06 | Post-Resistance | ILF2      | 3608   | 37 | 1  | 153640096 | 153640096 | Frame_Shift_Del | DEL | T    | -   | 7  | 1876 | c.329delA        | c.(328-330)AAGfs      | p.K110fs       |
| Pat_06 | Post-Resistance | KCNN3     | 3782   | 37 | 1  | 154842331 | 154842333 | In_Frame_Del    | DEL | TGC  | -   | 10 | 105  | c.108_110delGCAC | .(106-111)CAGCAA>CAA  | p.36_37QQ>Q    |
| Pat_06 | Post-Resistance | NES       | 10763  | 37 | 1  | 156642804 | 156642804 | Frame_Shift_Del | DEL | G    | -   | 18 | 1915 | c.1176delC       | c.(1174-1176)CCCfs    | p.P392fs       |
| Pat_06 | Post-Resistance | PVRL4     | 81607  | 37 | 1  | 161044057 | 161044059 | In_Frame_Del    | DEL | CAC  | -   | 8  | 714  | .1105_1107delIGT | c.(1105-1107)GTGdel   | p.V369del      |
| Pat_06 | Post-Resistance | PCP4L1    | 654790 | 37 | 1  | 161254154 | 161254156 | In_Frame_Del    | DEL | GGA  | -   | 10 | 830  | c.90_92delGGA    | c.(88-93)GCGGAG>GCG   | p.E35del       |
| Pat_06 | Post-Resistance | CACNA1S   | 779    | 37 | 1  | 201046178 | 201046180 | In_Frame_Del    | DEL | AGC  | -   | 7  | 1026 | .1695_1697delGC  | .(1693-1698)CTGCTC>CT | p.565_566LL>L  |
| Pat_06 | Post-Resistance | IPO9      | 55705  | 37 | 1  | 201843998 | 201844000 | In_Frame_Del    | DEL | GAG  | -   | 12 | 549  | .2872_2874delGAI | c.(2872-2874)GAGdel   | p.E962del      |
| Pat_06 | Post-Resistance | GPR37L1   | 9283   | 37 | 1  | 202097525 | 202097527 | In_Frame_Del    | DEL | CTG  | -   | 8  | 88   | .1287_1289delCT  | .(1285-1290)GACTGC>GA | p.C436del      |
| Pat_06 | Post-Resistance | ZC3H11A   | 9877   | 37 | 1  | 203786225 | 203786225 | Frame_Shift_Del | DEL | T    | -   | 13 | 364  | c.27delT         | c.(25-27)TATfs        | p.Y9fs         |
| Pat_06 | Post-Resistance | AVPR1B    | 553    | 37 | 1  | 206225073 | 206225075 | In_Frame_Del    | DEL | GGT  | -   | 7  | 833  | c.633_635delGGT  | .(631-636)CCGGTG>CCC  | p.V212del      |
| Pat_06 | Post-Resistance | DYRK3     | 8444   | 37 | 1  | 206821441 | 206821441 | Frame_Shift_Del | DEL | A    | -   | 9  | 600  | c.898delA        | c.(898-900)AAAFs      | p.K300fs       |
| Pat_06 | Post-Resistance | MOSC2     | 54996  | 37 | 1  | 220955170 | 220955170 | Frame_Shift_Del | DEL | T    | -   | 7  | 993  | c.935delT        | c.(934-936)CTTfs      | p.L312fs       |
| Pat_06 | Post-Resistance | OR2W5     | 441932 | 37 | 1  | 247654684 | 247654684 | Frame_Shift_Del | DEL | G    | -   | 7  | 702  | c.255delG        | c.(253-255)CTGfs      | p.L85fs        |
| Pat_06 | Post-Resistance | OR2T33    | 391195 | 37 | 1  | 248436882 | 248436882 | Frame_Shift_Del | DEL | T    | -   | 7  | 2732 | c.235delA        | c.(235-237)ATGfs      | p.M79fs        |
| Pat_06 | Post-Resistance | NET1      | 10276  | 37 | 10 | 5497067   | 5497070   | Frame_Shift_Del | DEL | AGCA | -   | 7  | 768  | .1183_1186delAGC | c.(1183-1188)AGCAAGfs | p.S395fs       |
| Pat_06 | Post-Resistance | NCOA4     | 8031   | 37 | 10 | 51585146  | 51585147  | Frame_Shift_Del | DEL | GT   | -   | 7  | 320  | :.1245_1246delGT | c.(1243-1248)GAGTGTfs | p.E415fs       |
| Pat_06 | Post-Resistance | SLC16A12  | 387700 | 37 | 10 | 91203597  | 91203598  | Frame_Shift_Ins | INS | -    | A   | 11 | 389  | c.129_130insT    | c.(127-132)TTTGTGfs   | p.F43fs        |
| Pat_06 | Post-Resistance | TNKS2     | 80351  | 37 | 10 | 93601945  | 93601946  | Frame_Shift_Ins | INS | -    | A   | 11 | 291  | c.1856_1857insA  | c.(1855-1857)ACAfs    | p.T619fs       |
| Pat_06 | Post-Resistance | PAX2      | 5076   | 37 | 10 | 102584452 | 102584452 | Frame_Shift_Del | DEL | C    | -   | 8  | 1691 | c.1036delC       | c.(1036-1038)CCCfs    | p.P346fs       |
| Pat_06 | Post-Resistance | ATRNL1    | 26033  | 37 | 10 | 117486826 | 117486826 | Frame_Shift_Del | DEL | G    | -   | 7  | 378  | c.3864delG       | c.(3862-3864)GTGfs    | p.V1288fs      |
| Pat_06 | Post-Resistance | RAB11FIP2 | 22841  | 37 | 10 | 119798647 | 119798647 | Frame_Shift_Del | DEL | T    | -   | 7  | 1027 | c.1101delA       | c.(1099-1101)AAAFs    | p.K367fs       |
| Pat_06 | Post-Resistance | CUZD1     | 50624  | 37 | 10 | 124593215 | 124593215 | Frame_Shift_Del | DEL | T    | -   | 8  | 1210 | c.1624delA       | c.(1624-1626)AGGfs    | p.R542fs       |
| Pat_06 | Post-Resistance | PTPRE     | 5791   | 37 | 10 | 129876002 | 129876004 | In_Frame_Del    | DEL | AGC  | -   | 8  | 742  | .1847_1849delAG  | .(1846-1851)AAGCAG>AA | p.Q620del      |
| Pat_06 | Post-Resistance | PHRF1     | 57661  | 37 | 11 | 592586    | 592588    | In_Frame_Del    | DEL | GAG  | -   | 8  | 1106 | c.532_534delGAG  | c.(532-534)GAGdel     | p.E181del      |
| Pat_06 | Post-Resistance | BRSK2     | 9024   | 37 | 11 | 1471060   | 1471060   | Frame_Shift_Del | DEL | C    | -   | 8  | 1128 | c.1281delC       | c.(1279-1281)AGCfs    | p.S427fs       |
| Pat_06 | Post-Resistance | DENND5A   | 23258  | 37 | 11 | 9182390   | 9182390   | Frame_Shift_Del | DEL | T    | -   | 8  | 1271 | c.2306delA       | c.(2305-2307)AAGfs    | p.K769fs       |
| Pat_06 | Post-Resistance | PAX6      | 5080   | 37 | 11 | 31812317  | 31812317  | Frame_Shift_Del | DEL | G    | -   | 7  | 714  | c.1124delC       | c.(1123-1125)CCAFs    | p.P375fs       |
| Pat_06 | Post-Resistance | PAMR1     | 25891  | 37 | 11 | 35513670  | 35513670  | Frame_Shift_Del | DEL | C    | -   | 8  | 2309 | c.302delG        | c.(301-303)GGTfs      | p.G101fs       |
| Pat_06 | Post-Resistance | DGKZ      | 8525   | 37 | 11 | 46400752  | 46400753  | Splice_Site     | INS | -    | C   | 10 | 932  | c.3104_splice    | c.e30-1               | p.A1035_splice |
| Pat_06 | Post-Resistance | CHRM4     | 1132   | 37 | 11 | 46406723  | 46406723  | Frame_Shift_Del | DEL | T    | -   | 7  | 353  | c.1385delA       | c.(1384-1386)AAGfs    | p.K462fs       |
| Pat_06 | Post-Resistance | CPSF7     | 79869  | 37 | 11 | 61183765  | 61183767  | In_Frame_Del    | DEL | AGG  | -   | 8  | 305  | c.775_777delCCT  | c.(775-777)CCTdel     | p.P259del      |
| Pat_06 | Post-Resistance | SLC22A12  | 116085 | 37 | 11 | 64367266  | 64367268  | In_Frame_Del    | DEL | CTG  | -   | 10 | 750  | .1189_1191delCT  | c.(1189-1191)CTGdel   | p.L400del      |
| Pat_06 | Post-Resistance | TM7SF2    | 7108   | 37 | 11 | 64880874  | 64880874  | Frame_Shift_Del | DEL | G    | -   | 7  | 594  | c.487delG        | c.(487-489)GGGfs      | p.G163fs       |
| Pat_06 | Post-Resistance | LRFN4     | 78999  | 37 | 11 | 66625231  | 66625233  | In_Frame_Del    | DEL | CTG  | -   | 11 | 200  | c.16_18delCTG    | c.(16-18)CTGdel       | p.L10del       |
| Pat_06 | Post-Resistance | UVRAG     | 7405   | 37 | 11 | 75727924  | 75727924  | Frame_Shift_Del | DEL | T    | -   | 7  | 1016 | c.1126delT       | c.(1126-1128)TTTfs    | p.F376fs       |
| Pat_06 | Post-Resistance | NCAPD3    | 23310  | 37 | 11 | 134048586 | 134048586 | Frame_Shift_Del | DEL | G    | -   | 7  | 778  | c.2725delC       | c.(2725-2727)CAGfs    | p.Q909fs       |
| Pat_06 | Post-Resistance | PRMT8     | 56341  | 37 | 12 | 3649780   | 3649780   | Frame_Shift_Del | DEL | C    | -   | 7  | 927  | c.84delC         | c.(82-84)AGCfs        | p.S28fs        |
| Pat_06 | Post-Resistance | TAS2R50   | 259296 | 37 | 12 | 11139432  | 11139432  | Frame_Shift_Del | DEL | A    | -   | 7  | 186  | c.28delT         | c.(28-30)TCAfs        | p.S10fs        |



|        |                 |          |        |    |    |           |           |                 |     |     |    |    |      |                  |                                    |               |
|--------|-----------------|----------|--------|----|----|-----------|-----------|-----------------|-----|-----|----|----|------|------------------|------------------------------------|---------------|
| Pat_06 | Post-Resistance | ITPR2    | 3709   | 37 | 12 | 26589238  | 26589239  | Frame_Shift_Del | DEL | AG  | -  | 8  | 763  | c.6684_6685delCT | c.(6682-6687)CTCTGGfs              | p.L2228fs     |
| Pat_06 | Post-Resistance | PKP2     | 5318   | 37 | 12 | 32955396  | 32955396  | Frame_Shift_Del | DEL | T   | -  | 7  | 1541 | c.2240delA       | c.(2239-2241)AAGfs                 | p.K747fs      |
| Pat_06 | Post-Resistance | SFRS2IP  | 9169   | 37 | 12 | 46318575  | 46318577  | In_Frame_Del    | DEL | GGT | -  | 23 | 1840 | .3840_3842delAC  | c.(3838-3843)CCACCC>CC1280_1281PP: |               |
| Pat_06 | Post-Resistance | SFRS2IP  | 9169   | 37 | 12 | 46320707  | 46320708  | Frame_Shift_Del | DEL | TC  | -  | 14 | 983  | c.2776_2777delGA | c.(2776-2778)GAAfs                 | p.E926fs      |
| Pat_06 | Post-Resistance | PRPF40B  | 25766  | 37 | 12 | 50025258  | 50025258  | Frame_Shift_Del | DEL | C   | -  | 10 | 1377 | c.93delC         | c.(91-93)ATCfs                     | p.I31fs       |
| Pat_06 | Post-Resistance | ACCN2    | 41     | 37 | 12 | 50452565  | 50452567  | In_Frame_Del    | DEL | GAG | -  | 7  | 744  | c.16_18delGAG    | c.(16-18)GAGdel                    | p.E9del       |
| Pat_06 | Post-Resistance | KRT77    | 374454 | 37 | 12 | 53097076  | 53097078  | In_Frame_Del    | DEL | CCA | -  | 8  | 645  | c.141_143delTGG  | c.(139-144)GGTGGGA>GG/p.47_48GG>G  |               |
| Pat_06 | Post-Resistance | B4GALNT1 | 2583   | 37 | 12 | 58025102  | 58025103  | Frame_Shift_Ins | INS | -   | C  | 8  | 820  | c.263_264insG    | c.(262-264)GGCfs                   | p.G88fs       |
| Pat_06 | Post-Resistance | CAND1    | 55832  | 37 | 12 | 67699692  | 67699692  | Frame_Shift_Del | DEL | G   | -  | 7  | 985  | c.2244delG       | c.(2242-2244)CAGfs                 | p.Q748fs      |
| Pat_06 | Post-Resistance | ZDHHC17  | 23390  | 37 | 12 | 77203639  | 77203640  | Splice_Site     | INS | -   | A  | 7  | 194  | c.543_splice     | c.e5+2                             | p.Q181_splice |
| Pat_06 | Post-Resistance | CEP290   | 80184  | 37 | 12 | 88524078  | 88524079  | Frame_Shift_Ins | INS | -   | T  | 11 | 967  | c.635_636insA    | c.(634-636)AACfs                   | p.N212fs      |
| Pat_06 | Post-Resistance | UTP20    | 27340  | 37 | 12 | 101680157 | 101680157 | Frame_Shift_Del | DEL | T   | -  | 13 | 1117 | c.385delT        | c.(385-387)TTTfs                   | p.F129fs      |
| Pat_06 | Post-Resistance | SPIC     | 121599 | 37 | 12 | 101876674 | 101876674 | Frame_Shift_Del | DEL | A   | -  | 7  | 501  | c.315delA        | c.(313-315)GGAfs                   | p.G105fs      |
| Pat_06 | Post-Resistance | CUX2     | 23316  | 37 | 12 | 111758235 | 111758237 | In_Frame_Del    | DEL | TCC | -  | 7  | 345  | .2422_2424delTC  | c.(2422-2424)TCCdel                | p.S813del     |
| Pat_06 | Post-Resistance | C12orf51 | 283450 | 37 | 12 | 112605648 | 112605650 | In_Frame_Del    | DEL | CAG | -  | 7  | 590  | 11014_11016delC1 | c.(11014-11016)CTGdel              | p.L3672del    |
| Pat_06 | Post-Resistance | WASF3    | 10810  | 37 | 13 | 27250862  | 27250863  | Splice_Site     | DEL | GT  | -  | 15 | 728  | c.716_splice     | c.e7+1                             | p.R239_splice |
| Pat_06 | Post-Resistance | WASF3    | 10810  | 37 | 13 | 27259836  | 27259836  | Frame_Shift_Del | DEL | A   | -  | 10 | 779  | c.1363delA       | c.(1363-1365)AAAfs                 | p.K455fs      |
| Pat_06 | Post-Resistance | ATP7B    | 540    | 37 | 13 | 52549201  | 52549201  | Frame_Shift_Del | DEL | C   | -  | 85 | 281  | c.155delG        | c.(154-156)GGCfs                   | p.G52fs       |
| Pat_06 | Post-Resistance | FBXL3    | 26224  | 37 | 13 | 77581683  | 77581683  | Frame_Shift_Del | DEL | A   | -  | 14 | 275  | c.884delT        | c.(883-885)TTAfs                   | p.L295fs      |
| Pat_06 | Post-Resistance | GPR18    | 2841   | 37 | 13 | 99907540  | 99907540  | Frame_Shift_Del | DEL | A   | -  | 8  | 508  | c.587delT        | c.(586-588)TTCfs                   | p.F196fs      |
| Pat_06 | Post-Resistance | OR4L1    | 122742 | 37 | 14 | 20528881  | 20528881  | Frame_Shift_Del | DEL | A   | -  | 7  | 1006 | c.678delA        | c.(676-678)CCAfs                   | p.P226fs      |
| Pat_06 | Post-Resistance | TEP1     | 7011   | 37 | 14 | 20854270  | 20854270  | Frame_Shift_Del | DEL | G   | -  | 8  | 998  | c.2946delC       | c.(2944-2946)CCCfs                 | p.P982fs      |
| Pat_06 | Post-Resistance | ACIN1    | 22985  | 37 | 14 | 23528502  | 23528503  | Frame_Shift_Del | DEL | TC  | -  | 10 | 276  | c.3880_3881delGA | c.(3880-3882)GAAfs                 | p.E1294fs     |
| Pat_06 | Post-Resistance | PCK2     | 5106   | 37 | 14 | 24572757  | 24572757  | Frame_Shift_Del | DEL | T   | -  | 7  | 923  | c.1507delT       | c.(1507-1509)TTTfs                 | p.F503fs      |
| Pat_06 | Post-Resistance | KLHDC2   | 23588  | 37 | 14 | 50241333  | 50241334  | Frame_Shift_Del | DEL | TG  | -  | 7  | 1251 | c.288_289delTG   | c.(286-291)GCTGTGfs                | p.A96fs       |
| Pat_06 | Post-Resistance | ARID4A   | 5926   | 37 | 14 | 58831995  | 58831996  | Frame_Shift_Ins | INS | -   | AG | 8  | 512  | c.3188_3189insAC | c.(3187-3189)CAAfs                 | p.Q1063fs     |
| Pat_06 | Post-Resistance | KCNH5    | 27133  | 37 | 14 | 63174303  | 63174303  | Frame_Shift_Del | DEL | G   | -  | 9  | 2261 | c.2890delC       | c.(2890-2892)CAGfs                 | p.Q964fs      |
| Pat_06 | Post-Resistance | RBM25    | 58517  | 37 | 14 | 73563781  | 73563783  | In_Frame_Del    | DEL | GAA | -  | 11 | 480  | c.702_704delGAA  | c.(700-705)AGGAAG>AGC              | p.K238del     |
| Pat_06 | Post-Resistance | PNMA1    | 9240   | 37 | 14 | 74179325  | 74179327  | In_Frame_Del    | DEL | CCT | -  | 7  | 97   | .1016_1018delAG  | c.(1015-1020)GAGGCT>GC             | p.E339del     |
| Pat_06 | Post-Resistance | GALC     | 2581   | 37 | 14 | 88406276  | 88406276  | Frame_Shift_Del | DEL | T   | -  | 9  | 2157 | c.1884delA       | c.(1882-1884)AAAfs                 | p.K628fs      |
| Pat_06 | Post-Resistance | FOXN3    | 1112   | 37 | 14 | 89629149  | 89629151  | In_Frame_Del    | DEL | GAG | -  | 20 | 290  | .1080_1082delCT  | c.(1078-1083)TCCTCA>TC.360_361SS>  |               |
| Pat_06 | Post-Resistance | AKT1     | 207    | 37 | 14 | 105242073 | 105242075 | In_Frame_Del    | DEL | CTC | -  | 10 | 689  | c.349_351delGAG  | c.(349-351)GAGdel                  | p.E117del     |
| Pat_06 | Post-Resistance | ZFP106   | 64397  | 37 | 15 | 42734498  | 42734498  | Frame_Shift_Del | DEL | A   | -  | 9  | 433  | c.3467delT       | c.(3466-3468)TTCfs                 | p.F1156fs     |
| Pat_06 | Post-Resistance | TTBK2    | 146057 | 37 | 15 | 43038031  | 43038031  | Frame_Shift_Del | DEL | G   | -  | 7  | 1929 | c.3697delC       | c.(3697-3699)CAAfs                 | p.Q1233fs     |
| Pat_06 | Post-Resistance | MNS1     | 55329  | 37 | 15 | 56736847  | 56736847  | Frame_Shift_Del | DEL | T   | -  | 8  | 1363 | c.481delA        | c.(481-483)ACCfs                   | p.T161fs      |
| Pat_06 | Post-Resistance | ALPK3    | 57538  | 37 | 15 | 85400267  | 85400267  | Frame_Shift_Del | DEL | A   | -  | 8  | 585  | c.2904delA       | c.(2902-2904)CCAfs                 | p.P968fs      |
| Pat_06 | Post-Resistance | FURIN    | 5045   | 37 | 15 | 91422039  | 91422039  | Frame_Shift_Del | DEL | G   | -  | 8  | 665  | c.886delG        | c.(886-888)GGGfs                   | p.G296fs      |
| Pat_06 | Post-Resistance | TFAP4    | 7023   | 37 | 16 | 4308219   | 4308219   | Frame_Shift_Del | DEL | T   | -  | 8  | 371  | c.854delA        | c.(853-855)AAGfs                   | p.K285fs      |
| Pat_06 | Post-Resistance | CLEC16A  | 23274  | 37 | 16 | 11141159  | 11141159  | Frame_Shift_Del | DEL | T   | -  | 7  | 188  | c.1826delT       | c.(1825-1827)ATTfs                 | p.I609fs      |
| Pat_06 | Post-Resistance | CLEC16A  | 23274  | 37 | 16 | 11272415  | 11272415  | Frame_Shift_Del | DEL | C   | -  | 7  | 658  | c.3030delC       | c.(3028-3030)GTCfs                 | p.V1010fs     |
| Pat_06 | Post-Resistance | NTAN1    | 123803 | 37 | 16 | 15131931  | 15131931  | Frame_Shift_Del | DEL | T   | -  | 8  | 480  | c.890delA        | c.(889-891)AATfs                   | p.N297fs      |
| Pat_06 | Post-Resistance | SRCAP    | 10847  | 37 | 16 | 30731611  | 30731611  | Frame_Shift_Del | DEL | C   | -  | 7  | 1911 | c.2946delC       | c.(2944-2946)GACfs                 | p.D982fs      |
| Pat_06 | Post-Resistance | ITGAD    | 3681   | 37 | 16 | 31435495  | 31435495  | Frame_Shift_Del | DEL | C   | -  | 7  | 464  | c.3232delC       | c.(3232-3234)CAfs                  | p.P1078fs     |
| Pat_06 | Post-Resistance | GPT2     | 84706  | 37 | 16 | 46956286  | 46956286  | Frame_Shift_Del | DEL | C   | -  | 13 | 921  | c.1170delC       | c.(1168-1170)AACfs                 | p.N390fs      |
| Pat_06 | Post-Resistance | NUDT21   | 11051  | 37 | 16 | 56485066  | 56485066  | Frame_Shift_Del | DEL | C   | -  | 7  | 1640 | c.49delG         | c.(49-51)GTCfs                     | p.V17fs       |
| Pat_06 | Post-Resistance | CCDC135  | 84229  | 37 | 16 | 57731885  | 57731887  | In_Frame_Del    | DEL | GGA | -  | 8  | 320  | c.24_26delGGA    | c.(22-27)GTGGAG>GTG                | p.E13del      |
| Pat_06 | Post-Resistance | ACD      | 65057  | 37 | 16 | 67693646  | 67693648  | In_Frame_Del    | DEL | GCA | -  | 11 | 1229 | c.551_553delTGC  | c.(550-555)CTGCAG>CAG              | p.L184del     |

|        |                 |          |        |    |    |           |           |                 |     |      |   |    |      |                   |                                    |               |
|--------|-----------------|----------|--------|----|----|-----------|-----------|-----------------|-----|------|---|----|------|-------------------|------------------------------------|---------------|
| Pat_06 | Post-Resistance | TSNAXIP1 | 55815  | 37 | 16 | 67859576  | 67859576  | Frame_Shift_Del | DEL | G    | - | 7  | 1192 | c.659delG         | c.(658-660)TGGfs                   | p.W220fs      |
| Pat_06 | Post-Resistance | DHX38    | 9785   | 37 | 16 | 72138457  | 72138457  | Frame_Shift_Del | DEL | T    | - | 7  | 791  | c.2083delT        | c.(2083-2085)TTTTfs                | p.F695fs      |
| Pat_06 | Post-Resistance | MYO18A   | 399687 | 37 | 17 | 27493058  | 27493058  | Frame_Shift_Del | DEL | C    | - | 9  | 1323 | c.901delG         | c.(901-903)GACfs                   | p.D301fs      |
| Pat_06 | Post-Resistance | NUFIP2   | 57532  | 37 | 17 | 27614342  | 27614342  | Frame_Shift_Del | DEL | T    | - | 8  | 756  | c.670delA         | c.(670-672)AGGfs                   | p.R224fs      |
| Pat_06 | Post-Resistance | GAS2L2   | 246176 | 37 | 17 | 34074257  | 34074257  | Frame_Shift_Del | DEL | G    | - | 10 | 2200 | c.863delC         | c.(862-864)CCGfs                   | p.P288fs      |
| Pat_06 | Post-Resistance | CDK12    | 51755  | 37 | 17 | 37686962  | 37686962  | Frame_Shift_Del | DEL | C    | - | 7  | 1352 | c.3866delC        | c.(3865-3867)GCCfs                 | p.A1289fs     |
| Pat_06 | Post-Resistance | FAM134C  | 162427 | 37 | 17 | 40737147  | 40737148  | Frame_Shift_Del | DEL | TC   | - | 7  | 465  | c.722_723delGA    | c.(721-723)AGAFs                   | p.R241fs      |
| Pat_06 | Post-Resistance | MPP3     | 4356   | 37 | 17 | 41888206  | 41888206  | Frame_Shift_Del | DEL | T    | - | 8  | 1639 | c.1427delA        | c.(1426-1428)AACfs                 | p.N476fs      |
| Pat_06 | Post-Resistance | CCDC43   | 124808 | 37 | 17 | 42756253  | 42756253  | Frame_Shift_Del | DEL | T    | - | 8  | 165  | c.646delA         | c.(646-648)AGGfs                   | p.R216fs      |
| Pat_06 | Post-Resistance | CCDC103  | 388389 | 37 | 17 | 42980014  | 42980015  | Frame_Shift_Del | DEL | AG   | - | 13 | 304  | c.558_559delAG    | c.(556-561)GCAGAGfs                | p.A186fs      |
| Pat_06 | Post-Resistance | HOXB7    | 3217   | 37 | 17 | 46685277  | 46685277  | Frame_Shift_Del | DEL | T    | - | 8  | 2779 | c.581delA         | c.(580-582)AAGfs                   | p.K194fs      |
| Pat_06 | Post-Resistance | ANKRD40  | 91369  | 37 | 17 | 48777070  | 48777071  | Frame_Shift_Ins | INS | -    | G | 7  | 690  | c.467_468insC     | c.(466-468)CCTfs                   | p.P156fs      |
| Pat_06 | Post-Resistance | MKS1     | 54903  | 37 | 17 | 56290367  | 56290369  | In_Frame_Del    | DEL | CTC  | - | 8  | 1744 | c.832_834delGAG   | c.(832-834)GAGdel                  | p.E278del     |
| Pat_06 | Post-Resistance | ACE      | 1636   | 37 | 17 | 61560495  | 61560495  | Frame_Shift_Del | DEL | C    | - | 8  | 2126 | c.1448delC        | c.(1447-1449)ACCfs                 | p.T483fs      |
| Pat_06 | Post-Resistance | GNA13    | 10672  | 37 | 17 | 63052468  | 63052469  | Frame_Shift_Del | DEL | CG   | - | 9  | 560  | c.243_244delCG    | c.(241-246)CGCGAGfs                | p.R81fs       |
| Pat_06 | Post-Resistance | SLC16A6  | 9120   | 37 | 17 | 66267124  | 66267125  | Frame_Shift_Ins | INS | -    | A | 7  | 1102 | c.1176_1177insT   | c.(1174-1179)TTTGGGfs              | p.F392fs      |
| Pat_06 | Post-Resistance | KIAA0195 | 9772   | 37 | 17 | 73482037  | 73482039  | In_Frame_Del    | DEL | TGC  | - | 7  | 442  | c.230_232delITGC  | c.(229-234)GTGCTG>GTC              | p.L81del      |
| Pat_06 | Post-Resistance | KIAA0195 | 9772   | 37 | 17 | 73491063  | 73491063  | Frame_Shift_Del | DEL | C    | - | 7  | 1553 | c.2676delC        | c.(2674-2676)ATCfs                 | p.I892fs      |
| Pat_06 | Post-Resistance | DNAH17   | 8632   | 37 | 17 | 76425217  | 76425217  | Frame_Shift_Del | DEL | G    | - | 9  | 1400 | c.3390delC        | c.(3388-3390)CCCfs                 | p.P1130fs     |
| Pat_06 | Post-Resistance | MPND     | 84954  | 37 | 19 | 4352936   | 4352938   | In_Frame_Del    | DEL | GAG  | - | 8  | 270  | c.574_576delGAG   | c.(574-576)GAGdel                  | p.E195del     |
| Pat_06 | Post-Resistance | GTF2F1   | 2962   | 37 | 19 | 6381410   | 6381412   | In_Frame_Del    | DEL | CTC  | - | 7  | 82   | c.976_978delGAG   | c.(976-978)GAGdel                  | p.E326del     |
| Pat_06 | Post-Resistance | SLC25A41 | 284427 | 37 | 19 | 6433605   | 6433605   | Frame_Shift_Del | DEL | G    | - | 8  | 467  | c.100delC         | c.(100-102)CAAfs                   | p.Q34fs       |
| Pat_06 | Post-Resistance | CD209    | 30835  | 37 | 19 | 7808004   | 7808004   | Frame_Shift_Del | DEL | T    | - | 7  | 1123 | c.1136delA        | c.(1135-1137)AAGfs                 | p.K379fs      |
| Pat_06 | Post-Resistance | FBXL12   | 54850  | 37 | 19 | 9922225   | 9922228   | Frame_Shift_Del | DEL | GCAG | - | 7  | 829  | c.325_328delCTGC  | c.(325-330)CTGCACfs                | p.L109fs      |
| Pat_06 | Post-Resistance | RFX1     | 5989   | 37 | 19 | 14083694  | 14083696  | In_Frame_Del    | DEL | CCG  | - | 7  | 46   | c.1173_1175delICG | c.(1171-1176)GGCGGG>GC.391_392GG>I |               |
| Pat_06 | Post-Resistance | F2RL3    | 9002   | 37 | 19 | 17000408  | 17000408  | Frame_Shift_Del | DEL | C    | - | 8  | 1412 | c.134delC         | c.(133-135)GCCfs                   | p.A45fs       |
| Pat_06 | Post-Resistance | ZNF43    | 7594   | 37 | 19 | 22002025  | 22002026  | Splice_Site     | INS | -    | A | 11 | 416  | c.4_splice        | c.e2-1                             | p.G2_splice   |
| Pat_06 | Post-Resistance | FFAR2    | 2867   | 37 | 19 | 35940788  | 35940790  | In_Frame_Del    | DEL | CTG  | - | 9  | 266  | c.172_174delCTG   | c.(172-174)CTGdel                  | p.L62del      |
| Pat_06 | Post-Resistance | TEAD2    | 8463   | 37 | 19 | 49850472  | 49850473  | Frame_Shift_Ins | INS | -    | G | 28 | 1519 | c.883_884insC     | c.(883-885)CATfs                   | p.H295fs      |
| Pat_06 | Post-Resistance | FUZ      | 80199  | 37 | 19 | 50310483  | 50310485  | In_Frame_Del    | DEL | CAG  | - | 13 | 400  | c.1180_1182delICT | c.(1180-1182)CTGdel                | p.L394del     |
| Pat_06 | Post-Resistance | PTOV1    | 53635  | 37 | 19 | 50363527  | 50363527  | Frame_Shift_Del | DEL | G    | - | 7  | 249  | c.1242delG        | c.(1240-1242)ATGfs                 | p.M414fs      |
| Pat_06 | Post-Resistance | ZNF416   | 55659  | 37 | 19 | 58084579  | 58084579  | Frame_Shift_Del | DEL | A    | - | 8  | 1541 | c.693delT         | c.(691-693)TTTfs                   | p.F231fs      |
| Pat_06 | Post-Resistance | ZIK1     | 284307 | 37 | 19 | 58101799  | 58101799  | Frame_Shift_Del | DEL | A    | - | 7  | 755  | c.620delA         | c.(619-621)CAAfs                   | p.Q207fs      |
| Pat_06 | Post-Resistance | PUM2     | 23369  | 37 | 2  | 20482977  | 20482979  | In_Frame_Del    | DEL | GCT  | - | 7  | 606  | c.1449_1451delAGI | c.(1447-1452)GCAGCT>GC.483_484AA>I |               |
| Pat_06 | Post-Resistance | HS1BP3   | 64342  | 37 | 2  | 20840864  | 20840864  | Frame_Shift_Del | DEL | G    | - | 7  | 2425 | c.275delC         | c.(274-276)CCAfs                   | p.P92fs       |
| Pat_06 | Post-Resistance | GTF3C2   | 2976   | 37 | 2  | 27549710  | 27549710  | Frame_Shift_Del | DEL | C    | - | 7  | 469  | c.2568delG        | c.(2566-2568)GGGfs                 | p.G856fs      |
| Pat_06 | Post-Resistance | CRIM1    | 51232  | 37 | 2  | 36583501  | 36583503  | In_Frame_Del    | DEL | GCT  | - | 8  | 125  | c.66_68delGCT     | c.(64-69)GGGCTG>GGG                | p.L27del      |
| Pat_06 | Post-Resistance | AFTPH    | 54812  | 37 | 2  | 64778672  | 64778674  | In_Frame_Del    | DEL | GAT  | - | 7  | 1194 | c.64_66delGAT     | c.(64-66)GATdel                    | p.D26del      |
| Pat_06 | Post-Resistance | MOGS     | 7841   | 37 | 2  | 74691815  | 74691815  | Frame_Shift_Del | DEL | C    | - | 8  | 515  | c.387delG         | c.(385-387)GGGfs                   | p.G129fs      |
| Pat_06 | Post-Resistance | SEMA4F   | 10505  | 37 | 2  | 74900583  | 74900583  | Splice_Site     | DEL | G    | - | 14 | 1098 | c.551_splice      | c.e6-1                             | p.G184_splice |
| Pat_06 | Post-Resistance | VPS24    | 51652  | 37 | 2  | 86732976  | 86732978  | In_Frame_Del    | DEL | TCC  | - | 9  | 418  | c.618_620delGGA   | c.(616-621)GAGGAA>GAA.206_207EE>I  |               |
| Pat_06 | Post-Resistance | GCC2     | 9648   | 37 | 2  | 109087883 | 109087884 | Frame_Shift_Ins | INS | -    | A | 10 | 773  | c.2098_2099insA   | c.(2098-2100)GAAfs                 | p.E700fs      |
| Pat_06 | Post-Resistance | ZC3H6    | 376940 | 37 | 2  | 113088959 | 113088961 | In_Frame_Del    | DEL | GAT  | - | 8  | 669  | c.2464_2466delGA  | c.(2464-2466)GATdel                | p.D825del     |
| Pat_06 | Post-Resistance | CDCA7    | 83879  | 37 | 2  | 174229648 | 174229650 | In_Frame_Del    | DEL | GGA  | - | 14 | 352  | c.588_590delGGAc  | c.(586-591)ATGGAG>ATG              | p.E202del     |
| Pat_06 | Post-Resistance | NEUROD1  | 4760   | 37 | 2  | 182542972 | 182542972 | Frame_Shift_Del | DEL | G    | - | 11 | 793  | c.616delC         | c.(616-618)CACfs                   | p.H206fs      |
| Pat_06 | Post-Resistance | HTR2B    | 3357   | 37 | 2  | 231973838 | 231973838 | Frame_Shift_Del | DEL | T    | - | 12 | 1285 | c.839delA         | c.(838-840)AAGfs                   | p.K280fs      |
| Pat_06 | Post-Resistance | DGKD     | 8527   | 37 | 2  | 234346026 | 234346026 | Frame_Shift_Del | DEL | C    | - | 7  | 490  | c.823delC         | c.(823-825)CACfs                   | p.H275fs      |

|        |                 |          |        |    |    |           |           |                 |     |      |     |    |      |                                                    |                      |               |
|--------|-----------------|----------|--------|----|----|-----------|-----------|-----------------|-----|------|-----|----|------|----------------------------------------------------|----------------------|---------------|
| Pat_06 | Post-Resistance | ADAM33   | 80332  | 37 | 20 | 3652888   | 3652888   | Frame_Shift_Del | DEL | G    | -   | 9  | 1100 | c.1490delC                                         | c.(1489-1491)CCAFs   | p.P497fs      |
| Pat_06 | Post-Resistance | RRBP1    | 6238   | 37 | 20 | 17617358  | 17617358  | Frame_Shift_Del | DEL | T    | -   | 10 | 1072 | c.902delA                                          | c.(901-903)AAGfs     | p.K301fs      |
| Pat_06 | Post-Resistance | PLAC4    | 191585 | 37 | 21 | 42551432  | 42551432  | Frame_Shift_Del | DEL | T    | -   | 7  | 338  | c.124delA                                          | c.(124-126)AGAFs     | p.R42fs       |
| Pat_06 | Post-Resistance | SLC19A1  | 6573   | 37 | 21 | 46951916  | 46951918  | In_Frame_Del    | DEL | CAG  | -   | 16 | 192  | c.334_336delCTG                                    | c.(334-336)CTGdel    | p.L112del     |
| Pat_06 | Post-Resistance | LSS      | 4047   | 37 | 21 | 47641824  | 47641824  | Frame_Shift_Del | DEL | C    | -   | 9  | 874  | c.494delG                                          | c.(493-495)GGTfs     | p.G165fs      |
| Pat_06 | Post-Resistance | MED15    | 51586  | 37 | 22 | 20918793  | 20918795  | In_Frame_Del    | DEL | CAG  | -   | 10 | 313  | c.508_510delCAG                                    | c.(508-510)CAGdel    | p.Q174del     |
| Pat_06 | Post-Resistance | MED15    | 51586  | 37 | 22 | 20918916  | 20918918  | In_Frame_Del    | DEL | CAG  | -   | 29 | 372  | c.631_633delCAG                                    | c.(631-633)CAGdel    | p.Q218del     |
| Pat_06 | Post-Resistance | ASCC2    | 84164  | 37 | 22 | 30218355  | 30218355  | Frame_Shift_Del | DEL | T    | -   | 7  | 1082 | c.510delA                                          | c.(508-510)AAAfs     | p.K170fs      |
| Pat_06 | Post-Resistance | TBC1D10A | 83874  | 37 | 22 | 30688545  | 30688545  | Frame_Shift_Del | DEL | G    | -   | 8  | 1130 | c.1346delC                                         | c.(1345-1347)CCAFs   | p.P449fs      |
| Pat_06 | Post-Resistance | SF3A1    | 10291  | 37 | 22 | 30742328  | 30742330  | In_Frame_Del    | DEL | CTG  | -   | 17 | 873  | c.364_366delCAG                                    | c.(364-366)CAGdel    | p.Q122del     |
| Pat_06 | Post-Resistance | SF11     | 9814   | 37 | 22 | 32002366  | 32002366  | Frame_Shift_Del | DEL | A    | -   | 8  | 454  | c.2107delA                                         | c.(2107-2109)AAAfs   | p.K703fs      |
| Pat_06 | Post-Resistance | SH3BP1   | 23616  | 37 | 22 | 38039752  | 38039754  | In_Frame_Del    | DEL | AGG  | -   | 9  | 692  | c.575_577delAGG;c.(574-579)AAGGAG>AAC              |                      | p.E197del     |
| Pat_06 | Post-Resistance | CYP2D6   | 1565   | 37 | 22 | 42524213  | 42524214  | Frame_Shift_Ins | INS | -    | G   | 8  | 196  | c.805_806insC                                      | c.(805-807)CGAfs     | p.R269fs      |
| Pat_06 | Post-Resistance | TCF20    | 6942   | 37 | 22 | 42605990  | 42605992  | In_Frame_Del    | DEL | CTG  | -   | 9  | 380  | .5320_5322delCAI                                   | c.(5320-5322)CAGdel  | p.Q1774del    |
| Pat_06 | Post-Resistance | SRGAP3   | 9901   | 37 | 3  | 9027284   | 9027286   | In_Frame_Del    | DEL | GCT  | -   | 9  | 456  | .3217_3219delAGI                                   | c.(3217-3219)AGCdel  | p.S1074del    |
| Pat_06 | Post-Resistance | GRIP2    | 80852  | 37 | 3  | 14552763  | 14552763  | Frame_Shift_Del | DEL | C    | -   | 7  | 339  | c.2137delG                                         | c.(2137-2139)GACfs   | p.D713fs      |
| Pat_06 | Post-Resistance | TRANK1   | 9881   | 37 | 3  | 36897261  | 36897261  | Frame_Shift_Del | DEL | G    | -   | 8  | 1766 | c.2170delC                                         | c.(2170-2172)CGGfs   | p.R724fs      |
| Pat_06 | Post-Resistance | LTF      | 4057   | 37 | 3  | 46479445  | 46479445  | Frame_Shift_Del | DEL | T    | -   | 7  | 1942 | c.2084delA                                         | c.(2083-2085)AAGfs   | p.K695fs      |
| Pat_06 | Post-Resistance | SCAP     | 22937  | 37 | 3  | 47456383  | 47456383  | Frame_Shift_Del | DEL | T    | -   | 8  | 685  | c.3240delA                                         | c.(3238-3240)AAAfs   | p.K1080fs     |
| Pat_06 | Post-Resistance | KLHDC8B  | 200942 | 37 | 3  | 49211690  | 49211691  | Frame_Shift_Ins | INS | -    | G   | 8  | 946  | c.395_396insG                                      | c.(394-396)CTGfs     | p.L132fs      |
| Pat_06 | Post-Resistance | ROBO2    | 6092   | 37 | 3  | 77657038  | 77657038  | Frame_Shift_Del | DEL | C    | -   | 16 | 664  | c.3226delC                                         | c.(3226-3228)CCCfs   | p.P1076fs     |
| Pat_06 | Post-Resistance | KIAA2018 | 205717 | 37 | 3  | 113380090 | 113380090 | Frame_Shift_Del | DEL | T    | -   | 12 | 406  | c.439delA                                          | c.(439-441)ATTfs     | p.I147fs      |
| Pat_06 | Post-Resistance | ATP6V1A  | 523    | 37 | 3  | 113505224 | 113505224 | Frame_Shift_Del | DEL | T    | -   | 7  | 1307 | c.710delT                                          | c.(709-711)CTTfs     | p.L237fs      |
| Pat_06 | Post-Resistance | NR112    | 8856   | 37 | 3  | 119531660 | 119531660 | Frame_Shift_Del | DEL | G    | -   | 7  | 769  | c.647delG                                          | c.(646-648)CGGfs     | p.R216fs      |
| Pat_06 | Post-Resistance | PARP15   | 165631 | 37 | 3  | 122340370 | 122340370 | Frame_Shift_Del | DEL | A    | -   | 7  | 609  | c.1143delA                                         | c.(1141-1143)GGAfs   | p.G381fs      |
| Pat_06 | Post-Resistance | EIF4G1   | 1981   | 37 | 3  | 184039744 | 184039746 | In_Frame_Del    | DEL | GAA  | -   | 10 | 280  | .1372_1374delGA                                    | c.(1372-1374)GAAdel  | p.E465del     |
| Pat_06 | Post-Resistance | CLCN2    | 1181   | 37 | 3  | 184070896 | 184070896 | Frame_Shift_Del | DEL | C    | -   | 9  | 917  | c.2068delG                                         | c.(2068-2070)GAGfs   | p.E690fs      |
| Pat_06 | Post-Resistance | SLC2A9   | 56606  | 37 | 4  | 9828133   | 9828133   | Frame_Shift_Del | DEL | T    | -   | 11 | 856  | c.1511delA                                         | c.(1510-1512)AACfs   | p.N504fs      |
| Pat_06 | Post-Resistance | ANAPC4   | 29945  | 37 | 4  | 25390191  | 25390191  | Frame_Shift_Del | DEL | A    | -   | 8  | 1112 | c.438delA                                          | c.(436-438)CCAFs     | p.P146fs      |
| Pat_06 | Post-Resistance | GABRG1   | 2565   | 37 | 4  | 46060358  | 46060358  | Frame_Shift_Del | DEL | A    | -   | 15 | 572  | c.792delT                                          | c.(790-792)TTTfs     | p.F264fs      |
| Pat_06 | Post-Resistance | CLOCK    | 9575   | 37 | 4  | 56304530  | 56304532  | In_Frame_Del    | DEL | CTG  | -   | 11 | 322  | .2278_2280delCAI                                   | c.(2278-2280)CAGdel  | p.Q760del     |
| Pat_06 | Post-Resistance | PRDM8    | 56978  | 37 | 4  | 81123250  | 81123252  | In_Frame_Del    | DEL | CAG  | -   | 7  | 161  | c.634_636delCAG                                    | c.(634-636)CAGdel    | p.Q217del     |
| Pat_06 | Post-Resistance | CDS1     | 1040   | 37 | 4  | 85556475  | 85556475  | Frame_Shift_Del | DEL | T    | -   | 13 | 431  | c.781delT                                          | c.(781-783)TTTfs     | p.F261fs      |
| Pat_06 | Post-Resistance | NAP1L5   | 266812 | 37 | 4  | 89618484  | 89618486  | In_Frame_Del    | DEL | TCC  | -   | 16 | 344  | c.420_422delGGA;c.(418-423)GAGGAA>GAA;.140_141EE>I |                      |               |
| Pat_06 | Post-Resistance | NPNT     | 255743 | 37 | 4  | 106863682 | 106863684 | In_Frame_Del    | DEL | CCA  | -   | 22 | 735  | c.982_984delCCA                                    | c.(982-984)CCAdel    | p.P333del     |
| Pat_06 | Post-Resistance | KIAA1109 | 84162  | 37 | 4  | 123178593 | 123178593 | Frame_Shift_Del | DEL | G    | -   | 8  | 1870 | c.6562delG                                         | c.(6562-6564)GGGfs   | p.G2188fs     |
| Pat_06 | Post-Resistance | ANKRD50  | 57182  | 37 | 4  | 125591169 | 125591169 | Frame_Shift_Del | DEL | T    | -   | 8  | 501  | c.3263delA                                         | c.(3262-3264)AATfs   | p.N1088fs     |
| Pat_06 | Post-Resistance | POU4F2   | 5458   | 37 | 4  | 147560457 | 147560458 | In_Frame_Ins    | INS | -    | GGC | 22 | 38   | c.165_166insGGC                                    | c.(163-168)insGGC    | p.68_69insG   |
| Pat_06 | Post-Resistance | LRBA     | 987    | 37 | 4  | 151842374 | 151842374 | Frame_Shift_Del | DEL | A    | -   | 11 | 1238 | c.621delT                                          | c.(619-621)TTTfs     | p.F207fs      |
| Pat_06 | Post-Resistance | FHDC1    | 85462  | 37 | 4  | 153889130 | 153889130 | Splice_Site     | DEL | A    | -   | 7  | 1485 | c.1101_splice                                      | c.e9-2               | p.R367_splice |
| Pat_06 | Post-Resistance | TLL1     | 7092   | 37 | 4  | 167020619 | 167020619 | Frame_Shift_Del | DEL | G    | -   | 8  | 1634 | c.2847delG                                         | c.(2845-2847)GTGfs   | p.V949fs      |
| Pat_06 | Post-Resistance | CLPTM1L  | 81037  | 37 | 5  | 1331941   | 1331943   | In_Frame_Del    | DEL | TCT  | -   | 7  | 526  | c.947_949delAGA;c.(946-951)AAGAGC>AGC              |                      | p.K316del     |
| Pat_06 | Post-Resistance | NIPBL    | 25836  | 37 | 5  | 37063925  | 37063927  | In_Frame_Del    | DEL | GAA  | -   | 7  | 174  | .7894_7896delGA                                    | c.(7894-7896)GAAAdel | p.E2636del    |
| Pat_06 | Post-Resistance | FGF10    | 2255   | 37 | 5  | 44388715  | 44388717  | In_Frame_Del    | DEL | AGC  | -   | 7  | 814  | c.68_70delGCT                                      | c.(67-72)TGCTTT>TTT  | p.C23del      |
| Pat_06 | Post-Resistance | FAM172A  | 83989  | 37 | 5  | 93111877  | 93111877  | Frame_Shift_Del | DEL | G    | -   | 7  | 1387 | c.1096delC                                         | c.(1096-1098)CGGfs   | p.R366fs      |
| Pat_06 | Post-Resistance | AP3S1    | 1176   | 37 | 5  | 115202418 | 115202421 | Frame_Shift_Del | DEL | AAGA | -   | 16 | 601  | .;121_124delAAG/                                   | c.(121-126)AAGAGAFs  | p.K41fs       |
| Pat_06 | Post-Resistance | FBN2     | 2201   | 37 | 5  | 127648337 | 127648337 | Frame_Shift_Del | DEL | G    | -   | 7  | 2504 | c.4868delC                                         | c.(4867-4869)CCTfs   | p.P1623fs     |

|        |                 |         |        |    |   |           |           |                 |     |     |   |    |      |                                      |                                  |             |
|--------|-----------------|---------|--------|----|---|-----------|-----------|-----------------|-----|-----|---|----|------|--------------------------------------|----------------------------------|-------------|
| Pat_06 | Post-Resistance | EGR1    | 1958   | 37 | 5 | 137801633 | 137801635 | In_Frame_Del    | DEL | CAG | - | 7  | 129  | c.183_185delCAGc.(181-186)AACAGC>AAC | p.S67del                         |             |
| Pat_06 | Post-Resistance | JAKMIP2 | 9832   | 37 | 5 | 147040890 | 147040890 | Frame_Shift_Del | DEL | T   | - | 8  | 1125 | c.248delA                            | c.(247-249)AAGfs                 | p.K83fs     |
| Pat_06 | Post-Resistance | FAT2    | 2196   | 37 | 5 | 150885487 | 150885488 | Frame_Shift_Ins | INS | -   | G | 7  | 1810 | :.12688_12689insC                    | c.(12688-12690)CTGfs             | p.L4230fs   |
| Pat_06 | Post-Resistance | CPLX2   | 10814  | 37 | 5 | 175306965 | 175306967 | In_Frame_Del    | DEL | GAG | - | 8  | 285  | c.322_324delGAG                      | c.(322-324)GAGdel                | p.E114del   |
| Pat_06 | Post-Resistance | HIVEP1  | 3096   | 37 | 6 | 12089463  | 12089463  | Frame_Shift_Del | DEL | A   | - | 7  | 556  | c.87delA                             | c.(85-87)TCAsfs                  | p.S29fs     |
| Pat_06 | Post-Resistance | HLA-G   | 3135   | 37 | 6 | 29797195  | 29797196  | Frame_Shift_Ins | INS | -   | C | 8  | 2152 | c.620_621insC                        | c.(619-621)GACfs                 | p.D207fs    |
| Pat_06 | Post-Resistance | TRIM26  | 7726   | 37 | 6 | 30157254  | 30157254  | Frame_Shift_Del | DEL | T   | - | 10 | 797  | c.845delA                            | c.(844-846)AAGfs                 | p.K282fs    |
| Pat_06 | Post-Resistance | GTF2H4  | 2968   | 37 | 6 | 30877804  | 30877804  | Frame_Shift_Del | DEL | T   | - | 8  | 1563 | c.338delT                            | c.(337-339)ATTfs                 | p.I113fs    |
| Pat_06 | Post-Resistance | CFB     | 629    | 37 | 6 | 31905102  | 31905102  | Frame_Shift_Del | DEL | A   | - | 7  | 994  | c.536delA                            | c.(535-537)GAAfs                 | p.E179fs    |
| Pat_06 | Post-Resistance | FANCE   | 2178   | 37 | 6 | 35425714  | 35425715  | Frame_Shift_Ins | INS | -   | C | 7  | 807  | c.922_923insC                        | c.(922-924)GCCfs                 | p.A308fs    |
| Pat_06 | Post-Resistance | MAPK13  | 5603   | 37 | 6 | 36099144  | 36099146  | In_Frame_Del    | DEL | GCT | - | 7  | 1218 | c.216_218delGCT:                     | c.(214-219)GAGCTG>GAC            | p.L76del    |
| Pat_06 | Post-Resistance | KHDRBS2 | 202559 | 37 | 6 | 62604602  | 62604602  | Frame_Shift_Del | DEL | C   | - | 9  | 2668 | c.748delG                            | c.(748-750)GCAfs                 | p.A250fs    |
| Pat_06 | Post-Resistance | MAP3K7  | 6885   | 37 | 6 | 91296568  | 91296570  | In_Frame_Del    | DEL | GAG | - | 15 | 288  | c.33_35delCTC                        | c.(31-36)TCCTCG>TCG              | p.11_12SS>S |
| Pat_06 | Post-Resistance | FYN     | 2534   | 37 | 6 | 111983042 | 111983042 | Frame_Shift_Del | DEL | T   | - | 7  | 1242 | c.1514delA                           | c.(1513-1515)AAGfs               | p.K505fs    |
| Pat_06 | Post-Resistance | SASH1   | 23328  | 37 | 6 | 148848658 | 148848658 | Frame_Shift_Del | DEL | A   | - | 10 | 1839 | c.1354delA                           | c.(1354-1356)AAAfs               | p.K452fs    |
| Pat_06 | Post-Resistance | CARD11  | 84433  | 37 | 7 | 2968323   | 2968323   | Frame_Shift_Del | DEL | G   | - | 7  | 1007 | c.1663delC                           | c.(1663-1665)CGGfs               | p.R555fs    |
| Pat_06 | Post-Resistance | ICA1    | 3382   | 37 | 7 | 8198251   | 8198251   | Frame_Shift_Del | DEL | T   | - | 8  | 342  | c.611delA                            | c.(610-612)AACfs                 | p.N204fs    |
| Pat_06 | Post-Resistance | PHF14   | 9678   | 37 | 7 | 11075380  | 11075381  | Frame_Shift_Del | DEL | AG  | - | 9  | 1577 | :.1569_1570delAC                     | c.(1567-1572)CAAGAGfs            | p.Q523fs    |
| Pat_06 | Post-Resistance | ETV1    | 2115   | 37 | 7 | 13975473  | 13975473  | Frame_Shift_Del | DEL | G   | - | 8  | 996  | c.414delC                            | c.(412-414)CCCfs                 | p.P138fs    |
| Pat_06 | Post-Resistance | AGR2    | 10551  | 37 | 7 | 16841329  | 16841329  | Frame_Shift_Del | DEL | T   | - | 8  | 1019 | c.92delA                             | c.(91-93)AAGfs                   | p.K31fs     |
| Pat_06 | Post-Resistance | OSBPL3  | 26031  | 37 | 7 | 24910452  | 24910453  | Frame_Shift_Del | DEL | TC  | - | 13 | 669  | c.279_280delGA                       | c.(277-282)GAGAAGfs              | p.E93fs     |
| Pat_06 | Post-Resistance | HOXA1   | 3198   | 37 | 7 | 27135314  | 27135316  | In_Frame_Del    | DEL | CGA | - | 11 | 449  | c.216_218delITCG                     | c.(214-219)CATCAC>CACp.72_73HH>H |             |
| Pat_06 | Post-Resistance | JAZF1   | 221895 | 37 | 7 | 27872456  | 27872456  | Frame_Shift_Del | DEL | G   | - | 13 | 2181 | c.695delC                            | c.(694-696)CCGfs                 | p.P232fs    |
| Pat_06 | Post-Resistance | GARS    | 2617   | 37 | 7 | 30634583  | 30634585  | In_Frame_Del    | DEL | CTG | - | 10 | 323  | c.46_48delCTG                        | c.(46-48)CTGdel                  | p.L20del    |
| Pat_06 | Post-Resistance | POU6F2  | 11281  | 37 | 7 | 39379288  | 39379290  | In_Frame_Del    | DEL | CAG | - | 21 | 266  | c.559_561delCAG                      | c.(559-561)CAGdel                | p.Q196del   |
| Pat_06 | Post-Resistance | ABCA13  | 154664 | 37 | 7 | 48318519  | 48318519  | Frame_Shift_Del | DEL | A   | - | 7  | 448  | c.7728delA                           | c.(7726-7728)TTAfs               | p.L2576fs   |
| Pat_06 | Post-Resistance | STX1A   | 6804   | 37 | 7 | 73123425  | 73123427  | In_Frame_Del    | DEL | CAT | - | 8  | 1316 | c.56_58delATG                        | c.(55-60)GATGTG>GTC              | p.D19del    |
| Pat_06 | Post-Resistance | HIP1    | 3092   | 37 | 7 | 75168684  | 75168684  | Frame_Shift_Del | DEL | T   | - | 7  | 2508 | c.3020delA                           | c.(3019-3021)AAGfs               | p.K1007fs   |
| Pat_06 | Post-Resistance | TMEM60  | 85025  | 37 | 7 | 77423460  | 77423460  | Frame_Shift_Del | DEL | T   | - | 15 | 508  | c.231delA                            | c.(229-231)AAAfs                 | p.K77fs     |
| Pat_06 | Post-Resistance | PHTF2   | 57157  | 37 | 7 | 77569581  | 77569581  | Frame_Shift_Del | DEL | T   | - | 10 | 585  | c.1702delT                           | c.(1702-1704)TTTfs               | p.F568fs    |
| Pat_06 | Post-Resistance | AKAP9   | 10142  | 37 | 7 | 91671392  | 91671393  | Frame_Shift_Del | DEL | AG  | - | 9  | 254  | :.4950_4951delAC                     | c.(4948-4953)TCAGAGfs            | p.S1650fs   |
| Pat_06 | Post-Resistance | CYP51A1 | 1595   | 37 | 7 | 91752494  | 91752494  | Frame_Shift_Del | DEL | T   | - | 8  | 844  | c.1026delA                           | c.(1024-1026)AAAfs               | p.K342fs    |
| Pat_06 | Post-Resistance | MLL5    | 55904  | 37 | 7 | 104749488 | 104749488 | Frame_Shift_Del | DEL | G   | - | 7  | 814  | c.3568delG                           | c.(3568-3570)GGAfs               | p.G1190fs   |
| Pat_06 | Post-Resistance | NUP205  | 23165  | 37 | 7 | 135301911 | 135301911 | Frame_Shift_Del | DEL | T   | - | 7  | 687  | c.3606delT                           | c.(3604-3606)GATfs               | p.D1202fs   |
| Pat_06 | Post-Resistance | GSTK1   | 373156 | 37 | 7 | 142961764 | 142961764 | Frame_Shift_Del | DEL | A   | - | 9  | 1910 | c.278delA                            | c.(277-279)GAAfs                 | p.E93fs     |
| Pat_06 | Post-Resistance | CHPF2   | 54480  | 37 | 7 | 150932283 | 150932283 | Frame_Shift_Del | DEL | G   | - | 7  | 1379 | c.413delG                            | c.(412-414)CGGfs                 | p.R138fs    |
| Pat_06 | Post-Resistance | MLL3    | 58508  | 37 | 7 | 151874013 | 151874013 | Frame_Shift_Del | DEL | T   | - | 7  | 846  | c.8525delA                           | c.(8524-8526)AATfs               | p.N2842fs   |
| Pat_06 | Post-Resistance | XRCC2   | 7516   | 37 | 7 | 152346220 | 152346220 | Frame_Shift_Del | DEL | A   | - | 8  | 569  | c.350delT                            | c.(349-351)TTGfs                 | p.L117fs    |
| Pat_06 | Post-Resistance | WDR60   | 55112  | 37 | 7 | 158704352 | 158704353 | Frame_Shift_Ins | INS | -   | A | 10 | 727  | c.1572_1573insA                      | c.(1570-1575)GGGAAfs             | p.G524fs    |
| Pat_06 | Post-Resistance | SFTPC   | 6440   | 37 | 8 | 22020159  | 22020161  | In_Frame_Del    | DEL | GTG | - | 11 | 1007 | c.115_117delGTG                      | c.(115-117)GTGdel                | p.V44del    |
| Pat_06 | Post-Resistance | WRN     | 7486   | 37 | 8 | 30945377  | 30945379  | In_Frame_Del    | DEL | AAG | - | 7  | 269  | .1517_1519delAA                      | c.(1516-1521)AAAGAA>AA           | p.E510del   |
| Pat_06 | Post-Resistance | ZFHX4   | 79776  | 37 | 8 | 77765755  | 77765755  | Frame_Shift_Del | DEL | A   | - | 7  | 1497 | c.6463delA                           | c.(6463-6465)ATAfs               | p.I2155fs   |
| Pat_06 | Post-Resistance | LRRCC1  | 85444  | 37 | 8 | 86038947  | 86038948  | Frame_Shift_Del | DEL | AG  | - | 7  | 371  | :.1296_1297delAC                     | c.(1294-1299)CAAGAGfs            | p.Q432fs    |
| Pat_06 | Post-Resistance | CA2     | 760    | 37 | 8 | 86386588  | 86386588  | Frame_Shift_Del | DEL | T   | - | 8  | 1774 | c.387delT                            | c.(385-387)GATfs                 | p.D129fs    |
| Pat_06 | Post-Resistance | TMEM55A | 55529  | 37 | 8 | 92032481  | 92032481  | Frame_Shift_Del | DEL | T   | - | 10 | 738  | c.266delA                            | c.(265-267)AACfs                 | p.N89fs     |
| Pat_06 | Post-Resistance | RUNX1T1 | 862    | 37 | 8 | 92998419  | 92998419  | Frame_Shift_Del | DEL | T   | - | 9  | 824  | c.1212delA                           | c.(1210-1212)AAAfs               | p.K404fs    |
| Pat_06 | Post-Resistance | CCNE2   | 9134   | 37 | 8 | 95902737  | 95902737  | Frame_Shift_Del | DEL | T   | - | 7  | 1605 | c.359delA                            | c.(358-360)AAGfs                 | p.K120fs    |

|        |                 |           |        |    |    |           |           |                 |     |     |        |    |      |                   |                                     |              |
|--------|-----------------|-----------|--------|----|----|-----------|-----------|-----------------|-----|-----|--------|----|------|-------------------|-------------------------------------|--------------|
| Pat_06 | Post-Resistance | VPS13B    | 157680 | 37 | 8  | 100887781 | 100887781 | Frame_Shift_Del | DEL | C   | -      | 10 | 883  | c.11956delC       | c.(11956-11958)CCCfs                | p.P3986fs    |
| Pat_06 | Post-Resistance | DCAF13    | 25879  | 37 | 8  | 104442912 | 104442912 | Frame_Shift_Del | DEL | A   | -      | 8  | 1055 | c.1153delA        | c.(1153-1155)AAAFs                  | p.K385fs     |
| Pat_06 | Post-Resistance | ENPP2     | 5168   | 37 | 8  | 120592369 | 120592369 | Frame_Shift_Del | DEL | T   | -      | 7  | 2390 | c.1767delA        | c.(1765-1767)AAAFs                  | p.K589fs     |
| Pat_06 | Post-Resistance | ZNF572    | 137209 | 37 | 8  | 125987892 | 125987893 | Frame_Shift_Ins | INS | -   | A      | 7  | 583  | c.10_11insA       | c.(10-12)GAAfs                      | p.E4fs       |
| Pat_06 | Post-Resistance | FAM135B   | 51059  | 37 | 8  | 139149485 | 139149485 | Frame_Shift_Del | DEL | T   | -      | 10 | 898  | c.3920delA        | c.(3919-3921)AACfs                  | p.N1307fs    |
| Pat_06 | Post-Resistance | TSNARE1   | 203062 | 37 | 8  | 143310866 | 143310868 | In_Frame_Del    | DEL | GAT | -      | 12 | 873  | c.1519_1521delATC | c.(1519-1521)ATCdel                 | p.I507del    |
| Pat_06 | Post-Resistance | PAX5      | 5079   | 37 | 9  | 37020764  | 37020764  | Frame_Shift_Del | DEL | A   | -      | 8  | 1383 | c.81delT          | c.(79-81)TTTfs                      | p.F27fs      |
| Pat_06 | Post-Resistance | FBP1      | 2203   | 37 | 9  | 97380075  | 97380075  | Frame_Shift_Del | DEL | C   | -      | 7  | 395  | c.401delG         | c.(400-402)GGAfs                    | p.G134fs     |
| Pat_06 | Post-Resistance | TMEM38B   | 55151  | 37 | 9  | 108456999 | 108456999 | Frame_Shift_Del | DEL | T   | -      | 7  | 840  | c.58delT          | c.(58-60)TTTfs                      | p.F20fs      |
| Pat_06 | Post-Resistance | TNC       | 3371   | 37 | 9  | 117797539 | 117797539 | Frame_Shift_Del | DEL | G   | -      | 16 | 1423 | c.5731delC        | c.(5731-5733)CGGfs                  | p.R1911fs    |
| Pat_06 | Post-Resistance | CRB2      | 286204 | 37 | 9  | 126139182 | 126139184 | In_Frame_Del    | DEL | CCT | -      | 9  | 112  | c.3699_3701delCC  | c.(3697-3702)TGCCTC>TG              | p.L1239del   |
| Pat_06 | Post-Resistance | FAM129B   | 64855  | 37 | 9  | 130270778 | 130270778 | Frame_Shift_Del | DEL | G   | -      | 7  | 1482 | c.1357delC        | c.(1357-1359)CACfs                  | p.H453fs     |
| Pat_06 | Post-Resistance | GOLGA2    | 2801   | 37 | 9  | 131019390 | 131019390 | Frame_Shift_Del | DEL | A   | -      | 11 | 810  | c.2965delT        | c.(2965-2967)TACfs                  | p.Y989fs     |
| Pat_06 | Post-Resistance | CEL       | 1056   | 37 | 9  | 135941982 | 135941982 | Frame_Shift_Del | DEL | G   | -      | 18 | 1462 | c.613delG         | c.(613-615)GGGfs                    | p.G205fs     |
| Pat_06 | Post-Resistance | C9orf86   | 55684  | 37 | 9  | 139734218 | 139734218 | Frame_Shift_Del | DEL | C   | -      | 8  | 671  | c.1831delC        | c.(1831-1833)CCCfs                  | p.P611fs     |
| Pat_06 | Post-Resistance | CDKL5     | 6792   | 37 | X  | 18622143  | 18622144  | Frame_Shift_Ins | INS | -   | T      | 7  | 1519 | c.1099_1100insT   | c.(1099-1101)CTAFs                  | p.L367fs     |
| Pat_06 | Post-Resistance | DMD       | 1756   | 37 | X  | 32717353  | 32717353  | Frame_Shift_Del | DEL | A   | -      | 7  | 1124 | c.707delT         | c.(706-708)TTCfs                    | p.F236fs     |
| Pat_06 | Post-Resistance | PCDH19    | 57526  | 37 | X  | 99663560  | 99663562  | In_Frame_Del    | DEL | CAG | -      | 7  | 126  | c.34_36delCTG     | c.(34-36)CTGdel                     | p.L12del     |
| Pat_06 | Post-Resistance | IRS4      | 8471   | 37 | X  | 107975867 | 107975869 | In_Frame_Del    | DEL | GTC | -      | 7  | 1834 | c.3706_3708delGA  | c.(3706-3708)GACdel                 | p.D1236del   |
| Pat_06 | Post-Resistance | NKAP      | 79576  | 37 | X  | 119072752 | 119072753 | Frame_Shift_Del | DEL | TC  | -      | 7  | 865  | c.407_408delGA    | c.(406-408)AGAfs                    | p.R136fs     |
| Pat_06 | Post-Resistance | BCORL1    | 63035  | 37 | X  | 129147360 | 129147361 | Frame_Shift_Ins | INS | -   | C      | 7  | 1405 | c.612_613insC     | c.(610-615)TGTCCTCfs                | p.C204fs     |
| Pat_06 | Post-Resistance | BCORL1    | 63035  | 37 | X  | 129190011 | 129190011 | Frame_Shift_Del | DEL | C   | -      | 7  | 420  | c.5036delC        | c.(5035-5037)TCCfs                  | p.S1679fs    |
| Pat_06 | Post-Resistance | CD99L2    | 83692  | 37 | X  | 149937526 | 149937528 | In_Frame_Del    | DEL | GGC | -      | 11 | 1875 | c.768_770delGCC   | c.(766-771)CCGCC>CCG.256_257PP>I    |              |
| Pat_08 | Pre-Treatment   | ARID1A    | 8289   | 37 | 1  | 27057930  | 27057931  | Frame_Shift_Ins | INS | -   | C      | 9  | 679  | c.1638_1639insC   | c.(1636-1641)CAGAGCfs               | p.Q546fs     |
| Pat_08 | Pre-Treatment   | MUTYH     | 4595   | 37 | 1  | 45795066  | 45795066  | Frame_Shift_Del | DEL | T   | -      | 7  | 1007 | c.1553delA        | c.(1552-1554)AAGfs                  | p.K518fs     |
| Pat_08 | Pre-Treatment   | NUDT17    | 200035 | 37 | 1  | 145586936 | 145586938 | In_Frame_Del    | DEL | TCC | -      | 10 | 323  | c.750_752delGGAC  | c.(748-753)GAGAGT>GAT               | p.E250del    |
| Pat_08 | Pre-Treatment   | TYSND1    | 219743 | 37 | 10 | 71905929  | 71905931  | In_Frame_Del    | DEL | CAG | -      | 2  | 4    | c.412_414delCTG   | c.(412-414)CTGdel                   | p.L138del    |
| Pat_08 | Pre-Treatment   | TSPAN4    | 7106   | 37 | 11 | 864443    | 864445    | In_Frame_Del    | DEL | CTG | -      | 13 | 337  | c.262_264delCTG   | c.(262-264)CTGdel                   | p.L92del     |
| Pat_08 | Pre-Treatment   | FAM111A   | 63901  | 37 | 11 | 58920855  | 58920857  | In_Frame_Del    | DEL | ATT | -      | 8  | 306  | c.1714_1716delAT  | c.(1714-1716)ATTdel                 | p.I572del    |
| Pat_08 | Pre-Treatment   | PRB1      | 5542   | 37 | 12 | 11506815  | 11506816  | In_Frame_Ins    | INS | -   | GGA    | 12 | 399  | c.221_222insTCC   | c.(220-222)CCA>CTCCA                | p.74_74PP>PP |
| Pat_08 | Pre-Treatment   | PRB2      | 653247 | 37 | 12 | 11546233  | 11546235  | In_Frame_Del    | DEL | GGA | -      | 7  | 151  | c.777_779delITCC  | c.(775-780)CCTCCA>CCA.259_260PP>I   |              |
| Pat_08 | Pre-Treatment   | DHX37     | 57647  | 37 | 12 | 125465270 | 125465272 | In_Frame_Del    | DEL | CTC | -      | 3  | 3    | c.502_504delGAG   | c.(502-504)GAGdel                   | p.E168del    |
| Pat_08 | Pre-Treatment   | PIWIL1    | 9271   | 37 | 12 | 130845801 | 130845801 | Frame_Shift_Del | DEL | C   | -      | 64 | 85   | c.1742delC        | c.(1741-1743)ACCfs                  | p.T581fs     |
| Pat_08 | Pre-Treatment   | MSLNL     | 401827 | 37 | 16 | 830829    | 830831    | In_Frame_Del    | DEL | AAG | -      | 7  | 506  | c.170_172delCTT   | c.(169-174)GCTTTC>GTC               | p.57_58AF>V  |
| Pat_08 | Pre-Treatment   | ZFH3      | 463    | 37 | 16 | 72821468  | 72821469  | Frame_Shift_Del | DEL | AG  | -      | 14 | 777  | c.10706_10707delC | c.(10705-10707)CCTfs                | p.P3569fs    |
| Pat_08 | Pre-Treatment   | ITGAE     | 3682   | 37 | 17 | 3638140   | 3638141   | Frame_Shift_Ins | INS | -   | G      | 13 | 432  | c.2625_2626insC   | c.(2623-2628)CCCAGAFs               | p.P875fs     |
| Pat_08 | Pre-Treatment   | BPTF      | 2186   | 37 | 17 | 65850118  | 65850118  | Frame_Shift_Del | DEL | C   | -      | 67 | 243  | c.676delC         | c.(676-678)CCCfs                    | p.P226fs     |
| Pat_08 | Pre-Treatment   | SERTAD1   | 29950  | 37 | 19 | 40929409  | 40929411  | In_Frame_Del    | DEL | CTC | -      | 9  | 377  | c.43_45delGAG     | c.(43-45)GAGdel                     | p.E15del     |
| Pat_08 | Pre-Treatment   | ZC3H4     | 23211  | 37 | 19 | 47572401  | 47572403  | In_Frame_Del    | DEL | CTC | -      | 8  | 246  | c.2344_2346delIGA | c.(2344-2346)GAGdel                 | p.E782del    |
| Pat_08 | Pre-Treatment   | RAB11FIP5 | 26056  | 37 | 2  | 73315337  | 73315339  | In_Frame_Del    | DEL | TGG | -      | 7  | 278  | c.1407_1409delICC | c.(1405-1410)CACCAA>CA              | p.H469del    |
| Pat_08 | Pre-Treatment   | RALGAPA2  | 57186  | 37 | 20 | 20527432  | 20527433  | Frame_Shift_Ins | INS | -   | A      | 21 | 50   | c.3200_3201insT   | c.(3199-3201)TTCfs                  | p.F1067fs    |
| Pat_08 | Pre-Treatment   | ULK4      | 54986  | 37 | 3  | 41860985  | 41860985  | Frame_Shift_Del | DEL | T   | -      | 8  | 74   | c.1778delA        | c.(1777-1779)AAGfs                  | p.K593fs     |
| Pat_08 | Pre-Treatment   | CRIPAK    | 285464 | 37 | 4  | 1388714   | 1388715   | Frame_Shift_Del | DEL | CA  | -      | 10 | 448  | c.415_416delCA    | c.(415-417)CACfs                    | p.H139fs     |
| Pat_08 | Pre-Treatment   | CRIPAK    | 285464 | 37 | 4  | 1388993   | 1388994   | Frame_Shift_Del | DEL | CA  | -      | 12 | 795  | c.694_695delCA    | c.(694-696)CACfs                    | p.H232fs     |
| Pat_08 | Pre-Treatment   | ENPEP     | 2028   | 37 | 4  | 111470502 | 111470503 | In_Frame_Ins    | INS | -   | AATACT | 8  | 89   | c.152_2153insAATA | c.(152-2154)GAA>GAATACb.718_719insY |              |
| Pat_08 | Pre-Treatment   | TPBG      | 7162   | 37 | 6  | 83074809  | 83074810  | Frame_Shift_Del | DEL | CG  | -      | 3  | 5    | c.131_132delCG    | c.(130-132)TCGfs                    | p.S44fs      |
| Pat_08 | Pre-Treatment   | ANK1      | 286    | 37 | 8  | 41543694  | 41543695  | Frame_Shift_Del | DEL | TG  | -      | 42 | 98   | c.4365_4366delCA  | c.(4363-4368)GTCATCfs               | p.V1455fs    |



|        |                 |          |        |    |    |           |           |                 |     |           |          |     |      |                                                      |                      |                |
|--------|-----------------|----------|--------|----|----|-----------|-----------|-----------------|-----|-----------|----------|-----|------|------------------------------------------------------|----------------------|----------------|
| Pat_08 | Pre-Treatment   | DENND3   | 22898  | 37 | 8  | 142161936 | 142161937 | Splice_Site     | INS | -         | GTTA     | 7   | 209  | c.834_splice                                         | c.e7+1               | p.K278_splice  |
| Pat_08 | Pre-Treatment   | CT45A5   | 441521 | 37 | X  | 134948047 | 134948047 | Frame_Shift_Del | DEL | G         | -        | 25  | 567  | c.278delC                                            | c.(277-279)CCTfs     | p.P93fs        |
| Pat_08 | Pre-Treatment   | RBMX     | 27316  | 37 | X  | 135956571 | 135956572 | Frame_Shift_Ins | INS | -         | GG       | 15  | 336  | c.905_906insCC                                       | c.(904-906)CCAfs     | p.P302fs       |
| Pat_08 | Post-Resistance | TMEM52   | 339456 | 37 | 1  | 1850628   | 1850636   | In_Frame_Del    | DEL | (GCGGCAG) | -        | 3   | 4    | c.77delCCTGCC(7-78)CTCCTGCCGCTG>C.23_26LLPL>I        |                      |                |
| Pat_08 | Post-Resistance | MMEL1    | 79258  | 37 | 1  | 2560819   | 2560821   | In_Frame_Del    | DEL | CAG       | -        | 7   | 54   | c.103_105delCTG                                      | c.(103-105)CTGdel    | p.L35del       |
| Pat_08 | Post-Resistance | MST1P9   | 11223  | 37 | 1  | 17085995  | 17085996  | Frame_Shift_Ins | INS | -         | C        | 7   | 218  | c.901_902insG                                        | c.(901-903)GCGfs     | p.A301fs       |
| Pat_08 | Post-Resistance | C1orf173 | 127254 | 37 | 1  | 75037803  | 75037803  | Frame_Shift_Del | DEL | G         | -        | 7   | 792  | c.3591delC                                           | c.(3589-3591)TCCfs   | p.S1197fs      |
| Pat_08 | Post-Resistance | GBP4     | 115361 | 37 | 1  | 89662859  | 89662861  | In_Frame_Del    | DEL | CCA       | -        | 8   | 447  | c.167_169delTTGG>C.(166-171)GTGGCC>GCC               |                      | p.V56del       |
| Pat_08 | Post-Resistance | KIAA1324 | 57535  | 37 | 1  | 109727724 | 109727725 | Frame_Shift_Del | DEL | AC        | -        | 9   | 791  | c.1010_1011delAC                                     | c.(1009-1011)TACfs   | p.Y337fs       |
| Pat_08 | Post-Resistance | LYZL2    | 119180 | 37 | 10 | 30900902  | 30900902  | Frame_Shift_Del | DEL | T         | -        | 7   | 1631 | c.567delA                                            | c.(565-567)AAAfs     | p.K189fs       |
| Pat_08 | Post-Resistance | POLL     | 27343  | 37 | 10 | 103345131 | 103345133 | In_Frame_Del    | DEL | GGA       | -        | 7   | 103  | c.513_515delTCCc.(511-516)CCTCCC>CCC.171_172PP>I     |                      |                |
| Pat_08 | Post-Resistance | TSPAN4   | 7106   | 37 | 11 | 864443    | 864445    | In_Frame_Del    | DEL | CTG       | -        | 10  | 400  | c.262_264delCTG                                      | c.(262-264)CTGdel    | p.L92del       |
| Pat_08 | Post-Resistance | OR4D11   | 219986 | 37 | 11 | 59271848  | 59271848  | Frame_Shift_Del | DEL | C         | -        | 8   | 1523 | c.800delC                                            | c.(799-801)ACAfs     | p.T267fs       |
| Pat_08 | Post-Resistance | TIGD3    | 220359 | 37 | 11 | 65123714  | 65123714  | Frame_Shift_Del | DEL | C         | -        | 7   | 355  | c.435delC                                            | c.(433-435)TTCfs     | p.F145fs       |
| Pat_08 | Post-Resistance | PRB2     | 653247 | 37 | 12 | 11546506  | 11546508  | In_Frame_Del    | DEL | TTG       | -        | 7   | 1060 | c.504_506delCAAc.(502-507)AACAAAG>AAG                |                      | p.N168del      |
| Pat_08 | Post-Resistance | NEUROD4  | 58158  | 37 | 12 | 55421128  | 55421128  | Frame_Shift_Del | DEL | C         | -        | 8   | 3752 | c.905delC                                            | c.(904-906)ACCfs     | p.T302fs       |
| Pat_08 | Post-Resistance | CUX2     | 23316  | 37 | 12 | 111760230 | 111760231 | Frame_Shift_Del | DEL | GG        | -        | 4   | 8    | c.2772_2773delGc.c.(2770-2775)CTGGGCfs               |                      | p.L924fs       |
| Pat_08 | Post-Resistance | BRAP     | 8315   | 37 | 12 | 112121081 | 112121081 | Frame_Shift_Del | DEL | T         | -        | 7   | 522  | c.113delA                                            | c.(112-114)AAGfs     | p.K38fs        |
| Pat_08 | Post-Resistance | PIWIL1   | 9271   | 37 | 12 | 130845801 | 130845801 | Frame_Shift_Del | DEL | C         | -        | 107 | 193  | c.1742delC                                           | c.(1741-1743)ACCfs   | p.T581fs       |
| Pat_08 | Post-Resistance | C14orf39 | 317761 | 37 | 14 | 60903565  | 60903565  | Frame_Shift_Del | DEL | A         | -        | 7   | 228  | c.1762delT                                           | c.(1762-1764)TGAfs   | p.*588fs       |
| Pat_08 | Post-Resistance | EML1     | 2009   | 37 | 14 | 100367334 | 100367334 | Frame_Shift_Del | DEL | T         | -        | 7   | 669  | c.966delT                                            | c.(964-966)GGTfs     | p.G322fs       |
| Pat_08 | Post-Resistance | ADAM6    | 8755   | 37 | 14 | 106774086 | 106774087 | Splice_Site     | INS | -         | AATACACG | 8   | 25   | c.15674_splice                                       | c.e430+1             |                |
| Pat_08 | Post-Resistance | CLPX     | 10845  | 37 | 15 | 65450094  | 65450094  | Frame_Shift_Del | DEL | T         | -        | 7   | 863  | c.1047delA                                           | c.(1045-1047)AAAfs   | p.K349fs       |
| Pat_08 | Post-Resistance | NUDT21   | 11051  | 37 | 16 | 56485066  | 56485066  | Frame_Shift_Del | DEL | C         | -        | 7   | 794  | c.49delG                                             | c.(49-51)GTCfs       | p.V17fs        |
| Pat_08 | Post-Resistance | ACD      | 65057  | 37 | 16 | 67693646  | 67693648  | In_Frame_Del    | DEL | GCA       | -        | 7   | 633  | c.551_553delITGCc.(550-555)CTGCAG>CAC                |                      | p.L184del      |
| Pat_08 | Post-Resistance | RANBP10  | 57610  | 37 | 16 | 67763279  | 67763281  | In_Frame_Del    | DEL | GAG       | -        | 8   | 101  | c.1254_1256delICTc.(1252-1257)TCCTCG>TCc.418_419SS>I |                      |                |
| Pat_08 | Post-Resistance | MYOCD    | 93649  | 37 | 17 | 12647692  | 12647694  | In_Frame_Del    | DEL | CAG       | -        | 9   | 114  | c.910_912delCAG                                      | c.(910-912)CAGdel    | p.Q310del      |
| Pat_08 | Post-Resistance | BPTF     | 2186   | 37 | 17 | 65850118  | 65850118  | Frame_Shift_Del | DEL | C         | -        | 158 | 336  | c.676delC                                            | c.(676-678)CCCfs     | p.P226fs       |
| Pat_08 | Post-Resistance | OR7E24   | 26648  | 37 | 19 | 9362007   | 9362007   | Frame_Shift_Del | DEL | C         | -        | 8   | 421  | c.288delC                                            | c.(286-288)GTCfs     | p.V96fs        |
| Pat_08 | Post-Resistance | ZNF224   | 7767   | 37 | 19 | 44611162  | 44611162  | Frame_Shift_Del | DEL | G         | -        | 7   | 745  | c.849delG                                            | c.(847-849)ACGfs     | p.T283fs       |
| Pat_08 | Post-Resistance | ZC3H4    | 23211  | 37 | 19 | 47572401  | 47572403  | In_Frame_Del    | DEL | CTC       | -        | 9   | 458  | c.2344_2346delGAc.c.(2344-2346)GAGdel                |                      | p.E782del      |
| Pat_08 | Post-Resistance | CPT1C    | 126129 | 37 | 19 | 50203964  | 50203964  | Frame_Shift_Del | DEL | G         | -        | 7   | 281  | c.305delG                                            | c.(304-306)CGGfs     | p.R102fs       |
| Pat_08 | Post-Resistance | SLC30A3  | 7781   | 37 | 2  | 27479380  | 27479380  | Frame_Shift_Del | DEL | G         | -        | 7   | 536  | c.892delC                                            | c.(892-894)CGCfs     | p.R298fs       |
| Pat_08 | Post-Resistance | ZDBF2    | 57683  | 37 | 2  | 207174869 | 207174869 | Frame_Shift_Del | DEL | A         | -        | 9   | 77   | c.5617delA                                           | c.(5617-5619)AAAfs   | p.K1873fs      |
| Pat_08 | Post-Resistance | RALGAPA2 | 57186  | 37 | 20 | 20527432  | 20527433  | Frame_Shift_Ins | INS | -         | A        | 36  | 94   | c.3200_3201insT                                      | c.(3199-3201)TTCfs   | p.F1067fs      |
| Pat_08 | Post-Resistance | SFRS15   | 57466  | 37 | 21 | 33043971  | 33043972  | Frame_Shift_Del | DEL | TC        | -        | 9   | 388  | c.3184_3185delGA                                     | c.(3184-3186)GATfs   | p.D1062fs      |
| Pat_08 | Post-Resistance | MN1      | 4330   | 37 | 22 | 28195625  | 28195627  | In_Frame_Del    | DEL | GCT       | -        | 8   | 40   | c.905_907delAGCc.(904-909)CAGCCC>CCC                 |                      | p.Q302del      |
| Pat_08 | Post-Resistance | SATB1    | 6304   | 37 | 3  | 18391133  | 18391135  | In_Frame_Del    | DEL | CTG       | -        | 11  | 118  | c.1819_1821delCAc.c.(1819-1821)CAGdel                |                      | p.Q607del      |
| Pat_08 | Post-Resistance | PRKCD    | 5580   | 37 | 3  | 53220653  | 53220653  | Frame_Shift_Del | DEL | G         | -        | 7   | 1794 | c.1294delG                                           | c.(1294-1296)GGGfs   | p.G432fs       |
| Pat_08 | Post-Resistance | MYLK     | 4638   | 37 | 3  | 123368043 | 123368044 | Splice_Site     | INS | -         | G        | 8   | 340  | c.4289_splice                                        | c.e25-1              | p.E1430_splice |
| Pat_08 | Post-Resistance | TRIM59   | 286827 | 37 | 3  | 160156367 | 160156368 | Frame_Shift_Ins | INS | -         | T        | 8   | 92   | c.604_605insA                                        | c.(604-606)AGTfs     | p.S202fs       |
| Pat_08 | Post-Resistance | SAMD7    | 344658 | 37 | 3  | 169646268 | 169646268 | Frame_Shift_Del | DEL | G         | -        | 8   | 685  | c.943delG                                            | c.(943-945)GGGfs     | p.G315fs       |
| Pat_08 | Post-Resistance | FXR1     | 8087   | 37 | 3  | 180666228 | 180666228 | Frame_Shift_Del | DEL | A         | -        | 9   | 252  | c.364delA                                            | c.(364-366)AAAfs     | p.K122fs       |
| Pat_08 | Post-Resistance | CRIPAK   | 285464 | 37 | 4  | 1388714   | 1388715   | Frame_Shift_Del | DEL | CA        | -        | 8   | 968  | c.415_416delCA                                       | c.(415-417)CACfs     | p.H139fs       |
| Pat_08 | Post-Resistance | LIMCH1   | 22998  | 37 | 4  | 41648508  | 41648509  | Frame_Shift_Del | DEL | GA        | -        | 7   | 291  | c.1263_1264delGA                                     | c.(1261-1266)CGGAGfs | p.R421fs       |
| Pat_08 | Post-Resistance | ENPEP    | 2028   | 37 | 4  | 111470502 | 111470503 | In_Frame_Ins    | INS | -         | AATACT   | 16  | 179  | c.152_215insAATA:152-215)GAA>GAATACb.718_719insY     |                      |                |
| Pat_08 | Post-Resistance | ITGA1    | 3672   | 37 | 5  | 52157315  | 52157315  | Frame_Shift_Del | DEL | A         | -        | 9   | 422  | c.217delA                                            | c.(217-219)AAAfs     | p.K73fs        |

|        |                 |          |        |    |    |           |           |                 |     |     |     |    |      |                  |                                    |                |
|--------|-----------------|----------|--------|----|----|-----------|-----------|-----------------|-----|-----|-----|----|------|------------------|------------------------------------|----------------|
| Pat_08 | Post-Resistance | KCNN2    | 3781   | 37 | 5  | 113698631 | 113698632 | In_Frame_Ins    | INS | -   | GCC | 8  | 20   | c.159_160insGCC  | c.(157-162)insGCC                  | p.58_59insA    |
| Pat_08 | Post-Resistance | PCDHB12  | 56124  | 37 | 5  | 140589279 | 140589279 | Frame_Shift_Del | DEL | G   | -   | 7  | 933  | c.800delG        | c.(799-801)TGGfs                   | p.W267fs       |
| Pat_08 | Post-Resistance | DEK      | 7913   | 37 | 6  | 18264079  | 18264081  | In_Frame_Del    | DEL | TCC | -   | 8  | 339  | c.138_140delGGA  | c.(136-141)GAGGAA>GAA              | p.46_47EE>E    |
| Pat_08 | Post-Resistance | ZBTB22   | 9278   | 37 | 6  | 33283522  | 33283522  | Frame_Shift_Del | DEL | C   | -   | 7  | 1632 | c.1172delG       | c.(1171-1173)GGTfs                 | p.G391fs       |
| Pat_08 | Post-Resistance | DAXX     | 1616   | 37 | 6  | 33287898  | 33287900  | In_Frame_Del    | DEL | TCC | -   | 7  | 210  | .1353_1355delGG  | c.(1351-1356)GAGGAA>GA             | p.451_452EE>I  |
| Pat_08 | Post-Resistance | SLC26A8  | 116369 | 37 | 6  | 35980013  | 35980013  | Frame_Shift_Del | DEL | G   | -   | 7  | 1932 | c.325delC        | c.(325-327)CAAFs                   | p.Q109fs       |
| Pat_08 | Post-Resistance | CUL9     | 23113  | 37 | 6  | 43173022  | 43173022  | Frame_Shift_Del | DEL | T   | -   | 7  | 1570 | c.4654delT       | c.(4654-4656)TACfs                 | p.Y1552fs      |
| Pat_08 | Post-Resistance | MEP1A    | 4224   | 37 | 6  | 46787424  | 46787424  | Frame_Shift_Del | DEL | G   | -   | 8  | 1917 | c.539delG        | c.(538-540)TGGfs                   | p.W180fs       |
| Pat_08 | Post-Resistance | GLCCI1   | 113263 | 37 | 7  | 8008992   | 8008994   | In_Frame_Del    | DEL | CCT | -   | 8  | 129  | c.11_13delCCT    | c.(10-15)GCCTCC>GCC                | p.S13del       |
| Pat_08 | Post-Resistance | STX1A    | 6804   | 37 | 7  | 73123425  | 73123427  | In_Frame_Del    | DEL | CAT | -   | 10 | 999  | c.56_58delATG    | c.(55-60)GATGTC>GTC                | p.D19del       |
| Pat_08 | Post-Resistance | LIMK1    | 3984   | 37 | 7  | 73535323  | 73535323  | Frame_Shift_Del | DEL | C   | -   | 7  | 1982 | c.1725delC       | c.(1723-1725)TGCfs                 | p.C575fs       |
| Pat_08 | Post-Resistance | ZKSCAN5  | 23660  | 37 | 7  | 99103706  | 99103706  | Frame_Shift_Del | DEL | C   | -   | 7  | 895  | c.39delC         | c.(37-39)GACfs                     | p.D13fs        |
| Pat_08 | Post-Resistance | MLL5     | 55904  | 37 | 7  | 104750923 | 104750923 | Splice_Site     | DEL | G   | -   | 8  | 2137 | c.3845_splice    | c.e25-1                            | p.G1282_splice |
| Pat_08 | Post-Resistance | SSPO     | 23145  | 37 | 7  | 149474083 | 149474083 | Frame_Shift_Del | DEL | G   | -   | 9  | 982  | c.293delG        | c.(292-294)TGGfs                   | p.W98fs        |
| Pat_08 | Post-Resistance | ANK1     | 286    | 37 | 8  | 41543694  | 41543695  | Frame_Shift_Del | DEL | TG  | -   | 99 | 243  | c.4365_4366delCA | c.(4363-4368)GTCATCfs              | p.V1455fs      |
| Pat_08 | Post-Resistance | HAS2     | 3037   | 37 | 8  | 122627104 | 122627104 | Frame_Shift_Del | DEL | G   | -   | 8  | 1372 | c.904delC        | c.(904-906)CAAFs                   | p.Q302fs       |
| Pat_08 | Post-Resistance | RLN2     | 6019   | 37 | 9  | 5304560   | 5304561   | Frame_Shift_Ins | INS | -   | A   | 7  | 358  | c.20_21insT      | c.(19-21)TTCfs                     | p.F7fs         |
| Pat_08 | Post-Resistance | NOL6     | 65083  | 37 | 9  | 33466939  | 33466939  | Frame_Shift_Del | DEL | G   | -   | 12 | 1560 | c.1921delC       | c.(1921-1923)CTGfs                 | p.L641fs       |
| Pat_08 | Post-Resistance | TPRN     | 286262 | 37 | 9  | 140087025 | 140087027 | In_Frame_Del    | DEL | TCC | -   | 11 | 83   | .1659_1661delGG  | c.(1657-1662)GAGGAA>GA             | p.553_554EE>I  |
| Pat_08 | Post-Resistance | FRMPD4   | 9758   | 37 | X  | 12734864  | 12734864  | Frame_Shift_Del | DEL | G   | -   | 7  | 816  | c.2286delG       | c.(2284-2286)GTGfs                 | p.V762fs       |
| Pat_08 | Post-Resistance | HUWE1    | 10075  | 37 | X  | 53589091  | 53589093  | In_Frame_Del    | DEL | TCC | -   | 9  | 277  | .7317_7319delGG  | c.(7315-7320)GAGGAA>GA2439_2440EE> |                |
| Pat_08 | Post-Resistance | ATRX     | 546    | 37 | X  | 76907782  | 76907784  | In_Frame_Del    | DEL | TCC | -   | 7  | 285  | .4377_4379delGG  | c.(4375-4380)GAGGAA>GA1459_1460EE> |                |
| Pat_11 | Pre-Treatment   | MFN2     | 9927   | 37 | 1  | 12052736  | 12052736  | Frame_Shift_Del | DEL | T   | -   | 8  | 670  | c.300delT        | c.(298-300)GCTfs                   | p.A100fs       |
| Pat_11 | Pre-Treatment   | PTPRF    | 5792   | 37 | 1  | 44071946  | 44071948  | In_Frame_Del    | DEL | GCG | -   | 8  | 323  | .3519_3521delGC  | c.(3517-3522)CAGCGG>CA             | p.R1178del     |
| Pat_11 | Pre-Treatment   | SNX7     | 51375  | 37 | 1  | 99167423  | 99167424  | Frame_Shift_Del | DEL | TG  | -   | 7  | 386  | c.1089_1090delTC | c.(1087-1092)GTTGAAfs              | p.V363fs       |
| Pat_11 | Pre-Treatment   | SLC22A15 | 55356  | 37 | 1  | 116605457 | 116605457 | Frame_Shift_Del | DEL | A   | -   | 8  | 745  | c.1246delA       | c.(1246-1248)AACfs                 | p.N416fs       |
| Pat_11 | Pre-Treatment   | ECM1     | 1893   | 37 | 1  | 150482151 | 150482151 | Frame_Shift_Del | DEL | C   | -   | 9  | 965  | c.136delC        | c.(136-138)CCCfs                   | p.P46fs        |
| Pat_11 | Pre-Treatment   | LCE2A    | 353139 | 37 | 1  | 152671425 | 152671425 | Frame_Shift_Del | DEL | C   | -   | 8  | 908  | c.48delC         | c.(46-48)TGCfs                     | p.C16fs        |
| Pat_11 | Pre-Treatment   | NPR1     | 4881   | 37 | 1  | 153659175 | 153659175 | Frame_Shift_Del | DEL | C   | -   | 8  | 780  | c.1812delC       | c.(1810-1812)GACfs                 | p.D604fs       |
| Pat_11 | Pre-Treatment   | BCAN     | 63827  | 37 | 1  | 156626160 | 156626160 | Frame_Shift_Del | DEL | G   | -   | 9  | 873  | c.2029delG       | c.(2029-2031)GGGfs                 | p.G677fs       |
| Pat_11 | Pre-Treatment   | TAGLN2   | 8407   | 37 | 1  | 159888725 | 159888725 | Frame_Shift_Del | DEL | G   | -   | 7  | 419  | c.465delC        | c.(463-465)TCCfs                   | p.S155fs       |
| Pat_11 | Pre-Treatment   | PRG4     | 10216  | 37 | 1  | 186276127 | 186276128 | In_Frame_Ins    | INS | -   | AGG | 11 | 258  | .1276_1277insAG  | c.(1276-1278)AAG>AAGGA             | p.426_427insE  |
| Pat_11 | Pre-Treatment   | SRGAP2   | 23380  | 37 | 1  | 206603573 | 206603574 | Splice_Site     | DEL | GT  | -   | 7  | 685  | c.1294_splice    | c.e11+1                            | p.G432_splice  |
| Pat_11 | Pre-Treatment   | RGS7     | 6000   | 37 | 1  | 240976980 | 240976980 | Frame_Shift_Del | DEL | C   | -   | 7  | 287  | c.894delG        | c.(892-894)TTGfs                   | p.L298fs       |
| Pat_11 | Pre-Treatment   | SYT15    | 83849  | 37 | 10 | 46969401  | 46969403  | In_Frame_Del    | DEL | CAG | -   | 9  | 94   | c.58_60delCTG    | c.(58-60)CTGdel                    | p.L21del       |
| Pat_11 | Pre-Treatment   | MKI67    | 4288   | 37 | 10 | 129902204 | 129902205 | Frame_Shift_Del | DEL | TG  | -   | 7  | 122  | c.7899_7900delCA | c.(7897-7902)CACAAAs               | p.H2633fs      |
| Pat_11 | Pre-Treatment   | NAT10    | 55226  | 37 | 11 | 34154601  | 34154601  | Frame_Shift_Del | DEL | C   | -   | 8  | 626  | c.1646delC       | c.(1645-1647)TCCfs                 | p.S549fs       |
| Pat_11 | Pre-Treatment   | MYBPC3   | 4607   | 37 | 11 | 47372804  | 47372806  | In_Frame_Del    | DEL | TTG | -   | 2  | 4    | c.276_278delCAA  | c.(274-279)CTCAAG>CTG              | p.K93del       |
| Pat_11 | Pre-Treatment   | OR10Q1   | 219960 | 37 | 11 | 57996280  | 57996280  | Frame_Shift_Del | DEL | G   | -   | 7  | 525  | c.68delC         | c.(67-69)ACAfs                     | p.T23fs        |
| Pat_11 | Pre-Treatment   | GANAB    | 23193  | 37 | 11 | 62393580  | 62393581  | Frame_Shift_Del | DEL | TA  | -   | 10 | 1162 | c.2681_2682delTA | c.(2680-2682)ATAfs                 | p.I894fs       |
| Pat_11 | Pre-Treatment   | SIK2     | 23235  | 37 | 11 | 111594527 | 111594529 | In_Frame_Del    | DEL | CAG | -   | 7  | 352  | .2455_2457delCA  | c.(2455-2457)CAGdel                | p.Q822del      |
| Pat_11 | Pre-Treatment   | ZNF202   | 7753   | 37 | 11 | 123601205 | 123601205 | Frame_Shift_Del | DEL | G   | -   | 8  | 857  | c.392delC        | c.(391-393)CCAFs                   | p.P131fs       |
| Pat_11 | Pre-Treatment   | PRB1     | 5542   | 37 | 12 | 11506632  | 11506633  | In_Frame_Ins    | INS | -   | GGA | 16 | 1063 | c.404_405insTCC  | c.(403-405)CCA>CCTCCA              | p.135_135P>PI  |
| Pat_11 | Pre-Treatment   | PRB2     | 653247 | 37 | 12 | 11546544  | 11546545  | In_Frame_Ins    | INS | -   | GGA | 7  | 767  | c.467_468insTCC  | c.(466-468)CCA>CCTCCA              | p.156_156P>PI  |
| Pat_11 | Pre-Treatment   | SLC4A8   | 9498   | 37 | 12 | 51865070  | 51865070  | Splice_Site     | DEL | G   | -   | 8  | 617  | c.1659_splice    | c.e14-1                            | p.K553_splice  |
| Pat_11 | Pre-Treatment   | HOXC11   | 3227   | 37 | 12 | 54367179  | 54367180  | Frame_Shift_Del | DEL | CC  | -   | 7  | 576  | c.154_155delCC   | c.(154-156)CCCfs                   | p.P52fs        |
| Pat_11 | Pre-Treatment   | SLC39A5  | 283375 | 37 | 12 | 56628997  | 56628999  | In_Frame_Del    | DEL | CTG | -   | 12 | 544  | c.691_693delCTG  | c.(691-693)CTGdel                  | p.L234del      |

|        |               |               |        |    |    |           |           |                 |     |     |   |    |      |                    |                        |               |
|--------|---------------|---------------|--------|----|----|-----------|-----------|-----------------|-----|-----|---|----|------|--------------------|------------------------|---------------|
| Pat_11 | Pre-Treatment | TSPAN31       | 6302   | 37 | 12 | 58140401  | 58140402  | Frame_Shift_Del | DEL | CA  | - | 8  | 279  | c.342_343delCA     | c.(340-345)GTCATGfs    | p.V114fs      |
| Pat_11 | Pre-Treatment | OLFM4         | 10562  | 37 | 13 | 53624374  | 53624376  | In_Frame_Del    | DEL | ACA | - | 7  | 305  | .1001_1003delAC    | c.(1000-1005)TACAAC>TA | p.N337del     |
| Pat_11 | Pre-Treatment | LMO7          | 4008   | 37 | 13 | 76415307  | 76415308  | Frame_Shift_Del | DEL | AG  | - | 9  | 283  | .2946_2947delAC    | c.(2944-2949)GCAGAGfs  | p.A982fs      |
| Pat_11 | Pre-Treatment | ABCC4         | 10257  | 37 | 13 | 95887054  | 95887055  | Frame_Shift_Del | DEL | CC  | - | 2  | 4    | c.340_341delGG     | c.(340-342)GGAfs       | p.G114fs      |
| Pat_11 | Pre-Treatment | ZIC5          | 85416  | 37 | 13 | 100617727 | 100617727 | Frame_Shift_Del | DEL | G   | - | 7  | 486  | c.1896delC         | c.(1894-1896)CCCfs     | p.P632fs      |
| Pat_11 | Pre-Treatment | ZIC2          | 7546   | 37 | 13 | 100635008 | 100635010 | In_Frame_Del    | DEL | CCA | - | 8  | 126  | c.690_692delCCA    | c.(688-693)GCCAC>GCC   | p.H239del     |
| Pat_11 | Pre-Treatment | COL4A2        | 1284   | 37 | 13 | 111156234 | 111156234 | Frame_Shift_Del | DEL | C   | - | 7  | 219  | c.4179delC         | c.(4177-4179)ATCfs     | p.I1393fs     |
| Pat_11 | Pre-Treatment | PABPN1        | 8106   | 37 | 14 | 23790952  | 23790953  | Frame_Shift_Ins | INS | -   | C | 2  | 4    | c.274_275insC      | c.(274-276)GCCfs       | p.A92fs       |
| Pat_11 | Pre-Treatment | DHRS4L2       | 317749 | 37 | 14 | 24464310  | 24464311  | Frame_Shift_Del | DEL | CT  | - | 7  | 914  | c.376_377delCT     | c.(376-378)CTAfs       | p.L126fs      |
| Pat_11 | Pre-Treatment | FMN1          | 342184 | 37 | 15 | 33149283  | 33149285  | In_Frame_Del    | DEL | CAC | - | 8  | 571  | .3190_3192delGT    | c.(3190-3192)GTGdel    | p.V1064del    |
| Pat_11 | Pre-Treatment | JMJD7-PLA2G4B | 8681   | 37 | 15 | 42138399  | 42138400  | Splice_Site     | DEL | AG  | - | 8  | 258  | c.1601_splice      | c.e17-1                | p.D534_splice |
| Pat_11 | Pre-Treatment | NOX5          | 79400  | 37 | 15 | 69331226  | 69331226  | Frame_Shift_Del | DEL | T   | - | 7  | 357  | c.1401delT         | c.(1399-1401)CCTfs     | p.P467fs      |
| Pat_11 | Pre-Treatment | EFTUD1        | 79631  | 37 | 15 | 82450051  | 82450052  | Splice_Site     | DEL | AA  | - | 7  | 468  | c.2030_splice      | c.e17+1                | p.R677_splice |
| Pat_11 | Pre-Treatment | NAGPA         | 51172  | 37 | 16 | 5083678   | 5083679   | Frame_Shift_Del | DEL | GC  | - | 10 | 105  | c.137_138delGC     | c.(136-138)CGCfs       | p.R46fs       |
| Pat_11 | Pre-Treatment | C16orf62      | 57020  | 37 | 16 | 19580800  | 19580802  | In_Frame_Del    | DEL | TCC | - | 7  | 294  | c.172_174delTCC    | c.(172-174)TCCdel      | p.S64del      |
| Pat_11 | Pre-Treatment | VPS35         | 55737  | 37 | 16 | 46695735  | 46695735  | Frame_Shift_Del | DEL | T   | - | 10 | 260  | c.2106delA         | c.(2104-2106)AAAsfs    | p.K702fs      |
| Pat_11 | Pre-Treatment | PLD2          | 5338   | 37 | 17 | 4720001   | 4720002   | Frame_Shift_Del | DEL | TA  | - | 7  | 845  | c.1542_1543delTA   | c.(1540-1545)CTTATCfs  | p.L514fs      |
| Pat_11 | Pre-Treatment | KDM6B         | 23135  | 37 | 17 | 7751859   | 7751861   | In_Frame_Del    | DEL | CAC | - | 7  | 143  | .2253_2255delCA    | c.(2251-2256)GTCACC>GT | p.T762del     |
| Pat_11 | Pre-Treatment | CHD3          | 1107   | 37 | 17 | 7788146   | 7788148   | In_Frame_Del    | DEL | GAG | - | 4  | 5    | c.22_24delGAG      | c.(22-24)GAGdel        | p.E14del      |
| Pat_11 | Pre-Treatment | TEKT3         | 64518  | 37 | 17 | 15234734  | 15234735  | Frame_Shift_Del | DEL | TG  | - | 10 | 134  | c.168_169delCA     | c.(166-171)TACAAAsfs   | p.Y56fs       |
| Pat_11 | Pre-Treatment | SLC5A10       | 125206 | 37 | 17 | 18863872  | 18863872  | Frame_Shift_Del | DEL | A   | - | 8  | 806  | c.360delA          | c.(358-360)TTAfs       | p.L120fs      |
| Pat_11 | Pre-Treatment | ZNRF4         | 148066 | 37 | 19 | 5455868   | 5455868   | Frame_Shift_Del | DEL | C   | - | 9  | 441  | c.366delC          | c.(364-366)GTCfs       | p.V122fs      |
| Pat_11 | Pre-Treatment | ATP4A         | 495    | 37 | 19 | 36054349  | 36054351  | In_Frame_Del    | DEL | CTT | - | 9  | 1058 | c.91_93delAAG      | c.(91-93)AAGdel        | p.K31del      |
| Pat_11 | Pre-Treatment | DMRTC2        | 63946  | 37 | 19 | 42353044  | 42353045  | Splice_Site     | DEL | GT  | - | 7  | 348  | c.628_splice       | c.e5+1                 | p.G210_splice |
| Pat_11 | Pre-Treatment | LHB           | 3972   | 37 | 19 | 49519948  | 49519950  | In_Frame_Del    | DEL | CAG | - | 7  | 390  | c.37_39delCTG      | c.(37-39)CTGdel        | p.L13del      |
| Pat_11 | Pre-Treatment | SHANK1        | 50944  | 37 | 19 | 51171736  | 51171738  | In_Frame_Del    | DEL | TGA | - | 7  | 389  | .3479_3481delTC    | c.(3478-3483)ATCAAG>AA | p.I1160del    |
| Pat_11 | Pre-Treatment | ZNF814        | 730051 | 37 | 19 | 58385404  | 58385404  | Frame_Shift_Del | DEL | T   | - | 2  | 4    | c.1354delA         | c.(1354-1356)AGGfs     | p.R452fs      |
| Pat_11 | Pre-Treatment | KIF3C         | 3797   | 37 | 2  | 26203464  | 26203466  | In_Frame_Del    | DEL | GTT | - | 7  | 556  | .1321_1323delAA    | c.(1321-1323)AACdel    | p.N441del     |
| Pat_11 | Pre-Treatment | RAB11FIP5     | 26056  | 37 | 2  | 73303133  | 73303133  | Frame_Shift_Del | DEL | G   | - | 7  | 816  | c.1746delC         | c.(1744-1746)ACCfs     | p.T582fs      |
| Pat_11 | Pre-Treatment | WBP1          | 23559  | 37 | 2  | 74687543  | 74687543  | Frame_Shift_Del | DEL | C   | - | 7  | 330  | c.545delC          | c.(544-546)GCCfs       | p.A182fs      |
| Pat_11 | Pre-Treatment | ITPRIPL1      | 150771 | 37 | 2  | 96992793  | 96992795  | In_Frame_Del    | DEL | GAG | - | 13 | 195  | c.424_426delGAG    | c.(424-426)GAGdel      | p.E147del     |
| Pat_11 | Pre-Treatment | HOXD9         | 3235   | 37 | 2  | 176988002 | 176988002 | Frame_Shift_Del | DEL | C   | - | 2  | 4    | c.506delC          | c.(505-507)GCCfs       | p.A169fs      |
| Pat_11 | Pre-Treatment | SPHKAP        | 80309  | 37 | 2  | 228883847 | 228883848 | Frame_Shift_Del | DEL | CA  | - | 8  | 520  | .c.1722_1723delITC | c.(1720-1725)GGTGAAsfs | p.G574fs      |
| Pat_11 | Pre-Treatment | C20orf96      | 140680 | 37 | 20 | 257710    | 257712    | In_Frame_Del    | DEL | TTC | - | 7  | 734  | c.798_800delGAA    | c.(796-801)AAGAAA>AAA  | p.266_267KK>I |
| Pat_11 | Pre-Treatment | IL10RB        | 3588   | 37 | 21 | 34668489  | 34668489  | Frame_Shift_Del | DEL | T   | - | 9  | 761  | c.805delT          | c.(805-807)TTTfs       | p.F269fs      |
| Pat_11 | Pre-Treatment | C21orf58      | 54058  | 37 | 21 | 47721986  | 47721988  | In_Frame_Del    | DEL | TGG | - | 4  | 9    | c.894_896delCCA    | c.(892-897)CACCAT>CAT  | p.298_299HH>I |
| Pat_11 | Pre-Treatment | MYH9          | 4627   | 37 | 22 | 36682821  | 36682821  | Frame_Shift_Del | DEL | G   | - | 8  | 544  | c.5004delC         | c.(5002-5004)GCCfs     | p.A1668fs     |
| Pat_11 | Pre-Treatment | TNRC6B        | 23112  | 37 | 22 | 40708591  | 40708591  | Frame_Shift_Del | DEL | G   | - | 8  | 565  | c.4518delG         | c.(4516-4518)CTGfs     | p.L1506fs     |
| Pat_11 | Pre-Treatment | MLC1          | 23209  | 37 | 22 | 50502593  | 50502595  | In_Frame_Del    | DEL | AGC | - | 7  | 125  | c.927_929delGCT    | c.(925-930)CTGCTA>CTA  | p.309_310LL>I |
| Pat_11 | Pre-Treatment | TMEM40        | 55287  | 37 | 3  | 12778265  | 12778265  | Frame_Shift_Del | DEL | G   | - | 8  | 377  | c.542delC          | c.(541-543)GCAfs       | p.A181fs      |
| Pat_11 | Pre-Treatment | ZNF662        | 389114 | 37 | 3  | 42950290  | 42950290  | Frame_Shift_Del | DEL | T   | - | 8  | 636  | c.40delT           | c.(40-42)TTTfs         | p.F14fs       |
| Pat_11 | Pre-Treatment | FBXW12        | 285231 | 37 | 3  | 48420887  | 48420888  | Splice_Site     | DEL | CA  | - | 7  | 746  | c.616_splice       | c.e7-2                 | p.V206_splice |
| Pat_11 | Pre-Treatment | SEMA3F        | 6405   | 37 | 3  | 50214214  | 50214214  | Frame_Shift_Del | DEL | A   | - | 8  | 547  | c.563delA          | c.(562-564)TACfs       | p.Y188fs      |
| Pat_11 | Pre-Treatment | C3orf63       | 23272  | 37 | 3  | 56667435  | 56667436  | Frame_Shift_Del | DEL | GA  | - | 8  | 218  | .c.3200_3201delTC  | c.(3199-3201)TTCfs     | p.F1067fs     |
| Pat_11 | Pre-Treatment | ROBO2         | 6092   | 37 | 3  | 77657038  | 77657038  | Frame_Shift_Del | DEL | C   | - | 7  | 269  | c.3226delC         | c.(3226-3228)CCCfs     | p.P1076fs     |
| Pat_11 | Pre-Treatment | GPR149        | 344758 | 37 | 3  | 154055553 | 154055553 | Frame_Shift_Del | DEL | G   | - | 7  | 605  | c.2131delC         | c.(2131-2133)CAGfs     | p.Q711fs      |
| Pat_11 | Pre-Treatment | PDE6B         | 5158   | 37 | 4  | 661763    | 661765    | In_Frame_Del    | DEL | AGG | - | 7  | 394  | .2471_2473delAG    | c.(2470-2475)AAGGAG>AA | p.E828del     |

|        |                 |             |        |    |    |           |           |                 |     |     |     |    |      |                                                     |                       |               |
|--------|-----------------|-------------|--------|----|----|-----------|-----------|-----------------|-----|-----|-----|----|------|-----------------------------------------------------|-----------------------|---------------|
| Pat_11 | Pre-Treatment   | CRIPAK      | 285464 | 37 | 4  | 1389147   | 1389148   | Frame_Shift_Del | DEL | AT  | -   | 17 | 701  | c.848_849delAT                                      | c.(847-849)CATfs      | p.H283fs      |
| Pat_11 | Pre-Treatment   | SLC34A2     | 10568  | 37 | 4  | 25673248  | 25673249  | Frame_Shift_Del | DEL | CG  | -   | 8  | 1192 | c.953_954delCG                                      | c.(952-954)TCGfs      | p.S318fs      |
| Pat_11 | Pre-Treatment   | PRDM5       | 11107  | 37 | 4  | 121738071 | 121738072 | Frame_Shift_Del | DEL | TG  | -   | 8  | 353  | c.658_659delCA                                      | c.(658-660)CAGfs      | p.Q220fs      |
| Pat_11 | Pre-Treatment   | BRD8        | 10902  | 37 | 5  | 137488268 | 137488269 | Frame_Shift_Del | DEL | TC  | -   | 10 | 692  | c.2758_2759delGA                                    | c.(2758-2760)GAAfs    | p.E920fs      |
| Pat_11 | Pre-Treatment   | HSPA9       | 3313   | 37 | 5  | 137902690 | 137902691 | Frame_Shift_Del | DEL | CT  | -   | 7  | 393  | c.878_879delAG                                      | c.(877-879)GAGfs      | p.E293fs      |
| Pat_11 | Pre-Treatment   | ATXN1       | 6310   | 37 | 6  | 16327864  | 16327865  | In_Frame_Ins    | INS | -   | TGC | 11 | 22   | c.677_678insGCAc.(676-678)CAC>CAGCACp.225_226insC   |                       |               |
| Pat_11 | Pre-Treatment   | MAP3K5      | 4217   | 37 | 6  | 136913692 | 136913694 | In_Frame_Del    | DEL | CTG | -   | 8  | 292  | c.2937_2939delCAc.(2935-2940)AGCAGT>AGc.979_980SS>! |                       |               |
| Pat_11 | Pre-Treatment   | ARID1B      | 57492  | 37 | 6  | 157517438 | 157517438 | Frame_Shift_Del | DEL | T   | -   | 8  | 438  | c.3948delT                                          | c.(3946-3948)AGTfs    | p.S1316fs     |
| Pat_11 | Pre-Treatment   | TULP4       | 56995  | 37 | 6  | 158923337 | 158923337 | Frame_Shift_Del | DEL | C   | -   | 10 | 675  | c.2642delC                                          | c.(2641-2643)ACCfs    | p.T881fs      |
| Pat_11 | Pre-Treatment   | LIMK1       | 3984   | 37 | 7  | 73513509  | 73513509  | Frame_Shift_Del | DEL | C   | -   | 10 | 1608 | c.549delC                                           | c.(547-549)GACfs      | p.D183fs      |
| Pat_11 | Pre-Treatment   | GPC2        | 221914 | 37 | 7  | 99771554  | 99771554  | Frame_Shift_Del | DEL | C   | -   | 7  | 548  | c.796delG                                           | c.(796-798)GTCfs      | p.V266fs      |
| Pat_11 | Pre-Treatment   | AP1S1       | 1174   | 37 | 7  | 100802405 | 100802405 | Frame_Shift_Del | DEL | G   | -   | 7  | 145  | c.357delG                                           | c.(355-357)ATGfs      | p.M119fs      |
| Pat_11 | Pre-Treatment   | MOGAT3      | 346606 | 37 | 7  | 100842086 | 100842086 | Frame_Shift_Del | DEL | G   | -   | 7  | 634  | c.314delC                                           | c.(313-315)CCGfs      | p.P105fs      |
| Pat_11 | Pre-Treatment   | CUX1        | 1523   | 37 | 7  | 101845358 | 101845358 | Frame_Shift_Del | DEL | C   | -   | 8  | 956  | c.2781delC                                          | c.(2779-2781)GTCfs    | p.V927fs      |
| Pat_11 | Pre-Treatment   | SPDYE6      | 729597 | 37 | 7  | 101991235 | 101991236 | Frame_Shift_Del | DEL | TG  | -   | 8  | 1233 | c.687_688delCA                                      | c.(685-690)GTCATAfs   | p.V229fs      |
| Pat_11 | Pre-Treatment   | CTTNBP2     | 83992  | 37 | 7  | 117450827 | 117450827 | Frame_Shift_Del | DEL | G   | -   | 7  | 1269 | c.406delC                                           | c.(406-408)CAAfs      | p.Q136fs      |
| Pat_11 | Pre-Treatment   | GBX1        | 2636   | 37 | 7  | 150845991 | 150845991 | Frame_Shift_Del | DEL | C   | -   | 7  | 463  | c.777delG                                           | c.(775-777)GGGfs      | p.G259fs      |
| Pat_11 | Pre-Treatment   | XRCC2       | 7516   | 37 | 7  | 152346220 | 152346220 | Frame_Shift_Del | DEL | A   | -   | 7  | 262  | c.350delT                                           | c.(349-351)TTGfs      | p.L117fs      |
| Pat_11 | Pre-Treatment   | KIAA1967    | 57805  | 37 | 8  | 22472975  | 22472975  | Frame_Shift_Del | DEL | C   | -   | 7  | 403  | c.1243delC                                          | c.(1243-1245)CCCfs    | p.P415fs      |
| Pat_11 | Pre-Treatment   | PALM2-AKAP2 | 445815 | 37 | 9  | 112899247 | 112899247 | Frame_Shift_Del | DEL | C   | -   | 53 | 82   | c.2119delC                                          | c.(2119-2121)CCCfs    | p.P707fs      |
| Pat_11 | Pre-Treatment   | GRIN1       | 2902   | 37 | 9  | 140056884 | 140056886 | In_Frame_Del    | DEL | GAG | -   | 9  | 113  | c.1780_1782delGAT                                   | c.(1780-1782)GAGdel   | p.E598del     |
| Pat_11 | Pre-Treatment   | GPR34       | 2857   | 37 | X  | 41555610  | 41555610  | Frame_Shift_Del | DEL | G   | -   | 2  | 4    | c.724delG                                           | c.(724-726)GGGfs      | p.G242fs      |
| Pat_11 | Pre-Treatment   | GDI1        | 2664   | 37 | X  | 153668286 | 153668287 | Splice_Site     | DEL | AG  | -   | 7  | 469  | c.389_splice                                        | c.e5-1                | p.N130_splice |
| Pat_11 | Pre-Treatment   | PLXNA3      | 55558  | 37 | X  | 153699572 | 153699572 | Frame_Shift_Del | DEL | A   | -   | 8  | 504  | c.5281delA                                          | c.(5281-5283)ACAfs    | p.T1761fs     |
| Pat_11 | Post-Resistance | RERE        | 473    | 37 | 1  | 8716109   | 8716109   | Frame_Shift_Del | DEL | T   | -   | 7  | 831  | c.248delA                                           | c.(247-249)AAGfs      | p.K83fs       |
| Pat_11 | Post-Resistance | MFN2        | 9927   | 37 | 1  | 12052736  | 12052736  | Frame_Shift_Del | DEL | T   | -   | 8  | 887  | c.300delT                                           | c.(298-300)GCTfs      | p.A100fs      |
| Pat_11 | Post-Resistance | ZMYM4       | 9202   | 37 | 1  | 35846959  | 35846960  | Frame_Shift_Ins | INS | -   | A   | 7  | 279  | c.1281_1282insA                                     | c.(1279-1284)CTGAAAfs | p.L427fs      |
| Pat_11 | Post-Resistance | SNIP1       | 79753  | 37 | 1  | 38003368  | 38003370  | In_Frame_Del    | DEL | TCC | -   | 8  | 628  | c.1170_1172delGGc.(1168-1173)GAGGAA>GAc.390_391EE>I |                       |               |
| Pat_11 | Post-Resistance | DAB1        | 1600   | 37 | 1  | 57537235  | 57537235  | Frame_Shift_Del | DEL | T   | -   | 8  | 335  | c.518delA                                           | c.(517-519)AAGfs      | p.K173fs      |
| Pat_11 | Post-Resistance | PGM1        | 5236   | 37 | 1  | 64095210  | 64095210  | Frame_Shift_Del | DEL | G   | -   | 7  | 821  | c.361delG                                           | c.(361-363)GGGfs      | p.G121fs      |
| Pat_11 | Post-Resistance | VANGL1      | 81839  | 37 | 1  | 116206586 | 116206586 | Frame_Shift_Del | DEL | T   | -   | 8  | 350  | c.509delT                                           | c.(508-510)CTTfs      | p.L170fs      |
| Pat_11 | Post-Resistance | ZNF687      | 57592  | 37 | 1  | 151263487 | 151263487 | Frame_Shift_Del | DEL | G   | -   | 9  | 685  | c.3516delG                                          | c.(3514-3516)CTGfs    | p.L1172fs     |
| Pat_11 | Post-Resistance | PSMB4       | 5692   | 37 | 1  | 151374040 | 151374040 | Frame_Shift_Del | DEL | A   | -   | 7  | 1735 | c.716delA                                           | c.(715-717)GAAfs      | p.E239fs      |
| Pat_11 | Post-Resistance | SCAMP3      | 10067  | 37 | 1  | 155230129 | 155230129 | Frame_Shift_Del | DEL | C   | -   | 8  | 918  | c.380delG                                           | c.(379-381)GGCfs      | p.G127fs      |
| Pat_11 | Post-Resistance | C1orf107    | 27042  | 37 | 1  | 210014267 | 210014267 | Frame_Shift_Del | DEL | C   | -   | 8  | 780  | c.1352delC                                          | c.(1351-1353)TCCfs    | p.S451fs      |
| Pat_11 | Post-Resistance | MYO3A       | 53904  | 37 | 10 | 26417378  | 26417378  | Frame_Shift_Del | DEL | A   | -   | 10 | 175  | c.2173delA                                          | c.(2173-2175)AAAfs    | p.K725fs      |
| Pat_11 | Post-Resistance | SLK         | 9748   | 37 | 10 | 105727547 | 105727549 | In_Frame_Del    | DEL | AGA | -   | 10 | 316  | c.44_46delAGA                                       | c.(43-48)GAGAAG>GAG   | p.K19del      |
| Pat_11 | Post-Resistance | ADD3        | 120    | 37 | 10 | 111890224 | 111890225 | Frame_Shift_Del | DEL | GT  | -   | 28 | 290  | c.1712_1713delGT                                    | c.(1711-1713)CGTfs    | p.R571fs      |
| Pat_11 | Post-Resistance | MYBPC3      | 4607   | 37 | 11 | 47359101  | 47359103  | In_Frame_Del    | DEL | TCT | -   | 14 | 263  | c.2441_2443delAGc.(2440-2445)AAGAGC>AG              |                       | p.K814del     |
| Pat_11 | Post-Resistance | OR4D9       | 390199 | 37 | 11 | 59282479  | 59282479  | Frame_Shift_Del | DEL | T   | -   | 7  | 664  | c.94delT                                            | c.(94-96)TTTfs        | p.F32fs       |
| Pat_11 | Post-Resistance | NOX4        | 50507  | 37 | 11 | 89106662  | 89106663  | Splice_Site     | INS | -   | A   | 22 | 611  | c.1075_splice                                       | c.e12-1               | p.C359_splice |
| Pat_11 | Post-Resistance | C11orf54    | 28970  | 37 | 11 | 93494710  | 93494710  | Frame_Shift_Del | DEL | T   | -   | 7  | 983  | c.804delT                                           | c.(802-804)CATfs      | p.H268fs      |
| Pat_11 | Post-Resistance | BUD13       | 84811  | 37 | 11 | 116628987 | 116628987 | Frame_Shift_Del | DEL | T   | -   | 10 | 1201 | c.1497delA                                          | c.(1495-1497)AAAfs    | p.K499fs      |
| Pat_11 | Post-Resistance | SIDT2       | 51092  | 37 | 11 | 117054525 | 117054527 | In_Frame_Del    | DEL | GTG | -   | 10 | 571  | c.733_735delGTG                                     | c.(733-735)GTGdel     | p.V249del     |
| Pat_11 | Post-Resistance | BCL9L       | 283149 | 37 | 11 | 118773004 | 118773004 | Frame_Shift_Del | DEL | G   | -   | 7  | 1028 | c.1448delC                                          | c.(1447-1449)CCGfs    | p.P483fs      |
| Pat_11 | Post-Resistance | CCDC153     | 283152 | 37 | 11 | 119061043 | 119061043 | Frame_Shift_Del | DEL | G   | -   | 7  | 520  | c.599delC                                           | c.(598-600)CCTfs      | p.P200fs      |
| Pat_11 | Post-Resistance | VWF         | 7450   | 37 | 12 | 6128360   | 6128362   | In_Frame_Del    | DEL | CTT | -   | 8  | 442  | c.4222_4224delAAI                                   | c.(4222-4224)AAGdel   | p.K1408del    |

|        |                 |          |        |    |    |           |           |                 |     |      |   |    |      |                   |                                 |            |
|--------|-----------------|----------|--------|----|----|-----------|-----------|-----------------|-----|------|---|----|------|-------------------|---------------------------------|------------|
| Pat_11 | Post-Resistance | PRPF40B  | 25766  | 37 | 12 | 50025258  | 50025258  | Frame_Shift_Del | DEL | C    | - | 9  | 923  | c.93delC          | c.(91-93)ATCfs                  | p.I31fs    |
| Pat_11 | Post-Resistance | SMARCC2  | 6601   | 37 | 12 | 56559113  | 56559113  | Frame_Shift_Del | DEL | G    | - | 11 | 546  | c.3128delC        | c.(3127-3129)CCTfs              | p.P1043fs  |
| Pat_11 | Post-Resistance | SLC39A5  | 283375 | 37 | 12 | 56628997  | 56628999  | In_Frame_Del    | DEL | CTG  | - | 11 | 856  | c.691_693delCTG   | c.(691-693)CTGdel               | p.L234del  |
| Pat_11 | Post-Resistance | EP400    | 57634  | 37 | 12 | 132445252 | 132445253 | Frame_Shift_Ins | INS | -    | C | 8  | 134  | c.88_89insC       | c.(88-90)GCCfs                  | p.A30fs    |
| Pat_11 | Post-Resistance | ZC3H13   | 23091  | 37 | 13 | 46553948  | 46553949  | Frame_Shift_Del | DEL | CT   | - | 11 | 1056 | c.1911_1912delAC  | c.(1909-1914)AGAGATfs           | p.R637fs   |
| Pat_11 | Post-Resistance | LRCH1    | 23143  | 37 | 13 | 47243183  | 47243186  | Frame_Shift_Del | DEL | CCTG | - | 16 | 1353 | c.471_474delCCTC  | c.(469-474)GCCCTGfs             | p.A157fs   |
| Pat_11 | Post-Resistance | CYSLTR2  | 57105  | 37 | 13 | 49281593  | 49281593  | Frame_Shift_Del | DEL | T    | - | 8  | 1173 | c.640delT         | c.(640-642)TTTfs                | p.F214fs   |
| Pat_11 | Post-Resistance | EBPL     | 84650  | 37 | 13 | 50235208  | 50235209  | Frame_Shift_Ins | INS | -    | A | 8  | 182  | c.516_517insT     | c.(514-519)TTTAACfs             | p.F172fs   |
| Pat_11 | Post-Resistance | DIS3     | 22894  | 37 | 13 | 73337684  | 73337684  | Frame_Shift_Del | DEL | T    | - | 10 | 405  | c.2032delA        | c.(2032-2034)ATTfs              | p.I678fs   |
| Pat_11 | Post-Resistance | LMO7     | 4008   | 37 | 13 | 76415307  | 76415308  | Frame_Shift_Del | DEL | AG   | - | 9  | 504  | c.2946_2947delAC  | c.(2944-2949)GCAGAGfs           | p.A982fs   |
| Pat_11 | Post-Resistance | ZIC2     | 7546   | 37 | 13 | 100635008 | 100635010 | In_Frame_Del    | DEL | CCA  | - | 7  | 156  | c.690_692delCCA   | c.(688-693)GCCCA>GCC            | p.H239del  |
| Pat_11 | Post-Resistance | FANCM    | 57697  | 37 | 14 | 45645955  | 45645955  | Frame_Shift_Del | DEL | A    | - | 7  | 164  | c.3998delA        | c.(3997-3999)CAAfs              | p.Q1333fs  |
| Pat_11 | Post-Resistance | ABHD12B  | 145447 | 37 | 14 | 51347190  | 51347190  | Frame_Shift_Del | DEL | G    | - | 8  | 553  | c.356delG         | c.(355-357)CGGfs                | p.R119fs   |
| Pat_11 | Post-Resistance | PTPN21   | 11099  | 37 | 14 | 88940113  | 88940113  | Frame_Shift_Del | DEL | T    | - | 10 | 421  | c.2545delA        | c.(2545-2547)ATTfs              | p.I849fs   |
| Pat_11 | Post-Resistance | BTBD7    | 55727  | 37 | 14 | 93761193  | 93761193  | Frame_Shift_Del | DEL | T    | - | 7  | 433  | c.173delA         | c.(172-174)AAGfs                | p.K58fs    |
| Pat_11 | Post-Resistance | CCNK     | 8812   | 37 | 14 | 99969244  | 99969246  | In_Frame_Del    | DEL | CAG  | - | 10 | 650  | c.934_936delCAG   | c.(934-936)CAGdel               | p.Q315del  |
| Pat_11 | Post-Resistance | IREB2    | 3658   | 37 | 15 | 78755395  | 78755395  | Frame_Shift_Del | DEL | T    | - | 7  | 887  | c.238delT         | c.(238-240)TTTfs                | p.F80fs    |
| Pat_11 | Post-Resistance | CHRNA3   | 1136   | 37 | 15 | 78913068  | 78913070  | In_Frame_Del    | DEL | CAG  | - | 3  | 3    | c.67_69delCTG     | c.(67-69)CTGdel                 | p.L23del   |
| Pat_11 | Post-Resistance | TIGD7    | 91151  | 37 | 16 | 3350471   | 3350472   | Frame_Shift_Ins | INS | -    | T | 10 | 335  | c.143_144insA     | c.(142-144)AATfs                | p.N48fs    |
| Pat_11 | Post-Resistance | C16orf62 | 57020  | 37 | 16 | 19580800  | 19580802  | In_Frame_Del    | DEL | TCC  | - | 8  | 310  | c.172_174delTCC   | c.(172-174)TCCdel               | p.S64del   |
| Pat_11 | Post-Resistance | CD2BP2   | 10421  | 37 | 16 | 30365550  | 30365552  | In_Frame_Del    | DEL | CAT  | - | 11 | 1686 | c.170_172delATG   | c.(169-174)GATGGG>GGC           | p.D57del   |
| Pat_11 | Post-Resistance | CHD3     | 1107   | 37 | 17 | 7798765   | 7798765   | Frame_Shift_Del | DEL | C    | - | 8  | 677  | c.1612delC        | c.(1612-1614)CCCfs              | p.P538fs   |
| Pat_11 | Post-Resistance | GAS2L2   | 246176 | 37 | 17 | 34074257  | 34074257  | Frame_Shift_Del | DEL | G    | - | 8  | 1342 | c.863delC         | c.(862-864)CCGfs                | p.P288fs   |
| Pat_11 | Post-Resistance | C18orf34 | 374864 | 37 | 18 | 30913143  | 30913143  | Frame_Shift_Del | DEL | T    | - | 10 | 105  | c.874delA         | c.(874-876)ATGfs                | p.M292fs   |
| Pat_11 | Post-Resistance | SNAPC2   | 6618   | 37 | 19 | 7986967   | 7986968   | Frame_Shift_Ins | INS | -    | C | 7  | 1080 | c.420_421insC     | c.(418-423)AAGCCCfs             | p.K140fs   |
| Pat_11 | Post-Resistance | NUDT19   | 390916 | 37 | 19 | 33200189  | 33200190  | Frame_Shift_Del | DEL | CT   | - | 11 | 751  | c.813_814delCT    | c.(811-816)GCCTCTfs             | p.A271fs   |
| Pat_11 | Post-Resistance | ATP4A    | 495    | 37 | 19 | 36054349  | 36054351  | In_Frame_Del    | DEL | CTT  | - | 11 | 1734 | c.91_93delAAG     | c.(91-93)AAGdel                 | p.K31del   |
| Pat_11 | Post-Resistance | ZNF566   | 84924  | 37 | 19 | 36940726  | 36940726  | Frame_Shift_Del | DEL | C    | - | 7  | 1490 | c.410delG         | c.(409-411)GGAfs                | p.G137fs   |
| Pat_11 | Post-Resistance | U2AF2    | 11338  | 37 | 19 | 56171899  | 56171901  | In_Frame_Del    | DEL | AGA  | - | 7  | 241  | c.248_250delAGA   | c.(247-252)GAGAAG>GAC           | p.K87del   |
| Pat_11 | Post-Resistance | DHX57    | 90957  | 37 | 2  | 39095411  | 39095413  | In_Frame_Del    | DEL | CCA  | - | 7  | 410  | c.135_137delTTGG  | c.(133-138)GGTGGG>GGp.45_46GG>G |            |
| Pat_11 | Post-Resistance | TMEM127  | 55654  | 37 | 2  | 96919781  | 96919783  | In_Frame_Del    | DEL | TGC  | - | 9  | 444  | c.480_482delGCA   | c.(478-483)CAGCAT>CAT           | p.Q160del  |
| Pat_11 | Post-Resistance | ITPRIPL1 | 150771 | 37 | 2  | 96992793  | 96992795  | In_Frame_Del    | DEL | GAG  | - | 10 | 262  | c.424_426delGAG   | c.(424-426)GAGdel               | p.E147del  |
| Pat_11 | Post-Resistance | RIF1     | 55183  | 37 | 2  | 152320541 | 152320541 | Frame_Shift_Del | DEL | A    | - | 7  | 249  | c.4507delA        | c.(4507-4509)AAAfs              | p.K1503fs  |
| Pat_11 | Post-Resistance | HOXD8    | 3234   | 37 | 2  | 176995458 | 176995458 | Frame_Shift_Del | DEL | C    | - | 7  | 1018 | c.364delC         | c.(364-366)CCCfs                | p.P122fs   |
| Pat_11 | Post-Resistance | DNAH7    | 56171  | 37 | 2  | 196801374 | 196801374 | Frame_Shift_Del | DEL | A    | - | 8  | 226  | c.3221delT        | c.(3220-3222)TTGfs              | p.L1074fs  |
| Pat_11 | Post-Resistance | ALS2CR11 | 151254 | 37 | 2  | 202352352 | 202352352 | Frame_Shift_Del | DEL | T    | - | 7  | 203  | c.1855delA        | c.(1855-1857)ATTfs              | p.I619fs   |
| Pat_11 | Post-Resistance | CRYGA    | 1418   | 37 | 2  | 209025577 | 209025577 | Frame_Shift_Del | DEL | C    | - | 11 | 810  | c.476delG         | c.(475-477)GGTfs                | p.G159fs   |
| Pat_11 | Post-Resistance | PRDM15   | 63977  | 37 | 21 | 43221415  | 43221417  | In_Frame_Del    | DEL | CTG  | - | 9  | 570  | c.4507_4509delCAI | c.(4507-4509)CAGdel             | p.Q1503del |
| Pat_11 | Post-Resistance | CECR6    | 27439  | 37 | 22 | 17601300  | 17601302  | In_Frame_Del    | DEL | CCA  | - | 10 | 253  | c.716_718delTTGG  | c.(715-720)GTGGGC>GGC           | p.V239del  |
| Pat_11 | Post-Resistance | MICAL3   | 57553  | 37 | 22 | 18314825  | 18314827  | In_Frame_Del    | DEL | CTC  | - | 7  | 98   | c.2848_2850delGAI | c.(2848-2850)GAGdel             | p.E950del  |
| Pat_11 | Post-Resistance | SREBF2   | 6721   | 37 | 22 | 42271637  | 42271637  | Frame_Shift_Del | DEL | C    | - | 7  | 605  | c.1295delC        | c.(1294-1296)TCCfs              | p.S432fs   |
| Pat_11 | Post-Resistance | BIK      | 638    | 37 | 22 | 43525245  | 43525247  | In_Frame_Del    | DEL | GCT  | - | 9  | 181  | c.417_419delGCT   | c.(415-420)GCCTG>GCC            | p.L144del  |
| Pat_11 | Post-Resistance | CLASP2   | 23122  | 37 | 3  | 33602361  | 33602361  | Frame_Shift_Del | DEL | T    | - | 12 | 718  | c.2869delA        | c.(2869-2871)ATGfs              | p.M957fs   |
| Pat_11 | Post-Resistance | XIRP1    | 165904 | 37 | 3  | 39228955  | 39228958  | Frame_Shift_Del | DEL | TGTC | - | 9  | 249  | c.1979_1982delGAC | c.(1978-1983)AGACACfs           | p.R660fs   |
| Pat_11 | Post-Resistance | DOCK3    | 1795   | 37 | 3  | 51417604  | 51417604  | Frame_Shift_Del | DEL | C    | - | 7  | 312  | c.5549delC        | c.(5548-5550)ACCfs              | p.T1850fs  |
| Pat_11 | Post-Resistance | VPRBP    | 9730   | 37 | 3  | 51457448  | 51457448  | Frame_Shift_Del | DEL | T    | - | 7  | 1450 | c.2976delA        | c.(2974-2976)AAAfs              | p.K992fs   |
| Pat_11 | Post-Resistance | FILIP1L  | 11259  | 37 | 3  | 99568272  | 99568273  | Frame_Shift_Ins | INS | -    | T | 13 | 397  | c.2247_2248insA   | c.(2245-2250)AAACTAfs           | p.K749fs   |



|        |                 |             |        |    |   |           |           |                 |     |     |     |    |      |                                                    |                       |             |
|--------|-----------------|-------------|--------|----|---|-----------|-----------|-----------------|-----|-----|-----|----|------|----------------------------------------------------|-----------------------|-------------|
| Pat_11 | Post-Resistance | WWTR1       | 25937  | 37 | 3 | 149260194 | 149260196 | In_Frame_Del    | DEL | CTG | -   | 10 | 281  | c.697_699delCAG                                    | c.(697-699)CAGdel     | p.Q233del   |
| Pat_11 | Post-Resistance | ATP13A3     | 79572  | 37 | 3 | 194147849 | 194147850 | Frame_Shift_Ins | INS | -   | A   | 11 | 308  | c.3079_3080insT                                    | c.(3079-3081)TGGfs    | p.W1027fs   |
| Pat_11 | Post-Resistance | PDE6B       | 5158   | 37 | 4 | 661763    | 661765    | In_Frame_Del    | DEL | AGG | -   | 12 | 535  | .2471_2473delAG(2470-2475)AAGGAG>AA                |                       | p.E828del   |
| Pat_11 | Post-Resistance | CRIPAK      | 285464 | 37 | 4 | 1388930   | 1388931   | Frame_Shift_Ins | INS | -   | CA  | 9  | 42   | c.631_632insCA                                     | c.(631-633)TCAfs      | p.S211fs    |
| Pat_11 | Post-Resistance | FAM193A     | 8603   | 37 | 4 | 2698177   | 2698177   | Frame_Shift_Del | DEL | A   | -   | 8  | 241  | c.2491delA                                         | c.(2491-2493)AAAfs    | p.K831fs    |
| Pat_11 | Post-Resistance | TBC1D1      | 23216  | 37 | 4 | 38020014  | 38020014  | Frame_Shift_Del | DEL | A   | -   | 7  | 409  | c.922delA                                          | c.(922-924)AAAfs      | p.K308fs    |
| Pat_11 | Post-Resistance | WDFY3       | 23001  | 37 | 4 | 85611708  | 85611709  | Frame_Shift_Del | DEL | CA  | -   | 12 | 511  | c.9313_9314delTTC                                  | c.(9313-9315)TGGfs    | p.W3105fs   |
| Pat_11 | Post-Resistance | NAP1L5      | 266812 | 37 | 4 | 89618484  | 89618486  | In_Frame_Del    | DEL | TCC | -   | 7  | 257  | c.420_422delGGA;c.(418-423)GAGGAA>GAA;140_141EE>I  |                       |             |
| Pat_11 | Post-Resistance | NPNT        | 255743 | 37 | 4 | 106863682 | 106863684 | In_Frame_Del    | DEL | CCA | -   | 7  | 466  | c.982_984delCCA                                    | c.(982-984)CCAdel     | p.P333del   |
| Pat_11 | Post-Resistance | EXOSC9      | 5393   | 37 | 4 | 122723894 | 122723894 | Frame_Shift_Del | DEL | T   | -   | 9  | 397  | c.227delT                                          | c.(226-228)CTTfs      | p.L76fs     |
| Pat_11 | Post-Resistance | FRG1        | 2483   | 37 | 4 | 190876218 | 190876219 | Frame_Shift_Ins | INS | -   | AT  | 8  | 628  | c.344_345insAT                                     | c.(343-345)AAAfs      | p.K115fs    |
| Pat_11 | Post-Resistance | C5orf23     | 79614  | 37 | 5 | 32789822  | 32789823  | Frame_Shift_Del | DEL | GT  | -   | 9  | 289  | c.315_316delGT                                     | c.(313-318)GGGTGTfs   | p.G105fs    |
| Pat_11 | Post-Resistance | C9          | 735    | 37 | 5 | 39341300  | 39341301  | Frame_Shift_Ins | INS | -   | G   | 7  | 389  | c.423_424insC                                      | c.(421-426)CCCTGCfs   | p.P141fs    |
| Pat_11 | Post-Resistance | ADAMTS6     | 11174  | 37 | 5 | 64569170  | 64569170  | Frame_Shift_Del | DEL | T   | -   | 10 | 835  | c.1617delA                                         | c.(1615-1617)AAAfs    | p.K539fs    |
| Pat_11 | Post-Resistance | TAF9        | 6880   | 37 | 5 | 68660786  | 68660788  | In_Frame_Del    | DEL | TCA | -   | 7  | 273  | c.777_779delTGA;c.(775-780)GATGAC>GAC;259_260DD>I  |                       |             |
| Pat_11 | Post-Resistance | ATXN1       | 6310   | 37 | 6 | 16327864  | 16327865  | In_Frame_Ins    | INS | -   | TGC | 8  | 39   | c.677_678insGCA;c.(676-678)CAC>CAGCACp.225_226insC |                       |             |
| Pat_11 | Post-Resistance | BAT1        | 7919   | 37 | 6 | 31504446  | 31504446  | Frame_Shift_Del | DEL | A   | -   | 7  | 246  | c.447delT                                          | c.(445-447)TTTfs      | p.F149fs    |
| Pat_11 | Post-Resistance | BAT4        | 7918   | 37 | 6 | 31631854  | 31631854  | Frame_Shift_Del | DEL | C   | -   | 7  | 487  | c.402delG                                          | c.(400-402)GGGfs      | p.G134fs    |
| Pat_11 | Post-Resistance | ZNF318      | 24149  | 37 | 6 | 43323502  | 43323502  | Frame_Shift_Del | DEL | T   | -   | 10 | 1393 | c.1570delA                                         | c.(1570-1572)AGGfs    | p.R524fs    |
| Pat_11 | Post-Resistance | TMEM63B     | 55362  | 37 | 6 | 44122157  | 44122159  | In_Frame_Del    | DEL | CTG | -   | 7  | 486  | .2282_2284delCT(2281-2286)ACTGCT>AC                |                       | p.A764del   |
| Pat_11 | Post-Resistance | DST         | 667    | 37 | 6 | 56510689  | 56510690  | Frame_Shift_Del | DEL | TC  | -   | 7  | 542  | c.1653_1654delGA;c.(1651-1656)GAGAAGfs             |                       | p.E551fs    |
| Pat_11 | Post-Resistance | TTK         | 7272   | 37 | 6 | 80751896  | 80751897  | Frame_Shift_Ins | INS | -   | A   | 9  | 366  | c.2551_2552insA                                    | c.(2551-2553)GAAfs    | p.E851fs    |
| Pat_11 | Post-Resistance | TPBG        | 7162   | 37 | 6 | 83075190  | 83075190  | Frame_Shift_Del | DEL | C   | -   | 7  | 1066 | c.512delC                                          | c.(511-513)GCCfs      | p.A171fs    |
| Pat_11 | Post-Resistance | SEC63       | 11231  | 37 | 6 | 108214774 | 108214774 | Frame_Shift_Del | DEL | T   | -   | 7  | 126  | c.1586delA                                         | c.(1585-1587)AAGfs    | p.K529fs    |
| Pat_11 | Post-Resistance | HOXA1       | 3198   | 37 | 7 | 27135314  | 27135316  | In_Frame_Del    | DEL | CGA | -   | 11 | 332  | c.216_218delTTC;c.(214-219)CATCAC>CACp.72_73HH>H   |                       |             |
| Pat_11 | Post-Resistance | PKD1L1      | 168507 | 37 | 7 | 47852764  | 47852764  | Frame_Shift_Del | DEL | C   | -   | 10 | 1057 | c.7301delG                                         | c.(7300-7302)GGCfs    | p.G2434fs   |
| Pat_11 | Post-Resistance | STX1A       | 6804   | 37 | 7 | 73123425  | 73123427  | In_Frame_Del    | DEL | CAT | -   | 11 | 1019 | c.56_58delATG                                      | c.(55-60)GATGTG>GTC   | p.D19del    |
| Pat_11 | Post-Resistance | EPHB4       | 2050   | 37 | 7 | 100410591 | 100410591 | Frame_Shift_Del | DEL | C   | -   | 7  | 1255 | c.1896delG                                         | c.(1894-1896)GGGfs    | p.G632fs    |
| Pat_11 | Post-Resistance | MOGAT3      | 346606 | 37 | 7 | 100841562 | 100841562 | Frame_Shift_Del | DEL | C   | -   | 8  | 440  | c.578delG                                          | c.(577-579)GGTfs      | p.G193fs    |
| Pat_11 | Post-Resistance | SLC26A3     | 1811   | 37 | 7 | 107432325 | 107432325 | Frame_Shift_Del | DEL | A   | -   | 8  | 640  | c.332delT                                          | c.(331-333)TTCfs      | p.F111fs    |
| Pat_11 | Post-Resistance | LAMB4       | 22798  | 37 | 7 | 107763584 | 107763584 | Frame_Shift_Del | DEL | A   | -   | 7  | 787  | c.26delT                                           | c.(25-27)TTGfs        | p.L9fs      |
| Pat_11 | Post-Resistance | WASL        | 8976   | 37 | 7 | 123332839 | 123332841 | In_Frame_Del    | DEL | AGG | -   | 9  | 314  | c.907_909delCCT                                    | c.(907-909)CCTdel     | p.P303del   |
| Pat_11 | Post-Resistance | SLC13A4     | 26266  | 37 | 7 | 135378949 | 135378951 | In_Frame_Del    | DEL | TCT | -   | 8  | 709  | .1052_1054delAG;(1051-1056)AAGACC>AC               |                       | p.K351del   |
| Pat_11 | Post-Resistance | SVOPL       | 136306 | 37 | 7 | 138312996 | 138312996 | Frame_Shift_Del | DEL | C   | -   | 7  | 745  | c.976delG                                          | c.(976-978)GACfs      | p.D326fs    |
| Pat_11 | Post-Resistance | ZC3HAV1     | 56829  | 37 | 7 | 138732539 | 138732539 | Frame_Shift_Del | DEL | T   | -   | 7  | 925  | c.2510delA                                         | c.(2509-2511)AACfs    | p.N837fs    |
| Pat_11 | Post-Resistance | EPHA1       | 2041   | 37 | 7 | 143104714 | 143104714 | Frame_Shift_Del | DEL | G   | -   | 7  | 4115 | c.140delC                                          | c.(139-141)CCAfs      | p.P47fs     |
| Pat_11 | Post-Resistance | BNIP3L      | 665    | 37 | 8 | 26240684  | 26240686  | In_Frame_Del    | DEL | ACA | -   | 9  | 282  | c.38_40delACA                                      | c.(37-42)CACAAAC>CAC  | p.N18del    |
| Pat_11 | Post-Resistance | PBK         | 55872  | 37 | 8 | 27668477  | 27668479  | In_Frame_Del    | DEL | TCA | -   | 7  | 317  | c.768_770delTGA;c.(766-771)GATGAA>GAA              |                       | p.D256del   |
| Pat_11 | Post-Resistance | BHLHE22     | 27319  | 37 | 8 | 65493617  | 65493618  | In_Frame_Ins    | INS | -   | GGC | 3  | 3    | c.270_271insGGC                                    | c.(268-273)insGGC     | p.97_98insG |
| Pat_11 | Post-Resistance | SULF1       | 23213  | 37 | 8 | 70514026  | 70514026  | Frame_Shift_Del | DEL | T   | -   | 10 | 1137 | c.1023delT                                         | c.(1021-1023)CCTfs    | p.P341fs    |
| Pat_11 | Post-Resistance | LRRCC1      | 85444  | 37 | 8 | 86038947  | 86038948  | Frame_Shift_Del | DEL | AG  | -   | 7  | 263  | c.1296_1297delAC                                   | c.(1294-1299)CAAGAGfs | p.Q432fs    |
| Pat_11 | Post-Resistance | CYP11B2     | 1585   | 37 | 8 | 143993951 | 143993953 | In_Frame_Del    | DEL | GCA | -   | 9  | 224  | .1391_1393delTG(1390-1395)CTGCAC>CA                |                       | p.L464del   |
| Pat_11 | Post-Resistance | PALM2-AKAP2 | 445815 | 37 | 9 | 112899247 | 112899247 | Frame_Shift_Del | DEL | C   | -   | 54 | 62   | c.2119delC                                         | c.(2119-2121)CCCfs    | p.P707fs    |
| Pat_11 | Post-Resistance | SNAPC4      | 6621   | 37 | 9 | 139277995 | 139277997 | In_Frame_Del    | DEL | GCT | -   | 8  | 10   | .1624_1626delAGI                                   | c.(1624-1626)AGCdel   | p.S542del   |
| Pat_11 | Post-Resistance | CNKSR2      | 22866  | 37 | X | 21627678  | 21627680  | In_Frame_Del    | DEL | GAG | -   | 14 | 144  | .2635_2637delGAI                                   | c.(2635-2637)GAGdel   | p.E886del   |
| Pat_11 | Post-Resistance | ATRX        | 546    | 37 | X | 76931742  | 76931744  | In_Frame_Del    | DEL | TCA | -   | 7  | 328  | .3786_3788delTG;(3784-3789)GATGAC>GA1262_1263DD:   |                       |             |
| Pat_11 | Post-Resistance | ARMCX3      | 51566  | 37 | X | 100880152 | 100880154 | In_Frame_Del    | DEL | TGA | -   | 13 | 810  | c.183_185delTGA;c.(181-186)TCTGAT>TCT              |                       | p.D66del    |

|        |                 |          |        |    |    |           |           |                 |     |     |         |    |      |                                                 |                       |                |
|--------|-----------------|----------|--------|----|----|-----------|-----------|-----------------|-----|-----|---------|----|------|-------------------------------------------------|-----------------------|----------------|
| Pat_11 | Post-Resistance | ZNF185   | 7739   | 37 | X  | 152087570 | 152087572 | In_Frame_Del    | DEL | GAG | -       | 10 | 97   | c.475_477delGAG                                 | c.(475-477)GAGdel     | p.E165del      |
| Pat_11 | Post-Resistance | F8       | 2157   | 37 | X  | 154157686 | 154157686 | Frame_Shift_Del | DEL | T   | -       | 10 | 224  | c.4379delA                                      | c.(4378-4380)AATfs    | p.N1460fs      |
| Pat_16 | Post-Resistance | CLSTN1   | 22883  | 37 | 1  | 9790726   | 9790728   | In_Frame_Del    | DEL | TCC | -       | 10 | 142  | .2784_2786delGG(2782-2787)GAGGAA>GA             | .928_929EE>I          |                |
| Pat_16 | Post-Resistance | AADACL3  | 126767 | 37 | 1  | 12785494  | 12785494  | Frame_Shift_Del | DEL | G   | -       | 8  | 322  | c.584delG                                       | c.(583-585)TGTfs      | p.C195fs       |
| Pat_16 | Post-Resistance | ATP13A2  | 23400  | 37 | 1  | 17313000  | 17313002  | In_Frame_Del    | DEL | CAG | -       | 8  | 252  | .3361_3363delCT                                 | c.(3361-3363)CTGdel   | p.L1121del     |
| Pat_16 | Post-Resistance | PADI4    | 23569  | 37 | 1  | 17672605  | 17672606  | Frame_Shift_Ins | INS | -   | A       | 8  | 350  | c.1018_1019insA                                 | c.(1018-1020)GAGfs    | p.E340fs       |
| Pat_16 | Post-Resistance | UBXN11   | 91544  | 37 | 1  | 26608843  | 26608844  | In_Frame_Ins    | INS | -   | GGGACA  | 8  | 68   | .509_1510insTGTCc.(1507-1512)insTGTC            | c.(1507-1512)insTGTC  | c.503_504insCI |
| Pat_16 | Post-Resistance | ARID1A   | 8289   | 37 | 1  | 27100182  | 27100184  | In_Frame_Del    | DEL | GCA | -       | 7  | 290  | .3978_3980delGC(3976-3981)CCGAG>CC              |                       | p.Q1334del     |
| Pat_16 | Post-Resistance | TMCO2    | 127391 | 37 | 1  | 40713708  | 40713709  | Frame_Shift_Del | DEL | TC  | -       | 22 | 469  | c.43_44delTC                                    | c.(43-45)TCTfs        | p.S15fs        |
| Pat_16 | Post-Resistance | PTPRF    | 5792   | 37 | 1  | 44071946  | 44071948  | In_Frame_Del    | DEL | GCG | -       | 10 | 264  | .3519_3521delGC(3517-3522)CAGCGG>CA             |                       | p.R1178del     |
| Pat_16 | Post-Resistance | FOXD2    | 2306   | 37 | 1  | 47904370  | 47904371  | Frame_Shift_Ins | INS | -   | C       | 7  | 1449 | c.563_564insC                                   | c.(562-564)ATCfs      | p.I188fs       |
| Pat_16 | Post-Resistance | TCHH     | 7062   | 37 | 1  | 152083818 | 152083820 | In_Frame_Del    | DEL | CGG | -       | 9  | 139  | .1873_1875delCC                                 | c.(1873-1875)CCGdel   | p.P625del      |
| Pat_16 | Post-Resistance | CACNA1E  | 777    | 37 | 1  | 181680102 | 181680103 | Frame_Shift_Del | DEL | AG  | -       | 9  | 311  | .1068_1069delAC                                 | c.(1066-1071)AAAGAGfs | p.K356fs       |
| Pat_16 | Post-Resistance | CDC73    | 79577  | 37 | 1  | 193111146 | 193111147 | Frame_Shift_Del | DEL | AG  | -       | 7  | 283  | c.679_680delAG                                  | c.(679-681)AGAFs      | p.R227fs       |
| Pat_16 | Post-Resistance | EPHX1    | 2052   | 37 | 1  | 226026384 | 226026384 | Frame_Shift_Del | DEL | C   | -       | 12 | 1087 | c.394delC                                       | c.(394-396)CCCfs      | p.P132fs       |
| Pat_16 | Post-Resistance | SFMBT2   | 57713  | 37 | 10 | 7212995   | 7212997   | In_Frame_Del    | DEL | CTC | -       | 9  | 697  | .2437_2439delGA                                 | c.(2437-2439)GAGdel   | p.E813del      |
| Pat_16 | Post-Resistance | KIAA1462 | 57608  | 37 | 10 | 30318585  | 30318585  | Frame_Shift_Del | DEL | C   | -       | 8  | 798  | c.492delG                                       | c.(490-492)ATGfs      | p.M164fs       |
| Pat_16 | Post-Resistance | NFKB2    | 4791   | 37 | 10 | 104158163 | 104158163 | Frame_Shift_Del | DEL | C   | -       | 8  | 1210 | c.874delC                                       | c.(874-876)CCCfs      | p.P292fs       |
| Pat_16 | Post-Resistance | ADAM12   | 8038   | 37 | 10 | 127737897 | 127737897 | Frame_Shift_Del | DEL | C   | -       | 8  | 652  | c.1851delG                                      | c.(1849-1851)GGGfs    | p.G617fs       |
| Pat_16 | Post-Resistance | KRTAP5-5 | 439915 | 37 | 11 | 1651199   | 1651200   | In_Frame_Ins    | INS | -   | CTGTGGC | 92 | 89   | .130insGGCTGTG(27-132)insGGCTGTGGCT.43_44insGCG |                       |                |
| Pat_16 | Post-Resistance | UBQLN3   | 50613  | 37 | 11 | 5529918   | 5529920   | In_Frame_Del    | DEL | TGG | -       | 10 | 459  | c.869_871delCCA(868-873)ACCAG>AGC               |                       | p.T290del      |
| Pat_16 | Post-Resistance | OR10A2   | 341276 | 37 | 11 | 6891253   | 6891255   | In_Frame_Del    | DEL | TTC | -       | 10 | 252  | c.268_270delTTC                                 | c.(268-270)TTCdel     | p.F94del       |
| Pat_16 | Post-Resistance | PRB2     | 653247 | 37 | 12 | 11546544  | 11546545  | In_Frame_Ins    | INS | -   | GGA     | 12 | 477  | c.467_468insTCCc.(466-468)CCA>CCTCCA            | .156_156P>PI          |                |
| Pat_16 | Post-Resistance | SFRS2IP  | 9169   | 37 | 12 | 46318575  | 46318577  | In_Frame_Del    | DEL | GGT | -       | 7  | 683  | .3840_3842delAC(3838-3843)CCACCC>CC1280_1281PP  |                       |                |
| Pat_16 | Post-Resistance | ESPL1    | 9700   | 37 | 12 | 53683876  | 53683877  | Frame_Shift_Del | DEL | TG  | -       | 7  | 219  | .5121_5122delITC                                | c.(5119-5124)ACTGTGfs | p.T1707fs      |
| Pat_16 | Post-Resistance | GPR182   | 11318  | 37 | 12 | 57389063  | 57389063  | Frame_Shift_Del | DEL | G   | -       | 7  | 423  | c.70delG                                        | c.(70-72)GGAfs        | p.G24fs        |
| Pat_16 | Post-Resistance | NCOR2    | 9612   | 37 | 12 | 124848228 | 124848228 | Frame_Shift_Del | DEL | G   | -       | 8  | 553  | c.2925delC                                      | c.(2923-2925)CCCfs    | p.P975fs       |
| Pat_16 | Post-Resistance | PABPC3   | 5042   | 37 | 13 | 25671804  | 25671806  | In_Frame_Del    | DEL | GCT | -       | 10 | 183  | .1468_1470delGC                                 | c.(1468-1470)GCTdel   | p.A496del      |
| Pat_16 | Post-Resistance | WASF3    | 10810  | 37 | 13 | 27257023  | 27257023  | Frame_Shift_Del | DEL | C   | -       | 7  | 795  | c.1263delC                                      | c.(1261-1263)GGCfs    | p.G421fs       |
| Pat_16 | Post-Resistance | B3GALTL  | 145173 | 37 | 13 | 31803392  | 31803392  | Frame_Shift_Del | DEL | A   | -       | 9  | 256  | c.231delA                                       | c.(229-231)TTAFs      | p.L77fs        |
| Pat_16 | Post-Resistance | C14orf4  | 64207  | 37 | 14 | 77493792  | 77493794  | In_Frame_Del    | DEL | TGT | -       | 8  | 65   | c.342_344delIACA(340-345)CAACAG>CAG             | .114_115QQ>(          |                |
| Pat_16 | Post-Resistance | RIN3     | 79890  | 37 | 14 | 93118772  | 93118772  | Frame_Shift_Del | DEL | C   | -       | 8  | 373  | c.1378delC                                      | c.(1378-1380)CCCfs    | p.P460fs       |
| Pat_16 | Post-Resistance | SPG11    | 80208  | 37 | 15 | 44876678  | 44876679  | Frame_Shift_Ins | INS | -   | T       | 16 | 82   | c.5199_5200insA                                 | c.(5197-5202)AAATGCfs | p.K1733fs      |
| Pat_16 | Post-Resistance | SLC24A1  | 9187   | 37 | 15 | 65918177  | 65918179  | In_Frame_Del    | DEL | CTG | -       | 10 | 272  | .1759_1761delCT                                 | c.(1759-1761)CTGdel   | p.L591del      |
| Pat_16 | Post-Resistance | IL32     | 9235   | 37 | 16 | 3119304   | 3119305   | Frame_Shift_Ins | INS | -   | G       | 8  | 771  | c.653_654insG                                   | c.(652-654)GACfs      | p.D218fs       |
| Pat_16 | Post-Resistance | C16orf71 | 146562 | 37 | 16 | 4796953   | 4796955   | In_Frame_Del    | DEL | GAG | -       | 10 | 53   | .1207_1209delGA                                 | c.(1207-1209)GAGdel   | p.E409del      |
| Pat_16 | Post-Resistance | SLC5A11  | 115584 | 37 | 16 | 24921737  | 24921739  | In_Frame_Del    | DEL | CAG | -       | 10 | 366  | .1761_1763delCA(1759-1764)GCCAGC>GC             |                       | p.S592del      |
| Pat_16 | Post-Resistance | ADCY7    | 113    | 37 | 16 | 50324522  | 50324522  | Frame_Shift_Del | DEL | A   | -       | 8  | 293  | c.326delA                                       | c.(325-327)TATfs      | p.Y109fs       |
| Pat_16 | Post-Resistance | HSD11B2  | 3291   | 37 | 16 | 67470245  | 67470245  | Frame_Shift_Del | DEL | G   | -       | 8  | 1012 | c.758delG                                       | c.(757-759)TGGfs      | p.W253fs       |
| Pat_16 | Post-Resistance | EDC4     | 23644  | 37 | 16 | 67913786  | 67913788  | In_Frame_Del    | DEL | AGC | -       | 11 | 191  | .1855_1857delAG                                 | c.(1855-1857)AGCdel   | p.S629del      |
| Pat_16 | Post-Resistance | ZFHX3    | 463    | 37 | 16 | 72821594  | 72821596  | In_Frame_Del    | DEL | GCC | -       | 7  | 321  | .0579_10581delGC                                | c.(10579-10581)GGCdel | p.G3527del     |
| Pat_16 | Post-Resistance | CMIP     | 80790  | 37 | 16 | 81735318  | 81735319  | Frame_Shift_Del | DEL | GC  | -       | 8  | 1847 | .1809_1810delGC                                 | c.(1807-1812)CTGCAGfs | p.L603fs       |
| Pat_16 | Post-Resistance | SMCR7    | 125170 | 37 | 17 | 18167778  | 18167780  | In_Frame_Del    | DEL | GCT | -       | 8  | 152  | .1065_1067delGC(1063-1068)CGGCTG>CG             |                       | p.L360del      |
| Pat_16 | Post-Resistance | FBXO47   | 494188 | 37 | 17 | 37101376  | 37101376  | Frame_Shift_Del | DEL | T   | -       | 56 | 179  | c.630delA                                       | c.(628-630)AAAfs      | p.K210fs       |
| Pat_16 | Post-Resistance | FKBP10   | 60681  | 37 | 17 | 39975559  | 39975559  | Frame_Shift_Del | DEL | C   | -       | 7  | 200  | c.825delC                                       | c.(823-825)CTCfs      | p.L275fs       |
| Pat_16 | Post-Resistance | EFTUD2   | 9343   | 37 | 17 | 42928700  | 42928701  | Frame_Shift_Ins | INS | -   | A       | 8  | 870  | c.2860_2861insT                                 | c.(2860-2862)GATfs    | p.D954fs       |
| Pat_16 | Post-Resistance | SP2      | 6668   | 37 | 17 | 45993612  | 45993612  | Frame_Shift_Del | DEL | C   | -       | 7  | 1330 | c.175delC                                       | c.(175-177)CCCfs      | p.P59fs        |

|        |                 |          |        |    |    |           |           |                        |     |          |   |     |      |                             |                                 |               |
|--------|-----------------|----------|--------|----|----|-----------|-----------|------------------------|-----|----------|---|-----|------|-----------------------------|---------------------------------|---------------|
| Pat_16 | Post-Resistance | KIAA0195 | 9772   | 37 | 17 | 73491062  | 73491063  | Frame_Shift_Ins        | INS | -        | C | 7   | 566  | c.2675_2676insC             | c.(2674-2676)ATCfs              | p.I892fs      |
| Pat_16 | Post-Resistance | EVI5L    | 115704 | 37 | 19 | 7917989   | 7917989   | Frame_Shift_Del        | DEL | C        | - | 7   | 2010 | c.1005delC                  | c.(1003-1005)ATCfs              | p.I335fs      |
| Pat_16 | Post-Resistance | CARM1    | 10498  | 37 | 19 | 11022887  | 11022887  | Frame_Shift_Del        | DEL | G        | - | 8   | 1775 | c.586delG                   | c.(586-588)GGGfs                | p.G196fs      |
| Pat_16 | Post-Resistance | OR7A5    | 26659  | 37 | 19 | 14938205  | 14938205  | Frame_Shift_Del        | DEL | G        | - | 7   | 515  | c.849delC                   | c.(847-849)CCCfs                | p.P283fs      |
| Pat_16 | Post-Resistance | DMKN     | 93099  | 37 | 19 | 36002362  | 36002412  | In_Frame_Del           | DEL | CACTGCTC | - | 29  | 40   | GGCGGCAGCAGTGGCGGCAGCAGTGGC | GSSSGSSG                        |               |
| Pat_16 | Post-Resistance | SBSN     | 374897 | 37 | 19 | 36019046  | 36019047  | Frame_Shift_Del        | DEL | CT       | - | 7   | 933  | c.137_138delAG              | c.(136-138)GAGfs                | p.E46fs       |
| Pat_16 | Post-Resistance | C19orf55 | 148137 | 37 | 19 | 36255947  | 36255949  | In_Frame_Del           | DEL | CTC      | - | 25  | 1505 | c.639_641delCTC             | c.(637-642)ATCTCC>ATC           | p.S218del     |
| Pat_16 | Post-Resistance | CADM4    | 199731 | 37 | 19 | 44127492  | 44127492  | Frame_Shift_Del        | DEL | A        | - | 162 | 258  | c.1157delT                  | c.(1156-1158)TTCfs              | p.F386fs      |
| Pat_16 | Post-Resistance | NUCB1    | 4924   | 37 | 19 | 49425109  | 49425111  | In_Frame_Del           | DEL | AGC      | - | 8   | 291  | .1199_1201delAGT            | c.(1198-1203)AAGCAG>AA          | p.Q407del     |
| Pat_16 | Post-Resistance | U2AF2    | 11338  | 37 | 19 | 56171899  | 56171901  | In_Frame_Del           | DEL | AGA      | - | 9   | 401  | c.248_250delAGA             | c.(247-252)GAGAAG>GAC           | p.K87del      |
| Pat_16 | Post-Resistance | DHX57    | 90957  | 37 | 2  | 39095411  | 39095413  | In_Frame_Del           | DEL | CCA      | - | 7   | 183  | c.135_137delTGG             | c.(133-138)GGTGA>GG/p.45_46GG>G |               |
| Pat_16 | Post-Resistance | OTX1     | 5013   | 37 | 2  | 63283259  | 63283261  | In_Frame_Del           | DEL | CCA      | - | 7   | 435  | c.873_875delCCA             | c.(871-876)GGCCAC>GGC           | p.H301del     |
| Pat_16 | Post-Resistance | TGOLN2   | 10618  | 37 | 2  | 85554289  | 85554289  | Frame_Shift_Del        | DEL | G        | - | 8   | 1425 | c.566delC                   | c.(565-567)CCAFs                | p.P189fs      |
| Pat_16 | Post-Resistance | DNAH7    | 56171  | 37 | 2  | 196788374 | 196788374 | Frame_Shift_Del        | DEL | T        | - | 11  | 146  | c.3770delA                  | c.(3769-3771)AATfs              | p.N1257fs     |
| Pat_16 | Post-Resistance | CCNYL1   | 151195 | 37 | 2  | 208611842 | 208611843 | Frame_Shift_Del        | DEL | GG       | - | 7   | 297  | c.558_559delGG              | c.(556-561)CTGGGAfs             | p.L186fs      |
| Pat_16 | Post-Resistance | CRYGA    | 1418   | 37 | 2  | 209025577 | 209025577 | Frame_Shift_Del        | DEL | C        | - | 12  | 572  | c.476delG                   | c.(475-477)GGTfs                | p.G159fs      |
| Pat_16 | Post-Resistance | ABCB6    | 10058  | 37 | 2  | 220078193 | 220078194 | Frame_Shift_Del        | DEL | TC       | - | 7   | 1266 | c.1686_1687delGA            | c.(1684-1689)GAGAACfs           | p.E562fs      |
| Pat_16 | Post-Resistance | GIN51    | 9837   | 37 | 20 | 25422397  | 25422397  | Frame_Shift_Del        | DEL | A        | - | 7   | 143  | c.507delA                   | c.(505-507)TTAFs                | p.L169fs      |
| Pat_16 | Post-Resistance | LPIN3    | 64900  | 37 | 20 | 39977799  | 39977799  | Frame_Shift_Del        | DEL | C        | - | 7   | 711  | c.625delC                   | c.(625-627)CCCfs                | p.P209fs      |
| Pat_16 | Post-Resistance | SLC19A1  | 6573   | 37 | 21 | 46951916  | 46951918  | In_Frame_Del           | DEL | CAG      | - | 7   | 119  | c.334_336delCTG             | c.(334-336)CTGdel               | p.L112del     |
| Pat_16 | Post-Resistance | TFIP11   | 24144  | 37 | 22 | 26906183  | 26906185  | In_Frame_Del           | DEL | TCA      | - | 8   | 379  | c.54_56delTGA               | c.(52-57)GATGAC>GAC             | p.L18_19DD>D  |
| Pat_16 | Post-Resistance | NEFH     | 4744   | 37 | 22 | 29885859  | 29885876  | In_Frame_Del           | DEL | GCCCCAG  | - | 135 | 241  | delGCTAAGTCCC247            | GCTAAGTCCCCAGA.AKSPEK750d       |               |
| Pat_16 | Post-Resistance | SREBF2   | 6721   | 37 | 22 | 42262949  | 42262951  | In_Frame_Del           | DEL | GCA      | - | 7   | 168  | c.203_205delGCA             | c.(202-207)GGCAGC>GGC           | p.S74del      |
| Pat_16 | Post-Resistance | CACNA1D  | 776    | 37 | 3  | 53529193  | 53529195  | Translation_Start_Site | DEL | GAT      | - | 11  | 363  |                             |                                 |               |
| Pat_16 | Post-Resistance | PCOLCE2  | 26577  | 37 | 3  | 142542392 | 142542392 | Frame_Shift_Del        | DEL | A        | - | 281 | 157  | c.931delT                   | c.(931-933)TATfs                | p.Y311fs      |
| Pat_16 | Post-Resistance | PDE6B    | 5158   | 37 | 4  | 661763    | 661765    | In_Frame_Del           | DEL | AGG      | - | 10  | 348  | c.2471_2473delAGT           | c.(2470-2475)AAGGAG>AA          | p.E828del     |
| Pat_16 | Post-Resistance | MMRN1    | 22915  | 37 | 4  | 90844391  | 90844393  | In_Frame_Del           | DEL | AGC      | - | 10  | 1861 | c.923_925delAGC             | c.(922-927)GAGCAG>GAC           | p.Q313del     |
| Pat_16 | Post-Resistance | PAPD7    | 11044  | 37 | 5  | 6755013   | 6755014   | Frame_Shift_Del        | DEL | AC       | - | 17  | 277  | c.1584_1585delAC            | c.(1582-1587)AAACACfs           | p.K528fs      |
| Pat_16 | Post-Resistance | TIMD4    | 91937  | 37 | 5  | 156378745 | 156378747 | In_Frame_Del           | DEL | TTG      | - | 8   | 1011 | c.455_457delCAA             | c.(454-459)ACAAGC>AGC           | p.T152del     |
| Pat_16 | Post-Resistance | FKBPL    | 63943  | 37 | 6  | 32097086  | 32097086  | Frame_Shift_Del        | DEL | C        | - | 7   | 1657 | c.472delG                   | c.(472-474)GAGfs                | p.E158fs      |
| Pat_16 | Post-Resistance | FOXP4    | 116113 | 37 | 6  | 41557781  | 41557781  | Frame_Shift_Del        | DEL | C        | - | 7   | 314  | c.1230delC                  | c.(1228-1230)CACfs              | p.H410fs      |
| Pat_16 | Post-Resistance | CUL7     | 9820   | 37 | 6  | 43011212  | 43011212  | Frame_Shift_Del        | DEL | G        | - | 9   | 475  | c.3329delC                  | c.(3328-3330)CCTfs              | p.P1110fs     |
| Pat_16 | Post-Resistance | SNAP91   | 9892   | 37 | 6  | 84285768  | 84285768  | Frame_Shift_Del        | DEL | A        | - | 2   | 4    | c.2304delT                  | c.(2302-2304)CTTfs              | p.L768fs      |
| Pat_16 | Post-Resistance | FOXP1    | 221937 | 37 | 7  | 4798771   | 4798771   | Frame_Shift_Del        | DEL | C        | - | 7   | 1249 | c.1334delC                  | c.(1333-1335)TCCfs              | p.S445fs      |
| Pat_16 | Post-Resistance | GLCC11   | 113263 | 37 | 7  | 8126097   | 8126099   | In_Frame_Del           | DEL | CAG      | - | 8   | 1232 | c.1573_1575delCA            | c.(1573-1575)CAGdel             | p.Q528del     |
| Pat_16 | Post-Resistance | DFNA5    | 1687   | 37 | 7  | 24749939  | 24749940  | Frame_Shift_Del        | DEL | CC       | - | 7   | 416  | c.765_766delGG              | c.(763-768)CTGAGCfs             | p.L255fs      |
| Pat_16 | Post-Resistance | POU6F2   | 11281  | 37 | 7  | 39379288  | 39379290  | In_Frame_Del           | DEL | CAG      | - | 10  | 175  | c.559_561delCAG             | c.(559-561)CAGdel               | p.Q196del     |
| Pat_16 | Post-Resistance | POLM     | 27434  | 37 | 7  | 44120414  | 44120414  | Frame_Shift_Del        | DEL | G        | - | 7   | 433  | c.290delC                   | c.(289-291)CCAFs                | p.P97fs       |
| Pat_16 | Post-Resistance | KRIT1    | 889    | 37 | 7  | 91864157  | 91864157  | Frame_Shift_Del        | DEL | T        | - | 8   | 477  | c.810delA                   | c.(808-810)AAAFs                | p.K270fs      |
| Pat_16 | Post-Resistance | TAF6     | 6878   | 37 | 7  | 99705124  | 99705124  | Frame_Shift_Del        | DEL | G        | - | 7   | 1072 | c.1779delC                  | c.(1777-1779)CCCfs              | p.P593fs      |
| Pat_16 | Post-Resistance | PUS7     | 54517  | 37 | 7  | 105122810 | 105122810 | Frame_Shift_Del        | DEL | T        | - | 7   | 959  | c.998delA                   | c.(997-999)AACfs                | p.N333fs      |
| Pat_16 | Post-Resistance | MDFIC    | 29969  | 37 | 7  | 114562639 | 114562641 | In_Frame_Del           | DEL | GAG      | - | 13  | 82   | c.168_170delGAG             | c.(166-171)AAGAGG>AAC           | p.R62del      |
| Pat_16 | Post-Resistance | OR9A4    | 130075 | 37 | 7  | 141619203 | 141619203 | Frame_Shift_Del        | DEL | T        | - | 7   | 830  | c.528delT                   | c.(526-528)AATfs                | p.N176fs      |
| Pat_16 | Post-Resistance | BNIP3L   | 665    | 37 | 8  | 26240684  | 26240686  | In_Frame_Del           | DEL | ACA      | - | 7   | 392  | c.38_40delACA               | c.(37-42)CACAAAC>CAC            | p.N18del      |
| Pat_16 | Post-Resistance | ST18     | 9705   | 37 | 8  | 53062481  | 53062482  | Frame_Shift_Ins        | INS | -        | T | 7   | 247  | c.1862_1863insA             | c.(1861-1863)AATfs              | p.N621fs      |
| Pat_16 | Post-Resistance | PABPC1   | 26986  | 37 | 8  | 101724994 | 101724995 | Frame_Shift_Ins        | INS | -        | A | 7   | 120  | c.761_762insT               | c.(760-762)AAGfs                | p.K254fs      |
| Pat_16 | Post-Resistance | ZC3H3    | 23144  | 37 | 8  | 144522387 | 144522389 | In_Frame_Del           | DEL | GAG      | - | 8   | 65   | c.2637_2639delCT            | c.(2635-2640)TCCTCA>TC          | p.879_880SS>S |

|        |                 |          |        |    |    |           |           |                        |     |          |   |     |      |                            |                        |               |
|--------|-----------------|----------|--------|----|----|-----------|-----------|------------------------|-----|----------|---|-----|------|----------------------------|------------------------|---------------|
| Pat_16 | Post-Resistance | CNKS2R   | 22866  | 37 | X  | 21627678  | 21627680  | In_Frame_Del           | DEL | GAG      | - | 9   | 162  | .2635_2637delGAG           | c.(2635-2637)GAGdel    | p.E886del     |
| Pat_16 | Post-Resistance | RBM10    | 8241   | 37 | X  | 47030467  | 47030469  | In_Frame_Del           | DEL | GGC      | - | 7   | 145  | c.242_244delGGC            | c.(241-246)AGGCGG>AGC  | p.81_82RR>R   |
| Pat_16 | Post-Resistance | NUDT11   | 55190  | 37 | X  | 51239296  | 51239309  | Translation_Start_Site | DEL | TCGAGGCA | - | 13  | 29   |                            |                        |               |
| Pat_16 | Pre-Treatment   | CAMTA1   | 23261  | 37 | 1  | 7811329   | 7811329   | Frame_Shift_Del        | DEL | A        | - | 7   | 781  | c.4760delA                 | c.(4759-4761)CAAfs     | p.Q1587fs     |
| Pat_16 | Pre-Treatment   | TMCO2    | 127391 | 37 | 1  | 40713708  | 40713709  | Frame_Shift_Del        | DEL | TC       | - | 9   | 600  | c.43_44delTC               | c.(43-45)TCTfs         | p.S15fs       |
| Pat_16 | Pre-Treatment   | WDR78    | 79819  | 37 | 1  | 67390426  | 67390426  | Frame_Shift_Del        | DEL | T        | - | 8   | 539  | c.89delA                   | c.(88-90)AAGfs         | p.K30fs       |
| Pat_16 | Pre-Treatment   | TYW3     | 127253 | 37 | 1  | 75229742  | 75229744  | In_Frame_Del           | DEL | ATG      | - | 7   | 421  | c.725_727delATG            | c.(724-729)AATGAT>AAT  | p.D247del     |
| Pat_16 | Pre-Treatment   | CLCA4    | 22802  | 37 | 1  | 87029432  | 87029432  | Frame_Shift_Del        | DEL | A        | - | 8   | 322  | c.537delA                  | c.(535-537)TCAfs       | p.S179fs      |
| Pat_16 | Pre-Treatment   | GBP5     | 115362 | 37 | 1  | 89735095  | 89735096  | Frame_Shift_Del        | DEL | GC       | - | 7   | 1057 | c.143_144delGC             | c.(142-144)CGCfs       | p.R48fs       |
| Pat_16 | Pre-Treatment   | SLC16A1  | 6566   | 37 | 1  | 113471890 | 113471890 | Frame_Shift_Del        | DEL | G        | - | 7   | 367  | c.41delC                   | c.(40-42)CCAfs         | p.P14fs       |
| Pat_16 | Pre-Treatment   | BCAN     | 63827  | 37 | 1  | 156626160 | 156626160 | Frame_Shift_Del        | DEL | G        | - | 8   | 771  | c.2029delG                 | c.(2029-2031)GGGfs     | p.G677fs      |
| Pat_16 | Pre-Treatment   | PEAR1    | 375033 | 37 | 1  | 156884483 | 156884483 | Frame_Shift_Del        | DEL | C        | - | 7   | 278  | c.3007delC                 | c.(3007-3009)CCCfs     | p.P1003fs     |
| Pat_16 | Pre-Treatment   | OR10Z1   | 128368 | 37 | 1  | 158576487 | 158576487 | Frame_Shift_Del        | DEL | G        | - | 7   | 957  | c.259delG                  | c.(259-261)GGGfs       | p.G87fs       |
| Pat_16 | Pre-Treatment   | SMG7     | 9887   | 37 | 1  | 183515266 | 183515267 | Frame_Shift_Ins        | INS | -        | A | 8   | 164  | c.2536_2537insA            | c.(2536-2538)GAAfs     | p.E846fs      |
| Pat_16 | Pre-Treatment   | APOBEC4  | 403314 | 37 | 1  | 183616826 | 183616828 | In_Frame_Del           | DEL | TTC      | - | 12  | 592  | .1089_1091delGA            | c.(1087-1092)AAGAAA>AA | p.363_364KK>I |
| Pat_16 | Pre-Treatment   | RAB7L1   | 8934   | 37 | 1  | 205741633 | 205741633 | Frame_Shift_Del        | DEL | C        | - | 7   | 1484 | c.187delG                  | c.(187-189)GATfs       | p.D63fs       |
| Pat_16 | Pre-Treatment   | OR10A2   | 341276 | 37 | 11 | 6891253   | 6891255   | In_Frame_Del           | DEL | TTC      | - | 11  | 215  | c.268_270delTTC            | c.(268-270)TTCdel      | p.F94del      |
| Pat_16 | Pre-Treatment   | C11orf46 | 120534 | 37 | 11 | 30352754  | 30352754  | Frame_Shift_Del        | DEL | A        | - | 7   | 398  | c.259delA                  | c.(259-261)AAAfs       | p.K87fs       |
| Pat_16 | Pre-Treatment   | ENO2     | 2026   | 37 | 12 | 7031245   | 7031245   | Frame_Shift_Del        | DEL | G        | - | 7   | 1029 | c.1094delG                 | c.(1093-1095)TGGfs     | p.W365fs      |
| Pat_16 | Pre-Treatment   | CLEC4A   | 50856  | 37 | 12 | 8281937   | 8281937   | Frame_Shift_Del        | DEL | A        | - | 11  | 150  | c.277delA                  | c.(277-279)AAAfs       | p.K93fs       |
| Pat_16 | Pre-Treatment   | CAND1    | 55832  | 37 | 12 | 67699692  | 67699692  | Frame_Shift_Del        | DEL | G        | - | 8   | 488  | c.2244delG                 | c.(2242-2244)CAGfs     | p.Q748fs      |
| Pat_16 | Pre-Treatment   | EP400    | 57634  | 37 | 12 | 132491394 | 132491394 | Frame_Shift_Del        | DEL | T        | - | 7   | 253  | c.3276delT                 | c.(3274-3276)GCTfs     | p.A1092fs     |
| Pat_16 | Pre-Treatment   | TSC22D1  | 8848   | 37 | 13 | 45148706  | 45148708  | In_Frame_Del           | DEL | TGC      | - | 7   | 591  | .1503_1505delGC            | c.(1501-1506)CAGCAA>CA | p.501_502QQ>I |
| Pat_16 | Pre-Treatment   | FBXL3    | 26224  | 37 | 13 | 77581683  | 77581683  | Frame_Shift_Del        | DEL | A        | - | 7   | 244  | c.884delT                  | c.(883-885)TTAfs       | p.L295fs      |
| Pat_16 | Pre-Treatment   | MYCBP2   | 23077  | 37 | 13 | 77641917  | 77641917  | Frame_Shift_Del        | DEL | G        | - | 8   | 903  | c.12140delC                | c.(12139-12141)CCAfs   | p.P4047fs     |
| Pat_16 | Pre-Treatment   | ERCC5    | 2073   | 37 | 13 | 103524612 | 103524612 | Frame_Shift_Del        | DEL | A        | - | 12  | 236  | c.2743delA                 | c.(2743-2745)AAAfs     | p.K915fs      |
| Pat_16 | Pre-Treatment   | SPG11    | 80208  | 37 | 15 | 44876678  | 44876679  | Frame_Shift_Ins        | INS | -        | T | 14  | 100  | c.5199_5200insA            | c.(5197-5202)AAATGCfs  | p.K1733fs     |
| Pat_16 | Pre-Treatment   | DMXL2    | 23312  | 37 | 15 | 51758424  | 51758424  | Frame_Shift_Del        | DEL | A        | - | 7   | 486  | c.7474delT                 | c.(7474-7476)TCAfs     | p.S2492fs     |
| Pat_16 | Pre-Treatment   | RNF111   | 54778  | 37 | 15 | 59359142  | 59359144  | In_Frame_Del           | DEL | CAC      | - | 7   | 568  | .1546_1548delCA            | c.(1546-1548)CACdel    | p.H520del     |
| Pat_16 | Pre-Treatment   | SLC24A1  | 9187   | 37 | 15 | 65918177  | 65918179  | In_Frame_Del           | DEL | CTG      | - | 8   | 252  | .1759_1761delCT            | c.(1759-1761)CTGdel    | p.L591del     |
| Pat_16 | Pre-Treatment   | POLG     | 5428   | 37 | 15 | 89876828  | 89876833  | In_Frame_Del           | DEL | TGCTGC   | - | 8   | 52   | 153_158delGCAG             | c.(151-159)CAGCAGCAA>C | p.51_53QQ>C   |
| Pat_16 | Pre-Treatment   | IL27     | 246778 | 37 | 16 | 28511176  | 28511178  | In_Frame_Del           | DEL | CTC      | - | 5   | 3    | c.526_528delGAG            | c.(526-528)GAGdel      | p.E176del     |
| Pat_16 | Pre-Treatment   | EDC4     | 23644  | 37 | 16 | 67913767  | 67913769  | In_Frame_Del           | DEL | CAG      | - | 8   | 160  | .1836_1838delCA            | c.(1834-1839)CCCAGC>CC | p.S617del     |
| Pat_16 | Pre-Treatment   | TRIM16   | 10626  | 37 | 17 | 15554725  | 15554725  | Frame_Shift_Del        | DEL | C        | - | 7   | 1027 | c.199delG                  | c.(199-201)GATfs       | p.D67fs       |
| Pat_16 | Pre-Treatment   | FBXO47   | 494188 | 37 | 17 | 37101376  | 37101376  | Frame_Shift_Del        | DEL | T        | - | 63  | 211  | c.630delA                  | c.(628-630)AAAfs       | p.K210fs      |
| Pat_16 | Pre-Treatment   | HOXB2    | 3212   | 37 | 17 | 46622130  | 46622132  | In_Frame_Del           | DEL | AGG      | - | 10  | 514  | c.142_144delCCT            | c.(142-144)CCTdel      | p.P48del      |
| Pat_16 | Pre-Treatment   | PIP5K1C  | 23396  | 37 | 19 | 3633460   | 3633460   | Frame_Shift_Del        | DEL | G        | - | 7   | 75   | c.1979delC                 | c.(1978-1980)CCGfs     | p.P660fs      |
| Pat_16 | Pre-Treatment   | LGI4     | 163175 | 37 | 19 | 35625552  | 35625554  | In_Frame_Del           | DEL | CAG      | - | 9   | 191  | c.31_33delCTG              | c.(31-33)CTGdel        | p.L11del      |
| Pat_16 | Pre-Treatment   | DMKN     | 93099  | 37 | 19 | 36002362  | 36002412  | In_Frame_Del           | DEL | CACTGCTC | - | 14  | 12   | GGCGGCAGCAGTGGCGCAGCAGTGGC | c.GSSSGGSSG            |               |
| Pat_16 | Pre-Treatment   | CADM4    | 199731 | 37 | 19 | 44127492  | 44127492  | Frame_Shift_Del        | DEL | A        | - | 209 | 301  | c.1157delT                 | c.(1156-1158)TTCfs     | p.F386fs      |
| Pat_16 | Pre-Treatment   | ZC3H4    | 23211  | 37 | 19 | 47572401  | 47572403  | In_Frame_Del           | DEL | CTC      | - | 8   | 473  | .2344_2346delGA            | c.(2344-2346)GAGdel    | p.E782del     |
| Pat_16 | Pre-Treatment   | ZNF649   | 65251  | 37 | 19 | 52394014  | 52394014  | Frame_Shift_Del        | DEL | C        | - | 7   | 1235 | c.1375delG                 | c.(1375-1377)GATfs     | p.D459fs      |
| Pat_16 | Pre-Treatment   | PUM2     | 23369  | 37 | 2  | 20482977  | 20482979  | In_Frame_Del           | DEL | GCT      | - | 8   | 399  | .1449_1451delAG            | c.(1447-1452)GACAGT>GC | p.483_484AA>A |
| Pat_16 | Pre-Treatment   | HS1BP3   | 64342  | 37 | 2  | 20840864  | 20840864  | Frame_Shift_Del        | DEL | G        | - | 10  | 1025 | c.275delC                  | c.(274-276)CCAfs       | p.P92fs       |
| Pat_16 | Pre-Treatment   | GPR113   | 165082 | 37 | 2  | 26534413  | 26534413  | Frame_Shift_Del        | DEL | C        | - | 7   | 309  | c.2183delG                 | c.(2182-2184)GGTfs     | p.G728fs      |
| Pat_16 | Pre-Treatment   | DHX57    | 90957  | 37 | 2  | 39095411  | 39095413  | In_Frame_Del           | DEL | CCA      | - | 9   | 246  | c.135_137delTGG            | c.(133-138)GGTGGA>GG   | p.45_46GG>G   |
| Pat_16 | Pre-Treatment   | CDCA7    | 83879  | 37 | 2  | 174229648 | 174229650 | In_Frame_Del           | DEL | GGA      | - | 7   | 187  | c.588_590delGGAc           | c.(586-591)ATGGAG>ATG  | p.E202del     |

|        |                 |           |        |    |    |           |           |                 |     |     |        |     |      |                  |                                       |           |
|--------|-----------------|-----------|--------|----|----|-----------|-----------|-----------------|-----|-----|--------|-----|------|------------------|---------------------------------------|-----------|
| Pat_16 | Pre-Treatment   | PTPRA     | 5786   | 37 | 20 | 3016542   | 3016544   | In_Frame_Del    | DEL | AGC | -      | 8   | 695  | .2186_2188delAG  | c.(2185-2190)AAGCAG>AA                | p.Q733del |
| Pat_16 | Pre-Treatment   | PTPN1     | 5770   | 37 | 20 | 49196293  | 49196293  | Frame_Shift_Del | DEL | C   | -      | 11  | 409  | c.918delC        | c.(916-918)ATCfs                      | p.I306fs  |
| Pat_16 | Pre-Treatment   | COL6A6    | 131873 | 37 | 3  | 130318621 | 130318621 | Frame_Shift_Del | DEL | C   | -      | 7   | 212  | c.4620delC       | c.(4618-4620)GGCfs                    | p.G1540fs |
| Pat_16 | Pre-Treatment   | PCOLCE2   | 26577  | 37 | 3  | 142542392 | 142542392 | Frame_Shift_Del | DEL | A   | -      | 205 | 154  | c.931delT        | c.(931-933)TATfs                      | p.Y311fs  |
| Pat_16 | Pre-Treatment   | SMC4      | 10051  | 37 | 3  | 160143940 | 160143940 | Frame_Shift_Del | DEL | A   | -      | 8   | 786  | c.2557delA       | c.(2557-2559)AAAfs                    | p.K853fs  |
| Pat_16 | Pre-Treatment   | ATP13A3   | 79572  | 37 | 3  | 194181471 | 194181473 | In_Frame_Del    | DEL | GAG | -      | 10  | 527  | c.139_141delICTC | c.(139-141)CTCdel                     | p.L47del  |
| Pat_16 | Pre-Treatment   | ANKRD17   | 26057  | 37 | 4  | 73956601  | 73956601  | Frame_Shift_Del | DEL | G   | -      | 8   | 1042 | c.6744delC       | c.(6742-6744)CCCfs                    | p.P2248fs |
| Pat_16 | Pre-Treatment   | NUP54     | 53371  | 37 | 4  | 77065307  | 77065309  | In_Frame_Del    | DEL | TGC | -      | 7   | 1036 | c.288_290delGCAc | c.(286-291)CAGCAA>CAAp.96_97QQ>Q      |           |
| Pat_16 | Pre-Treatment   | MMRN1     | 22915  | 37 | 4  | 90844391  | 90844393  | In_Frame_Del    | DEL | AGC | -      | 12  | 1517 | c.923_925delAGC  | c.(922-927)GAGCAG>GAC                 | p.Q313del |
| Pat_16 | Pre-Treatment   | SCLT1     | 132320 | 37 | 4  | 129864163 | 129864163 | Frame_Shift_Del | DEL | T   | -      | 10  | 376  | c.1620delA       | c.(1618-1620)AAAfs                    | p.K540fs  |
| Pat_16 | Pre-Treatment   | FGG       | 2266   | 37 | 4  | 155526059 | 155526059 | Frame_Shift_Del | DEL | C   | -      | 7   | 1185 | c.1289delG       | c.(1288-1290)GGAfs                    | p.G430fs  |
| Pat_16 | Pre-Treatment   | SORBS2    | 8470   | 37 | 4  | 186515044 | 186515044 | Frame_Shift_Del | DEL | C   | -      | 7   | 806  | c.3130delG       | c.(3130-3132)GAAfs                    | p.E1044fs |
| Pat_16 | Pre-Treatment   | ADAMTS6   | 11174  | 37 | 5  | 64569170  | 64569170  | Frame_Shift_Del | DEL | T   | -      | 7   | 1003 | c.1617delA       | c.(1615-1617)AAAfs                    | p.K539fs  |
| Pat_16 | Pre-Treatment   | SLC22A4   | 6583   | 37 | 5  | 131676327 | 131676327 | Frame_Shift_Del | DEL | T   | -      | 7   | 704  | c.1514delT       | c.(1513-1515)CTTfs                    | p.L505fs  |
| Pat_16 | Pre-Treatment   | HIVEP1    | 3096   | 37 | 6  | 12089463  | 12089463  | Frame_Shift_Del | DEL | A   | -      | 10  | 322  | c.87delA         | c.(85-87)TCAfs                        | p.S29fs   |
| Pat_16 | Pre-Treatment   | BTN1A1    | 696    | 37 | 6  | 26509321  | 26509321  | Frame_Shift_Del | DEL | G   | -      | 8   | 679  | c.1500delG       | c.(1498-1500)ATGfs                    | p.M500fs  |
| Pat_16 | Pre-Treatment   | CDSN      | 1041   | 37 | 6  | 31084620  | 31084622  | In_Frame_Del    | DEL | CCA | -      | 7   | 253  | c.770_772delTGG  | c.(769-774)GTGGAC>GAC                 | p.V257del |
| Pat_16 | Pre-Treatment   | CDK19     | 23097  | 37 | 6  | 110943300 | 110943300 | Frame_Shift_Del | DEL | T   | -      | 8   | 932  | c.1101delA       | c.(1099-1101)AAAfs                    | p.K367fs  |
| Pat_16 | Pre-Treatment   | GLCCI1    | 113263 | 37 | 7  | 8126097   | 8126099   | In_Frame_Del    | DEL | CAG | -      | 9   | 1141 | .1573_1575delCA  | c.(1573-1575)CAGdel                   | p.Q528del |
| Pat_16 | Pre-Treatment   | DYNC11I   | 1780   | 37 | 7  | 95614249  | 95614249  | Frame_Shift_Del | DEL | T   | -      | 8   | 1582 | c.754delT        | c.(754-756)TTTfs                      | p.F252fs  |
| Pat_16 | Pre-Treatment   | NAPEPLD   | 222236 | 37 | 7  | 102769241 | 102769242 | Splice_Site     | INS | -   | A      | 8   | 553  | c.-15_splice     | c.e2-1                                |           |
| Pat_16 | Pre-Treatment   | LAMB4     | 22798  | 37 | 7  | 107763584 | 107763584 | Frame_Shift_Del | DEL | A   | -      | 7   | 662  | c.26delT         | c.(25-27)TTGfs                        | p.L9fs    |
| Pat_16 | Pre-Treatment   | SGK223    | 157285 | 37 | 8  | 8176387   | 8176388   | In_Frame_Ins    | INS | -   | GGGGCG | 23  | 22   | .197_3498insCGCC | c.(196-3498)CCG>CCC GCC(1166_1166P>P. |           |
| Pat_16 | Pre-Treatment   | CDCA2     | 157313 | 37 | 8  | 25340934  | 25340936  | In_Frame_Del    | DEL | ATG | -      | 7   | 651  | .1052_1054delATC | c.(1051-1056)TATGAT>TAI               | p.D354del |
| Pat_16 | Pre-Treatment   | WRN       | 7486   | 37 | 8  | 30945377  | 30945379  | In_Frame_Del    | DEL | AAG | -      | 10  | 254  | .1517_1519delAA  | c.(1516-1521)AAAGAA>AA                | p.E510del |
| Pat_16 | Pre-Treatment   | WHSC1L1   | 54904  | 37 | 8  | 38205092  | 38205092  | Frame_Shift_Del | DEL | T   | -      | 9   | 759  | c.598delA        | c.(598-600)AGCfs                      | p.S200fs  |
| Pat_16 | Pre-Treatment   | UBR5      | 51366  | 37 | 8  | 103289348 | 103289349 | Frame_Shift_Ins | INS | -   | T      | 8   | 584  | c.6360_6361insA  | c.(6358-6363)AAAGAAfs                 | p.K2120fs |
| Pat_16 | Pre-Treatment   | CNKSR2    | 22866  | 37 | X  | 21627678  | 21627680  | In_Frame_Del    | DEL | GAG | -      | 7   | 130  | .2635_2637delAG  | c.(2635-2637)GAGdel                   | p.E886del |
| Pat_16 | Pre-Treatment   | HTATSF1   | 27336  | 37 | X  | 135585048 | 135585050 | In_Frame_Del    | DEL | AAG | -      | 15  | 305  | c.682_684delAAG  | c.(682-684)AAGdel                     | p.K232del |
| Pat_21 | Post-Resistance | FRAS1     | 80144  | 37 | 4  | 78979223  | 78979223  | Frame_Shift_Del | DEL | G   | -      | 10  | 364  | c.60delG         | c.(58-60)TTGfs                        | p.L20fs   |
| Pat_22 | Pre-Treatment   | GRRP1     | 79927  | 37 | 1  | 26487798  | 26487798  | Frame_Shift_Del | DEL | C   | -      | 2   | 4    | c.16delC         | c.(16-18)CCCfs                        | p.P6fs    |
| Pat_22 | Pre-Treatment   | SASS6     | 163786 | 37 | 1  | 100584675 | 100584676 | Frame_Shift_Ins | INS | -   | T      | 2   | 4    | c.567_568insA    | c.(565-570)AAACAAfs                   | p.K189fs  |
| Pat_22 | Pre-Treatment   | TCL6      | 27004  | 37 | 14 | 96136897  | 96136897  | Frame_Shift_Del | DEL | G   | -      | 2   | 4    | c.377delG        | c.(376-378)TGGfs                      | p.W126fs  |
| Pat_22 | Pre-Treatment   | LINGO1    | 84894  | 37 | 15 | 77908217  | 77908217  | Frame_Shift_Del | DEL | C   | -      | 2   | 4    | c.32delG         | c.(31-33)GGCfs                        | p.G11fs   |
| Pat_22 | Pre-Treatment   | ICAM4     | 3386   | 37 | 19 | 10397719  | 10397719  | Frame_Shift_Del | DEL | T   | -      | 3   | 4    | c.31delT         | c.(31-33)TTTfs                        | p.F11fs   |
| Pat_22 | Pre-Treatment   | CNOT3     | 4849   | 37 | 19 | 54649671  | 54649671  | Frame_Shift_Del | DEL | T   | -      | 10  | 125  | c.729delT        | c.(727-729)CCCfs                      | p.P243fs  |
| Pat_22 | Pre-Treatment   | NLRP13    | 126204 | 37 | 19 | 56424279  | 56424279  | Frame_Shift_Del | DEL | G   | -      | 2   | 4    | c.904delC        | c.(904-906)CAAfs                      | p.Q302fs  |
| Pat_22 | Pre-Treatment   | KRTAP10-7 | 386675 | 37 | 21 | 46021199  | 46021200  | Frame_Shift_Ins | INS | -   | T      | 47  | 174  | c.663_664insT    | c.(661-666)TCCTCCfs                   | p.S221fs  |
| Pat_22 | Pre-Treatment   | GARS      | 2617   | 37 | 7  | 30634677  | 30634679  | In_Frame_Del    | DEL | CCG | -      | 4   | 7    | c.140_142delCCG  | c.(139-144)CCGCC>CCC                  | p.A50del  |
| Pat_22 | Pre-Treatment   | PCLO      | 27445  | 37 | 7  | 82763982  | 82763982  | Frame_Shift_Del | DEL | C   | -      | 2   | 4    | c.2884delG       | c.(2884-2886)GCCfs                    | p.A962fs  |
| Pat_22 | Pre-Treatment   | NCBP1     | 4686   | 37 | 9  | 100410326 | 100410326 | Frame_Shift_Del | DEL | A   | -      | 2   | 4    | c.718delA        | c.(718-720)AAAfs                      | p.K240fs  |
| Pat_22 | Pre-Treatment   | FGD1      | 2245   | 37 | X  | 54472756  | 54472756  | Frame_Shift_Del | DEL | T   | -      | 2   | 4    | c.2672delA       | c.(2671-2673)AAGfs                    | p.K891fs  |
| Pat_22 | Pre-Treatment   | MAP7D3    | 79649  | 37 | X  | 135314194 | 135314194 | Frame_Shift_Del | DEL | G   | -      | 8   | 236  | c.922delC        | c.(922-924)CAGfs                      | p.Q308fs  |
| Pat_22 | Post-Resistance | CLSTN1    | 22883  | 37 | 1  | 9790640   | 9790642   | In_Frame_Del    | DEL | CCT | -      | 7   | 145  | .2870_2872delAG  | c.(2869-2874)GAGGGG>GC                | p.E957del |
| Pat_22 | Post-Resistance | SPEN      | 23013  | 37 | 1  | 16203144  | 16203146  | In_Frame_Del    | DEL | CAG | -      | 8   | 807  | c.852_854delCAG  | c.(850-855)ATCAGC>ATC                 | p.S289del |
| Pat_22 | Post-Resistance | TYW3      | 127253 | 37 | 1  | 75229742  | 75229744  | In_Frame_Del    | DEL | ATG | -      | 7   | 263  | c.725_727delATG  | c.(724-729)AATGAT>AAT                 | p.D247del |
| Pat_22 | Post-Resistance | ARHGAP29  | 9411   | 37 | 1  | 94639896  | 94639896  | Frame_Shift_Del | DEL | T   | -      | 9   | 695  | c.3315delA       | c.(3313-3315)AAAfs                    | p.K1105fs |



|        |                 |           |        |    |    |           |           |                 |     |     |     |    |      |                                                    |                     |            |
|--------|-----------------|-----------|--------|----|----|-----------|-----------|-----------------|-----|-----|-----|----|------|----------------------------------------------------|---------------------|------------|
| Pat_22 | Post-Resistance | BCL9      | 607    | 37 | 1  | 147092681 | 147092681 | Frame_Shift_Del | DEL | C   | -   | 12 | 1437 | c.2720delC                                         | c.(2719-2721)TCCfs  | p.S907fs   |
| Pat_22 | Post-Resistance | ARNT      | 405    | 37 | 1  | 150789283 | 150789283 | Frame_Shift_Del | DEL | G   | -   | 10 | 558  | c.1783delC                                         | c.(1783-1785)CGGfs  | p.R595fs   |
| Pat_22 | Post-Resistance | TCHH      | 7062   | 37 | 1  | 152082957 | 152082959 | In_Frame_Del    | DEL | CTC | -   | 13 | 348  | .2734_2736delGAI                                   | c.(2734-2736)GAGdel | p.E912del  |
| Pat_22 | Post-Resistance | HRNR      | 388697 | 37 | 1  | 152186039 | 152186040 | Frame_Shift_Del | DEL | CC  | -   | 9  | 377  | :.8065_8066delGC                                   | c.(8065-8067)GGTfs  | p.G2689fs  |
| Pat_22 | Post-Resistance | SLC27A3   | 11000  | 37 | 1  | 153751860 | 153751860 | Frame_Shift_Del | DEL | C   | -   | 9  | 685  | c.1927delC                                         | c.(1927-1929)CCCfs  | p.P643fs   |
| Pat_22 | Post-Resistance | TDRD10    | 126668 | 37 | 1  | 154493908 | 154493908 | Frame_Shift_Del | DEL | C   | -   | 7  | 971  | c.322delC                                          | c.(322-324)CCCfs    | p.P108fs   |
| Pat_22 | Post-Resistance | F5        | 2153   | 37 | 1  | 169510711 | 169510712 | Frame_Shift_Del | DEL | GG  | -   | 9  | 1135 | :.3616_3617delICC                                  | c.(3616-3618)CAAfs  | p.P1206fs  |
| Pat_22 | Post-Resistance | PLA2G4A   | 5321   | 37 | 1  | 186925445 | 186925447 | In_Frame_Del    | DEL | TGA | -   | 9  | 1387 | .1548_1550delTG.:(1546-1551)TTTGAT>TT              |                     | p.D519del  |
| Pat_22 | Post-Resistance | PTPN14    | 5784   | 37 | 1  | 214557049 | 214557051 | In_Frame_Del    | DEL | CCT | -   | 13 | 198  | .2147_2149delAG:(2146-2151)GAGGCT>GC               |                     | p.E716del  |
| Pat_22 | Post-Resistance | MTR       | 4548   | 37 | 1  | 237024474 | 237024474 | Frame_Shift_Del | DEL | A   | -   | 8  | 125  | c.2093delA                                         | c.(2092-2094)CAAfs  | p.Q698fs   |
| Pat_22 | Post-Resistance | PARD3     | 56288  | 37 | 10 | 34671501  | 34671501  | Frame_Shift_Del | DEL | T   | -   | 8  | 420  | c.1366delA                                         | c.(1366-1368)ATAfs  | p.I456fs   |
| Pat_22 | Post-Resistance | ARID5B    | 84159  | 37 | 10 | 63852298  | 63852298  | Frame_Shift_Del | DEL | A   | -   | 7  | 369  | c.3076delA                                         | c.(3076-3078)AAAfs  | p.K1026fs  |
| Pat_22 | Post-Resistance | FGFR2     | 2263   | 37 | 10 | 123239466 | 123239466 | Frame_Shift_Del | DEL | A   | -   | 42 | 141  | c.2371delT                                         | c.(2371-2373)TCTfs  | p.S791fs   |
| Pat_22 | Post-Resistance | DNHD1     | 144132 | 37 | 11 | 6578614   | 6578616   | In_Frame_Del    | DEL | GAG | -   | 8  | 35   | .8089_8091delGAI                                   | c.(8089-8091)GAGdel | p.E2703del |
| Pat_22 | Post-Resistance | OR10A2    | 341276 | 37 | 11 | 6891253   | 6891255   | In_Frame_Del    | DEL | TTC | -   | 9  | 361  | c.268_270delTTC                                    | c.(268-270)TTCdel   | p.F94del   |
| Pat_22 | Post-Resistance | PAMR1     | 25891  | 37 | 11 | 35513670  | 35513670  | Frame_Shift_Del | DEL | C   | -   | 9  | 1687 | c.302delG                                          | c.(301-303)GGTfs    | p.G101fs   |
| Pat_22 | Post-Resistance | LRP4      | 4038   | 37 | 11 | 46880748  | 46880748  | Frame_Shift_Del | DEL | C   | -   | 7  | 341  | c.5504delG                                         | c.(5503-5505)GGCfs  | p.G1835fs  |
| Pat_22 | Post-Resistance | MYBPC3    | 4607   | 37 | 11 | 47359101  | 47359103  | In_Frame_Del    | DEL | TCT | -   | 7  | 201  | .2441_2443delAG:(2440-2445)AAGAGC>AG               |                     | p.K814del  |
| Pat_22 | Post-Resistance | NEU3      | 10825  | 37 | 11 | 74705655  | 74705655  | Frame_Shift_Del | DEL | C   | -   | 7  | 1449 | c.196delC                                          | c.(196-198)CCCfs    | p.P66fs    |
| Pat_22 | Post-Resistance | TSKU      | 25987  | 37 | 11 | 76506673  | 76506675  | In_Frame_Del    | DEL | CTG | -   | 13 | 231  | c.13_15delCTG                                      | c.(13-15)CTGdel     | p.L9del    |
| Pat_22 | Post-Resistance | DDX10     | 1662   | 37 | 11 | 108788635 | 108788637 | In_Frame_Del    | DEL | TGA | -   | 10 | 91   | .2340_2342delTG.:(2338-2343)AGTGAT>AG              |                     | p.D788del  |
| Pat_22 | Post-Resistance | CHD4      | 1108   | 37 | 12 | 6711546   | 6711546   | Frame_Shift_Del | DEL | T   | -   | 7  | 633  | c.218delA                                          | c.(217-219)AAGfs    | p.K73fs    |
| Pat_22 | Post-Resistance | PRB1      | 5542   | 37 | 12 | 11506632  | 11506633  | In_Frame_Ins    | INS | -   | GGA | 14 | 887  | c.404_405insTCCc:(403-405)CCA>CCTCCA).135_135P>PI  |                     |            |
| Pat_22 | Post-Resistance | ITGA7     | 3679   | 37 | 12 | 56092271  | 56092271  | Frame_Shift_Del | DEL | C   | -   | 9  | 406  | c.1100delG                                         | c.(1099-1101)GGTfs  | p.G367fs   |
| Pat_22 | Post-Resistance | ATXN2     | 6311   | 37 | 12 | 111893853 | 111893853 | Frame_Shift_Del | DEL | G   | -   | 7  | 887  | c.3724delC                                         | c.(3724-3726)CACfs  | p.H1242fs  |
| Pat_22 | Post-Resistance | VPS33A    | 65082  | 37 | 12 | 122748169 | 122748169 | Frame_Shift_Del | DEL | A   | -   | 7  | 126  | c.246delT                                          | c.(244-246)TTTfs    | p.F82fs    |
| Pat_22 | Post-Resistance | SFRS8     | 6433   | 37 | 12 | 132281734 | 132281736 | In_Frame_Del    | DEL | AGA | -   | 10 | 546  | .2546_2548delAG:(2545-2550)GAGAAG>GA               |                     | p.K853del  |
| Pat_22 | Post-Resistance | RXFP2     | 122042 | 37 | 13 | 32376429  | 32376429  | Frame_Shift_Del | DEL | A   | -   | 15 | 202  | c.2152delA                                         | c.(2152-2154)AAAfs  | p.K718fs   |
| Pat_22 | Post-Resistance | C13orf34  | 79866  | 37 | 13 | 73320117  | 73320117  | Frame_Shift_Del | DEL | A   | -   | 8  | 401  | c.774delA                                          | c.(772-774)GCAfs    | p.A258fs   |
| Pat_22 | Post-Resistance | NIN       | 51199  | 37 | 14 | 51288635  | 51288635  | Frame_Shift_Del | DEL | G   | -   | 7  | 1728 | c.140delC                                          | c.(139-141)CAAfs    | p.P47fs    |
| Pat_22 | Post-Resistance | C14orf115 | 55237  | 37 | 14 | 74824463  | 74824463  | Frame_Shift_Del | DEL | G   | -   | 8  | 477  | c.977delG                                          | c.(976-978)CGGfs    | p.R326fs   |
| Pat_22 | Post-Resistance | VPS13C    | 54832  | 37 | 15 | 62270851  | 62270851  | Frame_Shift_Del | DEL | T   | -   | 7  | 376  | c.2264delA                                         | c.(2263-2265)AATfs  | p.N755fs   |
| Pat_22 | Post-Resistance | MPG       | 4350   | 37 | 16 | 133163    | 133163    | Frame_Shift_Del | DEL | C   | -   | 7  | 735  | c.428delC                                          | c.(427-429)ACCfs    | p.T143fs   |
| Pat_22 | Post-Resistance | EME2      | 197342 | 37 | 16 | 1824298   | 1824300   | In_Frame_Del    | DEL | TGC | -   | 7  | 327  | c.422_424delITGCc:(421-426)TTGCTG>TTG).141_142LL>L |                     |            |
| Pat_22 | Post-Resistance | C16orf88  | 400506 | 37 | 16 | 19725705  | 19725706  | Frame_Shift_Ins | INS | -   | T   | 8  | 90   | c.652_653insA                                      | c.(652-654)ATCfs    | p.I218fs   |
| Pat_22 | Post-Resistance | ATP2A1    | 487    | 37 | 16 | 28913640  | 28913640  | Frame_Shift_Del | DEL | C   | -   | 12 | 404  | c.2457delC                                         | c.(2455-2457)CGCfs  | p.R819fs   |
| Pat_22 | Post-Resistance | ITGAL     | 3683   | 37 | 16 | 30531249  | 30531251  | In_Frame_Del    | DEL | GCT | -   | 7  | 928  | .3300_3302delGC(3298-3303)GGGGCTG>GG               |                     | p.L1106del |
| Pat_22 | Post-Resistance | IRF8      | 3394   | 37 | 16 | 85936681  | 85936681  | Frame_Shift_Del | DEL | T   | -   | 8  | 876  | c.60delT                                           | c.(58-60)AGTfs      | p.S20fs    |
| Pat_22 | Post-Resistance | SMCR7     | 125170 | 37 | 17 | 18167868  | 18167868  | Frame_Shift_Del | DEL | G   | -   | 9  | 760  | c.1155delG                                         | c.(1153-1155)CTGfs  | p.L385fs   |
| Pat_22 | Post-Resistance | GAS2L2    | 246176 | 37 | 17 | 34071994  | 34071996  | In_Frame_Del    | DEL | TCC | -   | 9  | 137  | .2520_2522delIGG(2518-2523)GAGGAA>GA).840_841EE>I  |                     |            |
| Pat_22 | Post-Resistance | TNS4      | 84951  | 37 | 17 | 38643307  | 38643307  | Frame_Shift_Del | DEL | G   | -   | 8  | 2643 | c.1269delC                                         | c.(1267-1269)CCCfs  | p.P423fs   |
| Pat_22 | Post-Resistance | OTOP2     | 92736  | 37 | 17 | 72926595  | 72926595  | Frame_Shift_Del | DEL | T   | -   | 9  | 288  | c.865delT                                          | c.(865-867)TTTfs    | p.F289fs   |
| Pat_22 | Post-Resistance | FN3K      | 64122  | 37 | 17 | 80708466  | 80708466  | Frame_Shift_Del | DEL | C   | -   | 7  | 697  | c.765delC                                          | c.(763-765)TTCfs    | p.F255fs   |
| Pat_22 | Post-Resistance | STXBP2    | 6813   | 37 | 19 | 7706923   | 7706923   | Frame_Shift_Del | DEL | C   | -   | 8  | 1090 | c.582delC                                          | c.(580-582)GGCfs    | p.G194fs   |
| Pat_22 | Post-Resistance | CD209     | 30835  | 37 | 19 | 7807935   | 7807935   | Frame_Shift_Del | DEL | G   | -   | 7  | 260  | c.1205delC                                         | c.(1204-1206)CCTfs  | p.P402fs   |
| Pat_22 | Post-Resistance | TRMT1     | 55621  | 37 | 19 | 13226516  | 13226516  | Frame_Shift_Del | DEL | T   | -   | 7  | 1045 | c.377delA                                          | c.(376-378)AAGfs    | p.K126fs   |
| Pat_22 | Post-Resistance | SIGLEC8   | 27181  | 37 | 19 | 51961617  | 51961619  | In_Frame_Del    | DEL | GCA | -   | 7  | 357  | c.23_25delITGC                                     | c.(22-27)CTGCC>CCC  | p.L8del    |

|        |                 |           |        |    |    |           |           |                 |     |          |         |     |      |                                      |                       |             |
|--------|-----------------|-----------|--------|----|----|-----------|-----------|-----------------|-----|----------|---------|-----|------|--------------------------------------|-----------------------|-------------|
| Pat_22 | Post-Resistance | ZNF552    | 79818  | 37 | 19 | 58319468  | 58319468  | Frame_Shift_Del | DEL | T        | -       | 7   | 539  | c.1164delA                           | c.(1162-1164)AAAFs    | p.K388fs    |
| Pat_22 | Post-Resistance | C2orf71   | 388939 | 37 | 2  | 29295647  | 29295649  | In_Frame_Del    | DEL | TCC      | -       | 8   | 550  | .1479_1481delGG(1477-1482)GAGGAA>GA  | A).493_494EE>I        |             |
| Pat_22 | Post-Resistance | GCC2      | 9648   | 37 | 2  | 109087883 | 109087884 | Frame_Shift_Ins | INS | -        | A       | 8   | 701  | c.2098_2099insA                      | c.(2098-2100)GAAfs    | p.E700fs    |
| Pat_22 | Post-Resistance | AMMECR1L  | 83607  | 37 | 2  | 128627077 | 128627077 | Frame_Shift_Del | DEL | T        | -       | 8   | 459  | c.675delA                            | c.(673-675)AAAFs      | p.K225fs    |
| Pat_22 | Post-Resistance | CIR1      | 9541   | 37 | 2  | 175260285 | 175260286 | Frame_Shift_Del | DEL | GA       | -       | 9   | 754  | c.65_66delTC                         | c.(64-66)ATCFs        | p.I22fs     |
| Pat_22 | Post-Resistance | DNAH7     | 56171  | 37 | 2  | 196788374 | 196788374 | Frame_Shift_Del | DEL | T        | -       | 7   | 216  | c.3770delA                           | c.(3769-3771)AATfs    | p.N1257fs   |
| Pat_22 | Post-Resistance | IGFBP2    | 3485   | 37 | 2  | 217498290 | 217498291 | Splice_Site     | INS | -        | CCGCTGC | 6   | 5    | c.14_splice                          | c.e1+1                | p.P5_splice |
| Pat_22 | Post-Resistance | CD93      | 22918  | 37 | 20 | 23065992  | 23065992  | Frame_Shift_Del | DEL | C        | -       | 7   | 766  | c.838delG                            | c.(838-840)GATfs      | p.D280fs    |
| Pat_22 | Post-Resistance | TMEM90B   | 79953  | 37 | 20 | 24524183  | 24524185  | In_Frame_Del    | DEL | GGA      | -       | 10  | 663  | c.450_452delGGA                      | c.(448-453)GTGGAG>GTC | p.E155del   |
| Pat_22 | Post-Resistance | SPINLW1   | 57119  | 37 | 20 | 44174297  | 44174297  | Frame_Shift_Del | DEL | T        | -       | 7   | 1164 | c.204delA                            | c.(202-204)AAAFs      | p.K68fs     |
| Pat_22 | Post-Resistance | C20orf85  | 128602 | 37 | 20 | 56735727  | 56735727  | Frame_Shift_Del | DEL | C        | -       | 7   | 237  | c.263delC                            | c.(262-264)TCCfs      | p.S88fs     |
| Pat_22 | Post-Resistance | SYCP2     | 10388  | 37 | 20 | 58467046  | 58467047  | Frame_Shift_Ins | INS | -        | T       | 8   | 144  | c.2362_2363insA                      | c.(2362-2364)ATGfs    | p.M788fs    |
| Pat_22 | Post-Resistance | CDH4      | 1002   | 37 | 20 | 60485488  | 60485498  | Frame_Shift_Del | DEL | GTCCCCG  | -       | 17  | 136  | .1209delAGTCC(198-1209)GAGGTCCCCG    |                       | p.E400fs    |
| Pat_22 | Post-Resistance | IFNGR2    | 3460   | 37 | 21 | 34799292  | 34799292  | Frame_Shift_Del | DEL | T        | -       | 7   | 990  | c.514delT                            | c.(514-516)TTTfs      | p.F172fs    |
| Pat_22 | Post-Resistance | KRTAP10-7 | 386675 | 37 | 21 | 46021199  | 46021200  | Frame_Shift_Ins | INS | -        | T       | 132 | 519  | c.663_664insT                        | c.(661-666)TCCTCCfs   | p.S221fs    |
| Pat_22 | Post-Resistance | DIP2A     | 23181  | 37 | 21 | 47987309  | 47987311  | In_Frame_Del    | DEL | TGG      | -       | 8   | 561  | .4490_4492delITG(4489-4494)CTGGTG>CT |                       | p.V1501del  |
| Pat_22 | Post-Resistance | ARVCF     | 421    | 37 | 22 | 19969169  | 19969169  | Frame_Shift_Del | DEL | G        | -       | 7   | 340  | c.461delC                            | c.(460-462)CCAfs      | p.P154fs    |
| Pat_22 | Post-Resistance | PICK1     | 9463   | 37 | 22 | 38471034  | 38471036  | In_Frame_Del    | DEL | GGA      | -       | 7   | 222  | .1143_1145delIGG(1141-1146)GGGGAG>GC |                       | p.E388del   |
| Pat_22 | Post-Resistance | BIK       | 638    | 37 | 22 | 43525245  | 43525247  | In_Frame_Del    | DEL | GCT      | -       | 12  | 399  | c.417_419delGCT                      | c.(415-420)GCCTG>GCC  | p.L144del   |
| Pat_22 | Post-Resistance | SCUBE1    | 80274  | 37 | 22 | 43619184  | 43619184  | Frame_Shift_Del | DEL | G        | -       | 8   | 1135 | c.1246delC                           | c.(1246-1248)CGGfs    | p.R416fs    |
| Pat_22 | Post-Resistance | NKTR      | 4820   | 37 | 3  | 42679035  | 42679036  | Frame_Shift_Ins | INS | -        | C       | 13  | 1170 | c.1839_1840insC                      | c.(1837-1842)AGTCCCfs | p.S613fs    |
| Pat_22 | Post-Resistance | ATP13A3   | 79572  | 37 | 3  | 194147850 | 194147850 | Frame_Shift_Del | DEL | A        | -       | 10  | 288  | c.3079delT                           | c.(3079-3081)TGGfs    | p.W1027fs   |
| Pat_22 | Post-Resistance | RNF168    | 165918 | 37 | 3  | 196214338 | 196214338 | Frame_Shift_Del | DEL | T        | -       | 9   | 931  | c.490delA                            | c.(490-492)AGGfs      | p.R164fs    |
| Pat_22 | Post-Resistance | OTOP1     | 133060 | 37 | 4  | 4228274   | 4228282   | In_Frame_Del    | DEL | CACAGCAC | -       | 7   | 49   | .1318delCTGCTG(310-318)CTGCTGTGGd    |                       | p.LLW104del |
| Pat_22 | Post-Resistance | CCDC158   | 339965 | 37 | 4  | 77305357  | 77305357  | Frame_Shift_Del | DEL | T        | -       | 8   | 267  | c.610delA                            | c.(610-612)ATAfs      | p.I204fs    |
| Pat_22 | Post-Resistance | PCDH10    | 57575  | 37 | 4  | 134073569 | 134073571 | In_Frame_Del    | DEL | CTG      | -       | 7   | 98   | .2274_2276delCT(2272-2277)CTCTGC>CT  |                       | p.C763del   |
| Pat_22 | Post-Resistance | LRAT      | 9227   | 37 | 4  | 155670198 | 155670198 | Frame_Shift_Del | DEL | G        | -       | 7   | 334  | c.603delG                            | c.(601-603)TTGfs      | p.L201fs    |
| Pat_22 | Post-Resistance | TLL1      | 7092   | 37 | 4  | 166964485 | 166964485 | Frame_Shift_Del | DEL | G        | -       | 8   | 741  | c.1438delG                           | c.(1438-1440)GATfs    | p.D480fs    |
| Pat_22 | Post-Resistance | NNT       | 23530  | 37 | 5  | 43704415  | 43704416  | Frame_Shift_Del | DEL | TC       | -       | 7   | 461  | c.3170_3171delITC                    | c.(3169-3171)TTCfs    | p.F1057fs   |
| Pat_22 | Post-Resistance | RGNEF     | 64283  | 37 | 5  | 73072464  | 73072464  | Frame_Shift_Del | DEL | G        | -       | 7   | 1260 | c.783delG                            | c.(781-783)TTGfs      | p.L261fs    |
| Pat_22 | Post-Resistance | SSBP2     | 23635  | 37 | 5  | 80809493  | 80809493  | Frame_Shift_Del | DEL | G        | -       | 8   | 654  | c.326delC                            | c.(325-327)CCAfs      | p.P109fs    |
| Pat_22 | Post-Resistance | KCNN2     | 3781   | 37 | 5  | 113698631 | 113698632 | In_Frame_Ins    | INS | -        | GCC     | 8   | 23   | c.159_160insGCC                      | c.(157-162)insGCC     | p.58_59insA |
| Pat_22 | Post-Resistance | LMNB1     | 4001   | 37 | 5  | 126154700 | 126154701 | Frame_Shift_Del | DEL | AG       | -       | 8   | 434  | .1026_1027delAC                      | c.(1024-1029)AAAGAGfs | p.K342fs    |
| Pat_22 | Post-Resistance | TNXB      | 7148   | 37 | 6  | 32037508  | 32037508  | Frame_Shift_Del | DEL | A        | -       | 18  | 75   | c.5409delT                           | c.(5407-5409)TTTfs    | p.F1803fs   |
| Pat_22 | Post-Resistance | TNXB      | 7148   | 37 | 6  | 32063945  | 32063945  | Frame_Shift_Del | DEL | C        | -       | 4   | 7    | c.1685delG                           | c.(1684-1686)GGCfs    | p.G562fs    |
| Pat_22 | Post-Resistance | PHF1      | 5252   | 37 | 6  | 33380050  | 33380050  | Frame_Shift_Del | DEL | C        | -       | 7   | 241  | c.10delC                             | c.(10-12)CCCfs        | p.P4fs      |
| Pat_22 | Post-Resistance | DNAH8     | 1769   | 37 | 6  | 38749053  | 38749053  | Frame_Shift_Del | DEL | C        | -       | 7   | 655  | c.1512delC                           | c.(1510-1512)GACfs    | p.D504fs    |
| Pat_22 | Post-Resistance | ZNF318    | 24149  | 37 | 6  | 43323502  | 43323502  | Frame_Shift_Del | DEL | T        | -       | 8   | 1407 | c.1570delA                           | c.(1570-1572)AGGfs    | p.R524fs    |
| Pat_22 | Post-Resistance | MYO6      | 4646   | 37 | 6  | 76599857  | 76599858  | Frame_Shift_Ins | INS | -        | A       | 14  | 152  | c.2742_2743insA                      | c.(2740-2745)CAGAAfs  | p.Q914fs    |
| Pat_22 | Post-Resistance | GABRR1    | 2569   | 37 | 6  | 89891719  | 89891721  | In_Frame_Del    | DEL | AAG      | -       | 7   | 333  | c.852_854delCTT                      | c.(850-855)TTCTTG>TTG | p.F284del   |
| Pat_22 | Post-Resistance | GLCC11    | 113263 | 37 | 7  | 8008992   | 8008994   | In_Frame_Del    | DEL | CCT      | -       | 8   | 83   | c.11_13delCCT                        | c.(10-15)GCCTCC>GCC   | p.S13del    |
| Pat_22 | Post-Resistance | DTX2      | 113878 | 37 | 7  | 76112249  | 76112249  | Frame_Shift_Del | DEL | A        | -       | 10  | 1428 | c.693delA                            | c.(691-693)CCAfs      | p.P231fs    |
| Pat_22 | Post-Resistance | PTCD1     | 26024  | 37 | 7  | 99032605  | 99032607  | In_Frame_Del    | DEL | CTC      | -       | 10  | 387  | c.259_261delGAG                      | c.(259-261)GAGdel     | p.E87del    |
| Pat_22 | Post-Resistance | LUC7L2    | 51631  | 37 | 7  | 139094365 | 139094366 | Frame_Shift_Del | DEL | AG       | -       | 8   | 121  | c.744_745delAG                       | c.(742-747)GAAGAGfs   | p.E248fs    |
| Pat_22 | Post-Resistance | HIPK2     | 28996  | 37 | 7  | 139416310 | 139416310 | Frame_Shift_Del | DEL | T        | -       | 8   | 761  | c.524delA                            | c.(523-525)AACfs      | p.N175fs    |
| Pat_22 | Post-Resistance | SSPO      | 23145  | 37 | 7  | 149474083 | 149474083 | Frame_Shift_Del | DEL | G        | -       | 8   | 455  | c.293delG                            | c.(292-294)TGGfs      | p.W98fs     |
| Pat_22 | Post-Resistance | PRKDC     | 5591   | 37 | 8  | 48746799  | 48746799  | Frame_Shift_Del | DEL | T        | -       | 13  | 821  | c.8110delA                           | c.(8110-8112)AGGfs    | p.R2704fs   |

|        |                 |          |        |    |    |           |           |                 |     |     |   |    |      |                   |                         |               |
|--------|-----------------|----------|--------|----|----|-----------|-----------|-----------------|-----|-----|---|----|------|-------------------|-------------------------|---------------|
| Pat_22 | Post-Resistance | STAU2    | 27067  | 37 | 8  | 74507471  | 74507471  | Frame_Shift_Del | DEL | T   | - | 10 | 339  | c.1091delA        | c.(1090-1092)AATfs      | p.N364fs      |
| Pat_22 | Post-Resistance | ESRP1    | 54845  | 37 | 8  | 95686610  | 95686611  | Frame_Shift_Ins | INS | -   | A | 8  | 380  | c.1527_1528insA   | c.(1525-1530)CATAAAfs   | p.H509fs      |
| Pat_22 | Post-Resistance | KANK1    | 23189  | 37 | 9  | 712491    | 712491    | Frame_Shift_Del | DEL | G   | - | 9  | 758  | c.1725delG        | c.(1723-1725)GTGfs      | p.V575fs      |
| Pat_22 | Post-Resistance | CLIC3    | 9022   | 37 | 9  | 139889553 | 139889553 | Frame_Shift_Del | DEL | C   | - | 2  | 4    | c.381delG         | c.(379-381)CTGfs        | p.L127fs      |
| Pat_22 | Post-Resistance | PRKX     | 5613   | 37 | X  | 3539313   | 3539314   | Frame_Shift_Del | DEL | AA  | - | 8  | 197  | c.859_860delTT    | c.(859-861)TTAfs        | p.L287fs      |
| Pat_22 | Post-Resistance | MSL3     | 10943  | 37 | X  | 11790307  | 11790307  | Frame_Shift_Del | DEL | C   | - | 7  | 938  | c.1314delC        | c.(1312-1314)TACfs      | p.Y438fs      |
| Pat_22 | Post-Resistance | FAM47C   | 442444 | 37 | X  | 37027594  | 37027594  | Frame_Shift_Del | DEL | C   | - | 8  | 477  | c.1111delC        | c.(1111-1113)CCCfs      | p.P371fs      |
| Pat_22 | Post-Resistance | BTK      | 695    | 37 | X  | 100611894 | 100611894 | Frame_Shift_Del | DEL | C   | - | 7  | 1650 | c.1227delG        | c.(1225-1227)GGGfs      | p.G409fs      |
| Pat_22 | Post-Resistance | TEX13A   | 56157  | 37 | X  | 104463676 | 104463676 | Frame_Shift_Del | DEL | C   | - | 8  | 1241 | c.1200delG        | c.(1198-1200)GGGfs      | p.G400fs      |
| Pat_22 | Post-Resistance | MAP7D3   | 79649  | 37 | X  | 135314194 | 135314194 | Frame_Shift_Del | DEL | G   | - | 7  | 980  | c.922delC         | c.(922-924)CAGfs        | p.Q308fs      |
| Pat_22 | Post-Resistance | HTATSF1  | 27336  | 37 | X  | 135585048 | 135585050 | In_Frame_Del    | DEL | AAG | - | 7  | 436  | c.682_684delAAG   | c.(682-684)AAGdel       | p.K232del     |
| Pat_22 | Post-Resistance | MAGEC1   | 9947   | 37 | X  | 140995035 | 140995037 | In_Frame_Del    | DEL | TCT | - | 10 | 661  | .1845_1847delTC   | c.(1843-1848)CCTCTT>CC  | p.L616del     |
| Pat_22 | Post-Resistance | SPANXN3  | 139067 | 37 | X  | 142605149 | 142605149 | Frame_Shift_Del | DEL | T   | - | 13 | 382  | c.71delA          | c.(70-72)AATfs          | p.N24fs       |
| Pat_24 | Pre-Treatment   | TP73     | 7161   | 37 | 1  | 3645986   | 3645988   | In_Frame_Del    | DEL | GCA | - | 7  | 135  | .1170_1172delGC   | c.(1168-1173)CGGCAG>CG  | p.Q394del     |
| Pat_24 | Pre-Treatment   | ERRFI1   | 54206  | 37 | 1  | 8073804   | 8073804   | Frame_Shift_Del | DEL | G   | - | 7  | 311  | c.855delC         | c.(853-855)CCCfs        | p.P285fs      |
| Pat_24 | Pre-Treatment   | EIF4G3   | 8672   | 37 | 1  | 21177856  | 21177856  | Frame_Shift_Del | DEL | C   | - | 8  | 380  | c.3499delG        | c.(3499-3501)GAAfs      | p.E1167fs     |
| Pat_24 | Pre-Treatment   | ZBTB40   | 9923   | 37 | 1  | 22838561  | 22838563  | In_Frame_Del    | DEL | AAG | - | 11 | 176  | .2395_2397delAA   | c.(2395-2397)AAGdel     | p.K803del     |
| Pat_24 | Pre-Treatment   | HTR1D    | 3352   | 37 | 1  | 23520195  | 23520195  | Frame_Shift_Del | DEL | G   | - | 8  | 270  | c.518delC         | c.(517-519)CCGfs        | p.P173fs      |
| Pat_24 | Pre-Treatment   | RPS6KA1  | 6195   | 37 | 1  | 26873740  | 26873741  | Frame_Shift_Del | DEL | CT  | - | 7  | 158  | c.286_287delCT    | c.(286-288)CTGfs        | p.L96fs       |
| Pat_24 | Pre-Treatment   | ZSCAN20  | 7579   | 37 | 1  | 33959126  | 33959126  | Frame_Shift_Del | DEL | C   | - | 8  | 565  | c.1784delC        | c.(1783-1785)GCTfs      | p.A595fs      |
| Pat_24 | Pre-Treatment   | PIAS3    | 10401  | 37 | 1  | 145579285 | 145579285 | Frame_Shift_Del | DEL | C   | - | 7  | 1183 | c.622delC         | c.(622-624)CCCfs        | p.P208fs      |
| Pat_24 | Pre-Treatment   | MCL1     | 4170   | 37 | 1  | 150551952 | 150551952 | Frame_Shift_Del | DEL | C   | - | 7  | 166  | c.55delG          | c.(55-57)GCCfs          | p.A19fs       |
| Pat_24 | Pre-Treatment   | TCHH     | 7062   | 37 | 1  | 152084580 | 152084582 | In_Frame_Del    | DEL | CTC | - | 9  | 221  | :.1111_1113delGAC | c.(1111-1113)GAGdel     | p.E371del     |
| Pat_24 | Pre-Treatment   | FLG      | 2312   | 37 | 1  | 152275760 | 152275761 | Frame_Shift_Del | DEL | CA  | - | 8  | 723  | .11601_11602delT  | c.(11599-11604)AGTGACfs | p.S3867fs     |
| Pat_24 | Pre-Treatment   | UBAP2L   | 9898   | 37 | 1  | 154224054 | 154224054 | Frame_Shift_Del | DEL | C   | - | 7  | 538  | c.1589delC        | c.(1588-1590)TCTfs      | p.S530fs      |
| Pat_24 | Pre-Treatment   | CCT3     | 7203   | 37 | 1  | 156290648 | 156290648 | Frame_Shift_Del | DEL | T   | - | 7  | 731  | c.591delA         | c.(589-591)AAAfs        | p.K197fs      |
| Pat_24 | Pre-Treatment   | FCRL5    | 83416  | 37 | 1  | 157491062 | 157491062 | Frame_Shift_Del | DEL | G   | - | 9  | 242  | c.2260delC        | c.(2260-2262)CTCfs      | p.L754fs      |
| Pat_24 | Pre-Treatment   | CCDC19   | 25790  | 37 | 1  | 159854336 | 159854336 | Frame_Shift_Del | DEL | C   | - | 8  | 941  | c.787delG         | c.(787-789)GAAfs        | p.E263fs      |
| Pat_24 | Pre-Treatment   | TEDDM1   | 127670 | 37 | 1  | 182369245 | 182369245 | Frame_Shift_Del | DEL | C   | - | 7  | 635  | c.376delG         | c.(376-378)GAGfs        | p.E126fs      |
| Pat_24 | Pre-Treatment   | HMCN1    | 83872  | 37 | 1  | 185958660 | 185958660 | Frame_Shift_Del | DEL | C   | - | 8  | 443  | c.3089delC        | c.(3088-3090)GCAfs      | p.A1030fs     |
| Pat_24 | Pre-Treatment   | CD55     | 1604   | 37 | 1  | 207510731 | 207510732 | Frame_Shift_Del | DEL | AT  | - | 7  | 359  | c.1037_1038delAT  | c.(1036-1038)AATfs      | p.N346fs      |
| Pat_24 | Pre-Treatment   | ITPKB    | 3707   | 37 | 1  | 226836425 | 226836425 | Frame_Shift_Del | DEL | G   | - | 7  | 674  | c.1980delC        | c.(1978-1980)TTCfs      | p.F660fs      |
| Pat_24 | Pre-Treatment   | TTC13    | 79573  | 37 | 1  | 231067586 | 231067586 | Frame_Shift_Del | DEL | G   | - | 7  | 427  | c.1021delC        | c.(1021-1023)CAAfs      | p.Q341fs      |
| Pat_24 | Pre-Treatment   | TTC13    | 79573  | 37 | 1  | 231114543 | 231114545 | In_Frame_Del    | DEL | AGC | - | 5  | 6    | c.32_34delGCT     | c.(31-36)TGCTT>TTC      | p.C11del      |
| Pat_24 | Pre-Treatment   | RPP38    | 10557  | 37 | 10 | 15146145  | 15146145  | Frame_Shift_Del | DEL | A   | - | 7  | 80   | c.832delA         | c.(832-834)AAAfs        | p.K278fs      |
| Pat_24 | Pre-Treatment   | TRIM8    | 81603  | 37 | 10 | 104416541 | 104416541 | Frame_Shift_Del | DEL | C   | - | 8  | 690  | c.1086delC        | c.(1084-1086)GTCfs      | p.V362fs      |
| Pat_24 | Pre-Treatment   | SLK      | 9748   | 37 | 10 | 105767938 | 105767938 | Frame_Shift_Del | DEL | A   | - | 8  | 579  | c.2608delA        | c.(2608-2610)AAAfs      | p.K870fs      |
| Pat_24 | Pre-Treatment   | APBB1    | 322    | 37 | 11 | 6422218   | 6422218   | Splice_Site     | DEL | C   | - | 7  | 1006 | c.1672_splice     | c.e11+1                 | p.G558_splice |
| Pat_24 | Pre-Treatment   | PLEKHA7  | 144100 | 37 | 11 | 16822574  | 16822574  | Frame_Shift_Del | DEL | C   | - | 8  | 669  | c.2356delG        | c.(2356-2358)GAAfs      | p.E786fs      |
| Pat_24 | Pre-Treatment   | TMEM132A | 54972  | 37 | 11 | 60695118  | 60695118  | Frame_Shift_Del | DEL | C   | - | 7  | 857  | c.321delC         | c.(319-321)GTCfs        | p.V107fs      |
| Pat_24 | Pre-Treatment   | AHNAK    | 79026  | 37 | 11 | 62296087  | 62296087  | Frame_Shift_Del | DEL | G   | - | 8  | 1049 | c.5802delC        | c.(5800-5802)CCCfs      | p.P1934fs     |
| Pat_24 | Pre-Treatment   | MRGPRF   | 116535 | 37 | 11 | 68772804  | 68772804  | Frame_Shift_Del | DEL | C   | - | 4  | 4    | c.974delG         | c.(973-975)GGCfs        | p.G325fs      |
| Pat_24 | Pre-Treatment   | CHRDL2   | 25884  | 37 | 11 | 74413900  | 74413901  | Frame_Shift_Del | DEL | GC  | - | 7  | 359  | ..1058_1059delGC  | c.(1057-1059)GCGfs      | p.R353fs      |
| Pat_24 | Pre-Treatment   | DYNC2H1  | 79659  | 37 | 11 | 103124106 | 103124106 | Frame_Shift_Del | DEL | A   | - | 7  | 255  | c.10135delA       | c.(10135-10137)ATTfs    | p.I3379fs     |
| Pat_24 | Pre-Treatment   | TREH     | 11181  | 37 | 11 | 118529635 | 118529635 | Frame_Shift_Del | DEL | C   | - | 14 | 637  | c.1524delG        | c.(1522-1524)CAGfs      | p.Q508fs      |
| Pat_24 | Pre-Treatment   | UBASH3B  | 84959  | 37 | 11 | 122659833 | 122659833 | Frame_Shift_Del | DEL | C   | - | 8  | 874  | c.797delC         | c.(796-798)ACCfs        | p.T266fs      |
| Pat_24 | Pre-Treatment   | PARP11   | 57097  | 37 | 12 | 3935352   | 3935352   | Frame_Shift_Del | DEL | T   | - | 9  | 341  | c.295delA         | c.(295-297)AGAfs        | p.R99fs       |

|        |               |          |        |    |    |           |           |                 |     |     |    |    |      |                   |                         |               |
|--------|---------------|----------|--------|----|----|-----------|-----------|-----------------|-----|-----|----|----|------|-------------------|-------------------------|---------------|
| Pat_24 | Pre-Treatment | DYRK4    | 8798   | 37 | 12 | 4719362   | 4719362   | Frame_Shift_Del | DEL | A   | -  | 9  | 112  | c.1057delA        | c.(1057-1059)AAAFs      | p.K353fs      |
| Pat_24 | Pre-Treatment | LRRRC23  | 10233  | 37 | 12 | 7014818   | 7014819   | Frame_Shift_Del | DEL | AG  | -  | 7  | 257  | c.21_22delAG      | c.(19-24)CTAGAAfs       | p.L7fs        |
| Pat_24 | Pre-Treatment | ETV6     | 2120   | 37 | 12 | 12022502  | 12022502  | Frame_Shift_Del | DEL | C   | -  | 9  | 997  | c.608delC         | c.(607-609)TCCfs        | p.S203fs      |
| Pat_24 | Pre-Treatment | PPFIBP1  | 8496   | 37 | 12 | 27829484  | 27829485  | Frame_Shift_Del | DEL | TT  | -  | 7  | 260  | c.1585_1586delTT  | c.(1585-1587)TTTTfs     | p.F529fs      |
| Pat_24 | Pre-Treatment | SMARCC2  | 6601   | 37 | 12 | 56575490  | 56575490  | Frame_Shift_Del | DEL | C   | -  | 8  | 711  | c.838delG         | c.(838-840)GAGfs        | p.E280fs      |
| Pat_24 | Pre-Treatment | STAT2    | 6773   | 37 | 12 | 56750268  | 56750270  | In_Frame_Del    | DEL | CCA | -  | 8  | 276  | c.86_88delTGG     | c.(85-90)GTGGAC>GAC     | p.V29del      |
| Pat_24 | Pre-Treatment | PPTC7    | 160760 | 37 | 12 | 111020740 | 111020742 | In_Frame_Del    | DEL | CGC | -  | 8  | 4    | c.95_97delGCG     | c.(94-99)GGCGAC>GAC     | p.G32del      |
| Pat_24 | Pre-Treatment | NAA25    | 80018  | 37 | 12 | 112481653 | 112481654 | Frame_Shift_Del | DEL | TA  | -  | 8  | 127  | c.2025_2026delTA  | c.(2023-2028)CATAAGfs   | p.H675fs      |
| Pat_24 | Pre-Treatment | COQ5     | 84274  | 37 | 12 | 120954405 | 120954406 | Frame_Shift_Del | DEL | CC  | -  | 7  | 1364 | c.538_539delGG    | c.(538-540)GGAfs        | p.G180fs      |
| Pat_24 | Pre-Treatment | P2RX7    | 5027   | 37 | 12 | 121598747 | 121598747 | Frame_Shift_Del | DEL | A   | -  | 7  | 842  | c.406delA         | c.(406-408)AAAFs        | p.K136fs      |
| Pat_24 | Pre-Treatment | CDK2AP1  | 8099   | 37 | 12 | 123746312 | 123746312 | Frame_Shift_Del | DEL | C   | -  | 10 | 783  | c.319delG         | c.(319-321)GCAfs        | p.A107fs      |
| Pat_24 | Pre-Treatment | ZNF664   | 144348 | 37 | 12 | 124497356 | 124497357 | Frame_Shift_Ins | INS | -   | AA | 10 | 585  | c.665_666insAA    | c.(664-666)ACAfs        | p.T222fs      |
| Pat_24 | Pre-Treatment | IL25     | 64806  | 37 | 14 | 23845057  | 23845058  | Frame_Shift_Del | DEL | TG  | -  | 7  | 390  | c.502_503delTG    | c.(502-504)TGTfs        | p.C168fs      |
| Pat_24 | Pre-Treatment | ZFP36L1  | 677    | 37 | 14 | 69259613  | 69259613  | Frame_Shift_Del | DEL | C   | -  | 8  | 956  | c.43delG          | c.(43-45)GAAfs          | p.E15fs       |
| Pat_24 | Pre-Treatment | PAPLN    | 89932  | 37 | 14 | 73731388  | 73731388  | Frame_Shift_Del | DEL | G   | -  | 8  | 454  | c.3079delG        | c.(3079-3081)GGGfs      | p.G1027fs     |
| Pat_24 | Pre-Treatment | NEK9     | 91754  | 37 | 14 | 75580056  | 75580057  | Frame_Shift_Del | DEL | GA  | -  | 7  | 394  | c.923_924delTC    | c.(922-924)CTCfs        | p.L308fs      |
| Pat_24 | Pre-Treatment | BAG5     | 9529   | 37 | 14 | 104026871 | 104026871 | Frame_Shift_Del | DEL | C   | -  | 8  | 410  | c.631delG         | c.(631-633)GAGfs        | p.E211fs      |
| Pat_24 | Pre-Treatment | C15orf55 | 256646 | 37 | 15 | 34647879  | 34647880  | Frame_Shift_Del | DEL | CA  | -  | 8  | 311  | c.1586_1587delCA  | c.(1585-1587)TCAfs      | p.S529fs      |
| Pat_24 | Pre-Treatment | WDR72    | 256764 | 37 | 15 | 53992038  | 53992038  | Frame_Shift_Del | DEL | A   | -  | 7  | 774  | c.1674delT        | c.(1672-1674)TTTTfs     | p.F558fs      |
| Pat_24 | Pre-Treatment | NAGPA    | 51172  | 37 | 16 | 5083678   | 5083679   | Frame_Shift_Del | DEL | GC  | -  | 8  | 93   | c.137_138delGC    | c.(136-138)CGCfs        | p.R46fs       |
| Pat_24 | Pre-Treatment | TMC7     | 79905  | 37 | 16 | 19058466  | 19058467  | Frame_Shift_Del | DEL | GG  | -  | 8  | 858  | c.1635_1636delGC  | c.(1633-1638)CTGGGGfs   | p.L545fs      |
| Pat_24 | Pre-Treatment | KIAA0556 | 23247  | 37 | 16 | 27786300  | 27786300  | Frame_Shift_Del | DEL | G   | -  | 7  | 343  | c.4344delG        | c.(4342-4344)CTGfs      | p.L1448fs     |
| Pat_24 | Pre-Treatment | ARMC5    | 79798  | 37 | 16 | 31471010  | 31471010  | Frame_Shift_Del | DEL | G   | -  | 8  | 73   | c.165delG         | c.(163-165)GCGfs        | p.A55fs       |
| Pat_24 | Pre-Treatment | SALL1    | 6299   | 37 | 16 | 51175949  | 51175950  | Frame_Shift_Del | DEL | TG  | -  | 10 | 377  | c.183_184delCA    | c.(181-186)CACAAAGfs    | p.H61fs       |
| Pat_24 | Pre-Treatment | TCF25    | 22980  | 37 | 16 | 89951019  | 89951020  | Frame_Shift_Ins | INS | -   | A  | 9  | 161  | c.384_385insA     | c.(382-387)AAGAAAfs     | p.K128fs      |
| Pat_24 | Pre-Treatment | PLD2     | 5338   | 37 | 17 | 4719974   | 4719974   | Frame_Shift_Del | DEL | C   | -  | 8  | 814  | c.1515delC        | c.(1513-1515)TTCfs      | p.F505fs      |
| Pat_24 | Pre-Treatment | SHBG     | 6462   | 37 | 17 | 7535237   | 7535237   | Frame_Shift_Del | DEL | G   | -  | 8  | 643  | c.756delG         | c.(754-756)TTGfs        | p.L252fs      |
| Pat_24 | Pre-Treatment | DNAH2    | 146754 | 37 | 17 | 7702024   | 7702025   | Frame_Shift_Del | DEL | TG  | -  | 8  | 460  | c.8547_8548delTC  | c.(8545-8550)GATGAAfs   | p.D2849fs     |
| Pat_24 | Pre-Treatment | MYH8     | 4626   | 37 | 17 | 10303940  | 10303941  | Frame_Shift_Del | DEL | TG  | -  | 7  | 585  | c.3501_3502delCA  | c.(3499-3504)AACAAAGfs  | p.N1167fs     |
| Pat_24 | Pre-Treatment | MYH2     | 4620   | 37 | 17 | 10433227  | 10433228  | Frame_Shift_Del | DEL | TG  | -  | 2  | 4    | c.2861_2862delCA  | c.(2860-2862)TCAfs      | p.S954fs      |
| Pat_24 | Pre-Treatment | MYH3     | 4621   | 37 | 17 | 10535988  | 10535988  | Frame_Shift_Del | DEL | C   | -  | 9  | 577  | c.4761delG        | c.(4759-4761)CTGfs      | p.L1587fs     |
| Pat_24 | Pre-Treatment | ALDOC    | 230    | 37 | 17 | 26900923  | 26900923  | Frame_Shift_Del | DEL | C   | -  | 8  | 389  | c.829delG         | c.(829-831)GAAfs        | p.E277fs      |
| Pat_24 | Pre-Treatment | SEZ6     | 124925 | 37 | 17 | 27296913  | 27296914  | Frame_Shift_Ins | INS | -   | C  | 8  | 100  | c.915_916insG     | c.(913-918)GGGCCTfs     | p.G305fs      |
| Pat_24 | Pre-Treatment | KRT25    | 147183 | 37 | 17 | 38906647  | 38906647  | Frame_Shift_Del | DEL | A   | -  | 8  | 410  | c.1160delT        | c.(1159-1161)ATAfs      | p.I387fs      |
| Pat_24 | Pre-Treatment | CNTNAP1  | 8506   | 37 | 17 | 40843873  | 40843873  | Frame_Shift_Del | DEL | C   | -  | 9  | 988  | c.2394delC        | c.(2392-2394)TTCfs      | p.F798fs      |
| Pat_24 | Pre-Treatment | AARSD1   | 80755  | 37 | 17 | 41131190  | 41131190  | Frame_Shift_Del | DEL | G   | -  | 8  | 1339 | c.414delC         | c.(412-414)ATCfs        | p.I138fs      |
| Pat_24 | Pre-Treatment | HEXIM2   | 124790 | 37 | 17 | 43246388  | 43246388  | Frame_Shift_Del | DEL | G   | -  | 9  | 1707 | c.73delG          | c.(73-75)GGTfs          | p.G25fs       |
| Pat_24 | Pre-Treatment | NFE2L1   | 4779   | 37 | 17 | 46134729  | 46134729  | Frame_Shift_Del | DEL | A   | -  | 8  | 536  | c.837delA         | c.(835-837)ATAfs        | p.I279fs      |
| Pat_24 | Pre-Treatment | MED13    | 9969   | 37 | 17 | 60112873  | 60112874  | Frame_Shift_Del | DEL | GA  | -  | 8  | 290  | c.566_567delTC    | c.(565-567)CTCfs        | p.L189fs      |
| Pat_24 | Pre-Treatment | UBE2O    | 63893  | 37 | 17 | 74394955  | 74394957  | In_Frame_Del    | DEL | GTT | -  | 7  | 869  | c.1744_1746delIAA | c.(1744-1746)AACdel     | p.N582del     |
| Pat_24 | Pre-Treatment | FASN     | 2194   | 37 | 17 | 80046409  | 80046409  | Frame_Shift_Del | DEL | G   | -  | 8  | 85   | c.2450delC        | c.(2449-2451)CCAfs      | p.P817fs      |
| Pat_24 | Pre-Treatment | DSG1     | 1828   | 37 | 18 | 28923960  | 28923960  | Splice_Site     | DEL | T   | -  | 7  | 154  | c.1891_splice     | c.e13+2                 | p.G631_splice |
| Pat_24 | Pre-Treatment | ZBTB7C   | 201501 | 37 | 18 | 45566519  | 45566519  | Frame_Shift_Del | DEL | C   | -  | 7  | 161  | c.960delG         | c.(958-960)GGGfs        | p.G320fs      |
| Pat_24 | Pre-Treatment | SPTBN4   | 57731  | 37 | 19 | 41076369  | 41076369  | Frame_Shift_Del | DEL | C   | -  | 8  | 296  | c.7054delC        | c.(7054-7056)CCCfs      | p.P2352fs     |
| Pat_24 | Pre-Treatment | HNRNPUL1 | 11100  | 37 | 19 | 41811694  | 41811695  | Frame_Shift_Ins | INS | -   | A  | 10 | 443  | c.2376_2377insA   | c.(2374-2379)TACAACfs   | p.Y792fs      |
| Pat_24 | Pre-Treatment | CNOT3    | 4849   | 37 | 19 | 54656711  | 54656713  | In_Frame_Del    | DEL | TCT | -  | 8  | 1098 | c.2012_2014delTC  | c.(2011-2016)CTCTTC>CTC | p.F673del     |
| Pat_24 | Pre-Treatment | LILRB1   | 10859  | 37 | 19 | 55146148  | 55146150  | In_Frame_Del    | DEL | CTC | -  | 10 | 112  | c.1417_1419delCT  | c.(1417-1419)CTCdel     | p.L479del     |

|        |               |             |        |    |    |           |           |                 |     |     |     |     |      |                  |                        |               |
|--------|---------------|-------------|--------|----|----|-----------|-----------|-----------------|-----|-----|-----|-----|------|------------------|------------------------|---------------|
| Pat_24 | Pre-Treatment | TMEM18      | 129787 | 37 | 2  | 675512    | 675513    | Frame_Shift_Del | DEL | AG  | -   | 9   | 401  | c.175_176delCT   | c.(175-177)CTAfs       | p.L59fs       |
| Pat_24 | Pre-Treatment | CRIM1       | 51232  | 37 | 2  | 36668399  | 36668400  | Splice_Site     | DEL | AG  | -   | 7   | 209  | c.506_splice     | c.e3-1                 | p.E169_splice |
| Pat_24 | Pre-Treatment | LHCGR       | 3973   | 37 | 2  | 48914899  | 48914901  | In_Frame_Del    | DEL | CTT | -   | 8   | 450  | .2035_2037delAA  | c.(2035-2037)AAGdel    | p.K679del     |
| Pat_24 | Pre-Treatment | ANKRD57     | 65124  | 37 | 2  | 110373559 | 110373559 | Frame_Shift_Del | DEL | G   | -   | 7   | 456  | c.1493delG       | c.(1492-1494)AGGfs     | p.R498fs      |
| Pat_24 | Pre-Treatment | GLI2        | 2736   | 37 | 2  | 121743888 | 121743888 | Frame_Shift_Del | DEL | G   | -   | 7   | 207  | c.1991delG       | c.(1990-1992)TGCfs     | p.C664fs      |
| Pat_24 | Pre-Treatment | GPR155      | 151556 | 37 | 2  | 175326340 | 175326341 | Frame_Shift_Del | DEL | CC  | -   | 7   | 425  | .1444_1445delGC  | c.(1444-1446)GGAfs     | p.G482fs      |
| Pat_24 | Pre-Treatment | PDE11A      | 50940  | 37 | 2  | 178762800 | 178762801 | Frame_Shift_Del | DEL | CT  | -   | 8   | 453  | .1286_1287delAC  | c.(1285-1287)GAGfs     | p.E429fs      |
| Pat_24 | Pre-Treatment | COL3A1      | 1281   | 37 | 2  | 189873846 | 189873846 | Frame_Shift_Del | DEL | T   | -   | 121 | 123  | c.3722delT       | c.(3721-3723)GTTfs     | p.V1241fs     |
| Pat_24 | Pre-Treatment | CASP10      | 843    | 37 | 2  | 202093774 | 202093774 | Frame_Shift_Del | DEL | C   | -   | 10  | 1024 | c.1534delC       | c.(1534-1536)CCCfs     | p.P512fs      |
| Pat_24 | Pre-Treatment | NBEAL1      | 65065  | 37 | 2  | 204058567 | 204058567 | Frame_Shift_Del | DEL | C   | -   | 7   | 461  | c.6884delC       | c.(6883-6885)ACCfs     | p.T2295fs     |
| Pat_24 | Pre-Treatment | FN1         | 2335   | 37 | 2  | 216296605 | 216296606 | Frame_Shift_Del | DEL | CT  | -   | 8   | 671  | c.497_498delAG   | c.(496-498)GAGfs       | p.E166fs      |
| Pat_24 | Pre-Treatment | DES         | 1674   | 37 | 2  | 220283700 | 220283701 | Frame_Shift_Del | DEL | GC  | -   | 3   | 6    | c.516_517delGC   | c.(514-519)CAGCGCfs    | p.Q172fs      |
| Pat_24 | Pre-Treatment | DEFB119     | 245932 | 37 | 20 | 29965168  | 29965168  | Frame_Shift_Del | DEL | A   | -   | 8   | 753  | c.136delT        | c.(136-138)TACfs       | p.Y46fs       |
| Pat_24 | Pre-Treatment | SUN5        | 140732 | 37 | 20 | 31571699  | 31571699  | Frame_Shift_Del | DEL | C   | -   | 8   | 991  | c.1041delG       | c.(1039-1041)GGGfs     | p.G347fs      |
| Pat_24 | Pre-Treatment | ZHX3        | 23051  | 37 | 20 | 39831558  | 39831559  | Frame_Shift_Ins | INS | -   | T   | 7   | 980  | c.1998_1999insA  | c.(1996-2001)AAAGTGfs  | p.K666fs      |
| Pat_24 | Pre-Treatment | SYS1-DBNDD2 | 767557 | 37 | 20 | 44037564  | 44037564  | Frame_Shift_Del | DEL | C   | -   | 8   | 730  | c.263delC        | c.(262-264)ACCfs       | p.T88fs       |
| Pat_24 | Pre-Treatment | SNX21       | 90203  | 37 | 20 | 44469908  | 44469908  | Frame_Shift_Del | DEL | C   | -   | 9   | 1030 | c.1078delC       | c.(1078-1080)CCCfs     | p.P360fs      |
| Pat_24 | Pre-Treatment | PWP2        | 5822   | 37 | 21 | 45542213  | 45542214  | Frame_Shift_Del | DEL | AC  | -   | 8   | 369  | c.1792_1793delAC | c.(1792-1794)ACAfs     | p.T598fs      |
| Pat_24 | Pre-Treatment | MICAL3      | 57553  | 37 | 22 | 18314652  | 18314654  | In_Frame_Del    | DEL | TCC | -   | 7   | 47   | .3021_3023delGG  | c.(3019-3024)GAGGAC>GA | p.E1007del    |
| Pat_24 | Pre-Treatment | DGCR14      | 8220   | 37 | 22 | 19124913  | 19124913  | Frame_Shift_Del | DEL | C   | -   | 7   | 760  | c.958delG        | c.(958-960)GAGfs       | p.E320fs      |
| Pat_24 | Pre-Treatment | GCAT        | 23464  | 37 | 22 | 38211707  | 38211707  | Frame_Shift_Del | DEL | G   | -   | 7   | 494  | c.852delG        | c.(850-852)CTGfs       | p.L284fs      |
| Pat_24 | Pre-Treatment | TMEM40      | 55287  | 37 | 3  | 12790198  | 12790200  | In_Frame_Del    | DEL | GAG | -   | 8   | 319  | c.165_167delCTC  | c.(163-168)TCCTCT>TCT  | p.55_56SS>S   |
| Pat_24 | Pre-Treatment | ANKRD28     | 23243  | 37 | 3  | 15720817  | 15720817  | Frame_Shift_Del | DEL | G   | -   | 8   | 561  | c.2462delC       | c.(2461-2463)TCAfs     | p.S821fs      |
| Pat_24 | Pre-Treatment | EXOG        | 9941   | 37 | 3  | 38537920  | 38537920  | Frame_Shift_Del | DEL | T   | -   | 37  | 68   | c.62delT         | c.(61-63)GTGfs         | p.V21fs       |
| Pat_24 | Pre-Treatment | COL7A1      | 1294   | 37 | 3  | 48631059  | 48631060  | Frame_Shift_Del | DEL | TG  | -   | 10  | 877  | c.336_337delCA   | c.(334-339)TACAAGfs    | p.Y112fs      |
| Pat_24 | Pre-Treatment | DOCK3       | 1795   | 37 | 3  | 51399987  | 51399988  | Frame_Shift_Del | DEL | CT  | -   | 8   | 259  | .5175_5176delICT | c.(5173-5178)GGCTCAfs  | p.G1725fs     |
| Pat_24 | Pre-Treatment | CPOX        | 1371   | 37 | 3  | 98304365  | 98304366  | Frame_Shift_Del | DEL | AG  | -   | 7   | 611  | c.1091_1092delCT | c.(1090-1092)TCTfs     | p.S364fs      |
| Pat_24 | Pre-Treatment | MYH15       | 22989  | 37 | 3  | 108102443 | 108102443 | Frame_Shift_Del | DEL | T   | -   | 7   | 424  | c.5825delA       | c.(5824-5826)AAGfs     | p.K1942fs     |
| Pat_24 | Pre-Treatment | GRK7        | 131890 | 37 | 3  | 141535708 | 141535708 | Frame_Shift_Del | DEL | G   | -   | 8   | 733  | c.1478delG       | c.(1477-1479)CGGfs     | p.R493fs      |
| Pat_24 | Pre-Treatment | P2RY13      | 53829  | 37 | 3  | 151046039 | 151046039 | Frame_Shift_Del | DEL | C   | -   | 8   | 377  | c.805delG        | c.(805-807)GCTfs       | p.A269fs      |
| Pat_24 | Pre-Treatment | AP2M1       | 1173   | 37 | 3  | 183901278 | 183901279 | Frame_Shift_Del | DEL | CG  | -   | 8   | 352  | c.1182_1183delCC | c.(1180-1185)TTCGCGfs  | p.F394fs      |
| Pat_24 | Pre-Treatment | FAM193A     | 8603   | 37 | 4  | 2695447   | 2695447   | Frame_Shift_Del | DEL | G   | -   | 9   | 596  | c.2065delG       | c.(2065-2067)GCCfs     | p.A689fs      |
| Pat_24 | Pre-Treatment | TBC1D14     | 57533  | 37 | 4  | 7011611   | 7011612   | Frame_Shift_Ins | INS | -   | AT  | 209 | 440  | c.1454_1455insAT | c.(1453-1455)CCAfs     | p.P485fs      |
| Pat_24 | Pre-Treatment | UGT2B11     | 10720  | 37 | 4  | 70079993  | 70079993  | Frame_Shift_Del | DEL | C   | -   | 8   | 356  | c.448delG        | c.(448-450)GCAfs       | p.A150fs      |
| Pat_24 | Pre-Treatment | NAAA        | 27163  | 37 | 4  | 76862043  | 76862045  | In_Frame_Del    | DEL | CAG | -   | 4   | 4    | c.58_60delCTG    | c.(58-60)CTGdel        | p.L20del      |
| Pat_24 | Pre-Treatment | MAML3       | 55534  | 37 | 4  | 140810639 | 140810641 | In_Frame_Del    | DEL | GCT | -   | 10  | 78   | .1937_1939delAG  | c.(1936-1941)CAGCCG>CC | p.Q646del     |
| Pat_24 | Pre-Treatment | FASTKD3     | 79072  | 37 | 5  | 7867769   | 7867769   | Frame_Shift_Del | DEL | T   | -   | 8   | 241  | c.428delA        | c.(427-429)AAGfs       | p.K143fs      |
| Pat_24 | Pre-Treatment | ROPN1L      | 83853  | 37 | 5  | 10442412  | 10442413  | Splice_Site     | DEL | TA  | -   | 8   | 312  | c.131_splice     | c.e1+2                 | p.G44_splice  |
| Pat_24 | Pre-Treatment | SLC45A2     | 51151  | 37 | 5  | 33947305  | 33947305  | Frame_Shift_Del | DEL | T   | -   | 8   | 1057 | c.1331delA       | c.(1330-1332)AACfs     | p.N444fs      |
| Pat_24 | Pre-Treatment | BDP1        | 55814  | 37 | 5  | 70786918  | 70786918  | Frame_Shift_Del | DEL | G   | -   | 8   | 257  | c.1600delG       | c.(1600-1602)GAAfs     | p.E534fs      |
| Pat_24 | Pre-Treatment | JAKMIP2     | 9832   | 37 | 5  | 147040607 | 147040607 | Frame_Shift_Del | DEL | A   | -   | 10  | 554  | c.531delT        | c.(529-531)GATfs       | p.D177fs      |
| Pat_24 | Pre-Treatment | DCTN4       | 51164  | 37 | 5  | 150090860 | 150090860 | Frame_Shift_Del | DEL | C   | -   | 8   | 283  | c.1234delG       | c.(1234-1236)GAGfs     | p.E412fs      |
| Pat_24 | Pre-Treatment | LARP1       | 23367  | 37 | 5  | 154181822 | 154181822 | Frame_Shift_Del | DEL | G   | -   | 11  | 422  | c.1972delG       | c.(1972-1974)GGGfs     | p.G658fs      |
| Pat_24 | Pre-Treatment | WWC1        | 23286  | 37 | 5  | 167882494 | 167882494 | Frame_Shift_Del | DEL | C   | -   | 8   | 439  | c.2792delC       | c.(2791-2793)TCCfs     | p.S931fs      |
| Pat_24 | Pre-Treatment | FLT4        | 2324   | 37 | 5  | 180047630 | 180047632 | In_Frame_Del    | DEL | GAG | -   | 8   | 130  | .2383_2385delCT  | c.(2383-2385)CTCdel    | p.L795del     |
| Pat_24 | Pre-Treatment | HDGFL1      | 154150 | 37 | 6  | 22570346  | 22570347  | In_Frame_Ins    | INS | -   | GGC | 9   | 14   | c.542_543insGGC  | c.(541-543)AGG>AGGGCCp | p.188_189insA |
| Pat_24 | Pre-Treatment | ITPR3       | 3710   | 37 | 6  | 33657874  | 33657875  | Frame_Shift_Del | DEL | TA  | -   | 8   | 361  | c.6931_6932delTA | c.(6931-6933)TATfs     | p.Y2311fs     |



|        |                 |           |        |    |    |           |           |                 |     |          |     |    |      |                                                   |                     |               |
|--------|-----------------|-----------|--------|----|----|-----------|-----------|-----------------|-----|----------|-----|----|------|---------------------------------------------------|---------------------|---------------|
| Pat_24 | Pre-Treatment   | FTSJD2    | 23070  | 37 | 6  | 37414140  | 37414140  | Frame_Shift_Del | DEL | C        | -   | 8  | 1104 | c.359delC                                         | c.(358-360)TCCfs    | p.S120fs      |
| Pat_24 | Pre-Treatment   | KIF6      | 221458 | 37 | 6  | 39580993  | 39580993  | Frame_Shift_Del | DEL | A        | -   | 8  | 253  | c.611delT                                         | c.(610-612)TTAfs    | p.L204fs      |
| Pat_24 | Pre-Treatment   | UBR2      | 23304  | 37 | 6  | 42657355  | 42657355  | Frame_Shift_Del | DEL | T        | -   | 7  | 1630 | c.5073delT                                        | c.(5071-5073)TGTfs  | p.C1691fs     |
| Pat_24 | Pre-Treatment   | SRF       | 6722   | 37 | 6  | 43146551  | 43146551  | Frame_Shift_Del | DEL | C        | -   | 7  | 1430 | c.1362delC                                        | c.(1360-1362)GTCfs  | p.V454fs      |
| Pat_24 | Pre-Treatment   | GSTA3     | 2940   | 37 | 6  | 52770601  | 52770602  | Frame_Shift_Ins | INS | -        | A   | 8  | 306  | c.31_32insT                                       | c.(31-33)AATfs      | p.N11fs       |
| Pat_24 | Pre-Treatment   | CNR1      | 1268   | 37 | 6  | 88853620  | 88853621  | Frame_Shift_Ins | INS | -        | T   | 8  | 975  | c.1373_1374insA                                   | c.(1372-1374)AAGfs  | p.K458fs      |
| Pat_24 | Pre-Treatment   | HS3ST5    | 222537 | 37 | 6  | 114378467 | 114378467 | Frame_Shift_Del | DEL | T        | -   | 8  | 212  | c.995delA                                         | c.(994-996)AATfs    | p.N332fs      |
| Pat_24 | Pre-Treatment   | HBS1L     | 10767  | 37 | 6  | 135314919 | 135314932 | Frame_Shift_Del | DEL | GAATGAAG | -   | 8  | 98   | 060delGGACTTC/(1062)AAGGACTTCATTCC                |                     | p.K349fs      |
| Pat_24 | Pre-Treatment   | PRKAR1B   | 5575   | 37 | 7  | 720281    | 720281    | Frame_Shift_Del | DEL | G        | -   | 7  | 364  | c.260delC                                         | c.(259-261)CCGfs    | p.P87fs       |
| Pat_24 | Pre-Treatment   | HOXA11    | 3207   | 37 | 7  | 27222461  | 27222462  | Frame_Shift_Ins | INS | -        | T   | 7  | 648  | c.895_896insA                                     | c.(895-897)ATTfs    | p.I299fs      |
| Pat_24 | Pre-Treatment   | EGFR      | 1956   | 37 | 7  | 55229326  | 55229326  | Splice_Site     | DEL | T        | -   | 8  | 516  | c.1631_splice                                     | c.e13+2             | p.G544_splice |
| Pat_24 | Pre-Treatment   | FKBP9L    | 360132 | 37 | 7  | 55766777  | 55766778  | Frame_Shift_Del | DEL | CA       | -   | 8  | 418  | c.6_7delTG                                        | c.(4-9)GATGAAfs     | p.D2fs        |
| Pat_24 | Pre-Treatment   | PCLO      | 27445  | 37 | 7  | 82585325  | 82585325  | Frame_Shift_Del | DEL | A        | -   | 7  | 318  | c.4944delT                                        | c.(4942-4944)ACTfs  | p.T1648fs     |
| Pat_24 | Pre-Treatment   | CLDN12    | 9069   | 37 | 7  | 90042244  | 90042246  | In_Frame_Del    | DEL | TCC      | -   | 8  | 1116 | c.254_256delTCCc.(253-258)GTCCCTC>GTC             |                     | p.L86del      |
| Pat_24 | Pre-Treatment   | PTCD1     | 26024  | 37 | 7  | 99032605  | 99032607  | In_Frame_Del    | DEL | CTC      | -   | 8  | 507  | c.259_261delGAG                                   | c.(259-261)GAGdel   | p.E87del      |
| Pat_24 | Pre-Treatment   | CYP3A43   | 64816  | 37 | 7  | 99457609  | 99457610  | Frame_Shift_Del | DEL | AT       | -   | 8  | 232  | c.1022_1023delAT                                  | c.(1021-1023)AATfs  | p.N341fs      |
| Pat_24 | Pre-Treatment   | ZCWPW1    | 55063  | 37 | 7  | 100000151 | 100000151 | Frame_Shift_Del | DEL | T        | -   | 10 | 2168 | c.1459delA                                        | c.(1459-1461)ACCfs  | p.T487fs      |
| Pat_24 | Pre-Treatment   | SLC26A5   | 375611 | 37 | 7  | 102993339 | 102993339 | Frame_Shift_Del | DEL | A        | -   | 8  | 1273 | c.1549delT                                        | c.(1549-1551)TAGfs  | p.*517fs      |
| Pat_24 | Pre-Treatment   | MET       | 4233   | 37 | 7  | 116403141 | 116403141 | Frame_Shift_Del | DEL | G        | -   | 7  | 656  | c.2402delG                                        | c.(2401-2403)TGTfs  | p.C801fs      |
| Pat_24 | Pre-Treatment   | OR2A25    | 392138 | 37 | 7  | 143771315 | 143771315 | Frame_Shift_Del | DEL | G        | -   | 8  | 439  | c.3delG                                           | c.(1-3)ATGfs        | p.M1fs        |
| Pat_24 | Pre-Treatment   | PDIA4     | 9601   | 37 | 7  | 148702234 | 148702234 | Frame_Shift_Del | DEL | T        | -   | 7  | 949  | c.1521delA                                        | c.(1519-1521)AAAfs  | p.K507fs      |
| Pat_24 | Pre-Treatment   | NOM1      | 64434  | 37 | 7  | 156743209 | 156743211 | In_Frame_Del    | DEL | GAG      | -   | 7  | 108  | c.778_780delGAG                                   | c.(778-780)GAGdel   | p.E264del     |
| Pat_24 | Pre-Treatment   | ADRB3     | 155    | 37 | 8  | 37823104  | 37823105  | Frame_Shift_Del | DEL | CC       | -   | 2  | 4    | c.883_884delGG                                    | c.(883-885)GGTfs    | p.G295fs      |
| Pat_24 | Pre-Treatment   | PTDSS1    | 9791   | 37 | 8  | 97318739  | 97318739  | Frame_Shift_Del | DEL | G        | -   | 8  | 490  | c.962delG                                         | c.(961-963)TGGfs    | p.W321fs      |
| Pat_24 | Pre-Treatment   | WISP1     | 8840   | 37 | 8  | 134225137 | 134225137 | Frame_Shift_Del | DEL | T        | -   | 8  | 138  | c.100delT                                         | c.(100-102)TTTfs    | p.F34fs       |
| Pat_24 | Pre-Treatment   | NAPRT1    | 93100  | 37 | 8  | 144659876 | 144659876 | Frame_Shift_Del | DEL | C        | -   | 4  | 5    | c.388delG                                         | c.(388-390)GTGfs    | p.V130fs      |
| Pat_24 | Pre-Treatment   | TDRD7     | 23424  | 37 | 9  | 100235846 | 100235847 | Frame_Shift_Del | DEL | TG       | -   | 8  | 248  | c.2017_2018delITC                                 | c.(2017-2019)TGTfs  | p.C673fs      |
| Pat_24 | Pre-Treatment   | HEMGN     | 55363  | 37 | 9  | 100692776 | 100692777 | Frame_Shift_Del | DEL | TT       | -   | 8  | 292  | c.900_901delIAA                                   | c.(898-903)AAAATAfs | p.K300fs      |
| Pat_24 | Pre-Treatment   | OR1N2     | 138882 | 37 | 9  | 125315457 | 125315457 | Frame_Shift_Del | DEL | T        | -   | 7  | 324  | c.9delT                                           | c.(7-9)GGTfs        | p.G3fs        |
| Pat_24 | Pre-Treatment   | PTGES2    | 80142  | 37 | 9  | 130889794 | 130889794 | Frame_Shift_Del | DEL | C        | -   | 4  | 9    | c.203delG                                         | c.(202-204)GGAfs    | p.G68fs       |
| Pat_24 | Pre-Treatment   | RAPGEF1   | 2889   | 37 | 9  | 134504038 | 134504039 | Frame_Shift_Del | DEL | GG       | -   | 8  | 403  | c.863_864delCC                                    | c.(862-864)CCCfs    | p.P288fs      |
| Pat_24 | Pre-Treatment   | IQSEC2    | 23096  | 37 | X  | 53264131  | 53264133  | In_Frame_Del    | DEL | TGG      | -   | 4  | 9    | .3735_3737delCCc.(3733-3738)CACCAT>CA1245_1246HH: |                     |               |
| Pat_24 | Post-Resistance | PIAS3     | 10401  | 37 | 1  | 145583934 | 145583935 | Frame_Shift_Del | DEL | AG       | -   | 8  | 499  | c.1165_1166delAG                                  | c.(1165-1167)AGTfs  | p.S389fs      |
| Pat_24 | Post-Resistance | HIST2H2AB | 317772 | 37 | 1  | 149859168 | 149859168 | Frame_Shift_Del | DEL | C        | -   | 7  | 1193 | c.299delG                                         | c.(298-300)GGTfs    | p.G100fs      |
| Pat_24 | Post-Resistance | KPRP      | 448834 | 37 | 1  | 152732678 | 152732678 | Frame_Shift_Del | DEL | C        | -   | 7  | 425  | c.614delC                                         | c.(613-615)ACCfs    | p.T205fs      |
| Pat_24 | Post-Resistance | PBXP1     | 57326  | 37 | 1  | 154917508 | 154917510 | In_Frame_Del    | DEL | GGT      | -   | 8  | 255  | .2186_2188delAC(2185-2190)CACCGG>CG               |                     | p.H729del     |
| Pat_24 | Post-Resistance | NFASC     | 23114  | 37 | 1  | 204924033 | 204924033 | Frame_Shift_Del | DEL | C        | -   | 7  | 595  | c.489delC                                         | c.(487-489)AACfs    | p.N163fs      |
| Pat_24 | Post-Resistance | GPR44     | 11251  | 37 | 11 | 60620166  | 60620167  | In_Frame_Ins    | INS | -        | GCG | 12 | 12   | .1029_1030insCGI                                  | c.(1027-1032)insCGC | p.343_344insF |
| Pat_24 | Post-Resistance | C11orf95  | 65998  | 37 | 11 | 63533335  | 63533337  | In_Frame_Del    | DEL | TCC      | -   | 7  | 50   | c.579_581delGGA:(577-582)GAGGAA>GAA.193_194EE>I   |                     |               |
| Pat_24 | Post-Resistance | LTBP3     | 4054   | 37 | 11 | 65325326  | 65325328  | In_Frame_Del    | DEL | CAG      | -   | 7  | 38   | c.103_105delCTG                                   | c.(103-105)CTGdel   | p.L35del      |
| Pat_24 | Post-Resistance | ATG16L2   | 89849  | 37 | 11 | 72528863  | 72528865  | In_Frame_Del    | DEL | AGG      | -   | 9  | 274  | c.281_283delAGG:(280-285)CAGGAG>CAC               |                     | p.E98del      |
| Pat_24 | Post-Resistance | USPL1     | 10208  | 37 | 13 | 31227343  | 31227343  | Frame_Shift_Del | DEL | C        | -   | 7  | 614  | c.1297delC                                        | c.(1297-1299)CACfs  | p.H433fs      |
| Pat_24 | Post-Resistance | SLC24A1   | 9187   | 37 | 15 | 65938021  | 65938021  | Frame_Shift_Del | DEL | A        | -   | 4  | 4    | c.2212delA                                        | c.(2212-2214)AAGfs  | p.K738fs      |
| Pat_24 | Post-Resistance | CIRH1A    | 84916  | 37 | 16 | 69167515  | 69167515  | Frame_Shift_Del | DEL | G        | -   | 7  | 271  | c.153delG                                         | c.(151-153)CAGfs    | p.Q51fs       |
| Pat_24 | Post-Resistance | ZC3H18    | 124245 | 37 | 16 | 88694417  | 88694417  | Frame_Shift_Del | DEL | G        | -   | 10 | 504  | c.2359delG                                        | c.(2359-2361)GGGfs  | p.G787fs      |
| Pat_24 | Post-Resistance | PRPF8     | 10594  | 37 | 17 | 1562781   | 1562781   | Frame_Shift_Del | DEL | C        | -   | 8  | 434  | c.5008delG                                        | c.(5008-5010)GACfs  | p.D1670fs     |
| Pat_24 | Post-Resistance | ITGAE     | 3682   | 37 | 17 | 3638187   | 3638188   | Frame_Shift_Del | DEL | TT       | -   | 7  | 788  | c.2578_2579delAA                                  | c.(2578-2580)AACfs  | p.N860fs      |

|        |                 |          |        |    |    |           |           |                 |     |     |    |     |      |                   |                       |              |
|--------|-----------------|----------|--------|----|----|-----------|-----------|-----------------|-----|-----|----|-----|------|-------------------|-----------------------|--------------|
| Pat_24 | Post-Resistance | EIF5A    | 1984   | 37 | 17 | 7213020   | 7213021   | Frame_Shift_Del | DEL | CT  | -  | 8   | 503  | c.66_67delCT      | c.(64-69)TGCTCAfs     | p.C22fs      |
| Pat_24 | Post-Resistance | ENGASE   | 64772  | 37 | 17 | 77075668  | 77075668  | Frame_Shift_Del | DEL | C   | -  | 7   | 738  | c.514delC         | c.(514-516)CCCfs      | p.P172fs     |
| Pat_24 | Post-Resistance | HAUS1    | 115106 | 37 | 18 | 43685174  | 43685174  | Frame_Shift_Del | DEL | A   | -  | 10  | 71   | c.45delA          | c.(43-45)TTAfs        | p.L15fs      |
| Pat_24 | Post-Resistance | SEMA6B   | 10501  | 37 | 19 | 4552597   | 4552597   | Frame_Shift_Del | DEL | G   | -  | 7   | 189  | c.826delC         | c.(826-828)CGCfs      | p.R276fs     |
| Pat_24 | Post-Resistance | HNRNPUL1 | 11100  | 37 | 19 | 41811694  | 41811695  | Frame_Shift_Ins | INS | -   | A  | 9   | 511  | c.2376_2377insA   | c.(2374-2379)TACAACfs | p.Y792fs     |
| Pat_24 | Post-Resistance | PSG5     | 5673   | 37 | 19 | 43689036  | 43689036  | Frame_Shift_Del | DEL | G   | -  | 9   | 875  | c.328delC         | c.(328-330)CAGfs      | p.Q110fs     |
| Pat_24 | Post-Resistance | SNRNP70  | 6625   | 37 | 19 | 49589712  | 49589712  | Frame_Shift_Del | DEL | C   | -  | 10  | 2050 | c.41delC          | c.(40-42)GCCfs        | p.A14fs      |
| Pat_24 | Post-Resistance | HRC      | 3270   | 37 | 19 | 49656769  | 49656771  | In_Frame_Del    | DEL | CCT | -  | 10  | 100  | .1724_1726delAG   | (1723-1728)GAGGGG>GC  | p.E575del    |
| Pat_24 | Post-Resistance | LILRB1   | 10859  | 37 | 19 | 55146148  | 55146150  | In_Frame_Del    | DEL | CTC | -  | 10  | 126  | .1417_1419delCT   | c.(1417-1419)CTCdel   | p.L479del    |
| Pat_24 | Post-Resistance | HS1BP3   | 64342  | 37 | 2  | 20840864  | 20840864  | Frame_Shift_Del | DEL | G   | -  | 8   | 778  | c.275delC         | c.(274-276)CCAfs      | p.P92fs      |
| Pat_24 | Post-Resistance | LRP1B    | 53353  | 37 | 2  | 141607895 | 141607896 | Frame_Shift_Ins | INS | -   | T  | 2   | 4    | c.4714_4715insA   | c.(4714-4716)ATGfs    | p.M1572fs    |
| Pat_24 | Post-Resistance | COL3A1   | 1281   | 37 | 2  | 189873846 | 189873846 | Frame_Shift_Del | DEL | T   | -  | 36  | 140  | c.3722delT        | c.(3721-3723)GTTfs    | p.V1241fs    |
| Pat_24 | Post-Resistance | CCDC108  | 255101 | 37 | 2  | 219886541 | 219886541 | Frame_Shift_Del | DEL | C   | -  | 8   | 474  | c.3091delG        | c.(3091-3093)GAGfs    | p.E1031fs    |
| Pat_24 | Post-Resistance | NCOA3    | 8202   | 37 | 20 | 46268539  | 46268539  | Frame_Shift_Del | DEL | C   | -  | 17  | 226  | c.2926delC        | c.(2926-2928)CAAfs    | p.Q976fs     |
| Pat_24 | Post-Resistance | CELSR1   | 9620   | 37 | 22 | 46929720  | 46929721  | Frame_Shift_Del | DEL | GG  | -  | 7   | 679  | .3347_3348delCC   | c.(3346-3348)TCCfs    | p.S1116fs    |
| Pat_24 | Post-Resistance | TBC1D5   | 9779   | 37 | 3  | 17446189  | 17446189  | Frame_Shift_Del | DEL | T   | -  | 8   | 1029 | c.438delA         | c.(436-438)GAAfs      | p.E146fs     |
| Pat_24 | Post-Resistance | EXOG     | 9941   | 37 | 3  | 38537920  | 38537920  | Frame_Shift_Del | DEL | T   | -  | 16  | 78   | c.62delT          | c.(61-63)GTGfs        | p.V21fs      |
| Pat_24 | Post-Resistance | CRIPAK   | 285464 | 37 | 4  | 1388714   | 1388715   | Frame_Shift_Del | DEL | CA  | -  | 7   | 615  | c.415_416delCA    | c.(415-417)CACfs      | p.H139fs     |
| Pat_24 | Post-Resistance | TBC1D14  | 57533  | 37 | 4  | 7011611   | 7011612   | Frame_Shift_Ins | INS | -   | AT | 128 | 538  | c.1454_1455insAT  | c.(1453-1455)CCAfs    | p.P485fs     |
| Pat_24 | Post-Resistance | RASGEF1B | 153020 | 37 | 4  | 82363492  | 82363492  | Frame_Shift_Del | DEL | T   | -  | 7   | 78   | c.967delA         | c.(967-969)ACTfs      | p.T323fs     |
| Pat_24 | Post-Resistance | FAT1     | 2195   | 37 | 4  | 187510184 | 187510184 | Frame_Shift_Del | DEL | G   | -  | 7   | 655  | c.13329delC       | c.(13327-13329)CCCfs  | p.P4443fs    |
| Pat_24 | Post-Resistance | PAIP1    | 10605  | 37 | 5  | 43555989  | 43555990  | Frame_Shift_Del | DEL | AG  | -  | 8   | 667  | c.377_378delCT    | c.(376-378)TCTfs      | p.S126fs     |
| Pat_24 | Post-Resistance | BAT2     | 7916   | 37 | 6  | 31604005  | 31604005  | Frame_Shift_Del | DEL | C   | -  | 10  | 849  | c.5644delC        | c.(5644-5646)CCCfs    | p.P1882fs    |
| Pat_24 | Post-Resistance | TFAP2B   | 7021   | 37 | 6  | 50796386  | 50796386  | Frame_Shift_Del | DEL | A   | -  | 8   | 412  | c.595delA         | c.(595-597)AAAfs      | p.K199fs     |
| Pat_24 | Post-Resistance | DLX6     | 1750   | 37 | 7  | 96635545  | 96635547  | In_Frame_Del    | DEL | CAC | -  | 7   | 63   | c.172_174delCAC   | c.(172-174)CACdel     | p.H63del     |
| Pat_24 | Post-Resistance | CNPY4    | 245812 | 37 | 7  | 99717402  | 99717402  | Frame_Shift_Del | DEL | T   | -  | 11  | 273  | c.35delT          | c.(34-36)CTTfs        | p.L12fs      |
| Pat_24 | Post-Resistance | TMEM139  | 135932 | 37 | 7  | 142983583 | 142983583 | Frame_Shift_Del | DEL | C   | -  | 7   | 861  | c.312delC         | c.(310-312)CGCfs      | p.R104fs     |
| Pat_24 | Post-Resistance | PAXIP1   | 22976  | 37 | 7  | 154760267 | 154760269 | In_Frame_Del    | DEL | CTG | -  | 7   | 51   | .1642_1644delCA   | c.(1642-1644)CAGdel   | p.Q548del    |
| Pat_24 | Post-Resistance | KIAA0196 | 9897   | 37 | 8  | 126090986 | 126090986 | Frame_Shift_Del | DEL | G   | -  | 8   | 209  | c.705delC         | c.(703-705)TACfs      | p.Y235fs     |
| Pat_24 | Post-Resistance | C9orf142 | 286257 | 37 | 9  | 139887414 | 139887414 | Frame_Shift_Del | DEL | C   | -  | 8   | 498  | c.218delC         | c.(217-219)ACCfs      | p.T73fs      |
| Pat_24 | Post-Resistance | ENTPD2   | 954    | 37 | 9  | 139943111 | 139943112 | Frame_Shift_Del | DEL | AA  | -  | 4   | 7    | c.1485_1486delTT  | c.(1483-1488)ATTTAGfs | p.I495fs     |
| Pat_24 | Post-Resistance | TPRN     | 286262 | 37 | 9  | 140087025 | 140087027 | In_Frame_Del    | DEL | TCC | -  | 13  | 57   | .1659_1661delGG   | (1657-1662)GAGGAA>GA  | .553_554EE>I |
| Pat_24 | Post-Resistance | NLGN4X   | 57502  | 37 | X  | 5821444   | 5821445   | Frame_Shift_Del | DEL | TG  | -  | 4   | 9    | .c.1274_1275delCA | c.(1273-1275)ACAfs    | p.T425fs     |
| Pat_24 | Post-Resistance | SYN1     | 6853   | 37 | X  | 47434113  | 47434113  | Frame_Shift_Del | DEL | G   | -  | 4   | 5    | c.1367delC        | c.(1366-1368)CCGfs    | p.P456fs     |
| Pat_24 | Post-Resistance | TSPY4    | 728395 | 37 | Y  | 9197004   | 9197004   | Frame_Shift_Del | DEL | G   | -  | 2   | 4    | c.717delG         | c.(715-717)CTGfs      | p.L239fs     |
| Pat_27 | Post-Resistance | PABPC4   | 8761   | 37 | 1  | 40028016  | 40028016  | Frame_Shift_Del | DEL | G   | -  | 10  | 428  | c.1693delC        | c.(1693-1695)CAGfs    | p.Q565fs     |
| Pat_27 | Post-Resistance | GBP2     | 2634   | 37 | 1  | 89587526  | 89587528  | In_Frame_Del    | DEL | CCA | -  | 7   | 650  | c.122_124delTGG   | :(121-126)GTGGCG>GCC  | p.V41del     |
| Pat_27 | Post-Resistance | TCHH     | 7062   | 37 | 1  | 152082957 | 152082959 | In_Frame_Del    | DEL | CTC | -  | 12  | 557  | .2734_2736delGAI  | c.(2734-2736)GAGdel   | p.E912del    |
| Pat_27 | Post-Resistance | PAPPA2   | 60676  | 37 | 1  | 176525710 | 176525710 | Frame_Shift_Del | DEL | G   | -  | 7   | 1162 | c.252delG         | c.(250-252)GTGfs      | p.V84fs      |
| Pat_27 | Post-Resistance | FAM129A  | 116496 | 37 | 1  | 184764538 | 184764538 | Frame_Shift_Del | DEL | C   | -  | 7   | 1270 | c.2360delG        | c.(2359-2361)GGAfs    | p.G787fs     |
| Pat_27 | Post-Resistance | AGT      | 183    | 37 | 1  | 230839055 | 230839055 | Frame_Shift_Del | DEL | A   | -  | 7   | 302  | c.1290delT        | c.(1288-1290)TTTfs    | p.F430fs     |
| Pat_27 | Post-Resistance | CEP164   | 22897  | 37 | 11 | 117280451 | 117280453 | In_Frame_Del    | DEL | CGC | -  | 7   | 1356 | .3866_3868delCG   | (3865-3870)TCGCCG>TC  | p.P1292del   |
| Pat_27 | Post-Resistance | GPR19    | 2842   | 37 | 12 | 12814274  | 12814274  | Frame_Shift_Del | DEL | T   | -  | 13  | 519  | c.1109delA        | c.(1108-1110)AACfs    | p.N370fs     |
| Pat_27 | Post-Resistance | TENC1    | 23371  | 37 | 12 | 53452903  | 53452903  | Frame_Shift_Del | DEL | C   | -  | 9   | 454  | c.1478delC        | c.(1477-1479)ACCfs    | p.T493fs     |
| Pat_27 | Post-Resistance | RBM19    | 9904   | 37 | 12 | 114395612 | 114395612 | Frame_Shift_Del | DEL | T   | -  | 7   | 536  | c.815delA         | c.(814-816)AAGfs      | p.K272fs     |
| Pat_27 | Post-Resistance | INTS6    | 26512  | 37 | 13 | 51948408  | 51948408  | Frame_Shift_Del | DEL | T   | -  | 8   | 1034 | c.2040delA        | c.(2038-2040)AAAfs    | p.K680fs     |
| Pat_27 | Post-Resistance | APBA2    | 321    | 37 | 15 | 29346361  | 29346363  | In_Frame_Del    | DEL | GAG | -  | 7   | 863  | c.274_276delGAG   | c.(274-276)GAGdel     | p.E95del     |

|        |                 |          |        |    |    |           |           |                 |     |        |    |    |      |                                                  |               |
|--------|-----------------|----------|--------|----|----|-----------|-----------|-----------------|-----|--------|----|----|------|--------------------------------------------------|---------------|
| Pat_27 | Post-Resistance | MEF2A    | 4205   | 37 | 15 | 100252710 | 100252715 | In_Frame_Del    | DEL | CAGCAG | -  | 12 | 31   | :58_1263delCAGCc.(1258-1263)CAGCAGdel            | p.QQ428del    |
| Pat_27 | Post-Resistance | NFAT5    | 10725  | 37 | 16 | 69726420  | 69726422  | In_Frame_Del    | DEL | CAG    | -  | 7  | 159  | .2638_2640delCAI c.(2638-2640)CAGdel             | p.Q888del     |
| Pat_27 | Post-Resistance | CHRNB1   | 1140   | 37 | 17 | 7357666   | 7357668   | In_Frame_Del    | DEL | CTG    | -  | 9  | 574  | c.871_873delCTG c.(871-873)CTGdel                | p.L294del     |
| Pat_27 | Post-Resistance | SLC16A6  | 9120   | 37 | 17 | 66267125  | 66267125  | Frame_Shift_Del | DEL | A      | -  | 7  | 483  | c.1176delT c.(1174-1176)TTTTfs                   | p.F392fs      |
| Pat_27 | Post-Resistance | KIAA0195 | 9772   | 37 | 17 | 73491063  | 73491063  | Frame_Shift_Del | DEL | C      | -  | 7  | 641  | c.2676delC c.(2674-2676)ATCfs                    | p.1892fs      |
| Pat_27 | Post-Resistance | ICAM1    | 3383   | 37 | 19 | 10394740  | 10394740  | Frame_Shift_Del | DEL | C      | -  | 7  | 487  | c.669delC c.(667-669)AGCfs                       | p.S223fs      |
| Pat_27 | Post-Resistance | SLC44A2  | 57153  | 37 | 19 | 10748914  | 10748916  | In_Frame_Del    | DEL | TTC    | -  | 8  | 241  | :1852_1854delTTT c.(1852-1854)TTCdel             | p.F621del     |
| Pat_27 | Post-Resistance | KIR2DL4  | 3805   | 37 | 19 | 55324675  | 55324675  | Splice_Site     | DEL | A      | -  | 7  | 92   | c.801_splice c.e6+1                              | p.S267_splice |
| Pat_27 | Post-Resistance | PSME4    | 23198  | 37 | 2  | 54167139  | 54167140  | Splice_Site     | INS | -      | G  | 8  | 400  | c.501_splice c.e4-1                              | p.N167_splice |
| Pat_27 | Post-Resistance | OTX1     | 5013   | 37 | 2  | 63283275  | 63283277  | In_Frame_Del    | DEL | CAC    | -  | 8  | 424  | c.889_891delCAC c.(889-891)CACdel                | p.H301del     |
| Pat_27 | Post-Resistance | TEKT4    | 150483 | 37 | 2  | 95539829  | 95539830  | Frame_Shift_Ins | INS | -      | G  | 8  | 379  | c.689_690insG c.(688-690)CCGfs                   | p.P230fs      |
| Pat_27 | Post-Resistance | PLA2R1   | 22925  | 37 | 2  | 160801442 | 160801442 | Frame_Shift_Del | DEL | T      | -  | 8  | 446  | c.4119delA c.(4117-4119)AAAFs                    | p.K1373fs     |
| Pat_27 | Post-Resistance | CERKL    | 375298 | 37 | 2  | 182403897 | 182403899 | In_Frame_Del    | DEL | TCC    | -  | 7  | 571  | .1536_1538delGG.(1534-1539)GAGGAT>GA             | p.E512del     |
| Pat_27 | Post-Resistance | CLTCL1   | 8218   | 37 | 22 | 19220690  | 19220690  | Frame_Shift_Del | DEL | T      | -  | 8  | 1191 | c.1520delA c.(1519-1521)AAGfs                    | p.K507fs      |
| Pat_27 | Post-Resistance | CCDC116  | 164592 | 37 | 22 | 21990728  | 21990730  | In_Frame_Del    | DEL | GCA    | -  | 7  | 171  | .1211_1213delGC.(1210-1215)TGCAGC>TG             | p.S407del     |
| Pat_27 | Post-Resistance | CNTN6    | 27255  | 37 | 3  | 1371501   | 1371501   | Frame_Shift_Del | DEL | A      | -  | 8  | 298  | c.1246delA c.(1246-1248)AAAFs                    | p.K416fs      |
| Pat_27 | Post-Resistance | SGOL1    | 151648 | 37 | 3  | 20216050  | 20216050  | Frame_Shift_Del | DEL | T      | -  | 10 | 74   | c.973delA c.(973-975)ATGfs                       | p.M325fs      |
| Pat_27 | Post-Resistance | XIRP1    | 165904 | 37 | 3  | 39228955  | 39228958  | Frame_Shift_Del | DEL | TGTC   | -  | 7  | 171  | 1979_1982delGAC c.(1978-1983)AGACACfs            | p.R660fs      |
| Pat_27 | Post-Resistance | HHATL    | 57467  | 37 | 3  | 42739670  | 42739672  | In_Frame_Del    | DEL | GAA    | -  | 13 | 393  | c.655_657delTTC c.(655-657)TTCdel                | p.F219del     |
| Pat_27 | Post-Resistance | CELSR3   | 1951   | 37 | 3  | 48685385  | 48685385  | Frame_Shift_Del | DEL | C      | -  | 7  | 955  | c.7018delG c.(7018-7020)GCCfs                    | p.A2340fs     |
| Pat_27 | Post-Resistance | VGLL3    | 389136 | 37 | 3  | 87027685  | 87027685  | Frame_Shift_Del | DEL | G      | -  | 8  | 584  | c.394delC c.(394-396)CTAfs                       | p.L132fs      |
| Pat_27 | Post-Resistance | FILIP1L  | 11259  | 37 | 3  | 99569346  | 99569346  | Frame_Shift_Del | DEL | T      | -  | 7  | 573  | c.1174delA c.(1174-1176)ATGfs                    | p.M392fs      |
| Pat_27 | Post-Resistance | TMEM22   | 80723  | 37 | 3  | 136573486 | 136573486 | Frame_Shift_Del | DEL | A      | -  | 7  | 217  | c.184delA c.(184-186)AAAFs                       | p.K62fs       |
| Pat_27 | Post-Resistance | SULT1B1  | 27284  | 37 | 4  | 70599153  | 70599153  | Frame_Shift_Del | DEL | A      | -  | 7  | 858  | c.575delT c.(574-576)TTGfs                       | p.L192fs      |
| Pat_27 | Post-Resistance | FGF5     | 2250   | 37 | 4  | 81187992  | 81187994  | In_Frame_Del    | DEL | TCC    | -  | 7  | 445  | c.14_16delTCC c.(13-18)TTCCTC>TTC                | p.L9del       |
| Pat_27 | Post-Resistance | WDFY3    | 23001  | 37 | 4  | 85611708  | 85611709  | Frame_Shift_Del | DEL | CA     | -  | 7  | 390  | :.9313_9314delITC c.(9313-9315)TGGfs             | p.W3105fs     |
| Pat_27 | Post-Resistance | BTNL8    | 79908  | 37 | 5  | 180338421 | 180338421 | Frame_Shift_Del | DEL | C      | -  | 7  | 1234 | c.480delC c.(478-480)TTCfs                       | p.F160fs      |
| Pat_27 | Post-Resistance | FOXF2    | 2295   | 37 | 6  | 1390277   | 1390279   | In_Frame_Del    | DEL | CCG    | -  | 10 | 6    | c.95_97delCCG c.(94-99)CCCCGC>CCC                | p.A41del      |
| Pat_27 | Post-Resistance | HSP90AB1 | 3326   | 37 | 6  | 44221052  | 44221052  | Frame_Shift_Del | DEL | T      | -  | 7  | 2628 | c.2002delT c.(2002-2004)TTTTfs                   | p.F668fs      |
| Pat_27 | Post-Resistance | TBX18    | 9096   | 37 | 6  | 85446744  | 85446744  | Frame_Shift_Del | DEL | G      | -  | 7  | 958  | c.1483delC c.(1483-1485)CAGfs                    | p.Q495fs      |
| Pat_27 | Post-Resistance | ARID1B   | 57492  | 37 | 6  | 157100024 | 157100026 | In_Frame_Del    | DEL | GGA    | -  | 7  | 57   | c.787_789delGGA c.(787-789)GGAdel                | p.G270del     |
| Pat_27 | Post-Resistance | TTYH3    | 80727  | 37 | 7  | 2687612   | 2687614   | In_Frame_Del    | DEL | CTG    | -  | 7  | 402  | c.646_648delCTG c.(646-648)CTGdel                | p.L219del     |
| Pat_27 | Post-Resistance | SDK1     | 221935 | 37 | 7  | 4008947   | 4008947   | Frame_Shift_Del | DEL | G      | -  | 8  | 1753 | c.1605delG c.(1603-1605)TCGfs                    | p.S535fs      |
| Pat_27 | Post-Resistance | PURB     | 5814   | 37 | 7  | 44924044  | 44924046  | In_Frame_Del    | DEL | CGC    | -  | 7  | 611  | c.902_904delGCGc.(901-906)GGCGAA>GAA             | p.G301del     |
| Pat_27 | Post-Resistance | AKAP9    | 10142  | 37 | 7  | 91603085  | 91603085  | Frame_Shift_Del | DEL | A      | -  | 8  | 161  | c.109delA c.(109-111)AAAFs                       | p.K37fs       |
| Pat_27 | Post-Resistance | MLL3     | 58508  | 37 | 7  | 151856009 | 151856009 | Frame_Shift_Del | DEL | T      | -  | 8  | 1214 | c.11609delA c.(11608-11610)AAGfs                 | p.K3870fs     |
| Pat_27 | Post-Resistance | PSD3     | 23362  | 37 | 8  | 18413785  | 18413785  | Frame_Shift_Del | DEL | G      | -  | 7  | 845  | c.2862delC c.(2860-2862)CCCfs                    | p.P954fs      |
| Pat_27 | Post-Resistance | EPB49    | 2039   | 37 | 8  | 21927773  | 21927773  | Frame_Shift_Del | DEL | C      | -  | 7  | 440  | c.532delC c.(532-534)CCCfs                       | p.P178fs      |
| Pat_27 | Post-Resistance | PTPLAD2  | 401494 | 37 | 9  | 21007046  | 21007046  | Frame_Shift_Del | DEL | T      | -  | 9  | 280  | c.689delA c.(688-690)AAGfs                       | p.K230fs      |
| Pat_27 | Post-Resistance | HUWE1    | 10075  | 37 | X  | 53589091  | 53589093  | In_Frame_Del    | DEL | TCC    | -  | 7  | 168  | .7317_7319delGG(7315-7320)GAGGAA>GA2439_2440EE:  |               |
| Pat_27 | Post-Resistance | ATRX     | 546    | 37 | X  | 76931742  | 76931744  | In_Frame_Del    | DEL | TCA    | -  | 7  | 249  | .3786_3788delTG.(3784-3789)GATGAC>GA1262_1263DD: |               |
| Pat_28 | Post-Resistance | RBBP5    | 5929   | 37 | 1  | 205074198 | 205074198 | Frame_Shift_Del | DEL | A      | -  | 31 | 120  | c.317delT c.(316-318)TTCfs                       | p.F106fs      |
| Pat_28 | Post-Resistance | CR2      | 1380   | 37 | 1  | 207642044 | 207642044 | Frame_Shift_Del | DEL | C      | -  | 7  | 677  | c.618delC c.(616-618)GTCfs                       | p.V206fs      |
| Pat_28 | Post-Resistance | PITRM1   | 10531  | 37 | 10 | 3187863   | 3187863   | Frame_Shift_Del | DEL | T      | -  | 2  | 4    | c.2088delA c.(2086-2088)AAAFs                    | p.K696fs      |
| Pat_28 | Post-Resistance | PTEN     | 5728   | 37 | 10 | 89693002  | 89693003  | Frame_Shift_Ins | INS | -      | A  | 41 | 19   | c.486_487insA c.(484-489)GACAAAFs                | p.D162fs      |
| Pat_28 | Post-Resistance | CAPN5    | 726    | 37 | 11 | 76830082  | 76830082  | Frame_Shift_Del | DEL | T      | -  | 17 | 19   | c.1174delT c.(1174-1176)TTCfs                    | p.F392fs      |
| Pat_28 | Post-Resistance | FGFR1OP2 | 26127  | 37 | 12 | 27109491  | 27109492  | Frame_Shift_Ins | INS | -      | AA | 59 | 245  | c.151_152insAA c.(151-153)CAAFs                  | p.Q51fs       |

|        |                 |         |        |    |    |           |           |                 |     |        |     |     |      |                   |                        |              |
|--------|-----------------|---------|--------|----|----|-----------|-----------|-----------------|-----|--------|-----|-----|------|-------------------|------------------------|--------------|
| Pat_28 | Post-Resistance | LRCH1   | 23143  | 37 | 13 | 47243183  | 47243186  | Frame_Shift_Del | DEL | CCTG   | -   | 11  | 659  | :471_474delCCTC   | c.(469-474)GCCCTGfs    | p.A157fs     |
| Pat_28 | Post-Resistance | MAP3K9  | 4293   | 37 | 14 | 71275774  | 71275776  | In_Frame_Del    | DEL | CCT    | -   | 4   | 3    | c.113_115delAGG:  | (112-117)GAGGCG>GCC    | p.E38del     |
| Pat_28 | Post-Resistance | ITGA11  | 22801  | 37 | 15 | 68624270  | 68624271  | Frame_Shift_Ins | INS | -      | G   | 8   | 20   | c.1696_1697insC   | c.(1696-1698)CTGfs     | p.L566fs     |
| Pat_28 | Post-Resistance | NKTR    | 4820   | 37 | 3  | 42680269  | 42680271  | In_Frame_Del    | DEL | GAG    | -   | 7   | 249  | .3073_3075delGAI  | c.(3073-3075)GAGdel    | p.E1029del   |
| Pat_28 | Post-Resistance | NAP1L5  | 266812 | 37 | 4  | 89618484  | 89618486  | In_Frame_Del    | DEL | TCC    | -   | 7   | 135  | c.420_422delGGA:  | (418-423)GAGGAA>GAA:   | 140_141EE>I  |
| Pat_28 | Post-Resistance | MMRN1   | 22915  | 37 | 4  | 90844391  | 90844393  | In_Frame_Del    | DEL | AGC    | -   | 7   | 991  | c.923_925delAGC:  | (922-927)GAGCAG>GAC    | p.Q313del    |
| Pat_28 | Post-Resistance | BMP6    | 654    | 37 | 6  | 7880531   | 7880532   | Frame_Shift_Ins | INS | -      | A   | 61  | 335  | c.1497_1498insA   | c.(1495-1500)CTGAAfs   | p.L499fs     |
| Pat_28 | Post-Resistance | TRERF1  | 55809  | 37 | 6  | 42222620  | 42222620  | Frame_Shift_Del | DEL | T      | -   | 222 | 86   | c.2625delA        | c.(2623-2625)AAAfs     | p.K875fs     |
| Pat_28 | Post-Resistance | TARP    | 445347 | 37 | 7  | 38313227  | 38313227  | Frame_Shift_Del | DEL | T      | -   | 7   | 522  | c.388delA         | c.(388-390)ATCfs       | p.I130fs     |
| Pat_30 | Pre-Treatment   | MMEL1   | 79258  | 37 | 1  | 2560819   | 2560821   | In_Frame_Del    | DEL | CAG    | -   | 11  | 40   | c.103_105delCTG   | c.(103-105)CTGdel      | p.L35del     |
| Pat_30 | Pre-Treatment   | ESPNP   | 284729 | 37 | 1  | 17026043  | 17026044  | In_Frame_Ins    | INS | -      | GCA | 3   | 6    | .1291_1292insTG(  | (1291-1293)CCG>CTGCCp. | 430_431insL  |
| Pat_30 | Pre-Treatment   | MST1P9  | 11223  | 37 | 1  | 17085590  | 17085595  | In_Frame_Del    | DEL | GCGCTG | -   | 9   | 340  | 26_1131delCAGC    | c.(1126-1131)CAGCGCdel | p.QR376del   |
| Pat_30 | Pre-Treatment   | NFIA    | 4774   | 37 | 1  | 61848988  | 61848989  | Frame_Shift_Del | DEL | GG     | -   | 9   | 1268 | :.1026_1027delGC  | c.(1024-1029)CTGGGAfs  | p.L342fs     |
| Pat_30 | Pre-Treatment   | SLC27A3 | 11000  | 37 | 1  | 153751860 | 153751860 | Frame_Shift_Del | DEL | C      | -   | 7   | 591  | c.1927delC        | c.(1927-1929)CCCfs     | p.P643fs     |
| Pat_30 | Pre-Treatment   | HAX1    | 10456  | 37 | 1  | 154246391 | 154246391 | Frame_Shift_Del | DEL | C      | -   | 8   | 514  | c.458delC         | c.(457-459)TCCfs       | p.S153fs     |
| Pat_30 | Pre-Treatment   | TNR     | 7143   | 37 | 1  | 175372615 | 175372615 | Frame_Shift_Del | DEL | C      | -   | 8   | 1386 | c.637delG         | c.(637-639)GTGfs       | p.V213fs     |
| Pat_30 | Pre-Treatment   | PRG4    | 10216  | 37 | 1  | 186277340 | 186277340 | Frame_Shift_Del | DEL | C      | -   | 7   | 1140 | c.2489delC        | c.(2488-2490)ACCfs     | p.T830fs     |
| Pat_30 | Pre-Treatment   | ACBD3   | 64746  | 37 | 1  | 226352490 | 226352491 | Frame_Shift_Ins | INS | -      | T   | 10  | 251  | c.568_569insA     | c.(568-570)AGGfs       | p.R190fs     |
| Pat_30 | Pre-Treatment   | PSD     | 5662   | 37 | 10 | 104173620 | 104173622 | In_Frame_Del    | DEL | CCT    | -   | 8   | 155  | .1457_1459delIAG( | (1456-1461)GAGGCA>GC   | p.E486del    |
| Pat_30 | Pre-Treatment   | APBB1   | 322    | 37 | 11 | 6432090   | 6432092   | In_Frame_Del    | DEL | TCC    | -   | 7   | 42   | c.486_488delGGAc. | (484-489)GAGGAT>GAT    | p.E162del    |
| Pat_30 | Pre-Treatment   | OR10A2  | 341276 | 37 | 11 | 6891253   | 6891255   | In_Frame_Del    | DEL | TTC    | -   | 8   | 445  | c.268_270delITTC  | c.(268-270)TTCdel      | p.F94del     |
| Pat_30 | Pre-Treatment   | PLEKHA7 | 144100 | 37 | 11 | 16847710  | 16847710  | Frame_Shift_Del | DEL | G      | -   | 7   | 1731 | c.1300delC        | c.(1300-1302)CAGfs     | p.Q434fs     |
| Pat_30 | Pre-Treatment   | USH1C   | 10083  | 37 | 11 | 17542501  | 17542501  | Frame_Shift_Del | DEL | C      | -   | 7   | 1983 | c.1126delG        | c.(1126-1128)GAAfs     | p.E376fs     |
| Pat_30 | Pre-Treatment   | OR9G4   | 283189 | 37 | 11 | 56510933  | 56510933  | Frame_Shift_Del | DEL | A      | -   | 7   | 606  | c.355delT         | c.(355-357)TCCfs       | p.S119fs     |
| Pat_30 | Pre-Treatment   | EML3    | 256364 | 37 | 11 | 62376055  | 62376055  | Frame_Shift_Del | DEL | C      | -   | 7   | 1054 | c.1069delG        | c.(1069-1071)GCCfs     | p.A357fs     |
| Pat_30 | Pre-Treatment   | USP35   | 57558  | 37 | 11 | 77920720  | 77920722  | In_Frame_Del    | DEL | CGC    | -   | 7   | 442  | .1819_1821delCG   | c.(1819-1821)CGCdel    | p.R610del    |
| Pat_30 | Pre-Treatment   | MED17   | 9440   | 37 | 11 | 93528167  | 93528167  | Frame_Shift_Del | DEL | T      | -   | 97  | 243  | c.953delT         | c.(952-954)ATTfs       | p.I318fs     |
| Pat_30 | Pre-Treatment   | IGSF9B  | 22997  | 37 | 11 | 133807827 | 133807827 | Frame_Shift_Del | DEL | G      | -   | 7   | 96   | c.439delC         | c.(439-441)CAGfs       | p.Q147fs     |
| Pat_30 | Pre-Treatment   | PRB2    | 653247 | 37 | 12 | 11546233  | 11546235  | In_Frame_Del    | DEL | GGA    | -   | 7   | 361  | c.777_779delITCC  | c.(775-780)CCTCCA>CCA: | 259_260PP>I  |
| Pat_30 | Pre-Treatment   | LRP1    | 4035   | 37 | 12 | 57605948  | 57605948  | Frame_Shift_Del | DEL | G      | -   | 7   | 210  | c.13398delG       | c.(13396-13398)GTGfs   | p.V4466fs    |
| Pat_30 | Pre-Treatment   | PIP4K2C | 79837  | 37 | 12 | 57988949  | 57988949  | Frame_Shift_Del | DEL | C      | -   | 7   | 1078 | c.313delC         | c.(313-315)CCCfs       | p.P105fs     |
| Pat_30 | Pre-Treatment   | SIRT4   | 23409  | 37 | 12 | 120750293 | 120750294 | Frame_Shift_Ins | INS | -      | G   | 7   | 340  | c.532_533insG     | c.(532-534)CGGfs       | p.R178fs     |
| Pat_30 | Pre-Treatment   | DNAH10  | 196385 | 37 | 12 | 124274524 | 124274524 | Frame_Shift_Del | DEL | G      | -   | 7   | 585  | c.1488delG        | c.(1486-1488)ACGfs     | p.T496fs     |
| Pat_30 | Pre-Treatment   | EP400   | 57634  | 37 | 12 | 132547156 | 132547158 | In_Frame_Del    | DEL | GAC    | -   | 9   | 314  | .8244_8246delGAI( | (8242-8247)CAGACG>CA   | p.T2752del   |
| Pat_30 | Pre-Treatment   | TEP1    | 7011   | 37 | 14 | 20852647  | 20852647  | Frame_Shift_Del | DEL | C      | -   | 12  | 1255 | c.3242delG        | c.(3241-3243)GGTfs     | p.G1081fs    |
| Pat_30 | Pre-Treatment   | SAMD4A  | 23034  | 37 | 14 | 55226890  | 55226890  | Frame_Shift_Del | DEL | G      | -   | 7   | 1484 | c.1185delG        | c.(1183-1185)GAGfs     | p.E395fs     |
| Pat_30 | Pre-Treatment   | HERC1   | 8925   | 37 | 15 | 63928179  | 63928180  | Frame_Shift_Del | DEL | TG     | -   | 8   | 1894 | 12394_12395delC   | c.(12394-12396)CAAFs   | p.Q4132fs    |
| Pat_30 | Pre-Treatment   | DNAH3   | 55567  | 37 | 16 | 21132130  | 21132132  | In_Frame_Del    | DEL | CAG    | -   | 8   | 219  | .1628_1630delCT(  | (1627-1632)GCTGAT>GA   | p.A543del    |
| Pat_30 | Pre-Treatment   | POLDIP2 | 26073  | 37 | 17 | 26684394  | 26684395  | Splice_Site     | INS | -      | G   | 7   | 6    | c.78_splice       | c.e2+1                 | p.W26_splice |
| Pat_30 | Pre-Treatment   | GAS2L2  | 246176 | 37 | 17 | 34074257  | 34074257  | Frame_Shift_Del | DEL | G      | -   | 7   | 922  | c.863delC         | c.(862-864)CCGfs       | p.P288fs     |
| Pat_30 | Pre-Treatment   | RAMP2   | 10266  | 37 | 17 | 40913329  | 40913329  | Frame_Shift_Del | DEL | C      | -   | 2   | 4    | c.50delC          | c.(49-51)ACCfs         | p.T17fs      |
| Pat_30 | Pre-Treatment   | CA10    | 56934  | 37 | 17 | 50008357  | 50008357  | Frame_Shift_Del | DEL | C      | -   | 8   | 1682 | c.272delG         | c.(271-273)GGCfs       | p.G91fs      |
| Pat_30 | Pre-Treatment   | TIMP2   | 7077   | 37 | 17 | 76869979  | 76869982  | Frame_Shift_Del | DEL | ACTG   | -   | 59  | 369  | :.150_153delCAGI  | c.(148-153)GTCAGTfs    | p.V50fs      |
| Pat_30 | Pre-Treatment   | ASXL3   | 80816  | 37 | 18 | 31325784  | 31325784  | Frame_Shift_Del | DEL | C      | -   | 8   | 883  | c.5972delC        | c.(5971-5973)TCCfs     | p.S1991fs    |
| Pat_30 | Pre-Treatment   | ZNF490  | 57474  | 37 | 19 | 12692378  | 12692378  | Frame_Shift_Del | DEL | G      | -   | 7   | 714  | c.511delC         | c.(511-513)CTTfs       | p.L171fs     |
| Pat_30 | Pre-Treatment   | ATP4A   | 495    | 37 | 19 | 36054349  | 36054351  | In_Frame_Del    | DEL | CTT    | -   | 11  | 1373 | c.91_93delAAG     | c.(91-93)AAGdel        | p.K31del     |
| Pat_30 | Pre-Treatment   | KLC3    | 147700 | 37 | 19 | 45850756  | 45850758  | In_Frame_Del    | DEL | GAG    | -   | 7   | 486  | c.541_543delGAG   | c.(541-543)GAGdel      | p.E184del    |

|        |                 |          |        |    |    |           |           |                 |     |        |         |    |      |                                                  |                     |               |
|--------|-----------------|----------|--------|----|----|-----------|-----------|-----------------|-----|--------|---------|----|------|--------------------------------------------------|---------------------|---------------|
| Pat_30 | Pre-Treatment   | TSKS     | 60385  | 37 | 19 | 50243088  | 50243088  | Frame_Shift_Del | DEL | C      | -       | 8  | 352  | c.1724delG                                       | c.(1723-1725)GGAfs  | p.G575fs      |
| Pat_30 | Pre-Treatment   | ACPT     | 93650  | 37 | 19 | 51298106  | 51298106  | Frame_Shift_Del | DEL | C      | -       | 10 | 1393 | c.1050delC                                       | c.(1048-1050)CTCfs  | p.L350fs      |
| Pat_30 | Pre-Treatment   | ZNF432   | 9668   | 37 | 19 | 52537288  | 52537288  | Frame_Shift_Del | DEL | T      | -       | 7  | 538  | c.1644delA                                       | c.(1642-1644)AAAfs  | p.K548fs      |
| Pat_30 | Pre-Treatment   | NLRP9    | 338321 | 37 | 19 | 56249563  | 56249563  | Frame_Shift_Del | DEL | C      | -       | 10 | 1762 | c.178delG                                        | c.(178-180)GACfs    | p.D60fs       |
| Pat_30 | Pre-Treatment   | PUM2     | 23369  | 37 | 2  | 20494235  | 20494235  | Frame_Shift_Del | DEL | C      | -       | 8  | 977  | c.1054delG                                       | c.(1054-1056)GTGfs  | p.V352fs      |
| Pat_30 | Pre-Treatment   | CAD      | 790    | 37 | 2  | 27464020  | 27464020  | Frame_Shift_Del | DEL | C      | -       | 8  | 1261 | c.5733delC                                       | c.(5731-5733)CACfs  | p.H1911fs     |
| Pat_30 | Pre-Treatment   | KIF3B    | 9371   | 37 | 20 | 30898763  | 30898765  | In_Frame_Del    | DEL | GAG    | -       | 8  | 127  | .1183_1185delIGA                                 | c.(1183-1185)GAGdel | p.E399del     |
| Pat_30 | Pre-Treatment   | CECR6    | 27439  | 37 | 22 | 17601300  | 17601302  | In_Frame_Del    | DEL | CCA    | -       | 8  | 100  | c.716_718delTGG>.(715-720)GTGGGC>GGC             |                     | p.V239del     |
| Pat_30 | Pre-Treatment   | MN1      | 4330   | 37 | 22 | 28194933  | 28194934  | In_Frame_Ins    | INS | -      | TGC     | 11 | 46   | .1598_1599insGC>.(1597-1599)CAA>CAGCA.533_533Q>Q |                     |               |
| Pat_30 | Pre-Treatment   | MTMR3    | 8897   | 37 | 22 | 30408494  | 30408494  | Frame_Shift_Del | DEL | C      | -       | 8  | 1893 | c.1259delC                                       | c.(1258-1260)ACCfs  | p.T420fs      |
| Pat_30 | Pre-Treatment   | TAB1     | 10454  | 37 | 22 | 39772049  | 39772049  | Frame_Shift_Del | DEL | C      | -       | 7  | 689  | c.108delC                                        | c.(106-108)GACfs    | p.D36fs       |
| Pat_30 | Pre-Treatment   | MKL1     | 57591  | 37 | 22 | 40816887  | 40816889  | In_Frame_Del    | DEL | TGC    | -       | 12 | 343  | c.843_845delGCA>.(841-846)CAGCAC>CAC             |                     | p.Q281del     |
| Pat_30 | Pre-Treatment   | SGOL1    | 151648 | 37 | 3  | 20216050  | 20216050  | Frame_Shift_Del | DEL | T      | -       | 7  | 89   | c.973delA                                        | c.(973-975)ATGfs    | p.M325fs      |
| Pat_30 | Pre-Treatment   | XYLB     | 9942   | 37 | 3  | 38454444  | 38454444  | Frame_Shift_Del | DEL | C      | -       | 7  | 493  | c.1551delC                                       | c.(1549-1551)CTCfs  | p.L517fs      |
| Pat_30 | Pre-Treatment   | TM4SF4   | 7104   | 37 | 3  | 149192694 | 149192694 | Frame_Shift_Del | DEL | G      | -       | 9  | 170  | c.30delG                                         | c.(28-30)CTGfs      | p.L10fs       |
| Pat_30 | Pre-Treatment   | MED12L   | 116931 | 37 | 3  | 151148114 | 151148116 | In_Frame_Del    | DEL | CAG    | -       | 15 | 374  | .6331_6333delCA                                  | c.(6331-6333)CAGdel | p.Q2115del    |
| Pat_30 | Pre-Treatment   | FGF5     | 2250   | 37 | 4  | 81187992  | 81187994  | In_Frame_Del    | DEL | TCC    | -       | 7  | 385  | c.14_16delTCC                                    | c.(13-18)TTCCTC>TTC | p.L9del       |
| Pat_30 | Pre-Treatment   | CFI      | 3426   | 37 | 4  | 110662159 | 110662159 | Frame_Shift_Del | DEL | C      | -       | 7  | 1416 | c.1642delG                                       | c.(1642-1644)GAAfs  | p.E548fs      |
| Pat_30 | Pre-Treatment   | RASGRF2  | 5924   | 37 | 5  | 80409566  | 80409568  | In_Frame_Del    | DEL | CCA    | -       | 11 | 466  | .2297_2299delCC>.(2296-2301)CCCACC>CC            |                     | p.T770del     |
| Pat_30 | Pre-Treatment   | PCDHGB4  | 8641   | 37 | 5  | 140767492 | 140767497 | In_Frame_Del    | DEL | TGCCAG | -       | 2  | 4    | .41_46delTGCCA>.(40-48)CTGCCAGTG>CT              |                     | p.PV15del     |
| Pat_30 | Pre-Treatment   | SPRY4    | 81848  | 37 | 5  | 141694154 | 141694154 | Frame_Shift_Del | DEL | G      | -       | 8  | 666  | c.520delC                                        | c.(520-522)CGGfs    | p.R174fs      |
| Pat_30 | Pre-Treatment   | C6orf223 | 221416 | 37 | 6  | 43970503  | 43970504  | In_Frame_Ins    | INS | -      | GCG     | 10 | 34   | c.369_370insGCG                                  | c.(367-372)insGCG   | p.132_133insA |
| Pat_30 | Pre-Treatment   | COL12A1  | 1303   | 37 | 6  | 75887504  | 75887504  | Frame_Shift_Del | DEL | G      | -       | 8  | 1469 | c.2312delC                                       | c.(2311-2313)CCAfs  | p.P771fs      |
| Pat_30 | Pre-Treatment   | WBSCR17  | 64409  | 37 | 7  | 71142212  | 71142212  | Frame_Shift_Del | DEL | C      | -       | 7  | 1623 | c.1421delC                                       | c.(1420-1422)GCAfs  | p.A474fs      |
| Pat_30 | Pre-Treatment   | C7orf51  | 222950 | 37 | 7  | 100086313 | 100086313 | Frame_Shift_Del | DEL | C      | -       | 7  | 781  | c.969delC                                        | c.(967-969)ATCfs    | p.I323fs      |
| Pat_30 | Pre-Treatment   | SRRT     | 51593  | 37 | 7  | 100482040 | 100482042 | In_Frame_Del    | DEL | AGG    | -       | 7  | 78   | c.809_811delAGG>.(808-813)CAGGAG>CAC             |                     | p.E275del     |
| Pat_30 | Pre-Treatment   | FOXP2    | 93986  | 37 | 7  | 114271580 | 114271582 | Splice_Site     | DEL | CAG    | -       | 7  | 66   | c.598_splice                                     | c.e6-1              | p.Q200_splice |
| Pat_30 | Pre-Treatment   | CCNE2    | 9134   | 37 | 8  | 95902737  | 95902737  | Frame_Shift_Del | DEL | T      | -       | 7  | 1288 | c.359delA                                        | c.(358-360)AAGfs    | p.K120fs      |
| Pat_30 | Pre-Treatment   | KIAA2026 | 158358 | 37 | 9  | 5968044   | 5968044   | Frame_Shift_Del | DEL | T      | -       | 4  | 6    | c.2187delA                                       | c.(2185-2187)AAAfs  | p.K729fs      |
| Pat_30 | Pre-Treatment   | RUSC2    | 9853   | 37 | 9  | 35555452  | 35555452  | Frame_Shift_Del | DEL | C      | -       | 7  | 623  | c.2410delC                                       | c.(2410-2412)CCCfs  | p.P804fs      |
| Pat_30 | Pre-Treatment   | FRMPD4   | 9758   | 37 | X  | 12734864  | 12734864  | Frame_Shift_Del | DEL | G      | -       | 7  | 777  | c.2286delG                                       | c.(2284-2286)GTGfs  | p.V762fs      |
| Pat_30 | Post-Resistance | EXTL1    | 2134   | 37 | 1  | 26349533  | 26349535  | In_Frame_Del    | DEL | CCT    | -       | 7  | 187  | c.396_398delCCT>.(394-399)TGCCCT>TGC             |                     | p.L137del     |
| Pat_30 | Post-Resistance | RPS6KA1  | 6195   | 37 | 1  | 26885311  | 26885311  | Frame_Shift_Del | DEL | C      | -       | 7  | 321  | c.1098delC                                       | c.(1096-1098)ATCfs  | p.I366fs      |
| Pat_30 | Post-Resistance | KIAA0467 | 23334  | 37 | 1  | 43898257  | 43898257  | Frame_Shift_Del | DEL | C      | -       | 7  | 318  | c.2815delC                                       | c.(2815-2817)CCCfs  | p.P939fs      |
| Pat_30 | Post-Resistance | LCE2A    | 353139 | 37 | 1  | 152671425 | 152671425 | Frame_Shift_Del | DEL | C      | -       | 14 | 1173 | c.48delC                                         | c.(46-48)TGCfs      | p.C16fs       |
| Pat_30 | Post-Resistance | GATAD2B  | 57459  | 37 | 1  | 153784567 | 153784567 | Frame_Shift_Del | DEL | G      | -       | 7  | 533  | c.1461delC                                       | c.(1459-1461)CCCfs  | p.P487fs      |
| Pat_30 | Post-Resistance | SHC1     | 6464   | 37 | 1  | 154938468 | 154938468 | Frame_Shift_Del | DEL | G      | -       | 7  | 511  | c.1338delC                                       | c.(1336-1338)CCCfs  | p.P446fs      |
| Pat_30 | Post-Resistance | GON4L    | 54856  | 37 | 1  | 155774769 | 155774769 | Frame_Shift_Del | DEL | C      | -       | 7  | 766  | c.1616delG                                       | c.(1615-1617)GGAfs  | p.G539fs      |
| Pat_30 | Post-Resistance | EFCAB2   | 84288  | 37 | 1  | 245133550 | 245133551 | Frame_Shift_Del | DEL | GC     | -       | 5  | 4    | c.126_127delIGC                                  | c.(124-129)GGGCGCfs | p.G42fs       |
| Pat_30 | Post-Resistance | PTEN     | 5728   | 37 | 10 | 89623858  | 89623861  | Splice_Site     | DEL | GGCT   | -       | 4  | 4    | c.-365_splice                                    | c.e1+1              |               |
| Pat_30 | Post-Resistance | B4GALNT4 | 338707 | 37 | 11 | 369845    | 369847    | In_Frame_Del    | DEL | GCT    | -       | 4  | 8    | c.42_44delGCT                                    | c.(40-45)AAGCTG>AAG | p.L22del      |
| Pat_30 | Post-Resistance | C11orf95 | 65998  | 37 | 11 | 63531514  | 63531516  | In_Frame_Del    | DEL | CTC    | -       | 7  | 55   | .1579_1581delIGA                                 | c.(1579-1581)GAGdel | p.E527del     |
| Pat_30 | Post-Resistance | GPR137   | 56834  | 37 | 11 | 64055631  | 64055631  | Frame_Shift_Del | DEL | C      | -       | 7  | 716  | c.728delC                                        | c.(727-729)GCCfs    | p.A243fs      |
| Pat_30 | Post-Resistance | CTSF     | 8722   | 37 | 11 | 66335859  | 66335859  | Frame_Shift_Del | DEL | C      | -       | 2  | 4    | c.99delG                                         | c.(97-99)GGGfs      | p.G33fs       |
| Pat_30 | Post-Resistance | KRTAP5-8 | 57830  | 37 | 11 | 71249125  | 71249126  | In_Frame_Ins    | INS | -      | GCTCCGG | 10 | 586  | 3CTGTGGCTCCGnsGGCTGTGGCTCCGGC?_23insGGGSC        |                     |               |
| Pat_30 | Post-Resistance | MED17    | 9440   | 37 | 11 | 93528167  | 93528167  | Frame_Shift_Del | DEL | T      | -       | 58 | 83   | c.953delT                                        | c.(952-954)ATTfs    | p.I318fs      |
| Pat_30 | Post-Resistance | EFS      | 10278  | 37 | 14 | 23829997  | 23829997  | Frame_Shift_Del | DEL | G      | -       | 7  | 282  | c.64delC                                         | c.(64-66)CAGfs      | p.Q22fs       |



|        |                 |            |        |    |    |           |           |                 |     |      |        |     |      |                   |                                    |               |
|--------|-----------------|------------|--------|----|----|-----------|-----------|-----------------|-----|------|--------|-----|------|-------------------|------------------------------------|---------------|
| Pat_30 | Post-Resistance | NYNRIN     | 57523  | 37 | 14 | 24886571  | 24886571  | Frame_Shift_Del | DEL | G    | -      | 2   | 4    | c.5616delG        | c.(5614-5616)CTGfs                 | p.L1872fs     |
| Pat_30 | Post-Resistance | AKT1       | 207    | 37 | 14 | 105242073 | 105242075 | In_Frame_Del    | DEL | CTC  | -      | 8   | 283  | c.349_351delGAG   | c.(349-351)GAGdel                  | p.E117del     |
| Pat_30 | Post-Resistance | NUDT21     | 11051  | 37 | 16 | 56485066  | 56485066  | Frame_Shift_Del | DEL | C    | -      | 10  | 872  | c.49delG          | c.(49-51)GTCfs                     | p.V17fs       |
| Pat_30 | Post-Resistance | CAMTA2     | 23125  | 37 | 17 | 4883038   | 4883038   | Frame_Shift_Del | DEL | G    | -      | 7   | 407  | c.1579delC        | c.(1579-1581)CAGfs                 | p.Q527fs      |
| Pat_30 | Post-Resistance | WNK4       | 65266  | 37 | 17 | 40932962  | 40932962  | Frame_Shift_Del | DEL | C    | -      | 8   | 248  | c.246delC         | c.(244-246)GACfs                   | p.D82fs       |
| Pat_30 | Post-Resistance | TIMP2      | 7077   | 37 | 17 | 76869979  | 76869982  | Frame_Shift_Del | DEL | ACTG | -      | 102 | 187  | c.150_153delCAG   | c.(148-153)GTCAGTfs                | p.V50fs       |
| Pat_30 | Post-Resistance | ZNF700     | 90592  | 37 | 19 | 12060595  | 12060596  | Frame_Shift_Del | DEL | CA   | -      | 78  | 233  | c.1756_1757delCA  | c.(1756-1758)CACfs                 | p.H586fs      |
| Pat_30 | Post-Resistance | GLTSCR1    | 29998  | 37 | 19 | 48197567  | 48197568  | Frame_Shift_Ins | INS | -    | C      | 7   | 54   | c.2479_2480insC   | c.(2479-2481)GCCfs                 | p.A827fs      |
| Pat_30 | Post-Resistance | PMEPA1     | 56937  | 37 | 20 | 56284593  | 56284595  | In_Frame_Del    | DEL | CGG  | -      | 6   | 10   | c.44_46delCCG     | c.(43-48)GCCGGG>GGG                | p.A15del      |
| Pat_30 | Post-Resistance | MN1        | 4330   | 37 | 22 | 28194933  | 28194934  | In_Frame_Ins    | INS | -    | TGC    | 12  | 66   | c.1598_1599insGC  | c.(1597-1599)CAA>CAGCA.533_533Q>QI |               |
| Pat_30 | Post-Resistance | HSCB       | 150274 | 37 | 22 | 29140667  | 29140667  | Frame_Shift_Del | DEL | C    | -      | 7   | 300  | c.398delC         | c.(397-399)GCCfs                   | p.A133fs      |
| Pat_30 | Post-Resistance | MTMR3      | 8897   | 37 | 22 | 30408494  | 30408494  | Frame_Shift_Del | DEL | C    | -      | 7   | 1546 | c.1259delC        | c.(1258-1260)ACCfs                 | p.T420fs      |
| Pat_30 | Post-Resistance | C22orf30   | 253143 | 37 | 22 | 32099549  | 32099549  | Frame_Shift_Del | DEL | G    | -      | 7   | 574  | c.5987delC        | c.(5986-5988)CCAfs                 | p.P1996fs     |
| Pat_30 | Post-Resistance | MKL1       | 57591  | 37 | 22 | 40816887  | 40816889  | In_Frame_Del    | DEL | TGC  | -      | 16  | 275  | c.843_845delGCAc  | c.(841-846)CAGCAC>CAC              | p.Q281del     |
| Pat_30 | Post-Resistance | ADCY5      | 111    | 37 | 3  | 123167191 | 123167193 | In_Frame_Del    | DEL | GCT  | -      | 4   | 4    | c.200_202delAGC   | c.(199-204)CAGCGC>CGC              | p.Q67del      |
| Pat_30 | Post-Resistance | CXCL5      | 6374   | 37 | 4  | 74864215  | 74864217  | In_Frame_Del    | DEL | CAG  | -      | 2   | 4    | c.82_84delCTG     | c.(82-84)CTGdel                    | p.L28del      |
| Pat_30 | Post-Resistance | STK19      | 8859   | 37 | 6  | 31939829  | 31939830  | Frame_Shift_Ins | INS | -    | A      | 10  | 832  | c.56_57insA       | c.(55-57)GCAfs                     | p.A19fs       |
| Pat_30 | Post-Resistance | SCUBE3     | 222663 | 37 | 6  | 35210453  | 35210453  | Frame_Shift_Del | DEL | C    | -      | 8   | 670  | c.1589delC        | c.(1588-1590)TCCfs                 | p.S530fs      |
| Pat_30 | Post-Resistance | BYSL       | 705    | 37 | 6  | 41900405  | 41900405  | Frame_Shift_Del | DEL | C    | -      | 8   | 656  | c.1275delC        | c.(1273-1275)GTCfs                 | p.V425fs      |
| Pat_30 | Post-Resistance | CNPY3      | 10695  | 37 | 6  | 42897358  | 42897360  | In_Frame_Del    | DEL | TGC  | -      | 9   | 73   | c.50_52delTGC     | c.(49-54)TTGCTG>TTG                | p.17_18LL>L   |
| Pat_30 | Post-Resistance | C6orf223   | 221416 | 37 | 6  | 43970503  | 43970504  | In_Frame_Ins    | INS | -    | GCG    | 11  | 77   | c.369_370insGCG   | c.(367-372)insGCG                  | p.132_133insA |
| Pat_30 | Post-Resistance | TNFRSF21   | 27242  | 37 | 6  | 47253989  | 47253989  | Frame_Shift_Del | DEL | G    | -      | 8   | 1536 | c.439delC         | c.(439-441)CATfs                   | p.H147fs      |
| Pat_30 | Post-Resistance | GARS       | 2617   | 37 | 7  | 30671998  | 30671998  | Frame_Shift_Del | DEL | C    | -      | 7   | 389  | c.2039delC        | c.(2038-2040)ACCfs                 | p.T680fs      |
| Pat_30 | Post-Resistance | AGFG2      | 3268   | 37 | 7  | 100161550 | 100161551 | Frame_Shift_Ins | INS | -    | C      | 8   | 1285 | c.1265_1266insC   | c.(1264-1266)TTCfs                 | p.F422fs      |
| Pat_30 | Post-Resistance | SRRT       | 51593  | 37 | 7  | 100482040 | 100482042 | In_Frame_Del    | DEL | AGG  | -      | 7   | 67   | c.809_811delAGG   | c.(808-813)CAGGAG>CAC              | p.E275del     |
| Pat_30 | Post-Resistance | FLNC       | 2318   | 37 | 7  | 128480704 | 128480704 | Frame_Shift_Del | DEL | G    | -      | 9   | 1330 | c.1652delG        | c.(1651-1653)TGGfs                 | p.W551fs      |
| Pat_30 | Post-Resistance | ARHGEF5    | 7984   | 37 | 7  | 144075858 | 144075858 | Frame_Shift_Del | DEL | C    | -      | 11  | 1561 | c.4535delC        | c.(4534-4536)TCCfs                 | p.S1512fs     |
| Pat_30 | Post-Resistance | ZNF398     | 57541  | 37 | 7  | 148876153 | 148876153 | Frame_Shift_Del | DEL | C    | -      | 10  | 1166 | c.1189delC        | c.(1189-1191)CCCfs                 | p.P397fs      |
| Pat_30 | Post-Resistance | NOS3       | 4846   | 37 | 7  | 150696157 | 150696157 | Frame_Shift_Del | DEL | C    | -      | 8   | 1303 | c.940delC         | c.(940-942)CCCfs                   | p.P314fs      |
| Pat_30 | Post-Resistance | CDK5       | 1020   | 37 | 7  | 150754217 | 150754217 | Frame_Shift_Del | DEL | T    | -      | 9   | 1308 | c.68delA          | c.(67-69)AACfs                     | p.N23fs       |
| Pat_30 | Post-Resistance | LSM1       | 27257  | 37 | 8  | 38027393  | 38027393  | Frame_Shift_Del | DEL | C    | -      | 8   | 1110 | c.158delG         | c.(157-159)GGCfs                   | p.G53fs       |
| Pat_30 | Post-Resistance | TPD52      | 7163   | 37 | 8  | 80965625  | 80965625  | Frame_Shift_Del | DEL | G    | -      | 7   | 203  | c.296delC         | c.(295-297)GCAfs                   | p.A99fs       |
| Pat_30 | Post-Resistance | DDX58      | 23586  | 37 | 9  | 32466441  | 32466443  | Splice_Site     | DEL | TAT  | -      | 2   | 4    | c.2186_splice     | c.e16-1                            | p.G729_splice |
| Pat_30 | Post-Resistance | TFE3       | 7030   | 37 | X  | 48887806  | 48887808  | In_Frame_Del    | DEL | CCT  | -      | 7   | 233  | c.1589_1591delAG  | c.(1588-1593)GAGGGG>GC             | p.E530del     |
| Pat_31 | Pre-Treatment   | CAMTA1     | 23261  | 37 | 1  | 7811329   | 7811329   | Frame_Shift_Del | DEL | A    | -      | 9   | 765  | c.4760delA        | c.(4759-4761)CAAfs                 | p.Q1587fs     |
| Pat_31 | Pre-Treatment   | BEND5      | 79656  | 37 | 1  | 49201967  | 49201967  | Frame_Shift_Del | DEL | T    | -      | 7   | 255  | c.1052delA        | c.(1051-1053)AAGfs                 | p.K351fs      |
| Pat_31 | Pre-Treatment   | ST6GALNAC5 | 81849  | 37 | 1  | 77334292  | 77334293  | In_Frame_Ins    | INS | -    | CAGCAA | 29  | 25   | c.126_127insCAGC  | c.(124-129)insCAGCAA               | p.48_49insQQ  |
| Pat_31 | Pre-Treatment   | BCL9       | 607    | 37 | 1  | 147091501 | 147091501 | Frame_Shift_Del | DEL | C    | -      | 8   | 422  | c.1540delC        | c.(1540-1542)CCCfs                 | p.P514fs      |
| Pat_31 | Pre-Treatment   | PSMB4      | 5692   | 37 | 1  | 151374040 | 151374040 | Frame_Shift_Del | DEL | A    | -      | 12  | 1434 | c.716delA         | c.(715-717)GAAfs                   | p.E239fs      |
| Pat_31 | Pre-Treatment   | TCHH       | 7062   | 37 | 1  | 152082301 | 152082303 | In_Frame_Del    | DEL | CTC  | -      | 10  | 868  | c.3390_3392delGAT | c.(3388-3393)AAGAGA>AA             | p.R1133del    |
| Pat_31 | Pre-Treatment   | TCHH       | 7062   | 37 | 1  | 152084580 | 152084582 | In_Frame_Del    | DEL | CTC  | -      | 10  | 265  | c.1111_1113delGAC | c.(1111-1113)GAGdel                | p.E371del     |
| Pat_31 | Pre-Treatment   | FLG2       | 388698 | 37 | 1  | 152324558 | 152324559 | Frame_Shift_Del | DEL | TG   | -      | 11  | 1623 | c.5703_5704delCA  | c.(5701-5706)CACAGCfs              | p.H1901fs     |
| Pat_31 | Pre-Treatment   | KCNN3      | 3782   | 37 | 1  | 154680586 | 154680588 | In_Frame_Del    | DEL | GCT  | -      | 7   | 208  | c.2060_2062delAG  | c.(2059-2064)CAGCTC>CT             | p.Q687del     |
| Pat_31 | Pre-Treatment   | KCNN3      | 3782   | 37 | 1  | 154842331 | 154842333 | In_Frame_Del    | DEL | TGC  | -      | 8   | 81   | c.108_110delGCAc  | c.(106-111)CAGCAA>CAAp.36_37QQ>Q   |               |
| Pat_31 | Pre-Treatment   | PBXIP1     | 57326  | 37 | 1  | 154917508 | 154917510 | In_Frame_Del    | DEL | GGT  | -      | 7   | 260  | c.2186_2188delAC  | c.(2185-2190)CACCGG>CG             | p.H729del     |
| Pat_31 | Pre-Treatment   | SHC1       | 6464   | 37 | 1  | 154942910 | 154942911 | Frame_Shift_Ins | INS | -    | G      | 7   | 236  | c.92_93insC       | c.(91-93)CCGfs                     | p.P31fs       |
| Pat_31 | Pre-Treatment   | BCAN       | 63827  | 37 | 1  | 156626160 | 156626160 | Frame_Shift_Del | DEL | G    | -      | 7   | 656  | c.2029delG        | c.(2029-2031)GGGfs                 | p.G677fs      |

|        |               |              |           |    |    |           |           |                 |     |           |     |    |      |                                     |                        |                |
|--------|---------------|--------------|-----------|----|----|-----------|-----------|-----------------|-----|-----------|-----|----|------|-------------------------------------|------------------------|----------------|
| Pat_31 | Pre-Treatment | NES          | 10763     | 37 | 1  | 156642804 | 156642804 | Frame_Shift_Del | DEL | G         | -   | 15 | 902  | c.1176delC                          | c.(1174-1176)CCCfs     | p.P392fs       |
| Pat_31 | Pre-Treatment | OR10Z1       | 128368    | 37 | 1  | 158576487 | 158576487 | Frame_Shift_Del | DEL | G         | -   | 10 | 1048 | c.259delG                           | c.(259-261)GGGfs       | p.G87fs        |
| Pat_31 | Pre-Treatment | PVRL4        | 81607     | 37 | 1  | 161044104 | 161044106 | In_Frame_Del    | DEL | CCA       | -   | 7  | 562  | .1058_1060delTG(1057-1062)GTGGGT>GC |                        | p.V353del      |
| Pat_31 | Pre-Treatment | PCP4L1       | 654790    | 37 | 1  | 161254154 | 161254156 | In_Frame_Del    | DEL | GGA       | -   | 13 | 492  | c.90_92delGGA                       | c.(88-93)GCGGAG>GCG    | p.E35del       |
| Pat_31 | Pre-Treatment | PAPPA2       | 60676     | 37 | 1  | 176762724 | 176762724 | Frame_Shift_Del | DEL | C         | -   | 9  | 575  | c.5049delC                          | c.(5047-5049)ATCfs     | p.I1683fs      |
| Pat_31 | Pre-Treatment | CACNA1E      | 777       | 37 | 1  | 181680102 | 181680103 | Frame_Shift_Del | DEL | AG        | -   | 17 | 359  | .1068_1069delAC                     | c.(1066-1071)AAAGAGfs  | p.K356fs       |
| Pat_31 | Pre-Treatment | PRG4         | 10216     | 37 | 1  | 186276643 | 186276645 | In_Frame_Del    | DEL | AAG       | -   | 7  | 774  | .1792_1794delAA                     | c.(1792-1794)AAGdel    | p.K599del      |
| Pat_31 | Pre-Treatment | PPP1R15B     | 84919     | 37 | 1  | 204379335 | 204379335 | Frame_Shift_Del | DEL | C         | -   | 10 | 187  | c.1205delG                          | c.(1204-1206)AGTfs     | p.S402fs       |
| Pat_31 | Pre-Treatment | LOC642587    | 642587    | 37 | 1  | 209605637 | 209605648 | In_Frame_Del    | DEL | CAGCAGCA  | -   | 21 | 39   | .263delAGCAGCA(264)GTAGCAGCAGCAGC   | p.AAAA93del            |                |
| Pat_31 | Pre-Treatment | PTPN14       | 5784      | 37 | 1  | 214557049 | 214557051 | In_Frame_Del    | DEL | CCT       | -   | 10 | 221  | .2147_2149delAG(2146-2151)GAGGCT>GC |                        | p.E716del      |
| Pat_31 | Pre-Treatment | MIA3         | 375056    | 37 | 1  | 222838784 | 222838785 | Frame_Shift_Del | DEL | CC        | -   | 7  | 1664 | .5547_5548delCC                     | c.(5545-5550)GGCCCAfs  | p.G1849fs      |
| Pat_31 | Pre-Treatment | AGT          | 183       | 37 | 1  | 230839055 | 230839055 | Frame_Shift_Del | DEL | A         | -   | 9  | 362  | c.1290delT                          | c.(1288-1290)TTTfs     | p.F430fs       |
| Pat_31 | Pre-Treatment | LZTS2        | 84445     | 37 | 10 | 102763415 | 102763417 | In_Frame_Del    | DEL | CCT       | -   | 18 | 675  | c.560_562delCCT(559-564)GCCTCC>GCC  |                        | p.S197del      |
| Pat_31 | Pre-Treatment | FRG2B        | 441581    | 37 | 10 | 135438960 | 135438960 | Frame_Shift_Del | DEL | C         | -   | 18 | 680  | c.480delG                           | c.(478-480)AGGfs       | p.R160fs       |
| Pat_31 | Pre-Treatment | LOC653544    | 653544    | 37 | 10 | 135491013 | 135491014 | Frame_Shift_Ins | INS | -         | T   | 11 | 775  | c.624_625insT                       | c.(622-627)GCCAGGfs    | p.A208fs       |
| Pat_31 | Pre-Treatment | FADS2        | 9415      | 37 | 11 | 61607885  | 61607887  | In_Frame_Del    | DEL | TCC       | -   | 12 | 620  | c.398_400delTCC                     | c.(397-402)TTCTCC>TTC  | p.L137del      |
| Pat_31 | Pre-Treatment | UVRAG        | 7405      | 37 | 11 | 75694430  | 75694431  | Splice_Site     | INS | -         | A   | 14 | 125  | c.700_splice                        | c.e8-1                 | p.K234_splice  |
| Pat_31 | Pre-Treatment | CADM1        | 23705     | 37 | 11 | 115080312 | 115080314 | In_Frame_Del    | DEL | TGG       | -   | 7  | 212  | .1058_1060delCC(1057-1062)ACCATC>AT |                        | p.T353del      |
| Pat_31 | Pre-Treatment | H2AFX        | 3014      | 37 | 11 | 118965823 | 118965823 | Frame_Shift_Del | DEL | G         | -   | 8  | 751  | c.282delC                           | c.(280-282)CTCfs       | p.L94fs        |
| Pat_31 | Pre-Treatment | PRB2         | 653247    | 37 | 12 | 11546506  | 11546508  | In_Frame_Del    | DEL | TTG       | -   | 30 | 991  | c.504_506delCAA                     | c.(502-507)AACAAAG>AAG | p.N168del      |
| Pat_31 | Pre-Treatment | PRB2         | 653247    | 37 | 12 | 11546732  | 11546733  | In_Frame_Ins    | INS | -         | AGA | 12 | 1080 | c.279_280insTCT                     | c.(277-282)jinsTCT     | p.93_94insS    |
| Pat_31 | Pre-Treatment | GPR19        | 2842      | 37 | 12 | 12814274  | 12814274  | Frame_Shift_Del | DEL | T         | -   | 8  | 535  | c.1109delA                          | c.(1108-1110)AACfs     | p.N370fs       |
| Pat_31 | Pre-Treatment | R3HDM2       | 22864     | 37 | 12 | 57674205  | 57674207  | In_Frame_Del    | DEL | TGC       | -   | 11 | 245  | .1236_1238delGC(1234-1239)CAGCAA>CA | p.412_413QQ>           |                |
| Pat_31 | Pre-Treatment | EP400        | 57634     | 37 | 12 | 132446446 | 132446448 | In_Frame_Del    | DEL | GAG       | -   | 9  | 306  | .1282_1284delGA                     | c.(1282-1284)GAGdel    | p.E437del      |
| Pat_31 | Pre-Treatment | EP400        | 57634     | 37 | 12 | 132547138 | 132547139 | In_Frame_Ins    | INS | -         | CAA | 8  | 295  | .8226_8227insCA                     | c.(8224-8229)jinsCAA   | p.2748_2749ins |
| Pat_31 | Pre-Treatment | KBTD7        | 84078     | 37 | 13 | 41768293  | 41768293  | Frame_Shift_Del | DEL | A         | -   | 7  | 529  | c.101delT                           | c.(100-102)TTCfs       | p.F34fs        |
| Pat_31 | Pre-Treatment | TSC22D1      | 8848      | 37 | 13 | 45148706  | 45148708  | In_Frame_Del    | DEL | TGC       | -   | 21 | 336  | .1503_1505delGC(1501-1506)CAGCAA>CA | p.501_502QQ>           |                |
| Pat_31 | Pre-Treatment | FARP1        | 10160     | 37 | 13 | 99092237  | 99092237  | Frame_Shift_Del | DEL | G         | -   | 10 | 1272 | c.2456delG                          | c.(2455-2457)TGGfs     | p.W819fs       |
| Pat_31 | Pre-Treatment | FAM155A      | 728215    | 37 | 13 | 108518338 | 108518338 | Frame_Shift_Del | DEL | C         | -   | 11 | 696  | c.607delG                           | c.(607-609)GACfs       | p.D203fs       |
| Pat_31 | Pre-Treatment | FAM155A      | 728215    | 37 | 13 | 108518687 | 108518689 | In_Frame_Del    | DEL | CTG       | -   | 10 | 119  | c.256_258delCAG                     | c.(256-258)CAGdel      | p.Q86del       |
| Pat_31 | Pre-Treatment | APEX1        | 328       | 37 | 14 | 20923820  | 20923820  | Frame_Shift_Del | DEL | A         | -   | 9  | 256  | c.16delA                            | c.(16-18)AAfs          | p.K6fs         |
| Pat_31 | Pre-Treatment | EXOC5        | 10640     | 37 | 14 | 57714403  | 57714403  | Frame_Shift_Del | DEL | C         | -   | 4  | 7    | c.55delG                            | c.(55-57)GAAfs         | p.E19fs        |
| Pat_31 | Pre-Treatment | PTPN21       | 11099     | 37 | 14 | 88945628  | 88945630  | In_Frame_Del    | DEL | TCC       | -   | 10 | 161  | .2145_2147delGG(2143-2148)GAGGAC>GA |                        | p.E715del      |
| Pat_31 | Pre-Treatment | BTBD7        | 55727     | 37 | 14 | 93720048  | 93720048  | Frame_Shift_Del | DEL | T         | -   | 7  | 409  | c.1697delA                          | c.(1696-1698)AATfs     | p.N566fs       |
| Pat_31 | Pre-Treatment | MEIS2        | 4212      | 37 | 15 | 37385874  | 37385874  | Frame_Shift_Del | DEL | T         | -   | 7  | 944  | c.547delA                           | c.(547-549)ATGfs       | p.M183fs       |
| Pat_31 | Pre-Treatment | HERC1        | 8925      | 37 | 15 | 63922683  | 63922683  | Frame_Shift_Del | DEL | C         | -   | 7  | 1682 | c.12948delG                         | c.(12946-12948)GGGfs   | p.G4316fs      |
| Pat_31 | Pre-Treatment | KIAA0430     | 9665      | 37 | 16 | 15729982  | 15729984  | In_Frame_Del    | DEL | CCA       | -   | 7  | 475  | c.360_362delTGG(358-363)GGTGGC>GGC  | p.120_121GG>           |                |
| Pat_31 | Pre-Treatment | C16orf88     | 400506    | 37 | 16 | 19725706  | 19725706  | Frame_Shift_Del | DEL | T         | -   | 8  | 217  | c.652delA                           | c.(652-654)ATCfs       | p.I218fs       |
| Pat_31 | Pre-Treatment | LOC100132247 | 100132247 | 37 | 16 | 22545744  | 22545755  | In_Frame_Del    | DEL | CACCCCTCA | -   | 14 | 77   | .1451delTCCACCC(1452)CTTCCACCCCTCAG | p.PPSA485del           |                |
| Pat_31 | Pre-Treatment | SETD1A       | 9739      | 37 | 16 | 30982809  | 30982811  | In_Frame_Del    | DEL | TCC       | -   | 9  | 289  | .3127_3129delTCT                    | c.(3127-3129)TCCdel    | p.S1058del     |
| Pat_31 | Pre-Treatment | CCDC135      | 84229     | 37 | 16 | 57731885  | 57731887  | In_Frame_Del    | DEL | GGA       | -   | 7  | 260  | c.24_26delGGA                       | c.(22-27)GTGGAG>GTG    | p.E13del       |
| Pat_31 | Pre-Treatment | ACD          | 65057     | 37 | 16 | 67693646  | 67693648  | In_Frame_Del    | DEL | GCA       | -   | 11 | 783  | c.551_553delTGC(550-555)CTGCAG>CAC  |                        | p.L184del      |
| Pat_31 | Pre-Treatment | ADAMTS18     | 170692    | 37 | 16 | 77356311  | 77356311  | Frame_Shift_Del | DEL | A         | -   | 16 | 313  | c.2085delT                          | c.(2083-2085)TTTfs     | p.F695fs       |
| Pat_31 | Pre-Treatment | KIAA0182     | 23199     | 37 | 16 | 85682290  | 85682290  | Frame_Shift_Del | DEL | C         | -   | 17 | 439  | c.359delC                           | c.(358-360)ACCfs       | p.T120fs       |
| Pat_31 | Pre-Treatment | YBX2         | 51087     | 37 | 17 | 7193599   | 7193599   | Frame_Shift_Del | DEL | G         | -   | 7  | 681  | c.715delC                           | c.(715-717)CGGfs       | p.R239fs       |
| Pat_31 | Pre-Treatment | CHRN1        | 1140      | 37 | 17 | 7357666   | 7357668   | In_Frame_Del    | DEL | CTG       | -   | 9  | 547  | c.871_873delCTG                     | c.(871-873)CTGdel      | p.L294del      |
| Pat_31 | Pre-Treatment | KDM6B        | 23135     | 37 | 17 | 7751859   | 7751861   | In_Frame_Del    | DEL | CAC       | -   | 7  | 142  | .2253_2255delCA(2251-2256)GTCACC>GT |                        | p.T762del      |

|        |               |            |        |    |    |           |           |                 |     |     |     |    |      |                  |                                    |                |
|--------|---------------|------------|--------|----|----|-----------|-----------|-----------------|-----|-----|-----|----|------|------------------|------------------------------------|----------------|
| Pat_31 | Pre-Treatment | CHD3       | 1107   | 37 | 17 | 7798765   | 7798765   | Frame_Shift_Del | DEL | C   | -   | 9  | 443  | c.1612delC       | c.(1612-1614)CCCfs                 | p.P538fs       |
| Pat_31 | Pre-Treatment | PRR11      | 55771  | 37 | 17 | 57247171  | 57247171  | Frame_Shift_Del | DEL | A   | -   | 11 | 218  | c.58delA         | c.(58-60)AAafs                     | p.K20fs        |
| Pat_31 | Pre-Treatment | USP36      | 57602  | 37 | 17 | 76795074  | 76795074  | Frame_Shift_Del | DEL | G   | -   | 8  | 931  | c.3156delC       | c.(3154-3156)GTCfs                 | p.V1052fs      |
| Pat_31 | Pre-Treatment | PIAS4      | 51588  | 37 | 19 | 4037775   | 4037777   | In_Frame_Del    | DEL | GAG | -   | 9  | 47   | .1435_1437delGAT | c.(1435-1437)GAGdel                | p.E487del      |
| Pat_31 | Pre-Treatment | MLLT1      | 4298   | 37 | 19 | 6222272   | 6222274   | In_Frame_Del    | DEL | AGG | -   | 8  | 127  | c.968_970delCCT  | c.(967-972)TCCTTC>TTC              | p.S323del      |
| Pat_31 | Pre-Treatment | GADD45GIP1 | 90480  | 37 | 19 | 13065273  | 13065275  | In_Frame_Del    | DEL | GCT | -   | 8  | 306  | c.416_418delAGC  | c.(415-420)CAGCGG>CGC              | p.Q139del      |
| Pat_31 | Pre-Treatment | SFRS14     | 10147  | 37 | 19 | 19136394  | 19136394  | Frame_Shift_Del | DEL | T   | -   | 8  | 342  | c.763delA        | c.(763-765)ATAfs                   | p.I255fs       |
| Pat_31 | Pre-Treatment | ATP4A      | 495    | 37 | 19 | 36054349  | 36054351  | In_Frame_Del    | DEL | CTT | -   | 12 | 1307 | c.91_93delAAG    | c.(91-93)AAGdel                    | p.K31del       |
| Pat_31 | Pre-Treatment | HAUS5      | 23354  | 37 | 19 | 36108990  | 36108990  | Frame_Shift_Del | DEL | C   | -   | 7  | 882  | c.714delC        | c.(712-714)CACfs                   | p.H238fs       |
| Pat_31 | Pre-Treatment | PSG1       | 5669   | 37 | 19 | 43382402  | 43382402  | Frame_Shift_Del | DEL | G   | -   | 8  | 795  | c.93delC         | c.(91-93)CCCfs                     | p.P31fs        |
| Pat_31 | Pre-Treatment | TEAD2      | 8463   | 37 | 19 | 49850472  | 49850473  | Frame_Shift_Ins | INS | -   | G   | 10 | 761  | c.883_884insC    | c.(883-885)CATfs                   | p.H295fs       |
| Pat_31 | Pre-Treatment | LILRB1     | 10859  | 37 | 19 | 55146148  | 55146150  | In_Frame_Del    | DEL | CTC | -   | 9  | 181  | .1417_1419delCT  | c.(1417-1419)CTCdel                | p.L479del      |
| Pat_31 | Pre-Treatment | RPL23AP32  | 56969  | 37 | 2  | 54756588  | 54756588  | Frame_Shift_Del | DEL | A   | -   | 8  | 499  | c.106delA        | c.(106-108)AAafs                   | p.K36fs        |
| Pat_31 | Pre-Treatment | TMEM127    | 55654  | 37 | 2  | 96919781  | 96919783  | In_Frame_Del    | DEL | TGC | -   | 9  | 357  | c.480_482delGCA  | c.(478-483)CAGCAT>CAT              | p.Q160del      |
| Pat_31 | Pre-Treatment | ANKRD36    | 375248 | 37 | 2  | 97808574  | 97808575  | Splice_Site     | INS | -   | A   | 27 | 63   | c.901_splice     | c.e8+2                             | p.V301_splice  |
| Pat_31 | Pre-Treatment | MRPS9      | 64965  | 37 | 2  | 105713707 | 105713707 | Frame_Shift_Del | DEL | G   | -   | 7  | 251  | c.1024delG       | c.(1024-1026)GGAfs                 | p.G342fs       |
| Pat_31 | Pre-Treatment | CYP20A1    | 57404  | 37 | 2  | 204150380 | 204150380 | Frame_Shift_Del | DEL | A   | -   | 9  | 235  | c.896delA        | c.(895-897)CAAfs                   | p.Q299fs       |
| Pat_31 | Pre-Treatment | ALPP       | 250    | 37 | 2  | 233243529 | 233243531 | In_Frame_Del    | DEL | TGC | -   | 7  | 125  | c.17_19delTGC    | c.(16-21)ATGCTG>ATG                | p.L13del       |
| Pat_31 | Pre-Treatment | GAL3ST2    | 64090  | 37 | 2  | 242738494 | 242738496 | In_Frame_Del    | DEL | TCC | -   | 9  | 432  | c.44_46delTCC    | c.(43-48)ATCCTC>ATC                | p.L20del       |
| Pat_31 | Pre-Treatment | ZMYND8     | 23613  | 37 | 20 | 45875072  | 45875072  | Frame_Shift_Del | DEL | T   | -   | 7  | 589  | c.1904delA       | c.(1903-1905)AAGfs                 | p.K635fs       |
| Pat_31 | Pre-Treatment | CTCFL      | 140690 | 37 | 20 | 56099187  | 56099187  | Frame_Shift_Del | DEL | T   | -   | 9  | 1575 | c.75delA         | c.(73-75)AAafs                     | p.K25fs        |
| Pat_31 | Pre-Treatment | TPTE       | 7179   | 37 | 21 | 10944697  | 10944697  | Frame_Shift_Del | DEL | A   | -   | 19 | 725  | c.537delT        | c.(535-537)TTTfs                   | p.F179fs       |
| Pat_31 | Pre-Treatment | IFNGR2     | 3460   | 37 | 21 | 34799292  | 34799292  | Frame_Shift_Del | DEL | T   | -   | 9  | 1239 | c.514delT        | c.(514-516)TTTfs                   | p.F172fs       |
| Pat_31 | Pre-Treatment | DNAJC28    | 54943  | 37 | 21 | 34860940  | 34860940  | Frame_Shift_Del | DEL | G   | -   | 11 | 948  | c.761delC        | c.(760-762)CCAfs                   | p.P254fs       |
| Pat_31 | Pre-Treatment | PLAC4      | 191585 | 37 | 21 | 42551313  | 42551313  | Frame_Shift_Del | DEL | C   | -   | 10 | 86   | c.243delG        | c.(241-243)TGGfs                   | p.W81fs        |
| Pat_31 | Pre-Treatment | DGCR14     | 8220   | 37 | 22 | 19124913  | 19124913  | Frame_Shift_Del | DEL | C   | -   | 7  | 940  | c.958delG        | c.(958-960)GAGfs                   | p.E320fs       |
| Pat_31 | Pre-Treatment | MYH9       | 4627   | 37 | 22 | 36689419  | 36689421  | In_Frame_Del    | DEL | CCT | -   | 9  | 369  | .4049_4051delAG  | c.(4048-4053)GAGGCC>GC             | p.E1350del     |
| Pat_31 | Pre-Treatment | TCF20      | 6942   | 37 | 22 | 42605990  | 42605992  | In_Frame_Del    | DEL | CTG | -   | 8  | 323  | .5320_5322delCA  | c.(5320-5322)CAGdel                | p.Q1774del     |
| Pat_31 | Pre-Treatment | CCR3       | 1232   | 37 | 3  | 46306948  | 46306948  | Frame_Shift_Del | DEL | T   | -   | 7  | 703  | c.299delT        | c.(298-300)GTTfs                   | p.V100fs       |
| Pat_31 | Pre-Treatment | BSN        | 8927   | 37 | 3  | 49698670  | 49698670  | Frame_Shift_Del | DEL | T   | -   | 7  | 249  | c.9392delT       | c.(9391-9393)CTTfs                 | p.L3131fs      |
| Pat_31 | Pre-Treatment | SLCO2A1    | 6578   | 37 | 3  | 133670082 | 133670083 | Frame_Shift_Ins | INS | -   | A   | 7  | 198  | c.830_831insT    | c.(829-831)TTCfs                   | p.F277fs       |
| Pat_31 | Pre-Treatment | PDE6B      | 5158   | 37 | 4  | 661763    | 661765    | In_Frame_Del    | DEL | AGG | -   | 9  | 358  | .2471_2473delAG  | c.(2470-2475)AAGGAG>AA             | p.E828del      |
| Pat_31 | Pre-Treatment | SCLT1      | 132320 | 37 | 4  | 129864163 | 129864163 | Frame_Shift_Del | DEL | T   | -   | 9  | 377  | c.1620delA       | c.(1618-1620)AAafs                 | p.K540fs       |
| Pat_31 | Pre-Treatment | FRG1       | 2483   | 37 | 4  | 190878555 | 190878556 | Frame_Shift_Ins | INS | -   | A   | 9  | 119  | c.435_436insA    | c.(433-438)GGGAAafs                | p.G145fs       |
| Pat_31 | Pre-Treatment | MED10      | 84246  | 37 | 5  | 6374471   | 6374471   | Frame_Shift_Del | DEL | T   | -   | 7  | 352  | c.275delA        | c.(274-276)AATfs                   | p.N92fs        |
| Pat_31 | Pre-Treatment | C6         | 729    | 37 | 5  | 41160299  | 41160300  | Frame_Shift_Del | DEL | AC  | -   | 8  | 491  | .1628_1629delGT  | c.(1627-1629)TGTfs                 | p.C543fs       |
| Pat_31 | Pre-Treatment | HAPLN1     | 1404   | 37 | 5  | 82937358  | 82937358  | Frame_Shift_Del | DEL | T   | -   | 9  | 571  | c.1022delA       | c.(1021-1023)AAGfs                 | p.K341fs       |
| Pat_31 | Pre-Treatment | MCC        | 4163   | 37 | 5  | 112824048 | 112824049 | In_Frame_Ins    | INS | -   | GCC | 9  | 30   | c.63_64insGGC    | c.(61-66)insGGC                    | p.21_22insG    |
| Pat_31 | Pre-Treatment | KCTD16     | 57528  | 37 | 5  | 143853531 | 143853531 | Frame_Shift_Del | DEL | A   | -   | 7  | 227  | c.1141delA       | c.(1141-1143)AAafs                 | p.K381fs       |
| Pat_31 | Pre-Treatment | ATXN1      | 6310   | 37 | 6  | 16327864  | 16327865  | In_Frame_Ins    | INS | -   | TGC | 27 | 41   | c.677_678insGC   | c.(676-678)CAC>CAGCACp.225_226insC |                |
| Pat_31 | Pre-Treatment | BAT2       | 7916   | 37 | 6  | 31597338  | 31597340  | In_Frame_Del    | DEL | AGC | -   | 8  | 915  | .1970_1972delAG  | c.(1969-1974)AAGCAG>AA             | p.Q661del      |
| Pat_31 | Pre-Treatment | CYP21A2    | 1589   | 37 | 6  | 31975223  | 31975224  | Frame_Shift_Ins | INS | -   | T   | 8  | 403  | c.916_917insT    | c.(916-918)GTTfs                   | p.V306fs       |
| Pat_31 | Pre-Treatment | PHACTR2    | 9749   | 37 | 6  | 144086414 | 144086414 | Frame_Shift_Del | DEL | A   | -   | 7  | 401  | c.678delA        | c.(676-678)TCAfs                   | p.S226fs       |
| Pat_31 | Pre-Treatment | NOX3       | 50508  | 37 | 6  | 155743925 | 155743926 | Frame_Shift_Del | DEL | CA  | -   | 7  | 880  | c.1210_1211delTG | c.(1210-1212)TGCfs                 | p.C404fs       |
| Pat_31 | Pre-Treatment | TWISTNB    | 221830 | 37 | 7  | 19738111  | 19738113  | In_Frame_Del    | DEL | TTC | -   | 7  | 1597 | c.843_845delGAA  | c.(841-846)AAGAAA>AAA              | p.281_282KK>I  |
| Pat_31 | Pre-Treatment | POM121     | 9883   | 37 | 7  | 72413723  | 72413724  | In_Frame_Ins    | INS | -   | CTC | 13 | 201  | .3191_3192insCT  | c.(3190-3192)TTC>TTCCTC            | p.1064_1065ins |
| Pat_31 | Pre-Treatment | PTCD1      | 26024  | 37 | 7  | 99032605  | 99032607  | In_Frame_Del    | DEL | CTC | -   | 9  | 498  | c.259_261delGAG  | c.(259-261)GAGdel                  | p.E87del       |

|        |                 |            |        |    |    |           |           |                 |     |          |        |    |      |                                                   |                      |               |
|--------|-----------------|------------|--------|----|----|-----------|-----------|-----------------|-----|----------|--------|----|------|---------------------------------------------------|----------------------|---------------|
| Pat_31 | Pre-Treatment   | GPC2       | 221914 | 37 | 7  | 99771554  | 99771554  | Frame_Shift_Del | DEL | C        | -      | 8  | 794  | c.796delG                                         | c.(796-798)GTCfs     | p.V266fs      |
| Pat_31 | Pre-Treatment   | FOXP2      | 93986  | 37 | 7  | 114271580 | 114271582 | Splice_Site     | DEL | CAG      | -      | 9  | 56   | c.598_splice                                      | c.e6-1               | p.Q200_splice |
| Pat_31 | Pre-Treatment   | WASL       | 8976   | 37 | 7  | 123332839 | 123332841 | In_Frame_Del    | DEL | AGG      | -      | 7  | 179  | c.907_909delCCT                                   | c.(907-909)CCTdel    | p.P303del     |
| Pat_31 | Pre-Treatment   | LUC7L2     | 51631  | 37 | 7  | 139094365 | 139094366 | Frame_Shift_Del | DEL | AG       | -      | 8  | 120  | c.744_745delIAG                                   | c.(742-747)GAAGAGfs  | p.E248fs      |
| Pat_31 | Pre-Treatment   | OR9A4      | 130075 | 37 | 7  | 141619203 | 141619203 | Frame_Shift_Del | DEL | T        | -      | 7  | 956  | c.528delT                                         | c.(526-528)AATfs     | p.N176fs      |
| Pat_31 | Pre-Treatment   | CDK5       | 1020   | 37 | 7  | 150754217 | 150754217 | Frame_Shift_Del | DEL | T        | -      | 8  | 1275 | c.68delA                                          | c.(67-69)AACfs       | p.N23fs       |
| Pat_31 | Pre-Treatment   | EPB49      | 2039   | 37 | 8  | 21926552  | 21926552  | Frame_Shift_Del | DEL | C        | -      | 10 | 989  | c.275delC                                         | c.(274-276)TCCfs     | p.S92fs       |
| Pat_31 | Pre-Treatment   | SFTPC      | 6440   | 37 | 8  | 22020159  | 22020161  | In_Frame_Del    | DEL | GTG      | -      | 10 | 330  | c.115_117delGTG                                   | c.(115-117)GTGdel    | p.V44del      |
| Pat_31 | Pre-Treatment   | KIAA1967   | 57805  | 37 | 8  | 22473324  | 22473324  | Frame_Shift_Del | DEL | C        | -      | 7  | 486  | c.1507delC                                        | c.(1507-1509)CCCfs   | p.P503fs      |
| Pat_31 | Pre-Treatment   | CHD7       | 55636  | 37 | 8  | 61769038  | 61769040  | In_Frame_Del    | DEL | GGA      | -      | 10 | 118  | .7199_7201delGG(7198-7203)CGGAGG>CG2400_2401RR:   |                      |               |
| Pat_31 | Pre-Treatment   | KCNB2      | 9312   | 37 | 8  | 73479985  | 73479985  | Frame_Shift_Del | DEL | C        | -      | 7  | 610  | c.16delC                                          | c.(16-18)CCCfs       | p.P6fs        |
| Pat_31 | Pre-Treatment   | TSNARE1    | 203062 | 37 | 8  | 143310866 | 143310868 | In_Frame_Del    | DEL | GAT      | -      | 9  | 361  | .1519_1521delAT(                                  | c.(1519-1521)ATCdel  | p.I507del     |
| Pat_31 | Pre-Treatment   | TPRN       | 286262 | 37 | 9  | 140087025 | 140087027 | In_Frame_Del    | DEL | TCC      | -      | 7  | 41   | .1659_1661delGG(1657-1662)GAGGAA>GA).553_554EE>I  |                      |               |
| Pat_31 | Pre-Treatment   | MAP7D3     | 79649  | 37 | X  | 135314194 | 135314194 | Frame_Shift_Del | DEL | G        | -      | 7  | 603  | c.922delC                                         | c.(922-924)CAGfs     | p.Q308fs      |
| Pat_31 | Pre-Treatment   | MAGEC1     | 9947   | 37 | X  | 140994639 | 140994641 | In_Frame_Del    | DEL | CTC      | -      | 7  | 756  | .1449_1451delCT((1447-1452)AGCTCC>AG).483_484SS>! |                      |               |
| Pat_31 | Pre-Treatment   | MAGEC1     | 9947   | 37 | X  | 140995035 | 140995037 | In_Frame_Del    | DEL | TCT      | -      | 7  | 696  | .1845_1847delTC.(1843-1848)CCTCTT>CC              |                      | p.L616del     |
| Pat_31 | Post-Resistance | SPEN       | 23013  | 37 | 1  | 16262465  | 16262466  | Frame_Shift_Ins | INS | -        | C      | 7  | 98   | c.9730_9731insC                                   | c.(9730-9732)ACCfs   | p.T3244fs     |
| Pat_31 | Post-Resistance | NBPF1      | 55672  | 37 | 1  | 16918438  | 16918438  | Frame_Shift_Del | DEL | G        | -      | 8  | 1302 | c.79delC                                          | c.(79-81)CAGfs       | p.Q27fs       |
| Pat_31 | Post-Resistance | PABPC4     | 8761   | 37 | 1  | 40028016  | 40028016  | Frame_Shift_Del | DEL | G        | -      | 8  | 301  | c.1693delC                                        | c.(1693-1695)CAGfs   | p.Q565fs      |
| Pat_31 | Post-Resistance | ST6GALNAC5 | 81849  | 37 | 1  | 77334292  | 77334293  | In_Frame_Ins    | INS | -        | CAGCAA | 23 | 22   | 126_127insCAGC/                                   | c.(124-129)insCAGCAA | p.48_49insQQ  |
| Pat_31 | Post-Resistance | SPAG17     | 200162 | 37 | 1  | 118642274 | 118642274 | Frame_Shift_Del | DEL | G        | -      | 7  | 605  | c.784delC                                         | c.(784-786)CTGfs     | p.L262fs      |
| Pat_31 | Post-Resistance | NOTCH2     | 4853   | 37 | 1  | 120458346 | 120458347 | Frame_Shift_Del | DEL | CG       | -      | 17 | 813  | .6998_6999delICC                                  | c.(6997-6999)GCGfs   | p.A2333fs     |
| Pat_31 | Post-Resistance | ECM1       | 1893   | 37 | 1  | 150483467 | 150483467 | Frame_Shift_Del | DEL | C        | -      | 9  | 873  | c.501delC                                         | c.(499-501)TTCfs     | p.F167fs      |
| Pat_31 | Post-Resistance | NUP210L    | 91181  | 37 | 1  | 154026862 | 154026862 | Frame_Shift_Del | DEL | G        | -      | 7  | 219  | c.3325delC                                        | c.(3325-3327)CAGfs   | p.Q1109fs     |
| Pat_31 | Post-Resistance | KCNN3      | 3782   | 37 | 1  | 154842331 | 154842333 | In_Frame_Del    | DEL | TGC      | -      | 17 | 199  | c.108_110delGCAc.(106-111)CAGCAA>CAAp.36_37QQ>Q   |                      |               |
| Pat_31 | Post-Resistance | OR10Z1     | 128368 | 37 | 1  | 158576487 | 158576487 | Frame_Shift_Del | DEL | G        | -      | 7  | 702  | c.259delG                                         | c.(259-261)GGGfs     | p.G87fs       |
| Pat_31 | Post-Resistance | KCNJ9      | 3765   | 37 | 1  | 160054230 | 160054232 | In_Frame_Del    | DEL | TGC      | -      | 8  | 213  | c.410_412delITGC:(.409-414)GTGCTG>GTC             |                      | p.L141del     |
| Pat_31 | Post-Resistance | HMCN1      | 83872  | 37 | 1  | 186050426 | 186050426 | Frame_Shift_Del | DEL | C        | -      | 8  | 987  | c.8687delC                                        | c.(8686-8688)TCCfs   | p.S2896fs     |
| Pat_31 | Post-Resistance | LOC642587  | 642587 | 37 | 1  | 209605637 | 209605648 | In_Frame_Del    | DEL | CAGCAGCA | -      | 11 | 31   | 263delAGCAGCA(264)GTAGCAGCAGCAGC                  |                      | p.AAAA93del   |
| Pat_31 | Post-Resistance | URB2       | 9816   | 37 | 1  | 229771782 | 229771782 | Frame_Shift_Del | DEL | G        | -      | 8  | 1101 | c.1422delG                                        | c.(1420-1422)TTGfs   | p.L474fs      |
| Pat_31 | Post-Resistance | CHRM3      | 1131   | 37 | 1  | 240072444 | 240072444 | Frame_Shift_Del | DEL | A        | -      | 10 | 132  | c.1693delA                                        | c.(1693-1695)AAAFs   | p.K565fs      |
| Pat_31 | Post-Resistance | OR2M2      | 391194 | 37 | 1  | 248343440 | 248343441 | Frame_Shift_Del | DEL | GG       | -      | 8  | 1323 | c.153_154delGG                                    | c.(151-156)CTGGACfs  | p.L51fs       |
| Pat_31 | Post-Resistance | SFMBT2     | 57713  | 37 | 10 | 7212995   | 7212997   | In_Frame_Del    | DEL | CTC      | -      | 8  | 560  | .2437_2439delGAI                                  | c.(2437-2439)GAGdel  | p.E813del     |
| Pat_31 | Post-Resistance | MTPAP      | 55149  | 37 | 10 | 30653930  | 30653932  | In_Frame_Del    | DEL | TCC      | -      | 8  | 135  | c.250_252delGGA                                   | c.(250-252)GGAdel    | p.G84del      |
| Pat_31 | Post-Resistance | CHST15     | 51363  | 37 | 10 | 125804296 | 125804296 | Frame_Shift_Del | DEL | A        | -      | 4  | 8    | c.686delT                                         | c.(685-687)TTCfs     | p.F229fs      |
| Pat_31 | Post-Resistance | C11orf95   | 65998  | 37 | 11 | 63533335  | 63533337  | In_Frame_Del    | DEL | TCC      | -      | 8  | 41   | c.579_581delGGA:(.577-582)GAGGAA>GAA).193_194EE>I |                      |               |
| Pat_31 | Post-Resistance | TSKU       | 25987  | 37 | 11 | 76506673  | 76506675  | In_Frame_Del    | DEL | CTG      | -      | 10 | 155  | c.13_15delCTG                                     | c.(13-15)CTGdel      | p.L9del       |
| Pat_31 | Post-Resistance | PRDM10     | 56980  | 37 | 11 | 129827738 | 129827738 | Frame_Shift_Del | DEL | G        | -      | 7  | 1265 | c.137delC                                         | c.(136-138)CCAFs     | p.P46fs       |
| Pat_31 | Post-Resistance | PRPF40B    | 25766  | 37 | 12 | 50027673  | 50027675  | In_Frame_Del    | DEL | CAG      | -      | 7  | 392  | c.544_546delCAG                                   | c.(544-546)CAGdel    | p.Q185del     |
| Pat_31 | Post-Resistance | GEFT       | 115557 | 37 | 12 | 58005763  | 58005763  | Frame_Shift_Del | DEL | G        | -      | 8  | 196  | c.86delG                                          | c.(85-87)CGGfs       | p.R29fs       |
| Pat_31 | Post-Resistance | CUX2       | 23316  | 37 | 12 | 111758235 | 111758237 | In_Frame_Del    | DEL | TCC      | -      | 10 | 207  | .2422_2424delTCI                                  | c.(2422-2424)TCCdel  | p.S813del     |
| Pat_31 | Post-Resistance | PTPN21     | 11099  | 37 | 14 | 88945628  | 88945630  | In_Frame_Del    | DEL | TCC      | -      | 8  | 136  | .2145_2147delGG(2143-2148)GAGGAC>GA               |                      | p.E715del     |
| Pat_31 | Post-Resistance | HERC2      | 8924   | 37 | 15 | 28518115  | 28518115  | Frame_Shift_Del | DEL | C        | -      | 19 | 239  | c.836delG                                         | c.(835-837)GGAFs     | p.G279fs      |
| Pat_31 | Post-Resistance | THBS1      | 7057   | 37 | 15 | 39881489  | 39881489  | Frame_Shift_Del | DEL | C        | -      | 8  | 749  | c.1860delC                                        | c.(1858-1860)TGCfs   | p.C620fs      |
| Pat_31 | Post-Resistance | SHC4       | 399694 | 37 | 15 | 49254948  | 49254948  | Frame_Shift_Del | DEL | G        | -      | 10 | 401  | c.265delC                                         | c.(265-267)CGCfs     | p.R89fs       |
| Pat_31 | Post-Resistance | CPEB1      | 64506  | 37 | 15 | 83224645  | 83224646  | Frame_Shift_Del | DEL | CT       | -      | 7  | 183  | .1013_1014delIAG                                  | c.(1012-1014)GAGfs   | p.E338fs      |
| Pat_31 | Post-Resistance | C16orf79   | 283870 | 37 | 16 | 2260586   | 2260588   | In_Frame_Del    | DEL | CAG      | -      | 7  | 44   | c.115_117delCTG                                   | c.(115-117)CTGdel    | p.L39del      |

|        |                 |          |        |    |    |           |           |                 |     |     |     |    |      |                                                   |                       |               |
|--------|-----------------|----------|--------|----|----|-----------|-----------|-----------------|-----|-----|-----|----|------|---------------------------------------------------|-----------------------|---------------|
| Pat_31 | Post-Resistance | RABEP2   | 79874  | 37 | 16 | 28931200  | 28931202  | In_Frame_Del    | DEL | CTG | -   | 11 | 92   | c.337_339delCAG                                   | c.(337-339)CAGdel     | p.Q113del     |
| Pat_31 | Post-Resistance | LRRRC36  | 55282  | 37 | 16 | 67409220  | 67409220  | Frame_Shift_Del | DEL | C   | -   | 8  | 1339 | c.1565delC                                        | c.(1564-1566)ACCfs    | p.T522fs      |
| Pat_31 | Post-Resistance | ACD      | 65057  | 37 | 16 | 67693646  | 67693648  | In_Frame_Del    | DEL | GCA | -   | 10 | 1012 | c.551_553delTGC>:(550-555)CTGCAG>CAG              |                       | p.L184del     |
| Pat_31 | Post-Resistance | KIAA0182 | 23199  | 37 | 16 | 85682290  | 85682290  | Frame_Shift_Del | DEL | C   | -   | 14 | 358  | c.359delC                                         | c.(358-360)ACCfs      | p.T120fs      |
| Pat_31 | Post-Resistance | PELP1    | 27043  | 37 | 17 | 4575894   | 4575894   | Frame_Shift_Del | DEL | G   | -   | 9  | 154  | c.2392delC                                        | c.(2392-2394)CTGfs    | p.L798fs      |
| Pat_31 | Post-Resistance | PELP1    | 27043  | 37 | 17 | 4607293   | 4607295   | In_Frame_Del    | DEL | CAG | -   | 12 | 862  | c.112_114delCTG                                   | c.(112-114)CTGdel     | p.L38del      |
| Pat_31 | Post-Resistance | DHX33    | 56919  | 37 | 17 | 5372037   | 5372039   | In_Frame_Del    | DEL | CCT | -   | 7  | 228  | c.141_143delAGG>:(139-144)GGAGGC>GG(p.47_48GG>G   |                       |               |
| Pat_31 | Post-Resistance | PLSCR3   | 57048  | 37 | 17 | 7294059   | 7294059   | Frame_Shift_Del | DEL | C   | -   | 9  | 770  | c.725delG                                         | c.(724-726)GGCfs      | p.G242fs      |
| Pat_31 | Post-Resistance | CHD3     | 1107   | 37 | 17 | 7788146   | 7788148   | In_Frame_Del    | DEL | GAG | -   | 10 | 87   | c.22_24delGAG                                     | c.(22-24)GAGdel       | p.E14del      |
| Pat_31 | Post-Resistance | NUFIP2   | 57532  | 37 | 17 | 27620932  | 27620934  | In_Frame_Del    | DEL | TGG | -   | 7  | 582  | c.144_146delCCA c.(142-147)CACCAT>CAT p.48_49HH>H |                       |               |
| Pat_31 | Post-Resistance | KCNH4    | 23415  | 37 | 17 | 40328259  | 40328259  | Frame_Shift_Del | DEL | C   | -   | 10 | 393  | c.642delG                                         | c.(640-642)GGGfs      | p.G214fs      |
| Pat_31 | Post-Resistance | KIAA0195 | 9772   | 37 | 17 | 73482037  | 73482039  | In_Frame_Del    | DEL | TGC | -   | 7  | 313  | c.230_232delTGC>:(229-234)GTGCTG>GTC              |                       | p.L81del      |
| Pat_31 | Post-Resistance | CBX4     | 8535   | 37 | 17 | 77808241  | 77808243  | In_Frame_Del    | DEL | GTG | -   | 11 | 103  | .1198_1200delCAI                                  | c.(1198-1200)CACdel   | p.H400del     |
| Pat_31 | Post-Resistance | LRG1     | 116844 | 37 | 19 | 4538890   | 4538890   | Frame_Shift_Del | DEL | C   | -   | 7  | 276  | c.106delG                                         | c.(106-108)GTCfs      | p.V36fs       |
| Pat_31 | Post-Resistance | SLC25A41 | 284427 | 37 | 19 | 6433605   | 6433605   | Frame_Shift_Del | DEL | G   | -   | 8  | 173  | c.100delC                                         | c.(100-102)CAAfs      | p.Q34fs       |
| Pat_31 | Post-Resistance | MCOLN1   | 57192  | 37 | 19 | 7592423   | 7592423   | Frame_Shift_Del | DEL | C   | -   | 8  | 914  | c.589delC                                         | c.(589-591)CCCfs      | p.P197fs      |
| Pat_31 | Post-Resistance | MYO1F    | 4542   | 37 | 19 | 8595361   | 8595361   | Frame_Shift_Del | DEL | C   | -   | 7  | 1167 | c.2140delG                                        | c.(2140-2142)GAGfs    | p.E714fs      |
| Pat_31 | Post-Resistance | SBSN     | 374897 | 37 | 19 | 36019046  | 36019047  | Frame_Shift_Del | DEL | CT  | -   | 8  | 449  | c.137_138delIAG                                   | c.(136-138)GAGfs      | p.E46fs       |
| Pat_31 | Post-Resistance | BCL3     | 602    | 37 | 19 | 45262726  | 45262726  | Frame_Shift_Del | DEL | C   | -   | 7  | 1428 | c.1219delC                                        | c.(1219-1221)CCCfs    | p.P407fs      |
| Pat_31 | Post-Resistance | RELB     | 5971   | 37 | 19 | 45540824  | 45540824  | Frame_Shift_Del | DEL | C   | -   | 4  | 7    | c.1516delC                                        | c.(1516-1518)CCCfs    | p.P506fs      |
| Pat_31 | Post-Resistance | HRC      | 3270   | 37 | 19 | 49656769  | 49656771  | In_Frame_Del    | DEL | CCT | -   | 7  | 58   | .1724_1726delIAG(1723-1728)GAGGGG>GC              |                       | p.E575del     |
| Pat_31 | Post-Resistance | TBC1D17  | 79735  | 37 | 19 | 50385312  | 50385312  | Frame_Shift_Del | DEL | C   | -   | 7  | 2268 | c.542delC                                         | c.(541-543)TCCfs      | p.S181fs      |
| Pat_31 | Post-Resistance | SIGLEC9  | 27180  | 37 | 19 | 51628233  | 51628235  | In_Frame_Del    | DEL | TGC | -   | 7  | 114  | c.2_4delTGC                                       | c.(1-6)ATGCTG>ATG     | p.L6del       |
| Pat_31 | Post-Resistance | BRE      | 9577   | 37 | 2  | 28521301  | 28521301  | Frame_Shift_Del | DEL | A   | -   | 7  | 350  | c.1031delA                                        | c.(1030-1032)CAAfs    | p.Q344fs      |
| Pat_31 | Post-Resistance | HK2      | 3099   | 37 | 2  | 75061739  | 75061740  | Frame_Shift_Del | DEL | TC  | -   | 11 | 816  | c.32_33delTC                                      | c.(31-33)TTCfs        | p.F11fs       |
| Pat_31 | Post-Resistance | GAL3ST2  | 64090  | 37 | 2  | 242738494 | 242738496 | In_Frame_Del    | DEL | TCC | -   | 17 | 471  | c.44_46delTCC                                     | c.(43-48)ATCCTC>ATC   | p.L20del      |
| Pat_31 | Post-Resistance | MED15    | 51586  | 37 | 22 | 20918793  | 20918795  | In_Frame_Del    | DEL | CAG | -   | 8  | 183  | c.508_510delCAG                                   | c.(508-510)CAGdel     | p.Q174del     |
| Pat_31 | Post-Resistance | PI4KA    | 5297   | 37 | 22 | 21064242  | 21064242  | Frame_Shift_Del | DEL | C   | -   | 8  | 373  | c.5953delG                                        | c.(5953-5955)GACfs    | p.D1985fs     |
| Pat_31 | Post-Resistance | TFIP11   | 24144  | 37 | 22 | 26906183  | 26906185  | In_Frame_Del    | DEL | TCA | -   | 11 | 380  | c.54_56delTGA                                     | c.(52-57)GATGAC>GAC   | p.18_19DD>D   |
| Pat_31 | Post-Resistance | POLR2F   | 5435   | 37 | 22 | 38363691  | 38363691  | Frame_Shift_Del | DEL | G   | -   | 7  | 891  | c.353delG                                         | c.(352-354)TGGfs      | p.W118fs      |
| Pat_31 | Post-Resistance | PRKCD    | 5580   | 37 | 3  | 53220653  | 53220653  | Frame_Shift_Del | DEL | G   | -   | 7  | 1087 | c.1294delG                                        | c.(1294-1296)GGGfs    | p.G432fs      |
| Pat_31 | Post-Resistance | PDE6B    | 5158   | 37 | 4  | 661763    | 661765    | In_Frame_Del    | DEL | AGG | -   | 10 | 199  | .2471_2473delIAG(2470-2475)AAGGAG>AA              |                       | p.E828del     |
| Pat_31 | Post-Resistance | CRIPAK   | 285464 | 37 | 4  | 1388530   | 1388531   | Frame_Shift_Ins | INS | -   | CA  | 12 | 1495 | c.231_232insCA                                    | c.(229-234)GCTCATfs   | p.A77fs       |
| Pat_31 | Post-Resistance | CRIPAK   | 285464 | 37 | 4  | 1388993   | 1388994   | Frame_Shift_Del | DEL | CA  | -   | 14 | 1562 | c.694_695delCA                                    | c.(694-696)CACfs      | p.H232fs      |
| Pat_31 | Post-Resistance | GABRG1   | 2565   | 37 | 4  | 46060358  | 46060358  | Frame_Shift_Del | DEL | A   | -   | 8  | 95   | c.792delT                                         | c.(790-792)TTTfs      | p.F264fs      |
| Pat_31 | Post-Resistance | SPRY1    | 10252  | 37 | 4  | 124322763 | 124322763 | Frame_Shift_Del | DEL | A   | -   | 8  | 843  | c.17delA                                          | c.(16-18)CAAfs        | p.Q6fs        |
| Pat_31 | Post-Resistance | RGS14    | 10636  | 37 | 5  | 176798525 | 176798525 | Frame_Shift_Del | DEL | C   | -   | 9  | 904  | c.1433delC                                        | c.(1432-1434)TCCfs    | p.S478fs      |
| Pat_31 | Post-Resistance | ATXN1    | 6310   | 37 | 6  | 16327864  | 16327865  | In_Frame_Ins    | INS | -   | TGC | 30 | 57   | c.677_678insGCAC.(676-678)CAC>CAGCACp.225_226insC |                       |               |
| Pat_31 | Post-Resistance | REPS1    | 85021  | 37 | 6  | 139266690 | 139266690 | Frame_Shift_Del | DEL | T   | -   | 9  | 787  | c.422delA                                         | c.(421-423)AAGfs      | p.K141fs      |
| Pat_31 | Post-Resistance | GRM1     | 2911   | 37 | 6  | 146755399 | 146755401 | In_Frame_Del    | DEL | CAG | -   | 7  | 600  | .3052_3054delCAI                                  | c.(3052-3054)CAGdel   | p.Q1022del    |
| Pat_31 | Post-Resistance | STK31    | 56164  | 37 | 7  | 23809306  | 23809306  | Frame_Shift_Del | DEL | G   | -   | 7  | 303  | c.1644delG                                        | c.(1642-1644)ATGfs    | p.M548fs      |
| Pat_31 | Post-Resistance | HOXA1    | 3198   | 37 | 7  | 27135314  | 27135316  | In_Frame_Del    | DEL | CGA | -   | 10 | 355  | c.216_218delTCGc.(214-219)CATCAC>CACp.72_73HH>H   |                       |               |
| Pat_31 | Post-Resistance | MEPCE    | 56257  | 37 | 7  | 100028067 | 100028068 | Frame_Shift_Ins | INS | -   | G   | 7  | 114  | c.426_427insG                                     | c.(424-429)CCTGGGfs   | p.P142fs      |
| Pat_31 | Post-Resistance | FOXP2    | 93986  | 37 | 7  | 114271580 | 114271582 | Splice_Site     | DEL | CAG | -   | 10 | 52   | c.598_splice                                      | c.e6-1                | p.Q200_splice |
| Pat_31 | Post-Resistance | RBM28    | 55131  | 37 | 7  | 127964714 | 127964715 | Frame_Shift_Del | DEL | TG  | -   | 8  | 1595 | .1236_1237delCA                                   | c.(1234-1239)CTCAAGfs | p.L412fs      |
| Pat_31 | Post-Resistance | OR9A4    | 130075 | 37 | 7  | 141619203 | 141619203 | Frame_Shift_Del | DEL | T   | -   | 14 | 482  | c.528delT                                         | c.(526-528)AATfs      | p.N176fs      |
| Pat_31 | Post-Resistance | PAXIP1   | 22976  | 37 | 7  | 154760670 | 154760672 | In_Frame_Del    | DEL | TGC | -   | 8  | 49   | .1239_1241delIGC.(1237-1242)CAGCAC>CA             |                       | p.Q413del     |



|        |                 |          |        |    |    |           |           |                 |     |     |     |    |      |                  |                                  |              |
|--------|-----------------|----------|--------|----|----|-----------|-----------|-----------------|-----|-----|-----|----|------|------------------|----------------------------------|--------------|
| Pat_31 | Post-Resistance | RBM33    | 155435 | 37 | 7  | 155531073 | 155531074 | Frame_Shift_Del | DEL | CA  | -   | 10 | 498  | c.1713_1714delCA | c.(1711-1716)CCCACAFs            | p.P571fs     |
| Pat_31 | Post-Resistance | NEFM     | 4741   | 37 | 8  | 24771483  | 24771483  | Frame_Shift_Del | DEL | G   | -   | 7  | 502  | c.177delG        | c.(175-177)CCGfs                 | p.P59fs      |
| Pat_31 | Post-Resistance | GOT1L1   | 137362 | 37 | 8  | 37791958  | 37791958  | Frame_Shift_Del | DEL | G   | -   | 8  | 1097 | c.1119delC       | c.(1117-1119)CCCfs               | p.P373fs     |
| Pat_31 | Post-Resistance | SDCBP    | 6386   | 37 | 8  | 59484810  | 59484811  | Frame_Shift_Del | DEL | GA  | -   | 8  | 834  | c.177_178delGA   | c.(175-180)CTGAGTfs              | p.L59fs      |
| Pat_31 | Post-Resistance | CHD7     | 55636  | 37 | 8  | 61769038  | 61769040  | In_Frame_Del    | DEL | GGA | -   | 8  | 97   | .7199_7201delGG  | (7198-7203)CGGAGG>CG2400_2401RR: |              |
| Pat_31 | Post-Resistance | ZFHX4    | 79776  | 37 | 8  | 77775449  | 77775451  | In_Frame_Del    | DEL | CCT | -   | 8  | 68   | .9364_9366delCC  | c.(9364-9366)CCTdel              | p.P3128del   |
| Pat_31 | Post-Resistance | TSNARE1  | 203062 | 37 | 8  | 143310866 | 143310868 | In_Frame_Del    | DEL | GAT | -   | 8  | 393  | .1519_1521delAT  | c.(1519-1521)ATCdel              | p.L507del    |
| Pat_31 | Post-Resistance | ZC3H3    | 23144  | 37 | 8  | 144522387 | 144522389 | In_Frame_Del    | DEL | GAG | -   | 7  | 94   | .2637_2639delCT  | c.(2635-2640)TCCTCA>TC           | .879_880SS>! |
| Pat_31 | Post-Resistance | CYC1     | 1537   | 37 | 8  | 145151068 | 145151068 | Frame_Shift_Del | DEL | C   | -   | 7  | 1144 | c.368delC        | c.(367-369)TCCfs                 | p.S123fs     |
| Pat_31 | Post-Resistance | FAM75A6  | 389730 | 37 | 9  | 43625017  | 43625017  | Frame_Shift_Del | DEL | G   | -   | 11 | 719  | c.3670delC       | c.(3670-3672)CATfs               | p.H1224fs    |
| Pat_31 | Post-Resistance | NR4A3    | 8013   | 37 | 9  | 102590616 | 102590618 | In_Frame_Del    | DEL | CAC | -   | 15 | 94   | c.292_294delCAC  | c.(292-294)CACdel                | p.H108del    |
| Pat_31 | Post-Resistance | MAP7D3   | 79649  | 37 | X  | 135314194 | 135314194 | Frame_Shift_Del | DEL | G   | -   | 9  | 441  | c.922delC        | c.(922-924)CAGfs                 | p.Q308fs     |
| Pat_32 | Pre-Treatment   | NBPF1    | 55672  | 37 | 1  | 16892147  | 16892147  | Frame_Shift_Del | DEL | G   | -   | 11 | 1848 | c.3270delC       | c.(3268-3270)GGCfs               | p.G1090fs    |
| Pat_32 | Pre-Treatment   | EXTL1    | 2134   | 37 | 1  | 26349533  | 26349535  | In_Frame_Del    | DEL | CCT | -   | 8  | 189  | c.396_398delCCT  | c.(394-399)TGCCTC>TGC            | p.L137del    |
| Pat_32 | Pre-Treatment   | SDC3     | 9672   | 37 | 1  | 31347370  | 31347370  | Frame_Shift_Del | DEL | C   | -   | 7  | 553  | c.936delG        | c.(934-936)GGGfs                 | p.G312fs     |
| Pat_32 | Pre-Treatment   | MAP7D1   | 55700  | 37 | 1  | 36636587  | 36636587  | Frame_Shift_Del | DEL | C   | -   | 8  | 307  | c.62delC         | c.(61-63)ACCfs                   | p.T21fs      |
| Pat_32 | Pre-Treatment   | HIAT1    | 64645  | 37 | 1  | 100534122 | 100534122 | Frame_Shift_Del | DEL | T   | -   | 7  | 137  | c.799delT        | c.(799-801)TTTfs                 | p.F267fs     |
| Pat_32 | Pre-Treatment   | C1orf189 | 388701 | 37 | 1  | 154171938 | 154171939 | Frame_Shift_Del | DEL | GA  | -   | 7  | 529  | c.270_271delTC   | c.(268-273)AATCAGfs              | p.N90fs      |
| Pat_32 | Pre-Treatment   | ISG20L2  | 81875  | 37 | 1  | 156694023 | 156694023 | Frame_Shift_Del | DEL | G   | -   | 8  | 196  | c.865delC        | c.(865-867)CTCfs                 | p.L289fs     |
| Pat_32 | Pre-Treatment   | HMCN1    | 83872  | 37 | 1  | 186151356 | 186151356 | Frame_Shift_Del | DEL | G   | -   | 8  | 240  | c.16351delG      | c.(16351-16353)GGAfs             | p.G5451fs    |
| Pat_32 | Pre-Treatment   | CDC42BPA | 8476   | 37 | 1  | 227257519 | 227257519 | Frame_Shift_Del | DEL | C   | -   | 8  | 174  | c.2863delG       | c.(2863-2865)GCAfs               | p.A955fs     |
| Pat_32 | Pre-Treatment   | ARID5B   | 84159  | 37 | 10 | 63852298  | 63852298  | Frame_Shift_Del | DEL | A   | -   | 9  | 249  | c.3076delA       | c.(3076-3078)AAAfs               | p.K1026fs    |
| Pat_32 | Pre-Treatment   | LDB3     | 11155  | 37 | 10 | 88439241  | 88439242  | Frame_Shift_Del | DEL | TC  | -   | 40 | 75   | c.211_212delTC   | c.(211-213)TCTfs                 | p.S71fs      |
| Pat_32 | Pre-Treatment   | PDE3B    | 5140   | 37 | 11 | 14666110  | 14666110  | Frame_Shift_Del | DEL | G   | -   | 6  | 13   | c.489delG        | c.(487-489)CTGfs                 | p.L163fs     |
| Pat_32 | Pre-Treatment   | C11orf9  | 745    | 37 | 11 | 61539013  | 61539013  | Frame_Shift_Del | DEL | C   | -   | 7  | 216  | c.782delC        | c.(781-783)TCCfs                 | p.S261fs     |
| Pat_32 | Pre-Treatment   | SLC25A45 | 283130 | 37 | 11 | 65146856  | 65146856  | Frame_Shift_Del | DEL | C   | -   | 7  | 331  | c.330delG        | c.(328-330)GGGfs                 | p.G110fs     |
| Pat_32 | Pre-Treatment   | NDUFV1   | 4723   | 37 | 11 | 67377888  | 67377889  | Frame_Shift_Del | DEL | GG  | -   | 7  | 459  | c.547_548delGG   | c.(547-549)GGCfs                 | p.G183fs     |
| Pat_32 | Pre-Treatment   | C15orf52 | 388115 | 37 | 15 | 40631782  | 40631782  | Frame_Shift_Del | DEL | C   | -   | 7  | 549  | c.294delG        | c.(292-294)GGGfs                 | p.G98fs      |
| Pat_32 | Pre-Treatment   | SPTBN5   | 51332  | 37 | 15 | 42159187  | 42159187  | Frame_Shift_Del | DEL | C   | -   | 4  | 4    | c.6345delG       | c.(6343-6345)CTGfs               | p.L2115fs    |
| Pat_32 | Pre-Treatment   | BLM      | 641    | 37 | 15 | 91304286  | 91304288  | In_Frame_Del    | DEL | TGA | -   | 11 | 306  | .1683_1685delTG  | c.(1681-1686)TTTGAT>TT           | p.D566del    |
| Pat_32 | Pre-Treatment   | DHX33    | 56919  | 37 | 17 | 5365825   | 5365825   | Frame_Shift_Del | DEL | G   | -   | 8  | 428  | c.492delC        | c.(490-492)GACfs                 | p.D164fs     |
| Pat_32 | Pre-Treatment   | NUFIP2   | 57532  | 37 | 17 | 27620990  | 27620992  | In_Frame_Del    | DEL | GCT | -   | 7  | 91   | c.86_88delAGC    | c.(85-90)CAGCCG>CCG              | p.Q29del     |
| Pat_32 | Pre-Treatment   | STXBP4   | 252983 | 37 | 17 | 53068301  | 53068301  | Frame_Shift_Del | DEL | G   | -   | 45 | 120  | c.163delG        | c.(163-165)GGAfs                 | p.G55fs      |
| Pat_32 | Pre-Treatment   | ELAC1    | 55520  | 37 | 18 | 48510487  | 48510488  | Frame_Shift_Ins | INS | -   | CA  | 31 | 74   | c.179_180insCA   | c.(178-180)ATCfs                 | p.I60fs      |
| Pat_32 | Pre-Treatment   | SMAD4    | 4089   | 37 | 18 | 48584514  | 48584514  | Frame_Shift_Del | DEL | G   | -   | 8  | 107  | c.687delG        | c.(685-687)CTGfs                 | p.L229fs     |
| Pat_32 | Pre-Treatment   | DOHH     | 83475  | 37 | 19 | 3492277   | 3492278   | Frame_Shift_Del | DEL | GC  | -   | 4  | 9    | c.571_572delGC   | c.(571-573)GCCfs                 | p.A191fs     |
| Pat_32 | Pre-Treatment   | CHERP    | 10523  | 37 | 19 | 16640581  | 16640583  | In_Frame_Del    | DEL | TGC | -   | 13 | 89   | .1005_1007delGC  | c.(1003-1008)CAGCAA>CA           | .335_336QQ>! |
| Pat_32 | Pre-Treatment   | SPTBN4   | 57731  | 37 | 19 | 41060321  | 41060322  | Frame_Shift_Del | DEL | AC  | -   | 2  | 4    | c.4943_4944delAC | c.(4942-4944)GACfs               | p.D1648fs    |
| Pat_32 | Pre-Treatment   | ZNF579   | 163033 | 37 | 19 | 56089908  | 56089909  | In_Frame_Ins    | INS | -   | CCG | 5  | 9    | .1097_1098insCG  | (1096-1098)GGG>GGCGC             | .366_366G>G! |
| Pat_32 | Pre-Treatment   | AGBL5    | 60509  | 37 | 2  | 27278901  | 27278901  | Frame_Shift_Del | DEL | C   | -   | 9  | 647  | c.1260delC       | c.(1258-1260)ATCfs               | p.I420fs     |
| Pat_32 | Pre-Treatment   | GTF3C2   | 2976   | 37 | 2  | 27559092  | 27559092  | Frame_Shift_Del | DEL | C   | -   | 8  | 250  | c.1328delG       | c.(1327-1329)GGCfs               | p.G443fs     |
| Pat_32 | Pre-Treatment   | GCC2     | 9648   | 37 | 2  | 109087832 | 109087832 | Frame_Shift_Del | DEL | T   | -   | 7  | 254  | c.2047delT       | c.(2047-2049)TTGfs               | p.L683fs     |
| Pat_32 | Pre-Treatment   | CCDC150  | 284992 | 37 | 2  | 197596853 | 197596853 | Frame_Shift_Del | DEL | G   | -   | 9  | 133  | c.3166delG       | c.(3166-3168)GGGfs               | p.G1056fs    |
| Pat_32 | Pre-Treatment   | TRPM8    | 79054  | 37 | 2  | 234879010 | 234879010 | Frame_Shift_Del | DEL | C   | -   | 10 | 978  | c.2295delC       | c.(2293-2295)CACfs               | p.H765fs     |
| Pat_32 | Pre-Treatment   | SNX21    | 90203  | 37 | 20 | 44469908  | 44469908  | Frame_Shift_Del | DEL | C   | -   | 8  | 897  | c.1078delC       | c.(1078-1080)CCCfs               | p.P360fs     |
| Pat_32 | Pre-Treatment   | CEBPB    | 1051   | 37 | 20 | 48807612  | 48807614  | In_Frame_Del    | DEL | GCC | -   | 8  | 277  | c.42_44delGCC    | c.(40-45)CTGCCG>CTG              | p.P19del     |
| Pat_32 | Pre-Treatment   | SLMO2    | 51012  | 37 | 20 | 57613630  | 57613630  | Frame_Shift_Del | DEL | G   | -   | 8  | 1184 | c.92delC         | c.(91-93)CCAFs                   | p.P31fs      |

|        |                 |          |        |    |    |           |           |                 |     |      |   |    |      |                                      |                                   |            |
|--------|-----------------|----------|--------|----|----|-----------|-----------|-----------------|-----|------|---|----|------|--------------------------------------|-----------------------------------|------------|
| Pat_32 | Pre-Treatment   | SLC17A9  | 63910  | 37 | 20 | 61594045  | 61594045  | Frame_Shift_Del | DEL | C    | - | 7  | 441  | c.567delC                            | c.(565-567)TTCfs                  | p.F189fs   |
| Pat_32 | Pre-Treatment   | KCNE2    | 9992   | 37 | 21 | 35742893  | 35742893  | Frame_Shift_Del | DEL | C    | - | 7  | 456  | c.116delC                            | c.(115-117)GCCfs                  | p.A39fs    |
| Pat_32 | Pre-Treatment   | PTTG1IP  | 754    | 37 | 21 | 46276194  | 46276196  | In_Frame_Del    | DEL | GCA  | - | 8  | 173  | c.361_363delTGC                      | c.(361-363)TGCdel                 | p.C121del  |
| Pat_32 | Pre-Treatment   | C22orf32 | 91689  | 37 | 22 | 42478046  | 42478048  | In_Frame_Del    | DEL | GAT  | - | 8  | 461  | c.304_306delGAT                      | c.(304-306)GATdel                 | p.D107del  |
| Pat_32 | Pre-Treatment   | MCAT     | 27349  | 37 | 22 | 43537228  | 43537230  | In_Frame_Del    | DEL | CAG  | - | 7  | 576  | c.449_451delCTG>:(448-453)GCTGGA>GG/ |                                   | p.A150del  |
| Pat_32 | Pre-Treatment   | CELSR3   | 1951   | 37 | 3  | 48698223  | 48698224  | Frame_Shift_Del | DEL | CT   | - | 8  | 53   | c.1844_1845delAC                     | c.(1843-1845)GAGfs                | p.E615fs   |
| Pat_32 | Pre-Treatment   | GSK3B    | 2932   | 37 | 3  | 119624606 | 119624606 | Frame_Shift_Del | DEL | A    | - | 10 | 638  | c.809delT                            | c.(808-810)ATCfs                  | p.I270fs   |
| Pat_32 | Pre-Treatment   | TMCC1    | 23023  | 37 | 3  | 129370576 | 129370578 | In_Frame_Del    | DEL | CTG  | - | 10 | 198  | c.1708_1710delCA                     | c.(1708-1710)CAGdel               | p.Q570del  |
| Pat_32 | Pre-Treatment   | FGFRL1   | 53834  | 37 | 4  | 1019055   | 1019056   | Frame_Shift_Del | DEL | CA   | - | 8  | 9    | c.1435_1436delCA                     | c.(1435-1437)CACfs                | p.H479fs   |
| Pat_32 | Pre-Treatment   | CRIPAK   | 285464 | 37 | 4  | 1389330   | 1389331   | Frame_Shift_Del | DEL | CA   | - | 8  | 831  | c.1031_1032delCA                     | c.(1030-1032)TCAfs                | p.S344fs   |
| Pat_32 | Pre-Treatment   | PROM1    | 8842   | 37 | 4  | 15995680  | 15995680  | Frame_Shift_Del | DEL | T    | - | 8  | 225  | c.1697delA                           | c.(1696-1698)AATfs                | p.N566fs   |
| Pat_32 | Pre-Treatment   | EPHA5    | 2044   | 37 | 4  | 66213776  | 66213777  | Frame_Shift_Del | DEL | TG   | - | 8  | 425  | c.2653_2654delCA                     | c.(2653-2655)CAAfs                | p.Q885fs   |
| Pat_32 | Pre-Treatment   | C5orf35  | 133383 | 37 | 5  | 56208946  | 56208946  | Frame_Shift_Del | DEL | C    | - | 7  | 308  | c.575delC                            | c.(574-576)TCAfs                  | p.S192fs   |
| Pat_32 | Pre-Treatment   | IK       | 3550   | 37 | 5  | 140032593 | 140032594 | Frame_Shift_Del | DEL | GA   | - | 8  | 73   | c.268_269delGA                       | c.(268-270)GAGfs                  | p.E90fs    |
| Pat_32 | Pre-Treatment   | PCDHB4   | 56131  | 37 | 5  | 140502607 | 140502607 | Frame_Shift_Del | DEL | C    | - | 8  | 316  | c.1027delC                           | c.(1027-1029)CCCfs                | p.P343fs   |
| Pat_32 | Pre-Treatment   | SPRY4    | 81848  | 37 | 5  | 141694361 | 141694363 | In_Frame_Del    | DEL | TGC  | - | 9  | 416  | c.311_313delGCAC                     | c.(310-315)AGCACAA>ACA            | p.S104del  |
| Pat_32 | Pre-Treatment   | RBM27    | 54439  | 37 | 5  | 145647319 | 145647320 | Frame_Shift_Ins | INS | -    | A | 7  | 74   | c.2439_2440insA                      | c.(2437-2442)CTTAAfs              | p.L813fs   |
| Pat_32 | Pre-Treatment   | C6orf134 | 79969  | 37 | 6  | 30610757  | 30610757  | Frame_Shift_Del | DEL | G    | - | 7  | 462  | c.937delG                            | c.(937-939)GGGfs                  | p.G313fs   |
| Pat_32 | Pre-Treatment   | DAXX     | 1616   | 37 | 6  | 33288519  | 33288520  | Frame_Shift_Del | DEL | TA   | - | 8  | 452  | c.1032_1033delTA                     | c.(1030-1035)TATAGGfs             | p.Y344fs   |
| Pat_32 | Pre-Treatment   | SRPK1    | 6732   | 37 | 6  | 35888274  | 35888274  | Frame_Shift_Del | DEL | G    | - | 8  | 446  | c.45delC                             | c.(43-45)ACCfs                    | p.T15fs    |
| Pat_32 | Pre-Treatment   | TNRC18   | 84629  | 37 | 7  | 5352831   | 5352833   | In_Frame_Del    | DEL | CTG  | - | 5  | 6    | c.7689_7691delCA                     | c.(7687-7692)AGCAGT>AG2563_2564SS |            |
| Pat_32 | Pre-Treatment   | NEUROD6  | 63974  | 37 | 7  | 31378634  | 31378635  | Frame_Shift_Ins | INS | -    | T | 10 | 301  | c.248_249insA                        | c.(247-249)AAGfs                  | p.K83fs    |
| Pat_32 | Pre-Treatment   | LIMK1    | 3984   | 37 | 7  | 73510992  | 73510993  | Frame_Shift_Del | DEL | GA   | - | 8  | 311  | c.193_194delGA                       | c.(193-195)GAGfs                  | p.E65fs    |
| Pat_32 | Pre-Treatment   | PRKRIP1  | 79706  | 37 | 7  | 102065517 | 102065519 | In_Frame_Del    | DEL | GAG  | - | 8  | 209  | c.514_516delGAG                      | c.(514-516)GAGdel                 | p.E176del  |
| Pat_32 | Pre-Treatment   | TNPO3    | 23534  | 37 | 7  | 128610259 | 128610259 | Frame_Shift_Del | DEL | G    | - | 8  | 815  | c.2541delC                           | c.(2539-2541)CCCfs                | p.P847fs   |
| Pat_32 | Pre-Treatment   | PRKDC    | 5591   | 37 | 8  | 48746799  | 48746799  | Frame_Shift_Del | DEL | T    | - | 8  | 422  | c.8110delA                           | c.(8110-8112)AGGfs                | p.R2704fs  |
| Pat_32 | Pre-Treatment   | EIF2C2   | 27161  | 37 | 8  | 141554345 | 141554345 | Frame_Shift_Del | DEL | G    | - | 8  | 378  | c.1806delC                           | c.(1804-1806)CCCfs                | p.P602fs   |
| Pat_32 | Pre-Treatment   | TSTA3    | 7264   | 37 | 8  | 144696820 | 144696820 | Frame_Shift_Del | DEL | G    | - | 8  | 288  | c.438delC                            | c.(436-438)GCCfs                  | p.A146fs   |
| Pat_32 | Pre-Treatment   | HABP4    | 22927  | 37 | 9  | 99212888  | 99212889  | Frame_Shift_Ins | INS | -    | G | 4  | 2    | c.327_328insG                        | c.(325-330)CCCGGGfs               | p.P109fs   |
| Pat_32 | Pre-Treatment   | NUP188   | 23511  | 37 | 9  | 131742947 | 131742949 | In_Frame_Del    | DEL | CTC  | - | 7  | 211  | c.1332_1334delCT                     | c.(1330-1335)CTCTCC>CT            | p.S445del  |
| Pat_32 | Pre-Treatment   | HTATSF1  | 27336  | 37 | X  | 135585048 | 135585050 | In_Frame_Del    | DEL | AAG  | - | 7  | 321  | c.682_684delAAG                      | c.(682-684)AAGdel                 | p.K232del  |
| Pat_32 | Pre-Treatment   | HCFC1    | 3054   | 37 | X  | 153228755 | 153228755 | Frame_Shift_Del | DEL | T    | - | 7  | 622  | c.633delA                            | c.(631-633)AAAfs                  | p.K211fs   |
| Pat_32 | Post-Resistance | TNFRSF9  | 3604   | 37 | 1  | 7980912   | 7980914   | In_Frame_Del    | DEL | CTT  | - | 8  | 576  | c.749_751delAAG>:(748-753)GAAGGA>GG/ |                                   | p.E250del  |
| Pat_32 | Post-Resistance | SPEN     | 23013  | 37 | 1  | 16255142  | 16255143  | Frame_Shift_Del | DEL | GA   | - | 7  | 281  | c.2407_2408delGA                     | c.(2407-2409)GAGfs                | p.E803fs   |
| Pat_32 | Post-Resistance | FUCA1    | 2517   | 37 | 1  | 24192052  | 24192053  | Frame_Shift_Del | DEL | CC   | - | 8  | 369  | c.452_453delGG                       | c.(451-453)TGGfs                  | p.W151fs   |
| Pat_32 | Post-Resistance | EXTL1    | 2134   | 37 | 1  | 26349533  | 26349535  | In_Frame_Del    | DEL | CCT  | - | 11 | 261  | c.396_398delCCT                      | c.(394-399)TGCCCTC>TGC            | p.L137del  |
| Pat_32 | Post-Resistance | MACF1    | 23499  | 37 | 1  | 39788668  | 39788670  | In_Frame_Del    | DEL | GGA  | - | 9  | 742  | c.4239_4241delGG                     | c.(4237-4242)CTGGAG>CT            | p.E1417del |
| Pat_32 | Post-Resistance | MAST2    | 23139  | 37 | 1  | 46494559  | 46494559  | Frame_Shift_Del | DEL | T    | - | 10 | 683  | c.2172delT                           | c.(2170-2172)CCTfs                | p.P724fs   |
| Pat_32 | Post-Resistance | WDR78    | 79819  | 37 | 1  | 67390426  | 67390426  | Frame_Shift_Del | DEL | T    | - | 7  | 417  | c.89delA                             | c.(88-90)AAGfs                    | p.K30fs    |
| Pat_32 | Post-Resistance | ZRANB2   | 9406   | 37 | 1  | 71536533  | 71536533  | Frame_Shift_Del | DEL | G    | - | 8  | 1363 | c.660delC                            | c.(658-660)CCCfs                  | p.P220fs   |
| Pat_32 | Post-Resistance | TCHH     | 7062   | 37 | 1  | 152083818 | 152083820 | In_Frame_Del    | DEL | CGG  | - | 7  | 113  | c.1873_1875delCC                     | c.(1873-1875)CCGdel               | p.P625del  |
| Pat_32 | Post-Resistance | RPTN     | 126638 | 37 | 1  | 152128709 | 152128712 | Frame_Shift_Del | DEL | TGTC | - | 9  | 2069 | c.863_866delGAC                      | c.(862-867)AGACAAfs               | p.R288fs   |
| Pat_32 | Post-Resistance | FLG2     | 388698 | 37 | 1  | 152324558 | 152324559 | Frame_Shift_Del | DEL | TG   | - | 7  | 1240 | c.5703_5704delCA                     | c.(5701-5706)CACAGCfs             | p.H1901fs  |
| Pat_32 | Post-Resistance | ISG20L2  | 81875  | 37 | 1  | 156694023 | 156694023 | Frame_Shift_Del | DEL | G    | - | 12 | 364  | c.865delC                            | c.(865-867)CTCfs                  | p.L289fs   |
| Pat_32 | Post-Resistance | OR10R2   | 343406 | 37 | 1  | 158450570 | 158450571 | Frame_Shift_Del | DEL | CA   | - | 7  | 539  | c.903_904delCA                       | c.(901-906)GTCACCTfs              | p.V301fs   |
| Pat_32 | Post-Resistance | PCP4L1   | 654790 | 37 | 1  | 161254154 | 161254156 | In_Frame_Del    | DEL | GGA  | - | 7  | 523  | c.90_92delGGA                        | c.(88-93)GCGGAG>GCG               | p.E35del   |
| Pat_32 | Post-Resistance | PRG4     | 10216  | 37 | 1  | 186276374 | 186276376 | In_Frame_Del    | DEL | CCA  | - | 15 | 290  | c.1523_1525delCC                     | c.(1522-1527)CCCACC>CC            | p.T511del  |

|        |                 |           |        |    |    |           |           |                 |     |     |     |     |      |                   |                                  |
|--------|-----------------|-----------|--------|----|----|-----------|-----------|-----------------|-----|-----|-----|-----|------|-------------------|----------------------------------|
| Pat_32 | Post-Resistance | PCDH15    | 65217  | 37 | 10 | 55587198  | 55587200  | In_Frame_Del    | DEL | GGC | -   | 9   | 159  | .4320_4322delGC   | (4318-4323)CCGCCT>CC1440_1441PP: |
| Pat_32 | Post-Resistance | LDB3      | 11155  | 37 | 10 | 88439241  | 88439242  | Frame_Shift_Del | DEL | TC  | -   | 42  | 105  | c.211_212delTC    | c.(211-213)TCTfs p.S71fs         |
| Pat_32 | Post-Resistance | HELLS     | 3070   | 37 | 10 | 96331163  | 96331163  | Frame_Shift_Del | DEL | A   | -   | 7   | 148  | c.454delA         | c.(454-456)AAafs p.K152fs        |
| Pat_32 | Post-Resistance | LOC653544 | 653544 | 37 | 10 | 135491036 | 135491036 | Frame_Shift_Del | DEL | G   | -   | 8   | 325  | c.647delG         | c.(646-648)AGGfs p.R216fs        |
| Pat_32 | Post-Resistance | OR10A2    | 341276 | 37 | 11 | 6891253   | 6891255   | In_Frame_Del    | DEL | TTC | -   | 7   | 308  | c.268_270delTTC   | c.(268-270)TTCdel p.F94del       |
| Pat_32 | Post-Resistance | TMEM132A  | 54972  | 37 | 11 | 60695118  | 60695118  | Frame_Shift_Del | DEL | C   | -   | 8   | 450  | c.321delC         | c.(319-321)GTCfs p.V107fs        |
| Pat_32 | Post-Resistance | STX5      | 6811   | 37 | 11 | 62598584  | 62598585  | Frame_Shift_Ins | INS | -   | G   | 7   | 35   | c.131_132insC     | c.(130-132)CCAfs p.P44fs         |
| Pat_32 | Post-Resistance | KDM2A     | 22992  | 37 | 11 | 67018079  | 67018081  | In_Frame_Del    | DEL | GAG | -   | 7   | 48   | .2578_2580delGAI  | c.(2578-2580)GAGdel p.E866del    |
| Pat_32 | Post-Resistance | PRB2      | 653247 | 37 | 12 | 11546419  | 11546421  | In_Frame_Del    | DEL | GGA | -   | 9   | 189  | c.591_593delTCCc. | (589-594)CCTCCA>CCA,197_198PP>I  |
| Pat_32 | Post-Resistance | PRB2      | 653247 | 37 | 12 | 11546727  | 11546728  | In_Frame_Ins    | INS | -   | GGA | 16  | 609  | c.284_285insTCCc. | (283-285)CCA>CCTCCA p.95_95P>PP  |
| Pat_32 | Post-Resistance | PRB2      | 653247 | 37 | 12 | 11546732  | 11546733  | In_Frame_Ins    | INS | -   | AGA | 9   | 551  | c.279_280insTCT   | c.(277-282)jinsTCT p.93_94insS   |
| Pat_32 | Post-Resistance | PRB2      | 653247 | 37 | 12 | 11546856  | 11546858  | In_Frame_Del    | DEL | AGA | -   | 10  | 420  | c.154_156delTCT   | c.(154-156)TCTdel p.S52del       |
| Pat_32 | Post-Resistance | LGR5      | 8549   | 37 | 12 | 71960435  | 71960436  | Frame_Shift_Ins | INS | -   | A   | 8   | 542  | c.953_954insA     | c.(952-954)ATAfs p.I318fs        |
| Pat_32 | Post-Resistance | DCLK1     | 9201   | 37 | 13 | 36367554  | 36367554  | Frame_Shift_Del | DEL | G   | -   | 8   | 441  | c.2007delC        | c.(2005-2007)TTCfs p.F669fs      |
| Pat_32 | Post-Resistance | FAM155A   | 728215 | 37 | 13 | 108518687 | 108518689 | In_Frame_Del    | DEL | CTG | -   | 7   | 41   | c.256_258delCAG   | c.(256-258)CAGdel p.Q86del       |
| Pat_32 | Post-Resistance | NAA30     | 122830 | 37 | 14 | 57858199  | 57858201  | In_Frame_Del    | DEL | AGG | -   | 4   | 9    | c.524_526delAGG:  | (523-528)CAGGAG>CAC p.E180del    |
| Pat_32 | Post-Resistance | BEGAIN    | 57596  | 37 | 14 | 101005271 | 101005273 | In_Frame_Del    | DEL | CCT | -   | 7   | 34   | c.815_817delAGG:  | (814-819)GAGGCC>GCC p.E272del    |
| Pat_32 | Post-Resistance | CPLX3     | 594855 | 37 | 15 | 75122558  | 75122560  | In_Frame_Del    | DEL | GAG | -   | 7   | 221  | c.340_342delGAG   | c.(340-342)GAGdel p.E118del      |
| Pat_32 | Post-Resistance | NAGPA     | 51172  | 37 | 16 | 5083678   | 5083679   | Frame_Shift_Del | DEL | GC  | -   | 7   | 49   | c.137_138delGC    | c.(136-138)CGCfs p.R46fs         |
| Pat_32 | Post-Resistance | KIAA0182  | 23199  | 37 | 16 | 85682290  | 85682290  | Frame_Shift_Del | DEL | C   | -   | 10  | 221  | c.359delC         | c.(358-360)ACCfs p.T120fs        |
| Pat_32 | Post-Resistance | STXBP4    | 252983 | 37 | 17 | 53068301  | 53068301  | Frame_Shift_Del | DEL | G   | -   | 106 | 57   | c.163delG         | c.(163-165)GGAfs p.G55fs         |
| Pat_32 | Post-Resistance | CHERP     | 10523  | 37 | 19 | 16640581  | 16640583  | In_Frame_Del    | DEL | TGC | -   | 18  | 99   | .1005_1007delGC.  | (1003-1008)CAGCAA>CA,335_336QQ>I |
| Pat_32 | Post-Resistance | TEAD2     | 8463   | 37 | 19 | 49850472  | 49850473  | Frame_Shift_Ins | INS | -   | G   | 13  | 528  | c.883_884insC     | c.(883-885)CATfs p.H295fs        |
| Pat_32 | Post-Resistance | ZNF579    | 163033 | 37 | 19 | 56089908  | 56089909  | In_Frame_Ins    | INS | -   | CCG | 5   | 4    | .1097_1098insCGr  | (1096-1098)GGG>GGCGG,366_366G>Gf |
| Pat_32 | Post-Resistance | GIGYF2    | 26058  | 37 | 2  | 233676006 | 233676008 | In_Frame_Del    | DEL | CAG | -   | 8   | 244  | .1951_1953delCAI  | c.(1951-1953)CAGdel p.Q655del    |
| Pat_32 | Post-Resistance | SNX21     | 90203  | 37 | 20 | 44469908  | 44469908  | Frame_Shift_Del | DEL | C   | -   | 8   | 1385 | c.1078delC        | c.(1078-1080)CCCfs p.P360fs      |
| Pat_32 | Post-Resistance | PREX1     | 57580  | 37 | 20 | 47361666  | 47361667  | Frame_Shift_Del | DEL | CG  | -   | 8   | 2053 | c.309_310delCG    | c.(307-312)ATCGAAfs p.I103fs     |
| Pat_32 | Post-Resistance | DDX27     | 55661  | 37 | 20 | 47858504  | 47858504  | Frame_Shift_Del | DEL | A   | -   | 7   | 285  | c.2065delA        | c.(2065-2067)AAAfs p.K689fs      |
| Pat_32 | Post-Resistance | SLMO2     | 51012  | 37 | 20 | 57613630  | 57613630  | Frame_Shift_Del | DEL | G   | -   | 11  | 1889 | c.92delC          | c.(91-93)CAafs p.P31fs           |
| Pat_32 | Post-Resistance | TIAM1     | 7074   | 37 | 21 | 32595809  | 32595809  | Frame_Shift_Del | DEL | G   | -   | 7   | 417  | c.1908delC        | c.(1906-1908)CCCfs p.P636fs      |
| Pat_32 | Post-Resistance | PTTG1IP   | 754    | 37 | 21 | 46276194  | 46276196  | In_Frame_Del    | DEL | GCA | -   | 10  | 252  | c.361_363delITGC  | c.(361-363)TGCdel p.C121del      |
| Pat_32 | Post-Resistance | DIP2A     | 23181  | 37 | 21 | 47987309  | 47987311  | In_Frame_Del    | DEL | TGG | -   | 7   | 546  | .4490_4492delITG( | 4489-4494)CTGTGT>CT p.V1501del   |
| Pat_32 | Post-Resistance | MED15     | 51586  | 37 | 22 | 20918916  | 20918918  | In_Frame_Del    | DEL | CAG | -   | 8   | 38   | c.631_633delCAG   | c.(631-633)CAGdel p.Q218del      |
| Pat_32 | Post-Resistance | TFIP11    | 24144  | 37 | 22 | 26906183  | 26906185  | In_Frame_Del    | DEL | TCA | -   | 8   | 344  | c.54_56delTGA     | c.(52-57)GATGAC>GAC p.18_19DD>D  |
| Pat_32 | Post-Resistance | C22orf32  | 91689  | 37 | 22 | 42478046  | 42478048  | In_Frame_Del    | DEL | GAT | -   | 9   | 492  | c.304_306delGAT   | c.(304-306)GATdel p.D107del      |
| Pat_32 | Post-Resistance | WDR6      | 11180  | 37 | 3  | 49051381  | 49051382  | Frame_Shift_Ins | INS | -   | G   | 9   | 132  | c.2504_2505insG   | c.(2503-2505)GCGfs p.A835fs      |
| Pat_32 | Post-Resistance | BBX       | 56987  | 37 | 3  | 107497243 | 107497244 | Frame_Shift_Ins | INS | -   | A   | 7   | 245  | c.2080_2081insA   | c.(2080-2082)GAAfs p.E694fs      |
| Pat_32 | Post-Resistance | TMCC1     | 23023  | 37 | 3  | 129370576 | 129370578 | In_Frame_Del    | DEL | CTG | -   | 10  | 211  | .1708_1710delCAI  | c.(1708-1710)CAGdel p.Q570del    |
| Pat_32 | Post-Resistance | PDE6B     | 5158   | 37 | 4  | 661763    | 661765    | In_Frame_Del    | DEL | AGG | -   | 7   | 318  | .2471_2473delIAG( | 2470-2475)AAGGAG>AA p.E828del    |
| Pat_32 | Post-Resistance | TMEM175   | 84286  | 37 | 4  | 946206    | 946207    | Frame_Shift_Del | DEL | TG  | -   | 9   | 426  | c.430_431delITG   | c.(430-432)TGTfs p.C144fs        |
| Pat_32 | Post-Resistance | CRIPAK    | 285464 | 37 | 4  | 1389057   | 1389058   | Frame_Shift_Ins | INS | -   | AT  | 7   | 1180 | c.758_759insAT    | c.(757-759)ACGfs p.T253fs        |
| Pat_32 | Post-Resistance | CRIPAK    | 285464 | 37 | 4  | 1389330   | 1389331   | Frame_Shift_Del | DEL | CA  | -   | 12  | 1319 | .1031_1032delCA   | c.(1030-1032)TCafs p.S344fs      |
| Pat_32 | Post-Resistance | C4orf23   | 152992 | 37 | 4  | 8470022   | 8470022   | Frame_Shift_Del | DEL | T   | -   | 8   | 451  | c.1189delIT       | c.(1189-1191)TTAfs p.L397fs      |
| Pat_32 | Post-Resistance | BOD1L     | 259282 | 37 | 4  | 13603546  | 13603547  | Frame_Shift_Del | DEL | CA  | -   | 7   | 1117 | .4977_4978delITC  | c.(4975-4980)TCTGAAfs p.S1659fs  |
| Pat_32 | Post-Resistance | CPEB2     | 132864 | 37 | 4  | 15067858  | 15067858  | Frame_Shift_Del | DEL | T   | -   | 10  | 840  | c.1624delIT       | c.(1624-1626)TTTfs p.F542fs      |
| Pat_32 | Post-Resistance | KLF3      | 51274  | 37 | 4  | 38691496  | 38691496  | Frame_Shift_Del | DEL | C   | -   | 7   | 1001 | c.691delC         | c.(691-693)CAafs p.Q231fs        |
| Pat_32 | Post-Resistance | MTHFD2L   | 441024 | 37 | 4  | 75167509  | 75167509  | Frame_Shift_Del | DEL | A   | -   | 7   | 268  | c.1027delA        | c.(1027-1029)AAafs p.K343fs      |

|        |                 |         |        |    |   |           |           |                        |     |          |   |    |      |                                                 |               |
|--------|-----------------|---------|--------|----|---|-----------|-----------|------------------------|-----|----------|---|----|------|-------------------------------------------------|---------------|
| Pat_32 | Post-Resistance | MMRN1   | 22915  | 37 | 4 | 90844391  | 90844393  | In_Frame_Del           | DEL | AGC      | - | 8  | 1729 | c.923_925delAGC:(922-927)GAGCAG>GAC             | p.Q313del     |
| Pat_32 | Post-Resistance | EXOSC9  | 5393   | 37 | 4 | 122723894 | 122723894 | Frame_Shift_Del        | DEL | T        | - | 8  | 503  | c.227delT c.(226-228)CTTfs                      | p.L76fs       |
| Pat_32 | Post-Resistance | PCDH10  | 57575  | 37 | 4 | 134073569 | 134073571 | In_Frame_Del           | DEL | CTG      | - | 11 | 161  | .2274_2276delCT:(2272-2277)CTCTGC>CT            | p.C763del     |
| Pat_32 | Post-Resistance | POU4F2  | 5458   | 37 | 4 | 147561241 | 147561243 | In_Frame_Del           | DEL | CAC      | - | 11 | 85   | c.511_513delCAC c.(511-513)CACdel               | p.H182del     |
| Pat_32 | Post-Resistance | SLC22A4 | 6583   | 37 | 5 | 131676327 | 131676327 | Frame_Shift_Del        | DEL | T        | - | 9  | 472  | c.1514delT c.(1513-1515)CTTfs                   | p.L505fs      |
| Pat_32 | Post-Resistance | SYNJ2   | 8871   | 37 | 6 | 158508009 | 158508009 | Frame_Shift_Del        | DEL | C        | - | 7  | 135  | c.3331delC c.(3331-3333)CCCfs                   | p.P1111fs     |
| Pat_32 | Post-Resistance | SUN1    | 23353  | 37 | 7 | 883110    | 883110    | Frame_Shift_Del        | DEL | C        | - | 7  | 1346 | c.611delC c.(610-612)GCCfs                      | p.A204fs      |
| Pat_32 | Post-Resistance | GLCCI1  | 113263 | 37 | 7 | 8126097   | 8126099   | In_Frame_Del           | DEL | CAG      | - | 7  | 1184 | .1573_1575delCA c.(1573-1575)CAGdel             | p.Q528del     |
| Pat_32 | Post-Resistance | HOXA1   | 3198   | 37 | 7 | 27135314  | 27135316  | In_Frame_Del           | DEL | CGA      | - | 7  | 145  | c.216_218delTCGc.(214-219)CATCAC>CACp.72_73HH>H |               |
| Pat_32 | Post-Resistance | POU6F2  | 11281  | 37 | 7 | 39379288  | 39379290  | In_Frame_Del           | DEL | CAG      | - | 7  | 171  | c.559_561delCAG c.(559-561)CAGdel               | p.Q196del     |
| Pat_32 | Post-Resistance | AKAP9   | 10142  | 37 | 7 | 91671392  | 91671393  | Frame_Shift_Del        | DEL | AG       | - | 11 | 201  | .4950_4951delAAC c.(4948-4953)TCAGAGfs          | p.S1650fs     |
| Pat_32 | Post-Resistance | SAMD9L  | 219285 | 37 | 7 | 92761061  | 92761061  | Frame_Shift_Del        | DEL | T        | - | 10 | 918  | c.4224delA c.(4222-4224)AAAfs                   | p.K1408fs     |
| Pat_32 | Post-Resistance | CCDC132 | 55610  | 37 | 7 | 92923947  | 92923948  | Frame_Shift_Ins        | INS | -        | G | 7  | 507  | c.1166_1167insG c.(1165-1167)CAGfs              | p.Q389fs      |
| Pat_32 | Post-Resistance | GPC2    | 221914 | 37 | 7 | 99771554  | 99771554  | Frame_Shift_Del        | DEL | C        | - | 8  | 870  | c.796delG c.(796-798)GTCfs                      | p.V266fs      |
| Pat_32 | Post-Resistance | PRKRIP1 | 79706  | 37 | 7 | 102065517 | 102065519 | In_Frame_Del           | DEL | GAG      | - | 9  | 305  | c.514_516delGAG c.(514-516)GAGdel               | p.E176del     |
| Pat_32 | Post-Resistance | PAXIP1  | 22976  | 37 | 7 | 154760670 | 154760672 | In_Frame_Del           | DEL | TGC      | - | 9  | 44   | .1239_1241delGC.(1237-1242)CAGCAC>CA            | p.Q413del     |
| Pat_32 | Post-Resistance | DLC1    | 10395  | 37 | 8 | 12957611  | 12957613  | In_Frame_Del           | DEL | GCT      | - | 10 | 124  | .2233_2235delAG c.(2233-2235)AGCdel             | p.S745del     |
| Pat_32 | Post-Resistance | PRKDC   | 5591   | 37 | 8 | 48746799  | 48746799  | Frame_Shift_Del        | DEL | T        | - | 7  | 689  | c.8110delA c.(8110-8112)AGGfs                   | p.R2704fs     |
| Pat_32 | Post-Resistance | ROR2    | 4920   | 37 | 9 | 94486026  | 94486028  | In_Frame_Del           | DEL | TCC      | - | 7  | 152  | .2748_2750delGG(2746-2751)GAGGAA>GA.916_917EE>I |               |
| Pat_32 | Post-Resistance | PRDM12  | 59335  | 37 | 9 | 133543701 | 133543702 | Splice_Site            | DEL | GT       | - | 22 | 175  | c.570_splice c.e3+1                             | p.E190_splice |
| Pat_32 | Post-Resistance | ABL1    | 25     | 37 | 9 | 133759490 | 133759492 | In_Frame_Del           | DEL | AAG      | - | 11 | 186  | .1813_1815delAA c.(1813-1815)AAGdel             | p.K609del     |
| Pat_32 | Post-Resistance | NHS     | 4810   | 37 | X | 17742525  | 17742525  | Frame_Shift_Del        | DEL | C        | - | 8  | 688  | c.1152delC c.(1150-1152)ATCfs                   | p.I384fs      |
| Pat_32 | Post-Resistance | ACOT9   | 23597  | 37 | X | 23754034  | 23754034  | Splice_Site            | DEL | G        | - | 7  | 1066 | c.118_splice c.e2+1                             | p.V40_splice  |
| Pat_32 | Post-Resistance | DUSP21  | 63904  | 37 | X | 44703633  | 44703634  | Frame_Shift_Del        | DEL | TG       | - | 20 | 519  | c.255_256delTG c.(253-258)TTTGACfs              | p.F85fs       |
| Pat_32 | Post-Resistance | ZNF630  | 57232  | 37 | X | 47920326  | 47920327  | Splice_Site            | DEL | TA       | - | 8  | 716  | c.16_splice c.e3-1                              | p.E6_splice   |
| Pat_32 | Post-Resistance | NUDT11  | 55190  | 37 | X | 51239296  | 51239309  | Translation_Start_Site | DEL | TCGAGGCA | - | 12 | 43   |                                                 |               |
| Pat_32 | Post-Resistance | HUWE1   | 10075  | 37 | X | 53589091  | 53589093  | In_Frame_Del           | DEL | TCC      | - | 7  | 274  | .7317_7319delGG(7315-7320)GAGGAA>GA2439_2440EE> |               |
| Pat_32 | Post-Resistance | HEPH    | 9843   | 37 | X | 65390435  | 65390435  | Frame_Shift_Del        | DEL | G        | - | 25 | 175  | c.32delG c.(31-33)TGGfs                         | p.W11fs       |
| Pat_32 | Post-Resistance | TAF1    | 6872   | 37 | X | 70603000  | 70603000  | Frame_Shift_Del        | DEL | A        | - | 9  | 332  | c.1930delA c.(1930-1932)AAAfs                   | p.K644fs      |
| Pat_32 | Post-Resistance | ARMCX3  | 51566  | 37 | X | 100880152 | 100880154 | In_Frame_Del           | DEL | TGA      | - | 8  | 896  | c.183_185delITGA c.(181-186)TCTGAT>TCT          | p.D66del      |
| Pat_32 | Post-Resistance | BHLHB9  | 80823  | 37 | X | 102004419 | 102004421 | In_Frame_Del           | DEL | GAG      | - | 19 | 623  | c.496_498delGAG c.(496-498)GAGdel               | p.E171del     |
| Pat_32 | Post-Resistance | FRMD7   | 90167  | 37 | X | 131231343 | 131231343 | Frame_Shift_Del        | DEL | C        | - | 8  | 1556 | c.235delG c.(235-237)GTGfs                      | p.V79fs       |
| Pat_32 | Post-Resistance | HTATSF1 | 27336  | 37 | X | 135585048 | 135585050 | In_Frame_Del           | DEL | AAG      | - | 10 | 644  | c.682_684delAAG c.(682-684)AAGdel               | p.K232del     |
| Pat_36 | Post-Resistance | PLEKHG5 | 57449  | 37 | 1 | 6536011   | 6536013   | In_Frame_Del           | DEL | CTC      | - | 7  | 309  | c.295_297delGAG c.(295-297)GAGdel               | p.E99del      |
| Pat_36 | Post-Resistance | DNAJC11 | 55735  | 37 | 1 | 6727803   | 6727804   | Frame_Shift_Del        | DEL | TC       | - | 7  | 45   | c.343_344delGA c.(343-345)GAAfs                 | p.E115fs      |
| Pat_36 | Post-Resistance | VAMP3   | 9341   | 37 | 1 | 7838212   | 7838214   | In_Frame_Del           | DEL | TCA      | - | 8  | 468  | c.266_268delITCA c.(265-270)TTCATC>TTC          | p.I94del      |
| Pat_36 | Post-Resistance | GRIK3   | 2899   | 37 | 1 | 37324835  | 37324835  | Frame_Shift_Del        | DEL | C        | - | 7  | 355  | c.978delG c.(976-978)CTGfs                      | p.L326fs      |
| Pat_36 | Post-Resistance | EIF2B3  | 8891   | 37 | 1 | 45407181  | 45407182  | Frame_Shift_Ins        | INS | -        | T | 7  | 233  | c.450_451insA c.(448-453)AAAGCAfs               | p.K150fs      |
| Pat_36 | Post-Resistance | MIER1   | 57708  | 37 | 1 | 67447526  | 67447526  | Frame_Shift_Del        | DEL | C        | - | 7  | 512  | c.1294delC c.(1294-1296)CCCfs                   | p.P432fs      |
| Pat_36 | Post-Resistance | LRRIQ3  | 127255 | 37 | 1 | 74575212  | 74575213  | Frame_Shift_Ins        | INS | -        | T | 12 | 196  | c.732_733insA c.(730-735)AAACAGfs               | p.K244fs      |
| Pat_36 | Post-Resistance | TNNI3K  | 51086  | 37 | 1 | 74957824  | 74957826  | In_Frame_Del           | DEL | CTT      | - | 11 | 676  | .2225_2227delCT.(2224-2229)CCTTCT>CC            | p.S746del     |
| Pat_36 | Post-Resistance | BCL10   | 8915   | 37 | 1 | 85736511  | 85736511  | Frame_Shift_Del        | DEL | T        | - | 8  | 257  | c.136delA c.(136-138)ATAfs                      | p.I46fs       |
| Pat_36 | Post-Resistance | ZNF326  | 284695 | 37 | 1 | 90470782  | 90470784  | In_Frame_Del           | DEL | GTG      | - | 14 | 532  | c.188_190delGTGc.(187-192)AGTGGT>AGT            | p.G68del      |
| Pat_36 | Post-Resistance | EVI5    | 7813   | 37 | 1 | 93159366  | 93159366  | Frame_Shift_Del        | DEL | T        | - | 7  | 230  | c.1222delA c.(1222-1224)ATGfs                   | p.M408fs      |
| Pat_36 | Post-Resistance | COL11A1 | 1301   | 37 | 1 | 103348792 | 103348792 | Frame_Shift_Del        | DEL | C        | - | 7  | 473  | c.4934delG c.(4933-4935)GGTfs                   | p.G1645fs     |
| Pat_36 | Post-Resistance | SLC16A4 | 9122   | 37 | 1 | 110906427 | 110906427 | Frame_Shift_Del        | DEL | A        | - | 8  | 163  | c.1425delT c.(1423-1425)TTTfs                   | p.F475fs      |
| Pat_36 | Post-Resistance | SYCP1   | 6847   | 37 | 1 | 115537600 | 115537601 | Frame_Shift_Ins        | INS | -        | A | 19 | 141  | c.2891_2892insA c.(2890-2892)AGAFs              | p.R964fs      |

|        |                 |           |        |    |    |           |           |                 |     |          |     |    |      |                                         |             |
|--------|-----------------|-----------|--------|----|----|-----------|-----------|-----------------|-----|----------|-----|----|------|-----------------------------------------|-------------|
| Pat_36 | Post-Resistance | HFE2      | 148738 | 37 | 1  | 145415369 | 145415371 | In_Frame_Del    | DEL | GAG      | -   | 8  | 174  | c.188_190delGAG:(187-192)CGAGGA>CGA     | p.G69del    |
| Pat_36 | Post-Resistance | ADAMTSL4  | 54507  | 37 | 1  | 150526141 | 150526141 | Frame_Shift_Del | DEL | C        | -   | 7  | 429  | c.674delC c.(673-675)TCCfs              | p.S225fs    |
| Pat_36 | Post-Resistance | MCL1      | 4170   | 37 | 1  | 150551492 | 150551494 | In_Frame_Del    | DEL | TCC      | -   | 7  | 252  | c.513_515delGGA:(511-516)GAGGAC>GAC     | p.E171del   |
| Pat_36 | Post-Resistance | TCHH      | 7062   | 37 | 1  | 152084580 | 152084582 | In_Frame_Del    | DEL | CTC      | -   | 9  | 80   | :.1111_1113delGAC c.(1111-1113)GAGdel   | p.E371del   |
| Pat_36 | Post-Resistance | SPRR2B    | 6701   | 37 | 1  | 153043134 | 153043134 | Frame_Shift_Del | DEL | G        | -   | 8  | 593  | c.182delC c.(181-183)CCAFs              | p.P61fs     |
| Pat_36 | Post-Resistance | ADAR      | 103    | 37 | 1  | 154574333 | 154574333 | Frame_Shift_Del | DEL | G        | -   | 8  | 477  | c.785delC c.(784-786)CCAFs              | p.P262fs    |
| Pat_36 | Post-Resistance | NES       | 10763  | 37 | 1  | 156642804 | 156642804 | Frame_Shift_Del | DEL | G        | -   | 10 | 424  | c.1176delC c.(1174-1176)CCCfs           | p.P392fs    |
| Pat_36 | Post-Resistance | PCP4L1    | 654790 | 37 | 1  | 161254154 | 161254156 | In_Frame_Del    | DEL | GGA      | -   | 7  | 287  | c.90_92delGGA c.(88-93)GCGGAG>GCG       | p.E35del    |
| Pat_36 | Post-Resistance | POU2F1    | 5451   | 37 | 1  | 167385016 | 167385018 | In_Frame_Del    | DEL | CCA      | -   | 8  | 548  | .2201_2203delCC:(2200-2205)TCCACC>TC    | p.T738del   |
| Pat_36 | Post-Resistance | PRG4      | 10216  | 37 | 1  | 186276524 | 186276526 | In_Frame_Del    | DEL | AGG      | -   | 9  | 320  | .1673_1675delAG(1672-1677)AAGGAG>AA     | p.E559del   |
| Pat_36 | Post-Resistance | PKP1      | 5317   | 37 | 1  | 201292157 | 201292157 | Frame_Shift_Del | DEL | G        | -   | 8  | 808  | c.1583delG c.(1582-1584)TGCfs           | p.C528fs    |
| Pat_36 | Post-Resistance | REN       | 5972   | 37 | 1  | 204135375 | 204135377 | In_Frame_Del    | DEL | AGC      | -   | 9  | 464  | c.45_47delGCT c.(43-48)CTGCTC>CTC       | p.15_16LL>L |
| Pat_36 | Post-Resistance | TMEM81    | 388730 | 37 | 1  | 205052694 | 205052694 | Frame_Shift_Del | DEL | C        | -   | 7  | 624  | c.755delG c.(754-756)GGCfs              | p.G252fs    |
| Pat_36 | Post-Resistance | LOC642587 | 642587 | 37 | 1  | 209605637 | 209605648 | In_Frame_Del    | DEL | CAGCAGCA | -   | 11 | 49   | .263delAGCAGCA(264)GTAGCAGCAGCAGC       | p.AAAA93del |
| Pat_36 | Post-Resistance | KCTD3     | 51133  | 37 | 1  | 215747171 | 215747171 | Frame_Shift_Del | DEL | T        | -   | 7  | 835  | c.126delT c.(124-126)TCTfs              | p.S42fs     |
| Pat_36 | Post-Resistance | MIA3      | 375056 | 37 | 1  | 222803699 | 222803700 | Frame_Shift_Del | DEL | CT       | -   | 15 | 1414 | c.3137_3138delICT c.(3136-3138)CCTfs    | p.P1046fs   |
| Pat_36 | Post-Resistance | FAM177B   | 400823 | 37 | 1  | 222920005 | 222920007 | In_Frame_Del    | DEL | GAG      | -   | 8  | 226  | c.118_120delGAG c.(118-120)GAGdel       | p.E46del    |
| Pat_36 | Post-Resistance | FBXO28    | 23219  | 37 | 1  | 224345075 | 224345075 | Frame_Shift_Del | DEL | T        | -   | 7  | 969  | c.734delT c.(733-735)CTAFs              | p.L245fs    |
| Pat_36 | Post-Resistance | OBSCN     | 84033  | 37 | 1  | 228467013 | 228467013 | Frame_Shift_Del | DEL | G        | -   | 7  | 351  | c.7264delG c.(7264-7266)GGGfs           | p.G2422fs   |
| Pat_36 | Post-Resistance | EXOC8     | 149371 | 37 | 1  | 231471559 | 231471560 | Frame_Shift_Del | DEL | CC       | -   | 8  | 840  | :.1932_1933delIGC c.(1930-1935)TTGGAGfs | p.L644fs    |
| Pat_36 | Post-Resistance | SLC35F3   | 148641 | 37 | 1  | 234444927 | 234444927 | Frame_Shift_Del | DEL | G        | -   | 8  | 513  | c.482delG c.(481-483)TGGfs              | p.W161fs    |
| Pat_36 | Post-Resistance | MTR       | 4548   | 37 | 1  | 237024474 | 237024474 | Frame_Shift_Del | DEL | A        | -   | 8  | 188  | c.2093delA c.(2092-2094)CAAFs           | p.Q698fs    |
| Pat_36 | Post-Resistance | RYR2      | 6262   | 37 | 1  | 237969494 | 237969494 | Frame_Shift_Del | DEL | T        | -   | 7  | 198  | c.14209delT c.(14209-14211)TTTfs        | p.F4737fs   |
| Pat_36 | Post-Resistance | OR2W3     | 343171 | 37 | 1  | 248059041 | 248059042 | Frame_Shift_Del | DEL | GG       | -   | 8  | 1982 | c.153_154delGG c.(151-156)CTGGACfs      | p.L51fs     |
| Pat_36 | Post-Resistance | OR2L2     | 26246  | 37 | 1  | 248201719 | 248201719 | Frame_Shift_Del | DEL | G        | -   | 7  | 1799 | c.150delG c.(148-150)TTGfs              | p.L50fs     |
| Pat_36 | Post-Resistance | OR2L3     | 391192 | 37 | 1  | 248224578 | 248224578 | Frame_Shift_Del | DEL | T        | -   | 7  | 1140 | c.595delT c.(595-597)TTTfs              | p.F199fs    |
| Pat_36 | Post-Resistance | OR2T10    | 127069 | 37 | 1  | 248756363 | 248756363 | Frame_Shift_Del | DEL | T        | -   | 7  | 452  | c.707delA c.(706-708)AAGfs              | p.K236fs    |
| Pat_36 | Post-Resistance | TSPAN4    | 7106   | 37 | 11 | 864443    | 864445    | In_Frame_Del    | DEL | CTG      | -   | 8  | 299  | c.262_264delCTG c.(262-264)CTGdel       | p.L92del    |
| Pat_36 | Post-Resistance | NUP98     | 4928   | 37 | 11 | 3720389   | 3720389   | Frame_Shift_Del | DEL | T        | -   | 8  | 587  | c.3932delA c.(3931-3933)AACfs           | p.N1311fs   |
| Pat_36 | Post-Resistance | OR52E8    | 390079 | 37 | 11 | 5878504   | 5878504   | Frame_Shift_Del | DEL | G        | -   | 7  | 1712 | c.429delC c.(427-429)ACCfs              | p.T143fs    |
| Pat_36 | Post-Resistance | OR10A5    | 144124 | 37 | 11 | 6867223   | 6867225   | In_Frame_Del    | DEL | TTC      | -   | 8  | 293  | c.310_312delTTC c.(310-312)TTCdel       | p.F108del   |
| Pat_36 | Post-Resistance | PARVA     | 55742  | 37 | 11 | 12534902  | 12534902  | Frame_Shift_Del | DEL | A        | -   | 9  | 940  | c.793delA c.(793-795)AAAfs              | p.K265fs    |
| Pat_36 | Post-Resistance | OR8I2     | 120586 | 37 | 11 | 55861308  | 55861308  | Frame_Shift_Del | DEL | T        | -   | 8  | 640  | c.525delT c.(523-525)CATfs              | p.H175fs    |
| Pat_36 | Post-Resistance | PGA3      | 643834 | 37 | 11 | 60971045  | 60971047  | In_Frame_Del    | DEL | GCT      | -   | 8  | 493  | c.9_11delGCT c.(7-12)TGGCTG>TGG         | p.L7del     |
| Pat_36 | Post-Resistance | FADS2     | 9415   | 37 | 11 | 61607885  | 61607887  | In_Frame_Del    | DEL | TCC      | -   | 8  | 747  | c.398_400delITCC c.(397-402)TTCCCTC>TTC | p.L137del   |
| Pat_36 | Post-Resistance | TSKU      | 25987  | 37 | 11 | 76506673  | 76506675  | In_Frame_Del    | DEL | CTG      | -   | 9  | 201  | c.13_15delICTG c.(13-15)CTGdel          | p.L9del     |
| Pat_36 | Post-Resistance | NDUFC2    | 4718   | 37 | 11 | 77784147  | 77784147  | Frame_Shift_Del | DEL | A        | -   | 15 | 327  | c.207delT c.(205-207)TTTfs              | p.F69fs     |
| Pat_36 | Post-Resistance | CASP5     | 838    | 37 | 11 | 104879687 | 104879687 | Frame_Shift_Del | DEL | T        | -   | 19 | 265  | c.28delA c.(28-30)AGGfs                 | p.R10fs     |
| Pat_36 | Post-Resistance | CADM1     | 23705  | 37 | 11 | 115080312 | 115080314 | In_Frame_Del    | DEL | TGG      | -   | 8  | 292  | .1058_1060delCC:(1057-1062)ACCATC>ATC   | p.T353del   |
| Pat_36 | Post-Resistance | IFT46     | 56912  | 37 | 11 | 118427645 | 118427647 | In_Frame_Del    | DEL | TCA      | -   | 8  | 511  | c.159_161delTGAc.(157-162)GATGAA>GAA    | p.D53del    |
| Pat_36 | Post-Resistance | CBL       | 867    | 37 | 11 | 119149356 | 119149358 | In_Frame_Del    | DEL | ATG      | -   | 10 | 218  | .1364_1366delATC:(1363-1368)TATGAT>TAI  | p.D460del   |
| Pat_36 | Post-Resistance | CBL       | 867    | 37 | 11 | 119170435 | 119170435 | Frame_Shift_Del | DEL | A        | -   | 7  | 2569 | c.2665delA c.(2665-2667)AAAfs           | p.K889fs    |
| Pat_36 | Post-Resistance | PRB2      | 653247 | 37 | 12 | 11546727  | 11546728  | In_Frame_Ins    | INS | -        | GGA | 11 | 679  | c.284_285insTCCc.(283-285)CCA>CCTCCA    | p.95_95P>PP |
| Pat_36 | Post-Resistance | PRB2      | 653247 | 37 | 12 | 11546732  | 11546733  | In_Frame_Ins    | INS | -        | AGA | 11 | 641  | c.279_280insTCT c.(277-282)insTCT       | p.93_94insS |
| Pat_36 | Post-Resistance | KIF21A    | 55605  | 37 | 12 | 39727052  | 39727052  | Frame_Shift_Del | DEL | T        | -   | 8  | 465  | c.2449delA c.(2449-2451)AGAFs           | p.R817fs    |
| Pat_36 | Post-Resistance | RPAP3     | 79657  | 37 | 12 | 48084302  | 48084302  | Frame_Shift_Del | DEL | T        | -   | 8  | 547  | c.666delA c.(664-666)AAAfs              | p.K222fs    |
| Pat_36 | Post-Resistance | PRPF40B   | 25766  | 37 | 12 | 50027729  | 50027729  | Frame_Shift_Del | DEL | C        | -   | 7  | 396  | c.600delC c.(598-600)GACfs              | p.D200fs    |



|        |                 |          |        |    |    |           |           |                 |     |     |   |    |      |                   |                        |               |
|--------|-----------------|----------|--------|----|----|-----------|-----------|-----------------|-----|-----|---|----|------|-------------------|------------------------|---------------|
| Pat_36 | Post-Resistance | DIP2B    | 57609  | 37 | 12 | 51034605  | 51034606  | Frame_Shift_Del | DEL | GG  | - | 8  | 202  | c.271_272delGG    | c.(271-273)GGGfs       | p.G91fs       |
| Pat_36 | Post-Resistance | KRT73    | 319101 | 37 | 12 | 53012151  | 53012151  | Frame_Shift_Del | DEL | C   | - | 10 | 337  | c.158delG         | c.(157-159)GGTfs       | p.G53fs       |
| Pat_36 | Post-Resistance | OR6C75   | 390323 | 37 | 12 | 55759192  | 55759192  | Frame_Shift_Del | DEL | T   | - | 8  | 276  | c.298delT         | c.(298-300)TTTfs       | p.F100fs      |
| Pat_36 | Post-Resistance | RAP1B    | 5908   | 37 | 12 | 69047987  | 69047988  | Frame_Shift_Del | DEL | AC  | - | 8  | 1019 | c.279_280delAC    | c.(277-282)TTACAAfs    | p.L93fs       |
| Pat_36 | Post-Resistance | SBNO1    | 55206  | 37 | 12 | 123794283 | 123794283 | Frame_Shift_Del | DEL | T   | - | 12 | 418  | c.3416delA        | c.(3415-3417)AATfs     | p.N1139fs     |
| Pat_36 | Post-Resistance | TPTE2    | 93492  | 37 | 13 | 20041394  | 20041394  | Frame_Shift_Del | DEL | A   | - | 7  | 214  | c.483delT         | c.(481-483)TTTfs       | p.F161fs      |
| Pat_36 | Post-Resistance | DIAPH3   | 81624  | 37 | 13 | 60582733  | 60582734  | Frame_Shift_Ins | INS | -   | T | 10 | 370  | c.958_959insA     | c.(958-960)ATTfs       | p.I320fs      |
| Pat_36 | Post-Resistance | LMO7     | 4008   | 37 | 13 | 76415307  | 76415308  | Frame_Shift_Del | DEL | AG  | - | 8  | 211  | c.2946_2947delAC  | c.(2944-2949)GCAGAGfs  | p.A982fs      |
| Pat_36 | Post-Resistance | RBM26    | 64062  | 37 | 13 | 79918806  | 79918807  | Frame_Shift_Ins | INS | -   | T | 7  | 96   | c.2187_2188insA   | c.(2185-2190)AAACAGfs  | p.K729fs      |
| Pat_36 | Post-Resistance | SIPA1L1  | 26037  | 37 | 14 | 72190482  | 72190484  | In_Frame_Del    | DEL | TCC | - | 11 | 417  | c.4390_4392delTCT | c.(4390-4392)TCCdel    | p.S1468del    |
| Pat_36 | Post-Resistance | ZSCAN10  | 84891  | 37 | 16 | 3142237   | 3142237   | Frame_Shift_Del | DEL | G   | - | 7  | 151  | c.312delC         | c.(310-312)CCCfs       | p.P104fs      |
| Pat_36 | Post-Resistance | MEFV     | 4210   | 37 | 16 | 3294471   | 3294471   | Splice_Site     | DEL | A   | - | 8  | 470  | c.1726_splice     | c.e7+1                 | p.E576_splice |
| Pat_36 | Post-Resistance | UBN1     | 29855  | 37 | 16 | 4910691   | 4910693   | In_Frame_Del    | DEL | AGA | - | 13 | 663  | c.698_700delAGA   | c.(697-702)GAGAAG>GAC  | p.K238del     |
| Pat_36 | Post-Resistance | DNAH3    | 55567  | 37 | 16 | 21132130  | 21132132  | In_Frame_Del    | DEL | CAG | - | 7  | 195  | c.1628_1630delCTC | c.(1627-1632)GCTGAT>GA | p.A543del     |
| Pat_36 | Post-Resistance | TNRC6A   | 27327  | 37 | 16 | 24807240  | 24807240  | Frame_Shift_Del | DEL | A   | - | 8  | 724  | c.3541delA        | c.(3541-3543)AAAfs     | p.K1181fs     |
| Pat_36 | Post-Resistance | SRCAP    | 10847  | 37 | 16 | 30736314  | 30736314  | Frame_Shift_Del | DEL | C   | - | 8  | 798  | c.5569delC        | c.(5569-5571)CCCfs     | p.P1857fs     |
| Pat_36 | Post-Resistance | SETD1A   | 9739   | 37 | 16 | 30982809  | 30982811  | In_Frame_Del    | DEL | TCC | - | 10 | 169  | c.3127_3129delTCT | c.(3127-3129)TCCdel    | p.S1058del    |
| Pat_36 | Post-Resistance | COQ9     | 57017  | 37 | 16 | 57486732  | 57486734  | In_Frame_Del    | DEL | GAG | - | 10 | 365  | c.262_264delGAG   | c.(262-264)GAGdel      | p.E91del      |
| Pat_36 | Post-Resistance | CNGB1    | 1258   | 37 | 16 | 57983275  | 57983277  | In_Frame_Del    | DEL | TCC | - | 10 | 119  | c.1101_1103delGG  | c.(1099-1104)GAGGAA>GA | p.367_368EE>I |
| Pat_36 | Post-Resistance | EXOC3L   | 283849 | 37 | 16 | 67220950  | 67220951  | Frame_Shift_Del | DEL | CC  | - | 7  | 349  | c.1131_1132delGC  | c.(1129-1134)CTGGAGfs  | p.L377fs      |
| Pat_36 | Post-Resistance | SLC9A5   | 6553   | 37 | 16 | 67300017  | 67300019  | In_Frame_Del    | DEL | GAG | - | 8  | 197  | c.2107_2109delGAT | c.(2107-2109)GAGdel    | p.E708del     |
| Pat_36 | Post-Resistance | KIAA0182 | 23199  | 37 | 16 | 85682290  | 85682290  | Frame_Shift_Del | DEL | C   | - | 11 | 223  | c.359delC         | c.(358-360)ACCfs       | p.T120fs      |
| Pat_36 | Post-Resistance | C17orf85 | 55421  | 37 | 17 | 3721809   | 3721811   | In_Frame_Del    | DEL | TCC | - | 8  | 279  | c.1056_1058delGG  | c.(1054-1059)GAGGAA>GA | p.352_353EE>I |
| Pat_36 | Post-Resistance | MYOCD    | 93649  | 37 | 17 | 12639482  | 12639482  | Frame_Shift_Del | DEL | C   | - | 7  | 472  | c.420delC         | c.(418-420)AACfs       | p.N140fs      |
| Pat_36 | Post-Resistance | SLC13A2  | 9058   | 37 | 17 | 26821446  | 26821446  | Frame_Shift_Del | DEL | C   | - | 8  | 168  | c.1224delC        | c.(1222-1224)CTCfs     | p.L408fs      |
| Pat_36 | Post-Resistance | SUPT6H   | 6830   | 37 | 17 | 27001303  | 27001305  | In_Frame_Del    | DEL | GAG | - | 8  | 166  | c.112_114delGAG   | c.(112-114)GAGdel      | p.E43del      |
| Pat_36 | Post-Resistance | SUPT6H   | 6830   | 37 | 17 | 27027202  | 27027204  | In_Frame_Del    | DEL | AGC | - | 13 | 778  | c.4573_4575delAGI | c.(4573-4575)AGCdel    | p.S1528del    |
| Pat_36 | Post-Resistance | KRTAP4-8 | 728224 | 37 | 17 | 39254335  | 39254336  | Frame_Shift_Ins | INS | -   | T | 38 | 60   | c.1_2insA         | c.(1-3)ATGfs           | p.M1fs        |
| Pat_36 | Post-Resistance | COIL     | 8161   | 37 | 17 | 55028117  | 55028118  | Frame_Shift_Ins | INS | -   | T | 7  | 309  | c.485_486insA     | c.(484-486)AACfs       | p.N162fs      |
| Pat_36 | Post-Resistance | USP32    | 84669  | 37 | 17 | 58257949  | 58257949  | Frame_Shift_Del | DEL | T   | - | 7  | 583  | c.4598delA        | c.(4597-4599)AACfs     | p.N1533fs     |
| Pat_36 | Post-Resistance | ZNF236   | 7776   | 37 | 18 | 74593429  | 74593430  | Frame_Shift_Ins | INS | -   | A | 7  | 209  | c.1372_1373insA   | c.(1372-1374)GAAfs     | p.E458fs      |
| Pat_36 | Post-Resistance | HAUS8    | 93323  | 37 | 19 | 17160706  | 17160707  | Frame_Shift_Del | DEL | GA  | - | 10 | 635  | c.1209_1210delITC | c.(1207-1212)TCTCGTfs  | p.S403fs      |
| Pat_36 | Post-Resistance | RYR1     | 6261   | 37 | 19 | 38948159  | 38948160  | Frame_Shift_Del | DEL | TG  | - | 7  | 801  | c.1814_1815delITC | c.(1813-1815)CTGfs     | p.L605fs      |
| Pat_36 | Post-Resistance | PSG1     | 5669   | 37 | 19 | 43371298  | 43371298  | Frame_Shift_Del | DEL | C   | - | 7  | 196  | c.1248delG        | c.(1246-1248)TGGfs     | p.W416fs      |
| Pat_36 | Post-Resistance | CCDC8    | 83987  | 37 | 19 | 46915034  | 46915034  | Frame_Shift_Del | DEL | G   | - | 10 | 328  | c.1034delC        | c.(1033-1035)GCAfs     | p.A345fs      |
| Pat_36 | Post-Resistance | SLC8A2   | 6543   | 37 | 19 | 47935681  | 47935683  | In_Frame_Del    | DEL | TCC | - | 21 | 374  | c.2130_2132delGG  | c.(2128-2133)GAGGAC>GA | p.E710del     |
| Pat_36 | Post-Resistance | MAMSTR   | 284358 | 37 | 19 | 49218105  | 49218106  | Frame_Shift_Ins | INS | -   | G | 8  | 224  | c.485_486insC     | c.(484-486)CCAfs       | p.P162fs      |
| Pat_36 | Post-Resistance | CNOT3    | 4849   | 37 | 19 | 54649671  | 54649671  | Frame_Shift_Del | DEL | T   | - | 10 | 319  | c.729delT         | c.(727-729)CCCfs       | p.P243fs      |
| Pat_36 | Post-Resistance | TMC4     | 147798 | 37 | 19 | 54675747  | 54675749  | In_Frame_Del    | DEL | TCC | - | 12 | 227  | c.201_203delGGAc  | c.(199-204)GAGGAT>GAT  | p.E67del      |
| Pat_36 | Post-Resistance | ATP6V1C2 | 245973 | 37 | 2  | 10917819  | 10917820  | Frame_Shift_Del | DEL | AG  | - | 19 | 244  | c.934_935delAG    | c.(934-936)AGAfs       | p.R312fs      |
| Pat_36 | Post-Resistance | RASGRP3  | 25780  | 37 | 2  | 33749070  | 33749070  | Frame_Shift_Del | DEL | C   | - | 9  | 917  | c.641delC         | c.(640-642)ACCfs       | p.T214fs      |
| Pat_36 | Post-Resistance | PSME4    | 23198  | 37 | 2  | 54167139  | 54167140  | Splice_Site     | INS | -   | G | 8  | 382  | c.501_splice      | c.e4-1                 | p.N167_splice |
| Pat_36 | Post-Resistance | AFTPH    | 54812  | 37 | 2  | 64778672  | 64778674  | In_Frame_Del    | DEL | GAT | - | 8  | 706  | c.64_66delGAT     | c.(64-66)GATdel        | p.D26del      |
| Pat_36 | Post-Resistance | ZNF514   | 84874  | 37 | 2  | 95815944  | 95815945  | Frame_Shift_Del | DEL | GG  | - | 7  | 854  | c.285_286delCC    | c.(283-288)TTCCAGfs    | p.F95fs       |
| Pat_36 | Post-Resistance | ANKRD36  | 375248 | 37 | 2  | 97808574  | 97808575  | Splice_Site     | INS | -   | A | 14 | 40   | c.901_splice      | c.e8+2                 | p.V301_splice |
| Pat_36 | Post-Resistance | RBM45    | 129831 | 37 | 2  | 178988920 | 178988920 | Frame_Shift_Del | DEL | A   | - | 15 | 255  | c.1135delA        | c.(1135-1137)AAAfs     | p.K379fs      |
| Pat_36 | Post-Resistance | NCKAP1   | 10787  | 37 | 2  | 183888543 | 183888544 | Frame_Shift_Del | DEL | GC  | - | 7  | 455  | c.209_210delGC    | c.(208-210)CGCfs       | p.R70fs       |

|        |                 |          |           |    |    |           |           |                 |     |          |     |    |      |                   |                                  |             |
|--------|-----------------|----------|-----------|----|----|-----------|-----------|-----------------|-----|----------|-----|----|------|-------------------|----------------------------------|-------------|
| Pat_36 | Post-Resistance | SGOL2    | 151246    | 37 | 2  | 201436992 | 201436992 | Frame_Shift_Del | DEL | A        | -   | 7  | 332  | c.1923delA        | c.(1921-1923)CTAfs               | p.L641fs    |
| Pat_36 | Post-Resistance | TRPM8    | 79054     | 37 | 2  | 234879009 | 234879010 | Frame_Shift_Ins | INS | -        | C   | 8  | 991  | c.2294_2295insC   | c.(2293-2295)CACfs               | p.H765fs    |
| Pat_36 | Post-Resistance | GAL3ST2  | 64090     | 37 | 2  | 242738494 | 242738496 | In_Frame_Del    | DEL | TCC      | -   | 11 | 323  | c.44_46delTCC     | c.(43-48)ATCCTC>ATC              | p.L20del    |
| Pat_36 | Post-Resistance | SEL1L2   | 80343     | 37 | 20 | 13850192  | 13850192  | Frame_Shift_Del | DEL | T        | -   | 7  | 234  | c.1212delA        | c.(1210-1212)AAAfs               | p.K404fs    |
| Pat_36 | Post-Resistance | MYBL2    | 4605      | 37 | 20 | 42338611  | 42338611  | Frame_Shift_Del | DEL | C        | -   | 7  | 1146 | c.1514delC        | c.(1513-1515)ACCfs               | p.T505fs    |
| Pat_36 | Post-Resistance | NCOA3    | 8202      | 37 | 20 | 46279864  | 46279866  | In_Frame_Del    | DEL | CAA      | -   | 10 | 84   | .3790_3792delCA   | c.(3790-3792)CAAdel              | p.Q1276del  |
| Pat_36 | Post-Resistance | CTCFL    | 140690    | 37 | 20 | 56099187  | 56099187  | Frame_Shift_Del | DEL | T        | -   | 7  | 901  | c.75delA          | c.(73-75)AAAFs                   | p.K25fs     |
| Pat_36 | Post-Resistance | TPTE     | 7179      | 37 | 21 | 10944697  | 10944697  | Frame_Shift_Del | DEL | A        | -   | 9  | 480  | c.537delT         | c.(535-537)TTTfs                 | p.F179fs    |
| Pat_36 | Post-Resistance | ADAMTS5  | 11096     | 37 | 21 | 28302327  | 28302327  | Frame_Shift_Del | DEL | C        | -   | 8  | 1369 | c.2103delG        | c.(2101-2103)GGGfs               | p.G701fs    |
| Pat_36 | Post-Resistance | TFIP11   | 24144     | 37 | 22 | 26906183  | 26906185  | In_Frame_Del    | DEL | TCA      | -   | 9  | 331  | c.54_56delTGA     | c.(52-57)GATGAC>GAC              | p.18_19DD>D |
| Pat_36 | Post-Resistance | MN1      | 4330      | 37 | 22 | 28194933  | 28194934  | In_Frame_Ins    | INS | -        | TGC | 20 | 63   | .1598_1599insGC.  | (1597-1599)CAA>CAGCA.533_533Q>QI |             |
| Pat_36 | Post-Resistance | SELM     | 140606    | 37 | 22 | 31503422  | 31503422  | Frame_Shift_Del | DEL | C        | -   | 4  | 6    | c.70delG          | c.(70-72)GCCfs                   | p.A24fs     |
| Pat_36 | Post-Resistance | SH3BP1   | 23616     | 37 | 22 | 38039752  | 38039754  | In_Frame_Del    | DEL | AGG      | -   | 7  | 227  | c.575_577delAGGc. | (574-579)AAGGAG>AAC              | p.E197del   |
| Pat_36 | Post-Resistance | TRIOBP   | 11078     | 37 | 22 | 38120245  | 38120253  | In_Frame_Del    | DEL | CTCCAGA/ | -   | 7  | 498  | 2_1690delCC       | CC,1-1692)GCCTCCAGAACC           | p.SRT562del |
| Pat_36 | Post-Resistance | TAB1     | 10454     | 37 | 22 | 39772009  | 39772009  | Frame_Shift_Del | DEL | C        | -   | 7  | 463  | c.68delC          | c.(67-69)TCCfs                   | p.S23fs     |
| Pat_36 | Post-Resistance | ATP2B2   | 491       | 37 | 3  | 10443796  | 10443796  | Frame_Shift_Del | DEL | C        | -   | 7  | 611  | c.634delG         | c.(634-636)GACfs                 | p.D212fs    |
| Pat_36 | Post-Resistance | SYN2     | 6854      | 37 | 3  | 12046124  | 12046126  | In_Frame_Del    | DEL | AGC      | -   | 2  | 4    | c.99_101delAGC    | c.(97-102)CAACCG>CAG             | p.P40del    |
| Pat_36 | Post-Resistance | XPC      | 7508      | 37 | 3  | 14219966  | 14219968  | In_Frame_Del    | DEL | CCT      | -   | 9  | 107  | c.101_103delAGGc. | (100-105)GAGGAT>GAT              | p.E34del    |
| Pat_36 | Post-Resistance | ULK4     | 54986     | 37 | 3  | 41860984  | 41860985  | Frame_Shift_Ins | INS | -        | T   | 8  | 82   | c.1778_1779insA   | c.(1777-1779)AAGfs               | p.K593fs    |
| Pat_36 | Post-Resistance | NKTR     | 4820      | 37 | 3  | 42679035  | 42679036  | Frame_Shift_Ins | INS | -        | C   | 8  | 823  | c.1839_1840insC   | c.(1837-1842)AGTCCCfs            | p.S613fs    |
| Pat_36 | Post-Resistance | DNAH1    | 25981     | 37 | 3  | 52430786  | 52430786  | Frame_Shift_Del | DEL | G        | -   | 8  | 701  | c.11583delG       | c.(11581-11583)CTGfs             | p.L3861fs   |
| Pat_36 | Post-Resistance | PRKCD    | 5580      | 37 | 3  | 53220653  | 53220653  | Frame_Shift_Del | DEL | G        | -   | 10 | 1044 | c.1294delG        | c.(1294-1296)GGGfs               | p.G432fs    |
| Pat_36 | Post-Resistance | ERC2     | 26059     | 37 | 3  | 55733470  | 55733472  | In_Frame_Del    | DEL | TGG      | -   | 13 | 836  | .2781_2783delCC.  | (2779-2784)CACCAT>CA.927_928HH>I |             |
| Pat_36 | Post-Resistance | LRIG1    | 26018     | 37 | 3  | 66436625  | 66436627  | In_Frame_Del    | DEL | GCT      | -   | 9  | 712  | .1567_1569delAG   | c.(1567-1569)AGCdel              | p.S524del   |
| Pat_36 | Post-Resistance | ZNF717   | 100131827 | 37 | 3  | 75790810  | 75790811  | Frame_Shift_Ins | INS | -        | T   | 7  | 153  | c.134_135insA     | c.(133-135)ACCfs                 | p.T45fs     |
| Pat_36 | Post-Resistance | TMCC1    | 23023     | 37 | 3  | 129370576 | 129370578 | In_Frame_Del    | DEL | CTG      | -   | 11 | 275  | .1708_1710delCA   | c.(1708-1710)CAGdel              | p.Q570del   |
| Pat_36 | Post-Resistance | ASTE1    | 28990     | 37 | 3  | 130733047 | 130733047 | Frame_Shift_Del | DEL | T        | -   | 12 | 64   | c.1894delA        | c.(1894-1896)AGGfs               | p.R632fs    |
| Pat_36 | Post-Resistance | GRK7     | 131890    | 37 | 3  | 141535708 | 141535708 | Frame_Shift_Del | DEL | G        | -   | 7  | 754  | c.1478delG        | c.(1477-1479)CGGfs               | p.R493fs    |
| Pat_36 | Post-Resistance | PARL     | 55486     | 37 | 3  | 183560119 | 183560119 | Frame_Shift_Del | DEL | G        | -   | 8  | 885  | c.724delC         | c.(724-726)CAAfs                 | p.Q242fs    |
| Pat_36 | Post-Resistance | CRIPAK   | 285464    | 37 | 4  | 1389054   | 1389055   | Frame_Shift_Ins | INS | -        | CA  | 12 | 1266 | c.755_756insCA    | c.(754-756)CTCfs                 | p.L252fs    |
| Pat_36 | Post-Resistance | CRIPAK   | 285464    | 37 | 4  | 1389057   | 1389058   | Frame_Shift_Ins | INS | -        | AT  | 10 | 1312 | c.758_759insAT    | c.(757-759)ACGfs                 | p.T253fs    |
| Pat_36 | Post-Resistance | CRIPAK   | 285464    | 37 | 4  | 1389330   | 1389331   | Frame_Shift_Del | DEL | CA       | -   | 13 | 1459 | c.1031_1032delCA  | c.(1030-1032)TCAfs               | p.S344fs    |
| Pat_36 | Post-Resistance | CCKAR    | 886       | 37 | 4  | 26483672  | 26483674  | In_Frame_Del    | DEL | CTG      | -   | 7  | 188  | c.873_875delCAG.  | (871-876)AGCAGG>AGC              | p.S291del   |
| Pat_36 | Post-Resistance | CLOCK    | 9575      | 37 | 4  | 56336953  | 56336954  | Frame_Shift_Ins | INS | -        | A   | 10 | 279  | c.368_369insT     | c.(367-369)TTAfs                 | p.L123fs    |
| Pat_36 | Post-Resistance | MMRN1    | 22915     | 37 | 4  | 90844391  | 90844393  | In_Frame_Del    | DEL | AGC      | -   | 12 | 1286 | c.923_925delAGC.  | (922-927)GAGCAG>GAC              | p.Q313del   |
| Pat_36 | Post-Resistance | ANK2     | 287       | 37 | 4  | 114214679 | 114214681 | In_Frame_Del    | DEL | CAC      | -   | 10 | 226  | .2460_2462delCA   | c.(2458-2463)GTCACC>GT           | p.T826del   |
| Pat_36 | Post-Resistance | ANK2     | 287       | 37 | 4  | 114260460 | 114260460 | Frame_Shift_Del | DEL | C        | -   | 7  | 530  | c.3875delC        | c.(3874-3876)ACAfs               | p.T1292fs   |
| Pat_36 | Post-Resistance | OTUD4    | 54726     | 37 | 4  | 146063356 | 146063356 | Frame_Shift_Del | DEL | C        | -   | 8  | 665  | c.1619delG        | c.(1618-1620)GGAfs               | p.G540fs    |
| Pat_36 | Post-Resistance | LRBA     | 987       | 37 | 4  | 151842374 | 151842374 | Frame_Shift_Del | DEL | A        | -   | 8  | 441  | c.621delT         | c.(619-621)TTTfs                 | p.F207fs    |
| Pat_36 | Post-Resistance | DDX4     | 54514     | 37 | 5  | 55076947  | 55076948  | Frame_Shift_Del | DEL | TC       | -   | 8  | 221  | c.550_551delTC    | c.(550-552)TCTfs                 | p.S184fs    |
| Pat_36 | Post-Resistance | TAF9     | 6880      | 37 | 5  | 68660786  | 68660788  | In_Frame_Del    | DEL | TCA      | -   | 7  | 366  | c.777_779delTGAc. | (775-780)GATGAC>GAC.259_260DD>I  |             |
| Pat_36 | Post-Resistance | THBS4    | 7060      | 37 | 5  | 79372774  | 79372776  | In_Frame_Del    | DEL | TGA      | -   | 13 | 806  | .1989_1991delTG.  | (1987-1992)TGTGAT>TG             | p.D68del    |
| Pat_36 | Post-Resistance | HAVCR2   | 84868     | 37 | 5  | 156535948 | 156535950 | In_Frame_Del    | DEL | AGC      | -   | 7  | 180  | c.45_47delGCT     | c.(43-48)CTGCTA>CTA              | p.15_16LL>L |
| Pat_36 | Post-Resistance | NSD1     | 64324     | 37 | 5  | 176683996 | 176683996 | Frame_Shift_Del | DEL | A        | -   | 7  | 357  | c.4810delA        | c.(4810-4812)AAAfs               | p.K1604fs   |
| Pat_36 | Post-Resistance | CANX     | 821       | 37 | 5  | 179149920 | 179149920 | Frame_Shift_Del | DEL | T        | -   | 41 | 1847 | c.1298delT        | c.(1297-1299)ATTfs               | p.I433fs    |
| Pat_36 | Post-Resistance | RASGEF1C | 255426    | 37 | 5  | 179564993 | 179564993 | Frame_Shift_Del | DEL | G        | -   | 12 | 1016 | c.60delC          | c.(58-60)CCCfs                   | p.P20fs     |
| Pat_36 | Post-Resistance | RPP40    | 10799     | 37 | 6  | 4995370   | 4995371   | Frame_Shift_Del | DEL | TT       | -   | 8  | 542  | c.1033_1034delAA  | c.(1033-1035)AATfs               | p.N345fs    |

|        |                 |          |        |    |   |           |           |                 |     |     |     |    |      |                                                   |                       |               |
|--------|-----------------|----------|--------|----|---|-----------|-----------|-----------------|-----|-----|-----|----|------|---------------------------------------------------|-----------------------|---------------|
| Pat_36 | Post-Resistance | ATXN1    | 6310   | 37 | 6 | 16327900  | 16327901  | In_Frame_Ins    | INS | -   | TGC | 11 | 81   | c.641_642insGCA:c.(640-642)CAG>CAGCAC.214_214Q>QI |                       |               |
| Pat_36 | Post-Resistance | ATXN1    | 6310   | 37 | 6 | 16327907  | 16327909  | In_Frame_Del    | DEL | TGA | -   | 10 | 77   | c.633_635delTCAc.(631-636)CATCAG>CAG              | p.H211del             |               |
| Pat_36 | Post-Resistance | SLC17A2  | 10246  | 37 | 6 | 25921520  | 25921520  | Frame_Shift_Del | DEL | T   | -   | 8  | 472  | c.361delA                                         | c.(361-363)ATGfs      | p.M121fs      |
| Pat_36 | Post-Resistance | GABBR1   | 2550   | 37 | 6 | 29599254  | 29599254  | Frame_Shift_Del | DEL | C   | -   | 7  | 920  | c.208delG                                         | c.(208-210)GAGfs      | p.E70fs       |
| Pat_36 | Post-Resistance | HLA-F    | 3134   | 37 | 6 | 29694802  | 29694803  | Frame_Shift_Ins | INS | -   | T   | 13 | 998  | c.1179_1180insT                                   | c.(1177-1182)TTGTTTfs | p.L393fs      |
| Pat_36 | Post-Resistance | HLA-L    | 3139   | 37 | 6 | 30231140  | 30231140  | Frame_Shift_Del | DEL | T   | -   | 8  | 701  | c.584delT                                         | c.(583-585)ATTfs      | p.I195fs      |
| Pat_36 | Post-Resistance | RING1    | 6015   | 37 | 6 | 33178989  | 33178990  | Frame_Shift_Ins | INS | -   | G   | 7  | 1107 | c.510_511insG                                     | c.(508-513)AGTGGGfs   | p.S170fs      |
| Pat_36 | Post-Resistance | UHRF1BP1 | 54887  | 37 | 6 | 34804004  | 34804006  | In_Frame_Del    | DEL | CAG | -   | 9  | 866  | c.912_914delCAGc.(910-915)AACAGC>AAC              | p.S308del             |               |
| Pat_36 | Post-Resistance | CUL9     | 23113  | 37 | 6 | 43167713  | 43167714  | Frame_Shift_Del | DEL | AT  | -   | 9  | 441  | c.3203_3204delAT                                  | c.(3202-3204)CATfs    | p.H1068fs     |
| Pat_36 | Post-Resistance | MEP1A    | 4224   | 37 | 6 | 46761166  | 46761166  | Frame_Shift_Del | DEL | T   | -   | 8  | 1332 | c.31delT                                          | c.(31-33)TTTfs        | p.F11fs       |
| Pat_36 | Post-Resistance | TMEM14A  | 28978  | 37 | 6 | 52541950  | 52541950  | Frame_Shift_Del | DEL | T   | -   | 7  | 1116 | c.50delT                                          | c.(49-51)ATTfs        | p.I17fs       |
| Pat_36 | Post-Resistance | GSTA1    | 2938   | 37 | 6 | 52658948  | 52658948  | Frame_Shift_Del | DEL | T   | -   | 10 | 1656 | c.389delA                                         | c.(388-390)AATfs      | p.N130fs      |
| Pat_36 | Post-Resistance | KLHL31   | 401265 | 37 | 6 | 53519759  | 53519759  | Frame_Shift_Del | DEL | T   | -   | 11 | 746  | c.312delA                                         | c.(310-312)AAAfs      | p.K104fs      |
| Pat_36 | Post-Resistance | MYO6     | 4646   | 37 | 6 | 76599857  | 76599858  | Frame_Shift_Ins | INS | -   | A   | 9  | 204  | c.2742_2743insA                                   | c.(2740-2745)CAGAAAfs | p.Q914fs      |
| Pat_36 | Post-Resistance | RARS2    | 57038  | 37 | 6 | 88229955  | 88229955  | Frame_Shift_Del | DEL | T   | -   | 7  | 618  | c.1055delA                                        | c.(1054-1056)AAGfs    | p.K352fs      |
| Pat_36 | Post-Resistance | GRM1     | 2911   | 37 | 6 | 146755399 | 146755401 | In_Frame_Del    | DEL | CAG | -   | 9  | 492  | .3052_3054delCA                                   | c.(3052-3054)CAGdel   | p.Q1022del    |
| Pat_36 | Post-Resistance | IQCE     | 23288  | 37 | 7 | 2623881   | 2623881   | Frame_Shift_Del | DEL | C   | -   | 7  | 587  | c.786delC                                         | c.(784-786)CTCfs      | p.L262fs      |
| Pat_36 | Post-Resistance | ZDHC4    | 55146  | 37 | 7 | 6621848   | 6621849   | Frame_Shift_Ins | INS | -   | T   | 7  | 776  | c.336_337insT                                     | c.(334-339)CTGTTTfs   | p.L112fs      |
| Pat_36 | Post-Resistance | PHF14    | 9678   | 37 | 7 | 11075380  | 11075381  | Frame_Shift_Del | DEL | AG  | -   | 9  | 982  | .1569_1570delAC                                   | c.(1567-1572)CAAGAGfs | p.Q523fs      |
| Pat_36 | Post-Resistance | MPP6     | 51678  | 37 | 7 | 24705666  | 24705666  | Frame_Shift_Del | DEL | A   | -   | 9  | 468  | c.910delA                                         | c.(910-912)AAAfs      | p.K304fs      |
| Pat_36 | Post-Resistance | OSBPL3   | 26031  | 37 | 7 | 24846521  | 24846522  | Splice_Site     | DEL | TC  | -   | 8  | 522  | c.2318_splice                                     | c.e21-1               | p.N773_splice |
| Pat_36 | Post-Resistance | GARS     | 2617   | 37 | 7 | 30634583  | 30634585  | In_Frame_Del    | DEL | CTG | -   | 7  | 97   | c.46_48delCTG                                     | c.(46-48)CTGdel       | p.L20del      |
| Pat_36 | Post-Resistance | C7orf16  | 10842  | 37 | 7 | 31735179  | 31735179  | Frame_Shift_Del | DEL | A   | -   | 13 | 751  | c.179delA                                         | c.(178-180)CAAfs      | p.Q60fs       |
| Pat_36 | Post-Resistance | FKBP9    | 11328  | 37 | 7 | 33014804  | 33014804  | Frame_Shift_Del | DEL | C   | -   | 7  | 438  | c.378delC                                         | c.(376-378)ATCfs      | p.I126fs      |
| Pat_36 | Post-Resistance | OGDH     | 4967   | 37 | 7 | 44684936  | 44684936  | Frame_Shift_Del | DEL | T   | -   | 13 | 399  | c.233delT                                         | c.(232-234)ATTfs      | p.I78fs       |
| Pat_36 | Post-Resistance | ABCA13   | 154664 | 37 | 7 | 48318279  | 48318280  | Frame_Shift_Del | DEL | AG  | -   | 7  | 1006 | .7488_7489delAC                                   | c.(7486-7491)TTAGAAfs | p.L2496fs     |
| Pat_36 | Post-Resistance | MRPS17   | 51373  | 37 | 7 | 56022659  | 56022659  | Frame_Shift_Del | DEL | G   | -   | 7  | 1700 | c.181delG                                         | c.(181-183)GGGfs      | p.G61fs       |
| Pat_36 | Post-Resistance | DTX2     | 113878 | 37 | 7 | 76112249  | 76112249  | Frame_Shift_Del | DEL | A   | -   | 17 | 1426 | c.693delA                                         | c.(691-693)CCAfs      | p.P231fs      |
| Pat_36 | Post-Resistance | ABCB4    | 5244   | 37 | 7 | 87074281  | 87074282  | Frame_Shift_Ins | INS | -   | A   | 7  | 98   | c.1015_1016insT                                   | c.(1015-1017)TCAfs    | p.S339fs      |
| Pat_36 | Post-Resistance | PEX1     | 5189   | 37 | 7 | 92146721  | 92146721  | Frame_Shift_Del | DEL | T   | -   | 23 | 386  | c.1108delA                                        | c.(1108-1110)ATTfs    | p.I370fs      |
| Pat_36 | Post-Resistance | ZCWPW1   | 55063  | 37 | 7 | 100000151 | 100000151 | Frame_Shift_Del | DEL | T   | -   | 7  | 2574 | c.1459delA                                        | c.(1459-1461)ACCfs    | p.T487fs      |
| Pat_36 | Post-Resistance | ZCWPW1   | 55063  | 37 | 7 | 100004397 | 100004398 | Frame_Shift_Ins | INS | -   | A   | 7  | 239  | c.1089_1090insT                                   | c.(1087-1092)TTTGGGfs | p.F363fs      |
| Pat_36 | Post-Resistance | SRRT     | 51593  | 37 | 7 | 100482040 | 100482042 | In_Frame_Del    | DEL | AGG | -   | 9  | 57   | c.809_811delAGG:c.(808-813)CAGGAG>CAC             | p.E275del             |               |
| Pat_36 | Post-Resistance | RINT1    | 60561  | 37 | 7 | 105204285 | 105204285 | Frame_Shift_Del | DEL | G   | -   | 7  | 226  | c.1777delG                                        | c.(1777-1779)GATfs    | p.D593fs      |
| Pat_36 | Post-Resistance | TNPO3    | 23534  | 37 | 7 | 128610259 | 128610259 | Frame_Shift_Del | DEL | G   | -   | 8  | 1114 | c.2541delC                                        | c.(2539-2541)CCCfs    | p.P847fs      |
| Pat_36 | Post-Resistance | RBM33    | 155435 | 37 | 7 | 155531073 | 155531074 | Frame_Shift_Del | DEL | CA  | -   | 10 | 523  | .1713_1714delCA                                   | c.(1711-1716)CCCACAfs | p.P571fs      |
| Pat_36 | Post-Resistance | C8orf80  | 389643 | 37 | 8 | 27888776  | 27888776  | Frame_Shift_Del | DEL | T   | -   | 15 | 652  | c.1892delA                                        | c.(1891-1893)AATfs    | p.N631fs      |
| Pat_36 | Post-Resistance | TMEM66   | 51669  | 37 | 8 | 29931442  | 29931442  | Frame_Shift_Del | DEL | G   | -   | 7  | 1473 | c.233delC                                         | c.(232-234)CCAfs      | p.P78fs       |
| Pat_36 | Post-Resistance | MYST3    | 7994   | 37 | 8 | 41798420  | 41798422  | In_Frame_Del    | DEL | CTC | -   | 7  | 496  | .2977_2979delGAI                                  | c.(2977-2979)GAGdel   | p.E993del     |
| Pat_36 | Post-Resistance | MYST3    | 7994   | 37 | 8 | 41836184  | 41836184  | Frame_Shift_Del | DEL | T   | -   | 11 | 1400 | c.1019delA                                        | c.(1018-1020)AACfs    | p.N340fs      |
| Pat_36 | Post-Resistance | POP1     | 10940  | 37 | 8 | 99158810  | 99158811  | Frame_Shift_Del | DEL | AG  | -   | 7  | 485  | .1609_1610delAC                                   | c.(1609-1611)AGAFs    | p.R537fs      |
| Pat_36 | Post-Resistance | DPYS     | 1807   | 37 | 8 | 105440214 | 105440214 | Frame_Shift_Del | DEL | T   | -   | 8  | 1461 | c.1086delA                                        | c.(1084-1086)AAAfs    | p.K362fs      |
| Pat_36 | Post-Resistance | NDUFB9   | 4715   | 37 | 8 | 125559305 | 125559306 | Frame_Shift_Del | DEL | CC  | -   | 8  | 1225 | c.359_360delCC                                    | c.(358-360)GCCfs      | p.A120fs      |
| Pat_36 | Post-Resistance | KCNQ3    | 3786   | 37 | 8 | 133142050 | 133142050 | Frame_Shift_Del | DEL | G   | -   | 8  | 306  | c.2078delC                                        | c.(2077-2079)CCGfs    | p.P693fs      |
| Pat_36 | Post-Resistance | SMARCA2  | 6595   | 37 | 9 | 2104067   | 2104068   | Frame_Shift_Del | DEL | GC  | -   | 8  | 388  | .3190_3191delGC                                   | c.(3190-3192)GCGfs    | p.A1064fs     |
| Pat_36 | Post-Resistance | GRIN1    | 2902   | 37 | 9 | 140056884 | 140056886 | In_Frame_Del    | DEL | GAG | -   | 7  | 141  | .1780_1782delGAI                                  | c.(1780-1782)GAGdel   | p.E598del     |
| Pat_36 | Post-Resistance | ARHGAP6  | 395    | 37 | X | 11200196  | 11200196  | Frame_Shift_Del | DEL | T   | -   | 8  | 1912 | c.1316delA                                        | c.(1315-1317)AAGfs    | p.K439fs      |

|        |                 |          |           |    |    |           |           |                 |     |          |   |    |      |                    |                                   |               |
|--------|-----------------|----------|-----------|----|----|-----------|-----------|-----------------|-----|----------|---|----|------|--------------------|-----------------------------------|---------------|
| Pat_36 | Post-Resistance | OFD1     | 8481      | 37 | X  | 13764946  | 13764946  | Frame_Shift_Del | DEL | A        | - | 10 | 241  | c.702delA          | c.(700-702)GCAfs                  | p.A234fs      |
| Pat_36 | Post-Resistance | OFD1     | 8481      | 37 | X  | 13778677  | 13778677  | Frame_Shift_Del | DEL | G        | - | 8  | 763  | c.2098delG         | c.(2098-2100)GAGfs                | p.E700fs      |
| Pat_36 | Post-Resistance | FAM48B1  | 100130302 | 37 | X  | 24382374  | 24382376  | In_Frame_Del    | DEL | TGC      | - | 11 | 37   | .1497_1499delITGt: | (1495-1500)ATTGCT>AT              | p.A517del     |
| Pat_36 | Post-Resistance | PHF8     | 23133     | 37 | X  | 54011405  | 54011407  | In_Frame_Del    | DEL | CTC      | - | 37 | 537  | .2491_2493delIGA   | c.(2491-2493)GAGdel               | p.E831del     |
| Pat_36 | Post-Resistance | ARMCX3   | 51566     | 37 | X  | 100880152 | 100880154 | In_Frame_Del    | DEL | TGA      | - | 10 | 973  | c.183_185delITGA   | c.(181-186)TCTGAT>TCT             | p.D66del      |
| Pat_36 | Post-Resistance | RAB9B    | 51209     | 37 | X  | 103080347 | 103080348 | Frame_Shift_Del | DEL | CC       | - | 7  | 1613 | c.367_368delGG     | c.(367-369)GGTfs                  | p.G123fs      |
| Pat_36 | Post-Resistance | IRS4     | 8471      | 37 | X  | 107977802 | 107977803 | Frame_Shift_Ins | INS | -        | C | 26 | 1011 | c.1772_1773insG    | c.(1771-1773)GGCfs                | p.G591fs      |
| Pat_36 | Post-Resistance | CXorf56  | 63932     | 37 | X  | 118694316 | 118694316 | Frame_Shift_Del | DEL | G        | - | 7  | 826  | c.157delC          | c.(157-159)CGGfs                  | p.R53fs       |
| Pat_36 | Post-Resistance | AIFM1    | 9131      | 37 | X  | 129267377 | 129267378 | Frame_Shift_Del | DEL | CT       | - | 7  | 3116 | ∓.1358_1359delAC   | c.(1357-1359)GAGfs                | p.E453fs      |
| Pat_36 | Post-Resistance | SPANXN3  | 139067    | 37 | X  | 142605149 | 142605149 | Frame_Shift_Del | DEL | T        | - | 10 | 476  | c.71delA           | c.(70-72)AATfs                    | p.N24fs       |
| Pat_36 | Post-Resistance | SPANXN2  | 494119    | 37 | X  | 142803692 | 142803692 | Frame_Shift_Del | DEL | T        | - | 11 | 464  | c.71delA           | c.(70-72)AATfs                    | p.N24fs       |
| Pat_36 | Post-Resistance | MAMLD1   | 10046     | 37 | X  | 149639325 | 149639327 | In_Frame_Del    | DEL | CAG      | - | 11 | 240  | .1480_1482delCA    | c.(1480-1482)CAGdel               | p.Q502del     |
| Pat_36 | Post-Resistance | MAMLD1   | 10046     | 37 | X  | 149639633 | 149639635 | In_Frame_Del    | DEL | GCA      | - | 7  | 211  | .1788_1790delIGC   | (1786-1791)CTGCAG>CT              | p.Q606del     |
| Pat_36 | Post-Resistance | HMGB3    | 3149      | 37 | X  | 150156358 | 150156360 | In_Frame_Del    | DEL | GAG      | - | 10 | 143  | c.574_576delGAG    | c.(574-576)GAGdel                 | p.E198del     |
| Pat_36 | Post-Resistance | PASD1    | 139135    | 37 | X  | 150817142 | 150817144 | In_Frame_Del    | DEL | GCT      | - | 11 | 858  | c.685_687delGCT    | c.(685-687)GCTdel                 | p.A236del     |
| Pat_36 | Post-Resistance | F8       | 2157      | 37 | X  | 154157686 | 154157686 | Frame_Shift_Del | DEL | T        | - | 11 | 252  | c.4379delA         | c.(4378-4380)AATfs                | p.N1460fs     |
| Pat_37 | Post-Resistance | UBR4     | 23352     | 37 | 1  | 19488943  | 19488943  | Frame_Shift_Del | DEL | C        | - | 7  | 577  | c.4927delG         | c.(4927-4929)GAAfs                | p.E1643fs     |
| Pat_37 | Post-Resistance | MTPAP    | 55149     | 37 | 10 | 30653930  | 30653932  | In_Frame_Del    | DEL | TCC      | - | 11 | 399  | c.250_252delGGA    | c.(250-252)GGAdel                 | p.G84del      |
| Pat_37 | Post-Resistance | NLRP6    | 171389    | 37 | 11 | 281553    | 281555    | In_Frame_Del    | DEL | GAG      | - | 13 | 300  | .1819_1821delIGA   | c.(1819-1821)GAGdel               | p.E611del     |
| Pat_37 | Post-Resistance | UBQLN3   | 50613     | 37 | 11 | 5529918   | 5529920   | In_Frame_Del    | DEL | TGG      | - | 9  | 663  | c.869_871delCCA∓:  | (868-873)ACCAGC>AGC               | p.T290del     |
| Pat_37 | Post-Resistance | SPON1    | 10418     | 37 | 11 | 14276276  | 14276277  | Splice_Site     | DEL | GT       | - | 63 | 174  | c.1092_splice      | c.e9+1                            | p.E364_splice |
| Pat_37 | Post-Resistance | RIN1     | 9610      | 37 | 11 | 66103474  | 66103474  | Frame_Shift_Del | DEL | T        | - | 6  | 9    | c.242delA          | c.(241-243)CACfs                  | p.H81fs       |
| Pat_37 | Post-Resistance | MMP1     | 4312      | 37 | 11 | 102668791 | 102668793 | In_Frame_Del    | DEL | CAG      | - | 13 | 298  | c.31_33delCTG      | c.(31-33)CTGdel                   | p.L11del      |
| Pat_37 | Post-Resistance | TMPRSS13 | 84000     | 37 | 11 | 117789346 | 117789360 | In_Frame_Del    | DEL | ∓AGATGCC | - | 10 | 102  | ∓delGCCGGGCATI     | )GGCCGGGCATCTCCA∓p.GRAS           | P72de         |
| Pat_37 | Post-Resistance | RERG     | 85004     | 37 | 12 | 15262412  | 15262412  | Frame_Shift_Del | DEL | C        | - | 12 | 2794 | c.232delG          | c.(232-234)GAAfs                  | p.E78fs       |
| Pat_37 | Post-Resistance | ESPL1    | 9700      | 37 | 12 | 53683876  | 53683877  | Frame_Shift_Del | DEL | TG       | - | 8  | 286  | ∓.5121_5122delITC  | c.(5119-5124)ACTGTGfs             | p.T1707fs     |
| Pat_37 | Post-Resistance | OR6C65   | 403282    | 37 | 12 | 55794610  | 55794610  | Frame_Shift_Del | DEL | T        | - | 7  | 289  | c.298delT          | c.(298-300)TTTfs                  | p.F100fs      |
| Pat_37 | Post-Resistance | R3HDM2   | 22864     | 37 | 12 | 57651794  | 57651794  | Frame_Shift_Del | DEL | G        | - | 7  | 349  | c.2386delC         | c.(2386-2388)CGGfs                | p.R796fs      |
| Pat_37 | Post-Resistance | C12orf56 | 115749    | 37 | 12 | 64784307  | 64784307  | Frame_Shift_Del | DEL | C        | - | 7  | 18   | c.39delG           | c.(37-39)AGGfs                    | p.R13fs       |
| Pat_37 | Post-Resistance | UTP20    | 27340     | 37 | 12 | 101736770 | 101736770 | Frame_Shift_Del | DEL | T        | - | 9  | 601  | c.4348delT         | c.(4348-4350)TTTfs                | p.F1450fs     |
| Pat_37 | Post-Resistance | IFT81    | 28981     | 37 | 12 | 110618365 | 110618367 | In_Frame_Del    | DEL | CAA      | - | 15 | 281  | .1327_1329delCA    | c.(1327-1329)CAAdel               | p.Q445del     |
| Pat_37 | Post-Resistance | WASF3    | 10810     | 37 | 13 | 27250862  | 27250863  | Splice_Site     | DEL | GT       | - | 8  | 440  | c.716_splice       | c.e7+1                            | p.R239_splice |
| Pat_37 | Post-Resistance | MLH3     | 27030     | 37 | 14 | 75514338  | 75514338  | Frame_Shift_Del | DEL | T        | - | 7  | 248  | c.2021delA         | c.(2020-2022)AATfs                | p.N674fs      |
| Pat_37 | Post-Resistance | ASPG     | 374569    | 37 | 14 | 104571684 | 104571684 | Frame_Shift_Del | DEL | G        | - | 7  | 147  | c.1070delG         | c.(1069-1071)CGGfs                | p.R357fs      |
| Pat_37 | Post-Resistance | MGA      | 23269     | 37 | 15 | 42003383  | 42003385  | In_Frame_Del    | DEL | CAG      | - | 12 | 323  | .2920_2922delCA    | c.(2920-2922)CAGdel               | p.Q981del     |
| Pat_37 | Post-Resistance | ZNF592   | 9640      | 37 | 15 | 85327539  | 85327539  | Frame_Shift_Del | DEL | A        | - | 7  | 194  | c.1633delA         | c.(1633-1635)AAAfs                | p.K545fs      |
| Pat_37 | Post-Resistance | SRCAP    | 10847     | 37 | 16 | 30731611  | 30731611  | Frame_Shift_Del | DEL | C        | - | 8  | 1480 | c.2946delC         | c.(2944-2946)GACfs                | p.D982fs      |
| Pat_37 | Post-Resistance | RNF167   | 26001     | 37 | 17 | 4845690   | 4845690   | Frame_Shift_Del | DEL | C        | - | 8  | 688  | c.220delC          | c.(220-222)CCCfs                  | p.P74fs       |
| Pat_37 | Post-Resistance | CNTROB   | 116840    | 37 | 17 | 7843518   | 7843519   | Frame_Shift_Del | DEL | GA       | - | 12 | 448  | ∓.1269_1270delGA   | c.(1267-1272)CGGAGfs              | p.R423fs      |
| Pat_37 | Post-Resistance | TRIM16   | 10626     | 37 | 17 | 15554874  | 15554886  | Frame_Shift_Del | DEL | ∓GTGGCCC | - | 9  | 54   | 0delCCAGGGCC#-51   | )CCCAGGGCCACTG(                   | p.P13fs       |
| Pat_37 | Post-Resistance | ZNF207   | 7756      | 37 | 17 | 30677314  | 30677316  | In_Frame_Del    | DEL | AAG      | - | 8  | 1090 | c.10_12delAAG      | c.(10-12)AAGdel                   | p.K7del       |
| Pat_37 | Post-Resistance | BZRAP1   | 9256      | 37 | 17 | 56387404  | 56387406  | In_Frame_Del    | DEL | TCC      | - | 8  | 209  | .3813_3815delIGG   | (3811-3816)GAGGAA>GA1271_1272EE∓: |               |
| Pat_37 | Post-Resistance | FTSJ3    | 117246    | 37 | 17 | 61899155  | 61899157  | In_Frame_Del    | DEL | CTC      | - | 10 | 640  | .1522_1524delIGA   | c.(1522-1524)GAGdel               | p.E508del     |
| Pat_37 | Post-Resistance | C18orf10 | 25941     | 37 | 18 | 34376822  | 34376842  | In_Frame_Del    | DEL | ∓CCGGAGG | - | 11 | 70   | ∓CAGGACCCTCC       | )TCAGACCCTCCGGTCCGSPGSPS277(      |               |
| Pat_37 | Post-Resistance | TMEFF2   | 23671     | 37 | 2  | 193059175 | 193059177 | In_Frame_Del    | DEL | GCA      | - | 9  | 176  | c.74_76delITGC     | c.(73-78)CTGCC>CCC                | p.L25del      |
| Pat_37 | Post-Resistance | GBX2     | 2637      | 37 | 2  | 237076427 | 237076429 | In_Frame_Del    | DEL | GGC      | - | 4  | 9    | c.186_188delGCC∓:  | (184-189)CGGCC>CCC                | p.62_63PP>P   |
| Pat_37 | Post-Resistance | KIF3B    | 9371      | 37 | 20 | 30898763  | 30898765  | In_Frame_Del    | DEL | GAG      | - | 7  | 147  | .1183_1185delIGA   | c.(1183-1185)GAGdel               | p.E399del     |

|        |                 |          |        |    |    |           |           |                 |     |           |     |    |      |                                    |                                    |               |
|--------|-----------------|----------|--------|----|----|-----------|-----------|-----------------|-----|-----------|-----|----|------|------------------------------------|------------------------------------|---------------|
| Pat_37 | Post-Resistance | MICAL3   | 57553  | 37 | 22 | 18314825  | 18314827  | In_Frame_Del    | DEL | CTC       | -   | 7  | 171  | .2848_2850delGAT                   | c.(2848-2850)GAGdel                | p.E950del     |
| Pat_37 | Post-Resistance | CRYBB2   | 1415   | 37 | 22 | 25627664  | 25627664  | Frame_Shift_Del | DEL | C         | -   | 7  | 540  | c.543delC                          | c.(541-543)CACfs                   | p.H181fs      |
| Pat_37 | Post-Resistance | SF3A1    | 10291  | 37 | 22 | 30742328  | 30742330  | In_Frame_Del    | DEL | CTG       | -   | 14 | 474  | c.364_366delCAG                    | c.(364-366)CAGdel                  | p.Q122del     |
| Pat_37 | Post-Resistance | PICK1    | 9463   | 37 | 22 | 38471034  | 38471036  | In_Frame_Del    | DEL | GGA       | -   | 7  | 133  | .1143_1145delGG                    | c.(1141-1146)GGGGAG>GG             | p.E388del     |
| Pat_37 | Post-Resistance | MAPK8IP2 | 23542  | 37 | 22 | 51041769  | 51041771  | In_Frame_Del    | DEL | GAG       | -   | 7  | 37   | c.289_291delGAG                    | c.(289-291)GAGdel                  | p.E103del     |
| Pat_37 | Post-Resistance | GRM7     | 2917   | 37 | 3  | 7621013   | 7621013   | Frame_Shift_Del | DEL | T         | -   | 7  | 105  | c.2420delT                         | c.(2419-2421)ATTfs                 | p.1807fs      |
| Pat_37 | Post-Resistance | XPC      | 7508   | 37 | 3  | 14219966  | 14219968  | In_Frame_Del    | DEL | CCT       | -   | 13 | 198  | c.101_103delAGGc.                  | c.(100-105)GAGGAT>GAT              | p.E34del      |
| Pat_37 | Post-Resistance | MLH1     | 4292   | 37 | 3  | 37070349  | 37070349  | Frame_Shift_Del | DEL | C         | -   | 8  | 1768 | c.1484delC                         | c.(1483-1485)ACCfs                 | p.T495fs      |
| Pat_37 | Post-Resistance | SLC25A38 | 54977  | 37 | 3  | 39437924  | 39437924  | Frame_Shift_Del | DEL | C         | -   | 7  | 1105 | c.828delC                          | c.(826-828)ATCfs                   | p.1276fs      |
| Pat_37 | Post-Resistance | HHATL    | 57467  | 37 | 3  | 42740315  | 42740317  | In_Frame_Del    | DEL | AGC       | -   | 9  | 265  | c.366_368delGCTc.                  | c.(364-369)CTGCTT>CTT>.122_123LL>L |               |
| Pat_37 | Post-Resistance | LIMD1    | 8994   | 37 | 3  | 45636543  | 45636545  | In_Frame_Del    | DEL | CAG       | -   | 8  | 112  | c.172_174delCAG                    | c.(172-174)CAGdel                  | p.Q63del      |
| Pat_37 | Post-Resistance | ALS2CL   | 259173 | 37 | 3  | 46729622  | 46729624  | In_Frame_Del    | DEL | GCA       | -   | 11 | 267  | c.266_268delTGCc.                  | c.(265-270)CTGCGA>CGA              | p.L89del      |
| Pat_37 | Post-Resistance | VPRBP    | 9730   | 37 | 3  | 51457448  | 51457448  | Frame_Shift_Del | DEL | T         | -   | 8  | 1050 | c.2976delA                         | c.(2974-2976)AAAfs                 | p.K992fs      |
| Pat_37 | Post-Resistance | CPEB2    | 132864 | 37 | 4  | 15067858  | 15067858  | Frame_Shift_Del | DEL | T         | -   | 7  | 911  | c.1624delT                         | c.(1624-1626)TTTfs                 | p.F542fs      |
| Pat_37 | Post-Resistance | GABRG1   | 2565   | 37 | 4  | 46060358  | 46060358  | Frame_Shift_Del | DEL | A         | -   | 12 | 270  | c.792delT                          | c.(790-792)TTTfs                   | p.F264fs      |
| Pat_37 | Post-Resistance | SEC31A   | 22872  | 37 | 4  | 83745800  | 83745800  | Frame_Shift_Del | DEL | T         | -   | 8  | 115  | c.3319delA                         | c.(3319-3321)ATTfs                 | p.I1107fs     |
| Pat_37 | Post-Resistance | KIAA1109 | 84162  | 37 | 4  | 123188069 | 123188078 | Frame_Shift_Del | DEL | GATTCCAGA | -   | 57 | 277  | _7458delGGATTC447-7458)GTGGATTCAG/ | p.V2483fs                          |               |
| Pat_37 | Post-Resistance | PDZD2    | 23037  | 37 | 5  | 31799541  | 31799541  | Frame_Shift_Del | DEL | C         | -   | 7  | 837  | c.186delC                          | c.(184-186)AGCfs                   | p.S62fs       |
| Pat_37 | Post-Resistance | JARID2   | 3720   | 37 | 6  | 15501164  | 15501164  | Frame_Shift_Del | DEL | T         | -   | 8  | 1311 | c.1972delT                         | c.(1972-1974)TTTfs                 | p.F658fs      |
| Pat_37 | Post-Resistance | ATXN1    | 6310   | 37 | 6  | 16328093  | 16328093  | Frame_Shift_Del | DEL | G         | -   | 8  | 720  | c.449delC                          | c.(448-450)CCAfs                   | p.P150fs      |
| Pat_37 | Post-Resistance | HLA-DPB1 | 3115   | 37 | 6  | 33052934  | 33052934  | Frame_Shift_Del | DEL | C         | -   | 7  | 808  | c.572delC                          | c.(571-573)ACCfs                   | p.T191fs      |
| Pat_37 | Post-Resistance | PHF1     | 5252   | 37 | 6  | 33383637  | 33383637  | Frame_Shift_Del | DEL | C         | -   | 7  | 1097 | c.1466delC                         | c.(1465-1467)GCCfs                 | p.A489fs      |
| Pat_37 | Post-Resistance | PHACTR2  | 9749   | 37 | 6  | 144086414 | 144086414 | Frame_Shift_Del | DEL | A         | -   | 8  | 256  | c.678delA                          | c.(676-678)TCAfs                   | p.S226fs      |
| Pat_37 | Post-Resistance | GRM1     | 2911   | 37 | 6  | 146755399 | 146755401 | In_Frame_Del    | DEL | CAG       | -   | 9  | 958  | .3052_3054delCA                    | c.(3052-3054)CAGdel                | p.Q1022del    |
| Pat_37 | Post-Resistance | GLCCI1   | 113263 | 37 | 7  | 8126097   | 8126099   | In_Frame_Del    | DEL | CAG       | -   | 7  | 1014 | .1573_1575delCA                    | c.(1573-1575)CAGdel                | p.Q528del     |
| Pat_37 | Post-Resistance | PHF14    | 9678   | 37 | 7  | 11075380  | 11075381  | Frame_Shift_Del | DEL | AG        | -   | 9  | 971  | .1569_1570delAC                    | c.(1567-1572)CAAGAGfs              | p.Q523fs      |
| Pat_37 | Post-Resistance | LIMK1    | 3984   | 37 | 7  | 73535311  | 73535311  | Frame_Shift_Del | DEL | C         | -   | 7  | 1466 | c.1713delC                         | c.(1711-1713)TGCfs                 | p.C571fs      |
| Pat_37 | Post-Resistance | KIAA0020 | 9933   | 37 | 9  | 2837296   | 2837296   | Frame_Shift_Del | DEL | T         | -   | 7  | 1086 | c.188delA                          | c.(187-189)AAGfs                   | p.K63fs       |
| Pat_37 | Post-Resistance | KIAA2026 | 158358 | 37 | 9  | 5968043   | 5968044   | Frame_Shift_Ins | INS | -         | T   | 5  | 8    | c.2187_2188insA                    | c.(2185-2190)AAAGCAfs              | p.K729fs      |
| Pat_40 | Pre-Treatment   | TNFRSF9  | 3604   | 37 | 1  | 7998254   | 7998254   | Frame_Shift_Del | DEL | T         | -   | 8  | 324  | c.345delA                          | c.(343-345)AAAfs                   | p.K115fs      |
| Pat_40 | Pre-Treatment   | RERE     | 473    | 37 | 1  | 8716284   | 8716285   | Frame_Shift_Del | DEL | TC        | -   | 9  | 196  | c.72_73delGA                       | c.(70-75)GAGAAAfs                  | p.E24fs       |
| Pat_40 | Pre-Treatment   | FABP3    | 2170   | 37 | 1  | 31842256  | 31842257  | Frame_Shift_Del | DEL | TG        | -   | 8  | 869  | c.221_222delCA                     | c.(220-222)ACAfs                   | p.T74fs       |
| Pat_40 | Pre-Treatment   | JAK1     | 3716   | 37 | 1  | 65332708  | 65332708  | Frame_Shift_Del | DEL | C         | -   | 8  | 461  | c.831delG                          | c.(829-831)TTGfs                   | p.L277fs      |
| Pat_40 | Pre-Treatment   | FNDCC7   | 163479 | 37 | 1  | 109276138 | 109276138 | Frame_Shift_Del | DEL | A         | -   | 7  | 133  | c.2124delA                         | c.(2122-2124)CCAfs                 | p.P708fs      |
| Pat_40 | Pre-Treatment   | TCHH     | 7062   | 37 | 1  | 152082211 | 152082213 | In_Frame_Del    | DEL | CTC       | -   | 7  | 113  | .3480_3482delGA                    | c.(3478-3483)AAGAGA>AA             | p.R1163del    |
| Pat_40 | Pre-Treatment   | TCHH     | 7062   | 37 | 1  | 152084489 | 152084490 | In_Frame_Ins    | INS | -         | CTC | 3  | 3    | .1203_1204insGA                    | c.(1201-1206)insGAG                | p.401_402insE |
| Pat_40 | Pre-Treatment   | RPTN     | 126638 | 37 | 1  | 152127845 | 152127848 | Frame_Shift_Del | DEL | TGTC      | -   | 8  | 1303 | 1727_1730delGAC                    | c.(1726-1731)AGACAAfs              | p.R576fs      |
| Pat_40 | Pre-Treatment   | POU2F1   | 5451   | 37 | 1  | 167385016 | 167385018 | In_Frame_Del    | DEL | CCA       | -   | 8  | 448  | .2201_2203delCC.                   | c.(2200-2205)TCCACC>TC             | p.T738del     |
| Pat_40 | Pre-Treatment   | PAPPA2   | 60676  | 37 | 1  | 176709182 | 176709182 | Frame_Shift_Del | DEL | T         | -   | 7  | 432  | c.4001delT                         | c.(4000-4002)CTTfs                 | p.L1334fs     |
| Pat_40 | Pre-Treatment   | PRG4     | 10216  | 37 | 1  | 186276374 | 186276376 | In_Frame_Del    | DEL | CCA       | -   | 7  | 376  | .1523_1525delCC.                   | c.(1522-1527)CCCACC>CC             | p.T511del     |
| Pat_40 | Pre-Treatment   | OR1411   | 401994 | 37 | 1  | 248844831 | 248844832 | Frame_Shift_Del | DEL | CT        | -   | 8  | 299  | c.774_775delAG                     | c.(772-777)TTAGGAFs                | p.L258fs      |
| Pat_40 | Pre-Treatment   | JMJD1C   | 221037 | 37 | 10 | 64966802  | 64966802  | Frame_Shift_Del | DEL | G         | -   | 7  | 157  | c.4627delC                         | c.(4627-4629)CAAFs                 | p.Q1543fs     |
| Pat_40 | Pre-Treatment   | KCNMA1   | 3778   | 37 | 10 | 78729786  | 78729786  | Frame_Shift_Del | DEL | T         | -   | 11 | 163  | c.2306delA                         | c.(2305-2307)AAGfs                 | p.K769fs      |
| Pat_40 | Pre-Treatment   | ZMIZ1    | 57178  | 37 | 10 | 81072446  | 81072446  | Frame_Shift_Del | DEL | C         | -   | 12 | 388  | c.3144delC                         | c.(3142-3144)GACfs                 | p.D1048fs     |
| Pat_40 | Pre-Treatment   | CPXM2    | 119587 | 37 | 10 | 125528165 | 125528167 | In_Frame_Del    | DEL | CAG       | -   | 8  | 348  | .1174_1176delCTC                   | c.(1174-1176)CTGdel                | p.L392del     |
| Pat_40 | Pre-Treatment   | FTH1     | 2495   | 37 | 11 | 61732517  | 61732517  | Frame_Shift_Del | DEL | T         | -   | 11 | 611  | c.329delA                          | c.(328-330)AATfs                   | p.N110fs      |
| Pat_40 | Pre-Treatment   | SF3B2    | 10992  | 37 | 11 | 65836146  | 65836146  | Frame_Shift_Del | DEL | A         | -   | 9  | 108  | c.2618delA                         | c.(2617-2619)CAAFs                 | p.Q873fs      |



|        |               |          |        |    |    |           |           |                 |     |          |     |    |      |                                                    |                        |            |
|--------|---------------|----------|--------|----|----|-----------|-----------|-----------------|-----|----------|-----|----|------|----------------------------------------------------|------------------------|------------|
| Pat_40 | Pre-Treatment | CCS      | 9973   | 37 | 11 | 66372993  | 66372994  | Frame_Shift_Del | DEL | GA       | -   | 7  | 116  | c.601_602delGA                                     | c.(601-603)GATfs       | p.D201fs   |
| Pat_40 | Pre-Treatment | MMP12    | 4321   | 37 | 11 | 102738795 | 102738796 | Frame_Shift_Ins | INS | -        | T   | 34 | 1    | c.629_630insA                                      | c.(628-630)ACCfs       | p.T210fs   |
| Pat_40 | Pre-Treatment | TAS2R31  | 259290 | 37 | 12 | 11183679  | 11183680  | Frame_Shift_Del | DEL | TA       | -   | 8  | 348  | c.255_256delTA                                     | c.(253-258)TATAATfs    | p.Y85fs    |
| Pat_40 | Pre-Treatment | PRB1     | 5542   | 37 | 12 | 11506815  | 11506816  | In_Frame_Ins    | INS | -        | GGA | 7  | 153  | c.221_222insTCCc.(220-222)CCA>CCTCCA p.74_74P>PP   |                        |            |
| Pat_40 | Pre-Treatment | PRB2     | 653247 | 37 | 12 | 11546544  | 11546545  | In_Frame_Ins    | INS | -        | GGA | 7  | 255  | c.467_468insTCCc.(466-468)CCA>CCTCCA p.156_156P>PI |                        |            |
| Pat_40 | Pre-Treatment | GPR19    | 2842   | 37 | 12 | 12814274  | 12814274  | Frame_Shift_Del | DEL | T        | -   | 7  | 369  | c.1109delA                                         | c.(1108-1110)AACfs     | p.N370fs   |
| Pat_40 | Pre-Treatment | KIAA0528 | 9847   | 37 | 12 | 22646202  | 22646202  | Frame_Shift_Del | DEL | A        | -   | 9  | 706  | c.1217delT                                         | c.(1216-1218)TTAfs     | p.L406fs   |
| Pat_40 | Pre-Treatment | MARS     | 4141   | 37 | 12 | 57883053  | 57883053  | Frame_Shift_Del | DEL | T        | -   | 7  | 56   | c.204delT                                          | c.(202-204)TATfs       | p.Y68fs    |
| Pat_40 | Pre-Treatment | MDM1     | 56890  | 37 | 12 | 68689067  | 68689067  | Frame_Shift_Del | DEL | C        | -   | 8  | 207  | c.2112delG                                         | c.(2110-2112)AAGfs     | p.K704fs   |
| Pat_40 | Pre-Treatment | SART3    | 9733   | 37 | 12 | 108917255 | 108917255 | Frame_Shift_Del | DEL | G        | -   | 8  | 478  | c.2871delC                                         | c.(2869-2871)GCCfs     | p.A957fs   |
| Pat_40 | Pre-Treatment | TPCN1    | 53373  | 37 | 12 | 113704096 | 113704098 | In_Frame_Del    | DEL | CTG      | -   | 26 | 743  | c.349_351delCTG                                    | c.(349-351)CTGdel      | p.L122del  |
| Pat_40 | Pre-Treatment | SFRS8    | 6433   | 37 | 12 | 132281734 | 132281736 | In_Frame_Del    | DEL | AGA      | -   | 7  | 362  | .2546_2548delAG,(2545-2550)GAGAAG>GA               |                        | p.K853del  |
| Pat_40 | Pre-Treatment | POLE     | 5426   | 37 | 12 | 133220099 | 133220100 | Frame_Shift_Del | DEL | CA       | -   | 11 | 489  | c.4337_4338delTTC                                  | c.(4336-4338)GTGfs     | p.V1446fs  |
| Pat_40 | Pre-Treatment | NUFIP1   | 26747  | 37 | 13 | 45563293  | 45563293  | Frame_Shift_Del | DEL | G        | -   | 4  | 7    | c.279delC                                          | c.(277-279)TTCfs       | p.F93fs    |
| Pat_40 | Pre-Treatment | ZC3H13   | 23091  | 37 | 13 | 46549613  | 46549614  | Frame_Shift_Del | DEL | CT       | -   | 4  | 9    | c.2272_2273delAC                                   | c.(2272-2274)AGGfs     | p.R758fs   |
| Pat_40 | Pre-Treatment | DIAPH3   | 81624  | 37 | 13 | 60582733  | 60582734  | Frame_Shift_Ins | INS | -        | T   | 10 | 250  | c.958_959insA                                      | c.(958-960)ATTfs       | p.I320fs   |
| Pat_40 | Pre-Treatment | C14orf43 | 91748  | 37 | 14 | 74205926  | 74205928  | In_Frame_Del    | DEL | CTG      | -   | 10 | 34   | c.784_786delCAG                                    | c.(784-786)CAGdel      | p.Q262del  |
| Pat_40 | Pre-Treatment | DMXL2    | 23312  | 37 | 15 | 51773148  | 51773149  | Frame_Shift_Del | DEL | AT       | -   | 7  | 210  | c.6154_6155delAT                                   | c.(6154-6156)ATGfs     | p.M2052fs  |
| Pat_40 | Pre-Treatment | ZNF609   | 23060  | 37 | 15 | 64972995  | 64972997  | In_Frame_Del    | DEL | CAC      | -   | 9  | 450  | .4096_4098delCAI                                   | c.(4096-4098)CACdel    | p.H1371del |
| Pat_40 | Pre-Treatment | DIS3L    | 115752 | 37 | 15 | 66607405  | 66607405  | Frame_Shift_Del | DEL | G        | -   | 8  | 299  | c.846delG                                          | c.(844-846)ATGfs       | p.M282fs   |
| Pat_40 | Pre-Treatment | PKM2     | 5315   | 37 | 15 | 72502122  | 72502123  | Frame_Shift_Del | DEL | CA       | -   | 8  | 549  | c.456_457delTG                                     | c.(454-459)TGTGACfs    | p.C152fs   |
| Pat_40 | Pre-Treatment | CYP1A2   | 1544   | 37 | 15 | 75044574  | 75044575  | Frame_Shift_Del | DEL | CA       | -   | 8  | 596  | c.1152_1153delCA                                   | c.(1150-1155)TTCACCfs  | p.F384fs   |
| Pat_40 | Pre-Treatment | CPLX3    | 594855 | 37 | 15 | 75122558  | 75122560  | In_Frame_Del    | DEL | GAG      | -   | 7  | 155  | c.340_342delGAG                                    | c.(340-342)GAGdel      | p.E118del  |
| Pat_40 | Pre-Treatment | ADCY9    | 115    | 37 | 16 | 4016132   | 4016132   | Frame_Shift_Del | DEL | G        | -   | 8  | 186  | c.3706delC                                         | c.(3706-3708)CAGfs     | p.Q1236fs  |
| Pat_40 | Pre-Treatment | GLYR1    | 84656  | 37 | 16 | 4895089   | 4895089   | Frame_Shift_Del | DEL | A        | -   | 7  | 309  | c.141delT                                          | c.(139-141)TTTfs       | p.F47fs    |
| Pat_40 | Pre-Treatment | ARHGAP17 | 55114  | 37 | 16 | 24942118  | 24942119  | Frame_Shift_Del | DEL | GG       | -   | 7  | 717  | c.2501_2502delICC                                  | c.(2500-2502)TCCfs     | p.S834fs   |
| Pat_40 | Pre-Treatment | APOB48R  | 55911  | 37 | 16 | 28509543  | 28509543  | Frame_Shift_Del | DEL | A        | -   | 2  | 4    | c.3070delA                                         | c.(3070-3072)AACfs     | p.N1024fs  |
| Pat_40 | Pre-Treatment | SETD1A   | 9739   | 37 | 16 | 30982809  | 30982811  | In_Frame_Del    | DEL | TCC      | -   | 11 | 96   | c.3127_3129delTCT                                  | c.(3127-3129)TCCdel    | p.S1058del |
| Pat_40 | Pre-Treatment | TRPV2    | 51393  | 37 | 17 | 16335490  | 16335492  | In_Frame_Del    | DEL | TGC      | -   | 8  | 110  | c.1865_1867delTGT                                  | c.(1864-1869)GTGCTG>GT | p.L627del  |
| Pat_40 | Pre-Treatment | MYO1D    | 4642   | 37 | 17 | 31092016  | 31092017  | Frame_Shift_Del | DEL | AG       | -   | 9  | 124  | c.914_915delCT                                     | c.(913-915)TCTfs       | p.S305fs   |
| Pat_40 | Pre-Treatment | MMP28    | 79148  | 37 | 17 | 34105964  | 34105964  | Frame_Shift_Del | DEL | C        | -   | 8  | 239  | c.307delG                                          | c.(307-309)GCTfs       | p.A103fs   |
| Pat_40 | Pre-Treatment | KLHL10   | 317719 | 37 | 17 | 39998235  | 39998235  | Frame_Shift_Del | DEL | T        | -   | 7  | 190  | c.355delT                                          | c.(355-357)TTTfs       | p.F119fs   |
| Pat_40 | Pre-Treatment | BPTF     | 2186   | 37 | 17 | 65940454  | 65940456  | In_Frame_Del    | DEL | CAC      | -   | 9  | 410  | c.6666_6668delCAI                                  | c.(6664-6669)AGCACC>AG | p.T2227del |
| Pat_40 | Pre-Treatment | KPNA2    | 3838   | 37 | 17 | 66040578  | 66040579  | Frame_Shift_Ins | INS | -        | T   | 7  | 682  | c.1306_1307insT                                    | c.(1306-1308)ATTfs     | p.I436fs   |
| Pat_40 | Pre-Treatment | DOK6     | 220164 | 37 | 18 | 67406306  | 67406307  | Frame_Shift_Ins | INS | -        | T   | 43 | 262  | c.705_706insT                                      | c.(703-708)GAAAGAFs    | p.E235fs   |
| Pat_40 | Pre-Treatment | DMKN     | 93099  | 37 | 19 | 36002362  | 36002412  | In_Frame_Del    | DEL | CACTGCTC | -   | 7  | 17   | GGCGGCAGCAGTGGCGGCAGTGGC(GSSSGGSSG                 |                        |            |
| Pat_40 | Pre-Treatment | ZFP112   | 7771   | 37 | 19 | 44832512  | 44832512  | Frame_Shift_Del | DEL | C        | -   | 8  | 522  | c.1816delG                                         | c.(1816-1818)GAAfs     | p.E606fs   |
| Pat_40 | Pre-Treatment | NPAS1    | 4861   | 37 | 19 | 47542363  | 47542364  | Frame_Shift_Del | DEL | CC       | -   | 8  | 105  | c.758_759delCC                                     | c.(757-759)TCCfs       | p.S253fs   |
| Pat_40 | Pre-Treatment | FLT3LG   | 2323   | 37 | 19 | 49978960  | 49978962  | In_Frame_Del    | DEL | CTG      | -   | 7  | 178  | c.46_48delCTG                                      | c.(46-48)CTGdel        | p.L20del   |
| Pat_40 | Pre-Treatment | ZNF160   | 90338  | 37 | 19 | 53572481  | 53572482  | Frame_Shift_Del | DEL | AC       | -   | 7  | 267  | c.1305_1306delGT                                   | c.(1303-1308)AGGTACfs  | p.R435fs   |
| Pat_40 | Pre-Treatment | TMC4     | 147798 | 37 | 19 | 54672280  | 54672280  | Frame_Shift_Del | DEL | G        | -   | 4  | 9    | c.587delC                                          | c.(586-588)CCAFs       | p.P196fs   |
| Pat_40 | Pre-Treatment | HS1BP3   | 64342  | 37 | 2  | 20840864  | 20840864  | Frame_Shift_Del | DEL | G        | -   | 7  | 424  | c.275delC                                          | c.(274-276)CCAFs       | p.P92fs    |
| Pat_40 | Pre-Treatment | USP34    | 9736   | 37 | 2  | 61447530  | 61447530  | Frame_Shift_Del | DEL | T        | -   | 7  | 1116 | c.7962delA                                         | c.(7960-7962)AAAFs     | p.K2654fs  |
| Pat_40 | Pre-Treatment | SLC9A4   | 389015 | 37 | 2  | 103120126 | 103120127 | Frame_Shift_Del | DEL | TA       | -   | 8  | 257  | c.940_941delTA                                     | c.(940-942)TACfs       | p.Y314fs   |
| Pat_40 | Pre-Treatment | XIRP2    | 129446 | 37 | 2  | 168099958 | 168099958 | Frame_Shift_Del | DEL | G        | -   | 7  | 248  | c.2056delG                                         | c.(2056-2058)GGGfs     | p.G686fs   |
| Pat_40 | Pre-Treatment | SAMHD1   | 25939  | 37 | 20 | 35526234  | 35526234  | Frame_Shift_Del | DEL | G        | -   | 8  | 395  | c.1737delC                                         | c.(1735-1737)ACCfs     | p.T579fs   |
| Pat_40 | Pre-Treatment | TPTE     | 7179   | 37 | 21 | 10944697  | 10944697  | Frame_Shift_Del | DEL | A        | -   | 15 | 300  | c.537delT                                          | c.(535-537)TTTfs       | p.F179fs   |

|        |                 |          |        |    |    |           |           |                 |     |          |     |    |      |                  |                        |               |
|--------|-----------------|----------|--------|----|----|-----------|-----------|-----------------|-----|----------|-----|----|------|------------------|------------------------|---------------|
| Pat_40 | Pre-Treatment   | MN1      | 4330   | 37 | 22 | 28195603  | 28195605  | In_Frame_Del    | DEL | TGC      | -   | 3  | 5    | c.927_929delGCA  | c.(925-930)CAGCAT>CAT  | p.Q309del     |
| Pat_40 | Pre-Treatment   | MTMR3    | 8897   | 37 | 22 | 30408494  | 30408494  | Frame_Shift_Del | DEL | C        | -   | 7  | 954  | c.1259delC       | c.(1258-1260)ACCfs     | p.T420fs      |
| Pat_40 | Pre-Treatment   | TRIOBP   | 11078  | 37 | 22 | 38120245  | 38120253  | In_Frame_Del    | DEL | CTCCAGAA | -   | 9  | 316  | 2_1690delCCTCC   | c.1-1692)GCCTCCAGAACC  | p.SRT562del   |
| Pat_40 | Pre-Treatment   | GRIP2    | 80852  | 37 | 3  | 14555863  | 14555864  | Frame_Shift_Del | DEL | GC       | -   | 4  | 8    | c.1723_1724delGC | c.(1723-1725)GCCfs     | p.A575fs      |
| Pat_40 | Pre-Treatment   | GTF2E1   | 2960   | 37 | 3  | 120489634 | 120489634 | Frame_Shift_Del | DEL | A        | -   | 7  | 442  | c.508delA        | c.(508-510)AAAfs       | p.K170fs      |
| Pat_40 | Pre-Treatment   | CRIPAK   | 285464 | 37 | 4  | 1388345   | 1388346   | Frame_Shift_Del | DEL | CA       | -   | 7  | 551  | c.46_47delCA     | c.(46-48)CACfs         | p.H16fs       |
| Pat_40 | Pre-Treatment   | CRIPAK   | 285464 | 37 | 4  | 1389147   | 1389148   | Frame_Shift_Del | DEL | AT       | -   | 12 | 415  | c.848_849delAT   | c.(847-849)CATfs       | p.H283fs      |
| Pat_40 | Pre-Treatment   | CRIPAK   | 285464 | 37 | 4  | 1389175   | 1389176   | Frame_Shift_Del | DEL | CA       | -   | 10 | 471  | c.876_877delCA   | c.(874-879)CTCACAFs    | p.L292fs      |
| Pat_40 | Pre-Treatment   | CRIPAK   | 285464 | 37 | 4  | 1389236   | 1389237   | Frame_Shift_Ins | INS | -        | CA  | 7  | 616  | c.937_938insCA   | c.(937-939)TCAfs       | p.S313fs      |
| Pat_40 | Pre-Treatment   | CRIPAK   | 285464 | 37 | 4  | 1389425   | 1389426   | Frame_Shift_Del | DEL | CA       | -   | 15 | 715  | c.1126_1127delCA | c.(1126-1128)CACfs     | p.H376fs      |
| Pat_40 | Pre-Treatment   | HTT      | 3064   | 37 | 4  | 3076604   | 3076606   | In_Frame_Del    | DEL | CAG      | -   | 8  | 18   | c.58_60delCAG    | c.(58-60)CAGdel        | p.Q40del      |
| Pat_40 | Pre-Treatment   | SMAD1    | 4086   | 37 | 4  | 146436139 | 146436139 | Frame_Shift_Del | DEL | A        | -   | 9  | 462  | c.374delA        | c.(373-375)TACfs       | p.Y125fs      |
| Pat_40 | Pre-Treatment   | HAND2    | 9464   | 37 | 4  | 174450345 | 174450347 | In_Frame_Del    | DEL | GGC      | -   | 2  | 4    | c.94_96delGCC    | c.(94-96)GCCdel        | p.A32del      |
| Pat_40 | Pre-Treatment   | TNPO1    | 3842   | 37 | 5  | 72195897  | 72195898  | Frame_Shift_Del | DEL | TA       | -   | 8  | 320  | c.2403_2404delTA | c.(2401-2406)TTTATAfs  | p.F801fs      |
| Pat_40 | Pre-Treatment   | GPR98    | 84059  | 37 | 5  | 89948207  | 89948207  | Frame_Shift_Del | DEL | G        | -   | 7  | 367  | c.3461delG       | c.(3460-3462)TGGfs     | p.W1154fs     |
| Pat_40 | Pre-Treatment   | SRP19    | 6728   | 37 | 5  | 112227328 | 112227328 | Frame_Shift_Del | DEL | G        | -   | 2  | 4    | c.67delG         | c.(67-69)GCTfs         | p.A23fs       |
| Pat_40 | Pre-Treatment   | SLC22A4  | 6583   | 37 | 5  | 131676327 | 131676327 | Frame_Shift_Del | DEL | T        | -   | 11 | 385  | c.1514delT       | c.(1513-1515)CTTfs     | p.L505fs      |
| Pat_40 | Pre-Treatment   | KIF3A    | 11127  | 37 | 5  | 132070092 | 132070093 | Frame_Shift_Del | DEL | TC       | -   | 8  | 539  | c.84_85delGA     | c.(82-87)GAGAAAfs      | p.E28fs       |
| Pat_40 | Pre-Treatment   | RREB1    | 6239   | 37 | 6  | 7230034   | 7230034   | Frame_Shift_Del | DEL | G        | -   | 4  | 9    | c.1702delG       | c.(1702-1704)GGGfs     | p.G568fs      |
| Pat_40 | Pre-Treatment   | PHF14    | 9678   | 37 | 7  | 11075380  | 11075381  | Frame_Shift_Del | DEL | AG       | -   | 9  | 542  | c.1569_1570delAC | c.(1567-1572)CAAGAGfs  | p.Q523fs      |
| Pat_40 | Pre-Treatment   | ZNF716   | 441234 | 37 | 7  | 57529007  | 57529008  | In_Frame_Ins    | INS | -        | TCT | 8  | 174  | c.840_841insTCT  | c.(838-843)jinsTCT     | p.281_282insS |
| Pat_40 | Pre-Treatment   | ZNF716   | 441234 | 37 | 7  | 57529089  | 57529091  | In_Frame_Del    | DEL | TCT      | -   | 7  | 338  | c.922_924delTCT  | c.(922-924)TCTdel      | p.S309del     |
| Pat_40 | Pre-Treatment   | TNPO3    | 23534  | 37 | 7  | 128610259 | 128610259 | Frame_Shift_Del | DEL | G        | -   | 7  | 582  | c.2541delC       | c.(2539-2541)CCCfs     | p.P847fs      |
| Pat_40 | Pre-Treatment   | OR9A4    | 130075 | 37 | 7  | 141619203 | 141619203 | Frame_Shift_Del | DEL | T        | -   | 15 | 531  | c.528delT        | c.(526-528)AATfs       | p.N176fs      |
| Pat_40 | Pre-Treatment   | KCNU1    | 157855 | 37 | 8  | 36766827  | 36766828  | Splice_Site     | DEL | AG       | -   | 7  | 334  | c.2107_splice    | c.e21-1                | p.K703_splice |
| Pat_40 | Pre-Treatment   | SULF1    | 23213  | 37 | 8  | 70514026  | 70514026  | Frame_Shift_Del | DEL | T        | -   | 9  | 885  | c.1023delT       | c.(1021-1023)CCTfs     | p.P341fs      |
| Pat_40 | Pre-Treatment   | ZNF704   | 619279 | 37 | 8  | 81733778  | 81733778  | Frame_Shift_Del | DEL | T        | -   | 8  | 1134 | c.52delA         | c.(52-54)ATGfs         | p.M18fs       |
| Pat_40 | Pre-Treatment   | NBN      | 4683   | 37 | 8  | 90967512  | 90967512  | Frame_Shift_Del | DEL | T        | -   | 10 | 363  | c.1396delA       | c.(1396-1398)AGGfs     | p.R466fs      |
| Pat_40 | Pre-Treatment   | CCNE2    | 9134   | 37 | 8  | 95895082  | 95895083  | Frame_Shift_Del | DEL | CT       | -   | 8  | 512  | c.869_870delAG   | c.(868-870)GAGfs       | p.E290fs      |
| Pat_40 | Pre-Treatment   | TP53INP1 | 94241  | 37 | 8  | 95952409  | 95952411  | In_Frame_Del    | DEL | TCT      | -   | 7  | 185  | c.150_152delAGA  | :(148-153)GAAGAG>GAC   | p.50_51EE>E   |
| Pat_40 | Pre-Treatment   | RNF19A   | 25897  | 37 | 8  | 101299727 | 101299727 | Splice_Site     | DEL | A        | -   | 10 | 498  | c.674_splice     | c.e3+1                 | p.G225_splice |
| Pat_40 | Pre-Treatment   | DPYS     | 1807   | 37 | 8  | 105440214 | 105440214 | Frame_Shift_Del | DEL | T        | -   | 12 | 1004 | c.1086delA       | c.(1084-1086)AAAfs     | p.K362fs      |
| Pat_40 | Pre-Treatment   | HEATR7A  | 727957 | 37 | 8  | 145255353 | 145255353 | Frame_Shift_Del | DEL | A        | -   | 4  | 3    | c.1050delA       | c.(1048-1050)CTAFs     | p.L350fs      |
| Pat_40 | Pre-Treatment   | SMARCA2  | 6595   | 37 | 9  | 2039777   | 2039779   | In_Frame_Del    | DEL | CAG      | -   | 14 | 10   | c.667_669delCAG  | c.(667-669)CAGdel      | p.Q238del     |
| Pat_40 | Pre-Treatment   | MLLT3    | 4300   | 37 | 9  | 20414377  | 20414379  | In_Frame_Del    | DEL | CTG      | -   | 7  | 55   | c.465_467delCAG  | c.(463-468)AGCAGT>AGT  | p.155_156SS>A |
| Pat_40 | Pre-Treatment   | ZNF367   | 195828 | 37 | 9  | 99160470  | 99160470  | Frame_Shift_Del | DEL | G        | -   | 7  | 488  | c.547delC        | c.(547-549)CAGfs       | p.Q183fs      |
| Pat_40 | Pre-Treatment   | KIAA1529 | 57653  | 37 | 9  | 100082418 | 100082418 | Frame_Shift_Del | DEL | C        | -   | 7  | 679  | c.1639delC       | c.(1639-1641)CCCfs     | p.P547fs      |
| Pat_40 | Pre-Treatment   | SVEP1    | 79987  | 37 | 9  | 113166648 | 113166649 | Frame_Shift_Ins | INS | -        | T   | 7  | 549  | c.9624_9625insA  | c.(9622-9627)GCAGAAfs  | p.A3208fs     |
| Pat_40 | Pre-Treatment   | NUP214   | 8021   | 37 | 9  | 134007993 | 134007993 | Frame_Shift_Del | DEL | A        | -   | 8  | 157  | c.674delA        | c.(673-675)GAAfs       | p.E225fs      |
| Pat_40 | Pre-Treatment   | MED12    | 9968   | 37 | X  | 70360589  | 70360591  | In_Frame_Del    | DEL | AGC      | -   | 10 | 195  | c.6149_6151delAG | c.(6148-6153)GAGCAG>GA | p.Q2076del    |
| Pat_40 | Pre-Treatment   | ALG13    | 79868  | 37 | X  | 110928220 | 110928220 | Frame_Shift_Del | DEL | A        | -   | 7  | 483  | c.272delA        | c.(271-273)GAAfs       | p.E91fs       |
| Pat_40 | Pre-Treatment   | CUL4B    | 8450   | 37 | X  | 119694117 | 119694119 | In_Frame_Del    | DEL | GAG      | -   | 8  | 77   | c.429_431delCTC  | c.(427-432)TCCTCA>TCA  | p.143_144SS>A |
| Pat_40 | Pre-Treatment   | CDR1     | 1038   | 37 | X  | 139865995 | 139865995 | Frame_Shift_Del | DEL | C        | -   | 8  | 428  | c.537delG        | c.(535-537)TGGfs       | p.W179fs      |
| Pat_40 | Post-Resistance | VAMP3    | 9341   | 37 | 1  | 7838212   | 7838214   | In_Frame_Del    | DEL | TCA      | -   | 14 | 928  | c.266_268delTCA  | c.(265-270)TTCATC>TTC  | p.I94del      |
| Pat_40 | Post-Resistance | RERE     | 473    | 37 | 1  | 8716284   | 8716285   | Frame_Shift_Del | DEL | TC       | -   | 15 | 263  | c.72_73delGA     | c.(70-75)GAGAAAfs      | p.E24fs       |
| Pat_40 | Post-Resistance | AADACL3  | 126767 | 37 | 1  | 12785494  | 12785494  | Frame_Shift_Del | DEL | G        | -   | 8  | 304  | c.584delG        | c.(583-585)TGTfs       | p.C195fs      |
| Pat_40 | Post-Resistance | ZNF362   | 149076 | 37 | 1  | 33745818  | 33745820  | In_Frame_Del    | DEL | CCA      | -   | 8  | 738  | c.443_445delCCA  | :(442-447)CCCACC>CCC   | p.T151del     |

|        |                 |         |        |    |    |           |           |                 |     |     |     |    |      |                                                    |               |
|--------|-----------------|---------|--------|----|----|-----------|-----------|-----------------|-----|-----|-----|----|------|----------------------------------------------------|---------------|
| Pat_40 | Post-Resistance | MACF1   | 23499  | 37 | 1  | 39788668  | 39788670  | In_Frame_Del    | DEL | GGA | -   | 8  | 675  | .4239_4241delIGG(4237-4242)CTGGAG>CT               | p.E1417del    |
| Pat_40 | Post-Resistance | ROR1    | 4919   | 37 | 1  | 64608186  | 64608187  | Frame_Shift_Del | DEL | CA  | -   | 7  | 519  | c.1027_1028delCA c.(1027-1029)CACfs                | p.H343fs      |
| Pat_40 | Post-Resistance | CDC7    | 8317   | 37 | 1  | 91967356  | 91967357  | Frame_Shift_Ins | INS | -   | A   | 12 | 179  | c.83_84insA c.(82-84)TTAfs                         | p.L28fs       |
| Pat_40 | Post-Resistance | BRDT    | 676    | 37 | 1  | 92447228  | 92447230  | In_Frame_Del    | DEL | AGC | -   | 8  | 599  | .1918_1920delIAG c.(1918-1920)AGCdel               | p.S648del     |
| Pat_40 | Post-Resistance | COL11A1 | 1301   | 37 | 1  | 103355065 | 103355065 | Frame_Shift_Del | DEL | T   | -   | 8  | 423  | c.4410delA c.(4408-4410)AAAfs                      | p.K1470fs     |
| Pat_40 | Post-Resistance | FLG2    | 388698 | 37 | 1  | 152324558 | 152324559 | Frame_Shift_Del | DEL | TG  | -   | 7  | 1252 | c.5703_5704delCA c.(5701-5706)CACAGCfs             | p.H1901fs     |
| Pat_40 | Post-Resistance | LCE2A   | 353139 | 37 | 1  | 152671425 | 152671425 | Frame_Shift_Del | DEL | C   | -   | 7  | 1127 | c.48delC c.(46-48)TGCfs                            | p.C16fs       |
| Pat_40 | Post-Resistance | PVRL4   | 81607  | 37 | 1  | 161044057 | 161044059 | In_Frame_Del    | DEL | CAC | -   | 8  | 398  | .1105_1107delIGT c.(1105-1107)GTGdel               | p.V369del     |
| Pat_40 | Post-Resistance | PVRL4   | 81607  | 37 | 1  | 161044104 | 161044106 | In_Frame_Del    | DEL | CCA | -   | 7  | 527  | .1058_1060delITG(1057-1062)GTGGGT>GC               | p.V353del     |
| Pat_40 | Post-Resistance | POU2F1  | 5451   | 37 | 1  | 167385016 | 167385018 | In_Frame_Del    | DEL | CCA | -   | 10 | 867  | .2201_2203delCC c.(2200-2205)TCCACC>TC             | p.T738del     |
| Pat_40 | Post-Resistance | RCS1    | 92241  | 37 | 1  | 167654710 | 167654711 | Frame_Shift_Ins | INS | -   | C   | 7  | 642  | c.161_162insC c.(160-162)TTCfs                     | p.F54fs       |
| Pat_40 | Post-Resistance | GLUL    | 2752   | 37 | 1  | 182355463 | 182355463 | Frame_Shift_Del | DEL | G   | -   | 7  | 810  | c.403delC c.(403-405)CAGfs                         | p.Q135fs      |
| Pat_40 | Post-Resistance | PRG4    | 10216  | 37 | 1  | 186276127 | 186276128 | In_Frame_Ins    | INS | -   | AGG | 10 | 277  | .1276_1277insAG(1276-1278)AAG>AAGGA                | p.426_427insE |
| Pat_40 | Post-Resistance | PRG4    | 10216  | 37 | 1  | 186276374 | 186276376 | In_Frame_Del    | DEL | CCA | -   | 10 | 386  | .1523_1525delCC c.(1522-1527)CCCACC>CC             | p.T511del     |
| Pat_40 | Post-Resistance | PRG4    | 10216  | 37 | 1  | 186276386 | 186276388 | In_Frame_Del    | DEL | AGG | -   | 7  | 418  | .1535_1537delIAG(1534-1539)AAGGAG>AA               | p.E513del     |
| Pat_40 | Post-Resistance | SYT2    | 127833 | 37 | 1  | 202573647 | 202573649 | In_Frame_Del    | DEL | TTC | -   | 8  | 250  | c.279_281delGAAC c.(277-282)AAGAAC>AAC             | p.K93del      |
| Pat_40 | Post-Resistance | WNT9A   | 7483   | 37 | 1  | 228111954 | 228111954 | Frame_Shift_Del | DEL | C   | -   | 7  | 336  | c.500delG c.(499-501)GGCfs                         | p.G167fs      |
| Pat_40 | Post-Resistance | CDH23   | 64072  | 37 | 10 | 73337735  | 73337736  | Frame_Shift_Del | DEL | AC  | -   | 4  | 7    | c.818_819delAC c.(817-819)TACfs                    | p.Y273fs      |
| Pat_40 | Post-Resistance | HECTD2  | 143279 | 37 | 10 | 93247481  | 93247481  | Frame_Shift_Del | DEL | A   | -   | 9  | 425  | c.1137delA c.(1135-1137)GCAfs                      | p.A379fs      |
| Pat_40 | Post-Resistance | CTR9    | 9646   | 37 | 11 | 10789947  | 10789947  | Frame_Shift_Del | DEL | T   | -   | 7  | 527  | c.2018delIT c.(2017-2019)GTAfs                     | p.V673fs      |
| Pat_40 | Post-Resistance | BTBD10  | 84280  | 37 | 11 | 13441232  | 13441232  | Frame_Shift_Del | DEL | G   | -   | 8  | 1155 | c.359delC c.(358-360)CCAfs                         | p.P120fs      |
| Pat_40 | Post-Resistance | MMP12   | 4321   | 37 | 11 | 102738795 | 102738796 | Frame_Shift_Ins | INS | -   | T   | 23 | 3    | c.629_630insA c.(628-630)ACCfs                     | p.T210fs      |
| Pat_40 | Post-Resistance | CBL     | 867    | 37 | 11 | 119149356 | 119149358 | In_Frame_Del    | DEL | ATG | -   | 7  | 98   | .1364_1366delATC c.(1363-1368)TATGAT>TAI           | p.D460del     |
| Pat_40 | Post-Resistance | GPR19   | 2842   | 37 | 12 | 12814274  | 12814274  | Frame_Shift_Del | DEL | T   | -   | 7  | 629  | c.1109delA c.(1108-1110)AACfs                      | p.N370fs      |
| Pat_40 | Post-Resistance | PLBD1   | 79887  | 37 | 12 | 14664498  | 14664499  | Frame_Shift_Del | DEL | AT  | -   | 7  | 852  | c.991_992delIAT c.(991-993)ATGfs                   | p.M331fs      |
| Pat_40 | Post-Resistance | SFRS2IP | 9169   | 37 | 12 | 46318575  | 46318577  | In_Frame_Del    | DEL | GGT | -   | 10 | 810  | .3840_3842delIAC c.(3838-3843)CCACCC>CC1280_1281PP |               |
| Pat_40 | Post-Resistance | MARS    | 4141   | 37 | 12 | 57883053  | 57883053  | Frame_Shift_Del | DEL | T   | -   | 7  | 123  | c.204delIT c.(202-204)TATfs                        | p.Y68fs       |
| Pat_40 | Post-Resistance | TPCN1   | 53373  | 37 | 12 | 113704096 | 113704098 | In_Frame_Del    | DEL | CTG | -   | 19 | 831  | c.349_351delICTG c.(349-351)CTGdel                 | p.L122del     |
| Pat_40 | Post-Resistance | SFRS8   | 6433   | 37 | 12 | 132281734 | 132281736 | In_Frame_Del    | DEL | AGA | -   | 10 | 461  | .2546_2548delIAG c.(2545-2550)GAGAAG>GA            | p.K853del     |
| Pat_40 | Post-Resistance | POLE    | 5426   | 37 | 12 | 133220099 | 133220100 | Frame_Shift_Del | DEL | CA  | -   | 18 | 774  | c.4337_4338delITC c.(4336-4338)GTGfs               | p.V1446fs     |
| Pat_40 | Post-Resistance | ABCC4   | 10257  | 37 | 13 | 95768189  | 95768190  | Frame_Shift_Del | DEL | AA  | -   | 8  | 647  | c.2521_2522delITT c.(2521-2523)TTAfs               | p.L841fs      |
| Pat_40 | Post-Resistance | RNASE7  | 84659  | 37 | 14 | 21511560  | 21511561  | Frame_Shift_Del | DEL | CC  | -   | 7  | 343  | c.409_410delICC c.(409-411)CCCfs                   | p.P137fs      |
| Pat_40 | Post-Resistance | RBM23   | 55147  | 37 | 14 | 23378776  | 23378776  | Frame_Shift_Del | DEL | T   | -   | 7  | 978  | c.95delA c.(94-96)AAGfs                            | p.K32fs       |
| Pat_40 | Post-Resistance | FANCM   | 57697  | 37 | 14 | 45642288  | 45642289  | Frame_Shift_Del | DEL | CT  | -   | 12 | 525  | c.2191_2192delICT c.(2191-2193)CTCfs               | p.L731fs      |
| Pat_40 | Post-Resistance | FAM63B  | 54629  | 37 | 15 | 59064201  | 59064203  | In_Frame_Del    | DEL | GAG | -   | 7  | 201  | c.607_609delGAG c.(607-609)GAGdel                  | p.E206del     |
| Pat_40 | Post-Resistance | ZNF609  | 23060  | 37 | 15 | 64972995  | 64972997  | In_Frame_Del    | DEL | CAC | -   | 9  | 671  | .4096_4098delICA c.(4096-4098)CACdel               | p.H1371del    |
| Pat_40 | Post-Resistance | ZNF609  | 23060  | 37 | 15 | 64973567  | 64973567  | Frame_Shift_Del | DEL | C   | -   | 10 | 509  | c.4222delIC c.(4222-4224)CCCfs                     | p.P1408fs     |
| Pat_40 | Post-Resistance | CLPX    | 10845  | 37 | 15 | 65456384  | 65456384  | Frame_Shift_Del | DEL | G   | -   | 8  | 951  | c.656delIC c.(655-657)ACAfs                        | p.T219fs      |
| Pat_40 | Post-Resistance | PARP16  | 54956  | 37 | 15 | 65551806  | 65551808  | In_Frame_Del    | DEL | AGC | -   | 7  | 347  | c.906_908delGCT c.(904-909)CTGCTC>CTC              | p.302_303LL>L |
| Pat_40 | Post-Resistance | DNAH3   | 55567  | 37 | 16 | 21132130  | 21132132  | In_Frame_Del    | DEL | CAG | -   | 9  | 254  | .1628_1630delICT c.(1627-1632)GCTGAT>GA            | p.A543del     |
| Pat_40 | Post-Resistance | TNRC6A  | 27327  | 37 | 16 | 24788376  | 24788378  | In_Frame_Del    | DEL | CAG | -   | 9  | 150  | c.286_288delCAG c.(286-288)CAGdel                  | p.Q103del     |
| Pat_40 | Post-Resistance | RABEP2  | 79874  | 37 | 16 | 28916779  | 28916779  | Frame_Shift_Del | DEL | G   | -   | 4  | 9    | c.1547delIC c.(1546-1548)GCAfs                     | p.A516fs      |
| Pat_40 | Post-Resistance | STX4    | 6810   | 37 | 16 | 31046299  | 31046299  | Frame_Shift_Del | DEL | C   | -   | 7  | 680  | c.316delIC c.(316-318)CCCfs                        | p.P106fs      |
| Pat_40 | Post-Resistance | IRX6    | 79190  | 37 | 16 | 55362674  | 55362676  | In_Frame_Del    | DEL | GAG | -   | 8  | 106  | c.784_786delGAG c.(784-786)GAGdel                  | p.E268del     |
| Pat_40 | Post-Resistance | TRPV2   | 51393  | 37 | 17 | 16335490  | 16335492  | In_Frame_Del    | DEL | TGC | -   | 11 | 179  | .1865_1867delITG(1864-1869)GTGCTG>GT               | p.L627del     |
| Pat_40 | Post-Resistance | TUBG1   | 7283   | 37 | 17 | 40764472  | 40764472  | Frame_Shift_Del | DEL | G   | -   | 7  | 793  | c.427delIG c.(427-429)GGGfs                        | p.G143fs      |
| Pat_40 | Post-Resistance | PNPO    | 55163  | 37 | 17 | 46022008  | 46022010  | In_Frame_Del    | DEL | TGC | -   | 8  | 835  | c.290_292delTGC c.(289-294)TTGCTG>TTG              | p.97_98LL>L   |

|        |                 |           |        |    |    |           |           |                        |     |          |     |    |      |                   |                                  |               |
|--------|-----------------|-----------|--------|----|----|-----------|-----------|------------------------|-----|----------|-----|----|------|-------------------|----------------------------------|---------------|
| Pat_40 | Post-Resistance | COIL      | 8161   | 37 | 17 | 55027262  | 55027263  | Frame_Shift_Del        | DEL | AG       | -   | 7  | 391  | c.1340_1341delCT  | c.(1339-1341)TCTfs               | p.S447fs      |
| Pat_40 | Post-Resistance | GALR2     | 8811   | 37 | 17 | 74073334  | 74073334  | Frame_Shift_Del        | DEL | C        | -   | 2  | 4    | c.986delC         | c.(985-987)ACCfs                 | p.T329fs      |
| Pat_40 | Post-Resistance | ROCK1     | 6093   | 37 | 18 | 18564364  | 18564367  | Frame_Shift_Del        | DEL | TATT     | -   | 8  | 261  | 2434_2437delAAT   | c.(2434-2439)AATACTfs            | p.N812fs      |
| Pat_40 | Post-Resistance | DOK6      | 220164 | 37 | 18 | 67406306  | 67406307  | Frame_Shift_Ins        | INS | -        | T   | 69 | 334  | c.705_706insT     | c.(703-708)GAAAGAsfs             | p.E235fs      |
| Pat_40 | Post-Resistance | MAST1     | 22983  | 37 | 19 | 12978651  | 12978651  | Frame_Shift_Del        | DEL | C        | -   | 2  | 4    | c.2426delC        | c.(2425-2427)GCCfs               | p.A809fs      |
| Pat_40 | Post-Resistance | SERTAD1   | 29950  | 37 | 19 | 40929409  | 40929411  | In_Frame_Del           | DEL | CTC      | -   | 8  | 202  | c.43_45delGAG     | c.(43-45)GAGdel                  | p.E15del      |
| Pat_40 | Post-Resistance | ZFP112    | 7771   | 37 | 19 | 44832512  | 44832512  | Frame_Shift_Del        | DEL | C        | -   | 7  | 739  | c.1816delG        | c.(1816-1818)GAAfs               | p.E606fs      |
| Pat_40 | Post-Resistance | TEAD2     | 8463   | 37 | 19 | 49850472  | 49850473  | Frame_Shift_Ins        | INS | -        | G   | 8  | 530  | c.883_884insC     | c.(883-885)CATfs                 | p.H295fs      |
| Pat_40 | Post-Resistance | FLT3LG    | 2323   | 37 | 19 | 49978960  | 49978962  | In_Frame_Del           | DEL | CTG      | -   | 8  | 235  | c.46_48delCTG     | c.(46-48)CTGdel                  | p.L20del      |
| Pat_40 | Post-Resistance | TMC4      | 147798 | 37 | 19 | 54675747  | 54675749  | In_Frame_Del           | DEL | TCC      | -   | 11 | 147  | c.201_203delGGAc. | (199-204)GAGGAT>GAT              | p.E67del      |
| Pat_40 | Post-Resistance | RNASEH1   | 246243 | 37 | 2  | 3595620   | 3595620   | Frame_Shift_Del        | DEL | C        | -   | 8  | 1134 | c.675delG         | c.(673-675)TGGfs                 | p.W225fs      |
| Pat_40 | Post-Resistance | DHX57     | 90957  | 37 | 2  | 39095411  | 39095413  | In_Frame_Del           | DEL | CCA      | -   | 9  | 268  | c.135_137delTGGc. | (133-138)GGTGGGA>GG/p.45_46GG>G  |               |
| Pat_40 | Post-Resistance | ST3GAL5   | 8869   | 37 | 2  | 86075199  | 86075200  | Frame_Shift_Del        | DEL | GG       | -   | 8  | 1168 | c.446_447delCC    | c.(445-447)CCCfs                 | p.P149fs      |
| Pat_40 | Post-Resistance | MYO7B     | 4648   | 37 | 2  | 128367225 | 128367226 | Frame_Shift_Del        | DEL | CA       | -   | 8  | 454  | c.2959_2960delCA  | c.(2959-2961)CACfs               | p.H987fs      |
| Pat_40 | Post-Resistance | XIRP2     | 129446 | 37 | 2  | 168099958 | 168099958 | Frame_Shift_Del        | DEL | G        | -   | 7  | 437  | c.2056delG        | c.(2056-2058)GGGfs               | p.G686fs      |
| Pat_40 | Post-Resistance | TTN       | 7273   | 37 | 2  | 179481647 | 179481647 | Frame_Shift_Del        | DEL | G        | -   | 9  | 475  | c.40265delC       | c.(40264-40266)CCAFs             | p.P13422fs    |
| Pat_40 | Post-Resistance | SATB2     | 23314  | 37 | 2  | 200213559 | 200213559 | Frame_Shift_Del        | DEL | G        | -   | 7  | 411  | c.1038delC        | c.(1036-1038)CCCfs               | p.P346fs      |
| Pat_40 | Post-Resistance | ABI2      | 10152  | 37 | 2  | 204193211 | 204193213 | Translation_Start_Site | DEL | GAG      | -   | 4  | 9    | c.-26_-24delGAG   | c.(-28--22)ATGAGGA>ATGA          |               |
| Pat_40 | Post-Resistance | JAG1      | 182    | 37 | 20 | 10639255  | 10639256  | Frame_Shift_Del        | DEL | CA       | -   | 28 | 444  | c.554_555delTG    | c.(553-555)GTGfs                 | p.V185fs      |
| Pat_40 | Post-Resistance | NCOA6     | 23054  | 37 | 20 | 33330968  | 33330970  | In_Frame_Del           | DEL | TGC      | -   | 12 | 324  | .3090_3092delGC.  | (3088-3093)CAGCAA>CAI030_1031QQ: |               |
| Pat_40 | Post-Resistance | YTHDF1    | 54915  | 37 | 20 | 61833650  | 61833652  | In_Frame_Del           | DEL | CCT      | -   | 10 | 496  | .1640_1642delAG   | (1639-1644)GAGGTG>GT             | p.E547del     |
| Pat_40 | Post-Resistance | TPTE      | 7179   | 37 | 21 | 10944697  | 10944697  | Frame_Shift_Del        | DEL | A        | -   | 18 | 520  | c.537delT         | c.(535-537)TTTfs                 | p.F179fs      |
| Pat_40 | Post-Resistance | KRTAP19-4 | 337971 | 37 | 21 | 31869379  | 31869381  | In_Frame_Del           | DEL | CCT      | -   | 7  | 890  | c.48_50delIAGG    | c.(46-51)GGGAGC>GGC              | p.16_17GG>G   |
| Pat_40 | Post-Resistance | IFNGR2    | 3460   | 37 | 21 | 34799292  | 34799292  | Frame_Shift_Del        | DEL | T        | -   | 8  | 858  | c.514delT         | c.(514-516)TTTfs                 | p.F172fs      |
| Pat_40 | Post-Resistance | DYRK1A    | 1859   | 37 | 21 | 38884370  | 38884372  | In_Frame_Del           | DEL | CAC      | -   | 10 | 228  | .1828_1830delCA   | c.(1828-1830)CACdel              | p.H619del     |
| Pat_40 | Post-Resistance | ZNF70     | 7621   | 37 | 22 | 24087314  | 24087314  | Frame_Shift_Del        | DEL | G        | -   | 7  | 320  | c.14delC          | c.(13-15)CCAFs                   | p.P5fs        |
| Pat_40 | Post-Resistance | TRIOBP    | 11078  | 37 | 22 | 38120245  | 38120253  | In_Frame_Del           | DEL | CTCCAGA/ | -   | 8  | 355  | _2_1690delCTCC.   | 1-1692)GCCTCCAGAACC              | p.SRT562del   |
| Pat_40 | Post-Resistance | RANGAP1   | 5905   | 37 | 22 | 41650469  | 41650471  | In_Frame_Del           | DEL | TCC      | -   | 41 | 302  | .1101_1103delIGG. | (1099-1104)GAGGAA>GA             | p.367_368EE>I |
| Pat_40 | Post-Resistance | CACNA1D   | 776    | 37 | 3  | 53529193  | 53529195  | Translation_Start_Site | DEL | GAT      | -   | 8  | 148  |                   |                                  |               |
| Pat_40 | Post-Resistance | ADAMTS9   | 56999  | 37 | 3  | 64518879  | 64518880  | Frame_Shift_Del        | DEL | TG       | -   | 7  | 1380 | c.5680_5681delCA  | c.(5680-5682)CAAfs               | p.Q1894fs     |
| Pat_40 | Post-Resistance | ADAMTS9   | 56999  | 37 | 3  | 64644422  | 64644422  | Frame_Shift_Del        | DEL | C        | -   | 7  | 2484 | c.725delG         | c.(724-726)AGAsfs                | p.R242fs      |
| Pat_40 | Post-Resistance | MITF      | 4286   | 37 | 3  | 70014329  | 70014329  | Frame_Shift_Del        | DEL | C        | -   | 7  | 1501 | c.1493delC        | c.(1492-1494)TCCfs               | p.S498fs      |
| Pat_40 | Post-Resistance | VGLL3     | 389136 | 37 | 3  | 87027857  | 87027859  | In_Frame_Del           | DEL | CTC      | -   | 12 | 199  | c.220_222delGAG   | c.(220-222)GAGdel                | p.E74del      |
| Pat_40 | Post-Resistance | TMCC1     | 23023  | 37 | 3  | 129370576 | 129370578 | In_Frame_Del           | DEL | CTG      | -   | 11 | 253  | .1708_1710delCA   | c.(1708-1710)CAGdel              | p.Q570del     |
| Pat_40 | Post-Resistance | CRIPAK    | 285464 | 37 | 4  | 1389114   | 1389115   | Frame_Shift_Ins        | INS | -        | CA  | 18 | 604  | c.815_816insCA    | c.(814-816)CTCfs                 | p.L272fs      |
| Pat_40 | Post-Resistance | CRIPAK    | 285464 | 37 | 4  | 1389147   | 1389148   | Frame_Shift_Del        | DEL | AT       | -   | 7  | 576  | c.848_849delAT    | c.(847-849)CATfs                 | p.H283fs      |
| Pat_40 | Post-Resistance | CRIPAK    | 285464 | 37 | 4  | 1389236   | 1389237   | Frame_Shift_Ins        | INS | -        | CA  | 7  | 780  | c.937_938insCA    | c.(937-939)TCAfs                 | p.S313fs      |
| Pat_40 | Post-Resistance | CRIPAK    | 285464 | 37 | 4  | 1389425   | 1389426   | Frame_Shift_Del        | DEL | CA       | -   | 9  | 817  | c.1126_1127delCA  | c.(1126-1128)CACfs               | p.H376fs      |
| Pat_40 | Post-Resistance | RUFY3     | 22902  | 37 | 4  | 71628327  | 71628327  | Frame_Shift_Del        | DEL | G        | -   | 7  | 508  | c.270delG         | c.(268-270)CTGfs                 | p.L90fs       |
| Pat_40 | Post-Resistance | MMRN1     | 22915  | 37 | 4  | 90844391  | 90844393  | In_Frame_Del           | DEL | AGC      | -   | 11 | 1361 | c.923_925delAGC.  | (922-927)GAGCAG>GAC              | p.Q313del     |
| Pat_40 | Post-Resistance | POU4F2    | 5458   | 37 | 4  | 147560457 | 147560458 | In_Frame_Ins           | INS | -        | GGC | 4  | 8    | c.165_166insGGC   | c.(163-168)insGGC                | p.68_69insG   |
| Pat_40 | Post-Resistance | LRBA      | 987    | 37 | 4  | 151509211 | 151509211 | Frame_Shift_Del        | DEL | T        | -   | 8  | 783  | c.6352delA        | c.(6352-6354)ATCfs               | p.I2118fs     |
| Pat_40 | Post-Resistance | DDX60     | 55601  | 37 | 4  | 169229302 | 169229302 | Frame_Shift_Del        | DEL | A        | -   | 8  | 98   | c.119delT         | c.(118-120)TTGfs                 | p.L40fs       |
| Pat_40 | Post-Resistance | CDH10     | 1008   | 37 | 5  | 24492973  | 24492973  | Frame_Shift_Del        | DEL | A        | -   | 9  | 833  | c.1577delT        | c.(1576-1578)TTCfs               | p.F526fs      |
| Pat_40 | Post-Resistance | TIMD4     | 91937  | 37 | 5  | 156378745 | 156378747 | In_Frame_Del           | DEL | TTG      | -   | 7  | 631  | c.455_457delCAA.  | (454-459)ACAAGC>AGC              | p.T152del     |
| Pat_40 | Post-Resistance | TBC1D7    | 51256  | 37 | 6  | 13321262  | 13321263  | Frame_Shift_Del        | DEL | CC       | -   | 8  | 1506 | c.258_259delGG    | c.(256-261)TTGGATfs              | p.L86fs       |
| Pat_40 | Post-Resistance | NUP153    | 9972   | 37 | 6  | 17675499  | 17675499  | Frame_Shift_Del        | DEL | T        | -   | 11 | 727  | c.684delA         | c.(682-684)AAAsfs                | p.K228fs      |

|        |                 |          |           |    |   |           |           |                 |     |     |     |    |      |                   |                                   |                |
|--------|-----------------|----------|-----------|----|---|-----------|-----------|-----------------|-----|-----|-----|----|------|-------------------|-----------------------------------|----------------|
| Pat_40 | Post-Resistance | BTN2A2   | 10385     | 37 | 6 | 26384091  | 26384093  | In_Frame_Del    | DEL | CCT | -   | 8  | 478  | c.42_44delCCT     | c.(40-45)TCCCTC>TCC               | p.L24del       |
| Pat_40 | Post-Resistance | ANKS1A   | 23294     | 37 | 6 | 34951143  | 34951143  | Frame_Shift_Del | DEL | C   | -   | 7  | 520  | c.953delC         | c.(952-954)ACCfs                  | p.T318fs       |
| Pat_40 | Post-Resistance | TREML2   | 79865     | 37 | 6 | 41168714  | 41168716  | In_Frame_Del    | DEL | CAG | -   | 9  | 121  | c.31_33delCTG     | c.(31-33)CTGdel                   | p.L11del       |
| Pat_40 | Post-Resistance | MDFI     | 4188      | 37 | 6 | 41621169  | 41621171  | In_Frame_Del    | DEL | CTG | -   | 7  | 208  | c.597_599delCTGc. | (595-600)CTCTGC>CTC               | p.C204del      |
| Pat_40 | Post-Resistance | TTK      | 7272      | 37 | 6 | 80751896  | 80751897  | Frame_Shift_Ins | INS | -   | A   | 9  | 301  | c.2551_2552insA   | c.(2551-2553)GAAfs                | p.E851fs       |
| Pat_40 | Post-Resistance | KIAA1009 | 22832     | 37 | 6 | 84896233  | 84896233  | Frame_Shift_Del | DEL | A   | -   | 12 | 422  | c.1218delT        | c.(1216-1218)TTTTfs               | p.F406fs       |
| Pat_40 | Post-Resistance | SUN1     | 23353     | 37 | 7 | 883110    | 883110    | Frame_Shift_Del | DEL | C   | -   | 7  | 1067 | c.611delC         | c.(610-612)GCCfs                  | p.A204fs       |
| Pat_40 | Post-Resistance | SDK1     | 221935    | 37 | 7 | 4119173   | 4119173   | Frame_Shift_Del | DEL | A   | -   | 7  | 210  | c.3281delA        | c.(3280-3282)TATfs                | p.Y1094fs      |
| Pat_40 | Post-Resistance | USP42    | 84132     | 37 | 7 | 6155014   | 6155015   | Frame_Shift_Del | DEL | TT  | -   | 8  | 418  | c.302_303delTT    | c.(301-303)CTTfs                  | p.L101fs       |
| Pat_40 | Post-Resistance | HOXA11   | 3207      | 37 | 7 | 27222461  | 27222462  | Frame_Shift_Ins | INS | -   | T   | 7  | 328  | c.895_896insA     | c.(895-897)ATTfs                  | p.I299fs       |
| Pat_40 | Post-Resistance | ZNF716   | 441234    | 37 | 7 | 57529007  | 57529008  | In_Frame_Ins    | INS | -   | TCT | 11 | 243  | c.840_841insTCT   | c.(838-843)jinsTCT                | p.281_282insS  |
| Pat_40 | Post-Resistance | STAG3    | 10734     | 37 | 7 | 99780446  | 99780446  | Frame_Shift_Del | DEL | C   | -   | 7  | 1864 | c.320delC         | c.(319-321)GCCfs                  | p.A107fs       |
| Pat_40 | Post-Resistance | TNPO3    | 23534     | 37 | 7 | 128610259 | 128610259 | Frame_Shift_Del | DEL | G   | -   | 9  | 1107 | c.2541delC        | c.(2539-2541)CCCfs                | p.P847fs       |
| Pat_40 | Post-Resistance | LUZP6    | 767558    | 37 | 7 | 135635394 | 135635394 | Frame_Shift_Del | DEL | C   | -   | 7  | 1039 | c.223delG         | c.(223-225)GCTfs                  | p.A75fs        |
| Pat_40 | Post-Resistance | OR9A4    | 130075    | 37 | 7 | 141619203 | 141619203 | Frame_Shift_Del | DEL | T   | -   | 19 | 889  | c.528delT         | c.(526-528)AATfs                  | p.N176fs       |
| Pat_40 | Post-Resistance | PRKDC    | 5591      | 37 | 8 | 48746799  | 48746799  | Frame_Shift_Del | DEL | T   | -   | 9  | 1201 | c.8110delA        | c.(8110-8112)AGGfs                | p.R2704fs      |
| Pat_40 | Post-Resistance | ST18     | 9705      | 37 | 8 | 53062481  | 53062482  | Frame_Shift_Ins | INS | -   | T   | 10 | 509  | c.1862_1863insA   | c.(1861-1863)AATfs                | p.N621fs       |
| Pat_40 | Post-Resistance | MYBL1    | 4603      | 37 | 8 | 67488452  | 67488453  | Frame_Shift_Ins | INS | -   | T   | 11 | 1093 | c.1259_1260insA   | c.(1258-1260)AACfs                | p.N420fs       |
| Pat_40 | Post-Resistance | SULF1    | 23213     | 37 | 8 | 70514026  | 70514026  | Frame_Shift_Del | DEL | T   | -   | 9  | 1917 | c.1023delT        | c.(1021-1023)CCTfs                | p.P341fs       |
| Pat_40 | Post-Resistance | KCNB2    | 9312      | 37 | 8 | 73479985  | 73479985  | Frame_Shift_Del | DEL | C   | -   | 8  | 671  | c.16delC          | c.(16-18)CCCfs                    | p.P6fs         |
| Pat_40 | Post-Resistance | NBN      | 4683      | 37 | 8 | 90967512  | 90967512  | Frame_Shift_Del | DEL | T   | -   | 8  | 584  | c.1396delA        | c.(1396-1398)AGGfs                | p.R466fs       |
| Pat_40 | Post-Resistance | DECR1    | 1666      | 37 | 8 | 91057151  | 91057151  | Frame_Shift_Del | DEL | G   | -   | 10 | 939  | c.813delG         | c.(811-813)CTGfs                  | p.L271fs       |
| Pat_40 | Post-Resistance | RUNX1T1  | 862       | 37 | 8 | 93088215  | 93088215  | Frame_Shift_Del | DEL | T   | -   | 11 | 956  | c.66delA          | c.(64-66)AAAFs                    | p.K22fs        |
| Pat_40 | Post-Resistance | TP53INP1 | 94241     | 37 | 8 | 95952409  | 95952411  | In_Frame_Del    | DEL | TCT | -   | 10 | 353  | c.150_152delAGA:  | (148-153)GAAGAG>GAC               | p.50_51EE>E    |
| Pat_40 | Post-Resistance | ZFPM2    | 23414     | 37 | 8 | 106813775 | 106813776 | Frame_Shift_Del | DEL | GG  | -   | 7  | 482  | c.1465_1466delG   | c.(1465-1467)GGGfs                | p.G489fs       |
| Pat_40 | Post-Resistance | COL14A1  | 7373      | 37 | 8 | 121279110 | 121279110 | Frame_Shift_Del | DEL | C   | -   | 7  | 1286 | c.3061delC        | c.(3061-3063)CCAfs                | p.P1021fs      |
| Pat_40 | Post-Resistance | MYC      | 4609      | 37 | 8 | 128750605 | 128750607 | In_Frame_Del    | DEL | CAG | -   | 7  | 205  | c.97_99delCAG     | c.(97-99)CAGdel                   | p.Q37del       |
| Pat_40 | Post-Resistance | PLEC     | 5339      | 37 | 8 | 145000951 | 145000953 | Splice_Site     | DEL | CCT | -   | 9  | 501  | c.4455_splice     | c.e30+1                           | p.E1485_splice |
| Pat_40 | Post-Resistance | KANK1    | 23189     | 37 | 9 | 732475    | 732477    | In_Frame_Del    | DEL | GAG | -   | 14 | 422  | c.3103_3105delGAI | c.(3103-3105)GAGdel               | p.E1039del     |
| Pat_40 | Post-Resistance | SMARCA2  | 6595      | 37 | 9 | 2039777   | 2039779   | In_Frame_Del    | DEL | CAG | -   | 13 | 41   | c.667_669delCAG   | c.(667-669)CAGdel                 | p.Q238del      |
| Pat_40 | Post-Resistance | KIAA1432 | 57589     | 37 | 9 | 5774148   | 5774148   | Frame_Shift_Del | DEL | G   | -   | 7  | 222  | c.3937delG        | c.(3937-3939)GGAfs                | p.G1313fs      |
| Pat_40 | Post-Resistance | MLLT3    | 4300      | 37 | 9 | 20414377  | 20414379  | In_Frame_Del    | DEL | CTG | -   | 7  | 41   | c.465_467delCAGc. | (463-468)AGCAGT>AGT               | p.155_156SS>A  |
| Pat_40 | Post-Resistance | FAM157B  | 100132403 | 37 | 9 | 141107536 | 141107537 | In_Frame_Ins    | INS | -   | GCA | 12 | 20   | c.218_219insGCA:  | (217-219)CGG>CGGCAC               | p.85_86insQ    |
| Pat_40 | Post-Resistance | CNKSR2   | 22866     | 37 | X | 21627678  | 21627680  | In_Frame_Del    | DEL | GAG | -   | 8  | 177  | c.2635_2637delGAI | c.(2635-2637)GAGdel               | p.E886del      |
| Pat_40 | Post-Resistance | PHF8     | 23133     | 37 | X | 54011405  | 54011407  | In_Frame_Del    | DEL | CTC | -   | 7  | 306  | c.2491_2493delGAI | c.(2491-2493)GAGdel               | p.E831del      |
| Pat_40 | Post-Resistance | ATRX     | 546       | 37 | X | 76778785  | 76778787  | In_Frame_Del    | DEL | TCT | -   | 7  | 462  | c.6792_6794delAG: | (6790-6795)GAAGAG>GA2264_2265EE>E |                |
| Pat_40 | Post-Resistance | ALG13    | 79868     | 37 | X | 110987997 | 110987999 | In_Frame_Del    | DEL | CCT | -   | 10 | 90   | c.2797_2799delCC  | c.(2797-2799)CCTdel               | p.P945del      |
| Pat_40 | Post-Resistance | ODZ1     | 10178     | 37 | X | 123540196 | 123540196 | Frame_Shift_Del | DEL | G   | -   | 7  | 502  | c.5105delC        | c.(5104-5106)GCAfs                | p.A1702fs      |
| Pat_40 | Post-Resistance | MAP7D3   | 79649     | 37 | X | 135314194 | 135314194 | Frame_Shift_Del | DEL | G   | -   | 7  | 651  | c.922delC         | c.(922-924)CAGfs                  | p.Q308fs       |
| Pat_40 | Post-Resistance | HTATSF1  | 27336     | 37 | X | 135585048 | 135585050 | In_Frame_Del    | DEL | AAG | -   | 15 | 342  | c.682_684delAAG   | c.(682-684)AAGdel                 | p.K232del      |
| Pat_40 | Post-Resistance | SPANXN2  | 494119    | 37 | X | 142803692 | 142803692 | Frame_Shift_Del | DEL | T   | -   | 16 | 339  | c.71delA          | c.(70-72)AATfs                    | p.N24fs        |
| Pat_40 | Post-Resistance | PLXNA3   | 55558     | 37 | X | 153688565 | 153688565 | Frame_Shift_Del | DEL | G   | -   | 8  | 104  | c.42delG          | c.(40-42)GTGfs                    | p.V14fs        |
| Pat_41 | Pre-Treatment   | MST1P9   | 11223     | 37 | 1 | 17086085  | 17086086  | Frame_Shift_Ins | INS | -   | C   | 12 | 44   | c.811_812insG     | c.(811-813)GCGfs                  | p.A271fs       |
| Pat_41 | Pre-Treatment   | TNNI3K   | 51086     | 37 | 1 | 74957824  | 74957826  | In_Frame_Del    | DEL | CTT | -   | 7  | 707  | c.2225_2227delCT  | c.(2224-2229)CCTTCT>CC            | p.S746del      |
| Pat_41 | Pre-Treatment   | TRIM33   | 51592     | 37 | 1 | 114968116 | 114968118 | In_Frame_Del    | DEL | TGT | -   | 9  | 804  | c.1648_1650delAC: | c.(1648-1650)ACAdel               | p.T550del      |
| Pat_41 | Pre-Treatment   | ADAM30   | 11085     | 37 | 1 | 120436591 | 120436591 | Frame_Shift_Del | DEL | T   | -   | 7  | 943  | c.2369delA        | c.(2368-2370)AAGfs                | p.K790fs       |
| Pat_41 | Pre-Treatment   | TCHH     | 7062      | 37 | 1 | 152082957 | 152082959 | In_Frame_Del    | DEL | CTC | -   | 11 | 364  | c.2734_2736delGAI | c.(2734-2736)GAGdel               | p.E912del      |



|        |               |           |        |    |    |           |           |                 |     |          |   |    |      |                    |                                     |               |
|--------|---------------|-----------|--------|----|----|-----------|-----------|-----------------|-----|----------|---|----|------|--------------------|-------------------------------------|---------------|
| Pat_41 | Pre-Treatment | PRCC      | 5546   | 37 | 1  | 156761535 | 156761536 | Frame_Shift_Ins | INS | -        | C | 14 | 415  | c.1130_1131insC    | c.(1129-1131)GTCfs                  | p.V377fs      |
| Pat_41 | Pre-Treatment | IGSF9     | 57549  | 37 | 1  | 159900128 | 159900128 | Frame_Shift_Del | DEL | C        | - | 7  | 312  | c.1915delG         | c.(1915-1917)GTAfs                  | p.V639fs      |
| Pat_41 | Pre-Treatment | NR113     | 9970   | 37 | 1  | 161202999 | 161203000 | Frame_Shift_Ins | INS | -        | G | 8  | 862  | c.367_368insC      | c.(367-369)CGCfs                    | p.R123fs      |
| Pat_41 | Pre-Treatment | CACNA1E   | 777    | 37 | 1  | 181680102 | 181680103 | Frame_Shift_Del | DEL | AG       | - | 8  | 239  | c.1068_1069delAC   | c.(1066-1071)AAAGAGfs               | p.K356fs      |
| Pat_41 | Pre-Treatment | ASPM      | 259266 | 37 | 1  | 197065253 | 197065253 | Frame_Shift_Del | DEL | T        | - | 7  | 684  | c.8862delA         | c.(8860-8862)AAAfs                  | p.K2954fs     |
| Pat_41 | Pre-Treatment | AGT       | 183    | 37 | 1  | 230839055 | 230839055 | Frame_Shift_Del | DEL | A        | - | 8  | 184  | c.1290delT         | c.(1288-1290)TTTfs                  | p.F430fs      |
| Pat_41 | Pre-Treatment | MYO3A     | 53904  | 37 | 10 | 26462760  | 26462760  | Frame_Shift_Del | DEL | A        | - | 9  | 159  | c.3567delA         | c.(3565-3567)CCAfs                  | p.P1189fs     |
| Pat_41 | Pre-Treatment | PCDH15    | 65217  | 37 | 10 | 55587198  | 55587200  | In_Frame_Del    | DEL | GGC      | - | 9  | 233  | c.4320_4322delGC   | c.(4318-4323)CCGCCCT>CC1440_1441PPP |               |
| Pat_41 | Pre-Treatment | FAS       | 355    | 37 | 10 | 90768708  | 90768708  | Frame_Shift_Del | DEL | T        | - | 11 | 2497 | c.397delT          | c.(397-399)TTTfs                    | p.F133fs      |
| Pat_41 | Pre-Treatment | ABCC2     | 1244   | 37 | 10 | 101559000 | 101559000 | Frame_Shift_Del | DEL | A        | - | 9  | 524  | c.904delA          | c.(904-906)AAAfs                    | p.K302fs      |
| Pat_41 | Pre-Treatment | PTPRE     | 5791   | 37 | 10 | 129876002 | 129876004 | In_Frame_Del    | DEL | AGC      | - | 8  | 321  | c.1847_1849delAG   | c.(1846-1851)AAGCAG>AA              | p.Q620del     |
| Pat_41 | Pre-Treatment | LOC338651 | 338651 | 37 | 11 | 1619173   | 1619202   | In_Frame_Del    | DEL | GCCACAGC | - | 84 | 448  | c.ACAGGAGCCACAC    | c.ACAGGAGCCACAGCCCRSHSPWWS11        |               |
| Pat_41 | Pre-Treatment | DDX10     | 1662   | 37 | 11 | 108577464 | 108577464 | Splice_Site     | DEL | A        | - | 7  | 691  | c.1224_splice      | c.e10-2                             | p.R408_splice |
| Pat_41 | Pre-Treatment | CBL       | 867    | 37 | 11 | 119170435 | 119170435 | Frame_Shift_Del | DEL | A        | - | 8  | 2278 | c.2665delA         | c.(2665-2667)AAAfs                  | p.K889fs      |
| Pat_41 | Pre-Treatment | PRB2      | 653247 | 37 | 12 | 11546506  | 11546508  | In_Frame_Del    | DEL | TTG      | - | 20 | 836  | c.504_506delCAAC   | c.(502-507)AACAAAG>AAG              | p.N168del     |
| Pat_41 | Pre-Treatment | LRP1      | 4035   | 37 | 12 | 57605740  | 57605742  | In_Frame_Del    | DEL | TGC      | - | 7  | 344  | c.13289_13291delTC | c.(13288-13293)TTGCTG>T4430_4431LL  |               |
| Pat_41 | Pre-Treatment | GLI1      | 2735   | 37 | 12 | 57860075  | 57860075  | Frame_Shift_Del | DEL | G        | - | 9  | 714  | c.815delG          | c.(814-816)TGGfs                    | p.W272fs      |
| Pat_41 | Pre-Treatment | SFRS8     | 6433   | 37 | 12 | 132281734 | 132281736 | In_Frame_Del    | DEL | AGA      | - | 17 | 672  | c.2546_2548delAG   | c.(2545-2550)GAGAAG>GA              | p.K853del     |
| Pat_41 | Pre-Treatment | EP400     | 57634  | 37 | 12 | 132445252 | 132445253 | Frame_Shift_Ins | INS | -        | C | 9  | 74   | c.88_89insC        | c.(88-90)GCCfs                      | p.A30fs       |
| Pat_41 | Pre-Treatment | POLE      | 5426   | 37 | 12 | 133220099 | 133220100 | Frame_Shift_Del | DEL | CA       | - | 13 | 1002 | c.4337_4338delTC   | c.(4336-4338)GTGfs                  | p.V1446fs     |
| Pat_41 | Pre-Treatment | FAM155A   | 728215 | 37 | 13 | 108518338 | 108518338 | Frame_Shift_Del | DEL | C        | - | 16 | 486  | c.607delG          | c.(607-609)GACfs                    | p.D203fs      |
| Pat_41 | Pre-Treatment | LRP10     | 26020  | 37 | 14 | 23341527  | 23341529  | In_Frame_Del    | DEL | CCT      | - | 17 | 294  | c.15_17delCCT      | c.(13-18)ACCCCTC>ACC                | p.L11del      |
| Pat_41 | Pre-Treatment | C14orf39  | 317761 | 37 | 14 | 60903565  | 60903565  | Frame_Shift_Del | DEL | A        | - | 8  | 314  | c.1762delT         | c.(1762-1764)TGAfs                  | p.*588fs      |
| Pat_41 | Pre-Treatment | C14orf43  | 91748  | 37 | 14 | 74205926  | 74205928  | In_Frame_Del    | DEL | CTG      | - | 8  | 57   | c.784_786delCAG    | c.(784-786)CAGdel                   | p.Q262del     |
| Pat_41 | Pre-Treatment | BEGAIN    | 57596  | 37 | 14 | 101005271 | 101005273 | In_Frame_Del    | DEL | CCT      | - | 8  | 43   | c.815_817delAGG    | c.(814-819)GAGGCC>GCC               | p.E272del     |
| Pat_41 | Pre-Treatment | ZNF609    | 23060  | 37 | 15 | 64967246  | 64967247  | Frame_Shift_Ins | INS | -        | A | 8  | 482  | c.2193_2194insA    | c.(2191-2196)GACAAAs                | p.D731fs      |
| Pat_41 | Pre-Treatment | SLC24A1   | 9187   | 37 | 15 | 65943128  | 65943130  | In_Frame_Del    | DEL | GAG      | - | 7  | 55   | c.2641_2643delAG   | c.(2641-2643)GAGdel                 | p.E890del     |
| Pat_41 | Pre-Treatment | IL32      | 9235   | 37 | 16 | 3119304   | 3119305   | Frame_Shift_Ins | INS | -        | G | 11 | 631  | c.653_654insG      | c.(652-654)GACfs                    | p.D218fs      |
| Pat_41 | Pre-Treatment | NFAT5     | 10725  | 37 | 16 | 69726420  | 69726422  | In_Frame_Del    | DEL | CAG      | - | 7  | 132  | c.2638_2640delCA   | c.(2638-2640)CAGdel                 | p.Q888del     |
| Pat_41 | Pre-Treatment | ZFH3      | 463    | 37 | 16 | 72822564  | 72822566  | In_Frame_Del    | DEL | TGC      | - | 9  | 257  | c.9609_9611delGC   | c.(9607-9612)CAGCAA>CA3203_3204QQ   |               |
| Pat_41 | Pre-Treatment | ANKRD11   | 29123  | 37 | 16 | 89349641  | 89349641  | Frame_Shift_Del | DEL | T        | - | 7  | 287  | c.3309delA         | c.(3307-3309)AAAfs                  | p.K1103fs     |
| Pat_41 | Pre-Treatment | C17orf85  | 55421  | 37 | 17 | 3721809   | 3721811   | In_Frame_Del    | DEL | TCC      | - | 17 | 281  | c.1056_1058delGG   | c.(1054-1059)GAGGAA>GA352_353EE     |               |
| Pat_41 | Pre-Treatment | KDM6B     | 23135  | 37 | 17 | 7751859   | 7751861   | In_Frame_Del    | DEL | CAC      | - | 8  | 110  | c.2253_2255delCA   | c.(2251-2256)GTCACC>GT              | p.T762del     |
| Pat_41 | Pre-Treatment | SUPT6H    | 6830   | 37 | 17 | 27027202  | 27027204  | In_Frame_Del    | DEL | AGC      | - | 16 | 917  | c.4573_4575delAG   | c.(4573-4575)AGCdel                 | p.S1528del    |
| Pat_41 | Pre-Treatment | KRTAP4-1  | 85285  | 37 | 17 | 39340796  | 39340852  | Splice_Site     | DEL | TGGGGTGC | - | 13 | 265  | c.246_splice       | c.e2-1                              | p.S82_splice  |
| Pat_41 | Pre-Treatment | ETV4      | 2118   | 37 | 17 | 41610701  | 41610701  | Frame_Shift_Del | DEL | G        | - | 7  | 79   | c.399delC          | c.(397-399)CCCfs                    | p.P133fs      |
| Pat_41 | Pre-Treatment | ITGB1BP3  | 27231  | 37 | 19 | 3941094   | 3941094   | Frame_Shift_Del | DEL | C        | - | 7  | 449  | c.421delC          | c.(421-423)CCCfs                    | p.P141fs      |
| Pat_41 | Pre-Treatment | HAUS8     | 93323  | 37 | 19 | 17160706  | 17160707  | Frame_Shift_Del | DEL | GA       | - | 8  | 723  | c.1209_1210delTC   | c.(1207-1212)TCTCGTfs               | p.S403fs      |
| Pat_41 | Pre-Treatment | ZNF43     | 7594   | 37 | 19 | 22002025  | 22002026  | Splice_Site     | INS | -        | A | 8  | 482  | c.4_splice         | c.e2-1                              | p.G2_splice   |
| Pat_41 | Pre-Treatment | PRX       | 57716  | 37 | 19 | 40900180  | 40900182  | In_Frame_Del    | DEL | TCC      | - | 7  | 44   | c.4077_4079delGG   | c.(4075-4080)GAGGAA>GA1359_1360EE   |               |
| Pat_41 | Pre-Treatment | ATP6V1C2  | 245973 | 37 | 2  | 10917819  | 10917820  | Frame_Shift_Del | DEL | AG       | - | 15 | 321  | c.934_935delAG     | c.(934-936)AGAs                     | p.R312fs      |
| Pat_41 | Pre-Treatment | SLC9A2    | 6549   | 37 | 2  | 103324746 | 103324746 | Frame_Shift_Del | DEL | C        | - | 7  | 608  | c.2237delC         | c.(2236-2238)ACCfs                  | p.T746fs      |
| Pat_41 | Pre-Treatment | DCAF17    | 80067  | 37 | 2  | 172334537 | 172334538 | Frame_Shift_Ins | INS | -        | A | 8  | 192  | c.1223_1224insA    | c.(1222-1224)GTAfs                  | p.V408fs      |
| Pat_41 | Pre-Treatment | FKBP7     | 51661  | 37 | 2  | 179343217 | 179343217 | Frame_Shift_Del | DEL | T        | - | 10 | 1180 | c.10delA           | c.(10-12)ACCfs                      | p.T4fs        |
| Pat_41 | Pre-Treatment | TTN       | 7273   | 37 | 2  | 179596076 | 179596076 | Frame_Shift_Del | DEL | T        | - | 8  | 1407 | c.13685delA        | c.(13684-13686)AATfs                | p.N4562fs     |
| Pat_41 | Pre-Treatment | USP40     | 55230  | 37 | 2  | 234394236 | 234394237 | Frame_Shift_Ins | INS | -        | T | 8  | 122  | c.3477_3478insA    | c.(3475-3480)AACAAAs                | p.K1159fs     |
| Pat_41 | Pre-Treatment | GAL3ST2   | 64090  | 37 | 2  | 242738494 | 242738496 | In_Frame_Del    | DEL | TCC      | - | 15 | 312  | c.44_46delTCC      | c.(43-48)ATCCTC>ATC                 | p.L20del      |

|        |                 |                 |        |    |    |           |           |                 |     |     |    |    |      |                    |                       |               |
|--------|-----------------|-----------------|--------|----|----|-----------|-----------|-----------------|-----|-----|----|----|------|--------------------|-----------------------|---------------|
| Pat_41 | Pre-Treatment   | OSBPL2          | 9885   | 37 | 20 | 60854258  | 60854258  | Frame_Shift_Del | DEL | C   | -  | 7  | 354  | c.537delC          | c.(535-537)CACfs      | p.H179fs      |
| Pat_41 | Pre-Treatment   | IFNGR2          | 3460   | 37 | 21 | 34799292  | 34799292  | Frame_Shift_Del | DEL | T   | -  | 10 | 1249 | c.514delT          | c.(514-516)TTTfs      | p.F172fs      |
| Pat_41 | Pre-Treatment   | MYH9            | 4627   | 37 | 22 | 36696948  | 36696950  | In_Frame_Del    | DEL | CTC | -  | 10 | 350  | .2785_2787delGA    | c.(2785-2787)GAGdel   | p.E929del     |
| Pat_41 | Pre-Treatment   | MKL1            | 57591  | 37 | 22 | 40816887  | 40816889  | In_Frame_Del    | DEL | TGC | -  | 9  | 224  | c.843_845delGCAc.  | (841-846)CAGCAC>CAC   | p.Q281del     |
| Pat_41 | Pre-Treatment   | SREBF2          | 6721   | 37 | 22 | 42262949  | 42262951  | In_Frame_Del    | DEL | GCA | -  | 7  | 211  | c.203_205delGCAc.  | (202-207)GGCAGC>GGC   | p.S74del      |
| Pat_41 | Pre-Treatment   | BIK             | 638    | 37 | 22 | 43525245  | 43525247  | In_Frame_Del    | DEL | GCT | -  | 11 | 177  | c.417_419delGCTc.  | (415-420)GCGCTG>GCC   | p.L144del     |
| Pat_41 | Pre-Treatment   | ULK4            | 54986  | 37 | 3  | 41860985  | 41860985  | Frame_Shift_Del | DEL | T   | -  | 9  | 117  | c.1778delA         | c.(1777-1779)AAGfs    | p.K593fs      |
| Pat_41 | Pre-Treatment   | PRKCD           | 5580   | 37 | 3  | 53220653  | 53220653  | Frame_Shift_Del | DEL | G   | -  | 9  | 1161 | c.1294delG         | c.(1294-1296)GGGfs    | p.G432fs      |
| Pat_41 | Pre-Treatment   | DPPA4           | 55211  | 37 | 3  | 109049606 | 109049606 | Frame_Shift_Del | DEL | T   | -  | 10 | 333  | c.444delA          | c.(442-444)AAAfs      | p.K148fs      |
| Pat_41 | Pre-Treatment   | KTELC1          | 56983  | 37 | 3  | 119205753 | 119205753 | Frame_Shift_Del | DEL | A   | -  | 7  | 541  | c.712delA          | c.(712-714)AAAfs      | p.K238fs      |
| Pat_41 | Pre-Treatment   | GRK7            | 131890 | 37 | 3  | 141535708 | 141535708 | Frame_Shift_Del | DEL | G   | -  | 7  | 728  | c.1478delG         | c.(1477-1479)CGGfs    | p.R493fs      |
| Pat_41 | Pre-Treatment   | MED12L          | 116931 | 37 | 3  | 151095826 | 151095828 | In_Frame_Del    | DEL | TGG | -  | 9  | 329  | .4238_4240delITGc. | (4237-4242)TTGGTG>TTT | p.V1414del    |
| Pat_41 | Pre-Treatment   | HGFAC           | 3083   | 37 | 4  | 3443784   | 3443786   | In_Frame_Del    | DEL | TCC | -  | 7  | 87   | c.56_58delITCC     | c.(55-60)TTCCTC>TTC   | p.L29del      |
| Pat_41 | Pre-Treatment   | ADH1A           | 124    | 37 | 4  | 100208033 | 100208033 | Frame_Shift_Del | DEL | C   | -  | 8  | 1004 | c.233delG          | c.(232-234)GGAfs      | p.G78fs       |
| Pat_41 | Pre-Treatment   | INTS12          | 57117  | 37 | 4  | 106621122 | 106621122 | Frame_Shift_Del | DEL | A   | -  | 9  | 881  | c.41delT           | c.(40-42)TTGfs        | p.L14fs       |
| Pat_41 | Pre-Treatment   | RRH             | 10692  | 37 | 4  | 110756541 | 110756541 | Frame_Shift_Del | DEL | T   | -  | 12 | 236  | c.317delT          | c.(316-318)ATTfs      | p.I106fs      |
| Pat_41 | Pre-Treatment   | TRAM1L1         | 133022 | 37 | 4  | 118005517 | 118005517 | Frame_Shift_Del | DEL | T   | -  | 7  | 642  | c.1033delA         | c.(1033-1035)AGAfs    | p.R345fs      |
| Pat_41 | Pre-Treatment   | ZNF827          | 152485 | 37 | 4  | 146823381 | 146823383 | In_Frame_Del    | DEL | GTG | -  | 7  | 98   | .1028_1030delCAc.  | (1027-1032)CCACAA>CA  | p.P343del     |
| Pat_41 | Pre-Treatment   | FRG1            | 2483   | 37 | 4  | 190878555 | 190878556 | Frame_Shift_Ins | INS | -   | A  | 7  | 79   | c.435_436insA      | c.(433-438)GGGAAAfs   | p.G145fs      |
| Pat_41 | Pre-Treatment   | DNAH5           | 1767   | 37 | 5  | 13919383  | 13919383  | Frame_Shift_Del | DEL | T   | -  | 8  | 1057 | c.877delA          | c.(877-879)AGAfs      | p.R293fs      |
| Pat_41 | Pre-Treatment   | EGR1            | 1958   | 37 | 5  | 137801633 | 137801635 | In_Frame_Del    | DEL | CAG | -  | 9  | 118  | c.183_185delCAGc.  | (181-186)AACAGC>AAC   | p.S67del      |
| Pat_41 | Pre-Treatment   | \NKHD1-EIF4EBP: | 404734 | 37 | 5  | 139905676 | 139905676 | Frame_Shift_Del | DEL | A   | -  | 9  | 986  | c.4588delA         | c.(4588-4590)AAAfs    | p.K1530fs     |
| Pat_41 | Pre-Treatment   | LARP1           | 23367  | 37 | 5  | 154181822 | 154181822 | Frame_Shift_Del | DEL | G   | -  | 7  | 352  | c.1972delG         | c.(1972-1974)GGGfs    | p.G658fs      |
| Pat_41 | Pre-Treatment   | TRIM52          | 84851  | 37 | 5  | 180687612 | 180687614 | In_Frame_Del    | DEL | TCC | -  | 9  | 250  | c.201_203delGGAc.  | (199-204)GAGGAC>GAC   | p.E67del      |
| Pat_41 | Pre-Treatment   | MAS1L           | 116511 | 37 | 6  | 29455156  | 29455157  | Frame_Shift_Del | DEL | AC  | -  | 11 | 203  | c.523_524delIGT    | c.(523-525)GTCfs      | p.V175fs      |
| Pat_41 | Pre-Treatment   | BAT2            | 7916   | 37 | 6  | 31593814  | 31593815  | Frame_Shift_Ins | INS | -   | G  | 13 | 189  | c.857_858insG      | c.(856-858)GCGfs      | p.A286fs      |
| Pat_41 | Pre-Treatment   | RUNX2           | 860    | 37 | 6  | 45390467  | 45390469  | In_Frame_Del    | DEL | CAG | -  | 10 | 92   | c.196_198delCAG    | c.(196-198)CAGdel     | p.Q71del      |
| Pat_41 | Pre-Treatment   | GRIK2           | 2898   | 37 | 6  | 102503432 | 102503432 | Frame_Shift_Del | DEL | A   | -  | 7  | 318  | c.2539delA         | c.(2539-2541)AAAfs    | p.K847fs      |
| Pat_41 | Pre-Treatment   | VWC2            | 375567 | 37 | 7  | 49815163  | 49815163  | Frame_Shift_Del | DEL | C   | -  | 3  | 6    | c.132delC          | c.(130-132)GGCfs      | p.G44fs       |
| Pat_41 | Pre-Treatment   | CYP51A1         | 1595   | 37 | 7  | 91752494  | 91752494  | Frame_Shift_Del | DEL | T   | -  | 7  | 570  | c.1026delA         | c.(1024-1026)AAAfs    | p.K342fs      |
| Pat_41 | Pre-Treatment   | GIGYF1          | 64599  | 37 | 7  | 100283635 | 100283637 | In_Frame_Del    | DEL | TCC | -  | 8  | 161  | .1014_1016delIGG   | (1012-1017)GAGGAA>GA  | .338_339EE>I  |
| Pat_41 | Pre-Treatment   | SRRT            | 51593  | 37 | 7  | 100482040 | 100482042 | In_Frame_Del    | DEL | AGG | -  | 7  | 62   | c.809_811delAGGc.  | (808-813)CAGGAG>CAC   | p.E275del     |
| Pat_41 | Pre-Treatment   | OR9A4           | 130075 | 37 | 7  | 141619203 | 141619203 | Frame_Shift_Del | DEL | T   | -  | 7  | 774  | c.528delT          | c.(526-528)AATfs      | p.N176fs      |
| Pat_41 | Pre-Treatment   | TRY6            | 154754 | 37 | 7  | 142468305 | 142468306 | Splice_Site     | INS | -   | AG | 10 | 312  | c.46_splice        | c.e1+2                |               |
| Pat_41 | Pre-Treatment   | PRKDC           | 5591   | 37 | 8  | 48746799  | 48746799  | Frame_Shift_Del | DEL | T   | -  | 7  | 1048 | c.8110delA         | c.(8110-8112)AGGfs    | p.R2704fs     |
| Pat_41 | Pre-Treatment   | ZHX2            | 22882  | 37 | 8  | 123963963 | 123963964 | Frame_Shift_Ins | INS | -   | A  | 11 | 92   | c.213_214insA      | c.(211-216)TCCAAAfs   | p.S71fs       |
| Pat_41 | Pre-Treatment   | AMELX           | 265    | 37 | X  | 11316787  | 11316787  | Frame_Shift_Del | DEL | G   | -  | 7  | 921  | c.264delG          | c.(262-264)GTGfs      | p.V88fs       |
| Pat_41 | Pre-Treatment   | PHF8            | 23133  | 37 | X  | 54011405  | 54011407  | In_Frame_Del    | DEL | CTC | -  | 21 | 455  | .2491_2493delGA    | c.(2491-2493)GAGdel   | p.E831del     |
| Pat_41 | Pre-Treatment   | TAF1            | 6872   | 37 | X  | 70603000  | 70603000  | Frame_Shift_Del | DEL | A   | -  | 8  | 172  | c.1930delA         | c.(1930-1932)AAAfs    | p.K644fs      |
| Pat_41 | Pre-Treatment   | ATRX            | 546    | 37 | X  | 76907782  | 76907784  | In_Frame_Del    | DEL | TCC | -  | 7  | 352  | .4377_4379delIGG   | (4375-4380)GAGGAA>GA  | 1459_1460EE>  |
| Pat_41 | Pre-Treatment   | IRS4            | 8471   | 37 | X  | 107977802 | 107977803 | Frame_Shift_Ins | INS | -   | C  | 10 | 864  | c.1772_1773insG    | c.(1771-1773)GGCfs    | p.G591fs      |
| Pat_41 | Pre-Treatment   | IGSF1           | 3547   | 37 | X  | 130411036 | 130411036 | Frame_Shift_Del | DEL | C   | -  | 10 | 1628 | c.2485delG         | c.(2485-2487)GCCfs    | p.A829fs      |
| Pat_41 | Pre-Treatment   | PLAC1           | 10761  | 37 | X  | 133700354 | 133700354 | Frame_Shift_Del | DEL | T   | -  | 7  | 260  | c.359delA          | c.(358-360)AAGfs      | p.K120fs      |
| Pat_41 | Pre-Treatment   | SPANXN3         | 139067 | 37 | X  | 142605149 | 142605149 | Frame_Shift_Del | DEL | T   | -  | 10 | 464  | c.71delA           | c.(70-72)AATfs        | p.N24fs       |
| Pat_41 | Pre-Treatment   | MAMLD1          | 10046  | 37 | X  | 149639633 | 149639635 | In_Frame_Del    | DEL | GCA | -  | 7  | 174  | .1788_1790delGC.   | (1786-1791)CTGCAG>CT  | p.Q606del     |
| Pat_41 | Post-Resistance | TNFRSF9         | 3604   | 37 | 1  | 7980912   | 7980914   | In_Frame_Del    | DEL | CTT | -  | 7  | 503  | c.749_751delAAGc.  | (748-753)GAAGGA>GG    | p.E250del     |
| Pat_41 | Post-Resistance | MFN2            | 9927   | 37 | 1  | 12061824  | 12061825  | Splice_Site     | INS | -   | G  | 31 | 933  | c.971_splice       | c.e10-1               | p.G324_splice |

|        |                 |           |        |    |    |           |           |                 |     |          |     |    |      |                   |                             |                |
|--------|-----------------|-----------|--------|----|----|-----------|-----------|-----------------|-----|----------|-----|----|------|-------------------|-----------------------------|----------------|
| Pat_41 | Post-Resistance | SPEN      | 23013  | 37 | 1  | 16262680  | 16262680  | Frame_Shift_Del | DEL | C        | -   | 7  | 484  | c.9945delC        | c.(9943-9945)CACfs          | p.H3315fs      |
| Pat_41 | Post-Resistance | PAFAH2    | 5051   | 37 | 1  | 26310537  | 26310537  | Frame_Shift_Del | DEL | G        | -   | 9  | 1119 | c.452delC         | c.(451-453)CCAFs            | p.P151fs       |
| Pat_41 | Post-Resistance | RPS6KA1   | 6195   | 37 | 1  | 26885311  | 26885311  | Frame_Shift_Del | DEL | C        | -   | 8  | 388  | c.1098delC        | c.(1096-1098)ATCFs          | p.1366fs       |
| Pat_41 | Post-Resistance | ARID1A    | 8289   | 37 | 1  | 27106254  | 27106255  | Frame_Shift_Del | DEL | AG       | -   | 7  | 712  | c.5865_5866delAC  | c.(5863-5868)CTAGAGfs       | p.L1955fs      |
| Pat_41 | Post-Resistance | ZMYM6     | 9204   | 37 | 1  | 35476363  | 35476364  | Frame_Shift_Ins | INS | -        | A   | 17 | 265  | c.1336_1337insT   | c.(1336-1338)TACfs          | p.Y446fs       |
| Pat_41 | Post-Resistance | ST3GAL3   | 6487   | 37 | 1  | 44360095  | 44360096  | Frame_Shift_Del | DEL | CG       | -   | 7  | 616  | c.343_344delCG    | c.(343-345)CGCFs            | p.R115fs       |
| Pat_41 | Post-Resistance | SPATA1    | 64173  | 37 | 1  | 85018771  | 85018772  | Frame_Shift_Ins | INS | -        | A   | 2  | 4    | c.1344_1345insA   | c.(1342-1347)CAGAAfs        | p.Q448fs       |
| Pat_41 | Post-Resistance | ZNF326    | 284695 | 37 | 1  | 90470782  | 90470784  | In_Frame_Del    | DEL | GTG      | -   | 10 | 658  | c.188_190delGTGc. | (187-192)AGTGGT>AGT         | p.G68del       |
| Pat_41 | Post-Resistance | PRPF38B   | 55119  | 37 | 1  | 109242456 | 109242456 | Frame_Shift_Del | DEL | A        | -   | 23 | 280  | c.1455delA        | c.(1453-1455)TCAFs          | p.S485fs       |
| Pat_41 | Post-Resistance | MAGI3     | 260425 | 37 | 1  | 114225919 | 114225919 | Frame_Shift_Del | DEL | A        | -   | 11 | 239  | c.3729delA        | c.(3727-3729)CTAFs          | p.L1243fs      |
| Pat_41 | Post-Resistance | TRIM33    | 51592  | 37 | 1  | 114968116 | 114968118 | In_Frame_Del    | DEL | TGT      | -   | 7  | 1152 | c.1648_1650delAC. | c.(1648-1650)ACAdel         | p.T550del      |
| Pat_41 | Post-Resistance | GDAP2     | 54834  | 37 | 1  | 118454625 | 118454626 | Frame_Shift_Del | DEL | TG       | -   | 14 | 403  | c.549_550delCA    | c.(547-552)CACATAfs         | p.H183fs       |
| Pat_41 | Post-Resistance | BCL9      | 607    | 37 | 1  | 147091501 | 147091501 | Frame_Shift_Del | DEL | C        | -   | 14 | 406  | c.1540delC        | c.(1540-1542)CCCfs          | p.P514fs       |
| Pat_41 | Post-Resistance | TCHH      | 7062   | 37 | 1  | 152081327 | 152081328 | In_Frame_Ins    | INS | -        | GCT | 9  | 142  | c.4365_4366insAGI | c.(4363-4368)insAGC         | p.1455_1456ins |
| Pat_41 | Post-Resistance | TCHH      | 7062   | 37 | 1  | 152084657 | 152084658 | In_Frame_Ins    | INS | -        | CTC | 7  | 135  | c.1035_1036insGAI | c.(1033-1038)insGAG         | p.345_346insE  |
| Pat_41 | Post-Resistance | PRCC      | 5546   | 37 | 1  | 156761535 | 156761536 | Frame_Shift_Ins | INS | -        | C   | 7  | 507  | c.1130_1131insC   | c.(1129-1131)GTCfs          | p.V377fs       |
| Pat_41 | Post-Resistance | CACNA1E   | 777    | 37 | 1  | 181680102 | 181680103 | Frame_Shift_Del | DEL | AG       | -   | 11 | 181  | c.1068_1069delAC  | c.(1066-1071)AAAGAGfs       | p.K356fs       |
| Pat_41 | Post-Resistance | SMG7      | 9887   | 37 | 1  | 183502435 | 183502436 | Frame_Shift_Ins | INS | -        | T   | 96 | 1218 | c.980_981insT     | c.(979-981)TGTfs            | p.C327fs       |
| Pat_41 | Post-Resistance | EDEM3     | 80267  | 37 | 1  | 184680896 | 184680896 | Frame_Shift_Del | DEL | T        | -   | 34 | 507  | c.1652delA        | c.(1651-1653)AATfs          | p.N551fs       |
| Pat_41 | Post-Resistance | PRG4      | 10216  | 37 | 1  | 186276056 | 186276058 | In_Frame_Del    | DEL | AGG      | -   | 9  | 189  | c.1205_1207delAGI | c.(1204-1209)AAGGAG>AA      | p.E403del      |
| Pat_41 | Post-Resistance | PRG4      | 10216  | 37 | 1  | 186276127 | 186276128 | In_Frame_Ins    | INS | -        | AGG | 9  | 327  | c.1276_1277insAGI | c.(1276-1278)AAG>AAGGAp.    | 426_427insE    |
| Pat_41 | Post-Resistance | PRG4      | 10216  | 37 | 1  | 186276433 | 186276434 | In_Frame_Ins    | INS | -        | AGG | 11 | 344  | c.1582_1583insAGI | c.(1582-1584)AAG>AAGGAp.    | 528_529insE    |
| Pat_41 | Post-Resistance | PLXNA2    | 5362   | 37 | 1  | 208391176 | 208391176 | Frame_Shift_Del | DEL | G        | -   | 18 | 252  | c.92delC          | c.(91-93)CCAFs              | p.P31fs        |
| Pat_41 | Post-Resistance | KCTD3     | 51133  | 37 | 1  | 215793922 | 215793922 | Frame_Shift_Del | DEL | A        | -   | 21 | 339  | c.2410delA        | c.(2410-2412)AAAfs          | p.K804fs       |
| Pat_41 | Post-Resistance | USH2A     | 7399   | 37 | 1  | 215901396 | 215901396 | Frame_Shift_Del | DEL | A        | -   | 8  | 800  | c.12042delT       | c.(12040-12042)CCTfs        | p.P4014fs      |
| Pat_41 | Post-Resistance | EPHX1     | 2052   | 37 | 1  | 226026384 | 226026384 | Frame_Shift_Del | DEL | C        | -   | 7  | 621  | c.394delC         | c.(394-396)CCCfs            | p.P132fs       |
| Pat_41 | Post-Resistance | ZNF678    | 339500 | 37 | 1  | 227842489 | 227842489 | Frame_Shift_Del | DEL | C        | -   | 15 | 551  | c.538delC         | c.(538-540)CCCfs            | p.P180fs       |
| Pat_41 | Post-Resistance | RGS7      | 6000   | 37 | 1  | 241032080 | 241032081 | Frame_Shift_Ins | INS | -        | T   | 52 | 928  | c.522_523insA     | c.(520-525)CAAGCAfs         | p.Q174fs       |
| Pat_41 | Post-Resistance | CHML      | 1122   | 37 | 1  | 241798554 | 241798554 | Frame_Shift_Del | DEL | A        | -   | 8  | 951  | c.515delT         | c.(514-516)GTAfs            | p.V172fs       |
| Pat_41 | Post-Resistance | CSTF2T    | 23283  | 37 | 10 | 53457748  | 53457748  | Frame_Shift_Del | DEL | G        | -   | 2  | 4    | c.1562delC        | c.(1561-1563)GCAfs          | p.A521fs       |
| Pat_41 | Post-Resistance | USP54     | 159195 | 37 | 10 | 75258890  | 75258891  | Frame_Shift_Del | DEL | GG       | -   | 8  | 545  | c.4551_4552delCC  | c.(4549-4554)TCCCAfs        | p.S1517fs      |
| Pat_41 | Post-Resistance | CYP2C8    | 1558   | 37 | 10 | 96818090  | 96818090  | Splice_Site     | DEL | A        | -   | 7  | 236  | c.819_splice      | c.e5+1                      | p.Q273_splice  |
| Pat_41 | Post-Resistance | CPXM2     | 119587 | 37 | 10 | 125528165 | 125528167 | In_Frame_Del    | DEL | CAG      | -   | 7  | 525  | c.1174_1176delCTC | c.(1174-1176)CTGdel         | p.L392del      |
| Pat_41 | Post-Resistance | PKP3      | 11187  | 37 | 11 | 403623    | 403623    | Frame_Shift_Del | DEL | G        | -   | 8  | 59   | c.1929delG        | c.(1927-1929)GCGfs          | p.A643fs       |
| Pat_41 | Post-Resistance | LOC338651 | 338651 | 37 | 11 | 1619173   | 1619202   | In_Frame_Del    | DEL | GCCACAGC | -   | 66 | 307  | c.ACAGGAGCCACAC   | c.ACAGGAGCCACAGCCCRSHSPWS11 |                |
| Pat_41 | Post-Resistance | OR52A5    | 390054 | 37 | 11 | 5153679   | 5153679   | Frame_Shift_Del | DEL | A        | -   | 7  | 224  | c.194delT         | c.(193-195)TTGfs            | p.L65fs        |
| Pat_41 | Post-Resistance | FAM160A2  | 84067  | 37 | 11 | 6244097   | 6244097   | Frame_Shift_Del | DEL | C        | -   | 7  | 535  | c.967delG         | c.(967-969)GTTfs            | p.V323fs       |
| Pat_41 | Post-Resistance | LIN7C     | 55327  | 37 | 11 | 27520904  | 27520906  | Splice_Site     | DEL | ACC      | -   | 7  | 161  | c.438_splice      | c.e4+1                      | p.V146_splice  |
| Pat_41 | Post-Resistance | CPSF7     | 79869  | 37 | 11 | 61183649  | 61183649  | Frame_Shift_Del | DEL | G        | -   | 15 | 173  | c.893delC         | c.(892-894)CCAFs            | p.P298fs       |
| Pat_41 | Post-Resistance | VEGFB     | 7423   | 37 | 11 | 64004663  | 64004663  | Frame_Shift_Del | DEL | A        | -   | 7  | 283  | c.379delA         | c.(379-381)AAAfs            | p.K127fs       |
| Pat_41 | Post-Resistance | TPCN2     | 219931 | 37 | 11 | 68846258  | 68846258  | Frame_Shift_Del | DEL | G        | -   | 7  | 242  | c.1407delG        | c.(1405-1407)CTGfs          | p.L469fs       |
| Pat_41 | Post-Resistance | FUT4      | 2526   | 37 | 11 | 94277537  | 94277537  | Frame_Shift_Del | DEL | G        | -   | 2  | 4    | c.238delG         | c.(238-240)GGGfs            | p.G80fs        |
| Pat_41 | Post-Resistance | MMP12     | 4321   | 37 | 11 | 102738795 | 102738796 | Frame_Shift_Ins | INS | -        | T   | 10 | 24   | c.629_630insA     | c.(628-630)ACCfs            | p.T210fs       |
| Pat_41 | Post-Resistance | RAD51AP1  | 10635  | 37 | 12 | 4653063   | 4653063   | Frame_Shift_Del | DEL | A        | -   | 10 | 112  | c.202delA         | c.(202-204)AAAfs            | p.K68fs        |
| Pat_41 | Post-Resistance | ATN1      | 1822   | 37 | 12 | 7046235   | 7046236   | Frame_Shift_Del | DEL | CA       | -   | 7  | 294  | c.1805_1806delCA  | c.(1804-1806)CCAFs          | p.P602fs       |
| Pat_41 | Post-Resistance | TAS2R10   | 50839  | 37 | 12 | 10978836  | 10978836  | Frame_Shift_Del | DEL | A        | -   | 9  | 444  | c.33delT          | c.(31-33)TTTfs              | p.F11fs        |
| Pat_41 | Post-Resistance | PRB1      | 5542   | 37 | 12 | 11506632  | 11506633  | In_Frame_Ins    | INS | -        | GGA | 12 | 440  | c.404_405insTCCc. | (403-405)CCA>CCTCCA         | p.135_135P>PI  |

|        |                 |           |        |    |    |           |           |                 |     |          |     |    |      |                                       |                                    |                |
|--------|-----------------|-----------|--------|----|----|-----------|-----------|-----------------|-----|----------|-----|----|------|---------------------------------------|------------------------------------|----------------|
| Pat_41 | Post-Resistance | PRB1      | 5542   | 37 | 12 | 11506815  | 11506816  | In_Frame_Ins    | INS | -        | GGA | 11 | 361  | c.221_222insTCCc.(220-222)CCA>CTCCA   | p.74_74P>PP                        |                |
| Pat_41 | Post-Resistance | PRB2      | 653247 | 37 | 12 | 11546544  | 11546545  | In_Frame_Ins    | INS | -        | GGA | 16 | 351  | c.467_468insTCCc.(466-468)CCA>CTCCA   | p.156_156P>PI                      |                |
| Pat_41 | Post-Resistance | PRB2      | 653247 | 37 | 12 | 11546788  | 11546790  | In_Frame_Del    | DEL | GGA      | -   | 11 | 160  | c.222_224delITCCc.(220-225)CCTCCA>CCA | p.74_75PP>P                        |                |
| Pat_41 | Post-Resistance | EPS8      | 2059   | 37 | 12 | 15822389  | 15822389  | Frame_Shift_Del | DEL | C        | -   | 8  | 281  | c.448delG                             | c.(448-450)GCAfs                   | p.A150fs       |
| Pat_41 | Post-Resistance | FAR2      | 55711  | 37 | 12 | 29450110  | 29450110  | Frame_Shift_Del | DEL | A        | -   | 7  | 472  | c.522delA                             | c.(520-522)CCAfs                   | p.P174fs       |
| Pat_41 | Post-Resistance | LRRK2     | 120892 | 37 | 12 | 40704376  | 40704377  | Frame_Shift_Del | DEL | TG       | -   | 7  | 1255 | c.4461_4462delTC                      | c.(4459-4464)TTTGTGfs              | p.F1487fs      |
| Pat_41 | Post-Resistance | CCT2      | 10576  | 37 | 12 | 69987371  | 69987372  | Frame_Shift_Del | DEL | GG       | -   | 8  | 412  | c.960_961delGG                        | c.(958-963)GTGAAfs                 | p.V320fs       |
| Pat_41 | Post-Resistance | TMTC3     | 160418 | 37 | 12 | 88566417  | 88566417  | Frame_Shift_Del | DEL | T        | -   | 13 | 358  | c.1094delT                            | c.(1093-1095)CTTfs                 | p.L365fs       |
| Pat_41 | Post-Resistance | KIAA1033  | 23325  | 37 | 12 | 105534127 | 105534128 | Frame_Shift_Del | DEL | AT       | -   | 8  | 739  | c.1508_1509delAT                      | c.(1507-1509)CATfs                 | p.H503fs       |
| Pat_41 | Post-Resistance | ARPC3     | 10094  | 37 | 12 | 110878130 | 110878130 | Frame_Shift_Del | DEL | T        | -   | 9  | 100  | c.170delA                             | c.(169-171)AACfs                   | p.N57fs        |
| Pat_41 | Post-Resistance | POLE      | 5426   | 37 | 12 | 133220099 | 133220100 | Frame_Shift_Del | DEL | CA       | -   | 21 | 663  | c.4337_4338delITC                     | c.(4336-4338)GTGfs                 | p.V1446fs      |
| Pat_41 | Post-Resistance | TRPC4     | 7223   | 37 | 13 | 38357110  | 38357111  | Frame_Shift_Ins | INS | -        | T   | 18 | 310  | c.360_361insA                         | c.(358-363)AAACCTfs                | p.K120fs       |
| Pat_41 | Post-Resistance | CKAP2     | 26586  | 37 | 13 | 53049034  | 53049034  | Frame_Shift_Del | DEL | A        | -   | 14 | 142  | c.1810delA                            | c.(1810-1812)AAAfs                 | p.K604fs       |
| Pat_41 | Post-Resistance | LMO7      | 4008   | 37 | 13 | 76415307  | 76415308  | Frame_Shift_Del | DEL | AG       | -   | 15 | 307  | c.2946_2947delAC                      | c.(2944-2949)GCAGAGfs              | p.A982fs       |
| Pat_41 | Post-Resistance | MYCBP2    | 23077  | 37 | 13 | 77670520  | 77670521  | Frame_Shift_Ins | INS | -        | A   | 8  | 702  | c.9766_9767insT                       | c.(9766-9768)AGCfs                 | p.S3256fs      |
| Pat_41 | Post-Resistance | RNF113B   | 140432 | 37 | 13 | 98828697  | 98828697  | Frame_Shift_Del | DEL | T        | -   | 26 | 565  | c.794delA                             | c.(793-795)AACfs                   | p.N265fs       |
| Pat_41 | Post-Resistance | FAM155A   | 728215 | 37 | 13 | 108518338 | 108518338 | Frame_Shift_Del | DEL | C        | -   | 12 | 539  | c.607delG                             | c.(607-609)GACfs                   | p.D203fs       |
| Pat_41 | Post-Resistance | OR4Q3     | 441669 | 37 | 14 | 20215682  | 20215683  | Frame_Shift_Ins | INS | -        | T   | 7  | 367  | c.96_97insT                           | c.(94-99)TTGTTTfs                  | p.L32fs        |
| Pat_41 | Post-Resistance | LRP10     | 26020  | 37 | 14 | 23341527  | 23341529  | In_Frame_Del    | DEL | CCT      | -   | 15 | 307  | c.15_17delCCT                         | c.(13-18)ACCCTC>ACC                | p.L11del       |
| Pat_41 | Post-Resistance | PPP2R3C   | 55012  | 37 | 14 | 35585934  | 35585935  | Frame_Shift_Ins | INS | -        | T   | 9  | 106  | c.67_68insA                           | c.(67-69)AGTfs                     | p.S23fs        |
| Pat_41 | Post-Resistance | MAP3K9    | 4293   | 37 | 14 | 71205006  | 71205006  | Frame_Shift_Del | DEL | C        | -   | 8  | 198  | c.1800delG                            | c.(1798-1800)GGGfs                 | p.G600fs       |
| Pat_41 | Post-Resistance | PCNX      | 22990  | 37 | 14 | 71489915  | 71489916  | Splice_Site     | DEL | AG       | -   | 7  | 569  | c.3151_splice                         | c.e13-1                            | p.S1051_splice |
| Pat_41 | Post-Resistance | DCAF4     | 26094  | 37 | 14 | 73422362  | 73422363  | Frame_Shift_Del | DEL | CC       | -   | 8  | 878  | c.1137_1138delICC                     | c.(1135-1140)CTCCAAfs              | p.L379fs       |
| Pat_41 | Post-Resistance | C14orf174 | 161394 | 37 | 14 | 77844468  | 77844468  | Frame_Shift_Del | DEL | C        | -   | 7  | 280  | c.707delC                             | c.(706-708)ACCfs                   | p.T236fs       |
| Pat_41 | Post-Resistance | SEL1L     | 6400   | 37 | 14 | 81970641  | 81970643  | In_Frame_Del    | DEL | TCT      | -   | 7  | 363  | c.516_518delAGA:                      | c.(514-519)GAAGAG>GAG.             | p.172_173EE>I  |
| Pat_41 | Post-Resistance | PLA2G4E   | 123745 | 37 | 15 | 42302330  | 42302331  | Frame_Shift_Ins | INS | -        | C   | 7  | 102  | c.115_116insG                         | c.(115-117)GCCfs                   | p.A39fs        |
| Pat_41 | Post-Resistance | ZFP106    | 64397  | 37 | 15 | 42742957  | 42742957  | Frame_Shift_Del | DEL | A        | -   | 8  | 590  | c.1444delIT                           | c.(1444-1446)TCCfs                 | p.S482fs       |
| Pat_41 | Post-Resistance | AP4E1     | 23431  | 37 | 15 | 51242051  | 51242053  | In_Frame_Del    | DEL | CAG      | -   | 7  | 512  | c.1345_1347delCA                      | c.(1345-1347)CAGdel                | p.Q449del      |
| Pat_41 | Post-Resistance | GLCE      | 26035  | 37 | 15 | 69553629  | 69553629  | Frame_Shift_Del | DEL | A        | -   | 8  | 715  | c.790delA                             | c.(790-792)AAGfs                   | p.K264fs       |
| Pat_41 | Post-Resistance | PML       | 5371   | 37 | 15 | 74337151  | 74337151  | Frame_Shift_Del | DEL | G        | -   | 13 | 143  | c.2451delG                            | c.(2449-2451)CAGfs                 | p.Q817fs       |
| Pat_41 | Post-Resistance | NRG4      | 145957 | 37 | 15 | 76301581  | 76301582  | Frame_Shift_Ins | INS | -        | C   | 34 | 516  | c.63_64insG                           | c.(61-66)GGGCTTfs                  | p.G21fs        |
| Pat_41 | Post-Resistance | AGPHD1    | 123688 | 37 | 15 | 78825826  | 78825826  | Frame_Shift_Del | DEL | T        | -   | 9  | 204  | c.936delIT                            | c.(934-936)CGTfs                   | p.R312fs       |
| Pat_41 | Post-Resistance | IL32      | 9235   | 37 | 16 | 3119304   | 3119305   | Frame_Shift_Ins | INS | -        | G   | 20 | 533  | c.653_654insG                         | c.(652-654)GACfs                   | p.D218fs       |
| Pat_41 | Post-Resistance | AGRP      | 181    | 37 | 16 | 67516932  | 67516932  | Frame_Shift_Del | DEL | G        | -   | 8  | 572  | c.212delC                             | c.(211-213)GCAfs                   | p.A71fs        |
| Pat_41 | Post-Resistance | ZFH3      | 463    | 37 | 16 | 72822564  | 72822566  | In_Frame_Del    | DEL | TGC      | -   | 12 | 217  | c.9609_9611delGC:                     | c.(9607-9612)CAGCAA>CA3203_3204QQ: |                |
| Pat_41 | Post-Resistance | ADAMTS18  | 170692 | 37 | 16 | 77356311  | 77356311  | Frame_Shift_Del | DEL | A        | -   | 26 | 267  | c.2085delIT                           | c.(2083-2085)TTTfs                 | p.F695fs       |
| Pat_41 | Post-Resistance | EFNB3     | 1949   | 37 | 17 | 7611373   | 7611373   | Frame_Shift_Del | DEL | C        | -   | 7  | 91   | c.220delC                             | c.(220-222)CCTfs                   | p.P74fs        |
| Pat_41 | Post-Resistance | MYH13     | 8735   | 37 | 17 | 10210253  | 10210254  | Splice_Site     | DEL | CA       | -   | 28 | 109  | c.5295_splice                         | c.e36+1                            | p.D1765_splice |
| Pat_41 | Post-Resistance | SUPT6H    | 6830   | 37 | 17 | 27027202  | 27027204  | In_Frame_Del    | DEL | AGC      | -   | 8  | 569  | c.4573_4575delAGI                     | c.(4573-4575)AGCdel                | p.S1528del     |
| Pat_41 | Post-Resistance | KRTAP4-1  | 85285  | 37 | 17 | 39340796  | 39340852  | Splice_Site     | DEL | TGGGGTGC | -   | 65 | 224  | c.246_splice                          | c.e2-1                             | p.S82_splice   |
| Pat_41 | Post-Resistance | GHDC      | 84514  | 37 | 17 | 40345560  | 40345562  | In_Frame_Del    | DEL | GCA      | -   | 3  | 4    | c.38_40delITGC                        | c.(37-42)CTGCCA>CCA                | p.L13del       |
| Pat_41 | Post-Resistance | ZNF652    | 22834  | 37 | 17 | 47394579  | 47394579  | Frame_Shift_Del | DEL | C        | -   | 7  | 231  | c.509delIG                            | c.(508-510)GGAFs                   | p.G170fs       |
| Pat_41 | Post-Resistance | KIAA0195  | 9772   | 37 | 17 | 73482037  | 73482039  | In_Frame_Del    | DEL | TGC      | -   | 7  | 209  | c.230_232delTGC:                      | c.(229-234)GTGCTG>GTC              | p.L81del       |
| Pat_41 | Post-Resistance | ALPK2     | 115701 | 37 | 18 | 56246440  | 56246440  | Frame_Shift_Del | DEL | T        | -   | 9  | 1000 | c.1568delA                            | c.(1567-1569)AAGfs                 | p.K523fs       |
| Pat_41 | Post-Resistance | BSG       | 682    | 37 | 19 | 579603    | 579603    | Frame_Shift_Del | DEL | G        | -   | 21 | 111  | c.519delIG                            | c.(517-519)AAGfs                   | p.K173fs       |
| Pat_41 | Post-Resistance | ILF3      | 3609   | 37 | 19 | 10789308  | 10789308  | Frame_Shift_Del | DEL | C        | -   | 19 | 189  | c.579delIC                            | c.(577-579)GACfs                   | p.D193fs       |
| Pat_41 | Post-Resistance | ZNF90     | 7643   | 37 | 19 | 20216076  | 20216076  | Frame_Shift_Del | DEL | A        | -   | 35 | 590  | c.177delA                             | c.(175-177)GGAfs                   | p.G59fs        |

|        |                 |          |        |    |    |           |           |                 |     |           |     |     |      |                        |                                  |               |
|--------|-----------------|----------|--------|----|----|-----------|-----------|-----------------|-----|-----------|-----|-----|------|------------------------|----------------------------------|---------------|
| Pat_41 | Post-Resistance | ZNF714   | 148206 | 37 | 19 | 21300549  | 21300550  | Frame_Shift_Del | DEL | TG        | -   | 11  | 490  | c.1082_1083delTC       | c.(1081-1083)ATGfs               | p.M361fs      |
| Pat_41 | Post-Resistance | GPATCH1  | 55094  | 37 | 19 | 33585147  | 33585148  | Frame_Shift_Del | DEL | AA        | -   | 20  | 211  | c.525_526delAA         | c.(523-528)GTAAAGfs              | p.V175fs      |
| Pat_41 | Post-Resistance | DMKN     | 93099  | 37 | 19 | 36002394  | 36002405  | In_Frame_Del    | DEL | :CACTGCTG | -   | 7   | 49   | 337delAGCAGCAC(26-837) | AGCAGCAGTGG(p.SSSG276del         |               |
| Pat_41 | Post-Resistance | C19orf55 | 148137 | 37 | 19 | 36255947  | 36255949  | In_Frame_Del    | DEL | CTC       | -   | 7   | 665  | c.639_641delICTC       | c.(637-642)ATCTCC>ATC            | p.S218del     |
| Pat_41 | Post-Resistance | RYR1     | 6261   | 37 | 19 | 38948159  | 38948160  | Frame_Shift_Del | DEL | TG        | -   | 12  | 731  | c.1814_1815delTC       | c.(1813-1815)CTGfs               | p.L605fs      |
| Pat_41 | Post-Resistance | ZNF283   | 284349 | 37 | 19 | 44351735  | 44351735  | Frame_Shift_Del | DEL | T         | -   | 7   | 72   | c.982delIT             | c.(982-984)TTTfs                 | p.F328fs      |
| Pat_41 | Post-Resistance | LIG1     | 3978   | 37 | 19 | 48664673  | 48664674  | Frame_Shift_Del | DEL | CG        | -   | 8   | 455  | c.198_199delCG         | c.(196-201)AGCGAAfs              | p.S66fs       |
| Pat_41 | Post-Resistance | FCGRT    | 2217   | 37 | 19 | 50017191  | 50017191  | Frame_Shift_Del | DEL | G         | -   | 7   | 498  | c.126delIG             | c.(124-126)CCGfs                 | p.P42fs       |
| Pat_41 | Post-Resistance | ZNF808   | 388558 | 37 | 19 | 53046598  | 53046598  | Frame_Shift_Del | DEL | C         | -   | 7   | 657  | c.61delIC              | c.(61-63)CAGfs                   | p.Q21fs       |
| Pat_41 | Post-Resistance | ATP6V1C2 | 245973 | 37 | 2  | 10917819  | 10917820  | Frame_Shift_Del | DEL | AG        | -   | 20  | 261  | c.934_935delIAG        | c.(934-936)AGAFs                 | p.R312fs      |
| Pat_41 | Post-Resistance | C2orf71  | 388939 | 37 | 2  | 29295647  | 29295649  | In_Frame_Del    | DEL | TCC       | -   | 8   | 481  | .1479_1481delIGG       | (1477-1482)GAGGAA>GA,493_494EE>I |               |
| Pat_41 | Post-Resistance | SLC9A2   | 6549   | 37 | 2  | 103324746 | 103324746 | Frame_Shift_Del | DEL | C         | -   | 34  | 512  | c.2237delIC            | c.(2236-2238)ACCfs               | p.T746fs      |
| Pat_41 | Post-Resistance | DGKD     | 8527   | 37 | 2  | 234365952 | 234365952 | Frame_Shift_Del | DEL | G         | -   | 22  | 280  | c.2558delIG            | c.(2557-2559)TGGfs               | p.W853fs      |
| Pat_41 | Post-Resistance | TGM6     | 343641 | 37 | 20 | 2384126   | 2384126   | Frame_Shift_Del | DEL | C         | -   | 14  | 180  | c.1073delIC            | c.(1072-1074)ACCfs               | p.T358fs      |
| Pat_41 | Post-Resistance | ATRN     | 8455   | 37 | 20 | 3542970   | 3542970   | Frame_Shift_Del | DEL | G         | -   | 55  | 927  | c.1495delIG            | c.(1495-1497)GGGfs               | p.G499fs      |
| Pat_41 | Post-Resistance | RALGAPB  | 57148  | 37 | 20 | 37203485  | 37203485  | Frame_Shift_Del | DEL | C         | -   | 24  | 295  | c.4360delIC            | c.(4360-4362)CCCfs               | p.P1454fs     |
| Pat_41 | Post-Resistance | FAM83D   | 81610  | 37 | 20 | 37555322  | 37555323  | In_Frame_Ins    | INS | -         | GCG | 4   | 4    | c.327_328insGCG        | c.(325-330)insGCG                | p.116_117insA |
| Pat_41 | Post-Resistance | PREX1    | 57580  | 37 | 20 | 47317371  | 47317372  | Frame_Shift_Del | DEL | TA        | -   | 8   | 1074 | c.836_837delITA        | c.(835-837)TTAFs                 | p.L279fs      |
| Pat_41 | Post-Resistance | KCNB1    | 3745   | 37 | 20 | 47989771  | 47989772  | Frame_Shift_Ins | INS | -         | G   | 7   | 1562 | c.2325_2326insC        | c.(2323-2328)CCCAAfs             | p.P775fs      |
| Pat_41 | Post-Resistance | TAF4     | 6874   | 37 | 20 | 60574086  | 60574087  | Frame_Shift_Del | DEL | GC        | -   | 8   | 1410 | .2865_2866delIGC       | c.(2863-2868)AAGCAGfs            | p.K955fs      |
| Pat_41 | Post-Resistance | KCNJ15   | 3772   | 37 | 21 | 39671215  | 39671215  | Frame_Shift_Del | DEL | C         | -   | 7   | 232  | c.32delIC              | c.(31-33)ACCfs                   | p.T11fs       |
| Pat_41 | Post-Resistance | BRWD1    | 54014  | 37 | 21 | 40558989  | 40558989  | Frame_Shift_Del | DEL | A         | -   | 15  | 319  | c.6926delIT            | c.(6925-6927)TTAFs               | p.L2309fs     |
| Pat_41 | Post-Resistance | DIP2A    | 23181  | 37 | 21 | 47918510  | 47918510  | Frame_Shift_Del | DEL | C         | -   | 7   | 745  | c.419delIC             | c.(418-420)TCAfs                 | p.S140fs      |
| Pat_41 | Post-Resistance | CRKL     | 1399   | 37 | 22 | 21288130  | 21288130  | Frame_Shift_Del | DEL | G         | -   | 8   | 536  | c.375delIG             | c.(373-375)CTGfs                 | p.L125fs      |
| Pat_41 | Post-Resistance | C22orf43 | 51233  | 37 | 22 | 23959767  | 23959769  | In_Frame_Del    | DEL | CAT       | -   | 9   | 281  | c.512_514delATGc.      | (511-516)GATGCC>GCC              | p.D171del     |
| Pat_41 | Post-Resistance | NF2      | 4771   | 37 | 22 | 30057196  | 30057197  | Frame_Shift_Ins | INS | -         | A   | 7   | 371  | c.678_679insA          | c.(676-681)AATAAAfs              | p.N226fs      |
| Pat_41 | Post-Resistance | MYH9     | 4627   | 37 | 22 | 36691101  | 36691102  | Frame_Shift_Del | DEL | CA        | -   | 7   | 401  | .3506_3507delITC       | c.(3505-3507)GTGfs               | p.V1169fs     |
| Pat_41 | Post-Resistance | MYH9     | 4627   | 37 | 22 | 36696948  | 36696950  | In_Frame_Del    | DEL | CTC       | -   | 10  | 291  | .2785_2787delIGA       | c.(2785-2787)GAGdel              | p.E929del     |
| Pat_41 | Post-Resistance | EIF3L    | 51386  | 37 | 22 | 38247385  | 38247385  | Frame_Shift_Del | DEL | A         | -   | 21  | 193  | c.181delIA             | c.(181-183)AAAfs                 | p.K61fs       |
| Pat_41 | Post-Resistance | C22orf32 | 91689  | 37 | 22 | 42478046  | 42478048  | In_Frame_Del    | DEL | GAT       | -   | 8   | 484  | c.304_306delIGAT       | c.(304-306)GATdel                | p.D107del     |
| Pat_41 | Post-Resistance | TCF20    | 6942   | 37 | 22 | 42610573  | 42610575  | In_Frame_Del    | DEL | AGG       | -   | 12  | 243  | c.737_739delICCT       | c.(736-741)TCCTTC>TTC            | p.S246del     |
| Pat_41 | Post-Resistance | POLDIP3  | 84271  | 37 | 22 | 42988072  | 42988073  | Frame_Shift_Del | DEL | CA        | -   | 7   | 659  | c.909_910delITG        | c.(907-912)TGTGGGfs              | p.C303fs      |
| Pat_41 | Post-Resistance | BHLHE40  | 8553   | 37 | 3  | 5023155   | 5023157   | In_Frame_Del    | DEL | CAG       | -   | 8   | 1446 | c.337_339delICAG       | c.(337-339)CAGdel                | p.Q116del     |
| Pat_41 | Post-Resistance | CAPN7    | 23473  | 37 | 3  | 15283742  | 15283742  | Frame_Shift_Del | DEL | A         | -   | 21  | 143  | c.1846delIA            | c.(1846-1848)AAAfs               | p.K616fs      |
| Pat_41 | Post-Resistance | ERC2     | 26059  | 37 | 3  | 55733470  | 55733472  | In_Frame_Del    | DEL | TGG       | -   | 9   | 882  | .2781_2783delICC.      | (2779-2784)CACCAT>CA,927_928HH>I |               |
| Pat_41 | Post-Resistance | POLQ     | 10721  | 37 | 3  | 121207671 | 121207673 | In_Frame_Del    | DEL | CTT       | -   | 7   | 359  | .4105_4107delIAA       | c.(4105-4107)AAGdel              | p.K1369del    |
| Pat_41 | Post-Resistance | PARP14   | 54625  | 37 | 3  | 122418640 | 122418640 | Frame_Shift_Del | DEL | A         | -   | 7   | 579  | c.1239delIA            | c.(1237-1239)ATAfs               | p.I413fs      |
| Pat_41 | Post-Resistance | MBD4     | 8930   | 37 | 3  | 129155872 | 129155873 | Frame_Shift_Del | DEL | AG        | -   | 28  | 516  | c.614_615delICT        | c.(613-615)TCTfs                 | p.S205fs      |
| Pat_41 | Post-Resistance | CEP63    | 80254  | 37 | 3  | 134267969 | 134267970 | Frame_Shift_Del | DEL | TG        | -   | 8   | 313  | c.1133_1134delITG      | c.(1132-1134)CTGfs               | p.L378fs      |
| Pat_41 | Post-Resistance | MED12L   | 116931 | 37 | 3  | 151095826 | 151095828 | In_Frame_Del    | DEL | TGG       | -   | 109 | 309  | .4238_4240delITG       | (4237-4242)TTGGTG>TTI            | p.V1414del    |
| Pat_41 | Post-Resistance | SKIL     | 6498   | 37 | 3  | 170078207 | 170078207 | Frame_Shift_Del | DEL | A         | -   | 9   | 57   | c.88delIA              | c.(88-90)AAAfs                   | p.K30fs       |
| Pat_41 | Post-Resistance | MUC4     | 4585   | 37 | 3  | 195513582 | 195513582 | Frame_Shift_Del | DEL | G         | -   | 3   | 6    | c.4869delIC            | c.(4867-4869)TCCfs               | p.S1623fs     |
| Pat_41 | Post-Resistance | CRIPAK   | 285464 | 37 | 4  | 1388345   | 1388346   | Frame_Shift_Del | DEL | CA        | -   | 10  | 1216 | c.46_47delICA          | c.(46-48)CACfs                   | p.H16fs       |
| Pat_41 | Post-Resistance | CRIPAK   | 285464 | 37 | 4  | 1388441   | 1388442   | Frame_Shift_Ins | INS | -         | CG  | 8   | 1660 | c.142_143insCG         | c.(142-144)ATGfs                 | p.M48fs       |
| Pat_41 | Post-Resistance | CRIPAK   | 285464 | 37 | 4  | 1388683   | 1388684   | Frame_Shift_Del | DEL | CA        | -   | 11  | 1260 | c.384_385delICA        | c.(382-387)CTCACAFs              | p.L128fs      |
| Pat_41 | Post-Resistance | CRIPAK   | 285464 | 37 | 4  | 1389392   | 1389393   | Frame_Shift_Del | DEL | CA        | -   | 10  | 1602 | .1093_1094delICA       | c.(1093-1095)CACfs               | p.H365fs      |
| Pat_41 | Post-Resistance | TBC1D1   | 23216  | 37 | 4  | 38119764  | 38119765  | Frame_Shift_Del | DEL | CA        | -   | 7   | 690  | .2913_2914delICA       | c.(2911-2916)CTCACCFs            | p.L971fs      |



|        |                 |         |        |    |   |           |           |                 |     |           |     |    |      |                                          |                       |               |
|--------|-----------------|---------|--------|----|---|-----------|-----------|-----------------|-----|-----------|-----|----|------|------------------------------------------|-----------------------|---------------|
| Pat_41 | Post-Resistance | CSN2    | 1447   | 37 | 4 | 70823289  | 70823289  | Frame_Shift_Del | DEL | A         | -   | 11 | 125  | c.378delT                                | c.(376-378)TTTfs      | p.F126fs      |
| Pat_41 | Post-Resistance | MMRN1   | 22915  | 37 | 4 | 90844391  | 90844393  | In_Frame_Del    | DEL | AGC       | -   | 10 | 1403 | c.923_925delAGC:(922-927)GAGCAG>GAC      |                       | p.Q313del     |
| Pat_41 | Post-Resistance | MAML3   | 55534  | 37 | 4 | 140811064 | 140811072 | Splice_Site     | DEL | ΓGCTGCTGC | -   | 13 | 213  | c.1513_splice                            | c.e3-1                | p.Q505_splice |
| Pat_41 | Post-Resistance | THBS4   | 7060   | 37 | 5 | 79372774  | 79372776  | In_Frame_Del    | DEL | TGA       | -   | 12 | 863  | .1989_1991delTG:(1987-1992)TGTGAT>TG     |                       | p.D668del     |
| Pat_41 | Post-Resistance | MSH3    | 4437   | 37 | 5 | 79966113  | 79966114  | Frame_Shift_Ins | INS | -         | G   | 16 | 212  | c.777_778insG                            | c.(775-780)TTTGGGfs   | p.F259fs      |
| Pat_41 | Post-Resistance | RASGRF2 | 5924   | 37 | 5 | 80409566  | 80409568  | In_Frame_Del    | DEL | CCA       | -   | 7  | 375  | .2297_2299delCC:(2296-2301)CCCACC>CC     |                       | p.T770del     |
| Pat_41 | Post-Resistance | WDR36   | 134430 | 37 | 5 | 110459863 | 110459865 | In_Frame_Del    | DEL | GAA       | -   | 19 | 424  | .2494_2496delGA                          | c.(2494-2496)GAAAdel  | p.E833del     |
| Pat_41 | Post-Resistance | CTNNA1  | 1495   | 37 | 5 | 138160447 | 138160449 | In_Frame_Del    | DEL | GGA       | -   | 8  | 721  | c.817_819delGGA                          | c.(817-819)GGAdel     | p.G276del     |
| Pat_41 | Post-Resistance | LARP1   | 23367  | 37 | 5 | 154173390 | 154173390 | Frame_Shift_Del | DEL | C         | -   | 18 | 1116 | c.899delC                                | c.(898-900)GCCfs      | p.A300fs      |
| Pat_41 | Post-Resistance | UBLCP1  | 134510 | 37 | 5 | 158697424 | 158697425 | Frame_Shift_Del | DEL | TG        | -   | 7  | 485  | c.303_304delTG                           | c.(301-306)ATTGAAfs   | p.I101fs      |
| Pat_41 | Post-Resistance | FGF18   | 8817   | 37 | 5 | 170883644 | 170883644 | Frame_Shift_Del | DEL | C         | -   | 8  | 542  | c.459delC                                | c.(457-459)TTCfs      | p.F153fs      |
| Pat_41 | Post-Resistance | NSD1    | 64324  | 37 | 5 | 176637122 | 176637122 | Frame_Shift_Del | DEL | A         | -   | 20 | 151  | c.1722delA                               | c.(1720-1722)GGAfs    | p.G574fs      |
| Pat_41 | Post-Resistance | TUBB2B  | 347733 | 37 | 6 | 3225002   | 3225004   | In_Frame_Del    | DEL | CCT       | -   | 9  | 340  | .1319_1321delAG:(1318-1323)GAGGGC>GC     |                       | p.E440del     |
| Pat_41 | Post-Resistance | DST     | 667    | 37 | 6 | 56510689  | 56510690  | Frame_Shift_Del | DEL | TC        | -   | 7  | 391  | .1653_1654delGA                          | c.(1651-1656)GAGAAGfs | p.E551fs      |
| Pat_41 | Post-Resistance | FRK     | 2444   | 37 | 6 | 116325059 | 116325059 | Frame_Shift_Del | DEL | T         | -   | 19 | 87   | c.447delA                                | c.(445-447)AAAfs      | p.K149fs      |
| Pat_41 | Post-Resistance | SHPRH   | 257218 | 37 | 6 | 146275964 | 146275964 | Frame_Shift_Del | DEL | T         | -   | 8  | 65   | c.495delA                                | c.(493-495)AAAfs      | p.K165fs      |
| Pat_41 | Post-Resistance | MTHFD1L | 25902  | 37 | 6 | 151358163 | 151358164 | Frame_Shift_Ins | INS | -         | A   | 8  | 184  | c.2757_2758insA                          | c.(2755-2760)GACAAAfs | p.D919fs      |
| Pat_41 | Post-Resistance | PHF10   | 55274  | 37 | 6 | 170104147 | 170104148 | Frame_Shift_Ins | INS | -         | G   | 24 | 263  | c.1448_1449insC                          | c.(1447-1449)CCAfs    | p.P483fs      |
| Pat_41 | Post-Resistance | GPER    | 2852   | 37 | 7 | 1132270   | 1132270   | Frame_Shift_Del | DEL | C         | -   | 11 | 222  | c.906delC                                | c.(904-906)CACfs      | p.H302fs      |
| Pat_41 | Post-Resistance | PHF14   | 9678   | 37 | 7 | 11075380  | 11075381  | Frame_Shift_Del | DEL | AG        | -   | 10 | 687  | .1569_1570delAC                          | c.(1567-1572)CAAGAGfs | p.Q523fs      |
| Pat_41 | Post-Resistance | TRA2A   | 29896  | 37 | 7 | 23552546  | 23552546  | Frame_Shift_Del | DEL | A         | -   | 14 | 378  | c.492delT                                | c.(490-492)TTTfs      | p.F164fs      |
| Pat_41 | Post-Resistance | OGDH    | 4967   | 37 | 7 | 44684936  | 44684936  | Frame_Shift_Del | DEL | T         | -   | 10 | 465  | c.233delT                                | c.(232-234)ATTfs      | p.I78fs       |
| Pat_41 | Post-Resistance | ZNF716  | 441234 | 37 | 7 | 57529007  | 57529008  | In_Frame_Ins    | INS | -         | TCT | 12 | 190  | c.840_841insTCT                          | c.(838-843)jinsTCT    | p.281_282insS |
| Pat_41 | Post-Resistance | ZNF716  | 441234 | 37 | 7 | 57529089  | 57529091  | In_Frame_Del    | DEL | TCT       | -   | 10 | 366  | c.922_924delTCT                          | c.(922-924)TCTdel     | p.S309del     |
| Pat_41 | Post-Resistance | CYP51A1 | 1595   | 37 | 7 | 91752494  | 91752494  | Frame_Shift_Del | DEL | T         | -   | 7  | 555  | c.1026delA                               | c.(1024-1026)AAAfs    | p.K342fs      |
| Pat_41 | Post-Resistance | PEX1    | 5189   | 37 | 7 | 92120786  | 92120786  | Frame_Shift_Del | DEL | T         | -   | 8  | 458  | c.3238delA                               | c.(3238-3240)AGTfs    | p.S1080fs     |
| Pat_41 | Post-Resistance | TRRAP   | 8295   | 37 | 7 | 98609744  | 98609745  | Frame_Shift_Ins | INS | -         | A   | 11 | 169  | .11346_11347insA/c:(11344-11349)CACAAAfs |                       | p.H3782fs     |
| Pat_41 | Post-Resistance | PTCD1   | 26024  | 37 | 7 | 99032605  | 99032607  | In_Frame_Del    | DEL | CTC       | -   | 7  | 437  | c.259_261delGAG                          | c.(259-261)GAGdel     | p.E87del      |
| Pat_41 | Post-Resistance | MCM7    | 4176   | 37 | 7 | 99691822  | 99691822  | Frame_Shift_Del | DEL | C         | -   | 8  | 1018 | c.1822delG                               | c.(1822-1824)GCTfs    | p.A608fs      |
| Pat_41 | Post-Resistance | MEPCE   | 56257  | 37 | 7 | 100028452 | 100028454 | In_Frame_Del    | DEL | CAG       | -   | 9  | 1204 | c.811_813delCAG                          | c.(811-813)CAGdel     | p.Q274del     |
| Pat_41 | Post-Resistance | AP1S1   | 1174   | 37 | 7 | 100802405 | 100802405 | Frame_Shift_Del | DEL | G         | -   | 22 | 207  | c.357delG                                | c.(355-357)ATGfs      | p.M119fs      |
| Pat_41 | Post-Resistance | CBLL1   | 79872  | 37 | 7 | 107395909 | 107395909 | Frame_Shift_Del | DEL | A         | -   | 7  | 1059 | c.413delA                                | c.(412-414)GAAfs      | p.E138fs      |
| Pat_41 | Post-Resistance | CTTNBP2 | 83992  | 37 | 7 | 117431783 | 117431784 | Frame_Shift_Del | DEL | CC        | -   | 7  | 1572 | .1466_1467delGC                          | c.(1465-1467)CGGfs    | p.R489fs      |
| Pat_41 | Post-Resistance | CHRM2   | 1129   | 37 | 7 | 136700150 | 136700150 | Frame_Shift_Del | DEL | T         | -   | 10 | 536  | c.538delT                                | c.(538-540)TTTfs      | p.F180fs      |
| Pat_41 | Post-Resistance | BRAF    | 673    | 37 | 7 | 140482927 | 140482927 | Frame_Shift_Del | DEL | G         | -   | 8  | 260  | c.1208delC                               | c.(1207-1209)CCTfs    | p.P403fs      |
| Pat_41 | Post-Resistance | OR9A4   | 130075 | 37 | 7 | 141619203 | 141619203 | Frame_Shift_Del | DEL | T         | -   | 18 | 1002 | c.528delT                                | c.(526-528)AATfs      | p.N176fs      |
| Pat_41 | Post-Resistance | DLC1    | 10395  | 37 | 8 | 12957611  | 12957613  | In_Frame_Del    | DEL | GCT       | -   | 9  | 175  | .2233_2235delAG                          | c.(2233-2235)AGCdel   | p.S745del     |
| Pat_41 | Post-Resistance | PRKDC   | 5591   | 37 | 8 | 48746799  | 48746799  | Frame_Shift_Del | DEL | T         | -   | 11 | 962  | c.8110delA                               | c.(8110-8112)AGGfs    | p.R2704fs     |
| Pat_41 | Post-Resistance | LACTB2  | 51110  | 37 | 8 | 71556428  | 71556429  | Frame_Shift_Del | DEL | TC        | -   | 7  | 1159 | c.463_464delGA                           | c.(463-465)GAAfs      | p.E155fs      |
| Pat_41 | Post-Resistance | ZNF704  | 619279 | 37 | 8 | 81733778  | 81733778  | Frame_Shift_Del | DEL | T         | -   | 9  | 1386 | c.52delA                                 | c.(52-54)ATGfs        | p.M18fs       |
| Pat_41 | Post-Resistance | TMEM55A | 55529  | 37 | 8 | 92021005  | 92021006  | Frame_Shift_Del | DEL | TG        | -   | 8  | 512  | c.504_505delCA                           | c.(502-507)TTCAACfs   | p.F168fs      |
| Pat_41 | Post-Resistance | ESRP1   | 54845  | 37 | 8 | 95686611  | 95686611  | Frame_Shift_Del | DEL | A         | -   | 10 | 210  | c.1528delA                               | c.(1528-1530)AAAfs    | p.K510fs      |
| Pat_41 | Post-Resistance | UBR5    | 51366  | 37 | 8 | 103298813 | 103298813 | Frame_Shift_Del | DEL | C         | -   | 16 | 128  | c.4990delG                               | c.(4990-4992)GATfs    | p.D1664fs     |
| Pat_41 | Post-Resistance | CSMD3   | 114788 | 37 | 8 | 113303887 | 113303887 | Frame_Shift_Del | DEL | A         | -   | 8  | 555  | c.8826delT                               | c.(8824-8826)TCTfs    | p.S2942fs     |
| Pat_41 | Post-Resistance | ZHX2    | 22882  | 37 | 8 | 123963963 | 123963964 | Frame_Shift_Ins | INS | -         | A   | 15 | 60   | c.213_214insA                            | c.(211-216)TCCAAAfs   | p.S71fs       |
| Pat_41 | Post-Resistance | ATAD2   | 29028  | 37 | 8 | 124368685 | 124368685 | Frame_Shift_Del | DEL | A         | -   | 10 | 262  | c.1590delT                               | c.(1588-1590)TTTfs    | p.F530fs      |
| Pat_41 | Post-Resistance | FER1L6  | 654463 | 37 | 8 | 125022956 | 125022956 | Splice_Site     | DEL | T         | -   | 7  | 793  | c.1821_splice                            | c.e14+2               | p.L607_splice |

|        |                 |          |        |    |    |           |           |                 |     |     |     |    |      |                  |                      |               |
|--------|-----------------|----------|--------|----|----|-----------|-----------|-----------------|-----|-----|-----|----|------|------------------|----------------------|---------------|
| Pat_41 | Post-Resistance | PLEC     | 5339   | 37 | 8  | 144995120 | 144995122 | In_Frame_Del    | DEL | TGA | -   | 8  | 194  | .9278_9280delTC. | (9277-9282)ATCAAG>AA | p.I3093del    |
| Pat_41 | Post-Resistance | TFE3     | 7030   | 37 | X  | 48887952  | 48887952  | Frame_Shift_Del | DEL | C   | -   | 21 | 294  | c.1445delG       | c.(1444-1446)GGAfs   | p.G482fs      |
| Pat_41 | Post-Resistance | PHF8     | 23133  | 37 | X  | 54011405  | 54011407  | In_Frame_Del    | DEL | CTC | -   | 13 | 493  | .2491_2493delGA  | c.(2491-2493)GAGdel  | p.E831del     |
| Pat_41 | Post-Resistance | FAM155B  | 27112  | 37 | X  | 68725672  | 68725672  | Frame_Shift_Del | DEL | A   | -   | 7  | 70   | c.547delA        | c.(547-549)AAAfs     | p.K183fs      |
| Pat_41 | Post-Resistance | OGT      | 8473   | 37 | X  | 70782825  | 70782825  | Frame_Shift_Del | DEL | T   | -   | 10 | 352  | c.2106delT       | c.(2104-2106)ACTfs   | p.T702fs      |
| Pat_41 | Post-Resistance | TCEAL6   | 158931 | 37 | X  | 101396101 | 101396101 | Frame_Shift_Del | DEL | T   | -   | 14 | 293  | c.203delA        | c.(202-204)AAGfs     | p.K68fs       |
| Pat_41 | Post-Resistance | RGAG1    | 57529  | 37 | X  | 109694602 | 109694603 | Frame_Shift_Del | DEL | GG  | -   | 7  | 369  | c.757_758delGG   | c.(757-759)GGAfs     | p.G253fs      |
| Pat_41 | Post-Resistance | STAG2    | 10735  | 37 | X  | 123159727 | 123159727 | Frame_Shift_Del | DEL | G   | -   | 8  | 892  | c.82delG         | c.(82-84)GAAfs       | p.E28fs       |
| Pat_41 | Post-Resistance | GPR112   | 139378 | 37 | X  | 135455156 | 135455156 | Frame_Shift_Del | DEL | G   | -   | 8  | 1340 | c.7709delG       | c.(7708-7710)CGGfs   | p.R2570fs     |
| Pat_41 | Post-Resistance | MAGEC1   | 9947   | 37 | X  | 140994114 | 140994116 | In_Frame_Del    | DEL | CTC | -   | 7  | 542  | c.924_926delCTC. | (922-927)AGCTCC>AGC. | 308_309SS>!   |
| Pat_41 | Post-Resistance | ZNF185   | 7739   | 37 | X  | 152087570 | 152087572 | In_Frame_Del    | DEL | GAG | -   | 9  | 81   | c.475_477delGAG  | c.(475-477)GAGdel    | p.E165del     |
| Pat_41 | Post-Resistance | L1CAM    | 3897   | 37 | X  | 153130092 | 153130092 | Frame_Shift_Del | DEL | G   | -   | 7  | 410  | c.3114delC       | c.(3112-3114)CCCfs   | p.P1038fs     |
| Pat_41 | Post-Resistance | F8       | 2157   | 37 | X  | 154158427 | 154158428 | Frame_Shift_Ins | INS | -   | T   | 3  | 4    | c.3637_3638insA  | c.(3637-3639)ATTfs   | p.I1213fs     |
| Pat_44 | Pre-Treatment   | ARID1A   | 8289   | 37 | 1  | 27057991  | 27057991  | Frame_Shift_Del | DEL | C   | -   | 10 | 459  | c.1699delC       | c.(1699-1701)CAGfs   | p.Q567fs      |
| Pat_44 | Pre-Treatment   | RIT1     | 6016   | 37 | 1  | 155874584 | 155874585 | Frame_Shift_Del | DEL | TA  | -   | 7  | 66   | c.174_175delTA   | c.(172-177)TATAAGfs  | p.Y58fs       |
| Pat_44 | Pre-Treatment   | MBD6     | 114785 | 37 | 12 | 57918829  | 57918830  | Frame_Shift_Ins | INS | -   | T   | 24 | 135  | c.310_311insT    | c.(310-312)CGGfs     | p.R104fs      |
| Pat_44 | Pre-Treatment   | CEP290   | 80184  | 37 | 12 | 88473975  | 88473975  | Frame_Shift_Del | DEL | T   | -   | 2  | 4    | c.5210delA       | c.(5209-5211)AAGfs   | p.K1737fs     |
| Pat_44 | Pre-Treatment   | IPO4     | 79711  | 37 | 14 | 24656873  | 24656874  | Frame_Shift_Del | DEL | CT  | -   | 8  | 129  | c.407_408delAG   | c.(406-408)GAGfs     | p.E136fs      |
| Pat_44 | Pre-Treatment   | BCL11B   | 64919  | 37 | 14 | 99641544  | 99641546  | In_Frame_Del    | DEL | CTC | -   | 5  | 7    | .1627_1629delGA  | c.(1627-1629)GAGdel  | p.E543del     |
| Pat_44 | Pre-Treatment   | PDE8A    | 5151   | 37 | 15 | 85658713  | 85658713  | Frame_Shift_Del | DEL | C   | -   | 2  | 4    | c.1394delC       | c.(1393-1395)ACAfs   | p.T465fs      |
| Pat_44 | Pre-Treatment   | TSC2     | 7249   | 37 | 16 | 2112527   | 2112527   | Frame_Shift_Del | DEL | T   | -   | 2  | 4    | c.1287delT       | c.(1285-1287)TATfs   | p.Y429fs      |
| Pat_44 | Pre-Treatment   | CMIP     | 80790  | 37 | 16 | 81691378  | 81691379  | Splice_Site     | DEL | AG  | -   | 3  | 4    | c.640_splice     | c.e5-1               | p.N214_splice |
| Pat_44 | Pre-Treatment   | ATP6V0A1 | 535    | 37 | 17 | 40639289  | 40639289  | Frame_Shift_Del | DEL | G   | -   | 7  | 192  | c.927delG        | c.(925-927)CTGfs     | p.L309fs      |
| Pat_44 | Pre-Treatment   | BAHCC1   | 57597  | 37 | 17 | 79409922  | 79409922  | Frame_Shift_Del | DEL | C   | -   | 2  | 4    | c.1547delC       | c.(1546-1548)GCCfs   | p.A516fs      |
| Pat_44 | Pre-Treatment   | C19orf35 | 374872 | 37 | 19 | 2275696   | 2275696   | Frame_Shift_Del | DEL | C   | -   | 4  | 9    | c.1405delG       | c.(1405-1407)GCGfs   | p.A469fs      |
| Pat_44 | Pre-Treatment   | STAP2    | 55620  | 37 | 19 | 4324499   | 4324500   | Frame_Shift_Del | DEL | CC  | -   | 4  | 5    | :.1099_1100delGC | c.(1099-1101)GGCfs   | p.G367fs      |
| Pat_44 | Pre-Treatment   | UNC13A   | 23025  | 37 | 19 | 17766924  | 17766926  | In_Frame_Del    | DEL | CCT | -   | 2  | 4    | .1313_1315delAG  | (1312-1317)GAGGTG>GT | p.E438del     |
| Pat_44 | Pre-Treatment   | KIRREL2  | 84063  | 37 | 19 | 36352837  | 36352838  | Frame_Shift_Del | DEL | CC  | -   | 3  | 5    | :.1421_1422delCC | c.(1420-1422)ACCfs   | p.T474fs      |
| Pat_44 | Pre-Treatment   | SIPA1L3  | 23094  | 37 | 19 | 38684299  | 38684299  | Frame_Shift_Del | DEL | C   | -   | 4  | 9    | c.4719delC       | c.(4717-4719)TTCfs   | p.F1573fs     |
| Pat_44 | Pre-Treatment   | GTF3C3   | 9330   | 37 | 2  | 197649613 | 197649614 | Frame_Shift_Ins | INS | -   | T   | 2  | 4    | c.1081_1082insA  | c.(1081-1083)ACTfs   | p.T361fs      |
| Pat_44 | Pre-Treatment   | CADPS    | 8618   | 37 | 3  | 62464070  | 62464070  | Frame_Shift_Del | DEL | T   | -   | 2  | 4    | c.3195delA       | c.(3193-3195)GAAfs   | p.E1065fs     |
| Pat_44 | Pre-Treatment   | PRDM13   | 59336  | 37 | 6  | 100061624 | 100061625 | In_Frame_Ins    | INS | -   | CCG | 11 | 4    | :.1113_1114insCC | c.(1111-1116)insCCG  | p.378_379insF |
| Pat_44 | Pre-Treatment   | FAM83H   | 286077 | 37 | 8  | 144811169 | 144811170 | Frame_Shift_Ins | INS | -   | GT  | 7  | 268  | c.704_705insAC   | c.(703-705)GTGfs     | p.V235fs      |
| Pat_44 | Pre-Treatment   | CCDC22   | 28952  | 37 | X  | 49105637  | 49105637  | Frame_Shift_Del | DEL | G   | -   | 2  | 4    | c.1549delG       | c.(1549-1551)GATfs   | p.D517fs      |
| Pat_44 | Post-Resistance | ATAD3B   | 83858  | 37 | 1  | 1420436   | 1420437   | Frame_Shift_Del | DEL | CC  | -   | 4  | 7    | c.791_792delCC   | c.(790-792)GCCfs     | p.A264fs      |
| Pat_44 | Post-Resistance | LHX4     | 89884  | 37 | 1  | 180243506 | 180243506 | Frame_Shift_Del | DEL | C   | -   | 7  | 519  | c.965delC        | c.(964-966)TCCfs     | p.S322fs      |
| Pat_44 | Post-Resistance | PGBD2    | 267002 | 37 | 1  | 249211274 | 249211274 | Frame_Shift_Del | DEL | A   | -   | 8  | 305  | c.491delA        | c.(490-492)TATfs     | p.Y164fs      |
| Pat_44 | Post-Resistance | CHAT     | 1103   | 37 | 10 | 50872887  | 50872887  | Frame_Shift_Del | DEL | G   | -   | 8  | 799  | c.2042delG       | c.(2041-2043)TGCfs   | p.C681fs      |
| Pat_44 | Post-Resistance | ZMIZ1    | 57178  | 37 | 10 | 81067245  | 81067245  | Frame_Shift_Del | DEL | C   | -   | 7  | 185  | c.2752delC       | c.(2752-2754)CCCfs   | p.P918fs      |
| Pat_44 | Post-Resistance | FBXL15   | 79176  | 37 | 10 | 104181190 | 104181190 | Frame_Shift_Del | DEL | C   | -   | 2  | 4    | c.133delC        | c.(133-135)CAGfs     | p.Q45fs       |
| Pat_44 | Post-Resistance | UBQLN3   | 50613  | 37 | 11 | 5529918   | 5529920   | In_Frame_Del    | DEL | TGG | -   | 7  | 460  | c.869_871delCCA. | (868-873)ACCAGC>AGC  | p.T290del     |
| Pat_44 | Post-Resistance | AMBRA1   | 55626  | 37 | 11 | 46564695  | 46564696  | Frame_Shift_Del | DEL | CG  | -   | 4  | 4    | c.871_872delCG   | c.(871-873)CGAfs     | p.R291fs      |
| Pat_44 | Post-Resistance | CKAP5    | 9793   | 37 | 11 | 46789159  | 46789159  | Frame_Shift_Del | DEL | T   | -   | 7  | 329  | c.3377delA       | c.(3376-3378)AAGfs   | p.K1126fs     |
| Pat_44 | Post-Resistance | RARRES3  | 5920   | 37 | 11 | 63313709  | 63313709  | Frame_Shift_Del | DEL | A   | -   | 8  | 184  | c.476delA        | c.(475-477)CAAfs     | p.Q159fs      |
| Pat_44 | Post-Resistance | VEGFB    | 7423   | 37 | 11 | 64004663  | 64004663  | Frame_Shift_Del | DEL | A   | -   | 7  | 218  | c.379delA        | c.(379-381)AAAfs     | p.K127fs      |
| Pat_44 | Post-Resistance | ODZ4     | 26011  | 37 | 11 | 78387242  | 78387242  | Frame_Shift_Del | DEL | T   | -   | 2  | 4    | c.5451delA       | c.(5449-5451)AAAfs   | p.K1817fs     |
| Pat_44 | Post-Resistance | ADAMTS8  | 11095  | 37 | 11 | 130298118 | 130298120 | In_Frame_Del    | DEL | GCA | -   | 7  | 1    | c.62_64delTGC    | c.(61-66)CTGCCG>CCG  | p.L21del      |

|        |                 |           |        |    |    |           |           |                 |     |          |     |    |      |                  |                        |               |
|--------|-----------------|-----------|--------|----|----|-----------|-----------|-----------------|-----|----------|-----|----|------|------------------|------------------------|---------------|
| Pat_44 | Post-Resistance | RAD52     | 5893   | 37 | 12 | 1023096   | 1023097   | Frame_Shift_Del | DEL | CC       | -   | 7  | 140  | c.1158_1159delGC | c.(1156-1161)TGGGACfs  | p.W386fs      |
| Pat_44 | Post-Resistance | XPO4      | 64328  | 37 | 13 | 21436912  | 21436912  | Frame_Shift_Del | DEL | T        | -   | 7  | 869  | c.261delA        | c.(259-261)AAafs       | p.K87fs       |
| Pat_44 | Post-Resistance | RNASE8    | 122665 | 37 | 14 | 21526082  | 21526084  | In_Frame_Del    | DEL | CTG      | -   | 7  | 118  | c.31_33delCTG    | c.(31-33)CTGdel        | p.L16del      |
| Pat_44 | Post-Resistance | KCNH5     | 27133  | 37 | 14 | 63174357  | 63174357  | Frame_Shift_Del | DEL | T        | -   | 8  | 323  | c.2836delA       | c.(2836-2838)AGCfs     | p.S946fs      |
| Pat_44 | Post-Resistance | ZFYVE26   | 23503  | 37 | 14 | 68222747  | 68222747  | Frame_Shift_Del | DEL | C        | -   | 10 | 1189 | c.6704delG       | c.(6703-6705)GGAfs     | p.G2235fs     |
| Pat_44 | Post-Resistance | TRIP11    | 9321   | 37 | 14 | 92436027  | 92436027  | Frame_Shift_Del | DEL | A        | -   | 8  | 318  | c.5930delT       | c.(5929-5931)TTAfs     | p.L1977fs     |
| Pat_44 | Post-Resistance | BCL11B    | 64919  | 37 | 14 | 99641544  | 99641546  | In_Frame_Del    | DEL | CTC      | -   | 5  | 11   | c.1627_1629delGA | c.(1627-1629)GAGdel    | p.E543del     |
| Pat_44 | Post-Resistance | SPINT1    | 6692   | 37 | 15 | 41149075  | 41149077  | In_Frame_Del    | DEL | CAC      | -   | 7  | 724  | c.1492_1494delCA | c.(1492-1494)CACdel    | p.H501del     |
| Pat_44 | Post-Resistance | FBN1      | 2200   | 37 | 15 | 48704838  | 48704839  | Frame_Shift_Del | DEL | AC       | -   | 9  | 472  | c.8153_8154delGT | c.(8152-8154)TGTfs     | p.C2718fs     |
| Pat_44 | Post-Resistance | SCAPER    | 49855  | 37 | 15 | 77046232  | 77046233  | Frame_Shift_Del | DEL | CC       | -   | 8  | 595  | c.1782_1783delGC | c.(1780-1785)ATGGAAfs  | p.M594fs      |
| Pat_44 | Post-Resistance | POLR3E    | 55718  | 37 | 16 | 22339834  | 22339834  | Frame_Shift_Del | DEL | C        | -   | 8  | 261  | c.1870delC       | c.(1870-1872)CCCfs     | p.P624fs      |
| Pat_44 | Post-Resistance | NUTF2     | 10204  | 37 | 16 | 67902402  | 67902403  | Splice_Site     | DEL | AG       | -   | 8  | 964  | c.172_splice     | c.e4-1                 | p.S58_splice  |
| Pat_44 | Post-Resistance | PLSCR3    | 57048  | 37 | 17 | 7294059   | 7294059   | Frame_Shift_Del | DEL | C        | -   | 7  | 471  | c.725delG        | c.(724-726)GGCfs       | p.G242fs      |
| Pat_44 | Post-Resistance | SPAG9     | 9043   | 37 | 17 | 49077041  | 49077041  | Frame_Shift_Del | DEL | T        | -   | 10 | 152  | c.1645delA       | c.(1645-1647)AGGfs     | p.R549fs      |
| Pat_44 | Post-Resistance | ZNF442    | 79973  | 37 | 19 | 12461637  | 12461638  | Frame_Shift_Del | DEL | TC       | -   | 7  | 651  | c.761_762delGA   | c.(760-762)AGAfs       | p.R254fs      |
| Pat_44 | Post-Resistance | MAP3K10   | 4294   | 37 | 19 | 40697953  | 40697953  | Frame_Shift_Del | DEL | G        | -   | 2  | 4    | c.15delG         | c.(13-15)GAGfs         | p.E5fs        |
| Pat_44 | Post-Resistance | ZNF649    | 65251  | 37 | 19 | 52394014  | 52394014  | Frame_Shift_Del | DEL | C        | -   | 8  | 713  | c.1375delG       | c.(1375-1377)GATfs     | p.D459fs      |
| Pat_44 | Post-Resistance | MYT1L     | 23040  | 37 | 2  | 1921068   | 1921068   | Frame_Shift_Del | DEL | G        | -   | 8  | 309  | c.1527delC       | c.(1525-1527)CCCfs     | p.P509fs      |
| Pat_44 | Post-Resistance | NTSR2     | 23620  | 37 | 2  | 11800201  | 11800201  | Frame_Shift_Del | DEL | C        | -   | 8  | 318  | c.957delG        | c.(955-957)ATGfs       | p.M319fs      |
| Pat_44 | Post-Resistance | MITD1     | 129531 | 37 | 2  | 99787009  | 99787009  | Frame_Shift_Del | DEL | C        | -   | 9  | 397  | c.584delG        | c.(583-585)CGAfs       | p.R195fs      |
| Pat_44 | Post-Resistance | EPHA4     | 2043   | 37 | 2  | 222301266 | 222301266 | Frame_Shift_Del | DEL | C        | -   | 7  | 585  | c.2199delG       | c.(2197-2199)GGGfs     | p.G733fs      |
| Pat_44 | Post-Resistance | CLIC6     | 54102  | 37 | 21 | 36042463  | 36042492  | In_Frame_Del    | DEL | 3GGGTCCC | -   | 4  | 5    | c.3604_3605delG  | c.(3604-3605)GGGdel    | p.S378del     |
| Pat_44 | Post-Resistance | TRIOBP    | 11078  | 37 | 22 | 38120392  | 38120400  | In_Frame_Del    | DEL | CTCCAGA  | -   | 7  | 420  | c.3812_3813delCC | c.(8-1839)GCCTCCAGAACC | p.SRT611del   |
| Pat_44 | Post-Resistance | CLASP2    | 23122  | 37 | 3  | 33602361  | 33602361  | Frame_Shift_Del | DEL | T        | -   | 21 | 481  | c.2869delA       | c.(2869-2871)ATGfs     | p.M957fs      |
| Pat_44 | Post-Resistance | DLEC1     | 9940   | 37 | 3  | 38151740  | 38151740  | Frame_Shift_Del | DEL | C        | -   | 8  | 497  | c.3411delC       | c.(3409-3411)AGCfs     | p.S1137fs     |
| Pat_44 | Post-Resistance | CADPS     | 8618   | 37 | 3  | 62478091  | 62478091  | Frame_Shift_Del | DEL | C        | -   | 8  | 1527 | c.2758delG       | c.(2758-2760)GAGfs     | p.E920fs      |
| Pat_44 | Post-Resistance | CRIPAK    | 285464 | 37 | 4  | 1389147   | 1389148   | Frame_Shift_Del | DEL | AT       | -   | 11 | 854  | c.848_849delAT   | c.(847-849)CATfs       | p.H283fs      |
| Pat_44 | Post-Resistance | TTC23L    | 153657 | 37 | 5  | 34850347  | 34850347  | Frame_Shift_Del | DEL | G        | -   | 7  | 474  | c.313delG        | c.(313-315)GGGfs       | p.G105fs      |
| Pat_44 | Post-Resistance | SLCO6A1   | 133482 | 37 | 5  | 101794149 | 101794149 | Frame_Shift_Del | DEL | A        | -   | 7  | 204  | c.1068delT       | c.(1066-1068)TTTfs     | p.F356fs      |
| Pat_44 | Post-Resistance | DMXL1     | 1657   | 37 | 5  | 118533562 | 118533563 | Frame_Shift_Del | DEL | CG       | -   | 7  | 588  | c.7656_7657delCC | c.(7654-7659)ATCGCAfs  | p.I2552fs     |
| Pat_44 | Post-Resistance | LRRC1     | 55227  | 37 | 6  | 53787534  | 53787535  | Frame_Shift_Del | DEL | GG       | -   | 7  | 1416 | c.1518_1519delGC | c.(1516-1521)CTGGACfs  | p.L506fs      |
| Pat_44 | Post-Resistance | PRDM13    | 59336  | 37 | 6  | 100061624 | 100061625 | In_Frame_Ins    | INS | -        | CCG | 6  | 4    | c.1113_1114insCC | c.(1111-1116)insCCG    | p.378_379insP |
| Pat_44 | Post-Resistance | IFNGR1    | 3459   | 37 | 6  | 137519505 | 137519506 | Frame_Shift_Del | DEL | CT       | -   | 10 | 376  | c.1132_1133delAG | c.(1132-1134)AGTfs     | p.S378fs      |
| Pat_44 | Post-Resistance | PHACTR2   | 9749   | 37 | 6  | 144086414 | 144086414 | Frame_Shift_Del | DEL | A        | -   | 8  | 150  | c.678delA        | c.(676-678)TCAfs       | p.S226fs      |
| Pat_44 | Post-Resistance | UNC93A    | 54346  | 37 | 6  | 167728864 | 167728865 | Frame_Shift_Del | DEL | CC       | -   | 8  | 876  | c.1298_1299delCC | c.(1297-1299)TCCfs     | p.S433fs      |
| Pat_44 | Post-Resistance | PHTF2     | 57157  | 37 | 7  | 77569580  | 77569581  | Frame_Shift_Ins | INS | -        | T   | 8  | 269  | c.1701_1702insT  | c.(1699-1704)TTCTTTfs  | p.F567fs      |
| Pat_44 | Post-Resistance | PIK3CG    | 5294   | 37 | 7  | 106509566 | 106509566 | Frame_Shift_Del | DEL | G        | -   | 7  | 385  | c.1560delG       | c.(1558-1560)CTGfs     | p.L520fs      |
| Pat_44 | Post-Resistance | FOXP2     | 93986  | 37 | 7  | 114271580 | 114271582 | Splice_Site     | DEL | CAG      | -   | 7  | 54   | c.598_splice     | c.e6-1                 | p.Q200_splice |
| Pat_44 | Post-Resistance | ELP3      | 55140  | 37 | 8  | 27987174  | 27987174  | Frame_Shift_Del | DEL | C        | -   | 7  | 405  | c.773delC        | c.(772-774)ACCfs       | p.T258fs      |
| Pat_44 | Post-Resistance | STAU2     | 27067  | 37 | 8  | 74507471  | 74507471  | Frame_Shift_Del | DEL | T        | -   | 7  | 172  | c.1091delA       | c.(1090-1092)AATfs     | p.N364fs      |
| Pat_44 | Post-Resistance | TNFRSF11B | 4982   | 37 | 8  | 119936812 | 119936812 | Frame_Shift_Del | DEL | T        | -   | 8  | 366  | c.1007delA       | c.(1006-1008)AATfs     | p.N336fs      |
| Pat_44 | Post-Resistance | DMRT2     | 10655  | 37 | 9  | 1056908   | 1056908   | Frame_Shift_Del | DEL | G        | -   | 8  | 523  | c.1321delG       | c.(1321-1323)GACfs     | p.D441fs      |
| Pat_44 | Post-Resistance | ZNF462    | 58499  | 37 | 9  | 109736498 | 109736498 | Frame_Shift_Del | DEL | G        | -   | 8  | 1338 | c.6776delG       | c.(6775-6777)TGCfs     | p.C2259fs     |
| Pat_44 | Post-Resistance | C9orf173  | 441476 | 37 | 9  | 140147214 | 140147214 | Frame_Shift_Del | DEL | C        | -   | 2  | 4    | c.590delC        | c.(589-591)ACCfs       | p.T197fs      |
| Pat_44 | Post-Resistance | KAL1      | 3730   | 37 | X  | 8565091   | 8565091   | Frame_Shift_Del | DEL | G        | -   | 8  | 126  | c.525delC        | c.(523-525)CCCfs       | p.P175fs      |
| Pat_45 | Pre-Treatment   | SNRNP40   | 9410   | 37 | 1  | 31742030  | 31742031  | Frame_Shift_Del | DEL | TG       | -   | 7  | 498  | c.832_833delCA   | c.(832-834)CAafs       | p.Q278fs      |
| Pat_45 | Pre-Treatment   | LDLRAD1   | 388633 | 37 | 1  | 54480002  | 54480002  | Frame_Shift_Del | DEL | C        | -   | 2  | 4    | c.109delG        | c.(109-111)GCCfs       | p.A37fs       |

|        |               |           |        |    |    |           |           |                 |     |          |     |    |     |                    |                             |               |
|--------|---------------|-----------|--------|----|----|-----------|-----------|-----------------|-----|----------|-----|----|-----|--------------------|-----------------------------|---------------|
| Pat_45 | Pre-Treatment | CDC7      | 8317   | 37 | 1  | 91967356  | 91967357  | Frame_Shift_Ins | INS | -        | A   | 9  | 252 | c.83_84insA        | c.(82-84)TTAfs              | p.L28fs       |
| Pat_45 | Pre-Treatment | CELSR2    | 1952   | 37 | 1  | 109815643 | 109815644 | Frame_Shift_Del | DEL | CC       | -   | 4  | 7   | c.8332_8333delCC   | c.(8332-8334)CCCfs          | p.P2778fs     |
| Pat_45 | Pre-Treatment | FAM40A    | 85369  | 37 | 1  | 110585707 | 110585708 | Splice_Site     | INS | -        | T   | 4  | 9   | c.886_splice       | c.e9-2                      | p.C296_splice |
| Pat_45 | Pre-Treatment | APOBEC4   | 403314 | 37 | 1  | 183616826 | 183616828 | In_Frame_Del    | DEL | TTC      | -   | 7  | 555 | c.1089_1091delGA   | c.(1087-1092)AAGAAA>AA      | p.363_364KK>I |
| Pat_45 | Pre-Treatment | HEATR1    | 55127  | 37 | 1  | 236719429 | 236719429 | Frame_Shift_Del | DEL | T        | -   | 7  | 360 | c.5485delA         | c.(5485-5487)ACTfs          | p.T1829fs     |
| Pat_45 | Pre-Treatment | FOLH1     | 2346   | 37 | 11 | 49179535  | 49179535  | Frame_Shift_Del | DEL | T        | -   | 8  | 192 | c.1501delA         | c.(1501-1503)AGTfs          | p.S501fs      |
| Pat_45 | Pre-Treatment | PGA5      | 5222   | 37 | 11 | 61015898  | 61015899  | Frame_Shift_Ins | INS | -        | AG  | 8  | 629 | c.664_665insAG     | c.(664-666)AAGfs            | p.K222fs      |
| Pat_45 | Pre-Treatment | PDE2A     | 5138   | 37 | 11 | 72353321  | 72353323  | In_Frame_Del    | DEL | GCG      | -   | 4  | 4   | c.119_121delCGC    | c.(118-123)CCGCAG>CAC       | p.P40del      |
| Pat_45 | Pre-Treatment | MLL2      | 8085   | 37 | 12 | 49426661  | 49426669  | In_Frame_Del    | DEL | 3TTGTTGA | -   | 2  | 4   | c.9_11827delITTC   | c.(8-11829)CTTCAACAACA(p.LQ | p.LQ3940del   |
| Pat_45 | Pre-Treatment | ACAD10    | 80724  | 37 | 12 | 112130539 | 112130539 | Frame_Shift_Del | DEL | C        | -   | 8  | 138 | c.26delC           | c.(25-27)TCCfs              | p.S9fs        |
| Pat_45 | Pre-Treatment | RFC3      | 5983   | 37 | 13 | 34398062  | 34398063  | Frame_Shift_Ins | INS | -        | A   | 10 | 126 | c.234_235insA      | c.(232-237)TCTAAAFs         | p.S78fs       |
| Pat_45 | Pre-Treatment | ARID4A    | 5926   | 37 | 14 | 58831996  | 58831997  | Frame_Shift_Del | DEL | AG       | -   | 10 | 138 | c.3189_3190delAC   | c.(3187-3192)CAAGAGfs       | p.Q1063fs     |
| Pat_45 | Pre-Treatment | TMEM30B   | 161291 | 37 | 14 | 61747546  | 61747546  | Frame_Shift_Del | DEL | G        | -   | 4  | 2   | c.320delC          | c.(319-321)CCAfs            | p.P107fs      |
| Pat_45 | Pre-Treatment | PLA2G4D   | 283748 | 37 | 15 | 42363022  | 42363022  | Frame_Shift_Del | DEL | C        | -   | 4  | 5   | c.1936delG         | c.(1936-1938)GTGfs          | p.V646fs      |
| Pat_45 | Pre-Treatment | TLE3      | 7090   | 37 | 15 | 70358548  | 70358550  | In_Frame_Del    | DEL | GCT      | -   | 2  | 4   | c.380_382delAGC    | c.(379-384)CAGCTC>CTC       | p.Q127del     |
| Pat_45 | Pre-Treatment | GSPT1     | 2935   | 37 | 16 | 12009531  | 12009533  | In_Frame_Del    | DEL | CCG      | -   | 3  | 5   | c.45_47delCGG      | c.(43-48)GGCGGG>GGG         | p.15_16GG>G   |
| Pat_45 | Pre-Treatment | TRIM72    | 493829 | 37 | 16 | 31230512  | 31230513  | Splice_Site     | DEL | GT       | -   | 4  | 7   | c.486_splice       | c.e3+1                      | p.E162_splice |
| Pat_45 | Pre-Treatment | CDK10     | 8558   | 37 | 16 | 89761176  | 89761177  | Frame_Shift_Del | DEL | CC       | -   | 4  | 5   | c.772_773delCC     | c.(772-774)CCCfs            | p.P258fs      |
| Pat_45 | Pre-Treatment | PRDM7     | 11105  | 37 | 16 | 90126961  | 90126962  | Frame_Shift_Del | DEL | AG       | -   | 7  | 96  | c.1020_1021delCT   | c.(1018-1023)TTCTATfs       | p.F340fs      |
| Pat_45 | Pre-Treatment | TP53      | 7157   | 37 | 17 | 7579378   | 7579379   | Frame_Shift_Ins | INS | -        | T   | 19 | 36  | c.308_309insA      | c.(307-309)TACfs            | p.Y103fs      |
| Pat_45 | Pre-Treatment | MYH10     | 4628   | 37 | 17 | 8526401   | 8526401   | Frame_Shift_Del | DEL | C        | -   | 7  | 792 | c.164delG          | c.(163-165)GGAfs            | p.G55fs       |
| Pat_45 | Pre-Treatment | AKAP10    | 11216  | 37 | 17 | 19880956  | 19880956  | Frame_Shift_Del | DEL | G        | -   | 2  | 4   | c.37delC           | c.(37-39)CGCfs              | p.R13fs       |
| Pat_45 | Pre-Treatment | TP53I13   | 90313  | 37 | 17 | 27896102  | 27896102  | Frame_Shift_Del | DEL | C        | -   | 4  | 6   | c.139delC          | c.(139-141)CAGfs            | p.Q47fs       |
| Pat_45 | Pre-Treatment | KLHL14    | 57565  | 37 | 18 | 30350355  | 30350355  | Frame_Shift_Del | DEL | G        | -   | 4  | 5   | c.200delC          | c.(199-201)CCTfs            | p.P67fs       |
| Pat_45 | Pre-Treatment | LMAN1     | 3998   | 37 | 18 | 57013285  | 57013285  | Splice_Site     | DEL | T        | -   | 10 | 161 | c.823_splice       | c.e8-1                      | p.P275_splice |
| Pat_45 | Pre-Treatment | SERPINB12 | 89777  | 37 | 18 | 61233923  | 61233923  | Frame_Shift_Del | DEL | C        | -   | 9  | 408 | c.897delC          | c.(895-897)TTCfs            | p.F299fs      |
| Pat_45 | Pre-Treatment | CRTC1     | 23373  | 37 | 19 | 18794544  | 18794545  | Frame_Shift_Del | DEL | GC       | -   | 4  | 5   | c.32_33delGC       | c.(31-33)AGCfs              | p.S11fs       |
| Pat_45 | Pre-Treatment | C19orf47  | 126526 | 37 | 19 | 40834399  | 40834399  | Frame_Shift_Del | DEL | G        | -   | 10 | 184 | c.471delC          | c.(469-471)CCCfs            | p.P157fs      |
| Pat_45 | Pre-Treatment | SMC6      | 79677  | 37 | 2  | 17898356  | 17898356  | Frame_Shift_Del | DEL | T        | -   | 7  | 248 | c.1180delA         | c.(1180-1182)AGTfs          | p.S394fs      |
| Pat_45 | Pre-Treatment | ALMS1     | 7840   | 37 | 2  | 73786106  | 73786108  | In_Frame_Del    | DEL | TGC      | -   | 8  | 93  | c.10224_10226delIT | c.(10222-10227)AGTGCT>A     | p.A3413del    |
| Pat_45 | Pre-Treatment | EIF2AK3   | 9451   | 37 | 2  | 88926730  | 88926732  | In_Frame_Del    | DEL | CAG      | -   | 4  | 5   | c.61_63delCTG      | c.(61-63)CTGdel             | p.L21del      |
| Pat_45 | Pre-Treatment | XIRP2     | 129446 | 37 | 2  | 168104998 | 168105000 | In_Frame_Del    | DEL | CCT      | -   | 8  | 202 | c.7096_7098delCC   | c.(7096-7098)CCTdel         | p.P2370del    |
| Pat_45 | Pre-Treatment | CYP20A1   | 57404  | 37 | 2  | 204150380 | 204150380 | Frame_Shift_Del | DEL | A        | -   | 11 | 229 | c.896delA          | c.(895-897)CAAfs            | p.Q299fs      |
| Pat_45 | Pre-Treatment | DSTN      | 11034  | 37 | 20 | 17581679  | 17581680  | Frame_Shift_Ins | INS | -        | T   | 7  | 350 | c.300_301insT      | c.(298-303)ATGTTTfs         | p.M100fs      |
| Pat_45 | Pre-Treatment | TMEM90B   | 79953  | 37 | 20 | 24524183  | 24524185  | In_Frame_Del    | DEL | GGA      | -   | 10 | 318 | c.450_452delGGA    | c.(448-453)GTGGAG>GTC       | p.E155del     |
| Pat_45 | Pre-Treatment | SH3BGR    | 6450   | 37 | 21 | 40823995  | 40823995  | Frame_Shift_Del | DEL | G        | -   | 7  | 523 | c.162delG          | c.(160-162)TTGfs            | p.L54fs       |
| Pat_45 | Pre-Treatment | COL18A1   | 80781  | 37 | 21 | 46925143  | 46925143  | Frame_Shift_Del | DEL | C        | -   | 2  | 4   | c.4200delC         | c.(4198-4200)GCGfs          | p.G1400fs     |
| Pat_45 | Pre-Treatment | ITPR1     | 3708   | 37 | 3  | 4753512   | 4753512   | Frame_Shift_Del | DEL | T        | -   | 2  | 4   | c.5036delT         | c.(5035-5037)CTGfs          | p.L1679fs     |
| Pat_45 | Pre-Treatment | NCKIPSD   | 51517  | 37 | 3  | 48723233  | 48723233  | Frame_Shift_Del | DEL | C        | -   | 4  | 8   | c.8delG            | c.(7-9)CGCfs                | p.R3fs        |
| Pat_45 | Pre-Treatment | UROC1     | 131669 | 37 | 3  | 126236513 | 126236513 | Frame_Shift_Del | DEL | G        | -   | 4  | 2   | c.50delC           | c.(49-51)CCAFs              | p.P17fs       |
| Pat_45 | Pre-Treatment | MRAS      | 22808  | 37 | 3  | 138121035 | 138121037 | In_Frame_Del    | DEL | AGA      | -   | 12 | 809 | c.551_553delAGA    | c.(550-555)CAGAAG>CAG       | p.K189del     |
| Pat_45 | Pre-Treatment | ATR       | 545    | 37 | 3  | 142254993 | 142254994 | Frame_Shift_Del | DEL | GG       | -   | 8  | 259 | c.3775_3776delCC   | c.(3775-3777)CCAFs          | p.P1259fs     |
| Pat_45 | Pre-Treatment | PCOLCE2   | 26577  | 37 | 3  | 142548586 | 142548586 | Frame_Shift_Del | DEL | T        | -   | 8  | 508 | c.813delA          | c.(811-813)AAAfs            | p.K271fs      |
| Pat_45 | Pre-Treatment | CYP4V2    | 285440 | 37 | 4  | 187118244 | 187118245 | Frame_Shift_Ins | INS | -        | T   | 15 | 409 | c.564_565insT      | c.(562-567)TGCTTTfs         | p.C188fs      |
| Pat_45 | Pre-Treatment | LRRC14B   | 389257 | 37 | 5  | 191802    | 191803    | Frame_Shift_Del | DEL | CG       | -   | 4  | 2   | c.149_150delCG     | c.(148-150)ACGfs            | p.T50fs       |
| Pat_45 | Pre-Treatment | ZFR       | 51663  | 37 | 5  | 32419951  | 32419953  | In_Frame_Del    | DEL | GGT      | -   | 8  | 375 | c.393_395delACC    | c.(391-396)CCACCC>CCG       | p.131_132PP>I |
| Pat_45 | Pre-Treatment | MCC       | 4163   | 37 | 5  | 112824048 | 112824049 | In_Frame_Ins    | INS | -        | GCC | 3  | 5   | c.63_64insGGC      | c.(61-66)insGGC             | p.21_22insG   |

|        |                 |          |        |    |    |           |           |                 |     |        |     |    |     |                    |                                     |               |
|--------|-----------------|----------|--------|----|----|-----------|-----------|-----------------|-----|--------|-----|----|-----|--------------------|-------------------------------------|---------------|
| Pat_45 | Pre-Treatment   | ZNF608   | 57507  | 37 | 5  | 124079813 | 124079815 | In_Frame_Del    | DEL | CTC    | -   | 9  | 423 | c.868_870delGAG    | c.(868-870)GAGdel                   | p.E290del     |
| Pat_45 | Pre-Treatment   | ZNF354A  | 6940   | 37 | 5  | 178140336 | 178140336 | Frame_Shift_Del | DEL | G      | -   | 8  | 325 | c.543delC          | c.(541-543)CCCfs                    | p.P181fs      |
| Pat_45 | Pre-Treatment   | TULP1    | 7287   | 37 | 6  | 35479547  | 35479547  | Frame_Shift_Del | DEL | G      | -   | 4  | 2   | c.227delC          | c.(226-228)CCAFs                    | p.P76fs       |
| Pat_45 | Pre-Treatment   | SEC63    | 11231  | 37 | 6  | 108214774 | 108214774 | Frame_Shift_Del | DEL | T      | -   | 8  | 95  | c.1586delA         | c.(1585-1587)AAGfs                  | p.K529fs      |
| Pat_45 | Pre-Treatment   | RSPH4A   | 345895 | 37 | 6  | 116951612 | 116951612 | Frame_Shift_Del | DEL | C      | -   | 7  | 397 | c.1813delC         | c.(1813-1815)CCCfs                  | p.P605fs      |
| Pat_45 | Pre-Treatment   | ELFN1    | 392617 | 37 | 7  | 1784529   | 1784529   | Frame_Shift_Del | DEL | C      | -   | 2  | 4   | c.297delC          | c.(295-297)ATCfs                    | p.I99fs       |
| Pat_45 | Pre-Treatment   | PEX1     | 5189   | 37 | 7  | 92146721  | 92146721  | Frame_Shift_Del | DEL | T      | -   | 13 | 310 | c.1108delA         | c.(1108-1110)ATTfs                  | p.I370fs      |
| Pat_45 | Pre-Treatment   | LUC7L2   | 51631  | 37 | 7  | 139094365 | 139094366 | Frame_Shift_Del | DEL | AG     | -   | 7  | 137 | c.744_745delAG     | c.(742-747)GAAGAGfs                 | p.E248fs      |
| Pat_45 | Pre-Treatment   | MLL3     | 58508  | 37 | 7  | 151874148 | 151874148 | Frame_Shift_Del | DEL | T      | -   | 13 | 221 | c.8390delA         | c.(8389-8391)AAGfs                  | p.K2797fs     |
| Pat_45 | Pre-Treatment   | ADAM28   | 10863  | 37 | 8  | 24167472  | 24167473  | Frame_Shift_Ins | INS | -      | A   | 8  | 314 | c.216_217insA      | c.(214-219)TTGAAAFs                 | p.L72fs       |
| Pat_45 | Pre-Treatment   | TP53INP1 | 94241  | 37 | 8  | 95952409  | 95952411  | In_Frame_Del    | DEL | TCT    | -   | 7  | 139 | c.150_152delAGA:   | c.(148-153)GAAGAG>GAG               | p.50_51EE>E   |
| Pat_45 | Post-Resistance | CPSF3L   | 54973  | 37 | 1  | 1256424   | 1256424   | Frame_Shift_Del | DEL | G      | -   | 8  | 524 | c.78delC           | c.(76-78)GGCfs                      | p.G26fs       |
| Pat_45 | Post-Resistance | FOXJ3    | 22887  | 37 | 1  | 42744103  | 42744104  | Frame_Shift_Del | DEL | GG     | -   | 7  | 112 | c.284_285delCC     | c.(283-285)CCCfs                    | p.P95fs       |
| Pat_45 | Post-Resistance | PTCH2    | 8643   | 37 | 1  | 45288194  | 45288194  | Frame_Shift_Del | DEL | G      | -   | 8  | 89  | c.3505delC         | c.(3505-3507)CTGfs                  | p.L1169fs     |
| Pat_45 | Post-Resistance | AGL      | 178    | 37 | 1  | 100378028 | 100378028 | Frame_Shift_Del | DEL | A      | -   | 10 | 148 | c.3904delA         | c.(3904-3906)AAAFs                  | p.K1302fs     |
| Pat_45 | Post-Resistance | TCHHL1   | 126637 | 37 | 1  | 152058653 | 152058654 | Frame_Shift_Del | DEL | AA     | -   | 7  | 520 | c.1504_1505delTT   | c.(1504-1506)TTAFs                  | p.L502fs      |
| Pat_45 | Post-Resistance | RPTN     | 126638 | 37 | 1  | 152127312 | 152127313 | Frame_Shift_Del | DEL | GA     | -   | 11 | 890 | c.2262_2263delITC  | c.(2260-2265)CATCAGfs               | p.H754fs      |
| Pat_45 | Post-Resistance | EDEM3    | 80267  | 37 | 1  | 184692951 | 184692951 | Frame_Shift_Del | DEL | T      | -   | 7  | 333 | c.787delA          | c.(787-789)AGAFs                    | p.R263fs      |
| Pat_45 | Post-Resistance | PRG4     | 10216  | 37 | 1  | 186276433 | 186276434 | In_Frame_Ins    | INS | -      | AGG | 8  | 586 | .1582_1583insAG    | c.(1582-1584)AAG>AAGGAp.528_529insE |               |
| Pat_45 | Post-Resistance | IPO9     | 55705  | 37 | 1  | 201843998 | 201844000 | In_Frame_Del    | DEL | GAG    | -   | 11 | 151 | .2872_2874delGAI   | c.(2872-2874)GAGdel                 | p.E962del     |
| Pat_45 | Post-Resistance | TBCE     | 6905   | 37 | 1  | 235543449 | 235543449 | Frame_Shift_Del | DEL | G      | -   | 8  | 537 | c.85delG           | c.(85-87)GTCfs                      | p.V29fs       |
| Pat_45 | Post-Resistance | HEATR1   | 55127  | 37 | 1  | 236739561 | 236739562 | Frame_Shift_Del | DEL | TA     | -   | 7  | 311 | c.3041_3042delITA  | c.(3040-3042)ATAfs                  | p.I1014fs     |
| Pat_45 | Post-Resistance | KIAA1217 | 56243  | 37 | 10 | 24833923  | 24833923  | Frame_Shift_Del | DEL | C      | -   | 8  | 526 | c.5225delC         | c.(5224-5226)GCCfs                  | p.A1742fs     |
| Pat_45 | Post-Resistance | NANOS1   | 340719 | 37 | 10 | 120789523 | 120789525 | In_Frame_Del    | DEL | CGG    | -   | 4  | 5   | c.210_212delCGGc.  | c.(208-213)AACGGC>AAC               | p.G74del      |
| Pat_45 | Post-Resistance | APBB1    | 322    | 37 | 11 | 6423808   | 6423808   | Frame_Shift_Del | DEL | C      | -   | 8  | 224 | c.1252delG         | c.(1252-1254)GAAfs                  | p.E418fs      |
| Pat_45 | Post-Resistance | KBTD4    | 55709  | 37 | 11 | 47594883  | 47594883  | Frame_Shift_Del | DEL | C      | -   | 9  | 271 | c.1156delG         | c.(1156-1158)GAGfs                  | p.E386fs      |
| Pat_45 | Post-Resistance | FNBP4    | 23360  | 37 | 11 | 47744589  | 47744591  | In_Frame_Del    | DEL | GGA    | -   | 5  | 11  | .2742_2744delITC   | c.(2740-2745)CCTCCA>CC.             | p.914_915PP>I |
| Pat_45 | Post-Resistance | FNBP4    | 23360  | 37 | 11 | 47788664  | 47788669  | In_Frame_Del    | DEL | GGTGGT | -   | 4  | 4   | 172_177delACCAC    | c.(172-177)ACCACCdel                | p.TT58del     |
| Pat_45 | Post-Resistance | PRB2     | 653247 | 37 | 12 | 11546788  | 11546790  | In_Frame_Del    | DEL | GGA    | -   | 11 | 204 | c.222_224delITCCc. | c.(220-225)CCTCCA>CCA               | p.74_75PP>P   |
| Pat_45 | Post-Resistance | GRIP1    | 23426  | 37 | 12 | 66771014  | 66771014  | Frame_Shift_Del | DEL | C      | -   | 7  | 642 | c.2517delG         | c.(2515-2517)TGGfs                  | p.W839fs      |
| Pat_45 | Post-Resistance | DUSP6    | 1848   | 37 | 12 | 89744437  | 89744438  | Frame_Shift_Del | DEL | TG     | -   | 8  | 471 | c.765_766delICA    | c.(763-768)TACAAGfs                 | p.Y255fs      |
| Pat_45 | Post-Resistance | OLFM4    | 10562  | 37 | 13 | 53624374  | 53624376  | In_Frame_Del    | DEL | ACA    | -   | 7  | 194 | .1001_1003delAC.   | c.(1000-1005)TACAAC>TA              | p.N337del     |
| Pat_45 | Post-Resistance | TEP1     | 7011   | 37 | 14 | 20852647  | 20852647  | Frame_Shift_Del | DEL | C      | -   | 12 | 770 | c.3242delG         | c.(3241-3243)GGTfs                  | p.G1081fs     |
| Pat_45 | Post-Resistance | OR4E2    | 26686  | 37 | 14 | 22133534  | 22133535  | Frame_Shift_Del | DEL | AA     | -   | 8  | 474 | c.238_239delIAA    | c.(238-240)AAGfs                    | p.K80fs       |
| Pat_45 | Post-Resistance | MAP4K5   | 11183  | 37 | 14 | 50952892  | 50952892  | Frame_Shift_Del | DEL | G      | -   | 2  | 4   | c.187delC          | c.(187-189)CAAFs                    | p.Q63fs       |
| Pat_45 | Post-Resistance | BTBD7    | 55727  | 37 | 14 | 93717858  | 93717858  | Frame_Shift_Del | DEL | G      | -   | 7  | 662 | c.1893delC         | c.(1891-1893)ATCfs                  | p.I631fs      |
| Pat_45 | Post-Resistance | TNFAIP2  | 7127   | 37 | 14 | 103599784 | 103599786 | In_Frame_Del    | DEL | AGC    | -   | 8  | 236 | .1631_1633delAG    | c.(1630-1635)GAGCAG>GA              | p.Q548del     |
| Pat_45 | Post-Resistance | MGA      | 23269  | 37 | 15 | 42003383  | 42003385  | In_Frame_Del    | DEL | CAG    | -   | 10 | 172 | .2920_2922delCA    | c.(2920-2922)CAGdel                 | p.Q981del     |
| Pat_45 | Post-Resistance | CHRNA5   | 1138   | 37 | 15 | 78879004  | 78879005  | Frame_Shift_Del | DEL | AA     | -   | 7  | 429 | c.276_277delIAA    | c.(274-279)TTAATGfs                 | p.L92fs       |
| Pat_45 | Post-Resistance | CHD2     | 1106   | 37 | 15 | 93480819  | 93480819  | Frame_Shift_Del | DEL | A      | -   | 9  | 127 | c.515delA          | c.(514-516)CAAFs                    | p.Q172fs      |
| Pat_45 | Post-Resistance | SCARF1   | 8578   | 37 | 17 | 1542127   | 1542129   | In_Frame_Del    | DEL | CAG    | -   | 8  | 93  | .1335_1337delCT    | c.(1333-1338)TGCTGG>TG              | p.C445del     |
| Pat_45 | Post-Resistance | PELP1    | 27043  | 37 | 17 | 4575894   | 4575894   | Frame_Shift_Del | DEL | G      | -   | 8  | 117 | c.2392delC         | c.(2392-2394)CTGfs                  | p.L798fs      |
| Pat_45 | Post-Resistance | ENO3     | 2027   | 37 | 17 | 4859894   | 4859894   | Frame_Shift_Del | DEL | G      | -   | 10 | 419 | c.1094delG         | c.(1093-1095)TGGfs                  | p.W365fs      |
| Pat_45 | Post-Resistance | TP53     | 7157   | 37 | 17 | 7579378   | 7579379   | Frame_Shift_Ins | INS | -      | T   | 16 | 53  | c.308_309insA      | c.(307-309)TACfs                    | p.Y103fs      |
| Pat_45 | Post-Resistance | KDM6B    | 23135  | 37 | 17 | 7751859   | 7751861   | In_Frame_Del    | DEL | CAC    | -   | 7  | 101 | .2253_2255delCA    | c.(2251-2256)GTCACC>GT              | p.T762del     |
| Pat_45 | Post-Resistance | KLHL11   | 55175  | 37 | 17 | 40021586  | 40021588  | In_Frame_Del    | DEL | GCC    | -   | 2  | 4   | c.36_38delGGC      | c.(34-39)GCGGCC>GCC                 | p.I2_13AA>A   |
| Pat_45 | Post-Resistance | PLCD3    | 113026 | 37 | 17 | 43192760  | 43192762  | In_Frame_Del    | DEL | TCC    | -   | 9  | 51  | .1509_1511delIGG.  | c.(1507-1512)GAGGAT>GA              | p.E503del     |



|        |                 |          |        |    |    |           |           |                 |     |           |      |    |      |                   |                        |                |
|--------|-----------------|----------|--------|----|----|-----------|-----------|-----------------|-----|-----------|------|----|------|-------------------|------------------------|----------------|
| Pat_45 | Post-Resistance | BRIP1    | 83990  | 37 | 17 | 59876512  | 59876512  | Frame_Shift_Del | DEL | A         | -    | 9  | 182  | c.1289delT        | c.(1288-1290)ATAfs     | p.I430fs       |
| Pat_45 | Post-Resistance | TANC2    | 26115  | 37 | 17 | 61278171  | 61278174  | Frame_Shift_Del | DEL | CTGA      | -    | 8  | 941  | c.400_403delCTG/  | c.(400-405)CTGACTfs    | p.L134fs       |
| Pat_45 | Post-Resistance | ACE      | 1636   | 37 | 17 | 61560474  | 61560474  | Frame_Shift_Del | DEL | G         | -    | 8  | 877  | c.1427delG        | c.(1426-1428)TGGfs     | p.W476fs       |
| Pat_45 | Post-Resistance | DNAH17   | 8632   | 37 | 17 | 76425217  | 76425217  | Frame_Shift_Del | DEL | G         | -    | 7  | 439  | c.3390delC        | c.(3388-3390)CCCfs     | p.P1130fs      |
| Pat_45 | Post-Resistance | USP36    | 57602  | 37 | 17 | 76799858  | 76799859  | Frame_Shift_Ins | INS | -         | C    | 16 | 230  | c.2418_2419insG   | c.(2416-2421)CAGAGCfs  | p.Q806fs       |
| Pat_45 | Post-Resistance | DOT1L    | 84444  | 37 | 19 | 2191199   | 2191199   | Frame_Shift_Del | DEL | C         | -    | 7  | 452  | c.453delC         | c.(451-453)ATCfs       | p.I151fs       |
| Pat_45 | Post-Resistance | SLC5A5   | 6528   | 37 | 19 | 18001737  | 18001737  | Frame_Shift_Del | DEL | G         | -    | 7  | 745  | c.1694delG        | c.(1693-1695)TGGfs     | p.W565fs       |
| Pat_45 | Post-Resistance | ZFP36    | 7538   | 37 | 19 | 39898948  | 39898950  | In_Frame_Del    | DEL | CAC       | -    | 8  | 474  | c.590_592delCACc. | c.(589-594)TCACCA>TCA  | p.P201del      |
| Pat_45 | Post-Resistance | ZNF780B  | 163131 | 37 | 19 | 40540840  | 40540842  | In_Frame_Del    | DEL | TTT       | -    | 7  | 364  | c.1924_1926delAA  | c.(1924-1926)AAAadel   | p.K642del      |
| Pat_45 | Post-Resistance | TBC1D17  | 79735  | 37 | 19 | 50385607  | 50385607  | Frame_Shift_Del | DEL | C         | -    | 8  | 384  | c.748delC         | c.(748-750)CCCfs       | p.P250fs       |
| Pat_45 | Post-Resistance | PTPRH    | 5794   | 37 | 19 | 55718055  | 55718055  | Splice_Site     | DEL | A         | -    | 8  | 339  | c.352_splice      | c.e3+1                 | p.A118_splice  |
| Pat_45 | Post-Resistance | SLC9A4   | 389015 | 37 | 2  | 103149137 | 103149137 | Frame_Shift_Del | DEL | A         | -    | 11 | 151  | c.2387delA        | c.(2386-2388)CAAfs     | p.Q796fs       |
| Pat_45 | Post-Resistance | GTF3C3   | 9330   | 37 | 2  | 197641204 | 197641204 | Frame_Shift_Del | DEL | C         | -    | 9  | 231  | c.1540delG        | c.(1540-1542)GAAfs     | p.E514fs       |
| Pat_45 | Post-Resistance | TNP1     | 7141   | 37 | 2  | 217724625 | 217724626 | Frame_Shift_Del | DEL | CG        | -    | 7  | 505  | c.132_133delCG    | c.(130-135)GGCGATfs    | p.G44fs        |
| Pat_45 | Post-Resistance | DGCR8    | 54487  | 37 | 22 | 20074025  | 20074026  | Frame_Shift_Del | DEL | AT        | -    | 7  | 279  | c.539_540delAT    | c.(538-540)GATfs       | p.D180fs       |
| Pat_45 | Post-Resistance | TBC1D10A | 83874  | 37 | 22 | 30691732  | 30691732  | Frame_Shift_Del | DEL | C         | -    | 7  | 187  | c.518delG         | c.(517-519)GGCfs       | p.G173fs       |
| Pat_45 | Post-Resistance | SCUBE1   | 80274  | 37 | 22 | 43619184  | 43619184  | Frame_Shift_Del | DEL | G         | -    | 8  | 558  | c.1246delC        | c.(1246-1248)CGGfs     | p.R416fs       |
| Pat_45 | Post-Resistance | ABHD6    | 57406  | 37 | 3  | 58260511  | 58260511  | Frame_Shift_Del | DEL | G         | -    | 7  | 400  | c.650delG         | c.(649-651)TGCfs       | p.C217fs       |
| Pat_45 | Post-Resistance | CPOX     | 1371   | 37 | 3  | 98304296  | 98304297  | Frame_Shift_Del | DEL | GA        | -    | 8  | 745  | c.1160_1161delTC  | c.(1159-1161)CTCfs     | p.L387fs       |
| Pat_45 | Post-Resistance | MYH15    | 22989  | 37 | 3  | 108139933 | 108139933 | Splice_Site     | DEL | A         | -    | 8  | 256  | c.3889_splice     | c.e29+1                | p.G1297_splice |
| Pat_45 | Post-Resistance | MRAS     | 22808  | 37 | 3  | 138121035 | 138121037 | In_Frame_Del    | DEL | AGA       | -    | 7  | 386  | c.551_553delAGA:  | c.(550-555)CAGAAG>CAC  | p.K189del      |
| Pat_45 | Post-Resistance | PKD2     | 5311   | 37 | 4  | 88929174  | 88929176  | In_Frame_Del    | DEL | GAG       | -    | 6  | 3    | c.289_291delGAG   | c.(289-291)GAGdel      | p.E102del      |
| Pat_45 | Post-Resistance | CXXC4    | 80319  | 37 | 4  | 105412094 | 105412096 | In_Frame_Del    | DEL | GAG       | -    | 8  | 95   | c.357_359delCTC   | c.(355-360)TCCTCG>TCG. | p.119_120SS>G  |
| Pat_45 | Post-Resistance | SCLT1    | 132320 | 37 | 4  | 129864163 | 129864163 | Frame_Shift_Del | DEL | T         | -    | 8  | 188  | c.1620delA        | c.(1618-1620)AAAfs     | p.K540fs       |
| Pat_45 | Post-Resistance | PDLIM4   | 8572   | 37 | 5  | 131606779 | 131606779 | Frame_Shift_Del | DEL | C         | -    | 8  | 440  | c.499delC         | c.(499-501)CCCfs       | p.P167fs       |
| Pat_45 | Post-Resistance | TXNDC15  | 79770  | 37 | 5  | 134231988 | 134231989 | Frame_Shift_Del | DEL | TC        | -    | 7  | 121  | c.760_761delTC    | c.(760-762)TCTfs       | p.S254fs       |
| Pat_45 | Post-Resistance | PCDHA6   | 56142  | 37 | 5  | 140208053 | 140208053 | Frame_Shift_Del | DEL | T         | -    | 8  | 476  | c.377delT         | c.(376-378)ATTfs       | p.I126fs       |
| Pat_45 | Post-Resistance | VARS2    | 57176  | 37 | 6  | 30883771  | 30883771  | Frame_Shift_Del | DEL | G         | -    | 7  | 1285 | c.520delG         | c.(520-522)GGGfs       | p.G174fs       |
| Pat_45 | Post-Resistance | COL9A1   | 1297   | 37 | 6  | 70964878  | 70964878  | Frame_Shift_Del | DEL | C         | -    | 8  | 383  | c.1586delG        | c.(1585-1587)GGTfs     | p.G529fs       |
| Pat_45 | Post-Resistance | MDN1     | 23195  | 37 | 6  | 90374221  | 90374221  | Frame_Shift_Del | DEL | C         | -    | 8  | 466  | c.14221delG       | c.(14221-14223)GAGfs   | p.E4741fs      |
| Pat_45 | Post-Resistance | SUN1     | 23353  | 37 | 7  | 883110    | 883110    | Frame_Shift_Del | DEL | C         | -    | 8  | 1502 | c.611delC         | c.(610-612)GCCfs       | p.A204fs       |
| Pat_45 | Post-Resistance | MNX1     | 3110   | 37 | 7  | 156802730 | 156802732 | In_Frame_Del    | DEL | GCC       | -    | 4  | 8    | c.313_315delGGC   | c.(313-315)GGCdel      | p.G105del      |
| Pat_45 | Post-Resistance | TP53INP1 | 94241  | 37 | 8  | 95952409  | 95952411  | In_Frame_Del    | DEL | TCT       | -    | 10 | 125  | c.150_152delAGA:  | c.(148-153)GAAGAG>GAC  | p.50_51EE>E    |
| Pat_45 | Post-Resistance | CYC1     | 1537   | 37 | 8  | 145152139 | 145152141 | In_Frame_Del    | DEL | TGA       | -    | 8  | 114  | c.878_880delTGA   | c.(877-882)TTGATG>TTG  | p.M296del      |
| Pat_45 | Post-Resistance | ELAVL2   | 1993   | 37 | 9  | 23701410  | 23701410  | Frame_Shift_Del | DEL | G         | -    | 9  | 1190 | c.680delC         | c.(679-681)CCAfs       | p.P227fs       |
| Pat_45 | Post-Resistance | PIGO     | 84720  | 37 | 9  | 35091693  | 35091693  | Frame_Shift_Del | DEL | G         | -    | 9  | 181  | c.2191delC        | c.(2191-2193)CGTfs     | p.R731fs       |
| Pat_45 | Post-Resistance | GPR144   | 347088 | 37 | 9  | 127239329 | 127239331 | In_Frame_Del    | DEL | CTG       | -    | 4  | 3    | c.2842_2844delCT  | c.(2842-2844)CTGdel    | p.L948del      |
| Pat_45 | Post-Resistance | ANGPTL2  | 23452  | 37 | 9  | 129870357 | 129870357 | Frame_Shift_Del | DEL | G         | -    | 7  | 87   | c.654delC         | c.(652-654)CCCfs       | p.P218fs       |
| Pat_45 | Post-Resistance | C9orf69  | 90120  | 37 | 9  | 139008444 | 139008446 | In_Frame_Del    | DEL | CAG       | -    | 8  | 77   | c.375_377delCTG:  | c.(373-378)TGCTGG>TGG  | p.C125del      |
| Pat_45 | Post-Resistance | GYG2     | 8908   | 37 | X  | 2799201   | 2799202   | Frame_Shift_Ins | INS | -         | GGAA | 4  | 7    | c.1453_1454insGG  | c.(1453-1455)GGGfs     | p.G485fs       |
| Pat_51 | Pre-Treatment   | TARS2    | 80222  | 37 | 1  | 150460373 | 150460374 | Frame_Shift_Ins | INS | -         | T    | 7  | 125  | c.106_107insT     | c.(106-108)CTTfs       | p.L36fs        |
| Pat_51 | Pre-Treatment   | FAM5B    | 57795  | 37 | 1  | 177250096 | 177250097 | Frame_Shift_Ins | INS | -         | C    | 7  | 45   | c.1784_1785insC   | c.(1783-1785)GGCfs     | p.G595fs       |
| Pat_51 | Pre-Treatment   | TSPAN4   | 7106   | 37 | 11 | 864443    | 864445    | In_Frame_Del    | DEL | CTG       | -    | 9  | 102  | c.262_264delCTG   | c.(262-264)CTGdel      | p.L92del       |
| Pat_51 | Pre-Treatment   | TSPAN10  | 83882  | 37 | 17 | 79614933  | 79614936  | Splice_Site     | DEL | TAAC      | -    | 9  | 17   | c.681_splice      | c.e3-1                 | p.F227_splice  |
| Pat_51 | Pre-Treatment   | EPN1     | 29924  | 37 | 19 | 56190126  | 56190150  | Frame_Shift_Del | DEL | CTACAACG1 | -    | 11 | 34   | c.CCTCACCTACAA    | c.CCTCACCTACAACGTTG    | p.D45fs        |
| Pat_51 | Pre-Treatment   | BLCAP    | 10904  | 37 | 20 | 36147480  | 36147480  | Frame_Shift_Del | DEL | G         | -    | 15 | 33   | c.97delC          | c.(97-99)CTGfs         | p.L33fs        |
| Pat_51 | Pre-Treatment   | BAP1     | 8314   | 37 | 3  | 52442559  | 52442562  | Frame_Shift_Del | DEL | GACC      | -    | 14 | 1    | c.183_186delGGTC  | c.(181-186)AAGTCfs     | p.K61fs        |

|        |               |           |        |    |    |           |           |                 |     |           |    |    |      |                  |                                   |              |
|--------|---------------|-----------|--------|----|----|-----------|-----------|-----------------|-----|-----------|----|----|------|------------------|-----------------------------------|--------------|
| Pat_51 | Pre-Treatment | HLA-A     | 3105   | 37 | 6  | 29911319  | 29911319  | Frame_Shift_Del | DEL | G         | -  | 7  | 52   | c.618delG        | c.(616-618)ACGfs                  | p.T206fs     |
| Pat_51 | Pre-Treatment | PRSS35    | 167681 | 37 | 6  | 84233673  | 84233702  | In_Frame_Del    | DEL | AGGACTATC | -  | 9  | 75   | ATGGAAGGACTATG   | ATGGAAGGACTATGTG                  | GKDYVKGS1    |
| Pat_51 | Pre-Treatment | ZAN       | 7455   | 37 | 7  | 100385562 | 100385596 | Frame_Shift_Del | DEL | CTTGCAAGC | -  | 8  | 28   | CTTACCGCTTGC     | AGCTACCGCTTGAAGC                  | p.G2344fs    |
| Pat_53 | Pre-Treatment | PLEKHG5   | 57449  | 37 | 1  | 6536011   | 6536013   | In_Frame_Del    | DEL | CTC       | -  | 10 | 330  | c.295_297delGAG  | c.(295-297)GAGdel                 | p.E99del     |
| Pat_53 | Pre-Treatment | CAMTA1    | 23261  | 37 | 1  | 7811329   | 7811329   | Frame_Shift_Del | DEL | A         | -  | 11 | 995  | c.4760delA       | c.(4759-4761)CAAfs                | p.Q1587fs    |
| Pat_53 | Pre-Treatment | PRDM2     | 7799   | 37 | 1  | 14108749  | 14108749  | Frame_Shift_Del | DEL | A         | -  | 29 | 1122 | c.4459delA       | c.(4459-4461)AAAfs                | p.K1487fs    |
| Pat_53 | Pre-Treatment | MST1P9    | 11223  | 37 | 1  | 17085995  | 17085996  | Frame_Shift_Ins | INS | -         | C  | 9  | 175  | c.901_902insG    | c.(901-903)GCGfs                  | p.A301fs     |
| Pat_53 | Pre-Treatment | MST1P9    | 11223  | 37 | 1  | 17086085  | 17086086  | Frame_Shift_Ins | INS | -         | C  | 13 | 28   | c.811_812insG    | c.(811-813)GCGfs                  | p.A271fs     |
| Pat_53 | Pre-Treatment | ZBTB40    | 9923   | 37 | 1  | 22838561  | 22838563  | In_Frame_Del    | DEL | AAG       | -  | 9  | 171  | .2395_2397delAA  | c.(2395-2397)AAGdel               | p.K803del    |
| Pat_53 | Pre-Treatment | ARID1A    | 8289   | 37 | 1  | 27100182  | 27100184  | In_Frame_Del    | DEL | GCA       | -  | 9  | 214  | .3978_3980delGC  | c.(3976-3981)CCGAG>CC             | p.Q1334del   |
| Pat_53 | Pre-Treatment | SFRS4     | 6429   | 37 | 1  | 29475219  | 29475221  | In_Frame_Del    | DEL | CTT       | -  | 7  | 241  | .1186_1188delAAC | c.(1186-1188)AAGdel               | p.K396del    |
| Pat_53 | Pre-Treatment | TMCO2     | 127391 | 37 | 1  | 40713708  | 40713709  | Frame_Shift_Del | DEL | TC        | -  | 8  | 562  | c.43_44delTC     | c.(43-45)TCTfs                    | p.S15fs      |
| Pat_53 | Pre-Treatment | CCDC30    | 728621 | 37 | 1  | 43002200  | 43002201  | Frame_Shift_Del | DEL | AG        | -  | 37 | 269  | c.45_46delAG     | c.(43-48)AAAGAGfs                 | p.K15fs      |
| Pat_53 | Pre-Treatment | EIF2B3    | 8891   | 37 | 1  | 45407182  | 45407182  | Frame_Shift_Del | DEL | T         | -  | 10 | 341  | c.450delA        | c.(448-450)AAAfs                  | p.K150fs     |
| Pat_53 | Pre-Treatment | IPP       | 3652   | 37 | 1  | 46184897  | 46184898  | Frame_Shift_Del | DEL | AC        | -  | 15 | 438  | c.1163_1164delGT | c.(1162-1164)TGTfs                | p.C388fs     |
| Pat_53 | Pre-Treatment | IPP       | 3652   | 37 | 1  | 46193446  | 46193446  | Frame_Shift_Del | DEL | C         | -  | 9  | 694  | c.905delG        | c.(904-906)GGTfs                  | p.G302fs     |
| Pat_53 | Pre-Treatment | LRRRC41   | 10489  | 37 | 1  | 46752129  | 46752129  | Frame_Shift_Del | DEL | A         | -  | 9  | 234  | c.400delT        | c.(400-402)TCCfs                  | p.S134fs     |
| Pat_53 | Pre-Treatment | BEND5     | 79656  | 37 | 1  | 49201966  | 49201967  | Frame_Shift_Ins | INS | -         | T  | 11 | 238  | c.1052_1053insA  | c.(1051-1053)AAGfs                | p.K351fs     |
| Pat_53 | Pre-Treatment | LRRIQ3    | 127255 | 37 | 1  | 74575212  | 74575213  | Frame_Shift_Ins | INS | -         | T  | 15 | 307  | c.732_733insA    | c.(730-735)AAACAGfs               | p.K244fs     |
| Pat_53 | Pre-Treatment | TNNI3K    | 51086  | 37 | 1  | 74957824  | 74957826  | In_Frame_Del    | DEL | CTT       | -  | 10 | 577  | .2225_2227delCT  | c.(2224-2229)CCTTCT>CC            | p.S746del    |
| Pat_53 | Pre-Treatment | RBMXL1    | 494115 | 37 | 1  | 89448604  | 89448605  | Frame_Shift_Ins | INS | -         | GG | 26 | 787  | c.905_906insCC   | c.(904-906)CCAfs                  | p.P302fs     |
| Pat_53 | Pre-Treatment | RBMXL1    | 494115 | 37 | 1  | 89449509  | 89449509  | Frame_Shift_Del | DEL | T         | -  | 74 | 537  | c.1delA          | c.(1-3)ATGfs                      | p.M1fs       |
| Pat_53 | Pre-Treatment | EV15      | 7813   | 37 | 1  | 93159366  | 93159366  | Frame_Shift_Del | DEL | T         | -  | 7  | 365  | c.1222delA       | c.(1222-1224)ATGfs                | p.M408fs     |
| Pat_53 | Pre-Treatment | KIAA1324  | 57535  | 37 | 1  | 109727724 | 109727725 | Frame_Shift_Del | DEL | AC        | -  | 9  | 629  | c.1010_1011delAC | c.(1009-1011)TACfs                | p.Y337fs     |
| Pat_53 | Pre-Treatment | GSTM3     | 2947   | 37 | 1  | 110280279 | 110280279 | Frame_Shift_Del | DEL | T         | -  | 8  | 623  | c.467delA        | c.(466-468)AAGfs                  | p.K156fs     |
| Pat_53 | Pre-Treatment | RPTN      | 126638 | 37 | 1  | 152127881 | 152127884 | Frame_Shift_Del | DEL | TGTC      | -  | 9  | 2980 | 1691_1694delGAC  | c.(1690-1695)AGACAAfs             | p.R564fs     |
| Pat_53 | Pre-Treatment | ASH1L     | 55870  | 37 | 1  | 155307999 | 155308000 | Frame_Shift_Ins | INS | -         | T  | 10 | 306  | c.8698_8699insA  | c.(8698-8700)ACAfs                | p.T2900fs    |
| Pat_53 | Pre-Treatment | KIAA0907  | 22889  | 37 | 1  | 155886422 | 155886423 | Frame_Shift_Del | DEL | CT        | -  | 21 | 550  | .1546_1547delAC  | c.(1546-1548)AGGfs                | p.R516fs     |
| Pat_53 | Pre-Treatment | SLAMF1    | 6504   | 37 | 1  | 160589601 | 160589601 | Frame_Shift_Del | DEL | T         | -  | 19 | 869  | c.829delA        | c.(829-831)AGCfs                  | p.S277fs     |
| Pat_53 | Pre-Treatment | PVRL4     | 81607  | 37 | 1  | 161044057 | 161044059 | In_Frame_Del    | DEL | CAC       | -  | 8  | 312  | .1105_1107delGT  | c.(1105-1107)GTGdel               | p.V369del    |
| Pat_53 | Pre-Treatment | POU2F1    | 5451   | 37 | 1  | 167385016 | 167385018 | In_Frame_Del    | DEL | CCA       | -  | 10 | 583  | .2201_2203delCC  | c.(2200-2205)TCCACC>TC            | p.T738del    |
| Pat_53 | Pre-Treatment | CACNA1E   | 777    | 37 | 1  | 181680102 | 181680103 | Frame_Shift_Del | DEL | AG        | -  | 14 | 263  | .1068_1069delAC  | c.(1066-1071)AAAGAGfs             | p.K356fs     |
| Pat_53 | Pre-Treatment | APOBEC4   | 403314 | 37 | 1  | 183616826 | 183616828 | In_Frame_Del    | DEL | TTC       | -  | 11 | 662  | .1089_1091delGA  | c.(1087-1092)AAGAAA>AA            | .363_364KK>I |
| Pat_53 | Pre-Treatment | PRG4      | 10216  | 37 | 1  | 186276524 | 186276526 | In_Frame_Del    | DEL | AGG       | -  | 7  | 491  | .1673_1675delAG  | c.(1672-1677)AAGGAG>AA            | p.E559del    |
| Pat_53 | Pre-Treatment | IPO9      | 55705  | 37 | 1  | 201843998 | 201844000 | In_Frame_Del    | DEL | GAG       | -  | 7  | 209  | .2872_2874delGA  | c.(2872-2874)GAGdel               | p.E962del    |
| Pat_53 | Pre-Treatment | TMEM63A   | 9725   | 37 | 1  | 226034840 | 226034842 | In_Frame_Del    | DEL | CTG       | -  | 12 | 414  | .2323_2325delCA  | c.(2323-2325)CAGdel               | p.Q775del    |
| Pat_53 | Pre-Treatment | PCDH15    | 65217  | 37 | 10 | 55587198  | 55587200  | In_Frame_Del    | DEL | GGC       | -  | 11 | 215  | .4320_4322delGC  | c.(4318-4323)CCGCCT>CC1440_1441PP |              |
| Pat_53 | Pre-Treatment | ANK3      | 288    | 37 | 10 | 61828745  | 61828747  | In_Frame_Del    | DEL | GTG       | -  | 7  | 161  | 11892_11894delC  | c.(11890-11895)ACCACT>A           | 3964_3965TT  |
| Pat_53 | Pre-Treatment | FAS       | 355    | 37 | 10 | 90768708  | 90768708  | Frame_Shift_Del | DEL | T         | -  | 10 | 3598 | c.397delT        | c.(397-399)TTTfs                  | p.F133fs     |
| Pat_53 | Pre-Treatment | TM9SF3    | 56889  | 37 | 10 | 98336475  | 98336475  | Frame_Shift_Del | DEL | T         | -  | 8  | 481  | c.214delA        | c.(214-216)AGTfs                  | p.S72fs      |
| Pat_53 | Pre-Treatment | C10orf62  | 414157 | 37 | 10 | 99350236  | 99350237  | Frame_Shift_Ins | INS | -         | CA | 9  | 278  | c.582_583insCA   | c.(580-585)AATCACfs               | p.N194fs     |
| Pat_53 | Pre-Treatment | LOC653544 | 653544 | 37 | 10 | 135491013 | 135491014 | Frame_Shift_Ins | INS | -         | T  | 8  | 266  | c.624_625insT    | c.(622-627)GCCAGGfs               | p.A208fs     |
| Pat_53 | Pre-Treatment | LOC653544 | 653544 | 37 | 10 | 135491036 | 135491036 | Frame_Shift_Del | DEL | G         | -  | 14 | 268  | c.647delG        | c.(646-648)AGGfs                  | p.R216fs     |
| Pat_53 | Pre-Treatment | TSPAN4    | 7106   | 37 | 11 | 864443    | 864445    | In_Frame_Del    | DEL | CTG       | -  | 10 | 226  | c.262_264delCTG  | c.(262-264)CTGdel                 | p.L92del     |
| Pat_53 | Pre-Treatment | OR10A5    | 144124 | 37 | 11 | 6867223   | 6867225   | In_Frame_Del    | DEL | TTC       | -  | 10 | 212  | c.310_312delTTC  | c.(310-312)TTCdel                 | p.F108del    |
| Pat_53 | Pre-Treatment | RARRES3   | 5920   | 37 | 11 | 63313709  | 63313709  | Frame_Shift_Del | DEL | A         | -  | 11 | 526  | c.476delA        | c.(475-477)CAAfs                  | p.Q159fs     |
| Pat_53 | Pre-Treatment | VEGFB     | 7423   | 37 | 11 | 64004663  | 64004663  | Frame_Shift_Del | DEL | A         | -  | 14 | 595  | c.379delA        | c.(379-381)AAAfs                  | p.K127fs     |

|        |               |           |        |    |    |           |           |                 |     |      |   |    |      |                 |                        |              |
|--------|---------------|-----------|--------|----|----|-----------|-----------|-----------------|-----|------|---|----|------|-----------------|------------------------|--------------|
| Pat_53 | Pre-Treatment | UVRAG     | 7405   | 37 | 11 | 75727924  | 75727924  | Frame_Shift_Del | DEL | T    | - | 7  | 515  | c.1126delT      | c.(1126-1128)TTTfs     | p.F376fs     |
| Pat_53 | Pre-Treatment | CD3G      | 917    | 37 | 11 | 118220583 | 118220583 | Frame_Shift_Del | DEL | A    | - | 16 | 225  | c.205delA       | c.(205-207)AAAs        | p.K69fs      |
| Pat_53 | Pre-Treatment | MLL       | 4297   | 37 | 11 | 118344185 | 118344186 | Frame_Shift_Ins | INS | -    | C | 7  | 690  | c.2311_2312insC | c.(2311-2313)ACCfs     | p.T771fs     |
| Pat_53 | Pre-Treatment | CHEK1     | 1111   | 37 | 11 | 125505377 | 125505378 | Frame_Shift_Ins | INS | -    | A | 27 | 827  | c.667_668insA   | c.(667-669)GAAfs       | p.E223fs     |
| Pat_53 | Pre-Treatment | SRPR      | 6734   | 37 | 11 | 126137087 | 126137087 | Frame_Shift_Del | DEL | T    | - | 26 | 1121 | c.509delA       | c.(508-510)AAGfs       | p.K170fs     |
| Pat_53 | Pre-Treatment | PRDM10    | 56980  | 37 | 11 | 129772249 | 129772251 | In_Frame_Del    | DEL | TGG  | - | 8  | 651  | .3440_3442delCC | c.(3439-3444)ACCAAC>AA | p.T1147del   |
| Pat_53 | Pre-Treatment | GLB1L3    | 112937 | 37 | 11 | 134181005 | 134181005 | Frame_Shift_Del | DEL | C    | - | 7  | 1271 | c.1228delC      | c.(1228-1230)CCCfs     | p.P410fs     |
| Pat_53 | Pre-Treatment | LRRC23    | 10233  | 37 | 12 | 7015719   | 7015719   | Frame_Shift_Del | DEL | C    | - | 10 | 2402 | c.383delC       | c.(382-384)GCCfs       | p.A128fs     |
| Pat_53 | Pre-Treatment | PRB2      | 653247 | 37 | 12 | 11546506  | 11546508  | In_Frame_Del    | DEL | TTG  | - | 10 | 695  | c.504_506delCAA | c.(502-507)AACAAAG>AAG | p.N168del    |
| Pat_53 | Pre-Treatment | CASC1     | 55259  | 37 | 12 | 25314066  | 25314068  | In_Frame_Del    | DEL | CTC  | - | 7  | 864  | c.67_69delGAG   | c.(67-69)GAGdel        | p.E23del     |
| Pat_53 | Pre-Treatment | SFRS2IP   | 9169   | 37 | 12 | 46320707  | 46320708  | Frame_Shift_Del | DEL | TC   | - | 8  | 397  | .2776_2777delGA | c.(2776-2778)GAAfs     | p.E926fs     |
| Pat_53 | Pre-Treatment | CCNT1     | 904    | 37 | 12 | 49087434  | 49087436  | In_Frame_Del    | DEL | ATG  | - | 47 | 1644 | .1561_1563delCA | c.(1561-1563)CATdel    | p.H521del    |
| Pat_53 | Pre-Treatment | OR10A7    | 121364 | 37 | 12 | 55615114  | 55615116  | In_Frame_Del    | DEL | CTT  | - | 10 | 455  | c.306_308delCTT | c.(304-309)TACTTC>TAC  | p.F107del    |
| Pat_53 | Pre-Treatment | IKZF4     | 64375  | 37 | 12 | 56428977  | 56428978  | Frame_Shift_Del | DEL | GG   | - | 7  | 1087 | .1620_1621delGC | c.(1618-1623)CTGGACfs  | p.L540fs     |
| Pat_53 | Pre-Treatment | B4GALNT1  | 2583   | 37 | 12 | 58025102  | 58025103  | Frame_Shift_Ins | INS | -    | C | 8  | 228  | c.263_264insG   | c.(262-264)GGCfs       | p.G88fs      |
| Pat_53 | Pre-Treatment | MSI1      | 4440   | 37 | 12 | 120800902 | 120800903 | Frame_Shift_Ins | INS | -    | C | 7  | 722  | c.345_346insG   | c.(343-348)GGGCTGfs    | p.G115fs     |
| Pat_53 | Pre-Treatment | POP5      | 51367  | 37 | 12 | 121017154 | 121017156 | In_Frame_Del    | DEL | CTC  | - | 7  | 364  | c.457_459delGAG | c.(457-459)GAGdel      | p.E153del    |
| Pat_53 | Pre-Treatment | SBNO1     | 55206  | 37 | 12 | 123794283 | 123794283 | Frame_Shift_Del | DEL | T    | - | 19 | 422  | c.3416delA      | c.(3415-3417)AATfs     | p.N1139fs    |
| Pat_53 | Pre-Treatment | POLE      | 5426   | 37 | 12 | 133220099 | 133220100 | Frame_Shift_Del | DEL | CA   | - | 14 | 762  | .4337_4338delTC | c.(4336-4338)GTGfs     | p.V1446fs    |
| Pat_53 | Pre-Treatment | TSC22D1   | 8848   | 37 | 13 | 45148706  | 45148708  | In_Frame_Del    | DEL | TGC  | - | 7  | 250  | .1503_1505delGC | c.(1501-1506)CAGCAA>CA | .501_502QQ>I |
| Pat_53 | Pre-Treatment | ZC3H13    | 23091  | 37 | 13 | 46553948  | 46553949  | Frame_Shift_Del | DEL | CT   | - | 7  | 576  | .1911_1912delAC | c.(1909-1914)AGAGATfs  | p.R637fs     |
| Pat_53 | Pre-Treatment | LRCH1     | 23143  | 37 | 13 | 47243183  | 47243186  | Frame_Shift_Del | DEL | CCTG | - | 8  | 1045 | .471_474delCCTC | c.(469-474)GCCCTGfs    | p.A157fs     |
| Pat_53 | Pre-Treatment | ZIC2      | 7546   | 37 | 13 | 100635008 | 100635010 | In_Frame_Del    | DEL | CCA  | - | 13 | 96   | c.690_692delCCA | c.(688-693)GCCCAC>GCC  | p.H239del    |
| Pat_53 | Pre-Treatment | LRP10     | 26020  | 37 | 14 | 23341527  | 23341529  | In_Frame_Del    | DEL | CCT  | - | 14 | 266  | c.15_17delCCT   | c.(13-18)ACCCTC>ACC    | p.L11del     |
| Pat_53 | Pre-Treatment | JPH4      | 84502  | 37 | 14 | 24040436  | 24040436  | Frame_Shift_Del | DEL | C    | - | 23 | 388  | c.1504delG      | c.(1504-1506)GCAfs     | p.A502fs     |
| Pat_53 | Pre-Treatment | PSMA6     | 5687   | 37 | 14 | 35782216  | 35782216  | Frame_Shift_Del | DEL | A    | - | 11 | 835  | c.539delA       | c.(538-540)GAAfs       | p.E180fs     |
| Pat_53 | Pre-Treatment | C14orf106 | 55320  | 37 | 14 | 45693722  | 45693722  | Frame_Shift_Del | DEL | T    | - | 14 | 304  | c.2068delA      | c.(2068-2070)AGTfs     | p.S690fs     |
| Pat_53 | Pre-Treatment | MGAT2     | 4247   | 37 | 14 | 50088327  | 50088327  | Frame_Shift_Del | DEL | C    | - | 7  | 399  | c.341delC       | c.(340-342)GCCfs       | p.A114fs     |
| Pat_53 | Pre-Treatment | PRKCH     | 5583   | 37 | 14 | 62014535  | 62014535  | Frame_Shift_Del | DEL | T    | - | 7  | 1033 | c.1836delT      | c.(1834-1836)CCTfs     | p.P612fs     |
| Pat_53 | Pre-Treatment | SIPA1L1   | 26037  | 37 | 14 | 72190482  | 72190484  | In_Frame_Del    | DEL | TCC  | - | 10 | 347  | .4390_4392delTC | c.(4390-4392)TCCdel    | p.S1468del   |
| Pat_53 | Pre-Treatment | C15orf24  | 56851  | 37 | 15 | 34393991  | 34393993  | In_Frame_Del    | DEL | AGC  | - | 14 | 679  | c.48_50delGCT   | c.(46-51)CTGCTA>CTA    | p.16_17LL>L  |
| Pat_53 | Pre-Treatment | C15orf52  | 388115 | 37 | 15 | 40631782  | 40631782  | Frame_Shift_Del | DEL | C    | - | 8  | 435  | c.294delG       | c.(292-294)GGGfs       | p.G98fs      |
| Pat_53 | Pre-Treatment | SLTM      | 79811  | 37 | 15 | 59182564  | 59182565  | Frame_Shift_Del | DEL | CT   | - | 32 | 519  | .1994_1995delAC | c.(1993-1995)GAGfs     | p.E665fs     |
| Pat_53 | Pre-Treatment | RNF111    | 54778  | 37 | 15 | 59359142  | 59359144  | In_Frame_Del    | DEL | CAC  | - | 7  | 387  | .1546_1548delCA | c.(1546-1548)CACdel    | p.H520del    |
| Pat_53 | Pre-Treatment | ZNF609    | 23060  | 37 | 15 | 64972995  | 64972997  | In_Frame_Del    | DEL | CAC  | - | 9  | 632  | .4096_4098delCA | c.(4096-4098)CACdel    | p.H1371del   |
| Pat_53 | Pre-Treatment | SLC24A1   | 9187   | 37 | 15 | 65918177  | 65918179  | In_Frame_Del    | DEL | CTG  | - | 9  | 227  | .1759_1761delCT | c.(1759-1761)CTGdel    | p.L591del    |
| Pat_53 | Pre-Treatment | CPLX3     | 594855 | 37 | 15 | 75122558  | 75122560  | In_Frame_Del    | DEL | GAG  | - | 7  | 146  | c.340_342delGAG | c.(340-342)GAGdel      | p.E118del    |
| Pat_53 | Pre-Treatment | UBN1      | 29855  | 37 | 16 | 4910691   | 4910693   | In_Frame_Del    | DEL | AGA  | - | 8  | 932  | c.698_700delAGA | c.(697-702)GAGAAG>GAC  | p.K238del    |
| Pat_53 | Pre-Treatment | KIAA0430  | 9665   | 37 | 16 | 15729982  | 15729984  | In_Frame_Del    | DEL | CCA  | - | 10 | 509  | c.360_362delTGG | c.(358-363)GGTGGC>GGC  | .120_121GG>I |
| Pat_53 | Pre-Treatment | EIF3CL    | 728689 | 37 | 16 | 28734579  | 28734581  | In_Frame_Del    | DEL | GAG  | - | 12 | 2259 | c.871_873delGAG | c.(871-873)GAGdel      | p.E295del    |
| Pat_53 | Pre-Treatment | ITGAL     | 3683   | 37 | 16 | 30531249  | 30531251  | In_Frame_Del    | DEL | GCT  | - | 8  | 732  | .3300_3302delGC | c.(3298-3303)GGGCTG>GG | p.L1106del   |
| Pat_53 | Pre-Treatment | SRCAP     | 10847  | 37 | 16 | 30736370  | 30736371  | Frame_Shift_Ins | INS | -    | C | 13 | 486  | c.5625_5626insC | c.(5623-5628)CAGCCfs   | p.Q1875fs    |
| Pat_53 | Pre-Treatment | BRD7      | 29117  | 37 | 16 | 50368678  | 50368679  | Frame_Shift_Del | DEL | CT   | - | 54 | 778  | c.830_831delAG  | c.(829-831)GAGfs       | p.E277fs     |
| Pat_53 | Pre-Treatment | COQ9      | 57017  | 37 | 16 | 57486732  | 57486734  | In_Frame_Del    | DEL | GAG  | - | 9  | 371  | c.262_264delGAG | c.(262-264)GAGdel      | p.E91del     |
| Pat_53 | Pre-Treatment | CKLF      | 51192  | 37 | 16 | 66592117  | 66592117  | Frame_Shift_Del | DEL | T    | - | 7  | 766  | c.103delT       | c.(103-105)TTTfs       | p.F35fs      |
| Pat_53 | Pre-Treatment | ZFP90     | 146198 | 37 | 16 | 68598462  | 68598463  | Frame_Shift_Ins | INS | -    | A | 9  | 653  | c.1772_1773insA | c.(1771-1773)CGAfs     | p.R591fs     |
| Pat_53 | Pre-Treatment | NOB1      | 28987  | 37 | 16 | 69782978  | 69782980  | In_Frame_Del    | DEL | TCC  | - | 10 | 322  | c.567_569delGGA | c.(565-570)GAGGAA>GAA  | .189_190EE>I |

|        |               |          |        |    |    |           |           |                 |     |          |        |    |      |                         |                         |                 |
|--------|---------------|----------|--------|----|----|-----------|-----------|-----------------|-----|----------|--------|----|------|-------------------------|-------------------------|-----------------|
| Pat_53 | Pre-Treatment | ADAMTS18 | 170692 | 37 | 16 | 77356311  | 77356311  | Frame_Shift_Del | DEL | A        | -      | 7  | 305  | c.2085delT              | c.(2083-2085)TTTfs      | p.F695fs        |
| Pat_53 | Pre-Treatment | NUP88    | 4927   | 37 | 17 | 5290964   | 5290964   | Frame_Shift_Del | DEL | T        | -      | 7  | 845  | c.1796delA              | c.(1795-1797)AAGfs      | p.K599fs        |
| Pat_53 | Pre-Treatment | FXR2     | 9513   | 37 | 17 | 7495872   | 7495874   | In_Frame_Del    | DEL | CGG      | -      | 12 | 1022 | .1773_1775delCC         | c.(1771-1776)CGCCGT>CGC | p.S591_592RR>I  |
| Pat_53 | Pre-Treatment | SUPT6H   | 6830   | 37 | 17 | 27027202  | 27027204  | In_Frame_Del    | DEL | AGC      | -      | 19 | 830  | .4573_4575delAG         | c.(4573-4575)AGCdel     | p.S1528del      |
| Pat_53 | Pre-Treatment | SUPT6H   | 6830   | 37 | 17 | 27028487  | 27028487  | Frame_Shift_Del | DEL | A        | -      | 7  | 266  | c.5025delA              | c.(5023-5025)GGAfs      | p.G1675fs       |
| Pat_53 | Pre-Treatment | CDC27    | 996    | 37 | 17 | 45219355  | 45219355  | Frame_Shift_Del | DEL | C        | -      | 7  | 701  | c.1415delG              | c.(1414-1416)GGTfs      | p.G472fs        |
| Pat_53 | Pre-Treatment | SPAG9    | 9043   | 37 | 17 | 49077041  | 49077041  | Frame_Shift_Del | DEL | T        | -      | 8  | 210  | c.1645delA              | c.(1645-1647)AGGfs      | p.R549fs        |
| Pat_53 | Pre-Treatment | BZRAP1   | 9256   | 37 | 17 | 56387404  | 56387406  | In_Frame_Del    | DEL | TCC      | -      | 7  | 138  | .3813_3815delGG         | c.(3811-3816)GAGGAA>GA  | p.I271_1272EE>  |
| Pat_53 | Pre-Treatment | FTSJ3    | 117246 | 37 | 17 | 61899155  | 61899157  | In_Frame_Del    | DEL | CTC      | -      | 8  | 503  | .1522_1524delGA         | c.(1522-1524)GAGdel     | p.E508del       |
| Pat_53 | Pre-Treatment | BPTF     | 2186   | 37 | 17 | 65940454  | 65940456  | In_Frame_Del    | DEL | CAC      | -      | 7  | 578  | .6666_6668delCA         | c.(6664-6669)AGCACC>AG  | p.T2227del      |
| Pat_53 | Pre-Treatment | ZNF236   | 7776   | 37 | 18 | 74593429  | 74593430  | Frame_Shift_Ins | INS | -        | A      | 7  | 300  | c.1372_1373insA         | c.(1372-1374)GAAfs      | p.E458fs        |
| Pat_53 | Pre-Treatment | C19orf29 | 58509  | 37 | 19 | 3613226   | 3613227   | In_Frame_Ins    | INS | -        | CCTCGC | 14 | 86   | .15_16insGCGA           | c.(15-16)GCG>GCGGAG     | p.G538_539insGI |
| Pat_53 | Pre-Treatment | DNM2     | 1785   | 37 | 19 | 10940986  | 10940986  | Frame_Shift_Del | DEL | C        | -      | 10 | 505  | c.2475delC              | c.(2473-2475)TTCfs      | p.F825fs        |
| Pat_53 | Pre-Treatment | ZNF563   | 147837 | 37 | 19 | 12430217  | 12430217  | Frame_Shift_Del | DEL | A        | -      | 10 | 505  | c.622delT               | c.(622-624)TGGfs        | p.W208fs        |
| Pat_53 | Pre-Treatment | CHERP    | 10523  | 37 | 19 | 16640581  | 16640583  | In_Frame_Del    | DEL | TGC      | -      | 9  | 65   | .1005_1007delGC         | c.(1003-1008)CAGCAA>CA  | p.S335_336QQ>I  |
| Pat_53 | Pre-Treatment | HAMP     | 57817  | 37 | 19 | 35773520  | 35773522  | In_Frame_Del    | DEL | CTC      | -      | 9  | 479  | c.40_42delCTC           | c.(40-42)CTCdel         | p.L18del        |
| Pat_53 | Pre-Treatment | C19orf55 | 148137 | 37 | 19 | 36255947  | 36255949  | In_Frame_Del    | DEL | CTC      | -      | 8  | 624  | c.639_641delCTC         | c.(637-642)ATCTCC>ATC   | p.S218del       |
| Pat_53 | Pre-Treatment | LYPD3    | 27076  | 37 | 19 | 43969653  | 43969655  | In_Frame_Del    | DEL | AGC      | -      | 7  | 671  | c.69_71delGCT           | c.(67-72)CTGCTT>CTT     | p.P23_24LL>L    |
| Pat_53 | Pre-Treatment | RSPH6A   | 81492  | 37 | 19 | 46299147  | 46299149  | In_Frame_Del    | DEL | CCT      | -      | 7  | 193  | .2132_2134delAG         | c.(2131-2136)GAGGGC>GC  | p.E711del       |
| Pat_53 | Pre-Treatment | RSPH6A   | 81492  | 37 | 19 | 46299165  | 46299167  | In_Frame_Del    | DEL | CCT      | -      | 16 | 222  | .2114_2116delAG         | c.(2113-2118)GAGGGC>GC  | p.E705del       |
| Pat_53 | Pre-Treatment | SLC8A2   | 6543   | 37 | 19 | 47935681  | 47935683  | In_Frame_Del    | DEL | TCC      | -      | 10 | 291  | .2130_2132delGG         | c.(2128-2133)GAGGAC>GA  | p.E710del       |
| Pat_53 | Pre-Treatment | ASXL2    | 55252  | 37 | 2  | 26022304  | 26022306  | In_Frame_Del    | DEL | CTG      | -      | 15 | 685  | c.351_353delCAGC        | c.(349-354)AGCAGT>AGT   | p.T117_118SS>S  |
| Pat_53 | Pre-Treatment | DHX57    | 90957  | 37 | 2  | 39095411  | 39095413  | In_Frame_Del    | DEL | CCA      | -      | 12 | 253  | c.135_137delTGG         | c.(133-138)GGTGG>GG     | p.A45_46GG>G    |
| Pat_53 | Pre-Treatment | PSME4    | 23198  | 37 | 2  | 54167139  | 54167140  | Splice_Site     | INS | -        | G      | 8  | 637  | c.501_splice            | c.e4-1                  | p.N167_splice   |
| Pat_53 | Pre-Treatment | MTIF2    | 4528   | 37 | 2  | 55464461  | 55464461  | Frame_Shift_Del | DEL | T        | -      | 7  | 267  | c.1974delA              | c.(1972-1974)AAAfs      | p.K658fs        |
| Pat_53 | Pre-Treatment | UGP2     | 7360   | 37 | 2  | 64084969  | 64084969  | Frame_Shift_Del | DEL | A        | -      | 9  | 1913 | c.154delA               | c.(154-156)AAAfs        | p.K52fs         |
| Pat_53 | Pre-Treatment | TMEM127  | 55654  | 37 | 2  | 96919781  | 96919783  | In_Frame_Del    | DEL | TGC      | -      | 11 | 348  | c.480_482delGCA         | c.(478-483)CAGCAT>CAT   | p.Q160del       |
| Pat_53 | Pre-Treatment | ITPRIPL1 | 150771 | 37 | 2  | 96992793  | 96992795  | In_Frame_Del    | DEL | GAG      | -      | 14 | 147  | c.424_426delGAG         | c.(424-426)GAGdel       | p.E147del       |
| Pat_53 | Pre-Treatment | IL1F6    | 27179  | 37 | 2  | 113764196 | 113764198 | In_Frame_Del    | DEL | GCC      | -      | 7  | 1273 | c.146_148delGCC         | c.(145-150)TGCCGA>TGA   | p.A49_50CR>*    |
| Pat_53 | Pre-Treatment | MKI67IP  | 84365  | 37 | 2  | 122485323 | 122485323 | Frame_Shift_Del | DEL | T        | -      | 7  | 548  | c.859delA               | c.(859-861)AGAfs        | p.R287fs        |
| Pat_53 | Pre-Treatment | PLA2R1   | 22925  | 37 | 2  | 160801441 | 160801442 | Frame_Shift_Ins | INS | -        | T      | 8  | 660  | c.4119_4120insA         | c.(4117-4122)AAAGGCfs   | p.K1373fs       |
| Pat_53 | Pre-Treatment | MYO3B    | 140469 | 37 | 2  | 171240259 | 171240259 | Frame_Shift_Del | DEL | C        | -      | 7  | 356  | c.1225delC              | c.(1225-1227)CCCfs      | p.P409fs        |
| Pat_53 | Pre-Treatment | RBM45    | 129831 | 37 | 2  | 178988920 | 178988920 | Frame_Shift_Del | DEL | A        | -      | 20 | 321  | c.1135delA              | c.(1135-1137)AAAfs      | p.K379fs        |
| Pat_53 | Pre-Treatment | ITGAV    | 3685   | 37 | 2  | 187521084 | 187521085 | Frame_Shift_Ins | INS | -        | G      | 8  | 1043 | c.1675_1676insG         | c.(1675-1677)AGGfs      | p.R559fs        |
| Pat_53 | Pre-Treatment | SLC11A1  | 6556   | 37 | 2  | 219252307 | 219252307 | Frame_Shift_Del | DEL | T        | -      | 14 | 1437 | c.591delT               | c.(589-591)GCTfs        | p.A197fs        |
| Pat_53 | Pre-Treatment | GIGYF2   | 26058  | 37 | 2  | 233676006 | 233676008 | In_Frame_Del    | DEL | CAG      | -      | 11 | 343  | .1951_1953delCA         | c.(1951-1953)CAGdel     | p.Q655del       |
| Pat_53 | Pre-Treatment | GAL3ST2  | 64090  | 37 | 2  | 242738494 | 242738496 | In_Frame_Del    | DEL | TCC      | -      | 7  | 267  | c.44_46delTCC           | c.(43-48)ATCCTC>ATC     | p.L20del        |
| Pat_53 | Pre-Treatment | FRG1B    | 284802 | 37 | 20 | 29628229  | 29628230  | Frame_Shift_Ins | INS | -        | A      | 61 | 695  | c.141_142insA           | c.(139-144)GGGAAAfs     | p.G47fs         |
| Pat_53 | Pre-Treatment | NCOA6    | 23054  | 37 | 20 | 33330968  | 33330970  | In_Frame_Del    | DEL | TGC      | -      | 7  | 223  | .3090_3092delGC         | c.(3088-3093)CAGCAA>CA  | p.I030_1031QQ>  |
| Pat_53 | Pre-Treatment | KCNB1    | 3745   | 37 | 20 | 47989771  | 47989772  | Frame_Shift_Ins | INS | -        | G      | 7  | 1044 | c.2325_2326insC         | c.(2323-2328)CCCAAfs    | p.P775fs        |
| Pat_53 | Pre-Treatment | YTHDF1   | 54915  | 37 | 20 | 61833650  | 61833652  | In_Frame_Del    | DEL | CCT      | -      | 10 | 428  | .1640_1642delAG         | c.(1639-1644)GAGGTG>GT  | p.E547del       |
| Pat_53 | Pre-Treatment | TPTE     | 7179   | 37 | 21 | 10944697  | 10944697  | Frame_Shift_Del | DEL | A        | -      | 16 | 605  | c.537delT               | c.(535-537)TTTfs        | p.F179fs        |
| Pat_53 | Pre-Treatment | C21orf91 | 54149  | 37 | 21 | 19169352  | 19169352  | Frame_Shift_Del | DEL | G        | -      | 7  | 325  | c.211delC               | c.(211-213)CAGfs        | p.Q71fs         |
| Pat_53 | Pre-Treatment | SFRS15   | 57466  | 37 | 21 | 33044257  | 33044259  | In_Frame_Del    | DEL | GCT      | -      | 10 | 348  | .2897_2899delAG         | c.(2896-2901)CAGCCA>CC  | p.Q966del       |
| Pat_53 | Pre-Treatment | SF3A1    | 10291  | 37 | 22 | 30742328  | 30742330  | In_Frame_Del    | DEL | CTG      | -      | 9  | 252  | c.364_366delCAG         | c.(364-366)CAGdel       | p.Q122del       |
| Pat_53 | Pre-Treatment | MYH9     | 4627   | 37 | 22 | 36689419  | 36689421  | In_Frame_Del    | DEL | CCT      | -      | 7  | 157  | .4049_4051delAG         | c.(4048-4053)GAGGCC>GC  | p.E1350del      |
| Pat_53 | Pre-Treatment | CDC42EP1 | 11135  | 37 | 22 | 37964409  | 37964429  | In_Frame_Del    | DEL | CTGCTGCA | -      | 37 | 87   | .AGCGCTGTGAGCGCCTGCTGCA | c.AAC(APAANPS254c       |                 |

|        |               |         |        |    |    |           |           |                 |     |         |    |    |      |                                        |                       |            |
|--------|---------------|---------|--------|----|----|-----------|-----------|-----------------|-----|---------|----|----|------|----------------------------------------|-----------------------|------------|
| Pat_53 | Pre-Treatment | DNAJB7  | 150353 | 37 | 22 | 41257114  | 41257115  | Frame_Shift_Ins | INS | -       | T  | 8  | 404  | c.884_885insA                          | c.(883-885)AAGfs      | p.K295fs   |
| Pat_53 | Pre-Treatment | RANGAP1 | 5905   | 37 | 22 | 41650469  | 41650471  | In_Frame_Del    | DEL | TCC     | -  | 23 | 304  | .1101_1103delIGG,(1099-1104)GAGGAA>GA  | .367_368EE>I          |            |
| Pat_53 | Pre-Treatment | SREBF2  | 6721   | 37 | 22 | 42262949  | 42262951  | In_Frame_Del    | DEL | GCA     | -  | 7  | 159  | c.203_205delGCA:(202-207)GGCAGC>GGC    | p.S74del              |            |
| Pat_53 | Pre-Treatment | ARFGAP3 | 26286  | 37 | 22 | 43213780  | 43213780  | Frame_Shift_Del | DEL | T       | -  | 16 | 787  | c.896delA                              | c.(895-897)AATfs      | p.N299fs   |
| Pat_53 | Pre-Treatment | TATDN2  | 9797   | 37 | 3  | 10291121  | 10291123  | In_Frame_Del    | DEL | CTC     | -  | 8  | 742  | c.237_239delCTC c.(235-240)AACTCC>AAC  | p.S83del              |            |
| Pat_53 | Pre-Treatment | NKTR    | 4820   | 37 | 3  | 42679764  | 42679764  | Frame_Shift_Del | DEL | A       | -  | 8  | 234  | c.2568delA                             | c.(2566-2568)TCAfs    | p.S856fs   |
| Pat_53 | Pre-Treatment | ANO10   | 55129  | 37 | 3  | 43647213  | 43647213  | Frame_Shift_Del | DEL | T       | -  | 12 | 299  | c.132delA                              | c.(130-132)AAAfs      | p.K44fs    |
| Pat_53 | Pre-Treatment | MAP4    | 4134   | 37 | 3  | 47957524  | 47957525  | Frame_Shift_Del | DEL | TG      | -  | 7  | 679  | c.1792_1793delCA                       | c.(1792-1794)CAAfs    | p.Q598fs   |
| Pat_53 | Pre-Treatment | ALAS1   | 211    | 37 | 3  | 52246368  | 52246368  | Frame_Shift_Del | DEL | G       | -  | 8  | 1999 | c.1694delG                             | c.(1693-1695)CGGfs    | p.R565fs   |
| Pat_53 | Pre-Treatment | LNP1    | 348801 | 37 | 3  | 100148586 | 100148588 | In_Frame_Del    | DEL | GAT     | -  | 13 | 987  | c.13_15delGAT                          | c.(13-15)GATdel       | p.D10del   |
| Pat_53 | Pre-Treatment | EAF2    | 55840  | 37 | 3  | 121573658 | 121573659 | Frame_Shift_Ins | INS | -       | A  | 7  | 478  | c.326_327insA                          | c.(325-327)GTAfs      | p.V109fs   |
| Pat_53 | Pre-Treatment | MED12L  | 116931 | 37 | 3  | 151148114 | 151148116 | In_Frame_Del    | DEL | CAG     | -  | 12 | 305  | .6331_6333delCA                        | c.(6331-6333)CAGdel   | p.Q2115del |
| Pat_53 | Pre-Treatment | PHC3    | 80012  | 37 | 3  | 169896635 | 169896637 | In_Frame_Del    | DEL | TGG     | -  | 15 | 1587 | c.68_70delCCA                          | c.(67-72)ACCATC>ATC   | p.T23del   |
| Pat_53 | Pre-Treatment | FETUB   | 26998  | 37 | 3  | 186362544 | 186362544 | Frame_Shift_Del | DEL | A       | -  | 10 | 383  | c.429delA                              | c.(427-429)TCAfs      | p.S143fs   |
| Pat_53 | Pre-Treatment | RNF168  | 165918 | 37 | 3  | 196214338 | 196214338 | Frame_Shift_Del | DEL | T       | -  | 12 | 1197 | c.490delA                              | c.(490-492)AGGfs      | p.R164fs   |
| Pat_53 | Pre-Treatment | CRIPAK  | 285464 | 37 | 4  | 1388498   | 1388499   | Frame_Shift_Del | DEL | CA      | -  | 8  | 1203 | c.199_200delCA                         | c.(199-201)CACfs      | p.H67fs    |
| Pat_53 | Pre-Treatment | CRIPAK  | 285464 | 37 | 4  | 1388622   | 1388623   | Frame_Shift_Ins | INS | -       | CA | 10 | 1005 | c.323_324insCA                         | c.(322-324)CTCfs      | p.L108fs   |
| Pat_53 | Pre-Treatment | PROM1   | 8842   | 37 | 4  | 15995680  | 15995680  | Frame_Shift_Del | DEL | T       | -  | 8  | 327  | c.1697delA                             | c.(1696-1698)AATfs    | p.N566fs   |
| Pat_53 | Pre-Treatment | KLF3    | 51274  | 37 | 4  | 38691476  | 38691476  | Frame_Shift_Del | DEL | C       | -  | 7  | 938  | c.671delC                              | c.(670-672)TCCfs      | p.S224fs   |
| Pat_53 | Pre-Treatment | FIP1L1  | 81608  | 37 | 4  | 54319248  | 54319249  | Frame_Shift_Del | DEL | AG      | -  | 26 | 207  | c.1447_1448delAC                       | c.(1447-1449)AGAfs    | p.R483fs   |
| Pat_53 | Pre-Treatment | AASDH   | 132949 | 37 | 4  | 57220269  | 57220269  | Frame_Shift_Del | DEL | A       | -  | 25 | 268  | c.1319delT                             | c.(1318-1320)TTGfs    | p.L440fs   |
| Pat_53 | Pre-Treatment | MMRN1   | 22915  | 37 | 4  | 90844391  | 90844393  | In_Frame_Del    | DEL | AGC     | -  | 8  | 1289 | c.923_925delAGC:(922-927)GAGCAG>GAC    | p.Q313del             |            |
| Pat_53 | Pre-Treatment | EXOSC9  | 5393   | 37 | 4  | 122723894 | 122723894 | Frame_Shift_Del | DEL | T       | -  | 9  | 441  | c.227delT                              | c.(226-228)CTTfs      | p.L76fs    |
| Pat_53 | Pre-Treatment | OTUD4   | 54726  | 37 | 4  | 146077123 | 146077125 | In_Frame_Del    | DEL | CAG     | -  | 7  | 327  | c.458_460delCTG c.(457-462)GCTGAT>GAT  | p.A153del             |            |
| Pat_53 | Pre-Treatment | LRBA    | 987    | 37 | 4  | 151509211 | 151509211 | Frame_Shift_Del | DEL | T       | -  | 10 | 1102 | c.6352delA                             | c.(6352-6354)ATCfs    | p.I2118fs  |
| Pat_53 | Pre-Treatment | PAPD7   | 11044  | 37 | 5  | 6755013   | 6755014   | Frame_Shift_Del | DEL | AC      | -  | 9  | 177  | c.1584_1585delAC                       | c.(1582-1587)AAACACfs | p.K528fs   |
| Pat_53 | Pre-Treatment | CTNND2  | 1501   | 37 | 5  | 11110989  | 11110991  | In_Frame_Del    | DEL | TTC     | -  | 43 | 1126 | .2442_2444delGA:(2440-2445)AAGAAA>AA   | .814_815KK>I          |            |
| Pat_53 | Pre-Treatment | DNAH5   | 1767   | 37 | 5  | 13701426  | 13701426  | Frame_Shift_Del | DEL | A       | -  | 7  | 385  | c.13458delT                            | c.(13456-13458)TTTfs  | p.F4486fs  |
| Pat_53 | Pre-Treatment | CDH10   | 1008   | 37 | 5  | 24492973  | 24492973  | Frame_Shift_Del | DEL | A       | -  | 7  | 965  | c.1577delT                             | c.(1576-1578)TTCfs    | p.F526fs   |
| Pat_53 | Pre-Treatment | C6      | 729    | 37 | 5  | 41160299  | 41160300  | Frame_Shift_Del | DEL | AC      | -  | 9  | 581  | c.1628_1629delGT                       | c.(1627-1629)TGTfs    | p.C543fs   |
| Pat_53 | Pre-Treatment | TAF9    | 6880   | 37 | 5  | 68660786  | 68660788  | In_Frame_Del    | DEL | TCA     | -  | 8  | 354  | c.777_779delITGAc.(775-780)GATGAC>GAC  | .259_260DD>I          |            |
| Pat_53 | Pre-Treatment | THBS4   | 7060   | 37 | 5  | 79372774  | 79372776  | In_Frame_Del    | DEL | TGA     | -  | 9  | 838  | .1989_1991delITG:(1987-1992)TGATGAT>TG | p.D668del             |            |
| Pat_53 | Pre-Treatment | MSH3    | 4437   | 37 | 5  | 79970915  | 79970915  | Frame_Shift_Del | DEL | A       | -  | 12 | 828  | c.1141delA                             | c.(1141-1143)AAAfs    | p.K381fs   |
| Pat_53 | Pre-Treatment | AP3S1   | 1176   | 37 | 5  | 115202418 | 115202421 | Frame_Shift_Del | DEL | AAGA    | -  | 7  | 277  | .121_124delAAG/                        | c.(121-126)AAGAGAFs   | p.K41fs    |
| Pat_53 | Pre-Treatment | PCDHB3  | 56132  | 37 | 5  | 140481964 | 140481976 | Frame_Shift_Del | DEL | GGCGGCT | -  | 7  | 112  | .743delCCGGCG:(1743)CCCGGGCGGCT        | p.P577fs              |            |
| Pat_53 | Pre-Treatment | TIMD4   | 91937  | 37 | 5  | 156378745 | 156378747 | In_Frame_Del    | DEL | TTG     | -  | 9  | 716  | c.455_457delCAAc.(454-459)ACAAGC>AGC   | p.T152del             |            |
| Pat_53 | Pre-Treatment | RNF145  | 153830 | 37 | 5  | 158621763 | 158621763 | Frame_Shift_Del | DEL | A       | -  | 7  | 924  | c.254delT                              | c.(253-255)TTGfs      | p.L85fs    |
| Pat_53 | Pre-Treatment | CANX    | 821    | 37 | 5  | 179149920 | 179149920 | Frame_Shift_Del | DEL | T       | -  | 8  | 376  | c.1298delT                             | c.(1297-1299)ATTfs    | p.I433fs   |
| Pat_53 | Pre-Treatment | DSP     | 1832   | 37 | 6  | 7575664   | 7575664   | Frame_Shift_Del | DEL | A       | -  | 8  | 990  | c.2573delA                             | c.(2572-2574)GAAfs    | p.E858fs   |
| Pat_53 | Pre-Treatment | BTN2A2  | 10385  | 37 | 6  | 26384091  | 26384093  | In_Frame_Del    | DEL | CCT     | -  | 10 | 526  | c.42_44delCCT                          | c.(40-45)TCCCTC>TCC   | p.L24del   |
| Pat_53 | Pre-Treatment | BTN2A3  | 54718  | 37 | 6  | 26422388  | 26422390  | In_Frame_Del    | DEL | CCT     | -  | 31 | 837  | c.42_44delCCT                          | c.(40-45)TCCCTC>TCC   | p.L19del   |
| Pat_53 | Pre-Treatment | HLA-A   | 3105   | 37 | 6  | 29911319  | 29911319  | Frame_Shift_Del | DEL | G       | -  | 24 | 169  | c.618delG                              | c.(616-618)ACGfs      | p.T206fs   |
| Pat_53 | Pre-Treatment | BAT2    | 7916   | 37 | 6  | 31604005  | 31604005  | Frame_Shift_Del | DEL | C       | -  | 8  | 1619 | c.5644delC                             | c.(5644-5646)CCCfs    | p.P1882fs  |
| Pat_53 | Pre-Treatment | BAT3    | 7917   | 37 | 6  | 31617055  | 31617055  | Frame_Shift_Del | DEL | G       | -  | 7  | 413  | c.344delC                              | c.(343-345)CCTfs      | p.P115fs   |
| Pat_53 | Pre-Treatment | FKBPL   | 63943  | 37 | 6  | 32097086  | 32097086  | Frame_Shift_Del | DEL | C       | -  | 7  | 1472 | c.472delG                              | c.(472-474)GAGfs      | p.E158fs   |
| Pat_53 | Pre-Treatment | FKBP5   | 2289   | 37 | 6  | 35610515  | 35610515  | Frame_Shift_Del | DEL | T       | -  | 7  | 658  | c.87delA                               | c.(85-87)AAAFs        | p.K29fs    |
| Pat_53 | Pre-Treatment | ZNF318  | 24149  | 37 | 6  | 43323502  | 43323502  | Frame_Shift_Del | DEL | T       | -  | 9  | 1684 | c.1570delA                             | c.(1570-1572)AGGfs    | p.R524fs   |



|        |                 |          |        |    |   |           |           |                 |     |       |   |    |      |                                      |                       |                |
|--------|-----------------|----------|--------|----|---|-----------|-----------|-----------------|-----|-------|---|----|------|--------------------------------------|-----------------------|----------------|
| Pat_53 | Pre-Treatment   | CD2AP    | 23607  | 37 | 6 | 47576961  | 47576961  | Frame_Shift_Del | DEL | A     | - | 7  | 393  | c.1735delA                           | c.(1735-1737)AAAFs    | p.K579fs       |
| Pat_53 | Pre-Treatment   | KIAA1009 | 22832  | 37 | 6 | 84896233  | 84896233  | Frame_Shift_Del | DEL | A     | - | 11 | 463  | c.1218delT                           | c.(1216-1218)TTTTfs   | p.F406fs       |
| Pat_53 | Pre-Treatment   | GRM1     | 2911   | 37 | 6 | 146755399 | 146755401 | In_Frame_Del    | DEL | CAG   | - | 9  | 339  | .3052_3054delCA                      | c.(3052-3054)CAGdel   | p.Q1022del     |
| Pat_53 | Pre-Treatment   | COX19    | 90639  | 37 | 7 | 1009017   | 1009017   | Frame_Shift_Del | DEL | T     | - | 7  | 1627 | c.270delA                            | c.(268-270)AAAFs      | p.K90fs        |
| Pat_53 | Pre-Treatment   | C7orf16  | 10842  | 37 | 7 | 31735179  | 31735179  | Frame_Shift_Del | DEL | A     | - | 12 | 671  | c.179delA                            | c.(178-180)CAAFs      | p.Q60fs        |
| Pat_53 | Pre-Treatment   | POU6F2   | 11281  | 37 | 7 | 39379288  | 39379290  | In_Frame_Del    | DEL | CAG   | - | 7  | 85   | c.559_561delCAG                      | c.(559-561)CAGdel     | p.Q196del      |
| Pat_53 | Pre-Treatment   | OGDH     | 4967   | 37 | 7 | 44684936  | 44684936  | Frame_Shift_Del | DEL | T     | - | 15 | 609  | c.233delT                            | c.(232-234)ATTFs      | p.I78fs        |
| Pat_53 | Pre-Treatment   | DTX2     | 113878 | 37 | 7 | 76112249  | 76112249  | Frame_Shift_Del | DEL | A     | - | 11 | 1281 | c.693delA                            | c.(691-693)CCAFs      | p.P231fs       |
| Pat_53 | Pre-Treatment   | CYP51A1  | 1595   | 37 | 7 | 91752494  | 91752494  | Frame_Shift_Del | DEL | T     | - | 10 | 663  | c.1026delA                           | c.(1024-1026)AAAFs    | p.K342fs       |
| Pat_53 | Pre-Treatment   | XRCC2    | 7516   | 37 | 7 | 152346220 | 152346220 | Frame_Shift_Del | DEL | A     | - | 7  | 287  | c.350delT                            | c.(349-351)TTGfs      | p.L117fs       |
| Pat_53 | Pre-Treatment   | SFTPC    | 6440   | 37 | 8 | 22020159  | 22020161  | In_Frame_Del    | DEL | GTG   | - | 8  | 251  | c.115_117delGTG                      | c.(115-117)GTGdel     | p.V44del       |
| Pat_53 | Pre-Treatment   | C8orf80  | 389643 | 37 | 8 | 27888776  | 27888776  | Frame_Shift_Del | DEL | T     | - | 7  | 576  | c.1892delA                           | c.(1891-1893)AATfs    | p.N631fs       |
| Pat_53 | Pre-Treatment   | MYST3    | 7994   | 37 | 8 | 41798420  | 41798422  | In_Frame_Del    | DEL | CTC   | - | 17 | 519  | .2977_2979delGA                      | c.(2977-2979)GAGdel   | p.E993del      |
| Pat_53 | Pre-Treatment   | PABPC1   | 26986  | 37 | 8 | 101730036 | 101730037 | Frame_Shift_Ins | INS | -     | C | 24 | 276  | c.467_468insG                        | c.(466-468)GAAfs      | p.E156fs       |
| Pat_53 | Pre-Treatment   | C8orf76  | 84933  | 37 | 8 | 124250059 | 124250063 | Frame_Shift_Del | DEL | CGCCT | - | 28 | 138  | 332_336delAGGC                       | c.(331-336)GAGCGGfs   | p.E111fs       |
| Pat_53 | Pre-Treatment   | ANXA13   | 312    | 37 | 8 | 124707761 | 124707762 | Frame_Shift_Ins | INS | -     | T | 13 | 772  | c.451_452insA                        | c.(451-453)ATCfs      | p.I151fs       |
| Pat_53 | Pre-Treatment   | PLEC     | 5339   | 37 | 8 | 145000951 | 145000953 | Splice_Site     | DEL | CCT   | - | 7  | 494  | c.4455_splice                        | c.e30+1               | p.E1485_splice |
| Pat_53 | Pre-Treatment   | MLLT3    | 4300   | 37 | 9 | 20414377  | 20414379  | In_Frame_Del    | DEL | CTG   | - | 13 | 97   | c.465_467delCAGc.(463-468)AGCAGT>AGT | .155_156SS>!          |                |
| Pat_53 | Pre-Treatment   | TAF1L    | 138474 | 37 | 9 | 32633584  | 32633584  | Frame_Shift_Del | DEL | T     | - | 10 | 255  | c.1994delA                           | c.(1993-1995)AAGfs    | p.K665fs       |
| Pat_53 | Pre-Treatment   | VCP      | 7415   | 37 | 9 | 35059646  | 35059647  | Frame_Shift_Ins | INS | -     | T | 10 | 234  | c.1847_1848insA                      | c.(1846-1848)AATfs    | p.N616fs       |
| Pat_53 | Pre-Treatment   | TLN1     | 7094   | 37 | 9 | 35720430  | 35720430  | Frame_Shift_Del | DEL | T     | - | 7  | 801  | c.1283delA                           | c.(1282-1284)AAGfs    | p.K428fs       |
| Pat_53 | Pre-Treatment   | C9orf114 | 51490  | 37 | 9 | 131591119 | 131591120 | Frame_Shift_Ins | INS | -     | T | 11 | 253  | c.102_103insA                        | c.(100-105)AAATGGfs   | p.K34fs        |
| Pat_53 | Pre-Treatment   | NUP188   | 23511  | 37 | 9 | 131750436 | 131750436 | Frame_Shift_Del | DEL | C     | - | 9  | 679  | c.2504delC                           | c.(2503-2505)TCCfs    | p.S835fs       |
| Pat_53 | Pre-Treatment   | PRRG1    | 5638   | 37 | X | 37312611  | 37312611  | Frame_Shift_Del | DEL | C     | - | 15 | 355  | c.394delC                            | c.(394-396)CCCfs      | p.P132fs       |
| Pat_53 | Pre-Treatment   | PHF8     | 23133  | 37 | X | 54011405  | 54011407  | In_Frame_Del    | DEL | CTC   | - | 10 | 242  | .2491_2493delGA                      | c.(2491-2493)GAGdel   | p.E831del      |
| Pat_53 | Pre-Treatment   | IRS4     | 8471   | 37 | X | 107977802 | 107977803 | Frame_Shift_Ins | INS | -     | C | 10 | 367  | c.1772_1773insG                      | c.(1771-1773)GGCfs    | p.G591fs       |
| Pat_53 | Pre-Treatment   | SLC25A5  | 292    | 37 | X | 118603706 | 118603707 | Frame_Shift_Ins | INS | -     | G | 56 | 590  | c.194_195insG                        | c.(193-195)CAGfs      | p.Q65fs        |
| Pat_53 | Pre-Treatment   | MAGEC1   | 9947   | 37 | X | 140994639 | 140994641 | In_Frame_Del    | DEL | CTC   | - | 7  | 470  | .1449_1451delCT((1447-1452)AGCTCC>AG | .483_484SS>!          |                |
| Pat_53 | Pre-Treatment   | SPANXN3  | 139067 | 37 | X | 142605149 | 142605149 | Frame_Shift_Del | DEL | T     | - | 12 | 233  | c.71delA                             | c.(70-72)AATfs        | p.N24fs        |
| Pat_53 | Post-Resistance | CAMTA1   | 23261  | 37 | 1 | 7811329   | 7811329   | Frame_Shift_Del | DEL | A     | - | 8  | 622  | c.4760delA                           | c.(4759-4761)CAAFs    | p.Q1587fs      |
| Pat_53 | Post-Resistance | TNFRSF9  | 3604   | 37 | 1 | 7998254   | 7998254   | Frame_Shift_Del | DEL | T     | - | 8  | 643  | c.345delA                            | c.(343-345)AAAFs      | p.K115fs       |
| Pat_53 | Post-Resistance | PRDM2    | 7799   | 37 | 1 | 14108749  | 14108749  | Frame_Shift_Del | DEL | A     | - | 48 | 794  | c.4459delA                           | c.(4459-4461)AAAFs    | p.K1487fs      |
| Pat_53 | Post-Resistance | MST1P9   | 11223  | 37 | 1 | 17086085  | 17086086  | Frame_Shift_Ins | INS | -     | C | 7  | 9    | c.811_812insG                        | c.(811-813)GCGfs      | p.A271fs       |
| Pat_53 | Post-Resistance | ZBTB40   | 9923   | 37 | 1 | 22838561  | 22838563  | In_Frame_Del    | DEL | AAG   | - | 7  | 187  | .2395_2397delAA                      | c.(2395-2397)AAGdel   | p.K803del      |
| Pat_53 | Post-Resistance | CCDC30   | 728621 | 37 | 1 | 43002200  | 43002201  | Frame_Shift_Del | DEL | AG    | - | 24 | 139  | c.45_46delAG                         | c.(43-48)AAAGAGfs     | p.K15fs        |
| Pat_53 | Post-Resistance | LRRIQ3   | 127255 | 37 | 1 | 74575212  | 74575213  | Frame_Shift_Ins | INS | -     | T | 20 | 398  | c.732_733insA                        | c.(730-735)AAACAGfs   | p.K244fs       |
| Pat_53 | Post-Resistance | BCL10    | 8915   | 37 | 1 | 85736511  | 85736511  | Frame_Shift_Del | DEL | T     | - | 9  | 305  | c.136delA                            | c.(136-138)ATAfs      | p.I46fs        |
| Pat_53 | Post-Resistance | GBP3     | 2635   | 37 | 1 | 89473441  | 89473442  | Frame_Shift_Ins | INS | -     | T | 23 | 504  | c.1753_1754insA                      | c.(1753-1755)ACCfs    | p.T585fs       |
| Pat_53 | Post-Resistance | EVI5     | 7813   | 37 | 1 | 93159366  | 93159366  | Frame_Shift_Del | DEL | T     | - | 7  | 299  | c.1222delA                           | c.(1222-1224)ATGfs    | p.M408fs       |
| Pat_53 | Post-Resistance | TRIM33   | 51592  | 37 | 1 | 114968116 | 114968118 | In_Frame_Del    | DEL | TGT   | - | 9  | 620  | .1648_1650delAC                      | c.(1648-1650)ACAdel   | p.T550del      |
| Pat_53 | Post-Resistance | CDI160   | 11126  | 37 | 1 | 145704034 | 145704034 | Frame_Shift_Del | DEL | A     | - | 7  | 501  | c.383delT                            | c.(382-384)TTCfs      | p.F128fs       |
| Pat_53 | Post-Resistance | BCL9     | 607    | 37 | 1 | 147091501 | 147091501 | Frame_Shift_Del | DEL | C     | - | 12 | 251  | c.1540delC                           | c.(1540-1542)CCCfs    | p.P514fs       |
| Pat_53 | Post-Resistance | ADAMTSL4 | 54507  | 37 | 1 | 150530506 | 150530506 | Frame_Shift_Del | DEL | G     | - | 12 | 207  | c.2263delG                           | c.(2263-2265)GGGfs    | p.G755fs       |
| Pat_53 | Post-Resistance | RPTN     | 126638 | 37 | 1 | 152127845 | 152127848 | Frame_Shift_Del | DEL | TGTC  | - | 8  | 1574 | 1727_1730delGAC                      | c.(1726-1731)AGACAAfs | p.R576fs       |
| Pat_53 | Post-Resistance | RPTN     | 126638 | 37 | 1 | 152127881 | 152127884 | Frame_Shift_Del | DEL | TGTC  | - | 13 | 2210 | 1691_1694delGAC                      | c.(1690-1695)AGACAAfs | p.R564fs       |
| Pat_53 | Post-Resistance | RPTN     | 126638 | 37 | 1 | 152127917 | 152127920 | Frame_Shift_Del | DEL | TGTC  | - | 14 | 2404 | 1655_1658delGAC                      | c.(1654-1659)AGACAAfs | p.R552fs       |
| Pat_53 | Post-Resistance | NPR1     | 4881   | 37 | 1 | 153659175 | 153659175 | Frame_Shift_Del | DEL | C     | - | 12 | 231  | c.1812delC                           | c.(1810-1812)GACfs    | p.D604fs       |

|        |                 |           |        |    |    |           |           |                 |     |      |     |    |      |                   |                                  |               |
|--------|-----------------|-----------|--------|----|----|-----------|-----------|-----------------|-----|------|-----|----|------|-------------------|----------------------------------|---------------|
| Pat_53 | Post-Resistance | KIAA0907  | 22889  | 37 | 1  | 155886422 | 155886423 | Frame_Shift_Del | DEL | CT   | -   | 22 | 506  | c.1546_1547delAC  | c.(1546-1548)AGGfs               | p.R516fs      |
| Pat_53 | Post-Resistance | SLAMF1    | 6504   | 37 | 1  | 160589601 | 160589601 | Frame_Shift_Del | DEL | T    | -   | 12 | 820  | c.829delA         | c.(829-831)AGCfs                 | p.S277fs      |
| Pat_53 | Post-Resistance | PVRL4     | 81607  | 37 | 1  | 161044057 | 161044059 | In_Frame_Del    | DEL | CAC  | -   | 7  | 218  | .1105_1107delGT(  | c.(1105-1107)GTGdel              | p.V369del     |
| Pat_53 | Post-Resistance | PCP4L1    | 654790 | 37 | 1  | 161254154 | 161254156 | In_Frame_Del    | DEL | GGA  | -   | 9  | 299  | c.90_92delGGA     | c.(88-93)GCGGAG>GCG              | p.E35del      |
| Pat_53 | Post-Resistance | ABL2      | 27     | 37 | 1  | 179078404 | 179078404 | Frame_Shift_Del | DEL | G    | -   | 8  | 662  | c.1998delC        | c.(1996-1998)CCCfs               | p.P666fs      |
| Pat_53 | Post-Resistance | APOBEC4   | 403314 | 37 | 1  | 183616826 | 183616828 | In_Frame_Del    | DEL | TTC  | -   | 10 | 448  | .1089_1091delGA.  | (1087-1092)AAGAAA>AA.363_364KK>I |               |
| Pat_53 | Post-Resistance | PRG4      | 10216  | 37 | 1  | 186276374 | 186276376 | In_Frame_Del    | DEL | CCA  | -   | 7  | 370  | .1523_1525delCC.  | (1522-1527)CCCACC>CC             | p.T511del     |
| Pat_53 | Post-Resistance | TP53BP2   | 7159   | 37 | 1  | 223991931 | 223991931 | Frame_Shift_Del | DEL | T    | -   | 7  | 640  | c.594delA         | c.(592-594)AAAfs                 | p.K198fs      |
| Pat_53 | Post-Resistance | CUBN      | 8029   | 37 | 10 | 17113554  | 17113554  | Frame_Shift_Del | DEL | A    | -   | 7  | 339  | c.2496delT        | c.(2494-2496)TTTfs               | p.F832fs      |
| Pat_53 | Post-Resistance | FRMPD2    | 143162 | 37 | 10 | 49409419  | 49409420  | Frame_Shift_Ins | INS | -    | T   | 8  | 350  | c.1805_1806insA   | c.(1804-1806)AAGfs               | p.K602fs      |
| Pat_53 | Post-Resistance | BICC1     | 80114  | 37 | 10 | 60380663  | 60380663  | Splice_Site     | DEL | T    | -   | 7  | 249  | c.237_splice      | c.e2+2                           | p.K79_splice  |
| Pat_53 | Post-Resistance | RUFY2     | 55680  | 37 | 10 | 70156583  | 70156583  | Frame_Shift_Del | DEL | T    | -   | 12 | 195  | c.457delA         | c.(457-459)ATGfs                 | p.M153fs      |
| Pat_53 | Post-Resistance | TM9SF3    | 56889  | 37 | 10 | 98336475  | 98336475  | Frame_Shift_Del | DEL | T    | -   | 9  | 294  | c.214delA         | c.(214-216)AGTfs                 | p.S72fs       |
| Pat_53 | Post-Resistance | LZTS2     | 84445  | 37 | 10 | 102763415 | 102763417 | In_Frame_Del    | DEL | CCT  | -   | 8  | 308  | c.560_562delCCT.  | (559-564)GCCTCC>GCC              | p.S197del     |
| Pat_53 | Post-Resistance | UBQLN3    | 50613  | 37 | 11 | 5529918   | 5529920   | In_Frame_Del    | DEL | TGG  | -   | 8  | 146  | c.869_871delCCA.  | (868-873)ACCAGC>AGC              | p.T290del     |
| Pat_53 | Post-Resistance | TSG101    | 7251   | 37 | 11 | 18505466  | 18505466  | Frame_Shift_Del | DEL | T    | -   | 8  | 669  | c.794delA         | c.(793-795)AAGfs                 | p.K265fs      |
| Pat_53 | Post-Resistance | APIP      | 51074  | 37 | 11 | 34910341  | 34910341  | Frame_Shift_Del | DEL | T    | -   | 7  | 190  | c.283delA         | c.(283-285)AGCfs                 | p.S95fs       |
| Pat_53 | Post-Resistance | PAMR1     | 25891  | 37 | 11 | 35513670  | 35513670  | Frame_Shift_Del | DEL | C    | -   | 11 | 558  | c.302delG         | c.(301-303)GGTfs                 | p.G101fs      |
| Pat_53 | Post-Resistance | ACCS      | 84680  | 37 | 11 | 44098856  | 44098856  | Frame_Shift_Del | DEL | A    | -   | 8  | 457  | c.584delA         | c.(583-585)TATfs                 | p.Y195fs      |
| Pat_53 | Post-Resistance | TSKU      | 25987  | 37 | 11 | 76506673  | 76506675  | In_Frame_Del    | DEL | CTG  | -   | 9  | 121  | c.13_15delCTG     | c.(13-15)CTGdel                  | p.L9del       |
| Pat_53 | Post-Resistance | TAF1D     | 79101  | 37 | 11 | 93471453  | 93471453  | Frame_Shift_Del | DEL | T    | -   | 7  | 533  | c.281delA         | c.(280-282)AAGfs                 | p.K94fs       |
| Pat_53 | Post-Resistance | CD3G      | 917    | 37 | 11 | 118220583 | 118220583 | Frame_Shift_Del | DEL | A    | -   | 10 | 143  | c.205delA         | c.(205-207)AAAfs                 | p.K69fs       |
| Pat_53 | Post-Resistance | CBL       | 867    | 37 | 11 | 119149356 | 119149358 | In_Frame_Del    | DEL | ATG  | -   | 7  | 102  | .1364_1366delATC. | (1363-1368)TATGAT>TAI            | p.D460del     |
| Pat_53 | Post-Resistance | C11orf61  | 79684  | 37 | 11 | 124637350 | 124637350 | Frame_Shift_Del | DEL | C    | -   | 7  | 280  | c.1402delG        | c.(1402-1404)GAAfs               | p.E468fs      |
| Pat_53 | Post-Resistance | CHEK1     | 1111   | 37 | 11 | 125505377 | 125505378 | Frame_Shift_Ins | INS | -    | A   | 12 | 489  | c.667_668insA     | c.(667-669)GAAfs                 | p.E223fs      |
| Pat_53 | Post-Resistance | SRPR      | 6734   | 37 | 11 | 126137087 | 126137087 | Frame_Shift_Del | DEL | T    | -   | 35 | 1096 | c.509delA         | c.(508-510)AAGfs                 | p.K170fs      |
| Pat_53 | Post-Resistance | PRB1      | 5542   | 37 | 12 | 11506815  | 11506816  | In_Frame_Ins    | INS | -    | GGA | 9  | 354  | c.221_222insTCCc. | (220-222)CCA>CCTCCA p.74_74P>PP  |               |
| Pat_53 | Post-Resistance | SFRS2IP   | 9169   | 37 | 12 | 46320707  | 46320708  | Frame_Shift_Del | DEL | TC   | -   | 7  | 232  | .:2776_2777delGA  | c.(2776-2778)GAAfs               | p.E926fs      |
| Pat_53 | Post-Resistance | CCNT1     | 904    | 37 | 12 | 49087434  | 49087436  | In_Frame_Del    | DEL | ATG  | -   | 35 | 867  | .:1561_1563delCA  | c.(1561-1563)CATdel              | p.H521del     |
| Pat_53 | Post-Resistance | KRT1      | 3848   | 37 | 12 | 53069189  | 53069190  | In_Frame_Ins    | INS | -    | GCC | 2  | 4    | .1722_1723insGG   | c.(1720-1725)insGGC              | p.574_575insC |
| Pat_53 | Post-Resistance | OR10A7    | 121364 | 37 | 12 | 55615114  | 55615116  | In_Frame_Del    | DEL | CTT  | -   | 11 | 307  | c.306_308delCTT   | c.(304-309)TACTTC>TAC            | p.F107del     |
| Pat_53 | Post-Resistance | ESYT1     | 23344  | 37 | 12 | 56525070  | 56525070  | Frame_Shift_Del | DEL | T    | -   | 7  | 309  | c.684delT         | c.(682-684)TATfs                 | p.Y228fs      |
| Pat_53 | Post-Resistance | UHRF1BP1L | 23074  | 37 | 12 | 100466559 | 100466559 | Frame_Shift_Del | DEL | G    | -   | 7  | 257  | c.1440delC        | c.(1438-1440)CCCfs               | p.P480fs      |
| Pat_53 | Post-Resistance | SBNO1     | 55206  | 37 | 12 | 123794283 | 123794283 | Frame_Shift_Del | DEL | T    | -   | 10 | 189  | c.3416delA        | c.(3415-3417)AATfs               | p.N1139fs     |
| Pat_53 | Post-Resistance | POLE      | 5426   | 37 | 12 | 133220099 | 133220100 | Frame_Shift_Del | DEL | CA   | -   | 13 | 328  | .:4337_4338delTC  | c.(4336-4338)GTGfs               | p.V1446fs     |
| Pat_53 | Post-Resistance | SACS      | 26278  | 37 | 13 | 23914687  | 23914687  | Frame_Shift_Del | DEL | T    | -   | 27 | 853  | c.3328delA        | c.(3328-3330)ATTfs               | p.I1110fs     |
| Pat_53 | Post-Resistance | LRCH1     | 23143  | 37 | 13 | 47243183  | 47243186  | Frame_Shift_Del | DEL | CCTG | -   | 7  | 864  | .:471_474delCCTC  | c.(469-474)GCCCTGfs              | p.A157fs      |
| Pat_53 | Post-Resistance | ABCC4     | 10257  | 37 | 13 | 95696016  | 95696016  | Frame_Shift_Del | DEL | T    | -   | 11 | 276  | c.3655delA        | c.(3655-3657)ATCfs               | p.I1219fs     |
| Pat_53 | Post-Resistance | LRP10     | 26020  | 37 | 14 | 23341527  | 23341529  | In_Frame_Del    | DEL | CCT  | -   | 14 | 206  | c.15_17delCCT     | c.(13-18)ACCCTC>ACC              | p.L11del      |
| Pat_53 | Post-Resistance | C14orf106 | 55320  | 37 | 14 | 45693722  | 45693722  | Frame_Shift_Del | DEL | T    | -   | 15 | 199  | c.2068delA        | c.(2068-2070)AGTfs               | p.S690fs      |
| Pat_53 | Post-Resistance | MGAT2     | 4247   | 37 | 14 | 50088327  | 50088327  | Frame_Shift_Del | DEL | C    | -   | 7  | 355  | c.341delC         | c.(340-342)GCCfs                 | p.A114fs      |
| Pat_53 | Post-Resistance | C15orf24  | 56851  | 37 | 15 | 34393991  | 34393993  | In_Frame_Del    | DEL | AGC  | -   | 21 | 611  | c.48_50delGCT     | c.(46-51)CTGCTA>CTA              | p.16_17LL>L   |
| Pat_53 | Post-Resistance | SLTM      | 79811  | 37 | 15 | 59182564  | 59182565  | Frame_Shift_Del | DEL | CT   | -   | 22 | 405  | .:1994_1995delAC  | c.(1993-1995)GAGfs               | p.E665fs      |
| Pat_53 | Post-Resistance | CPLX3     | 594855 | 37 | 15 | 75122558  | 75122560  | In_Frame_Del    | DEL | GAG  | -   | 7  | 175  | c.340_342delGAG   | c.(340-342)GAGdel                | p.E118del     |
| Pat_53 | Post-Resistance | TIGD7     | 91151  | 37 | 16 | 3350472   | 3350472   | Frame_Shift_Del | DEL | T    | -   | 8  | 281  | c.143delA         | c.(142-144)AATfs                 | p.N48fs       |
| Pat_53 | Post-Resistance | C16orf88  | 400506 | 37 | 16 | 19722723  | 19722724  | Frame_Shift_Ins | INS | -    | T   | 7  | 250  | c.957_958insA     | c.(955-960)AAAGGCfs              | p.K319fs      |
| Pat_53 | Post-Resistance | EIF3CL    | 728689 | 37 | 16 | 28734579  | 28734581  | In_Frame_Del    | DEL | GAG  | -   | 16 | 2050 | c.871_873delGAG   | c.(871-873)GAGdel                | p.E295del     |

|        |                 |          |        |    |    |           |           |                 |     |          |   |    |      |                                                   |             |
|--------|-----------------|----------|--------|----|----|-----------|-----------|-----------------|-----|----------|---|----|------|---------------------------------------------------|-------------|
| Pat_53 | Post-Resistance | ITGAL    | 3683   | 37 | 16 | 30531249  | 30531251  | In_Frame_Del    | DEL | GCT      | - | 9  | 484  | .3300_3302delGC(3298-3303)GGGCTG>GG               | p.L1106del  |
| Pat_53 | Post-Resistance | SRCAP    | 10847  | 37 | 16 | 30736370  | 30736371  | Frame_Shift_Ins | INS | -        | C | 14 | 564  | c.5625_5626insC c.(5623-5628)CAGCCcfs             | p.Q1875fs   |
| Pat_53 | Post-Resistance | BRD7     | 29117  | 37 | 16 | 50368678  | 50368679  | Frame_Shift_Del | DEL | CT       | - | 44 | 726  | c.830_831delAG c.(829-831)GAGfs                   | p.E277fs    |
| Pat_53 | Post-Resistance | IRX6     | 79190  | 37 | 16 | 55362674  | 55362676  | In_Frame_Del    | DEL | GAG      | - | 12 | 82   | c.784_786delGAG c.(784-786)GAGdel                 | p.E268del   |
| Pat_53 | Post-Resistance | CPNE2    | 221184 | 37 | 16 | 57153143  | 57153144  | Frame_Shift_Del | DEL | TA       | - | 8  | 356  | c.544_545delTA c.(544-546)TATfs                   | p.Y182fs    |
| Pat_53 | Post-Resistance | CIAPIN1  | 57019  | 37 | 16 | 57473182  | 57473182  | Frame_Shift_Del | DEL | C        | - | 7  | 690  | c.222delG c.(220-222)CTGfs                        | p.L74fs     |
| Pat_53 | Post-Resistance | COQ9     | 57017  | 37 | 16 | 57486732  | 57486734  | In_Frame_Del    | DEL | GAG      | - | 10 | 305  | c.262_264delGAG c.(262-264)GAGdel                 | p.E91del    |
| Pat_53 | Post-Resistance | SLC9A5   | 6553   | 37 | 16 | 67300017  | 67300019  | In_Frame_Del    | DEL | GAG      | - | 8  | 118  | .2107_2109delGAG c.(2107-2109)GAGdel              | p.E708del   |
| Pat_53 | Post-Resistance | KIAA0182 | 23199  | 37 | 16 | 85682290  | 85682290  | Frame_Shift_Del | DEL | C        | - | 8  | 177  | c.359delC c.(358-360)ACCfs                        | p.T120fs    |
| Pat_53 | Post-Resistance | FXR2     | 9513   | 37 | 17 | 7495872   | 7495874   | In_Frame_Del    | DEL | CGG      | - | 19 | 1016 | .1773_1775delCC(1771-1776)CGCCGT>CG.591_592RR>I   |             |
| Pat_53 | Post-Resistance | CNTROB   | 116840 | 37 | 17 | 7843518   | 7843519   | Frame_Shift_Del | DEL | GA       | - | 10 | 271  | .1269_1270delGAG c.(1267-1272)CGGAGfs             | p.R423fs    |
| Pat_53 | Post-Resistance | CYTSB    | 92521  | 37 | 17 | 20135087  | 20135087  | Frame_Shift_Del | DEL | G        | - | 8  | 414  | c.2088delG c.(2086-2088)CTGfs                     | p.L696fs    |
| Pat_53 | Post-Resistance | SUPT6H   | 6830   | 37 | 17 | 27027202  | 27027204  | In_Frame_Del    | DEL | AGC      | - | 12 | 637  | .4573_4575delAG c.(4573-4575)AGCdel               | p.S1528del  |
| Pat_53 | Post-Resistance | SSH2     | 85464  | 37 | 17 | 27959375  | 27959375  | Frame_Shift_Del | DEL | G        | - | 9  | 744  | c.2756delC c.(2755-2757)CCAfs                     | p.P919fs    |
| Pat_53 | Post-Resistance | GPATCH8  | 23131  | 37 | 17 | 42477345  | 42477346  | Frame_Shift_Del | DEL | AG       | - | 10 | 1073 | .2099_2100delCT c.(2098-2100)TCTfs                | p.S700fs    |
| Pat_53 | Post-Resistance | CCDC43   | 124808 | 37 | 17 | 42756253  | 42756253  | Frame_Shift_Del | DEL | T        | - | 8  | 78   | c.646delA c.(646-648)AGGfs                        | p.R216fs    |
| Pat_53 | Post-Resistance | MYL4     | 4635   | 37 | 17 | 45299094  | 45299095  | Frame_Shift_Del | DEL | GC       | - | 8  | 284  | c.360_361delGC c.(358-363)CTGCAGfs                | p.L120fs    |
| Pat_53 | Post-Resistance | COX11    | 1353   | 37 | 17 | 53040139  | 53040139  | Frame_Shift_Del | DEL | A        | - | 8  | 183  | c.786delT c.(784-786)TTTfs                        | p.F262fs    |
| Pat_53 | Post-Resistance | SLC9A3R1 | 9368   | 37 | 17 | 72764624  | 72764624  | Frame_Shift_Del | DEL | C        | - | 8  | 604  | c.906delC c.(904-906)AGCfs                        | p.S302fs    |
| Pat_53 | Post-Resistance | CHERP    | 10523  | 37 | 19 | 16640581  | 16640583  | In_Frame_Del    | DEL | TGC      | - | 7  | 29   | .1005_1007delGC.(1003-1008)CAGCAA>CA.335_336QQ>I  |             |
| Pat_53 | Post-Resistance | LSM14A   | 26065  | 37 | 19 | 34710340  | 34710340  | Frame_Shift_Del | DEL | C        | - | 8  | 401  | c.826delC c.(826-828)CGGfs                        | p.R276fs    |
| Pat_53 | Post-Resistance | HAMP     | 57817  | 37 | 19 | 35773520  | 35773522  | In_Frame_Del    | DEL | CTC      | - | 11 | 291  | c.40_42delCTC c.(40-42)CTCdel                     | p.L18del    |
| Pat_53 | Post-Resistance | LYPD3    | 27076  | 37 | 19 | 43969653  | 43969655  | In_Frame_Del    | DEL | AGC      | - | 10 | 401  | c.69_71delGCT c.(67-72)CTGCTT>CTT                 | p.23_24LL>L |
| Pat_53 | Post-Resistance | PNMAL1   | 55228  | 37 | 19 | 46973195  | 46973197  | In_Frame_Del    | DEL | CTT      | - | 8  | 336  | .1096_1098delAA c.(1096-1098)AAGdel               | p.K366del   |
| Pat_53 | Post-Resistance | ASXL2    | 55252  | 37 | 2  | 26022304  | 26022306  | In_Frame_Del    | DEL | CTG      | - | 11 | 454  | c.351_353delCAGc.(349-354)AGCAGT>AGT.117_118SS>S  |             |
| Pat_53 | Post-Resistance | USP34    | 9736   | 37 | 2  | 61575023  | 61575025  | In_Frame_Del    | DEL | TGG      | - | 9  | 114  | .2265_2267delCC.(2263-2268)CACCAT>CA.755_756HH>I  |             |
| Pat_53 | Post-Resistance | DYSF     | 8291   | 37 | 2  | 71801420  | 71801422  | In_Frame_Del    | DEL | CCG      | - | 8  | 332  | .3267_3269delCC.(3265-3270)TTCCGC>TT              | p.R1093del  |
| Pat_53 | Post-Resistance | ITPRIPL1 | 150771 | 37 | 2  | 96992793  | 96992795  | In_Frame_Del    | DEL | GAG      | - | 9  | 82   | c.424_426delGAG c.(424-426)GAGdel                 | p.E147del   |
| Pat_53 | Post-Resistance | 7-Mar    | 64844  | 37 | 2  | 160604680 | 160604680 | Frame_Shift_Del | DEL | T        | - | 9  | 133  | c.879delT c.(877-879)ACTfs                        | p.T293fs    |
| Pat_53 | Post-Resistance | GRB14    | 2888   | 37 | 2  | 165365288 | 165365288 | Frame_Shift_Del | DEL | T        | - | 16 | 369  | c.891delA c.(889-891)AAAfs                        | p.K297fs    |
| Pat_53 | Post-Resistance | RBM45    | 129831 | 37 | 2  | 178988920 | 178988920 | Frame_Shift_Del | DEL | A        | - | 8  | 234  | c.1135delA c.(1135-1137)AAAfs                     | p.K379fs    |
| Pat_53 | Post-Resistance | ASNSD1   | 54529  | 37 | 2  | 190531266 | 190531266 | Frame_Shift_Del | DEL | T        | - | 7  | 398  | c.408delT c.(406-408)GATfs                        | p.D136fs    |
| Pat_53 | Post-Resistance | CYP20A1  | 57404  | 37 | 2  | 204150380 | 204150380 | Frame_Shift_Del | DEL | A        | - | 8  | 234  | c.896delA c.(895-897)CAAfs                        | p.Q299fs    |
| Pat_53 | Post-Resistance | RQCD1    | 9125   | 37 | 2  | 219449364 | 219449364 | Frame_Shift_Del | DEL | T        | - | 13 | 885  | c.350delT c.(349-351)CTTfs                        | p.L117fs    |
| Pat_53 | Post-Resistance | DSTN     | 11034  | 37 | 20 | 17581488  | 17581489  | Frame_Shift_Ins | INS | -        | T | 12 | 349  | c.109_110insT c.(109-111)ATTfs                    | p.I37fs     |
| Pat_53 | Post-Resistance | FRG1B    | 284802 | 37 | 20 | 29628229  | 29628230  | Frame_Shift_Ins | INS | -        | A | 36 | 581  | c.141_142insA c.(139-144)GGGAAAFs                 | p.G47fs     |
| Pat_53 | Post-Resistance | BCL2L1   | 598    | 37 | 20 | 30309591  | 30309591  | Frame_Shift_Del | DEL | A        | - | 7  | 1960 | c.431delT c.(430-432)TTCfs                        | p.F144fs    |
| Pat_53 | Post-Resistance | MYLK2    | 85366  | 37 | 20 | 30407987  | 30407987  | Frame_Shift_Del | DEL | C        | - | 8  | 272  | c.111delC c.(109-111)GGCfs                        | p.G37fs     |
| Pat_53 | Post-Resistance | SYCP2    | 10388  | 37 | 20 | 58490593  | 58490593  | Frame_Shift_Del | DEL | T        | - | 7  | 483  | c.526delA c.(526-528)ATGfs                        | p.M176fs    |
| Pat_53 | Post-Resistance | SFRS15   | 57466  | 37 | 21 | 33044257  | 33044259  | In_Frame_Del    | DEL | GCT      | - | 13 | 314  | .2897_2899delAG(2896-2901)CAGCCA>CC               | p.Q966del   |
| Pat_53 | Post-Resistance | TCP10L   | 140290 | 37 | 21 | 33949091  | 33949091  | Frame_Shift_Del | DEL | C        | - | 7  | 554  | c.641delG c.(640-642)GGTfs                        | p.G214fs    |
| Pat_53 | Post-Resistance | IFNGR2   | 3460   | 37 | 21 | 34799292  | 34799292  | Frame_Shift_Del | DEL | T        | - | 13 | 1666 | c.514delT c.(514-516)TTTfs                        | p.F172fs    |
| Pat_53 | Post-Resistance | TTC3     | 7267   | 37 | 21 | 38538054  | 38538054  | Frame_Shift_Del | DEL | A        | - | 8  | 714  | c.3538delA c.(3538-3540)AAAfs                     | p.K1180fs   |
| Pat_53 | Post-Resistance | SF3A1    | 10291  | 37 | 22 | 30742328  | 30742330  | In_Frame_Del    | DEL | CTG      | - | 8  | 216  | c.364_366delCAG c.(364-366)CAGdel                 | p.Q122del   |
| Pat_53 | Post-Resistance | CDC42EP1 | 11135  | 37 | 22 | 37964409  | 37964429  | In_Frame_Del    | DEL | CTGCTGCA | - | 31 | 80   | .AGCGCTGTGAGCGCCTGCTGCAAAC(APAANPS254c            |             |
| Pat_53 | Post-Resistance | RANGAP1  | 5905   | 37 | 22 | 41650469  | 41650471  | In_Frame_Del    | DEL | TCC      | - | 25 | 252  | .1101_1103delIGG.(1099-1104)GAGGAA>GA.367_368EE>I |             |
| Pat_53 | Post-Resistance | ARFGAP3  | 26286  | 37 | 22 | 43213780  | 43213780  | Frame_Shift_Del | DEL | T        | - | 13 | 730  | c.896delA c.(895-897)AATfs                        | p.N299fs    |

|        |                 |          |        |    |    |           |           |                 |     |      |   |    |      |                   |                          |                |
|--------|-----------------|----------|--------|----|----|-----------|-----------|-----------------|-----|------|---|----|------|-------------------|--------------------------|----------------|
| Pat_53 | Post-Resistance | TUBGCP6  | 85378  | 37 | 22 | 50664481  | 50664481  | Frame_Shift_Del | DEL | G    | - | 7  | 195  | c.1831delC        | c.(1831-1833)CGGfs       | p.R611fs       |
| Pat_53 | Post-Resistance | CNTN6    | 27255  | 37 | 3  | 1371501   | 1371501   | Frame_Shift_Del | DEL | A    | - | 7  | 337  | c.1246delA        | c.(1246-1248)AAAfs       | p.K416fs       |
| Pat_53 | Post-Resistance | NKTR     | 4820   | 37 | 3  | 42679035  | 42679036  | Frame_Shift_Ins | INS | -    | C | 14 | 827  | c.1839_1840insC   | c.(1837-1842)AGTCCCfs    | p.S613fs       |
| Pat_53 | Post-Resistance | ANO10    | 55129  | 37 | 3  | 43647213  | 43647213  | Frame_Shift_Del | DEL | T    | - | 8  | 251  | c.132delA         | c.(130-132)AAAfs         | p.K44fs        |
| Pat_53 | Post-Resistance | ABHD5    | 51099  | 37 | 3  | 43756534  | 43756534  | Frame_Shift_Del | DEL | A    | - | 10 | 379  | c.757delA         | c.(757-759)AATfs         | p.N253fs       |
| Pat_53 | Post-Resistance | MYLK     | 4638   | 37 | 3  | 123368043 | 123368044 | Splice_Site     | INS | -    | G | 7  | 131  | c.4289_splice     | c.e25-1                  | p.E1430_splice |
| Pat_53 | Post-Resistance | TOPBP1   | 11073  | 37 | 3  | 133329880 | 133329880 | Frame_Shift_Del | DEL | T    | - | 7  | 559  | c.4141delA        | c.(4141-4143)ATCfs       | p.I1381fs      |
| Pat_53 | Post-Resistance | DBR1     | 51163  | 37 | 3  | 137880741 | 137880743 | In_Frame_Del    | DEL | TCG  | - | 8  | 142  | .1623_1625delCG.  | c.(1621-1626)GATGAT>GAt. | 541_542DD>I    |
| Pat_53 | Post-Resistance | MED12L   | 116931 | 37 | 3  | 151148114 | 151148116 | In_Frame_Del    | DEL | CAG  | - | 13 | 257  | .6331_6333delCAI  | c.(6331-6333)CAGdel      | p.Q2115del     |
| Pat_53 | Post-Resistance | PHC3     | 80012  | 37 | 3  | 169896635 | 169896637 | In_Frame_Del    | DEL | TGG  | - | 14 | 959  | c.68_70delCCA     | c.(67-72)ACCATC>ATC      | p.T23del       |
| Pat_53 | Post-Resistance | PARL     | 55486  | 37 | 3  | 183585678 | 183585678 | Frame_Shift_Del | DEL | A    | - | 7  | 316  | c.296delT         | c.(295-297)ATAfs         | p.I99fs        |
| Pat_53 | Post-Resistance | FETUB    | 26998  | 37 | 3  | 186362544 | 186362544 | Frame_Shift_Del | DEL | A    | - | 8  | 242  | c.429delA         | c.(427-429)TCAfs         | p.S143fs       |
| Pat_53 | Post-Resistance | PROM1    | 8842   | 37 | 4  | 15995680  | 15995680  | Frame_Shift_Del | DEL | T    | - | 11 | 253  | c.1697delA        | c.(1696-1698)AATfs       | p.N566fs       |
| Pat_53 | Post-Resistance | FIP1L1   | 81608  | 37 | 4  | 54319248  | 54319249  | Frame_Shift_Del | DEL | AG   | - | 34 | 150  | .1447_1448delAC   | c.(1447-1449)AGAfs       | p.R483fs       |
| Pat_53 | Post-Resistance | CFI      | 3426   | 37 | 4  | 110670394 | 110670394 | Frame_Shift_Del | DEL | C    | - | 8  | 1093 | c.1128delG        | c.(1126-1128)CTGfs       | p.L376fs       |
| Pat_53 | Post-Resistance | EXOSC9   | 5393   | 37 | 4  | 122728764 | 122728764 | Frame_Shift_Del | DEL | T    | - | 7  | 359  | c.592delT         | c.(592-594)TTTfs         | p.F198fs       |
| Pat_53 | Post-Resistance | CLGN     | 1047   | 37 | 4  | 141313402 | 141313402 | Frame_Shift_Del | DEL | T    | - | 7  | 749  | c.1622delA        | c.(1621-1623)AAGfs       | p.K541fs       |
| Pat_53 | Post-Resistance | OTUD4    | 54726  | 37 | 4  | 146077123 | 146077125 | In_Frame_Del    | DEL | CAG  | - | 11 | 287  | c.458_460delCTGc. | c.(457-462)GCTGAT>GAT    | p.A153del      |
| Pat_53 | Post-Resistance | HMGB2    | 3148   | 37 | 4  | 174253277 | 174253279 | In_Frame_Del    | DEL | TCC  | - | 14 | 267  | c.582_584delGGA.  | c.(580-585)GAGGAA>GA.    | 194_195EE>I    |
| Pat_53 | Post-Resistance | CTNND2   | 1501   | 37 | 5  | 11110989  | 11110991  | In_Frame_Del    | DEL | TTC  | - | 27 | 844  | .2442_2444delGA.  | c.(2440-2445)AAGAAA>AA.  | 814_815KK>I    |
| Pat_53 | Post-Resistance | MYO10    | 4651   | 37 | 5  | 16694605  | 16694606  | Frame_Shift_Ins | INS | -    | C | 7  | 299  | c.3674_3675insG   | c.(3673-3675)GGCfs       | p.G1225fs      |
| Pat_53 | Post-Resistance | CDH10    | 1008   | 37 | 5  | 24492973  | 24492973  | Frame_Shift_Del | DEL | A    | - | 8  | 871  | c.1577delT        | c.(1576-1578)TTCfs       | p.F526fs       |
| Pat_53 | Post-Resistance | THBS4    | 7060   | 37 | 5  | 79372774  | 79372776  | In_Frame_Del    | DEL | TGA  | - | 11 | 470  | .1989_1991delTG.  | c.(1987-1992)TGATGAT>TG  | p.D668del      |
| Pat_53 | Post-Resistance | MSH3     | 4437   | 37 | 5  | 79970915  | 79970915  | Frame_Shift_Del | DEL | A    | - | 18 | 941  | c.1141delA        | c.(1141-1143)AAAfs       | p.K381fs       |
| Pat_53 | Post-Resistance | AP3S1    | 1176   | 37 | 5  | 115202418 | 115202421 | Frame_Shift_Del | DEL | AAGA | - | 7  | 259  | .121_124delAAG/   | c.(121-126)AAGAGAfs      | p.K41fs        |
| Pat_53 | Post-Resistance | ZNF608   | 57507  | 37 | 5  | 124079813 | 124079815 | In_Frame_Del    | DEL | CTC  | - | 14 | 585  | c.868_870delGAG   | c.(868-870)GAGdel        | p.E290del      |
| Pat_53 | Post-Resistance | RAPGEF6  | 51735  | 37 | 5  | 130782332 | 130782332 | Frame_Shift_Del | DEL | T    | - | 7  | 422  | c.3265delA        | c.(3265-3267)AGGfs       | p.R1089fs      |
| Pat_53 | Post-Resistance | SLC22A4  | 6583   | 37 | 5  | 131676327 | 131676327 | Frame_Shift_Del | DEL | T    | - | 7  | 524  | c.1514delT        | c.(1513-1515)CTTfs       | p.L505fs       |
| Pat_53 | Post-Resistance | IK       | 3550   | 37 | 5  | 140032593 | 140032594 | Frame_Shift_Del | DEL | GA   | - | 10 | 190  | c.268_269delGA    | c.(268-270)GAGfs         | p.E90fs        |
| Pat_53 | Post-Resistance | PCDH1    | 5097   | 37 | 5  | 141244442 | 141244442 | Frame_Shift_Del | DEL | G    | - | 9  | 392  | c.1454delC        | c.(1453-1455)CCAfs       | p.P485fs       |
| Pat_53 | Post-Resistance | LARP1    | 23367  | 37 | 5  | 154173389 | 154173390 | Frame_Shift_Ins | INS | -    | C | 13 | 762  | c.898_899insC     | c.(898-900)GCCfs         | p.A300fs       |
| Pat_53 | Post-Resistance | MRPL22   | 29093  | 37 | 5  | 154336746 | 154336746 | Frame_Shift_Del | DEL | A    | - | 8  | 412  | c.313delA         | c.(313-315)AAAfs         | p.K105fs       |
| Pat_53 | Post-Resistance | BTN2A2   | 10385  | 37 | 6  | 26384091  | 26384093  | In_Frame_Del    | DEL | CCT  | - | 9  | 321  | c.42_44delCCT     | c.(40-45)TCCCTC>TCC      | p.L24del       |
| Pat_53 | Post-Resistance | BTN2A3   | 54718  | 37 | 6  | 26422388  | 26422390  | In_Frame_Del    | DEL | CCT  | - | 18 | 489  | c.42_44delCCT     | c.(40-45)TCCCTC>TCC      | p.L19del       |
| Pat_53 | Post-Resistance | HLA-A    | 3105   | 37 | 6  | 29911319  | 29911319  | Frame_Shift_Del | DEL | G    | - | 22 | 166  | c.618delG         | c.(616-618)ACGfs         | p.T206fs       |
| Pat_53 | Post-Resistance | BAT2     | 7916   | 37 | 6  | 31604005  | 31604005  | Frame_Shift_Del | DEL | C    | - | 9  | 1126 | c.5644delC        | c.(5644-5646)CCCfs       | p.P1882fs      |
| Pat_53 | Post-Resistance | BAT3     | 7917   | 37 | 6  | 31608571  | 31608571  | Frame_Shift_Del | DEL | G    | - | 7  | 221  | c.2842delC        | c.(2842-2844)CAGfs       | p.Q948fs       |
| Pat_53 | Post-Resistance | KIFC1    | 3833   | 37 | 6  | 33372838  | 33372838  | Frame_Shift_Del | DEL | G    | - | 7  | 261  | c.966delG         | c.(964-966)CCGfs         | p.P322fs       |
| Pat_53 | Post-Resistance | ZNF318   | 24149  | 37 | 6  | 43323502  | 43323502  | Frame_Shift_Del | DEL | T    | - | 7  | 1062 | c.1570delA        | c.(1570-1572)AGGfs       | p.R524fs       |
| Pat_53 | Post-Resistance | C6orf165 | 154313 | 37 | 6  | 88144700  | 88144700  | Frame_Shift_Del | DEL | A    | - | 11 | 191  | c.1423delA        | c.(1423-1425)AAAfs       | p.K475fs       |
| Pat_53 | Post-Resistance | ARID1B   | 57492  | 37 | 6  | 157510806 | 157510806 | Frame_Shift_Del | DEL | C    | - | 7  | 502  | c.3527delC        | c.(3526-3528)ACCfs       | p.T1176fs      |
| Pat_53 | Post-Resistance | QKI      | 9444   | 37 | 6  | 163899920 | 163899920 | Frame_Shift_Del | DEL | A    | - | 7  | 255  | c.394delA         | c.(394-396)AAAfs         | p.K132fs       |
| Pat_53 | Post-Resistance | COX19    | 90639  | 37 | 7  | 1009017   | 1009017   | Frame_Shift_Del | DEL | T    | - | 8  | 1450 | c.270delA         | c.(268-270)AAAfs         | p.K90fs        |
| Pat_53 | Post-Resistance | GLCC1    | 113263 | 37 | 7  | 8126097   | 8126099   | In_Frame_Del    | DEL | CAG  | - | 7  | 776  | .1573_1575delCAI  | c.(1573-1575)CAGdel      | p.Q528del      |
| Pat_53 | Post-Resistance | C7orf16  | 10842  | 37 | 7  | 31735179  | 31735179  | Frame_Shift_Del | DEL | A    | - | 10 | 482  | c.179delA         | c.(178-180)CAAfs         | p.Q60fs        |
| Pat_53 | Post-Resistance | OGDH     | 4967   | 37 | 7  | 44684936  | 44684936  | Frame_Shift_Del | DEL | T    | - | 9  | 629  | c.233delT         | c.(232-234)ATTfs         | p.I78fs        |
| Pat_53 | Post-Resistance | DTX2     | 113878 | 37 | 7  | 76112249  | 76112249  | Frame_Shift_Del | DEL | A    | - | 10 | 950  | c.693delA         | c.(691-693)CCAfs         | p.P231fs       |

|        |                 |          |        |    |    |           |           |                 |     |           |     |    |      |                                                   |                     |              |
|--------|-----------------|----------|--------|----|----|-----------|-----------|-----------------|-----|-----------|-----|----|------|---------------------------------------------------|---------------------|--------------|
| Pat_53 | Post-Resistance | TMEM60   | 85025  | 37 | 7  | 77423460  | 77423460  | Frame_Shift_Del | DEL | T         | -   | 9  | 466  | c.231delA                                         | c.(229-231)AAafs    | p.K77fs      |
| Pat_53 | Post-Resistance | PHTF2    | 57157  | 37 | 7  | 77569581  | 77569581  | Frame_Shift_Del | DEL | T         | -   | 14 | 735  | c.1702delT                                        | c.(1702-1704)TTTTfs | p.F568fs     |
| Pat_53 | Post-Resistance | PCLO     | 27445  | 37 | 7  | 82784451  | 82784451  | Frame_Shift_Del | DEL | T         | -   | 10 | 418  | c.1506delA                                        | c.(1504-1506)CAAfs  | p.Q502fs     |
| Pat_53 | Post-Resistance | SLC25A40 | 55972  | 37 | 7  | 87483549  | 87483549  | Frame_Shift_Del | DEL | A         | -   | 8  | 481  | c.234delT                                         | c.(232-234)TATfs    | p.Y78fs      |
| Pat_53 | Post-Resistance | CYP51A1  | 1595   | 37 | 7  | 91752494  | 91752494  | Frame_Shift_Del | DEL | T         | -   | 12 | 530  | c.1026delA                                        | c.(1024-1026)AAAfs  | p.K342fs     |
| Pat_53 | Post-Resistance | CCDC132  | 55610  | 37 | 7  | 92923947  | 92923948  | Frame_Shift_Ins | INS | -         | G   | 9  | 419  | c.1166_1167insG                                   | c.(1165-1167)CAGfs  | p.Q389fs     |
| Pat_53 | Post-Resistance | PTCD1    | 26024  | 37 | 7  | 99032605  | 99032607  | In_Frame_Del    | DEL | CTC       | -   | 7  | 275  | c.259_261delGAG                                   | c.(259-261)GAGdel   | p.E87del     |
| Pat_53 | Post-Resistance | GPC2     | 221914 | 37 | 7  | 99771554  | 99771554  | Frame_Shift_Del | DEL | C         | -   | 10 | 500  | c.796delG                                         | c.(796-798)GTCfs    | p.V266fs     |
| Pat_53 | Post-Resistance | DNAJC2   | 27000  | 37 | 7  | 102964992 | 102964992 | Frame_Shift_Del | DEL | T         | -   | 7  | 367  | c.590delA                                         | c.(589-591)AATfs    | p.N197fs     |
| Pat_53 | Post-Resistance | LAMB4    | 22798  | 37 | 7  | 107763584 | 107763584 | Frame_Shift_Del | DEL | A         | -   | 7  | 503  | c.26delT                                          | c.(25-27)TTGfs      | p.L9fs       |
| Pat_53 | Post-Resistance | OR9A4    | 130075 | 37 | 7  | 141619203 | 141619203 | Frame_Shift_Del | DEL | T         | -   | 10 | 460  | c.528delT                                         | c.(526-528)AATfs    | p.N176fs     |
| Pat_53 | Post-Resistance | CNPY1    | 285888 | 37 | 7  | 155299760 | 155299760 | Frame_Shift_Del | DEL | G         | -   | 8  | 143  | c.196delC                                         | c.(196-198)CAGfs    | p.Q66fs      |
| Pat_53 | Post-Resistance | RP1L1    | 94137  | 37 | 8  | 10467706  | 10467707  | In_Frame_Ins    | INS | -         | CCC | 23 | 347  | .3901_3902insGG(3901-3903)GTG>GGGGT.1300_1301ins  |                     |              |
| Pat_53 | Post-Resistance | MTMR7    | 9108   | 37 | 8  | 17169103  | 17169103  | Frame_Shift_Del | DEL | C         | -   | 8  | 1209 | c.1018delG                                        | c.(1018-1020)GATfs  | p.D340fs     |
| Pat_53 | Post-Resistance | C8orf80  | 389643 | 37 | 8  | 27888776  | 27888776  | Frame_Shift_Del | DEL | T         | -   | 7  | 417  | c.1892delA                                        | c.(1891-1893)AATfs  | p.N631fs     |
| Pat_53 | Post-Resistance | GOT1L1   | 137362 | 37 | 8  | 37791833  | 37791834  | Frame_Shift_Ins | INS | -         | T   | 9  | 219  | c.1243_1244insA                                   | c.(1243-1245)ACAfs  | p.T415fs     |
| Pat_53 | Post-Resistance | ADAM9    | 8754   | 37 | 8  | 38880792  | 38880793  | Frame_Shift_Ins | INS | -         | G   | 8  | 338  | c.862_863insG                                     | c.(862-864)CGGfs    | p.R288fs     |
| Pat_53 | Post-Resistance | PRKDC    | 5591   | 37 | 8  | 48746799  | 48746799  | Frame_Shift_Del | DEL | T         | -   | 7  | 832  | c.8110delA                                        | c.(8110-8112)AGGfs  | p.R2704fs    |
| Pat_53 | Post-Resistance | CA2      | 760    | 37 | 8  | 86386635  | 86386635  | Frame_Shift_Del | DEL | T         | -   | 10 | 454  | c.434delT                                         | c.(433-435)ATTfs    | p.I145fs     |
| Pat_53 | Post-Resistance | TP53INP1 | 94241  | 37 | 8  | 95952409  | 95952411  | In_Frame_Del    | DEL | TCT       | -   | 7  | 148  | c.150_152delAGA:(148-153)GAAGAG>GAC p.50_51EE>E   |                     |              |
| Pat_53 | Post-Resistance | PABPC1   | 26986  | 37 | 8  | 101721933 | 101721933 | Frame_Shift_Del | DEL | T         | -   | 9  | 139  | c.999delA                                         | c.(997-999)AAAfs    | p.K333fs     |
| Pat_53 | Post-Resistance | C8orf76  | 84933  | 37 | 8  | 124250059 | 124250063 | Frame_Shift_Del | DEL | CGCCT     | -   | 11 | 137  | 332_336delAGGC                                    | c.(331-336)GAGCGGfs | p.E111fs     |
| Pat_53 | Post-Resistance | TSNARE1  | 203062 | 37 | 8  | 143310866 | 143310868 | In_Frame_Del    | DEL | GAT       | -   | 7  | 124  | .1519_1521delAT(                                  | c.(1519-1521)ATCdel | p.I507del    |
| Pat_53 | Post-Resistance | MLLT3    | 4300   | 37 | 9  | 20414377  | 20414379  | In_Frame_Del    | DEL | CTG       | -   | 9  | 36   | c.465_467delCAGc.(463-468)AGCAGT>AGT.155_156SS>!  |                     |              |
| Pat_53 | Post-Resistance | NFIL3    | 4783   | 37 | 9  | 94172779  | 94172779  | Frame_Shift_Del | DEL | T         | -   | 8  | 610  | c.238delA                                         | c.(238-240)AGGfs    | p.R80fs      |
| Pat_53 | Post-Resistance | ECM2     | 1842   | 37 | 9  | 95277146  | 95277148  | In_Frame_Del    | DEL | TCC       | -   | 9  | 140  | c.819_821delGGAc.(817-822)GAGAGT>GAT              |                     | p.E273del    |
| Pat_53 | Post-Resistance | C9orf114 | 51490  | 37 | 9  | 131591119 | 131591120 | Frame_Shift_Ins | INS | -         | T   | 7  | 173  | c.102_103insA                                     | c.(100-105)AAATGGfs | p.K34fs      |
| Pat_53 | Post-Resistance | TXLNG    | 55787  | 37 | X  | 16850849  | 16850850  | Frame_Shift_Del | DEL | AG        | -   | 8  | 90   | c.968_969delIAG                                   | c.(967-969)CAGfs    | p.Q323fs     |
| Pat_53 | Post-Resistance | PRRG1    | 5638   | 37 | X  | 37312611  | 37312611  | Frame_Shift_Del | DEL | C         | -   | 9  | 312  | c.394delC                                         | c.(394-396)CCCfs    | p.P132fs     |
| Pat_53 | Post-Resistance | PHF8     | 23133  | 37 | X  | 54011405  | 54011407  | In_Frame_Del    | DEL | CTC       | -   | 12 | 209  | .2491_2493delIGA(                                 | c.(2491-2493)GAGdel | p.E831del    |
| Pat_53 | Post-Resistance | OPHN1    | 4983   | 37 | X  | 67454384  | 67454384  | Frame_Shift_Del | DEL | A         | -   | 7  | 220  | c.431delT                                         | c.(430-432)TTAfs    | p.L144fs     |
| Pat_53 | Post-Resistance | BRWD3    | 254065 | 37 | X  | 79938006  | 79938007  | Frame_Shift_Del | DEL | AG        | -   | 8  | 550  | c.4354_4355delICT                                 | c.(4354-4356)CTAfs  | p.L1452fs    |
| Pat_53 | Post-Resistance | ARMCX3   | 51566  | 37 | X  | 100880152 | 100880154 | In_Frame_Del    | DEL | TGA       | -   | 16 | 255  | c.183_185delITGA c.(181-186)TCTGAT>TCT            |                     | p.D66del     |
| Pat_53 | Post-Resistance | PSMD10   | 5716   | 37 | X  | 107331258 | 107331258 | Frame_Shift_Del | DEL | T         | -   | 8  | 340  | c.285delA                                         | c.(283-285)AAAfs    | p.K95fs      |
| Pat_53 | Post-Resistance | SLC25A5  | 292    | 37 | X  | 118603706 | 118603707 | Frame_Shift_Ins | INS | -         | G   | 46 | 503  | c.194_195insG                                     | c.(193-195)CAGfs    | p.Q65fs      |
| Pat_53 | Post-Resistance | HTATSF1  | 27336  | 37 | X  | 135585048 | 135585050 | In_Frame_Del    | DEL | AAG       | -   | 10 | 256  | c.682_684delAAG                                   | c.(682-684)AAGdel   | p.K232del    |
| Pat_53 | Post-Resistance | MAGEC1   | 9947   | 37 | X  | 140994114 | 140994116 | In_Frame_Del    | DEL | CTC       | -   | 13 | 388  | c.924_926delCTCc.(922-927)AGCTCC>AGC.308_309SS>!  |                     |              |
| Pat_58 | Pre-Treatment   | TCHH     | 7062   | 37 | 1  | 152084580 | 152084582 | In_Frame_Del    | DEL | CTC       | -   | 8  | 39   | .1111_1113delIGAC                                 | c.(1111-1113)GAGdel | p.E371del    |
| Pat_58 | Pre-Treatment   | BUB1B    | 701    | 37 | 15 | 40477506  | 40477506  | Frame_Shift_Del | DEL | C         | -   | 7  | 159  | c.892delC                                         | c.(892-894)CCCfs    | p.P298fs     |
| Pat_58 | Pre-Treatment   | RAI1     | 10743  | 37 | 17 | 17699359  | 17699359  | Frame_Shift_Del | DEL | C         | -   | 3  | 5    | c.3097delC                                        | c.(3097-3099)CCCfs  | p.P1033fs    |
| Pat_58 | Pre-Treatment   | POLDIP2  | 26073  | 37 | 17 | 26684394  | 26684395  | Splice_Site     | INS | -         | G   | 3  | 5    | c.78_splice                                       | c.e2+1              | p.W26_splice |
| Pat_58 | Pre-Treatment   | SEMA6B   | 10501  | 37 | 19 | 4544182   | 4544182   | Frame_Shift_Del | DEL | G         | -   | 2  | 4    | c.2098delC                                        | c.(2098-2100)CACfs  | p.H700fs     |
| Pat_58 | Pre-Treatment   | INHBA    | 3624   | 37 | 7  | 41729741  | 41729743  | In_Frame_Del    | DEL | TTC       | -   | 8  | 21   | c.786_788delGAAc.(784-789)AAGAAA>AAA).262_263KK>I |                     |              |
| Pat_58 | Pre-Treatment   | AUTS2    | 26053  | 37 | 7  | 70231241  | 70231242  | Frame_Shift_Ins | INS | -         | C   | 8  | 138  | c.1610_1611insC                                   | c.(1609-1611)CACfs  | p.H537fs     |
| Pat_58 | Pre-Treatment   | POMT1    | 10585  | 37 | 9  | 134393867 | 134393879 | Frame_Shift_Del | DEL | AGACCATCC | -   | 33 | 150  | 386delGAAGACC2-1386)TGGAAGACCATC                  |                     | p.W458fs     |
| Pat_58 | Pre-Treatment   | TPRN     | 286262 | 37 | 9  | 140087025 | 140087027 | In_Frame_Del    | DEL | TCC       | -   | 3  | 5    | .1659_1661delIGG(1657-1662)GAGGAA>GA).553_554EE>I |                     |              |
| Pat_58 | Post-Resistance | DLGAP3   | 58512  | 37 | 1  | 35370281  | 35370283  | In_Frame_Del    | DEL | TGG       | -   | 7  | 371  | c.702_704delCCA:(700-705)CACCAG>CAG               |                     | p.H234del    |



|        |                 |          |        |    |    |           |           |                 |     |      |   |    |      |                                      |                       |            |
|--------|-----------------|----------|--------|----|----|-----------|-----------|-----------------|-----|------|---|----|------|--------------------------------------|-----------------------|------------|
| Pat_58 | Post-Resistance | SNIP1    | 79753  | 37 | 1  | 38003363  | 38003365  | In_Frame_Del    | DEL | CTT  | - | 9  | 423  | .1175_1177delAAC(1174-1179)GAAGTG>GT | p.E392del             |            |
| Pat_58 | Post-Resistance | BCL10    | 8915   | 37 | 1  | 85736511  | 85736511  | Frame_Shift_Del | DEL | T    | - | 11 | 373  | c.136delA                            | c.(136-138)ATAfs      | p.L46fs    |
| Pat_58 | Post-Resistance | EVI5     | 7813   | 37 | 1  | 93159366  | 93159366  | Frame_Shift_Del | DEL | T    | - | 7  | 327  | c.1222delA                           | c.(1222-1224)ATGfs    | p.M408fs   |
| Pat_58 | Post-Resistance | COL11A1  | 1301   | 37 | 1  | 103355065 | 103355065 | Frame_Shift_Del | DEL | T    | - | 9  | 325  | c.4410delA                           | c.(4408-4410)AAAfs    | p.K1470fs  |
| Pat_58 | Post-Resistance | HAX1     | 10456  | 37 | 1  | 154245864 | 154245866 | In_Frame_Del    | DEL | GAA  | - | 7  | 230  | c.106_108delGAA                      | c.(106-108)GAAdel     | p.E40del   |
| Pat_58 | Post-Resistance | EPHX1    | 2052   | 37 | 1  | 226026384 | 226026384 | Frame_Shift_Del | DEL | C    | - | 8  | 751  | c.394delC                            | c.(394-396)CCCfs      | p.P132fs   |
| Pat_58 | Post-Resistance | UBQLN3   | 50613  | 37 | 11 | 5529918   | 5529920   | In_Frame_Del    | DEL | TGG  | - | 8  | 364  | c.869_871delCCA:(868-873)ACCAGC>AGC  | p.T290del             |            |
| Pat_58 | Post-Resistance | IFT46    | 56912  | 37 | 11 | 118427683 | 118427685 | In_Frame_Del    | DEL | ATC  | - | 9  | 282  | c.121_123delGAT                      | c.(121-123)GATdel     | p.D41del   |
| Pat_58 | Post-Resistance | SFRS2IP  | 9169   | 37 | 12 | 46320707  | 46320708  | Frame_Shift_Del | DEL | TC   | - | 7  | 403  | :.2776_2777delGA                     | c.(2776-2778)GAAfs    | p.E926fs   |
| Pat_58 | Post-Resistance | SLC39A5  | 283375 | 37 | 12 | 56628997  | 56628999  | In_Frame_Del    | DEL | CTG  | - | 8  | 586  | c.691_693delCTG                      | c.(691-693)CTGdel     | p.L234del  |
| Pat_58 | Post-Resistance | TMTC3    | 160418 | 37 | 12 | 88566417  | 88566417  | Frame_Shift_Del | DEL | T    | - | 7  | 392  | c.1094delT                           | c.(1093-1095)CTTfs    | p.L365fs   |
| Pat_58 | Post-Resistance | RXFP2    | 122042 | 37 | 13 | 32376429  | 32376429  | Frame_Shift_Del | DEL | A    | - | 32 | 451  | c.2152delA                           | c.(2152-2154)AAAfs    | p.K718fs   |
| Pat_58 | Post-Resistance | LRCH1    | 23143  | 37 | 13 | 47127609  | 47127611  | In_Frame_Del    | DEL | CCA  | - | 3  | 6    | c.78_80delCCA                        | c.(76-81)CCCCAC>CCC   | p.H33del   |
| Pat_58 | Post-Resistance | LRCH1    | 23143  | 37 | 13 | 47243183  | 47243186  | Frame_Shift_Del | DEL | CCTG | - | 13 | 792  | :.471_474delCCTC                     | c.(469-474)GCCCTGfs   | p.A157fs   |
| Pat_58 | Post-Resistance | SIPA1L1  | 26037  | 37 | 14 | 72190482  | 72190484  | In_Frame_Del    | DEL | TCC  | - | 13 | 439  | .4390_4392delTC                      | c.(4390-4392)TCCdel   | p.S1468del |
| Pat_58 | Post-Resistance | C14orf43 | 91748  | 37 | 14 | 74205926  | 74205928  | In_Frame_Del    | DEL | CTG  | - | 7  | 55   | c.784_786delCAG                      | c.(784-786)CAGdel     | p.Q262del  |
| Pat_58 | Post-Resistance | BTBD7    | 55727  | 37 | 14 | 93761193  | 93761193  | Frame_Shift_Del | DEL | T    | - | 7  | 439  | c.173delA                            | c.(172-174)AAGfs      | p.K58fs    |
| Pat_58 | Post-Resistance | VPS33B   | 26276  | 37 | 15 | 91550236  | 91550238  | In_Frame_Del    | DEL | TCC  | - | 8  | 508  | c.642_644delGGAc.(640-645)GAGGAT>GAT | p.E214del             |            |
| Pat_58 | Post-Resistance | SETD1A   | 9739   | 37 | 16 | 30982809  | 30982811  | In_Frame_Del    | DEL | TCC  | - | 11 | 329  | .3127_3129delTC                      | c.(3127-3129)TCCdel   | p.S1058del |
| Pat_58 | Post-Resistance | C17orf85 | 55421  | 37 | 17 | 3721809   | 3721811   | In_Frame_Del    | DEL | TCC  | - | 7  | 303  | .1056_1058delGG(1054-1059)GAGGAA>GA  | p.352_353EE>I         |            |
| Pat_58 | Post-Resistance | SDF2     | 6388   | 37 | 17 | 26988863  | 26988863  | Frame_Shift_Del | DEL | C    | - | 7  | 975  | c.32delG                             | c.(31-33)GGTfs        | p.G11fs    |
| Pat_58 | Post-Resistance | ZNF207   | 7756   | 37 | 17 | 30677314  | 30677316  | In_Frame_Del    | DEL | AAG  | - | 8  | 883  | c.10_12delAAG                        | c.(10-12)AAGdel       | p.K7del    |
| Pat_58 | Post-Resistance | FAM134C  | 162427 | 37 | 17 | 40737147  | 40737148  | Frame_Shift_Del | DEL | TC   | - | 8  | 277  | c.722_723delGA                       | c.(721-723)AGAfs      | p.R241fs   |
| Pat_58 | Post-Resistance | PLCD3    | 113026 | 37 | 17 | 43192760  | 43192762  | In_Frame_Del    | DEL | TCC  | - | 7  | 100  | .1509_1511delGG.(1507-1512)GAGGAT>GA | p.E503del             |            |
| Pat_58 | Post-Resistance | TNFSF9   | 8744   | 37 | 19 | 6531149   | 6531151   | In_Frame_Del    | DEL | GCT  | - | 7  | 193  | c.102_104delGCT:(100-105)GGGCTG>GGC  | p.L41del              |            |
| Pat_58 | Post-Resistance | CYP4F3   | 4051   | 37 | 19 | 15769322  | 15769322  | Frame_Shift_Del | DEL | T    | - | 9  | 1204 | c.1271delT                           | c.(1270-1272)GTTfs    | p.V424fs   |
| Pat_58 | Post-Resistance | NWD1     | 284434 | 37 | 19 | 16908642  | 16908642  | Frame_Shift_Del | DEL | T    | - | 10 | 1393 | c.3404delT                           | c.(3403-3405)GTTfs    | p.V1135fs  |
| Pat_58 | Post-Resistance | FFAR2    | 2867   | 37 | 19 | 35940788  | 35940790  | In_Frame_Del    | DEL | CTG  | - | 7  | 166  | c.172_174delCTG                      | c.(172-174)CTGdel     | p.L62del   |
| Pat_58 | Post-Resistance | USP34    | 9736   | 37 | 2  | 61575023  | 61575025  | In_Frame_Del    | DEL | TGG  | - | 13 | 264  | .2265_2267delCC:(2263-2268)CACCAT>CA | p.755_756HH>I         |            |
| Pat_58 | Post-Resistance | ZMYND8   | 23613  | 37 | 20 | 45875072  | 45875072  | Frame_Shift_Del | DEL | T    | - | 10 | 706  | c.1904delA                           | c.(1903-1905)AAGfs    | p.K635fs   |
| Pat_58 | Post-Resistance | SYCP2    | 10388  | 37 | 20 | 58452518  | 58452519  | Frame_Shift_Ins | INS | -    | T | 7  | 153  | c.3071_3072insA                      | c.(3070-3072)AACfs    | p.N1024fs  |
| Pat_58 | Post-Resistance | C22orf43 | 51233  | 37 | 22 | 23959767  | 23959769  | In_Frame_Del    | DEL | CAT  | - | 8  | 288  | c.512_514delATGc.(511-516)GATGCC>GCC | p.D171del             |            |
| Pat_58 | Post-Resistance | APPL1    | 26060  | 37 | 3  | 57276921  | 57276921  | Frame_Shift_Del | DEL | A    | - | 8  | 321  | c.453delA                            | c.(451-453)TCAfs      | p.S151fs   |
| Pat_58 | Post-Resistance | ETV5     | 2119   | 37 | 3  | 185783667 | 185783667 | Frame_Shift_Del | DEL | G    | - | 7  | 383  | c.845delC                            | c.(844-846)CCAfs      | p.P282fs   |
| Pat_58 | Post-Resistance | ATP13A3  | 79572  | 37 | 3  | 194181471 | 194181473 | In_Frame_Del    | DEL | GAG  | - | 9  | 462  | c.139_141delCTC                      | c.(139-141)CTCdel     | p.L47del   |
| Pat_58 | Post-Resistance | CPEB2    | 132864 | 37 | 4  | 15067858  | 15067858  | Frame_Shift_Del | DEL | T    | - | 8  | 567  | c.1624delT                           | c.(1624-1626)TTTfs    | p.F542fs   |
| Pat_58 | Post-Resistance | SORBS2   | 8470   | 37 | 4  | 186544620 | 186544622 | In_Frame_Del    | DEL | GGT  | - | 10 | 170  | .1949_1951delAC(1948-1953)CACCGC>CG  | p.H650del             |            |
| Pat_58 | Post-Resistance | PAPD7    | 11044  | 37 | 5  | 6755013   | 6755014   | Frame_Shift_Del | DEL | AC   | - | 7  | 105  | :.1584_1585delAC                     | c.(1582-1587)AAACACfs | p.K528fs   |
| Pat_58 | Post-Resistance | NIPBL    | 25836  | 37 | 5  | 36985083  | 36985083  | Frame_Shift_Del | DEL | A    | - | 7  | 166  | c.1801delA                           | c.(1801-1803)AAAfs    | p.K601fs   |
| Pat_58 | Post-Resistance | DEK      | 7913   | 37 | 6  | 18264079  | 18264081  | In_Frame_Del    | DEL | TCC  | - | 7  | 331  | c.138_140delGGA:(136-141)GAGGAA>GA   | p.46_47EE>E           |            |
| Pat_58 | Post-Resistance | CYP21A2  | 1589   | 37 | 6  | 31975223  | 31975224  | Frame_Shift_Ins | INS | -    | T | 7  | 414  | c.916_917insT                        | c.(916-918)GTTfs      | p.V306fs   |
| Pat_58 | Post-Resistance | SLC17A5  | 26503  | 37 | 6  | 74351590  | 74351590  | Frame_Shift_Del | DEL | A    | - | 10 | 529  | c.349delT                            | c.(349-351)TATfs      | p.Y117fs   |
| Pat_58 | Post-Resistance | ARHGAP18 | 93663  | 37 | 6  | 129959602 | 129959603 | Frame_Shift_Ins | INS | -    | T | 7  | 724  | c.488_489insA                        | c.(487-489)AACfs      | p.N163fs   |
| Pat_58 | Post-Resistance | SDK1     | 221935 | 37 | 7  | 4008947   | 4008947   | Frame_Shift_Del | DEL | G    | - | 16 | 1579 | c.1605delG                           | c.(1603-1605)TCGfs    | p.S535fs   |
| Pat_58 | Post-Resistance | NEUROD6  | 63974  | 37 | 7  | 31378634  | 31378635  | Frame_Shift_Ins | INS | -    | T | 10 | 624  | c.248_249insA                        | c.(247-249)AAGfs      | p.K83fs    |
| Pat_58 | Post-Resistance | INHBA    | 3624   | 37 | 7  | 41729741  | 41729743  | In_Frame_Del    | DEL | TTC  | - | 7  | 127  | c.786_788delGAAc.(784-789)AAGAAA>AAA | p.262_263KK>I         |            |
| Pat_58 | Post-Resistance | WBSR17   | 64409  | 37 | 7  | 71142234  | 71142234  | Frame_Shift_Del | DEL | G    | - | 10 | 1838 | c.1443delG                           | c.(1441-1443)CAGfs    | p.Q481fs   |

|        |                 |          |        |    |    |           |           |                 |     |           |     |     |      |                                                    |                       |             |
|--------|-----------------|----------|--------|----|----|-----------|-----------|-----------------|-----|-----------|-----|-----|------|----------------------------------------------------|-----------------------|-------------|
| Pat_58 | Post-Resistance | STX1A    | 6804   | 37 | 7  | 73123425  | 73123427  | In_Frame_Del    | DEL | CAT       | -   | 14  | 1048 | c.56_58delATG                                      | c.(55-60)GATGTC>GTC   | p.D19del    |
| Pat_58 | Post-Resistance | MEPCE    | 56257  | 37 | 7  | 100028823 | 100028825 | In_Frame_Del    | DEL | CCA       | -   | 7   | 285  | .1182_1184delCC/(1180-1185)CGCCAC>CG               |                       | p.H399del   |
| Pat_58 | Post-Resistance | SRRT     | 51593  | 37 | 7  | 100482040 | 100482042 | In_Frame_Del    | DEL | AGG       | -   | 9   | 115  | c.809_811delAGG:(808-813)CAGGAG>CAC                |                       | p.E275del   |
| Pat_58 | Post-Resistance | LRRC17   | 10234  | 37 | 7  | 102584992 | 102584993 | Frame_Shift_Ins | INS | -         | A   | 7   | 442  | c.1264_1265insA                                    | c.(1264-1266)GAAfs    | p.E422fs    |
| Pat_58 | Post-Resistance | WNT2     | 7472   | 37 | 7  | 116955171 | 116955175 | Frame_Shift_Del | DEL | TCCTT     | -   | 7   | 481  | 538_542delAAGG                                     | c.(538-543)AAGGATfs   | p.K180fs    |
| Pat_58 | Post-Resistance | ZNF398   | 57541  | 37 | 7  | 148876153 | 148876153 | Frame_Shift_Del | DEL | C         | -   | 7   | 782  | c.1189delC                                         | c.(1189-1191)CCCfs    | p.P397fs    |
| Pat_58 | Post-Resistance | CDK5     | 1020   | 37 | 7  | 150754217 | 150754217 | Frame_Shift_Del | DEL | T         | -   | 7   | 1117 | c.68delA                                           | c.(67-69)AACfs        | p.N23fs     |
| Pat_58 | Post-Resistance | NOM1     | 64434  | 37 | 7  | 156743209 | 156743211 | In_Frame_Del    | DEL | GAG       | -   | 9   | 206  | c.778_780delGAG                                    | c.(778-780)GAGdel     | p.E264del   |
| Pat_58 | Post-Resistance | WDR60    | 55112  | 37 | 7  | 158704353 | 158704353 | Frame_Shift_Del | DEL | A         | -   | 7   | 468  | c.1573delA                                         | c.(1573-1575)AAAfs    | p.K525fs    |
| Pat_58 | Post-Resistance | MYST3    | 7994   | 37 | 8  | 41798420  | 41798422  | In_Frame_Del    | DEL | CTC       | -   | 11  | 638  | .2977_2979delGAT                                   | c.(2977-2979)GAGdel   | p.E993del   |
| Pat_58 | Post-Resistance | SULF1    | 23213  | 37 | 8  | 70514026  | 70514026  | Frame_Shift_Del | DEL | T         | -   | 8   | 910  | c.1023delT                                         | c.(1021-1023)CCTfs    | p.P341fs    |
| Pat_58 | Post-Resistance | INTS8    | 55656  | 37 | 8  | 95892420  | 95892421  | Frame_Shift_Ins | INS | -         | A   | 7   | 256  | c.2946_2947insA                                    | c.(2944-2949)AGGAAAfs | p.R982fs    |
| Pat_58 | Post-Resistance | C9orf131 | 138724 | 37 | 9  | 35043650  | 35043650  | Frame_Shift_Del | DEL | C         | -   | 8   | 1214 | c.1024delC                                         | c.(1024-1026)CCCfs    | p.P342fs    |
| Pat_58 | Post-Resistance | NFIL3    | 4783   | 37 | 9  | 94172779  | 94172779  | Frame_Shift_Del | DEL | T         | -   | 8   | 552  | c.238delA                                          | c.(238-240)AGGfs      | p.R80fs     |
| Pat_58 | Post-Resistance | POMT1    | 10585  | 37 | 9  | 134393867 | 134393879 | Frame_Shift_Del | DEL | AGACCATCC | -   | 211 | 288  | 386delGAAGACC2-1386)TGGAAGACCATC                   |                       | p.W458fs    |
| Pat_58 | Post-Resistance | LRCH2    | 57631  | 37 | X  | 114468474 | 114468476 | In_Frame_Del    | DEL | CCG       | -   | 3   | 6    | c.129_131delICGG:(127-132)GGCGGG>GG(p.43_44GG>G    |                       |             |
| Pat_58 | Post-Resistance | NKAP     | 79576  | 37 | X  | 119072752 | 119072753 | Frame_Shift_Del | DEL | TC        | -   | 11  | 425  | c.407_408delGA                                     | c.(406-408)AGAfs      | p.R136fs    |
| Pat_58 | Post-Resistance | AFF2     | 2334   | 37 | X  | 147733548 | 147733548 | Frame_Shift_Del | DEL | A         | -   | 7   | 828  | c.76delA                                           | c.(76-78)AAAfs        | p.K26fs     |
| Pat_59 | Pre-Treatment   | SNIP1    | 79753  | 37 | 1  | 38003368  | 38003370  | In_Frame_Del    | DEL | TCC       | -   | 7   | 191  | .1170_1172delIGG.(1168-1173)GAGGAA>GA(.390_391EE>I |                       |             |
| Pat_59 | Pre-Treatment   | CDC14A   | 8556   | 37 | 1  | 100843107 | 100843107 | Frame_Shift_Del | DEL | A         | -   | 7   | 152  | c.146delA                                          | c.(145-147)TATfs      | p.Y49fs     |
| Pat_59 | Pre-Treatment   | FMO5     | 2330   | 37 | 1  | 146684955 | 146684955 | Frame_Shift_Del | DEL | T         | -   | 7   | 468  | c.407delA                                          | c.(406-408)AAGfs      | p.K136fs    |
| Pat_59 | Pre-Treatment   | TCHH     | 7062   | 37 | 1  | 152081323 | 152081324 | In_Frame_Ins    | INS | -         | GGC | 7   | 172  | .4369_4370insGC(.4369-4371)CAG>CGCCA.1456_1457ins  |                       |             |
| Pat_59 | Pre-Treatment   | TCHH     | 7062   | 37 | 1  | 152082211 | 152082213 | In_Frame_Del    | DEL | CTC       | -   | 8   | 85   | .3480_3482delGAT(.3478-3483)AAGAGA>AA              |                       | p.R1163del  |
| Pat_59 | Pre-Treatment   | PAPPA2   | 60676  | 37 | 1  | 176762724 | 176762724 | Frame_Shift_Del | DEL | C         | -   | 8   | 220  | c.5049delC                                         | c.(5047-5049)ATCfs    | p.I1683fs   |
| Pat_59 | Pre-Treatment   | FAM5B    | 57795  | 37 | 1  | 177247719 | 177247719 | Frame_Shift_Del | DEL | A         | -   | 7   | 594  | c.1033delA                                         | c.(1033-1035)AAAfs    | p.K345fs    |
| Pat_59 | Pre-Treatment   | ETNK2    | 55224  | 37 | 1  | 204120939 | 204120939 | Frame_Shift_Del | DEL | A         | -   | 2   | 4    | c.42delT                                           | c.(40-42)TTTfs        | p.F14fs     |
| Pat_59 | Pre-Treatment   | PARP1    | 142    | 37 | 1  | 226558192 | 226558192 | Frame_Shift_Del | DEL | C         | -   | 8   | 194  | c.2097delG                                         | c.(2095-2097)GGGfs    | p.G699fs    |
| Pat_59 | Pre-Treatment   | OR2L2    | 26246  | 37 | 1  | 248201881 | 248201881 | Frame_Shift_Del | DEL | G         | -   | 7   | 143  | c.312delG                                          | c.(310-312)TTGfs      | p.L104fs    |
| Pat_59 | Pre-Treatment   | ZNF365   | 22891  | 37 | 10 | 64159366  | 64159366  | Frame_Shift_Del | DEL | A         | -   | 9   | 384  | c.1087delA                                         | c.(1087-1089)AAAfs    | p.K363fs    |
| Pat_59 | Pre-Treatment   | FAM53B   | 9679   | 37 | 10 | 126370292 | 126370292 | Frame_Shift_Del | DEL | A         | -   | 2   | 4    | c.790delT                                          | c.(790-792)TCCfs      | p.S264fs    |
| Pat_59 | Pre-Treatment   | NUP98    | 4928   | 37 | 11 | 3720389   | 3720389   | Frame_Shift_Del | DEL | T         | -   | 8   | 335  | c.3932delA                                         | c.(3931-3933)AACfs    | p.N1311fs   |
| Pat_59 | Pre-Treatment   | DCHS1    | 8642   | 37 | 11 | 6662763   | 6662764   | In_Frame_Ins    | INS | -         | CAA | 4   | 9    | c.81_82insTTG                                      | c.(79-84)insTTG       | p.33_34insL |
| Pat_59 | Pre-Treatment   | C11orf80 | 79703  | 37 | 11 | 66512290  | 66512291  | In_Frame_Ins    | INS | -         | GGC | 8   | 4    | c.77_78insGGC                                      | c.(76-78)GGG>GGGGCG   | p.34_35insA |
| Pat_59 | Pre-Treatment   | C11orf54 | 28970  | 37 | 11 | 93486914  | 93486914  | Frame_Shift_Del | DEL | A         | -   | 9   | 97   | c.221delA                                          | c.(220-222)CAAfs      | p.Q74fs     |
| Pat_59 | Pre-Treatment   | KDM4D    | 55693  | 37 | 11 | 94730807  | 94730807  | Frame_Shift_Del | DEL | A         | -   | 7   | 147  | c.271delA                                          | c.(271-273)AAAfs      | p.K91fs     |
| Pat_59 | Pre-Treatment   | NPAT     | 4863   | 37 | 11 | 108032189 | 108032192 | Frame_Shift_Del | DEL | GGTC      | -   | 7   | 622  | 3621_3624delGAC                                    | c.(3619-3624)ATGACCfs | p.M1207fs   |
| Pat_59 | Pre-Treatment   | TMPRSS5  | 80975  | 37 | 11 | 113561583 | 113561583 | Frame_Shift_Del | DEL | C         | -   | 2   | 4    | c.1043delG                                         | c.(1042-1044)GGCfs    | p.G348fs    |
| Pat_59 | Pre-Treatment   | PRB1     | 5542   | 37 | 12 | 11506327  | 11506329  | In_Frame_Del    | DEL | GGA       | -   | 10  | 251  | c.708_710delTCCc.(706-711)CCTCCA>CCA(.236_237PP>I  |                       |             |
| Pat_59 | Pre-Treatment   | PRB1     | 5542   | 37 | 12 | 11506510  | 11506512  | In_Frame_Del    | DEL | GGA       | -   | 42  | 707  | c.525_527delTCCc.(523-528)CCTCCA>CCA(.175_176PP>I  |                       |             |
| Pat_59 | Pre-Treatment   | PRB1     | 5542   | 37 | 12 | 11506632  | 11506633  | In_Frame_Ins    | INS | -         | GGA | 13  | 1007 | c.404_405insTCCc.(403-405)CCA>CCTCCA(.135_135P>PI  |                       |             |
| Pat_59 | Pre-Treatment   | PRB2     | 653247 | 37 | 12 | 11546419  | 11546421  | In_Frame_Del    | DEL | GGA       | -   | 7   | 183  | c.591_593delTCCc.(589-594)CCTCCA>CCA(.197_198PP>I  |                       |             |
| Pat_59 | Pre-Treatment   | CASC1    | 55259  | 37 | 12 | 25314066  | 25314068  | In_Frame_Del    | DEL | CTC       | -   | 7   | 599  | c.67_69delGAG                                      | c.(67-69)GAGdel       | p.E23del    |
| Pat_59 | Pre-Treatment   | NCKAP5L  | 57701  | 37 | 12 | 50188584  | 50188586  | In_Frame_Del    | DEL | TGG       | -   | 2   | 4    | .3057_3059delCCc.(3055-3060)TACCAA>TA(.1019_1020YQ |                       |             |
| Pat_59 | Pre-Treatment   | OR6C75   | 390323 | 37 | 12 | 55759192  | 55759192  | Frame_Shift_Del | DEL | T         | -   | 7   | 263  | c.298delT                                          | c.(298-300)TTTfs      | p.F100fs    |
| Pat_59 | Pre-Treatment   | MARS     | 4141   | 37 | 12 | 57883053  | 57883053  | Frame_Shift_Del | DEL | T         | -   | 11  | 99   | c.204delT                                          | c.(202-204)TATfs      | p.Y68fs     |
| Pat_59 | Pre-Treatment   | GNPTAB   | 79158  | 37 | 12 | 102158002 | 102158002 | Frame_Shift_Del | DEL | T         | -   | 10  | 312  | c.2693delA                                         | c.(2692-2694)AAGfs    | p.K898fs    |
| Pat_59 | Pre-Treatment   | TMEM116  | 89894  | 37 | 12 | 112374986 | 112374986 | Frame_Shift_Del | DEL | G         | -   | 8   | 84   | c.151delC                                          | c.(151-153)CAAfs      | p.Q51fs     |

|        |               |          |        |    |    |           |           |                        |     |     |     |    |     |                                                   |                       |               |
|--------|---------------|----------|--------|----|----|-----------|-----------|------------------------|-----|-----|-----|----|-----|---------------------------------------------------|-----------------------|---------------|
| Pat_59 | Pre-Treatment | TPTE2    | 93492  | 37 | 13 | 20041394  | 20041394  | Frame_Shift_Del        | DEL | A   | -   | 7  | 114 | c.483delT                                         | c.(481-483)TTTfs      | p.F161fs      |
| Pat_59 | Pre-Treatment | RXFP2    | 122042 | 37 | 13 | 32376428  | 32376429  | Frame_Shift_Ins        | INS | -   | A   | 9  | 154 | c.2151_2152insA                                   | c.(2149-2154)ATTTAAfs | p.I1717fs     |
| Pat_59 | Pre-Treatment | NBEA     | 26960  | 37 | 13 | 35517069  | 35517069  | Frame_Shift_Del        | DEL | G   | -   | 2  | 4   | c.112delG                                         | c.(112-114)GGGfs      | p.G38fs       |
| Pat_59 | Pre-Treatment | ABCC4    | 10257  | 37 | 13 | 95696016  | 95696016  | Frame_Shift_Del        | DEL | T   | -   | 12 | 240 | c.3655delA                                        | c.(3655-3657)ATCfs    | p.I1219fs     |
| Pat_59 | Pre-Treatment | ERCC5    | 2073   | 37 | 13 | 103459866 | 103459866 | Frame_Shift_Del        | DEL | T   | -   | 8  | 170 | c.249delT                                         | c.(247-249)TATfs      | p.Y83fs       |
| Pat_59 | Pre-Treatment | HEATR5A  | 25938  | 37 | 14 | 31856337  | 31856337  | Frame_Shift_Del        | DEL | T   | -   | 7  | 285 | c.299delA                                         | c.(298-300)AAGfs      | p.K100fs      |
| Pat_59 | Pre-Treatment | KIAA0391 | 9692   | 37 | 14 | 35592700  | 35592700  | Frame_Shift_Del        | DEL | T   | -   | 7  | 49  | c.249delT                                         | c.(247-249)CATfs      | p.H83fs       |
| Pat_59 | Pre-Treatment | CREBBP   | 1387   | 37 | 16 | 3817721   | 3817721   | Frame_Shift_Del        | DEL | T   | -   | 7  | 242 | c.3250delA                                        | c.(3250-3252)ATCfs    | p.I1084fs     |
| Pat_59 | Pre-Treatment | UBN1     | 29855  | 37 | 16 | 4910691   | 4910693   | In_Frame_Del           | DEL | AGA | -   | 9  | 504 | c.698_700delAGA>.(697-702)GAGAAG>GAC              |                       | p.K238del     |
| Pat_59 | Pre-Treatment | 1-Sep    | 1731   | 37 | 16 | 30392716  | 30392717  | Frame_Shift_Ins        | INS | -   | T   | 7  | 163 | c.383_384insA                                     | c.(382-384)AACfs      | p.N128fs      |
| Pat_59 | Pre-Treatment | COQ9     | 57017  | 37 | 16 | 57486732  | 57486734  | In_Frame_Del           | DEL | GAG | -   | 10 | 184 | c.262_264delGAG                                   | c.(262-264)GAGdel     | p.E91del      |
| Pat_59 | Pre-Treatment | LGALS9   | 3965   | 37 | 17 | 25973579  | 25973579  | Frame_Shift_Del        | DEL | G   | -   | 7  | 751 | c.634delG                                         | c.(634-636)GCCfs      | p.A212fs      |
| Pat_59 | Pre-Treatment | SPAG9    | 9043   | 37 | 17 | 49077041  | 49077041  | Frame_Shift_Del        | DEL | T   | -   | 11 | 218 | c.1645delA                                        | c.(1645-1647)AGGfs    | p.R549fs      |
| Pat_59 | Pre-Treatment | PPM1D    | 8493   | 37 | 17 | 58677987  | 58677987  | Frame_Shift_Del        | DEL | C   | -   | 4  | 9   | c.212delC                                         | c.(211-213)GCAfs      | p.A71fs       |
| Pat_59 | Pre-Treatment | BPTF     | 2186   | 37 | 17 | 65822234  | 65822236  | In_Frame_Del           | DEL | GAG | -   | 6  | 13  | c.394_396delGAG                                   | c.(394-396)GAGdel     | p.E138del     |
| Pat_59 | Pre-Treatment | AZ11     | 22994  | 37 | 17 | 79166370  | 79166370  | Frame_Shift_Del        | DEL | A   | -   | 4  | 9   | c.2462delT                                        | c.(2461-2463)CTGfs    | p.L821fs      |
| Pat_59 | Pre-Treatment | LMAN1    | 3998   | 37 | 18 | 57013285  | 57013285  | Splice_Site            | DEL | T   | -   | 9  | 314 | c.823_splice                                      | c.e8-1                | p.P275_splice |
| Pat_59 | Pre-Treatment | ISYNA1   | 51477  | 37 | 19 | 18547527  | 18547528  | Frame_Shift_Del        | DEL | CG  | -   | 2  | 4   | c.575_576delCG                                    | c.(574-576)GCGfs      | p.A192fs      |
| Pat_59 | Pre-Treatment | C19orf47 | 126526 | 37 | 19 | 40834399  | 40834399  | Frame_Shift_Del        | DEL | G   | -   | 7  | 236 | c.471delC                                         | c.(469-471)CCCfs      | p.P157fs      |
| Pat_59 | Pre-Treatment | NOVA2    | 4858   | 37 | 19 | 46476609  | 46476610  | Translation_Start_Site | INS | -   | G   | 4  | 7   |                                                   |                       |               |
| Pat_59 | Pre-Treatment | FPR3     | 2359   | 37 | 19 | 52327875  | 52327875  | Frame_Shift_Del        | DEL | T   | -   | 13 | 451 | c.874delT                                         | c.(874-876)TTTfs      | p.F292fs      |
| Pat_59 | Pre-Treatment | ROCK2    | 9475   | 37 | 2  | 11332379  | 11332379  | Frame_Shift_Del        | DEL | G   | -   | 7  | 707 | c.4058delC                                        | c.(4057-4059)CCAfs    | p.P1353fs     |
| Pat_59 | Pre-Treatment | HNRPLL   | 92906  | 37 | 2  | 38818670  | 38818670  | Splice_Site            | DEL | A   | -   | 7  | 332 | c.308_splice                                      | c.e2+1                | p.C103_splice |
| Pat_59 | Pre-Treatment | TET3     | 200424 | 37 | 2  | 74273651  | 74273651  | Frame_Shift_Del        | DEL | T   | -   | 4  | 9   | c.202delT                                         | c.(202-204)TTTfs      | p.F68fs       |
| Pat_59 | Pre-Treatment | LOXL3    | 84695  | 37 | 2  | 74779723  | 74779723  | Frame_Shift_Del        | DEL | C   | -   | 4  | 6   | c.39delG                                          | c.(37-39)GGGfs        | p.G13fs       |
| Pat_59 | Pre-Treatment | SCN9A    | 6335   | 37 | 2  | 167055992 | 167055992 | Frame_Shift_Del        | DEL | T   | -   | 7  | 636 | c.5124delA                                        | c.(5122-5124)AAAfs    | p.K1708fs     |
| Pat_59 | Pre-Treatment | DNAJC10  | 54431  | 37 | 2  | 183594603 | 183594605 | In_Frame_Del           | DEL | CAA | -   | 7  | 298 | c.662_664delCAA>.(661-666)TCAAAG>TAG>.221_222SK>  |                       |               |
| Pat_59 | Pre-Treatment | NINL     | 22981  | 37 | 20 | 25485706  | 25485708  | In_Frame_Del           | DEL | GCA | -   | 4  | 9   | c.524_526delTGC>.(523-528)CTGCAG>CAC              |                       | p.L175del     |
| Pat_59 | Pre-Treatment | RBL1     | 5933   | 37 | 20 | 35663913  | 35663914  | Splice_Site            | INS | -   | A   | 4  | 9   | c.1904_splice                                     | c.e15-1               | p.D635_splice |
| Pat_59 | Pre-Treatment | FAM83D   | 81610  | 37 | 20 | 37555322  | 37555323  | In_Frame_Ins           | INS | -   | GCG | 8  | 12  | c.327_328insGCG                                   | c.(325-330)insGCG     | p.116_117insA |
| Pat_59 | Pre-Treatment | CNOT10   | 25904  | 37 | 3  | 32805950  | 32805950  | Frame_Shift_Del        | DEL | C   | -   | 8  | 289 | c.1844delC                                        | c.(1843-1845)TCAfs    | p.S615fs      |
| Pat_59 | Pre-Treatment | NKTR     | 4820   | 37 | 3  | 42680269  | 42680271  | In_Frame_Del           | DEL | GAG | -   | 7  | 148 | .3073_3075delAGA                                  | c.(3073-3075)GAGdel   | p.E1029del    |
| Pat_59 | Pre-Treatment | VGLL3    | 389136 | 37 | 3  | 87027857  | 87027859  | In_Frame_Del           | DEL | CTC | -   | 7  | 49  | c.220_222delGAG                                   | c.(220-222)GAGdel     | p.E74del      |
| Pat_59 | Pre-Treatment | WDR49    | 151790 | 37 | 3  | 167293789 | 167293789 | Frame_Shift_Del        | DEL | C   | -   | 8  | 252 | c.403delG                                         | c.(403-405)GCAfs      | p.A135fs      |
| Pat_59 | Pre-Treatment | MUC4     | 4585   | 37 | 3  | 195513456 | 195513456 | Frame_Shift_Del        | DEL | A   | -   | 6  | 4   | c.4995delT                                        | c.(4993-4995)CTTfs    | p.L1665fs     |
| Pat_59 | Pre-Treatment | MUC4     | 4585   | 37 | 3  | 195516779 | 195516779 | Frame_Shift_Del        | DEL | T   | -   | 10 | 262 | c.1672delA                                        | c.(1672-1674)ACAfs    | p.T58fs       |
| Pat_59 | Pre-Treatment | RNF168   | 165918 | 37 | 3  | 196214338 | 196214338 | Frame_Shift_Del        | DEL | T   | -   | 9  | 583 | c.490delA                                         | c.(490-492)AGGfs      | p.R164fs      |
| Pat_59 | Pre-Treatment | UGT2B11  | 10720  | 37 | 4  | 70078331  | 70078332  | Frame_Shift_Del        | DEL | AC  | -   | 7  | 730 | c.829_830delGT                                    | c.(829-831)GTTfs      | p.V277fs      |
| Pat_59 | Pre-Treatment | AFM      | 173    | 37 | 4  | 74347532  | 74347532  | Frame_Shift_Del        | DEL | T   | -   | 7  | 188 | c.40delT                                          | c.(40-42)TTTfs        | p.F14fs       |
| Pat_59 | Pre-Treatment | ADAMTS16 | 170690 | 37 | 5  | 5186212   | 5186213   | Frame_Shift_Del        | DEL | TA  | -   | 7  | 170 | c.811_812delTA                                    | c.(811-813)TATfs      | p.Y271fs      |
| Pat_59 | Pre-Treatment | PAM      | 5066   | 37 | 5  | 102296908 | 102296910 | In_Frame_Del           | DEL | AGA | -   | 7  | 330 | .1137_1139delAG>.(1135-1140)CGAGAA>CG             |                       | p.E383del     |
| Pat_59 | Pre-Treatment | MGC29506 | 51237  | 37 | 5  | 138725510 | 138725512 | In_Frame_Del           | DEL | CAG | -   | 3  | 6   | c.34_36delCTG                                     | c.(34-36)CTGdel       | p.L12del      |
| Pat_59 | Pre-Treatment | TRIM26   | 7726   | 37 | 6  | 30157254  | 30157254  | Frame_Shift_Del        | DEL | T   | -   | 9  | 242 | c.845delA                                         | c.(844-846)AAGfs      | p.K282fs      |
| Pat_59 | Pre-Treatment | STK19    | 8859   | 37 | 6  | 31939829  | 31939830  | Frame_Shift_Ins        | INS | -   | A   | 7  | 304 | c.56_57insA                                       | c.(55-57)GCAfs        | p.A19fs       |
| Pat_59 | Pre-Treatment | DAXX     | 1616   | 37 | 6  | 33287898  | 33287900  | In_Frame_Del           | DEL | TCC | -   | 11 | 82  | .1353_1355delIGG(1351-1356)GAGGAA>GA>.451_452EE>I |                       |               |
| Pat_59 | Pre-Treatment | MAP3K7   | 6885   | 37 | 6  | 91296568  | 91296570  | In_Frame_Del           | DEL | GAG | -   | 9  | 58  | c.33_35delCTC                                     | c.(31-36)TCCTCG>TCG   | p.11_12SS>S   |
| Pat_59 | Pre-Treatment | PRDM1    | 639    | 37 | 6  | 106536280 | 106536280 | Frame_Shift_Del        | DEL | T   | -   | 7  | 351 | c.247delT                                         | c.(247-249)TTAfs      | p.L83fs       |

|        |                 |           |        |    |    |           |           |                 |     |     |     |    |     |                  |                        |               |
|--------|-----------------|-----------|--------|----|----|-----------|-----------|-----------------|-----|-----|-----|----|-----|------------------|------------------------|---------------|
| Pat_59 | Pre-Treatment   | C7orf16   | 10842  | 37 | 7  | 31735179  | 31735179  | Frame_Shift_Del | DEL | A   | -   | 8  | 327 | c.179delA        | c.(178-180)CAAFs       | p.Q60fs       |
| Pat_59 | Pre-Treatment   | POLM      | 27434  | 37 | 7  | 44120414  | 44120414  | Frame_Shift_Del | DEL | G   | -   | 8  | 98  | c.290delC        | c.(289-291)CCAFs       | p.P97fs       |
| Pat_59 | Pre-Treatment   | TMEM60    | 85025  | 37 | 7  | 77423460  | 77423460  | Frame_Shift_Del | DEL | T   | -   | 11 | 207 | c.231delA        | c.(229-231)AAAFs       | p.K77fs       |
| Pat_59 | Pre-Treatment   | PCLO      | 27445  | 37 | 7  | 82545386  | 82545386  | Frame_Shift_Del | DEL | G   | -   | 8  | 437 | c.11916delC      | c.(11914-11916)CCCFs   | p.P3972fs     |
| Pat_59 | Pre-Treatment   | SERPINE1  | 5054   | 37 | 7  | 100773817 | 100773817 | Frame_Shift_Del | DEL | C   | -   | 8  | 553 | c.387delC        | c.(385-387)GTCfs       | p.V129fs      |
| Pat_59 | Pre-Treatment   | TNPO3     | 23534  | 37 | 7  | 128610259 | 128610259 | Frame_Shift_Del | DEL | G   | -   | 7  | 504 | c.2541delC       | c.(2539-2541)CCCFs     | p.P847fs      |
| Pat_59 | Pre-Treatment   | SGK223    | 157285 | 37 | 8  | 8175804   | 8175806   | In_Frame_Del    | DEL | TCA | -   | 8  | 299 | 4079_4081delTG   | c.(4078-4083)ATGAAG>AA | p.M1360del    |
| Pat_59 | Pre-Treatment   | ADAM28    | 10863  | 37 | 8  | 24167472  | 24167473  | Frame_Shift_Ins | INS | -   | A   | 10 | 134 | c.216_217insA    | c.(214-219)TTGAAAFs    | p.L72fs       |
| Pat_59 | Pre-Treatment   | SLC26A7   | 115111 | 37 | 8  | 92406218  | 92406218  | Frame_Shift_Del | DEL | T   | -   | 7  | 163 | c.1886delT       | c.(1885-1887)ATTfs     | p.I629fs      |
| Pat_59 | Pre-Treatment   | RGS22     | 26166  | 37 | 8  | 100990177 | 100990178 | Frame_Shift_Ins | INS | -   | T   | 7  | 150 | c.3486_3487insA  | c.(3484-3489)AAATTGfs  | p.K1162fs     |
| Pat_59 | Pre-Treatment   | CRAT      | 1384   | 37 | 9  | 131864813 | 131864814 | Frame_Shift_Ins | INS | -   | C   | 7  | 305 | c.495_496insG    | c.(493-498)GGGAAGfs    | p.G165fs      |
| Pat_59 | Pre-Treatment   | PPP2R4    | 5524   | 37 | 9  | 131890273 | 131890273 | Frame_Shift_Del | DEL | C   | -   | 2  | 4   | c.247delC        | c.(247-249)CAGfs       | p.Q83fs       |
| Pat_59 | Pre-Treatment   | NHS       | 4810   | 37 | X  | 17394330  | 17394330  | Frame_Shift_Del | DEL | C   | -   | 2  | 4   | c.450delC        | c.(448-450)TTCfs       | p.F150fs      |
| Pat_59 | Pre-Treatment   | NAP1L3    | 4675   | 37 | X  | 92928035  | 92928036  | Frame_Shift_Ins | INS | -   | C   | 9  | 42  | c.268_269insG    | c.(268-270)GCCfs       | p.A90fs       |
| Pat_59 | Pre-Treatment   | BHLHB9    | 80823  | 37 | X  | 102004419 | 102004421 | In_Frame_Del    | DEL | GAG | -   | 8  | 102 | c.496_498delGAG  | c.(496-498)GAGdel      | p.E171del     |
| Pat_59 | Pre-Treatment   | TCEAL4    | 79921  | 37 | X  | 102841867 | 102841868 | Frame_Shift_Del | DEL | AG  | -   | 2  | 4   | c.264_265delAG   | c.(262-267)TCAGAGfs    | p.S88fs       |
| Pat_59 | Post-Resistance | SCNN1D    | 6339   | 37 | 1  | 1226736   | 1226736   | Frame_Shift_Del | DEL | G   | -   | 2  | 4   | c.1663delG       | c.(1663-1665)GCCfs     | p.A555fs      |
| Pat_59 | Post-Resistance | HSPG2     | 3339   | 37 | 1  | 22202765  | 22202766  | Frame_Shift_Del | DEL | CC  | -   | 2  | 4   | 2959_2960delGC   | c.(2959-2961)GGAfs     | p.G987fs      |
| Pat_59 | Post-Resistance | SASS6     | 163786 | 37 | 1  | 100550947 | 100550947 | Frame_Shift_Del | DEL | G   | -   | 10 | 788 | c.1911delC       | c.(1909-1911)TCCfs     | p.S637fs      |
| Pat_59 | Post-Resistance | FNDC7     | 163479 | 37 | 1  | 109276138 | 109276138 | Frame_Shift_Del | DEL | A   | -   | 7  | 155 | c.2124delA       | c.(2122-2124)CCAFs     | p.P708fs      |
| Pat_59 | Post-Resistance | PRG4      | 10216  | 37 | 1  | 186276524 | 186276526 | In_Frame_Del    | DEL | AGG | -   | 11 | 237 | 1673_1675delAG   | c.(1672-1677)AAGGAG>AA | p.E559del     |
| Pat_59 | Post-Resistance | PIH1D2    | 120379 | 37 | 11 | 111941931 | 111941932 | Frame_Shift_Ins | INS | -   | T   | 10 | 380 | c.377_378insA    | c.(376-378)AATfs       | p.N126fs      |
| Pat_59 | Post-Resistance | SNX19     | 399979 | 37 | 11 | 130775872 | 130775872 | Frame_Shift_Del | DEL | G   | -   | 7  | 161 | c.2419delC       | c.(2419-2421)CAAFs     | p.Q807fs      |
| Pat_59 | Post-Resistance | DDX12     | 440081 | 37 | 12 | 9574061   | 9574061   | Frame_Shift_Del | DEL | G   | -   | 7  | 368 | c.1975delC       | c.(1975-1977)CTGfs     | p.L659fs      |
| Pat_59 | Post-Resistance | PRB1      | 5542   | 37 | 12 | 11506327  | 11506329  | In_Frame_Del    | DEL | GGA | -   | 8  | 133 | c.708_710delITCC | c.(706-711)CCTCCA>CCA  | p.236_237PP>I |
| Pat_59 | Post-Resistance | PRB1      | 5542   | 37 | 12 | 11506632  | 11506633  | In_Frame_Ins    | INS | -   | GGA | 7  | 405 | c.404_405insTCC  | c.(403-405)CCA>CCTCCA  | p.135_135P>PI |
| Pat_59 | Post-Resistance | RERG      | 85004  | 37 | 12 | 15262412  | 15262412  | Frame_Shift_Del | DEL | C   | -   | 8  | 956 | c.232delG        | c.(232-234)GAAfs       | p.E78fs       |
| Pat_59 | Post-Resistance | PPM1A     | 5494   | 37 | 14 | 60752371  | 60752371  | Frame_Shift_Del | DEL | G   | -   | 7  | 452 | c.864delG        | c.(862-864)TTGfs       | p.L288fs      |
| Pat_59 | Post-Resistance | KIAA0317  | 9870   | 37 | 14 | 75151191  | 75151191  | Frame_Shift_Del | DEL | T   | -   | 7  | 133 | c.209delA        | c.(208-210)TATfs       | p.Y70fs       |
| Pat_59 | Post-Resistance | C14orf174 | 161394 | 37 | 14 | 77844868  | 77844869  | Frame_Shift_Ins | INS | -   | A   | 7  | 344 | c.1107_1108insA  | c.(1105-1110)GAGAAAFs  | p.E369fs      |
| Pat_59 | Post-Resistance | TTC8      | 123016 | 37 | 14 | 89338724  | 89338726  | In_Frame_Del    | DEL | CAA | -   | 7  | 323 | 1323_1325delCA   | c.(1321-1326)GTCAAC>GT | p.N445del     |
| Pat_59 | Post-Resistance | C14orf102 | 55051  | 37 | 14 | 90798215  | 90798215  | Frame_Shift_Del | DEL | C   | -   | 7  | 287 | c.34delG         | c.(34-36)GAGfs         | p.E12fs       |
| Pat_59 | Post-Resistance | NFAT5     | 10725  | 37 | 16 | 69693775  | 69693775  | Frame_Shift_Del | DEL | C   | -   | 8  | 229 | c.1288delC       | c.(1288-1290)CAAFs     | p.Q430fs      |
| Pat_59 | Post-Resistance | STXBP4    | 252983 | 37 | 17 | 53077006  | 53077007  | Frame_Shift_Del | DEL | TG  | -   | 7  | 158 | c.301_302delTG   | c.(301-303)TGGfs       | p.W101fs      |
| Pat_59 | Post-Resistance | EXOC7     | 23265  | 37 | 17 | 74097358  | 74097358  | Frame_Shift_Del | DEL | G   | -   | 7  | 225 | c.411delC        | c.(409-411)AACfs       | p.N137fs      |
| Pat_59 | Post-Resistance | CEBPZ     | 10153  | 37 | 2  | 37454908  | 37454908  | Frame_Shift_Del | DEL | T   | -   | 8  | 54  | c.1428delA       | c.(1426-1428)AAAFs     | p.K476fs      |
| Pat_59 | Post-Resistance | IFIH1     | 64135  | 37 | 2  | 163134716 | 163134716 | Frame_Shift_Del | DEL | T   | -   | 7  | 140 | c.1764delA       | c.(1762-1764)AAAFs     | p.K588fs      |
| Pat_59 | Post-Resistance | OSBPL6    | 114880 | 37 | 2  | 179248813 | 179248813 | Frame_Shift_Del | DEL | C   | -   | 9  | 652 | c.1923delC       | c.(1921-1923)TTCfs     | p.F641fs      |
| Pat_59 | Post-Resistance | TNS1      | 7145   | 37 | 2  | 218712998 | 218712998 | Frame_Shift_Del | DEL | A   | -   | 8  | 88  | c.1867delT       | c.(1867-1869)TCGfs     | p.S623fs      |
| Pat_59 | Post-Resistance | RQCD1     | 9125   | 37 | 2  | 219449364 | 219449364 | Frame_Shift_Del | DEL | T   | -   | 7  | 445 | c.350delT        | c.(349-351)CTTfs       | p.L117fs      |
| Pat_59 | Post-Resistance | C20orf194 | 25943  | 37 | 20 | 3355680   | 3355681   | Frame_Shift_Del | DEL | GG  | -   | 8  | 819 | c.501_502delCC   | c.(499-504)TCCCAAFs    | p.S167fs      |
| Pat_59 | Post-Resistance | XPNPEP3   | 63929  | 37 | 22 | 41318413  | 41318413  | Frame_Shift_Del | DEL | G   | -   | 7  | 715 | c.1132delG       | c.(1132-1134)GGGfs     | p.G378fs      |
| Pat_59 | Post-Resistance | TUBGCP6   | 85378  | 37 | 22 | 50666360  | 50666360  | Frame_Shift_Del | DEL | A   | -   | 4  | 2   | c.1388delT       | c.(1387-1389)TTCfs     | p.F463fs      |
| Pat_59 | Post-Resistance | CRIPAK    | 285464 | 37 | 4  | 1389236   | 1389237   | Frame_Shift_Ins | INS | -   | CA  | 8  | 361 | c.937_938insCA   | c.(937-939)TCAfs       | p.S313fs      |
| Pat_59 | Post-Resistance | CRIPAK    | 285464 | 37 | 4  | 1389297   | 1389298   | Frame_Shift_Del | DEL | CA  | -   | 10 | 461 | c.998_999delCA   | c.(997-999)TCAfs       | p.S333fs      |
| Pat_59 | Post-Resistance | GABRG1    | 2565   | 37 | 4  | 46060358  | 46060358  | Frame_Shift_Del | DEL | A   | -   | 7  | 137 | c.792delT        | c.(790-792)TTTfs       | p.F264fs      |
| Pat_59 | Post-Resistance | KIAA0947  | 23379  | 37 | 5  | 5447608   | 5447609   | Frame_Shift_Del | DEL | TT  | -   | 2  | 4   | c.493_494delTT   | c.(493-495)TTTfs       | p.F165fs      |

|        |                 |         |        |    |    |           |           |                 |     |          |    |    |      |                                                     |             |
|--------|-----------------|---------|--------|----|----|-----------|-----------|-----------------|-----|----------|----|----|------|-----------------------------------------------------|-------------|
| Pat_59 | Post-Resistance | HNRNPA0 | 10949  | 37 | 5  | 137089109 | 137089111 | In_Frame_Del    | DEL | CCG      | -  | 2  | 4    | c.645_647delCCG:(643-648)GGCGGT>GG1.215_216GG>      |             |
| Pat_59 | Post-Resistance | BTN2A2  | 10385  | 37 | 6  | 26384091  | 26384093  | In_Frame_Del    | DEL | CCT      | -  | 15 | 241  | c.42_44delCCT c.(40-45)TCCCTC>TCC                   | p.L24del    |
| Pat_59 | Post-Resistance | RRAGD   | 58528  | 37 | 6  | 90121645  | 90121647  | In_Frame_Del    | DEL | TCC      | -  | 6  | 7    | c.66_68delGGA c.(64-69)GAGGAT>GAT                   | p.E22del    |
| Pat_59 | Post-Resistance | PMPCB   | 9512   | 37 | 7  | 102952294 | 102952295 | Frame_Shift_Del | DEL | TA       | -  | 7  | 245  | c.1280_1281delITA c.(1279-1281)TTAfs                | p.L427fs    |
| Pat_59 | Post-Resistance | RBM33   | 155435 | 37 | 7  | 155531073 | 155531074 | Frame_Shift_Del | DEL | CA       | -  | 9  | 258  | c.1713_1714delCA c.(1711-1716)CCCACAfs              | p.P571fs    |
| Pat_59 | Post-Resistance | RANBP6  | 26953  | 37 | 9  | 6013873   | 6013873   | Frame_Shift_Del | DEL | C        | -  | 8  | 308  | c.1735delG c.(1735-1737)GAAfs                       | p.E579fs    |
| Pat_63 | Pre-Treatment   | MAP3K6  | 9064   | 37 | 1  | 27687695  | 27687696  | Frame_Shift_Ins | INS | -        | G  | 4  | 6    | c.1784_1785insC c.(1783-1785)CCGfs                  | p.P595fs    |
| Pat_63 | Pre-Treatment   | HDAC1   | 3065   | 37 | 1  | 32782289  | 32782289  | Frame_Shift_Del | DEL | G        | -  | 7  | 245  | c.186delG c.(184-186)GAGfs                          | p.E62fs     |
| Pat_63 | Pre-Treatment   | AMY2B   | 280    | 37 | 1  | 104118151 | 104118151 | Frame_Shift_Del | DEL | C        | -  | 7  | 517  | c.1090delC c.(1090-1092)CAAfs                       | p.Q364fs    |
| Pat_63 | Pre-Treatment   | FAM102B | 284611 | 37 | 1  | 109172239 | 109172240 | Frame_Shift_Del | DEL | GG       | -  | 8  | 155  | c.1000_1001delGC c.(1000-1002)GGGfs                 | p.G334fs    |
| Pat_63 | Pre-Treatment   | ANP32E  | 81611  | 37 | 1  | 150201420 | 150201420 | Frame_Shift_Del | DEL | C        | -  | 7  | 238  | c.478delG c.(478-480)GAGfs                          | p.E160fs    |
| Pat_63 | Pre-Treatment   | ILF2    | 3608   | 37 | 1  | 153635185 | 153635185 | Frame_Shift_Del | DEL | G        | -  | 7  | 457  | c.1008delC c.(1006-1008)GCCfs                       | p.A336fs    |
| Pat_63 | Pre-Treatment   | PLA2G4A | 5321   | 37 | 1  | 186925445 | 186925447 | In_Frame_Del    | DEL | TGA      | -  | 14 | 255  | c.1548_1550delTG c.(1546-1551)TTTGAT>TT             | p.D519del   |
| Pat_63 | Pre-Treatment   | LAMB3   | 3914   | 37 | 1  | 209795971 | 209795971 | Frame_Shift_Del | DEL | C        | -  | 7  | 225  | c.2611delG c.(2611-2613)GAGfs                       | p.E871fs    |
| Pat_63 | Pre-Treatment   | RUFY2   | 55680  | 37 | 10 | 70156583  | 70156583  | Frame_Shift_Del | DEL | T        | -  | 10 | 50   | c.457delA c.(457-459)ATGfs                          | p.M153fs    |
| Pat_63 | Pre-Treatment   | DGKZ    | 8525   | 37 | 11 | 46391529  | 46391529  | Frame_Shift_Del | DEL | C        | -  | 7  | 138  | c.1104delC c.(1102-1104)CGCfs                       | p.R368fs    |
| Pat_63 | Pre-Treatment   | MMP1    | 4312   | 37 | 11 | 102668791 | 102668793 | In_Frame_Del    | DEL | CAG      | -  | 7  | 93   | c.31_33delCTG c.(31-33)CTGdel                       | p.L11del    |
| Pat_63 | Pre-Treatment   | PAN3    | 255967 | 37 | 13 | 28713064  | 28713064  | Frame_Shift_Del | DEL | G        | -  | 4  | 7    | c.270delG c.(268-270)CTGfs                          | p.L90fs     |
| Pat_63 | Pre-Treatment   | ITM2B   | 9445   | 37 | 13 | 48807583  | 48807583  | Frame_Shift_Del | DEL | C        | -  | 3  | 4    | c.87delC c.(85-87)ATCfs                             | p.I29fs     |
| Pat_63 | Pre-Treatment   | FOXN3   | 1112   | 37 | 14 | 89629149  | 89629151  | In_Frame_Del    | DEL | GAG      | -  | 5  | 5    | c.1080_1082delCT c.(1078-1083)TCCTCA>TC.360_361SS>  |             |
| Pat_63 | Pre-Treatment   | BTBD7   | 55727  | 37 | 14 | 93720048  | 93720048  | Frame_Shift_Del | DEL | T        | -  | 7  | 141  | c.1697delA c.(1696-1698)AATfs                       | p.N566fs    |
| Pat_63 | Pre-Treatment   | SEPHS2  | 22928  | 37 | 16 | 30456879  | 30456879  | Frame_Shift_Del | DEL | A        | -  | 4  | 7    | c.170delT c.(169-171)ATGfs                          | p.M57fs     |
| Pat_63 | Pre-Treatment   | WSCD1   | 23302  | 37 | 17 | 5984072   | 5984074   | In_Frame_Del    | DEL | CTG      | -  | 4  | 6    | c.94_96delCTG c.(94-96)CTGdel                       | p.L35del    |
| Pat_63 | Pre-Treatment   | FMNL1   | 752    | 37 | 17 | 43319435  | 43319437  | In_Frame_Del    | DEL | CCG      | -  | 2  | 4    | c.1807_1809delCC c.(1807-1809)CCGdel                | p.P612del   |
| Pat_63 | Pre-Treatment   | MAP3K14 | 9020   | 37 | 17 | 43344473  | 43344473  | Frame_Shift_Del | DEL | C        | -  | 4  | 4    | c.2419delG c.(2419-2421)GATfs                       | p.D807fs    |
| Pat_63 | Pre-Treatment   | ACE     | 1636   | 37 | 17 | 61574550  | 61574550  | Frame_Shift_Del | DEL | G        | -  | 3  | 4    | c.3744delG c.(3742-3744)CTGfs                       | p.L1248fs   |
| Pat_63 | Pre-Treatment   | SPOPL   | 339745 | 37 | 2  | 139326585 | 139326586 | Frame_Shift_Del | DEL | CG       | -  | 7  | 554  | c.1114_1115delCG c.(1114-1116)CGAfs                 | p.R372fs    |
| Pat_63 | Pre-Treatment   | THBD    | 7056   | 37 | 20 | 23029278  | 23029279  | Frame_Shift_Del | DEL | GC       | -  | 4  | 8    | c.863_864delGC c.(862-864)TGCfs                     | p.C288fs    |
| Pat_63 | Pre-Treatment   | DOK5    | 55816  | 37 | 20 | 53260114  | 53260114  | Frame_Shift_Del | DEL | C        | -  | 4  | 5    | c.853delC c.(853-855)CAAfs                          | p.Q285fs    |
| Pat_63 | Pre-Treatment   | PCNT    | 5116   | 37 | 21 | 47831343  | 47831343  | Frame_Shift_Del | DEL | C        | -  | 4  | 5    | c.5356delC c.(5356-5358)CAGfs                       | p.Q1786fs   |
| Pat_63 | Pre-Treatment   | TRIOBP  | 11078  | 37 | 22 | 38120098  | 38120109  | In_Frame_Del    | DEL | TCCAGAAC | -  | 7  | 61   | c.1546delCCCTCCAC(1548)GCCTCCAGAACCT(p.SRTS513del   |             |
| Pat_63 | Pre-Treatment   | TRIOBP  | 11078  | 37 | 22 | 38120245  | 38120253  | In_Frame_Del    | DEL | TCCAGAAC | -  | 8  | 155  | c.12_1690delCCCTCC(1-1692)GCCTCCAGAACCT(p.SRT562del |             |
| Pat_63 | Pre-Treatment   | ARFGAP3 | 26286  | 37 | 22 | 43213780  | 43213780  | Frame_Shift_Del | DEL | T        | -  | 18 | 1303 | c.896delA c.(895-897)AATfs                          | p.N299fs    |
| Pat_63 | Pre-Treatment   | TMCC1   | 23023  | 37 | 3  | 129546725 | 129546725 | Frame_Shift_Del | DEL | G        | -  | 4  | 8    | c.497delC c.(496-498)TCTfs                          | p.S166fs    |
| Pat_63 | Pre-Treatment   | LMLN    | 89782  | 37 | 3  | 197687255 | 197687255 | Frame_Shift_Del | DEL | C        | -  | 7  | 201  | c.163delC c.(163-165)CCCfs                          | p.P55fs     |
| Pat_63 | Pre-Treatment   | CRIPAK  | 285464 | 37 | 4  | 1389236   | 1389237   | Frame_Shift_Ins | INS | -        | CA | 13 | 325  | c.937_938insCA c.(937-939)TCAfs                     | p.S313fs    |
| Pat_63 | Pre-Treatment   | WFS1    | 7466   | 37 | 4  | 6293083   | 6293084   | Frame_Shift_Del | DEL | TC       | -  | 3  | 6    | c.620_621delTC c.(619-621)GTCfs                     | p.V207fs    |
| Pat_63 | Pre-Treatment   | CCNA2   | 890    | 37 | 4  | 122740016 | 122740017 | Frame_Shift_Ins | INS | -        | A  | 7  | 121  | c.1054_1055insT c.(1054-1056)CCAfs                  | p.P352fs    |
| Pat_63 | Pre-Treatment   | DIAPH1  | 1729   | 37 | 5  | 140953387 | 140953387 | Frame_Shift_Del | DEL | G        | -  | 4  | 5    | c.2030delC c.(2029-2031)CCAfs                       | p.P677fs    |
| Pat_63 | Pre-Treatment   | KLHDC3  | 116138 | 37 | 6  | 42986216  | 42986216  | Frame_Shift_Del | DEL | T        | -  | 8  | 180  | c.655delT c.(655-657)TTTfs                          | p.F219fs    |
| Pat_63 | Pre-Treatment   | ATG5    | 9474   | 37 | 6  | 106764043 | 106764043 | Frame_Shift_Del | DEL | C        | -  | 7  | 420  | c.41delG c.(40-42)GGAfs                             | p.G14fs     |
| Pat_63 | Pre-Treatment   | BCL7B   | 9275   | 37 | 7  | 72957887  | 72957888  | Frame_Shift_Del | DEL | CA       | -  | 8  | 477  | c.255_256delTG c.(253-258)CTTGAAs                   | p.L85fs     |
| Pat_63 | Pre-Treatment   | SEMA3C  | 10512  | 37 | 7  | 80546049  | 80546051  | In_Frame_Del    | DEL | TAG      | -  | 7  | 331  | c.47_49delCTA c.(46-51)TCTATC>TTC                   | p.16_17SI>F |
| Pat_63 | Pre-Treatment   | DOCK4   | 9732   | 37 | 7  | 111407097 | 111407097 | Frame_Shift_Del | DEL | G        | -  | 7  | 196  | c.3879delC c.(3877-3879)AGCfs                       | p.S1293fs   |
| Pat_63 | Pre-Treatment   | MET     | 4233   | 37 | 7  | 116339595 | 116339595 | Frame_Shift_Del | DEL | G        | -  | 7  | 576  | c.457delG c.(457-459)GACfs                          | p.D153fs    |
| Pat_63 | Pre-Treatment   | IDO2    | 169355 | 37 | 8  | 39836691  | 39836692  | Frame_Shift_Del | DEL | GC       | -  | 4  | 4    | c.340_341delGC c.(340-342)GCGfs                     | p.A114fs    |
| Pat_63 | Pre-Treatment   | SULF1   | 23213  | 37 | 8  | 70514026  | 70514026  | Frame_Shift_Del | DEL | T        | -  | 10 | 1278 | c.1023delT c.(1021-1023)CCTfs                       | p.P341fs    |



|        |                 |         |        |    |    |           |           |                 |     |        |   |     |      |                                      |                       |               |
|--------|-----------------|---------|--------|----|----|-----------|-----------|-----------------|-----|--------|---|-----|------|--------------------------------------|-----------------------|---------------|
| Pat_63 | Pre-Treatment   | ATAD2   | 29028  | 37 | 8  | 124368685 | 124368685 | Frame_Shift_Del | DEL | A      | - | 9   | 251  | c.1590delT                           | c.(1588-1590)TTTfs    | p.F530fs      |
| Pat_63 | Pre-Treatment   | ANXA13  | 312    | 37 | 8  | 124724928 | 124724928 | Frame_Shift_Del | DEL | G      | - | 8   | 860  | c.81delC                             | c.(79-81)TGCfs        | p.C27fs       |
| Pat_63 | Pre-Treatment   | MYC     | 4609   | 37 | 8  | 128750605 | 128750607 | In_Frame_Del    | DEL | CAG    | - | 7   | 264  | c.97_99delCAG                        | c.(97-99)CAGdel       | p.Q37del      |
| Pat_63 | Pre-Treatment   | KIF24   | 347240 | 37 | 9  | 34256285  | 34256285  | Frame_Shift_Del | DEL | G      | - | 4   | 9    | c.3320delC                           | c.(3319-3321)TCAfs    | p.S1107fs     |
| Pat_63 | Pre-Treatment   | ALDH1A1 | 216    | 37 | 9  | 75531976  | 75531976  | Frame_Shift_Del | DEL | G      | - | 8   | 398  | c.895delC                            | c.(895-897)CAGfs      | p.Q299fs      |
| Pat_63 | Pre-Treatment   | TPRN    | 286262 | 37 | 9  | 140087025 | 140087027 | In_Frame_Del    | DEL | TCC    | - | 4   | 8    | .1659_1661delIGG(1657-1662)GAGGAA>GA | .553_554EE>I          |               |
| Pat_63 | Pre-Treatment   | CDKL5   | 6792   | 37 | X  | 18631336  | 18631336  | Frame_Shift_Del | DEL | A      | - | 8   | 141  | c.2217delA                           | c.(2215-2217)CTAfs    | p.L739fs      |
| Pat_63 | Pre-Treatment   | ZBTB33  | 10009  | 37 | X  | 119388255 | 119388257 | In_Frame_Del    | DEL | GAG    | - | 7   | 180  | c.985_987delGAG                      | c.(985-987)GAGdel     | p.E333del     |
| Pat_63 | Pre-Treatment   | PRRG3   | 79057  | 37 | X  | 150869296 | 150869297 | Frame_Shift_Ins | INS | -      | G | 4   | 8    | c.487_488insG                        | c.(487-489)CGGfs      | p.R163fs      |
| Pat_63 | Post-Resistance | PHACTR4 | 65979  | 37 | 1  | 28785729  | 28785730  | Frame_Shift_Ins | INS | -      | A | 9   | 74   | c.150_151insA                        | c.(148-153)AGGAAfs    | p.R50fs       |
| Pat_63 | Post-Resistance | ROR1    | 4919   | 37 | 1  | 64608186  | 64608187  | Frame_Shift_Del | DEL | CA     | - | 7   | 324  | c.1027_1028delCA                     | c.(1027-1029)CACfs    | p.H343fs      |
| Pat_63 | Post-Resistance | FNDC7   | 163479 | 37 | 1  | 109276138 | 109276138 | Frame_Shift_Del | DEL | A      | - | 7   | 93   | c.2124delA                           | c.(2122-2124)CCAfs    | p.P708fs      |
| Pat_63 | Post-Resistance | S100A1  | 6271   | 37 | 1  | 153604197 | 153604197 | Frame_Shift_Del | DEL | G      | - | 7   | 1554 | c.165delG                            | c.(163-165)GTGfs      | p.V55fs       |
| Pat_63 | Post-Resistance | SLAMF1  | 6504   | 37 | 1  | 160589601 | 160589601 | Frame_Shift_Del | DEL | T      | - | 9   | 292  | c.829delA                            | c.(829-831)AGCfs      | p.S277fs      |
| Pat_63 | Post-Resistance | PRG4    | 10216  | 37 | 1  | 186276548 | 186276550 | In_Frame_Del    | DEL | AGG    | - | 12  | 307  | .1697_1699delIAG(1696-1701)AAGGAG>AA |                       | p.E567del     |
| Pat_63 | Post-Resistance | CTSE    | 1510   | 37 | 1  | 206325294 | 206325294 | Frame_Shift_Del | DEL | C      | - | 8   | 400  | c.519delC                            | c.(517-519)GGCfs      | p.G173fs      |
| Pat_63 | Post-Resistance | RUFY2   | 55680  | 37 | 10 | 70156583  | 70156583  | Frame_Shift_Del | DEL | T      | - | 8   | 60   | c.457delA                            | c.(457-459)ATGfs      | p.M153fs      |
| Pat_63 | Post-Resistance | SAAL1   | 113174 | 37 | 11 | 18127531  | 18127533  | In_Frame_Del    | DEL | CCT    | - | 7   | 44   | c.56_58delIAGG                       | c.(55-60)GAGGTG>GTG   | p.E19del      |
| Pat_63 | Post-Resistance | FADS2   | 9415   | 37 | 11 | 61607885  | 61607887  | In_Frame_Del    | DEL | TCC    | - | 7   | 421  | c.398_400delITCC                     | c.(397-402)TTCTCC>TTC | p.L137del     |
| Pat_63 | Post-Resistance | IFFO1   | 25900  | 37 | 12 | 6649704   | 6649706   | In_Frame_Del    | DEL | GGC    | - | 8   | 220  | .1623_1625delIGC                     | (1621-1626)CCGCCA>CC  | .541_542PP>I  |
| Pat_63 | Post-Resistance | DHX37   | 57647  | 37 | 12 | 125473494 | 125473494 | Frame_Shift_Del | DEL | G      | - | 7   | 85   | c.75delC                             | c.(73-75)CCCfs        | p.P25fs       |
| Pat_63 | Post-Resistance | LIG4    | 3981   | 37 | 13 | 108862104 | 108862105 | Frame_Shift_Del | DEL | GA     | - | 7   | 387  | c.1512_1513delITC                    | c.(1510-1515)TCTCGTfs | p.S504fs      |
| Pat_63 | Post-Resistance | VPS18   | 57617  | 37 | 15 | 41188208  | 41188208  | Frame_Shift_Del | DEL | A      | - | 108 | 690  | c.164delA                            | c.(163-165)GAGfs      | p.E55fs       |
| Pat_63 | Post-Resistance | FAM174B | 400451 | 37 | 15 | 93198679  | 93198684  | In_Frame_Del    | DEL | TGGAGC | - | 4   | 5    | 206_211delIGCTC(205-213)AGCTCCAAC>A  |                       | p.SS69del     |
| Pat_63 | Post-Resistance | AFTPH   | 54812  | 37 | 2  | 64778672  | 64778674  | In_Frame_Del    | DEL | GAT    | - | 9   | 345  | c.64_66delIGAT                       | c.(64-66)GATdel       | p.D26del      |
| Pat_63 | Post-Resistance | LRP2    | 4036   | 37 | 2  | 170136098 | 170136099 | Frame_Shift_Ins | INS | -      | A | 8   | 29   | c.1348_1349insT                      | c.(1348-1350)TCAfs    | p.S450fs      |
| Pat_63 | Post-Resistance | PRKAG3  | 53632  | 37 | 2  | 219692729 | 219692729 | Frame_Shift_Del | DEL | G      | - | 4   | 9    | c.772delC                            | c.(772-774)CTGfs      | p.L258fs      |
| Pat_63 | Post-Resistance | OLIG1   | 116448 | 37 | 21 | 34442677  | 34442679  | In_Frame_Del    | DEL | CCT    | - | 6   | 12   | c.125_127delICTC                     | c.(124-129)CCCTCC>CCC | p.S48del      |
| Pat_63 | Post-Resistance | DNAJB7  | 150353 | 37 | 22 | 41257114  | 41257115  | Frame_Shift_Ins | INS | -      | T | 10  | 952  | c.884_885insA                        | c.(883-885)AAGfs      | p.K295fs      |
| Pat_63 | Post-Resistance | SREBF2  | 6721   | 37 | 22 | 42271637  | 42271637  | Frame_Shift_Del | DEL | C      | - | 7   | 608  | c.1295delC                           | c.(1294-1296)TCCfs    | p.S432fs      |
| Pat_63 | Post-Resistance | TCF20   | 6942   | 37 | 22 | 42610776  | 42610778  | In_Frame_Del    | DEL | TGC    | - | 13  | 337  | c.534_536delIGCAc                    | (.532-537)CAGCAA>CAA  | .178_179QQ>I  |
| Pat_63 | Post-Resistance | ARFGAP3 | 26286  | 37 | 22 | 43213780  | 43213780  | Frame_Shift_Del | DEL | T      | - | 19  | 1761 | c.896delA                            | c.(895-897)AATfs      | p.N299fs      |
| Pat_63 | Post-Resistance | NCEH1   | 57552  | 37 | 3  | 172365826 | 172365826 | Frame_Shift_Del | DEL | T      | - | 8   | 100  | c.313delA                            | c.(313-315)AGCfs      | p.S105fs      |
| Pat_63 | Post-Resistance | AASDH   | 132949 | 37 | 4  | 57220269  | 57220269  | Frame_Shift_Del | DEL | A      | - | 9   | 111  | c.1319delT                           | c.(1318-1320)TTGfs    | p.L440fs      |
| Pat_63 | Post-Resistance | CCNO    | 10309  | 37 | 5  | 54529340  | 54529340  | Frame_Shift_Del | DEL | G      | - | 6   | 8    | c.12delC                             | c.(10-12)CCCfs        | p.P4fs        |
| Pat_63 | Post-Resistance | DEPDC1B | 55789  | 37 | 5  | 59938636  | 59938637  | Splice_Site     | INS | -      | A | 13  | 70   | c.757_splice                         | c.e6+1                | p.W253_splice |
| Pat_63 | Post-Resistance | MSH3    | 4437   | 37 | 5  | 79970915  | 79970915  | Frame_Shift_Del | DEL | A      | - | 10  | 387  | c.1141delA                           | c.(1141-1143)AAfs     | p.K381fs      |
| Pat_63 | Post-Resistance | LARP1   | 23367  | 37 | 5  | 154173389 | 154173390 | Frame_Shift_Ins | INS | -      | C | 9   | 659  | c.898_899insC                        | c.(898-900)GCCfs      | p.A300fs      |
| Pat_63 | Post-Resistance | RDBP    | 7936   | 37 | 6  | 31926206  | 31926206  | Frame_Shift_Del | DEL | G      | - | 7   | 366  | c.18delC                             | c.(16-18)CCCfs        | p.P6fs        |
| Pat_63 | Post-Resistance | SLC35F1 | 222553 | 37 | 6  | 118606435 | 118606435 | Frame_Shift_Del | DEL | C      | - | 8   | 749  | c.936delC                            | c.(934-936)GTCfs      | p.V312fs      |
| Pat_63 | Post-Resistance | DNAH11  | 8701   | 37 | 7  | 21698641  | 21698641  | Frame_Shift_Del | DEL | A      | - | 2   | 4    | c.5335delA                           | c.(5335-5337)AAfs     | p.K1779fs     |
| Pat_63 | Post-Resistance | EGFR    | 1956   | 37 | 7  | 55221748  | 55221748  | Frame_Shift_Del | DEL | C      | - | 7   | 332  | c.792delC                            | c.(790-792)TGCfs      | p.C264fs      |
| Pat_63 | Post-Resistance | PEX1    | 5189   | 37 | 7  | 92146721  | 92146721  | Frame_Shift_Del | DEL | T      | - | 7   | 171  | c.1108delA                           | c.(1108-1110)ATTfs    | p.I370fs      |
| Pat_63 | Post-Resistance | PXDNL   | 137902 | 37 | 8  | 52359603  | 52359603  | Frame_Shift_Del | DEL | C      | - | 7   | 2188 | c.1486delG                           | c.(1486-1488)GTGfs    | p.V496fs      |
| Pat_63 | Post-Resistance | SULF1   | 23213  | 37 | 8  | 70514026  | 70514026  | Frame_Shift_Del | DEL | T      | - | 21  | 2547 | c.1023delT                           | c.(1021-1023)CCTfs    | p.P341fs      |
| Pat_63 | Post-Resistance | ZNF704  | 619279 | 37 | 8  | 81733778  | 81733778  | Frame_Shift_Del | DEL | T      | - | 9   | 765  | c.52delA                             | c.(52-54)ATGfs        | p.M18fs       |
| Pat_63 | Post-Resistance | ZHX1    | 11244  | 37 | 8  | 124266775 | 124266775 | Frame_Shift_Del | DEL | T      | - | 10  | 1528 | c.1412delA                           | c.(1411-1413)AAGfs    | p.K471fs      |

|        |                 |           |        |    |    |           |           |                 |     |          |         |    |      |                                |                         |                 |
|--------|-----------------|-----------|--------|----|----|-----------|-----------|-----------------|-----|----------|---------|----|------|--------------------------------|-------------------------|-----------------|
| Pat_63 | Post-Resistance | ATAD2     | 29028  | 37 | 8  | 124368685 | 124368685 | Frame_Shift_Del | DEL | A        | -       | 8  | 313  | c.1590delT                     | c.(1588-1590)TTTfs      | p.F530fs        |
| Pat_63 | Post-Resistance | MYC       | 4609   | 37 | 8  | 128750605 | 128750607 | In_Frame_Del    | DEL | CAG      | -       | 7  | 471  | c.97_99delCAG                  | c.(97-99)CAGdel         | p.Q37del        |
| Pat_63 | Post-Resistance | CNKS2R2   | 22866  | 37 | X  | 21627678  | 21627680  | In_Frame_Del    | DEL | GAG      | -       | 12 | 101  | .2635_2637delGAT               | c.(2635-2637)GAGdel     | p.E886del       |
| Pat_63 | Post-Resistance | ZFP92     | 139735 | 37 | X  | 152686591 | 152686591 | Frame_Shift_Del | DEL | G        | -       | 2  | 4    | c.756delG                      | c.(754-756)CTGfs        | p.L252fs        |
| Pat_70 | Pre-Treatment   | PLEKHG5   | 57449  | 37 | 1  | 6536011   | 6536013   | In_Frame_Del    | DEL | CTC      | -       | 18 | 458  | c.295_297delGAG                | c.(295-297)GAGdel       | p.E99del        |
| Pat_70 | Pre-Treatment   | MST1P9    | 11223  | 37 | 1  | 17085995  | 17085996  | Frame_Shift_Ins | INS | -        | C       | 11 | 232  | c.901_902insG                  | c.(901-903)GCGfs        | p.A301fs        |
| Pat_70 | Pre-Treatment   | SFRS4     | 6429   | 37 | 1  | 29475219  | 29475221  | In_Frame_Del    | DEL | CTT      | -       | 12 | 156  | .1186_1188delAAC               | c.(1186-1188)AAGdel     | p.K396del       |
| Pat_70 | Pre-Treatment   | TMCO2     | 127391 | 37 | 1  | 40713708  | 40713709  | Frame_Shift_Del | DEL | TC       | -       | 10 | 341  | c.43_44delTC                   | c.(43-45)TCTfs          | p.S15fs         |
| Pat_70 | Pre-Treatment   | CPT2      | 1376   | 37 | 1  | 53676267  | 53676284  | In_Frame_Del    | DEL | GTGGCAAT | -       | 23 | 173  | eIGAGTAGTGGC/ATGAGTAGTGGCAATGA | (SSGNEE308d             |                 |
| Pat_70 | Pre-Treatment   | USP24     | 23358  | 37 | 1  | 55620379  | 55620380  | Frame_Shift_Ins | INS | -        | TGAA    | 52 | 115  | .1182_1183insTTC               | c.(1180-1185)TCAGATfs   | p.S394fs        |
| Pat_70 | Pre-Treatment   | TCHH      | 7062   | 37 | 1  | 152083818 | 152083820 | In_Frame_Del    | DEL | CGG      | -       | 9  | 81   | .1873_1875delCC                | c.(1873-1875)CCGdel     | p.P625del       |
| Pat_70 | Pre-Treatment   | KCNN3     | 3782   | 37 | 1  | 154842331 | 154842333 | In_Frame_Del    | DEL | TGC      | -       | 7  | 84   | c.108_110delGCAC               | c.(106-111)CAGCAA>CAA   | p.36_37QQ>Q     |
| Pat_70 | Pre-Treatment   | KIAA0907  | 22889  | 37 | 1  | 155886422 | 155886423 | Frame_Shift_Del | DEL | CT       | -       | 9  | 379  | c.1546_1547delAC               | c.(1546-1548)AGGfs      | p.R516fs        |
| Pat_70 | Pre-Treatment   | LOC642587 | 642587 | 37 | 1  | 209605637 | 209605648 | In_Frame_Del    | DEL | CAGCAGCA | -       | 7  | 36   | .263delAGCAGCA(264)            | GTAGCAGCAGCAGC          | p.AAAA93del     |
| Pat_70 | Pre-Treatment   | TMEM63A   | 9725   | 37 | 1  | 226034840 | 226034842 | In_Frame_Del    | DEL | CTG      | -       | 13 | 392  | .2323_2325delCA                | c.(2323-2325)CAGdel     | p.Q775del       |
| Pat_70 | Pre-Treatment   | AGT       | 183    | 37 | 1  | 230839055 | 230839055 | Frame_Shift_Del | DEL | A        | -       | 7  | 104  | c.1290delIT                    | c.(1288-1290)TTTTfs     | p.F430fs        |
| Pat_70 | Pre-Treatment   | CPXM2     | 119587 | 37 | 10 | 125528165 | 125528167 | In_Frame_Del    | DEL | CAG      | -       | 8  | 447  | .1174_1176delICT               | c.(1174-1176)CTGdel     | p.L392del       |
| Pat_70 | Pre-Treatment   | PAMR1     | 25891  | 37 | 11 | 35513670  | 35513670  | Frame_Shift_Del | DEL | C        | -       | 13 | 976  | c.302delG                      | c.(301-303)GGTfs        | p.G101fs        |
| Pat_70 | Pre-Treatment   | KBTD4     | 55709  | 37 | 11 | 47599139  | 47599139  | Frame_Shift_Del | DEL | A        | -       | 8  | 1015 | c.413delIT                     | c.(412-414)TTGfs        | p.L138fs        |
| Pat_70 | Pre-Treatment   | STX5      | 6811   | 37 | 11 | 62598584  | 62598585  | Frame_Shift_Ins | INS | -        | G       | 9  | 28   | c.131_132insC                  | c.(130-132)CCAfs        | p.P44fs         |
| Pat_70 | Pre-Treatment   | DDX6      | 1656   | 37 | 11 | 118629613 | 118629614 | Splice_Site     | INS | -        | G       | 12 | 401  | c.865_splice                   | c.e9-1                  | p.N289_splice   |
| Pat_70 | Pre-Treatment   | CHEK1     | 1111   | 37 | 11 | 125505377 | 125505378 | Frame_Shift_Ins | INS | -        | A       | 12 | 420  | c.667_668insA                  | c.(667-669)GAAfs        | p.E223fs        |
| Pat_70 | Pre-Treatment   | PRB2      | 653247 | 37 | 12 | 11546506  | 11546508  | In_Frame_Del    | DEL | TTG      | -       | 16 | 443  | c.504_506delCAA                | c.(502-507)AACAA>AAG    | p.N168del       |
| Pat_70 | Pre-Treatment   | SFRS2IP   | 9169   | 37 | 12 | 46318575  | 46318577  | In_Frame_Del    | DEL | GGT      | -       | 8  | 492  | .3840_3842delAC                | c.(3838-3843)CCACCC>CC  | p.1280_1281PP   |
| Pat_70 | Pre-Treatment   | SYCP3     | 50511  | 37 | 12 | 102122901 | 102122901 | Frame_Shift_Del | DEL | T        | -       | 7  | 58   | c.643delA                      | c.(643-645)ATTfs        | p.I215fs        |
| Pat_70 | Pre-Treatment   | POLE      | 5426   | 37 | 12 | 133220099 | 133220100 | Frame_Shift_Del | DEL | CA       | -       | 16 | 659  | c.4337_4338delITC              | c.(4336-4338)GTGfs      | p.V1446fs       |
| Pat_70 | Pre-Treatment   | PABPC3    | 5042   | 37 | 13 | 25671804  | 25671806  | In_Frame_Del    | DEL | GCT      | -       | 8  | 82   | .1468_1470delGC                | c.(1468-1470)GCTdel     | p.A496del       |
| Pat_70 | Pre-Treatment   | TEP1      | 7011   | 37 | 14 | 20852647  | 20852647  | Frame_Shift_Del | DEL | C        | -       | 10 | 650  | c.3242delG                     | c.(3241-3243)GGTfs      | p.G1081fs       |
| Pat_70 | Pre-Treatment   | APEX1     | 328    | 37 | 14 | 20923820  | 20923820  | Frame_Shift_Del | DEL | A        | -       | 9  | 303  | c.16delA                       | c.(16-18)AAAs           | p.K6fs          |
| Pat_70 | Pre-Treatment   | LRP10     | 26020  | 37 | 14 | 23341527  | 23341529  | In_Frame_Del    | DEL | CCT      | -       | 23 | 301  | c.15_17delCCT                  | c.(13-18)ACCCTC>ACC     | p.L11del        |
| Pat_70 | Pre-Treatment   | PSMA6     | 5687   | 37 | 14 | 35782215  | 35782216  | Frame_Shift_Ins | INS | -        | A       | 7  | 382  | c.538_539insA                  | c.(538-540)GAAfs        | p.E180fs        |
| Pat_70 | Pre-Treatment   | C14orf106 | 55320  | 37 | 14 | 45693722  | 45693722  | Frame_Shift_Del | DEL | T        | -       | 8  | 151  | c.2068delA                     | c.(2068-2070)AGTfs      | p.S690fs        |
| Pat_70 | Pre-Treatment   | ZNF609    | 23060  | 37 | 15 | 64972995  | 64972997  | In_Frame_Del    | DEL | CAC      | -       | 10 | 630  | .4096_4098delCA                | c.(4096-4098)CACdel     | p.H1371del      |
| Pat_70 | Pre-Treatment   | SLC24A1   | 9187   | 37 | 15 | 65918177  | 65918179  | In_Frame_Del    | DEL | CTG      | -       | 13 | 178  | .1759_1761delCT                | c.(1759-1761)CTGdel     | p.L591del       |
| Pat_70 | Pre-Treatment   | APOB48R   | 55911  | 37 | 16 | 28507398  | 28507424  | Splice_Site     | DEL | CAGGAGGC | -       | 15 | 31   | c.1043_splice                  | c.e2+1                  | p.A348_splice   |
| Pat_70 | Pre-Treatment   | EIF3CL    | 728689 | 37 | 16 | 28734579  | 28734581  | In_Frame_Del    | DEL | GAG      | -       | 9  | 1502 | c.871_873delGAG                | c.(871-873)GAGdel       | p.E295del       |
| Pat_70 | Pre-Treatment   | SETD1A    | 9739   | 37 | 16 | 30982809  | 30982811  | In_Frame_Del    | DEL | TCC      | -       | 8  | 174  | .3127_3129delITC               | c.(3127-3129)TCCdel     | p.S1058del      |
| Pat_70 | Pre-Treatment   | SLC9A5    | 6553   | 37 | 16 | 67300017  | 67300019  | In_Frame_Del    | DEL | GAG      | -       | 12 | 173  | .2107_2109delGAI               | c.(2107-2109)GAGdel     | p.E708del       |
| Pat_70 | Pre-Treatment   | ENO3      | 2027   | 37 | 17 | 4859894   | 4859894   | Frame_Shift_Del | DEL | G        | -       | 7  | 511  | c.1094delG                     | c.(1093-1095)TGGfs      | p.W365fs        |
| Pat_70 | Pre-Treatment   | KDM6B     | 23135  | 37 | 17 | 7751859   | 7751864   | In_Frame_Del    | DEL | CACCAC   | -       | 16 | 142  | .253_2258delCACC               | c.(251-2259)GTCACCACC>C | p.TT760del      |
| Pat_70 | Pre-Treatment   | TRPV2     | 51393  | 37 | 17 | 16335490  | 16335492  | In_Frame_Del    | DEL | TGC      | -       | 9  | 217  | .1865_1867delITG               | c.(1864-1869)GTGCTG>GT  | p.L627del       |
| Pat_70 | Pre-Treatment   | CDK12     | 51755  | 37 | 17 | 37686901  | 37686901  | Frame_Shift_Del | DEL | C        | -       | 7  | 895  | c.3805delC                     | c.(3805-3807)CCCfs      | p.P1269fs       |
| Pat_70 | Pre-Treatment   | KRT10     | 3858   | 37 | 17 | 38978766  | 38978768  | In_Frame_Del    | DEL | TCC      | -       | 8  | 79   | c.70_72delGGA                  | c.(70-72)GGAdel         | p.G24del        |
| Pat_70 | Pre-Treatment   | KRTAP4-5  | 85289  | 37 | 17 | 39305775  | 39305776  | In_Frame_Ins    | INS | -        | GCAGCTG | 22 | 101  | 5insGCCCCAGCT                  | c.(3)CAG>CGCCCCAGCTG    | p.C81_82insRPSC |
| Pat_70 | Pre-Treatment   | FMNL1     | 752    | 37 | 17 | 43319434  | 43319435  | In_Frame_Ins    | INS | -        | CCG     | 7  | 6    | .1806_1807insCC                | c.(1804-1809)insCCG     | p.612_613insF   |
| Pat_70 | Pre-Treatment   | NPEPPS    | 9520   | 37 | 17 | 45669428  | 45669429  | Splice_Site     | INS | -        | A       | 13 | 28   | c.1365_splice                  | c.e11+2                 | p.K455_splice   |
| Pat_70 | Pre-Treatment   | CXXC1     | 30827  | 37 | 18 | 47812275  | 47812277  | In_Frame_Del    | DEL | CTG      | -       | 12 | 174  | c.481_483delCAG                | c.(481-483)CAGdel       | p.Q161del       |

|        |               |          |        |    |    |           |           |                 |     |     |          |    |      |                                                    |                  |          |
|--------|---------------|----------|--------|----|----|-----------|-----------|-----------------|-----|-----|----------|----|------|----------------------------------------------------|------------------|----------|
| Pat_70 | Pre-Treatment | LDLR     | 3949   | 37 | 19 | 11216065  | 11216065  | Frame_Shift_Del | DEL | C   | -        | 8  | 446  | c.483delC                                          | c.(481-483)ATCfs | p.L161fs |
| Pat_70 | Pre-Treatment | HAMP     | 57817  | 37 | 19 | 35773520  | 35773522  | In_Frame_Del    | DEL | CTC | -        | 14 | 421  | c.40_42delCTC                                      | c.(40-42)CTCdel  | p.L18del |
| Pat_70 | Pre-Treatment | ZFP36    | 7538   | 37 | 19 | 39898948  | 39898950  | In_Frame_Del    | DEL | CAC | -        | 8  | 764  | c.590_592delCACc.(589-594)TCACCA>TCA               | p.P201del        |          |
| Pat_70 | Pre-Treatment | LYPD3    | 27076  | 37 | 19 | 43969653  | 43969655  | In_Frame_Del    | DEL | AGC | -        | 17 | 799  | c.69_71delIGCT c.(67-72)CTGCTT>CTT                 | p.23_24LL>L      |          |
| Pat_70 | Pre-Treatment | SLC8A2   | 6543   | 37 | 19 | 47935681  | 47935683  | In_Frame_Del    | DEL | TCC | -        | 19 | 361  | .2130_2132delIGG(2128-2133)GAGGAC>GA               | p.E710del        |          |
| Pat_70 | Pre-Treatment | TMC4     | 147798 | 37 | 19 | 54675747  | 54675749  | In_Frame_Del    | DEL | TCC | -        | 8  | 147  | c.201_203delGGAc.(199-204)GAGGAT>GAT               | p.E67del         |          |
| Pat_70 | Pre-Treatment | LILRB2   | 10288  | 37 | 19 | 54780707  | 54780709  | In_Frame_Del    | DEL | GAG | -        | 7  | 281  | .1435_1437delICT c.(1435-1437)CTCdel               | p.L479del        |          |
| Pat_70 | Pre-Treatment | LILRB1   | 10859  | 37 | 19 | 55146148  | 55146150  | In_Frame_Del    | DEL | CTC | -        | 7  | 74   | .1417_1419delICT c.(1417-1419)CTCdel               | p.L479del        |          |
| Pat_70 | Pre-Treatment | ZNF579   | 163033 | 37 | 19 | 56089908  | 56089909  | In_Frame_Ins    | INS | -   | CCG      | 7  | 10   | .1097_1098insCG(1096-1098)GGG>GGCGC.366_366G>G     |                  |          |
| Pat_70 | Pre-Treatment | C2orf71  | 388939 | 37 | 2  | 29295647  | 29295649  | In_Frame_Del    | DEL | TCC | -        | 9  | 387  | .1479_1481delIGG(1477-1482)GAGGAA>GA.493_494EE>I   |                  |          |
| Pat_70 | Pre-Treatment | ITPRIPL1 | 150771 | 37 | 2  | 96992793  | 96992795  | In_Frame_Del    | DEL | GAG | -        | 12 | 158  | c.424_426delGAG c.(424-426)GAGdel                  | p.E147del        |          |
| Pat_70 | Pre-Treatment | SLC20A1  | 6574   | 37 | 2  | 113416607 | 113416608 | Frame_Shift_Del | DEL | AG  | -        | 7  | 85   | c.984_985delIAG c.(982-987)CCAGAGfs                | p.P328fs         |          |
| Pat_70 | Pre-Treatment | UGGT1    | 56886  | 37 | 2  | 128938648 | 128938649 | Splice_Site     | INS | -   | 3GCCCTT/ | 7  | 168  | c.4083_splice c.e36+2                              | p.Q1361_splice   |          |
| Pat_70 | Pre-Treatment | NCOA6    | 23054  | 37 | 20 | 33330968  | 33330970  | In_Frame_Del    | DEL | TGC | -        | 11 | 209  | .3090_3092delIGC.(3088-3093)CAGCAA>CAI030_1031QQ:  |                  |          |
| Pat_70 | Pre-Treatment | SFRS15   | 57466  | 37 | 21 | 33044257  | 33044259  | In_Frame_Del    | DEL | GCT | -        | 7  | 311  | .2897_2899delIAG(2896-2901)CAGCCA>CC               | p.Q966del        |          |
| Pat_70 | Pre-Treatment | TRIOBP   | 11078  | 37 | 22 | 38120029  | 38120031  | In_Frame_Del    | DEL | CCT | -        | 12 | 310  | .1466_1468delCC(1465-1470)GCCTCC>GC                | p.S491del        |          |
| Pat_70 | Pre-Treatment | TRIOBP   | 11078  | 37 | 22 | 38120323  | 38120325  | In_Frame_Del    | DEL | CCT | -        | 11 | 644  | .1760_1762delCC(1759-1764)GCCTCC>GC                | p.S589del        |          |
| Pat_70 | Pre-Treatment | RANGAP1  | 5905   | 37 | 22 | 41650469  | 41650471  | In_Frame_Del    | DEL | TCC | -        | 15 | 215  | .1101_1103delIGG.(1099-1104)GAGGAA>GA.367_368EE>I  |                  |          |
| Pat_70 | Pre-Treatment | XPC      | 7508   | 37 | 3  | 14219966  | 14219968  | In_Frame_Del    | DEL | CCT | -        | 9  | 163  | c.101_103delIAGGc.(100-105)GAGGAT>GAT              | p.E34del         |          |
| Pat_70 | Pre-Treatment | QRICH1   | 54870  | 37 | 3  | 49094313  | 49094314  | In_Frame_Ins    | INS | -   | TGC      | 36 | 73   | .1319_1320insGC.(1318-1320)CAA>CAGCA.440_440Q>Q    |                  |          |
| Pat_70 | Pre-Treatment | ROBO2    | 6092   | 37 | 3  | 77657038  | 77657038  | Frame_Shift_Del | DEL | C   | -        | 7  | 139  | c.3226delC c.(3226-3228)CCCfs                      | p.P1076fs        |          |
| Pat_70 | Pre-Treatment | LNP1     | 348801 | 37 | 3  | 100148586 | 100148588 | In_Frame_Del    | DEL | GAT | -        | 9  | 1040 | c.13_15delIGAT c.(13-15)GATdel                     | p.D10del         |          |
| Pat_70 | Pre-Treatment | CRIPAK   | 285464 | 37 | 4  | 1388900   | 1388901   | Frame_Shift_Del | DEL | CA  | -        | 13 | 686  | c.601_602delICA c.(601-603)CACfs                   | p.H201fs         |          |
| Pat_70 | Pre-Treatment | CRIPAK   | 285464 | 37 | 4  | 1389392   | 1389393   | Frame_Shift_Del | DEL | CA  | -        | 12 | 1369 | c.1093_1094delICA c.(1093-1095)CACfs               | p.H365fs         |          |
| Pat_70 | Pre-Treatment | PROM1    | 8842   | 37 | 4  | 15995680  | 15995680  | Frame_Shift_Del | DEL | T   | -        | 7  | 170  | c.1697delA c.(1696-1698)AATfs                      | p.N566fs         |          |
| Pat_70 | Pre-Treatment | MMRN1    | 22915  | 37 | 4  | 90844391  | 90844393  | In_Frame_Del    | DEL | AGC | -        | 9  | 1178 | c.923_925delAGC:(.922-927)GAGCAG>GAC               | p.Q313del        |          |
| Pat_70 | Pre-Treatment | RRH      | 10692  | 37 | 4  | 110756541 | 110756541 | Frame_Shift_Del | DEL | T   | -        | 7  | 182  | c.317delT c.(316-318)ATTfs                         | p.I106fs         |          |
| Pat_70 | Pre-Treatment | SDHA     | 6389   | 37 | 5  | 256484    | 256485    | Frame_Shift_Del | DEL | TT  | -        | 23 | 389  | c.1944_1945delITT c.(1942-1947)ACTTTGfs            | p.T648fs         |          |
| Pat_70 | Pre-Treatment | HLA-F    | 3134   | 37 | 6  | 29694802  | 29694803  | Frame_Shift_Ins | INS | -   | T        | 15 | 715  | c.1179_1180insT c.(1177-1182)TTGTTTfs              | p.L393fs         |          |
| Pat_70 | Pre-Treatment | KIAA1949 | 170954 | 37 | 6  | 30653494  | 30653496  | In_Frame_Del    | DEL | TGC | -        | 7  | 114  | c.300_302delIGAc.(298-303)CAGCAA>CAA.100_101QQ>I   |                  |          |
| Pat_70 | Pre-Treatment | ZBTB22   | 9278   | 37 | 6  | 33283253  | 33283254  | Frame_Shift_Del | DEL | CC  | -        | 8  | 1203 | :.1440_1441delIGC c.(1438-1443)GGGGAcfs            | p.G480fs         |          |
| Pat_70 | Pre-Treatment | MDN1     | 23195  | 37 | 6  | 90432674  | 90432675  | Frame_Shift_Ins | INS | -   | T        | 8  | 413  | c.5966_5967insA c.(5965-5967)AAGfs                 | p.K1989fs        |          |
| Pat_70 | Pre-Treatment | MAP3K7   | 6885   | 37 | 6  | 91296568  | 91296570  | In_Frame_Del    | DEL | GAG | -        | 8  | 99   | c.33_35delCTC c.(31-36)TCCTCG>TCG                  | p.11_12SS>S      |          |
| Pat_70 | Pre-Treatment | HOXA1    | 3198   | 37 | 7  | 27135314  | 27135316  | In_Frame_Del    | DEL | CGA | -        | 7  | 134  | c.216_218delITCGc.(214-219)CATCAC>CACp.72_73HH>H   |                  |          |
| Pat_70 | Pre-Treatment | GARS     | 2617   | 37 | 7  | 30634583  | 30634585  | In_Frame_Del    | DEL | CTG | -        | 7  | 130  | c.46_48delCTG c.(46-48)CTGdel                      | p.L20del         |          |
| Pat_70 | Pre-Treatment | DTX2     | 113878 | 37 | 7  | 76112249  | 76112249  | Frame_Shift_Del | DEL | A   | -        | 22 | 1228 | c.693delA c.(691-693)CCAFs                         | p.P231fs         |          |
| Pat_70 | Pre-Treatment | RSBN1L   | 222194 | 37 | 7  | 77326220  | 77326222  | In_Frame_Del    | DEL | CCG | -        | 10 | 140  | c.434_436delCCG:(.433-438)CCGCC>CCC                | p.A151del        |          |
| Pat_70 | Pre-Treatment | MCM7     | 4176   | 37 | 7  | 99695272  | 99695272  | Frame_Shift_Del | DEL | C   | -        | 7  | 1266 | c.1082delG c.(1081-1083)GGTfs                      | p.G361fs         |          |
| Pat_70 | Pre-Treatment | MUC17    | 140453 | 37 | 7  | 100684131 | 100684133 | In_Frame_Del    | DEL | CTC | -        | 36 | 1591 | .9434_9436delICT(.9433-9438)TCTCCT>TC              | p.P3146del       |          |
| Pat_70 | Pre-Treatment | MUC17    | 140453 | 37 | 7  | 100684307 | 100684308 | In_Frame_Ins    | INS | -   | CTC      | 61 | 1466 | :.9610_9611insCT(.9610-9612)TCT>TCTCC.3204_3205ins |                  |          |
| Pat_70 | Pre-Treatment | SCRIB    | 23513  | 37 | 8  | 144890900 | 144890902 | In_Frame_Del    | DEL | TCC | -        | 8  | 45   | .1992_1994delIGG(1990-1995)GAGGAA>GA.664_665EE>I   |                  |          |
| Pat_70 | Pre-Treatment | KANK1    | 23189  | 37 | 9  | 732475    | 732477    | In_Frame_Del    | DEL | GAG | -        | 10 | 365  | .3103_3105delIGA c.(3103-3105)GAGdel               | p.E1039del       |          |
| Pat_70 | Pre-Treatment | TAF1L    | 138474 | 37 | 9  | 32633584  | 32633584  | Frame_Shift_Del | DEL | T   | -        | 7  | 165  | c.1994delA c.(1993-1995)AAGfs                      | p.K665fs         |          |
| Pat_70 | Pre-Treatment | NR4A3    | 8013   | 37 | 9  | 102590616 | 102590618 | In_Frame_Del    | DEL | CAC | -        | 10 | 72   | c.292_294delCAC c.(292-294)CACdel                  | p.H108del        |          |
| Pat_70 | Pre-Treatment | PRDM12   | 59335  | 37 | 9  | 133543701 | 133543702 | Splice_Site     | DEL | GT  | -        | 16 | 192  | c.570_splice c.e3+1                                | p.E190_splice    |          |
| Pat_70 | Pre-Treatment | CEL      | 1056   | 37 | 9  | 135941982 | 135941982 | Frame_Shift_Del | DEL | G   | -        | 7  | 408  | c.613delG c.(613-615)GGGfs                         | p.G205fs         |          |
| Pat_70 | Pre-Treatment | TSPAN7   | 7102   | 37 | X  | 38530682  | 38530682  | Frame_Shift_Del | DEL | C   | -        | 7  | 761  | c.323delC c.(322-324)TCAFs                         | p.S108fs         |          |

|        |                 |           |        |    |   |           |           |                 |     |          |      |    |      |                  |                        |              |
|--------|-----------------|-----------|--------|----|---|-----------|-----------|-----------------|-----|----------|------|----|------|------------------|------------------------|--------------|
| Pat_70 | Pre-Treatment   | PHF8      | 23133  | 37 | X | 54011405  | 54011407  | In_Frame_Del    | DEL | CTC      | -    | 13 | 368  | .2491_2493delGAI | c.(2491-2493)GAGdel    | p.E831del    |
| Pat_70 | Pre-Treatment   | BHLHB9    | 80823  | 37 | X | 102004419 | 102004421 | In_Frame_Del    | DEL | GAG      | -    | 7  | 311  | c.496_498delGAG  | c.(496-498)GAGdel      | p.E171del    |
| Pat_70 | Pre-Treatment   | FAM199X   | 139231 | 37 | X | 103432837 | 103432839 | In_Frame_Del    | DEL | CAG      | -    | 7  | 330  | c.846_848delCAG  | c.(844-849)GCCAGC>GCC  | p.S286del    |
| Pat_70 | Pre-Treatment   | SLC25A5   | 292    | 37 | X | 118603706 | 118603707 | Frame_Shift_Ins | INS | -        | G    | 33 | 745  | c.194_195insG    | c.(193-195)CAGfs       | p.Q65fs      |
| Pat_70 | Pre-Treatment   | CD99L2    | 83692  | 37 | X | 149984524 | 149984526 | In_Frame_Del    | DEL | GTG      | -    | 7  | 466  | c.156_158delCAC  | c.(154-159)ACCACA>ACA  | p.52_53TT>T  |
| Pat_70 | Pre-Treatment   | BCAP31    | 10134  | 37 | X | 152981034 | 152981043 | Frame_Shift_Del | DEL | CCTCTGGG | -    | 35 | 239  | _304delGCCAG     | c.(295-306)GCCAGAGGAA  | p.A99fs      |
| Pat_70 | Post-Resistance | RPL22     | 6146   | 37 | 1 | 6257785   | 6257785   | Frame_Shift_Del | DEL | T        | -    | 7  | 253  | c.44delA         | c.(43-45)AAGfs         | p.K15fs      |
| Pat_70 | Post-Resistance | PLEKHG5   | 57449  | 37 | 1 | 6536011   | 6536013   | In_Frame_Del    | DEL | CTC      | -    | 29 | 618  | c.295_297delGAG  | c.(295-297)GAGdel      | p.E99del     |
| Pat_70 | Post-Resistance | AADACL3   | 126767 | 37 | 1 | 12785494  | 12785494  | Frame_Shift_Del | DEL | G        | -    | 17 | 724  | c.584delG        | c.(583-585)TGTfs       | p.C195fs     |
| Pat_70 | Post-Resistance | MST1P9    | 11223  | 37 | 1 | 17085995  | 17085996  | Frame_Shift_Ins | INS | -        | C    | 18 | 358  | c.901_902insG    | c.(901-903)GCGfs       | p.A301fs     |
| Pat_70 | Post-Resistance | RPS6KA1   | 6195   | 37 | 1 | 26885311  | 26885311  | Frame_Shift_Del | DEL | C        | -    | 9  | 496  | c.1098delC       | c.(1096-1098)ATCfs     | p.I366fs     |
| Pat_70 | Post-Resistance | XKR8      | 55113  | 37 | 1 | 28293145  | 28293147  | In_Frame_Del    | DEL | CTG      | -    | 9  | 611  | c.622_624delCTG  | c.(622-624)CTGdel      | p.L211del    |
| Pat_70 | Post-Resistance | SFRS4     | 6429   | 37 | 1 | 29475219  | 29475221  | In_Frame_Del    | DEL | CTT      | -    | 17 | 348  | .1186_1188delIAA | c.(1186-1188)AAGdel    | p.K396del    |
| Pat_70 | Post-Resistance | SFRS4     | 6429   | 37 | 1 | 29475575  | 29475575  | Frame_Shift_Del | DEL | G        | -    | 8  | 1472 | c.832delC        | c.(832-834)CAAfs       | p.Q278fs     |
| Pat_70 | Post-Resistance | ZMYM6     | 9204   | 37 | 1 | 35485090  | 35485090  | Frame_Shift_Del | DEL | T        | -    | 8  | 426  | c.292delA        | c.(292-294)ATGfs       | p.M98fs      |
| Pat_70 | Post-Resistance | ZMYM4     | 9202   | 37 | 1 | 35846959  | 35846960  | Frame_Shift_Ins | INS | -        | A    | 9  | 272  | c.1281_1282insA  | c.(1279-1284)CTGAAAs   | p.L427fs     |
| Pat_70 | Post-Resistance | INPP5B    | 3633   | 37 | 1 | 38411495  | 38411495  | Frame_Shift_Del | DEL | C        | -    | 7  | 319  | c.85delG         | c.(85-87)GACfs         | p.D29fs      |
| Pat_70 | Post-Resistance | TMCO2     | 127391 | 37 | 1 | 40713708  | 40713709  | Frame_Shift_Del | DEL | TC       | -    | 13 | 879  | c.43_44delTC     | c.(43-45)TCTfs         | p.S15fs      |
| Pat_70 | Post-Resistance | STIL      | 6491   | 37 | 1 | 47767947  | 47767947  | Frame_Shift_Del | DEL | T        | -    | 7  | 420  | c.224delA        | c.(223-225)AATfs       | p.N75fs      |
| Pat_70 | Post-Resistance | CPT2      | 1376   | 37 | 1 | 53676267  | 53676284  | In_Frame_Del    | DEL | GTGGCAAT | -    | 10 | 399  | eIGAGTAGTGGC     | c.(ATGAGTAGTGGCAATGA   | (SSGNEE308d  |
| Pat_70 | Post-Resistance | USP24     | 23358  | 37 | 1 | 55620379  | 55620380  | Frame_Shift_Ins | INS | -        | TGAA | 55 | 389  | .1182_1183insTTC | c.(1180-1185)TCAGATfs  | p.S394fs     |
| Pat_70 | Post-Resistance | TNNI3K    | 51086  | 37 | 1 | 74957824  | 74957826  | In_Frame_Del    | DEL | CTT      | -    | 13 | 1099 | .2225_2227delICT | c.(2224-2229)CCTTCT>CC | p.S746del    |
| Pat_70 | Post-Resistance | BCL10     | 8915   | 37 | 1 | 85736511  | 85736511  | Frame_Shift_Del | DEL | T        | -    | 16 | 450  | c.136delA        | c.(136-138)ATAfs       | p.I46fs      |
| Pat_70 | Post-Resistance | CDC7      | 8317   | 37 | 1 | 91967356  | 91967357  | Frame_Shift_Ins | INS | -        | A    | 10 | 286  | c.83_84insA      | c.(82-84)TTAfs         | p.L28fs      |
| Pat_70 | Post-Resistance | IGSF3     | 3321   | 37 | 1 | 117122270 | 117122272 | In_Frame_Del    | DEL | GTC      | -    | 7  | 60   | .3076_3078delGAI | c.(3076-3078)GACdel    | p.D1026del   |
| Pat_70 | Post-Resistance | ADAM30    | 11085  | 37 | 1 | 120436591 | 120436591 | Frame_Shift_Del | DEL | T        | -    | 8  | 1059 | c.2369delA       | c.(2368-2370)AAGfs     | p.K790fs     |
| Pat_70 | Post-Resistance | NBPF9     | 400818 | 37 | 1 | 144615246 | 144615247 | Splice_Site     | INS | -        | AG   | 8  | 135  | c.114_splice     | c.e3+2                 | p.L38_splice |
| Pat_70 | Post-Resistance | HFE2      | 148738 | 37 | 1 | 145415369 | 145415371 | In_Frame_Del    | DEL | GAG      | -    | 8  | 464  | c.188_190delGAG  | c.(187-192)CGAGGA>CGA  | p.G69del     |
| Pat_70 | Post-Resistance | ADAMTSL4  | 54507  | 37 | 1 | 150530506 | 150530506 | Frame_Shift_Del | DEL | G        | -    | 8  | 546  | c.2263delG       | c.(2263-2265)GGGfs     | p.G755fs     |
| Pat_70 | Post-Resistance | MCL1      | 4170   | 37 | 1 | 150551492 | 150551494 | In_Frame_Del    | DEL | TCC      | -    | 14 | 591  | c.513_515delGGA  | c.(511-516)GAGGAC>GAC  | p.E171del    |
| Pat_70 | Post-Resistance | TCHH      | 7062   | 37 | 1 | 152082957 | 152082959 | In_Frame_Del    | DEL | CTC      | -    | 12 | 399  | .2734_2736delGAI | c.(2734-2736)GAGdel    | p.E912del    |
| Pat_70 | Post-Resistance | LCE4A     | 199834 | 37 | 1 | 152681693 | 152681698 | In_Frame_Del    | DEL | TGTGGT   | -    | 12 | 389  | 142_147delTGTGC  | c.(142-147)TGTGGTdel   | p.CG48del    |
| Pat_70 | Post-Resistance | SLC27A3   | 11000  | 37 | 1 | 153751859 | 153751860 | Frame_Shift_Ins | INS | -        | C    | 7  | 740  | c.1926_1927insC  | c.(1924-1929)CGTCCfs   | p.R642fs     |
| Pat_70 | Post-Resistance | KIAA0907  | 22889  | 37 | 1 | 155886422 | 155886423 | Frame_Shift_Del | DEL | CT       | -    | 25 | 917  | .1546_1547delAC  | c.(1546-1548)AGGfs     | p.R516fs     |
| Pat_70 | Post-Resistance | ISG20L2   | 81875  | 37 | 1 | 156694023 | 156694023 | Frame_Shift_Del | DEL | G        | -    | 14 | 573  | c.865delC        | c.(865-867)CTCfs       | p.L289fs     |
| Pat_70 | Post-Resistance | ARHGAP30  | 257106 | 37 | 1 | 161039361 | 161039361 | Frame_Shift_Del | DEL | A        | -    | 7  | 501  | c.54delT         | c.(52-54)TTTfs         | p.F18fs      |
| Pat_70 | Post-Resistance | PVRL4     | 81607  | 37 | 1 | 161044057 | 161044059 | In_Frame_Del    | DEL | CAC      | -    | 7  | 581  | .1105_1107delGTG | c.(1105-1107)GTGdel    | p.V369del    |
| Pat_70 | Post-Resistance | PVRL4     | 81607  | 37 | 1 | 161044104 | 161044106 | In_Frame_Del    | DEL | CCA      | -    | 9  | 736  | .1058_1060delTG  | c.(1057-1062)GTGGGT>GG | p.V353del    |
| Pat_70 | Post-Resistance | GPA33     | 10223  | 37 | 1 | 167024257 | 167024259 | In_Frame_Del    | DEL | GCA      | -    | 8  | 642  | c.781_783delTGC  | c.(781-783)TGCdel      | p.C261del    |
| Pat_70 | Post-Resistance | C1orf114  | 57821  | 37 | 1 | 169366580 | 169366580 | Frame_Shift_Del | DEL | T        | -    | 7  | 159  | c.1265delA       | c.(1264-1266)AAGfs     | p.K422fs     |
| Pat_70 | Post-Resistance | PAPPA2    | 60676  | 37 | 1 | 176762724 | 176762724 | Frame_Shift_Del | DEL | C        | -    | 11 | 872  | c.5049delC       | c.(5047-5049)ATCfs     | p.I1683fs    |
| Pat_70 | Post-Resistance | CACNA1E   | 777    | 37 | 1 | 181680102 | 181680103 | Frame_Shift_Del | DEL | AG       | -    | 33 | 674  | .1068_1069delAC  | c.(1066-1071)AAAGAGfs  | p.K356fs     |
| Pat_70 | Post-Resistance | APOBEC4   | 403314 | 37 | 1 | 183616826 | 183616828 | In_Frame_Del    | DEL | TTC      | -    | 10 | 787  | .1089_1091delGA  | c.(1087-1092)AAGAAA>AA | .363_364KK>I |
| Pat_70 | Post-Resistance | CAMSAP1L1 | 23271  | 37 | 1 | 200822549 | 200822549 | Frame_Shift_Del | DEL | A        | -    | 9  | 341  | c.3782delA       | c.(3781-3783)CAAfs     | p.Q1261fs    |
| Pat_70 | Post-Resistance | IPO9      | 55705  | 37 | 1 | 201843998 | 201844000 | In_Frame_Del    | DEL | GAG      | -    | 12 | 473  | .2872_2874delGAI | c.(2872-2874)GAGdel    | p.E962del    |
| Pat_70 | Post-Resistance | LOC642587 | 642587 | 37 | 1 | 209605637 | 209605648 | In_Frame_Del    | DEL | CAGCAGCA | -    | 10 | 82   | .263delAGCAGCA   | c.(264)GTAGCAGCAGCAGC  | p.AAAA93del  |
| Pat_70 | Post-Resistance | INTS7     | 25896  | 37 | 1 | 212115191 | 212115193 | In_Frame_Del    | DEL | TGC      | -    | 7  | 917  | .2862_2864delGC  | c.(2860-2865)CAGCAA>CA | .954_955QQ>I |

|        |                 |           |        |    |    |           |           |                 |     |     |     |    |      |                   |                                   |               |
|--------|-----------------|-----------|--------|----|----|-----------|-----------|-----------------|-----|-----|-----|----|------|-------------------|-----------------------------------|---------------|
| Pat_70 | Post-Resistance | TMEM63A   | 9725   | 37 | 1  | 226034840 | 226034842 | In_Frame_Del    | DEL | CTG | -   | 37 | 766  | .2323_2325delCAI  | c.(2323-2325)CAGdel               | p.Q775del     |
| Pat_70 | Post-Resistance | AGT       | 183    | 37 | 1  | 230839055 | 230839055 | Frame_Shift_Del | DEL | A   | -   | 8  | 309  | c.1290delT        | c.(1288-1290)TTTfs                | p.F430fs      |
| Pat_70 | Post-Resistance | KMO       | 8564   | 37 | 1  | 241753511 | 241753511 | Frame_Shift_Del | DEL | T   | -   | 8  | 682  | c.1206delT        | c.(1204-1206)ACTfs                | p.T402fs      |
| Pat_70 | Post-Resistance | ANK3      | 288    | 37 | 10 | 61828727  | 61828729  | In_Frame_Del    | DEL | GTG | -   | 10 | 264  | 11910_11912delC/  | 11908-11913)ACCACT>A(3970_3971TT: |               |
| Pat_70 | Post-Resistance | ZMIZ1     | 57178  | 37 | 10 | 81072446  | 81072446  | Frame_Shift_Del | DEL | C   | -   | 8  | 1241 | c.3144delC        | c.(3142-3144)GACfs                | p.D1048fs     |
| Pat_70 | Post-Resistance | PANK1     | 53354  | 37 | 10 | 91359120  | 91359120  | Frame_Shift_Del | DEL | T   | -   | 7  | 1206 | c.1199delA        | c.(1198-1200)AAGfs                | p.K400fs      |
| Pat_70 | Post-Resistance | SEMA4G    | 57715  | 37 | 10 | 102743836 | 102743836 | Frame_Shift_Del | DEL | A   | -   | 7  | 538  | c.2480delA        | c.(2479-2481)GAAfs                | p.E827fs      |
| Pat_70 | Post-Resistance | LZTS2     | 84445  | 37 | 10 | 102763415 | 102763417 | In_Frame_Del    | DEL | CCT | -   | 16 | 648  | c.560_562delCCT:  | (559-564)GCCTCC>GCC               | p.S197del     |
| Pat_70 | Post-Resistance | TACC2     | 10579  | 37 | 10 | 123970380 | 123970380 | Frame_Shift_Del | DEL | C   | -   | 10 | 625  | c.6440delC        | c.(6439-6441)ACCfs                | p.T2147fs     |
| Pat_70 | Post-Resistance | CPXM2     | 119587 | 37 | 10 | 125528165 | 125528167 | In_Frame_Del    | DEL | CAG | -   | 12 | 1142 | .1174_1176delICT  | c.(1174-1176)CTGdel               | p.L392del     |
| Pat_70 | Post-Resistance | LOC653544 | 653544 | 37 | 10 | 135491013 | 135491014 | Frame_Shift_Ins | INS | -   | T   | 9  | 548  | c.624_625insT     | c.(622-627)GCCAGGfs               | p.A208fs      |
| Pat_70 | Post-Resistance | TSPAN4    | 7106   | 37 | 11 | 864443    | 864445    | In_Frame_Del    | DEL | CTG | -   | 15 | 403  | c.262_264delCTG   | c.(262-264)CTGdel                 | p.L92del      |
| Pat_70 | Post-Resistance | OR10A5    | 144124 | 37 | 11 | 6867223   | 6867225   | In_Frame_Del    | DEL | TTC | -   | 13 | 409  | c.310_312delTTC   | c.(310-312)TTCdel                 | p.F108del     |
| Pat_70 | Post-Resistance | OR10A2    | 341276 | 37 | 11 | 6891253   | 6891255   | In_Frame_Del    | DEL | TTC | -   | 15 | 558  | c.268_270delTTC   | c.(268-270)TTCdel                 | p.F94del      |
| Pat_70 | Post-Resistance | C11orf46  | 120534 | 37 | 11 | 30352754  | 30352754  | Frame_Shift_Del | DEL | A   | -   | 18 | 610  | c.259delA         | c.(259-261)AAAfs                  | p.K87fs       |
| Pat_70 | Post-Resistance | OR8I2     | 120586 | 37 | 11 | 55861308  | 55861308  | Frame_Shift_Del | DEL | T   | -   | 15 | 1003 | c.525delT         | c.(523-525)CATfs                  | p.H175fs      |
| Pat_70 | Post-Resistance | FADS2     | 9415   | 37 | 11 | 61607885  | 61607887  | In_Frame_Del    | DEL | TCC | -   | 11 | 888  | c.398_400delTCC   | c.(397-402)TTCTCC>TTC             | p.L137del     |
| Pat_70 | Post-Resistance | RARRES3   | 5920   | 37 | 11 | 63313708  | 63313709  | Frame_Shift_Ins | INS | -   | A   | 11 | 618  | c.475_476insA     | c.(475-477)CAAfs                  | p.Q159fs      |
| Pat_70 | Post-Resistance | FAU       | 2197   | 37 | 11 | 64888248  | 64888250  | In_Frame_Del    | DEL | TCT | -   | 7  | 340  | c.305_307delAGAc. | (304-309)AAGACA>ACA               | p.K102del     |
| Pat_70 | Post-Resistance | KDM2A     | 22992  | 37 | 11 | 67018079  | 67018081  | In_Frame_Del    | DEL | GAG | -   | 9  | 134  | .2578_2580delGAI  | c.(2578-2580)GAGdel               | p.E866del     |
| Pat_70 | Post-Resistance | ATG16L2   | 89849  | 37 | 11 | 72528863  | 72528865  | In_Frame_Del    | DEL | AGG | -   | 9  | 300  | c.281_283delAGG:  | (280-285)CAGGAG>CAC               | p.E98del      |
| Pat_70 | Post-Resistance | C11orf30  | 56946  | 37 | 11 | 76207304  | 76207304  | Frame_Shift_Del | DEL | C   | -   | 9  | 858  | c.1154delC        | c.(1153-1155)TCCfs                | p.S385fs      |
| Pat_70 | Post-Resistance | MMP12     | 4321   | 37 | 11 | 102738793 | 102738794 | Splice_Site     | INS | -   | T   | 11 | 49   | c.630_splice      | c.e5+1                            | p.T210_splice |
| Pat_70 | Post-Resistance | DDX10     | 1662   | 37 | 11 | 108788635 | 108788637 | In_Frame_Del    | DEL | TGA | -   | 7  | 182  | .2340_2342delTG.  | (2338-2343)AGTGAT>AG              | p.D788del     |
| Pat_70 | Post-Resistance | CHEK1     | 1111   | 37 | 11 | 125505377 | 125505378 | Frame_Shift_Ins | INS | -   | A   | 22 | 872  | c.667_668insA     | c.(667-669)GAAfs                  | p.E223fs      |
| Pat_70 | Post-Resistance | PRDM10    | 56980  | 37 | 11 | 129772249 | 129772251 | In_Frame_Del    | DEL | TGG | -   | 9  | 1039 | .3440_3442delCC.  | (3439-3444)ACCAAC>AA              | p.T1147del    |
| Pat_70 | Post-Resistance | KLHDC5    | 57542  | 37 | 12 | 27950769  | 27950769  | Frame_Shift_Del | DEL | G   | -   | 8  | 423  | c.1188delG        | c.(1186-1188)GTGfs                | p.V396fs      |
| Pat_70 | Post-Resistance | FAR2      | 55711  | 37 | 12 | 29450110  | 29450110  | Frame_Shift_Del | DEL | A   | -   | 7  | 686  | c.522delA         | c.(520-522)CCAfs                  | p.P174fs      |
| Pat_70 | Post-Resistance | C12orf35  | 55196  | 37 | 12 | 32134718  | 32134720  | In_Frame_Del    | DEL | CCT | -   | 7  | 520  | c.829_831delCCT   | c.(829-831)CCTdel                 | p.P281del     |
| Pat_70 | Post-Resistance | KIF21A    | 55605  | 37 | 12 | 39735366  | 39735368  | In_Frame_Del    | DEL | TCC | -   | 12 | 258  | .1860_1862delIGG  | (1858-1863)GAGGAA>GA,620_621EE>I  |               |
| Pat_70 | Post-Resistance | ANO6      | 196527 | 37 | 12 | 45610140  | 45610142  | In_Frame_Del    | DEL | GGA | -   | 9  | 134  | c.36_38delGGA     | c.(34-39)ATGGAG>ATG               | p.E16del      |
| Pat_70 | Post-Resistance | SFRS2IP   | 9169   | 37 | 12 | 46318575  | 46318577  | In_Frame_Del    | DEL | GGT | -   | 9  | 781  | .3840_3842delACI  | (3838-3843)CCACCC>CC1280_1281PP:  |               |
| Pat_70 | Post-Resistance | SFRS2IP   | 9169   | 37 | 12 | 46320707  | 46320708  | Frame_Shift_Del | DEL | TC  | -   | 14 | 596  | :.2776_2777delGA  | c.(2776-2778)GAAfs                | p.E926fs      |
| Pat_70 | Post-Resistance | PRPF40B   | 25766  | 37 | 12 | 50025258  | 50025258  | Frame_Shift_Del | DEL | C   | -   | 7  | 697  | c.93delC          | c.(91-93)ATCfs                    | p.I31fs       |
| Pat_70 | Post-Resistance | TENC1     | 23371  | 37 | 12 | 53451561  | 53451561  | Frame_Shift_Del | DEL | C   | -   | 7  | 1102 | c.963delC         | c.(961-963)TTCfs                  | p.F321fs      |
| Pat_70 | Post-Resistance | AMHR2     | 269    | 37 | 12 | 53818999  | 53819001  | In_Frame_Del    | DEL | CTG | -   | 7  | 566  | c.475_477delCTG   | c.(475-477)CTGdel                 | p.L162del     |
| Pat_70 | Post-Resistance | OR10A7    | 121364 | 37 | 12 | 55615114  | 55615116  | In_Frame_Del    | DEL | CTT | -   | 7  | 774  | c.306_308delCTT   | c.(304-309)TACTTC>TAC             | p.F107del     |
| Pat_70 | Post-Resistance | SLC39A5   | 283375 | 37 | 12 | 56628997  | 56628999  | In_Frame_Del    | DEL | CTG | -   | 7  | 662  | c.691_693delCTG   | c.(691-693)CTGdel                 | p.L234del     |
| Pat_70 | Post-Resistance | GOLGA2B   | 55592  | 37 | 12 | 100551828 | 100551830 | In_Frame_Del    | DEL | CCT | -   | 12 | 162  | c.23_25delAGG     | c.(22-27)GAGGTG>GTG               | p.E8del       |
| Pat_70 | Post-Resistance | CUX2      | 23316  | 37 | 12 | 111758235 | 111758237 | In_Frame_Del    | DEL | TCC | -   | 7  | 230  | .2422_2424delTCI  | c.(2422-2424)TCCdel               | p.S813del     |
| Pat_70 | Post-Resistance | GCN1L1    | 10985  | 37 | 12 | 120595737 | 120595739 | In_Frame_Del    | DEL | CTC | -   | 9  | 270  | .3001_3003delGAI  | c.(3001-3003)GAGdel               | p.E1001del    |
| Pat_70 | Post-Resistance | SBNO1     | 55206  | 37 | 12 | 123794283 | 123794283 | Frame_Shift_Del | DEL | T   | -   | 14 | 573  | c.3416delA        | c.(3415-3417)AATfs                | p.N1139fs     |
| Pat_70 | Post-Resistance | NCOR2     | 9612   | 37 | 12 | 124848228 | 124848228 | Frame_Shift_Del | DEL | G   | -   | 7  | 778  | c.2925delC        | c.(2923-2925)CCCfs                | p.P975fs      |
| Pat_70 | Post-Resistance | EP400     | 57634  | 37 | 12 | 132547138 | 132547139 | In_Frame_Ins    | INS | -   | CAG | 14 | 320  | .8226_8227insCAI  | c.(8224-8229)insCAG               | .2748_2749ins |
| Pat_70 | Post-Resistance | POLE      | 5426   | 37 | 12 | 133220099 | 133220100 | Frame_Shift_Del | DEL | CA  | -   | 38 | 1337 | :.4337_4338delTC  | c.(4336-4338)GTGfs                | p.V1446fs     |
| Pat_70 | Post-Resistance | TPTE2     | 93492  | 37 | 13 | 20041394  | 20041394  | Frame_Shift_Del | DEL | A   | -   | 9  | 347  | c.483delT         | c.(481-483)TTTfs                  | p.F161fs      |
| Pat_70 | Post-Resistance | PABPC3    | 5042   | 37 | 13 | 25671804  | 25671806  | In_Frame_Del    | DEL | GCT | -   | 7  | 224  | .1468_1470delIGC  | c.(1468-1470)GCTdel               | p.A496del     |



|        |                 |           |        |    |    |           |           |                 |     |        |   |    |      |                  |                                    |               |
|--------|-----------------|-----------|--------|----|----|-----------|-----------|-----------------|-----|--------|---|----|------|------------------|------------------------------------|---------------|
| Pat_70 | Post-Resistance | CDK8      | 1024   | 37 | 13 | 26975609  | 26975611  | In_Frame_Del    | DEL | CAG    | - | 7  | 266  | .1117_1119delCAC | c.(1117-1119)CAGdel                | p.Q377del     |
| Pat_70 | Post-Resistance | WASF3     | 10810  | 37 | 13 | 27250862  | 27250863  | Splice_Site     | DEL | GT     | - | 12 | 559  | c.716_splice     | c.e7+1                             | p.R239_splice |
| Pat_70 | Post-Resistance | RXFP2     | 122042 | 37 | 13 | 32376429  | 32376429  | Frame_Shift_Del | DEL | A      | - | 15 | 261  | c.2152delA       | c.(2152-2154)AAAFs                 | p.K718fs      |
| Pat_70 | Post-Resistance | ZC3H13    | 23091  | 37 | 13 | 46542016  | 46542017  | Frame_Shift_Del | DEL | CT     | - | 12 | 396  | .3943_3944delAC  | c.(3943-3945)AGGfs                 | p.R1315fs     |
| Pat_70 | Post-Resistance | LRCH1     | 23143  | 37 | 13 | 47243183  | 47243186  | Frame_Shift_Del | DEL | CCTG   | - | 17 | 1386 | .471_474delCCTC  | c.(469-474)GCCCTGfs                | p.A157fs      |
| Pat_70 | Post-Resistance | RBM26     | 64062  | 37 | 13 | 79918806  | 79918807  | Frame_Shift_Ins | INS | -      | T | 11 | 182  | c.2187_2188insA  | c.(2185-2190)AAACAGfs              | p.K729fs      |
| Pat_70 | Post-Resistance | TOX4      | 9878   | 37 | 14 | 21961060  | 21961062  | In_Frame_Del    | DEL | GCT    | - | 18 | 404  | .1285_1287delGC  | c.(1285-1287)GCTdel                | p.A434del     |
| Pat_70 | Post-Resistance | LRP10     | 26020  | 37 | 14 | 23341527  | 23341529  | In_Frame_Del    | DEL | CCT    | - | 17 | 562  | c.15_17delCCT    | c.(13-18)ACCCTC>ACC                | p.L11del      |
| Pat_70 | Post-Resistance | IRF9      | 10379  | 37 | 14 | 24633132  | 24633134  | In_Frame_Del    | DEL | AGC    | - | 7  | 303  | c.541_543delAGC  | c.(541-543)AGCdel                  | p.S187del     |
| Pat_70 | Post-Resistance | G2E3      | 55632  | 37 | 14 | 31074771  | 31074772  | Frame_Shift_Ins | INS | -      | A | 7  | 76   | c.1071_1072insA  | c.(1069-1074)ATTAAAFs              | p.I357fs      |
| Pat_70 | Post-Resistance | CTAGE5    | 4253   | 37 | 14 | 39746243  | 39746243  | Frame_Shift_Del | DEL | T      | - | 7  | 374  | c.169delT        | c.(169-171)TTTfs                   | p.F57fs       |
| Pat_70 | Post-Resistance | C14orf106 | 55320  | 37 | 14 | 45693722  | 45693722  | Frame_Shift_Del | DEL | T      | - | 18 | 365  | c.2068delA       | c.(2068-2070)AGTfs                 | p.S690fs      |
| Pat_70 | Post-Resistance | PLEKHG3   | 26030  | 37 | 14 | 65207900  | 65207900  | Frame_Shift_Del | DEL | C      | - | 8  | 716  | c.1665delC       | c.(1663-1665)GACfs                 | p.D555fs      |
| Pat_70 | Post-Resistance | C14orf43  | 91748  | 37 | 14 | 74205926  | 74205928  | In_Frame_Del    | DEL | CTG    | - | 12 | 133  | c.784_786delCAG  | c.(784-786)CAGdel                  | p.Q262del     |
| Pat_70 | Post-Resistance | C14orf115 | 55237  | 37 | 14 | 74824463  | 74824463  | Frame_Shift_Del | DEL | G      | - | 7  | 631  | c.977delG        | c.(976-978)CGGfs                   | p.R326fs      |
| Pat_70 | Post-Resistance | MLH3      | 27030  | 37 | 14 | 75514604  | 75514604  | Frame_Shift_Del | DEL | T      | - | 9  | 241  | c.1755delA       | c.(1753-1755)AAAFs                 | p.K585fs      |
| Pat_70 | Post-Resistance | PTPN21    | 11099  | 37 | 14 | 88945628  | 88945630  | In_Frame_Del    | DEL | TCC    | - | 7  | 308  | .2145_2147delGG  | c.(2143-2148)GAGGAC>GA             | p.E715del     |
| Pat_70 | Post-Resistance | TTC8      | 123016 | 37 | 14 | 89338724  | 89338726  | In_Frame_Del    | DEL | CAA    | - | 7  | 648  | .1323_1325delCA. | c.(1321-1326)GTCAAC>GT             | p.N445del     |
| Pat_70 | Post-Resistance | ATXN3     | 4287   | 37 | 14 | 92537355  | 92537357  | In_Frame_Del    | DEL | CTG    | - | 8  | 374  | c.913_915delCAG  | c.(913-915)CAGdel                  | p.Q305del     |
| Pat_70 | Post-Resistance | YY1       | 7528   | 37 | 14 | 100705708 | 100705710 | In_Frame_Del    | DEL | GAG    | - | 10 | 123  | c.127_129delGAG  | c.(127-129)GAGdel                  | p.E47del      |
| Pat_70 | Post-Resistance | C15orf52  | 388115 | 37 | 15 | 40631782  | 40631782  | Frame_Shift_Del | DEL | C      | - | 7  | 585  | c.294delG        | c.(292-294)GGGfs                   | p.G98fs       |
| Pat_70 | Post-Resistance | ZFP106    | 64397  | 37 | 15 | 42742957  | 42742957  | Frame_Shift_Del | DEL | A      | - | 7  | 1046 | c.1444delT       | c.(1444-1446)TCCfs                 | p.S482fs      |
| Pat_70 | Post-Resistance | ADAL      | 161823 | 37 | 15 | 43641115  | 43641115  | Frame_Shift_Del | DEL | A      | - | 10 | 423  | c.563delA        | c.(562-564)CAAfs                   | p.Q188fs      |
| Pat_70 | Post-Resistance | TUBGCP4   | 27229  | 37 | 15 | 43687855  | 43687855  | Frame_Shift_Del | DEL | G      | - | 7  | 2064 | c.1140delG       | c.(1138-1140)TTGfs                 | p.L380fs      |
| Pat_70 | Post-Resistance | SPG11     | 80208  | 37 | 15 | 44905698  | 44905698  | Frame_Shift_Del | DEL | T      | - | 10 | 378  | c.3075delA       | c.(3073-3075)AAAFs                 | p.K1025fs     |
| Pat_70 | Post-Resistance | ZNF609    | 23060  | 37 | 15 | 64972995  | 64972997  | In_Frame_Del    | DEL | CAC    | - | 11 | 877  | .4096_4098delCA  | c.(4096-4098)CACdel                | p.H1371del    |
| Pat_70 | Post-Resistance | SPG21     | 51324  | 37 | 15 | 65262526  | 65262526  | Frame_Shift_Del | DEL | T      | - | 8  | 876  | c.487delA        | c.(487-489)ATAfs                   | p.I163fs      |
| Pat_70 | Post-Resistance | SLC24A1   | 9187   | 37 | 15 | 65918177  | 65918179  | In_Frame_Del    | DEL | CTG    | - | 21 | 370  | .1759_1761delCT  | c.(1759-1761)CTGdel                | p.L591del     |
| Pat_70 | Post-Resistance | NOX5      | 79400  | 37 | 15 | 69328208  | 69328210  | In_Frame_Del    | DEL | CTG    | - | 11 | 857  | .1120_1122delCT  | c.(1120-1122)CTGdel                | p.L380del     |
| Pat_70 | Post-Resistance | KIF7      | 374654 | 37 | 15 | 90189153  | 90189155  | In_Frame_Del    | DEL | CTC    | - | 8  | 207  | .1891_1893delGA  | c.(1891-1893)GAGdel                | p.E631del     |
| Pat_70 | Post-Resistance | RAB40C    | 57799  | 37 | 16 | 677579    | 677580    | Frame_Shift_Ins | INS | -      | C | 13 | 337  | c.803_804insC    | c.(802-804)AGCfs                   | p.S268fs      |
| Pat_70 | Post-Resistance | NTAN1     | 123803 | 37 | 16 | 15131931  | 15131931  | Frame_Shift_Del | DEL | T      | - | 8  | 579  | c.890delA        | c.(889-891)AATfs                   | p.N297fs      |
| Pat_70 | Post-Resistance | C16orf62  | 57020  | 37 | 16 | 19580800  | 19580802  | In_Frame_Del    | DEL | TCC    | - | 9  | 374  | c.172_174delTCC  | c.(172-174)TCCdel                  | p.S64del      |
| Pat_70 | Post-Resistance | C16orf88  | 400506 | 37 | 16 | 19725705  | 19725706  | Frame_Shift_Ins | INS | -      | T | 11 | 191  | c.652_653insA    | c.(652-654)ATCfs                   | p.I218fs      |
| Pat_70 | Post-Resistance | DNAH3     | 55567  | 37 | 16 | 21132130  | 21132132  | In_Frame_Del    | DEL | CAG    | - | 8  | 287  | .1628_1630delCT  | c.(1627-1632)GCTGAT>GA             | p.A543del     |
| Pat_70 | Post-Resistance | IL4R      | 3566   | 37 | 16 | 27373787  | 27373789  | In_Frame_Del    | DEL | GAG    | - | 10 | 169  | .1114_1116delGAC | c.(1114-1116)GAGdel                | p.E376del     |
| Pat_70 | Post-Resistance | EIF3CL    | 728689 | 37 | 16 | 28734579  | 28734581  | In_Frame_Del    | DEL | GAG    | - | 11 | 2604 | c.871_873delGAG  | c.(871-873)GAGdel                  | p.E295del     |
| Pat_70 | Post-Resistance | ATP2A1    | 487    | 37 | 16 | 28913640  | 28913640  | Frame_Shift_Del | DEL | C      | - | 11 | 525  | c.2457delC       | c.(2455-2457)CGCfs                 | p.R819fs      |
| Pat_70 | Post-Resistance | ITGAL     | 3683   | 37 | 16 | 30531249  | 30531251  | In_Frame_Del    | DEL | GCT    | - | 7  | 1252 | .3300_3302delIGC | c.(3298-3303)GGGCTG>GG             | p.L1106del    |
| Pat_70 | Post-Resistance | SETD1A    | 9739   | 37 | 16 | 30982809  | 30982811  | In_Frame_Del    | DEL | TCC    | - | 8  | 300  | .3127_3129delTCT | c.(3127-3129)TCCdel                | p.S1058del    |
| Pat_70 | Post-Resistance | SALL1     | 6299   | 37 | 16 | 51175413  | 51175415  | In_Frame_Del    | DEL | CTG    | - | 7  | 444  | c.718_720delCAG  | c.(718-720)CAGdel                  | p.Q240del     |
| Pat_70 | Post-Resistance | COQ9      | 57017  | 37 | 16 | 57486732  | 57486734  | In_Frame_Del    | DEL | GAG    | - | 8  | 738  | c.262_264delGAG  | c.(262-264)GAGdel                  | p.E91del      |
| Pat_70 | Post-Resistance | SLC9A5    | 6553   | 37 | 16 | 67300017  | 67300019  | In_Frame_Del    | DEL | GAG    | - | 15 | 284  | .2107_2109delGAI | c.(2107-2109)GAGdel                | p.E708del     |
| Pat_70 | Post-Resistance | MARVELD3  | 91862  | 37 | 16 | 71668442  | 71668442  | Frame_Shift_Del | DEL | G      | - | 7  | 338  | c.942delG        | c.(940-942)GCGfs                   | p.A314fs      |
| Pat_70 | Post-Resistance | ZFHX3     | 463    | 37 | 16 | 72822564  | 72822566  | In_Frame_Del    | DEL | TGC    | - | 14 | 387  | .9609_9611delGC. | c.(9607-9612)CAGCAA>CA3203_3204QQ: |               |
| Pat_70 | Post-Resistance | KDM6B     | 23135  | 37 | 17 | 7751859   | 7751864   | In_Frame_Del    | DEL | CACCAC | - | 18 | 104  | .253_2258delCACC | c.(251-2259)GTCACCACC>C            | p.TT760del    |
| Pat_70 | Post-Resistance | CHD3      | 1107   | 37 | 17 | 7801857   | 7801859   | In_Frame_Del    | DEL | AAG    | - | 10 | 244  | .2095_2097delIAA | c.(2095-2097)AAGdel                | p.K703del     |

|        |                 |           |        |    |    |           |           |                 |     |        |          |     |      |                                                   |                |
|--------|-----------------|-----------|--------|----|----|-----------|-----------|-----------------|-----|--------|----------|-----|------|---------------------------------------------------|----------------|
| Pat_70 | Post-Resistance | TRPV2     | 51393  | 37 | 17 | 16335490  | 16335492  | In_Frame_Del    | DEL | TGC    | -        | 17  | 381  | .1865_1867delTG(1864-1869)GTGCTG>GT               | p.L627del      |
| Pat_70 | Post-Resistance | MED9      | 55090  | 37 | 17 | 17394705  | 17394707  | In_Frame_Del    | DEL | CAG    | -        | 9   | 587  | c.337_339delCAG c.(337-339)CAGdel                 | p.Q117del      |
| Pat_70 | Post-Resistance | NUFIP2    | 57532  | 37 | 17 | 27620932  | 27620934  | In_Frame_Del    | DEL | TGG    | -        | 7   | 655  | c.144_146delCCA c.(142-147)CACCAT>CAT             | p.48_49HH>H    |
| Pat_70 | Post-Resistance | CDK12     | 51755  | 37 | 17 | 37686901  | 37686901  | Frame_Shift_Del | DEL | C      | -        | 8   | 1658 | c.3805delC c.(3805-3807)CCCfs                     | p.P1269fs      |
| Pat_70 | Post-Resistance | KRT10     | 3858   | 37 | 17 | 38978766  | 38978768  | In_Frame_Del    | DEL | TCC    | -        | 16  | 130  | c.70_72delGGA c.(70-72)GGAdel                     | p.G24del       |
| Pat_70 | Post-Resistance | KRTAP4-5  | 85289  | 37 | 17 | 39305775  | 39305776  | In_Frame_Ins    | INS | -      | GCAGCTG  | 104 | 345  | 5insGCCCCAGCT)CAG>CGCCCCAGCTG(81_82insRPSC        |                |
| Pat_70 | Post-Resistance | STAT5B    | 6777   | 37 | 17 | 40370236  | 40370236  | Frame_Shift_Del | DEL | G      | -        | 12  | 283  | c.1102delC c.(1102-1104)CAGfs                     | p.Q368fs       |
| Pat_70 | Post-Resistance | CDC27     | 996    | 37 | 17 | 45219355  | 45219355  | Frame_Shift_Del | DEL | C      | -        | 9   | 742  | c.1415delG c.(1414-1416)GGTfs                     | p.G472fs       |
| Pat_70 | Post-Resistance | NPEPPS    | 9520   | 37 | 17 | 45669428  | 45669429  | Splice_Site     | INS | -      | A        | 14  | 54   | c.1365_splice c.e11+2                             | p.K455_splice  |
| Pat_70 | Post-Resistance | HOXB2     | 3212   | 37 | 17 | 46622130  | 46622132  | In_Frame_Del    | DEL | AGG    | -        | 9   | 373  | c.142_144delCCT c.(142-144)CCTdel                 | p.P48del       |
| Pat_70 | Post-Resistance | BZRAP1    | 9256   | 37 | 17 | 56387404  | 56387406  | In_Frame_Del    | DEL | TCC    | -        | 9   | 270  | .3813_3815delIGG (3811-3816)GAGGAA>GA1271_1272EE: |                |
| Pat_70 | Post-Resistance | GGA3      | 23163  | 37 | 17 | 73239175  | 73239175  | Frame_Shift_Del | DEL | T      | -        | 7   | 695  | c.497delA c.(496-498)AACfs                        | p.N166fs       |
| Pat_70 | Post-Resistance | NEDD4L    | 23327  | 37 | 18 | 55992284  | 55992286  | In_Frame_Del    | DEL | TCC    | -        | 16  | 943  | c.570_572delITCC c.(568-573)CTTCT>CTT             | p.P194del      |
| Pat_70 | Post-Resistance | MLLT1     | 4298   | 37 | 19 | 6222272   | 6222274   | In_Frame_Del    | DEL | AGG    | -        | 10  | 152  | c.968_970delCCT c.(967-972)TCCTTC>TTC             | p.S323del      |
| Pat_70 | Post-Resistance | HAUS8     | 93323  | 37 | 19 | 17160706  | 17160707  | Frame_Shift_Del | DEL | GA     | -        | 11  | 1102 | c.1209_1210delITC c.(1207-1212)TCTCGTfs           | p.S403fs       |
| Pat_70 | Post-Resistance | ANO8      | 57719  | 37 | 19 | 17439422  | 17439424  | In_Frame_Del    | DEL | TCC    | -        | 7   | 82   | .1773_1775delIGG (1771-1776)GAGGAC>GA             | p.E591del      |
| Pat_70 | Post-Resistance | IL12RB1   | 3594   | 37 | 19 | 18194264  | 18194265  | Frame_Shift_Ins | INS | -      | G        | 8   | 850  | c.101_102insC c.(100-102)CCGfs                    | p.P34fs        |
| Pat_70 | Post-Resistance | LSM14A    | 26065  | 37 | 19 | 34710340  | 34710340  | Frame_Shift_Del | DEL | C      | -        | 11  | 708  | c.826delC c.(826-828)CGGfs                        | p.R276fs       |
| Pat_70 | Post-Resistance | HAMP      | 57817  | 37 | 19 | 35773520  | 35773522  | In_Frame_Del    | DEL | CTC    | -        | 25  | 853  | c.40_42delICTC c.(40-42)CTCdel                    | p.L18del       |
| Pat_70 | Post-Resistance | ZNF569    | 148266 | 37 | 19 | 37916813  | 37916815  | In_Frame_Del    | DEL | TTC    | -        | 7   | 2209 | c.193_195delGAA c.(193-195)GAAdel                 | p.E65del       |
| Pat_70 | Post-Resistance | FAM98C    | 147965 | 37 | 19 | 38899502  | 38899504  | In_Frame_Del    | DEL | AAG    | -        | 16  | 178  | .1030_1032delAA c.(1030-1032)AAGdel               | p.K349del      |
| Pat_70 | Post-Resistance | ZFP36     | 7538   | 37 | 19 | 39898948  | 39898950  | In_Frame_Del    | DEL | CAC    | -        | 9   | 976  | c.590_592delCAC c.(589-594)TCACCA>TCA             | p.P201del      |
| Pat_70 | Post-Resistance | SERTAD1   | 29950  | 37 | 19 | 40929409  | 40929411  | In_Frame_Del    | DEL | CTC    | -        | 7   | 353  | c.43_45delGAG c.(43-45)GAGdel                     | p.E15del       |
| Pat_70 | Post-Resistance | LYPD3     | 27076  | 37 | 19 | 43969653  | 43969655  | In_Frame_Del    | DEL | AGC    | -        | 16  | 1004 | c.69_71delIGCT c.(67-72)CTGCTT>CTT                | p.23_24LL>L    |
| Pat_70 | Post-Resistance | MARK4     | 57787  | 37 | 19 | 45805664  | 45805664  | Frame_Shift_Del | DEL | C      | -        | 7   | 1703 | c.1955delC c.(1954-1956)GCCfs                     | p.A652fs       |
| Pat_70 | Post-Resistance | RSPH6A    | 81492  | 37 | 19 | 46299165  | 46299167  | In_Frame_Del    | DEL | CCT    | -        | 9   | 437  | .2114_2116delIAG(2113-2118)GAGGGC>GC              | p.E705del      |
| Pat_70 | Post-Resistance | PNMAL1    | 55228  | 37 | 19 | 46973195  | 46973197  | In_Frame_Del    | DEL | CTT    | -        | 7   | 585  | .1096_1098delAA c.(1096-1098)AAGdel               | p.K366del      |
| Pat_70 | Post-Resistance | SLC8A2    | 6543   | 37 | 19 | 47935681  | 47935683  | In_Frame_Del    | DEL | TCC    | -        | 40  | 605  | .2130_2132delIGG (2128-2133)GAGGAC>GA             | p.E710del      |
| Pat_70 | Post-Resistance | TMC4      | 147798 | 37 | 19 | 54675747  | 54675749  | In_Frame_Del    | DEL | TCC    | -        | 18  | 392  | c.201_203delIGGAc.(199-204)GAGGAT>GAT             | p.E67del       |
| Pat_70 | Post-Resistance | LILRB2    | 10288  | 37 | 19 | 54780707  | 54780709  | In_Frame_Del    | DEL | GAG    | -        | 22  | 582  | .1435_1437delICT c.(1435-1437)CTCdel              | p.L479del      |
| Pat_70 | Post-Resistance | LILRB1    | 10859  | 37 | 19 | 55146148  | 55146150  | In_Frame_Del    | DEL | CTC    | -        | 9   | 201  | .1417_1419delICT c.(1417-1419)CTCdel              | p.L479del      |
| Pat_70 | Post-Resistance | C2orf71   | 388939 | 37 | 2  | 29295647  | 29295649  | In_Frame_Del    | DEL | TCC    | -        | 17  | 728  | .1479_1481delIGG (1477-1482)GAGGAA>GA,493_494EE>I |                |
| Pat_70 | Post-Resistance | DHX57     | 90957  | 37 | 2  | 39095411  | 39095413  | In_Frame_Del    | DEL | CCA    | -        | 11  | 285  | c.135_137delTGG:(133-138)GGTGGA>GG/p.45_46GG>G    |                |
| Pat_70 | Post-Resistance | USP34     | 9736   | 37 | 2  | 61577526  | 61577527  | Splice_Site     | INS | -      | A        | 7   | 489  | c.1378_splice c.e12-1                             | p.T460_splice  |
| Pat_70 | Post-Resistance | AFTPH     | 54812  | 37 | 2  | 64778672  | 64778674  | In_Frame_Del    | DEL | GAT    | -        | 11  | 758  | c.64_66delGAT c.(64-66)GATdel                     | p.D26del       |
| Pat_70 | Post-Resistance | RAB11FIP5 | 26056  | 37 | 2  | 73315337  | 73315339  | In_Frame_Del    | DEL | TGG    | -        | 7   | 407  | .1407_1409delCC.(1405-1410)CACCAA>CA              | p.H469del      |
| Pat_70 | Post-Resistance | ALMS1     | 7840   | 37 | 2  | 73613032  | 73613037  | In_Frame_Del    | DEL | GGAGGA | -        | 7   | 25   | .36_41delGGAGG (34-42)CTGGAGGAG>CT                | p.EE27del      |
| Pat_70 | Post-Resistance | TMEM127   | 55654  | 37 | 2  | 96919781  | 96919783  | In_Frame_Del    | DEL | TGC    | -        | 13  | 511  | c.480_482delGCAc.(478-483)CAGCAT>CAT              | p.Q160del      |
| Pat_70 | Post-Resistance | ITPRIPL1  | 150771 | 37 | 2  | 96992793  | 96992795  | In_Frame_Del    | DEL | GAG    | -        | 12  | 203  | c.424_426delGAG c.(424-426)GAGdel                 | p.E147del      |
| Pat_70 | Post-Resistance | REV1      | 51455  | 37 | 2  | 100055102 | 100055102 | Frame_Shift_Del | DEL | T      | -        | 7   | 555  | c.1174delA c.(1174-1176)ATGfs                     | p.M392fs       |
| Pat_70 | Post-Resistance | GCC2      | 9648   | 37 | 2  | 109087883 | 109087884 | Frame_Shift_Ins | INS | -      | A        | 11  | 994  | c.2098_2099insA c.(2098-2100)GAAfs                | p.E700fs       |
| Pat_70 | Post-Resistance | NPHP1     | 4867   | 37 | 2  | 110922711 | 110922713 | In_Frame_Del    | DEL | CTT    | -        | 7   | 650  | c.644_646delAAG:(643-648)GAAGGC>GGC               | p.E215del      |
| Pat_70 | Post-Resistance | SLC20A1   | 6574   | 37 | 2  | 113416607 | 113416608 | Frame_Shift_Del | DEL | AG     | -        | 8   | 241  | c.984_985delIAG c.(982-987)CCAGAGfs               | p.P328fs       |
| Pat_70 | Post-Resistance | UGGT1     | 56886  | 37 | 2  | 128938648 | 128938649 | Splice_Site     | INS | -      | 3GCCCTT/ | 20  | 359  | c.4083_splice c.e36+2                             | p.Q1361_splice |
| Pat_70 | Post-Resistance | RIF1      | 55183  | 37 | 2  | 152293790 | 152293790 | Frame_Shift_Del | DEL | T      | -        | 7   | 797  | c.1408delT c.(1408-1410)TTTfs                     | p.F470fs       |
| Pat_70 | Post-Resistance | PLA2R1    | 22925  | 37 | 2  | 160801441 | 160801442 | Frame_Shift_Ins | INS | -      | T        | 12  | 709  | c.4119_4120insA c.(4117-4122)AAAGGCfs             | p.K1373fs      |
| Pat_70 | Post-Resistance | PPP1R1C   | 151242 | 37 | 2  | 182852619 | 182852619 | Frame_Shift_Del | DEL | C      | -        | 8   | 1336 | c.135delC c.(133-135)AACfs                        | p.N45fs        |

|        |                 |           |        |    |    |           |           |                 |     |      |         |    |      |                   |                                  |             |
|--------|-----------------|-----------|--------|----|----|-----------|-----------|-----------------|-----|------|---------|----|------|-------------------|----------------------------------|-------------|
| Pat_70 | Post-Resistance | SLC11A1   | 6556   | 37 | 2  | 219252307 | 219252307 | Frame_Shift_Del | DEL | T    | -       | 10 | 1368 | c.591delT         | c.(589-591)GCTfs                 | p.A197fs    |
| Pat_70 | Post-Resistance | DOCK10    | 55619  | 37 | 2  | 225729790 | 225729790 | Frame_Shift_Del | DEL | A    | -       | 9  | 544  | c.1272delT        | c.(1270-1272)TTTTfs              | p.F424fs    |
| Pat_70 | Post-Resistance | USP40     | 55230  | 37 | 2  | 234394236 | 234394237 | Frame_Shift_Ins | INS | -    | T       | 8  | 184  | c.3477_3478insA   | c.(3475-3480)AAACAafs            | p.K1159fs   |
| Pat_70 | Post-Resistance | GAL3ST2   | 64090  | 37 | 2  | 242738494 | 242738496 | In_Frame_Del    | DEL | TCC  | -       | 17 | 503  | c.44_46delTCC     | c.(43-48)ATCCTC>ATC              | p.L20del    |
| Pat_70 | Post-Resistance | FRG1B     | 284802 | 37 | 20 | 29625899  | 29625900  | Frame_Shift_Ins | INS | -    | AT      | 20 | 404  | c.53_54insAT      | c.(52-54)AAafs                   | p.K18fs     |
| Pat_70 | Post-Resistance | NCOA6     | 23054  | 37 | 20 | 33330968  | 33330970  | In_Frame_Del    | DEL | TGC  | -       | 14 | 508  | .3090_3092delGC.  | (3088-3093)CAGCAA>CAI030_1031QQ: |             |
| Pat_70 | Post-Resistance | KCNB1     | 3745   | 37 | 20 | 47989771  | 47989772  | Frame_Shift_Ins | INS | -    | G       | 7  | 2126 | c.2325_2326insC   | c.(2323-2328)CCCAAAfs            | p.P775fs    |
| Pat_70 | Post-Resistance | CTCFL     | 140690 | 37 | 20 | 56099187  | 56099187  | Frame_Shift_Del | DEL | T    | -       | 13 | 1891 | c.75delA          | c.(73-75)AAafs                   | p.K25fs     |
| Pat_70 | Post-Resistance | COL9A3    | 1299   | 37 | 20 | 61468444  | 61468444  | Frame_Shift_Del | DEL | C    | -       | 7  | 2144 | c.1613delC        | c.(1612-1614)GCAfs               | p.A538fs    |
| Pat_70 | Post-Resistance | SFRS15    | 57466  | 37 | 21 | 33044257  | 33044259  | In_Frame_Del    | DEL | GCT  | -       | 29 | 637  | .2897_2899delAGI  | (2896-2901)CAGCCA>CC             | p.Q966del   |
| Pat_70 | Post-Resistance | KRTAP10-6 | 386674 | 37 | 21 | 46012219  | 46012220  | In_Frame_Ins    | INS | -    | CGCAGCA | 8  | 160  | 7insCAGCTGCTG*)   | CCG>CCCAGCTGCTGCI9_49P>PSCC      |             |
| Pat_70 | Post-Resistance | MCM3AP    | 8888   | 37 | 21 | 47663397  | 47663397  | Frame_Shift_Del | DEL | G    | -       | 7  | 592  | c.5278delC        | c.(5278-5280)CGGfs               | p.R1760fs   |
| Pat_70 | Post-Resistance | C22orf43  | 51233  | 37 | 22 | 23959767  | 23959769  | In_Frame_Del    | DEL | CAT  | -       | 8  | 375  | c.512_514delATGc. | (511-516)GATGCC>GCC              | p.D171del   |
| Pat_70 | Post-Resistance | MYH9      | 4627   | 37 | 22 | 36689419  | 36689421  | In_Frame_Del    | DEL | CCT  | -       | 7  | 427  | .4049_4051delAGI  | (4048-4053)GAGGCC>GC             | p.E1350del  |
| Pat_70 | Post-Resistance | TRIOBP    | 11078  | 37 | 22 | 38120323  | 38120325  | In_Frame_Del    | DEL | CCT  | -       | 8  | 1133 | .1760_1762delCC   | (1759-1764)GCCTCC>GC             | p.S589del   |
| Pat_70 | Post-Resistance | MKL1      | 57591  | 37 | 22 | 40807831  | 40807831  | Frame_Shift_Del | DEL | G    | -       | 9  | 687  | c.2359delC        | c.(2359-2361)CTGfs               | p.L787fs    |
| Pat_70 | Post-Resistance | RANGAP1   | 5905   | 37 | 22 | 41650469  | 41650471  | In_Frame_Del    | DEL | TCC  | -       | 44 | 427  | .1101_1103delIGG. | (1099-1104)GAGGAA>GA.            | 367_368EE>I |
| Pat_70 | Post-Resistance | TCF20     | 6942   | 37 | 22 | 42610573  | 42610575  | In_Frame_Del    | DEL | AGG  | -       | 21 | 384  | c.737_739delCCT   | c.(736-741)TCCTTC>TTC            | p.S246del   |
| Pat_70 | Post-Resistance | TCF20     | 6942   | 37 | 22 | 42610776  | 42610778  | In_Frame_Del    | DEL | TGC  | -       | 8  | 320  | c.534_536delGC.   | (532-537)CAGCAA>CAA.             | 178_179QQ>I |
| Pat_70 | Post-Resistance | BIK       | 638    | 37 | 22 | 43525245  | 43525247  | In_Frame_Del    | DEL | GCT  | -       | 10 | 332  | c.417_419delGCT.  | (415-420)GCCTG>GCC               | p.L144del   |
| Pat_70 | Post-Resistance | GRM7      | 2917   | 37 | 3  | 7621013   | 7621013   | Frame_Shift_Del | DEL | T    | -       | 7  | 137  | c.2420delT        | c.(2419-2421)ATTfs               | p.I807fs    |
| Pat_70 | Post-Resistance | XPC       | 7508   | 37 | 3  | 14219966  | 14219968  | In_Frame_Del    | DEL | CCT  | -       | 9  | 236  | c.101_103delAGGc. | (100-105)GAGAT>GAT               | p.E34del    |
| Pat_70 | Post-Resistance | KAT2B     | 8850   | 37 | 3  | 20113879  | 20113879  | Frame_Shift_Del | DEL | C    | -       | 8  | 822  | c.358delC         | c.(358-360)CCCfs                 | p.P120fs    |
| Pat_70 | Post-Resistance | CLASP2    | 23122  | 37 | 3  | 33602361  | 33602361  | Frame_Shift_Del | DEL | T    | -       | 11 | 827  | c.2869delA        | c.(2869-2871)ATGfs               | p.M957fs    |
| Pat_70 | Post-Resistance | PDCD6IP   | 10015  | 37 | 3  | 33866811  | 33866811  | Frame_Shift_Del | DEL | T    | -       | 8  | 328  | c.595delT         | c.(595-597)TTTfs                 | p.F199fs    |
| Pat_70 | Post-Resistance | MLH1      | 4292   | 37 | 3  | 37070349  | 37070349  | Frame_Shift_Del | DEL | C    | -       | 9  | 1766 | c.1484delC        | c.(1483-1485)ACCfs               | p.T495fs    |
| Pat_70 | Post-Resistance | HHATL     | 57467  | 37 | 3  | 42739670  | 42739672  | In_Frame_Del    | DEL | GAA  | -       | 7  | 472  | c.655_657delITTC  | c.(655-657)TTCdel                | p.F219del   |
| Pat_70 | Post-Resistance | CDC25A    | 993    | 37 | 3  | 48200922  | 48200923  | Frame_Shift_Del | DEL | TC   | -       | 15 | 454  | .1345_1346delIGA  | c.(1345-1347)GATfs               | p.D449fs    |
| Pat_70 | Post-Resistance | QRICH1    | 54870  | 37 | 3  | 49094313  | 49094314  | In_Frame_Ins    | INS | -    | TGC     | 68 | 169  | .1319_1320insGC.  | (1318-1320)CAA>CAGCA.            | 440_440Q>Qi |
| Pat_70 | Post-Resistance | USP4      | 7375   | 37 | 3  | 49321969  | 49321971  | In_Frame_Del    | DEL | TCT  | -       | 10 | 550  | .2318_2320delAG.  | (2317-2322)AAGACC>AC             | p.K773del   |
| Pat_70 | Post-Resistance | DAG1      | 1605   | 37 | 3  | 49569266  | 49569268  | In_Frame_Del    | DEL | CCA  | -       | 11 | 640  | .1322_1324delCC.  | (1321-1326)TCCACC>TC             | p.T446del   |
| Pat_70 | Post-Resistance | FOXP1     | 27086  | 37 | 3  | 71027087  | 71027087  | Frame_Shift_Del | DEL | G    | -       | 9  | 731  | c.1240delC        | c.(1240-1242)CTGfs               | p.L414fs    |
| Pat_70 | Post-Resistance | FOXP1     | 27086  | 37 | 3  | 71247357  | 71247359  | In_Frame_Del    | DEL | TGC  | -       | 9  | 419  | c.174_176delGC.   | (172-177)CAGCAA>CAA.             | 58_59QQ>Q   |
| Pat_70 | Post-Resistance | VGLL3     | 389136 | 37 | 3  | 87027857  | 87027859  | In_Frame_Del    | DEL | CTC  | -       | 29 | 246  | c.220_222delGAG   | c.(220-222)GAGdel                | p.E74del    |
| Pat_70 | Post-Resistance | TBC1D23   | 55773  | 37 | 3  | 100039736 | 100039736 | Frame_Shift_Del | DEL | A    | -       | 8  | 246  | c.1939delA        | c.(1939-1941)AAafs               | p.K647fs    |
| Pat_70 | Post-Resistance | LNP1      | 348801 | 37 | 3  | 100148586 | 100148588 | In_Frame_Del    | DEL | GAT  | -       | 7  | 1420 | c.13_15delGAT     | c.(13-15)GATdel                  | p.D10del    |
| Pat_70 | Post-Resistance | SLC9A10   | 285335 | 37 | 3  | 111981842 | 111981845 | Frame_Shift_Del | DEL | GCAT | -       | 8  | 337  | 1123_1126delATG   | c.(1123-1128)ATGCCTfs            | p.M375fs    |
| Pat_70 | Post-Resistance | KIAA2018  | 205717 | 37 | 3  | 113380090 | 113380090 | Frame_Shift_Del | DEL | T    | -       | 9  | 281  | c.439delA         | c.(439-441)ATTfs                 | p.I147fs    |
| Pat_70 | Post-Resistance | GPR156    | 165829 | 37 | 3  | 119885960 | 119885960 | Frame_Shift_Del | DEL | C    | -       | 9  | 1485 | c.2364delG        | c.(2362-2364)GGGfs               | p.G788fs    |
| Pat_70 | Post-Resistance | PARP14    | 54625  | 37 | 3  | 122433232 | 122433232 | Frame_Shift_Del | DEL | A    | -       | 10 | 203  | c.3956delA        | c.(3955-3957)GAAfs               | p.E1319fs   |
| Pat_70 | Post-Resistance | ZXDC      | 79364  | 37 | 3  | 126178522 | 126178522 | Frame_Shift_Del | DEL | T    | -       | 11 | 2630 | c.2186delA        | c.(2185-2187)AAGfs               | p.K729fs    |
| Pat_70 | Post-Resistance | TMCC1     | 23023  | 37 | 3  | 129546680 | 129546682 | In_Frame_Del    | DEL | GCA  | -       | 9  | 317  | c.540_542delTGC.  | (538-543)GCTGCA>GC.              | 180_181AA>A |
| Pat_70 | Post-Resistance | DBR1      | 51163  | 37 | 3  | 137880741 | 137880743 | In_Frame_Del    | DEL | TCG  | -       | 11 | 417  | .1623_1625delCG.  | (1621-1626)GATGAT>GA.            | 541_542DD>I |
| Pat_70 | Post-Resistance | FXR1      | 8087   | 37 | 3  | 180666228 | 180666228 | Frame_Shift_Del | DEL | A    | -       | 8  | 410  | c.364delA         | c.(364-366)AAafs                 | p.K122fs    |
| Pat_70 | Post-Resistance | ATP13A3   | 79572  | 37 | 3  | 194181471 | 194181473 | In_Frame_Del    | DEL | GAG  | -       | 8  | 737  | c.139_141delCTC   | c.(139-141)CTCdel                | p.L47del    |
| Pat_70 | Post-Resistance | TNK2      | 10188  | 37 | 3  | 195595229 | 195595229 | Frame_Shift_Del | DEL | G    | -       | 12 | 310  | c.1895delC        | c.(1894-1896)CCGfs               | p.P632fs    |
| Pat_70 | Post-Resistance | CRIPAK    | 285464 | 37 | 4  | 1388900   | 1388901   | Frame_Shift_Del | DEL | CA   | -       | 9  | 1300 | c.601_602delCA    | c.(601-603)CACfs                 | p.H201fs    |

|        |                 |          |        |    |   |           |           |                 |     |           |   |    |      |                   |                         |               |
|--------|-----------------|----------|--------|----|---|-----------|-----------|-----------------|-----|-----------|---|----|------|-------------------|-------------------------|---------------|
| Pat_70 | Post-Resistance | CRIPAK   | 285464 | 37 | 4 | 1389456   | 1389457   | Frame_Shift_Del | DEL | CA        | - | 13 | 843  | c.1157_1158delCA  | c.(1156-1158)TCafs      | p.S386fs      |
| Pat_70 | Post-Resistance | GRK4     | 2868   | 37 | 4 | 3015470   | 3015470   | Frame_Shift_Del | DEL | A         | - | 11 | 397  | c.656delA         | c.(655-657)CAafs        | p.Q219fs      |
| Pat_70 | Post-Resistance | OTOP1    | 133060 | 37 | 4 | 4228274   | 4228282   | In_Frame_Del    | DEL | CCACAGCAC | - | 7  | 115  | c.318delCTGCTG    | c.(310-318)CTGCTGTGGdel | p.LLW104del   |
| Pat_70 | Post-Resistance | LYAR     | 55646  | 37 | 4 | 4276167   | 4276169   | In_Frame_Del    | DEL | CTT       | - | 7  | 1332 | c.757_759delAAG   | c.(757-759)AAGdel       | p.K253del     |
| Pat_70 | Post-Resistance | PROM1    | 8842   | 37 | 4 | 15995680  | 15995680  | Frame_Shift_Del | DEL | T         | - | 24 | 492  | c.1697delA        | c.(1696-1698)AATfs      | p.N566fs      |
| Pat_70 | Post-Resistance | GABRG1   | 2565   | 37 | 4 | 46060358  | 46060358  | Frame_Shift_Del | DEL | A         | - | 8  | 284  | c.792delT         | c.(790-792)TTTfs        | p.F264fs      |
| Pat_70 | Post-Resistance | KIAA1211 | 57482  | 37 | 4 | 57182265  | 57182267  | In_Frame_Del    | DEL | AGA       | - | 9  | 185  | c.2597_2599delIAG | c.(2596-2601)CAGAAG>CA  | p.K870del     |
| Pat_70 | Post-Resistance | UTP3     | 57050  | 37 | 4 | 71554620  | 71554622  | In_Frame_Del    | DEL | GAG       | - | 8  | 220  | c.226_228delGAG   | c.(226-228)GAGdel       | p.E81del      |
| Pat_70 | Post-Resistance | SEC31A   | 22872  | 37 | 4 | 83745800  | 83745800  | Frame_Shift_Del | DEL | T         | - | 9  | 223  | c.3319delA        | c.(3319-3321)ATTfs      | p.I1107fs     |
| Pat_70 | Post-Resistance | SEC31A   | 22872  | 37 | 4 | 83785565  | 83785565  | Frame_Shift_Del | DEL | T         | - | 13 | 267  | c.1384delA        | c.(1384-1386)ATTfs      | p.I462fs      |
| Pat_70 | Post-Resistance | WDFY3    | 23001  | 37 | 4 | 85611708  | 85611709  | Frame_Shift_Del | DEL | CA        | - | 15 | 602  | c.9313_9314delITC | c.(9313-9315)TGGfs      | p.W3105fs     |
| Pat_70 | Post-Resistance | NAP1L5   | 266812 | 37 | 4 | 89618431  | 89618433  | In_Frame_Del    | DEL | CCT       | - | 8  | 446  | c.473_475delAGG   | c.(472-477)GAGGCT>GCT   | p.E158del     |
| Pat_70 | Post-Resistance | RRH      | 10692  | 37 | 4 | 110756541 | 110756541 | Frame_Shift_Del | DEL | T         | - | 7  | 382  | c.317delIT        | c.(316-318)ATTfs        | p.I106fs      |
| Pat_70 | Post-Resistance | GAB1     | 2549   | 37 | 4 | 144390234 | 144390236 | In_Frame_Del    | DEL | TGT       | - | 7  | 473  | c.1977_1979delITG | c.(1975-1980)TATGTT>TAI | p.V662del     |
| Pat_70 | Post-Resistance | OTUD4    | 54726  | 37 | 4 | 146077123 | 146077125 | In_Frame_Del    | DEL | CAG       | - | 16 | 479  | c.458_460delICTG  | c.(457-462)GCTGAT>GAT   | p.A153del     |
| Pat_70 | Post-Resistance | SDHA     | 6389   | 37 | 5 | 256484    | 256485    | Frame_Shift_Del | DEL | TT        | - | 55 | 811  | c.1944_1945delITT | c.(1942-1947)ACTTTGfs   | p.T648fs      |
| Pat_70 | Post-Resistance | PAPD7    | 11044  | 37 | 5 | 6755013   | 6755014   | Frame_Shift_Del | DEL | AC        | - | 16 | 362  | c.1584_1585delIAC | c.(1582-1587)AAACACfs   | p.K528fs      |
| Pat_70 | Post-Resistance | NNT      | 23530  | 37 | 5 | 43651893  | 43651893  | Frame_Shift_Del | DEL | C         | - | 7  | 1392 | c.1770delIC       | c.(1768-1770)GACfs      | p.D590fs      |
| Pat_70 | Post-Resistance | AP3B1    | 8546   | 37 | 5 | 77536741  | 77536741  | Frame_Shift_Del | DEL | T         | - | 8  | 1167 | c.224delIA        | c.(223-225)AATfs        | p.N75fs       |
| Pat_70 | Post-Resistance | TNFAIP8  | 25816  | 37 | 5 | 118728991 | 118728992 | Frame_Shift_Del | DEL | TG        | - | 7  | 694  | c.512_513delITG   | c.(511-513)TTGfs        | p.L171fs      |
| Pat_70 | Post-Resistance | ALDH7A1  | 501    | 37 | 5 | 125891661 | 125891661 | Frame_Shift_Del | DEL | T         | - | 8  | 299  | c.1055delIA       | c.(1054-1056)AAGfs      | p.K352fs      |
| Pat_70 | Post-Resistance | SLC12A2  | 6558   | 37 | 5 | 127420207 | 127420209 | In_Frame_Del    | DEL | CGG       | - | 8  | 172  | c.561_563delICGG  | c.(559-564)TCCGGC>TCC   | p.G192del     |
| Pat_70 | Post-Resistance | RAPGEF6  | 51735  | 37 | 5 | 130782332 | 130782332 | Frame_Shift_Del | DEL | T         | - | 7  | 716  | c.3265delIA       | c.(3265-3267)AGGfs      | p.R1089fs     |
| Pat_70 | Post-Resistance | RAPGEF6  | 51735  | 37 | 5 | 130815368 | 130815369 | Frame_Shift_Ins | INS | -         | T | 8  | 648  | c.1918_1919insA   | c.(1918-1920)AGTfs      | p.S640fs      |
| Pat_70 | Post-Resistance | SLC22A4  | 6583   | 37 | 5 | 131676327 | 131676327 | Frame_Shift_Del | DEL | T         | - | 12 | 902  | c.1514delIT       | c.(1513-1515)CTTfs      | p.L505fs      |
| Pat_70 | Post-Resistance | IK       | 3550   | 37 | 5 | 140032593 | 140032594 | Frame_Shift_Del | DEL | GA        | - | 10 | 289  | c.268_269delIGA   | c.(268-270)GAGfs        | p.E90fs       |
| Pat_70 | Post-Resistance | KCTD16   | 57528  | 37 | 5 | 143853531 | 143853531 | Frame_Shift_Del | DEL | A         | - | 8  | 195  | c.1141delIA       | c.(1141-1143)AAafs      | p.K381fs      |
| Pat_70 | Post-Resistance | LARS     | 51520  | 37 | 5 | 145523014 | 145523014 | Frame_Shift_Del | DEL | C         | - | 7  | 1847 | c.1838delIG       | c.(1837-1839)GGTfs      | p.G613fs      |
| Pat_70 | Post-Resistance | HAVCR2   | 84868  | 37 | 5 | 156535948 | 156535950 | In_Frame_Del    | DEL | AGC       | - | 10 | 550  | c.45_47delIGCT    | c.(43-48)CTGCTA>CTA     | p.15_16LL>L   |
| Pat_70 | Post-Resistance | RIOK1    | 83732  | 37 | 6 | 7393450   | 7393452   | In_Frame_Del    | DEL | GAC       | - | 8  | 343  | c.190_192delIGAC  | c.(190-192)GACdel       | p.D69del      |
| Pat_70 | Post-Resistance | JARID2   | 3720   | 37 | 6 | 15501164  | 15501164  | Frame_Shift_Del | DEL | T         | - | 8  | 1199 | c.1972delIT       | c.(1972-1974)TTTfs      | p.F658fs      |
| Pat_70 | Post-Resistance | HSPA1L   | 3305   | 37 | 6 | 31778562  | 31778564  | In_Frame_Del    | DEL | CAG       | - | 8  | 532  | c.1186_1188delICT | c.(1186-1188)CTGdel     | p.L396del     |
| Pat_70 | Post-Resistance | STK19    | 8859   | 37 | 6 | 31939829  | 31939830  | Frame_Shift_Ins | INS | -         | A | 13 | 856  | c.56_57insA       | c.(55-57)GCAfs          | p.A19fs       |
| Pat_70 | Post-Resistance | SYNGAP1  | 8831   | 37 | 6 | 33411201  | 33411203  | In_Frame_Del    | DEL | CAC       | - | 7  | 329  | c.2872_2874delICA | c.(2872-2874)CACdel     | p.H966del     |
| Pat_70 | Post-Resistance | TULP1    | 7287   | 37 | 6 | 35478775  | 35478777  | In_Frame_Del    | DEL | TCC       | - | 7  | 363  | c.360_362delIGGA  | c.(358-363)GAGGAA>GAA   | p.120_121EE>I |
| Pat_70 | Post-Resistance | MDF1     | 4188   | 37 | 6 | 41621169  | 41621171  | In_Frame_Del    | DEL | CTG       | - | 10 | 444  | c.597_599delICTG  | c.(595-600)CTCTGC>CTC   | p.C204del     |
| Pat_70 | Post-Resistance | GABRR1   | 2569   | 37 | 6 | 89891719  | 89891721  | In_Frame_Del    | DEL | AAG       | - | 11 | 598  | c.852_854delICTT  | c.(850-855)TTCTTG>TTG   | p.F284del     |
| Pat_70 | Post-Resistance | GABRR2   | 2570   | 37 | 6 | 89975427  | 89975429  | In_Frame_Del    | DEL | AAG       | - | 7  | 564  | c.867_869delICTT  | c.(865-870)TTCTTG>TTG   | p.F289del     |
| Pat_70 | Post-Resistance | REV3L    | 5980   | 37 | 6 | 111693904 | 111693904 | Frame_Shift_Del | DEL | G         | - | 7  | 963  | c.5654delIC       | c.(5653-5655)CCAfs      | p.P1885fs     |
| Pat_70 | Post-Resistance | CCDC28A  | 25901  | 37 | 6 | 139097330 | 139097330 | Frame_Shift_Del | DEL | A         | - | 10 | 517  | c.343delIA        | c.(343-345)AAafs        | p.K115fs      |
| Pat_70 | Post-Resistance | MTHFD1L  | 25902  | 37 | 6 | 151358163 | 151358164 | Frame_Shift_Ins | INS | -         | A | 8  | 428  | c.2757_2758insA   | c.(2755-2760)GACAAafs   | p.D919fs      |
| Pat_70 | Post-Resistance | QKI      | 9444   | 37 | 6 | 163899920 | 163899920 | Frame_Shift_Del | DEL | A         | - | 8  | 404  | c.394delIA        | c.(394-396)AAafs        | p.K132fs      |
| Pat_70 | Post-Resistance | CARD11   | 84433  | 37 | 7 | 2963941   | 2963943   | In_Frame_Del    | DEL | GGA       | - | 8  | 351  | c.1864_1866delICT | c.(1864-1866)TCCdel     | p.S622del     |
| Pat_70 | Post-Resistance | PHF14    | 9678   | 37 | 7 | 11075380  | 11075381  | Frame_Shift_Del | DEL | AG        | - | 11 | 1375 | c.1569_1570delIAC | c.(1567-1572)CAAGAGfs   | p.Q523fs      |
| Pat_70 | Post-Resistance | HOXA1    | 3198   | 37 | 7 | 27135314  | 27135316  | In_Frame_Del    | DEL | CGA       | - | 8  | 280  | c.216_218delICTG  | c.(214-219)CATCAC>CAC   | p.72_73HH>H   |
| Pat_70 | Post-Resistance | NEUROD6  | 63974  | 37 | 7 | 31378635  | 31378635  | Frame_Shift_Del | DEL | T         | - | 7  | 1030 | c.248delIA        | c.(247-249)AAGfs        | p.K83fs       |
| Pat_70 | Post-Resistance | POU6F2   | 11281  | 37 | 7 | 39379288  | 39379290  | In_Frame_Del    | DEL | CAG       | - | 11 | 221  | c.559_561delICAG  | c.(559-561)CAGdel       | p.Q196del     |

|        |                 |         |        |    |   |           |           |                 |     |     |   |    |      |                   |                         |               |
|--------|-----------------|---------|--------|----|---|-----------|-----------|-----------------|-----|-----|---|----|------|-------------------|-------------------------|---------------|
| Pat_70 | Post-Resistance | AEBP1   | 165    | 37 | 7 | 44153778  | 44153780  | In_Frame_Del    | DEL | AGA | - | 7  | 265  | .3395_3397delAG.  | (3394-3399)GAGAAA>GA    | p.K1133del    |
| Pat_70 | Post-Resistance | STX1A   | 6804   | 37 | 7 | 73123425  | 73123427  | In_Frame_Del    | DEL | CAT | - | 7  | 923  | c.56_58delATG     | c.(55-60)GATGTC>GTC     | p.D19del      |
| Pat_70 | Post-Resistance | LIMK1   | 3984   | 37 | 7 | 73513509  | 73513509  | Frame_Shift_Del | DEL | C   | - | 7  | 1429 | c.549delC         | c.(547-549)GACfs        | p.D183fs      |
| Pat_70 | Post-Resistance | DTX2    | 113878 | 37 | 7 | 76112249  | 76112249  | Frame_Shift_Del | DEL | A   | - | 46 | 2230 | c.693delA         | c.(691-693)CCAFs        | p.P231fs      |
| Pat_70 | Post-Resistance | TMEM60  | 85025  | 37 | 7 | 77423460  | 77423460  | Frame_Shift_Del | DEL | T   | - | 7  | 359  | c.231delA         | c.(229-231)AAAfs        | p.K77fs       |
| Pat_70 | Post-Resistance | SEMA3D  | 223117 | 37 | 7 | 84651801  | 84651801  | Frame_Shift_Del | DEL | G   | - | 7  | 1892 | c.1320delC        | c.(1318-1320)TTCfs      | p.F440fs      |
| Pat_70 | Post-Resistance | AKAP9   | 10142  | 37 | 7 | 91671392  | 91671393  | Frame_Shift_Del | DEL | AG  | - | 10 | 179  | c.4950_4951delAC  | c.(4948-4953)TCAGAGfs   | p.S1650fs     |
| Pat_70 | Post-Resistance | AKAP9   | 10142  | 37 | 7 | 91732039  | 91732039  | Frame_Shift_Del | DEL | G   | - | 8  | 1491 | c.11229delG       | c.(11227-11229)ATGfs    | p.M3743fs     |
| Pat_70 | Post-Resistance | CNPY4   | 245812 | 37 | 7 | 99717401  | 99717402  | Frame_Shift_Ins | INS | -   | T | 7  | 321  | c.34_35insT       | c.(34-36)CTTfs          | p.L12fs       |
| Pat_70 | Post-Resistance | AGFG2   | 3268   | 37 | 7 | 100150976 | 100150976 | Frame_Shift_Del | DEL | C   | - | 7  | 713  | c.438delC         | c.(436-438)GTCfs        | p.V146fs      |
| Pat_70 | Post-Resistance | KCND2   | 3751   | 37 | 7 | 119915596 | 119915597 | Frame_Shift_Ins | INS | -   | C | 24 | 154  | c.910_911insC     | c.(910-912)TCCfs        | p.S304fs      |
| Pat_70 | Post-Resistance | TNPO3   | 23534  | 37 | 7 | 128610259 | 128610259 | Frame_Shift_Del | DEL | G   | - | 11 | 1543 | c.2541delC        | c.(2539-2541)CCCfs      | p.P847fs      |
| Pat_70 | Post-Resistance | OR9A4   | 130075 | 37 | 7 | 141619203 | 141619203 | Frame_Shift_Del | DEL | T   | - | 10 | 950  | c.528delT         | c.(526-528)AATfs        | p.N176fs      |
| Pat_70 | Post-Resistance | SGK223  | 157285 | 37 | 8 | 8175804   | 8175806   | In_Frame_Del    | DEL | TCA | - | 7  | 1234 | c.4079_4081delTG. | c.(4078-4083)ATGAAG>AA  | p.M1360del    |
| Pat_70 | Post-Resistance | DLC1    | 10395  | 37 | 8 | 12957997  | 12957997  | Frame_Shift_Del | DEL | G   | - | 8  | 446  | c.1849delC        | c.(1849-1851)CGGfs      | p.R617fs      |
| Pat_70 | Post-Resistance | TUSC3   | 7991   | 37 | 8 | 15601076  | 15601078  | In_Frame_Del    | DEL | CTA | - | 8  | 1357 | c.892_894delCTA   | c.(892-894)CTAdel       | p.L298del     |
| Pat_70 | Post-Resistance | C8orf80 | 389643 | 37 | 8 | 27888776  | 27888776  | Frame_Shift_Del | DEL | T   | - | 7  | 937  | c.1892delA        | c.(1891-1893)AATfs      | p.N631fs      |
| Pat_70 | Post-Resistance | MYST3   | 7994   | 37 | 8 | 41798420  | 41798422  | In_Frame_Del    | DEL | CTC | - | 8  | 668  | c.2977_2979delGAI | c.(2977-2979)GAGdel     | p.E993del     |
| Pat_70 | Post-Resistance | PRKDC   | 5591   | 37 | 8 | 48746799  | 48746799  | Frame_Shift_Del | DEL | T   | - | 12 | 1442 | c.8110delA        | c.(8110-8112)AGGfs      | p.R2704fs     |
| Pat_70 | Post-Resistance | MYBL1   | 4603   | 37 | 8 | 67488452  | 67488453  | Frame_Shift_Ins | INS | -   | T | 7  | 923  | c.1259_1260insA   | c.(1258-1260)AACfs      | p.N420fs      |
| Pat_70 | Post-Resistance | SULF1   | 23213  | 37 | 8 | 70514026  | 70514026  | Frame_Shift_Del | DEL | T   | - | 11 | 1441 | c.1023delT        | c.(1021-1023)CCTfs      | p.P341fs      |
| Pat_70 | Post-Resistance | NBN     | 4683   | 37 | 8 | 90967512  | 90967512  | Frame_Shift_Del | DEL | T   | - | 8  | 537  | c.1396delA        | c.(1396-1398)AGGfs      | p.R466fs      |
| Pat_70 | Post-Resistance | DPYS    | 1807   | 37 | 8 | 105440214 | 105440214 | Frame_Shift_Del | DEL | T   | - | 11 | 1576 | c.1086delA        | c.(1084-1086)AAAfs      | p.K362fs      |
| Pat_70 | Post-Resistance | WDR67   | 93594  | 37 | 8 | 124140520 | 124140521 | Splice_Site     | INS | -   | T | 9  | 192  | c.1885_splice     | c.e14-1                 | p.F629_splice |
| Pat_70 | Post-Resistance | ATAD2   | 29028  | 37 | 8 | 124368685 | 124368685 | Frame_Shift_Del | DEL | A   | - | 9  | 261  | c.1590delT        | c.(1588-1590)TTTfs      | p.F530fs      |
| Pat_70 | Post-Resistance | EIF2C2  | 27161  | 37 | 8 | 141554345 | 141554345 | Frame_Shift_Del | DEL | G   | - | 8  | 827  | c.1806delC        | c.(1804-1806)CCCfs      | p.P602fs      |
| Pat_70 | Post-Resistance | TSNARE1 | 203062 | 37 | 8 | 143310866 | 143310868 | In_Frame_Del    | DEL | GAT | - | 11 | 488  | c.1519_1521delATC | c.(1519-1521)ATCdel     | p.I507del     |
| Pat_70 | Post-Resistance | KANK1   | 23189  | 37 | 9 | 732475    | 732477    | In_Frame_Del    | DEL | GAG | - | 12 | 623  | c.3103_3105delGAI | c.(3103-3105)GAGdel     | p.E1039del    |
| Pat_70 | Post-Resistance | RANBP6  | 26953  | 37 | 9 | 6012690   | 6012690   | Frame_Shift_Del | DEL | T   | - | 8  | 531  | c.2918delA        | c.(2917-2919)AATfs      | p.N973fs      |
| Pat_70 | Post-Resistance | TAF1L   | 138474 | 37 | 9 | 32633584  | 32633584  | Frame_Shift_Del | DEL | T   | - | 14 | 530  | c.1994delA        | c.(1993-1995)AAGfs      | p.K665fs      |
| Pat_70 | Post-Resistance | KIF24   | 347240 | 37 | 9 | 34257623  | 34257623  | Frame_Shift_Del | DEL | T   | - | 7  | 230  | c.1982delA        | c.(1981-1983)AAGfs      | p.K661fs      |
| Pat_70 | Post-Resistance | HRCT1   | 646962 | 37 | 9 | 35906605  | 35906607  | In_Frame_Del    | DEL | CCG | - | 9  | 78   | c.321_323delCCG.  | c.(319-324)CACCGC>CAC   | p.R108del     |
| Pat_70 | Post-Resistance | ROR2    | 4920   | 37 | 9 | 94486026  | 94486028  | In_Frame_Del    | DEL | TCC | - | 7  | 405  | c.2748_2750delIGG | c.(2746-2751)GAGGAA>GA. | p.916_917EE>I |
| Pat_70 | Post-Resistance | XPA     | 7507   | 37 | 9 | 100455962 | 100455964 | In_Frame_Del    | DEL | TTC | - | 9  | 302  | c.250_252delGAA   | c.(250-252)GAAdel       | p.E84del      |
| Pat_70 | Post-Resistance | NR4A3   | 8013   | 37 | 9 | 102590616 | 102590618 | In_Frame_Del    | DEL | CAC | - | 9  | 175  | c.292_294delCAC   | c.(292-294)CACdel       | p.H108del     |
| Pat_70 | Post-Resistance | TNC     | 3371   | 37 | 9 | 117797539 | 117797539 | Frame_Shift_Del | DEL | G   | - | 11 | 875  | c.5731delC        | c.(5731-5733)CGGfs      | p.R1911fs     |
| Pat_70 | Post-Resistance | ASTN2   | 23245  | 37 | 9 | 119976989 | 119976991 | In_Frame_Del    | DEL | CAG | - | 13 | 294  | c.661_663delCTG   | c.(661-663)CTGdel       | p.L221del     |
| Pat_70 | Post-Resistance | RAB14   | 51552  | 37 | 9 | 123954449 | 123954450 | Frame_Shift_Ins | INS | -   | T | 7  | 475  | c.105_106insA     | c.(103-108)AAATTTfs     | p.K35fs       |
| Pat_70 | Post-Resistance | DAB2IP  | 153090 | 37 | 9 | 124522389 | 124522391 | In_Frame_Del    | DEL | AAG | - | 12 | 355  | c.757_759delAAG   | c.(757-759)AAGdel       | p.K257del     |
| Pat_70 | Post-Resistance | PRDM12  | 59335  | 37 | 9 | 133543701 | 133543702 | Splice_Site     | DEL | GT  | - | 33 | 447  | c.570_splice      | c.e3+1                  | p.E190_splice |
| Pat_70 | Post-Resistance | GRIN1   | 2902   | 37 | 9 | 140056884 | 140056886 | In_Frame_Del    | DEL | GAG | - | 13 | 201  | c.1780_1782delGAI | c.(1780-1782)GAGdel     | p.E598del     |
| Pat_70 | Post-Resistance | IQSEC2  | 23096  | 37 | X | 53285045  | 53285047  | In_Frame_Del    | DEL | CTC | - | 7  | 152  | c.934_936delGAG   | c.(934-936)GAGdel       | p.E312del     |
| Pat_70 | Post-Resistance | PHF8    | 23133  | 37 | X | 54011405  | 54011407  | In_Frame_Del    | DEL | CTC | - | 36 | 867  | c.2491_2493delGAI | c.(2491-2493)GAGdel     | p.E831del     |
| Pat_70 | Post-Resistance | NAP1L2  | 4674   | 37 | X | 72433664  | 72433666  | In_Frame_Del    | DEL | TCC | - | 8  | 165  | c.663_665delGGA.  | c.(661-666)GAGGAC>GAC   | p.E221del     |
| Pat_70 | Post-Resistance | ARMCX3  | 51566  | 37 | X | 100880152 | 100880154 | In_Frame_Del    | DEL | TGA | - | 14 | 1187 | c.183_185delTGA   | c.(181-186)TCTGAT>TCT   | p.D66del      |
| Pat_70 | Post-Resistance | BHLHB9  | 80823  | 37 | X | 102004419 | 102004421 | In_Frame_Del    | DEL | GAG | - | 20 | 809  | c.496_498delGAG   | c.(496-498)GAGdel       | p.E171del     |
| Pat_70 | Post-Resistance | SLC6A14 | 11254  | 37 | X | 115584255 | 115584256 | Frame_Shift_Ins | INS | -   | T | 7  | 360  | c.1233_1234insT   | c.(1231-1236)TTATTTfs   | p.L411fs      |



|        |                 |           |        |    |    |           |           |                 |     |          |     |     |      |                  |                         |               |
|--------|-----------------|-----------|--------|----|----|-----------|-----------|-----------------|-----|----------|-----|-----|------|------------------|-------------------------|---------------|
| Pat_70 | Post-Resistance | SLC25A5   | 292    | 37 | X  | 118603706 | 118603707 | Frame_Shift_Ins | INS | -        | G   | 74  | 1071 | c.194_195insG    | c.(193-195)CAGfs        | p.Q65fs       |
| Pat_70 | Post-Resistance | ZBTB33    | 10009  | 37 | X  | 119387381 | 119387382 | Frame_Shift_Del | DEL | TG       | -   | 7   | 1884 | c.111_112delTG   | c.(109-114)ATTGTGfs     | p.I37fs       |
| Pat_70 | Post-Resistance | CUL4B     | 8450   | 37 | X  | 119694117 | 119694119 | In_Frame_Del    | DEL | GAG      | -   | 11  | 194  | c.429_431delCTC  | c.(427-432)TCCTCA>TCA   | p.143_144SS>A |
| Pat_70 | Post-Resistance | USP26     | 83844  | 37 | X  | 132160788 | 132160788 | Frame_Shift_Del | DEL | A        | -   | 13  | 696  | c.1461delT       | c.(1459-1461)TTTTfs     | p.F487fs      |
| Pat_70 | Post-Resistance | PLAC1     | 10761  | 37 | X  | 133700525 | 133700525 | Frame_Shift_Del | DEL | G        | -   | 7   | 1281 | c.188delC        | c.(187-189)CCAfs        | p.P63fs       |
| Pat_70 | Post-Resistance | MAGEC1    | 9947   | 37 | X  | 140994114 | 140994116 | In_Frame_Del    | DEL | CTC      | -   | 8   | 1124 | c.924_926delCTC  | c.(922-927)AGCTCC>AGC   | p.308_309SS>A |
| Pat_70 | Post-Resistance | MAMLD1    | 10046  | 37 | X  | 149639325 | 149639327 | In_Frame_Del    | DEL | CAG      | -   | 10  | 285  | c.1480_1482delCA | c.(1480-1482)CAGdel     | p.Q502del     |
| Pat_70 | Post-Resistance | CD99L2    | 83692  | 37 | X  | 149984524 | 149984526 | In_Frame_Del    | DEL | GTG      | -   | 13  | 1064 | c.156_158delCAC  | c.(154-159)ACCACA>ACA   | p.52_53TT>T   |
| Pat_70 | Post-Resistance | ZNF185    | 7739   | 37 | X  | 152087570 | 152087572 | In_Frame_Del    | DEL | GAG      | -   | 10  | 119  | c.475_477delGAG  | c.(475-477)GAGdel       | p.E165del     |
| Pat_70 | Post-Resistance | BCAP31    | 10134  | 37 | X  | 152981034 | 152981043 | Frame_Shift_Del | DEL | CCTCTGGG | -   | 27  | 513  | c.304delGCCAG    | c.(295-306)GCCAGAGGAA   | p.A99fs       |
| Pat_70 | Post-Resistance | F8        | 2157   | 37 | X  | 154157686 | 154157686 | Frame_Shift_Del | DEL | T        | -   | 12  | 329  | c.4379delA       | c.(4378-4380)AATfs      | p.N1460fs     |
| Pat_73 | Pre-Treatment   | AHDC1     | 27245  | 37 | 1  | 27875353  | 27875355  | In_Frame_Del    | DEL | AGG      | -   | 11  | 126  | c.3272_3274delCC | c.(3271-3276)TCCTTC>TT  | p.S1091del    |
| Pat_73 | Pre-Treatment   | THRAP3    | 9967   | 37 | 1  | 36752261  | 36752262  | Frame_Shift_Del | DEL | AG       | -   | 8   | 578  | c.430_431delAG   | c.(430-432)AGAfs        | p.R144fs      |
| Pat_73 | Pre-Treatment   | ROR1      | 4919   | 37 | 1  | 64608186  | 64608187  | Frame_Shift_Del | DEL | CA       | -   | 7   | 450  | c.1027_1028delCA | c.(1027-1029)CACfs      | p.H343fs      |
| Pat_73 | Pre-Treatment   | PRG4      | 10216  | 37 | 1  | 186276143 | 186276145 | In_Frame_Del    | DEL | CTC      | -   | 25  | 446  | c.1292_1294delCT | c.(1291-1296)ACTCCC>AC  | p.P432del     |
| Pat_73 | Pre-Treatment   | INTS7     | 25896  | 37 | 1  | 212115191 | 212115193 | In_Frame_Del    | DEL | TGC      | -   | 8   | 382  | c.2862_2864delGC | c.(2860-2865)CAGCAA>CA  | p.954_955QQ>A |
| Pat_73 | Pre-Treatment   | FLVCR1    | 28982  | 37 | 1  | 213037113 | 213037114 | Frame_Shift_Del | DEL | AC       | -   | 7   | 265  | c.785_786delAC   | c.(784-786)AACfs        | p.N262fs      |
| Pat_73 | Pre-Treatment   | LZTS2     | 84445  | 37 | 10 | 102763415 | 102763417 | In_Frame_Del    | DEL | CCT      | -   | 10  | 336  | c.560_562delCCT  | c.(559-564)GCCTCC>GCC   | p.S197del     |
| Pat_73 | Pre-Treatment   | LOC653544 | 653544 | 37 | 10 | 135491036 | 135491036 | Frame_Shift_Del | DEL | G        | -   | 17  | 421  | c.647delG        | c.(646-648)AGGfs        | p.R216fs      |
| Pat_73 | Pre-Treatment   | FADS2     | 9415   | 37 | 11 | 61615748  | 61615748  | Frame_Shift_Del | DEL | C        | -   | 8   | 852  | c.736delC        | c.(736-738)CCCfs        | p.P246fs      |
| Pat_73 | Pre-Treatment   | KLHL35    | 283212 | 37 | 11 | 75134762  | 75134762  | Frame_Shift_Del | DEL | C        | -   | 7   | 657  | c.877delG        | c.(877-879)GAGfs        | p.E293fs      |
| Pat_73 | Pre-Treatment   | PRB2      | 653247 | 37 | 12 | 11546506  | 11546508  | In_Frame_Del    | DEL | TTG      | -   | 25  | 726  | c.504_506delCAA  | c.(502-507)AACAAAG>AAG  | p.N168del     |
| Pat_73 | Pre-Treatment   | DACH1     | 1602   | 37 | 13 | 72440659  | 72440664  | Splice_Site     | DEL | GCCGCC   | -   | 4   | 7    | c.242_splice     | c.e2-1                  | p.G81_splice  |
| Pat_73 | Pre-Treatment   | SNX6      | 58533  | 37 | 14 | 35099154  | 35099154  | Frame_Shift_Del | DEL | G        | -   | 2   | 4    | c.49delC         | c.(49-51)CTGfs          | p.L17fs       |
| Pat_73 | Pre-Treatment   | FANCM     | 57697  | 37 | 14 | 45642288  | 45642289  | Frame_Shift_Del | DEL | CT       | -   | 7   | 172  | c.2191_2192delCT | c.(2191-2193)CTCfs      | p.L731fs      |
| Pat_73 | Pre-Treatment   | C14orf39  | 317761 | 37 | 14 | 60903565  | 60903565  | Frame_Shift_Del | DEL | A        | -   | 7   | 168  | c.1762delT       | c.(1762-1764)TGAfs      | p.*588fs      |
| Pat_73 | Pre-Treatment   | EIF3CL    | 728689 | 37 | 16 | 28734579  | 28734581  | In_Frame_Del    | DEL | GAG      | -   | 7   | 2395 | c.871_873delGAG  | c.(871-873)GAGdel       | p.E295del     |
| Pat_73 | Pre-Treatment   | CD2BP2    | 10421  | 37 | 16 | 30365550  | 30365552  | In_Frame_Del    | DEL | CAT      | -   | 11  | 1107 | c.170_172delATG  | c.(169-174)GATGGG>GGC   | p.D57del      |
| Pat_73 | Pre-Treatment   | PSTPIP2   | 9050   | 37 | 18 | 43591185  | 43591185  | Frame_Shift_Del | DEL | C        | -   | 7   | 530  | c.316delG        | c.(316-318)GAAfs        | p.E106fs      |
| Pat_73 | Pre-Treatment   | SPPL2B    | 56928  | 37 | 19 | 2340953   | 2340953   | Frame_Shift_Del | DEL | C        | -   | 7   | 129  | c.897delC        | c.(895-897)CTCfs        | p.L299fs      |
| Pat_73 | Pre-Treatment   | USE1      | 55850  | 37 | 19 | 17330180  | 17330181  | Frame_Shift_Del | DEL | TC       | -   | 4   | 2    | c.581_582delTC   | c.(580-582)ATCfs        | p.I194fs      |
| Pat_73 | Pre-Treatment   | C2orf71   | 388939 | 37 | 2  | 29295647  | 29295649  | In_Frame_Del    | DEL | TCC      | -   | 7   | 418  | c.1479_1481delGG | c.(1477-1482)GAGGAA>GA  | p.493_494EE>I |
| Pat_73 | Pre-Treatment   | ARHGAP25  | 9938   | 37 | 2  | 69002410  | 69002410  | Frame_Shift_Del | DEL | C        | -   | 7   | 1250 | c.119delC        | c.(118-120)ACCfs        | p.T40fs       |
| Pat_73 | Pre-Treatment   | ANKRD36   | 375248 | 37 | 2  | 97808574  | 97808575  | Splice_Site     | INS | -        | A   | 19  | 49   | c.901_splice     | c.e8+2                  | p.V301_splice |
| Pat_73 | Pre-Treatment   | CD28      | 940    | 37 | 2  | 204591576 | 204591576 | Frame_Shift_Del | DEL | C        | -   | 7   | 305  | c.273delC        | c.(271-273)GGCfs        | p.G91fs       |
| Pat_73 | Pre-Treatment   | PLAC4     | 191585 | 37 | 21 | 42551313  | 42551313  | Frame_Shift_Del | DEL | C        | -   | 13  | 87   | c.243delG        | c.(241-243)TGGfs        | p.W81fs       |
| Pat_73 | Pre-Treatment   | RNF215    | 200312 | 37 | 22 | 30783221  | 30783223  | In_Frame_Del    | DEL | GCA      | -   | 6   | 4    | c.80_82delTGC    | c.(79-84)CTGCC>CCC      | p.L27del      |
| Pat_73 | Pre-Treatment   | MST1R     | 4486   | 37 | 3  | 49940112  | 49940112  | Frame_Shift_Del | DEL | C        | -   | 7   | 302  | c.931delG        | c.(931-933)GCCfs        | p.A311fs      |
| Pat_73 | Pre-Treatment   | LNP1      | 348801 | 37 | 3  | 100148586 | 100148588 | In_Frame_Del    | DEL | GAT      | -   | 7   | 944  | c.13_15delGAT    | c.(13-15)GATdel         | p.D10del      |
| Pat_73 | Pre-Treatment   | ACTL6A    | 86     | 37 | 3  | 179301188 | 179301188 | Frame_Shift_Del | DEL | G        | -   | 215 | 180  | c.1074delG       | c.(1072-1074)CAGfs      | p.Q358fs      |
| Pat_73 | Pre-Treatment   | CRIPAK    | 285464 | 37 | 4  | 1388441   | 1388442   | Frame_Shift_Ins | INS | -        | CG  | 18  | 2494 | c.142_143insCG   | c.(142-144)ATGfs        | p.M48fs       |
| Pat_73 | Pre-Treatment   | CRIPAK    | 285464 | 37 | 4  | 1389143   | 1389144   | Frame_Shift_Ins | INS | -        | CA  | 7   | 1287 | c.844_845insCA   | c.(844-846)TCAfs        | p.S282fs      |
| Pat_73 | Pre-Treatment   | SH3TC2    | 79628  | 37 | 5  | 148386620 | 148386620 | Frame_Shift_Del | DEL | C        | -   | 7   | 265  | c.3499delG       | c.(3499-3501)GTGfs      | p.V1167fs     |
| Pat_73 | Pre-Treatment   | SLIT3     | 6586   | 37 | 5  | 168137990 | 168137991 | Frame_Shift_Del | DEL | TG       | -   | 4   | 8    | c.2628_2629delCA | c.(2626-2631)TACAAGfs   | p.Y876fs      |
| Pat_73 | Pre-Treatment   | FOXC1     | 2296   | 37 | 6  | 1612017   | 1612018   | In_Frame_Ins    | INS | -        | CGG | 21  | 42   | c.1337_1338insCG | c.(1336-1338)CAC>CACGGp | p.456_457insC |
| Pat_73 | Pre-Treatment   | RIOK1     | 83732  | 37 | 6  | 7393450   | 7393452   | In_Frame_Del    | DEL | GAC      | -   | 9   | 357  | c.190_192delGAC  | c.(190-192)GACdel       | p.D69del      |
| Pat_73 | Pre-Treatment   | ATXN1     | 6310   | 37 | 6  | 16327900  | 16327901  | In_Frame_Ins    | INS | -        | TGC | 7   | 202  | c.641_642insGCA  | c.(640-642)CAG>CAGCAC   | p.214_214Q>QI |

|        |                 |           |        |    |    |           |           |                 |     |          |     |     |      |                                                     |                       |               |
|--------|-----------------|-----------|--------|----|----|-----------|-----------|-----------------|-----|----------|-----|-----|------|-----------------------------------------------------|-----------------------|---------------|
| Pat_73 | Pre-Treatment   | ATXN1     | 6310   | 37 | 6  | 16327907  | 16327909  | In_Frame_Del    | DEL | TGA      | -   | 8   | 199  | c.633_635delTCAc.(631-636)CATCAG>CAG                | p.H211del             |               |
| Pat_73 | Pre-Treatment   | PPP1R10   | 5514   | 37 | 6  | 30570264  | 30570266  | In_Frame_Del    | DEL | GGA      | -   | 7   | 218  | .2160_2162delTCc.(2158-2163)CCTCCA>CCc.720_721PP>I  |                       |               |
| Pat_73 | Pre-Treatment   | DDR1      | 780    | 37 | 6  | 30863251  | 30863251  | Frame_Shift_Del | DEL | C        | -   | 8   | 1757 | c.1584delC                                          | c.(1582-1584)GGCfs    | p.G528fs      |
| Pat_73 | Pre-Treatment   | CFB       | 629    | 37 | 6  | 31895549  | 31895549  | Frame_Shift_Del | DEL | T        | -   | 7   | 2402 | c.20delT                                            | c.(19-21)CTTfs        | p.L7fs        |
| Pat_73 | Pre-Treatment   | TULP1     | 7287   | 37 | 6  | 35478775  | 35478777  | In_Frame_Del    | DEL | TCC      | -   | 10  | 454  | c.360_362delGGAc.(358-363)GAGGAA>GAAc.120_121EE>I   |                       |               |
| Pat_73 | Pre-Treatment   | FTSJD2    | 23070  | 37 | 6  | 37447821  | 37447821  | Frame_Shift_Del | DEL | G        | -   | 9   | 955  | c.2408delG                                          | c.(2407-2409)TGGfs    | p.W803fs      |
| Pat_73 | Pre-Treatment   | MDFI      | 4188   | 37 | 6  | 41621169  | 41621171  | In_Frame_Del    | DEL | CTG      | -   | 21  | 773  | c.597_599delCTGc.(595-600)CTCTGC>CTC                | p.C204del             |               |
| Pat_73 | Pre-Treatment   | TTBK1     | 84630  | 37 | 6  | 43250681  | 43250683  | In_Frame_Del    | DEL | GAG      | -   | 11  | 210  | .2203_2205delGAc.                                   | c.(2203-2205)GAGdel   | p.E740del     |
| Pat_73 | Pre-Treatment   | TNFRSF21  | 27242  | 37 | 6  | 47200623  | 47200624  | Frame_Shift_Del | DEL | CA       | -   | 8   | 1338 | c.1845_1846delTC                                    | c.(1843-1848)ATTGAAfs | p.I615fs      |
| Pat_73 | Pre-Treatment   | KCNB2     | 9312   | 37 | 8  | 73480397  | 73480397  | Frame_Shift_Del | DEL | A        | -   | 8   | 393  | c.428delA                                           | c.(427-429)CAAfs      | p.Q143fs      |
| Pat_73 | Pre-Treatment   | C9orf43   | 257169 | 37 | 9  | 116187646 | 116187648 | In_Frame_Del    | DEL | GCA      | -   | 7   | 154  | c.888_890delGCAc.(886-891)CGGCAG>CGC                | p.Q304del             |               |
| Pat_73 | Pre-Treatment   | TNC       | 3371   | 37 | 9  | 117848734 | 117848735 | Frame_Shift_Del | DEL | CA       | -   | 8   | 704  | c.1275_1276delTC                                    | c.(1273-1278)TGTGATfs | p.C425fs      |
| Pat_73 | Post-Resistance | DPH2      | 1802   | 37 | 1  | 44436809  | 44436809  | Frame_Shift_Del | DEL | C        | -   | 2   | 4    | c.432delC                                           | c.(430-432)GACfs      | p.D144fs      |
| Pat_73 | Post-Resistance | LOC653544 | 653544 | 37 | 10 | 135491036 | 135491036 | Frame_Shift_Del | DEL | G        | -   | 14  | 238  | c.647delG                                           | c.(646-648)AGGfs      | p.R216fs      |
| Pat_73 | Post-Resistance | PRB2      | 653247 | 37 | 12 | 11546506  | 11546508  | In_Frame_Del    | DEL | TTG      | -   | 8   | 425  | c.504_506delCAAc.(502-507)AACAAAG>AAG               | p.N168del             |               |
| Pat_73 | Post-Resistance | LRP1      | 4035   | 37 | 12 | 57605740  | 57605742  | In_Frame_Del    | DEL | TGC      | -   | 8   | 150  | I3289_13291delTc.(13288-13293)TTGCTG>T              | 4430_4431LL>          |               |
| Pat_73 | Post-Resistance | C14orf4   | 64207  | 37 | 14 | 77493648  | 77493650  | In_Frame_Del    | DEL | GCG      | -   | 4   | 9    | c.486_488delCGCc.(484-489)GCCGCT>GCTb.162_163AA>)   |                       |               |
| Pat_73 | Post-Resistance | DYX1C1    | 161582 | 37 | 15 | 55759242  | 55759242  | Frame_Shift_Del | DEL | T        | -   | 2   | 4    | c.523delA                                           | c.(523-525)ATTfs      | p.I175fs      |
| Pat_73 | Post-Resistance | CHRNA3    | 1136   | 37 | 15 | 78913068  | 78913070  | In_Frame_Del    | DEL | CAG      | -   | 6   | 3    | c.67_69delCTG                                       | c.(67-69)CTGdel       | p.L23del      |
| Pat_73 | Post-Resistance | CCDC144B  | 284047 | 37 | 17 | 18498059  | 18498060  | Splice_Site     | INS | -        | A   | 7   | 41   | c.1867_splice                                       | c.e9-1                | p.E623_splice |
| Pat_73 | Post-Resistance | ITPRIPL1  | 150771 | 37 | 2  | 96992793  | 96992795  | In_Frame_Del    | DEL | GAG      | -   | 9   | 78   | c.424_426delGAG                                     | c.(424-426)GAGdel     | p.E147del     |
| Pat_73 | Post-Resistance | MFF       | 56947  | 37 | 2  | 228197214 | 228197214 | Frame_Shift_Del | DEL | G        | -   | 7   | 775  | c.339delG                                           | c.(337-339)CTGfs      | p.L113fs      |
| Pat_73 | Post-Resistance | MKL1      | 57591  | 37 | 22 | 40816887  | 40816889  | In_Frame_Del    | DEL | TGC      | -   | 7   | 122  | c.843_845delGCAc.(841-846)CAGCAC>CAC                | p.Q281del             |               |
| Pat_73 | Post-Resistance | C22orf26  | 55267  | 37 | 22 | 46449890  | 46449890  | Frame_Shift_Del | DEL | G        | -   | 4   | 4    | c.84delC                                            | c.(82-84)CCCfs        | p.P28fs       |
| Pat_73 | Post-Resistance | LNP1      | 348801 | 37 | 3  | 100148586 | 100148588 | In_Frame_Del    | DEL | GAT      | -   | 7   | 480  | c.13_15delGAT                                       | c.(13-15)GATdel       | p.D10del      |
| Pat_73 | Post-Resistance | ACTL6A    | 86     | 37 | 3  | 179301188 | 179301188 | Frame_Shift_Del | DEL | G        | -   | 107 | 129  | c.1074delG                                          | c.(1072-1074)CAGfs    | p.Q358fs      |
| Pat_73 | Post-Resistance | CRIPAK    | 285464 | 37 | 4  | 1388441   | 1388442   | Frame_Shift_Ins | INS | -        | CG  | 25  | 1243 | c.142_143insCG                                      | c.(142-144)ATGfs      | p.M48fs       |
| Pat_73 | Post-Resistance | FOXC1     | 2296   | 37 | 6  | 1612017   | 1612018   | In_Frame_Ins    | INS | -        | CGG | 4   | 6    | .1337_1338insCGIc.(1336-1338)CAC>CACGGp.456_457insC |                       |               |
| Pat_73 | Post-Resistance | RIOK1     | 83732  | 37 | 6  | 7393450   | 7393452   | In_Frame_Del    | DEL | GAC      | -   | 8   | 225  | c.190_192delGAC                                     | c.(190-192)GACdel     | p.D69del      |
| Pat_73 | Post-Resistance | MDFI      | 4188   | 37 | 6  | 41621169  | 41621171  | In_Frame_Del    | DEL | CTG      | -   | 7   | 337  | c.597_599delCTGc.(595-600)CTCTGC>CTC                | p.C204del             |               |
| Pat_74 | Pre-Treatment   | ZBTB40    | 9923   | 37 | 1  | 22838561  | 22838563  | In_Frame_Del    | DEL | AAG      | -   | 9   | 77   | .2395_2397delAAc.                                   | c.(2395-2397)AAGdel   | p.K803del     |
| Pat_74 | Pre-Treatment   | PHACTR4   | 65979  | 37 | 1  | 28785730  | 28785730  | Frame_Shift_Del | DEL | A        | -   | 7   | 96   | c.151delA                                           | c.(151-153)AAAfs      | p.K51fs       |
| Pat_74 | Pre-Treatment   | HFE2      | 148738 | 37 | 1  | 145415369 | 145415371 | In_Frame_Del    | DEL | GAG      | -   | 9   | 86   | c.188_190delGAGc.(187-192)CGAGGA>CGA                | p.G69del              |               |
| Pat_74 | Pre-Treatment   | DARC      | 2532   | 37 | 1  | 159176167 | 159176167 | Frame_Shift_Del | DEL | G        | -   | 7   | 732  | c.938delG                                           | c.(937-939)CGCfs      | p.R313fs      |
| Pat_74 | Pre-Treatment   | RNF141    | 50862  | 37 | 11 | 10536563  | 10536563  | Frame_Shift_Del | DEL | G        | -   | 7   | 300  | c.593delC                                           | c.(592-594)GCAfs      | p.A198fs      |
| Pat_74 | Pre-Treatment   | RNF121    | 55298  | 37 | 11 | 71705825  | 71705825  | Frame_Shift_Del | DEL | G        | -   | 7   | 439  | c.688delG                                           | c.(688-690)GGGfs      | p.G230fs      |
| Pat_74 | Pre-Treatment   | PRB2      | 653247 | 37 | 12 | 11546506  | 11546508  | In_Frame_Del    | DEL | TTG      | -   | 8   | 355  | c.504_506delCAAc.(502-507)AACAAAG>AAG               | p.N168del             |               |
| Pat_74 | Pre-Treatment   | C15orf24  | 56851  | 37 | 15 | 34393991  | 34393993  | In_Frame_Del    | DEL | AGC      | -   | 7   | 451  | c.48_50delGCT                                       | c.(46-51)CTGCTA>CTA   | p.16_17LL>L   |
| Pat_74 | Pre-Treatment   | CHD2      | 1106   | 37 | 15 | 93480819  | 93480819  | Frame_Shift_Del | DEL | A        | -   | 7   | 179  | c.515delA                                           | c.(514-516)CAAfs      | p.Q172fs      |
| Pat_74 | Pre-Treatment   | CXXC1     | 30827  | 37 | 18 | 47812275  | 47812277  | In_Frame_Del    | DEL | CTG      | -   | 7   | 75   | c.481_483delCAG                                     | c.(481-483)CAGdel     | p.Q161del     |
| Pat_74 | Pre-Treatment   | LRP2      | 4036   | 37 | 2  | 170009348 | 170009349 | Frame_Shift_Del | DEL | AC       | -   | 7   | 646  | 12421_12422delG                                     | c.(12421-12423)GTAfs  | p.V4141fs     |
| Pat_74 | Pre-Treatment   | C20orf85  | 128602 | 37 | 20 | 56735727  | 56735727  | Frame_Shift_Del | DEL | C        | -   | 8   | 112  | c.263delC                                           | c.(262-264)TCCfs      | p.S88fs       |
| Pat_74 | Pre-Treatment   | PLAC4     | 191585 | 37 | 21 | 42551313  | 42551313  | Frame_Shift_Del | DEL | C        | -   | 7   | 39   | c.243delG                                           | c.(241-243)TGGfs      | p.W81fs       |
| Pat_74 | Pre-Treatment   | TRIOBP    | 11078  | 37 | 22 | 38120029  | 38120031  | In_Frame_Del    | DEL | CCT      | -   | 18  | 261  | .1466_1468delCCc.(1465-1470)GCCTCC>GC               | p.S491del             |               |
| Pat_74 | Pre-Treatment   | CTNNB1    | 1499   | 37 | 3  | 41266134  | 41266136  | In_Frame_Del    | DEL | CTT      | -   | 35  | 58   | c.131_133delCTT                                     | c.(130-135)CCTTCT>CCT | p.S45del      |
| Pat_74 | Pre-Treatment   | CRIPAK    | 285464 | 37 | 4  | 1388900   | 1388901   | Frame_Shift_Del | DEL | CA       | -   | 9   | 428  | c.601_602delCA                                      | c.(601-603)CACfs      | p.H201fs      |
| Pat_74 | Pre-Treatment   | TMEM154   | 201799 | 37 | 4  | 153562130 | 153562137 | Frame_Shift_Del | DEL | AAAGTCGG | -   | 8   | 98   | *9_486delCCGACc.(478-486)GCCGACTTfs                 | p.A160fs              |               |

|        |                 |            |        |    |    |           |           |                 |     |          |   |     |      |                                      |                        |               |
|--------|-----------------|------------|--------|----|----|-----------|-----------|-----------------|-----|----------|---|-----|------|--------------------------------------|------------------------|---------------|
| Pat_74 | Pre-Treatment   | PHF3       | 23469  | 37 | 6  | 64394097  | 64394097  | Frame_Shift_Del | DEL | A        | - | 9   | 672  | c.474delA                            | c.(472-474)ACAfs       | p.T158fs      |
| Pat_74 | Pre-Treatment   | CDCA7L     | 55536  | 37 | 7  | 21956486  | 21956486  | Frame_Shift_Del | DEL | A        | - | 7   | 331  | c.51delT                             | c.(49-51)TTTfs         | p.F17fs       |
| Pat_74 | Pre-Treatment   | MUC17      | 140453 | 37 | 7  | 100684131 | 100684133 | In_Frame_Del    | DEL | CTC      | - | 29  | 830  | .9434_9436delCTT                     | c.(9433-9438)TCTCCT>TC | p.P3146del    |
| Pat_74 | Pre-Treatment   | CSGALNACT1 | 55790  | 37 | 8  | 19315974  | 19315974  | Frame_Shift_Del | DEL | T        | - | 7   | 1461 | c.814delA                            | c.(814-816)AGGfs       | p.R272fs      |
| Pat_74 | Pre-Treatment   | MYST3      | 7994   | 37 | 8  | 41798420  | 41798422  | In_Frame_Del    | DEL | CTC      | - | 7   | 253  | .2977_2979delGAT                     | c.(2977-2979)GAGdel    | p.E993del     |
| Pat_74 | Post-Resistance | ZBTB40     | 9923   | 37 | 1  | 22838561  | 22838563  | In_Frame_Del    | DEL | AAG      | - | 8   | 59   | .2395_2397delAAAT                    | c.(2395-2397)AAGdel    | p.K803del     |
| Pat_74 | Post-Resistance | XPOT       | 11260  | 37 | 12 | 64812755  | 64812755  | Frame_Shift_Del | DEL | T        | - | 8   | 100  | c.370delT                            | c.(370-372)TTTfs       | p.F124fs      |
| Pat_74 | Post-Resistance | RTN4       | 57142  | 37 | 2  | 55253746  | 55253746  | Frame_Shift_Del | DEL | T        | - | 7   | 64   | c.1489delA                           | c.(1489-1491)ATAfs     | p.I497fs      |
| Pat_74 | Post-Resistance | RNF160     | 26046  | 37 | 21 | 30339206  | 30339206  | Frame_Shift_Del | DEL | T        | - | 7   | 44   | c.1745delA                           | c.(1744-1746)AATfs     | p.N582fs      |
| Pat_74 | Post-Resistance | PLAC4      | 191585 | 37 | 21 | 42551313  | 42551313  | Frame_Shift_Del | DEL | C        | - | 5   | 8    | c.243delG                            | c.(241-243)TGGfs       | p.W81fs       |
| Pat_74 | Post-Resistance | MYH9       | 4627   | 37 | 22 | 36689419  | 36689421  | In_Frame_Del    | DEL | CCT      | - | 7   | 62   | .4049_4051delIAG                     | c.(4048-4053)GAGGCC>GC | p.E1350del    |
| Pat_74 | Post-Resistance | TRIOBP     | 11078  | 37 | 22 | 38120029  | 38120031  | In_Frame_Del    | DEL | CCT      | - | 14  | 186  | .1466_1468delCC                      | c.(1465-1470)GCCTCC>GC | p.S491del     |
| Pat_74 | Post-Resistance | CTNNB1     | 1499   | 37 | 3  | 41266134  | 41266136  | In_Frame_Del    | DEL | CTT      | - | 26  | 36   | c.131_133delCTT                      | c.(130-135)CCTTCT>CCT  | p.S45del      |
| Pat_74 | Post-Resistance | TMEM154    | 201799 | 37 | 4  | 153562130 | 153562137 | Frame_Shift_Del | DEL | AAAGTCGG | - | 12  | 60   | .79_486delCCGAC                      | c.(478-486)GCCGACTTTfs | p.A160fs      |
| Pat_74 | Post-Resistance | MPP6       | 51678  | 37 | 7  | 24705665  | 24705666  | Frame_Shift_Ins | INS | -        | A | 7   | 168  | c.909_910insA                        | c.(907-912)AGCAAfs     | p.S303fs      |
| Pat_74 | Post-Resistance | MUC17      | 140453 | 37 | 7  | 100684131 | 100684133 | In_Frame_Del    | DEL | CTC      | - | 9   | 487  | .9434_9436delCTT                     | c.(9433-9438)TCTCCT>TC | p.P3146del    |
| Pat_76 | Pre-Treatment   | LRRC47     | 57470  | 37 | 1  | 3712520   | 3712520   | Frame_Shift_Del | DEL | C        | - | 4   | 8    | c.521delG                            | c.(520-522)CGCfs       | p.R174fs      |
| Pat_76 | Pre-Treatment   | DNAJC11    | 55735  | 37 | 1  | 6727803   | 6727804   | Frame_Shift_Del | DEL | TC       | - | 9   | 81   | c.343_344delGA                       | c.(343-345)GAAfs       | p.E115fs      |
| Pat_76 | Pre-Treatment   | HFE2       | 148738 | 37 | 1  | 145415369 | 145415371 | In_Frame_Del    | DEL | GAG      | - | 7   | 230  | c.188_190delGAG                      | c.(187-192)CGAGGA>CGA  | p.G69del      |
| Pat_76 | Pre-Treatment   | POLR3C     | 10623  | 37 | 1  | 145608575 | 145608575 | Frame_Shift_Del | DEL | G        | - | 7   | 444  | c.232delC                            | c.(232-234)CAGfs       | p.Q78fs       |
| Pat_76 | Pre-Treatment   | PEAR1      | 375033 | 37 | 1  | 156877507 | 156877507 | Frame_Shift_Del | DEL | C        | - | 8   | 511  | c.750delC                            | c.(748-750)TGCfs       | p.C250fs      |
| Pat_76 | Pre-Treatment   | PVRL4      | 81607  | 37 | 1  | 161044104 | 161044106 | In_Frame_Del    | DEL | CCA      | - | 8   | 373  | .1058_1060delITG                     | c.(1057-1062)GTGGGT>GC | p.V353del     |
| Pat_76 | Pre-Treatment   | PCP4L1     | 654790 | 37 | 1  | 161254154 | 161254156 | In_Frame_Del    | DEL | GGA      | - | 10  | 316  | c.90_92delGGA                        | c.(88-93)GCGGAG>GCG    | p.E35del      |
| Pat_76 | Pre-Treatment   | POU2F1     | 5451   | 37 | 1  | 167385016 | 167385018 | In_Frame_Del    | DEL | CCA      | - | 12  | 784  | .2201_2203delCC                      | c.(2200-2205)TCCACC>TC | p.T738del     |
| Pat_76 | Pre-Treatment   | SCYL3      | 57147  | 37 | 1  | 169825006 | 169825006 | Frame_Shift_Del | DEL | A        | - | 113 | 75   | c.1405delT                           | c.(1405-1407)TCTfs     | p.S469fs      |
| Pat_76 | Pre-Treatment   | KLHL20     | 27252  | 37 | 1  | 173744859 | 173744859 | Frame_Shift_Del | DEL | C        | - | 8   | 317  | c.1516delC                           | c.(1516-1518)CAGfs     | p.Q506fs      |
| Pat_76 | Pre-Treatment   | PAPPA2     | 60676  | 37 | 1  | 176809369 | 176809369 | Frame_Shift_Del | DEL | G        | - | 7   | 615  | c.5263delG                           | c.(5263-5265)GGGfs     | p.G1755fs     |
| Pat_76 | Pre-Treatment   | GPR25      | 2848   | 37 | 1  | 200842776 | 200842778 | In_Frame_Del    | DEL | TGC      | - | 7   | 36   | c.611_613delITGC                     | c.(610-615)TTGCTG>TTG  | c.204_205LL>L |
| Pat_76 | Pre-Treatment   | PPP2R5A    | 5525   | 37 | 1  | 212534111 | 212534111 | Frame_Shift_Del | DEL | A        | - | 8   | 57   | c.1460delA                           | c.(1459-1461)TAAfs     | p.*487fs      |
| Pat_76 | Pre-Treatment   | PANK1      | 53354  | 37 | 10 | 91359120  | 91359120  | Frame_Shift_Del | DEL | T        | - | 7   | 536  | c.1199delA                           | c.(1198-1200)AAGfs     | p.K400fs      |
| Pat_76 | Pre-Treatment   | MKI67      | 4288   | 37 | 10 | 129905725 | 129905725 | Frame_Shift_Del | DEL | T        | - | 7   | 289  | c.4379delA                           | c.(4378-4380)AAGfs     | p.K1460fs     |
| Pat_76 | Pre-Treatment   | SYT8       | 90019  | 37 | 11 | 1858552   | 1858552   | Frame_Shift_Del | DEL | C        | - | 2   | 4    | c.1097delC                           | c.(1096-1098)GCCfs     | p.A366fs      |
| Pat_76 | Pre-Treatment   | ACCSL      | 390110 | 37 | 11 | 44074222  | 44074222  | Frame_Shift_Del | DEL | G        | - | 7   | 624  | c.783delG                            | c.(781-783)CTGfs       | p.L261fs      |
| Pat_76 | Pre-Treatment   | RAD9A      | 5883   | 37 | 11 | 67164978  | 67164978  | Frame_Shift_Del | DEL | C        | - | 7   | 108  | c.1124delC                           | c.(1123-1125)TCCfs     | p.S375fs      |
| Pat_76 | Pre-Treatment   | TCIRG1     | 10312  | 37 | 11 | 67811611  | 67811612  | Frame_Shift_Del | DEL | AC       | - | 4   | 3    | c.820_821delIAC                      | c.(820-822)ACAfs       | p.T274fs      |
| Pat_76 | Pre-Treatment   | CCDC15     | 80071  | 37 | 11 | 124857232 | 124857252 | In_Frame_Del    | DEL | GAAGGCC  | - | 28  | 142  | TGAGCCAGAAGICTGAGCCAGAAGGCCACEPEGQAI | p.I371c                |               |
| Pat_76 | Pre-Treatment   | SFRS8      | 6433   | 37 | 12 | 132281734 | 132281736 | In_Frame_Del    | DEL | AGA      | - | 12  | 545  | .2546_2548delIAG                     | c.(2545-2550)GAGAAG>GA | p.K853del     |
| Pat_76 | Pre-Treatment   | IPO4       | 79711  | 37 | 14 | 24656873  | 24656874  | Frame_Shift_Del | DEL | CT       | - | 7   | 197  | c.407_408delIAG                      | c.(406-408)GAGfs       | p.E136fs      |
| Pat_76 | Pre-Treatment   | TMED10     | 10972  | 37 | 14 | 75614382  | 75614383  | Frame_Shift_Del | DEL | CG       | - | 7   | 1036 | c.395_396delCG                       | c.(394-396)GCGfs       | p.A132fs      |
| Pat_76 | Pre-Treatment   | DMXL2      | 23312  | 37 | 15 | 51780185  | 51780185  | Frame_Shift_Del | DEL | A        | - | 7   | 661  | c.5183delT                           | c.(5182-5184)TTCfs     | p.F1728fs     |
| Pat_76 | Pre-Treatment   | MCTP2      | 55784  | 37 | 15 | 94841579  | 94841579  | Frame_Shift_Del | DEL | A        | - | 7   | 514  | c.85delA                             | c.(85-87)AAAfs         | p.K29fs       |
| Pat_76 | Pre-Treatment   | IGFALS     | 3483   | 37 | 16 | 1841122   | 1841123   | Frame_Shift_Ins | INS | -        | C | 4   | 7    | c.1296_1297insG                      | c.(1294-1299)GGGCTGfs  | p.G432fs      |
| Pat_76 | Pre-Treatment   | ABCA3      | 21     | 37 | 16 | 2373583   | 2373583   | Frame_Shift_Del | DEL | A        | - | 8   | 627  | c.554delT                            | c.(553-555)TTCfs       | p.F185fs      |
| Pat_76 | Pre-Treatment   | KIF1C      | 10749  | 37 | 17 | 4906945   | 4906945   | Frame_Shift_Del | DEL | G        | - | 20  | 34   | c.759delG                            | c.(757-759)GAGfs       | p.E253fs      |
| Pat_76 | Pre-Treatment   | MYOCD      | 93649  | 37 | 17 | 12647692  | 12647694  | In_Frame_Del    | DEL | CAG      | - | 7   | 20   | c.910_912delCAG                      | c.(910-912)CAGdel      | p.Q310del     |
| Pat_76 | Pre-Treatment   | TOP3A      | 7156   | 37 | 17 | 18188461  | 18188462  | Frame_Shift_Del | DEL | TG       | - | 7   | 271  | c.1871_1872delCA                     | c.(1870-1872)GCAfs     | p.A624fs      |
| Pat_76 | Pre-Treatment   | ADAM11     | 4185   | 37 | 17 | 42851673  | 42851673  | Frame_Shift_Del | DEL | T        | - | 4   | 6    | c.1003delT                           | c.(1003-1005)TTCfs     | p.F335fs      |

|        |                 |           |        |    |    |           |           |                        |     |     |         |     |      |                                   |                         |             |
|--------|-----------------|-----------|--------|----|----|-----------|-----------|------------------------|-----|-----|---------|-----|------|-----------------------------------|-------------------------|-------------|
| Pat_76 | Pre-Treatment   | ABCA6     | 23460  | 37 | 17 | 67125767  | 67125767  | Frame_Shift_Del        | DEL | A   | -       | 8   | 117  | c.917delT                         | c.(916-918)TTAfs        | p.L306fs    |
| Pat_76 | Pre-Treatment   | GRIN2C    | 2905   | 37 | 17 | 72839130  | 72839131  | In_Frame_Ins           | INS | -   | CTCCGGG | 2   | 4    | 5_3146insCCCCG5-3147)CTG>CCCCCGGA | 048_1049insP            |             |
| Pat_76 | Pre-Treatment   | DHPS      | 1725   | 37 | 19 | 12791042  | 12791042  | Frame_Shift_Del        | DEL | C   | -       | 8   | 472  | c.305delG                         | c.(304-306)GGAfs        | p.G102fs    |
| Pat_76 | Pre-Treatment   | OR10H1    | 26539  | 37 | 19 | 15918794  | 15918795  | Frame_Shift_Del        | DEL | AG  | -       | 115 | 137  | c.53_54delCT                      | c.(52-54)TCTfs          | p.S18fs     |
| Pat_76 | Pre-Treatment   | PSG9      | 5678   | 37 | 19 | 43772052  | 43772053  | Frame_Shift_Ins        | INS | -   | C       | 213 | 362  | c.313_314insG                     | c.(313-315)GCAfs        | p.A105fs    |
| Pat_76 | Pre-Treatment   | LILRB5    | 10990  | 37 | 19 | 54760181  | 54760181  | Frame_Shift_Del        | DEL | A   | -       | 48  | 62   | c.380delT                         | c.(379-381)TTAfs        | p.L127fs    |
| Pat_76 | Pre-Treatment   | RAB11FIP5 | 26056  | 37 | 2  | 73315337  | 73315339  | In_Frame_Del           | DEL | TGG | -       | 7   | 216  | .1407_1409delCC.                  | (1405-1410)CACCAA>CA    | p.H469del   |
| Pat_76 | Pre-Treatment   | RBM45     | 129831 | 37 | 2  | 178988920 | 178988920 | Frame_Shift_Del        | DEL | A   | -       | 8   | 105  | c.1135delA                        | c.(1135-1137)AAAfs      | p.K379fs    |
| Pat_76 | Pre-Treatment   | ABI2      | 10152  | 37 | 2  | 204193211 | 204193213 | Translation_Start_Site | DEL | GAG | -       | 3   | 3    | c.-26_-24delGAG                   | .(-28--22)ATGAGGA>ATGA  |             |
| Pat_76 | Pre-Treatment   | NINL      | 22981  | 37 | 20 | 25442165  | 25442166  | Frame_Shift_Del        | DEL | TG  | -       | 8   | 167  | c.3688_3689delCA                  | c.(3688-3690)CAAfs      | p.Q1230fs   |
| Pat_76 | Pre-Treatment   | SYCP2     | 10388  | 37 | 20 | 58467047  | 58467047  | Frame_Shift_Del        | DEL | T   | -       | 8   | 95   | c.2362delA                        | c.(2362-2364)ATGfs      | p.M788fs    |
| Pat_76 | Pre-Treatment   | SFRS15    | 57466  | 37 | 21 | 33043971  | 33043972  | Frame_Shift_Del        | DEL | TC  | -       | 9   | 206  | c.3184_3185delGA                  | c.(3184-3186)GATfs      | p.D1062fs   |
| Pat_76 | Pre-Treatment   | HMGXB4    | 10042  | 37 | 22 | 35661543  | 35661544  | Frame_Shift_Ins        | INS | -   | A       | 8   | 47   | c.1162_1163insA                   | c.(1162-1164)GAAfs      | p.E388fs    |
| Pat_76 | Pre-Treatment   | COLQ      | 8292   | 37 | 3  | 15518644  | 15518645  | Frame_Shift_Del        | DEL | CA  | -       | 4   | 5    | c.453_454delTG                    | c.(451-456)CCTGAAfs     | p.P151fs    |
| Pat_76 | Pre-Treatment   | KIAA2018  | 205717 | 37 | 3  | 113380090 | 113380090 | Frame_Shift_Del        | DEL | T   | -       | 8   | 133  | c.439delA                         | c.(439-441)ATTfs        | p.I147fs    |
| Pat_76 | Pre-Treatment   | GPR156    | 165829 | 37 | 3  | 119885960 | 119885960 | Frame_Shift_Del        | DEL | C   | -       | 8   | 1157 | c.2364delG                        | c.(2362-2364)GGGfs      | p.G788fs    |
| Pat_76 | Pre-Treatment   | DIRC2     | 84925  | 37 | 3  | 122598119 | 122598119 | Frame_Shift_Del        | DEL | G   | -       | 9   | 666  | c.1331delG                        | c.(1330-1332)TGGfs      | p.W444fs    |
| Pat_76 | Pre-Treatment   | FAM194A   | 131831 | 37 | 3  | 150421591 | 150421593 | In_Frame_Del           | DEL | TCC | -       | 7   | 29   | c.93_95delGGA                     | c.(91-96)GAGGAA>GAA     | p.31_32EE>E |
| Pat_76 | Pre-Treatment   | PHC3      | 80012  | 37 | 3  | 169896635 | 169896637 | In_Frame_Del           | DEL | TGG | -       | 13  | 918  | c.68_70delCCA                     | c.(67-72)ACCATC>ATC     | p.T23del    |
| Pat_76 | Pre-Treatment   | EMCN      | 51705  | 37 | 4  | 101439033 | 101439033 | Frame_Shift_Del        | DEL | G   | -       | 7   | 486  | c.39delC                          | c.(37-39)CCCfs          | p.P13fs     |
| Pat_76 | Pre-Treatment   | RRH       | 10692  | 37 | 4  | 110756541 | 110756541 | Frame_Shift_Del        | DEL | T   | -       | 7   | 117  | c.317delT                         | c.(316-318)ATTfs        | p.I106fs    |
| Pat_76 | Pre-Treatment   | RBM27     | 54439  | 37 | 5  | 145641118 | 145641118 | Frame_Shift_Del        | DEL | A   | -       | 8   | 137  | c.1939delA                        | c.(1939-1941)ACCfs      | p.T647fs    |
| Pat_76 | Pre-Treatment   | PPP2R2B   | 5521   | 37 | 5  | 145969651 | 145969652 | Frame_Shift_Ins        | INS | -   | C       | 8   | 387  | c.1190_1191insG                   | c.(1189-1191)GGCfs      | p.G397fs    |
| Pat_76 | Pre-Treatment   | KIF13A    | 63971  | 37 | 6  | 17764958  | 17764958  | Frame_Shift_Del        | DEL | A   | -       | 4   | 8    | c.4801delT                        | c.(4801-4803)TCCfs      | p.S1601fs   |
| Pat_76 | Pre-Treatment   | HLA-F     | 3134   | 37 | 6  | 29694802  | 29694803  | Frame_Shift_Ins        | INS | -   | T       | 7   | 426  | c.1179_1180insT                   | c.(1177-1182)TTGTTTfs   | p.L393fs    |
| Pat_76 | Pre-Treatment   | CCHCR1    | 54535  | 37 | 6  | 31122281  | 31122281  | Frame_Shift_Del        | DEL | G   | -       | 7   | 951  | c.526delC                         | c.(526-528)CAAfs        | p.Q176fs    |
| Pat_76 | Pre-Treatment   | HSPA1L    | 3305   | 37 | 6  | 31778150  | 31778151  | Frame_Shift_Del        | DEL | GG  | -       | 7   | 558  | c.1599_1600delCC                  | c.(1597-1602)GTCCAGfs   | p.V533fs    |
| Pat_76 | Pre-Treatment   | RNF5      | 6048   | 37 | 6  | 32147672  | 32147672  | Frame_Shift_Del        | DEL | C   | -       | 7   | 397  | c.291delC                         | c.(289-291)CGCfs        | p.R97fs     |
| Pat_76 | Pre-Treatment   | PKHD1     | 5314   | 37 | 6  | 51523814  | 51523815  | Frame_Shift_Del        | DEL | TC  | -       | 7   | 294  | .11109_11110delG                  | c.(11107-11112)GAGAATfs | p.E3703fs   |
| Pat_76 | Pre-Treatment   | ICK       | 22858  | 37 | 6  | 52883129  | 52883129  | Frame_Shift_Del        | DEL | T   | -       | 7   | 455  | c.662delA                         | c.(661-663)AAGfs        | p.K221fs    |
| Pat_76 | Pre-Treatment   | GLCC1     | 113263 | 37 | 7  | 8126097   | 8126099   | In_Frame_Del           | DEL | CAG | -       | 9   | 683  | .1573_1575delCA                   | c.(1573-1575)CAGdel     | p.Q528del   |
| Pat_76 | Pre-Treatment   | POU6F2    | 11281  | 37 | 7  | 39379288  | 39379290  | In_Frame_Del           | DEL | CAG | -       | 7   | 105  | c.559_561delCAG                   | c.(559-561)CAGdel       | p.Q196del   |
| Pat_76 | Pre-Treatment   | LIMK1     | 3984   | 37 | 7  | 73535323  | 73535323  | Frame_Shift_Del        | DEL | C   | -       | 7   | 768  | c.1725delC                        | c.(1723-1725)TGCfs      | p.C575fs    |
| Pat_76 | Pre-Treatment   | GIGYF1    | 64599  | 37 | 7  | 100280978 | 100280980 | In_Frame_Del           | DEL | CTG | -       | 7   | 306  | .2140_2142delCA                   | c.(2140-2142)CAGdel     | p.Q714del   |
| Pat_76 | Pre-Treatment   | EPHB4     | 2050   | 37 | 7  | 100410591 | 100410591 | Frame_Shift_Del        | DEL | C   | -       | 7   | 514  | c.1896delG                        | c.(1894-1896)GGGfs      | p.G632fs    |
| Pat_76 | Pre-Treatment   | PPP1R3A   | 5506   | 37 | 7  | 113519082 | 113519082 | Frame_Shift_Del        | DEL | T   | -       | 7   | 1411 | c.2065delA                        | c.(2065-2067)AGAFs      | p.R689fs    |
| Pat_76 | Pre-Treatment   | LUC7L2    | 51631  | 37 | 7  | 139094365 | 139094366 | Frame_Shift_Del        | DEL | AG  | -       | 15  | 163  | c.744_745delAG                    | c.(742-747)GAAGAGfs     | p.E248fs    |
| Pat_76 | Pre-Treatment   | OR9A4     | 130075 | 37 | 7  | 141619203 | 141619203 | Frame_Shift_Del        | DEL | T   | -       | 10  | 492  | c.528delT                         | c.(526-528)AATfs        | p.N176fs    |
| Pat_76 | Pre-Treatment   | CNTNAP2   | 26047  | 37 | 7  | 146829358 | 146829358 | Frame_Shift_Del        | DEL | G   | -       | 8   | 410  | c.1105delG                        | c.(1105-1107)GTGfs      | p.V369fs    |
| Pat_76 | Pre-Treatment   | SSPO      | 23145  | 37 | 7  | 149501110 | 149501110 | Frame_Shift_Del        | DEL | G   | -       | 4   | 9    | c.8246delG                        | c.(8245-8247)TGGfs      | p.W2749fs   |
| Pat_76 | Pre-Treatment   | ANXA13    | 312    | 37 | 8  | 124707761 | 124707762 | Frame_Shift_Ins        | INS | -   | T       | 7   | 468  | c.451_452insA                     | c.(451-453)ATCfs        | p.I151fs    |
| Pat_76 | Pre-Treatment   | FLJ43860  | 389690 | 37 | 8  | 142505021 | 142505022 | Frame_Shift_Ins        | INS | -   | TGTG    | 10  | 27   | .424_425insCAC                    | c.(424-426)AAGfs        | p.K142fs    |
| Pat_76 | Pre-Treatment   | OFD1      | 8481   | 37 | X  | 13786842  | 13786842  | Frame_Shift_Del        | DEL | A   | -       | 7   | 519  | c.2934delA                        | c.(2932-2934)TCAsfs     | p.S978fs    |
| Pat_76 | Pre-Treatment   | FGD1      | 2245   | 37 | X  | 54497147  | 54497148  | Frame_Shift_Ins        | INS | -   | G       | 3   | 4    | c.527_528insC                     | c.(526-528)CCAsfs       | p.P176fs    |
| Pat_76 | Pre-Treatment   | NXF5      | 55998  | 37 | X  | 101097764 | 101097764 | Frame_Shift_Del        | DEL | T   | -       | 8   | 374  | c.1delA                           | c.(1-3)ATGfs            | p.M1fs      |
| Pat_76 | Pre-Treatment   | CXorf66   | 347487 | 37 | X  | 139038599 | 139038599 | Frame_Shift_Del        | DEL | T   | -       | 9   | 302  | c.542delA                         | c.(541-543)AAGfs        | p.K181fs    |
| Pat_76 | Post-Resistance | PVRL4     | 81607  | 37 | 1  | 161044057 | 161044059 | In_Frame_Del           | DEL | CAC | -       | 7   | 256  | .1105_1107delGT                   | c.(1105-1107)GTGdel     | p.V369del   |

|        |                 |          |        |    |    |           |           |                 |     |           |   |    |     |                                           |                     |           |
|--------|-----------------|----------|--------|----|----|-----------|-----------|-----------------|-----|-----------|---|----|-----|-------------------------------------------|---------------------|-----------|
| Pat_76 | Post-Resistance | SCYL3    | 57147  | 37 | 1  | 169825006 | 169825006 | Frame_Shift_Del | DEL | A         | - | 38 | 16  | c.1405delT                                | c.(1405-1407)TCTfs  | p.S469fs  |
| Pat_76 | Post-Resistance | CCDC15   | 80071  | 37 | 11 | 124857232 | 124857252 | In_Frame_Del    | DEL | \GAAGGCC/ | - | 11 | 52  | TTGAGCCAGAAGICTGAGCCAGAAGGCCACEPEGQAI371c |                     |           |
| Pat_76 | Post-Resistance | SFRS8    | 6433   | 37 | 12 | 132281734 | 132281736 | In_Frame_Del    | DEL | AGA       | - | 10 | 252 | .2546_2548delAG,(2545-2550)GAGAAG>GA      |                     | p.K853del |
| Pat_76 | Post-Resistance | RAP1GAP2 | 23108  | 37 | 17 | 2894618   | 2894618   | Frame_Shift_Del | DEL | A         | - | 2  | 4   | c.841delA                                 | c.(841-843)AATfs    | p.N281fs  |
| Pat_76 | Post-Resistance | OR10H1   | 26539  | 37 | 19 | 15918794  | 15918795  | Frame_Shift_Del | DEL | AG        | - | 62 | 187 | c.53_54delCT                              | c.(52-54)TCTfs      | p.S18fs   |
| Pat_76 | Post-Resistance | LGI4     | 163175 | 37 | 19 | 35625454  | 35625454  | Frame_Shift_Del | DEL | G         | - | 2  | 4   | c.131delC                                 | c.(130-132)CCGfs    | p.P44fs   |
| Pat_76 | Post-Resistance | SBSN     | 374897 | 37 | 19 | 36019046  | 36019047  | Frame_Shift_Del | DEL | CT        | - | 7  | 260 | c.137_138delAG                            | c.(136-138)GAGfs    | p.E46fs   |
| Pat_76 | Post-Resistance | PSG9     | 5678   | 37 | 19 | 43772052  | 43772053  | Frame_Shift_Ins | INS | -         | C | 75 | 217 | c.313_314insG                             | c.(313-315)GCAfs    | p.A105fs  |
| Pat_76 | Post-Resistance | LILRB5   | 10990  | 37 | 19 | 54760181  | 54760181  | Frame_Shift_Del | DEL | A         | - | 48 | 66  | c.380delT                                 | c.(379-381)TTAfs    | p.L127fs  |
| Pat_76 | Post-Resistance | PHC3     | 80012  | 37 | 3  | 169896635 | 169896637 | In_Frame_Del    | DEL | TGG       | - | 12 | 426 | c.68_70delCCA                             | c.(67-72)ACCATC>ATC | p.T23del  |
| Pat_76 | Post-Resistance | THEMIS   | 387357 | 37 | 6  | 128134540 | 128134540 | Frame_Shift_Del | DEL | T         | - | 13 | 27  | c.1246delA                                | c.(1246-1248)ATCfs  | p.I416fs  |



| Strand | Exon | Transcript Position | Other Transcripts  | Refseq mRNA_Id | Refseq prot_Id | SwissProt acc Id | SwissProt entry Id | UniProt Region                 | COSMIC overlapping mutations | COSMIC total alterations in gene | ref context    | gc content | dbSNP RS    |
|--------|------|---------------------|--------------------|----------------|----------------|------------------|--------------------|--------------------------------|------------------------------|----------------------------------|----------------|------------|-------------|
| -      | 3    | 486                 | IAA0562_uc001ak    | NM_014704      | NP_055519      | O60308           | CE104_HUMAN        |                                |                              | 0                                | :TTGTGAAACTC   | 0.368      |             |
| +      | 2    | 716                 | pv.2_Missense_Mi   | NM_025106      | NP_079382      | Q96BD6           | SPSB1_HUMAN        | 330.2/SPRY.                    |                              | 0                                | :GCACTCTGTCG   | 0.647      |             |
| +      | 4    | 493                 | SF8_uc010bcb.1_    | NM_001243      | NP_001234      | P28908           | TNR8_HUMAN         | (Potential), TNFR-Cys 2.       |                              | 5                                | :TAGACGACCTCC  | 0.597      |             |
| +      | 21   | 4982                | p.S1614F VPS13C    | NM_015378      | NP_056193      | Q5THJ4           | VP13D_HUMAN        |                                |                              | 5                                | :TCAAATCCTTTAC | 0.438      |             |
| -      | 3    | 438                 | MEF5_uc001aur.2_   | NM_001010889   | NP_001010889   | Q5VXH4           | PRAM6_HUMAN        |                                |                              | 0                                | :TAGCTTCAGACC  | 0.493      |             |
| +      | 4    | 364                 | e_Mutation_p.S95I  | NM_004070      | NP_004061      | P51800           | CLCKA_HUMAN        |                                |                              | 1                                | :TCTTTCTGGAAC  | 0.627      |             |
| +      | 3    | 1201                |                    | NM_030812      | NP_110439      | Q9H568           | ACTL8_HUMAN        |                                |                              | 4                                | :TCTGGGAGGGT   | 0.577      | rs115420942 |
| -      | 2    | 1083                | K2N1_uc001bdg.2_   | NM_018584      | NP_061054      | Q7Z7J9           | CK2N1_HUMAN        |                                |                              | 0                                | :CACCAGGAGGT   | 0.438      |             |
| -      | 10   | 1263                | xm.1_Missense_M    | NM_052896      | NP_443128      | Q7Z408           | CSMD2_HUMAN        | extracellular (Potential).     |                              | 12                               | :CGAGGGGCCCTC  | 0.537      |             |
| -      | 3    | 1224                | 'Q_uc001byr.2_5'F  | NM_005066      | NP_005057      | P23246           | SFPQ_HUMAN         | RRM 2.                         |                              | 8                                | :GAAAGATTACG   | 0.448      |             |
| -      | 6    | 819                 | ion_p.S214F CSF3   | NM_000760      | NP_000751      | Q99062           | CSF3R_HUMAN        | III 1. Extracellular (Potentia |                              | 3                                | :GTGGGGACATG   | 0.507      |             |
| -      | 11   | 1858                | sa.1_Missense_ML   | NM_000831      | NP_000822      | Q13003           | GRIK3_HUMAN        | ical; (Potential).             |                              | 7                                | :GACCCCAAGGT   | 0.562      |             |
| +      | 1    | 24                  | P1_uc010oid.1_5'I  | NM_003462      | NP_003453      | O14645           | IDLC_HUMAN         |                                |                              | 2                                | :GGCAAACAAGG   | 0.647      |             |
| +      | 2    | 161                 | ALI1_uc010ioie.1_f | NM_003462      | NP_003453      | O14645           | IDLC_HUMAN         |                                |                              | 2                                | :AGGCTCGGCTA   | 0.577      |             |
| +      | 10   | 1509                | p.W419* CYP4X1     | NM_178033      | NP_828847      | Q8N118           | CP4X1_HUMAN        |                                |                              | 2                                | :TGTCTGGAATA   | 0.418      |             |
| +      | 6    | 869                 | DN_uc010onr.1_M    | NM_153703      | NP_714914      | Q7Z5L7           | PODN_HUMAN         | LRR 7.                         |                              | 2                                | :CTGCCCTGTAC   | 0.662      | rs138853761 |
| +      | 7    | 1189                | wk.1_Missense_M    | NM_052940      | NP_443172      | Q9Y546           | LRC42_HUMAN        |                                |                              | 0                                | :GGAGCCTAGAG   | 0.458      |             |
| -      | 3    | 383                 | i_p.E44K C8B_ucC   | NM_000066      | NP_000057      | P07358           | CO8B_HUMAN         | SP type-1 1.                   |                              | 4                                | :GACTTCCTTGT   | 0.498      |             |
| +      | 2    | 353                 |                    | NM_152489      | NP_689702      | Q5VVX9           | UBE2U_HUMAN        |                                |                              | 0                                | :AATGGGAAGTT   | 0.294      |             |
| -      | 7    | 1152                | idy.2_Missense_M   | NM_001018067   | NP_001018077   | Q8NC51           | PAIRB_HUMAN        |                                |                              | 1                                | :AACCGAATCTTC  | 0.403      |             |
| -      | 13   | 1448                |                    | NM_000329      | NP_000320      | Q16518           | RPE65_HUMAN        |                                |                              | 1                                | :GGTATGAATCAC  | 0.393      |             |
| -      | 7    | 1327                | liQ3_uc001dfz.3_f  | NM_001105659   | NP_001099129   | A6PVS8           | LRIQ3_HUMAN        |                                |                              | 2                                | :TGCAGGAAAAA   | 0.353      |             |
| -      | 14   | 3835                |                    | NM_001002912   | NP_001002912   | Q5RHP9           | CA173_HUMAN        | Glu-rich.                      |                              | 5                                | :CCCTTCCTTCA   | 0.592      |             |
| -      | 14   | 2596                |                    | NM_001002912   | NP_001002912   | Q5RHP9           | CA173_HUMAN        | Glu-rich.                      |                              | 5                                | :CTCCCCTTTTC   | 0.522      |             |
| -      | 22   | 2078                | p.S603F SLC44A4    | NM_152697      | NP_689910      | Q8NCS7           | CTL5_HUMAN         | cellular (Potential).          |                              | 4                                | :TTAAAGATGCTC  | 0.284      |             |
| +      | 7    | 944                 | lib.3_Missense_ML  | NM_144573      | NP_653174      | Q0ZGT2           | NEXN_HUMAN         | Glu-rich.                      |                              | 2                                | :ACAACGACCAT   | 0.318      |             |
| +      | 11   | 1739                | i_p.I417S NEXN_i   | NM_144573      | NP_653174      | Q0ZGT2           | NEXN_HUMAN         | Glu-rich.                      |                              | 2                                | :TGAATTAAGA    | 0.294      |             |
| +      | 2    | 253                 | 2_5'UTR CLCA4_i    | NM_012128      | NP_036260      | Q14CN2           | CLCA4_HUMAN        |                                |                              | 2                                | :AAAAAAGATTTT  | 0.333      |             |
| +      | 2    | 248                 | sw.1_Nonsense_M    | NM_003503      | NP_003494      | O00311           | CDC7_HUMAN         |                                |                              | 5                                | :GCTCTTAAAAAA  | 0.403      |             |
| +      | 2    | 360                 | ie_Mutation_p.S64  | NM_020190      | NP_064575      | Q9NRN5           | OLFL3_HUMAN        | Potential.                     |                              | 0                                | :CATCTCCGGGA   | 0.587      |             |
| +      | 3    | 557                 | ie_Mutation_p.W1   | NM_001767      | NP_001758      | P06729           | CD2_HUMAN          | Potential). Ig-like C2-type.   |                              | 1                                | :AAGTGACCAC    | 0.502      |             |
| +      | 4    | 725_726             | hw.2_Missense_IV   | NM_000862      | NP_000853      | P14060           | 3BHS1_HUMAN        |                                |                              | 2                                | :GGAAGGAAGCC   | 0.5        |             |
| +      | 34   | 4366_4367           | 10_uc010oyl.1_Int  | NM_001039703   | NP_001034792   | A6NDV3           | A6NDV3_HUMAN       |                                |                              | 0                                | :ACTGAATAGATC  | 0.48       |             |
| +      | 3    | 387                 | CM1_uc001euu.2_    | NM_004425      | NP_004416      | Q16610           | ECM1_HUMAN         |                                |                              | 3                                | :CTCCTCTCAGC   | 0.587      |             |
| -      | 3    | 1199                |                    | NM_001009931   | NP_001009931   | Q86YZ3           | HORN_HUMAN         |                                |                              | 3                                | :TTGTCCCTGGC   | 0.562      |             |
| -      | 3    | 7754                |                    | NM_002016      | NP_002007      | P20930           | FILA_HUMAN         | rich. Filaggrin 15.            |                              | 16                               | :CCTGACTGTCA   | 0.587      |             |
| -      | 2    | 177                 |                    | NM_001014291   | NP_001014313   | Q9BYE4           | SPR2G_HUMAN        |                                |                              | 0                                | :GCGTGGGGCAC   | 0.582      |             |
| +      | 5    | 1602                | _Mutation_p.G14C   | NM_000906      | NP_000897      | P16066           | ANPRA_HUMAN        | cellular (Potential).          |                              | 7                                | :GACAGGATACC   | 0.483      |             |
| -      | 16   | 2372                | UP210L_uc010pe     | NM_207308      | NP_997191      | Q5VU65           | P210L_HUMAN        |                                |                              | 11                               | :TATACTGGAGTTA | 0.493      |             |
| -      | 9    | 1463                | i PKLR_uc001fka.3  | NM_000298      | NP_000289      | P30613           | KPYR_HUMAN         | ic activator binding.          |                              | 5                                | :TTGTGGTCAGC   | 0.617      |             |
| -      | 5    | 549                 | i_p.S54F PAQR6_    | NM_198406      | NP_940798      | Q6TCH4           | PAQR6_HUMAN        | ical; (Potential).             |                              | 0                                | :GGAAGGAGTTG   | 0.677      |             |
| -      | 17   | 2005                |                    | NM_178229      | NP_839943      | Q86VI3           | IQGA3_HUMAN        |                                |                              | 6                                | :GTCGGGAACTA   | 0.607      |             |
| +      | 1    | 364                 |                    | NM_001004473   | NP_001004473   | Q8NGX5           | O10K1_HUMAN        | lasmic (Potential).            |                              | 1                                | :TATGATCGCTAT  | 0.527      |             |

|   |    |       |                   |              |              |        |             |                                 |    |                 |       |             |
|---|----|-------|-------------------|--------------|--------------|--------|-------------|---------------------------------|----|-----------------|-------|-------------|
| + | 1  | 751   |                   | NM_001004478 | NP_001004478 | Q8NGY1 | O10Z1_HUMAN | Name=6; (Potential).            | 2  | :ATTATTCATTATG  | 0.517 |             |
| + | 4  | 403   |                   | NM_002001    | NP_001992    | P12319 | FCERA_HUMAN | ar (Potential). Ig-like 1.      | 5  | :AGAGTGAACCTC   | 0.408 |             |
| + | 5  | 601   |                   | NM_002001    | NP_001992    | P12319 | FCERA_HUMAN | xtracellular p.V168F(1)         | 5  | :CCACAGTTGAAAC  | 0.438 |             |
| + | 2  | 724   |                   | NM_001639    | NP_001630    | P02743 | SAMP_HUMAN  | Pentaxin.                       | 2  | :ACTATGAAATCA   | 0.488 |             |
| + | 5  | 761   | sz.1_Missense_Mi  | NM_001004310 | NP_001004310 | Q6DN72 | FCRL6_HUMAN | 3. Extracellu p.S240F(1)        | 3  | TGTATTCCTTCTA   | 0.592 | rs140713881 |
| - | 1  | 130   | on_p.P5S SLAMF    | NM_033438    | NP_254273    | Q96A28 | SLAF9_HUMAN |                                 | 1  | :CCAAGGAAAGG    | 0.587 |             |
| - | 1  | 410   | \MF1_uc010pjm.1   | NM_003037    | NP_003028    | Q13291 | SLAF1_HUMAN | ellular (Potential).            | 2  | :GTAGCTTGCCCA   | 0.557 |             |
| - | 2  | 435   |                   | NM_199351    | NP_955383    | Q71H61 | ILDR2_HUMAN |                                 | 1  | :TATTACCATGAA   | 0.455 |             |
| - | 14 | 1860  | lpj.1_Missense_M  | NM_018417    | NP_060887    | Q96PN6 | ADCYA_HUMAN |                                 | 3  | CTTTTTCCATATC   | 0.378 |             |
| - | 18 | 5745  |                   | NM_000130    | NP_000121    | P12259 | FA5_HUMAN   |                                 | 6  | :ATGAACCTAAAAAT | 0.368 |             |
| + | 9  | 1572  | i_Mutation_p.G47  | NM_002021    | NP_002012    | Q01740 | FMO1_HUMAN  |                                 | 1  | :CCCAGGAAAAAT   | 0.507 |             |
| + | 3  | 557   | i_uc009wwd.2_Intr | NM_014283    | NP_055098    | Q9UBS9 | OSPT_HUMAN  |                                 | 2  | :CTATTTCTCCAA   | 0.308 |             |
| + | 12 | 4826  | PA2_uc009www.2    | NM_020318    | NP_064714    | Q9BXP8 | PAPP2_HUMAN |                                 | 16 | :CACATCATACCA   | 0.423 |             |
| - | 6  | 1931  | LGPS2_uc010pnb    | NM_004673    | NP_004664    | Q95841 | ANGL1_HUMAN | rogen C-terminal.               | 0  | :ATCATCATCTGA   | 0.403 |             |
| + | 6  | 1071  | uc001gof.1_Intron | NM_033343    | NP_203129    | Q969G2 | LHX4_HUMAN  |                                 | 1  | :AGCGGACAGT     | 0.502 |             |
| - | 8  | 1063  | wyh.1_Missense_M  | NM_052966    | NP_443198    | Q9BZQ8 | NIBAN_HUMAN |                                 | 4  | CTTAATCCTTCTC   | 0.468 |             |
| - | 8  | 1221  | yo.2_Missense_Mi  | NM_000963    | NP_000954    | P35354 | PGH2_HUMAN  |                                 | 2  | CAATACGATTTTC   | 0.378 |             |
| - | 2  | 271   | S2_uc009wyo.2_5   | NM_000963    | NP_000954    | P35354 | PGH2_HUMAN  | EGF-like.                       | 2  | :TCCGGGTACAA    | 0.438 |             |
| + | 21 | 3605  |                   | NM_000186    | NP_000177    | P08603 | CFAH_HUMAN  | Sushi 19.                       | 6  | TTACTTCATTCCC   | 0.403 |             |
| + | 3  | 418   |                   | NM_030787    | NP_110414    | Q9BXR6 | FHR5_HUMAN  | Sushi 2.                        | 2  | :TCATTCTGAATC   | 0.318 |             |
| - | 2  | 124   |                   | NM_001994    | NP_001985    | P05160 | F13B_HUMAN  | Sushi 1.                        | 3  | GAGGAAAACCA     | 0.303 |             |
| - | 1  | 961   | z.1_RNA CRB1_u    | NM_194314    | NP_919290    | Q5SVQ8 | ZBT41_HUMAN |                                 | 2  | :TCCAGGGTCTCT   | 0.388 |             |
| + | 18 | 2123  | p.G487E PTPRC_    | NM_002838    | NP_002829    | P08575 | PTPRC_HUMAN | lasmic (Potential).             | 12 | :ATGAAGGAAGAC   | 0.338 |             |
| + | 10 | 1454  | e_Mutation_p.P38  | NM_203459    | NP_982284    | Q08AD1 | CAMP2_HUMAN |                                 | 4  | :ATTTGCCTTCTAC  | 0.343 |             |
| + | 7  | 1145  | 1hel.1_Missense_  | NM_032960    | NP_116584    | P49137 | MAPK2_HUMAN | rotein kinase.                  | 0  | :AATTTCCCAACC   | 0.468 |             |
| + | 4  | 622   |                   | NM_000715    | NP_000706    | P04003 | C4BPA_HUMAN |                                 | 3  | GAAGGGTGAGT     | 0.318 |             |
| - | 8  | 1234  | 34_uc001hgx.1_3'  | NM_001025109 | NP_001020280 | P28906 | CD34_HUMAN  | lasmic (Potential).             | 1  | :GTCTTCGCCCT    | 0.517 |             |
| - | 20 | 2923  | p.R816C INTS7_u   | NM_015434    | NP_056249    | Q9NVH2 | INT7_HUMAN  | Gln-rich.                       | 0  | :TAAGCGAATTTG   | 0.463 |             |
| + | 13 | 5959  |                   | NM_016343    | NP_057427    | P49454 | CENPF_HUMAN | Potential.                      | 13 | :TAGTTCAAACA    | 0.418 |             |
| + | 13 | 6500  |                   | NM_016343    | NP_057427    | P49454 | CENPF_HUMAN | tion with NDE1 and NDEL         | 13 | :GAGCTCAACAC    | 0.512 |             |
| + | 13 | 6803  |                   | NM_016343    | NP_057427    | P49454 | CENPF_HUMAN | n repeats. Interaction with I   | 13 | :AAGGTCTGAAA    | 0.353 |             |
| - | 63 | 12935 |                   | NM_206933    | NP_996816    | O75445 | USH2A_HUMAN | ential). Fibronectin type-III : | 26 | :TTTTCCATTG     | 0.473 |             |
| - | 63 | 12712 |                   | NM_206933    | NP_996816    | O75445 | USH2A_HUMAN | II 26. Extracellular (Potenti   | 26 | :GTACTCCAGGA    | 0.483 |             |
| + | 1  | 1415  |                   | NM_152610    | NP_689823    | Q8N715 | CA065_HUMAN | Potential.                      | 2  | :TCATGGACTGCA   | 0.602 |             |
| - | 3  | 581   | e_Mutation_p.P27  | NM_020997    | NP_066277    | O75610 | LFTY1_HUMAN |                                 | 0  | :TCGTGGACGG     | 0.716 |             |
| - | 19 | 3631  | p.D1044N NID1_uc  | NM_002508    | NP_002499    | P14543 | NID1_HUMAN  |                                 | 2  | :AAGATCGAGAG    | 0.502 |             |
| - | 7  | 762   | 1LB_uc010pvt.1_l  | NM_019891    | NP_063944    | Q86YB8 | ERO1B_HUMAN |                                 | 0  | :CTCATCTGAAC    | 0.398 |             |
| + | 4  | 262   | 1hvx.1_Missense_  | NM_145861    | NP_665860    | Q8WWZ3 | EDAD_HUMAN  |                                 | 0  | :CCCACGAAATTC   | 0.249 |             |
| + | 5  | 2869  | re.1_Missense_Mu  | NM_020066    | NP_064450    | Q9NZ56 | FMN2_HUMAN  | ro-rich. FH1.                   | 12 | :CTCCCCTCTCT    | 0.602 |             |
| + | 5  | 2023  | p.E629K NLRP3_    | NM_001079821 | NP_001073289 | Q96P20 | NALP3_HUMAN |                                 | 26 | :AGCTGGAATTG    | 0.468 |             |
| + | 1  | 544   |                   | NM_001004689 | NP_001004689 | Q8NG83 | OR2M3_HUMAN | ellular (Potential).            | 2  | :ACTTCCCCTCC    | 0.418 |             |
| - | 5  | 633   | in_p.E126K AKR1C  | NM_205845    | NP_995317    | P52895 | AK1C2_HUMAN |                                 | 0  | :CTTCTCCATGGC   | 0.458 |             |
| - | 6  | 647   | p.R224Q PRKCCQ_   | NM_006257    | NP_006248    | Q04759 | KPCT_HUMAN  | I-ester/DAG-type 1.             | 6  | :TACGTCGGCAC    | 0.378 |             |
| - | 4  | 584   |                   | NM_001010924 | NP_001010924 | Q5VUB5 | F1711_HUMAN | ellular (Potential).            | 4  | AATTACCTGTTCT   | 0.463 |             |
| - | 6  | 691   | AM188A_uc001iof   | NM_024948    | NP_079224    | Q9H8M7 | F188A_HUMAN |                                 | 1  | :TGAACGATCTT    | 0.289 |             |
| - | 10 | 1302  | j.2_RNA NEBL_uc   | NM_006393    | NP_006384    | O76041 | NEBL_HUMAN  | Nebulin 8.                      | 2  | :ATTCTCGCTAAA   | 0.373 |             |
| + | 3  | 358   | ct.1_Missense_Mu  | NM_012443    | NP_036575    | O75602 | SPAG6_HUMAN |                                 | 1  | TTATAATGATGAC   | 0.408 |             |

|   |    |      |                    |              |              |        |             |                               |    |                 |       |             |
|---|----|------|--------------------|--------------|--------------|--------|-------------|-------------------------------|----|-----------------|-------|-------------|
| + | 2  | 621  | AA1217_uc010qcy    | NM_019590    | NP_062536    | Q5T5P2 | SKT_HUMAN   |                               | 7  | AGCCCCGAAGTT    | 0.517 |             |
| - | 18 | 2748 | qdt.1_Missense_IV  | NM_018076    | NP_060546    | Q5T2S8 | ARMC4_HUMAN | ARM 7.                        | 6  | AAGTTCCAAACC    | 0.338 |             |
| + | 7  | 1054 |                    | NM_052997    | NP_443723    | Q9BXX3 | AN30A_HUMAN |                               | 9  | CGTGGCCAGCA     | 0.423 |             |
| + | 13 | 1718 |                    | NM_052997    | NP_443723    | Q9BXX3 | AN30A_HUMAN |                               | 9  | TAAATGGAAAATT   | 0.323 |             |
| - | 3  | 1715 | np.2_Missense_Mi   | NM_004962    | NP_004953    | P55107 | BMP3B_HUMAN |                               | 2  | GGTTGGATGGA     | 0.587 |             |
| + | 3  | 1246 |                    | NM_199459    | NP_955629    | Q711Q0 | CJ071_HUMAN |                               | 0  | AAGCTCCCAAG     | 0.542 |             |
| - | 21 | 2867 | igt.1_Missense_Mi  | NM_018245    | NP_060715    | Q9ULD0 | OGDHL_HUMAN |                               | 1  | TTTCTCCTCCA     | 0.632 |             |
| - | 33 | 5659 | ation_p.P1715L P   | NM_033056    | NP_149045    | Q96QU1 | PCD15_HUMAN | lasmic (Potential).           | 13 | agaaggaggagaaat | 0.129 |             |
| - | 33 | 4986 | ation_p.E1491K P   | NM_033056    | NP_149045    | Q96QU1 | PCD15_HUMAN | lasmic (Potential).           | 13 | FGTTTTCTTATA    | 0.368 |             |
| + | 17 | 2318 | vj.1_Missense_Mu   | NM_001080512 | NP_001073981 | Q9H694 | BICC1_HUMAN |                               | 4  | TATCAAGGAGT     | 0.448 |             |
| - | 8  | 903  | qie.1_Missense_IV  | NM_198215    | NP_937858    | Q8NE31 | FA13C_HUMAN |                               | 2  | TGGGGCTGACT     | 0.443 |             |
| - | 37 | 5419 | K3_uc010qih.1_In   | NM_020987    | NP_066267    | Q12955 | ANK3_HUMAN  | Ser-rich.                     | 19 | TTTTTCTCTGTAA   | 0.418 |             |
| - | 37 | 4976 | K3_uc010qih.1_In   | NM_020987    | NP_066267    | Q12955 | ANK3_HUMAN  | Ser-rich.                     | 19 | CAGAGGAAACT     | 0.473 |             |
| + | 17 | 2573 | l1jrg.2_Missense_I | NM_080722    | NP_542453    | Q8WXS8 | ATS14_HUMAN | SP type-1 2.                  | 6  | GGCCCCCTGCA     | 0.617 |             |
| + | 8  | 1020 | l.1_Missense_Mut   | NM_004190    | NP_004181    | P07098 | LIPG_HUMAN  |                               | 0  | AGCAGGAACCT     | 0.348 |             |
| + | 7  | 1345 | p.P365S CYP26A     | NM_000783    | NP_000774    | O43174 | CP26A_HUMAN |                               | 3  | TCATTCCATTTG    | 0.458 |             |
| + | 2  | 631  | inu.1_Missense_IV  | NM_181745    | NP_859529    | Q5NUL3 | O3FA1_HUMAN | cellular (Potential).         | 0  | AAATTCGATTTC    | 0.438 |             |
| + | 2  | 618  | 8R CYP2C19_uc      | NM_000772    | NP_000763    | P33260 | CP2C1_HUMAN |                               | 5  | GAAAGAGGAAGT    | 0.448 |             |
| - | 7  | 1068 | nse_Mutation_p.E   | NM_000770    | NP_000761    | P10632 | CP2C8_HUMAN |                               | 0  | CTCTTCTGGA      | 0.423 |             |
| + | 3  | 1371 |                    | NM_032727    | NP_116116    | Q16352 | AINX_HUMAN  | Tail.                         | 2  | CTCATCCACTG     | 0.473 |             |
| - | 5  | 739  | k.2_RNA PCGF6      | NM_001011663 | NP_001011663 | Q9BYE7 | PCGF6_HUMAN |                               | 1  | TACCAGGTTTAC    | 0.289 |             |
| + | 10 | 2058 | q.1_Missense_Mu    | NM_006951    | NP_008882    | Q15542 | TAF5_HUMAN  | WD 5.                         | 2  | TTTTCTCCAATG    | 0.373 |             |
| + | 13 | 2097 |                    | NM_001008723 | NP_001008723 | Q5T655 | CC147_HUMAN | Potential.                    | 5  | AATCCTCAGA      | 0.453 |             |
| - | 6  | 785  | _p.Q215* AFAP1L    | NM_001001936 | NP_001001936 | Q8N4X5 | AF1L2_HUMAN |                               | 2  | CCACTGGTAAG     | 0.647 |             |
| + | 2  | 632  |                    | NM_002775    | NP_002766    | Q92743 | HTRA1_HUMAN |                               | 0  | CCATAATATAAC    | 0.453 | rs35089212  |
| + | 7  | 543  | T1_uc009xzz.1_M    | NM_007329    | NP_015568    | Q9UGM3 | DMBT1_HUMAN | SRCR 1.                       | 7  | TTGTGGCTGGG     | 0.602 |             |
| + | 20 | 2283 | zz.1_Missense_Ml   | NM_007329    | NP_015568    | Q9UGM3 | DMBT1_HUMAN |                               | 7  | CTGTAGGATCTG    | 0.537 |             |
| + | 26 | 3362 | 3T1_uc009xzz.1_A   | NM_007329    | NP_015568    | Q9UGM3 | DMBT1_HUMAN | SRCR 8.                       | 7  | TAGTGAAGAC      | 0.532 |             |
| - | 3  | 595  |                    | NM_001010912 | NP_001010912 | Q5SQS8 | CJ120_HUMAN |                               | 1  | GTAACCTTTCA     | 0.478 |             |
| - | 13 | 8936 | l.1_Missense_Mut   | NM_002417    | NP_002408    | P46013 | KI67_HUMAN  | approximate repeats. 16.      | 7  | CCAGGGGTTGG     | 0.527 |             |
| - | 13 | 1861 | ycc.2_Missense_I   | NM_021924    | NP_068743    | Q9HBB8 | CDHR5_HUMAN | tem repeats. 2. Extracellular | 0  | TCCCATACTGGC    | 0.672 |             |
| + | 11 | 1256 |                    | NM_017511    | NP_059981    | Q9HC84 | MUC5B_HUMAN | TIL 1.                        | 0  | TGCAGGGACGG     | 0.667 |             |
| + | 11 | 1355 |                    | NM_017511    | NP_059981    | Q9HC84 | MUC5B_HUMAN |                               | 0  | CTACTCCACAG     | 0.662 |             |
| + | 1  | 905  |                    | NM_001005172 | NP_001005172 | Q8NGK3 | O52K2_HUMAN | lasmic (Potential).           | 2  | AATCCGTGAGA     | 0.493 | rs138594066 |
| + | 1  | 175  |                    | NM_001005171 | NP_001005171 | Q8NGK4 | O52K1_HUMAN | Name=2; (Potential).          | 0  | CTCCATGAACCC    | 0.498 |             |
| - | 2  | 692  |                    | NM_030774    | NP_110401    | Q9H255 | O51E2_HUMAN | Name=4; (Potential).          | 5  | TCCGCGGACCA     | 0.557 |             |
| - | 1  | 972  | .1_Intron HBE1_uc  | NM_033180    | NP_149420    | Q9Y5P1 | O51B2_HUMAN | lasmic (Potential).           | 3  | TTTTAGATAAAA    | 0.368 |             |
| - | 16 | 6858 |                    | NM_003737    | NP_003728    | Q96JQ0 | PCD16_HUMAN | Extracellular (Potential).    | 5  | GGCTCCTCCAC     | 0.592 |             |
| + | 1  | 589  |                    | NM_207186    | NP_997069    | Q9H209 | O10A4_HUMAN | cellular (Potential).         | 1  | TGTTTGAAGTGC    | 0.498 |             |
| - | 1  | 906  |                    | NM_001004461 | NP_001004461 | Q8NH74 | O10A6_HUMAN | lasmic (Potential).           | 2  | TAATTCATCAAA    | 0.383 |             |
| - | 1  | 499  |                    | NM_001004461 | NP_001004461 | Q8NH74 | O10A6_HUMAN | cellular (Potential).         | 2  | AAAGGGAAAAC     | 0.323 |             |
| - | 2  | 940  |                    | NM_176821    | NP_789791    | Q86W26 | NAL10_HUMAN | NACHT.                        | 9  | CATGACGTGCT     | 0.532 |             |
| - | 2  | 633  | IO1_uc001mgh.1_    | NM_002315    | NP_002306    | P25800 | RBTN1_HUMAN | l zinc-binding 1.             | 0  | GTCTTCGTGCC     | 0.607 |             |
| + | 12 | 2121 | yic.2_Missense_M   | NM_004211    | NP_004202    | Q9Y345 | SC6A5_HUMAN | Name=9; (Potential).          | 4  | TATCATGGGTTTI   | 0.522 |             |
| + | 9  | 1067 | _p.R333Q NELL1_    | NM_006157    | NP_006148    | Q92832 | NELL1_HUMAN | VWFC 1.                       | 3  | ATGCCGAAGGA     | 0.517 |             |
| - | 6  | 1166 | u.1_Missense_Ml    | NM_020826    | NP_065877    | Q7L8C5 | SYT13_HUMAN | toplasmic (Potential).        | 1  | TGACTCGTTTAC    | 0.547 |             |
| - | 5  | 736  | ykx.2_Missense_I   | NM_001101802 | NP_001095272 | Q96BD5 | PF21A_HUMAN | Gln-rich.                     | 2  | TTCATGAAGCT     | 0.373 |             |

|   |    |      |                   |              |              |        |             |                               |    |                 |       |             |
|---|----|------|-------------------|--------------|--------------|--------|-------------|-------------------------------|----|-----------------|-------|-------------|
| - | 28 | 4284 |                   | NM_002334    | NP_002325    | O75096 | LRP4_HUMAN  | cellular (Potential).         | 4  | AACAGGGACAT     | 0.527 |             |
| + | 2  | 561  | 9ymb.2_Missense   | NR_027044    |              |        |             |                               | 0  | GTGTGGGGCAG     | 0.517 |             |
| + | 3  | 806  | ik.1_Nonsense_Mi  | NM_001004704 | NP_001004704 | Q8NH72 | OR4C6_HUMAN | cellular (Potential).         | 2  | TTGTTTCAGTTGT   | 0.433 |             |
| + | 1  | 294  |                   | NM_001004739 | NP_001004739 | Q8NGL0 | OR5L2_HUMAN | cellular (Potential).         | 1  | ATGCATGGTGCA    | 0.468 |             |
| + | 1  | 626  |                   | NM_001005202 | NP_001005202 | Q8NH51 | OR8K3_HUMAN | Name=5; (Potential).          | 4  | TGATTTTCATCTCT  | 0.378 |             |
| - | 1  | 647  |                   | NM_001005282 | NP_001005282 | Q8NGP6 | OR5M8_HUMAN | Name=5; (Potential).          | 1  | AGGTAGGAAATA    | 0.413 |             |
| - | 1  | 91   |                   | NM_001002925 | NP_001002925 | Q8NGF4 | O5AP2_HUMAN | cellular (Potential).         | 4  | AGACTCCTTGTA    | 0.408 |             |
| + | 5  | 1059 | VG1_uc001nkr.1_f  | NM_000062    | NP_000053    | P05155 | IC1_HUMAN   |                               | 1  | ATCCTCCTCAAT    | 0.552 |             |
| + | 1  | 775  | IQ1_uc001nmj.2_li | NM_001005186 | NP_001005186 | Q8NGQ2 | OR6Q1_HUMAN | Name=6; (Potential).          | 1  | AGCACTCTTTTC    | 0.522 |             |
| + | 1  | 809  |                   | NM_001004729 | NP_001004729 | Q8NGI8 | O5AN1_HUMAN | cellular (Potential).         | 1  | ATTCAGCTTTGT    | 0.388 |             |
| + | 1  | 509  |                   | NM_001004706 | NP_001004706 | Q8NGI4 | OR4DB_HUMAN | cellular (Potential).         | 2  | ATGTGGACCCA     | 0.507 |             |
| + | 3  | 292  |                   | NM_006552    | NP_006543    | O95968 | SG1D1_HUMAN | p.G82R(1)                     | 1  | TCAAGGAAAAAT    | 0.413 |             |
| - | 5  | 912  | 4L3_uc001ntt.1_Mi | NM_153265    | NP_694997    | Q32P44 | EMAL3_HUMAN |                               | 1  | ATCCAGGGCCCC    | 0.577 |             |
| + | 2  | 631  | ux.2_Missense_Mt  | NM_173810    | NP_776171    | Q8N5M4 | TTC9C_HUMAN | TPR 2.                        | 2  | AGCCCCGTGAAC    | 0.512 |             |
| - | 9  | 1607 | 2A25_uc009yoq.1   | NM_199352    | NP_955384    | Q6T423 | S22AP_HUMAN | lasmic (Potential).           | 4  | AGGCTATTTACTC   | 0.507 |             |
| + | 4  | 745  | pc.1_Missense_M   | NM_178864    | NP_849195    | Q8IUM7 | NPAS4_HUMAN |                               | 0  | ATCACAGCTTTCTC  | 0.627 |             |
| + | 7  | 2194 | pc.1_Missense_Mt  | NM_178864    | NP_849195    | Q8IUM7 | NPAS4_HUMAN |                               | 0  | ACTGTCCCTGTCT   | 0.607 |             |
| + | 11 | 1211 | TN3_uc010rpi.1_F  | NM_001104    | NP_001095    | Q08043 | ACTN3_HUMAN | Spectrin 1.                   | 0  | AGCTCTCGGAGA    | 0.652 |             |
| - | 1  | 660  | Blank CABP4_uc0   | NM_206997    | NP_996880    | Q8TDT2 | GP152_HUMAN | lasmic (Potential).           | 0  | ACAGGCTGTGG     | 0.677 |             |
| - | 21 | 4822 | 11opz.2_Missense  | NM_012309    | NP_036441    | Q9UPX8 | SHAN2_HUMAN |                               | 5  | ggcgggggagcgggc | 0.413 |             |
| - | 15 | 2168 | 09ysn.1_Intron SH | NM_012309    | NP_036441    | Q9UPX8 | SHAN2_HUMAN | PDZ.                          | 5  | ATGTGGCCGACT    | 0.587 |             |
| + | 14 | 5006 |                   | NM_014786    | NP_055601    | Q96PE2 | ARHG_HUMAN  |                               | 0  | ATCCTCCAGCTT    | 0.642 |             |
| + | 8  | 1060 | ifz.2_Missense_Mt | NM_014361    | NP_055176    | O94779 | CNTN5_HUMAN | like C2-type 2.               | 8  | TGGCGGAAGAC     | 0.398 |             |
| - | 2  | 317  |                   | NM_002427    | NP_002418    | P45452 | MMP13_HUMAN | switch (By similarity).       | 3  | AAACCCCGCATC    | 0.418 |             |
| + | 1  | 1390 | .2_Intron PDGFD   | NM_001001711 | NP_001001711 | Q8WTU0 | DDI1_HUMAN  |                               | 5  | ACAAGGAAATT     | 0.468 | rs35182086  |
| - | 7  | 895  | 9yyb.1_Missense   | NM_020809    | NP_065860    | Q9P2F6 | RHG20_HUMAN | as-associating.               | 5  | AATGCTCTTGGC    | 0.413 |             |
| - | 13 | 1729 | lrwj.1_Missense_M | NM_002716    | NP_002707    | P30154 | 2AAB_HUMAN  | HEAT 14.                      | 0  | GAAGCGAACAT     | 0.363 |             |
| + | 4  | 745  | CO2_uc010rwt.1_f  | NM_031938    | NP_114144    | Q9BYV7 | BCDO2_HUMAN |                               | 0  | AAACAGAAAAG     | 0.308 |             |
| + | 12 | 1766 |                   | NM_001076682 | NP_001070150 | P13591 | NCAM1_HUMAN | 5. Extracellular (Potential). | 1  | GGTTTCGGGATC    | 0.552 |             |
| + | 8  | 1687 | R3A_uc009yyx.2_f  | NM_213621    | NP_998786    | P46098 | 5HT3A_HUMAN | Cytoplasmic (Potential).      | 0  | GGGCTCCGTGC     | 0.602 |             |
| - | 3  | 723  |                   | NM_000482    | NP_000473    |        |             |                               | 0  | GAATTCGTCAGC    | 0.622 | rs145184607 |
| + | 3  | 208  | .1_5'UTR POU2F3   | NM_014352    | NP_055167    | Q9UKI9 | PO2F3_HUMAN |                               | 2  | AATGATCGAAATC   | 0.378 |             |
| + | 18 | 2535 |                   | NM_003105    | NP_003096    | Q92673 | SORL_HUMAN  | ntial). LDL-receptor class E  | 15 | TGAATGGAAGCA    | 0.453 |             |
| + | 1  | 454  |                   | NM_001007249 | NP_001007250 | Q15614 | OR8G2_HUMAN |                               | 0  | TCCTATCACCAC    | 0.448 |             |
| - | 1  | 20   |                   | NM_012378    | NP_036510    | Q15620 | OR8B8_HUMAN | cellular (Potential).         | 1  | CGAAGGAGGAA     | 0.502 |             |
| + | 5  | 420  | nce.2_Missense_M  | NM_152713    | NP_689926    | P46977 | STT3A_HUMAN | renal (Potential).            | 0  | GTACTCCATTTT    | 0.448 |             |
| + | 2  | 1064 | r_p.V134 NTM_uc   | NM_016522    | NP_057606    | Q9P121 | NTRI_HUMAN  |                               | 6  | TGCAAGGTAGG     | 0.552 |             |
| + | 6  | 616  | iq.1_Missense_Mu  | NM_001975    | NP_001966    | P09104 | ENOG_HUMAN  |                               | 0  | CTGTATCGCCAC    | 0.627 |             |
| - | 3  | 159  | lsge.1_Missense_f | NM_174941    | NP_777601    | Q9NR16 | C163B_HUMAN | cellular (Potential).         | 11 | CAAACTCTGTTCC   | 0.448 |             |
| - | 14 | 3352 | .R1075Q CD163_u   | NM_004244    | NP_004235    | Q86VB7 | C163A_HUMAN | lasmic (Potential).           | 8  | TGCTTCGCTTT     | 0.433 |             |
| - | 3  | 449  | DA_uc001quq.1_M   | NM_020661    | NP_065712    | Q9GZX7 | AICDA_HUMAN |                               | 2  | CCCTCGGGCT      | 0.652 |             |
| + | 25 | 3543 | se_Mutation_p.P1  | NM_004570    | NP_004561    | O75747 | P3C2G_HUMAN | PI3K/PI4K.                    | 21 | ATCGTCCACAAC    | 0.408 |             |
| + | 3  | 1041 |                   | NM_000921    | NP_000912    | Q14432 | PDE3A_HUMAN |                               | 4  | ATCAGGAACCA     | 0.483 |             |
| + | 2  | 138  | i.2_Intron SLCO1A | NM_000415    | NP_000406    | P10997 | IAPP_HUMAN  |                               | 0  | TTGCAGAAAATT    | 0.338 |             |
| - | 11 | 1563 |                   | NM_016551    | NP_057635    | Q9NS93 | TM7S3_HUMAN | ical; (Potential).            | 2  | CCACCGAATAGC    | 0.428 |             |
| + | 14 | 1865 | e_Mutation_p.V78/ | NM_152641    | NP_689854    | Q68CP9 | ARID2_HUMAN |                               | 10 | ATGTTGTCGTG     | 0.378 |             |
| + | 1  | 854  |                   | NM_001005203 | NP_001005203 | Q8NH09 | OR8S1_HUMAN | Name=7; (Potential).          | 1  | TGAATCCCTCA     | 0.408 |             |

|   |    |           |                    |              |              |        |             |                               |    |               |       |             |
|---|----|-----------|--------------------|--------------|--------------|--------|-------------|-------------------------------|----|---------------|-------|-------------|
| + | 13 | 2215      | 'ATS2_uc001ruf.2_  | NM_023071    | NP_075559    | Q86XZ4 | SPAS2_HUMAN | Ser-rich.                     | 1  | CTCTCCTCCCA   | 0.537 |             |
| - | 5  | 2359      | smk.1_Missense_    | NM_032130    | NP_115506    | Q8IYM0 | F186B_HUMAN |                               | 1  | CATGGTTGATCC  | 0.488 |             |
| + | 12 | 1586_1587 | p.P432S SMARCB1    | NM_003076    | NP_003067    | Q96GM5 | SMRD1_HUMAN | R/NR3C1 interaction with t    | 1  | 3GTAACCCAGAC  | 0.535 |             |
| + | 6  | 724       | a.2_Missense_Mu    | NM_005276    | NP_005267    | P21695 | GPDA_HUMAN  |                               | 0  | GGCTGGGACTC   | 0.577 |             |
| + | 24 | 3023      | lt.2_Missense_Mu   | NM_173602    | NP_775873    | Q9P265 | DIP2B_HUMAN |                               | 6  | TGCTTCCGTGA   | 0.458 |             |
| - | 1  | 241       |                    | NM_175068    | NP_778238    | Q86Y46 | K2C73_HUMAN | lead. Gly-rich.               | 6  | AGCCTCCTGCC   | 0.652 |             |
| - | 2  | 794       |                    | NM_015848    | NP_056932    | Q01546 | K22O_HUMAN  | Coil 1B. Rod.                 | 2  | GAAGTGAATCT   | 0.542 |             |
| - | 10 | 1691_1692 | Missense_Mutatio   | NM_000966    | NP_000957    | P13631 | RARG_HUMAN  | gand-binding.                 | 4  | AATCTCCATCTT  | 0.55  |             |
| - | 2  | 388_389   | r.p.P76L SP7_uc    | NM_152860    | NP_690599    | Q8TDD2 | SP7_HUMAN   |                               | 0  | GAAAAGGGAGG   | 0.579 |             |
| - | 1  | 202       |                    | NM_001005493 | NP_001005493 | A6NF89 | OR6C6_HUMAN | Name=2; (Potential).          | 2  | TACTTCCAAAAA  | 0.378 |             |
| + | 1  | 184       |                    | NM_001005497 | NP_001005497 | A6NL08 | O6C75_HUMAN | lasmic (Potential).           | 3  | TCCTTCGGAAC   | 0.433 |             |
| - | 1  | 243       |                    | NM_014770    | NP_055585    | Q99490 | AGAP2_HUMAN |                               | 5  | ACCTCGAATGCT  | 0.527 | rs143760313 |
| - | 7  | 825       | L_uc001sqk.1_5'F   | NM_006576    | NP_006567    | O75366 | AVIL_HUMAN  | 3. Core (By similarity).      | 1  | TACCTCTGTGA   | 0.493 |             |
| - | 3  | 859       | zql.2_Missense_M   | NM_152440    | NP_689653    | Q96MD2 | CL066_HUMAN |                               | 1  | ACTTGGAAGA    | 0.458 |             |
| - | 6  | 773       | tl.1_Missense_Mut  | NM_021150    | NP_066973    | Q9Y3R0 | GRIP1_HUMAN | PDZ 2.                        | 2  | TGGACGAGATT   | 0.383 |             |
| + | 3  | 1196      |                    | NM_013381    | NP_037513    | Q9UKU6 | TRHDE_HUMAN | cellular (Potential).         | 3  | CCTATTCTTGCC  | 0.378 |             |
| - | 4  | 2288      | i.2_Missense_Mut   | NM_139137    | NP_631875    | Q96PR1 | KCNC2_HUMAN | lasmic (Potential).           | 6  | TGTAATCACCTG  | 0.463 |             |
| + | 16 | 4358_4359 | v3_uc010sub.1_     | NM_014903    | NP_055718    | Q8IVL0 | NAV3_HUMAN  | Ser-rich.                     | 17 | CACGAGGTCCAC  | 0.55  |             |
| + | 17 | 3739      | ab.1_Missense_Mt   | NM_001079910 | NP_001073379 | Q96JM4 | LRIQ1_HUMAN |                               | 6  | TACTGAATACC   | 0.363 |             |
| - | 2  | 795       | di.2_Missense_Mt   | NM_020698    | NP_065749    | Q9ULS5 | TMCC3_HUMAN |                               | 2  | TCTAAGGAATTT  | 0.498 |             |
| + | 5  | 935_936   | i.2_Intron TMPO_t  | NM_001032283 | NP_001027454 | P42167 | LAP2B_HUMAN | potential). NAKAP95-binding   | 2  | TGAATGGACAAC  | 0.396 |             |
| + | 22 | 2587      | 811F MYBPC1_uc     | NM_206820    | NP_996556    | Q00872 | MYPC1_HUMAN |                               | 4  | CCATTCTCGTG   | 0.423 |             |
| + | 53 | 5785      | B2_uc009zug.2_F    | NM_017564    | NP_060034    | Q8WWQ8 | STAB2_HUMAN | lar (Potential). FAS1 6.      | 14 | GGGAGCTCTTG   | 0.428 |             |
| - | 2  | 245       | _p.E29K SELPLG     | NM_003006    | NP_002997    | Q14242 | SELPL_HUMAN | cellular (Potential).         | 0  | CTTCTCGGCTT   | 0.572 |             |
| + | 7  | 816       | _p.T186I MAPKAl    | NM_139078    | NP_620777    | Q8IW41 | MAPK5_HUMAN | rotein kinase.                | 3  | AGTTCACCCCTT  | 0.453 |             |
| - | 16 | 3180      | wn.1_Missense_M    | NM_000620    | NP_000611    | P29475 | NOS1_HUMAN  | avodoxin-like.                | 7  | TCATTTCCATCA  | 0.498 |             |
| + | 20 | 3327      |                    | NM_144668    | NP_653269    | Q8TBY9 | WDR66_HUMAN |                               | 2  | CAAAGGGAAAA   | 0.468 |             |
| - | 16 | 2589      | uek.1_Missense_    | NM_020845    | NP_065896    | Q9BZ72 | PITM2_HUMAN | DDHD.                         | 3  | AGGGGGCGCC    | 0.667 |             |
| + | 7  | 1647      | 1uhf.1_Missense_   | NM_052907    | NP_443139    | Q14DG7 | T132B_HUMAN | cellular (Potential).         | 19 | .CCCGGAAAGC   | 0.537 |             |
| + | 8  | 2004      | 1uhf.1_Missense_   | NM_052907    | NP_443139    | Q14DG7 | T132B_HUMAN | cellular (Potential).         | 19 | TCGTAGCTGGC   | 0.597 |             |
| + | 5  | 1623      | p.R215Q ZNF140_    | NM_003440    | NP_003431    | P52738 | ZN140_HUMAN | C2H2-type 6.                  | 0  | TACTCGACATCA  | 0.418 |             |
| - | 3  | 606       | n_p.T18I GJB6_uc   | NM_006783    | NP_006774    | Q95452 | CXB6_HUMAN  | lasmic (Potential).           | 1  | TGCTGGTGGAG   | 0.512 |             |
| + | 3  | 1566      | .1_Missense_Muta   | NM_004795    | NP_004786    | Q9UEF7 | KLOT_HUMAN  | e-1 2. Extracellular (Potenti | 3  | ACATTTCCCTGT  | 0.438 |             |
| - | 5  | 1174      | uwz.2_Missense_I   | NM_025138    | NP_079414    | Q86XN7 | CM023_HUMAN |                               | 5  | AGGACGAGAAT   | 0.338 |             |
| - | 34 | 4179      |                    | NM_015058    | NP_055873    | A3KMH1 | K0564_HUMAN |                               | 6  | CAACAACATATT  | 0.358 |             |
| - | 6  | 1772      | .1_Intron DACH1_   | NM_080759    | NP_542937    | Q9UI36 | DACH1_HUMAN |                               | 1  | GCCTTCTCCCC   | 0.567 |             |
| + | 1  | 167       | a.1_RNA POTEG_     | NM_001005356 | NP_001005356 | Q6S5H5 | POTEG_HUMAN |                               | 1  | GGAGCGGCAAC   | 0.592 |             |
| + | 1  | 698       |                    | NM_001005501 | NP_001005501 | Q8NGD2 | OR4K2_HUMAN | lasmic (Potential).           | 4  | AGGATCATCTAA  | 0.388 |             |
| + | 1  | 313       |                    | NM_001004063 | NP_001004063 | Q8NGD4 | OR4K1_HUMAN | Name=3; (Potential).          | 3  | TTCTTACAGTT   | 0.428 |             |
| - | 1  | 694_695   |                    | NM_001004714 | NP_001004714 | Q8NH42 | OR4KD_HUMAN | lasmic (Potential).           | 2  | AGGATCGACTAG  | 0.495 |             |
| - | 1  | 289       |                    | NM_001005465 | NP_001005465 | Q8NGC4 | O10G3_HUMAN | cellular (Potential).         | 2  | ACAGCCACCAA   | 0.483 |             |
| + | 1  | 266       |                    | NM_001001912 | NP_001001912 | Q8NGC2 | OR4E2_HUMAN | cellular (Potential).         | 4  | AGAAAGAAAGA   | 0.443 |             |
| + | 13 | 4653      |                    | NM_004274    | NP_004265    | Q13023 | AKAP6_HUMAN |                               | 21 | TGTGGAGGAT    | 0.368 |             |
| + | 13 | 5941      |                    | NM_004274    | NP_004265    | Q13023 | AKAP6_HUMAN |                               | 21 | CATGGGAAAG    | 0.383 |             |
| - | 10 | 1538      | p.L383F RALGAP,    | NM_014990    | NP_055805    | Q6GYQ0 | RGPA1_HUMAN |                               | 4  | ACAGAGACTAG   | 0.378 | rs145415708 |
| + | 3  | 1657      | R1_uc010amu.1_I    | NM_001049    | NP_001040    | P30872 | SSR1_HUMAN  | lasmic (Potential).           | 5  | CGCCGCGGAGG   | 0.587 |             |
| - | 4  | 686       | lwuv.1_Splice_Site | NM_001079537 | NP_001073005 | Q86S22 | TPC6B_HUMAN |                               | 0  | TAAATACCTTAGA | 0.333 |             |



|   |    |           |                   |              |              |        |             |                               |    |               |       |             |
|---|----|-----------|-------------------|--------------|--------------|--------|-------------|-------------------------------|----|---------------|-------|-------------|
| - | 5  | 702       | _Mutation_p.D98N  | NM_018168    | NP_060638    | Q9NVL8 | CN105_HUMAN |                               | 0  | FATGGTCCCTTGC | 0.413 |             |
| - | 2  | 469       | dd.2_Missense_M   | NM_001001872 | NP_001001872 | Q86TY3 | CN037_HUMAN | cellular (Potential).         | 0  | GTGAGGGGACAC  | 0.488 |             |
| + | 1  | 173       |                   | NM_003813    | NP_003804    | Q9UKJ8 | ADA21_HUMAN |                               | 2  | GGCTCCTGGAT   | 0.542 |             |
| + | 14 | 1644      | _p.S375F DCAF4    | NM_015604    | NP_056419    | Q8WV16 | DCAF4_HUMAN |                               | 3  | GGGCTCCCGGG   | 0.637 |             |
| - | 2  | 530       | se_Mutation_p.S10 | NM_001040108 | NP_001035197 | Q9UHC1 | MLH3_HUMAN  |                               | 2  | CAGCACTGGCC   | 0.438 |             |
| + | 9  | 1812      | RXN3_uc010asv.1   | NM_004796    | NP_004787    | Q9Y4C0 | NRX3A_HUMAN | 4. Extracellular (Potential). | 10 | ACATTGAAACG   | 0.433 |             |
| - | 11 | 1172      | ense_Mutation_p.E | NM_152446    | NP_689659    | Q6ZU80 | CE128_HUMAN | Potential.                    | 0  | GCTTGGAAATC   | 0.403 |             |
| - | 11 | 1595      | ALC_uc010tvv.1    | NM_000153    | NP_000144    | P54803 | GALC_HUMAN  |                               | 0  | AAGGAAGAAATC  | 0.289 |             |
| - | 20 | 3465      |                   | NM_018036    | NP_060506    | Q96BY7 | ATG2B_HUMAN |                               | 3  | AGAACGATAGT   | 0.358 |             |
| + | 8  | 891       |                   | NM_152327    | NP_689540    | Q96M32 | KAD7_HUMAN  | Potential.                    | 1  | CTGTTCATACCC  | 0.368 |             |
| + | 4  | 672       |                   | NM_182560    | NP_872366    | Q52M58 | CN177_HUMAN |                               | 0  | AGACATGAAGAA  | 0.453 |             |
| + | 7  | 1519      | JOR4N4_uc010tzv   | NM_001005241 | NP_001005241 | Q8N0Y3 | OR4N4_HUMAN | cellular (Potential).         | 5  | TCTGTGATGTCC  | 0.532 |             |
| - | 10 | 1070      | Splice_Site_p.V58 | NM_001012423 | NP_001012423 |        |             |                               | 0  | CAAACCTGCCC   | 0.547 |             |
| - | 1  | 706       |                   | NM_019066    | NP_061939    |        |             |                               | 0  | CAGAGGGGCC    | 0.577 |             |
| - | 1  | 105       |                   | NM_002487    | NP_002478    | Q99608 | NECD_HUMAN  |                               | 0  | TCAGATCCTTAC  | 0.647 |             |
| - | 6  | 801       | zba.2_Nonsense_I  | NM_000814    | NP_000805    | P28472 | GBRB3_HUMAN | cellular (Probable).          | 5  | TCCTCGAGACC   | 0.557 |             |
| - | 1  | 226       | RA5_uc001zbd.1    | NM_021912    | NP_068712    | P28472 | GBRB3_HUMAN |                               | 5  | CAAATCCAGAG   | 0.577 |             |
| - | 26 | 3632_3633 | e_Mutation_p.E10  | NM_002420    | NP_002411    | Q7Z4N2 | TRPM1_HUMAN | plasmic (Potential).          | 4  | CTTCTCCCGGAA  | 0.609 |             |
| - | 4  | 1645      |                   | NM_001103184 | NP_001096654 | Q68DA7 | FMN1_HUMAN  | ction with alpha-catenin (By  | 1  | TAGCTCGTGT    | 0.468 | rs144234543 |
| + | 3  | 1205      | zhl.1_Missense_M  | NM_012125    | NP_036257    | P08912 | ACM5_HUMAN  | llular (By similarity).       | 2  | ACAGTCCACTG   | 0.542 |             |
| + | 2  | 315       |                   | NM_207444    | NP_997327    | Q8NAA6 | CO053_HUMAN |                               | 0  | GCAAGGAAATG   | 0.498 |             |
| + | 16 | 1669      | _p.W754* JMJD7-f  | NM_001114633 | NP_001108105 | P0C869 | PA24B_HUMAN | PLA2c.                        | 1  | GTTCTGGGACC   | 0.642 |             |
| - | 13 | 2735      |                   | NM_016642    | NP_057726    | Q9NRC6 | SPTN5_HUMAN |                               | 2  | TCCAGGGCCCT   | 0.622 |             |
| - | 2  | 843       | px.2_Intron ZFP1  | NM_022473    | NP_071918    | Q9H2Y7 | ZF106_HUMAN |                               | 3  | GGAGCCTCCTG   | 0.448 |             |
| - | 10 | 1659      | p.D208N TGM5_u    | NM_201631    | NP_963925    | O43548 | TGM5_HUMAN  |                               | 1  | GCCATCGTGCA   | 0.537 |             |
| + | 2  | 334       | e_Mutation_p.P32  | NM_014444    | NP_055259    | Q9UGJ1 | GCP4_HUMAN  |                               | 3  | ACTTCCCTTTC   | 0.527 |             |
| - | 11 | 1569      |                   | NM_000138    | NP_000129    | P35555 | FBN1_HUMAN  | Pro-rich.                     | 3  | GAACAGGGAGA   | 0.507 |             |
| - | 4  | 1184      |                   | NM_203349    | NP_976224    | Q6S5L8 | SHC4_HUMAN  | PID.                          | 5  | TACTTTTGCCAA  | 0.323 |             |
| - | 23 | 3485      | aw.1_Missense_M   | NM_017672    | NP_060142    | Q96QT4 | TRPM7_HUMAN | cellular (Potential).         | 10 | GAAATGGAGTC   | 0.313 |             |
| + | 3  | 538       | agd.2_Missense_I  | NM_004751    | NP_004742    | O95395 | GCNT3_HUMAN | renal (Potential).            | 2  | ACTTCTTTTAC   | 0.473 |             |
| + | 4  | 3241      |                   | NM_015042    | NP_055857    | O15014 | ZN609_HUMAN |                               | 3  | ATCATTCCAAG   | 0.572 |             |
| + | 3  | 845       | ujp.1_Missense_M  | NM_002755    | NP_002746    | Q02750 | MP2K1_HUMAN | rotein kinase.                | 0  | ACTCTCCGTAC   | 0.507 |             |
| + | 9  | 2651_2652 |                   | NM_001031807 | NP_001026977 | P84550 | SKOR1_HUMAN |                               | 0  | CTATGCCATCCA  | 0.574 |             |
| - | 7  | 620       | se_Mutation_p.W7  | NM_022369    | NP_071764    | Q9BX79 | STRA6_HUMAN | cellular (Potential).         | 1  | TATCTCCAGGC   | 0.612 |             |
| - | 3  | 278       | G4_uc010bkn.2_F   | NM_138573    | NP_612640    | Q8WWG1 | NRG4_HUMAN  | ar (Potential). EGF-like.     | 0  | AAATGGGCTGG   | 0.393 |             |
| - | 25 | 3213      | bx.2_Missense_M   | NM_020843    | NP_065894    | Q9BY12 | SCAPE_HUMAN |                               | 3  | AAGTCCAGTTG   | 0.388 |             |
| - | 5  | 691       | 32_uc010uoj.1_M   | NM_004644    | NP_004635    | Q13367 | AP3B2_HUMAN |                               | 5  | GTAGAGTTTAGC  | 0.567 |             |
| + | 14 | 1750      | p.R509H ADAMTS    | NM_207517    | NP_997400    | P82987 | ATL3_HUMAN  | TSP type-1 3 p.R509R(1)       | 27 | CCACCGCGGAG   | 0.458 |             |
| - | 7  | 1667      | nr.3_Missense_Mu  | NM_002693    | NP_002684    | P54098 | DPOG1_HUMAN |                               | 2  | ATCAACGACTTC  | 0.602 |             |
| + | 6  | 1301      | DIA2_uc002cgo.1   | NM_006849    | NP_006840    | Q13087 | PDIA2_HUMAN | hioredoxin 1.                 | 2  | TGGTGGAAATC   | 0.692 |             |
| - | 10 | 1441      | clz.2_Missense_M  | NM_014714    | NP_055529    | Q96RY7 | IF140_HUMAN | WD 5.                         | 5  | CGGGGCTGCC    | 0.582 |             |
| - | 4  | 592       | S22_uc002crz.1_I  | NM_022119    | NP_071402    | Q9GZN4 | BSSP4_HUMAN | eptidase S1.                  | 1  | GATCCAGCAGT   | 0.607 |             |
| + | 3  | 619       | rff68_uc002cza.2  | NM_024109    | NP_077014    | Q9BUU2 | MET22_HUMAN |                               | 0  | AAGCTCAGCTG   | 0.592 |             |
| - | 30 | 4167      | YH11_uc010bvg.2   | NM_002474    | NP_002465    | P35749 | MYH11_HUMAN | Potential.                    | 15 | CTCCTCGTCCAC  | 0.592 |             |
| + | 8  | 1249      |                   | NM_017888    | NP_060358    | Q6NUN0 | ACSM5_HUMAN | (By similarity).              | 2  | TGTACGAAGGC   | 0.617 |             |
| + | 10 | 1452      |                   | NM_017888    | NP_060358    | Q6NUN0 | ACSM5_HUMAN |                               | 2  | TGCTATTTGGTA  | 0.363 |             |
| - | 4  | 532       | p.R108C ACSM2E    | NM_182617    | NP_872423    | Q68CK6 | ACS2B_HUMAN | p.R108C(1)                    | 5  | CACACGATCCC   | 0.562 | rs148136861 |

|   |    |                                |                    |              |              |             |              |                               |              |               |       |             |
|---|----|--------------------------------|--------------------|--------------|--------------|-------------|--------------|-------------------------------|--------------|---------------|-------|-------------|
| + | 12 | 1932                           | gc.1_Missense_Mi   | NM_001114    | NP_001105    | P51828      | ADCY7_HUMAN  | lasmic (Potential).           | 1            | TGAGGGGCTCA   | 0.602 |             |
| - | 2  | 2411                           | ə_Mutation_p.P69   | NM_002968    | NP_002959    | Q9NSC2      | SALL1_HUMAN  |                               | 8            | FGTTGGGGATCT  | 0.527 |             |
| + | 6  | 1187                           | κl.2_Missense_Mi   | NM_032206    | NP_115582    | Q86WI3      | NLRC5_HUMAN  | NACHT.                        | 7            | ITGGCCAGGCC   | 0.562 |             |
| + | 15 | 1631                           | _Missense_Mutatic  | NM_024712    | NP_078988    | Q96BJ8      | ELMO3_HUMAN  | ELMO.                         | 0            | ITGGCCCGCACT  | 0.662 |             |
| - | 6  | 973                            |                    | NM_000229    | NP_000220    | P04180      | LCAT_HUMAN   |                               | 0            | ICACGTGACTGC  | 0.577 |             |
| - | 5  | 1220                           | KL_uc002fdc.2_Inl  | NM_152649    | NP_689862    | Q8NB16      | MLKL_HUMAN   | rotein kinase.                | 2            | ATGTTGGGAGAT  | 0.353 |             |
| - | 4  | 571                            | TL1_uc010chk.2_    | NM_021149    | NP_066972    | Q14019      | COTL1_HUMAN  |                               | 1            | ACTCCGTCTGG   | 0.612 |             |
| + | 5  | 350                            | z.2_Missense_Mi    | NM_001012759 | NP_001012777 | Q2VPK5      | CTU2_HUMAN   |                               | 1            | ATTCTGCCAAAAC | 0.562 |             |
| + | 10 | 1524                           | νqr.1_Missense_Mi  | NM_000934    | NP_000925    | P08697      | A2AP_HUMAN   |                               | 0            | IAGGAGGATTAC  | 0.602 |             |
| - | 1  | 935                            |                    | NM_003555    | NP_003546    | P47890      | OR1G1_HUMAN  | lasmic (Potential).           | 0            | TAAGGGGAATGA  | 0.423 |             |
| + | 7  | 958                            | κu.2_Missense_Mi   | NM_182538    | NP_872344    | Q6ZMD2      | SPNS3_HUMAN  |                               | 1            | ICAGCAACCCCG  | 0.642 |             |
| - | 2  | 362                            | GR2_uc002ger.3_    | NM_001181    | NP_001172    | P07307      | ASGR2_HUMAN  | lasmic (Potential).           | 1            | ICTGGGATTCA   | 0.517 |             |
| + | 9  | 1649_1650_5'Flank EIF4A1_u     | NM_015670          | NP_056485    | Q9H4L4       | SENP3_HUMAN | Protease.    | 2                             | AATCCCATCCA  | 0.505         |       |             |
| - | 21 | 3310_3311_3'UTR uc010cnv.2_    | NM_025099          | NP_079375    | Q2NKJ3       | CTC1_HUMAN  |              | 0                             | ACCACGGCTTCG | 0.579         |       |             |
| + | 21 | 2759_2760_3'UTR Mutation_p.S44 | NM_012393          | NP_036525    | O15067       | PUR4_HUMAN  |              | 5                             | CTTCTCCCAGCT | 0.649         |       |             |
| + | 9  | 1394                           | va.1_Missense_Mi   | NM_153210    | NP_694942    | Q70EL4      | UBP43_HUMAN  |                               | 5            | IACTCTCTGTGG  | 0.502 |             |
| - | 3  | 144                            | uc002gml.1_Intron  | NM_002472    | NP_002463    | P13535      | MYH8_HUMAN   | osin head-like.               | 11           | ITAGGGAGCAG   | 0.498 |             |
| - | 5  | 525                            | uc002gml.1_Intron  | NM_005963    | NP_005954    | P12882      | MYH1_HUMAN   | osin head-like.               | 21           | TGCCCTCGGTAG  | 0.512 |             |
| - | 27 | 3757                           | _Missense_Mutatio  | NM_001100112 | NP_001093582 | Q9UKX2      | MYH2_HUMAN   | Potential.                    | 14           | GCTCCCCAAGCT  | 0.532 |             |
| - | 21 | 2506                           | _Missense_Mutatio  | NM_001100112 | NP_001093582 | Q9UKX2      | MYH2_HUMAN   | IQ.                           | 14           | FGGGTTCGGGTA  | 0.473 |             |
| - | 15 | 1897                           |                    | NM_002470    | NP_002461    | P11055      | MYH3_HUMAN   | osin head-like.               | 7            | IGCCCAACCACA  | 0.552 |             |
| + | 52 | 10310                          | oo.2_Splice_Site_  | NM_001372    | NP_001363    | Q9NYC9      | DYH9_HUMAN   |                               | 20           | CTGAAAGTACGT  | 0.348 |             |
| + | 7  | 871                            | E182K RICH2_uc     | NM_014859    | NP_055674    | Q17R89      | RHG44_HUMAN  | BAR.                          | 0            | IGGGAAGAAATG  | 0.547 |             |
| + | 14 | 2031                           | _p.V659I MPRIIP_u  | NM_201274    | NP_958431    | Q6WCQ1      | MPRIIP_HUMAN | ction with RHOA.              | 0            | ICCCCGTCCAC   | 0.602 |             |
| - | 12 | 1551                           | CP3A_uc002gsw.1    | NM_004618    | NP_004609    | Q13472      | TOP3A_HUMAN  |                               | 3            | ICCAGGAAATGG  | 0.537 |             |
| + | 11 | 2082                           | ν.P253L EPN2_uc    | NM_014964    | NP_055779    | O95208      | EPN2_HUMAN   | EJ-P-W.ν3 X 3 AA repeats o    | 1            | ITGCTCCCGCCA  | 0.517 |             |
| - | 3  | 524                            |                    | NM_173624    | NP_775895    |             |              |                               | 0            | IGCTTCCAGTTC  | 0.542 |             |
| - | 14 | 3151                           | bb.1_Missense_Mi   | NM_001033561 | NP_001028733 | Q96QT6      | PHF12_HUMAN  |                               | 1            | ITCTCCGAGAAG  | 0.507 |             |
| - | 2  | 1746                           | IP2_uc002hdx.3_I   | NM_020772    | NP_065823    | Q7Z417      | NUFP2_HUMAN  |                               | 4            | ITGAGGGAATTA  | 0.453 |             |
| - | 4  | 668                            | _p.D76N SLFN11     | NM_001104588 | NP_001098058 | Q7Z7L1      | SLN11_HUMAN  |                               | 3            | ITAAATCCAGTCC | 0.438 |             |
| - | 4  | 2584                           | _p.P752S SLFN13    | NM_144682    | NP_653283    | Q68D06      | SLN13_HUMAN  |                               | 2            | ITGGAGGATTTT  | 0.393 |             |
| - | 5  | 2251                           |                    | NM_001145027 | NP_001138499 |             |              |                               | 1            | CACATATTAATTG | 0.418 |             |
| + | 7  | 1091                           | _p.P266S CASC3_    | NM_007359    | NP_031385    | O15234      | CASC3_HUMAN  | l and localization in nucleus | 1            | GGAGTCCTCCA   | 0.368 |             |
| - | 7  | 1735                           | 2_RNA TMEM99_u     | NM_000421    | NP_000412    | P13645      | K1C10_HUMAN  | ich. Gly-rich. Tail.          | 0            | ICGGAAGAGGAG  | 0.313 | rs112018671 |
| - | 5  | 967                            |                    | NM_021013    | NP_066293    | O76011      | KRT34_HUMAN  | Rod. Coil 2.                  | 1            | ITGTGCGTCTCA  | 0.582 |             |
| - | 12 | 1798                           | P1_uc002hxo.1_N    | NM_177977    | NP_817084    | P54257      | HAP1_HUMAN   | Glu-rich.                     | 2            | ICAGTTCACCT   | 0.622 |             |
| + | 3  | 516                            | ə_Mutation_p.G15   | NM_145273    | NP_660316    | Q6UXG3      | CLM9_HUMAN   | ellular (Potential).          | 0            | ICCCAGGATTG   | 0.572 |             |
| + | 4  | 551                            | R56C CRHR1_uc      | NM_001145146 | NP_001138618 | P34998      | CRFR1_HUMAN  | ellular (Pote p.R96S(1)       | 3            | ICCGCCGCGCT   | 0.642 |             |
| + | 6  | 903                            | APT_uc002ijx.3_Ini | NM_016835    | NP_058519    | P10636      | TAU_HUMAN    |                               | 1            | ITAGGAGACCTG  | 0.682 |             |
| + | 10 | 1551                           | IB3_uc010wkr.1_F   | NM_000212    | NP_000203    | P05106      | ITB3_HUMAN   | ial). Cysteine-rich tandem r  | 6            | IAGGACGAATGC  | 0.627 | rs150951945 |
| - | 2  | 762                            | B3_uc010dbf.2_5'   | NM_002147    | NP_002138    | P09067      | HXB5_HUMAN   | Homeobox.                     | 0            | GCGCTCGGACA   | 0.577 |             |
| + | 13 | 3274                           | c002irv.1_Nonsen   | NM_018896    | NP_061496    | O43497      | CAC1G_HUMAN  | lasmic (Potential).           | 1            | IGCTTCCAGGCG  | 0.587 |             |
| + | 12 | 1696                           | κk.3_Nonsense_Mi   | NM_003786    | NP_003777    | O15438      | MRP3_HUMAN   | ilarity). ABC transmembr      | 4            | ICACCTGGATGT  | 0.662 |             |
| + | 3  | 130                            |                    | NM_153228    | NP_694960    | Q8N957      | ANKF1_HUMAN  |                               | 2            | ACAGAGGCTGA   | 0.433 |             |
| + | 8  | 1631                           | _p.S530F TBX4_uc   | NM_018488    | NP_060958    | P57082      | TBX4_HUMAN   |                               | 2            | AATCTTCTTAC   | 0.532 |             |
| - | 9  | 1740                           | zp.2_Missense_Mi   | NM_005121    | NP_005112    | Q9UHV7      | MED13_HUMAN  |                               | 2            | ICTGAGGAGTTG  | 0.458 |             |
| + | 9  | 1466                           | 'Flank ACE_uc010   | NM_000789    | NP_000780    | P12821      | ACE_HUMAN    | Potential). Peptidase M2 1.   | 4            | GTGGGCGTACC   | 0.552 |             |

|   |    |           |                    |              |              |        |             |                                |     |              |       |
|---|----|-----------|--------------------|--------------|--------------|--------|-------------|--------------------------------|-----|--------------|-------|
| - | 19 | 3844      | ig.2_Nonsense_Mt   | NM_018672    | NP_061142    | Q8WWZ7 | ABCA5_HUMAN | ical; (Potential).             | 4   | AACTGAACTGT  | 0.308 |
| - | 19 | 2478      | p.D179N C17orf28   | NM_030630    | NP_085133    | Q8IV36 | CQ028_HUMAN |                                | 0   | GGTGTGCTACC  | 0.622 |
| - | 1  | 186_187   | 2jnf.2_Missense_Iv | NM_006937    | NP_008868    | P61956 | SUMO2_HUMAN |                                | 0   | ACCTTGGGCTTT | 0.698 |
| + | 7  | 698       | CR1_uc002kcz.2_    | NM_024083    | NP_076988    | Q9BZE9 | ASPC1_HUMAN |                                | 162 | CACTTCCCTTG  | 0.662 |
| - | 22 | 3143      | rzej.1_Missense_Mt | NM_005559    | NP_005550    | P25391 | LAMA1_HUMAN | inin EGF-like 11.              | 21  | AGGGGGGAGAGA | 0.552 |
| - | 1  | 1671      |                    | NM_172241    | NP_758441    | Q96RT6 | CTGE2_HUMAN |                                | 1   | TCCTCCCCGTG  | 0.512 |
| + | 21 | 2559      | ur.2_Missense_Mt   | NM_198129    | NP_937762    | Q16787 | LAMA3_HUMAN | IV 1 (domain IV B).            | 11  | AGGAGCCAGCC  | 0.433 |
| - | 16 | 3078      | 2_uc002kwc.3_3'    | NM_024422    | NP_077740    | Q02487 | DSC2_HUMAN  | lasmic (Potential).            | 3   | CTTGTGCTTAC  | 0.413 |
| + | 13 | 2118      | 3_uc002kwt.2_5'F   | NM_001944    | NP_001935    | P32926 | DSG3_HUMAN  | lasmic (Potential).            | 9   | GTGGGGGAATTG | 0.428 |
| + | 5  | 654       |                    | NM_001943    | NP_001934    | Q14126 | DSG2_HUMAN  | r (Potential). Cadherin 1.     | 9   | ACAACGAACCA  | 0.373 |
| + | 12 | 5081      | q.2_Missense_Mu    | NM_030632    | NP_085135    | Q9C0F0 | ASXL3_HUMAN |                                | 3   | AAGCAGACAAG  | 0.473 |
| + | 8  | 1436_1437 | lh.1_Missense_Mt   | NM_006033    | NP_006024    | Q9Y5X9 | LIPE_HUMAN  | PLAT.                          | 2   | TGCCACCAACAC | 0.559 |
| + | 8  | 1183      | p.H346Y CTDP1_u    | NM_004715    | NP_004706    | Q9Y5B0 | CTDP1_HUMAN |                                | 0   | TAAATCATTCTC | 0.493 |
| - | 12 | 1305      | ndz.2_Nonsense_I   | NM_007322    | NP_015561    | Q9H6Z4 | RANB3_HUMAN |                                | 1   | CTCCTGGGACG  | 0.572 |
| + | 15 | 1811      | PLA6_uc002mgr.     | NM_006702    | NP_006693    | Q8IY17 | PLPL6_HUMAN | cytoplasmic (Potential).       | 3   | CATCATTGCC   | 0.612 |
| + | 11 | 2508      | _Mutation_p.D830   | NM_020902    | NP_065953    | Q9P1Y5 | CAMP3_HUMAN | Pro-rich.                      | 1   | CCCACGACGTA  | 0.716 |
| - | 4  | 521       | q.2_Missense_Mu    | NM_021155    | NP_066978    | Q9NNX6 | CD209_HUMAN | 7 X approximate tandem r       | 1   | CAGCCAGGTCA  | 0.557 |
| - | 81 | 43373     | wj.2_Missense_Mt   | NM_024690    | NP_078966    | Q8WXI7 | MUC16_HUMAN | xtracellular (Potential).      | 57  | GGGAGTCCACC  | 0.517 |
| - | 3  | 31148     |                    | NM_024690    | NP_078966    | Q8WXI7 | MUC16_HUMAN | ch. Extracellular (Potential). | 57  | AGTAGCATCC   | 0.532 |
| - | 3  | 14344     |                    | NM_024690    | NP_078966    | Q8WXI7 | MUC16_HUMAN | xtracellular (Potential).      | 57  | AAACCCCTCAG  | 0.498 |
| - | 3  | 11893     |                    | NM_024690    | NP_078966    | Q8WXI7 | MUC16_HUMAN | xtracellular (Potential).      | 57  | TGGTAACCTCCT | 0.453 |
| - | 1  | 5870      |                    | NM_024690    | NP_078966    | Q8WXI7 | MUC16_HUMAN | ch. Extracellular (Potential). | 57  | TGTTTCCCATAC | 0.502 |
| + | 6  | 893       | ARM1_uc002mqa.2    | NM_199141    | NP_954592    | Q86X55 | CARM1_HUMAN |                                | 0   | CATCTCGAGCC  | 0.597 |
| + | 3  | 2106      |                    | NR_027049    |              |        |             |                                | 0   | ACTACGAACAC  | 0.438 |
| - | 4  | 1707      | _p.R487* ZNF20_u   | NM_021143    | NP_066966    | P17024 | ZNF20_HUMAN | 2H2-type 15.                   | 0   | TCTCTGACATG  | 0.398 |
| - | 5  | 787       | zi.2_Missense_Mu   | NM_002918    | NP_002909    | P22670 | RFX1_HUMAN  |                                | 2   | GAGAGCCTGG   | 0.527 |
| - | 14 | 1703      | _p.L169F ILVBL_uc  | NM_006844    | NP_006835    | A1L0T0 | ILVBL_HUMAN | osphate binding (By similari   | 2   | GATGAGGCTGT  | 0.577 |
| - | 15 | 2656      | _p.S197F RASAL3    | NM_022904    | NP_075055    | Q86YV0 | RASL3_HUMAN |                                | 0   | AGCGGAGTCC   | 0.716 |
| + | 1  | 432_433   |                    | NM_013939    | NP_039227    | O60403 | O10H2_HUMAN | lasmic (Potential).            | 3   | GACCCACGGG   | 0.634 |
| - | 8  | 1263      | BP1_uc002nft.1_R   | NM_031941    | NP_114147    | Q8N6Y0 | USBP1_HUMAN |                                | 1   | ATGCTTCTTTTC | 0.597 |
| + | 9  | 845_846   | SBP4_uc002niz.2    | NM_032627    | NP_116016    | Q9BWG4 | SSBP4_HUMAN | Pro-rich.                      | 0   | CGCCTCCTCGTC | 0.678 |
| - | 4  | 818       | mc.2_Missense_Iv   | NM_023002    | NP_075378    | Q86UW8 | HPLN4_HUMAN | Link 1.                        | 1   | TATGGCGATACC | 0.701 |
| + | 8  | 1279_1280 | w.3_Missense_Mt    | NM_153221    | NP_694953    | Q8IUL8 | CILP2_HUMAN |                                | 1   | CCTGAGGACTGT | 0.683 |
| - | 18 | 2104      | _p.P637S GMIP_uc   | NM_016573    | NP_057657    | Q9P107 | GMIP_HUMAN  | Rho-GAP.                       | 1   | GCTGGGGCTGG  | 0.617 |
| - | 5  | 1656      | 208_uc002nqo.1_I   | NM_007153    | NP_009084    |        |             |                                | 7   | CAGTATGAATTC | 0.358 |
| - | 2  | 277       | se_Mutation_p.L4K  | NM_007153    | NP_009084    |        |             |                                | 7   | CACCCAGGAAG  | 0.308 |
| + | 4  | 494       | ecy.2_Missense_Iv  | NM_033468    | NP_258429    | Q9Y2Q1 | ZN257_HUMAN |                                | 0   | AAACATGAGAA  | 0.363 |
| + | 2  | 968       | add.1_Missense_Iv  | NM_014717    | NP_055532    | O15090 | ZN536_HUMAN | 2H2-type 3.                    | 11  | CTGTACCTTCTC | 0.667 |
| + | 15 | 4353      |                    | NM_015073    | NP_055888    | O60292 | S1L3_HUMAN  |                                | 2   | GCAGCCACAGC  | 0.602 |
| - | 2  | 2165      |                    | NM_020862    | NP_065913    | Q9P244 | LRFN1_HUMAN | lasmic (Potential).            | 2   | GGCGCGGGCGC  | 0.741 |
| + | 2  | 261       | omf.2_Missense_    | NM_020129    | NP_064514    | Q8TCE9 | PPL13_HUMAN | Galectin.                      | 2   | TGTTTCTTGTG  | 0.522 |
| - | 31 | 14265     |                    | NM_003890    | NP_003881    | Q9Y6R7 | FCGBP_HUMAN | TIL 11.                        | 9   | CACAGGGCAGG  | 0.637 |
| + | 5  | 901       | ACAM21_uc002o      | NM_001098506 | NP_001091976 | Q3KPI0 | CEA21_HUMAN | lasmic (Potential).            | 1   | CCAGCGATCAG  | 0.532 |
| - | 2  | 421       | ig.1_Intron PSG3_  | NM_021016    | NP_066296    | Q16557 | PSG3_HUMAN  | g-like V-type.                 | 2   | TGTCCTACTGT  | 0.453 |
| - | 3  | 498       | ovi.2_Missense_Iv  | NM_002782    | NP_002773    | Q00889 | PSG6_HUMAN  | like C2-type 1.                | 2   | AGATGGAGGGC  | 0.507 |
| - | 10 | 1083      |                    | NM_138568    | NP_612635    | Q2M3D2 | EX3L2_HUMAN |                                | 1   | TCCCTCTCAG   | 0.672 |
| + | 2  | 972       | lc.1_Nonsense_M    | NM_014681    | NP_055496    | Q14147 | DHX34_HUMAN | ase ATP-binding.               | 5   | GCACCCAGCCC  | 0.637 |

|   |    |                            |                    |              |              |        |             |                                |     |               |       |
|---|----|----------------------------|--------------------|--------------|--------------|--------|-------------|--------------------------------|-----|---------------|-------|
| + | 2  | 257                        | p.G18R CPT1C_u     | NM_152359    | NP_689572    | Q8TCG5 | CPT1C_HUMAN | lasmic (Potential).            | 3   | CGGACGGGGCT   | 0.587 |
| - | 7  | 876                        | Y KLK6_uc010ycn    | NM_001012964 | NP_001012982 | Q92876 | KLK6_HUMAN  | peptidase S1.                  | 0   | GAGGTGGTCTC   | 0.383 |
| - | 6  | 603                        | qar.3_Missense_M   | NM_001102603 | NP_001096073 | Q9HCG1 | ZN160_HUMAN | KRAB.                          | 1   | TTTCCCTTCTC   | 0.458 |
| - | 1  | 1411                       |                    | NM_033341    | NP_203127    | Q96P09 | BIRC8_HUMAN | BIR.                           | 1   | CCAAGGATCTT   | 0.433 |
| + | 7  | 2752                       | qr.1_Missense_M    | NM_018555    | NP_061025    | Q9NQX6 | ZN331_HUMAN | 2H2-type 12.                   | 6   | CTACGAATGTA   | 0.468 |
| + | 7  | 1034                       | p.S251F PRKCG_     | NM_002739    | NP_002730    | P05129 | KPCG_HUMAN  | C2.                            | 9   | GACCTCCCGCA   | 0.677 |
| + | 1  | 124                        | era.1_Missense_M   | NM_031896    | NP_114102    | P62955 | CCG7_HUMAN  |                                | 1   | ACATGGAAGAA   | 0.627 |
| - | 7  | 1489                       | _RB2_uc002qfc.2_   | NM_005874    | NP_005865    | Q8N423 | LIRB2_HUMAN | potential). Ig-like C2-type 4. | 1   | GGTGAGACAGC   | 0.632 |
| - | 2  | 1440                       |                    | NM_176820    | NP_789790    | Q7RTR0 | NALP9_HUMAN |                                | 7   | TGCTTCCAATGC  | 0.468 |
| + | 3  | 1038                       | VF776_uc002qqa.2_  | NM_173632    | NP_775903    | Q68D11 | ZN776_HUMAN | 2H2-type 3.                    | 1   | ATGAATCATTTTC | 0.388 |
| - | 4  | 1328                       | s.1_intron CMPK2   | NM_207315    | NP_997198    | Q5EBM0 | CMPK2_HUMAN | Potential.                     | 0   | TTGACGAAACAC  | 0.542 |
| + | 14 | 1580                       | ja.1_Missense_ML   | NM_005680    | NP_005671    | Q53T94 | TAF1B_HUMAN |                                | 3   | ACAGCCTTCAG   | 0.418 |
| - | 26 | 9693                       |                    | NM_000384    | NP_000375    | P04114 | APOB_HUMAN  | parin-binding.                 | 27  | CAAAGGATTTG   | 0.348 |
| - | 26 | 7164                       |                    | NM_000384    | NP_000375    | P04114 | APOB_HUMAN  |                                | 27  | CCTCTCGATTAA  | 0.373 |
| - | 26 | 5229                       |                    | NM_000384    | NP_000375    | P04114 | APOB_HUMAN  |                                | 27  | TTTCCCATCCCA  | 0.473 |
| - | 5  | 537                        |                    | NM_000384    | NP_000375    | P04114 | APOB_HUMAN  | Vitellogenin.                  | 27  | CCCTTCTGGAAT  | 0.512 |
| + | 1  | 2225                       |                    | NM_032266    | NP_115642    | Q68DN1 | CB016_HUMAN |                                | 1   | AGTAGGGACTG   | 0.428 |
| + | 14 | 1631_1632:512_uc010yix.1_M |                    | NM_032434    | NP_115810    | Q96ME7 | ZN512_HUMAN |                                | 1   | CTTCCCGAGAC   | 0.535 |
| - | 16 | 1740                       |                    | NM_000379    | NP_000370    | P47989 | XDH_HUMAN   |                                | 8   | CTGGGGGGTCT   | 0.498 |
| + | 13 | 1696                       | se_Mutation_p.L45  | NM_017735    | NP_060205    | Q6P3X3 | TTC27_HUMAN | TPR 2.                         | 1   | AAATCCTTAGAC  | 0.373 |
| - | 15 | 2455                       | j.3_Missense_Mut   | NM_005633    | NP_005624    | Q07889 | SOS1_HUMAN  | Ras-GEF.                       | 10  | CTTCCAATAAT   | 0.333 |
| - | 6  | 923                        |                    | NM_018079    | NP_060549    | Q8N5C6 | SRBD1_HUMAN | Potential.                     | 1   | TTTTCTGGATTGT | 0.343 |
| + | 9  | 1415                       | i.3_intron LHCGR_  | NM_172196    | NP_751946    | Q9UNN4 | TF2AY_HUMAN |                                | 0   | GACATCGTTTA   | 0.244 |
| - | 2  | 153                        |                    | NM_015717    | NP_056532    | Q9UJ71 | CLC4K_HUMAN | lasmic (Potential).            | 2   | CCCCGGGACCA   | 0.552 |
| - | 24 | 3231                       | Missense_Mutatio   | NM_021196    | NP_067019    | Q9BY07 | S4A5_HUMAN  | cellular (Potential).          | 9   | TTTTTCTTCTC   | 0.527 |
| + | 12 | 1851                       | p.V616M CTNNA2     | NM_004389    | NP_004380    | P26232 | CTNA2_HUMAN |                                | 9   | GCTGGTGTATC   | 0.522 |
| + | 5  | 1039                       | Intron TEKT4_uc0   | NM_144705    | NP_653306    | Q8WW24 | TEKT4_HUMAN | Potential.                     | 3   | TGCGGAAATC.   | 0.607 |
| + | 16 | 2548                       | I0yvi.1_Nonsense_  | NM_144992    | NP_659429    | Q502W6 | VWA3B_HUMAN |                                | 6   | AGTTCCAGAAA   | 0.413 |
| - | 23 | 3753                       | i.2_Missense_Mut   | NM_002285    | NP_002276    | P51826 | AFF3_HUMAN  |                                | 6   | GTAGTCGTAGC   | 0.547 |
| + | 2  | 218                        |                    | NM_024065    | NP_076970    | Q9H2J4 | PDCL3_HUMAN |                                | 0   | AAGAGGAGCAG   | 0.522 |
| + | 4  | 531_532                    | 3H2P_uc002tkd.2_   | NM_182905    | NP_878908    |        |             |                                | 0   | CCCTCCGGTGC   | 0.574 |
| + | 24 | 4205                       | flu.2_Missense_M   | NM_130773    | NP_570129    | Q8WYK1 | CNTP5_HUMAN | lasmic (Potential).            | 10  | TATCCAGAAAATI | 0.433 |
| + | 5  | 1363                       |                    | NM_080386    | NP_525125    | Q13748 | TBA3C_HUMAN |                                | 0   | GTTCTCTGAGG   | 0.582 |
| + | 4  | 1148                       | 4SD7B_uc002tvb.2_  | NM_001080427 | NP_001073896 |        |             | p.S414F(1)                     | 7   | AGTCTCTCTCC   | 0.493 |
| + | 25 | 3063_3064                  | i.2_Missense_Mut   | NM_018151    | NP_060621    | Q5UIP0 | RIF1_HUMAN  |                                | 15  | GGAATCCAGTGC  | 0.337 |
| - | 66 | 9669                       |                    | NM_004543    | NP_004534    | P20929 | NEBU_HUMAN  | Nebulin 86.                    | 20  | CACATCCATAG   | 0.463 |
| - | 41 | 5059                       |                    | NM_004543    | NP_004534    | P20929 | NEBU_HUMAN  |                                | 20  | ACTTGGTCTTGC  | 0.468 |
| + | 5  | 2203                       | .NT5_uc010zci.1_I  | NM_014568    | NP_055383    | Q7Z7M9 | GALT5_HUMAN | renal (Potential).             | 4   | ACAATTCCTCCA  | 0.343 |
| - | 39 | 5530                       | ca.2_Missense_ML   | NM_002349    | NP_002340    | O60449 | LY75_HUMAN  |                                | 0   | AAATTACCGTGC  | 0.368 |
| - | 15 | 1844                       | b.2_Missense_Mu    | NM_001935    | NP_001926    | P27487 | DPP4_HUMAN  | cellular (Potential).          | 3   | TCCTTCTCTCTC  | 0.303 |
| - | 17 | 3471                       | uc002udp.2_Intror  | NM_002977    | NP_002968    | Q15858 | SCN9A_HUMAN |                                | 13  | TTTTTCTTGGAG  | 0.393 |
| + | 8  | 1516                       | udy.2_Missense_M   | NM_152381    | NP_689594    | A4UGR9 | XIRP2_HUMAN |                                | 14  | TTAAACCGTTTA  | 0.373 |
| + | 8  | 2992                       | udy.2_Missense_M   | NM_152381    | NP_689594    | A4UGR9 | XIRP2_HUMAN |                                | 14  | CCATTCAAGATC  | 0.393 |
| + | 19 | 2307                       | 3B_uc002ufz.2_Mi   | NM_138995    | NP_620482    | Q8WXR4 | MYO3B_HUMAN | rosin head-like.               | 19  | ATCTTGGATATC  | 0.403 |
| + | 3  | 837                        |                    | NM_006898    | NP_008829    | P31249 | HXD3_HUMAN  | Homeobox.                      | 0   | TGTCCCGCCGC   | 0.592 |
| - | 7  | 985                        | A_uc002ume.2_M     | NM_003690    | NP_003681    | O75569 | PRKRA_HUMAN | association and interaction    | 2   | TCATACCTATATC | 0.294 |
| - | 78 | 19870                      | FN_uc010zfi.1_Intr | NM_133378    | NP_596869    | Q8WZ42 | TITIN_HUMAN |                                | 153 | AGGTTCTGATG.  | 0.428 |

|   |    |           |                    |              |              |        |             |                                |     |               |       |             |
|---|----|-----------|--------------------|--------------|--------------|--------|-------------|--------------------------------|-----|---------------|-------|-------------|
| - | 31 | 7428      | TN_uc010zjf.1_Mi   | NM_133378    | NP_596869    | Q8WZ42 | TITIN_HUMAN |                                | 153 | AATGTGAACCC   | 0.463 |             |
| - | 42 | 3123      | frx.2_Missense_Mi  | NM_000393    | NP_000384    | P05997 | CO5A2_HUMAN |                                | 2   | CCCATGAGAGC   | 0.612 |             |
| - | 39 | 2883      | frx.2_Missense_Mi  | NM_000393    | NP_000384    | P05997 | CO5A2_HUMAN |                                | 2   | CATCTCCCTTCT  | 0.443 |             |
| - | 7  | 1244      |                    | NM_014585    | NP_055400    | Q9NP59 | S40A1_HUMAN |                                | 1   | ACCCATCCATCT  | 0.512 |             |
| + | 26 | 2972      | p.K513N AOX1_u     | NM_001159    | NP_001150    | Q06278 | ADO_HUMAN   |                                | 6   | ATACAAGGAAAT  | 0.368 |             |
| + | 12 | 1737      | nse_Mutation_p.H   | NM_015040    | NP_055855    | Q9Y2I7 | FYV1_HUMAN  |                                | 10  | AACTTCCATATC  | 0.532 |             |
| + | 42 | 6363      |                    | NM_015040    | NP_055855    | Q9Y2I7 | FYV1_HUMAN  | atalytic. PIPK.                | 10  | TGTCTCCGGAG   | 0.433 |             |
| + | 7  | 1261      | i.1_intron MAP2_u  | NM_002374    | NP_002365    | P11137 | MAP2_HUMAN  |                                | 17  | AACATCGCCCT   | 0.438 | rs144486691 |
| - | 5  | 824       |                    | NM_001608    | NP_001599    | P28330 | ACADL_HUMAN |                                | 0   | TTGCTTCCATTG  | 0.323 |             |
| - | 1  | 169       |                    | NM_079420    | NP_524144    | P05976 | MYL1_HUMAN  |                                | 1   | CGCAGCCGCAG   | 0.313 |             |
| + | 32 | 4036      | o.P1308S CPS1_u    | NM_001875    | NP_001866    | P31327 | CPSM_HUMAN  |                                | 13  | ATAATTCCTGCT  | 0.343 |             |
| + | 1  | 41_42     | 62_uc002vhs.2_5'   | NM_198559    | NP_940961    | Q7Z7H3 | CB062_HUMAN |                                | 0   | TCCAAGGTTTAC  | 0.574 |             |
| + | 3  | 1058      |                    | NM_025216    | NP_079492    | Q9GZT5 | WN10A_HUMAN |                                | 2   | CCCTGCCACA    | 0.657 |             |
| - | 27 | 4489      |                    | NM_194302    | NP_919278    | Q6ZU64 | CC108_HUMAN |                                | 4   | TTCTCTCGTTCT  | 0.532 |             |
| + | 25 | 2570      | i.1_intron SP100_u | NM_003113    | NP_003104    | P23497 | SP100_HUMAN | HMG box 2.                     | 5   | ATAACCCGCTG   | 0.289 |             |
| + | 11 | 1666      | PP_uc002vsr.2_R    | NM_001632    | NP_001623    | P05187 | PPB1_HUMAN  |                                | 1   | CGCCCCCGCC    | 0.736 |             |
| + | 1  | 153       | up.2_intron UGT1   | NM_019075    | NP_061948    | Q9HAW8 | UD110_HUMAN |                                | 3   | TGGGAGTCACT   | 0.567 |             |
| + | 1  | 389       | up.2_intron UGT1   | NM_019075    | NP_061948    | Q9HAW8 | UD110_HUMAN |                                | 3   | CCAGTGGTTTT   | 0.378 |             |
| + | 9  | 1037      | _p.E193K LRRFIP    | NM_001137552 | NP_001131024 | Q32MZ4 | LRRF1_HUMAN | Potential.                     | 3   | TGCTCGAGGTA   | 0.368 |             |
| + | 3  | 367       |                    | NM_001080504 | NP_001073973 | Q6ZP01 | RBM44_HUMAN |                                | 4   | TTATTAGAGCCA  | 0.338 |             |
| - | 13 | 2479      | _p.E117K FERMT     | NM_017671    | NP_060141    | Q9BQL6 | FERM1_HUMAN | FERM.                          | 3   | AAACTCAGGCA   | 0.547 |             |
| - | 5  | 1114      | nj.2_Missense_Mi   | NM_020341    | NP_065074    | Q9P286 | PAK7_HUMAN  | Linker.                        | 23  | AAATCGGATTTCA | 0.473 |             |
| - | 2  | 176       | 0zrf.1_Missense_Mi | NM_025229    | NP_079505    | Q5TEA6 | SE1L2_HUMAN | ellular (Potential).           | 2   | TTCTTTCTTTTC  | 0.254 |             |
| + | 6  | 706       |                    | NM_020689    | NP_065740    | Q9HC58 | NCKX3_HUMAN | (Potential). Alpha-1.          | 1   | TTTCAGGGGTCT  | 0.522 |             |
| + | 3  | 1280      | i.1_intron GZF1_u  | NM_022482    | NP_071927    | Q9H116 | GZF1_HUMAN  | 2H2-type 2.                    | 1   | GCGCCACGTGC   | 0.652 |             |
| - | 22 | 3892      | _p.A924V NINL_uc   | NM_025176    | NP_079452    | Q9Y2I6 | NINL_HUMAN  | Potential.                     | 5   | CTCTGGCCTGC   | 0.677 |             |
| + | 6  | 639       | xb.1_RNA TLL9      | NM_001008409 | NP_001008409 | Q3SXZ7 | TLL9_HUMAN  | TTL.                           | 2   | GGCAGGAAAGC   | 0.552 |             |
| + | 16 | 2750      |                    | NM_016436    | NP_057520    | Q9BV10 | PHF20_HUMAN |                                | 1   | CTTTCCCGCC    | 0.607 |             |
| - | 24 | 3005      | ixgk.2_Missense_Mi | NM_152503    | NP_689716    | Q9H579 | CT132_HUMAN |                                | 0   | GATGGGAAGTT   | 0.373 |             |
| + | 3  | 360       | n_p.P64S TOX2_u    | NM_001098798 | NP_001092268 | Q96NM4 | TOX2_HUMAN  |                                | 1   | TGCTCCCTGCC   | 0.647 |             |
| + | 8  | 1128_1129 | '_RNA PABPC1L_u    | NM_001124756 | NP_001118228 | Q4VXU2 | PAP1L_HUMAN | RRM 4.                         | 1   | AAAGGCCGTGAC  | 0.564 |             |
| + | 2  | 1637      | _p.S527F SEMG2     | NM_003008    | NP_002999    | Q02383 | SEMG2_HUMAN | at-rich region. 3-2.           | 1   | AAAGTCTGGTC   | 0.378 |             |
| + | 2  | 176       | ATN4_uc010zwr.     | NM_014276    | NP_055091    | Q9UBG7 | RBPJL_HUMAN |                                | 1   | CGACAGGCGGA   | 0.652 |             |
| - | 13 | 1752      | gho.1_Nonsense_Mi  | NM_022829    | NP_073740    | Q8WWT9 | S13A3_HUMAN | ellular (Potential).           | 1   | CAGCTGGAAGA   | 0.557 |             |
| - | 21 | 3040      | zyt.1_Missense_Mi  | NM_080829    | NP_543019    | Q96MK2 | FA65C_HUMAN |                                | 2   | GGTTTCCCGGG   | 0.602 |             |
| + | 7  | 2222      | ze.1_Missense_Mi   | NM_001164116 | NP_001157588 | Q9NQ75 | CASS4_HUMAN |                                | 3   | GACTCCTGAGA   | 0.527 |             |
| - | 7  | 980       |                    | NM_198996    | NP_945347    | Q6XZB0 | LIPI_HUMAN  |                                | 2   | TGGCTTGATAACC | 0.323 |             |
| + | 18 | 2749      | cb.1_Missense_Mi   | NM_004540    | NP_004531    | O15394 | NCAM2_HUMAN | lasmic (Potential).            | 4   | AAGACGACAGC   | 0.358 |             |
| - | 1  | 210       |                    | NM_181621    | NP_853652    | Q52LG2 | KR132_HUMAN | approximate repeats. 2.        | 0   | GGGCTCCAGC    | 0.607 |             |
| - | 5  | 2362      | zyuj.3_Missense_Mi | NM_001001890 | NP_001001890 | Q01196 | RUNX1_HUMAN | o/Ser/Thr-ric p.Q262*(1)       | 387 | TGATCCCAGGT   | 0.517 |             |
| - | 3  | 457       | wo.2_Missense_Mi   | NM_002240    | NP_002231    | P48051 | IRK6_HUMAN  | ellular (By similarity).       | 1   | TGAGGTTGGTA   | 0.478 |             |
| - | 16 | 3442      | DAM_uc002yyr.1_f   | NM_001389    | NP_001380    | O60469 | DSCAM_HUMAN | III 2. Extracellular (Potentia | 11  | TGAGATGATATAC | 0.517 |             |
| - | 14 | 1940      | yzp.2_Missense_Mi  | NM_022115    | NP_071398    | P57071 | PRD15_HUMAN |                                | 0   | CCCGGGTGTG    | 0.562 |             |
| - | 2  | 273       |                    | NM_003225    | NP_003216    | P04155 | TFF1_HUMAN  |                                | 0   | CTTCTGGAGGG   | 0.483 |             |
| + | 9  | 1280      | _p.S356L TRPM2     | NM_003307    | NP_003298    | O94759 | TRPM2_HUMAN | lasmic (Potential).            | 3   | GGGCTCGGGCC   | 0.642 | rs138507862 |
| - | 5  | 739       | gpv.1_Missense_Mi  | NM_144991    | NP_659428    | Q8WU66 | TSEAR_HUMAN |                                | 0   | GGTGGCTCTG    | 0.672 | rs146216896 |
| + | 2  | 466       | HIR1306_hsa-mir-   | NM_022720    | NP_073557    | Q8WYQ5 | DGCR8_HUMAN | nd retention. Necessary for    | 0   | ACCTCCCTGC    | 0.637 |             |



|   |    |             |                   |              |              |        |             |    |               |       |             |
|---|----|-------------|-------------------|--------------|--------------|--------|-------------|----|---------------|-------|-------------|
| + | 2  | 198         | zuz.1_Missense_I  | NM_003347    | NP_003338    | P68036 | UB2L3_HUMAN | 0  | ATTGTTCTGTG/  | 0.413 |             |
| - | 7  | 714         |                   | NM_016449    | NP_057533    | Q6PGQ1 | CV043_HUMAN | 1  | AGAACCTGGAA/  | 0.398 |             |
| + | 14 | 1869        | p.G531E CABIN1_   | NM_012295    | NP_036427    | Q9Y6J0 | CABIN_HUMAN | 5  | ATTTTGGACCTG. | 0.537 |             |
| + | 4  | 530         | p.E69K UPB1_u     | NM_016327    | NP_057411    | Q9UBR1 | BUP1_HUMAN  | 2  | GGACAGAATTT/  | 0.502 |             |
| - | 6  | 685         | nse_Mutation_p.P: | NM_014303    | NP_055118    | O00541 | PESC_HUMAN  | 0  | CATAGGGAGTG   | 0.567 |             |
| + | 13 | 1728        | alz.1_Missense_M  | NM_000343    | NP_000334    | P13866 | SC5A1_HUMAN | 1  | TTTACGATGAT/  | 0.478 |             |
| - | 15 | 1442        | c010gwo.2_Misser  | NM_174932    | NP_777592    | Q8NFG6 | BPIL2_HUMAN | 2  | TTTGAGGATGTT  | 0.473 |             |
| + | 10 | 1115        | 4_uc003apz.3_3'l  | NM_000631    | NP_000622    | Q15080 | NCF4_HUMAN  | 1  | AGGCTCGTGGC   | 0.597 |             |
| + | 8  | 1085        | aqc.3_Missense_IV | NM_000395    | NP_000386    | P32927 | IL3RB_HUMAN | 3  | AGTGTCCCCA    | 0.667 |             |
| - | 3  | 724         | OX10_uc003auo.    | NM_006941    | NP_008872    | P56693 | SOX10_HUMAN | 0  | CGCTTGCACTT   | 0.627 |             |
| + | 2  | 1203        | xy.2_Missense_Mi  | NM_002409    | NP_002400    | Q09327 | MGAT3_HUMAN | 0  | AGATCCCGGCC   | 0.632 |             |
| + | 4  | 474         | v50_uc011aqd.1_!  | NM_015380    | NP_056195    | Q9Y512 | SAM50_HUMAN | 1  | TCCGCTTTGGA   | 0.363 |             |
| - | 24 | 5787        | CP6_uc010har.1_   | NM_020461    | NP_065194    | Q96RT7 | GCP6_HUMAN  | 4  | CCCAGGGGGCC   | 0.612 |             |
| - | 22 | 3605        | brg.1_Missense_IV | NM_014850    | NP_055665    | O43295 | SRGP2_HUMAN | 9  | GAGTTCCCGCA/  | 0.647 |             |
| - | 2  | 572         | va.1_Missense_M   | NM_173472    | NP_775743    | Q96PS1 | CC024_HUMAN | 0  | AAGTCCCGGTC   | 0.517 |             |
| - | 23 | 3932        | 120N ATP2B2_uc    | NM_001001331 | NP_001001331 | Q01814 | AT2B2_HUMAN | 6  | GTTATGGATGG/  | 0.537 |             |
| + | 1  | 230         | byv.1_Missense_I  | NM_014229    | NP_055044    | P48066 | S6A11_HUMAN | 4  | CCGGGGAGATC   | 0.552 |             |
| + | 7  | 1336        | H8_uc010hex.1_!   | NM_144633    | NP_653234    | Q96L42 | KCNH8_HUMAN | 5  | AAATGGAGAGG/  | 0.408 |             |
| + | 4  | 575         | p.S51L RARB_uc    | NM_016152    | NP_057236    | P10826 | RARB_HUMAN  | 3  | GACTTCGAAGC.  | 0.502 |             |
| - | 19 | 1779        | 10_uc003cds.1_5'  | NM_199347    | NP_955379    | Q6ZWH5 | NEK10_HUMAN | 13 | TCAATATTTTAC  | 0.348 |             |
| + | 6  | 736         | AC_uc011aya.1_!   | NM_003149    | NP_003140    | Q99469 | STAC_HUMAN  | 4  | CAGATCTTGTG/  | 0.478 |             |
| - | 12 | 2016        | D608N SCN5A_u     | NM_198056    | NP_932173    | Q14524 | SCN5A_HUMAN | 9  | TGGGTCGCCCTG  | 0.647 |             |
| - | 10 | 1672        |                   | NM_014139    | NP_054858    | Q9UI33 | SCNBA_HUMAN | 9  | ACTTACCTTTTI  | 0.358 |             |
| - | 2  | 3150        | e_Mutation_p.D97  | NM_194293    | NP_919269    | Q702N8 | XIRP1_HUMAN | 8  | GGGGTCCAGTG/  | 0.672 |             |
| - | 1  | 997_998     | mg.2_Intron CYP8  | NM_004391    | NP_004382    | Q9UNU6 | CP8B1_HUMAN | 2  | CACTCCCGGGC   | 0.559 |             |
| - | 10 | 1733        | p.Q187* SLC6A2    | NM_020208    | NP_064593    | Q9NP91 | S6A20_HUMAN | 2  | GGCTTGATACTI  | 0.572 |             |
| - | 4  | 471         | al.1_Missense_M   | NM_024513    | NP_078789    | Q9BQS8 | FYCO1_HUMAN | 1  | AAAGCGGATCC   | 0.507 | rs141476300 |
| - | 14 | 1484        | bbd.1_Missense_I  | NM_003074    | NP_003065    | Q92922 | SMRC1_HUMAN | 3  | ACCATGATGCAT/ | 0.433 |             |
| + | 11 | 2069_2070   | n_p.P509L MIR12   | NM_138615    | NP_619520    | Q7L2E3 | DHX30_HUMAN | 4  | CAACCCAGCCCT  | 0.624 |             |
| - | 48 | 11609_11610 | cuk.2_Missense_I  | NM_001407    | NP_001398    | Q9NYQ7 | CELR3_HUMAN | 11 | GAGGGGAGCG/   | 0.668 |             |
| + | 31 | 3249        |                   | NM_004947    | NP_004938    | Q8IZD9 | DOCK3_HUMAN | 0  | CCCTATGAACTG  | 0.428 |             |
| + | 21 | 3843        | BO2_uc011bgk.1_   | NM_002942    | NP_002933    | Q9HCK4 | ROBO2_HUMAN | 11 | TGGATCCACTTC  | 0.438 |             |
| + | 1  | 460         |                   | NM_001005338 | NP_001005338 | A6NKK0 | OR5H1_HUMAN | 2  | GGTATTCTTCAT/ | 0.373 |             |
| + | 1  | 340         |                   | NM_001005514 | NP_001005514 | A6NHG9 | O5H14_HUMAN | 1  | GTCTTCTCTTGC  | 0.398 |             |
| - | 8  | 1007        | p.S266F SENP7_u   | NM_020654    | NP_065705    | Q9BQF6 | SENP7_HUMAN | 5  | TCCTGGAAATC/  | 0.363 |             |
| - | 27 | 2713        | hn.1_Nonsense_IV  | NM_014429    | NP_055244    | Q86VD1 | MORC1_HUMAN | 8  | TATTTGGACCAT  | 0.279 |             |
| + | 4  | 714         | 96_uc003dxx.2_Ini | NM_198196    | NP_937839    | P40200 | TACT_HUMAN  | 3  | CTTAGGAAAAC/  | 0.428 |             |
| + | 13 | 1432        | lbi.1_Missense_M  | NM_014980    | NP_055795    | Q9Y2K9 | STB5L_HUMAN | 9  | TGATTTCTATAGG | 0.308 |             |
| + | 23 | 2575        | lbi.1_Missense_M  | NM_014980    | NP_055795    | Q9Y2K9 | STB5L_HUMAN | 9  | AAAATTCCTATA/ | 0.284 |             |
| + | 25 | 3246        | bi.1_Missense_Mi  | NM_014980    | NP_055795    | Q9Y2K9 | STB5L_HUMAN | 9  | CCAATGAAGGAC  | 0.403 |             |
| - | 13 | 5830        | Q1868* GOLGB1     | NM_004487    | NP_004478    | Q14789 | G0GB1_HUMAN | 10 | TCTCTGGATTT/  | 0.368 |             |
| - | 14 | 2264        | MA5B_uc003egb.    | NM_001031702 | NP_001026872 | Q9P283 | SEM5B_HUMAN | 7  | GGCTGGCCCCA/  | 0.607 |             |
| - | 7  | 788         | e_Mutation_p.R16: | NM_053025    | NP_444253    | Q15746 | MYLK_HUMAN  | 9  | CAACTCGGCC    | 0.562 |             |
| + | 12 | 2534        | _uc003epw.1_Intrc | NM_001063    | NP_001054    | P02787 | TRFE_HUMAN  | 2  | TACATCCGTCTG1 | 0.587 |             |
| + | 3  | 1795        |                   | NM_152616    | NP_689829    | Q8IWZ5 | TRI42_HUMAN | 7  | CCAGCGAAGCT/  | 0.592 |             |
| + | 16 | 2003        | p.T615R PLS1_uc   | NM_001145319 | NP_001138791 | Q14651 | PLS1_HUMAN  | 1  | TATGACGGTGT/  | 0.388 | rs149708405 |
| + | 10 | 1491        | yn.2_Missense_M   | NM_053002    | NP_443728    | Q86YW9 | MD12L_HUMAN | 7  | CTTATCATAAG/  | 0.343 |             |

|   |    |           |                    |              |              |        |             |                               |    |               |       |
|---|----|-----------|--------------------|--------------|--------------|--------|-------------|-------------------------------|----|---------------|-------|
| - | 7  | 1040      | r_p.l66F IFT80_uc  | NM_020800    | NP_065851    | Q9P2H3 | IFT80_HUMAN | WD 4.                         | 1  | ATAAAATAAGATC | 0.269 |
| + | 13 | 1511      | <Cl_uc003fgt.2_5'l | NM_002740    | NP_002731    | P41743 | KPCI_HUMAN  | rotein kinase.                | 5  | AAATTTTAAGAC  | 0.343 |
| + | 6  | 770       | se_Mutation_p.T24  | NM_033540    | NP_284941    | Q8IWA4 | MFN1_HUMAN  | lasmic (Potential).           | 3  | GAAATACGGTAGC | 0.358 |
| - | 2  | 86        | l1D1_uc011bqn.1_   | NM_020640    | NP_065691    | Q96GG9 | DCNL1_HUMAN | UBA-like.                     | 1  | CTGACGGAACCTT | 0.308 |
| - | 5  | 1231      |                    | NM_014398    | NP_055213    | Q9UQV4 | LAMP3_HUMAN | lenal (Potential).            | 3  | TGAAGGAATGC   | 0.473 |
| - | 7  | 971       | brs.1_Missense_IV  | NM_001966    | NP_001957    | Q08426 | ECHP_HUMAN  | yl-CoA dehydrogenase.         | 3  | CAAAAAGAAATG  | 0.418 |
| - | 7  | 699       | iy.2_Missense_Mu   | NM_004454    | NP_004445    | P41161 | ETV5_HUMAN  |                               | 5  | GTGGGGGAAAT   | 0.612 |
| + | 10 | 2044      | G1_uc003fqr.2_Inl  | NM_001102416 | NP_001095886 | P01042 | KNG1_HUMAN  |                               | 1  | GACCTCCCCAA   | 0.433 |
| - | 2  | 2996      | p.2_Intron MUC4_   | NM_018406    | NP_060876    | Q99102 | MUC4_HUMAN  | Ser-rich.                     | 0  | CAATTCGGTTG   | 0.552 |
| + | 15 | 2196_2197 | o.2_3'UTR ADD1_u   | NM_001119    | NP_001110    | P35611 | ADDA_HUMAN  |                               | 1  | CAAGCCCCTCTG  | 0.649 |
| - | 6  | 767       | md.2_Missense_IV   | NM_020041    | NP_064425    | Q9NRM0 | GTR9_HUMAN  | Name=6; (Potential).          | 3  | CACTCCAAACA   | 0.587 |
| - | 2  | 197       | Site_p.D30_splic   | NM_147182    | NP_671711    | Q6PIL6 | KCIP4_HUMAN |                               | 0  | GCTGTCTGTGG   | 0.498 |
| + | 3  | 307       | C4_uc003grp.2_5    | NM_013367    | NP_037499    | Q9UJX5 | APC4_HUMAN  |                               | 5  | TTTCCACCAAAAT | 0.333 |
| - | 47 | 6901      | gyi.1_Splice_Site_ | NM_015030    | NP_055845    | O94915 | FRYL_HUMAN  |                               | 1  | AAAGCCTATCA   | 0.313 |
| + | 5  | 1208      | cam.1_Missense_    | NM_001075    | NP_001066    | P36537 | UDB10_HUMAN |                               | 5  | CATTGTTTTTTTC | 0.453 |
| + | 10 | 1410      | ej.1_Missense_Mu   | NM_000253    | NP_000244    | P55157 | MTP_HUMAN   | Vitellogenin.                 | 4  | TGACAGCAGCA   | 0.433 |
| + | 1  | 643       |                    | NM_001977    | NP_001968    | Q07075 | AMPE_HUMAN  | ellular (Potential).          | 5  | CAGTCCACTAC   | 0.612 |
| + | 1  | 665       |                    | NM_001977    | NP_001968    | Q07075 | AMPE_HUMAN  | ellular (Potential).          | 5  | GAAGCCCCTGT   | 0.612 |
| + | 8  | 7244      | e_Mutation_p.G71   | NM_024582    | NP_078858    | Q6V017 | FAT4_HUMAN  | Extracellular (Potential).    | 18 | GACAGGACAAA   | 0.413 |
| - | 4  | 3379      | p.D209N PCDH18     | NM_019035    | NP_061908    | Q9HCL0 | PCD18_HUMAN | y similarity). Cytoplasmic (I | 5  | GGTATCCCCAG   | 0.512 |
| - | 9  | 982       | 0A7_uc010ipa.2_f   | NM_001029998 | NP_001025169 | Q0GE19 | NTCP7_HUMAN | ical; (Potential).            | 0  | TGGATAGAAAAAT | 0.284 |
| - | 10 | 1213      |                    | NM_004564    | NP_004555    | O75879 | GATB_HUMAN  |                               | 0  | GACTTCGTTCT   | 0.403 |
| - | 25 | 7132      |                    | NM_017639    | NP_060109    | Q6V1P9 | PCD23_HUMAN | Cadherin 21.                  | 4  | AAATATCCCCTGT | 0.413 |
| - | 5  | 1326_1327 | e_Mutation_p.G42   | NM_000508    | NP_000499    | P02671 | FIBA_HUMAN  | By similarity.                | 3  | CTTGTCCTCGG   | 0.5   |
| - | 5  | 1108      | RF1_uc010irc.1_5'  | NM_020870    | NP_065921    | Q7Z6J0 | SH3R1_HUMAN | SH3 2.                        | 3  | CAGCCGAGTTA   | 0.453 |
| - | 13 | 2114      | 1ckv.1_Missense_I  | NM_021069    | NP_066547    | O94875 | SRBS2_HUMAN |                               | 1  | CCATGGGGCAG   | 0.602 |
| - | 3  | 544       |                    | NM_024830    | NP_079106    | Q8NF37 | PCAT1_HUMAN | lenal (Potential).            | 2  | CACAGGGATGG   | 0.657 |
| - | 18 | 3126      |                    | NM_003966    | NP_003957    | Q13591 | SEM5A_HUMAN | Extracellular (Potential).    | 2  | GGTCCGAATG    | 0.587 |
| - | 77 | 13511     | fc.2_Missense_Mu   | NM_001369    | NP_001360    | Q8TE73 | DYH5_HUMAN  |                               | 31 | AAATCCCTGGC   | 0.408 |
| - | 75 | 13123     | fc.2_Missense_Mu   | NM_001369    | NP_001360    | Q8TE73 | DYH5_HUMAN  |                               | 31 | ATCATCAGCCAG  | 0.577 |
| - | 23 | 3544      |                    | NM_001369    | NP_001360    | Q8TE73 | DYH5_HUMAN  | n (By similarity).            | 31 | AAATTCAGAAAC  | 0.403 |
| + | 53 | 8315      | riO_uc003jfg.2_Rf  | NM_007118    | NP_009049    | O75962 | TRIO_HUMAN  | l-like C2-type.               | 18 | CTCATCGTCGG   | 0.572 |
| - | 8  | 1716      | o.D447N CDH18_u    | NM_004934    | NP_004925    | Q13634 | CAD18_HUMAN | r (Potential). Cadherin 4.    | 7  | TCTGTGCGAAAT  | 0.363 |
| - | 5  | 915       | g.2_Missense_Mu    | NM_016279    | NP_057363    | Q9ULB4 | CADH9_HUMAN | r (Potential). Cadherin 2.    | 9  | TTCCAGAAAGG   | 0.448 |
| - | 12 | 1292      | p.E58K AGXT2_uc    | NM_031900    | NP_114106    | Q9BYV1 | AGT2_HUMAN  |                               | 4  | TGTTTTCTGTAT  | 0.398 |
| - | 4  | 492       |                    | NM_001737    | NP_001728    | P02748 | CO9_HUMAN   | receptor class A.             | 0  | CACTTTCACAAT  | 0.478 |
| - | 21 | 2627      | 3jmi.3_Missense_I  | NM_173489    | NP_775760    | Q7Z745 | HTRB2_HUMAN |                               | 8  | CTTGGGAGCATC  | 0.498 |
| - | 7  | 1686      |                    | NM_021072    | NP_066550    | O60741 | HCN1_HUMAN  | toplasmic (Potential).        | 1  | CAGCTCGAACAC  | 0.413 |
| + | 10 | 1351      | p.S397F IL31RA_    | NM_139017    | NP_620586    | Q8NI17 | IL31R_HUMAN | ential). Fibronectin type-III | 1  | CATCTCTGTGTA  | 0.428 |
| + | 10 | 1704      | u_p.L481I BDP1_uc  | NM_018429    | NP_060899    | A6H8Y1 | BDP1_HUMAN  |                               | 2  | AATCTTTTAGAAA | 0.378 |
| + | 5  | 5248_5249 | /x.1_Missense_Mu   | NM_005909    | NP_005900    | P46821 | MAP1B_HUMAN |                               | 5  | GATCACCTACA   | 0.465 |
| - | 8  | 911       | p.E230K FAM169     | NM_015566    | NP_056381    | Q9Y6X4 | F169A_HUMAN |                               | 0  | TTGCTTCGTATTC | 0.338 |
| + | 18 | 2013      | p.D601E PDE8B_     | NM_003719    | NP_003710    | O95263 | PDE8B_HUMAN | ytic (By similarity).         | 0  | CATGACGTGGA   | 0.552 |
| + | 14 | 10296     | o.R1560C VCAN_u    | NM_004385    | NP_004376    | P13611 | CSPG2_HUMAN | Sushi.                        | 16 | AAACCTCGTTATC | 0.423 |
| + | 15 | 10540     | p.R1641K VCAN_u    | NM_004385    | NP_004376    | P13611 | CSPG2_HUMAN |                               | 16 | GTCGAGGCGCT   | 0.408 |
| + | 20 | 4132      | R98_uc003kjt.2_5'l | NM_032119    | NP_115495    | Q8WXG9 | GPR98_HUMAN | ellular (Potential).          | 16 | ACCATCCCTCCA  | 0.448 |
| + | 3  | 208       | _Intron CAST_uc01  | NM_001042443 | NP_001035908 | P20810 | ICAL_HUMAN  |                               | 5  | AGATGGAAGGA   | 0.388 |

rs143717547

rs145743816

|   |    |      |                     |              |              |        |             |                                 |    |              |       |
|---|----|------|---------------------|--------------|--------------|--------|-------------|---------------------------------|----|--------------|-------|
| + | 22 | 1693 | 439F CAST_uc001     | NM_001042443 | NP_001035908 | P20810 | ICAL_HUMAN  |                                 | 5  | ACTTCCTTCTG  | 0.378 |
| - | 35 | 5048 | n.2_Missense_Mu     | NM_001270    | NP_001261    | O14646 | CHD1_HUMAN  | repeats of H-S-D-H-R.           | 5  | TGAGTGAGAAC  | 0.408 |
| + | 21 | 4184 |                     | NM_002372    | NP_002363    | Q16706 | MA2A1_HUMAN | lenal (Potential).              | 3  | AAAAGGGTTTG  | 0.453 |
| - | 4  | 316  | TARD4_uc003kpi.     | NM_139164    | NP_631903    | Q96DR4 | STAR4_HUMAN | START.                          | 1  | CCAATCCAAC   | 0.393 |
| - | 6  | 1953 | 3kxy.1_Missense_    | NM_133456    | NP_597713    | Q2M3G4 | SHRM1_HUMAN |                                 | 1  | GGGAGGGGAGC  | 0.587 |
| + | 1  | 1576 | p.E526K PCDHA1      | NM_018900    | NP_061723    | Q9Y5I3 | PCDA1_HUMAN | Extracellular (Potential).      | 1  | ACCACGAGGAG  | 0.677 |
| + | 1  | 1940 | 03lhc.1_Nonsense    | NM_018905    | NP_061728    | Q9Y5H9 | PCDA2_HUMAN | Extracellular (Potential).      | 4  | AGTTCAGCTG   | 0.647 |
| + | 1  | 217  | ihd.2_Intron PCD    | NM_018906    | NP_061729    | Q9Y5H8 | PCDA3_HUMAN | Extracellular (Potential).      | 8  | ACGGGGACCTT  | 0.622 |
| + | 1  | 642  | 03lhf.2_Intron PC   | NM_018907    | NP_061730    | Q9UN74 | PCDA4_HUMAN | r (Potential). Cadherin 2.      | 6  | CTCTGGAAAAAC | 0.478 |
| + | 1  | 204  | :003lhi.2_Intron PC | NM_018908    | NP_061731    | Q9Y5H7 | PCDA5_HUMAN | r (Potential). p.Q49fs*50(1)    | 3  | TCCAAGGGCCG  | 0.642 |
| + | 1  | 392  | hh.1_Intron PCDH    | NM_018910    | NP_061733    | Q9UN72 | PCDA7_HUMAN | Extracellular (Potential).      | 4  | CCCTCCGGTGT  | 0.587 |
| + | 1  | 812  |                     | NM_018938    | NP_061761    | Q9Y5E5 | PCDB4_HUMAN | Extracellular (Potential).      | 3  | TGCTGGAAACTT | 0.418 |
| + | 1  | 797  | lah.1_Missense_IV   | NM_018939    | NP_061762    | Q9Y5E3 | PCDB6_HUMAN | Extracellular (Potential).      | 1  | AGCCAGAGATT  | 0.483 |
| + | 1  | 1608 | HB16_uc010jfw.1_    | NM_020957    | NP_066008    | Q9NRJ7 | PCDBG_HUMAN | r (Potential). Cadherin 2.      | 2  | ACTGAGTTCCC  | 0.398 |
| + | 1  | 2311 | dan.1_Missense_I    | NM_018912    | NP_061735    | Q9Y5H4 | PCDG1_HUMAN | lasmic (Potential).             | 3  | TTTTCCCCAG   | 0.547 |
| + | 1  | 1766 | :010jfx.1_Missense  | NM_018916    | NP_061739    | Q9Y5H0 | PCDG3_HUMAN | r (Potential). Cadherin 6.      | 1  | GGTGACCAAGG  | 0.682 |
| + | 1  | 1889 | l10jfx.1_Missense_  | NM_018916    | NP_061739    | Q9Y5H0 | PCDG3_HUMAN | r (Potential). Cadherin 6.      | 1  | GGCGCGAGCCC  | 0.706 |
| + | 5  | 1139 | p.R367C TCERG1      | NM_006706    | NP_006697    | O14776 | TCRG1_HUMAN | Pro-rich.                       | 2  | CGTTTTCGTGT  | 0.468 |
| - | 9  | 1682 | loh.3_Missense_IV   | NM_004576    | NP_004567    | Q00005 | 2ABB_HUMAN  |                                 | 2  | GGATAGCCCGG  | 0.502 |
| - | 6  | 1451 | isense_Mutation_p   | NM_014790    | NP_055605    | Q96AA8 | JKIP2_HUMAN | Potential.                      | 2  | AATTTTCTTGGT | 0.408 |
| + | 9  | 1563 | RIA1_uc011dxc.1_    | NM_001114183 | NP_001107655 | P42261 | GRIA1_HUMAN | cellular (Potential).           | 6  | GGGGCGATAAT  | 0.478 |
| - | 5  | 691  | NJL_uc003lyc.1_F    | NM_024565    | NP_078841    | Q8IV13 | CCNJL_HUMAN | clin N-terminal.                | 0  | TTCCCGATCCT  | 0.557 |
| + | 5  | 1030 | i_p.V223 ODZ2_u     | NM_001122679 | NP_001116151 |        |             |                                 | 10 | GAACGGTTTAC  | 0.567 |
| - | 20 | 2617 | g.2_Missense_Mul    | NM_003062    | NP_003053    | O75094 | SLIT3_HUMAN | LRRNT 4.                        | 4  | TGTCTCCATAC  | 0.632 |
| + | 2  | 713  | l1_uc003maj.3_In    | NM_012188    | NP_036320    | Q12951 | FOXI1_HUMAN |                                 | 4  | ATGTTTCTCTAC | 0.512 |
| + | 8  | 1138 | l17_uc003meu.2_f    | NM_001099408 | NP_001092878 | A6NMX2 | I4E1B_HUMAN | ning mRNA cap binding (B)       | 0  | CAAGGGGGACA  | 0.622 |
| + | 5  | 657  | i_p.E50K ZFP2_uc    | NM_030613    | NP_085116    | Q6ZN57 | ZFP2_HUMAN  |                                 | 3  | GGTAATGAATTT | 0.413 |
| + | 1  | 936  | .2_5'UTR DCCDC2_    | NM_181337    | NP_851854    | Q9UBP8 | KAAG1_HUMAN |                                 | 0  | GCGCGGGATCG  | 0.657 |
| - | 1  | 534  |                     | NM_001005226 | NP_001005226 |        |             |                                 | 1  | CAGCACTGAGT  | 0.498 |
| - | 3  | 528  | p.G121D HLA-DO.     | NM_002119    | NP_002110    | P06340 | DOA_HUMAN   | ntial). Alpha-2.  Ig-like C1-t  | 0  | TTTGGCCGTTG  | 0.587 |
| + | 2  | 1543 | lj.1_RNA BRPF3_u    | NM_015695    | NP_056510    | Q9ULD4 | BRPF3_HUMAN |                                 | 2  | TGGCTCCCTCA  | 0.448 |
| - | 7  | 831  | on_p.G231D YIPF:    | NM_015388    | NP_056203    | Q9GZM5 | YIPF3_HUMAN | ical; (Potential).              | 0  | AGAGGCCATAG  | 0.547 |
| + | 6  | 421  | ense_Mutation_p.C   | NM_005588    | NP_005579    | Q16819 | MEP1A_HUMAN | potential). Metalloprotease.    | 3  | TTGATGGGTTG  | 0.313 |
| - | 9  | 851  | i.G199R CRISP2_u    | NM_001142408 | NP_001135880 | P16562 | CRIS2_HUMAN |                                 | 1  | ATAGTCTTTGTC | 0.323 |
| - | 1  | 194  |                     | NM_138733    | NP_620061    | P07205 | PGK2_HUMAN  |                                 | 1  | CTTCTCATGGG  | 0.418 |
| + | 2  | 249  |                     | NM_001010872 | NP_001010872 | Q5T0W9 | FA83B_HUMAN |                                 | 6  | TACCAAGAATTT | 0.383 |
| - | 6  | 1821 | P5_uc011dxf.1_Inl   | NM_021073    | NP_066551    | P22003 | BMP5_HUMAN  |                                 | 2  | ATAATCCAGTCC | 0.254 |
| + | 4  | 947  | odi.3_Missense_M    | NM_152731    | NP_689944    | Q5SZJ8 | BEND6_HUMAN |                                 | 0  | TTAAGGGTGGG  | 0.438 |
| + | 10 | 3331 | n.2_Missense_Mu     | NM_015153    | NP_055968    | Q92576 | PHF3_HUMAN  |                                 | 5  | CTATGTCTAAAG | 0.363 |
| - | 10 | 1091 | COL9A1_uc003pff.    | NM_001851    | NP_001842    | P20849 | CO9A1_HUMAN | elical region (COL3).           | 4  | GCTTTCCCGGT  | 0.622 |
| + | 14 | 2670 | at.2_Missense_Mi    | NM_019842    | NP_062816    | Q9NR82 | KCNQ5_HUMAN |                                 | 7  | TTACAGGAAAGC | 0.522 |
| + | 1  | 1171 |                     | NM_032602    | NP_115991    | Q969M2 | CXA10_HUMAN | lasmic (Potential).             | 0  | CCAGGACCCA   | 0.522 |
| - | 10 | 1362 | p.R140C C6orf167    | NM_198468    | NP_940870    | Q6ZRQ5 | MMS22_HUMAN |                                 | 0  | ATGGCGATCAA  | 0.328 |
| - | 10 | 1411 | u.2_Missense_Mu     | NM_005068    | NP_005059    | P81133 | SIM1_HUMAN  | inded C-terminal.               | 4  | TGTCATGATCAG | 0.532 |
| - | 14 | 6325 | √3L_uc003puz.3_     | NM_002912    | NP_002903    | O60673 | DPOLZ_HUMAN |                                 | 6  | GACTTGGGGCA  | 0.433 |
| - | 29 | 4979 | 1_Intron GOPC_u     | NM_002944    | NP_002935    | P08922 | ROS_HUMAN   | III 7.  Extracellular (Potentia | 25 | CAACTGATAACC | 0.443 |
| - | 8  | 1572 |                     | NM_005907    | NP_005898    | P33908 | MA1A1_HUMAN | lenal (Potential).              | 4  | ACTGTTCGAATA | 0.343 |

rs142835485

|   |     |           |                     |              |              |        |              |                                         |       |                |       |             |
|---|-----|-----------|---------------------|--------------|--------------|--------|--------------|-----------------------------------------|-------|----------------|-------|-------------|
| - | 22  | 3581      | c.2_Missense_Mut    | NM_002844    | NP_002835    | Q15262 | PTPRK_HUMAN  | phosphatase 1, cytoplasmic (Potential). | 8     | TGGGAGGGTTTG   | 0.483 |             |
| - | 101 | 19489     | .R820K SYNE1_ur     | NM_182961    | NP_892006    | Q8NF91 | SYNE1_HUMAN  | phosphatase 1, cytoplasmic (Potential). | 45    | TTTCATTCTCATCT | 0.378 |             |
| - | 55  | 9090      | u.3_Missense_Mut    | NM_182961    | NP_892006    | Q8NF91 | SYNE1_HUMAN  | phosphatase 1, cytoplasmic (Potential). | 45    | TTTTTTCCTAGTA  | 0.398 |             |
| + | 2   | 387       | 'CT1_uc003qpc.3_    | NM_025107    | NP_079383    | Q8N699 | MYCT1_HUMAN  |                                         | 1     | TTTACC GCCCAC  | 0.517 | rs17852097  |
| - | 20  | 3097      |                     | NM_005577    | NP_005568    | P08519 | APOA_HUMAN   | Kringle 31.                             | 6     | TAGGATCTGGAT   | 0.453 |             |
| + | 5   | 837       | p.V205M PACRG_      | NM_152410    | NP_689623    | Q96M98 | PACRG_HUMAN  |                                         | 0     | TGAATGGTGAGT   | 0.428 |             |
| + | 5   | 751       |                     | NM_001145121 | NP_001138593 | B9ZVM9 | B9ZVM9_HUMAN |                                         | 0     | TGACTCCCGGTG   | 0.522 |             |
| - | 4   | 441       | v.1_Missense_Mut    | NM_001013836 | NP_001013858 | Q9Y6D9 | MD1L1_HUMAN  | Potential. p.R59G(1)                    | 2     | TGCAACGGATCT   | 0.562 | rs121908982 |
| - | 3   | 566       | p.R177H ACTB_u      | NM_001101    | NP_001092    | P60709 | ACTB_HUMAN   |                                         | 0     | TCCAGACGCAGG   | 0.642 |             |
| + | 36  | 6042      |                     | NM_003777    | NP_003768    | Q96DT5 | DYH11_HUMAN  | 1 (By similarity).                      | 15    | TGAACCCGGGTT   | 0.398 |             |
| + | 61  | 9794      |                     | NM_003777    | NP_003768    | Q96DT5 | DYH11_HUMAN  | k (By similarity).                      | 15    | TTGCAGGTTGAT   | 0.338 |             |
| + | 22  | 2712      | p.R882Q STK31_u     | NM_031414    | NP_113602    | Q9BXU1 | STK31_HUMAN  | protein kinase.                         | 9     | TTCAGCGAGCCT   | 0.383 |             |
| - | 2   | 772       | bw.1_Missense_Mut   | NM_013389    | NP_037521    | Q9UHC9 | NPCL1_HUMAN  | cellular (Potential).                   | 5     | TCAACCCCTCA    | 0.632 |             |
| + | 8   | 1313      | 3tvz.2_Missense_Mut | NM_022479    | NP_071924    | Q6IS24 | GLTL3_HUMAN  | cellular (Potential).                   | 7     | CATTAAGGAAAA   | 0.448 |             |
| - | 14  | 3887_3888 |                     | NM_032408    | NP_115784    | Q9UIG0 | BAZ1B_HUMAN  |                                         | 7     | TCTGCGGACATA   | 0.431 | rs148299208 |
| - | 19  | 3585      | p.P1097S MAGI2_     | NM_012301    | NP_036433    | Q86UL8 | MAGI2_HUMAN  | Pro-rich.                               | 11    | CAAGGGTGGGG    | 0.612 |             |
| - | 8   | 13625     | v.2_Missense_Mut    | NM_033026    | NP_149015    | Q9Y6V0 | PCLO_HUMAN   |                                         | 7     | GTTTATCAAACC   | 0.463 |             |
| - | 7   | 12686     | v.R4133C PCLO_u     | NM_033026    | NP_149015    | Q9Y6V0 | PCLO_HUMAN   |                                         | 7     | CTCTACGAAATC   | 0.408 |             |
| - | 6   | 11237     | p.D3650N PCLO_u     | NM_033026    | NP_149015    | Q9Y6V0 | PCLO_HUMAN   |                                         | 7     | TTATATCATCAGG  | 0.468 |             |
| - | 6   | 9714      | p.S3142L PCLO_u     | NM_033026    | NP_149015    | Q9Y6V0 | PCLO_HUMAN   |                                         | 7     | TAAATATGATCTAG | 0.428 |             |
| - | 5   | 8217      | _Mutation_p.G264    | NM_033026    | NP_149015    | Q9Y6V0 | PCLO_HUMAN   |                                         | 7     | TAAAGCTCCAGAG  | 0.433 |             |
| - | 3   | 2357      | v.2_Missense_Mut    | NM_033026    | NP_149015    | Q9Y6V0 | PCLO_HUMAN   | Pro-rich.                               | 7     | TTTTGGTGCA     | 0.532 |             |
| - | 16  | 2180      | hc.1_Missense_Mut   | NM_000927    | NP_000918    | P08183 | MDR1_HUMAN   | 1, cytoplasmic (Potential)              | 7     | TCAAACGATGAG   | 0.393 |             |
| + | 33  | 8809      | p.Q2485* AKAP9_     | NM_005751    | NP_005742    | Q99996 | AKAP9_HUMAN  |                                         | 26    | TCCGTTTCAGTTA  | 0.373 |             |
| - | 5   | 1117      | 10ff.2_Missense_Mut | NM_001039372 | NP_001034461 | A8MVW5 | HECA2_HUMAN  | cellular (Potential).                   | 5     | CACATGGATATA   | 0.289 |             |
| - | 3   | 577       | 10ff.2_Missense_Mut | NM_001039372 | NP_001034461 | A8MVW5 | HECA2_HUMAN  | 1, extracellular (Potential).           | 5     | CTCCCATTTTTTA  | 0.507 |             |
| + | 3   | 228       | 'PC1B_uc003uqb.1_   | NM_005720    | NP_005711    | O15143 | ARC1B_HUMAN  |                                         | 0     | TGCACGAGCTC    | 0.577 |             |
| - | 7   | 1349      | p.R381C TRIM4_      | NM_033017    | NP_148977    | Q9C037 | TRIM4_HUMAN  | 330.2/SPRY.                             | 2     | TTGAACGATCAG   | 0.512 |             |
| + | 8   | 969       | p.P60S STAG3_u      | NM_012447    | NP_036579    | Q9UJ98 | STAG3_HUMAN  |                                         | 8     | AGGGGCCAGGG    | 0.522 |             |
| - | 2   | 433       |                     | NM_001004323 | NP_001004323 | Q8IZ16 | CG061_HUMAN  |                                         | 0     | TTTTGGGAGCT    | 0.542 |             |
| - | 4   | 497       |                     | NM_138403    | NP_612412    | Q9BUA6 | MYL10_HUMAN  | band 1, p1 (Potential).                 | 2     | TGTCTCTTTGT    | 0.622 |             |
| - | 66  | 10533     | .2_Missense_Mut     | NM_005045    | NP_005036    | P78509 | RELN_HUMAN   | Arg-rich (basic).                       | 19    | TGGTATCGCCTA   | 0.328 |             |
| - | 44  | 7031      | .2_Missense_Mut     | NM_005045    | NP_005036    | P78509 | RELN_HUMAN   |                                         | 19    | TCCGAAGGCGAG   | 0.498 |             |
| - | 1   | 371       | z.2_Missense_Mut    | NM_005045    | NP_005036    | P78509 | RELN_HUMAN   | Reelin.                                 | 19    | TTGTCCCGGAAC   | 0.637 |             |
| + | 8   | 1033      | P29_uc011klz.1_in   | NM_018844    | NP_061332    | Q9UHQ4 | BAP29_HUMAN  | phosphatase 1, cytoplasmic (Potential). | 2     | TAGGATCGTTTAC  | 0.299 |             |
| - | 4   | 492       | _Mutation_p.G74E    | NM_012252    | NP_036384    | O14948 | TFEC_HUMAN   | transcriptional transactivator          | 1     | TAAATTCCTTGT   | 0.333 |             |
| + | 2   | 755       | h.1_Missense_Mut    | NM_000245    | NP_000236    | P08581 | MET_HUMAN    | cellular (Potential). Sema.             | 159   | TAAAGGACCCGG   | 0.463 |             |
| + | 6   | 809       | pa.1_Missense_Mut   | NM_005011    | NP_005002    | Q16656 | NRF1_HUMAN   |                                         | 1     | TCAAGCCATCT    | 0.542 |             |
| + | 11  | 1529      | a.1_Missense_Mut    | NM_005011    | NP_005002    | Q16656 | NRF1_HUMAN   | transcriptional activation.             | 1     | TCAACGGACCAG   | 0.602 |             |
| + | 5   | 568       | e_Mutation_p.G78    | NM_001868    | NP_001859    | P15085 | CBPA1_HUMAN  |                                         | 1     | CGGGGGGCAGT    | 0.622 |             |
| + | 6   | 717       | rf.2_Missense_Mut   | NM_002402    | NP_002393    | Q5EB52 | MEST_HUMAN   |                                         | 2     | TGGTCGGCTTA    | 0.468 | rs142718124 |
| - | 2   | 497       | i_p.E90K PLXNA4_    | NM_020911    | NP_065962    | Q9HCM2 | PLXA4_HUMAN  | cellular (Potential). Sema.             | 1     | TCTCTCGTCCG    | 0.547 |             |
| - | 11  | 1848      | ivtv.2_Missense_Mut | NM_194071    | NP_919047    | Q70SY1 | CR3L2_HUMAN  | cellular (Potential).                   | 160   | TCTTCTCCAGGC   | 0.547 |             |
| + | 2   | 253       | 0lnb.2_Missense_Mut | NM_001085429 | NP_001078898 | A2RRL7 | TM213_HUMAN  | cellular (Potential).                   | 0     | TCCCTGGAGCAG   | 0.562 |             |
| + | 13  | 1788      | AS1_uc003vvi.2_in   | NM_001130966 | NP_001124438 | P24557 | THAS_HUMAN   | phosphatase 1, cytoplasmic (Potential). | 3     | TGCTCCACGTG    | 0.692 |             |
| - | 15  | 1859_1860 |                     | NM_004333    | NP_004324    | P15056 | BRAF_HUMAN   | protein kinase, R603>I(2) p.T           | 18290 | TATTTCACTGTAG  | 0.366 | rs121913378 |
| - | 1   | 553       |                     | NM_176817    | NP_789787    | P59533 | T2R38_HUMAN  | Name=4; (Potential).                    | 2     | TACAGAGGACAG   | 0.453 |             |

|   |    |           |                    |              |              |        |             |                            |      |                |       |             |
|---|----|-----------|--------------------|--------------|--------------|--------|-------------|----------------------------|------|----------------|-------|-------------|
| + | 1  | 595       |                    | NM_176881    | NP_795362    | P59534 | T2R39_HUMAN | cellular (Potential).      | 1    | AAGAAAACATAC1  | 0.438 |             |
| - | 6  | 2601      | wcu.3_Nonsense_    | NM_014690    | NP_055505    | Q86XD5 | F131B_HUMAN |                            | 0    | TTCTCGTGGGG    | 0.597 |             |
| - | 4  | 1978      | nse_Mutation_p.V   | NM_014690    | NP_055505    | Q86XD5 | F131B_HUMAN |                            | 0    | TCCCCAGCCC     | 0.612 |             |
| + | 1  | 364       |                    | NM_012365    | NP_036497    | Q96R48 | OR2A5_HUMAN | plasmic (Potential).       | 3    | TACGATCGGTAC/  | 0.468 | rs139541008 |
| + | 70 | 9759_9760 |                    | NM_198455    | NP_940857    | A2VEC9 | SSPO_HUMAN  | SP type-1 12.              | 0    | CTGGGGGATGC    | 0.703 |             |
| + | 4  | 479       | 362_uc003wgm.2_    | NM_001099220 | NP_001092690 | O60290 | ZN862_HUMAN |                            | 1    | AGGTCCCACCA/   | 0.517 |             |
| + | 2  | 903       | 3_uc003wip.2_Spli  | NM_004769    | NP_004760    | Q9UHC3 | ACCN3_HUMAN |                            | 2    | CCCCAGATCTT/   | 0.572 |             |
| - | 2  | 848       |                    | NM_001098834 | NP_001092304 | Q14549 | GBX1_HUMAN  |                            | 0    | CTCTTCTCTCT/   | 0.592 |             |
| - | 60 | 9821      | o.W2473* CSMD1_    | NM_033225    | NP_150094    | Q96PZ7 | CSMD1_HUMAN | extracellular (Potential). | 25   | CTTCCACACCC    | 0.557 |             |
| - | 4  | 6182      |                    | NM_178857    | NP_849188    | Q8IWN7 | RP1L1_HUMAN |                            | 8    | GGTCTCCACTT/   | 0.597 |             |
| - | 9  | 1336      | 3_Mutation_p.E39E  | NM_138715    | NP_619729    | P21757 | MSRE_HUMAN  | intracellular (Potential). | 1    | CACTTCCCAGC    | 0.542 |             |
| + | 2  | 967       |                    | NM_000015    | NP_000006    | P11245 | ARY2_HUMAN  |                            | 2    | ATGGATCCCTTA/  | 0.274 |             |
| - | 8  | 1225      | e_Mutation_p.E25   | NM_001135691 | NP_001129163 | P54219 | VMAT1_HUMAN | vesicle (Potential).       | 2    | CAAACCTCGTACA/ | 0.522 | rs144299315 |
| - | 4  | 941       | xbj.3_Missense_IV  | NM_001099335 | NP_001092805 | Q92561 | PHYIP_HUMAN | connexin type-III.         | 0    | GTACTCCGTGCC   | 0.642 |             |
| + | 22 | 2820      | ise_Mutation_p.L8  | NM_018068    | NP_060538    | Q8TC59 | PIWL2_HUMAN | Piwi.                      | 1    | TCTATCTTCTTGC  | 0.398 |             |
| + | 14 | 1545      | se_Mutation_p.D2E  | NM_014265    | NP_055080    | Q9UKQ2 | ADA28_HUMAN | Extracellular (Potential). | 5    | CTGATGATAGAT   | 0.502 |             |
| + | 16 | 1917      | ec.2_Missense_Mi   | NM_003817    | NP_003808    | Q9H2U9 | ADAM7_HUMAN | ar (Potential). Cys-rich.  | 5    | AATTGGCCTGC/   | 0.373 |             |
| - | 15 | 1704      | kek.2_Intron EBF2  | NM_022659    | NP_073150    | Q9HAK2 | COE2_HUMAN  | p.G563R(1)                 | 4    | TGAATCCATTTCC  | 0.493 | rs144787348 |
| - | 13 | 1182      | .2_Intron EBF2_uc  | NM_022659    | NP_073150    | Q9HAK2 | COE2_HUMAN  |                            | 4    | TGTCTACAAA/    | 0.488 |             |
| - | 1  | 4630      |                    | NM_031271    | NP_112561    | Q9BXT5 | TEX15_HUMAN |                            | 7    | TAATTTCCCCTT/  | 0.378 |             |
| - | 30 | 3653      | IK1_uc003xoj.2_M   | NM_020476    | NP_065209    | P16157 | ANK1_HUMAN  |                            | 9    | TGGTTCCTGTT/   | 0.537 |             |
| - | 17 | 2740      | JNL_uc003xqt.3_F   | NM_144651    | NP_653252    | A1KZ92 | PXDNL_HUMAN |                            | 2    | TAGACTGAATCC/  | 0.662 |             |
| - | 17 | 2622      | JNL_uc003xqt.3_F   | NM_144651    | NP_653252    | A1KZ92 | PXDNL_HUMAN |                            | 2    | AACAAGGAGGGT   | 0.692 |             |
| - | 6  | 1173      | n_p.R278* PCMTL    | NM_052937    | NP_443169    | Q96MG8 | PCMD1_HUMAN |                            | 0    | TCTTTCTTTTCC1  | 0.363 |             |
| + | 4  | 3384      | 21_uc011ldy.1_Intr | NM_006269    | NP_006260    | P56715 | RP1_HUMAN   |                            | 12   | AACCTCCAAAAG.  | 0.418 |             |
| + | 1  | 130       |                    | NM_052898    | NP_443130    | Q5GH76 | XKR4_HUMAN  |                            | 2    | GCAGGGATTGG    | 0.443 |             |
| + | 8  | 962       | 1.1_RNA CSPP1_u    | NM_001077204 | NP_001070672 | Q1MSJ5 | CSPP1_HUMAN |                            | 5    | AGGATCGTGTT/   | 0.373 | rs114953032 |
| + | 3  | 270       | lyy.1_Missense_M   | NM_052958    | NP_443190    | Q49A92 | CH034_HUMAN |                            | 1    | AGAATCCAAAGC   | 0.308 |             |
| + | 6  | 557       | p.E170K C8orf34_   | NM_052958    | NP_443190    | Q49A92 | CH034_HUMAN |                            | 1    | TTCAGGAAACAC   | 0.388 |             |
| + | 3  | 2833      |                    | NM_004770    | NP_004761    | Q92953 | KCNB2_HUMAN | plasmic (Pote p.P749S(1)   | 7    | CTACCCCGCAG    | 0.562 | rs143326877 |
| + | 2  | 2353      | u.1_Nonsense_Mi    | NM_024721    | NP_078997    | Q86UP3 | ZFHX4_HUMAN | C2H2-type 2.               | 15   | AATATCAGCAG/   | 0.517 |             |
| - | 2  | 564       | p.R41K TPD52_u     | NM_001025252 | NP_001020423 | P55327 | TPD52_HUMAN | Potential. p.R81del(1)     | 1    | AGTTCTCTTCTT/  | 0.428 |             |
| - | 2  | 199       | P2_uc010lzv.1_Int  | NM_002677    | NP_002668    | P02689 | MYP2_HUMAN  |                            | 0    | AAATTTCCCAGT   | 0.398 |             |
| - | 8  | 1474      | 1.1_Missense_Mut   | NM_015668    | NP_056483    | Q8NE09 | RGS22_HUMAN |                            | 7    | CTCTCCAATG1    | 0.343 |             |
| - | 5  | 545       | hb.1_Missense_M    | NM_152628    | NP_689841    | Q8N9S9 | SNX31_HUMAN |                            | 0    | TAATTTTCGATTCT | 0.368 |             |
| - | 57 | 9295      | nt.2_Missense_Mi   | NM_198123    | NP_937756    | Q72407 | CSMD3_HUMAN | extracellular (Potential). | 63   | TAGAGTTGTG.    | 0.393 |             |
| + | 3  | 1420      |                    | NM_014943    | NP_055758    | Q9Y6X8 | ZHX2_HUMAN  | homodimerization. Required | 2    | AGTTTCTTACC    | 0.502 |             |
| + | 2  | 2310      | 1_p.S99F FAM83A    | NM_032899    | NP_116288    | Q86UY5 | FA83A_HUMAN |                            | 4    | CAGCTCCCTAC/   | 0.662 |             |
| - | 1  | 1098      | nds.2_Missense_IV  | NM_001115    | NP_001106    | P40145 | ADCY8_HUMAN | ical; (Potential).         | 6    | TGTAGGTGGCG/   | 0.672 |             |
| - | 5  | 1213      |                    | NM_152888    | NP_690848    | Q8NFW1 | COMA1_HUMAN | 3P N-terminal.             | 13   | AGATTTCTTCCAC  | 0.453 |             |
| - | 4  | 710       | au.2_Missense_Mi   | NM_001029976 | NP_001025147 | P17020 | ZNF16_HUMAN |                            | 5    | TGTAGGGATTTC   | 0.537 |             |
| + | 22 | 3629      | p.Q762* KDM4C_     | NM_015061    | NP_055876    | Q9H3R0 | KDM4C_HUMAN |                            | 1    | TATCCAAGGGC/   | 0.448 |             |
| - | 10 | 2409      | EM1_uc010mic.2_f   | NM_144966    | NP_659403    | Q5H8C1 | FREM1_HUMAN | CSPG 3.                    | 5    | AATCTTCAAAGA/  | 0.373 |             |
| - | 2  | 384       | KN2A_uc010miu.2    | NM_000077    | NP_000068    | P42771 | CD2A1_HUMAN | ANK 2.  p.V28_V51de        | 3678 | CACTGGGGCGC    | 0.677 | rs121913387 |
| + | 1  | 783       |                    | NM_004039    | NP_004030    |        |             |                            | 0    | CATCAGGAAAG.   | 0.478 |             |
| - | 4  | 965_966   |                    | NM_001145196 | NP_001138668 | Q5VVP1 | F75A6_HUMAN |                            | 0    | AGCTTCCATCTG.  | 0.525 |             |
| - | 1  | 1026      |                    | NM_001126334 | NP_001119806 | Q5VV16 | FX4L5_HUMAN |                            | 0    | CCCCGCCAC/     | 0.547 |             |



|   |    |      |                   |              |              |        |             |                                |     |               |       |             |
|---|----|------|-------------------|--------------|--------------|--------|-------------|--------------------------------|-----|---------------|-------|-------------|
| - | 2  | 937  |                   | NM_001163    | NP_001154    | Q02410 | APBA1_HUMAN |                                | 1   | CTCGTCGCGCT   | 0.726 |             |
| + | 11 | 2141 | RNA uc004aho.1_   | NM_153267    | NP_694999    | Q7Z304 | MAMC2_HUMAN | MAM 4.                         | 2   | GGAGAGTGAC    | 0.483 |             |
| - | 16 | 2390 | ahy.2_Missense_I  | NM_001007471 | NP_001007472 | Q9HCF6 | TRPM3_HUMAN | lasmic (Potential).            | 9   | CTGTTTCGCTCT  | 0.567 |             |
| + | 22 | 2748 | uc004ajc.1_Splice | NM_138691    | NP_619636    | Q8TDI8 | TMC1_HUMAN  |                                | 1   | AAAATGGTATGAT | 0.303 |             |
| + | 3  | 923  | e_Mutation_p.P12  | NM_006200    | NP_006191    | Q92824 | PCSK5_HUMAN | Catalytic.                     | 3   | ATGATCCCAAGT  | 0.478 |             |
| + | 19 | 2928 | CSK5_uc004akb.2   | NM_006200    | NP_006191    | Q92824 | PCSK5_HUMAN | I (Cys-rich motif).            | 3   | AGGAGCTGATG   | 0.458 |             |
| - | 8  | 4931 |                   | NM_015225    | NP_056040    | Q8WUY3 | PRUN2_HUMAN |                                | 0   | TTTTCTCTAAATC | 0.368 |             |
| - | 8  | 1175 |                   | NM_015225    | NP_056040    | Q8WUY3 | PRUN2_HUMAN |                                | 0   | GACTTCCTTGAC  | 0.552 |             |
| - | 2  | 1658 | ibq.1_Missense_M  | NM_133445    | NP_597702    | Q8TCU5 | NMD3A_HUMAN | ellular (Potential).           | 7   | CCAACGAAGTTCT | 0.512 |             |
| + | 1  | 200  |                   | NM_001004485 | NP_001004485 | Q8NGS4 | O13F1_HUMAN | Name=2; (Potential).           | 3   | ATCTCTCCTTTCT | 0.483 |             |
| - | 7  | 983  | bea.2_Missense_I  | NM_019114    | NP_061987    | Q9H329 | E41LB_HUMAN | FERM.                          | 3   | GAACCGAAACTCT | 0.443 |             |
| + | 14 | 2478 | ez.1_Missense_Mt  | NM_005592    | NP_005583    | O15146 | MUSK_HUMAN  | cytoplasmic (Potential).       | 6   | CTGGGAGATC    | 0.527 |             |
| - | 7  | 824  | rf84_uc004bfq.2_I | NM_173521    | NP_775792    | Q5VXU9 | CI084_HUMAN |                                | 2   | TCAATTCATGCT  | 0.353 |             |
| + | 1  | 442  |                   | NM_001004457 | NP_001004457 | Q8NGR9 | OR1N2_HUMAN | lasmic (Potential).            | 4   | CACTCCATTACCT | 0.522 |             |
| - | 11 | 2007 | p.P535L CIZ1_uc   | NM_001131016 | NP_001124488 | Q9ULV3 | CIZ1_HUMAN  |                                | 4   | GCTGAGGCTCC   | 0.667 |             |
| + | 4  | 550  | 1mbx.1_Missense   | NM_001136557 | NP_001130029 | Q5VW38 | GP107_HUMAN |                                | 1   | TGAATTACTGTA  | 0.363 |             |
| + | 11 | 1096 | p.S228F ASS1_uc   | NM_000050    | NP_000041    | P00966 | ASSY_HUMAN  |                                | 1   | GACCTCCTTGG   | 0.652 |             |
| + | 15 | 2213 | ez_Mutation_p.P13 | NM_005085    | NP_005076    | P35658 | NU214_HUMAN | approximate repeats.           | 16  | AGATCCTGTAAT  | 0.448 |             |
| + | 24 | 3598 | z_Missense_Mutat  | NM_139025    | NP_620594    | Q76LX8 | ATS13_HUMAN | SP type-1 7.                   | 6   | TGGACGAGGCG   | 0.667 |             |
| + | 7  | 1473 |                   | NM_000093    | NP_000084    | P20908 | CO5A1_HUMAN | helical region.                | 11  | GAACCCCGACC   | 0.592 |             |
| + | 44 | 3896 |                   | NM_000093    | NP_000084    | P20908 | CO5A1_HUMAN | le-helical region.             | 11  | AGGGGGACAAA   | 0.617 |             |
| - | 11 | 1852 | p.G508R CAMSAF    | NM_015447    | NP_056262    | Q5T5Y3 | CAMP1_HUMAN |                                | 3   | CTCCCTTCCCCT  | 0.532 |             |
| - | 10 | 1607 | CH1_uc004cia.1_5  | NM_017617    | NP_060087    | P46531 | NOTC1_HUMAN | GF-like 14; calcium-binding    | 856 | TGCAGGGGGTGCT | 0.647 |             |
| - | 3  | 281  | u.1_Missense_Mu   | NM_003792    | NP_003783    | O60869 | EDF1_HUMAN  | ye. Interaction with NR5A      | 0   | CTGCCGACCTTC  | 0.632 |             |
| + | 2  | 324  | z NDOR1_uc011m    | NM_014434    | NP_055249    | Q9UHB4 | NDOR1_HUMAN |                                | 0   | TGAAGGTAAGGCT | 0.512 |             |
| - | 4  | 809  |                   | NM_015419    | NP_056234    | Q9NR99 | MXRA5_HUMAN | LRRCT.                         | 8   | CCACGGATTTCT  | 0.478 |             |
| + | 16 | 3294 | mij.1_Missense_M  | NM_014728    | NP_055543    | Q14CM0 | FRPD4_HUMAN |                                | 13  | AGTCAGAAAACT  | 0.547 |             |
| + | 10 | 953  |                   | NM_005089    | NP_005080    | Q15696 | U2AFM_HUMAN | RRM.                           | 3   | CTGCCCGTGACT  | 0.428 |             |
| - | 5  | 1007 | ifb.2_Missense_Mt | NM_153346    | NP_699177    | Q8NDZ0 | BEND2_HUMAN |                                | 5   | CATTTTCATTTTC | 0.433 |             |
| - | 3  | 496  | 4czl.2_Missense_I | NM_031892    | NP_114098    | Q96B97 | SH3K1_HUMAN |                                | 0   | TTTCTTCATCTCT | 0.393 |             |
| + | 3  | 296  | mjn.1_Missense_I  | NM_014927    | NP_055742    | Q8WXI2 | CNKR2_HUMAN | CRIC.                          | 2   | TAAAAACCCTTTC | 0.303 |             |
| + | 9  | 2561 | se_Mutation_p.S8  | NM_003410    | NP_003401    | P17010 | ZFX_HUMAN   | 2H2-type 12.                   | 2   | TTATTTCCATTCA | 0.433 |             |
| + | 4  | 1809 | 4dni.2_Missense_I | NM_033215    | NP_149992    | Q6ZSY5 | PPR3F_HUMAN | ellular (Potential).           | 3   | GGAATCGCCTCT  | 0.612 | rs148829919 |
| - | 1  | 488  |                   | NM_138703    | NP_619648    | Q8TD90 | MAGE2_HUMAN | MAGE 1.                        | 2   | GCTTTTCATTCTC | 0.537 |             |
| + | 1  | 1071 | 4efm.1_Nonsense   | NM_032968    | NP_116750    | Q9BZA7 | PC11X_HUMAN | r (Potential). Cadherin 1.     | 2   | CTGATTCGAATTC | 0.443 |             |
| - | 3  | 438  |                   | NM_018476    | NP_060946    | Q9HBH7 | BEX1_HUMAN  |                                | 1   | ATGCATCATATCC | 0.517 | rs1045082   |
| + | 19 | 3503 | c.1_Missense_Mut  | NM_198465    | NP_940867    | Q7Z2Y5 | NRK_HUMAN   |                                | 14  | CGTTTCGAACCA  | 0.493 |             |
| - | 3  | 1385 | cm.1_Missense_M   | NM_012471    | NP_036603    | Q9UL62 | TRPC5_HUMAN | nic (Potential). ANK 4.        | 1   | GTATTCGATAGTT | 0.512 |             |
| + | 3  | 1024 |                   | NM_001004308 | NP_001004308 | Q6ZR62 | ZCH16_HUMAN |                                | 1   | AGGATGAAGAG   | 0.473 |             |
| + | 3  | 367  | e_Mutation_p.P62  | NM_018990    | NP_061863    | O75995 | SASH3_HUMAN |                                | 3   | CACCCAGAAAG   | 0.547 |             |
| - | 8  | 1610 | p.E447K IGSF1_u   | NM_001555    | NP_001546    | Q8N6C5 | IGSF1_HUMAN | potential). Ig-like C2-type 5. | 5   | ATGTTTCTCTTTC | 0.463 |             |
| + | 6  | 659  | ez_Mutation_p.M13 | NM_018666    | NP_061136    | Q9NXZ1 | SAGE1_HUMAN |                                | 3   | AGAATGGAAAAAT | 0.463 |             |
| + | 6  | 2218 | p.D438N GPR112    | NM_153834    | NP_722576    | Q8IZF6 | GP112_HUMAN | ellular (Potential).           | 12  | CAACTGATGAAC  | 0.498 |             |
| - | 1  | 848  | uc004bf.1_RNA     | NM_004065    | NP_004056    | P51861 | CDR1_HUMAN  |                                | 0   | CAAATCCAGGTT  | 0.438 |             |
| - | 7  | 881  | IRE_uc011myd.1_   | NM_004961    | NP_004952    | P78334 | GBRE_HUMAN  |                                | 2   | CAAACCGCCTGT  | 0.493 |             |
| - | 5  | 625  | 4ffl.2_Missense_I | NM_001011543 | NP_001011543 | P43363 | MAGAA_HUMAN |                                | 0   | AACCTCCTCTGT  | 0.383 |             |
| + | 3  | 1002 | z_Mutation_p.E270 | NM_005363    | NP_005354    | P43360 | MAGA6_HUMAN | MAGE.                          | 0   | GCTATGAGTTCC  | 0.527 |             |

|   |    |           |                    |              |              |        |             |                                 |    |                   |       |             |
|---|----|-----------|--------------------|--------------|--------------|--------|-------------|---------------------------------|----|-------------------|-------|-------------|
| + | 15 | 2743      | 9Y_uc010nwu.1_l    | NM_004654    | NP_004645    | O00507 | USP9Y_HUMAN |                                 | 0  | TTTTATCGCCATG     | 0.348 |             |
| + | 2  | 161       | ALI1_uc010oie.1_F  | NM_003462    | NP_003453    | O14645 | IDLC_HUMAN  |                                 | 2  | :AGGCTCGGCTA      | 0.577 |             |
| - | 1  | 130       | on_p.P5S SLAMF     | NM_033438    | NP_254273    | Q96A28 | SLAF9_HUMAN |                                 | 1  | :CCAAGGAAAGG      | 0.587 |             |
| - | 1  | 410       | \MF1_uc010pjm.1    | NM_003037    | NP_003028    | Q13291 | SLAF1_HUMAN | ellular (Potential).            | 2  | :GTAGCTTGCCCI     | 0.557 |             |
| + | 10 | 1454      | e_Mutation_p.P38   | NM_203459    | NP_982284    | Q08AD1 | CAMP2_HUMAN |                                 | 4  | ATTTGCCCTTCTAC    | 0.343 |             |
| + | 13 | 6500      |                    | NM_016343    | NP_057427    | P49454 | CENPF_HUMAN | tion with NDE1 and NDEL         | 13 | :GAGCTCAACAC/     | 0.512 |             |
| + | 17 | 2318      | qj.1_Missense_Mu   | NM_001080512 | NP_001073981 | Q9H694 | BICC1_HUMAN |                                 | 4  | :TATCAAGGAGT      | 0.448 |             |
| + | 1  | 589       |                    | NM_207186    | NP_997069    | Q9H209 | O10A4_HUMAN | ellular (Potential).            | 1  | :TGTTTGAAGTGC     | 0.498 |             |
| + | 1  | 509       |                    | NM_001004706 | NP_001004706 | Q8NGI4 | OR4DB_HUMAN | ellular (Potential).            | 2  | :CTGTGGACCCA      | 0.507 |             |
| + | 8  | 1722      |                    | NM_025004    | NP_079280    | Q0P6D6 | CCD15_HUMAN |                                 | 2  | :TCTCCCCAAAG/     | 0.403 | rs112861775 |
| + | 14 | 1644      | _p.S375F DCAF4     | NM_015604    | NP_056419    | Q8WV16 | DCAF4_HUMAN |                                 | 3  | GGGCTCCCGGG       | 0.637 |             |
| + | 2  | 334       | e_Mutation_p.P32   | NM_014444    | NP_055259    | Q9UGJ1 | GCP4_HUMAN  |                                 | 3  | :ACTTCCCTTTCC     | 0.527 |             |
| - | 4  | 532       | p.R108C ACSM2E     | NM_182617    | NP_872423    | Q68CK6 | ACS2B_HUMAN | p.R108C(1)                      | 5  | :CACACGATCCCI     | 0.562 | rs148136861 |
| + | 9  | 1649_1650 | _5'Flank EIF4A1_l  | NM_015670    | NP_056485    | Q9H4L4 | SEN3_HUMAN  | Protease.                       | 2  | AATCCCATCCA       | 0.505 |             |
| - | 12 | 1798      | P1_uc002hxo.1_M    | NM_177977    | NP_817084    | P54257 | HAP1_HUMAN  | Glu-rich.                       | 2  | :CAGTTCACCTCI     | 0.622 |             |
| + | 6  | 903       | \PT_uc002ijx.3_Ini | NM_016835    | NP_058519    | P10636 | TAU_HUMAN   |                                 | 1  | :TAGGAGACCTGI     | 0.682 |             |
| + | 10 | 1551      | iB3_uc010wkr.1_F   | NM_000212    | NP_000203    | P05106 | ITB3_HUMAN  | ial). Cysteine-rich tandem r    | 6  | :AGGACGAATGC.     | 0.627 | rs150951945 |
| - | 2  | 762       | B3_uc010dbf.2_5'   | NM_002147    | NP_002138    | P09067 | HXB5_HUMAN  | Homeobox.                       | 0  | GCGCTCGGACA       | 0.577 |             |
| - | 9  | 1740      | zp.2_Missense_Mt   | NM_005121    | NP_005112    | Q9UHV7 | MED13_HUMAN |                                 | 2  | :CTGAGGAGTTG,     | 0.458 |             |
| - | 26 | 7164      |                    | NM_000384    | NP_000375    | P04114 | APOB_HUMAN  |                                 | 27 | \CCTCTCGATTAA     | 0.373 |             |
| - | 24 | 3231      | Missense_Mutatio   | NM_021196    | NP_067019    | Q9BY07 | S4A5_HUMAN  | ellular (Potential).            | 9  | TTTTTCTCTTCTC     | 0.527 |             |
| + | 3  | 367       |                    | NM_001080504 | NP_001073973 | Q6ZP01 | RBM44_HUMAN |                                 | 4  | TTATTAGAGCCA      | 0.338 |             |
| + | 2  | 444       |                    | NM_022358    | NP_071753    | Q9H427 | KCNKF_HUMAN | ical; (Potential).              | 0  | CCAGAGCCTGGC      | 0.672 |             |
| + | 2  | 1629      | zgx.1_Missense_M   | NM_080752    | NP_542790    | Q96MP5 | ZSWM3_HUMAN |                                 | 2  | :CAGACGCACAG      | 0.577 | rs139419541 |
| - | 13 | 1752      | gho.1_Nonsense_    | NM_022829    | NP_073740    | Q8WWT9 | S13A3_HUMAN | ellular (Potential).            | 1  | :CAGCTGGAAGA      | 0.557 |             |
| - | 12 | 2016      | o.D608N SCN5A_l    | NM_198056    | NP_932173    | Q14524 | SCN5A_HUMAN |                                 | 9  | :TGGTTCGCCCTG     | 0.647 |             |
| - | 13 | 5830      | o.Q1868* GOLGB1    | NM_004487    | NP_004478    | Q14789 | G0GB1_HUMAN | ic (Potential). Potential.      | 10 | :TCTTTGGATTTC     | 0.368 |             |
| - | 9  | 1116      | dx.1_Missense_Mt   | NM_024007    | NP_076870    | Q9UH73 | COE1_HUMAN  | IPT/TIG.                        | 5  | :CCATCCTTCACT     | 0.468 |             |
| - | 3  | 528       | p.G121D HLA-DO     | NM_002119    | NP_002110    | P06340 | DOA_HUMAN   | ntial). Alpha-2.  Ig-like C1-ty | 0  | :TTTGGCCGTTG      | 0.587 |             |
| + | 6  | 421       | ense_Mutation_p.C  | NM_005588    | NP_005579    | Q16819 | MEP1A_HUMAN | potential). Metalloprotease.    | 3  | TTTGATGGGTTG      | 0.313 |             |
| - | 22 | 3581      | c.2_Missense_Mut   | NM_002844    | NP_002835    | Q15262 | PTPRK_HUMAN | hatase 1.  Cytoplasmic (Po      | 8  | :GGGAGGGTTTG      | 0.483 |             |
| - | 2  | 772       | bw.1_Missense_M    | NM_013389    | NP_037521    | Q9UHC9 | NPCL1_HUMAN | ellular (Potential).            | 5  | :CAACCCCTCA       | 0.632 |             |
| - | 14 | 3887_3888 |                    | NM_032408    | NP_115784    | Q9UIG0 | BAZ1B_HUMAN |                                 | 7  | TCTGCGGACATA      | 0.431 | rs148299208 |
| + | 8  | 969       | _p.P60S STAG3_l    | NM_012447    | NP_036579    | Q9UJ98 | STAG3_HUMAN |                                 | 8  | AGGGGCCAGGG       | 0.522 |             |
| - | 4  | 492       | e_Mutation_p.G74E  | NM_012252    | NP_036384    | O14948 | TFEC_HUMAN  | anscriptional transactivation   | 1  | :AAATTCCTTGTI     | 0.333 |             |
| + | 1  | 595       |                    | NM_176881    | NP_795362    | P59534 | T2R39_HUMAN | ellular (Potential).            | 1  | :AGAAAACATACT     | 0.438 |             |
| + | 16 | 1917      | ec.2_Missense_Mt   | NM_003817    | NP_003808    | Q9H2U9 | ADAM7_HUMAN | ar (Potential). Cys-rich.       | 5  | :ACATTGGCCTGC     | 0.373 |             |
| - | 30 | 3653      | IK1_uc003xoj.2_M   | NM_020476    | NP_065209    | P16157 | ANK1_HUMAN  |                                 | 9  | :TGGTTCTCTGT/     | 0.537 |             |
| + | 10 | 953       |                    | NM_005089    | NP_005080    | Q15696 | U2AFM_HUMAN | RRM.                            | 3  | CTGCCCGTGAC       | 0.428 |             |
| + | 19 | 3503      | c.1_Missense_Mut   | NM_198465    | NP_940867    | Q722Y5 | NRK_HUMAN   |                                 | 14 | :CGTTCGAACCA      | 0.493 |             |
| + | 3  | 1002      | e_Mutation_p.E27C  | NM_005363    | NP_005354    | P43360 | MAGA6_HUMAN | MAGE.                           | 0  | :GCTATGAGTTCC     | 0.527 |             |
| - | 20 | 1882      | o.R557C CDK11B     | NM_033486    | NP_277021    | P21127 | CD11B_HUMAN | rotein kinase.                  | 1  | GGCGCGGTACC.      | 0.687 |             |
| - | 10 | 1474      | ATA21_uc010occ.    | NM_198546    | NP_940948    | Q72572 | SPT21_HUMAN |                                 | 3  | :GATTTCTCTAA      | 0.542 |             |
| - | 2  | 554       |                    | NM_152365    | NP_689578    | Q8NAX2 | CA172_HUMAN |                                 | 2  | :CTGCCCATGGT      | 0.642 |             |
| - | 8  | 1333      | IA7_uc001cux.2_5   | NM_006671    | NP_006662    | O00341 | EAA5_HUMAN  | ical; (Potential).              | 3  | GATGGCGGCCA       | 0.627 |             |
| - | 13 | 1443      | R11_uc010pbm.1     | NM_001145862 | NP_001139334 | A4FU01 | MTMRB_HUMAN | ularin phosphatase.             | 1  | :TGTTCGGGCTTC     | 0.562 |             |
| - | 2  | 1066      | ie.1_Missense_Mt   | NM_007113    | NP_009044    | Q07283 | TRHY_HUMAN  | eats of R-R-E-Q-E-E-E-R-        | 5  | tcctcctcctcctcgcg | 0     |             |

|   |    |      |                   |              |              |        |             |                               |       |               |       |             |
|---|----|------|-------------------|--------------|--------------|--------|-------------|-------------------------------|-------|---------------|-------|-------------|
| - | 3  | 1023 |                   | NM_001122965 | NP_001116437 | Q6XPR3 | RPTN_HUMAN  | Gln-rich.                     | 0     | CTGACTGTAGTC  | 0.507 | rs12117644  |
| - | 18 | 3154 | uc001fdc.1_RNA    | NM_014856    | NP_055671    | O75064 | DEN4B_HUMAN | Gln-rich.                     | 1     | CTGCCTCTTGA   | 0.453 |             |
| - | 2  | 1266 | c010pit.1_5'Flank | NM_033418    | NP_219486    | O95568 | MET18_HUMAN |                               | 0     | CACCTACACCAA  | 0.348 | rs1801567   |
| - | 6  | 1408 | kv.2_Missense_Mi  | NM_206933    | NP_996816    | O75445 | USH2A_HUMAN | nal. Extracellular (Potential | 26    | GAGAGGATGGG   | 0.443 |             |
| + | 34 | 9203 | p.13053M OBSCN    | NM_001098623 | NP_001092093 | Q5VST9 | OBSCN_HUMAN | Ig-like 30.                   | 28    | GAGATCGATGCC  | 0.657 |             |
| - | 1  | 1019 | KG1_uc001jfn.2_Ir | NM_015235    | NP_056050    | Q9H0L4 | CSTFT_HUMAN | Gly-rich.                     | 1     | AGGAGGCAGAC   | 0.572 |             |
| + | 4  | 1231 |                   | NM_000314    | NP_000305    | P60484 | PTEN_HUMAN  | atase tensi;7_Y68insY(1)      | 2334  | ACAAGATATACAA | 0.279 |             |
| - | 6  | 810  | h.1_Missense_Mul  | NM_002334    | NP_002325    | O75096 | LRP4_HUMAN  | ntial);LDL-receptor class /   | 4     | AGACTCGTCTG/  | 0.622 |             |
| - | 1  | 292  |                   | NM_006637    | NP_006628    | Q13606 | OR5I1_HUMAN | ellular (Potential).          | 1     | CACACCCATAAT/ | 0.428 |             |
| - | 1  | 617  |                   | NM_001004740 | NP_001004740 | Q8NGP8 | OR5M1_HUMAN | Name=5; (Potential).          | 1     | AGAGATTAAGAC  | 0.443 |             |
| - | 13 | 1912 | CE_uc001nrb.2_F   | NM_152718    | NP_689931    | Q96DN2 | VWCE_HUMAN  | VWFC 3.                       | 1     | TTCTCGGGGGC/  | 0.672 |             |
| - | 8  | 2614 | p.S614L TRPC6_    | NM_004621    | NP_004612    | Q9Y210 | TRPC6_HUMAN | lasmic (Potential).           | 4     | GGGAATGAACTG  | 0.328 |             |
| - | 3  | 318  | _uc001pmu.2_5'Fl  | NM_138789    | NP_620144    | Q8WWB5 | PIHD2_HUMAN |                               | 1     | ATTGGGGAGCT/  | 0.363 |             |
| + | 13 | 1942 | e_Mutation_p.Y59  | NM_005480    | NP_005471    | Q12815 | TROAP_HUMAN | approximate tandem repea      | 1     | AGTCCTACTGTAC | 0.617 |             |
| + | 1  | 255  | KC5_uc001set.2_Ii | NM_004503    | NP_004494    | P09630 | HXC6_HUMAN  |                               | 3     | GAAACCGGATCT/ | 0.562 |             |
| - | 17 | 2082 | p.P410S R3HDM2    | NM_014925    | NP_055740    | Q9Y2K5 | R3HD2_HUMAN | Gln-rich.                     | 2     | AGAGGGAGACT   | 0.547 |             |
| + | 26 | 3147 | x.2_Missense_Mu   | NM_178826    | NP_849148    | Q32M45 | ANO4_HUMAN  | lasmic (Potential).           | 6     | GATACCGGACT   | 0.408 |             |
| + | 8  | 905  |                   | NM_017564    | NP_060034    | Q8WWQ8 | STAB2_HUMAN | r (Potential);EGF-like 4.     | 14    | TCAATCCATGTT/ | 0.483 |             |
| + | 2  | 360  |                   | NM_007076    | NP_009007    | Q9BVA6 | FICD_HUMAN  |                               | 0     | ATGCCGCCACC   | 0.662 |             |
| + | 2  | 876  | _p.E82K GPC6_u    | NM_005708    | NP_005699    | Q9Y625 | GPC6_HUMAN  |                               | 0     | AAACTCGAATTT/ | 0.413 |             |
| - | 1  | 461  |                   | NM_001001968 | NP_001001968 | Q8NH40 | OR6S1_HUMAN | Name=4; (Potential).          | 2     | CGAGTCCCCCC   | 0.607 |             |
| + | 3  | 307  | HD4_uc010tna.1_I  | NM_022060    | NP_071343    | Q8TB40 | ABHD4_HUMAN |                               | 1     | GGGGCGCGGTG   | 0.577 |             |
| - | 8  | 1465 | C35F4_uc010apa.   | NM_001080455 | NP_001073924 |        |             |                               | 2     | CTTTTCCTTCAG  | 0.522 |             |
| + | 15 | 1725 | qv.2_Missense_Mi  | NM_015197    | NP_056012    | Q86VP3 | PACS2_HUMAN |                               | 1     | GGTGTGCACGT   | 0.632 |             |
| + | 15 | 2318 | _Mutation_p.R39   | NM_006122    | NP_006113    | P49641 | MA2A2_HUMAN | renal (Potential).            | 3     | CTGTGCGCATC   | 0.672 |             |
| - | 24 | 2048 | ze.1_Missense_Mi  | NM_002582    | NP_002573    | O95453 | PARN_HUMAN  |                               | 2     | GTCAGGAACTT/  | 0.527 |             |
| - | 16 | 2723 | _p.T663I KCTD1    | NM_001100915 | NP_001094385 | Q17RG1 | KCD19_HUMAN |                               | 1     | GCAGTGAAGC    | 0.552 |             |
| - | 4  | 669  | .2_5'UTR KCTD1    | NM_001100915 | NP_001094385 | Q17RG1 | KCD19_HUMAN |                               | 1     | CACTCGCACTC   | 0.612 |             |
| - | 34 | 5280 |                   | NM_032821    | NP_116210    | Q4G0P3 | HYDIN_HUMAN |                               | 2     | AGTTTCCACCAC  | 0.488 |             |
| + | 14 | 2519 | vof.1_Missense_M  | NM_005153    | NP_005144    | Q14694 | UBP10_HUMAN |                               | 0     | TATTACCGCCGAC | 0.572 |             |
| - | 12 | 2633 | :CHC14_uc002fkb.  | NM_015144    | NP_055959    | Q8WYQ9 | ZCH14_HUMAN |                               | 2     | CAAACGTGGAC   | 0.632 |             |
| - | 4  | 568  | TP53_uc010cni.1   | NM_001126112 | NP_001119584 | P04637 | P53_HUMAN   | with HIPK1 (G105_T125del      | 22245 | TGACCGTGCAA/  | 0.542 |             |
| - | 31 | 4319 |                   | NM_003802    | NP_003793    | Q9UKX3 | MYH13_HUMAN | Potential.                    | 6     | TCGCCGTCTCC   | 0.532 |             |
| - | 29 | 4074 |                   | NM_002470    | NP_002461    | P11055 | MYH3_HUMAN  | Potential.                    | 7     | CAGGGCGTGCG   | 0.552 |             |
| + | 4  | 400  |                   | NM_002795    | NP_002786    | P49720 | PSB3_HUMAN  |                               | 0     | AGCCAGTCATT/  | 0.517 |             |
| - | 2  | 875  | _5'Flank PLEKHH   | NM_016602    | NP_057686    | P46092 | CCR10_HUMAN | Name=7; (Potential).          | 0     | CAGTGCACAT/   | 0.677 |             |
| - | 18 | 2941 | w.1_Missense_Mu   | NM_004104    | NP_004095    | P49327 | FAS_HUMAN   |                               | 1     | GGCACGGGAGG   | 0.687 |             |
| + | 1  | 718  |                   | NM_005913    | NP_005904    | P33032 | MC5R_HUMAN  | Name=6; (Potential).          | 6     | TACCAGTCACC   | 0.617 |             |
| + | 4  | 1429 | 3YR_uc002kva.2_I  | NM_012189    | NP_036321    | O75952 | CABYR_HUMAN |                               | 0     | TTCAAATAGTCTC | 0.502 | rs142770673 |
| - | 9  | 1375 |                   | NM_152769    | NP_689982    | Q8N350 | DOS_HUMAN   |                               | 0     | AGGGGCGGGGG   | 0.692 |             |
| - | 2  | 642  | V5_uc002mat.1_In  | NM_052972    | NP_443204    | P02750 | A2GL_HUMAN  |                               | 1     | CAGCGGACCC'   | 0.577 |             |
| - | 4  | 452  | vq.2_Missense_Mi  | NM_021155    | NP_066978    | Q9NNX6 | CD209_HUMAN | 2, 7 X approximate tanden     | 1     | CAGCCGGGTCA   | 0.567 | rs146082308 |
| + | 1  | 85   |                   | NM_017682    | NP_060152    | Q8NFU1 | BEST2_HUMAN | ical; (Potential).            | 2     | AGCATCTACAAA/ | 0.547 |             |
| + | 2  | 751  |                   | NM_173482    | NP_775753    | Q8IYK2 | CC105_HUMAN | Potential.                    | 1     | GATATGGAAAAA/ | 0.498 |             |
| - | 4  | 1447 | p.K353E ZNF708_   | NM_021269    | NP_067092    | P17019 | ZN708_HUMAN |                               | 6     | GTTTCTTTCCAG' | 0.343 |             |
| + | 29 | 5900 |                   | NM_014727    | NP_055542    | Q9UMN6 | MLL4_HUMAN  | Poly-Pro.                     | 11    | TATCTCCACCAC/ | 0.657 |             |
| + | 29 | 6004 |                   | NM_014727    | NP_055542    | Q9UMN6 | MLL4_HUMAN  |                               | 11    | CTGAGCCCTTC   | 0.667 |             |

|   |     |       |                                                          |              |              |        |             |                               |       |                 |       |             |
|---|-----|-------|----------------------------------------------------------|--------------|--------------|--------|-------------|-------------------------------|-------|-----------------|-------|-------------|
| + | 29  | 6164  |                                                          | NM_014727    | NP_055542    | Q9UMN6 | MLL4_HUMAN  |                               | 11    | :TGGAGCCCCC     | 0.697 |             |
| + | 98  | 14321 | i.2_Missense_Mut                                         | NM_000540    | NP_000531    | P21817 | RYR1_HUMAN  |                               | 12    | :ATGGGGACATC    | 0.612 |             |
| + | 100 | 14561 | i.2_Missense_Mut                                         | NM_000540    | NP_000531    | P21817 | RYR1_HUMAN  |                               | 12    | TTCTTTGCTGCC    | 0.587 |             |
| - | 12  | 2175  | se_Mutation_p.A5                                         | NM_001081563 | NP_001075032 | Q09013 | DMPK_HUMAN  | p.T544M(1)                    | 3     | :TGACAGCTGGA    | 0.662 |             |
| + | 3   | 296   | i_p.A75V NUCB1_                                          | NM_006184    | NP_006175    | Q02818 | NUCB1_HUMAN |                               | 0     | .GGCTGCCAATG    | 0.582 |             |
| + | 5   | 3725  |                                                          | NM_020719    | NP_065770    | Q9ULL5 | PRR12_HUMAN | Pro-rich.                     | 2     | :CTCATCGGGTG    | 0.622 |             |
| + | 2   | 96    | eti.2_Missense_Mi                                        | NM_033106    | NP_149097    | Q9UBC7 | GALP_HUMAN  |                               | 0     | :TCCCTCCGTCC    | 0.642 |             |
| + | 4   | 655   | p.R173Q ZNF324E                                          | NM_207395    | NP_997278    | Q6AW86 | Z324B_HUMAN |                               | 1     | .GTACCGGGTGC    | 0.677 |             |
| + | 14  | 1746  | :512_uc010yx.1_1                                         | NM_032434    | NP_115810    | Q96ME7 | ZN512_HUMAN |                               | 1     | :TTCCAGAAAGT    | 0.488 |             |
| - | 1   | 760   | sd.3_Missense_Mi                                         | NM_021097    | NP_066920    | P32418 | NAC1_HUMAN  | ical; (Potential).            | 4     | :CACAAACAGAA    | 0.443 |             |
| - | 9   | 1458  | :1_uc010ypr.1_Mi                                         | NM_003400    | NP_003391    | O14980 | XPO1_HUMAN  | lex-mediated mRNA export      | 4     | :TTTGGTCTCAA    | 0.348 |             |
| - | 7   | 932   |                                                          | NM_005735    | NP_005726    | P42025 | ACTY_HUMAN  |                               | 1     | :CAACGTGTACT    | 0.642 |             |
| + | 6   | 596   | 0zbl.1_Missense_                                         | NM_018460    | NP_060930    | Q53QZ3 | RHG15_HUMAN | PH.                           | 2     | :CCAAGGAAAAA    | 0.358 |             |
| - | 282 | 81666 | 843* TTN_uc010zl                                         | NM_133378    | NP_596869    | Q8WZ42 | TITIN_HUMAN |                               | 153   | :ACCCTGTCCAG    | 0.423 |             |
| + | 3   | 339   |                                                          | NM_080628    | NP_542195    | A0PJX2 | CT118_HUMAN | TLD.                          | 0     | GGGACCAGGAC     | 0.677 |             |
| - | 4   | 598   | se_Mutation_p.G1                                         | NM_198433    | NP_940835    | O14965 | AURKA_HUMAN |                               | 8     | .CAGGTCCTGAA    | 0.383 |             |
| - | 1   | 326   | GP_uc002yvx.1_1                                          | NM_153681    | NP_710148    | P57054 | PIGP_HUMAN  |                               | 0     | TAAATCGCTCTT    | 0.478 |             |
| - | 1   | 5912  | :E2_uc002yyx.2_1                                         | NM_182832    | NP_878252    | Q8WY50 | PLAC4_HUMAN |                               | 0     | gtccagggtgaggag | 0.04  |             |
| - | 28  | 6150  | i.2_Missense_Mut                                         | NM_198056    | NP_932173    | Q14524 | SCN5A_HUMAN |                               | 9     | :GTTATCGCTGG    | 0.607 |             |
| - | 23  | 4417  | G1408E SCN5A_1                                           | NM_198056    | NP_932173    | Q14524 | SCN5A_HUMAN |                               | 9     | .GGTACCCGGCC    | 0.542 |             |
| - | 2   | 310   | :m.1_Missense_M                                          | NM_000581    | NP_000572    | P07203 | GPX1_HUMAN  |                               | 1     | TGCACGGGAAG     | 0.617 |             |
| - | 17  | 2101  | :R523C ITI4_uc                                           | NM_002218    | NP_002209    | Q14624 | ITI4_HUMAN  |                               | 3     | CAGACGGCGGA     | 0.622 |             |
| + | 18  | 1678  | p.E450K CACNA2                                           | NM_018398    | NP_060868    | Q8IZS8 | CA2D3_HUMAN | lar (Potential). Cache.       | 7     | :AGTACGAAGAA    | 0.443 |             |
| - | 5   | 506   |                                                          | NM_018338    | NP_060808    | Q96MT7 | WDR52_HUMAN |                               | 1     | :ACTGTCTGCCA    | 0.423 |             |
| - | 5   | 916   | ln.2_RNA PAQR3                                           | NM_001040202 | NP_001035292 | Q6TCH7 | PAQR3_HUMAN | ional (Potential).            | 0     | ACGGGGTGCAA     | 0.353 |             |
| + | 10  | 1421  | e_Mutation_p.K19                                         | NM_005983    | NP_005974    | Q13309 | SKP2_HUMAN  |                               | 4     | CATCAAATGCCG    | 0.453 |             |
| + | 1   | 672   | uc011ctk.1_Intron                                        | NM_032567    | NP_115956    | Q9BXG8 | SPZ1_HUMAN  |                               | 1     | AAACAGGAGATG    | 0.358 |             |
| + | 8   | 3268  | e_Mutation_p.N98                                         | NM_001105251 | NP_001098721 | Q7Z3T8 | ZFY16_HUMAN |                               | 0     | ACAGCAATTTAC    | 0.353 |             |
| + | 20  | 4090  | R98_uc003kjt.2_5'l                                       | NM_032119    | NP_115495    | Q8WXG9 | GPR98_HUMAN | ellular (Potential).          | 16    | TTACCGGACTAC    | 0.443 |             |
| + | 10  | 1820  |                                                          | NM_133369    | NP_588610    | Q6ZN44 | UNC5A_HUMAN | oplasmic (Potential).         | 1     | GGGCAGCTGGG     | 0.667 |             |
| + | 5   | 723   | 11dme.1_Intron HLA-J_uc003nou.3_RNA HLA-J_uc003nov.3_RNA |              |              |        |             |                               | 0     | :CTGAGAGGCAA    | 0.438 | rs113017032 |
| + | 56  | 7970  | ey.2_Missense_Mu                                         | NM_002224    | NP_002215    | Q14573 | ITPR3_HUMAN | lasmic (Potential).           | 19    | :CTACACGGGCC    | 0.537 |             |
| + | 12  | 1398  | vn.1_Missense_Mi                                         | NM_007058    | NP_008989    | Q9UMQ6 | CAN11_HUMAN | Domain III.                   | 2     | :ACTGGCGGCAT    | 0.612 |             |
| - | 2   | 976   |                                                          | NM_001003760 | NP_001003760 | Q9H511 | KLH31_HUMAN |                               | 1     | :TTGCATCATTCT   | 0.408 |             |
| - | 12  | 1237  | ense_Mutation_p.F                                        | NM_014841    | NP_055656    | O60641 | AP180_HUMAN |                               | 1     | :TGGCTGGAGAA    | 0.453 |             |
| - | 3   | 414   | q.2_Missense_Mi                                          | NM_001080453 | NP_001073922 | Q8N201 | INT1_HUMAN  |                               | 0     | CGACGGAGAAAT    | 0.577 |             |
| + | 8   | 902   | k.2_Missense_Mut                                         | NM_001159767 | NP_001153239 | Q9Y6E2 | BZW2_HUMAN  |                               | 2     | :AGGAGCTTTCC    | 0.488 |             |
| + | 35  | 5930  |                                                          | NM_003777    | NP_003768    | Q96DT5 | DYH11_HUMAN | .1 (By similarity).           | 15    | :TGGCAGTACAA    | 0.438 |             |
| + | 9   | 1413  | :5'Flank AEBP1_1                                         | NM_001129    | NP_001120    | Q8IUX7 | AEBP1_HUMAN |                               | 0     | :GAAAGGCGGAG    | 0.647 |             |
| + | 16  | 2096  | n_p.V570I DYNC1                                          | NM_004411    | NP_004402    | O14576 | DC111_HUMAN | WD 7.                         | 4     | :ATGACGTTGGAC   | 0.473 | rs145694237 |
| + | 17  | 3762  | Mutation_p.S493F                                         | NM_022742    | NP_073579    | Q96JN2 | CC136_HUMAN | ical; (Potential).            | 2     | :CTTCTCCTTGC    | 0.532 |             |
| - | 15  | 1860  |                                                          | NM_004333    | NP_004324    | P15056 | BRAF_HUMAN  | rotein kinase_R603>I(2) p.T   | 18290 | :ATTTCCTGTAC    | 0.368 |             |
| + | 8   | 1601  |                                                          | NM_014141    | NP_054860    | Q9UHC6 | CNTP2_HUMAN | 1. Extracellular (Potential). | 11    | :ACAGGAAATTT    | 0.433 |             |
| + | 2   | 890   |                                                          | NM_024012    | NP_076917    | P47898 | 5HT5A_HUMAN | smic (By similarity).         | 3     | :CGTGGCGGGAG    | 0.607 |             |
| - | 14  | 1457  | ck.1_Missense_M                                          | NM_001464    | NP_001455    | Q99965 | ADAM2_HUMAN | r (Potential). Disintegrin.   | 2     | :CAGATGATCCA    | 0.408 |             |
| + | 10  | 988   | pc.2_Missense_Mi                                         | NM_005662    | NP_005653    | Q9Y277 | VDAC3_HUMAN | inded; (By similarity).       | 1     | :ACTGGAAGCTT    | 0.398 |             |
| + | 4   | 4659  |                                                          | NM_001001670 | NP_001001670 | Q6ZQQ2 | F75D1_HUMAN |                               | 0     | :GCCTGGTGTGT    | 0.517 |             |

|   |     |       |                   |              |              |        |             |                               |       |               |       |             |
|---|-----|-------|-------------------|--------------|--------------|--------|-------------|-------------------------------|-------|---------------|-------|-------------|
| - | 5   | 1131  |                   | NM_017561    | NP_060031    | A1L443 | FA22F_HUMAN | Pro-rich.                     | 0     | GTGGGCGTTGGT  | 0.692 |             |
| - | 18  | 3549  | ja.1_Missense_Mu  | NM_153366    | NP_699197    | Q4LDE5 | SVEP1_HUMAN |                               | 7     | AGACACGATCA   | 0.423 |             |
| - | 26  | 2318  | _p.N394 TEX11_u   | NM_001003811 | NP_001003811 | Q8IYF3 | TEX11_HUMAN |                               | 5     | ATGTCATTGCATC | 0.388 |             |
| - | 10  | 1474  | ATA21_uc010occ.   | NM_198546    | NP_940948    | Q7Z572 | SPT21_HUMAN |                               | 3     | FGATTTCTCTAA  | 0.542 |             |
| - | 2   | 554   |                   | NM_152365    | NP_689578    | Q8NAX2 | CA172_HUMAN |                               | 2     | CTGCCCATGGT   | 0.642 |             |
| + | 8   | 1012  | ciy.2_Missense_Mi | NM_001255    | NP_001246    | Q12834 | CDC20_HUMAN |                               | 0     | GGCCACACTGA   | 0.562 |             |
| - | 6   | 1408  | kv.2_Missense_Mi  | NM_206933    | NP_996816    | O75445 | USH2A_HUMAN | nal. Extracellular (Potential | 26    | GAGAGGATGGG   | 0.443 |             |
| + | 4   | 1231  |                   | NM_000314    | NP_000305    | P60484 | PTEN_HUMAN  | hatase tensi;7_Y68insY(1)     | 2334  | ACAAGATATACAA | 0.279 |             |
| - | 4   | 531   | _Mutation_p.D144  | NM_199292    | NP_954986    | P07101 | TY3H_HUMAN  |                               | 0     | CCAGGTCCCCC   | 0.697 |             |
| - | 1   | 292   |                   | NM_006637    | NP_006628    | Q13606 | OR5I1_HUMAN | ellular (Potential).          | 1     | CACACCCATAAT  | 0.428 |             |
| - | 8   | 2614  | _p.S614L TRPC6_   | NM_004621    | NP_004612    | Q9Y210 | TRPC6_HUMAN | lasmic (Potential).           | 4     | FGGAATGAACCTG | 0.328 |             |
| + | 29  | 6083  | Flank PFDN5_uc0   | NM_012291    | NP_036423    | Q14674 | ESPL1_HUMAN |                               | 3     | GATTTGTATATGT | 0.547 |             |
| - | 7   | 795   |                   | NM_024057    | NP_076962    | Q8NFH4 | NUP37_HUMAN |                               | 1     | TATTTTGAGGAT  | 0.353 |             |
| + | 8   | 905   |                   | NM_017564    | NP_060034    | Q8WWQ8 | STAB2_HUMAN | r (Potential). EGF-like 4.    | 14    | TCAATCCATGTT  | 0.483 |             |
| + | 2   | 876   | _p.E82K GPC6_u    | NM_005708    | NP_005699    | Q9Y625 | GPC6_HUMAN  |                               | 0     | AAACTCGAATTT  | 0.413 |             |
| + | 4   | 1054  | ml.2_Missense_Mi  | NM_004274    | NP_004265    | Q13023 | AKAP6_HUMAN |                               | 21    | AGGTATCTCAAG  | 0.468 |             |
| - | 8   | 1465  | C35F4_uc010apa.   | NM_001080455 | NP_001073924 |        |             |                               | 2     | CTTTTCTTCCAG  | 0.522 |             |
| + | 8   | 902   | IP_uc002dcx.3_R   | NM_006985    | NP_008916    | Q9UND3 | NPIP_HUMAN  | Pro-rich.                     | 0     | CTCAGCGGATG   | 0.557 |             |
| - | 2   | 1257  | uc002dyl.1_5'Flan | NM_024671    | NP_078947    | Q9H5H4 | ZN768_HUMAN | C2H2-type 4.                  | 0     | TCGCAGGAGGT   | 0.632 |             |
| - | 34  | 5280  |                   | NM_032821    | NP_116210    | Q4G0P3 | HYDIN_HUMAN |                               | 2     | AGTTTCCACCAC  | 0.488 |             |
| - | 4   | 568   | TP53_uc010cni.1   | NM_001126112 | NP_001119584 | P04637 | P53_HUMAN   | with HIPK1 (G105_T125del      | 22245 | TGACCGTGCAA   | 0.542 |             |
| - | 7   | 554   | 3_Intron PIK3R5_u | NM_014308    | NP_055123    | Q8WYR1 | PI3R5_HUMAN |                               | 5     | CAGCACGGTGC   | 0.642 | rs149885535 |
| + | 19  | 2544  | _p.E479G KSR1_u   | NM_014238    | NP_055053    | Q8IVT5 | KSR1_HUMAN  | rotein kinase.                | 4     | CGGGGAAGGAA   | 0.572 |             |
| - | 18  | 2941  | w.1_Missense_Mu   | NM_004104    | NP_004095    | P49327 | FAS_HUMAN   |                               | 1     | GGCACGGGAGG   | 0.687 |             |
| - | 1   | 757   | TEC_uc010xaj.1_F  | NM_001137671 | NP_001131143 | B2RU33 | POTEC_HUMAN |                               | 3     | CAGCACCACTT   | 0.622 |             |
| + | 4   | 1429  | 3YR_uc002kva.2_l  | NM_012189    | NP_036321    | O75952 | CABYR_HUMAN |                               | 0     | TTCAATAGTCTC  | 0.502 | rs142770673 |
| - | 37  | 5246  | _p.C223Y MYO5B_   | NM_001080467 | NP_001073936 | Q9ULV0 | MYO5B_HUMAN | Dilute.                       | 5     | CCAGGCAGTAT   | 0.522 |             |
| - | 2   | 642   | N5_uc002mat.1_In  | NM_052972    | NP_443204    | P02750 | A2GL_HUMAN  |                               | 1     | CAGCGGACCCC   | 0.577 |             |
| - | 8   | 1939  | kc.2_Missense_M   | NM_032152    | NP_115528    | Q96QH2 | PRAM_HUMAN  | SH3.                          | 0     | TTCTGGGCACG   | 0.701 |             |
| + | 2   | 751   |                   | NM_173482    | NP_775753    | Q8IYK2 | CC105_HUMAN | Potential.                    | 1     | GATATGGAAAAA  | 0.498 |             |
| + | 29  | 6004  |                   | NM_014727    | NP_055542    | Q9UMN6 | MLL4_HUMAN  |                               | 11    | CTGAGCCCTTC   | 0.667 |             |
| + | 29  | 6164  |                   | NM_014727    | NP_055542    | Q9UMN6 | MLL4_HUMAN  |                               | 11    | TGGAGCCCCCC   | 0.697 |             |
| + | 98  | 14321 | .1.2_Missense_Mut | NM_000540    | NP_000531    | P21817 | RYR1_HUMAN  |                               | 12    | ATGGGGACATC   | 0.612 |             |
| + | 100 | 14561 | .1.2_Missense_Mut | NM_000540    | NP_000531    | P21817 | RYR1_HUMAN  |                               | 12    | TTCTTTGCTGCC  | 0.587 |             |
| - | 5   | 1308  | uj.3_Missense_Mu  | NM_182707    | NP_874366    | Q9UQ74 | PSG8_HUMAN  | like C2-type 3.               | 0     | ACTTTCTTGGC   | 0.468 |             |
| + | 3   | 273   | 880_uc002pzb.3_l  | NM_001145434 | NP_001138906 | Q6PDB4 | ZN880_HUMAN | KRAB.                         | 0     | AAATAGCAAACA  | 0.423 |             |
| + | 11  | 1400  | _p.V391I BRSK1_   | NM_032430    | NP_115806    | Q8TDC3 | BRSK1_HUMAN |                               | 6     | AATGATGTTGGT  | 0.393 |             |
| + | 3   | 1505  |                   | NM_021216    | NP_067039    | Q9NQZ8 | ZNF71_HUMAN | C2H2-type 11.                 | 1     | AGAGCGCCTAC   | 0.642 |             |
| + | 3   | 1069  | :002sma.1_Silent  | NM_016170    | NP_057254    | O43763 | TLX2_HUMAN  |                               | 0     | GCCCCGGGACC   | 0.726 |             |
| - | 7   | 932   |                   | NM_005735    | NP_005726    | P42025 | ACTY_HUMAN  |                               | 1     | CAACGTGTACT   | 0.642 |             |
| - | 3   | 687   |                   | NM_001099771 | NP_001093241 | A5A3E0 | POTEF_HUMAN |                               | 5     | ATCTTGTTCTGT  | 0.607 |             |
| + | 6   | 596   | ozbl.1_Missense_l | NM_018460    | NP_060930    | Q53QZ3 | RHG15_HUMAN | PH.                           | 2     | CCAAGGAAAAA   | 0.358 |             |
| - | 4   | 848   | f.2_Missense_Mut  | NM_003111    | NP_003102    | Q02447 | SP3_HUMAN   | ation domain (Gln-rich).      | 6     | TGTGGTATGAG   | 0.453 |             |
| - | 282 | 81666 | 843* TTN_uc010zl  | NM_133378    | NP_596869    | Q8WZ42 | TITIN_HUMAN |                               | 153   | ACCCTGTCCAG   | 0.423 |             |
| - | 4   | 598   | se_Mutation_p.G1  | NM_198433    | NP_940835    | O14965 | AURKA_HUMAN |                               | 8     | CAGGTCTGAA    | 0.383 |             |
| - | 1   | 326   | GP_uc002yvx.1_N   | NM_153681    | NP_710148    | P57054 | PIGP_HUMAN  |                               | 0     | TAAATCGCTCTT  | 0.478 |             |
| - | 28  | 6150  | i.2_Missense_Mut  | NM_198056    | NP_932173    | Q14524 | SCN5A_HUMAN |                               | 9     | GTATCGCTGG    | 0.607 |             |



|   |    |                           |                    |              |              |        |             |                               |       |               |       |
|---|----|---------------------------|--------------------|--------------|--------------|--------|-------------|-------------------------------|-------|---------------|-------|
| + | 18 | 1678                      | p.E450K CACNA2     | NM_018398    | NP_060868    | Q8IZS8 | CA2D3_HUMAN | lar (Potential). Cache.       | 7     | AGTACGAAGAA   | 0.443 |
| + | 13 | 3836                      | p.A355T PPP2R3A    | NM_002718    | NP_002709    | Q06190 | P2R3A_HUMAN |                               | 7     | TTGCCGCTGAG   | 0.448 |
| - | 5  | 485                       | r.1_Intron PHC3_u  | NM_024947    | NP_079223    | Q8NDX5 | PHC3_HUMAN  | Ser-rich.                     | 2     | GGAACGGCTTA   | 0.453 |
| - | 13 | 1384                      | se_Mutation_p.A42  | NM_001313    | NP_001304    | Q14194 | DPYL1_HUMAN |                               | 2     | CCACCGCCTGC   | 0.458 |
| + | 10 | 1421                      | e_Mutation_p.K19   | NM_005983    | NP_005974    | Q13309 | SKP2_HUMAN  |                               | 4     | CATCAAATGCCG  | 0.453 |
| + | 8  | 3268                      | e_Mutation_p.N98   | NM_001105251 | NP_001098721 | Q7Z3T8 | ZFY16_HUMAN |                               | 0     | ACAGCAATTTAC  | 0.353 |
| + | 1  | 645                       |                    | NR_024356    |              |        |             |                               | 0     | CTCATCGGGATC  | 0.662 |
| - | 2  | 976                       |                    | NM_001003760 | NP_001003760 | Q9H511 | KLH31_HUMAN |                               | 1     | TTGCATCATTCT  | 0.408 |
| - | 3  | 414                       | q.2_Missense_Mu    | NM_001080453 | NP_001073922 | Q8N201 | INT1_HUMAN  |                               | 0     | CGACGGAGAAA   | 0.577 |
| + | 8  | 902                       | k.2_Missense_Mu    | NM_001159767 | NP_001153239 | Q9Y6E2 | BZW2_HUMAN  |                               | 2     | AGGAGCTTTCC   | 0.488 |
| + | 16 | 2039                      | e.1_Missense_Mu    | NM_031414    | NP_113602    | Q9BXU1 | STK31_HUMAN |                               | 9     | GCAGATGATCCT  | 0.308 |
| + | 13 | 1662                      | ldp.2_Missense_M   | NM_020879    | NP_065930    | Q8IYE0 | CC146_HUMAN |                               | 2     | ACTGAGAGAGT   | 0.313 |
| + | 16 | 2096                      | n_p.V570 DYNC1     | NM_004411    | NP_004402    | O14576 | DC111_HUMAN | WD 7.                         | 4     | ATGACGTTGGA   | 0.473 |
| + | 17 | 3762                      | Mutation_p.S493F   | NM_022742    | NP_073579    | Q96JN2 | CC136_HUMAN | ical; (Potential).            | 2     | GCTTCTCCTTGC  | 0.532 |
| - | 15 | 1860                      |                    | NM_004333    | NP_004324    | P15056 | BRAF_HUMAN  | rotein kinas_R603>1(2) p.T    | 18290 | ATTTCACTGTAC  | 0.368 |
| + | 8  | 1601                      |                    | NM_014141    | NP_054860    | Q9UHC6 | CNTP2_HUMAN | 1. Extracellular (Potential). | 11    | ACAGGGAAATTT  | 0.433 |
| - | 14 | 1457                      | ck.1_Missense_M    | NM_001464    | NP_001455    | Q99965 | ADAM2_HUMAN | r (Potential). Disintegrin.   | 2     | CGATGATCCAT   | 0.408 |
| + | 10 | 988                       | pc.2_Missense_M    | NM_005662    | NP_005653    | Q9Y277 | VDAC3_HUMAN | inded; (By similarity).       | 1     | ACTGGAAGCTT   | 0.398 |
| - | 14 | 2175                      |                    | NM_031415    | NP_113603    | Q9BYG8 | GSDMC_HUMAN |                               | 3     | GATGCTCCTTAC  | 0.468 |
| + | 6  | 1697                      |                    | NM_001702    | NP_001693    | O14514 | BAI1_HUMAN  | (Potential). TSP type-1 4.    | 8     | GTGCCAGGGCC   | 0.697 |
| + | 21 | 3206                      | _p.F338L RGS3_L    | NM_144488    | NP_652759    | P49796 | RGS3_HUMAN  |                               | 3     | CTCTTCTTCACA  | 0.607 |
| - | 6  | 637                       | p.R123H PRICKL1    | NM_006150    | NP_006141    | O43900 | PRIC3_HUMAN | l zinc-binding 1.             | 1     | CTGCACGGCTG   | 0.562 |
| - | 12 | 1474                      | _p.P402L FOXP3_    | NM_014009    | NP_054728    | Q9BZS1 | FOXP3_HUMAN |                               | 0     | GGCCAGGTGTA   | 0.622 |
| - | 26 | 2318                      | _p.N394I TEX11_u   | NM_001003811 | NP_001003811 | Q8IYF3 | TEX11_HUMAN |                               | 5     | ATGTCATTGCATC | 0.388 |
| - | 18 | 2892                      | lD5_uc001amc.1_    | NM_015557    | NP_056372    | Q8TDI0 | CHD5_HUMAN  |                               | 12    | TGAGCCGCCCTG  | 0.592 |
| - | 6  | 1389                      | nx.2_Missense_M    | NM_001079843 | NP_001073312 | Q86V15 | CASZ1_HUMAN |                               | 1     | GTCGGGGCTGC   | 0.632 |
| + | 5  | 738                       | M1_uc001axg.1_M    | NM_017556    | NP_060026    | Q8WUP2 | FBL11_HUMAN | Pro-rich.                     | 1     | GTGCTTCTTGAC  | 0.652 |
| - | 3  | 1243                      | _p.S231L HSPB7_    | NM_014424    | NP_055239    | Q9UBY9 | HSPB7_HUMAN |                               | 0     | GAGCCGAGGTC   | 0.642 |
| - | 2  | 66                        | :G2D_uc009vpo.2_   | NM_012400    | NP_036532    | Q9UNK4 | PA2GD_HUMAN |                               | 0     | GATTGGAATCAC  | 0.577 |
| - | 5  | 536                       | p.P94S EIF4G3_uc   | NM_003760    | NP_003751    | O43432 | IF4G3_HUMAN |                               | 1     | AAAAGGACCTGC  | 0.423 |
| + | 4  | 534                       | se_Mutation_p.P38  | NM_000478    | NP_000469    | P05186 | PPBT_HUMAN  |                               | 5     | AGTTCCCTTCTC  | 0.473 |
| - | 65 | 8508                      | pd.2_Missense_M    | NM_005529    | NP_005520    | P98160 | PGBM_HUMAN  | ike C2-type 13.               | 9     | CACCTGGGGCT   | 0.677 |
| + | 4  | 383                       | _p.H108N GRHL3_    | NM_021180    | NP_067003    | Q8TE85 | GRHL3_HUMAN |                               | 1     | CCACACACCTC   | 0.522 |
| + | 8  | 1610                      | C21_uc010ofa.1_M   | NM_022778    | NP_073615    | Q6P2H3 | CEP85_HUMAN | Potential.                    | 0     | CATCAGAAGCAC  | 0.542 |
| + | 7  | 807                       | os.2_Missense_M    | NM_152660    | NP_689873    | Q8TAV0 | FA76A_HUMAN | Potential.                    | 0     | CAAAAAGGATCAC | 0.448 |
| - | 4  | 3698                      | se_Mutation_p.P82  | NM_024503    | NP_078779    | Q5T1R4 | ZEP3_HUMAN  | TRAF-dependent NF-Kapp        | 6     | TGATGGGAACT   | 0.552 |
| - | 4  | 1479                      | se_Mutation_p.S8   | NM_024503    | NP_078779    | Q5T1R4 | ZEP3_HUMAN  |                               | 6     | GCAGGATGCT    | 0.607 |
| + | 12 | 1672                      | nse_Mutation_p.Q   | NM_001017922 | NP_001017922 | Q96PL5 | ERMAP_HUMAN | lasmic (Potential).           | 1     | CCCTTCAGGAG   | 0.562 |
| + | 14 | 2321                      | _p.Q704K TIE1_uc   | NM_005424    | NP_005415    | P35590 | TIE1_HUMAN  | ellular (Potential).          | 7     | CAGTCCAAGGAG  | 0.642 |
| + | 20 | 4028                      | wt.2_Missense_M    | NM_002840    | NP_002831    | P10586 | PTPRF_HUMAN | ellular (Potential).          | 10    | TGAAGGAACCC   | 0.592 |
| - | 28 | 4910                      | ctz.2_Missense_M   | NM_015269    | NP_056084    | Q5TAX3 | TUT4_HUMAN  | Pro-rich.                     | 3     | CCAGGGAATTT   | 0.463 |
| - | 5  | 1273                      | se_Mutation_p.P347 | NM_015269    | NP_056084    | Q5TAX3 | TUT4_HUMAN  |                               | 3     | GGAAGGAGGTG   | 0.328 |
| - | 3  | 1480                      |                    | NM_201546    | NP_963840    | Q5VXM1 | CDCP2_HUMAN | CUB 2.                        | 1     | GGGTGGGCGCA   | 0.632 |
| - | 4  | 696                       | yr.1_Nonsense_M    | NM_021080    | NP_066566    | O75553 | DAB1_HUMAN  |                               | 3     | TACTTGAAGTT   | 0.453 |
| + | 8  | 1092                      | ij.3_Nonsense_Mu   | NM_018291    | NP_060761    | Q96C11 | FGGY_HUMAN  |                               | 1     | TCTGTGGAACG   | 0.572 |
| - | 3  | 402                       |                    | NM_152377    | NP_689590    | Q8N0U7 | CA087_HUMAN |                               | 2     | TTGCCCTGTTA   | 0.368 |
| + | 7  | 1276_1277:K7_uc001dap.2_L |                    | NM_014495    | NP_055310    | Q9Y5C1 | ANGL3_HUMAN | rogen C-terminal.             | 0     | AGTGTGGAGAAA  | 0.391 |

rs145694237

rs144929442

|   |    |           |                                                 |              |              |              |             |                               |             |              |       |
|---|----|-----------|-------------------------------------------------|--------------|--------------|--------------|-------------|-------------------------------|-------------|--------------|-------|
| - | 11 | 1820      | 73_uc001dgi.3_Mi                                | NM_001002912 | NP_001002912 | Q5RHP9       | CA173_HUMAN | Glu-rich.                     | 5           | TCTTTTTATCAT | 0.403 |
| + | 6  | 716       | HN2_uc001div.2_I                                | NM_012302    | NP_036434    | O95490       | LPHN2_HUMAN | otential). Olfactomedin-like  | 9           | CCCTATCGTACC | 0.398 |
| + | 13 | 2645      | E822K LPHN2_uc                                  | NM_012302    | NP_036434    | O95490       | LPHN2_HUMAN | ular (Potential). GPS.        | 9           | ACAGGGAAATT  | 0.428 |
| + | 16 | 3119      | HN2_uc009wcd.2_                                 | NM_012302    | NP_036434    | O95490       | LPHN2_HUMAN | Name=5; (Potential).          | 9           | ATATGGAGCTTC | 0.358 |
| - | 8  | 1905      | e_Mutation_p.E25                                | NM_152763    | NP_689976    | Q5T1N1       | AKND1_HUMAN |                               | 3           | CTCCTCGTTGG  | 0.662 |
| - | 11 | 1958      | p.E568* NOTCH2                                  | NM_024408    | NP_077719    | Q04721       | NOTC2_HUMAN | ng (Potential). Extracellular | 27          | CTCCTCACACA  | 0.463 |
| - | 3  | 1227      | h.2_Missense_Mu                                 | NM_014849    | NP_055664    | Q7L0J3       | SV2A_HUMAN  | ical; (Potential).            | 7           | GAAGGCGAAGA  | 0.532 |
| - | 5  | 909       | eto.2_Missense_IV                               | NM_020205    | NP_064590    | Q6GQQ9       | OTU7B_HUMAN | OTU. TRAF-binding.            | 3           | CAAAGGAAGCA  | 0.517 |
| - | 3  | 2451      |                                                 | NM_001009931 | NP_001009931 | Q86YZ3       | HORN_HUMAN  | 8                             | GTTGGCCGTGG | 0.597        |       |
| - | 3  | 1020      |                                                 | NM_016190    | NP_057274    | Q9UBG3       | CRNN_HUMAN  | Gln-rich.                     | 3           | TGTCTGGGTGC  | 0.602 |
| - | 3  | 326       | RL4_uc010phy.1_F                                | NM_031282    | NP_112572    | Q96PJ5       | FCRL4_HUMAN | otential). Ig-like C2-type 1. | 4           | TTCTCCCCAGT  | 0.517 |
| - | 8  | 1547      | sn.2_RNA FCRL3                                  | NM_052939    | NP_443171    | Q96P31       | FCRL3_HUMAN | 5. Extracellular (Potential). | 4           | CTCATGATAAAA | 0.582 |
| - | 1  | 367       |                                                 | NM_001004475 | NP_001004475 | Q8NGX3       | O10T2_HUMAN | lasmic (Potential).           | 3           | CATAGCGATCAT | 0.478 |
| - | 4  | 665       |                                                 | NM_003126    | NP_003117    | P02549       | SPTA1_HUMAN | Spectrin 2.                   | 8           | GGCCCGCAGCA  | 0.527 |
| - | 1  | 772       |                                                 | NM_001005279 | NP_001005279 | Q8NGY2       | OR6K2_HUMAN | Name=6; (Potential).          | 1           | CATGAGAGTCA  | 0.468 |
| - | 12 | 2129      | p.G441S ARHGAF                                  | NM_001025598 | NP_001020769 | Q7Z6I6       | RHG30_HUMAN |                               | 3           | GGGGCCAGCGG  | 0.567 |
| - | 7  | 1089      | se_Mutation_p.P9                                | NM_001025598 | NP_001020769 | Q7Z6I6       | RHG30_HUMAN |                               | 3           | GCAGTGGCCCTG | 0.587 |
| - | 6  | 1308      | i_p.E16K PVRL4_u                                | NM_030916    | NP_112178    | Q96NY8       | PVRL4_HUMAN | ellular (Potential).          | 2           | GTCTTCTCTGGG | 0.602 |
| - | 3  | 209       | p.W12C DEDD_u                                   | NM_001039712 | NP_001034801 | O75618       | DEDD_HUMAN  |                               | 0           | TCTGGCCACAC  | 0.592 |
| + | 1  | 576       |                                                 | NR_024151    |              |              |             |                               | 0           | CAAGACGTTCT  | 0.637 |
| + | 3  | 478       | cr.1_Nonsense_Mi                                | NM_145697    | NP_663735    | Q9BZD4       | NUF2_HUMAN  | i the N-terminus of NDC80.    | 4           | GAATTCGACTGC | 0.348 |
| - | 2  | 304       |                                                 | NM_199351    | NP_955383    | Q71H61       | ILDR2_HUMAN | . Extracellular (Potential).  | 1           | GGTTTCTCTTGC | 0.537 |
| - | 14 | 1981      | te_p.S78_splice S                               | NM_178527    | NP_848622    | Q5TAH2       | S9A11_HUMAN |                               | 2           | GCTACTCTAAAC | 0.333 |
| - | 15 | 1952      | glh.1_Missense_IV                               | NM_033127    | NP_149118    | Q96JE7       | SC16B_HUMAN |                               | 4           | TGAAGGATTTGC | 0.498 |
| + | 3  | 245       | rf49_uc001glv.1_F                               | NM_032126    | NP_115502    | Q5T0J7       | CA049_HUMAN | Potential.                    | 0           | TTACCAAAGCA  | 0.418 |
| + | 6  | 1811      | pb.1_Missense_M                                 | NM_201253    | NP_957705    | P82279       | CRUM1_HUMAN | otential). Laminin G-like 1.  | 9           | CTATTTCCACAA | 0.458 |
| + | 5  | 1140      | i_Mutation_p.R297                               | NM_000299    | NP_000290    | Q13835       | PKP1_HUMAN  | ARM 2.                        | 2           | TCCTCCGCAGC  | 0.617 |
| + | 13 | 2534_2535 | p.V873S CR2_ucC                                 | NM_001877    | NP_001868    | P20023       | CR2_HUMAN   | extracellular (Potential).    | 8           | TGTATGTTGACT | 0.441 |
| - | 9  | 1466      | i_p.M306 IRF6_uc                                | NM_006147    | NP_006138    | O14896       | IRF6_HUMAN  |                               | 2           | TAGATCATCCG  | 0.453 |
| + | 7  | 1275      | xcu.1_Missense_I                                | NM_014388    | NP_055203    | Q68CQ4       | DIEXF_HUMAN |                               | 0           | AGATCCCGAGG  | 0.468 |
| - | 5  | 717       | ic.2_Missense_Mi                                | NM_172362    | NP_758872    | O95259       | KCNH1_HUMAN | lasmic (Potential).           | 5           | CAGGCGGGAGT  | 0.517 |
| - | 21 | 4948      | v.2_Missense_Mu                                 | NM_206933    | NP_996816    | O75445       | USH2A_HUMAN | 1. Extracellular (Potential). | 26          | GAAACGGATTCC | 0.433 |
| + | 2  | 276       | hoi.2_Missense_IV                               | NM_144780    | NP_659004    | O15121       | DEGS1_HUMAN | ical; (Potential).            | 0           | CAGTTGGGTGC  | 0.383 |
| + | 27 | 7217      | 3CN_uc001hsp.1_I                                | NM_001098623 | NP_001092093 | Q5VST9       | OBSCN_HUMAN |                               | 28          | GTGATGGAGCC  | 0.632 |
| + | 41 | 11140     | 3G3699E OBSCN                                   | NM_001098623 | NP_001092093 | Q5VST9       | OBSCN_HUMAN | Ig-like 37.                   | 28          | GTGCGGAAGG   | 0.622 |
| + | 2  | 234       |                                                 | NM_173508    | NP_775779    | Q8IY50       | S35F3_HUMAN |                               | 2           | CCGGAGACTGT  | 0.647 |
| + | 7  | 704       | BCE_uc010pxr.1_I                                | NM_003193    | NP_003184    | Q15813       | TBCE_HUMAN  | LRR 2.                        | 0           | ATTTCCCTCCGC | 0.333 |
| + | 8  | 1124      | n_p.R234L MTR_u                                 | NM_000254    | NP_000245    | Q99707       | METH_HUMAN  | Hcy-binding.                  | 3           | TGGGCGGACTC  | 0.393 |
| + | 41 | 6485      |                                                 | NM_001035    | NP_001026    | Q92736       | RYR2_HUMAN  | ilarity). 4 X approximate rep | 33          | GGCATCCCTTG  | 0.502 |
| - | 2  | 770       |                                                 | NM_022469    | NP_071914    | Q9H772       | GREM2_HUMAN |                               | 0           | CGAGTCGCTCA  | 0.517 |
| + | 6  | 770       | .1_Intron SDCCAC                                | NM_006642    | NP_006633    | Q86SQ7       | SDCG8_HUMAN |                               | 0           | AAAGACCATTTT | 0.413 |
| + | 11 | 2817      | i_p.Q411* KIF26B                                | NM_018012    | NP_060482    | Q2KJY2       | KI26B_HUMAN |                               | 3           | ACCATCCAGATT | 0.607 |
| + | 1  | 276       |                                                 | NM_001001915 | NP_001001915 | Q8NGZ5       | OR2G2_HUMAN | ellular (Potential).          | 0           | ACCCATGAAAAC | 0.522 |
| + | 1  | 26        |                                                 | NM_001004696 | NP_001004696 | Q8NH00       | OR2T4_HUMAN | ellular (Potential).          | 1           | GGCCAGCCACA  | 0.483 |
| + | 1  | 55        |                                                 | NM_001004696 | NP_001004696 | Q8NH00       | OR2T4_HUMAN | ellular (Potential).          | 1           | TCCTGATGGGA  | 0.488 |
| - | 13 | 1525      | p.S95F PITRM1_uc001igu.1_Missense_Mutation_p.S5 |              | E7ES23       | E7ES23_HUMAN |             |                               | 1           | CGGGGACAGAG  | 0.557 |
| + | 8  | 1072      | p.D274N AKR1C3                                  | NM_003739    | NP_003730    | P42330       | AK1C3_HUMAN |                               | 1           | CCATAGATGGC  | 0.358 |

rs140989725

|   |    |           |                    |              |              |        |              |    |               |       |             |
|---|----|-----------|--------------------|--------------|--------------|--------|--------------|----|---------------|-------|-------------|
| - | 9  | 1472      | ND7_uc001iml.2_F   | NM_152751    | NP_689964    | Q8N7W2 | BEND7_HUMAN  | 2  | FGTCCCTTTTCTT | 0.557 |             |
| - | 3  | 340       | e_Mutation_p.R10   | NM_001029954 | NP_001025125 | Q49AH0 | CDNF_HUMAN   | 0  | TTGGGCGAGTG   | 0.438 |             |
| + | 3  | 992       | DC2_uc001iqh.1_I   | NM_032812    | NP_116201    | Q6UX71 | PXDC2_HUMAN  | 4  | ATATCTCGAATAT | 0.333 |             |
| - | 28 | 3287      | BL_uc001iqk.2_Mi   | NM_006393    | NP_006384    | O76041 | NEBL_HUMAN   | 2  | TGTAATCGTACAT | 0.502 |             |
| + | 6  | 1989      | e_Mutation_p.G37   | NM_019590    | NP_062536    | Q5T5P2 | SKT_HUMAN    | 7  | CTGCAGGATTATC | 0.552 |             |
| - | 16 | 2397      | qdt.1_Missense_M   | NM_018076    | NP_060546    | Q5T2S8 | ARMC4_HUMAN  | 6  | CTGATCTGTTAC  | 0.428 |             |
| + | 7  | 2588      | _p.A624E ZEB1_u    | NM_030751    | NP_110378    | P37275 | ZEB1_HUMAN   | 5  | AGGTGGCATACA  | 0.488 |             |
| - | 1  | 736       | _p.G94R GDF10_u    | NM_004962    | NP_004953    | P55107 | BMP3B_HUMAN  | 2  | CCCTCCCGGCC   | 0.662 |             |
| - | 4  | 382       | _p.R73Q A1CF_uc    | NM_138932    | NP_620310    | Q9NQ94 | A1CF_HUMAN   | 1  | GGTCTCGGGGA   | 0.393 |             |
| - | 25 | 3711      | se_Mutation_p.R1   | NM_033056    | NP_149045    | Q96QU1 | PCD15_HUMAN  | 13 | GACTCGAAGTA   | 0.373 |             |
| - | 19 | 2776      | DH15_uc010qhw      | NM_033056    | NP_149045    | Q96QU1 | PCD15_HUMAN  | 13 | CTGCTCCATCTC  | 0.423 | rs146468805 |
| - | 40 | 12746     | p.S750T ANK3_uc    | NM_020987    | NP_066267    | Q12955 | ANK3_HUMAN   | 19 | CAAAACTTCTGC  | 0.328 |             |
| - | 1  | 235       | IK3_uc001j kz.3_In | NM_020987    | NP_066267    | Q12955 | ANK3_HUMAN   | 19 | TGATTTCTAAATC | 0.408 |             |
| + | 10 | 2638      |                    | NM_032199    | NP_115575    | Q14865 | ARI5B_HUMAN  | 4  | TTTTCTTCCCA   | 0.483 |             |
| + | 2  | 1010      | mx.3_Intron CTNN   | NM_178011    | NP_821079    | Q86VH5 | LRRT3_HUMAN  | 3  | AGTTTCGGGGC   | 0.448 |             |
| + | 6  | 1371      | e_Mutation_p.P39   | NM_032578    | NP_115967    | Q86TC9 | MYPN_HUMAN   | 5  | TTCTCCAGCA    | 0.458 |             |
| - | 2  | 256       |                    | NM_020999    | NP_066279    | Q9Y4Z2 | NGN3_HUMAN   | 0  | CGGACGTGGGG   | 0.716 |             |
| + | 6  | 1031      | iLC29A3_uc001jrt   | NM_018344    | NP_060814    | Q9BZD2 | S29A3_HUMAN  | 0  | CCCCGCCATCTC  | 0.562 |             |
| + | 2  | 949       | G3_uc001kcp.2_M    | NM_001010848 | NP_001010848 | P56975 | NRG3_HUMAN   | 6  | TGATCGAAACCC  | 0.557 |             |
| + | 7  | 1252      | mk.1_Missense_M    | NM_033282    | NP_150598    | Q9UHM6 | OPN4_HUMAN   | 1  | GGCCTCTGCAA   | 0.602 |             |
| + | 3  | 125       |                    | NM_019054    | NP_061927    | Q86V20 | FA35A_HUMAN  | 4  | TGGAGGATCTC   | 0.338 |             |
| + | 20 | 2455_2456 |                    | NM_006204    | NP_006195    | P51160 | PDE6C_HUMAN  | 4  | AATTACCTAAAC  | 0.277 |             |
| - | 4  | 620       | uv.2_Missense_M    | NM_020992    | NP_066272    | O00151 | PDLI1_HUMAN  | 0  | CACCCCGCTGG   | 0.572 |             |
| - | 11 | 1822      | _p.P478L CRTAC1    | NM_018058    | NP_060528    | Q9NQ79 | CRAC1_HUMAN  | 5  | CCACGGGCTCC   | 0.607 |             |
| + | 26 | 3678      |                    | NM_014978    | NP_055793    | Q9UPU3 | SORC3_HUMAN  | 10 | AAAATCCCTTGG  | 0.488 |             |
| + | 7  | 447       | u.1_RNA PNLIPRI    | NM_005396    | NP_005387    | P54317 | LIPR2_HUMAN  | 1  | ACATTCGGGTT   | 0.562 |             |
| - | 7  | 1375      | orf46_uc010qst.1_  | NM_153810    | NP_722517    | Q86Y37 | CJ046_HUMAN  | 0  | TGAACCCACTC   | 0.348 |             |
| + | 10 | 1295      |                    | NM_014937    | NP_055752    | Q9Y2H2 | SAC2_HUMAN   | 2  | TAACTTGGTAG   | 0.338 |             |
| + | 3  | 440       | lw.2_Missense_M    | NM_001083909 | NP_001077378 | Q86SQ6 | GP123_HUMAN  | 0  | CTCAGGATCTGA  | 0.657 |             |
| - | 13 | 1964      | p.G652E TRPM5_u    | NM_014555    | NP_055370    | Q9NZQ8 | TRPM5_HUMAN  | 4  | AGGCTCCTAGC   | 0.647 |             |
| - | 2  | 365       |                    | NM_001039165 | NP_001034254 | Q86SM8 | MARGRE_HUMAN | 2  | CACATCCTCCTC  | 0.667 |             |
| - | 1  | 865       | z2_uc001mak.1_lr   | NM_145053    | NP_659490    | Q81YU4 | UBQLN_HUMAN  | 3  | AATGAAGTCC    | 0.473 |             |
| - | 1  | 911       | z2_uc001mak.1_lr   | NM_001005289 | NP_001005289 | Q8NGJ2 | O52H1_HUMAN  | 2  | GCTTGGTCTTC   | 0.408 |             |
| - | 8  | 1224      | 5_uc001mbn.2_In    | NM_033034    | NP_149023    | Q9C035 | TRIM5_HUMAN  | 1  | TTTCGGAGAGC   | 0.413 |             |
| - | 1  | 926       |                    | NM_001005173 | NP_001005173 | Q8NGH7 | O52L1_HUMAN  | 2  | AACATGGACAT   | 0.502 |             |
| + | 7  | 1852      | _p.C430S DNHD1_    | NM_144666    | NP_653267    | Q96M86 | DNHD1_HUMAN  | 2  | ATCGGTGCTATC  | 0.552 |             |
| - | 12 | 2308      | ow.1_Missense_M    | NM_002645    | NP_002636    | O00443 | P3C2A_HUMAN  | 10 | GATAGGAAAAAT  | 0.308 |             |
| - | 1  | 532       |                    | NM_147199    | NP_671732    | Q96LB2 | MARGX1_HUMAN | 3  | AGTAGGAAAAC   | 0.547 |             |
| + | 7  | 810       | qj.2_Missense_Mu   | NM_213599    | NP_998764    | Q75V66 | ANO5_HUMAN   | 4  | CACACTCTATA   | 0.463 |             |
| + | 18 | 2283      | qj.2_Missense_Mu   | NM_213599    | NP_998764    | Q75V66 | ANO5_HUMAN   | 4  | GATGGGAGCAG   | 0.403 |             |
| - | 7  | 803       | o.1_Missense_Mu    | NM_015957    | NP_057041    | Q96GX9 | MTNB_HUMAN   | 0  | GCTGTGAAGGA   | 0.313 |             |
| - | 2  | 412       | 1_5'Flank C11orf7  | NM_000536    | NP_000527    | P55895 | RAG2_HUMAN   | 5  | TGGCTGGGTAG   | 0.433 |             |
| + | 7  | 843       | 2_uc001ndg.3_RN    | NM_000506    | NP_000497    | P00734 | THRB_HUMAN   | 3  | AGACGGGGATG   | 0.632 |             |
| - | 12 | 1585      | _p.L427F FOLH1_u   | NM_004476    | NP_004467    | Q04609 | FOLH1_HUMAN  | 3  | TGAAGGAGTC    | 0.368 |             |
| - | 1  | 899       |                    | NM_001005270 | NP_001005270 | Q96R67 | OR4CC_HUMAN  | 3  | TCTCAAAGCT    | 0.348 |             |
| + | 1  | 272       |                    | NM_001004701 | NP_001004701 | Q8NGL9 | OR4CG_HUMAN  | 2  | TATCTCCTCAG   | 0.448 |             |
| + | 1  | 857       |                    | NM_001004735 | NP_001004735 | Q8NGL3 | OR5DE_HUMAN  | 3  | CCCCATGCTGA   | 0.428 |             |

|   |    |         |                    |              |              |        |             |                                  |    |               |       |             |
|---|----|---------|--------------------|--------------|--------------|--------|-------------|----------------------------------|----|---------------|-------|-------------|
| - | 1  | 547     |                    | NM_001004058 | NP_001004058 | Q8NH50 | OR8K5_HUMAN | cellular (Potential).            | 4  | 3CAAAGGAACAT  | 0.353 |             |
| + | 1  | 374_375 |                    | NM_001004745 | NP_001004745 | Q8NG75 | OR5T1_HUMAN | Name=3; (Potential).             | 3  | ATGCTTTCTCTT  | 0.411 |             |
| - | 6  | 940     | SLS5_uc010rmq.1    | NM_054108    | NP_473449    | Q96KN8 | HRSL5_HUMAN |                                  | 1  | TCCTTCCATCAC  | 0.512 |             |
| + | 3  | 540     | DX5_uc001nzw.2_l   | NM_012094    | NP_036226    | P30044 | PRDX5_HUMAN | Thioredoxin.                     | 1  | GAGCCCACAAG   | 0.577 |             |
| - | 5  | 1522    | v.1_Missense_Mul   | NM_006795    | NP_006786    | Q9H4M9 | EHD1_HUMAN  |                                  | 0  | GTGCCCGAACG   | 0.667 |             |
| - | 3  | 906     | ce.1_Missense_Mt   | NM_138456    | NP_612465    | Q8N1L9 | BATF2_HUMAN |                                  | 1  | AGGGTGAGGGC   | 0.612 |             |
| + | 5  | 357     |                    | NM_001008778 | NP_001008778 | Q5MJ68 | SPDYC_HUMAN | aired for CDK- binding (By s     | 0  | GCAAACGACATC  | 0.562 |             |
| + | 15 | 2758    | 2_5'Flank PCNXL3   | NM_032223    | NP_115599    | Q9H6A9 | PCX3_HUMAN  | ical; (Potential).               | 0  | GCCTCCTGCC    | 0.632 |             |
| + | 4  | 696     | .S4_uc010rpc.1_5'  | NM_178864    | NP_849195    | Q8IUM7 | NPAS4_HUMAN |                                  | 0  | CGATTCATGCT   | 0.612 |             |
| + | 10 | 1190    | RD13D_uc001okg.    | NM_207354    | NP_997237    | Q6ZTN6 | AN13D_HUMAN |                                  | 1  | ACACCGGGGTG   | 0.687 | rs144238691 |
| - | 6  | 1157    | alice_Site_p.G323_ | NM_004910    | NP_004901    | O00562 | PITM1_HUMAN |                                  | 3  | AGCCCTGCCG    | 0.632 |             |
| + | 1  | 238     |                    | NM_003251    | NP_003242    | Q92748 | THRSP_HUMAN |                                  | 1  | ACCATGGGCTG   | 0.632 |             |
| - | 5  | 951     | :S2_uc010rsq.1_5'  | NM_024678    | NP_078954    | Q96I59 | SYNM_HUMAN  |                                  | 2  | GTTCTCCAGCT   | 0.343 |             |
| - | 26 | 4517    |                    | NM_001098816 | NP_001092286 | Q6N022 | TEN4_HUMAN  | ilar (Potential). NHL 3.         | 4  | CTTACCCCTGG   | 0.443 |             |
| + | 11 | 1687    | rtq.1_Missense_IV  | NM_001156474 | NP_001149946 | Q6ZN84 | CCD81_HUMAN |                                  | 1  | CTGCGCTTAATG  | 0.373 |             |
| - | 1  | 940     | mw.1_RNA PGR_u     | NM_000926    | NP_000917    | P06401 | PRGR_HUMAN  | ulating, Pro-Rich.               | 4  | CCTGTCCCTGG   | 0.637 |             |
| + | 5  | 494     | J* C11orf70_uc001  | NM_032930    | NP_116319    | Q9BRQ4 | CK070_HUMAN |                                  | 1  | AAATATGAAATAT | 0.343 |             |
| - | 5  | 809     |                    | NM_002425    | NP_002416    | P09238 | MMP10_HUMAN |                                  | 4  | CTCACCGTAGAC  | 0.458 |             |
| - | 10 | 1316    |                    | NM_002426    | NP_002417    | P39900 | MMP12_HUMAN | mopexin-like 3.                  | 0  | CGATTCCTTGG   | 0.393 |             |
| - | 5  | 807     | xg.1_Missense_Mt   | NM_001225    | NP_001216    | P49662 | CASP4_HUMAN |                                  | 4  | TCAGACTGAGG   | 0.473 |             |
| - | 5  | 1697    | p.R457Q GUCY1A     | NM_000855    | NP_000846    | P33402 | GCYA2_HUMAN |                                  | 8  | GCCCTCGGCC    | 0.463 |             |
| + | 3  | 515     | .R60Q LAYN_uc0C    | NM_178834    | NP_849156    | Q6UX15 | LAYN_HUMAN  | . Extracellular (Potential).     | 0  | TTCTCGAAGACT  | 0.463 |             |
| + | 14 | 2088    |                    | NM_001076682 | NP_001070150 | P13591 | NCAM1_HUMAN | ential). Fibronectin type-III    | 1  | GCATTCCAAGT   | 0.532 |             |
| + | 5  | 917     | os.1_Missense_Mt   | NM_006169    | NP_006160    | P40261 | NNMT_HUMAN  |                                  | 1  | GGGCCGGGAGC   | 0.542 |             |
| + | 3  | 343     | i4_uc010rxr.1_5'U  | NM_019894    | NP_063947    | Q9NRS4 | TMPS4_HUMAN | lasmic (Potential).              | 2  | TCAAACCCCTG   | 0.552 |             |
| + | 19 | 2644    | p.G786E GRIK4_t    | NM_014619    | NP_055434    | Q16099 | GRIK4_HUMAN | ellular (Potential).             | 3  | GGAAGGAGGGA   | 0.567 |             |
| + | 45 | 6228    | p.E896K SORL1_     | NM_003105    | NP_003096    | Q92673 | SORL_HUMAN  | ential). Fibronectin type-III    | 15 | TTAAAGGAAAAG  | 0.343 |             |
| + | 1  | 597     |                    | NM_001001965 | NP_001001965 | Q8NGN0 | OR4D5_HUMAN | Name=5; (Potential).             | 1  | TTAATGGGTCT   | 0.502 |             |
| - | 1  | 71      |                    | NM_001004474 | NP_001004474 | Q8NGN2 | O10S1_HUMAN | ellular (Potential).             | 2  | VGAAGTGGCTC   | 0.502 |             |
| + | 2  | 268     |                    | NM_052959    | NP_443191    | Q96QZ0 | PANX3_HUMAN | ellular (Potential).             | 0  | CTGCTTCACCAT  | 0.562 |             |
| - | 2  | 1158    | _p.M350I KCNJ1_    | NM_000220    | NP_000211    | P48048 | IRK1_HUMAN  | smic (By similarity).            | 4  | TCCTTCATCCTC  | 0.428 |             |
| - | 4  | 649     | e_Mutation_p.R36   | NM_003044    | NP_003035    | P48065 | S6A12_HUMAN | lasmic (Potential).              | 1  | GCCCCGATCCT   | 0.577 |             |
| + | 20 | 3060    | _uc001qkn.2_Miss   | NM_199460    | NP_955630    | Q13936 | CAC1C_HUMAN | :1 of repeat III; (Potential). I | 11 | 3CATTTCCTGG   | 0.582 |             |
| - | 1  | 348     |                    | NM_020996    | NP_066276    | P10767 | FGF6_HUMAN  |                                  | 3  | GTCGGGGAGCA   | 0.632 |             |
| + | 11 | 1959    |                    | NM_017417    | NP_059113    | Q9NY28 | GALT8_HUMAN | ectin. Lumenal (Potential).      | 4  | GTGGGAAATC    | 0.512 |             |
| - | 17 | 2517    | vF_uc010set.1_Int  | NM_000552    | NP_000543    | P04275 | VWF_HUMAN   |                                  | 12 | ACAGGGGACTG   | 0.557 |             |
| + | 6  | 783     | sl.2_Missense_Mu   | NM_201442    | NP_958850    | P09871 | C1S_HUMAN   | CUB 1.                           | 1  | ATGGGGAGATC   | 0.483 |             |
| - | 10 | 1897    |                    | NM_001733    | NP_001724    | P00736 | C1R_HUMAN   | eptidase S1.                     | 0  | CTACGGGCAGAC  | 0.517 |             |
| + | 1  | 143     |                    | NM_001007033 | NP_001007034 | Q6EIG7 | CLC6A_HUMAN | lasmic (Potential).              | 1  | TCAAAGTACAG   | 0.458 |             |
| + | 2  | 98      | D1_uc009zhh.2_5'   | NM_001114396 | NP_001107868 | Q13241 | KLRD1_HUMAN |                                  | 0  | CTTTCAGATTCT  | 0.328 |             |
| - | 1  | 298     |                    | NM_023919    | NP_076408    | Q9NYW3 | TA2R7_HUMAN | ellular (Potential).             | 1  | TCATTTCTTTACC | 0.358 |             |
| - | 3  | 700     | B4_uc001qzf.1_Int  | NM_006249    | NP_006240    | Q04118 | PRB3_HUMAN  | G-[PQS]-P-[PS]-Q-[GE]-G-I        | 1  | CGGACGAGGT    | 0.622 | rs113884749 |
| - | 3  | 1119    |                    | NM_006248    | NP_006239    |        |             |                                  | 0  | TGGAGGAGATC   | 0.612 |             |
| - | 10 | 1545    |                    | NM_024829    | NP_079105    | Q6P4A8 | PLBL1_HUMAN |                                  | 0  | AAGGATCCTTCT  | 0.448 |             |
| - | 3  | 279     | rdr.2_Missense_IV  | NM_024730    | NP_079006    | Q9H628 | RERGL_HUMAN | all GTPase-like.                 | 0  | CAATGAATCGCT  | 0.333 |             |
| - | 3  | 277     | rdr.2_Missense_M   | NM_024730    | NP_079006    | Q9H628 | RERGL_HUMAN | all GTPase-like.                 | 0  | ATGAATCGCTTAC | 0.338 | rs138852095 |
| + | 27 | 3807    | se_Mutation_p.E1:  | NM_004570    | NP_004561    | O75747 | P3C2G_HUMAN | PX.                              | 21 | VACAACGAAACA  | 0.418 |             |

|   |    |      |                   |              |              |        |                                       |    |                  |       |
|---|----|------|-------------------|--------------|--------------|--------|---------------------------------------|----|------------------|-------|
| + | 29 | 4063 | se_Mutation_p.S1  | NM_004570    | NP_004561    | O75747 | P3C2G_HUMAN                           | 21 | AAGAATCATCAC     | 0.284 |
| + | 27 | 3157 | ria.2_Missense_M  | NM_003622    | NP_003613    | Q86W92 | LIPB1_HUMAN                           | 5  | TTGTCCAATGG      | 0.383 |
| + | 14 | 1765 | nn.1_Missense_Mi  | NM_001843    | NP_001834    | Q12860 | CNTN1_HUMAN like C2-type 6.           | 9  | TTAACAAAGAGA     | 0.393 |
| - | 25 | 3619 | _p.P325T ADAMT    | NM_025003    | NP_079279    | P59510 | ATS20_HUMAN SP type-1 8.              | 19 | ACAAGGGGTAA      | 0.373 |
| - | 10 | 941  | _p.C228F SLC38A   | NM_030674    | NP_109599    | Q9H2H9 | S38A1_HUMAN ical; (Potential).        | 5  | CCATACAGCTC      | 0.269 |
| + | 4  | 1828 | rpq.2_Missense_Iv | NM_138371    | NP_612380    | Q96HM7 | F113B_HUMAN Pro-rich.                 | 5  | ATGCAGGTTTCT     | 0.527 |
| - | 34 | 2465 | DL2A1_uc001rqv.2  | NM_001844    | NP_001835    | P02458 | CO2A1_HUMAN le-helical region.        | 2  | GGGCCAGCGA       | 0.627 |
| - | 10 | 1541 |                   | NM_003482    | NP_003473    | O14686 | MLL2_HUMAN of S/P-P-P-E/P-E/A. Pro-ri | 41 | CCAGTGGAGAA      | 0.622 |
| - | 11 | 1140 | 001rxh.1_Missense | NM_000617    | NP_000608    | P49281 | NRAM2_HUMAN ellular (Potential).      | 1  | GAGTTATCTTTAG    | 0.408 |
| - | 5  | 900  | ans.1_Nonsense_A  | NM_001146225 | NP_001139697 | Q14CN4 | K2C72_HUMAN inker 12. Rod.            | 6  | GGACTGGATCT      | 0.572 |
| - | 1  | 194  | _p.S59A KRT8_uc   | NM_002273    | NP_002264    | P05787 | K2C8_HUMAN ead. Ser-rich.             | 2  | GCGGGAACCGG      | 0.662 |
| + | 7  | 915  | _p.Y237H EIF4B_u  | NM_001417    | NP_001408    | P23588 | IF4B_HUMAN j-rich. Asp-rich.          | 2  | ggatgggtatcgggat | 0.388 |
| + | 3  | 738  | eq.2_Missense_Mi  | NM_006897    | NP_008828    | P31274 | HXC9_HUMAN Homeobox.                  | 3  | CTCTTCAATATG     | 0.537 |
| + | 8  | 781  | 3173C DGKA_uc0    | NM_001345    | NP_001336    | P23743 | DGKA_HUMAN nd 2. 2 (Probable).        | 4  | GCAGTGGCTCT      | 0.547 |
| - | 10 | 1105 |                   | NM_173595    | NP_775866    | Q8NB46 | ANR52_HUMAN ANK 11.                   | 2  | TGTTCCCAAATT     | 0.577 |
| - | 22 | 2521 | _p.R598* MYO1A_   | NM_005379    | NP_005370    | Q9UBC5 | MYO1A_HUMAN IQ 3.                     | 7  | CTTTCGGGCCCTC    | 0.443 |
| - | 10 | 1123 | _p.R132C MYO1A_   | NM_005379    | NP_005370    | Q9UBC5 | MYO1A_HUMAN osin head-like.           | 7  | ATCACGGATGC      | 0.527 |
| + | 6  | 1248 | _2_RNA SLC26A1C   | NM_133489    | NP_597996    | Q8NG04 | S2610_HUMAN                           | 2  | CCAACCAGGTG      | 0.537 |
| - | 10 | 1585 | 1svf.2_Missense_f | NM_032735    | NP_116124    | Q8N1M1 | BEST3_HUMAN lasmic (Potential).       | 0  | AGCAGGATTTTC     | 0.592 |
| + | 2  | 949  |                   | NM_013381    | NP_037513    | Q9UKU6 | TRHDE_HUMAN ellular (Potential).      | 3  | CAGTGGAAACT      | 0.403 |
| - | 3  | 263  | ltan.2_Missense_f | NM_152589    | NP_689802    | Q8NA57 | CL050_HUMAN                           | 3  | TTCGAGGTTTGC     | 0.378 |
| - | 3  | 1553 | az.2_Missense_Mi  | NM_001946    | NP_001937    | Q16828 | DUS6_HUMAN protein phosphatase.       | 0  | GTGCTGGAACC      | 0.507 |
| - | 4  | 698  | CN_uc001tbr.2_Int | NM_133503    | NP_598010    | P07585 | PGS2_HUMAN LRR 6.                     | 4  | GGAGAGCTTCT      | 0.398 |
| - | 9  | 926  |                   | NM_003566    | NP_003557    | Q15075 | EEA1_HUMAN Potential.                 | 3  | CATCTTCTATACC    | 0.333 |
| - | 2  | 532  | e_Mutation_p.S28  | NM_021229    | NP_067052    | Q9HB63 | NET4_HUMAN                            | 2  | AGCGGGAACTC      | 0.512 |
| - | 13 | 2732 | tgk.2_Missense_n  | NM_152788    | NP_690001    | Q7Z6G8 | ANS1B_HUMAN                           | 0  | 3GTGTTCTTTCA     | 0.423 |
| + | 1  | 399  | 9ztx.2_Missense_f | NM_139319    | NP_647480    | Q8NDX2 | VGLU3_HUMAN lasmic (Potential).       | 3  | ATTCTTTGGGAA     | 0.383 |
| - | 13 | 2187 |                   | NM_024312    | NP_077288    | Q3T906 | GNPTA_HUMAN                           | 2  | TTTGGGAATATC     | 0.423 |
| + | 5  | 1429 | i_Mutation_p.G22E | NM_014653    | NP_055468    | Q2TBF2 | WSCD2_HUMAN                           | 3  | CAGATGGAAGTC     | 0.458 |
| + | 2  | 702  |                   | NM_004416    | NP_004407    | Q86Y01 | DTX1_HUMAN WWE 2.                     | 4  | CTACGATATGGA     | 0.622 |
| - | 2  | 854  |                   | NM_022363    | NP_071758    | Q9H2C1 | LHX5_HUMAN l zinc-binding 2.          | 0  | ACACACCATGCA     | 0.582 |
| - | 5  | 1857 | u.1_Missense_Mu   | NM_016569    | NP_057653    | O15119 | TBX3_HUMAN ox; second part.           | 3  | CAAAAGGGTTG      | 0.353 |
| - | 1  | 1020 | i_p.P19L TBX3_uc  | NM_016569    | NP_057653    | O15119 | TBX3_HUMAN                            | 3  | .GGAACGGATGG     | 0.687 |
| + | 16 | 2059 | ij.1_Missense_Mu  | NM_004764    | NP_004755    | Q96J94 | PIWL1_HUMAN ng (By similarity). Piwi. | 2  | TGACCCGGTGA      | 0.507 |
| - | 3  | 636  | 4L_uc001ujz.1_5f  | NM_175066    | NP_778236    | Q8N8A6 | DDX51_HUMAN                           | 2  | TCCTCGATAGG      | 0.587 |
| - | 9  | 1152 |                   | NM_005932    | NP_005923    | Q99797 | MIPEP_HUMAN                           | 1  | TTACGGAATTTT     | 0.308 |
| + | 1  | 876  |                   | NM_001033602 | NP_001028774 | Q5JR59 | MTUS2_HUMAN                           | 0  | AGTGGGGGCAC      | 0.512 |
| + | 1  | 1965 |                   | NM_001033602 | NP_001028774 | Q5JR59 | MTUS2_HUMAN                           | 0  | .GGAGAGGACAG     | 0.542 |
| + | 4  | 840  | RY_uc010tdw.1_Rf  | NM_023037    | NP_075463    | Q5TBA9 | FRY_HUMAN                             | 7  | GAGCTCCCTTTC     | 0.408 |
| + | 35 | 5165 | RY_uc010tdw.1_Rf  | NM_023037    | NP_075463    | Q5TBA9 | FRY_HUMAN                             | 7  | TGAAAGAATCTC     | 0.383 |
| + | 11 | 1345 | S5B_uc010abg.2    | NM_015032    | NP_055847    | Q9NTI5 | PDS5B_HUMAN HEAT.                     | 4  | AGAGAGAACAT      | 0.249 |
| - | 11 | 1823 | awz.2_Missense_A  | NM_025138    | NP_079414    | Q86XN7 | CM023_HUMAN Pro-rich.                 | 5  | GCCCTGGGAAC      | 0.512 |
| - | 9  | 2102 | p.H553Y ELF1_ucf  | NM_172373    | NP_758961    | P32519 | ELF1_HUMAN                            | 1  | TCAAATGATCTTC    | 0.418 |
| - | 7  | 2226 | 7B_uc010tgu.1_Mi  | NM_000053    | NP_000044    | P35670 | ATP7B_HUMAN ellular (Potential).      | 3  | AGTCCTGGAATG     | 0.483 |
| - | 2  | 1673 | RK6_uc010afe.1_I  | NM_032229    | NP_115605    | Q9H5Y7 | SLIK6_HUMAN ilar (Potential). LRR 7.  | 3  | ACGATCCTCTTI     | 0.343 |
| - | 31 | 4066 | p.S107L ABCC4_u   | NM_005845    | NP_005836    | O15439 | MRP4_HUMAN                            | 4  | AGGTGAGGGGC      | 0.383 |
| - | 12 | 1430 | OCK9_uc010tis.1   | NM_015296    | NP_056111    | Q9BZ29 | DOCK9_HUMAN                           | 1  | CTTCGGATACT      | 0.532 |

rs147166068



|   |    |           |                    |              |              |        |             |                              |    |                |       |             |
|---|----|-----------|--------------------|--------------|--------------|--------|-------------|------------------------------|----|----------------|-------|-------------|
| - | 11 | 1143      | RS2_uc010tjm.1_F   | NM_024537    | NP_078813    | Q9HA77 | SYCM_HUMAN  |                              | 0  | .GCCCCAGGAGC   | 0.637 |             |
| + | 1  | 305       |                    | NM_002929    | NP_002920    | Q15835 | RK_HUMAN    | 3S.[N-terminal.              | 2  | .GCAGCCCATCG   | 0.582 |             |
| + | 1  | 423       |                    | NM_001004724 | NP_001004724 | Q8IXE1 | OR4N5_HUMAN | Name=4; (Potential).         | 1  | AGCCTGCTATGC   | 0.517 |             |
| - | 2  | 908       | akj_2_Nonsense_I   | NM_012244    | NP_036376    | Q9UHI5 | LAT2_HUMAN  |                              | 1  | .TTGGCGAGACA   | 0.547 | rs142012722 |
| + | 2  | 129       | S4L1_uc010tnu.1_   | NM_001082488 | NP_001075957 | P0CG22 | DR4L1_HUMAN |                              | 0  | .TCACAGGATCG   | 0.418 |             |
| + | 9  | 4699      |                    | NM_025081    | NP_079357    | Q9P2P1 | NYNRI_HUMAN |                              | 3  | .CAAAGGATGTGC  | 0.607 |             |
| - | 3  | 291       |                    | NM_001911    | NP_001902    | P08311 | CATG_HUMAN  | 3eptidase S1.                | 2  | .GCTGGGTGTTT   | 0.532 | rs34281853  |
| + | 10 | 1156      | .p.P220S SRP54_    | NM_003136    | NP_003127    | P61011 | SRP54_HUMAN | G-domain.                    | 1  | .AAAAGTCCGATT  | 0.373 |             |
| + | 10 | 1867      | CM_uc010anf.2_     | NM_020937    | NP_065988    | Q8IYD8 | FANCM_HUMAN | case C-terminal.             | 7  | .TCCTTTCTGAAG  | 0.398 |             |
| - | 2  | 396       | .v.2_5'UTR PYGL_   | NM_002863    | NP_002854    | P06737 | PYGL_HUMAN  |                              | 1  | .ATGTAAAATTCC  | 0.403 |             |
| - | 6  | 1007      | O34_uc001xbv.2_    | NM_199047    | NP_950248    | Q6SJ96 | TBPL2_HUMAN |                              | 0  | .ACAATTCGTGGT  | 0.333 |             |
| - | 4  | 352       | B_uc010tsm.1_      | NM_198686    | NP_941959    | P59190 | RAB15_HUMAN |                              | 1  | .CGCTGCTAATGT  | 0.537 |             |
| + | 10 | 1118_1119 | .p.R342L GALNTL    | NM_020692    | NP_065743    | Q8N428 | GLTL1_HUMAN | main B. Lumenal (Potential   | 2  | .GAGCCGGGTGG   | 0.525 |             |
| + | 16 | 4819      | xmv.2_Missense_I   | NM_015556    | NP_056371    | O43166 | SI1L1_HUMAN |                              | 4  | .AACCCGAAGGA   | 0.393 |             |
| - | 10 | 2469      | .p.S195F ZFYVE1    | NM_021260    | NP_067083    | Q9HBF4 | ZFYV1_HUMAN | FYVE-type 1.                 | 1  | .TAAAGGACGTCC  | 0.527 |             |
| + | 6  | 347       | p.D105N C14orf17   | NM_001102564 | NP_001096034 | Q96FT9 | IFT43_HUMAN |                              | 0  | .TTCCGGATCTGC  | 0.483 |             |
| + | 1  | 1486      | .l_5'Flank TMED8_  | NM_001010860 | NP_001010860 | Q9P1V8 | SAM15_HUMAN |                              | 0  | .FACTCAGATCCC  | 0.398 | rs151304084 |
| - | 6  | 739       | .o.3_Missense_Mu   | NM_005065    | NP_005056    | Q9UBV2 | SE1L1_HUMAN | with ERLEC1, OS9 and SY      | 1  | .GATACCGATATG  | 0.348 |             |
| - | 15 | 2023      |                    | NM_001080414 | NP_001073883 | Q9P219 | DAPLE_HUMAN | Potential.                   | 3  | .CTCCTCCTGGA   | 0.632 |             |
| - | 28 | 5808      | v.2_Missense_Mut   | NM_030621    | NP_085124    | Q9UPY3 | DICER_HUMAN | DRBM.                        | 5  | .CCTCCCGTCTG   | 0.428 |             |
| + | 7  | 858       | .jg.3_Missense_Mt  | NM_001099402 | NP_001092872 | O75909 | CCNK_HUMAN  |                              | 0  | .VTGTCCCGGTCG  | 0.473 |             |
| + | 25 | 2699      | on.3_Missense_Mt   | NM_153046    | NP_694591    | Q8NDG6 | TDRD9_HUMAN |                              | 3  | .ATCAGACAGGT   | 0.358 |             |
| + | 18 | 2838      | .2_uc001ypc.2_No   | NM_022489    | NP_071934    | Q27J81 | INF2_HUMAN  | otential. FH2.               | 0  | .TGTGTGAGGAC   | 0.657 |             |
| + | 24 | 2896      | p.E959G CYFIP1_    | NM_014608    | NP_055423    | Q7L576 | CYFP1_HUMAN |                              | 9  | .CATGGAGGAGC   | 0.572 |             |
| - | 81 | 12620     |                    | NM_004667    | NP_004658    | O95714 | HERC2_HUMAN | RCC1 17.                     | 13 | .GTCCCCGTCCC   | 0.627 |             |
| + | 2  | 1093      |                    | NM_015995    | NP_057079    | Q9Y2Y9 | KLF13_HUMAN |                              | 0  | .TCCACCCGGGA   | 0.701 |             |
| + | 35 | 5006      | r.2_Missense_Mut   | NM_001036    | NP_001027    | Q15413 | RYR3_HUMAN  | eats. Cytoplasmic (By simil  | 10 | .CGGACGAGTCC   | 0.567 |             |
| - | 10 | 1645      | ise_Mutation_p.P4  | NM_133647    | NP_598408    | Q9UHW9 | S12A6_HUMAN | icat; (Potential).           | 7  | .CAGAGGGAAAAG  | 0.438 |             |
| - | 2  | 368       | uc001zit.1_5'Flank | NM_020660    | NP_065711    | Q9UKL4 | CXD2_HUMAN  | lasmic (Potential).          | 0  | .CTATGGACTCAC  | 0.557 |             |
| - | 3  | 503       | 1zkd.3_Missense_   | NM_005739    | NP_005730    | O95267 | GRP1_HUMAN  | ansforming activity (By sim  | 2  | .GATATAGGGTGA  | 0.393 |             |
| + | 4  | 2402      |                    | NM_020857    | NP_065908    | Q9P253 | VPS18_HUMAN | Clathrin.                    | 3  | .TGGGGCCAGCC   | 0.637 |             |
| + | 2  | 225       | .p.P62Q JMJD7-PI   | NM_005090    | NP_005081    | P0C869 | PA24B_HUMAN |                              | 1  | .CTGGCCGGCCCC  | 0.622 |             |
| - | 13 | 2151      | .p.Y372N TGM5_u    | NM_201631    | NP_963925    | O43548 | TGM5_HUMAN  |                              | 1  | .CTACATAAACATT | 0.433 |             |
| - | 11 | 1216      | .wh.3_5'Flank MYE  | NM_016132    | NP_057216    | Q9P2K5 | MYEF2_HUMAN | Gly-rich.                    | 3  | .CATTCCCATACCT | 0.289 |             |
| - | 8  | 1114      | ew.1_Missense_M    | NM_017672    | NP_060142    | Q96QT4 | TRPM7_HUMAN | lasmic (Potential).          | 10 | .CACAGGGACAC   | 0.408 |             |
| - | 30 | 7625      | iy.1_Missense_Mu   | NM_015263    | NP_056078    | Q8TDJ6 | DMXL2_HUMAN |                              | 9  | .iACAAAGGAAGA  | 0.219 |             |
| + | 1  | 617       |                    | NM_001080534 | NP_001074003 | Q8NB66 | UN13C_HUMAN |                              | 7  | .iAAAATCCTGGG  | 0.438 |             |
| + | 1  | 2500      |                    | NM_001080534 | NP_001074003 | Q8NB66 | UN13C_HUMAN |                              | 7  | .AGATTTCCGACA  | 0.438 |             |
| - | 27 | 5153      | api.2_Missense_M   | NM_005848    | NP_005839    | Q72401 | MYCPP_HUMAN |                              | 4  | .AGGGGCCAGAA   | 0.403 |             |
| + | 10 | 1545      | se_Mutation_p.R4;  | NM_024505    | NP_078781    | Q96PH1 | NOX5_HUMAN  | smic (Potential). C-terminal | 2  | .CATTTCGGTCC   | 0.567 |             |
| - | 11 | 1020_1021 | p.R333C GRAMD2     | NM_001012642 | NP_001012660 | Q8IU3  | GRAM2_HUMAN |                              | 0  | .AATACGGAACGC  | 0.475 | rs144563180 |
| - | 14 | 1441      | .lA6_uc002axl.2_N  | NM_022369    | NP_071764    | Q9BX79 | STRA6_HUMAN | ellular (Potential).         | 1  | .CTCATCCAACAG  | 0.622 |             |
| - | 3  | 636       | .:2_RNA MESDC2     | NM_015154    | NP_055969    | Q14696 | MESD_HUMAN  | omain (By similarity).       | 0  | .iACACCTGGCCC  | 0.493 |             |
| + | 3  | 1246      | e_Mutation_p.P37   | NM_001008226 | NP_001008227 | Q658L1 | F154B_HUMAN |                              | 2  | .ATTATTCTGTGAC | 0.358 |             |
| + | 11 | 1414      | p.S397N ADAMTS     | NM_207517    | NP_997400    | P82987 | ATL3_HUMAN  |                              | 27 | .iATGCAGCATGG  | 0.418 |             |
| + | 15 | 1875      | p.K551E ADAMTS     | NM_207517    | NP_997400    | P82987 | ATL3_HUMAN  |                              | 27 | .GGCTGAAACAA   | 0.388 |             |
| + | 15 | 1691      | LC28A1_uc010upf    | NM_004213    | NP_004204    | O00337 | S28A1_HUMAN |                              | 3  | .iGAACGAGTTTC  | 0.597 |             |

|   |    |           |                   |              |              |        |             |                            |     |              |       |
|---|----|-----------|-------------------|--------------|--------------|--------|-------------|----------------------------|-----|--------------|-------|
| + | 22 | 4215      | p.S998F BLM_uc    | NM_000057    | NP_000048    | P54132 | BLM_HUMAN   |                            | 6   | GAATCTCCCA   | 0.398 |
| + | 6  | 1404      | 2B_uc010uqv.1_M   | NM_014848    | NP_055663    | Q7L1I2 | SV2B_HUMAN  | lasmic (Potential).        | 8   | AGTTTCCAACA  | 0.368 |
| + | 2  | 579       | p.E177K IGF1R_u   | NM_000875    | NP_000866    | P08069 | IGF1R_HUMAN |                            | 8   | CAAAGGAATGT  | 0.522 |
| + | 7  | 938       | uwc.1_Missense_I  | NM_015944    | NP_057028    | Q9Y303 | NAGA_HUMAN  |                            | 4   | GGATCGCCCA   | 0.672 |
| - | 2  | 756       |                   | NM_000243    | NP_000234    | O15553 | MEFV_HUMAN  |                            | 6   | TAGGTGCGATC  | 0.617 |
| - | 4  | 931       |                   | NM_152457    | NP_689670    | Q96LX8 | ZN597_HUMAN | 2H2-type 4.                | 0   | CCACATAAAACC | 0.443 |
| + | 3  | 355       | JAT15_uc010uxc.1  | NM_001083601 | NP_001077070 | Q9H7X0 | NAT15_HUMAN | cetyltransferase.          | 0   | CCATCGAGTAA  | 0.657 |
| - | 31 | 7354      | vw.2_Missense_M   | NM_004380    | NP_004371    | Q92793 | CBP_HUMAN   |                            | 127 | GGGGTGGGGGG  | 0.647 |
| - | 7  | 1237      |                   | NM_003223    | NP_003214    | Q01664 | TFAP4_HUMAN |                            | 1   | CCTCCCGGCTC  | 0.706 |
| - | 13 | 4425      | D1293N GRIN2A_I   | NM_001134407 | NP_001127879 | Q12879 | NMDE1_HUMAN | lasmic (Potential).        | 45  | FGTTATCGTAGG | 0.527 |
| - | 3  | 553       | 3_Intron CPPED    | NM_018340    | NP_060810    | Q9BRF8 | CPPED_HUMAN |                            | 0   | GTCATCTCCCC  | 0.607 |
| + | 14 | 2028      | p.P633Q TMC7_uc   | NM_024847    | NP_079123    | Q7Z402 | TMC7_HUMAN  | cellular (Potential).      | 3   | TGGGCGGTTCA  | 0.607 |
| - | 43 | 6364      |                   | NM_017539    | NP_060009    | Q8TD57 | DYH3_HUMAN  | 3 (By similarity).         | 18  | TGTCGATCCCA  | 0.517 |
| - | 5  | 1511_1512 | p.R165* ZKSCAN    | NM_001012981 | NP_001012999 | Q63HK3 | ZKSC2_HUMAN |                            | 4   | ATTCGGGGACA  | 0.455 |
| + | 3  | 735       | P223S JMJD5_uc    | NM_024773    | NP_079049    | Q8N371 | KDM8_HUMAN  |                            | 3   | CAGTCCCCCGG  | 0.512 |
| + | 3  | 286       | _p.W18* IL21R_uc  | NM_181078    | NP_851564    | Q9HBE5 | IL21R_HUMAN |                            | 4   | AGGCTGGGGCT  | 0.632 |
| + | 19 | 2925      | Mutation_p.N914S  | NM_173201    | NP_775293    | O14983 | AT2A1_HUMAN | ame=8; (By similarity).    | 4   | ACTGAACAGGTC | 0.632 |
| + | 6  | 722       | uc002dsc.2_Intron | NM_014387    | NP_055202    | O43561 | LAT_HUMAN   | lasmic (Potential).        | 0   | AGGCTGGGTGG  | 0.607 |
| + | 13 | 1623      | 3_Mutation_p.P40  | NM_002209    | NP_002200    | P20701 | ITAL_HUMAN  | Extracellular (Potential). | 10  | TGCCCCACTG   | 0.597 |
| - | 11 | 1636      | fig.1_Missense_M  | NM_173502    | NP_775773    | Q5K4E3 | POLS2_HUMAN | aptidase S1 2.             | 1   | TGATTCCAGCC  | 0.567 |
| + | 7  | 716       | ip.1_Missense_M   | NM_005353    | NP_005344    | Q13349 | ITAD_HUMAN  | ilar (Potential). VWFA.    | 1   | TGAAAGGCCTG  | 0.597 |
| + | 16 | 1888      | cap.1_Splice_Site | NM_005353    | NP_005344    | Q13349 | ITAD_HUMAN  |                            | 1   | CCTCAGGAGTC  | 0.632 |
| - | 9  | 1226      | 3ep.2_Missense_M  | NM_005880    | NP_005871    | O60884 | DNJA2_HUMAN |                            | 1   | GTTAGGAACTTC | 0.403 |
| + | 4  | 1903      | c010cbm.1_Misse   | NM_022162    | NP_071445    | Q9HC29 | NOD2_HUMAN  | NACHT.                     | 4   | CCCCTGGAATTC | 0.567 |
| + | 4  | 2179      | la.1_Missense_M   | NM_025134    | NP_079410    | Q3L8U1 | CHD9_HUMAN  |                            | 7   | TTTACCTGGTG  | 0.308 |
| - | 9  | 1162      | m.1_Missense_M    | NM_002080    | NP_002071    | P00505 | AATM_HUMAN  |                            | 2   | GATCGGTCAG   | 0.488 |
| - | 5  | 965       | 3oh.2_Missense_M  | NM_001796    | NP_001787    | P55286 | CADH8_HUMAN | r (Potential). Cadherin 2. | 9   | TACTCTCCTTG  | 0.448 |
| + | 11 | 1843      |                   | NM_001795    | NP_001786    | P33151 | CADH5_HUMAN | Extracellular (Potential). | 6   | GGATGCCAAGT  | 0.592 |
| - | 1  | 528       | 3vjt.1_Missense_M | NM_001082486 | NP_001075955 | Q96AP0 | ACD_HUMAN   |                            | 1   | CTTCTCCTCGG  | 0.746 |
| - | 84 | 14757     | DIN_uc010cfy.2_R  | NM_032821    | NP_116210    | Q4G0P3 | HYDIN_HUMAN |                            | 2   | AAACTGGGAGG  | 0.622 |
| - | 56 | 9492      |                   | NM_032821    | NP_116210    | Q4G0P3 | HYDIN_HUMAN |                            | 2   | TGCATGGAAGA  | 0.468 |
| - | 25 | 3961      |                   | NM_032821    | NP_116210    | Q4G0P3 | HYDIN_HUMAN |                            | 2   | GTTTTCTTAGTI | 0.463 |
| - | 18 | 3148      | _p.S498F ADAMT    | NM_199355    | NP_955387    | Q8TE60 | ATS18_HUMAN |                            | 18  | AATGAGGAATTG | 0.388 |
| + | 2  | 406       | utation_p.R63K B  | NM_017429    | NP_059125    | Q9HAY6 | BCDO1_HUMAN |                            | 0   | CATCAGAGACG  | 0.358 |
| + | 7  | 1865      | ense_Mutation_p.I | NM_013370    | NP_037502    | Q9UJX0 | OSG11_HUMAN |                            | 0   | GCTGACTTTGC  | 0.647 |
| + | 5  | 764       | 3C50_uc010chi.1_I | NM_178452    | NP_848547    | Q8NEP3 | DAAF1_HUMAN | LRR 4.                     | 0   | GCCTCCAGTC   | 0.388 |
| - | 16 | 2404_2405 | sf.1_Missense_M   | NM_014389    | NP_055204    | Q8IZL8 | PELP1_HUMAN | Pro-rich.                  | 2   | TGAGGGCCAGC  | 0.629 |
| - | 8  | 1232      | 3R1_uc010vur.1_M  | NM_002616    | NP_002607    | O15534 | PER1_HUMAN  |                            | 9   | TGCAGGGGCC   | 0.642 |
| - | 6  | 864       |                   | NM_001128076 | NP_001121548 | A6NLX3 | SPDE4_HUMAN |                            | 0   | CGGGCCACAC   | 0.592 |
| - | 36 | 5338_5339 | uc002gml.1_Intron | NM_017533    | NP_060003    | Q9Y623 | MYH4_HUMAN  | Potential.                 | 13  | TCTCTCCTGGA  | 0.446 |
| - | 3  | 304       | uc002gml.1_Intron | NM_017533    | NP_060003    | Q9Y623 | MYH4_HUMAN  | rosin head-like.           | 13  | AGCTTCGGTCT  | 0.458 |
| + | 51 | 10107     | 3o.2_Missense_M   | NM_001372    | NP_001363    | Q9NYC9 | DYH9_HUMAN  |                            | 20  | TCTCCCTTGCC  | 0.502 |
| + | 4  | 506       | 3ovvi.1_Missense_ | NM_003010    | NP_003001    | P45985 | MP2K4_HUMAN | rotein kinase p.?(1)       | 58  | AACTTCTTATGG | 0.353 |
| + | 13 | 1118      | _uc002gsj.1_3'UT  | NM_001388    | NP_001379    | P55039 | DRG2_HUMAN  |                            | 1   | TGGAGCATGAG  | 0.662 |
| + | 1  | 50        |                   | NM_002986    | NP_002977    | P51671 | CCL11_HUMAN |                            | 0   | ATAAAAGCGAGC | 0.557 |
| - | 4  | 1148      | _p.F283L HNF1B_   | NM_000458    | NP_000449    | P35680 | HNF1B_HUMAN | 3obox; HNF1-type.          | 3   | TGCCGAATGCI  | 0.622 |
| + | 5  | 913       | 32_uc002hui.1_Mi  | NM_133264    | NP_573571    | Q8TF74 | WIPF2_HUMAN |                            | 3   | GACCTCTGCTI  | 0.607 |

|   |    |         |                   |              |              |        |             |                                |    |                |       |             |
|---|----|---------|-------------------|--------------|--------------|--------|-------------|--------------------------------|----|----------------|-------|-------------|
| - | 1  | 520     |                   | NM_033059    | NP_149048    | Q9BYQ6 | KR411_HUMAN | C-[GIKRQVHEL]- [SPTR]-[        | 0  | AGACGCAGGcagc  | 0.323 | rs141357429 |
| - | 4  | 859     | vfr.1_Missense_Mu | NM_153490    | NP_705694    | P13646 | K1C13_HUMAN | inker 12. Rod.                 | 5  | GCCTGGGGTGG    | 0.577 |             |
| - | 2  | 157     |                   | NM_024320    | NP_077296    | Q9BU68 | PR15L_HUMAN |                                | 1  | TTTCCGGAGGA/   | 0.567 |             |
| - | 7  | 1743    | x.3_Missense_Mut  | NM_020178    | NP_064563    | Q9NS85 | CAH10_HUMAN |                                | 2  | TGTTCAATTATGAT | 0.393 |             |
| + | 11 | 1346    | fissense_Mutation | NM_030938    | NP_112200    | Q96GC9 | VMP1_HUMAN  | lasmic (Potential).            | 0  | ACACCCACAGG    | 0.488 |             |
| + | 16 | 2355    | E_uc010wpj.1_Mis  | NM_000789    | NP_000780    | P12821 | ACE_HUMAN   | potential). Peptidase M2 2.    | 4  | GTCCCGGAAAT.   | 0.532 |             |
| + | 9  | 2140    | pm.1_Missense_M   | NM_030779    | NP_110406    | Q9H252 | KCNH6_HUMAN | toplasmic (Potential).         | 1  | CCAGCGGGCAG    | 0.607 |             |
| - | 32 | 4606    | se_Mutation_p.A2  | NM_080282    | NP_525021    | Q8WWZ4 | ABCAA_HUMAN | ntial). ABC transporter 2.     | 4  | ACCAGCTCCATT   | 0.358 |             |
| - | 2  | 617     | _p.A157V CDC42E   | NM_012121    | NP_036253    | Q9H3Q1 | BORG4_HUMAN |                                | 0  | TGCCCGCCTCC    | 0.662 |             |
| - | 4  | 378     | r.2_Missense_Mut  | NM_015654    | NP_056469    | Q9BTE0 | NAT9_HUMAN  | ceyltransferase.               | 0  | CAAGGTGAGGT    | 0.592 |             |
| - | 5  | 628     | 1_Missense_Muta   | NM_014984    | NP_055799    | Q9UPN4 | AZI1_HUMAN  |                                | 4  | AACTCCGGGCA    | 0.637 |             |
| + | 3  | 1396    | .F208L TGIF1_uc   | NM_170695    | NP_733796    | Q15583 | TGIF1_HUMAN |                                | 1  | AAAACTTCACA    | 0.488 |             |
| + | 3  | 844     |                   | NM_153000    | NP_694545    | Q8J025 | APCD1_HUMAN | ellular (Potential).           | 0  | AGCTCGCCAG     | 0.667 |             |
| + | 5  | 2973    | _p.S807F ZNF532   | NM_018181    | NP_060651    | Q9HCE3 | ZN532_HUMAN |                                | 2  | ACAAATCTCCCT/  | 0.512 |             |
| - | 1  | 628     |                   | NM_005912    | NP_005903    | P32245 | MC4R_HUMAN  | lasmic (Potential).            | 1  | TTCTTGCTATTG   | 0.453 |             |
| + | 9  | 1243    | _p.E234K SERPIN   | NM_001143818 | NP_001137290 | P05120 | PAI2_HUMAN  |                                | 2  | AAGATGAAGTT    | 0.368 |             |
| + | 2  | 628     |                   | NM_012283    | NP_036415    | Q9UJ96 | KCNG2_HUMAN |                                | 0  | AGGGCGAGTGC    | 0.701 |             |
| + | 5  | 658     | se_Mutation_p.S1  | NM_024100    | NP_077005    | Q9BV38 | WDR18_HUMAN | WD 4.                          | 1  | FGCTCTCCGTCC   | 0.652 |             |
| + | 8  | 1867    |                   | NM_177401    | NP_796375    | Q504T8 | MIDN_HUMAN  |                                | 0  | GGACTCCGTGT    | 0.682 |             |
| + | 2  | 1084    | 2_Intron SCAMP4   | NM_138422    | NP_612431    | Q96EY9 | ADAT3_HUMAN |                                | 2  | TGTACGTGACC    | 0.731 |             |
| - | 10 | 1606    |                   | NM_005934    | NP_005925    | Q03111 | ENL_HUMAN   |                                | 1  | CAGGCTTGCTG    | 0.667 |             |
| - | 5  | 877     | xjg.1_Missense_M  | NM_005490    | NP_005481    | Q9BRG2 | SH23A_HUMAN |                                | 2  | TCGGGGGACGT    | 0.667 |             |
| - | 4  | 665_666 | 320_uc002mjl.1_   | NM_016579    | NP_057663    | Q9NPF0 | CD320_HUMAN | ellular (Potential).           | 0  | AGGGGGCCCCAT   | 0.609 |             |
| - | 5  | 34481   |                   | NM_024690    | NP_078966    | Q8WXI7 | MUC16_HUMAN | xtracellular (Potential).      | 57 | CACCAGAAGAA    | 0.458 |             |
| - | 3  | 26315   |                   | NM_024690    | NP_078966    | Q8WXI7 | MUC16_HUMAN | ch. Extracellular (Potential). | 57 | GGGAGGAAGTT    | 0.493 |             |
| - | 3  | 24798   |                   | NM_024690    | NP_078966    | Q8WXI7 | MUC16_HUMAN | ch. Extracellular (Potential). | 57 | ATCATCATTTCT   | 0.483 |             |
| - | 3  | 23674   |                   | NM_024690    | NP_078966    | Q8WXI7 | MUC16_HUMAN | ch. Extracellular (Potential). | 57 | TAGCTCTGCT     | 0.547 |             |
| - | 1  | 8465    |                   | NM_024690    | NP_078966    | Q8WXI7 | MUC16_HUMAN | ch. Extracellular (Potential). | 57 | TAGTTCCCGCA    | 0.493 |             |
| - | 1  | 575     |                   | NM_001005191 | NP_001005191 | Q8NG98 | OR7D4_HUMAN | ellular (Potential).           | 4  | GGAGGGTGTTA    | 0.502 |             |
| - | 4  | 595     | YK2_uc002mod.2_   | NM_003331    | NP_003322    | P29597 | TYK2_HUMAN  | FERM.                          | 9  | AAAGAGATTGA    | 0.527 |             |
| - | 4  | 719     | _p.M127I CCDC15   | NM_145045    | NP_659482    | A5D8V7 | CC151_HUMAN | Potential.                     | 1  | TCCGCCATCTC    | 0.667 |             |
| - | 4  | 814     | _p.P48S ZNF823    | NM_001080493 | NP_001073962 | P16415 | ZN823_HUMAN | 2H2-type 3.                    | 2  | AAAAGGAAAGG    | 0.413 |             |
| - | 20 | 3624    | nwy.3_Missense_M  | NM_001127221 | NP_001120693 | O00555 | CAC1A_HUMAN | lasmic (Potential).            | 2  | GTTCGGGGT      | 0.652 |             |
| - | 14 | 2065    | nwy.3_Missense_   | NM_001127221 | NP_001120693 | O00555 | CAC1A_HUMAN | lasmic (Potential). II.        | 2  | TCATGGAGTTG/   | 0.577 |             |
| + | 1  | 705     |                   | NM_001004713 | NP_001004713 | O60431 | OR111_HUMAN | lasmic (Potential).            | 3  | AAAGTGAAAGC    | 0.537 |             |
| + | 7  | 874     | F3_uc010xom.1_M   | NM_000896    | NP_000887    | Q08477 | CP4F3_HUMAN |                                | 3  | GCGGCGCCGCA    | 0.572 |             |
| + | 1  | 97      |                   | NM_013938    | NP_039226    | O60404 | O10H3_HUMAN | Name=1; (Potential).           | 0  | TGTACCTCCTG    | 0.498 |             |
| - | 3  | 117     | 9orf42_uc002neo.  | NM_024104    | NP_077009    | Q9BQ49 | CS042_HUMAN | ellular (Potential).           | 0  | TCTTTTCTTACA   | 0.502 |             |
| - | 13 | 1527    |                   | NM_015692    | NP_056507    | Q8IZJ3 | CPMD8_HUMAN |                                | 13 | GCACTGGCTGG    | 0.592 |             |
| - | 4  | 589_590 | nse_Mutation_p.S  | NM_031941    | NP_114147    | Q8N6Y0 | USBP1_HUMAN |                                | 1  | CAAGGGAACCT    | 0.683 |             |
| - | 1  | 159     | _5'Flank uc002ngr | NM_004335    | NP_004326    | Q10589 | BST2_HUMAN  | ellular (Potential).           | 3  | GCTCTGCTGTT    | 0.562 |             |
| + | 2  | 465     | _p.S190L ZNF493   | NM_175910    | NP_787106    | Q6ZR52 | ZN493_HUMAN | 2H2-type 2.                    | 1  | GCAATCATTTTC   | 0.299 |             |
| + | 2  | 903     | _p.P336L ZNF493   | NM_175910    | NP_787106    | Q6ZR52 | ZN493_HUMAN | ype 7; degenerate.             | 1  | CAACCCCTACTA/  | 0.348 | rs142651314 |
| + | 2  | 260     | 257_uc010ecy.2_5  | NM_033468    | NP_258429    | Q9Y2Q1 | ZN257_HUMAN | KRAB.                          | 0  | TATAGGATGTG/   | 0.403 |             |
| - | 3  | 1051    |                   | NM_001001411 | NP_001001411 | Q8N7Q3 | ZN676_HUMAN | 2H2-type 3.                    | 0  | GAATTATCTTATG  | 0.363 |             |
| + | 4  | 1759    | rk.1_Missense_M   | NM_203282    | NP_975011    | O75437 | ZN254_HUMAN |                                | 0  | TACTGAAGAGAA   | 0.353 |             |
| + | 4  | 1782    | rk.1_Missense_M   | NM_203282    | NP_975011    | O75437 | ZN254_HUMAN | 2H2-type 13.                   | 0  | TGAAAAATGTC    | 0.358 |             |

|   |    |           |                   |              |              |        |              |                               |    |               |       |             |
|---|----|-----------|-------------------|--------------|--------------|--------|--------------|-------------------------------|----|---------------|-------|-------------|
| - | 11 | 1248      | C123_uc010edg.2   | NM_032816    | NP_116205    | Q96ST8 | CEP89_HUMAN  | Potential.                    | 0  | :CTTGAGGGTGG  | 0.383 |             |
| - | 1  | 307_308   | ad.1_Missense_Mu  | NM_198538    | NP_940940    | Q6UWP8 | SBSN_HUMAN   | a Gly/His-rich.               | 1  | :TTGCCGGTGTG  | 0.554 |             |
| + | 3  | 449       |                   | NM_014727    | NP_055542    | Q9UMN6 | MLL4_HUMAN   |                               | 11 | GCCCCGAGGTC   | 0.527 |             |
| + | 3  | 1484      |                   | NM_014727    | NP_055542    | Q9UMN6 | MLL4_HUMAN   | Pro-rich.                     | 11 | :TCCTCCCCTCC  | 0.672 |             |
| - | 5  | 676       | uc002oev.1_Intron | NM_206894    | NP_996777    | Q6PG37 | ZN790_HUMAN  |                               | 2  | FGTTGAGTATGAT | 0.353 |             |
| - | 6  | 854       | igx.1_Missense_M  | NM_014898    | NP_055713    | Q9Y2G7 | ZFP30_HUMAN  |                               | 0  | :CAAGTCCACAG  | 0.358 |             |
| + | 13 | 1556      | iu.2_Missense_Mu  | NM_000540    | NP_000531    | P21817 | RYR1_HUMAN   | Cytoplasmic.                  | 12 | :AGAGCCCTCTCC | 0.701 |             |
| - | 13 | 1058      | oij.1_Missense_M  | NM_007181    | NP_009112    | Q92918 | M4K1_HUMAN   |                               | 8  | :TGATCCGCCGA  | 0.607 |             |
| - | 4  | 461       |                   | NM_001828    | NP_001819    | Q05315 | LPPL_HUMAN   | Galectin.                     | 0  | AGATATCTCTCC  | 0.418 |             |
| - | 7  | 2178      | ε_Mutation_p.P49f | NM_181882    | NP_870998    | Q9BXM0 | PRAX_HUMAN   | L - LIVMAP - A QK HRPE ;      | 2  | :CTCAGGGAGTT  | 0.577 |             |
| - | 4  | 541       | :K4_uc002oos.2_1  | NM_024876    | NP_079152    | Q96D53 | ADCK4_HUMAN  |                               | 0  | :GTTCTCGAGAG  | 0.592 |             |
| + | 3  | 706       |                   | NM_002483    | NP_002474    | P40199 | CEAM6_HUMAN  | like C2-type p.P186P(1)       | 1  | :CCTCCCGGTCA  | 0.527 |             |
| - | 11 | 1478      | _p.W53* GRIK5_u   | NM_002088    | NP_002079    | Q16478 | GRIK5_HUMAN  | cellular (Potential).         | 0  | CCCGTCCAGGA   | 0.697 |             |
| - | 5  | 1040      | ozb.3_Missense_M  | NM_004234    | NP_004225    | Q14590 | ZN235_HUMAN  |                               | 3  | :AGTACGAACAC  | 0.438 | rs144837895 |
| + | 3  | 368       | e_Mutation_p.P11: | NM_015710    | NP_056525    | Q9NZM5 | GSCR2_HUMAN  |                               | 1  | :GAAACCCCTTC  | 0.527 |             |
| - | 4  | 257       | utation_p.R75L Sf | NM_000979    | NP_000970    | Q07020 | RL18_HUMAN   |                               | 0  | TTTCCCGGCCA   | 0.582 |             |
| - | 2  | 492       | se_Mutation_p.D2f | NM_053003    | NP_443729    | Q96PQ1 | SIG12_HUMAN  | 2. Extracellular (Potential). | 5  | :TAGGTCCTGGG  | 0.587 |             |
| + | 4  | 2668      | dw.1_Missense_M   | NM_138374    | NP_612383    | Q96IR2 | ZN845_HUMAN  | :2H2-type 23.                 | 0  | :ATAAGGCAATTC | 0.383 |             |
| + | 4  | 2891      | dw.1_Missense_M   | NM_138374    | NP_612383    | Q96IR2 | ZN845_HUMAN  | :2H2-type 26.                 | 0  | :CTTCCGTCACA  | 0.363 | rs150688663 |
| - | 11 | 1685      | A6_uc002qel.1_Mi  | NM_006864    | NP_006855    | O75022 | LIRB3_HUMAN  | lasmic (Potential).           | 3  | :CCACCTGTCC   | 0.423 |             |
| + | 4  | 931       | igr.2_Missense_M  | NM_006847    | NP_006838    | Q8NHJ6 | LIRB4_HUMAN  | 2. Extracellular (Potential). | 3  | GCACGGGGGGA   | 0.607 |             |
| + | 5  | 727       | 10esf.2_Missense_ | NM_013289    | NP_037421    | P43629 | KI3L1_HUMAN  | cellular (Potential).         | 5  | :CATATGAGAAA  | 0.552 |             |
| - | 2  | 1670      |                   | NM_176820    | NP_789790    | Q7RTR0 | NALP9_HUMAN  |                               | 7  | :CAAACCAATGA  | 0.338 |             |
| - | 1  | 610       | 2qnt.2_Missense_  | NM_001146186 | NP_001139658 | Q9GZU2 | PEG3_HUMAN   | SCAN box.                     | 12 | :AGACTCGATGA  | 0.537 |             |
| - | 5  | 1533      |                   | NM_052882    | NP_443114    | Q96PE6 | ZIM3_HUMAN   | :2H2-type 8.                  | 2  | GGATTTTTTATG  | 0.383 |             |
| + | 3  | 702       | VF776_uc002qqa.2  | NM_173632    | NP_775903    | Q68D11 | ZN776_HUMAN  |                               | 1  | :ATATGCACATGA | 0.403 |             |
| - | 3  | 1016      | _p.C230G ZNF417   | NM_152475    | NP_689688    | Q8TAU3 | ZN417_HUMAN  | :2H2-type 3.                  | 0  | :CCCACACTCTCC | 0.433 |             |
| - | 4  | 2172      | IF418_uc010yho.1  | NM_133460    | NP_597717    | Q8TF45 | ZN418_HUMAN  | :2H2-type 15.                 | 0  | :CAAAGGATTTCC | 0.433 |             |
| + | 5  | 1285      | se_Mutation_p.HC  | NM_003436    | NP_003427    | B4DHH9 | B4DHH9_HUMAN |                               | 1  | :AGTGCCATGAG  | 0.542 |             |
| - | 17 | 2414      |                   | NM_012293    | NP_036425    | Q92626 | PXDN_HUMAN   |                               | 8  | :TCGGTGGGGGT  | 0.652 |             |
| - | 14 | 2761      | se_Mutation_p.S64 | NM_015025    | NP_055840    | Q9UL68 | MYT1L_HUMAN  |                               | 6  | CAAACGAGGTC   | 0.483 |             |
| - | 10 | 1760_1761 | utation_p.311_312 | NM_015025    | NP_055840    | Q9UL68 | MYT1L_HUMAN  |                               | 6  | CTTTCCATGAG   | 0.475 |             |
| + | 3  | 896       | c.1_Missense_Mu   | NM_003597    | NP_003588    | O14901 | KLF11_HUMAN  |                               | 2  | :CACTGACAAAG  | 0.527 |             |
| - | 51 | 6853      | AS_uc010exl.1_Mi  | NM_015909    | NP_056993    | A2RRP1 | NBAS_HUMAN   |                               | 4  | :CTGCCGTGATT  | 0.418 | rs144615326 |
| + | 3  | 557       | uc002rvb.2_Intron | NM_012249    | NP_036381    | P17081 | RHOQ_HUMAN   |                               | 2  | :ACCCAATGACCC | 0.393 |             |
| - | 40 | 4636      | ense_Mutation_p.: | NM_014614    | NP_055429    | Q14997 | PSME4_HUMAN  |                               | 5  | :GAGGCATATGC  | 0.383 |             |
| - | 3  | 257       | ie_Mutation_p.P66 | NM_144709    | NP_653310    | Q3MIT2 | PUS10_HUMAN  | Potential. p.P66R(1)          | 4  | :GAGGTGGGTTC  | 0.353 |             |
| + | 5  | 541       |                   | NM_019617    | NP_062563    | Q9NS71 | GKN1_HUMAN   | BRICHOS.                      | 1  | :GGATTCCAACA  | 0.507 |             |
| + | 3  | 563       | se_Mutation_p.G4: | NM_001298    | NP_001289    | Q16281 | CNGA3_HUMAN  |                               | 6  | :GCCGGGGATCG  | 0.587 |             |
| - | 7  | 1415      |                   | NM_207362    | NP_997245    | Q6NV74 | CB055_HUMAN  | Pro-rich.                     | 0  | :GCGCCTCCCCA  | 0.756 |             |
| - | 10 | 1873_1874 | _p.A596V TBC1D8   | NM_001102426 | NP_001095896 | Q95759 | TBCD8_HUMAN  | ab-GAP TBC.                   | 3  | :GGTGGGCATAG  | 0.569 |             |
| + | 21 | 5084      | e_Mutation_p.H85  | NM_182588    | NP_872394    | Q7Z3J3 | RGPD4_HUMAN  |                               | 2  | :CAGATCACTTA  | 0.453 |             |
| + | 9  | 1823      | ffj.2_Missense_Mi | NM_021815    | NP_068587    | Q9GZV3 | SC5A7_HUMAN  | lasmic (Potential).           | 4  | :TGATGCTGTTG1 | 0.358 |             |
| + | 24 | 2608      |                   | NM_001029996 | NP_001025167 | Q4G0U5 | PCDP1_HUMAN  |                               | 0  | :AAGTGAATTC   | 0.383 |             |
| + | 2  | 525       | Ofiu.2_Missense_M | NM_130773    | NP_570129    | Q8WYK1 | CNTP5_HUMAN  | Extracellular (Potential).    | 10 | :TCACAGCCCAG  | 0.478 |             |
| + | 12 | 2217      | fflu.2_Missense_M | NM_130773    | NP_570129    | Q8WYK1 | CNTP5_HUMAN  | ential). Fibrinogen C-termin  | 10 | :TCTCCAGGTGT  | 0.532 |             |
| - | 2  | 585       |                   | NM_004807    | NP_004798    | O60243 | H6ST1_HUMAN  | renal (Potential).            | 1  | :CTCGTAGCAGG  | 0.622 |             |

|   |     |       |                    |              |              |        |             |                              |     |                |       |
|---|-----|-------|--------------------|--------------|--------------|--------|-------------|------------------------------|-----|----------------|-------|
| + | 6   | 562   |                    | NM_033416    | NP_219484    | Q96G21 | IMP4_HUMAN  | Brix.                        | 2   | GGAGGCCAAGC    | 0.642 |
| - | 1   | 1002  |                    | NR_002826    |              |        |             |                              | 0   | GGACGGGGCCA    | 0.577 |
| - | 14  | 3070  | AP5_uc002ttq.2_l   | NM_207363    | NP_997246    | O14513 | NCKP5_HUMAN |                              | 0   | .TGGCAGGCCTT   | 0.632 |
| + | 2   | 175   | i.1_RNA THSD7B     | NM_001080427 | NP_001073896 |        |             |                              | 7   | .CAAAGGAAAGA   | 0.537 |
| + | 2   | 608   | SD7B_uc002tvb.2    | NM_001080427 | NP_001073896 |        |             |                              | 7   | .TCCTCTTGGGG   | 0.463 |
| + | 25  | 4413  | D7B_uc010zbj.1_l   | NM_001080427 | NP_001073896 |        |             |                              | 7   | GATAATGAAATC   | 0.378 |
| - | 72  | 12103 |                    | NM_018557    | NP_061027    | Q9NZR2 | LRP1B_HUMAN |                              | 50  | .CCATACCACAC   | 0.438 |
| - | 55  | 9712  |                    | NM_018557    | NP_061027    | Q9NZR2 | LRP1B_HUMAN | ntial). LDL-receptor class A | 50  | AGTCATCCTTATT  | 0.398 |
| - | 7   | 1830  | 1B_uc010fnl.1_in   | NM_018557    | NP_061027    | Q9NZR2 | LRP1B_HUMAN | ntial). LDL-receptor class E | 50  | CATTTGTTGCAC   | 0.403 |
| + | 10  | 1004  | p.E292K KYNU_uc    | NM_003937    | NP_003928    | Q16719 | KYNU_HUMAN  |                              | 2   | .ATTCATGAAAGC  | 0.308 |
| - | 71  | 10581 |                    | NM_004543    | NP_004534    | P20929 | NEBU_HUMAN  | Nebulin 95.                  | 20  | TGACATGAATAG   | 0.348 |
| + | 8   | 1100  |                    | NM_052905    | NP_443137    | Q96PY5 | FMNL2_HUMAN | GBD/FH3.                     | 3   | .CTCATCCACACC  | 0.378 |
| + | 3   | 1489  | IJ3_uc010zce.1_3'  | NM_002239    | NP_002230    | P48549 | IRK3_HUMAN  | smic (By similarity).        | 2   | .TGGGAGACTTG   | 0.413 |
| + | 4   | 550   | o.2_Missense_Mu    | NM_173355    | NP_775491    | O95045 | UPP2_HUMAN  |                              | 0   | .CATCCCTCCA    | 0.408 |
| + | 10  | 1311  | C4A10_uc002uby.    | NM_022058    | NP_071341    | Q6U841 | S4A10_HUMAN | lasmic (Potential).          | 5   | TCTGGGACCCCT   | 0.333 |
| - | 8   | 2104  | ici.2_Missense_Mt  | NM_033272    | NP_150375    | Q9NS40 | KCNH7_HUMAN | y filter (By similarity).    | 5   | .CATTCGCCAAT   | 0.383 |
| - | 17  | 3783  | zcx.1_Missense_M   | NM_014900    | NP_055715    | Q53SF7 | COBL1_HUMAN |                              | 3   | .TGAGTCTTGAC   | 0.428 |
| - | 28  | 5539  | y.2_Missense_Mut   | NM_006922    | NP_008853    | Q9NY46 | SCN3A_HUMAN |                              | 10  | .AGCTTCCTTTT   | 0.453 |
| + | 7   | 1186  | p.S299L SCN2A_     | NM_001040142 | NP_001035232 | Q99250 | SCN2A_HUMAN | I.                           | 8   | .CAATTCATTGGA  | 0.333 |
| - | 6   | 981   | o.R85* SCN9A_uc    | NM_002977    | NP_002968    | Q15858 | SCN9A_HUMAN | er; Name=S: p.R214*(1)       | 13  | .AGTTCCGAAGG   | 0.338 |
| - | 20  | 3098  | ff.1_Missense_Mu   | NM_004525    | NP_004516    | P98164 | LRP2_HUMAN  | cellular (Potential).        | 29  | TCATACGATTTCA  | 0.398 |
| - | 185 | 36159 | .1_Missense_Mute   | NM_133378    | NP_596869    | Q8WZ42 | TITIN_HUMAN |                              | 153 | .GCCCTTCGTCTT  | 0.433 |
| - | 61  | 15111 | v_uc010zjf.1_Intro | NM_133378    | NP_596869    | Q8WZ42 | TITIN_HUMAN |                              | 153 | .CAGAGGCTTCA   | 0.463 |
| - | 58  | 14493 | v_uc010zjf.1_Intro | NM_133378    | NP_596869    | Q8WZ42 | TITIN_HUMAN |                              | 153 | .GCATTGGTTGTC  | 0.388 |
| - | 52  | 12562 | N_uc010zjf.1_Intr  | NM_133378    | NP_596869    | Q8WZ42 | TITIN_HUMAN |                              | 153 | .AAAATGGAGCA   | 0.463 |
| - | 46  | 15286 | N_uc010zfi.1_Intr  | NM_133379    | NP_596870    | Q8WZ42 | TITIN_HUMAN |                              | 153 | TCACCTCCTGAA   | 0.393 |
| - | 46  | 11904 | N_uc010zfi.1_Intr  | NM_133379    | NP_596870    | Q8WZ42 | TITIN_HUMAN |                              | 153 | CTATTTCTTCACT  | 0.358 |
| - | 46  | 10905 | N_uc010zfi.1_Intr  | NM_133379    | NP_596870    | Q8WZ42 | TITIN_HUMAN |                              | 153 | .AGAGTGATGGT   | 0.418 |
| - | 28  | 5598  | TN_uc010zjf.1_Mi   | NM_133378    | NP_596869    | Q8WZ42 | TITIN_HUMAN |                              | 153 | .AATAAGGGTAGC  | 0.413 |
| + | 12  | 1208  | qqn.1_Missense_M   | NM_032168    | NP_115544    | Q8IWA0 | WDR75_HUMAN |                              | 2   | .TGATTATGGTCT  | 0.333 |
| + | 6   | 944   | sy.2_RNA OBFC2A    | NM_001031716 | NP_001026886 | Q96AH0 | SOSB2_HUMAN |                              | 0   | .CACTGGCCCTG   | 0.388 |
| - | 43  | 8022  |                    | NM_018897    | NP_061720    | Q8WXX0 | DYH7_HUMAN  | k (By similarity).           | 12  | .TTTTTTCAGTTTT | 0.418 |
| - | 9   | 848   |                    | NM_018897    | NP_061720    | Q8WXX0 | DYH7_HUMAN  | n (By similarity).           | 12  | AATTTCCATTCTC  | 0.294 |
| - | 1   | 261   | se_Mutation_p.Q4   | NM_024989    | NP_079265    | Q75T13 | PGAP1_HUMAN | renal (Potential).           | 4   | .CCTTACCTGATAC | 0.562 |
| + | 42  | 6732  | zsz.3_Missense_M   | NM_001114132 | NP_001107604 | Q6ZS30 | NBEL1_HUMAN | BEACH.                       | 2   | .CGACAGTTCCA   | 0.338 |
| + | 5   | 1937  |                    | NM_020923    | NP_065974    | Q9HCK1 | ZDBF2_HUMAN |                              | 3   | .AACTTCGGAAG   | 0.438 |
| - | 7   | 617   |                    | NM_001099334 | NP_001092804 | Q0P641 | CB080_HUMAN |                              | 1   | .TTTGCGGGCGT   | 0.463 |
| - | 21  | 2712  | zji.1_Missense_M   | NM_005235    | NP_005226    | Q15303 | ERBB4_HUMAN | o. Cytoplasm p.E872K(1)      | 33  | .TTTTTTCATCTCC | 0.378 |
| - | 17  | 2886  | p.P830S TNS1_u     | NM_022648    | NP_072174    | Q9HBL0 | TENS1_HUMAN |                              | 4   | .CCCTGGAGGGC   | 0.602 |
| - | 16  | 1379  | vj.1_Nonsense_M    | NM_022648    | NP_072174    | Q9HBL0 | TENS1_HUMAN |                              | 4   | .GTGTTATAGTCC  | 0.607 |
| - | 15  | 1689  | o.1_Missense_Mt    | NM_024506    | NP_078782    | Q6UWU2 | GLB1L_HUMAN |                              | 0   | .AGACCCAAAGC   | 0.453 |
| + | 4   | 246   | se_Mutation_p.Q6   | NM_013335    | NP_037467    | Q96IJ6 | GMPPA_HUMAN |                              | 0   | .TTCTACCAACCT  | 0.532 |
| + | 5   | 1539  | p.K528* ACCN4_u    | NM_182847    | NP_878267    | Q96FT7 | ACCN4_HUMAN | cellular (Potential).        | 2   | .CGAGGAAGTAC   | 0.443 |
| - | 7   | 4371  | o.E1442K SPHKAF    | NM_001142644 | NP_001136116 | Q2M3C7 | SPKAP_HUMAN |                              | 10  | .AGGTTCCCGAG   | 0.498 |
| - | 2   | 446   | P55_uc010fxs.1_    | NM_005683    | NP_005674    | Q9Y2T6 | GPR55_HUMAN | cellular (Potential).        | 1   | .TACCTGGGACA   | 0.562 |
| + | 5   | 736   | mp.1_Missense_M    | NM_001017915 | NP_001017915 | Q92835 | SHIP1_HUMAN |                              | 2   | .CCCAGGACTCT   | 0.473 |
| + | 2   | 187   |                    | NM_153325    | NP_697020    | Q8N687 | DB125_HUMAN |                              | 3   | .CACATGAATATA  | 0.368 |

rs112041013



|   |    |           |                                                       |              |              |        |             |                            |    |                |       |           |
|---|----|-----------|-------------------------------------------------------|--------------|--------------|--------|-------------|----------------------------|----|----------------|-------|-----------|
| - | 6  | 725       | 2orf27_uc002wjh.                                      | NM_001039140 | NP_001034229 | Q9GZN8 | CT027_HUMAN |                            | 0  | FGTGCTCTGAGT   | 0.662 |           |
| + | 2  | 241       | i_p.P14T SMOX_u                                       | NM_175839    | NP_787033    | Q9NWM0 | SMOX_HUMAN  |                            | 1  | 3ATGACCCCTCTC/ | 0.617 |           |
| - | 6  | 1798      | nj.2_Missense_Mu                                      | NM_020341    | NP_065074    | Q9P286 | PAK7_HUMAN  | Linker.                    | 23 | 3AGGAGGAGCCC   | 0.652 |           |
| + | 1  | 344       |                                                       | NM_001052    | NP_001043    | P31391 | SSR4_HUMAN  | Name=2; (Potential).       | 1  | 3CCGACGAGCTC   | 0.662 |           |
| + | 2  | 63        | tj.1_RNA FRG1B_uc010gdr.1_RNA FRG1B_uc010ztk.1_Intron |              |              |        |             |                            | 0  | 3AATCGCCCTG.   | 0.353 | rs7266938 |
| - | 5  | 953       | 11_splice COMMD                                       | NM_053041    | NP_444269    | Q86VX2 | COMD7_HUMAN |                            | 1  | 3AATTATACCTTTT | 0.274 |           |
| + | 33 | 4352      |                                                       | NM_020884    | NP_065935    | A7E2Y1 | MYH7B_HUMAN | Potential.                 | 2  | 3CAGTGGAGGAG   | 0.627 |           |
| - | 28 | 4302      |                                                       | NM_032221    | NP_115597    | Q8TD26 | CHD6_HUMAN  |                            | 14 | 3CTGCCCGGCTG   | 0.408 |           |
| - | 16 | 2573      | 3_Mutation_p.E81f                                     | NM_007050    | NP_008981    | O14522 | PTPRT_HUMAN | lasmic (Potential).        | 20 | 3CATCTCCCTCTC/ | 0.557 |           |
| + | 14 | 2221      | wj.1_Missense_Mt                                      | NM_002466    | NP_002457    | P10244 | MYBB_HUMAN  |                            | 5  | CTGCGGGGGGA    | 0.617 |           |
| + | 3  | 231       | i_p.N21Y TOX2_ur                                      | NM_001098798 | NP_001092268 | Q96NM4 | TOX2_HUMAN  |                            | 1  | 3CGGAGAACAAC   | 0.507 |           |
| + | 2  | 427       | G2_uc010ggz.2_Ir                                      | NM_003007    | NP_002998    | P04279 | SEMG1_HUMAN |                            | 2  | 3ATTTTTCACAGG/ | 0.418 |           |
| - | 4  | 389       | ws.1_Missense_Mi                                      | NM_002999    | NP_002990    | P31431 | SDC4_HUMAN  | cellular (Potential).      | 0  | 3GGGTGAGATTC   | 0.527 |           |
| + | 11 | 1246      | 3A8_uc010gic.2_I                                      | NM_015266    | NP_056081    | Q9Y2E8 | SL9A8_HUMAN |                            | 1  | 3AGATCCTCATG/  | 0.552 |           |
| + | 6  | 2087      | e_Mutation_p.S62                                      | NM_001164116 | NP_001157588 | Q9NQ75 | CASS4_HUMAN |                            | 3  | 3TGAATCACACC/  | 0.408 |           |
| - | 9  | 2426      |                                                       | NM_003185    | NP_003176    | O00268 | TAF4_HUMAN  |                            | 3  | GTGCCGAGACA/   | 0.512 |           |
| + | 13 | 1481      | p.E415* OSBPL2_                                       | NM_144498    | NP_653081    | Q9H1P3 | OSBL2_HUMAN |                            | 2  | 3GGCTGGAGGAG   | 0.622 |           |
| - | 5  | 1126_1127 | p.S342F EEF1A2_                                       | NM_001958    | NP_001949    | Q05639 | EF1A2_HUMAN |                            | 0  | ACCCTGGGAGGT/  | 0.678 |           |
| - | 3  | 606       |                                                       | NM_080823    | NP_543013    | Q9H3Y6 | SRMS_HUMAN  | SH2.                       | 2  | CAGGCCGGGAA    | 0.637 |           |
| - | 21 | 1714      | TE_uc002yir.1_Mi                                      | NM_199261    | NP_954870    | P56180 | TPTE_HUMAN  | 2 tensin-type.             | 5  | 3ATTTTCTAATC   | 0.318 |           |
| + | 1  | 509       |                                                       | NM_174981    | NP_778146    | Q86YR6 | POTED_HUMAN |                            | 6  | 3AAGTCCCCAGA   | 0.567 |           |
| + | 19 | 2577      | P25_uc002yjj.1_M                                      | NM_013396    | NP_037528    | Q9UHP3 | UBP25_HUMAN |                            | 5  | 3TGAAGGTTGG    | 0.343 |           |
| - | 4  | 714       | YR1_uc002yme.2                                        | NM_052954    | NP_443186    | Q96J86 | CYYR1_HUMAN | lasmic (Potential).        | 0  | 3AGTATGGAGGA   | 0.527 |           |
| - | 9  | 1715      | on_p.K417N GRIK                                       | NM_000830    | NP_000821    | P39086 | GRIK1_HUMAN | cellular (Potential).      | 3  | 3CAAACCTTCTT/  | 0.438 |           |
| + | 2  | 268       |                                                       | NM_172201    | NP_751951    | Q9Y6J6 | KCNE2_HUMAN |                            | 0  | 3TGATGCTGAGA/  | 0.458 |           |
| + | 12 | 1582      |                                                       | NM_005441    | NP_005432    | Q13112 | CAF1B_HUMAN |                            | 2  | 3CATCCCGGAGG   | 0.532 |           |
| - | 2  | 251       |                                                       | NM_003225    | NP_003216    | P04155 | TFF1_HUMAN  | P-type.                    | 0  | 3ATTAGGATAGAA  | 0.468 |           |
| - | 2  | 250       |                                                       | NM_080860    | NP_543136    | Q8WYR4 | RSPH1_HUMAN | MORN 2.                    | 1  | 3GAATTCGTAGC1  | 0.502 |           |
| + | 1  | 96        | .1_Intron C21orf29                                    | NM_198689    | NP_941962    | P60409 | KR107_HUMAN |                            | 0  | 3TGGTTCCTGTG/  | 0.662 |           |
| + | 1  | 632       | .1_Intron C21orf29                                    | NM_198699    | NP_941972    | P60413 | KR10C_HUMAN | 3 repeats of C-C-X(3).     | 0  | 3CCGCCCTGTGT/  | 0.716 |           |
| + | 3  | 718       | e_Mutation_p.P86                                      | NM_006031    | NP_006022    | O95613 | PCNT_HUMAN  |                            | 8  | 3CCACCAGCAG    | 0.438 |           |
| - | 7  | 829       | p.N135K SLC25A1                                       | NM_005984    | NP_005975    | P53007 | TXTP_HUMAN  | 3; (Potential). Solcar 3.  | 0  | 3GGAGTGTTCCTC. | 0.612 |           |
| + | 5  | 1643      |                                                       | NM_152612    | NP_689825    | Q8IYX3 | CC116_HUMAN |                            | 2  | 3CACCTCCCACT/  | 0.662 |           |
| - | 8  | 1305      | 2_5'UTR HPS4_uc                                       | NM_022081    | NP_071364    | Q9NQG7 | HPS4_HUMAN  |                            | 0  | 3CGGTGAAGCA/   | 0.562 |           |
| + | 4  | 2181      | H_uc003afp.2_5'l                                      | NM_021076    | NP_066554    | P12036 | NFH_HUMAN   | S-P-[AEPV]-[EAK]-[AEVK]    | 0  | 3CAAAGTCCCTCT/ | 0.557 |           |
| - | 21 | 2755      | h.1_Missense_Mu                                       | NM_002473    | NP_002464    | P35579 | MYH9_HUMAN  | Potential.                 | 11 | 3TGCCGGCTCA/   | 0.617 |           |
| - | 8  | 1045      | p.V302I TMPRSS                                        | NM_153609    | NP_705837    | Q8IU80 | TMPS6_HUMAN | intracellular (Potential). | 6  | 3CAGACGACCG/   | 0.667 |           |
| + | 4  | 570       | us.2_Missense_M                                       | NM_012407    | NP_036539    | Q9NRD5 | PICK1_HUMAN | PDZ.                       | 0  | 3GCCTTGACGG    | 0.547 |           |
| - | 13 | 2130      | 3xp.2_Missense_M                                      | NM_001098504 | NP_001091974 | Q92841 | DDX17_HUMAN |                            | 4  | 3TAGAGCTCTGT/  | 0.532 |           |
| + | 4  | 536       | 3RAP2_uc011aoo.                                       | NM_004810    | NP_004801    | O75791 | GRAP2_HUMAN | SH2.                       | 2  | 3GGGGACTTCTC   | 0.562 |           |
| - | 2  | 222       | 3dr.1_Missense_Mi                                     | NM_015140    | NP_055955    | Q14166 | TTL12_HUMAN |                            | 1  | 3TCCCAGCGT/    | 0.642 |           |
| - | 20 | 3449      | XNB2_uc003bku.1                                       | NM_012401    | NP_036533    | O15031 | PLXB2_HUMAN | cellular (Potential).      | 6  | 3ACCCGGGGCT    | 0.642 |           |
| + | 18 | 2440      | p.P653S CNTN6_1                                       | NM_014461    | NP_055276    | Q9UQ52 | CNTN6_HUMAN | nectin type-III 2.         | 8  | 3CAATTCAGAA/   | 0.388 |           |
| + | 24 | 3235      | 3pf.2_Missense_Mi                                     | NM_175607    | NP_783200    | Q8IWW2 | CNTN4_HUMAN |                            | 7  | 3CACTTCGAATG/  | 0.468 |           |
| + | 42 | 5755      | 3R1_uc011asu.1_Ir                                     | NM_001099952 | NP_001093422 | Q14643 | ITPR1_HUMAN | lasmic (Potential).        | 21 | 3ACTCCTTTTTCT1 | 0.428 |           |
| - | 16 | 2027      | RIP2_uc011avh.1                                       | NM_001080423 | NP_001073892 | Q9C0E4 | GRIP2_HUMAN | PDZ 5.                     | 1  | 3CTCGTTTCTGT/  | 0.483 |           |
| - | 10 | 1351      | 3y.3_Missense_Mu                                      | NM_001128176 | NP_001121648 | P10828 | THB_HUMAN   | g. Interaction with NR2F6. | 3  | 3ACTGCCATTTCT/ | 0.527 |           |

|   |    |           |                    |              |              |        |             |                        |    |                 |       |             |
|---|----|-----------|--------------------|--------------|--------------|--------|-------------|------------------------|----|-----------------|-------|-------------|
| + | 7  | 2062      | en.2_Missense_IV   | NM_003242    | NP_003233    | P37173 | TGFR2_HUMAN | lasmic (Potential).    | 26 | 'GAAGACGGCTC    | 0.592 |             |
| - | 15 | 1510      |                    | NM_207359    | NP_997242    | Q6ZQY3 | GADL1_HUMAN |                        | 0  | .CCTTTCCCGG'    | 0.562 |             |
| + | 2  | 1361      |                    | NM_001137674 | NP_001131146 | A6NHJ4 | ZN860_HUMAN | 2H2-type 2.            | 1  | 'GAAGCGATACC'   | 0.368 |             |
| + | 6  | 552       | P21_uc011axy.1_n   | NM_016300    | NP_057384    | Q9UBL0 | ARP21_HUMAN |                        | 3  | 'TCCAGTTTTTCC'  | 0.363 |             |
| - | 9  | 3829      |                    | NM_014831    | NP_055646    | O15050 | TRNK1_HUMAN | TPR 3.                 | 2  | 'ATGCACCTCCT'   | 0.478 |             |
| + | 21 | 6812      | GA4_uc010hgs.2_    | NM_002078    | NP_002069    | Q13439 | GOGA4_HUMAN | RIP Potential.         | 4  | 'TCTTTGGAGAA'   | 0.363 |             |
| + | 3  | 424       | 003cja.2_Missense  | NM_145755    | NP_665698    | Q8NDW8 | TT21A_HUMAN |                        | 1  | 'ATGCTCACAAA'   | 0.542 |             |
| + | 5  | 797       | kz.3_Missense_Mi   | NM_001042646 | NP_001036111 | Q9UPV9 | TRAK1_HUMAN | si HAP1 N-terminal.    | 1  | 'AACCCCGTAAG'   | 0.577 |             |
| + | 6  | 2604      | IF167_uc003cnj.2_  | NM_018651    | NP_061121    | Q9P0L1 | ZN167_HUMAN | 2H2-type 13.           | 2  | 'CCAGCGAACTC'   | 0.458 | rs151170690 |
| + | 1  | 944       |                    | NM_014240    | NP_055055    | Q9UGP4 | LIMD1_HUMAN |                        | 1  | 'TGTGAGCACCC'   | 0.622 |             |
| + | 2  | 1312      | _p.E355K CCRL2_    | NM_003965    | NP_003956    | O00421 | CCRL2_HUMAN | lasmic (Potential).    | 1  | 'CCACCGAAGTG'   | 0.423 |             |
| - | 26 | 3041      | _pz.1_Nonsense_IV  | NM_147129    | NP_667340    | Q60I27 | AL2CL_HUMAN |                        | 5  | 'GAGCTCCCTGG'   | 0.607 |             |
| - | 54 | 5048      | a-mir-711 MI00124  | NM_000094    | NP_000085    | Q02388 | CO7A1_HUMAN | le-helical region.     | 11 | 'CATTTGTCCTATC' | 0.567 |             |
| - | 5  | 428       |                    | NM_000884    | NP_000875    | P12268 | IMDH2_HUMAN |                        | 1  | 'GAATCCCTGTTC'  | 0.512 |             |
| - | 5  | 1033      | mw.2_Missense_IV   | NM_003392    | NP_003383    | P41221 | WNT5A_HUMAN |                        | 0  | 'GCACTTGCAGG'   | 0.552 |             |
| - | 13 | 2537      | lm.2_Missense_Mi   | NM_003716    | NP_003707    | Q9ULU8 | CAPS1_HUMAN |                        | 3  | 'GATGTCGGTGA'   | 0.512 |             |
| - | 23 | 3441      | 3dmh.1_Missense_   | NM_182920    | NP_891550    | Q9P2N4 | ATS9_HUMAN  | SP type-1 6.           | 4  | 'AGTCCCAATGAT'  | 0.413 |             |
| - | 2  | 612       | _x.1_Missense_Mu   | NM_007114    | NP_009045    | P82094 | TMF1_HUMAN  |                        | 0  | 'GTTGTGATTTTC'  | 0.428 |             |
| - | 2  | 1677      | Int.2_Missense_M   | NM_198271    | NP_938012    | Q0VAK6 | LMOD3_HUMAN |                        | 1  | 'CTTCAGCTTAC'   | 0.532 |             |
| - | 3  | 1206      |                    | NM_016206    | NP_057290    | A8MV65 | VGLL3_HUMAN |                        | 0  | 'TGTGCTTTGTG'   | 0.542 |             |
| + | 4  | 1237      | lrp.1_Missense_Mi  | NM_001080448 | NP_001073917 | Q9UF33 | EPHA6_HUMAN | cellular (Potential).  | 16 | 'ATACATGGAAGC'  | 0.383 |             |
| + | 5  | 942       | x.2_Missense_Mu    | NM_198196    | NP_937839    | P40200 | TACT_HUMAN  | cellular (Potential).  | 3  | 'TCTTGAGGAGC'   | 0.498 |             |
| + | 3  | 659       | dyn.2_Missense_IV  | NM_001008272 | NP_001008273 | Q9UI15 | TAGL3_HUMAN | CH.                    | 0  | 'AAATCTCCCAGT'  | 0.488 |             |
| + | 8  | 968       | bjd.1_Missense_IV  | NM_033364    | NP_203528    | Q7Z4T9 | AAT1_HUMAN  | Potential.             | 3  | 'CTAAAAGAGCTC'  | 0.443 |             |
| + | 10 | 1045      | lbn.1_Missense_M   | NM_014980    | NP_055795    | Q9Y2K9 | STB5L_HUMAN |                        | 9  | 'GAAAATCTGAAT'  | 0.254 |             |
| + | 1  | 161       | lbn.1_Missense_    | NM_021082    | NP_066568    | Q16348 | S15A2_HUMAN |                        | 1  | 'GGAATCCTTTCC'  | 0.493 |             |
| - | 9  | 1494      | hrt.2_Missense_M   | NM_022757    | NP_073594    | Q49A88 | CCD14_HUMAN |                        | 0  | 'CTGTTGGAAGT'   | 0.353 |             |
| - | 7  | 877       | J03eht.3_Missense  | NM_024628    | NP_078904    | A0AV02 | S12A8_HUMAN |                        | 0  | 'GAGGTCGCCCC'   | 0.637 |             |
| + | 4  | 787       | SEC_uc003ekj.2_l   | NM_021937    | NP_068756    | P57772 | SELB_HUMAN  |                        | 1  | 'CTCCATCAGCC'   | 0.582 |             |
| - | 18 | 3673_3674 |                    | NM_015103    | NP_055918    | Q9Y4D7 | PLXD1_HUMAN | cellular (Potential).  | 1  | 'CTCCCGGGGTC'   | 0.668 |             |
| + | 4  | 1367      | _Mutation_p.D365   | NM_023943    | NP_076432    | Q6UXF1 | TM108_HUMAN | cellular (Potential).  | 4  | 'CCCTTCGATACC'  | 0.592 | rs79118437  |
| - | 5  | 685       | lu.1_Nonsense_IV   | NM_016577    | NP_057661    | Q9NRW1 | RAB6B_HUMAN |                        | 1  | 'CTGTTGGAAGG'   | 0.547 |             |
| - | 13 | 2017      |                    | NM_173543    | NP_775814    | Q8IYY4 | DZ1L1_HUMAN |                        | 2  | 'TGGCTGGGCTC'   | 0.577 |             |
| - | 2  | 1219      |                    | NM_005067    | NP_005058    | O43255 | SIAH2_HUMAN | SBD.                   | 2  | 'CTGAAGGGTGG'   | 0.537 |             |
| - | 4  | 4475      |                    | NM_178822    | NP_849144    | Q6WRI0 | IGS10_HUMAN |                        | 13 | 'TGGGAGTCGCC'   | 0.493 |             |
| - | 1  | 293       | _p.E89K SERPIN     | NM_006217    | NP_006208    | O75830 | SPI2_HUMAN  |                        | 3  | 'AGGTTTCCTGTT'  | 0.358 |             |
| + | 7  | 1388      | hwy.1_Missense_I   | NM_207015    | NP_996898    | Q58DX5 | NADL2_HUMAN | cellular (Potential).  | 1  | 'TTGTTGGATTTG'  | 0.299 |             |
| - | 6  | 827       | JC39_uc003fkn.2_   | NM_181426    | NP_852091    | Q9UFE4 | CCD39_HUMAN | Potential.             | 4  | 'TCCATCCCTCTI'  | 0.348 |             |
| + | 33 | 4874      | c003fnv.3_Missense | NM_198241    | NP_937884    | Q04637 | IF4G1_HUMAN | EIF4A-binding.         | 7  | 'AGGATGCCTCTC'  | 0.577 |             |
| - | 2  | 892       |                    | NM_001025266 | NP_001020437 | A6NLC5 | CC070_HUMAN |                        | 0  | 'AGGGGAGAGAGA'  | 0.537 |             |
| + | 1  | 108       |                    | NM_153708    | NP_714919    | P59025 | RTP1_HUMAN  | lasmic (Potential).    | 3  | 'AGGTGGAAATTC'  | 0.527 |             |
| - | 2  | 442       | ASP1_uc003frk.1_   | NM_001879    | NP_001870    | P48740 | MASP1_HUMAN | MBL2. Homodimerization | 4  | 'AGTCTGGATAAC'  | 0.483 |             |
| - | 2  | 1027      |                    | NM_001004312 | NP_001004312 | Q5QGT7 | RTP2_HUMAN  | ical; (Potential).     | 0  | 'CCAGCGAAGAG'   | 0.587 |             |
| - | 3  | 1118      | 3fsg.2_Missense_I  | NM_018192    | NP_060662    | Q8IVL5 | P3H2_HUMAN  |                        | 4  | 'TGTATCTTCAAC'  | 0.418 |             |
| - | 19 | 2227      |                    | NM_198505    | NP_940907    | Q4VNC0 | AT135_HUMAN |                        | 11 | 'AATGATCACTTC'  | 0.468 |             |
| - | 2  | 2438      | p.2_Intron MUC4_   | NM_018406    | NP_060876    | Q99102 | MUC4_HUMAN  |                        | 0  | 'GGTGTGAGTCAT'  | 0.562 |             |
| + | 9  | 987       | p.R322Q LMLN_u     | NM_033029    | NP_149018    | Q96KR4 | LMLN_HUMAN  |                        | 1  | 'AGTTGGAAAAGT'  | 0.308 |             |

|   |    |         |                    |              |              |        |              |                                |      |               |       |
|---|----|---------|--------------------|--------------|--------------|--------|--------------|--------------------------------|------|---------------|-------|
| + | 3  | 305     | .P50L ZNF595_ucl   | NM_182524    | NP_872330    | Q7Z3I0 | Q7Z3I0_HUMAN |                                | 0    | :TAACCCAGACCT | 0.398 |
| + | 2  | 666     | ao.3_Missense_Mi   | NM_000283    | NP_000274    | P35913 | PDE6B_HUMAN  | GAF 1.                         | 0    | :GCGAAGACGAA  | 0.403 |
| + | 7  | 1459    | jcg.2_Missense_Iv  | NM_021923    | NP_068742    | Q8N441 | FGRL1_HUMAN  | lasmic (Potential).            | 0    | :ACCTTCCCTCGT | 0.736 |
| - | 8  | 831     | lk.1_Missense_Mu   | NM_006527    | NP_006518    | Q14493 | SLBP_HUMAN   |                                | 0    | TGGTGGGTGTG   | 0.493 |
| + | 11 | 1380    | se_Mutation_p.E3E  | NM_018986    | NP_061859    | Q8TE82 | S3TC1_HUMAN  |                                | 3    | :CGCAGGAAAAA  | 0.577 |
| + | 13 | 2581    | .R781S STIM2_uc    | NM_020860    | NP_065911    | Q9P246 | STIM2_HUMAN  | lasmic (Potential).            | 2    | :AACCTCGCCAC  | 0.483 |
| - | 2  | 557     | n_p.L60I TLR10_u   | NM_030956    | NP_112218    | Q9BXR5 | TLR10_HUMAN  | ilar (Potential). LRR 2.       | 2    | :AAAAAGGAGGT  | 0.423 |
| + | 8  | 3224    | zz.1_Missense_M    | NM_020722    | NP_065773    | Q6ZU35 | K1211_HUMAN  | Pro-rich.                      | 2    | :CCCCGGCTCCG  | 0.652 |
| - | 5  | 458     |                    | NM_182502    | NP_872308    | Q86T26 | TM11B_HUMAN  | racellular (Potential).        | 1    | TTGAACCATTGG  | 0.328 |
| - | 9  | 1264    |                    | NM_001042784 | NP_001036249 | Q5M9N0 | CD158_HUMAN  | Potential.                     | 6    | :AGATTCCTGAC  | 0.368 |
| + | 3  | 226     |                    | NM_006419    | NP_006410    | O43927 | CXL13_HUMAN  |                                | 0    | ATTGATCGAATTC | 0.393 |
| - | 2  | 827_828 |                    | NM_006168    | NP_006159    | P78426 | NKX61_HUMAN  | Homeobox.                      | 0    | GTCATCCCCAAC  | 0.54  |
| + | 4  | 1156    | n.2_Missense_Mu    | NM_020203    | NP_064588    | Q9NQ76 | MEPE_HUMAN   |                                | 3    | :AGTTTCATTACC | 0.438 |
| - | 5  | 982     | _p.R163S ABCG2     | NM_004827    | NP_004818    | Q9UNQ0 | ABCG2_HUMAN  | er. Cytoplasmic (Potential).   | 1    | :AATGACCCTGTT | 0.438 |
| + | 3  | 1691    | 190A_uc010ikv.2_   | NM_001145065 | NP_001138537 | Q9C0I3 | F190A_HUMAN  |                                | 2    | :CATTTCGTGAAC | 0.363 |
| + | 6  | 2267    | v190A_uc003hsw.    | NM_001145065 | NP_001138537 | Q9C0I3 | F190A_HUMAN  |                                | 2    | GTTCTTCAAGAG  | 0.313 |
| - | 6  | 911     | f_uc011ced.1_Mis   | NM_000670    | NP_000661    | P08319 | ADH4_HUMAN   |                                | 2    | FGGTTTCAGATCC | 0.378 |
| + | 29 | 3407    | _p.D279N ANK2_u    | NM_001148    | NP_001139    | Q01484 | ANK2_HUMAN   | raction with SPTBN1.           | 14   | :ATGGGGACAGC  | 0.468 |
| - | 21 | 2688    | utation_p.G803S    | NM_001083    | NP_001074    | O76074 | PDE5A_HUMAN  | ytic (By similarity).          | 0    | :GCAGCCATCTAC | 0.517 |
| - | 3  | 515     | _p.P89S PRDM5_     | NM_018699    | NP_061169    | Q9NQX1 | PRDM5_HUMAN  | SET.                           | 2    | :AGATGGTGCCCT | 0.448 |
| + | 1  | 106     |                    | NM_024582    | NP_078858    | Q6V0I7 | FAT4_HUMAN   |                                | 18   | TTCCGGGGCGAG  | 0.632 |
| + | 1  | 783     | P_uc003ijr.1_Miss  | NM_022475    | NP_071920    | Q96QV1 | HHIP_HUMAN   | Arg-rich.                      | 6    | :TGGGAACCCCC  | 0.592 |
| - | 18 | 4567    |                    | NM_017639    | NP_060109    | Q6V1P9 | PCD23_HUMAN  | Cadherin 13.                   | 4    | :TGCACCAGAAG  | 0.483 |
| - | 5  | 962     | e_Mutation_p.P30   | NM_000508    | NP_000499    | P02671 | FIBA_HUMAN   | By similarity.                 | 3    | TCCAGGTCCAG   | 0.572 |
| + | 10 | 1555    | _p.S391F GUCY1E    | NM_000857    | NP_000848    | Q02153 | GCYB1_HUMAN  | anylate cyclase.               | 0    | :TGATTCCCGGA  | 0.488 |
| - | 5  | 684     |                    | NM_001334    | NP_001325    | P43234 | CATO_HUMAN   |                                | 0    | :ATCCAGAATGTC | 0.294 |
| + | 8  | 1434    | IL3_uc010irs.2_3'L | NM_018248    | NP_060718    | Q8TAT5 | NEIL3_HUMAN  |                                | 4    | AAACGATATAACT | 0.373 |
| - | 4  | 458     | PDLIM3_uc003ixy.   | NM_014476    | NP_055291    | Q53GG5 | PDLI3_HUMAN  |                                | 2    | :GTTCCCGTCTC  | 0.473 |
| - | 13 | 3274    | ckv.1_Missense_A   | NM_021069    | NP_066547    | O94875 | SRBS2_HUMAN  |                                | 1    | TTCTCCCGCAGT  | 0.607 |
| - | 3  | 390     | :1_5'UTR CTNND:    | NM_001332    | NP_001323    | Q9UQB3 | CTND2_HUMAN  | Potential.                     | 8    | TTGCATCGCTCC  | 0.522 |
| - | 53 | 8891    |                    | NM_001369    | NP_001360    | Q8TE73 | DYH5_HUMAN   | 4 (By similarity).             | 31   | :CATTTCCTGAC  | 0.438 |
| + | 3  | 433     |                    | NM_138348    | NP_612357    | Q96BN8 | F105B_HUMAN  |                                | 2    | :CAAAAAGAATC  | 0.323 |
| + | 9  | 1098    |                    | NM_020227    | NP_064612    | Q9NQV7 | PRDM9_HUMAN  | SET.                           | 6    | TATGTGGATGGA  | 0.423 |
| + | 27 | 4021    | e_Mutation_p.E79C  | NM_024867    | NP_079143    | Q9C093 | SPEF2_HUMAN  |                                | 4    | :AAAAGGAGCCA  | 0.403 |
| - | 1  | 296     | .2_Missense_Mut    | NM_199335    | NP_955367    | O15117 | FYB_HUMAN    |                                | 2    | :GGTTTCCCTTGT | 0.552 |
| - | 18 | 2276    | 3jmi.3_Nonsense_   | NM_173489    | NP_775760    | Q72745 | HTRB2_HUMAN  | HEAT 7.                        | 8    | :ATCCTGAGTCAC | 0.388 |
| - | 4  | 659     |                    | NM_000436    | NP_000427    | P55809 | SCOT1_HUMAN  |                                | 3    | CCATGCGTTTTAT | 0.423 |
| + | 5  | 431     | R_uc011cpq.1_5'L   | NM_000163    | NP_000154    | P10912 | GHR_HUMAN    | ellular (Potential).           | 6    | :AGCTAACTAGCA | 0.333 |
| + | 9  | 1203    | _p.S348T IL31RA_   | NM_139017    | NP_620586    | Q8NI17 | IL31R_HUMAN  | tential). Fibronectin type-III | 1    | :AAAGCTCTGCT  | 0.522 |
| - | 2  | 294     | ikin.2_Missense_Iv | NM_001884    | NP_001875    | P10915 | HPLN1_HUMAN  | g-like V-type.                 | 5    | TTTTATGGATTCC | 0.428 |
| + | 4  | 658     | se_Mutation_p.R8I  | NM_198150    | NP_937793    | Q6UWY0 | ARSK_HUMAN   |                                | 1    | :TAACAGGACTA  | 0.413 |
| + | 16 | 3357    | y.3_Missense_Mut   | NM_001127511 | NP_001120983 | P25054 | APC_HUMAN    | through a p1(1)p.K993fs*       | 2515 | :AAAGTAAGTTTT | 0.348 |
| + | 3  | 1252    |                    | NM_175856    | NP_787052    | Q70JA7 | CHSS3_HUMAN  | renal (Potential).             | 3    | :AACTTCGCTACC | 0.488 |
| - | 3  | 462     | n_p.S107F FNIP1_   | NM_133372    | NP_588613    | Q8TF40 | FNIP1_HUMAN  |                                | 2    | CAGAAGATGAAC  | 0.308 |
| + | 3  | 345     |                    | NM_002188    | NP_002179    | P35225 | IL13_HUMAN   |                                | 2    | :CAGCTGGGGTA  | 0.612 |
| + | 21 | 3055    |                    | NM_014829    | NP_055644    | Q7L014 | DDX46_HUMAN  |                                | 1    | :ACTCTGAAGCC  | 0.418 |
| - | 5  | 1429    | ase_Mutation_p.G   | NM_020389    | NP_065122    | Q9HCX4 | TRPC7_HUMAN  | ical; (Potential).             | 0    | :CATCCCGAAAT  | 0.572 |

rs142749005

|   |    |         |                    |              |              |        |             |                               |    |                   |       |
|---|----|---------|--------------------|--------------|--------------|--------|-------------|-------------------------------|----|-------------------|-------|
| - | 3  | 661     | LHL3_uc010jem.1    | NM_017415    | NP_059111    | Q9UH77 | KLHL3_HUMAN | BTB.                          | 0  | .GTAGGGGCTGC      | 0.542 |
| + | 1  | 1384    | hh.1_intron PCDH.  | NM_018910    | NP_061733    | Q9UN72 | PCDA7_HUMAN | Extracellular (Potential).    | 4  | TATACGGTGTTC      | 0.667 |
| + | 1  | 1132    |                    | NM_018940    | NP_061763    | Q9Y5E2 | PCDB7_HUMAN | r (Potential). Cadherin 3.    | 6  | .CTATTCCAGGCCA    | 0.418 |
| - | 3  | 1004    | jgh.2_Missense_I   | NM_005471    | NP_005462    | P46926 | GNP11_HUMAN |                               | 0  | .TCTCCGGGTGG      | 0.542 |
| - | 2  | 194     |                    | NM_003122    | NP_003113    | P00995 | ISK1_HUMAN  |                               | 0  | CCAGGGAGTCA       | 0.373 |
| - | 2  | 470     | on_p.G92E CSF1F    | NM_005211    | NP_005202    | P07333 | CSF1R_HUMAN | 1. Extracellular (Potential). | 54 | .TGCCTCCCAGG      | 0.597 |
| - | 5  | 842     | AD4_uc010jii.2_Int | NM_138379    | NP_612388    | Q96H15 | TIMD4_HUMAN | xtracellular (Potential).     | 2  | .ATGTTGATGGG      | 0.398 |
| + | 26 | 5531    | i.3_Missense_Mut   | NM_001122679 | NP_001116151 |        |             |                               | 10 | ATGATCGAAATAT     | 0.507 |
| + | 3  | 748     |                    | NM_003862    | NP_003853    | O76093 | FGF18_HUMAN |                               | 0  | .TGGGCCCGCAGG     | 0.592 |
| + | 4  | 1395    | mcf.2_Missense_I   | NM_153607    | NP_705835    | Q8IUR6 | CE041_HUMAN | Glu-rich.                     | 0  | ggaggatgltgatgatg | 0.139 |
| + | 2  | 179     |                    | NM_015980    | NP_057064    | Q9Y328 | NSG2_HUMAN  | lasmic (Potential).           | 1  | .AGAAGGGAACC      | 0.532 |
| + | 13 | 2239    |                    | NM_133369    | NP_588610    | Q6ZN44 | UNC5A_HUMAN | lasmic (Potential).           | 1  | GGAATGGCACG       | 0.622 |
| - | 4  | 580     |                    | NM_001012418 | NP_001012418 | Q86YV6 | MYLK4_HUMAN |                               | 4  | .CTTGGCTGTCA      | 0.463 |
| - | 7  | 1709    | iorf146_uc003mvy.  | NM_173563    | NP_775834    | Q8IXS0 | CF146_HUMAN |                               | 1  | TTCTTCTCTCTC      | 0.388 |
| + | 16 | 2482    | q.1_Missense_Mu    | NM_004415    | NP_004406    | P15924 | DESP_HUMAN  | Globular 1.                   | 9  | TCAGAGGTTCTC      | 0.363 |
| + | 9  | 7846    | EP1_uc011diq.1_F   | NM_002114    | NP_002105    | P15822 | ZEP1_HUMAN  |                               | 6  | .AATCCCTCAGT      | 0.532 |
| + | 3  | 692     | p.W120G EDN1_u     | NM_001955    | NP_001946    | P05305 | EDN1_HUMAN  | ndothelin-like.               | 1  | .AGTGCTGGAAT      | 0.443 |
| + | 3  | 534     | dkk.1_Missense_I   | NM_007048    | NP_008979    | O00481 | BT3A1_HUMAN | 1. Extracellular (Potential). | 2  | .TGTTCCCGACC      | 0.572 |
| + | 3  | 275     | 1_5'UTR PRSS16     | NM_005865    | NP_005856    | Q9NQE7 | TSSP_HUMAN  |                               | 5  | .ACATTGGGTTG      | 0.488 |
| - | 3  | 2488    |                    | NM_052923    | NP_443155    | Q6R2W3 | SCND3_HUMAN |                               | 1  | TTGCATGGATATT     | 0.413 |
| - | 1  | 906     |                    | NM_030876    | NP_110503    | Q9UGF6 | OR5V1_HUMAN | Name=7; (Potential).          | 4  | .CACTGAAACC       | 0.423 |
| + | 4  | 641     | uc003nuj.2_Silent  | NM_000594    | NP_000585    | P01375 | TNFA_HUMAN  | ellular (Potential).          | 3  | .TCAGCCGCATC      | 0.632 |
| - | 28 | 3543    | tion_p.S976* EHM   | NM_006709    | NP_006700    | Q96KQ7 | EHMT2_HUMAN | Post-SET.                     | 1  | .CGGCTGAGTGC      | 0.582 |
| - | 19 | 6917    |                    | NM_019105    | NP_061978    | P22105 | TENX_HUMAN  | nectin type-III 15.           | 0  | .CACCCGCACCG      | 0.632 |
| - | 5  | 1239    | sq.1_Missense_Mi   | NM_012391    | NP_036523    | O95238 | SPDEF_HUMAN | ETS.                          | 5  | .CCTTCTCCTTG      | 0.637 |
| - | 8  | 1581    |                    | NM_001010903 | NP_001010903 | P0C671 | CF222_HUMAN |                               | 4  | TGGGTCGTCGG       | 0.607 |
| + | 25 | 3473    |                    | NM_001371    | NP_001362    |        |             |                               | 21 | TTTCAGGATCTT      | 0.333 |
| + | 27 | 3854    |                    | NM_001371    | NP_001362    |        |             | p.R1085Q(2)                   | 21 | CTGTCCGATATCT     | 0.328 |
| + | 58 | 8884    |                    | NM_001371    | NP_001362    |        |             |                               | 21 | .ATATATGAATTGC    | 0.378 |
| + | 32 | 6398    | _9_uc010jyk.2_Mi   | NM_015089    | NP_055904    | Q8IWT3 | CUL9_HUMAN  | RING-type 1.                  | 12 | .GCAGAACCTTG      | 0.592 |
| - | 2  | 680     | i_p.P33S CLIC5_u   | NM_001114086 | NP_001107558 | Q9NZA1 | CLIC5_HUMAN |                               | 2  | .GAAAGGACAGT      | 0.478 |
| + | 1  | 4054    | e.2_Missense_Mu    | NM_001010870 | NP_001010870 | O60522 | TDRD6_HUMAN | Tudor 6.                      | 6  | .GTCCACCTTTG      | 0.373 |
| + | 6  | 994     | p.H303Y GPR115     | NM_153838    | NP_722580    | Q8IZF3 | GP115_HUMAN | ellular (Potential).          | 8  | .GGTTTCACATCA     | 0.393 |
| - | 1  | 403     |                    | NM_138733    | NP_620061    | P07205 | PGK2_HUMAN  |                               | 1  | .CTACACAGTCC      | 0.537 |
| - | 3  | 334     | wu.1_Missense_M    | NM_002388    | NP_002379    | P25205 | MCM3_HUMAN  |                               | 3  | .GGAAGGCAACC      | 0.468 |
| + | 10 | 1423    | JAG_uc010jzt.2_R   | NM_014464    | NP_055279    | Q9UJW2 | TINAG_HUMAN |                               | 4  | .ACAAGGGCAGA      | 0.363 |
| + | 5  | 1186    |                    | NM_001010872 | NP_001010872 | Q5T0W9 | FA83B_HUMAN |                               | 6  | .TCACGGATACA      | 0.328 |
| + | 6  | 933     |                    | NM_207410    | NP_997293    | Q6UXV0 | GFRAL_HUMAN | ellular (Potential).          | 2  | .ATATCCTTGGGA     | 0.413 |
| - | 3  | 436     | MGCLL1_uc011dx     | NM_019036    | NP_061909    | Q8TB92 | HMGC2_HUMAN |                               | 4  | CTACCTTTTCATT     | 0.308 |
| - | 7  | 1931    | cf.1_Missense_Mu   | NM_021073    | NP_066551    | P22003 | BMP5_HUMAN  |                               | 2  | .CAGATGAACCTC     | 0.333 |
| - | 23 | 2334    | OL21A1_uc011dxi    | NM_030820    | NP_110447    | Q96P44 | COLA1_HUMAN | ollagen-like 4.               | 2  | GTATTTCTTTGT      | 0.299 |
| - | 10 | 1607    | ise_Mutation_p.D4  | NM_030820    | NP_110447    | Q96P44 | COLA1_HUMAN | ollagen-like 1.               | 2  | .AGGGTCACCCT.     | 0.458 |
| - | 4  | 891     | ise_Mutation_p.R2  | NM_030820    | NP_110447    | Q96P44 | COLA1_HUMAN |                               | 2  | .GAATTCGTGTT      | 0.323 |
| + | 3  | 1070    | k.2_Missense_Mut   | NM_001704    | NP_001695    | O60242 | BAI3_HUMAN  | ellular (Potential).          | 50 | .GGATCGACGAC      | 0.493 |
| + | 6  | 538_539 | lkam.1_Missense_   | NM_001858    | NP_001849    | Q14993 | COJA1_HUMAN | 3P N-terminal.                | 4  | AGAAGGTGGTG       | 0.332 |
| - | 10 | 1746    | DL12A1_uc003phu    | NM_004370    | NP_004361    | Q99715 | COCA1_HUMAN | VWFA 2.                       | 9  | TTCTCTGTGACAT     | 0.378 |
| - | 13 | 1697    |                    | NM_001563    | NP_001554    | Q17R60 | IMPG1_HUMAN |                               | 3  | ACAGATCCATTT      | 0.498 |

|   |    |           |                  |              |              |        |             |                                |    |               |       |             |
|---|----|-----------|------------------|--------------|--------------|--------|-------------|--------------------------------|----|---------------|-------|-------------|
| + | 17 | 2793      | p.Q836K DOPEY1   | NM_015018    | NP_055833    | Q5JWR5 | DOP1_HUMAN  |                                | 4  | :CAAACCAGGGA  | 0.463 |             |
| - | 3  | 895       |                  | NM_198568    | NP_940970    | Q6PEY0 | CXB7_HUMAN  | ical; (Potential).             | 0  | :ATGACCAAGAA  | 0.388 |             |
| + | 16 | 1980_1981 | ε_Mutation_p.G48 | NM_014942    | NP_055757    | Q9Y2G4 | ANKR6_HUMAN |                                | 3  | CTGCAGGTCCAC  | 0.53  |             |
| - | 3  | 1299      | ου.2_Missense_Mt | NM_001143957 | NP_001137429 | Q9BZJ6 | GPR63_HUMAN | lasmic (Potential).            | 2  | :ATCCTCAAGGCA | 0.463 |             |
| + | 5  | 867       | SP3_uc003pvo.2_  | NM_003880    | NP_003871    | O95389 | WISP3_HUMAN | TSP type-1.                    | 0  | :CTTGCGACAGC  | 0.338 | rs140750750 |
| - | 27 | 3886      | υ.P1186S LAMA4_  | NM_001105206 | NP_001098676 | Q16363 | LAMA4_HUMAN | minin G-like 2.                | 9  | TAGGGGAAGGT   | 0.458 |             |
| - | 3  | 234       |                  | NM_001010876 | NP_001010876 | Q5VVB8 | CF191_HUMAN |                                | 1  | :GAAATCAAATGC | 0.338 |             |
| - | 9  | 1442      | 3qci.2_Missense_ | NM_001431    | NP_001422    | O43491 | E41L2_HUMAN | FERM.                          | 2  | :CCCAGCTTGAT  | 0.413 |             |
| + | 7  | 1097      | el.2_Missense_Mt | NM_004865    | NP_004856    | P62380 | TBPL1_HUMAN |                                | 0  | :GTGTTTGAAGC  | 0.388 |             |
| + | 4  | 559       | B_uc003qgr.2_Mis | NM_018945    | NP_061818    | Q9NP56 | PDE7B_HUMAN |                                | 1  | CTGCTTCGTGGA  | 0.468 |             |
| + | 2  | 185       | ην.p.Q3K TAB2_uc | NM_015093    | NP_055908    | Q9NYJ8 | TAB2_HUMAN  |                                | 0  | :TGCCCAAGGA   | 0.423 |             |
| - | 45 | 7290      | ου.3_Missense_Mt | NM_182961    | NP_892006    | Q8NF91 | SYNE1_HUMAN | γytoplasmic (Potential).       | 45 | :GAGGTGGTTAT  | 0.413 |             |
| + | 2  | 173       | ην.p.M1L VIP_uc0 | NM_003381    | NP_003372    | P01282 | VIP_HUMAN   |                                | 0  | :CAGAAATGGAC  | 0.478 |             |
| - | 3  | 493       |                  | NM_018452    | NP_060922    | Q9NWH2 | CF035_HUMAN |                                | 0  | :CAAGGAAGAC   | 0.493 |             |
| + | 10 | 1307_1308 | δYNJ2_uc011efn.1 | NM_003898    | NP_003889    | O15056 | SYNJ2_HUMAN | SAC. p.T411T(1)                | 1  | :AAGACCTGGC   | 0.564 | rs150778836 |
| + | 9  | 1583      | ε2A1_uc003qtd.2_ | NM_003057    | NP_003048    | O15245 | S22A1_HUMAN | ical; (Potential).             | 0  | :GCAAGCCTTGC  | 0.498 |             |
| - | 18 | 2804      |                  | NM_005577    | NP_005568    | P08519 | APOA_HUMAN  | Kringle 30.                    | 6  | :ACTCCCACCTG  | 0.512 | rs35765299  |
| + | 3  | 566       | _5'Flank TTYH3_  | NM_025250    | NP_079526    | Q9C0H2 | TTYH3_HUMAN | cellular (Potential).          | 0  | :CCAACCGCACG  | 0.711 |             |
| - | 17 | 1646      | a.2_Missense_Mu  | NM_004080    | NP_004071    | Q9Y6T7 | DGKB_HUMAN  | DAGKc.                         | 12 | :GTCAGGAACAT  | 0.373 |             |
| - | 5  | 596       | p.D137N DGKB_u   | NM_004080    | NP_004071    | Q9Y6T7 | DGKB_HUMAN  |                                | 12 | :AATGTCTTCAC  | 0.433 |             |
| + | 6  | 949       | uh.2_Missense_Mi | NM_178559    | NP_848654    | Q2M3G0 | ABCB5_HUMAN | r 1. Extracellular (Potential) | 6  | :TGGTAGCACAC  | 0.403 |             |
| + | 16 | 2425      | h.2_Missense_Mu  | NM_178559    | NP_848654    | Q2M3G0 | ABCB5_HUMAN | otential). ABC transporter 2   | 6  | :TGCAAGGACAA  | 0.483 |             |
| + | 19 | 2983      | uh.2_Nonstop_Mu  | NM_178559    | NP_848654    | Q2M3G0 | ABCB5_HUMAN |                                | 6  | :TGCAGTGATGC  | 0.368 |             |
| + | 3  | 676       | lkwc.1_RNA INMT_ | NM_006774    | NP_006765    | O95050 | INMT_HUMAN  |                                | 0  | GAGGAGGTGGA   | 0.582 |             |
| + | 9  | 817       | _p.L224P AVL9_uc | NM_015060    | NP_055875    | Q8NBF6 | AVL9_HUMAN  | ical; (Potential).             | 0  | TATCCCTTTTCC  | 0.328 |             |
| + | 7  | 1355      | kal.1_Missense_M | NM_007270    | NP_009201    | O95302 | FKBP9_HUMAN | ise FKBP-type 4.               | 14 | :GATTACCTCAA  | 0.527 |             |
| + | 8  | 1345      | e_Mutation_p.R27 | NM_198428    | NP_940820    | Q3SYG4 | PTHB1_HUMAN |                                | 5  | CAAATTCGATTC  | 0.378 |             |
| - | 5  | 1323      | λtes.3_Missense_ | NM_022373    | NP_071768    | Q9BSE4 | HERP2_HUMAN |                                | 3  | :CTTGCCAGGA   | 0.408 |             |
| + | 7  | 1198      | 3tvz.2_Missense_ | NM_022479    | NP_071924    | Q6IS24 | GLTL3_HUMAN | renal (Potential).             | 7  | :CTCTTCGCTTC  | 0.537 |             |
| + | 10 | 1116      |                  | NM_000265    | NP_000256    | P14598 | NCF1_HUMAN  | rich (highly basic).           | 1  | :GAGCCCGCTCG  | 0.517 |             |
| - | 6  | 10908     | p.R3540Q PCLO_   | NM_033026    | NP_149015    | Q9Y6V0 | PCLO_HUMAN  |                                | 7  | :GTGCCCGTATG  | 0.443 |             |
| - | 5  | 8183      | _Mutation_p.P263 | NM_033026    | NP_149015    | Q9Y6V0 | PCLO_HUMAN  |                                | 7  | AAATTGGAATTC  | 0.458 |             |
| - | 3  | 2934      | iv.2_Missense_Mu | NM_033026    | NP_149015    | Q9Y6V0 | PCLO_HUMAN  | Pro-rich.                      | 7  | :TAGGTCTGTGG  | 0.517 |             |
| + | 3  | 1009      |                  | NM_002523    | NP_002514    | P47972 | NPTX2_HUMAN | Pentaxin.                      | 3  | :CCAACGAGATC  | 0.637 |             |
| + | 18 | 2374      | p.S722F TRRAP_   | NM_003496    | NP_003487    | Q9Y4A5 | TRRAP_HUMAN | p.S722F(10)                    | 37 | CTGTCTCCCTCT  | 0.413 | rs147405090 |
| + | 52 | 8015_8016 | υ.R2585* TRRAP_  | NM_003496    | NP_003487    | Q9Y4A5 | TRRAP_HUMAN |                                | 37 | ACTCTCCGAGAC  | 0.475 |             |
| - | 15 | 1882      | ΓAF6_uc011kji.1_ | NM_139315    | NP_647476    | P49848 | TAF6_HUMAN  |                                | 2  | :ACTCCAGGAC   | 0.652 |             |
| + | 14 | 2890      | ΖAN_uc003uwl.2_  | NM_003386    | NP_003377    | Q9Y493 | ZAN_HUMAN   | ate) (mucin-like domain). E    | 11 | :CATCTCCCCA   | 0.502 |             |
| + | 14 | 2893      | ΖAN_uc003uwl.2_  | NM_003386    | NP_003377    | Q9Y493 | ZAN_HUMAN   | ate) (mucin-like domain). E    | 11 | :TCTCCCAGAA   | 0.498 |             |
| + | 4  | 485       |                  | NM_001283    | NP_001274    | P61966 | AP1S1_HUMAN |                                | 0  | :CAGGACACTC   | 0.577 |             |
| - | 3  | 173       | vey.2_Missense_M | NM_007356    | NP_031382    | A4D0S4 | LAMB4_HUMAN | inin N-terminal.               | 8  | :TGGTGGGATGA  | 0.517 |             |
| + | 10 | 1479      | :D1_uc011kmo.1_  | NM_001007245 | NP_001007246 | O00458 | IFRD1_HUMAN |                                | 2  | GGGCAGTGGAG   | 0.433 |             |
| - | 4  | 1731      |                  | NM_033427    | NP_219499    | Q8WZ74 | CTTB2_HUMAN | Pro-rich.                      | 5  | TTTTGGAGGGA   | 0.537 |             |
| - | 4  | 1212      |                  | NM_033427    | NP_219499    | Q8WZ74 | CTTB2_HUMAN | Pro-rich.                      | 5  | AGGTGGGAAAG   | 0.547 |             |
| + | 12 | 3361      | .2_Intron PTPRZ1 | NM_002851    | NP_002842    | P23471 | PTPRZ_HUMAN | cellular (Potential).          | 9  | :TCATGCCCTCT  | 0.453 |             |
| - | 23 | 2788      | ib.2_Missense_Mu | NM_005763    | NP_005754    | Q9UDR5 | AASS_HUMAN  | ipine dehydrogenase.           | 2  | :AAAGGCCCCA   | 0.368 |             |
| - | 5  | 1124      | _p.E21K CADPS2   | NM_017954    | NP_060424    | Q86UW7 | CAPS2_HUMAN |                                | 2  | :ACTTTCAAAT   | 0.343 |             |



|   |    |           |                    |              |              |        |             |                                |       |                |       |             |
|---|----|-----------|--------------------|--------------|--------------|--------|-------------|--------------------------------|-------|----------------|-------|-------------|
| + | 3  | 1086      | i_p.T182I BPGM_t   | NM_199186    | NP_954655    | P07738 | PMGE_HUMAN  |                                | 0     | GCAAACCATTC    | 0.443 |             |
| - | 1  | 663       | NND2A_uc003vww     | NM_015689    | NP_056504    | Q9ULE3 | DEN2A_HUMAN |                                | 4     | CCGACCCATCC    | 0.597 |             |
| - | 15 | 1860      |                    | NM_004333    | NP_004324    | P15056 | BRAF_HUMAN  | rotein kinas_R603>I(2) p.T     | 18290 | ATTTCACTGTAC   | 0.368 |             |
| + | 1  | 595       |                    | NM_001001656 | NP_001001656 | Q8NGU2 | OR9A4_HUMAN | Name=5; (Potential).           | 1     | TTTATCCTCTTC   | 0.403 |             |
| + | 14 | 1639      |                    | NM_004668    | NP_004659    | O43451 | MGA_HUMAN   | (Potential). Maltase.          | 2     | TTGTAGGATATG/  | 0.353 |             |
| - | 15 | 1885      |                    | NM_000420    | NP_000411    | P23276 | KELL_HUMAN  | ellular (Potential).           | 4     | TGGGGGTTGGA/   | 0.542 |             |
| - | 1  | 454       |                    | NM_001001658 | NP_001001658 | Q8NGT5 | OR9A2_HUMAN | Name=4; (Potential).           | 1     | AGATTTCCAGAAA/ | 0.413 |             |
| + | 1  | 19        |                    | NM_001001667 | NP_001001667 | Q8N148 | OR6V1_HUMAN | ellular (Potential).           | 1     | GCCAGCCCTCC    | 0.393 |             |
| - | 4  | 584       | jjo.1_Missense_Mi  | NM_007189    | NP_009120    | Q9UG63 | ABCF2_HUMAN | C transporter 1.               | 1     | GCAAGGGTGTGTC  | 0.562 |             |
| - | 12 | 1443      | _p.E435* SMARCC    | NM_001003801 | NP_001003801 | Q6STE5 | SMRD3_HUMAN |                                | 2     | GAACTCAGCCCC/  | 0.637 |             |
| + | 13 | 2623      | vv.1_Missense_Mt   | NM_053043    | NP_444271    | Q96EV2 | RBM33_HUMAN |                                | 1     | CAGAAGCTCAC/   | 0.552 |             |
| + | 10 | 1160_1161 | M2_uc011kwi.1_li   | NM_003970    | NP_003961    | P54296 | MYOM2_HUMAN | like C2-type 2.                | 6     | CCTGTCCTTCAG   | 0.569 |             |
| + | 29 | 3705      | lkwi.1_Splice_Site | NM_003970    | NP_003961    | P54296 | MYOM2_HUMAN |                                | 6     | CAAAGGTATCAC/  | 0.418 |             |
| - | 52 | 8407      | _Mutation_p.E20(   | NM_033225    | NP_150094    | Q96PZ7 | CSMD1_HUMAN | ar (Potential). Sushi 17.      | 25    | AGTTTCGCTGCC/  | 0.458 |             |
| - | 25 | 4282      | p.P690S CSMD1_     | NM_033225    | NP_150094    | Q96PZ7 | CSMD1_HUMAN | lar (Potential). CUB 8.        | 25    | ATACGGAGCTG/   | 0.468 |             |
| - | 2  | 307       |                    | NM_001926    | NP_001917    | Q01524 | DEF6_HUMAN  |                                | 0     | TGACAGTGCGAG/  | 0.438 |             |
| + | 5  | 836       |                    | NM_016353    | NP_057437    | Q9UIJ5 | ZDHC2_HUMAN | DHHC-type.                     | 0     | TCTGTGATAAG    | 0.388 |             |
| - | 12 | 1564      | _e_Mutation_p.R36  | NM_001135691 | NP_001129163 | P54219 | VMAT1_HUMAN | lasmic (Potential).            | 2     | ATACCGACCCA    | 0.498 | rs138845247 |
| + | 4  | 1100      | I10ltz.2_RNA SLC   | NM_016612    | NP_057696    | Q9NYZ2 | MFRN1_HUMAN | ical; Name=6; (Potential).     | 0     | CCATTTCTTGGT/  | 0.512 |             |
| + | 16 | 1905      | AM28_uc010lua.2    | NM_014265    | NP_055080    | Q9UKQ2 | ADA28_HUMAN | ar (Potential). Cys-rich.      | 5     | GTGGCGATAAC/   | 0.408 |             |
| + | 9  | 953       | ec.2_Missense_M    | NM_003817    | NP_003808    | Q9H2U9 | ADAM7_HUMAN | B.  Extracellular (Potential). | 5     | CTTAAACACGC    | 0.299 |             |
| - | 6  | 1148      | _p.E364K CLU_uc(   | NM_203339    | NP_976084    | P10909 | CLUS_HUMAN  |                                | 2     | CTGCTCGTTCAC   | 0.572 |             |
| + | 13 | 1595      | ar.1_Missense_Mu   | NM_018091    | NP_060561    | Q9H9T3 | ELP3_HUMAN  | etyltransferase.               | 0     | TGGTCCCTGTG/   | 0.428 |             |
| + | 4  | 678       | qa.1_Missense_Mi   | NM_001005365 | NP_001005365 | Q6S8J7 | POTEA_HUMAN | ANK 4.                         | 1     | ACAGCGAATGG    | 0.303 | rs148181653 |
| - | 6  | 1168      | _p.R276K PCMTI     | NM_052937    | NP_443169    | Q96MG8 | PCMD1_HUMAN |                                | 0     | TTTTCCTTTTGG   | 0.373 |             |
| - | 15 | 2681      | xrf.3_Missense_Mi  | NM_014781    | NP_055596    | Q8TDY2 | RBCC1_HUMAN |                                | 11    | TGTTTGGATGGC   | 0.363 | rs34016926  |
| + | 1  | 339       |                    | NM_052898    | NP_443130    | Q5GH76 | XKR4_HUMAN  |                                | 2     | GCAGGGAGCAG    | 0.463 |             |
| + | 3  | 928       | xui.2_RNA CLVS1    | NM_173519    | NP_775790    | Q8IUQ0 | CLVS1_HUMAN | CRAL-TRIO.                     | 5     | CAATCCTTAAAC   | 0.378 |             |
| - | 2  | 365       |                    | NM_004820    | NP_004811    | O75881 | CP7B1_HUMAN |                                | 3     | GATAAGGAAGC/   | 0.373 |             |
| + | 2  | 838       |                    | NM_004770    | NP_004761    | Q92953 | KCNB2_HUMAN | lasmic (Potential).            | 7     | TGAACGAGAAC/   | 0.512 |             |
| - | 10 | 1618      | _p.S485G RUNX11    | NM_175634    | NP_783552    | Q06455 | MTG8_HUMAN  |                                | 16    | CTCGCTTGAAT/   | 0.483 |             |
| - | 6  | 975       | se_Mutation_p.V1(  | NM_012415    | NP_036547    | O95073 | FSBP_HUMAN  |                                | 4     | ATATACAAGGTA   | 0.358 |             |
| + | 14 | 2536      | .1_Missense_Mute   | NM_002380    | NP_002371    | O00339 | MATN2_HUMAN | VWFA 2.                        | 2     | CCGACGGACGG    | 0.557 |             |
| + | 1  | 409       |                    | NM_024410    | NP_077721    | Q14990 | ODFP1_HUMAN |                                | 2     | AAGATGAGAAG/   | 0.363 |             |
| + | 3  | 1185      |                    | NM_030788    | NP_110415    | Q9H295 | TM7S4_HUMAN | ical; (Potential).             | 4     | GGTTCCTCTCA/   | 0.398 |             |
| + | 50 | 8637      |                    | NM_177531    | NP_803875    | Q86W11 | PKHL1_HUMAN | ellular (Potential).           | 14    | GCTTTCACCGT    | 0.443 |             |
| - | 62 | 10049     | nt.2_Missense_Mi   | NM_198123    | NP_937756    | Q7Z407 | CSMD3_HUMAN | ar (Potential). Sushi 26.      | 63    | GGGCAGGTATAC   | 0.383 |             |
| - | 22 | 2211      | tion_p.Y601H PTK   | NM_153831    | NP_722560    | Q05397 | FAK1_HUMAN  | rotein kinase.                 | 6     | GCATAGGCC      | 0.522 |             |
| - | 7  | 1375      | 1_5'Flank LRRC14   | NM_004260    | NP_004251    | O94761 | RECQ4_HUMAN |                                | 4     | CGGTGGGGTCC    | 0.627 |             |
| + | 33 | 4322      | igv.2_Missense_M   | NM_203447    | NP_982272    | Q8NF50 | DOCK8_HUMAN | DHR-2.                         | 6     | AGACACATTGG/   | 0.403 |             |
| - | 38 | 5360      | .V1143A PTPRD_1    | NM_002839    | NP_002830    | P23468 | PTPRD_HUMAN | l). Tyrosine-protein phosphi   | 22    | GCACAACCATC/   | 0.468 |             |
| - | 1  | 254       |                    | NM_001017363 | NP_001017363 | A6NKF2 | ARI3C_HUMAN |                                | 1     | AAGGCGAGCTG/   | 0.413 | rs143589793 |
| - | 15 | 2604      | NAP3_uc011lqr.1_   | NM_033655    | NP_387504    | Q9BZ76 | CNTP3_HUMAN | ninal.  Extracellular (Potenti | 1     | CTTACGATCTCC   | 0.448 | rs148747631 |
| - | 7  | 1311      | 4aia.2_Missense_   | NM_001007471 | NP_001007472 | Q9HCF6 | TRPM3_HUMAN | lasmic (Potential).            | 9     | GCACGGGAGGG    | 0.537 |             |
| - | 8  | 6452      | i_5'Flank PRUNE2   | NM_015225    | NP_056040    | Q8WUY3 | PRUN2_HUMAN |                                | 0     | CAGAATCGTGAC   | 0.488 |             |
| - | 8  | 3341      |                    | NM_015225    | NP_056040    | Q8WUY3 | PRUN2_HUMAN |                                | 0     | GCTTCCCGA/     | 0.468 |             |
| + | 1  | 203       |                    | NM_001013735 | NP_001013735 | Q5VYV0 | FOXB2_HUMAN | Fork-head.                     | 0     | CTTCAACGACT/   | 0.617 |             |

|   |    |           |                     |              |              |        |             |                              |     |               |       |
|---|----|-----------|---------------------|--------------|--------------|--------|-------------|------------------------------|-----|---------------|-------|
| - | 18 | 2172      | o.N614H SLC28A3     | NM_022127    | NP_071410    | Q9HAS3 | S28A3_HUMAN | cellular (Potential).        | 4   | GCAGTTAAAGG   | 0.438 |
| - | 2  | 454       |                     | NM_017594    | NP_060064    | Q96HU8 | DIRA2_HUMAN |                              | 0   | GATGGGGATGC   | 0.582 |
| - | 1  | 963       | o04atq.3_5'Flank F, | NM_198841    | NP_942138    | Q5T036 | F120S_HUMAN |                              | 0   | GGACACTTGAG   | 0.657 |
| - | 5  | 1131      |                     | NM_017561    | NP_060031    | A1L443 | FA22F_HUMAN | Pro-rich.                    | 0   | TGGGCGTTGGT   | 0.692 |
| - | 6  | 1050      |                     | NM_005458    | NP_005449    | O75899 | GABR2_HUMAN | cellular (Potential).        | 4   | GATGAGTTGGC   | 0.542 |
| + | 3  | 895       | oag.1_Missense_M    | NM_006981    | NP_008912    | Q92570 | NR4A3_HUMAN |                              | 173 | CCCTGCCCAGC   | 0.572 |
| + | 6  | 689       | ox.2_RNA STX17_     | NM_017919    | NP_060389    | P56962 | STX17_HUMAN | omology. Cytoplasmic (Pot    | 1   | GCCAACTGGTC/  | 0.343 |
| - | 1  | 420       | N3A_uc004bbq.1_     | NM_147180    | NP_671709    | Q96LZ3 | CANB2_HUMAN | EF-hand 3.                   | 2   | CACCTGGAAGA/  | 0.532 |
| - | 1  | 190       | N3A_uc004bbq.1_     | NM_147180    | NP_671709    | Q96LZ3 | CANB2_HUMAN | EF-hand 1. 1.                | 2   | TGAGAGACCCT   | 0.557 |
| + | 1  | 814       |                     | NM_001004483 | NP_001004483 | Q8NGS7 | O13C8_HUMAN | cellular (Potential).        | 2   | CAGGTAATGAAC  | 0.453 |
| - | 1  | 709       |                     | NM_001001956 | NP_001001956 | Q8NGT0 | O13C9_HUMAN | lasmic (Potential).          | 0   | AGAAAGCTTTGC  | 0.408 |
| - | 6  | 1754      | _p.E473K SVEP1_     | NM_153366    | NP_699197    | Q4LDE5 | SVEP1_HUMAN | Sushi 2.                     | 7   | GCCTTCTAGTC   | 0.473 |
| - | 6  | 1704      | _p.M456T SVEP1_     | NM_153366    | NP_699197    | Q4LDE5 | SVEP1_HUMAN | Sushi 2.                     | 7   | TATAACATTTCCC | 0.428 |
| + | 6  | 1983      | 483_uc004bfg.2_     | NM_133464    | NP_597721    | Q8TF39 | ZN483_HUMAN | 2H2-type 6.                  | 1   | GAAAAGCCTTT/  | 0.398 |
| + | 8  | 3209      | _p.G638E PAPPA_     | NM_002581    | NP_002572    | Q13219 | PAPP1_HUMAN |                              | 9   | CCATGGAAGTG/  | 0.438 |
| - | 8  | 1645      | _b.1_Nonsense_M     | NM_001080497 | NP_001073966 | Q9H1U4 | MEGF9_HUMAN | cellular (Potential).        | 0   | AAATTTGGGTCC/ | 0.403 |
| + | 3  | 457       | _p.S68L LRRC8A      | NM_019594    | NP_062540    | Q8IWT6 | LRC8A_HUMAN |                              | 0   | TGATTCGTTCCC  | 0.612 |
| - | 10 | 1608      | _p.GEF1_uc010mz     | NM_005312    | NP_005303    | Q13905 | RPGF1_HUMAN |                              | 7   | TCTGCAGGTCC   | 0.627 |
| + | 43 | 3836      |                     | NM_000093    | NP_000084    | P20908 | CO5A1_HUMAN | le-helical region.           | 11  | GTCCCCCTGGA   | 0.632 |
| - | 5  | 881       |                     | NM_182974    | NP_892019    | Q7Z4J2 | GL6D1_HUMAN | lenal (Potential).           | 1   | TCTCTCTCATA/  | 0.522 |
| + | 3  | 342       | Mutation_p.E113K    | NM_015160    | NP_055975    | Q10713 | MPPA_HUMAN  |                              | 0   | TTTTTGAAAAAAT | 0.303 |
| - | 2  | 1463      | A2_uc004ckl.1_5'    | NM_004479    | NP_004470    | Q11130 | FUT7_HUMAN  | lenal (Potential).           | 0   | CATTGGCACGG   | 0.647 |
| + | 8  | 1073      | ies.1_Missense_M    | NM_014434    | NP_055249    | Q9UHB4 | NDOR1_HUMAN | -binding FR-type.            | 0   | TCTATCCCTCC/  | 0.632 |
| - | 2  | 464       | 25A6_uc004cpu.2_    | NM_001636    | NP_001627    | P12236 | ADT3_HUMAN  | al; Name=3; (By similarity). | 0   | CGCCGGCCGCA   | 0.642 |
| + | 6  | 500       | _o.2_Missense_Mut   | NM_175569    | NP_780778    | P55808 | XG_HUMAN    | cellular (Potential).        | 1   | ACCGTGATGAC/  | 0.627 |
| + | 8  | 1032      | _p.M64 GYG2_uc      | NM_003918    | NP_003909    | O15488 | GLYG2_HUMAN |                              | 2   | TCCATGAAACC   | 0.507 |
| + | 4  | 550       |                     | NM_001011719 | NP_001011719 | Q5FYA8 | ARSH_HUMAN  | ical; (Potential).           | 1   | TCAATCCCAAG/  | 0.517 |
| - | 6  | 6504      |                     | NM_015419    | NP_056234    | Q9NR99 | MXRA5_HUMAN | like C2-type 5.              | 8   | CGCTGTCCTTG/  | 0.662 |
| - | 5  | 4379      |                     | NM_015419    | NP_056234    | Q9NR99 | MXRA5_HUMAN |                              | 8   | AAGGGGAGGGT   | 0.507 |
| - | 6  | 2360      | Indi.2_Missense_M   | NM_181332    | NP_851849    | Q8N0W4 | NLGNX_HUMAN | cellular (Potential).        | 4   | GAAATGATGTC/  | 0.498 |
| - | 4  | 1265      | Indi.2_Missense_M   | NM_181332    | NP_851849    | Q8N0W4 | NLGNX_HUMAN | cellular (Potential).        | 4   | CCCCAGCCCCC   | 0.572 |
| - | 4  | 1235      | Indi.2_Missense_M   | NM_181332    | NP_851849    | Q8N0W4 | NLGNX_HUMAN | cellular (Potential).        | 4   | TCTTGGGGTCC/  | 0.582 |
| + | 3  | 553       |                     | NM_013452    | NP_038480    | Q9H320 | VCX1_HUMAN  | its of L-S-Q-E-S- [EQ]-V-E-  | 0   | TGGAGGAACCA   | 0.647 |
| + | 19 | 2870      | se_Mutation_p.R5E   | NM_015691    | NP_056506    | Q9ULE0 | WWC3_HUMAN  |                              | 4   | CAGCCGCCGGG   | 0.557 |
| + | 4  | 579       | _p.E105K HCCS_u     | NM_005333    | NP_005324    | P53701 | CCHL_HUMAN  |                              | 0   | TGAGAGAAGAG   | 0.398 |
| + | 6  | 861       | _p.R199C HCCS_u     | NM_005333    | NP_005324    | P53701 | CCHL_HUMAN  |                              | 0   | GAAATTCGTTCC  | 0.463 |
| + | 3  | 493       | se_Mutation_p.R54   | NM_001118885 | NP_001112357 | P23416 | GLRA2_HUMAN | cellular (Probable).         | 2   | GGGAAGGACATC  | 0.403 |
| + | 9  | 960       | owj.2_Missense_M    | NM_152581    | NP_689794    | Q8NHP6 | MSPD2_HUMAN |                              | 1   | CTCTTCTAAAA/  | 0.199 |
| + | 6  | 777       | cyd.2_Missense_M    | NM_001037540 | NP_001032629 | Q9UN30 | SCML1_HUMAN |                              | 3   | TTCGCCGAGCA/  | 0.507 |
| - | 20 | 1830      | se_Mutation_p.L53   | NM_001079858 | NP_001073327 | Q8IZP9 | GPR64_HUMAN | cellular (Potential).        | 0   | TCTTAATGTGAC  | 0.512 |
| + | 5  | 567       | IA1_uc011mjd.1_M    | NM_000284    | NP_000275    | P08559 | ODPA_HUMAN  |                              | 1   | AGGACGAAAAAG/ | 0.488 |
| - | 16 | 2053      | 4czj.1_Missense_M   | NM_001001671 | NP_001001671 | Q6ZN16 | M3K15_HUMAN | ilarity). Protein kinase.    | 7   | CAATCCCATACC  | 0.468 |
| - | 15 | 2161_2162 | _p.L663F MAP7D2     | NM_152780    | NP_689993    | Q96T17 | MA7D2_HUMAN |                              | 3   | GATAAGGTTTTT  | 0.426 |
| + | 1  | 314       |                     | NM_152577    | NP_689790    | Q8N7E2 | ZN645_HUMAN | RING-type.                   | 2   | AAAGTCGGATAT/ | 0.403 |
| + | 2  | 289       | se_Mutation_p.E32   | NM_002970    | NP_002961    | P21673 | SAT1_HUMAN  | etyltransferase.             | 0   | GGAAGAACAAG   | 0.517 |
| + | 4  | 651       | h.2_Missense_Mu     | NM_005391    | NP_005382    | Q15120 | PKD3_HUMAN  | tidine kinase.               | 6   | TTGATCCTTCA/  | 0.373 |
| + | 9  | 712       | _p.G236D POLA1_     | NM_016937    | NP_058633    | P09884 | DPOLA_HUMAN |                              | 3   | TACAGCGCATG   | 0.358 |

rs147311433

|   |    |           |                   |              |              |        |             |                           |    |                |       |             |
|---|----|-----------|-------------------|--------------|--------------|--------|-------------|---------------------------|----|----------------|-------|-------------|
| + | 2  | 479       |                   | NM_173699    | NP_775970    | Q96M61 | MAGBI_HUMAN |                           | 1  | CAAGGGAAGCTC   | 0.463 |             |
| + | 3  | 970       | nse_Mutation_p.L2 | NM_001097579 | NP_001091048 | Q9UPC5 | GPR34_HUMAN | Name=5; (Potential).      | 1  | TCTGGCTAATTTT  | 0.328 |             |
| + | 3  | 990       | nse_Mutation_p.L2 | NM_001097579 | NP_001091048 | Q9UPC5 | GPR34_HUMAN | Name=5; (Potential).      | 1  | ATAATCCTTTTCAI | 0.328 |             |
| - | 6  | 775       | _p.S184L MAOB_L   | NM_000898    | NP_000889    | P27338 | AOFB_HUMAN  | Cytoplasmic.              | 2  | TTGTGCAGATG/   | 0.463 | rs12850496  |
| + | 15 | 2171      | hq.2_Missense_Mi  | NM_004651    | NP_004642    | P51784 | UBP11_HUMAN |                           | 3  | GAACTCCAATG/   | 0.597 |             |
| - | 4  | 2073      | rw.3_Missense_Mi  | NM_153380    | NP_700359    | P51814 | ZNF41_HUMAN | :2H2-type 13.             | 3  | GATTCTATGAT    | 0.468 |             |
| + | 4  | 1542_1543 | fdni.2_Missense_I | NM_033215    | NP_149992    | Q6ZSY5 | PPR3F_HUMAN | ellular (Potential).      | 3  | GAGGGGGTG/     | 0.668 |             |
| - | 25 | 3432      |                   | NM_001013742 | NP_001013764 | Q5KSL6 | DGKK_HUMAN  |                           | 2  | CCACTGTCTTG/   | 0.443 |             |
| - | 3  | 257       |                   | NM_173358    | NP_775494    | Q7RTT5 | SSX7_HUMAN  | :RAB-related.             | 1  | TTCTTAGAGAA    | 0.388 |             |
| + | 1  | 335       | e_Mutation_p.P68I | NM_022117    | NP_071400    | Q9H2G4 | TSYL2_HUMAN | Pro-rich.                 | 0  | GGGCCCCGCGC    | 0.692 |             |
| - | 9  | 3182      |                   | NM_198510    | NP_940912    | Q6UXX5 | ITH5L_HUMAN |                           | 6  | CAGCTCCTCCC    | 0.483 |             |
| + | 3  | 567       | Q154K TRO_uc00    | NM_001039705 | NP_001034794 | Q12816 | TROP_HUMAN  |                           | 1  | GCTCCAATCC/    | 0.502 |             |
| + | 5  | 716       | IEPH_uc010nkr.2_  | NM_138737    | NP_620074    | Q9BQS7 | HEPH_HUMAN  | ellular (Potential).      | 9  | CTCCCCCTCCT/   | 0.478 |             |
| - | 2  | 1979      | g.2_Missense_Mu   | NM_145119    | NP_660095    | Q8NG27 | PJA1_HUMAN  |                           | 0  | ATTGGCCACCT    | 0.567 |             |
| + | 3  | 297       |                   | NM_198512    | NP_940914    | Q6ZPD8 | DG2L6_HUMAN |                           | 1  | AGGTGGCAGGC    | 0.557 |             |
| + | 6  | 902       | TAF1_uc004dzt.3_  | NM_138923    | NP_620278    | P21675 | TAF1_HUMAN  | otein kinase 1.           | 17 | AGAATCAGAAG    | 0.512 |             |
| - | 1  | 1191      | nqj.1_Missense_M  | NM_021963    | NP_068798    | Q9ULW6 | NP1L2_HUMAN |                           | 1  | GCCAGGATCTG    | 0.363 |             |
| + | 5  | 792       | ifz.2_Missense_Mi | NM_022144    | NP_071427    | Q9H2S6 | TNMD_HUMAN  | ellular (Potential).      | 1  | ATCCCACTCTAA   | 0.378 |             |
| + | 8  | 1271      | rh.1_Missense_Mi  | NM_001939    | NP_001930    | Q13474 | DRP2_HUMAN  | Spectrin 2.               | 2  | TTGCCATTTCTG/  | 0.488 |             |
| + | 4  | 969       | shw.2_Missense_I  | NM_016608    | NP_057692    | Q9P291 | ARMX1_HUMAN | ARM 1.                    | 4  | ATTGATGATATTC  | 0.468 |             |
| + | 4  | 1511      | shw.2_Missense_I  | NM_016608    | NP_057692    | Q9P291 | ARMX1_HUMAN | ARM 3.                    | 4  | AAAGAATGGGAT   | 0.333 |             |
| + | 5  | 1633      | eib.1_Missense_IV | NM_016607    | NP_057691    | Q9UH62 | ARMX3_HUMAN |                           | 2  | CATGGCCAAAC    | 0.239 |             |
| - | 2  | 4238      | n.2_Missense_Mu   | NM_032441    | NP_115817    | Q5H9K5 | ZMAT1_HUMAN |                           | 1  | CTATCTCCTATC   | 0.408 |             |
| + | 5  | 4093      | .Q1098* GPRASP    | NM_014710    | NP_055525    | Q5JY77 | GASP1_HUMAN | PRD1-binding.             | 2  | GAAGATCAGGAA   | 0.468 |             |
| + | 11 | 1204      | K_uc010npc.1_5'L  | NM_198465    | NP_940867    | Q7Z2Y5 | NRK_HUMAN   | rotein kinase.            | 14 | TGTTTTCGTCT/   | 0.363 |             |
| - | 2  | 663       | _p.P216L SERPIN   | NM_000354    | NP_000345    | P05543 | THBG_HUMAN  |                           | 0  | TGGATGGATCA/   | 0.403 |             |
| - | 1  | 564       | _p.G183E SERPIN   | NM_000354    | NP_000345    | P05543 | THBG_HUMAN  |                           | 0  | ACTTTCCCTTTG/  | 0.408 |             |
| - | 11 | 1508      | nse_Mutation_p.P  | NM_024657    | NP_078933    | Q8TE76 | MORC4_HUMAN | CW-type.                  | 1  | GGTCAGGAACC    | 0.403 |             |
| + | 12 | 1141      | 1_Missense_Muta   | NM_052936    | NP_443168    | Q8WYNO | ATG4A_HUMAN |                           | 1  | CCCAGGAAATT/   | 0.428 |             |
| + | 46 | 4311      | _p.P1367L COL4A   | NM_033380    | NP_203699    | P29400 | CO4A5_HUMAN | le-helical region.        | 4  | TGGTCTTCAGC    | 0.483 |             |
| + | 51 | 5102      | _p.P1631S COL4A   | NM_033380    | NP_203699    | P29400 | CO4A5_HUMAN | llagen IV NC1.            | 4  | CAGCTCCCTTC/   | 0.488 |             |
| + | 3  | 1689      | nsr.1_Missense_M  | NM_020769    | NP_065820    | Q8NET4 | RGAG1_HUMAN |                           | 4  | TCTATGAAAGCC   | 0.512 |             |
| + | 4  | 852       | _p.D42N HTR2C     | NM_000868    | NP_000859    | P28335 | 5HT2C_HUMAN | llular (By similarity).   | 3  | CCTCCGATGGTC   | 0.423 | rs143566182 |
| + | 4  | 541       | A14_uc011mtm.1_   | NM_007231    | NP_009162    | Q9UN76 | S6A14_HUMAN | ellular (Potential).      | 3  | TTGCTTCTTTTCA  | 0.343 |             |
| - | 11 | 1219      | _p.R317Q THOC2    | NM_001081550 | NP_001075019 | Q8NI27 | THOC2_HUMAN |                           | 3  | ACCTTCGGTAGA   | 0.343 |             |
| + | 3  | 404       | AST4_uc010nrj.1_I | NM_016542    | NP_057626    | Q9P289 | MST4_HUMAN  | ilarity). Protein kinase. | 9  | GCTCATTTGGG/   | 0.398 |             |
| - | 3  | 849       | vh.1_Missense_Mi  | NM_004484    | NP_004475    | P51654 | GPC3_HUMAN  |                           | 5  | ACTTGGAAACC    | 0.468 |             |
| + | 10 | 1558      | 26B_uc004eyx.3_E  | NM_182540    | NP_872346    | Q5JSJ4 | DX26B_HUMAN |                           | 0  | CAGATGACTTGT   | 0.343 |             |
| - | 8  | 1247      | awc.1_Missense_I  | NM_024597    | NP_078873    | Q8IWC1 | MA7D3_HUMAN |                           | 4  | CTCCGGGGATG    | 0.597 |             |
| - | 2  | 311       |                   | NM_145665    | NP_663698    | Q8TAD1 | SPNXE_HUMAN |                           | 0  | TCTTTCGGGCG    | 0.428 |             |
| + | 9  | 1069      | R1_uc004fck.3_Mi  | NM_002024    | NP_002015    | Q06787 | FMR1_HUMAN  | KH 2.                     | 3  | TAGTAGGTAAG    | 0.328 |             |
| + | 11 | 1199      | _p.S337F FMR1_L   | NM_002024    | NP_002015    | Q06787 | FMR1_HUMAN  |                           | 3  | CAAATCCCTTC/   | 0.259 |             |
| + | 3  | 537       |                   | NM_152578    | NP_689791    | Q8N0W7 | FMR1N_HUMAN | tracellular (Potential).  | 1  | AGAGTGAATGT    | 0.368 |             |
| + | 14 | 1595      | TM1_uc011mxz.1_   | NM_000252    | NP_000243    | Q13496 | MTM1_HUMAN  | ularin phosphatase.       | 3  | AATAAAGAAAAA   | 0.363 |             |
| + | 14 | 1714      | TM1_uc011mxz.1_   | NM_000252    | NP_000243    | Q13496 | MTM1_HUMAN  |                           | 3  | ATCAAGCAACA    | 0.358 |             |
| + | 5  | 622       | MGB3_uc004fer.2_  | NM_005342    | NP_005333    | O15347 | HMGB3_HUMAN |                           | 0  | TTGCCCGGAAA/   | 0.289 |             |
| - | 10 | 996       | 4fir.2_Missense_I | NM_004135    | NP_004126    | P51553 | IDH3G_HUMAN |                           | 0  | CATCACCATGAC   | 0.617 |             |

|   |    |         |                    |              |              |        |             |                                |    |                |       |
|---|----|---------|--------------------|--------------|--------------|--------|-------------|--------------------------------|----|----------------|-------|
| - | 41 | 6961    | i.1_Missense_Mut   | NM_001110556 | NP_001104026 | P21333 | FLNA_HUMAN  | Filamin 21.                    | 6  | 'GTGGGCTCCCC   | 0.667 |
| + | 2  | 210     |                    | NM_004699    | NP_004690    | Q14320 | FA50A_HUMAN |                                | 1  | 'CGCAGGAGAAC   | 0.577 |
| - | 4  | 492     | .2_uc001afk.2_5'F  | NM_017971    | NP_060441    | Q9BYC9 | RM20_HUMAN  |                                | 0  | 'TCCCCAAGGC    | 0.498 |
| - | 3  | 843     | SLC35E2_uc001af    | NM_182838    | NP_878258    | P0CK97 | S35E2_HUMAN | ical; (Potential).             | 1  | 'CATAAGGAAGTT  | 0.468 |
| + | 13 | 3076    | p.R998Q PRDM1f     | NM_022114    | NP_071397    | Q9HAZ2 | PRD16_HUMAN | f TGF-beta signaling. Inter    | 7  | 'ACGTCCGGAACA  | 0.617 |
| + | 10 | 1476    | p.L423R PIK3CD_    | NM_005026    | NP_005017    | O00329 | PK3CD_HUMAN |                                | 7  | 'CCAACCTCATGC  | 0.652 |
| - | 4  | 732     | itb.1_Missense_Mt  | NM_005957    | NP_005948    | P42898 | MTHR_HUMAN  |                                | 0  | 'CACTTCGGATG'  | 0.567 |
| + | 36 | 8173    | atx.2_Missense_M   | NM_015378    | NP_056193    | Q5THJ4 | VP13D_HUMAN |                                | 5  | 'ATGCGGAACCT'  | 0.502 |
| + | 5  | 958     |                    | NM_001013641 | NP_001013663 | A0PJX8 | TMM82_HUMAN | . Helical; (Potential).        | 2  | 'ATGGCGGCCTC   | 0.682 |
| - | 13 | 2154    | _p.L26F ARHGEF     | NM_153213    | NP_694945    | Q8IW93 | ARHGJ_HUMAN | PH.                            | 3  | 'GTGGAGGAGCT'  | 0.647 |
| - | 4  | 1468    |                    | NM_152232    | NP_689418    | Q8TE23 | TS1R2_HUMAN |                                | 4  | 'GCTGACCGTGT   | 0.637 |
| - | 22 | 2954    | m.1_Missense_Mt    | NM_020765    | NP_065816    | Q5T4S7 | UBR4_HUMAN  |                                | 25 | 'TTCTCCTAACTG' | 0.438 |
| - | 16 | 2136    | G463R TMCO4_u      | NM_181719    | NP_859070    | Q5TGY1 | TMCO4_HUMAN |                                | 0  | 'CAGCCCCGTGC'  | 0.642 |
| - | 7  | 1370    | _p.R398C ZNF683    | NM_173574    | NP_775845    | Q8IZ20 | ZN683_HUMAN | ype 3; degenerate.             | 0  | 'CAGGCGCAGGT   | 0.637 |
| - | 1  | 422     |                    | NM_018066    | NP_060536    | Q9H9Y4 | GNP2_HUMAN  |                                | 0  | 'TGGCCGGGTCC   | 0.731 |
| - | 6  | 435_436 | p.P91S EYA3_ucf    | NM_001990    | NP_001981    | Q99504 | EYA3_HUMAN  |                                | 3  | 'TCCAGGTAAGC   | 0.416 |
| - | 5  | 1025    | l1_uc001bsa.1_Mi   | NM_002379    | NP_002370    | P21941 | MATN1_HUMAN | VWFA 2.                        | 1  | 'GAAGCGACCCA'  | 0.567 |
| + | 7  | 1159    | p.W172* HCRTR1     | NM_001525    | NP_001516    | O43613 | OX1R_HUMAN  | lasmic (Potential).            | 1  | 'AACTGGAAGCG   | 0.647 |
| + | 3  | 283     | SP_uc001coj.1_M    | NM_002482    | NP_002473    | P49321 | NASP_HUMAN  | TPR 1.                         | 1  | 'ATCCAGCAGCT'  | 0.348 |
| + | 20 | 3395    | R_uc009waq.2_3'    | NM_002303    | NP_002294    | P48357 | LEPR_HUMAN  | lasmic (Potential).            | 1  | 'TGGAGGGAAT'   | 0.373 |
| + | 17 | 1725    | _p.A103V SGIP1_u   | NM_032291    | NP_115667    | Q9BQI5 | SGIP1_HUMAN |                                | 3  | 'GCGGGCTGAAA'  | 0.458 |
| - | 5  | 1879    | se_Mutation_p.S4f  | NM_015534    | NP_056349    | Q8IYH5 | ZZZ3_HUMAN  |                                | 5  | 'TGGCAGATGGC.  | 0.393 |
| + | 4  | 447     | se_Mutation_p.R8:  | NM_001081472 | NP_001074941 |        |             |                                | 1  | 'GGAGCGTCTTG   | 0.308 |
| - | 10 | 1391    | LN2_uc001dkn.2_    | NM_153259    | NP_694991    | Q8IZK6 | MCLN2_HUMAN | ical; (Potential).             | 4  | 'TAGAGGTTCCA'  | 0.408 |
| - | 6  | 1125    | _p.F321L GFI1_ucl  | NM_001127215 | NP_001120687 | Q99684 | GFI1_HUMAN  | 2H2-type 3.                    | 1  | 'GTTGAAGCTCT'  | 0.428 |
| - | 8  | 731     | ej WDR77_uc010o    | NM_024102    | NP_077007    | Q9BQA1 | MEP50_HUMAN |                                | 0  | 'ATCACCTGTAG'  | 0.313 |
| + | 5  | 1193    | vgy.1_Missense_M   | NM_138959    | NP_620409    | Q8TAA9 | VANG1_HUMAN | lasmic (Potential).            | 1  | 'TGGCCGGGCTG   | 0.463 |
| - | 4  | 532     | _p.A31V REG4_ur    | NM_001159352 | NP_001152824 | Q9BYZ8 | REG4_HUMAN  |                                | 1  | 'CAGGAGCACAG'  | 0.373 |
| - | 2  | 317     | Z_uc010pdc.1_Mi    | NM_015100    | NP_055915    | Q7Z3K3 | POGZ_HUMAN  |                                | 3  | 'GGTCGGTGTCC   | 0.388 |
| - | 3  | 1807    |                    | NM_001122965 | NP_001116437 | Q6XPR3 | RPTN_HUMAN  | Gln-rich.                      | 0  | 'AGTGGGAACTCT  | 0.463 |
| - | 23 | 3281    | JP210L_uc010peh    | NM_207308    | NP_997191    | Q5VU65 | P210L_HUMAN |                                | 11 | 'TATTTTCTTCCC' | 0.378 |
| - | 9  | 1006    | _p.P328L THBS3     | NM_007112    | NP_009043    | P49746 | TSP3_HUMAN  | alcium-binding (Potential).    | 5  | 'AGCCCGGAAA    | 0.617 |
| - | 9  | 1016    | ij.1_Nonsense_Mt   | NM_005998    | NP_005989    | P49368 | TCPG_HUMAN  |                                | 2  | 'AATTCGGGTGA.  | 0.468 |
| - | 5  | 1048    | DCAF8_uc010pjb.    | NM_015726    | NP_056541    | Q5TAQ9 | DCAF8_HUMAN | WD 2.                          | 2  | 'GTTAGGAAGAA.  | 0.428 |
| - | 5  | 842     | _p.R212Q SLAMFf    | NM_052931    | NP_443163    | Q96DU3 | SLAF6_HUMAN | lasmic (Potential).            | 2  | 'GTGTTGCTGTA   | 0.483 |
| - | 8  | 2418    |                    | NM_005099    | NP_005090    | O75173 | ATS4_HUMAN  | Cys-rich.                      | 5  | 'GATGCGATCAC'  | 0.547 |
| - | 7  | 696     | ie_Mutation_p.P99  | NM_019026    | NP_061899    | Q9UM00 | TMCO1_HUMAN | Poly-Pro.                      | 1  | 'AGAAGGAGGTG'  | 0.473 |
| - | 5  | 769     | o.2_Missense_Mut   | NM_153832    | NP_722561    | Q8N6U8 | GP161_HUMAN | Name=4; (Potential).           | 0  | 'GAAGCCAGATG   | 0.552 |
| + | 9  | 1633    | e_Mutation_p.I499l | NM_002021    | NP_002012    | Q01740 | FMO1_HUMAN  |                                | 1  | 'GTCATCAAAGC'  | 0.458 |
| - | 3  | 927     | ij ANGPTL1_uc00'   | NM_004673    | NP_004664    | O95841 | ANGL1_HUMAN | Potential.                     | 0  | 'GGAAAGTTCAA'  | 0.398 |
| + | 70 | 11078   |                    | NM_031935    | NP_114141    | Q96RW7 | HMCN1_HUMAN |                                | 23 | 'AGAGTGCATGGT  | 0.388 |
| + | 7  | 1615    | _Mutation_p.P429,  | NM_005807    | NP_005798    | Q92954 | PRG4_HUMAN  | ats of K-X-P-X-P-T-T-X. 23     | 1  | 'AGGAGCCTGCA'  | 0.637 |
| - | 46 | 6775    |                    | NM_003292    | NP_003283    | P12270 | TPR_HUMAN   |                                | 7  | 'GACACCAGCAA'  | 0.393 |
| + | 4  | 554     |                    | NM_133494    | NP_598001    | Q8TDX7 | NEK7_HUMAN  | rotein kinase.                 | 4  | 'AGCACGTGCTG   | 0.279 |
| + | 13 | 2359    | p.A682V PKP1_uc    | NM_000299    | NP_000290    | Q13835 | PKP1_HUMAN  | ARM 9.                         | 2  | 'AGAAGCTGCCC   | 0.577 |
| + | 15 | 1970    | ibi.2_Missense_Mt  | NM_001005388 | NP_001005388 | O94856 | NFASC_HUMAN | 'otential). Ig-like C2-type 6. | 6  | 'AGCAGACCCCC   | 0.597 |
| + | 4  | 871     | _p.A272T RASSFf    | NM_182663    | NP_872604    | Q8WWW0 | RAS5_HUMAN  |                                | 1  | 'TGGCGCTACC.   | 0.587 |

rs149372302

|   |    |         |                    |              |              |        |              |                                 |    |               |       |
|---|----|---------|--------------------|--------------|--------------|--------|--------------|---------------------------------|----|---------------|-------|
| + | 4  | 860     | .1_RNA CD55_uc     | NM_000574    | NP_000565    | P08174 | DAF_HUMAN    | Sushi 3.                        | 1  | CTTCTCATGTAA  | 0.378 |
| - | 5  | 1015    | e_Mutation_p.G16   | NM_144567    | NP_653168    | Q5VTE6 | ANGE2_HUMAN  |                                 | 0  | ACTAATCCAACAT | 0.418 |
| - | 6  | 1688    |                    | NM_024746    | NP_079022    | Q6UWX4 | HIPL2_HUMAN  |                                 | 1  | AAAGATCCTGCT  | 0.438 |
| + | 12 | 1583    |                    | NM_016002    | NP_057086    | Q8NBX0 | SCPDH_HUMAN  |                                 | 1  | ATTGACAGACT   | 0.418 |
| + | 6  | 857     | iin.2_Missense_M   | NM_153498    | NP_705718    | Q8IU85 | KCC1D_HUMAN  | rotein kinase.                  | 2  | CCATCGGAGTG   | 0.408 |
| - | 1  | 3215    |                    | NR_003525    |              |        |              |                                 | 0  | AGGTGGACCTG   | 0.498 |
| - | 1  | 1979    |                    | NR_003525    |              |        |              |                                 | 0  | GGTCTCCTGCT   | 0.552 |
| + | 12 | 1598    |                    | NM_052997    | NP_443723    | Q9BXX3 | AN30A_HUMAN  |                                 | 9  | AGAATCCAAC    | 0.279 |
| - | 23 | 3507    | se_Mutation_p.E1   | NM_033056    | NP_149045    | Q96QU1 | PCD15_HUMAN  | Extracellular (Potential).      | 13 | TTCTCCTGTGT   | 0.413 |
| + | 2  | 813     | 1jmx.3_Intron CTN  | NM_178011    | NP_821079    | Q86VH5 | LRRT3_HUMAN  | ilar (Potential). LRR 2.        | 3  | AGCTCACCTGGC  | 0.383 |
| - | 8  | 1938    | u.3_Missense_Mt    | NM_001144000 | NP_001137472 | A6NIR3 | AGAP5_HUMAN  | ANK 1.                          | 0  | CTTGCGGCAGG   | 0.662 |
| + | 13 | 2746    | AA0913_uc001jvi.2  | NM_015037    | NP_055852    | A7E2V4 | K0913_HUMAN  |                                 | 1  | GTGCCGGGCAG   | 0.572 |
| + | 8  | 1187    | il1_uc001kjd.3_Int | NM_005097    | NP_005088    | O95970 | LGI1_HUMAN   | EAR 2.                          | 4  | CACTGTAGTATC  | 0.458 |
| - | 5  | 762     | uv.2_Missense_M    | NM_020992    | NP_066272    | O00151 | PDLI1_HUMAN  |                                 | 0  | GCAAACCAAG    | 0.458 |
| - | 11 | 1163    | 9L1_uc001kqt.1_A   | NM_018294    | NP_060764    | Q69YN2 | C19L1_HUMAN  |                                 | 0  | CATCAGATAAGC  | 0.488 |
| - | 1  | 441     | C2_uc009xxx.2_Ir   | NR_026715    |              |        |              |                                 | 0  | CCAGGTGCCCC   | 0.537 |
| + | 4  | 456     |                    | NM_058222    | NP_478129    | Q96PL2 | TECTB_HUMAN  | ZP.                             | 0  | TTTGAGAGCCA   | 0.498 |
| + | 9  | 939     |                    | NM_000936    | NP_000927    | P16233 | LIPP_HUMAN   |                                 | 3  | TTGCTGGATTCC  | 0.448 |
| - | 2  | 606     | b.1_Missense_Mul   | NM_001112704 | NP_001106175 | Q5SQQ9 | VAX1_HUMAN   | Homeobox.                       | 2  | GCAGCGCTGGA   | 0.657 |
| - | 5  | 923     | 2P216S SIRT3_uc    | NM_012239    | NP_036371    | Q9NTG7 | SIRT3_HUMAN  | tylase sirtuin-type.            | 1  | CAGCGCTCCC    | 0.587 |
| - | 15 | 2518    | qwh.1_5'Flank CDI  | NM_021924    | NP_068743    | Q9HBB8 | CDHR5_HUMAN  | lasmic (Potential).             | 0  | GAGAACGACCA   | 0.706 |
| - | 2  | 258     |                    | NM_016564    | NP_057648    | Q8N111 | CEND_HUMAN   | lasmic (Potential).             | 0  | CGGGGTACCT    | 0.692 |
| + | 51 | 14351   | b.2_Missense_Mu    | NM_017511    | NP_059981    | Q9HC84 | MUC5B_HUMAN  | em repeats, Ser/Thr- rich.[]    | 0  | CACCCGTCCT    | 0.642 |
| - | 1  | 71      | x.1_Intron LOC33E  | NM_001005922 | NP_001005922 | Q6L8H4 | KRA51_HUMAN  |                                 | 0  | ACAGCTGGAGC   | 0.672 |
| - | 22 | 3313    | p.E1008K NUP98_    | NM_016320    | NP_057404    | P52948 | NUP98_HUMAN  |                                 | 12 | AGATTTCTTGAG  | 0.418 |
| + | 1  | 496     |                    | NM_001005170 | NP_001005170 | Q8NH67 | O52I2_HUMAN  | lasmic (Potential).             | 1  | GAATTCACGC    | 0.498 |
| - | 4  | 1132    | .1_Intron MUC15_   | NM_145650    | NP_663625    | Q8N387 | MUC15_HUMAN  | lasmic (Potential).             | 3  | GTTCCGGTGCA   | 0.378 |
| + | 11 | 1850    | _p.V427I PDHX_u    | NM_003477    | NP_003468    | O00330 | ODPX_HUMAN   |                                 | 1  | TGGCGTTGGG    | 0.498 |
| - | 10 | 1430    | ew.1_Missense_M    | NM_001001991 | NP_001001991 | Q6UXH9 | PAMR1_HUMAN  | peptidase S1.                   | 2  | CCACGGCCAGC   | 0.547 |
| + | 4  | 321     | yd.2_Missense_M    | NM_002231    | NP_002222    | P27701 | CD82_HUMAN   | ical; (Potential).              | 1  | TGGCGCAGTG    | 0.617 |
| + | 15 | 1879    | lncz.2_Missense_I  | NM_001142673 | NP_001136145 | O75143 | ATG13_HUMAN  |                                 | 0  | TTTGCTCCCAAG  | 0.512 |
| + | 6  | 1068    | uc001nej.2_Intro   | NM_005693    | NP_005684    | Q13133 | NR1H3_HUMAN  | -binding (Potential).           | 3  | TCAGCCGGGAG   | 0.582 |
| + | 1  | 385     |                    | NM_001004739 | NP_001004739 | Q8NGL0 | OR5L2_HUMAN  | lasmic (Potential).             | 1  | GTAACCCCTGC   | 0.532 |
| + | 11 | 2586    | _p.A799V TMEM1:    | NM_178031    | NP_821174    | Q24JP5 | T132A_HUMAN  | lization similar to full-length | 1  | GGTGGCAGGCA   | 0.612 |
| + | 3  | 291_292 | 1_Intron DAK_uc0   | NM_015533    | NP_056348    | Q3LXA3 | DHAK_HUMAN   | DhaK.                           | 0  | TGGCTGGCTGT   | 0.624 |
| + | 1  | 629     | 2A9_uc001nwx.2     | NM_080866    | NP_543142    | Q8IVM8 | S22A9_HUMAN  | ellular (Potential).            | 3  | GCTGGGTGTAT   | 0.512 |
| - | 20 | 3284    | 9ypw.2_5'Flank R   | NM_005609    | NP_005600    | P11217 | PYGM_HUMAN   |                                 | 2  | CTCCGGGCAT    | 0.617 |
| + | 8  | 1504    | 2_RNA KDM2A_u      | NM_012308    | NP_036440    | Q9Y2K7 | KDM2A_HUMAN  | JmjC.                           | 9  | ATGTGGACTTTC  | 0.433 |
| + | 23 | 4900    | g.2_Missense_Mut   | NM_002335    | NP_002326    | O75197 | LRP5_HUMAN   | nic (Potential). PPPSP mot      | 7  | CTCCGTCCTCC   | 0.582 |
| + | 4  | 485     | _p.W116* FOLR1_    | NM_016724    | NP_057936    | P15328 | FOLR1_HUMAN  |                                 | 1  | GCCCTGGATCC   | 0.572 |
| + | 19 | 2287    | sg.2_Missense_M    | NM_001567    | NP_001558    | O15357 | SHIP2_HUMAN  |                                 | 4  | ACATCGTACCA   | 0.552 |
| - | 7  | 829     | e_Mutation_p.P17:  | NM_015159    | NP_055974    | Q92567 | F168A_HUMAN  |                                 | 0  | AACAGGTGCTG   | 0.602 |
| - | 9  | 3007    | m.2_Missense_Ml    | NM_016578    | NP_057662    | Q96T23 | RSF1_HUMAN   | Potential.                      | 4  | GGCAGCTCTTT   | 0.338 |
| + | 10 | 2986    | sp.1_Missense_Ml   | NM_020798    | NP_065849    | Q9P2H5 | UBP35_HUMAN  |                                 | 3  | TTCTTCCCTAAGC | 0.587 |
| + | 2  | 224     | PRSS23_uc010rts.   | NM_007173    | NP_009104    | O95084 | PRSS23_HUMAN |                                 | 2  | GGCAGGGATTC   | 0.552 |
| + | 2  | 1369    |                    | NM_015036    | NP_055851    | O94919 | ENDD1_HUMAN  |                                 | 0  | CTGTCCGTGTC   | 0.547 |
| + | 12 | 1323    | _p.R299C ELMOD     | NM_018712    | NP_061182    | Q8N336 | ELMD1_HUMAN  | ELMO.                           | 0  | AATTCGCAAG    | 0.463 |

rs146995349

rs140465562



|   |    |           |                                                                                                   |              |              |        |             |                               |    |                |       |             |
|---|----|-----------|---------------------------------------------------------------------------------------------------|--------------|--------------|--------|-------------|-------------------------------|----|----------------|-------|-------------|
| + | 1  | 229       |                                                                                                   | NM_017516    | NP_059986    | Q14964 | RB39A_HUMAN | ³ (By similarity).            | 0  | CGGCGGGACAG    | 0.741 |             |
| + | 8  | 1453      | JL5_uc001pju.2_R                                                                                  | NM_003478    | NP_003469    | Q93034 | CUL5_HUMAN  |                               | 1  | ³CTCATGGAATG   | 0.328 |             |
| + | 21 | 2037      | e_Mutation_p.R68                                                                                  | NM_001040455 | NP_001035545 | Q8NBJ9 | SIDT2_HUMAN | ³ellular (Potential).         | 0  | ATCTTCGCCCGC   | 0.642 |             |
| - | 9  | 1712      | ³_p.R319W SLC37                                                                                   | NM_001164277 | NP_001157749 | O43826 | G6PT1_HUMAN | ³ical; (Potential).           | 1  | ³TACCCGGAAGA   | 0.567 |             |
| + | 6  | 1422      | ³.R403C NLRX1_L                                                                                   | NM_024618    | NP_078894    | Q86UT6 | NLRX1_HUMAN | ³raction with MAVS,³NACH      | 2  | ³TCCTGCGCCTC   | 0.592 |             |
| + | 25 | 3555      | ³zp.1_Missense_M                                                                                  | NM_003105    | NP_003096    | Q92673 | SORL1_HUMAN | ³ntial),³LDL-receptor class ³ | 15 | ³AGTGCCGGAGT   | 0.517 |             |
| + | 1  | 569       |                                                                                                   | NM_001005197 | NP_001005197 | Q8NGM9 | OR8D4_HUMAN | ³ellular (Potential).         | 1  | ³CTGCTCCAGCA   | 0.373 |             |
| - | 2  | 244       | 09zcl.2_Missense_                                                                                 | NM_145013    | NP_659450    | Q8TAV5 | CK045_HUMAN |                               | 0  | caggggcgagaGGT | 0.124 |             |
| + | 6  | 715       | 78_uc010sde.1_Missense_Mutation_p.S54G LOC100288778_uc010sdf.1_Missense_Mutation_p.S54G LOC100288 |              |              |        |             |                               | 0  | ³TGCCCAAGCATT  | 0.587 |             |
| + | 8  | 1455      | .1_Missense_Mut                                                                                   | NM_000616    | NP_000607    | P01730 | CD4_HUMAN   | ³ical; (Potential).           | 0  | TGGGGGGCGTC    | 0.627 |             |
| + | 2  | 375       | ³_p.P43L CLEC4A                                                                                   | NM_016184    | NP_057268    | Q9UMR7 | CLC4A_HUMAN | ³lasmic (Potential).          | 0  | ³ATTCCCAAGC    | 0.398 |             |
| - | 2  | 203       |                                                                                                   | NM_014358    | NP_055173    | Q9JLY5 | CLC4E_HUMAN |                               | 1  | ³TCTCTCTGTAG   | 0.408 |             |
| + | 22 | 2854      | p.C499Y A2ML1_L                                                                                   | NM_144670    | NP_653271    | A8K2U0 | A2ML1_HUMAN |                               | 3  | GCTGTGCCCAA    | 0.418 |             |
| - | 12 | 1431      | k.1_Missense_Mut                                                                                  | NM_000014    | NP_000005    | P01023 | A2MG_HUMAN  |                               | 5  | ³GTGTTCTTCTG   | 0.418 |             |
| - | 3  | 700       | B4_uc001qzf.1_Inl                                                                                 | NM_006249    | NP_006240    | Q04118 | PRB3_HUMAN  | G-[PQS]-P-[PS]-Q-[GE]-G-I     | 1  | ³CGGACGAGGT    | 0.622 | rs113884749 |
| - | 3  | 257       | zt.2_Missense_Mt                                                                                  | NM_002723    | NP_002714    | P10163 | PRB4_HUMAN  | ³R]-[PR]-P-Q-G-G-N-Q-[PS      | 1  | TCCTGGAGGAG    | 0.607 |             |
| + | 6  | 645       |                                                                                                   | NM_006446    | NP_006437    | Q9Y6L6 | SO1B1_HUMAN | Name=4; (Potential).          | 8  | ³TGCTTCGTGGA   | 0.348 | rs138965366 |
| + | 4  | 865       |                                                                                                   | NM_018169    | NP_060639    | Q9HCM1 | CL035_HUMAN |                               | 2  | ³GCCGGCACTAC   | 0.418 |             |
| - | 19 | 2689      | nse_Mutation_p.V                                                                                  | NM_017641    | NP_060111    | Q7Z4S6 | KI21A_HUMAN |                               | 7  | ³GAGTAACTTTC   | 0.483 |             |
| + | 4  | 1135_1136 | p.S15F FAM113B                                                                                    | NM_138371    | NP_612380    | Q96HM7 | F113B_HUMAN |                               | 5  | GAACTCCTGGAC   | 0.604 |             |
| - | 9  | 1585      | ³ CCNT1_uc009zk                                                                                   | NM_001240    | NP_001231    | O60563 | CCNT1_HUMAN | ³Potential.                   | 6  | ³GGGCAGCATAT   | 0.463 |             |
| - | 19 | 2501      | ut.1_Missense_Mt                                                                                  | NM_175736    | NP_783863    | Q8IVF7 | FMNL3_HUMAN | ³FH2.                         | 4  | TGACGGAAGCG    | 0.552 |             |
| - | 1  | 194       | ³_p.S59A KRT8_uc                                                                                  | NM_002273    | NP_002264    | P05787 | K2C8_HUMAN  | ³ead,³Ser-rich.               | 2  | GCGGGAACCGG    | 0.662 |             |
| - | 8  | 896       | ³se_Mutation_p.T2                                                                                 | NM_001130059 | NP_001123531 | P17544 | ATF7_HUMAN  | ³activation domain.           | 2  | ³TGGCAGTACCC   | 0.537 |             |
| + | 3  | 351       | ³P_uc001sht.2_5³                                                                                  | NM_014182    | NP_054901    | Q53FV1 | ORML2_HUMAN |                               | 0  | ³ACTGGGAGCAA   | 0.517 |             |
| - | 27 | 5409      | p.P545S BAZ2A_u                                                                                   | NM_013449    | NP_038477    | Q9UIF9 | BAZ2A_HUMAN |                               | 0  | ³CTTTGGGAAAC   | 0.542 |             |
| - | 9  | 1569      | ³_5³Flank BAZ2A_L                                                                                 | NM_001686    | NP_001677    | P06576 | ATPB_HUMAN  |                               | 1  | ³CCTTTGATGGT   | 0.468 |             |
| - | 5  | 608       | ³_uc001soc.2_Miss                                                                                 | NM_032496    | NP_115885    | Q9BRR9 | RHG09_HUMAN | ³SH3.                         | 1  | ³AGCTTCTAGGC   | 0.552 |             |
| + | 18 | 2579      | ³se_Mutation_p.S8                                                                                 | NM_003667    | NP_003658    | O75473 | LGR5_HUMAN  | ³lasmic (Potential).          | 9  | ³AAGATCAAAC    | 0.448 |             |
| + | 4  | 680       | ³vy.2_Missense_Mt                                                                                 | NM_173353    | NP_775489    | Q8IWU9 | TPH2_HUMAN  |                               | 4  | ³CCACCAGTAA    | 0.468 |             |
| - | 9  | 926       | ³rf50_uc001tan.2_L                                                                                | NM_152589    | NP_689802    | Q8NA57 | CL050_HUMAN |                               | 3  | ³CATGCGTTGTAC  | 0.358 | rs112656239 |
| + | 15 | 1831      |                                                                                                   | NM_017564    | NP_060034    | Q8WWQ8 | STAB2_HUMAN | ³lar (Potential),³FAS1 2.     | 14 | ³ATGGAGTTGGT   | 0.403 |             |
| + | 8  | 823       | FX4_uc001tit.2_M                                                                                  | NM_213594    | NP_998759    | Q33E94 | RFX4_HUMAN  |                               | 1  | ³TTGTCGGCGTG   | 0.542 |             |
| + | 9  | 1264      | E3B_uc001too.1_F                                                                                  | NM_130466    | NP_569733    | Q7Z3V4 | UBE3B_HUMAN |                               | 4  | ³GACCCCGTCCT   | 0.398 |             |
| + | 5  | 789       | ³)1tzs.2_Missense_                                                                                | NM_002560    | NP_002551    | Q99571 | P2RX4_HUMAN | ³ellular (Potential).         | 0  | GGTGGCGGCCT    | 0.522 |             |
| - | 10 | 1394      | ³_p.Q26H ANAPC                                                                                    | NM_016237    | NP_057321    | Q9UJX4 | APC5_HUMAN  |                               | 6  | ³GTTTTCTGTGC   | 0.552 |             |
| - | 2  | 564       | ci.1_Missense_Mu                                                                                  | NM_002956    | NP_002947    | P30622 | CLIP1_HUMAN | ³Ser-rich.                    | 3  | ³TGCCGTAGAA    | 0.557 |             |
| - | 8  | 1690      | 15A4_uc001uhv.2                                                                                   | NM_145648    | NP_663623    | Q8N697 | S15A4_HUMAN | ³ical; (Potential).           | 0  | ³GGAGGGTAGCT   | 0.468 |             |
| - | 5  | 1682      |                                                                                                   | NM_133448    | NP_597705    | Q14C87 | T132D_HUMAN | ³ellular (Potential).         | 14 | ³TTTCAACGGGA   | 0.562 |             |
| - | 2  | 450       |                                                                                                   | NM_133448    | NP_597705    | Q14C87 | T132D_HUMAN | ³ellular (Potential).         | 14 | ³GCAAGGAAAAC   | 0.527 |             |
| + | 18 | 2209      | ³ij.1_Missense_Mu                                                                                 | NM_004764    | NP_004755    | Q96J94 | PIWL1_HUMAN | ³Piwi.                        | 2  | GAGACGGCCAG    | 0.478 |             |
| + | 3  | 573       | ³S8_uc001ujb.1_5                                                                                  | NM_004592    | NP_004583    | Q12872 | SFSWA_HUMAN |                               | 0  | ³ATGGGAGCTAC   | 0.453 |             |
| - | 25 | 3134      |                                                                                                   | NM_006437    | NP_006428    | Q9UKK3 | PARP4_HUMAN | ³VWFA.                        | 4  | ³GTGACGATTTG   | 0.333 |             |
| + | 33 | 4828      | ³Y_uc010tdw.1_R                                                                                   | NM_023037    | NP_075463    | Q5TBA9 | FRY_HUMAN   |                               | 7  | ³GCCAACAATGA   | 0.448 |             |
| - | 1  | 442       |                                                                                                   | NM_145203    | NP_660204    | Q8N752 | KC1AL_HUMAN |                               | 1  | ³CACAACGAGTT   | 0.587 |             |
| - | 17 | 2165      | ³c.3_Missense_Mt                                                                                  | NM_001127615 | NP_001121087 | Q8TC92 | ENOX1_HUMAN |                               | 2  | ³CACCCGTGAAT   | 0.433 |             |
| - | 38 | 3394      | 4A1_uc010agl.2_L                                                                                  | NM_001845    | NP_001836    | P02462 | CO4A1_HUMAN | ³le-helical region.           | 6  | ³GCATTCCTGGG   | 0.527 |             |

|   |    |         |                   |              |              |        |              |                            |    |                |       |             |
|---|----|---------|-------------------|--------------|--------------|--------|--------------|----------------------------|----|----------------|-------|-------------|
| - | 5  | 728     | vsf.2_Missense_I  | NM_006322    | NP_006313    | Q96CW5 | GCP3_HUMAN   |                            | 1  | :TGGGAGGAGAG   | 0.577 |             |
| + | 8  | 830     | 1vxb.1_Splice_Sit | NM_005484    | NP_005475    | Q9UGN5 | PARP2_HUMAN  |                            | 2  | :ACTTGGTAGGAC  | 0.353 |             |
| - | 20 | 2981    | EP1_uc010tlf.1_R  | NM_007110    | NP_009041    | Q99973 | TEP1_HUMAN   |                            | 5  | :GGGGGAATGT    | 0.557 |             |
| - | 31 | 4745    | Mutation_p.R1447C | NM_020920    | NP_065971    | Q9HCK8 | CHD8_HUMAN   |                            | 10 | :AGTGC GGAAGC  | 0.493 |             |
| + | 4  | 678     | OX4_uc010tiu.1_I  | NM_014828    | NP_055643    | O94842 | TOX4_HUMAN   |                            | 1  | :TTTCCGGAGGG   | 0.488 |             |
| - | 9  | 2687    | IN1_uc001wir.3_I  | NM_014977    | NP_055792    | Q9UKV3 | ACINU_HUMAN  |                            | 4  | :AGGTTCTGGAA   | 0.537 |             |
| - | 14 | 1479    | O4_uc001wmy.1_I   | NM_024658    | NP_078934    | Q8TEX9 | IPO4_HUMAN   | HEAT 3.                    | 1  | :GTGTCCAAGAG   | 0.577 |             |
| - | 5  | 1813    | o.R475W NOVA1_I   | NM_002515    | NP_002506    | P51513 | NOVA1_HUMAN  |                            | 5  | :AGCCCCAACTC   | 0.448 |             |
| - | 5  | 720     | lqb.1_Missense_M  | NM_006364    | NP_006355    | Q15436 | SC23A_HUMAN  |                            | 5  | :TAATAAGTCCA   | 0.383 |             |
| + | 4  | 807     | ly.1_Missense_Mu  | NM_054024    | NP_473365    | Q96PC5 | MIA2_HUMAN   |                            | 2  | :GTATGGAACAG   | 0.443 |             |
| - | 1  | 866     |                   | NM_032135    | NP_115511    | Q5H9T9 | FSCB_HUMAN   |                            | 9  | :CCGACGATTTA   | 0.373 |             |
| - | 11 | 1560    | xbt.2_Missense_M  | NM_014750    | NP_055565    | Q15398 | DLGP5_HUMAN  |                            | 2  | :CGAAGCAATGT   | 0.338 |             |
| + | 4  | 951     | jx.2_Missense_Ml  | NM_016651    | NP_057735    | Q9NYF0 | DACT1_HUMAN  |                            | 5  | :AAAACGGGAAT   | 0.493 |             |
| - | 1  | 1432    | 1_Intron TMEM30   | NM_001017970 | NP_001017970 | Q3MIR4 | CC50B_HUMAN  |                            | 0  | :CCGCCGTGCGC   | 0.687 |             |
| - | 9  | 1669    | p.L540V KCNH5_I   | NM_139318    | NP_647479    | Q8NCM2 | KCNH5_HUMAN  | lasmic (Potential).        | 9  | :GTTTAGATGAAC  | 0.483 |             |
| + | 62 | 12420   | E2_uc010apx.1_I   | NM_015180    | NP_055995    | Q8WXH0 | SYNE2_HUMAN  | Cytoplasmic (Potential).   | 14 | :CCACCGTACTA   | 0.458 | rs144164967 |
| - | 2  | 1674    |                   | NM_003814    | NP_003805    | O43506 | ADA20_HUMAN  | Extracellular (Potential). | 1  | :CTGCCGTATGG   | 0.443 | rs147557544 |
| - | 11 | 3145    | o.1_Missense_Ml   | NM_001002860 | NP_001002860 | Q9P203 | BTBD7_HUMAN  |                            | 1  | :TATTCCTGTGGA  | 0.478 |             |
| + | 3  | 1081    | agl.1_Missense_Ml | NM_001127258 | NP_001120730 | Q96JK4 | HIPL1_HUMAN  |                            | 2  | :AGACCCCTTTG   | 0.527 |             |
| - | 1  | 400     |                   | NR_024387    |              |        |              |                            | 0  | :TCGTTACATTTAT | 0.373 |             |
| + | 4  | 1390    |                   | NM_020857    | NP_065908    | Q9P253 | VPS18_HUMAN  |                            | 3  | :TGACCGGGCAG   | 0.632 |             |
| + | 10 | 2280    |                   | NM_019074    | NP_061947    | Q9NR61 | DLL4_HUMAN   | lasmic (Potential).        | 2  | :AGTGTCCGATA   | 0.562 |             |
| - | 13 | 1854    |                   | NM_015540    | NP_056355    | Q9BWH6 | RPAP1_HUMAN  |                            | 1  | :ATTCCAGGGAA   | 0.597 |             |
| + | 7  | 855     | e_Mutation_p.S19C | NM_001128608 | NP_001122080 | O60336 | MABP1_HUMAN  | WD 3.                      | 10 | :ATTGCAGCTACT  | 0.517 |             |
| - | 17 | 2017    | lk.1_Missense_Mu  | NM_174916    | NP_777576    | Q8IWW7 | UBR1_HUMAN   |                            | 1  | :ACAACGTAAG    | 0.393 |             |
| + | 13 | 1837    |                   | NM_024908    | NP_079184    | Q9H967 | WDR76_HUMAN  | WD 7.                      | 0  | :CAACTCGGTATA  | 0.418 | rs140407429 |
| + | 10 | 1278    | e_Mutation_p.A37  | NM_002044    | NP_002035    | Q01415 | GALK2_HUMAN  |                            | 1  | :TTGGGGCTCAA   | 0.438 |             |
| + | 6  | 1484    | p.P365S SLC27A    | NM_003645    | NP_003636    | O14975 | S27A2_HUMAN  | lasmic (Potential).        | 2  | :AGATTCACAAA   | 0.353 |             |
| - | 6  | 745     | p.A165V CYP19A    | NM_031226    | NP_112503    | P11511 | CP19A_HUMAN  |                            | 3  | :ATTACAGCACAG  | 0.537 |             |
| - | 6  | 804     |                   | NM_003613    | NP_003604    | O75339 | CILP1_HUMAN  |                            | 7  | :CCATTGGGCAG   | 0.537 |             |
| - | 8  | 3321    |                   | NM_005477    | NP_005468    | Q9Y3Q4 | HCN4_HUMAN   | lasmic (Potential).        | 6  | :TCAGCGGGGTC   | 0.687 |             |
| - | 5  | 1233    | n_p.F107L CYP1A   | NM_000499    | NP_000490    | P04798 | CP1A1_HUMAN  |                            | 5  | :GATGAAGGCCT   | 0.577 |             |
| - | 5  | 753_754 | azg.2_Splice_Site | NM_020447    | NP_065180    | Q5XKK7 | COO17_HUMAN  |                            | 0  | :GTTCACCTGCTA  | 0.53  | rs143038267 |
| + | 12 | 2270    | i_uc002bpg.2_Mis  | NM_172217    | NP_757366    | Q14005 | IL16_HUMAN   |                            | 4  | :CCACCTGTGGC   | 0.512 |             |
| - | 2  | 835     |                   | NM_032246    | NP_115622    | Q6ZN04 | MEX3B_HUMAN  | KH 2.                      | 2  | :CACGAGCCCA    | 0.662 |             |
| - | 14 | 1683    | ogu.1_Missense_I  | NM_024580    | NP_078856    | Q72222 | ETUD1_HUMAN  |                            | 1  | :CAATAAAAGACT  | 0.433 | rs142283736 |
| + | 7  | 3091    | 13_uc002blu.1_Mi  | NM_007200    | NP_009131    | Q12802 | AKP13_HUMAN  |                            | 9  | :TGCCAAGGACA   | 0.463 |             |
| + | 12 | 6954    | e_Mutation_p.D21I | NM_013227    | NP_037359    | E7EX88 | E7EX88_HUMAN |                            | 3  | :CTGGAGACAGG   | 0.612 |             |
| + | 14 | 1847    |                   | NM_002569    | NP_002560    | P09958 | FURIN_HUMAN  |                            | 7  | :TCCCTCTGGCG   | 0.572 |             |
| - | 10 | 1551    | 2vbx.1_Missense_I | NM_139057    | NP_620688    | Q8TE56 | ATS17_HUMAN  | Disintegrin.               | 3  | :CTTACCTCCATG  | 0.572 |             |
| - | 11 | 1633    | clz.2_Missense_M  | NM_014714    | NP_055529    | Q96RY7 | IF140_HUMAN  |                            | 5  | :GACTCGGGGAG   | 0.617 |             |
| + | 5  | 1113    | yu.1_Missense_Mu  | NM_018723    | NP_061193    | Q9NWB1 | RFOX1_HUMAN  |                            | 0  | :AATACACGGCCC  | 0.637 | rs146499343 |
| - | 10 | 1588    | x.2_Missense_Mul  | NM_001007240 | NP_001007241 | P55259 | GP2_HUMAN    |                            | 4  | :CTCTCCGAGTG   | 0.527 |             |
| - | 19 | 2353    | p.P278S ARHGA     | NM_001006634 | NP_001006635 | Q68EM7 | RHG17_HUMAN  | rg (Potential). Pro-rich.  | 0  | :GGGAGGGGTGT   | 0.622 |             |
| - | 4  | 562     | Missense_Mutator  | NM_000086    | NP_000077    | Q13286 | CLN3_HUMAN   |                            | 0  | :TCGGCGTTGGG   | 0.483 |             |
| + | 5  | 1403    | 2S SH2B1_uc002    | NM_001145795 | NP_001139267 | Q9NRF2 | SH2B1_HUMAN  | dependent of JAK2 phospho  | 2  | :GCATCCCCTGC   | 0.542 |             |
| + | 3  | 456     | t_Site FBXL19_uc  | NM_001099784 | NP_001093254 | Q6PCT2 | FXL19_HUMAN  | PHD-type.                  | 4  | :ACACGGTGGAG   | 0.602 |             |

|   |    |       |                                           |              |              |        |             |                               |    |                 |       |             |
|---|----|-------|-------------------------------------------|--------------|--------------|--------|-------------|-------------------------------|----|-----------------|-------|-------------|
| + | 3  | 341   | ag.2_Missense_M                           | NM_025193    | NP_079469    | Q9H2F3 | 3BHS7_HUMAN |                               | 0  | GTGGCCGAGCC     | 0.647 |             |
| - | 4  | 617   | <DC2_uc002eyb.2_RNA PDXDC2_uc002eyc.2_RNA |              |              |        |             |                               | 0  | TTTGGCGTCT      | 0.373 | rs139165288 |
| + | 16 | 2493  | p.G630E CNTNAF                            | NM_033401    | NP_207837    | Q9C0A0 | CNTP4_HUMAN | ential). Fibrinogen C-termin  | 2  | GGTAGGAAGAA     | 0.408 |             |
| + | 8  | 1132  | nt.1_Missense_Mi                          | NM_001257    | NP_001248    | P55290 | CAD13_HUMAN | Cadherin 2.                   | 1  | TGGCTGGACTG     | 0.418 |             |
| - | 6  | 1179  | se_Mutation_p.G3:                         | NM_020947    | NP_065998    | Q6P9B6 | K1609_HUMAN | TLD.                          | 2  | CAGTCCGTTCC     | 0.597 |             |
| - | 4  | 1556  | p.G334E NLRP1_                            | NM_033004    | NP_127497    | Q9C000 | NALP1_HUMAN | IT. ATP (Potential).          | 9  | CAGCCCCCTGC     | 0.532 |             |
| - | 6  | 1191  | L1_uc010clk.2_M                           | NM_014336    | NP_055151    | Q9NZN9 | AIPL1_HUMAN |                               | 0  | gcagggggccctgcg | 0.264 |             |
| - | 3  | 400   | se_Mutation_p.R8                          | NM_014336    | NP_055151    | Q9NZN9 | AIPL1_HUMAN | ase FKBP-type.                | 0  | GGCTCCGGGAT     | 0.632 |             |
| - | 28 | 4367  | URL4_uc002gfy.1_                          | NM_032442    | NP_115818    | Q96JN8 | NEUL4_HUMAN |                               | 2  | CCCAGGTTCTC     | 0.612 |             |
| + | 3  | 459   | 11_uc010vtw.1_In                          | NM_175734    | NP_783861    | Q0P670 | CQ074_HUMAN | Arg-rich.                     | 0  | cgccgcgcgcgcac  | 0.413 |             |
| + | 75 | 11602 | m.1_Missense_M                            | NM_020877    | NP_065928    | Q9P225 | DYH2_HUMAN  | 6 (By similarity).            | 13 | CCAGCGCTTCC     | 0.657 |             |
| + | 25 | 4151  | Missense_Mutatio                          | NM_001005273 | NP_001005273 | Q12873 | CHD3_HUMAN  |                               | 1  | ACCTAGCCCGGA    | 0.527 |             |
| + | 16 | 3097  |                                           | NM_000180    | NP_000171    | Q02846 | GUC2D_HUMAN | ise. Cytoplasmic (Potential)  | 1  | CTCGCGCATGG     | 0.697 |             |
| - | 18 | 2179  | i.1_Missense_Mut                          | NM_002018    | NP_002009    | Q13045 | FLII_HUMAN  | tion with ACTL6A.             | 2  | AGAGGGCTCC      | 0.592 |             |
| + | 2  | 179   | S9C_uc010vyb.1_                           | NM_001040078 | NP_001035167 | Q6DKI2 | LEG9C_HUMAN | Galectin 1.                   | 1  | GGGCCGTTCTC     | 0.562 |             |
| - | 2  | 171   | se_Mutation_p.A3f                         | NM_001042685 | NP_001036150 | Q3B8N2 | LEG9B_HUMAN | Galectin 1.                   | 1  | AACGGCCCCAT     | 0.562 | rs144269928 |
| - | 11 | 2310  | ry.1_Missense_Mi                          | NM_178860    | NP_849191    | Q53EL9 | SEZ6_HUMAN  | ellular (Potential).          | 2  | ATTGGGGGCA      | 0.612 |             |
| + | 10 | 2747  |                                           | NM_207313    | NP_997196    | Q6IEE7 | T132E_HUMAN | ical; (Potential).            | 1  | TGGGCGTCTTC     | 0.637 |             |
| - | 1  | 520   |                                           | NM_033059    | NP_149048    | Q9BYQ6 | KR411_HUMAN | C-[GIKRQVHEL]- [SPTR]-[       | 0  | GACGCAGGcagc    | 0.323 | rs141357429 |
| + | 17 | 2897  | JAP1_uc010wgs.1                           | NM_003632    | NP_003623    | P78357 | CNTP1_HUMAN | 3. Extracellular (Potential). | 8  | TCACCGGCCCT     | 0.567 |             |
| - | 11 | 3171  | _p.C973R PLEKHA                           | NM_014798    | NP_055613    | Q9Y4G2 | PKHM1_HUMAN | ol-ester/DAG-type.            | 0  | CTGGCAGATGA     | 0.582 |             |
| + | 6  | 885   | se_Mutation_p.R18f                        | NM_006310    | NP_006301    | P55786 | PSA_HUMAN   |                               | 0  | TGACCGGAAAC     | 0.343 |             |
| + | 2  | 339   | n_p.Q8*B4GALN1                            | NM_153446    | NP_703147    | Q8NHY0 | B4GN2_HUMAN | renal (Potential).            | 2  | TCCTTCAAGCA     | 0.502 |             |
| - | 1  | 649   | _p.S205F TOB1_uc                          | NM_005749    | NP_005740    | P50616 | TOB1_HUMAN  |                               | 1  | TGGGAGAAGTA     | 0.473 |             |
| - | 16 | 2161  | if.2_Missense_Mu                          | NM_001130528 | NP_001124000 | O60271 | JIP4_HUMAN  |                               | 5  | TCTGAGGCAGA     | 0.483 |             |
| + | 4  | 461   | p.R46W PCTP_ucf                           | NM_021213    | NP_067036    | Q9UKL6 | PPCT_HUMAN  | START.                        | 1  | ACCTTCGGCAGC    | 0.572 | rs151142834 |
| - | 6  | 1458  |                                           | NM_007146    | NP_009077    | Q14119 | VEZF1_HUMAN | ts of P-[LV]-T-[IL]-T-[ST]-P  | 2  | CATTGGGCTGG     | 0.488 |             |
| - | 22 | 4862  | se_Mutation_p.S1                          | NM_004758    | NP_004749    | O95153 | RIMB1_HUMAN |                               | 3  | GATGCTAAAGAC    | 0.463 |             |
| - | 3  | 307   | 2jde.2_Missense_f                         | NM_022579    | NP_072101    | Q14406 | CSHL_HUMAN  |                               | 0  | AGAAGGAGGTC     | 0.527 |             |
| - | 4  | 565   | _p.S141F ABCA9_                           | NM_080283    | NP_525022    | Q8IUA7 | ABCA9_HUMAN |                               | 6  | CCCAAGAAAAAC    | 0.368 |             |
| - | 18 | 2762  | vc.1_Missense_M                           | NM_020753    | NP_065804    | Q8WXE0 | CSKI2_HUMAN | Pro-rich.                     | 1  | GGGCCGCTCTG     | 0.657 |             |
| - | 18 | 1927  | _p.T516I UNC13C                           | NM_199242    | NP_954712    | Q70J99 | UN13D_HUMAN | tion with RAB27A.             | 2  | TGAGGGTACTG     | 0.622 |             |
| + | 9  | 1258  | _p.W331R SEC14L                           | NM_003003    | NP_002994    | Q92503 | S14L1_HUMAN | CRAL-TRIO.                    | 2  | GAGGCTGGCAT     | 0.498 |             |
| + | 3  | 417   | vub.1_Missense_M                          | NM_017950    | NP_060420    | Q4G0X9 | CCD40_HUMAN |                               | 3  | ATACGATAGGT     | 0.562 |             |
| + | 8  | 4802  | IA RNF213_uc010                           | NM_020914    | NP_065965    | Q9HCF4 | ALO17_HUMAN |                               | 21 | TTTCTGATGTG     | 0.602 |             |
| + | 9  | 2032  | T FOXK2_uc002kf                           | NM_004514    | NP_004505    | Q01167 | FOXK2_HUMAN |                               | 0  | ACAACGGTGAC     | 0.627 |             |
| + | 5  | 1526  |                                           | NM_153000    | NP_694545    | Q8J025 | APCD1_HUMAN | ellular (Potential).          | 0  | TGCGGGGCCG      | 0.587 |             |
| - | 16 | 2026  | IRE1_uc010wzx.1                           | NM_001128626 | NP_001122098 | Q08AE8 | SPIR1_HUMAN |                               | 0  | GGGCAGTGGAG     | 0.517 |             |
| - | 5  | 1696  | cxk.1_Missense_M                          | NM_022751    | NP_073588    | Q9H706 | FA59A_HUMAN | Pro-rich.                     | 2  | TGAGGGGACTG     | 0.577 |             |
| + | 12 | 4163  | q.2_Missense_Mu                           | NM_030632    | NP_085135    | Q9C0F0 | ASXL3_HUMAN |                               | 3  | AGATTTCTTCTC    | 0.498 |             |
| + | 7  | 962   | e_Mutation_p.R13                          | NM_020776    | NP_065827    | Q86T90 | K1328_HUMAN |                               | 1  | CAGATCGTGTT     | 0.458 |             |
| + | 4  | 1209  | mn.3_Missense_Mi                          | NM_152791    | NP_690004    | Q8NEP9 | ZN555_HUMAN | 2H2-type 8.                   | 1  | AGTGTGGGAAG     | 0.448 |             |
| + | 9  | 696   | E6_uc010dtg.2_Mi                          | NM_024760    | NP_079036    | Q9H808 | TLE6_HUMAN  |                               | 1  | TGAGGGTTCCC     | 0.652 |             |
| + | 10 | 1291  | o.G362R JP3_ucf                           | NM_014428    | NP_055243    | Q95049 | ZO3_HUMAN   | PDZ 3.                        | 3  | TGGCAGGGGGC     | 0.672 |             |
| - | 2  | 334   | _p.R27*I UBXN6_u                          | NM_025241    | NP_079517    | Q9BZV1 | UBXN6_HUMAN |                               | 0  | GTTCGGATGG      | 0.657 |             |
| - | 3  | 1676  | I4_uc010dub.1_5f                          | NM_001080400 | NP_001073869 | Q96Q06 | PLIN4_HUMAN | roximate tandem repeat.[1f    | 0  | CCCCGTGAGC      | 0.612 |             |
| + | 6  | 768   | S4_uc002mji.2_5l                          | NM_024552    | NP_078828    | Q9HA82 | CERS4_HUMAN | helical; (Potential).         | 1  | TGGGGCGCCTC     | 0.617 |             |

|   |     |       |                   |              |              |        |             |                               |    |               |       |
|---|-----|-------|-------------------|--------------|--------------|--------|-------------|-------------------------------|----|---------------|-------|
| - | 22  | 2888  | p.L359M ADAMTS    | NM_030957    | NP_112219    | Q9H324 | ATS10_HUMAN | SP type-1 2.                  | 4  | GGGCAGCTTGC   | 0.672 |
| + | 4   | 1683  | ym.1_Missense_M   | NM_001136501 | NP_001129973 | Q08AG5 | ZN844_HUMAN |                               | 0  | CTTCACATCTGC  | 0.408 |
| - | 4   | 1523  |                   | NM_145276    | NP_660319    | Q8TA94 | ZN563_HUMAN | :2H2-type 11.                 | 0  | ATAACGCTTTCC  | 0.428 |
| - | 1   | 71    | um.1_Missense_IV  | NM_032301    | NP_115677    | Q5XUX1 | FBXW9_HUMAN |                               | 1  | GGTCTGTCTCT   | 0.687 |
| - | 22  | 3677  | ao.1_Missense_M   | NM_000435    | NP_000426    | Q9UM47 | NOTC3_HUMAN | GF-like 30; calcium-binding   | 21 | GCAGCGCAAAC   | 0.652 |
| - | 5   | 705   | HERP_uc002nej.2   | NM_006387    | NP_006378    | Q8IWX8 | CHERP_HUMAN | CID.                          | 2  | CAGCCGAGCT    | 0.642 |
| + | 31  | 5190  | l_Missense_Mutat  | NM_004145    | NP_004136    | Q13459 | MYO9B_HUMAN | rbol-ester/DAG-type.          | 1  | AGAGCCACTGC   | 0.577 |
| + | 4   | 1706  |                   | NM_031218    | NP_112495    | P35789 | ZNF93_HUMAN |                               | 1  | TCATACTAGAGA  | 0.358 |
| + | 2   | 903   | _p.P336L ZNF493   | NM_175910    | NP_787106    | Q6ZR52 | ZN493_HUMAN | ype 7; degenerate.            | 1  | AACCCCTACTA   | 0.348 |
| - | 6   | 2953  | 208_uc002nqo.1_I  | NM_007153    | NP_009084    |        |             |                               | 7  | GCTTTGCCACAT  | 0.453 |
| + | 4   | 1483  |                   | NM_020855    | NP_065906    | Q9P255 | ZN492_HUMAN | :2H2-type 10.                 | 0  | TAAGATAATTCAT | 0.363 |
| + | 4   | 1759  | rk.1_Missense_Mi  | NM_203282    | NP_975011    | O75437 | ZN254_HUMAN |                               | 0  | TACTGAAGAGAA  | 0.353 |
| + | 4   | 1782  | rk.1_Missense_Mi  | NM_203282    | NP_975011    | O75437 | ZN254_HUMAN | :2H2-type 13.                 | 0  | GTGAAAAATGTC  | 0.358 |
| - | 4   | 1973  | dm.1_Missense_IV  | NM_001007248 | NP_001007249 | Q96NL3 | ZN599_HUMAN | :2H2-type 12.                 | 2  | CAGTGTGGATCC  | 0.423 |
| - | 1   | 386   |                   | NM_152481    | NP_689694    | Q17R55 | F187B_HUMAN | ellular (Potential).          | 2  | GGGTGGTGACA   | 0.532 |
| + | 6   | 735   | ap.2_Missense_Mi  | NM_024321    | NP_077297    | Q9BTD8 | RBM42_HUMAN | Pro-rich.                     | 0  | GGCTCCATGG    | 0.677 |
| + | 17  | 5043  |                   | NM_015073    | NP_055888    | O60292 | SI1L3_HUMAN |                               | 2  | TCGAGGATGAC   | 0.582 |
| + | 5   | 632   |                   | NM_001001414 | NP_001001414 | Q6ZVX7 | NCRP1_HUMAN | FBA.                          | 1  | CCGACCGCCGC   | 0.682 |
| + | 18  | 2264  | AXL_uc010ehk.2_   | NM_021913    | NP_068713    | P30530 | UFO_HUMAN   | Potential). Protein kinase.   | 13 | ACTTCGGGCTC   | 0.552 |
| - | 2   | 518   | tion_p.G127E PSC  | NM_006905    | NP_008836    | P11464 | PSG1_HUMAN  | g-like V-type.                | 2  | TCATCTCCCTTT  | 0.502 |
| + | 2   | 764   | 0ekb.1_Missense_  | NM_006732    | NP_006723    | P53539 | FOSB_HUMAN  |                               | 3  | CCACGGTCACC   | 0.517 |
| - | 3   | 467   | o.E145G STRN4_u   | NM_013403    | NP_037535    | Q9NRL3 | STRN4_HUMAN |                               | 0  | TCCTCTCCCCC   | 0.493 |
| - | 10  | 1290  | H4_uc002pgb.1_Ir  | NM_015168    | NP_055983    | Q9UPT8 | ZC3H4_HUMAN |                               | 6  | TGGGAGTTCGA   | 0.453 |
| + | 5   | 479   |                   | NM_004533    | NP_004524    | Q14324 | MYPC2_HUMAN | like C2-type 1.               | 1  | GGACACCTGTG   | 0.602 |
| + | 4   | 1385  | dw.1_Missense_M   | NM_138374    | NP_612383    | Q96IR2 | ZN845_HUMAN | :2H2-type 8.                  | 0  | TCAGATGTATC   | 0.408 |
| + | 11  | 1796  | se_Mutation_p.R4f | NM_006669    | NP_006660    | Q8NHL6 | LIRB1_HUMAN | lasmic (Potential).           | 3  | ACATCGACGTC   | 0.473 |
| + | 2   | 336   | 20H2_uc002qkk.1   | NM_032701    | NP_116090    | Q86Y97 | SV422_HUMAN |                               | 0  | GTTCGACACC    | 0.687 |
| + | 22  | 4156  | bp.1_Missense_Mi  | NM_014668    | NP_055483    | Q4ZG55 | GREB1_HUMAN |                               | 1  | TGCCCTCCCCC   | 0.647 |
| - | 3   | 226   | 2rfu.1_RNA DNA    | NM_016544    | NP_057628    | Q9NZQ0 | DJC27_HUMAN |                               | 1  | GACGTGATCCC   | 0.343 |
| - | 7   | 575   | _p.T154I IFT172_u | NM_015662    | NP_056477    | Q9UG01 | IF172_HUMAN | WD 4.                         | 2  | CATGGTACCAT   | 0.358 |
| + | 3   | 557   | uc002rvb.2_Intron | NM_012249    | NP_036381    | P17081 | RHOQ_HUMAN  |                               | 2  | ACCAATGACCC   | 0.393 |
| + | 10  | 1486  | p.S300F EHBP1_u   | NM_015252    | NP_056067    | Q8NDI1 | EHBP1_HUMAN |                               | 2  | GGATTCTCCTCC  | 0.373 |
| + | 45  | 5270  | YSF_uc010fej.2_M  | NM_003494    | NP_003485    | O75923 | DYSF_HUMAN  | mic (Potential). C2 5.        | 7  | TGTCGAGCTG    | 0.572 |
| + | 3   | 790   |                   | NM_003124    | NP_003115    | P35270 | SPRE_HUMAN  |                               | 2  | GGAAAAGGACG   | 0.512 |
| - | 2   | 875   | 2sit.3_Missense_I | NM_015470    | NP_056285    | Q9BXF6 | RFIP5_HUMAN |                               | 0  | TGGGAGGATGG   | 0.552 |
| - | 9   | 1678  | nc.2_Missense_M   | NM_133637    | NP_598376    | Q8TE96 | DQX1_HUMAN  |                               | 2  | AGGACGGGTAA   | 0.527 |
| + | 5   | 852   | 2_5'Flank TMEM10  | NM_004804    | NP_004795    | O76071 | CIAO1_HUMAN | WD 5.                         | 0  | TGACCGTACTG   | 0.542 |
| + | 3   | 512   | l.2_Missense_Mut  | NM_002881    | NP_002872    | P11234 | RALB_HUMAN  |                               | 3  | AATTCAGGTAT   | 0.443 |
| + | 6   | 1178  | Ofu.2_Missense_M  | NM_130773    | NP_570129    | Q8WYK1 | CNTP5_HUMAN | 1. Extracellular (Potential). | 10 | ACTCGGTCCCTC  | 0.607 |
| - | 4   | 618   |                   | NM_005915    | NP_005906    | Q14566 | MCM6_HUMAN  |                               | 0  | GATTCGGCAG    | 0.398 |
| + | 2   | 361   | HSD7B_uc002tvb.2  | NM_001080427 | NP_001073896 |        |             |                               | 7  | ACCGAACTGTG   | 0.532 |
| - | 63  | 10964 |                   | NM_018557    | NP_061027    | Q9NZR2 | LRP1B_HUMAN | ntial). LDL-receptor class A  | 50 | CAGAATGGAATA  | 0.328 |
| - | 9   | 1274  | Ofnn.2_Missense_I | NM_001006636 | NP_001006637 | Q4AE62 | GTDC1_HUMAN |                               | 1  | CCCTGAAAAA    | 0.358 |
| - | 129 | 17979 | o.Q2353K NEB_uc   | NM_004543    | NP_004534    | P20929 | NEBU_HUMAN  | Nebulin 162.                  | 20 | CATCTGCTGAG   | 0.448 |
| - | 40  | 4879  |                   | NM_004543    | NP_004534    | P20929 | NEBU_HUMAN  | Nebulin 40.                   | 20 | TGACGCAACA    | 0.303 |
| + | 8   | 7058  | se_Mutation_p.P2' | NM_152381    | NP_689594    | A4UGR9 | XIRP2_HUMAN | Pro-rich.                     | 14 | CTTCTCCAC     | 0.458 |
| + | 4   | 669   | gh.2_Missense_Mi  | NM_000817    | NP_000808    | Q99259 | DCE1_HUMAN  |                               | 1  | ACAGCACC      | 0.552 |

rs142651314

rs142522111

|   |     |           |                                                       |              |              |        |             |                               |      |               |       |
|---|-----|-----------|-------------------------------------------------------|--------------|--------------|--------|-------------|-------------------------------|------|---------------|-------|
| - | 287 | 84469     | 777V TTN_uc010zr                                      | NM_133378    | NP_596869    | Q8WZ42 | TITIN_HUMAN |                               | 153  | ITGGGAGCACAA  | 0.448 |
| - | 17  | 3046      | _p.T895 TTN_uc0                                       | NM_133378    | NP_596869    | Q8WZ42 | TITIN_HUMAN |                               | 153  | IGTGGAGTAACA  | 0.353 |
| + | 4   | 2591      |                                                       | NM_194250    | NP_919226    | Q7Z570 | Z804A_HUMAN |                               | 11   | CCATATCCTTAAC | 0.318 |
| - | 3   | 192       | rv.2_Missense_M                                       | NM_014362    | NP_055177    | Q6NVY1 | HIBCH_HUMAN |                               | 0    | ICACCTCTTCTGC | 0.358 |
| - | 41  | 7471      |                                                       | NM_018897    | NP_061720    | Q8WXX0 | DYH7_HUMAN  | 4 (By similarity).            | 12   | TGAAAAGGGCT/  | 0.458 |
| - | 12  | 1603      | p.G446V FAM126                                        | NM_173822    | NP_776183    | Q8IXS8 | F126B_HUMAN |                               | 1    | CAGTGCCAACC   | 0.453 |
| - | 3   | 587       | p.W67* GPR1_u                                         | NM_005279    | NP_005270    | P46091 | GPR1_HUMAN  | lasmic (Potential).           | 0    | CTTCTCCACTTC  | 0.458 |
| + | 11  | 1612      | iv.2_Missense_Mu                                      | NM_015690    | NP_056505    | Q9NRP7 | STK36_HUMAN |                               | 11   | CCAGCGCATCC/  | 0.507 |
| + | 5   | 426       | e_Mutation_p.D12                                      | NM_013335    | NP_037467    | Q96IJ6 | GMPPA_HUMAN |                               | 0    | GCTCCGACTTC/  | 0.597 |
| - | 4   | 1389      | h.1_Missense_Mu                                       | NM_024536    | NP_078812    | Q8IZ52 | CHSS2_HUMAN | lenal (Potential).            | 0    | AAAGCGGGAGG/  | 0.657 |
| + | 7   | 536       | se_Mutation_p.F67                                     | NM_015575    | NP_056390    | Q6Y7W6 | PERQ2_HUMAN |                               | 7    | AAAGAATTTCTG/ | 0.418 |
| + | 7   | 1413      | l10_uc002vzn.1_M                                      | NM_023083    | NP_075571    | Q9HC96 | CAN10_HUMAN | Domain III 1 p.A410A(1)       | 6    | CCCAGCGAGCA   | 0.657 |
| - | 3   | 1147      | _Mutation_p.A326v                                     | NM_014948    | NP_055763    | O94941 | RNF37_HUMAN | U-box.                        | 2    | TCGGGCCTTG/   | 0.602 |
| - | 7   | 782_783   | ici.1_Missense_Mt                                     | NM_024704    | NP_078980    | Q96L93 | KI16B_HUMAN | inesin-motor.                 | 8    | GGTCCGGTTGA   | 0.48  |
| + | 2   | 435       | 130264_uc010zsd                                       | NM_020689    | NP_065740    | Q9HC58 | NCKX3_HUMAN | cellular (Potential).         | 1    | ATGCCGGACTC/  | 0.547 |
| - | 5   | 635       | wtu.2_Missense_L                                      | NM_178312    | NP_842564    | Q9BX51 | GGTL1_HUMAN |                               | 1    | CGTGACGTTGG/  | 0.622 |
| + | 2   | 63        | tj.1_RNA FRG1B_uc010gdr.1_RNA FRG1B_uc010ztk.1_Intron |              |              |        |             |                               | 0    | GAATCGCCCTG.  | 0.353 |
| + | 8   | 1220      | 2wxg.2_Missense_                                      | NM_080625    | NP_542192    | Q9NUG4 | CT160_HUMAN |                               | 4    | GCGGAGTAAGCT  | 0.607 |
| + | 12  | 2260      | sb.2_Missense_Mt                                      | NM_015338    | NP_056153    | Q8IXJ9 | ASXL1_HUMAN | p.Q592fs*5(1)                 | 248  | GCGCCAGGACC   | 0.637 |
| + | 11  | 2022      | isense_Mutation_p.                                    | NM_020336    | NP_065069    | Q86X10 | RLGPB_HUMAN |                               | 2    | CAGCTCTTGAA/  | 0.438 |
| + | 15  | 1847_1848 | uc002xjn.1_Intron                                     | NM_003286    | NP_003277    | P11387 | TOP1_HUMAN  |                               | 7    | GGACTCCATCA/  | 0.455 |
| - | 5   | 896       | itron SYS1-DBNDI                                      | NM_014477    | NP_055292    | Q9Y2B4 | T53G5_HUMAN |                               | 1    | GCGATCTCCAC/  | 0.557 |
| - | 14  | 1466      | e_Mutation_p.E35c                                     | NM_006045    | NP_006036    | O75110 | ATP9A_HUMAN | lasmic (Potential).           | 4    | AGTCTTCGTAC   | 0.597 |
| + | 17  | 1772      | e_Mutation_p.L501                                     | NM_016434    | NP_057518    | Q9NZ71 | RTEL1_HUMAN |                               | 0    | TCATCCTTACCA  | 0.677 |
| - | 14  | 2312      |                                                       | NM_020713    | NP_065764    | Q96KM6 | Z512B_HUMAN | 2-type 6; atypical.           | 0    | CGTTGGGACAG   | 0.622 |
| - | 1   | 130       |                                                       | NM_181609    | NP_853640    | Q7Z4W3 | KR193_HUMAN |                               | 0    | TCCGTAGCCTC/  | 0.567 |
| + | 3   | 204       | p.P30S PPIL2_u                                        | NM_148175    | NP_680480    | Q13356 | PPIL2_HUMAN |                               | 2    | ATCTCCCAAA/   | 0.353 |
| + | 19  | 3912      | p.D1062N BCR_u                                        | NM_004327    | NP_004318    | P11274 | BCR_HUMAN   | Rho-GAP.                      | 12   | CCCTTCGACGTC  | 0.632 |
| + | 5   | 730       |                                                       | NM_019601    | NP_062547    | Q9UGT4 | SUSD2_HUMAN | cellular (Potential).         | 1    | CGGCTCTTTCA/  | 0.552 |
| - | 13  | 1968      | p.P595L AP1B1_u                                       | NM_001127    | NP_001118    | Q10567 | AP1B1_HUMAN | ich (stalk region).           | 2    | TGCGAGGTGGC   | 0.637 |
| + | 4   | 2181      | H_uc003afp.2_5'l                                      | NM_021076    | NP_066554    | P12036 | NFH_HUMAN   | S-P-[AEPV]-[EAK]-[AEVK]       | 0    | CAAAGTCCCTC/  | 0.557 |
| - | 3   | 961       |                                                       | NM_052906    | NP_443138    | Q5R3F8 | LRFN6_HUMAN | tracellular (Potential).      | 2    | CAGGTCGTGCA   | 0.592 |
| + | 6   | 795       | atq.1_Missense_M                                      | NM_001039141 | NP_001034230 | Q9H2D6 | TARA_HUMAN  |                               | 1    | GATCCCGAGGA/  | 0.627 |
| - | 4   | 458       | o.2_Missense_Mt                                       | NM_152221    | NP_689407    | P49674 | KC1E_HUMAN  | rotein kinase.                | 3    | TGGACGGGATC/  | 0.647 |
| + | 3   | 344       | ion_p.G6D L3MBT                                       | NM_031488    | NP_113676    | Q969R5 | LMBL2_HUMAN | FCS-type.                     | 3    | CGTGGGTACAA/  | 0.512 |
| + | 14  | 1795      | H7B_uc010gyl.1_l                                      | NM_017590    | NP_060060    | Q9UGR2 | Z3H7B_HUMAN |                               | 1    | TCTTCGACCCG/  | 0.622 |
| + | 22  | 2806      | H7B_uc010gyl.1_l                                      | NM_017590    | NP_060060    | Q9UGR2 | Z3H7B_HUMAN | C2H2-type.                    | 1    | AGTCCGAGAAG   | 0.622 |
| + | 13  | 1258      | se_Mutation_p.Rc                                      | NM_016300    | NP_057384    | Q9UBL0 | ARP21_HUMAN |                               | 3    | CTCTTTCGGTTG/ | 0.303 |
| + | 9   | 1026      | rc.2_Missense_Mt                                      | NM_002207    | NP_002198    | Q13797 | ITA9_HUMAN  | r (Potential). FG-GAP 5.      | 6    | TGGGGGCCCCC   | 0.542 |
| + | 4   | 697       | .C22A13_uc011ay                                       | NM_004256    | NP_004247    | Q9Y226 | S22AD_HUMAN | ical; (Potential).            | 1    | TGACAGAATGG/  | 0.622 |
| - | 14  | 2344      | p.P717L SCN5A_u                                       | NM_198056    | NP_932173    | Q14524 | SCN5A_HUMAN | S1 of repeat II; (Potential). | 9    | TAAACGGGTCC.  | 0.547 |
| + | 5   | 608       | isense_Mutation_p.                                    | NM_001904    | NP_001895    | P35222 | CTNB1_HUMAN | ARM 1.  del(1)p.A20_F         | 3166 | CACACGTGCAA   | 0.433 |
| + | 14  | 2032      | p.G606S TRAK1_                                        | NM_001042646 | NP_001036111 | Q9UPV9 | TRAK1_HUMAN |                               | 1    | GCCCCGGTGTG   | 0.512 |
| + | 14  | 2053      | p.R613W TRAK1_                                        | NM_001042646 | NP_001036111 | Q9UPV9 | TRAK1_HUMAN |                               | 1    | GCTCCGGGACG   | 0.582 |
| + | 10  | 1065      | it.1_Missense_Mu                                      | NM_015340    | NP_056155    | Q15031 | SYLM_HUMAN  |                               | 2    | CGGGCGAAAAG   | 0.557 |
| + | 3   | 449       | J10hiv.1_Missense                                     | NM_031200    | NP_112477    | P51686 | CCR9_HUMAN  | Name=2; (Potential).          | 3    | CTCTTCTTGTG/  | 0.473 |
| + | 2   | 820       | al.1_Intron CXCR                                      | NM_006564    | NP_006555    | O00574 | CXCR6_HUMAN | Name=6; (Potential).          | 1    | ATGCCCTTCAAC  | 0.493 |

rs7266938



|   |    |           |                   |              |              |        |              |                                |    |                |       |
|---|----|-----------|-------------------|--------------|--------------|--------|--------------|--------------------------------|----|----------------|-------|
| - | 4  | 514       |                   | NM_000258    | NP_000249    | P08590 | MYL3_HUMAN   | EF-hand 2.                     | 0  | :CTTGTCGAAGAC  | 0.587 |
| - | 3  | 578       | i_p.L44F CCDC51   | NM_024661    | NP_078937    | Q96ER9 | CCD51_HUMAN  | Potential.                     | 0  | :CTCGAGAGTAGI  | 0.612 |
| - | 2  | 4427      | uf.1_Missense_Mt  | NM_001407    | NP_001398    | Q9NYQ7 | CELR3_HUMAN  | ial). EGF-like 1; calcium-bir  | 11 | CAGGGCTCTCGI   | 0.662 |
| - | 20 | 4283      | dc.1_Missense_Mt  | NM_002447    | NP_002438    | Q04912 | RON_HUMAN    | Potential). Protein kinase.    | 6  | CCACCTCCCCC.   | 0.557 |
| + | 43 | 4447      |                   | NM_004947    | NP_004938    | Q8IZD9 | DOCK3_HUMAN  | DHR-2.                         | 0  | :CCTGTGGATTG,  | 0.537 |
| + | 3  | 645       | _p.G79R ABHD6_    | NM_020676    | NP_065727    | Q9BV23 | ABHD6_HUMAN  | lasmic (Potential).            | 2  | :TCCACGGATTCT  | 0.448 |
| - | 7  | 2117      |                   | NM_198859    | NP_942559    | Q7Z3G6 | PRIC2_HUMAN  |                                | 5  | :GCCCCCTTCTCT  | 0.547 |
| - | 12 | 1332      | o.D106N LRIG1_u   | NM_015541    | NP_056356    | Q96JA1 | LRIG1_HUMAN  | lar (Potential). LRRCT.        | 5  | :GCTGTCGCTGC   | 0.562 |
| + | 6  | 1612      | ie_Mutation_p.P46 | NM_005233    | NP_005224    | P29320 | EPHA3_HUMAN  | tential). Fibronectin type-III | 33 | :AACATCCTAATG  | 0.453 |
| + | 4  | 1217      | rp.1_Missense_Mt  | NM_001080448 | NP_001073917 | Q9UF33 | EPHA6_HUMAN  | ellular (Potential).           | 16 | :GTCCTCCACAC/  | 0.373 |
| + | 12 | 1861      | T1_uc011big.1_Mi  | NM_017699    | NP_060169    | Q9NXL6 | SIDT1_HUMAN  | lasmic (Potential).            | 5  | :AGAGCGGACTTC  | 0.552 |
| - | 5  | 807       | abb.1_Splice_Site | NM_000796    | NP_000787    | P35462 | DRD3_HUMAN   |                                | 4  | :GTACCTGAAAA/  | 0.498 |
| + | 6  | 643_644   | p.P105L UPK1B_t   | NM_006952    | NP_008883    | O75841 | UPK1B_HUMAN  | ellular (Potential).           | 0  | :TATCCCTGGGCC  | 0.46  |
| - | 2  | 418       | 439A_uc003ecl.1_  | NM_018266    | NP_060736    | Q9NV64 | TM39A_HUMAN  |                                | 2  | :AGAAGGTAAGI   | 0.483 |
| - | 17 | 4112_4113 | p.A203T HEG1_uc   | NM_020733    | NP_065784    | Q9ULI3 | HEG1_HUMAN   | lasmic (Potential).            | 2  | :TAGGCCGGGT/   | 0.431 |
| - | 5  | 1016      | oy.2_Missense_M   | NM_032169    | NP_115545    | Q709F0 | ACD11_HUMAN  |                                | 1  | :TTGTGATTATCG  | 0.403 |
| + | 5  | 1030      |                   | NM_003571    | NP_003562    | Q13515 | BFSP2_HUMAN  |                                | 0  | :CACAGCAACAC   | 0.572 |
| - | 14 | 1829      | eyh.2_Missense_A  | NM_152394    | NP_689607    | Q7L0X2 | F194A_HUMAN  |                                | 3  | :TACTCTCCACTT/ | 0.453 |
| + | 16 | 2076      | M1_uc003fcg.2_M   | NM_024996    | NP_079272    | Q96RP9 | EFGM_HUMAN   |                                | 4  | :TAGCTCCAAAT/  | 0.383 |
| - | 13 | 2749      | p.S827F MECOM     | NM_005241    | NP_005232    | Q03112 | EV11_HUMAN   |                                | 14 | :GTTCAGAATGAC  | 0.408 |
| - | 16 | 2449      | p.T290A ABCC5_    | NM_005688    | NP_005679    | O15440 | MRP5_HUMAN   | C transporter 1.               | 4  | :TTCCGTAATACA  | 0.428 |
| - | 16 | 1883      | 13A4_uc011bsr.1_  | NM_032279    | NP_115655    | Q4VNC1 | AT134_HUMAN  | ellular (Potential).           | 2  | :CAATTCCTTCC/  | 0.473 |
| + | 6  | 1442      | 1bus.1_Missense_  | NM_182524    | NP_872330    | Q7Z3I0 | Q7Z3I0_HUMAN |                                | 0  | :AGAATGTGGCA.  | 0.383 |
| - | 3  | 1986      |                   | NM_053042    | NP_444270    | Q9C0D4 | Z518B_HUMAN  |                                | 4  | :ATGCAGCTCCA/  | 0.378 |
| + | 27 | 3029      | is.1_Missense_Mu  | NM_004787    | NP_004778    | O94813 | SLIT2_HUMAN  | EGF-like 1.                    | 11 | :TTACCGATGCAC  | 0.398 |
| - | 13 | 1259      |                   | NM_003215    | NP_003206    | P42680 | TEC_HUMAN    | rotein kinase.                 | 9  | :GGCTCGCCATT   | 0.453 |
| + | 5  | 1220      | jyb.1_Missense_IV | NM_020846    | NP_065897    | Q9P270 | SLAI2_HUMAN  |                                | 0  | :ACCCAGAAATT/  | 0.478 |
| - | 10 | 1921      | rk.1_RNA CENPC    | NM_001812    | NP_001803    | Q03188 | CENPC_HUMAN  |                                | 2  | :CTGCCTTTTAAC  | 0.343 |
| - | 1  | 1475      |                   | NM_033214    | NP_149991    | Q14410 | GLPK2_HUMAN  |                                | 4  | :TCAATCGTTCC/  | 0.507 |
| + | 45 | 7493      | ja.2_Missense_Mt  | NM_080683    | NP_542414    | Q12923 | PTN13_HUMAN  | protein phosphatase.           | 6  | :ACTTCGACTGG   | 0.448 |
| + | 5  | 782       | 36_splice HSPA4L  | NM_014278    | NP_055093    | O95757 | HS74L_HUMAN  |                                | 4  | :TGCAGGTGAGC   | 0.328 |
| + | 9  | 1367      | _p.V331I HSPA4L   | NM_014278    | NP_055093    | O95757 | HS74L_HUMAN  |                                | 4  | :AAGCTGTTGCA/  | 0.338 |
| - | 17 | 1613      | jz.3_Missense_Mt  | NM_001102653 | NP_001096123 | Q01804 | OTUD4_HUMAN  |                                | 3  | CAGGAGAAGGG    | 0.353 |
| - | 7  | 1613      | ne.2_Nonsense_A   | NM_001009555 | NP_001009555 | Q5HYK7 | SH319_HUMAN  | Pro-rich.                      | 2  | :GGCTTGATGAT/  | 0.552 |
| - | 7  | 1368      | ime.2_Missense_A  | NM_001009555 | NP_001009555 | Q5HYK7 | SH319_HUMAN  | Pro-rich.                      | 2  | :TCCCCTTCTT/   | 0.537 |
| + | 3  | 364_365   | B_uc010ipv.2_Intr | NM_005141    | NP_005132    | P02675 | FIBB_HUMAN   |                                | 3  | :TACAGGATGTC   | 0.401 |
| - | 3  | 1339      | sn.3_Nonsense_IV  | NM_021647    | NP_067679    | O75121 | MFA3L_HUMAN  | lasmic (Potential).            | 1  | :TCCAGGTAAGCT  | 0.483 |
| - | 4  | 809       |                   | NM_153343    | NP_699174    | Q6UWR7 | ENPP6_HUMAN  | ellular (Potential).           | 1  | :GATCCACTTGG   | 0.547 |
| + | 3  | 470       | v.1_RNA C5orf22_  | NM_018356    | NP_060826    | Q49AR2 | CE022_HUMAN  |                                | 2  | :ACTTTTTAGTAG  | 0.378 |
| - | 20 | 4256      | liuq.1_Missense_A | NM_030955    | NP_112217    | P58397 | ATS12_HUMAN  | SP type-1 5.                   | 9  | :AGCACAGGGAC   | 0.557 |
| - | 6  | 1038      |                   | NM_001007527 | NP_001007528 | Q68DH5 | LMBD2_HUMAN  | lasmic (Potential).            | 0  | :GAATTCACCA/   | 0.423 |
| - | 12 | 1984      | 1_Missense_Muta   | NM_000065    | NP_000056    | P13671 | CO6_HUMAN    | SP type-1 3.                   | 7  | :GGCAGGATTAT   | 0.502 |
| - | 1  | 633       | 4_uc003jng.2_5F   | NM_001014279 | NP_001014301 | Q3ZCQ2 | AX2R_HUMAN   |                                | 0  | :GGTTCCTCTG/   | 0.607 |
| + | 21 | 3298      | .2_Missense_Muta  | NM_012343    | NP_036475    | Q13423 | NNTM_HUMAN   | chondrial matrix.              | 3  | :ATTGAGCAGCTC  | 0.343 |
| + | 10 | 2324      |                   | NM_005921    | NP_005912    | Q13233 | M3K1_HUMAN   |                                | 2  | :TGGGGCAGCA/   | 0.577 |
| + | 13 | 1990      | o.G542R POLK_uc   | NM_016218    | NP_057302    | Q9UBT6 | POLK_HUMAN   | UBZ-type 1.                    | 4  | :CTCAAGGGTGC   | 0.368 |
| + | 2  | 10147     |                   | NM_153610    | NP_705838    | Q8N3K9 | CMYA5_HUMAN  |                                | 9  | :GTCACGGTAAT/  | 0.483 |

|   |    |           |                     |              |              |        |             |                                |    |              |       |             |
|---|----|-----------|---------------------|--------------|--------------|--------|-------------|--------------------------------|----|--------------|-------|-------------|
| - | 8  | 1129      | SK1_uc010jbi.1_in   | NM_000439    | NP_000430    | P29120 | NEC1_HUMAN  | Catalytic.                     | 2  | CGTTTCCCGAA  | 0.512 |             |
| - | 2  | 1198      | ij.1_Missense_Mul   | NM_005260    | NP_005251    | O60383 | GDF9_HUMAN  |                                | 1  | GTGACGGTGAT  | 0.512 |             |
| - | 2  | 962       | 1_RNA TRPC7_uc      | NM_020389    | NP_065122    | Q9HCX4 | TRPC7_HUMAN | lasmic (Potential).            | 0  | CTTACCTTCTTG | 0.493 |             |
| + | 20 | 4926_4927 | p.P1232F KDM3B      | NM_016604    | NP_057688    | Q7LBC6 | KDM3B_HUMAN | JmjC.                          | 11 | GGATTCCCATCG | 0.421 |             |
| + | 1  | 1887      | .2_Intron PCDHA6    | NM_018903    | NP_061726    | Q9UN75 | PCDAC_HUMAN | Extracellular (Potential).     | 0  | GGGTGCGGGGCC | 0.682 |             |
| + | 1  | 1848      | IA7_uc003lhq.2_lr   | NM_018898    | NP_061721    | Q9H158 | PCDC1_HUMAN | ellular (Pote p.P558S(1)       | 5  | TGTTTCCCTTGC | 0.493 | rs140626189 |
| + | 1  | 802       |                     | NM_018940    | NP_061763    | Q9Y5E2 | PCDB7_HUMAN | r (Potential). Cadherin 2.     | 6  | TCAGTTTAACCC | 0.498 |             |
| + | 1  | 964       | DHGA4_uc003ljq.     | NM_018919    | NP_061742    | Q9Y5G7 | PCDG6_HUMAN | Extracellular (Potential).     | 1  | AAGCCCGGGAT  | 0.413 |             |
| + | 11 | 2285      | p.R542Q LARP1_      | NM_033551    | NP_291029    | Q6PKG0 | LARP1_HUMAN |                                | 4  | TGGGCGGAAGA  | 0.502 |             |
| - | 2  | 1043      |                     | NM_130899    | NP_570969    | Q8TC56 | FA71B_HUMAN | Ala-rich.                      | 6  | TGCTCCCGCCA  | 0.532 |             |
| + | 19 | 2120      | 61_splice CYFIP2_   | NM_001037333 | NP_001032410 | Q96F07 | CYFP2_HUMAN |                                | 0  | ATGGAGTAAGAC | 0.522 |             |
| + | 2  | 495       |                     | NM_000811    | NP_000802    | Q16445 | GBRA6_HUMAN |                                | 12 | TGGAGGTAAGA  | 0.453 |             |
| + | 8  | 1317      | lyy.3_Missense_M    | NM_000816    | NP_000807    | P18507 | GBRG2_HUMAN | ical; (Probable).              | 5  | CAGCACCATTC  | 0.463 |             |
| + | 10 | 1903      | Missense_Mutation   | NM_001122679 | NP_001116151 |        |             |                                | 10 | GCGACGTGCC   | 0.577 |             |
| + | 11 | 1648      | leq.1_Missense_M    | NM_017785    | NP_060255    | Q96EA4 | SPDLY_HUMAN |                                | 2  | TGCTCCCTGTG  | 0.448 |             |
| + | 3  | 342       | ick.3_Missense_M    | NM_001205    | NP_001196    | Q12981 | SEC20_HUMAN | Cytoplasmic (Potential).       | 1  | TCCAGGAAGTG  | 0.473 |             |
| - | 10 | 1399      | T2L2_uc003mja.2_    | NM_153373    | NP_699204    | Q8IUZ5 | AT2L2_HUMAN |                                | 1  | CTCTTCAGTTG  | 0.512 |             |
| - | 7  | 1576      | ense_Mutation_p.A   | NM_000843    | NP_000834    | O15303 | GRM6_HUMAN  | ellular (Potential).           | 8  | CGGGCGCATCT  | 0.642 |             |
| + | 1  | 326       | q.1_Missense_ML     | NM_004415    | NP_004406    | P15924 | DESP_HUMAN  | plakophilin 1 and junction p   | 9  | GGCCCGCATGA  | 0.697 |             |
| - | 23 | 2971      | ch.3_Missense_M     | NM_022113    | NP_071396    | Q9H1H9 | KI13A_HUMAN |                                | 4  | CCGGTGGCCCC  | 0.473 |             |
| + | 7  | 1298      | 3_Mutation_p.R27I   | NM_006355    | NP_006346    | O00635 | TRI38_HUMAN | 330.2/SPRY.                    | 0  | GTTAAGGAGTC  | 0.438 |             |
| + | 7  | 1253      | c011dly.1_RNA LC    | NM_001098479 | NP_001091949 | P30511 | HLAF_HUMAN  |                                | 0  | GCCTCCGGAGT  | 0.512 |             |
| - | 4  | 1107      | 39_uc003npd.2_lr    | NM_025236    | NP_079512    | Q9H2S5 | RNF39_HUMAN | 330.2/SPRY.                    | 0  | GGGTGCCCGTA  | 0.756 |             |
| - | 13 | 6352      | rf.3_Missense_ML    | NM_014641    | NP_055456    | Q14676 | MDC1_HUMAN  | uclear localization (NLS2).    | 4  | GGTCCGGTCACC | 0.547 |             |
| - | 10 | 4203      | IC1_uc011dmp.1_     | NM_014641    | NP_055456    | Q14676 | MDC1_HUMAN  | on with the PRKDC comple       | 4  | TGTGGAGGTGG  | 0.532 |             |
| + | 2  | 229       | CA_uc003rxz.1_5'UTR |              |              |        |             |                                | 0  | AGAAATGCAGG  | 0.552 | rs17200172  |
| - | 2  | 821       | 2_5'Flank ATF6B_t   | NM_022110    | NP_071393    | Q9UIM3 | FKBPL_HUMAN |                                | 0  | TGACAGGAGGT  | 0.587 |             |
| - | 3  | 737       | 1_Mutation_p.E219   | NM_002123    | NP_002114    | P01920 | DQB1_HUMAN  | ntial). Beta-2.  lg-like C1-ty | 0  | CCACTCCACGG  | 0.537 |             |
| - | 3  | 592       | fb.2_Missense_ML    | NM_001142883 | NP_001136355 | Q96PC2 | IP6K3_HUMAN |                                | 0  | AGGGCTCCAGC  | 0.622 |             |
| - | 10 | 4907      | 318_uc003ouw.2_l    | NM_014345    | NP_055160    | Q5VUA4 | ZN318_HUMAN |                                | 7  | TGTCTGAACTT  | 0.502 |             |
| - | 3  | 221       |                     | NM_032111    | NP_115487    | Q6P1L8 | RM14_HUMAN  |                                | 1  | GAATCGCACTC  | 0.532 |             |
| - | 2  | 585       | bx.2_Missense_ML    | NM_001498    | NP_001489    | P48506 | GSH1_HUMAN  |                                | 2  | ACCAACCGGACT | 0.378 | rs148272922 |
| + | 1  | 818       |                     | NM_032602    | NP_115991    | Q969M2 | CXA10_HUMAN | lasmic (Potential).            | 0  | FGATTTGCTCTT | 0.423 |             |
| - | 4  | 830       | oqi.1_Missense_M    | NM_001040179 | NP_001035269 | Q969V1 | MCHR2_HUMAN | Name=4; (Potential).           | 8  | CTTCGAGTAG   | 0.443 | rs145638548 |
| - | 27 | 3384      | at.1_Missense_Mu    | NM_001145128 | NP_001138600 | Q5TCS8 | AKD1_HUMAN  |                                | 1  | TTCAGAAATTC  | 0.303 | rs144036651 |
| + | 2  | 567_568   |                     | NM_175057    | NP_778227    | Q96R19 | TAAR9_HUMAN | ellular (Potential).           | 0  | TAGGAGGCTGCC | 0.406 |             |
| - | 2  | 277       | fr.1_Missense_ML    | NM_001033080 | NP_001028252 | Q9P1P5 | TAAR2_HUMAN | Name=2; (Potential).           | 1  | GAATCCCAGGA  | 0.423 |             |
| + | 12 | 1592      | ense_Mutation_p.A   | NM_015440    | NP_056255    | Q6UB35 | C1TM_HUMAN  | hydrofolate synthetase.        | 4  | TGACCGCACAC  | 0.502 |             |
| - | 82 | 16305     | ou.3_Missense_M     | NM_182961    | NP_892006    | Q8NF91 | SYNE1_HUMAN | lasmic (Potential).            | 45 | TTCAGGTAACT  | 0.398 |             |
| - | 29 | 4657      |                     | NM_005577    | NP_005568    | P08519 | APOA_HUMAN  | Kringle 36.                    | 6  | AGGATATGCCTC | 0.448 |             |
| + | 9  | 1153      |                     | NM_000301    | NP_000292    | P00747 | PLMN_HUMAN  |                                | 4  | TGGCTCCACA   | 0.488 |             |
| - | 3  | 421       |                     | NM_182924    | NP_891554    | Q8IY33 | MILK2_HUMAN | CH.                            | 1  | CAGCCGGTCAG  | 0.657 | rs150995341 |
| - | 9  | 1183      | sh.1_Missense_M     | NM_001013836 | NP_001013858 | Q9Y6D9 | MD1L1_HUMAN | Potential.                     | 2  | CGTTCTCCAGC  | 0.637 |             |
| + | 3  | 873       | p.S125L FOXK1_      | NM_001037165 | NP_001032242 | P85037 | FOXK1_HUMAN |                                | 2  | CGCGTCGGAGC  | 0.657 |             |
| + | 7  | 964       | .S268N SLC29A4_     | NM_153247    | NP_694979    | Q7RTT9 | S29A4_HUMAN | lasmic (Potential).            | 1  | TGACAGCCACC  | 0.662 |             |
| - | 8  | 1320      |                     | NM_001077653 | NP_001071121 | Q9UMR3 | TBX20_HUMAN |                                | 1  | ATGGCGTAGTC  | 0.498 |             |
| + | 48 | 13316     | CA13_uc010kyt.1_    | NM_152701    | NP_689914    | Q86UQ4 | ABCAD_HUMAN |                                | 10 | CAATACGGTAAT | 0.358 |             |

|   |    |      |                      |              |              |        |             |                                           |     |               |       |             |
|---|----|------|----------------------|--------------|--------------|--------|-------------|-------------------------------------------|-----|---------------|-------|-------------|
| + | 10 | 1116 |                      | NM_000265    | NP_000256    | P14598 | NCF1_HUMAN  | Pro-rich (highly basic).                  | 1   | AGAGCCGCTCG   | 0.517 |             |
| - | 11 | 1659 |                      | NM_012431    | NP_036563    | O15041 | SEM3E_HUMAN | Sema.                                     | 3   | TCATCAGGATAG  | 0.393 |             |
| - | 3  | 337  |                      | NM_006304    | NP_006295    | P60896 | DSS1_HUMAN  |                                           | 0   | CCATACGGGGTT  | 0.363 |             |
| + | 1  | 1411 | 1_5'Flank ZCWP1      | NM_019606    | NP_062552    | Q7L2J0 | MEPCE_HUMAN | in3-type SAM.                             | 1   | TTGGGCGCCTTC  | 0.562 |             |
| + | 4  | 734  | p.G181S SERPIN       | NM_000602    | NP_000593    | P05121 | PAI1_HUMAN  |                                           | 3   | TCAACGGCCAG   | 0.562 |             |
| - | 7  | 718  |                      | NM_138403    | NP_612412    | Q9BUA6 | MYL10_HUMAN | EF-hand 2.                                | 2   | TTTTTCTTTGATG | 0.562 |             |
| - | 22 | 3342 | v.2_Missense_Mu      | NM_002291    | NP_002282    | P07942 | LAMB1_HUMAN | in1 EGF-like 10.                          | 8   | CGTGTGGTACA   | 0.532 |             |
| - | 3  | 330  | 3A1_uc010lks.2_5     | NM_022444    | NP_071889    | Q9BZW2 | S13A1_HUMAN |                                           | 2   | AAATTCATTTT   | 0.378 |             |
| - | 12 | 2684 | JB_uc003vko.2_M      | NM_178827    | NP_849149    | Q8NA54 | IQUB_HUMAN  |                                           | 4   | GGGATTATTCC   | 0.468 |             |
| - | 4  | 393  | 4PDH1_uc011kon.      | NM_001142573 | NP_001136045 | P20839 | IMDH1_HUMAN |                                           | 4   | CTGGGGTGCAG   | 0.612 |             |
| + | 9  | 1728 | p.A525T ZYX_uc       | NM_001010972 | NP_001010972 | Q15942 | ZYX_HUMAN   | 1 zinc-binding 3.                         | 0   | TGGTCCGCCCTG  | 0.607 |             |
| + | 44 | 6434 |                      | NM_198455    | NP_940857    | A2VEC9 | SSPO_HUMAN  | F5/8 type C.                              | 0   | CTCCTCCAACG   | 0.617 |             |
| - | 5  | 995  | p.R232C KCNH2_       | NM_000238    | NP_000229    | Q12809 | KCNH2_HUMAN | transmembrane (Potential).                | 4   | GGTGCGGTAGC   | 0.617 |             |
| + | 24 | 3030 | p.P913L ARHGGE       | NM_014629    | NP_055444    | O15013 | ARHGA_HUMAN |                                           | 1   | ACCCCGGACC    | 0.592 |             |
| - | 1  | 101  | 1_Intron FAM66D      | NM_201402    | NP_958804    | Q6R6M4 | U17L2_HUMAN |                                           | 3   | AAGTCCGCTGG   | 0.522 |             |
| - | 18 | 6054 | p.I1837T MYST3_1     | NM_001099412 | NP_001092882 | Q92794 | MYST3_HUMAN |                                           | 7   | TGCCAATGTTG   | 0.562 |             |
| + | 8  | 801  | p.c.2_Missense_Mt    | NM_005662    | NP_005653    | Q9Y277 | VDAC3_HUMAN | transmembrane; (By similarity).           | 1   | GTTTTGGCATT   | 0.423 |             |
| + | 2  | 243  |                      | NM_000749    | NP_000740    | Q05901 | ACHB3_HUMAN | transmembrane (Potential).                | 1   | TCCAAGTTATC   | 0.423 |             |
| + | 3  | 461  | 1_qa.1_Missense_M    | NM_001005365 | NP_001005365 | Q6S8J7 | POTEA_HUMAN | ANK 2.                                    | 1   | AGCCGTACA     | 0.373 |             |
| + | 5  | 482  | ITG1_uc010lxz.1_1    | NM_018967    | NP_061840    | Q9NSN8 | SNTG1_HUMAN |                                           | 5   | TTGATGATCCAG  | 0.383 |             |
| + | 1  | 420  |                      | NM_022454    | NP_071899    | Q9H6I2 | SOX17_HUMAN | HMG box.                                  | 1   | CCGATGAACGC   | 0.677 |             |
| - | 22 | 3851 | nt.2_Missense_Mu     | NM_198123    | NP_937756    | Q7Z407 | CSMD3_HUMAN | transmembrane (Potential).                | 63  | TGTCACTCCAC   | 0.507 |             |
| - | 7  | 2645 | i.2_RNA ZFAT_uc      | NM_020863    | NP_065914    | Q9P243 | ZFAT_HUMAN  |                                           | 1   | CAGTGTGTGT    | 0.478 |             |
| - | 4  | 684  | p.S158L ZFAT_uc      | NM_020863    | NP_065914    | Q9P243 | ZFAT_HUMAN  |                                           | 1   | TTTTTCGAGGCT  | 0.438 |             |
| - | 3  | 552  | c003yxj.2_Missense   | NM_000497    | NP_000488    | P15538 | C11B1_HUMAN |                                           | 3   | GGCTCCCCCGG   | 0.632 |             |
| + | 18 | 2474 | 3zjl.3_Missense_N    | NM_020829    | NP_065880    | Q4ADV7 | RIC1_HUMAN  |                                           | 0   | AGAAGCTACCT   | 0.542 |             |
| - | 1  | 2961 | i_p.I632L RANBP6     | NM_012416    | NP_036548    | O60518 | RNBP6_HUMAN | HEAT 7.                                   | 3   | TCCCTATTGCTG  | 0.363 |             |
| + | 21 | 2593 | zoh.1_Missense_N     | NM_017794    | NP_060264    | Q5VW36 | K1797_HUMAN |                                           | 10  | TATGACGATGAA  | 0.378 |             |
| + | 1  | 490  | 42421_uc004aed.1_RNA |              |              |        |             |                                           | 0   | TTAACCCCTTCC  | 0.582 |             |
| + | 7  | 613  | 1_RNA TMC1_uc0       | NM_138691    | NP_619636    | Q8TDI8 | TMC1_HUMAN  | Pro-rich/Asp/Glu/Lys-rich (highly basic). | 1   | AAGAGGAAGAG   | 0.413 |             |
| - | 5  | 1128 |                      | NM_004297    | NP_004288    | O95837 | GNA14_HUMAN | transmembrane; (By similarity).           | 2   | CCCAACATCC    | 0.428 |             |
| + | 13 | 2217 | lsz.1_Missense_M     | NM_001018064 | NP_001018074 | Q16620 | NTRK2_HUMAN | transmembrane (Potential).                | 16  | AAACCGGTCGG   | 0.458 | rs142393662 |
| - | 5  | 1131 |                      | NM_017561    | NP_060031    | A1L443 | FA22F_HUMAN | Pro-rich.                                 | 0   | TGGGCGTTGGT   | 0.692 |             |
| + | 10 | 7136 | 1sense_Mutation_f    | NM_021224    | NP_067047    | Q96JM2 | ZN462_HUMAN |                                           | 5   | TTGTCCCCATT   | 0.428 |             |
| + | 5  | 692  | 1_Intron SLC31A1     | NM_001859    | NP_001850    | O15431 | COPT1_HUMAN | transmembrane; (Potential).               | 0   | GGCCGGTACAG   | 0.502 |             |
| + | 3  | 883  | L27A1_uc010mvd.      | NM_032888    | NP_116277    | Q8IZC6 | CORA1_HUMAN | Pro-rich.                                 | 4   | CACCCGCCACG   | 0.672 | rs145824150 |
| - | 12 | 3883 | f.2_Missense_Mut     | NM_002160    | NP_002151    | P24821 | TENA_HUMAN  | transmembrane type-III 7.                 | 7   | CTCGGCCACC    | 0.502 |             |
| - | 2  | 558  | p.A153T ASTN2_1      | NM_198187    | NP_937830    | O75129 | ASTN2_HUMAN | transmembrane (Potential).                | 9   | CGCTGCTGTGC   | 0.607 |             |
| - | 10 | 4055 | p.K910R SETX_uc      | NM_015046    | NP_055861    | Q7Z333 | SETX_HUMAN  |                                           | 3   | GACCCTTTTTCC  | 0.438 |             |
| - | 1  | 105  |                      | NM_001080483 | NP_001073952 | A6NI61 | TMM8C_HUMAN | transmembrane; (Potential).               | 0   | TAGACCATGGC   | 0.647 |             |
| - | 9  | 1460 |                      | NM_017617    | NP_060087    | P46531 | NOTC1_HUMAN | GF-like 12; calcium-binding               | 856 | CTCGCAGTGC    | 0.652 |             |
| + | 10 | 1733 | .R468Q GRIN1_uc      | NM_007327    | NP_015566    | Q05586 | NMDZ1_HUMAN | transmembrane (Potential).                | 1   | GCACGGACCA    | 0.632 |             |
| + | 3  | 531  | p.P165L EHMT1_       | NM_024757    | NP_079033    | Q9H9B1 | EHMT1_HUMAN |                                           | 3   | GACTCCAAGCC   | 0.657 |             |
| - | 5  | 687  | v.2_Missense_Mut     | NM_003662    | NP_003653    | O00625 | PIR_HUMAN   |                                           | 1   | TGACAGCAACT   | 0.473 |             |
| + | 4  | 938  |                      | NM_014271    | NP_055086    | Q9NZN1 | IRPL1_HUMAN | 2. Extracellular (Potential).             | 5   | CTCTGCTATAAT  | 0.393 |             |
| - | 6  | 1982 | i_p.T440I TAB3_uc    | NM_152787    | NP_690000    | Q8N5C8 | TAB3_HUMAN  | Pro-rich.                                 | 1   | TGGAGTACAAC   | 0.393 |             |
| - | 16 | 2197 | D_uc004ddb.1_Nc      | NM_004006    | NP_003997    | P11532 | DMD_HUMAN   | Spectrin 3.                               | 6   | TATCCAACAC    | 0.388 |             |

|   |    |           |                   |              |              |        |             |                            |    |                 |       |
|---|----|-----------|-------------------|--------------|--------------|--------|-------------|----------------------------|----|-----------------|-------|
| + | 1  | 1665      |                   | NM_001013736 | NP_001013758 | Q5HY64 | FA47C_HUMAN |                            | 3  | AGCCTCCTGAG     | 0.617 |
| + | 4  | 742       | hh.2_Missense_M   | NM_005676    | NP_005667    | P98175 | RBM10_HUMAN | Poly-Glu.                  | 5  | aggatgaggaggagg | 0.522 |
| + | 8  | 1202      | p.S352N WDR13_    | NM_017883    | NP_060353    | Q9H1Z4 | WDR13_HUMAN |                            | 2  | GGGGAGCCCTG     | 0.627 |
| - | 19 | 1766      | p.R210K TEX11_u   | NM_001003811 | NP_001003811 | Q81YF3 | TEX11_HUMAN |                            | 5  | AACTCTCTCTCT    | 0.328 |
| - | 3  | 1571_1572 |                   | NM_001008537 | NP_001008537 | Q5QGS0 | K2022_HUMAN |                            | 15 | ATTGTCCTGAAA    | 0.416 |
| + | 6  | 1814      | w.2_Missense_Mt   | NM_000052    | NP_000043    | Q04656 | ATP7A_HUMAN | ytoplasmic (Potential).    | 0  | GATTTGGAGCC     | 0.388 |
| + | 4  | 249       | r.p.L45F ARL13A_  | NM_001012990 | NP_001013008 | Q5H913 | AR13A_HUMAN |                            | 1  | CAGTACTTCCC     | 0.428 |
| + | 10 | 1465      | h.1_Missense_Mu   | NM_001939    | NP_001930    | Q13474 | DRP2_HUMAN  | WW.                        | 2  | CCAATAAAGTTC    | 0.502 |
| - | 16 | 2789      | ense_Mutation_p.1 | NM_024657    | NP_078933    | Q8TE76 | MORC4_HUMAN | Potential.                 | 1  | GTTTTGTTCTTT    | 0.488 |
| - | 1  | 3026      |                   | NM_003604    | NP_003595    | O14654 | IRS4_HUMAN  |                            | 10 | GGGGAGGAAGT     | 0.488 |
| - | 4  | 1187      | p.R258C DCX_uc    | NM_000555    | NP_000546    | O43602 | DCX_HUMAN   | oublecortin 2.             | 4  | CATAGCGAAATT    | 0.388 |
| - | 6  | 2388      | om.1_Missense_M   | NM_012471    | NP_036603    | Q9UL62 | TRPC5_HUMAN | ical; (Potential).         | 1  | CGCAACGAACTT    | 0.463 |
| - | 2  | 137       | A69_uc004ery.1_ξ  | NM_001000    | NP_000991    | P62891 | RL39_HUMAN  |                            | 0  | CTGGGGAATGG     | 0.408 |
| + | 1  | 310       |                   | NM_182540    | NP_872346    | Q5JSJ4 | DX26B_HUMAN |                            | 0  | CGGCAGTGAGG     | 0.557 |
| - | 8  | 1196      | nwc.1_Missense_M  | NM_024597    | NP_078873    | Q8IWC1 | MA7D3_HUMAN |                            | 4  | CGGGAGTGCTT     | 0.582 |
| + | 5  | 943       | r.2_Intron MAGEA  | NM_005366    | NP_005357    | P43364 | MAGAB_HUMAN | MAGE.                      | 2  | TGAAGGAAGTG     | 0.473 |
| + | 12 | 1615      | eh.1_Missense_Mi  | NM_003828    | NP_003819    | Q13613 | MTMR1_HUMAN | ularin phosphatase.        | 1  | ATGCCGATGCT     | 0.378 |
| + | 2  | 1208      | 3202-2 MI0014253  | NM_003492    | NP_003483    | Q14656 | TM187_HUMAN |                            | 0  | CACAGGCCACT     | 0.552 |
| - | 6  | 631       | se_Mutation_p.K1  | NM_002436    | NP_002427    | Q00013 | EM55_HUMAN  | SH3.                       | 3  | TCCTTTTTGGG     | 0.463 |
| - | 5  | 887       | o.R241W TMLHE_    | NM_018196    | NP_060666    | Q9NVH6 | TMLH_HUMAN  |                            | 1  | GTGCCGATCCA     | 0.418 |
| - | 21 | 2902      | RSF25_uc001ani.   | NM_001042663 | NP_001036128 | O94827 | PKHG5_HUMAN |                            | 1  | CCCTCGGACTTA    | 0.697 |
| - | 2  | 262       |                   | NM_001009611 | NP_001009611 | O60810 | PRAM4_HUMAN |                            | 1  | GGCGGCGGAAG     | 0.602 |
| - | 2  | 227       | r.p.P13S ATP13A_  | NM_022089    | NP_071372    | Q9NQ11 | AT132_HUMAN | ical; (Potential).         | 4  | GGTGGCGTGC      | 0.527 |
| + | 1  | 2328      | C7A_uc009vpg.2_   | NM_152375    | NP_689588    | Q5VTJ3 | KLD7A_HUMAN |                            | 3  | GGGCACCCTCC     | 0.647 |
| + | 3  | 435       | r.p.Q90* SYTL1_u  | NM_032872    | NP_116261    | Q8IYJ3 | SYTL1_HUMAN |                            | 1  | GCTCCCAGCGG     | 0.642 |
| - | 6  | 1017      | K2_uc010olo.1_Mi  | NM_007170    | NP_009101    | Q96S53 | TESK2_HUMAN | rotein kinase.             | 5  | CATCGGGGATC     | 0.542 |
| + | 8  | 1233      | nr.1_Missense_Mt  | NM_153703    | NP_714914    | Q7Z5L7 | PODN_HUMAN  | LRR 12.                    | 2  | GCGGTTGCACA     | 0.662 |
| - | 3  | 385       |                   | NM_022159    | NP_071442    | Q9HBW9 | ELTD1_HUMAN | GF-like 2; calcium-binding | 2  | GTGTGTTAGTGC    | 0.343 |
| + | 6  | 978       | p.D75N CLCA4_u    | NM_012128    | NP_036260    | Q14CN2 | CLCA4_HUMAN | VWFA.                      | 2  | TTCTTGATAAGT    | 0.423 |
| - | 2  | 714       | P6_uc009wjj.1_Int | NM_016361    | NP_057445    | Q9NPH0 | PPA6_HUMAN  |                            | 4  | GGGTGGGACCT     | 0.418 |
| + | 14 | 1688      | vkt.1_Missense_M  | NM_001102663 | NP_001096133 |        |             |                            | 0  | CTCAGCAGGGA     | 0.478 |
| + | 3  | 814       | .2_Intron CD1E_uc | NM_030893    | NP_112155    | P15812 | CD1E_HUMAN  | Ig-like.                   | 3  | CCCTCGATTC1     | 0.507 |
| + | 1  | 586       |                   | NM_001004478 | NP_001004478 | Q8NGY1 | O10Z1_HUMAN | ellular (Potential).       | 2  | CGAGTGAGCTG     | 0.498 |
| + | 10 | 1447      | wb.2_Missense_M   | NM_015569    | NP_056384    | Q9UQ16 | DYN3_HUMAN  |                            | 1  | GCCTTCCTTGA     | 0.398 |
| - | 6  | 1040      | A11_uc010pmq.1_   | NM_178527    | NP_848622    | Q5TAH2 | S9A11_HUMAN |                            | 2  | GATTCTGTTGC     | 0.274 |
| - | 7  | 1507_1508 | Mutation_p.G432   | NM_004319    | NP_004310    | O14525 | ASTN1_HUMAN |                            | 15 | TGGCTCCCTCC     | 0.589 |
| + | 3  | 355       | R3_uc010poy.1_M   | NM_021023    | NP_066303    | Q02985 | FHR3_HUMAN  | Sushi 2.                   | 0  | TATTTTCCTTATT   | 0.299 |
| + | 3  | 391       |                   | NM_030787    | NP_110414    | Q9BXR6 | FHR5_HUMAN  | Sushi 2.                   | 2  | TGTGTTCCTTTC    | 0.308 |
| - | 6  | 981       |                   | NM_001994    | NP_001985    | P05160 | F13B_HUMAN  | Sushi 5.                   | 3  | TATTTCTGCTGA    | 0.363 |
| - | 30 | 4297      | gh.1_Missense_M   | NM_018072    | NP_060542    | Q9H583 | HEAT1_HUMAN |                            | 3  | GCTCGGGGACG     | 0.443 |
| - | 4  | 531       |                   | NM_001010924 | NP_001010924 | Q5VUB5 | F1711_HUMAN | ellular (Potential).       | 4  | CGAAGGGGAG      | 0.517 |
| - | 8  | 919       |                   | NM_001031746 | NP_001026916 | Q8IW00 | CJ072_HUMAN | lasmic (Potential).        | 0  | GGTGGGTTTG      | 0.488 |
| + | 3  | 2053      |                   | NM_199459    | NP_955629    | Q711Q0 | CJ071_HUMAN |                            | 0  | TCAATCCCAG      | 0.542 |
| - | 6  | 1624      | hv.1_Missense_Mt  | NM_014912    | NP_055727    | Q8NE35 | CPEB3_HUMAN | RRM 1.                     | 0  | TACCTTTAGGAC    | 0.413 |
| + | 22 | 2606      | p.P710L HELLS_u   | NM_018063    | NP_060533    | Q9NRZ9 | HELLS_HUMAN |                            | 2  | CAGTCTGAAT      | 0.323 |
| + | 3  | 807       | C19_uc009xus.1_   | NM_000772    | NP_000763    | P33260 | CP2CI_HUMAN |                            | 5  | CCAATGGTGGG     | 0.323 |
| + | 4  | 962       | V212* CYP2C19_u   | NM_000772    | NP_000763    | P33260 | CP2CI_HUMAN |                            | 5  | CCATGGATCCA     | 0.294 |

rs146027951

|   |    |             |                   |              |              |        |             |       |                |       |             |
|---|----|-------------|-------------------|--------------|--------------|--------|-------------|-------|----------------|-------|-------------|
| - | 9  | 1393        | P2C8_uc010qob.1   | NM_000770    | NP_000761    | P10632 | CP2C8_HUMAN | 0     | CAAATTCGTTTTTC | 0.363 |             |
| + | 1  | 386         | y.2_intron DHDPS  | NM_001009997 | NP_001009997 | Q5T681 | CJ062_HUMAN | 0     | 3CTCCACGGTTC   | 0.582 |             |
| - | 20 | 2209        | ise_Mutation_p.Qe | NM_198060    | NP_932326    | Q86VF7 | NRAP_HUMAN  | 10    | TTGACTGCAGC    | 0.502 |             |
| - | 1  | 488         |                   | NM_001005238 | NP_001005238 | Q8NGK0 | O51G2_HUMAN | 2     | 3GTAATGGAAAA   | 0.473 |             |
| + | 7  | 1301        | ax.1_5'UTR ZNF21  | NM_013250    | NP_037382    | Q9UL58 | ZN215_HUMAN | 0     | 3TTTAGACATGAA  | 0.403 |             |
| - | 3  | 366         |                   | NM_000315    | NP_000306    | P01270 | PTHY_HUMAN  | 1     | 3CCTTTTTTCGGC  | 0.458 |             |
| - | 13 | 2124        | q.1_Missense_Mu   | NM_024783    | NP_079059    | Q5U5Z8 | CBPC2_HUMAN | 2     | 3GACTGAGTG     | 0.259 |             |
| + | 1  | 922         |                   | NM_001004739 | NP_001004739 | Q8NGL0 | OR5L2_HUMAN | 1     | 3GCTCCAAAATT   | 0.463 |             |
| + | 1  | 151         |                   | NM_001005201 | NP_001005201 | Q8N146 | OR8H3_HUMAN | 2     | 3TAATCCGCCTGC  | 0.438 |             |
| + | 1  | 298         |                   | NM_001004747 | NP_001004747 | Q8NGG3 | OR5T3_HUMAN | 0     | 3TCTTGATGCTT   | 0.383 |             |
| + | 1  | 29          |                   | NM_001013358 | NP_001013376 | P0C7N8 | OR9G9_HUMAN | 0     | 3TGACTGAGTTTA  | 0.478 |             |
| + | 2  | 1105        | ir.2_Missense_Mu  | NM_015177    | NP_055992    | Q9Y2E6 | DTX4_HUMAN  | 3     | 3CAGCAAGACCG   | 0.632 |             |
| - | 10 | 1516        | iss.2_Missense_M  | NM_001040118 | NP_001035207 | Q96P48 | ARAP1_HUMAN | 1     | 3AGCGGGTCAG    | 0.622 | rs138364636 |
| + | 6  | 820         | 3_Mutation_p.E19  | NM_018480    | NP_060950    | Q8IUX1 | T126B_HUMAN | 0     | 3TATTTGAAGAG   | 0.333 |             |
| + | 1  | 1190        |                   | NM_001161630 | NP_001155102 | B2RXH2 | KD4DL_HUMAN | 0     | 3ACGATGGATTG   | 0.512 |             |
| + | 16 | 2258        | e_Mutation_p.l64C | NM_014361    | NP_055176    | O94779 | CNTN5_HUMAN | 8     | 3GAACATCCTCT   | 0.463 |             |
| - | 3  | 2639        | R_uc009yww.1_Rf   | NM_000926    | NP_000917    | P06401 | PRGR_HUMAN  | 4     | 3AGGACCATGCC   | 0.368 |             |
| - | 4  | 1441        | _p.R351* GUCY1A   | NM_000855    | NP_000846    | P33402 | GCYA2_HUMAN | 8     | 3ACATCGAAGCT   | 0.473 |             |
| + | 1  | 299         |                   | NM_000486    | NP_000477    | P41181 | AQP2_HUMAN  | 2     | 3CCCTGCCGTGA   | 0.662 |             |
| - | 3  | 776         |                   | NM_004693    | NP_004684    | O95678 | K2C75_HUMAN | 0     | 3AAATTCATTCTC  | 0.478 |             |
| + | 21 | 2435        |                   | NM_017564    | NP_060034    | Q8WWQ8 | STAB2_HUMAN | 14    | 3CTCAGGAAATG   | 0.413 |             |
| + | 5  | 1112        |                   | NM_001080533 | NP_001074002 | A6NIH7 | U119B_HUMAN | 1     | 3AAATCCTTACGA  | 0.443 |             |
| + | 63 | 10837_10838 |                   | NM_207437    | NP_997320    | Q8IVF4 | DYH10_HUMAN | 6     | 3TCCACGGGGAA   | 0.594 |             |
| - | 1  | 2778        |                   | NM_052910    | NP_443142    | Q96PX8 | SLIK1_HUMAN | 5     | 3AGCGGAGGGTC   | 0.592 |             |
| - | 45 | 5042        | 3.P306S DOCK9_L   | NM_015296    | NP_056111    | Q9BZ29 | DOCK9_HUMAN | 1     | 3GTGGGGGAGAA   | 0.592 |             |
| + | 1  | 158         | a.1_RNA POTEG_    | NM_001005356 | NP_001005356 | Q6S5H5 | POTEG_HUMAN | 1     | 3GGTGACGGGGG   | 0.592 |             |
| - | 1  | 127         | 3vo.3_Missense_M  | NM_005065    | NP_005056    | Q9UBV2 | SE1L1_HUMAN | 1     | 3TATCCGGACCC   | 0.706 |             |
| + | 14 | 1474        | _p.P465S SLC24A   | NM_153646    | NP_705932    | Q8NFF2 | NCKX4_HUMAN | 3     | 3GTGTTCCAGAC   | 0.542 |             |
| + | 6  | 523         | _p.l147R KIAA14   | NM_020818    | NP_065869    | Q9P2D8 | UNC79_HUMAN | 17    | 3TGTATAGACCC   | 0.418 |             |
| + | 3  | 846         | ujp.1_Missense_M  | NM_002755    | NP_002746    | Q02750 | MP2K1_HUMAN | 0     | 3CTCTCCGTACA   | 0.512 |             |
| - | 9  | 713         | _p.P230L GRAMD    | NM_001012642 | NP_001012660 | Q8IUY3 | GRAM2_HUMAN | 0     | 3ATGATGGAGGG   | 0.537 |             |
| + | 2  | 2715        | _p.P799S C15orf3  | NM_015492    | NP_056307    | Q6ZRI6 | CO039_HUMAN | 0     | 3CTGGCCCTGG    | 0.642 |             |
| - | 13 | 1918        | _p.T617N ACSBG1   | NM_015162    | NP_055977    | Q96GR2 | ACBG1_HUMAN | 1     | 3CAGAGGTGCTC   | 0.527 |             |
| + | 1  | 318         | 9M SLCO3A1_ucC    | NM_013272    | NP_037404    | Q9UIG8 | SO3A1_HUMAN | 1     | 3AACATCAAGATC  | 0.662 |             |
| - | 12 | 3745        |                   | NM_032444    | NP_115820    | Q8IY92 | SLX4_HUMAN  | 0     | 3CTGGGAGGGCC   | 0.662 |             |
| + | 13 | 1422        | 3N1_uc002cxb.2_M  | NM_001142290 | NP_001135762 | O60291 | MGRN1_HUMAN | 2     | 3CTGTCCCCTCG   | 0.662 |             |
| - | 14 | 2043        |                   | NM_153603    | NP_705831    | P83436 | COG7_HUMAN  | 0     | 3ACTAAAGGCGG   | 0.517 |             |
| + | 2  | 1755        |                   | NM_006040    | NP_006031    | Q9Y661 | HS3S4_HUMAN | 2     | 3AGGGTGATAAA   | 0.468 |             |
| + | 2  | 232         | 32_uc010cbk.1_Mi  | NM_022162    | NP_071445    | Q9HC29 | NOD2_HUMAN  | 4     | 3TGGTCGAGCTG   | 0.602 |             |
| - | 2  | 391         | p.W81* CES7_ucC   | NM_001143685 | NP_001137157 | Q6NT32 | EST5A_HUMAN | 0     | 3TATCCCAGGGC   | 0.592 |             |
| - | 4  | 729         | nse_Mutation_p.P  | NM_017853    | NP_060323    | Q9NX01 | TXN4B_HUMAN | 1     | 3TTTGGGAATATT  | 0.383 |             |
| - | 5  | 802         | 8B_uc010vmu.1_M   | NM_001011880 | NP_001011880 | Q6UXF7 | CL18B_HUMAN | 0     | 3AGGCACCCTTC   | 0.607 |             |
| + | 2  | 120         | _p TRAPPC2L_uc00  | NM_016209    | NP_057293    | Q9UL33 | TPC2L_HUMAN | 0     | 3CTACGGAGAAC   | 0.552 |             |
| - | 9  | 1486        | 2fnc.1_Missense_M | NM_013275    | NP_037407    | Q6UB99 | ANR11_HUMAN | 6     | 3TGACGGGGGCC   | 0.547 |             |
| - | 1  | 697         |                   | NM_002551    | NP_002542    | P47893 | OR3A2_HUMAN | 1     | 3AACCAAAGGTG   | 0.562 |             |
| - | 10 | 1218        | TP53_uc002gii.1_J | NM_001126112 | NP_001119584 | P04637 | P53_HUMAN   | 22245 | 3CTCTCGGAACA   | 0.498 |             |
| - | 45 | 7282        | 3m.2_Missense_M   | NM_006311    | NP_006302    | O75376 | NCOR1_HUMAN | 5     | 3CCGTTCCGTTTC  | 0.502 |             |



|   |     |         |                    |              |              |        |             |                                |     |               |       |
|---|-----|---------|--------------------|--------------|--------------|--------|-------------|--------------------------------|-----|---------------|-------|
| - | 4   | 2350    | p.R674C SLFN13     | NM_144682    | NP_653283    | Q68D06 | SLN13_HUMAN |                                | 2   | :AGTACGGAAAT  | 0.433 |
| - | 6   | 1756    |                    | NM_139285    | NP_644814    | Q8NHY3 | GA2L2_HUMAN |                                | 2   | :AGGTCCCAGGA  | 0.612 |
| - | 3   | 372_373 | nse_Mutation_p.G   | NM_152349    | NP_689562    | Q8N1A0 | KT222_HUMAN | Potential.                     | 2   | CTAGTCCCTTCAA | 0.46  |
| - | 16  | 2488    | .2_Intron TTL6_u   | NM_001130918 | NP_001124390 | Q8N841 | TTL6_HUMAN  |                                | 0   | :CAGAGCTGTCA  | 0.547 |
| + | 1   | 120     | .1_Intron B4GALN   | NM_153446    | NP_703147    | Q8NHY0 | B4GN2_HUMAN | lasmic (Potential).            | 2   | :GCCGGGAATGT  | 0.667 |
| + | 9   | 1125    |                    | NM_153228    | NP_694960    | Q8N957 | ANKF1_HUMAN | onectin type-III.              | 2   | :CACCCGCATGT  | 0.502 |
| + | 12  | 2517    | pm.1_Missense_M    | NM_030779    | NP_110406    | Q9H252 | KCNH6_HUMAN | lasmic (Potential).            | 1   | :CTCAGGAAGAC  | 0.622 |
| - | 24  | 5443    |                    | NM_000334    | NP_000325    | P35499 | SCN4A_HUMAN |                                | 3   | :TTGGCGAGCTG  | 0.667 |
| + | 5   | 1028    | hjp.2_Missense_M   | NM_018658    | NP_061128    | Q9NPI9 | IRK16_HUMAN | smic (By similarity).          | 3   | :CCCAAACCATT  | 0.463 |
| - | 2   | 609     |                    | NM_006678    | NP_006669    | Q08708 | CLM6_HUMAN  | (Potential). Ig-like V-type.   | 0   | :TGATGGACACT  | 0.547 |
| + | 12  | 1755    | hjh.2_Missense_M   | NM_198955    | NP_945193    | Q3V5L5 | MGT5B_HUMAN | lenal (Potential).             | 3   | :CGCCCCCTGG   | 0.657 |
| - | 5   | 1264    |                    | NM_002522    | NP_002513    | Q15818 | NPTX1_HUMAN | Pentaxin.                      | 0   | :CCTGGGTGGCA  | 0.622 |
| - | 10  | 1602    | rm.2_Missense_Mt   | NM_024421    | NP_077739    | Q08554 | DSC1_HUMAN  | r (Potential). Cadherin 3.     | 4   | :GTGAGCTCGCT  | 0.408 |
| + | 15  | 2641    | rp.1_Missense_ML   | NM_001942    | NP_001933    | Q02413 | DSG1_HUMAN  | lasmic (Potential).            | 7   | :AATTTCTGAGAC | 0.517 |
| + | 8   | 1055    | o.R268Q RNF165_    | NM_152470    | NP_689683    | Q6ZSG1 | RN165_HUMAN | G-type; atypical.              | 0   | :CTGCCGAGTGG  | 0.577 |
| + | 2   | 168     | o2ljj.3_5'UTR SEF  | NM_080475    | NP_536723    | Q96P15 | SPB11_HUMAN |                                | 1   | :AGTCTGCTTTAT | 0.443 |
| - | 3   | 208     |                    | NM_017550    | NP_060020    | Q8N344 | MIER2_HUMAN |                                | 0   | :GTCTGGGCACC  | 0.597 |
| + | 4   | 708     | .2_Intron MADCA    | NM_130760    | NP_570116    | Q13477 | MADCA_HUMAN | T-S-[QP]-E. Extracellular      | 0   | :GCCTCCCAGCA  | 0.592 |
| - | 29  | 3841    | 3_uc002mfi.2_5'U   | NM_000064    | NP_000055    | P01024 | CO3_HUMAN   |                                | 5   | :TAGTATCTCTGT | 0.577 |
| + | 11  | 1150    | a.1_Missense_Mu    | NM_005428    | NP_005419    | P15498 | VAV_HUMAN   | DH.                            | 16  | :GCGATGGAGAA  | 0.627 |
| - | 48  | 6181    | l3_uc002mje.2_5'F  | NM_032447    | NP_115823    | Q75N90 | FBN3_HUMAN  | TB 8.                          | 11  | :CAGTTCGCAGG  | 0.612 |
| - | 3   | 19097   |                    | NM_024690    | NP_078966    | Q8WXI7 | MUC16_HUMAN | xtracellular (Potential).      | 57  | TTTATAGAAGGAT | 0.448 |
| - | 1   | 6782    |                    | NM_024690    | NP_078966    | Q8WXI7 | MUC16_HUMAN | ch. Extracellular (Potential). | 57  | :TAAAGGAAACC  | 0.468 |
| - | 1   | 2516    |                    | NM_024690    | NP_078966    | Q8WXI7 | MUC16_HUMAN | xtracellular (Potential).      | 57  | :TGAGGAAAGA   | 0.502 |
| - | 10  | 1717    | hwr.1_Missense_M   | NM_152476    | NP_689689    | Q96MR9 | ZN560_HUMAN | 2H2-type 6.                    | 6   | :AAAAAGAGATG  | 0.413 |
| + | 6   | 1372    | ivq.1_Missense_M   | NM_018443    | NP_060913    | Q9NR11 | ZN302_HUMAN | 2H2-type 5.                    | 0   | :ATGTTCTGCTCT | 0.413 |
| - | 5   | 449     | se_Mutation_p.P11  | NM_000234    | NP_000225    | P18858 | DNL11_HUMAN |                                | 3   | :CCATGGGAGAG  | 0.557 |
| + | 32  | 4599    | .1_Missense_Mut    | NM_024729    | NP_079005    | Q7Z406 | MYH14_HUMAN | Potential.                     | 1   | :GTGAGGAGCTG  | 0.706 |
| - | 4   | 340     | n_p.T41I KLK5_uc   | NM_001077491 | NP_001070959 | Q9Y337 | KLK5_HUMAN  |                                | 0   | :GCACGGTGTTA  | 0.627 |
| + | 7   | 2419    | p.R600K ZNF761_    | NM_001008401 | NP_001008401 | Q86XN6 | ZN761_HUMAN | 2H2-type 16.                   | 1   | :ATAGGAGAATTC | 0.398 |
| + | 6   | 1933    | 470_uc010etr.2_li  | NM_001001668 | NP_001001668 | Q6ECI4 | ZN470_HUMAN | 2H2-type 7.                    | 2   | :AACTACTACTGG | 0.413 |
| - | 1   | 554     | qnt.2_Missense_M   | NM_001146186 | NP_001139658 | Q9GZU2 | PEG3_HUMAN  | SCAN box.                      | 12  | :AGTTTTCGGAGT | 0.502 |
| + | 3   | 2079    | i47_uc002qpm.3_I   | NM_001023561 | NP_001018855 | O43361 | ZN749_HUMAN |                                | 0   | :CTGGAGAAAAG  | 0.388 |
| + | 4   | 2168    | aud.1_Intron ZNF5  | NM_153263    | NP_694995    | Q6P9A3 | ZN549_HUMAN |                                | 1   | :AGAGCCCTAGC  | 0.428 |
| + | 1   | 439     |                    | NM_001105569 | NP_001099039 | A6NI15 | MSGN1_HUMAN | -loop-helix motif.             | 1   | :CACACCCTCCGG | 0.572 |
| - | 4   | 854     | .2_3'UTR TMEM17    | NM_198276    | NP_938017    | Q86X19 | TMM17_HUMAN |                                | 0   | :GAAACGAACTG  | 0.428 |
| - | 12  | 2083    | p.R615W LOXL3_u    | NM_032603    | NP_115992    | P58215 | LOXL3_HUMAN | yl-oxidase like.               | 0   | :ATGCCGGTAGA  | 0.517 |
| - | 4   | 1138    |                    | NM_000575    | NP_000566    | P01583 | IL1A_HUMAN  |                                | 1   | :TTTAGAGGTTTC | 0.453 |
| + | 2   | 108     | h THSD7B_uc002h    | NM_001080427 | NP_001073896 |        |             |                                | 7   | :AGTGTGGTGTTT | 0.507 |
| - | 17  | 3485    | p.P1036L SCN1A_    | NM_006920    | NP_008851    | P35498 | SCN1A_HUMAN |                                | 13  | :CTACGGGCTGT  | 0.418 |
| - | 29  | 5058    |                    | NM_004525    | NP_004516    | P98164 | LRP2_HUMAN  | : B 13. Extracellular (Potent  | 29  | :GAGTCCATGAA  | 0.478 |
| - | 4   | 1537    | f.2_Missense_Mut   | NM_003111    | NP_003102    | Q02447 | SP3_HUMAN   | ation domain (Gln-rich).       | 6   | :GTCCAGAAGGG  | 0.433 |
| + | 14  | 1735    | fe.1_Nonsense_M    | NM_032523    | NP_115912    | Q9BZF3 | OSBL6_HUMAN |                                | 1   | :GTGATCAGGTT  | 0.328 |
| - | 226 | 45691   | _uc010zfi.1_Misse  | NM_133378    | NP_596869    | Q8WZ42 | TITIN_HUMAN |                                | 153 | :TGGTTCCAACG  | 0.443 |
| - | 46  | 15390   | N_uc010zfi.1_Intri | NM_133379    | NP_596870    | Q8WZ42 | TITIN_HUMAN |                                | 153 | :CTCCCTGGGG   | 0.498 |
| - | 17  | 2224    |                    | NM_018897    | NP_061720    | Q8WXX0 | DYH7_HUMAN  | r similarity). Potential.      | 12  | :CCAAATGAATAA | 0.328 |
| - | 15  | 1632    | hjh.1_Missense_Mt  | NM_006190    | NP_006181    | Q13416 | ORC2_HUMAN  |                                | 0   | :ATAGGAGGTTTC | 0.433 |

rs149936210

|   |    |           |                   |              |              |        |             |    |               |       |
|---|----|-----------|-------------------|--------------|--------------|--------|-------------|----|---------------|-------|
| + | 17 | 2525      | ε_Mutation_p.R77  | NM_152526    | NP_689739    | Q8TEW8 | PAR3L_HUMAN | 4  | GGTTCGAGGCC   | 0.517 |
| - | 10 | 1922_1923 | ve.1_Missense_M   | NM_005689    | NP_005680    | Q9NP58 | ABCB6_HUMAN | 2  | AGTAGGTGCCAA  | 0.51  |
| + | 1  | 760       | rmv.1_Missense_I  | NM_019076    | NP_061949    | Q9HAW9 | UD18_HUMAN  | 2  | CCCTCTGAAATTC | 0.418 |
| - | 1  | 143       | Qzpn.1_Missense_  | NM_015985    | NP_057069    | Q9Y264 | ANGP4_HUMAN | 2  | CACAAGGAGGA   | 0.592 |
| - | 1  | 238       | PROKR2_uc010zc    | NM_144773    | NP_658986    | Q8NFJ6 | PKR2_HUMAN  | 5  | ATAGCGGGTGAC  | 0.552 |
| + | 5  | 794       | SP1_uc010zri.1_In | NM_080826    | NP_543016    | B1AKI9 | ISM1_HUMAN  | 0  | FGTTTAGGAATTC | 0.398 |
| - | 9  | 885       | L1L2_uc010zri.1_I | NM_025229    | NP_079505    | Q5TEA6 | SE1L2_HUMAN | 2  | GTCTTTCCGTTT  | 0.368 |
| + | 2  | 162       |                   | NM_153324    | NP_697019    | Q8N688 | DB123_HUMAN | 0  | CCAAAGATGCT   | 0.423 |
| + | 14 | 1760      | e_Mutation_p.R42  | NM_012156    | NP_036288    | Q9H4G0 | E41L1_HUMAN | 3  | GGATCGAGACT   | 0.607 |
| + | 1  | 371       | .2_Intron SGK2_uc | NM_016276    | NP_057360    | Q9HBY8 | SGK2_HUMAN  | 6  | TGTCCCCCAG    | 0.617 |
| + | 5  | 733       | p.R20W NCAM2_1    | NM_004540    | NP_004531    | O15394 | NCAM2_HUMAN | 4  | CAGATCGGTTCT  | 0.403 |
| - | 3  | 575       | p.P33L RCAN1_u    | NM_004414    | NP_004405    | P53805 | RCAN1_HUMAN | 0  | CTGGCGGAGAG   | 0.542 |
| - | 2  | 671       | p.G177S CLDN14    | NM_012130    | NP_036262    | O95500 | CLD14_HUMAN | 0  | GCCACCAATGA   | 0.637 |
| - | 12 | 1399      | p.D273N TMPRSE    | NM_024022    | NP_076927    | P57727 | TMPS3_HUMAN | 3  | GCTGTCCCCCT   | 0.597 |
| + | 13 | 2837      | SL_uc011akd.1_Mi  | NM_021115    | NP_066938    | Q9BYH1 | SE6L1_HUMAN | 6  | GCCAGGAGAGT   | 0.567 |
| + | 7  | 3572      | itq.1_Missense_Mi | NM_001039141 | NP_001034230 | Q9H2D6 | TARA_HUMAN  | 1  | AGTCCCCCCT    | 0.667 |
| + | 2  | 1635      | xy.2_Missense_Mi  | NM_002409    | NP_002400    | Q09327 | MGAT3_HUMAN | 0  | GGTTCGACGGC   | 0.637 |
| + | 11 | 1815      | e_Mutation_p.P55  | NM_018995    | NP_061868    | Q9BXT6 | M10L1_HUMAN | 3  | GGAGGCCTTCT   | 0.473 |
| - | 2  | 934       | hfn.2_Missense_I  | NM_005442    | NP_005433    | O95936 | EOMES_HUMAN | 4  | GTAGTGGGCAG   | 0.502 |
| - | 7  | 970       | p.F259S SCN5A_    | NM_198056    | NP_932173    | Q14524 | SCN5A_HUMAN | 9  | GGCAGAAGACT   | 0.592 |
| - | 2  | 389       |                   | NM_006514    | NP_006505    | Q9Y5Y9 | SCNAA_HUMAN | 10 | GATATGAGTGG   | 0.483 |
| - | 14 | 2453      | 1A_uc010hhn.1_5   | NM_014139    | NP_054858    | Q9UI33 | SCNBA_HUMAN | 9  | ATCCCCATGTC   | 0.498 |
| - | 2  | 885_886   | tron NAT6_uc003c  | NM_012191    | NP_036323    | Q93015 | NAT6_HUMAN  | 1  | AAGGGGGCCCT   | 0.579 |
| + | 31 | 5284      |                   | NM_015512    | NP_056327    | Q9P2D7 | DYH1_HUMAN  | 3  | TGGTGCCATCC   | 0.612 |
| + | 5  | 784       |                   | NM_022072    | NP_071355    | Q9H649 | NSUN3_HUMAN | 1  | TGTTTTCTTCTG  | 0.398 |
| + | 1  | 644       |                   | NM_001005515 | NP_001005515 | A6NDH6 | O5H15_HUMAN | 2  | CTATTCTTATATC | 0.348 |
| + | 1  | 848       |                   | NM_001004736 | NP_001004736 | Q8NHB7 | OR5K1_HUMAN | 1  | TAGTCCCTTACT  | 0.308 |
| - | 2  | 1379      | .2_Intron CD96_uc | NM_024508    | NP_078784    | Q9BTP6 | ZBED2_HUMAN | 1  | CTGCCCTTTCC   | 0.602 |
| - | 5  | 557       | 2018_uc003eal.2_! | NM_001009899 | NP_001009899 | Q68DE3 | K2018_HUMAN | 3  | GGGCAGGAGAA   | 0.368 |
| + | 4  | 505       |                   | NM_017554    | NP_060024    | Q460N5 | PAR14_HUMAN | 6  | TTCCTCTTGGT   | 0.378 |
| + | 5  | 2003      |                   | NM_001102608 | NP_001096078 | A6NMZ7 | CO6A6_HUMAN | 8  | CAGATCGGGTG   | 0.418 |
| + | 4  | 873       | _Mutation_p.R200  | NM_023943    | NP_076432    | Q6UXF1 | TM108_HUMAN | 4  | AGGACGAAATC   | 0.592 |
| - | 1  | 469       |                   | NM_001134659 | NP_001128131 | A6NEV1 | PR23A_HUMAN | 0  | CTCCTCGTAGG   | 0.632 |
| - | 8  | 847       | 5_uc010hus.1_RI   | NM_001039547 | NP_001034636 | Q6ZS86 | GLPK5_HUMAN | 0  | GTATCGAAATTA  | 0.348 |
| - | 2  | 401       | uc003ewz.2_Mis    | NM_000096    | NP_000087    | P00450 | CERU_HUMAN  | 1  | ATGTTCCCTGCA  | 0.328 |
| - | 11 | 1028      | p.M235I ZBBX_uc   | NM_024687    | NP_078963    | A8MT70 | ZBBX_HUMAN  | 2  | TCTTTTCATCGT  | 0.328 |
| - | 7  | 2080      | fk.2_Missense_Mu  | NM_005241    | NP_005232    | Q03112 | EV11_HUMAN  | 14 | TTTTTTCGAGGC  | 0.512 |
| + | 13 | 1768      | se_Mutation_p.S4E | NM_003722    | NP_003713    | Q9H3D4 | P63_HUMAN   | 12 | TTCATCATGTCT  | 0.448 |
| - | 4  | 455       | LG1_uc010ial.2_A  | NM_001098424 | NP_001091894 | Q12959 | DLG1_HUMAN  | 3  | AGAGCTTGGAA   | 0.408 |
| - | 2  | 178       |                   | NM_001001290 | NP_001001290 | Q9NRM0 | GTR9_HUMAN  | 3  | TCGGTCTTTT    | 0.388 |
| - | 3  | 3405      |                   | NM_053042    | NP_444270    | Q9C0D4 | Z518B_HUMAN | 4  | AAACAACCTTGA  | 0.443 |
| + | 13 | 1672      | p.S292F FAM114    | NM_138389    | NP_612398    | Q8IWE2 | NXP20_HUMAN | 1  | TGGCTCTTTATC  | 0.323 |
| - | 6  | 785       |                   | NM_182592    | NP_872398    | Q8N8F6 | YIPF7_HUMAN | 0  | CTTTCATGTGC   | 0.453 |
| + | 9  | 1541_1542 | se_Mutation_p.EE  | NM_145263    | NP_660306    | Q8TC71 | MIEAP_HUMAN | 4  | ATCCAGGAGATA  | 0.426 |
| - | 11 | 1834      |                   | NM_001042784 | NP_001036249 | Q5M9N0 | CD158_HUMAN | 6  | CTGTCTCTCTC   | 0.478 |
| - | 10 | 1812      | p.S358F LEF1_ucl  | NM_016269    | NP_057353    | Q9UUJ2 | LEF1_HUMAN  | 1  | ATGCAGATTC    | 0.433 |
| + | 38 | 9920      | AK2_uc003ibh.3_Ir | NM_001148    | NP_001139    | Q01484 | ANK2_HUMAN  | 14 | ATTCTCCCGAT   | 0.443 |

rs140878635

|   |    |             |                    |              |              |        |             |                                |    |               |       |
|---|----|-------------|--------------------|--------------|--------------|--------|-------------|--------------------------------|----|---------------|-------|
| + | 3  | 617         | ae_Mutation_p.P14  | NM_001128933 | NP_001122405 | Q9UMS6 | SYNP2_HUMAN |                                | 2  | 3AAGTCCCCCTAC | 0.547 |
| + | 6  | 940         | R17_uc003ium.3_I   | NM_170710    | NP_733828    | Q8IZU2 | WDR17_HUMAN |                                | 6  | ACAACATTTAATC | 0.433 |
| - | 2  | 138_139     | AM173B_uc010itr.   | NM_199133    | NP_954584    | Q6P4H8 | F173B_HUMAN |                                | 2  | AGAACCCCCAGT  | 0.475 |
| - | 14 | 2020        |                    | NM_001369    | NP_001360    | Q8TE73 | DYH5_HUMAN  | n (By similarity).             | 31 | FGCGAATTATAGC | 0.532 |
| - | 3  | 374         | r.1_Intron TTC33_  | NM_012382    | NP_036514    | Q6PID6 | TTC33_HUMAN | TPR 1.                         | 1  | CTCCCCGATATCT | 0.284 |
| - | 6  | 1463        |                    | NM_021072    | NP_066550    | O60741 | HCN1_HUMAN  | rtoplasmic (Potential).        | 1  | AGGATCCGCAT   | 0.383 |
| + | 5  | 1551        | 486K MARVELD2_     | NM_001038603 | NP_001033692 | Q8N4S9 | MALD2_HUMAN | lasmic (Potential).            | 0  | ATTCGGAAAGC   | 0.408 |
| + | 30 | 6646        | p.T2128 BDP1_uc    | NM_018429    | NP_060899    | A6H8Y1 | BDP1_HUMAN  |                                | 2  | ITGTAACCAAGC  | 0.338 |
| + | 2  | 578         |                    | NM_153610    | NP_705838    | Q8N3K9 | CMYA5_HUMAN |                                | 9  | 3CAGTCCTTTAA  | 0.383 |
| + | 70 | 14320       | y.E2448K GPR98_    | NM_032119    | NP_115495    | Q8WXG9 | GPR98_HUMAN | ellular (Potential).           | 16 | 3GAGCCGAACTG  | 0.438 |
| - | 8  | 1706        | w.1_Missense_Mu    | NM_004883    | NP_004874    | O14511 | NRG2_HUMAN  | lasmic (Potential).            | 6  | ITCCCAGAGAAG  | 0.542 |
| + | 1  | 323         | HB2_uc003lim.1_I   | NM_018936    | NP_061759    | Q9Y5E7 | PCDB2_HUMAN | r (Potential). Cadherin 1.     | 6  | ACTTGCTGTGAC  | 0.502 |
| + | 1  | 2443        | _5'Flank PCDHB1    | NM_019120    | NP_061993    | Q9UN66 | PCDB8_HUMAN | lasmic (Potential).            | 4  | AGTACGAGGTG   | 0.577 |
| + | 1  | 1418        | GHGA5_uc003lju.1   | NM_018925    | NP_061748    | Q9Y5G0 | PCDGH_HUMAN | r (Potential). Cadherin 5.     | 0  | CGCCTCGGACC   | 0.587 |
| - | 2  | 439         | IP2_uc003lwr.2_I   | NM_001001343 | NP_001001343 | Q8TBE3 | FNDC9_HUMAN | onectin type-III.              | 0  | ITGTAAGGGAAG  | 0.567 |
| + | 3  | 380         | ED9_uc010jko.2_F   | NM_017510    | NP_059980    | Q9BVK6 | TMED9_HUMAN | Luminal (Potential).           | 0  | 3CAATTCACCA   | 0.562 |
| - | 7  | 2280        | .R705W NEDD9_L     | NM_006403    | NP_006394    | Q14511 | CASL_HUMAN  |                                | 0  | CTGCCGATCCT   | 0.517 |
| - | 3  | 577         | 1dip.1_Splice_Site | NM_032744    | NP_116133    | Q96I22 | CF105_HUMAN |                                | 0  | ACAAACTGGAA   | 0.363 |
| + | 4  | 2526        | EP1_uc011diq.1_F   | NM_002114    | NP_002105    | P15822 | ZEP1_HUMAN  |                                | 6  | 3ATTCCCCAAA   | 0.433 |
| + | 4  | 1052        | p.K313Q ZNF193_    | NM_006299    | NP_006290    | O15535 | ZN193_HUMAN | 2H2-type 3.                    | 0  | ACTGCAAGGAG   | 0.458 |
| - | 1  | 7           |                    | NM_030959    | NP_112221    | Q9UGF7 | O12D3_HUMAN | ellular (Potential).           | 3  | ATTCTCCATTGCT | 0.343 |
| + | 3  | 1230        | _p.P263S OR2H1_    | NM_030883    | NP_112145    | Q9GZK4 | OR2H1_HUMAN | ellular (Potential).           | 0  | AAAAATCCGTATC | 0.517 |
| - | 2  | 284         | iR1_uc003nmp.3_    | NM_006398    | NP_006389    | O15205 | UBD_HUMAN   | Ubiquitin 1.                   | 0  | AAAGGTCAATAA  | 0.488 |
| + | 15 | 2234        |                    | NM_001371    | NP_001362    |        |             |                                | 21 | AAGTCCGGACG   | 0.368 |
| + | 14 | 3331        |                    | NM_032538    | NP_115927    | Q5TCY1 | TTBK1_HUMAN |                                | 9  | ATGGCCCCGGCC  | 0.667 |
| - | 13 | 2123        | yp.3_Missense_M    | NM_001098518 | NP_001091988 | Q8IZF2 | GP116_HUMAN | ellular (Potential).           | 2  | CTTACCAGCAGC  | 0.393 |
| - | 3  | 1538        | cf.1_Missense_Mu   | NM_021073    | NP_066551    | P22003 | BMP5_HUMAN  |                                | 2  | ATCCCCGTGTTT  | 0.348 |
| - | 64 | 10851_10852 |                    | NM_014611    | NP_055426    | Q9NU22 | MDN1_HUMAN  |                                | 10 | 3CAGGGGGAAC   | 0.495 |
| - | 9  | 3120        | nw.2_Missense_M    | NM_021813    | NP_068585    | Q9BYV9 | BACH2_HUMAN |                                | 6  | ITGGCTCCAAGC  | 0.642 |
| - | 5  | 1325        | p.D362N EPHA7_I    | NM_004440    | NP_004431    | Q15375 | EPHA7_HUMAN | tential). Fibronectin type-III | 28 | TCACATCGTTTCT | 0.498 |
| + | 17 | 2033        |                    | NM_173560    | NP_775831    | Q8HWS3 | RFX6_HUMAN  |                                | 3  | GCATTAACCAAGC | 0.527 |
| + | 12 | 2039        |                    | NM_020340    | NP_065073    | Q5TH69 | BIG3_HUMAN  | SEC7.                          | 2  | GTCCTCGGAAG   | 0.572 |
| + | 2  | 1234        |                    | NM_016217    | NP_057301    | Q9UBI9 | HDC_HUMAN   |                                | 0  | CATGTGTTCAGA  | 0.607 |
| - | 9  | 6741        |                    | NM_006734    | NP_006725    | P31629 | ZEP2_HUMAN  |                                | 6  | ATAGCCTCTGGT  | 0.438 |
| + | 16 | 4238        | qf.2_Missense_Mu   | NM_012454    | NP_036586    | Q8IVF5 | TIAM2_HUMAN |                                | 4  | 3ACAGTGACCTG  | 0.532 |
| + | 5  | 919         | 22A3_uc011efx.1_   | NM_021977    | NP_068812    | O75751 | S22A3_HUMAN |                                | 4  | ITTACTCGGAAG  | 0.428 |
| + | 13 | 1733        | ae.1_Missense_Mu   | NM_031414    | NP_113602    | Q9BXU1 | STK31_HUMAN |                                | 9  | ITCCTAGAGAAG  | 0.378 |
| + | 4  | 434         | i_p.E71K ADCYAF    | NM_001118    | NP_001109    | P41586 | PACR_HUMAN  | ellular (Potential).           | 1  | ITGGGTGAGATG  | 0.562 |
| + | 14 | 1562        |                    | NM_016616    | NP_057700    | Q8N427 | TXND3_HUMAN | NDK 2.                         | 3  | AATACTGGAAAC  | 0.403 |
| - | 5  | 1673        |                    | NM_033273    | NP_150376    | Q96JC4 | ZN479_HUMAN | 2H2-type 11.                   | 4  | ATTCTTCACATG  | 0.428 |
| - | 9  | 1623        | dy.1_Missense_ML   | NM_012301    | NP_036433    | Q86UL8 | MAGI2_HUMAN | PDZ 2.                         | 11 | CATCCGGAATCA  | 0.428 |
| - | 5  | 366         | uix.1_Missense_M   | NM_018849    | NP_061337    | P21439 | MDR3_HUMAN  | ity). ABC transmembrane 1      | 6  | 3GAAAAGTTCAC  | 0.244 |
| + | 4  | 1908        |                    | NM_181646    | NP_857597    | A4D1E1 | Z804B_HUMAN |                                | 11 | ITCAATGGCCTAC | 0.418 |
| + | 4  | 2384        |                    | NM_181646    | NP_857597    | A4D1E1 | Z804B_HUMAN |                                | 11 | AGAAAGGCAGTT  | 0.388 |
| + | 68 | 10894       | p.T3533 TRRAP_     | NM_003496    | NP_003487    | Q9Y4A5 | TRRAP_HUMAN | PI3K/PI4K.                     | 37 | GGAGACCACCA   | 0.582 |
| - | 50 | 8277        | ..2_Missense_Muti  | NM_005045    | NP_005036    | P78509 | RELN_HUMAN  |                                | 19 | ITACCTGAAGTTT | 0.483 |
| - | 3  | 619         | IT2_uc003vja.2_In  | NM_003391    | NP_003382    | P09544 | WNT2_HUMAN  | p.E107E(1)                     | 7  | 3AGATCCCCGAC  | 0.398 |

|   |    |           |                    |              |              |        |             |                                |       |                 |       |
|---|----|-----------|--------------------|--------------|--------------|--------|-------------|--------------------------------|-------|-----------------|-------|
| - | 15 | 1860      |                    | NM_004333    | NP_004324    | P15056 | BRAF_HUMAN  | rotein kinas_R603>I(2)]p.T     | 18290 | 3ATTTCACTGTAC   | 0.368 |
| + | 7  | 2428      | o.1_intron uc011kt | NM_001130025 | NP_001123497 | A6NFK2 | F115C_HUMAN |                                | 0     | ACCTTTGGTCAG    | 0.617 |
| + | 1  | 533       |                    | NM_001004685 | NP_001004685 | O95006 | OR2F2_HUMAN | ellular (Potential).           | 4     | ACATATCCTGTG    | 0.498 |
| + | 5  | 1198      |                    | NM_014141    | NP_054860    | Q9UHC6 | CNTP2_HUMAN | 1. Extracellular (Potential).  | 11    | TGCACGGAGAA     | 0.388 |
| + | 4  | 1084      |                    | NM_175571    | NP_783161    | Q8ND71 | GIMA8_HUMAN |                                | 7     | TCCTCCTTGTG     | 0.562 |
| + | 11 | 1683      | p.E463K NOS3_u     | NM_000603    | NP_000594    | P29474 | NOS3_HUMAN  | ction with NOSIP.              | 8     | ATCAGGAGATG     | 0.627 |
| - | 5  | 416       | vs.1_Missense_M    | NM_007349    | NP_031375    | Q6ZW49 | PAX11_HUMAN | ction with PA1 (By similarity  | 5     | TCCCCCATAGA     | 0.443 |
| - | 2  | 232       | r_p.S22L SPAG11    | NM_016512    | NP_057596    | Q08648 | SG11B_HUMAN |                                | 0     | GAGACGATCCT     | 0.582 |
| - | 3  | 660       |                    | NM_003155    | NP_003146    | P52823 | STC1_HUMAN  |                                | 4     | CTCTTCTGCA      | 0.537 |
| + | 4  | 557       | r_p.E34K ADAMDI    | NM_014479    | NP_055294    | O15204 | ADEC1_HUMAN |                                | 2     | GAGAGGAAATT     | 0.453 |
| + | 16 | 1766      | AM18_uc010lwx.:    | NM_014237    | NP_055052    | Q9Y3Q7 | ADA18_HUMAN | extracellular (Potential).     | 6     | GAGATCAGATG     | 0.368 |
| - | 1  | 272       |                    | NM_152418    | NP_689631    | Q8NA75 | DC4L2_HUMAN |                                | 1     | CTGGACCTTTT     | 0.502 |
| - | 5  | 407       |                    | NM_005836    | NP_005827    | P52758 | UK114_HUMAN |                                | 1     | TAGCAGGAAAA     | 0.274 |
| + | 10 | 1639      |                    | NM_024915    | NP_079191    | Q6ISB3 | GRHL2_HUMAN |                                | 3     | AGAAAGGGAAA     | 0.468 |
| - | 13 | 3201      | M135B_uc003yva     | NM_015912    | NP_056996    | Q49AJ0 | F135B_HUMAN |                                | 9     | GACCCCATGAT     | 0.512 |
| - | 2  | 759       |                    | NM_001163    | NP_001154    | Q02410 | APBA1_HUMAN |                                | 1     | CGCATTATGGC     | 0.677 |
| + | 3  | 923_924   | e_Mutation_p.P12:  | NM_006200    | NP_006191    | Q92824 | PCSK5_HUMAN | Catalytic.                     | 3     | ATGATCCCAAGT    | 0.475 |
| + | 1  | 894       |                    | NM_001005235 | NP_001005235 | Q8NGR5 | OR1L4_HUMAN | lasmic (Potential).            | 0     | GATATGAAAAGC    | 0.398 |
| - | 1  | 876       |                    | NM_203434    | NP_982258    | Q5T953 | IER5L_HUMAN | Ala-rich.                      | 0     | gcgggaggagaagcg | 0.353 |
| + | 3  | 832       |                    | NM_006059    | NP_006050    | Q9Y6N6 | LAMC3_HUMAN | inin N-terminal.               | 3     | GTTTGGGGACG     | 0.592 |
| + | 10 | 1238      | rd.1_Missense_Mt   | NM_002183    | NP_002174    | P26951 | IL3RA_HUMAN | ellular (Potential).           | 3     | AGGAGGAGGGC     | 0.667 |
| - | 5  | 3341      |                    | NM_015419    | NP_056234    | Q9NR99 | MXRA5_HUMAN |                                | 8     | ACATCTCTTCTA    | 0.458 |
| - | 6  | 526       | M9B_uc004csh.2_    | NM_205849    | NP_995321    | Q8IZU0 | FAM9B_HUMAN |                                | 0     | CTAACACTTCTA    | 0.318 |
| + | 4  | 983       | p.W221* MAGEB'     | NM_002363    | NP_002354    | P43366 | MAGB1_HUMAN | MAGE.                          | 0     | 3ATCTGGAAATT    | 0.483 |
| - | 5  | 370       | z.1_Missense_Mul   | NM_175723    | NP_783729    | O60225 | SSX5_HUMAN  |                                | 0     | AGATTCCTGG      | 0.423 |
| + | 5  | 652       | _5'UTR TBC1D25_    | NM_002536    | NP_002527    | Q3MII6 | TBC25_HUMAN |                                | 1     | AGGTCCAACAA     | 0.582 |
| - | 23 | 3169      |                    | NM_001013742 | NP_001013764 | Q5KSL6 | DGKK_HUMAN  |                                | 2     | TTACCCGATCTC    | 0.438 |
| + | 2  | 1132      |                    | NM_005448    | NP_005439    | O95972 | BMP15_HUMAN |                                | 2     | ATTTTGTACAAGC   | 0.463 |
| - | 1  | 1         |                    | NM_001009616 | NP_001009616 | Q5MJ07 | SPXN5_HUMAN |                                | 0     | TTCCATGATTCTC   | 0.448 |
| + | 6  | 2479      | p.D461N NHSL2_     | NM_001013627 | NP_001013649 | Q5HYW2 | NHSL2_HUMAN |                                | 0     | AGTCCGACCTA     | 0.512 |
| - | 22 | 2196      | p.M707V RPS6KA     | NM_014496    | NP_055311    | Q9UK32 | KS6A6_HUMAN |                                | 8     | CAACCATTGCTC    | 0.403 |
| + | 13 | 2218      | nr.1_Missense_M    | NM_019045    | NP_061918    | Q5JSH3 | WDR44_HUMAN |                                | 5     | GCAACGGCCAT     | 0.343 |
| + | 2  | 105       | e_Mutation_p.Y26   | NM_006649    | NP_006640    | Q9BVJ6 | UT14A_HUMAN |                                | 2     | AAAgaactaccttg  | 0.259 |
| + | 6  | 744       |                    | NM_016024    | NP_057108    | Q9Y388 | RBMX2_HUMAN | Lys-rich.                      | 4     | CAAATCCAGGA     | 0.557 |
| - | 8  | 1820_1821 | p.P567* GPC3_u     | NM_004484    | NP_004475    | P51654 | GPC3_HUMAN  |                                | 5     | CCTTCGGAGTTG    | 0.495 |
| + | 2  | 768       |                    | NM_001727    | NP_001718    | P32247 | BRS3_HUMAN  | ellular (Potential).           | 1     | TCTTATCCTGTCT   | 0.348 |
| - | 5  | 1312      | p.R227Q FGF13_L    | NM_004114    | NP_004105    | Q92913 | FGF13_HUMAN |                                | 3     | CAGATCGGGAG     | 0.517 |
| - | 3  | 582       |                    | NM_005362    | NP_005353    | P43357 | MAGA3_HUMAN | MAGE.                          | 0     | GGCTCGACTCT     | 0.532 |
| + | 2  | 993       | Y3_uc010nvl.1_in   | NM_005840    | NP_005831    | O43610 | SPY3_HUMAN  | PR. Cys-rich.                  | 0     | TGAGAGCCTCC     | 0.582 |
| + | 2  | 1001      | Y3_uc010nvl.1_in   | NM_005840    | NP_005831    | O43610 | SPY3_HUMAN  | PR. Cys-rich.                  | 0     | CTCCTCGATTATC   | 0.592 |
| + | 2  | 241       |                    | NM_000815    | NP_000806    | O14764 | GBRD_HUMAN  | ellular (Probable).            | 3     | GTATGCCGGCT     | 0.677 |
| - | 21 | 2902      | rRSF25_uc001ani.   | NM_001042663 | NP_001036128 | O94827 | PKHG5_HUMAN |                                | 1     | CCCTCGGACTTA    | 0.697 |
| - | 2  | 262       |                    | NM_001009611 | NP_001009611 | O60810 | PRAM4_HUMAN |                                | 1     | GGCGGCGGAAG     | 0.602 |
| + | 3  | 526       | on_p.A3P TMMEM51   | NM_001136216 | NP_001129688 | Q9NWX7 | TMM51_HUMAN |                                | 0     | TGATGGCCCGAG    | 0.557 |
| - | 7  | 1702      |                    | NM_004431    | NP_004422    | P29317 | EPHA2_HUMAN | tential). Fibronectin type-III | 10    | ATTCTGTGCACC    | 0.617 |
| - | 2  | 227       | r_p.P13S ATP13A'   | NM_022089    | NP_071372    | Q9NQ11 | AT132_HUMAN | ical; (Potential).             | 4     | GGTGGCGGTGC     | 0.527 |
| + | 1  | 2328      | C7A_uc009vpg.2_    | NM_152375    | NP_689588    | Q5VTJ3 | KLD7A_HUMAN |                                | 3     | GCGCACCTCC      | 0.647 |

rs145715341

|   |    |           |                                                           |              |              |        |             |                               |    |                 |       |             |
|---|----|-----------|-----------------------------------------------------------|--------------|--------------|--------|-------------|-------------------------------|----|-----------------|-------|-------------|
| - | 85 | 12608     | 2_5'Flank UBR4_u                                          | NM_020765    | NP_065816    | Q5T4S7 | UBR4_HUMAN  |                               | 25 | :CCGAGCTGCCA    | 0.537 |             |
| + | 12 | 1741      | jb.2_Missense_Mt                                          | NM_032264    | NP_115640    | Q9H094 | NBPF3_HUMAN | NBPF 4.                       | 2  | :GAAAAAGGACC    | 0.468 |             |
| + | 16 | 2953      |                                                           | NM_020526    | NP_065387    | P29322 | EPHA8_HUMAN | mic (Potential). SAM.         | 13 | :CATCCGCATGGC   | 0.692 |             |
| + | 5  | 589       | se_Mutation_p.V1!                                         | NM_198137    | NP_937770    | Q7RTX7 | CTSR4_HUMAN | =Segment S4; (Potential).     | 1  | :TGCGCGGTGGAG   | 0.627 |             |
| + | 3  | 435       | r_p.Q90* SYTL1_u                                          | NM_032872    | NP_116261    | Q8IYJ3 | SYTL1_HUMAN |                               | 1  | :GCTCCAGCGG     | 0.642 |             |
| + | 7  | 969       | _p.D146Y EIF3L_u                                          | NM_003757    | NP_003748    | Q13347 | EIF3L_HUMAN | WD 3.                         | 1  | TGCAATGACTCT/   | 0.532 |             |
| + | 15 | 2243      |                                                           | NM_017629    | NP_060099    | Q9HCK5 | AGO4_HUMAN  | Piwi.                         | 1  | FGGCCAGAACTA    | 0.393 |             |
| + | 2  | 214       | ciy.2_Missense_M                                          | NM_001255    | NP_001246    | Q12834 | CDC20_HUMAN |                               | 0  | :AGCCCGGCC      | 0.672 |             |
| - | 6  | 1017      | K2_uc010olo.1_Mi                                          | NM_007170    | NP_009101    | Q96S53 | TESK2_HUMAN | rotein kinase.                | 5  | ACATCGGGGATC    | 0.542 |             |
| + | 15 | 1648      | o.S512G RAD54L_u                                          | NM_001142548 | NP_001136020 | Q92698 | RAD54_HUMAN | case C-terminal.              | 3  | :GCCGTAGCAGT    | 0.547 |             |
| - | 8  | 952       | p.P263S SPATA6_u                                          | NM_019073    | NP_061946    | Q9NWH7 | SPAT6_HUMAN |                               | 1  | TTGGGGGATCAA    | 0.418 |             |
| + | 8  | 1233      | nr.1_Missense_Mt                                          | NM_153703    | NP_714914    | Q7Z5L7 | PODN_HUMAN  | LRR 12.                       | 2  | GCGGTTGCACA     | 0.662 |             |
| - | 2  | 1413      |                                                           | NM_152268    | NP_689481    | Q7L3T8 | SYPM_HUMAN  |                               | 2  | TGCAGGGTCTCT    | 0.512 |             |
| + | 19 | 1835      | oK1_uc001czp.2_I                                          | NM_015888    | NP_056972    | Q9UJC3 | HOOK1_HUMAN | Potential.                    | 2  | CAGATATAAATC/   | 0.353 |             |
| + | 2  | 188       | id1_uc001dbp.1_!                                          | NM_020925    | NP_065976    | Q5VU97 | CAHD1_HUMAN | ellular (Potential).          | 2  | AAATCTCAAATGC   | 0.378 |             |
| - | 3  | 385       |                                                           | NM_022159    | NP_071442    | Q9HBW9 | ELTD1_HUMAN | :GF-like 2; calcium-binding   | 2  | CTGTGTTAGTGC    | 0.343 |             |
| + | 6  | 978       | _p.D75N CLCA4_u                                           | NM_012128    | NP_036260    | Q14CN2 | CLCA4_HUMAN | VWFA.                         | 2  | TTCTTTGATAAGT   | 0.423 |             |
| - | 1  | 264       | e_Mutation_p.A3V                                          | NM_024408    | NP_077719    | Q04721 | NOTC2_HUMAN |                               | 27 | :GCAGGGCGGG     | 0.647 | rs150390977 |
| - | 2  | 714       | P6_uc009wjj.1_Int                                         | NM_016361    | NP_057445    | Q9NPH0 | PPA6_HUMAN  |                               | 4  | :GGGTGGGACCT    | 0.418 |             |
| - | 3  | 3611      | uc001ezv.2_Intron                                         | NM_001014342 | NP_001014364 | Q5D862 | FILA2_HUMAN | Ser-rich.                     | 17 | :CTGTCCAAAAC    | 0.493 |             |
| + | 3  | 814       | .2_Intron CD1E_uc                                         | NM_030893    | NP_112155    | P15812 | CD1E_HUMAN  | Ig-like.                      | 3  | :CCCTCGATTTCT   | 0.507 |             |
| + | 1  | 586       |                                                           | NM_001004478 | NP_001004478 | Q8NGY1 | O10Z1_HUMAN | ellular (Potential).          | 2  | :CGAGTGAGCTG    | 0.498 |             |
| + | 1  | 931       |                                                           | NM_001005184 | NP_001005184 | Q8NGW6 | OR6K6_HUMAN | Name=7; (Potential).          | 1  | :CTCCCTTTTTC/   | 0.438 |             |
| + | 3  | 275       | _p.R85H FCRL6_u                                           | NM_001004310 | NP_001004310 | Q6DN72 | FCRL6_HUMAN | 1. Extracellular (Potential). | 3  | :GAGCCGTGGCC    | 0.488 | rs147917646 |
| - | 10 | 1448      | _p.A214T ARHGA                                            | NM_001025598 | NP_001020769 | Q7Z6I6 | RHG30_HUMAN |                               | 3  | :CTCTGCTGCCT    | 0.632 |             |
| + | 10 | 1447      | wb.2_Missense_M                                           | NM_015569    | NP_056384    | Q9UQ16 | DYN3_HUMAN  |                               | 1  | :GCCCTTCTTGA    | 0.398 |             |
| - | 6  | 1040      | IA11_uc010pmq.1                                           | NM_178527    | NP_848622    | Q5TAH2 | S9A11_HUMAN |                               | 2  | :GGATTCTGTTGC   | 0.274 |             |
| - | 7  | 1507_1508 | :_Mutation_p.G432                                         | NM_004319    | NP_004310    | O14525 | ASTN1_HUMAN |                               | 15 | TGGCTCCCTCC     | 0.589 |             |
| + | 7  | 2159      | _Mutation_p.E610                                          | NM_005807    | NP_005798    | Q92954 | PRG4_HUMAN  | <-X-P-X-P-T-T-X. 42; appro    | 1  | :TAAGGAGACTG    | 0.592 |             |
| + | 3  | 355       | R3_uc010poy.1_M                                           | NM_021023    | NP_066303    | Q02985 | FHR3_HUMAN  | Sushi 2.                      | 0  | TATTTTCCTTATT   | 0.299 |             |
| + | 3  | 391       |                                                           | NM_030787    | NP_110414    | Q9BXR6 | FHR5_HUMAN  | Sushi 2.                      | 2  | TGTGTTCCTTTC    | 0.308 |             |
| - | 6  | 981       |                                                           | NM_001994    | NP_001985    | P05160 | F13B_HUMAN  | Sushi 5.                      | 3  | ATATTTCTGCTG/   | 0.363 |             |
| - | 1  | 347_348   | e_Mutation_p.E31l                                         | NM_018136    | NP_060606    | Q8IZT6 | ASPM_HUMAN  |                               | 6  | :gctctctctggccg | 0.277 |             |
| + | 3  | 757       | YRK3_uc001hei.2                                           | NM_003582    | NP_003573    | O43781 | DYRK3_HUMAN |                               | 3  | :GGGCCTATATC    | 0.428 |             |
| - | 2  | 1179      | ha.3_Missense_M                                           | NM_025179    | NP_079455    | O75051 | PLXA2_HUMAN | ilar (Potential). Sema.       | 3  | CAGCCGCAGCA     | 0.572 |             |
| + | 10 | 1269      | _p.T323M HHAT_u                                           | NM_001122834 | NP_001116306 | Q5VTY9 | HHAT_HUMAN  | ical; (Potential).            | 2  | TTCCACGGCGA     | 0.557 |             |
| - | 48 | 9761      |                                                           | NM_206933    | NP_996816    | O75445 | USH2A_HUMAN | ential). Fibronectin type-III | 26 | :GAAGAGATCTGC   | 0.358 |             |
| - | 15 | 2157      | RS_uc001hiz.1_M                                           | NM_004446    | NP_004437    | P07814 | SYEP_HUMAN  | yl-tRNA synthetase.           | 2  | GTGATCAAGTG     | 0.393 |             |
| + | 4  | 1739      |                                                           | NM_021958    | NP_068777    | Q14774 | HLX_HUMAN   | Ser-rich.                     | 2  | gagcagcggcggcgg | 0.224 |             |
| - | 30 | 4297      | qgh.1_Missense_M                                          | NM_018072    | NP_060542    | Q9H583 | HEAT1_HUMAN |                               | 3  | GCTCCGGGACG     | 0.443 |             |
| + | 7  | 726       | GTPBP4_uc010q;                                            | NM_012341    | NP_036473    | Q9BZE4 | NOG1_HUMAN  |                               | 2  | TTGTTAGGTTGT/   | 0.557 |             |
| - | 3  | 245       |                                                           | NM_145314    | NP_660357    | Q8WVF2 | UCMA_HUMAN  |                               | 0  | CTTGAGGAAAT     | 0.577 |             |
| - | 4  | 531       |                                                           | NM_001010924 | NP_001010924 | Q5VUB5 | F1711_HUMAN | ellular (Potential).          | 4  | CCGAAGGGGAG     | 0.517 |             |
| + | 5  | 599       | lizo.1_RNA HSD17B7P2_uc001izp.1_Missense_Mutation_p.N173S | NM_001031746 | NP_001026916 | Q8IW00 | CJ072_HUMAN | lasmic (Potential).           | 0  | :TCGCAATGCAAC   | 0.453 | rs2257765   |
| - | 8  | 919       |                                                           | NM_001031746 | NP_001026916 | Q8IW00 | CJ072_HUMAN | lasmic (Potential).           | 0  | :GGTGGGTTTG     | 0.488 |             |
| + | 3  | 2053      |                                                           | NM_199459    | NP_955629    | Q711Q0 | CJ071_HUMAN |                               | 0  | TCATCCCCAG/     | 0.542 |             |
| - | 9  | 1349      | _p.K409R CTNNA3                                           | NM_001127384 | NP_001120856 | Q9UI47 | CTNA3_HUMAN |                               | 8  | TTTCTTTTCCC     | 0.438 |             |



|   |    |      |                   |              |              |        |             |                            |    |               |       |             |
|---|----|------|-------------------|--------------|--------------|--------|-------------|----------------------------|----|---------------|-------|-------------|
| - | 6  | 1624 | hv.1_Missense_Mt  | NM_014912    | NP_055727    | Q8NE35 | CPEB3_HUMAN | RRM 1.                     | 0  | TTACCTTTAGGAC | 0.413 |             |
| - | 23 | 2908 | _p.L389F IDE_uc0  | NM_004969    | NP_004960    | P14735 | IDE_HUMAN   |                            | 3  | FACTGCCAACAT  | 0.428 |             |
| + | 19 | 5153 | o.E1491K PLCE1_   | NM_016341    | NP_057425    | Q9P212 | PLCE1_HUMAN | 'I-PLC X-box.              | 3  | TTGGAGAAAAG   | 0.303 |             |
| + | 22 | 2606 | p.P710L HELLS_u   | NM_018063    | NP_060533    | Q9NRZ9 | HELLS_HUMAN |                            | 2  | AGAGTCTGAAAT  | 0.323 |             |
| + | 3  | 807  | o.C19_uc009xus.1_ | NM_000772    | NP_000763    | P33260 | CP2C1_HUMAN |                            | 5  | CCAAATGGTGGG  | 0.323 |             |
| + | 4  | 962  | v212* CYP2C19_u   | NM_000772    | NP_000763    | P33260 | CP2C1_HUMAN |                            | 5  | CCATGGATCCAA  | 0.294 |             |
| - | 9  | 1393 | P2C8_uc010qob.1   | NM_000770    | NP_000761    | P10632 | CP2C8_HUMAN |                            | 0  | CAAATTCGTTTTT | 0.363 |             |
| + | 1  | 386  | y.2_Intron DHDPS  | NM_001009997 | NP_001009997 | Q5T681 | CJ062_HUMAN |                            | 0  | CTCCACGGTTC   | 0.582 |             |
| - | 14 | 2391 | nse_Mutation_p.R  | NM_014631    | NP_055446    | Q5TCZ1 | SPD2A_HUMAN |                            | 0  | CGCCGTAAG     | 0.647 |             |
| - | 1  | 341  | C2_uc009xxx.2_Ir  | NR_026715    |              |        |             |                            | 0  | AGTGCAGTCAA   | 0.592 |             |
| - | 20 | 2209 | se_Mutation_p.QE  | NM_198060    | NP_932326    | Q86VF7 | NRAP_HUMAN  | Nebulin 16.                | 10 | TTGACTGCAGC   | 0.502 |             |
| + | 10 | 2035 | .RC2_uc001lay.1_I | NM_198514    | NP_940916    | Q8NBF2 | NHLC2_HUMAN |                            | 1  | GACTGCGTGTG   | 0.463 | rs150975627 |
| + | 5  | 723  |                   | NM_198075    | NP_932341    | Q81YG6 | LRC56_HUMAN |                            | 1  | GAGGACGCTGG   | 0.647 |             |
| - | 1  | 488  |                   | NM_001005238 | NP_001005238 | Q8NGK0 | O51G2_HUMAN | Name=4; (Potential).       | 2  | GTAATGGAAAA   | 0.473 |             |
| - | 2  | 619  | z2_uc001mak.1_Ir  | NM_017481    | NP_059509    | Q9H347 | UBQL3_HUMAN |                            | 3  | GACCCGGGATG   | 0.552 |             |
| - | 21 | 3000 | _Mutation_p.Y557F | NM_001100167 | NP_001093637 | Q9Y6F6 | MRV11_HUMAN | ical; (Potential).         | 3  | ATTGTAGAGCC   | 0.532 |             |
| - | 3  | 366  |                   | NM_000315    | NP_000306    | P01270 | PTHY_HUMAN  |                            | 1  | CCTTTTTTCGGC  | 0.458 |             |
| - | 5  | 416  | RFGAP2_uc010rh    | NM_032389    | NP_115765    | Q8N6H7 | ARFG2_HUMAN | interaction with coatomer. | 1  | TCTATCCAAAGC  | 0.502 |             |
| - | 13 | 2124 | q.1_Missense_Mu   | NM_024783    | NP_079059    | Q5U5Z8 | CBPC2_HUMAN |                            | 2  | GACACTGAGTG   | 0.259 |             |
| + | 1  | 922  |                   | NM_001004739 | NP_001004739 | Q8NGL0 | OR5L2_HUMAN | lasmic (Potential).        | 1  | GCTCCAAAATT   | 0.463 |             |
| + | 1  | 151  |                   | NM_001005201 | NP_001005201 | Q8N146 | OR8H3_HUMAN | lasmic (Potential).        | 2  | TAATCCGCCTGC  | 0.438 |             |
| + | 1  | 298  |                   | NM_001004747 | NP_001004747 | Q8NGG3 | OR5T3_HUMAN | Name=2; (Potential).       | 0  | TCTTGGATGCTT  | 0.383 |             |
| + | 1  | 29   |                   | NM_001013358 | NP_001013376 | P0C7N8 | OR9G9_HUMAN | ellular (Potential).       | 0  | TGACTGAGTTTA  | 0.478 |             |
| + | 2  | 1105 | ir.2_Missense_Mu  | NM_015177    | NP_055992    | Q9Y2E6 | DTX4_HUMAN  |                            | 3  | CAGCAAGACCG   | 0.632 |             |
| - | 4  | 849  | R225C CYBASC3     | NM_001161452 | NP_001154924 | Q8NBI2 | CYAC3_HUMAN |                            | 0  | TGGGCCTTCC    | 0.607 |             |
| - | 2  | 906  | ier.2_Missense_Mt | NM_033347    | NP_203133    | Q9Y2U2 | KCNK7_HUMAN |                            | 0  | CACGGGTGCA    | 0.652 |             |
| + | 10 | 1054 | rm.1_Missense_IV  | NM_001619    | NP_001610    | P25098 | ARBK1_HUMAN | rotein kinase.             | 1  | CCACACGCCAG   | 0.662 |             |
| + | 23 | 4900 | j.2_Missense_Mut  | NM_002335    | NP_002326    | O75197 | LRP5_HUMAN  | nic (Potential). PPSP mot  | 7  | CTCCGTCCTCC   | 0.582 |             |
| - | 10 | 1516 | ss.2_Missense_M   | NM_001040118 | NP_001035207 | Q96P48 | ARAP1_HUMAN | PH 2.                      | 1  | AGCGCGTCCAG   | 0.622 | rs138364636 |
| + | 1  | 1652 |                   | NM_014786    | NP_055601    | Q96PE2 | ARHG_HUMAN  |                            | 0  | GAGAGCAAAGT   | 0.642 |             |
| + | 6  | 820  | z_Mutation_p.E19  | NM_018480    | NP_060950    | Q8IUX1 | T126B_HUMAN |                            | 0  | TATTTGAAGAG   | 0.333 |             |
| - | 1  | 683  | _p.L161F GRM5_u   | NM_001143831 | NP_001137303 | P41594 | GRM5_HUMAN  | ellular (Potential).       | 9  | TGGAGCAAATT   | 0.498 |             |
| + | 1  | 1190 |                   | NM_001161630 | NP_001155102 | B2RXH2 | KD4DL_HUMAN | JmjC.                      | 0  | CACGATGGATTG  | 0.512 |             |
| + | 16 | 2258 | e_Mutation_p.l64C | NM_014361    | NP_055176    | O94779 | CNTN5_HUMAN | like C2-type 6.            | 8  | GAACATCCTTC   | 0.463 |             |
| - | 3  | 2639 | R_uc009yww.1_Rf   | NM_000926    | NP_000917    | P06401 | PRGR_HUMAN  | clear receptor.            | 4  | AGGACCATGCC   | 0.368 |             |
| - | 4  | 1441 | _p.R351* GUCY1A   | NM_000855    | NP_000846    | P33402 | GCYA2_HUMAN |                            | 8  | CATCGAAGCT    | 0.473 |             |
| - | 11 | 1321 | z_Mutation_p.H31  | NM_020809    | NP_065860    | Q9P2F6 | RHG20_HUMAN |                            | 5  | CAGGTGAGTGC   | 0.428 |             |
| + | 4  | 653  | EM25_uc001pti.2   | NM_032780    | NP_116169    | Q86YD3 | TMM25_HUMAN | ellular (Potential).       | 0  | CCCGCGGCCA    | 0.617 |             |
| + | 16 | 2001 | aw.1_Nonsense_M   | NM_014619    | NP_055434    | Q16099 | GRIK4_HUMAN | lasmic (Potential).        | 3  | CTACGAGTGG    | 0.438 |             |
| + | 8  | 1632 |                   | NM_025004    | NP_079280    | Q0P6D6 | CCD15_HUMAN |                            | 2  | TCTCCACAAAG   | 0.418 | rs113451248 |
| - | 1  | 198  | ds.1_Missense_M   | NM_016533    | NP_057617    | Q9NZG7 | NINJ2_HUMAN |                            | 2  | GCACGGGTGC    | 0.597 |             |
| + | 9  | 1375 | se_Mutation_p.R2  | NM_201442    | NP_958850    | P09871 | C1S_HUMAN   | CUB 2.                     | 1  | CTTGCGGAGAG   | 0.468 | rs147341600 |
| - | 3  | 370  | 124G PRH1_uc00    | NM_007244    | NP_009175    | Q16378 | PROL4_HUMAN |                            | 0  | CAGGTGACAG    | 0.532 |             |
| + | 1  | 287  |                   | NM_001310    | NP_001301    | O60519 | CRBL2_HUMAN |                            | 0  | TGACAGTAAGG   | 0.677 |             |
| + | 21 | 2442 | MP_uc001rgi.2_R   | NM_006152    | NP_006143    | Q12912 | LRMP_HUMAN  | renal (Potential).         | 2  | ATGCCGCTCCC   | 0.502 |             |
| - | 11 | 2773 | _p.K514R SFRS2lf  | NM_004719    | NP_004710    | Q99590 | SCAFB_HUMAN |                            | 0  | GAGACTTCTGT   | 0.473 |             |
| - | 9  | 1530 | CCNT1_uc009zk;    | NM_001240    | NP_001231    | O60563 | CCNT1_HUMAN | Potential.                 | 6  | CTTCTGGGCAG   | 0.438 |             |

|   |    |      |                   |              |              |        |             |                               |    |               |       |
|---|----|------|-------------------|--------------|--------------|--------|-------------|-------------------------------|----|---------------|-------|
| + | 1  | 299  |                   | NM_000486    | NP_000477    | P41181 | AQP2_HUMAN  | nic (Potential). NPA 1.       | 2  | CCCTGCCGTGA   | 0.662 |
| - | 6  | 546  | on_p.W150L SLC1   | NM_000617    | NP_000608    | P49281 | NRAM2_HUMAN | lasmic (Potential).           | 1  | TCAGCCACAGG   | 0.428 |
| - | 3  | 776  |                   | NM_004693    | NP_004684    | O95678 | K2C75_HUMAN | Coil 1B. Rod.                 | 0  | CAAATTCATTCTC | 0.478 |
| - | 2  | 1328 | r.3_Missense_Mut  | NM_006163    | NP_006154    | Q16621 | NFE2_HUMAN  | Basic motif.                  | 0  | TGCCCCGTCGT   | 0.567 |
| + | 3  | 538  | RDH5_uc010spu.    | NM_002905    | NP_002896    | Q92781 | RDH1_HUMAN  |                               | 1  | TCATCGGACCC   | 0.587 |
| - | 2  | 408  | e_Mutation_p.Q20  | NM_001113201 | NP_001106672 | Q13765 | NACA_HUMAN  |                               | 1  | CAGCCTGGGGC   | 0.483 |
| - | 1  | 446  |                   | NM_145913    | NP_666018    | Q8N695 | SC5A8_HUMAN | ical; (Potential).            | 0  | TGCCCGCGAAC   | 0.682 |
| + | 22 | 2783 |                   | NM_014503    | NP_055318    | O75691 | UTP20_HUMAN |                               | 4  | GGTGGCAGAGG   | 0.498 |
| + | 21 | 2435 |                   | NM_017564    | NP_060034    | Q8WWW8 | STAB2_HUMAN | r (Potential). EGF-like 6.    | 14 | CTCAGGAAATG   | 0.413 |
| + | 6  | 871  | _p.V264I TPCN1_   | NM_017901    | NP_060371    | Q9ULQ1 | TPC1_HUMAN  | =S3 of repeat I; (Potential). | 3  | TGTTGGTACGG   | 0.652 |
| + | 7  | 851  | h.2_Missense_Mu   | NM_138432    | NP_612441    | Q96GA7 | SDSL_HUMAN  |                               | 0  | AGCCGGCAAGC   | 0.622 |
| + | 5  | 1112 |                   | NM_001080533 | NP_001074002 | A6NIH7 | U119B_HUMAN |                               | 1  | AAATCCTTACGA  | 0.443 |
| - | 3  | 328  | PS33A_uc001uce.   | NM_022916    | NP_075067    | Q96AX1 | VP33A_HUMAN |                               | 1  | CTGCCGGCAAA   | 0.373 |
| - | 5  | 1715 | ise_Mutation_p.P4 | NM_183044    | NP_898865    | Q9Y252 | RNF6_HUMAN  |                               | 2  | TGATGGCTCA    | 0.448 |
| - | 1  | 1414 | uzo.1_Missense_I  | NM_183422    | NP_904358    | Q15714 | T22D1_HUMAN |                               | 0  | TGCCAGTAACA   | 0.388 |
| + | 2  | 1640 | 14C_uc001vgc.2_   | NM_021645    | NP_067677    | Q5TAP6 | UT14C_HUMAN |                               | 5  | TGACGGACCG    | 0.547 |
| - | 1  | 2778 |                   | NM_052910    | NP_443142    | Q96PX8 | SLIK1_HUMAN | ical; (Potential).            | 5  | AGCCGGAGGTC   | 0.592 |
| - | 45 | 5042 | o.P306S DOCK9_t   | NM_015296    | NP_056111    | Q9BZ29 | DOCK9_HUMAN | DHR-2.                        | 1  | GTGGGGGAGAA   | 0.592 |
| - | 5  | 1033 | p.Q215K NOVA1_    | NM_002515    | NP_002506    | P51513 | NOVA1_HUMAN |                               | 5  | TCTTCTGGATGAT | 0.458 |
| + | 25 | 3115 | ie_Mutation_p.K98 | NM_014992    | NP_055807    | Q9Y4D1 | DAAM1_HUMAN | FH2.                          | 1  | GAAAAAGGAGG   | 0.418 |
| - | 23 | 3911 |                   | NM_000428    | NP_000419    | Q14767 | LTBP2_HUMAN | m-binding (Potential). Cys-   | 2  | CACCTCACAC    | 0.647 |
| - | 1  | 127  | vo.3_Missense_M   | NM_005065    | NP_005056    | Q9UBV2 | SE1L1_HUMAN |                               | 1  | TATCCGGACCC   | 0.706 |
| + | 14 | 1474 | p.P465S SLC24A    | NM_153646    | NP_705932    | Q8NFF2 | NCKX4_HUMAN | ic (Potential). Alpha-2.      | 3  | GTGTTCCAGAC   | 0.542 |
| + | 6  | 523  | _p.I147R KIAA14   | NM_020818    | NP_065869    | Q9P2D8 | UNC79_HUMAN |                               | 17 | TGTATAGACCC   | 0.418 |
| - | 3  | 845  |                   | NM_001080451 | NP_001073920 | Q86U17 | SPA11_HUMAN |                               | 1  | GGACGGTGCAA   | 0.532 |
| - | 4  | 407  | \K2_uc001ypx.2_   | NM_138420    | NP_612429    | Q8IVF2 | AHNK2_HUMAN |                               | 1  | ATGTCCGTGAG   | 0.592 |
| - | 1  | 1786 |                   | NM_019066    | NP_061939    |        |             |                               | 0  | TACTCTAGGTAC  | 0.488 |
| - | 9  | 1274 | zba.2_Missense_Iv | NM_000814    | NP_000805    | P28472 | GBRB3_HUMAN | lasmic (Probable).            | 5  | CATTCATTTCATT | 0.453 |
| + | 2  | 410  | _p.T14M GREM1_    | NM_013372    | NP_037504    | O60565 | GREM1_HUMAN |                               | 0  | TGTACGGAGC    | 0.642 |
| - | 3  | 522  | .2_Intron BMF_uc  | NM_033503    | NP_277038    | Q96LC9 | BMF_HUMAN   | BH3.                          | 1  | AAGCCGGTGGA   | 0.602 |
| - | 6  | 1279 |                   | NM_139265    | NP_644670    | Q9H223 | EHD4_HUMAN  |                               | 2  | CGTGCTCGTCT   | 0.637 |
| - | 12 | 3139 | AA1370_uc002acf   | NM_019600    | NP_062546    | Q32MH5 | K1370_HUMAN |                               | 0  | AGGTACAGAAA   | 0.368 |
| - | 9  | 3382 | X7_uc002adn.1_n   | NM_022841    | NP_073752    | Q2KHR2 | RFX7_HUMAN  |                               | 0  | ATGCTGCACAG   | 0.458 |
| - | 20 | 3000 | p.P953L SLTM_uc   | NM_024755    | NP_079031    | Q9NWH9 | SLTM_HUMAN  |                               | 1  | AGGGTGGACCA   | 0.507 |
| + | 6  | 1741 | ifu.2_Missense_Mi | NM_017610    | NP_060080    | Q6ZNA4 | RN111_HUMAN |                               | 2  | CATGTGGAGGG   | 0.498 |
| - | 61 | 8256 | o.R2728C VPS13C   | NM_020821    | NP_065872    | Q709C8 | VP13C_HUMAN |                               | 2  | TATGCGGAAATC  | 0.448 |
| + | 2  | 472  | c002amk.2_5'Flan  | NM_203373    | NP_976307    | Q6P050 | FXL22_HUMAN |                               | 0  | CGACTTGCCTC   | 0.746 |
| + | 4  | 1235 |                   | NM_015042    | NP_055857    | O15014 | ZN609_HUMAN |                               | 3  | TGGGGCAGCC    | 0.547 |
| + | 3  | 846  | ujp.1_Missense_M  | NM_002755    | NP_002746    | Q02750 | MP2K1_HUMAN | rotein kinase.                | 0  | CTCTCCGTACA   | 0.512 |
| - | 9  | 713  | _p.P230L GRAMD    | NM_001012642 | NP_001012660 | Q8IUY3 | GRAM2_HUMAN |                               | 0  | TATGATGGAGGG  | 0.537 |
| + | 5  | 1129 | E299K CD276_uc    | NM_001024736 | NP_001019907 | Q5ZPR3 | CD276_HUMAN | 2. Extracellular (Potential). | 1  | TCACCGAAGGC   | 0.647 |
| - | 9  | 983  | _p.T165I UBL7_uc  | NM_032907    | NP_116296    | Q96S82 | UBL7_HUMAN  |                               | 1  | AGCCGGTGGCC   | 0.682 |
| + | 2  | 2715 | _p.P799S C15orf3  | NM_015492    | NP_056307    | Q6ZR16 | CO039_HUMAN |                               | 0  | CTGGGCCCTGG   | 0.642 |
| + | 3  | 247  | _p.D16H HMG20     | NM_018200    | NP_060670    | Q9NP66 | HM20A_HUMAN |                               | 3  | TTCAGATGAAC   | 0.418 |
| - | 13 | 1918 | _p.T617N ACSBG1   | NM_015162    | NP_055977    | Q96GR2 | ACBG1_HUMAN |                               | 1  | CAGAGGTGTCT   | 0.527 |
| + | 2  | 1796 | unk.1_Missense_h  | NM_015206    | NP_056021    | Q9UPX6 | K1024_HUMAN |                               | 4  | CAACGCAAGG    | 0.517 |
| + | 20 | 3282 | b.1_RNA LRRK1_    | NM_024652    | NP_078928    | Q38SD2 | LRRK1_HUMAN |                               | 12 | TGACAGGTGAG   | 0.582 |

|   |    |         |                                              |              |              |        |             |                              |       |                  |       |             |
|---|----|---------|----------------------------------------------|--------------|--------------|--------|-------------|------------------------------|-------|------------------|-------|-------------|
| + | 38 | 4934    | _uc002cio.1_Miss                             | NM_145294    | NP_660337    | Q96KV7 | WDR90_HUMAN |                              | 1     | :CACCACGGAGG     | 0.652 |             |
| - | 13 | 5309    |                                              | NM_032444    | NP_115820    | Q8IY92 | SLX4_HUMAN  | raction with PLK1 and TEF    | 0     | :TCGGCGTTATG     | 0.502 |             |
| - | 12 | 3745    |                                              | NM_032444    | NP_115820    | Q8IY92 | SLX4_HUMAN  | PLK1 and TERF2-TERF2IF       | 0     | :CTGGGGAGGGCC    | 0.662 |             |
| + | 13 | 1422    | AN1_uc002cxb.2_f                             | NM_001142290 | NP_001135762 | O60291 | MGRN1_HUMAN |                              | 2     | :CTGTCCCCCTCG    | 0.662 |             |
| - | 27 | 3907    | 2_RNA ABCC6_u                                | NM_001171    | NP_001162    | O95255 | MRP6_HUMAN  | similarity). ABC transporter | 3     | :CCTGCGTGGAT     | 0.597 |             |
| - | 14 | 2043    |                                              | NM_153603    | NP_705831    | P83436 | COG7_HUMAN  |                              | 0     | :ACTAAAGGCGG     | 0.517 |             |
| + | 2  | 1755    |                                              | NM_006040    | NP_006031    | Q9Y661 | HS3S4_HUMAN | ional (Potential).           | 2     | :AGGGTGATAAA     | 0.468 |             |
| - | 3  | 824     |                                              | NM_001080417 | NP_001073886 | Q9UEG4 | ZN629_HUMAN | 2H2-type 3.                  | 0     | :ACTTGTAGGGCT    | 0.657 |             |
| - | 3  | 713     | efb.1_RNA ABCC                               | NM_033226    | NP_150229    | Q96J65 | MRP9_HUMAN  | smembrane type-1 1.          | 3     | :CAACACGCGTG     | 0.572 |             |
| + | 2  | 232     | 2_uc010cbk.1_Mi                              | NM_022162    | NP_071445    | Q9HC29 | NOD2_HUMAN  | CARD 1.                      | 4     | :TGGTCGAGCTG     | 0.602 |             |
| - | 2  | 391     | p.W81* CES7_uc                               | NM_001143685 | NP_001137157 | Q6NT32 | EST5A_HUMAN |                              | 0     | :TATCCCAGGGC     | 0.592 |             |
| + | 16 | 1794    |                                              | NM_005886    | NP_005877    | Q9BVA0 | KTNB1_HUMAN | NA1 and NDEL1 (By simil      | 0     | :AGGCCGTGAAG     | 0.637 |             |
| + | 2  | 221     | se_Mutation_p.V5                             | NM_024922    | NP_079198    | Q6UWW8 | EST3_HUMAN  |                              | 5     | :TGGGCGTGAAG     | 0.632 | rs149175900 |
| - | 18 | 2924    | 4OD1_uc010ced.2                              | NM_013241    | NP_037373    | Q9Y613 | FHOD1_HUMAN | FH2.                         | 3     | :ACGGCGGGCAC     | 0.662 |             |
| - | 3  | 633     |                                              | NM_032178    | NP_115554    | Q96CW6 | S7A6O_HUMAN |                              | 1     | :TGGCCGTCTCC     | 0.542 | rs139184366 |
| - | 4  | 729     | nse_Mutation_p.P                             | NM_017853    | NP_060323    | Q9NX01 | TXN4B_HUMAN |                              | 1     | :ATTTGGGAATATT   | 0.383 |             |
| - | 5  | 802     | 8B_uc010vmu.1_f                              | NM_001011880 | NP_001011880 | Q6UXF7 | CL18B_HUMAN |                              | 0     | :CAGGCACCTTC     | 0.607 |             |
| + | 2  | 120     | . TRAPPC2L_uc00                              | NM_016209    | NP_057293    | Q9UL33 | TPC2L_HUMAN |                              | 0     | :CTACGGAGAAC     | 0.552 |             |
| - | 9  | 1486    | 2fnc.1_Missense_f                            | NM_013275    | NP_037407    | Q6UB99 | ANR11_HUMAN |                              | 6     | :TGACGGGGGCC     | 0.547 |             |
| + | 2  | 147     | in CDK10_uc002fo                             | NM_052988    | NP_443714    | Q15131 | CDK10_HUMAN |                              | 1     | :CCGGAGTGTGA     | 0.522 |             |
| - | 1  | 697     |                                              | NM_002551    | NP_002542    | P47893 | OR3A2_HUMAN | Name=5; (Potential).         | 1     | :AACCAAAGGTG     | 0.562 |             |
| - | 1  | 617     |                                              | NM_003554    | NP_003545    | P47887 | OR1E2_HUMAN | Name=5; (Potential).         | 1     | :ATCACCCATTCAT   | 0.473 |             |
| + | 1  | 64      | VMO1_uc010vsi.                               | NM_001014985 | NP_001014985 |        |             |                              | 0     | :AGTGGCGGGCGC    | 0.672 |             |
| + | 23 | 3033    |                                              | NM_006612    | NP_006603    | O43896 | KIF1C_HUMAN |                              | 2     | :AGGCAGCCCCC     | 0.647 |             |
| - | 10 | 1218    | TP53_uc002gii.1_I                            | NM_001126112 | NP_001119584 | P04637 | P53_HUMAN   | teraction with) p.R342Q(2)   | 22245 | :CTCTCGGAACA     | 0.498 |             |
| - | 4  | 760     | uc010cnq.1_RNA                               | NM_001139    | NP_001130    | O75342 | LX12B_HUMAN | ipoxygenase.                 | 0     | :CCTCCGCACCG     | 0.657 |             |
| - | 39 | 5629    | i.R1876C MYH10_                              | NM_005964    | NP_005955    | P35580 | MYH10_HUMAN | Potential.                   | 2     | :TGCACGGACTA     | 0.448 |             |
| - | 2  | 337     | 2glo.2_Missense_f                            | NM_144681    | NP_653282    | Q96M95 | CCD42_HUMAN |                              | 1     | :ACTCCGACGCC     | 0.542 |             |
| + | 13 | 2060    | p.S682N USP43_u                              | NM_153210    | NP_694942    | Q70EL4 | UBP43_HUMAN |                              | 5     | :TGACAGCACGG     | 0.542 |             |
| - | 30 | 4146    |                                              | NM_003802    | NP_003793    | Q9UKX3 | MYH13_HUMAN | Potential.                   | 6     | :CTCCTCCTCATA    | 0.612 |             |
| - | 45 | 7282    | om.2_Missense_M                              | NM_006311    | NP_006302    | O75376 | NCOR1_HUMAN | with C1D (By similarity).    | 5     | :CCGTTCCGTTTC    | 0.502 |             |
| + | 2  | 370     | B_uc010vve.1_Int                             | NM_018955    | NP_061828    | P0CG47 | UBB_HUMAN   | biquitin-like 2.             | 3     | :GTATGCAGATC     | 0.537 |             |
| + | 7  | 1129    | ibj.2_Missense_M                             | NM_003593    | NP_003584    | O15353 | FOXN1_HUMAN | Fork-head.                   | 1     | :AGACAGCACCC     | 0.557 |             |
| + | 5  | 727     | :37B2_uc010wbq.1_RNA LRRC37B2_uc010csi.2_RNA |              |              |        |             |                              | 0     | :CCAGGATATGAC    | 0.249 |             |
| - | 4  | 2350    | p.R674C SLFN13                               | NM_144682    | NP_653283    | Q68D06 | SLN13_HUMAN |                              | 2     | :AGTACGGAAATT    | 0.433 |             |
| - | 6  | 1756    |                                              | NM_139285    | NP_644814    | Q8NHY3 | GA2L2_HUMAN |                              | 2     | :AGGTCCCAGGA     | 0.612 |             |
| + | 3  | 512     | cwb.2_Missense_I                             | NM_004448    | NP_004439    | P04626 | ERBB2_HUMAN | ellular (Pote p.R92G(1)      | 143   | :AAGTGAGGCAG     | 0.597 |             |
| - | 5  | 492     | n_p.R144C IKZF3                              | NM_012481    | NP_036613    | Q9UKT9 | IKZF3_HUMAN |                              | 6     | :TGGGCGTTTAC     | 0.428 |             |
| - | 3  | 372_373 | nse_Mutation_p.G                             | NM_152349    | NP_689562    | Q8N1A0 | KT222_HUMAN | Potential.                   | 2     | :TAGTCTTCAA      | 0.46  |             |
| - | 1  | 355     |                                              | NM_031960    | NP_114166    | Q9BYQ9 | KRA48_HUMAN | : KRQVHEC]-[SPRT]-[STC       | 0     | :ctggacacacagcag | 0.204 |             |
| - | 2  | 2008    |                                              | NM_018143    | NP_060613    | Q9NVR0 | KLH11_HUMAN |                              | 0     | :TGTGCCATGCA     | 0.527 |             |
| - | 5  | 486     | N1_uc010whc.1_li                             | NM_003766    | NP_003757    | Q14457 | BECN1_HUMAN |                              | 1     | :GACTTGCCTTCA    | 0.582 |             |
| - | 5  | 371     | n_p.V25 GPATCH                               | NM_001002909 | NP_001002909 | Q9UKJ3 | GPTC8_HUMAN | Potential.                   | 4     | :TTTCTACTTCTAG   | 0.393 |             |
| - | 16 | 2488    | .2_Intron TLL6_u                             | NM_001130918 | NP_001124390 | Q8N841 | TLL6_HUMAN  |                              | 0     | :CAGAGCTGTCA     | 0.547 |             |
| + | 1  | 120     | .1_Intron B4GALN                             | NM_153446    | NP_703147    | Q8NHY0 | B4GN2_HUMAN | lasmic (Potential).          | 2     | :GCCGGGAATGT     | 0.667 |             |
| + | 9  | 1125    |                                              | NM_153228    | NP_694960    | Q8N957 | ANKF1_HUMAN | onectin type-III.            | 2     | :CACCGGCATGT     | 0.502 |             |
| + | 12 | 2517    | pm.1_Missense_f                              | NM_030779    | NP_110406    | Q9H252 | KCNH6_HUMAN | lasmic (Potential).          | 1     | :CTCAGGAAGAC     | 0.622 |             |

|   |    |       |                   |              |              |        |             |                                |    |               |       |             |
|---|----|-------|-------------------|--------------|--------------|--------|-------------|--------------------------------|----|---------------|-------|-------------|
| - | 22 | 3126  |                   | NM_080284    | NP_525023    | Q8N139 | ABCA6_HUMAN |                                | 7  | AGTAGCCCATTC  | 0.299 |             |
| + | 5  | 1028  | jip.2_Missense_M  | NM_018658    | NP_061128    | Q9NPI9 | IRK16_HUMAN | smic (By similarity).          | 3  | CCCAAACCATTC  | 0.463 |             |
| - | 2  | 609   |                   | NM_006678    | NP_006669    | Q08708 | CLM6_HUMAN  | (Potential). Ig-like V-type.   | 0  | TGATGGACACTC  | 0.547 |             |
| + | 4  | 577   | _p.R106L NUP85_   | NM_024844    | NP_079120    | Q9BW27 | NUP85_HUMAN |                                | 1  | ACTACCGATCAG  | 0.199 |             |
| + | 12 | 1755  | jth.2_Missense_M  | NM_198955    | NP_945193    | Q3V5L5 | MGT5B_HUMAN | lenal (Potential).             | 3  | CGCCCCCTGG    | 0.657 |             |
| - | 11 | 1379  | 02jwb.1_Translati | NM_025090    | NP_079366    | Q9P275 | UBP36_HUMAN |                                | 5  | CGGACGTATGTT  | 0.433 |             |
| + | 7  | 906   | jyd.1_Missense_M  | NM_173626    | NP_775897    | Q86WA9 | S2611_HUMAN | ical; (Potential).             | 0  | TGCTGCTGGTG   | 0.682 |             |
| - | 5  | 1264  |                   | NM_002522    | NP_002513    | Q15818 | NPTX1_HUMAN | Pentaxin.                      | 0  | CCTGGGTGGCA   | 0.622 |             |
| - | 4  | 842   | e_Mutation_p.G27  | NM_001614    | NP_001605    | P63261 | ACTG_HUMAN  |                                | 2  | GATGCCGCAAG   | 0.537 |             |
| - | 6  | 921   | IRE1_uc010wzx.1   | NM_001128626 | NP_001122098 | Q08AE8 | SPIR1_HUMAN |                                | 0  | CTGCCGCTCTTC  | 0.443 |             |
| - | 10 | 1602  | m.2_Missense_Mt   | NM_024421    | NP_077739    | Q08554 | DSC1_HUMAN  | r (Potential). Cadherin 3.     | 4  | GTGAGCTCGCT   | 0.408 |             |
| + | 15 | 2641  | p.1_Missense_Mt   | NM_001942    | NP_001933    | Q02413 | DSG1_HUMAN  | lasmic (Potential).            | 7  | TAATTTCTGAGAC | 0.517 |             |
| + | 11 | 1920  | xq.2_Missense_Mt  | NM_030632    | NP_085135    | Q9C0F0 | ASXL3_HUMAN | Ser-rich.                      | 3  | GCCCTGTACCA   | 0.488 |             |
| + | 8  | 1055  | .R268Q RNF165_    | NM_152470    | NP_689683    | Q6ZSG1 | RN165_HUMAN | G-type; atypical.              | 0  | CTGCCGAGTGG   | 0.577 |             |
| + | 3  | 644   | p.Y131C LIPG_ucl  | NM_006033    | NP_006024    | Q9Y5X9 | LIPE_HUMAN  |                                | 2  | GCCTTACACGG   | 0.557 |             |
| + | 2  | 168   | 02jij.3_5'UTR SEF | NM_080475    | NP_536723    | Q96P15 | SPB11_HUMAN |                                | 1  | AGTCTGCTTTATC | 0.443 |             |
| - | 3  | 208   |                   | NM_017550    | NP_060020    | Q8N344 | MIER2_HUMAN |                                | 0  | GTCTGGGCACC   | 0.597 |             |
| + | 4  | 708   | .2_Intron MADCA   | NM_130760    | NP_570116    | Q13477 | MADCA_HUMAN | T-S-[QP]-E. Extracellular      | 0  | GCCTCCCGACA   | 0.592 |             |
| - | 4  | 434   | ED16_uc010xfw.1_  | NM_005481    | NP_005472    | Q9Y2X0 | MED16_HUMAN | WD 1.                          | 0  | GAGCCGGGAGC   | 0.642 |             |
| + | 4  | 1228  | wn.3_Missense_M   | NM_152791    | NP_690004    | Q8NEP9 | ZN555_HUMAN | C2H2-type 8.                   | 1  | TTTATCCCCAGTC | 0.463 |             |
| + | 4  | 1336  | ra.1_Missense_Mt  | NM_173480    | NP_775751    | Q68EA5 | ZNF57_HUMAN | C2H2-type 9.                   | 3  | GAACAATGTGGC  | 0.428 |             |
| + | 4  | 1430  | ra.1_Missense_Mt  | NM_173480    | NP_775751    | Q68EA5 | ZNF57_HUMAN | C2H2-type 10.                  | 3  | GAAAAACCTTC   | 0.453 |             |
| + | 1  | 79    |                   | NM_003811    | NP_003802    | P41273 | TNFL9_HUMAN | lasmic (Potential).            | 1  | AGCCCCGTGGC   | 0.572 |             |
| - | 29 | 3841  | 3_uc002mfl.2_5'U  | NM_000064    | NP_000055    | P01024 | CO3_HUMAN   |                                | 5  | TAGTATCTCTGT  | 0.577 |             |
| + | 11 | 1150  | a.1_Missense_Mu   | NM_005428    | NP_005419    | P15498 | VAV_HUMAN   | DH.                            | 16 | GCGATGGAGAA   | 0.627 |             |
| - | 48 | 6181  | l3_uc002mje.2_5'F | NM_032447    | NP_115823    | Q75N90 | FBN3_HUMAN  | TB 8.                          | 11 | CAGTTCGCAGG   | 0.612 | rs149936210 |
| - | 20 | 2204  |                   | NM_012335    | NP_036467    | O00160 | MYO1F_HUMAN | IQ.                            | 3  | TTCCGGGCAAAG  | 0.662 |             |
| - | 27 | 38206 |                   | NM_024690    | NP_078966    | Q8WXI7 | MUC16_HUMAN | ellular (Potential).           | 57 | GGTGGGCACAG   | 0.537 |             |
| - | 3  | 19097 |                   | NM_024690    | NP_078966    | Q8WXI7 | MUC16_HUMAN | xtracellular (Potential).      | 57 | TTTATAGAAGGAT | 0.448 |             |
| - | 1  | 6782  |                   | NM_024690    | NP_078966    | Q8WXI7 | MUC16_HUMAN | ch. Extracellular (Potential). | 57 | TAAAGGAAACCA  | 0.468 |             |
| - | 1  | 2516  |                   | NM_024690    | NP_078966    | Q8WXI7 | MUC16_HUMAN | xtracellular (Potential).      | 57 | TGGAGGAAAGA   | 0.502 |             |
| - | 10 | 1717  | lwr.1_Missense_M  | NM_152476    | NP_689689    | Q96MR9 | ZN560_HUMAN | C2H2-type 6.                   | 6  | CAAAAAGAGATG  | 0.413 |             |
| - | 1  | 211   | T1_uc002mnh.2_5   | NM_001379    | NP_001370    | P26358 | DNMT1_HUMAN | . Interaction with the PRC2.   | 6  | TGTGGGCACCC   | 0.736 |             |
| + | 4  | 1515  | ym.1_Missense_M   | NM_001136501 | NP_001129973 | Q08AG5 | ZN844_HUMAN |                                | 0  | CTTCAGATCTGC  | 0.423 |             |
| - | 11 | 1417  | _Missense_Mutatic | NM_013447    | NP_038475    | Q9UHX3 | EMR2_HUMAN  | ellular (Potential).           | 4  | GGGCAGGGTCT   | 0.607 |             |
| - | 2  | 454   |                   | NM_024527    | NP_078803    | Q96I13 | ABHD8_HUMAN |                                | 0  | GGAGAGGTCCC   | 0.692 |             |
| + | 2  | 903   | _p.P336L ZNF493_  | NM_175910    | NP_787106    | Q6ZR52 | ZN493_HUMAN | ype 7; degenerate.             | 1  | CAACCCCTACTA  | 0.348 | rs142651314 |
| - | 4  | 1395  | 1_Intron ZNF208_  | NM_007153    | NP_009084    |        |             |                                | 7  | TGACCTCATGTT  | 0.368 |             |
| + | 4  | 1512  |                   | NM_020855    | NP_065906    | Q9P255 | ZN492_HUMAN | C2H2-type 11.                  | 0  | CAAAATGTGAAG  | 0.373 |             |
| - | 4  | 1567  |                   | NM_138330    | NP_612203    | Q8TD23 | ZN675_HUMAN | C2H2-type 12.                  | 2  | GATTGGATAAAA  | 0.368 |             |
| + | 6  | 1372  | lvq.1_Missense_M  | NM_018443    | NP_060913    | Q9NR11 | ZN302_HUMAN | C2H2-type 5.                   | 0  | ATAGTTCGTCTC1 | 0.413 |             |
| + | 25 | 2614  | e_Mutation_p.S812 | NM_001111020 | NP_001104490 | O00267 | SPT5H_HUMAN | am repeats of G- S-[QR]-T-I    | 4  | TGGCAGCCGCA   | 0.632 |             |
| - | 4  | 581   | RB_uc010egw.1_f   | NM_000713    | NP_000704    | P30043 | BLVRB_HUMAN |                                | 0  | TGGCGGCATCA   | 0.547 |             |
| - | 5  | 602   |                   | NM_145296    | NP_660339    | Q8NFZ8 | CADM4_HUMAN | potential). Ig-like C2-type 1. | 0  | AAACCGTACTG   | 0.597 |             |
| + | 10 | 1302  | F3A_uc002pek.2_I  | NM_152795    | NP_690008    | Q9Y2N7 | HIF3A_HUMAN |                                | 3  | ATGGGGCTTCA   | 0.672 |             |
| - | 14 | 2373  | H4_uc002pgb.1_Ir  | NM_015168    | NP_055983    | Q9UPT8 | ZC3H4_HUMAN | Potential.                     | 6  | CTCCTCTGCTC   | 0.701 |             |
| - | 5  | 449   | se_Mutation_p.P11 | NM_000234    | NP_000225    | P18858 | DNL11_HUMAN |                                | 3  | CCATGGGAGAG   | 0.557 |             |

|   |     |           |                    |              |              |        |             |                               |     |               |       |
|---|-----|-----------|--------------------|--------------|--------------|--------|-------------|-------------------------------|-----|---------------|-------|
| + | 2   | 1765      |                    | NM_014330    | NP_055145    | O75807 | PR15A_HUMAN | Interaction with MLL.  4 X 34 | 1   | GGACTGGGGAG   | 0.627 |
| + | 32  | 4599      | .1_Missense_Mut    | NM_024729    | NP_079005    | Q7Z406 | MYH14_HUMAN | Potential.                    | 1   | GTGAGGAGCTG   | 0.706 |
| - | 4   | 340       | n_p.T41 KCLK5_uc   | NM_001077491 | NP_001070959 | Q9Y337 | KLK5_HUMAN  |                               | 0   | GCACGGTGTTA   | 0.627 |
| - | 5   | 2086      | ydj.1_Missense_M   | NM_001102657 | NP_001096127 | Q6ZNA1 | ZN836_HUMAN | :2H2-type 13.                 | 0   | TTATGAATTGAAA | 0.383 |
| - | 5   | 2067      | rdj.1_Missense_Mi  | NM_001102657 | NP_001096127 | Q6ZNA1 | ZN836_HUMAN | :2H2-type 13.                 | 0   | ACTGTAATTGAA  | 0.388 |
| + | 4   | 1385_1386 | dw.1_Missense_M    | NM_138374    | NP_612383    | Q96IR2 | ZN845_HUMAN | :2H2-type 8.                  | 0   | TCAGATGTCATC  | 0.411 |
| + | 7   | 2419      | p.R600K ZNF761     | NM_001008401 | NP_001008401 | Q86XN6 | ZN761_HUMAN | :2H2-type 16.                 | 1   | ATAGGAGAATTC  | 0.398 |
| + | 4   | 292       | i_p.R79Q RPS9_u    | NM_001013    | NP_001004    | P46781 | RS9_HUMAN   |                               | 1   | GCTGCGGCGGC   | 0.433 |
| - | 3   | 294       | jne.2_Missense_M   | NM_022103    | NP_071386    | Q5HYK9 | ZN667_HUMAN | KRAB.                         | 1   | ATTCTCCAACATC | 0.443 |
| + | 6   | 1933      | 470_uc010etn.2_li  | NM_001001668 | NP_001001668 | Q6ECI4 | ZN470_HUMAN | :2H2-type 7.                  | 2   | AACTCATACTGG  | 0.413 |
| - | 1   | 554       | qnt.2_Missense_M   | NM_001146186 | NP_001139658 | Q9GZU2 | PEG3_HUMAN  | SCAN box.                     | 12  | AGGTTTCGGAGT  | 0.502 |
| + | 3   | 2079      | id47_uc002qpm.3_l  | NM_001023561 | NP_001018855 | O43361 | ZN749_HUMAN |                               | 0   | CTGGAGAAAAG   | 0.388 |
| + | 5   | 1461      | nse_Mutation_p.F   | NM_024691    | NP_078967    | Q96HQ0 | ZN419_HUMAN | :2H2-type 8.                  | 0   | GAGATTCTTTAG  | 0.423 |
| + | 4   | 2168      | aud.1_Intron ZNF5  | NM_153263    | NP_694995    | Q6P9A3 | ZN549_HUMAN |                               | 1   | AGAGCCCTAGC   | 0.428 |
| - | 3   | 1987      |                    | NM_003433    | NP_003424    | P52740 | ZN132_HUMAN | :2H2-type 12.                 | 2   | TCAGGCTGGAG   | 0.498 |
| + | 1   | 439       |                    | NM_001105569 | NP_001099039 | A6NI15 | MSGN1_HUMAN | -loop-helix motif.            | 1   | CACACCCTCCCG  | 0.572 |
| + | 3   | 1112      | ow.2_Missense_Mt   | NM_002252    | NP_002243    | Q9BQ31 | KCNS3_HUMAN | =Segment S2; (Potential).     | 4   | ATCCGGTGCTG   | 0.577 |
| - | 6   | 1404      | p.R13L ADCY3_uc    | NM_004036    | NP_004027    | O60266 | ADCY3_HUMAN | asmic (Potential).            | 4   | TTCTCCCGCAC   | 0.642 |
| - | 1   | 1055      | 3C_uc010ykr.1_M    | NM_002254    | NP_002245    | O14782 | KIF3C_HUMAN | kinesin-motor.                | 4   | GGGAGCGGGAG   | 0.597 |
| + | 12  | 1842      | 002kr.2_Missense   | NM_013392    | NP_037524    | Q9UHY1 | NRBP_HUMAN  |                               | 3   | CCTTGCGGCC    | 0.522 |
| + | 1   | 5338      | 1_5'Flank ZNF512   | NM_032266    | NP_115642    | Q68DN1 | CB016_HUMAN | m repeat of P-S-E-R-S-H-F     | 1   | CCTCTGAGAGA   | 0.527 |
| + | 4   | 556       | _p.P103S SPTBN1    | NM_003128    | NP_003119    | Q01082 | SPTB2_HUMAN | 1. Actin-binding.             | 8   | CTAAACCACCA   | 0.512 |
| - | 4   | 854       | .2_3'UTR TMM17     | NM_198276    | NP_938017    | Q86X19 | TMM17_HUMAN |                               | 0   | GAAACGAACTG   | 0.428 |
| - | 3   | 842       | _p.A23V TGFBRA1    | NM_004257    | NP_004248    | Q8WUH2 | TGFA1_HUMAN | CNH.                          | 2   | CAGCCGCCCA    | 0.532 |
| - | 4   | 1138      |                    | NM_000575    | NP_000566    | P01583 | IL1A_HUMAN  |                               | 1   | TTTAGAGGTTTC  | 0.453 |
| - | 8   | 1412      | _p.I375M ERCC3     | NM_000122    | NP_000113    | P19447 | ERCC3_HUMAN | ase ATP-binding.              | 7   | TCCAGGATCATC  | 0.552 |
| + | 2   | 108       | q THSD7B_uc002h    | NM_001080427 | NP_001073896 |        |             |                               | 7   | AGTGTGGTGT    | 0.507 |
| - | 17  | 3485      | p.P1036L SCN1A     | NM_006920    | NP_008851    | P35498 | SCN1A_HUMAN |                               | 13  | CTACGGGCTGT   | 0.418 |
| + | 8   | 9514      | dy.2_Missense_Mt   | NM_152381    | NP_689594    | A4UGR9 | XIRP2_HUMAN |                               | 14  | AAATTCACAGAC  | 0.473 |
| - | 29  | 5058      |                    | NM_004525    | NP_004516    | P98164 | LRP2_HUMAN  | ; B 13. Extracellular (Potent | 29  | GAGTCCATGAA   | 0.478 |
| - | 4   | 1537      | f.2_Missense_Mut   | NM_003111    | NP_003102    | Q02447 | SP3_HUMAN   | ation domain (Gln-rich).      | 6   | GTCCAGAAGGG   | 0.433 |
| - | 4   | 1003      | f.2_Missense_Mut   | NM_003111    | NP_003102    | Q02447 | SP3_HUMAN   |                               | 6   | TGCCCAGAGAT   | 0.443 |
| + | 14  | 1735      | fe.1_Nonsense_M    | NM_032523    | NP_115912    | Q9BZF3 | OSBL6_HUMAN |                               | 1   | GTGATCAGGTT   | 0.328 |
| - | 226 | 45691     | _uc010zfi.1_Misse  | NM_133378    | NP_596869    | Q8WZ42 | TITIN_HUMAN |                               | 153 | TGGTTCCAACG   | 0.443 |
| - | 88  | 22894     | v_uc010zfi.1_Intro | NM_133378    | NP_596869    | Q8WZ42 | TITIN_HUMAN |                               | 153 | TGGCTGGTTCC   | 0.403 |
| - | 46  | 15390     | N_uc010zfi.1_Intri | NM_133379    | NP_596870    | Q8WZ42 | TITIN_HUMAN |                               | 153 | CTCCCTGGGG    | 0.498 |
| + | 4   | 1819      |                    | NM_019048    | NP_061921    | Q9NWL6 | ASND1_HUMAN | agine synthetase.             | 3   | TGGCTGTGCAG   | 0.403 |
| - | 17  | 2224      |                    | NM_018897    | NP_061720    | Q8WXX0 | DYH7_HUMAN  | r similarity). Potential.     | 12  | CAAATGAATAA   | 0.328 |
| - | 15  | 1632      | h.1_Missense_Mt    | NM_006190    | NP_006181    | Q13416 | ORC2_HUMAN  |                               | 0   | ATAGGAGGTTT   | 0.433 |
| + | 17  | 2525      | g_Mutation_p.R77   | NM_152526    | NP_689739    | Q8TEW8 | PAR3L_HUMAN |                               | 4   | GGTTCGAGGCC   | 0.517 |
| - | 4   | 471       | jv.2_Missense_Mu   | NM_015680    | NP_056495    | Q9BV87 | CNPD1_HUMAN |                               | 0   | GTGCCGAGGCC   | 0.522 |
| - | 10  | 1922_1923 | ve.1_Missense_M    | NM_005689    | NP_005680    | Q9NP58 | ABCB6_HUMAN | i. ABC transmembrane type     | 2   | AGTAGGTGCCAA  | 0.51  |
| + | 1   | 760       | mv.1_Missense_M    | NM_019076    | NP_061949    | Q9HAW9 | UD18_HUMAN  |                               | 2   | CCTCTGAAATTC  | 0.418 |
| - | 1   | 143       | Opn.1_Missense_    | NM_015985    | NP_057069    | Q9Y264 | ANGP4_HUMAN |                               | 2   | CACAAGGAGGA   | 0.592 |
| - | 1   | 238       | PROKR2_uc010zc     | NM_144773    | NP_658986    | Q8NFJ6 | PKR2_HUMAN  | asmic (Potential).            | 5   | ATAGCGGGTGAC  | 0.552 |
| - | 12  | 1270      | hmd.3_Splice_Sit   | NM_019593    | NP_062539    | Q9NPB8 | GPCP1_HUMAN |                               | 0   | GCACCCTGACA   | 0.383 |
| + | 3   | 1542      |                    | NM_001200    | NP_001191    | P12643 | BMP2_HUMAN  |                               | 2   | ACCAAGATGAA   | 0.483 |

rs148051282



|   |    |         |                   |              |              |        |             |    |               |       |
|---|----|---------|-------------------|--------------|--------------|--------|-------------|----|---------------|-------|
| + | 5  | 794     | 3P1_uc010zri.1_in | NM_080826    | NP_543016    | B1AKI9 | ISM1_HUMAN  | 0  | FGTTTAGGAATTC | 0.398 |
| - | 9  | 885     | L1L2_uc010zrl.1_1 | NM_025229    | NP_079505    | Q5TEA6 | SE1L2_HUMAN | 2  | 3GTCTTTCCGTTA | 0.368 |
| + | 2  | 162     |                   | NM_153324    | NP_697019    | Q8N688 | DB123_HUMAN | 0  | 3CCAAAGATGCTA | 0.423 |
| + | 14 | 1760    | e_Mutation_p.R42  | NM_012156    | NP_036288    | Q9H4G0 | E41L1_HUMAN | 3  | 3GGATCGAGACTA | 0.607 |
| + | 1  | 371     | .2_Intron SGK2_ur | NM_016276    | NP_057360    | Q9HBY8 | SGK2_HUMAN  | 6  | 3TGTCCCCCCAG, | 0.617 |
| + | 11 | 1610    | n.2_Missense_Mu   | NM_181659    | NP_858045    | Q9Y6Q9 | NCOA3_HUMAN | 5  | 3CACATGGGAGTA | 0.498 |
| + | 2  | 516     | 3A41_uc002ydc.1_  | NM_016354    | NP_057438    | Q96BD0 | SO4A1_HUMAN | 1  | 3CAAGGGCATCC  | 0.647 |
| - | 4  | 724     |                   | NM_080823    | NP_543013    | Q9H3Y6 | SRMS_HUMAN  | 2  | 3ATTGCGAGTGTA | 0.667 |
| - | 1  | 598     | 02ygf.2_Missense  | NM_003224    | NP_003215    | Q13795 | ARFRP_HUMAN | 2  | 3CATGTACTTGTA | 0.517 |
| + | 5  | 733     | p.R20W NCAM2_1    | NM_004540    | NP_004531    | O15394 | NCAM2_HUMAN | 4  | 3CAGATCGGTTCA | 0.403 |
| - | 3  | 575     | .p.P33L RCAN1_u   | NM_004414    | NP_004405    | P53805 | RCAN1_HUMAN | 0  | CTGGCGGAGAGA  | 0.542 |
| - | 2  | 671     | p.G177S CLDN14    | NM_012130    | NP_036262    | O95500 | CLD14_HUMAN | 0  | 3GCCACCAATGA  | 0.637 |
| - | 12 | 1399    | p.D273N TMPRSS    | NM_024022    | NP_076927    | P57727 | TMPS3_HUMAN | 3  | 3GCTGTCCCCCTA | 0.597 |
| - | 5  | 618     | 3g.1_Missense_Mt  | NM_033661    | NP_387510    | P57081 | WDR4_HUMAN  | 1  | 3AGAAGGACTCG  | 0.612 |
| - | 20 | 1968    | .2_Missense_Mute  | NM_001001438 | NP_001001438 | P48449 | ERG7_HUMAN  | 0  | 3CTCCCCCCAGA  | 0.612 |
| + | 13 | 2837    | 3L_uc011akd.1_Mi  | NM_021115    | NP_066938    | Q9BYH1 | SE6L1_HUMAN | 6  | GCCAGGAGAGTA  | 0.567 |
| + | 7  | 3572    | itq.1_Missense_Mt | NM_001039141 | NP_001034230 | Q9H2D6 | TARA_HUMAN  | 1  | 3AGTCCCCCAA   | 0.667 |
| + | 2  | 1635    | xy.2_Missense_Mt  | NM_002409    | NP_002400    | Q09327 | MGAT3_HUMAN | 0  | 3GGTTCGACGGC  | 0.637 |
| - | 2  | 485     | 3.1_Missense_Mut  | NM_032311    | NP_115687    | Q9BY77 | PDIP3_HUMAN | 0  | AGGCAGCAGGG   | 0.552 |
| + | 11 | 1815    | e_Mutation_p.P55  | NM_018995    | NP_061868    | Q9BXT6 | M10L1_HUMAN | 3  | 3GGAGGCCCTTCT | 0.473 |
| + | 2  | 356     | 3CAV3_uc003brb.2  | NM_001234    | NP_001225    | P56539 | CAV3_HUMAN  | 2  | 3TCTCCTTCTGCA | 0.577 |
| + | 2  | 911     | 3sg.2_Missense_M  | NM_004634    | NP_004625    | P55201 | BRPF1_HUMAN | 3  | 3TGCAGCACCAA  | 0.562 |
| - | 13 | 2394    | p.P571T XPC_ucC   | NM_004628    | NP_004619    | Q01831 | XPC_HUMAN   | 3  | 3CTGGGCAGGA   | 0.597 |
| - | 2  | 934     | hfn.2_Missense_N  | NM_005442    | NP_005433    | O95936 | EOMES_HUMAN | 4  | GTAGTGGGCAGT  | 0.502 |
| - | 7  | 970     | p.F259S SCN5A_    | NM_198056    | NP_932173    | Q14524 | SCN5A_HUMAN | 9  | 3GGCAGAAGACT  | 0.592 |
| - | 2  | 389     |                   | NM_006514    | NP_006505    | Q9Y5Y9 | SCNAA_HUMAN | 10 | 3GATATGAGTGG  | 0.483 |
| - | 14 | 2453    | 1A_uc010hhn.1_5   | NM_014139    | NP_054858    | Q9UI33 | SCNBA_HUMAN | 9  | 3ATCCCCCATGTC | 0.498 |
| + | 3  | 777     | 0hiv.1_Missense_I | NM_031200    | NP_112477    | P51686 | CCR9_HUMAN  | 3  | 3TGAGAGCACCA  | 0.493 |
| - | 5  | 618     | se_Mutation_p.P1  | NM_016479    | NP_057563    | Q8N114 | SHSA5_HUMAN | 0  | 3TGAGGCTGAG   | 0.602 |
| - | 21 | 2794    |                   | NM_003335    | NP_003326    | P41226 | UBA7_HUMAN  | 2  | 3CCGTGGCCCCAC | 0.577 |
| - | 2  | 885_886 | tron NAT6_uc003c  | NM_012191    | NP_036323    | Q93015 | NAT6_HUMAN  | 1  | 3AAGGGGGCCCT  | 0.579 |
| + | 5  | 2740    | se_Mutation_p.R2  | NM_000839    | NP_000830    | Q14416 | GRM2_HUMAN  | 1  | 3CAGCCGCTTTGA | 0.637 |
| + | 4  | 706     | dn.2_Intron GLYC  | NM_145262    | NP_660305    | Q8IVS8 | GLCTK_HUMAN | 0  | TGGCAGCCCGTA  | 0.622 |
| + | 8  | 1363    | ldt.1_Missense_Mt | NM_015512    | NP_056327    | Q9P2D7 | DYH1_HUMAN  | 3  | 3AGGACCCTTGC  | 0.602 |
| + | 31 | 5284    |                   | NM_015512    | NP_056327    | Q9P2D7 | DYH1_HUMAN  | 3  | 3TGGTGCCATCC  | 0.612 |
| - | 13 | 1556    | 31_uc010hmg.2_R   | NM_004656    | NP_004647    | Q92560 | BAP1_HUMAN  | 65 | 3CGAGTGTGTGG  | 0.602 |
| + | 58 | 6334    | ion_p.R102H STAI  | NM_015136    | NP_055951    | Q9NY15 | STAB1_HUMAN | 9  | 3TGGCCGTGTGT  | 0.642 |
| + | 2  | 1183    | 3EF3_uc003dih.2_  | NM_181727    | NP_859078    | Q7Z615 | SPT12_HUMAN | 0  | 3TTACTGAGGGC  | 0.299 |
| + | 5  | 784     |                   | NM_022072    | NP_071355    | Q9H649 | NSUN3_HUMAN | 1  | TGTTTTCTTCTGA | 0.398 |
| + | 1  | 644     |                   | NM_001005515 | NP_001005515 | A6NDH6 | O5H15_HUMAN | 2  | 3CTATTCTATATC | 0.348 |
| + | 1  | 848     |                   | NM_001004736 | NP_001004736 | Q8NHB7 | OR5K1_HUMAN | 1  | TAGTCCCTTACT1 | 0.308 |
| + | 12 | 1994    | 77_splice GPR12E  | NM_032787    | NP_116176    | Q96K78 | GP128_HUMAN | 4  | 3ATGGGGTAAGTA | 0.308 |
| - | 2  | 1379    | .2_Intron CD96_ur | NM_024508    | NP_078784    | Q9BTP6 | ZBED2_HUMAN | 1  | 3CTGCCCTTTCC  | 0.602 |
| - | 5  | 557     | 2018_uc003eal.2_! | NM_001009899 | NP_001009899 | Q68DE3 | K2018_HUMAN | 3  | GGGCAGGAGAA   | 0.368 |
| + | 13 | 1432    | lbj.1_Missense_M  | NM_014980    | NP_055795    | Q9Y2K9 | STB5L_HUMAN | 9  | TGTATTCTATAGG | 0.308 |
| + | 4  | 505     |                   | NM_017554    | NP_060024    | Q460N5 | PAR14_HUMAN | 6  | 3TTCCTCTTTGGT | 0.378 |
| + | 5  | 2003    |                   | NM_001102608 | NP_001096078 | A6NMZ7 | CO6A6_HUMAN | 8  | 3CAGATCGGGTG  | 0.418 |

rs151337676

|   |    |           |                    |              |              |        |              |                            |            |    |                |       |             |
|---|----|-----------|--------------------|--------------|--------------|--------|--------------|----------------------------|------------|----|----------------|-------|-------------|
| + | 4  | 873       | _Mutation_p.R200   | NM_023943    | NP_076432    | Q6UXF1 | TM108_HUMAN  | cellular (Pote             | p.R200Q(1) | 4  | AGGACGAAATC    | 0.592 | rs140878635 |
| + | 11 | 3585      | ...R271Q PPP2R3#   | NM_002718    | NP_002709    | Q06190 | P2R3A_HUMAN  | EF-hand 2.                 |            | 7  | TGAACGGATGG    | 0.493 | rs149384978 |
| - | 1  | 469       |                    | NM_001134659 | NP_001128131 | A6NEV1 | PR23A_HUMAN  |                            |            | 0  | CTCCTCGTAGG    | 0.632 |             |
| - | 8  | 847       | <5_uc010hus.1_RI   | NM_001039547 | NP_001034636 | Q6ZS86 | GLPK5_HUMAN  |                            |            | 0  | GTATCGAAATT#   | 0.348 |             |
| + | 2  | 1611      |                    | NM_004267    | NP_004258    | Q9Y4C5 | CHST2_HUMAN  | renal (Potential).         |            | 3  | CGGGGGGCGC#    | 0.667 |             |
| - | 2  | 401       | _uc003ewz.2_Mis    | NM_000096    | NP_000087    | P00450 | CERU_HUMAN   | ...1. Plastocyanin-like 1. |            | 1  | ATGTTCCCTGC/   | 0.328 |             |
| - | 11 | 1028      | _p.M235I ZBBX_u    | NM_024687    | NP_078963    | A8MT70 | ZBBX_HUMAN   |                            |            | 2  | TCTTTTCATCGT   | 0.328 |             |
| - | 7  | 2080      | fk.2_Missense_Mu   | NM_005241    | NP_005232    | Q03112 | EV11_HUMAN   |                            |            | 14 | TTTTTTCGAGGC   | 0.512 |             |
| + | 24 | 3707      | _Mutation_p.R117   | NM_198241    | NP_937884    | Q04637 | IF4G1_HUMAN  |                            |            | 7  | GGACCGTGGGG    | 0.627 |             |
| + | 7  | 1084      | .A280T CHRD_ucl    | NM_003741    | NP_003732    | Q9H2X0 | CHRD_HUMAN   | CHRD 2.                    |            | 3  | TGGCTGCAGGT.   | 0.617 |             |
| + | 13 | 1768      | se_Mutation_p.S4E  | NM_003722    | NP_003713    | Q9H3D4 | P63_HUMAN    | SAM.                       |            | 12 | TTCATCATGTCT   | 0.448 |             |
| - | 8  | 13589     | tion_p.L69F MUC    | NM_018406    | NP_060876    | Q99102 | MUC4_HUMAN   | NIDO.                      |            | 0  | CATGAGCACCG    | 0.622 |             |
| + | 5  | 1146      | 141_uc003gab.2_I   | NM_003441    | NP_003432    | Q15928 | ZN141_HUMAN  | 2H2-type 6.                |            | 0  | TAGGTCCACAAC   | 0.378 |             |
| + | 5  | 1178      | 141_uc003gab.2_I   | NM_003441    | NP_003432    | Q15928 | ZN141_HUMAN  |                            |            | 0  | ATTCATACTGGAC  | 0.398 |             |
| - | 5  | 1288      |                    | NM_177998    | NP_819056    | Q7RTM1 | OTOP1_HUMAN  |                            |            | 3  | GTAGCGGGGGT    | 0.572 |             |
| - | 2  | 178       |                    | NM_001001290 | NP_001001290 | Q9NRM0 | GTR9_HUMAN   |                            |            | 3  | TCGGTCTTTT     | 0.388 |             |
| - | 3  | 3405      |                    | NM_053042    | NP_444270    | Q9C0D4 | Z518B_HUMAN  |                            |            | 4  | AAACAACTTTGA   | 0.443 |             |
| + | 28 | 3112      | is.1_Missense_Mu   | NM_004787    | NP_004778    | O94813 | SLIT2_HUMAN  | EGF-like 2.                |            | 11 | ATGAGGAACT     | 0.448 |             |
| + | 13 | 1672      | _p.S292F FAM114    | NM_138389    | NP_612398    | Q81WE2 | NXP20_HUMAN  |                            |            | 1  | TGGCTCTTATC    | 0.323 |             |
| - | 6  | 785       |                    | NM_182592    | NP_872398    | Q8N8F6 | YIPF7_HUMAN  |                            |            | 0  | TCCTCCATGTG    | 0.453 |             |
| + | 9  | 1541_1542 | se_Mutation_p.EE   | NM_145263    | NP_660306    | Q8TC71 | MIEAP_HUMAN  |                            |            | 4  | ATCCAGGAGATA   | 0.426 |             |
| - | 16 | 2661      | t.1_Missense_Mut   | NM_002253    | NP_002244    | P35968 | VGFR2_HUMAN  | ical; (Potential).         |            | 33 | GGTCCGTAGGA    | 0.433 | rs1139774   |
| + | 9  | 3142      |                    | NM_031889    | NP_114095    | Q9NRM1 | ENAM_HUMAN   |                            |            | 3  | GAGGAGGAACA    | 0.443 |             |
| - | 11 | 1834      |                    | NM_001042784 | NP_001036249 | Q5M9N0 | CD158_HUMAN  | Potential.                 |            | 6  | CTTGTCCTTCT    | 0.478 |             |
| + | 11 | 1546      | .2_Missense_Mut    | NM_198892    | NP_942595    | Q9NSY1 | BMP2K_HUMAN  | Gln/His-rich.              |            | 1  | CTCACcagcagcag | 0.254 |             |
| + | 4  | 452       | DAPP1_uc010ilh.2   | NM_014395    | NP_055210    | Q9UN19 | DAPP1_HUMAN  | SH2.                       |            | 0  | AGGCACTCTGA    | 0.418 |             |
| - | 10 | 1812      | p.S358F LEF1_ucl   | NM_016269    | NP_057353    | Q9UJU2 | LEF1_HUMAN   |                            |            | 1  | TATGCAGATTC    | 0.433 |             |
| + | 38 | 9920      | VK2_uc003ibh.3_Ir  | NM_001148    | NP_001139    | Q01484 | ANK2_HUMAN   |                            |            | 14 | TATTCTCCCGAT   | 0.443 |             |
| + | 3  | 617       | se_Mutation_p.P14  | NM_001128933 | NP_001122405 | Q9UMS6 | SYNP2_HUMAN  |                            |            | 2  | TAGTCCCCCTA    | 0.547 |             |
| + | 32 | 4282      | ...W1411*KIAA092   | NM_015196    | NP_056011    | A2VDJ0 | T131L_HUMAN  | lasmic (Potential).        |            | 2  | CTGTGGCCAC     | 0.567 |             |
| + | 6  | 1377      |                    | NM_001034845 | NP_001030017 | Q49A17 | GLTL6_HUMAN  | main A. Lumenal (Potential |            | 4  | TATCCGGACCC    | 0.517 | rs146548110 |
| + | 6  | 940       | R17_uc003ium.3_I   | NM_170710    | NP_733828    | Q8IZU2 | WDR17_HUMAN  |                            |            | 6  | ACAACATTTAATC  | 0.433 |             |
| + | 1  | 502       |                    | NM_178556    | NP_848651    | Q8N9V2 | TRIML_HUMAN  |                            |            | 4  | TCCAGCGAGGC    | 0.577 | rs138508820 |
| - | 2  | 138_139   | AM173B_uc010itr.   | NM_199133    | NP_954584    | Q6P4H8 | F173B_HUMAN  |                            |            | 2  | AGAACCCCGAGT   | 0.475 |             |
| - | 14 | 2020      |                    | NM_001369    | NP_001360    | Q8TE73 | DYH5_HUMAN   | n (By similarity).         |            | 31 | TGCGAATTATAGC  | 0.532 |             |
| - | 26 | 5351      | orf42_uc011coz.1_  | NM_023073    | NP_075561    | E9PH94 | E9PH94_HUMAN |                            |            | 7  | TGAGTCCAAAAA   | 0.323 |             |
| - | 3  | 374       | ...1_Intron TTC33_ | NM_012382    | NP_036514    | Q6PID6 | TTC33_HUMAN  | TPR 1.                     |            | 1  | CTCCCGATATCT   | 0.284 |             |
| - | 6  | 1463      |                    | NM_021072    | NP_066550    | Q60741 | HCN1_HUMAN   | rtoplasmic (Potential).    |            | 1  | TAGGATCCGCAT   | 0.383 |             |
| + | 5  | 1551      | 486K MARVELD2      | NM_001038603 | NP_001033692 | Q8N4S9 | MALD2_HUMAN  | lasmic (Potential).        |            | 0  | TATCGGAAAGCC   | 0.408 |             |
| + | 30 | 6646      | p.T2128I BDP1_ur   | NM_018429    | NP_060899    | A6H8Y1 | BDP1_HUMAN   |                            |            | 2  | TGTAAACAAAGC   | 0.338 |             |
| - | 2  | 2246      | is.1_Missense_Mu   | NM_003633    | NP_003624    | Q14682 | ENC1_HUMAN   | Kelch 2.                   |            | 3  | TGGGGGCAGCC    | 0.602 |             |
| + | 2  | 1269      |                    | NM_005242    | NP_005233    | P55085 | PAR2_HUMAN   | lasmic (Potential).        |            | 1  | TGTCCGCACTG    | 0.448 | rs149001132 |
| + | 2  | 578       |                    | NM_153610    | NP_705838    | Q8N3K9 | CMYA5_HUMAN  |                            |            | 9  | TCACTCTTTAA    | 0.383 |             |
| + | 1  | 1158      | uc011ctk.1_RNA     | NM_032567    | NP_115956    | Q9BXG8 | SPZ1_HUMAN   | ucine-zipper.              |            | 1  | TGGAGGAACAG    | 0.423 |             |
| + | 70 | 14320     | ...E2448K GPR98_   | NM_032119    | NP_115495    | Q8WXG9 | GPR98_HUMAN  | cellular (Potential).      |            | 16 | TGAGCCGAACTC   | 0.438 |             |
| + | 1  | 424       | uc003kni.2_5'Flan  | NM_198507    | NP_940909    | Q8TBP5 | F174A_HUMAN  | cellular (Potential).      |            | 0  | CCGGGAAGGC     | 0.701 |             |
| - | 16 | 2395      | rm.1_Missense_Mi   | NM_015082    | NP_055897    | Q6MZW2 | FSTL4_HUMAN  |                            |            | 2  | TGTCATACAGG    | 0.582 |             |

|   |    |             |                    |              |              |        |             |                                |    |                |       |
|---|----|-------------|--------------------|--------------|--------------|--------|-------------|--------------------------------|----|----------------|-------|
| - | 8  | 1706        | w.1_Missense_Mu    | NM_004883    | NP_004874    | O14511 | NRG2_HUMAN  | lasmic (Potential).            | 6  | :TCCCAGAGAAG   | 0.542 |
| + | 1  | 323         | HB2_uc003lim.1_J   | NM_018936    | NP_061759    | Q9Y5E7 | PCDB2_HUMAN | r (Potential). Cadherin 1.     | 6  | :ACTTGCTGTGAC  | 0.502 |
| + | 1  | 2443        | _5'Flank PCDHB1    | NM_019120    | NP_061993    | Q9UN66 | PCDB8_HUMAN | lasmic (Potential).            | 4  | :AGTACGAGGTG   | 0.577 |
| + | 1  | 1418        | DHGA5_uc003ju.1    | NM_018925    | NP_061748    | Q9Y5G0 | PCDGH_HUMAN | r (Potential). Cadherin 5.     | 0  | :CGCCTCGGACC   | 0.587 |
| - | 3  | 562         | e_Mutation_p.G41   | NM_001024947 | NP_001020118 | Q969M3 | YIPF5_HUMAN | lasmic (Potential).            | 2  | :ATAGCCAGCAT   | 0.403 |
| + | 2  | 162         | ?_Missense_Mutat   | NM_024028    | NP_076933    | Q8NBM8 | PCYXL_HUMAN |                                | 1  | :TTGGGGCTGGC   | 0.587 |
| - | 21 | 3341        | ijhd.2_Missense_Iv | NM_002609    | NP_002600    | P09619 | PGFRB_HUMAN | Potential). Protein kinase.    | 17 | :CTCAGAAAGCA   | 0.557 |
| - | 2  | 439         | IP2_uc003lwr.2_J   | NM_001001343 | NP_001001343 | Q8TBE3 | FNDC9_HUMAN | onectin type-III.              | 0  | :TGTAAGGGGAA   | 0.567 |
| + | 39 | 4038        | OCK2_uc010jim.2_   | NM_004946    | NP_004937    | Q92608 | DOCK2_HUMAN | nteraction with CRKL.          | 7  | :TCAGCCAGAAC   | 0.587 |
| + | 4  | 685         | 2_splice TSPAN17   | NM_012171    | NP_036303    | Q96FV3 | TSN17_HUMAN |                                | 0  | :AATACGTGAGT   | 0.547 |
| + | 3  | 380         | ED9_uc010jko.2_F   | NM_017510    | NP_059980    | Q9BVK6 | TMED9_HUMAN | Luminal (Potential).           | 0  | :CAATTCACCCA   | 0.562 |
| + | 5  | 1766        | kz.1_Missense_Mt   | NM_182594    | NP_872400    | Q8N9F8 | ZN454_HUMAN | :2H2-type 12.                  | 3  | :AATGTAATAAAT  | 0.388 |
| - | 2  | 1013        | rh.3_Missense_Mt   | NM_002406    | NP_002397    | P26572 | MGAT1_HUMAN | lenal (Potential).             | 1  | :CCGGCCGGCACC  | 0.701 |
| + | 5  | 1950        | se_Mutation_p.R41  | NM_033549    | NP_291027    | Q8WV44 | TRI41_HUMAN | B30.2/SPRY.                    | 0  | :CGTGAGGAAAA   | 0.582 |
| + | 3  | 447         | P2L_uc011dim.1_    | NM_001040274 | NP_001035364 | Q5T4T6 | SYC2L_HUMAN |                                | 2  | :AGAAAGAGAGC   | 0.323 |
| - | 7  | 2280        | .R705W NEDD9_L     | NM_006403    | NP_006394    | Q14511 | CASL_HUMAN  |                                | 0  | :CTGCCGATCCT   | 0.517 |
| - | 3  | 577         | 1dip.1_Splice_Site | NM_032744    | NP_116133    | Q96I22 | CF105_HUMAN |                                | 0  | :ACAAACTGGAA   | 0.363 |
| + | 4  | 2526        | EP1_uc011diq.1_F   | NM_002114    | NP_002105    | P15822 | ZEP1_HUMAN  |                                | 6  | :ATTCCCCCAA    | 0.433 |
| - | 1  | 7           |                    | NM_030959    | NP_112221    | Q9UGF7 | O12D3_HUMAN | ellular (Potential).           | 3  | :ATTCTCCATTGCT | 0.343 |
| + | 3  | 1230        | _p.P263S OR2H1     | NM_030883    | NP_112145    | Q9GZK4 | OR2H1_HUMAN | ellular (Potential).           | 0  | :AAAAATCCGTATC | 0.517 |
| - | 2  | 284         | IR1_uc003nmp.3_    | NM_006398    | NP_006389    | O15205 | UBD_HUMAN   | Ubiquitin 1.                   | 0  | :AAGGTCATTA    | 0.488 |
| - | 10 | 4339        | IC1_uc011dmp.1_    | NM_014641    | NP_055456    | Q14676 | MDC1_HUMAN  | on with the PRKDC comple       | 4  | :TGACAGGTCGC   | 0.572 |
| - | 10 | 1351        | _p.R463C CCHCR     | NM_019052    | NP_061925    | Q8TD31 | CCHCR_HUMAN | Potential.                     | 1  | :AGCACGGCTCA   | 0.652 |
| - | 8  | 919         | i_uc010juo.1_RNA   | NM_005452    | NP_005443    | O15213 | WDR46_HUMAN | WD 3.                          | 0  | :CAGCTGTAGCC   | 0.562 |
| + | 2  | 200         | e_Mutation_p.G65   | NM_152753    | NP_689966    | Q8IX30 | SCUB3_HUMAN | alcium-binding (Potential).    | 1  | :GGACGGCAAAC   | 0.572 |
| + | 8  | 1639        | _p.R414T RNF8_u    | NM_003958    | NP_003949    | O76064 | RNF8_HUMAN  |                                | 1  | :AGCAAAGAGATT  | 0.373 |
| + | 15 | 2234        |                    | NM_001371    | NP_001362    |        |             |                                | 21 | :AAGTCCGGACG   | 0.368 |
| + | 14 | 3331        |                    | NM_032538    | NP_115927    | Q5TCY1 | TTBK1_HUMAN |                                | 9  | :ATGGCCCGGCC   | 0.667 |
| - | 13 | 2123        | oyp.3_Missense_M   | NM_001098518 | NP_001091988 | Q8IZF2 | GP116_HUMAN | ellular (Potential).           | 2  | :CTTACCAGCAGC  | 0.393 |
| + | 7  | 652         | _p.R191* FBXO9     | NM_012347    | NP_036479    | Q9UK97 | FBX9_HUMAN  | F-box.                         | 1  | :TCTTCCGATGGC  | 0.453 |
| - | 3  | 1538        | rf.1_Missense_Mut  | NM_021073    | NP_066551    | P22003 | BMP5_HUMAN  |                                | 2  | :ATCCCCTGTTTC  | 0.348 |
| - | 59 | 8708        | ht.2_Missense_M    | NM_004370    | NP_004361    | Q99715 | COCA1_HUMAN | on (COL2) with 1 imperfecti    | 9  | :TGACCGTCTT    | 0.458 |
| - | 64 | 10851_10852 |                    | NM_014611    | NP_055426    | Q9NU22 | MDN1_HUMAN  |                                | 10 | :CAGGGGGAAC    | 0.495 |
| - | 9  | 3120        | nw.2_Missense_M    | NM_021813    | NP_068585    | Q9BYV9 | BACH2_HUMAN |                                | 6  | :TGGCTCCAAGC   | 0.642 |
| - | 5  | 1325        | p.D362N EPHA7_I    | NM_004440    | NP_004431    | Q15375 | EPHA7_HUMAN | tential). Fibronectin type-III | 28 | :CACATCGTTTTCT | 0.498 |
| - | 9  | 1825        | _p.A401V ASCC3_    | NM_006828    | NP_006819    | Q8N3C0 | HELC1_HUMAN | inding 1. ATP (Potential).     | 6  | :TAGGGGCACAA   | 0.398 |
| - | 10 | 2150        | tx.1_Missense_Mt   | NM_003931    | NP_003922    | Q92558 | WASF1_HUMAN |                                | 0  | :ATGGTCGAATGC  | 0.562 |
| + | 17 | 2033        |                    | NM_173560    | NP_775831    | Q8HWS3 | RFX6_HUMAN  |                                | 3  | :CATTAAACCAAGC | 0.527 |
| + | 12 | 2039        |                    | NM_020340    | NP_065073    | Q5TH69 | BIG3_HUMAN  | SEC7.                          | 2  | :GTCCCTGGAAAG  | 0.572 |
| + | 2  | 1234        |                    | NM_016217    | NP_057301    | Q9UBI9 | HDC_HUMAN   |                                | 0  | :CATGTGTTCAGA  | 0.607 |
| + | 16 | 4238        | qf.2_Missense_Mu   | NM_012454    | NP_036586    | Q8IVF5 | TIAM2_HUMAN |                                | 4  | :ACAGTGACCTG   | 0.532 |
| + | 5  | 919         | 22A3_uc011efx.1_   | NM_021977    | NP_068812    | O75751 | S22A3_HUMAN |                                | 4  | :TTACTCGGAAG   | 0.428 |
| + | 13 | 1733        | se.1_Missense_Mu   | NM_031414    | NP_113602    | Q9BXU1 | STK31_HUMAN |                                | 9  | :TCCTAGAGAAG   | 0.378 |
| + | 4  | 434         | _p.E71K ADCYAF     | NM_001118    | NP_001109    | P41586 | PACR_HUMAN  | ellular (Potential).           | 1  | :TGGGTGAGATG   | 0.562 |
| + | 14 | 1562        |                    | NM_016616    | NP_057700    | Q8N427 | TXND3_HUMAN | NDK 2.                         | 3  | :AATACTGGA AAC | 0.403 |
| + | 5  | 911         | xo.2_Missense_M    | NM_007252    | NP_009183    | P78424 | PO6F2_HUMAN | rich. Gln-rich.                | 1  | :CACGCCACCCA   | 0.468 |
| + | 2  | 846         |                    | NM_018697    | NP_061167    | Q9NS86 | LANC2_HUMAN |                                | 2  | :TGGAAGAAGGG   | 0.398 |

|   |    |         |                     |              |              |        |             |                               |       |                |       |
|---|----|---------|---------------------|--------------|--------------|--------|-------------|-------------------------------|-------|----------------|-------|
| - | 5  | 1673    |                     | NM_033273    | NP_150376    | Q96JC4 | ZN479_HUMAN | :2H2-type 11.                 | 4     | ATTCTTCACATG1  | 0.428 |
| + | 4  | 1390    |                     | NM_001159522 | NP_001152994 | A8MUV8 | ZN727_HUMAN | :2H2-type 9.                  | 0     | 3CAAAAAGCTTTAC | 0.388 |
| + | 5  | 983     |                     | NM_153363    | NP_699194    | Q8IYX0 | ZN679_HUMAN |                               | 1     | AGAGAAACCCCTA  | 0.408 |
| - | 9  | 1623    | dy.1_Missense_Mt    | NM_012301    | NP_036433    | Q86UL8 | MAGI2_HUMAN | PDZ 2.                        | 11    | CATCCGGAATCA   | 0.428 |
| - | 5  | 366     | uix.1_Missense_M    | NM_018849    | NP_061337    | P21439 | MDR3_HUMAN  | ity). ABC transmembrane t     | 6     | 3GAAAAGTTCCAC  | 0.244 |
| + | 4  | 1908    |                     | NM_181646    | NP_857597    | A4D1E1 | Z804B_HUMAN |                               | 11    | TCAATGGCCTAC   | 0.418 |
| + | 4  | 2384    |                     | NM_181646    | NP_857597    | A4D1E1 | Z804B_HUMAN |                               | 11    | AGAAAGGCAGTT   | 0.388 |
| + | 68 | 10894   | p.T3533I TRRAP_     | NM_003496    | NP_003487    | Q9Y4A5 | TRRAP_HUMAN | PI3K/PI4K.                    | 37    | GGAGACCACCA    | 0.582 |
| + | 14 | 2798    | 'AN_uc003uwl.2_F    | NM_003386    | NP_003377    | Q9Y493 | ZAN_HUMAN   | ate) (mucin-like domain). E   | 11    | AAAACTCACCA    | 0.502 |
| + | 3  | 10033   | C17_uc010lho.1_F    | NM_001040105 | NP_001035194 | Q685J3 | MUC17_HUMAN | 3 X approximate tandem re     | 27    | GTGACGGTACTAC  | 0.493 |
| - | 20 | 3239    | og.3_RNA DPY19L     | NR_003561    |              |        |             |                               | 0     | TTGACACTTGC    | 0.373 |
| - | 50 | 8277    | ..2_Missense_Mut:   | NM_005045    | NP_005036    | P78509 | RELN_HUMAN  |                               | 19    | TACCTGAAGTTT   | 0.483 |
| - | 29 | 3981    | 'kg.3_Missense_M    | NM_017954    | NP_060424    | Q86UW7 | CAPS2_HUMAN |                               | 2     | AGGCTGTGGCC    | 0.458 |
| - | 2  | 2081    |                     | NM_005302    | NP_005293    | O15354 | GPR37_HUMAN | lasmic (Potential).           | 3     | CTCGGGTACAG    | 0.433 |
| + | 40 | 6802    | a.3_Missense_Mut    | NM_001458    | NP_001449    | Q14315 | FLNC_HUMAN  | adomain insert.               | 12    | GCGGGCGGGGC    | 0.682 |
| - | 15 | 1860    |                     | NM_004333    | NP_004324    | P15056 | BRAF_HUMAN  | rotein kinas_R603>1(2))p.T    | 18290 | 3ATTTCACTGTAC  | 0.368 |
| + | 7  | 2428    | o.1_Intron uc011ktj | NM_001130025 | NP_001123497 | A6NFQ2 | F115C_HUMAN |                               | 0     | ACTTTGGTCAG    | 0.617 |
| + | 1  | 533     |                     | NM_001004685 | NP_001004685 | O95006 | OR2F2_HUMAN | ellular (Potential).          | 4     | ACATATCCTGTG   | 0.498 |
| + | 5  | 1198    |                     | NM_014141    | NP_054860    | Q9UHC6 | CNTP2_HUMAN | 1. Extracellular (Potential). | 11    | TGCACGGAGAA    | 0.388 |
| + | 4  | 1084    |                     | NM_175571    | NP_783161    | Q8ND71 | GIMA8_HUMAN |                               | 7     | TCCTCCTGTG     | 0.562 |
| + | 11 | 1683    | p.E463K NOS3_u      | NM_000603    | NP_000594    | P29474 | NOS3_HUMAN  | ction with NOSIP.             | 8     | ATCAGGAGATG    | 0.627 |
| - | 5  | 416     | vs.1_Missense_M     | NM_007349    | NP_031375    | Q6ZW49 | PAX1_HUMAN  | tion with PA1 (By similarity  | 5     | TCCCCCATAGA    | 0.443 |
| - | 2  | 232     | r_p.S22L SPAG11     | NM_016512    | NP_057596    | Q08648 | SG11B_HUMAN |                               | 0     | GAGACGATCT     | 0.582 |
| - | 3  | 660     |                     | NM_003155    | NP_003146    | P52823 | STC1_HUMAN  |                               | 4     | CTTCTCTGCA     | 0.537 |
| + | 4  | 557     | r_p.E34K ADAMDi     | NM_014479    | NP_055294    | O15204 | ADEC1_HUMAN |                               | 2     | 3GAGAGGAAATT   | 0.453 |
| + | 2  | 1839    |                     | NM_025069    | NP_079345    | Q9H7S9 | ZN703_HUMAN |                               | 2     | ACCCCTATGGC    | 0.517 |
| + | 16 | 1766    | JAM18_uc010lwx.:    | NM_014237    | NP_055052    | Q9Y3Q7 | ADA18_HUMAN | :xtracellular (Potential).    | 6     | GAGATCAGATG    | 0.368 |
| + | 4  | 374     |                     | NM_032237    | NP_115613    | Q9H5K3 | SG196_HUMAN | ical; (Potential).            | 0     | GCCTCGACCAC    | 0.572 |
| - | 31 | 2907    | ae.1_Missense_Mt    | NM_003580    | NP_003571    | Q92636 | FAN_HUMAN   | WD 6.                         | 1     | TGCTACACTGT    | 0.378 |
| - | 1  | 272     |                     | NM_152418    | NP_689631    | Q8NA75 | DC4L2_HUMAN |                               | 1     | CTGGACCTTTT    | 0.502 |
| + | 5  | 544     |                     | NM_022351    | NP_071746    | Q8N987 | NECA1_HUMAN |                               | 1     | 3CAAAACAAAGA   | 0.308 |
| - | 5  | 407     |                     | NM_005836    | NP_005827    | P52758 | UK114_HUMAN |                               | 1     | TAGCAGGAAAT    | 0.274 |
| + | 10 | 1639    |                     | NM_024915    | NP_079191    | Q6ISB3 | GRHL2_HUMAN |                               | 3     | AGAAAGGGAAA    | 0.468 |
| - | 1  | 390     | rpe.2_Missense_M    | NM_021021    | NP_066301    | Q13884 | SNTB1_HUMAN | PH 1.                         | 5     | ACGCCGACGCG    | 0.458 |
| - | 13 | 3201    | JM135B_uc003yva     | NM_015912    | NP_056996    | Q49AJ0 | F135B_HUMAN |                               | 9     | 3GACCCATGAT    | 0.512 |
| + | 20 | 3322    |                     | NM_001702    | NP_001693    | O14514 | BAI1_HUMAN  | lasmic (Potential).           | 8     | GGAACCGCCTC    | 0.657 |
| - | 6  | 1253    | nse_Mutation_p.R    | NM_021061    | NP_066405    | P15622 | ZN250_HUMAN | :2H2-type 7.                  | 0     | CTGAGCGGTCG    | 0.577 |
| + | 1  | 860     | iK1B_uc011lrq.1_J   | NM_138333    | NP_612206    | Q96E09 | F122A_HUMAN |                               | 0     | AAACAGCAGCA    | 0.498 |
| - | 2  | 759     |                     | NM_001163    | NP_001154    | Q02410 | APBA1_HUMAN |                               | 1     | CGATTCATGGC    | 0.677 |
| + | 3  | 923_924 | e_Mutation_p.P12'   | NM_006200    | NP_006191    | Q92824 | PCSK5_HUMAN | Catalytic.                    | 3     | ATGATCCCAAGT   | 0.475 |
| - | 6  | 545     | nsf.2_Missense_M    | NM_007001    | NP_008932    | Q76EJ3 | S35D2_HUMAN | ical; (Potential).            | 0     | AGCCCGAGAA     | 0.408 |
| + | 1  | 894     |                     | NM_001005235 | NP_001005235 | Q8NGR5 | OR1L4_HUMAN | lasmic (Potential).           | 0     | AGATATGAAAGC   | 0.398 |
| + | 13 | 1126    | se_Mutation_p.E2E   | NM_001005373 | NP_001005373 | Q6UWE0 | LRSM1_HUMAN | Potential.                    | 0     | TGCAGGAACAG    | 0.587 |
| - | 1  | 876     |                     | NM_203434    | NP_982258    | Q5T953 | IER5L_HUMAN | Ala-rich.                     | 0     | gcgggcggaagcg  | 0.353 |
| + | 3  | 832     |                     | NM_006059    | NP_006050    | Q9Y6N6 | LAMC3_HUMAN | inin N-terminal.              | 3     | GTTTGGGGACG    | 0.592 |
| + | 43 | 3786    |                     | NM_000093    | NP_000084    | P20908 | CO5A1_HUMAN | le-helical region.            | 11    | AGACGGTCTCC    | 0.622 |
| - | 16 | 1746    | mez.1_Missense_     | NM_001130969 | NP_001124441 | Q6X4W1 | NELF_HUMAN  |                               | 0     | AGTACGTCTCG    | 0.672 |

rs149450685

|   |    |           |                   |              |              |        |             |                           |    |                    |       |             |
|---|----|-----------|-------------------|--------------|--------------|--------|-------------|---------------------------|----|--------------------|-------|-------------|
| + | 10 | 1238      | rd.1_Missense_Mt  | NM_002183    | NP_002174    | P26951 | IL3RA_HUMAN | cellular (Potential).     | 3  | AGGAGGAGGGC        | 0.667 |             |
| - | 5  | 3341      |                   | NM_015419    | NP_056234    | Q9NR99 | MXRA5_HUMAN |                           | 8  | ACATCTCTTTCA1      | 0.458 |             |
| - | 6  | 526       | .M9B_uc004csh.2_  | NM_205849    | NP_995321    | Q8IZU0 | FAM9B_HUMAN |                           | 0  | CTAACACTTCTA1      | 0.318 |             |
| + | 4  | 983       | p.W221* IMAGEB'   | NM_002363    | NP_002354    | P43366 | MAGB1_HUMAN | MAGE.                     | 0  | 3ATCTGGAAATT(      | 0.483 |             |
| - | 15 | 1951      | i.D595N RPGR_uc   | NM_001034853 | NP_001030025 | Q92834 | RPGR_HUMAN  | Glu-rich.                 | 1  | cttttgatcctctgctcc | 0.179 |             |
| + | 5  | 815       | lh.2_Missense_M   | NM_005676    | NP_005667    | P98175 | RBM10_HUMAN | RRM 1.                    | 5  | AGATCCGTGGC(       | 0.607 |             |
| - | 5  | 370       | z.1_Missense_Mul  | NM_175723    | NP_783729    | O60225 | SSX5_HUMAN  |                           | 0  | AGATTCCTGG,        | 0.423 |             |
| + | 5  | 652       | _5'UTR TBC1D25    | NM_002536    | NP_002527    | Q3MII6 | TBC25_HUMAN |                           | 1  | AGGTCCAACAA(       | 0.582 |             |
| + | 7  | 564       | 1_Missense_Muta   | NM_006044    | NP_006035    | Q9UBN7 | HDAC6_HUMAN | ne deacetylase 1.         | 4  | ACAACCCAGTAC.      | 0.502 |             |
| - | 4  | 601       | n_p.T138 FOXP3_   | NM_014009    | NP_054728    | Q9BZS1 | FOXP3_HUMAN |                           | 0  | .CCCCAGTGGCG       | 0.662 |             |
| - | 23 | 3169      |                   | NM_001013742 | NP_001013764 | Q5KSL6 | DGKK_HUMAN  |                           | 2  | TTACCCGATCTC'      | 0.438 |             |
| + | 2  | 1132      |                   | NM_005448    | NP_005439    | O95972 | BMP15_HUMAN |                           | 2  | ATTTTGTAACAAGC     | 0.463 |             |
| - | 1  | 1         |                   | NM_001009616 | NP_001009616 | Q5MJ07 | SPXN5_HUMAN |                           | 0  | TTCCATGATTCTC      | 0.448 |             |
| - | 5  | 2051      | isc.2_Missense_M  | NM_001111125 | NP_001104595 | Q5JU85 | IQEC2_HUMAN | Pro-rich.                 | 3  | GCTGGCGGTGG        | 0.632 |             |
| + | 6  | 2479      | _p.D461N NHSL2_   | NM_001013627 | NP_001013649 | Q5HYW2 | NHSL2_HUMAN |                           | 0  | AGTCCGACCTAC(      | 0.512 |             |
| - | 22 | 2196      | p.M707V RPS6KA    | NM_014496    | NP_055311    | Q9UK32 | KS6A6_HUMAN |                           | 8  | CAACCATGCTC(       | 0.403 | rs145715341 |
| - | 7  | 759       | o.2_Missense_Mu   | NM_000061    | NP_000052    | Q06187 | BTK_HUMAN   |                           | 6  | TTGGGGGAAGA        | 0.478 |             |
| - | 4  | 1735      | _p.S168* MORF4L   | NM_012286    | NP_036418    | Q15014 | MO4L2_HUMAN |                           | 0  | CCTGCGATTTCT1      | 0.413 |             |
| - | 5  | 1127      | itron TEX13A_uc0  | NM_031274    | NP_112564    | Q9BXU3 | TX13A_HUMAN |                           | 2  | ATCAAAGCCTC        | 0.547 |             |
| + | 11 | 1149      | _uc010npc.1_Splic | NM_198465    | NP_940867    | Q7Z2Y5 | NRK_HUMAN   |                           | 14 | TTTTTTAGTCCC       | 0.413 |             |
| + | 2  | 874       | LDN2_uc004emt.    | NM_020384    | NP_065117    | P57739 | CLD2_HUMAN  | ical; (Potential).        | 1  | TGGCGGTAGCA(       | 0.537 |             |
| + | 13 | 2218      | ntr.1_Missense_M  | NM_019045    | NP_061918    | Q5JSH3 | WDR44_HUMAN |                           | 5  | GCAACGGCCAT        | 0.343 |             |
| + | 5  | 401       | P14_uc004esf.2_l  | NM_178813    | NP_848928    | Q86UN6 | AKA28_HUMAN |                           | 0  | ACAGAAGTGTG        | 0.333 |             |
| + | 2  | 105       | e_Mutation_p.Y26  | NM_006649    | NP_006640    | Q9BVJ6 | UT14A_HUMAN |                           | 2  | :AAAgaactaccttg    | 0.259 |             |
| + | 6  | 744       |                   | NM_016024    | NP_057108    | Q9Y388 | RBMX2_HUMAN | Lys-rich.                 | 4  | :CAAATCCAGGA(      | 0.557 |             |
| - | 3  | 459       | _Mutation_p.P77L  | NM_018388    | NP_060858    | Q9NUK0 | MBNL3_HUMAN | Pro-rich.                 | 0  | TGGGAGGATTA(       | 0.418 |             |
| - | 8  | 1820_1821 | _p.P567* GPC3_u   | NM_004484    | NP_004475    | P51654 | GPC3_HUMAN  |                           | 5  | CCTTCGGAGTTG       | 0.495 |             |
| + | 2  | 768       |                   | NM_001727    | NP_001718    | P32247 | BRS3_HUMAN  | cellular (Potential).     | 1  | TCTTATCCTGTCT1     | 0.348 |             |
| - | 5  | 1312      | p.R227Q FGF13_L   | NM_004114    | NP_004105    | Q92913 | FGF13_HUMAN |                           | 3  | :CAGATCGGGAG       | 0.517 |             |
| - | 3  | 582       |                   | NM_005362    | NP_005353    | P43357 | MAGA3_HUMAN | MAGE.                     | 0  | GGCTCGATACT1       | 0.532 |             |
| + | 2  | 993       | Y3_uc010nvl.1_In  | NM_005840    | NP_005831    | O43610 | SPY3_HUMAN  | PR. Cys-rich.             | 0  | TGAGAGCCTCC        | 0.582 |             |
| + | 2  | 1001      | Y3_uc010nvl.1_In  | NM_005840    | NP_005831    | O43610 | SPY3_HUMAN  | PR. Cys-rich.             | 0  | CTCCTCGATTATC      | 0.592 |             |
| - | 6  | 781       | 1_Missense_Muta   | NM_030937    | NP_112199    | Q96S94 | CCNL2_HUMAN | Cyclin-like 2.            | 3  | GCGTCCGGGCA        | 0.478 |             |
| - | 5  | 566       | ie.2_Missense_ML  | NM_023018    | NP_075394    | O95544 | NADK_HUMAN  |                           | 0  | GCTGGCGATGG(       | 0.522 |             |
| - | 9  | 1430      | 5_uc001amc.1_5'l  | NM_015557    | NP_056372    | Q8TDI0 | CHD5_HUMAN  | PHD-type 2.               | 12 | :GGGTTGAGGC        | 0.517 |             |
| - | 3  | 255       | ime.2_Missense_A  | NM_000983    | NP_000974    | P35268 | RL22_HUMAN  |                           | 0  | AGGTGATCTTG(       | 0.542 |             |
| - | 8  | 1859      | p.G357D CLSTN1_   | NM_001009566 | NP_001009566 | O94985 | CSTN1_HUMAN | cellular (Potential).     | 1  | GGGTGCCGTTG        | 0.622 |             |
| + | 18 | 1954      | _p.P330L CLCN6_L  | NM_001286    | NP_001277    | P51797 | CLCN6_HUMAN | c (By similarity). CBS 1. | 0  | CTACCCGCACAC       | 0.627 |             |
| + | 1  | 151       |                   | NM_001080830 | NP_001074299 | O95522 | PRA12_HUMAN |                           | 3  | TCATGGAGGCC        | 0.597 |             |
| + | 1  | 1735      |                   | NM_006511    | NP_006502    | Q92681 | RSCA1_HUMAN | UBA.                      | 1  | TTGACCGCATTC       | 0.468 |             |
| + | 3  | 307       | :LCNKB_uc001ax>   | NM_000085    | NP_000076    | P51801 | CLCKB_HUMAN |                           | 1  | GGTCCGAGGTA,       | 0.632 | rs139676842 |
| + | 19 | 2044      | ense_Mutation_p.ξ | NM_000085    | NP_000076    | P51801 | CLCKB_HUMAN | CBS 2.                    | 1  | TTCAATCCCTCT1      | 0.602 | rs144513133 |
| + | 2  | 1201      |                   | NM_000871    | NP_000862    | P50406 | 5HT6R_HUMAN | smic (By similarity).     | 1  | ACGCCAGGGG         | 0.537 |             |
| - | 23 | 2147      | GAP_uc001bew.2_   | NM_002885    | NP_002876    | P47736 | RPGP1_HUMAN |                           | 3  | iGTATCGAGAG(       | 0.692 |             |
| - | 73 | 9777      | rd.2_Missense_ML  | NM_005529    | NP_005520    | P98160 | PGBM_HUMAN  | ike C2-type 18.           | 9  | AGCTTGACCAG        | 0.632 |             |
| - | 27 | 3512      | rd.2_Missense_ML  | NM_005529    | NP_005520    | P98160 | PGBM_HUMAN  | GF-like 5; second part.   | 9  | GCAGCGTTCAC.       | 0.637 |             |
| - | 14 | 1773      | qd.2_Missense_Ml  | NM_005529    | NP_005520    | P98160 | PGBM_HUMAN  | inin IV type A 1.         | 9  | ACTCGTGCAGG        | 0.652 |             |



|   |    |           |                   |              |              |        |             |                                |    |                   |       |
|---|----|-----------|-------------------|--------------|--------------|--------|-------------|--------------------------------|----|-------------------|-------|
| + | 13 | 1857      | TC1_uc001bnp.1_   | NM_015023    | NP_055838    | Q8N5D0 | WDTC1_HUMAN |                                | 2  | GGCCCGCTGCC       | 0.582 |
| - | 5  | 1040      | i_Mutation_p.R256 | NM_004672    | NP_004663    | O95382 | M3K6_HUMAN  |                                | 9  | GTCTCCGCTGC/      | 0.562 |
| + | 5  | 573       | _p.W135* GMEB1_   | NM_006582    | NP_006573    | Q9Y692 | GMEB1_HUMAN | SAND.                          | 0  | GACTGGAAGAG       | 0.428 |
| + | 7  | 841       | _p.A225T GMEB1_   | NM_006582    | NP_006573    | Q9Y692 | GMEB1_HUMAN |                                | 0  | TCACCGCTGCT/      | 0.502 |
| + | 5  | 1632      | 8A_uc001bvm.2_lr  | NM_001040441 | NP_001035531 | Q96BR9 | ZBT8A_HUMAN |                                | 0  | TGGAAGCTGAA/      | 0.463 |
| + | 1  | 4075      | i.1_Intron MACF1_ | NM_015038    | NP_055853    | O94854 | K0754_HUMAN | Ala-rich.]8.                   | 0  | AGCCACCTCC        | 0.726 |
| - | 13 | 2894      |                   | NM_020883    | NP_065934    | Q9P217 | ZSWM5_HUMAN |                                | 0  | AACCATCGTACC/     | 0.542 |
| - | 11 | 2610      |                   | NM_020883    | NP_065934    | Q9P217 | ZSWM5_HUMAN |                                | 0  | GTGAACCAGCG       | 0.527 |
| - | 8  | 1123      | e_Mutation_p.G35f | NM_000778    | NP_000769    | Q02928 | CP4AB_HUMAN |                                | 4  | GGCTCCATCAC/      | 0.617 |
| - | 2  | 708       | se_Mutation_p.A4  | NM_003189    | NP_003180    | P17542 | TAL1_HUMAN  |                                | 1  | CGGCCGCGCGG       | 0.527 |
| - | 5  | 669_670   | i5RL_uc001cwx.3_  | NM_001031672 | NP_001026842 | Q6IPT4 | NB5R5_HUMAN | -binding FR-type.              | 0  | CTATCCCTCTGA/     | 0.347 |
| - | 3  | 2008_2009 | 3_Intron KANK4_u  | NM_181712    | NP_859063    | Q577N3 | KANK4_HUMAN |                                | 6  | TCCTTCCCTGGC/     | 0.619 |
| + | 13 | 2076      | P_R_uc009waq.2_lr | NM_002303    | NP_002294    | P48357 | LEPR_HUMAN  | Fibronectin type-III 2.]WSX    | 1  | TAATTGGAGCA       | 0.423 |
| - | 12 | 2141      | 73_uc001dgi.3_Mi  | NM_001002912 | NP_001002912 | Q5RHP9 | CA173_HUMAN | Glu-rich.                      | 5  | CAATTTCTAAGC      | 0.413 |
| + | 3  | 382       | 2_5'UTR CLCA4_u   | NM_012128    | NP_036260    | Q14CN2 | CLCA4_HUMAN |                                | 2  | AGGTAGAGATG/      | 0.363 |
| - | 9  | 1173      | _p.P232S CCBL2_   | NM_001008661 | NP_001008661 | Q6YP21 | KAT3_HUMAN  |                                | 1  | ACCTGGAAAAG       | 0.308 |
| - | 1  | 76_77     | T_uc010oug.1_5'L  | NM_001918    | NP_001909    | P11182 | ODB2_HUMAN  |                                | 1  | GCTTCCCGCAT       | 0.579 |
| - | 8  | 1552      | _p.T424A COL11A   | NM_001854    | NP_001845    | P12107 | COBA1_HUMAN | nhelical region.               | 12 | TTTCTGTAATATC     | 0.338 |
| - | 7  | 662       | vm.1_Missense_M   | NM_133181    | NP_573444    | Q8TE67 | ES8L3_HUMAN | Pro-rich.                      | 3  | CCCTTCCATAG/      | 0.597 |
| + | 11 | 1190      | t.2_Missense_Mut  | NM_201653    | NP_970615    | Q9BZP6 | CHIA_HUMAN  |                                | 1  | CCATTGATCTG/      | 0.498 |
| - | 5  | 1313      |                   | NM_001047980 | NP_001041445 | P0C2Y1 | NBPF7_HUMAN | NBPF 1.                        | 2  | TTGAATAAGTGA/     | 0.468 |
| + | 2  | 302       | 1orf51_uc001euj.2 | NM_144697    | NP_653298    | Q8N365 | CA051_HUMAN |                                | 0  | GTTCACGGCCCC      | 0.602 |
| + | 16 | 3230      | .A1014T SETDB1_   | NM_001145415 | NP_001138887 | Q15047 | SETB1_HUMAN | SET.                           | 3  | GCCGGGCTGGG       | 0.542 |
| - | 3  | 1246      |                   | NM_001008536 | NP_001008536 | Q5QJ38 | TCHL1_HUMAN |                                | 2  | CCTCTCCTCTCT      | 0.473 |
| - | 2  | 1147_1148 | re.1_Missense_Mt  | NM_007113    | NP_009044    | Q07283 | TRHY_HUMAN  | repeats of R-R-E-Q-Q-L.]2      | 5  | cgccctcagctgctgct | 0     |
| - | 3  | 5990_5991 |                   | NM_001009931 | NP_001009931 | Q86YZ3 | HORN_HUMAN  | 22                             | 3  | ACCACCCTGAGC      | 0.604 |
| + | 2  | 506       |                   | NM_005547    | NP_005538    | P07476 | INVO_HUMAN  | QEK]-[PLSQE]-[EQDV]- [C        | 3  | TGTTGGAGCTC/      | 0.259 |
| - | 2  | 754       | SHC1_uc001ffx.2   | NM_183001    | NP_892113    | P29353 | SHC1_HUMAN  | PID.                           | 2  | CCAGGGCACGC       | 0.602 |
| - | 6  | 947       | PKLR_uc001fka.3   | NM_000298    | NP_000289    | P30613 | KPYR_HUMAN  |                                | 5  | CTTCCGGACCC/      | 0.602 |
| - | 1  | 91        | 23E ROBLD3_ucC    | NM_020131    | NP_064516    | Q9NRR5 | UBQL4_HUMAN | Jbiquitin-like.                | 2  | CTCCTTGCTCTT      | 0.438 |
| + | 3  | 1046      | r.2_Missense_Mut  | NM_014655    | NP_055470    | Q96H78 | S2544_HUMAN | Solcar 3.                      | 1  | CCAATCCCATG/      | 0.562 |
| - | 12 | 1319      | vsb.1_Missense_M  | NM_178229    | NP_839943    | Q86VI3 | IQGA3_HUMAN |                                | 6  | TAGACGATGCA/      | 0.597 |
| + | 1  | 194       |                   | NM_001004473 | NP_001004473 | Q8NGX5 | O10K1_HUMAN | Name=2; (Potential).           | 1  | TGCCATCCTTTT      | 0.488 |
| - | 15 | 2193      |                   | NM_003126    | NP_003117    | P02549 | SPTA1_HUMAN | Spectrin 7.                    | 8  | TGGCAACTTCA/      | 0.443 |
| - | 3  | 560       | i.2_Intron SLAMFf | NM_033438    | NP_254273    | Q96A28 | SLAF9_HUMAN | e.]Extracellular (Potential).  | 1  | AGGCACCTTCC/      | 0.527 |
| + | 8  | 1624      | lg.2_Missense_Mt  | NM_021165    | NP_066988    | Q9C0B6 | FAM5B_HUMAN |                                | 6  | TCCTGGAACAG/      | 0.587 |
| + | 13 | 1532      | pos.1_Missense_M  | NM_024420    | NP_077734    | P47712 | PA24A_HUMAN | PLA2c.                         | 3  | CACACGAACCC/      | 0.393 |
| - | 2  | 1784      | 73_uc001gtb.2_lr  | NM_003783    | NP_003774    | O43825 | B3GT2_HUMAN | renal (Potential).             | 1  | AGGGGTACAG        | 0.428 |
| - | 7  | 2682      | e_Mutation_p.R80f | NM_018136    | NP_060606    | Q8IZT6 | ASPM_HUMAN  |                                | 6  | CTGAGTTCTCC/      | 0.328 |
| - | 14 | 2305      | 1_5'Flank PLEKHA  | NM_014935    | NP_055750    | Q9Y2H5 | PKHA6_HUMAN |                                | 4  | TCTTCTCAGC/       | 0.597 |
| - | 3  | 1057      | _p.M223 LRRN2_    | NM_006338    | NP_006329    | O75325 | LRRN2_HUMAN | tracellular (Potential).       | 2  | AGGTTCATGCC       | 0.607 |
| - | 2  | 402       | i_p.V65M LGTN_u   | NM_006893    | NP_008824    | P41214 | EIF2D_HUMAN |                                | 0  | ACTCAGTACA/       | 0.458 |
| + | 4  | 827       | 2_uc009xch.2_Mis  | NM_001877    | NP_001868    | P20023 | CR2_HUMAN   | xtracellular (Potential).      | 8  | ATGAAGGGTGA/      | 0.453 |
| - | 11 | 2562      | nic.2_Missense_M  | NM_172362    | NP_758872    | O95259 | KCNH1_HUMAN | lasmic (Potential).            | 5  | GGATACGGGCG       | 0.662 |
| - | 17 | 3849      | kv.2_Missense_Mt  | NM_206933    | NP_996816    | O75445 | USH2A_HUMAN | tential).]Fibronectin type-III | 26 | TAACCTAAAGTC      | 0.423 |
| + | 12 | 1666      |                   | NM_018060    | NP_060530    | Q9NSE4 | SYIM_HUMAN  |                                | 4  | ATTGGTGTATATC     | 0.363 |
| - | 12 | 2057      | BP2_uc010puz.1_   | NM_001031685 | NP_001026855 | Q13625 | ASPP2_HUMAN |                                | 3  | GGCCGGACGG        | 0.532 |

rs783822

|   |    |           |                                                |              |              |        |             |                         |    |               |       |             |
|---|----|-----------|------------------------------------------------|--------------|--------------|--------|-------------|-------------------------|----|---------------|-------|-------------|
| - | 4  | 1384      | 9xes.2_Missense_                               | NM_003607    | NP_003598    | Q5VT25 | MRCKA_HUMAN | rotein kinase.          | 11 | 3TTATTGTCATCC | 0.294 |             |
| + | 2  | 897       |                                                | NM_020435    | NP_065168    | Q5T442 | CXG2_HUMAN  | ellular (Potential).    | 0  | FGCGACCGTTCT  | 0.642 |             |
| + | 89 | 19968     | sr.1_Missense_Mu                               | NM_001098623 | NP_001092093 | Q5VST9 | OBSCN_HUMAN | otein kinase 1.         | 28 | GTGAGCGAAGCC  | 0.612 |             |
| + | 92 | 20169     | sr.1_Missense_Mu                               | NM_001098623 | NP_001092093 | Q5VST9 | OBSCN_HUMAN | otein kinase 1.         | 28 | GGGCCCGGCCT   | 0.701 |             |
| + | 13 | 1678      | p.R492* ACTN2_u                                | NM_001103    | NP_001094    | P35609 | ACTN2_HUMAN | Spectrin 2.             | 5  | GGGACCGACTG   | 0.383 |             |
| + | 5  | 2683      | re.1_Missense_Mu                               | NM_020066    | NP_064450    | Q9NZ56 | FMN2_HUMAN  | ro-rich. FH1.           | 12 | GGTCTGCTGGG   | 0.532 |             |
| + | 9  | 1700      | o.3_Missense_Mu                                | NM_152609    | NP_689822    | Q6PJW8 | CNST_HUMAN  |                         | 0  | 3TGACCGTATAC  | 0.502 |             |
| - | 4  | 658       | p.P183A TUBB8_                                 | NM_177987    | NP_817124    | Q3ZCM7 | TBB8_HUMAN  |                         | 1  | GGTGGGTGTGG   | 0.537 |             |
| - | 3  | 520       | p.L121F IL2RA_u                                | NM_000417    | NP_000408    | P01589 | IL2RA_HUMAN | ellular (Potential).    | 2  | TGGAAGGCTCG   | 0.507 |             |
| + | 3  | 423       | lav.1_Missense_M                               | NM_032905    | NP_116294    | Q96I25 | SPF45_HUMAN |                         | 0  | TGACCGGCAAA   | 0.512 |             |
| - | 13 | 2540      | o.2_Nonsense_Mu                                | NM_030569    | NP_085046    | Q86UX2 | ITIH5_HUMAN |                         | 4  | GTGTGCTGGA    | 0.592 |             |
| + | 6  | 1692      | e.Mutation_p.R28                               | NM_019590    | NP_062536    | Q5T5P2 | SKT_HUMAN   |                         | 7  | CATCCGGTCAG   | 0.498 |             |
| + | 16 | 3759      | n_p.S1084F KIAA                                | NM_019590    | NP_062536    | Q5T5P2 | SKT_HUMAN   |                         | 7  | CTCCTCCTCAA   | 0.542 |             |
| + | 4  | 1325      |                                                | NM_020752    | NP_065803    | Q5T848 | GP158_HUMAN | Name=1; (Potential).    | 8  | GCATCTCCTTCC  | 0.522 |             |
| - | 2  | 976       | nse.Mutation_p.G                               | NM_020848    | NP_065899    | Q9P266 | K1462_HUMAN | Pro-rich.               | 4  | CTCCTCCCCTA   | 0.597 |             |
| - | 9  | 1286      | ion_p.G385E PAR                                | NM_019619    | NP_062565    | Q8TEW0 | PARD3_HUMAN |                         | 1  | GTTTTCCCAG    | 0.517 |             |
| + | 7  | 794       |                                                | NM_052997    | NP_443723    | Q9BXX3 | AN30A_HUMAN |                         | 9  | CTTGCGGAAA    | 0.423 |             |
| + | 7  | 1016      |                                                | NM_052997    | NP_443723    | Q9BXX3 | AN30A_HUMAN |                         | 9  | AAATTACGAGTC  | 0.433 |             |
| - | 6  | 2139      | NF248_uc001izc.2                               | NM_021045    | NP_066383    | Q8NDW4 | ZN248_HUMAN |                         | 1  | GCATACGGCTTC  | 0.443 |             |
| - | 1  | 2221      |                                                | NM_002900    | NP_002891    | P10745 | RET3_HUMAN  | nate tandem repeats. 3. | 2  | GCTGTGGAACA   | 0.627 |             |
| - | 1  | 1687      |                                                | NM_002900    | NP_002891    | P10745 | RET3_HUMAN  | nate tandem repeats. 2. | 2  | GAGCTCCATGT   | 0.652 |             |
| - | 1  | 1235      |                                                | NM_002900    | NP_002891    | P10745 | RET3_HUMAN  | nate tandem repeats. 2. | 2  | GGCCGGCATTG   | 0.647 |             |
| - | 24 | 2863      | u.1_Missense_Mut                               | NM_020987    | NP_066267    | Q12955 | ANK3_HUMAN  |                         | 19 | CAATTCCTTAAC  | 0.483 |             |
| - | 18 | 2317      | p.R703* ANK3_u                                 | NM_020987    | NP_066267    | Q12955 | ANK3_HUMAN  | ANK 20.                 | 19 | CACTCGATCTTC  | 0.522 |             |
| - | 8  | 1915      | jk.2_Missense_M                                | NM_014836    | NP_055651    | O94844 | RHBT1_HUMAN | BTB 2.                  | 1  | CTCCATCGTCCA  | 0.527 | rs139669589 |
| + | 2  | 1515_1516 | jmx.3_Intron CTNF                              | NM_178011    | NP_821079    | Q86VH5 | LRRT3_HUMAN | lar (Potential). LRRCT. | 3  | TTGCTCCCTTGT  | 0.401 |             |
| + | 3  | 957       | oy.2_Intron STOX1                              | NM_001130161 | NP_001123633 | Q6ZVD7 | STOX1_HUMAN |                         | 2  | GAGCACCACAT   | 0.458 |             |
| + | 6  | 786       | _Mutation_p.Q203                               | NM_004922    | NP_004913    | P53992 | SC24C_HUMAN |                         | 3  | CTCCCAGCGA    | 0.607 |             |
| - | 6  | 1634      | p.V146I MMRN2                                  | NM_024756    | NP_079032    | Q9H8L6 | MMRN2_HUMAN |                         | 1  | GATGACGTCCA   | 0.647 |             |
| + | 4  | 1721      | 35A_uc001kej.3_5                               | NM_019054    | NP_061927    | Q86V20 | FA35A_HUMAN |                         | 4  | TTGGGAGTTATT  | 0.328 |             |
| - | 1  | 2137      |                                                | NR_002319    |              |        |             |                         | 0  | CATTATCCAGTG  | 0.537 |             |
| + | 29 | 6876      | jm.2_Missense_Mu                               | NM_016341    | NP_057425    | Q9P212 | PLCE1_HUMAN | s-associating 1.        | 3  | ATTCCAGAGAG   | 0.373 |             |
| + | 8  | 1228      | qny.1_Missense_M                               | NM_000769    | NP_000760    | P33261 | CP2CJ_HUMAN |                         | 6  | ACCCTCGTCAC   | 0.393 | rs17879685  |
| - | 9  | 1491      |                                                | NM_032211    | NP_115587    | Q96JB6 | LOXL4_HUMAN | SRCR 4.                 | 5  | CGCTCCCCCAG   | 0.637 |             |
| + | 19 | 2623      | p.A795T GBF1_uc                                | NM_004193    | NP_004184    | Q92538 | GBF1_HUMAN  | SEC7.                   | 2  | GGGAAGCACCA   | 0.547 |             |
| + | 2  | 337       | se.Mutation_p.T4                               | NM_017787    | NP_060257    | Q9NX94 | OPA1L_HUMAN |                         | 1  | TGACACAGGAC   | 0.438 | rs79433636  |
| - | 38 | 4955      | xxq.2_Missense_M                               | NM_025145    | NP_079421    | Q8NDM7 | WDR96_HUMAN |                         | 0  | AGTCAGTTTAGA  | 0.328 |             |
| - | 9  | 1212      | p.A357V AFAP1L                                 | NM_001001936 | NP_001001936 | Q8N4X5 | AF1L2_HUMAN |                         | 2  | CTGAAGCCGAC   | 0.527 |             |
| + | 1  | 157       |                                                | NM_181840    | NP_862823    | Q7Z418 | KCNKI_HUMAN |                         | 1  | TGGCAGCAGAT   | 0.567 |             |
| + | 15 | 8353      | ACC2_uc001lfz.2_                               | NM_206862    | NP_996744    | O95359 | TACC2_HUMAN |                         | 10 | AGCCCCGACTTA  | 0.542 |             |
| + | 18 | 2223      | iT1_uc009xzz.1_M                               | NM_007329    | NP_015568    | Q9UGM3 | DMBT1_HUMAN |                         | 7  | CCAGTCCCGGT   | 0.522 |             |
| - | 6  | 1322      | ZD1_uc010qty.1_I                               | NM_022034    | NP_071317    | Q86UP6 | CUZD1_HUMAN | llular (Potential). ZP. | 2  | CTTACCTTTCTC  | 0.299 |             |
| - | 3  | 497       | p.E223* C10orf9                                | NM_001004298 | NP_001004298 | Q96M02 | CJ090_HUMAN |                         | 2  | CTCCTCTTTGGC  | 0.647 |             |
| + | 2  | 376       | lybe.2_Missense_M                              | NM_138499    | NP_612508    | Q6NUJ5 | PWP2B_HUMAN | Pro-rich.               | 0  | GCCCCGTACC    | 0.751 |             |
| + | 15 | 2817      | p.S874F KNDC1_                                 | NM_152643    | NP_689856    | Q76N11 | VKIND_HUMAN |                         | 2  | CCATTTCCGAGA  | 0.537 |             |
| - | 10 | 1034      | p.S367N ADAM8_uc009ybi.2_Missense_Mutation_p.S |              |              | P78325 | ADAM8_HUMAN |                         | 3  | CAATGCTGCC    | 0.682 |             |
| - | 9  | 655       | CE1_uc009ybn.2_                                | NM_001143764 | NP_001137236 | Q8N0S2 | SYCE1_HUMAN | Potential.              | 1  | AAATCTCCTTGC  | 0.522 |             |

|   |    |                           |                   |              |              |        |             |                               |   |                  |       |
|---|----|---------------------------|-------------------|--------------|--------------|--------|-------------|-------------------------------|---|------------------|-------|
| - | 8  | 867                       | _p.A169T]OSBPL!   | NM_020896    | NP_065947    | Q9H0X9 | OSBL5_HUMAN | PH.                           | 3 | CAGGGCGTCCA      | 0.701 |
| + | 1  | 766                       | _uc001mam.1_Int   | NM_001004757 | NP_001004757 | Q8NH59 | O51Q1_HUMAN | Name=6; (Potential).          | 1 | GACATCCCATGC     | 0.517 |
| - | 1  | 737                       |                   | NM_001146033 | NP_001139505 | P0C7T3 | O56A5_HUMAN | lasmic (Potential).           | 0 | AGTGGGAACCA      | 0.473 |
| - | 1  | 155                       |                   | NM_001005173 | NP_001005173 | Q8NGH7 | O52L1_HUMAN | ellular (Potential).          | 2 | AAATCCCTACCA     | 0.463 |
| - | 3  | 1568                      | p.G422D]ZNF214_   | NM_013249    | NP_037381    | Q9UL59 | ZN214_HUMAN | 2H2-type 6.                   | 1 | ATAAAGCCTTTA     | 0.413 |
| + | 1  | 1004                      |                   | NM_014469    | NP_055284    | O75526 | HNRGT_HUMAN | g/Gly/Pro-rich.               | 0 | GGGATCATCTG      | 0.662 |
| - | 4  | 650                       | P3_uc010rbu.1_In  | NM_020645    | NP_065696    | Q9NQ35 | NRIP3_HUMAN |                               | 0 | CCAGGCGGAGG      | 0.542 |
| - | 19 | 2545                      | e_Mutation_p.S79  | NM_020974    | NP_066025    | Q9NQ36 | SCUB2_HUMAN | CUB.                          | 2 | TTTGGGGATTCA     | 0.547 |
| - | 3  | 541                       | se_Mutation_p.G9  | NM_015213    | NP_056028    | Q6IQ26 | DEN5A_HUMAN | UDENN.                        | 1 | CCATTCCTACTG     | 0.393 |
| - | 1  | 1274                      | ITL4_uc001mjo.2_  | NM_177559    | NP_808227    |        |             |                               | 0 | GCTGACGGGCG      | 0.567 |
| + | 3  | 1667                      |                   | NM_032867    | NP_116256    | Q6ZW33 | MICLK_HUMAN | Poly-Pro.                     | 1 | ctctctctctctctct | 0.458 |
| + | 15 | 1698_1699..2_Missense_Mut |                   | NM_001178    | NP_001169    | O00327 | BMAL1_HUMAN | PAC.                          | 0 | AAGGAAGTAGA      | 0.361 |
| + | 7  | 985                       | HA_uc009yho.2_In  | NM_005566    | NP_005557    | P00338 | LDHA_HUMAN  |                               | 3 | CAGTGCTTATGA     | 0.388 |
| + | 16 | 1714_1715423LK>F*]PRMT3_  |                   | NM_005788    | NP_005779    | O60678 | ANM3_HUMAN  |                               | 0 | GCCTTGAAAGG      | 0.366 |
| + | 9  | 1770                      | yc.2_Nonsense_In  | NM_004211    | NP_004202    | Q9Y345 | SC6A5_HUMAN |                               | 4 | TGCTACAGGTA      | 0.458 |
| - | 4  | 1753                      |                   | NM_003654    | NP_003645    | O43916 | CHST1_HUMAN | renal (Potential).            | 5 | GGAAGCGCCAC      | 0.672 |
| + | 7  | 1680                      |                   | NM_005456    | NP_005447    | Q9UQF2 | JIP1_HUMAN  | SH3.                          | 4 | GACACGAAGAC      | 0.602 |
| + | 12 | 1716                      | Site_p.R535_splic | NM_152312    | NP_689525    | Q8N3Y3 | LARG2_HUMAN |                               | 3 | CCTCAGGGCCT      | 0.642 |
| - | 17 | 2182                      | ly.2_Missense_Mu  | NM_004476    | NP_004467    | Q04609 | FOLH1_HUMAN | ellular (Probable).           | 3 | CAATTTCTGTAA     | 0.269 |
| + | 1  | 785                       |                   | NM_001005275 | NP_001005275 | Q8NGL6 | O4A15_HUMAN | lasmic (Potential).           | 2 | GAAACGAAAAG      | 0.438 |
| + | 12 | 1181                      |                   | NM_002559    | NP_002550    | P56373 | P2RX3_HUMAN | lasmic (Potential).           | 0 | AAATCGCGGCT      | 0.547 |
| + | 9  | 2251                      | sense_Mutation_p  | NM_001085458 | NP_001078927 | O60716 | CTND1_HUMAN | ARM 5.                        | 6 | CATTTTCATTGTT    | 0.453 |
| - | 1  | 644                       |                   | NM_001005469 | NP_001005469 | Q8NH48 | OR5B3_HUMAN | Name=5; (Potential).          | 0 | TGTAGGATATC      | 0.403 |
| + | 3  | 251                       | npb.2_Missense_M  | NM_148975    | NP_683876    | Q96JQ5 | M4A4A_HUMAN | ical; (Potential).            | 0 | GCATGGGAATA      | 0.428 |
| + | 10 | 2151                      | _Mutation_p.R654  | NM_178031    | NP_821174    | Q24JP5 | T132A_HUMAN | By similarity.}Extracellular  | 1 | GAGCCGGGGCA      | 0.662 |
| + | 5  | 930                       |                   | NR_002775    |              |        |             |                               | 0 | GAACGCCATG       | 0.567 |
| + | 3  | 665                       | o.1_Missense_Mu   | NM_004265    | NP_004256    | O95864 | FADS2_HUMAN | ical; (Potential).            | 2 | CTCTCAGGTGA      | 0.567 |
| + | 4  | 951                       | nw.1_Missense_M   | NM_001040694 | NP_001035784 | Q9NQS7 | INCE_HUMAN  |                               | 1 | CGGGACGGGGC      | 0.622 |
| - | 12 | 1767                      | t.1_Missense_Mut  | NM_153265    | NP_694997    | Q32P44 | EMAL3_HUMAN | WD 4.                         | 1 | GCTCCGCCCCC      | 0.542 |
| + | 2  | 340                       | sense_Mutation_p. | NM_020155    | NP_064540    | Q96N19 | G137A_HUMAN | ellular (Potential).          | 1 | GCCTGCTGCCG      | 0.622 |
| - | 30 | 3926                      |                   | NM_017525    | NP_059995    | Q6DT37 | MRCKG_HUMAN | CNH.                          | 4 | GGCCACGAGAC      | 0.652 |
| + | 6  | 1348                      | _p.S394C]SIPA1_L  | NM_006747    | NP_006738    | Q96FS4 | SIPA1_HUMAN | Rap-GAP.                      | 0 | GCACTCCCTCT      | 0.542 |
| + | 5  | 835                       | xx.1_Missense_Mu  | NM_001134775 | NP_001128247 | Q9H0B6 | KLC2_HUMAN  | TPR 1.                        | 0 | CCCGGCTCCGC      | 0.632 |
| + | 7  | 698                       | CS_uc001ois.2_R   | NM_005125    | NP_005116    | O14618 | CCS_HUMAN   | xide dismutase-like.          | 0 | TCACAGGGAAC      | 0.602 |
| - | 2  | 707                       |                   | NM_005117    | NP_005108    | O95750 | FGF19_HUMAN |                               | 1 | CTTGATCTCCA      | 0.657 |
| - | 22 | 5329                      | tation_p.D1156N]u | NM_012309    | NP_036441    | Q9UPX8 | SHAN2_HUMAN |                               | 5 | TAGATCCCCAG      | 0.562 |
| + | 25 | 2918                      | sg.2_Missense_M   | NM_001567    | NP_001558    | O15357 | SHIP2_HUMAN |                               | 4 | AGAGGCCTCCT      | 0.632 |
| - | 5  | 883                       | _5'UTR]ARAP1_uc   | NM_001040118 | NP_001035207 | Q96P48 | ARAP1_HUMAN |                               | 1 | CTCATCGTAGT      | 0.657 |
| + | 9  | 1142                      | se_Mutation_p.P3  | NM_152222    | NP_689408    | Q969Z4 | TR19L_HUMAN | lasmic (Potential).           | 1 | TAACCCGACCA      | 0.652 |
| - | 19 | 3660                      |                   | NM_015531    | NP_056346    | Q4AC94 | C2CD3_HUMAN |                               | 7 | CTCACGATGCT      | 0.433 |
| + | 1  | 278                       |                   | NM_003251    | NP_003242    | Q92748 | THRSP_HUMAN |                               | 1 | GGCAGGCAGCG      | 0.607 |
| + | 23 | 12341                     | li.3_Missense_Mut | NM_001008781 | NP_001008781 | Q8TDW7 | FAT3_HUMAN  | GF-like 4; calcium-binding    | 5 | TGTGAGAACGG      | 0.627 |
| + | 4  | 827                       |                   | NM_001098672 | NP_001092142 | Q6MZM0 | HPHL1_HUMAN | e 2.}Extracellular (Potential | 3 | TGGATCGAGAG      | 0.383 |
| - | 2  | 691                       | hp.2_Missense_M   | NM_025208    | NP_079484    | Q9GZP0 | PDGFD_HUMAN | CUB.                          | 2 | AGATATCATTTTC    | 0.383 |
| + | 3  | 627_628                   | piv.2_Missense_M  | NM_000829    | NP_000820    | P48058 | GRIA4_HUMAN | ellular (Potential).          | 8 | AAGCTCCTTTTA     | 0.391 |
| - | 6  | 1250                      | rx.1_Missense_M   | NM_152315    | NP_689528    | Q8N323 | FA55A_HUMAN |                               | 0 | CCCGAGGGATA      | 0.433 |
| + | 7  | 1404                      | 2_Missense_Mutal  | NM_015157    | NP_055972    | Q86UU1 | PHLB1_HUMAN |                               | 0 | GCCCCGGGCTG      | 0.657 |

rs74507390

|   |    |       |                    |              |              |        |             |                              |    |               |       |             |
|---|----|-------|--------------------|--------------|--------------|--------|-------------|------------------------------|----|---------------|-------|-------------|
| - | 2  | 1064  | 2_uc001pwn.3_in    | NM_004205    | NP_004196    | O75604 | UBP2_HUMAN  |                              | 4  | CCATGCCGTCTC  | 0.647 |             |
| + | 8  | 1964  |                    | NM_025004    | NP_079280    | Q0P6D6 | CCD15_HUMAN |                              | 2  | GAAGGTGTTCTT  | 0.423 |             |
| + | 2  | 403   | _p.R30H KCNJ5_t    | NM_000890    | NP_000881    | P48544 | IRK5_HUMAN  | smic (By similarity).        | 1  | AGCCCGCGATT   | 0.577 | rs142140011 |
| + | 4  | 1136  |                    | NM_052875    | NP_443107    | Q4G0F5 | VP26B_HUMAN |                              | 0  | ATGACACGATAG  | 0.532 |             |
| + | 13 | 1536  | 1L2_uc009zdg.1_    | NM_138342    | NP_612351    | Q8IW92 | GLBL2_HUMAN |                              | 3  | ATGATCGGGGG   | 0.542 |             |
| - | 3  | 229   | _p.R56C MLF2_u     | NM_005439    | NP_005430    | Q15773 | MLF2_HUMAN  |                              | 1  | CCGGCGGCTGG   | 0.517 |             |
| - | 1  | 312   | lutation_p.Y34* EN | NM_001144831 | NP_001138303 | Q99623 | PHB2_HUMAN  | transcriptional repression.  | 3  | ACACCGTAGGC   | 0.716 |             |
| - | 1  | 271   |                    | NM_020634    | NP_065685    | Q9NR23 | GDF3_HUMAN  |                              | 6  | CCCGCGGACGC   | 0.493 |             |
| + | 1  | 81    |                    | NM_199286    | NP_954980    | Q6W0C5 | DPPA3_HUMAN |                              | 0  | CCGATGGACCC   | 0.493 |             |
| - | 6  | 799   |                    | NM_014358    | NP_055173    | Q9ULY5 | CLC4E_HUMAN | cellular (Potential).        | 1  | TCAAAGGATTAT  | 0.418 |             |
| - | 4  | 552   | V_uc009zdk.1_5'U   | NM_000014    | NP_000005    | P01023 | A2MG_HUMAN  |                              | 5  | CAACACGAAATT  | 0.393 |             |
| + | 15 | 2248  | ense_Mutation_p.T  | NM_004570    | NP_004561    | O75747 | P3C2G_HUMAN |                              | 21 | TGCATACCATTTT | 0.413 |             |
| + | 9  | 1157  | zip.2_Missense_M   | NM_017435    | NP_059131    | Q9NYB5 | SO1C1_HUMAN | cellular (Potential).        | 7  | AAGATCCCCAG   | 0.388 |             |
| - | 9  | 1457  |                    | NM_021957    | NP_068776    | P54840 | GS2_HUMAN   |                              | 2  | TTTTTCCAAAC   | 0.294 |             |
| + | 19 | 2607  | nh.1_Nonsense_M    | NM_198578    | NP_940980    | Q5S007 | LRRK2_HUMAN |                              | 24 | CTAATTTAAGGA  | 0.318 |             |
| - | 2  | 121   |                    | NM_025003    | NP_079279    | P59510 | ATS20_HUMAN |                              | 19 | TACTTCGTAGG   | 0.567 |             |
| + | 4  | 434   | I_uc001rny.3_Intro | NM_001114182 | NP_001107654 | Q9NWZ3 | IRAK4_HUMAN | Death.                       | 0  | TGCTCCCAGGT   | 0.393 |             |
| - | 11 | 2026  | _p.N265I SFRS2I    | NM_004719    | NP_004710    | Q99590 | SCAFB_HUMAN |                              | 0  | TCTTCAATTAACA | 0.353 |             |
| - | 19 | 3805  | Y6_uc001rsi.3_M    | NM_015270    | NP_056085    | O43306 | ADCY6_HUMAN | lasmic (Potential).          | 0  | CTGATCGTAGG   | 0.552 |             |
| + | 13 | 1896  | n_p.V577I TROAP    | NM_005480    | NP_005471    | Q12815 | TROAP_HUMAN | ate tandem repeats. Cys-ri   | 1  | TTGAGGTACCT   | 0.597 |             |
| + | 2  | 581   | nf.1_Missense_Mu   | NM_005556    | NP_005547    | P08729 | K2C7_HUMAN  | od. Coil 1B.                 | 0  | GTCAGCTTGAG   | 0.622 |             |
| - | 4  | 860   |                    | NM_004693    | NP_004684    | O95678 | K2C75_HUMAN | Coil 1B. Rod.                | 0  | GATCTCCTCGG   | 0.483 |             |
| - | 1  | 408   | nh.2_Missense_M    | NM_000424    | NP_000415    | P13647 | K2C5_HUMAN  | lead. Gly-rich.              | 0  | TGAAGCTGCCA   | 0.348 |             |
| - | 9  | 1622  |                    | NM_175053    | NP_778223    | Q7RTS7 | K2C74_HUMAN | Tail.                        | 2  | CTTTCCTTGCT   | 0.627 |             |
| - | 11 | 1710  | 3_Mutation_p.R54   | NM_000889    | NP_000880    | P26010 | ITB7_HUMAN  | repeats. Extracellular (Pote | 8  | TGCAGCGTCCAC  | 0.622 | rs61730604  |
| + | 2  | 458   |                    | NM_021191    | NP_067014    | Q9HD90 | NDF4_HUMAN  |                              | 4  | TGGCTCCCAAA   | 0.413 |             |
| - | 2  | 228   | tion_p.R61H TMEI   | NM_001130963 | NP_001124435 | O14524 | T194A_HUMAN |                              | 0  | TGGCACGCTTT   | 0.388 |             |
| + | 8  | 1693  | o.2_Missense_Mu    | NM_014903    | NP_055718    | Q8IVL0 | NAV3_HUMAN  |                              | 17 | GATCCCTAAGGC  | 0.423 |             |
| + | 3  | 731   | zm.1_Missense_M    | NM_024560    | NP_078836    | Q9H6R3 | ACSS3_HUMAN |                              | 4  | ATCATGTAAAGC  | 0.373 |             |
| - | 48 | 6972  | 3q.2_Missense_M    | NM_025114    | NP_079390    | O15078 | CE290_HUMAN | Potential.                   | 7  | TTTACGAAGCC   | 0.313 |             |
| + | 12 | 1994  | ltx.2_Missense_M   | NM_139319    | NP_647480    | Q8NDX2 | VGLU3_HUMAN | lasmic (Potential).          | 3  | AGAAGGAATGG   | 0.448 |             |
| + | 34 | 4636  | d.1_RNA ACACB_     | NM_001093    | NP_001084    | O00763 | ACACB_HUMAN |                              | 8  | GATGCGTAAGT   | 0.552 |             |
| + | 35 | 4824  | d.1_RNA ACACB_     | NM_001093    | NP_001084    | O00763 | ACACB_HUMAN |                              | 8  | GGCTGCTCCTG   | 0.607 |             |
| - | 7  | 974   | TD10_uc001toj.1_   | NM_031954    | NP_114160    | Q9H3F6 | BACD3_HUMAN |                              | 0  | CACGCGCTCGA   | 0.716 |             |
| - | 54 | 8893  |                    | NM_001109662 | NP_001103132 |        |             |                              | 2  | GATGGCGTCAC   | 0.687 |             |
| - | 29 | 4385  |                    | NM_001109662 | NP_001103132 |        |             |                              | 2  | AGGAGGGGACA   | 0.567 |             |
| - | 28 | 4908  |                    | NM_000620    | NP_000611    | P29475 | NOS1_HUMAN  |                              | 7  | CACTTCGTACG   | 0.488 |             |
| + | 12 | 1684  |                    | NM_194286    | NP_919262    | A7MD48 | SRRM4_HUMAN |                              | 2  | CTTCAGGGAGC   | 0.657 |             |
| + | 74 | 12798 | ifu.3_Missense_M   | NM_207437    | NP_997320    | Q8IVF4 | DYH10_HUMAN | Potential.                   | 6  | TCAAAGGGTGA   | 0.532 |             |
| + | 40 | 7387  | .P2450L EP400_u    | NM_015409    | NP_056224    | Q96L91 | EP400_HUMAN |                              | 12 | GAAATCCCTTTC  | 0.388 |             |
| - | 16 | 1308  | _p.G289E TPTE2     | NM_199254    | NP_954863    | Q6XPS3 | TPTE2_HUMAN | atase tensin-type.           | 0  | TCTACTCCCTGA  | 0.368 |             |
| - | 3  | 707   | vo.2_Missense_M    | NM_001142296 | NP_001135768 | Q8N0X7 | SPG20_HUMAN |                              | 0  | GAGTTGAGGTG   | 0.453 |             |
| - | 11 | 2938  | fwz.2_Missense_M   | NM_025138    | NP_079414    | Q86XN7 | CM023_HUMAN | Ser-rich.                    | 5  | AATGGGAGTGG   | 0.438 |             |
| - | 11 | 2032  | wz.2_Missense_M    | NM_025138    | NP_079414    | Q86XN7 | CM023_HUMAN |                              | 5  | GGACCGTGGTG   | 0.542 |             |
| - | 11 | 1348  | Missense_Mutator   | NM_001268    | NP_001259    | O95199 | RCBT2_HUMAN | RCC1 5.                      | 5  | CTGCGTCTTG    | 0.577 |             |
| + | 7  | 731   |                    | NM_001846    | NP_001837    | P08572 | CO4A2_HUMAN |                              | 6  | CACAGGGGCC    | 0.672 |             |
| + | 5  | 1062  | POTEG_uc010ah      | NM_001005356 | NP_001005356 | Q6S5H5 | POTEG_HUMAN |                              | 1  | TCTATCTGGAC   | 0.358 |             |

|   |    |                          |              |              |        |             |                                |     |               |       |             |
|---|----|--------------------------|--------------|--------------|--------|-------------|--------------------------------|-----|---------------|-------|-------------|
| - | 15 | 2287_2288 p.D628N CHD8_u | NM_020920    | NP_065971    | Q9HCK8 | CHD8_HUMAN  |                                | 10  | GAGATCCCCAAA  | 0.421 |             |
| - | 20 | 2493                     | NM_002471    | NP_002462    | P13533 | MYH6_HUMAN  | IQ.                            | 4   | ACCTGCGTTCC   | 0.483 |             |
| + | 3  | 629                      | NM_025081    | NP_079357    | Q9P2P1 | NYNRI_HUMAN |                                | 3   | CTGCTGGAGCA   | 0.632 |             |
| + | 1  | 240                      | NM_005249    | NP_005240    | P55316 | FOXG1_HUMAN |                                | 4   | GATCCCCAAGTC  | 0.393 |             |
| - | 11 | 2785 IH5_uc001xfy.2_3'   | NM_139318    | NP_647479    | Q8NCM2 | KCNH5_HUMAN | ibly) (By similarity). Cyto    | 9   | GACTTCTGCA    | 0.522 |             |
| - | 3  | 887 p.P140L ESR2_uc      | NM_001437    | NP_001428    | Q92731 | ESR2_HUMAN  | Modulating.                    | 3   | AACCTGGACCA   | 0.483 |             |
| - | 13 | 1967 s.2_Missense_Mu     | NM_000347    | NP_000338    | P11277 | SPTB1_HUMAN | Spectrin 4.                    | 11  | AGAGTCGTTTG   | 0.557 |             |
| + | 8  | 1012_1013                | NM_152443    | NP_689656    | Q96NR8 | RDH12_HUMAN |                                | 1   | TGCACCCAGGCC  | 0.634 | rs104894476 |
| + | 27 | 5377 p.P1533L PCNX_u     | NM_014982    | NP_055797    | Q96RV3 | PCX1_HUMAN  |                                | 1   | TGAACCTGGCC   | 0.453 |             |
| + | 2  | 351                      | NM_006399    | NP_006390    | Q16520 | BATF_HUMAN  | Basic motif.                   | 1   | AAAAATCGTATTG | 0.522 |             |
| - | 13 | 2166 wc.1_Missense_M     | NM_007039    | NP_008970    | Q16825 | PTN21_HUMAN |                                | 4   | CCACGGGCAGG   | 0.682 |             |
| + | 37 | 6039 ybs.1_Missense_M    | NM_020818    | NP_065869    | Q9P2D8 | UNC79_HUMAN |                                | 17  | AGAATTTACCAC  | 0.418 |             |
| + | 2  | 246 ch.2_Missense_M      | NM_023112    | NP_075601    | Q96DC9 | OTUB2_HUMAN |                                | 0   | TTACCGGAGGA   | 0.453 | rs144803702 |
| - | 3  | 890                      | NM_001080451 | NP_001073920 | Q86U17 | SPA11_HUMAN |                                | 1   | GGAGGACCAGC   | 0.537 |             |
| + | 7  | 1486 \IP2_uc010txz.1_1   | NM_006291    | NP_006282    | Q03169 | TNAP2_HUMAN |                                | 1   | GCTGGCCCCC    | 0.632 |             |
| + | 5  | 508 t_Mutation_p.E158    | NM_024071    | NP_076976    | Q9BQ24 | ZFY21_HUMAN |                                | 0   | ATCGAAATTGTA  | 0.498 |             |
| + | 1  | 1169                     | NM_018958    | NP_061831    | Q9NZP6 | CO002_HUMAN |                                | 8   | GAGCTCCTGCT   | 0.612 |             |
| + | 3  | 559 p.G118R APBA2_u      | NM_005503    | NP_005494    | Q99767 | APBA2_HUMAN |                                | 0   | GCAACGGGGAG   | 0.652 |             |
| - | 27 | 4456 e_Mutation_p.S13    | NM_002420    | NP_002411    | Q7Z4N2 | TRPM1_HUMAN | lasmic (Potential).            | 4   | CCCGGAATAG    | 0.453 |             |
| + | 17 | 2689 t_Mutation_p.S581   | NM_001013703 | NP_001013725 | Q9P2K8 | E2AK4_HUMAN | otein kinase 2.                | 4   | TGACAGCAAA    | 0.353 |             |
| + | 26 | 7062 bt.1_Missense_Mt    | NM_170589    | NP_733468    | Q8NG31 | CASC5_HUMAN | ation and for interaction with | 5   | ATCACGTTGGG   | 0.323 |             |
| + | 19 | 2766                     | NM_006293    | NP_006284    | Q06418 | TYRO3_HUMAN | lasmic (Potential).            | 6   | ACTGTCCGGTAC  | 0.647 |             |
| + | 3  | 395 t.1_Intron MGA_uc    | NM_001164273 | NP_001157745 | Q8IW19 | MGAP_HUMAN  |                                | 12  | TCAGTACTGTCA  | 0.522 |             |
| - | 15 | 1744 p.E54K PLA2G4E      | NM_001080490 | NP_001073959 | Q3MJ16 | PA24E_HUMAN | PLA2c.                         | 0   | CCCACCGATGT   | 0.617 |             |
| + | 1  | 556 oudg.1_Intron CAI    | NM_000070    | NP_000061    | P20807 | CAN3_HUMAN  | lpain catalytic.               | 1   | CGGATGAGACC   | 0.478 |             |
| + | 7  | 954 3_uc010bfc.1_Spli    | NM_014547    | NP_055362    | Q9NYL9 | TMOD3_HUMAN |                                | 1   | CTACTGTAAGTA  | 0.388 |             |
| + | 1  | 2164                     | NM_001080534 | NP_001074003 | Q8NB66 | UN13C_HUMAN | p.P722P(1)                     | 7   | CTTCTCCATGCC  | 0.408 |             |
| + | 19 | 5077                     | NM_001080534 | NP_001074003 | Q8NB66 | UN13C_HUMAN | MHD1.                          | 7   | CCTTTTGTCA    | 0.348 |             |
| - | 9  | 3907 X7_uc002adn.1_M     | NM_022841    | NP_073752    | Q2KHR2 | RFX7_HUMAN  |                                | 0   | TGGAATCGATCA  | 0.413 |             |
| + | 3  | 298 X5_uc010bid.1_M      | NM_024505    | NP_078781    | Q96PH1 | NOX5_HUMAN  | nal regulatory region; inter   | 2   | TGGACGCCCA    | 0.552 |             |
| - | 15 | 2687 p.L333F MYO9A_u     | NM_006901    | NP_008832    | B2RTY4 | MYO9A_HUMAN |                                | 3   | ACTTTTCAAAATT | 0.348 |             |
| + | 4  | 1424 jg.2_Missense_Mt    | NM_001130136 | NP_001123608 | Q6UXK2 | ISLR2_HUMAN | lar (Potential). LRRCT.        | 0   | TGCAGGGGGTG   | 0.731 |             |
| + | 4  | 722 C33_uc002exp.2_f     | NM_025055    | NP_079331    | Q8N5R6 | CCD33_HUMAN | C2.                            | 5   | TGATCCTCAAG   | 0.448 |             |
| + | 21 | 3640 .R1139Q ADAMTS      | NM_207517    | NP_997400    | P82987 | ATL3_HUMAN  |                                | 27  | GTGGCGGGGCA   | 0.552 | rs148037443 |
| - | 3  | 440 10upl.1_Translatio   | NM_001012338 | NP_001012338 | Q16288 | NTRK3_HUMAN | ellular (Potential).           | 281 | TGAGCGTGTGA   | 0.443 | rs147992979 |
| - | 9  | 1516 p.R401Q PCSK6_u     | NM_002570    | NP_002561    | P29122 | PCSK6_HUMAN | Catalytic.                     | 2   | ATTTTTCGCTCAT | 0.532 |             |
| + | 1  | 780                      | NM_001001674 | NP_001001674 | Q8NGB8 | O4F15_HUMAN | ellular (Potential).           | 0   | ACATGGCCTTCT  | 0.423 |             |
| + | 5  | 955 _Missense_Mutatir    | NM_002434    | NP_002425    | P29372 | 3MG_HUMAN   |                                | 2   | ACCGGAGGCTC   | 0.637 |             |
| - | 4  | 704 \8A_uc002cgv.3_f     | NM_021259    | NP_067082    | Q9HCN3 | TMM8A_HUMAN | ellular (Potential).           | 3   | TGATGGAAATCT  | 0.667 |             |
| + | 2  | 694 p.A198T PIGQ_u       | NM_148920    | NP_683721    | Q9BRB3 | PIGQ_HUMAN  |                                | 1   | TGGAGGCCAGC   | 0.667 |             |
| + | 12 | 1451 ge.1_Missense_Mt    | NM_001761    | NP_001752    | P41002 | CCNF_HUMAN  |                                | 2   | CTGCCGAGCC    | 0.667 |             |
| + | 13 | 8644                     | NM_016333    | NP_057417    | Q9UQ35 | SRRM2_HUMAN | r-rich. Arg-rich.              | 4   | AGCGTCGCCGT   | 0.642 |             |
| + | 5  | 849 VLEN2_uc010bsx.2     | NM_172229    | NP_757384    | Q8NCW0 | KREM2_HUMAN | lar (Potential). WSC.          | 2   | TGGCCGGGGGA   | 0.622 |             |
| + | 14 | 1967 p.A327T A2BP1_u     | NM_018723    | NP_061193    | Q9NWB1 | RFOX1_HUMAN |                                | 0   | CTGCCGTGCC    | 0.498 | rs139929599 |
| - | 11 | 1355 e_Mutation_p.L28    | NM_003470    | NP_003461    | Q93009 | UBP7_HUMAN  |                                | 3   | CTGTAAGCCATC  | 0.363 |             |
| - | 13 | 3478 uyn.1_Missense_M    | NM_001134407 | NP_001127879 | Q12879 | NMDE1_HUMAN | lasmic (Potential).            | 45  | CATAGTTATTGA  | 0.478 |             |
| + | 8  | 1161 ssense_Mutation_u   | NM_024847    | NP_079123    | Q7Z402 | TMC7_HUMAN  | lasmic (Potential).            | 3   | AATGGGCAGAG   | 0.398 |             |



|   |    |           |                      |                                  |              |        |             |                              |    |                |       |             |
|---|----|-----------|----------------------|----------------------------------|--------------|--------|-------------|------------------------------|----|----------------|-------|-------------|
| + | 9  | 1419      | ssense_Mutation_     | NM_024847                        | NP_079123    | Q7Z402 | TMC7_HUMAN  | lasmic (Potential).          | 3  | GCATCCGCTATG/  | 0.343 | rs150991752 |
| - | 5  | 1189      |                      | NM_001012991                     | NP_001013009 | Q1ED39 | CP088_HUMAN | th ZFP106 (By similarity).   | 0  | GGGGCGGCTGA    | 0.567 |             |
| - | 9  | 1238      | _p.P343L ACSM2E      | NM_182617                        | NP_872423    | Q68CK6 | ACS2B_HUMAN |                              | 5  | TTTCTGGAAGA/   | 0.527 |             |
| - | 13 | 2072      | 31_uc010bxm.2_5      | NM_020718                        | NP_065769    | Q70CQ4 | UBP31_HUMAN |                              | 10 | TCCACGGGGAC    | 0.562 |             |
| - | 22 | 3050      | _p.2_Missense_Mu     | NM_033266                        | NP_150296    | Q76MJ5 | ERN2_HUMAN  | lasmic (Potential).          | 6  | TGAGTCTGGCG    | 0.642 |             |
| + | 14 | 1764      | me.2_Missense_M      | NM_212535                        | NP_997700    | P05771 | KPCB_HUMAN  | rotein kinase.               | 9  | CGGTGGATTGG    | 0.458 |             |
| - | 32 | 4932      | ou.2_Missense_Mi     | NM_001520                        | NP_001511    | Q12789 | TF3C1_HUMAN |                              | 5  | TGCTCCGGCGC    | 0.602 | rs142762967 |
| - | 6  | 872       | 'Flank RNFA40_uc0    | NM_001014979                     | NP_001014979 | A1A4V9 | CP093_HUMAN |                              | 0  | AGCCCGCTGTG    | 0.542 |             |
| - | 25 | 3931      | :C11_uc002efh.1_I    | NM_033151                        | NP_149163    | Q96J66 | ABCCB_HUMAN | r 2. Cytoplasmic (Potential) | 6  | CCATGGGCTCC    | 0.597 |             |
| - | 15 | 1679      | age.1_Splice_Site_   | NM_013263                        | NP_037395    | Q9NP11 | BRD7_HUMAN  |                              | 0  | CACTTACCTTCA   | 0.443 |             |
| - | 2  | 779_780   |                      | NM_024336                        | NP_077312    | P78415 | IRX3_HUMAN  |                              | 0  | GTA CTGGCCATA  | 0.678 |             |
| - | 5  | 764       |                      | NM_013242                        | NP_037374    | Q9Y6A4 | CP080_HUMAN |                              | 0  | CCGTCGGATGC    | 0.483 |             |
| - | 2  | 980       | _Missense_Mutati     | NM_033309                        | NP_171608    | Q6UX72 | B3GN9_HUMAN | ienal (Potential).           | 0  | CGTCGGGGCAG    | 0.577 |             |
| - | 14 | 2271      | 33922_uc010vms.1_RNA |                                  |              |        |             |                              | 0  | ggggaggggagggg | 0.498 |             |
| - | 13 | 2432      | _p.K259N ADAMT:      | NM_199355                        | NP_955387    | Q8TE60 | ATS18_HUMAN | Cys-rich.                    | 18 | TAGGGTTTCCAC   | 0.378 |             |
| + | 2  | 404       |                      | NM_020927                        | NP_065978    | Q9HCJ6 | VAT1L_HUMAN |                              | 1  | TGCCAGGATTT    | 0.438 |             |
| + | 10 | 1210      | RISPLD2_uc002fir     | NM_031476                        | NP_113664    | Q9H0B8 | CRLD2_HUMAN | LCCL 1.                      | 0  | CCAGTCGTCTA    | 0.532 |             |
| - | 2  | 400       |                      | NM_198491                        | NP_940893    | Q6ZTR7 | FA92B_HUMAN |                              | 1  | CTGCCGGTAA     | 0.657 |             |
| - | 7  | 1167      |                      | NM_003486                        | NP_003477    | Q01650 | LAT1_HUMAN  |                              | 0  | TGGATCATGGA    | 0.657 |             |
| - | 16 | 1770      | _Site_p.E336_splic   | NM_021962                        | NP_068781    | Q12979 | ABR_HUMAN   |                              | 1  | AACTCTGGGG     | 0.562 |             |
| + | 6  | 670       | _Mutation_p.G78S     | NM_001383                        | NP_001374    | Q9BZG8 | DPH1_HUMAN  |                              | 1  | TCCTGGGCTGC    | 0.582 |             |
| - | 16 | 3789      | iv.1_Missense_ML     | NM_017575                        | NP_060045    | Q86US8 | EST1A_HUMAN |                              | 4  | AACAAAGGTCTG   | 0.582 |             |
| - | 5  | 744       | g_Mutation_p.R13     | NM_002561                        | NP_002552    | Q93086 | P2RX5_HUMAN | ellular (Potential).         | 0  | TCTCCGCAGGC/   | 0.662 |             |
| - | 15 | 2462      | _p.E771K ATP2A3      | NM_174955                        | NP_777615    | Q93084 | AT2A3_HUMAN | ame=5; (By similarity).      | 5  | GACCTCGCCAA    | 0.602 |             |
| - | 15 | 2112      | _Mutation_p.R684     | NM_014520                        | NP_055335    | Q9BQG0 | MBB1A_HUMAN |                              | 2  | GGCACGCGGGG    | 0.647 |             |
| + | 25 | 2718      | i.2_Missense_Mut     | NM_002663                        | NP_002654    | O14939 | PLD2_HUMAN  |                              | 5  | CCCTGCGGACT    | 0.647 |             |
| - | 7  | 532       | /i411 CAMTA2_uc      | NM_015099                        | NP_055914    | O94983 | CMTA2_HUMAN | CG-1.                        | 1  | AAGGACGATGT    | 0.572 | rs149046611 |
| + | 4  | 445       |                      | NM_006612                        | NP_006603    | O43896 | KIF1C_HUMAN | inesin-motor.                | 2  | CAATCCTAAACA   | 0.542 |             |
| - | 4  | 1847      | hd.3_Missense_Mi     | NM_001128833                     | NP_001122305 | Q9P1Z0 | ZBTB4_HUMAN | Pro-rich.                    | 4  | GGTGGGTGTGG    | 0.662 |             |
| + | 2  | 812       | 'A_uc002ghe.2_5'f    | NM_001102614                     | NP_001096084 | P0C7Q6 | AMCL3_HUMAN | ical; (Potential).           | 0  | TGCTGGGCTCT    | 0.627 |             |
| - | 16 | 2366      | _p.E822K ALOXE3      | NM_021628                        | NP_067641    | Q9BYJ1 | LOXE3_HUMAN | ipoxxygenase.                | 5  | GGCCTCCTCTG    | 0.617 |             |
| + | 8  | 1629      | _p.P503L ARHGFE      | NM_173728                        | NP_776089    | O94989 | ARHGF_HUMAN | DH.                          | 3  | GGGGCCTTCTC    | 0.587 |             |
| - | 13 | 1321      | uc002gml.1_Intron    | NM_002472                        | NP_002463    | P13535 | MYH8_HUMAN  | rosin head-like.             | 11 | TGCCAACCTTG/   | 0.507 |             |
| - | 23 | 3037      | uc002gml.1_Intron    | NM_017533                        | NP_060003    | Q9Y623 | MYH4_HUMAN  | Potential.                   | 13 | GTTCTCTGTGG    | 0.343 |             |
| - | 23 | 2786      | uc002gml.1_Intron    | NM_005963                        | NP_005954    | P12882 | MYH1_HUMAN  | Potential.                   | 21 | AGCTTCTGAG/    | 0.358 |             |
| + | 20 | 4064_4065 | _Missense_Mutati     | NM_001372                        | NP_001363    | Q9NYC9 | DYH9_HUMAN  | . Stem (By similarity).      | 20 | GCCATGGAGTTC   | 0.559 |             |
| + | 8  | 1132_1133 | CD_uc002gnp.1_I      | NM_153604                        | NP_705832    | Q8IZQ8 | MYCD_HUMAN  |                              | 5  | GAAGTCCCTCC    | 0.485 |             |
| - | 1  | 235       | 416_uc002gor.1_I     | NM_006382                        | NP_006373    | O95170 | CDRT1_HUMAN |                              | 0  | ACAACGAAAATA   | 0.493 |             |
| + | 6  | 1033_1034 | rwa.1_Missense_I     | NM_001130842                     | NP_001124314 | Q9HBT8 | Z286A_HUMAN |                              | 1  | CAAAGGATCTT    | 0.337 |             |
| + | 8  | 1090      | _p.R345Q MPRIP_      | NM_201274                        | NP_958431    | Q6WCQ1 | MPRIP_HUMAN | ith F-actin (By similarity). | 0  | GAAGCGGGTGA    | 0.667 |             |
| + | 6  | 1016      |                      | NM_024052                        | NP_076957    | Q8IVV7 | CQ039_HUMAN |                              | 1  | ATCAGTCCCTCA   | 0.468 |             |
| - | 20 | 2398      | i.1_Missense_Muti    | NM_002018                        | NP_002009    | Q13045 | FLII_HUMAN  | h ACTL6A. Gelsolin-like 3.   | 2  | CACGTCGGACC    | 0.672 |             |
| - | 5  | 716       | \_uc010vxs.1_Mis     | NM_004618                        | NP_004609    | Q13472 | TOP3A_HUMAN | Toprim.                      | 3  | TACACAGTGGA    | 0.468 |             |
| + | 1  | 275       | gul.2_Missense_M     | NM_031456                        | NP_113644    | Q5XX13 | FBW10_HUMAN |                              | 1  | TATTTTCGTTGTC  | 0.493 |             |
| - | 5  | 441       | 'AP4_uc002gvs.2_     | NM_002404                        | NP_002395    | P55083 | MFAP4_HUMAN | rogen C-terminal.            | 0  | FAGCCGTGTTG    | 0.587 |             |
| - | 3  | 260       | _Splice_Site_p.K69   | splice IFT20_uc010wae.1_Intron T |              | Q8IY31 | IFT20_HUMAN |                              | 0  | CAATTTCTTTTAC  | 0.393 |             |
| - | 4  | 1151      | ht.2_Missense_Mi     | NM_001094                        | NP_001085    | Q16515 | ACCN1_HUMAN | llular (By similarity).      | 4  | CATCTCTGAGG    | 0.547 |             |

|   |    |           |                    |              |              |        |              |                               |     |               |       |             |
|---|----|-----------|--------------------|--------------|--------------|--------|--------------|-------------------------------|-----|---------------|-------|-------------|
| + | 6  | 700       | Iron ACACA_uc00:   | NM_173625    | NP_775896    | Q8N4C9 | CQ078_HUMAN  |                               | 0   | 'AGGAGCCAGGA  | 0.493 |             |
| - | 15 | 3139      | p.G844S SRCIN1_    | NM_025248    | NP_079524    | Q9C0H9 | SRCN1_HUMAN  | Pro-rich.                     | 0   | 'CTGGCCGTGGG' | 0.692 |             |
| - | 3  | 791       | _p.R104* PIP4K2E   | NM_003559    | NP_003550    | P78356 | PI42B_HUMAN  | PIPK.                         | 1   | 'GTTCGGAACA'  | 0.498 |             |
| - | 9  | 1166      | vt.2_Missense_Mu   | NM_198993    | NP_945344    | Q6ZMT1 | STAC2_HUMAN  | SH3.                          | 1   | 'GATCTCCAGGC' | 0.627 |             |
| - | 4  | 1019      | P_uc010wfs.1_Inti  | NM_005557    | NP_005548    | P08779 | K1C16_HUMAN  | Rod. Coil 2.                  | 1   | 'CTGCTCGTACT' | 0.617 |             |
| + | 3  | 1391      | _p.A411T KLHL10_   | NM_152467    | NP_689680    | Q6JEL2 | KLHL10_HUMAN | Kelch 3.                      | 4   | 'TCATCGCCCCC. | 0.498 |             |
| + | 11 | 1457      | JBG2_uc002ias.2_   | NM_016437    | NP_057521    | Q9NRH3 | TBG2_HUMAN   |                               | 1   | 'GGAAGCGGGAT  | 0.498 |             |
| + | 7  | 1181      | JAP1_uc010wgs.1    | NM_003632    | NP_003623    | P78357 | CNTP1_HUMAN  | 1. Extracellular (Potential). | 8   | 'CCGCGGTGCA   | 0.632 |             |
| - | 11 | 1405      | gg.3_Missense_M    | NM_000342    | NP_000333    | P02730 | B3AT_HUMAN   | . Membrane (anion exchan      | 3   | 'TGCGGGTGAC   | 0.582 |             |
| - | 6  | 879       | i.R260W KIF18B_u   | NM_001080443 | NP_001073912 |        |              |                               | 2   | 'TGCCCGCTCTG, | 0.627 |             |
| - | 4  | 815       | _p.R187C DCAKD_    | NM_024819    | NP_079095    | Q8WVC6 | DCAKD_HUMAN  | DPKC.                         | 0   | 'CTGGCGTTTGG' | 0.642 | rs138288180 |
| - | 6  | 844       | ie_Mutation_p.P1C  | NM_199282    | NP_954976    | Q6ZUM4 | RHG27_HUMAN  |                               | 0   | 'CTGCTGGGACC  | 0.612 |             |
| + | 2  | 134       | ikiy.2_Missense_Iv | NM_004287    | NP_004278    | O14653 | GOSR2_HUMAN  | lasmic (Potential).           | 2   | 'TGGGACGCCTG' | 0.517 |             |
| - | 1  | 185       |                    | NM_000088    | NP_000079    | P02452 | CO1A1_HUMAN  |                               | 382 | 'CGTGCGTCAGG, | 0.572 |             |
| + | 3  | 881       | _T2_uc010dbo.2_F   | NM_022167    | NP_071450    | Q9H1B5 | XYLT2_HUMAN  | ienal (Potential).            | 1   | 'ATCACGAGCAG' | 0.592 |             |
| - | 1  | 657       | mn.1_Intron ACSF   | NM_001267    | NP_001258    | O15335 | CHAD_HUMAN   | LRR 6.                        | 3   | 'GTCCACGTGGA  | 0.632 |             |
| + | 5  | 460       | n_p.E8K STXBP4_    | NM_178509    | NP_848604    | Q6ZWJ1 | STXB4_HUMAN  | PDZ.                          | 1   | 'TTGAAGAAGCA' | 0.358 |             |
| - | 7  | 1018_1019 | 19>198L SEPT4_uc0  | NM_004574    | NP_004565    | O43236 | SEPT4_HUMAN  | 3 (By similarity).            | 0   | 'ACTTCGGGAGG1 | 0.574 | rs148239346 |
| + | 7  | 726       | v4_uc010wou.1_Rl   | NM_000717    | NP_000708    | P22748 | CAH4_HUMAN   |                               | 0   | 'CAAGGAGGAGA  | 0.587 |             |
| - | 25 | 5812      |                    | NM_005121    | NP_005112    | Q9UHV7 | MED13_HUMAN  |                               | 2   | 'AGCAAGCACTG  | 0.403 |             |
| + | 20 | 2987      | IE_uc010wpj.1_Mit  | NM_000789    | NP_000780    | P12821 | ACE_HUMAN    | 3potential). Peptidase M2 2.  | 4   | 'ACCACGAAATG' | 0.572 |             |
| + | 7  | 685       | _p.S136F PSMC5     | NM_002805    | NP_002796    | P62195 | PRS8_HUMAN   |                               | 1   | 'TGTCTCTGGCT' | 0.522 |             |
| - | 17 | 3288      |                    | NM_000334    | NP_000325    | P35499 | SCN4A_HUMAN  | 3=S2 of repeat III; (Potentia | 3   | 'GAAGACCTTGT' | 0.557 |             |
| - | 25 | 2989      | JC46_uc010dep.2    | NM_145036    | NP_659473    | Q8N8E3 | CE112_HUMAN  | Potential.                    | 0   | 'TGCTTCAAGTT' | 0.328 |             |
| - | 32 | 4204      | iz.2_Missense_Mu   | NM_080283    | NP_525022    | Q8IUA7 | ABCA9_HUMAN  | C transporter 2.              | 6   | 'CGCTCCCTTTC. | 0.507 |             |
| + | 3  | 538       | rrq.1_Nonsense_Iv  | NM_178233    | NP_839947    | Q7RTS5 | OTOP3_HUMAN  |                               | 1   | 'TCTCCGAGTG'  | 0.607 |             |
| - | 23 | 2744      | p.R815W FBF1_u     | NM_001080542 | NP_001074011 | Q8TES7 | FBF1_HUMAN   |                               | 0   | 'CACCCGCCAGC  | 0.652 |             |
| - | 4  | 1059      | 2_Missense_Muta    | NM_001153244 | NP_001153244 | Q8WVQ1 | CANT1_HUMAN  | ienal (Potential).            | 0   | 'CCACGGTGCCC' | 0.582 |             |
| - | 5  | 2039      | rrf70_uc010wuq.1   | NM_001109760 | NP_001103230 | Q0VG06 | FP100_HUMAN  |                               | 2   | 'TGTGTGTGGCG' | 0.682 |             |
| - | 4  | 819       | t168H CSNK1D_u     | NM_001893    | NP_001884    | P48730 | KC1D_HUMAN   | rotein kinase.                | 2   | 'TCTCACGATAGC | 0.617 |             |
| - | 37 | 5441      | zj.1_Missense_Mu   | NM_005559    | NP_005550    | P25391 | LAMA1_HUMAN  | n II and I. Potential.        | 21  | 'CATGAGCAGCA' | 0.463 |             |
| + | 70 | 9361      | is.3_Missense_Mu   | NM_198129    | NP_937762    | Q16787 | LAMA3_HUMAN  | minin G-like 4.               | 11  | 'GGAGGAAGTT   | 0.493 |             |
| + | 6  | 5037      |                    | NM_015559    | NP_056374    | Q9Y6X0 | SETBP_HUMAN  |                               | 3   | 'TGAAAGCCAAA. | 0.662 |             |
| + | 7  | 869       | p.R206Q RNF165     | NM_152470    | NP_689683    | Q6ZSG1 | RN165_HUMAN  |                               | 0   | 'ATAGCGAAGACC | 0.522 |             |
| - | 3  | 230       |                    | NM_139171    | NP_631910    | P59095 | STAR6_HUMAN  | START.                        | 1   | 'TGCAATGATTAT | 0.328 |             |
| + | 2  | 324       | ic.2_Missense_Ml   | NM_001144967 | NP_001138439 | Q96PU5 | NED4L_HUMAN  | C2.                           | 4   | 'ACAGGGAGAGT' | 0.373 |             |
| - | 7  | 839       | 2A CCBE1_uc002l    | NM_133459    | NP_597716    | Q6UXH8 | CCBE1_HUMAN  | ollagen-like 1.               | 3   | 'GGGAGGGCCCT' | 0.577 |             |
| + | 7  | 716       | 3F SERPINB10_uc    | NM_002575    | NP_002566    | P05120 | PAI2_HUMAN   |                               | 2   | 'GGTTTCCTCAAT | 0.333 |             |
| + | 27 | 3040      | _Missense_Mutatic  | NM_198531    | NP_940933    | O43861 | ATP9B_HUMAN  | lasmic (Potential).           | 3   | 'CTTGCTCTTCA' | 0.433 |             |
| + | 2  | 1223      | _p.S257F NFATC1    | NM_006162    | NP_006153    | O95644 | NFAC1_HUMAN  | X SP repeats.                 | 2   | 'CTCCTCCAGAC' | 0.726 |             |
| - | 12 | 1588      | CSK4_uc002lta.2    | NM_017573    | NP_060043    | Q6UW60 | PCSK4_HUMAN  |                               | 0   | 'TGAGCGAGATC  | 0.692 |             |
| - | 8  | 993       | ia.2_Missense_Mu   | NM_017573    | NP_060043    | Q6UW60 | PCSK4_HUMAN  | ytic (By similarity).         | 0   | 'GCCGTCGCAGT' | 0.692 |             |
| + | 14 | 1434      | Ivr.2_Missense_Ml  | NM_152988    | NP_694533    | Q8TCT7 | PSL1_HUMAN   | ical; (Potential).            | 0   | 'CCATCGGTAAG' | 0.537 |             |
| + | 4  | 1228      | wn.3_Missense_M    | NM_152791    | NP_690004    | Q8NEP9 | ZN555_HUMAN  | 2H2-type 8.                   | 1   | 'TTATCCCCAGTC | 0.463 |             |
| + | 7  | 986       | o.D260G JP3_ucl    | NM_014428    | NP_055243    | O95049 | ZO3_HUMAN    |                               | 3   | 'CTCGGACCTCG' | 0.612 |             |
| + | 17 | 2150      | rf.2_RNA UHRF1_    | NM_001048201 | NP_001041666 | Q96T88 | UHRF1_HUMAN  |                               | 2   | 'CGGGTCCCCGC  | 0.687 |             |
| - | 8  | 1080      | ic.2_Missense_Mu   | NM_000635    | NP_000626    | P48378 | RFX2_HUMAN   | type winged-helix.            | 6   | 'CAGACGAATCC  | 0.577 |             |

|   |    |           |                                                  |              |              |        |             |                                |    |              |       |
|---|----|-----------|--------------------------------------------------|--------------|--------------|--------|-------------|--------------------------------|----|--------------|-------|
| - | 10 | 1116      |                                                  | NM_000064    | NP_000055    | P01024 | CO3_HUMAN   |                                | 5  | GTAGGGAGAGG  | 0.602 |
| + | 26 | 3233      | .A6_uc002mgr.1_l                                 | NM_006702    | NP_006693    | Q81Y17 | PLPL6_HUMAN | asmic (Potential). GXSXG.      | 3  | CGGCACGTCCA  | 0.672 |
| - | 3  | 220       |                                                  | NM_005001    | NP_004992    | O95182 | NDUA7_HUMAN |                                | 0  | ATTCCCGGCGG  | 0.582 |
| - | 39 | 39322     | C16_uc010dwj.2_f                                 | NM_024690    | NP_078966    | Q8WXI7 | MUC16_HUMAN | ilar (Potential). SEA 7.       | 57 | CCTCTCTGTGG  | 0.562 |
| - | 3  | 15725     |                                                  | NM_024690    | NP_078966    | Q8WXI7 | MUC16_HUMAN | xtracellular (Potential).      | 57 | CAGAGGAACCA  | 0.498 |
| - | 5  | 1214      |                                                  | NM_198535    | NP_940937    | Q32M78 | ZN699_HUMAN | C2H2-type 8.                   | 0  | TTAAGGAGGAG  | 0.433 |
| - | 12 | 1133      | RI1_uc002mox.1_l                                 | NM_023008    | NP_075384    | Q8N9T8 | KRI1_HUMAN  | Glu-rich.                      | 1  | CTTCCGCAGC   | 0.587 |
| + | 23 | 3453      | 057_splice SMAR                                  | NM_003072    | NP_003063    | P51532 | SMCA4_HUMAN | p?(1)                          | 67 | TGACAGGAGTC  | 0.632 |
| - | 4  | 381       | dyn.1_RNA ZNF62                                  | NM_145233    | NP_660276    | Q96I27 | ZN625_HUMAN |                                | 0  | GATGATCTTCT  | 0.398 |
| - | 3  | 572       |                                                  | NM_024038    | NP_076943    | Q9BQ61 | CS043_HUMAN |                                | 0  | GGGCCGAGTTT  | 0.532 |
| - | 15 | 1970      | vk.2_Missense_Mt                                 | NM_017722    | NP_060192    | Q9NXH9 | TRM1_HUMAN  |                                | 2  | AGTTCGTGCGG  | 0.637 |
| - | 6  | 1326      | ense_Mutation_p.                                 | NM_001008701 | NP_001008701 | O94910 | LPHN1_HUMAN | ke. Extracellular (Potential)  | 5  | GTCCACGCGGT  | 0.602 |
| - | 8  | 1337      | ao.1_Missense_IV                                 | NM_000435    | NP_000426    | Q9UM47 | NOTC3_HUMAN | GF-like 10; calcium-binding    | 21 | GCCACGACCGC  | 0.657 |
| - | 14 | 1402      | S15L1_uc002nea.                                  | NM_021235    | NP_067058    | Q9UBC2 | EP15R_HUMAN |                                | 5  | CCGGACGTGCG  | 0.627 |
| + | 6  | 2190      | _p.R455* INWD1_uc002nev.3_Nonsense_Mutation_p.R. |              |              | Q149M9 | NWD1_HUMAN  | NACHT.                         | 7  | CTTCCCGGTAA  | 0.378 |
| + | 12 | 1126      |                                                  | NM_015016    | NP_055831    | O60307 | MAST3_HUMAN | nilarity). Protein kinase.     | 5  | GCAACGGAGCC  | 0.597 |
| + | 14 | 1441      |                                                  | NM_015016    | NP_055831    | O60307 | MAST3_HUMAN | rotein kinase.                 | 5  | GAGTACCTGCAT | 0.652 |
| + | 2  | 151       | :P1_uc002nit.1_5'l                               | NM_017712    | NP_060182    | Q9NXJ5 | PGPI_HUMAN  |                                | 0  | TGAACGCCAGT  | 0.542 |
| - | 3  | 405       | ..1_intron PBX4_u                                | NM_025245    | NP_079521    | Q9BYU1 | PBX4_HUMAN  |                                | 2  | TCTGTGCGATCT | 0.512 |
| - | 4  | 694       | op.2_Missense_IV                                 | NM_033196    | NP_149973    | O95780 | ZN682_HUMAN | C2H2-type 1.                   | 2  | CTTATGATAAGA | 0.333 |
| - | 3  | 1610      |                                                  | NM_001001411 | NP_001001411 | Q8N7Q3 | ZN676_HUMAN | C2H2-type 10.                  | 0  | ACCAGCTGAAG  | 0.448 |
| - | 4  | 1399      |                                                  | NM_001098626 | NP_001092096 | A6NK75 | ZNF98_HUMAN | C2H2-type 9.                   | 2  | TGAATTCCTTAT | 0.373 |
| + | 4  | 3095      | idd.1_Missense_M                                 | NM_014717    | NP_055532    | O15090 | ZN536_HUMAN |                                | 11 | CGCCTCCCTCC  | 0.572 |
| - | 2  | 1423      |                                                  | NM_020856    | NP_065907    | Q63HK5 | TSH3_HUMAN  |                                | 8  | GGGACGTGAAG  | 0.552 |
| + | 13 | 2088      | CH1_uc002nuh.1_!                                 | NM_018025    | NP_060495    | Q9BRR8 | GPTC1_HUMAN |                                | 1  | ATGTGCGGGAT  | 0.448 |
| + | 6  | 1276      | _p.L352F ZNF567_                                 | NM_152603    | NP_689816    | Q8N184 | ZN567_HUMAN | C2H2-type 5.                   | 0  | TCACACCTCATT | 0.478 |
| + | 10 | 3427      |                                                  | NM_015073    | NP_055888    | O60292 | SI1L3_HUMAN | PDZ.                           | 2  | GAACGGGCTCG  | 0.667 |
| + | 3  | 294       | F1B_uc002oia.2_3                                 | NM_033520    | NP_277055    | Q9GZP8 | IMUP_HUMAN  |                                | 0  | CGGATGTGAAG  | 0.687 |
| - | 4  | 424       | _p.R55H SIRT2_t                                  | NM_012237    | NP_036369    | Q8IXJ6 | SIRT2_HUMAN | tylase sirtuin-type.           | 0  | CACAGCGTTCG  | 0.572 |
| + | 6  | 817       | ..1_RNA TIMM50_l                                 | NM_001001563 | NP_001001563 | Q3ZCQ8 | TIM50_HUMAN | intermembrane (Potential).     | 1  | CAGATGATCATC | 0.607 |
| - | 26 | 12093     |                                                  | NM_003890    | NP_003881    | Q9Y6R7 | FCGBP_HUMAN | Cys-rich.                      | 9  | CTGCCCGGCT   | 0.537 |
| - | 17 | 8396      |                                                  | NM_003890    | NP_003881    | Q9Y6R7 | FCGBP_HUMAN |                                | 9  | GTTCTACCTCA  | 0.532 |
| + | 2  | 2010      | isk.3_Missense_M                                 | NM_022752    | NP_073589    | Q6ZN55 | ZN574_HUMAN | C2H2-type 14.                  | 0  | CCCCCGCTCCT  | 0.652 |
| + | 3  | 656       |                                                  | NM_133444    | NP_597701    | Q8TF50 | ZN526_HUMAN |                                | 0  | TGCTACGGTAGC | 0.597 |
| + | 10 | 2639      |                                                  | NM_015125    | NP_055940    | Q96RK0 | CIC_HUMAN   | Pro-rich.                      | 11 | CCCTCCCACCG  | 0.682 |
| - | 5  | 626       |                                                  | NM_145296    | NP_660339    | Q8NFX8 | CADM4_HUMAN | potential). Ig-like C2-type 1. | 0  | ACCGTCGTCTT  | 0.597 |
| + | 6  | 1199      | 226_uc010ejg.2_3                                 | NM_001032373 | NP_001027545 | Q9NYT6 | ZN226_HUMAN | C2H2-type 4.                   | 0  | TTAATGTTTATT | 0.478 |
| + | 8  | 1258      | t.2_Missense_Mut                                 | NM_012116    | NP_036248    | Q9ULV8 | CBLC_HUMAN  |                                | 6  | AGGCCGTGAGT  | 0.642 |
| + | 3  | 1146_1147 | ocf.2_Missense_M                                 | NM_001080401 | NP_001073870 | Q8N819 | PPM1N_HUMAN |                                | 0  | CTGGGGGAGGC  | 0.46  |
| + | 6  | 1224      | ekn.2_Splice_Site                                | NM_017659    | NP_060129    | Q9NXS2 | QPCTL_HUMAN |                                | 1  | CAGAGGTACCA  | 0.592 |
| - | 1  | 1961      |                                                  | NM_032040    | NP_114429    | Q9H0W5 | CCDC8_HUMAN |                                | 3  | GGCCTCTGCC   | 0.607 |
| + | 6  | 617       | o.G148E CCDC15!                                  | NM_144688    | NP_653289    | Q8N6L0 | CC155_HUMAN |                                | 2  | CTTCGGAGGCG  | 0.562 |
| + | 15 | 2148      | ayas.1_Missense_I                                | NM_153329    | NP_699160    | Q8IZ83 | A16A1_HUMAN |                                | 1  | CCTTCGTGTCCT | 0.692 |
| + | 25 | 3052      |                                                  | NM_004533    | NP_004524    | Q14324 | MYPC2_HUMAN | nectin type-III 3.             | 1  | GGCAATGAATAC | 0.537 |
| - | 3  | 300_301   | K1_uc010ycg.1_R                                  | NM_002257    | NP_002248    | P06870 | KLK1_HUMAN  | peptidase S1.                  | 0  | AAACTGGGCTGT | 0.55  |
| - | 6  | 814       | 71F KLK8_uc002p                                  | NM_007196    | NP_009127    | O60259 | KLK8_HUMAN  | peptidase S1.                  | 1  | CCTCCAGAATCG | 0.557 |
| - | 2  | 232       | w.1_RNA KLK9_uc                                  | NM_012315    | NP_036447    | Q9UKQ9 | KLK9_HUMAN  | peptidase S1.                  | 1  | CGCCCCACAGA  | 0.677 |

|   |    |           |                    |              |              |        |              |                                 |     |               |       |
|---|----|-----------|--------------------|--------------|--------------|--------|--------------|---------------------------------|-----|---------------|-------|
| - | 5  | 740       | 397V KLIK12_uc01   | NM_145894    | NP_665901    | Q9UKR0 | KLK12_HUMAN  | Peptidase S1.                   | 1   | CTCCCCACAC    | 0.542 |
| - | 7  | 1874      | Jycy.1_Missense_I  | NM_033130    | NP_149121    | Q96LC7 | SIG10_HUMAN  | 3. Extracellular (Potential).   | 1   | TCCTTCGTGCTC  | 0.667 |
| - | 2  | 79        | 3_uc002qae.2_Spl   | NM_001008801 | NP_001008801 | Q5VIY5 | ZN468_HUMAN  |                                 | 2   | TCAATCCTGAAT  | 0.433 |
| + | 3  | 580       |                    | NM_001012728 | NP_001012746 | A6NFQ7 | DPRX_HUMAN   |                                 | 0   | AGCTTCCATTCTC | 0.398 |
| - | 5  | 1742      | n.1_Missense_Mu    | NM_003180    | NP_003171    | O00445 | SYT5_HUMAN   | lasmic (Potential).             | 0   | CAGCTCCCGCC   | 0.701 |
| + | 7  | 1656      | mi.2_Missense_M    | NM_153447    | NP_703148    | P59047 | NALP5_HUMAN  | NACHT.                          | 7   | CTCATGGTTCA   | 0.527 |
| + | 5  | 956       | p.G264E ZNF583     | NM_001159860 | NP_001153332 | Q96ND8 | ZN583_HUMAN  |                                 | 1   | TACTGGAGAGA   | 0.438 |
| + | 3  | 809       |                    | NM_152677    | NP_689890    | Q8NAM6 | ZSCA4_HUMAN  |                                 | 1   | 3AAGAAGGGATT  | 0.388 |
| + | 5  | 809       | lqr.2_Missense_M   | NM_003436    | NP_003427    | B4DHH9 | B4DHH9_HUMAN |                                 | 1   | TCACAGCTCAG   | 0.468 |
| - | 6  | 859       | se_Mutation_p.R1   | NM_015025    | NP_055840    | Q9UL68 | MYT1L_HUMAN  |                                 | 6   | GCGTGCATGTC   | 0.617 |
| - | 3  | 205       | AS_uc002rncd.1_R   | NM_015909    | NP_056993    | A2RRP1 | NBAS_HUMAN   |                                 | 4   | AATAATAACGAT  | 0.274 |
| + | 24 | 2234      |                    | NM_004939    | NP_004930    | Q92499 | DDX1_HUMAN   | ecessary for interaction with l | 4   | 3AGGCTGTACCA  | 0.338 |
| - | 25 | 4290      |                    | NM_000384    | NP_000375    | P04114 | APOB_HUMAN   |                                 | 27  | GTAACGAGCCCA  | 0.527 |
| + | 10 | 1331      | h.v.3_Missense_M   | NM_020134    | NP_064519    | Q9BPU6 | DPYL5_HUMAN  |                                 | 2   | CGCAAGGGCCG   | 0.537 |
| + | 6  | 980       | l10yli.1_Missense_ | NM_173650    | NP_775921    | Q8N7S2 | DNJ5G_HUMAN  |                                 | 1   | GAAGATGATTTTI | 0.338 |
| - | 4  | 1293      | e_Mutation_p.M34   | NM_021209    | NP_067032    | Q9NPP4 | NLRC4_HUMAN  | NACHT.                          | 6   | TCACCCATCTGC  | 0.438 |
| - | 8  | 1492      | ynd.1_Missense_Iv  | NM_015475    | NP_056290    | Q8NCA5 | FA98A_HUMAN  | Gly-rich.                       | 1   | GCCTGcagacca  | 0.373 |
| + | 15 | 1770      | l.2_Missense_Mut   | NM_053276    | NP_444506    | Q6UXI7 | VITRN_HUMAN  | VWFA 2.                         | 2   | TCGACGGCTCC   | 0.602 |
| - | 7  | 1111      | p.T185M EIF2AK2    | NM_002759    | NP_002750    | P19525 | E2AK2_HUMAN  |                                 | 5   | TCACACGTAGTA  | 0.368 |
| - | 9  | 1119      | p.A254V LRPPRC     | NM_133259    | NP_573566    | P42704 | LRPPRC_HUMAN |                                 | 3   | GCAACGCTACA   | 0.353 |
| + | 8  | 3829      | i.1_Missense_Mut   | NM_000179    | NP_000170    | P52701 | MSH6_HUMAN   |                                 | 168 | 3GACGGCAATAG  | 0.303 |
| - | 1  | 356       | P2_uc002rxq.3_Ir   | NM_001003937 | NP_001003937 | Q8N831 | TSYL6_HUMAN  |                                 | 0   | ACTGCGACCCG   | 0.647 |
| - | 4  | 994       | l0ypj.1_Missense_  | NM_022893    | NP_075044    | Q9H165 | BC11A_HUMAN  |                                 | 13  | CCCTTCTGCCA   | 0.572 |
| - | 8  | 1092      |                    | NM_014709    | NP_055524    | Q70CQ2 | UBP34_HUMAN  |                                 | 19  | 3TTTCTGTGTCC  | 0.249 |
| + | 29 | 3413      | iF_uc010fek.2_Mi   | NM_003494    | NP_003485    | O75923 | DYSF_HUMAN   | lasmic (Potential).             | 7   | 3GCTGGGAGTAT  | 0.617 |
| + | 30 | 3660      | 2_Missense_Muta    | NM_003494    | NP_003485    | O75923 | DYSF_HUMAN   | ic (Potential). Arg-rich.       | 7   | 3CTGGCGCCGTC  | 0.662 |
| - | 9  | 1069      | se_Mutation_p.S3   | NM_021196    | NP_067019    | Q9BY07 | S4A5_HUMAN   | lasmic (Potential).             | 9   | TTGTAGGATTTTC | 0.328 |
| - | 25 | 3225      | in_p.R838W DCTN    | NM_004082    | NP_004073    | Q14203 | DCTN1_HUMAN  | Potential.                      | 5   | CAGCCGCACAT   | 0.572 |
| + | 2  | 754       | c002sma.1_Silent   | NM_016170    | NP_057254    | O43763 | TLX2_HUMAN   |                                 | 0   | GCGCCGCATAG   | 0.667 |
| - | 4  | 635       | l.1_uc002smc.2_5'i | NM_133637    | NP_598376    | Q8TE96 | DQX1_HUMAN   | ase ATP-binding.                | 2   | GGGTCGAGGCC   | 0.607 |
| + | 3  | 2159      |                    | NM_000189    | NP_000180    | P52789 | HXK2_HUMAN   | Regulatory.                     | 2   | CACCGGAGAGT   | 0.488 |
| + | 1  | 432       | IC285033_uc002s    | NM_001037228 | NP_001032305 | Q3KRF4 | Q3KRF4_HUMAN |                                 | 0   | CTGCTTCTTCC   | 0.547 |
| + | 9  | 1094      | e_Mutation_p.S31   | NM_015341    | NP_056156    | Q15003 | CND2_HUMAN   |                                 | 2   | TGTGTCGGCCC   | 0.488 |
| - | 18 | 2664      | szl.3_Missense_M   | NM_182911    | NP_878915    | Q9BZW7 | TSG10_HUMAN  | with HIF1A (By similarity).     | 2   | 3GATCGATGG    | 0.383 |
| - | 7  | 1512      | c.2_Nonsense_ML    | NM_016316    | NP_057400    | Q9UBZ9 | REV1_HUMAN   | UmuC.                           | 2   | TATTTCTGATACC | 0.308 |
| - | 2  | 735       | l.R206W ST6GAL     | NM_001142351 | NP_001135823 | Q96JF0 | SIAT2_HUMAN  | renal (Potential).              | 11  | GAGCCGGTACA   | 0.617 |
| - | 2  | 151       | p.R11Q ST6GAL      | NM_001142351 | NP_001135823 | Q96JF0 | SIAT2_HUMAN  | lasmic (Potential).             | 11  | GCATTCGTTGT   | 0.507 |
| + | 20 | 3830      | e_Mutation_p.D43   | NM_182588    | NP_872394    | Q7Z3J3 | RGPD4_HUMAN  |                                 | 2   | 3AATGGGATAACT | 0.443 |
| + | 9  | 1404      | ljj.2_Missense_Ml  | NM_021815    | NP_068587    | Q9GZV3 | SC5A7_HUMAN  | ellular (Potential).            | 4   | 3AAAGAATCGT   | 0.433 |
| + | 6  | 971       | dx.2_Nonsense_M    | NM_001056    | NP_001047    | O00338 | ST1C2_HUMAN  |                                 | 1   | 3TTCTGGTTTG   | 0.438 |
| + | 4  | 829       | r.1_RNA SULT1C2    | NM_006588    | NP_006579    | O75897 | ST1C4_HUMAN  |                                 | 0   | 3AGAATGAATAA  | 0.423 |
| - | 14 | 4388_4389 | AP5_uc002ttq.2_I   | NM_207363    | NP_997246    | O14513 | NCKP5_HUMAN  |                                 | 0   | CCTCCCAACACT  | 0.614 |
| - | 8  | 3256      |                    | NM_002299    | NP_002290    | P09848 | LPH_HUMAN    | ential). 4 X approximate ref    | 13  | TCACCCCTGGG   | 0.512 |
| + | 4  | 1168      | lSD7B_uc002tvb.2   | NM_001080427 | NP_001073896 |        |              |                                 | 7   | 3AGCAGGATCCC  | 0.542 |
| - | 45 | 8435      |                    | NM_018557    | NP_061027    | Q9NZR2 | LRP1B_HUMAN  | ellular (Potential).            | 50  | 3AACAATTCACT  | 0.408 |
| - | 77 | 11578     |                    | NM_004543    | NP_004534    | P20929 | NEBU_HUMAN   | Nebulin 104.                    | 20  | ATTTTTCTGCA   | 0.423 |
| + | 22 | 3941      | om.1_Missense_Iv   | NM_033394    | NP_203752    | Q9C0D5 | TANC1_HUMAN  | ANK 10.                         | 3   | ATGGCGATGCC   | 0.552 |

rs119466000

|   |     |       |                    |              |              |        |              |                               |     |                |       |             |
|---|-----|-------|--------------------|--------------|--------------|--------|--------------|-------------------------------|-----|----------------|-------|-------------|
| - | 7   | 1400  | ə_Mutation_p.D20l  | NM_004490    | NP_004481    | Q14449 | GRB14_HUMAN  | PH.                           | 7   | AAATATCACTATT  | 0.333 |             |
| - | 3   | 554   | ı_p.S21F SCN3A_    | NM_006922    | NP_008853    | Q9NY46 | SCN3A_HUMAN  |                               | 10  | 3CAAGAGATTCT   | 0.438 |             |
| - | 8   | 1021  | ıf.1_Missense_Mu   | NM_004525    | NP_004516    | P98164 | LRP2_HUMAN   | s A 7. Extracellular (Potenti | 29  | ACCATTCTCTTGC  | 0.448 |             |
| - | 284 | 83316 | ı93K TTN_uc010z    | NM_133378    | NP_596869    | Q8WZ42 | TITIN_HUMAN  |                               | 153 | ıAGTTTTCCCGCT  | 0.413 |             |
| - | 275 | 76341 | ı68K TTN_uc010z    | NM_133378    | NP_596869    | Q8WZ42 | TITIN_HUMAN  |                               | 153 | ıCTTTTTCGTTAAC | 0.418 |             |
| - | 275 | 73362 | ı75R TTN_uc010z    | NM_133378    | NP_596869    | Q8WZ42 | TITIN_HUMAN  |                               | 153 | ıATTTTCCAAAGTC | 0.418 |             |
| - | 255 | 56146 | ı36Q TTN_uc010z    | NM_133378    | NP_596869    | Q8WZ42 | TITIN_HUMAN  |                               | 153 | ıCTTTTCGCCAA   | 0.478 | rs148684589 |
| - | 223 | 44670 | _uc010zfi.1_Misse  | NM_133378    | NP_596869    | Q8WZ42 | TITIN_HUMAN  |                               | 153 | ıTGAGGTCCTTTC  | 0.393 |             |
| - | 100 | 25998 | ıuc010zfi.1_Intro  | NM_133378    | NP_596869    | Q8WZ42 | TITIN_HUMAN  |                               | 153 | ıATTTTTCATATTC | 0.368 |             |
| + | 39  | 2843  |                    | NM_000090    | NP_000081    | P02461 | CO3A1_HUMAN  | le-helical region.            | 13  | ıTGCGGGTAACA   | 0.557 |             |
| - | 46  | 3582  | ıfrx.2_Missense_Mi | NM_000393    | NP_000384    | P05997 | CO5A2_HUMAN  |                               | 2   | ıTACCGGATCTC   | 0.537 |             |
| - | 18  | 1417  | ı5A2_uc010frx.2_ı  | NM_000393    | NP_000384    | P05997 | CO5A2_HUMAN  |                               | 2   | ıGATTTCTCTGGA  | 0.328 |             |
| - | 8   | 2033  |                    | NM_014585    | NP_055400    | Q9NP59 | S40A1_HUMAN  |                               | 1   | ıGCCTTCCTAACT  | 0.393 |             |
| + | 19  | 3488  | ıuqx.1_Splice_Site | NM_144708    | NP_653309    | Q7Z5J8 | ANKAR_HUMAN  |                               | 4   | ıTTTATAGGGGAAT | 0.343 |             |
| + | 8   | 1795  | ıp.P407L NAB1_uc   | NM_005966    | NP_005957    | Q13506 | NAB1_HUMAN   |                               | 0   | ıCAGTCCTAACG   | 0.483 |             |
| - | 2   | 817   |                    | NM_004657    | NP_004648    | O95810 | SDPR_HUMAN   |                               | 2   | ıATTTTCTCTCTC  | 0.468 |             |
| - | 9   | 1302  |                    | NM_016192    | NP_057276    | Q9UIK5 | TEFF2_HUMAN  | ıding. Extracellular (Potenti | 5   | ıTAGTCCTTTTTT  | 0.398 |             |
| + | 2   | 235   | ıuc010zggq.1_Intr  | NM_001080539 | NP_001074008 | Q8NCX0 | CC150_HUMAN  |                               | 0   | ıTTCAGCAAAGG   | 0.403 |             |
| - | 7   | 802   | ıKRD44_uc002uul    | NM_153697    | NP_710181    | Q8N8A2 | ANKR44_HUMAN | ANK 7.                        | 5   | ıCTGCAGCATGC   | 0.468 |             |
| + | 28  | 3304  | ıp.S624L AOX1_u    | NM_001159    | NP_001150    | Q06278 | ADO_HUMAN    |                               | 6   | ıAATGTCGAATG   | 0.453 |             |
| - | 6   | 598   | ıp.T145I ICA1L_u   | NM_138468    | NP_612477    | Q8NDH6 | ICA1L_HUMAN  | AH.                           | 0   | ıTCAAGGTATCAC  | 0.463 |             |
| + | 5   | 625   | ır.2_Missense_Mut  | NM_001875    | NP_001866    | P31327 | CPSM_HUMAN   | ıhoribosyltransferase homo    | 13  | ıGAGTGGACACA   | 0.299 |             |
| + | 2   | 327   | ızjl.1_Missense_Mi | NM_001080500 | NP_001073969 | B2RUY7 | VWC2L_HUMAN  | VWFC 1.                       | 0   | ıAGAACGATTTT   | 0.458 |             |
| - | 5   | 1492  | ıjm.1_Missense_Mi  | NM_000465    | NP_000456    | Q99728 | BARD1_HUMAN  | ANK 1.                        | 2   | ıTTGGATCACTTC  | 0.323 |             |
| + | 3   | 362   | ıp.G4E ATIC_uc0    | NM_004044    | NP_004035    | P31939 | PUR9_HUMAN   |                               | 29  | ıGGGGGGACGTCG  | 0.398 |             |
| + | 16  | 1909  | ıp.L304P VIL1_uc   | NM_007127    | NP_009058    | P09327 | VIL1_HUMAN   | Core.                         | 1   | ıAAACCTGGTCA   | 0.507 |             |
| + | 3   | 1005  | ıp.S47F TLL4_uc    | NM_014640    | NP_055455    | Q14679 | TLL4_HUMAN   |                               | 3   | ıTTCCTCCTATAA  | 0.537 |             |
| + | 2   | 563   |                    | NM_080671    | NP_542402    | Q8WWG9 | KCNE4_HUMAN  | ıasmic (Potential).           | 1   | ıACCTCACCATT   | 0.637 |             |
| + | 5   | 529   |                    | NM_031313    | NP_112603    | P10696 | PPBN_HUMAN   |                               | 1   | ıCTCAGGAAAGT   | 0.617 |             |
| + | 24  | 2935  | ıse_Mutation_p.E9  | NM_152879    | NP_690618    | Q16760 | DGKD_HUMAN   |                               | 5   | ıTGTCGGAGGAG   | 0.627 |             |
| - | 2   | 290   | ınw.1_Missense_M   | NM_022817    | NP_073728    | O15055 | PER2_HUMAN   |                               | 2   | ıCCACGGGCTCC   | 0.607 |             |
| + | 6   | 789   |                    | NM_001001891 | NP_001001891 | Q6IWH7 | ANO7_HUMAN   | ıasmic (Potential).           | 3   | ıCTACTCTGCCC   | 0.632 |             |
| + | 15  | 1766  |                    | NM_001001891 | NP_001001891 | Q6IWH7 | ANO7_HUMAN   | ıcal; (Potential).            | 3   | ıACCTCGTCTTC   | 0.657 | rs149170904 |
| + | 13  | 1349  | ıFARP2_uc010zor.   | NM_014808    | NP_055623    | O94887 | FARP2_HUMAN  |                               | 3   | ıCTCTCCTCCCA   | 0.542 |             |
| + | 12  | 1990  |                    | NM_003245    | NP_003236    | Q08188 | TGM3_HUMAN   |                               | 9   | ıCTGATGGTGGAA  | 0.647 |             |
| + | 8   | 865   | ıow.1_Missense_Mi  | NM_080751    | NP_542789    | Q8TDI7 | TMC2_HUMAN   | ıcal; (Potential).            | 3   | ıGCATGCCCTATC  | 0.443 |             |
| + | 2   | 537   |                    | NM_012409    | NP_036541    | Q9UKY0 | PRND_HUMAN   |                               | 0   | ıGACTTCGGGTC   | 0.597 |             |
| + | 4   | 472   | ıə_Mutation_p.E14  | NM_018993    | NP_061866    | Q8WYP3 | RIN2_HUMAN   | SH2.                          | 5   | ıTCAAGGAATTT   | 0.493 |             |
| + | 4   | 886   |                    | NM_014012    | NP_054731    | O75628 | REM1_HUMAN   |                               | 4   | ıGGCCCGCTGCC   | 0.612 |             |
| + | 3   | 1706  |                    | NM_001011718 | NP_001011718 | Q5GH72 | XKR7_HUMAN   |                               | 3   | ıCACACCAGTGG   | 0.657 |             |
| + | 7   | 808   | ıp.R192G HCK_uc    | NM_002110    | NP_002101    | P08631 | HCK_HUMAN    | SH2.                          | 9   | ıCCCCCGAAGC    | 0.587 | rs144393224 |
| + | 3   | 197   | ıse_Mutation_p.S2  | NM_031483    | NP_113671    | Q96J02 | ITCH_HUMAN   |                               | 6   | ıTATGTCTGACA   | 0.388 |             |
| - | 3   | 902   | ıxdk.2_Intron CPNE | NM_152838    | NP_690051    | Q9NTZ6 | RBM12_HUMAN  | Pro-rich.                     | 3   | ıCGGGGGCACAG   | 0.602 |             |
| + | 9   | 2477  | ı_Intron DLGAP4_u  | NM_014902    | NP_055717    | Q9Y2H0 | DLGP4_HUMAN  |                               | 3   | ıCTCTCGGAGG    | 0.468 |             |
| - | 2   | 614   | ıICOA5_uc002xre.ı  | NM_020967    | NP_066018    | Q9HCD5 | NCOA5_HUMAN  | ıcharge). Transcription repre | 2   | ıTTGGGGATCGA   | 0.537 |             |
| - | 8   | 1235  | ıp.P194L STAU1_    | NM_017453    | NP_059347    | O95793 | STAU1_HUMAN  |                               | 5   | ıTCTGTGGCTGA   | 0.488 |             |
| - | 2   | 1037  | ıyx.1_Missense_M   | NM_173091    | NP_775114    | Q13469 | NFAC2_HUMAN  | SP repeats.ı3; approximat     | 2   | ıGTCGGGGAGC    | 0.726 |             |



|   |    |           |                   |              |              |        |              |                               |    |               |       |             |
|---|----|-----------|-------------------|--------------|--------------|--------|--------------|-------------------------------|----|---------------|-------|-------------|
| - | 77 | 10670     |                   | NM_005560    | NP_005551    | O15230 | LAMA5_HUMAN  | minin G-like 5.               | 3  | TGGGAGGTCTG   | 0.687 | rs141478116 |
| - | 7  | 1139      |                   | NM_005560    | NP_005551    | O15230 | LAMA5_HUMAN  |                               | 3  | ACTCACACTGG   | 0.687 |             |
| - | 13 | 1442      | L1_uc011abm.1_n   | NM_017859    | NP_060329    | Q9NWZ5 | UCKL1_HUMAN  |                               | 0  | CACGCGCACTG   | 0.637 |             |
| + | 5  | 1116      | _uc010gks.2_Spli  | NM_003195    | NP_003186    | Q15560 | TCEA2_HUMAN  |                               | 0  | GGACCGTGAGT   | 0.682 |             |
| + | 3  | 3383      | ON_uc002ysd.2_N   | NM_138927    | NP_620305    | P18583 | SON_HUMAN    | repeats of [ED]-R-S-M-M-S     | 6  | CTGACCGATCT   | 0.453 |             |
| - | 7  | 2111      |                   | NM_003906    | NP_003897    | O60318 | MCM3A_HUMAN  |                               | 5  | AGGGCCGCAGC   | 0.612 |             |
| - | 11 | 1322      | se_Mutation_p.E36 | NM_003325    | NP_003316    | P54198 | HIRA_HUMAN   |                               | 1  | CTCCTCGCTCAC  | 0.557 |             |
| + | 5  | 546       | _p.R157H CDC45_   | NM_003504    | NP_003495    | O75419 | CDC45_HUMAN  |                               | 1  | GGAAGCGCACAC  | 0.517 |             |
| - | 3  | 771       | .R186W TRMT2A_    | NM_182984    | NP_892029    | Q8IZ69 | TRM2A_HUMAN  | Potential.                    | 1  | CTTCCGCTCAA   | 0.632 |             |
| - | 1  | 4573      |                   | NM_015672    | NP_056487    |        |              |                               | 0  | GCTGGGGAGGT   | 0.572 |             |
| + | 17 | 1567      | se_Mutation_p.R36 | NM_005160    | NP_005151    | P35626 | ARBK2_HUMAN  | kinase C-terminal.            | 7  | CTCCCCGGGGA   | 0.428 |             |
| + | 4  | 549       | cp.3_Missense_Mt  | NM_001013694 | NP_001013716 | Q9UH36 | SRR1L_HUMAN  |                               | 0  | TGACCTCTGTI   | 0.448 |             |
| + | 6  | 632       | eo.2_Missense_M   | NM_133455    | NP_597712    | Q96A84 | EMID1_HUMAN  | Collagen-like.                | 0  | GGGCAGCCCCG   | 0.493 |             |
| + | 7  | 2163      | i2L1_uc003afc.1_f | NM_152236    | NP_689422    | Q99501 | GA2L1_HUMAN  |                               | 0  | CCGCCGCCCT    | 0.667 |             |
| - | 4  | 633       | aii.1_Missense_M  | NM_004861    | NP_004852    | Q99999 | G3ST1_HUMAN  | lenal (Potential).            | 0  | GGGTCGCGGA    | 0.647 |             |
| + | 3  | 527       | e_Mutation_p.K11  | NM_000355    | NP_000346    | P20062 | TCO2_HUMAN   |                               | 1  | CACAAGGGGGA   | 0.617 |             |
| + | 11 | 1705      | Missense_Mutation | NM_006932    | NP_008863    | P53814 | SMTN_HUMAN   |                               | 3  | GCCCCGACCC    | 0.622 |             |
| + | 20 | 2447      | i1_uc011alp.1_Mi  | NM_001007467 | NP_001007468 | A8K8P3 | SFI1_HUMAN   |                               | 1  | GCTGCGGTGAG   | 0.637 |             |
| + | 7  | 1626      | atq.1_Missense_M  | NM_001039141 | NP_001034230 | Q9H2D6 | TARA_HUMAN   |                               | 1  | CCCCACAACAT   | 0.597 |             |
| + | 7  | 2145      | atq.1_Missense_M  | NM_001039141 | NP_001034230 | Q9H2D6 | TARA_HUMAN   |                               | 1  | CCCGAGAACAT   | 0.592 |             |
| + | 15 | 5931      | 174H TRIOBP_uci   | NM_001039141 | NP_001034230 | Q9H2D6 | TARA_HUMAN   | PH.                           | 1  | CGTACGTCCAA   | 0.572 |             |
| - | 7  | 1038      | re.1_Missense_Mt  | NM_020831    | NP_065882    | Q969V6 | MKL1_HUMAN   | Gln-rich.                     | 5  | TGCTGCTGGTT   | 0.657 |             |
| + | 7  | 1956_1957 |                   | NM_001429    | NP_001420    | Q09472 | EP300_HUMAN  |                               | 64 | GTGTAGGAGTTC  | 0.366 |             |
| - | 6  | 1011      | e_Mutation_p.M1   | NM_000106    | NP_000097    | Q6NWU0 | Q6NWU0_HUMAN |                               | 2  | GTCACCATCCC   | 0.612 |             |
| - | 5  | 916       | 10gyv.2_5'UTR CY  | NR_002570    |              |        |              |                               | 0  | GTCTCGGGGTG   | 0.612 |             |
| - | 2  | 282       |                   | NM_022766    | NP_073603    | Q8TCT0 | CERK1_HUMAN  | o sulfatide and phosphoino    | 1  | AACGGCGATGA   | 0.443 |             |
| - | 33 | 5300      | p.R524C PLXNB2_   | NM_012401    | NP_036533    | O15031 | PLXB2_HUMAN  | lasmic (Potential).           | 6  | CACGGGCTCA    | 0.617 |             |
| + | 14 | 1867      | blc.2_Missense_M  | NM_014678    | NP_055493    | O75170 | PP6R2_HUMAN  |                               | 0  | CACACGGATCG   | 0.667 |             |
| + | 15 | 2004      | blc.2_Missense_M  | NM_014678    | NP_055493    | O75170 | PP6R2_HUMAN  |                               | 0  | CGAACCGCAGG   | 0.692 |             |
| + | 6  | 753       | ow.1_Missense_Mt  | NM_006614    | NP_006605    | O00533 | CHL1_HUMAN   | 2. Extracellular (Potential). | 12 | TCCCACCTTTAC  | 0.398 |             |
| + | 49 | 6965      | R1_uc011asu.1_In  | NM_001099952 | NP_001093422 | Q14643 | ITPR1_HUMAN  | lasmic (Potential).           | 21 | TCTGCGGTCTG   | 0.423 |             |
| - | 8  | 790       | G204R C3orf32_u   | NM_015931    | NP_057015    | Q9Y2M2 | CC032_HUMAN  | Cys-rich. p.G182E(1)          | 1  | GGCTCCGCAGC   | 0.662 |             |
| + | 14 | 1747      | _p.P544S ATG7_uc  | NM_006395    | NP_006386    | O95352 | ATG7_HUMAN   |                               | 1  | ACATCCCTGGT   | 0.493 |             |
| - | 5  | 1795      | _p.E474K IQSEC1_  | NM_014869    | NP_055684    | Q6DN90 | IQEC1_HUMAN  | SEC7.                         | 1  | CATCTCGTCCAC  | 0.612 |             |
| - | 4  | 692       | 385D_uc010hfb.1_  | NM_024697    | NP_078973    | Q9H6B1 | Z385D_HUMAN  | latrin-type 1.                | 5  | CCGCAGCCTGC   | 0.443 |             |
| + | 19 | 2326      | _p.G689R ARPP21   | NM_016300    | NP_057384    | Q9UBL0 | ARPP21_HUMAN | Gln-rich.                     | 3  | AACAGGGATTCC  | 0.468 |             |
| + | 1  | 203       | LC22A13_uc011ay   | NM_004256    | NP_004247    | Q9Y226 | S22AD_HUMAN  | ellular (Potential).          | 1  | CCACTGTGCAG   | 0.532 |             |
| + | 12 | 1074      | _p.C185F XYLB_u   | NM_005108    | NP_005099    | O75191 | XYLB_HUMAN   |                               | 1  | CTTCTGCAACCC  | 0.607 |             |
| - | 11 | 1751      |                   | NM_014139    | NP_054858    | Q9UI33 | SCNBA_HUMAN  |                               | 9  | CCCTTTGGAGAG  | 0.498 |             |
| - | 10 | 1662      |                   | NM_014139    | NP_054858    | Q9UI33 | SCNBA_HUMAN  |                               | 9  | PTTGGCAATCTI  | 0.378 |             |
| + | 4  | 1315      | ab.1_Missense_M   | NM_001134440 | NP_001127912 | Q8TBZ5 | ZN502_HUMAN  | C2H2-type 8.                  | 0  | AATGTAAGAAT   | 0.388 |             |
| - | 9  | 2519      |                   | NM_022842    | NP_073753    | Q9H5V8 | CDP1_HUMAN   | lasmic (Potential).           | 3  | AGCGAGGAGGT   | 0.587 |             |
| - | 3  | 542       | on.2_Missense_Mi  | NM_022842    | NP_073753    | Q9H5V8 | CDP1_HUMAN   | ellular (Potential).          | 3  | TCTAAACCGATG  | 0.552 |             |
| + | 2  | 905       | _p.S219L CCRL2_   | NM_003965    | NP_003956    | O00421 | CCRL2_HUMAN  | Name=5; (Potential).          | 1  | ACATTTGCGTTC1 | 0.393 |             |
| - | 6  | 1135      | aqf.1_Missense_M  | NM_013270    | NP_037402    | Q9UI38 | TSP50_HUMAN  |                               | 0  | CCCTGCCCGTTG  | 0.657 |             |
| - | 22 | 7632      | 3R3_uc010hkf.2_5  | NM_001407    | NP_001398    | Q9NYQ7 | CELRS_HUMAN  | ellular (Potential).          | 11 | GCGTCCGTGGA   | 0.597 | rs118038433 |
| + | 5  | 7862      |                   | NM_003458    | NP_003449    | Q9UPA5 | BSN_HUMAN    |                               | 8  | CGACAGCAGCG   | 0.637 |             |

|   |    |         |                     |              |              |        |                                           |    |                |       |
|---|----|---------|---------------------|--------------|--------------|--------|-------------------------------------------|----|----------------|-------|
| - | 2  | 941     | 3HD14B_uc003dc      | NM_032750    | NP_116139    | Q96IU4 | ABHEB_HUMAN                               | 0  | AGAGGGCCTGG    | 0.632 |
| - | 3  | 1034    |                     | NM_001947    | NP_001938    | Q16829 | DUS7_HUMAN protein phosphatase.           | 1  | GGCTTCGTCTG    | 0.607 |
| + | 2  | 103     | CTK_uc003ddn.2_     | NM_145262    | NP_660305    | Q8IVS8 | GLCTK_HUMAN                               | 0  | TGGCTGCAGCC    | 0.657 |
| - | 13 | 1599    | '1_uc010hmg.2_R     | NM_004656    | NP_004647    | Q92560 | BAP1_HUMAN                                | 65 | AGGCCGTGTCT    | 0.647 |
| - | 3  | 666     | _p.N36S FAM107/     | NM_007177    | NP_009108    | O95990 | F107A_HUMAN                               | 0  | .CGGGGTTCAAGC. | 0.622 |
| - | 5  | 456_457 | hob.2_Missense_I    | NM_003848    | NP_003839    | Q96I99 | SUCB2_HUMAN ATP-grasp.                    | 2  | GCTTCAGCAACC   | 0.485 |
| + | 17 | 3210    | .1_RNA ROBO2_L      | NM_002942    | NP_002933    | Q9HCK4 | ROBO2_HUMAN cellular (Potential).         | 11 | TGTGGTGAAGC,   | 0.393 |
| + | 1  | 599     |                     | NM_153605    | NP_705833    |        |                                           | 0  | CCCTTCTCCAGT   | 0.458 |
| - | 6  | 1095    | se_Mutation_p.P2E   | NM_170662    | NP_733762    | Q13191 | CBLB_HUMAN -PTB. SH2-like.                | 9  | FAACCTGGATGT   | 0.333 |
| - | 1  | 183     | idxk.2_Missense_I   | NM_005459    | NP_005450    | O95843 | GUC1C_HUMAN EF-hand 1.                    | 0  | TAAATTCATGTAC  | 0.388 |
| - | 16 | 1645    | hn.1_Missense_M     | NM_014429    | NP_055244    | Q86VD1 | MORC1_HUMAN CW-type.                      | 8  | GTTTTCCAAGCC   | 0.274 |
| - | 3  | 207     |                     | NM_018338    | NP_060808    | Q96MT7 | WDR52_HUMAN                               | 1  | CTTCCCCTTTG    | 0.323 |
| - | 5  | 793     |                     | NM_199420    | NP_955452    | O75417 | DPOLQ_HUMAN ase ATP-binding.              | 11 | AGTCTCCCAGCA   | 0.383 |
| + | 15 | 1487    | bjn.1_Missense_I    | NM_021082    | NP_066568    | Q16348 | S15A2_HUMAN                               | 1  | CAAATCCTTTCA   | 0.323 |
| - | 7  | 753_754 | e_Mutation_p.E15    | NM_053025    | NP_444253    | Q15746 | MYLK_HUMAN                                | 9  | GCACTCCCCC/    | 0.55  |
| + | 5  | 857     | hfh.1_Missense_M    | NM_001024660 | NP_001019831 | O60229 | KALRN_HUMAN Spectrin 1.                   | 6  | TGGAGGAGCTG    | 0.627 |
| + | 1  | 215     | uc011bk.1_5'UTR     | NM_000373    | NP_000364    | P11172 | UMPS_HUMAN OPRase.                        | 1  | CCCATCTACATC   | 0.602 |
| + | 11 | 1353    | rn_p.V337A SEC6     | NM_013336    | NP_037468    | P61619 | S61A1_HUMAN lasmic (Potential).           | 1  | GCAGGTTGCAA    | 0.562 |
| + | 15 | 4413    | 6A6_uc003eni.3_5    | NM_001102608 | NP_001096078 | A6NMZ7 | CO6A6_HUMAN le-helical region.            | 8  | AGTTGGGGAAA    | 0.373 |
| + | 19 | 1865    | no.2_Missense_M     | NM_014382    | NP_055197    | P98194 | AT2C1_HUMAN smic (By similarity).         | 1  | TCCACCTAGAAC   | 0.418 |
| + | 6  | 567     | htq.1_Missense_I    | NM_015268    | NP_056083    | O75165 | DJC13_HUMAN                               | 2  | AAGGAGGATTT    | 0.328 |
| - | 2  | 529     | r_p.Q80* AMOTL2     | NM_016201    | NP_057285    | Q9Y2J4 | AMOL2_HUMAN                               | 1  | GCCCTGGTGT     | 0.672 |
| + | 7  | 814     | mc.1_Splice_Site_   | NM_000532    | NP_000523    | P05166 | PCCB_HUMAN                                | 0  | GTCAGGTGAGA    | 0.473 |
| + | 10 | 1909    | _Mutation_p.R425    | NM_032383    | NP_115759    | Q969F9 | HPS3_HUMAN                                | 6  | GGCCCGCACGG    | 0.398 |
| - | 6  | 1083    | ns.1_Missense_M     | NM_015472    | NP_056287    | Q9GZV5 | VWTR1_HUMAN                               | 4  | GGAAACGGGTC    | 0.413 |
| + | 2  | 1200    | 33GNT5_uc003fl.2    | NM_032047    | NP_114436    | Q9BYG0 | B3GN5_HUMAN enal (Potential).             | 1  | GTGTTTCATCGT   | 0.438 |
| + | 18 | 2597    | 003flz.2_Translatic | NM_018023    | NP_060493    | Q9ULM3 | YETS2_HUMAN Gly-rich.                     | 4  | TGGGAGTGGTC    | 0.224 |
| + | 13 | 1512    | nt.2_Missense_Mu    | NM_004423    | NP_004414    | Q92997 | DVL3_HUMAN DEP.                           | 3  | AAGGCTCACG     | 0.582 |
| + | 3  | 2238    | ense_Mutation_p.A   | NM_144635    | NP_653236    | Q6UXB0 | F131A_HUMAN                               | 1  | AGCCAGCCCC     | 0.662 |
| + | 1  | 1377    |                     | NM_153690    | NP_710157    | Q8N2R8 | FA43A_HUMAN                               | 1  | .CGCGGGCTGC    | 0.706 |
| + | 5  | 607     | r_p.E20K OSTalph    | NM_152672    | NP_689885    | Q86UW1 | OSTA_HUMAN ical; (Potential).             | 1  | TGGTGAAGGC     | 0.507 |
| - | 27 | 4028    | iAK_uc010ibi.2_Mi   | NM_005255    | NP_005246    | O14976 | GAK_HUMAN J.                              | 4  | :CTGTCCGGGT    | 0.532 |
| + | 6  | 772     | .EA_uc003gdd.2_F    | NM_001017405 | NP_001017405 | Q7L5Y9 | MAEA_HUMAN                                | 2  | .CGCCGACACG    | 0.602 |
| - | 8  | 1229    | bvl.1_Missense_M    | NM_020972    | NP_066023    | Q9HCC9 | LST2_HUMAN                                | 3  | .GGCAGCGGGTC   | 0.657 |
| + | 8  | 3378    | _p.S177F RGS12_     | NM_198229    | NP_937872    | O14924 | RGS12_HUMAN RGS.                          | 1  | GAAGTCCCGC     | 0.587 |
| - | 4  | 949     | p.E225K JAKMIP1     | NM_144720    | NP_653321    | Q96N16 | JKIP1_HUMAN ; association with microtubu  | 4  | AAAGTTCCTTCT   | 0.542 |
| + | 3  | 404     | 3A3_uc011bxo.1_I    | NM_020973    | NP_066024    | Q9H227 | GBA3_HUMAN                                | 0  | ATCATCGATGAT   | 0.363 |
| + | 19 | 2512    | p.E660K LIMCH1_     | NM_014988    | NP_055803    | Q9UPQ0 | LIMC1_HUMAN Glu-rich.                     | 4  | ATGAGGAGGTAC   | 0.478 |
| + | 8  | 1293    | aze.1_Missense_M    | NM_000812    | NP_000803    | P18505 | GBRB1_HUMAN ical; (Probable).             | 2  | GCGATTGATATT   | 0.453 |
| - | 3  | 465     | _p.G55R KDR_uc      | NM_002253    | NP_002244    | P35968 | VGFR2_HUMAN 1. Extracellular (Potential). | 33 | CTGTCCCCTGA    | 0.428 |
| + | 10 | 1396    | _p.Q396* PAICS_u    | NM_006452    | NP_006443    | P22234 | PUR6_HUMAN R carboxylase.                 | 0  | CTGCTCAGATAT   | 0.413 |
| - | 12 | 2270    | ah.1_Missense_M     | NM_004439    | NP_004430    | P54756 | EPHA5_HUMAN Potential). Protein kinase.   | 24 | CAAACGTCCAC    | 0.358 |
| - | 1  | 1833    | GNRHR_uc003hdi      | NM_000406    | NP_000397    | P30968 | GNRHR_HUMAN cellular (Potential).         | 1  | GGGGAGGTTGC    | 0.463 |
| - | 7  | 713     |                     | NM_182502    | NP_872308    | Q86T26 | TM11B_HUMAN . Extracellular (Potential).  | 1  | :CCCCTCCAGGG   | 0.502 |
| + | 1  | 331     | Ohr.2_Missense_I    | NM_053039    | NP_444267    | Q9BY64 | UDB28_HUMAN                               | 1  | TTTTTACAAGA    | 0.294 |
| + | 2  | 778     | ihro.2_Missense_M   | NM_053039    | NP_444267    | Q9BY64 | UDB28_HUMAN                               | 1  | ATATCGAAACT    | 0.398 |
| + | 13 | 917     |                     | NM_016519    | NP_057603    | Q9NP70 | AMBN_HUMAN                                | 4  | TCCAGGATTTGC   | 0.507 |

rs145158238

|   |    |           |                    |              |              |        |              |                                |    |               |       |             |
|---|----|-----------|--------------------|--------------|--------------|--------|--------------|--------------------------------|----|---------------|-------|-------------|
| + | 27 | 4724      | ite_p.G1396_splic  | NM_080683    | NP_542414    | Q12923 | PTN13_HUMAN  |                                | 6  | TTTTAGGTGATC  | 0.383 |             |
| + | 4  | 467       | _Mutation_p.D101   | NM_014606    | NP_055421    | Q15034 | HERC3_HUMAN  | RCC1 2.                        | 4  | TCAGTGACCGA   | 0.512 |             |
| + | 8  | 1097      | zj_1_Missense_Mu   | NM_000253    | NP_000244    | P55157 | MTP_HUMAN    | Vitellogenin.                  | 4  | CCAGTTGATCA   | 0.463 |             |
| - | 40 | 6518      | xc.1_Missense_Mt   | NM_001813    | NP_001804    | Q02224 | CENPE_HUMAN  | Binding domain.  Potential.    | 9  | GAAGTGAGAGG   | 0.363 |             |
| + | 12 | 1960_1961 | p.G543K GSTCD      | NM_001031720 | NP_001026890 | Q8NEC7 | GSTCD_HUMAN  |                                | 2  | TTGTGGGAGTCC  | 0.45  |             |
| + | 9  | 962       | p.R288* ANK2_uc    | NM_001148    | NP_001139    | Q01484 | ANK2_HUMAN   | ANK 8. p.R288*(1)              | 14 | TGGATCGAGGC   | 0.428 | rs146907003 |
| + | 2  | 1719      |                    | NM_152618    | NP_689831    | Q6ZW61 | BBS12_HUMAN  |                                | 2  | AGTTACTGCAC   | 0.413 |             |
| + | 9  | 10450     | p.D1782N FAT4_L    | NM_024582    | NP_078858    | Q6V0I7 | FAT4_HUMAN   | Extracellular p.D3484N(2)      | 18 | CTGTTGATTAC   | 0.458 | rs143981594 |
| + | 13 | 12422     | p.G2404E FAT4_u    | NM_024582    | NP_078858    | Q6V0I7 | FAT4_HUMAN   | 1.  Extracellular (Potential). | 18 | CAATGGAAGGC   | 0.413 |             |
| + | 2  | 292_293   | on_p.P6F ARFIP1    | NM_001025595 | NP_001020766 | P53367 | ARFP1_HUMAN  |                                | 1  | AATCTCCCAAAA  | 0.347 |             |
| - | 7  | 1324      | tz.1_Missense_ML   | NM_006529    | NP_006520    | O75311 | GLRA3_HUMAN  | ical; (Probable).              | 3  | AGAATGAAACCC  | 0.478 |             |
| - | 2  | 273       | _5'Flank AGA_uc    | NM_000027    | NP_000018    | P20933 | ASPG_HUMAN   |                                | 0  | AGAGCCGTAC    | 0.507 |             |
| - | 7  | 860       |                    | NM_024830    | NP_079106    | Q8NF37 | PCAT1_HUMAN  | ional (Potential).             | 2  | GCCACGTCCAT   | 0.617 |             |
| - | 4  | 532       | '4_uc011cmf.1_5'L  | NM_016358    | NP_057442    | P78413 | IRX4_HUMAN   |                                | 0  | ATGGTTCATAC   | 0.677 |             |
| - | 4  | 441       |                    | NM_032286    | NP_115662    | Q9BTT4 | MED10_HUMAN  |                                | 1  | AAGCGGGTGA    | 0.517 |             |
| - | 19 | 3314      | ND2_uc011cmz.1_    | NM_001332    | NP_001323    | Q9UQB3 | CTND2_HUMAN  |                                | 8  | GGAGGCGTGC    | 0.577 |             |
| - | 56 | 9455      | H5_uc003jfc.2_5'F  | NM_001369    | NP_001360    | Q8TE73 | DYH5_HUMAN   | 4 (By similarity).             | 31 | CCAAACTGCAG   | 0.413 |             |
| - | 3  | 1083      | 0itw.1_Missense_   | NM_001102562 | NP_001096032 | A6NNE9 | MARHB_HUMAN  | ical; (Potential).             | 0  | TAGATCCATAAA  | 0.448 |             |
| - | 4  | 930       | o.D185N CDH18_L    | NM_004934    | NP_004925    | Q13634 | CAD18_HUMAN  | r (Potential).  Cadherin 2.    | 7  | TGCATCAGTAG   | 0.433 |             |
| - | 2  | 380       | rn_p.M1 CDH18_L    | NM_004934    | NP_004925    | Q13634 | CAD18_HUMAN  |                                | 7  | AATTTTCATTGTA | 0.428 |             |
| + | 3  | 321       |                    | NM_020227    | NP_064612    | Q9NQV7 | PRDM9_HUMAN  | RAB-related.                   | 6  | ACTGGGAGAAA   | 0.428 |             |
| - | 12 | 2476      | H10_uc011cnu.1_F   | NM_006727    | NP_006718    | Q9Y6N8 | CAD10_HUMAN  | lasmic (Potential).            | 12 | CTTTCATTAATGA | 0.463 |             |
| - | 30 | 3957      | p.A1163T RNASEI    | NM_013235    | NP_037367    | Q9NRR4 | RNC_HUMAN    | 8 and pri-miRNA processin      | 0  | TTATGGCGTACT  | 0.527 |             |
| + | 9  | 2135      | _p.V583 PDZD2_     | NM_178140    | NP_835260    | O15018 | PDZD2_HUMAN  |                                | 9  | CCATCCGTCATC  | 0.463 |             |
| + | 20 | 4268      | m.2_Missense_Mu    | NM_178140    | NP_835260    | O15018 | PDZD2_HUMAN  |                                | 9  | CGGGGAGAAA    | 0.657 |             |
| + | 20 | 5993      | m.2_Missense_Mu    | NM_178140    | NP_835260    | O15018 | PDZD2_HUMAN  |                                | 9  | GTCCGGCAGAA   | 0.512 |             |
| - | 34 | 6808      | orf42_uc011coz.1_  | NM_023073    | NP_075561    | E9PH94 | E9PH94_HUMAN |                                | 7  | TATTTCCAGCAG  | 0.433 |             |
| - | 22 | 2202      | 26_splice RICTOR   | NM_152756    | NP_689969    | Q6R327 | RICTR_HUMAN  |                                | 10 | TACTCACATCAC  | 0.318 |             |
| - | 6  | 857       | 1_Missense_Muta    | NM_000065    | NP_000056    | P13671 | CO6_HUMAN    | MACPF.                         | 7  | TATTTCTCCAG   | 0.423 |             |
| + | 28 | 2855      | iwr.2_Missense_M   | NM_016338    | NP_057422    | Q9UI26 | IPO11_HUMAN  |                                | 4  | AAACAGGAACT   | 0.333 |             |
| + | 4  | 1287      | 'ELD2_uc003jwr.1   | NM_001038603 | NP_001033692 | Q8N4S9 | MALD2_HUMAN  | lasmic (Potential).            | 0  | AAAGTTAATTTCA | 0.423 |             |
| - | 2  | 2573      | is.1_Missense_Mu   | NM_003633    | NP_003624    | O14682 | ENC1_HUMAN   | Kelch 4.                       | 3  | GCCAGGGCTGG   | 0.507 |             |
| + | 18 | 1958      | p.G583E PDE8B_     | NM_003719    | NP_003710    | O95263 | PDE8B_HUMAN  | ytic (By similarity).          | 0  | CCAGGGAAGCC   | 0.567 |             |
| - | 4  | 1551      | _p.P401S ANKRD:    | NM_001004441 | NP_001004441 | A5PLL1 | AN34B_HUMAN  |                                | 1  | GGAAGGAGATG   | 0.488 |             |
| + | 1  | 271       |                    | NR_003719    |              |        |              |                                | 0  | TGTTTGGGTTT   | 0.443 |             |
| + | 11 | 2122      | R98_uc003kjt.2_5'l | NM_032119    | NP_115495    | Q8WXG9 | GPR98_HUMAN  | ellular (Potential).           | 16 | TACATTCCTTAC  | 0.363 |             |
| + | 49 | 10328     | o.A1117V GPR98_L   | NM_032119    | NP_115495    | Q8WXG9 | GPR98_HUMAN  | tracellular (Potential).       | 16 | CGTGGCCTTGT   | 0.473 |             |
| + | 75 | 16226     | .G3083E GPR98_L    | NM_032119    | NP_115495    | Q8WXG9 | GPR98_HUMAN  | ellular (Potential).           | 16 | GAGTGGACTAG   | 0.388 |             |
| + | 20 | 2646      | _Mutation_p.G75f   | NM_000919    | NP_000910    | P19021 | AMD_HUMAN    | idating lyase (By similarity)  | 0  | TACAAGGATTTG  | 0.398 |             |
| + | 2  | 1436      |                    | NM_207317    | NP_997200    | Q6S9Z5 | ZN474_HUMAN  |                                | 0  | AAGACGCATTAC  | 0.478 | rs76983161  |
| + | 3  | 324       | iNCAIP_uc010jcu.   | NM_005460    | NP_005451    | Q9Y6H5 | SNCAP_HUMAN  |                                | 2  | AAAACGAAGAC   | 0.478 |             |
| + | 1  | 541       | p.D181N PCDHA1     | NM_018900    | NP_061723    | Q9Y5I3 | PCDA1_HUMAN  | Extracellular (Potential).     | 1  | CTTTGGATGTAG  | 0.423 |             |
| + | 1  | 1853      | lhd.2_Intron PCDH  | NM_018906    | NP_061729    | Q9Y5H8 | PCDA3_HUMAN  | Extracellular (Potential).     | 8  | CGGTGCGCGCA   | 0.677 |             |
| + | 1  | 1789      | 03lhf.2_Intron PCC | NM_018907    | NP_061730    | Q9UN74 | PCDA4_HUMAN  | Extracellular (Potential).     | 6  | CGCGCCAGCAC   | 0.677 |             |
| + | 1  | 2140      | q.1_Intron PCDHG   | NM_018924    | NP_061747    | Q9Y5G1 | PCDGF_HUMAN  | lasmic (Potential).            | 0  | CCCTGCGCCTG   | 0.582 |             |
| - | 23 | 12656     | AT2_uc003lud.3_L   | NM_001447    | NP_001438    | Q9NYQ8 | FAT2_HUMAN   | lasmic (Potential).            | 6  | CATCACGACTG   | 0.622 |             |
| - | 11 | 9177      | 2A_uc011dcs.1_In   | NM_001447    | NP_001438    | Q9NYQ8 | FAT2_HUMAN   | (Potential).  Cadherin 27.     | 6  | CATGCGCCCCAC  | 0.463 |             |

|   |    |      |                    |              |              |        |             |                                |    |                   |       |
|---|----|------|--------------------|--------------|--------------|--------|-------------|--------------------------------|----|-------------------|-------|
| - | 4  | 579  | _p.D98N GLRA1_u    | NM_001146040 | NP_001139512 | P23415 | GLRA1_HUMAN | cellular (Probable).           | 2  | GGGGTCGTTCC       | 0.517 |
| + | 3  | 907  | _Mutation_p.R131   | NM_001135037 | NP_001128509 | P55082 | MFAP3_HUMAN | Extracellular (Potential).     | 0  | CAATTCGTGCC       | 0.443 |
| + | 6  | 1477 | lIPAL4_uc011ddq.   | NM_001099287 | NP_001092757 | Q0D2K0 | NIP4A_HUMAN | lasmic (Potential).            | 0  | CTCATCACCAG/      | 0.478 |
| - | 10 | 1392 | r.1_intron GABRB   | NM_021911    | NP_068711    | P47870 | GBRB2_HUMAN | lasmic (Probable).             | 0  | GAGAAATCGTaat     | 0.184 |
| + | 35 | 3574 | OCK2_uc010jlm.2_   | NM_004946    | NP_004937    | Q92608 | DOCK2_HUMAN | interaction with CRKL.         | 7  | GCACCCAACCA       | 0.587 |
| - | 4  | 839  | mkq.2_Missense_I   | NM_014275    | NP_055090    | Q9UQ53 | MGT4B_HUMAN | lenal (Potential).             | 0  | GGTACGAGTGC.      | 0.682 |
| + | 7  | 1592 | wr.2_Missense_Mi   | NM_006567    | NP_006558    | O95363 | SYFM_HUMAN  | FDX-ACB.                       | 0  | GTACCGCCACA       | 0.592 |
| + | 10 | 3560 | p.P1057L RREB1_    | NM_001003698 | NP_001003698 | Q92766 | RREB1_HUMAN | Pro-rich.                      | 11 | GCCCCCGTGA        | 0.657 |
| + | 5  | 723  | ag.1_Missense_Iv   | NM_030948    | NP_112210    | Q9C0D0 | PHAR1_HUMAN |                                | 0  | AAAGCGAAAAG       | 0.438 |
| - | 2  | 119  | 3C1D7_uc003nao.:   | NM_016495    | NP_057579    | Q9P0N9 | TBCD7_HUMAN |                                | 1  | TGAACGAAAGT       | 0.388 |
| + | 1  | 275  | AN4_uc011dlb.1_ε   | NM_001007531 | NP_001007532 | Q5M9Q1 | NKAPL_HUMAN |                                | 2  | GGCGGCTCCC/       | 0.617 |
| - | 4  | 3842 |                    | NM_052923    | NP_443155    | Q6R2W3 | SCND3_HUMAN |                                | 1  | agtgcttctgatttcaa | 0     |
| + | 5  | 561  | _Mutation_p.G119I  | NM_013993    | NP_054699    | Q08345 | DDR1_HUMAN  | (Potential),IF5/8 type C.      | 9  | GGTGGGCACCC.      | 0.672 |
| - | 2  | 626  | S1C1_uc010jsj.1_   | NM_014069    | NP_054788    | Q9UIG4 | PS1C2_HUMAN |                                | 0  | CCGGCCAAGGG       | 0.667 |
| + | 6  | 761  | se_Mutation_p.P1   | NM_080686    | NP_542417    | P48634 | PRC2A_HUMAN | AA type A repeats.             | 0  | ATTTCGACCC        | 0.577 |
| + | 9  | 1100 | :.3_Missense_Mut:  | NM_080686    | NP_542417    | P48634 | PRC2A_HUMAN | 57 AA type A repeats.          | 0  | TCCCCGTGTGG       | 0.493 |
| + | 16 | 2984 | ΔT2_uc003nvc.3_Iv  | NM_080686    | NP_542417    | P48634 | PRC2A_HUMAN | AA type A repeats.             | 0  | CCAGGGCCCCC       | 0.692 |
| + | 25 | 3229 | 1_Missense_Muta    | NM_007293    | NP_009224    | P0C0L4 | CO4A_HUMAN  |                                | 0  | AGTTTCGGGAAG      | 0.612 |
| - | 15 | 5777 |                    | NM_019105    | NP_061978    | P22105 | TENX_HUMAN  |                                | 0  | GGCGACGGCCG       | 0.642 |
| - | 3  | 589  | BP_uc003odz.2_↑    | NM_003190    | NP_003181    | O15533 | TPSN_HUMAN  | lenal (Potential).             | 1  | TGGTCGCAAGA       | 0.602 |
| + | 31 | 4219 |                    | NM_002224    | NP_002215    | Q14573 | ITPR3_HUMAN | lasmic (Potential).            | 19 | TGGTCGTGTTT       | 0.612 |
| - | 2  | 425  | dsq.1_Missense_I   | NM_012391    | NP_036523    | O95238 | SPDEF_HUMAN |                                | 5  | GCTGGCGCTGC       | 0.667 |
| + | 62 | 9419 | uc003oof.1_intron  | NM_001371    | NP_001362    |        |             |                                | 21 | CATTTCAAGATC      | 0.358 |
| + | 10 | 1062 | h.2_RNA GLP1R_     | NM_002062    | NP_002053    | P43220 | GLP1R_HUMAN | lasmic (Potential).            | 5  | TCCAAACTGAAC      | 0.547 |
| - | 2  | 1327 |                    | NM_020737    | NP_065788    | Q9ULH4 | LRFN2_HUMAN | xtracellular (Potential).      | 3  | AGCGGCTCGC        | 0.622 |
| + | 8  | 1336 | _p.S291F FOXP4_    | NM_001012426 | NP_001012426 | Q8IVH2 | FOXP4_HUMAN |                                | 1  | CTCTTCCCACG/      | 0.632 |
| + | 12 | 2933 | p.R953Q CUL9_uc    | NM_015089    | NP_055904    | Q8IWT3 | CUL9_HUMAN  |                                | 12 | GATTCGATCCCT      | 0.597 |
| + | 1  | 361  | _p.A88T SLC22A7    | NM_153320    | NP_696961    | Q9Y694 | S22A7_HUMAN |                                | 0  | CCCAGGCTCTC       | 0.637 |
| - | 7  | 1041 | p.R247Q GTPBP2_    | NM_019096    | NP_061969    | Q9BX10 | GTPB2_HUMAN |                                | 2  | GGACCGCTCC.       | 0.597 |
| + | 16 | 1568 | se_Mutation_p.E4   | NM_018426    | NP_060896    | Q5T3F8 | TM63B_HUMAN |                                | 3  | TCTTTGAAGCC       | 0.597 |
| + | 7  | 1184 | p.R325Q RUNX2_     | NM_001024630 | NP_001019801 | Q13950 | RUNX2_HUMAN | o/Ser/Thr-rich.                | 3  | CACACGGGGCA       | 0.592 |
| - | 22 | 2282 | utation_p.E69K C   | NM_030820    | NP_110447    | Q96P44 | COLA1_HUMAN | ollagen-like 4.                | 2  | TGGTTCTCCTGC      | 0.418 |
| + | 30 | 4688 | i14_splice BAI3_uc | NM_001704    | NP_001695    | O60242 | BAI3_HUMAN  |                                | 50 | TACAGAGAAG/       | 0.234 |
| - | 9  | 1057 | COL9A1_uc003pff.   | NM_001851    | NP_001842    | P20849 | CO9A1_HUMAN | alical region (COL3).          | 4  | CGGGGGCCCC1       | 0.577 |
| - | 3  | 590  | ou.2_Missense_Iv   | NM_001143957 | NP_001137429 | Q9BZJ6 | GPR63_HUMAN | cellular (Potential).          | 2  | GTCAGGATGCT       | 0.473 |
| + | 6  | 1091 | SP3_uc003pvo.2_    | NM_003880    | NP_003871    | O95389 | WSP3_HUMAN  | CTCK.                          | 0  | AAATGGAAGATC      | 0.373 |
| + | 8  | 882  | _p.P255S NT5DC1    | NM_152729    | NP_689942    | Q5TFE4 | NT5D1_HUMAN |                                | 0  | AGAGACCTTTCC      | 0.398 |
| - | 32 | 5474 | .1_RNA GOPC_uc     | NM_002944    | NP_002935    | P08922 | ROS_HUMAN   | III 9. Extracellular (Potentia | 25 | TTTGGGAATGCC      | 0.338 |
| + | 2  | 662  | ie_Mutation_p.G3E  | NM_000165    | NP_000156    | P17302 | CXA1_HUMAN  | lasmic (Potential).            | 2  | AGTACGGTATTC      | 0.443 |
| + | 14 | 2737 | iqai.2_Missense_Iv | NM_181782    | NP_861447    | Q8NI08 | NCOA7_HUMAN |                                | 3  | CATGCAGCTACT/     | 0.507 |
| + | 3  | 279  | i1_uc010kfm.1_Mi   | NM_000045    | NP_000036    | P05089 | ARG1_HUMAN  |                                | 1  | TGTGGGAAAAG       | 0.483 |
| - | 1  | 931  | PP3_uc010kfq.2_Ir  | NM_001145659 | NP_001139131 | A4FU28 | CTGE9_HUMAN |                                | 0  | TTCGGAGGAT        | 0.368 |
| - | 2  | 524  | IRA_uc003qhk.2_ε   | NM_014432    | NP_055247    | Q9UHF4 | I2ORA_HUMAN | cellular (Potential).          | 4  | ACAGGGAACGTG      | 0.353 |
| - | 6  | 3204 | p.R781* LATS1_uc   | NM_004690    | NP_004681    | O95835 | LATS1_HUMAN | rotein kinase.                 | 6  | ACATCGACAGC       | 0.473 |
| + | 2  | 521  |                    | NM_030949    | NP_112211    | Q8TAE6 | PP14C_HUMAN |                                | 0  | AGCTTCAAAAT       | 0.443 |
| - | 43 | 6870 | ou.3_Missense_Mi   | NM_182961    | NP_892006    | Q8NF91 | SYNE1_HUMAN | ic (Potential), Potential.     | 45 | GATATTCTCTCAT     | 0.368 |
| - | 5  | 1302 | p.R275Q RSPH3_     | NM_031924    | NP_114130    | Q86UC2 | RSPH3_HUMAN | Potential.                     | 2  | CTTCTCGGTGTC      | 0.388 |

rs150956270

|   |    |           |                    |              |              |        |             |                              |       |                  |       |
|---|----|-----------|--------------------|--------------|--------------|--------|-------------|------------------------------|-------|------------------|-------|
| - | 6  | 728       | _p.E215K PHF10_    | NM_018288    | NP_060758    | Q8WUB8 | PHF10_HUMAN | SAY.                         | 1     | 'GCGTTCCTGGT     | 0.368 |
| + | 2  | 436       | md.2_Missense_IV   | NM_018641    | NP_061111    | Q9NRB3 | CHSTC_HUMAN | lenal (Potential).           | 1     | 'AGAGCGTGAGA     | 0.687 |
| - | 4  | 1024      | RADIL_uc011jwc.1   | NM_018059    | NP_060529    | Q96JH8 | RADIL_HUMAN |                              | 7     | 'TGCTGGGCTTG'    | 0.682 |
| + | 13 | 1897      | _p.V592M USP42_    | NM_032172    | NP_115548    | Q9H9J4 | UBP42_HUMAN |                              | 5     | 'AGCCCGTGATG     | 0.537 |
| + | 15 | 3238      | wq.1_Missense_IV   | NM_032172    | NP_115548    | Q9H9J4 | UBP42_HUMAN | Arg-rich.                    | 5     | ACACCCGAGGGC'    | 0.692 |
| + | 2  | 326       | ow.2_Missense_Mi   | NM_006908    | NP_008839    | P63000 | RAC1_HUMAN  |                              | 2     | 'GCATTTCTGGAC'   | 0.353 |
| - | 7  | 2138      |                    | NM_015204    | NP_056019    | Q9UPZ6 | THS7A_HUMAN | cellular (Potential).        | 3     | 'ATGGGGCATCA'    | 0.522 |
| + | 3  | 517       | _p.T27_splice KLH  | NM_001031710 | NP_001026880 | Q8IXQ5 | KLHL7_HUMAN |                              | 0     | ATTGTAGCTAAC'    | 0.383 |
| - | 2  | 140       | kut.1_intron DFNA  | NM_001127453 | NP_001120925 | O60443 | DFNA5_HUMAN |                              | 1     | 'CAGGTCACCAT'    | 0.373 |
| + | 3  | 1630      | _e_Mutation_p.L200 | NM_001989    | NP_001980    | P49640 | EVX1_HUMAN  |                              | 1     | 'GCCTTCTCACC'    | 0.726 |
| + | 16 | 1488      | ADCYAP1R1_uc0      | NM_001118    | NP_001109    | P41586 | PACR_HUMAN  | lasmic (Potential).          | 1     | 'FGAACCGTTACT'   | 0.587 |
| + | 12 | 1680      | _lp.2_Missense_Mt  | NM_002541    | NP_002532    | Q02218 | ODO1_HUMAN  |                              | 2     | 'GCAGCCGCTCA'    | 0.572 |
| + | 15 | 2542      |                    | NM_021116    | NP_066939    | Q08828 | ADCY1_HUMAN | lasmic (Potential).          | 6     | 'TCCTGCCGGCC'    | 0.607 |
| - | 22 | 3234      | w.2_Missense_Mu    | NM_022748    | NP_073585    | Q68CZ2 | TENS3_HUMAN |                              | 4     | 'CCATGGGCTTG'    | 0.602 |
| - | 45 | 6761      | 1_intron PKD1L1_   | NM_138295    | NP_612152    | Q8TDX9 | PK1L1_HUMAN | lasmic (Potential).          | 11    | 'GGTGGCGAGCT'    | 0.657 |
| - | 26 | 4149      |                    | NM_138295    | NP_612152    | Q8TDX9 | PK1L1_HUMAN |                              | 11    | 'CACTTACCTTATT'  | 0.338 |
| + | 26 | 9800      | _p.D333N ABCA1     | NM_152701    | NP_689914    | Q86UQ4 | ABCAD_HUMAN |                              | 10    | CTTAGCGATTCT'    | 0.368 |
| + | 4  | 329       | _e_Mutation_p.A87  | NM_000265    | NP_000256    | P14598 | NCF1_HUMAN  | PX.                          | 1     | GGGCCGCCGAG      | 0.652 |
| + | 12 | 2240      | _fj.3_Missense_Mul | NM_020892    | NP_065943    | Q86UW9 | DTX2_HUMAN  |                              | 2     | 'CTCATCTTCACAC'  | 0.463 |
| - | 3  | 2846      | iv.2_Missense_Mu   | NM_033026    | NP_149015    | Q9Y6V0 | PCLO_HUMAN  | Pro-rich.                    | 7     | GTTCTTCTTCT'     | 0.483 |
| - | 16 | 2063      |                    | NM_006080    | NP_006071    | Q14563 | SEM3A_HUMAN | l-like C2-type.              | 4     | 'TGATTCTCTCTT'   | 0.408 |
| + | 3  | 1246      | _o.G285S STEAP2_   | NM_152999    | NP_694544    | Q8NFT2 | STEA2_HUMAN | oxidoreductase.              | 2     | 'GATTACGGCACC'   | 0.408 |
| - | 3  | 3481_3482 | ng.2_Missense_Mt   | NM_017654    | NP_060124    | Q5K651 | SAMD9_HUMAN |                              | 7     | 'CCGATGGATACT'   | 0.381 |
| + | 44 | 3376      | 1A2_uc011kib.1_l   | NM_000089    | NP_000080    | P08123 | CO1A2_HUMAN |                              | 9     | GCCCCGTGGGT'     | 0.537 |
| + | 6  | 711       | _p.V208I ARPC1f    | NM_005720    | NP_005711    | O15143 | ARC1B_HUMAN |                              | 0     | 'ATGGCGTCTGT'    | 0.637 |
| + | 3  | 773       | AN1_uc003usl.1_f   | NM_003439    | NP_003430    | P17029 | ZKSC1_HUMAN |                              | 3     | GTCTCGGAAACC     | 0.532 |
| + | 15 | 1678      | 33_uc011kjk.1_Mi   | NM_012447    | NP_036579    | Q9UJ98 | STAG3_HUMAN |                              | 8     | 'GGCTCGGCTGA'    | 0.562 |
| - | 12 | 2599      | _p.S610F EPHB4     | NM_004444    | NP_004435    | P54760 | EPHB4_HUMAN | Potential) Protein kinase.   | 15    | 'GGAAGGAGTCC'    | 0.607 |
| + | 8  | 1007      | liv.2_Missense_M   | NM_004279    | NP_004270    | O75439 | MPPB_HUMAN  |                              | 4     | 'GGGATCGCTCT'    | 0.403 |
| + | 17 | 2528      | _e_Mutation_p.R66  | NM_182931    | NP_891847    | Q8IZD2 | MLL5_HUMAN  |                              | 3     | 'GCAGCGTCGGA'    | 0.398 |
| - | 9  | 1107      | cv.2_Missense_M    | NM_182691    | NP_872633    | P78362 | SRPK2_HUMAN | rotein kinase.               | 6     | 'CTGAGGTGATG'    | 0.473 |
| - | 4  | 1488      |                    | NM_002711    | NP_002702    | Q16821 | PPR3A_HUMAN |                              | 34    | 'CTCTTCGTAAC'    | 0.363 |
| + | 10 | 1472      | ow.1_Missense_Mt   | NM_080928    | NP_563616    | Q8WXX1 | ASB15_HUMAN | ANK 8.                       | 3     | 'AATTATGAAATTG'  | 0.428 |
| - | 4  | 673       | g.1_Missense_Mu    | NM_006193    | NP_006184    | O43316 | PAX4_HUMAN  |                              | 1     | 'GGGTACCCCGG'    | 0.572 |
| - | 4  | 750       |                    | NM_001708    | NP_001699    | P03999 | OPSB_HUMAN  | Name=6; (Potential).         | 0     | 'ACCACCATGCG'    | 0.567 |
| + | 2  | 368       | rc.1_Missense_Mi   | NM_001008749 | NP_001008749 | A4D155 | RAB19_HUMAN |                              | 0     | 'CGTGCGTTCCC'    | 0.438 |
| - | 1  | 608       | NND2A_uc003vww     | NM_015689    | NP_056504    | Q9ULE3 | DEN2A_HUMAN |                              | 4     | 'GGGATCGTTCT'    | 0.602 |
| - | 15 | 1860      |                    | NM_004333    | NP_004324    | P15056 | BRAF_HUMAN  | rotein kinase_R603>I(2)) p.T | 18290 | 'ATTTCCTACTGTAC' | 0.368 |
| + | 13 | 1565      |                    | NM_004668    | NP_004659    | O43451 | MGA_HUMAN   | (Potential) Maltase.         | 2     | 'CAATCCCAACTC'   | 0.363 |
| + | 1  | 240       |                    | NM_178829    | NP_849151    | Q96L11 | CG034_HUMAN |                              | 0     | 'AAACGCCCTCT'    | 0.547 |
| + | 1  | 698       |                    | NM_001004685 | NP_001004685 | O95006 | OR2F2_HUMAN | lasmic (Potential).          | 4     | 'AGAAGGAAGAA'    | 0.512 |
| - | 7  | 1413      |                    | NM_004911    | NP_004902    | P13667 | PDIA4_HUMAN |                              | 6     | 'GCTTACCTGGA'    | 0.562 |
| + | 12 | 1459      | PO_uc010lpl.1_Int  | NM_198455    | NP_940857    | A2VEC9 | SSPO_HUMAN  | TIL 1.                       | 0     | GCTGCGAGGCG      | 0.672 |
| + | 3  | 836       | lpu.2_Missense_IV  | NM_018384    | NP_060854    | Q96F15 | GIMA5_HUMAN | lasmic (Potential).          | 2     | 'CCCTGGATGAC'    | 0.552 |
| - | 6  | 1403      | _p.I368F KCNH2_    | NM_000238    | NP_000229    | Q12809 | KCNH2_HUMAN | =Segment S2; (Potential).    | 4     | 'ACAATGAACAT'    | 0.607 |
| - | 3  | 406       | x.2_RNA VIPR2_u    | NM_003382    | NP_003373    | P41587 | VIPR2_HUMAN | ellular (Potential).         | 2     | GCAGGCACCG       | 0.567 |
| - | 32 | 5419      | _i.D1069N CSMD1_   | NM_033225    | NP_150094    | Q96PZ7 | CSMD1_HUMAN | ar (Potential) CUB 10.       | 25    | 'CAAATCATTCAG'   | 0.423 |



|   |    |      |                    |              |              |        |             |                                |      |               |       |             |
|---|----|------|--------------------|--------------|--------------|--------|-------------|--------------------------------|------|---------------|-------|-------------|
| + | 3  | 621  | AT5_uc011kwm.1_    | NM_018361    | NP_060831    | Q9NUQ2 | PLCE_HUMAN  |                                | 0    | GCTGACATCTTC  | 0.473 |             |
| + | 4  | 805  | tz.2_Missense_Mu   | NM_001715    | NP_001706    | P51451 | BLK_HUMAN   | SH3.                           | 3    | TGATCGGGACC   | 0.567 |             |
| + | 19 | 3399 | _p.V993I PCM1_u    | NM_006197    | NP_006188    | Q15154 | PCM1_HUMAN  |                                | 36   | GCTTACGTAGAAC | 0.413 |             |
| - | 5  | 680  | IAH1_uc003wyn.2    | NM_177924    | NP_808592    | Q13510 | ASAH1_HUMAN |                                | 0    | ATATCAGTAACAG | 0.323 |             |
| - | 13 | 1577 | se_Mutation_p.S3f  | NM_001135691 | NP_001129163 | P54219 | VMAT1_HUMAN | ical; (Potential).             | 2    | ATTAGGGAACAC/ | 0.468 |             |
| + | 14 | 1774 | p.R567C XPO7_uc    | NM_015024    | NP_055839    | Q9UIA9 | XPO7_HUMAN  |                                | 5    | CAGTTTCGTAAG  | 0.483 |             |
| + | 4  | 530  | _p.E25K ADAMF      | NM_014479    | NP_055294    | O15204 | ADEC1_HUMAN |                                | 2    | TACACTGAAACA  | 0.468 |             |
| + | 2  | 235  | ea.1_Missense_M    | NM_003817    | NP_003808    | Q9H2U9 | ADAM7_HUMAN | ellular (Potential).           | 5    | GAAGCGAGATA   | 0.403 |             |
| + | 9  | 906  | ec.2_Missense_IV   | NM_003817    | NP_003808    | Q9H2U9 | ADAM7_HUMAN | 'B. Extracellular (Potential). | 5    | AATATAGAAACTA | 0.318 |             |
| + | 3  | 443  | nse_Mutation_p.D   | NM_004331    | NP_004322    | O60238 | BNI3L_HUMAN |                                | 0    | ATGTTTGATGTG  | 0.398 |             |
| + | 3  | 445  | nse_Mutation_p.D   | NM_004331    | NP_004322    | O60238 | BNI3L_HUMAN |                                | 0    | TTTGATGTGGA/  | 0.398 |             |
| + | 5  | 1324 | gb.1_Missense_IV   | NM_016240    | NP_057324    | Q6AZY7 | SCAR3_HUMAN | ellular (Potential).           | 4    | CCGAGGAGCTC   | 0.602 |             |
| - | 2  | 175  | nse_Mutation_p.f   | NM_172366    | NP_758954    | Q8IX29 | FBX16_HUMAN |                                | 1    | GATGGTTTAGGC  | 0.373 |             |
| + | 9  | 1048 | p.L275P ADAM32     | NM_145004    | NP_659441    | Q8TC27 | ADA32_HUMAN | 'B. Extracellular (Potential). | 3    | TAACTAAGGCC   | 0.303 |             |
| + | 8  | 850  | M4_uc011ldi.1_M    | NM_182746    | NP_877423    | P33991 | MCM4_HUMAN  |                                | 4    | TGACTCAATCT   | 0.328 |             |
| + | 14 | 2076 | p.R661C MCM4_u     | NM_182746    | NP_877423    | P33991 | MCM4_HUMAN  | MCM.                           | 4    | ACAGGCGTCTG   | 0.463 | rs144738849 |
| - | 17 | 2692 | NL_uc003xqt.3_F    | NM_144651    | NP_653252    | A1KZ92 | PXDNL_HUMAN |                                | 2    | TGGAGCGCGCC   | 0.662 |             |
| + | 5  | 1047 |                    | NM_147189    | NP_671722    | Q8TC76 | F110B_HUMAN |                                | 1    | GGAGGCCGACA   | 0.677 |             |
| - | 22 | 2009 | ae.1_Missense_Mt   | NM_003580    | NP_003571    | Q92636 | FAN_HUMAN   |                                | 1    | CTCTTCACCTGC  | 0.363 |             |
| + | 5  | 1781 | _p.A433S YTHDF3    | NM_152758    | NP_689971    | Q7Z739 | YTHD3_HUMAN | YTH.                           | 0    | CGTATGCTGGTC  | 0.418 |             |
| - | 16 | 2734 | xxl.1_Missense_IV  | NM_006421    | NP_006412    | Q9Y6D6 | BIG1_HUMAN  | SEC7.                          | 8    | CATACGAAGGG   | 0.398 |             |
| - | 10 | 3078 | r736W SLCO5A1_     | NM_030958    | NP_112220    | Q9H2Y9 | SO5A1_HUMAN | lasmic (Potential).            | 4    | AGTCCGGGCAT   | 0.572 |             |
| - | 3  | 219  | nse_Mutation_p.f   | NM_001738    | NP_001729    | P00915 | CAH1_HUMAN  |                                | 2    | ATATCCCCAGTC  | 0.328 |             |
| + | 4  | 623  | 8_uc011lq.1_RN     | NM_017864    | NP_060334    | Q75QN2 | INT8_HUMAN  |                                | 0    | AAAACCCGGAC   | 0.353 |             |
| + | 42 | 7898 | iw.2_Missense_Mt   | NM_017890    | NP_060360    | Q7Z7G8 | VP13B_HUMAN |                                | 20   | TGATTCTGTATT  | 0.443 | rs145208175 |
| - | 22 | 2984 | s.1_Missense_Mu    | NM_015902    | NP_056986    | O95071 | UBR5_HUMAN  | Poly-Ser.                      | 28   | ACCTTCGGCTAC  | 0.413 |             |
| + | 2  | 1099 |                    | NM_003301    | NP_003292    | P34981 | TRFR_HUMAN  | lasmic (Potential).            | 3    | TGACAGCCATTT  | 0.473 |             |
| + | 1  | 250  | _Translation_Start | NM_173851    | NP_776250    | Q8IWU4 | ZNT8_HUMAN  | lasmic (Potential).            | 4    | AAGAACGTATCT  | 0.428 |             |
| - | 2  | 193  | se_Mutation_p.E2   | NM_207506    | NP_997389    | Q8N8I0 | SAM12_HUMAN |                                | 1    | ACCTTCAGCATG  | 0.418 |             |
| + | 7  | 960  | 2_5'UTR COL14A     | NM_021110    | NP_066933    | Q05707 | COEA1_HUMAN | VWFA 1.                        | 12   | ATAAGGAGGAA/  | 0.363 |             |
| - | 9  | 2444 | Y8_uc010mds.2_I    | NM_001115    | NP_001106    | P40145 | ADCY8_HUMAN | ical; (Potential).             | 6    | AACTTTGTATTGC | 0.353 |             |
| + | 10 | 2265 |                    | NM_003235    | NP_003226    | P01266 | THYG_HUMAN  | globulin type-1 7.             | 15   | GGACGGTGCCAG  | 0.527 | rs145363255 |
| - | 11 | 1988 |                    | NM_152888    | NP_690848    | Q8NFW1 | COMA1_HUMAN | ke 1. Pro-rich. Gly-rich.      | 13   | TCTCTCCCTTAC  | 0.587 |             |
| - | 6  | 1294 |                    | NM_152888    | NP_690848    | Q8NFW1 | COMA1_HUMAN | SP N-terminal.                 | 13   | ACATCCCTGG    | 0.522 | rs145554134 |
| + | 13 | 1399 |                    | NM_139021    | NP_620590    | Q8TD08 | MK15_HUMAN  |                                | 2    | TGCGCCTCCC    | 0.687 |             |
| - | 1  | 4908 |                    | NM_031308    | NP_112598    | P58107 | EPIPL_HUMAN | Plectin 27.                    | 2    | AACATTCTGCT   | 0.627 |             |
| + | 9  | 1275 |                    | NM_003801    | NP_003792    | O43292 | GPAA1_HUMAN |                                | 0    | GGCTACGCTCT   | 0.637 |             |
| - | 6  | 1275 | RPIN_uc003zbb.2    | NM_030974    | NP_112236    | Q9H0F6 | SHRPN_HUMAN | tion with SHANK1 (By simi      | 1    | CTGGCGGGAAA   | 0.652 |             |
| - | 25 | 2779 |                    | NM_013291    | NP_037423    | Q10570 | CPSF1_HUMAN | lization signal (Potential).   | 1    | CTCAGGGAAGT   | 0.642 |             |
| + | 12 | 4202 | 10mgx.1_Splice_S   | NM_015158    | NP_055973    | Q14678 | KANK1_HUMAN |                                | 4    | TGCCGGTATGTT  | 0.522 |             |
| + | 3  | 659  | LR_uc003zhm.1_F    | NM_003383    | NP_003374    | P98155 | VLDLR_HUMAN | ntial). LDL-receptor class /   | 3    | CCAGCCGATGG   | 0.453 |             |
| + | 27 | 5048 | _p.G342S ADAMT3    | NM_001040272 | NP_001035362 | Q8N6G6 | ATL1_HUMAN  |                                | 5    | GGGATGGCATC   | 0.527 |             |
| - | 2  | 553  | TR CDKN2A_uc01     | NM_000077    | NP_000068    | P42771 | CD2A1_HUMAN | ANK 4.  83fs*2(2) p.P1         | 3678 | CCAGGGCAGAGA  | 0.731 | rs121913386 |
| - | 1  | 1687 | uc003zrh.1_RNA     | NM_153809    | NP_722516    | Q8IZX4 | TAF1L_HUMAN |                                | 26   | ATCAGGAATTT   | 0.483 |             |
| + | 36 | 4421 | wr.2_Missense_Mt   | NM_006377    | NP_006368    | O14795 | UN13B_HUMAN | MHD2.                          | 5    | AAACCTTCCTG   | 0.512 |             |
| - | 6  | 994  | u.3_Missense_Mu    | NM_006289    | NP_006280    | Q9Y490 | TLN1_HUMAN  | FERM.                          | 13   | CAGGAGTTCA    | 0.577 |             |
| + | 1  | 287  |                    | NM_001039792 | NP_001034881 | Q6UXD1 | HRCT1_HUMAN |                                | 0    | GCGGCGGGGCC   | 0.542 |             |

|   |    |           |                   |              |              |        |             |                                |     |                |       |             |
|---|----|-----------|-------------------|--------------|--------------|--------|-------------|--------------------------------|-----|----------------|-------|-------------|
| + | 18 | 2026      | o.1_Missense_Mut  | NM_014791    | NP_055606    | Q14680 | MELK_HUMAN  | KA1.                           | 6   | .GGCAGCGGCTT.  | 0.453 |             |
| - | 3  | 1430      |                   | NM_003028    | NP_003019    | Q15464 | SHB_HUMAN   | with LAT, FAK1, JAK1 and       | 3   | .GGACCCGGACAC  | 0.512 |             |
| + | 2  | 146       |                   | NM_000692    | NP_000683    | P30837 | AL1B1_HUMAN |                                | 1   | .TTAGCCTCCAGC  | 0.602 |             |
| - | 8  | 3852_3853 |                   | NM_015225    | NP_056040    | Q8WUY3 | PRUN2_HUMAN |                                | 0   | .TGCTCTGAATCT  | 0.45  |             |
| - | 4  | 999       |                   | NM_016848    | NP_058544    | Q92529 | SHC3_HUMAN  | PID.                           | 4   | .TGGCCGTGGAG   | 0.547 |             |
| - | 23 | 4108      | q.2_Missense_Mu   | NM_000264    | NP_000255    | Q13635 | PTC1_HUMAN  | lasmic (Potential).            | 379 | .CTCTGGGGGGG   | 0.657 |             |
| - | 38 | 7118      | ty.2_Missense_Mt  | NM_153366    | NP_699197    | Q4LDE5 | SVEP1_HUMAN | Sushi 14.                      | 7   | .GAGAGGAACAC   | 0.483 |             |
| - | 5  | 1510      |                   | NM_001101338 | NP_001094808 | P0CG24 | ZN883_HUMAN | 2H2-type 3.                    | 0   | .CAGTATGGACTC  | 0.363 |             |
| - | 7  | 705       | p.S151L ALAD_uc   | NM_000031    | NP_000022    | P13716 | HEM2_HUMAN  |                                | 0   | .TGTCCGACGGG   | 0.627 |             |
| + | 18 | 4798      | q.1_Missense_Mt   | NM_002581    | NP_002572    | Q13219 | PAPP1_HUMAN | Sushi 4.                       | 9   | .GCCAGGAGATG   | 0.537 |             |
| - | 24 | 2990      |                   | NM_001735    | NP_001726    | P01031 | CO5_HUMAN   |                                | 2   | .ACAAGATCTCA   | 0.428 |             |
| + | 3  | 315       | ie_Mutation_p.D8E | NM_198469    | NP_940871    | Q5VZ52 | MORN5_HUMAN |                                | 0   | .ACTGCACGGC    | 0.507 |             |
| + | 2  | 191       | awa.2_Missense_M  | NM_138777    | NP_620132    | Q96E11 | RRFM_HUMAN  |                                | 3   | .GACCCGTTTCA   | 0.463 | rs140821991 |
| + | 7  | 1774      | aw.1_Missense_Mt  | NM_173689    | NP_775960    | Q5IJ48 | CRUM2_HUMAN | 3potential). Laminin G-like 1. | 1   | .AACTCCGCTGC   | 0.682 |             |
| + | 6  | 627       | vj.2_Missense_Mu  | NM_014397    | NP_055212    | Q9HC98 | NEK6_HUMAN  | rotein kinase.                 | 3   | .GCGCCGTGGAC   | 0.607 |             |
| + | 7  | 819       | zo.1_Missense_Mt  | NM_001045476 | NP_001038941 | Q5JTN6 | WDR38_HUMAN | WD 6.                          | 0   | .TATTCCCGCATG  | 0.612 |             |
| - | 5  | 1145      | 3.5'UTR SH2D3C    | NM_170600    | NP_733745    | Q8N5H7 | SH2D3_HUMAN |                                | 1   | .CTGTCCCAGGC   | 0.657 |             |
| + | 11 | 1480      | o.R465W DNM1_u    | NM_004408    | NP_004399    | Q05193 | DYN1_HUMAN  |                                | 2   | .ACATCCGGGAG   | 0.697 |             |
| - | 6  | 1271      | 3B6_uc011mbt.1_f  | NM_017873    | NP_060343    | Q9NWX5 | ASB6_HUMAN  | SOCS box.                      | 0   | .GCTCTCCAGCT   | 0.607 |             |
| + | 33 | 6032      | e_Mutation_p.P14C | NM_005085    | NP_005076    | P35658 | NU214_HUMAN | 1 X 5 AA approximate repe      | 16  | .TGCTCCAGTGT   | 0.537 |             |
| - | 11 | 2639      | F1_uc004cbm.2_b   | NM_007344    | NP_031370    | Q15361 | TTF1_HUMAN  |                                | 4   | .GTCTCGAAATG   | 0.313 |             |
| - | 4  | 990       | 11mdf.1_Missense  | NM_020385    | NP_065118    | Q9GZR2 | REXO4_HUMAN | Exonuclease.                   | 0   | .CACACGGGCGG   | 0.557 |             |
| + | 7  | 1470      |                   | NM_000093    | NP_000084    | P20908 | CO5A1_HUMAN | nhelical region.               | 11  | .GGAGAACCCCG   | 0.592 |             |
| - | 17 | 2635      | ia.1_Missense_M   | NM_017617    | NP_060087    | P46531 | NOTC1_HUMAN | GF-like 23; calcium-binding    | 856 | .GTGCCGGCACG   | 0.701 |             |
| - | 21 | 3308      | e_Mutation_p.D98C | NM_001606    | NP_001597    | Q9BZC7 | ABCA2_HUMAN | C transporter 1.               | 0   | .GATGTCTGCC    | 0.632 |             |
| + | 7  | 1269      | p.G411D EHMT1_    | NM_024757    | NP_079033    | Q9H9B1 | EHMT1_HUMAN |                                | 3   | .AGGCGGTGACG   | 0.587 |             |
| - | 2  | 1285      |                   | NM_178129    | NP_835230    | Q86VZ1 | P2RY8_HUMAN | lasmic (Potential).            | 5   | .TGGCTCCCTCC   | 0.706 |             |
| - | 7  | 764       | se_Mutation_p.H2  | NM_006089    | NP_006080    | Q9UQR0 | SCML2_HUMAN | MBT 2.                         | 0   | .TGATATGAACTTC | 0.428 |             |
| - | 6  | 574       | i.2_intron CDKL5_ | NM_000330    | NP_000321    | O15537 | XLRS1_HUMAN | F5/8 type C.                   | 2   | .CGTCCGAGTTG   | 0.587 |             |
| - | 1  | 404       |                   | NM_001017930 | NP_001017930 | A6NGE4 | DC8L1_HUMAN | Glu-rich.                      | 4   | .TGCTCTCTCTCC  | 0.368 |             |
| - | 4  | 597       | p.R102Q BCOR_u    | NM_001123385 | NP_001116857 | Q6W2J9 | BCOR_HUMAN  |                                | 4   | .CCTCCCGACCT   | 0.562 |             |
| + | 5  | 812       | p.L203F EBP_ucC   | NM_006579    | NP_006570    | Q15125 | EBP_HUMAN   | ical; (Potential).             | 1   | .GAGTCCTTGTG   | 0.562 |             |
| - | 6  | 2988      | OM4_uc004dpd.3    | NM_020717    | NP_065768    | Q9ULL8 | SHRM4_HUMAN |                                | 1   | .AGCCATTTCCC   | 0.269 |             |
| - | 12 | 1449      | R8_uc011mou.1_l   | NM_017677    | NP_060147    | Q96EF0 | MTMR8_HUMAN | ularin phosphatase.            | 4   | .GAAAGGCCACA   | 0.398 |             |
| + | 2  | 660       | GJB1_uc004dzg.3   | NM_001097642 | NP_001091111 | P08034 | CXB1_HUMAN  | ellular (Probable).            | 1   | .AAACCGTCTTC   | 0.617 |             |
| + | 8  | 1294      | RN1_uc011mpt.1_l  | NM_052957    | NP_443189    | Q96QF7 | ACRC_HUMAN  | Asp/Ser-rich.                  | 3   | .AAGCTCCCAGC   | 0.557 |             |
| - | 31 | 3651      | nqi.1_Missense_M  | NM_002637    | NP_002628    | P46020 | KPB1_HUMAN  |                                | 4   | .GTACACGATTC   | 0.448 | rs143802511 |
| - | 34 | 4071      | Splice_Site_p.D94 | NM_153252    | NP_694984    | Q6RI45 | BRWD3_HUMAN |                                | 4   | .TGATCCTTAATT  | 0.328 |             |
| - | 17 | 1945      | p.Y231F BRWD3_    | NM_153252    | NP_694984    | Q6RI45 | BRWD3_HUMAN |                                | 4   | .GACGATAATCCC  | 0.383 |             |
| + | 6  | 1474      | fa.2_Missense_Mt  | NM_019117    | NP_061990    | Q9C0H6 | KLHL4_HUMAN | Kelch 1.                       | 5   | .GGCACTTTATG   | 0.403 |             |
| - | 1  | 121       | 7L_uc004ehc.1_5f  | NM_024885    | NP_079161    | Q5H9L4 | TAF7L_HUMAN |                                | 1   | .CCCACGGTCGA   | 0.527 |             |
| - | 14 | 1526      | p.E15K BTK_uc0    | NM_000061    | NP_000052    | Q06187 | BTK_HUMAN   | rotein kinase.                 | 6   | .GGCTTCTTCAAT  | 0.428 |             |
| + | 15 | 2701      | c.1_Missense_Mut  | NM_198465    | NP_940867    | Q722Y5 | NRK_HUMAN   |                                | 14  | .CACATCATGTC   | 0.294 |             |
| + | 7  | 1266      | sk.1_Nonsense_M   | NM_182607    | NP_872413    | Q86XK7 | VSIG1_HUMAN | lasmic (Potential).            | 2   | .gagtcagagcTGG | 0.408 |             |
| + | 30 | 2652      | p.G817E COL4A5    | NM_033380    | NP_203699    | P29400 | CO4A5_HUMAN | le-helical region.             | 4   | .GCCAGGAATAG   | 0.438 |             |
| + | 44 | 4151      | _Mutation_p.P131  | NM_033380    | NP_203699    | P29400 | CO4A5_HUMAN | le-helical region.             | 4   | .GTAATCCTGGCC  | 0.383 |             |
| - | 1  | 1622      |                   | NM_003604    | NP_003595    | O14654 | IRS4_HUMAN  |                                | 10  | .CACCTCGGGAT   | 0.632 |             |

|   |    |           |                   |              |              |        |              |                                |    |                |       |             |
|---|----|-----------|-------------------|--------------|--------------|--------|--------------|--------------------------------|----|----------------|-------|-------------|
| + | 7  | 1114      | 164_uc010npq.2_   | NM_032227    | NP_115603    | Q5U3C3 | TM164_HUMAN  | ical; (Potential).             | 3  | 'ACCATGACCCAC  | 0.522 |             |
| + | 8  | 1044      |                   | NM_007231    | NP_009162    | Q9UN76 | S6A14_HUMAN  |                                | 3  | 'GAAAGATGCTC   | 0.259 |             |
| - | 2  | 2416      | r.2_Missense_Mul  | NM_017544    | NP_060014    | O15226 | NKRF_HUMAN   | G-patch.                       | 2  | 'CTTCCCGCTTA   | 0.493 |             |
| + | 22 | 2581      | e_Mutation_p.E79  | NM_000276    | NP_000267    | Q01968 | OCRL_HUMAN   | Rho-GAP.                       | 4  | 'GTTACGAGCTG   | 0.517 |             |
| - | 15 | 3065      | p.I937F IGSF1_u   | NM_001555    | NP_001546    | Q8N6C5 | IGSF1_HUMAN  | potential). lg-like C2-type 9. | 5  | 'GTAGATACAGC   | 0.517 |             |
| + | 6  | 1844      | p.P313L GPR112    | NM_153834    | NP_722576    | Q8IZF6 | GP112_HUMAN  | xellular (Potential).          | 12 | 'CACACCTGCCC   | 0.428 |             |
| + | 3  | 1264      |                   | NM_001727    | NP_001718    | P32247 | BRS3_HUMAN   | lasmic (Potential).            | 1  | 'GGTCCCGGGCA   | 0.512 |             |
| + | 4  | 876       | EC1_uc010nsl.1_l  | NM_005462    | NP_005453    | O60732 | MAGC1_HUMAN  |                                | 4  | 'AGTCTCCACTCC  | 0.498 |             |
| + | 4  | 1679      | EC1_uc010nsl.1_l  | NM_005462    | NP_005453    | O60732 | MAGC1_HUMAN  |                                | 4  | 'CTGAGAGAACTC  | 0.478 |             |
| + | 4  | 1681      | EC1_uc010nsl.1_l  | NM_005462    | NP_005453    | O60732 | MAGC1_HUMAN  |                                | 4  | 'GAGAGAACTCA   | 0.483 |             |
| + | 4  | 2369      | EC1_uc010nsl.1_l  | NM_005462    | NP_005453    | O60732 | MAGC1_HUMAN  |                                | 4  | 'AAATTCCTCAG   | 0.562 |             |
| - | 13 | 2122      | u.1_Missense_Mu   | NM_001110556 | NP_001104026 | P21333 | FLNA_HUMAN   | Filamin 4.                     | 6  | 'CTTGTCGTAC    | 0.632 |             |
| + | 16 | 1851      | p.P538S ATAD3B    | NM_031921    | NP_114127    | Q5T9A4 | ATD3B_HUMAN  |                                | 0  | 'AGCACCCCTA    | 0.647 |             |
| - | 9  | 1430      | 5_uc001amc.1_5'l  | NM_015557    | NP_056372    | Q8TDI0 | CHD5_HUMAN   | PHD-type 2.                    | 12 | 'CGGGTTGAGGC   | 0.517 |             |
| - | 3  | 255       | me.2_Missense_l   | NM_000983    | NP_000974    | P35268 | RL22_HUMAN   |                                | 0  | 'CGGTGATCTTG   | 0.542 |             |
| - | 8  | 1859      | o.G357D CLSTN1    | NM_001009566 | NP_001009566 | O94985 | CSTN1_HUMAN  | xellular (Potential).          | 1  | 'GGGTGCCGTTG   | 0.622 |             |
| + | 1  | 151       |                   | NM_001080830 | NP_001074299 | O95522 | PRA12_HUMAN  |                                | 3  | 'TCATGGAGGCC   | 0.597 |             |
| + | 3  | 319       |                   | NM_001013641 | NP_001013663 | A0PJX8 | TMM82_HUMAN  | Leu-rich.                      | 2  | 'GACCCGAAAAG   | 0.697 |             |
| + | 19 | 2044      | ense_Mutation_p.s | NM_000085    | NP_000076    | P51801 | CLKKB_HUMAN  | CBS 2.                         | 1  | 'TCATTCCTCTT   | 0.602 | rs144513133 |
| - | 73 | 9777      | d.2_Missense_Ml   | NM_005529    | NP_005520    | P98160 | PGBM_HUMAN   | ike C2-type 18.                | 9  | 'GCTTGACCAG    | 0.632 |             |
| + | 5  | 573       | p.W135* GMEB1_    | NM_006582    | NP_006573    | Q9Y692 | GMEB1_HUMAN  | SAND.                          | 0  | 'GACTGGAAGAG   | 0.428 |             |
| - | 11 | 2056      |                   | NM_005955    | NP_005946    | Q14872 | MTF1_HUMAN   |                                | 2  | 'GTCCCGGCATG   | 0.607 |             |
| - | 11 | 2610      |                   | NM_020883    | NP_065934    | Q9P217 | ZSWM5_HUMAN  |                                | 0  | 'GTGAACCAGCG   | 0.527 |             |
| - | 5  | 669_670   | i5RL_uc001cwx.3_  | NM_001031672 | NP_001026842 | Q6IPT4 | NB5R5_HUMAN  | -binding FR-type.              | 0  | 'CTATCCCTCTGA  | 0.347 |             |
| - | 12 | 2141      | 73_uc001dgi.3_Mi  | NM_001002912 | NP_001002912 | Q5RHP9 | CA173_HUMAN  | Glu-rich.                      | 5  | 'CAATTTCTAAGC  | 0.413 |             |
| + | 3  | 382       | 2_5'UTR CLCA4_u   | NM_012128    | NP_036260    | Q14CN2 | CLCA4_HUMAN  |                                | 2  | 'AGGTAGAGATG   | 0.363 |             |
| - | 9  | 1173      | p.P232S CCBL2_    | NM_001008661 | NP_001008661 | Q6YP21 | KAT3_HUMAN   |                                | 1  | 'ACCTGGAAAAG   | 0.308 |             |
| - | 1  | 76_77     | T_uc010oug.1_5'L  | NM_001918    | NP_001909    | P11182 | ODB2_HUMAN   |                                | 1  | 'GCTTCCCGCAT   | 0.579 |             |
| - | 8  | 1552      | p.T424A COL11A    | NM_001854    | NP_001845    | P12107 | COBA1_HUMAN  | helicl region.                 | 12 | 'TTTCTGTAATATC | 0.338 |             |
| - | 7  | 662       | vfm.1_Missense_lv | NM_133181    | NP_573444    | Q8TE67 | ES8L3_HUMAN  | Pro-rich.                      | 3  | 'CCTTTCCATAGC  | 0.597 |             |
| + | 78 | 9679      | 3PF10_uc010oyl.1  | NM_001039703 | NP_001034792 | A6NDV3 | A6NDV3_HUMAN |                                | 0  | 'GGAGCTGCTGG   | 0.468 |             |
| - | 3  | 1246      |                   | NM_001008536 | NP_001008536 | Q5QJ38 | TCHL1_HUMAN  |                                | 2  | 'CCTCTCCTCTCT  | 0.473 |             |
| - | 3  | 5990_5991 |                   | NM_001009931 | NP_001009931 | Q86Y23 | HORN_HUMAN   | 22                             | 3  | 'ACCACCCTGAGC  | 0.604 |             |
| + | 2  | 506       |                   | NM_005547    | NP_005538    | P07476 | INVO_HUMAN   | QEK]-[PLSQE]-[EQDV]- [C        | 3  | 'TGTTGGAGCTC   | 0.259 |             |
| - | 1  | 91        | '23E ROBLD3_ucC   | NM_020131    | NP_064516    | Q9NRR5 | UBQL4_HUMAN  | Jbiquitin-like.                | 2  | 'CTCCTTGCTCTT  | 0.438 |             |
| - | 12 | 1319      | vsb.1_Missense_lv | NM_178229    | NP_839943    | Q86VI3 | IQGA3_HUMAN  |                                | 6  | 'TAGACGATGCA   | 0.597 |             |
| + | 1  | 194       |                   | NM_001004473 | NP_001004473 | Q8NGX5 | O10K1_HUMAN  | Name=2; (Potential).           | 1  | 'TGCCATCCTTTT  | 0.488 |             |
| - | 3  | 560       | i.2_Intron SLAMFE | NM_033438    | NP_254273    | Q96A28 | SLAF9_HUMAN  | extracellular (Potential).     | 1  | 'AGGCACCTTCC   | 0.527 |             |
| + | 8  | 1624      | lg.2_Missense_Ml  | NM_021165    | NP_066988    | Q9C0B6 | FAM5B_HUMAN  |                                | 6  | 'TCCTGGAACAG   | 0.587 |             |
| - | 8  | 2173      | npj.1_Missense_Ml | NM_014875    | NP_055690    | Q15058 | KIF14_HUMAN  | inesin-motor.                  | 7  | 'TGGGTGATCAC   | 0.388 | rs144936292 |
| - | 14 | 2305      | 1_5'Flank PLEKHA  | NM_014935    | NP_055750    | Q9Y2H5 | PKHA6_HUMAN  |                                | 4  | 'TCTTCTCAGCC   | 0.597 |             |
| - | 3  | 1057      | p.M223I LRRN2_    | NM_006338    | NP_006329    | O75325 | LRRN2_HUMAN  | tracellular (Potential).       | 2  | 'AGGTTGATGCC   | 0.607 |             |
| + | 4  | 827       | 2_uc009xch.2_Mis  | NM_001877    | NP_001868    | P20023 | CR2_HUMAN    | xtracellular (Potential).      | 8  | 'ATGAAGGGTGA   | 0.453 |             |
| + | 12 | 1666      |                   | NM_018060    | NP_060530    | Q9NSE4 | SYIM_HUMAN   |                                | 4  | 'ATTGGTGATATC  | 0.363 |             |
| - | 22 | 4088      | u.2_Intron PCNXL  | NM_014801    | NP_055616    | A6NKB5 | PCX2_HUMAN   | ical; (Potential).             | 2  | 'CTTGGAAGCAC   | 0.448 |             |
| + | 13 | 1678      | p.R492* ACTN2_u   | NM_001103    | NP_001094    | P35609 | ACTN2_HUMAN  | Spectrin 2.                    | 5  | 'GGGACCGACTG   | 0.383 |             |
| + | 2  | 598       | pxx.1_Missense_l  | NM_000254    | NP_000245    | Q99707 | METH_HUMAN   | Hcy-binding.                   | 3  | 'AAGATCATGCCA  | 0.458 |             |

|   |    |           |                   |              |              |        |             |                               |    |               |       |
|---|----|-----------|-------------------|--------------|--------------|--------|-------------|-------------------------------|----|---------------|-------|
| - | 3  | 520       | i_p.L121F IL2RA_u | NM_000417    | NP_000408    | P01589 | IL2RA_HUMAN | cellular (Potential).         | 2  | :TGGAAGGCTCG  | 0.507 |
| + | 16 | 3759      | n_p.S1084F KIAA   | NM_019590    | NP_062536    | Q5T5P2 | SKT_HUMAN   |                               | 7  | :CTCCTCCTCAA  | 0.542 |
| + | 4  | 1325      |                   | NM_020752    | NP_065803    | Q5T848 | GP158_HUMAN | Name=1; (Potential).          | 8  | GCATCTCCTTCC  | 0.522 |
| + | 9  | 1103      | D3A_uc009xkp.1_l  | NM_017433    | NP_059129    | Q8NEV4 | MYO3A_HUMAN | rotein kinase.                | 18 | :ACCCCCAAAAC  | 0.388 |
| - | 2  | 976       | nse_Mutation_p.G  | NM_020848    | NP_065899    | Q9P266 | K1462_HUMAN | Pro-rich.                     | 4  | :CTCCTCCCCTA  | 0.597 |
| - | 6  | 2139      | NF248_uc001izc.2  | NM_021045    | NP_066383    | Q8NDW4 | ZN248_HUMAN |                               | 1  | GCATACGGCTTCT | 0.443 |
| - | 1  | 1687      |                   | NM_002900    | NP_002891    | P10745 | RET3_HUMAN  | nate tandem repeats. 2.       | 2  | :GAGCTCCATGT  | 0.652 |
| - | 1  | 1235      |                   | NM_002900    | NP_002891    | P10745 | RET3_HUMAN  | nate tandem repeats. 2.       | 2  | :GGCCGGCATTG  | 0.647 |
| - | 24 | 2863      | i.1_Missense_Mut  | NM_020987    | NP_066267    | Q12955 | ANK3_HUMAN  |                               | 19 | :CAATTCTTAAC  | 0.483 |
| - | 18 | 2317      | i_p.R703* ANK3_u  | NM_020987    | NP_066267    | Q12955 | ANK3_HUMAN  | ANK 20.                       | 19 | GCACCTCGATCTT | 0.522 |
| + | 2  | 1515_1516 | jmx.3_Intron CTNF | NM_178011    | NP_821079    | Q86VH5 | LRRT3_HUMAN | lar (Potential). LRRCT.       | 3  | TTGCTCCCTTGT  | 0.401 |
| + | 3  | 957       | oy.2_Intron STOX1 | NM_001130161 | NP_001123633 | Q6ZVD7 | STOX1_HUMAN |                               | 2  | :GAGCACCACAT  | 0.458 |
| + | 6  | 786       | _Mutation_p.Q203  | NM_004922    | NP_004913    | P53992 | SC24C_HUMAN |                               | 3  | :CTCCCAGCGA   | 0.607 |
| - | 1  | 2137      |                   | NR_002319    |              |        |             |                               | 0  | CATTATCCAGTG  | 0.537 |
| + | 8  | 1228      | qny.1_Missense_M  | NM_000769    | NP_000760    | P33261 | CP2CJ_HUMAN |                               | 6  | :ACCCTCGTCAC  | 0.393 |
| - | 38 | 4955      | xxq.2_Missense_M  | NM_025145    | NP_079421    | Q8NDM7 | WDR96_HUMAN |                               | 0  | :AGTCAGTTTAGA | 0.328 |
| + | 8  | 1332      | i.1_Intron WDR11_ | NM_018117    | NP_060587    | Q9BZH6 | WDR11_HUMAN | WD 3.                         | 0  | :CTGTCTGTCA   | 0.483 |
| + | 15 | 8353      | ACC2_uc001lfz.2_  | NM_206862    | NP_996744    | O95359 | TACC2_HUMAN |                               | 10 | :AGCCCGACTTA  | 0.542 |
| + | 18 | 2223      | iT1_uc009xzz.1_M  | NM_007329    | NP_015568    | Q9UGM3 | DMBT1_HUMAN |                               | 7  | :CCAGTCCCGGT  | 0.522 |
| - | 6  | 1322      | ZD1_uc010qty.1_f  | NM_022034    | NP_071317    | Q86UP6 | CUZD1_HUMAN | llular (Potential). ZP.       | 2  | :TTTACCTTTCTC | 0.299 |
| - | 3  | 497       | _p.E223* C10orf9  | NM_001004298 | NP_001004298 | Q96M02 | CJ090_HUMAN |                               | 2  | :CTCCTCTTTGGC | 0.647 |
| + | 15 | 2817      | _p.S874F KNDC1_   | NM_152643    | NP_689856    | Q76NI1 | VKIND_HUMAN |                               | 2  | :CATTTCGGAGA  | 0.537 |
| - | 9  | 655       | CE1_uc009ybn.2_   | NM_001143764 | NP_001137236 | Q8N0S2 | SYCE1_HUMAN | Potential.                    | 1  | :AATCTCCTTTCG | 0.522 |
| + | 1  | 766       | _uc001mam.1_Int   | NM_001004757 | NP_001004757 | Q8NH59 | O51Q1_HUMAN | Name=6; (Potential).          | 1  | :ACATTCATGC   | 0.517 |
| + | 1  | 281       | .1_Intron TRIM22_ | NM_001005175 | NP_001005175 | Q8NGI2 | O52N4_HUMAN | cellular (Potential).         | 2  | :CTCTAGTACAAT | 0.463 |
| + | 1  | 1004      |                   | NM_014469    | NP_055284    | O75526 | HNRGT_HUMAN | g/Gly/Pro-rich.               | 0  | :GGGATCATCTG  | 0.662 |
| + | 15 | 1698_1699 | .2_Missense_Mut   | NM_001178    | NP_001169    | O00327 | BMAL1_HUMAN | PAC.                          | 0  | :AAGGAAGTAGA  | 0.361 |
| + | 8  | 1511      |                   | NM_020229    | NP_064614    | Q9NQV5 | PRD11_HUMAN |                               | 1  | :TTCATCATTCA  | 0.562 |
| + | 12 | 1716      | Site_p.R535_splic | NM_152312    | NP_689525    | Q8N3Y3 | LARG2_HUMAN |                               | 3  | :CTCAGGGCCT   | 0.642 |
| - | 17 | 2182      | ly.2_Missense_Mu  | NM_004476    | NP_004467    | Q04609 | FOLH1_HUMAN | cellular (Probable).          | 3  | :CAATTTCTGTAA | 0.269 |
| + | 1  | 785       |                   | NM_001005275 | NP_001005275 | Q8NGL6 | O4A15_HUMAN | lasmic (Potential).           | 2  | :GAAACGAAAAG  | 0.438 |
| + | 4  | 1602      | se_Mutation_p.R6  | NM_015457    | NP_056272    | Q9C0B5 | ZDHC5_HUMAN | DHHC-type.                    | 1  | :CCCCTCGATGT  | 0.507 |
| - | 1  | 644       |                   | NM_001005469 | NP_001005469 | Q8NH48 | OR5B3_HUMAN | Name=5; (Potential).          | 0  | :GTAGGATATCA  | 0.403 |
| + | 3  | 251       | npb.2_Missense_M  | NM_148975    | NP_683876    | Q96JQ5 | M4A4A_HUMAN | ical; (Potential).            | 0  | :GCATGGGAATA  | 0.428 |
| + | 3  | 665       | o.1_Missense_Mu   | NM_004265    | NP_004256    | O95864 | FADS2_HUMAN | ical; (Potential).            | 2  | :CTCTCAGGTGA  | 0.567 |
| - | 6  | 1318_1319 | nwj.2_Missense_M  | NM_004790    | NP_004781    | Q4U2R8 | S22A6_HUMAN | ical; (Potential).            | 0  | :AAGAGGTGGCC  | 0.624 |
| + | 6  | 1348      | _p.S394C SIPA1_u  | NM_006747    | NP_006738    | Q96FS4 | SIPA1_HUMAN | Rap-GAP.                      | 0  | :GCACTCCCTCT  | 0.542 |
| + | 5  | 835       | xx.1_Missense_Mu  | NM_001134775 | NP_001128247 | Q9H0B6 | KLC2_HUMAN  | TPR 1.                        | 0  | :CCCGGCTCCGC  | 0.632 |
| + | 7  | 698       | CS_uc001ois.2_R   | NM_005125    | NP_005116    | O14618 | CCS_HUMAN   | xide dismutase-like.          | 0  | :TCACAGGGAAC  | 0.602 |
| - | 2  | 707       |                   | NM_005117    | NP_005108    | O95750 | FGF19_HUMAN |                               | 1  | :CTTGATCTCCA  | 0.657 |
| + | 25 | 2918      | sg.2_Missense_M   | NM_001567    | NP_001558    | O15357 | SHIP2_HUMAN |                               | 4  | :AGAGGCCTCCT  | 0.632 |
| + | 9  | 1142      | se_Mutation_p.P3  | NM_152222    | NP_689408    | Q969Z4 | TR19L_HUMAN | lasmic (Potential).           | 1  | :TAACCCGACCA  | 0.652 |
| + | 4  | 827       |                   | NM_001098672 | NP_001092142 | Q6MZM0 | HPHL1_HUMAN | e 2. Extracellular (Potential | 3  | :TGATCGAGAG   | 0.383 |
| + | 3  | 627_628   | piv.2_Missense_M  | NM_000829    | NP_000820    | P48058 | GRIA4_HUMAN | cellular (Potential).         | 8  | :AAGCTCCTTTT  | 0.391 |
| + | 10 | 1589      |                   | NM_015191    | NP_056006    | Q9H0K1 | SIK2_HUMAN  |                               | 3  | :CCAATCAACTG  | 0.552 |
| - | 8  | 1237      | gy.1_Missense_M   | NM_014987    | NP_055802    | Q9UPX0 | TUTLB_HUMAN | ar (Potential). Ig-like 4.    | 0  | :GGGCAGTAAA   | 0.517 |
| - | 3  | 229       | i_p.R56C MLF2_u   | NM_005439    | NP_005430    | Q15773 | MLF2_HUMAN  |                               | 1  | :CGGGGGCTGG   | 0.517 |

rs17879685

|   |    |           |                    |              |              |        |             |                               |    |               |       |
|---|----|-----------|--------------------|--------------|--------------|--------|-------------|-------------------------------|----|---------------|-------|
| - | 6  | 799       |                    | NM_014358    | NP_055173    | Q9ULY5 | CLC4E_HUMAN | cellular (Potential).         | 1  | TCAAAGGATTAT  | 0.418 |
| - | 4  | 552       | M_uc009zgzk.1_5'U  | NM_000014    | NP_000005    | P01023 | A2MG_HUMAN  |                               | 5  | CAACACGAAATT  | 0.393 |
| - | 3  | 176       | zt.2_Missense_Mt   | NM_002723    | NP_002714    | P10163 | PRB4_HUMAN  | 'R]-[PR]-P-Q-G-G-N-Q-[PS      | 1  | ACGTTGGGGCT   | 0.572 |
| + | 15 | 2248      | ense_Mutation_p.1  | NM_004570    | NP_004561    | O75747 | P3C2G_HUMAN |                               | 21 | TGCATACCATTTT | 0.413 |
| + | 9  | 1157      | zip.2_Missense_M   | NM_017435    | NP_059131    | Q9NYB5 | SO1C1_HUMAN | cellular (Potential).         | 7  | AAGATCCCCAG   | 0.388 |
| + | 19 | 2607      | nh.1_Nonsense_IV   | NM_198578    | NP_940980    | Q5S007 | LRRK2_HUMAN |                               | 24 | CTAATTTAAGGAA | 0.318 |
| + | 4  | 434       | l_uc001rny.3_Intro | NM_001114182 | NP_001107654 | Q9NWX3 | IRAK4_HUMAN | Death.                        | 0  | TGCTCCCAGGT   | 0.393 |
| - | 4  | 860       |                    | NM_004693    | NP_004684    | O95678 | K2C75_HUMAN | Coil 1B. Rod.                 | 0  | GATCTCCTCGG   | 0.483 |
| - | 9  | 1622      |                    | NM_175053    | NP_778223    | Q7RTS7 | K2C74_HUMAN | Tail.                         | 2  | CTTTCTTGCT    | 0.627 |
| + | 8  | 1693      | o.2_Missense_Mu    | NM_014903    | NP_055718    | Q8IVL0 | NAV3_HUMAN  |                               | 17 | GATCCCTAAGG   | 0.423 |
| - | 29 | 4385      |                    | NM_001109662 | NP_001103132 |        |             |                               | 2  | AGGAGGGGACA   | 0.567 |
| - | 28 | 4908      |                    | NM_000620    | NP_000611    | P29475 | NOS1_HUMAN  |                               | 7  | CACTTCGTACG   | 0.488 |
| + | 12 | 1684      |                    | NM_194286    | NP_919262    | A7MD48 | SRRM4_HUMAN |                               | 2  | CTTCAGGGAGC   | 0.657 |
| + | 74 | 12798     | ifu.3_Missense_M   | NM_207437    | NP_997320    | Q8IVF4 | DYH10_HUMAN | Potential.                    | 6  | TCAAAGGGTGA   | 0.532 |
| + | 40 | 7387      | .P2450L EP400_u    | NM_015409    | NP_056224    | Q96L91 | EP400_HUMAN |                               | 12 | GAATCCCTTTC   | 0.388 |
| - | 16 | 1308      | l_p.G289E TPTE2    | NM_199254    | NP_954863    | Q6XPS3 | TPTE2_HUMAN | hatase tensin-type.           | 0  | TCTACTCCCTGA  | 0.368 |
| - | 7  | 2930      | .2_RNA CENPJ_u     | NM_018451    | NP_060921    | Q9HC77 | CENPJ_HUMAN |                               | 2  | GGTCTTGACTTA  | 0.348 |
| - | 3  | 707       | vo.2_Missense_M    | NM_001142296 | NP_001135768 | Q8N0X7 | SPG20_HUMAN |                               | 0  | GAGTTGAGGTG   | 0.453 |
| - | 1  | 457       |                    | NM_025113    | NP_079389    | Q9H714 | CM018_HUMAN |                               | 0  | CTACACGCATC   | 0.453 |
| - | 15 | 2287_2288 | p.D628N CHD8_u     | NM_020920    | NP_065971    | Q9HCK8 | CHD8_HUMAN  |                               | 10 | GAGATCCCCAAA  | 0.421 |
| - | 2  | 1292      | .200Q SALL2_uc0    | NM_005407    | NP_005398    | Q9Y467 | SALL2_HUMAN |                               | 3  | GGCCTCGGGCT   | 0.607 |
| - | 8  | 1172      | p.W75L ADCY4_L     | NM_139247    | NP_640340    | Q8NFM4 | ADCY4_HUMAN | lasmic (Potential).           | 3  | GTGACCAAACG   | 0.602 |
| + | 3  | 629       |                    | NM_025081    | NP_079357    | Q9P2P1 | NYNRI_HUMAN |                               | 3  | CTGCTGGAGCA   | 0.632 |
| + | 3  | 356       |                    | NM_016039    | NP_057123    | Q9Y224 | CN166_HUMAN |                               | 0  | AAGATCGACAAC  | 0.368 |
| - | 11 | 2785      | IH5_uc001xfy.2_3'  | NM_139318    | NP_647479    | Q8NCM2 | KCNH5_HUMAN | ibly) (By similarity). Cytope | 9  | GACTTCCTGCAC  | 0.522 |
| - | 3  | 887       | p.P140L ESR2_uc    | NM_001437    | NP_001428    | Q92731 | ESR2_HUMAN  | Modulating.                   | 3  | AACCTGGACCA   | 0.483 |
| + | 8  | 1012_1013 |                    | NM_152443    | NP_689656    | Q96NR8 | RDH12_HUMAN |                               | 1  | TGCACCCAGGCC  | 0.634 |
| + | 2  | 351       |                    | NM_006399    | NP_006390    | Q16520 | BATF_HUMAN  | Basic motif.                  | 1  | AAAAATCGTATT  | 0.522 |
| - | 13 | 2166      | wc.1_Missense_M    | NM_007039    | NP_008970    | Q16825 | PTN21_HUMAN |                               | 4  | CCACGGGCAGG   | 0.682 |
| + | 37 | 6039      | ybs.1_Missense_IV  | NM_020818    | NP_065869    | Q9P2D8 | UNC79_HUMAN |                               | 17 | AGAATTTACCAC  | 0.418 |
| - | 3  | 890       |                    | NM_001080451 | NP_001073920 | Q86U17 | SPA11_HUMAN |                               | 1  | GGAGGACCAGC   | 0.537 |
| + | 7  | 1486      | \IP2_uc010txz.1_1  | NM_006291    | NP_006282    | Q03169 | TNAP2_HUMAN |                               | 1  | GCTGGGCCCCC   | 0.632 |
| + | 5  | 508       | i_Mutation_p.E158  | NM_024071    | NP_076976    | Q9BQ24 | ZFY21_HUMAN |                               | 0  | ATCGAAATTGTA  | 0.498 |
| + | 12 | 2306      |                    | NM_015656    | NP_056471    | Q9ULI4 | KI26A_HUMAN |                               | 1  | CCGCACGCCTC   | 0.721 |
| + | 11 | 3534      | ie.2_Missense_Mt   | NM_170589    | NP_733468    | Q8NG31 | CASC5_HUMAN | IA approximate repeats.       | 5  | ATAACGAAAGTC  | 0.378 |
| + | 1  | 556       | oudg.1_Intron CAI  | NM_000070    | NP_000061    | P20807 | CAN3_HUMAN  | lpain catalytic.              | 1  | CGGATGAGACC   | 0.478 |
| - | 9  | 1516      | p.R401Q PCSK6_     | NM_002570    | NP_002561    | P29122 | PCSK6_HUMAN | Catalytic.                    | 2  | ATTTTCGCTCAT  | 0.532 |
| + | 1  | 780       |                    | NM_001001674 | NP_001001674 | Q8NGB8 | O4F15_HUMAN | cellular (Potential).         | 0  | ACATGGCCTTC   | 0.423 |
| - | 4  | 704       | v8A_uc002cgv.3_1   | NM_021259    | NP_067082    | Q9HCN3 | TMM8A_HUMAN | cellular (Potential).         | 3  | ATGATGGAAATC  | 0.667 |
| + | 2  | 694       | _p.A198T PIGQ_u    | NM_148920    | NP_683721    | Q9BRB3 | PIGQ_HUMAN  |                               | 1  | TGGAGGCCAGC   | 0.667 |
| + | 2  | 976       | l24_uc002cqm.2_1   | NM_020705    | NP_065756    | Q9ULP9 | TBC24_HUMAN |                               | 0  | GAAGACGGTGT   | 0.602 |
| - | 13 | 3478      | uyn.1_Missense_IV  | NM_001134407 | NP_001127879 | Q12879 | NMDE1_HUMAN | lasmic (Potential).           | 45 | ACATAGTTATTGA | 0.478 |
| - | 1  | 655       | 3_5'Flank CLEC16.  | NM_014015    | NP_054734    | O95424 | DEX1_HUMAN  |                               | 0  | CGTCGAGCTCC   | 0.637 |
| + | 8  | 1161      | ssense_Mutation_I  | NM_024847    | NP_079123    | Q72402 | TMC7_HUMAN  | lasmic (Potential).           | 3  | AATGCGGCAGA   | 0.398 |
| - | 9  | 1238      | _p.P343L ACSM2E    | NM_182617    | NP_872423    | Q68CK6 | ACS2B_HUMAN |                               | 5  | TTTCTGGAAGA   | 0.527 |
| - | 13 | 1450      | n.1_Missense_Mul   | NM_003460    | NP_003451    | Q05996 | ZP2_HUMAN   | llular (Potential). ZP.       | 3  | CACTGGAGGAG   | 0.428 |
| + | 2  | 444       |                    | NM_000336    | NP_000327    | P51168 | SCNNB_HUMAN | llular (By similarity).       | 7  | AGACCATGGAC   | 0.602 |

rs104894476

rs150466803



|   |    |           |                                                     |              |              |        |             |                              |    |               |       |             |
|---|----|-----------|-----------------------------------------------------|--------------|--------------|--------|-------------|------------------------------|----|---------------|-------|-------------|
| + | 14 | 1764      | me.2_Missense_M                                     | NM_212535    | NP_997700    | P05771 | KPCB_HUMAN  | rotein kinase.               | 9  | 'CCGTGGATTGG' | 0.458 |             |
| - | 25 | 3931      | :C11_uc002efh.1_I                                   | NM_033151    | NP_149163    | Q96J66 | ABCCB_HUMAN | r 2. Cytoplasmic (Potential) | 6  | :CCATGGGCTCC. | 0.597 |             |
| + | 9  | 1361      | efx.2_Missense_M                                    | NM_182922    | NP_891552    | Q7Z4Q2 | HEAT3_HUMAN |                              | 2  | :AGAATTCCTTAC | 0.502 |             |
| + | 1  | 1169      | H3_uc010vlii.1_5'L                                  | NM_001793    | NP_001784    | P22223 | CADH3_HUMAN | p.?(1)                       | 5  | :TCCTCCTTCTCC | 0.731 |             |
| - | 13 | 2432      | _p.K259N ADAMT                                      | NM_199355    | NP_955387    | Q8TE60 | ATS18_HUMAN | Cys-rich.                    | 18 | :TAGGGTTTCCAC | 0.378 |             |
| + | 2  | 404       |                                                     | NM_020927    | NP_065978    | Q9HCJ6 | VAT1L_HUMAN |                              | 1  | :TGCCAGGATTT  | 0.438 |             |
| - | 2  | 404       | fhu.1_Missense_M                                    | NM_172347    | NP_758857    | Q8TDN1 | KCNG4_HUMAN | lasmic (Potential).          | 3  | :CTCCTCGTAGC' | 0.622 |             |
| + | 10 | 1210      | RISPLD2_uc002fir                                    | NM_031476    | NP_113664    | Q9H0B8 | CRLD2_HUMAN | LCCL 1.                      | 0  | :CCAGTCGTCTA  | 0.532 |             |
| - | 16 | 1770      | _Site_p.E336_splic                                  | NM_021962    | NP_068781    | Q12979 | ABR_HUMAN   |                              | 1  | :AACTCTGGGG,  | 0.562 |             |
| - | 16 | 3789      | qv.1_Missense_ML                                    | NM_017575    | NP_060045    | Q86US8 | EST1A_HUMAN |                              | 4  | AACAAAGGTCTG  | 0.582 |             |
| + | 2  | 812       | :A_uc002ghe.2_5'f                                   | NM_001102614 | NP_001096084 | P0C7Q6 | AMCL3_HUMAN | ical; (Potential).           | 0  | :TGCTGGGCTCT  | 0.627 |             |
| - | 13 | 1321      | uc002gml.1_Intron                                   | NM_002472    | NP_002463    | P13535 | MYH8_HUMAN  | osin head-like.              | 11 | TGCCAACCTTG/  | 0.507 |             |
| - | 23 | 3037      | uc002gml.1_Intron                                   | NM_017533    | NP_060003    | Q9Y623 | MYH4_HUMAN  | Potential.                   | 13 | :GTTTCTGTGG/  | 0.343 |             |
| - | 23 | 2786      | uc002gml.1_Intron                                   | NM_005963    | NP_005954    | P12882 | MYH1_HUMAN  | Potential.                   | 21 | :AGTTCTCTGAG/ | 0.358 |             |
| - | 34 | 4909      | _Missense_Mutati                                    | NM_001100112 | NP_001093582 | Q9UKX2 | MYH2_HUMAN  | Potential.                   | 14 | :GGTTTCTCTTCA | 0.468 |             |
| - | 1  | 235       | :16_uc002gor.1_Ir                                   | NM_006382    | NP_006373    | O95170 | CDRT1_HUMAN |                              | 0  | :ACAACGAAAATA | 0.493 |             |
| + | 6  | 1016      |                                                     | NM_024052    | NP_076957    | Q8IVV7 | CQ039_HUMAN |                              | 1  | ATCAGTCCCTCA  | 0.468 |             |
| + | 1  | 275       | gul.2_Missense_N                                    | NM_031456    | NP_113644    | Q5XX13 | FBW10_HUMAN |                              | 1  | TATTTTCGTTGTC | 0.493 |             |
| - | 3  | 260       | _Splice_Site_p.K69_splice IFT20_uc010wae.1_Intron T |              |              | Q8IY31 | IFT20_HUMAN |                              | 0  | CAATTTCTTTTAC | 0.393 |             |
| - | 4  | 1151      | iht.2_Missense_ML                                   | NM_001094    | NP_001085    | Q16515 | ACCN1_HUMAN | llular (By similarity).      | 4  | :CATCTCTGAGG, | 0.547 |             |
| - | 15 | 3139      | p.G844S SRCIN1_                                     | NM_025248    | NP_079524    | Q9C0H9 | SRCN1_HUMAN | Pro-rich.                    | 0  | CTGGCCGTGGG/  | 0.692 |             |
| - | 9  | 1166      | vt.2_Missense_Mu                                    | NM_198993    | NP_945344    | Q6ZMT1 | STAC2_HUMAN | SH3.                         | 1  | :GATCTCCAGGC/ | 0.627 |             |
| - | 4  | 1019      | P_uc010wfs.1_Int                                    | NM_005557    | NP_005548    | P08779 | K1C16_HUMAN | Rod. Coil 2.                 | 1  | :CTGCTCGTACT/ | 0.617 |             |
| - | 7  | 1018_1019 | :198L SEPT4_uc0                                     | NM_004574    | NP_004565    | O43236 | SEPT4_HUMAN | : (By similarity).           | 0  | ACTTCGGGAGG1  | 0.574 | rs148239346 |
| + | 7  | 726       | :4_uc010wou.1_Rl                                    | NM_000717    | NP_000708    | P22748 | CAH4_HUMAN  |                              | 0  | :CAAGGAGGAGA  | 0.587 |             |
| + | 20 | 2987      | :E_uc010wpj.1_Mi                                    | NM_000789    | NP_000780    | P12821 | ACE_HUMAN   | :potential). Peptidase M2 2. | 4  | :ACCACGAAATG/ | 0.572 |             |
| + | 7  | 685       | _p.S136F PSMC5                                      | NM_002805    | NP_002796    | P62195 | PRS8_HUMAN  |                              | 1  | :TGTCTCTGGCT/ | 0.522 |             |
| - | 4  | 2190      | _p.R673C TEX2_uc                                    | NM_018469    | NP_060939    | Q8IWB9 | TEX2_HUMAN  |                              | 1  | AGGGCGGGGTG   | 0.483 |             |
| - | 25 | 2989      | :C46_uc010dep.2                                     | NM_145036    | NP_659473    | Q8N8E3 | CE112_HUMAN | Potential.                   | 0  | :GTCTTCAAGTT/ | 0.328 |             |
| - | 4  | 1059      | 2_Missense_Muta                                     | NM_001159772 | NP_001153244 | Q8WVQ1 | CANT1_HUMAN | lenal (Potential).           | 0  | CCACGGTGCCG'  | 0.582 |             |
| + | 2  | 867       | XNDC2_uc002koh                                      | NM_001098529 | NP_001091999 | Q86VQ3 | TXND2_HUMAN | repeat of Q-P-K-X-G-D-I-P.   | 2  | :CAGAAAAAGCC. | 0.547 | rs146821851 |
| - | 1  | 720       | TEC_uc010xaj.1_F                                    | NM_001137671 | NP_001131143 | B2RU33 | POTEC_HUMAN |                              | 3  | :TAAAGGAGTTG' | 0.607 |             |
| - | 15 | 2532      |                                                     | NM_005406    | NP_005397    | Q13464 | ROCK1_HUMAN | h FHOD1. Potential. REM.     | 5  | AATTCTGACTGA/ | 0.294 |             |
| + | 70 | 9361      | is.3_Missense_Mu                                    | NM_198129    | NP_937762    | Q16787 | LAMA3_HUMAN | minin G-like 4.              | 11 | :GGAGGGAAGTT  | 0.493 |             |
| + | 6  | 5037      |                                                     | NM_015559    | NP_056374    | Q9Y6X0 | SETBP_HUMAN |                              | 3  | :TGAAAGCCAAA. | 0.662 |             |
| + | 7  | 869       | _p.R206Q RNF165                                     | NM_152470    | NP_689683    | Q6ZSG1 | RN165_HUMAN |                              | 0  | :ATAGCGAAGACC | 0.522 |             |
| - | 3  | 230       |                                                     | NM_139171    | NP_631910    | P59095 | STAR6_HUMAN | START.                       | 1  | TGCAATGATTTAT | 0.328 |             |
| - | 7  | 839       | 2A CCBE1_uc002l                                     | NM_133459    | NP_597716    | Q6UXH8 | CCBE1_HUMAN | ollagen-like 1.              | 3  | GGGAGGGCCCT'  | 0.577 |             |
| + | 7  | 716       | :F SERPINB10_uc                                     | NM_002575    | NP_002566    | P05120 | PAI2_HUMAN  |                              | 2  | :GGTTTCTCAAT  | 0.333 |             |
| + | 27 | 3040      | _Missense_Mutatic                                   | NM_198531    | NP_940933    | O43861 | ATP9B_HUMAN | lasmic (Potential).          | 3  | :CTTGTCCTTCA/ | 0.433 |             |
| + | 2  | 1223      | _p.S257F NFATC1                                     | NM_006162    | NP_006153    | O95644 | NFAC1_HUMAN | X SP repeats.                | 2  | :CTCCTCCAGAC/ | 0.726 |             |
| + | 2  | 157       | JP3_uc010xhu.1_I                                    | NM_014428    | NP_055243    | O95049 | ZO3_HUMAN   | PDZ 1.                       | 3  | :GGCCCCGTGG/  | 0.642 |             |
| + | 7  | 986       | :D260G JP3_ucf                                      | NM_014428    | NP_055243    | O95049 | ZO3_HUMAN   |                              | 3  | :CTCGGACCTCG/ | 0.612 |             |
| - | 5  | 667       | R2_uc010xhx.1_R                                     | NM_015174    | NP_055989    | Q9UPR6 | ZFR2_HUMAN  | Pro-rich.                    | 2  | :TGAGGATAGA/  | 0.677 |             |
| - | 8  | 1080      | :c.2_Missense_Mu                                    | NM_000635    | NP_000626    | P48378 | RFX2_HUMAN  | type winged-helix.           | 6  | :CAGACGAATCC  | 0.577 |             |
| - | 10 | 1116      |                                                     | NM_000064    | NP_000055    | P01024 | CO3_HUMAN   |                              | 5  | GTAGGGAGAGG'  | 0.602 |             |
| - | 3  | 15725     |                                                     | NM_024690    | NP_078966    | Q8WXI7 | MUC16_HUMAN | xtracellular (Potential).    | 57 | :CAGAGGAACCA' | 0.498 |             |

|   |    |           |                   |              |              |        |              |                               |    |               |       |
|---|----|-----------|-------------------|--------------|--------------|--------|--------------|-------------------------------|----|---------------|-------|
| - | 5  | 1214      |                   | NM_198535    | NP_940937    | Q32M78 | ZN699_HUMAN  | 2H2-type 8.                   | 0  | TTAAGGAGGAGC  | 0.433 |
| + | 23 | 3453      | 057_splice SMAR   | NM_003072    | NP_003063    | P51532 | SMCA4_HUMAN  | p.?(1)                        | 67 | TTGCAGGAGTC   | 0.632 |
| - | 2  | 160       | n_p.T5M ACP5_u    | NM_001611    | NP_001602    | P13686 | PPA5_HUMAN   |                               | 1  | AGCCCGTCCAC   | 0.647 |
| - | 4  | 381       | yn.1_RNA ZNF62    | NM_145233    | NP_660276    | Q96I27 | ZN625_HUMAN  |                               | 0  | GATGATCTTCTT  | 0.398 |
| - | 15 | 1970      | vk.2_Missense_Mt  | NM_017722    | NP_060192    | Q9NXH9 | TRM1_HUMAN   |                               | 2  | AGCTTCGTCGGC  | 0.637 |
| - | 6  | 1335      | sense_Mutation_p. | NM_001008701 | NP_001008701 | O94910 | LPHN1_HUMAN  | ke. Extracellular (Potential) | 5  | GAAGGCATAGTC  | 0.597 |
| - | 5  | 559       | _p.R106W ELL_uc   | NM_006532    | NP_006523    | P55199 | ELL_HUMAN    |                               | 1  | TTTCCGAAACTC  | 0.602 |
| - | 3  | 405       | .:1_intron PBX4_u | NM_025245    | NP_079521    | Q9BYU1 | PBX4_HUMAN   |                               | 2  | CTGTCCGGATCT  | 0.512 |
| + | 4  | 3095      | dd.1_Missense_M   | NM_014717    | NP_055532    | O15090 | ZN536_HUMAN  |                               | 11 | CGCCTCCCTCC   | 0.572 |
| - | 2  | 1423      |                   | NM_020856    | NP_065907    | Q63HK5 | TSH3_HUMAN   |                               | 8  | GGACGTGAAG    | 0.552 |
| + | 10 | 3427      |                   | NM_015073    | NP_055888    | O60292 | SI1L3_HUMAN  | PDZ.                          | 2  | GAACGGGCTCG   | 0.667 |
| + | 13 | 4095      |                   | NM_015073    | NP_055888    | O60292 | SI1L3_HUMAN  |                               | 2  | GCCACGATGGG   | 0.632 |
| + | 6  | 817       | .:1_RNA TIMM50_u  | NM_001001563 | NP_001001563 | Q3ZCQ8 | TIM50_HUMAN  | intermembrane (Potential).    | 1  | CAGATGATCATC  | 0.607 |
| - | 26 | 12093     |                   | NM_003890    | NP_003881    | Q9Y6R7 | FCGBP_HUMAN  | Cys-rich.                     | 9  | CTGCCCCGGCT   | 0.537 |
| - | 3  | 383       | 3.1_5'UTR CYP2A   | NM_000762    | NP_000753    | P11509 | CP2A6_HUMAN  |                               | 2  | CTCCCCGTTG    | 0.706 |
| + | 10 | 2639      |                   | NM_015125    | NP_055940    | Q96RK0 | CIC_HUMAN    | Pro-rich.                     | 11 | CCCTCCCACCG   | 0.682 |
| + | 3  | 1146_1147 | ccf.2_Missense_M  | NM_001080401 | NP_001073870 | Q8N819 | PPM1N_HUMAN  |                               | 0  | CTGGGGGAGGC   | 0.46  |
| + | 6  | 617       | 3.G148E CCDC15    | NM_144688    | NP_653289    | Q8N6L0 | CC155_HUMAN  |                               | 2  | CTTCGGAGGCG   | 0.562 |
| + | 6  | 599_600   |                   | NM_021228    | NP_067051    | Q9H7N4 | SFR19_HUMAN  |                               | 0  | GCAAAACGGGT   | 0.614 |
| + | 25 | 3052      |                   | NM_004533    | NP_004524    | Q14324 | MYPC2_HUMAN  | nectin type-III 3.            | 1  | GGCAATGAATAC  | 0.537 |
| - | 3  | 300_301   | K1_uc010ycg.1_R   | NM_002257    | NP_002248    | P06870 | KLK1_HUMAN   | peptidase S1.                 | 0  | AAACTGGGCTGT  | 0.55  |
| - | 6  | 814       | 71F KLK8_uc002p   | NM_007196    | NP_009127    | O60259 | KLK8_HUMAN   | peptidase S1.                 | 1  | CTCCAGAATCG   | 0.557 |
| - | 7  | 1874      | Jycy.1_Missense_I | NM_033130    | NP_149121    | Q96LC7 | SIG10_HUMAN  | 3. Extracellular (Potential). | 1  | CTCTTCGTGCT   | 0.667 |
| - | 5  | 1664      |                   | NM_014650    | NP_055465    | O94892 | ZN432_HUMAN  | 2H2-type 9.                   | 3  | GATTCGCTGA    | 0.423 |
| + | 6  | 1236      |                   | NM_001099694 | NP_001093164 | Q96N58 | ZN578_HUMAN  | 2H2-type 4.                   | 0  | CTTACATGCC    | 0.423 |
| + | 3  | 809       |                   | NM_152677    | NP_689890    | Q8NAM6 | ZSCA4_HUMAN  |                               | 1  | AAGAAGGGATT   | 0.388 |
| - | 3  | 205       | AS_uc002rcd.1_R   | NM_015909    | NP_056993    | A2RRP1 | NBAS_HUMAN   |                               | 4  | AATAATAACGAT  | 0.274 |
| - | 25 | 4290      |                   | NM_000384    | NP_000375    | P04114 | APOB_HUMAN   |                               | 27 | GTAACGAGCCC   | 0.527 |
| + | 10 | 1331      | hv.3_Missense_M   | NM_020134    | NP_064519    | Q9BPU6 | DPYL5_HUMAN  |                               | 2  | CGCAAGGGCCG   | 0.537 |
| + | 6  | 980       | 10yli.1_Missense_ | NM_173650    | NP_775921    | Q8N7S2 | DNJ5G_HUMAN  |                               | 1  | GAAGATGATTTT  | 0.338 |
| - | 7  | 651       | p.A147T RBKS_uc   | NM_022128    | NP_071411    | Q9H477 | RBSK_HUMAN   |                               | 2  | TGCAGCGCTGC   | 0.498 |
| - | 11 | 1117      |                   | NM_000379    | NP_000370    | P47989 | XDH_HUMAN    |                               | 8  | ACTCACCGCCAC  | 0.52  |
| + | 5  | 861       |                   | NM_005400    | NP_005391    | Q02156 | KPCE_HUMAN   |                               | 10 | GTGCTGGGTTA   | 0.542 |
| - | 4  | 994       | 10ypj.1_Missense_ | NM_022893    | NP_075044    | Q9H165 | BC11A_HUMAN  |                               | 13 | CCCTTCTGCCA   | 0.572 |
| - | 8  | 1092      |                   | NM_014709    | NP_055524    | Q70CQ2 | UBP34_HUMAN  |                               | 19 | TTTCTGTGTCC   | 0.249 |
| + | 29 | 3413      | iF_uc010fek.2_Mi  | NM_003494    | NP_003485    | O75923 | DYSF_HUMAN   | lasmic (Potential).           | 7  | CGTGGGAGTAT   | 0.617 |
| - | 9  | 1069      | se_Mutation_p.S3  | NM_021196    | NP_067019    | Q9BY07 | S4A5_HUMAN   | lasmic (Potential).           | 9  | TTGTAGGATTTTC | 0.328 |
| + | 2  | 261       |                   | NM_138800    | NP_620155    | Q96BQ3 | TRI43_HUMAN  | RING-type.                    | 1  | CCTTCGTGGG    | 0.502 |
| + | 1  | 432       | IC285033_uc002s   | NM_001037228 | NP_001032305 | Q3KRF4 | Q3KRF4_HUMAN |                               | 0  | TGCTTCCTTCC   | 0.547 |
| - | 18 | 2664      | szi.3_Missense_M  | NM_182911    | NP_878915    | Q9BZW7 | TSG10_HUMAN  | with HIF1A (By similarity).   | 2  | GAGATCGATGG   | 0.383 |
| - | 2  | 151       | _p.R11Q ST6GAL    | NM_001142351 | NP_001135823 | Q96JF0 | SIAT2_HUMAN  | lasmic (Potential).           | 11 | GCATTCGTTGT   | 0.507 |
| + | 20 | 3830      | 3. Mutation_p.D43 | NM_182588    | NP_872394    | Q7Z3J3 | RGPD4_HUMAN  |                               | 2  | AATGGGATAACT  | 0.443 |
| + | 9  | 1404      | hjj.2_Missense_M  | NM_021815    | NP_068587    | Q9GZV3 | SC5A7_HUMAN  | ellular (Potential).          | 4  | AAAGAATCGT    | 0.433 |
| + | 6  | 971       | dx.2_Nonsense_M   | NM_001056    | NP_001047    | O00338 | ST1C2_HUMAN  |                               | 1  | TTCTGGTTTG    | 0.438 |
| + | 4  | 829       | r.1_RNA SULT1C2   | NM_006588    | NP_006579    | O75897 | ST1C4_HUMAN  |                               | 0  | AGAATGAATAA   | 0.423 |
| + | 14 | 2645      | 2_Missense_Mutal  | NM_012455    | NP_036587    | Q8NDX1 | PSD4_HUMAN   | PH.                           | 2  | GCAGGGAGAAG   | 0.622 |
| + | 4  | 683       | il.2_Missense_Mut | NM_002881    | NP_002872    | P11234 | RALB_HUMAN   |                               | 3  | CCAACGTGGAC   | 0.547 |

rs144415591

|   |     |           |                    |              |        |              |                               |     |                |       |
|---|-----|-----------|--------------------|--------------|--------|--------------|-------------------------------|-----|----------------|-------|
| - | 45  | 8435      | NM_018557          | NP_061027    | Q9NZR2 | LRP1B_HUMAN  | cellular (Potential).         | 50  | GAACAATTCAC    | 0.408 |
| - | 42  | 7772      | NM_018557          | NP_061027    | Q9NZR2 | LRP1B_HUMAN  |                               | 50  | CACATCTAGTGC   | 0.398 |
| - | 77  | 11578     | NM_004543          | NP_004534    | P20929 | NEBU_HUMAN   | Nebulin 104.                  | 20  | ATTTTTCCTGCAI  | 0.423 |
| - | 7   | 1400      | ε_Mutation_p.D20I  | NP_004481    | Q14449 | GRB14_HUMAN  | PH.                           | 7   | AAATATCACTATTI | 0.333 |
| - | 3   | 554       | ι_p.S21F SCN3A_    | NP_008853    | Q9NY46 | SCN3A_HUMAN  |                               | 10  | CAAGAGATTCTI   | 0.438 |
| + | 1   | 242       | ρo.2_Missense_Mi   | NP_689594    | A4UGR9 | XIRP2_HUMAN  |                               | 14  | GAAGCCGGAAG.   | 0.512 |
| - | 8   | 1021      | ff.1_Missense_Mul  | NP_004516    | P98164 | LRP2_HUMAN   | s A 7. Extracellular (Potenti | 29  | CCATTCTCTTGC   | 0.448 |
| - | 284 | 83316     | β93K TTN_uc010zr   | NP_596869    | Q8WZ42 | TITIN_HUMAN  |                               | 153 | AGTTTCCCCTGCT  | 0.413 |
| - | 275 | 76341     | β68K TTN_uc010zr   | NP_596869    | Q8WZ42 | TITIN_HUMAN  |                               | 153 | CTTTTCGTTAAC   | 0.418 |
| - | 275 | 73362     | β75R TTN_uc010zl   | NP_596869    | Q8WZ42 | TITIN_HUMAN  |                               | 153 | ATTTTCCAAAGTC  | 0.418 |
| - | 100 | 25998     | ν_uc010zjf.1_Intro | NP_596869    | Q8WZ42 | TITIN_HUMAN  |                               | 153 | ATTTTTCATATTC  | 0.368 |
| + | 5   | 974       | μpr.1_Missense_Iv  | NP_803237    | Q6P995 | F171B_HUMAN  | cellular (Potential).         | 10  | GGGATCGCATAI   | 0.358 |
| - | 46  | 3582      | frx.2_Missense_Mi  | NP_000384    | P05997 | CO5A2_HUMAN  |                               | 2   | TTACCGGATCTCI  | 0.537 |
| + | 19  | 3488      | ιuqx.1_Splice_Site | NP_653309    | Q7Z5J8 | ANKAR_HUMAN  |                               | 4   | TTTATAGGGAATT  | 0.343 |
| + | 8   | 1795      | ρ.P407L NAB1_uc    | NP_005957    | Q13506 | NAB1_HUMAN   |                               | 0   | CAGTCCTAACCI   | 0.483 |
| - | 6   | 598       | _p.T145I ICA1L_u   | NP_612477    | Q8NDH6 | ICA1L_HUMAN  | AH.                           | 0   | ATCAAGGTATCAC  | 0.463 |
| + | 5   | 625       | r.2_Missense_Mut   | NP_001875    | P31327 | CPSM_HUMAN   | horibosyltransferase homo     | 13  | GAGTGGACACA    | 0.299 |
| + | 3   | 362       | ι_p.G4E ATIC_uc0   | NP_004035    | P31939 | PUR9_HUMAN   |                               | 29  | GGGGGGACGTG    | 0.398 |
| + | 16  | 1909      | _p.L304P VIL1_uc   | NP_009058    | P09327 | VIL1_HUMAN   | Core.                         | 1   | AAACCTGGTCA    | 0.507 |
| + | 3   | 1005      | _p.S47F TLL4_u     | NP_055455    | Q14679 | TLL4_HUMAN   |                               | 3   | CTTCTCCTATAA   | 0.537 |
| + | 4   | 563       | zlp.1_Missense_M   | NP_689599    | Q8IWX5 | SGPP2_HUMAN  | ical; (Potential).            | 2   | AGTATCCATTTGT  | 0.458 |
| + | 5   | 529       |                    | NP_112603    | P10696 | PPBN_HUMAN   |                               | 1   | CTCAGGAAAGTI   | 0.617 |
| - | 2   | 290       | nw.1_Missense_M    | NP_022817    | O15055 | PER2_HUMAN   |                               | 2   | CCACGGGCTCC    | 0.607 |
| + | 6   | 789       |                    | NP_001001891 | Q6IWH7 | ANO7_HUMAN   | lasmic (Potential).           | 3   | CTACTCCTGCCCI  | 0.632 |
| + | 13  | 1349      | FARP2_uc010zor.    | NP_055623    | O94887 | FARP2_HUMAN  |                               | 3   | CTCTCCCTCCCAI  | 0.542 |
| + | 9   | 1458      | βDH_uc002wcg.1_    | NP_689996    | Q8N465 | D2HDH_HUMAN  |                               | 0   | AGCACGTGGTG    | 0.587 |
| + | 8   | 865       | ωw.1_Missense_Mi   | NP_080751    | Q8TDI7 | TMC2_HUMAN   | ical; (Potential).            | 3   | GCATGCCCTATC   | 0.443 |
| - | 16  | 1509      | ι.L337R SEL1L2_u   | NP_025229    | Q5TEA6 | SE1L2_HUMAN  | r (Potential). Sel1-like 9.   | 2   | GGCCTAGTTCAI   | 0.438 |
| + | 3   | 1706      |                    | NP_001011718 | Q5GH72 | XKR7_HUMAN   |                               | 3   | CACACAGTGGCI   | 0.657 |
| + | 3   | 197       | se_Mutation_p.S2I  | NP_031483    | Q96J02 | ITCH_HUMAN   |                               | 6   | ATATGTCTGACAI  | 0.388 |
| - | 8   | 1235      | _p.P194L STAU1_    | NP_017453    | O95793 | STAU1_HUMAN  |                               | 5   | ITCTGTGGCTGAI  | 0.488 |
| + | 18  | 2229      |                    | NP_060365    | Q96GQ7 | DDX27_HUMAN  |                               | 2   | CAAGCGGGCCC    | 0.567 |
| + | 4   | 549       | ρp.3_Missense_Mi   | NP_001013694 | Q9UH36 | SRR1L_HUMAN  |                               | 0   | TGACCCTCTGTI   | 0.448 |
| - | 4   | 633       | iaii.1_Missense_M  | NP_004861    | Q99999 | G3ST1_HUMAN  | renal (Potential).            | 0   | GGGGTCGCGGA    | 0.647 |
| + | 3   | 527       | e_Mutation_p.K11   | NP_000355    | P20062 | TCO2_HUMAN   |                               | 1   | CACAAGGGGGA    | 0.617 |
| + | 11  | 1705      | Missense_Mutation  | NP_006932    | P53814 | SMTN_HUMAN   |                               | 3   | CGCCCCGACCC    | 0.622 |
| + | 4   | 588       | B1_uc003axr.2_Int  | NP_004711    | O43759 | SNG1_HUMAN   |                               | 0   | TTGGCGCCGAC    | 0.687 |
| + | 7   | 1956_1957 |                    | NP_001429    | Q09472 | EP300_HUMAN  |                               | 64  | GTGTAGGAGTTC   | 0.366 |
| - | 6   | 1011      | ε_Mutation_p.M1I   | NP_000106    | Q6NWX0 | Q6NWX0_HUMAN |                               | 2   | GTCAACATCCCI   | 0.612 |
| + | 15  | 2004      | blc.2_Missense_M   | NP_014678    | O75170 | PP6R2_HUMAN  |                               | 0   | CGAACCGCAGG    | 0.692 |
| - | 41  | 5872      | fi.2_Missense_Mut  | NP_002972    | O95248 | MTMR5_HUMAN  |                               | 0   | TCAGCGTCCG     | 0.682 |
| + | 6   | 753       | ωw.1_Missense_Mi   | NP_006614    | O00533 | CHL1_HUMAN   | 2. Extracellular (Potential). | 12  | TCCACCTTTAC.   | 0.398 |
| - | 4   | 692       | β385D_uc010hfb.1_  | NP_024697    | Q9H6B1 | Z385D_HUMAN  | Matrin-type 1.                | 5   | CGCGAGCCTGC    | 0.443 |
| + | 19  | 2326      | ρ.G689R ARPP21     | NP_016300    | Q9UBL0 | ARP21_HUMAN  | Gln-rich.                     | 3   | AACAGGGATTCI   | 0.468 |
| - | 11  | 1751      |                    | NP_054858    | Q9UI33 | SCNBA_HUMAN  |                               | 9   | CTTTGGAGAG     | 0.498 |
| - | 10  | 1662      |                    | NP_054858    | Q9UI33 | SCNBA_HUMAN  |                               | 9   | FTTTGGCAATCTI  | 0.378 |
| + | 13  | 1355      | η_p.V201I VIPR1_   | NP_004615    | P32241 | VIPR1_HUMAN  | lasmic (Potential).           | 1   | AGGGCGTCTCG    | 0.687 |

rs149646688

|   |    |           |                    |              |              |        |             |                               |    |               |       |
|---|----|-----------|--------------------|--------------|--------------|--------|-------------|-------------------------------|----|---------------|-------|
| - | 3  | 542       | on.2_Missense_Mi   | NM_022842    | NP_073753    | Q9H5V8 | CDCP1_HUMAN | cellular (Potential).         | 3  | TCTAAACCGATG  | 0.552 |
| - | 6  | 1095      | se_Mutation_p.P2E  | NM_170662    | NP_733762    | Q13191 | CBLB_HUMAN  | -PTB. SH2-like.               | 9  | TAACCTGGATGT  | 0.333 |
| - | 1  | 183       | idxk.2_Missense_I  | NM_005459    | NP_005450    | O95843 | GUC1C_HUMAN | EF-hand 1.                    | 0  | TAAATTCATGTAC | 0.388 |
| - | 3  | 207       |                    | NM_018338    | NP_060808    | Q96MT7 | WDR52_HUMAN |                               | 1  | CTTCCCCTTTG   | 0.323 |
| - | 5  | 793       |                    | NM_199420    | NP_955452    | O75417 | DPOLQ_HUMAN | ase ATP-binding.              | 11 | AGTCTCCCAGCA  | 0.383 |
| + | 15 | 1487      | bjn.1_Missense_IV  | NM_021082    | NP_066568    | Q16348 | S15A2_HUMAN |                               | 1  | GCAAATCCTTTCA | 0.323 |
| - | 7  | 753_754   | e_Mutation_p.E15   | NM_053025    | NP_444253    | Q15746 | MYLK_HUMAN  |                               | 9  | GCACTCCCCC    | 0.55  |
| + | 11 | 1353      | rn_p.V337A SEC6    | NM_013336    | NP_037468    | P61619 | S61A1_HUMAN | lasmic (Potential).           | 1  | GCAGGTTGCAA   | 0.562 |
| + | 15 | 4413      | 6A6_uc003eni.3_5   | NM_001102608 | NP_001096078 | A6NMZ7 | CO6A6_HUMAN | le-helical region.            | 8  | AGTTGGGGAAA   | 0.373 |
| + | 19 | 1865      | no.2_Missense_Mi   | NM_014382    | NP_055197    | P98194 | AT2C1_HUMAN | smic (By similarity).         | 1  | ATCCACCTAGAAC | 0.418 |
| + | 6  | 567       | htq.1_Missense_IV  | NM_015268    | NP_056083    | O75165 | DJC13_HUMAN |                               | 2  | AAGGAGGATTT   | 0.328 |
| - | 2  | 529       | r_p.Q80* AMOTL2    | NM_016201    | NP_057285    | Q9Y2J4 | AMOL2_HUMAN |                               | 1  | GCCCTGGTGCT   | 0.672 |
| + | 2  | 1200      | 33GNT5_uc003fl.    | NM_032047    | NP_114436    | Q9BYG0 | B3GN5_HUMAN | lenal (Potential).            | 1  | GTGTTTCATCGT  | 0.438 |
| + | 13 | 1512      | nt.2_Missense_Mu   | NM_004423    | NP_004414    | Q92997 | DVL3_HUMAN  | DEP.                          | 3  | AAGGCTTCACG   | 0.582 |
| + | 5  | 607       | r_p.E20K OSTalph   | NM_152672    | NP_689885    | Q86UW1 | OSTA_HUMAN  | ical; (Potential).            | 1  | TGGTGGAAAGGC  | 0.507 |
| + | 8  | 3378      | _p.S177F RGS12     | NM_198229    | NP_937872    | O14924 | RGS12_HUMAN | RGS.                          | 1  | GAAGTCCCCGC   | 0.587 |
| + | 3  | 404       | 3A3_uc011bxo.1_f   | NM_020973    | NP_066024    | Q9H227 | GBA3_HUMAN  |                               | 0  | ATCATCGATGAT  | 0.363 |
| + | 8  | 1293      | oze.1_Missense_IV  | NM_000812    | NP_000803    | P18505 | GBRB1_HUMAN | ical; (Probable).             | 2  | GCGATTGATATT  | 0.453 |
| - | 3  | 465       | _p.G55R KDR_uc     | NM_002253    | NP_002244    | P35968 | VGFR2_HUMAN | 1. Extracellular (Potential). | 33 | GTGTCCCCTGA   | 0.428 |
| + | 1  | 331       | Jihr.2_Missense_IV | NM_053039    | NP_444267    | Q9BY64 | UDB28_HUMAN |                               | 1  | TTTTTTCACAAGA | 0.294 |
| + | 2  | 778       | Jihr.2_Missense_M  | NM_053039    | NP_444267    | Q9BY64 | UDB28_HUMAN |                               | 1  | GTATGCGAAACTC | 0.398 |
| - | 40 | 6518      | xc.1_Missense_Mi   | NM_001813    | NP_001804    | Q02224 | CENPE_HUMAN | inding domain. Potential.     | 9  | GAAGTGAGAGG   | 0.363 |
| + | 12 | 1960_1961 | _p.G543K GSTCD     | NM_001031720 | NP_001026890 | Q8NEC7 | GSTCD_HUMAN |                               | 2  | TTGTGGGAGTCC  | 0.45  |
| + | 9  | 10450     | _p.D1782N FAT4_u   | NM_024582    | NP_078858    | Q6V0I7 | FAT4_HUMAN  | Extracellular p.D3484N(2)     | 18 | CTGTTGATTAC   | 0.458 |
| + | 13 | 12422     | p.G2404E FAT4_u    | NM_024582    | NP_078858    | Q6V0I7 | FAT4_HUMAN  | 1. Extracellular (Potential). | 18 | GCAATGGAAGGC  | 0.413 |
| + | 2  | 293       | on_p.P6L ARFIP1    | NM_001025595 | NP_001020766 | P53367 | ARFP1_HUMAN |                               | 1  | AATCTCCCAAAA  | 0.343 |
| - | 7  | 1324      | tz.1_Missense_Mi   | NM_006529    | NP_006520    | O75311 | GLRA3_HUMAN | ical; (Probable).             | 3  | AGAATGAAACCC  | 0.478 |
| - | 19 | 3314      | VD2_uc011cmz.1_    | NM_001332    | NP_001323    | Q9UQB3 | CTND2_HUMAN |                               | 8  | GGAGGGCGTGC   | 0.577 |
| + | 3  | 764       |                    | NM_012304    | NP_036436    | Q9UJT9 | FBXL7_HUMAN |                               | 3  | GACCCGCTC     | 0.647 |
| - | 4  | 930       | o.D185N CDH18_u    | NM_004934    | NP_004925    | Q13634 | CAD18_HUMAN | r (Potential). Cadherin 2.    | 7  | TGCATCAGTAGC  | 0.433 |
| - | 2  | 380       | rn_p.M1I CDH18_u   | NM_004934    | NP_004925    | Q13634 | CAD18_HUMAN |                               | 7  | AATTTTCATTGTA | 0.428 |
| + | 3  | 321       |                    | NM_020227    | NP_064612    | Q9NQV7 | PRDM9_HUMAN | RAB-related.                  | 6  | ACTGGGAGAAA   | 0.428 |
| - | 12 | 2476      | H10_uc011cnu.1_F   | NM_006727    | NP_006718    | Q9Y6N8 | CAD10_HUMAN | lasmic (Potential).           | 12 | CTTTCATTAATGA | 0.463 |
| + | 20 | 4268      | m.2_Missense_Mi    | NM_178140    | NP_835260    | O15018 | PDZD2_HUMAN |                               | 9  | CGGGGAGAGAAA  | 0.657 |
| - | 8  | 1241      |                    | NM_001007527 | NP_001007528 | Q68DH5 | LMBD2_HUMAN | lasmic (Potential).           | 0  | CTGTAGGGCAC   | 0.224 |
| + | 4  | 1287      | 'ELD2_uc003jwr.1   | NM_001038603 | NP_001033692 | Q8N4S9 | MALD2_HUMAN | lasmic (Potential).           | 0  | AAAGTTAATTTCA | 0.423 |
| - | 2  | 2573      | is.1_Missense_Mu   | NM_003633    | NP_003624    | O14682 | ENC1_HUMAN  | Kelch 4.                      | 3  | GCCAGGGCTGG   | 0.507 |
| + | 1  | 816       | uc011ctk.1_RNA     | NM_032567    | NP_115956    | Q9BXG8 | SPZ1_HUMAN  | notif (By similarity).        | 1  | AAACAGCAGATG  | 0.353 |
| - | 4  | 1551      | _p.P401S ANKRD     | NM_001004441 | NP_001004441 | A5PLL1 | AN34B_HUMAN |                               | 1  | GGAAGGAGATG   | 0.488 |
| + | 32 | 7174      | g_Mutation_p.R66   | NM_032119    | NP_115495    | Q8WXG9 | GPR98_HUMAN | cellular (Potential).         | 16 | TTTATCGTGTT   | 0.418 |
| + | 49 | 10328     | o.A1117V GPR98_u   | NM_032119    | NP_115495    | Q8WXG9 | GPR98_HUMAN | tracellular (Potential).      | 16 | CGTGGCTTGT    | 0.473 |
| + | 75 | 16226     | .G3083E GPR98_u    | NM_032119    | NP_115495    | Q8WXG9 | GPR98_HUMAN | cellular (Potential).         | 16 | GAGTGGACTAG   | 0.388 |
| + | 20 | 2646      | g_Mutation_p.G75   | NM_000919    | NP_000910    | P19021 | AMD_HUMAN   | idating lyase (By similarity) | 0  | TACAAGGATTTG  | 0.398 |
| + | 3  | 324       | iNCAIP_uc010jcu.   | NM_005460    | NP_005451    | Q9Y6H5 | SNCAP_HUMAN |                               | 2  | AAAACGAAGAC   | 0.478 |
| - | 7  | 1046      | cf.1_Missense_Mu   | NM_007054    | NP_008985    | Q9Y496 | KIF3A_HUMAN | inesin-motor.                 | 1  | GTTAGGATAAGC  | 0.383 |
| + | 1  | 541       | p.D181N PCDHA1     | NM_018900    | NP_061723    | Q9Y5I3 | PCDA1_HUMAN | Extracellular (Potential).    | 1  | CTTTGGATGTAG  | 0.423 |
| + | 1  | 2140      | q.1_Intron PCDHG   | NM_018924    | NP_061747    | Q9Y5G1 | PCDGF_HUMAN | lasmic (Potential).           | 0  | CCCTGCGCTG    | 0.582 |

rs143981594

|   |    |                           |                    |              |              |        |             |                                |    |                   |       |             |
|---|----|---------------------------|--------------------|--------------|--------------|--------|-------------|--------------------------------|----|-------------------|-------|-------------|
| + | 5  | 1306                      | p.R383W PPARGC     | NM_133263    | NP_573570    | Q86YN6 | PRGC2_HUMAN |                                | 0  | TCGCGCGCCT        | 0.448 |             |
| + | 3  | 907                       | _Mutation_p.R131   | NM_001135037 | NP_001128509 | P55082 | MFAP3_HUMAN | Extracellular (Potential).     | 0  | CAATTCGTGCC       | 0.443 |             |
| - | 2  | 579                       | ense_Mutation_p.\  | NM_024007    | NP_076870    | Q9UH73 | COE1_HUMAN  |                                | 5  | CTCCACGAACC       | 0.632 |             |
| - | 10 | 1392                      | r.1_Intron GABRB   | NM_021911    | NP_068711    | P47870 | GBRB2_HUMAN | lasmic (Probable).             | 0  | GAGAAATCGTaat     | 0.184 | rs150956270 |
| - | 4  | 3842                      |                    | NM_052923    | NP_443155    | Q6R2W3 | SCND3_HUMAN |                                | 1  | aggtcattcgatttcaa | 0     |             |
| - | 3  | 582                       | IM26_uc003npt.2_   | NM_003449    | NP_003440    | Q12899 | TRI26_HUMAN | B box-type.                    | 3  | CTCCCAGCACACA     | 0.657 |             |
| + | 25 | 3229                      | 1_Missense_Muta    | NM_007293    | NP_009224    | P0C0L4 | CO4A_HUMAN  |                                | 0  | AGTTTCGGAAG       | 0.612 |             |
| + | 62 | 9419                      | uc003oof.1_Intron  | NM_001371    | NP_001362    |        |             |                                | 21 | CATTTCGAAGATC     | 0.358 |             |
| + | 10 | 1062                      | h.2_RNA GLP1R_     | NM_002062    | NP_002053    | P43220 | GLP1R_HUMAN | lasmic (Potential).            | 5  | TCCAAACTGAAC      | 0.547 |             |
| + | 1  | 361                       | _p.A88T SLC22A7    | NM_153320    | NP_696961    | Q9Y694 | S22A7_HUMAN |                                | 0  | CCCAGGCTCTC       | 0.637 |             |
| + | 11 | 1337                      | wh.1_Missense_M    | NM_005588    | NP_005579    | Q16819 | MEP1A_HUMAN | lar (Potential). MAM.          | 3  | CTGCCCCACAG       | 0.517 |             |
| - | 11 | 2069                      | lwl.1_Missense_M   | NM_153840    | NP_722582    | Q5T601 | GP110_HUMAN | lasmic (Potential).            | 3  | AATACGACGTG       | 0.468 | rs138895375 |
| - | 22 | 2282                      | utation_p.E69K C   | NM_030820    | NP_110447    | Q96P44 | COLA1_HUMAN | ollagen-like 4.                | 2  | TGGTTCCTCTGC      | 0.418 |             |
| + | 30 | 4688                      | i14_splice BAI3_uc | NM_001704    | NP_001695    | O60242 | BAI3_HUMAN  |                                | 50 | TTACAGAGAAG       | 0.234 |             |
| + | 6  | 1091                      | SP3_uc003pvo.2_    | NM_003880    | NP_003871    | O95389 | WISP3_HUMAN | CTCK.                          | 0  | AAATGGAAGATC      | 0.373 |             |
| + | 8  | 882                       | _p.P255S NT5DC1    | NM_152729    | NP_689942    | Q5TFE4 | NT5D1_HUMAN |                                | 0  | AGAGACCTTTC       | 0.398 |             |
| + | 3  | 279                       | i1_uc010kfm.1_Mi   | NM_000045    | NP_000036    | P05089 | ARGI1_HUMAN |                                | 1  | TGTGGGAAAAAG      | 0.483 |             |
| - | 1  | 931                       | P3_uc010kfq.2_Ir   | NM_001145659 | NP_001139131 | A4FU28 | CTGE9_HUMAN |                                | 0  | TTTCGGAGGAT       | 0.368 |             |
| - | 6  | 3204                      | p.R781* LATS1_uc   | NM_004690    | NP_004681    | O95835 | LATS1_HUMAN | rotein kinase.                 | 6  | ACATCGACAGC       | 0.473 |             |
| - | 43 | 6870                      | u.3_Missense_Mt    | NM_182961    | NP_892006    | Q8NF91 | SYNE1_HUMAN | ic (Potential). Potential.     | 45 | GATATTCTCTCAT     | 0.368 |             |
| - | 6  | 728                       | _p.E215K PHF10_    | NM_018288    | NP_060758    | Q8WUB8 | PHF10_HUMAN | SAY.                           | 1  | GCGTTCCCGGT       | 0.368 |             |
| - | 9  | 2112                      |                    | NM_005618    | NP_005609    | O00548 | DLL1_HUMAN  | icat; (Potential).             | 5  | GCACACGGCCA       | 0.701 |             |
| - | 4  | 1024                      | RADIL_uc011jwc.1   | NM_018059    | NP_060529    | Q96JH8 | RADIL_HUMAN |                                | 7  | TGCTGGGCTTG       | 0.682 |             |
| + | 2  | 326                       | ow.2_Missense_M    | NM_006908    | NP_008839    | P63000 | RAC1_HUMAN  |                                | 2  | CATTTCCTGGA       | 0.353 |             |
| - | 2  | 140                       | kut.1_Intron DFNA  | NM_001127453 | NP_001120925 | O60443 | DFNA5_HUMAN |                                | 1  | CAGGTCACCAT       | 0.373 |             |
| + | 12 | 1680                      | lp.2_Missense_Mt   | NM_002541    | NP_002532    | Q02218 | ODO1_HUMAN  |                                | 2  | GCAGCCGCTCA       | 0.572 |             |
| - | 22 | 3234                      | w.2_Missense_Mu    | NM_022748    | NP_073585    | Q68CZ2 | TENS3_HUMAN |                                | 4  | CCATGGGCTTG       | 0.602 |             |
| + | 26 | 9800                      | _p.D333N ABCA1     | NM_152701    | NP_689914    | Q86UQ4 | ABCAD_HUMAN |                                | 10 | CTTAGCGATTCT      | 0.368 |             |
| + | 19 | 4407                      | p.P1198T AUTS2_    | NM_015570    | NP_056385    | Q8WXX7 | AUTS2_HUMAN |                                | 3  | CTCCCCCGCTC       | 0.662 |             |
| + | 12 | 2240                      | fj.3_Missense_Mut  | NM_020892    | NP_065943    | Q86UW9 | DTX2_HUMAN  |                                | 2  | TCATCTTCACAC      | 0.463 |             |
| + | 8  | 2568                      | gm.2_Missense_M    | NM_198467    | NP_940869    | Q6PCB5 | RSBNL_HUMAN |                                | 1  | AAGACGATGAC.      | 0.308 |             |
| - | 3  | 2846                      | iv.2_Missense_Mu   | NM_033026    | NP_149015    | Q9Y6V0 | PCLO_HUMAN  | Pro-rich.                      | 7  | GTTCTTCTCTT       | 0.483 |             |
| - | 16 | 2063                      |                    | NM_006080    | NP_006071    | Q14563 | SEM3A_HUMAN | l-like C2-type.                | 4  | TGATTCTCTCTT      | 0.408 |             |
| - | 12 | 2599                      | i_p.S610F EPHB4    | NM_004444    | NP_004435    | P54760 | EPHB4_HUMAN | Potential). Protein kinase.    | 15 | GGAAGGAGTCC.      | 0.607 |             |
| - | 6  | 1205                      | zb.2_Missense_M    | NM_001146210 | NP_001139682 | P0CI01 | SPDE6_HUMAN |                                | 0  | CTCGTCGTCTC       | 0.552 |             |
| - | 9  | 1107                      | cv.2_Missense_M    | NM_182691    | NP_872633    | P78362 | SRPK2_HUMAN | rotein kinase.                 | 6  | CTGAGGTGATG       | 0.473 |             |
| + | 13 | 1565                      |                    | NM_004668    | NP_004659    | O43451 | MGA_HUMAN   | (Potential). Maltase.          | 2  | CAATCCCAACTC      | 0.363 |             |
| + | 1  | 698                       |                    | NM_001004685 | NP_001004685 | O95006 | OR2F2_HUMAN | lasmic (Potential).            | 4  | AGAAGGAAGAA.      | 0.512 |             |
| + | 3  | 836                       | lpu.2_Missense_M   | NM_018384    | NP_060854    | Q96F15 | GIMA5_HUMAN | lasmic (Potential).            | 2  | CCCTGGATGAC       | 0.552 |             |
| - | 3  | 406                       | x.2_RNA VIPR2_u    | NM_003382    | NP_003373    | P41587 | VIPR2_HUMAN | ellular (Potential).           | 2  | GCAGGGCACCG       | 0.567 |             |
| - | 32 | 5419                      | i.D1069N CSMD1_    | NM_033225    | NP_150094    | Q96PZ7 | CSMD1_HUMAN | ar (Potential). CUB 10.        | 25 | CAAATCATTAC       | 0.423 |             |
| - | 13 | 1577                      | se_Mutation_p.S3   | NM_001135691 | NP_001129163 | P54219 | VMAT1_HUMAN | ical; (Potential).             | 2  | TTAGGGAACAC       | 0.468 |             |
| - | 16 | 3801_3802_2_Missense_Muta |                    | NM_005144    | NP_005135    | O43593 | HAIR_HUMAN  | JmjC.                          | 2  | FGCCGGAGACC       | 0.658 |             |
| + | 4  | 530                       | i_p.E25K ADAMDI    | NM_014479    | NP_055294    | O15204 | ADEC1_HUMAN |                                | 2  | TACTACTGAAACA     | 0.468 |             |
| + | 9  | 906                       | ec.2_Missense_M    | NM_003817    | NP_003808    | Q9H2U9 | ADAM7_HUMAN | 'B. Extracellular (Potential). | 5  | AATATAGAAACTA     | 0.318 |             |
| + | 3  | 443                       | nse_Mutation_p.D   | NM_004331    | NP_004322    | O60238 | BNI3L_HUMAN |                                | 0  | ATGTTTGATGTG      | 0.398 |             |
| + | 3  | 445                       | nse_Mutation_p.D   | NM_004331    | NP_004322    | O60238 | BNI3L_HUMAN |                                | 0  | TTTGATGTGGA       | 0.398 |             |



|   |    |      |                   |              |              |        |             |                                |      |                |       |             |
|---|----|------|-------------------|--------------|--------------|--------|-------------|--------------------------------|------|----------------|-------|-------------|
| + | 5  | 1324 | gb.1_Missense_I   | NM_016240    | NP_057324    | Q6AZY7 | SCAR3_HUMAN | cellular (Potential).          | 4    | CCGAGGAGCTC    | 0.602 |             |
| - | 2  | 175  | ense_Mutation_p.f | NM_172366    | NP_758954    | Q8IX29 | FBX16_HUMAN |                                | 1    | GATGGTTTAGGC   | 0.373 |             |
| + | 8  | 850  | M4_uc011ldi.1_M   | NM_182746    | NP_877423    | P33991 | MCM4_HUMAN  |                                | 4    | TGACTCAATCTT   | 0.328 |             |
| + | 5  | 1047 |                   | NM_147189    | NP_671722    | Q8TC76 | F110B_HUMAN |                                | 1    | GGAGGCCGACA    | 0.677 |             |
| - | 22 | 2009 | ee.1_Missense_Mt  | NM_003580    | NP_003571    | Q92636 | FAN_HUMAN   |                                | 1    | CTCTTCACCTGC   | 0.363 |             |
| - | 16 | 2734 | ixl.1_Missense_I  | NM_006421    | NP_006412    | Q9Y6D6 | BIG1_HUMAN  | SEC7.                          | 8    | CATACGAAGGG    | 0.398 |             |
| - | 3  | 219  | ense_Mutation_p.f | NM_001738    | NP_001729    | P00915 | CAH1_HUMAN  |                                | 2    | ATATCCCCAGTC   | 0.328 |             |
| + | 4  | 623  | s8_uc011lq.1_RN   | NM_017864    | NP_060334    | Q75QN2 | INT8_HUMAN  |                                | 0    | AAAACCCGGAC    | 0.353 |             |
| + | 42 | 7898 | w.2_Missense_Mt   | NM_017890    | NP_060360    | Q7Z7G8 | VP13B_HUMAN |                                | 20   | TTGATTCTGTATT  | 0.443 | rs145208175 |
| + | 2  | 1099 |                   | NM_003301    | NP_003292    | P34981 | TRFR_HUMAN  | lasmic (Potential).            | 3    | TGAGACCATTTC   | 0.473 |             |
| + | 7  | 960  | 2_5'UTR COL14A    | NM_021110    | NP_066933    | Q05707 | COEA1_HUMAN | VWFA 1.                        | 12   | TAAAGGAGGAA    | 0.363 |             |
| - | 9  | 2444 | Y8_uc010mds.2_I   | NM_001115    | NP_001106    | P40145 | ADCY8_HUMAN | ical; (Potential).             | 6    | ACTTTGTATTGC   | 0.353 |             |
| - | 30 | 2939 | ljo.1_Missense_M  | NM_152888    | NP_690848    | Q8NFW1 | COMA1_HUMAN | ly-rich. Collagen-like 6.      | 13   | TCAGTCCTGGA    | 0.383 |             |
| - | 11 | 1988 |                   | NM_152888    | NP_690848    | Q8NFW1 | COMA1_HUMAN | ke 1. Pro-rich. Gly-rich.      | 13   | TCTCTCCCTTAC   | 0.587 |             |
| + | 13 | 1399 |                   | NM_139021    | NP_620590    | Q8TD08 | MK15_HUMAN  |                                | 2    | TGCGCCCTCCC    | 0.687 |             |
| - | 1  | 4908 |                   | NM_031308    | NP_112598    | P58107 | EPIPL_HUMAN | Plectin 27.                    | 2    | AACATTCCTGCT   | 0.627 |             |
| - | 25 | 2779 |                   | NM_013291    | NP_037423    | Q10570 | CPSF1_HUMAN | lization signal (Potential).   | 1    | CTCACGGAAGT    | 0.642 |             |
| - | 1  | 2961 | u_p.l632L RANBP6  | NM_012416    | NP_036548    | O60518 | RNBP6_HUMAN | HEAT 7.                        | 3    | CCCTATTGCTGT   | 0.363 |             |
| - | 24 | 3077 |                   | NM_000170    | NP_000161    | P23378 | GCSP_HUMAN  |                                | 2    | AGGCCGGTCCC    | 0.557 |             |
| - | 2  | 553  | TR CDKN2A_uc01    | NM_000077    | NP_000068    | P42771 | CD2A1_HUMAN | ANK 4. l83fs*2(2) p.P1         | 3678 | CCACGGGCAGA    | 0.731 | rs121913386 |
| + | 36 | 4421 | wr.2_Missense_Mt  | NM_006377    | NP_006368    | O14795 | UN13B_HUMAN | MHD2.                          | 5    | AAACCTTCCTGT   | 0.512 |             |
| + | 2  | 146  |                   | NM_000692    | NP_000683    | P30837 | AL1B1_HUMAN |                                | 1    | TTAGCCTCCAGC   | 0.602 |             |
| - | 5  | 1131 |                   | NM_017561    | NP_060031    | A1L443 | FA22F_HUMAN | Pro-rich.                      | 0    | TGGGCGTTGGT    | 0.692 |             |
| + | 18 | 2329 |                   | NM_001855    | NP_001846    | P39059 | COFA1_HUMAN | lical region 2 (COL2).         | 6    | GAAAAAGGGAC    | 0.617 |             |
| - | 38 | 7118 | ty.2_Missense_Mt  | NM_153366    | NP_699197    | Q4LDE5 | SVEP1_HUMAN | Sushi 14.                      | 7    | GAGAGGAACAC    | 0.483 |             |
| - | 5  | 1510 |                   | NM_001101338 | NP_001094808 | P0CG24 | ZN883_HUMAN | 2H2-type 3.                    | 0    | AGTATGGACTC    | 0.363 |             |
| + | 7  | 1774 | w.1_Missense_Mt   | NM_173689    | NP_775960    | Q5IJ48 | CRUM2_HUMAN | potential). Laminin G-like 1.  | 1    | AACTCCGCTGC    | 0.682 |             |
| + | 4  | 541  | _uc004bxn.1_Intro | NM_178001    | NP_821068    | Q15257 | PTPA_HUMAN  |                                | 3    | CTTGCGATGAA    | 0.154 |             |
| - | 6  | 1271 | B6_uc011mbt.1_I   | NM_017873    | NP_060343    | Q9NWX5 | ASB6_HUMAN  | SOCS box.                      | 0    | GCTCTCCAGCTC   | 0.607 |             |
| - | 11 | 2639 | F1_uc004cbm.2_N   | NM_007344    | NP_031370    | Q15361 | TTF1_HUMAN  |                                | 4    | TCTCGAAATGC    | 0.313 |             |
| - | 4  | 990  | 11mdf.1_Missense  | NM_020385    | NP_065118    | Q9GZR2 | REXO4_HUMAN | Exonuclease.                   | 0    | CACACGGGCGG    | 0.557 |             |
| + | 1  | 1462 | T1_uc011mei.1_5'  | NM_001080482 | NP_001073951 | C9J069 | CI172_HUMAN |                                | 0    | AAGCCGGCGCG    | 0.751 |             |
| - | 7  | 764  | se_Mutation_p.H2  | NM_006089    | NP_006080    | Q9UQR0 | SCML2_HUMAN | MBT 2.                         | 0    | TGATATGAACCTC  | 0.428 |             |
| - | 1  | 404  |                   | NM_001017930 | NP_001017930 | A6NGE4 | DC8L1_HUMAN | Glu-rich.                      | 4    | TGTCTCCTCTCC   | 0.368 |             |
| - | 34 | 4071 | Splice_Site_p.D94 | NM_153252    | NP_694984    | Q6RI45 | BRWD3_HUMAN |                                | 4    | TGTATCCTTAATT  | 0.328 |             |
| + | 15 | 2701 | c.1_Missense_Mut  | NM_198465    | NP_940867    | Q7Z2Y5 | NRK_HUMAN   |                                | 14   | CACATCATGTC    | 0.294 |             |
| + | 7  | 1266 | sk.1_Nonsense_M   | NM_182607    | NP_872413    | Q86XK7 | VSIG1_HUMAN | lasmic (Potential).            | 2    | gagtcagagccTGG | 0.408 |             |
| + | 30 | 2652 | p.G817E COL4A5    | NM_033380    | NP_203699    | P29400 | CO4A5_HUMAN | le-helical region.             | 4    | TGCCAGGAATAG   | 0.438 |             |
| + | 44 | 4151 | _Mutation_p.P131  | NM_033380    | NP_203699    | P29400 | CO4A5_HUMAN | le-helical region.             | 4    | GTAATCCTGGCC   | 0.383 |             |
| - | 15 | 3065 | u_p.l937F IGSF1_u | NM_001555    | NP_001546    | Q8N6C5 | IGSF1_HUMAN | potential). Ig-like C2-type 9. | 5    | GTAGATACAGC    | 0.517 |             |
| + | 4  | 2369 | EC1_uc010nsl.1_I  | NM_005462    | NP_005453    | O60732 | MAGC1_HUMAN |                                | 4    | AAATTCCTCAG    | 0.562 |             |
| + | 3  | 1144 |                   | NM_000314    | NP_000305    | P60484 | PTEN_HUMAN  | atase tensi7_N212>Y(2) f       | 2334 | ATTCCTGCAG     | 0.289 |             |
| + | 14 | 1708 |                   | NM_001012423 | NP_001012423 |        |             |                                | 1    | GCCGAGTGTCC    | 0.607 |             |
| - | 11 | 1435 | o.1_Missense_Mu   | NM_005374    | NP_005365    | Q14168 | MPP2_HUMAN  | ylate kinase-like.             | 0    | GTAGCGCCAG     | 0.627 | rs149328604 |
| - | 4  | 1916 | 799_uc002mts.3_I  | NM_001080821 | NP_001074290 | Q96GE5 | ZN799_HUMAN | 2H2-type 17.                   | 6    | TACATTCATACG   | 0.413 |             |
| - | 16 | 3123 | uc002udp.2_Intror | NM_002977    | NP_002968    | Q15858 | SCN9A_HUMAN | II.                            | 13   | ACCAGCGACCT    | 0.478 |             |
| - | 8  | 1212 | yi.1_Missense_Mt  | NM_000961    | NP_000952    | Q16647 | PTGIS_HUMAN |                                | 3    | AAGGGGAAGAG    | 0.562 |             |

|   |    |                            |                                                       |              |              |             |              |                             |      |               |       |             |
|---|----|----------------------------|-------------------------------------------------------|--------------|--------------|-------------|--------------|-----------------------------|------|---------------|-------|-------------|
| - | 13 | 1491                       | AC10_uc003bkh.2                                       | NM_032019    | NP_114408    | Q969S8      | HDA10_HUMAN  |                             | 0    | CTGGGGAGTGG   | 0.657 |             |
| - | 1  | 572                        | r_p.H16N MAG1_                                        | NM_001033057 | NP_001028229 | Q96QZ7      | MAG1_HUMAN   |                             | 6    | ATTCGTGAACCC  | 0.602 |             |
| + | 8  | 1480                       | L7R PIK3R1_uc0                                        | NM_181523    | NP_852664    | P27986      | P85A_HUMAN   | p.?(1)                      | 101  | AGCACTGCCTC   | 0.353 |             |
| + | 10 | 1748                       | dur.2_Missense_                                       | NM_020978    | NP_066188    | P19961      | AMY2B_HUMAN  |                             | 0    | CCAAATAAATG   | 0.363 | rs144066229 |
| + | 12 | 1400                       | i_RNA NBPF9_uc                                        | NM_001037675 | NP_001032764 | Q3BBV1      | NBPFK_HUMAN  | NBPF 2.                     | 0    | ATGACAATGAA   | 0.423 |             |
| + | 7  | 1252                       | i_Mutation_p.T308                                     | NM_005807    | NP_005798    | Q92954      | PRG4_HUMAN   | ats of K-X-P-X-P-T-X.[7.    | 1    | CCACCACCAAG   | 0.642 |             |
| + | 3  | 1144                       |                                                       | NM_000314    | NP_000305    | P60484      | PTEN_HUMAN   | atase tensi7_N212>Y(2)]r    | 2334 | ATTCCTGCAG/   | 0.289 |             |
| + | 1  | 2080                       |                                                       | NR_003268    |              |             |              |                             | 0    | TAGACGCTCTG   | 0.418 |             |
| + | 14 | 1708                       |                                                       | NM_001012423 | NP_001012423 |             |              |                             | 1    | GCCGAGTGTCC   | 0.607 |             |
| - | 13 | 2057                       | vb.2_Missense_Mt                                      | NM_015092    | NP_055907    | Q96Q15      | SMG1_HUMAN   | with SMG8 and SMG9.         | 16   | ACTTATAGGCAG  | 0.398 |             |
| - | 9  | 1179                       | cf.2_Intron PRDM                                      | NM_001098173 | NP_001091643 | Q9NQW5      | PRDM7_HUMAN  |                             | 1    | CCCCATACCAG   | 0.522 |             |
| - | 11 | 1435                       | o.1_Missense_Mu                                       | NM_005374    | NP_005365    | Q14168      | MPP2_HUMAN   | ylate kinase-like.          | 0    | GTAGCGCCAG    | 0.627 | rs149328604 |
| - | 4  | 508                        | ira.2_Missense_Mi                                     | NM_052916    | NP_443148    | Q96PX1      | RN157_HUMAN  |                             | 1    | CCTGGCAATAC   | 0.483 |             |
| - | 6  | 2022                       | ense_Mutation_p.(                                     | NM_001010880 | NP_001010880 | O75290      | Z780A_HUMAN  | 2H2-type 16.                | 0    | AATAAGTTGCAT  | 0.403 |             |
| - | 5  | 1005                       | i77_uc010ydf.1_5'                                     | NM_023074    | NP_075562    | Q9BS31      | ZN649_HUMAN  | 2H2-type 3.                 | 3    | CTGTACCTCTTG  | 0.502 |             |
| + | 6  | 1175                       |                                                       | NM_001099694 | NP_001093164 | Q96N58      | ZN578_HUMAN  |                             | 0    | ACACTGGTGAG   | 0.418 |             |
| - | 16 | 3123                       | uc002udp.2_Intror                                     | NM_002977    | NP_002968    | Q15858      | SCN9A_HUMAN  | II.                         | 13   | ACCAGCGACCT   | 0.478 |             |
| - | 5  | 635                        | wtu.2_Missense_                                       | NM_178312    | NP_842564    | Q9BX51      | GGTL1_HUMAN  |                             | 1    | CGTGACGTTGG   | 0.622 |             |
| + | 2  | 127                        | tj.1_RNA FRG1B_uc010gdr.1_RNA FRG1B_uc010ztk.1_Intron |              |              |             |              |                             | 0    | ATTCAGATGCAA  | 0.333 |             |
| - | 8  | 1212                       | yi.1_Missense_ML                                      | NM_000961    | NP_000952    | Q16647      | PTGIS_HUMAN  |                             | 3    | AAGGGGAAGAG   | 0.562 |             |
| - | 4  | 356                        | nc.2_Missense_M                                       | NM_006585    | NP_006576    | P50990      | TCPO_HUMAN   |                             | 0    | ATTACAATCATTT | 0.368 |             |
| + | 3  | 591                        | e_Mutation_p.S44                                      | NM_006031    | NP_006022    | O95613      | PCNT_HUMAN   |                             | 8    | CAGTCAGTGAC   | 0.552 |             |
| - | 3  | 3294                       | ron ABCA11P_uc0                                       | NM_133474    | NP_597731    | D9N162      | D9N162_HUMAN |                             | 1    | CATTCTCCACAT  | 0.418 |             |
| + | 8  | 1480                       | L7R PIK3R1_uc0                                        | NM_181523    | NP_852664    | P27986      | P85A_HUMAN   | p.?(1)                      | 101  | AGCACTGCCTC   | 0.353 |             |
| - | 4  | 272                        |                                                       | NM_138493    | NP_612502    | Q9P0B6      | CF129_HUMAN  | Potential.                  | 0    | TTGCCGAAGAA   | 0.542 |             |
| + | 2  | 269                        | F25_uc003qwl.1_I                                      | NM_030615    | NP_085118    | Q9UIL4      | KIF25_HUMAN  | inesin-moto p.W3C(1)        | 2    | TGACATGGACC   | 0.602 |             |
| - | 5  | 698                        | U_uc003ynm.3_M                                        | NM_001099754 | NP_001093224 | Q9NX95      | SYBU_HUMAN   | raction with KIF5B. Ser-ric | 1    | AGGACCTCGAC   | 0.473 |             |
| - | 9  | 870                        | nse_Mutation_p.L'                                     | NM_017871    | NP_060341    | Q5TA45      | INT11_HUMAN  |                             | 0    | CGGTCAGCCCC   | 0.577 |             |
| + | 2  | 401                        |                                                       | NM_152228    | NP_689414    | Q7RTX0      | TS1R3_HUMAN  | ellular (Potential).        | 0    | GCAGTACCAGC   | 0.642 |             |
| + | 3  | 857                        | inv.2_Intron TAS1F                                    | NM_138697    | NP_619642    | Q7RTX1      | TS1R1_HUMAN  | ellular (Potential).        | 3    | CGAGTCCGTGG   | 0.642 |             |
| - | 4  | 1598_1599_HL21_uc009vme.   | NM_014851                                             | NP_055666    | Q9UJP4       | KLH21_HUMAN | Kelch 6.     |                             | 1    | CAGAGACGTACA  | 0.629 |             |
| + | 18 | 4676                       | laoj.2_Missense_                                      | NM_015215    | NP_056030    | Q9Y6Y1      | CMTA1_HUMAN  |                             | 9    | CCTCCCTCCGC   | 0.488 |             |
| - | 12 | 1399                       |                                                       | NM_207420    | NP_997303    | Q6PXP3      | GTR7_HUMAN   | lasmic (Potential).         | 0    | CTCCGGAATAAC  | 0.478 |             |
| + | 4  | 1478                       | asi.1_Missense_M                                      | NM_020780    | NP_065831    | Q9P2K9      | PTHD2_HUMAN  | ellular (Potential).        | 7    | TGGGGGACAG.   | 0.512 |             |
| - | 1  | 306                        |                                                       | NM_001089591 | NP_001083060 |             |              |                             | 0    | AAAGATTTTGTG  | 0.428 |             |
| + | 1  | 536                        | C7A_uc009vpg.2_                                       | NM_152375    | NP_689588    | Q5VTJ3      | KLD7A_HUMAN  |                             | 3    | GCTTGGGCAGC   | 0.632 |             |
| + | 8  | 1985                       | p.G461S PAX7_u                                        | NM_002584    | NP_002575    | P23759      | PAX7_HUMAN   |                             | 203  | AGTACGGCCAG   | 0.642 | rs140323790 |
| - | 11 | 1562                       | fc.2_Missense_Mi                                      | NM_032236    | NP_115612    | Q86UV5      | UBP48_HUMAN  |                             | 2    | TATCCCAGTCTAC | 0.363 |             |
| - | 4  | 621                        | h.2_Intron RHCE_i                                     | NM_020485    | NP_065231    | P18577      | RHCE_HUMAN   | ical; (Potential).          | 0    | CCCCAAAATAGG  | 0.542 |             |
| - | 25 | 3671                       | sw.1_Missense_M                                       | NM_004672    | NP_004663    | O95382      | M3K6_HUMAN   |                             | 9    | GCTGGGAGTCC   | 0.647 |             |
| + | 4  | 1171                       | xt.2_Missense_Mi                                      | NM_032884    | NP_116273    | Q6P1W5      | CA094_HUMAN  |                             | 0    | ACTTTCTACAC   | 0.512 |             |
| - | 2  | 437                        | 122_uc001ccb.1_                                       | NM_024640    | NP_078916    | Q86U90      | YRDC_HUMAN   | YrdC-like.                  | 0    | GTCTTTCAGGAC  | 0.478 |             |
| - | 2  | 149                        | loix.1_Missense_                                      | NM_016257    | NP_057341    | Q9UM19      | HPCL4_HUMAN  | p.P10H(1)                   | 1    | CCTCGGGGGCC   | 0.632 |             |
| - | 6  | 1390_1391.2_Intron PPIE_uc | NM_001720                                             | NP_001711    | P34820       | BMP8B_HUMAN |              |                             | 0    | GAGTCCAGTGG   | 0.639 |             |
| + | 12 | 1444                       | ise_Mutation_p.R3                                     | NM_001017922 | NP_001017922 | Q96PL5      | ERMAP_HUMAN  | (Potential). B30.2/SPRY.    | 1    | CCCTTCGCCCT   | 0.448 |             |
| - | 9  | 1249                       | e_Mutation_p.P40                                      | NM_000778    | NP_000769    | Q02928      | CP4AB_HUMAN  |                             | 4    | ATCAGGGAAGG   | 0.577 |             |
| - | 9  | 1244                       | e_Mutation_p.T39                                      | NM_000778    | NP_000769    | Q02928      | CP4AB_HUMAN  |                             | 4    | GGAAGGTGACG   | 0.582 |             |

|   |    |         |                                                           |              |              |        |                                          |    |               |       |             |
|---|----|---------|-----------------------------------------------------------|--------------|--------------|--------|------------------------------------------|----|---------------|-------|-------------|
| - | 17 | 2295    | rf168_uc001cyl.2_                                         | NM_001004303 | NP_001004303 | Q5VWT5 | CA168_HUMAN                              | 5  | TTCTAGGAGAG/  | 0.323 |             |
| - | 1  | 342_343 |                                                           | NM_032027    | NP_114416    | Q9BX74 | TM2D1_HUMAN                              | 1  | CACGGCCTCCGC  | 0.673 |             |
| - | 3  | 2055    | 3_Intron KANK4_u                                          | NM_181712    | NP_859063    | Q577N3 | KANK4_HUMAN                              | 6  | CCCAATAGTGG/  | 0.617 |             |
| - | 4  | 377     |                                                           | NM_018841    | NP_061329    | Q9UBI6 | GBG12_HUMAN                              | 0  | TGAAAGGGTTT/  | 0.453 |             |
| - | 11 | 1931    | P2_uc001dmy.1_F                                           | NM_004120    | NP_004111    | P32456 | GBP2_HUMAN                               | 1  | CTGTTCTAAA/   | 0.408 |             |
| - | 12 | 1667    | p.M202L HFM1_u                                            | NM_001017975 | NP_001017975 | A2PYH4 | HFM1_HUMAN case C-terminal.              | 0  | AGTACATTTGTA/ | 0.328 |             |
| - | 18 | 2341    | HGAP29_uc001d                                             | NM_004815    | NP_004806    | Q52LW3 | RHG29_HUMAN                              | 11 | ATGACCACAAA/  | 0.328 |             |
| - | 2  | 265     | PYD_uc001drw.2_                                           | NM_000110    | NP_000101    | Q12882 | DPYD_HUMAN                               | 8  | GATTTCTTTTCC  | 0.383 |             |
| - | 40 | 3424    | G1048R COL11A                                             | NM_001854    | NP_001845    | P12107 | COBA1_HUMAN le-helical region.           | 12 | AGTCCAGGAA/   | 0.383 |             |
| + | 7  | 1186    | va.1_Missense_Mi                                          | NM_001144937 | NP_001138409 | Q5VTL7 | FNDC7_HUMAN nnectin type-III 5.          | 2  | CTGTCCGTGGT/  | 0.512 |             |
| + | 2  | 370     | p.G114E CD2_ucl                                           | NM_001767    | NP_001758    | P06729 | CD2_HUMAN -3 (CD58) binding region 2.    | 1  | AAAAGGAAAA/   | 0.308 |             |
| + | 76 | 9459    | 3PF10_uc010oyl.1                                          | NM_001039703 | NP_001034792 | A6NDV3 | A6NDV3_HUMAN                             | 0  | TGCTGGATGAG   | 0.483 |             |
| + | 10 | 1004    | IKRD35_uc010oyx                                           | NM_144698    | NP_653299    | Q8N283 | ANR35_HUMAN Potential.                   | 5  | GTGGAGGTGG/   | 0.557 |             |
| - | 3  | 4818    | uc001ezv.2_Intron                                         | NM_001014342 | NP_001014364 | Q5D862 | FILA2_HUMAN                              | 17 | CTTCACTGTCA/  | 0.507 |             |
| + | 2  | 1035    |                                                           | NM_001025231 | NP_001020402 | Q5T749 | KPRP_HUMAN Pro-rich.                     | 5  | GTGCCGAATCG   | 0.617 |             |
| + | 3  | 589     | o.2_Missense_Mt                                           | NM_021948    | NP_068767    | Q96GW7 | PGCB_HUMAN g-like V-type.                | 2  | CCCGGGCCCGG   | 0.711 |             |
| - | 1  | 815     |                                                           | NM_001005278 | NP_001005278 | Q8NGY6 | OR6N2_HUMAN Name=7; (Potential).         | 0  | GTGTTCCGGTCA/ | 0.433 |             |
| - | 7  | 816     |                                                           | NM_017625    | NP_060095    | Q8WWA0 | ITLN1_HUMAN ogen C-terminal.             | 7  | AAATCCCGCAG   | 0.488 |             |
| + | 10 | 1625    |                                                           | NM_002022    | NP_002013    | P31512 | FMO4_HUMAN                               | 3  | CTTATCAGTACC  | 0.498 |             |
| - | 3  | 263     |                                                           | NM_005092    | NP_005083    | Q9UNG2 | TNF18_HUMAN xellular (Potential).        | 1  | TGAGGGTAATG/  | 0.333 |             |
| + | 12 | 2886    |                                                           | NM_022093    | NP_071376    | Q9UQP3 | TENN_HUMAN nnectin type-III 8.           | 9  | ACGGAGAGACC.  | 0.607 |             |
| - | 12 | 3066    | g.3_Missense_Mul                                          | NM_007314    | NP_009298    | P42684 | ABL2_HUMAN ig (By similarity). Pro-rich. | 14 | GTTGTGAGTGG/  | 0.572 |             |
| + | 34 | 8228    | p.K750N CEP350                                            | NM_014810    | NP_055625    | Q5VT06 | CE350_HUMAN                              | 4  | GAGAAATCCCT/  | 0.363 |             |
| + | 4  | 366     | jgh.2_Missense_M                                          | NM_173156    | NP_775179    | Q92540 | SMG7_HUMAN                               | 3  | CAATCCGAATC   | 0.423 |             |
| + | 7  | 1183    | i_Mutation_p.P285                                         | NM_005807    | NP_005798    | Q92954 | PRG4_HUMAN K-X-P-X-P-T-T-X. 4; approx    | 1  | CCACCCCCAAG/  | 0.637 |             |
| + | 7  | 1369    | _Mutation_p.P347                                          | NM_005807    | NP_005798    | Q92954 | PRG4_HUMAN ats of K-X-P-X-P-T-T-X. 12    | 1  | CCACCCCCAAG.  | 0.652 |             |
| - | 8  | 1763    | ot.1_Missense_Mt                                          | NM_199051    | NP_950252    | Q76B58 | FAM5C_HUMAN                              | 5  | TGGCATGGACTT/ | 0.468 |             |
| + | 6  | 922     | p.G531R CFHR4_                                            | NM_006684    | NP_006675    | Q92496 | FHR4_HUMAN Sushi 5.                      | 3  | TAAAGGAAAA/   | 0.279 |             |
| + | 3  | 511     |                                                           | NM_030787    | NP_110414    | Q9BXR6 | FHR5_HUMAN Sushi 2.                      | 2  | CATTTCTGTGT/  | 0.378 |             |
| - | 8  | 2163    | o.1_Missense_M                                            | NM_014875    | NP_055690    | Q15058 | KIF14_HUMAN inesisin-motor.              | 7  | CCAGGGTGAAA.  | 0.373 |             |
| - | 42 | 5436    |                                                           | NM_000069    | NP_000060    | Q13698 | CAC1S_HUMAN lasmic (Potential).          | 5  | AGGAGGTGCCT   | 0.597 |             |
| - | 2  | 103     | _Mutation_p.E12K                                          | NM_000364    | NP_000355    | P45379 | TNNT2_HUMAN                              | 0  | CTCCTCGTACT/  | 0.567 |             |
| - | 18 | 3275    | p.L962S LAMB3_                                            | NM_001017402 | NP_001017402 | Q13751 | LAMB3_HUMAN nain I. Potential.           | 6  | CCTGCAACCGG/  | 0.602 |             |
| - | 7  | 2070    | p.l479N SUSD4_                                            | NM_017982    | NP_060452    | Q5VX71 | SUSD4_HUMAN lasmic (Potential).          | 0  | CTGCAATGTGCA/ | 0.617 |             |
| + | 1  | 214     |                                                           | NM_019090    | NP_061963    | Q9P2G4 | K1383_HUMAN                              | 1  | ATATTCCTCAGG/ | 0.408 |             |
| - | 4  | 479     | M20_uc009xfx.1_I                                          | NM_014765    | NP_055580    | Q15388 | TOM20_HUMAN lasmic (Potential).          | 0  | CATATTCACCTGT | 0.408 |             |
| - | 3  | 490     | nse_Mutation_p.P:                                         | NM_002924    | NP_002915    | P49802 | RG57_HUMAN DEP.                          | 7  | CGTAGGTATCTT/ | 0.378 |             |
| + | 1  | 619     |                                                           | NM_001004698 | NP_001004698 | A6NFC9 | OR2W5_HUMAN                              | 3  | GCTCTCCTCT/   | 0.567 | rs141044958 |
| - | 1  | 906     |                                                           | NM_001004691 | NP_001004691 | Q8NG81 | OR2M7_HUMAN lasmic (Potential).          | 2  | GATTTTCATTAAT | 0.403 |             |
| - | 5  | 791     | mo.3_Missense_M                                           | NM_152751    | NP_689964    | Q8N7W2 | BEND7_HUMAN Poly-Lys.                    | 2  | TTCTTTTATTTTC | 0.433 |             |
| - | 23 | 2739    | i.2_RNA NEBL_uc                                           | NM_006393    | NP_006384    | O76041 | NEBL_HUMAN Nebulin 22.                   | 2  | ACCATTGAAATAT | 0.383 |             |
| + | 15 | 3515    | A1217_uc010qda                                            | NM_019590    | NP_062536    | Q5T5P2 | SKT_HUMAN                                | 7  | ACTTGAAAAAG/  | 0.502 |             |
| + | 20 | 2543    | .S728F MYO3A_u                                            | NM_017433    | NP_059129    | Q8NEV4 | MYO3A_HUMAN rosin head-like.             | 18 | AAATTCCTTCGA/ | 0.333 |             |
| - | 9  | 1207    | ito.2_Missense_                                           | NM_145698    | NP_663736    | Q5T8D3 | ACBD5_HUMAN                              | 0  | AATCCAGAATTT/ | 0.413 |             |
| - | 2  | 2401    | nse_Mutation_p.R                                          | NM_020848    | NP_065899    | Q9P266 | K1462_HUMAN                              | 4  | GACTTCGGCCT   | 0.617 |             |
| + | 5  | 1842    | 33A_uc010qev.1_I                                          | NM_006974    | NP_008905    | Q06730 | ZN33A_HUMAN C2H2-type 9.                 | 3  | ATGTCGCCGAATC | 0.423 |             |
| + | 5  | 599     | lizo.1_RNA HSD17B7P2_uc001izp.1_Missense_Mutation_p.N173S |              |              |        |                                          | 0  | TCGCAATGCAAC  | 0.453 | rs2257765   |

|   |    |         |                   |              |              |        |             |                                |     |                  |       |             |
|---|----|---------|-------------------|--------------|--------------|--------|-------------|--------------------------------|-----|------------------|-------|-------------|
| - | 12 | 1599    | TKN2_uc001jlv.2_  | NM_145307    | NP_660350    | Q8IZC4 | RTKN2_HUMAN |                                | 0   | TGTCTCTTTTTCC    | 0.418 |             |
| - | 10 | 1468    | p.A449T CTNNA3    | NM_001127384 | NP_001120856 | Q9UI47 | CTNA3_HUMAN |                                | 8   | 3ATTGGCTGCAA     | 0.289 |             |
| - | 27 | 3320    | n.2_Missense_Mut  | NM_015179    | NP_055994    | Q5JTH9 | RRP12_HUMAN | Glu-rich.                      | 3   | cctcctcctcctcctc | 0.547 |             |
| - | 2  | 661     | c001kvi.1_Missen  | NM_002779    | NP_002770    | A5PKW4 | PSD1_HUMAN  | Pro-rich.                      | 3   | .GCAAGGAGCCT     | 0.692 |             |
| - | 26 | 2226    | a-mir-936 MI0005  | NM_000494    | NP_000485    | Q9UMD9 | COHA1_HUMAN | (ential). Triple-helical regio | 5   | GGAGCCCTTGG      | 0.498 |             |
| - | 13 | 1831    | 9ycc.2_Missense_  | NM_021924    | NP_068743    | Q9HBB8 | CDHR5_HUMAN | tem repeats.  2.  Extracellule | 0   | TCCTGGCTCTG      | 0.667 | rs139058512 |
| - | 1  | 1006    |                   | NM_001005177 | NP_001005177 | Q8NGF1 | O52R1_HUMAN | Name=6; (Potential).           | 1   | 3GGCTGGGATAT     | 0.483 |             |
| + | 3  | 411     |                   | NM_021801    | NP_068573    | Q9NRE1 | MMP26_HUMAN |                                | 0   | ATCTGGAGCAA      | 0.408 |             |
| + | 1  | 80      | 32_uc001mak.1_lr  | NM_001005162 | NP_001005162 | Q8NGF0 | O52B6_HUMAN | ellular (Potential).           | 1   | TGACACTCGCA      | 0.502 |             |
| + | 1  | 890     |                   | NM_001003443 | NP_001003443 | Q8NH54 | O56A3_HUMAN | Name=7; (Potential).           | 0   | TTACGGGGTGAC     | 0.443 |             |
| - | 1  | 887     |                   | NM_001001917 | NP_001001917 | Q8NGH5 | O56A1_HUMAN | Name=7; (Potential).           | 3   | CAATAGGGTTC      | 0.458 |             |
| - | 3  | 982     | p.P208L FAM160    | NM_001098794 | NP_001092264 | Q8N612 | F16A2_HUMAN |                                | 2   | GACGGGGAGCG      | 0.582 |             |
| - | 1  | 262     |                   | NM_001004461 | NP_001004461 | Q8NH74 | O10A6_HUMAN | ellular (Potential).           | 2   | TTTTTCTCAGTAGA   | 0.438 |             |
| - | 1  | 1095    | p.R59K STK33_uc   | NM_030906    | NP_112168    | Q9BYT3 | STK33_HUMAN |                                | 7   | TTTTTCTCTCCA     | 0.378 |             |
| - | 2  | 199     | NF141_uc001mit.   | NM_016422    | NP_057506    | Q8WVD5 | RN141_HUMAN |                                | 0   | CTGGTAACTTGT     | 0.378 |             |
| + | 17 | 1901    | Js.1_Missense_Mt  | NM_031418    | NP_113606    | Q9BYT9 | ANO3_HUMAN  | ellular (Potential).           | 4   | TGGAATTCATC      | 0.388 |             |
| - | 3  | 581     | n_p.S154F MPPEI   | NM_001584    | NP_001575    | Q15777 | MPPD2_HUMAN |                                | 1   | GGAGGGACTGA      | 0.413 |             |
| - | 6  | 703     | n.1_Missense_Mut  | NM_002334    | NP_002325    | O75096 | LRP4_HUMAN  | ellular (Potential).           | 4   | CTGGCACTGCT      | 0.632 |             |
| + | 1  | 31      |                   | NM_001004727 | NP_001004727 | Q8NGF9 | OR4X2_HUMAN | ellular (Potential).           | 0   | TTTCTCCAACC      | 0.433 |             |
| + | 1  | 116     |                   | NM_001004059 | NP_001004059 | Q8NH73 | OR4S2_HUMAN | Name=1; (Potential).           | 3   | TCTGGGAAATCT     | 0.388 |             |
| + | 1  | 636     |                   | NM_001004738 | NP_001004738 | Q8NGL2 | OR5L1_HUMAN | Name=5; (Potential).           | 5   | CATCATGATCATC    | 0.502 |             |
| + | 1  | 898     |                   | NM_001001952 | NP_001001952 | Q8NGL1 | OR5D1_HUMAN | lasmic (Potential).            | 3   | 3TCAAGGATACAC    | 0.413 |             |
| + | 1  | 474_475 |                   | NM_001005492 | NP_001005492 | Q8NH18 | OR5J2_HUMAN | Name=4; (Potential).           | 4   | TTAATCCACACA     | 0.441 |             |
| - | 1  | 563     |                   | NM_001004471 | NP_001004471 | Q8NGQ4 | O10Q1_HUMAN | ellular (Potential).           | 2   | GGACGGGAGGC      | 0.622 |             |
| + | 1  | 800     |                   | NM_001004728 | NP_001004728 | Q8NGJ0 | OR5A1_HUMAN | ellular (Potential).           | 2   | CAGCTCCAGCT      | 0.522 |             |
| + | 1  | 553     |                   | NM_001004708 | NP_001004708 | Q8NGJ1 | OR4D6_HUMAN | ellular (Potential).           | 1   | AGGTGGTAAAA      | 0.507 |             |
| + | 1  | 689     | oaj.2_Nonsense_I  | NM_018484    | NP_060954    | Q9NSA0 | S22AB_HUMAN | ellular (Potential).           | 2   | AGCTGGAGCGA      | 0.682 |             |
| - | 4  | 846     | p.S258L MEN1_u    | NM_130800    | NP_570712    | O00255 | MEN1_HUMAN  | tion with FA3L(1) p.D252fs     | 238 | CCAGCGAGTCG      | 0.308 |             |
| + | 5  | 678     | v.1_RNA TSGA10I   | NM_152762    | NP_689975    | Q3SY00 | T10IP_HUMAN |                                | 0   | AGGTCCAGCTG      | 0.647 |             |
| - | 7  | 894     | p.L242F CPT1A_    | NM_001876    | NP_001867    | P50416 | CPT1A_HUMAN | lasmic (Potential).            | 2   | TCGGAGGTAGA      | 0.657 |             |
| + | 10 | 1915    | 35_uc010rsp.1_5'  | NM_020798    | NP_065849    | Q9P2H5 | UBP35_HUMAN |                                | 3   | CCGAGGAGCCC      | 0.587 |             |
| + | 4  | 813     | DC83_uc001pbi.1   | NM_173556    | NP_775827    | Q8IWF9 | CCD83_HUMAN | Potential.                     | 1   | ATGAAGGAAAA      | 0.383 |             |
| - | 6  | 3114    | _Mutation_p.E689I | NM_000926    | NP_000917    | P06401 | PRGR_HUMAN  | teroid-binding.                | 4   | ATGATTCTTTCAT    | 0.378 |             |
| - | 2  | 391     |                   | NM_002422    | NP_002413    | P08254 | MMP3_HUMAN  |                                | 2   | TCCTCCACTTCC     | 0.468 |             |
| - | 10 | 1365    |                   | NM_002427    | NP_002418    | P45452 | MMP13_HUMAN | mopexin-like 4.                | 3   | TGGGTCCGTTG      | 0.308 |             |
| - | 2  | 200     |                   | NM_002427    | NP_002418    | P45452 | MMP13_HUMAN |                                | 3   | CATTCTCCTTCA     | 0.448 |             |
| - | 2  | 162     |                   | NM_002427    | NP_002418    | P45452 | MMP13_HUMAN |                                | 3   | TAGTATGATCTC     | 0.458 |             |
| - | 6  | 875     | p.V212F CASP4_1   | NM_001225    | NP_001216    | P49662 | CASP4_HUMAN |                                | 4   | CTGACCCACA       | 0.498 |             |
| - | 3  | 474     | Wissense_Mutator  | NM_052968    | NP_443200    | Q6Q788 | APOA5_HUMAN | Potential.                     | 0   | GCTTCCCCCA       | 0.657 |             |
| + | 8  | 1722    |                   | NM_025004    | NP_079280    | Q0P6D6 | CCD15_HUMAN |                                | 2   | TCTCCCAAAG       | 0.403 | rs112861775 |
| - | 11 | 1603    | gy.1_Missense_Mi  | NM_014987    | NP_055802    | Q9UPX0 | TUTLB_HUMAN | ar (Potential). Ilg-like 5.    | 0   | 3CTCCCTACTT      | 0.632 |             |
| - | 7  | 774     | 3dl.1_Missense_M  | NM_016615    | NP_057699    | Q9NSD5 | S6A13_HUMAN | Name=5; (Potential).           | 0   | 3GTAAGGAAATG1    | 0.453 |             |
| + | 14 | 1496    | p.F402C B4GALN    | NM_173593    | NP_775864    | Q6L9W6 | B4GN3_HUMAN | renal (Potential).             | 2   | GTCCTTCCGAG      | 0.622 |             |
| + | 11 | 1431    | X47_uc001rax.2_1  | NM_016355    | NP_057439    | Q9H0S4 | DDX47_HUMAN | case C-terminal.               | 0   | CCAGAGAACAG      | 0.423 |             |
| - | 2  | 441     | 2A1_uc001rqv.2_1  | NM_001844    | NP_001835    | P02458 | CO2A1_HUMAN | VWFC.                          | 2   | AGATGGGGCAG      | 0.488 |             |
| - | 3  | 336     | slr.1_Missense_Mu | NM_024095    | NP_077000    | Q9H765 | ASB8_HUMAN  | ANK 1.                         | 1   | GCAAGGGCTTC      | 0.483 |             |
| - | 3  | 404     | r_p.P66L ZNF641_  | NM_152320    | NP_689533    | Q96N77 | ZN641_HUMAN |                                | 2   | .CCAGGGAGCA      | 0.537 |             |

|   |    |      |                    |              |              |        |             |                               |    |               |       |             |
|---|----|------|--------------------|--------------|--------------|--------|-------------|-------------------------------|----|---------------|-------|-------------|
| - | 7  | 1199 |                    | NM_002282    | NP_002273    | P78385 | KRT83_HUMAN | Rod. Coil 2.                  | 1  | GCAGGGCGCCC   | 0.627 |             |
| - | 7  | 1269 |                    | NM_033448    | NP_258259    | Q3SY84 | K2C71_HUMAN | Coil 2. Rod.                  | 2  | GCAGGGCGCCC   | 0.652 |             |
| + | 9  | 970  | T2_uc009zms.2_li   | NM_003578    | NP_003569    | O75908 | SOAT2_HUMAN |                               | 1  | AGGTGGAATTAT  | 0.547 |             |
| + | 1  | 209  | KC5_uc001set.2_li  | NM_004503    | NP_004494    | P09630 | HXC6_HUMAN  |                               | 3  | TATGATCCAGTG  | 0.562 |             |
| - | 2  | 463  |                    | NM_020370    | NP_065103    | Q9NQ55 | GPR84_HUMAN | lasmic (Potential).           | 2  | CTTAGGGTGGG   | 0.567 |             |
| + | 1  | 259  |                    | NM_001005182 | NP_001005182 | Q96RD1 | OR6C1_HUMAN | ellular (Potential).          | 2  | CAGGAGATAAAA  | 0.383 |             |
| + | 1  | 940  |                    | NM_001005519 | NP_001005519 | A6NDL8 | O6C68_HUMAN | lasmic (Potential).           | 1  | CATTTTCGTTTAA | 0.279 |             |
| + | 17 | 2175 | c.1_Missense_Mut   | NM_001982    | NP_001973    | P21860 | ERBB3_HUMAN | ical; (Potential).            | 8  | GGCGGCACTT    | 0.448 |             |
| - | 1  | 369  |                    | NM_012064    | NP_036196    | P30301 | MIP_HUMAN   | llular (By similarity).       | 1  | TCCTCGGACAG   | 0.597 |             |
| - | 11 | 1165 | PS2_uc001sxi.3_lr  | NM_032606    | NP_115995    | Q9BXY5 | CAYP2_HUMAN |                               | 2  | TAAGGGATTGG   | 0.343 |             |
| + | 13 | 1785 | p.R564K ACSS3_     | NM_024560    | NP_078836    | Q9H6R3 | ACSS3_HUMAN |                               | 4  | TCACAGAATTT   | 0.398 |             |
| - | 1  | 1123 |                    | NM_152638    | NP_689851    | Q8TC90 | CL012_HUMAN |                               | 2  | CGGAGGATCTG   | 0.632 |             |
| - | 5  | 1898 | p.R585Q USP44_     | NM_001042403 | NP_001035862 | Q9H0E7 | UBP44_HUMAN |                               | 3  | TTCTCTCGTTAT  | 0.423 |             |
| + | 11 | 1707 | tztx.2_Missense_Mu | NM_139319    | NP_647480    | Q8NDX2 | VGLU3_HUMAN | ical; (Potential).            | 3  | CTGTCCCCTCA   | 0.493 |             |
| + | 6  | 515  | G138E MYBPC1_      | NM_206820    | NP_996556    | Q00872 | MYPC1_HUMAN | like C2-type 1.               | 4  | TCAGGAAATTA   | 0.383 |             |
| + | 2  | 272  |                    | NM_017564    | NP_060034    | Q8WWQ8 | STAB2_HUMAN | ellular (Potential).          | 14 | GGCAAGAAGAT   | 0.423 |             |
| - | 7  | 2885 |                    | NM_014840    | NP_055655    | O60285 | NUAK1_HUMAN |                               | 2  | GGAGGGGATG    | 0.582 |             |
| - | 22 | 5039 |                    | NM_015335    | NP_056150    | Q71F56 | MD13L_HUMAN |                               | 8  | CGTGGGAATTC   | 0.473 |             |
| - | 27 | 3168 |                    | NM_006836    | NP_006827    | Q92616 | GCN1L_HUMAN |                               | 4  | GAGCGGAGCCC   | 0.567 |             |
| + | 31 | 5409 |                    | NM_207437    | NP_997320    | Q8IVF4 | DYH10_HUMAN | 1 (By similarity).            | 6  | CTACGGCTACG   | 0.597 |             |
| - | 9  | 3011 | 1uia.2_Missense_Mu | NM_133448    | NP_597705    | Q14C87 | T132D_HUMAN | ellular (Potential).          | 14 | TCTGGGAGGTT   | 0.527 |             |
| + | 29 | 4921 | bi.2_Missense_Mu   | NM_015678    | NP_056493    | Q8NFP9 | NBEA_HUMAN  |                               | 11 | CAATTCGGTTCT  | 0.373 |             |
| + | 1  | 2788 |                    | NM_207361    | NP_997244    | Q5SZK8 | FREM2_HUMAN | extracellular (Potential).    | 11 | TGGACAACCAAG  | 0.547 |             |
| - | 26 | 3235 |                    | NM_052867    | NP_443099    | Q8IZF0 | NALCN_HUMAN | S5 of repeat III; (Potential) | 16 | AATTCCTTGAA   | 0.438 |             |
| - | 26 | 2019 | 4A1_uc010agl.2_l   | NM_001845    | NP_001836    | P02462 | CO4A1_HUMAN | le-helical region.            | 6  | CTCACCTGGCA   | 0.622 |             |
| - | 13 | 1711 | p.E255K ADCY4_     | NM_139247    | NP_640340    | Q8NFM4 | ADCY4_HUMAN | lasmic (Potential).           | 3  | CTTCTCTCTGA   | 0.562 |             |
| + | 9  | 2663 | FATC4_uc010tot.1   | NM_004554    | NP_004545    | Q14934 | NFAC4_HUMAN | Pro-rich.                     | 3  | CAGTTTCTTCC   | 0.657 |             |
| - | 4  | 700  | se_Mutation_p.P11  | NM_001083893 | NP_001077362 | Q13033 | STRN3_HUMAN |                               | 0  | TGTGGGAGCCT   | 0.353 |             |
| + | 13 | 5916 |                    | NM_004274    | NP_004265    | Q13023 | AKAP6_HUMAN |                               | 21 | CAAAGGTATCA   | 0.363 |             |
| + | 3  | 423  | p.G90D NPAS3_      | NM_173159    | NP_071406    | Q8IXF0 | NPAS3_HUMAN |                               | 2  | GGAAGGCCCTC   | 0.448 |             |
| - | 13 | 1961 | s.2_Missense_Mu    | NM_000347    | NP_000338    | P11277 | SPTB1_HUMAN | Spectrin 4.                   | 11 | GTTTGGACTGC   | 0.557 |             |
| - | 2  | 1590 | e_Mutation_p.G27   | NM_183002    | NP_892114    | P57103 | NAC3_HUMAN  | lasmic (Potential).           | 7  | GGTCACCCCTC   | 0.483 |             |
| - | 2  | 595  |                    | NM_001105579 | NP_001099049 | A6NDD5 | SYN1L_HUMAN |                               | 0  | GGATGGTGACA   | 0.577 |             |
| - | 2  | 960  | zh.2_Missense_Mu   | NM_003485    | NP_003476    | Q15743 | OGR1_HUMAN  | lasmic (Potential).           | 1  | GATGCCCTGGT   | 0.657 |             |
| - | 27 | 3393 | Jaub.1_Missense_Mu | NM_024764    | NP_079040    | Q9H7T0 | CTSRB_HUMAN |                               | 5  | CCACGGATGGA   | 0.428 |             |
| + | 3  | 811  | p.D286N SERPIN     | NM_006215    | NP_006206    | P29622 | KAIN_HUMAN  |                               | 4  | TGCAGGACCAG   | 0.493 |             |
| - | 7  | 802  | p.A197V DICER1_    | NM_030621    | NP_085124    | Q9UPY3 | DICER_HUMAN | ase ATP-binding.              | 5  | TGGAAGCAGTTA  | 0.358 |             |
| + | 14 | 1696 |                    | NM_001012423 | NP_001012423 |        |             |                               | 1  | ACCTCGGCCCA   | 0.607 |             |
| + | 11 | 2017 | at.1_Missense_Mu   | NM_005503    | NP_005494    | Q99767 | APBA2_HUMAN | PDZ 1.                        | 0  | ATGGCGGCCCG   | 0.662 | rs1046394   |
| - | 27 | 4363 | e_Mutation_p.S13   | NM_002420    | NP_002411    | Q724N2 | TRPM1_HUMAN | lasmic (Potential).           | 4  | GATAGGAAATA   | 0.398 |             |
| + | 5  | 1335 | p.E422K C15orf5E   | NM_175741    | NP_786883    | Q86Y26 | NUT_HUMAN   |                               | 30 | AAGAGGAAGAA   | 0.517 |             |
| + | 11 | 1843 | bbi.2_Missense_Mu  | NM_003246    | NP_003237    | P07996 | TSP1_HUMAN  | EGF-like 1.                   | 6  | CAATCCCTGCT   | 0.517 |             |
| + | 12 | 1383 | _Intron GCOM1_u    | NM_001018100 | NP_001018110 | POCAP1 | GCOM1_HUMAN |                               | 1  | AAGTGGAAACC   | 0.363 |             |
| + | 4  | 777  | e_Mutation_p.E57I  | NM_000236    | NP_000227    | P11150 | LIPC_HUMAN  |                               | 1  | TTGGAGAAACC   | 0.478 |             |
| + | 13 | 1932 | .1_Intron IQCH_uc  | NM_001031715 | NP_001026885 | Q86VS3 | IQCH_HUMAN  |                               | 4  | ATATATGATATTT | 0.433 |             |
| - | 13 | 2759 | bla.2_Missense_Mu  | NM_144572    | NP_653173    | Q9UPU7 | TBD2B_HUMAN | p.D903N(1)                    | 3  | CGCGTGGTTTC   | 0.617 | rs117285325 |
| + | 2  | 1781 | unk.1_Missense_Mu  | NM_015206    | NP_056021    | Q9UPX6 | K1024_HUMAN |                               | 4  | TGCCAATGGGG   | 0.532 |             |



|   |    |         |                   |              |              |        |             |                                |    |               |       |
|---|----|---------|-------------------|--------------|--------------|--------|-------------|--------------------------------|----|---------------|-------|
| + | 12 | 1753    | lunn.1_Missense_I | NM_018689    | NP_061159    | Q8WUJ3 | K1199_HUMAN |                                | 3  | 3GAACATCATAG  | 0.532 |
| - | 5  | 2991    | rs.1_Missense_Mt  | NM_001717    | NP_001708    | Q01954 | BNC1_HUMAN  | C2H2-type 6.                   | 3  | ACAGACGAAAAC  | 0.498 |
| + | 7  | 756     | p.R15* LRRC28_u   | NM_144598    | NP_653199    | Q86X40 | LRC28_HUMAN | LRR 8.                         | 0  | TAGGTCGATCTC  | 0.348 |
| + | 25 | 4872    | i_p.V248F CACNA   | NM_021098    | NP_066921    | O95180 | CAC1H_HUMAN | 6 of repeat III; (Potential).  | 2  | CTCATCGTCAGC  | 0.647 |
| - | 1  | 227     |                   | NM_000243    | NP_000234    | O15553 | MEFV_HUMAN  | DAPIN.                         | 6  | ACTCTTCCCCAT/ | 0.642 |
| - | 13 | 3523    | uyn.1_Missense_I  | NM_001134407 | NP_001127879 | Q12879 | NMDE1_HUMAN | lasmic (Potential).            | 45 | TTAGGGTTGGAC  | 0.493 |
| - | 13 | 3418    | uyn.1_Missense_I  | NM_001134407 | NP_001127879 | Q12879 | NMDE1_HUMAN | lasmic (Potential).            | 45 | TTGTCTCCAAAA/ | 0.433 |
| - | 53 | 9011    | bd.1_Missense_Mi  | NM_017539    | NP_060009    | Q8TD57 | DYH3_HUMAN  |                                | 18 | ACAGTTCCTGAG/ | 0.532 |
| + | 1  | 1355    |                   | NM_006539    | NP_006530    | O60359 | CCG3_HUMAN  |                                | 0  | ACAGCAGGAAGA  | 0.443 |
| + | 3  | 201     |                   | NM_013292    | NP_037424    | Q96A32 | MLRS_HUMAN  | IEF-hand 1.                    | 0  | AGGAGGACCTT/  | 0.542 |
| + | 34 | 9656    | CAP_uc002dzg.1_   | NM_006662    | NP_006653    | Q6ZRS2 | SRCAP_HUMAN |                                | 4  | ATAATTCAGGAT/ | 0.617 |
| + | 3  | 456     | 75Q TSNAXIP1_uc   | NM_018430    | NP_060900    | Q2TAA8 | TXIP1_HUMAN |                                | 0  | AAATCGAAAAC/  | 0.582 |
| - | 5  | 1044    | se_Mutation_p.E2/ | NM_020947    | NP_065998    | Q6P9B6 | K1609_HUMAN | TLD.                           | 2  | CACCTCCAAG/   | 0.582 |
| - | 30 | 4839    |                   | NM_006445    | NP_006436    | Q6P2Q9 | PRP8_HUMAN  |                                | 6  | AAGATCTGGAT/  | 0.512 |
| - | 10 | 1551    | flux.1_Missense_I | NM_015229    | NP_056044    | O75153 | K0664_HUMAN |                                | 2  | GCCGGGGATGA   | 0.662 |
| + | 14 | 1872    | VASEK_uc002gea    | NM_000697    | NP_000688    | P18054 | LOX12_HUMAN | ipoxygenase.                   | 1  | TGCCTCTGGGG   | 0.468 |
| - | 9  | 1087    | rd.1_Missense_Mt  | NM_004860    | NP_004851    | P51116 | FXR2_HUMAN  |                                | 0  | GGTAGCTTCGG/  | 0.418 |
| + | 14 | 2631    | oo.2_Missense_M   | NM_001372    | NP_001363    | Q9NYC9 | DYH9_HUMAN  | n (By similarity).             | 20 | TCAAGGAATCTC  | 0.418 |
| + | 1  | 331     |                   | NR_002211    |              |        |             |                                | 0  | GGATTCGAGACC  | 0.607 |
| + | 15 | 5208    |                   | NM_016239    | NP_057323    | Q9UKN7 | MYO15_HUMAN | rosin head-like.               | 9  | AGGAGGAGCAG   | 0.498 |
| - | 19 | 3680    |                   | NM_014680    | NP_055495    | Q14667 | K0100_HUMAN |                                | 4  | ACTTAGAGGCT/  | 0.537 |
| + | 2  | 362     | _uc002hcz.1_RNA   | NM_005702    | NP_005693    | O75616 | ERAL1_HUMAN |                                | 1  | TGGTCTCTCTG/  | 0.522 |
| - | 4  | 1027    | IF12_uc002hdj.1_  | NM_001033561 | NP_001028733 | Q96QT6 | PHF12_HUMAN | ction with SIN3A.              | 1  | TGGGTGTGCCA/  | 0.562 |
| - | 1  | 229     | ssense_Mutation_f | NM_001042471 | NP_001035936 | Q8TAX9 | GSDMB_HUMAN |                                | 2  | AGCCAGAATCC.  | 0.502 |
| - | 1  | 310     |                   | NM_031957    | NP_114163    | Q9BYS1 | KRA15_HUMAN | -C-[QEPVRC]- [TPIVLE]-[S       | 0  | AGCTGATCTGG   | 0.632 |
| - | 1  | 329     |                   | NM_030966    | NP_112228    | Q8IUG1 | KRA13_HUMAN |                                | 0  | TCCACTGCTGC/  | 0.652 |
| - | 1  | 335     |                   | NM_002279    | NP_002270    | Q14525 | KT33B_HUMAN | inker 1. Rod.                  | 0  | GCAAGGGCTCC   | 0.602 |
| + | 1  | 573     | 2A_uc002hyx.2_5/  | NM_033194    | NP_149971    | Q9BQS6 | HSPB9_HUMAN |                                | 0  | TCTAAGGCTTCC. | 0.627 |
| + | 10 | 1304    | p.P197S TUBG2_    | NM_016437    | NP_057521    | Q9NRH3 | TBG2_HUMAN  |                                | 1  | TCATCCCCTGG/  | 0.657 |
| + | 1  | 1206    |                   | NM_001466    | NP_001457    | Q14332 | FZD2_HUMAN  | lasmic (Potential).            | 3  | GGCATGAAGT/   | 0.627 |
| + | 10 | 1978    | _p.P512L CLTC_u   | NM_004859    | NP_004850    | Q00610 | CLH1_HUMAN  | lexible linker.                | 48 | CACTCCAGATT/  | 0.363 |
| + | 13 | 2731    | rpm.1_Missense_I  | NM_030779    | NP_110406    | Q9H252 | KCNH6_HUMAN | lasmic (Potential).            | 1  | GAGTCCAGGGC   | 0.637 |
| - | 2  | 708_709 | wro.1_Missense_I  | NM_173477    | NP_775748    | Q495M9 | USH1G_HUMAN |                                | 2  | CTGAGGGTGT/   | 0.708 |
| + | 3  | 204     | knq.2_Missense_I  | NM_015210    | NP_056025    | Q9Y4B5 | CC165_HUMAN | Potential.                     | 0  | TCGGCGAGAAC   | 0.488 |
| - | 1  | 809     | TEC_uc010xaj.1_F  | NM_001137671 | NP_001131143 | B2RU33 | POTEC_HUMAN |                                | 3  | CCAAGCGCCCA/  | 0.597 |
| + | 9  | 1244    |                   | NM_001944    | NP_001935    | P32926 | DSG3_HUMAN  | Extracellular (Potential).     | 9  | TAAGAGAAGGA.  | 0.383 |
| + | 2  | 673_674 | lbox.2_Missense_I | NM_145055    | NP_659492    | Q96B23 | CR025_HUMAN |                                | 2  | CCTTCCTCTAG/  | 0.505 |
| + | 6  | 1719    | _p.Q226* DCC_uc   | NM_005215    | NP_005206    | P43146 | DCC_HUMAN   | potential). Ig-like C2-type 4. | 17 | TATTTTCAGATAG | 0.308 |
| + | 8  | 1169    | p.S343F SERPINE   | NM_012397    | NP_036529    | Q9UIV8 | SPB13_HUMAN |                                | 1  | ACAGTTCCTTTG/ | 0.567 |
| - | 3  | 20955   |                   | NM_024690    | NP_078966    | Q8WXI7 | MUC16_HUMAN | xtracellular (Potential).      | 57 | GTATCCATTGG/  | 0.463 |
| - | 1  | 3628    |                   | NM_024690    | NP_078966    | Q8WXI7 | MUC16_HUMAN | xtracellular (Potential).      | 57 | AGGATCAGGAG   | 0.458 |
| + | 3  | 434     |                   | NM_152356    | NP_689569    | Q8N8L2 | ZN491_HUMAN | ype 1; degenerate.             | 2  | GATATTCATCT/  | 0.393 |
| + | 1  | 130     | ZNF763_uc010xm    | NM_144566    | NP_653167    | Q9H0M5 | ZN700_HUMAN |                                | 0  | CTATGCCCTGC   | 0.647 |
| - | 4  | 866     | 799_uc002mts.3_I  | NM_001080821 | NP_001074290 | Q96GE5 | ZN799_HUMAN | C2H2-type 4.                   | 6  | GATAGGAAGT/   | 0.368 |
| - | 4  | 914     |                   | NM_005815    | NP_005806    | Q9Y2A4 | ZN443_HUMAN | C2H2-type 4.                   | 1  | GATAGGAAGT/   | 0.358 |
| + | 8  | 1454    |                   | NM_004843    | NP_004834    | Q6UWB1 | I27RA_HUMAN | tential). Fibronectin type-III | 0  | ACCGGGGCCTG   | 0.637 |
| + | 13 | 1610    |                   | NM_023944    | NP_076433    |        |             |                                | 7  | GGGTGGAGCCC   | 0.567 |

rs149471544

|   |    |           |                   |              |              |        |              |                                |    |                 |       |             |
|---|----|-----------|-------------------|--------------|--------------|--------|--------------|--------------------------------|----|-----------------|-------|-------------|
| - | 3  | 757       | _p.L181F KIAA168  | NM_025249    | NP_079525    | Q9H0B3 | K1683_HUMAN  |                                | 2  | ACAGAAGGCGGT    | 0.607 |             |
| - | 3  | 590       | _p.S125F KIAA168  | NM_025249    | NP_079525    | Q9H0B3 | K1683_HUMAN  | IQ 1.                          | 2  | ATCTGGGAAATCA   | 0.572 |             |
| - | 4  | 1282      | top_2_Missense_M  | NM_033196    | NP_149973    | O95780 | ZN682_HUMAN  | 2H2-type 8.                    | 2  | GCTTGTGTTTAGT   | 0.358 |             |
| - | 5  | 1987      | 208_uc002nqo.1_I  | NM_007153    | NP_009084    |        |              |                                | 7  | TGAATTCCTTTAT   | 0.368 |             |
| - | 5  | 580       | nto.1_Missense_I  | NM_032139    | NP_115515    | Q96NW4 | ANR27_HUMAN  |                                | 5  | ACTCTCTCACATC   | 0.498 |             |
| + | 22 | 2699      | dd.2_Nonsense_IV  | NM_173636    | NP_775907    | O43379 | WDR62_HUMAN  |                                | 0  | CCGGCCAAGAC     | 0.602 |             |
| + | 14 | 1476      | oe.2_Missense_M   | NM_138392    | NP_612401    | Q8TBC3 | SHKB1_HUMAN  |                                | 2  | TCGCTTCCTTAA    | 0.617 |             |
| + | 6  | 798       | zt.1_Missense_Mu  | NM_005581    | NP_005572    | P50895 | BCAM_HUMAN   | Potential). Ig-like V-type 2.  | 1  | GCCTGGACAGC     | 0.677 |             |
| - | 3  | 479       | ie_Mutation_p.E14 | NM_017509    | NP_059979    | Q9H2R5 | KLK15_HUMAN  | Peptidase S1.                  | 2  | AGGCTCGTTGT     | 0.687 |             |
| - | 7  | 1841      | ocy.1_Missense_   | NM_033130    | NP_149121    | Q96LC7 | SIG10_HUMAN  | 3. Extracellular (Potential).  | 1  | CAGGACCCCGG     | 0.667 |             |
| - | 5  | 1930      | VF614_uc010epj.2  | NM_025040    | NP_079316    | Q8N883 | ZN614_HUMAN  |                                | 5  | CATAAGGTTTCTC   | 0.433 |             |
| + | 6  | 1175      |                   | NM_001099694 | NP_001093164 | Q96N58 | ZN578_HUMAN  |                                | 0  | AACTGCGTGAG     | 0.418 |             |
| - | 6  | 1052      | ifi.2_Missense_Mu | NM_012276    | NP_036408    | P59901 | LIRA4_HUMAN  | 4. Extracellular (Potential).  | 2  | CCGTGGGGCCCC    | 0.612 |             |
| + | 7  | 785       | d.2_Nonsense_Mt   | NM_004829    | NP_004820    | O76036 | NCTR1_HUMAN  | ellular (Potential).           | 2  | CTCTGGGATCA     | 0.468 |             |
| - | 4  | 1400      | p.E442K NLRP7_L   | NM_206828    | NP_996611    | Q8WX94 | NALP7_HUMAN  | NACHT.                         | 3  | GGACTCCTGCA     | 0.652 |             |
| + | 15 | 2027      | p.P600S BRSK1_u   | NM_032430    | NP_115806    | Q8TDC3 | BRSK1_HUMAN  |                                | 6  | TGACGCCAGAG     | 0.607 |             |
| + | 4  | 2178      | tg.2_Missense_Mt  | NM_176811    | NP_789781    | Q86W28 | NALP8_HUMAN  |                                | 13 | CGAATGATAAGC    | 0.512 |             |
| + | 5  | 1133      | p.P323L ZNF583_   | NM_001159860 | NP_001153332 | Q96ND8 | ZN583_HUMAN  |                                | 1  | AGAGACCTTTCG    | 0.403 |             |
| + | 6  | 2209      | 470_uc010etn.2_I  | NM_001001668 | NP_001001668 | Q6ECI4 | ZN470_HUMAN  | 2H2-type 11.                   | 2  | GAATGTAAGGA     | 0.438 |             |
| + | 5  | 1616      |                   | NM_152677    | NP_689890    | Q8NAM6 | ZSCA4_HUMAN  |                                | 1  | CCCATGGAGTC     | 0.463 |             |
| + | 4  | 315       | nse_Mutation_p.S  | NM_000547    | NP_000538    | P07202 | PERT_HUMAN   | ellular (Potential).           | 20 | TTCTGTCTTTTT    | 0.388 |             |
| - | 10 | 1753      | ie_Mutation_p.G3C | NM_015025    | NP_055840    | Q9UL68 | MYT1L_HUMAN  |                                | 6  | ATGAGTCCCGTT    | 0.478 |             |
| + | 4  | 677       | ense_Mutation_p.  | NM_198182    | NP_937825    | Q9NZI5 | GRHL1_HUMAN  |                                | 2  | TGTGGGAATCC     | 0.552 |             |
| - | 11 | 1427      | gt.1_Missense_Mu  | NM_018263    | NP_060733    | Q76L83 | ASXL2_HUMAN  |                                | 1  | GGTTTTCTTTACT   | 0.413 |             |
| + | 3  | 428       |                   | NM_001105519 | NP_001098989 | A6NJV1 | CB070_HUMAN  |                                | 1  | CGTGAGGGAGC     | 0.592 |             |
| - | 1  | 1709_1710 |                   | NM_001029883 | NP_001025054 | A6NGG8 | CB071_HUMAN  |                                | 1  | GTCCTCCCTCC     | 0.589 |             |
| - | 10 | 2732      | utation_p.S890F   | NM_021097    | NP_066920    | P32418 | NAC1_HUMAN   | lasmic (Potential).            | 4  | CAGGGGACACT     | 0.557 |             |
| + | 1  | 684       | 3TF2A1L_uc002rv   | NM_006873    | NP_006864    | B7ZL16 | B7ZL16_HUMAN |                                | 5  | ACAAGGAGATG     | 0.413 |             |
| - | 11 | 1103      | 2A1L_uc002rwt.2_  | NM_000233    | NP_000224    | P22888 | LSHR_HUMAN   | ellular (Potential).           | 8  | ITTCAGGAGCAC    | 0.423 |             |
| - | 10 | 1009      | _p.S250F FSHR_u   | NM_000145    | NP_000136    | P23945 | FSHR_HUMAN   | ellular (Potential).           | 8  | AGAGGATCTC      | 0.408 |             |
| + | 10 | 3436      | ijg.2_Nonsense_M  | NM_015120    | NP_055935    | Q8TCU4 | ALMS1_HUMAN  | roximate tandem repeat.[1:     | 9  | TCTACCAACAG     | 0.488 |             |
| + | 8  | 2423      | _p.V651G CNGA3    | NM_001298    | NP_001289    | Q16281 | CNGA3_HUMAN  |                                | 6  | CCAGTGGAAGG     | 0.562 |             |
| + | 6  | 941       | 3R1_uc0002bw.3_I  | NM_016232    | NP_057316    | Q01638 | ILRL1_HUMAN  | potential). Ig-like C2-type 3. | 4  | ATAAGGAAGTG     | 0.373 |             |
| + | 6  | 2790      | rd.2_Missense_Mu  | NM_181453    | NP_852118    | Q8IWI2 | GCC2_HUMAN   | Potential.                     | 1  | ATCTTTAATTCA    | 0.313 |             |
| + | 1  | 293_294   | 2_uc010yxw.1_5'U  | NM_172003    | NP_742000    | Q8IUF1 | CBWD2_HUMAN  |                                | 0  | CCCTCGGCGCC     | 0.54  |             |
| - | 8  | 3835      |                   | NM_002299    | NP_002290    | P09848 | LPH_HUMAN    | ential). J4 X approximate ref  | 13 | CCACTCCGTTT     | 0.507 |             |
| - | 8  | 2251      | e_Mutation_p.P56  | NM_014795    | NP_055610    | O60315 | ZEB2_HUMAN   |                                | 9  | GCCAGGAAAAC     | 0.418 |             |
| + | 8  | 9488      | dy.2_Missense_Mi  | NM_152381    | NP_689594    | A4UGR9 | XIRP2_HUMAN  |                                | 14 | AAGAAGGCCCA     | 0.468 |             |
| - | 2  | 459       | IKL_uc002uod.1_I  | NM_002500    | NP_002491    | Q13562 | NDF1_HUMAN   | lu.  Glu-rich (acidic).        | 1  | GTCAtcctcctctcc | 0.383 |             |
| - | 2  | 139       | rn_p.L19F PDE1A   | NM_001003683 | NP_001003683 | P54750 | PDE1A_HUMAN  |                                | 3  | CTGTAAGATACT    | 0.403 |             |
| + | 4  | 797       | _p.S174L ITGAV_u  | NM_002210    | NP_002201    | P06756 | ITAV_HUMAN   | Extracellular (Potential).     | 4  | GATGATCACGTA    | 0.353 |             |
| - | 53 | 4515      | frx.2_Missense_Mi | NM_000393    | NP_000384    | P05997 | COSA2_HUMAN  | lar collagen NC1.              | 2  | CTTGATCGTCCA    | 0.383 | rs139229616 |
| - | 48 | 9100      |                   | NM_018897    | NP_061720    | Q8WXX0 | DYH7_HUMAN   | 5 (By similarity).             | 12 | TTGATCCATTAT    | 0.408 |             |
| + | 3  | 285       | 10ziu.1_5'Flank E | NM_001037663 | NP_001032752 | P24534 | EF1B_HUMAN   | ST C-terminal.                 | 0  | GTCCAGCCCA      | 0.468 |             |
| - | 1  | 166       |                   | NM_079420    | NP_524144    | P05976 | MYL1_HUMAN   |                                | 1  | AGCCGAGCCA      | 0.318 | rs143705321 |
| + | 11 | 1576      | iv.2_Missense_Mu  | NM_015690    | NP_056505    | Q9NRP7 | STK36_HUMAN  |                                | 11 | GGCTCCTCTCA     | 0.557 |             |
| + | 2  | 473       | G_uc010fwh.1_5'L  | NM_005876    | NP_005867    | Q15772 | SPEG_HUMAN   |                                | 14 | CACCCACGGI      | 0.607 |             |

|   |    |         |                   |              |              |        |             |                               |     |                |       |             |
|---|----|---------|-------------------|--------------|--------------|--------|-------------|-------------------------------|-----|----------------|-------|-------------|
| + | 36 | 8650    |                   | NM_005876    | NP_005867    | Q15772 | SPEG_HUMAN  | Pro-rich.                     | 14  | CGATCCCAGCC    | 0.627 |             |
| + | 2  | 745     |                   | NM_002191    | NP_002182    | P05111 | INHA_HUMAN  |                               | 1   | CGTGTCCCTC     | 0.682 |             |
| - | 3  | 226     | lzm.1_Missense_I  | NM_004438    | NP_004429    | P54764 | EPHA4_HUMAN | cellular (Potential).         | 12  | TTTTTCATCCAT   | 0.428 |             |
| - | 30 | 3248    |                   | NM_000092    | NP_000083    | P53420 | CO4A4_HUMAN | le-helical region. p.P865S(1) | 11  | CAGCTGGCCCG    | 0.622 |             |
| - | 24 | 2443    |                   | NM_000092    | NP_000083    | P53420 | CO4A4_HUMAN | le-helical region.            | 11  | CTGGATCCCCTT   | 0.463 |             |
| + | 2  | 315     | g_Mutation_p.M65I | NM_030926    | NP_112188    | Q9NQX7 | ITM2C_HUMAN | type II membrane protein;     | 0   | GGCATGGTCGT    | 0.622 |             |
| - | 3  | 1088    |                   | NM_006056    | NP_006047    | Q9HB89 | NMUR1_HUMAN | cellular (Potential).         | 5   | ATCTGTCCACTG   | 0.622 |             |
| - | 2  | 552_553 | C20orf26_uc002wr  | NM_016652    | NP_057736    | Q9BZJ0 | CRNL1_HUMAN |                               | 3   | CTTTGGGAATCC   | 0.653 |             |
| + | 3  | 428     | ew.2_Missense_    | NM_012156    | NP_036288    | Q9H4G0 | E41L1_HUMAN |                               | 3   | GAAATCGCCCC    | 0.567 |             |
| + | 12 | 1285    |                   | NM_004139    | NP_004130    | P18428 | LBP_HUMAN   |                               | 2   | AAGTTGGACTAT   | 0.358 |             |
| + | 10 | 1360    | ggc.2_Missense_   | NM_015568    | NP_056383    | Q96T49 | PP16B_HUMAN |                               | 3   | CCAGGACAGAC    | 0.602 |             |
| - | 3  | 1440    | CTCFL_uc010gje    | NM_080618    | NP_542185    | Q8NI51 | CTCFL_HUMAN | C2H2-type 1.                  | 4   | GACATCACAGTC   | 0.388 |             |
| + | 8  | 2816    | R127H GNAS_uc     | NM_080425    | NP_536350    | P63092 | GNAS2_HUMAN | (By similar7) p.R201L(1)      | 292 | CTGCCGTGTCC    | 0.423 | rs121913495 |
| - | 32 | 3282    |                   | NM_014258    | NP_055073    | Q9BX26 | SYCP2_HUMAN |                               | 5   | TTTACTGGTATGT  | 0.264 |             |
| - | 5  | 743     | g_Mutation_p.E134 | NM_005975    | NP_005966    | Q13882 | PTK6_HUMAN  | rotein kinase.                | 2   | GATCTCCGACTC   | 0.652 |             |
| + | 7  | 846     | qt.2_Missense_Mi  | NM_014339    | NP_055154    | Q96F46 | I17RA_HUMAN | cellular (Potential).         | 2   | TTTTCCGCACAT   | 0.552 |             |
| - | 9  | 985     | n.1_Missense_Mul  | NM_014303    | NP_055118    | O00541 | PESC_HUMAN  |                               | 0   | TCACCCCATCGC   | 0.597 |             |
| - | 3  | 534_535 | 26EF>DI SYN3_uc   | NM_003490    | NP_003481    | O14994 | SYN3_HUMAN  | and synaptic-vesicle bindin   | 1   | TGAGAATTCAGC   | 0.441 |             |
| + | 3  | 1108    |                   | NM_030642    | NP_085145    | Q9BWW9 | APOL5_HUMAN |                               | 0   | GATCCCGTGTG    | 0.607 |             |
| - | 14 | 1677    | AB6_uc010gzi.1_   | NM_022785    | NP_073622    | Q5THR3 | EFCB6_HUMAN |                               | 7   | CAGGAGGAAAG    | 0.368 |             |
| + | 10 | 1166    | ak.2_Missense_M   | NM_024324    | NP_077300    | Q6UXH1 | CREL2_HUMAN |                               | 0   | AAGCCCGACAC    | 0.552 |             |
| - | 3  | 702     |                   | NM_012401    | NP_036533    | O15031 | PLXB2_HUMAN | ilar (Potential). Sema.       | 6   | TGTAGGCTTCA    | 0.607 |             |
| + | 26 | 3620    | E1133K CHL1_uc    | NM_006614    | NP_006605    | O00533 | CHL1_HUMAN  | lasmic (Potential).           | 12  | AAAAGGAAGAT    | 0.224 |             |
| - | 3  | 1039    | AP3_uc003bri.1_   | NM_014850    | NP_055665    | O43295 | SRGP2_HUMAN |                               | 9   | ATTGTTTCATGAAC | 0.542 |             |
| - | 9  | 1330    | e_Mutation_p.S23  | NM_022340    | NP_071735    | Q9H1K0 | RBNS5_HUMAN | try for the correct targeting | 2   | GGACCGAGCTG    | 0.592 |             |
| - | 6  | 1181    |                   | NM_024697    | NP_078973    | Q9H6B1 | Z385D_HUMAN |                               | 5   | GTGTTTCCTTTA   | 0.438 |             |
| + | 12 | 1880    | Mutation_p.R620C  | NM_007335    | NP_031361    | Q9Y238 | DLEC1_HUMAN |                               | 9   | TCATACGATTTGA  | 0.488 |             |
| + | 15 | 2323    | v.1_Missense_Mut  | NM_007335    | NP_031361    | Q9Y238 | DLEC1_HUMAN |                               | 9   | CAGGGGAGAAC    | 0.488 |             |
| - | 28 | 5098    | i.2_Missense_Mut  | NM_198056    | NP_932173    | Q14524 | SCN5A_HUMAN | ; Name=S4 of repeat IV; (P    | 9   | TCAGTCTGAGG    | 0.597 |             |
| - | 26 | 4631    |                   | NM_014139    | NP_054858    | Q9UI33 | SCNBA_HUMAN | ; Name=S4 of repeat IV; (B    | 9   | AGCCCGGACAA    | 0.473 |             |
| - | 19 | 2330    | cz.1_Nonsense_M   | NM_147129    | NP_667340    | Q60I27 | AL2CL_HUMAN |                               | 5   | CTCCTGGGCCA    | 0.627 |             |
| - | 2  | 260     | Intron NAT6_uc00  | NM_012191    | NP_036323    | Q93015 | NAT6_HUMAN  |                               | 1   | AGCTGGGGTCT    | 0.597 |             |
| + | 1  | 1859    |                   | NM_013286    | NP_037418    | Q8NDT2 | RB15B_HUMAN |                               | 0   | GTTTGGCCCAAG   | 0.597 |             |
| + | 72 | 11768   | dv.2_Missense_M   | NM_015512    | NP_056327    | Q9P2D7 | DYH1_HUMAN  | 6 (By similarity).            | 3   | TGGGCCCTGG     | 0.562 |             |
| + | 74 | 12217   | dv.2_Missense_Mi  | NM_015512    | NP_056327    | Q9P2D7 | DYH1_HUMAN  |                               | 3   | GGGAGGAGGTG    | 0.617 |             |
| - | 9  | 788     | 1_uc010hmg.2_5'f  | NM_004656    | NP_004647    | Q92560 | BAP1_HUMAN  |                               | 65  | GATGTCGTGGT    | 0.632 |             |
| + | 8  | 1434    | lz.2_Nonsense_Mi  | NM_016483    | NP_057567    | Q9BWX1 | PHF7_HUMAN  |                               | 1   | ACAATCGAAAAC   | 0.438 |             |
| + | 13 | 1536    | ei.1_Missense_Mi  | NM_015136    | NP_055951    | Q9NY15 | STAB1_HUMAN | lar (Potential). FAS1 1.      | 9   | TCTTCCACGTG    | 0.582 |             |
| - | 3  | 1130    |                   | NM_015576    | NP_056391    | O15083 | ERC2_HUMAN  | Potential.                    | 2   | CGTTTCAATTCT   | 0.468 |             |
| - | 2  | 363     | 3dmh.1_5'UTR AC   | NM_182920    | NP_891550    | Q9P2N4 | ATS9_HUMAN  |                               | 4   | GATTAATAGAAA   | 0.488 |             |
| - | 15 | 3011    | il1_uc003dmp.2_A  | NM_001033057 | NP_001028229 | Q96QZ7 | MAGI1_HUMAN | PDZ 4.                        | 6   | TCCACCCAGAA    | 0.438 |             |
| + | 3  | 934     | e_Mutation_p.E23  | NM_005233    | NP_005224    | P29320 | EPHA3_HUMAN | ar (Potential p.E237K(1)      | 33  | AGGAGGAAGATC   | 0.473 | rs139652107 |
| + | 1  | 272_273 |                   | NM_001004737 | NP_001004737 | Q8NHB8 | OR5K2_HUMAN | cellular (Potential).         | 2   | CAAAAGGATTTTC  | 0.446 |             |
| - | 12 | 1120    |                   | NM_014981    | NP_055796    | Q9Y2K3 | MYH15_HUMAN | rosin head-like.              | 7   | ATCAGGAAGAAA   | 0.448 |             |
| + | 5  | 370     | px.1_Missense_M   | NM_016388    | NP_057472    | Q6PIZ9 | TRAT1_HUMAN | lasmic (Potential).           | 1   | ATGGATGAAAAT   | 0.343 |             |
| + | 4  | 1420    | w.3_Missense_Mi   | NM_000388    | NP_000379    | P41180 | CASR_HUMAN  | cellular (Potential).         | 7   | CCAAGGATTTT    | 0.507 |             |
| + | 3  | 716     |                   | NM_015720    | NP_056535    | Q9NZ53 | PDXL2_HUMAN | cellular (Potential).         | 2   | CTCATCAGGTG    | 0.622 |             |

|   |    |                          |                   |              |              |             |             |                             |              |                |            |
|---|----|--------------------------|-------------------|--------------|--------------|-------------|-------------|-----------------------------|--------------|----------------|------------|
| + | 5  | 1751_1752:D12_uc010hsq_2 | NM_207335         | NP_997218    | Q3ZCT8       | KBTBC_HUMAN | Kelch 4.    | 1                           | CCAGTGGAATGT | 0.475          |            |
| - | 14 | 3699                     | NM_014602         | NP_055417    | Q99570       | PI3R4_HUMAN | WD 2.       | 12                          | CAATTCGGCTGT | 0.403          |            |
| - | 3  | 243                      | ij.2_RNA ANAPC1   | NM_015391    | NP_056206    | Q9BS18      | APC13_HUMAN | 1                           | TGACAGATTCTC | 0.423          | rs11544840 |
| - | 36 | 4287                     |                   | NM_001041    | NP_001032    | P14410      | SUIS_HUMAN  | ase. Luminal.               | 14           | TGCATTGATTAGT  | 0.254      |
| - | 25 | 2953                     |                   | NM_001041    | NP_001032    | P14410      | SUIS_HUMAN  | P-type 2. Isomaltase.       | 14           | ATTACCGTTCTCC  | 0.299      |
| - | 5  | 1014                     | p.G329E SERPIN    | NM_006217    | NP_006208    | O75830      | SPI2_HUMAN  |                             | 3            | TTATTCCAGAA    | 0.303      |
| + | 27 | 3308                     | 1_Missense_Mutat  | NM_014616    | NP_055431    | Q9Y2G3      | AT11B_HUMAN | ical; (Potential).          | 3            | TAGATGGCTCTC   | 0.294      |
| + | 15 | 2062                     | p.P557L ECE2_u    | NM_014693    | NP_055508    | O60344      | ECE2_HUMAN  | othelin-converting enzyme   | 4            | GACCCCCAGA     | 0.612      |
| + | 15 | 2457                     | e_Mutation_p.G60  | NM_006206    | NP_006197    | P16234      | PGFRA_HUMAN | α. Cytoplasmic (Potential). | 674          | CTTTGGATTGAA   | 0.443      |
| - | 11 | 2615                     | p.S721F AASDH_    | NM_181806    | NP_861522    | Q4L235      | ACSF4_HUMAN |                             | 4            | CACCTAGATACAC  | 0.368      |
| - | 5  | 722                      | EF2_uc003hiz.1_I  | NM_006239    | NP_006230    | O14830      | PPE2_HUMAN  |                             | 4            | GGAGTGGGAAG    | 0.527      |
| + | 56 | 8643                     |                   | NM_025074    | NP_079350    | Q86XX4      | FRAS1_HUMAN | (Potential). Calx-beta 2.   | 5            | CTAGAGGGATGT   | 0.468      |
| - | 21 | 3698                     |                   | NM_014991    | NP_055806    | Q8IZQ1      | WDFY3_HUMAN |                             | 3            | CGGAGGGAGGA    | 0.343      |
| - | 4  | 357                      | .P96S ADH1A_uc    | NM_000667    | NP_000658    | P07327      | ADH1A_HUMAN |                             | 2            | CTGAGGAATAG    | 0.393      |
| + | 4  | 1977                     | ε_Mutation_p.G59  | NM_001128933 | NP_001122405 | Q9UMS6      | SYNP2_HUMAN | Pro-rich.                   | 2            | CCCAGGGTCTG    | 0.542      |
| - | 6  | 847_848                  | e_Mutation_p.P11  | NM_144643    | NP_653244    | Q96NL6      | SCLT1_HUMAN | Potential.                  | 5            | CCAGGGGAAAC    | 0.386      |
| - | 14 | 3568                     |                   | NM_017639    | NP_060109    | Q6V1P9      | PCD23_HUMAN | Cadherin 10.                | 4            | TGGATCGTGAG    | 0.453      |
| - | 14 | 3031                     |                   | NM_017639    | NP_060109    | Q6V1P9      | PCD23_HUMAN | Cadherin 8.                 | 4            | AAGTTCTTAGA    | 0.363      |
| + | 6  | 773                      |                   | NM_000824    | NP_000815    | P48167      | GLRB_HUMAN  | cellular (Probable).        | 2            | TTGTTCCCATG    | 0.348      |
| + | 8  | 717                      | p.R131Q RXFP1_u   | NM_021634    | NP_067647    | Q9HBX9      | RXFP1_HUMAN | tracellular (Potential).    | 0            | GCAGTCGAATTC   | 0.294      |
| + | 8  | 1130                     | IL2_uc003irc.2_M  | NM_007246    | NP_009177    | O95198      | KLHL2_HUMAN |                             | 0            | CGTATATTAATGA  | 0.443      |
| + | 21 | 3689                     | p.*1037Y TLL1_uc  | NM_012464    | NP_036596    | O43897      | TLL1_HUMAN  |                             | 7            | AAAATAACACCA   | 0.308      |
| - | 6  | 533                      | s.1_Nonsense_Mu   | NM_016950    | NP_058646    | Q9BQ16      | TICN3_HUMAN |                             | 3            | CCCTCCACTGC    | 0.388      |
| - | 2  | 623                      |                   | NM_005429    | NP_005420    | P49767      | VEGFC_HUMAN |                             | 5            | TACTACTGGACAC  | 0.423      |
| - | 19 | 2358                     | p.P529S NSUN2_u   | NM_017755    | NP_060225    | Q08J23      | NSUN2_HUMAN |                             | 1            | GGGTGGATGGA    | 0.627      |
| - | 3  | 690                      | p.D105N CDH18_u   | NM_004934    | NP_004925    | Q13634      | CAD18_HUMAN | r (Potential). Cadherin 1.  | 7            | TGGTATCGTCAA   | 0.438      |
| - | 3  | 262                      | ijju.1_Missense_M | NM_001042625 | NP_001036090 | Q8WWF8      | CAPSL_HUMAN | nd 1. 1 (Potential).        | 1            | GTTTCGATTATTAT | 0.303      |
| - | 3  | 550                      |                   | NM_004465    | NP_004456    | O15520      | FGF10_HUMAN |                             | 3            | AGCTCCTTTTC    | 0.438      |
| + | 4  | 504                      |                   | NM_138453    | NP_612462    | Q96E17      | RAB3C_HUMAN |                             | 2            | ACAATGCCCAAG   | 0.413      |
| + | 11 | 1983                     | rd.2_Nonsense_M   | NM_181523    | NP_852664    | P27986      | P85A_HUMAN  | (2) p.Q475_E476>VLQ(1) i    | 101          | ACATCCAGGTG    | 0.284      |
| + | 6  | 691                      | iOA5_uc003jvk.2_ε | NM_022902    | NP_075053    | Q8TAD4      | ZNT5_HUMAN  | ical; (Potential).          | 1            | TGTTTATTGCTTI  | 0.363      |
| - | 13 | 1651                     | p.L397S WDR41_    | NM_018268    | NP_060738    | Q9HAD4      | WDR41_HUMAN |                             | 0            | AGGTATAAGTCA   | 0.348      |
| + | 7  | 4311                     | i.2_Missense_Mut  | NM_004385    | NP_004376    | P13611      | CSPG2_HUMAN | minoglycan attachment dor   | 16           | AAATTCACCCCT   | 0.443      |
| - | 6  | 1038                     | p.1_Missense_Mu   | NM_005711    | NP_005702    | O43854      | EDIL3_HUMAN | :5/8 type C 1.              | 2            | TGCAGCTGTCCA   | 0.398      |
| + | 23 | 2999                     | .2_Intron PAM_uc  | NM_000919    | NP_000910    | P19021      | AMD_HUMAN   | ical; (Potential).          | 0            | TTATTCCGGTGT   | 0.483      |
| + | 17 | 2443_2444                | ui.3_Nonsense_M   | NM_032446    | NP_115822    | Q96KG7      | MEG10_HUMAN | P2M1, self-assembly and f   | 4            | CGGTTGGATTGG   | 0.416      |
| + | 3  | 562                      | uj.3_Missense_Mi  | NM_130809    | NP_570721    | Q96M27      | PRRC1_HUMAN | Pro-rich.                   | 0            | TCGGGTCCTCCT   | 0.502      |
| + | 1  | 2048                     | hh.1_Intron PCDH  | NM_018910    | NP_061733    | Q9UN72      | PCDA7_HUMAN | cellular (Potential).       | 4            | GGCATCGTTGG    | 0.632      |
| + | 1  | 1916                     | IA6_uc003ihn.2_Ii | NM_018902    | NP_061725    | Q9Y511      | PCDAB_HUMAN | Extracellular p.S353S(1)    | 1            | TGACTTCCTTGT   | 0.572      |
| + | 1  | 1805                     |                   | NM_018938    | NP_061761    | Q9Y5E5      | PCDB4_HUMAN | Extracellular (Potential).  | 3            | GGTGTGATACC    | 0.731      |
| + | 1  | 716                      | IB16_uc003liv.2_5 | NM_019120    | NP_061993    | Q9UN66      | PCDB8_HUMAN | Extracellular (Potential).  | 4            | CCAACCTCTATTI  | 0.502      |
| - | 2  | 399                      | sense_Mutation_p  | NM_014790    | NP_055605    | Q96AA8      | JKIP2_HUMAN |                             | 2            | TTATTCGCCCT    | 0.458      |
| + | 2  | 459                      | iRIA1_uc011dcx.1  | NM_001114183 | NP_001107655 | P42261      | GRIA1_HUMAN | cellular (Potential).       | 6            | TTATTCCAAACC   | 0.453      |
| - | 5  | 932                      | ibl.1_Nonsense_M  | NM_012300    | NP_036432    | Q9UKB1      | FBW1B_HUMAN | p.N260_I262(1)              | 2            | TGATCCCTGGC    | 0.328      |
| - | 9  | 1636                     | p.D279N RNF44_    | NM_014901    | NP_055716    | Q7L0R7      | RNF44_HUMAN |                             | 0            | GGTGTCCGGGT    | 0.657      |
| + | 14 | 2512                     |                   | NM_133369    | NP_588610    | Q6ZN44      | UNC5A_HUMAN | rotoplasmic (Potential).    | 1            | GGCGGGTGCC     | 0.672      |
| + | 4  | 2386                     | EP1_uc011diq.1_F  | NM_002114    | NP_002105    | P15822      | ZEP1_HUMAN  |                             | 6            | AGATGCGCCAC    | 0.507      |

|   |    |                          |                   |              |              |        |              |                                    |       |               |       |             |
|---|----|--------------------------|-------------------|--------------|--------------|--------|--------------|------------------------------------|-------|---------------|-------|-------------|
| + | 3  | 628                      |                   | NM_001076781 | NP_001070249 | Q9UJN7 | ZN391_HUMAN  |                                    | 3     | AATCCTCTTTTG/ | 0.423 |             |
| + | 1  | 886                      |                   | NM_012367    | NP_036499    | P58173 | OR2B6_HUMAN  | lasmic (Potential).                | 1     | ACAAGGAGGTA/  | 0.383 |             |
| - | 3  | 1726                     |                   | NM_052923    | NP_443155    | Q6R2W3 | SCND3_HUMAN  | grase catalytic.                   | 1     | TAACCTCCTTAA/ | 0.343 |             |
| + | 1  | 503                      |                   | NM_030946    | NP_112208    | Q9UGF5 | O14J1_HUMAN  | ellular (Potential).               | 1     | CTGTGGGAAGA/  | 0.483 |             |
| + | 2  | 360                      | uc010jsz.1_Misser | NM_001320    | NP_001311    | P67870 | CSK2B_HUMAN  |                                    | 0     | GGAGGTGTCCCT  | 0.502 |             |
| + | 20 | 1904_1905.1_Missense_Mut |                   | NM_172166    | NP_751898    | O43196 | MSH5_HUMAN   |                                    | 3     | TGATCACATTCA  | 0.554 |             |
| - | 18 | 2255                     | issense_Mutation_ | NM_006709    | NP_006700    | Q96KQ7 | EHMT2_HUMAN  |                                    | 1     | GTCCCTCCTCTC  | 0.647 |             |
| - | 3  | 582                      | obz.2_Missense_   | NR_003937    |              | Q5SR06 | Q5SR06_HUMAN |                                    | 0     | ACCGGCTGTCT/  | 0.542 |             |
| - | 10 | 843_844                  | w.3_Missense_Mi   | NM_003322    | NP_003313    | O00294 | TULP1_HUMAN  |                                    | 3     | CTCCTCCTTCTG  | 0.723 |             |
| - | 4  | 512                      | p.S134L SLC26A    | NM_052961    | NP_443193    | Q96RN1 | S26A8_HUMAN  | ical; (Potential).                 | 2     | TACCGAAGAAC   | 0.393 |             |
| + | 73 | 11127_11128              | og.1_5'UTR uc0    | NM_001371    | NP_001362    |        |              |                                    | 21    | TTGGGCCGACCC  | 0.411 |             |
| + | 6  | 812                      |                   | NM_032538    | NP_115927    | Q5TCY1 | TTBK1_HUMAN  | rotein kinase.                     | 9     | CTTCGGGCTGG/  | 0.647 |             |
| - | 10 | 6683                     | 318_uc003ouw.2_J  | NM_014345    | NP_055160    | Q5VUA4 | ZN318_HUMAN  |                                    | 7     | FCCAGGGAACCTA | 0.473 |             |
| + | 4  | 771                      | PATS1_uc010jzb.2  | NM_145026    | NP_659463    | Q496A3 | SPAS1_HUMAN  |                                    | 1     | GGCATCGTCTCT/ | 0.478 | rs145942181 |
| + | 1  | 550                      | P2D_uc011dwt.1_   | NM_172238    | NP_758438    | Q7Z6R9 | AP2D_HUMAN   |                                    | 7     | ATGCCGAGGTAT  | 0.333 |             |
| + | 9  | 1246                     |                   | NM_207410    | NP_997293    | Q6UXV0 | GFRAL_HUMAN  | lasmic (Potential).                | 2     | CTTCATCGATCC/ | 0.264 |             |
| + | 24 | 3584                     | x.1_Missense_Mu   | NM_001704    | NP_001695    | O60242 | BAI3_HUMAN   | lasmic (Potential).                | 50    | TTAATAAACTTC  | 0.388 |             |
| + | 29 | 4361                     | p.E1305K BAI3_uc  | NM_001704    | NP_001695    | O60242 | BAI3_HUMAN   | lasmic (Potential).                | 50    | TGATGGAAAGT/  | 0.388 |             |
| + | 19 | 2230                     | .3_Missense_Mut:  | NM_003318    | NP_003309    | P33981 | TTK_HUMAN    | rotein kinase.                     | 11    | TTTGGTCTTAGC/ | 0.254 |             |
| + | 3  | 467                      |                   | NM_001010905 | NP_001010905 | Q6P5S2 | CF058_HUMAN  |                                    | 0     | GGATATCATCAG/ | 0.398 |             |
| - | 15 | 2283                     | nse_Mutation_p.D  | NM_001431    | NP_001422    | O43491 | E41L2_HUMAN  |                                    | 2     | TTTCGTCTTTCCC | 0.423 |             |
| - | 4  | 1074                     | .S272F BCLAF1_u   | NM_014739    | NP_055554    | Q9NYF8 | BCLF1_HUMAN  |                                    | 1     | AACGAGACCCA/  | 0.448 |             |
| + | 2  | 179                      | 2L_uc011edq.1_5'  | NM_001077706 | NP_001071174 | Q008S8 | ECT2L_HUMAN  |                                    | 0     | TTCAGGAAAGAC/ | 0.378 |             |
| + | 2  | 326                      | ow.2_Missense_Mi  | NM_006908    | NP_008839    | P63000 | RAC1_HUMAN   |                                    | 2     | GCATTTCTGGAC/ | 0.353 |             |
| + | 13 | 2655                     | p.P614S AUTS2_    | NM_015570    | NP_056385    | Q8WXX7 | AUTS2_HUMAN  |                                    | 3     | CAGATCCTTTCT/ | 0.368 |             |
| - | 16 | 1792                     | p.R383G TYW1B_    | NM_001145440 | NP_001138912 | Q6NUM6 | TYW1B_HUMAN  |                                    | 0     | TTTCTCTGCAGT/ | 0.418 |             |
| - | 7  | 834                      | ense_Mutation_p.F | NM_032158    | NP_115534    |        |              |                                    | 0     | CTGGCGGGGGG   | 0.622 |             |
| + | 2  | 471                      | SCR28_uc003tzl.2  | NM_182504    | NP_872310    | Q6UE05 | WBS28_HUMAN  | ical; (Potential).                 | 1     | CTCTTGGTGGT/  | 0.602 |             |
| - | 21 | 1767                     | 2_5'Flank PION_u  | NM_017439    | NP_059135    | A4D1B5 | GSAP_HUMAN   |                                    | 1     | GACCTTCTTTTTC | 0.368 |             |
| - | 17 | 2519                     |                   | NM_012431    | NP_036563    | O15041 | SEM3E_HUMAN  |                                    | 3     | ATCGTCTTGT/   | 0.483 |             |
| + | 16 | 1797                     | u.2_Missense_Mu   | NM_021151    | NP_066974    | Q9UKG9 | OCTC_HUMAN   |                                    | 3     | AGGAAGGTCTT/  | 0.373 |             |
| - | 2  | 323                      | 10ff.2_Missense_  | NM_001039372 | NP_001034461 | A8MVW5 | HECA2_HUMAN  | ellular (Potential).               | 5     | GGCATCATGGT/  | 0.453 |             |
| + | 15 | 3450                     | ZAN_uc003uwl.2_   | NM_003386    | NP_003377    | Q9Y493 | ZAN_HUMAN    | ellular (Potential).               | 11    | CAATTGCTTCTAC | 0.572 |             |
| - | 17 | 2143                     | ey.2_Missense_Mi  | NM_007356    | NP_031382    | A4D0S4 | LAMB4_HUMAN  | nin IV type B.                     | 8     | AGACATCTATGG/ | 0.408 |             |
| + | 14 | 1921                     | ncq.1_Missense_M  | NM_000492    | NP_000483    | P13569 | CFTR_HUMAN   | otential). ABC transporter 1       | 5     | TGGCTAACAAA/  | 0.269 |             |
| - | 10 | 1125                     | lks.2_Missense_M  | NM_022444    | NP_071889    | Q9BZW2 | S13A1_HUMAN  | ical; (Potential).                 | 2     | CAAATCCGGGG   | 0.428 |             |
| - | 15 | 1859_1860                |                   | NM_004333    | NP_004324    | P15056 | BRAF_HUMAN   | rotein kinas_R603>I(2) p.T         | 18290 | ATTTCACTGTAG  | 0.366 | rs121913378 |
| + | 4  | 426_427                  |                   | NM_002652    | NP_002643    | P12273 | PIP_HUMAN    |                                    | 1     | GTAATCCCATC   | 0.436 |             |
| - | 14 | 2431                     |                   | NM_005232    | NP_005223    | P21709 | EPHA1_HUMAN  | ellular). Cytoplasmic (Potential). | 5     | GGTTTCGTATG/  | 0.483 |             |
| + | 19 | 2756                     | l.1_Missense_Mu   | NM_198455    | NP_940857    | A2VEC9 | SSPO_HUMAN   | VWFC 1.                            | 0     | CCCTTACAGG/   | 0.612 |             |
| - | 14 | 2410                     | kwj.1_Missense_M  | NM_033225    | NP_150094    | Q96PZ7 | CSMD1_HUMAN  | lar (Potential). CUB 4.            | 25    | AAATCCAAGC/   | 0.468 |             |
| + | 2  | 392_393                  |                   | NM_000015    | NP_000006    | P11245 | ARY2_HUMAN   |                                    | 2     | TACATCCCTCCA  | 0.5   |             |
| + | 5  | 904                      | p.R145C SH2D4A    | NM_022071    | NP_071354    | Q9H788 | SH24A_HUMAN  |                                    | 0     | TCAATCGTATGA  | 0.398 |             |
| - | 2  | 598                      |                   | NM_002318    | NP_002309    | Q9Y4K0 | LOXL2_HUMAN  | SRCR 1.                            | 3     | GAAATCGTATC/  | 0.637 | rs144452398 |
| - | 6  | 1453                     | cgk.2_Missense_M  | NM_173833    | NP_776194    | Q6ZMJ2 | SCAR5_HUMAN  | . Extracellular (Potential).       | 2     | TACCTCTCTCCC  | 0.582 |             |
| - | 3  | 7628                     |                   | NM_031271    | NP_112561    | Q9BXT5 | TEX15_HUMAN  |                                    | 7     | ATAGATGAATTA  | 0.353 |             |
| - | 19 | 2155                     | ck.1_Missense_Mi  | NM_001464    | NP_001455    | Q99965 | ADAM2_HUMAN  | ical; (Potential).                 | 2     | GAAAGGAATGA/  | 0.318 |             |



|   |    |      |                   |              |              |        |             |                                   |    |               |       |
|---|----|------|-------------------|--------------|--------------|--------|-------------|-----------------------------------|----|---------------|-------|
| - | 5  | 629  | cw.1_Missense_M   | NM_004198    | NP_004189    | Q15825 | ACHA6_HUMAN | Extracellular.                    | 0  | TATCCACTTTTGA | 0.353 |
| + | 2  | 346  | /S1_uc003xui.2_lr | NM_173519    | NP_775790    | Q8IUQ0 | CLVS1_HUMAN |                                   | 5  | CTTCTTCCAAAA  | 0.478 |
| + | 5  | 1166 | i.2_RNA CLVS1_u   | NM_173519    | NP_775790    | Q8IUQ0 | CLVS1_HUMAN |                                   | 5  | CATGGGAACCTC  | 0.448 |
| - | 15 | 1990 | 1_Intron uc003xyy | NM_007332    | NP_015628    | O75762 | TRPA1_HUMAN | Cytoplasmic (Potential).          | 6  | TTCATCCCATCTC | 0.338 |
| - | 1  | 5171 |                   | NM_031308    | NP_112598    | P58107 | EPIPL_HUMAN | Plectin 30.                       | 2  | GGGGTCCGCCA   | 0.667 |
| - | 27 | 3608 | 3zkl.2_Missense_M | NM_002839    | NP_002830    | P23468 | PTPRD_HUMAN | III 7. Extracellular (Potentia    | 22 | .TCGGGAGAAGG  | 0.468 |
| - | 9  | 2295 | EM1_uc010mic.2_f  | NM_144966    | NP_659403    | Q5H8C1 | FREM1_HUMAN | CSPG 3.                           | 5  | GATCTCCCACG   | 0.483 |
| - | 1  | 2210 | uc003zrh.1_RNA    | NM_153809    | NP_722516    | Q8IZX4 | TAF1L_HUMAN |                                   | 26 | AGGGTCCATTTT  | 0.433 |
| + | 8  | 660  | se_Mutation_p.P1f | NM_021111    | NP_066934    | O95980 | RECK_HUMAN  | Not repeats. Knot 3.              | 3  | ATTAGTCCACAA  | 0.373 |
| - | 4  | 1058 | mw.2_Missense_M   | NM_013438    | NP_038466    | Q9UMX0 | UBQL1_HUMAN |                                   | 0  | CAAACCCAAGC   | 0.403 |
| + | 2  | 247  | e_Mutation_p.S12  | NM_014425    | NP_055240    | Q9Y283 | INVS_HUMAN  |                                   | 2  | TGGTTCATCATT  | 0.453 |
| - | 12 | 1713 |                   | NM_005502    | NP_005493    | O95477 | ABCA1_HUMAN | Extracellular.                    | 17 | TGGCCAAAAAC   | 0.517 |
| + | 1  | 32   | afh.1_Missense_Mi | NM_004108    | NP_004099    | Q15485 | FCN2_HUMAN  |                                   | 1  | CTGTGGGGGTC   | 0.607 |
| + | 6  | 995  |                   | NM_000718    | NP_000709    | Q00975 | CAC1B_HUMAN | Intracellular (Potential).        | 6  | AGTGCCGGGAG   | 0.592 |
| - | 1  | 926  |                   | NM_001135995 | NP_001129467 | Q9H3M9 | ATX3L_HUMAN | Josephin.                         | 6  | GTAATCGAGCC   | 0.393 |
| - | 8  | 1215 | b.2_Nonsense_ML   | NM_021804    | NP_068576    | Q9BYF1 | ACE2_HUMAN  | Extracellular (Potential).        | 3  | AGGTCCCAAGC   | 0.463 |
| + | 4  | 624  | rf22_uc010ngv.2_l | NM_152632    | NP_689845    | Q6ZTR5 | CX022_HUMAN |                                   | 3  | ATTTTTCCAAC   | 0.398 |
| + | 14 | 2421 | rf22_uc010ngv.2_l | NM_152632    | NP_689845    | Q6ZTR5 | CX022_HUMAN |                                   | 3  | ATACTGATTTAG  | 0.343 |
| - | 17 | 2140 |                   | NM_032591    | NP_115980    | Q96T83 | SL9A7_HUMAN |                                   | 2  | GGCTCGAAACC   | 0.632 |
| - | 11 | 1232 | lpg.1_Missense_M  | NM_002547    | NP_002538    | O60890 | OPHN1_HUMAN | PH.                               | 2  | CCAAGGGCCCC   | 0.423 |
| - | 12 | 1624 | MT2B_uc004egt.2   | NM_024917    | NP_079193    | Q96GJ1 | TRM2_HUMAN  |                                   | 1  | GGATGGCCCTG   | 0.363 |
| + | 6  | 1793 | e_Mutation_p.W3E  | NM_000868    | NP_000859    | P28335 | 5HT2C_HUMAN | Same=7; (By similarity).          | 3  | GTTTTGATTGG   | 0.383 |
| + | 5  | 680  | p.E149K MST4_uc   | NM_016542    | NP_057626    | Q9P289 | MST4_HUMAN  | Protein kinase.                   | 9  | CTAAAGGAAATT  | 0.358 |
| - | 3  | 521  |                   | NM_016249    | NP_057333    | Q9UBF1 | MAGC2_HUMAN | Ser-rich.                         | 2  | AAGAGGATGTG   | 0.468 |
| - | 10 | 1481 |                   | NM_000808    | NP_000799    | P34903 | GBRA3_HUMAN | Cytoplasmic (Probable).           | 1  | ATGGTGAAAAAT  | 0.547 |
| + | 27 | 4795 |                   | NM_198576    | NP_940978    | O00468 | AGRIN_HUMAN |                                   | 3  | ATCCAGGACCA   | 0.726 |
| + | 1  | 338  |                   | NM_080431    | NP_536356    | Q8TDY3 | ACTT2_HUMAN |                                   | 0  | AATTCAGGCTC   | 0.597 |
| + | 9  | 2380 |                   | NM_015215    | NP_056030    | Q9Y6Y1 | CMTA1_HUMAN |                                   | 9  | CCAACGGGGTA   | 0.677 |
| - | 10 | 1717 | zx.1_Missense_Mi  | NM_012102    | NP_036234    | Q9P2R6 | RERE_HUMAN  | ELM2.                             | 2  | AGAAGGAAATG   | 0.443 |
| + | 1  | 136  |                   | NM_001080830 | NP_001074299 | O95522 | PRA12_HUMAN |                                   | 3  | CTCTTCCCCCA   | 0.627 |
| - | 4  | 1316 |                   | NM_001146344 | NP_001139816 | O60813 | PRA11_HUMAN |                                   | 0  | GGCAGGATACA   | 0.498 |
| + | 4  | 1056 |                   | NM_001012276 | NP_001012276 | Q5VWM4 | PRAM8_HUMAN | LRR 1.                            | 0  | AGCTGGACCTG   | 0.582 |
| - | 3  | 1200 |                   | NM_001099850 | NP_001093320 | Q5VWM3 | PRA18_HUMAN |                                   | 0  | GCCGTGAAAGC   | 0.567 |
| - | 16 | 1792 | oco.1_Missense_M  | NM_181719    | NP_859070    | Q5TGY1 | TMCO4_HUMAN |                                   | 0  | CCACGGCCTTC   | 0.677 |
| - | 12 | 2780 | p.E166K KIF17_u   | NM_020816    | NP_065867    | Q9P2E2 | KIF17_HUMAN | p.E888K(1)                        | 4  | TATCTTCGCCCC  | 0.577 |
| - | 22 | 3629 | .T845P EIF4G3_u   | NM_003760    | NP_003751    | O43432 | IF4G3_HUMAN |                                   | 1  | TAAGTCCCTTCC  | 0.502 |
| + | 2  | 326  | l.L42F TMEM57_u   | NM_018202    | NP_060672    | Q8N5G2 | MACO1_HUMAN | Intracellular (Potential).        | 0  | TGTGCTCCTAC   | 0.368 |
| - | 2  | 180  |                   | NM_152365    | NP_689578    | Q8NAX2 | CA172_HUMAN | Pro-rich.                         | 2  | GTTTATCATATG  | 0.637 |
| - | 21 | 3380 | p.S651F BAI2_uc   | NM_001703    | NP_001694    | O60241 | BAI2_HUMAN  | Name=3; (Potential).              | 13 | AGGAGGAGAGA   | 0.647 |
| - | 31 | 1902 | cfi.1_Missense_Mi | NM_001852    | NP_001843    | Q14055 | CO9A2_HUMAN | Intracellular region 2 (COL2).    | 2  | GCCCCGTCCC    | 0.512 |
| + | 11 | 1631 | q.2_Missense_Mu   | NM_005424    | NP_005415    | P35590 | TIE1_HUMAN  | (Potential). Fibronectin type-III | 7  | GTTTCGTGTG    | 0.602 |
| - | 14 | 1748 | lgl.1_Missense_Mi | NM_003738    | NP_003729    | Q9Y6C5 | PTC2_HUMAN  | Cytoplasmic (Potential).          | 18 | GCAGGATCTGA   | 0.592 |
| + | 2  | 291  |                   | NM_006252    | NP_006243    | P54646 | AAPK2_HUMAN | Protein kinase.                   | 6  | CGTCATCCTCAT  | 0.254 |
| - | 3  | 1307 | orf168_uc009vzv.  | NM_001004303 | NP_001004303 | Q5VWT5 | CA168_HUMAN |                                   | 5  | CTTGGGAACAG   | 0.607 |
| + | 4  | 574  |                   | NM_000562    | NP_000553    | P07357 | CO8A_HUMAN  | MACPF.                            | 3  | ATCCAGGATCAC  | 0.498 |
| + | 6  | 922  |                   | NM_000562    | NP_000553    | P07357 | CO8A_HUMAN  | MACPF.                            | 3  | TGGTGGGTGTAC  | 0.408 |
| + | 10 | 1660 |                   | NM_000562    | NP_000553    | P07357 | CO8A_HUMAN  | EGF-like.                         | 3  | CCATCCTCGAG   | 0.617 |

rs141985868

|   |    |         |                    |              |              |        |             |                               |              |               |       |
|---|----|---------|--------------------|--------------|--------------|--------|-------------|-------------------------------|--------------|---------------|-------|
| - | 5  | 638     | _p.L129FIC8B_uc    | NM_000066    | NP_000057    | P07358 | CO8B_HUMAN  | MACPF.                        | 4            | ATCAAGAACTGC  | 0.458 |
| + | 2  | 775_776 | s.1_Nonsense_Mu    | NM_001134673 | NP_001128145 | Q12857 | NFIA_HUMAN  | CTF/NF-I.                     | 2            | ACAGGGAAAAAA  | 0.48  |
| + | 6  | 983     | :K7_uc001dap.2_l   | NM_014495    | NP_055310    | Q9Y5C1 | ANGL3_HUMAN | rogen C-terminal.             | 0            | TTCAGGAGAATT  | 0.318 |
| - | 4  | 554_555 | se_Mutation_p.S9C  | NM_002227    | NP_002218    | P23458 | JAK1_HUMAN  | FERM.                         | 61           | CGGAGGGACATC  | 0.554 |
| - | 6  | 677     | 173_uc001dgi.3_5   | NM_001002912 | NP_001002912 | Q5RHP9 | CA173_HUMAN |                               | 5            | TATATGGTCGAC  | 0.403 |
| - | 15 | 2127    |                    | NM_001013660 | NP_001013682 | Q6ZNA5 | FRRS1_HUMAN | (Potential). Cytochrome b5    | 1            | ATCAGGAAGAT   | 0.448 |
| + | 3  | 669     | l.1_Missense_Mut   | NM_000642    | NP_000633    | P35573 | GDE_HUMAN   | glucanotransferase.           | 3            | TGGTTCATTTCA  | 0.308 |
| + | 5  | 357     | vu.1_Missense_Mu   | NM_000851    | NP_000842    | P46439 | GSTM5_HUMAN | ST C-terminal.                | 6            | AGATTCGTGTG   | 0.542 |
| - | 7  | 763     | e_Mutation_p.P19f  | NM_002557    | NP_002548    | Q12889 | OVGP1_HUMAN |                               | 5            | ATTTGGGGTCT   | 0.483 |
| - | 2  | 332     | 8F ATP5F1_uc00     | NM_024102    | NP_077007    | Q9BQA1 | MEP50_HUMAN | WD 1.                         | 0            | AATCGGAGGCC   | 0.582 |
| - | 2  | 995     | 3N1_uc001edr.2_F   | NM_018364    | NP_060834    | Q5VWQ0 | RSBN1_HUMAN |                               | 1            | AAATTTAATCGGC | 0.393 |
| - | 4  | 586     | n_p.R77* VTCN1_    | NM_024626    | NP_078902    | Q7Z7D3 | VTCN1_HUMAN | Potential). Ig-like V-type 2. | 0            | CCATCGGGGAG   | 0.552 |
| - | 26 | 3783    |                    | NM_206996    | NP_996879    | Q6Q759 | SPG17_HUMAN |                               | 6            | TGTCCAATGA    | 0.448 |
| - | 2  | 261     | RS2_uc010oxg.1_l   | NM_015836    | NP_056651    | Q9UGM6 | SYWM_HUMAN  |                               | 0            | TAATGGAGTGG   | 0.502 |
| + | 11 | 1337    | GA10_uc009wiw.4    | NM_003637    | NP_003628    | O75578 | ITA10_HUMAN | r (Potential). FG-GAP 4.      | 8            | AGTTCCTCCCT   | 0.592 |
| + | 10 | 1187    | IKRD35_uc010oyx    | NM_144698    | NP_653299    | Q8N283 | ANR35_HUMAN |                               | 5            | AGGCTCTAGTC   | 0.592 |
| + | 7  | 948     | sense_Mutation_p.  | NM_004425    | NP_004416    | Q16610 | ECM1_HUMAN  | roximate repeats. 1.          | 3            | GTTCTCGGTCA   | 0.632 |
| - | 3  | 1598    |                    | NM_001009931 | NP_001009931 | Q86YZ3 | HORN_HUMAN  | 5                             | TAGATCCTTGTC | 0.562         |       |
| - | 3  | 428     |                    | NM_001009931 | NP_001009931 | Q86YZ3 | HORN_HUMAN  | 1                             | TCTCCTTTTTTC | 0.418         |       |
| - | 3  | 6625    |                    | NM_002016    | NP_002007    | P20930 | FILA_HUMAN  | Ser-rich.                     | 16           | ATTGTTCCTTGT  | 0.547 |
| - | 3  | 682     | uc001ezv.2_Intron  | NM_002016    | NP_002007    | P20930 | FILA_HUMAN  | Potential.                    | 16           | CATAATCATATAC | 0.353 |
| - | 3  | 726     |                    | NM_016190    | NP_057274    | Q9UBG3 | CRNN_HUMAN  | Gln-rich.                     | 3            | TCTGTCTCTGTT  | 0.582 |
| + | 2  | 348     |                    | NM_178353    | NP_848130    | Q5T753 | LCE1E_HUMAN | Cys-rich.                     | 0            | GCCAGCCCTCA   | 0.657 |
| - | 9  | 1699    | l1fn.2_Missense_Mu | NM_006589    | NP_006580    | P81408 | F189B_HUMAN |                               | 2            | GGAGCGAAAGA   | 0.701 |
| + | 1  | 308     |                    | NM_001004473 | NP_001004473 | Q8NGX5 | O10K1_HUMAN | Name=3; (Potential).          | 1            | TGTTTTCTTCC   | 0.498 |
| - | 8  | 1197    |                    | NM_003126    | NP_003117    | P02549 | SPTA1_HUMAN | Spectrin 4.                   | 8            | GATGGGAAAGT   | 0.478 |
| - | 1  | 85      |                    | NM_001004467 | NP_001004467 | Q5JRS4 | O10J3_HUMAN | Name=1; (Potential).          | 2            | AACAAAGAAGA   | 0.448 |
| - | 2  | 388     |                    | NM_030916    | NP_112178    | Q96NY8 | PVRL4_HUMAN |                               | 2            | CCGCGGGGCAC   | 0.632 |
| - | 6  | 2161    |                    | NM_005099    | NP_005090    | O75173 | ATS4_HUMAN  | Cys-rich.                     | 5            | CACCTGAGCCA   | 0.627 |
| - | 13 | 2279    |                    | NM_000130    | NP_000121    | P12259 | FA5_HUMAN   | B.                            | 6            | CTAAACGATCAT  | 0.403 |
| - | 7  | 1088    | f112_uc001ggj.2_l  | NM_000450    | NP_000441    | P16581 | LYAM2_HUMAN | ar (Potential). Sushi 3.      | 5            | ATTCTGAGGCT   | 0.512 |
| + | 14 | 5246    | A2_uc009www.2      | NM_020318    | NP_064714    | Q9BXP8 | PAPP2_HUMAN |                               | 16           | TCTCTCCCGCA   | 0.517 |
| - | 23 | 3997    | N1_uc001glb.1_lr   | NM_004319    | NP_004310    | O14525 | ASTN1_HUMAN |                               | 15           | CAAGTCCGTAG   | 0.567 |
| + | 38 | 5309    | lgox.1_Missense_Mu | NM_000721    | NP_000712    | Q15878 | CAC1E_HUMAN | Name=S6 of repeat IV.         | 6            | GATGCTCAACC   | 0.547 |
| + | 45 | 7370    |                    | NM_031935    | NP_114141    | Q96RW7 | HMCN1_HUMAN |                               | 23           | GTGTCATGGT    | 0.408 |
| + | 7  | 1183    | e_Mutation_p.P285  | NM_005807    | NP_005798    | Q92954 | PRG4_HUMAN  | K-X-P-X-P-T-T-X. 4; approx    | 1            | CCACCCCAAG    | 0.637 |
| + | 5  | 617     |                    | NM_001039152 | NP_001034241 | Q2M5E4 | RGS21_HUMAN |                               | 2            | AAAATGGCTCC   | 0.333 |
| + | 9  | 3670    | p.D1067N CRB1_L    | NM_201253    | NP_957705    | P82279 | CRUM1_HUMAN | ng (Potential). Extracellular | 9            | ACATCGATGAA   | 0.483 |
| - | 8  | 2173    | npj.1_Missense_Mu  | NM_014875    | NP_055690    | Q15058 | KIF14_HUMAN | inesin-motor.                 | 7            | TGGGTCATCAC   | 0.388 |
| + | 4  | 241     | PE_uc010pqn.1_l    | NM_003094    | NP_003085    | P62304 | RUXE_HUMAN  |                               | 0            | GAGATTCATTCT  | 0.313 |
| + | 6  | 727     |                    | NM_000715    | NP_000706    | P04003 | C4BPA_HUMAN | Sushi 3.                      | 3            | GCCTCTCCAG    | 0.448 |
| + | 27 | 4537    | .G1016E CR1_uc     | NM_000573    | NP_000564    | P17927 | CR1_HUMAN   | ar (Potential). Sushi 23.     | 3            | CAATGGAATGG   | 0.378 |
| - | 64 | 14398   |                    | NM_206933    | NP_996816    | O75445 | USH2A_HUMAN | II 32. Extracellular (Potenti | 26           | ATAATTCGTAATA | 0.418 |
| + | 30 | 8209    | iCN_uc001hsp.1_l   | NM_001098623 | NP_001092093 | Q5VST9 | OBSCN_HUMAN | Ig-like 26.                   | 28           | GGGCTCCGAGG   | 0.692 |
| + | 2  | 464     | hvy.1_Missense_Mu  | NM_173508    | NP_775779    | Q8IY50 | S35F3_HUMAN | ical; (Potential).            | 2            | CTCCTCGTGGG   | 0.637 |
| + | 37 | 5303    |                    | NM_001035    | NP_001026    | Q92736 | RYR2_HUMAN  | ilarity). 4 X approximate rep | 33           | TGTCCCATGAC   | 0.557 |
| + | 1  | 668     | re.1_Missense_Mu   | NM_020066    | NP_064450    | Q9NZ56 | FMN2_HUMAN  |                               | 12           | TCTGGGCCTG    | 0.682 |

rs67657858

rs144936292

|   |    |         |                   |              |              |        |             |                                 |    |              |       |
|---|----|---------|-------------------|--------------|--------------|--------|-------------|---------------------------------|----|--------------|-------|
| + | 5  | 3164    | ve.1_Missense_Mt  | NM_020066    | NP_064450    | Q9NZ56 | FMN2_HUMAN  | Pro-rich, FH1.                  | 12 | ACCCCTCTAC   | 0.711 |
| + | 3  | 1175    |                   | NM_175911    | NP_787107    | Q8N349 | OR2LD_HUMAN | Name=7; (Potential).            | 4  | ACCATCCTTACC | 0.468 |
| - | 4  | 855     | ihz.2_Missense_M  | NM_024803    | NP_079079    | A6NHL2 | TBAL3_HUMAN |                                 | 1  | AAATGTATTCTC | 0.512 |
| + | 6  | 672     | LAH_uc001int.2_l  | NM_001039702 | NP_001034791 | Q9NV23 | SAST_HUMAN  |                                 | 0  | GGCATCGCATT  | 0.393 |
| - | 8  | 2105    |                   | NM_001010924 | NP_001010924 | Q5VUB5 | F1711_HUMAN | lasmic (Potential).             | 4  | CGGCTTCCCAC  | 0.572 |
| - | 27 | 2827    | cb.1_Missense_Mt  | NM_003638    | NP_003629    | P53708 | ITA8_HUMAN  | cellular (Potential).           | 6  | CGCTTCTCCTC  | 0.478 |
| - | 20 | 2044    | cb.1_Missense_Mu  | NM_003638    | NP_003629    | P53708 | ITA8_HUMAN  | cellular (Potential).           | 6  | TGCTCCTTCCC  | 0.363 |
| - | 16 | 2001    | BL_uc001iqk.2_int | NM_006393    | NP_006384    | O76041 | NEBL_HUMAN  | Nebulin 15.                     | 2  | TGCATTCCTTTC | 0.368 |
| - | 2  | 419     |                   | NM_005028    | NP_005019    | P48426 | PI42A_HUMAN | PIPK.                           | 2  | CAGGGATTG    | 0.353 |
| - | 1  | 344     |                   | NM_001034842 | NP_001030014 | Q3KNS1 | PTHD3_HUMAN |                                 | 4  | CCGGGGGGGTG  | 0.721 |
| - | 13 | 1342    | p.S313F MPP7_u    | NM_173496    | NP_775767    | Q5T2T1 | MPP7_HUMAN  |                                 | 1  | TGTTGGAAACT  | 0.408 |
| + | 31 | 2789    |                   | NM_052997    | NP_443723    | Q9BXX3 | AN30A_HUMAN |                                 | 9  | AAAGTGAAAAAT | 0.328 |
| + | 8  | 1780    | p.H321Y ZNF37A_   | NM_001007094 | NP_001007095 | P17032 | ZN37A_HUMAN | 2H2-type 4.                     | 1  | GAATTCATACAG | 0.418 |
| + | 12 | 1711    | p.E506K ALOX5_    | NM_000698    | NP_000689    | P09917 | LOX5_HUMAN  | lipoxygenase.                   | 2  | TGTCGGAGTAC  | 0.711 |
| - | 12 | 1524    | p.L442F FRMPD:    | NM_001018071 | NP_001018081 | Q68DX3 | FRPD2_HUMAN | FERM.                           | 1  | GGCAAGGACCC  | 0.537 |
| - | 11 | 1535    | p.D408N OGDHL_    | NM_018245    | NP_060715    | Q9ULD0 | OGDHL_HUMAN |                                 | 1  | GTTCATCGGCAT | 0.562 |
| + | 2  | 309     | l.1_Missense_Mut  | NM_001145263 | NP_001138735 | Q13772 | NCOA4_HUMAN |                                 | 2  | TTCTCCGGGCT  | 0.493 |
| - | 11 | 1515    | p.P374S PCDH15    | NM_033056    | NP_149045    | Q96QU1 | PCD15_HUMAN | Extracellular (Potential).      | 13 | AAGAGGATGAC  | 0.348 |
| - | 37 | 11398   | K3_uc010qih.1_in  | NM_020987    | NP_066267    | Q12955 | ANK3_HUMAN  |                                 | 19 | GCCTTCTTCT   | 0.418 |
| - | 14 | 2017    | mw.2_Missense_M   | NM_001127384 | NP_001120856 | Q9UI47 | CTNA3_HUMAN |                                 | 8  | CAGTTCCTCTG  | 0.299 |
| + | 37 | 2599    | e_Mutation_p.G62  | NM_005203    | NP_005194    | Q5TAT6 | CODA1_HUMAN | al), Triple-helical region 3 (C | 1  | TAAAGGGGATA  | 0.428 |
| + | 2  | 468     | T3_uc009xqs.1_Rl  | NM_152635    | NP_689848    | Q8WWZ8 | OIT3_HUMAN  |                                 | 2  | CCCACGCACCT  | 0.567 |
| - | 4  | 370     | Qqkx.1_5'UTR PL   | NM_001001791 | NP_001001791 | Q5SWW7 | CJ055_HUMAN |                                 | 0  | CCAGCGAACTG  | 0.562 |
| + | 6  | 492     | PA1_uc010qlt.1_ξ  | NM_005411    | NP_005402    | Q8IWL2 | SFTA1_HUMAN |                                 | 0  | TCTCAGCCCTC  | 0.557 |
| + | 2  | 845     | tt.2_Missense_Mu  | NM_001548    | NP_001539    | P09914 | IFIT1_HUMAN | TPR 5.                          | 0  | GACAGGAAGCT  | 0.453 |
| + | 2  | 562     | 79E CYP2C19_uc    | NM_000772    | NP_000763    | P33260 | CP2C1_HUMAN | p.G79V(1)                       | 5  | GCATGGATATG  | 0.423 |
| + | 9  | 6856    | 1lfz.2_Missense_M | NM_206862    | NP_996744    | O95359 | TACC2_HUMAN |                                 | 10 | CCAGTGGGGAG  | 0.562 |
| + | 2  | 766     |                   | NM_153442    | NP_703143    | Q8NDV2 | GPR26_HUMAN | lasmic (Potential).             | 1  | ACAGCGAGCCA  | 0.572 |
| - | 9  | 1464    | XM2_uc001lhj.2_F  | NM_198148    | NP_937791    | Q8N436 | CPXM2_HUMAN |                                 | 2  | CATTGCCGTGG  | 0.597 |
| + | 13 | 1962    | p.P523S C10orf1   | NM_015608    | NP_056423    | Q3B7T1 | EDRF1_HUMAN |                                 | 10 | TCTGATCCATCA | 0.373 |
| - | 12 | 1578    | p.P389S ADAM1     | NM_003474    | NP_003465    | O43184 | ADA12_HUMAN | potential), Peptidase M12B.     | 9  | CATGGGAAATG  | 0.547 |
| - | 3  | 969     | p.P380R C10orf9   | NM_001004298 | NP_001004298 | Q96M02 | CJ090_HUMAN |                                 | 2  | TTTTGGGGCTG  | 0.498 |
| - | 1  | 748     |                   | NM_001005164 | NP_001005164 | Q8NGJ4 | O5E2_HUMAN  | Name=6; (Potential).            | 3  | GGCAAGGATTA  | 0.453 |
| - | 1  | 643     | 45_uc001mbq.1_l   | NM_001005168 | NP_001005168 | Q6IFG1 | O5E8_HUMAN  | Name=5; (Potential).            | 2  | TAACATCCAGTA | 0.478 |
| - | 1  | 380     |                   | NM_001005173 | NP_001005173 | Q8NGH7 | O5L1_HUMAN  | cellular (Potential).           | 2  | AATCTCGTGGG  | 0.537 |
| + | 4  | 820     | GA4_uc001mcn.2    | NM_001037329 | NP_001032406 | Q8IV77 | CNGA4_HUMAN | cellular (Potential).           | 1  | GCCGCAGCCA   | 0.582 |
| - | 2  | 735     |                   | NM_003737    | NP_003728    | Q96JQ0 | PCD16_HUMAN | Extracellular (Potential).      | 5  | CTCAGGTCCA   | 0.597 |
| + | 1  | 697_698 |                   | NM_001004489 | NP_001004489 | Q9H205 | O2AG1_HUMAN | lasmic (Potential).             | 1  | TGAGGGGAGG   | 0.49  |
| + | 6  | 1275    | ax.1_Intron ZNF21 | NM_013250    | NP_037382    | Q9UL58 | ZN215_HUMAN | KRAB.                           | 0  | GAGAAAGAAAT  | 0.358 |
| + | 4  | 1110    |                   | NM_176822    | NP_789792    | Q86W24 | NAL14_HUMAN | NACHT.                          | 8  | TTCGATGAAGT  | 0.453 |
| + | 4  | 1327    |                   | NM_176822    | NP_789792    | Q86W24 | NAL14_HUMAN | NACHT.                          | 8  | TGCAAGAGAGG  | 0.388 |
| + | 11 | 3457    |                   | NM_176822    | NP_789792    | Q86W24 | NAL14_HUMAN |                                 | 8  | TAAACTACAAG  | 0.398 |
| - | 3  | 1348    | e_Mutation_p.P38  | NM_213618    | NP_998783    | P78524 | ST5_HUMAN   | Pro-rich.                       | 1  | TTTGGGGACAG  | 0.587 |
| - | 18 | 3002    | 22_uc001mpa.2_    | NM_173588    | NP_775859    | Q8N9C0 | IGS22_HUMAN | nectin type-III 2.              | 7  | TCATCTCAAGGA | 0.562 |
| + | 3  | 532     | S2_uc001mqn.2_f   | NM_001143830 | NP_001137302 | O43903 | GAS2_HUMAN  | CH.                             | 2  | TGCAGGAGAAA  | 0.388 |
| - | 9  | 791     | 1L1_uc001muf.1_   | NM_001326    | NP_001317    | Q12996 | CSTF3_HUMAN |                                 | 0  | TACTCCGATCTT | 0.239 |
| - | 2  | 807     | 1_5'Flank C11orf7 | NM_000536    | NP_000527    | P55895 | RAG2_HUMAN  |                                 | 5  | GACATGAAAAG  | 0.423 |

|   |    |                          |              |              |        |             |    |                 |       |
|---|----|--------------------------|--------------|--------------|--------|-------------|----|-----------------|-------|
| - | 9  | 1472_1473_p.P284L PHF21A | NM_001101802 | NP_001095272 | Q96BD5 | PF21A_HUMAN | 2  | GGACGGGGTGC     | 0.584 |
| + | 3  | 485_igo.3_Missense_M     | NM_002843    | NP_002834    | Q12913 | PTPRJ_HUMAN | 8  | CAATTCCTGACC    | 0.418 |
| + | 1  | 227                      | NM_001005512 | NP_001005512 | Q6IF82 | O4A47_HUMAN | 2  | CATTTCCCCCA     | 0.423 |
| + | 2  | 402                      | NM_024114    | NP_077019    | Q8IWZ4 | TRI48_HUMAN | 0  | CTGAGGAGCAA     | 0.483 |
| + | 3  | 224_C6_uc010rik.1_5'F    | NM_001004704 | NP_001004704 | Q8NH72 | OR4C6_HUMAN | 2  | TATTTAGGATTCT   | 0.368 |
| + | 1  | 221                      | NM_001004739 | NP_001004739 | Q8NGL0 | OR5L2_HUMAN | 1  | GCTACTCCTCAA    | 0.463 |
| + | 1  | 932                      | NM_001001921 | NP_001001921 | Q8N127 | O5AS1_HUMAN | 5  | ATATTTCAAATGA   | 0.284 |
| + | 1  | 740                      | NM_001005200 | NP_001005200 | Q8N162 | OR8H2_HUMAN | 2  | CTTGGGAGTCA     | 0.353 |
| + | 1  | 692                      | NM_001005205 | NP_001005205 | Q8NGP2 | OR8J1_HUMAN | 2  | ITTCATCAGAAGG   | 0.343 |
| - | 1  | 465_NR_uc001njin.3_F     | NM_005161    | NP_005152    | P35414 | APJ_HUMAN   | 6  | AAAATCACCACC    | 0.562 |
| - | 7  | 1048                     | NM_003146    | NP_003137    | Q08945 | SSRP1_HUMAN | 2  | TGGGGGATCCAC    | 0.458 |
| + | 5  | 925_no.2_Missense_M      | NM_001142521 | NP_001135993 | Q96PZ2 | F111A_HUMAN | 3  | TTCTTTCTTTCT    | 0.408 |
| + | 1  | 326                      | NM_001004706 | NP_001004706 | Q8NGI4 | OR4DB_HUMAN | 2  | TGGTGGGGCAG     | 0.468 |
| + | 1  | 694                      | NM_001004711 | NP_001004711 | Q8NGE8 | OR4D9_HUMAN | 0  | GGGAAGGCAGG     | 0.502 |
| + | 6  | 677_A2_uc009ymu.2_3      | NM_000139    | NP_000130    | Q01362 | FCERB_HUMAN | 1  | TCTGGGACTTGC    | 0.403 |
| + | 3  | 432_1_Intron DAK_uc0     | NM_015533    | NP_056348    | Q3LXA3 | DHAK_HUMAN  | 0  | CTGGCCATGAG     | 0.637 |
| - | 4  | 655_A2_uc010rik.1_5'L    | NM_004739    | NP_004730    | O94776 | MTA2_HUMAN  | 2  | TTGCCGAGAAA     | 0.522 |
| - | 7  | 1209_q.1_RNA SLC22A2     | NM_199352    | NP_955384    | Q6T423 | S22AP_HUMAN | 4  | ACGGCTCATGTG    | 0.502 |
| + | 1  | 213_A10_uc001nwu.3       | NM_001039752 | NP_001034841 | Q63ZE4 | S22AA_HUMAN | 2  | AATGGCCTTTGA    | 0.398 |
| + | 9  | 1712_2A10_uc001nwu.3     | NM_001039752 | NP_001034841 | Q63ZE4 | S22AA_HUMAN | 2  | ATTATGGAATCT    | 0.443 |
| + | 1  | 1087_yps.1_Missense_N    | NM_144585    | NP_653186    | Q96S37 | S22AC_HUMAN | 1  | ACACGGAGCCG     | 0.667 |
| - | 7  | 754                      | NM_017525    | NP_059995    | Q6DT37 | MRCKG_HUMAN | 4  | GTAGTGGCCCT     | 0.592 |
| + | 10 | 1382_ense_Mutation_p.l   | NM_003273    | NP_003264    | O76062 | ERG24_HUMAN | 1  | TTACCGCATCAT    | 0.652 |
| - | 7  | 753_p.M160 CABP2_        | NM_016366    | NP_057450    | Q9NPB3 | CABP2_HUMAN | 1  | AGACATCATTCG    | 0.572 |
| + | 16 | 2306_R703Q PPF1A1_u      | NM_003626    | NP_003617    | Q13136 | LIPA1_HUMAN | 3  | CCCACGAAGGA     | 0.602 |
| - | 32 | 6434_p.D216N ODZ4_u      | NM_001098816 | NP_001092286 | Q6N022 | TEN4_HUMAN  | 4  | FGAAGTCCTGTA    | 0.557 |
| - | 8  | 1079_e_Mutation_p.P26    | NM_007166    | NP_009097    | Q13492 | PICAL_HUMAN | 2  | GTCTGGTATATC    | 0.279 |
| + | 2  | 975                      | NM_005959    | NP_005950    | P49286 | MTR1B_HUMAN | 2  | TATTTGCTACTAC   | 0.512 |
| + | 9  | 1662_uc001pen.1_Intror   | NM_001098672 | NP_001092142 | Q6MZM0 | HPHL1_HUMAN | 3  | CTCAGGATTTGT    | 0.473 |
| - | 9  | 2662_p.R630K TRPC6_      | NM_004621    | NP_004612    | Q9Y210 | TRPC6_HUMAN | 4  | TTGGCCCTTGCA    | 0.428 |
| + | 2  | 325_R3A_uc009yyx.2_F     | NM_213621    | NP_998786    | P46098 | 5HT3A_HUMAN | 0  | CAGGAGGAGCC     | 0.562 |
| - | 3  | 723                      | NM_000482    | NP_000473    |        |             | 0  | GAATTCGTCAGC    | 0.622 |
| + | 16 | 5318                     | NM_005422    | NP_005413    | O75443 | TECTA_HUMAN | 10 | CAACCGAACTTC    | 0.542 |
| + | 5  | 530                      | NM_017425    | NP_059121    | Q15506 | SP17_HUMAN  | 0  | CCAGAGAGGAG     | 0.403 |
| - | 7  | 836_dy.1_Missense_Mt     | NM_152640    | NP_689853    | Q8IZD4 | DCP1B_HUMAN | 1  | ctgctgctgGTGGAC | 0.458 |
| - | 24 | 2994_p.N3Y A2M_uc0       | NM_000014    | NP_000005    | P01023 | A2MG_HUMAN  | 5  | TGTGTTTTGCAT    | 0.393 |
| - | 31 | 4104_2_Missense_Muta     | NM_002864    | NP_002855    |        |             | 5  | TCCATCGCAAG     | 0.433 |
| - | 3  | 532                      | NM_006248    | NP_006239    |        |             | 0  | TGTCTCCTTGTC    | 0.607 |
| + | 25 | 3540_ise_Mutation_p.R1   | NM_004570    | NP_004561    | O75747 | P3C2G_HUMAN | 21 | ATCTTCGTCCAC    | 0.403 |
| + | 29 | 4033_se_Mutation_p.S1    | NM_004570    | NP_004561    | O75747 | P3C2G_HUMAN | 21 | CCTCTCTGAGGC    | 0.289 |
| - | 14 | 1824_se_Mutation_p.H2    | NM_033123    | NP_149114    | Q86YW0 | PLCZ1_HUMAN | 3  | GGACATGAATAA    | 0.308 |
| + | 1  | 813_Z1_uc001rdw.3_5'l    | NM_033328    | NP_201585    | Q96KX2 | CAZA3_HUMAN | 2  | ACCAAGCTCAAC    | 0.408 |
| - | 25 | 3156_o.G1046S ABCC9_     | NM_005691    | NP_005682    | O60706 | ABCC9_HUMAN | 6  | AATGCCTGCTCA    | 0.413 |
| - | 23 | 2759                     | NM_183378    | NP_899234    | Q7RTY7 | OVCH1_HUMAN | 10 | FGTAATCCACCTA   | 0.363 |
| + | 2  | 297_p.P30S C12orf72      | NM_001135864 | NP_001129336 | Q8IXQ9 | MET20_HUMAN | 0  | TGTTTCCCTGTC    | 0.537 |
| - | 5  | 1331_p.V406 PKP2_uc      | NM_004572    | NP_004563    | Q99959 | PKP2_HUMAN  | 2  | CTGAACTTTTAG    | 0.438 |
| + | 13 | 1972_orf40_uc009zjv.1_l  | NM_001031748 | NP_001026918 | Q86WS4 | CL040_HUMAN | 6  | TGAATCTGTAAT    | 0.398 |

rs145184607

|   |    |           |             |              |              |        |              |                                |     |                 |       |
|---|----|-----------|-------------|--------------|--------------|--------|--------------|--------------------------------|-----|-----------------|-------|
| + | 4  | 517       | rs1120725   | NM_000725    | NP_000716    | P54284 | CACB3_HUMAN  | SH3.                           | 0   | GGATCGGGCGG     | 0.627 |
| - | 2  | 656       | rs1120721   | NM_007210    | NP_009141    | Q8NCL4 | GALT6_HUMAN  | terminal (Potential).          | 2   | CAAAAGGCATTG    | 0.567 |
| - | 7  | 1297      |             | NM_005555    | NP_005546    | P04259 | K2C6B_HUMAN  | rodent Coil 2.                 | 2   | CATCTCCCCAC     | 0.562 |
| + | 12 | 2574      | rs112291    | NM_012291    | NP_036423    | Q14674 | ESPL1_HUMAN  |                                | 3   | CGGCTGTCCCA     | 0.602 |
| + | 16 | 3041      | rs112291    | NM_012291    | NP_036423    | Q14674 | ESPL1_HUMAN  |                                | 3   | AGGTTCTTTTCA    | 0.527 |
| + | 1  | 49        |             | NM_001005183 | NP_001005183 | A6NM76 | O6C76_HUMAN  | cellular (Potential).          | 0   | TGACGGATAAT     | 0.388 |
| + | 8  | 1092      | rs1121982   | NM_001982    | NP_001973    | P21860 | ERBB3_HUMAN  | cellular (Potential).          | 8   | AACATCCTGTGT    | 0.507 |
| + | 25 | 3155      | rs1121982   | NM_001982    | NP_001973    | P21860 | ERBB3_HUMAN  | intracellular (Potential).     | 8   | TAGCCCTGGG      | 0.502 |
| + | 3  | 293       | rs1121982   | NM_005726    | NP_005717    | P43897 | EFTS_HUMAN   |                                | 0   | TCTGGCTCCAC     | 0.473 |
| + | 11 | 1561      | rs112392    | NM_002392    | NP_002383    | Q00987 | MDM2_HUMAN   | protein interaction with USP2. | 3   | AGAAACCCAAG     | 0.393 |
| + | 9  | 1371      | rs1135805   | NM_001135805 | NP_001129277 | P21579 | SYT1_HUMAN   | phospholipid binding (Probe)   | 6   | TTTGATCGTTTCT   | 0.393 |
| + | 2  | 455       | rs1124560   | NM_024560    | NP_078836    | Q9H6R3 | ACSS3_HUMAN  |                                | 4   | CATATTGAAAATC   | 0.338 |
| - | 31 | 3826      | rs11003625  | NM_003625    | NP_003616    | B7Z663 | B7Z663_HUMAN |                                | 6   | TAAATCCAGCTC    | 0.443 |
| + | 4  | 465       | rs11017988  | NM_017988    | NP_060458    | Q6P3W7 | SCYL2_HUMAN  | protein kinase.                | 6   | TCTCCCTATAT     | 0.328 |
| - | 15 | 2162      |             | NM_145913    | NP_666018    | Q8N695 | SC5A8_HUMAN  | intracellular (Potential).     | 0   | TGAAAGCAGGA     | 0.383 |
| + | 6  | 1283      | rs11016816  | NM_016816    | NP_058132    | P00973 | OAS1_HUMAN   |                                | 2   | CAGAAGAGGAC     | 0.373 |
| + | 3  | 766       | rs1178499   | NM_178499    | NP_848594    | Q8IWA6 | CCD60_HUMAN  |                                | 3   | CAGCCGAAAAG     | 0.423 |
| - | 6  | 1297      | rs11003733  | NM_003733    | NP_003724    | Q15646 | OASL_HUMAN   | biquitin-like 1.               | 1   | GGAGGGGATGG     | 0.542 |
| + | 12 | 1752      | rs11207437  | NM_207437    | NP_997320    | Q8IVF4 | DYH10_HUMAN  | protein (By similarity).       | 6   | GGAACGATCTC     | 0.418 |
| - | 8  | 1348      | rs11015347  | NM_015347    | NP_056162    | O15034 | RIMB2_HUMAN  | lectin type-III 2.             | 11  | GGTGGGAGGGG     | 0.637 |
| - | 2  | 469       |             | NM_004004    | NP_003995    | P29033 | CXB2_HUMAN   | intracellular; (Potential).    | 0   | GCGTGACACCG     | 0.552 |
| + | 13 | 1611      | rs1175854   | NM_175854    | NP_787050    | Q58A45 | PAN3_HUMAN   | protein Interaction with PAN2. | 1   | TGCCCAGTACC     | 0.299 |
| + | 10 | 916       | rs1130806   | NM_130806    | NP_570718    | Q8WXD0 | RXFP2_HUMAN  | intracellular (Potential).     | 0   | CGATTCGCTCA     | 0.323 |
| - | 5  | 727       | rs1178006   | NM_178006    | NP_821074    | Q9Y3M8 | STA13_HUMAN  |                                | 4   | TGTTTCGCTGT     | 0.627 |
| - | 4  | 1156      | rs110142296 | NM_001142296 | NP_001135768 | Q8N0X7 | SPG20_HUMAN  |                                | 0   | TATCAGGAAACAT   | 0.448 |
| + | 7  | 861       | rs11000321  | NM_000321    | NP_000312    | P06400 | RB_HUMAN     | protein p.(5)                  | 358 | ACCTCCCATGT     | 0.249 |
| - | 4  | 514       | rs11007015  | NM_007015    | NP_008946    | O75829 | LECT1_HUMAN  | BRICHOS.                       | 2   | TTCGCTTTAAT     | 0.448 |
| + | 3  | 218       | rs1144777   | NM_144777    | NP_659001    | O95171 | SCEL_HUMAN   |                                | 5   | GAGATGAAGAG     | 0.443 |
| - | 19 | 2851      | rs1198968   | NM_198968    | NP_945319    | Q86YF9 | DZIP1_HUMAN  |                                | 2   | AAAAGGATCTT     | 0.269 |
| + | 19 | 2304      | rs11015205  | NM_015205    | NP_056020    | P98196 | AT11A_HUMAN  | intracellular (Potential).     | 4   | CAGCGGAGCC      | 0.657 |
| + | 1  | 902       | rs1172194   | NM_172194    | NP_751944    | Q8NH05 | OR4Q3_HUMAN  | intracellular (Potential).     | 3   | GAAGAAGCTGA     | 0.388 |
| + | 1  | 178       |             | NM_001005503 | NP_001005503 | Q8NGC1 | O11G2_HUMAN  | cellular (Potential).          | 2   | CCAGGGAGGGG     | 0.527 |
| - | 3  | 186_187   | rs11002471  | NM_002471    | NP_002462    | P13533 | MYH6_HUMAN   | myosin head-like.              | 4   | TATCGGGCACC     | 0.579 |
| + | 3  | 305       | rs11071406  | NM_173159    | NP_071406    | Q8IXF0 | NPAS3_HUMAN  | alpha-loop-helix motif.        | 2   | TCTTCTGCA       | 0.488 |
| + | 11 | 1384      | rs1138731   | NM_138731    | NP_620059    | Q8TD10 | MIPO1_HUMAN  | intracellular (Potential).     | 2   | GACTTCAGCAA     | 0.433 |
| - | 1  | 663       | rs11080746  | NM_080746    | NP_542784    | Q96L21 | RL10L_HUMAN  |                                | 1   | TACGGGATGAC     | 0.517 |
| + | 2  | 976       | rs11000953  | NM_000953    | NP_000944    | Q13258 | PD2R_HUMAN   | cellular (Potential).          | 4   | TTAAGGATGTC     | 0.398 |
| + | 4  | 502       | rs11017799  | NM_017799    | NP_060269    | Q9NX78 | CN101_HUMAN  |                                | 2   | TGTCGGGGG       | 0.418 |
| + | 3  | 694       | rs11066283  | NM_021003    | NP_066283    | P35813 | PPM1A_HUMAN  |                                | 1   | AATGTAAGAATC    | 0.418 |
| + | 4  | 1285_1286 | rs11066283  | NM_021003    | NP_066283    | P35813 | PPM1A_HUMAN  |                                | 1   | ATGCACCAAAC     | 0.376 |
| - | 12 | 1359      | rs11007039  | NM_007039    | NP_008970    | Q16825 | PTN21_HUMAN  | Poly-Pro.                      | 4   | ACTGCGGTGGG     | 0.413 |
| + | 8  | 1183      | rs11060789  | NM_018319    | NP_060789    | Q9NUW8 | TYDP1_HUMAN  |                                | 2   | AAGGTTCTGTAC    | 0.428 |
| - | 14 | 1389      | rs11024764  | NM_024764    | NP_079040    | Q9H7T0 | CTSRB_HUMAN  |                                | 5   | GGGATGAAATA     | 0.408 |
| - | 8  | 801       | rs11024764  | NM_024764    | NP_079040    | Q9H7T0 | CTSRB_HUMAN  |                                | 5   | TGGTATCATAATC   | 0.378 |
| + | 1  | 135       | rs11065869  | NM_020818    | NP_065869    | Q9P2D8 | UNC79_HUMAN  |                                | 17  | ATCATTGAATATC   | 0.338 |
| - | 3  | 242       | rs110821092 | NM_178013    | NP_821092    | Q86XR5 | PRIMA_HUMAN  | intracellular (Potential).     | 2   | aggtggcgggggtgg | 0.353 |
| + | 2  | 170       | rs11006215  | NM_006215    | NP_006206    | P29622 | KAIN_HUMAN   |                                | 4   | CAGCTCCACC      | 0.557 |

rs144275111



|   |    |           |                   |              |              |        |             |                                |     |               |       |             |
|---|----|-----------|-------------------|--------------|--------------|--------|-------------|--------------------------------|-----|---------------|-------|-------------|
| + | 3  | 610       |                   | NM_182560    | NP_872366    | Q52M58 | CN177_HUMAN |                                | 0   | GGCCAGGTGCT   | 0.473 |             |
| + | 9  | 1684_1685 | e_Mutation_p.G51  | NM_014844    | NP_055659    | O15040 | TCPR2_HUMAN |                                | 3   | 3TCCTGGGCAGT  | 0.54  |             |
| + | 9  | 2088      | e_Mutation_p.S64  | NM_014844    | NP_055659    | O15040 | TCPR2_HUMAN |                                | 3   | GAACACTCACTCA | 0.602 |             |
| - | 15 | 2293      |                   | NM_006035    | NP_006026    | Q9Y5S2 | MRCKB_HUMAN | Potential.                     | 11  | CTCGGATTTGAT  | 0.463 |             |
| - | 8  | 1240      | i.2_Missense_Mut  | NM_005163    | NP_005154    | P31749 | AKT1_HUMAN  | rotein kinase.                 | 134 | TTGGCGTACTCC  | 0.687 |             |
| - | 12 | 1913      | i.2_Missense_Mut  | NM_003257    | NP_003248    | Q07157 | ZO1_HUMAN   | PDZ 3.                         | 6   | CTTCTCTTATGA  | 0.368 |             |
| + | 2  | 259       |                   | NM_001211    | NP_001202    | O60566 | BUB1B_HUMAN |                                | 4   | CATGTCCCTGG   | 0.413 |             |
| - | 15 | 2095_2096 | P1_uc001zoc.2_5'  | NM_015540    | NP_056355    | Q9BWH6 | RPAP1_HUMAN |                                | 1   | TTCTTGGGGAGC  | 0.599 |             |
| + | 8  | 1291      |                   | NM_006293    | NP_006284    | Q06418 | TYRO3_HUMAN | III 2. Extracellular (Potentia | 6   | CCCTGGGACCCT  | 0.567 |             |
| + | 17 | 2359      |                   | NM_198141    | NP_937784    | Q8TET4 | GANC_HUMAN  |                                | 2   | GTATTCTCTGTT  | 0.512 |             |
| - | 7  | 3802_3803 | pv.2_Missense_M   | NM_022473    | NP_071918    | Q9H2Y7 | ZF106_HUMAN |                                | 3   | AGTGGGAAAAAG  | 0.525 |             |
| + | 1  | 561       |                   | NM_001080534 | NP_001074003 | Q8NB66 | UN13C_HUMAN |                                | 7   | AAATGGAAAAAC  | 0.458 |             |
| + | 2  | 701       | p.P141L RNF111_   | NM_017610    | NP_060080    | Q6ZNA4 | RN111_HUMAN |                                | 2   | TTCTCTTTCATC  | 0.383 |             |
| + | 3  | 240       | uha.1_Missense_M  | NM_152450    | NP_689663    | Q8TBF8 | FA81A_HUMAN |                                | 1   | CCAGTCCCTGA   | 0.522 |             |
| - | 3  | 400       | O2apj.3_Missense_ | NM_005848    | NP_005839    | Q7Z401 | MYCPP_HUMAN |                                | 4   | AACACGAGGCC   | 0.363 |             |
| + | 15 | 1985      | ukf.1_Missense_M  | NM_017691    | NP_060161    | Q8IUZ0 | LRC49_HUMAN |                                | 1   | CCAAAGGAAAA   | 0.308 |             |
| - | 9  | 1150      | o.2_RNA PARP6_t   | NM_020214    | NP_064599    | Q2NL67 | PARP6_HUMAN |                                | 0   | CTGGGGGCTGG   | 0.597 |             |
| - | 8  | 3320      |                   | NM_005477    | NP_005468    | Q9Y3Q4 | HCN4_HUMAN  | lasmic (Potential).            | 6   | CAGCGGGGTCC   | 0.687 | rs148714049 |
| - | 8  | 1566      | se_Mutation_p.E3  | NM_000781    | NP_000772    | P05108 | CP11A_HUMAN |                                | 2   | CATCTCTAGCTC  | 0.562 |             |
| - | 26 | 3021      | '9F MAN2C1_uc0    | NM_006715    | NP_006706    | Q9NTJ4 | MA2C1_HUMAN |                                | 0   | CAAGAGATCGC   | 0.622 |             |
| - | 16 | 2717      | iRF1_uc002ber.3_  | NM_002891    | NP_002882    | Q13972 | RGRF1_HUMAN |                                | 6   | GTAGCCATTG    | 0.597 |             |
| + | 13 | 1864      | unn.1_Missense_M  | NM_018689    | NP_061159    | Q8WUJ3 | K1199_HUMAN |                                | 3   | ATTTAAGGCAG   | 0.542 |             |
| - | 16 | 1834      | C3_uc002bpg.2_N   | NM_001080532 | NP_001074001 | Q7Z5M5 | TMC3_HUMAN  | lasmic (Potential).            | 2   | GGCTCGAAATA   | 0.473 |             |
| - | 3  | 477       | as.1_Missense_Mu  | NM_001717    | NP_001708    | Q01954 | BNC1_HUMAN  |                                | 3   | CCAAGGCATGG   | 0.493 |             |
| + | 6  | 3070      |                   | NM_020778    | NP_065829    | Q96L96 | ALPK3_HUMAN |                                | 12  | TTTCCCAAAAA   | 0.537 |             |
| + | 7  | 1643      | O3A1_uc010boc.1_  | NM_013272    | NP_037404    | Q9UIG8 | SO3A1_HUMAN | ir (Potential) Kazal-like.     | 1   | CGATTCTTCA    | 0.468 |             |
| + | 7  | 1691      | p.S155F RAB11F1   | NM_014700    | NP_055515    | O75154 | RFIP3_HUMAN |                                | 0   | CCCTCCCCCG    | 0.592 |             |
| + | 35 | 4388      | _uc002cio.1_Misse | NM_145294    | NP_660337    | Q96KV7 | WDR90_HUMAN | WD 17.                         | 1   | CAGCCCCGGGG   | 0.632 |             |
| + | 1  | 1373      |                   | NM_020982    | NP_066192    | O95484 | CLD9_HUMAN  | ellular (Potential).           | 0   | AGGCCCTCAAG   | 0.697 |             |
| - | 5  | 884       | nse_Mutation_p.C  | NM_032805    | NP_116194    | Q96SZ4 | ZSC10_HUMAN |                                | 1   | GGACCATCTT    | 0.637 |             |
| - | 12 | 4921      |                   | NM_032444    | NP_115820    | Q8IY92 | SLX4_HUMAN  | raction with PLK1 and TEF      | 0   | GAGGGCTCCA    | 0.647 |             |
| - | 11 | 2253      | dbg.1_Nonsense_M  | NM_015914    | NP_056998    | Q6PKC3 | TXD11_HUMAN | hioredoxin 2.                  | 0   | TAGCTGGATGA   | 0.522 |             |
| - | 15 | 1905      | dx.2_Missense_Mi  | NM_002474    | NP_002465    | P35749 | MYH11_HUMAN | rosin head-like.               | 15  | GTCATTGACGC   | 0.542 |             |
| + | 29 | 4317      | i.2_Missense_Mu   | NM_004996    | NP_004987    | P33527 | MRP1_HUMAN  | porter 2. Cytoplasmic.         | 4   | TTTTCGGGTT    | 0.562 |             |
| - | 5  | 920       | wb.2_Missense_M   | NM_015092    | NP_055907    | Q96Q15 | SMG1_HUMAN  | with SMG8 and SMG9.            | 16  | TGTTAACTAGTA  | 0.274 |             |
| + | 5  | 619       | is.2_Missense_Mu  | NM_016138    | NP_057222    | Q99807 | COQ7_HUMAN  | ximate tandem repeats.         | 1   | GCCTCGACCAT   | 0.468 |             |
| + | 13 | 1747      |                   | NM_017888    | NP_060358    | Q6NUN0 | ACSM5_HUMAN |                                | 2   | TAACGCGGGAA   | 0.483 | rs138362252 |
| - | 1  | 469_470   | _uc002dja.2_RNA   | NR_002594    |              |        |             |                                | 0   | TTGAGGAAGGC   | 0.639 |             |
| + | 2  | 1468      |                   | NM_006539    | NP_006530    | O60359 | CCG3_HUMAN  |                                | 0   | ACTACGAACAG   | 0.562 |             |
| - | 7  | 1030_1031 | xz.1_Missense_M   | NM_001109763 | NP_001103233 | Q6UXU4 | GS61L_HUMAN |                                | 1   | TGCTTCTGTGC   | 0.649 |             |
| + | 8  | 1144      | !P_uc002drv.2_Mi  | NM_032815    | NP_116204    | Q8NCF5 | NF2IP_HUMAN | Jbiquitin-like.                | 1   | TGTCCCACTATC  | 0.547 |             |
| - | 9  | 1639_1640 | '397F SEZ6L2_uc   | NM_201575    | NP_963869    | Q6UXD5 | SE6L2_HUMAN | xtracellular (Potential).      | 2   | GAAAGGGGGCG   | 0.564 |             |
| + | 7  | 1615      |                   | NM_014712    | NP_055527    | O15047 | SET1A_HUMAN | Ser-rich. p.S310F(1)           | 3   | CTTTTCCCGCC   | 0.522 | rs146035438 |
| + | 13 | 1965      | gc.1_Missense_M   | NM_001114    | NP_001105    | P51828 | ADCY7_HUMAN | lasmic (Potential).            | 1   | CAAGTCCGATG   | 0.662 |             |
| - | 2  | 3320      | _Mutation_p.P100  | NM_002968    | NP_002959    | Q9NSC2 | SALL1_HUMAN |                                | 8   | CTGAGGAGAAA   | 0.572 |             |
| + | 10 | 2618      | kl.2_Missense_Mi  | NM_032206    | NP_115582    | Q86WI3 | NLRC5_HUMAN |                                | 7   | GTGTCTACCG    | 0.547 |             |
| - | 21 | 3136      | NOT1_uc002enx.2   | NM_016284    | NP_057368    | A5YKK6 | CNOT1_HUMAN |                                | 6   | TTTTGGATCCAA  | 0.418 |             |

|   |    |           |                   |              |              |        |             |                                  |     |                  |       |             |
|---|----|-----------|-------------------|--------------|--------------|--------|-------------|----------------------------------|-----|------------------|-------|-------------|
| - | 1  | 125       | 5_uc002esm.2_5'   | NM_013241    | NP_037373    | Q9Y613 | FHOD1_HUMAN |                                  | 3   | GTCTTCCCCGC      | 0.677 |             |
| - | 72 | 12396     | DIN_uc010cfy.2_R  | NM_032821    | NP_116210    | Q4G0P3 | HYDIN_HUMAN |                                  | 2   | GTTGAGGTGTG      | 0.493 |             |
| - | 2  | 185       | r_p.S29F TAT_uc   | NM_000353    | NP_000344    | P17735 | ATTY_HUMAN  |                                  | 2   | GCACAGAGCTT      | 0.527 |             |
| - | 10 | 1415      | ep.1_Missense_Mt  | NM_012091    | NP_036223    | Q9BUB4 | ADAT1_HUMAN | ADAT1 editase.                   | 2   | TGAAGAGTTCC      | 0.413 |             |
| - | 2  | 329       |                   | NM_152342    | NP_689555    | Q8N8U2 | CDYL2_HUMAN |                                  | 1   | GCTTGGAGGTA      | 0.527 |             |
| + | 3  | 376       | e_Mutation_p.N13  | NM_001257    | NP_001248    | P55290 | CAD13_HUMAN |                                  | 1   | TGAGAAACATA      | 0.527 |             |
| - | 9  | 1090      | cjf.2_Intron PRDM | NM_001098173 | NP_001091643 | Q9NQW5 | PRDM7_HUMAN | SET.                             | 1   | CCCCAGACCAG      | 0.532 |             |
| - | 12 | 1879      | PV3_uc010vrl.1_N  | NM_145068    | NP_659505    | Q8NET8 | TRPV3_HUMAN | TRPV3 (Potential).               | 4   | CAGGCATCCGA      | 0.567 |             |
| - | 6  | 918       | th.1_Missense_Mu  | NM_053285    | NP_444515    | Q969V4 | TEKT1_HUMAN | Potential.                       | 2   | TTGTATCCTTCAG    | 0.537 |             |
| + | 6  | 972       | se_Mutation_p.H2  | NM_001143990 | NP_001137462 | Q9BUR4 | WAP53_HUMAN | WAP53 WD 3.                      | 0   | ACAACCACCTG      | 0.602 |             |
| + | 3  | 873       | 2gld.2_Missense_  | NM_173728    | NP_776089    | O94989 | ARHGF_HUMAN |                                  | 3   | CCGCCCCACC       | 0.677 |             |
| + | 15 | 2462      | p.S816F USP43_u   | NM_153210    | NP_694942    | Q70EL4 | UBP43_HUMAN |                                  | 5   | TGGATCCAAGG      | 0.577 | rs76912039  |
| - | 34 | 4976      | uc002gml.1_Intron | NM_005963    | NP_005954    | P12882 | MYH1_HUMAN  | Potential.                       | 21  | CATTTCAATTGAG    | 0.498 |             |
| - | 27 | 3495      | _Missense_Mutati  | NM_001100112 | NP_001093582 | Q9UKX2 | MYH2_HUMAN  | Potential.                       | 14  | CAGCTCCTCAAT     | 0.552 |             |
| + | 10 | 1132      | i.3_Missense_Mut  | NM_014859    | NP_055674    | Q17R89 | RHG44_HUMAN | Rho-GAP.                         | 0   | AGATCGCCTTC      | 0.637 |             |
| - | 16 | 3118      |                   | NM_014680    | NP_055495    | Q14667 | K0100_HUMAN |                                  | 4   | GACAAGATCTA      | 0.507 | rs114130011 |
| - | 5  | 1332      | F12_uc002hdj.1_N  | NM_001033561 | NP_001028733 | Q96QT6 | PHF12_HUMAN | PHF12 (Potential).               | 1   | TAAAGGAACGA      | 0.388 |             |
| + | 50 | 7681      | o.2_Nonsense_Mu   | NM_001042492 | NP_001035957 | P21359 | NF1_HUMAN   | NF1 p.R2450*(1)                  | 330 | AAGTTCGAAGT      | 0.363 |             |
| - | 6  | 1470      | ht.2_Missense_Mi  | NM_001094    | NP_001085    | Q16515 | ACCN1_HUMAN | ACCN1 (By similarity).           | 4   | ACTTACGAGATA     | 0.438 |             |
| - | 2  | 972       | ht.2_Missense_Mt  | NM_001094    | NP_001085    | Q16515 | ACCN1_HUMAN | ACCN1 (By similarity).           | 4   | TCTCTCCCCAG      | 0.612 |             |
| + | 9  | 1214      | hjc.2_Missense_M  | NM_173167    | NP_775259    | Q8IWX7 | UN45B_HUMAN |                                  | 6   | AGCGCGATCAC      | 0.468 | rs148057044 |
| - | 5  | 2416      |                   | NM_001145027 | NP_001138499 |        |             |                                  | 1   | AAACTCCTCATC     | 0.423 |             |
| - | 6  | 1268      |                   | NM_002278    | NP_002269    | Q14532 | K1H2_HUMAN  | K1H2 Coil 2. Rod.                | 0   | GTCCTCGTTCT      | 0.617 | rs70964671  |
| - | 1  | 448       | P_uc010wfs.1_Int  | NM_000226    | NP_000217    | P35527 | K1C9_HUMAN  | K1C9 Head.                       | 3   | ccactcccatagccac | 0.09  |             |
| - | 1  | 441       | T14_uc010cxp.1_N  | NM_000526    | NP_000517    | P02533 | K1C14_HUMAN | K1C14 Coil 1A. Rod.              | 1   | AGGAGGCCAGG      | 0.458 |             |
| + | 1  | 265       | .1_5'UTR WNK4_u   | NM_032387    | NP_115763    | Q96J92 | WNK4_HUMAN  |                                  | 7   | CTCCGGACCCC      | 0.716 |             |
| - | 3  | 697       | iK MEOX1_uc002i   | NM_004527    | NP_004518    | P50221 | MEOX1_HUMAN | MEOX1 Homeobox.                  | 0   | TCATCCTTCGG      | 0.582 |             |
| - | 1  | 107       | M101_uc010wis.1_  | NM_032376    | NP_115752    | Q96IK0 | TM101_HUMAN | TM101 (Potential).               | 2   | CCAAAAGGGGC      | 0.622 |             |
| - | 1  | 486       | ikd.2_Missense_N  | NM_015443    | NP_056258    | Q7Z3B3 | K1267_HUMAN |                                  | 2   | CTAAGGAAAAC      | 0.438 |             |
| + | 3  | 296       | jgl.2_Missense_Mi | NM_002266    | NP_002257    | P52292 | IMA2_HUMAN  | IMA2 IBB.                        | 2   | TAGCTCATTTCC     | 0.413 |             |
| - | 4  | 640       | 17orf28_uc002jmk. | NM_030630    | NP_085133    | Q8IV36 | CQ028_HUMAN |                                  | 0   | TCCTCCGGTGG      | 0.662 |             |
| - | 2  | 901       | nse_Mutation_p.C  | NM_001454    | NP_001445    | Q92949 | FOXJ1_HUMAN |                                  | 1   | ATGCCCCAGCC      | 0.736 |             |
| + | 3  | 275       | .P32L SEPT9_uc0   | NM_001113491 | NP_001106963 | Q9UHD8 | SEPT9_HUMAN |                                  | 3   | GACTCCCCTAC      | 0.567 |             |
| - | 6  | 927       | r_p.L56F LGALS3i  | NM_005567    | NP_005558    | Q08380 | LG3BP_HUMAN |                                  | 4   | GAGGAGGATGG      | 0.612 |             |
| + | 32 | 4292      | lk.3_RNA SMCHD    | NM_015295    | NP_056110    | A6NHR9 | SMHD1_HUMAN |                                  | 0   | AAAAACCCGTT      | 0.353 |             |
| + | 2  | 1157      | NDC2_uc002koh.:   | NM_001098529 | NP_001091999 | Q86VQ3 | TXND2_HUMAN | TXND2 repeat of Q-P-K-X-G-D-I-P. | 2   | AAGGAGAGTGA      | 0.562 |             |
| + | 21 | 2215      | D30B_uc010xak.1   | NM_001145029 | NP_001138501 | Q9BXX2 | AN30B_HUMAN |                                  | 2   | AGTCTCCTGAT      | 0.289 |             |
| - | 9  | 1728      | _p.L286* NPC1_u   | NM_000271    | NP_000262    | O15118 | NPC1_HUMAN  |                                  | 2   | TAATTTAACACAC    | 0.463 |             |
| - | 9  | 1709      | p.C280S NPC1_u    | NM_000271    | NP_000262    | O15118 | NPC1_HUMAN  |                                  | 2   | GGTGCAGTTCCG     | 0.448 |             |
| + | 53 | 6901      | us.3_Missense_M   | NM_198129    | NP_937762    | Q16787 | LAMA3_HUMAN | LAMA3 domain II and I.           | 11  | AGATGGTCTTC      | 0.423 |             |
| - | 10 | 1810      | n.1_Missense_Mu   | NM_001792    | NP_001783    | P19022 | CADH2_HUMAN | CADH2 (Potential). Cadherin 3.   | 4   | AAAGTCGATTGC     | 0.393 |             |
| - | 13 | 2062      | mi.3_Missense_Mu  | NM_001941    | NP_001932    | Q14574 | DSC3_HUMAN  | DSC3 (Potential). Cadherin 5.    | 4   | GATATGAAAGAC     | 0.333 |             |
| - | 3  | 728       | n_p.R92* DSC2_u   | NM_024422    | NP_077740    | Q02487 | DSC2_HUMAN  |                                  | 3   | ACTTCTCTTCTC     | 0.338 |             |
| - | 12 | 2022_2023 | rm.2_Missense_M   | NM_024421    | NP_077739    | Q08554 | DSC1_HUMAN  | DSC1 (Potential). Cadherin 5.    | 4   | TCCTCATTATTC     | 0.391 |             |
| - | 12 | 2073      | 1012_uc002kxd.3   | NM_014939    | NP_055754    | Q9Y2L5 | TPPC8_HUMAN |                                  | 0   | TAAATCGATGGC     | 0.333 |             |
| - | 1  | 202       | rf.2_Missense_Mu  | NM_002930    | NP_002921    | Q99578 | RIT2_HUMAN  |                                  | 1   | CCGGGAGCAG       | 0.537 | rs140593847 |
| + | 9  | 1131      | LC14A1_uc002lbh   | NM_001146036 | NP_001139508 | Q13336 | UT1_HUMAN   |                                  | 2   | AAACAGGACTCA     | 0.512 |             |

|   |    |         |                    |              |              |        |             |                               |    |                |       |             |
|---|----|---------|--------------------|--------------|--------------|--------|-------------|-------------------------------|----|----------------|-------|-------------|
| - | 13 | 1037    | _uc002lbq.3_Silen  | NM_024430    | NP_077748    | Q9H939 | PIIP2_HUMAN |                               | 1  | CTTTTAGGAATG   | 0.249 |             |
| - | 1  | 1626    | VAL2_uc002lco.2_   | NM_016427    | NP_057511    | Q8IYF1 | ELOA2_HUMAN |                               | 4  | CGAATCCCAGG    | 0.547 |             |
| - | 1  | 817     | VAL2_uc002lco.2_   | NM_016427    | NP_057511    | Q8IYF1 | ELOA2_HUMAN |                               | 4  | CACTTTCTCTCA   | 0.662 |             |
| + | 3  | 1014    | .C_uc010xdr.1_5'U  | NM_005215    | NP_005206    | P43146 | DCC_HUMAN   | potential),Ig-like C2-type 2. | 17 | AGGTTCCCTTTCAC | 0.388 |             |
| + | 12 | 2494    | .p.S484L DCC_ucl   | NM_005215    | NP_005206    | P43146 | DCC_HUMAN   | ential), Fibronectin type-III | 17 | TCAATCAAGAG    | 0.408 |             |
| - | 4  | 1859    |                    | NM_052947    | NP_443179    | Q86TB3 | ALPK2_HUMAN |                               | 14 | ATTGCGCTTCTT   | 0.512 |             |
| + | 6  | 632     | ixet.1_Missense_M  | NM_001040147 | NP_001035237 | O75635 | SPB7_HUMAN  |                               | 3  | CAAAGGCAAGTC   | 0.393 |             |
| + | 12 | 2390    | b.2_Missense_Mu    | NM_033646    | NP_387450    | Q9ULB5 | CADH7_HUMAN | lasmic (Potential).           | 4  | ACTCCAGAAATT   | 0.483 |             |
| - | 3  | 2151    | e.2_RNA ZNF516_    | NM_014643    | NP_055458    | Q92618 | ZN516_HUMAN |                               | 1  | CGCCCGGTGTCT   | 0.542 |             |
| + | 2  | 1550    | ra.2_Missense_Mt   | NM_171999    | NP_741996    | Q9BXA9 | SALL3_HUMAN |                               | 4  | CAAGCCCGTGC    | 0.716 |             |
| + | 7  | 2014    |                    | NM_001194    | NP_001185    | Q9UL51 | HCN2_HUMAN  | rtoplasmic (Potential).       | 0  | CGAGACGGTGG    | 0.701 |             |
| + | 7  | 1253    | b.1_Missense_Mu    | NM_004368    | NP_004359    | Q99439 | CNN2_HUMAN  |                               | 0  | AGGTCCCTGAAT   | 0.637 |             |
| + | 4  | 1073    | wq.2_Missense_M    | NM_024967    | NP_079243    | Q9HAH1 | ZN556_HUMAN | 2H2-type 7 p.S329F(1)         | 3  | CCTCATCCTTAC   | 0.522 | rs142040650 |
| - | 5  | 428     | .p.P124L PIP5K1C   | NM_012398    | NP_036530    | O60331 | PI51C_HUMAN | PIPK.                         | 4  | GGGCGGGGGTGC   | 0.622 |             |
| + | 8  | 1096    | .p.N211S ZNF557_   | NM_001044388 | NP_001037853 | Q8N988 | ZN557_HUMAN | 2H2-type 3.                   | 2  | ATGCAATGACTC   | 0.453 |             |
| - | 5  | 36001   |                    | NM_024690    | NP_078966    | Q8WXI7 | MUC16_HUMAN | xtracellular (Potential).     | 57 | AAATTCTGGGG    | 0.493 |             |
| - | 5  | 35987   |                    | NM_024690    | NP_078966    | Q8WXI7 | MUC16_HUMAN | xtracellular (Potential).     | 57 | CAACTGAAGTT    | 0.493 |             |
| - | 3  | 18701   |                    | NM_024690    | NP_078966    | Q8WXI7 | MUC16_HUMAN | xtracellular (Potential).     | 57 | CAAGAGATGTC    | 0.488 |             |
| - | 4  | 1916    | 799_uc002mts.3_I   | NM_001080821 | NP_001074290 | Q96GE5 | ZN799_HUMAN | 2H2-type 17.                  | 6  | TTACATTCATACG  | 0.413 |             |
| + | 8  | 852     |                    | NM_173483    | NP_775754    | Q6NT55 | CP4FN_HUMAN |                               | 2  | AGTGATTATATCT  | 0.557 |             |
| + | 1  | 255     |                    | NM_013939    | NP_039227    | O60403 | O10H2_HUMAN | ellular (Potential).          | 3  | ATCATCCCAGCGC  | 0.627 |             |
| - | 9  | 1513    | 3P1_uc002nft.1_R   | NM_031941    | NP_114147    | Q8N6Y0 | USBP1_HUMAN |                               | 1  | GGGTCCCCAGA    | 0.607 |             |
| + | 4  | 1529    |                    | NM_031218    | NP_112495    | P35789 | ZNF93_HUMAN | 2H2-type 12.                  | 1  | ATAAGAAAATTC   | 0.368 |             |
| + | 4  | 1613    |                    | NM_031218    | NP_112495    | P35789 | ZNF93_HUMAN | 2H2-type 13.                  | 1  | ATAAGAAAATTC   | 0.348 |             |
| - | 4  | 1190    | pc.1_Missense_M    | NM_001076675 | NP_001070143 | Q68DY1 | ZN626_HUMAN | 2H2-type 7.                   | 1  | CTTTGCCACAT    | 0.383 |             |
| - | 4  | 827     | pc.1_Missense_M    | NM_001076675 | NP_001070143 | Q68DY1 | ZN626_HUMAN |                               | 1  | CTTTCTCTCCA    | 0.393 |             |
| - | 4  | 743     | pc.1_Missense_M    | NM_001076675 | NP_001070143 | Q68DY1 | ZN626_HUMAN |                               | 1  | CTTTCCCTCCA    | 0.363 |             |
| + | 4  | 1124    | cy.2_Missense_M    | NM_033468    | NP_258429    | Q9Y2Q1 | ZN257_HUMAN | 2H2-type 6.                   | 0  | AATGTGAAGAG    | 0.423 |             |
| - | 3  | 1834    |                    | NM_001001411 | NP_001001411 | Q8N7Q3 | ZN676_HUMAN | 2H2-type 13.                  | 0  | CATTTGTAGCC    | 0.388 |             |
| - | 3  | 1829    |                    | NM_001001411 | NP_001001411 | Q8N7Q3 | ZN676_HUMAN |                               | 0  | TTGATGCTTTCT   | 0.388 |             |
| - | 4  | 1530    |                    | NM_001098626 | NP_001092096 | A6NK75 | ZNF98_HUMAN | 2H2-type 11.                  | 2  | TAAAAGCTTTGC   | 0.373 |             |
| - | 7  | 2771    |                    | NM_001080409 | NP_001073878 |        |             |                               | 2  | TAAAAGCTTTGC   | 0.368 |             |
| - | 4  | 326     |                    | NM_001080409 | NP_001073878 |        |             |                               | 2  | TCTGATCTGGCC   | 0.289 |             |
| + | 4  | 475     | 1_5'UTR LRP3_uc    | NM_002333    | NP_002324    | O75074 | LRP3_HUMAN  | lar (Potential), CUB 1.       | 3  | CTGCCTTCATC    | 0.662 |             |
| + | 15 | 2245    | cd.3_Missense_M    | NM_199180    | NP_954649    | Q6UWL6 | KIRR2_HUMAN | ytoplasmic (Potential).       | 3  | CACATCCTTTGC   | 0.617 |             |
| - | 5  | 1009    | .p.H236Y ZNF565_   | NM_152477    | NP_689690    | Q8N9K5 | ZN565_HUMAN | 2H2-type 5.                   | 2  | CTGTGTGGATTC   | 0.507 |             |
| + | 8  | 1979    | .p.R402C ZNF383_   | NM_152604    | NP_689817    | Q8NA42 | ZN383_HUMAN | 2H2-type 11.                  | 2  | CTATTTCGTCATC  | 0.378 |             |
| + | 8  | 1821    | L3_uc002olw.2_Int  | NM_016941    | NP_058637    | Q9NYJ7 | DLL3_HUMAN  | lasmic (Potential).           | 3  | AGGTAGCGACGC   | 0.562 |             |
| - | 3  | 232_233 |                    | NM_001828    | NP_001819    | Q05315 | LPPL_HUMAN  | Galectin.                     | 0  | GAAATGGAAGAC   | 0.505 |             |
| + | 9  | 738     | 2ooe.2_Missense_   | NM_138392    | NP_612401    | Q8TBC3 | SHKB1_HUMAN |                               | 2  | GTTTTCCAGCC    | 0.627 |             |
| + | 2  | 375     | 2orj.1_Missense_   | NM_004363    | NP_004354    | P06731 | CEAM5_HUMAN | Ig-like 1.                    | 2  | TAAAGAACTCA    | 0.468 |             |
| - | 14 | 1750    | .p.W144* GRIK5_L   | NM_002088    | NP_002079    | Q16478 | GRIK5_HUMAN | lasmic (Potential).           | 0  | TTATACCACTCAT  | 0.607 |             |
| - | 3  | 750     | 3_Mutation_p.E96f  | NM_182707    | NP_874366    | Q9UQ74 | PSG8_HUMAN  | Ig-like C2-type 1.            | 0  | GTATTTACATTC   | 0.512 |             |
| - | 3  | 571     | 10eio.1_Missense_  | NM_006905    | NP_008836    | P11464 | PSG1_HUMAN  | p.E145G(1)                    | 2  | AGTCTCCACTG    | 0.517 |             |
| - | 5  | 1261    | nf.3_Missense_Mt   | NM_002784    | NP_002775    | Q00887 | PSG9_HUMAN  | Ig-like C2-type 3.            | 2  | CGCTATGATTC    | 0.443 |             |
| + | 5  | 1076    | ejj.2_Intron ZNF23 | NM_181756    | NP_861421    | A6NK53 | ZN233_HUMAN | ype 2; degenerate.            | 2  | GGAATGGTGAC    | 0.507 |             |
| + | 6  | 853     | en.2_Missense_M    | NM_006247    | NP_006238    | P53041 | PPP5_HUMAN  | Catalytic.                    | 2  | ACCAACCCCTAT   | 0.557 |             |

|   |     |       |                   |              |              |        |             |                                 |    |               |       |             |
|---|-----|-------|-------------------|--------------|--------------|--------|-------------|---------------------------------|----|---------------|-------|-------------|
| + | 2   | 416   | D2_uc010xyu.1_in  | NM_014601    | NP_055416    | Q9NZN4 | EHD2_HUMAN  |                                 | 2  | ACTTCGACGGC   | 0.677 |             |
| + | 5   | 2330  | uc002pxc.1_5'Flan | NM_007147    | NP_009078    | Q9Y473 | ZN175_HUMAN | :2H2-type 14.                   | 0  | GAAATCGTTCA   | 0.438 | rs145951696 |
| - | 5   | 1020  |                   | NM_003830    | NP_003821    | O15389 | SIGL5_HUMAN | :potential). Ig-like C2-type 2. | 4  | TATTGGAGATG   | 0.622 |             |
| + | 2   | 710   | p.G222E FPR2_ur   | NM_001005738 | NP_001005738 | P25090 | FPR2_HUMAN  | Name=5; (Potential).            | 4  | TATGGGCTCA    | 0.502 |             |
| + | 2   | 496   |                   | NM_002030    | NP_002021    | P25089 | FPR3_HUMAN  | Name=3; (Potential).            | 6  | TGTTATGATAG   | 0.468 |             |
| - | 7   | 964   | p.S147L ZNF611_   | NM_030972    | NP_112234    | Q8N823 | ZN611_HUMAN |                                 | 1  | AGTAATGAAGAA  | 0.378 |             |
| - | 7   | 1008  | .15_uc002qau.2_iv | NR_028343    |              | Q09FC8 | ZN415_HUMAN |                                 | 1  | AGGAACCATGG   | 0.383 |             |
| + | 5   | 623   | L1_uc002qhl.3_inl | NM_012314    | NP_036446    | P43632 | KI2S4_HUMAN | :potential). Ig-like C2-type 2. | 0  | .CCCACGGAGGG  | 0.592 |             |
| + | 9   | 2952  | tg.2_Missense_Mt  | NM_176811    | NP_789781    | Q86W28 | NALP8_HUMAN |                                 | 13 | .GGCTGGAAAA   | 0.512 |             |
| + | 8   | 1918  | uc002qnk.1_Intron | NM_020828    | NP_065879    | Q8NHY6 | ZFP28_HUMAN |                                 | 1  | AGAAGCCTTTTG  | 0.428 |             |
| - | 4   | 322   | 329_uc002qro.1_   | NM_024620    | NP_078896    | Q86UD4 | ZN329_HUMAN |                                 | 1  | GCAGGGAACCT   | 0.463 |             |
| + | 4   | 800   | IF8_uc002qrz.2_R  | NM_021089    | NP_066575    | P17098 | ZNF8_HUMAN  |                                 | 1  | GCTCCCAGGA    | 0.473 |             |
| - | 12  | 1501  | .b.1_Missense_Mu  | NM_012293    | NP_036425    | Q92626 | PXDN_HUMAN  | like C2-type 3.                 | 8  | ACCAGGTGCCG   | 0.602 |             |
| - | 9   | 1162  |                   | NM_000384    | NP_000375    | P04114 | APOB_HUMAN  | Vitellogenin.                   | 27 | AGATTAGCTCT   | 0.458 |             |
| - | 16  | 2240  | ATAD2B_uc002re    | NM_017552    | NP_060022    | Q9ULI0 | ATD2B_HUMAN |                                 | 1  | GGGACTAAGC    | 0.502 |             |
| - | 1   | 1370  | 3C_uc010ykr.1_iv  | NM_002254    | NP_002245    | O14782 | KIF3C_HUMAN | : kinesin-motor.                | 4  | .CCACTCGGAT   | 0.607 |             |
| - | 12  | 1641  | ayv.1_Missense_M  | NM_021095    | NP_066918    | Q9Y289 | SC5A6_HUMAN |                                 | 2  | GGGAGAAATA    | 0.468 |             |
| + | 1   | 5312  | 1_5'Flank ZNF512_ | NM_032266    | NP_115642    | Q68DN1 | CB016_HUMAN | m repeat of P-S-E-R-S-H-F       | 1  | TCCCTCTGAGA   | 0.557 |             |
| + | 5   | 910   | mm.1_Missense_    | NM_199280    | NP_954974    | Q6ZUX3 | F179A_HUMAN |                                 | 4  | CTGAGGCCAGC   | 0.637 |             |
| - | 1   | 1027  |                   | NM_001029883 | NP_001025054 | A6NGG8 | CB071_HUMAN |                                 | 1  | GGGGAGACCT    | 0.587 |             |
| - | 33  | 5500  | p.P115S HEATR5    | NM_019024    | NP_061897    | Q9P2D3 | HTR5B_HUMAN |                                 | 8  | TGGAGGAACCT   | 0.408 |             |
| - | 2   | 1120  |                   | NM_005760    | NP_005751    | Q03701 | CEBPZ_HUMAN |                                 | 1  | GGCTCGAGTTT   | 0.413 |             |
| - | 1   | 676   | HH2_uc002rtf.3_   | NM_001101330 | NP_001094800 |        |             |                                 | 0  | TCGCATATTTAC  | 0.378 |             |
| - | 10  | 2016  | p.E586K FSHR_u    | NM_000145    | NP_000136    | P23945 | FSHR_HUMAN  | : lasmic (Potential).           | 8  | TCATTTCATAGC  | 0.483 |             |
| + | 5   | 1560  |                   | NM_019002    | NP_061875    | Q9NY74 | ETAA1_HUMAN |                                 | 4  | AATTATCCACTGC | 0.249 |             |
| + | 7   | 806   | p.P193L CCT7_uc   | NM_006429    | NP_006420    | Q99832 | TCPH_HUMAN  |                                 | 0  | CAATCCCAAGAT  | 0.438 |             |
| + | 10  | 2257  | ig.2_Missense_Mu  | NM_015120    | NP_055935    | Q8TCU4 | ALMS1_HUMAN | pproximate tandem repeat        | 9  | TACTCCCCAC    | 0.478 |             |
| + | 18  | 2821  | ysg.1_Missense_M  | NM_004389    | NP_004380    | P26232 | CTNA2_HUMAN |                                 | 9  | CATTTGCGCTG   | 0.368 |             |
| - | 4   | 358   | p.D130N SFTPB_    | NM_198843    | NP_942140    | P07988 | PSPB_HUMAN  | : posin B-type 1.               | 2  | GTAGTCGTCAA   | 0.617 | rs45557339  |
| - | 13  | 2343  |                   | NM_004836    | NP_004827    | Q9NZJ5 | E2AK3_HUMAN | : Potential). Protein kinase.   | 3  | GTGAAGGAGCT   | 0.453 |             |
| + | 15  | 2401  | yn.1_RNA VWA3E    | NM_144992    | NP_659429    | Q502W6 | VWA3B_HUMAN |                                 | 6  | AAAAGGATGGA   | 0.522 |             |
| + | 11  | 2466  |                   | NM_001011552 | NP_001011552 | Q6AI14 | SL9A4_HUMAN | : lasmic (Potential).           | 3  | TGCAGGAAGAG   | 0.428 |             |
| + | 20  | 7391  |                   | NM_006267    | NP_006258    | P49792 | RBP2_HUMAN  | : RanBD1 3.                     | 18 | CTGTTCTTTTA   | 0.373 |             |
| - | 7   | 1645  |                   | NM_000575    | NP_000566    | P01583 | IL1A_HUMAN  |                                 | 1  | AGTGCCGTGAG   | 0.468 |             |
| - | 7   | 893   | i.1_Missense_Mut  | NM_000576    | NP_000567    | P01584 | IL1B_HUMAN  |                                 | 4  | TTTAGGAAGAC   | 0.502 |             |
| - | 17  | 5698  | ttq.2_Missense_M  | NM_207363    | NP_997246    | O14513 | NCKP5_HUMAN |                                 | 0  | TGGAGGAAGGC   | 0.597 |             |
| - | 3   | 227   | p.P66S YSK4_uc    | NM_025052    | NP_079328    | Q56UN5 | YSK4_HUMAN  |                                 | 5  | ACTGGGATCTT   | 0.418 |             |
| + | 4   | 443   | 10zbl.1_Missense_ | NM_018460    | NP_060930    | Q53QZ3 | RHG15_HUMAN | : PH.                           | 2  | AAGAACTAAGG   | 0.333 |             |
| - | 131 | 18129 | p.E2403K NEB_uc   | NM_004543    | NP_004534    | P20929 | NEBU_HUMAN  | : Nebulin 163.                  | 20 | TGCTTTCCTCTA  | 0.418 |             |
| - | 11  | 1569  | p.D284N CCDC14    | NM_138803    | NP_620158    | Q8NFR7 | CC148_HUMAN |                                 | 2  | GAAGATCTCTCA  | 0.303 |             |
| - | 5   | 980   | xs.2_Missense_Mu  | NM_002349    | NP_002340    | O60449 | LY75_HUMAN  | : Potential). C-type lectin 1.  | 0  | TTACCTGGATCC  | 0.423 |             |
| - | 4   | 363   | ae ITGB6_uc010zc  | NM_000888    | NP_000879    | P18564 | ITB6_HUMAN  |                                 | 3  | ACCACCTGCAA   | 0.522 |             |
| - | 23  | 4711  | .Y1358D SCN3A_    | NM_006922    | NP_008853    | Q9NY46 | SCN3A_HUMAN |                                 | 10 | AAGATAGCCAG   | 0.398 |             |
| - | 13  | 2246  | p.W623* SCN1A_    | NM_006920    | NP_008851    | P35498 | SCN1A_HUMAN | : II.                           | 13 | TTTAACCAATATG | 0.383 |             |
| + | 3   | 461   | n_p.W123* G6PC2   | NM_021176    | NP_066999    | Q9NQR9 | G6PC2_HUMAN | : ical; (Potential).            | 1  | GTCTGGTATGT   | 0.478 |             |
| + | 7   | 1327  | p.S256F ITGA6_u   | NM_001079818 | NP_001073286 | P23229 | ITA6_HUMAN  | : Extracellular (Potential).    | 2  | AAGATTCTATGTT | 0.358 |             |
| - | 2   | 1268  | p.G67E PDE11A     | NM_016953    | NP_058649    | Q9HCR9 | PDE11_HUMAN | : GAF 1.                        | 4  | TTGTATCCAGTTA | 0.408 |             |

|   |     |                           |                                                              |              |              |             |             |                                |     |                |       |             |
|---|-----|---------------------------|--------------------------------------------------------------|--------------|--------------|-------------|-------------|--------------------------------|-----|----------------|-------|-------------|
| - | 284 | 82389                     | 84S TTN_uc010z                                               | NM_133378    | NP_596869    | Q8WZ42      | TITIN_HUMAN |                                | 153 | GAGAGGAGGAT    | 0.438 |             |
| - | 275 | 6982_7698:282S TTN_uc010z | NM_133378                                                    | NP_596869    | Q8WZ42       | TITIN_HUMAN |             |                                | 153 | ACCTGGGGGAC    | 0.47  |             |
| - | 275 | 71443                     | 435* TTN_uc010zf                                             | NM_133378    | NP_596869    | Q8WZ42      | TITIN_HUMAN |                                | 153 | 3GAGACCATGTT   | 0.438 |             |
| - | 275 | 68106                     | 323A TTN_uc010z                                              | NM_133378    | NP_596869    | Q8WZ42      | TITIN_HUMAN |                                | 153 | GCACAGTAACTG   | 0.463 |             |
| - | 275 | 63906                     | 23Q TTN_uc010zl                                              | NM_133378    | NP_596869    | Q8WZ42      | TITIN_HUMAN |                                | 153 | GATACTCTAATCC  | 0.458 |             |
| - | 238 | 48616                     | 826E TTN_uc010z                                              | NM_133378    | NP_596869    | Q8WZ42      | TITIN_HUMAN |                                | 153 | TTGGTTCCTCTT   | 0.378 |             |
| - | 220 | 43725                     | _uc010zfi.1_Missense                                         | NM_133378    | NP_596869    | Q8WZ42      | TITIN_HUMAN |                                | 153 | 3AGGTTCCCAAG   | 0.398 |             |
| - | 200 | 39450                     | .1_Missense_Mutation                                         | NM_133378    | NP_596869    | Q8WZ42      | TITIN_HUMAN |                                | 153 | CTTTTCCATGTTT  | 0.363 |             |
| - | 143 | 30597                     | z.1_Missense_Mutation                                        | NM_133378    | NP_596869    | Q8WZ42      | TITIN_HUMAN |                                | 153 | 3AACTTCTCTTCT  | 0.453 |             |
| - | 80  | 20457                     | _uc010zjf.1_Intro                                            | NM_133378    | NP_596869    | Q8WZ42      | TITIN_HUMAN |                                | 153 | iCTTGCGGATGA   | 0.512 |             |
| + | 4   | 2903                      |                                                              | NM_194250    | NP_919226    | Q7Z570      | Z804A_HUMAN | p.R770Q(1)                     | 11  | CTATCGAAAACC   | 0.333 |             |
| - | 4   | 587                       | _p.K178* CLK1_uc                                             | NM_004071    | NP_004062    | P49759      | CLK1_HUMAN  |                                | 2   | TTCTTTTCCCTTCC | 0.443 |             |
| + | 5   | 4094                      |                                                              | NM_020923    | NP_065974    | Q9HCK1      | ZDBF2_HUMAN |                                | 3   | CTACAGATTCCA   | 0.393 |             |
| - | 2   | 90                        |                                                              | NM_020989    | NP_066269    | P07315      | CRGC_HUMAN  | 3 crystallin 'Greek key' 1.    | 0   | TGGTTTCGTAGC   | 0.522 | rs145041511 |
| + | 11  | 4932                      | g.1_Missense_Mutation                                        | NM_002374    | NP_002365    | P11137      | MAP2_HUMAN  |                                | 17  | 3AGAATTCCTCTT  | 0.458 |             |
| - | 3   | 320                       | eb.2_Missense_Mutation                                       | NM_079420    | NP_524144    | P05976      | MYL1_HUMAN  | EF-hand 1.                     | 1   | CTGTTCTGTCA    | 0.438 |             |
| + | 7   | 1185                      | .3_Missense_Mutation                                         | NM_005070    | NP_005061    | P48751      | B3A3_HUMAN  | Cytoplasmic.                   | 5   | ATCCTTCGCAGG   | 0.652 | rs140021661 |
| + | 10  | 1638                      | 484S SLC4A3_uc                                               | NM_005070    | NP_005061    | P48751      | B3A3_HUMAN  | Cytoplasmic.                   | 5   | CAACTCCCAGC    | 0.612 |             |
| - | 3   | 757                       | Mutation_p.W131R                                             | NM_181457    | NP_852122    | P23760      | PAX3_HUMAN  | Paired.                        | 766 | TTCCCAGCTGA    | 0.532 |             |
| - | 8   | 4528                      | _Mutation_p.A14S                                             | NM_001142644 | NP_001136116 | Q2M3C7      | SPKAP_HUMAN |                                | 10  | CTTCAGCCTCT    | 0.552 |             |
| - | 3   | 447                       | ct.3_Missense_Mutation                                       | NM_001100818 | NP_001094288 | Q7Z2X4      | PCL1_HUMAN  | PID.                           | 4   | 3GATTTCCAGGA   | 0.557 |             |
| + | 5   | 653                       | ase_Mutation_p.E1                                            | NM_007237    | NP_009168    | Q13342      | LY10_HUMAN  |                                | 0   | CTCAGGAAGCC    | 0.498 |             |
| + | 5   | 818                       | _p.R196Q ITM2C_                                              | NM_030926    | NP_112188    | Q9NQX7      | ITM2C_HUMAN |                                | 0   | GCGCCGGGCAA    | 0.632 |             |
| - | 2   | 361                       |                                                              | NM_006056    | NP_006047    | Q9HB89      | NMUR1_HUMAN | Name=1; (Potential).           | 5   | GGATGACCAGA    | 0.632 |             |
| + | 1   | 515                       | omy.1_Intron UGT                                             | NM_000463    | NP_000454    | P22309      | UD11_HUMAN  |                                | 2   | CTTGCCCACTG    | 0.567 |             |
| - | 3   | 443                       | ek.2_Missense_Mutation                                       | NM_001029871 | NP_001025042 | Q2I0M5      | RSPO4_HUMAN | FU.                            | 0   | ACTTCCCCTTGT   | 0.627 |             |
| + | 3   | 187                       | RG1B_uc010gdr.1_RNA FRG1B_uc010ztk.1_Missense_Mutation_p.L4S |              |              |             |             |                                | 0   | TTTGTGGCCCT    | 0.353 |             |
| + | 3   | 189                       | RG1B_uc010gdr.1_RNA FRG1B_uc010ztk.1_Missense_Mutation_p.A5T |              |              |             |             |                                | 0   | TTGTTGGCCTCA   | 0.353 |             |
| + | 2   | 143                       |                                                              | NM_001037730 | NP_001032819 | Q30KQ5      | DB115_HUMAN |                                | 1   | 3GAAATCATGCA   | 0.323 |             |
| - | 2   | 116                       |                                                              | NM_001037731 | NP_001032820 | Q30KQ4      | DB116_HUMAN |                                | 0   | TCATGGATTCC    | 0.468 |             |
| + | 2   | 248                       |                                                              | NM_182658    | NP_872599    | P59826      | LPLC3_HUMAN | Leu-rich.                      | 4   | 3CCACGGAGGGC   | 0.597 |             |
| - | 5   | 446                       | _p.E65K NECAB3                                               | NM_031232    | NP_112509    | Q96P71      | NECA3_HUMAN |                                | 1   | 3GATTTCCAATGC  | 0.612 |             |
| + | 7   | 924                       | SS2_uc010gey.2_f                                             | NM_018677    | NP_061147    | Q9NR19      | ACSA_HUMAN  |                                | 0   | AGTCCCCCCCCAA  | 0.537 |             |
| - | 24  | 3507                      | p.G1127A PTPRT_                                              | NM_007050    | NP_008981    | O14522      | PTPRT_HUMAN | phatase 1. Cytoplasmic (Po     | 20  | ACCACCCCTTCA   | 0.577 |             |
| - | 22  | 3180                      | o.R1018Q PTPRT_                                              | NM_007050    | NP_008981    | O14522      | PTPRT_HUMAN | phatase 1. Cytoplasmic (Po     | 20  | CAGTATCGCACA   | 0.438 |             |
| - | 21  | 3155                      | p.E1010K PTPRT_                                              | NM_007050    | NP_008981    | O14522      | PTPRT_HUMAN | phatase 1. Cytoplasmic (Po     | 20  | CACTTCCACCA    | 0.468 |             |
| - | 8   | 1628                      | gj.2_Missense_Mutation                                       | NM_007050    | NP_008981    | O14522      | PTPRT_HUMAN | tential). Fibronectin type-III | 20  | GTCTTCTCAG     | 0.552 |             |
| - | 7   | 1154                      | gj.2_Missense_Mutation                                       | NM_007050    | NP_008981    | O14522      | PTPRT_HUMAN | tential). Fibronectin type-III | 20  | :CACTTCTTCTCAG | 0.567 |             |
| + | 4   | 651                       |                                                              | NM_004994    | NP_004985    | P14780      | MMP9_HUMAN  |                                | 2   | GTGGTCCCTGG    | 0.637 |             |
| - | 8   | 1852                      | hk.1_Missense_Mutation                                       | NM_021248    | NP_067071    | Q9UJ99      | CAD22_HUMAN | r (Potential). Cadherin 4.     | 5   | :TTAGGGATGCC   | 0.552 |             |
| - | 5   | 705                       | Missense_Mutation                                            | NM_022829    | NP_073740    | Q8WWT9      | S13A3_HUMAN | lasmic (Potential).            | 1   | :ATCCTCTTCTCT  | 0.532 |             |
| - | 12  | 2135                      | F2_uc002xtq.2_Sp                                             | NM_018837    | NP_061325    | Q8IWU5      | SULF2_HUMAN |                                | 6   | ACTCACCAGATGT  | 0.594 |             |
| - | 2   | 1634                      | as.1_Nonsense_Mutation                                       | NM_004975    | NP_004966    | Q14721      | KCNB1_HUMAN | lasmic (Potential).            | 2   | CTTTGTCCATTT   | 0.433 |             |
| + | 7   | 2296                      | ze.1_Missense_Mutation                                       | NM_001164116 | NP_001157588 | Q9NQ75      | CASS4_HUMAN |                                | 3   | 3CATTTACGGC    | 0.577 |             |
| + | 1   | 917                       |                                                              | NM_178457    | NP_848552    | Q5JPB2      | ZN831_HUMAN |                                | 14  | .GAAGTCGCCGA   | 0.697 |             |
| + | 2   | 3772                      |                                                              | NM_178457    | NP_848552    | Q5JPB2      | ZN831_HUMAN |                                | 14  | TCGCCAGCAC     | 0.498 |             |
| + | 5   | 4780                      |                                                              | NM_178457    | NP_848552    | Q5JPB2      | ZN831_HUMAN |                                | 14  | CCAGAGGCCAG    | 0.468 |             |



|   |    |         |                   |              |              |        |             |                                |    |                 |       |
|---|----|---------|-------------------|--------------|--------------|--------|-------------|--------------------------------|----|-----------------|-------|
| + | 7  | 724     | co.2_Missense_M   | NM_007002    | NP_008933    | Q16186 | ADRM1_HUMAN | Ser-rich.                      | 0  | GGCAGCGGTCA     | 0.706 |
| + | 11 | 1202    | ion_p.R312* ITSN  | NM_003024    | NP_003015    | Q15811 | ITSN1_HUMAN |                                | 4  | (GAGTTCGATCTC   | 0.388 |
| - | 15 | 3372    | AM_uc002yrr.1_f   | NM_001389    | NP_001380    | O60469 | DSCAM_HUMAN | tential). Fibronectin type-III | 11 | 'GAGCTCGTTGC'   | 0.587 |
| + | 2  | 173     | c.2_RNA UBASH3    | NM_018961    | NP_061834    | P57075 | UBS3A_HUMAN | UBA.                           | 3  | CACGGGGAGGA     | 0.607 |
| - | 9  | 1614    | p.H232Y DGCR2_    | NM_005137    | NP_005128    | P98153 | IDD_HUMAN   | lasmic (Potential).            | 1  | CGGGTGGATGG,    | 0.627 |
| + | 6  | 1677    | p.V489M ZNF74_    | NM_003426    | NP_003417    | Q16587 | ZNF74_HUMAN | 2H2-type 9.                    | 1  | :TCATCGTGCACC   | 0.637 |
| + | 26 | 4610    | guz.1_Missense_   | NM_032608    | NP_115997    | Q81UG5 | MY18B_HUMAN | potential. Tail.               | 12 | AAGGTGATGTG     | 0.612 |
| + | 2  | 755     |                   | NM_020437    | NP_065170    | Q61CH7 | ASPH2_HUMAN | lenal (Potential).             | 1  | :ACAACGAGGGC    | 0.637 |
| - | 10 | 1209    | y.P292L RBM9_uc   | NM_001082578 | NP_001076047 | O43251 | RFOX2_HUMAN | Ala-rich.                      | 0  | AGGCGGGGATG     | 0.512 |
| + | 14 | 1907    | aqc.3_Missense_IV | NM_000395    | NP_000386    | P32927 | IL3RB_HUMAN | lasmic (Potential).            | 3  | CCACAGAGCAG     | 0.637 |
| + | 14 | 2411    | aqc.3_Missense_IV | NM_000395    | NP_000386    | P32927 | IL3RB_HUMAN | lasmic (Potential).            | 3  | :TAGTTCCTCTC    | 0.627 |
| - | 5  | 2021    | iAP1_uc003azu.2_  | NM_002883    | NP_002874    | P46060 | RAGP1_HUMAN |                                | 0  | (CAAAGACCTTC/   | 0.582 |
| - | 8  | 840     |                   | NM_002676    | NP_002667    | Q92871 | PMM1_HUMAN  |                                | 1  | :CTCATGAGCTG    | 0.587 |
| - | 7  | 640     |                   | NM_002676    | NP_002667    | Q92871 | PMM1_HUMAN  |                                | 1  | :CCTCGGGGAAG    | 0.592 |
| + | 16 | 2991    | EBF2_uc003bbj.2_  | NM_004599    | NP_004590    | Q12772 | SRBP2_HUMAN | lasmic (Potential).            | 4  | AGATTCCCTCT     | 0.622 |
| - | 3  | 448     | oba.1_Intron TNFR | NM_052945    | NP_443177    | Q96RJ3 | TR13C_HUMAN | lasmic (Potential).            | 0  | ATCCCGGAGAC     | 0.632 |
| - | 5  | 815     | ..1_Intron PHF21B | NM_138415    | NP_612424    | Q96EK2 | PF21B_HUMAN |                                | 3  | gggtaaggggacagt | 0.274 |
| + | 4  | 381     | E1_uc011aqz.1_5'  | NM_016426    | NP_057510    | Q9NYZ3 | GTSE1_HUMAN |                                | 1  | TCGGACCCTTTC    | 0.388 |
| + | 3  | 417     | 1arp.1_Missense_  | NM_018995    | NP_061868    | Q9BXT6 | M10L1_HUMAN |                                | 3  | :GGAGTCCCTCA    | 0.512 |
| + | 3  | 1711    | p.E437K PANX2_    | NM_052839    | NP_443071    | Q96RD6 | PANX2_HUMAN | lasmic (Potential).            | 1  | AGAAGGAAATC     | 0.701 |
| + | 1  | 1741    |                   | NM_138433    | NP_612442    | Q96G42 | KLD7B_HUMAN | Kelch 5.                       | 1  | :CACACCCTGG     | 0.687 |
| + | 3  | 551     | '_uc010hbh.1_Mis: | NM_001097    | NP_001088    | P10323 | ACRO_HUMAN  | peptidase S1.                  | 0  | GGTGGCCGGCT     | 0.627 |
| + | 10 | 1293    |                   | NM_001570    | NP_001561    | O43187 | IRAK2_HUMAN | rotein kinase.                 | 8  | GTTGGCCGAGG     | 0.542 |
| - | 7  | 2096    | p.P574L IQSEC1_   | NM_014869    | NP_055684    | Q6DN90 | IQEC1_HUMAN | SEC7.                          | 1  | CACGGGGAATG     | 0.527 |
| + | 3  | 419_420 | bzi.2_Missense_M  | NM_003298    | NP_003289    | P49116 | NR2C2_HUMAN |                                | 0  | TGGCTTCCCCAG    | 0.554 |
| - | 11 | 1677    | p.P495S SCN5A_    | NM_198056    | NP_932173    | Q14524 | SCN5A_HUMAN |                                | 9  | .CTTGGGGAGCC    | 0.527 |
| - | 27 | 5456    |                   | NM_006514    | NP_006505    | Q9Y5Y9 | SCNAA_HUMAN |                                | 10 | (GAGAAATCCAAC   | 0.448 |
| - | 2  | 4092    | 2_3'UTR XIRP1_u   | NM_194293    | NP_919269    | Q702N8 | XIRP1_HUMAN | Pro-rich.                      | 8  | :AAGAAGGGGGT    | 0.607 |
| + | 8  | 992     | YRIP_uc010hww.2   | NM_015460    | NP_056275    | Q8NFW9 | MYRIP_HUMAN | yosin-binding.                 | 5  | .CCGTGCTCCCG    | 0.597 |
| + | 12 | 2230    | ssense_Mutation_  | NM_015460    | NP_056275    | Q8NFW9 | MYRIP_HUMAN | actin-binding.                 | 5  | :TGGAAAGAAAAT   | 0.507 |
| - | 19 | 2006    | w.2_Missense_Mu   | NM_017886    | NP_060356    | Q96C45 | ULK4_HUMAN  |                                | 0  | :CCAAGGGAACA    | 0.448 |
| + | 3  | 918     | g_Mutation_p.R24: | NM_001296    | NP_001287    | O00590 | CCBP2_HUMAN | lasmic (Potential).            | 5  | :AGGGCCGGGC     | 0.532 |
| - | 9  | 1224    |                   | NM_000094    | NP_000085    | Q02388 | CO7A1_HUMAN | i (NC1). Fibronectin type-III  | 11 | .TCAGGGAAGTG    | 0.647 |
| - | 12 | 982     | QARS_uc003cvy.2   | NM_005051    | NP_005042    | P47897 | SYQ_HUMAN   |                                | 1  | :GTAGCCTGGGG    | 0.547 |
| + | 6  | 339     |                   | NM_004947    | NP_004938    | Q8IZD9 | DOCK3_HUMAN |                                | 0  | :TTTCAGAAACA    | 0.388 |
| + | 32 | 3386    |                   | NM_004947    | NP_004938    | Q8IZD9 | DOCK3_HUMAN |                                | 0  | GACATGATGGAC    | 0.473 |
| + | 42 | 5330    | g_Mutation_p.D17  | NM_001128840 | NP_001122312 | Q01668 | CAC1D_HUMAN | lasmic (Potential).            | 11 | :CAAGTGATACT    | 0.458 |
| + | 37 | 3202    |                   | NM_018398    | NP_060868    | Q8IZS8 | CA2D3_HUMAN | ellular (Potential).           | 7  | (GGCGCCAGAA     | 0.443 |
| - | 14 | 2699    | RC2_uc003dht.1_   | NM_015576    | NP_056391    | O15083 | ERC2_HUMAN  | Potential.                     | 2  | :CAGTTCCTGTC'   | 0.512 |
| + | 6  | 762     | e_Mutation_p.L112 | NM_001098783 | NP_001092253 | O95059 | RPP14_HUMAN |                                | 0  | .TTTCTTCTTGCA   | 0.393 |
| - | 12 | 2359    | lm.2_Missense_M   | NM_003716    | NP_003707    | Q9ULU8 | CAPS1_HUMAN |                                | 3  | TAAATTCATCCAT   | 0.383 |
| - | 8  | 1272    | hjh.1_Missense_   | NM_182920    | NP_891550    | Q9P2N4 | ATS9_HUMAN  | ptidase M12B.                  | 4  | TATAGGGATCAC/   | 0.403 |
| + | 3  | 780     | BD8_uc011bfv.1_   | NM_032505    | NP_115894    | Q8NFY9 | KBTB8_HUMAN | BACK.                          | 4  | :GTTTTCTCTG/    | 0.398 |
| - | 8  | 998_999 | M86D_uc003dpq.2   | NR_024241    |              |        |             |                                | 0  | :GCCCGGCGCTG    | 0.569 |
| + | 17 | 3169    | hA3_uc010hon.1_   | NM_005233    | NP_005224    | P29320 | EPHA3_HUMAN | ntial). PDZ-binding (Potent    | 33 | :CAGTTCCTGTC    | 0.493 |
| + | 6  | 1698    |                   | NM_001080448 | NP_001073917 | Q9UF33 | EPHA6_HUMAN | III 2. Extracellular (Potentia | 16 | AAAATAGCATTG    | 0.418 |
| + | 7  | 1922    | i.3_5'UTR EPHA6_  | NM_001080448 | NP_001073917 | Q9UF33 | EPHA6_HUMAN | III 2. Extracellular (Potentia | 16 | :AATTTGAAACAG   | 0.373 |

rs147992008

|   |    |           |                   |              |              |        |             |                                |    |               |       |             |
|---|----|-----------|-------------------|--------------|--------------|--------|-------------|--------------------------------|----|---------------|-------|-------------|
| - | 36 | 5089      |                   | NM_014981    | NP_055796    | Q9Y2K3 | MYH15_HUMAN | Potential.                     | 7  | TGAGATCACTGT  | 0.522 |             |
| + | 7  | 1066      | o.1_Missense_Mut  | NM_175862    | NP_787058    | P42081 | CD86_HUMAN  | lasmic (Potential).            | 2  | AAGTTCGAAGAC  | 0.333 | rs141281931 |
| + | 4  | 453_454   | bjq.1_Missense_IV | NM_014367    | NP_055182    | Q96A26 | F162A_HUMAN |                                | 1  | ATTGAGGGCAAG  | 0.45  |             |
| + | 3  | 633       | ekj.2_Missense_M  | NM_021937    | NP_068756    | P57772 | SELB_HUMAN  |                                | 1  | AAGCTCCACAG   | 0.572 |             |
| - | 1  | 1334      |                   | NM_025041    | NP_079317    | Q3SXR2 | CC036_HUMAN |                                | 1  | CCCCCAGGTG    | 0.672 |             |
| + | 2  | 370       | .1_RNA IL20RB_u   | NM_144717    | NP_653318    | Q6UXL0 | I20RB_HUMAN | III 1. Extracellular (Potentia | 1  | GAGAACCTCTCT  | 0.512 |             |
| + | 17 | 2909      |                   | NM_022131    | NP_071414    | Q9H4D0 | CSTN2_HUMAN | idic). Cytoplasmic (Potenti    | 7  | AGGAGGAAGAA   | 0.542 |             |
| - | 38 | 6565      | y.1_Missense_Mu   | NM_001184    | NP_001175    | Q13535 | ATR_HUMAN   | FAT.                           | 20 | AAATTCGAGAG   | 0.343 |             |
| + | 4  | 487       | _p.S150F MED12L   | NM_053002    | NP_443728    | Q86YW9 | MD12L_HUMAN |                                | 7  | AATATTCTGTGCC | 0.353 |             |
| - | 3  | 1117      | 80_uc003fda.2_R   | NM_173084    | NP_775107    | Q8IWR1 | TRI59_HUMAN |                                | 0  | TTGGAGAAATTT  | 0.308 |             |
| - | 31 | 3780      |                   | NM_001041    | NP_001032    | P14410 | SUIS_HUMAN  | rase. Lumenal.                 | 14 | TTCCCGAACCTC  | 0.343 |             |
| - | 2  | 2627      | fek.2_Missense_IV | NM_014926    | NP_055741    | O94933 | SLIK3_HUMAN | lasmic (Potential).            | 10 | GAGAGGAAAGA   | 0.448 |             |
| - | 1  | 140       | _p.E38K SERPIN    | NM_006217    | NP_006208    | O75830 | SPI2_HUMAN  |                                | 3  | CAAATTCGGTAT  | 0.368 | rs147443553 |
| - | 2  | 388       | _p.H81Y WDR49_    | NM_178824    | NP_849146    | Q8IV35 | WDR49_HUMAN | WD 1.                          | 3  | GAGAGTGATAAT  | 0.378 |             |
| + | 13 | 2193      | _p.S331F EIF2B5   | NM_003907    | NP_003898    | Q13144 | EI2BE_HUMAN | W2.                            | 5  | GGATTCCCCGC   | 0.532 |             |
| + | 2  | 423       | l.2_Intron IGF2BP | NR_027317    |              |        |             |                                | 0  | GTAGGGAAGCA   | 0.562 |             |
| + | 9  | 1660      | w.1_Missense_Mt   | NM_198485    | NP_940887    | Q6ZUI0 | TPRG1_HUMAN |                                | 0  | CTCTATCGCATC  | 0.498 |             |
| - | 4  | 1218_1219 | p.A168T C3orf21_  | NM_152531    | NP_689744    | Q8NBI6 | CC021_HUMAN |                                | 0  | ATAGGCCCTCGAA | 0.624 |             |
| + | 5  | 906       | Missense_Mutation | NM_000283    | NP_000274    | P35913 | PDE6B_HUMAN | GAF 2.                         | 0  | CCCAGGAATTT   | 0.662 |             |
| + | 17 | 3303      | 3gee.3_RNA WHS    | NM_001042424 | NP_001035889 | O96028 | NSD2_HUMAN  | AWS.                           | 9  | GCCACCCGCAG   | 0.532 |             |
| + | 17 | 3789      | E1154K SH3TC1_    | NM_018986    | NP_061859    | Q8TE82 | S3TC1_HUMAN |                                | 3  | TTGACGAGGAG   | 0.632 |             |
| + | 11 | 2045      | _p.S503L CPZ_uc   | NM_001014447 | NP_001014447 | Q66K79 | CBPZ_HUMAN  |                                | 3  | CACATCGCTGAC  | 0.706 |             |
| - | 3  | 2151      |                   | NM_053042    | NP_444270    | Q9C0D4 | Z518B_HUMAN |                                | 4  | TTGTAGATTCCA  | 0.433 |             |
| - | 3  | 1452      | fF16_uc003gpo.2_  | NM_017741    | NP_060211    | Q9NXF7 | DCA16_HUMAN |                                | 1  | GCTGGGACTTG   | 0.512 |             |
| + | 20 | 2264      | is.1_Missense_Mu  | NM_004787    | NP_004778    | O94813 | SLIT2_HUMAN | LRRCT 3.                       | 11 | CACGGGAAATC   | 0.438 |             |
| + | 5  | 1316      | _p.V102I GBA3_uc  | NM_020973    | NP_066024    | Q9H227 | GBA3_HUMAN  |                                | 0  | GATAAAGTCAATC | 0.393 |             |
| - | 7  | 1441      |                   | NM_001358    | NP_001349    | O43143 | DHX15_HUMAN | case C-terminal.               | 1  | ACGTCTCTGCTA  | 0.318 |             |
| - | 7  | 705       | 3hdp.2_5'UTR TM   | NM_004262    | NP_004253    | O60235 | TM11D_HUMAN | . Extracellular (Potential).   | 1  | GCTGCCTCCAC   | 0.532 |             |
| - | 5  | 1309      | e_Mutation_p.S28  | NM_021139    | NP_066962    | P06133 | UD2B4_HUMAN |                                | 2  | TACTCGACATTC  | 0.413 |             |
| + | 6  | 201       | _p.R51K CSN1S1    | NM_001890    | NP_001881    | P47710 | CASA1_HUMAN |                                | 0  | GAACAGGGTAA   | 0.274 |             |
| + | 2  | 177       |                   | NM_021225    | NP_067048    | Q99935 | PROL1_HUMAN |                                | 1  | AGAATGAAATTA  | 0.299 |             |
| + | 5  | 2791      | 3hkf.1_Missense_I | NM_020859    | NP_065910    | Q8TF72 | SHRM3_HUMAN |                                | 3  | GCAAGCGGGTG   | 0.562 |             |
| + | 56 | 8829      |                   | NM_025074    | NP_079350    | Q86XX4 | FRAS1_HUMAN | Extracellular (Potential).     | 5  | CCAACGATGCC   | 0.537 |             |
| - | 1  | 384       |                   | NM_032693    | NP_116082    | Q9BSU3 | NAA11_HUMAN | etyltransferase.               | 2  | GCGCCGGTGTG   | 0.562 |             |
| - | 10 | 1590      | .S276F ANTXR2_u   | NM_001145794 | NP_001139266 | P58335 | ANTR2_HUMAN | ellular (Potential).           | 1  | GCATAGAATTA   | 0.269 |             |
| - | 5  | 793       | _p.E216K RASGE    | NM_152545    | NP_689758    | Q0VAM2 | RGF1B_HUMAN | Ras-GEF.                       | 0  | CAGCTCTATATC  | 0.468 |             |
| - | 17 | 3170      |                   | NM_014991    | NP_055806    | Q8IZQ1 | WDFY3_HUMAN |                                | 3  | GGGGCGGGTGC   | 0.502 |             |
| - | 11 | 1433      |                   | NM_174952    | NP_777612    | Q8N412 | CD037_HUMAN |                                | 0  | AGATTTCCCTTC  | 0.269 |             |
| + | 8  | 1787      |                   | NM_001977    | NP_001968    | Q07075 | AMPE_HUMAN  | ellular (Potential).           | 5  | GTAGGGATCTT   | 0.294 |             |
| - | 4  | 796       | X2_uc010iml.2_In  | NM_153426    | NP_700475    | Q99697 | PITX2_HUMAN |                                | 0  | GTCTCTATTCT   | 0.592 |             |
| - | 4  | 1047      |                   | NM_024574    | NP_078850    | Q8TB73 | CD031_HUMAN |                                | 0  | CTCAGGGTATG   | 0.483 |             |
| + | 7  | 902       | _p.R224C ADAD1_   | NM_139243    | NP_640336    | Q96M93 | ADAD1_HUMAN |                                | 0  | GTAATCGTTCAC  | 0.269 |             |
| + | 8  | 7432      | e_Mutation_p.P77  | NM_024582    | NP_078858    | Q6V017 | FAT4_HUMAN  | (Potential). Cadherin 24.      | 18 | CATCTCTACTC   | 0.383 |             |
| - | 1  | 2734      | .1_Intron PCDH18  | NM_019035    | NP_061908    | Q9HCL0 | PCD18_HUMAN | lasmic (Potential).            | 5  | GGTAGGAGATG   | 0.507 |             |
| - | 1  | 2338      | .1_Intron PCDH18  | NM_019035    | NP_061908    | Q9HCL0 | PCD18_HUMAN | Extracellular (Potential).     | 5  | CCATTCTGTGT   | 0.438 | rs141226164 |
| - | 5  | 872       | ik.1_Missense_Mu  | NM_021833    | NP_068605    | P25874 | UCP1_HUMAN  | Solcar 3.                      | 1  | GAAAGCCGTTG   | 0.428 |             |
| - | 3  | 521       | k.1_Missense_Mu   | NM_021833    | NP_068605    | P25874 | UCP1_HUMAN  | Solcar 2.                      | 1  | GATTCGGTGA    | 0.468 |             |

|   |    |           |                    |              |              |        |             |                               |    |              |       |
|---|----|-----------|--------------------|--------------|--------------|--------|-------------|-------------------------------|----|--------------|-------|
| - | 6  | 1693      | p.G305R RNF150     | NM_020724    | NP_065775    | Q9ULK6 | RN150_HUMAN | lasmic (Potential).           | 1  | ACCTCCCAGAG  | 0.542 |
| - | 3  | 304       | s.S30L GYPA_uc0    | NM_002099    | NP_002090    | P02724 | GLPA_HUMAN  | Extracellular.                | 2  | ATTTCTGAAACT | 0.413 |
| + | 7  | 1946      |                    | NM_022475    | NP_071920    | Q96QV1 | HHIP_HUMAN  |                               | 6  | TCCACGATCCA  | 0.517 |
| - | 14 | 1947      | p.L576F IDDX60L    | NM_001012967 | NP_001012985 | Q5H9U9 | DDX6L_HUMAN |                               | 1  | TTTGAGAAATG  | 0.333 |
| + | 5  | 1556      | irr.2_Missense_Mi  | NM_014269    | NP_055084    | Q9UKF5 | ADA29_HUMAN | B. Extracellular (Potential). | 16 | TAAGAGGGTTA  | 0.428 |
| - | 5  | 1236      |                    | NM_005429    | NP_005420    | P49767 | VEGFC_HUMAN |                               | 5  | CATCTCCAGCA  | 0.398 |
| + | 4  | 350       | IRR_uc010isy.2_Ir  | NM_013232    | NP_037364    | O75340 | PDCD6_HUMAN | nd 2. 2 (Potential).          | 1  | TCAGCGAGTTC  | 0.537 |
| + | 1  | 278       |                    | NM_182632    | NP_872438    | Q96N87 | S6A18_HUMAN | Name=2; (Potential).          | 1  | CTATGGAGGAG  | 0.637 |
| - | 7  | 2379      | RT_uc003jcc.1_Mi   | NM_198253    | NP_937983    | O14746 | TERT_HUMAN  | rse transcriptase.            | 12 | ACTGTGCGATG  | 0.642 |
| - | 2  | 299       |                    | NM_001044    | NP_001035    | Q01959 | SC6A3_HUMAN | lasmic (Potential).           | 6  | CTCCCGATCTC  | 0.602 |
| - | 11 | 2084      | Mutation_p.M56     | NM_004934    | NP_004925    | Q13634 | CAD18_HUMAN | r (Potential). Cadherin 5.    | 7  | AGATCATAATG  | 0.498 |
| - | 5  | 654       | p.S192F AGXT2_     | NM_031900    | NP_114106    | Q9BYV1 | AGT2_HUMAN  |                               | 4  | TGAAAGAAATG  | 0.448 |
| - | 10 | 1942      | RLR_uc003jji.1_Inl | NM_000949    | NP_000940    | P16471 | PRLR_HUMAN  | lasmic (Potential).           | 3  | CCCTTCCCTCT  | 0.542 |
| + | 17 | 2734      | jle.1_Missense_M   | NM_152403    | NP_689616    | Q63HQ2 | EGFLA_HUMAN | EGF-like 3.                   | 7  | GGAAGGAGGGC  | 0.622 |
| + | 14 | 1939      | 7_uc011cpn.1_RN    | NM_000587    | NP_000578    | P10643 | CO7_HUMAN   | Sushi 1.                      | 0  | GAAACCCAGTG  | 0.388 |
| - | 23 | 2840      | 3jmi.3_Missense_f  | NM_173489    | NP_775760    | Q7Z745 | HTRB2_HUMAN | HEAT 9.                       | 8  | GTAAACCAATCA | 0.433 |
| - | 1  | 4         |                    | NM_000524    | NP_000515    | P08908 | 5HT1A_HUMAN | llular (By similarity).       | 4  | CACATCCATGC  | 0.637 |
| + | 5  | 4571      | rx.1_Missense_Mu   | NM_005909    | NP_005900    | P46821 | MAP1B_HUMAN |                               | 5  | TAAGTCCAGTT  | 0.413 |
| + | 2  | 132       | 1_5'Flank GFM2_L   | NM_014886    | NP_055701    | O95478 | NSA2_HUMAN  |                               | 1  | GATACCGTTTG  | 0.328 |
| - | 1  | 368       |                    | NR_004845    |              |        |             |                               | 0  | AGCTGGAGCCC  | 0.542 |
| + | 20 | 3793_3794 | r98_uc003kjt.2_5'l | NM_032119    | NP_115495    | Q8WXG9 | GPR98_HUMAN | ellular (Potential).          | 16 | TGTTCCATTCA  | 0.421 |
| + | 36 | 8419      | p.D481N GPR98_U    | NM_032119    | NP_115495    | Q8WXG9 | GPR98_HUMAN | . Extracellular (Potential).  | 16 | TGTTGGATGAC  | 0.338 |
| + | 38 | 8726      | p.G583E GPR98_U    | NM_032119    | NP_115495    | Q8WXG9 | GPR98_HUMAN | ellular (Potential).          | 16 | AGTAGGAAACC  | 0.393 |
| + | 45 | 9775      | p.R933* GPR98_U    | NM_032119    | NP_115495    | Q8WXG9 | GPR98_HUMAN | lar (Potential). EAR 1.       | 16 | TATCTCGAACTA | 0.393 |
| + | 5  | 1344      | I_Intron SNCAIP_U  | NM_005460    | NP_005451    | Q9Y6H5 | SNCAP_HUMAN | ANK 1.                        | 2  | TCAATGAGCGC  | 0.488 |
| + | 7  | 780       | dd.1_Missense_M    | NM_032446    | NP_115822    | Q96KG7 | MEG10_HUMAN | self-assembly and formati     | 4  | CCTGCGATGGT  | 0.582 |
| - | 2  | 321       |                    | NM_015082    | NP_055897    | Q6MZW2 | FSTL4_HUMAN |                               | 2  | CACCCCACATC  | 0.557 |
| + | 1  | 970       | hd.2_Intron PCDH   | NM_018906    | NP_061729    | Q9Y5H8 | PCDA3_HUMAN | Extracellular (Potential).    | 8  | CCACGGATAAA  | 0.373 |
| + | 1  | 217       | lhh.1_Intron PCDF  | NM_018910    | NP_061733    | Q9UN72 | PCDA7_HUMAN | Extracellular (Potential).    | 4  | GTGGGATCTTC  | 0.612 |
| + | 1  | 1823      | DHA7_uc003lhq.2    | NM_018904    | NP_061727    | Q9Y5I0 | PCDAD_HUMAN | Extracellular (Potential).    | 6  | GGCTTCGTATG  | 0.682 |
| + | 1  | 1932      |                    | NM_013340    | NP_037472    | Q9Y5F3 | PCDB1_HUMAN | Extracellular (Potential).    | 0  | CTGTTCAAAGAC | 0.438 |
| + | 1  | 1974      |                    | NM_015669    | NP_056484    | Q9Y5E4 | PCDB5_HUMAN | Extracellular (Potential).    | 5  | GGTGACCAAGG  | 0.697 |
| + | 1  | 1934      |                    | NM_018940    | NP_061763    | Q9Y5E2 | PCDB7_HUMAN | Extracellular (Potential).    | 6  | GGTGACCAAGG  | 0.706 |
| + | 1  | 2177      | daj.1_Missense_A   | NM_018931    | NP_061754    | Q9Y5F2 | PCDBB_HUMAN | lasmic (Potential).           | 6  | CTGCTCGGTGC  | 0.657 |
| + | 1  | 1997      | dak.1_Missense_f   | NM_018932    | NP_061755    | Q9Y5F1 | PCDBC_HUMAN | r (Potential). Cadherin 6.    | 3  | GCTGTGATACC  | 0.726 |
| + | 1  | 2011      | B5_uc003lkf.1_Intr | NM_018928    | NP_061751    | Q9Y5F7 | PCDGL_HUMAN | Extracellular (Potential).    | 4  | ACTATCCAGTTC | 0.488 |
| - | 4  | 3323      |                    | NM_032420    | NP_115796    | Q08174 | PCDH1_HUMAN |                               | 5  | TGGACGGCGTC  | 0.637 |
| - | 1  | 3399      |                    | NM_016580    | NP_057664    | Q9NPG4 | PCD12_HUMAN | ical; (Potential).            | 3  | CAACCCGAAGA  | 0.597 |
| + | 1  | 1303      | TC2_uc003lpp.1_I   | NM_000024    | NP_000015    | P07550 | ADRB2_HUMAN | Cytoplasmic.                  | 1  | CTACTCCAGCA  | 0.522 |
| + | 2  | 567       |                    | NM_000112    | NP_000103    | P50443 | S26A2_HUMAN | lasmic (Potential).           | 0  | GCTCCAAAAT   | 0.423 |
| - | 1  | 587       |                    | NM_130899    | NP_570969    | Q8TC56 | FA71B_HUMAN |                               | 6  | GAGATCTTCCC  | 0.507 |
| - | 23 | 4448      | jit.1_Missense_Mu  | NM_025153    | NP_079429    | O94823 | AT10B_HUMAN | ical; (Potential).            | 5  | TGCATCCACCA  | 0.418 |
| + | 9  | 1539      | lyv.2_Missense_M   | NM_000811    | NP_000802    | Q16445 | GBRA6_HUMAN | lasmic (Prot p.P401L(1))      | 12 | CAACACCTGTC  | 0.463 |
| + | 11 | 640       |                    | NM_001079529 | NP_001072997 | P0C7A2 | F153B_HUMAN |                               | 1  | TGGAGGAGCAT  | 0.507 |
| + | 14 | 2470      |                    | NM_133369    | NP_588610    | Q6ZN44 | UNC5A_HUMAN | lasmic (Potential).           | 1  | TCAATCGGCAG  | 0.637 |
| + | 10 | 491       | 3mig.1_Missense_   | NM_001079527 | NP_001072995 |        |             |                               | 0  | TCCTTCTCTG   | 0.527 |
| + | 13 | 1925_1926 | q.1_Missense_Mu    | NM_004415    | NP_004406    | P15924 | DESP_HUMAN  | plakophilin 1 and junction p  | 9  | GGTGTCTGGC   | 0.525 |

|   |     |           |                             |              |              |        |             |                                |    |                   |       |
|---|-----|-----------|-----------------------------|--------------|--------------|--------|-------------|--------------------------------|----|-------------------|-------|
| + | 2   | 1010      |                             | NM_001718    | NP_001709    | P22004 | BMP6_HUMAN  |                                | 3  | ATTTATCAAGTC1     | 0.483 |
| + | 2   | 201       |                             | NM_002114    | NP_002105    | P15822 | ZEP1_HUMAN  |                                | 6  | AAATTCATCCCA      | 0.388 |
| - | 1   | 88        |                             | NM_005493    | NP_005484    | Q96S59 | RANB9_HUMAN | Poly-Pro.                      | 2  | ctgctgctggcgccggc | 0.517 |
| + | 6   | 720       | M133 CAP2_uc                | NM_006366    | NP_006357    | P40123 | CAP2_HUMAN  |                                | 1  | GAGATGAATGAC      | 0.398 |
| + | 21  | 2121      | p.G582E LRRC16              | NM_017640    | NP_060110    | Q5VZK9 | LR16A_HUMAN | LRR 9.                         | 4  | CAACGGAATGG       | 0.547 |
| + | 1   | 31        |                             | NM_003523    | NP_003514    | P62807 | H2B1C_HUMAN |                                | 0  | CCGCCCGAAG        | 0.527 |
| + | 6   | 1262      | A3_uc011dkm.1_Intron        |              |              |        |             |                                | 0  | CTCTCTGGAGG       | 0.507 |
| + | 7   | 1149      |                             | NM_001732    | NP_001723    | Q13410 | BT1A1_HUMAN | Cytoplasmic (Potential).       | 2  | GTAGGGAGAAT       | 0.557 |
| + | 11  | 1396      | jb.2_Missense_M             | NM_005865    | NP_005856    | Q9NQE7 | TSSP_HUMAN  |                                | 5  | GCCTCAGAATCA      | 0.567 |
| + | 2   | 166       | se_Mutation_p.S5            | NM_001509    | NP_001500    | O75715 | GPX5_HUMAN  |                                | 1  | GTGTTTCTTCAA      | 0.423 |
| + | 3   | 573       | v.2_RNA PPP1R11             | NM_021959    | NP_068778    | O60927 | PP1RB_HUMAN | Pro-rich.                      | 3  | ACCGACCCCA        | 0.612 |
| - | 5   | 1323      | DC1_uc003nrh.1              | NM_014641    | NP_055456    | Q14676 | MDC1_HUMAN  | uclear localization (NLS1).    | 4  | TCCAGGAGGTT       | 0.542 |
| + | 2   | 3502      |                             | NM_080870    | NP_543146    | Q3MIW9 | DPCR1_HUMAN |                                | 0  | CCACAGAACAC       | 0.463 |
| - | 2   | 508       | 1_5'Flank PSORS             | NM_014070    | NP_054789    | Q6UXA7 | CF015_HUMAN |                                | 0  | CTGGTGGAGGA       | 0.622 |
| + | 1   | 80        | F_uc003nuj.2_5'Fl           | NM_000594    | NP_000585    | P01375 | TNFA_HUMAN  |                                | 3  | TCAGACGCCAC       | 0.592 |
| + | 4   | 674       | c003nuj.2_Silent_           | NM_000594    | NP_000585    | P01375 | TNFA_HUMAN  | ellular (Potential).           | 3  | CAACCTCCTC        | 0.632 |
| + | 6   | 468       | IF1_uc003nva.2_N            | NM_001623    | NP_001614    | P55008 | AIF1_HUMAN  |                                | 1  | AAAAGGAAAAG       | 0.488 |
| + | 10  | 1580      | inzf.1_Missense_N           | NM_000500    | NP_000491    | P08686 | CP21A_HUMAN |                                | 0  | TGGGGGCCCAC       | 0.682 |
| - | 48  | 3769_3770 | se_Mutation_p.P1            | NM_080680    | NP_542411    | P13942 | COBA2_HUMAN | le-helical region.             | 5  | TGGGGGGCCAC       | 0.594 |
| + | 6   | 961       | B_uc011dqu.1_5'F            | NM_001077516 | NP_001070984 | Q92504 | S39A7_HUMAN |                                | 1  | AAAAGGAAACA       | 0.488 |
| + | 60  | 9020      |                             | NM_001371    | NP_001362    |        |             |                                | 21 | TTTCACGAATAAT     | 0.363 |
| + | 89  | 13573     |                             | NM_001371    | NP_001362    |        |             |                                | 21 | TCACTGAACCTT      | 0.443 |
| - | 2   | 410       | H_uc011dvl.1_5'Fl           | NM_020750    | NP_065801    | Q9HAV4 | XPO5_HUMAN  | for interaction with Ran.      | 4  | AAGGCCAAAATC      | 0.418 |
| - | 10  | 944       | E230K CRISP2_               | NM_001142408 | NP_001135880 | P16562 | CRIS2_HUMAN |                                | 1  | ACTTTTCTTGAC      | 0.393 |
| + | 8   | 983       |                             | NM_018214    | NP_060684    | Q9BTT6 | LRRC1_HUMAN | LRR 10.                        | 1  | AGACTTCTGAA       | 0.378 |
| + | 5   | 1866      |                             | NM_001010872 | NP_001010872 | Q5T0W9 | FA83B_HUMAN |                                | 6  | ACACCCCTACG       | 0.473 |
| + | 5   | 2655      |                             | NM_001010872 | NP_001010872 | Q5T0W9 | FA83B_HUMAN |                                | 6  | AGTAAGGAAGAT      | 0.388 |
| - | 1   | 860       | xf.1_Missense_Mt            | NM_021073    | NP_066551    | P22003 | BMP5_HUMAN  |                                | 2  | TATTTCCCGTCT      | 0.453 |
| - | 5   | 532       | iBL2_uc011dpx.1_RNA         |              |              |        |             |                                | 0  | GTGCGATACC        | 0.507 |
| - | 10  | 2034      | p.A499V EYS_uc              | NM_001142800 | NP_001136272 | Q5T1H1 | EYS_HUMAN   |                                | 6  | AAATAGGCATCA      | 0.343 |
| + | 18  | 3102      | L_Missense_Mutat            | NM_014989    | NP_055804    | Q86UR5 | RIMS1_HUMAN |                                | 10 | GATGTGGATAGT      | 0.363 |
| - | 9   | 1237      | CBP_uc011dyx.1              | NM_198920    | NP_944602    | Q7Z6J8 | UB2CB_HUMAN | HECT-like.                     | 1  | ACGGCGAAGGG       | 0.463 |
| - | 14  | 2723      | p.E823K EPHA7_              | NM_004440    | NP_004431    | Q15375 | EPHA7_HUMAN | Potential). Protein kinase.    | 28 | TAACCTCCACAT      | 0.408 |
| - | 4   | 438       | ub.2_Intron DDO_            | NM_003649    | NP_003640    | Q99489 | OXDD_HUMAN  |                                | 3  | ATCTTCGAAATC      | 0.468 |
| + | 4   | 886       | E_uc003pwt.2_Nor            | NM_001080976 | NP_001074445 | Q9UL01 | DSE_HUMAN   |                                | 1  | CCTACTTATGGAC     | 0.443 |
| + | 3   | 1553      | Okfi.2_Missense_M           | NM_052913    | NP_443145    | Q86VY9 | T200A_HUMAN | lasmic (Potential).            | 1  | TGGAGGAGGAT       | 0.498 |
| - | 4   | 1209      | S317F BCLAF1_               | NM_014739    | NP_055554    | Q9NYF8 | BCLF1_HUMAN |                                | 1  | ACGAGGAACGG       | 0.403 |
| - | 3   | 780       | _uc003qhk.2_Intrc           | NM_014432    | NP_055247    | Q9UHF4 | I20RA_HUMAN | tential). Fibronectin type-III | 4  | TCCCCAAATGC       | 0.363 |
| + | 23  | 3910      |                             | NM_020340    | NP_065073    | Q5TH69 | BIG3_HUMAN  |                                | 2  | CCCTGGAAACA       | 0.493 |
| - | 143 | 26523     | p.R8641W SYNE1              | NM_182961    | NP_892006    | Q8NF91 | SYNE1_HUMAN | Cytoplasmic (Potential).       | 45 | FGAGCCGATTTCT     | 0.423 |
| + | 29  | 4232_4233 | vc.1_Missense_Mi            | NM_001040001 | NP_001035090 | P55196 | AFAD_HUMAN  | Pro-rich.                      | 5  | ACCTGCCTCCGC      | 0.614 |
| - | 13  | 2100      |                             | NM_032415    | NP_115791    | Q9BXL7 | CAR11_HUMAN | p.I566I(1)                     | 50 | GGGCTCGGCGC       | 0.622 |
| + | 7   | 672       | i8_uc010kst.2_Silent_p.A14A |              |              |        |             |                                | 0  | CGCCGCCCCCG       | 0.617 |
| - | 15  | 1881      | Oktd.1_Missense_I           | NM_173565    | NP_775836    | B2RC85 | R10B2_HUMAN |                                | 3  | AAATTGCCTAAA      | 0.338 |
| + | 2   | 326       | ow.2_Missense_Mi            | NM_006908    | NP_008839    | P63000 | RAC1_HUMAN  |                                | 2  | CATTTCTGGA        | 0.353 |
| - | 13  | 3127      |                             | NM_015204    | NP_056019    | Q9UPZ6 | THS7A_HUMAN | . Extracellular (Potential).   | 3  | TTTGTACAAGG       | 0.388 |
| - | 1   | 484       |                             | NM_175886    | NP_787082    | P21108 | PRPS3_HUMAN |                                | 1  | GCCCTGAATTTCT     | 0.448 |

|   |    |           |                                  |              |              |        |             |                              |       |               |       |
|---|----|-----------|----------------------------------|--------------|--------------|--------|-------------|------------------------------|-------|---------------|-------|
| + | 10 | 2243      | h.1_Missense_Mu                  | NM_002214    | NP_002205    | P26012 | ITB8_HUMAN  | peats.II. Extracellular (Pc  | 3     | CAAGTCACACA   | 0.373 |
| + | 74 | 11997     |                                  | NM_003777    | NP_003768    | Q96DT5 | DYH11_HUMAN | 6 (By similarity).           | 15    | CAAAGGAGGAC   | 0.512 |
| - | 9  | 819       |                                  | NM_012294    | NP_036426    | Q92565 | RPGF5_HUMAN |                              | 1     | TGTCCGTCTGC   | 0.443 |
| - | 3  | 481       | tbc.2_RNA GGCT_                  | NM_024051    | NP_076956    | O75223 | GGCT_HUMAN  |                              | 0     | TATTTCTTTTCC  | 0.373 |
| + | 16 | 1461      | ADCYAP1R1_uc0                    | NM_001118    | NP_001109    | P41586 | PACR_HUMAN  | lasmic (Potential).          | 1     | CAAGCGAAAAT   | 0.612 |
| - | 21 | 2270      | o.1_RNA DPY19L2P1_uc010kwz.1_RNA |              |              |        |             |                              | 0     | GATTTTCGACTA  | 0.274 |
| - | 8  | 1287      |                                  | NM_001077653 | NP_001071121 | Q9UMR3 | TBX20_HUMAN |                              | 1     | CCTGCTGAAAAT  | 0.517 |
| + | 11 | 1124      |                                  | NM_016616    | NP_057700    | Q8N427 | TXND3_HUMAN | NDK 1.                       | 3     | CGAACGATCTG   | 0.443 |
| - | 5  | 1091      | v.2_intron TBRG4_                | NM_004749    | NP_004740    | Q969Z0 | TBRG4_HUMAN |                              | 0     | TGAGGGATAGC   | 0.592 |
| + | 1  | 1202      |                                  | NR_003595    |              |        |             |                              | 0     | AACTTCTCTCTC  | 0.473 |
| + | 1  | 470       | i_p.G22E VSTM2A                  | NM_182546    | NP_872352    | Q8TAG5 | VTM2A_HUMAN |                              | 0     | ACAAGGGCTTT   | 0.403 |
| - | 4  | 488       |                                  | NM_033273    | NP_150376    | Q96JC4 | ZN479_HUMAN | KRAB.                        | 4     | GGAAGCTTTATT  | 0.383 |
| + | 4  | 680       |                                  | NM_001159279 | NP_001152751 |        |             |                              | 2     | AAAACGATGGC   | 0.328 |
| + | 4  | 505       |                                  | NM_153363    | NP_699194    | Q8IYX0 | ZN679_HUMAN | KRAB.                        | 1     | AAAGAGAAATGA  | 0.393 |
| + | 6  | 1033      | 3tvz.2_Missense_                 | NM_022479    | NP_071924    | Q6IS24 | GLTL3_HUMAN | main B. Lumenal (Potential   | 7     | TGGATCCTGGC   | 0.502 |
| - | 15 | 1835      | n.2_Missense_Mu                  | NM_000601    | NP_000592    | P14210 | HGF_HUMAN   | peptidase S1.                | 4     | CATCTCCTCTTC  | 0.363 |
| - | 7  | 800       | 3umu.1_Missense_                 | NM_001742    | NP_001733    | P30988 | CALCR_HUMAN | Name=1; (Potential).         | 9     | CTAGGGTGAAA   | 0.358 |
| + | 13 | 4572      |                                  | NM_014916    | NP_055731    | Q8IWU2 | LMTK2_HUMAN |                              | 16    | CCAGATCCTTTT  | 0.507 |
| + | 29 | 3345      | .3_intron GATS_u                 | NM_012447    | NP_036579    | Q9UJ98 | STAG3_HUMAN |                              | 8     | CAGCAGAGACC   | 0.632 |
| + | 26 | 5158      | ZAN_uc010lhh.2_F                 | NM_003386    | NP_003377    | Q9Y493 | ZAN_HUMAN   | ar (Potential). VWFD 2.      | 11    | TGGTGGAAAGTG  | 0.602 |
| + | 3  | 7653      | C17_uc010lho.1_F                 | NM_001040105 | NP_001035194 | Q685J3 | MUC17_HUMAN | 3 X approximate tandem re    | 27    | CTAGCACCCCTT  | 0.488 |
| - | 5  | 563       | 3_Mutation_p.P77                 | NM_022777    | NP_073614    | Q9H7X7 | RABL5_HUMAN |                              | 0     | CTCAGGGTCAT   | 0.443 |
| - | 34 | 5121      | .2_Nonsense_Mut                  | NM_005045    | NP_005036    | P78509 | RELN_HUMAN  |                              | 19    | AATCCCAGGTC   | 0.388 |
| - | 30 | 4595      | .2_Missense_Mut                  | NM_005045    | NP_005036    | P78509 | RELN_HUMAN  | p.D1479E(1)                  | 19    | GCCATCGTTAAC  | 0.488 |
| - | 24 | 3332      | .2_Missense_Mut                  | NM_005045    | NP_005036    | P78509 | RELN_HUMAN  | EGF-like 2.                  | 19    | GCAATCAGTGC   | 0.527 |
| - | 4  | 3362      |                                  | NM_002711    | NP_002702    | Q16821 | PPR3A_HUMAN |                              | 34    | CTCTCCAGG     | 0.353 |
| - | 4  | 949       | ja.2_Missense_Mu                 | NM_003391    | NP_003382    | P09544 | WNT2_HUMAN  |                              | 7     | CCTGAGAGTAC   | 0.552 |
| + | 5  | 709       | R_uc011knq.1_5'l                 | NM_000492    | NP_000483    | P13569 | CFTR_HUMAN  | al). ABC transmembrane ty    | 5     | TTTGATGAAGTAT | 0.323 |
| + | 12 | 4488      | .2_intron PTPRZ1                 | NM_002851    | NP_002842    | P23471 | PTPRZ_HUMAN | ellular (Potential).         | 9     | CTGATCATTCTC  | 0.403 |
| - | 13 | 1407      | .2_Missense_Mut                  | NM_004717    | NP_004708    | O75912 | DGKI_HUMAN  | DAGKc.                       | 3     | GAGTTCGAGCC   | 0.552 |
| - | 15 | 1859_1860 |                                  | NM_004333    | NP_004324    | P15056 | BRAF_HUMAN  | rotein kinase_R603>(2) p.T   | 18290 | ATTTCACTGTAG  | 0.366 |
| - | 8  | 1160      |                                  | NM_004333    | NP_004324    | P15056 | BRAF_HUMAN  |                              | 18290 | ATTTGGGAGCTG  | 0.393 |
| - | 5  | 504       | se_Mutation_p.G1                 | NM_013252    | NP_037384    | Q9NY25 | CLC5A_HUMAN | . Extracellular (Potential). | 0     | GGATCCTTTTCC  | 0.448 |
| - | 1  | 149       |                                  | NM_176817    | NP_789787    | P59533 | T2R38_HUMAN | Name=1; (Potential).         | 2     | GGAAGGAAATG   | 0.438 |
| + | 5  | 669       | Intron uc003wad.2                | NM_002769    | NP_002760    | P07477 | TRY1_HUMAN  | peptidase S1.                | 2     | GGGGTGATGGC   | 0.522 |
| + | 2  | 189       | .2_intron uc003wa                | NR_001296    |              |        |             |                              | 0     | CTGTCCCCTACC  | 0.547 |
| + | 1  | 644       |                                  | NM_001001667 | NP_001001667 | Q8N148 | OR6V1_HUMAN | Name=5; (Potential).         | 1     | TCATCTCCTATG  | 0.552 |
| + | 3  | 1008      | _intron uc011kto.1               | NM_001130025 | NP_001123497 | A6NFQ2 | F115C_HUMAN |                              | 0     | TAAAAGATCTGT  | 0.562 |
| + | 1  | 650       |                                  | NM_012365    | NP_036497    | Q96R48 | OR2A5_HUMAN | Name=5; (Potential).         | 3     | GGTCTCCTACT   | 0.612 |
| + | 43 | 6259      |                                  | NM_198455    | NP_940857    | A2VEC9 | SSPO_HUMAN  | F5/8 type C.                 | 0     | AGCTGGAACAC   | 0.667 |
| + | 3  | 207       | MAP4_uc011kuv.                   | NM_018326    | NP_060796    | Q9NUV9 | GIMA4_HUMAN | TP (Potential).              | 1     | AGCAGGAAAAA   | 0.463 |
| - | 7  | 1717      | p.W472* KCNH2_                   | NM_000238    | NP_000229    | Q12809 | KCNH2_HUMAN | =Segment S5; (Potential).    | 4     | GCGTACCAGAT   | 0.617 |
| - | 52 | 8270      | 3_Mutation_p.S19                 | NM_033225    | NP_150094    | Q96PZ7 | CSMD1_HUMAN | ar (Potential). Sushi 17.    | 25    | GAAAGGAAAGG   | 0.398 |
| - | 14 | 2275      | wj.1_Missense_M                  | NM_033225    | NP_150094    | Q96PZ7 | CSMD1_HUMAN | lar (Potential). CUB 4.      | 25    | CAAATCATTAA   | 0.418 |
| + | 8  | 1339      | .2_Missense_Mut                  | NM_001715    | NP_001706    | P51451 | BLK_HUMAN   | ase. ATP (By similarity).    | 3     | ATTGCGCGAAG   | 0.572 |
| - | 1  | 464       | .1_intron FAM66D                 | NM_201402    | NP_958804    | Q6R6M4 | U17L2_HUMAN |                              | 3     | TCCTCTATGG    | 0.522 |
| - | 5  | 585       |                                  | NM_003840    | NP_003831    | Q9UBN6 | TR10D_HUMAN | (Potential). TNFR-Cys 3.     | 0     | CATCCCTCTGG   | 0.562 |

rs121913378



|   |    |           |                    |              |              |         |             |                                |    |                    |       |
|---|----|-----------|--------------------|--------------|--------------|---------|-------------|--------------------------------|----|--------------------|-------|
| + | 12 | 1263      | ec.2_Missense_Mi   | NM_003817    | NP_003808    | Q9H2U9  | ADAM7_HUMAN | 'B. Extracellular (Potential). | 5  | TTGAAGGATTATA      | 0.353 |
| - | 13 | 1198      | kek.2_intron EBF2  | NM_022659    | NP_073150    | Q9HAK2  | COE2_HUMAN  |                                | 4  | CGGCTCGCTTC        | 0.488 |
| - | 10 | 999       | kek.2_intron EBF2  | NM_022659    | NP_073150    | Q9HAK2  | COE2_HUMAN  | IPT/TIG.                       | 4  | GGCTCCTTTGC        | 0.488 |
| - | 3  | 1765      |                    | NM_007257    | NP_009188    | Q9UL42  | PNMA2_HUMAN |                                | 0  | ctcttctcccgattacct | 0.209 |
| + | 6  | 628       | o.Y135C ADAM32     | NM_145004    | NP_659441    | Q8TC27  | ADA32_HUMAN |                                | 3  | TTTCTTATGGAAT      | 0.289 |
| + | 11 | 1255      | se_Mutation_p.G7   | NM_194294    | NP_919270    | Q6ZQW0  | I23O2_HUMAN |                                | 2  | ATCTGGACAGG        | 0.507 |
| - | 6  | 1334      | 3xpe.2_Missense_   | NM_006749    | NP_006740    | Q08357  | S20A2_HUMAN | ical; (Potential).             | 2  | TATGGCCCACA        | 0.537 |
| + | 4  | 2771      | o1_uc011ldy.1_intr | NM_006269    | NP_006260    | P56715  | RP1_HUMAN   |                                | 12 | AAGGGGATAAA        | 0.358 |
| + | 3  | 1672      |                    | NM_052898    | NP_443130    | Q5GH76  | XKR4_HUMAN  |                                | 2  | CCCTACGGTCCA       | 0.587 |
| - | 3  | 543       | r_p.L99F CA8_uc    | NM_004056    | NP_004047    | P35219  | CAH8_HUMAN  |                                | 0  | CGAAAGAACTG        | 0.393 |
| - | 3  | 1045_1046 |                    | NM_004820    | NP_004811    | O75881  | CP7B1_HUMAN |                                | 3  | CTATTTCAAGGT       | 0.366 |
| + | 15 | 1468      | vt.2_Missense_Mu   | NM_001033578 | NP_001028750 | Q96BR1  | SGK3_HUMAN  | rotein kinase.                 | 4  | CTGGTCCATTC        | 0.428 |
| - | 7  | 2422      | O5A1_uc011lfa.1_   | NM_030958    | NP_112220    | Q9H2Y9  | SO5A1_HUMAN | ir (Potential). Kazal-like.    | 4  | CATCTGATCCAC       | 0.428 |
| - | 11 | 1308      |                    | NM_006540    | NP_006531    | Q15596  | NCOA2_HUMAN |                                | 16 | GGATTCATCAC        | 0.408 |
| - | 5  | 451       | nse_Mutation_p.F   | NM_001738    | NP_001729    | P00915  | CAH1_HUMAN  |                                | 2  | AGAAAGGACCA        | 0.418 |
| - | 5  | 451       | _p.P109L CDH17_    | NM_004063    | NP_004054    | Q12864  | CAD17_HUMAN | r (Potential). Cadherin 1.     | 6  | GGACTGGACCC        | 0.483 |
| - | 8  | 1276      | o.1_Missense_Mut   | NM_015668    | NP_056483    | Q8NE09  | RGS22_HUMAN |                                | 7  | GCCATGAATAG        | 0.343 |
| + | 2  | 798       | _p.R216Q RIMS2_    | NM_014677    | NP_055492    | Q9UQ26  | RIMS2_HUMAN |                                | 15 | ATCAGCGATCTT       | 0.458 |
| + | 4  | 471       |                    | NM_177531    | NP_803875    | Q86W11  | PKHL1_HUMAN | ir (Potential). IPT/TIG 1.     | 14 | TTACGGAAAT         | 0.398 |
| + | 14 | 1429      |                    | NM_177531    | NP_803875    | Q86W11  | PKHL1_HUMAN | ellular (Potential).           | 14 | TTTTTCCAGTCC       | 0.353 |
| + | 38 | 5455      |                    | NM_177531    | NP_803875    | Q86W11  | PKHL1_HUMAN | r (Potential). IPT/TIG 10.     | 14 | CATTGGAAATCA       | 0.413 |
| + | 26 | 3547      | uc003yqy.1_intron  | NM_001039112 | NP_001034201 | Q2WVGJ9 | FR1L6_HUMAN | lasmic (Potential).            | 11 | AGATTCGCTAAC       | 0.527 |
| - | 2  | 331       | _5'Flank MGC708!   | NM_001001795 | NP_001001795 | Q6P1X6  | CH082_HUMAN |                                | 0  | TTTTTGAATCAT       | 0.582 |
| + | 9  | 1154      | _p.E343K ADAMT     | NM_001040272 | NP_001035362 | Q8N6G6  | ATL1_HUMAN  |                                | 5  | ACCCAGAGAAC        | 0.453 |
| - | 1  | 745       | zob.1_Missense_N   | NM_020344    | NP_065077    | Q9UI40  | NCKX2_HUMAN | lasmic (Potential).            | 3  | TTTCTCTAGAAA       | 0.413 |
| - | 1  | 190       | uc003zrh.1_intron  | NM_153809    | NP_722516    | Q8IZX4  | TAF1L_HUMAN |                                | 26 | AAATGGGCCAC        | 0.567 |
| + | 2  | 1646      |                    | NM_000692    | NP_000683    | P30837  | AL1B1_HUMAN |                                | 1  | TCAAGGTTCTCT       | 0.517 |
| + | 5  | 378       | _p.G102S ANXA1_    | NM_000700    | NP_000691    | P04083  | ANXA1_HUMAN | Annexin 1.                     | 2  | TTACAGGTCAC        | 0.403 |
| - | 25 | 3758      | o.1_intron TRPM6   | NM_017662    | NP_060132    | Q9BX84  | TRPM6_HUMAN | lasmic (Potential).            | 8  | CACTCGGATTC        | 0.368 |
| - | 21 | 3003      | 1_intron TRPM6_L   | NM_017662    | NP_060132    | Q9BX84  | TRPM6_HUMAN | ical; (Potential).             | 8  | CAGCTGAAAAAC       | 0.473 |
| + | 17 | 2706      | _p.E590K NTRK2_    | NM_001018064 | NP_001018074 | Q16620  | NTRK2_HUMAN | o. Cytoplasmic (Potential).    | 16 | AGGCCGAGCTC        | 0.542 |
| + | 4  | 4327      |                    | NM_178828    | NP_849150    | Q6ZUB1  | CI079_HUMAN |                                | 3  | CCATCCACAGC        | 0.607 |
| - | 2  | 726       |                    | NM_005384    | NP_005375    | Q16649  | NFIL3_HUMAN | ucine-zipper.                  | 0  | CGTTTTCTTCTCC      | 0.388 |
| - | 3  | 451       | on_p.G129E ECM     | NM_001393    | NP_001384    | O94769  | ECM2_HUMAN  | VWFC.                          | 2  | CTCTTCCATCTC       | 0.522 |
| + | 9  | 1736      | e_Mutation_p.E37!  | NM_001083536 | NP_001077005 | Q5JSP0  | FGD3_HUMAN  | PH 1.                          | 2  | CCAATGAACTG        | 0.587 |
| - | 1  | 90        | N3A_uc004bbq.1_    | NM_147180    | NP_671709    | Q96LZ3  | CANB2_HUMAN |                                | 2  | GGCCTCGTTTTC       | 0.592 |
| - | 3  | 2811      | o_bq.1_Missense_N  | NM_133445    | NP_597702    | Q8TCU5  | NMD3A_HUMAN | lasmic (Potential).            | 7  | CATTTTGGAGGT       | 0.448 |
| - | 2  | 1691      | o_bq.1_Missense_M  | NM_133445    | NP_597702    | Q8TCU5  | NMD3A_HUMAN | ellular (Potential).           | 7  | CAGTTCTCTCCA       | 0.512 |
| - | 1  | 278       |                    | NM_001001919 | NP_001001919 | Q8NGS5  | O13C4_HUMAN | ellular (Potential).           | 1  | AGAAGGAAATG        | 0.448 |
| - | 17 | 2442      | o_rf5_uc004bdr.3_I | NM_032012    | NP_114401    | Q9H330  | CI005_HUMAN |                                | 1  | GTAAGGATGGC        | 0.433 |
| - | 38 | 8688      | ity.2_Missense_Mi  | NM_153366    | NP_699197    | Q4LDE5  | SVEP1_HUMAN | Sushi 23. p.V27841(1)          | 7  | TGGATCCATTC        | 0.478 |
| - | 38 | 7457      | ity.2_Missense_Mi  | NM_153366    | NP_699197    | Q4LDE5  | SVEP1_HUMAN | Sushi 16.                      | 7  | AACAGGGAAG         | 0.463 |
| - | 4  | 1344      | o_eu.2_Missense_N  | NM_153366    | NP_699197    | Q4LDE5  | SVEP1_HUMAN |                                | 7  | TGATTCCTCTC        | 0.522 |
| - | 2  | 923       | o_P1_uc004beu.2_N  | NM_153366    | NP_699197    | Q4LDE5  | SVEP1_HUMAN | VWFA.                          | 7  | TCCATCAGTGAT       | 0.423 |
| - | 2  | 547       | vf.2_Missense_Mu   | NM_002160    | NP_002151    | P24821  | TENA_HUMAN  |                                | 7  | ACTGGGATCCC        | 0.572 |
| - | 5  | 1058      | o_d.2_Missense_Mi  | NM_014618    | NP_055433    | O60477  | DBC1_HUMAN  | MACPF.                         | 8  | CCAGAGCCCA         | 0.512 |
| - | 6  | 1353      | o_p.E139K TRAF1_L  | NM_005658    | NP_005649    | Q13077  | TRAF1_HUMAN |                                | 3  | CTCCTCCATGAC       | 0.617 |

|   |    |      |                   |              |              |        |             |                             |    |               |       |
|---|----|------|-------------------|--------------|--------------|--------|-------------|-----------------------------|----|---------------|-------|
| + | 11 | 1721 | mf.1_Missense_M   | NM_000962    | NP_000953    | P23219 | PGH1_HUMAN  |                             | 2  | CTTTTCCCTCA   | 0.512 |
| + | 1  | 349  |                   | NM_001005234 | NP_001005234 | Q8NH93 | OR1L3_HUMAN | Name=3; (Potential).        | 1  | TGGCGGCTATG   | 0.433 |
| + | 13 | 1978 | p.L622F GLE1_uc   | NM_001003722 | NP_001003722 | Q53GS7 | GLE1_HUMAN  |                             | 0  | ACCCTCCTCTTT  | 0.502 |
| + | 6  | 1196 | e_Mutation_p.S26l | NM_013355    | NP_037487    | Q6P5Z2 | PKN3_HUMAN  |                             | 4  | GCCTTCAGGGA   | 0.612 |
| + | 12 | 1236 | bf.2_Missense_Mt  | NM_020822    | NP_065873    | Q5JUK3 | KCNT1_HUMAN |                             | 4  | TCATGGACTTC   | 0.647 |
| + | 6  | 1029 | f.1_Missense_Mut  | NM_004042    | NP_004033    | P54793 | ARSF_HUMAN  |                             | 2  | TGAAGGAAGCG   | 0.408 |
| + | 6  | 586  | r_p.S22F TBL1X_l  | NM_001139466 | NP_001132938 | O60907 | TBL1X_HUMAN | LisH.                       | 1  | TTTTTCCCCTC   | 0.552 |
| - | 2  | 1585 | RHGAP6_uc004c     | NM_013427    | NP_038286    | O43182 | RHG06_HUMAN |                             | 2  | ACAGTCCTGTT   | 0.557 |
| + | 3  | 791  |                   | NM_016562    | NP_057646    | Q9NYK1 | TLR7_HUMAN  | ilar (Potential);LRR 7.     | 5  | TCACAGCCGTC   | 0.338 |
| - | 5  | 872  | p.D177N GEMIN8    | NM_017856    | NP_060326    | Q9NWZ8 | GEMI8_HUMAN |                             | 0  | CAGGTCGTGGT   | 0.592 |
| + | 3  | 435  | e_Mutation_p.G3f  | NM_001118885 | NP_001112357 | P23416 | GLRA2_HUMAN | ellular (Probable).         | 2  | GGTCTGGAAAA   | 0.418 |
| + | 3  | 507  | e_Mutation_p.D5f  | NM_001118885 | NP_001112357 | P23416 | GLRA2_HUMAN | ellular (Probable).         | 2  | GATATGATGCA   | 0.378 |
| - | 3  | 1798 | p.E410K RAI2_uc   | NM_021785    | NP_068557    | Q9Y5P3 | RAI2_HUMAN  |                             | 2  | CATCTCGGTAG   | 0.557 |
| + | 3  | 291  | _p.G46D PDHA1_    | NM_000284    | NP_000275    | P08559 | ODPA_HUMAN  |                             | 1  | GAAGGCCCTC    | 0.458 |
| - | 2  | 100  | l1mj.1_Missense_  | NM_004586    | NP_004577    | P51812 | KS6A3_HUMAN |                             | 8  | CTCTCCCATAG   | 0.348 |
| - | 2  | 320  | w.2_RNA APOO_l    | NM_024122    | NP_077027    | Q9BUR5 | APOO_HUMAN  |                             | 0  | TGGGAGGTGAG   | 0.413 |
| - | 14 | 1897 | .E577K RPGR_uc    | NM_001034853 | NP_001030025 | Q92834 | RPGR_HUMAN  | Glu-rich.                   | 1  | ATGCTTCGATAG  | 0.423 |
| + | 40 | 7412 | c.2_Missense_Mut  | NM_001039590 | NP_001034679 | Q93008 | USP9X_HUMAN |                             | 6  | TTTTGGTGATC   | 0.333 |
| - | 24 | 2345 | p.P587S CASK_uc   | NM_003688    | NP_003679    | O14936 | CSKP_HUMAN  | ylate kinase-like.          | 6  | ACGTGGAATAG   | 0.303 |
| - | 1  | 161  | dgi.3_Missense_M  | NM_176819    | NP_789789    | Q9H7Y0 | CX036_HUMAN |                             | 1  | AGAAAGAACAG   | 0.592 |
| - | 7  | 794  | jit.2_Missense_Mt | NM_006962    | NP_008893    | P17025 | ZN182_HUMAN |                             | 3  | AACAAGGTTTG   | 0.338 |
| + | 12 | 1513 |                   | NM_000377    | NP_000368    | P42768 | WASP_HUMAN  | Glu-rich (acidic).          | 1  | CAGACGAAGGG   | 0.582 |
| + | 8  | 1396 | uq.2_Missense_M   | NM_016656    | NP_057740    | Q5VZM2 | RRAGB_HUMAN |                             | 0  | AGCTGGAAATG   | 0.393 |
| + | 13 | 1557 | _p.S477L KIF4A_l  | NM_012310    | NP_036442    | O95239 | KIF4A_HUMAN | Potential.                  | 4  | AGTTATCGGTAAC | 0.393 |
| - | 1  | 939  | mjq.1_Missense_M  | NM_021963    | NP_068798    | Q9ULW6 | NP1L2_HUMAN | u-rich (acidic).            | 1  | CATATTCATGTAC | 0.338 |
| - | 1  | 525  | 1L2_uc011mqj.1_l  | NM_021963    | NP_068798    | Q9ULW6 | NP1L2_HUMAN |                             | 1  | TTCTTCCCAAC   | 0.592 |
| - | 4  | 498  | ase_Mutation_p.P1 | NM_022052    | NP_071335    | Q9H4D5 | NXF3_HUMAN  | RRM.                        | 3  | AACTGGGACGA   | 0.458 |
| + | 22 | 3977 | c.1_Missense_Mut  | NM_198465    | NP_940867    | Q7Z2Y5 | NRK_HUMAN   | CNH.                        | 14 | GTTGGGAACCC   | 0.353 |
| + | 20 | 1421 | _p.Q407* COL4A2   | NM_033380    | NP_203699    | P29400 | CO4A5_HUMAN | le-helical region.          | 4  | GGGTCAGAAA    | 0.527 |
| + | 24 | 1862 | _p.P554S COL4A5   | NM_033380    | NP_203699    | P29400 | CO4A5_HUMAN | le-helical region.          | 4  | ACTTTTCCAGGA  | 0.498 |
| - | 11 | 3395 |                   | NM_012471    | NP_036603    | Q9UL62 | TRPC5_HUMAN | lasmic (Potential).         | 1  | TGACTTTCCTTC  | 0.453 |
| - | 1  | 984  |                   | NM_016521    | NP_057605    | Q5H9I0 | TFDP3_HUMAN | ating E2F activity; DCB2 (E | 1  | CATGCCCATCC   | 0.478 |
| + | 18 | 2663 | _p.M801I SAGE1_l  | NM_018666    | NP_061136    | Q9NXZ1 | SAGE1_HUMAN |                             | 3  | TTAATGAAAGAA  | 0.343 |
| - | 22 | 2767 | n.1_Nonsense_Mt   | NM_005369    | NP_005360    | P10911 | MCF2_HUMAN  |                             | 2  | TTAATTGATCCTC | 0.333 |
| + | 6  | 676  |                   | NM_173493    | NP_775764    | Q8IV76 | PASD1_HUMAN |                             | 3  | AAGAGGAAATG1  | 0.294 |
| + | 3  | 1086 | _Mutation_p.R298  | NM_005363    | NP_005354    | P43360 | MAGA6_HUMAN | MAGE.                       | 0  | GACCTCGCATT   | 0.557 |
| - | 3  | 1149 |                   | NM_005362    | NP_005353    | P43357 | MAGA3_HUMAN |                             | 0  | CTCACTTCCCC   | 0.572 |
| - | 10 | 1717 | zx.1_Missense_Mt  | NM_012102    | NP_036234    | Q9P2R6 | RERE_HUMAN  | ELM2.                       | 2  | AGAAGGAAATG   | 0.443 |
| + | 1  | 136  |                   | NM_001080830 | NP_001074299 | O95522 | PRA12_HUMAN |                             | 3  | CTTTTCCCA     | 0.627 |
| - | 4  | 1316 |                   | NM_001146344 | NP_001139816 | O60813 | PRA11_HUMAN |                             | 0  | GGCAGGATACA   | 0.498 |
| + | 4  | 1056 |                   | NM_001012276 | NP_001012276 | Q5VWM4 | PRAM8_HUMAN | LRR 1.                      | 0  | AGCTGGACCTG   | 0.582 |
| + | 5  | 475  | :M50A_uc009vrr.2  | NM_014313    | NP_055128    | O95807 | TM50A_HUMAN | ical; (Potential).          | 0  | TCTCTGATTGCA  | 0.348 |
| + | 2  | 326  | .L42F TMEM57_u    | NM_018202    | NP_060672    | Q8N5G2 | MACO1_HUMAN | ical; (Potential).          | 0  | TTGTCTCTCTAC  | 0.368 |
| - | 57 | 8859 | :m.1_Missense_Mt  | NM_052896    | NP_443128    | Q7Z408 | CSMD2_HUMAN | :xtracellular (Potential).  | 12 | AGGGTCACTGC   | 0.587 |
| - | 14 | 1748 | lg.1_Missense_Ml  | NM_003738    | NP_003729    | Q9Y6C5 | PTC2_HUMAN  | lasmic (Potential).         | 18 | GAGGATCTGA    | 0.592 |
| - | 6  | 1713 | Domj.1_Missense_  | NM_014774    | NP_055589    | O75071 | K0494_HUMAN |                             | 0  | TGACGGAATGA   | 0.423 |
| - | 6  | 1289 |                   | NM_177414    | NP_803133    | O14495 | LPP3_HUMAN  | ical; (Potential).          | 0  | GGCTCTTGA     | 0.502 |

|   |    |         |                    |              |              |        |             |                               |    |                |       |
|---|----|---------|--------------------|--------------|--------------|--------|-------------|-------------------------------|----|----------------|-------|
| + | 2  | 291     |                    | NM_006252    | NP_006243    | P54646 | AAPK2_HUMAN | rotein kinase.                | 6  | CGTCATCCTCAT/  | 0.254 |
| - | 8  | 1565    | u.1_intron C1orf16 | NM_001004303 | NP_001004303 | Q5VWT5 | CA168_HUMAN |                               | 5  | GTTTTTCCTTCA   | 0.338 |
| - | 3  | 1307    | orf168_uc009vzv.   | NM_001004303 | NP_001004303 | Q5VWT5 | CA168_HUMAN |                               | 5  | CTTGGGAACAG/   | 0.607 |
| + | 4  | 574     |                    | NM_000562    | NP_000553    | P07357 | CO8A_HUMAN  | MACPF.                        | 3  | ATCCAGGATCAC/  | 0.498 |
| + | 10 | 1660    |                    | NM_000562    | NP_000553    | P07357 | CO8A_HUMAN  | EGF-like.                     | 3  | CCATCCTCGAG/   | 0.617 |
| - | 5  | 638     | p.L129F C8B_ucf    | NM_000066    | NP_000057    | P07358 | CO8B_HUMAN  | MACPF.                        | 4  | ATCAAGAACTGC/  | 0.458 |
| + | 2  | 775_776 | s.1_Nonsense_Ml    | NM_001134673 | NP_001128145 | Q12857 | NFIA_HUMAN  | CTF/NF-I.                     | 2  | ACAGGGAAAAAA   | 0.48  |
| + | 6  | 983     | K7_uc001dap.2_li   | NM_014495    | NP_055310    | Q9Y5C1 | ANGL3_HUMAN | rogen C-terminal.             | 0  | TTCAGGAGAATT   | 0.318 |
| - | 6  | 943     | e_Mutation_p.G29   | NM_024763    | NP_079039    | Q5VTH9 | WDR78_HUMAN |                               | 2  | GTGCTCCATTG/   | 0.294 |
| - | 7  | 1630    | IQ3_uc001dfz.3_li  | NM_001105659 | NP_001099129 | A6PVS8 | LRIQ3_HUMAN |                               | 2  | TGTTCTGAATTG/  | 0.328 |
| + | 3  | 2550    | fnn.2_Missense_lv  | NM_001134479 | NP_001127951 | Q7L1W4 | LRC8D_HUMAN | LRR 9.                        | 2  | ACTTGGAGTCA    | 0.348 |
| - | 15 | 2127    |                    | NM_001013660 | NP_001013682 | Q6ZNA5 | FRRS1_HUMAN | (Potential). Cytochrome b5    | 1  | ATCAGGAAGAT/   | 0.448 |
| + | 3  | 669     | l.1_Missense_Mut   | NM_000642    | NP_000633    | P35573 | GDE_HUMAN   | glucanotransferase.           | 3  | CTGGTTCATTTCA/ | 0.308 |
| - | 3  | 372     | .FM3_uc001dui.2_   | NM_058170    | NP_477518    | Q96PB7 | NOE3_HUMAN  | Potential.                    | 3  | GACTTCAATAGA   | 0.348 |
| - | 4  | 2465    | ab.2_Missense_lv   | NM_018372    | NP_060842    | Q5T3J3 | LRIF1_HUMAN |                               | 0  | TTTCTTCTAACTC  | 0.363 |
| - | 7  | 763     | a_Mutation_p.P19f  | NM_002557    | NP_002548    | Q12889 | OVGP1_HUMAN |                               | 5  | ATTTGGGGTCT    | 0.483 |
| - | 2  | 332     | 8F ATP5F1_uc00     | NM_024102    | NP_077007    | Q9BQA1 | MEP50_HUMAN | WD 1.                         | 0  | AATCGGAGGCC    | 0.582 |
| - | 2  | 995     | 3N1_uc001edr.2_F   | NM_018364    | NP_060834    | Q5VWQ0 | RSBN1_HUMAN |                               | 1  | AAATTTAATCGGC  | 0.393 |
| - | 3  | 404     | ie_Mutation_p.G1E  | NM_024626    | NP_078902    | Q7Z7D3 | VTCN1_HUMAN | 1. Extracellular (Potential). | 0  | GCATTGCCAACT.  | 0.473 |
| - | 26 | 3783    |                    | NM_206996    | NP_996879    | Q6Q759 | SPG17_HUMAN |                               | 6  | TTGTCCAATGA/   | 0.448 |
| - | 2  | 261     | RS2_uc010oxg.1_l   | NM_015836    | NP_056651    | Q9UGM6 | SYWM_HUMAN  |                               | 0  | TAATGGAGTGG/   | 0.502 |
| - | 1  | 299     | t2BE_uc001etc.2_   | NM_175065    | NP_778235    | Q8IUE6 | H2A2B_HUMAN |                               | 2  | TGACACCCCCG    | 0.557 |
| + | 7  | 948     | sense_Mutation_p.  | NM_004425    | NP_004416    | Q16610 | ECM1_HUMAN  | roximate repeats. 1.          | 3  | GTCTCGGTCA.    | 0.632 |
| + | 1  | 907     |                    | NM_017860    | NP_060330    | Q9BUN1 | CA056_HUMAN |                               | 0  | CACCAGTACCA/   | 0.602 |
| - | 3  | 1598    |                    | NM_001009931 | NP_001009931 | Q86YZ3 | HORN_HUMAN  | 5                             | 3  | TAGATCCTTGTC/  | 0.562 |
| - | 3  | 428     |                    | NM_001009931 | NP_001009931 | Q86YZ3 | HORN_HUMAN  | 1                             | 3  | TCTCCTTTTTTC   | 0.418 |
| - | 3  | 682     | uc001ezv.2_Intron  | NM_002016    | NP_002007    | P20930 | FILA_HUMAN  | Potential.                    | 16 | CATAATCATATAC  | 0.353 |
| - | 3  | 726     |                    | NM_016190    | NP_057274    | Q9UBG3 | CRNN_HUMAN  | Gln-rich.                     | 3  | CTCTGTCCTGTT/  | 0.582 |
| + | 2  | 348     |                    | NM_178353    | NP_848130    | Q5T753 | LCE1E_HUMAN | Cys-rich.                     | 0  | GCCAGCCCTCA/   | 0.657 |
| + | 12 | 1363    | p.P391L UBAP2L     | NM_014847    | NP_055662    | Q14157 | UBP2L_HUMAN |                               | 2  | ATCCCCATCACT   | 0.527 |
| + | 10 | 1247    | p.T409I DCST1_l    | NM_152494    | NP_689707    | Q5T197 | DCST1_HUMAN | ical; (Potential).            | 2  | CTGCACCTTTCC/  | 0.687 |
| - | 9  | 1699    | l1fn.2_Missense_l  | NM_006589    | NP_006580    | P81408 | F189B_HUMAN |                               | 2  | GGAGCGAAAGA/   | 0.701 |
| + | 1  | 308     |                    | NM_001004473 | NP_001004473 | Q8NGX5 | O10K1_HUMAN | Name=3; (Potential).          | 1  | TGTTTTCTTCC/   | 0.498 |
| - | 8  | 1197    |                    | NM_003126    | NP_003117    | P02549 | SPTA1_HUMAN | Spectrin 4.                   | 8  | GATGGGAAAGT/   | 0.478 |
| - | 1  | 85      |                    | NM_001004467 | NP_001004467 | Q5JRS4 | O10J3_HUMAN | Name=1; (Potential).          | 2  | AACAAAGAAGA/   | 0.448 |
| - | 2  | 388     |                    | NM_030916    | NP_112178    | Q96NY8 | PVRL4_HUMAN |                               | 2  | CCGCGGGGCAC    | 0.632 |
| - | 6  | 2161    |                    | NM_005099    | NP_005090    | O75173 | ATS4_HUMAN  | Cys-rich.                     | 5  | CACCTGAGCCA/   | 0.627 |
| - | 13 | 2279    |                    | NM_000130    | NP_000121    | P12259 | FA5_HUMAN   | B.                            | 6  | CTAAACGATCAT/  | 0.403 |
| - | 7  | 1088    | f112_uc001ggj.2_l  | NM_000450    | NP_000441    | P16581 | LYAM2_HUMAN | ar (Potential). Sushi 3.      | 5  | ATTCTGAGGCT/   | 0.512 |
| + | 16 | 3561    | mh.1_Missense_h    | NM_015172    | NP_055987    | Q9Y520 | PRC2C_HUMAN |                               | 0  | AAAAACCATCT/   | 0.468 |
| - | 23 | 3997    | N1_uc001glb.1_lr   | NM_004319    | NP_004310    | O14525 | ASTN1_HUMAN |                               | 15 | CAAGTCCGTAG/   | 0.567 |
| + | 38 | 5309    | lgox.1_Missense_   | NM_000721    | NP_000712    | Q15878 | CAC1E_HUMAN | Name=S6 of repeat IV.         | 6  | GATGTCACACC    | 0.547 |
| + | 45 | 7370    |                    | NM_031935    | NP_114141    | Q96RW7 | HMCN1_HUMAN |                               | 23 | GTGTCATGGT/    | 0.408 |
| + | 96 | 15201   | rs.1_Missense_Ml   | NM_031935    | NP_114141    | Q96RW7 | HMCN1_HUMAN | en G2 beta-barrel.            | 23 | TGTGAGTGGCT/   | 0.423 |
| + | 5  | 617     |                    | NM_001039152 | NP_001034241 | Q2M5E4 | RGS21_HUMAN |                               | 2  | AAAATGGCTCC/   | 0.333 |
| + | 12 | 3161    | p.P953L CAMSAF     | NM_203459    | NP_982284    | Q08AD1 | CAMP2_HUMAN |                               | 4  | CTCCCTCGTCT/   | 0.453 |
| + | 4  | 241     | rPE_uc010pqn.1_l   | NM_003094    | NP_003085    | P62304 | RUXE_HUMAN  |                               | 0  | GAGATTCATTCT/  | 0.313 |

rs149336231

|   |    |         |                   |              |              |        |             |                                 |    |                |       |
|---|----|---------|-------------------|--------------|--------------|--------|-------------|---------------------------------|----|----------------|-------|
| + | 6  | 727     |                   | NM_000715    | NP_000706    | P04003 | C4BPA_HUMAN | Sushi 3.                        | 3  | .GCCTCCTCCAG,  | 0.448 |
| - | 11 | 1373    | _p.R299K INTS7_u  | NM_015434    | NP_056249    | Q9NVH2 | INT7_HUMAN  |                                 | 0  | GGGGCCTGCC     | 0.453 |
| - | 64 | 14398   |                   | NM_206933    | NP_996816    | O75445 | USH2A_HUMAN | II 32. Extracellular (Potenti   | 26 | 'ATAATTCGTAATA | 0.418 |
| - | 63 | 13933   |                   | NM_206933    | NP_996816    | O75445 | USH2A_HUMAN | II 30. Extracellular (Potenti   | 26 | 'ACCCCTTGGC'   | 0.502 |
| - | 10 | 993     | :2_RNA RAB3GAF    | NM_012414    | NP_036546    | Q9H2M9 | RBGPR_HUMAN |                                 | 1  | AAAGGGGGACA    | 0.348 |
| + | 7  | 1186    | e_Mutation_p.P33  | NM_017898    | NP_060368    | Q969Z3 | MOSC2_HUMAN | MOSC.                           | 0  | GTGACCCCTGTG   | 0.458 |
| + | 30 | 8209    | icN_uc001hsp.1_l  | NM_001098623 | NP_001092093 | Q5VST9 | OBSCN_HUMAN | Ig-like 26.                     | 28 | GGGCTCCGAGG    | 0.692 |
| + | 2  | 464     | hvy.1_Missense_I  | NM_173508    | NP_775779    | Q8IY50 | S35F3_HUMAN | ical; (Potential).              | 2  | CTCCTCGTGGG    | 0.637 |
| + | 37 | 5303    |                   | NM_001035    | NP_001026    | Q92736 | RYR2_HUMAN  | ilarity). 4 X approximate rej   | 33 | TGTCCCCATGAC   | 0.557 |
| + | 1  | 835     |                   | NM_001004698 | NP_001004698 | A6NFC9 | OR2W5_HUMAN |                                 | 3  | CTTCTACCCATC   | 0.517 |
| + | 3  | 1175    |                   | NM_175911    | NP_787107    | Q8N349 | OR2LD_HUMAN | Name=7; (Potential).            | 4  | ACCATCCTTACCC  | 0.468 |
| - | 4  | 855     | ihz.2_Missense_I  | NM_024803    | NP_079079    | A6NHL2 | TBAL3_HUMAN |                                 | 1  | 'AAATGTATTCTC  | 0.512 |
| + | 6  | 672     | LAH_uc001int.2_l  | NM_001039702 | NP_001034791 | Q9NV23 | SAST_HUMAN  |                                 | 0  | TGGCATCGCATT   | 0.393 |
| - | 27 | 2827    | ib.1_Missense_Mt  | NM_003638    | NP_003629    | P53708 | ITA8_HUMAN  | ellular (Potential).            | 6  | CGCTTCTCCTC    | 0.478 |
| - | 20 | 2044    | ib.1_Missense_Mu  | NM_003638    | NP_003629    | P53708 | ITA8_HUMAN  | ellular (Potential).            | 6  | TGCTCCTTCCCC   | 0.363 |
| - | 2  | 419     |                   | NM_005028    | NP_005019    | P48426 | PI42A_HUMAN | PIPK.                           | 2  | ACAGGGATTTG/   | 0.353 |
| - | 1  | 343_344 |                   | NM_001034842 | NP_001030014 | Q3KNS1 | PTHD3_HUMAN |                                 | 4  | CGGGGGGGTG     | 0.718 |
| - | 13 | 1342    | _p.S313F MPP7_u   | NM_173496    | NP_775767    | Q5T2T1 | MPP7_HUMAN  |                                 | 1  | TGTTGGAAACT    | 0.408 |
| + | 31 | 2789    |                   | NM_052997    | NP_443723    | Q9BXX3 | AN30A_HUMAN |                                 | 9  | 'AAGTGGAAAAAT  | 0.328 |
| + | 8  | 1780    | p.H321Y ZNF37A_   | NM_001007094 | NP_001007095 | P17032 | ZN37A_HUMAN | C2H2-type 4.                    | 1  | 'GAATTCATACAG  | 0.418 |
| - | 12 | 1524    | _p.L442F FRMPD;   | NM_001018071 | NP_001018081 | Q68DX3 | FRPD2_HUMAN | FERM.                           | 1  | GGCAAGGACCC    | 0.537 |
| - | 11 | 1535    | p.D408N OGDHL_    | NM_018245    | NP_060715    | Q9ULD0 | OGDHL_HUMAN |                                 | 1  | GTTCATCGGCAT   | 0.562 |
| + | 2  | 309     | i.1_Missense_Mut  | NM_001145263 | NP_001138735 | Q13772 | NCOA4_HUMAN |                                 | 2  | TTCTCCGGGCT    | 0.493 |
| - | 11 | 1515    | _p.P374S PCDH15   | NM_033056    | NP_149045    | Q96QU1 | PCD15_HUMAN | Extracellular (Potential).      | 13 | AAAGAGGATGAC   | 0.348 |
| + | 12 | 1636    | qj.1_Missense_Mu  | NM_001080512 | NP_001073981 | Q9H694 | BICC1_HUMAN |                                 | 4  | 'TCCCCCTCCTC   | 0.463 |
| - | 37 | 11398   | K3_uc010qih.1_in  | NM_020987    | NP_066267    | Q12955 | ANK3_HUMAN  |                                 | 19 | GGCCTTCTTCT'   | 0.418 |
| + | 37 | 2599    | e_Mutation_p.G62  | NM_005203    | NP_005194    | Q5TAT6 | CODA1_HUMAN | al). Triple-helical region 3 (C | 1  | TAAGGGGATA/    | 0.428 |
| - | 4  | 370     | Qqkx.1_5'UTR PL   | NM_001001791 | NP_001001791 | Q5SWW7 | CJ055_HUMAN |                                 | 0  | 'CCAGCGAACTG'  | 0.562 |
| + | 6  | 492     | PA1_uc010qlt.1_ξ  | NM_005411    | NP_005402    | Q8IWL2 | SFTA1_HUMAN |                                 | 0  | TCTCAGCCCTC,   | 0.557 |
| + | 2  | 845     | tt.2_Missense_Mu  | NM_001548    | NP_001539    | P09914 | IFIT1_HUMAN | TPR 5.                          | 0  | GACAGGAAGCT    | 0.453 |
| + | 2  | 562     | 79E CYP2C19_uc    | NM_000772    | NP_000763    | P33260 | CP2C1_HUMAN | p.G79V(1)                       | 5  | TGCATGGATATG/  | 0.423 |
| + | 5  | 2125    | kr.2_Missense_I   | NM_018121    | NP_060591    | Q8IX21 | F178A_HUMAN |                                 | 0  | AAAGACTAATAA   | 0.428 |
| + | 9  | 6856    | 1lfz.2_Missense_I | NM_206862    | NP_996744    | O95359 | TACC2_HUMAN |                                 | 10 | :CCAGTGGGGAG   | 0.562 |
| + | 13 | 1962    | _p.P523S C10orf1  | NM_015608    | NP_056423    | Q3B7T1 | EDRF1_HUMAN |                                 | 10 | TCTGATCCATCA   | 0.373 |
| - | 3  | 969     | _p.P380R C10orf9  | NM_001004298 | NP_001004298 | Q96M02 | CJ090_HUMAN |                                 | 2  | 'TTTTGGGGCTG'  | 0.498 |
| + | 6  | 1275    | ax.1_intron ZNF21 | NM_013250    | NP_037382    | Q9UL58 | ZN215_HUMAN | KRAB.                           | 0  | GAGAAAGAAAT/   | 0.358 |
| + | 4  | 1110    |                   | NM_176822    | NP_789792    | Q86W24 | NAL14_HUMAN | NACHT.                          | 8  | TTCGATGAACTG,  | 0.453 |
| + | 11 | 3457    |                   | NM_176822    | NP_789792    | Q86W24 | NAL14_HUMAN |                                 | 8  | GTAACACTACAAG' | 0.398 |
| + | 3  | 456     |                   | NM_003621    | NP_003612    | Q8ND30 | LIPB2_HUMAN |                                 | 4  | 'AGGCACTAAAA   | 0.517 |
| - | 3  | 1348    | e_Mutation_p.P38  | NM_213618    | NP_998783    | P78524 | ST5_HUMAN   | Pro-rich.                       | 1  | 'TTTGGGGACAG   | 0.587 |
| + | 6  | 997     | on_p.S30F TEAD1   | NM_021961    | NP_068780    | P28347 | TEAD1_HUMAN |                                 | 0  | CATGTCTCAG     | 0.577 |
| - | 8  | 1314    | ε_Mutation_p.D33  | NM_032320    | NP_115696    | Q9BSF8 | BTBDA_HUMAN |                                 | 0  | CCACATCTCTGT'  | 0.254 |
| + | 3  | 532     | S2_uc001mqn.2_f   | NM_001143830 | NP_001137302 | O43903 | GAS2_HUMAN  | CH.                             | 2  | TGCAGGAGAAA'   | 0.388 |
| - | 6  | 361     | _p.G106E CCDC7    | NM_001008391 | NP_001008392 | Q6ZRK6 | CCD73_HUMAN | Potential.                      | 2  | TATTTTCCCTTTA  | 0.259 |
| - | 9  | 791     | 1L1_uc001muf.1_   | NM_001326    | NP_001317    | Q12996 | CSTF3_HUMAN |                                 | 0  | TACTCCGATCTT   | 0.239 |
| - | 2  | 807     | 1_5'Flank C11orf7 | NM_000536    | NP_000527    | P55895 | RAG2_HUMAN  |                                 | 5  | GACATGAAAAG/   | 0.423 |
| + | 1  | 246     | e_Mutation_p.P18  | NM_175732    | NP_783859    | Q8WUK0 | PTPM1_HUMAN |                                 | 1  | 'CTACCCGACGC'  | 0.776 |

|   |    |       |                    |              |              |        |             |                              |    |               |       |
|---|----|-------|--------------------|--------------|--------------|--------|-------------|------------------------------|----|---------------|-------|
| + | 3  | 485   | igo.3_Missense_M   | NM_002843    | NP_002834    | Q12913 | PTPRJ_HUMAN | cellular (Potential).        | 8  | CAATTCCTGAC   | 0.418 |
| + | 2  | 402   |                    | NM_024114    | NP_077019    | Q8IWZ4 | TRI48_HUMAN | B box-type.                  | 0  | CTGAGGAGCAA   | 0.483 |
| + | 3  | 224   | C6_uc010rik.1_5'F  | NM_001004704 | NP_001004704 | Q8NH72 | OR4C6_HUMAN |                              | 2  | TATTTAGGATTCT | 0.368 |
| + | 1  | 221   |                    | NM_001004739 | NP_001004739 | Q8NGL0 | OR5L2_HUMAN | Name=2; (Potential).         | 1  | GCTACTCCTCAA  | 0.463 |
| + | 1  | 932   |                    | NM_001001921 | NP_001001921 | Q8N127 | O5AS1_HUMAN | lasmic (Potential).          | 5  | ATATTTCAAATGA | 0.284 |
| + | 1  | 740   |                    | NM_001005200 | NP_001005200 | Q8N162 | OR8H2_HUMAN | Name=6; (Potential).         | 2  | CTTGGGAGTCA   | 0.353 |
| + | 1  | 692   |                    | NM_001005205 | NP_001005205 | Q8NGP2 | OR8J1_HUMAN | lasmic (Potential).          | 2  | ITTCATCAGAAGC | 0.343 |
| + | 5  | 925   | no.2_Missense_M    | NM_001142521 | NP_001135993 | Q96PZ2 | F111A_HUMAN |                              | 3  | TTCTTTCTTTCT  | 0.408 |
| + | 1  | 326   |                    | NM_001004706 | NP_001004706 | Q8NGI4 | OR4DB_HUMAN | Name=3; (Potential).         | 2  | TGGTGGGGCAG   | 0.468 |
| + | 1  | 694   |                    | NM_001004711 | NP_001004711 | Q8NGE8 | OR4D9_HUMAN | lasmic (Potential).          | 0  | GGGAAGGCAGG   | 0.502 |
| - | 13 | 2614  | BP_uc009ymr.1_F    | NM_002556    | NP_002547    | P22059 | OSBP1_HUMAN |                              | 1  | TGTGGGGGCAG   | 0.473 |
| + | 6  | 677   | A2_uc009ymu.2_3    | NM_000139    | NP_000130    | Q01362 | FCERB_HUMAN | ical; (Potential).           | 1  | TCTGGGACTTG   | 0.403 |
| + | 3  | 432   | 1_Intron DAK_uc0   | NM_015533    | NP_056348    | Q3LXA3 | DHAK_HUMAN  | icetone binding (By similari | 0  | CTGGCCATGAG   | 0.637 |
| - | 5  | 10114 | IAK_uc001ntk.1_Ir  | NM_001620    | NP_001611    | Q09666 | AHNK_HUMAN  |                              | 19 | ATCTGGGCCAT   | 0.408 |
| - | 4  | 655   | A2_uc010rix.1_5'L  | NM_004739    | NP_004730    | O94776 | MTA2_HUMAN  | BAH.                         | 2  | TTGCCGAGAAA   | 0.522 |
| - | 7  | 1209  | 1_RNA SLC22A2      | NM_199352    | NP_955384    | Q6T423 | S22AP_HUMAN | lasmic (Potential).          | 4  | ACGGCTCATGTG  | 0.502 |
| + | 1  | 213   | A10_uc001nwu.3     | NM_001039752 | NP_001034841 | Q63ZE4 | S22AA_HUMAN | lasmic (Potential).          | 2  | AATGGCCTTTG   | 0.398 |
| + | 9  | 1712  | 2A10_uc001nwu.3    | NM_001039752 | NP_001034841 | Q63ZE4 | S22AA_HUMAN | ical; (Potential).           | 2  | ATTTATGGAATCT | 0.443 |
| + | 1  | 1087  | yps.1_Missense_M   | NM_144585    | NP_653186    | Q96S37 | S22AC_HUMAN |                              | 1  | ACACGGAGCCC   | 0.667 |
| - | 7  | 754   |                    | NM_017525    | NP_059995    | Q6DT37 | MRCKG_HUMAN | rotein kinase.               | 4  | GTAGTGGCCCT   | 0.592 |
| + | 6  | 850   | ense_Mutation_p.t  | NM_003273    | NP_003264    | O76062 | ERG24_HUMAN |                              | 1  | ACGTGGGTGAT   | 0.607 |
| + | 10 | 1382  | ense_Mutation_p.l  | NM_003273    | NP_003264    | O76062 | ERG24_HUMAN |                              | 1  | TTACCGCATCA   | 0.652 |
| + | 7  | 2193  | cc.1_Missense_Mt   | NM_178864    | NP_849195    | Q8IUM7 | NPAS4_HUMAN |                              | 0  | ACCTGTCCCTG   | 0.607 |
| - | 7  | 753   | _p.M160 CABP2_     | NM_016366    | NP_057450    | Q9NPB3 | CABP2_HUMAN | EF-hand 4.                   | 1  | AGACATCATTCG  | 0.572 |
| + | 16 | 2306  | .R703Q PPF1A1_u    | NM_003626    | NP_003617    | Q13136 | LIPA1_HUMAN |                              | 3  | CCCACGAAGGA   | 0.602 |
| - | 10 | 1949  | a.2_5'UTR SYTL2    | NM_001162951 | NP_001156423 | Q9HCH5 | SYTL2_HUMAN |                              | 3  | TCATCCTTTTG   | 0.398 |
| - | 8  | 1079  | e_Mutation_p.P26   | NM_007166    | NP_009097    | Q13492 | PICAL_HUMAN |                              | 2  | GTCTGGTATATC  | 0.279 |
| - | 9  | 2662  | p.R630K TRPC6_     | NM_004621    | NP_004612    | Q9Y210 | TRPC6_HUMAN | lasmic (Potential).          | 4  | TTGGCCCTTGCA  | 0.428 |
| - | 3  | 723   |                    | NM_000482    | NP_000473    |        |             |                              | 0  | GAATTCGTCAGC  | 0.622 |
| + | 5  | 530   |                    | NM_017425    | NP_059121    | Q15506 | SP17_HUMAN  | IQ.                          | 0  | CCAGAGAGGAG   | 0.403 |
| - | 24 | 3071  | _p.P980L NFRKB     | NM_001143835 | NP_001137307 | Q6P4R8 | NFRKB_HUMAN |                              | 3  | AAGAGGGCGGC   | 0.547 |
| + | 19 | 5657  | _p.P1470L WNK1_    | NM_018979    | NP_061852    | Q9H4A3 | WNK1_HUMAN  |                              | 23 | ATTTACCACTAGC | 0.488 |
| - | 3  | 532   |                    | NM_006248    | NP_006239    |        |             |                              | 0  | TGTCTCCTTGTC  | 0.607 |
| + | 29 | 4033  | se_Mutation_p.S1   | NM_004570    | NP_004561    | O75747 | P3C2G_HUMAN | PX.                          | 21 | CCTCTCTGAGGC  | 0.289 |
| - | 14 | 1824  | se_Mutation_p.H2   | NM_033123    | NP_149114    | Q86YW0 | PLCZ1_HUMAN | C2.                          | 3  | GGACATGAATAA  | 0.308 |
| - | 25 | 3156  | .G1046S ABCC9_     | NM_005691    | NP_005682    | O60706 | ABCC9_HUMAN | ntial). ABC transmembrane    | 6  | AATGCCTGCTC   | 0.413 |
| - | 23 | 2759  |                    | NM_183378    | NP_899234    | Q7RTY7 | OVCH1_HUMAN | CUB 3.                       | 10 | GTAAATCCACCTA | 0.363 |
| + | 13 | 1972  | rf40_uc009zjv.1_I  | NM_001031748 | NP_001026918 | Q86WS4 | CL040_HUMAN |                              | 6  | TGAATCTGTAAT  | 0.398 |
| - | 6  | 895   | _p.Q230* ZNF641_   | NM_152320    | NP_689533    | Q96N77 | ZN641_HUMAN | ansactivation.               | 2  | TTCTGGAAGAAA  | 0.527 |
| + | 13 | 1738  | '2B_uc009zlt.2_Inl | NM_173602    | NP_775873    | Q9P265 | DIP2B_HUMAN |                              | 6  | TAAATGGGAGTT  | 0.378 |
| - | 2  | 656   | se_Mutation_p.A1   | NM_007210    | NP_009141    | Q8NCL4 | GALT6_HUMAN | renal (Potential).           | 2  | CAAAGGCATTG   | 0.567 |
| - | 7  | 1297  |                    | NM_005555    | NP_005546    | P04259 | K2C6B_HUMAN | Rod. Coil 2.                 | 2  | CATCTCCCAC    | 0.562 |
| + | 16 | 3041  | p.L659F ESPL1_u    | NM_012291    | NP_036423    | Q14674 | ESPL1_HUMAN |                              | 3  | AGTTCTTTTCA   | 0.527 |
| + | 1  | 49    |                    | NM_001005183 | NP_001005183 | A6NM76 | O6C76_HUMAN | cellular (Potential).        | 0  | TGACGGATAAT   | 0.388 |
| + | 8  | 1092  | RBB3_uc010sqc.1    | NM_001982    | NP_001973    | P21860 | ERBB3_HUMAN | cellular (Potential).        | 8  | AACATCCTGTG   | 0.507 |
| + | 25 | 3155  | RBB3_uc009zok.2    | NM_001982    | NP_001973    | P21860 | ERBB3_HUMAN | lasmic (Potential).          | 8  | TAGCCCTGGG    | 0.502 |
| - | 6  | 486   | 3C3_uc010sqy.1_F   | NM_013251    | NP_037383    | Q9UHF0 | TKNK_HUMAN  |                              | 2  | AGCTGGGGACG   | 0.517 |

rs145184607



|   |    |           |                   |              |              |        |             |                             |    |               |       |
|---|----|-----------|-------------------|--------------|--------------|--------|-------------|-----------------------------|----|---------------|-------|
| + | 11 | 1561      | :sense_Mutation_p | NM_002392    | NP_002383    | Q00987 | MDM2_HUMAN  | or interaction with USP2.   | 3  | AGAAACCCAAG   | 0.393 |
| + | 2  | 455       | zm.1_Missense_M   | NM_024560    | NP_078836    | Q9H6R3 | ACSS3_HUMAN |                             | 4  | CATATTGAAAATC | 0.338 |
| + | 2  | 23        | _Intron SCYL2_uc0 | NM_017988    | NP_060458    | Q6P3W7 | SCYL2_HUMAN |                             | 6  | TTTCTAGGTAAC  | 0.333 |
| - | 15 | 2162      |                   | NM_145913    | NP_666018    | Q8N695 | SC5A8_HUMAN | lasmic (Potential).         | 0  | TTGAAAGCAGGA  | 0.383 |
| + | 11 | 1561      | _p.D416N CCDC6    | NM_152591    | NP_689804    | Q8NA47 | CCD63_HUMAN | p.D456N(1)                  | 8  | CCAACGACCTG   | 0.597 |
| - | 18 | 3149      | e_Mutation_p.T70  | NM_002973    | NP_002964    | Q99700 | ATX2_HUMAN  | Pro-rich.                   | 2  | CTATATGTCTTGC | 0.348 |
| - | 2  | 321       | ici.1_Missense_Mi | NM_002956    | NP_002947    | P30622 | CLIP1_HUMAN |                             | 3  | ATAAATCCAGGC  | 0.473 |
| + | 12 | 1752      | _p.R118Q DNAH1C   | NM_207437    | NP_997320    | Q8IVF4 | DYH10_HUMAN | n (By similarity).          | 6  | GGAACGATCTC   | 0.418 |
| - | 11 | 1812      | kb.2_Missense_M   | NM_001122636 | NP_001116108 | Q9HCQ5 | GALT9_HUMAN | ectin. Lumenal (Potential). | 0  | GCAGCGGCCCG   | 0.622 |
| - | 7  | 704       | plice_Site_p.G207 | NM_001161344 | NP_001154816 | Q96EP1 | CHFR_HUMAN  |                             | 1  | AGACCTGTGA    | 0.557 |
| - | 4  | 380       | ense_Mutation_p.T | NM_001161344 | NP_001154816 | Q96EP1 | CHFR_HUMAN  |                             | 1  | CCCCAGTCTGT   | 0.458 |
| - | 2  | 469       |                   | NM_004004    | NP_003995    | P29033 | CXB2_HUMAN  | ical; (Potential).          | 0  | GCGTGGACACG   | 0.552 |
| + | 13 | 1611      | y.2_Nonsense_Mu   | NM_175854    | NP_787050    | Q58A45 | PAN3_HUMAN  | ie. Interaction with PAN2.  | 1  | TGGCCAGTACC   | 0.299 |
| - | 5  | 727       | :D13_uc001uux.2_  | NM_178006    | NP_821074    | Q9Y3M8 | STA13_HUMAN |                             | 4  | FGCTTTCGCTGT  | 0.627 |
| - | 4  | 1156      | vo.2_Missense_Mi  | NM_001142296 | NP_001135768 | Q8N0X7 | SPG20_HUMAN |                             | 0  | TATCAGGAAACAT | 0.448 |
| - | 9  | 1235      |                   | NM_012345    | NP_036477    | Q9UHK0 | NUFP1_HUMAN |                             | 0  | CACTGCCTATCA  | 0.328 |
| + | 3  | 218       | _p.M16I SCEL_uc   | NM_144777    | NP_659001    | O95171 | SCEL_HUMAN  |                             | 5  | GAGATGAAGAG   | 0.443 |
| - | 6  | 468       | agl.2_Missense_M  | NM_001845    | NP_001836    | P02462 | CO4A1_HUMAN |                             | 6  | TGGCGGGCCGT   | 0.448 |
| - | 3  | 509       | vxk.2_Missense_M  | NM_144568    | NP_653169    | Q86T03 | TM55B_HUMAN |                             | 0  | TTTTCCCTGGGC  | 0.473 |
| + | 2  | 427       | d.1_Missense_Mu   | NM_173527    | NP_775798    | Q8IYK8 | REM2_HUMAN  | GTP.                        | 2  | GTGGGGGAGA    | 0.607 |
| - | 3  | 186_187   | kp.1_Missense_M   | NM_002471    | NP_002462    | P13533 | MYH6_HUMAN  | rosin head-like.            | 4  | TCATCGGGCACC  | 0.579 |
| + | 3  | 305       | e_Mutation_p.P51  | NM_173159    | NP_071406    | Q8IXF0 | NPAS3_HUMAN | -loop-helix motif.          | 2  | CTCTTCTCTGCA  | 0.488 |
| + | 11 | 1384      | IPOL1_uc010ams.   | NM_138731    | NP_620059    | Q8TD10 | MIPO1_HUMAN | Potential.                  | 2  | GACTTCAGCAA   | 0.433 |
| - | 16 | 2673      | e_Mutation_p.V82  | NM_006939    | NP_008870    | Q07890 | SOS2_HUMAN  | Ras-GEF.                    | 2  | AAAAACTTGCA   | 0.343 |
| + | 2  | 976       |                   | NM_000953    | NP_000944    | Q13258 | PD2R_HUMAN  | ellular (Potential).        | 4  | TTAAGGATGTC   | 0.398 |
| + | 3  | 219       | V20L_uc010trq.1_  | NM_207377    | NP_997260    | Q6UXN7 | TO20L_HUMAN | lasmic (Potential).         | 0  | TGTGGGATCCAA  | 0.308 |
| + | 3  | 694       | xex.3_Nonsense_   | NM_021003    | NP_066283    | P35813 | PPM1A_HUMAN |                             | 1  | AATGTAAGAATC  | 0.418 |
| + | 4  | 1285_1286 | xex.3_Missense_M  | NM_021003    | NP_066283    | P35813 | PPM1A_HUMAN |                             | 1  | ATGCACCCAAAG  | 0.376 |
| - | 21 | 2864      | p.G123S NEK9_uc   | NM_033116    | NP_149107    | Q8TD19 | NEK9_HUMAN  | Potential.                  | 5  | CAGACCTGCA    | 0.502 |
| + | 1  | 135       | _p.E18K KIAA140   | NM_020818    | NP_065869    | Q9P2D8 | UNC79_HUMAN |                             | 17 | ATCATTGAATATC | 0.338 |
| - | 21 | 3438      | _p.P1076S DICE1   | NM_030621    | NP_085124    | Q9UPY3 | DICER_HUMAN |                             | 5  | CGCAGGAAGTG   | 0.453 |
| + | 9  | 2088      | e_Mutation_p.S64  | NM_014844    | NP_055659    | O15040 | TCPR2_HUMAN |                             | 3  | GAACTCACTCA   | 0.602 |
| - | 15 | 2293      |                   | NM_006035    | NP_006026    | Q9Y5S2 | MRCKB_HUMAN | Potential.                  | 11 | CTCGGATTGTAT  | 0.463 |
| + | 17 | 1827      | TA1_uc001yrb.2_N  | NM_004689    | NP_004680    | Q13330 | MTA1_HUMAN  | inding (Potential).         | 2  | CCGCCCCCCA    | 0.682 |
| - | 12 | 1913      | _2_Missense_Mut   | NM_003257    | NP_003248    | Q07157 | ZO1_HUMAN   | PDZ 3.                      | 6  | CTTCTTATGAT   | 0.368 |
| + | 2  | 259       |                   | NM_001211    | NP_001202    | O60566 | BUB1B_HUMAN |                             | 4  | CATGTCCTTGG   | 0.413 |
| - | 15 | 2095_2096 | P1_uc001zoc.2_5'  | NM_015540    | NP_056355    | Q9BWH6 | RPAP1_HUMAN |                             | 1  | TTCTGGGGAGC   | 0.599 |
| + | 17 | 2359      |                   | NM_198141    | NP_937784    | Q8TET4 | GANC_HUMAN  |                             | 2  | GTATTCTCTGTT  | 0.512 |
| + | 2  | 565       | 1zt.2_Missense_M  | NM_016396    | NP_057480    | Q05D32 | CTSL2_HUMAN |                             | 0  | TGTTGTCTTCAA  | 0.323 |
| - | 5  | 942       | _p.T173I GABPB1   | NM_005254    | NP_005245    | Q06547 | GABP1_HUMAN |                             | 1  | TCACAGTGTAC   | 0.423 |
| - | 8  | 845       | afi.1_Missense_Mi | NM_182758    | NP_877435    | Q3MJ13 | WDR72_HUMAN |                             | 2  | GGATTCTGTGAC  | 0.423 |
| + | 1  | 561       |                   | NM_001080534 | NP_001074003 | Q8NB66 | UN13C_HUMAN |                             | 7  | AAATGGAAAAA   | 0.458 |
| + | 2  | 701       | _p.P141L RNF111_  | NM_017610    | NP_060080    | Q6ZNA4 | RN111_HUMAN |                             | 2  | TTCTCCTTATC   | 0.383 |
| - | 30 | 5660      |                   | NM_003922    | NP_003913    | Q15751 | HERC1_HUMAN |                             | 19 | ATTGAACTACTTT | 0.333 |
| - | 7  | 1237      | ANK1G1_uc002anl   | NM_022048    | NP_071331    | Q9HCP0 | KC1G1_HUMAN | rotein kinase.              | 0  | GAGTCCTTGCC   | 0.458 |
| - | 3  | 400       | 2apj.3_Missense_  | NM_005848    | NP_005839    | Q7Z401 | MYCPP_HUMAN |                             | 4  | AACACGAGGCC   | 0.363 |
| + | 21 | 3051      | an_p.V659I IQCH_  | NM_001031715 | NP_001026885 | Q86VS3 | IQCH_HUMAN  |                             | 4  | TAAGAGTAACAA  | 0.353 |

rs138877502

|   |    |         |                    |              |              |        |                                         |     |               |       |             |
|---|----|---------|--------------------|--------------|--------------|--------|-----------------------------------------|-----|---------------|-------|-------------|
| + | 15 | 1985    | ukf.1_Missense_M   | NM_017691    | NP_060161    | Q8IUZ0 | LRC49_HUMAN                             | 1   | 'CCAAAGGAAAA/ | 0.308 |             |
| - | 9  | 1150    | o.2_RNA PARP6_u    | NM_020214    | NP_064599    | Q2NL67 | PARP6_HUMAN                             | 0   | CTGGGGGCTGG   | 0.597 |             |
| - | 8  | 1566    | se_Mutation_p.E3'  | NM_000781    | NP_000772    | P05108 | CP11A_HUMAN                             | 2   | TCATCTCTAGCTC | 0.562 |             |
| + | 13 | 1864    | unn.1_Missense_l   | NM_018689    | NP_061159    | Q8WUJ3 | K1199_HUMAN                             | 3   | ATTTAAGGCAG/  | 0.542 |             |
| + | 6  | 3070    |                    | NM_020778    | NP_065829    | Q96L96 | ALPK3_HUMAN                             | 12  | TTTTCCCAAAAA/ | 0.537 |             |
| + | 7  | 1643    | D3A1_uc010boc.1_   | NM_013272    | NP_037404    | Q9UIG8 | SO3A1_HUMAN ir (Potential). Kazal-like. | 1   | CGATTCCCTTCA/ | 0.468 |             |
| + | 16 | 3186    | o_Mutation_p.E104  | NM_000875    | NP_000866    | P08069 | IGF1R_HUMAN o. Cytoplasmic (Potential). | 8   | AGGATTGAGTTT/ | 0.473 |             |
| - | 15 | 6988    | xt.1_Missense_Mu   | NM_001009944 | NP_001009944 | P98161 | PKD1_HUMAN ular (Potential). REJ.       | 3   | CCCTCAATGATG/ | 0.622 |             |
| - | 12 | 3752    |                    | NM_032444    | NP_115820    | Q8IY92 | SLX4_HUMAN PLK1 and TERF2-TERF2lf       | 0   | TCCCGCCCTGG   | 0.672 |             |
| - | 5  | 920     | wb.2_Missense_M    | NM_015092    | NP_055907    | Q96Q15 | SMG1_HUMAN with SMG8 and SMG9.          | 16  | TGTTTAACTAGTA | 0.274 |             |
| + | 2  | 1468    |                    | NM_006539    | NP_006530    | O60359 | CCG3_HUMAN                              | 0   | ACTACGAACAG/  | 0.562 |             |
| + | 7  | 1615    |                    | NM_014712    | NP_055527    | O15047 | SET1A_HUMAN Ser-rich. p.S310F(1)        | 3   | CTTTTCCCGCC/  | 0.522 | rs146035438 |
| + | 10 | 1452    | _p.E353V GPT2_u    | NM_133443    | NP_597700    | Q8TD30 | ALAT2_HUMAN                             | 2   | TGTGGAGGCTG   | 0.582 |             |
| - | 4  | 727     | _p.G98E CDH11_u    | NM_001797    | NP_001788    | P55287 | CAD11_HUMAN r (Potential). Cadherin 1.  | 14  | TGTTTCCAGCT/  | 0.433 |             |
| + | 3  | 528     | se_Mutation_p.N9   | NM_001048251 | NP_001041716 | Q96MX0 | CKLF3_HUMAN MARVEL.                     | 1   | GCTGAATGACA/  | 0.592 |             |
| - | 7  | 2151    | ers.2_Missense_M   | NM_001040715 | NP_001035805 | Q68EN5 | K895L_HUMAN                             | 0   | CCAGCCGGTTG/  | 0.637 |             |
| - | 2  | 185     | _p.S29F TAT_ucC    | NM_000353    | NP_000344    | P17735 | ATTY_HUMAN                              | 2   | GACAGAGCTT/   | 0.527 |             |
| - | 10 | 1415    | ep.1_Missense_Mu   | NM_012091    | NP_036223    | Q9BUB4 | ADAT1_HUMAN l to l editase.             | 2   | TGAAGAGTTCC/  | 0.413 |             |
| + | 11 | 1938    |                    | NM_022041    | NP_071324    | Q9H2C0 | GAN_HUMAN                               | 2   | TTCCTTGAGC    | 0.527 |             |
| - | 4  | 641_642 | DL1_uc010vrv.1_fr  | NM_031463    | NP_113651    | Q3SXM5 | HSDL1_HUMAN                             | 0   | ACACCCACG1    | 0.475 | rs144743188 |
| - | 11 | 3752    | o.G1036E NLRP1_    | NM_033004    | NP_127497    | Q9C000 | NALP1_HUMAN                             | 9   | GGTCCCTTGAC   | 0.567 |             |
| + | 2  | 1231    |                    | NM_000676    | NP_000667    | P29275 | AA2BR_HUMAN smic (By similarity).       | 2   | CTACACTTTTC/  | 0.488 |             |
| - | 1  | 424     | .1_Intron uc002gy/ | NM_001004306 | NP_001004306 | Q6NUI1 | C144L_HUMAN                             | 0   | TCCAGGAGCCA/  | 0.627 |             |
| - | 5  | 1332    | F12_uc002hdj.1_M   | NM_001033561 | NP_001028733 | Q96QT6 | PHF12_HUMAN ction with SIN3A.           | 1   | TAAAGGAACGA   | 0.388 |             |
| + | 50 | 7681    | o.2_Nonsense_Mu    | NM_001042492 | NP_001035957 | P21359 | NF1_HUMAN p.R2450*(1)                   | 330 | AAGTTCGAAGT/  | 0.363 |             |
| + | 9  | 1214    | hjc.2_Missense_M   | NM_173167    | NP_775259    | Q8IWX7 | UN45B_HUMAN                             | 6   | AGCGGATCAC    | 0.468 | rs148057044 |
| - | 6  | 1268    |                    | NM_002278    | NP_002269    | Q14532 | K1H2_HUMAN Coil 2. Rod.                 | 0   | GTCCTCGTTCT/  | 0.617 | rs70964671  |
| - | 1  | 441     | T14_uc010cxp.1_l   | NM_000526    | NP_000517    | P02533 | K1C14_HUMAN Coil 1A. Rod.               | 1   | AGGAGCCAGG    | 0.458 |             |
| + | 1  | 265     | .1_5'UTR WNK4_u    | NM_032387    | NP_115763    | Q96J92 | WNK4_HUMAN                              | 7   | CTCCGGACCCC   | 0.716 |             |
| - | 3  | 697     | oK MEOX1_uc002i    | NM_004527    | NP_004518    | P50221 | MEOX1_HUMAN Homeobox.                   | 0   | TCATCTCTCG/   | 0.582 |             |
| - | 1  | 486     | ikd.2_Missense_M   | NM_015443    | NP_056258    | Q7Z3B3 | K1267_HUMAN                             | 2   | CTAAGGAAACT   | 0.438 |             |
| + | 2  | 722     | h.2_5'UTR HLF_uc   | NM_002126    | NP_002117    | Q16534 | HLF_HUMAN                               | 2   | CCTGGGGCCTA   | 0.488 |             |
| + | 3  | 296     | jgl.2_Missense_Mu  | NM_002266    | NP_002257    | P52292 | IMA2_HUMAN IBB.                         | 2   | TAGCTCATTTCC  | 0.413 |             |
| + | 2  | 207     |                    | NM_001545    | NP_001536    | Q14197 | ICT1_HUMAN                              | 2   | AAGCCGACAGT   | 0.269 |             |
| - | 4  | 309     | D2_uc010dfz.2_In   | NM_006356    | NP_006347    | O75947 | ATP5H_HUMAN                             | 0   | CCTCTGGCACGC  | 0.448 |             |
| + | 32 | 4292    | lk.3_RNA SMCHD     | NM_015295    | NP_056110    | A6NHR9 | SMHD1_HUMAN                             | 0   | AAAAACCCGTT/  | 0.353 |             |
| + | 2  | 1157    | 'NDC2_uc002koh.:   | NM_001098529 | NP_001091999 | Q86VQ3 | TXND2_HUMAN repeat of Q-P-K-X-G-D-I-P.  | 2   | AAGGAGAGTGA   | 0.562 |             |
| + | 21 | 2215    | :D30B_uc010xak.1   | NM_001145029 | NP_001138501 | Q9BXX2 | AN30B_HUMAN                             | 2   | AGTCTCCTGAT/  | 0.289 |             |
| - | 9  | 1728    | _p.L286* NPC1_u    | NM_000271    | NP_000262    | O15118 | NPC1_HUMAN                              | 2   | TAATTTAACACAC | 0.463 |             |
| - | 9  | 1709    | _p.C280S NPC1_u    | NM_000271    | NP_000262    | O15118 | NPC1_HUMAN                              | 2   | GGTGAGTTTCG   | 0.448 |             |
| + | 27 | 3373    | jr.2_Missense_Mu   | NM_198129    | NP_937762    | Q16787 | LAMA3_HUMAN IV 1 (domain IV B).         | 11  | AGAGTCGTCAC   | 0.438 |             |
| + | 53 | 6901    | us.3_Missense_M    | NM_198129    | NP_937762    | Q16787 | LAMA3_HUMAN omain II and I.             | 11  | AGATGTCTTCT/  | 0.423 |             |
| - | 13 | 2062    | mi.3_Missense_Mu   | NM_001941    | NP_001932    | Q14574 | DSC3_HUMAN r (Potential). Cadherin 5.   | 4   | GATATGAAAGAC  | 0.333 |             |
| - | 3  | 728     | n_p.R92* DSC2_u    | NM_024422    | NP_077740    | Q02487 | DSC2_HUMAN                              | 3   | ACTTCTTCTCT/  | 0.338 |             |
| - | 12 | 2073    | 1012_uc002kxd.3_   | NM_014939    | NP_055754    | Q9Y2L5 | TPPC8_HUMAN                             | 0   | TAAATCGATGGC  | 0.333 |             |
| - | 13 | 1037    | _uc002lbq.3_Silen  | NM_024430    | NP_077748    | Q9H939 | PPIP2_HUMAN                             | 1   | TTTTAGGAATTC  | 0.249 |             |
| - | 1  | 1626    | VAL2_uc002lco.2_   | NM_016427    | NP_057511    | Q8IYF1 | ELOA2_HUMAN                             | 4   | CGAATCCCAGG,  | 0.547 |             |

|   |    |       |                    |              |              |        |             |                               |    |               |       |             |
|---|----|-------|--------------------|--------------|--------------|--------|-------------|-------------------------------|----|---------------|-------|-------------|
| - | 1  | 817   | NAL2_uc002lco.2_   | NM_016427    | NP_057511    | Q8IYF1 | ELOA2_HUMAN |                               | 4  | CACTTTCTCTCA  | 0.662 |             |
| + | 3  | 1014  | C_uc010xdr.1_5'U   | NM_005215    | NP_005206    | P43146 | DCC_HUMAN   | potential),Ig-like C2-type 2. | 17 | AGGTTCCCTTTCA | 0.388 |             |
| + | 12 | 2494  | p.S484L DCC_ucl    | NM_005215    | NP_005206    | P43146 | DCC_HUMAN   | ential), Fibronectin type-III | 17 | TCAATTC AAGAG | 0.408 |             |
| - | 4  | 1859  |                    | NM_052947    | NP_443179    | Q86TB3 | ALPK2_HUMAN |                               | 14 | ATTTCGGCTTCTT | 0.512 |             |
| + | 6  | 632   | ixet.1_Missense_Iv | NM_001040147 | NP_001035237 | O75635 | SPB7_HUMAN  |                               | 3  | CAAAGGCAAGTC  | 0.393 |             |
| + | 12 | 2390  | b.2_Missense_Mu    | NM_033646    | NP_387450    | Q9ULB5 | CADH7_HUMAN | lasmic (Potential).           | 4  | ACTCCAGAAATT  | 0.483 |             |
| + | 7  | 1253  | b.1_Missense_Mu    | NM_004368    | NP_004359    | Q99439 | CNN2_HUMAN  |                               | 0  | AGGTCCCTGAAT  | 0.637 |             |
| - | 5  | 428   | _p.P124L PIP5K1C   | NM_012398    | NP_036530    | O60331 | PI51C_HUMAN | PIPK.                         | 4  | GGGCGGGGGGTG  | 0.622 |             |
| + | 3  | 450   | ixib.1_Missense_Ih | NM_032607    | NP_115996    | Q68CJ9 | CR3L3_HUMAN | lasmic (Potential).           | 2  | CCGCCGGCTGC   | 0.657 | rs145839480 |
| + | 5  | 702   | _p.A80T ZNF557_    | NM_001044388 | NP_001037853 | Q8N988 | ZN557_HUMAN | KRAB.                         | 2  | ACCTGGCCTCA   | 0.433 |             |
| - | 5  | 36001 |                    | NM_024690    | NP_078966    | Q8WXI7 | MUC16_HUMAN | xtracellular (Potential).     | 57 | AAATTCTGGGG   | 0.493 |             |
| - | 5  | 35987 |                    | NM_024690    | NP_078966    | Q8WXI7 | MUC16_HUMAN | xtracellular (Potential).     | 57 | CAACTGAAGTT   | 0.493 |             |
| - | 3  | 18701 |                    | NM_024690    | NP_078966    | Q8WXI7 | MUC16_HUMAN | xtracellular (Potential).     | 57 | CAAGAGATGTC   | 0.488 |             |
| - | 6  | 1016  | p.E248K ZNF562_    | NM_001130032 | NP_001123504 | Q6V9R5 | ZN562_HUMAN |                               | 0  | ACTTCTCTCCTT  | 0.348 |             |
| + | 8  | 852   |                    | NM_173483    | NP_775754    | Q6NT55 | CP4FN_HUMAN |                               | 2  | AGTGATTATATCT | 0.557 |             |
| - | 9  | 1513  | 3P1_uc002nft.1_R   | NM_031941    | NP_114147    | Q8N6Y0 | USBP1_HUMAN |                               | 1  | GGGTCCCCAGA   | 0.607 |             |
| - | 3  | 1834  |                    | NM_001001411 | NP_001001411 | Q8N7Q3 | ZN676_HUMAN | 2H2-type 13.                  | 0  | CATTTGTAGCC   | 0.388 |             |
| + | 6  | 2690  | td.2_Nonsense_M    | NM_001136156 | NP_001129628 | Q8TCN5 | ZN507_HUMAN | 2H2-type 8.                   | 5  | TATGTGAAACAT  | 0.453 |             |
| + | 15 | 2245  | cd.3_Missense_M    | NM_199180    | NP_954649    | Q6UWL6 | KIRR2_HUMAN | ytoplasmic (Potential).       | 3  | CACATCCTTTCG  | 0.617 |             |
| - | 5  | 1009  | p.H236Y ZNF565_    | NM_152477    | NP_689690    | Q8N9K5 | ZN565_HUMAN | 2H2-type 5.                   | 2  | TGTGTGGATTC   | 0.507 |             |
| + | 8  | 1979  | p.R402C ZNF383_    | NM_152604    | NP_689817    | Q8NA42 | ZN383_HUMAN | 2H2-type 11.                  | 2  | TATTTCGTCATC  | 0.378 |             |
| - | 3  | 232   |                    | NM_001828    | NP_001819    | Q05315 | LPPL_HUMAN  | Galectin.                     | 0  | AAATGGAAGAC.  | 0.502 |             |
| + | 9  | 738   | 2ooe.2_Missense_   | NM_138392    | NP_612401    | Q8TBC3 | SHKB1_HUMAN |                               | 2  | GTTTTCCAGCC   | 0.627 |             |
| + | 2  | 375   | 2orj.1_Missense_   | NM_004363    | NP_004354    | P06731 | CEAM5_HUMAN | Ig-like 1.                    | 2  | AATAGGAACTCA  | 0.468 |             |
| - | 3  | 750   | _Mutation_p.E96I   | NM_182707    | NP_874366    | Q9UQ74 | PSG8_HUMAN  | like C2-type 1.               | 0  | GTATTTACATTC  | 0.512 |             |
| - | 3  | 571   | 10eio.1_Missense_  | NM_006905    | NP_008836    | P11464 | PSG1_HUMAN  | p.E145G(1)                    | 2  | AGTCTCCACTG   | 0.517 |             |
| - | 5  | 1261  | mf.3_Missense_Ml   | NM_002784    | NP_002775    | Q00887 | PSG9_HUMAN  | like C2-type 3.               | 2  | CGCTATGATTC   | 0.443 |             |
| + | 2  | 146   |                    | NM_015603    | NP_056418    | Q9Y3X0 | CCDC9_HUMAN |                               | 0  | CCTCAGTGCTG   | 0.542 |             |
| + | 5  | 2330  | uc002pxc.1_5'Flan  | NM_007147    | NP_009078    | Q9Y473 | ZN175_HUMAN | 2H2-type 14.                  | 0  | GAAATCGTTCA   | 0.438 | rs145951696 |
| - | 5  | 1020  |                    | NM_003830    | NP_003821    | O15389 | SIGL5_HUMAN | potential),Ig-like C2-type 2. | 4  | TATTGGAGATGC  | 0.622 |             |
| + | 2  | 710   | p.G222E FPR2_u     | NM_001005738 | NP_001005738 | P25090 | FPR2_HUMAN  | Name=5; (Potential).          | 4  | CTATGGGCTCAT  | 0.502 |             |
| + | 2  | 496   |                    | NM_002030    | NP_002021    | P25089 | FPR3_HUMAN  | Name=3; (Potential).          | 6  | TGTATGATAGAC  | 0.468 |             |
| - | 7  | 964   | p.S147L ZNF611_    | NM_030972    | NP_112234    | Q8N823 | ZN611_HUMAN |                               | 1  | AGTAATGAAGAA  | 0.378 |             |
| + | 5  | 623   | L1_uc002qhl.3_Inl  | NM_012314    | NP_036446    | P43632 | KI2S4_HUMAN | potential),Ig-like C2-type 2. | 0  | .CCCACGGAGGG  | 0.592 |             |
| + | 9  | 2952  | tg.2_Missense_Ml   | NM_176811    | NP_789781    | Q86W28 | NALP8_HUMAN |                               | 13 | .GGCTGAAAAAC  | 0.512 |             |
| + | 8  | 1918  | uc002qnk.1_Intron  | NM_020828    | NP_065879    | Q8NHY6 | ZFP28_HUMAN |                               | 1  | AGAAGCCTTTTG  | 0.428 |             |
| - | 4  | 322   | 329_uc002qro.1_I   | NM_024620    | NP_078896    | Q86UD4 | ZN329_HUMAN |                               | 1  | GCAGGAACTT    | 0.463 |             |
| - | 16 | 2240  | v ATAD2B_uc002re   | NM_017552    | NP_060022    | Q9ULI0 | ATD2B_HUMAN |                               | 1  | GGGCTAAGC.    | 0.502 |             |
| + | 11 | 883   | _Mutation_p.E17I   | NM_007266    | NP_009197    | Q9HCN4 | GPN1_HUMAN  |                               | 0  | AAATGAACGTC   | 0.373 |             |
| - | 1  | 1027  |                    | NM_001029883 | NP_001025054 | A6NGG8 | CB071_HUMAN |                               | 1  | GGGGAGACCCT   | 0.587 |             |
| + | 7  | 806   | p.P193L CCT7_uc    | NM_006429    | NP_006420    | Q99832 | TCPH_HUMAN  |                               | 0  | CAATCCAAGAT   | 0.438 |             |
| + | 6  | 1126  | ijf.1_Missense_Mu  | NM_015120    | NP_055935    | Q8TCU4 | ALMS1_HUMAN |                               | 9  | TGTATCGTTAT   | 0.378 |             |
| + | 18 | 2821  | ysg.1_Missense_Ih  | NM_004389    | NP_004380    | P26232 | CTNA2_HUMAN |                               | 9  | CATTTGCGCTG   | 0.368 |             |
| - | 13 | 2343  |                    | NM_004836    | NP_004827    | Q9NZJ5 | E2AK3_HUMAN | Potential). Protein kinase.   | 3  | GTGAAGGAGCT   | 0.453 |             |
| + | 11 | 2466  |                    | NM_001011552 | NP_001011552 | Q6AI14 | SL9A4_HUMAN | lasmic (Potential).           | 3  | TGCAGGAAGAG   | 0.428 |             |
| - | 7  | 1645  |                    | NM_000575    | NP_000566    | P01583 | IL1A_HUMAN  |                               | 1  | AGTGCCGTGAG   | 0.468 |             |
| - | 17 | 5698  | ttq.2_Missense_M   | NM_207363    | NP_997246    | O14513 | NCKP5_HUMAN |                               | 0  | TGGAGGAAGGC   | 0.597 |             |

|   |     |       |                    |              |              |        |             |                                |     |               |       |             |
|---|-----|-------|--------------------|--------------|--------------|--------|-------------|--------------------------------|-----|---------------|-------|-------------|
| + | 4   | 443   | 10zbl.1_Missense_  | NM_018460    | NP_060930    | Q53QZ3 | RHG15_HUMAN | PH.                            | 2   | AAGAACTAAGG   | 0.333 |             |
| - | 11  | 1569  | p.D284N CCDC14     | NM_138803    | NP_620158    | Q8NFR7 | CC148_HUMAN |                                | 2   | GAAGATCTCTCA  | 0.303 |             |
| - | 5   | 980   | s.2_Missense_Mu    | NM_002349    | NP_002340    | O60449 | LY75_HUMAN  | Potential). C-type lectin 1.   | 0   | TTACCTGGATCC  | 0.423 |             |
| - | 4   | 363   | ce ITGB6_uc010zc   | NM_000888    | NP_000879    | P18564 | ITB6_HUMAN  |                                | 3   | ACCACCTGCAA   | 0.522 |             |
| - | 13  | 2246  | p.W623* SCN1A_     | NM_006920    | NP_008851    | P35498 | SCN1A_HUMAN | II.                            | 13  | TTTAACCAATATG | 0.383 |             |
| + | 3   | 461   | n_p.W123* G6PC2    | NM_021176    | NP_066999    | Q9NQR9 | G6PC2_HUMAN | ical; (Potential).             | 1   | FGTCTGGTATGT  | 0.478 |             |
| + | 39  | 5582  | e_Mutation_p.R71   | NM_172070    | NP_742067    | Q6ZT12 | UBR3_HUMAN  |                                | 0   | GGAAAGATACA   | 0.368 |             |
| + | 7   | 1327  | p.S256F ITGA6_u    | NM_001079818 | NP_001073286 | P23229 | ITA6_HUMAN  | Extracellular (Potential).     | 2   | AAGATTCTATGTT | 0.358 |             |
| - | 306 | 92958 | 07K TTN_uc010z     | NM_133378    | NP_596869    | Q8WZ42 | TITIN_HUMAN |                                | 153 | ATATTTCACTCC  | 0.388 |             |
| - | 275 | 71443 | 435* TTN_uc010zf   | NM_133378    | NP_596869    | Q8WZ42 | TITIN_HUMAN |                                | 153 | GAGACCATGTT   | 0.438 |             |
| - | 275 | 68106 | 323A TTN_uc010z    | NM_133378    | NP_596869    | Q8WZ42 | TITIN_HUMAN |                                | 153 | GCACAGTAACTG  | 0.463 |             |
| - | 275 | 63906 | 23Q TTN_uc010zf    | NM_133378    | NP_596869    | Q8WZ42 | TITIN_HUMAN |                                | 153 | GATACTCTAATCC | 0.458 |             |
| - | 220 | 43725 | _uc010zfi.1_Misse  | NM_133378    | NP_596869    | Q8WZ42 | TITIN_HUMAN |                                | 153 | AGGTTCCCAAG   | 0.398 |             |
| - | 200 | 39450 | .1_Missense_Muta   | NM_133378    | NP_596869    | Q8WZ42 | TITIN_HUMAN |                                | 153 | CTTTCCATGTTI  | 0.363 |             |
| - | 157 | 32061 | Intron TTN_uc010l  | NM_133378    | NP_596869    | Q8WZ42 | TITIN_HUMAN |                                | 153 | TTGGGAGCCTC   | 0.423 |             |
| - | 143 | 30597 | z.1_Missense_Mu    | NM_133378    | NP_596869    | Q8WZ42 | TITIN_HUMAN |                                | 153 | AACTTCTCTTC   | 0.453 |             |
| - | 80  | 20457 | v_uc010zfi.1_Intro | NM_133378    | NP_596869    | Q8WZ42 | TITIN_HUMAN |                                | 153 | CTTGCGGATGA   | 0.512 |             |
| + | 4   | 2903  |                    | NM_194250    | NP_919226    | Q7Z570 | Z804A_HUMAN | p.R770Q(1)                     | 11  | CTATCGAAAACC  | 0.333 |             |
| - | 4   | 587   | p.K178* CLK1_uc    | NM_004071    | NP_004062    | P49759 | CLK1_HUMAN  |                                | 2   | TTCTTTTCCCTCC | 0.443 |             |
| + | 5   | 4094  |                    | NM_020923    | NP_065974    | Q9HCK1 | ZDBF2_HUMAN |                                | 3   | CTACAGATTCC   | 0.393 |             |
| - | 2   | 90    |                    | NM_020989    | NP_066269    | P07315 | CRGC_HUMAN  | a crystallin 'Greek key' 1.    | 0   | TGGTTTCGTAGC  | 0.522 | rs145041511 |
| + | 7   | 2206  | i.1_Intron MAP2_u  | NM_002374    | NP_002365    | P11137 | MAP2_HUMAN  |                                | 17  | ACCCAGTTCTC   | 0.443 |             |
| + | 11  | 4932  | g.1_Missense_Mu    | NM_002374    | NP_002365    | P11137 | MAP2_HUMAN  |                                | 17  | AGAATTCCTTC   | 0.458 |             |
| - | 3   | 320   | sb.2_Missense_Mt   | NM_079420    | NP_524144    | P05976 | MYL1_HUMAN  | EF-hand 1.                     | 1   | CTGTTCTGTCA   | 0.438 |             |
| - | 7   | 970   | vb.2_Intron SLC23  | NM_001144889 | NP_001138361 | Q6PIS1 | S23A3_HUMAN | ical; (Potential).             | 0   | CTGGGGGATAA   | 0.522 |             |
| + | 7   | 1185  | .3_Missense_Mut    | NM_005070    | NP_005061    | P48751 | B3A3_HUMAN  | Cytoplasmic.                   | 5   | TCCTTCGCAGG   | 0.652 | rs140021661 |
| + | 5   | 653   | ase_Mutation_p.E1  | NM_007237    | NP_009168    | Q13342 | LY10_HUMAN  |                                | 0   | CTCAGGAAGCC   | 0.498 |             |
| - | 2   | 361   |                    | NM_006056    | NP_006047    | Q9HB89 | NMUR1_HUMAN | Name=1; (Potential).           | 5   | GGATGACCAGA   | 0.632 |             |
| + | 8   | 1425  |                    | NM_018327    | NP_060797    | Q9NUV7 | SPTC3_HUMAN |                                | 0   | GAGTTACATAGC  | 0.512 |             |
| - | 2   | 258   | i_p.P53S C20orf3_  | NM_020531    | NP_065392    | Q9HDC9 | APMAP_HUMAN | type II membrane protein;      | 1   | CAGGGGAACGG   | 0.517 |             |
| - | 2   | 116   |                    | NM_001037731 | NP_001032820 | Q30KQ4 | DB116_HUMAN |                                | 0   | GCATGGATTCC   | 0.468 |             |
| - | 5   | 446   | i_p.E65K NECAB3    | NM_031232    | NP_112509    | Q96P71 | NECA3_HUMAN |                                | 1   | CGATTCCAATGC  | 0.612 |             |
| - | 24  | 3507  | p.G1127A PTPRT_    | NM_007050    | NP_008981    | O14522 | PTPRT_HUMAN | phatase 1. Cytoplasmic (Po     | 20  | ACCACCCCTTCA  | 0.577 |             |
| - | 22  | 3180  | v.R1018Q PTPRT_    | NM_007050    | NP_008981    | O14522 | PTPRT_HUMAN | phatase 1. Cytoplasmic (Po     | 20  | CAGTATCGCACA  | 0.438 |             |
| - | 21  | 3155  | p.E1010K PTPRT_    | NM_007050    | NP_008981    | O14522 | PTPRT_HUMAN | phatase 1. Cytoplasmic (Po     | 20  | CACTTCCACCA   | 0.468 |             |
| + | 4   | 651   |                    | NM_004994    | NP_004985    | P14780 | MMP9_HUMAN  |                                | 2   | TGGTCCCTGG    | 0.637 |             |
| - | 8   | 1852  | hk.1_Missense_M    | NM_021248    | NP_067071    | Q9UJ99 | CAD22_HUMAN | r (Potential). Cadherin 4.     | 5   | TTAGGGATGCC   | 0.552 |             |
| - | 5   | 705   | Missense_Mutatio   | NM_022829    | NP_073740    | Q8WWT9 | S13A3_HUMAN | asmic (Potential).             | 1   | ATCCTCCTTCT   | 0.532 |             |
| - | 2   | 1634  | js.1_Nonsense_M    | NM_004975    | NP_004966    | Q14721 | KCNB1_HUMAN | asmic (Potential).             | 2   | CTTTGTCCATTT  | 0.433 |             |
| + | 2   | 3772  |                    | NM_178457    | NP_848552    | Q5JPB2 | ZN831_HUMAN |                                | 14  | TGCCCAGCAC    | 0.498 |             |
| + | 5   | 4780  |                    | NM_178457    | NP_848552    | Q5JPB2 | ZN831_HUMAN |                                | 14  | CCAGAGGCCAG   | 0.468 |             |
| + | 11  | 1202  | ion_p.R312* ITSN   | NM_003024    | NP_003015    | Q15811 | ITSN1_HUMAN |                                | 4   | GAGTTCGATCT   | 0.388 |             |
| - | 15  | 3372  | AM_uc002yvr.1_f    | NM_001389    | NP_001380    | O60469 | DSCAM_HUMAN | tential). Fibronectin type-III | 11  | GAGCTCGTTGC   | 0.587 |             |
| + | 2   | 173   | c.2_RNA UBASH3     | NM_018961    | NP_061834    | P57075 | UBS3A_HUMAN | UBA.                           | 3   | CACGGGGAGGA   | 0.607 |             |
| + | 26  | 4610  | guz.1_Missense_M   | NM_032608    | NP_115997    | Q8IUG5 | MY18B_HUMAN | potential. Tail.               | 12  | AAGGTGATGTG   | 0.612 |             |
| + | 2   | 755   |                    | NM_020437    | NP_065170    | Q6ICH7 | ASPH2_HUMAN | renal (Potential).             | 1   | ACAACGAGGGC   | 0.637 |             |
| - | 4   | 1063  | OX10_uc003auo.     | NM_006941    | NP_008872    | P56693 | SOX10_HUMAN |                                | 0   | CCATGGAGCGC   | 0.627 |             |

|   |    |      |                    |              |              |        |                                            |    |                  |       |             |
|---|----|------|--------------------|--------------|--------------|--------|--------------------------------------------|----|------------------|-------|-------------|
| - | 5  | 2021 | iAP1_uc003azu.2_   | NM_002883    | NP_002874    | P46060 | RAGP1_HUMAN                                | 0  | (CAAAGACCTTC/    | 0.582 |             |
| - | 8  | 840  |                    | NM_002676    | NP_002667    | Q92871 | PMM1_HUMAN                                 | 1  | CTCATGAGCTG      | 0.587 |             |
| - | 7  | 640  |                    | NM_002676    | NP_002667    | Q92871 | PMM1_HUMAN                                 | 1  | CCTCGGGGAAG      | 0.592 |             |
| - | 3  | 283  | 3bde.3_Missense_   | NM_007229    | NP_009160    | Q9UNF0 | PACN2_HUMAN FCH.                           | 0  | CCCACCTAGG/      | 0.642 |             |
| - | 5  | 815  | ..1_Intron PHF21B_ | NM_138415    | NP_612424    | Q96EK2 | PF21B_HUMAN                                | 3  | gggtgaaggggacagt | 0.274 |             |
| + | 3  | 551  | uc010hbb.1_Mis:    | NM_001097    | NP_001088    | P10323 | ACRO_HUMAN peptidase S1.                   | 0  | GGTGGCCGGCT      | 0.627 |             |
| - | 7  | 2096 | p.P574L IQSEC1_    | NM_014869    | NP_055684    | Q6DN90 | IQEC1_HUMAN SEC7.                          | 1  | CACGGGGAATG      | 0.527 |             |
| + | 12 | 2230 | ssense_Mutation_   | NM_015460    | NP_056275    | Q8NFW9 | MYRIP_HUMAN actin-binding.                 | 5  | TGGAAGAAAAA      | 0.507 |             |
| + | 3  | 918  | Mutation_p.R24:    | NM_001296    | NP_001287    | O00590 | CCBP2_HUMAN lasmic (Potential).            | 5  | AGGGCCGGGC       | 0.532 |             |
| + | 5  | 526  | ic003cyw.2_5'UTR   | NM_004636    | NP_004627    | Q13214 | SEM3B_HUMAN Sema.                          | 6  | GGCCCTGTGG       | 0.642 |             |
| + | 6  | 339  |                    | NM_004947    | NP_004938    | Q8IZD9 | DOCK3_HUMAN                                | 0  | TTTCAGAAACA      | 0.388 |             |
| + | 32 | 3386 |                    | NM_004947    | NP_004938    | Q8IZD9 | DOCK3_HUMAN                                | 0  | GACATGATGGAC     | 0.473 |             |
| + | 42 | 5330 | Mutation_p.D17:    | NM_001128840 | NP_001122312 | Q01668 | CAC1D_HUMAN lasmic (Potential).            | 11 | CAAGTGATACT      | 0.458 |             |
| - | 14 | 2699 | R2_uc003dht.1_     | NM_015576    | NP_056391    | O15083 | ERC2_HUMAN Potential.                      | 2  | CAGTTCCTGCT      | 0.512 |             |
| - | 12 | 2359 | lm.2_Missense_M    | NM_003716    | NP_003707    | Q9ULU8 | CAPS1_HUMAN                                | 3  | TAAATTCATCCAT    | 0.383 |             |
| - | 8  | 1272 | fmh.1_Missense_    | NM_182920    | NP_891550    | Q9P2N4 | ATS9_HUMAN ptidase M12B.                   | 4  | TATAGGGATCAC/    | 0.403 |             |
| + | 7  | 1922 | i.3_5'UTR EPHA6_   | NM_001080448 | NP_001073917 | Q9UF33 | EPHA6_HUMAN III 2. Extracellular (Potentia | 16 | AATTTGAAACAG     | 0.373 |             |
| - | 14 | 2050 | ite.2_Missense_M   | NM_080927    | NP_563615    | Q96PD2 | DCBD2_HUMAN lasmic (Potential).            | 3  | GGTGCCTTCAG      | 0.378 |             |
| - | 36 | 5089 |                    | NM_014981    | NP_055796    | Q9Y2K3 | MYH15_HUMAN Potential.                     | 7  | CAGATCACTGT      | 0.522 |             |
| + | 4  | 438  | uc003eeo.2_Splic   | NM_018456    | NP_060926    | Q96CJ1 | EAF2_HUMAN                                 | 0  | TTGCAGAGTTG/     | 0.323 |             |
| + | 7  | 1066 | o.1_Missense_Mut   | NM_175862    | NP_787058    | P42081 | CD86_HUMAN lasmic (Potential).             | 2  | AAGTTCGAAGA      | 0.333 | rs141281931 |
| + | 3  | 633  | ekj.2_Missense_M   | NM_021937    | NP_068756    | P57772 | SELB_HUMAN                                 | 1  | AAGCTCCACAG      | 0.572 |             |
| + | 2  | 370  | .1_RNA IL20RB_u    | NM_144717    | NP_653318    | Q6UXL0 | I20RB_HUMAN III 1. Extracellular (Potentia | 1  | AGAACCTCTCT      | 0.512 |             |
| - | 38 | 6565 | y.1_Missense_Mu    | NM_001184    | NP_001175    | Q13535 | ATR_HUMAN FAT.                             | 20 | AAATTCGAGAG/     | 0.343 |             |
| + | 4  | 487  | p.S150F MED12L     | NM_053002    | NP_443728    | Q86YW9 | MD12L_HUMAN                                | 7  | AATATTCTGTGCC    | 0.353 |             |
| - | 3  | 1117 | 80_uc003fda.2_R    | NM_173084    | NP_775107    | Q8IWR1 | TRI59_HUMAN                                | 0  | TTGAGAAATTT      | 0.308 |             |
| - | 1  | 140  | p.E38K SERPIN      | NM_006217    | NP_006208    | O75830 | SPI2_HUMAN                                 | 3  | CAAATTCGGTAT     | 0.368 | rs147443553 |
| - | 2  | 388  | p.H81Y WDR49_      | NM_178824    | NP_849146    | Q8IV35 | WDR49_HUMAN WD 1.                          | 3  | GAGAGTGATAAT     | 0.378 |             |
| + | 13 | 2193 | p.S331F EIF2B5_    | NM_003907    | NP_003898    | Q13144 | EI2BE_HUMAN W2.                            | 5  | GGATTCCTCCGC     | 0.532 |             |
| + | 9  | 1660 | w.1_Missense_Mu    | NM_198485    | NP_940887    | Q6ZUI0 | TPRG1_HUMAN                                | 0  | TCTATCGCATCT     | 0.498 |             |
| + | 17 | 3303 | 3gee.3_RNA WHS     | NM_001042424 | NP_001035889 | O96028 | NSD2_HUMAN AWS.                            | 9  | GCCACCCGCAG      | 0.532 |             |
| - | 8  | 1542 | bvl.1_Missense_M   | NM_020972    | NP_066023    | Q9HCC9 | LST2_HUMAN                                 | 3  | CCGTCCTCCCTC     | 0.701 |             |
| - | 3  | 2151 |                    | NM_053042    | NP_444270    | Q9C0D4 | Z518B_HUMAN                                | 4  | TTGTAGATTCCA     | 0.433 |             |
| - | 3  | 1452 | fF16_uc003gpo.2_   | NM_017741    | NP_060211    | Q9NXF7 | DCA16_HUMAN                                | 1  | GCTGGGACTTG      | 0.512 |             |
| + | 20 | 2264 | is.1_Missense_Mu   | NM_004787    | NP_004778    | O94813 | SLIT2_HUMAN LRRCT 3.                       | 11 | CACGGGAAATCT     | 0.438 |             |
| - | 7  | 1441 |                    | NM_001358    | NP_001349    | O43143 | DHX15_HUMAN case C-terminal.               | 1  | ACGTCTCTGCTA     | 0.318 |             |
| - | 14 | 1561 |                    | NM_003215    | NP_003206    | P42680 | TEC_HUMAN                                  | 9  | GTTTACCAGAT      | 0.433 |             |
| - | 5  | 1422 | ah.1_Missense_Mu   | NM_004439    | NP_004430    | P54756 | EPHA5_HUMAN III 1. Extracellular (Potentia | 24 | CATGACCCGCA      | 0.502 |             |
| - | 7  | 705  | 3hdp.2_5'UTR TM    | NM_004262    | NP_004253    | O60235 | TM11D_HUMAN . Extracellular (Potential).   | 1  | GCTGCTCCAC/      | 0.532 |             |
| - | 5  | 1309 | e_Mutation_p.S28   | NM_021139    | NP_066962    | P06133 | UD2B4_HUMAN                                | 2  | TACTCGACATTC     | 0.413 |             |
| + | 6  | 201  | p.R51K CSN1S1      | NM_001890    | NP_001881    | P47710 | CASA1_HUMAN                                | 0  | GAACAGGGTAA      | 0.274 |             |
| + | 2  | 177  |                    | NM_021225    | NP_067048    | Q99935 | PROL1_HUMAN                                | 1  | AGAATGAAATTA     | 0.299 |             |
| - | 1  | 384  |                    | NM_032693    | NP_116082    | Q9BSU3 | NAA11_HUMAN cetyltransferase.              | 2  | GCGCCGGTGTG      | 0.562 |             |
| - | 10 | 1590 | .S276F ANTXR2_u    | NM_001145794 | NP_001139266 | P58335 | ANTR2_HUMAN ellular (Potential).           | 1  | GCATAGAATTAA     | 0.269 |             |
| - | 17 | 3170 |                    | NM_014991    | NP_055806    | Q8IZQ1 | WDFY3_HUMAN                                | 3  | GGGGGGGGTGC      | 0.502 |             |
| - | 11 | 1433 |                    | NM_174952    | NP_777612    | Q8N412 | CD037_HUMAN                                | 0  | AGATTTCTTTCT     | 0.269 |             |
| - | 8  | 1385 | ilir.2_Missense_Mu | NM_020395    | NP_065128    | Q96CB8 | INT12_HUMAN Ser-rich.                      | 0  | TAACTGAGCGA      | 0.448 |             |



|   |    |           |                    |              |              |        |              |                                |    |               |       |
|---|----|-----------|--------------------|--------------|--------------|--------|--------------|--------------------------------|----|---------------|-------|
| + | 8  | 1787      |                    | NM_001977    | NP_001968    | Q07075 | AMPE_HUMAN   | cellular (Potential).          | 5  | TGTAGGGATCTT  | 0.294 |
| - | 4  | 796       | X2_uc010iml.2_In   | NM_153426    | NP_700475    | Q99697 | PITX2_HUMAN  |                                | 0  | CGTCCTCATTCT  | 0.592 |
| + | 2  | 865       | e_Mutation_p.D11   | NM_001128174 | NP_001121646 | Q16880 | CGT_HUMAN    |                                | 2  | ACTGTGACCTG   | 0.443 |
| + | 36 | 6028      | AA1109_uc003iek    | NM_015312    | NP_056127    | Q2LD37 | K1109_HUMAN  |                                | 12 | CTCCAGATTCA   | 0.368 |
| - | 3  | 1434      | p.D211N ANKRDE     | NM_020337    | NP_065070    | Q9ULJ7 | ANR50_HUMAN  |                                | 1  | GGATATCTAACTT | 0.393 |
| + | 1  | 2630      |                    | NM_024582    | NP_078858    | Q6V0I7 | FAT4_HUMAN   | r (Potential). Cadherin 8.     | 18 | AGACACTATGG   | 0.463 |
| + | 8  | 7432      | e_Mutation_p.P77   | NM_024582    | NP_078858    | Q6V0I7 | FAT4_HUMAN   | (Potential). Cadherin 24.      | 18 | CATCTCCTACTC  | 0.383 |
| - | 1  | 2338      | .1_Intron PCDH18   | NM_019035    | NP_061908    | Q9HCL0 | PCD18_HUMAN  | Extracellular (Potential).     | 5  | CCATTCTGTGT   | 0.438 |
| - | 5  | 872       | ik.1_Missense_Mu   | NM_021833    | NP_068605    | P25874 | UCP1_HUMAN   | Solcar 3.                      | 1  | GAAAGCCGTTG   | 0.428 |
| - | 3  | 521       | k.1_Missense_Mu    | NM_021833    | NP_068605    | P25874 | UCP1_HUMAN   | Solcar 2.                      | 1  | GATCCGTGGA    | 0.468 |
| - | 6  | 1693      | p.G305R RNF150     | NM_020724    | NP_065775    | Q9ULK6 | RN150_HUMAN  | lasmic (Potential).            | 1  | ACCTCCCAGAG   | 0.542 |
| - | 3  | 304       | s.S30L GYPA_uc0    | NM_002099    | NP_002090    | P02724 | GLPA_HUMAN   | Extracellular.                 | 2  | ATTTCTGAAACT  | 0.413 |
| + | 7  | 1946      |                    | NM_022475    | NP_071920    | Q96QV1 | HHIP_HUMAN   |                                | 6  | TCCACGATCCA   | 0.517 |
| - | 14 | 1947      | p.L576F DDX60L     | NM_001012967 | NP_001012985 | Q5H9U9 | DDX6L_HUMAN  |                                | 1  | TTTGAGAAATG   | 0.333 |
| + | 5  | 1556      | irr.2_Missense_Mi  | NM_014269    | NP_055084    | Q9UKF5 | ADA29_HUMAN  | 'B. Extracellular (Potential). | 16 | TAAGAGGGTTA   | 0.428 |
| + | 5  | 652       | R17_uc003ium.3_f   | NM_170710    | NP_733828    | Q8IZU2 | WDR17_HUMAN  |                                | 6  | ATTGTACACAAAC | 0.443 |
| - | 5  | 1236      |                    | NM_005429    | NP_005420    | P49767 | VEGFC_HUMAN  |                                | 5  | CATCTCCAGCAT  | 0.398 |
| + | 4  | 350       | IRR_uc010isy.2_Ir  | NM_013232    | NP_037364    | O75340 | PDCD6_HUMAN  | nd 2. 2 (Potential).           | 1  | TCAGCGAGTTC   | 0.537 |
| + | 1  | 278       |                    | NM_182632    | NP_872438    | Q96N87 | S6A18_HUMAN  | Name=2; (Potential).           | 1  | CTATGGAGGAG   | 0.637 |
| - | 1  | 680       |                    | NM_019599    | NP_062545    | Q9NYW7 | TA2R1_HUMAN  | lasmic (Potential).            | 3  | ATATCCTCATCTT | 0.453 |
| - | 10 | 1942      | RLR_uc003jji.1_Inl | NM_000949    | NP_000940    | P16471 | PRLR_HUMAN   | lasmic (Potential).            | 3  | CCCTTCCCTCT   | 0.542 |
| - | 23 | 2840      | 3jmi.3_Missense_f  | NM_173489    | NP_775760    | Q7Z745 | HTRB2_HUMAN  | HEAT 9.                        | 8  | GTAAACCAATCAC | 0.433 |
| - | 3  | 385       | X29_uc010ivw.2_F   | NM_019030    | NP_061903    | Q7Z478 | DHX29_HUMAN  |                                | 4  | AATTACCACCTG  | 0.323 |
| - | 6  | 564       | CC8_uc011cqp.1_    | NM_000082    | NP_000073    | Q13216 | ERCC8_HUMAN  |                                | 0  | TGGGTCTCTAC   | 0.328 |
| + | 5  | 4571      | ix.1_Missense_Mu   | NM_005909    | NP_005900    | P46821 | MAP1B_HUMAN  |                                | 5  | TAAGTCCAGTT   | 0.413 |
| + | 2  | 743       |                    | NM_153217    | NP_694949    | Q8WUU8 | TM174_HUMAN  |                                | 1  | TCTCTCTCCCC   | 0.468 |
| - | 1  | 368       |                    | NR_004845    |              |        |              |                                | 0  | AGCTGGAGCCC   | 0.542 |
| + | 45 | 9775      | p.R933* GPR98_I    | NM_032119    | NP_115495    | Q8WXG9 | GPR98_HUMAN  | lar (Potential). EAR 1.        | 16 | TATCTCGAACT   | 0.393 |
| + | 6  | 1871      | nw.1_Missense_M    | NM_005575    | NP_005566    | Q9UIQ6 | LCAP_HUMAN   | cellular (Potential).          | 4  | CAATGGCGGAT   | 0.473 |
| + | 5  | 449       | P19_uc011cvu.1_I   | NM_003135    | NP_003126    | P09132 | SRP19_HUMAN  |                                | 0  | AACAGGAGGTG   | 0.308 |
| - | 8  | 1022      | p.P123S CEP120     | NM_153223    | NP_694955    | Q8N960 | CE120_HUMAN  |                                | 1  | GTTTGAGGGGT   | 0.493 |
| + | 5  | 1269      | INB1_uc010jdb.1_   | NM_005573    | NP_005564    | P20700 | LMNB1_HUMAN  | Rod. Coil 2.                   | 2  | GAATTGAGAGC   | 0.428 |
| + | 7  | 780       | dd.1_Missense_M    | NM_032446    | NP_115822    | Q96KG7 | MEG10_HUMAN  | self-assembly and formati      | 4  | CCCTGCATGGT   | 0.582 |
| + | 23 | 4315      | _Missense_Mutati   | NM_020690    | NP_065741    | Q8IWZ2 | Q8IWZ2_HUMAN |                                | 6  | ACAATTACAGAT  | 0.318 |
| + | 1  | 970       | hd.2_Intron PCDH   | NM_018906    | NP_061729    | Q9Y5H8 | PCDA3_HUMAN  | Extracellular (Potential).     | 8  | CCACGGATAAA   | 0.373 |
| + | 1  | 217       | lhh.1_Intron PCDF  | NM_018910    | NP_061733    | Q9UN72 | PCDA7_HUMAN  | Extracellular (Potential).     | 4  | GTGGGATCTT    | 0.612 |
| + | 1  | 1823      | CHA7_uc003lhq.2    | NM_018904    | NP_061727    | Q9Y5I0 | PCDAD_HUMAN  | Extracellular (Potential).     | 6  | GGCTTTCGTATG  | 0.682 |
| + | 1  | 2177      | daj.1_Missense_A   | NM_018931    | NP_061754    | Q9Y5F2 | PCDBB_HUMAN  | lasmic (Potential).            | 6  | CTGCTCGGTGC   | 0.657 |
| + | 1  | 1997      | dak.1_Missense_f   | NM_018932    | NP_061755    | Q9Y5F1 | PCDBC_HUMAN  | r (Potential). Cadherin 6.     | 3  | CGTGTCTGACC   | 0.726 |
| - | 4  | 3323      |                    | NM_032420    | NP_115796    | Q08174 | PCDH1_HUMAN  |                                | 5  | TGACGGCGTCTC  | 0.637 |
| + | 2  | 567       |                    | NM_000112    | NP_000103    | P50443 | S26A2_HUMAN  | lasmic (Potential).            | 0  | CGTCCCAAAT    | 0.423 |
| - | 23 | 4448      | jit.1_Missense_Mu  | NM_025153    | NP_079429    | O94823 | AT10B_HUMAN  | ical; (Potential).             | 5  | TGCATCCACCA   | 0.418 |
| + | 9  | 1539      | lyv.2_Missense_M   | NM_000811    | NP_000802    | Q16445 | GBRA6_HUMAN  | lasmic (Prot p.P401L(1)        | 12 | CAACACCTGTC   | 0.463 |
| + | 8  | 991       | en.1_Missense_M    | NM_015238    | NP_056053    | Q8IX03 | KIBRA_HUMAN  | Potential.                     | 5  | TGGCAGAGAAG   | 0.468 |
| - | 34 | 4531      | l.2_Missense_Mut   | NM_003062    | NP_003053    | O75094 | SLIT3_HUMAN  | EGF-like 8.                    | 4  | GCAGGGTCCC    | 0.667 |
| + | 10 | 491       | 3mig.1_Missense_   | NM_001079527 | NP_001072995 |        |              |                                | 0  | TCCTTCTCTG    | 0.527 |
| + | 13 | 1925_1926 | q.1_Missense_Mu    | NM_004415    | NP_004406    | P15924 | DESP_HUMAN   | plakophilin 1 and junction p   | 9  | GGTGTCTGGC    | 0.525 |

rs141226164

rs35400610

|   |     |           |                      |              |              |        |             |                                |    |               |       |
|---|-----|-----------|----------------------|--------------|--------------|--------|-------------|--------------------------------|----|---------------|-------|
| + | 2   | 201       |                      | NM_002114    | NP_002105    | P15822 | ZEP1_HUMAN  |                                | 6  | AAATTCATCCC   | 0.388 |
| + | 6   | 720       | M133 CAP2_uc         | NM_006366    | NP_006357    | P40123 | CAP2_HUMAN  |                                | 1  | GAGATGAATGAC  | 0.398 |
| + | 21  | 2121      | p.G582E LRRC16       | NM_017640    | NP_060110    | Q5VZK9 | LR16A_HUMAN | LRR 9.                         | 4  | CAACGGAATGG   | 0.547 |
| + | 1   | 31        |                      | NM_003523    | NP_003514    | P62807 | H2B1C_HUMAN |                                | 0  | CCGCCCGAAG    | 0.527 |
| + | 6   | 1262      | A3_uc011dkm.1_Intron |              |              |        |             |                                | 0  | CTCTCTGGAGG   | 0.507 |
| + | 7   | 1149      |                      | NM_001732    | NP_001723    | Q13410 | BT1A1_HUMAN | Cytoplasmic (Potential).       | 2  | GTAGGGAGAAT   | 0.557 |
| + | 11  | 1396      | jb.2_Missense_M      | NM_005865    | NP_005856    | Q9NQE7 | TSSP_HUMAN  |                                | 5  | GCCTCAGAATCA  | 0.567 |
| + | 2   | 166       | se_Mutation_p.S5     | NM_001509    | NP_001500    | O75715 | GPX5_HUMAN  |                                | 1  | TGTTTCTTCAA   | 0.423 |
| + | 3   | 573       | v.2_RNA PPP1R11      | NM_021959    | NP_068778    | O60927 | PP1RB_HUMAN | Pro-rich.                      | 3  | ACCGACCCCA    | 0.612 |
| - | 5   | 1323      | DC1_uc003nrh.1_      | NM_014641    | NP_055456    | Q14676 | MDC1_HUMAN  | uclear localization (NLS1).    | 4  | TCCAGGAGGTT   | 0.542 |
| - | 2   | 508       | 1_5'Flank PSORS      | NM_014070    | NP_054789    | Q6UXA7 | CF015_HUMAN |                                | 0  | CTGGTGGAGGA   | 0.622 |
| - | 9   | 1634      | D335N BAT1_uc        | NM_004640    | NP_004631    | Q13838 | DX39B_HUMAN | case C-terminal.               | 0  | GAAATCTTTAA   | 0.413 |
| + | 4   | 674       | c003nuj.2_Silent_    | NM_000594    | NP_000585    | P01375 | TNFA_HUMAN  | ellular (Potential).           | 3  | TCAACCTCCTC   | 0.632 |
| - | 7   | 1044      | p.P238S BAT3_uc      | NM_004639    | NP_004630    | P46379 | BAG6_HUMAN  | proximate repeats. Pro-rich    | 0  | GGCTGGGGCAC   | 0.607 |
| + | 6   | 961       | B_uc011dqu.1_5'F     | NM_001077516 | NP_001070984 | Q92504 | S39A7_HUMAN |                                | 1  | AAAAGGAAACA   | 0.488 |
| + | 80  | 12200     | sense_Mutation_p     | NM_001371    | NP_001362    |        |             |                                | 21 | TAGGTCTTGGTC  | 0.338 |
| + | 89  | 13573     |                      | NM_001371    | NP_001362    |        |             |                                | 21 | TCACTGAACCTT  | 0.443 |
| - | 2   | 410       | H_uc011dvl.1_5'F     | NM_020750    | NP_065801    | Q9HAV4 | XPO5_HUMAN  | for interaction with Ran.      | 4  | AAGGCCAAAATC  | 0.418 |
| - | 10  | 944       | E230K CRISP2_        | NM_001142408 | NP_001135880 | P16562 | CRIS2_HUMAN |                                | 1  | ACTTTTCTTGAC  | 0.393 |
| + | 8   | 983       |                      | NM_018214    | NP_060684    | Q9BTT6 | LRRC1_HUMAN | LRR 10.                        | 1  | GACTTCTGAA    | 0.378 |
| + | 5   | 1866      |                      | NM_001010872 | NP_001010872 | Q5T0W9 | FA83B_HUMAN |                                | 6  | CACCCCTACG    | 0.473 |
| + | 5   | 2655      |                      | NM_001010872 | NP_001010872 | Q5T0W9 | FA83B_HUMAN |                                | 6  | GTAAGGAAGAT   | 0.388 |
| - | 1   | 860       | xf.1_Missense_Mt     | NM_021073    | NP_066551    | P22003 | BMP5_HUMAN  |                                | 2  | TATTTCCCGTCT  | 0.453 |
| - | 5   | 532       | BL2_uc011dxdp.1_RNA  |              |              |        |             |                                | 0  | GTGCGATACC    | 0.507 |
| + | 18  | 3102      | L_Missense_Mutat     | NM_014989    | NP_055804    | Q86UR5 | RIMS1_HUMAN |                                | 10 | TATGTGGATAGT  | 0.363 |
| - | 9   | 1237      | CBP_uc011dyx.1_      | NM_198920    | NP_944602    | Q726J8 | UB2CB_HUMAN | HECT-like.                     | 1  | ACGGCGAAGGG   | 0.463 |
| - | 14  | 2723      | p.E823K EPHA7_       | NM_004440    | NP_004431    | Q15375 | EPHA7_HUMAN | Potential). Protein kinase.    | 28 | TAACTTCCCACAT | 0.408 |
| - | 11  | 1895      | u.2_Missense_Mu      | NM_005068    | NP_005059    | P81133 | SIM1_HUMAN  | inded C-terminal.              | 4  | CAATTTTCTGCTG | 0.453 |
| - | 4   | 438       | ub.2_Intron DDO_     | NM_003649    | NP_003640    | Q99489 | OXDD_HUMAN  |                                | 3  | TCTTTTCGAAATC | 0.468 |
| + | 4   | 886       | E_uc003pwt.2_Nor     | NM_001080976 | NP_001074445 | Q9UL01 | DSE_HUMAN   |                                | 1  | CCTACTTATGGAC | 0.443 |
| - | 14  | 1929      | ebw.1_Nonsense_      | NM_033515    | NP_277050    | Q8N392 | RHG18_HUMAN |                                | 3  | CAACCCACTATC  | 0.363 |
| - | 3   | 780       | _uc003qhk.2_Intrc    | NM_014432    | NP_055247    | Q9UHF4 | I20RA_HUMAN | tential). Fibronectin type-III | 4  | TTCCCAAATGC   | 0.363 |
| + | 23  | 3910      |                      | NM_020340    | NP_065073    | Q5TH69 | BIG3_HUMAN  |                                | 2  | CCCTGGAAACA   | 0.493 |
| - | 143 | 26523     | p.R8641W SYNE1       | NM_182961    | NP_892006    | Q8NF91 | SYNE1_HUMAN | Cytoplasmic (Potential).       | 45 | FGAGCCGATTTCT | 0.423 |
| + | 29  | 4232_4233 | vc.1_Missense_Mi     | NM_001040001 | NP_001035090 | P55196 | AFAD_HUMAN  | Pro-rich.                      | 5  | ACTGCCTCCGC   | 0.614 |
| - | 22  | 4531      |                      | NM_015204    | NP_056019    | Q9UPZ6 | THS7A_HUMAN | Potential). TSP type-1 15.     | 3  | CAGCTGACACA   | 0.453 |
| - | 13  | 3127      |                      | NM_015204    | NP_056019    | Q9UPZ6 | THS7A_HUMAN | . Extracellular (Potential).   | 3  | TTTGTCAACAAG  | 0.388 |
| - | 1   | 484       |                      | NM_175886    | NP_787082    | P21108 | PRPS3_HUMAN |                                | 1  | GCCCTGAATTTCT | 0.448 |
| + | 13  | 1957      | p.P642L HDAC9_       | NM_058176    | NP_478056    | Q9UKV0 | HDAC9_HUMAN | one deacetylase.               | 5  | TGACCCCTTGA   | 0.438 |
| + | 10  | 2243      | h.1_Missense_Mu      | NM_002214    | NP_002205    | P26012 | ITB8_HUMAN  | peats.} Extracellular (Pc      | 3  | CAAGTCACACA   | 0.373 |
| - | 9   | 819       |                      | NM_012294    | NP_036426    | Q92565 | RPGF5_HUMAN |                                | 1  | TGTCGTCTGCTG  | 0.443 |
| - | 3   | 481       | bc.2_RNA GGCT_       | NM_024051    | NP_076956    | O75223 | GGCT_HUMAN  |                                | 0  | TATTTCTTTTCTT | 0.373 |
| + | 16  | 1461      | ADCYAP1R1_uc0        | NM_001118    | NP_001109    | P41586 | PACR_HUMAN  | lasmic (Potential).            | 1  | CAAGCGAAATCT  | 0.612 |
| + | 11  | 1124      |                      | NM_016616    | NP_057700    | Q8N427 | TXND3_HUMAN | NDK 1.                         | 3  | CGAACGATCTG   | 0.443 |
| + | 1   | 470       | p.G22E VSTM2A        | NM_182546    | NP_872352    | Q8TAG5 | VTM2A_HUMAN |                                | 0  | ACAAGGGCTTTT  | 0.403 |
| + | 4   | 680       |                      | NM_001159279 | NP_001152751 |        |             |                                | 2  | AAAACGATGGC   | 0.328 |
| + | 4   | 505       |                      | NM_153363    | NP_699194    | Q8IYX0 | ZN679_HUMAN | KRAB.                          | 1  | AAAGAGAAATGA  | 0.393 |

|   |    |           |                    |              |              |        |             |                                |       |                    |       |             |
|---|----|-----------|--------------------|--------------|--------------|--------|-------------|--------------------------------|-------|--------------------|-------|-------------|
| + | 1  | 125       | 03tte.2_Translatic | NM_016220    | NP_057304    | Q9UII5 | ZN107_HUMAN |                                | 1     | :TAAGACGCCGG       | 0.602 |             |
| - | 15 | 1835      | n.2_Missense_Mu    | NM_000601    | NP_000592    | P14210 | HGF_HUMAN   | peptidase S1.                  | 4     | :CATCTCCTCTTC      | 0.363 |             |
| + | 2  | 622       | ense_Mutation_p.E  | NM_138290    | NP_612147    | Q96NL0 | RUN3B_HUMAN | RUN.                           | 1     | ATTTTGAACAG,       | 0.328 |             |
| + | 1  | 1396      |                    | NM_003505    | NP_003496    | Q9UP38 | FZD1_HUMAN  | Name=1; (Potential).           | 0     | GTCAGTGCCTGT       | 0.622 |             |
| - | 7  | 800       | sumu.1_Missense_   | NM_001742    | NP_001733    | P30988 | CALCR_HUMAN | Name=1; (Potential).           | 9     | :CTAGGGTGAAA       | 0.358 |             |
| + | 8  | 1079      | a.2_Missense_Mut   | NM_015908    | NP_056992    | Q9BXP5 | SRRT_HUMAN  | Glu-rich.                      | 2     | AGCAGGAGGAG        | 0.597 |             |
| + | 3  | 7653      | C17_uc010lho.1_F   | NM_001040105 | NP_001035194 | Q685J3 | MUC17_HUMAN | 3 X approximate tandem re      | 27    | :CTAGCACCCCTT      | 0.488 |             |
| - | 5  | 563       | e_Mutation_p.P77   | NM_022777    | NP_073614    | Q9H7X7 | RABL5_HUMAN |                                | 0     | :CTCAGGGTCAT       | 0.443 |             |
| - | 30 | 4595      | .2_Missense_Mut    | NM_005045    | NP_005036    | P78509 | RELN_HUMAN  | p.D1479E(1)                    | 19    | :GCCATCGTTAAC      | 0.488 |             |
| - | 24 | 3332      | .2_Missense_Mut    | NM_005045    | NP_005036    | P78509 | RELN_HUMAN  | EGF-like 2.                    | 19    | :GCATTCAGTGC       | 0.527 |             |
| - | 4  | 3362      |                    | NM_002711    | NP_002702    | Q16821 | PPR3A_HUMAN |                                | 34    | :CTCTTCCCAGG,      | 0.353 |             |
| - | 4  | 949       | ja.2_Missense_Mu   | NM_003391    | NP_003382    | P09544 | WNT2_HUMAN  |                                | 7     | :CCTGAGAGTAC/      | 0.552 |             |
| + | 5  | 709       | R_uc011knq.1_5'l   | NM_000492    | NP_000483    | P13569 | CFTR_HUMAN  | al). ABC transmembrane tyj     | 5     | TTTGATGAAGTAT      | 0.323 |             |
| + | 12 | 4488      | .2_Intron PTPRZ1   | NM_002851    | NP_002842    | P23471 | PTPRZ_HUMAN | cellular (Potential).          | 9     | :CTGATCATTCTC      | 0.403 |             |
| - | 13 | 1407      | .2_Missense_Mut    | NM_004717    | NP_004708    | O75912 | DGKI_HUMAN  | DAGKc.                         | 3     | .GAGTTCGAGCC,      | 0.552 |             |
| - | 15 | 1859_1860 |                    | NM_004333    | NP_004324    | P15056 | BRAF_HUMAN  | rotein kinase_R603>(2) p.T     | 18290 | :ATTTCACTGTAG      | 0.366 | rs121913378 |
| - | 8  | 1160      |                    | NM_004333    | NP_004324    | P15056 | BRAF_HUMAN  |                                | 18290 | :ATTGGGAGCTG,      | 0.393 |             |
| - | 5  | 504       | se_Mutation_p.G1l  | NM_013252    | NP_037384    | Q9NY25 | CLC5A_HUMAN | . Extracellular (Potential).   | 0     | FGGATCCTTTTTC      | 0.448 |             |
| - | 1  | 149       |                    | NM_176817    | NP_789787    | P59533 | T2R38_HUMAN | Name=1; (Potential).           | 2     | :GGACTGAAATG/      | 0.438 |             |
| + | 5  | 669       | Intron uc003wad.2  | NM_002769    | NP_002760    | P07477 | TRY1_HUMAN  | peptidase S1.                  | 2     | GGGGTGATGGC        | 0.522 |             |
| + | 1  | 644       |                    | NM_001001667 | NP_001001667 | Q8N148 | OR6V1_HUMAN | Name=5; (Potential).           | 1     | TCATCTCCTATGC      | 0.552 |             |
| + | 3  | 1008      | _Intron uc011kto.1 | NM_001130025 | NP_001123497 | A6NFQ2 | F115C_HUMAN |                                | 0     | :TAAAAGATCTGT      | 0.562 |             |
| + | 1  | 650       |                    | NM_012365    | NP_036497    | Q96R48 | OR2A5_HUMAN | Name=5; (Potential).           | 3     | :GGTCTCCTACTC      | 0.612 |             |
| - | 18 | 2189      | p.V680M EZH2_uc    | NM_004456    | NP_004447    | Q15910 | EZH2_HUMAN  | SET. p.N675K(1)                | 183   | :ATCCACCACAA.      | 0.353 |             |
| + | 43 | 6259      |                    | NM_198455    | NP_940857    | A2VEC9 | SSPO_HUMAN  | F5/8 type C.                   | 0     | :AGCTGGAACAC       | 0.667 |             |
| + | 8  | 1031      | P343L AGAP3_uc     | NM_031946    | NP_114152    | Q96P47 | AGAP3_HUMAN | all GTPase-like.               | 3     | :CACCCCCAGCA       | 0.657 |             |
| + | 33 | 4042      | wi.1_Missense_M    | NM_003970    | NP_003961    | P54296 | MYOM2_HUMAN |                                | 6     | AAATACACTTTTC      | 0.423 | rs144413619 |
| - | 49 | 7828      | p.G1809S CSMD1     | NM_033225    | NP_150094    | Q96PZ7 | CSMD1_HUMAN | :xtracellular (Potential).     | 25    | :CATGCCAAGTG/      | 0.502 |             |
| - | 14 | 2275      | wj.1_Missense_M    | NM_033225    | NP_150094    | Q96PZ7 | CSMD1_HUMAN | lar (Potential). CUB 4.        | 25    | CAAATCATTAA        | 0.418 |             |
| - | 3  | 723       | .1_RNA FGF20_uc    | NM_019851    | NP_062825    | Q9NP95 | FGF20_HUMAN |                                | 1     | :TTTCTGGATCC/      | 0.423 |             |
| + | 9  | 1436      | _p.P322L SH2D4A    | NM_022071    | NP_071354    | Q9H788 | SH24A_HUMAN | SH2.                           | 0     | :CATGCCCCGGCA      | 0.468 |             |
| + | 9  | 1212      | se_Mutation_p.G3i  | NM_001722    | NP_001713    | P05423 | RPC4_HUMAN  |                                | 0     | :TCTGGGACAC        | 0.547 |             |
| + | 12 | 1263      | ec.2_Missense_Mi   | NM_003817    | NP_003808    | Q9H2U9 | ADAM7_HUMAN | :B. Extracellular (Potential). | 5     | TTGAAGGATTATA      | 0.353 |             |
| - | 10 | 999       | kek.2_Intron EBF2  | NM_022659    | NP_073150    | Q9HAK2 | COE2_HUMAN  | IPT/TIG.                       | 4     | :GGCTCCTTTGC.      | 0.488 |             |
| - | 3  | 1765      |                    | NM_007257    | NP_009188    | Q9UL42 | PNMA2_HUMAN |                                | 0     | ctcttctccgtattacct | 0.209 |             |
| + | 4  | 502       | C1_uc003xnn.2_R    | NM_002164    | NP_002155    | P14902 | I23O1_HUMAN |                                | 2     | :ACTGTGTCTTG/      | 0.383 |             |
| + | 11 | 1255      | se_Mutation_p.G7   | NM_194294    | NP_919270    | Q6ZQW0 | I23O2_HUMAN |                                | 2     | :ATCTGGACAGG/      | 0.507 |             |
| + | 3  | 352       | ny.2_Missense_M    | NM_032336    | NP_115712    | Q9BRT9 | SLD5_HUMAN  |                                | 1     | :GCAAGCCTGAG       | 0.463 |             |
| - | 6  | 1334      | 3xpe.2_Missense_   | NM_006749    | NP_006740    | Q08357 | S20A2_HUMAN | ical; (Potential).             | 2     | :TATGGCCACAT       | 0.537 |             |
| + | 6  | 636       | c003xql.1_Missen:  | NM_182746    | NP_877423    | P33991 | MCM4_HUMAN  |                                | 4     | :AAGAAGAAGAA       | 0.348 | rs140307429 |
| - | 6  | 773       | se_Mutation_p.P1!  | NM_024593    | NP_078869    | Q9HAE3 | EFCB1_HUMAN |                                | 0     | :ATTTGGATCTTT      | 0.299 |             |
| + | 4  | 2771      | 21_uc011ldy.1_Intr | NM_006269    | NP_006260    | P56715 | RP1_HUMAN   |                                | 12    | :AAGGGGATAAA/      | 0.358 |             |
| - | 3  | 543       | r_p.L99F CA8_uc    | NM_004056    | NP_004047    | P35219 | CAH8_HUMAN  |                                | 0     | :CGAAAGAACTG.      | 0.393 |             |
| - | 3  | 1045_1046 |                    | NM_004820    | NP_004811    | O75881 | CP7B1_HUMAN |                                | 3     | :CTATTTCAAGGT/     | 0.366 |             |
| + | 15 | 1468      | vt.2_Missense_Mu   | NM_001033578 | NP_001028750 | Q96BR1 | SGK3_HUMAN  | rotein kinase.                 | 4     | :CTGGTCCATTC       | 0.428 |             |
| - | 5  | 451       | ense_Mutation_p.F  | NM_001738    | NP_001729    | P00915 | CAH1_HUMAN  |                                | 2     | :AGAAAGGACCA       | 0.418 |             |
| - | 8  | 1276      | .1_Missense_Muti   | NM_015668    | NP_056483    | Q8NE09 | RGS22_HUMAN |                                | 7     | :GCCATGAATAG/      | 0.343 |             |

|   |    |      |                    |              |              |        |                                        |    |                |       |
|---|----|------|--------------------|--------------|--------------|--------|----------------------------------------|----|----------------|-------|
| + | 2  | 798  | p.R216Q RIMS2_     | NM_014677    | NP_055492    | Q9UQ26 | RIMS2_HUMAN                            | 15 | ATCAGCGATCTT/  | 0.458 |
| + | 4  | 471  |                    | NM_177531    | NP_803875    | Q86WI1 | PKHL1_HUMAN ir (Potential), IPT/TIG 1. | 14 | TTACGGAAAAT/   | 0.398 |
| + | 14 | 1429 |                    | NM_177531    | NP_803875    | Q86WI1 | PKHL1_HUMAN ellular (Potential).       | 14 | ATTTTCCAGTCC   | 0.353 |
| + | 38 | 5455 |                    | NM_177531    | NP_803875    | Q86WI1 | PKHL1_HUMAN r (Potential), IPT/TIG 10. | 14 | TCATTGGAAATCA/ | 0.413 |
| + | 26 | 3547 | uc003yqy.1_Intron  | NM_001039112 | NP_001034201 | Q2WGI9 | FR1L6_HUMAN lasmic (Potential).        | 11 | AGATTCGCTAAC   | 0.527 |
| + | 14 | 1590 | 2_uc003zda.2_5'F   | NM_145754    | NP_665697    | Q96AC6 | KIFC2_HUMAN inesin-motor.              | 3  | CGCTGCAGTCG    | 0.667 |
| - | 2  | 331  | _5'Flank MGC708    | NM_001001795 | NP_001001795 | Q6P1X6 | CH082_HUMAN                            | 0  | ATTTTGGAAATCAT | 0.582 |
| + | 9  | 1154 | p.E343K ADAMT5     | NM_001040272 | NP_001035362 | Q8N6G6 | ATL1_HUMAN                             | 5  | ACCCAGAGAAAC/  | 0.453 |
| - | 1  | 745  | zob.1_Missense_M   | NM_020344    | NP_065077    | Q9UI40 | NCKX2_HUMAN lasmic (Potential).        | 3  | ATTTCTCTAGAAA  | 0.413 |
| - | 1  | 190  | uc003zrh.1_Intron  | NM_153809    | NP_722516    | Q8IZX4 | TAF1L_HUMAN                            | 26 | AAATGGGCCAC/   | 0.567 |
| + | 4  | 416  | _p.D20Y NUDT2_     | NM_001161    | NP_001152    | P50583 | AP4A_HUMAN dix hydrolase.              | 0  | AAAGTGAGAAC.   | 0.468 |
| + | 5  | 378  | p.G102S ANXA1_     | NM_000700    | NP_000691    | P04083 | ANXA1_HUMAN Annexin 1.                 | 2  | TTACAGGTCA/    | 0.403 |
| - | 25 | 3758 | 1_Intron TRPM6_    | NM_017662    | NP_060132    | Q9BX84 | TRPM6_HUMAN lasmic (Potential).        | 8  | CACTCGGATTC/   | 0.368 |
| - | 21 | 3003 | 1_Intron TRPM6_L   | NM_017662    | NP_060132    | Q9BX84 | TRPM6_HUMAN ical; (Potential).         | 8  | CAGCTGAAAA/    | 0.473 |
| - | 11 | 886  | VRNPK_uc004ani.    | NM_031262    | NP_112552    | P61978 | HNRPK_HUMAN DX1. 2 X 22 AA approxima   | 1  | GTGCACGTCCT    | 0.418 |
| + | 3  | 1955 | p.3_Missense_Mu    | NM_024945    | NP_079221    | Q9H9A7 | RMI1_HUMAN                             | 0  | TGTAACCTTAAC   | 0.383 |
| + | 4  | 4327 |                    | NM_178828    | NP_849150    | Q6ZUB1 | CI079_HUMAN                            | 3  | CCATCCACAGC    | 0.607 |
| - | 2  | 726  |                    | NM_005384    | NP_005375    | Q16649 | NFIL3_HUMAN ucine-zipper.              | 0  | CGTTTTCTTCTC/  | 0.388 |
| - | 3  | 451  | on_p.G129E ECM2    | NM_001393    | NP_001384    | O94769 | ECM2_HUMAN VWFC.                       | 2  | CTCTTCCATCTC   | 0.522 |
| + | 9  | 1736 | e_Mutation_p.E37I  | NM_001083536 | NP_001077005 | Q5JSP0 | FGD3_HUMAN PH 1.                       | 2  | CCCAATGAACTG   | 0.587 |
| + | 7  | 1712 | _p.Q510* PTPDC     | NM_177995    | NP_818931    | A2A3K4 | PTPC1_HUMAN                            | 1  | GGAGTCAGTCA/   | 0.478 |
| - | 1  | 90   | N3A_uc004bbq.1_    | NM_147180    | NP_671709    | Q96LZ3 | CANB2_HUMAN                            | 2  | GGCCTCGTTTC/   | 0.592 |
| - | 3  | 2811 | bbq.1_Missense_M   | NM_133445    | NP_597702    | Q8TCU5 | NMD3A_HUMAN lasmic (Potential).        | 7  | CATTTTGGAGGT   | 0.448 |
| - | 1  | 278  |                    | NM_001001919 | NP_001001919 | Q8NGS5 | O13C4_HUMAN ellular (Potential).       | 1  | AGAAGGAAATG    | 0.448 |
| - | 28 | 4257 |                    | NM_005502    | NP_005493    | O95477 | ABCA1_HUMAN                            | 17 | TAGGACCCTTTG/  | 0.473 |
| - | 15 | 2223 | mc.1_Missense_M    | NM_003640    | NP_003631    | O95163 | ELP1_HUMAN                             | 7  | CTACTGACTTGC   | 0.408 |
| - | 17 | 2442 | lorf5_uc004bdr.3_I | NM_032012    | NP_114401    | Q9H330 | CI005_HUMAN                            | 1  | GTAAAGGATGGC   | 0.433 |
| - | 38 | 7457 | ty.2_Missense_M    | NM_153366    | NP_699197    | Q4LDE5 | SVEP1_HUMAN Sushi 16.                  | 7  | AACAGGGAAG/    | 0.463 |
| - | 2  | 923  | :P1_uc004beu.2_I   | NM_153366    | NP_699197    | Q4LDE5 | SVEP1_HUMAN VWFA.                      | 7  | TCCATCAGTGAT   | 0.423 |
| - | 15 | 1808 | muc.1_Missense_I   | NM_001080398 | NP_001073867 |        |                                        | 0  | AATGTGGCATCC   | 0.353 |
| - | 20 | 2186 | lxc.1_Missense_M   | NM_015258    | NP_056073    | Q5T1M5 | FKB15_HUMAN Potential.                 | 3  | CTGCACTTTGG/   | 0.463 |
| - | 2  | 547  | vf.2_Missense_Mu   | NM_002160    | NP_002151    | P24821 | TENA_HUMAN                             | 7  | ACTGGGATCCC.   | 0.572 |
| - | 5  | 1058 | cd.2_Missense_ML   | NM_014618    | NP_055433    | O60477 | DBC1_HUMAN MACPF.                      | 8  | CCAGAGGCCCA    | 0.512 |
| - | 1  | 65   | LOC253039_uc0C     | NM_005047    | NP_005038    | Q16401 | PSMD5_HUMAN                            | 0  | CGCTTCCAGCC    | 0.711 |
| + | 12 | 1236 | bf.2_Missense_ML   | NM_020822    | NP_065873    | Q5JUK3 | KCNT1_HUMAN                            | 4  | TCATGGACTTCC/  | 0.647 |
| + | 6  | 586  | _p.S22F TBL1X_L    | NM_001139466 | NP_001132938 | O60907 | TBL1X_HUMAN LisH.                      | 1  | TTTTTCCCCTC/   | 0.552 |
| - | 2  | 1585 | VRHGAP6_uc004c     | NM_013427    | NP_038286    | O43182 | RHG06_HUMAN                            | 2  | CAGCTCCTGTT/   | 0.557 |
| - | 5  | 872  | p.D177N GEMIN8     | NM_017856    | NP_060326    | Q9NWZ8 | GEM18_HUMAN                            | 0  | CAGGTCGTGGT/   | 0.592 |
| + | 3  | 435  | ie_Mutation_p.G3E  | NM_001118885 | NP_001112357 | P23416 | GLRA2_HUMAN ellular (Probable).        | 2  | GGTCTGGAAAA/   | 0.418 |
| + | 3  | 507  | ie_Mutation_p.D5E  | NM_001118885 | NP_001112357 | P23416 | GLRA2_HUMAN ellular (Probable).        | 2  | GTATGATGCA/    | 0.378 |
| - | 3  | 1798 | p.E410K RAI2_uc    | NM_021785    | NP_068557    | Q9Y5P3 | RAI2_HUMAN                             | 2  | CATCTCGGTAG/   | 0.557 |
| + | 3  | 291  | _p.G46D PDHA1_     | NM_000284    | NP_000275    | P08559 | ODPA_HUMAN                             | 1  | AGAAGGCCCTC    | 0.458 |
| - | 2  | 100  | l1mj.1_Missense_   | NM_004586    | NP_004577    | P51812 | KS6A3_HUMAN                            | 8  | CTCTCCATAG/    | 0.348 |
| - | 2  | 320  | w.2_RNA APOO_L     | NM_024122    | NP_077027    | Q9BUR5 | APOO_HUMAN                             | 0  | TGGGAGGTGAG    | 0.413 |
| - | 4  | 1359 |                    | NM_030624    | NP_085127    | Q96M94 | KLH15_HUMAN Kelch 1.                   | 2  | AGCGTGGTACA/   | 0.468 |
| + | 1  | 435  |                    | NM_001013736 | NP_001013758 | Q5HY64 | FA47C_HUMAN                            | 3  | AAGATATGCCT/   | 0.572 |
| + | 40 | 7412 | c.2_Missense_Mu    | NM_001039590 | NP_001034679 | Q93008 | USP9X_HUMAN                            | 6  | TTTTGGTGATC/   | 0.333 |

|   |    |      |                   |              |              |        |             |                             |    |                |       |             |
|---|----|------|-------------------|--------------|--------------|--------|-------------|-----------------------------|----|----------------|-------|-------------|
| - | 24 | 2345 | o.P587S CASK_uc   | NM_003688    | NP_003679    | O14936 | CSKP_HUMAN  | ylate kinase-like.          | 6  | TACGTGGAATAGC  | 0.303 |             |
| - | 7  | 794  | dit.2_Missense_Mt | NM_006962    | NP_008893    | P17025 | ZN182_HUMAN |                             | 3  | CAACAAGGTTTG   | 0.338 |             |
| - | 10 | 1848 | vq.1_Missense_Mi  | NM_017677    | NP_060147    | Q96EF0 | MTMR8_HUMAN |                             | 4  | AGACACGAGCCA   | 0.527 |             |
| + | 2  | 1827 | XOX4_uc004dyt.1   | NM_005938    | NP_005929    | P98177 | FOXO4_HUMAN |                             | 3  | TATGATGATGAGC  | 0.493 |             |
| + | 8  | 1290 | RN1_uc011mpt.1    | NM_052957    | NP_443189    | Q96QF7 | ACRC_HUMAN  | Asp/Ser-rich.               | 3  | TCGGAAGCTCC    | 0.552 |             |
| - | 1  | 939  | mjq.1_Missense_N  | NM_021963    | NP_068798    | Q9ULW6 | NP1L2_HUMAN | u-rich (acidic).            | 1  | CATATTCATGTAC  | 0.338 |             |
| - | 1  | 525  | 1L2_uc011mqj.1    | NM_021963    | NP_068798    | Q9ULW6 | NP1L2_HUMAN |                             | 1  | TTCCTCCCAAC    | 0.592 |             |
| - | 4  | 534  | ow.2_Missense_Mt  | NM_183353    | NP_899196    | Q9NVW2 | RNF12_HUMAN |                             | 2  | TATTTTCATCTGA  | 0.418 |             |
| - | 3  | 1735 |                   | NM_001008537 | NP_001008537 | Q5QGS0 | K2022_HUMAN |                             | 15 | CCCCCAGATG     | 0.468 |             |
| + | 4  | 535  | P2_uc011mrh.1_5'  | NM_001939    | NP_001930    | Q13474 | DRP2_HUMAN  |                             | 2  | CTGGGGTTCCC    | 0.517 |             |
| + | 5  | 1189 | eib.1_Missense_N  | NM_016607    | NP_057691    | Q9UH62 | ARMX3_HUMAN |                             | 2  | CTCATCTGTGC    | 0.383 |             |
| - | 4  | 498  | ase.Mutation_p.P1 | NM_022052    | NP_071335    | Q9H4D5 | NXF3_HUMAN  | RRM.                        | 3  | AACTGGGACGA    | 0.458 |             |
| - | 38 | 3825 | _Mutation_p.G121  | NM_001847    | NP_001838    | Q14031 | CO4A6_HUMAN | le-helical region.          | 8  | GGAGACCAGCA    | 0.572 |             |
| - | 11 | 793  | msn.1_Splice_Site | NM_001847    | NP_001838    | Q14031 | CO4A6_HUMAN |                             | 8  | TGTTTACCTTGAC  | 0.398 |             |
| + | 20 | 1421 | _p.Q407* COL4A5   | NM_033380    | NP_203699    | P29400 | CO4A5_HUMAN | le-helical region.          | 4  | .GGGGTCAGAAA   | 0.527 |             |
| + | 24 | 1862 | _p.P554S COL4A5   | NM_033380    | NP_203699    | P29400 | CO4A5_HUMAN | le-helical region.          | 4  | ACTTTTCCAGGA   | 0.498 |             |
| - | 13 | 2752 | Y2F_uc011msq.1    | NM_001522    | NP_001513    | P51841 | GUC2F_HUMAN | lasmic (Potential).         | 8  | ATCCGAAGCA     | 0.353 | rs145623152 |
| - | 11 | 3395 |                   | NM_012471    | NP_036603    | Q9UL62 | TRPC5_HUMAN | lasmic (Potential).         | 1  | TGACTTTCCTTC   | 0.453 |             |
| + | 10 | 1573 | _splice PLS3_uc01 | NM_005032    | NP_005023    | P13797 | PLST_HUMAN  |                             | 2  | TAGAAGGTAACT   | 0.348 |             |
| - | 4  | 1054 | sv.2_Missense_Mt  | NM_003588    | NP_003579    | Q13620 | CUL4B_HUMAN |                             | 3  | AATTTAGGCTTAT  | 0.313 |             |
| + | 14 | 2383 | e.Mutation_p.A69  | NM_007325    | NP_015564    | P42263 | GRIA3_HUMAN | ellular (Potential).        | 5  | AATTGCTGTGT    | 0.408 |             |
| + | 18 | 2663 | _p.M801 SAGE1_u   | NM_018666    | NP_061136    | Q9NXZ1 | SAGE1_HUMAN |                             | 3  | TTAATGAAAGAA   | 0.343 |             |
| - | 12 | 2051 | awc.1_Missense_N  | NM_024597    | NP_078873    | Q8IWC1 | MA7D3_HUMAN |                             | 4  | CCCATCTTTGAC   | 0.418 |             |
| - | 19 | 2351 | n.1_Missense_Mu   | NM_005369    | NP_005360    | P10911 | MCF2_HUMAN  |                             | 2  | AGTTTCCCTAGA   | 0.408 |             |
| + | 1  | 392  |                   | NM_001012989 | NP_001013007 | Q5JXB2 | UE2NL_HUMAN |                             | 0  | ATGATCCATTAGC  | 0.443 |             |
| + | 11 | 2350 | o.1_Missense_Mut  | NM_002025    | NP_002016    | P51816 | AFF2_HUMAN  |                             | 5  | TCAAAGGCAAA    | 0.448 |             |
| + | 3  | 1086 | _Mutation_p.R298  | NM_005363    | NP_005354    | P43360 | MAGA6_HUMAN | MAGE.                       | 0  | GACCTCGCATT    | 0.557 |             |
| - | 3  | 1149 |                   | NM_005362    | NP_005353    | P43357 | MAGA3_HUMAN |                             | 0  | TCACTCTTCCC    | 0.572 |             |
| - | 17 | 5851 | .1_Missense_Mut   | NM_000132    | NP_000123    | P00451 | FA8_HUMAN   | 3. Plastocyanin-like 6.     | 11 | CAAATTCCTGTAC  | 0.468 |             |
| - | 14 | 2968 |                   | NM_000132    | NP_000123    | P00451 | FA8_HUMAN   | B.                          | 11 | ACTATCATAATG   | 0.378 |             |
| + | 4  | 857  |                   | NM_017655    | NP_060125    | Q8TF65 | GIPC2_HUMAN |                             | 1  | GGAAGGCAACA    | 0.398 |             |
| + | 1  | 301  |                   | NM_006536    | NP_006527    | Q9UQC9 | CLCA2_HUMAN | ellular (Potential).        | 3  | ATTGCAATTAATC  | 0.418 |             |
| + | 5  | 3341 |                   | NM_001080426 | NP_001073895 | Q5VZP5 | DUS27_HUMAN |                             | 3  | TGCATCTGGACC   | 0.507 |             |
| + | 6  | 1019 | _p.P192L CACNA1   | NM_000721    | NP_000712    | Q15878 | CAC1E_HUMAN | ellular (Potential).        | 6  | CGGCCCAATG     | 0.517 |             |
| - | 1  | 869  |                   | NM_001001966 | NP_001001966 | Q8NH5  | O14AG_HUMAN | lasmic (Potential).         | 0  | TTGTTTCTCAA    | 0.393 |             |
| - | 1  | 475  |                   | NM_001001966 | NP_001001966 | Q8NH5  | O14AG_HUMAN | ellular (Potential).        | 0  | TCCAGCTGTGT    | 0.473 |             |
| + | 7  | 1156 |                   | NM_052997    | NP_443723    | Q9BXX3 | AN30A_HUMAN |                             | 9  | CGTGGGCAGCA    | 0.408 |             |
| - | 2  | 1239 | mjq.2_Missense_Mt | NM_005674    | NP_005665    | Q16600 | ZN239_HUMAN |                             | 0  | TATATGATGACC   | 0.438 |             |
| - | 4  | 658  |                   | NM_001031746 | NP_001026916 | Q8IW00 | CJ072_HUMAN | lasmic (Potential).         | 0  | TCTCTGGATTCC   | 0.517 |             |
| + | 1  | 838  |                   | NM_001001916 | NP_001001916 | Q8NH60 | O52J3_HUMAN | Name=7; (Potential).        | 3  | GCCAATCTCTAT   | 0.393 | rs138334057 |
| - | 6  | 682  | F22_uc001mpa.2_   | NM_173588    | NP_775859    | Q8N9C0 | IGS22_HUMAN | Lys-rich.                   | 7  | AAAGTCCATTTTC  | 0.517 |             |
| + | 1  | 306  |                   | NM_001004703 | NP_001004703 | A6NHA9 | O4C46_HUMAN | ellular (Potential).        | 1  | TGGAGAACATTTTC | 0.463 |             |
| - | 1  | 1081 |                   | NM_207374    | NP_997257    | Q8NGF6 | O10W1_HUMAN | lasmic (Potential).         | 1  | GGCCCGGTGGC    | 0.582 |             |
| + | 6  | 1233 | nwu.3_RNA SLC2    | NM_001039752 | NP_001034841 | Q63ZE4 | S22AA_HUMAN | ellular (Potential).        | 2  | TTCGCAACCA     | 0.398 |             |
| + | 7  | 1025 |                   | NM_207345    | NP_997228    | Q6UXN8 | CLC9A_HUMAN | (Potential). C-type lectin. | 1  | CCAGTCAAGAG    | 0.378 |             |
| - | 4  | 942  | B4_uc001qzf.1_Inl | NM_006249    | NP_006240    | Q04118 | PRB3_HUMAN  | Pro-rich.                   | 1  | GAGGATCTGT     | 0.537 |             |
| - | 3  | 252  |                   | NM_006248    | NP_006239    |        |             |                             | 0  | AGGAGGTGGGG    | 0.607 |             |



|   |     |       |                   |              |              |        |             |                                |       |                    |       |             |
|---|-----|-------|-------------------|--------------|--------------|--------|-------------|--------------------------------|-------|--------------------|-------|-------------|
| + | 1   | 236   |                   | NM_001004063 | NP_001004063 | Q8NGD4 | OR4K1_HUMAN | Name=2; (Potential).           | 3     | :CACCCCAAGA'       | 0.398 |             |
| - | 14  | 1683  | ngu.1_Missense_Iv | NM_024580    | NP_078856    | Q7Z2Z2 | ETUD1_HUMAN |                                | 1     | :CAATAAAAGAC1      | 0.433 | rs142283736 |
| - | 13  | 4054  | lyn.1_Missense_M  | NM_001134407 | NP_001127879 | Q12879 | NMDE1_HUMAN | lasmic (Potential).            | 45    | :GGTCCGGTTC        | 0.537 |             |
| + | 1   | 225   | PIRE2_uc010ciw.1  | NM_032451    | NP_115827    | Q8WWL2 | SPIR2_HUMAN | KIND.                          | 1     | :CCGGCGCCTGC       | 0.483 |             |
| + | 48  | 7584  |                   | NM_020877    | NP_065928    | Q9P225 | DYH2_HUMAN  | 3 (By similarity).             | 13    | :TCTAGGAAATG'      | 0.597 |             |
| + | 6   | 754   |                   | NM_001145127 | NP_001138599 | A8MZ36 | EVPLL_HUMAN |                                | 0     | :CAATACCGAGA       | 0.682 |             |
| + | 5   | 445   | iCA_uc002iqj.2_M  | NM_000023    | NP_000014    | Q16586 | SGCA_HUMAN  | cellular (Potential).          | 2     | :AAGCCGAGTTC       | 0.677 |             |
| + | 1   | 977   | uc010wna.1_RNA    | NM_032559    | NP_115948    | Q8N4N8 | KIF2B_HUMAN | kinin-motor.                   | 8     | :CAAAGCCTCCA/      | 0.557 |             |
| - | 5   | 1201  | .Q156H CXXC1_u    | NM_014593    | NP_055408    | Q9P0U4 | CXXC1_HUMAN |                                | 2     | ctgctgctgctgctgatg | 0.468 |             |
| - | 4   | 803   | ntq.2_Missense_M  | NM_145276    | NP_660319    | Q8TA94 | ZN563_HUMAN | type 2; degenerate.            | 0     | :CACTACCATGT       | 0.423 |             |
| - | 3   | 307   | ILRA3_uc010erk.2  | NM_006865    | NP_006856    | Q8N6C8 | LIRA3_HUMAN | like C2-type p.G81G(1)         | 1     | :AACTGGCCCTTC      | 0.542 |             |
| + | 4   | 403   | p.2_RNA SNTG2_    | NM_018968    | NP_061841    | Q9NY99 | SNTG2_HUMAN | PDZ.                           | 3     | :AGGTTCTGAGC       | 0.393 |             |
| - | 3   | 266   | _p.E52K REG1B_    | NM_006507    | NP_006498    | P48304 | REG1B_HUMAN | C-type lectin.                 | 2     | :GTCCTCATTA/       | 0.532 |             |
| - | 27  | 4708  |                   | NM_004525    | NP_004516    | P98164 | LRP2_HUMAN  | in B 10. Extracellular (Potent | 29    | :TCTGTCCGTT        | 0.438 |             |
| - | 225 | 45447 | _uc010zfi.1_Misse | NM_133378    | NP_596869    | Q8WZ42 | TITIN_HUMAN |                                | 153   | :CACCCGAAGTT       | 0.483 |             |
| - | 2   | 356   |                   | NM_020760    | NP_065811    | Q9P2P5 | HECW2_HUMAN |                                | 18    | :TGGAGCGGCTC       | 0.582 |             |
| - | 4   | 999   | uf.1_Missense_Mu  | NM_003098    | NP_003089    | Q13424 | SNTA1_HUMAN | PH 1.                          | 1     | :TTGACCATCTGC      | 0.597 |             |
| + | 6   | 949   | H26_uc010zzy.1_F  | NM_177980    | NP_817089    | Q8IXH8 | CAD26_HUMAN | Extracellular (Potential).     | 4     | :AAAGTGGTTTT       | 0.358 |             |
| + | 18  | 2574  | N_uc003ajn.1_Mis  | NM_006932    | NP_008863    | P53814 | SMTN_HUMAN  |                                | 3     | :GCGCAGCCGTG       | 0.662 |             |
| - | 13  | 2147  | vw.2_Missense_M   | NM_001001331 | NP_001001331 | Q01814 | AT2B2_HUMAN | lasmic (Potential).            | 6     | :GCACTCCGTCT       | 0.642 |             |
| + | 9   | 3930  | 6A6_uc003eni.3_5  | NM_001102608 | NP_001096078 | A6NMZ7 | CO6A6_HUMAN | Nonhelical region.             | 8     | :TGMTCTTTTAT1      | 0.333 |             |
| - | 8   | 1822  | :GC1A_uc011bxp.'  | NM_013261    | NP_037393    | Q9UBK2 | PRGC1_HUMAN | Arg/Ser-rich.                  | 8     | :TGAACGAGAGC       | 0.453 |             |
| + | 16  | 2807  | cl.1_Nonsense_Mt  | NM_005509    | NP_005500    | Q9Y485 | DMXL1_HUMAN | WD 7.                          | 2     | :GCACTCAAGAC/      | 0.348 |             |
| + | 1   | 960   | .2_Intron PCDHA6  | NM_018903    | NP_061726    | Q9UN75 | PCDAC_HUMAN | Extracellular (Potential).     | 0     | :AAATTCCTATGC      | 0.368 |             |
| + | 2   | 258   |                   | NM_005546    | NP_005537    | Q08881 | ITK_HUMAN   | PH.                            | 26    | :TCTCCGAATCA.      | 0.458 |             |
| - | 1   | 728   |                   | NM_033057    | NP_149046    | Q9GZK3 | OR2B2_HUMAN | Name=6; (Potential).           | 0     | :GATGGGAGCCA/      | 0.468 |             |
| + | 58  | 8231  | f125_uc003oez.1_  | NM_002224    | NP_002215    | Q14573 | ITPR3_HUMAN | lasmic (Potential).            | 19    | :TAGCCGCTGAG       | 0.612 |             |
| + | 41  | 10444 | _p.E3030* AKAP9_  | NM_005751    | NP_005742    | Q99996 | AKAP9_HUMAN | Potential.                     | 26    | :TGCATGAGCTCC      | 0.443 |             |
| - | 15  | 1860  |                   | NM_004333    | NP_004324    | P15056 | BRAF_HUMAN  | rotein kinasi_R603>(2) p.T     | 18290 | :ATTTCACTGTAC      | 0.368 |             |
| - | 2   | 229   |                   | NM_001103176 | NP_001096646 | Q3B7I2 | CNPY1_HUMAN |                                | 0     | :TTGGTATATTTG      | 0.388 |             |
| - | 13  | 1198  | kek.2_Intron EBF2 | NM_022659    | NP_073150    | Q9HAK2 | COE2_HUMAN  |                                | 4     | :CGGCTCGCTTC       | 0.488 |             |
| - | 5   | 1165  | e_Mutation_p.G24  | NM_014682    | NP_055497    | O60284 | ST18_HUMAN  |                                | 5     | :TTCCCTGCTAC       | 0.433 |             |
| + | 32  | 4196  | yoz.2_Missense_I  | NM_021110    | NP_066933    | Q05707 | COEA1_HUMAN | ion (NC4). TSP N-terminal.     | 12    | :TAAATAAAAT        | 0.393 |             |
| - | 38  | 8675  | ty.2_Missense_Mt  | NM_153366    | NP_699197    | Q4LDE5 | SVEP1_HUMAN | Sushi 23.                      | 7     | :GACTGGATTTG       | 0.473 |             |
| - | 7   | 8075  |                   | NM_015419    | NP_056234    | Q9NR99 | MXRA5_HUMAN | ike C2-type 11.                | 8     | :CTGTTTGCTTC       | 0.637 |             |
| + | 4   | 857   |                   | NM_017655    | NP_060125    | Q8TF65 | GIPC2_HUMAN |                                | 1     | :GAAGGGCAACA       | 0.398 |             |
| + | 1   | 301   |                   | NM_006536    | NP_006527    | Q9UQC9 | CLCA2_HUMAN | cellular (Potential).          | 3     | :ATTGCAATTAATC     | 0.418 |             |
| - | 9   | 502   | 25_splice HORMA1  | NM_032132    | NP_115508    | Q86X24 | HORM1_HUMAN |                                | 3     | :TTTTACTAGAAG      | 0.308 |             |
| + | 5   | 3341  |                   | NM_001080426 | NP_001073895 | Q5VZP5 | DUS27_HUMAN |                                | 3     | :TGCATCTGGACC      | 0.507 |             |
| + | 6   | 1019  | _p.P192L CACNA1   | NM_000721    | NP_000712    | Q15878 | CAC1E_HUMAN | cellular (Potential).          | 6     | :CGGCCCAATG/       | 0.517 |             |
| - | 1   | 869   |                   | NM_001001966 | NP_001001966 | Q8NHC5 | O14AG_HUMAN | lasmic (Potential).            | 0     | :TTGTTTCTCAA/      | 0.393 |             |
| - | 1   | 475   |                   | NM_001001966 | NP_001001966 | Q8NHC5 | O14AG_HUMAN | cellular (Potential).          | 0     | :GCCAGCTGTGT       | 0.473 |             |
| - | 2   | 1239  | mj.2_Missense_Mt  | NM_005674    | NP_005665    | Q16600 | ZN239_HUMAN |                                | 0     | :ATATGGATGACC      | 0.438 |             |
| - | 4   | 658   |                   | NM_001031746 | NP_001026916 | Q8IW00 | CJ072_HUMAN | lasmic (Potential).            | 0     | :CTCTGGATTTCC      | 0.517 |             |
| + | 2   | 273   | _p.Q11* BUB3_uc   | NM_004725    | NP_004716    | O43684 | BUB3_HUMAN  | WD 1.                          | 1     | :TGAACCAGCCA/      | 0.627 |             |
| + | 1   | 838   |                   | NM_001001916 | NP_001001916 | Q8NH60 | O52J3_HUMAN | Name=7; (Potential).           | 3     | :GCCAATCTCTAT1     | 0.393 | rs138334057 |
| - | 6   | 682   | =22_uc001mpa.2_   | NM_173588    | NP_775859    | Q8N9C0 | IGS22_HUMAN | Lys-rich.                      | 7     | :AAGTCCATTTTC      | 0.517 |             |

|   |     |         |                                                       |              |              |        |             |                               |       |               |       |             |
|---|-----|---------|-------------------------------------------------------|--------------|--------------|--------|-------------|-------------------------------|-------|---------------|-------|-------------|
| + | 1   | 306     |                                                       | NM_001004703 | NP_001004703 | A6NHA9 | O4C46_HUMAN | cellular (Potential).         | 1     | GGAGAACATTT   | 0.463 |             |
| - | 1   | 1081    |                                                       | NM_207374    | NP_997257    | Q8NGF6 | O10W1_HUMAN | plasmic (Potential).          | 1     | GGCCCGGTGGC   | 0.582 |             |
| + | 7   | 1025    |                                                       | NM_207345    | NP_997228    | Q6UXN8 | CLC9A_HUMAN | (Potential). C-type lectin.   | 1     | ACCAGTCAAGAG  | 0.378 |             |
| + | 25  | 2347    | _Mutation_p.A756                                      | NM_017901    | NP_060371    | Q9ULQ1 | TPC1_HUMAN  | 56 of repeat II; (Potential). | 3     | ATTGTCGCCTTT  | 0.597 |             |
| - | 46  | 5946    | o.E1483K CIT_uc0                                      | NM_007174    | NP_009105    | O14578 | CTRO_HUMAN  |                               | 10    | iCAGCTCGGTCC  | 0.731 |             |
| + | 38  | 3852    | TC1_uc010taf.1_In                                     | NM_014708    | NP_055523    | P50748 | KNTC1_HUMAN |                               | 10    | 3ATATCCCTTGG  | 0.204 |             |
| + | 1   | 236     |                                                       | NM_001004063 | NP_001004063 | Q8NGD4 | OR4K1_HUMAN | Name=2; (Potential).          | 3     | ACACCCCAAGA   | 0.398 |             |
| - | 2   | 600     |                                                       | NM_003814    | NP_003805    | O43506 | ADA20_HUMAN |                               | 1     | CTGTCCCCCAA   | 0.517 |             |
| - | 22  | 8319    | _Mutation_p.A270                                      | NM_001009944 | NP_001009944 | P98161 | PKD1_HUMAN  | ular (Potential). REJ.        | 3     | GCCCGCGGTGC   | 0.687 |             |
| - | 13  | 4054    | yn.1_Missense_M                                       | NM_001134407 | NP_001127879 | Q12879 | NMDE1_HUMAN | plasmic (Potential).          | 45    | 3GGTTCGGTTC   | 0.537 |             |
| + | 48  | 7584    |                                                       | NM_020877    | NP_065928    | Q9P225 | DYH2_HUMAN  | 3 (By similarity).            | 13    | CTCTAGGAAATG  | 0.597 |             |
| + | 6   | 754     |                                                       | NM_001145127 | NP_001138599 | A8MZ36 | EVPLL_HUMAN |                               | 0     | CCAATACCGAGA  | 0.682 |             |
| + | 5   | 445     | iCA_uc002iqj.2_M                                      | NM_000023    | NP_000014    | Q16586 | SGCA_HUMAN  | cellular (Potential).         | 2     | AAGCCGAGTTCC  | 0.677 |             |
| - | 4   | 803     | ntq.2_Missense_M                                      | NM_145276    | NP_660319    | Q8TA94 | ZN563_HUMAN | type 2; degenerate.           | 0     | 3CACTACCATGT  | 0.423 |             |
| + | 4   | 1415    | ipo.1_Intron ZNF5                                     | NM_001143939 | NP_001137411 | Q76KX8 | ZN534_HUMAN | 2H2-type 10.                  | 0     | CCTTACGAATGT  | 0.433 |             |
| - | 3   | 307     | ILRA3_uc010erk.2                                      | NM_006865    | NP_006856    | Q8N6C8 | LIRA3_HUMAN | like C2-type p.G81G(1)        | 1     | AACTGGCCCTTC  | 0.542 |             |
| + | 4   | 403     | p.2_RNA SNTG2_                                        | NM_018968    | NP_061841    | Q9NY99 | SNTG2_HUMAN | PDZ.                          | 3     | 3AGGTTCTGAGC  | 0.393 |             |
| - | 225 | 45447   | _uc010zfi.1_Misse                                     | NM_133378    | NP_596869    | Q8WZ42 | TITIN_HUMAN |                               | 153   | TCACCCGAAGTT  | 0.483 |             |
| - | 10  | 1100    | p.H236R CSNK2A                                        | NM_177559    | NP_808227    | P68400 | CSK21_HUMAN | rotein kinase.                | 1     | TGTCATGTCCAT  | 0.373 | rs61730060  |
| + | 2   | 61      | tj.1_RNA FRG1B_uc010gdr.1_RNA FRG1B_uc010ztk.1_Intron |              |              |        |             |                               | 0     | .CAGAATCGCCC  | 0.353 | rs143761036 |
| + | 6   | 949     | H26_uc010zzy.1_F                                      | NM_177980    | NP_817089    | Q8IXH8 | CAD26_HUMAN | Extracellular (Potential).    | 4     | 3AAAGTGGTTTCC | 0.358 |             |
| + | 1   | 299     | .1_Intron C21orf29                                    | NM_198697    | NP_941970    | P60328 | KR123_HUMAN | 1A approximate repeats.       | 1     | .TGCCCTCTGCA  | 0.617 |             |
| - | 13  | 2147    | vw.2_Missense_M                                       | NM_001001331 | NP_001001331 | Q01814 | AT2B2_HUMAN | plasmic (Potential).          | 6     | 3GCACTCCGTCT  | 0.642 |             |
| - | 1   | 666_667 | pv.1_Missense_Mt                                      | NM_198407    | NP_940799    | Q92847 | GHSR_HUMAN  | Name=5; (Potential).          | 5     | AGGAAGGAAGA   | 0.629 |             |
| + | 21  | 3297    |                                                       | NM_006218    | NP_006209    | P42336 | PK3CA_HUMAN | PI3K/PI4K.32) p.H1047Y(       | 3553  | ITGCACATCATGC | 0.378 | rs121913279 |
| - | 16  | 2401    | 74_splice ABCC5_                                      | NM_005688    | NP_005679    | O15440 | MRP5_HUMAN  |                               | 4     | 3AGGTACTGAAG  | 0.338 |             |
| - | 8   | 1822    | .GC1A_uc011bxp.                                       | NM_013261    | NP_037393    | Q9UBK2 | PRGC1_HUMAN | Arg/Ser-rich.                 | 8     | TGAACGAGAGC   | 0.453 |             |
| - | 12  | 1842    | p.E468V FSTL5_u                                       | NM_020116    | NP_064501    | Q8N475 | FSTL5_HUMAN |                               | 8     | TCACATTCTATGG | 0.328 |             |
| + | 11  | 2236    |                                                       | NM_020227    | NP_064612    | Q9NQV7 | PRDM9_HUMAN | 2H2-type 7.                   | 6     | .GAGGACACACA  | 0.602 | rs111488757 |
| + | 16  | 2807    | cl.1_Nonsense_Mt                                      | NM_005509    | NP_005500    | Q9Y485 | DMXL1_HUMAN | WD 7.                         | 2     | GCACTCAAGAC   | 0.348 |             |
| + | 1   | 960     | .2_Intron PCDHA6                                      | NM_018903    | NP_061726    | Q9UN75 | PCDAC_HUMAN | Extracellular (Potential).    | 0     | AAATTTCTATGC  | 0.368 |             |
| + | 2   | 258     |                                                       | NM_005546    | NP_005537    | Q08881 | ITK_HUMAN   | PH.                           | 26    | TCTCCCGAATCA  | 0.458 |             |
| - | 1   | 728     |                                                       | NM_033057    | NP_149046    | Q9GZK3 | OR2B2_HUMAN | Name=6; (Potential).          | 0     | GATGGGAGCCA   | 0.468 |             |
| - | 1   | 18      |                                                       | NM_030903    | NP_112165    | Q9Y3N9 | OR2W1_HUMAN | cellular (Potential).         | 3     | AGAACTATAATTG | 0.284 |             |
| + | 5   | 704     | 55_splice SYNGA1                                      | NM_006772    | NP_006763    | Q96PV0 | SYGP1_HUMAN |                               | 4     | GACCGGTACAG   | 0.517 |             |
| + | 41  | 10444   | p.E3030* AKAP9_                                       | NM_005751    | NP_005742    | Q99996 | AKAP9_HUMAN | Potential.                    | 26    | ITGCATGAGCTCC | 0.443 |             |
| - | 15  | 1860    |                                                       | NM_004333    | NP_004324    | P15056 | BRAF_HUMAN  | rotein kinase_R603>I(2)) p.T  | 18290 | 3ATTTCACTGTAC | 0.368 |             |
| + | 6   | 397     | p.R107* SSBP1_u                                       | NM_003143    | NP_003134    | Q04837 | SSBP_HUMAN  | SSB.                          | 1     | AGGTCTCGAATT  | 0.338 |             |
| - | 2   | 229     |                                                       | NM_001103176 | NP_001096646 | Q3B712 | CNPY1_HUMAN |                               | 0     | TTGGTATATTTTG | 0.388 |             |
| - | 13  | 1198    | kek.2_Intron EBF2                                     | NM_022659    | NP_073150    | Q9HAK2 | COE2_HUMAN  |                               | 4     | 3CGGCTCGCTTC  | 0.488 |             |
| - | 11  | 1289    |                                                       | NM_000637    | NP_000628    | P00390 | GSHR_HUMAN  |                               | 5     | CCTTATATCAAAA | 0.388 |             |
| - | 5   | 1165    | e_Mutation_p.G24                                      | NM_014682    | NP_055497    | O60284 | ST18_HUMAN  |                               | 5     | TTCCCTGCTAC   | 0.433 |             |
| + | 32  | 4196    | yoz.2_Missense_M                                      | NM_021110    | NP_066933    | Q05707 | COEA1_HUMAN | ion (NC4). TSP N-terminal.    | 12    | TTAAATAAAAATT | 0.393 |             |
| - | 12  | 1815    |                                                       | NM_001100878 | NP_001094348 | A6NGR9 | CH073_HUMAN |                               | 1     | 3GTATCGCTGAA  | 0.657 |             |
| - | 38  | 8675    | ity.2_Missense_Mt                                     | NM_153366    | NP_699197    | Q4LDE5 | SVEP1_HUMAN | Sushi 23.                     | 7     | TGACTGGATTTGC | 0.473 |             |
| - | 2   | 143     | 3_5'Flank COQ4_u                                      | NM_015679    | NP_056494    | O95900 | TRUB2_HUMAN |                               | 1     | AGGAGCGGGAG   | 0.368 |             |
| - | 7   | 8075    |                                                       | NM_015419    | NP_056234    | Q9NR99 | MXRA5_HUMAN | ike C2-type 11.               | 8     | 3CTGTTTGCTTC  | 0.637 |             |

|   |    |           |                    |              |              |        |             |    |                 |       |            |
|---|----|-----------|--------------------|--------------|--------------|--------|-------------|----|-----------------|-------|------------|
| - | 1  | 654       | p.R191W FAM120     | NM_017848    | NP_060318    | Q9NX05 | F120C_HUMAN | 2  | CTGCCGCTCGG     | 0.716 |            |
| - | 37 | 2875      | _p.P666L COL16A    | NM_001856    | NP_001847    | Q07092 | COGA1_HUMAN | 8  | :CAGGAGGTCCC    | 0.577 |            |
| + | 3  | 511       | fbz.2_Missense_M   | NM_203464    | NP_982289    | P27144 | KAD4_HUMAN  | 0  | :CTTGATGGTGA    | 0.448 |            |
| + | 16 | 3063      | I2RB2_uc010oql.1   | NM_001559    | NP_001550    | Q99665 | I12R2_HUMAN | 3  | VTGACCTCCCCT    | 0.567 | rs17838066 |
| + | 3  | 542       | l.1_Missense_Mut   | NM_000642    | NP_000633    | P35573 | GDE_HUMAN   | 3  | GTGTATACAAATT   | 0.363 |            |
| - | 5  | 1002      | ise_Mutation_p.E1  | NM_030920    | NP_112182    | Q9BTT0 | AN32E_HUMAN | 0  | :CTCCCTCTCCC    | 0.308 |            |
| - | 4  | 587       | sl GBA_uc001fjk.2  | NM_000157    | NP_000148    | P04062 | GLCM_HUMAN  | 2  | AAGTACGATTTA    | 0.383 |            |
| - | 43 | 6503      |                    | NM_003292    | NP_003283    | P12270 | TPR_HUMAN   | 7  | GTGCTCGAGGG     | 0.512 |            |
| - | 2  | 441       | ot.1_Missense_M    | NM_199051    | NP_950252    | Q76B58 | FAM5C_HUMAN | 5  | :TAAATCCCTGCC   | 0.448 |            |
| + | 6  | 2111      | ob.1_Missense_Mt   | NM_201253    | NP_957705    | P82279 | CRUM1_HUMAN | 9  | :CATCTCGTCTG    | 0.448 |            |
| - | 16 | 1772      | KCQ_uc009xin.1_    | NM_006257    | NP_006248    | Q04759 | KPCT_HUMAN  | 6  | :GAACCCCGAAG    | 0.507 |            |
| - | 8  | 2371      | :2_Missense_Mut    | NM_080599    | NP_542166    | Q9HAU5 | RENT2_HUMAN | 3  | :AGACATGCAGG    | 0.338 |            |
| + | 19 | 2792      | 1jrg.2_Missense_M  | NM_080722    | NP_542453    | Q8WXS8 | ATS14_HUMAN | 6  | :GACACGGGGGA    | 0.667 |            |
| - | 2  | 1178      | p.P369S ITPRIP_1   | NM_033397    | NP_203755    | Q8IWB1 | IPRI_HUMAN  | 0  | AGAGGGCTCCC     | 0.567 |            |
| - | 2  | 189       | .S30P RIC8A_uc0i   | NM_001098787 | NP_001092257 | Q9NYM9 | BET1L_HUMAN | 0  | :TTTGGAGGCCA    | 0.587 |            |
| + | 1  | 29        |                    | NM_001003443 | NP_001003443 | Q8NH54 | O56A3_HUMAN | 0  | :CCTCTCCACTG    | 0.453 |            |
| + | 27 | 3091      | en.1_Missense_Mt   | NM_024662    | NP_078938    | Q9H0A0 | NAT10_HUMAN | 2  | :CACAGAAGGA     | 0.478 |            |
| - | 8  | 1704      | n_p.T362I SLC1A2   | NM_004171    | NP_004162    | P43004 | EAA2_HUMAN  | 3  | :GAAAGGTGACA    | 0.453 |            |
| + | 1  | 343       |                    | NM_001001967 | NP_001001967 | Q8NGL4 | OR5DD_HUMAN | 3  | GAAACTTTCATG    | 0.418 |            |
| + | 1  | 278       |                    | NM_001004730 | NP_001004730 | Q8NGP9 | O5AR1_HUMAN | 0  | TTATCTCCTTCTC   | 0.488 |            |
| + | 9  | 2029      | ep.E613_splICE TI  | NM_178031    | NP_821174    | Q24JP5 | T132A_HUMAN | 1  | TGAGGTAAGCAC    | 0.662 |            |
| - | 5  | 7393_7394 | IAK_uc001ntk.1_Ir  | NM_001620    | NP_001611    | Q09666 | AHNK_HUMAN  | 19 | CATTTGGGCCTT    | 0.465 |            |
| + | 7  | 1034      | A2_uc010rod.1_M    | NM_002689    | NP_002680    | Q14181 | DPOA2_HUMAN | 0  | :CGAACTCAAGG    | 0.358 |            |
| + | 6  | 676       | _p.P106S FRMD8_    | NM_031904    | NP_114110    | Q9BZ67 | FRMD8_HUMAN | 2  | :GGTACCCGTGC    | 0.706 |            |
| + | 1  | 488       |                    | NM_021046    | NP_066384    | O75690 | KRA58_HUMAN | 0  | :CCTGCTGCTGC    | 0.602 |            |
| + | 14 | 2615      | uc001pen.1_Intror  | NM_001098672 | NP_001092142 | Q6MZM0 | HPHL1_HUMAN | 3  | :AGGTGGGCAAC    | 0.438 |            |
| + | 6  | 481       | .I126V TTC12_uc    | NM_017868    | NP_060338    | Q9H892 | TTC12_HUMAN | 4  | :CAGCTATCCTG    | 0.473 |            |
| + | 1  | 843       |                    | NM_001007249 | NP_001007250 | Q15614 | OR8G2_HUMAN | 0  | :TCCATGGACCAC   | 0.473 |            |
| - | 13 | 1789      | ise_Mutation_p.R4  | NM_003044    | NP_003035    | P48065 | S6A12_HUMAN | 1  | :CTTCCGGAGCT    | 0.647 |            |
| + | 15 | 2300      | l1qik.1_Missense_  | NM_173593    | NP_775864    | Q6L9W6 | B4GN3_HUMAN | 2  | :GAATACCCGGG    | 0.642 |            |
| - | 53 | 7882      | g.1_Missense_Mu    | NM_002223    | NP_002214    | Q14571 | ITPR2_HUMAN | 14 | :CAGCACGGTGA    | 0.413 |            |
| + | 20 | 2516      | lt.2_Missense_Mu   | NM_173602    | NP_775873    | Q9P265 | DIP2B_HUMAN | 6  | :TGTTGGGGATG    | 0.373 |            |
| + | 30 | 5820      | ib.1_Missense_Mu   | NM_014903    | NP_055718    | Q8IVL0 | NAV3_HUMAN  | 17 | TCATTAGGACTT    | 0.483 |            |
| + | 7  | 1001      |                    | NM_198520    | NP_940922    | Q6ZTY8 | CL063_HUMAN | 7  | AAAAATCCAAAT    | 0.423 |            |
| + | 12 | 1856      | lzt.2_Missense_M   | NM_139319    | NP_647480    | Q8NDX2 | VGLU3_HUMAN | 3  | :AGAATCTCTCT    | 0.468 |            |
| - | 2  | 320       | H1L2_uc009zup.2_   | NM_001034173 | NP_001029345 | Q3SY69 | AL1L2_HUMAN | 1  | :CTACCCAGAG     | 0.403 |            |
| + | 1  | 13        | 001ufm.2_5'Flank   | NM_001516    | NP_001507    | Q13889 | TF2H3_HUMAN | 0  | :CTGAGGTGCTG    | 0.662 |            |
| + | 29 | 5893      | .V1952A EP400_u    | NM_015409    | NP_056224    | Q96L91 | EP400_HUMAN | 12 | :CGTCGTGTTTT    | 0.493 |            |
| + | 7  | 1325      | AO7_uc010thw.1_I   | NM_015842    | NP_056667    | Q8WWI1 | LMO7_HUMAN  | 5  | CATACCAAATTC    | 0.463 |            |
| - | 1  | 1         |                    | NM_004196    | NP_004187    | Q00532 | CDKL1_HUMAN | 2  | gctccatgggaactg | 0.114 |            |
| - | 10 | 2638      |                    | NM_024734    | NP_079010    | Q96JQ2 | CLMN_HUMAN  | 0  | TTGGGGATTCC     | 0.443 |            |
| - | 4  | 2014      | gb.2_Missense_M    | NM_138576    | NP_612808    | Q9C0K0 | BC11B_HUMAN | 10 | :Ttgccgcgcccgc  | 0.567 |            |
| - | 14 | 1690      | ep_Mutation_p.E23K | NM_001012420 | NP_001012420 |        |             | 0  | :CCCCCTCACTG    | 0.612 |            |
| - | 7  | 897       |                    | NM_052955    | NP_443187    | Q96PF1 | TGM7_HUMAN  | 2  | :AACACGGGTTG    | 0.413 |            |
| + | 16 | 2410      | QCH_uc002aqp.      | NM_001031715 | NP_001026885 | Q86VS3 | IQCH_HUMAN  | 4  | :TACCACCGTGC    | 0.507 |            |
| - | 2  | 207       |                    | NM_001038640 | NP_001033729 | Q9NYA3 | GOG6A_HUMAN | 0  | TTGTCTCAGGGC    | 0.493 |            |
| + | 3  | 356_357   | REB2_uc002bdq.2    | NM_004136    | NP_004127    | P48200 | IREB2_HUMAN | 0  | TTATGAACATTTT   | 0.376 |            |

|   |     |       |                                |              |              |        |             |                              |     |                |       |
|---|-----|-------|--------------------------------|--------------|--------------|--------|-------------|------------------------------|-----|----------------|-------|
| - | 26  | 3925  | p.P1168S RASGR                 | NM_002891    | NP_002882    | Q13972 | RGRF1_HUMAN | Ras-GEF.                     | 6   | .GGGTGGGTCAC   | 0.493 |
| + | 21  | 3357  | b.1_RNA LRRK1_                 | NM_024652    | NP_078928    | Q38SD2 | LRRK1_HUMAN |                              | 12  | .CAACACCATTCA  | 0.557 |
| + | 2   | 873   | KN1_uc002chs.1_                | NM_053284    | NP_444514    | Q96NZ8 | WFKN1_HUMAN | ]-like C2-type.              | 0   | .TCAGCGGCCCGC  | 0.677 |
| + | 7   | 970   | ua.2_Missense_M                | NM_001042428 | NP_001035893 | O95201 | ZN205_HUMAN |                              | 0   | GCGTCCCGGAG    | 0.706 |
| - | 3   | 447   | T125 RSL1D1_uc                 | NM_015659    | NP_056474    | O76021 | RL1D1_HUMAN |                              | 0   | .3AAACGGTTTTA  | 0.323 |
| - | 12  | 2844  |                                | NM_022166    | NP_071449    | Q86Y38 | XYLT1_HUMAN | lenal (Potential).           | 4   | .3TGGCACAGATG  | 0.667 |
| - | 51  | 8231  | bd.1_Missense_Mi               | NM_017539    | NP_060009    | Q8TD57 | DYH3_HUMAN  | k (By similarity).           | 18  | .3CAGCAACATTG  | 0.388 |
| + | 3   | 544   | efx.2_Missense_A               | NM_182922    | NP_891552    | Q7Z4Q2 | HEAT3_HUMAN |                              | 2   | .3CTCTGGTTGCG  | 0.378 |
| - | 2   | 134   | .1_5'UTR SALL1_t               | NM_002968    | NP_002959    | Q9NSC2 | SALL1_HUMAN |                              | 8   | AGGGCGACTCG    | 0.448 |
| + | 10  | 1139  | ejc.2_Missense_M               | NM_018233    | NP_060703    | Q8N543 | OGFD1_HUMAN |                              | 1   | CATGAAGTTATT   | 0.423 |
| - | 14  | 1993  |                                | NM_031885    | NP_114091    | Q9BXC9 | BBS2_HUMAN  |                              | 1   | .GACAGGAAAATC  | 0.368 |
| - | 5   | 1286  |                                | NM_152342    | NP_689555    | Q8N8U2 | CDYL2_HUMAN |                              | 1   | AGGAGGAGCAG    | 0.632 |
| - | 9   | 1393  | efc.1_Missense_A               | NM_013275    | NP_037407    | Q6UB99 | ANR11_HUMAN |                              | 6   | .AACTGGAAGGT   | 0.577 |
| + | 3   | 996   | rf97_uc010vpz.1_               | NM_001013672 | NP_001013694 | Q6ZQX7 | CQ097_HUMAN | tandem repeat of A-L-K-G     | 1   | .CCACACTGACCC  | 0.687 |
| - | 1   | 532   | X1_uc010ckm.1_5                | NM_002558    | NP_002549    | P51575 | P2RX1_HUMAN | Name=1; (Potential).         | 2   | .AGATAACGCCCA  | 0.657 |
| - | 3   | 281   |                                | NM_031898    | NP_114104    | Q9BXF9 | TEKT3_HUMAN |                              | 2   | .GTAGCTTGAGG   | 0.517 |
| - | 2   | 171   | se_Mutation_p.A3f              | NM_001042685 | NP_001036150 | Q3B8N2 | LEG9B_HUMAN | Galectin 1.                  | 1   | .AACGGCCCCAT   | 0.562 |
| - | 7   | 1670  | .p.D357N GHDC_                 | NM_032484    | NP_115873    | Q8N2G8 | GHDC_HUMAN  |                              | 0   | .AATATCTTCCCC  | 0.637 |
| - | 5   | 318   | 10woz.1_RNA uc010wpa.1_5'Flank |              |              |        |             |                              | 0   | .CCCGCCGAATT   | 0.562 |
| - | 2   | 894   |                                | NM_003955    | NP_003946    | O14543 | SOCS3_HUMAN |                              | 1   | .3GGGGGACTCC   | 0.657 |
| - | 12  | 1540  |                                | NM_006796    | NP_006787    | Q9Y4W6 | AFG32_HUMAN |                              | 0   | .3TGGTCCTTTAG  | 0.398 |
| - | 5   | 620   | nse_Mutation_p.S               | NM_194281    | NP_919257    | Q6PI98 | IN80C_HUMAN |                              | 0   | .ATGTAGGAAAA   | 0.567 |
| + | 17  | 3091  | .1_Intron DCC_uc               | NM_005215    | NP_005206    | P43146 | DCC_HUMAN   | ellular (Potential).         | 17  | .CCCCACCTCGG   | 0.443 |
| + | 9   | 1105  | 3F11A_uc010dpv.2               | NM_003839    | NP_003830    | Q9Y6Q6 | TNR11_HUMAN | lasmic (Potential).          | 3   | .CCAGCCCACAG   | 0.532 |
| + | 3   | 587   | 1G2_uc010dsu.2_                | NM_001319    | NP_001310    | P78368 | KC1G2_HUMAN |                              | 1   | .AGGCCGGCGGG   | 0.642 |
| - | 9   | 1255  | .p.R333W DPP9_uc               | NM_139159    | NP_631898    | Q86TI2 | DPP9_HUMAN  |                              | 1   | .3GTACCGATACG  | 0.622 |
| - | 1   | 247   |                                | NM_001005191 | NP_001005191 | Q8NG98 | OR7D4_HUMAN | ellular (Potential).         | 4   | .FGCTCACTAGCA  | 0.498 |
| - | 4   | 545   | .p.P35S ILVBL_uc               | NM_006844    | NP_006835    | A1L0T0 | ILVBL_HUMAN |                              | 2   | .3GATTGGGGACT  | 0.642 |
| - | 6   | 2332  |                                | NM_001080409 | NP_001073878 |        |             |                              | 2   | .CACATTCTTCAC  | 0.383 |
| + | 2   | 714   | oid.2_Missense_M               | NM_004823    | NP_004814    | Q9Y257 | KCNK6_HUMAN |                              | 1   | .AGCTTCTTGGAT  | 0.632 |
| - | 8   | 4287  |                                | NM_003890    | NP_003881    | Q9Y6R7 | FCGBP_HUMAN | VWFD 3.                      | 9   | .GCAGGGAGAGT   | 0.627 |
| - | 3   | 807   | e_Site_p.P115_sp               | NM_182707    | NP_874366    | Q9UQ74 | PSG8_HUMAN  |                              | 0   | .TACTCACGGAG   | 0.527 |
| + | 2   | 211   |                                | NM_019612    | NP_062558    | Q6NXR0 | IIGP5_HUMAN |                              | 3   | .CCAAGGAAAGG   | 0.642 |
| - | 3   | 407   | ie_Mutation_p.P11              | NM_007254    | NP_009185    | Q96T60 | PNKP_HUMAN  |                              | 2   | .AGCGCGAGTAT   | 0.592 |
| + | 3   | 368   | phn.1_Intron KIR3f             | NM_006737    | NP_006728    | P43630 | KI3L2_HUMAN | ellular (Potential).         | 2   | .3CAACCCCTGG   | 0.607 |
| - | 7   | 2373  |                                | NM_176810    | NP_789780    | Q86W25 | NAL13_HUMAN | LRR 2.                       | 9   | .3TCAGCTTGCTG  | 0.498 |
| - | 7   | 1521  |                                | NM_017880    | NP_060350    | Q9NWW7 | CB042_HUMAN |                              | 0   | .GCAGGGCATCA   | 0.418 |
| - | 13  | 2089  | of.1_Missense_Mu               | NM_000122    | NP_000113    | P19447 | ERCC3_HUMAN | case C-terminal.             | 7   | .3TGTCTGGGAT   | 0.423 |
| - | 28  | 5629  | nl.1_Missense_Mu               | NM_018557    | NP_061027    | Q9NZR2 | LRP1B_HUMAN | ellular (Potential).         | 50  | .ACAGGAGCAC    | 0.408 |
| - | 8   | 946   | cl.1_Missense_Mu               | NM_004288    | NP_004279    | O60759 | CYTIP_HUMAN | Ser-rich.                    | 3   | .3AAAATCATCCCC | 0.532 |
| - | 5   | 587   | .p.T83N ACVR1_                 | NM_00111067  | NP_001104537 | Q04771 | ACVR1_HUMAN | ellular (Potential).         | 3   | .3GCGGGGTCTTA  | 0.567 |
| - | 245 | 50577 | 80N TTN_uc010zl                | NM_133378    | NP_596869    | Q8WZ42 | TITIN_HUMAN |                              | 153 | .AGGTATCACCTT  | 0.418 |
| + | 25  | 2848  | .p.S472F AOX1_u                | NM_001159    | NP_001150    | Q06278 | ADO_HUMAN   |                              | 6   | .TTCCATCCAACAC | 0.498 |
| - | 8   | 3364  | p.E420K COL6A3_                | NM_004369    | NP_004360    | P12111 | CO6A3_HUMAN | helicl region.               | 18  | .3CTTTTCACCTG  | 0.438 |
| + | 18  | 2112  | orf26_uc002wrw.2               | NM_015585    | NP_056400    | Q8NHU2 | CT026_HUMAN |                              | 4   | .3AATTTCTTCC1  | 0.333 |
| + | 8   | 769   |                                | NM_020884    | NP_065935    | A7E2Y1 | MYH7B_HUMAN | I-like. ATP (By similarity). | 2   | .3TAAGACGGTTA  | 0.602 |
| + | 1   | 743   | AS_uc002xzu.3_5                | NM_016592    | NP_057676    | P63092 | GNAS2_HUMAN |                              | 292 | .3ACTTCGAGACC  | 0.642 |

rs144269928

|   |     |           |                    |              |              |        |              |                            |       |                 |       |
|---|-----|-----------|--------------------|--------------|--------------|--------|--------------|----------------------------|-------|-----------------|-------|
| + | 3   | 1040      | D4A1_uc002ydc.1    | NM_016354    | NP_057438    | Q96BD0 | SO4A1_HUMAN  | Name=5; (Potential).       | 1     | CTGCCGGCTAC     | 0.677 |
| - | 2   | 485       | B46_uc002ygu.2     | NM_025224    | NP_079500    | Q86UZ6 | ZBT46_HUMAN  | BTB.                       | 2     | GCGCCAGGTGC     | 0.617 |
| + | 8   | 1125      | f.2_Missense_Mu    | NM_005239    | NP_005230    | P15036 | ETS2_HUMAN   |                            | 4     | TCCTTCTCTCG/    | 0.552 |
| + | 1   | 97        | .1_Intron C21orf29 | NM_198692    | NP_941965    | P60412 | KR10B_HUMAN  |                            | 1     | CCTGGCAGGTG     | 0.642 |
| + | 4   | 2223      | FH_uc003afp.2_5'l  | NM_021076    | NP_066554    | P12036 | NFH_HUMAN    | S-P-[AEPV]-[EAK]- [AEVK]   | 0     | CAAAGTCCCTC/    | 0.552 |
| + | 4   | 2440      | J3afp.2_Translator | NM_021076    | NP_066554    | P12036 | NFH_HUMAN    | S-P-[AEPV]-[EAK]- [AEVK]   | 0     | TGTCAAGGAGG     | 0.532 |
| - | 6   | 762       | M184B_uc003avh.    | NM_012264    | NP_036396    | Q9Y519 | T184B_HUMAN  | ical; (Potential).         | 0     | ACAGAACTGCA/    | 0.612 |
| + | 4   | 855       | LA3_uc010gzm.1_    | NM_025225    | NP_079501    | Q9NST1 | PLPL3_HUMAN  | ional (Potential).         | 0     | TTGTCCCCCG/     | 0.547 |
| - | 14  | 2026      | se_Mutation_p.G5   | NM_001145137 | NP_001138609 | Q92523 | CPT1B_HUMAN  | lasmic (Potential).        | 2     | GGACCCCTCCA     | 0.612 |
| - | 2   | 2548      | e_Mutation_p.R77l  | NM_194293    | NP_919269    | Q702N8 | XIRP1_HUMAN  |                            | 8     | GAGTCCGCAGG     | 0.632 |
| - | 110 | 8130      |                    | NM_000094    | NP_000085    | Q02388 | CO7A1_HUMAN  | le-helical region.         | 11    | GGAAGCCCCCA     | 0.602 |
| - | 5   | 481       |                    | NM_138805    | NP_620160    | Q96BQ1 | FAM3D_HUMAN  |                            | 0     | GGCTGGGCAGG     | 0.527 |
| - | 7   | 975       | M86D_uc003dpq.     | NR_024241    |              |        |              |                            | 0     | CAGCTGGCACG     | 0.652 |
| + | 1   | 160       |                    | NM_054106    | NP_473447    | Q9NZP5 | O5AC2_HUMAN  | lasmic (Potential).        | 1     | GGAACGACCCC     | 0.448 |
| + | 1   | 214       |                    | NM_001005479 | NP_001005479 | Q8NGV6 | OR5H6_HUMAN  | Name=2; (Potential).       | 3     | CACCTTCATATC    | 0.423 |
| - | 16  | 5611      | id.2_Missense_Mu   | NM_199420    | NP_955452    | O75417 | DPOLQ_HUMAN  |                            | 11    | CATCAATTATGG/   | 0.398 |
| - | 10  | 1217      | jq.2_Missense_ML   | NM_053025    | NP_444253    | Q15746 | MYLK_HUMAN   |                            | 9     | GCTGGCTGTTT/    | 0.617 |
| + | 3   | 605       |                    | NM_015720    | NP_056535    | Q9NZ53 | PDXL2_HUMAN  | ar (Potential). Glu-rich.  | 2     | GGAATGGATCCC/   | 0.348 |
| - | 3   | 2319      | itron ABCA11P_uc   | NM_133474    | NP_597731    | D9N162 | D9N162_HUMAN |                            | 1     | AAAGGATTGCGC    | 0.403 |
| - | 3   | 2300      | itron ABCA11P_uc   | NM_133474    | NP_597731    | D9N162 | D9N162_HUMAN |                            | 1     | AAAGGCTTTGCG/   | 0.408 |
| - | 6   | 1721      |                    | NM_177998    | NP_819056    | Q7RTM1 | OTOP1_HUMAN  | ical; (Potential).         | 3     | GACAGCCAAAG/    | 0.512 |
| - | 2   | 288       |                    | NM_173536    | NP_775807    | Q8N1C3 | GBRG1_HUMAN  | ellular (Probable).        | 2     | TTAAATCCTCAT/   | 0.328 |
| - | 7   | 979       | A_uc011ceg.1_Mis   | NM_000667    | NP_000658    | P07327 | ADH1A_HUMAN  |                            | 2     | TCATTGAGAGG     | 0.463 |
| - | 14  | 2197      | n.1_Missense_Mu    | NM_001039580 | NP_001034669 | Q49MG5 | MAP9_HUMAN   |                            | 2     | CACTTTTGCGA/    | 0.348 |
| - | 8   | 1073      |                    | NM_006598    | NP_006589    | Q9Y666 | S12A7_HUMAN  |                            | 4     | GCGCGGAGGTG     | 0.657 |
| - | 12  | 2472      | i_Mutation_p.P699  | NM_004934    | NP_004925    | Q13634 | CAD18_HUMAN  | lasmic (Potential).        | 7     | TCTGGGAGTGA     | 0.502 |
| + | 7   | 1576      | d.1_Missense_Mu    | NM_004932    | NP_004923    | P55285 | CADH6_HUMAN  | r (Potential). Cadherin 4. | 7     | TCCTGTCAAGT/    | 0.418 |
| - | 51  | 9481      | y.1_Missense_Mut   | NM_023073    | NP_075561    | E9PH94 | E9PH94_HUMAN |                            | 7     | ACACGGAGCAT     | 0.373 |
| - | 2   | 513       | z.2_Intron PPAP2A  | NM_003711    | NP_003702    | O14494 | LPP1_HUMAN   | ellular (Potential).       | 2     | GAAGGGGGTAT     | 0.348 |
| + | 77  | 16598     | i.S3207F GPR98_i   | NM_032119    | NP_115495    | Q8WXG9 | GPR98_HUMAN  | ellular (Potential).       | 16    | ATTTTCTGTGGC    | 0.438 |
| - | 12  | 2172      |                    | NM_012081    | NP_036213    | O00472 | ELL2_HUMAN   |                            | 1     | TCATGGTAATT     | 0.353 |
| - | 5   | 630       | ia.3_Missense_ML   | NM_018343    | NP_060813    | Q9BVS4 | RIOK2_HUMAN  |                            | 1     | AACTGGAAATT/    | 0.338 |
| - | 15  | 2616      | CC_uc003kql.3_Mi   | NM_002387    | NP_002378    | P23508 | CRCM_HUMAN   |                            | 1     | CACTCCTGAC/     | 0.597 |
| + | 3   | 1609      |                    | NM_175856    | NP_787052    | Q70JA7 | CHSS3_HUMAN  | ional (Potential).         | 3     | TGGAGTACATT     | 0.468 |
| - | 8   | 957       | wm.2_Missense_IV   | NM_006638    | NP_006629    | O75818 | RPP40_HUMAN  |                            | 0     | CCATGGAGCTA/    | 0.348 |
| - | 5   | 813       | n_p.D167N ETV7_    | NM_016135    | NP_057219    | Q9Y603 | ETV7_HUMAN   |                            | 2     | CTCACCAGCGA/    | 0.597 |
| + | 33  | 3736      | e_Mutation_p.W8E   | NM_015255    | NP_056070    | Q8IWW8 | UBR2_HUMAN   |                            | 4     | CTCAGTGGATT/    | 0.318 |
| + | 33  | 3778      | se_Mutation_p.L9C  | NM_015255    | NP_056070    | Q8IWW8 | UBR2_HUMAN   |                            | 4     | AGTTTCTTAGGA/   | 0.343 |
| + | 3   | 637       | i.2_Missense_Muti  | NM_005922    | NP_005913    | Q9Y6R4 | M3K4_HUMAN   |                            | 9     | CTCATTGATTT/    | 0.418 |
| + | 2   | 269       | F25_uc003qwl.1_I   | NM_030615    | NP_085118    | Q9UIL4 | KIF25_HUMAN  | inesin-moto p.W3C(1)       | 2     | TGACATGGACC     | 0.602 |
| + | 19  | 2979      | io.2_Missense_Mu   | NM_152744    | NP_689957    | Q7Z5N4 | SDK1_HUMAN   | onectin type-III 3.        | 6     | CACTCCGTTCT     | 0.552 |
| - | 17  | 2492_2493 | ng.2_Missense_M    | NM_033054    | NP_149043    | B011T2 | MYO1G_HUMAN  |                            | 4     | GGAAGGGCTGC     | 0.614 |
| - | 5   | 1584      |                    | NM_033273    | NP_150376    | Q96JC4 | ZN479_HUMAN  | :2H2-type 10.              | 4     | CACATTTGTAGC    | 0.453 |
| + | 8   | 2094      | _Mutation_p.P451   | NM_015570    | NP_056385    | Q8WXX7 | AUTS2_HUMAN  |                            | 3     | ccagcccccgccac/ | 0.244 |
| - | 21  | 3202      | kgz.1_Missense_I   | NM_001142749 | NP_001136221 | A8MWY0 | K132L_HUMAN  | lasmic (Potential).        | 7     | CCAAAGATTTG/    | 0.393 |
| + | 1   | 1344      |                    | NM_012281    | NP_036413    | Q9NZV8 | KCND2_HUMAN  | lasmic (Potential).        | 5     | TCCCGGAAATC/    | 0.577 |
| - | 15  | 1860      |                    | NM_004333    | NP_004324    | P15056 | BRAF_HUMAN   | rotein kinas_R603>I(2))p.T | 18290 | ATTTCACTGTAC    | 0.368 |

rs144904530

rs144467995



|   |    |           |                    |              |              |        |             |                                |    |               |       |             |
|---|----|-----------|--------------------|--------------|--------------|--------|-------------|--------------------------------|----|---------------|-------|-------------|
| + | 1  | 608       |                    | NM_001001656 | NP_001001656 | Q8NGU2 | OR9A4_HUMAN | Name=5; (Potential).           | 1  | TAATGGCTGTTT  | 0.413 |             |
| + | 24 | 2765      |                    | NM_004668    | NP_004659    | O43451 | MGA_HUMAN   | (Potential). Maltase.          | 2  | TTAAAATCTTGG  | 0.388 |             |
| + | 4  | 538       | 1_Intron uc010loj. | NR_001296    |              |        |             |                                | 0  | TCACAGCCGAC   | 0.493 |             |
| - | 4  | 887_888   | p.R214W ZNF786     | NM_152411    | NP_689624    | Q8N393 | ZN786_HUMAN | C2H2-type 2.                   | 4  | CTTCCGGCGGA/  | 0.644 |             |
| + | 8  | 1170      | nse_Mutation_p.E   | NM_012082    | NP_036214    | Q8WW38 | FOG2_HUMAN  | C2H2-type 3.                   | 5  | ACCAGGAGCTC   | 0.507 |             |
| + | 20 | 3414      | 3ywa.1_Missense    | NM_014957    | NP_055772    | A2RUS2 | DEND3_HUMAN |                                | 1  | CTGTGGTGCTGT  | 0.622 |             |
| - | 39 | 5437      | E1169K PTPRD_1     | NM_002839    | NP_002830    | P23468 | PTPRD_HUMAN | l). Tyrosine-protein phosph    | 22 | TTTTTTCATGCT  | 0.388 |             |
| + | 17 | 3283      | p.D904E TEK_ucf    | NM_000459    | NP_000450    | Q02763 | TIE2_HUMAN  | 3). Cytoplasmic (Potential).   | 12 | GCCGACGTGGC/  | 0.552 | rs56154987  |
| + | 3  | 1546      | L2_uc004awr.1_ir   | NM_001045477 | NP_001038942 | Q5VZR2 | FA22G_HUMAN |                                | 1  | TACGAGATGGCC  | 0.652 |             |
| + | 11 | 1438      | FD1_uc004cvs.3_1   | NM_003611    | NP_003602    | O75665 | OFD1_HUMAN  | Potential.                     | 0  | AGGATGACTACA  | 0.378 |             |
| + | 1  | 901       |                    | NM_001136234 | NP_001129706 |        |             |                                | 1  | ATTTGGCCGTG/  | 0.512 |             |
| - | 2  | 1754      | oo.1_Missense_M    | NM_201286    | NP_958443    | Q70EK9 | UBP51_HUMAN |                                | 3  | CTCTGGCCTTG   | 0.483 |             |
| + | 2  | 502       |                    | NM_003868    | NP_003859    | O43320 | FGF16_HUMAN |                                | 1  | ACAAAGATGGC   | 0.478 |             |
| + | 5  | 546       | _p.l144V ARL13A    | NM_001012990 | NP_001013008 | Q5H913 | AR13A_HUMAN |                                | 1  | GATATTATTGACT | 0.423 |             |
| - | 5  | 562       | F5_uc004ejj.1_RN   | NM_032946    | NP_116564    | Q9H1B4 | NXF5_HUMAN  | RRM.                           | 1  | GACATCCTTCA/  | 0.502 |             |
| + | 4  | 2514      | P2_uc004ejm.2_1    | NM_138437    | NP_612446    | Q96D09 | GASP2_HUMAN |                                | 1  | GGGCAGAAAAA/  | 0.532 |             |
| + | 1  | 365       |                    |              |              |        |             |                                | 1  | CCATCACCTCC/  | 0.622 |             |
| + | 18 | 2945      | c.1_Missense_Mu/   | NM_198465    | NP_940867    | Q7Z2Y5 | NRK_HUMAN   |                                | 14 | AAATATCACCCC/ | 0.413 |             |
| - | 2  | 359       | PL1_uc010nqa.2_    | NM_178175    | NP_835469    | Q86W10 | LHPL1_HUMAN |                                | 0  | GGGTCCCACC    | 0.532 |             |
| - | 18 | 3278      | 1.P1071S ODZ1_u    | NM_014253    | NP_055068    | Q9UKZ4 | TEN1_HUMAN  | ellular (Potential).           | 23 | GGCGGAAACC    | 0.483 |             |
| + | 1  | 494       |                    | NM_001727    | NP_001718    | P32247 | BRS3_HUMAN  | ellular (Potential).           | 1  | CTGTTCGGAAG   | 0.448 |             |
| + | 7  | 1405      | _p.L171F IMAGEC:   | NM_138702    | NP_619647    | Q8TD91 | MAGC3_HUMAN | MAGE 2.                        | 3  | CTTCTCCTCAA/  | 0.468 |             |
| - | 3  | 500       |                    | NM_000808    | NP_000799    | P34903 | GBRA3_HUMAN | ellular (Probable).            | 1  | GACCTCCAAGC/  | 0.448 |             |
| - | 4  | 510       | _1_uc009vka.2_5f   | NM_004421    | NP_004412    | O14640 | DVL1_HUMAN  |                                | 0  | ACCTCCTCGC/   | 0.652 |             |
| - | 16 | 2006      | lvkz.1_Missense_f  | NM_001080484 | NP_001073953 | Q9C0B2 | K1751_HUMAN |                                | 1  | CTACCGAACAT   | 0.502 |             |
| - | 7  | 963       | HP4_uc009vlt.1_ir  | NM_015102    | NP_055917    | O75161 | NPHP4_HUMAN |                                | 1  | CTGGAGGCGAG   | 0.577 |             |
| + | 2  | 226       |                    | NM_023013    | NP_075389    | O95521 | PRAM1_HUMAN |                                | 0  | TTCATGGAGGC/  | 0.587 |             |
| + | 6  | 728       | 522_uc010ohm.1_    | NM_020888    | NP_065939    | Q9P206 | K1522_HUMAN |                                | 0  | GCATCCCCACA/  | 0.721 |             |
| - | 7  | 1328      | IQ3_uc001dfz.3_f   | NM_001105659 | NP_001099129 | A6PVS8 | LRIQ3_HUMAN |                                | 2  | TATGCAGAAAA/  | 0.348 |             |
| - | 10 | 1886      | 1_uc010ose.1_RN    | NM_152890    | NP_690850    | Q17RW2 | COA1_HUMAN  |                                | 5  | GTGCACCTTTAG  | 0.338 |             |
| - | 3  | 713       |                    | NM_205848    | NP_995320    | Q5T7P8 | SYT6_HUMAN  | mic (Potential). C2 1.         | 5  | GTAAATCGTAGCC | 0.527 | rs140277785 |
| - | 3  | 272       |                    | NM_002506    | NP_002497    | P01138 | NGF_HUMAN   |                                | 2  | GTGGGCTTGGG   | 0.602 |             |
| + | 25 | 2542      | 2_Intron SPAG17_1  | NM_006784    | NP_006775    | Q9UNX4 | WDR3_HUMAN  |                                | 1  | TACTTGTGCTGC/ | 0.363 |             |
| - | 4  | 703       | D7B_uc001eto.2_1   | NM_020205    | NP_064590    | Q6GQQ9 | OTU7B_HUMAN |                                | 3  | CATTGGAGGAG   | 0.557 |             |
| + | 9  | 1620      | 3_Mutation_p.G39/  | NM_144618    | NP_653219    | Q8TAK5 | GABP2_HUMAN |                                | 0  | GACTGGGTCAG/  | 0.473 |             |
| + | 3  | 326       |                    | NM_176823    | NP_789793    | Q86SG5 | S1A7A_HUMAN |                                | 1  | GCAGAGCCATG/  | 0.527 |             |
| - | 4  | 555       | LC39A1_uc001fdk    | NM_014437    | NP_055252    | Q9NY26 | S39A1_HUMAN | lasmic (Potential).            | 0  | AGTGTGATCTGC  | 0.572 |             |
| - | 11 | 1963_1964 | p.P601F YY1AP1     | NM_139118    | NP_620829    | Q9H869 | YYAP1_HUMAN |                                | 3  | ACAGGGGAAGC/  | 0.53  |             |
| - | 4  | 562       | _p.G150E FCRL1     | NM_052938    | NP_443170    | Q96LA6 | FCRL1_HUMAN | 2.  Extracellular (Potential). | 7  | CAGCCCCTTTG   | 0.512 |             |
| + | 2  | 828       |                    | NM_001763    | NP_001754    | P06126 | CD1A_HUMAN  | ellular (Potential).           | 3  | GAATTCGTAGA/  | 0.468 |             |
| + | 1  | 898       |                    | NM_001004473 | NP_001004473 | Q8NGX5 | O10K1_HUMAN | lasmic (Potential).            | 1  | AATCAGCCCTAC  | 0.279 |             |
| - | 36 | 5318      |                    | NM_003126    | NP_003117    | P02549 | SPTA1_HUMAN | Spectrin 16.                   | 8  | TTTTTCGTGGTC  | 0.443 |             |
| - | 4  | 515       | nse_Mutation_p.Si  | NM_016946    | NP_058642    | Q9Y624 | JAM1_HUMAN  | Potential). Ig-like V-type 1.  | 2  | GCATAGGAAGCT/ | 0.537 |             |
| + | 8  | 1017      | q.1_Missense_Mu/   | NM_007348    | NP_031374    | P18850 | ATF6A_HUMAN | Cytoplasmic p.R317*(1)         | 3  | AAATCGAGAATC  | 0.378 |             |
| - | 10 | 1233      | EM3_uc010pom.1     | NM_025191    | NP_079467    | Q9BZQ6 | EDEM3_HUMAN |                                | 1  | AATACCTCATT   | 0.403 |             |
| + | 13 | 1547      | _p.S295L PTPRC_    | NM_002838    | NP_002829    | P08575 | PTPRC_HUMAN | tential). Fibronectin type-III | 12 | TTTTATCATTACA | 0.308 |             |
| + | 19 | 2400      | _Mutation_p.R702   | NM_001005388 | NP_001005388 | O94856 | NFASC_HUMAN | tential). Fibronectin type-III | 6  | CTCCGGCTGT/   | 0.582 | rs151110151 |

|   |    |         |                    |              |              |        |             |                                 |    |                |       |
|---|----|---------|--------------------|--------------|--------------|--------|-------------|---------------------------------|----|----------------|-------|
| - | 18 | 4393    | cv.2_Missense_Mu   | NM_206933    | NP_996816    | O75445 | USH2A_HUMAN | III 3. Extracellular (Potentia  | 26 | GGAACCTACTACTT | 0.418 |
| - | 6  | 889     |                    | NM_000143    | NP_000134    | P07954 | FUMH_HUMAN  |                                 | 5  | CCAATTCTAGTA   | 0.398 |
| + | 1  | 650     |                    | NM_001004689 | NP_001004689 | Q8NG83 | OR2M3_HUMAN | Name=5; (Potential).            | 2  | TTGCTTCCTATGC  | 0.423 |
| + | 33 | 4928    | v.1_RNA MYO3A_     | NM_017433    | NP_059129    | Q8NEV4 | MYO3A_HUMAN |                                 | 18 | AAAAACGAAGAC   | 0.239 |
| - | 6  | 834     | vRMC4_uc001itz.2   | NM_018076    | NP_060546    | Q5T2S8 | ARMC4_HUMAN |                                 | 6  | AAATTTCCCCAC   | 0.393 |
| - | 36 | 5324    | zhr.1_Missense_M   | NM_001142771 | NP_001136243 | Q96QU1 | PCD15_HUMAN |                                 | 13 | TTCAATCATGGAC  | 0.483 |
| - | 3  | 1067    | p.A305T EGR2_uc    | NM_001136177 | NP_001129649 | P11161 | EGR2_HUMAN  | Poly-Ala.                       | 2  | TGGCGGCGGCTG   | 0.701 |
| - | 29 | 3879    |                    | NM_007055    | NP_008986    | O14802 | RPC1_HUMAN  |                                 | 0  | GGGCGGCCTCG    | 0.557 |
| - | 54 | 4469    | 7A1_uc001kxq.2_ξ   | NM_000494    | NP_000485    | Q9UMD9 | COHA1_HUMAN | (tential). Triple-helical regio | 5  | TGGCTCCATAAG   | 0.498 |
| + | 21 | 3124    | CS3_uc010qqz.1_    | NM_014978    | NP_055793    | Q9UPU3 | SORC3_HUMAN | lenal (Potential).              | 10 | GCATTTCCCTCA   | 0.448 |
| - | 8  | 3800    |                    | NM_014881    | NP_055696    | Q6PJP8 | DCR1A_HUMAN |                                 | 2  | TCTGTAGGTCGA   | 0.358 |
| + | 15 | 2031    |                    | NM_014937    | NP_055752    | Q9Y2H2 | SAC2_HUMAN  |                                 | 2  | TCTGGGCCCTCA   | 0.473 |
| - | 29 | 3851    |                    | NM_005961    | NP_005952    | Q6W4X9 | MUC6_HUMAN  | rich. Thr-rich.                 | 1  | CCGAGGAGGCT    | 0.647 |
| + | 7  | 1076    | p.W107* KCNQ1_     | NM_000218    | NP_000209    | P51787 | KCNQ1_HUMAN | ellular (Potential).            | 1  | GACGTGGGTCTG   | 0.632 |
| - | 1  | 196     |                    | NM_001005238 | NP_001005238 | Q8NGK0 | O51G2_HUMAN | Name=2; (Potential).            | 2  | TGAAGAGATACA   | 0.483 |
| - | 1  | 901     |                    | NM_001146033 | NP_001139505 | P0C7T3 | O56A5_HUMAN | lasmic (Potential).             | 0  | TGATCTCCTTGG   | 0.443 |
| - | 14 | 2141    |                    | NM_000352    | NP_000343    | Q09428 | ABCC8_HUMAN | smic (By similarity).           | 1  | TTCATCGCCATCT  | 0.652 |
| - | 8  | 725     | e_Mutation_p.E20   | NM_005709    | NP_005700    | Q9Y6N9 | USH1C_HUMAN |                                 | 1  | TGTTTTCCCGATT  | 0.597 |
| + | 3  | 753     |                    | NM_020346    | NP_065079    | Q9P2U8 | VGLU2_HUMAN |                                 | 4  | TCCATAGAAAGC   | 0.512 |
| + | 1  | 254     |                    | NM_001004727 | NP_001004727 | Q8NGF9 | OR4X2_HUMAN | ellular (Potential).            | 0  | TGATATCTTGGTG  | 0.502 |
| - | 7  | 1148    | z_Mutation_p.P281  | NM_004476    | NP_004467    | Q04609 | FOLH1_HUMAN | . Extracellular (Probable).     | 3  | TCAATTGGATGAA  | 0.358 |
| - | 1  | 563     |                    | NM_001004471 | NP_001004471 | Q8NGQ4 | O10Q1_HUMAN | ellular (Potential).            | 2  | TGGACGGGAGGC   | 0.622 |
| + | 5  | 617_618 |                    | NM_014207    | NP_055022    | P06127 | CD5_HUMAN   | ar (Potential). SRCR 2.         | 1  | TGCGCCGGCGTGC  | 0.649 |
| - | 7  | 1554    | v.wj.2_Missense_M  | NM_004790    | NP_004781    | Q4U2R8 | S22A6_HUMAN | ical; (Potential).              | 0  | TCTGGGGTATC    | 0.612 |
| + | 3  | 723     | zA10_uc001nwu.3    | NM_001039752 | NP_001034841 | Q63ZE4 | S22AA_HUMAN | lasmic (Potential).             | 2  | TTGGGCGAAGAT   | 0.403 |
| - | 1  | 1945    | S_uc001oir.2_5'Fl  | NM_018219    | NP_060689    | Q9NVE4 | CCD87_HUMAN |                                 | 2  | TGAGGGGCCACA   | 0.478 |
| - | 8  | 849     | vth.3_Missense_M   | NM_014824    | NP_055639    | O94868 | FCSD2_HUMAN |                                 | 1  | GATAATCATTCCCT | 0.373 |
| - | 2  | 500     | p.P66L DLG2_uc     | NM_001364    | NP_001355    | Q15700 | DLG2_HUMAN  |                                 | 6  | TTCAGAGGAGAA   | 0.418 |
| - | 7  | 1945    | v.m.2_Missense_M   | NM_001143831 | NP_001137303 | P41594 | GRM5_HUMAN  | Name=1; (Potential).            | 9  | TGAGCTGCAATG   | 0.493 |
| + | 14 | 4727    |                    | NM_005422    | NP_005413    | O75443 | TECTA_HUMAN | VWFD 4.                         | 10 | AACTGGTTTGGC   | 0.353 |
| + | 24 | 3366    | uc001qkn.2_Miss    | NM_199460    | NP_955630    | Q13936 | CAC1C_HUMAN | z=S4 of repeat III; (Potentia   | 11 | TCTTGCGAGTCC   | 0.562 |
| - | 10 | 1657    |                    | NM_001733    | NP_001724    | P00736 | C1R_HUMAN   | eptidase S1.                    | 0  | TGATTTCTTAGC   | 0.552 |
| - | 11 | 2787    | p.P887S CD163_t    | NM_004244    | NP_004235    | Q86VB7 | C163A_HUMAN | :tracellular (Potential).       | 8  | TGATGGGAATGG   | 0.547 |
| - | 2  | 279     | P_uc009zgl.2_5'U   | NM_002864    | NP_002855    |        |             |                                 | 5  | TACAGTGAATA    | 0.512 |
| - | 3  | 658     |                    | NM_006248    | NP_006239    |        |             |                                 | 0  | TGCCTCCTTGTG   | 0.602 |
| - | 4  | 791     | v1raj.1_Missense_I | NM_018050    | NP_060520    | Q9H8J5 | MANS1_HUMAN | ellular (Potential).            | 0  | TCTGAGGATCCA   | 0.428 |
| - | 25 | 3058    |                    | NM_004963    | NP_004954    | P25092 | GUC2C_HUMAN | lasmic (Potential).             | 6  | TGAGTTCTCTTC   | 0.428 |
| - | 16 | 2233    |                    | NM_021957    | NP_068776    | P54840 | GYS2_HUMAN  |                                 | 2  | TATCTTCCACATC  | 0.488 |
| + | 9  | 796     | ssense_Mutation_   | NM_020183    | NP_064568    | Q8WYA1 | BMAL2_HUMAN |                                 | 2  | TGAGCTGGTTTG   | 0.388 |
| + | 3  | 1597    |                    | NM_032834    | NP_116223    | Q5BKT4 | AG10A_HUMAN | ellular (Potential).            | 1  | TTATAGGCTTAAC  | 0.338 |
| - | 40 | 13631   |                    | NM_003482    | NP_003473    | O14686 | MLL2_HUMAN  |                                 | 41 | TGACCCCGTCC    | 0.627 |
| - | 8  | 1212    | se_Mutation_p.L38  | NM_000889    | NP_000880    | P26010 | ITB7_HUMAN  | tracellular (Potential).        | 8  | TGATGAGCTGTAC  | 0.552 |
| + | 1  | 192     |                    | NM_014212    | NP_055027    | O43248 | HXC11_HUMAN |                                 | 1  | TGCGGAGGAGC    | 0.617 |
| - | 2  | 1474    |                    | NM_005447    | NP_005438    | O75901 | RASF9_HUMAN |                                 | 1  | TGTTTTCTTTAA   | 0.418 |
| - | 7  | 1034    | e_Mutation_p.P12   | NM_133503    | NP_598010    | P07585 | PGS2_HUMAN  | LRR 11.                         | 4  | TGAGTGGGCAGA   | 0.408 |
| - | 14 | 1983    | v1tgp.2_Missense_  | NM_015054    | NP_055869    | A0JNW5 | UH1BL_HUMAN |                                 | 2  | TGAGAAGGAATG   | 0.353 |
| + | 6  | 924     | v.1_Missense_Mut   | NM_017915    | NP_060385    | Q9NWS1 | PR1BP_HUMAN |                                 | 0  | TGAAATACAAACC  | 0.299 |

|   |    |           |                                                 |              |              |        |             |                             |    |              |       |
|---|----|-----------|-------------------------------------------------|--------------|--------------|--------|-------------|-----------------------------|----|--------------|-------|
| + | 2  | 356       |                                                 | NM_017564    | NP_060034    | Q8WWQ8 | STAB2_HUMAN | cellular (Potential).       | 14 | CGGATGGTTACA | 0.463 |
| - | 14 | 1624      | C3_uc010swd.1_5                                 | NM_001031701 | NP_001026871 | Q86UY8 | NT5D3_HUMAN |                             | 3  | AGGCGGGCAGT  | 0.592 |
| + | 3  | 280       | lex_2_Missense_M                                | NM_020382    | NP_065115    | Q9NQR1 | SETD8_HUMAN |                             | 0  | ATCACGAAGTC  | 0.488 |
| - | 49 | 6847      | LE_uc001ukr.1_M                                 | NM_006231    | NP_006222    | Q07864 | DPOE1_HUMAN |                             | 8  | AGGTACGACATG | 0.602 |
| + | 6  | 693       | p.E180K SGCG_u                                  | NM_000231    | NP_000222    | Q13326 | SGCG_HUMAN  | cellular (Potential).       | 0  | CAGTGGAGACA  | 0.393 |
| + | 1  | 91        | ase_Mutation_p.R1                               | NM_031277    | NP_112567    | Q9BXT8 | RNF17_HUMAN |                             | 2  | CCAGCGAATGGC | 0.617 |
| + | 6  | 507       |                                                 | NM_000982    | NP_000973    | P46778 | RL21_HUMAN  |                             | 0  | CTATTCCTATG  | 0.403 |
| - | 1  | 154       | i4P_uc001vwb.3_F                                | NM_001145442 | NP_001138914 | A6NI47 | POTEM_HUMAN |                             | 0  | CTGCACCAGGG  | 0.587 |
| - | 1  | 649       |                                                 | NM_001005465 | NP_001005465 | Q8NGC4 | O10G3_HUMAN | Name=5; (Potential).        | 2  | GGAGAGGAGGA  | 0.542 |
| + | 13 | 1429      | p.G446S GALNTL                                  | NM_020692    | NP_065743    | Q8N428 | GLTL1_HUMAN | ectin. Lumenal (Potential). | 2  | CTCAGGGCCAG  | 0.582 |
| - | 4  | 929       | 2_uc010asx.2_3'U                                | NM_000793    | NP_000784    | Q92813 | IOD2_HUMAN  |                             | 1  | AAGAGGAGTCC  | 0.557 |
| - | 8  | 1267      | e_Mutation_p.R26                                | NM_000153    | NP_000144    | P54803 | GALC_HUMAN  |                             | 0  | AATGCGACCCC  | 0.338 |
| - | 2  | 1052      | 1ycu.3_Missense_                                | NM_016186    | NP_057270    | Q9UK55 | ZPI_HUMAN   |                             | 3  | CATTGCGAAAAT | 0.398 |
| + | 3  | 534       | ense_Mutation_p.1                               | NM_000623    | NP_000614    | P30411 | BKRB2_HUMAN | Name=2; (Potential).        | 5  | CTTCTGGGCCA  | 0.592 |
| - | 21 | 4656      | o.S1508F TP53BP                                 | NM_005657    | NP_005648    | Q12888 | TP53B_HUMAN | h dimethylated histone H4.  | 7  | TCCCAGAGTAA  | 0.473 |
| - | 23 | 3139      | un.2_Missense_Mi                                | NM_014080    | NP_054799    | Q9NRD8 | DUOX2_HUMAN | teraction with TXNDC11 (B   | 5  | CCAGTCCCTGG  | 0.597 |
| - | 32 | 4062      | o5C_uc010uga.1_l                                | NM_018728    | NP_061198    | Q9NQX4 | MYO5C_HUMAN | Potential.                  | 14 | ATGCTTCCTGCC | 0.458 |
| + | 1  | 1833_1834 |                                                 | NM_001080534 | NP_001074003 | Q8NB66 | UN13C_HUMAN |                             | 7  | GTTCAGGGTATC | 0.5   |
| + | 1  | 172       | 5'UTR NOX5_uc0                                  | NM_145658    | NP_663633    | Q6UW49 | SPESP_HUMAN |                             | 0  | GCCTTCGCTGT  | 0.642 |
| + | 3  | 403       | ie_Mutation_p.G97                               | NM_001008226 | NP_001008227 | Q658L1 | F154B_HUMAN |                             | 2  | AAATTTGGAAT  | 0.393 |
| + | 1  | 405       | 2_5'Flank LOC146                                | NM_001053    | NP_001044    | P35346 | SSR5_HUMAN  | cellular (Potential).       | 1  | CTGGCCCTTCG  | 0.622 |
| - | 7  | 833       | o.2_Missense_Mutation_p.P61L UNKL_uc002clp.2_Mi | NM_001053    | NP_001044    | Q9H9P5 | UNKL_HUMAN  |                             | 0  | CGTTTGGACTT  | 0.657 |
| - | 2  | 1867      | p.D634H IGFALS_                                 | NM_004970    | NP_004961    | P35858 | ALS_HUMAN   | LRRCT.                      | 0  | GAGGTCCCACA  | 0.682 |
| - | 5  | 2693      |                                                 | NM_001116    | NP_001107    | O60503 | ADCY9_HUMAN | lasmic (Potential).         | 6  | GATGTTCTTGAA | 0.547 |
| - | 28 | 3119      | iP7_uc010uyj.1_M                                | NM_003470    | NP_003461    | Q93009 | UBP7_HUMAN  |                             | 3  | GATTTCTGGG   | 0.488 |
| - | 13 | 3942      | uyn.1_Missense_N                                | NM_001134407 | NP_001127879 | Q12879 | NMDE1_HUMAN | lasmic (Potential).         | 45 | GGGTGGACTA   | 0.527 |
| + | 3  | 657       | IP2_uc010uyp.1_l                                | NM_024997    | NP_079273    | Q5U623 | MCAF2_HUMAN |                             | 0  | AAAACGATTCTC | 0.438 |
| - | 1  | 231       | CSM1_uc010bwg.                                  | NM_052956    | NP_443188    | Q08AH1 | ACSM1_HUMAN |                             | 2  | CAGTACATAACT | 0.483 |
| + | 2  | 3236      |                                                 | NM_014699    | NP_055514    | O15015 | ZN646_HUMAN |                             | 2  | GTTCTGGGACT  | 0.577 |
| + | 3  | 1084      | aiu.3_Missense_M                                | NM_138736    | NP_620073    | P09471 | GNAO_HUMAN  |                             | 2  | TCTCCGGAGAA  | 0.512 |
| + | 29 | 4139      | RC5_uc010ccs.1_                                 | NM_032206    | NP_115582    | Q86W13 | NLRC5_HUMAN |                             | 7  | AGGCTCAGTGA  | 0.572 |
| + | 10 | 1460      | G7_uc002fnk.1_R                                 | NM_003119    | NP_003110    | Q9UQ90 | SPG7_HUMAN  | trial matrix (Potential).   | 0  | TCTCCCCACGC  | 0.617 |
| + | 2  | 133       | o.P34S DPH1_uc0                                 | NM_001383    | NP_001374    | Q9BZG8 | DPH1_HUMAN  |                             | 1  | TCCCCCTGAG   | 0.537 |
| + | 3  | 466       | ie_Mutation_p.S89                               | NM_001042    | NP_001033    | P14672 | GTR4_HUMAN  | Name=2; (Potential).        | 0  | CTTTCCGTGGC  | 0.622 |
| - | 2  | 263       |                                                 | NM_004853    | NP_004844    | Q9UNK0 | STX8_HUMAN  | lasmic (Potential).         | 1  | CTTTGGTGCC   | 0.388 |
| + | 6  | 446       | 7* TBC1D3_uc002                                 | NM_032258    | NP_115634    | Q8IZP1 | TBC3A_HUMAN |                             | 0  | ATAGATCGAGCG | 0.552 |
| - | 1  | 516       |                                                 | NM_019016    | NP_061889    | Q2M215 | K1C24_HUMAN | Rod. Coil 1A.               | 0  | AGGTAATTGGCC | 0.527 |
| - | 1  | 44        |                                                 | NM_181534    | NP_853512    | Q7Z3Z0 | K1C25_HUMAN |                             | 2  | AACGCGTTGCA  | 0.488 |
| - | 3  | 249       |                                                 | NM_002634    | NP_002625    | P35232 | PHB_HUMAN   |                             | 0  | CCCACGGGATG  | 0.498 |
| - | 3  | 363       |                                                 | NM_018509    | NP_060979    | Q96AG4 | LR59_HUMAN  | cytoplasmic (Potential).    | 1  | TTCTTACTCAGG | 0.458 |
| + | 3  | 103       |                                                 | NM_153228    | NP_694960    | Q8N957 | ANKF1_HUMAN |                             | 2  | AATAGGAAGGA  | 0.398 |
| - | 7  | 1201      |                                                 | NM_000250    | NP_000241    | P05164 | PERM_HUMAN  |                             | 4  | GTACACCATGC  | 0.652 |
| - | 4  | 874       | idea.1_Missense_                                | NM_001098426 | NP_001091896 | Q92925 | SMRD2_HUMAN |                             | 0  | GAGGCTTTTTG  | 0.557 |
| + | 7  | 1026      | jth.2_Missense_M                                | NM_198955    | NP_945193    | Q3V5L5 | MG15B_HUMAN | ienal (Potential).          | 3  | GGAGTCCGGGG  | 0.672 |
| - | 5  | 890       | o.D147N NOL4_uc                                 | NM_003787    | NP_003778    | O94818 | NOL4_HUMAN  |                             | 3  | ATTCATCACTTT | 0.328 |
| + | 15 | 2721      | mz.1_Nonsense_N                                 | NM_025135    | NP_079411    | Q2V2M9 | FHOD3_HUMAN |                             | 8  | GGCTTAGGGT   | 0.557 |
| + | 4  | 562       | p.R81W SLC14A                                   | NM_007163    | NP_009094    | Q15849 | UT2_HUMAN   |                             | 4  | CCCATCGGGAC  | 0.507 |

rs72556388

|   |     |           |                                          |              |              |        |             |                                                |      |               |       |            |
|---|-----|-----------|------------------------------------------|--------------|--------------|--------|-------------|------------------------------------------------|------|---------------|-------|------------|
| - | 4   | 694       | ac.1_Missense_Mut                        | NM_001080467 | NP_001073936 | Q9ULV0 | MYO5B_HUMAN | Myosin head-like.                              | 5    | GGGGTCCATGT   | 0.488 |            |
| + | 5   | 1450      | r.1_Missense_Mut                         | NM_005215    | NP_005206    | P43146 | DCC_HUMAN   | Immunoglobulin-like C2-type 3.                 | 17   | AGTATCTTTATT  | 0.358 |            |
| + | 6   | 652       | rb.2_Missense_Mut                        | NM_001974    | NP_001965    | Q14246 | EMR1_HUMAN  | EGF-like 4; calcium-binding                    | 5    | TGAATCCAGCAC  | 0.478 |            |
| - | 5   | 670       |                                          | NM_198535    | NP_940937    | Q32M78 | ZN699_HUMAN | Immunoglobulin-like type 2; degenerate.        | 0    | GCACTGATAGG   | 0.438 |            |
| - | 2   | 974       |                                          | NM_024527    | NP_078803    | Q96I13 | ABHD8_HUMAN |                                                | 0    | ACATTTTCGCTTC | 0.592 |            |
| + | 16  | 2019      | AXL_uc010ehk.2                           | NM_021913    | NP_068713    | P30530 | UFO_HUMAN   | Potential). Protein kinase.                    | 13   | TGAACGAGAGA   | 0.597 |            |
| - | 1   | 187       | rsense_Mutation_f                        | NM_006905    | NP_008836    | P11464 | PSG1_HUMAN  |                                                | 2    | GAGCCCCCTCC   | 0.562 |            |
| - | 10  | 1541      | oejp.1_Missense_Mut                      | NM_001102597 | NP_001096067 | Q6UY09 | CEA20_HUMAN | Epithelial (Potential).                        | 2    | CTCAGGACTCAC  | 0.527 |            |
| - | 1   | 1682      |                                          | NM_032040    | NP_114429    | Q9H0W5 | CCDC8_HUMAN | Poly-Arg.                                      | 3    | TCCTGCGGCGC   | 0.627 |            |
| - | 2   | 1895      | ort.1_Missense_Mut                       | NM_004977    | NP_004968    | Q14003 | KCNC3_HUMAN | Transmembrane Segment S6; (Potential).         | 1    | CACAGGCATGG   | 0.607 |            |
| + | 3   | 388       | luc002pyz.3_Split                        | NM_001161426 | NP_001154898 | Q8N9Z0 | ZN610_HUMAN |                                                | 3    | CATTTAGGATTGA | 0.443 |            |
| + | 7   | 1897      | oqr.1_Missense_Mut                       | NM_018555    | NP_061025    | Q9NQX6 | ZN331_HUMAN |                                                | 6    | ATACTGGTGAG   | 0.413 |            |
| - | 8   | 2661      | o.G862E NLRP7_L                          | NM_206828    | NP_996611    | Q8WX94 | NALP7_HUMAN | Nucleotide-binding domain LRR 6.               | 3    | TCACCCCTGTAT  | 0.507 |            |
| - | 15  | 3486      |                                          | NM_004304    | NP_004295    | Q9UM73 | ALK_HUMAN   | Extracellular (Potential).                     | 1218 | CCAGTCTCTCTC  | 0.607 |            |
| + | 1   | 366       |                                          | NR_003663    |              |        |             |                                                | 0    | GAGGTGGATTT   | 0.478 |            |
| + | 11  | 1809      | irR1_uc002tbw.3_Ir                       | NM_016232    | NP_057316    | Q01638 | ILRL1_HUMAN | Epithelial (Potential).                        | 4    | GTGGAGGGAGG   | 0.512 |            |
| + | 9   | 1556      | fiz.2_Missense_Mut                       | NM_003853    | NP_003844    | O95256 | I18RA_HUMAN | Immunoglobulin-like; (Potential).              | 5    | GAGGAGGTAAG   | 0.438 |            |
| + | 16  | 1491      | lyf.1_Missense_Mut                       | NM_006770    | NP_006761    | Q9UEW3 | MARCO_HUMAN | Extracellular (Potential).                     | 6    | CAAAATTCTGAT  | 0.542 |            |
| + | 1   | 789       | uc002tpw.1_RNA                           | NM_032144    | NP_115520    | Q9H0N0 | RAB6C_HUMAN |                                                | 1    | TGTCAGAACAG   | 0.428 |            |
| - | 9   | 3768      | _Mutation_p.R113:                        | NM_025052    | NP_079328    | Q56UN5 | YSK4_HUMAN  | Protein kinase.                                | 5    | ATTTCCTCCAT   | 0.498 |            |
| + | 14  | 2957      | D7B_uc010zjb.1_I                         | NM_001080427 | NP_001073896 |        |             |                                                | 7    | TTGTGGAATTGC  | 0.418 |            |
| - | 41  | 4956      |                                          | NM_004543    | NP_004534    | P20929 | NEBU_HUMAN  |                                                | 20   | AAATCCAACTTC  | 0.413 |            |
| - | 11  | 1822      | p.E444K SCN3A_I                          | NM_006922    | NP_008853    | Q9NY46 | SCN3A_HUMAN |                                                | 10   | AAATTCGGCTC   | 0.413 |            |
| - | 11  | 1757      | p.R449Q SCN1A_I                          | NM_006920    | NP_008851    | P35498 | SCN1A_HUMAN |                                                | 13   | TTGCTCGCCCTC  | 0.478 |            |
| - | 253 | 54795     | 386K TTN_uc010z                          | NM_133378    | NP_596869    | Q8WZ42 | TITIN_HUMAN |                                                | 153  | AACTTCTCTCTG  | 0.428 |            |
| - | 225 | 45513     | _uc010zfi.1_Missense                     | NM_133378    | NP_596869    | Q8WZ42 | TITIN_HUMAN |                                                | 153  | TGTTTCAGCCA   | 0.423 |            |
| - | 143 | 30754     | z.1_Missense_Mut                         | NM_133378    | NP_596869    | Q8WZ42 | TITIN_HUMAN |                                                | 153  | TTTAACTTCTCTG | 0.438 |            |
| - | 46  | 13716     | .E4431K TTN_uc0                          | NM_133437    | NP_597681    | Q8WZ42 | TITIN_HUMAN |                                                | 153  | TCTTCGGTAT    | 0.378 |            |
| - | 16  | 2985      | p.G875R TTN_uc0                          | NM_133378    | NP_596869    | Q8WZ42 | TITIN_HUMAN |                                                | 153  | GCGTCCGTGCA   | 0.527 |            |
| - | 6   | 880       |                                          | NM_173648    | NP_775919    | Q6ZP82 | CC141_HUMAN |                                                | 10   | GATGTCGACTC   | 0.502 |            |
| - | 13  | 1676      | ofrt.2_Splice_Site                       | NM_005795    | NP_005786    | Q16602 | CALRL_HUMAN |                                                | 4    | CCATACCTGGA   | 0.388 |            |
| + | 3   | 285       | l0ziu.1_5'Flank E                        | NM_001037663 | NP_001032752 | P24534 | EF1B_HUMAN  | EF1B C-terminal.                               | 0    | TGTCCAGCCCA   | 0.468 |            |
| - | 8   | 1349      | fF2_uc010fuw.2_IV                        | NM_016260    | NP_057344    | Q9UKS7 | IKZF2_HUMAN |                                                | 0    | TTCCTGGGGTCTC | 0.498 |            |
| + | 12  | 1356      | ver.2_Missense_Mut                       | NM_024532    | NP_078808    | Q8N0X2 | SPG16_HUMAN | WD 2.                                          | 2    | TTATGGGATCTAT | 0.418 |            |
| - | 3   | 961       | C19A3_uc010ziv.1                         | NM_025243    | NP_079519    | Q9BZV2 | S19A3_HUMAN | Immunoglobulin-like; (Potential).              | 2    | TAAACCTGCTC   | 0.458 |            |
| + | 4   | 590       | mp.1_Missense_Mut                        | NM_001017915 | NP_001017915 | Q92835 | SHIP1_HUMAN | SH2 domain p.F28L(1)                           | 2    | TTTTTCAAACG   | 0.587 |            |
| - | 2   | 432       | p.R123* SIRPG_L                          | NM_018556    | NP_061026    | Q9P1W8 | SIRPG_HUMAN | Potential). Ig-like V-type.                    | 1    | TTTTTCGAAACT  | 0.498 |            |
| + | 2   | 452       | u.1_RNA CSTL1_I                          | NM_138283    | NP_612140    | Q9H114 | CST1L_HUMAN |                                                | 0    | TAATTCGAAGTC  | 0.458 |            |
| + | 1   | 63        | RG1B_uc010ztj.1_RNA FRG1B_uc010gdr.1_RNA |              |              |        |             |                                                | 0    | TGATACGTTGG   | 0.219 | rs62197050 |
| - | 2   | 387       | lOgel.2_5'UTR CDI                        | NM_016408    | NP_057492    | Q96SZ6 | CK5P1_HUMAN | Protein tyrosine kinase activation inhibition. | 5    | GATAGGGAGGT   | 0.483 |            |
| + | 9   | 1271      | fo.1_Missense_Mut                        | NM_016436    | NP_057520    | Q9BVI0 | PHF20_HUMAN |                                                | 1    | CCACTCCTTTGC  | 0.473 |            |
| + | 6   | 791       | rjz.1_Missense_Mut                       | NM_013396    | NP_037528    | Q9UHP3 | UBP25_HUMAN |                                                | 5    | TTTTTGAATTTA  | 0.299 |            |
| - | 25  | 4818_4819 | DAM_uc002yyr.1_f                         | NM_001389    | NP_001380    | O60469 | DSCAM_HUMAN | III 5. Extracellular (Potential)               | 11   | CCACTCCATTTT  | 0.475 |            |
| + | 1   | 214       |                                          | NM_000394    | NP_000385    | P02489 | CRYAA_HUMAN |                                                | 2    | TACTACCGCCAG  | 0.632 | rs74315441 |
| + | 1   | 59        | .1_Intron C21orf29                       | NM_198689    | NP_941962    | P60409 | KR107_HUMAN |                                                | 0    | CCAGCGACCTG   | 0.532 |            |
| + | 29  | 3671      | fz.1_Missense_Mut                        | NM_015151    | NP_055966    | Q14689 | DIP2A_HUMAN |                                                | 2    | TATTAGCGGAG   | 0.493 |            |
| + | 20  | 2849      | l_p.L843F SGSM1                          | NM_001039948 | NP_001035037 | Q2NKQ1 | SGSM1_HUMAN | Small GTP-binding protein GAP TBC.             | 5    | AAAGTCTCTTCC  | 0.587 |            |

|   |    |                          |              |              |        |             |                               |    |                  |       |
|---|----|--------------------------|--------------|--------------|--------|-------------|-------------------------------|----|------------------|-------|
| + | 11 | 1185_1186_p.P120L SAMM5C | NM_015380    | NP_056195    | Q9Y512 | SAM50_HUMAN |                               | 1  | ATAAGCCGTCAA     | 0.361 |
| + | 6  | 636_qx.1_Missense_Mt     | NM_017931    | NP_060401    | Q5R3I4 | TTC38_HUMAN | TPR 2.                        | 1  | TCTACTCTTTTGC    | 0.383 |
| - | 9  | 1184_uc003bkh.2_Siler    | NM_032019    | NP_114408    | Q969S8 | HDA10_HUMAN | one deacetylase.              | 0  | CTCAGGGTCCC      | 0.652 |
| + | 9  | 1079_ww.1_Missense_Mt    | NM_006614    | NP_006605    | O00533 | CHL1_HUMAN  | 3. Extracellular (Potential). | 12 | CAACTCCACAG      | 0.338 |
| + | 3  | 507_M43_uc003byl.1_E     | NM_024334    | NP_077310    | Q9BTV4 | TMM43_HUMAN | lenal (Potential).            | 1  | AGAATGAAGGA      | 0.597 |
| + | 4  | 1721                     | NM_001039111 | NP_001034200 | Q2Q1W2 | LIN41_HUMAN | Filamin.                      | 3  | TTACCGACCCC      | 0.577 |
| - | 22 | 3904                     | NM_006514    | NP_006505    | Q9Y5Y9 | SCNAA_HUMAN | 3=S5 of repeat III; (Potentia | 10 | GAAGAGGTTCA      | 0.502 |
| - | 9  | 1412                     | NM_014139    | NP_054858    | Q9UI33 | SCNBA_HUMAN |                               | 9  | CTGCTCCTCAT      | 0.473 |
| - | 8  | 1106_e_Mutation_p.E25i   | NM_016598    | NP_057682    | Q9NYG2 | ZDHC3_HUMAN | lasmic (Potential).           | 0  | ATTGTTCTATTCC    | 0.458 |
| - | 34 | 9424_ikf.2_Missense_Mt   | NM_001407    | NP_001398    | Q9NYQ7 | CELR3_HUMAN | lasmic (Potential).           | 11 | TGCGACCGTAAC     | 0.647 |
| + | 32 | 3423                     | NM_015136    | NP_055951    | Q9NY15 | STAB1_HUMAN | xtracellular (Potential).     | 9  | ACCAGGCTTTAC     | 0.617 |
| + | 31 | 2729_ie_Mutation_p.S80   | NM_018398    | NP_060868    | Q8IZS8 | CA2D3_HUMAN | ellular (Potential).          | 7  | GGGCTCCTTTA      | 0.403 |
| - | 8  | 987_E1L3_uc003djp.1_     | NM_004944    | NP_004935    | Q13609 | DNSL3_HUMAN | lization signal (Potential).  | 3  | CTCTCCTTAGAC     | 0.373 |
| - | 8  | 1123_p.S265F PLSCR4      | NM_001128305 | NP_001121777 | Q9NRQ2 | PLS4_HUMAN  | smic (By similarity).         | 0  | CAAGGGATTTG      | 0.388 |
| - | 2  | 1052_HE_uc003fen.3_in    | NM_000055    | NP_000046    | P06276 | CHLE_HUMAN  |                               | 4  | TTTCTTGGGGAT     | 0.403 |
| - | 12 | 1248_p.E309K ZBBX_u      | NM_024687    | NP_078963    | A8MT70 | ZBBX_HUMAN  |                               | 2  | TAAGTCAATATT     | 0.279 |
| - | 10 | 933_p.E204K ZBBX_u       | NM_024687    | NP_078963    | A8MT70 | ZBBX_HUMAN  |                               | 2  | TATTCTCCTTTT     | 0.333 |
| - | 3  | 12691_l1bth.1_intron MUC | NM_018406    | NP_060876    | Q99102 | MUC4_HUMAN  |                               | 0  | GTGGCGTGACC      | 0.597 |
| + | 7  | 310_uc003fzv.1_Silent    | NM_001039127 | NP_001034216 | Q3SXZ3 | ZN718_HUMAN | KRAB.                         | 0  | CAAAATAAAAGAC    | 0.453 |
| + | 3  | 859_3gdy.1_Missense_     | NM_001042424 | NP_001035889 | O96028 | NSD2_HUMAN  | PWWP 1.                       | 9  | GTGGTCCAAAG      | 0.433 |
| + | 7  | 1250_uc003ghf.2_Silent   | NM_173660    | NP_775931    | Q18PE1 | DOK7_HUMAN  |                               | 1  | CAGTCGAGTAC      | 0.701 |
| - | 6  | 2123_D4_uc003gwm.2_C     | NM_207406    | NP_997289    | Q6ZU67 | BEND4_HUMAN |                               | 0  | GTGATCGATCC      | 0.527 |
| + | 5  | 847_zl.1_Nonsense_Mt     | NM_025087    | NP_079363    | Q9H720 | PG2IP_HUMAN |                               | 3  | CAGATGGGCAG      | 0.527 |
| - | 19 | 2934_t.1_Missense_Mut    | NM_002253    | NP_002244    | P35968 | VGFR2_HUMAN | 3. Cytoplasmic (Potential).   | 33 | ATGCTCACTGT      | 0.468 |
| - | 3  | 965_2A3_uc010ihp.1_I     | NM_024743    | NP_079019    | Q6UWM9 | UD2A3_HUMAN | ellular (Potential).          | 2  | ATTTTGAAACAC     | 0.403 |
| - | 6  | 862_DH1B_uc011ceh.1      | NM_000668    | NP_000659    | P00325 | ADH1B_HUMAN |                               | 2  | CTCCATCAGTCA     | 0.463 |
| - | 6  | 862                      | NM_000673    | NP_000664    | P40394 | ADH7_HUMAN  |                               | 3  | CTTGGGACTGA      | 0.478 |
| + | 4  | 587_p.M138L MTTP_ur      | NM_000253    | NP_000244    | P55157 | MTP_HUMAN   | Vitellogenin.                 | 4  | AAATAATGGGAA     | 0.398 |
| + | 3  | 803_ill.2_Missense_Mt    | NM_017935    | NP_060405    | Q8NDB2 | BANK1_HUMAN |                               | 3  | CTGGGGAAATA      | 0.368 |
| + | 9  | 8267_p.S1054L FAT4_u     | NM_024582    | NP_078858    | Q6V0I7 | FAT4_HUMAN  | Extracellular (Potential).    | 18 | TACTTCAGTAA      | 0.383 |
| + | 9  | 9194_p.G1363E FAT4_u     | NM_024582    | NP_078858    | Q6V0I7 | FAT4_HUMAN  | (Potential). Cadherin 29.     | 18 | TAAGGGAAACCI     | 0.423 |
| + | 9  | 10025_p.R1640Q FAT4_u    | NM_024582    | NP_078858    | Q6V0I7 | FAT4_HUMAN  | Extracellular (Potential).    | 18 | TAGTCGAAAGA      | 0.413 |
| + | 9  | 11284_p.L2060F FAT4_u    | NM_024582    | NP_078858    | Q6V0I7 | FAT4_HUMAN  | ellular (Potential).          | 18 | CGTTTCTTTTGG     | 0.458 |
| - | 5  | 764_mm.3_Missense_Mt     | NM_004564    | NP_004555    | O75879 | GATB_HUMAN  |                               | 0  | TGTTCCGCTGG      | 0.532 |
| - | 1  | 580_CH1_uc003iqs.1_I     | NM_012403    | NP_036535    | O43423 | AN32C_HUMAN | i-rich (highly acidic).       | 0  | cctctcaccttctctc | 0.184 |
| + | 15 | 2910_e.1_Missense_Mut    | NM_001080477 | NP_001073946 | Q9P273 | TEN3_HUMAN  | ellular (Potential).          | 0  | GAGTGGATTCCG     | 0.418 |
| - | 12 | 2569_e_Mutation_p.P731   | NM_004934    | NP_004925    | Q13634 | CAD18_HUMAN | lasmic (Potential).           | 7  | CATAAGGGGGA      | 0.478 |
| - | 8  | 2597                     | NM_021072    | NP_066550    | O60741 | HCN1_HUMAN  | ic (Potential). Poly-Pro.     | 1  | TGCTGGAGGGG      | 0.587 |
| - | 8  | 2513                     | NM_021072    | NP_066550    | O60741 | HCN1_HUMAN  | lasmic (Potential).           | 1  | GCCCCCTGCCT      | 0.677 |
| - | 4  | 636_p.S188F DEPDC        | NM_018369    | NP_060839    | Q8WUY9 | DEP1B_HUMAN |                               | 1  | TTCATAGACTTCC    | 0.383 |
| + | 9  | 1323                     | NM_003248    | NP_003239    | P35443 | TSP4_HUMAN  | alcium-binding (Potential).   | 0  | ACCATCCCTGCT     | 0.483 |
| + | 8  | 9021_i.2_Intron VCAN_u   | NM_004385    | NP_004376    | P13611 | CSPG2_HUMAN | GAG-beta.                     | 16 | CTGAGCCTCCC      | 0.383 |
| - | 8  | 1347_p.E300K EDIL3_u     | NM_005711    | NP_005702    | O43854 | EDIL3_HUMAN | :5/8 type C 1.                | 2  | AAATTCCATTCC     | 0.368 |
| + | 56 | 11785_i.E1603K GPR98_u   | NM_032119    | NP_115495    | Q8WXG9 | GPR98_HUMAN | ellular (Potential).          | 16 | GAAATGAAATA      | 0.408 |
| + | 6  | 1479_NB1_uc010jdb.1_F    | NM_005573    | NP_005564    | P20700 | LMNB1_HUMAN | Rod. Coil 2.                  | 2  | CCCTGGACATG      | 0.448 |
| + | 7  | 1354                     | NM_133638    | NP_598377    | Q8TE59 | ATS19_HUMAN |                               | 9  | TGTTGGTAAGTC     | 0.299 |
| + | 1  | 2041_i03lhf.2_Intron PCI | NM_018907    | NP_061730    | Q9UN74 | PCDA4_HUMAN | Extracellular (Potential).    | 6  | CCGCCTACTGG      | 0.677 |

rs146193104

rs145476419



|   |    |           |                   |              |               |        |             |                            |       |               |       |             |
|---|----|-----------|-------------------|--------------|---------------|--------|-------------|----------------------------|-------|---------------|-------|-------------|
| + | 1  | 201       |                   | NM_013340    | NP_037472     | Q9Y5F3 | PCDB1_HUMAN | Extracellular (Potential). | 0     | AGAGCGGCTCG   | 0.537 |             |
| + | 1  | 674       |                   | NM_015669    | NP_056484     | Q9Y5E4 | PCDB5_HUMAN | Extracellular (Potential). | 5     | GTGTTTCCCTTA  | 0.463 |             |
| + | 5  | 886       | _p.E243K PPARG    | NM_133263    | NP_573570     | Q86YN6 | PRGC2_HUMAN |                            | 0     | CCCAGGAAGAC   | 0.677 |             |
| - | 9  | 1456_1457 | Idk.1_Missense_M  | NM_015465    | NP_056280     | Q8TEQ6 | GEMI5_HUMAN | WD 8.                      | 3     | TTGTTGGAGTAG  | 0.262 |             |
| - | 7  | 772       | _p.T185N GABRB2   | NM_021911    | NP_068711     | P47870 | GBRB2_HUMAN | ellular (Probable).        | 0     | GCATCAGTTGTG  | 0.249 |             |
| - | 11 | 1478      | 2_Missense_Muta   | NM_003062    | NP_003053     | O75094 | SLIT3_HUMAN | LRR 8.                     | 4     | TCAGGCCCTGG   | 0.522 |             |
| + | 3  | 866       | P3_uc003mil.1_5'  | NM_015111    | NP_055926     | O15049 | N4BP3_HUMAN |                            | 0     | CTAGCCCCTTC   | 0.672 |             |
| - | 54 | 4148      | ise_Mutation_p.P1 | NM_080680    | NP_542411     | P13942 | COBA2_HUMAN | le-helical region.         | 5     | CGGTGGGACCA   | 0.622 |             |
| - | 4  | 1650      | cf.1_Missense_Mu  | NM_021073    | NP_066551     | P22003 | BMP5_HUMAN  |                            | 2     | CGGATCGAAGA   | 0.453 |             |
| + | 15 | 1575      |                   | NM_000947    | NP_000938     | P49643 | PRI2_HUMAN  |                            | 0     | GAAATGGATATC  | 0.403 |             |
| + | 16 | 2850      | k.2_Missense_Mu   | NM_001704    | NP_001695     | O60242 | BAI3_HUMAN  | ellular (Potential).       | 50    | CGATTCGTTTCT  | 0.368 |             |
| + | 13 | 4449      | .P4_uc003qrg.2_Ir | NM_020245    | NP_064630     | Q9NRJ4 | TULP4_HUMAN |                            | 1     | GCCCCCACCTG   | 0.746 |             |
| + | 18 | 3899      | iz.1_RNA MAP3K4   | NM_005922    | NP_005913     | Q9Y6R4 | M3K4_HUMAN  |                            | 9     | CAAGCCCCACG   | 0.438 |             |
| + | 5  | 1433      | z_Mutation_p.A16z | NM_003088    | NP_003079     | Q16658 | FSCN1_HUMAN |                            | 1     | CTCCGCGGTCA   | 0.617 | rs17850070  |
| + | 7  | 951       | szk.2_Missense_h  | NM_006024    | NP_006015     | Q86VP1 | TAXB1_HUMAN | Potential.                 | 1     | CAACATGAAAGA  | 0.214 |             |
| - | 1  | 577       |                   | NR_002789    |               |        |             |                            | 0     | GTAAAGATTCC   | 0.463 |             |
| - | 8  | 1126      | .D161H TYW1B_u    | NM_001145440 | NP_001138912  | Q6NUM6 | TYW1B_HUMAN |                            | 0     | AGCATCGACTA   | 0.413 | rs147711959 |
| - | 7  | 1425      | se_Mutation_p.D4  | NM_178125    | NP_835226     | Q86XT4 | TRI50_HUMAN | 330.2/SPRY.                | 1     | GTCATCGGGGC   | 0.682 |             |
| + | 4  | 735       |                   | NM_001077621 | NP_001071089  | Q86XT2 | VP37D_HUMAN |                            | 0     | GGGGCCACCAG   | 0.766 |             |
| + | 1  | 70        | 3ugm.2_5'Flank uc | NM_198467    | NP_940869     | Q6PCB5 | RSBNL_HUMAN |                            | 1     | CGTGCACTGTG   | 0.692 |             |
| + | 4  | 2307      |                   | NM_181646    | NP_857597     | A4D1E1 | Z804B_HUMAN |                            | 11    | AAAGGATTGTGC  | 0.378 |             |
| + | 17 | 4633      | if.2_Missense_Mu  | NM_005751    | NP_005742     | Q99996 | AKAP9_HUMAN |                            | 26    | AAAGAAAATACT  | 0.323 |             |
| - | 6  | 741       | ph.1_Missense_h   | NM_015395    | NP_056210     | Q7Z6L1 | TCPR1_HUMAN |                            | 1     | TCGAGGGGATC   | 0.637 |             |
| + | 22 | 3141      | p.E978K TRRAP_    | NM_003496    | NP_003487     | Q9Y4A5 | TRRAP_HUMAN |                            | 37    | GCCTGGAGGAC   | 0.562 |             |
| - | 3  | 261       | _p.W48* CYP3A5    | NM_000777    | NP_000768     | P20815 | CP3A5_HUMAN |                            | 0     | AATTTCCAGAG   | 0.398 |             |
| + | 3  | 2248      | 456_uc003uxr.2_Ir | NM_030961    | NP_112223     | Q9BRZ2 | TRI56_HUMAN |                            | 3     | ACAAGGGGCCA   | 0.592 |             |
| + | 8  | 1102      | R_uc011knq.1_5'   | NM_000492    | NP_000483     | P13569 | CFTR_HUMAN  | ntial). ABC transmembrane  | 5     | TGCTTCCCTATC  | 0.463 |             |
| + | 35 | 5979      | z.3_Missense_Mut  | NM_001458    | NP_001449     | Q14315 | FLNC_HUMAN  | Filamin 17.                | 12    | CGCTGGAGAC    | 0.597 |             |
| + | 4  | 523       | KR1D1_uc011kqe.   | NM_005989    | NP_005980     | P51857 | AK1D1_HUMAN |                            | 1     | CTTGGGAGGTA   | 0.323 |             |
| - | 15 | 1860      |                   | NM_004333    | NP_004324     | P15056 | BRAF_HUMAN  | rotein kinas_R603>(2) p.T  | 18290 | GATTTCACTGTAC | 0.368 |             |
| - | 7  | 1096      |                   | NM_001080392 | NP_001073861  | A4D1U4 | LCHN_HUMAN  |                            | 1     | CTGCTCGTTGAC  | 0.597 |             |
| + | 1  | 454       |                   | NM_001001656 | NP_001001656  | Q8NGU2 | OR9A4_HUMAN | Name=4; (Potential).       | 1     | TGTTTGGGTTT   | 0.433 |             |
| + | 10 | 1171      |                   | NM_004668    | NP_004659     | O43451 | MGA_HUMAN   | (Potential). Maltase.      | 2     | CCCTTCCCTCC   | 0.418 |             |
| + | 1  | 351       |                   | NM_012365    | NP_036497     | Q96R48 | OR2A5_HUMAN | Name=3; (Potential).       | 3     | GTAATGATGTCC  | 0.458 |             |
| - | 4  | 1764      |                   | NM_001001661 | NP_001001661  | Q6IV72 | ZN425_HUMAN | :2H2-type 13.              | 3     | TCCAGGAGAAG   | 0.617 |             |
| - | 4  | 1157      |                   | NM_001001661 | NP_001001661  | Q6IV72 | ZN425_HUMAN | :2H2-type 6.               | 3     | ACACTCGGGAC   | 0.607 |             |
| + | 4  | 833       |                   | NM_006207    | NP_006198     | Q15198 | PGFRL_HUMAN |                            | 0     | CTCCGTC AAG   | 0.567 |             |
| + | 9  | 1605      | sense_Mutation_p  | NM_001128431 | NP_0011121903 | Q15043 | S39AE_HUMAN | ical; (Potential).         | 0     | GATTCACCATCAT | 0.537 |             |
| + | 3  | 1244      | md.1_Intron TACC  | NM_006283    | NP_006274     | O75410 | TACC1_HUMAN | with YEATS4. SPAZ 1.       | 1     | CTCCCCCTGAC   | 0.542 |             |
| + | 5  | 630       | o.1_RNA IDO2_uc   | NM_194294    | NP_919270     | Q6ZQW0 | I23O2_HUMAN |                            | 2     | TTGTGGAAGTCT  | 0.473 |             |
| - | 3  | 491       |                   | NM_014420    | NP_055235     | Q9UBT3 | DKK4_HUMAN  |                            | 1     | GCTTCTTTTTC   | 0.448 |             |
| + | 2  | 107       | xpg.2_Missense_h  | NM_001135676 | NP_001129148  | Q96E16 | CH040_HUMAN |                            | 0     | TTCACGAAGCC   | 0.408 |             |
| + | 2  | 235       |                   | NM_001007176 | NP_001007177  | Q8WWR9 | PDPFL_HUMAN |                            | 0     | TATTATCGAAGTA | 0.413 |             |
| - | 17 | 3286_3287 | ONL_uc003xqt.3_F  | NM_144651    | NP_653252     | A1KZ92 | PXDNL_HUMAN |                            | 2     | AGAATAGGATTG  | 0.46  |             |
| + | 4  | 1178      | 1_uc0111dy.1_Intr | NM_006269    | NP_006260     | P56715 | RP1_HUMAN   |                            | 12    | AAGAGGAAGAA   | 0.338 |             |
| - | 2  | 318       | IC1_uc011leo.1_5' | NM_018120    | NP_060590     | Q9NVT9 | ARMC1_HUMAN |                            | 1     | TTAACGGATCTC  | 0.488 |             |
| - | 1  | 2933      |                   | NM_025054    | NP_079330     | Q96JH7 | VCIP1_HUMAN |                            | 8     | ACATTTCTTTTTC | 0.363 |             |

|   |    |           |                                                            |              |              |        |              |     |                |       |             |
|---|----|-----------|------------------------------------------------------------|--------------|--------------|--------|--------------|-----|----------------|-------|-------------|
| + | 4  | 3580      | i.E1091K ZFHx4_u                                           | NM_024721    | NP_078997    | Q86UP3 | ZFHx4_HUMAN  | 15  | :CAGAGGAGGAC   | 0.532 |             |
| - | 5  | 1289      | no.2_Missense_M                                            | NM_001146    | NP_001137    | Q15389 | ANGP1_HUMAN  | 7   | TTTCCTCCCTTTA  | 0.308 |             |
| + | 49 | 8481      |                                                            | NM_177531    | NP_803875    | Q86W11 | PKHL1_HUMAN  | 14  | GAACATGAAATG   | 0.373 |             |
| - | 1  | 1001      |                                                            | NM_031308    | NP_112598    | P58107 | EPIPL_HUMAN  | 2   | GGGGTCCACCA    | 0.672 |             |
| + | 3  | 1316      | kk.1_Missense_M                                            | NM_198572    | NP_940974    | Q76KD6 | SPERI_HUMAN  | 2   | :AGGTCACGCA    | 0.617 |             |
| + | 2  | 747       |                                                            | NM_021240    | NP_067063    | Q9NQL9 | DMRT3_HUMAN  | 3   | :CCTCGGGGACT   | 0.562 |             |
| - | 37 | 7015      | zlk.2_RNA FREM1                                            | NM_144966    | NP_659403    | Q5H8C1 | FREM1_HUMAN  | 5   | :GTTGAGAGGGC   | 0.478 |             |
| - | 22 | 3847      | q.2_Missense_Mu                                            | NM_000264    | NP_000255    | Q13635 | PTC1_HUMAN   | 379 | :CGGAGGAATCA   | 0.687 |             |
| - | 4  | 723       | bjg.2_Missense_Iv                                          | NM_005118    | NP_005109    | O95150 | TNF15_HUMAN  | 0   | :TACTTCGCATAC  | 0.527 | rs150498686 |
| - | 8  | 1729      | p.P543H ASTN2_u                                            | NM_198187    | NP_937830    | O75129 | ASTN2_HUMAN  | 9   | GAACAGGGTCA    | 0.498 |             |
| - | 12 | 1707      | p.P489L FAM129I                                            | NM_022833    | NP_073744    | Q96TA1 | NIBL1_HUMAN  | 0   | :GGAACGGGATG   | 0.632 |             |
| - | 2  | 259       | I10_uc011mee.1_Missense_Mutation_p.A67V LCN10_u            | NM_00114938  | NP_001108410 | Q6JVE6 | LCN10_HUMAN  | 1   | CGGACGCCCCC    | 0.632 |             |
| - | 7  | 1523      | clq.1_Missense_M                                           | NM_013366    | NP_037498    | Q9UJX6 | ANC2_HUMAN   | 1   | CACAGGGTCCG    | 0.642 |             |
| - | 5  | 1865      |                                                            | NM_015419    | NP_056234    | Q9NR99 | MXRA5_HUMAN  | 8   | CAAGTACCCAT    | 0.527 |             |
| - | 4  | 424       | nse_Mutation_p.P:                                          | NM_001033583 | NP_001028755 | Q9Y305 | ACOT9_HUMAN  | 3   | :CCAAAGGCAAG   | 0.373 |             |
| + | 8  | 1045      | hq.2_Missense_M                                            | NM_004651    | NP_004642    | P51784 | UBP11_HUMAN  | 3   | :ACTCCGCAAC    | 0.582 |             |
| - | 20 | 2894      |                                                            | NM_001013742 | NP_001013764 | Q5KSL6 | DGKK_HUMAN   | 2   | :AGAAGTTGATA   | 0.468 |             |
| + | 2  | 976       |                                                            | NM_005448    | NP_005439    | O95972 | BMP15_HUMAN  | 2   | :GTCTCCGAGTA   | 0.532 |             |
| + | 10 | 1733      | p.K354N DACH2_                                             | NM_053281    | NP_444511    | Q96NX9 | DACH2_HUMAN  | 5   | :AAGAAGGAGAA   | 0.428 |             |
| - | 4  | 1943      | om.1_Missense_M                                            | NM_012471    | NP_036603    | Q9UL62 | TRPC5_HUMAN  | 1   | :CATGGGAAACA   | 0.498 |             |
| + | 3  | 380       |                                                            | NM_000686    | NP_000677    | P50052 | AGTR2_HUMAN  | 3   | :AATTGGATTTCT  | 0.358 |             |
| - | 15 | 2438      | rt_Site UTY_uc004                                          | NM_007125    | NP_009056    | O14607 | UTY_HUMAN    | 0   | :AATCAGTTATGC  | 0.433 |             |
| + | 2  | 212       |                                                            | NM_021933    | NP_068752    | Q5JXC2 | MIIP_HUMAN   | 1   | :GCTCGGCTGC    | 0.682 |             |
| - | 6  | 741       | e_Mutation_p.R19c                                          | NM_152372    | NP_689585    | Q5VTT5 | MYOM3_HUMAN  | 3   | TCAATCCGTGTG   | 0.388 |             |
| - | 4  | 349       | _5'UTR UBXN11_u                                            | NM_183008    | NP_892120    | Q5T124 | UBX11_HUMAN  | 1   | :TCCTCGCCTCC   | 0.557 |             |
| - | 5  | 1160      | p.R348C ZNF683                                             | NM_173574    | NP_775845    | Q8IZ20 | ZN683_HUMAN  | 0   | :TGGACGCTCTC   | 0.597 |             |
| - | 4  | 777       | R201H CCDC17_u                                             | NM_001114938 | NP_001108410 | Q96LX7 | CCD17_HUMAN  | 1   | :GAATGCGGGCC   | 0.701 |             |
| - | 15 | 2232      | r.1_Missense_Mut                                           | NM_021080    | NP_066566    | O75553 | DAB1_HUMAN   | 3   | :CTCTTCGCTTTI  | 0.423 | rs142236626 |
| + | 7  | 2004      | Isf.2_Missense_Mi                                          | NM_017734    | NP_060204    | Q9NP74 | PALMD_HUMAN  | 3   | CATTCCCCATTT   | 0.448 |             |
| - | 1  | 261       | 2_5'UTR C1orf10c                                           | NM_018372    | NP_060842    | Q5T3J3 | LRIF1_HUMAN  | 0   | :TTATTTGACATTI | 0.562 |             |
| - | 13 | 1795_1796 | eff.1_Missense_Mi                                          | NM_000036    | NP_000027    | P23109 | AMPD1_HUMAN  | 4   | :AGTGAGGTCGG   | 0.446 |             |
| - | 11 | 1603      | _Mutation_p.P553:                                          | NM_005060    | NP_005051    | P51449 | RORG_HUMAN   | 2   | TGGAGGGAAAG    | 0.597 |             |
| - | 2  | 109       |                                                            | NM_001008536 | NP_001008536 | Q5QJ38 | TCHL1_HUMAN  | 2   | TGTGGAATGTC    | 0.463 |             |
| + | 5  | 1198      | 1C_uc001frv.2_Int                                          | NM_001765    | NP_001756    | P29017 | CD1C_HUMAN   | 4   | TTCCATGAATTGC  | 0.378 |             |
| + | 4  | 914       | p.T136M PBX1_uc                                            | NM_002585    | NP_002576    | P40424 | PBX1_HUMAN   | 5   | GAGCACGTGCG    | 0.607 |             |
| + | 71 | 11133     |                                                            | NM_031935    | NP_114141    | Q96RW7 | HMCN1_HUMAN  | 23  | :GTTACGGAACA   | 0.418 |             |
| + | 4  | 607       |                                                            | NM_014359    | NP_055174    | Q9UBM4 | OPT_HUMAN    | 0   | :CAACCGCATCA   | 0.557 |             |
| - | 4  | 1362      |                                                            | NM_173854    | NP_776253    | Q8IVJ1 | S41A1_HUMAN  | 2   | :GTGTCCAATGTT  | 0.572 |             |
| - | 4  | 1042      | w.1_Missense_Mu                                            | NM_003268    | NP_003259    | O60602 | TLR5_HUMAN   | 4   | :AAAAGGAGAGC   | 0.423 |             |
| - | 31 | 5805      | e_Mutation_p.R50                                           | NM_014801    | NP_055616    | A6NKB5 | PCX2_HUMAN   | 2   | :CTAATCTGTCCA  | 0.537 |             |
| - | 13 | 2678      | izu.2_Missense_M                                           | NM_014812    | NP_055627    | Q5SW79 | CE170_HUMAN  | 2   | :ACTGAGCCTCC   | 0.378 |             |
| + | 12 | 5211      | .R1209W KIF26B_                                            | NM_018012    | NP_060482    | Q2KJY2 | KIF26B_HUMAN | 3   | TGGCTCGGCC     | 0.687 |             |
| + | 3  | 528       | zjb.1_Missense_Iv                                          | NM_001001957 | NP_001001957 | Q7Z3T1 | OR2W3_HUMAN  | 3   | :TTAATGGATGTC  | 0.567 |             |
| + | 1  | 429       | L13_uc001ids.2_Ii                                          | NM_001001963 | NP_001001963 | Q8NGY9 | OR2L8_HUMAN  | 2   | :CTGATGATAAC   | 0.433 |             |
| + | 17 | 2450      | qy.2_Missense_Mi                                           | NM_004641    | NP_004632    | P55197 | AF10_HUMAN   | 2   | :AAGTCTCTCGC   | 0.423 |             |
| + | 5  | 599       | I1izo.1_RNA HSD17B7P2_uc001izp.1_Missense_Mutation_p.N173S | NM_001057    | NP_001048    | P21452 | NK2R_HUMAN   | 0   | :TCGCAATGCAAC  | 0.453 | rs2257765   |
| - | 1  | 741       |                                                            | NM_001057    | NP_001048    | P21452 | NK2R_HUMAN   | 1   | :TACCGTCACG    | 0.607 | rs140763069 |

|   |    |      |                    |              |              |        |             |    |               |       |             |
|---|----|------|--------------------|--------------|--------------|--------|-------------|----|---------------|-------|-------------|
| + | 53 | 8038 | ljsl.3_Splice_Site | NM_022124    | NP_071407    | Q9H251 | CAD23_HUMAN | 11 | GTGCCAGAGGCC  | 0.627 |             |
| - | 24 | 2464 | g_Mutation_p.R76l  | NM_013451    | NP_038479    | Q9NZM1 | MYOF_HUMAN  | 4  | GTCCCGGATCAI  | 0.502 |             |
| + | 4  | 2300 | _p.L556F PLCE1_u   | NM_016341    | NP_057425    | Q9P212 | PLCE1_HUMAN | 3  | GACTACCTTTGC  | 0.537 |             |
| + | 7  | 1217 | c010qol.1_Missense | NM_001776    | NP_001767    | P49961 | ENTP1_HUMAN | 3  | TTTACAAGACCC  | 0.423 |             |
| - | 7  | 1141 | sn.2_Missense_Mt   | NM_024895    | NP_079171    | Q9H5P4 | PDZD7_HUMAN | 3  | TACGTCGGTCC   | 0.547 |             |
| + | 11 | 1427 | 3P2_uc010qrz.1_F   | NM_004132    | NP_004123    | Q14520 | HABP2_HUMAN | 3  | TCCTTTCCCTCTC | 0.512 |             |
| + | 8  | 1100 | e_Mutation_p.W2E   | NM_198496    | NP_940898    | Q5GFL6 | VWA2_HUMAN  | 5  | ATGCTGGAGAG   | 0.642 |             |
| - | 4  | 464  | rf82_uc001lcs.1_3  | NM_144661    | NP_653262    | Q8WW14 | CJ082_HUMAN | 0  | CAGGAAGTCTT   | 0.552 |             |
| + | 4  | 873  |                    | NM_020346    | NP_065079    | Q9P2U8 | VGLU2_HUMAN | 4  | TCAGGGTTTTCCG | 0.343 |             |
| + | 2  | 461  | o.1_Missense_Mu    | NM_004265    | NP_004256    | O95864 | FADS2_HUMAN | 2  | CCACGGCAAGA   | 0.627 |             |
| - | 2  | 179  | .1_Silent_p.C67C   | NM_018093    | NP_060563    | Q6RFH5 | WDR74_HUMAN | 1  | CAGCAGCAGCC   | 0.652 |             |
| + | 10 | 2258 | cu.2_5'Flank TM7:  | NM_013265    | NP_037397    | Q9UID3 | FFR_HUMAN   | 0  | TACCTGTGGCGT  | 0.637 |             |
| - | 1  | 1147 |                    | NM_053054    | NP_444282    | Q8NEC5 | CTSR1_HUMAN | 2  | GGCATCGTGAA   | 0.562 |             |
| + | 1  | 519  |                    | NM_005553    | NP_005544    | P26371 | KRA59_HUMAN | 0  | TGGGTTCATCTI  | 0.627 |             |
| + | 5  | 396  | vF1_uc009ytx.1_R   | NM_025155    | NP_079431    | Q9BRP4 | PAAF1_HUMAN | 2  | GCAGGCTTCCA   | 0.453 |             |
| + | 6  | 2112 | A1_uc001ovm.2_u    | NM_001098638 | NP_001092108 | Q8NCN4 | RN169_HUMAN | 1  | CCTACGGTCCAC  | 0.498 |             |
| - | 1  | 414  | c.1_RNA CREBZF     | NM_001039618 | NP_001034707 | Q9NS37 | ZHANG_HUMAN | 1  | GCCGGGAGATC   | 0.726 |             |
| + | 2  | 433  |                    | NM_153696    | NP_710163    | Q9HBA9 | FOH1B_HUMAN | 6  | GAATACGCTTAT  | 0.328 |             |
| + | 11 | 2550 | pfc.2_Missense_M   | NM_130847    | NP_570899    | Q8IY63 | AMOL1_HUMAN | 2  | CGTCCGTTCCA   | 0.537 |             |
| + | 6  | 736  | g_Mutation_p.R18:  | NM_015517    | NP_056332    | Q9BQA5 | HINFP_HUMAN | 4  | AGGACCGCAGT   | 0.547 |             |
| + | 42 | 5298 | l CACNA1C_uc00     | NM_199460    | NP_955630    | Q13936 | CAC1C_HUMAN | 11 | GGTACCCTGGI   | 0.512 |             |
| + | 11 | 1088 | ses.1_Missense_M   | NM_005002    | NP_004993    | Q16795 | NDUA9_HUMAN | 1  | CTTACCCTGGI   | 0.542 | rs3210083   |
| - | 3  | 276  | u_p.E50K CD163_u   | NM_004244    | NP_004235    | Q86VB7 | C163A_HUMAN | 8  | TCAGCTCCTGTI  | 0.438 |             |
| - | 5  | 723  |                    | NM_018423    | NP_060893    | Q6J9G0 | STYK1_HUMAN | 8  | TGGAGGAACAGI  | 0.527 | rs140174760 |
| - | 4  | 579  | zhz.2_Missense_M   | NM_004963    | NP_004954    | P25092 | GUC2C_HUMAN | 6  | CAATCCAAAACI  | 0.403 |             |
| + | 8  | 816  | zp.1_Missense_M    | NM_181711    | NP_859062    | Q7Z6J2 | GRASP_HUMAN | 2  | TGCTCCCGGGC   | 0.741 |             |
| - | 8  | 661  | IAA0748_uc010sp    | NM_001098815 | NP_001092285 | A2RU30 | K0748_HUMAN | 2  | AAAATCGGGCG   | 0.517 |             |
| + | 3  | 511  | i.2_5'Flank TSFM_  | NM_015433    | NP_056248    | Q96AZ1 | MT21B_HUMAN | 0  | GGTGCCTGCCT   | 0.602 |             |
| + | 7  | 895  | p.A280D SRGAP1     | NM_020762    | NP_065813    | Q7Z6B7 | SRGP1_HUMAN | 4  | CAGAGCCCTAAI  | 0.328 |             |
| + | 13 | 2635 | qo.1_Nonsense_M    | NM_014319    | NP_055134    | Q9Y2U8 | MAN1_HUMAN  | 4  | TTCCCCAGGCTI  | 0.373 |             |
| + | 25 | 3063 | ix.2_Nonsense_M    | NM_178826    | NP_849148    | Q32M45 | ANO4_HUMAN  | 6  | GTATTTCGAATTI | 0.483 | rs145182702 |
| + | 1  | 912  |                    | NM_004316    | NP_004307    | P50553 | ASCL1_HUMAN | 0  | GCCGCAGCAGC   | 0.667 |             |
| - | 7  | 475  | x.3_Missense_Mu    | NM_000432    | NP_000423    | P10916 | MLRV_HUMAN  | 1  | GGTCAACCTGC   | 0.612 |             |
| + | 12 | 1870 | _p.G430* ALDH2_u   | NM_000690    | NP_000681    | P05091 | ALDH2_HUMAN | 4  | TGTTTGAGGCC   | 0.527 |             |
| - | 8  | 1130 | 1tts.2_Missense_M  | NM_001109662 | NP_001103132 |        |             | 2  | GAGAGTCCACTG  | 0.423 |             |
| + | 4  | 889  | ui.1_Missense_Mu   | NM_016817    | NP_058197    | P29728 | OAS2_HUMAN  | 1  | TCAGAACCCTAC  | 0.502 |             |
| - | 4  | 731  |                    | NM_032656    | NP_116045    | Q8IY37 | DHX37_HUMAN | 1  | CAGCCGGCACGI  | 0.697 |             |
| + | 3  | 353  | p2_uc001vgu.2_lr   | NM_001098525 | NP_001091995 | Q8WWW9 | CKAP2_HUMAN | 2  | TTTTTAAGTAGTA | 0.378 |             |
| - | 1  | 164  |                    | NR_027466    |              |        |             | 0  | AGTTCCCATGG   | 0.488 |             |
| + | 1  | 416  |                    | NM_001005483 | NP_001005483 | Q8NGD3 | OR4K5_HUMAN | 2  | CCGAAGGACATI  | 0.453 |             |
| - | 1  | 1554 |                    | NM_175060    | NP_778230    | Q86T13 | CLC14_HUMAN | 4  | TGCTCACAATAI  | 0.507 |             |
| + | 20 | 2463 | dq.2_Missense_M    | NM_002892    | NP_002883    | P29374 | ARI4A_HUMAN | 6  | GAATCCAAAG    | 0.284 |             |
| - | 7  | 5741 | px.2_Missense_M    | NM_138420    | NP_612429    | Q8IVF2 | AHNK2_HUMAN | 1  | GGAGCGGAATG   | 0.662 |             |
| + | 1  | 496  | on_p.P7L MKRN3     | NM_005664    | NP_005655    | Q13064 | MKRN3_HUMAN | 10 | AGCTCCCTCAG   | 0.642 |             |
| - | 4  | 405  | Jbec.2_Missense_   | NM_144565    | NP_653166    | Q1HG43 | DOXA1_HUMAN | 1  | GTGTGTAATTGAT | 0.582 |             |
| + | 2  | 728  | g_Mutation_p.E16f  | NM_003645    | NP_003636    | O14975 | S27A2_HUMAN | 2  | GTGTGGAAGAG   | 0.333 |             |
| - | 29 | 7501 | y.1_Missense_Mu    | NM_015263    | NP_056078    | Q8TDJ6 | DMXL2_HUMAN | 9  | TCAGGGACGA    | 0.413 |             |

|   |    |           |                                 |              |              |        |             |                                |    |                    |       |             |
|---|----|-----------|---------------------------------|--------------|--------------|--------|-------------|--------------------------------|----|--------------------|-------|-------------|
| + | 2  | 808       | A GCOM1_uc010t                  | NM_015532    | NP_056347    | P0CAP1 | GCOM1_HUMAN |                                | 0  | TTCCAGTGGGA        | 0.448 |             |
| - | 8  | 866       | p.L249V ALDH1A1                 | NM_003888    | NP_003879    | O94788 | AL1A2_HUMAN |                                | 1  | AGATAAGCTTTCC      | 0.448 |             |
| - | 10 | 1418      | p.P351L MEGF11                  | NM_032445    | NP_115821    | A6BM72 | MEG11_HUMAN | EGF-like 7.                    | 1  | AGCCCCGAGCA        | 0.637 |             |
| + | 16 | 2345      | IQCH_uc002aqp.                  | NM_001031715 | NP_001026885 | Q86VS3 | IQCH_HUMAN  |                                | 4  | :GGGAAAATCAG       | 0.517 |             |
| + | 4  | 694       | 154N CD276_uc0c                 | NM_001024736 | NP_001019907 | Q5ZPR3 | CD276_HUMAN | potential). lg-like C2-type 1. | 1  | ACAAGGACCTG        | 0.637 |             |
| + | 13 | 2280      | yj.3_Missense_Mu                | NM_001130028 | NP_001123500 | P49761 | CLK3_HUMAN  | rotein kinase.                 | 2  | :CTGCCACGCGC       | 0.592 |             |
| - | 5  | 1722_1723 | ik.2_RNA DET1_u                 | NM_001144074 | NP_001137546 | Q7L5Y6 | DET1_HUMAN  |                                | 2  | CAAAAGGGTGAA       | 0.554 |             |
| + | 18 | 3335      | lL_uc002cmf.2_Sf                | NM_020825    | NP_065876    | Q96RY5 | CRML_HUMAN  |                                | 0  | TGGCAGGTGAA        | 0.602 |             |
| - | 13 | 4257      | yn.1_Missense_M                 | NM_001134407 | NP_001127879 | Q12879 | NMDE1_HUMAN | lasmic (Potential).            | 45 | \GGCATCGCACT       | 0.582 |             |
| + | 3  | 533       |                                 | NM_001039    | NP_001030    | P51170 | SCNNG_HUMAN | llular (By similarity).        | 6  | :GCTTTCCAGAG       | 0.577 |             |
| - | 2  | 1390      |                                 | NM_020807    | NP_065858    | Q9P2F9 | ZN319_HUMAN |                                | 0  | AGGGCCGCTCG        | 0.622 |             |
| + | 17 | 2104      | p.l714M FUK_uc0                 | NM_145059    | NP_659496    | Q8N0W3 | FUK_HUMAN   |                                | 1  | :CTGATCCGCCA       | 0.667 |             |
| + | 2  | 494       | ao.2_Missense_Mt                | NM_005769    | NP_005760    | Q8NCG5 | CHST4_HUMAN | lenal (Potential).             | 0  | TGTGCGACATG        | 0.607 |             |
| + | 8  | 1475      | rnw.1_Missense_IV               | NM_178452    | NP_848547    | Q8NEP3 | DAAF1_HUMAN | Pro-rich.                      | 0  | AAGGAGAGGAC        | 0.617 | rs144990549 |
| + | 2  | 250       | 1_5'Flank CYB5D1                | NM_203411    | NP_981956    | Q6PEY1 | TMM88_HUMAN |                                | 0  | GCACCGCGCAC        | 0.682 |             |
| - | 32 | 4469      |                                 | NM_003802    | NP_003793    | Q9UKX3 | MYH13_HUMAN | Potential.                     | 6  | GCTTCCACTCTC       | 0.512 |             |
| + | 11 | 2443      | CD_uc002gnp.1_f                 | NM_153604    | NP_705832    | Q8IZQ8 | MYCD_HUMAN  |                                | 5  | CAATTTAGAGG        | 0.408 |             |
| + | 2  | 3640_3641 |                                 | NM_016239    | NP_057323    | Q9UKN7 | MYO15_HUMAN | rosin head-like.               | 9  | CTGCCCAAGGC        | 0.678 |             |
| - | 4  | 1128_1129 | p.R229K SLFN11                  | NM_001104588 | NP_001098058 | Q7Z7L1 | SLN11_HUMAN |                                | 3  | AATTGTCTTTTT       | 0.391 |             |
| + | 2  | 154       | lT_uc002hsi.1_5'F               | NM_003673    | NP_003664    | O15273 | TELT_HUMAN  |                                | 0  | :CCAGAGACATG       | 0.677 |             |
| + | 3  | 349       | 02hui.1_Nonsense                | NM_133264    | NP_573571    | Q8TF74 | WIPF2_HUMAN | WH2.                           | 3  | GGGGTCGAGGC        | 0.488 |             |
| + | 4  | 782       | on_p.S4*KPNB1_                  | NM_002265    | NP_002256    | Q14974 | IMB1_HUMAN  | HEAT 1.                        | 3  | :GGAGTCGACAT       | 0.453 |             |
| + | 2  | 455       | i00A_uc010dfr.2_l               | NM_007261    | NP_009192    | Q9UGN4 | CLM8_HUMAN  | (Potential). lg-like V-type.   | 2  | AGACCCTCAACA       | 0.537 |             |
| - | 9  | 1915      | e_Mutation_p.D44                | NM_018414    | NP_060884    | Q9NSC7 | SIA7A_HUMAN | lenal (Potential).             | 0  | :TTCATCGTGATC      | 0.532 |             |
| - | 20 | 3382      |                                 | NM_005406    | NP_005397    | Q13464 | ROCK1_HUMAN | Glu-rich.                      | 5  | TCCAATAAAGTA       | 0.303 |             |
| + | 61 | 8128      | as.3_Missense_Mt                | NM_198129    | NP_937762    | Q16787 | LAMA3_HUMAN | minin G-like 2.                | 11 | ACCATTCCGGTAC      | 0.383 |             |
| - | 5  | 1201      | .Q156H CXXC1_u                  | NM_014593    | NP_055408    | Q9P0U4 | CXXC1_HUMAN |                                | 2  | ctgctgctgctggtgatg | 0.468 |             |
| - | 6  | 747_748   |                                 | NM_005570    | NP_005561    | P49257 | LMAN1_HUMAN | tential). L-type lectin-like.  | 1  | GTGCAGGGATA        | 0.356 |             |
| + | 28 | 3198      | aa.2_Missense_Mt                | NM_198531    | NP_940933    | O43861 | ATP9B_HUMAN | lasmic (Potential).            | 3  | :TGACCGTCCGC       | 0.577 | rs147969611 |
| + | 2  | 1162      | _p.S237P NFATC1                 | NM_006162    | NP_006153    | O95644 | NFAC1_HUMAN | : SP repeats. 2.               | 2  | :GGCACTCCCCC       | 0.701 |             |
| + | 2  | 1191      |                                 | NM_012283    | NP_036415    | Q9UJ96 | KCNG2_HUMAN | =Segment S6; (Potential).      | 0  | :CTCATGGCCTTC      | 0.682 |             |
| + | 13 | 1737      | dsu.2_Missense_f                | NM_001319    | NP_001310    | P78368 | KC1G2_HUMAN |                                | 1  | CAAGAGGAGAA        | 0.652 |             |
| + | 20 | 2309      | uc002lvd.1_5'Flan               | NM_032482    | NP_115871    | Q8TEK3 | DOT1L_HUMAN |                                | 4  | CCGGCCGCGCC        | 0.677 |             |
| + | 2  | 339       | cp.2_Missense_Mt                | NM_205843    | NP_995315    | P08651 | NFIC_HUMAN  | CTF/NF-I.                      | 0  | ACTTCGTGCTG        | 0.677 |             |
| - | 7  | 1618_1619 | p.Y504H INSR_uc                 | NM_000208    | NP_000199    | P06213 | INSR_HUMAN  |                                | 12 | AAATGTAAGAAA       | 0.45  |             |
| - | 25 | 3245      |                                 | NM_032447    | NP_115823    | Q75N90 | FBN3_HUMAN  | : 14; calcium-binding.         | 11 | :TTGCACACTCG       | 0.617 |             |
| + | 7  | 827       | mwa.1_Nonsense_                 | NM_005053    | NP_005044    | P54725 | RD23A_HUMAN |                                | 1  | :AGCCCCAGTTC       | 0.642 |             |
| - | 4  | 1518      | o.R366W WIZ_uc0                 | NM_021241    | NP_067064    | O95785 | WIZ_HUMAN   |                                | 0  | :CACCCGTATTTC      | 0.627 |             |
| + | 1  | 493       |                                 | NM_001004466 | NP_001004466 | Q8NGA6 | O10H5_HUMAN | ellular (Potential).           | 1  | ATTTTCCACCTC       | 0.597 |             |
| + | 8  | 2016      | rnw.3_Missense_Mt               | NM_153221    | NP_694953    | Q8IUL8 | CILP2_HUMAN |                                | 1  | TTTCTCCGTGG        | 0.726 |             |
| - | 4  | 1663      |                                 | NM_001098626 | NP_001092096 | A6NK75 | ZNF98_HUMAN |                                | 2  | TTCTCTCCAGTA       | 0.388 |             |
| + | 4  | 3673      | ld.1_Missense_Mt                | NM_014717    | NP_055532    | O15090 | ZN536_HUMAN |                                | 11 | ACAACGATGAA        | 0.557 |             |
| - | 3  | 279       | nse_Mutation_p.R                | NM_032816    | NP_116205    | Q96ST8 | CEP89_HUMAN |                                | 0  | :CGTCCGCCAG        | 0.547 |             |
| - | 6  | 746       | .SGRP4_uc010xuc                 | NM_170604    | NP_733749    | Q8TDF6 | GRP4_HUMAN  |                                | 3  | TGGGGGGCCAG        | 0.617 |             |
| + | 20 | 2646      | u.2_Missense_Mu                 | NM_000540    | NP_000531    | P21817 | RYR1_HUMAN  | Cytoplasmic.                   | 12 | CCTGGTGGGCC        | 0.642 |             |
| + | 13 | 1754      | 8F LTBP4_uc002o                 | NM_001042544 | NP_001036009 | Q8N2S1 | LTBP4_HUMAN | -rich. EGF-like 3.             | 1  | :CCGATGCATTG       | 0.682 |             |
| - | 2  | 123       | 2pav.2_Missense_Mutation_p.S49W |              |              | O75865 | TPC6A_HUMAN |                                | 0  | :GGACCGACAGG       | 0.697 |             |

|   |     |       |                                                              |              |              |        |             |                               |      |               |       |             |
|---|-----|-------|--------------------------------------------------------------|--------------|--------------|--------|-------------|-------------------------------|------|---------------|-------|-------------|
| - | 7   | 660   | e_Mutation_p.E17                                             | NM_015953    | NP_057037    | Q9Y314 | NOSIP_HUMAN |                               | 1    | GGCTTCGGGCG   | 0.662 |             |
| + | 11  | 1637  | Missense_Mutatio                                             | NM_007121    | NP_009052    | P55055 | NR1H2_HUMAN | -binding (Potential).         | 0    | GCTGTCGGAGA   | 0.647 |             |
| - | 1   | 665   | _p.R11W SYT3_uc                                              | NM_032298    | NP_115674    | Q9BQG1 | SYT3_HUMAN  | cular (Potential).            | 3    | CCGCCGGCAGA   | 0.607 | rs140892148 |
| - | 5   | 2581  | P12_uc002qjq.3_l                                             | NM_144687    | NP_653288    | P59046 | NAL12_HUMAN |                               | 7    | AGCATCATGCC   | 0.498 |             |
| + | 8   | 1419  | _p.D427N LILRA2                                              | NM_001130917 | NP_001124389 | Q8N149 | LIRA2_HUMAN | ellular (Potential).          | 1    | CCCAGGATTAC   | 0.587 |             |
| + | 1   | 313   | tg.2_Missense_Mi                                             | NM_176811    | NP_789781    | Q86W28 | NALP8_HUMAN | DAPIN.                        | 13   | CAGCTGGGCAG   | 0.522 |             |
| - | 5   | 508   | orf43_uc010ykc.1                                             | NM_021925    | NP_068744    | Q9H6V9 | CB043_HUMAN |                               | 0    | GGCACGAATTA   | 0.383 |             |
| - | 18  | 2821  |                                                              | NM_000384    | NP_000375    | P04114 | APOB_HUMAN  |                               | 27   | GGACCCCACTC   | 0.498 |             |
| + | 2   | 1197  | 7L_uc010ymf.1_5'                                             | NM_018158    | NP_060628    | Q9BWU0 | NADAP_HUMAN |                               | 0    | GAGAAGAAGAT   | 0.463 |             |
| + | 3   | 798   |                                                              | NM_003124    | NP_003115    | P35270 | SPRE_HUMAN  |                               | 2    | ACGAGTTCAAG   | 0.512 |             |
| + | 9   | 4114  |                                                              | NM_144993    | NP_659430    | O43151 | TET3_HUMAN  |                               | 0    | GAGGACGGCTG   | 0.677 |             |
| - | 4   | 615   | ssp.1_Missense_l                                             | NM_016618    | NP_057702    | Q9NPI7 | KRCC1_HUMAN |                               | 1    | TGCATGATCTTG  | 0.468 |             |
| + | 4   | 700   | n_p.P95S CNGA3                                               | NM_001298    | NP_001289    | Q16281 | CNGA3_HUMAN |                               | 6    | AGGGACCCGGAC  | 0.602 |             |
| - | 10  | 1797  | _p.R571C TBC1D8                                              | NM_001102426 | NP_001095896 | O95759 | TBCD8_HUMAN | ab-GAP TBC.                   | 3    | GGAGCGGTGCA   | 0.577 |             |
| + | 2   | 625   |                                                              | NM_001099289 | NP_001092759 | Q8TEJ3 | SH3R3_HUMAN | SH3 1.                        | 1    | GGAAGGAACCT   | 0.592 |             |
| + | 1   | 362   |                                                              | NM_002193    | NP_002184    | P09529 | INHBB_HUMAN |                               | 3    | TCACGGCCCTG   | 0.731 |             |
| - | 69  | 11682 |                                                              | NM_018557    | NP_061027    | Q9NZR2 | LRP1B_HUMAN | ntial). LDL-receptor class A  | 50   | ACATTTCCATTTT | 0.358 |             |
| - | 55  | 10793 |                                                              | NM_004525    | NP_004516    | P98164 | LRP2_HUMAN  | ; A 26. Extracellular (Potent | 29   | GATAGGAATG    | 0.498 |             |
| - | 275 | 70159 | J07K TTN_uc010z                                              | NM_133378    | NP_596869    | Q8WZ42 | TITIN_HUMAN |                               | 153  | ATGCTGTCTTCT  | 0.393 |             |
| - | 44  | 10570 | v_uc010zjf.1_Intro                                           | NM_133437    | NP_597681    | Q8WZ42 | TITIN_HUMAN |                               | 153  | GGATGGAACTT   | 0.378 |             |
| - | 6   | 1476  | se_Mutation_p.Q2                                             | NM_015265    | NP_056080    | Q9UPW6 | SATB2_HUMAN |                               | 1    | ACTCCTGGCAC   | 0.313 |             |
| - | 16  | 2734  |                                                              | NM_015049    | NP_055864    | O60296 | TRAK2_HUMAN |                               | 0    | GGAGGGGGTTC   | 0.517 |             |
| + | 16  | 2242  | _Mutation_p.S659                                             | NM_015690    | NP_056505    | Q9NRP7 | STK36_HUMAN |                               | 11   | CATTTCTCTG    | 0.572 |             |
| - | 5   | 1353  | e_Mutation_p.R31                                             | NM_005689    | NP_005680    | Q9NP58 | ABCB6_HUMAN | nsmembrane type-1.            | 2    | GCCAGCGCAGT   | 0.672 |             |
| - | 7   | 3168  | o.E1041K SPHKAF                                              | NM_001142644 | NP_001136116 | Q2M3C7 | SPKAP_HUMAN |                               | 10   | CACTTCATTGG   | 0.512 |             |
| + | 1   | 1177  | _p.R232K GPR35                                               | NM_005301    | NP_005292    | Q9HC97 | GPR35_HUMAN | lasmic (Potential).           | 3    | CCAGAGGCCAC   | 0.657 |             |
| + | 3   | 180   | RG1B_uc010gdr.1_RNA FRG1B_uc010ztk.1_Missense_Mutation_p.A2P |              |              |        |             |                               | 0    | AAAATGGCTTTG  | 0.333 | rs145412486 |
| + | 16  | 2039  | _Mutation_p.R511                                             | NM_006892    | NP_008823    | Q9UBC3 | DNM3B_HUMAN |                               | 5    | AAGGCGGCCA    | 0.587 | rs143300013 |
| + | 3   | 428   | kw.2_Missense_                                               | NM_012156    | NP_036288    | Q9H4G0 | E41L1_HUMAN |                               | 3    | GAAATCGCCCC   | 0.567 |             |
| - | 18  | 2164  | xgk.2_Missense_l                                             | NM_152503    | NP_689716    | Q9H579 | CT132_HUMAN |                               | 0    | TTTTCCATGATG  | 0.453 |             |
| + | 7   | 797   | A3_uc002xtm.2_M                                              | NM_181659    | NP_858045    | Q9Y6Q9 | NCOA3_HUMAN |                               | 5    | ATTGCCGTATGT  | 0.378 |             |
| - | 68  | 9390  |                                                              | NM_005560    | NP_005551    | O15230 | LAMA5_HUMAN | minin G-like 2.               | 3    | CTGTCGTGTTCA  | 0.687 |             |
| - | 21  | 1714  | TE_uc002yir.1_Mi                                             | NM_199261    | NP_954870    | P56180 | TPTE_HUMAN  | 2 tensin-type.                | 5    | CATTTTCCTAATC | 0.318 |             |
| - | 4   | 2618  |                                                              | NM_003489    | NP_003480    | P48552 | NRIP1_HUMAN | ession domain 2.              | 0    | TGAGAGCAAAGC  | 0.393 |             |
| - | 1   | 433   |                                                              | NM_001085455 | NP_001078924 | Q3LI83 | KR241_HUMAN |                               | 0    | CATTTTCGAGTG  | 0.353 |             |
| - | 12  | 1616  | _p.H318Y ERG_uc                                              | NM_001136155 | NP_001129627 | P11308 | ERG_HUMAN   |                               | 2828 | AGGGTGGGGCC   | 0.577 |             |
| + | 12  | 1571  | c.2_RNA UBASH3                                               | NM_018961    | NP_061834    | P57075 | UBS3A_HUMAN | osphatase-like.               | 3    | AAATCTTGAATC  | 0.418 |             |
| + | 11  | 1310  | zmq.1_Nonsense_                                              | NM_031481    | NP_113669    | Q9H1K4 | GHC2_HUMAN  | Solcar 3.                     | 0    | CTCTGGATTAC   | 0.547 |             |
| + | 1   | 1651  | x.2_Missense_Mu                                              | NM_004327    | NP_004318    | P11274 | BCR_HUMAN   | ling to ABL SH2-domain.       | 12   | CAGCCGCGTGT   | 0.627 |             |
| + | 43  | 7427  | J18B_uc011aka.1                                              | NM_032608    | NP_115997    | Q8IU65 | MY18B_HUMAN |                               | 12   | TGGACGATGCG   | 0.597 |             |
| - | 14  | 1891  | h.1_Missense_Ml                                              | NM_002473    | NP_002464    | P35579 | MYH9_HUMAN  | rosin head-like.              | 11   | CTTGGGGTGGG   | 0.612 |             |
| - | 3   | 692   |                                                              | NM_006078    | NP_006069    | Q9Y698 | CCG2_HUMAN  | ical; (Potential).            | 0    | GGCACTCAGG    | 0.562 |             |
| + | 7   | 2541  | atq.1_Missense_M                                             | NM_001039141 | NP_001034230 | Q9H2D6 | TARA_HUMAN  |                               | 1    | AGCCTCCTCTC   | 0.567 |             |
| + | 5   | 799   |                                                              | NM_006855    | NP_006846    | O43731 | ERD23_HUMAN |                               | 2    | CAATCTGAGGA   | 0.363 |             |
| + | 16  | 2107  | RNA POLR3H_uc0                                               | NM_001098    | NP_001089    | Q99798 | ACON_HUMAN  |                               | 4    | ATCCACGGTGA   | 0.627 |             |
| + | 3   | 378   | ln.2_Missense_Mu                                             | NM_007311    | NP_009295    | B1AH88 | TPOB_HUMAN  |                               | 0    | GCTGGCGTGGG   | 0.677 |             |
| - | 8   | 1292  | _p.I259F PNPLA5                                              | NM_138814    | NP_620169    | Q726Z6 | PLPL5_HUMAN |                               | 0    | CTGATGGGCC    | 0.672 |             |



|   |    |       |                    |              |              |        |             |    |               |       |
|---|----|-------|--------------------|--------------|--------------|--------|-------------|----|---------------|-------|
| - | 4  | 750   | 385D_uc010hfb.1_   | NM_024697    | NP_078973    | Q9H6B1 | Z385D_HUMAN | 5  | ATTTTTCATGGCT | 0.463 |
| - | 2  | 994   | ə_Mutation_p.R25i  | NM_194293    | NP_919269    | Q702N8 | XIRP1_HUMAN | 8  | CCTCCCGGCATC  | 0.612 |
| - | 7  | 865   | VT_uc003cwy.2_IV   | NM_000481    | NP_000472    | P48728 | GCST_HUMAN  | 1  | AAATAGCTGTTGC | 0.587 |
| + | 2  | 594   | o.3_Intron GRM2_   | NM_000839    | NP_000830    | Q14416 | GRM2_HUMAN  | 1  | CACGCCACATC   | 0.582 |
| + | 49 | 7872  |                    | NM_015512    | NP_056327    | Q9P2D7 | DYH1_HUMAN  | 3  | CAGATGATGCA   | 0.398 |
| - | 5  | 588   | hna.2_Missense_I   | NM_017563    | NP_060033    | Q8NFM7 | I17RD_HUMAN | 0  | GGAAGGAAAAGC  | 0.408 |
| + | 21 | 3814  | if.2_Missense_Mul  | NM_001457    | NP_001448    | O75369 | FLNB_HUMAN  | 19 | ACTCCCCGCC    | 0.537 |
| - | 5  | 1284  | np.2_Splice_Site_J | NM_001033057 | NP_001028229 | Q96QZ7 | MAGI1_HUMAN | 6  | AATCGGCTGCTT  | 0.448 |
| - | 2  | 738   | lzg.2_Missense_M   | NM_199512    | NP_955806    | Q76M96 | CCD80_HUMAN | 2  | CACATCGTCTT   | 0.567 |
| + | 4  | 457   | p.E100K PLS1_uc    | NM_001145319 | NP_001138791 | Q14651 | PLS1_HUMAN  | 1  | AGAGGGAAGGG   | 0.343 |
| - | 1  | 301   |                    | NM_033214    | NP_149991    | Q14410 | GLPK2_HUMAN | 4  | FGGTTTCCCTCT  | 0.428 |
| + | 4  | 698   | ie_Mutation_p.P17  | NM_017912    | NP_060382    | Q8IVU3 | HERC6_HUMAN | 5  | CAGCCCGCAGA   | 0.592 |
| + | 1  | 600   | ku.2_Nonsense_M    | NM_007351    | NP_031377    | Q13201 | MMRN1_HUMAN | 4  | GAAATCGAGCC   | 0.353 |
| - | 2  | 285   |                    | NM_000134    | NP_000125    | P12104 | FABP1_HUMAN | 1  | AGTCCCGTCTG   | 0.318 |
| + | 1  | 86    |                    | NM_024582    | NP_078858    | Q6V0I7 | FAT4_HUMAN  | 18 | TGTTTTGGCTAC  | 0.617 |
| + | 13 | 2708  | ciu.1_Missense_IV  | NM_001083619 | NP_001077088 | P42262 | GRIA2_HUMAN | 4  | FGGATTCCAAAG  | 0.438 |
| - | 4  | 546   | orf45_uc010iq.1_F  | NM_152543    | NP_689756    | Q96LM5 | CD045_HUMAN | 0  | ATAGCCCATTTG  | 0.443 |
| - | 2  | 1017  |                    | NM_005958    | NP_005949    | P48039 | MTR1A_HUMAN | 5  | CGGTTTCCATTT  | 0.478 |
| + | 6  | 667   |                    | NM_004477    | NP_004468    | Q14331 | FRG1_HUMAN  | 0  | TAGATGCAATGA  | 0.368 |
| - | 4  | 448   |                    | NM_020040    | NP_064424    | Q99867 | TBB4Q_HUMAN | 0  | GAGAAGGGTAC   | 0.557 |
| - | 20 | 3198  |                    | NM_001369    | NP_001360    | Q8TE73 | DYH5_HUMAN  | 31 | TCACTGCTCCA   | 0.483 |
| - | 1  | 361   | 3jif.3_Missense_M  | NM_016180    | NP_057264    | Q9UMX9 | S45A2_HUMAN | 3  | TGGCCGATCCG   | 0.642 |
| + | 14 | 1645  | o.2_Missense_Mi    | NM_024615    | NP_078891    | Q8N3A8 | PARP8_HUMAN | 5  | AGACCGTGGCT   | 0.294 |
| + | 1  | 1439  | _p.A417T SNX18_    | NM_052870    | NP_443102    | Q96RF0 | SNX18_HUMAN | 0  | CCGCCGCTGCC   | 0.617 |
| - | 14 | 2212  | bi.1_Missense_Mu   | NM_000439    | NP_000430    | P29120 | NEC1_HUMAN  | 2  | GGAGTCGCAGC   | 0.542 |
| - | 9  | 2817  | 3kxy.1_Missense_I  | NM_133456    | NP_597713    | Q2M3G4 | SHRM1_HUMAN | 1  | GCAGCCGCTCC   | 0.682 |
| - | 14 | 2102  | HL3_uc003lbr.3_M   | NM_017415    | NP_059111    | Q9UH77 | KLHL3_HUMAN | 0  | CCACCGAAGCC   | 0.532 |
| - | 10 | 2107  | w.1_Missense_Mu    | NM_004883    | NP_004874    | O14511 | NRG2_HUMAN  | 6  | CACGGCGTGCG   | 0.592 |
| - | 2  | 399   | sense_Mutation_p   | NM_014790    | NP_055605    | Q96AA8 | JKIP2_HUMAN | 2  | TTATTTCCGCC   | 0.458 |
| - | 2  | 828   | IP2_uc003lwr.2_I   | NM_001001343 | NP_001001343 | Q8TBE3 | FNDC9_HUMAN | 0  | TGGGTACCAC    | 0.572 |
| - | 9  | 1546  |                    | NM_005990    | NP_005981    | O94804 | STK10_HUMAN | 8  | TGACACGGGTC   | 0.612 |
| - | 13 | 2077  | _p.S514L UIMC1_t   | NM_016290    | NP_057374    | Q96RL1 | UIMC1_HUMAN | 4  | TCACTGAAGTC   | 0.483 |
| + | 13 | 1770  |                    | NM_003052    | NP_003043    | Q06495 | NPT2A_HUMAN | 1  | TGGTGCTCATC   | 0.632 |
| + | 7  | 1619  | wr.2_Missense_Mi   | NM_006567    | NP_006558    | O95363 | SYFM_HUMAN  | 0  | CCAGAGAGAGG   | 0.597 |
| + | 7  | 1584  |                    | NM_033229    | NP_150232    | Q9C019 | TRI15_HUMAN | 0  | TGGCCGGGGAG   | 0.731 |
| + | 2  | 261   | _p.G17R MICB_u     | NM_005931    | NP_005922    | Q29980 | MICB_HUMAN  | 0  | CTGAGGGACAT   | 0.562 |
| - | 1  | 807   |                    | NR_001444    |              |        |             | 0  | GACAGGAGGCA   | 0.577 |
| + | 76 | 11602 | sense_Mutation_p   | NM_001371    | NP_001362    |        |             | 21 | TGGCTGCAGAA   | 0.507 |
| + | 6  | 1883  | p.G599D GPR115_    | NM_153838    | NP_722580    | Q8IZF3 | GP115_HUMAN | 8  | GAAAGGCTACA   | 0.478 |
| - | 45 | 7257  | pht.2_Missense_M   | NM_004370    | NP_004361    | Q99715 | COCA1_HUMAN | 9  | CAAATGAAACC   | 0.443 |
| + | 3  | 568   | se_Mutation_p.L92  | NM_001446    | NP_001437    | O15540 | FABP7_HUMAN | 0  | GACAACTTGTT   | 0.353 |
| - | 12 | 1817  | ju.2_Missense_Mu   | NM_003980    | NP_003971    | Q14244 | MAP7_HUMAN  | 0  | GAGTCGTCCCTC  | 0.582 |
| - | 2  | 173   | AT2_uc003qjk.1_F   | NM_182503    | NP_872309    | Q726V5 | ADAT2_HUMAN | 0  | AACAGGAACCT   | 0.388 |
| + | 8  | 3010  | o.R847H GRM1_uc    | NM_000838    | NP_000829    | Q13255 | GRM1_HUMAN  | 19 | TGTCCGCAGTG   | 0.512 |
| + | 11 | 1619  |                    | NM_000876    | NP_000867    | P11717 | MPRI_HUMAN  | 3  | TGGTCCGCCAT   | 0.532 |
| + | 18 | 2589  | nc.1_Missense_Mi   | NM_001040001 | NP_001035090 | P55196 | AFAD_HUMAN  | 5  | GGGTGCGATT    | 0.537 |
| - | 16 | 1605  | a.2_Missense_Mul   | NM_004080    | NP_004071    | Q9Y6T7 | DGKB_HUMAN  | 12 | CATTTCAGAA    | 0.289 |

|   |    |           |                    |              |              |        |             |                              |       |               |       |
|---|----|-----------|--------------------|--------------|--------------|--------|-------------|------------------------------|-------|---------------|-------|
| + | 5  | 600       | _uc011kcg.1_Miss   | NM_181597    | NP_853628    | Q16831 | UPP1_HUMAN  |                              | 0     | TAATCCAAACAT  | 0.413 |
| + | 17 | 4934      | yr.2_Missense_Mt   | NM_152701    | NP_689914    | Q86UQ4 | ABCAD_HUMAN |                              | 10    | ATAAGGGATGTG  | 0.388 |
| - | 7  | 925       | n.1_Missense_Mu    | NM_000601    | NP_000592    | P14210 | HGF_HUMAN   | Kringle 2.                   | 4     | AAAGCCCTTGTC  | 0.493 |
| + | 23 | 3676      | '1_uc011kkn.1_Intr | NM_181552    | NP_853530    | P39880 | CUX1_HUMAN  |                              | 8     | GCGGCGGCACA   | 0.657 |
| - | 4  | 2400      |                    | NM_002711    | NP_002702    | Q16821 | PPR3A_HUMAN |                              | 34    | ATATCTCGTTGAC | 0.398 |
| + | 1  | 1383      |                    | NM_012281    | NP_036413    | Q9NZV8 | KCND2_HUMAN | lasmic (Pote p.R140H(1)      | 5     | AGGATCGCAGG   | 0.602 |
| + | 22 | 3290      |                    | NM_024913    | NP_079189    | A4D0V7 | CG058_HUMAN |                              | 9     | ACAGGGGAAGT   | 0.323 |
| - | 15 | 1860      |                    | NM_004333    | NP_004324    | P15056 | BRAF_HUMAN  | rotein kinase_R603>I(2))p.T  | 18290 | ATTTCACTGTAC  | 0.368 |
| - | 5  | 983       | rl.1_Missense_Mt   | NM_001008270 | NP_001008271 | A4D1T9 | PRS37_HUMAN | peptidase S1.                | 1     | TCGATTCCTGG   | 0.443 |
| - | 1  | 99        |                    | NM_001001658 | NP_001001658 | Q8NGT5 | OR9A2_HUMAN | Name=1; (Potential).         | 1     | TAATAGAAGAA   | 0.433 |
| + | 1  | 737       |                    | NM_001004685 | NP_001004685 | O95006 | OR2F2_HUMAN | Name=6; (Potential).         | 4     | .CCTCACGGTGG  | 0.517 |
| - | 2  | 271       |                    | NM_003840    | NP_003831    | Q9UBN6 | TR10D_HUMAN | (Potential). TNFR-Cys 1.     | 0     | CCTGCCGGGGG   | 0.582 |
| - | 5  | 1124_1125 | 2_5'Flank uc003xd  | NM_002318    | NP_002309    | Q9Y4K0 | LOXL2_HUMAN | SRCR 2.                      | 3     | TCCATGGAGAAT  | 0.604 |
| - | 1  | 771       | JRG_uc003xim.1_    | NM_013357    | NP_037489    | Q9UJV8 | PURG_HUMAN  | By similarity.               | 0     | CCTCTTCGTTCT  | 0.453 |
| - | 2  | 306       | P2_uc010lvz.1_Inl  | NM_002677    | NP_002668    | P02689 | MYP2_HUMAN  |                              | 0     | AAATTCCTGGC   | 0.398 |
| - | 9  | 960       | se_Mutation_p.G2   | NM_001738    | NP_001729    | P00915 | CAH1_HUMAN  |                              | 2     | TCTGCCCTTCA   | 0.448 |
| - | 13 | 1731      | p.P322S CDH17_     | NM_004063    | NP_004054    | Q12864 | CAD17_HUMAN | r (Potential). Cadherin 5.   | 6     | CTCAGGATTTT   | 0.403 |
| - | 5  | 853       | o.D138N MTERFD     | NM_015942    | NP_057026    | Q96E29 | MTER1_HUMAN |                              | 1     | FGTTATCCAGTC  | 0.348 |
| - | 2  | 481       | ny.2_Missense_M    | NM_014112    | NP_054831    | Q9UHF7 | TRPS1_HUMAN |                              | 7     | CAGAGGGGGGT   | 0.418 |
| + | 7  | 1160      | lid.1_Missense_M   | NM_022783    | NP_073620    | Q8TB45 | DPTOR_HUMAN |                              | 0     | GGGCTCCGTA    | 0.507 |
| - | 17 | 2755      | uc011llh.1_Intron  | NM_013432    | NP_038460    | Q96HA7 | TONSL_HUMAN |                              | 0     | ACTGGGCTCTG   | 0.672 |
| + | 7  | 956       | rf68_uc003zik.2_Ir | NM_004170    | NP_004161    | P43005 | EAA3_HUMAN  |                              | 0     | TTTCTCAATGC   | 0.418 |
| - | 1  | 2961      | u_p.l632L RANBP    | NM_012416    | NP_036548    | O60518 | RNBP6_HUMAN | HEAT 7.                      | 3     | CCCTATTGCTG   | 0.363 |
| - | 1  | 368       |                    | NM_005454    | NP_005445    | O95813 | CER1_HUMAN  |                              | 0     | GGGTCCCAGGT   | 0.493 |
| - | 1  | 3853      | uc003zrh.1_5'Flanl | NM_153809    | NP_722516    | Q8IZX4 | TAF1L_HUMAN |                              | 26    | GTTCGCTTAAC   | 0.463 |
| - | 9  | 3304      | p.R553W PIGO_uc    | NM_032634    | NP_116023    | Q8TEQ8 | PIGO_HUMAN  |                              | 3     | CTCCGCAGCC    | 0.607 |
| - | 2  | 443       |                    | NM_001100111 | NP_001093581 |        |             |                              | 0     | CTTTTCTCTGG   | 0.438 |
| - | 9  | 2001      | ri.1_Missense_Mu   | NM_004560    | NP_004551    | Q01974 | ROR2_HUMAN  | Potential). Protein kinase.  | 20    | TCCC GCCCGCG  | 0.622 |
| - | 1  | 454       |                    | NM_001001961 | NP_001001961 | Q8NGS6 | O13C3_HUMAN | lasmic (Potential).          | 1     | CATAACGATCAA  | 0.473 |
| - | 5  | 672       | o.V182M UCK1_uc    | NM_031432    | NP_113620    | Q9HA47 | UCK1_HUMAN  |                              | 0     | CTTACGAAGG    | 0.617 |
| - | 30 | 3780      | LA7_uc010ncj.1_    | NM_152286    | NP_689499    | Q6ZV29 | PLPL7_HUMAN |                              | 1     | GGCGCTCTGA    | 0.662 |
| + | 11 | 1647      | rf.1_Missense_Mu   | NM_004042    | NP_004033    | P54793 | ARSF_HUMAN  |                              | 2     | CCCCGGTATTC   | 0.363 |
| - | 7  | 7904      |                    | NM_015419    | NP_056234    | Q9NR99 | MXRA5_HUMAN | ike C2-type 10.              | 8     | CAGATCGGTGC   | 0.647 |
| + | 1  | 683       |                    | NM_182699    | NP_874358    | Q86TM3 | DDX53_HUMAN |                              | 3     | AGAAAGGAAAAT  | 0.388 |
| + | 4  | 1045      | p.R242H MAGEB      | NM_002363    | NP_002354    | P43366 | MAGB1_HUMAN | MAGE.                        | 0     | AACCCGTAAGT   | 0.488 |
| - | 66 | 9884      | sn.2_Missense_Mt   | NM_031407    | NP_113584    | Q7Z6Z7 | HUWE1_HUMAN |                              | 17    | TGTTATGGCTG   | 0.388 |
| - | 17 | 3402      | tc.1_Missense_Mt   | NM_001002838 | NP_001002838 | Q9BYP7 | WNK3_HUMAN  |                              | 11    | CAGCTGGAATC   | 0.443 |
| - | 7  | 1047      | o_Mutation_p.T181  | NM_144969    | NP_659406    | Q96MV8 | ZDH15_HUMAN | ical; (Potential).           | 2     | ACTGTCGTAGCA  | 0.373 |
| - | 4  | 951       |                    | NM_153448    | NP_703149    | Q8N693 | ESX1_HUMAN  | n repeats of P-P-x-x-P-x- P  | 1     | TGGGCGGCCAG   | 0.672 |
| - | 3  | 627       | pz.2_Missense_Mt   | NM_020871    | NP_065922    | Q5VUJ6 | LRCH2_HUMAN | LRR 5.                       | 1     | ACTTCCCAATTT  | 0.289 |
| + | 32 | 3568      | oqq.2_Missense_M   | NM_144658    | NP_653259    | Q5JSL3 | DOC11_HUMAN |                              | 3     | ACCTCCCTTTT   | 0.333 |
| - | 2  | 1117      |                    | NM_001145718 | NP_001139190 | POC2W7 | CT47B_HUMAN | Potential.                   | 0     | CACATCCTTCT   | 0.448 |
| + | 8  | 1011      | uc.2_Missense_M    | NM_006603    | NP_006594    | Q8N3U4 | STAG2_HUMAN |                              | 5     | GTATGAAGTT    | 0.289 |
| - | 4  | 339       | fen.2_Intron CD99  | NM_031462    | NP_113650    | Q8TCZ2 | C99L2_HUMAN | ellular (Potential).         | 3     | CATCAGCCAAG   | 0.438 |
| + | 16 | 3093      |                    | NM_017514    | NP_059984    | P51805 | PLXA3_HUMAN | Extracellular (Potential).   | 3     | CAGCGAGTGC    | 0.697 |
| - | 11 | 1854      | lo.1_Missense_Mu   | NM_007170    | NP_009101    | Q96S53 | TESK2_HUMAN |                              | 5     | CGGTGGTGGG    | 0.552 |
| + | 6  | 813       | HN2_uc001div.2_I   | NM_012302    | NP_036434    | O95490 | LPHN2_HUMAN | otential). Olfactomedin-like | 9     | TACTGGATTTG   | 0.358 |

rs121909577

|   |    |           |                   |              |              |        |             |                                |    |               |       |             |
|---|----|-----------|-------------------|--------------|--------------|--------|-------------|--------------------------------|----|---------------|-------|-------------|
| + | 22 | 3137      | p.P775Q PKN2_u    | NM_006256    | NP_006247    | Q16513 | PKN2_HUMAN  | kinase C-terminal.             | 3  | AGCCACCATTAT  | 0.358 |             |
| - | 8  | 1208      | hj.1_Missense_Mu  | NM_152380    | NP_689593    | Q96SF7 | TBX15_HUMAN |                                | 2  | TGCTTCGGGCA   | 0.537 |             |
| + | 12 | 1449      | GA10_uc009wiw.2   | NM_003637    | NP_003628    | O75578 | ITA10_HUMAN | r (Potential). FG-GAP 4.       | 8  | ATCGAGGAAAAG  | 0.547 |             |
| - | 3  | 1734      |                   | NM_001008536 | NP_001008536 | Q5QJ38 | TCHL1_HUMAN |                                | 2  | GCCTTCCTCTGA  | 0.542 |             |
| - | 4  | 395       | nv.1_Missense_M   | NM_002928    | NP_002919    | O15492 | RGS16_HUMAN | RGS.                           | 1  | GAAAGCGTGGA   | 0.532 |             |
| + | 16 | 3192_3193 |                   | NM_002293    | NP_002284    | P11047 | LAMC1_HUMAN | inin EGF-like 10.              | 5  | CTGAAGGCTGCA  | 0.54  |             |
| - | 2  | 130       | zz.1_Missense_Mt  | NM_005465    | NP_005456    | Q9Y243 | AKT3_HUMAN  | PH.                            | 4  | TATATTCTCTAC  | 0.348 |             |
| + | 22 | 3072      |                   | NM_000392    | NP_000383    | Q92887 | MRP2_HUMAN  | ime=12; (By similarity).       | 1  | TGTTTTCGATATT | 0.413 |             |
| + | 2  | 206_207   |                   | NM_021801    | NP_068573    | Q9NRE1 | MMP26_HUMAN |                                | 0  | ATCATCGGAATGG | 0.525 |             |
| - | 9  | 1089      | kj.1_Missense_Mt  | NM_004811    | NP_004802    | O60711 | LPXN_HUMAN  | I zinc-binding 3.              | 1  | AGAATGGACGT   | 0.517 |             |
| + | 7  | 713       | rip.1_Missense_N  | NM_018318    | NP_060788    | Q7Z6B0 | CCD91_HUMAN | nodimerization.                | 1  | GCTATTGAAAAA  | 0.363 |             |
| - | 13 | 1517_1518 | 24A6_uc001tva.2   | NM_024959    | NP_079235    | Q6J4K2 | NCKX6_HUMAN | Name=9; (Potential).           | 1  | ATGGCGGCCCGC  | 0.619 |             |
| + | 12 | 1707      | aa.2_Missense_N   | NM_001676    | NP_001667    | P54707 | AT12A_HUMAN | lasmic (Potential).            | 6  | GCTCCATCCACG  | 0.517 |             |
| - | 1  | 511       |                   | NM_001004714 | NP_001004714 | Q8NH42 | OR4KD_HUMAN | ellular (Potential).           | 2  | ATTGGGACCACA  | 0.483 |             |
| - | 2  | 1083      | ie_Mutation_p.R11 | NM_183002    | NP_892114    | P57103 | NAC3_HUMAN  | lasmic (Potential).            | 7  | ACTCCCTCTCT   | 0.478 |             |
| + | 19 | 5338      | mv.2_Missense_N   | NM_015556    | NP_056371    | O43166 | SI1L1_HUMAN |                                | 4  | TGCCCGACCCCT  | 0.587 |             |
| - | 3  | 338       |                   | NM_014691    | NP_055506    | O60306 | AQR_HUMAN   |                                | 1  | CAATCTCTTTTT  | 0.279 |             |
| + | 13 | 3141      | w.2_Missense_Mu   | NM_032866    | NP_116255    | Q0VF96 | CGNL1_HUMAN | Potential.                     | 11 | GTTACGGGACT   | 0.537 |             |
| + | 3  | 427       | brb.2_Missense_N  | NM_006011    | NP_006002    | Q92186 | SIA8B_HUMAN | enal (Potential).              | 0  | CCAGACGCTCT   | 0.463 |             |
| - | 11 | 3798      |                   | NM_001116    | NP_001107    | O60503 | ADCY9_HUMAN | se 2. Cytoplasmic (Potentia    | 6  | GAGCTCGTTGA   | 0.587 |             |
| - | 6  | 581       | RN3_uc010uzq.1    | NM_018427    | NP_060897    | Q9NYV6 | RRN3_HUMAN  |                                | 1  | ATCAGAATCTGA  | 0.239 |             |
| - | 5  | 1338      | 002ffe.1_Missens  | NM_199355    | NP_955387    | Q8TE60 | ATS18_HUMAN | ptidase M12B.                  | 18 | GCTTTTCCACCA  | 0.463 |             |
| + | 8  | 1530      | mw.1_Missense_N   | NM_178452    | NP_848547    | Q8NEP3 | DAAF1_HUMAN | Pro-rich.                      | 0  | ACCCCGCCAC    | 0.607 |             |
| + | 8  | 1255      | jf.2_Missense_Mu  | NM_001005273 | NP_001005273 | Q12873 | CHD3_HUMAN  |                                | 1  | GAGGAGGAGGAC  | 0.438 |             |
| - | 8  | 996       | p.S264F CCT6B_t   | NM_006584    | NP_006575    | Q92526 | TCPW_HUMAN  |                                | 1  | GTAAGGAAAATC  | 0.224 |             |
| - | 49 | 6163      | hno.2_Missense_f  | NM_198836    | NP_942133    | Q13085 | ACACA_HUMAN | oxyltransferase.               | 2  | CTGTTCCGGTT   | 0.458 |             |
| + | 3  | 436       | e_Mutation_p.P13  | NM_145273    | NP_660316    | Q6UXG3 | CLM9_HUMAN  | ellular (Potential).           | 0  | TCCTCCCTCCC   | 0.587 |             |
| + | 10 | 1574      | lac.1_Nonsense_   | NM_020776    | NP_065827    | Q86T90 | K1328_HUMAN |                                | 1  | TGTTTCAGTCT   | 0.458 |             |
| - | 4  | 1916      | 799_uc002mts.3_l  | NM_001080821 | NP_001074290 | Q96GE5 | ZN799_HUMAN | :2H2-type 17.                  | 6  | TTACATTCATACG | 0.413 |             |
| - | 1  | 38        |                   | NM_001005190 | NP_001005190 | O76100 | OR7AA_HUMAN | ellular (Potential).           | 0  | AGGAGAAGAAAT  | 0.358 |             |
| - | 4  | 743       | pc.1_Missense_M   | NM_001076675 | NP_001070143 | Q68DY1 | ZN626_HUMAN |                                | 1  | GTTTCCCTCCA   | 0.363 |             |
| - | 4  | 1027      | rj.1_Missense_Mu  | NM_003430    | NP_003421    | Q05481 | ZNF91_HUMAN | :2H2-type 6.                   | 0  | AAGAATGGCTA   | 0.413 |             |
| + | 73 | 10887     | iv.1_Missense_Mt  | NM_000540    | NP_000531    | P21817 | RYR1_HUMAN  |                                | 12 | GACGCGCGATG   | 0.652 |             |
| + | 4  | 1894      | po.1_Intron ZNF5  | NM_001143939 | NP_001137411 | Q76KX8 | ZN534_HUMAN | :2H2-type 15.                  | 0  | TAGGAAAATTCAT | 0.423 |             |
| + | 4  | 2891      | dw.1_Missense_M   | NM_138374    | NP_612383    | Q96IR2 | ZN845_HUMAN | :2H2-type 26.                  | 0  | CTTCCGTCACA   | 0.363 | rs150688663 |
| + | 7  | 1015      | p.T132I ZNF761    | NM_001008401 | NP_001008401 | Q86XN6 | ZN761_HUMAN |                                | 1  | CCAAAACCCATA  | 0.358 |             |
| - | 16 | 2414      |                   | NM_019024    | NP_061897    | Q9P2D3 | HTR5B_HUMAN |                                | 8  | GAGGGGACCA    | 0.478 |             |
| + | 2  | 1334      | nse_Mutation_p.S  | NM_014497    | NP_055312    | Q14966 | ZN638_HUMAN |                                | 4  | TTTTCGTCGGAA  | 0.398 |             |
| - | 8  | 1996      | e_Mutation_p.P47  | NM_014795    | NP_055610    | O60315 | ZEB2_HUMAN  |                                | 9  | TATTAGGAGAAG  | 0.413 |             |
| + | 4  | 391_392   | p.P131F RQCD1_    | NM_005444    | NP_005435    | Q92600 | RCD1_HUMAN  |                                | 2  | CACGTCCCTTTC  | 0.426 |             |
| + | 9  | 1223      |                   | NM_003245    | NP_003236    | Q08188 | TGM3_HUMAN  |                                | 9  | GTGTTCGAGAG   | 0.567 |             |
| + | 6  | 801       | se_Mutation_p.P2  | NM_022896    | NP_075047    | Q9BQK8 | LPIN3_HUMAN |                                | 4  | CAGTCCCCTAA   | 0.632 |             |
| - | 4  | 843       | jf.1_Missense_Mu  | NM_175878    | NP_787074    | Q5GH77 | XKR3_HUMAN  | ical; (Potential).             | 3  | TACACGTGAGA   | 0.423 |             |
| - | 20 | 3679      |                   | NM_006514    | NP_006505    | Q9Y5Y9 | SCNAA_HUMAN | :=S3 of repeat III; (Potentia  | 10 | GCACATTCACAAT | 0.537 |             |
| - | 10 | 890       |                   | NM_004704    | NP_004695    | O43818 | U3IP2_HUMAN | WD 4.                          | 3  | CAGCGTCCTGG   | 0.632 |             |
| + | 4  | 382       | p.P104S NISCH_l   | NM_007184    | NP_009115    | Q9Y211 | NISCH_HUMAN | ositide-3-P; not sufficient fo | 4  | CTTCCCTGGC    | 0.517 |             |
| + | 8  | 1057      | fk.3_Missense_Mi  | NM_001122681 | NP_001116153 | P78314 | 3BP2_HUMAN  |                                | 1  | GCCACGGGGCC   | 0.672 | rs141518457 |

|   |    |           |                    |              |              |        |              |                               |       |               |       |             |
|---|----|-----------|--------------------|--------------|--------------|--------|--------------|-------------------------------|-------|---------------|-------|-------------|
| + | 1  | 225       | 1_p.H18Y LPHN3_    | NM_015236    | NP_056051    | Q9HAR2 | LPHN3_HUMAN  | p.H18R(1)                     | 18    | ATAATTCATGGTA | 0.383 |             |
| + | 4  | 965       | 1MUC7_uc003hfj.2   | NM_001145006 | NP_001138478 | Q8TAX7 | MUC7_HUMAN   | 3. Thr-rich.                  | 4     | CTCCACCATCTT  | 0.582 |             |
| + | 8  | 3417      | p.P419S MMRN1_     | NM_007351    | NP_031377    | Q13201 | MMRN1_HUMAN  | C1q.                          | 4     | CTGGTCTCTATCC | 0.363 |             |
| - | 5  | 551       | 1x.2_Missense_Mt   | NM_017639    | NP_060109    | Q6V1P9 | PCD23_HUMAN  | Cadherin 2.                   | 4     | ATGCTCGTCACA  | 0.498 | rs148693426 |
| - | 3  | 355       | 11cle.1_Missense_  | NM_173553    | NP_775824    | Q8N7C3 | TRIMM_HUMAN  | Potential.                    | 2     | CTATTCTCTGGA  | 0.403 |             |
| - | 14 | 1925      | 1x.2_Nonsense_Mt   | NM_012334    | NP_036466    | Q9HD67 | MYO10_HUMAN  | Myosin head-like.             | 3     | TCTATCCAGTCA  | 0.378 |             |
| - | 8  | 858       | 1oo.2_Missense_M   | NM_001387    | NP_001378    | Q14195 | DPYL3_HUMAN  |                               | 1     | CTAGAGAGGGGC  | 0.498 |             |
| + | 9  | 1018      |                    | NM_002269    | NP_002260    | O15131 | IMA5_HUMAN   | ARM 6.                        | 4     | CTGATTCTGGAG  | 0.358 |             |
| + | 16 | 1807      | 1sem.1_Nonsense_   | NM_001029884 | NP_001025055 | Q9ULL1 | PKHG1_HUMAN  |                               | 2     | CTCCCCAGCTG   | 0.493 | rs35532326  |
| + | 17 | 5654      | 1yr.2_Missense_Mt  | NM_152701    | NP_689914    | Q86UQ4 | ABCAD_HUMAN  |                               | 10    | ATGAAAGCTCC   | 0.418 |             |
| + | 16 | 3678      | 1sense_Mutation_p  | NM_022742    | NP_073579    | Q96JN2 | CC136_HUMAN  | Glu-rich.                     | 2     | ACTCTTCCCTTG  | 0.338 |             |
| - | 15 | 1860      |                    | NM_004333    | NP_004324    | P15056 | BRAF_HUMAN   | serine kinase_R603>I(2) p.T   | 18290 | CTATTCAGTGTAC | 0.368 |             |
| + | 17 | 3250      |                    | NM_014141    | NP_054860    | Q9UHC6 | CNTP2_HUMAN  | 3. Extracellular (Potential). | 11    | CAGAAGGCCAC   | 0.552 |             |
| - | 4  | 2276      |                    | NM_001001661 | NP_001001661 | Q6IV72 | ZN425_HUMAN  | 2H2-type 19.                  | 3     | CGCCCCACGT    | 0.577 |             |
| - | 16 | 1737_1738 | 1p.P457F KIF13B_   | NM_015254    | NP_056069    | Q9NQT8 | KI13B_HUMAN  |                               | 0     | GGAGGGATCCT   | 0.431 |             |
| - | 5  | 1072      |                    | NM_014729    | NP_055544    | O94900 | TOX_HUMAN    | HMG box.                      | 4     | CGTTTGGATTTI  | 0.468 |             |
| - | 4  | 574       | 1p.G173S MPDZ_     | NM_003829    | NP_003820    | O75970 | MPDZ_HUMAN   | PDZ 1.                        | 6     | CACTGCCCTCTT  | 0.443 |             |
| - | 11 | 1306      | 1p.A361V MAOB_L    | NM_000898    | NP_000889    | P27338 | AOFB_HUMAN   | Cytoplasmic.                  | 2     | CCAGAGCTTCTA  | 0.458 |             |
| + | 6  | 1681      |                    | NM_007137    | NP_009068    | P51508 | ZNF81_HUMAN  |                               | 0     | TACAGGAGAGAC  | 0.433 |             |
| - | 42 | 5574_5575 | 1Isn.2_Missense_M  | NM_031407    | NP_113584    | Q7Z6Z7 | HUWE1_HUMAN  |                               | 17    | TAGGGCCAAAGC  | 0.426 |             |
| - | 18 | 1919      |                    | NM_031407    | NP_113584    | Q7Z6Z7 | HUWE1_HUMAN  |                               | 17    | GAAGTGCTGCT   | 0.398 |             |
| - | 3  | 4644      |                    | NM_001008537 | NP_001008537 | Q5QGS0 | K2022_HUMAN  |                               | 15    | GGGTTCCCAAAC  | 0.478 |             |
| - | 6  | 799       | 1es.2_Missense_Mt  | NM_024921    | NP_079197    | Q8WVV4 | POF1B_HUMAN  |                               | 0     | TTATTCCTGTGA  | 0.438 |             |
| + | 44 | 4182      | 1p.G1324E COL4A    | NM_033380    | NP_203699    | P29400 | CO4A5_HUMAN  | le-helical region.            | 4     | GAAAGGAGATC   | 0.433 |             |
| + | 7  | 658       | 1K11_uc004eqq.2_f  | NM_144658    | NP_653259    | Q5JSL3 | DOC11_HUMAN  | PH.                           | 3     | CAACTTCTGAC   | 0.358 |             |
| + | 4  | 551       | 1EC1_uc010nsl.1_I  | NM_005462    | NP_005453    | O60732 | MAGC1_HUMAN  |                               | 4     | CTGAGGGCGAC   | 0.582 |             |
| - | 5  | 1421      | 14fl.2_Missense_M  | NM_001011543 | NP_001011543 | P43363 | MAGAA_HUMAN  |                               | 0     | CTCTTCTCTCA   | 0.468 |             |
| + | 7  | 1049      | 1lagl.1_Missense_M | NM_080875    | NP_543151    | Q96AX9 | MIB2_HUMAN   |                               | 0     | GCAGGGTGAGT   | 0.677 |             |
| - | 13 | 1413      | 1Inzr.1_Missense_M | NM_001042663 | NP_001036128 | O94827 | PKHG5_HUMAN  | DH.                           | 1     | CAGGCGCTCCG   | 0.731 |             |
| + | 8  | 3948      | 1j.2_Intron PRDM2  | NM_012231    | NP_036363    | Q13029 | PRDM2_HUMAN  | 1g (Potential) Pro-rich.      | 1     | CTCTCCCTCTC   | 0.498 |             |
| - | 5  | 1003      | 1C16_uc001awu.2    | NM_024758    | NP_079034    | Q9BSE5 | SPEB_HUMAN   |                               | 1     | CTGTCCCTGGC   | 0.522 |             |
| - | 1  | 402       | 1C16_uc001awu.2    | NM_024758    | NP_079034    | Q9BSE5 | SPEB_HUMAN   |                               | 1     | AGGCCGGTTGG   | 0.697 |             |
| - | 57 | 8423      | 1k.1_Missense_Mu   | NM_020765    | NP_065816    | Q5T4S7 | UBR4_HUMAN   |                               | 25    | AGGTGGGATGT   | 0.592 |             |
| + | 4  | 370       | 1p.G78R LCK_uc01   | NM_005356    | NP_005347    | P06239 | LCK_HUMAN    | SH3.                          | 6     | ACGACGGAGAT   | 0.602 |             |
| - | 6  | 983       | 1sa.1_Missense_Mt  | NM_000831    | NP_000822    | Q13003 | GRIK3_HUMAN  | cellular (Potential).         | 7     | GAATCCGGAAT   | 0.572 |             |
| - | 6  | 717       | 1nv.1_Missense_Mt  | NM_020365    | NP_065098    | Q9NR50 | EI2BG_HUMAN  |                               | 1     | GACCCGTGTGG   | 0.388 |             |
| - | 5  | 498       | 1ont.1_Missense_M  | NM_002370    | NP_002361    | P61326 | MGN_HUMAN    |                               | 0     | ATCCAATAAGAC  | 0.378 |             |
| + | 37 | 4957      | 1se_Mutation_p.R4  | NM_176877    | NP_795352    | Q8NI35 | INADL_HUMAN  | PDZ 9.                        | 4     | GACTCCGAGCT   | 0.473 |             |
| - | 3  | 1069      | 13_Intron KANK4_u  | NM_181712    | NP_859063    | Q5T7N3 | KANK4_HUMAN  | Pro-rich.                     | 6     | CAGCTCCCTCC   | 0.547 |             |
| + | 5  | 449       | 1ote.1_Missense_M  | NM_001012425 | NP_001012425 | Q5VVC0 | CA146_HUMAN  |                               | 1     | CAGTAAATGCTA  | 0.358 |             |
| - | 20 | 2219      | 1OL11A1_uc001dur   | NM_001854    | NP_001845    | P12107 | COBA1_HUMAN  | le-helical region.            | 12    | GTTTCTCCCTGT  | 0.284 |             |
| + | 1  | 433       |                    | NM_018137    | NP_060607    | Q96LA8 | ANM6_HUMAN   |                               | 0     | GGCCGGGAGG    | 0.687 |             |
| - | 4  | 454       | 1orf194_uc009wew   | NM_001122961 | NP_001116433 | Q5T5A4 | CA194_HUMAN  |                               | 1     | AGTGTCTGATG   | 0.493 |             |
| + | 14 | 1330      | 1se_Mutation_p.S3  | NM_003176    | NP_003167    | Q15431 | SYCP1_HUMAN  | Potential.                    | 1     | CTCATTGTTTG   | 0.308 |             |
| + | 11 | 1623      | 1L465F PHGDH_u     | NM_006623    | NP_006614    | O43175 | SERA_HUMAN   |                               | 1     | CCCTGCTCCTA   | 0.627 |             |
| + | 5  | 1023      | 1ron NBPF10_uc00   | NM_203458    | NP_982283    | Q7Z3S9 | NT2NL_HUMAN  |                               | 1     | GTTTCTTAAGCT  | 0.378 |             |
| + | 10 | 1491      | 1e_Mutation_p.H45  | NM_001039703 | NP_001034792 | A6NDV3 | A6NDV3_HUMAN |                               | 0     | ATAGCCATGGC   | 0.468 |             |

|   |    |           |                    |      |              |              |        |              |                           |    |                 |       |             |
|---|----|-----------|--------------------|------|--------------|--------------|--------|--------------|---------------------------|----|-----------------|-------|-------------|
| + | 8  | 1210      | p.P311S RP         | RD2_ | NM_015203    | NP_056018    | Q5VT52 | RPRD2_HUMAN  |                           | 1  | AGTCTCCTTTTC    | 0.502 |             |
| - | 10 | 1044      | nr.1_Missense_Mi   |      | NM_001025603 | NP_001020774 | P48382 | RFX5_HUMAN   |                           | 1  | TGTGGGCTCCA     | 0.522 |             |
| - | 2  | 163       |                    |      | NM_001045479 | NP_001038944 |        |              |                           | 1  | TTGGCGAAACAT    | 0.443 | rs140012440 |
| - | 3  | 529       |                    |      | NM_017582    | NP_060052    | Q7Z7E8 | UB2Q1_HUMAN  |                           | 0  | ATGCTGCAATAG    | 0.507 |             |
| + | 1  | 540       |                    |      | NM_001004473 | NP_001004473 | Q8NGX5 | O10K1_HUMAN  | cellular (Potential).     | 1  | TGTGACATCTCC    | 0.517 |             |
| + | 6  | 944       | _uc010pjo.1_Miss   |      | NM_021181    | NP_067004    | Q9NQ25 | SLAF7_HUMAN  | lasmic (Potential).       | 3  | AAATACCGAAAA    | 0.368 |             |
| + | 6  | 829       | nd.1_Missense_Mi   |      | NM_001460    | NP_001451    | Q99518 | FMO2_HUMAN   |                           | 1  | ACACCCGGTTT     | 0.473 |             |
| + | 13 | 1813      | _p.P503S RABGA     |      | NM_014857    | NP_055672    | Q5R372 | RBG1L_HUMAN  | ab-GAP TBC.               | 4  | TGTGTCCTTGAA    | 0.473 |             |
| - | 2  | 1083      |                    |      | NM_001009992 | NP_001009992 | Q5T619 | ZN648_HUMAN  | 2H2-type 1.               | 1  | GTGTGCCCGCGG    | 0.697 |             |
| + | 2  | 390       |                    |      | NM_130782    | NP_570138    | Q9NS28 | RGS18_HUMAN  |                           | 3  | CCAAAGAAACA     | 0.348 |             |
| - | 3  | 1195      | pl.1_Missense_Mi   |      | NM_001031725 | NP_001026895 | Q5T1V6 | DDX59_HUMAN  | ase ATP-binding.          | 4  | CAGACGATAAAC    | 0.408 |             |
| + | 12 | 3444      | .K1047N CAMSAF     |      | NM_203459    | NP_982284    | Q08AD1 | CAMP2_HUMAN  |                           | 4  | TCCAAAGGGAC     | 0.408 |             |
| + | 9  | 896       | b.2_RNA LGR6_uc    |      | NM_001017403 | NP_001017403 | Q9HBX8 | LGR6_HUMAN   | tracellular (99_A300insGF | 10 | AAGATCGGCAT     | 0.488 |             |
| + | 4  | 1226      | :C2_uc001hcb.1_A   |      | NM_014858    | NP_055673    | O75069 | TMCC2_HUMAN  |                           | 1  | CCTCCCCGCGG     | 0.672 |             |
| - | 31 | 4445      | gh.1_Missense_Mi   |      | NM_018072    | NP_060542    | Q9H583 | HEAT1_HUMAN  |                           | 3  | TGCTTCTAAATP    | 0.368 |             |
| + | 20 | 2710      | .R836W ACTN2_L     |      | NM_001103    | NP_001094    | P35609 | ACTN2_HUMAN  |                           | 5  | TCTTCCGGATC     | 0.502 |             |
| - | 3  | 397       | ibk.2_Missense_Mi  |      | NM_022743    | NP_073580    | Q9H7B4 | SMYD3_HUMAN  |                           | 0  | GAACGGAGTCT     | 0.398 |             |
| + | 5  | 214       | a.3_RNA C1orf15    |      | NM_145278    | NP_660321    | Q5JQS6 | CA150_HUMAN  |                           | 0  | GGCAGGAAAAA     | 0.438 |             |
| + | 15 | 3650      | orf18_uc001iik.2_I |      | NM_017782    | NP_060252    | Q5VWN6 | CJ018_HUMAN  |                           | 2  | ATGCAGCAGTG     | 0.448 |             |
| + | 3  | 962       |                    |      | NM_031923    | NP_114129    | Q5VVG9 | TAFF3_HUMAN  |                           | 1  | aagagtcceaagagc | 0.393 |             |
| + | 4  | 593       | iln.2_Missense_Mi  |      | NM_153498    | NP_705718    | Q8IU85 | KCC1D_HUMAN  | rotein kinase.            | 2  | AGAAGGATGCC     | 0.507 |             |
| + | 11 | 1364      | D3A_uc009xkp.1_I   |      | NM_017433    | NP_059129    | Q8NEV4 | MYO3A_HUMAN  |                           | 18 | TAATATCCAATCT   | 0.348 |             |
| + | 13 | 1580      |                    |      | NM_019043    | NP_061916    | Q7Z5R6 | AB11P_HUMAN  |                           | 7  | TATGGGAAGA      | 0.463 |             |
| - | 15 | 2317_2318 | tdt.1_Nonsense_Mi  |      | NM_018076    | NP_060546    | Q5T2S8 | ARMC4_HUMAN  |                           | 6  | ATTTCATATA      | 0.446 |             |
| + | 6  | 716       |                    |      | NM_052997    | NP_443723    | Q9BXX3 | AN30A_HUMAN  | ANK 6.                    | 9  | ATATACGAAAATT   | 0.269 |             |
| - | 5  | 847       | P22_uc010qgl.1_I   |      | NM_021226    | NP_067049    | Q7Z5H3 | RHG22_HUMAN  | Rho-GAP.                  | 1  | TCTCCGGATGA     | 0.647 |             |
| - | 16 | 2273      | igt.1_Missense_Mi  |      | NM_018245    | NP_060715    | Q9ULD0 | OGDHL_HUMAN  |                           | 1  | GACTCCGTACT     | 0.657 |             |
| - | 1  | 237       |                    |      | NM_000242    | NP_000233    | P11226 | MBL2_HUMAN   | Collagen-like.            | 1  | TCTTTCTCCCTI    | 0.532 |             |
| - | 36 | 4893      | ation_p.E1488K P   |      | NM_001142769 | NP_001136241 | Q96QU1 | PCD15_HUMAN  |                           | 13 | TTCTTCTCTCAGC   | 0.393 |             |
| - | 15 | 1429      | p.3_Missense_Mu    |      | NM_013451    | NP_038479    | Q9NZM1 | MYOF_HUMAN   | mic (Potential). C2 3.    | 4  | TTTTTCACACAC    | 0.254 |             |
| + | 8  | 1229      | ut.2_Missense_Mi   |      | NM_000771    | NP_000762    | P11712 | CP2C9_HUMAN  |                           | 6  | AATTTCCAACC     | 0.378 |             |
| + | 6  | 1398      |                    |      | NM_005063    | NP_005054    | O00767 | ACOD_HUMAN   | lasmic (Potential).       | 0  | ACCACTCCTTTC    | 0.443 |             |
| + | 7  | 3608      | rc1_uc010qqj.1_M   |      | NM_015062    | NP_055877    | Q5VV67 | PPRC1_HUMAN  |                           | 3  | TCTCTCTCCGG     | 0.517 |             |
| - | 23 | 3132      | .P1042S SORCS1     |      | NM_052918    | NP_443150    | Q8WY21 | SORC1_HUMAN  | renal (Potential).        | 2  | AGCTGGATCTT     | 0.542 |             |
| - | 11 | 1565      | lqsp.1_Missense_I  |      | NM_001127211 | NP_001120683 | A0MZ66 | SHOT1_HUMAN  | Pro-rich.                 | 0  | aggaggagggtggg  | 0.333 |             |
| + | 50 | 6431      | p.G2108R DMBT1     |      | NM_007329    | NP_015568    | Q9UGM3 | DMBT1_HUMAN  | CUB 2.                    | 7  | GGAGAGGGTTCT    | 0.527 |             |
| + | 52 | 6879      | _p.S2257Y DMBT1    |      | NM_007329    | NP_015568    | Q9UGM3 | DMBT1_HUMAN  | ZP.                       | 7  | ACATTTCTTTT     | 0.463 |             |
| + | 9  | 1405      |                    |      | NM_001105521 | NP_001098991 |        |              |                           | 1  | ACGGGCTCCTCC    | 0.587 |             |
| - | 1  | 348       | x.1_Intron LOC33E  |      | NM_001005922 | NP_001005922 | Q6L8H4 | KRA51_HUMAN  | repeats of C-C-X-P.       | 0  | TCTTGAGGCC      | 0.672 |             |
| - | 1  | 530       |                    |      | NM_001005329 | NP_001005329 | Q8NGJ6 | O51A4_HUMAN  | cellular (Potential).     | 3  | AATGGGATAAT     | 0.413 |             |
| - | 2  | 465       | BE1_uc001mam.1     |      | NM_005330    | NP_005321    | P02100 | HBE_HUMAN    |                           | 0  | CAAAGGAAGTC     | 0.512 |             |
| + | 14 | 2456      | sq.2_Missense_Mi   |      | NM_001003819 | NP_001003819 | B2RNG4 | B2RNG4_HUMAN |                           | 1  | CAAATCGTCAA     | 0.413 | rs138080438 |
| + | 6  | 1151      | 2_uc010qzm.1_Mi    |      | NM_006074    | NP_006065    | Q8IYM9 | TRI22_HUMAN  | 330.2/SPRY.               | 0  | TAAAGGTAAGC     | 0.443 |             |
| - | 8  | 1859      | p.G372D TRIM3_L    |      | NM_006458    | NP_006449    | O75382 | TRIM3_HUMAN  | NHL 1.                    | 5  | GACACACCTTGT    | 0.498 |             |
| + | 3  | 893       |                    |      | NM_006108    | NP_006099    | Q9HCB6 | SPON1_HUMAN  | Reelin.                   | 0  | TAGACGAAGAA     | 0.438 |             |
| - | 1  | 1265      | mb.3_Missense_Mi   |      | NM_000525    | NP_000516    | B4DWI4 | B4DWI4_HUMAN |                           | 1  | GTGGAGGGGCA     | 0.617 |             |
| + | 7  | 1484      | ric.2_Nonsense_Mi  |      | NM_004211    | NP_004202    | Q9Y345 | SC6A5_HUMAN  | Name=4; (Potential).      | 4  | GCTTGGGTCA      | 0.453 |             |



|   |    |      |                    |              |              |        |             |                                |    |               |       |             |
|---|----|------|--------------------|--------------|--------------|--------|-------------|--------------------------------|----|---------------|-------|-------------|
| + | 4  | 3577 | p.P865S QSER1_     | NM_001076786 | NP_001070254 | Q2KHR3 | QSER1_HUMAN |                                | 6  | AGAATCCAAGG   | 0.413 |             |
| + | 9  | 1085 |                    | NM_006133    | NP_006124    | Q9Y4D2 | DGLA_HUMAN  | lasmic (Potential).            | 3  | CTGCTCGTGAG   | 0.642 |             |
| - | 2  | 729  |                    | NM_203422    | NP_981967    | Q8ND94 | LRN4L_HUMAN | -III. Extracellular (Potential | 0  | .GCCCTTCAGT   | 0.677 |             |
| + | 7  | 1397 | R PRDX5_uc001n     | NM_004451    | NP_004442    | P11474 | ERR1_HUMAN  | AF-2 domain.                   | 0  | .GGGCAAGGTGC  | 0.647 |             |
| - | 4  | 521  | roz.1_Missense_Iv  | NM_004292    | NP_004283    | Q13671 | RIN1_HUMAN  | SH2.                           | 3  | .GCCCTCCAAGG  | 0.662 |             |
| + | 5  | 882  | sS4_uc010rpc.1_Ir  | NM_178864    | NP_849195    | Q8IUM7 | NPAS4_HUMAN | PAS 2.                         | 0  | TCCTAATCTACC  | 0.542 |             |
| - | 3  | 413  | PP1CA_uc001okv     | NM_002708    | NP_002699    | P62136 | PP1A_HUMAN  |                                | 2  | GCTTGCCCTCG   | 0.552 |             |
| + | 7  | 807  | p.P177S IL18BP_    | NM_001039659 | NP_001034748 | O95998 | I18BP_HUMAN |                                | 0  | .CCTTGCCCCCC  | 0.597 |             |
| + | 3  | 802  | p.V157M P2RY2_     | NM_002564    | NP_002555    | P41231 | P2RY2_HUMAN | Name=4; (Potential).           | 4  | .GGGCCGTGTGC  | 0.726 |             |
| + | 2  | 193  | tion_p.R65W MOG    | NM_025098    | NP_079374    | Q3SYC2 | MOGT2_HUMAN |                                | 2  | AGCCACGGCAG   | 0.562 |             |
| - | 6  | 1423 | ia.3_Missense_Mu   | NM_000795    | NP_000786    | P14416 | DRD2_HUMAN  | nteraction with PPP1R9B (      | 2  | CTTCTCCTTCTC  | 0.577 |             |
| + | 5  | 665  | l_p.S100F TMPRE    | NM_019894    | NP_063947    | Q9NRS4 | TMPS4_HUMAN | ilar (Potential). SRCR.        | 2  | .GTTCTCTGCCT  | 0.552 |             |
| + | 15 | 5059 |                    | NM_005422    | NP_005413    | O75443 | TECTA_HUMAN | VWFD 4.                        | 10 | .TGCAAGGGTGT  | 0.552 |             |
| + | 8  | 1632 |                    | NM_025004    | NP_079280    | Q0P6D6 | CCD15_HUMAN |                                | 2  | .TCTCCACAAAG  | 0.418 | rs113451248 |
| - | 15 | 2057 | p.R313C SLC2A1     | NM_153449    | NP_703150    | Q8TDB8 | GTR14_HUMAN | lasmic (Potential).            | 1  | TGGGCGGGGGC   | 0.547 |             |
| - | 14 | 2015 | lrey.2_Splice_Site | NM_032941    | NP_116559    | P46063 | RECQ1_HUMAN |                                | 2  | TACATACTTAAG  | 0.358 |             |
| - | 15 | 2107 |                    | NM_021957    | NP_068776    | P54840 | GYS2_HUMAN  |                                | 2  | .ATCTGGAAAAGC | 0.303 |             |
| - | 10 | 1559 | p.Q385K BCAT1_     | NM_005504    | NP_005495    | P54687 | BCAT1_HUMAN |                                | 2  | .TACCTGGATATC | 0.279 |             |
| - | 12 | 1945 | C1_uc001rja.2_Nc   | NM_175861    | NP_787057    | Q8IUR5 | TMTC1_HUMAN | TPR 4.                         | 0  | .CTTCTTAAACCC | 0.328 |             |
| + | 9  | 866  | slz.1_Missense_Iv  | NM_000725    | NP_000716    | P54284 | CACB3_HUMAN |                                | 0  | .CCTCTCCCTGG  | 0.582 |             |
| - | 2  | 712  |                    | NM_175053    | NP_778223    | Q7RTS7 | K2C74_HUMAN | Coil 1B. Rod.                  | 2  | .CACCAGATCCC  | 0.572 |             |
| - | 2  | 674  | 79_uc001sba.2_5l   | NM_175834    | NP_787028    | Q5XKE5 | K2C79_HUMAN | Rod. Coil 1B.                  | 4  | .GCCTCCCCCGC  | 0.617 |             |
| + | 7  | 1689 | cj.2_Missense_Mu   | NM_012291    | NP_036423    | Q14674 | ESPL1_HUMAN |                                | 3  | .GGCAGCCCTGC  | 0.552 |             |
| + | 3  | 858  | 2_RNA SLC26A1(     | NM_133489    | NP_597996    | Q8NG04 | S2610_HUMAN |                                | 2  | .TCTCTCTCTTC  | 0.622 |             |
| - | 14 | 3349 | l.A1325T PTPRB_    | NM_002837    | NP_002828    | P23467 | PTPRB_HUMAN | II 13. Extracellular (Potenti  | 3  | TGAGGCGGTCC   | 0.552 |             |
| + | 10 | 1533 | p.G480E ACSS3_     | NM_024560    | NP_078836    | Q9H6R3 | ACSS3_HUMAN |                                | 4  | .TCCCAGGATACA | 0.403 |             |
| + | 5  | 400  | i RFX4_uc001tlt.2  | NM_213594    | NP_998759    | Q33E94 | RFX4_HUMAN  | type winged-helix.             | 1  | CAGTTTCTCAG   | 0.498 |             |
| - | 20 | 2434 | tul.2_Missense_M   | NM_004658    | NP_004649    | O95294 | RASL1_HUMAN |                                | 4  | AGTCCCCCAGG   | 0.632 |             |
| - | 13 | 1067 | c.2_Missense_Mut   | NM_002150    | NP_002141    | P32754 | HPPD_HUMAN  |                                | 0  | .GGGCCGGTCCT  | 0.612 |             |
| - | 8  | 2397 | l1uia.2_Missense_  | NM_133448    | NP_597705    | Q14C87 | T132D_HUMAN | ellular (Pote p.l690l(1)       | 14 | .CAAAGATGGCC  | 0.577 |             |
| + | 18 | 2425 | nh.2_Missense_Mi   | NM_005766    | NP_005757    | Q9Y4F1 | FARP1_HUMAN | DH.                            | 2  | .TCCTGGAGCGG  | 0.622 |             |
| + | 9  | 976  |                    | NM_182614    | NP_872420    | Q8WV15 | FA70B_HUMAN | Pro-rich.                      | 0  | .TCCCCCGGGG   | 0.557 |             |
| + | 1  | 839  |                    | NM_001004724 | NP_001004724 | Q8IXE1 | OR4N5_HUMAN | Name=7; (Potential).           | 1  | .TCTTCTTTGAT  | 0.403 |             |
| - | 10 | 1644 | P1_uc010tlg.1_Mi   | NM_007110    | NP_009041    | Q99973 | TEP1_HUMAN  | TROVE.                         | 5  | .CAACCCGACG   | 0.522 |             |
| - | 4  | 1916 | p.D499N ZNF219     | NM_016423    | NP_057507    | Q9P2Y4 | ZN219_HUMAN | C2H2-type 6.                   | 1  | .ACAATCCTTGC  | 0.607 |             |
| - | 35 | 6066 | ar.1_Nonsense_ML   | NM_020920    | NP_065971    | Q9HCK8 | CHD8_HUMAN  |                                | 10 | .CCATCAACTTG  | 0.408 |             |
| + | 1  | 415  | LHL28_uc001wvr.    | NM_015091    | NP_055906    | Q9Y4F4 | F179B_HUMAN |                                | 3  | .GGCCTCGGCC   | 0.587 |             |
| - | 2  | 469  | dd.2_Missense_M    | NM_001001872 | NP_001001872 | Q86TY3 | CN037_HUMAN | ellular (Potential).           | 0  | .TGAGGGGACAC  | 0.488 |             |
| + | 16 | 3033 | p.V1043I PLEKHK    | NM_015549    | NP_056364    | A1L390 | PKHG3_HUMAN |                                | 1  | .AGCGCGTCAAG  | 0.632 |             |
| + | 11 | 1219 | p.D376N GALNTL     | NM_020692    | NP_065743    | Q8N428 | GLTL1_HUMAN | renal (Potential).             | 2  | .GGATGGATGAA  | 0.547 |             |
| + | 2  | 1698 |                    | NM_018228    | NP_060698    | Q9H8Y1 | VRTN_HUMAN  |                                | 0  | .GGATGCCCTGT  | 0.672 |             |
| + | 2  | 2208 |                    | NM_018228    | NP_060698    | Q9H8Y1 | VRTN_HUMAN  |                                | 0  | .ACAAGGAGTTC  | 0.567 |             |
| + | 10 | 1037 | e_Mutation_p.D27   | NM_015072    | NP_055887    | Q6EMB2 | TTL5_HUMAN  | TTL.                           | 3  | .GTGGAGATTAC  | 0.468 |             |
| - | 23 | 4085 |                    | NM_001080414 | NP_001073883 | Q9P219 | DAPLE_HUMAN | Potential.                     | 3  | .AGTCCCCCTTG  | 0.388 |             |
| + | 9  | 882  | e.2_Missense_Mu    | NM_152328    | NP_689541    | Q8N142 | PURA1_HUMAN |                                | 2  | .CCTTTGTGACT  | 0.587 |             |
| + | 1  | 562  |                    | NM_001080841 | NP_001074310 |        |             |                                | 0  | CAGCCGACAAG   | 0.453 |             |
| + | 6  | 550  |                    | NM_004212    | NP_004203    | O43868 | S28A2_HUMAN | ical; (Potential).             | 4  | .ACTGTGGTTGG  | 0.478 |             |

|   |    |      |                    |              |              |        |              |                           |    |                |       |
|---|----|------|--------------------|--------------|--------------|--------|--------------|---------------------------|----|----------------|-------|
| + | 16 | 4768 | acl.2_Missense_M   | NM_001080534 | NP_001074003 | Q8NB66 | UN13C_HUMAN  |                           | 7  | AATTTGGATTTTT  | 0.393 |
| - | 6  | 1258 | p.V238G NPTN_u     | NM_012428    | NP_036560    | Q9Y639 | NPTN_HUMAN   | ical; (Potential).        | 0  | ATCACCACAAGG,  | 0.522 |
| - | 26 | 3409 | bx.2_Missense_M    | NM_020843    | NP_065894    | Q9BY12 | SCAPE_HUMAN  |                           | 3  | AGCAGGCACAC    | 0.488 |
| + | 2  | 243  | 0bmt.1_Missense_   | NM_207517    | NP_997400    | P82987 | ATL3_HUMAN   |                           | 27 | .CGAGCCCCTGG   | 0.562 |
| + | 4  | 1439 | 592_uc010upb.1_    | NM_014630    | NP_055445    | Q92610 | ZN592_HUMAN  |                           | 6  | :CAGCTCCCCAC   | 0.517 |
| + | 13 | 1289 | _C28A1_uc010upf    | NM_004213    | NP_004204    | O00337 | S28A1_HUMAN  | ical; (Potential).        | 3  | :AGATCGATGCC,  | 0.577 |
| + | 6  | 1389 | AN_uc010upp.1_     | NM_013227    | NP_037359    | E7EX88 | E7EX88_HUMAN |                           | 3  | TACCCCGACCCC   | 0.642 |
| + | 39 | 5911 |                    | NM_001271    | NP_001262    | O14647 | CHD2_HUMAN   |                           | 2  | TACCCCCATTGC,  | 0.542 |
| + | 5  | 787  | ve.2_Missense_M    | NM_005587    | NP_005578    | Q02078 | MEF2A_HUMAN  | Ser/Thr-rich.             | 1  | :AATGTCTGTAC   | 0.433 |
| + | 6  | 765  | :010bqt.1_Translat | NM_006849    | NP_006840    | Q13087 | PDIA2_HUMAN  |                           | 2  | :AGTCCGTGTCT   | 0.557 |
| - | 3  | 627  | 002cgv.3_Translati | NM_021259    | NP_067082    | Q9HCN3 | TMM8A_HUMAN  | ellular (Potential).      | 3  | :AACTCGATCTTC  | 0.657 |
| - | 7  | 693  | :uc002coe.1_Spli   | NM_178167    | NP_835461    | Q86UK7 | ZN598_HUMAN  |                           | 2  | AGTCGCTGGCA    | 0.657 |
| - | 3  | 288  | _p.G43D PRSS33_    | NM_152891    | NP_690851    | Q8NF86 | PRS33_HUMAN  | eptidase S1.              | 0  | CCCGGCCATCC    | 0.711 |
| - | 13 | 3943 | uyn.1_Missense_M   | NM_001134407 | NP_001127879 | Q12879 | NMDE1_HUMAN  | lasmic (Potential).       | 45 | 'GGGGTGGATCT   | 0.532 |
| - | 7  | 1032 |                    | NM_174924    | NP_777584    | Q8N807 | PDILT_HUMAN  |                           | 1  | AACTCGGAAATC,  | 0.458 |
| - | 15 | 2410 | ia.1_Missense_Mu   | NM_020718    | NP_065769    | Q70CQ4 | UBP31_HUMAN  | Ser-rich.                 | 10 | AGCTGCAGAGG    | 0.582 |
| + | 2  | 411  | _S2_uc002dlt.3_5F  | NM_019116    | NP_061989    | O14562 | UBFD1_HUMAN  |                           | 0  | .GGCCTCGGTCA   | 0.622 |
| - | 3  | 726  |                    | NM_001080417 | NP_001073886 | Q9UEG4 | ZN629_HUMAN  |                           | 0  | 'CTCCCGTGTGG   | 0.682 |
| + | 23 | 2826 | ap.1_Missense_Mt   | NM_005353    | NP_005344    | Q13349 | ITAD_HUMAN   | ellular (Potential).      | 1  | 'GATCAGCAGGT   | 0.552 |
| - | 16 | 1694 | ie.1_Nonsense_Mt   | NM_013263    | NP_037395    | Q9NP11 | BRD7_HUMAN   | Potential.                | 0  | TCTTCTGGAATA   | 0.453 |
| + | 3  | 405  |                    | NM_033119    | NP_149110    | Q969G9 | NKD1_HUMAN   |                           | 0  | TAGGCCGAAGC,   | 0.662 |
| - | 3  | 491  | _p.P102L TOX3_uc   | NM_001080430 | NP_001073899 | O15405 | TOX3_HUMAN   |                           | 0  | GAGGGGGAAC'    | 0.532 |
| + | 5  | 1636 | ense_Mutation_p.1  | NM_024731    | NP_079007    | Q8N4N3 | KLH36_HUMAN  | Kelch 5.                  | 2  | CCATCGGGGGC,   | 0.677 |
| - | 9  | 1179 | cjf.2_Intron PRDM  | NM_001098173 | NP_001091643 | Q9NQW5 | PRDM7_HUMAN  |                           | 1  | 'CCCCATACCAG   | 0.522 |
| - | 9  | 1090 | cjf.2_Intron PRDM  | NM_001098173 | NP_001091643 | Q9NQW5 | PRDM7_HUMAN  | SET.                      | 1  | CCCCAGACCAG,   | 0.532 |
| - | 2  | 546  | 'qa.1_Missense_M   | NM_015721    | NP_056536    | P57678 | GEMI4_HUMAN  |                           | 4  | :AAAGCGCTCTA   | 0.562 |
| - | 22 | 2766 | :_Missense_Mutat   | NM_001100112 | NP_001093582 | Q9UKX2 | MYH2_HUMAN   | Potential.                | 14 | TTTCTCCAGTTC   | 0.433 |
| - | 22 | 2755 | :_Missense_Mutat   | NM_001100112 | NP_001093582 | Q9UKX2 | MYH2_HUMAN   | Potential.                | 14 | TCCTTCTTTTTG   | 0.428 |
| + | 11 | 2459 | ie_Mutation_p.E26  | NM_014695    | NP_055510    | A2RUR9 | C144A_HUMAN  | Potential.                | 0  | :AAAAGGAACTA   | 0.333 |
| + | 12 | 1441 |                    | NM_004140    | NP_004131    | Q15334 | L2GL1_HUMAN  | WD 8.                     | 6  | :TTCTGGGATGC   | 0.622 |
| + | 4  | 794  | _p.A170V SMCR7_    | NM_139162    | NP_631901    | Q96C03 | SMCR7_HUMAN  |                           | 0  | :ATGTGCGTCTC   | 0.706 |
| - | 3  | 1312 | 494_uc010waq.1_    | NM_006461    | NP_006452    | Q96R06 | SPAG5_HUMAN  |                           | 1  | TGGTGCCAACC,   | 0.502 |
| - | 18 | 3581 | p.P991L SRCIN1_    | NM_025248    | NP_079524    | Q9C0H9 | SRCN1_HUMAN  |                           | 0  | TGTCGGGGCTG    | 0.672 |
| + | 4  | 505  | ense_Mutation_p.1  | NM_133264    | NP_573571    | Q8TF74 | WIPF2_HUMAN  |                           | 3  | :TCTTCCAAGCA   | 0.517 |
| - | 2  | 1903 |                    | NM_018143    | NP_060613    | Q9NVR0 | KLH11_HUMAN  | Kelch 5.                  | 0  | AATATCGGTAGG   | 0.458 |
| + | 4  | 777  | vha.1_Missense_M   | NM_173478    | NP_775749    | Q8N815 | CNTD1_HUMAN  |                           | 1  | :CACTCCCTGG    | 0.443 |
| - | 23 | 2701 | ilw.1_Missense_M   | NM_145798    | NP_665741    | Q9BZF2 | OSBL7_HUMAN  |                           | 0  | TCCCATAGCCTC   | 0.652 |
| + | 5  | 1137 | p.A230T KCNH6_u    | NM_030779    | NP_110406    | Q9H252 | KCNH6_HUMAN  | =Segment S3; (Potential). | 1  | :TGGCCGCCATC   | 0.622 |
| - | 35 | 4574 |                    | NM_080284    | NP_525023    | Q8N139 | ABCA6_HUMAN  | C transporter 2.          | 7  | 'CAGGAGGACAC   | 0.483 |
| + | 13 | 1862 | IAI2_uc010dfp.2_F  | NM_023036    | NP_075462    | Q9GZS0 | DNAI2_HUMAN  |                           | 3  | gaggaggagaggaa | 0.373 |
| - | 3  | 795  |                    | NM_006678    | NP_006669    | Q08708 | CLM6_HUMAN   | xtracellular (Potential). | 0  | :CCATGGAGCTC'  | 0.617 |
| + | 4  | 1373 |                    | NM_020914    | NP_065965    | Q9HCF4 | ALO17_HUMAN  |                           | 21 | ATGACGACCAC,   | 0.532 |
| - | 22 | 3185 | rzj.1_Missense_Mt  | NM_005559    | NP_005550    | P25391 | LAMA1_HUMAN  | inin EGF-like 11.         | 21 | AGTGCCCATCCT   | 0.557 |
| + | 4  | 675  | _p.E197K LAMA3_    | NM_198129    | NP_937762    | Q16787 | LAMA3_HUMAN  | inin N-terminal.          | 11 | TAAAAGAATTTG   | 0.323 |
| + | 10 | 1446 |                    | NM_194449    | NP_919431    | O60346 | PHLP1_HUMAN  | LRR 12.                   | 0  | :TGCCCGGTGAC   | 0.368 |
| + | 12 | 2378 | b.2_Missense_Mu    | NM_033646    | NP_387450    | Q9ULB5 | CADH7_HUMAN  | lasmic (Potential).       | 4  | :GGAGGGATGTG   | 0.478 |
| - | 9  | 1672 | _p.G462E NETO1_    | NM_138966    | NP_620416    | Q8TDF5 | NETO1_HUMAN  | lasmic (Potential).       | 4  | :GTTTTCTGGC    | 0.488 |

|   |    |           |                    |              |              |        |             |                               |    |                 |       |             |
|---|----|-----------|--------------------|--------------|--------------|--------|-------------|-------------------------------|----|-----------------|-------|-------------|
| + | 5  | 408       | 5C5_uc002mhj.1_1   | NM_174918    | NP_777578    | Q8IX19 | MCEM1_HUMAN | cellular (Potential)          | 1  | AAACTCCGTAC     | 0.547 | rs139191722 |
| + | 2  | 265       | N16_uc002mq.1      | NM_012466    | NP_036598    | Q9UKR8 | TSN16_HUMAN | ical; (Potential).            | 1  | AATGTGGAGGG     | 0.498 |             |
| - | 4  | 1355      |                    | NM_145276    | NP_660319    | Q8TA94 | ZN563_HUMAN | 2H2-type 9.                   | 0  | ATAACGTTTTCCC   | 0.413 |             |
| - | 17 | 2589      |                    | NM_002918    | NP_002909    | P22670 | RFX1_HUMAN  | ary for dimerization.         | 2  | 3CATCTGGTTGA    | 0.617 |             |
| - | 37 | 4969      | PAMD8_uc002nfd     | NM_015692    | NP_056507    | Q8IZJ3 | CPMD8_HUMAN |                               | 13 | TTCATCCCCATG    | 0.572 |             |
| + | 4  | 1529      |                    | NM_031218    | NP_112495    | P35789 | ZNF93_HUMAN | 2H2-type 12.                  | 1  | ATAAGAAAATTC    | 0.368 |             |
| - | 7  | 1345      | _p.D79N LGI4_uc    | NM_139284    | NP_644813    | Q8N135 | LGI4_HUMAN  | EAR 1.                        | 1  | GTAGTCCCAGG     | 0.677 |             |
| + | 2  | 129       | yb.1_RNA FXVD1     | NM_021902    | NP_068702    | O00168 | PLM_HUMAN   |                               | 0  | CCAAGGCAGGT     | 0.617 |             |
| - | 3  | 759       | 02ovk.1_Missense   | NM_002785    | NP_002776    | Q9UQ72 | PSG11_HUMAN | like C2-type 1.               | 0  | ATATTTACATTC    | 0.507 |             |
| + | 2  | 540       | jk.1_Missense_Mt   | NM_018485    | NP_060955    | Q9P296 | C5ARL_HUMAN | cellular (Potential).         | 1  | GCTGTCGGGCG     | 0.652 |             |
| + | 4  | 3383      |                    | NM_020719    | NP_065770    | Q9ULL5 | PRR12_HUMAN | Pro-rich.                     | 2  | CAGCTGCCGCT     | 0.701 |             |
| + | 6  | 4435      |                    | NM_020719    | NP_065770    | Q9ULL5 | PRR12_HUMAN | Pro-rich.                     | 2  | gccgccacagccagc | 0.204 |             |
| - | 8  | 1124      |                    | NM_016148    | NP_057232    | Q9Y566 | SHAN1_HUMAN | ANK 5.                        | 2  | ACCTCGATACAC    | 0.542 |             |
| - | 4  | 1509      | 616_uc002pyn.2_1   | NM_178523    | NP_848618    | Q08AN1 | ZN616_HUMAN | 2H2-type 9.                   | 0  | ATTGCAAGGT      | 0.393 |             |
| + | 4  | 1894      | po.1_intron ZNF5   | NM_001143939 | NP_001137411 | Q76KX8 | ZN534_HUMAN | 2H2-type 15.                  | 0  | TAGGAAAATTCAT   | 0.423 |             |
| - | 5  | 1271      | k.1_intron ZNF81   | NM_001031665 | NP_001026835 | Q0VGE8 | ZN816_HUMAN | 2H2-type 4.                   | 0  | CTTCTCACTGA     | 0.443 | rs141188407 |
| + | 1  | 820       |                    | NM_173856    | NP_776255    | Q8NFX6 | VN1R2_HUMAN | cellular (Potential).         | 0  | GAGATTTGGGA     | 0.428 |             |
| - | 3  | 2049      | 2qcj.3_Missense_M  | NM_144687    | NP_653288    | P59046 | NAL12_HUMAN |                               | 7  | CCAAGGAGCCC     | 0.567 |             |
| - | 6  | 1228      | ILRA3_uc010erk.2   | NM_006865    | NP_006856    | Q8N6C8 | LIRA3_HUMAN | like C2-type 4.               | 1  | CCGAGGTCACA     | 0.587 |             |
| + | 12 | 1838      | 3_Mutation_p.D50   | NM_006669    | NP_006660    | Q8NHL6 | LIRB1_HUMAN | lasmic (Potential).           | 3  | AGGCTGATTTCT    | 0.607 |             |
| + | 9  | 2527      | p.T790M NLRP2_1    | NM_017852    | NP_060322    | Q9NX02 | NALP2_HUMAN | LRR 1.                        | 2  | CCTGACGTGCG     | 0.517 |             |
| - | 8  | 318       | _p.E77K TNNT1_u    | NM_003283    | NP_003274    | P13805 | TNNT1_HUMAN |                               | 1  | CAGCTCCAGCA     | 0.607 |             |
| - | 8  | 1673      | _p.E356K PTPRH_    | NM_002842    | NP_002833    | Q9HD43 | PTPRH_HUMAN | tential) Fibronectin type-III | 4  | CAGTTCTTTTAC    | 0.577 |             |
| - | 23 | 2880_2881 | 02aju.2_5'Flank S/ | NM_014931    | NP_055746    | Q9UPN7 | PP6R1_HUMAN |                               | 0  | CTGGGAGCCTC     | 0.653 |             |
| - | 2  | 164       | tation_p.S33F uc0  | NM_144690    | NP_653291    | Q96NG8 | ZN582_HUMAN |                               | 4  | CAAGGACATG      | 0.448 |             |
| + | 4  | 633       | _p.E166K ZNF324    | NM_207395    | NP_997278    | Q6AW86 | Z324B_HUMAN |                               | 1  | CCAGGAAAAAG     | 0.662 |             |
| + | 14 | 1633      | 512_uc010ylx.1_1   | NM_032434    | NP_115810    | Q96ME7 | ZN512_HUMAN |                               | 1  | TTCCCGAGACA     | 0.542 |             |
| - | 11 | 1264      | np.1_Missense_M    | NM_144575    | NP_653176    | Q6MZZ7 | CAN13_HUMAN |                               | 2  | GTCTCTCTGCA     | 0.473 |             |
| + | 2  | 568       | M1B_uc002rtv.2_In  | NM_002706    | NP_002697    | O75688 | PPM1B_HUMAN |                               | 2  | TATTCCTCACG     | 0.453 |             |
| - | 1  | 152       | P2_uc002rxq.3_Ir   | NM_001003937 | NP_001003937 | Q8N831 | TSYL6_HUMAN |                               | 0  | AGTAGCGGGGC     | 0.597 |             |
| - | 19 | 3297      | 2_Missense_Mut     | NM_002285    | NP_002276    | P51826 | AFF3_HUMAN  |                               | 6  | GGGCCTTGTT      | 0.443 |             |
| - | 8  | 1432      | _p.S449F TBC1D8    | NM_001102426 | NP_001095896 | O95759 | TBCD8_HUMAN |                               | 3  | TTTGAGAAGAC     | 0.532 |             |
| - | 6  | 1196      | 149_uc002tax.1_I   | NM_173647    | NP_775918    | Q8NC42 | RN149_HUMAN |                               | 2  | ATTCAGCAGGG     | 0.473 |             |
| + | 11 | 1550      | wd.1_Missense_M    | NM_003855    | NP_003846    | Q13478 | IL18R_HUMAN | oplasmic (Potential).         | 3  | TGAAAGAAAAA     | 0.353 |             |
| + | 7  | 1174      | tdx.2_Missense_M   | NM_001056    | NP_001047    | O00338 | ST1C2_HUMAN |                               | 1  | CAAATCGTTCT     | 0.403 | rs112864909 |
| + | 5  | 480       | _uc002tks.3_Miss   | NM_007082    | NP_009013    | Q9UBK7 | RBL2A_HUMAN |                               | 1  | TCCTCTACT       | 0.582 |             |
| + | 16 | 1427      | ryf.1_Missense_M   | NM_006770    | NP_006761    | Q9UEW3 | MARCO_HUMAN | tracellular (Potential).      | 6  | TAACCGAGGCC     | 0.532 |             |
| - | 6  | 691       | flr.2_Missense_M   | NM_014553    | NP_055368    | Q9NZ16 | TF2L1_HUMAN |                               | 3  | CATTCTCGTTCT    | 0.587 |             |
| - | 3  | 707       |                    | NM_001099771 | NP_001093241 | A5A3E0 | POTEF_HUMAN |                               | 5  | GTGGCAGCACC     | 0.617 |             |
| - | 3  | 687       |                    | NM_001099771 | NP_001093241 | A5A3E0 | POTEF_HUMAN |                               | 5  | ATCTTGTTCTCT    | 0.607 |             |
| - | 3  | 596       |                    | NM_001099771 | NP_001093241 | A5A3E0 | POTEF_HUMAN |                               | 5  | GTGGGGCACC      | 0.602 |             |
| + | 17 | 2162      | up.2_Missense_M    | NM_015361    | NP_056176    | Q15032 | R3HD1_HUMAN | Poly-Pro.                     | 1  | accgccaccaccacc | 0.398 |             |
| + | 2  | 599       | hSD7B_uc002tvb.2   | NM_001080427 | NP_001073896 |        |             |                               | 7  | CCATTTCTGTCT    | 0.458 |             |
| - | 6  | 1090      | _p.P175S ZEB2_u    | NM_014795    | NP_055610    | O60315 | ZEB2_HUMAN  |                               | 9  | ATCTGGAGTTCT    | 0.557 |             |
| - | 21 | 2136      | r.1_Missense_Mut   | NM_004543    | NP_004534    | P20929 | NEBU_HUMAN  |                               | 20 | CACAGTAATTCAT   | 0.358 |             |
| - | 17 | 3502      | 3.E1042K SCN1A_    | NM_006920    | NP_008851    | P35498 | SCN1A_HUMAN |                               | 13 | AGTTTCTTCAG     | 0.428 |             |
| + | 7  | 576       | _p.T119K PPIG_uc   | NM_004792    | NP_004783    | Q13427 | PPIG_HUMAN  | e cyclophilin-type.           | 3  | AGGATACAAATG    | 0.269 |             |

|   |     |           |                                                               |              |              |        |             |                             |    |                |       |
|---|-----|-----------|---------------------------------------------------------------|--------------|--------------|--------|-------------|-----------------------------|----|----------------|-------|
| + | 9   | 836       | 3A1_uc010frw.1_5'                                             | NM_000090    | NP_000081    | P02461 | CO3A1_HUMAN | le-helical region.          | 13 | ACCTGGAGAGC    | 0.383 |
| + | 18  | 2063      | .1_Missense_Mute                                              | NM_001080539 | NP_001074008 | Q8NCX0 | CC150_HUMAN | Potential.                  | 0  | TAATGCGGCC'    | 0.428 |
| + | 1   | 159       | uc002uup.2_Intror                                             | NM_138395    | NP_612404    | Q96GW9 | SYMM_HUMAN  |                             | 3  | CGCATGATGCTT'  | 0.627 |
| + | 2   | 322       | ce CDK15_uc010f                                               | NM_139158    | NP_631897    | Q96Q40 | CDK15_HUMAN |                             | 5  | AGTGGGTGAGT'   | 0.512 |
| + | 4   | 656       | p.R144H CXCR2_                                                | NM_001557    | NP_001548    | P25025 | CXCR2_HUMAN | lasmic (Potential).         | 2  | 'GGACCGTTACC'  | 0.532 |
| - | 10  | 891       | w.2_Missense_Mt                                               | NM_022453    | NP_071898    | Q96BH1 | RNF25_HUMAN |                             | 2  | 3CAGGAGGCTAC   | 0.557 |
| - | 3   | 329       | zlm.1_Missense_Iv                                             | NM_004438    | NP_004429    | P54764 | EPHA4_HUMAN | ellular (Potential).        | 12 | ACACCCCTCTGAC  | 0.463 |
| - | 22  | 2212      |                                                               | NM_000092    | NP_000083    | P53420 | CO4A4_HUMAN | le-helical region.          | 11 | GCCAGGGAGGCC   | 0.587 |
| + | 3   | 564       | rpe.2_Missense_M                                              | NM_004504    | NP_004495    | P52594 | AGFG1_HUMAN | Arf-GAP.                    | 4  | AAATCCAGACTT   | 0.328 |
| + | 16  | 2065      | rmp.1_Missense_I                                              | NM_001017915 | NP_001017915 | Q92835 | SHIP1_HUMAN |                             | 2  | AAAGAAATCACG   | 0.473 |
| + | 4   | 1265      | p.R291K SH3BP4                                                | NM_014521    | NP_055336    | Q9P0V3 | SH3B4_HUMAN |                             | 4  | CCACAGGAAGC'   | 0.577 |
| - | 21  | 3034      | p.E936K HDLBP_                                                | NM_203346    | NP_976221    | Q00341 | VIGLN_HUMAN | KH 11.                      | 4  | 'AGCCTCTCTCC'  | 0.542 |
| - | 16  | 2050      | p.R608C HDLBP_                                                | NM_203346    | NP_976221    | Q00341 | VIGLN_HUMAN | KH 7.                       | 4  | 'TTCACGAATCTA  | 0.502 |
| - | 5   | 817       | wrt.1_Missense_M                                              | NM_016652    | NP_057736    | Q9BZJ0 | CRNL1_HUMAN | HAT 2.                      | 3  | 'TGGATCGAGCC'  | 0.388 |
| + | 3   | 187       | 'RG1B_uc010gdr.1_RNA FRG1B_uc010ztk.1_Missense_Mutation_p.L4S |              |              |        |             |                             | 0  | 'TTTGTGGCCT'   | 0.353 |
| + | 3   | 189       | 'RG1B_uc010gdr.1_RNA FRG1B_uc010ztk.1_Missense_Mutation_p.A5T |              |              |        |             |                             | 0  | 'TTGTTGGCCTCA  | 0.353 |
| + | 9   | 1763      | 'T2_uc002wzf.1_R                                              | NM_005093    | NP_005084    | O43439 | MTG8R_HUMAN |                             | 2  | .GCACAGCCCTG   | 0.498 |
| - | 4   | 1844      | 1_5'Flank EIF6_uc                                             | NM_178468    | NP_848563    | Q9BQN1 | FA83C_HUMAN |                             | 2  | 3ATCACCAGGTC'  | 0.642 |
| + | 12  | 2112_2113 | im.2_Missense_Mt                                              | NM_181659    | NP_858045    | Q9Y6Q9 | NCOA3_HUMAN | Ser-rich.                   | 5  | 'TTCCTCCTTGAC  | 0.47  |
| - | 3   | 1304      |                                                               | NM_021035    | NP_066363    | Q9P2E3 | ZNFX1_HUMAN |                             | 2  | GCGAAGGAAGG    | 0.502 |
| + | 15  | 1841      | _p.T244M SLC9A8                                               | NM_015266    | NP_056081    | Q9Y2E8 | SL9A8_HUMAN |                             | 1  | 'GCTGACGCAGG   | 0.642 |
| - | 15  | 1164      | 'TE_uc002yir.1_Mi                                             | NM_199261    | NP_954870    | P56180 | TPTE_HUMAN  | hatase tensin-type.         | 5  | CAACTTCTCTAAA' | 0.333 |
| - | 3   | 422       | GE_uc002yiw.1_R                                               | NM_182482    | NP_872288    |        |             |                             | 0  | GAAAGGTGTCTG'  | 0.423 |
| - | 4   | 362       | SAMSN1_uc002yj\                                               | NM_022136    | NP_071419    | Q9NSI8 | SAMN1_HUMAN |                             | 4  | 'TTCATCCTTCAG' | 0.413 |
| - | 1   | 271       |                                                               | NM_001085455 | NP_001078924 | Q3LI83 | KR241_HUMAN |                             | 0  | 'TGGTACTGCAG   | 0.483 |
| - | 1   | 349       |                                                               | NM_181621    | NP_853652    | Q52LG2 | KR132_HUMAN |                             | 0  | .GGGAGCGGCAC   | 0.607 |
| + | 8   | 1178      | c.2_RNA UBASH3.                                               | NM_018961    | NP_061834    | P57075 | UBS3A_HUMAN |                             | 3  | 'GGCAAGGAGTC   | 0.448 |
| - | 1   | 825       | .1_Intron C21orf29                                            | NM_198688    | NP_941961    | P60371 | KR106_HUMAN | \ repeats of C-C-X(3).      | 0  | CAGGCGTGCTG'   | 0.642 |
| - | 1   | 551       | zlh.1_5'UTR POTE                                              | NM_001136213 | NP_001129685 | Q6S545 | POTEH_HUMAN |                             | 1  | 'CGGCTCCATGA'  | 0.587 |
| - | 1   | 396       | 'EH_uc002zlh.1_5                                              | NM_001136213 | NP_001129685 | Q6S545 | POTEH_HUMAN |                             | 1  | 'CGTGTCTCTTG'  | 0.592 |
| + | 14  | 1899      | iv.1_Missense_Mu                                              | NM_013430    | NP_038347    | P19440 | GGT1_HUMAN  | ellular (Potential).        | 0  | GGGAGCTGCTG'   | 0.652 |
| + | 2   | 594       |                                                               | NM_001013618 | NP_001013640 |        |             |                             | 0  | 'TGGTACCCCCA'  | 0.582 |
| + | 12  | 2704      | sense_Mutation_p                                              | NM_001017437 | NP_001017437 | Q569K6 | CC157_HUMAN |                             | 1  | CCCCACCTCGG'   | 0.682 |
| - | 24  | 3765      |                                                               | NM_014941    | NP_055756    | Q9Y6X9 | MORC2_HUMAN |                             | 2  | 'TGTATCAAGGC'  | 0.597 |
| + | 8   | 1078      | _p.R271H PPARA_                                               | NM_005036    | NP_005027    | Q07869 | PPARA_HUMAN |                             | 2  | AGGTCCGCATCT   | 0.557 |
| - | 1   | 2135      |                                                               | NM_014246    | NP_055061    | Q9NYQ6 | CELR1_HUMAN | r (Potential). Cadherin 5.  | 11 | GGTCGCGGGCC    | 0.637 |
| - | 3   | 1039      | 3AP3_uc003bri.1_                                              | NM_014850    | NP_055665    | O43295 | SRGP2_HUMAN |                             | 9  | ATTGTTTCATGAAC | 0.542 |
| + | 1   | 846       | 'k.1_Missense_Mu                                              | NM_152536    | NP_689749    | Q6ZNL6 | FGD5_HUMAN  | Glu-rich.                   | 5  | 'AGGATGCTGAG   | 0.632 |
| + | 2   | 833       | cdq.2_Missense_I                                              | NM_052953    | NP_443185    | Q96PB8 | LRC3B_HUMAN | LRR 1.                      | 4  | 'CCAATGAAATTT  | 0.408 |
| + | 5   | 878       | chb.2_Missense_I                                              | NM_178339    | NP_848029    | Q8IVJ8 | APRG1_HUMAN |                             | 1  | 'TGGACCTTTGG'  | 0.448 |
| - | 21  | 3695      |                                                               | NM_014139    | NP_054858    | Q9UI33 | SCNBA_HUMAN | III.                        | 9  | 'CACCACCTTATC  | 0.448 |
| + | 1   | 992       |                                                               | NM_152393    | NP_689606    | Q2TBA0 | KBTB5_HUMAN |                             | 1  | 'AGGAGGCCGAA   | 0.567 |
| + | 3   | 618       | Ohiv.1_Missense_                                              | NM_031200    | NP_112477    | P51686 | CCR9_HUMAN  | lasmic (Potential).         | 3  | 'GAGAGCACATA'  | 0.473 |
| - | 116 | 8537      | v2_uc003cty.1_5'F                                             | NM_000094    | NP_000085    | Q02388 | CO7A1_HUMAN | lical region (NC2).         | 11 | AGGGGGTACCC    | 0.597 |
| - | 2   | 367       |                                                               | NM_003335    | NP_003326    | P41226 | UBA7_HUMAN  | ximate repeats. 1-1.        | 2  | .GGTGGGTGGG    | 0.657 |
| - | 28  | 4388      | 3dmh.1_Splice_Si                                              | NM_182920    | NP_891550    | Q9P2N4 | ATS9_HUMAN  |                             | 4  | 'CCGTACCGAGC   | 0.468 |
| + | 15  | 2743      | 4A3_uc010hon.1_f                                              | NM_005233    | NP_005224    | P29320 | EPHA3_HUMAN | Potential). Protein kinase. | 33 | 'ATGAGGGCTATC  | 0.498 |

rs4913558

|   |    |           |                    |              |              |        |              |                                |      |               |       |             |
|---|----|-----------|--------------------|--------------|--------------|--------|--------------|--------------------------------|------|---------------|-------|-------------|
| - | 26 | 2202      | ul.2_Missense_Mu   | NM_015429    | NP_056244    | Q7Z7G0 | TARSH_HUMAN  | Pro-rich.                      | 4    | GTGGGCGGCGA   | 0.403 |             |
| + | 12 | 1925      | _p.S462F ALCAM     | NM_001627    | NP_001618    | Q13740 | CD166_HUMAN  | potential). Ig-like C2-type 3. | 3    | AGGAATCTCCTT  | 0.343 |             |
| + | 1  | 384       |                    | NM_032600    | NP_115989    | Q8NEL0 | CCD54_HUMAN  |                                | 0    | ATATCCCCTG    | 0.388 |             |
| - | 4  | 645       | A1C_uc003dxc.2_    | NM_005459    | NP_005450    | O95843 | GUC1C_HUMAN  |                                | 0    | GGAGTCTGTCT   | 0.458 | rs146701862 |
| - | 7  | 942       |                    | NM_138815    | NP_620170    | Q7Z7J5 | DPPA2_HUMAN  |                                | 3    | CTGCCGAGAGA   | 0.512 | rs151045476 |
| + | 2  | 318       | xx.2_Missense_M    | NM_198196    | NP_937839    | P40200 | TACT_HUMAN   | Potential). Ig-like V-type 1.  | 3    | AGACAGTAGGC   | 0.443 |             |
| - | 7  | 1734      | leal.2_Missense_N  | NM_001009899 | NP_001009899 | Q68DE3 | K2018_HUMAN  |                                | 3    | AATAGTGTTCCT  | 0.438 |             |
| + | 10 | 1217      | bik.1_Missense_N   | NM_001690    | NP_001681    | P38606 | VATA_HUMAN   |                                | 3    | TGGCCTCGTTT   | 0.443 |             |
| + | 4  | 1022      |                    | NM_000539    | NP_000530    | P08100 | OPSD_HUMAN   | Name=7; (Potential).           | 0    | ATGATGAACAAG  | 0.612 |             |
| + | 2  | 504       |                    | NM_001102608 | NP_001096078 | A6NMZ7 | CO6A6_HUMAN  | cal region. VWFA 1.            | 8    | AGACGGAGTGA   | 0.498 |             |
| + | 3  | 1216      |                    | NM_139209    | NP_631948    | Q8WTQ7 | GRK7_HUMAN   | rotein kinase.                 | 5    | CCATGGGATGC   | 0.428 |             |
| + | 4  | 1438      |                    | NM_139209    | NP_631948    | Q8WTQ7 | GRK7_HUMAN   | rotein kinase.                 | 5    | AAACATCATTC   | 0.423 |             |
| - | 4  | 573       | _p.R82W PLSCR4     | NM_001128305 | NP_001121777 | Q9NRQ2 | PLS4_HUMAN   | smic (By similarity).          | 0    | ATACCCGACAG   | 0.517 | rs149536276 |
| + | 10 | 1775      |                    | NM_006218    | NP_006209    | P42336 | PK3CA_HUMAN  | PI3K helical.                  | 3553 | GATCCTCTCTC   | 0.328 |             |
| + | 7  | 933       | _Mutation_p.R261   | NM_018358    | NP_060828    | Q9NUQ8 | ABCF3_HUMAN  | C transporter 1.               | 4    | CGAGGGAGC     | 0.602 |             |
| - | 2  | 370_371   | _Intron MASP1_u    | NM_001879    | NP_001870    | P48740 | MASP1_HUMAN  |                                | 4    | ACAGGGAGAAC   | 0.47  |             |
| - | 3  | 593       | _6_uc010hza.2_5'   | NM_001130845 | NP_001124317 | P41182 | BCL6_HUMAN   | BTB.                           | 5    | TTTTATGGGCTC  | 0.517 |             |
| + | 3  | 307       | D51N ZNF595_uc     | NM_182524    | NP_872330    | Q7Z3I0 | Q7Z3I0_HUMAN |                                | 0    | ACCCAGACCTG   | 0.403 |             |
| + | 2  | 548       | bwi.1_Missense_A   | NM_020777    | NP_065828    | Q96PQ0 | SORC2_HUMAN  | Luminal (Potential).           | 2    | GTGGCGGTAAG   | 0.522 |             |
| - | 5  | 1121      |                    | NM_001358    | NP_001349    | O43143 | DHX15_HUMAN  |                                | 1    | CAACAGGATGT   | 0.403 |             |
| + | 3  | 443       | _Site_p.G58_splice | NM_018317    | NP_060787    | Q8N5T2 | TBC19_HUMAN  |                                | 1    | AAACAGGTTGGC  | 0.254 |             |
| - | 4  | 1146      |                    | NM_001024611 | NP_001019782 | Q68CR7 | LRC66_HUMAN  | ical; (Potential).             | 3    | ACACCCCCAGA   | 0.567 |             |
| + | 3  | 506       |                    | NM_206919    | NP_996802    | Q6T311 | ARL9_HUMAN   |                                | 0    | TGTACCTATCCA  | 0.463 |             |
| + | 4  | 1139      | MUC7_uc003hjf.2    | NM_001145006 | NP_001138478 | Q8TAX7 | MUC7_HUMAN   | 6. Thr-rich.                   | 4    | TGCCCCACCCA   | 0.577 |             |
| + | 4  | 1629      | _Mutation_p.E412   | NM_004885    | NP_004876    | Q9Y5X5 | NPFF2_HUMAN  | lasmic (Potential).            | 3    | TGATGGAAGAA   | 0.343 |             |
| - | 2  | 893       |                    | NM_198281    | NP_938022    | Q6ZVF9 | GRIN3_HUMAN  |                                | 3    | TCAATGGTGTG   | 0.572 |             |
| - | 11 | 949       | _G244E EMCN_u      | NM_016242    | NP_057326    | Q9ULC0 | MUCEN_HUMAN  | lasmic (Potential).            | 0    | TTTTTCTTGTG   | 0.373 |             |
| + | 12 | 1785      | _p.P470Q HSPA4L    | NM_014278    | NP_055093    | O95757 | HS74L_HUMAN  |                                | 4    | TGCTCCAATGG   | 0.343 |             |
| - | 1  | 1919      | _1_Intron PCDH18   | NM_019035    | NP_061908    | Q9HCL0 | PCD18_HUMAN  | r (Potential). Cadherin 5.     | 5    | AACTTCCTAGA   | 0.418 |             |
| - | 7  | 3217      | _ML3_uc011chd.1    | NM_018717    | NP_061187    | Q96JK9 | MAML3_HUMAN  | Gln-rich.                      | 1    | TGAGCCGTGAC   | 0.587 |             |
| - | 13 | 2014      | ckv.1_Missense_I   | NM_021069    | NP_066547    | O94875 | SRBS2_HUMAN  |                                | 1    | GAGATCGTCAC   | 0.542 |             |
| - | 58 | 9763      | _H5_uc003jfc.2_5'  | NM_001369    | NP_001360    | Q8TE73 | DYH5_HUMAN   |                                | 31   | TAAGACCTAATC  | 0.413 |             |
| - | 27 | 4360      |                    | NM_001369    | NP_001360    | Q8TE73 | DYH5_HUMAN   | . Stem (By similarity).        | 31   | TTTTTCAATATT  | 0.313 |             |
| + | 2  | 680       | hm.2_Missense_M    | NM_178140    | NP_835260    | O15018 | PDZD2_HUMAN  | PDZ 1.                         | 9    | TATGGTGAAAAG  | 0.567 |             |
| - | 9  | 1634      | 0iuq.1_Missense_I  | NM_030955    | NP_112217    | P58397 | ATS12_HUMAN  | Disintegrin.                   | 9    | TACTTCTGGC    | 0.473 |             |
| + | 6  | 981       | jib.1_Missense_M   | NM_152403    | NP_689616    | Q63HQ2 | EGFLA_HUMAN  | nectin type-III 2.             | 7    | GCAATGAATTC   | 0.562 |             |
| + | 8  | 1478      |                    | NM_003999    | NP_003990    | Q99650 | OSMR_HUMAN   | III 1. Extracellular (Potentia | 5    | AACTCCATGGTC  | 0.343 |             |
| + | 5  | 1168      | L21_uc003lbc.2_Ir  | NM_012159    | NP_036291    | Q9UKT6 | FXL21_HUMAN  | LRR 7.                         | 1    | CCCTTCATCAGG  | 0.418 |             |
| + | 1  | 946       | 03lhi.2_Intron PCI | NM_018908    | NP_061731    | Q9Y5H7 | PCDA5_HUMAN  | r (Potential). Cadherin 3.     | 3    | TCATATGAAATT  | 0.323 |             |
| + | 1  | 1318      | 03lhi.2_Intron PCI | NM_018908    | NP_061731    | Q9Y5H7 | PCDA5_HUMAN  | r (Potential). Cadherin 4.     | 3    | CCAGCGTGTCT   | 0.672 | rs147205231 |
| + | 1  | 1755_1756 | :DHA7_uc003lhq.2   | NM_018904    | NP_061727    | Q9Y5I0 | PCDAD_HUMAN  | Extracellular (Potential).     | 6    | TCGGTGGGTGC   | 0.693 |             |
| + | 1  | 1197      |                    | NR_001280    |              |        |              |                                | 0    | AGAAAATTTCTAC | 0.458 |             |
| - | 3  | 754       | loh.3_Missense_N   | NM_004576    | NP_004567    | Q00005 | 2ABB_HUMAN   |                                | 2    | GGTTCATGGC    | 0.373 |             |
| + | 27 | 2630      | ow.2_Nonsense_M    | NM_006846    | NP_006837    | Q9NQ38 | ISK5_HUMAN   | cazal-like 13.                 | 4    | AAATTCGAAGC   | 0.388 |             |
| + | 15 | 2394      | e_Mutation_p.E75i  | NM_205836    | NP_995308    | Q6PIJ6 | FBX38_HUMAN  |                                | 6    | TGAGGAGACTC   | 0.597 |             |
| - | 5  | 4004      | 2A_uc011dcs.1_In   | NM_001447    | NP_001438    | Q9NYQ8 | FAT2_HUMAN   | (Potential). Cadherin 11.      | 6    | TAGCCGGACAC   | 0.572 |             |
| + | 8  | 1540      | : ODZ2_uc003lzc.3  | NM_001122679 | NP_001116151 |        |              |                                | 10   | TGACGGGAAG    | 0.537 |             |



|   |    |         |                                 |              |              |        |             |                            |       |               |       |
|---|----|---------|---------------------------------|--------------|--------------|--------|-------------|----------------------------|-------|---------------|-------|
| - | 7  | 1149    | dy.2_Missense_Mi                | NM_016356    | NP_057440    | Q9UHG0 | DCDC2_HUMAN |                            | 1     | AATTCACGCTTT  | 0.363 |
| - | 18 | 3061    | 1dq.1_Nonsense_                 | NM_014809    | NP_055624    | Q5VV43 | K0319_HUMAN | cellular (Potential).      | 2     | ACGCTGTATAAG  | 0.502 |
| + | 5  | 2314    | 5_uc003nki.3_Mis                | NM_003447    | NP_003438    | P49910 | ZN165_HUMAN | 2H2-type 4.                | 0     | ATTC AACCTGAA | 0.463 |
| + | 5  | 806     |                                 | NR_027822    |              |        |             |                            | 0     | CATCCCCATCG   | 0.602 |
| - | 9  | 850     | AT5_uc003nvz.1_I                | NM_021160    | NP_066983    | O95870 | ABHGA_HUMAN |                            | 0     | CTCAGCTGTCC   | 0.592 |
| - | 7  | 895     | e_Mutation_p.P52                | NM_001145776 | NP_001139248 | Q13451 | FKBP5_HUMAN | use FKBP-type 2.           | 1     | AATTTAGGCTTCC | 0.358 |
| + | 6  | 2250    | tj.1_RNA BRPF3_u                | NM_015695    | NP_056510    | Q9ULD4 | BRPF3_HUMAN | Bromo.                     | 2     | ATTTTCCACCGAC | 0.408 |
| - | 2  | 246     |                                 | NM_001010903 | NP_001010903 | P0C671 | CF222_HUMAN |                            | 4     | GGGCCTGCGGC   | 0.632 |
| + | 10 | 1117    | wh.1_Missense_M                 | NM_005588    | NP_005579    | Q16819 | MEP1A_HUMAN | lar (Potential). MAM.      | 3     | GACTCGTTGTC   | 0.488 |
| + | 5  | 1290    |                                 | NM_001010872 | NP_001010872 | Q5T0W9 | FA83B_HUMAN |                            | 6     | CTGGGGAACAG   | 0.403 |
| + | 13 | 2532    | k.2_Missense_Mu                 | NM_001704    | NP_001695    | O60242 | BAI3_HUMAN  | cellular (Potential).      | 50    | AGAATTCATACTT | 0.328 |
| - | 9  | 1058    | COL9A1_uc003pff                 | NM_001851    | NP_001842    | P20849 | CO9A1_HUMAN | ical region (COL3).        | 4     | CCGGGGGGGCC   | 0.572 |
| - | 17 | 2783    | .1_RNA GOPC_uc                  | NM_002944    | NP_002935    | P08922 | ROS_HUMAN   | cellular (Potential).      | 25    | CCGAAGAACAG   | 0.378 |
| + | 3  | 532_533 | BLD1_uc003pxr.1                 | NM_173674    | NP_775945    | Q8N8Z6 | DCBD1_HUMAN | racellular (Potential).    | 1     | TGGATCCCACAT  | 0.436 |
| - | 13 | 1866    | p.G514R SAMDM3_                 | NM_001017373 | NP_001017373 | Q8N6K7 | SAMD3_HUMAN |                            | 1     | GAAATCCTACTTC | 0.368 |
| + | 3  | 1830    | 0kfi.2_Missense_A               | NM_052913    | NP_443145    | Q86VY9 | T200A_HUMAN | lasmic (Potential).        | 1     | GTCAAGGAATT   | 0.433 |
| + | 3  | 2157    | 0kfi.2_Missense_A               | NM_052913    | NP_443145    | Q86VY9 | T200A_HUMAN | lasmic (Potential).        | 1     | CAAGGGGATATA  | 0.463 |
| - | 2  | 398     |                                 | NM_153235    | NP_694967    | Q8N3L3 | TXLNB_HUMAN |                            | 2     | GTTTTCCCTGCT  | 0.532 |
| - | 13 | 1781    |                                 | NM_015718    | NP_056533    | Q9HBY0 | NOX3_HUMAN  | lasmic (Potential).        | 1     | GAAATGAACACC  | 0.418 |
| - | 3  | 399     | TR TAGAP_uc003                  | NM_054114    | NP_473455    | Q8N103 | TAGAP_HUMAN |                            | 1     | CATTCGATTAC   | 0.308 |
| + | 11 | 1508    |                                 | NM_000876    | NP_000867    | P11717 | MPRI_HUMAN  | onal (Potential). 3.       | 3     | TTGACTGCACC   | 0.493 |
| - | 4  | 574     | J03qvc.1_Missens                | NM_021135    | NP_066958    | Q15349 | KS6A2_HUMAN | otein kinase 1.            | 8     | GAAGGGGTGAT   | 0.408 |
| - | 4  | 424     |                                 | NM_003247    | NP_003238    | P35442 | TSP2_HUMAN  | Heparin-binding (Potential | 5     | CAAAGCGCACG   | 0.592 |
| - | 20 | 2213    | .1_RNA DPY19L2P1_uc010kwz.1_RNA |              |              |        |             |                            | 0     | GTAAGTGGAT    | 0.408 |
| - | 2  | 1141    | bw.1_Missense_M                 | NM_013389    | NP_037521    | Q9UHC9 | NPCL1_HUMAN | Name=2; (Potential).       | 5     | CCACCGGGATG   | 0.627 |
| - | 22 | 3354    | w.2_Missense_Mu                 | NM_022748    | NP_073585    | Q68CZ2 | TENS3_HUMAN |                            | 4     | GGAAAGGAGCC   | 0.677 |
| + | 4  | 1558    |                                 | NM_001159522 | NP_001152994 | A8MUV8 | ZN727_HUMAN | 2H2-type 11.               | 0     | CAAAACCTTTAC  | 0.428 |
| + | 4  | 1570    |                                 | NM_001159522 | NP_001152994 | A8MUV8 | ZN727_HUMAN | 2H2-type 11.               | 0     | CTGCTCCTCAAC  | 0.418 |
| + | 2  | 1062    | se_Mutation_p.V2                | NM_003596    | NP_003587    | O60507 | TPST1_HUMAN | enal (Potential).          | 0     | GTTGGTTCACT   | 0.418 |
| + | 6  | 906     |                                 | NM_001099435 | NP_001092905 | A6NIY4 | SPDE5_HUMAN | Arg-rich.                  | 0     | GAACCCGAGGG   | 0.592 |
| + | 5  | 517     | Site POR_uc011kg                | NM_000941    | NP_000932    | P16435 | NCPR_HUMAN  | avodoxin-like.             | 1     | GGTGGGGGAGA   | 0.627 |
| - | 5  | 7232    | _Mutation_p.E231                | NM_033026    | NP_149015    | Q9Y6V0 | PCLO_HUMAN  |                            | 7     | AAACTCCAGAA   | 0.423 |
| - | 3  | 2720    | v.2_Missense_Mu                 | NM_033026    | NP_149015    | Q9Y6V0 | PCLO_HUMAN  | Pro-rich.                  | 7     | TTTTTCCCTGT   | 0.433 |
| + | 13 | 1626    | 7orf63_uc011khj.1               | NM_001039706 | NP_001034795 | A5D8W1 | CG063_HUMAN |                            | 1     | CAGATCCGTTT   | 0.348 |
| + | 43 | 3267    | 1A2_uc011kib.1_I                | NM_000089    | NP_000080    | P08123 | CO1A2_HUMAN |                            | 9     | GGGAACGATGG   | 0.488 |
| - | 23 | 3290    |                                 | NM_015395    | NP_056210    | Q7Z6L1 | TCPR1_HUMAN | TECPR 7.                   | 1     | GGACGGGATGT   | 0.592 |
| + | 4  | 649_650 | VT1_uc010ljj.1_Int              | NM_021930    | NP_068749    | Q6NUQ1 | RINT1_HUMAN |                            | 4     | CGCAACCTTGG   | 0.396 |
| + | 4  | 1549    | CHRM2_uc003vrm                  | NM_001006630 | NP_001006631 | P08172 | ACM2_HUMAN  | smic (By similarity).      | 5     | AGTTTCCACTTC  | 0.463 |
| - | 15 | 1860    |                                 | NM_004333    | NP_004324    | P15056 | BRAF_HUMAN  | rotein kinas_R603>1(2) p.T | 18290 | ATTTCACTGTAC  | 0.368 |
| + | 18 | 2177    |                                 | NM_004668    | NP_004659    | O43451 | MGA_HUMAN   | (Potential). Maltase.      | 2     | GAATTCCTCCAC  | 0.547 |
| - | 9  | 1451    |                                 | NM_019841    | NP_062815    | Q9NQA5 | TRPV5_HUMAN | ical; (Potential).         | 6     | TCACAGCCCCA   | 0.537 |
| + | 6  | 734     |                                 | NM_018487    | NP_060957    | Q96HP8 | T176A_HUMAN |                            | 2     | GTTCCCAACCA   | 0.542 |
| + | 4  | 507     | p.P75L SLC4A2                   | NM_003040    | NP_003031    | P04920 | B3A2_HUMAN  | ic (Potential). Pro-rich.  | 0     | TCACCCACTGTC  | 0.692 |
| - | 1  | 143     |                                 | NM_001005504 | NP_001005504 | O95013 | O4F21_HUMAN | Name=1; (Potential).       | 0     | TCACAGAAAAC   | 0.488 |
| - | 1  | 5470    |                                 | NM_031271    | NP_112561    | Q9BXT5 | TEX15_HUMAN |                            | 7     | CAGGTCCTCTA   | 0.368 |
| + | 10 | 1131    | se_Mutation_p.R3                | NM_194294    | NP_919270    | Q6ZQW0 | I23O2_HUMAN |                            | 2     | GCATTCGTGAT   | 0.448 |
| - | 22 | 4294    | DNL_uc003xqt.3_F                | NM_144651    | NP_653252    | A1KZ92 | PXDNL_HUMAN | VWFC.                      | 2     | CCTCTAACATCT  | 0.517 |

|   |    |       |                    |              |              |        |             |     |                 |       |
|---|----|-------|--------------------|--------------|--------------|--------|-------------|-----|-----------------|-------|
| + | 4  | 3017  | 1_uc011ldy.1_Intr  | NM_006269    | NP_006260    | P56715 | RP1_HUMAN   | 12  | AATGATCCCCAT    | 0.323 |
| - | 3  | 771   | .2_5'UTR RSPO2_    | NM_178565    | NP_848660    | Q6UXX9 | RSPO2_HUMAN | 7   | CAAATGGGATTT    | 0.358 |
| + | 19 | 2139  |                    | NM_177531    | NP_803875    | Q86WI1 | PKHL1_HUMAN | 14  | TTGAAGAAGGA     | 0.289 |
| + | 19 | 2759  | lja.1_Nonsense_Iv  | NM_016018    | NP_057102    | A8MW92 | P20L1_HUMAN | 2   | GGAAGCGAAAA     | 0.353 |
| - | 10 | 1262  | ion_p.E413K NAPI   | NM_145201    | NP_660202    | Q6XQN6 | PNCB_HUMAN  | 1   | CTTCTCGGGT      | 0.657 |
| - | 13 | 1475  | zo.1_Missense_Mt   | NM_015356    | NP_056171    | Q14160 | SCRIB_HUMAN | 5   | CCGCCCTCGA      | 0.682 |
| + | 7  | 725   | l3zbi.3_Missense_  | NM_032450    | NP_115826    | Q8NDA8 | HTR7A_HUMAN | 0   | CCTGCCATCCG     | 0.692 |
| - | 3  | 1243  |                    | NM_003923    | NP_003914    | O75593 | FOXH1_HUMAN | 0   | AGGAAGGGGGC     | 0.682 |
| - | 1  | 1323  | _5'Flank DOCK8_    | NM_152569    | NP_689782    | Q5T8R8 | CI066_HUMAN | 1   | GCCTACATCCC     | 0.642 |
| - | 1  | 101   | uc003zrh.1_Intron  | NM_153809    | NP_722516    | Q8IZX4 | TAF1L_HUMAN | 26  | CGCAGCCGGGT     | 0.542 |
| - | 4  | 884   | on_p.E251D ECM     | NM_001393    | NP_001384    | O94769 | ECM2_HUMAN  | 2   | ctctcatctctctcc | 0.398 |
| - | 6  | 1128  | rl.2_Missense_Mu   | NM_000507    | NP_000498    | P09467 | F16P1_HUMAN | 0   | TAGCGGGTAC      | 0.358 |
| + | 8  | 1817  | ix.1_Missense_Mt   | NM_014290    | NP_055105    | Q8NHU6 | TDRD7_HUMAN | 3   | GTTACGGGCAC     | 0.418 |
| + | 4  | 760   | c.2_Missense_Mut   | NM_207299    | NP_997182    | Q8TBJ4 | LPPR1_HUMAN | 0   | CTTACTTCGA      | 0.373 |
| - | 3  | 1511  | hNB31_uc004bja.3   | NM_015404    | NP_056219    | Q9P202 | WHRN_HUMAN  | 6   | GGACCGCCCGT     | 0.632 |
| - | 3  | 846   | f.2_Missense_Mut   | NM_002160    | NP_002151    | P24821 | TENA_HUMAN  | 7   | ACCGCTACAGA     | 0.557 |
| + | 7  | 956   | 36_uc004cjk.1_RN   | NM_024718    | NP_078994    | Q3YEC7 | PARF_HUMAN  | 0   | AATATCCCATTTT   | 0.512 |
| - | 25 | 3397  | p.W547L MAP3K      | NM_001001671 | NP_001001671 | Q6ZN16 | M3K15_HUMAN | 7   | ACATCCAGTGG     | 0.423 |
| + | 1  | 1320  |                    | NM_152577    | NP_689790    | Q8N7E2 | ZN645_HUMAN | 2   | ATAGACGGTATT    | 0.463 |
| + | 1  | 25    |                    | NM_004651    | NP_004642    | P51784 | UBP11_HUMAN | 3   | TGTTTGGGGGG     | 0.562 |
| + | 11 | 1741  | lyz.2_Nonsense_Iv  | NM_005120    | NP_005111    | Q93074 | MED12_HUMAN | 4   | AGCTGCAAGCG     | 0.527 |
| + | 7  | 2564  | ps.1_Missense_M    | NM_018977    | NP_061850    | Q9NZ94 | NLGN3_HUMAN | 1   | ACCACGAGTGT     | 0.687 |
| - | 2  | 460   | uc004esi.1_Intron  | NM_032498    | NP_115887    | P0C7M4 | RHF2B_HUMAN | 0   | CTTCCCATAGC     | 0.607 |
| - | 1  | 1311  |                    | NM_138289    | NP_612146    | Q8TDG2 | ACTT1_HUMAN | 5   | TCTTTGAACCA     | 0.478 |
| + | 9  | 1374  |                    | NM_018558    | NP_061028    | Q9UN88 | GBRT_HUMAN  | 3   | TGAGCGATCTC     | 0.602 |
| - | 2  | 214   |                    |              |              | Q8N1B3 | FA58A_HUMAN | 0   | AGTACCTGCGC     | 0.527 |
| + | 7  | 763   | R1_uc001ajf.1_3'L  | NM_007033    | NP_008964    | O15258 | RER1_HUMAN  | 0   | TGCCGGCAAGG     | 0.493 |
| - | 21 | 2575  | RSF25_uc001ani.    | NM_001042663 | NP_001036128 | O94827 | PKHG5_HUMAN | 1   | ACAGCGTGTCC     | 0.622 |
| + | 10 | 1160  | k.1_Missense_Mut   | NM_002631    | NP_002622    | P52209 | 6PGD_HUMAN  | 1   | TGGTGGCATCGC    | 0.552 |
| + | 8  | 3152  | od.1_Missense_M    | NM_012231    | NP_036363    | Q13029 | PRDM2_HUMAN | 1   | CCGATGCCGGG     | 0.522 |
| + | 8  | 3948  | ij.2_Intron PRDM2  | NM_012231    | NP_036363    | Q13029 | PRDM2_HUMAN | 1   | CTCTCCCTCTC     | 0.498 |
| - | 5  | 1003  | C16_uc001awu.2     | NM_024758    | NP_079034    | Q9BSE5 | SPEB_HUMAN  | 1   | CTGTCCCTGGC     | 0.522 |
| + | 11 | 8698  | p.1_Missense_Mut   | NM_015001    | NP_055816    | Q96T58 | MINT_HUMAN  | 15  | TCAGCGCCAAG     | 0.582 |
| - | 16 | 2569  | abr.1_Missense_M   | NM_003443    | NP_003434    | Q13105 | ZBT17_HUMAN | 0   | GAGGGCGGAAG     | 0.677 |
| - | 5  | 784   | FBXO42_uc001ayf    | NM_018994    | NP_061867    | Q6P3S6 | FBX42_HUMAN | 2   | GCCACCAAACA     | 0.483 |
| + | 8  | 1974  | p.G457D PAX7_u     | NM_002584    | NP_002575    | P23759 | PAX7_HUMAN  | 203 | GGCCGGCTATC     | 0.672 |
| - | 21 | 2003  | bew.2_Missense_I   | NM_002885    | NP_002876    | P47736 | RPGP1_HUMAN | 3   | CTCCGTCTCC      | 0.667 |
| - | 2  | 839   | vrj.2_Missense_M   | NM_004350    | NP_004341    | Q13761 | RUNX3_HUMAN | 0   | CACTGCGGCC      | 0.597 |
| - | 12 | 1220  | _1_Missense_Mutati | NM_183008    | NP_892120    | Q5T124 | UBX11_HUMAN | 1   | CCAAGCCTTG      | 0.647 |
| - | 14 | 1373  | ik.1_Nonsense_Mi   | NM_006802    | NP_006793    | Q12874 | SF3A3_HUMAN | 0   | CCCTCGGTAGG     | 0.393 |
| + | 30 | 12702 | a.1_Missense_Mu    | NM_033044    | NP_149033    | Q9UPN3 | MACF1_HUMAN | 16  | TGTCCGATGCT     | 0.483 |
| + | 11 | 1695  | M4A_uc010oki.1_Ir  | NM_014663    | NP_055478    | O75164 | KDM4A_HUMAN | 1   | ATCTTCTAGCCT    | 0.522 |
| + | 22 | 1994  | 3BPL9_uc001csw.:   | NM_024586    | NP_078862    | Q96SU4 | OSBL9_HUMAN | 1   | TGGAAGATCAG     | 0.438 |
| + | 4  | 1551  |                    | NM_000098    | NP_000089    | P23786 | CPT2_HUMAN  | 0   | ATGGGGATGGC     | 0.517 |
| + | 37 | 4957  | se_Mutation_p.R4:  | NM_176877    | NP_795352    | Q8NI35 | INADL_HUMAN | 4   | GACTCCGAGCT     | 0.473 |
| - | 3  | 1069  | 3_Intron KANK4_u   | NM_181712    | NP_859063    | Q5T7N3 | KANK4_HUMAN | 6   | CAGCTCCCTCC     | 0.547 |
| + | 5  | 449   | ote.1_Missense_h   | NM_001012425 | NP_001012425 | Q5VVC0 | CA146_HUMAN | 1   | CAGTAAATGCTA    | 0.358 |

rs34433473

|   |    |           |                      |              |              |        |              |                            |    |                |       |             |
|---|----|-----------|----------------------|--------------|--------------|--------|--------------|----------------------------|----|----------------|-------|-------------|
| - | 20 | 2219      | OL11A1_uc001dur      | NM_001854    | NP_001845    | P12107 | COBA1_HUMAN  | le-helical region.         | 12 | GCTTCTCCCTGT   | 0.284 |             |
| - | 10 | 1464      | nse_Mutation_p.V     | NM_001048210 | NP_001041675 | Q96S66 | CLCC1_HUMAN  |                            | 1  | TACCACCGTGG    | 0.468 |             |
| - | 4  | 454       | orf194_uc009wew      | NM_001122961 | NP_001116433 | Q5T5A4 | CA194_HUMAN  |                            | 1  | AGTGTCTGATG    | 0.493 |             |
| + | 4  | 491       | wey_2_Missense_      | NM_020775    | NP_065826    | Q6UXG2 | K1324_HUMAN  | ellular (Potential).       | 5  | CCCTCGGCACA    | 0.587 |             |
| - | 1  | 791       |                      | NM_005549    | NP_005540    | Q16322 | KCA10_HUMAN  |                            | 4  | GGCCCGTTC      | 0.448 |             |
| + | 14 | 1330      | se_Mutation_p.S3     | NM_003176    | NP_003167    | Q15431 | SYCP1_HUMAN  | Potential.                 | 1  | CTCATTCGTTTG   | 0.308 |             |
| + | 22 | 3382      | spliceC1orf203_uc    | NM_000701    | NP_000692    | P05023 | AT1A1_HUMAN  |                            | 1  | TGGCCGTAATT    | 0.493 |             |
| + | 7  | 934       | p.R236H PHGDH        | NM_006623    | NP_006614    | O43175 | SERA_HUMAN   | NAD.                       | 1  | TGCCCGTGGAG    | 0.617 |             |
| + | 5  | 1023      | ron NBPF10_uc00      | NM_203458    | NP_982283    | Q7Z3S9 | NT2NL_HUMAN  |                            | 1  | GTTTCCTAAGCT   | 0.378 |             |
| + | 10 | 1491      | e_Mutation_p.H45     | NM_001039703 | NP_001034792 | A6NDV3 | A6NDV3_HUMAN |                            | 0  | AATAGCCATGGC   | 0.468 |             |
| + | 2  | 237       | \10_uc010oyv.1_n     | NM_003637    | NP_003628    | O75578 | ITA10_HUMAN  | r (Potential). FG-GAP 1.   | 8  | ACAGCGATGGT    | 0.507 |             |
| + | 8  | 1210      | p.P311S RPD2_        | NM_015203    | NP_056018    | Q5VT52 | RPRD2_HUMAN  |                            | 1  | AGTCTCCTTTTC   | 0.502 |             |
| + | 6  | 577       | xn.2_Missense_IV     | NM_002810    | NP_002801    | P55036 | PSMD4_HUMAN  | VWFA.                      | 0  | GGTGACAGTGC    | 0.512 |             |
| - | 10 | 1044      | nr.1_Missense_Mt     | NM_001025603 | NP_001020774 | P48382 | RFX5_HUMAN   |                            | 1  | TGTGGGCTCCA    | 0.522 |             |
| - | 2  | 2653      | ae.1_Missense_Mt     | NM_007113    | NP_009044    | Q07283 | TRHY_HUMAN   |                            | 5  | GCGCGTCTCT     | 0.612 |             |
| - | 2  | 163       |                      | NM_001045479 | NP_001038944 |        |              |                            | 1  | TGGCGAAACAT    | 0.443 | rs140012440 |
| - | 13 | 3445      | i.2_Missense_Mut     | NM_001111    | NP_001102    | P55265 | DSRAD_HUMAN  | \ to l editase.            | 6  | CACGACAGCAA    | 0.453 |             |
| + | 2  | 1319      | Flank RUSC1_uc       | NM_001105203 | NP_001098673 | Q9BVN2 | RUSC1_HUMAN  |                            | 2  | CGGCACCTCCT    | 0.687 |             |
| - | 3  | 1166      | p.P229L ASH1L_u      | NM_018489    | NP_060959    | Q9NR48 | ASH1L_HUMAN  |                            | 11 | TGGAAGGAGGA    | 0.453 |             |
| - | 12 | 1222      | sb.1_Missense_M      | NM_178229    | NP_839943    | Q86VI3 | IQGA3_HUMAN  |                            | 6  | GATCCGCTGCAC   | 0.612 |             |
| + | 3  | 1087      |                      | NM_001763    | NP_001754    | P06126 | CD1A_HUMAN   | ilar (Potential). lg-like. | 3  | CCCACGTTTCA    | 0.468 | rs142655599 |
| + | 1  | 540       |                      | NM_001004473 | NP_001004473 | Q8NGX5 | O10K1_HUMAN  | ellular (Potential).       | 1  | TGTGACATCTCC   | 0.517 |             |
| + | 1  | 82        | \12_uc001gbp.2_\u00e | NM_007240    | NP_009171    | Q9UNI6 | DUS12_HUMAN  |                            | 1  | CTGTGCCGGGC    | 0.672 |             |
| + | 7  | 958       | nd.1_Missense_M      | NM_001460    | NP_001451    | Q99518 | FMO2_HUMAN   |                            | 1  | TGAAGGAACTC    | 0.408 |             |
| + | 13 | 1813      | _p.P503S RABGA       | NM_014857    | NP_055672    | Q5R372 | RBG1L_HUMAN  | ab-GAP TBC.                | 4  | TGTCTCCCTGAA   | 0.473 |             |
| + | 17 | 2915      | p.Q867H LAMC2_       | NM_005562    | NP_005553    | Q13753 | LAMC2_HUMAN  | al. Domain II and I.       | 3  | TTCAGGTGAG     | 0.478 |             |
| + | 2  | 390       |                      | NM_130782    | NP_570138    | Q9NS28 | RGS18_HUMAN  |                            | 3  | CCAAAGAAACA    | 0.348 |             |
| - | 8  | 2173      | pj.1_Missense_Mt     | NM_014875    | NP_055690    | Q15058 | KIF14_HUMAN  | inesin-motor.              | 7  | TGGGTATCACC    | 0.388 | rs144936292 |
| - | 8  | 2151      | pj.1_Missense_Mt     | NM_014875    | NP_055690    | Q15058 | KIF14_HUMAN  | inesin-motor.              | 7  | CTGAATGAGATC   | 0.393 |             |
| - | 3  | 1195      | pl.1_Missense_Mt     | NM_001031725 | NP_001026895 | Q5T1V6 | DDX59_HUMAN  | ase ATP-binding.           | 4  | CAGACGATAAAC   | 0.408 |             |
| + | 4  | 772       | NPEP_uc001gxf.2      | NM_020216    | NP_064601    | Q9H4A4 | AMPB_HUMAN   |                            | 1  | GAGCCGGGTGT    | 0.502 |             |
| + | 9  | 896       | b.2_RNA LGR6_uc      | NM_001017403 | NP_001017403 | Q9HBX8 | LGR6_HUMAN   | tracellular (99_A300insGF  | 10 | AAGATCGGCAT    | 0.488 |             |
| - | 1  | 475       |                      | NM_032833    | NP_116222    | Q5SWA1 | PR15B_HUMAN  |                            | 2  | GAAAAGGGTG     | 0.627 |             |
| + | 9  | 965       | y.1_Intron MDM4_     | NM_002393    | NP_002384    | O15151 | MDM4_HUMAN   | Asp/Glu-rich (acidic).     | 3  | AGTAGGGAAG     | 0.353 |             |
| + | 4  | 1226      | :C2_uc001hcb.1_n     | NM_014858    | NP_055673    | O75069 | TMCC2_HUMAN  |                            | 1  | CCTCCCCGCG     | 0.672 |             |
| + | 3  | 288       | p.R60H PFKFB2_       | NM_006212    | NP_006203    | O60825 | F262_HUMAN   | phofructo-2-kinase.        | 1  | AACACGCTACC    | 0.507 |             |
| - | 29 | 4384      |                      | NM_004446    | NP_004437    | P07814 | SYEP_HUMAN   | -tRNA synthetase.          | 2  | ATCACGTGGCC    | 0.383 | rs113334654 |
| + | 3  | 355       | se_Mutation_p.Q9     | NM_032324    | NP_115700    | Q9BSD7 | NTPCR_HUMAN  |                            | 0  | TTGAGCAGTTGC   | 0.458 |             |
| - | 3  | 397       | ibk.2_Missense_M     | NM_022743    | NP_073580    | Q9H7B4 | SMYD3_HUMAN  |                            | 0  | GAACGGAGTCT    | 0.398 |             |
| + | 5  | 214       | a.3_RNA C1orf15(     | NM_145278    | NP_660321    | Q5JQS6 | CA150_HUMAN  |                            | 0  | GGCAGGAAAC     | 0.438 |             |
| - | 1  | 625       |                      | NM_001004692 | NP_001004692 | Q8NG77 | O2T12_HUMAN  | Name=5; (Potential).       | 3  | GGAAAAGGGGA    | 0.547 |             |
| + | 3  | 962       |                      | NM_031923    | NP_114129    | Q5VVG9 | TAF3_HUMAN   |                            | 1  | aagagtccaagagc | 0.393 |             |
| + | 4  | 593       | iln.2_Missense_M     | NM_153498    | NP_705718    | Q8IU85 | KCC1D_HUMAN  | rotein kinase.             | 2  | AGAAGGATGCC    | 0.507 |             |
| - | 8  | 1249      | qcu.1_Missense_n     | NM_005028    | NP_005019    | P48426 | PI42A_HUMAN  | PIPK.                      | 2  | ATGTTCCGATCG   | 0.537 |             |
| + | 11 | 1364      | D3A_uc009xkp.1_f     | NM_017433    | NP_059129    | Q8NEV4 | MYO3A_HUMAN  |                            | 18 | TAATATCCAATCT  | 0.348 |             |
| + | 13 | 1580      |                      | NM_019043    | NP_061916    | Q7Z5R6 | AB1IP_HUMAN  |                            | 7  | GTATGGGAAGA    | 0.463 |             |
| - | 15 | 2317_2318 | tdt.1_Nonsense_n     | NM_018076    | NP_060546    | Q5T2S8 | ARMC4_HUMAN  |                            | 6  | CATTTCCATATA   | 0.446 |             |

|   |    |           |                    |              |              |        |              |                              |    |                  |       |             |
|---|----|-----------|--------------------|--------------|--------------|--------|--------------|------------------------------|----|------------------|-------|-------------|
| - | 19 | 4504      | ju.1_Missense_Mt   | NM_021738    | NP_068506    | O95425 | SVIL_HUMAN   |                              | 6  | 'ACCTTCCAGGG'    | 0.542 |             |
| + | 17 | 1845      | se_Mutation_p.D4E  | NM_024688    | NP_078964    | Q9H943 | CJ068_HUMAN  |                              | 3  | 'GGAAGAGATATA'   | 0.299 |             |
| + | 6  | 716       |                    | NM_052997    | NP_443723    | Q9BXX3 | AN30A_HUMAN  | ANK 6.                       | 9  | 'ATATACGAAATT'   | 0.269 |             |
| - | 1  | 237       |                    | NM_000242    | NP_000233    | P11226 | MBL2_HUMAN   | Collagen-like.               | 1  | 'CTTTTCTCCCTT'   | 0.532 |             |
| - | 36 | 4893      | ation_p.E1488K P   | NM_001142769 | NP_001136241 | Q96QU1 | PCD15_HUMAN  |                              | 13 | 'ATTCTTCTCAGC'   | 0.393 |             |
| - | 27 | 5139_5140 | 35_uc001jzj.2_Mis  | NM_004747    | NP_004738    | Q8TDM6 | DLG5_HUMAN   |                              | 8  | 'TTCCTCCGAAAA'   | 0.53  | rs146019787 |
| - | 8  | 1075      | utation_p.T275M A  | NM_001613    | NP_001604    | P62736 | ACTA_HUMAN   |                              | 0  | 'GGGCCGTGATC'    | 0.517 |             |
| + | 8  | 1229      | ut.2_Missense_M    | NM_000771    | NP_000762    | P11712 | CP2C9_HUMAN  |                              | 6  | 'AATTTCCAACC'    | 0.378 |             |
| + | 1  | 240       | ng.2_Missense_M    | NM_004088    | NP_004079    | P04053 | TDT_HUMAN    |                              | 1  | 'TGATGGCCTCC'    | 0.577 |             |
| - | 7  | 842       | h.1_Missense_Mt    | NM_003061    | NP_003052    | O75093 | SLIT1_HUMAN  | LRR 6.                       | 4  | 'ACACGGGGATG'    | 0.592 |             |
| + | 6  | 1398      |                    | NM_005063    | NP_005054    | O00767 | ACOD_HUMAN   | lasmic (Potential).          | 0  | 'ACCACTCCTTTC'   | 0.443 |             |
| - | 5  | 650       | _uc001krw.1_Intror | NM_176792    | NP_789762    | Q8N983 | RM43_HUMAN   |                              | 1  | 'GGGCTGGAGCA'    | 0.453 |             |
| - | 23 | 3132      | .P1042S SORCS1     | NM_052918    | NP_443150    | Q8WY21 | SORC1_HUMAN  | ional (Potential).           | 2  | 'AGCTGGATCCT'    | 0.542 |             |
| - | 1  | 441       | IC2_uc009xxx.2_Ir  | NR_026715    |              |        |              |                              | 0  | 'CCAGGTGCCCC'    | 0.537 |             |
| - | 11 | 1565      | lqsp.1_Missense_I  | NM_001127211 | NP_001120683 | A0MZ66 | SHOT1_HUMAN  | Pro-rich.                    | 0  | 'aggaggagggtggg' | 0.333 |             |
| - | 19 | 3423      | p.M1059L EIF3A_u   | NM_003750    | NP_003741    | Q14152 | EIF3A_HUMAN  | DE]-DE]-R-[SEVGFPILV]-[      | 0  | 'ATCCATGCCTCC'   | 0.627 |             |
| + | 50 | 6431      | p.G2108R DMBT1     | NM_007329    | NP_015568    | Q9UGM3 | DMBT1_HUMAN  | CUB 2.                       | 7  | 'GGAGAGGGTTC'    | 0.527 |             |
| + | 52 | 6879      | _p.S2257Y DMBT1    | NM_007329    | NP_015568    | Q9UGM3 | DMBT1_HUMAN  | ZP.                          | 7  | 'ACATTTCTTTT'    | 0.463 |             |
| + | 9  | 1238      |                    | NM_032182    | NP_115558    | Q15018 | F175B_HUMAN  |                              | 0  | 'ATTCTCGACCCA'   | 0.448 |             |
| - | 4  | 405       | D9_uc010qvv.1_5'   | NM_001012302 | NP_001012302 | A1A5B4 | ANO9_HUMAN   | lasmic (Potential).          | 4  | 'GCGCGGCCAGC'    | 0.647 |             |
| + | 9  | 1150      | ation_p.P327L TN   | NM_138567    | NP_612634    | Q8NBV8 | SYT8_HUMAN   | toplasmic (Potential).       | 1  | 'TGAGCCCCTAG'    | 0.687 |             |
| + | 8  | 1963      | _p.E467K DNHD1_    | NM_144666    | NP_653267    | Q96M86 | DNHD1_HUMAN  |                              | 2  | 'TTTACGAGGAC'    | 0.522 |             |
| - | 3  | 665       | _p.A105D CYP2R1    | NM_024514    | NP_078790    | Q6VVX0 | CP2R1_HUMAN  |                              | 2  | 'CACTGGCAGCT'    | 0.388 |             |
| - | 1  | 1265      | mb.3_Missense_M    | NM_000525    | NP_000516    | B4DWI4 | B4DWI4_HUMAN |                              | 1  | 'GTGAGGGGGCA'    | 0.617 |             |
| + | 7  | 1484      | ric.2_Nonsense_M   | NM_004211    | NP_004202    | Q9Y345 | SC6A5_HUMAN  | Name=4; (Potential).         | 4  | 'GGCTTGGGTCA'    | 0.453 |             |
| + | 4  | 3577      | p.P865S QSER1_     | NM_001076786 | NP_001070254 | Q2KHR3 | QSER1_HUMAN  |                              | 6  | 'AGAATCCAAGG'    | 0.413 |             |
| - | 3  | 308       | L1_uc001ocq.1_5'   | NM_080668    | NP_542399    | Q96FF9 | CDCA5_HUMAN  |                              | 0  | 'TGGGTGTCTGG'    | 0.552 |             |
| + | 5  | 882       | S4_uc010rpc.1_Ir   | NM_178864    | NP_849195    | Q8IUM7 | NPAS4_HUMAN  | PAS 2.                       | 0  | 'TCTTAATCTACC'   | 0.542 |             |
| - | 6  | 1423      | ia.3_Missense_Mu   | NM_000795    | NP_000786    | P14416 | DRD2_HUMAN   | nteraction with PPP1R9B (    | 2  | 'CTTCTCTTCTC'    | 0.577 |             |
| + | 5  | 665       | _p.S100F TMPRE     | NM_019894    | NP_063947    | Q9NRS4 | TMPS4_HUMAN  | ilar (Potential). SRCR.      | 2  | 'GTTCTCTGCCT'    | 0.552 |             |
| - | 14 | 1621      | p.G495R TREH_u     | NM_007180    | NP_009111    | O43280 | TREA_HUMAN   |                              | 1  | 'TCCCCACCGG'     | 0.617 |             |
| + | 8  | 1632      |                    | NM_025004    | NP_079280    | Q0P6D6 | CCD15_HUMAN  |                              | 2  | 'TCTCCACAAAG'    | 0.418 | rs113451248 |
| - | 5  | 761       | R43H RPUSD4_u      | NM_032795    | NP_116184    | Q96CM3 | RUSD4_HUMAN  |                              | 1  | 'GGCTGCGCCGC'    | 0.547 |             |
| + | 9  | 1226      | p.G351D FAM118E    | NM_024556    | NP_078832    | Q9BPY3 | F118B_HUMAN  |                              | 0  | 'TACAGGCTGTA'    | 0.408 |             |
| - | 16 | 2360      | gy.1_Missense_M    | NM_014987    | NP_055802    | Q9UPX0 | TUTLB_HUMAN  | ellular (Potential).         | 0  | 'GCTGCGGGAAG'    | 0.637 |             |
| + | 14 | 2336      | _uc001qkn.2_Miss   | NM_199460    | NP_955630    | Q13936 | CAC1C_HUMAN  | acellular (Potential).       | 11 | 'TTGGAGGAAAG'    | 0.418 |             |
| + | 3  | 778       | seh.1_5'Flank TUL  | NR_027363    |              |        |              |                              | 0  | 'CCCCGAGGAC'     | 0.512 |             |
| - | 22 | 3176      | VF_uc010set.1_Int  | NM_000552    | NP_000543    | P04275 | VWF_HUMAN    | VWFD 3.                      | 12 | 'GTGGCGGTCCC'    | 0.552 |             |
| + | 26 | 3357      | p.M667V A2ML1_u    | NM_144670    | NP_653271    | A8K2U0 | A2ML1_HUMAN  |                              | 3  | 'CAGCTATGAAG'    | 0.448 |             |
| + | 29 | 3634      | _p.P759L A2ML1_u   | NM_144670    | NP_653271    | A8K2U0 | A2ML1_HUMAN  |                              | 3  | 'TACTCCATCATC'   | 0.478 |             |
| - | 4  | 563       | se_Mutation_p.F16' | NM_001781    | NP_001772    | Q07108 | CD69_HUMAN   | . Extracellular (Potential). | 0  | 'TTGTTAAATCTT'   | 0.398 |             |
| - | 3  | 276       |                    | NM_006248    | NP_006239    |        |              |                              | 0  | 'GGGTGGTCTTT'    | 0.612 |             |
| - | 23 | 4953      | .RP6_uc010shl.1_   | NM_002336    | NP_002327    | O75581 | LRP6_HUMAN   | Potential). PPPSP motif E.   | 12 | 'GTGGCGGTGGG'    | 0.517 |             |
| - | 15 | 2107      |                    | NM_021957    | NP_068776    | P54840 | GYS2_HUMAN   |                              | 2  | 'ATCTGAAAAGC'    | 0.303 |             |
| - | 12 | 1945      | C1_uc001rja.2_Nc   | NM_175861    | NP_787057    | Q8IUR5 | TMTC1_HUMAN  | TPR 4.                       | 0  | 'TCTTTAAACCC'    | 0.328 |             |
| - | 2  | 641       | rmf.2_Missense_M   | NM_052885    | NP_443117    | Q96QE2 | MYCT_HUMAN   | Name=4; (Potential).         | 1  | 'CCTCCGCAATG'    | 0.403 |             |
| + | 21 | 2256      | d.2_Missense_Mu    | NM_000289    | NP_000280    | P08237 | K6PF_HUMAN   |                              | 4  | 'AGTTACCGTAATC'  | 0.527 |             |

|   |    |      |                    |              |              |        |             |                                |    |               |       |
|---|----|------|--------------------|--------------|--------------|--------|-------------|--------------------------------|----|---------------|-------|
| + | 9  | 866  | slz.1_Missense_I   | NM_000725    | NP_000716    | P54284 | CACB3_HUMAN |                                | 0  | ACCTCTCCCTGG  | 0.582 |
| - | 12 | 1269 | lrvs.2_Missense_I  | NM_013277    | NP_037409    | Q9H0H5 | RGAP1_HUMAN | ol-ester/DAG-type.             | 1  | CCACACGACAG   | 0.463 |
| - | 6  | 1295 | rT8_uc009zml.1_I   | NM_002273    | NP_002264    | P05787 | K2C8_HUMAN  | Rod. Coil 2.                   | 2  | CTCCTCGCCCTI  | 0.657 |
| + | 18 | 4145 | _Mutation_p.R102   | NM_012291    | NP_036423    | Q14674 | ESPL1_HUMAN |                                | 3  | CAGACCGGATC   | 0.577 |
| + | 3  | 458  | 5A_uc010srr.1_Inl  | NM_004984    | NP_004975    | Q12840 | KIF5A_HUMAN | inesin-motor.                  | 3  | ATTTTTGCTTATG | 0.488 |
| + | 6  | 494  | r_p.M92V RAP1B     | NM_001089704 | NP_001083173 | P61224 | RAP1B_HUMAN |                                | 0  | TTCCAATGATTC  | 0.303 |
| - | 14 | 3349 | .A1325T PTPRB_I    | NM_002837    | NP_002828    | P23467 | PTPRB_HUMAN | II 13. Extracellular (Potenti  | 3  | TGAGGCGGTCC   | 0.552 |
| - | 2  | 301  | se_Mutation_p.R8   | NM_001109754 | NP_001103224 | P23467 | PTPRB_HUMAN | p.R86H(1)                      | 3  | AAACAGCGGTCC  | 0.542 |
| - | 4  | 976  | stq.1_Missense_M   | NM_002849    | NP_002840    | Q15256 | PTPRR_HUMAN | ellular (Potential).           | 3  | GTGAACGAAGA   | 0.363 |
| + | 13 | 1527 | swv.2_Splice_Site  | NM_022771    | NP_073608    | Q8TC07 | TBC15_HUMAN |                                | 0  | AAATGGTAAGA   | 0.308 |
| + | 10 | 1533 | p.G480E ACSS3_     | NM_024560    | NP_078836    | Q9H6R3 | ACSS3_HUMAN |                                | 4  | TCCCAGGATACA  | 0.403 |
| - | 1  | 720  |                    | NM_032148    | NP_115524    | Q96JW4 | S41A2_HUMAN | Cytoplasmic.                   | 2  | CCACCTGTACTA  | 0.363 |
| + | 5  | 400  | i RFX4_uc001tit.2  | NM_213594    | NP_998759    | Q33E94 | RFX4_HUMAN  | type winged-helix.             | 1  | CAGTTTCTCAG   | 0.498 |
| - | 20 | 2434 | tul.2_Missense_M   | NM_004658    | NP_004649    | O95294 | RASL1_HUMAN |                                | 4  | AGTCCCCCAGG   | 0.632 |
| + | 11 | 2162 | JF10_uc001tyq.3_I  | NM_014868    | NP_055683    | Q8N5U6 | RNF10_HUMAN |                                | 2  | ACAGCGTCACA   | 0.458 |
| - | 7  | 981  | Iuaf.2_RNA ANAP    | NM_016237    | NP_057321    | Q9UJX4 | APC5_HUMAN  |                                | 6  | GCTTCGCTCC    | 0.483 |
| - | 8  | 2397 | Iuia.2_Missense_   | NM_133448    | NP_597705    | Q14C87 | T132D_HUMAN | ellular (Pote p.I690I(1)       | 14 | CAAGATGGCC    | 0.577 |
| + | 8  | 957  | 37_splice NUPL1_   | NM_014089    | NP_054808    | Q9BVL2 | NUPL1_HUMAN |                                | 0  | TTCTTAGGGATA  | 0.308 |
| - | 5  | 1615 | ase_Mutation_p.R   | NM_183044    | NP_898865    | Q9Y252 | RNF6_HUMAN  |                                | 2  | TCGGCGAAAGC   | 0.433 |
| - | 8  | 1327 | c.3_Missense_Mu    | NM_002019    | NP_002010    | P17948 | VGFR1_HUMAN | 4. Extracellular (Potential).  | 24 | TGCCAGTACGG   | 0.408 |
| + | 8  | 979  | DGKH_uc010tj.1     | NM_178009    | NP_821077    | Q86XP1 | DGKH_HUMAN  |                                | 2  | CGATGGTATGTA  | 0.338 |
| - | 19 | 4122 | .R1257H ATP7B_     | NM_000053    | NP_000044    | P35670 | ATP7B_HUMAN | lasmic (Potential).            | 3  | TTGATGCGTATC  | 0.542 |
| - | 25 | 3343 | hu.2_Missense_M    | NM_001042517 | NP_001035982 | Q9NSV4 | DIAP3_HUMAN | Potential.                     | 2  | TTGGCGTTCGA   | 0.323 |
| + | 12 | 2822 | .Q587K LMO7_uc     | NM_015842    | NP_056667    | Q8WWI1 | LMO7_HUMAN  |                                | 5  | CTAGCCAGAAAC  | 0.502 |
| + | 21 | 2636 |                    | NM_003291    | NP_003282    | P29144 | TPP2_HUMAN  |                                | 2  | CTTTGTGAACTA  | 0.368 |
| + | 40 | 3936 |                    | NM_001846    | NP_001837    | P08572 | CO4A2_HUMAN | le-helical region.             | 6  | CATCCACGGAG   | 0.557 |
| + | 9  | 976  |                    | NM_182614    | NP_872420    | Q8WV15 | FA70B_HUMAN | Pro-rich.                      | 0  | TTCCCCGGGGG   | 0.557 |
| + | 1  | 839  |                    | NM_001004724 | NP_001004724 | Q8IXE1 | OR4N5_HUMAN | Name=7; (Potential).           | 1  | TCTTCTTTGAT   | 0.403 |
| - | 35 | 6066 | ar.1_Nonsense_ML   | NM_020920    | NP_065971    | Q9HCK8 | CHD8_HUMAN  |                                | 10 | CCATCAACTTG   | 0.408 |
| + | 5  | 304  | se_Mutation_p.Q3   | NM_178336    | NP_848026    | Q86TS9 | RM52_HUMAN  |                                | 0  | CATGGCAGCTC   | 0.473 |
| + | 5  | 1439 | he.2_Missense_ML   | NM_014045    | NP_054764    | Q7Z4F1 | LRP10_HUMAN | tracellular (Potential).       | 1  | ATGGTCGTGGC   | 0.582 |
| + | 2  | 379  | rd.1_Missense_ML   | NM_173527    | NP_775798    | Q8IYK8 | REM2_HUMAN  |                                | 2  | AGGGGAGGCAG   | 0.617 |
| - | 5  | 519  | R91H RBM23_uc0     | NM_001077351 | NP_001070819 | Q86U06 | RBM23_HUMAN | Arg-rich.                      | 1  | GTCGACGATCC   | 0.542 |
| - | 14 | 1604 | MT5_uc010tng.1_I   | NM_006109    | NP_006100    | O14744 | ANM5_HUMAN  |                                | 1  | ACAGCCGTACCA  | 0.507 |
| - | 2  | 469  | dd.2_Missense_M    | NM_001001872 | NP_001001872 | Q86TY3 | CN037_HUMAN | ellular (Potential).           | 0  | TGAGGGGACAC   | 0.488 |
| + | 2  | 606  | HG3_uc001xhp.2_I   | NM_015549    | NP_056364    | A1L390 | PKHG3_HUMAN | DH.                            | 1  | ACCTGCGCAGC   | 0.622 |
| + | 11 | 1219 | p.D376N GALNTL     | NM_020692    | NP_065743    | Q8N428 | GLTL1_HUMAN | renal (Potential).             | 2  | TGGATGGATGAA  | 0.547 |
| + | 9  | 2092 | rRS5_uc001xlp.2_   | NM_006925    | NP_008856    | Q13243 | SRSF5_HUMAN | r-rich (RS domain).            | 0  | CAGCCGGTCAAC  | 0.537 |
| - | 2  | 1415 |                    | NM_003814    | NP_003805    | O43506 | ADA20_HUMAN | :B. Extracellular (Potential). | 1  | TGGCCCCAAAGT  | 0.428 |
| + | 2  | 2208 |                    | NM_018228    | NP_060698    | Q9H8Y1 | VRTN_HUMAN  |                                | 0  | ACAAGGAGTTCA  | 0.567 |
| - | 2  | 214  | Itvf.1_Missense_IV | NM_015305    | NP_056120    | Q9UNK9 | ANGE1_HUMAN |                                | 4  | TGTTCCCCAGA   | 0.537 |
| - | 23 | 4085 |                    | NM_001080414 | NP_001073883 | Q9P219 | DAPLE_HUMAN | Potential.                     | 3  | AGTTCCCCTTG   | 0.388 |
| + | 4  | 487  | iu.3_Missense_Mu   | NM_003836    | NP_003827    | P80370 | DLK1_HUMAN  | r (Potential). EGF-like 3.     | 4  | CTCTATGAATGC  | 0.582 |
| + | 1  | 562  |                    | NM_001080841 | NP_001074310 |        |             |                                | 0  | CAGCCGACAAG   | 0.453 |
| + | 9  | 1995 |                    | NM_019074    | NP_061947    | Q9NR61 | DLL4_HUMAN  | lasmic (Potential).            | 2  | TTCGACGGCCG   | 0.617 |
| + | 16 | 4768 | acl.2_Missense_M   | NM_001080534 | NP_001074003 | Q8NB66 | UN13C_HUMAN |                                | 7  | AATTTGGATTTTT | 0.393 |
| - | 48 | 9705 |                    | NM_003922    | NP_003913    | Q15751 | HERC1_HUMAN |                                | 19 | TTCTGGCCAGA   | 0.483 |



|   |    |      |                   |              |              |        |             |                                 |    |               |       |
|---|----|------|-------------------|--------------|--------------|--------|-------------|---------------------------------|----|---------------|-------|
| - | 6  | 550  | uc010ujo.1_Misser | NM_017858    | NP_060328    | Q9BVW5 | TIPIN_HUMAN |                                 | 1  | TTGCTAACAAAAT | 0.219 |
| - | 2  | 149  | ibis.2_Missense_M | NM_001012642 | NP_001012660 | Q8IU3  | GRAM2_HUMAN |                                 | 0  | AGTCCGGGGGC   | 0.517 |
| - | 11 | 1788 | t521H PKM2_uc01   | NM_182471    | NP_872271    | P14618 | KPYM_HUMAN  | ; part of allosteric site. Inte | 1  | CAGGGCGCCAT   | 0.622 |
| - | 6  | 1258 | p.V238G NPTN_u    | NM_012428    | NP_036560    | Q9Y639 | NPTN_HUMAN  | ical; (Potential).              | 0  | TCACCACAAGG,  | 0.522 |
| + | 2  | 243  | 0bmt.1_Missense_M | NM_207517    | NP_997400    | P82987 | ATL3_HUMAN  |                                 | 27 | CGAGCCCCTGG   | 0.562 |
| + | 4  | 1439 | 592_uc010upb.1_   | NM_014630    | NP_055445    | Q92610 | ZN592_HUMAN |                                 | 6  | CAGCTCCCCAC   | 0.517 |
| + | 12 | 5371 | pc.1_Missense_M   | NM_020778    | NP_065829    | Q96L96 | ALPK3_HUMAN | ype protein kinase.             | 12 | TTCTCGGGAATC  | 0.547 |
| + | 13 | 1289 | C28A1_uc010upf    | NM_004213    | NP_004204    | O00337 | S28A1_HUMAN | ical; (Potential).              | 3  | AGATCGATGCC,  | 0.577 |
| + | 4  | 567  | 2_Missense_Mutat  | NM_006122    | NP_006113    | P49641 | MA2A2_HUMAN | ional (Potential).              | 3  | 3CAAGGCTTCG   | 0.602 |
| + | 11 | 2328 | R_uc010bon.2_Mi   | NM_000875    | NP_000866    | P08069 | IGF1R_HUMAN | ellular (Potential).            | 8  | CGCCCGCAGAC   | 0.527 |
| + | 5  | 787  | ve.2_Missense_M   | NM_005587    | NP_005578    | Q02078 | MEF2A_HUMAN | Ser/Thr-rich.                   | 1  | AATGTCTGTAC   | 0.433 |
| + | 18 | 1718 | o.R538H BAIAP3_u  | NM_003933    | NP_003924    | O94812 | BAIP3_HUMAN |                                 | 1  | CAACCGTGAGT   | 0.443 |
| - | 6  | 1859 |                   | NM_032444    | NP_115820    | Q8IY92 | SLX4_HUMAN  | 20orf94, ERCC4 and MSH          | 0  | CCTCCGCCCTC   | 0.597 |
| - | 13 | 3943 | uyn.1_Missense_M  | NM_001134407 | NP_001127879 | Q12879 | NMDE1_HUMAN | lasmic (Potential).             | 45 | GGGTGGATCT    | 0.532 |
| - | 50 | 8796 | o.M2671I SMG1_u   | NM_015092    | NP_055907    | Q96Q15 | SMG1_HUMAN  |                                 | 16 | CCGCTCATACTC  | 0.532 |
| - | 7  | 1032 |                   | NM_174924    | NP_777584    | Q8N807 | PDILT_HUMAN |                                 | 1  | ACTCGGAAATC,  | 0.458 |
| - | 3  | 253  | u_p.G15S ACSM2E   | NM_182617    | NP_872423    | Q68CK6 | ACS2B_HUMAN |                                 | 5  | AGTACCCACAC   | 0.498 |
| + | 13 | 1998 |                   | NM_001039    | NP_001030    | P51170 | SCNNG_HUMAN | smic (By similarity).           | 6  | AGTCCCGGCA    | 0.572 |
| - | 2  | 144  | ICE1_uc002doj.1_  | NM_145080    | NP_659547    | Q8WV22 | NSE1_HUMAN  |                                 | 0  | CGCCCGTGG     | 0.547 |
| + | 16 | 3232 |                   | NM_015202    | NP_056017    | O60303 | K0556_HUMAN |                                 | 8  | GCCACGTTGCC   | 0.532 |
| - | 16 | 1694 | je.1_Nonsense_Mt  | NM_013263    | NP_037395    | Q9NP11 | BRD7_HUMAN  | Potential.                      | 0  | TCTTCTGGAATA  | 0.453 |
| - | 3  | 491  | p.P102L TOX3_uc   | NM_001080430 | NP_001073899 | O15405 | TOX3_HUMAN  |                                 | 0  | GAGGGGAAAC    | 0.532 |
| - | 3  | 378  | am.2_Missense_M   | NM_001012398 | NP_001012398 | Q9H8T0 | AKTIP_HUMAN |                                 | 0  | GGCAGGAGAT    | 0.468 |
| + | 5  | 1861 | ation_p.R72* NFAT | NM_173165    | NP_775188    | Q12968 | NFAC3_HUMAN | RHD.                            | 3  | AACCTCGAAAAC  | 0.343 |
| - | 6  | 3010 | eyx.2_Missense_M  | NM_006927    | NP_008858    | Q16842 | SIA4B_HUMAN | ional (Potential).              | 1  | TGTCGGCCCG    | 0.697 |
| - | 36 | 5718 |                   | NM_032821    | NP_116210    | Q4G0P3 | HYDIN_HUMAN | p.D1816H(1)                     | 2  | CTGATCAAATTC  | 0.443 |
| - | 5  | 854  | 8B_uc010vmu.1_u   | NM_001011880 | NP_001011880 | Q6UXF7 | CL18B_HUMAN |                                 | 0  | TGGTCCCAGGC   | 0.607 |
| + | 4  | 2028 | nn.1_Missense_M   | NM_015251    | NP_056066    | O43313 | ATMIN_HUMAN |                                 | 0  | 3GACATAGAGAC  | 0.458 |
| - | 8  | 1446 | se_Mutation_p.E4; | NM_020947    | NP_065998    | Q6P9B6 | K1609_HUMAN |                                 | 2  | CCCTTCGCTGT   | 0.632 |
| - | 8  | 1131 | se_Mutation_p.P2; | NM_017740    | NP_060210    | Q9NXF8 | ZDHC7_HUMAN |                                 | 1  | TGTGGGCTTCT   | 0.572 |
| + | 2  | 1176 | H3_uc010vou.1_R   | NM_020655    | NP_065706    | Q8WXH2 | JPH3_HUMAN  | ic (Potential). MORN 7.         | 2  | CGACGGGCTC    | 0.647 |
| - | 24 | 2243 | pn.1_Missense_M   | NM_000135    | NP_000126    | O15360 | FANCA_HUMAN |                                 | 6  | CACTGGAGGCA   | 0.642 |
| - | 9  | 1179 | cjf.2_Intron PRDM | NM_001098173 | NP_001091643 | Q9NQW5 | PRDM7_HUMAN |                                 | 1  | CCCCATACCAG   | 0.522 |
| + | 3  | 758  | orf97_uc010vpz.1_ | NM_001013672 | NP_001013694 | Q6ZQX7 | CQ097_HUMAN | tandem repeat of A-L-K-G-       | 1  | ACCCCGACCC    | 0.726 |
| - | 11 | 1809 | fta.1_RNA SCARF   | NM_003693    | NP_003684    | Q14162 | SREC_HUMAN  | Cytoplasmic (Potential).        | 1  | TGGCCGCTTGG   | 0.667 |
| + | 9  | 1237 | _p.L215H CTNS_u   | NM_004937    | NP_004928    | O60931 | CTNS_HUMAN  | ical; (Potential).              | 0  | TTGCCTCACGC   | 0.607 |
| + | 20 | 3089 | 7M USP6_uc010ck   | NM_004505    | NP_004496    | P35125 | UBP6_HUMAN  | ab-GAP TBC.                     | 5  | TGGACGTGTAT   | 0.587 |
| - | 4  | 2644 | p.G697R NLRP1_    | NM_033004    | NP_127497    | Q9C000 | NALP1_HUMAN |                                 | 9  | CCTCCCTGAG,   | 0.562 |
| - | 5  | 808  | XE3_uc010vuo.1_   | NM_021628    | NP_067641    | Q9BYJ1 | LOXE3_HUMAN | ipoxygenase.                    | 5  | ATCTTCCAGCTI  | 0.473 |
| - | 4  | 751  | 5A35_uc002gkt.2_  | NM_201520    | NP_958928    | Q3KQZ1 | S2535_HUMAN | Solcar 3.                       | 0  | GGGCTGGTTGT   | 0.597 |
| - | 34 | 4856 | uc002gml.1_Intron | NM_017533    | NP_060003    | Q9Y623 | MYH4_HUMAN  | Potential.                      | 13 | TCTTTTCAGCA   | 0.408 |
| - | 22 | 2766 | 3_Missense_Mutat  | NM_001100112 | NP_001093582 | Q9UKX2 | MYH2_HUMAN  | Potential.                      | 14 | TTCTTCCAGTTC  | 0.433 |
| - | 22 | 2755 | 3_Missense_Mutat  | NM_001100112 | NP_001093582 | Q9UKX2 | MYH2_HUMAN  | Potential.                      | 14 | TCCTTCTTTTTC  | 0.428 |
| - | 9  | 1701 | ow.2_Missense_M   | NM_006470    | NP_006461    | O95361 | TRI16_HUMAN | 330.2/SPRY.                     | 3  | GTGTGCTGTGTC  | 0.557 |
| + | 11 | 2459 | ae_Mutation_p.E26 | NM_014695    | NP_055510    | A2RUR9 | C144A_HUMAN | Potential.                      | 0  | AAAAGGAACTA   | 0.333 |
| + | 9  | 767  | vyb.1_Missense_M  | NM_001040078 | NP_001035167 | Q6DKI2 | LEG9C_HUMAN | Galectin 2.                     | 1  | CCATTCCGGGA   | 0.587 |
| - | 53 | 6774 | no.2_Missense_M   | NM_198836    | NP_942133    | Q13085 | ACACA_HUMAN |                                 | 2  | CATCCGGCCTG   | 0.512 |

rs70958396

|   |    |      |                   |              |              |        |              |    |                |       |             |
|---|----|------|-------------------|--------------|--------------|--------|--------------|----|----------------|-------|-------------|
| - | 8  | 1873 | di.1_Missense_Mt  | NM_000458    | NP_000449    | P35680 | HNF1B_HUMAN  | 3  | ATTACCTGTTTAC  | 0.537 |             |
| + | 2  | 219  | q.2_Missense_Mu   | NM_000759    | NP_000750    | P09919 | CSF3_HUMAN   | 1  | CGCAGCGCTCC    | 0.642 |             |
| + | 4  | 505  | ense_Mutation_p.l | NM_133264    | NP_573571    | Q8TF74 | WIPF2_HUMAN  | 3  | TCTTCCAAGGA    | 0.517 |             |
| - | 1  | 117  |                   | NM_030967    | NP_112229    | Q07627 | KRA11_HUMAN  | 0  | AGGTCCCCTG     | 0.607 |             |
| - | 10 | 1604 |                   | NM_021078    | NP_066564    | Q92830 | KAT2A_HUMAN  | 2  | ACACCCGCCGG    | 0.642 |             |
| + | 4  | 561  | _5'Flank EFTUD2   | NM_213607    | NP_998772    | Q8IW40 | CC103_HUMAN  | 1  | CTGACCGGGCA    | 0.647 | rs143476313 |
| + | 21 | 2888 | p.R706Q KPNB1     | NM_002265    | NP_002256    | Q14974 | IMB1_HUMAN   | 3  | AGGGCGGAGAT    | 0.428 |             |
| - | 23 | 2701 | ilw.1_Missense_Mi | NM_145798    | NP_665741    | Q9BZF2 | OSBL7_HUMAN  | 0  | TCCCATAGCCTC   | 0.652 |             |
| + | 14 | 1574 | ense_Mutation_p.l | NM_176096    | NP_788276    | Q96JB5 | CK5P3_HUMAN  | 0  | CGGGCGCCCTG    | 0.542 |             |
| - | 2  | 870  |                   | NM_001080439 | NP_001073908 | Q4G112 | HSF5_HUMAN   | 3  | TATCTGAAAATG   | 0.478 |             |
| + | 4  | 473  | R11_uc002ixg.1_F  | NM_018304    | NP_060774    | Q96HE9 | PRR11_HUMAN  | 2  | AGGAAGCACTG    | 0.234 |             |
| - | 6  | 1305 | EKHM1P_uc010wc    | NR_024386    |              |        |              | 0  | TGAGGGAGAGA    | 0.657 |             |
| + | 2  | 857  | o.R266C BPTF_uc   | NM_182641    | NP_872579    | Q12830 | BPTF_HUMAN   | 4  | CTTTTCGCTTTC   | 0.443 |             |
| - | 35 | 4574 |                   | NM_080284    | NP_525023    | Q8N139 | ABCA6_HUMAN  | 7  | CAGGAGGACAC    | 0.483 |             |
| - | 3  | 771  |                   | NM_006678    | NP_006669    | Q08708 | CLM6_HUMAN   | 0  | CTGTGGTCGTC    | 0.592 |             |
| + | 17 | 2389 | l195_uc010wsb.1_  | NM_014738    | NP_055553    | Q12767 | K0195_HUMAN  | 1  | TGGCACCGCTG    | 0.592 |             |
| - | 7  | 784  | _p.P201L NPLOC    | NM_017921    | NP_060391    | Q8TAT6 | NPL4_HUMAN   | 2  | CATTCGGCCAC    | 0.512 |             |
| + | 19 | 2973 | p.V849I RBBP8_u   | NM_002894    | NP_002885    | Q99708 | COM1_HUMAN   | 3  | AAGACGTCAGC    | 0.368 |             |
| + | 4  | 675  | p.E197K LAMA3_    | NM_198129    | NP_937762    | Q16787 | LAMA3_HUMAN  | 11 | TAAAAAGAAATTTG | 0.323 |             |
| - | 15 | 2458 | vi.3_Missense_Mu  | NM_001941    | NP_001932    | Q14574 | DSC3_HUMAN   | 4  | CTGATCCCATAC   | 0.433 |             |
| + | 4  | 555  |                   | NM_000371    | NP_000362    | P02766 | TTHY_HUMAN   | 1  | CACGGCTGTCG    | 0.537 |             |
| + | 12 | 2378 | b.2_Missense_Mu   | NM_033646    | NP_387450    | Q9ULB5 | CADH7_HUMAN  | 4  | GGAGGATGTG     | 0.478 |             |
| - | 9  | 1672 | p.G462E NETO1_    | NM_138966    | NP_620416    | Q8TDF5 | NETO1_HUMAN  | 4  | GTTCCTTCTGGC   | 0.488 |             |
| + | 8  | 2176 |                   | NM_001194    | NP_001185    | Q9UL51 | HCN2_HUMAN   | 0  | GCTGGGTCAGC    | 0.567 |             |
| - | 4  | 530  | _p.T91M DPP9_u    | NM_139159    | NP_631898    | Q86TI2 | DPP9_HUMAN   | 1  | GCATCCGTCTCT   | 0.642 |             |
| - | 2  | 1759 |                   | NM_182919    | NP_891549    | Q8IUC6 | TCAM1_HUMAN  | 1  | TGGCCGTGTCG    | 0.652 |             |
| - | 2  | 1251 |                   | NM_182919    | NP_891549    | Q8IUC6 | TCAM1_HUMAN  | 1  | TTGGAGTGGCG    | 0.512 |             |
| - | 5  | 874  | qjg.1_Missense_M  | NM_005490    | NP_005481    | Q9BRG2 | SH23A_HUMAN  | 2  | GGGGACGTTCA    | 0.662 |             |
| + | 5  | 408  | p.C5_uc002mhj.1_  | NM_174918    | NP_777578    | Q8IX19 | MCEM1_HUMAN  | 1  | AAACTCCGTAC    | 0.547 | rs139191722 |
| - | 4  | 384  | q.2_Missense_Mu   | NM_021155    | NP_066978    | Q9NNX6 | CD209_HUMAN  | 1  | TCAGCTGGGTC    | 0.562 |             |
| - | 1  | 2819 |                   | NM_024690    | NP_078966    | Q8WXI7 | MUC16_HUMAN  | 57 | CAGATGGATTCC   | 0.488 |             |
| - | 24 | 3703 | e.2_Missense_Mu   | NM_003331    | NP_003322    | P29597 | TYK2_HUMAN   | 9  | CTCAAGGAATT    | 0.373 |             |
| + | 7  | 885  | l2_uc010dxk.2_5'  | NM_031209    | NP_112486    | Q9BXR0 | TGT_HUMAN    | 1  | GACAGCGGTGA    | 0.632 |             |
| + | 2  | 265  | N16_uc002mqu.1    | NM_012466    | NP_036598    | Q9UKR8 | TSN16_HUMAN  | 1  | AATGTGGAGGG    | 0.498 |             |
| + | 4  | 1932 | e_Mutation_p.S62  | NM_144566    | NP_653167    | Q9H0M5 | ZN700_HUMAN  | 0  | CTCAGTTGTGCT   | 0.483 |             |
| + | 4  | 1934 | e_Mutation_p.C62  | NM_144566    | NP_653167    | Q9H0M5 | ZN700_HUMAN  | 0  | GCAGTTGTGCT    | 0.483 |             |
| - | 5  | 600  |                   | NM_001080404 | NP_001073873 | C9JN71 | ZN878_HUMAN  | 0  | GGAAACCTGAA    | 0.423 |             |
| - | 4  | 1916 | 799_uc002mts.3_   | NM_001080821 | NP_001074290 | Q96GE5 | ZN799_HUMAN  | 6  | TACATTCATACG   | 0.413 |             |
| + | 10 | 1708 |                   | NM_004843    | NP_004834    | Q6UWB1 | I27RA_HUMAN  | 0  | ATGCCCTCCA     | 0.647 |             |
| + | 11 | 1468 | e_Mutation_p.R17  | NM_173544    | NP_775815    | Q86XR2 | NIBL2_HUMAN  | 0  | CCGAGCGGAGC    | 0.607 |             |
| + | 6  | 923  | _p.V118I RFKANK   | NM_003721    | NP_003712    | O14593 | RFK_HUMAN    | 2  | AGACCGTTGCG    | 0.667 |             |
| + | 8  | 3047 | aw.3_Missense_Mi  | NM_153221    | NP_694953    | Q8IUL8 | CILP2_HUMAN  | 1  | CCTCGGCAGCC    | 0.697 |             |
| + | 4  | 1529 |                   | NM_031218    | NP_112495    | P35789 | ZNF93_HUMAN  | 1  | ATAAGAAAATTC   | 0.368 |             |
| + | 4  | 1613 |                   | NM_031218    | NP_112495    | P35789 | ZNF93_HUMAN  | 1  | ATAAGAAAATTC   | 0.348 |             |
| - | 4  | 935  |                   | NM_001159293 | NP_001152765 | C9JHM3 | C9JHM3_HUMAN | 1  | TCTCCACTATGA   | 0.403 |             |
| - | 4  | 743  | pc.1_Missense_M   | NM_001076675 | NP_001070143 | Q68DY1 | ZN626_HUMAN  | 1  | GTTCCTCCA      | 0.363 |             |
| - | 4  | 1447 | p.K353E ZNF708_   | NM_021269    | NP_067092    | P17019 | ZN708_HUMAN  | 6  | GTTCTTCCAG     | 0.343 |             |

|   |    |           |                    |              |              |        |             |                                |    |              |       |             |
|---|----|-----------|--------------------|--------------|--------------|--------|-------------|--------------------------------|----|--------------|-------|-------------|
| - | 4  | 1111      | rj.1_Missense_Mu   | NM_003430    | NP_003421    | Q05481 | ZNF91_HUMAN | C2H2-type 7.                   | 0  | AAAGAACGGCTA | 0.393 | rs410211    |
| + | 8  | 893       | rss.2_Missense_M   | NM_003796    | NP_003787    | O94763 | RMP_HUMAN   |                                | 2  | GAACTGTTTCAG | 0.279 |             |
| - | 29 | 3224      |                    | NM_032139    | NP_115515    | Q96NW4 | ANR27_HUMAN |                                | 5  | CTACCGTGTGTC | 0.612 |             |
| - | 3  | 613       | LC7A10_uc010xrc    | NM_019849    | NP_062823    | Q9NS82 | AAA1_HUMAN  |                                | 2  | GGGGGGGATGC  | 0.632 |             |
| - | 7  | 1345      | _p.D79N LGI4_ucl   | NM_139284    | NP_644813    | Q8N135 | LGI4_HUMAN  | EAR 1.                         | 1  | GTAGTCCCAGG  | 0.677 |             |
| + | 2  | 129       | yb.1_RNA FXDYD1_   | NM_021902    | NP_068702    | O00168 | PLM_HUMAN   |                                | 0  | CCAAGGCAGGT  | 0.617 |             |
| - | 8  | 1186      |                    | NM_021232    | NP_067055    | Q9UF12 | PROD2_HUMAN |                                | 2  | GGCCACCGCTC  | 0.622 |             |
| - | 5  | 1710      |                    | NM_133466    | NP_597723    | Q8N141 | ZFP82_HUMAN | C2H2-type 12.                  | 2  | ATAAGGGATGAA | 0.388 |             |
| + | 6  | 1744      | o.1_Missense_Mut   | NM_181786    | NP_861451    | P10072 | HKR1_HUMAN  |                                | 2  | ACACACGGGGG  | 0.537 |             |
| - | 7  | 1908      | e_Mutation_p.Q40l  | NM_181882    | NP_870998    | Q9BXM0 | PRAX_HUMAN  | L-[LIVMAP]-[AQKHRPE];          | 2  | CAGCTGTACCT  | 0.587 |             |
| + | 1  | 83        | ise_Mutation_p.P3  | NM_001815    | NP_001806    | P40198 | CEAM3_HUMAN |                                | 1  | TGGGGCCCCCC  | 0.597 |             |
| - | 3  | 759       | 02ovk.1_Missense   | NM_002785    | NP_002776    | Q9UQ72 | PSG11_HUMAN | like C2-type 1.                | 0  | ATATTTACATTC | 0.507 |             |
| + | 3  | 654       | TL_uc010ekn.2_l    | NM_017659    | NP_060129    | Q9NXS2 | QPCTL_HUMAN |                                | 1  | TGGGGCCAGTG  | 0.622 |             |
| + | 19 | 2884      | _p.G764S TRPM4_    | NM_017636    | NP_060106    | Q8TD43 | TRPM4_HUMAN | ical; (Potential).             | 2  | TCCTCGCGTG   | 0.607 |             |
| + | 8  | 954       | _p.P88S MED25_     | NM_030973    | NP_112235    | Q71SY5 | MED25_HUMAN | Pro-rich.                      | 1  | TGGGCCCTCGC  | 0.627 |             |
| - | 8  | 1124      |                    | NM_016148    | NP_057232    | Q9Y566 | SHAN1_HUMAN | ANK 5.                         | 2  | ACCTCGATACAC | 0.542 |             |
| + | 1  | 820       |                    | NM_173856    | NP_776255    | Q8NFX6 | VN1R2_HUMAN | cellular (Potential).          | 0  | GAGATTTGGGA  | 0.428 |             |
| - | 3  | 2049      | 2qcj.3_Missense_M  | NM_144687    | NP_653288    | P59046 | NAL12_HUMAN |                                | 7  | CCAAGGAGCCC  | 0.567 |             |
| - | 6  | 1228      | ILRA3_uc010erk.2   | NM_006865    | NP_006856    | Q8N6C8 | LIRA3_HUMAN | like C2-type 4.                | 1  | CCGAGGTCACA  | 0.587 |             |
| - | 8  | 318       | _p.E77K TNNT1_u    | NM_003283    | NP_003274    | P13805 | TNNT1_HUMAN |                                | 1  | CAGCTCCAGCA  | 0.607 |             |
| - | 8  | 1673      | _p.E356K PTPRH_    | NM_002842    | NP_002833    | Q9HD43 | PTPRH_HUMAN | tential). Fibronectin type-III | 4  | CAGTTCCTTTAC | 0.577 |             |
| - | 23 | 2880_2881 | 02aju.2_5'Flank S/ | NM_014931    | NP_055746    | Q9UPN7 | PP6R1_HUMAN |                                | 0  | ACTGGGAGCCTC | 0.653 |             |
| + | 3  | 981       | tg.2_Missense_Mt   | NM_176811    | NP_789781    | Q86W28 | NALP8_HUMAN | NACHT.                         | 13 | TGAGTGAAGAC  | 0.493 |             |
| - | 2  | 164       | tation_p.S33F uc0l | NM_144690    | NP_653291    | Q96NG8 | ZN582_HUMAN |                                | 4  | CAAGGACATG   | 0.448 |             |
| + | 2  | 187       | NF324B_uc010eu     | NM_207395    | NP_997278    | Q6AW86 | Z324B_HUMAN | KRAB.                          | 1  | GTACCGCCACG  | 0.562 |             |
| - | 2  | 604       | _p.R60C CHMP2A     | NM_198426    | NP_940818    | O43633 | CHM2A_HUMAN | ction with VPS4B.              | 0  | GATCGAACAG   | 0.522 |             |
| - | 2  | 219       | aya.2_Missense_M   | NM_025203    | NP_079479    | Q9H6R7 | CB044_HUMAN |                                | 2  | CCCATCGTCC/  | 0.478 |             |
| + | 2  | 240       | 2rhv.3_Missense_M  | NM_020134    | NP_064519    | Q9BPU6 | DPYL5_HUMAN |                                | 2  | CTGACGTCTAC  | 0.572 | rs139435744 |
| - | 11 | 1264      | np.1_Missense_M    | NM_144575    | NP_653176    | Q6MZZ7 | CAN13_HUMAN |                                | 2  | GTCTCTCTGCA  | 0.473 |             |
| + | 2  | 568       | M1B_uc002rtv.2_In  | NM_002706    | NP_002697    | O75688 | PPM1B_HUMAN |                                | 2  | TATTCTCTCACG | 0.453 |             |
| - | 2  | 790       |                    | NM_014482    | NP_055297    | O95393 | BMP10_HUMAN |                                | 2  | CTTTTGCCAAC  | 0.502 |             |
| + | 4  | 766       |                    | NM_178439    | NP_848526    | Q96IK5 | GMCL1_HUMAN |                                | 3  | TGGCAGCAGCT  | 0.398 |             |
| + | 23 | 12476     | .R4078_splice ALM  | NM_015120    | NP_055935    | Q8TCU4 | ALMS1_HUMAN |                                | 9  | AAACGGTAAGA  | 0.448 |             |
| + | 1  | 64        | Mutation_p.R20Q    | NM_004389    | NP_004380    | P26232 | CTNA2_HUMAN |                                | 9  | AATCCGGACGC  | 0.408 |             |
| - | 4  | 948       | svr.2_Nonsense_I   | NM_017849    | NP_060319    | O75204 | TM127_HUMAN |                                | 0  | TGGCTGGAACT  | 0.617 |             |
| - | 7  | 2705      |                    | NM_207362    | NP_997245    | Q6NV74 | CB055_HUMAN | Pro-rich.                      | 0  | CAGCTCCCCTG  | 0.701 |             |
| - | 19 | 3297      | i.2_Missense_Mut   | NM_002285    | NP_002276    | P51826 | AFF3_HUMAN  |                                | 6  | GGGCCCTTGTT  | 0.443 |             |
| - | 8  | 1432      | _p.S449F TBC1D8    | NM_001102426 | NP_001095896 | O95759 | TBCD8_HUMAN |                                | 3  | TTTGAGAAGAC  | 0.532 |             |
| + | 11 | 1550      | wd.1_Missense_M    | NM_003855    | NP_003846    | Q13478 | IL18R_HUMAN | oplasmic (Potential).          | 3  | TGAAAGAAAAA  | 0.353 |             |
| + | 2  | 229       |                    | NM_032411    | NP_115787    | Q9H1Z8 | AUGN_HUMAN  |                                | 0  | AAAAACGAGAA  | 0.363 |             |
| + | 7  | 1174      | tdx.2_Missense_M   | NM_001056    | NP_001047    | O00338 | ST1C2_HUMAN |                                | 1  | CAAATCGTTCT/ | 0.403 | rs112864909 |
| + | 4  | 564       | SH2P_uc002tkd.2_   | NM_182905    | NP_878908    |        |             |                                | 0  | CATCGCCAAG   | 0.522 |             |
| + | 5  | 480       | _uc002tks.3_Miss   | NM_007082    | NP_009013    | Q9UBK7 | RBL2A_HUMAN |                                | 1  | TGCTCTACT/   | 0.582 |             |
| + | 16 | 1427      | ryf.1_Missense_M   | NM_006770    | NP_006761    | Q9UEW3 | MARCO_HUMAN | tracellular (Potential).       | 6  | TAACCGAGGCC  | 0.532 |             |
| - | 6  | 691       | flr.2_Missense_M   | NM_014553    | NP_055368    | Q9NZI6 | TF2L1_HUMAN |                                | 3  | CATTCTCGTTCT | 0.587 |             |
| + | 2  | 599       | tsd7B_uc002tvs.2   | NM_001080427 | NP_001073896 |        |             |                                | 7  | CCATTTCTGTCT | 0.458 |             |
| - | 6  | 1090      | _p.P175S ZEB2_u    | NM_014795    | NP_055610    | O60315 | ZEB2_HUMAN  |                                | 9  | ATCTGGAGTTCC | 0.557 |             |

|   |    |           |                   |              |              |        |             |                               |    |               |       |             |
|---|----|-----------|-------------------|--------------|--------------|--------|-------------|-------------------------------|----|---------------|-------|-------------|
| - | 21 | 2136      | r_1_Missense_Mut  | NM_004543    | NP_004534    | P20929 | NEBU_HUMAN  |                               | 20 | CACAGTAATTCAT | 0.358 |             |
| - | 1  | 370       |                   | NM_019845    | NP_062819    | Q9NS64 | RPRM_HUMAN  |                               | 0  | TCCTCCGCGA    | 0.667 |             |
| - | 17 | 3502      | s.E1042K SCN1A_   | NM_006920    | NP_008851    | P35498 | SCN1A_HUMAN |                               | 13 | AGTTTCTTCAGC  | 0.428 |             |
| - | 2  | 469       |                   | NM_013233    | NP_037365    | Q9UEW8 | STK39_HUMAN | rotein kinase.                | 2  | TCATCCATACTG  | 0.458 |             |
| - | 48 | 9207      |                   | NM_004525    | NP_004516    | P98164 | LRP2_HUMAN  | ; A 23. Extracellular (Potent | 29 | ACAGGTGAATTC  | 0.453 |             |
| - | 4  | 695       | rfp_2_Missense_M  | NM_014168    | NP_054887    | Q9NRN9 | METL5_HUMAN |                               | 1  | CTGTTCTTGCC   | 0.338 |             |
| + | 9  | 836       | A1_uc010frw.1_5'  | NM_000090    | NP_000081    | P02461 | CO3A1_HUMAN | le-helical region.            | 13 | ACCTGGAGAGC   | 0.383 |             |
| + | 1  | 159       | uc002uup.2_Intror | NM_138395    | NP_612404    | Q96GW9 | SYMM_HUMAN  |                               | 3  | CGATGATGCTT   | 0.627 |             |
| + | 8  | 1252      | rch.2_Missense_M  | NM_001142300 | NP_001135772 | Q8N7R7 | CCYL1_HUMAN |                               | 0  | TCATTGGTATTC  | 0.408 |             |
| + | 1  | 133       |                   | NM_001927    | NP_001918    | P17661 | DESM_HUMAN  | Head.                         | 2  | CCGCCGCACCT   | 0.557 |             |
| - | 3  | 329       | zlm.1_Missense_M  | NM_004438    | NP_004429    | P54764 | EPHA4_HUMAN | ellular (Potential).          | 12 | ACACCCTCTGAC  | 0.463 |             |
| - | 22 | 2212      |                   | NM_000092    | NP_000083    | P53420 | CO4A4_HUMAN | le-helical region.            | 11 | GCCAGGGAGCC   | 0.587 |             |
| + | 3  | 564       | rpe.2_Missense_M  | NM_004504    | NP_004495    | P52594 | AGFG1_HUMAN | Arf-GAP.                      | 4  | AATCCAGACTT   | 0.328 |             |
| + | 16 | 2065      | mp.1_Missense_M   | NM_001017915 | NP_001017915 | Q92835 | SHIP1_HUMAN |                               | 2  | AAGAAATCACG   | 0.473 |             |
| + | 10 | 1145      | n_p.L229 LRRFIP   | NM_001137552 | NP_001131024 | Q32MZ4 | LRRF1_HUMAN |                               | 3  | AAGAGTTAAATC  | 0.458 |             |
| - | 9  | 1161      | as.2_Missense_M   | NM_019609    | NP_062555    | Q96SM3 | CPXM1_HUMAN |                               | 4  | CCCGCCCCAGG   | 0.657 |             |
| + | 1  | 160       | l10gbd.1_RNA PAI  | NM_153638    | NP_705902    | Q9BZ23 | PANK2_HUMAN |                               | 0  | TGGACGGAGGC   | 0.652 |             |
| + | 3  | 638       | 2_Missense_Mutat  | NM_022096    | NP_071379    | Q9NU02 | ANKR5_HUMAN |                               | 2  | GGCTGTACTC    | 0.438 |             |
| + | 15 | 2481      | se_Mutation_p.A7  | NM_032819    | NP_116208    | Q9BYN7 | ZN341_HUMAN |                               | 2  | GACACGCTGAG   | 0.692 |             |
| + | 9  | 1816      | M2_uc010zuv.1_Ir  | NM_006690    | NP_006681    | Q9Y5R2 | MMP24_HUMAN | ical; (Potential).            | 0  | TGGCCGTGGTC   | 0.607 |             |
| - | 4  | 1844      | 1_5'Flank EIF6_uc | NM_178468    | NP_848563    | Q9BQN1 | FA83C_HUMAN |                               | 2  | ATACCAGGTC    | 0.642 |             |
| + | 7  | 908       | T_uc002xoi.1_RN   | NM_015937    | NP_057021    | Q969N2 | PIGT_HUMAN  | lenal (Potential).            | 1  | AGAGCCGAGTC   | 0.607 |             |
| + | 12 | 2112_2113 | im.2_Missense_M   | NM_181659    | NP_858045    | Q9Y6Q9 | NCOA3_HUMAN | Ser-rich.                     | 5  | TCCTCCTTGAC   | 0.47  |             |
| - | 24 | 3016      | tv.1_Missense_M   | NM_020820    | NP_065871    | Q8TCU6 | PREX1_HUMAN |                               | 6  | TGTTGCGTCCA   | 0.527 |             |
| - | 3  | 1304      |                   | NM_021035    | NP_066363    | Q9P2E3 | ZNFX1_HUMAN |                               | 2  | GCGAAGGAAGG   | 0.502 |             |
| + | 15 | 1841      | _p.T244M SLC9A8   | NM_015266    | NP_056081    | Q9Y2E8 | SL9A8_HUMAN |                               | 1  | GCTGACGCAGG   | 0.642 |             |
| - | 4  | 1659      | zyx.1_Missense_M  | NM_173091    | NP_775114    | Q13469 | NFAC2_HUMAN | RHD.                          | 2  | TCCCCTGATTC   | 0.517 | rs145327846 |
| - | 9  | 1880      | mj.2_Missense_Mu  | NM_199427    | NP_955459    | Q9NPA5 | ZF64A_HUMAN | 2H2-type 7.                   | 2  | CACGCGCAGGG   | 0.657 |             |
| - | 3  | 1956      | gij.1_Missense_M  | NM_006526    | NP_006517    | O75362 | ZN217_HUMAN |                               | 6  | ACCATCAAAA    | 0.448 |             |
| - | 3  | 436       | j.3_Missense_Mut  | NM_001336    | NP_001327    | Q9UBR2 | CATZ_HUMAN  |                               | 1  | GATCCGATCTGC  | 0.622 |             |
| + | 5  | 447       | _p.R121* OGFR_    | NM_007346    | NP_031372    | Q9NZT2 | OGFR_HUMAN  |                               | 0  | CTCTGCGAGAA   | 0.622 |             |
| - | 15 | 1164      | 'TE_uc002yir.1_Mi | NM_199261    | NP_954870    | P56180 | TPTE_HUMAN  | hatase tensin-type.           | 5  | CAACTTCTTAAA  | 0.333 |             |
| - | 4  | 362       | SAMSN1_uc002yjn   | NM_022136    | NP_071419    | Q9NSI8 | SAMN1_HUMAN |                               | 4  | TCATCCTTCAG   | 0.413 |             |
| - | 6  | 953       | F160_uc010gll.1_F | NM_015565    | NP_056380    | O94822 | LTN1_HUMAN  |                               | 0  | AGGTACACTGT   | 0.303 |             |
| + | 8  | 874       |                   | NM_005441    | NP_005432    | Q13112 | CAF1B_HUMAN | WD 5.                         | 2  | CCGACGGATCT   | 0.468 |             |
| - | 1  | 551       | zlh.1_5'UTR POTE  | NM_001136213 | NP_001129685 | Q6S545 | POTEH_HUMAN |                               | 1  | CGGCTCCATGA   | 0.587 |             |
| + | 15 | 1204      | vg.3_Missense_M   | NM_148175    | NP_680480    | Q13356 | PPIL2_HUMAN | e cyclophilin-type.           | 2  | GGCCCGCGGA    | 0.632 |             |
| + | 5  | 1944      | A2A_uc010guq.2_   | NM_000675    | NP_000666    | P29274 | AA2AR_HUMAN | Cytoplasmic.                  | 0  | AGTGTGCCAG    | 0.607 |             |
| - | 14 | 2096      | jj.1_Missense_Mu  | NM_001008496 | NP_001008496 | Q723Z3 | PIWL3_HUMAN |                               | 4  | TATTCCGTAATG  | 0.328 | rs149915066 |
| - | 10 | 1571      | jj.1_Missense_Mu  | NM_001008496 | NP_001008496 | Q723Z3 | PIWL3_HUMAN | PAZ.                          | 4  | AGGCCCTTTTTC  | 0.468 |             |
| - | 12 | 2430      | k.2_Missense_Mut  | NM_022081    | NP_071364    | Q9NQG7 | HPS4_HUMAN  |                               | 0  | CCTGGGCAGCG   | 0.582 |             |
| - | 3  | 749       |                   | NM_020530    | NP_065391    | P13725 | ONCM_HUMAN  |                               | 1  | CTGCGCACCC    | 0.667 |             |
| + | 3  | 1422      | 3_uc003amy.2_In   | NM_000362    | NP_000353    | P35625 | TIMP3_HUMAN | NTR.                          | 1  | CCATGTGCAGT   | 0.448 |             |
| - | 15 | 2572      | wp.2_Missense_M   | NM_004737    | NP_004728    | O95461 | LARGE_HUMAN | lenal (Potential).            | 3  | AGTCACGTCTCA  | 0.572 |             |
| - | 3  | 674       | _p.P12L MYH9_u    | NM_002473    | NP_002464    | P35579 | MYH9_HUMAN  | rosin head-like.              | 11 | TGTGAGGGGGC   | 0.532 |             |
| - | 3  | 475       | aqe.2_Missense_M  | NM_001163857 | NP_001157329 | O43247 | EAN57_HUMAN |                               | 0  | CCTCTCCGAG    | 0.637 |             |
| - | 7  | 1624      |                   | NM_152512    | NP_689725    | Q8IYW4 | ENTD1_HUMAN |                               | 3  | TAAAGGAGGTAC  | 0.468 |             |

|   |    |           |                    |              |              |        |              |                                |      |               |       |             |
|---|----|-----------|--------------------|--------------|--------------|--------|--------------|--------------------------------|------|---------------|-------|-------------|
| - | 9  | 1682      | ye.1_Missense_Mt   | NM_020831    | NP_065882    | Q969V6 | MKL1_HUMAN   | p.S492S(1)                     | 5    | GTGGCGAGGCC   | 0.677 |             |
| + | 23 | 3133      | H7B_uc010gyl.1_li  | NM_017590    | NP_060060    | Q9UGR2 | Z3H7B_HUMAN  | Poly-Ala.                      | 1    | iCCACCGCCACC  | 0.662 | rs140753362 |
| - | 1  | 2941      |                    | NM_014246    | NP_055061    | Q9NYQ6 | CELR1_HUMAN  | r (Potential). Cadherin 7.     | 11   | CGAGGCGCTAAC  | 0.567 |             |
| - | 18 | 3075      | _5'Flank PLXNB2_   | NM_012401    | NP_036533    | O15031 | PLXB2_HUMAN  | Extracellular p.P1033R(1)      | 6    | GTAGCGGCTCG   | 0.657 |             |
| + | 11 | 1357      | _p.A379V CNTN4_    | NM_175607    | NP_783200    | Q8IWW2 | CNTN4_HUMAN  | like C2-type 4.                | 7    | AGATGCTGGCA   | 0.363 |             |
| - | 3  | 1039      | AP3_uc003bri.1_    | NM_014850    | NP_055665    | O43295 | SRGP2_HUMAN  |                                | 9    | ATTGTTTCATGAA | 0.542 |             |
| - | 12 | 1499      | vh.1_Missense_M    | NM_001080423 | NP_001073892 | Q9C0E4 | GRIP2_HUMAN  |                                | 1    | TGCAGGAAAAG   | 0.612 |             |
| + | 4  | 1009      | za.2_Missense_M    | NM_032137    | NP_115513    | Q8ND61 | CC020_HUMAN  |                                | 4    | iCTACAGCAGCG  | 0.537 |             |
| - | 21 | 2609      | dj.2_Missense_Mt   | NM_001068    | NP_001059    | Q02880 | TOP2B_HUMAN  |                                | 5    | CTACACGTTGAT  | 0.383 |             |
| + | 2  | 833       | cdq.2_Missense_M   | NM_052953    | NP_443185    | Q96PB8 | LRC3B_HUMAN  | LRR 1.                         | 4    | iCCAATGAAATTI | 0.408 |             |
| - | 5  | 1458      |                    | NM_015551    | NP_056366    | O60279 | SUSD5_HUMAN  | cellular (Potential).          | 2    | GCCCCGAGGGA   | 0.527 | rs113725248 |
| + | 5  | 878       | chb.2_Missense_M   | NM_178339    | NP_848029    | Q8IVJ8 | APRG1_HUMAN  |                                | 1    | iTGACCTTTGG   | 0.448 |             |
| - | 21 | 3695      |                    | NM_014139    | NP_054858    | Q9UI33 | SCNBA_HUMAN  | III.                           | 9    | iCACCACCTTATC | 0.448 |             |
| + | 1  | 992       |                    | NM_152393    | NP_689606    | Q2TBA0 | KBTB5_HUMAN  |                                | 1    | iAGGAGGCCGAA  | 0.567 |             |
| - | 9  | 1515      | _p.A114V SLC6A2    | NM_020208    | NP_064593    | Q9NP91 | S6A20_HUMAN  | cellular (Potential).          | 2    | iTGCCCGCTAG   | 0.577 |             |
| - | 1  | 1000      | _5'Flank ARIH2_L   | NM_001123040 | NP_001116512 | Q8N7S6 | CC071_HUMAN  |                                | 0    | iTGACCCTAAGT  | 0.572 |             |
| - | 2  | 367       |                    | NM_003335    | NP_003326    | P41226 | UBA7_HUMAN   | ximate repeats. 1-1.           | 2    | .GGTGGGGTGGC  | 0.657 |             |
| - | 4  | 1355      | zv.2_Missense_Mu   | NM_033158    | NP_149348    | Q12891 | HYAL2_HUMAN  | EGF-like.                      | 1    | iGTTGCGGCGCA  | 0.632 |             |
| + | 38 | 3833_3834 |                    | NM_004947    | NP_004938    | Q8IZD9 | DOCK3_HUMAN  | DHR-2.                         | 0    | iAGTGGGAGGAC  | 0.589 |             |
| + | 15 | 2743      | A3_uc010hon.1_f    | NM_005233    | NP_005224    | P29320 | EPHA3_HUMAN  | Potential). Protein kinase.    | 33   | iATGAGGGCTAT  | 0.498 |             |
| + | 12 | 1925      | _p.S462F ALCAM     | NM_001627    | NP_001618    | Q13740 | CD166_HUMAN  | Potential). Ig-like C2-type 3. | 3    | AGGAATCTCCTT  | 0.343 |             |
| + | 1  | 384       |                    | NM_032600    | NP_115989    | Q8NEL0 | CCD54_HUMAN  |                                | 0    | iATATCCCCTGT  | 0.388 |             |
| - | 7  | 942       |                    | NM_138815    | NP_620170    | Q7Z7J5 | DPPA2_HUMAN  |                                | 3    | iCTGCCGAGAGA  | 0.512 | rs151045476 |
| + | 2  | 318       | xx.2_Missense_M    | NM_198196    | NP_937839    | P40200 | TACT_HUMAN   | Potential). Ig-like V-type 1.  | 3    | iAGACAGTAGGC  | 0.443 |             |
| + | 10 | 1217      | bik.1_Missense_M   | NM_001690    | NP_001681    | P38606 | VATA_HUMAN   |                                | 3    | iGGCCTCGTTTT  | 0.443 |             |
| + | 2  | 233       | ehf.1_Missense_M   | NM_001024660 | NP_001019831 | O60229 | KALRN_HUMAN  | CRAL-TRIO.                     | 6    | iATGTCCTTCTT  | 0.468 |             |
| + | 4  | 1022      |                    | NM_000539    | NP_000530    | P08100 | OPSD_HUMAN   | Name=7; (Potential).           | 0    | ATGATGAACAAG  | 0.612 |             |
| + | 2  | 504       |                    | NM_001102608 | NP_001096078 | A6NMZ7 | CO6A6_HUMAN  | cal region. VWFA 1.            | 8    | iAGACGGAGTGA  | 0.498 |             |
| + | 1  | 216       |                    | NM_001002026 | NP_001002026 | P56856 | CLD18_HUMAN  | cellular (Potential).          | 2    | iGTGCCGAGAG   | 0.607 |             |
| + | 4  | 1438      |                    | NM_139209    | NP_631948    | Q8WTQ7 | GRK7_HUMAN   | rotein kinase.                 | 5    | iAAACATCATTT  | 0.423 |             |
| + | 2  | 1765      |                    | NM_003412    | NP_003403    | Q15915 | ZIC1_HUMAN   | C2H2-type 4.                   | 2    | iCGACCGCAAGA  | 0.542 |             |
| - | 6  | 6215_6216 | _p.W99* IGSF10_    | NM_178822    | NP_849144    | Q6WRI0 | IGS10_HUMAN  | like C2-type 7.                | 13   | iAAACTCCAAGAT | 0.436 |             |
| + | 10 | 1775      |                    | NM_006218    | NP_006209    | P42336 | PK3CA_HUMAN  | PI3K helical.                  | 3553 | GATCCTCTCTCT  | 0.328 |             |
| + | 21 | 2733      | _uc011bqm.1_Mis    | NM_014616    | NP_055431    | Q9Y2G3 | AT11B_HUMAN  | lasmic (Potential).            | 3    | iATGACGTAAGC  | 0.338 |             |
| + | 18 | 1753      | d.1_Missense_Mu    | NM_015303    | NP_056118    | Q8N3P4 | VPS8_HUMAN   |                                | 1    | iCAAAGCAGTAC  | 0.443 |             |
| - | 2  | 370_371   | _2_Intron MASP1_u  | NM_001879    | NP_001870    | P48740 | MASP1_HUMAN  |                                | 4    | iACAGGGAGAAG  | 0.47  |             |
| - | 3  | 593       | _6_uc010hza.2_5'   | NM_001130845 | NP_001124317 | P41182 | BCL6_HUMAN   | BTB.                           | 5    | TTTTATGGGCTC  | 0.517 |             |
| - | 5  | 1428      | fsg.2_Missense_M   | NM_018192    | NP_060662    | Q8IVL5 | P3H2_HUMAN   |                                | 4    | TAGTAATCCACAT | 0.418 |             |
| + | 3  | 307       | D51N ZNF595_uc     | NM_182524    | NP_872330    | Q7Z310 | Q7Z310_HUMAN |                                | 0    | ACCCAGACCTGT  | 0.403 |             |
| + | 8  | 3510      | _p.K221R RGS12_    | NM_198229    | NP_937872    | O14924 | RGS12_HUMAN  |                                | 1    | iAAAAAAGGTGA  | 0.632 |             |
| - | 2  | 252       | X3_uc003gld.3_M    | NM_003501    | NP_003492    | O15254 | ACOX3_HUMAN  |                                | 1    | iACAGCGCCAGC  | 0.597 | rs145529976 |
| - | 5  | 1121      |                    | NM_001358    | NP_001349    | O43143 | DHX15_HUMAN  |                                | 1    | iCAACAGGATGT  | 0.403 |             |
| + | 3  | 443       | _Site_p.G58_splice | NM_018317    | NP_060787    | Q8N5T2 | TBC19_HUMAN  |                                | 1    | AAACAGGTTGGC  | 0.254 |             |
| + | 6  | 1427      | _p.R264Q KLHL5_    | NM_015990    | NP_057074    | Q96PQ7 | KLHL5_HUMAN  |                                | 1    | iAGACGACCCA   | 0.378 |             |
| - | 5  | 860       | _p.G85R UGDH_u     | NM_003359    | NP_003350    | O60701 | UGDH_HUMAN   |                                | 4    | iATCCCCTCCAAT | 0.512 |             |
| - | 39 | 5347      | YL_uc003gyi.1_Mi   | NM_015030    | NP_055845    | O94915 | FRYL_HUMAN   |                                | 1    | iCGTAATCCACC  | 0.507 |             |
| + | 3  | 474       |                    | NM_206919    | NP_996802    | Q6T311 | ARL9_HUMAN   | P (By similarity).             | 0    | iTGCCAGTAAAC  | 0.483 |             |



|   |    |                           |                    |              |              |        |             |                                |    |               |       |             |
|---|----|---------------------------|--------------------|--------------|--------------|--------|-------------|--------------------------------|----|---------------|-------|-------------|
| + | 4  | 965                       | . MUC7_uc003hjf.2  | NM_001145006 | NP_001138478 | Q8TAX7 | MUC7_HUMAN  | 3. Thr-rich.                   | 4  | CTCCACCATCTT  | 0.582 |             |
| + | 4  | 1139                      | . MUC7_uc003hjf.2  | NM_001145006 | NP_001138478 | Q8TAX7 | MUC7_HUMAN  | 6. Thr-rich.                   | 4  | GTGCCCCACCCA  | 0.577 |             |
| + | 4  | 1629                      | ε_Mutation_p.E41   | NM_004885    | NP_004876    | Q9Y5X5 | NPFF2_HUMAN | lasmic (Potential).            | 3  | GTGATGGAAGAA  | 0.343 |             |
| + | 5  | 3504                      | 3hkf.1_Missense_M  | NM_020859    | NP_065910    | Q8TF72 | SHRM3_HUMAN |                                | 3  | AAAACGGGGAG   | 0.607 |             |
| - | 8  | 937                       | T6L_uc003hkt.1_M   | NM_144571    | NP_653172    | Q96LI5 | CNO6L_HUMAN |                                | 1  | ATTTTGGCACGTC | 0.398 |             |
| - | 11 | 949                       | ε.G244E EMCN_ur    | NM_016242    | NP_057326    | Q9ULC0 | MUCEN_HUMAN | lasmic (Potential).            | 0  | ATTTTTCTTTGTG | 0.373 |             |
| - | 5  | 617                       | aa.2_Missense_Mi   | NM_001130721 | NP_001124193 | Q9H5J4 | ELOV6_HUMAN | ical; (Potential).             | 1  | ACCAACCTCCCC  | 0.522 |             |
| - | 1  | 1919                      | .1_Intron PCDH18   | NM_019035    | NP_061908    | Q9HCL0 | PCD18_HUMAN | r (Potential). Cadherin 5.     | 5  | AAACTTCTCTAGA | 0.418 |             |
| + | 4  | 732                       | _p.C169* FGB_uc    | NM_005141    | NP_005132    | P02675 | FIBB_HUMAN  |                                | 3  | CAGTTGCAATATT | 0.383 |             |
| - | 13 | 2014                      | Ickv.1_Missense_M  | NM_021069    | NP_066547    | O94875 | SRBS2_HUMAN |                                | 1  | AGAGATCGTCAC  | 0.542 |             |
| + | 8  | 1215                      |                    | NM_001003841 | NP_001003841 | Q695T7 | S6A19_HUMAN | ellular (Potential).           | 0  | ATCAACGCCTTC  | 0.657 |             |
| + | 2  | 1281                      |                    | NM_024337    | NP_077313    | P78414 | IRX1_HUMAN  | Poly-Pro.                      | 2  | ACCTCCACCAC   | 0.701 |             |
| - | 58 | 9763                      | 4H5_uc003jfc.2_5   | NM_001369    | NP_001360    | Q8TE73 | DYH5_HUMAN  |                                | 31 | TAAGACCTAATTC | 0.413 |             |
| - | 27 | 4360                      |                    | NM_001369    | NP_001360    | Q8TE73 | DYH5_HUMAN  | . Stem (By similarity).        | 31 | TTTTTTCAATATT | 0.313 |             |
| + | 11 | 2068                      |                    | NM_020227    | NP_064612    | Q9NQV7 | PRDM9_HUMAN | 2H2-type 5.                    | 6  | GAGGAGACACA   | 0.612 | rs112192848 |
| - | 11 | 2145                      | -110_uc011cnu.1_F  | NM_006727    | NP_006718    | Q9Y6N8 | CAD10_HUMAN | Extracellular (Potential).     | 12 | AGGGAGGAGCA   | 0.522 |             |
| - | 9  | 1634                      | 0iuq.1_Missense_M  | NM_030955    | NP_112217    | P58397 | ATS12_HUMAN | Disintegrin.                   | 9  | TACTTCTGGGC   | 0.473 |             |
| + | 6  | 981                       | j lb.1_Missense_M  | NM_152403    | NP_689616    | Q63HQ2 | EGFLA_HUMAN | nectin type-III 2.             | 7  | AGCAATGAATTC  | 0.562 |             |
| + | 8  | 1478                      |                    | NM_003999    | NP_003990    | Q99650 | OSMR_HUMAN  | III 1. Extracellular (Potentia | 5  | AACTCCATGGTC  | 0.343 |             |
| - | 6  | 818                       | d.2_Intron IL6ST_u | NM_002184    | NP_002175    | P40189 | IL6RB_HUMAN | tential). Fibronectin type-III | 2  | TACACAGTAGAA  | 0.383 |             |
| + | 28 | 4488                      | _Mutation_p.G140   | NM_015183    | NP_055998    | O15021 | MAST4_HUMAN |                                | 13 | GGGAAGGCACG   | 0.602 |             |
| - | 24 | 3656                      | v.2_Missense_Mut   | NM_001999    | NP_001990    | P35556 | FBN2_HUMAN  | .15; calcium-binding.          | 15 | AGTTACCTTTGT  | 0.537 |             |
| + | 5  | 1168                      | L21_uc003lbc.2_Ir  | NM_012159    | NP_036291    | Q9UKT6 | FXL21_HUMAN | LRR 7.                         | 1  | CCCTTCATCAGG  | 0.418 |             |
| + | 6  | 1020                      | eq.2_Missense_M    | NM_003339    | NP_003330    | P62837 | UB2D2_HUMAN |                                | 1  | ATAGAGAAAAAG  | 0.403 |             |
| + | 1  | 1755_1756:DHA7_uc003lhq.2 |                    | NM_018904    | NP_061727    | Q9Y5I0 | PCDAD_HUMAN | Extracellular (Potential).     | 6  | TCGGTGGGTGCA  | 0.693 |             |
| + | 1  | 1991                      |                    | NM_013340    | NP_037472    | Q9Y5F3 | PCDB1_HUMAN | Extracellular (Potential).     | 0  | CATGATGCAGAA  | 0.438 |             |
| + | 1  | 1442                      | 10jfx.1_Missense_M | NM_018916    | NP_061739    | Q9Y5H0 | PCDG3_HUMAN | r (Potential). Cadherin 5.     | 1  | CAGATAGCAACA  | 0.552 |             |
| + | 1  | 2105                      | 10jfx.1_Missense_M | NM_018916    | NP_061739    | Q9Y5H0 | PCDG3_HUMAN | ical; (Potential).             | 1  | TCTCCTGCGTCT  | 0.682 |             |
| - | 3  | 754                       | loh.3_Missense_M   | NM_004576    | NP_004567    | Q00005 | 2ABB_HUMAN  |                                | 2  | GGGTTTCATGGC  | 0.373 |             |
| + | 9  | 1090                      | tion_p.R125* G3B   | NM_005754    | NP_005745    | Q13283 | G3BP1_HUMAN |                                | 4  | GAACAACGAATA  | 0.463 |             |
| + | 14 | 1779                      | o.1_Missense_Mu    | NM_002887    | NP_002878    | P54136 | SYRC_HUMAN  |                                | 3  | ATTTTACGGTTCC | 0.398 |             |
| + | 21 | 3259                      | q.1_Missense_Mu    | NM_004415    | NP_004406    | P15924 | DESP_HUMAN  | Globular 1.                    | 9  | ATTCTGCAAGAG  | 0.299 |             |
| + | 6  | 970                       | p.A222T BTN3A3     | NM_006994    | NP_008925    | O00478 | BT3A3_HUMAN | ical; (Potential).             | 0  | TCTCTGCAGGAA  | 0.562 |             |
| - | 10 | 4192                      | IC1_uc011dmp.1_I   | NM_014641    | NP_055456    | Q14676 | MDC1_HUMAN  | on with the PRKDC comple       | 4  | AAGGCTGGAGC   | 0.527 |             |
| - | 24 | 8474                      |                    | NM_019105    | NP_061978    | P22105 | TENX_HUMAN  | nectin type-III 20.            | 0  | GGGGATGGTCC   | 0.672 |             |
| - | 9  | 2791                      | ε_Mutation_p.T56ε  | NM_000841    | NP_000832    | Q14833 | GRM4_HUMAN  | lasmic (Potential).            | 6  | TTCTGCGTGAAC  | 0.617 | rs146041340 |
| - | 7  | 895                       | e_Mutation_p.P52   | NM_001145776 | NP_001139248 | Q13451 | FKBP5_HUMAN | ise FKBP-type 2.               | 1  | AATTTAGGCTTCC | 0.358 |             |
| + | 6  | 2250                      | lj.1_RNA BRPF3_u   | NM_015695    | NP_056510    | Q9ULD4 | BRPF3_HUMAN | Bromo.                         | 2  | ATTTTCCACCGAC | 0.408 |             |
| - | 2  | 246                       |                    | NM_001010903 | NP_001010903 | P0C671 | CF222_HUMAN |                                | 4  | GGGCCTGCGGC   | 0.632 |             |
| + | 9  | 1411                      | ε.G439R SLC22A7    | NM_153320    | NP_696961    | Q9Y694 | S22A7_HUMAN | ical; (Potential).             | 0  | GTGATGGGAAAA  | 0.557 |             |
| + | 11 | 1886                      | vh.1_Missense_Mi   | NM_001146016 | NP_001139488 | Q5JTD0 | TJAP1_HUMAN |                                | 0  | ATAACAGGGGC   | 0.647 |             |
| - | 2  | 273                       | 2P5_uc011dvz.1_I   | NM_021572    | NP_067547    | Q9UJA9 | ENPP5_HUMAN |                                | 0  | GGAGAGAAAAAG  | 0.373 |             |
| + | 10 | 1117                      | wh.1_Missense_M    | NM_005588    | NP_005579    | Q16819 | MEP1A_HUMAN | lar (Potential). MAM.          | 3  | AGACTCGTTGTC  | 0.488 |             |
| + | 6  | 1238                      | e_Mutation_p.Q34   | NM_153839    | NP_722581    | Q8IZF7 | GP111_HUMAN | ular (Potential). GPS.         | 1  | ATGATTCAGAAA  | 0.443 |             |
| + | 5  | 1290                      |                    | NM_001010872 | NP_001010872 | Q5T0W9 | FA83B_HUMAN |                                | 6  | CTGGGGAACAG   | 0.403 |             |
| + | 13 | 2532                      | k.2_Missense_Mu    | NM_001704    | NP_001695    | O60242 | BAI3_HUMAN  | ellular (Potential).           | 50 | AGAATTCATACTT | 0.328 |             |
| - | 9  | 1058                      | COL9A1_uc003pff    | NM_001851    | NP_001842    | P20849 | CO9A1_HUMAN | elical region (COL3).          | 4  | CCGGGGGGGCC   | 0.572 |             |

|   |    |         |                                  |              |              |        |             |                            |       |                 |       |             |
|---|----|---------|----------------------------------|--------------|--------------|--------|-------------|----------------------------|-------|-----------------|-------|-------------|
| - | 21 | 2243    | zg.1_Missense_M                  | NM_153816    | NP_722523    | Q9Y5W7 | SNX14_HUMAN | PX.                        | 0     | 'AGGGGAAAGAA    | 0.333 |             |
| + | 16 | 2319    | ε_Mutation_p.D59f                | NM_014942    | NP_055757    | Q9Y2G4 | ANKR6_HUMAN |                            | 3     | 'TTCGGGACACC'   | 0.567 |             |
| - | 14 | 6171    | √3L_uc003puz.3_1                 | NM_002912    | NP_002903    | O60673 | DPOLZ_HUMAN |                            | 6     | 'AAGACGAAGTC'   | 0.468 |             |
| - | 17 | 2783    | .1_RNA GOPC_uc                   | NM_002944    | NP_002935    | P08922 | ROS_HUMAN   | cellular (Potential).      | 25    | 'CCGAAGAACAG'   | 0.378 |             |
| + | 3  | 532_533 | :BLD1_uc003pxr.1                 | NM_173674    | NP_775945    | Q8N8Z6 | DCBD1_HUMAN | tracellular (Potential).   | 1     | 'TGGATCCCACAT'  | 0.436 |             |
| - | 3  | 2099    |                                  | NM_001012279 | NP_001012279 | Q5TF21 | CF174_HUMAN | Potential.                 | 6     | 'GAGGCGGTACT'   | 0.607 |             |
| - | 13 | 1866    | p.G514R SAMDM3_                  | NM_001017373 | NP_001017373 | Q8N6K7 | SAMD3_HUMAN |                            | 1     | 'GAAATCCTACTT'  | 0.368 |             |
| + | 3  | 1830    | 0kfi.2_Missense_1                | NM_052913    | NP_443145    | Q86VY9 | T200A_HUMAN | lasmic (Potential).        | 1     | 'GTCAAGGAATT'   | 0.433 |             |
| + | 3  | 2157    | 0kfi.2_Missense_1                | NM_052913    | NP_443145    | Q86VY9 | T200A_HUMAN | lasmic (Potential).        | 1     | 'CAAGGGATATA'   | 0.463 |             |
| - | 2  | 398     |                                  | NM_153235    | NP_694967    | Q8N3L3 | TXLNB_HUMAN |                            | 2     | 'CTTTCCCTGCT'   | 0.532 |             |
| - | 78 | 14828   | ou.3_Missense_M                  | NM_182961    | NP_892006    | Q8NF91 | SYNE1_HUMAN | lasmic (Potential).        | 45    | 'CCTGTGCTGCG'   | 0.512 |             |
| - | 13 | 1781    |                                  | NM_015718    | NP_056533    | Q9HBY0 | NOX3_HUMAN  | lasmic (Potential).        | 1     | 'GAAATGAACACC'  | 0.418 |             |
| - | 3  | 399     | TR TAGAP_uc003                   | NM_054114    | NP_473455    | Q8N103 | TAGAP_HUMAN |                            | 1     | 'ACATTCGATTAC'  | 0.308 |             |
| + | 11 | 1508    |                                  | NM_000876    | NP_000867    | P11717 | MPRI_HUMAN  | anal (Potential). 3.       | 3     | 'GTTGACTGCACC'  | 0.493 |             |
| - | 4  | 574     | J03qvc.1_Missens                 | NM_021135    | NP_066958    | Q15349 | KS6A2_HUMAN | otein kinase 1.            | 8     | 'GAAGGGGTGAT'   | 0.408 |             |
| - | 17 | 2786    |                                  | NM_003247    | NP_003238    | P35442 | TSP2_HUMAN  |                            | 5     | 'CCTCACCTGGT'   | 0.632 | rs141075952 |
| - | 6  | 2535    |                                  | NM_006092    | NP_006083    | Q9Y239 | NOD1_HUMAN  |                            | 2     | 'TGGCCGCCAGC'   | 0.617 |             |
| - | 22 | 2449    | o.1_RNA DPY19L2P1_uc010kwz.1_RNA |              |              |        |             |                            | 0     | 'CCTGGCATCTT'   | 0.453 |             |
| + | 13 | 3931    | hj.2_Nonsense_M                  | NM_003718    | NP_003709    | Q14004 | CDK13_HUMAN |                            | 5     | 'TCATTACAACCTC' | 0.473 |             |
| + | 7  | 1082    | z_Missense_Mutat                 | NM_031449    | NP_113637    | Q8NF64 | ZMIZ2_HUMAN | Pro-rich.                  | 5     | 'GTCCCTGTCCG'   | 0.697 |             |
| - | 22 | 3354    | w.2_Missense_Mu                  | NM_022748    | NP_073585    | Q68CZ2 | TENS3_HUMAN |                            | 4     | 'GGAAAGGAGCC'   | 0.677 |             |
| + | 4  | 1570    |                                  | NM_001159522 | NP_001152994 | A8MUV8 | ZN727_HUMAN | :2H2-type 11.              | 0     | 'CTGCTCCTCAAC'  | 0.418 |             |
| + | 2  | 1062    | ise_Mutation_p.V2                | NM_003596    | NP_003587    | O60507 | TPST1_HUMAN | renal (Potential).         | 0     | 'GTTGGTTCACT'   | 0.418 |             |
| + | 11 | 2947    | p.A718T POM121                   | NM_172020    | NP_742017    | Q96HA1 | P121A_HUMAN | :side (Potential).         | 0     | 'GGCCGCCAAG'    | 0.652 |             |
| + | 3  | 221     | CF1B_uc011ker.1                  | NM_000265    | NP_000256    |        |             |                            | 0     | 'ACTGCGGCACG'   | 0.622 |             |
| - | 2  | 288     | nse_Mutation_p.V                 | NM_178125    | NP_835226    | Q86XT4 | TRI50_HUMAN | RING-type.                 | 1     | 'GCACACGGGGC'   | 0.677 | rs61743391  |
| - | 5  | 7232    | _Mutation_p.E231                 | NM_033026    | NP_149015    | Q9Y6V0 | PCLO_HUMAN  |                            | 7     | 'AAACTCCAGAA'   | 0.423 |             |
| - | 3  | 2720    | 1v.2_Missense_Mu                 | NM_033026    | NP_149015    | Q9Y6V0 | PCLO_HUMAN  | Pro-rich.                  | 7     | 'TTTTTCCCTGT'   | 0.433 |             |
| - | 2  | 1685    | 1v.2_Missense_Mu                 | NM_033026    | NP_149015    | Q9Y6V0 | PCLO_HUMAN  |                            | 7     | 'GTTGGGCCAG'    | 0.612 |             |
| + | 13 | 1626    | 7orf63_uc011khj.1                | NM_001039706 | NP_001034795 | A5D8W1 | CG063_HUMAN |                            | 1     | 'ACAGATCCGTTT'  | 0.348 |             |
| + | 43 | 3267    | 1A2_uc011kib.1_1                 | NM_000089    | NP_000080    | P08123 | CO1A2_HUMAN |                            | 9     | 'GGGAACGATGG'   | 0.488 |             |
| - | 23 | 3290    |                                  | NM_015395    | NP_056210    | Q7Z6L1 | TCPR1_HUMAN | TECPR 7.                   | 1     | 'GGACGGGATGT'   | 0.592 |             |
| + | 4  | 649_650 | VT1_uc010ljj.1_Int               | NM_021930    | NP_068749    | Q6NUQ1 | RINT1_HUMAN |                            | 4     | 'CGCAACCTTGG'   | 0.396 |             |
| - | 4  | 744     |                                  | NM_033427    | NP_219499    | Q8WZ74 | CTTB2_HUMAN | Potential.                 | 5     | 'TCTTCTTTCTC'   | 0.473 |             |
| - | 1  | 386     | PS2_uc010lkq.2_                  | NM_198085    | NP_932351    | Q8N7C7 | RN148_HUMAN |                            | 0     | 'TCTCTCCTAATC'  | 0.453 |             |
| + | 8  | 1513    | a.3_Missense_Mu                  | NM_001458    | NP_001449    | Q14315 | FLNC_HUMAN  | Filamin 2.                 | 12    | 'CAGCACGTTCC'   | 0.657 |             |
| - | 12 | 1529    | llmc.1_Missense_1                | NM_032842    | NP_116231    | Q96SK2 | TM209_HUMAN |                            | 3     | 'CGTCGGGATACT'  | 0.358 | rs17857472  |
| + | 4  | 1549    | CHRM2_uc003vrm                   | NM_001006630 | NP_001006631 | P08172 | ACM2_HUMAN  | smic (By similarity).      | 5     | 'AGTTTCCACTTC'  | 0.463 |             |
| - | 15 | 1860    |                                  | NM_004333    | NP_004324    | P15056 | BRAF_HUMAN  | rotein kinas_R603>1(2) p.T | 18290 | 'ATTTCCTGTACT'  | 0.368 |             |
| + | 18 | 2177    |                                  | NM_004668    | NP_004659    | O43451 | MGA_HUMAN   | (Potential). Maltase.      | 2     | 'GAATTCCTCCAC'  | 0.547 |             |
| - | 9  | 1451    |                                  | NM_019841    | NP_062815    | Q9NQA5 | TRPV5_HUMAN | ical; (Potential).         | 6     | 'TCACAGCCCCA'   | 0.537 |             |
| + | 4  | 507     | 1_p.P75L SLC4A2                  | NM_003040    | NP_003031    | P04920 | B3A2_HUMAN  | ic (Potential). Pro-rich.  | 0     | 'TCACCCACTGT'   | 0.692 |             |
| + | 14 | 2932    | _Mutation_p.G664I                | NM_053043    | NP_444271    | Q96EV2 | RBM33_HUMAN |                            | 1     | 'CAACGGTAACCT'  | 0.542 |             |
| - | 2  | 826     | wtw.2_Missense_                  | NM_053279    | NP_444509    | Q96KS9 | F167A_HUMAN |                            | 0     | 'AGCTCGCCTGT'   | 0.697 |             |
| + | 5  | 1124    | anse_Mutation_p.F                | NM_020844    | NP_065895    | Q9P272 | K1456_HUMAN |                            | 0     | 'AAAACGGTCCC'   | 0.458 |             |
| - | 6  | 1319    |                                  | NM_002318    | NP_002309    | Q9Y4K0 | LOXL2_HUMAN | SRCR 3.                    | 3     | 'TCAGTCGCACC'   | 0.642 |             |
| - | 6  | 1867    | p.E405K CHRNA2                   | NM_000742    | NP_000733    | Q15822 | ACHA2_HUMAN | Cytoplasmic.               | 1     | 'GTCCTCCTCTC'   | 0.657 |             |

|   |    |      |                    |              |              |        |             |     |               |       |             |
|---|----|------|--------------------|--------------|--------------|--------|-------------|-----|---------------|-------|-------------|
| - | 12 | 1510 | e_Mutation_p.D38   | NM_018250    | NP_060720    | Q9NV88 | INT9_HUMAN  | 2   | CCACGTCCCCG   | 0.493 |             |
| - | 1  | 5470 |                    | NM_031271    | NP_112561    | Q9BXT5 | TEX15_HUMAN | 7   | CAGGTCCTCTA   | 0.368 |             |
| - | 6  | 565  | ck.1_Missense_Mi   | NM_001464    | NP_001455    | Q99965 | ADAM2_HUMAN | 2   | AAAGGACAGATC  | 0.308 |             |
| + | 10 | 1131 | se_Mutation_p.R3   | NM_194294    | NP_919270    | Q6ZQW0 | I23O2_HUMAN | 2   | GCAATTCGTCAT  | 0.448 |             |
| - | 22 | 4294 | ONL_uc003xqt.3_F   | NM_144651    | NP_653252    | A1KZ92 | PXDNL_HUMAN | 2   | CCTCTAACATCTC | 0.517 |             |
| + | 4  | 3017 | 1_uc011ldy.1_Intr  | NM_006269    | NP_006260    | P56715 | RP1_HUMAN   | 12  | AATGATCCCCAT  | 0.323 |             |
| + | 3  | 676  | 13_uc003ydf.1_R    | NM_198584    | NP_940986    | Q8N1Q1 | CAH13_HUMAN | 0   | TAGATGGAGTG   | 0.498 |             |
| - | 4  | 397  | nse_Mutation_p.S   | NM_001738    | NP_001729    | P00915 | CAH1_HUMAN  | 2   | GGAAGGAATGCC  | 0.378 |             |
| - | 4  | 318  | _Intron SNORA72    | NM_000989    | NP_000980    | P62888 | RL30_HUMAN  | 0   | ATGCTGTGCCCC  | 0.378 |             |
| + | 34 | 5573 | w.2_Missense_Mt    | NM_017890    | NP_060360    | Q7Z7G8 | VP13B_HUMAN | 20  | TGCCCGTCCCTC  | 0.408 |             |
| - | 3  | 771  | .2_5'UTR RSPO2     | NM_178565    | NP_848660    | Q6UXX9 | RSPO2_HUMAN | 7   | CAAATGGGATTT  | 0.358 |             |
| + | 19 | 2139 |                    | NM_177531    | NP_803875    | Q86W11 | PKHL1_HUMAN | 14  | TTGAAGAAGGA   | 0.289 |             |
| - | 26 | 3627 |                    | NM_003184    | NP_003175    | Q6P1X5 | TAF2_HUMAN  | 6   | ATCTCCAAAGG   | 0.448 |             |
| + | 20 | 2953 | R67_uc003yps.1_I   | NM_145647    | NP_663622    | Q96DN5 | WDR67_HUMAN | 1   | AGTTCGTTTGT   | 0.358 |             |
| - | 10 | 1043 | p.R19H FAM49B      | NM_016623    | NP_057707    | Q9NUQ9 | FA49B_HUMAN | 0   | TCATACGACTC   | 0.338 |             |
| - | 6  | 1127 | 1_uc011lff.1_5'UTF | NM_001045556 | NP_001039021 | Q13239 | SLAP1_HUMAN | 2   | CAGCTGCAGCA   | 0.582 |             |
| - | 4  | 1185 | M1_uc010mic.2_f    | NM_144966    | NP_659403    | Q5H8C1 | FREM1_HUMAN | 5   | TCCACGAGGTT   | 0.517 |             |
| + | 5  | 3148 | JSC2_uc003zwx.3    | NM_014806    | NP_055621    | Q8N2Y8 | RUSC2_HUMAN | 1   | ACCCCTTTTCC   | 0.507 |             |
| + | 3  | 967  | b.2_Missense_Mu    | NM_003995    | NP_003986    | P20594 | ANPRB_HUMAN | 3   | TTGGTGTGGAG   | 0.517 |             |
| - | 6  | 1109 | e_Mutation_p.R17i  | NM_016734    | NP_057953    | Q02548 | PAX5_HUMAN  | 147 | CTCCGGAGGA    | 0.572 |             |
| - | 1  | 1064 |                    | NM_001126334 | NP_001119806 | Q5VV16 | FX4L5_HUMAN | 0   | GCCGCCGCCGC   | 0.677 |             |
| + | 8  | 1075 | e_Mutation_p.R25i  | NM_003558    | NP_003549    | O14986 | PI51B_HUMAN | 1   | CTGCCGGTAA    | 0.398 |             |
| + | 20 | 4367 | p.G1419A WNK2      | NM_006648    | NP_006639    | Q9Y3S1 | WNK2_HUMAN  | 12  | AGGGGTCCAG    | 0.672 |             |
| - | 6  | 1128 | rl.2_Missense_Mu   | NM_000507    | NP_000498    | P09467 | F16P1_HUMAN | 0   | TAGCGGGGTAC   | 0.358 |             |
| - | 10 | 838  | 7B3_uc010msc.1     | NM_000197    | NP_000188    | P37058 | DHB3_HUMAN  | 0   | AGGTTTCACCTC  | 0.453 |             |
| + | 4  | 760  | c.2_Missense_Mul   | NM_207299    | NP_997182    | Q8TBJ4 | LPPR1_HUMAN | 0   | CCTTACTTCGA   | 0.373 |             |
| + | 3  | 1840 | bbi.1_Missense_M   | NM_003452    | NP_003443    | O75820 | ZN189_HUMAN | 6   | AGCTTAGTCAG   | 0.448 | rs138924117 |
| + | 11 | 1817 | mf.1_Missense_M    | NM_000962    | NP_000953    | P23219 | PGH1_HUMAN  | 2   | GACGGCCACAC   | 0.562 |             |
| + | 12 | 1130 | al.1_Nonsense_Mi   | NM_004957    | NP_004948    | Q05932 | FOLC_HUMAN  | 0   | GAGTGGCCGGG   | 0.721 |             |
| + | 14 | 1777 | p.R567H SPTAN1     | NM_003127    | NP_003118    | Q13813 | SPTA2_HUMAN | 10  | CCGCCCAATG    | 0.512 | rs139998823 |
| - | 3  | 627  |                    | NM_006336    | NP_006327    | Q7Z7L7 | ZER1_HUMAN  | 1   | TGGGCTCGAAG   | 0.607 |             |
| - | 8  | 874  | bw.1_Missense_I    | NM_020145    | NP_064530    | Q9NR46 | SHLB2_HUMAN | 0   | TGCTACTGATT   | 0.622 |             |
| - | 4  | 576  | co.1_Missense_Mi   | NM_004269    | NP_004260    | Q6P2C8 | MED27_HUMAN | 1   | TATGTTCCATTG  | 0.413 |             |
| + | 7  | 956  | 36_uc004cjk.1_RN   | NM_024718    | NP_078994    | Q3YEC7 | PARF_HUMAN  | 0   | AATATCCCATTT  | 0.512 |             |
| - | 2  | 648  | C2_uc011mer.1_I    | NM_013366    | NP_037498    | Q9UJX6 | ANC2_HUMAN  | 1   | CCCTTCCCCC    | 0.592 |             |
| - | 11 | 1496 | py.1_Missense_M    | NM_004192    | NP_004183    | Q95671 | ASML_HUMAN  | 0   | CACCCGTGCAG   | 0.582 |             |
| + | 2  | 742  | nf.1_Missense_M    | NM_173495    | NP_775766    | Q96NR3 | PTHD1_HUMAN | 6   | CAACAGCAAAG   | 0.498 |             |
| + | 1  | 25   |                    | NM_004651    | NP_004642    | P51784 | UBP11_HUMAN | 3   | TGTTGGGGGG    | 0.562 |             |
| + | 11 | 2054 | O9_splice MAGED    | NM_001005332 | NP_001005332 | Q9Y5V3 | MAGD1_HUMAN | 3   | CAGAGGTAATG   | 0.527 |             |
| - | 2  | 674  | xg.2_Intron PJA1   | NM_145119    | NP_660095    | Q8NG27 | PJA1_HUMAN  | 0   | AGCCCCCTCCT   | 0.522 |             |
| + | 7  | 2564 | ps.1_Missense_M    | NM_018977    | NP_061850    | Q9NZ94 | NLGN3_HUMAN | 1   | ACCACGAGTGT   | 0.687 |             |
| - | 25 | 6039 | .K1898R ATRX_uc    | NM_000489    | NP_000480    | P46100 | ATRX_HUMAN  | 30  | TTCCCTTTTCC   | 0.318 |             |
| - | 1  | 2479 | p.G268D PCDH1E     | NM_020766    | NP_001098713 | Q8TAB3 | PCD19_HUMAN | 7   | TGGTGCCCTCG   | 0.612 |             |
| - | 5  | 694  | utation_p.T163M    | NM_007052    | NP_008983    | Q9Y5S8 | NOX1_HUMAN  | 1   | TCACCGTGTTC   | 0.507 |             |
| + | 6  | 1094 | 4ejh.2_Missense_I  | NM_022838    | NP_073749    | Q6P1M9 | ARMX5_HUMAN | 1   | GCTATGGCTGT   | 0.498 |             |
| + | 3  | 4057 | sr.1_Missense_Mu   | NM_020769    | NP_065820    | Q8NET4 | RGAG1_HUMAN | 4   | TTCTACGGACC   | 0.522 |             |
| - | 2  | 460  | uc004esi.1_Intron  | NM_032498    | NP_115887    | POC7M4 | RHF2B_HUMAN | 0   | CTTCCCATAGC   | 0.607 |             |

|   |    |      |                   |              |              |        |             |                               |    |              |       |             |
|---|----|------|-------------------|--------------|--------------|--------|-------------|-------------------------------|----|--------------|-------|-------------|
| - | 1  | 1311 |                   | NM_138289    | NP_612146    | Q8TDG2 | ACTT1_HUMAN |                               | 5  | TTCTTTGAACCA | 0.478 |             |
| + | 4  | 1055 | EC1_uc010nsl.1_I  | NM_005462    | NP_005453    | O60732 | MAGC1_HUMAN |                               | 4  | AGAACTCAGAGT | 0.498 |             |
| - | 2  | 1936 | fbv2_Missense_IV  | NM_173078    | NP_775101    | Q8IW52 | SLIK4_HUMAN | ellular (Potential).          | 2  | AGATTGCAACTG | 0.498 |             |
| + | 4  | 649  |                   | NM_152578    | NP_689791    | Q8N0W7 | FMR1N_HUMAN | ical; (Potential).            | 1  | FTGGTGCATCA  | 0.393 |             |
| + | 3  | 309  | i_p.G53D MAMLD    | NM_005491    | NP_005482    | Q13495 | MAMD1_HUMAN |                               | 0  | ATGGGGGCTACC | 0.423 |             |
| + | 9  | 1374 |                   | NM_018558    | NP_061028    | Q9UN88 | GBRT_HUMAN  |                               | 3  | GTGACCGATCTC | 0.602 |             |
| - | 2  | 214  |                   |              |              | Q8N1B3 | FA58A_HUMAN |                               | 0  | AGTACCTGCGC  | 0.527 |             |
| - | 8  | 800  | in.1_Missense_Mu  | NM_003491    | NP_003482    | P41227 | NAA10_HUMAN |                               | 1  | CGGAGGCCTCT  | 0.602 |             |
| - | 14 | 1523 | EL1_uc009Vlg.1_F  | NM_033467    | NP_258428    | Q495T6 | MMEL1_HUMAN | ional (Potential).            | 0  | TTCACGCCAGC  | 0.662 |             |
| + | 18 | 3194 | p.A1008T PER3_t   | NM_016831    | NP_058515    | P56645 | PER3_HUMAN  | Ser-rich.                     | 3  | CCAGCGCTCTG  | 0.587 | rs57875989  |
| - | 21 | 4456 | h.R1216C RERE_u   | NM_012102    | NP_036234    | Q9P2R6 | RERE_HUMAN  | p.R1216C(1)                   | 2  | GAGGCGACCTT  | 0.642 |             |
| - | 18 | 3430 | ag.1_Missense_M   | NM_001009566 | NP_001009566 | O94985 | CSTN1_HUMAN | lasmic (Potential).           | 1  | ATCCCGCATGG  | 0.612 | rs148167401 |
| + | 6  | 1335 | l_uc001avj.2_RNA  | NM_012231    | NP_036363    | Q13029 | PRDM2_HUMAN |                               | 1  | CGCCCGGAGCA  | 0.443 |             |
| - | 3  | 519  | ocj.1_Nonsense_IV | NR_026567    |              |        |             |                               | 0  | CCGCCCCACAG  | 0.612 |             |
| + | 6  | 571  |                   | NM_207421    | NP_997304    | Q6TGC4 | PADI6_HUMAN |                               | 1  | GTGCCAGATG   | 0.507 |             |
| + | 6  | 907  | iACTR4_uc001bp    | NM_001048183 | NP_001041648 | Q8IZ21 | PHAR4_HUMAN |                               | 0  | CACCCGCTGCC  | 0.572 |             |
| + | 6  | 787  | iP4_uc010ohj.1_5' | NM_005610    | NP_005601    | Q09028 | RBBP4_HUMAN |                               | 1  | GTGCCGTTCCA  | 0.438 | rs34196891  |
| + | 6  | 1818 | 522_uc010ohm.1    | NM_020888    | NP_065939    | Q9P206 | K1522_HUMAN | Pro-rich.                     | 0  | TCTTCGCTCCC  | 0.642 |             |
| - | 8  | 1143 | ux.2_Missense_Mi  | NM_022111    | NP_071394    | Q9HAW4 | CLSPN_HUMAN |                               | 8  | TCATTTCAAGT  | 0.378 |             |
| + | 3  | 315  | p.R31W THRAP3     | NM_005119    | NP_005110    | Q9Y2W1 | TR150_HUMAN | g-rich. Ser-rich.             | 9  | AGTCTCGGTCC  | 0.463 |             |
| + | 3  | 276  | oir.1_Missense_Mi | NM_012090    | NP_036222    | Q9UPN3 | MACF1_HUMAN | actin-binding.                | 16 | GTGACGATCTT  | 0.627 |             |
| - | 2  | 1296 | p.E107K KIAA04    | NM_014774    | NP_055589    | O75071 | K0494_HUMAN |                               | 0  | ATTTTTCTTGAC | 0.333 |             |
| - | 16 | 3081 | ense_Mutation_p.v | NM_003035    | NP_003026    | Q15468 | STIL_HUMAN  |                               | 3  | GTAAACGTTTT  | 0.388 |             |
| - | 3  | 1342 |                   | NM_147193    | NP_671726    | Q8NBF1 | GLIS1_HUMAN |                               | 1  | CTTCTCGCCCG  | 0.667 |             |
| + | 1  | 1676 |                   | NM_001408    | NP_001399    | Q9HCU4 | CELR2_HUMAN | Extracellular (Potential).    | 8  | ATGCCCGCCTG  | 0.587 | rs138919468 |
| + | 12 | 5568 |                   | NM_001408    | NP_001399    | Q9HCU4 | CELR2_HUMAN | ial). EGF-like 6; calcium-bir | 8  | GAACCCGTGTG  | 0.572 |             |
| + | 7  | 1455 | A17_uc001dze.1_ξ  | NM_001010898 | NP_001010898 | Q9H1V8 | S6A17_HUMAN | lasmic (Potential).           | 2  | ACTTCGATGCC  | 0.547 |             |
| + | 9  | 1920 | dze.1_Missense_I  | NM_001010898 | NP_001010898 | Q9H1V8 | S6A17_HUMAN | lasmic (Potential).           | 2  | ATCATCGACACC | 0.587 |             |
| + | 10 | 1855 | V10_uc001ecm.2    | NM_001130079 | NP_001123551 | Q9HCE1 | MOV10_HUMAN | g (By similarity).            | 5  | GCACCCGCAAG  | 0.592 |             |
| + | 5  | 800  | gn.1_Missense_M   | NM_014813    | NP_055628    | O94898 | LRIG2_HUMAN | tracellular (Potential).      | 3  | AAACCGTAACCC | 0.353 |             |
| + | 3  | 612  | e_Mutation_p.E19  | NM_001767    | NP_001758    | P06729 | CD2_HUMAN   | Potential). Ig-like C2-type.  | 1  | GCAAGGAATCC  | 0.542 |             |
| - | 11 | 2048 | h.G598R NOTCH2    | NM_024408    | NP_077719    | Q04721 | NOTC2_HUMAN | GF-like 15; calcium-binding   | 27 | GTACCCGGGAT  | 0.522 |             |
| - | 27 | 4457 | E4DIP_uc001elm.ξ  | NM_014644    | NP_055459    | Q5VU43 | MYOME_HUMAN | p.S1389S(1)                   | 5  | CTAGACGAATAA | 0.517 |             |
| + | 1  | 324  | F10_uc001emp.3    | NM_153713    | NP_714924    | Q8IVB5 | LIX1L_HUMAN |                               | 1  | AGGCCGTGGTG  | 0.642 |             |
| + | 8  | 3004 | zr.1_Missense_Mu  | NM_004326    | NP_004317    | O00512 | BCL9_HUMAN  | Pro-rich.                     | 6  | GTGGCTCAGACA | 0.557 |             |
| - | 2  | 923  | B_uc001exu.2_Mi   | NM_002651    | NP_002642    | Q9UBF8 | PI4KB_HUMAN |                               | 4  | GTCTCTGTTGC  | 0.493 |             |
| + | 22 | 2343 | n_p.E502K INTS3   | NM_023015    | NP_075391    | Q68E01 | INT3_HUMAN  |                               | 3  | GTGTACGAGTCA | 0.622 |             |
| + | 5  | 637  |                   | NM_000748    | NP_000739    | P17787 | ACHB2_HUMAN | ellular (Potential).          | 0  | CTGACGGCATG  | 0.552 |             |
| - | 3  | 387  | fpx.1_Missense_IV | NM_024540    | NP_078816    | Q96A35 | RM24_HUMAN  | KOW.                          | 0  | AGTTTCGCTGC  | 0.562 |             |
| + | 5  | 1275 | Y9_uc001fwx.2_Inl | NM_002348    | NP_002339    | Q9HBG7 | LY9_HUMAN   | otential). Ig-like C2-type 2. | 1  | AAGGGGAATCA  | 0.547 | rs35268513  |
| + | 3  | 537  | lb.1_Missense_Mi  | NM_012474    | NP_036606    | Q9BZX2 | UCK2_HUMAN  |                               | 1  | TTCCCGGTAAG  | 0.512 |             |
| + | 2  | 258  | ix.1_Missense_Mi  | NM_022093    | NP_071376    | Q9UQP3 | TENN_HUMAN  |                               | 9  | AGATCGATGTG  | 0.627 |             |
| + | 12 | 2665 | h.R988Q RASAL2    | NM_004841    | NP_004832    | Q9UJF2 | NGAP_HUMAN  |                               | 5  | CAGGCGGCACA  | 0.517 |             |
| + | 7  | 1474 | _Mutation_p.A382  | NM_005807    | NP_005798    | Q92954 | PRG4_HUMAN  | ats of K-X-P-X-P-T-T-X. 17    | 1  | AGCCTGCACCC  | 0.657 | rs138528418 |
| + | 30 | 3500 | p.S1059F PTPRC    | NM_002838    | NP_002829    | P08575 | PTPRC_HUMAN | hataase 2. Cytoplasmic (Po    | 12 | ACATTCCAAAG  | 0.363 |             |
| + | 2  | 989  |                   | NM_004767    | NP_004758    | O60883 | ETBR2_HUMAN | ellular (Potential).          | 2  | CGCCCGCATGT  | 0.612 |             |
| - | 4  | 501  | opw.1_Missense_I  | NM_002832    | NP_002823    | P35236 | PTN7_HUMAN  | rotein phosphatase.           | 1  | GTATCGGTCTT  | 0.547 |             |

|   |    |         |                   |              |              |        |              |                              |    |               |       |             |
|---|----|---------|-------------------|--------------|--------------|--------|--------------|------------------------------|----|---------------|-------|-------------|
| - | 15 | 3117    | cty.1_Missense_Mi | NM_005401    | NP_005392    | Q15678 | PTN14_HUMAN  | protein phosphatase.         | 5  | TCTACTCGATTC1 | 0.463 |             |
| + | 5  | 1573    | ense_Mutation_p.F | NM_001098623 | NP_001092093 | Q5VST9 | OBSCN_HUMAN  |                              | 28 | ACAGGAAGCCCTC | 0.622 |             |
| + | 10 | 1096    | 1_Missense_Mutat  | NM_001103    | NP_001094    | P35609 | ACTN2_HUMAN  | Spectrin 1.                  | 5  | GGATTCGTCGC,  | 0.512 |             |
| + | 2  | 517     | o.3_Missense_Mi   | NM_152609    | NP_689822    | Q6PJW8 | CNST_HUMAN   |                              | 0  | GGGACGGGCAT   | 0.502 |             |
| + | 1  | 55      |                   | NM_001004696 | NP_001004696 | Q8NH00 | OR2T4_HUMAN  | cellular (Potential).        | 1  | TCCTGATGGGA(  | 0.488 |             |
| + | 3  | 1478    | o.R193Q PGBD2_u   | NM_170725    | NP_733843    | Q6P3X8 | PGBD2_HUMAN  |                              | 1  | AACCGCGACTC,  | 0.542 | rs138323244 |
| + | 6  | 704_705 | lipx.2_Missense_M | NM_201596    | NP_963890    | Q08289 | CACB2_HUMAN  |                              | 3  | TAGTTCAGAAA   | 0.366 |             |
| - | 2  | 580     | ense_Mutation_p.F | NM_020848    | NP_065899    | Q9P266 | K1462_HUMAN  |                              | 4  | ACATTCGCAAT   | 0.547 |             |
| + | 7  | 794     |                   | NM_052997    | NP_443723    | Q9BXX3 | AN30A_HUMAN  |                              | 9  | CTTGGCGGAAA   | 0.423 |             |
| + | 7  | 1054    |                   | NM_052997    | NP_443723    | Q9BXX3 | AN30A_HUMAN  |                              | 9  | CGTGGCCAGCA/  | 0.423 |             |
| + | 7  | 1156    |                   | NM_052997    | NP_443723    | Q9BXX3 | AN30A_HUMAN  |                              | 9  | CGTGGGCAGCA/  | 0.408 |             |
| - | 2  | 1519    | nse_Mutation_p.A  | NM_170753    | NP_736609    | Q8N328 | PGBD3_HUMAN  |                              | 3  | TGAGGCAACAG   | 0.403 |             |
| - | 12 | 1632    | p.R440Q OGDHL_u   | NM_018245    | NP_060715    | Q9ULD0 | OGDHL_HUMAN  |                              | 1  | CACGCCGGCGC   | 0.572 |             |
| - | 7  | 1309    | GMS1_uc009xou.    | NM_147156    | NP_671512    | Q86VZ5 | SMS1_HUMAN   |                              | 2  | ACATGGGGATCT  | 0.502 |             |
| - | 21 | 7225    | se_Mutation_p.R21 | NM_032776    | NP_116165    | Q15652 | JHD2C_HUMAN  | JmjC.                        | 6  | AGGACGTACAA   | 0.363 |             |
| - | 3  | 449     | _p.R38C PLA2G1z   | NM_032562    | NP_115951    | Q9BX93 | PG12B_HUMAN  |                              | 1  | ACAGCGATATTI  | 0.493 |             |
| + | 18 | 3538    | livi.2_Missense_M | NM_015037    | NP_055852    | A7E2V4 | K0913_HUMAN  | Ser-rich.                    | 1  | CTGGGCCCCCA   | 0.612 |             |
| - | 4  | 1609    | _uc009xtu.1_Nons  | NM_148977    | NP_683878    | Q8TE04 | PANK1_HUMAN  |                              | 0  | CAAATCGTTCAT/ | 0.468 |             |
| + | 8  | 864     | _p.R255Q HECTDz   | NM_182765    | NP_877497    | Q5U5R9 | HECD2_HUMAN  |                              | 1  | GCTACGACAGA   | 0.318 |             |
| + | 2  | 384     |                   | NM_024954    | NP_079230    | Q9HAC8 | UBTD1_HUMAN  |                              | 0  | GGGCCGCAAGG   | 0.622 |             |
| - | 7  | 2025    | 2_Missense_Muta   | NM_013274    | NP_037406    | Q9UGP5 | DPOLL_HUMAN  | mer binding (By similarity). | 0  | TTCCCCGTCGG   | 0.607 |             |
| - | 2  | 650     | p.V193M TPRIP_u   | NM_033397    | NP_203755    | Q8IWB1 | IPRI_HUMAN   |                              | 0  | GTCCACGCCAA   | 0.612 |             |
| - | 1  | 441     | IC2_uc009xxx.2_Ir | NR_026715    |              |        |              |                              | 0  | CCAGGTGCCCC   | 0.537 |             |
| + | 5  | 672     |                   | NM_006426    | NP_006417    | O14531 | DPYL4_HUMAN  |                              | 2  | GGACCGGTGCC.  | 0.632 |             |
| + | 12 | 1479    |                   | NM_006426    | NP_006417    | O14531 | DPYL4_HUMAN  |                              | 2  | GGGAGCGCCTG   | 0.657 |             |
| + | 7  | 988     | lra.2_Missense_M  | NM_006755    | NP_006746    | P37837 | TALDO_HUMAN  |                              | 0  | AGATCCGCAAGT  | 0.552 | rs143237187 |
| - | 2  | 492     |                   | NM_003141    | NP_003132    | P19474 | RO52_HUMAN   |                              | 4  | AAGAGGGACCA   | 0.557 |             |
| - | 1  | 34      |                   | NM_001004752 | NP_001004752 | A6NLW9 | A6NLW9_HUMAN |                              | 2  | AGGTTGGAAATT  | 0.443 |             |
| - | 6  | 557     | f.2_5'UTR HPX_uc  | NM_000613    | NP_000604    | P02790 | HEMO_HUMAN   |                              | 0  | CTCGCGGTCAC   | 0.333 |             |
| - | 22 | 2758    | ense_Mutation_p.L | NM_030962    | NP_112224    | Q86WG5 | MTMRD_HUMAN  | GRAM.                        | 3  | CTCTAAGAATCTI | 0.294 |             |
| - | 8  | 739     | VA1_uc010rcp.1_F  | NM_002786    | NP_002777    | P25786 | PSA1_HUMAN   |                              | 2  | GAAGCGTCTCT   | 0.313 |             |
| - | 10 | 1702    | cy.1_Missense_Mi  | NM_000352    | NP_000343    | Q09428 | ABCC8_HUMAN  | ity). ABC transmembrane 1    | 1  | CCTGCGGTCG    | 0.602 |             |
| + | 2  | 250     | se_Mutation_p.V61 | NM_006157    | NP_006148    | Q92832 | NELL1_HUMAN  |                              | 3  | ATATCGTCACCC  | 0.473 |             |
| + | 27 | 2979    | s.1_Missense_Mu   | NM_031418    | NP_113606    | Q9BYT9 | ANO3_HUMAN   | lasmic (Potential).          | 4  | TGACCGAATACC  | 0.408 |             |
| + | 7  | 845     | 2_uc001ndg.3_RN   | NM_000506    | NP_000497    | P00734 | THRB_HUMAN   | Kringle 2.                   | 3  | ACGGGGATGAG/  | 0.632 |             |
| + | 1  | 365     |                   | NM_001004730 | NP_001004730 | Q8NGP9 | O5AR1_HUMAN  | lasmic (Potential).          | 0  | TGGTCGTTTTGT  | 0.512 | rs143043362 |
| + | 1  | 446     |                   | NM_001004705 | NP_001004705 | Q8NGI6 | OR4DA_HUMAN  | Name=4; (Potential).         | 3  | TGCCTGGTTGG/  | 0.532 |             |
| - | 22 | 2981    | _p.D230N DDB1_u   | NM_001923    | NP_001914    | Q16531 | DDB1_HUMAN   | with CDT1 and CUL4A.         | 4  | GAAGTCGCCCT   | 0.557 |             |
| + | 18 | 2185    | ch.1_Missense_Mi  | NM_000932    | NP_000923    | Q01970 | PLCB3_HUMAN  | C2.                          | 2  | CTTGGCGGTC,   | 0.662 |             |
| - | 1  | 918     |                   | NM_020404    | NP_065137    | Q9HCU0 | CD248_HUMAN  | cellular (Potential).        | 3  | TGGCCGGAAC    | 0.642 |             |
| - | 2  | 1285    | jb.2_Missense_Mi  | NM_031492    | NP_113680    | Q9BQ04 | RBM4B_HUMAN  | ith TNPO3 (By similarity).   | 0  | TTCCCGTAGC/   | 0.512 |             |
| - | 14 | 2361    |                   | NM_006946    | NP_008877    | O15020 | SPTN2_HUMAN  | Spectrin 5.                  | 4  | TAACCAACCA/   | 0.677 |             |
| + | 2  | 239     |                   | NM_015516    | NP_056331    | Q8WUA8 | TSK_HUMAN    | LRRNT.                       | 0  | TCCCGGGTGC    | 0.652 |             |
| + | 7  | 924     | m.1_Missense_Mi   | NM_000260    | NP_000251    | Q13402 | MYO7A_HUMAN  | rosin head-like.             | 4  | TACATCGACATC/ | 0.582 |             |
| - | 4  | 671     | p.G126E MMP8_u    | NM_002424    | NP_002415    | P22894 | MMP8_HUMAN   |                              | 4  | CTCCTCCAATAC  | 0.413 |             |
| - | 10 | 1258    |                   | NM_002426    | NP_002417    | P39900 | MMP12_HUMAN  | mopexin-like 3.              | 0  | TCCTTTCATCATA | 0.448 |             |
| - | 1  | 80      | se_Mutation_p.S5I | NM_001680    | NP_001671    | P54710 | ATNG_HUMAN   |                              | 0  | CCATCGACAAC/  | 0.617 |             |



|   |    |           |                   |              |              |        |             |                              |     |              |       |             |
|---|----|-----------|-------------------|--------------|--------------|--------|-------------|------------------------------|-----|--------------|-------|-------------|
| + | 4  | 580       | EM25_uc001pti.2_  | NM_032780    | NP_116169    | Q86YD3 | TMM25_HUMAN | cellular (Potential).        | 0   | AAAGTCGGCGCC | 0.587 |             |
| - | 7  | 1136      | ze.1_Missense_M   | NM_003455    | NP_003446    | O95125 | ZN202_HUMAN | KRAB.                        | 1   | GGAAAAGCATA  | 0.453 |             |
| - | 1  | 182       |                   | NM_001004474 | NP_001004474 | Q8NGN2 | O10S1_HUMAN | lasmic (Potential).          | 2   | CCACAGTTAGG  | 0.532 |             |
| - | 1  | 366       |                   | NM_001004463 | NP_001004463 | Q8NGN6 | O10G7_HUMAN | lasmic (Potential).          | 2   | GCCAGGTAGCG  | 0.567 |             |
| - | 2  | 205       | nse_Mutation_p.G  | NM_014231    | NP_055046    | P23763 | VAMP1_HUMAN | lasmic (Potential).          | 0   | GGGGACCCCCA  | 0.542 |             |
| + | 5  | 1050      | ia.1_Missense_Mu  | NM_001987    | NP_001978    | P41212 | ETV6_HUMAN  |                              | 250 | CCCCCGGCAGG  | 0.607 |             |
| + | 1  | 341       |                   | NR_003932    |              |        |             |                              | 0   | TTGACGGCATC  | 0.612 |             |
| + | 9  | 1284      | zip.2_Missense_M  | NM_017435    | NP_059131    | Q9NYB5 | SO1C1_HUMAN | lasmic (Potential).          | 7   | TAATTCCTCCTC | 0.388 |             |
| - | 6  | 946       | _p.V287I IFLTD1_  | NM_152590    | NP_689803    | Q8N9Z9 | ILFT1_HUMAN |                              | 3   | TTCAACGTCAG  | 0.373 |             |
| + | 1  | 70        | orf54_uc009zky.1_ | NM_152319    | NP_689532    | Q6X4T0 | CL054_HUMAN |                              | 0   | AGCATCCCTGC  | 0.478 |             |
| + | 13 | 1843      | _p.C559Y TROAP_   | NM_005480    | NP_005471    | Q12815 | TROAP_HUMAN | ate tandem repeats.[Cys-ri   | 1   | GTCCTGCTGTAC | 0.597 |             |
| + | 5  | 687       | ase_Mutation_p.R  | NM_015416    | NP_056231    | Q6P1Q0 | LTMD1_HUMAN | membrane (Potential). LET    | 2   | GACTCCGGTGG  | 0.423 |             |
| + | 6  | 1001      | f81_uc001sac.2_Ir | NM_002284    | NP_002275    | O43790 | KRT86_HUMAN | Rod. Coil 2.                 | 1   | GTAGCCGGGCT  | 0.547 |             |
| + | 9  | 1294      | my.1_Nonsense_M   | NM_020547    | NP_065434    | Q16671 | AMHR2_HUMAN | Potential). Protein kinase.  | 2   | CCCTCCGACGA  | 0.582 |             |
| - | 1  | 569_570   | ifr.3_Missense_Mu | NM_006163    | NP_006154    | Q16621 | NFE2_HUMAN  | ad for interaction with MAP1 | 0   | CCTAGCTCTGAA | 0.594 |             |
| + | 2  | 289       | _p.G30E ACAD10    | NM_025247    | NP_079523    | Q6JQN1 | ACD10_HUMAN |                              | 2   | CCAGGGGTCCC  | 0.597 |             |
| + | 9  | 1531_1532 | itation_p.417_418 | NM_153348    | NP_699179    | Q8N3Y1 | FBXW8_HUMAN | WD 5.                        | 3   | CAGATGGATGAC | 0.594 |             |
| + | 5  | 928       | uc001tbf.2_Intron | NM_178499    | NP_848594    | Q8IWA6 | CCD60_HUMAN |                              | 3   | TCTCCGCCCAG  | 0.517 | rs147505092 |
| - | 5  | 1199      | _p.R214C GOLGA3   | NM_005895    | NP_005886    | Q08378 | GOGA3_HUMAN | -targeting domain.           | 6   | GGTGCGCAGGA  | 0.512 |             |
| - | 33 | 5015      |                   | NM_006437    | NP_006428    | Q9UKK3 | PARP4_HUMAN | th the major vault protein.  | 4   | GGTGCGAATAA  | 0.383 | rs148540630 |
| + | 1  | 656       |                   | NM_030979    | NP_112241    | Q9H361 | PABP3_HUMAN | RRM 3.                       | 4   | AATTTTGAGAA  | 0.428 |             |
| + | 1  | 2894      |                   | NM_207361    | NP_997244    | Q5SZK8 | FREM2_HUMAN | extracellular (Potential).   | 11  | ATGTTGCCCATA | 0.507 |             |
| + | 1  | 4846      |                   | NM_207361    | NP_997244    | Q5SZK8 | FREM2_HUMAN | in (Potential). CSPG 10.     | 11  | TACCCGATGGA  | 0.453 |             |
| - | 3  | 343       |                   | NM_018191    | NP_060661    | Q8NDN9 | RCBT1_HUMAN |                              | 1   | GGTGCCGAAGA  | 0.478 |             |
| + | 1  | 1881      |                   | NR_003268    |              |        |             |                              | 0   | TGGACCACCAG  | 0.547 |             |
| - | 1  | 402       | RP1_uc001vni.2_Ir | NM_178861    | NP_849192    | Q8IZP6 | R113B_HUMAN |                              | 3   | TGGCGTATGG   | 0.652 |             |
| + | 1  | 745       |                   | NM_001099780 | NP_001093250 | A5LHX3 | PSB11_HUMAN |                              | 0   | CGTGCGGGAGA  | 0.622 |             |
| - | 18 | 1936      | _p.A466V IPO4_uc  | NM_024658    | NP_078934    | Q8TEX9 | IPO4_HUMAN  |                              | 1   | GGGGCGCCAGG  | 0.607 |             |
| - | 5  | 1736      | lwmz.1_5'UTR TM   | NM_006405    | NP_006396    | O15321 | TM9S1_HUMAN |                              | 1   | ATGACAGTAGAC | 0.527 |             |
| - | 30 | 5913      | rb.1_5'UTR HECT   | NM_015382    | NP_056197    | Q9ULT8 | HECD1_HUMAN |                              | 5   | TCGACTTCTTCC | 0.343 |             |
| + | 7  | 2884      | ml.2_Missense_Mu  | NM_004274    | NP_004265    | Q13023 | AKAP6_HUMAN |                              | 21  | GGAAGGGACTG  | 0.478 |             |
| + | 13 | 6102      |                   | NM_004274    | NP_004265    | Q13023 | AKAP6_HUMAN |                              | 21  | CCCTTACTCCC  | 0.403 |             |
| - | 3  | 857       | _p.S229I OTX2_u   | NM_172337    | NP_758840    | P32243 | OTX2_HUMAN  |                              | 1   | GATGGCTGGTG  | 0.512 |             |
| - | 9  | 2532      | se_Mutation_p.A2  | NM_021136    | NP_066959    | Q16799 | RTN1_HUMAN  | Reticulon.                   | 4   | CTCAGCATGCC  | 0.393 |             |
| + | 22 | 3342      | ty.1_Missense_Mu  | NM_173462    | NP_775733    | O95428 | PPN_HUMAN   | like C2-type 2.              | 3   | CCAGCGGATCC  | 0.642 | rs138138992 |
| - | 2  | 2155      | orf43_uc010tud.1_ | NM_194278    | NP_919254    | Q6PJG2 | CN043_HUMAN | Poly-Arg.                    | 5   | CCGGCGCCTCC  | 0.657 |             |
| - | 2  | 1741      | orf43_uc010tud.1_ | NM_194278    | NP_919254    | Q6PJG2 | CN043_HUMAN | Pro-rich.                    | 5   | CAGTTCTGGGT  | 0.667 |             |
| + | 7  | 735       | LL5_uc010ask.1_I  | NM_015072    | NP_055887    | Q6EMB2 | TTLL5_HUMAN | TTL.                         | 3   | GACCTTGATAG  | 0.413 |             |
| - | 1  | 100       | .RS_uc001yhj.1_In | NM_173701    | NP_776049    | P23381 | SYWC_HUMAN  |                              | 1   | TGCGGGCTCAC  | 0.547 |             |
| + | 8  | 988       | _Mutation_p.G18I  | NM_001112726 | NP_001106197 | Q9Y4F5 | K0284_HUMAN |                              | 1   | GGCAGGTGGGG  | 0.642 |             |
| - | 10 | 2367      |                   | NM_024490    | NP_077816    | O60312 | AT10A_HUMAN | lasmic (Potential).          | 5   | GGTGCCGGATC  | 0.607 |             |
| + | 10 | 1347      |                   | NM_033223    | NP_150092    | Q99928 | GBRG3_HUMAN | lasmic (Probable).           | 0   | CAATTCGGTTTA | 0.423 |             |
| + | 9  | 1986      |                   | NM_019074    | NP_061947    | Q9NR61 | DLL4_HUMAN  | lasmic (Potential).          | 2   | AGCTGCGGCTT  | 0.632 |             |
| + | 8  | 964       | e_Mutation_p.R24  | NM_014444    | NP_055259    | Q9UGJ1 | GCP4_HUMAN  |                              | 3   | ACTAGCGCCTG  | 0.428 |             |
| - | 37 | 7136      |                   | NM_003922    | NP_003913    | Q15751 | HERC1_HUMAN |                              | 19  | ATGGCGCCAG   | 0.527 |             |
| + | 3  | 1066_1067 |                   | NM_001031807 | NP_001026977 | P84550 | SKOR1_HUMAN |                              | 0   | GCTTCCCTACGG | 0.579 |             |
| - | 2  | 686       |                   | NM_002833    | NP_002824    | P43378 | PTN9_HUMAN  |                              | 2   | GGCACGGAGCA  | 0.493 | rs114183309 |

|   |    |         |                                        |              |              |        |             |                               |     |               |       |             |
|---|----|---------|----------------------------------------|--------------|--------------|--------|-------------|-------------------------------|-----|---------------|-------|-------------|
| + | 1  | 116     | _5'Flank SNX33_u                       | NM_153271    | NP_695003    | Q8WV41 | SNX33_HUMAN | SH3.                          | 1   | 3CCGAGCCCTCT  | 0.557 |             |
| + | 22 | 2968    | ib.1_Missense_Mu                       | NM_004136    | NP_004127    | P48200 | IREB2_HUMAN |                               | 0   | TCAGCGTGATTC  | 0.363 |             |
| - | 6  | 634     | bgn.2_Missense_f                       | NM_181900    | NP_871629    | Q9NSY2 | STAR5_HUMAN | START.                        | 1   | TGGGAGGTAAC   | 0.522 |             |
| + | 7  | 1505    | IA2_uc002cgo.1_                        | NM_006849    | NP_006840    | Q13087 | PDIA2_HUMAN | thioredoxin 1.                | 2   | CGGAGGAGTAC   | 0.682 |             |
| + | 4  | 1625    | ih.1_Missense_Mu                       | NM_005632    | NP_005623    | O75808 | CAN15_HUMAN | anBP2-type 5.                 | 2   | TGCCTGTACCC   | 0.766 |             |
| - | 29 | 4263    | lz.2_Missense_Mu                       | NM_014714    | NP_055529    | Q96RY7 | IF140_HUMAN |                               | 5   | CTTTGTCTAGT   | 0.647 |             |
| - | 22 | 3153    | lz.2_Missense_Mu                       | NM_014714    | NP_055529    | Q96RY7 | IF140_HUMAN | TPR 3. p.R931C(1)             | 5   | GAAGCGGTGCG   | 0.622 |             |
| + | 2  | 343     | I24_uc002cqm.2_f                       | NM_020705    | NP_065756    | Q9ULP9 | TBC24_HUMAN | ab-GAP TBC.                   | 0   | GGTCACGCCCTG  | 0.667 |             |
| + | 2  | 864     | I24_uc002cqm.2_f                       | NM_020705    | NP_065756    | Q9ULP9 | TBC24_HUMAN | ab-GAP TBC.                   | 0   | TGTACCGCGTG   | 0.632 |             |
| + | 11 | 7111    | rl.1_Missense_Mu                       | NM_016333    | NP_057417    | Q9UQ35 | SRRM2_HUMAN | rich. Ser-rich.               | 4   | CACGATATCAGT  | 0.572 |             |
| - | 12 | 3145    |                                        | NM_032444    | NP_115820    | Q8IY92 | SLX4_HUMAN  | PLK1 and TERF2-TERF2II        | 0   | TTCCTCGTGGT   | 0.468 |             |
| + | 5  | 1239    | IP2_uc010uyp.1_j                       | NM_024997    | NP_079273    | Q5U623 | MCAF2_HUMAN | Potential.                    | 0   | CTATTTGATAAGA | 0.308 |             |
| + | 8  | 962     | IP_uc002dcx.3_R                        | NM_006985    | NP_008916    | Q9UND3 | NPIP_HUMAN  | Pro-rich.                     | 0   | AGCTCCACCCCT  | 0.532 |             |
| - | 33 | 4730    |                                        | NM_017539    | NP_060009    | Q8TD57 | DYH3_HUMAN  |                               | 18  | CACACCTTCTC   | 0.483 |             |
| - | 2  | 273     |                                        | NM_005003    | NP_004994    | O14561 | ACPM_HUMAN  |                               | 0   | GAACACGGTCC   | 0.423 |             |
| + | 15 | 4273    | C6A_uc002dmo.2_                        | NM_014494    | NP_055309    | Q8NDV7 | TNR6A_HUMAN |                               | 2   | ACAACGGTGGC   | 0.443 |             |
| + | 7  | 1186    | efx.2_Missense_M                       | NM_182922    | NP_891552    | Q7Z4Q2 | HEAT3_HUMAN |                               | 2   | ACTTTCGTTTCA  | 0.353 |             |
| + | 6  | 726     | _uc010vhl.1_Silent                     | NM_012106    | NP_036238    | Q9Y2Y0 | AR2BP_HUMAN |                               | 0   | ATCTGCGGCAC   | 0.483 |             |
| - | 17 | 2354    | V739M CDH16_t                          | NM_004062    | NP_004053    | O75309 | CAD16_HUMAN | Potential). Ectodomain G.     | 3   | GACACACGATCA  | 0.507 |             |
| - | 1  | 2329    | 2L_uc002evj.2_5'F                      | NM_018380    | NP_060850    | Q9NUL7 | DDX28_HUMAN | case C-terminal.              | 1   | CGCTCCCCACA   | 0.582 |             |
| - | 5  | 852     | _Splice_Site VAC1+                     | NM_018052    | NP_060522    | Q08AM6 | VAC14_HUMAN |                               | 2   | 3CCTTACCCAGG  | 0.522 |             |
| + | 2  | 477     | ao.2_Missense_M                        | NM_005769    | NP_005760    | Q8NCG5 | CHST4_HUMAN | enal (Potential).             | 0   | GATACGGGCCG   | 0.592 |             |
| - | 8  | 1412    | LPP2_uc010cgf.2_                       | NM_015020    | NP_055835    | Q6ZVD8 | PHLP2_HUMAN | LRR 10.                       | 2   | GATTCCGCCCA   | 0.502 |             |
| + | 2  | 274     |                                        | NM_005752    | NP_005743    | O75596 | CLC3A_HUMAN |                               | 0   | 3CCTGCAGACA   | 0.443 |             |
| - | 13 | 2178    | fh.2_Missense_M                        | NM_003791    | NP_003782    | Q14703 | MBTP1_HUMAN | enal (Potential).             | 2   | AGCCCCACCAA   | 0.537 |             |
| - | 14 | 2210    | 1C_uc010vnz.1_A                        | NM_005679    | NP_005670    | Q15572 | TAF1C_HUMAN |                               | 1   | TCTGGCGGTGG   | 0.672 |             |
| + | 6  | 539_540 | 0vqr.1_Missense_                       | NM_000934    | NP_000925    | P08697 | A2AP_HUMAN  |                               | 0   | AGGACCTGGGC   | 0.673 |             |
| + | 8  | 719     |                                        | NM_002945    | NP_002936    | P27694 | RFA1_HUMAN  |                               | 0   | GTGCTCGTGT    | 0.448 |             |
| - | 1  | 227     |                                        | NM_002550    | NP_002541    | P47881 | OR3A1_HUMAN | Name=2; (Potential).          | 3   | TGATGCACCCA   | 0.567 |             |
| + | 8  | 1475    | p.G518E ZMYND1                         | NM_032265    | NP_115641    | Q9H091 | ZMY15_HUMAN |                               | 0   | GGCCGGGAAGC   | 0.532 |             |
| + | 3  | 405     | x.1_Missense_Mut                       | NM_019013    | NP_061886    | Q9BSJ6 | FA64A_HUMAN |                               | 0   | GGCCAGGAGGC   | 0.602 |             |
| + | 7  | 1156    | R381Q DNAH2_t                          | NM_020877    | NP_065928    | Q9P225 | DYH2_HUMAN  | n (By similarity).            | 13  | CACTCGGGAGA   | 0.542 |             |
| + | 36 | 5749    |                                        | NM_020877    | NP_065928    | Q9P225 | DYH2_HUMAN  | 1 (By similarity).            | 13  | TGGCCGCACAG   | 0.463 | rs147216751 |
| - | 27 | 3829    | uc002gml.1_Intron                      | NM_017533    | NP_060003    | Q9Y623 | MYH4_HUMAN  | Potential.                    | 13  | CAGTCTCCATGT  | 0.423 |             |
| + | 9  | 1848    |                                        | NM_001372    | NP_001363    | Q9NYC9 | DYH9_HUMAN  | n (By similarity).            | 20  | 3AAGCAGAACTT  | 0.423 |             |
| - | 2  | 480     | n NCRNA00188_u                         | NM_001113567 | NP_001107039 | Q8NAA5 | CQ076_HUMAN |                               | 0   | GTTCCGGAAGC   | 0.622 |             |
| - | 2  | 526     | L SREBF1_uc002c                        | NM_004176    | NP_004167    | P36956 | SRBP1_HUMAN | Cytoplasmic (Potential).      | 1   | ATGGACGGGTAC  | 0.647 | rs115855236 |
| + | 3  | 879     | N2_uc010vvo.1_Ir                       | NM_014964    | NP_055779    | O95208 | EPN2_HUMAN  | ENTH.                         | 1   | TGAGAGGGCCC   | 0.582 |             |
| - | 11 | 1214    | g.1_Missense_Mu                        | NM_014030    | NP_054749    | Q9Y2X7 | GIT1_HUMAN  | milarity). PTK2-binding (By   | 0   | AAAGCGGGCCA   | 0.602 |             |
| + | 4  | 893     | uc010csm.2_Silen                       | NM_032322    | NP_115698    | Q8IUD6 | RN135_HUMAN | 330.2/SPRY p.?(1)             | 2   | 3CTTCTCGTTT   | 0.507 |             |
| - | 6  | 1143    | p.T221M PIP4K2B                        | NM_003559    | NP_003550    | P78356 | PI42B_HUMAN | PIPK.                         | 1   | CAACCGTAGAA   | 0.537 |             |
| + | 11 | 1508    | p.V227I ERBB2_                         | NM_004448    | NP_004439    | P04626 | ERBB2_HUMAN | ellular (Potential).          | 143 | TGAGCGTCTTC   | 0.577 | rs142783371 |
| - | 4  | 1073    | T23_uc010cxg.2_A                       | NM_015515    | NP_056330    | Q9C075 | K1C23_HUMAN | Rod. Coiled 1B.               | 1   | CATTTTCATACCT | 0.403 |             |
| + | 7  | 1210    | JAP1_uc010wgs.1                        | NM_003632    | NP_003623    | P78357 | CNTP1_HUMAN | 1. Extracellular (Potential). | 8   | ACCGGCTCAAC   | 0.612 |             |
| - | 3  | 696     | .S1073S WNK4_uc010wgx.1_Silent_p.S737S |              |              | Q9Y2R0 | CCD56_HUMAN |                               | 0   | GAGAGCGACCG   | 0.607 |             |
| - | 7  | 882     | _Mutation_p.S252I                      | NM_001256    | NP_001247    | P30260 | CDC27_HUMAN |                               | 5   | ATATGGAAGTTC  | 0.383 |             |
| - | 16 | 1822    | ihw.1_Missense_M                       | NM_145798    | NP_665741    | Q9BZF2 | OSBL7_HUMAN |                               | 0   | AGACAGCAAAG   | 0.627 |             |

|   |    |         |                                                 |              |              |            |                |                                |    |               |       |
|---|----|---------|-------------------------------------------------|--------------|--------------|------------|----------------|--------------------------------|----|---------------|-------|
| - | 3  | 281     |                                                 | NM_002634    | NP_002625    | P35232     | PHB_HUMAN      |                                | 0  | AGAACGGCAGT   | 0.488 |
| + | 9  | 2764    | p.A845T AKAP1_u                                 | NM_003488    | NP_003479    | Q92667     | AKAP1_HUMAN    |                                | 1  | ATGCCGCCATG   | 0.557 |
| - | 10 | 1434    | ez.2_Nonsense_M                                 | NM_080283    | NP_525022    | Q8IUA7     | ABCA9_HUMAN    | p.R431Q(1)                     | 6  | AACATCGATGTC  | 0.438 |
| - | 11 | 1040    | se_Mutation_p.R24                               | NM_001080542 | NP_001074011 | Q8TES7     | FBF1_HUMAN     |                                | 0  | CGGGCGGGCCA   | 0.672 |
| + | 7  | 2983    |                                                 | NM_032048    | NP_114437    | Q9BXX0     | EMIL2_HUMAN    | C1q.                           | 3  | GCACCGGTGAC   | 0.602 |
| - | 60 | 8666    | nl.2_Missense_Mu                                | NM_005559    | NP_005550    | P25391     | LAMA1_HUMAN    | minin G-like 4.                | 21 | GGCAGGGATGC   | 0.522 |
| - | 48 | 6978    | zj.1_Missense_Mu                                | NM_005559    | NP_005550    | P25391     | LAMA1_HUMAN    | minin G-like 1.                | 21 | ACCCACGGCAC   | 0.438 |
| + | 7  | 1622    | koc.2_Missense_Iv                               | NM_006788    | NP_006779    | Q15311     | RBP1_HUMAN     | acts with RalA.                | 1  | AGGATGTTTCC   | 0.333 |
| + | 2  | 1410    | NDC2_uc002koh.                                  | NM_001098529 | NP_001091999 | Q86VQ3     | TXND2_HUMAN    | repeat of Q-P-K-X-G-D-I-F      | 2  | AAGAAGCCATC   | 0.597 |
| + | 2  | 1425    | NDC2_uc002koh.                                  | NM_001098529 | NP_001091999 | Q86VQ3     | TXND2_HUMAN    | repeat of Q-P-K-X-G-D-I-F      | 2  | CCAAGGAGGGT   | 0.592 |
| - | 27 | 4337    | e_Mutation_p.H12                                | NM_014939    | NP_055754    | Q9Y2L5     | TPPC8_HUMAN    |                                | 0  | TTGATGAAATGC  | 0.353 |
| - | 10 | 1547    | ix.3_Missense_ML                                | NM_006111    | NP_006102    | P42765     | THIM_HUMAN     |                                | 1  | ACCTCCAATGC   | 0.448 |
| + | 7  | 950     | n_p.G136E SERPI                                 | NM_001143818 | NP_001137290 | P05120     | PAI2_HUMAN     |                                | 2  | CAAAGGAAAGTC  | 0.383 |
| - | 11 | 1811    | l.1_RNA CDH19_u                                 | NM_021153    | NP_066976    | Q9H159     | CAD19_HUMAN    | Extracellular (Potential).     | 2  | GTGACGGGATT   | 0.443 |
| - | 4  | 455     | ED16_uc010xfw.1                                 | NM_005481    | NP_005472    | Q9Y2X0     | MED16_HUMAN    | WD 1.                          | 0  | CCCGTCGGCAT   | 0.637 |
| - | 7  | 1144    | va.1_Missense_Mi                                | NM_032737    | NP_116126    | Q03252     | LMNB2_HUMAN    | Rod. Coil 2.                   | 2  | GTACTCGGCCA   | 0.657 |
| + | 4  | 1228    | wn.3_Missense_M                                 | NM_152791    | NP_690004    | Q8NEP9     | ZN555_HUMAN    | 2H2-type 8.                    | 1  | TTATCCCCAGTC  | 0.463 |
| - | 3  | 309     | a.1_5'UTR AES_uc                                | NM_001130    | NP_001121    | Q08117     | AES_HUMAN      | rich (Q domain).               | 0  | ACATTCGAGCTT  | 0.627 |
| - | 10 | 1629    |                                                 | NM_001961    | NP_001952    | P13639     | EF2_HUMAN      |                                | 0  | CAGGTCAGCCG   | 0.652 |
| - | 3  | 3055    | jb.1_Missense_ML                                | NM_001080400 | NP_001073869 | Q96Q06     | PLIN4_HUMAN    |                                | 0  | GAGCCAGCCGG   | 0.652 |
| - | 3  | 2585    | V4_uc010dub.1_In                                | NM_001080400 | NP_001073869 | Q96Q06     | PLIN4_HUMAN    | roximate tandem repeat.[2      | 0  | CTTTGGCCACT   | 0.582 |
| - | 6  | 736     | o.R160W DPP9_uc                                 | NM_139159    | NP_631898    | Q86T12     | DPP9_HUMAN     |                                | 1  | TTTCCGCTCCC   | 0.632 |
| - | 2  | 522     | o.2_Nonsense_ML                                 | NM_002034    | NP_002025    | Q11128     | FUT5_HUMAN     | renal (Potential).             | 0  | AGATCCAGCCG   | 0.627 |
| - | 6  | 916     | _p.E35K GTF2F1_                                 | NM_002096    | NP_002087    | P35269     | T2FA_HUMAN     |                                | 0  | GTCCCTCCAGGT  | 0.637 |
| + | 8  | 1096    | _p.N211S ZNF557_                                | NM_001044388 | NP_001037853 | Q8N988     | ZN557_HUMAN    | 2H2-type 3.                    | 2  | ATGCAATGACTC  | 0.453 |
| + | 5  | 607_608 | l_uc010dvs.2_Mis                                | NM_001144910 | NP_001138382 | Q9H2X3     | CLC4M_HUMAN    | 7 X approximate tandem r       | 1  | CTGACCCGGCTC  | 0.584 |
| + | 1  | 183     | R40W MAP2K7_u                                   | NM_145185    | NP_660186    | O14733     | MP2K7_HUMAN    |                                | 11 | GGCCCAGGCC    | 0.373 |
| - | 5  | 706     |                                                 | NM_001419    | NP_001410    | Q15717     | ELAV1_HUMAN    | RRM 2.                         | 0  | TCACTGTGATGC  | 0.557 |
| - | 14 | 1743    |                                                 | NM_032447    | NP_115823    | Q75N90     | FBN3_HUMAN     | 3 7; calcium-binding.          | 11 | CACTCGTCAAT   | 0.493 |
| - | 3  | 23843   |                                                 | NM_024690    | NP_078966    | Q8WXI7     | MUC16_HUMAN    | ch. Extracellular (Potential). | 57 | CTGGTGATATT   | 0.493 |
| + | 26 | 4452    |                                                 | NM_014975    | NP_055790    | Q9Y2H9     | MAST1_HUMAN    |                                | 7  | CTGCGCGGCC    | 0.726 |
| - | 4  | 1218    | p.D266N WIZ_uc0                                 | NM_021241    | NP_067064    | O95785     | WIZ_HUMAN      |                                | 0  | CGTGTGATGG    | 0.637 |
| + | 9  | 1140    | om.1_Missense_Iv                                | NM_000896    | NP_000887    | Q08477     | CP4F3_HUMAN    |                                | 3  | TGAAGGACCGT   | 0.582 |
| + | 4  | 1812    | i.1_Intron ZNF90_u                              | NM_007138    | NP_009069    | Q03938     | ZNF90_HUMAN    | 2H2-type 14.                   | 2  | GATAAGTCATAC  | 0.378 |
| + | 5  | 1539    | pk.2_Missense_Iv                                | NM_025189    | NP_079465    | Q9H8G1     | ZN430_HUMAN    | 2H2-type 10.                   | 2  | CATAAGGTAATT  | 0.373 |
| - | 4  | 1717    | p.K443E ZNF708_                                 | NM_021269    | NP_067092    | P17019     | ZN708_HUMAN    | 2H2-type 14.                   | 6  | ATTCTTTACATT  | 0.368 |
| - | 4  | 1447    | p.K353E ZNF708_                                 | NM_021269    | NP_067092    | P17019     | ZN708_HUMAN    |                                | 6  | GTTTCTTCCAG   | 0.343 |
| - | 4  | 1363    | p.E325K ZNF708_                                 | NM_021269    | NP_067092    | P17019     | ZN708_HUMAN    |                                | 6  | GTTTCTCTCCAG  | 0.368 |
| + | 2  | 1494    | _p.T533S ZNF493_                                | NM_175910    | NP_787106    | Q6ZR52     | ZN493_HUMAN    | 2H2-type 14.                   | 1  | CCCTTACTATAC  | 0.343 |
| - | 4  | 1483    |                                                 | NM_001098626 | NP_001092096 | A6NK75     | ZNF98_HUMAN    | 2H2-type 10.                   | 2  | TGAATTATCTTAT | 0.363 |
| + | 4  | 1782    | rk.1_Missense_Mi                                | NM_203282    | NP_975011    | O75437     | ZN254_HUMAN    | 2H2-type 13.                   | 0  | TGAAAAAATGTC  | 0.358 |
| - | 11 | 1445    | p.G128R NFKBID                                  | NM_139239    | NP_640332    | Q8NI38     | IKBD_HUMAN     |                                | 0  | CGGCCCGGGCC   | 0.701 |
| - | 4  | 568     | F_uc002otd.3_5'U                                | NM_006494    | NP_006485    | P50548     | ERF_HUMAN      |                                | 4  | CACCCGACGGC   | 0.662 |
| + | 5  | 678     |                                                 | NM_015125    | NP_055940    | Q96RK0     | CIC_HUMAN      | HMG box.                       | 11 | CAAGCGGCACC   | 0.617 |
| + | 7  | 1115    |                                                 | NM_015125    | NP_055940    | Q96RK0     | CIC_HUMAN      |                                | 11 | ACAGCGGGGTA   | 0.662 |
| - | 5  | 1941    | uc010eif.1_Intron                               | NM_005357    | NP_005348    | Q05469     | LIPS_HUMAN     |                                | 2  | TGTTGGCCAGA   | 0.637 |
| - | 2  | 386     | 'SG2_uc010eif.1_Missense_Mutation_p.R98Q PSG2_u |              | Q00889       | PSG6_HUMAN | g-like V-type. |                                | 2  | GTTTCTCGTCCA  | 0.448 |

rs150218743

|   |    |         |                                                    |              |              |        |                                            |     |                |       |
|---|----|---------|----------------------------------------------------|--------------|--------------|--------|--------------------------------------------|-----|----------------|-------|
| - | 1  | 1961    |                                                    | NM_032040    | NP_114429    | Q9H0W5 | CCDC8_HUMAN                                | 3   | GGGCCTCTGCC    | 0.607 |
| + | 1  | 1751    |                                                    | NM_004491    | NP_004482    | Q9NRY4 | RHG35_HUMAN                                | 1   | TGACCGGAATC    | 0.488 |
| + | 6  | 1231    | i.2_Missense_Mut                                   | NM_020126    | NP_064511    | Q9NRA0 | SPHK2_HUMAN DAGKc.                         | 1   | ACCAGCACGGG    | 0.632 |
| - | 6  | 1056    | 25D IRF3_uc002p                                    | NM_001571    | NP_001562    | Q14653 | IRF3_HUMAN 1 in HERC5 binding.             | 2   | GCAGGCCCTCC    | 0.652 |
| - | 2  | 307     | 0ydc.1_Missense_                                   | NM_001245    | NP_001236    | Q43699 | SIGL6_HUMAN (Potential). Ig-like V-type.   | 1   | .GGGTACGAGGA   | 0.597 |
| + | 7  | 1195    | pzi.2_Missense_M                                   | NM_032423    | NP_115799    | Q3MIS6 | ZN528_HUMAN 2H2-type 2.                    | 2   | ACCTTTCACAA    | 0.388 |
| - | 5  | 1746    | ik.1_Intron ZNF81                                  | NM_001031665 | NP_001026835 | Q0VGE8 | ZN816_HUMAN 2H2-type 10.                   | 0   | TTACATGTGTAAC  | 0.408 |
| - | 5  | 934     | _p.L275F LILRB5_                                   | NM_006840    | NP_006831    | Q75023 | LIRB5_HUMAN 3. Extracellular (Potential).  | 2   | GGAGAGCCCAG    | 0.637 |
| + | 6  | 1417    | o.E228K U2AF2_uc                                   | NM_013301    | NP_037433    | Q9BWC9 | CC106_HUMAN                                | 0   | .CCCCGAGAAG    | 0.662 |
| + | 5  | 377     | '_uc010eti.2_Splic                                 | NM_033106    | NP_149097    | Q9UBC7 | GALP_HUMAN                                 | 0   | TGGAGGTAAAG    | 0.488 |
| + | 5  | 1260    |                                                    | NM_152677    | NP_689890    | Q8NAM6 | ZSCA4_HUMAN                                | 1   | TCACAGGATATG   | 0.373 |
| + | 7  | 839     | o.G183S COLEC1                                     | NM_024027    | NP_076932    | Q9BWP8 | COL11_HUMAN 2-type lectin.                 | 0   | .GCAGCGGTGAG   | 0.622 |
| + | 12 | 1663    | se_Mutation_p.G3                                   | NM_198182    | NP_937825    | Q9NZI5 | GRHL1_HUMAN                                | 2   | TGGAGGTTGAA    | 0.224 |
| - | 26 | 10732   |                                                    | NM_000384    | NP_000375    | P04114 | APOB_HUMAN                                 | 27  | TGGAAGTGCCCT   | 0.443 |
| - | 2  | 614     | AD2B_uc010exx.1                                    | NM_017552    | NP_060022    | Q9ULI0 | ATD2B_HUMAN                                | 1   | GTACTTCGTGAT   | 0.398 |
| + | 12 | 2833    | _p.A708T NCOA1                                     | NM_003743    | NP_003734    | Q15788 | NCOA1_HUMAN 1:tion with CREBBP.            | 11  | .CCACTGCCAGA   | 0.468 |
| + | 37 | 5947    | v.2_Missense_Mul                                   | NM_004341    | NP_004332    | P27708 | PYR1_HUMAN 1:artate transcarbamylase).     | 10  | .TGTCCGTCAG    | 0.592 |
| - | 35 | 3999    |                                                    | NM_000379    | NP_000370    | P47989 | XDH_HUMAN                                  | 8   | GCATTGCGGATC   | 0.582 |
| + | 36 | 7213    |                                                    | NM_016252    | NP_057336    | Q9NR09 | BIRC6_HUMAN                                | 14  | TTGCACGCATTG   | 0.373 |
| - | 16 | 1998    | oq.1_RNA PSME4                                     | NM_014614    | NP_055429    | Q14997 | PSME4_HUMAN                                | 5   | .GTGGGGAACAA   | 0.318 |
| - | 11 | 1449    | o4_uc010yoq.1_Rf                                   | NM_014614    | NP_055429    | Q14997 | PSME4_HUMAN                                | 5   | .ACTGCGGGCTA   | 0.428 |
| + | 1  | 378_379 | i.2_Intron SPTBN1                                  | NR_002229    |              |        |                                            | 0   | TGAGTTTGCCAT   | 0.48  |
| - | 4  | 411     |                                                    | NM_002056    | NP_002047    | Q06210 | GFPT1_HUMAN 1:imidotransferase type-2.     | 1   | CCATATCTTGTTG  | 0.368 |
| - | 8  | 1630    | nc.2_Missense_M                                    | NM_133637    | NP_598376    | Q8TE96 | DQX1_HUMAN                                 | 2   | CCATCTCGTCCA   | 0.517 |
| - | 3  | 543     | r_p.A9V FAM176A                                    | NM_001135032 | NP_001128504 | Q9H8M9 | F176A_HUMAN 1:calization and biological ac | 0   | .TAGCCGCTAGG   | 0.617 |
| - | 7  | 1122    | _p.A198V IMMT_u                                    | NM_006839    | NP_006830    | Q16891 | IMMT_HUMAN 1:intermembrane (Potential).    | 1   | .TGACCGCAGCA   | 0.458 |
| - | 5  | 682     | yuv.1_Missense_M                                   | NM_030805    | NP_110432    | Q9H0V9 | LMA2L_HUMAN 1:like. Lumenal (Potential).   | 0   | .GTAGCGAATCAC  | 0.562 |
| - | 14 | 1950    | p.A572T AFF3_uc                                    | NM_002285    | NP_002276    | P51826 | AFF3_HUMAN                                 | 6   | CTCCGCGGGCG    | 0.771 |
| + | 7  | 707     | o2_uc002tjv.2_Spli                                 | NM_172003    | NP_742000    | Q8IUF1 | CBWD2_HUMAN                                | 0   | .GTTTAGCATTTA  | 0.264 |
| + | 5  | 674     | oH2P_uc002tkb.2_                                   | NM_182905    | NP_878908    |        |                                            | 0   | .GTGGGCACTTG   | 0.612 |
| + | 1  | 275     | ITEE_uc002tsk.2_!                                  | NM_001083538 | NP_001077007 | Q6S8J3 | POTEE_HUMAN                                | 0   | GGGGGAGTGGC    | 0.587 |
| - | 12 | 1941    | oq.1_Missense_ML                                   | NM_000888    | NP_000879    | P18564 | ITB6_HUMAN 1:cellular (Potential).         | 3   | CTTCTCGGGCTI   | 0.453 |
| - | 2  | 257     | fi.1_Missense_Mutation_p.P11L TTN_uc010zjf.1_Misse |              |              | Q8WZ42 | TITIN_HUMAN                                | 153 | .GTAACGGCTGC   | 0.448 |
| - | 9  | 1233    |                                                    | NM_182521    | NP_872327    | Q8NEG5 | ZSWM2_HUMAN                                | 3   | .ACTGCTGAATTTI | 0.363 |
| + | 28 | 4811    | ouzs.3_Splice_Site                                 | NM_001114132 | NP_001107604 | Q6ZS30 | NBEL1_HUMAN                                | 2   | .ACTAACGTAAGC  | 0.348 |
| - | 3  | 441     |                                                    | NM_014617    | NP_055432    | P11844 | CRGA_HUMAN 1:crystallin 'Greek key' 4.     | 0   | CTGCCGCCCC     | 0.577 |
| + | 1  | 220     | o2R_uc010zjb.1_Ir                                  | NM_005048    | NP_005039    | P49190 | PTH2R_HUMAN                                | 3   | TGGCCGGGCTG    | 0.637 |
| + | 33 | 7994    |                                                    | NM_005876    | NP_005867    | Q15772 | SPEG_HUMAN 1:lg-like 9.                    | 14  | GGGCAGCATCA    | 0.662 |
| + | 3  | 597     | 1486_uc010fxa.1_                                   | NM_020864    | NP_065915    | Q9P242 | K1486_HUMAN                                | 3   | .ACCACCAAAC    | 0.577 |
| - | 1  | 1929    |                                                    | NM_005544    | NP_005535    | P35568 | IRS1_HUMAN                                 | 12  | .CCTTCGGCCA    | 0.642 |
| + | 48 | 4415    | o1418_splice COL4                                  | NM_000091    | NP_000082    | Q01955 | CO4A3_HUMAN                                | 3   | TTGAAGGACCAC   | 0.378 |
| + | 12 | 1178    | se_Mutation_p.V3!                                  | NM_025139    | NP_079415    | Q7Z3E5 | ARMC9_HUMAN                                | 1   | .AGACCGTTCTG   | 0.493 |
| - | 2  | 424     |                                                    | NM_006056    | NP_006047    | Q9HB89 | NMUR1_HUMAN Name=2; (Potential).           | 5   | .GGTCCGACACG   | 0.632 |
| + | 1  | 46      |                                                    | NM_005383    | NP_005374    | Q9Y3R4 | NEUR2_HUMAN                                | 0   | .AGTCGGGAGCC   | 0.627 |
| + | 2  | 815     | _p.R151H PRNP_L                                    | NM_001080122 | NP_001073591 | P04156 | PRIOR_HUMAN 1:2, ERI3 and SYN1 (By simi    | 1   | .ACTATCGTAAAA  | 0.532 |
| - | 17 | 2484    | oL1_uc002xgj.1_Mi                                  | NM_002895    | NP_002886    | P28749 | RBL1_HUMAN 1:ocket; binds T and E1A.       | 10  | .GTAAGCGTACA   | 0.348 |
| + | 2  | 260     | se_Mutation_p.V5                                   | NM_022896    | NP_075047    | Q9BQK8 | LPIN3_HUMAN 1:N-LIP.                       | 4   | .TGGGCGTCTCG   | 0.637 |

rs138249576

|   |    |       |                    |              |              |        |             |                         |    |              |       |             |
|---|----|-------|--------------------|--------------|--------------|--------|-------------|-------------------------|----|--------------|-------|-------------|
| - | 6  | 683   | ox.2_Missense_M    | NM_181510    | NP_852611    | Q8IUA0 | WFDC8_HUMAN | WAP 3.                  | 0  | 'GCGTGGGCAGA | 0.423 |             |
| + | 9  | 1374  |                    | NM_004994    | NP_004985    | P14780 | MMP9_HUMAN  |                         | 2  | .GCCACGGCCTC | 0.577 |             |
| - | 18 | 1901  | ε_Mutation_p.T49f  | NM_006045    | NP_006036    | O75110 | ATP9A_HUMAN | lasmic (Potential).     | 4  | ATCACCGTGGCC | 0.637 |             |
| + | 2  | 2781  |                    | NM_173485    | NP_775756    | Q9NRE2 | TSH2_HUMAN  |                         | 6  | AAGATGAAGCG  | 0.507 |             |
| + | 5  | 1072  | _p.E235K EDN3_u    | NM_000114    | NP_000105    | P14138 | EDN3_HUMAN  |                         | 1  | TTCAGGAAGGA  | 0.562 |             |
| - | 5  | 592   |                    | NM_020713    | NP_065764    | Q96KM6 | Z512B_HUMAN |                         | 0  | GGTGACCCGGCC | 0.602 |             |
| + | 20 | 3541  | DDL1_uc002zag.1    | NM_001004416 | NP_001004416 | Q5DID0 | UROL1_HUMAN | llular (Potential). ZP. | 3  | CTGTGCCCAAC  | 0.502 |             |
| + | 28 | 5685  | i.2_Missense_Mut   | NM_006031    | NP_006022    | O95613 | PCNT_HUMAN  | Potential.              | 8  | AGTTCGAAGCG  | 0.612 |             |
| - | 26 | 5112  | _Mutation_p.A150k  | NM_015241    | NP_056056    | Q7RTP6 | MICA3_HUMAN |                         | 0  | TTCCGCGGACA  | 0.687 |             |
| - | 2  | 984   | TNF6_uc003aqy.1    | NM_182486    | NP_872292    | Q9BXI9 | C1QT6_HUMAN | C1q.                    | 0  | CGGTCCGCATG  | 0.552 |             |
| + | 7  | 2145  | atq.1_Missense_M   | NM_001039141 | NP_001034230 | Q9H2D6 | TARA_HUMAN  |                         | 1  | .CCCCAGAACAT | 0.592 |             |
| + | 7  | 2376  | atq.1_Missense_M   | NM_001039141 | NP_001034230 | Q9H2D6 | TARA_HUMAN  |                         | 1  | ITGCCAACGGG  | 0.582 |             |
| - | 7  | 1038  | ve.1_Missense_Ml   | NM_020831    | NP_065882    | Q969V6 | MKL1_HUMAN  | Gln-rich.               | 5  | TGCTGCTGGTT  | 0.657 |             |
| - | 9  | 1553  | _p.A501T SMC1B_    | NM_148674    | NP_683515    | Q8NDV3 | SMC1B_HUMAN | lexible hinge.          | 2  | CTCTGCTCTCT  | 0.348 |             |
| - | 4  | 893   | ΔA_uc003bnd.3_M    | NM_001085426 | NP_001078895 | P15289 | ARSA_HUMAN  |                         | 2  | CTGGCGCTGGG  | 0.642 |             |
| + | 2  | 819   | cc.1_RNA GRM7_L    | NM_000844    | NP_000835    | Q14831 | GRM7_HUMAN  | ellular (Potential).    | 7  | ATCAACGGCAC  | 0.502 |             |
| + | 5  | 1326  | l0hcg.2_Missense   | NM_000844    | NP_000835    | Q14831 | GRM7_HUMAN  | ellular (Potential).    | 7  | ACTTTACGTCCC | 0.383 |             |
| - | 5  | 1151  | ε_Mutation_p.E23f  | NM_001001331 | NP_001001331 | Q01814 | AT2B2_HUMAN | lasmic (Potential).     | 6  | AGCTTTCATCAA | 0.592 |             |
| + | 2  | 1818  |                    | NM_001137674 | NP_001131146 | A6NHJ4 | ZN860_HUMAN |                         | 1  | 'GAAGAGAGATC | 0.348 |             |
| + | 14 | 1268  | ε_Mutation_p.R30   | NM_016300    | NP_057384    | Q9UBL0 | ARP21_HUMAN |                         | 3  | CAACAGAGATG  | 0.532 |             |
| - | 3  | 1707  |                    | NM_014831    | NP_055646    | O15050 | TRNK1_HUMAN |                         | 2  | GAGGTCGATCAC | 0.542 |             |
| + | 4  | 431   | cko.2_Missense_M   | NM_001098414 | NP_001091884 | Q6ZSS3 | ZN621_HUMAN | KRAB.                   | 1  | ATGGGGCCAG   | 0.498 |             |
| + | 3  | 1496  |                    | NM_152393    | NP_689606    | Q2TBA0 | KBTB5_HUMAN | Kelch 3.                | 1  | CTACGTAATTG  | 0.577 |             |
| - | 6  | 700   | .2_Missense_Mute   | NM_002343    | NP_002334    | P02788 | TRFL_HUMAN  | ansferrin-like 1.       | 4  | CAGCCCCGCTC  | 0.537 |             |
| - | 21 | 2535  | pz.1_Missense_M    | NM_147129    | NP_667340    | Q60I27 | AL2CL_HUMAN |                         | 5  | CCTCCGCTCA   | 0.567 |             |
| - | 1  | 987   | cuf.1_Missense_M   | NM_001407    | NP_001398    | Q9NYQ7 | CELR3_HUMAN | ellular (Potential).    | 11 | CCCTGGAAGAC  | 0.657 |             |
| - | 5  | 697   | MPPB_uc003cxl.1    | NM_021971    | NP_068806    | Q9Y5P6 | GMPPB_HUMAN |                         | 0  | .GAACCGGTGAA | 0.572 |             |
| + | 22 | 4422  | bdu.1_Missense_M   | NM_015106    | NP_055921    | Q9Y4B4 | ARIP4_HUMAN |                         | 3  | TCCTACGGTCC  | 0.542 | rs148251727 |
| + | 53 | 5710  | 1_5'UTR STAB1_L    | NM_015136    | NP_055951    | Q9NY15 | STAB1_HUMAN | ellular (Potential).    | 9  | GACCCGGCCCC  | 0.652 |             |
| - | 7  | 788   | _p.S28L TMEM11C    | NM_198563    | NP_940965    | Q86TL2 | TM110_HUMAN |                         | 1  | TCCTCGAGTCC  | 0.567 |             |
| + | 1  | 646   | E3_uc011bgd.1_5    | NM_018971    | NP_061844    | Q9NS67 | GPR27_HUMAN | lasmic (Potential).     | 1  | TGCGGCCCGCG  | 0.751 |             |
| + | 1  | 1055  | u.1_Intron PPP4R2  | NM_018029    | NP_060499    | Q6P2I7 | EBLN2_HUMAN |                         | 0  | .GAGACGATTCA | 0.473 |             |
| - | 10 | 1846  | _p.S282P PDZRN3    | NM_015009    | NP_055824    | Q9UPQ7 | PZRN3_HUMAN |                         | 7  | CTCCGAGCTCT  | 0.637 |             |
| + | 1  | 389   |                    | NM_001005515 | NP_001005515 | A6NDH6 | O5H15_HUMAN | lasmic (Potential).     | 2  | AACCTTACTTTA | 0.368 |             |
| + | 4  | 662   | hpn.2_Missense_M   | NM_145037    | NP_659474    | Q969Y0 | FA55C_HUMAN |                         | 3  | AACTACGGCTT  | 0.448 |             |
| + | 7  | 1630  | pn.2_Nonsense_M    | NM_145037    | NP_659474    | Q969Y0 | FA55C_HUMAN |                         | 3  | .CAGTGGAGGCC | 0.358 |             |
| - | 2  | 183   | _p.E25K ATG3_uc    | NM_022488    | NP_071933    | Q9NT62 | ATG3_HUMAN  |                         | 3  | TTGATTCTAAAA | 0.328 |             |
| + | 10 | 2052  |                    | NM_020754    | NP_065805    | Q2M1Z3 | RHG31_HUMAN |                         | 2  | .CAGCACGCCGT | 0.592 |             |
| + | 6  | 886   | o.2_RNA C3orf1_L   | NM_016589    | NP_057673    | Q9NPL8 | TIDC1_HUMAN |                         | 0  | AGGATCGAAAG  | 0.493 | rs149481081 |
| + | 4  | 2224  | rj.2_Missense_Mu   | NM_138287    | NP_612144    | Q8TDB6 | DTX3L_HUMAN |                         | 4  | .ATCCGGTTTGC | 0.428 |             |
| - | 8  | 1123  | 3eft.1_Missense_M  | NM_024610    | NP_078886    | Q96EW2 | HBAP1_HUMAN |                         | 2  | AGCGATCAAAAA | 0.403 |             |
| + | 2  | 1216  | B3GNT5_uc003ffl.   | NM_032047    | NP_114436    | Q9BYG0 | B3GN5_HUMAN | renal (Potential).      | 1  | CCCTCCCATTA  | 0.433 |             |
| - | 15 | 1754  | _p.V423I IGF2BP2   | NM_006548    | NP_006539    | Q9Y6M1 | IF2B2_HUMAN | KH 4.                   | 0  | TCTGACGATCAC | 0.507 |             |
| - | 3  | 339   | ΔF2BP2_uc010hyl    | NM_006548    | NP_006539    | Q9Y6M1 | IF2B2_HUMAN | RRM 2.                  | 0  | ATGTTTGAATC  | 0.398 |             |
| - | 3  | 12755 | l1bth.1_Intron MUC | NM_018406    | NP_060876    | Q99102 | MUC4_HUMAN  | Ser-rich.               | 0  | GGTGACAGGAA  | 0.582 |             |
| - | 3  | 12698 | l1bth.1_Intron MUC | NM_018406    | NP_060876    | Q99102 | MUC4_HUMAN  |                         | 0  | AAGAGGGGTGG  | 0.597 |             |
| - | 4  | 509   | 1_5'Flank KIAA022  | NM_014687    | NP_055502    | Q92622 | RUBIC_HUMAN | RUN.                    | 0  | CTGGTGGTCTC  | 0.572 |             |



|   |    |         |                                 |              |              |        |             |                                |    |               |       |             |
|---|----|---------|---------------------------------|--------------|--------------|--------|-------------|--------------------------------|----|---------------|-------|-------------|
| + | 5  | 1113    | 141_uc003gab.2_I                | NM_003441    | NP_003432    | Q15928 | ZN141_HUMAN | 2H2-type 6.                    | 0  | CTACAAATGTG   | 0.398 |             |
| + | 59 | 8084    |                                 | NM_002111    | NP_002102    | P42858 | HD_HUMAN    |                                | 4  | aggCCGACGCC   | 0.423 |             |
| - | 18 | 2245    | yyk.2_Splice_Site_              | NM_015030    | NP_055845    | O94915 | FRYL_HUMAN  |                                | 1  | TACATACGTAATC | 0.403 |             |
| + | 3  | 791     | l_Mutation_p.T79N               | NM_001136258 | NP_001129730 | Q8NHU3 | SMS2_HUMAN  |                                | 1  | AGAAAACGGGCA  | 0.478 |             |
| - | 2  | 441     | lC3_uc003ief.2_Mi               | NM_001130698 | NP_001124170 | Q13507 | TRPC3_HUMAN | nic (Potential). ANK 1.        | 2  | GTTGCCGTACTC  | 0.667 |             |
| - | 15 | 1457    | iz.3_Missense_Mu                | NM_001102653 | NP_001096123 | Q01804 | OTUD4_HUMAN |                                | 3  | TTCTCCGCCTGC  | 0.383 |             |
| - | 2  | 379     | e_Mutation_p.D11                | NM_178835    | NP_849157    | Q17R98 | ZN827_HUMAN |                                | 0  | GTTCATCGTCAC  | 0.582 |             |
| - | 4  | 624_625 | AP9_uc003iot.1_I                | NM_001039580 | NP_001034669 | Q49MG5 | MAP9_HUMAN  |                                | 2  | TTCACACCCATC  | 0.332 |             |
| + | 5  | 381     |                                 | NM_005651    | NP_005642    | P48775 | T23O_HUMAN  |                                | 0  | ATGAAAGGAACA  | 0.423 |             |
| - | 4  | 650     |                                 | NM_001100389 | NP_001093859 | Q81Y95 | TM192_HUMAN | ical; (Potential).             | 1  | CATATCAGGGAA  | 0.463 |             |
| + | 5  | 1209    |                                 | NM_001034845 | NP_001030017 | Q49A17 | GLTL6_HUMAN | main A. Lumenal (Potential     | 4  | CTCGCGGACCA   | 0.428 | rs149727048 |
| + | 4  | 391     |                                 | NM_020227    | NP_064612    | Q9NQV7 | PRDM9_HUMAN | RAB-related.                   | 6  | CACTCGACCAG   | 0.483 |             |
| - | 5  | 1168    | _p.A325T UGT3A                  | NM_174914    | NP_777574    | Q3SY77 | UD3A2_HUMAN | ellular (Potential).           | 6  | CTTACCCAGGA   | 0.527 |             |
| - | 21 | 3512    | o.2_RNA ADAMT                   | NM_197941    | NP_922932    | Q9UKP5 | ATS6_HUMAN  | SP type-1 2.                   | 0  | AGGTGGGCAGG   | 0.378 |             |
| - | 2  | 808     | on_p.T159I TAF9_I               | NM_003187    | NP_003178    | Q16594 | TAF9_HUMAN  |                                | 0  | TGGGAGTACTTC  | 0.463 |             |
| - | 11 | 1962    | _p.S430L MEF2C_                 | NM_002397    | NP_002388    | Q06413 | MEF2C_HUMAN |                                | 7  | TCGTACGAACTG  | 0.592 |             |
| - | 40 | 4505    |                                 | NM_014639    | NP_055454    | Q6PGP7 | TTC37_HUMAN | TPR 20.                        | 4  | CTTGGGATTGAT  | 0.438 |             |
| + | 14 | 2119    | _p.D646N YTHDC                  | NM_022828    | NP_073739    | Q9H6S0 | YTDC2_HUMAN | case C-terminal.               | 3  | TTGATGACAAGC  | 0.368 |             |
| - | 10 | 954     | _l_Intron BRD8_ucC              | NM_139199    | NP_631938    | Q9H0E9 | BRD8_HUMAN  |                                | 1  | CTACAGGGGGT   | 0.537 |             |
| + | 1  | 2177    | lhd.2_Intron PCDH               | NM_018906    | NP_061729    | Q9Y5H8 | PCDA3_HUMAN | lasmic (Potential).            | 8  | CGCGCCGCCAA   | 0.637 |             |
| + | 1  | 2359    | CDHA5_uc003lhk.                 | NM_018911    | NP_061734    | Q9Y5H6 | PCDA8_HUMAN | ial). 5 X 4 AA repeats of P->  | 2  | TAGCGGAAGAG   | 0.453 |             |
| + | 1  | 2364    | 2_Intron PCDHA6                 | NM_018903    | NP_061726    | Q9UN75 | PCDAC_HUMAN | P-X-X-P. Cytoplasmic (Pote     | 0  | CGTGGGGAGTT   | 0.672 |             |
| - | 6  | 1145    | se_Mutation_p.R1                | NM_006058    | NP_006049    | Q15025 | TNIP1_HUMAN | eracts with Nef.               | 2  | CATCGGCCCA    | 0.652 |             |
| - | 9  | 969     | 35_splice ADAM19                | NM_033274    | NP_150377    | Q9H013 | ADA19_HUMAN |                                | 8  | TATTTACGTGAT  | 0.493 |             |
| + | 29 | 7960    | i.3_Nonsense_Mut                | NM_001122679 | NP_001116151 |        |             |                                | 10 | AGACTCGAAGG   | 0.627 |             |
| - | 11 | 1407    | 3_uc003mez.2_5'L                | NM_002115    | NP_002106    | P52790 | HXK3_HUMAN  | Regulatory.                    | 7  | CAGGACGCTGC   | 0.622 |             |
| + | 18 | 2548    | ifu.1_Missense_Mi               | NM_002011    | NP_002002    | P22455 | FGFR4_HUMAN | lasmic (Potential).            | 16 | CTCCTCCCCCT   | 0.632 |             |
| - | 3  | 939     | _5'Flnk GRM6_uc                 | NM_000843    | NP_000834    | O15303 | GRM6_HUMAN  | ellular (Potential).           | 8  | TTGGTTCCCTGG  | 0.592 |             |
| - | 23 | 3257    | .3_Missense_Mut                 | NM_002020    | NP_002011    | P35916 | VGFR3_HUMAN | Potential). Protein kinase.    | 15 | GTCCCGGGCAA   | 0.617 | rs68096331  |
| + | 1  | 646     |                                 | NM_206880    | NP_996763    | Q96R30 | OR2V2_HUMAN | Name=5; (Potential).           | 2  | ATCATCGTGGCC  | 0.522 |             |
| - | 1  | 543     | lC2_uc003mte.2_I                | NM_148959    | NP_683762    | Q8NHY5 | HUS1B_HUMAN |                                | 0  | GCCCACGTTCCG  | 0.607 |             |
| - | 4  | 1485    | ense_Mutation_p.                | NM_178012    | NP_821080    | Q9BVA1 | TBB2B_HUMAN |                                | 1  | TGTTCGTCGGC   | 0.657 |             |
| + | 3  | 536     | o.1_Intron HLA-H_uc003nod.2_RNA |              |              |        |             |                                | 0  | ACCTGGAGAACC  | 0.677 |             |
| - | 7  | 986     | R10_uc010jsc.1_                 | NM_002714    | NP_002705    | Q96QC0 | PP1RA_HUMAN | l (By similarity). TFIIS N-ter | 4  | GAGAGCGGATG   | 0.478 |             |
| - | 8  | 1573    | HX16_uc011dmo.1                 | NM_003587    | NP_003578    | O60231 | DHX16_HUMAN | ase ATP-binding.               | 4  | CTCTCCGGGGT   | 0.522 |             |
| - | 4  | 553     | Flnk NRM_uc003i                 | NM_007243    | NP_009174    | Q8IXM6 | NRM_HUMAN   | . Nuclear (Potential).         | 0  | AGGCTCGCCCA   | 0.572 | rs11539189  |
| - | 2  | 447     | l_uc011doo.1_Intr               | NM_181842    | NP_862825    | Q9Y330 | ZBT12_HUMAN | BTB.                           | 0  | GGCGCCCGTGT   | 0.607 |             |
| - | 1  | 807     |                                 | NR_001444    |              |        |             |                                | 0  | GACAGGAGGCA   | 0.577 |             |
| + | 38 | 5491    |                                 | NM_001371    | NP_001362    |        |             |                                | 21 | ATGGCCGTCATAT | 0.358 | rs149016705 |
| + | 11 | 1345    |                                 | NM_032538    | NP_115927    | Q5TCY1 | TTBK1_HUMAN |                                | 9  | ACACCGAGGAT   | 0.662 |             |
| - | 19 | 2581    | l_Intron TMEM151                | NM_020745    | NP_065796    | Q5JTZ9 | SYAM_HUMAN  |                                | 1  | CTTACGGATGGC  | 0.602 | rs150351026 |
| + | 15 | 4463    | o.Q1391H PHF3_u                 | NM_015153    | NP_055968    | Q92576 | PHF3_HUMAN  |                                | 5  | TGGTCAAGTATAT | 0.388 |             |
| + | 3  | 1151    | _p.A72V TPBG_u                  | NM_006670    | NP_006661    | Q13641 | TPBG_HUMAN  | lar (Potential). LRRNT.        | 1  | GGCAGCGCGCA   | 0.642 |             |
| + | 4  | 515     | 1dzi.1_Missense_I               | NM_006416    | NP_006407    | P78382 | S35A1_HUMAN | ical; (Potential).             | 0  | AGTGGGTTTCA   | 0.403 |             |
| + | 2  | 118     | il_uc003pmg.2_M                 | NM_012381    | NP_036513    | Q9UBD5 | ORC3_HUMAN  |                                | 0  | CTGCCAATAGC   | 0.333 |             |
| + | 4  | 842     | o.3_Missense_Mi                 | NM_021956    | NP_068775    | Q13002 | GRIK2_HUMAN | ellular (Potential).           | 5  | CTCTGACTCA    | 0.323 |             |
| - | 4  | 1182    | e_Mutation_p.W20                | NM_031922    | NP_114128    | Q96D71 | REPS1_HUMAN |                                | 2  | GGAGACAAAA    | 0.383 |             |

|   |    |           |                      |              |              |        |             |                             |       |                    |       |
|---|----|-----------|----------------------|--------------|--------------|--------|-------------|-----------------------------|-------|--------------------|-------|
| - | 10 | 1323      |                      | NM_015718    | NP_056533    | Q9HBY0 | NOX3_HUMAN  | ical; (Potential).          | 1     | .TCCCCGCGGCA       | 0.527 |
| + | 6  | 2346      | p.R330H TULP4_u      | NM_020245    | NP_064630    | Q9NRJ4 | TULP4_HUMAN |                             | 1     | .TGTTCTGGGGG/      | 0.483 |
| + | 30 | 4701      | _p.R797Q SDK1_u      | NM_152744    | NP_689957    | Q7Z5N4 | SDK1_HUMAN  | nectin type-III 9.          | 6     | GCCTCGGGGTG        | 0.667 |
| - | 15 | 1967      | on_p.P490L OSBP      | NM_015550    | NP_056365    | Q9H4L5 | OSBL3_HUMAN |                             | 1     | TGCTCGGGCAG/       | 0.587 |
| - | 3  | 346       | _p.G76D CPVL_u       | NM_031311    | NP_112601    | Q9H3G5 | CPVL_HUMAN  |                             | 2     | .AGGAAGCCGGC/      | 0.458 |
| - | 2  | 1078      |                      | NM_022728    | NP_073565    | Q96NK8 | NDF6_HUMAN  |                             | 2     | .AGAAGGATTCAT      | 0.483 |
| - | 4  | 908       | se_Mutation_p.R2     | NM_000598    | NP_000589    | P17936 | IBP3_HUMAN  | oglobulin type-1.           | 3     | .AGCCCCGCTTC       | 0.582 |
| + | 4  | 1013      |                      | NM_001159279 | NP_001152751 |        |             |                             | 2     | .AAGATGTGGC/       | 0.423 |
| + | 4  | 968       |                      | NM_001159524 | NP_001152996 | P0CB33 | ZN735_HUMAN |                             | 0     | .AGAGAAACCCCT      | 0.418 |
| + | 4  | 977       |                      | NM_001159524 | NP_001152996 | P0CB33 | ZN735_HUMAN | 2H2-type 7.                 | 0     | .CTACACATGTG/      | 0.433 |
| + | 4  | 955_956   | zu.2_Missense_Mt     | NM_152626    | NP_689839    | Q03936 | ZNF92_HUMAN | 2H2-type 5.                 | 0     | .CTAACCCCTTAC      | 0.351 |
| + | 2  | 229       | _uc003ukk.1_RN/      | NM_033107    | NP_149098    | A4D1E9 | GTPBA_HUMAN |                             | 0     | ATGACTTTAAAC       | 0.433 |
| + | 48 | 7207      | .T2315M TRRAP_u      | NM_003496    | NP_003487    | Q9Y4A5 | TRRAP_HUMAN | action with TP53.           | 37    | .GAAGACGCGCC       | 0.522 |
| - | 2  | 1672      | _CHE_uc003uxg.2      | NM_000665    | NP_000656    | P22303 | ACES_HUMAN  |                             | 2     | CAGTCGCTGGG/       | 0.612 |
| + | 3  | 9609      | C17_uc010lho.1_F     | NM_001040105 | NP_001035194 | Q685J3 | MUC17_HUMAN | ch.[59 X approximate tand   | 27    | .TTTCAGCAACT/      | 0.483 |
| + | 6  | 836       | _R_uc011knq.1_5'l    | NM_000492    | NP_000483    | P13569 | CFTR_HUMAN  | tial). ABC transmembrane    | 5     | .TGCCCTTTTTC/      | 0.438 |
| - | 4  | 1962      |                      | NM_033427    | NP_219499    | Q8WZ74 | CTTB2_HUMAN |                             | 5     | .GCCTGCAGGTG       | 0.557 |
| - | 15 | 1860      |                      | NM_004333    | NP_004324    | P15056 | BRAF_HUMAN  | rotein kinase_R603>1(2) p.T | 18290 | .ATTTCACTGTAC      | 0.368 |
| + | 6  | 1044      | tr.2_RNA GALNTL      | NM_145292    | NP_660335    | Q7Z4T8 | GLTL5_HUMAN | enal (Potential).           | 2     | .AAGGGAACTT        | 0.433 |
| + | 1  | 475       |                      | NM_001427    | NP_001418    | P19622 | HME2_HUMAN  |                             | 1     | .TCTGCGGCC         | 0.498 |
| + | 19 | 2947      | rni.3_Missense_Mt    | NM_014671    | NP_055486    | Q15386 | UBE3C_HUMAN | HECT.                       | 5     | .AAGACGATGTG/      | 0.527 |
| + | 2  | 839       | rpm.2_Missense_M     | NM_004745    | NP_004736    | Q9P1A6 | DLGP2_HUMAN |                             | 0     | .GCTACCCCGAC/      | 0.672 |
| - | 4  | 289       | lck.1_Missense_M     | NM_001464    | NP_001455    | Q99965 | ADAM2_HUMAN |                             | 2     | TGTAACCTCTAA/      | 0.264 |
| - | 4  | 351       | ns.2_Missense_M      | NM_024645    | NP_078921    | Q9H898 | ZMAT4_HUMAN |                             | 3     | .CATGTCGGCAT/      | 0.483 |
| - | 14 | 1878      | t.2_Missense_Mut     | NM_000930    | NP_000921    | P00750 | TPA_HUMAN   | eptidase S1.                | 2     | .GTCACGAATCC/      | 0.547 |
| + | 4  | 541       |                      | NM_152419    | NP_689632    | Q68CP4 | HGNAT_HUMAN |                             | 0     | ACCCTCGTACGT/      | 0.393 |
| + | 2  | 472       |                      | NM_020697    | NP_065748    | Q9ULS6 | KCNS2_HUMAN | lasmic (Potential).         | 1     | CGAGACGCGCC        | 0.652 |
| + | 38 | 5293      |                      | NM_177531    | NP_803875    | Q86W11 | PKHL1_HUMAN | Extracellular (Potential).  | 14    | ACATGGAGTGCC       | 0.438 |
| + | 6  | 1019      | p.V285M GRINA_u      | NM_001009184 | NP_001009184 | Q7Z429 | GRINA_HUMAN | ical; (Potential).          | 1     | .TGGGCGTGCTC/      | 0.627 |
| + | 2  | 1592      |                      | NM_022160    | NP_071443    | Q5VZB9 | DMRTA_HUMAN |                             | 2     | .CTACCTAACACC      | 0.438 |
| + | 18 | 2337      | qx.3_Missense_M      | NM_002197    | NP_002188    | P21399 | ACOC_HUMAN  |                             | 0     | AACATTCGCTTG       | 0.493 |
| + | 1  | 490       | 42421_uc004aed.1_RNA |              |              |        |             |                             | 0     | .TTAACCCCTTCC      | 0.582 |
| - | 13 | 1979_1980 | p.P547L AGTPBP       | NM_015239    | NP_056054    | Q9UPW5 | CBPC1_HUMAN |                             | 7     | .TAATCGGGATAA/     | 0.411 |
| + | 11 | 976       | _Mutation_p.R68l     | NM_020893    | NP_065944    |        |             |                             | 7     | TGCCCGCATCG/       | 0.572 |
| - | 2  | 637       | <S6_uc004ayy.1_F     | NM_173551    | NP_775822    | Q68DC2 | ANKS6_HUMAN | ANK 5.                      | 2     | .CACCACGGCCT       | 0.687 |
| - | 4  | 310       | f80_uc010muk.2_l     | NM_021218    | NP_067041    | Q9NRY2 | SOSSC_HUMAN |                             | 0     | .AGAGTGCAATGC      | 0.413 |
| + | 1  | 545       |                      | NM_001004457 | NP_001004457 | Q8NGR9 | OR1N2_HUMAN | ellular (Potential).        | 4     | .GACCCGCGTGG       | 0.527 |
| + | 10 | 1430      | fc.1_Missense_Mu     | NM_002957    | NP_002948    | P19793 | RXRA_HUMAN  | gand-binding.               | 2     | .CCTGCGGGCTC       | 0.607 |
| - | 5  | 1336_1337 | ibh.2_Missense_M     | NM_144653    | NP_653254    | Q96BF6 | NACC2_HUMAN | BEN.                        | 0     | CAGTCCCGCAGC/      | 0.668 |
| - | 31 | 5780      |                      | NM_017617    | NP_060087    | P46531 | NOTC1_HUMAN | nic (Potential). ANK 1.     | 856   | .GCCCCGTGCGG       | 0.667 |
| - | 4  | 1021      | ense_Mutation_p.F    | NM_033290    | NP_150632    | O15344 | TRI18_HUMAN |                             | 3     | .TCTGTCTCTTT       | 0.388 |
| + | 2  | 1423      | d.2_Missense_Mu      | NM_138636    | NP_619542    | Q9NR97 | TLR8_HUMAN  | ellular (Potential).        | 7     | .ATATCCGAAACC      | 0.388 |
| - | 1  | 271       |                      | NM_001163264 | NP_001156736 | Q9Y5K3 | PCY1B_HUMAN |                             | 0     | .GAGCGCGATTG       | 0.413 |
| + | 3  | 270       | ite_p.D89_splice P   | NM_016937    | NP_058633    | P09884 | DPOLA_HUMAN |                             | 3     | .TGATGGTAGGT/      | 0.507 |
| - | 1  | 391       |                      | NM_001013742 | NP_001013764 | Q5KSL6 | DGKK_HUMAN  | imate tandem repeats of E-  | 2     | .xggttctggggccggc/ | 0.02  |
| - | 8  | 1634      | nse_Mutation_p.R     | NM_201599    | NP_963893    | Q14202 | ZMYM3_HUMAN |                             | 1     | .CATTACGATCC/      | 0.502 |
| + | 26 | 4049      | on_p.A507V TAF1      | NM_138923    | NP_620278    | P21675 | TAF1_HUMAN  |                             | 17    | .TAGTGGCGGATG/     | 0.408 |

rs141183982

|   |    |         |                   |              |              |        |             |                              |    |                |       |             |
|---|----|---------|-------------------|--------------|--------------|--------|-------------|------------------------------|----|----------------|-------|-------------|
| - | 1  | 981     | nqj.1_Missense_I  | NM_021963    | NP_068798    | Q9ULW6 | NP1L2_HUMAN | u-rich (acidic).             | 1  | TCATAATCATAATA | 0.343 |             |
| + | 38 | 4097    | qq.2_Missense_M   | NM_144658    | NP_653259    | Q5JSL3 | DOC11_HUMAN |                              | 3  | ACTTCGGAATAG/  | 0.403 |             |
| - | 1  | 1268    |                   | NM_138289    | NP_612146    | Q8TDG2 | ACTT1_HUMAN |                              | 5  | GTGACCCACAT/   | 0.458 |             |
| + | 3  | 925     |                   | NM_005364    | NP_005355    | P43361 | MAGA8_HUMAN | MAGE.                        | 0  | TGGGAGGGGAGC/  | 0.587 |             |
| - | 3  | 1639    | ise_Mutation_p.E4 | NM_001142392 | NP_001135864 | P09131 | P3_HUMAN    | ical; (Potential).           | 2  | CATCTCGGAGG/   | 0.622 |             |
| - | 2  | 405     | nh.1_Nonsense_I   | NM_020994    | NP_066274    | O75638 | CTAG2_HUMAN |                              | 1  | TGGTCGGGGGA/   | 0.632 |             |
| + | 2  | 238     | _9R_uc004fnu.1_I  | NM_002186    | NP_002177    | Q01113 | IL9R_HUMAN  |                              | 0  | GAGGCGAGACA/   | 0.612 |             |
| - | 20 | 2207    | EL1_uc009vlg.1_F  | NM_033467    | NP_258428    | Q495T6 | MMEL1_HUMAN | ional (Potential).           | 0  | CTGTTCGTCTGC/  | 0.637 |             |
| - | 3  | 267_268 | me.2_Missense_I   | NM_000983    | NP_000974    | P35268 | RL22_HUMAN  |                              | 0  | ACCTCGGATGTC/  | 0.564 | rs148093039 |
| + | 8  | 1153    | lobc.1_Missense_I | NM_001243    | NP_001234    | P28908 | TNR8_HUMAN  | (Potential). TNFR-Cys 6.     | 5  | AGACGGTCACC/   | 0.637 |             |
| + | 6  | 808     | se_Mutation_p.S4  | NM_001066    | NP_001057    | P20333 | TNR1B_HUMAN | ellular (Potential).         | 3  | CACCTCCTTCC/   | 0.562 |             |
| - | 5  | 1213    | ub.2_Missense_M   | NM_004753    | NP_004744    | O75911 | DHRS3_HUMAN |                              | 1  | CTGTCTCCGGG/   | 0.478 |             |
| + | 4  | 1331    |                   | NM_023013    | NP_075389    | O95521 | PRAM1_HUMAN |                              | 0  | GCCTGGAGACG/   | 0.537 |             |
| + | 11 | 2227    | rp.1_Missense_Mu  | NM_015001    | NP_055816    | Q96T58 | MINT_HUMAN  | g-rich. Tyr-rich.            | 15 | TACTACGATGATC/ | 0.428 |             |
| + | 10 | 991     | nse_Mutation_p.F  | NM_000085    | NP_000076    | P51801 | CLKKB_HUMAN |                              | 1  | TCAGCGAATCT/   | 0.612 |             |
| + | 14 | 1646    |                   | NM_016233    | NP_057317    | Q9ULW8 | PADI3_HUMAN |                              | 2  | AATAAGACCTC/   | 0.512 |             |
| - | 7  | 752_753 | cy.1_Missense_Mt  | NM_201252    | NP_957704    |        |             |                              | 0  | TGCAGGGCCTTC/  | 0.639 |             |
| - | 3  | 326     |                   | NM_014589    | NP_055404    | Q9NZK7 | PA2GE_HUMAN |                              | 0  | ACGTTTCGCTGAC/ | 0.577 |             |
| + | 11 | 2126    | igf.2_Missense_Mt | NM_017449    | NP_059145    | P29323 | EPHB2_HUMAN | Potential). Protein kinase.  | 5  | ACACGGAGAAG/   | 0.597 |             |
| - | 15 | 1833    | bio.2_Missense_M  | NM_152372    | NP_689585    | Q5VTT5 | MYOM3_HUMAN | nectin type-III 2.           | 3  | TCGGGGATCTC/   | 0.557 |             |
| + | 13 | 1236    | o.R342H RPS6KA    | NM_002953    | NP_002944    | Q15418 | KS6A1_HUMAN | kinase C-terminal.           | 1  | GTCCTCCACAC/   | 0.572 |             |
| + | 12 | 1265    | _p.R390C KPNA6    | NM_012316    | NP_036448    | O60684 | IMA7_HUMAN  | 'minor) (By similarity). ARM | 0  | AGTTTTCGTACA/  | 0.463 |             |
| - | 11 | 2039    | _p.S663F PHC2_t   | NM_198040    | NP_932157    | Q8IXK0 | PHC2_HUMAN  | FCS-type.                    | 1  | CCATGGAACAG/   | 0.547 |             |
| - | 51 | 7647    | tm.1_Missense_Mt  | NM_052896    | NP_443128    | Q7Z408 | CSMD2_HUMAN | ar (Potential). Sushi 15.    | 12 | CATTCCATTCTT/  | 0.488 |             |
| + | 6  | 1429    | xt.2_Missense_Mt  | NM_032884    | NP_116273    | Q6P1W5 | CA094_HUMAN |                              | 0  | TACATCCCTTTTC/ | 0.557 |             |
| + | 10 | 1119    | YC_uc001cfy.3_In  | NM_001142588 | NP_001136060 | Q13952 | NFYC_HUMAN  |                              | 3  | CCCAGCAGAGC/   | 0.627 |             |
| + | 13 | 1966    | _p.R317Q CCDC3    | NM_001080850 | NP_001074319 | Q5VVM6 | CCD30_HUMAN | Potential.                   | 0  | GAGAGCGAATTAT/ | 0.428 |             |
| + | 4  | 465     |                   | NM_024097    | NP_077002    | Q9BV19 | CA050_HUMAN |                              | 1  | ATTTTTCCATCAT/ | 0.388 |             |
| + | 7  | 1278    | ense_Mutation_p.  | NM_152498    | NP_689711    | Q96MR6 | WDR65_HUMAN |                              | 1  | GTATCCATTGCA/  | 0.493 |             |
| - | 1  | 177     |                   | NM_005764    | NP_005755    | Q13113 | PDZ11_HUMAN |                              | 0  | GCTGAGGGGCC/   | 0.642 |             |
| + | 5  | 927     | o.A237V ELAVL4_I  | NM_021952    | NP_068771    | P26378 | ELAV4_HUMAN | p.A220A(1)                   | 2  | CCAGGCCCTGC/   | 0.587 |             |
| + | 19 | 3607    | of.1_RNA C1orf17  | NM_001039464 | NP_001034553 | Q68CQ1 | HEAT8_HUMAN | HEAT 3.                      | 0  | TCAGCGACGTG/   | 0.592 |             |
| + | 3  | 799     | .1_RNA PCSK9_u    | NM_174936    | NP_777596    | Q8NBP7 | PCSK9_HUMAN | eptidase S8.                 | 4  | CCGATGAATAC/   | 0.622 |             |
| - | 5  | 1109    |                   | NM_177414    | NP_803133    | O14495 | LPP3_HUMAN  | ical; (Potential).           | 0  | ACATGGAGAAG/   | 0.463 |             |
| - | 18 | 2519    | rf168_uc001cyl.2  | NM_001004303 | NP_001004303 | Q5VWT5 | CA168_HUMAN |                              | 5  | AATTACGCATAT/  | 0.269 |             |
| + | 7  | 1096    |                   | NM_000562    | NP_000553    | P07357 | CO8A_HUMAN  | MACPF.                       | 3  | AGCTTCCAGAT/   | 0.403 |             |
| - | 5  | 667     |                   | NM_152377    | NP_689590    | Q8N0U7 | CA087_HUMAN |                              | 2  | AGTTGGAACCTCA/ | 0.448 |             |
| + | 10 | 1288    | au.2_Nonsense_M   | NM_178221    | NP_835739    | Q96DT6 | ATG4C_HUMAN |                              | 1  | TCTTTTCGAAAA/  | 0.308 | rs41305874  |
| - | 8  | 1166    |                   | NM_022159    | NP_071442    | Q9HBW9 | ELTD1_HUMAN | ellular (Potential).         | 2  | GACTGAAATT/    | 0.333 |             |
| - | 7  | 1000    |                   | NM_022159    | NP_071442    | Q9HBW9 | ELTD1_HUMAN | ellular (Potential).         | 2  | TTGAAATATATT/  | 0.279 |             |
| + | 14 | 2778    | R866Q LPHN2_uc    | NM_012302    | NP_036434    | O95490 | LPHN2_HUMAN | lasmic (Potential).          | 9  | GTGACCGAAATA/  | 0.408 |             |
| + | 3  | 763     | 3D8_uc010otc.1_F  | NM_183242    | NP_899065    | Q5XKL5 | BTBD8_HUMAN |                              | 1  | AGCATGAAATTC/  | 0.328 |             |
| - | 10 | 1398    | tn.1_Missense_Mt  | NM_000350    | NP_000341    | P78363 | ABCA4_HUMAN | Extracellular.               | 12 | TCTTCCCAGG/    | 0.493 |             |
| + | 7  | 1282    | sf.2_Missense_Mt  | NM_017734    | NP_060204    | Q9NP74 | PALMD_HUMAN |                              | 3  | CCCTGGACCAA/   | 0.423 |             |
| + | 11 | 1521    | CC14A_uc001dff.2  | NM_003672    | NP_003663    | Q9UNH5 | CC14A_HUMAN |                              | 1  | AAAATCGACCAT/  | 0.323 |             |
| - | 62 | 4873    | i1_splice COL11A1 | NM_001854    | NP_001845    | P12107 | COBA1_HUMAN |                              | 12 | GGTCCCTGTTA/   | 0.423 |             |
| - | 11 | 1698    | nse_Mutation_p.G  | NM_001048210 | NP_001041675 | Q96S66 | CLCC1_HUMAN |                              | 1  | CACACCTCTTG/   | 0.582 |             |

|   |    |           |                    |              |              |        |             |                               |    |                 |       |             |
|---|----|-----------|--------------------|--------------|--------------|--------|-------------|-------------------------------|----|-----------------|-------|-------------|
| + | 8  | 1545      | r.1_Missense_Mut   | NM_004037    | NP_004028    | Q01433 | AMPD2_HUMAN |                               | 3  | 'ACACCCGCAGG'   | 0.652 |             |
| - | 16 | 2852      | ENND2C_uc001ef     | NM_198459    | NP_940861    | Q68D51 | DEN2C_HUMAN | DENN.                         | 3  | 'GTGAACGGATAC,  | 0.463 |             |
| - | 8  | 1171      | eff.1_Missense_Mt  | NM_000036    | NP_000027    | P23109 | AMPD1_HUMAN |                               | 4  | 'AGCATGAACATC'  | 0.418 |             |
| - | 32 | 4678      |                    | NM_206996    | NP_996879    | Q6Q759 | SPG17_HUMAN |                               | 6  | 'AAAGAGAGCCTC'  | 0.388 |             |
| - | 27 | 3842_3843 |                    | NM_206996    | NP_996879    | Q6Q759 | SPG17_HUMAN |                               | 6  | 'CTGACGGACCAT'  | 0.48  |             |
| + | 2  | 159       | ehw.2_Missense_    | NM_000862    | NP_000853    | P14060 | 3BHS1_HUMAN |                               | 2  | 'CTGGAGCTGCC'   | 0.562 |             |
| - | 1  | 1427      |                    | NM_021794    | NP_068566    | Q9UKF2 | ADA30_HUMAN | Extracellular (Potential).    | 3  | 'ACACCCGATCTT'  | 0.448 |             |
| + | 19 | 2193      | ition_p.E30G NBP   | NM_001037675 | NP_001032764 | Q3BBV1 | NBPFK_HUMAN | NBPF 5.                       | 0  | 'GAAAGAGCCTG,   | 0.483 |             |
| - | 31 | 5299      | E4DIP_uc001elm.3   | NM_014644    | NP_055459    | Q5VU43 | MYOME_HUMAN |                               | 5  | 'GGATTCGGCCT'   | 0.498 | rs139225578 |
| - | 16 | 2504      | _Missense_Mutatio  | NM_014644    | NP_055459    | Q5VU43 | MYOME_HUMAN |                               | 5  | 'ATCTGGGTATG'   | 0.368 |             |
| - | 2  | 379       | R PDE4DIP_uc001    | NM_014644    | NP_055459    | Q5VU43 | MYOME_HUMAN |                               | 5  | 'ATCTCCCCATCAT' | 0.403 |             |
| + | 11 | 1314      | GA10_uc009wiw.2    | NM_003637    | NP_003628    | O75578 | ITA10_HUMAN | ellular (Potential).          | 8  | 'CCCACGAATGG'   | 0.582 |             |
| - | 9  | 1836      | .3_intron FMO5_u   | NM_001461    | NP_001452    | P49326 | FMO5_HUMAN  |                               | 3  | 'AGCCCCATCCC,   | 0.493 |             |
| - | 9  | 1795      | .3_intron FMO5_u   | NM_001461    | NP_001452    | P49326 | FMO5_HUMAN  |                               | 3  | 'TTGGAGTGCAG'   | 0.532 |             |
| - | 2  | 932       | xt.1_Missense_Mu   | NM_181703    | NP_859054    | P36382 | CXA5_HUMAN  | lasmic (Potential).           | 1  | 'CGGGGGGTGGT'   | 0.527 |             |
| - | 5  | 802       | fo.1_Missense_Mt   | NM_005060    | NP_005051    | P51449 | RORG_HUMAN  | age (Potential).              | 2  | 'AAAACGAAGTC'   | 0.612 |             |
| - | 3  | 906       |                    | NM_001008536 | NP_001008536 | Q5QJ38 | TCHL1_HUMAN |                               | 2  | 'CTTTTCTGTTCT'  | 0.453 |             |
| - | 2  | 230       | rne.1_Missense_M   | NM_007113    | NP_009044    | Q07283 | TRHY_HUMAN  | and 2. S-100-like.            | 5  | 'AAATAAATAGGA'  | 0.483 |             |
| - | 3  | 8603      |                    | NM_002016    | NP_002007    | P20930 | FILA_HUMAN  | ich. Filaggrin 17.            | 16 | 'GACGCGACCCCT'  | 0.577 |             |
| - | 3  | 862       |                    | NM_016190    | NP_057274    | Q9UBG3 | CRNN_HUMAN  | Gln-rich.                     | 3  | 'TCTGGTCATTGC'  | 0.602 |             |
| + | 2  | 239       | faw.2_Missense_†   | NM_005987    | NP_005978    | P35321 | SPR1A_HUMAN | ximate tandem repeats. 3.     | 0  | 'AGTGCTGAGC'    | 0.637 |             |
| - | 4  | 366       | 1fbp.2_Missense_↓  | NM_020393    | NP_065126    | Q96LB8 | PGRP4_HUMAN |                               | 4  | 'CAGTTCCCGCA'   | 0.557 |             |
| - | 3  | 992       | HE_uc001ffc.2_Rn   | NM_001010846 | NP_001010846 | Q5VZ18 | SHE_HUMAN   |                               | 6  | 'CTGCCCTGGGC'   | 0.647 |             |
| - | 21 | 2957      | IN4L_uc001fmb.3    | NM_001037533 | NP_001032622 | Q3T8J9 | GON4L_HUMAN |                               | 3  | 'GCTTCGATCTG/   | 0.502 | rs143360629 |
| + | 3  | 650       | o.2_Missense_Mu    | NM_021948    | NP_068767    | Q96GW7 | PGCB_HUMAN  | g-like V-type.                | 2  | 'CTACCCGGTCC'   | 0.682 |             |
| + | 6  | 585       | e_Mutation_p.D19   | NM_001080471 | NP_001073940 | Q5VY43 | PEAR1_HUMAN |                               | 3  | 'CGTGTGATCCC,   | 0.622 |             |
| - | 27 | 4037      |                    | NM_003126    | NP_003117    | P02549 | SPTA1_HUMAN | Spectrin 12.                  | 8  | 'ACGATCCTTTGT'  | 0.547 |             |
| - | 22 | 3308      |                    | NM_003126    | NP_003117    | P02549 | SPTA1_HUMAN |                               | 8  | 'CTCATCGTGGG'   | 0.572 |             |
| - | 6  | 878       |                    | NM_003126    | NP_003117    | P02549 | SPTA1_HUMAN |                               | 8  | 'TTTTCTGTTG/    | 0.378 |             |
| + | 3  | 137       | _p.G39E FCRL6_u    | NM_001004310 | NP_001004310 | Q6DN72 | FCRL6_HUMAN | 1. Extracellular (Potential). | 3  | 'TGAAGGAGATG'   | 0.507 |             |
| - | 9  | 1108      | 1_p.E279K CCDC     | NM_012337    | NP_036469    | Q9UL16 | CCD19_HUMAN | Potential.                    | 1  | 'TTTCTCCCTCCC'  | 0.547 |             |
| - | 2  | 667       |                    | NM_002241    | NP_002232    | P78508 | IRK10_HUMAN | smic (By similarity).         | 1  | 'CTTCTGGGCC'    | 0.547 |             |
| - | 8  | 1031      | ae_Mutation_p.P33  | NM_003874    | NP_003865    | Q9UIB8 | SLAF5_HUMAN | lasmic (Potential).           | 4  | 'TCCCAGGAGGT'   | 0.512 |             |
| - | 2  | 525       | tp.2_RNA CD244_    | NM_016382    | NP_057466    | Q9BZW8 | CD244_HUMAN | ar (Potential). Ig-like 1.    | 1  | 'TCTGAACCTTTT'  | 0.453 |             |
| - | 3  | 176       | ie_Mutation_p.E39  | NM_080878    | NP_543154    | Q8WWU7 | ITLN2_HUMAN |                               | 1  | 'AGGTTTCGAATC'  | 0.478 |             |
| + | 14 | 1579      | ae_Mutation_p.A41  | NM_002697    | NP_002688    | P14859 | PO2F1_HUMAN |                               | 5  | 'GTGCAGCAACT'   | 0.488 |             |
| - | 14 | 1866      | lplj.1_Missense_M  | NM_018417    | NP_060887    | Q96PN6 | ADCYA_HUMAN |                               | 3  | 'ATCTGGCTTTTT'  | 0.358 |             |
| + | 19 | 2763      | lk.1_Missense_Mu   | NM_001017977 | NP_001017977 | Q58WW2 | DCAF6_HUMAN |                               | 3  | 'CAGACCGGTTG'   | 0.323 |             |
| - | 13 | 3627      |                    | NM_000130    | NP_000121    | P12259 | FA5_HUMAN   | B.                            | 6  | 'GACTTCGGTCA'   | 0.488 |             |
| - | 13 | 2225      |                    | NM_000130    | NP_000121    | P12259 | FA5_HUMAN   | B.                            | 6  | 'AAATCTCATATGA' | 0.388 |             |
| + | 11 | 1511      | ae_Mutation_p.H3   | NM_014283    | NP_055098    | Q9UBS9 | OSPT_HUMAN  | SUN.                          | 2  | 'ACTTTTCATGGT/  | 0.303 |             |
| - | 11 | 2677      | u.1_Missense_Mu    | NM_003285    | NP_003276    | Q92752 | TENR_HUMAN  | onectin type-III 7.           | 11 | 'TGGGGGATCAA'   | 0.433 |             |
| - | 2  | 751       | _p.E224K TNR_uc    | NM_003285    | NP_003276    | Q92752 | TENR_HUMAN  | rich. EGF-like 2.             | 11 | 'GTACTCGCTGT'   | 0.627 |             |
| + | 2  | 1486      | ae_Mutation_p.P10  | NM_020318    | NP_064714    | Q9BXP8 | PAPP2_HUMAN |                               | 16 | 'TTGTCCCCCA'    | 0.562 |             |
| + | 3  | 3146      | ae_Mutation_p.S66' | NM_020318    | NP_064714    | Q9BXP8 | PAPP2_HUMAN | stalloprotease.               | 16 | 'TGACTCACCCA/   | 0.498 |             |
| + | 8  | 2146      | lg.2_Missense_Mt   | NM_021165    | NP_066988    | Q9C0B6 | FAM5B_HUMAN |                               | 6  | 'TTCTGACTGGG'   | 0.527 |             |
| + | 19 | 2345      | orf125_uc001gmp.:  | NM_144696    | NP_653297    | Q5T1B0 | AXDN1_HUMAN |                               | 0  | 'ATATAGGAGTTG'  | 0.428 |             |

|   |    |       |                    |              |              |        |             |                               |    |               |       |             |
|---|----|-------|--------------------|--------------|--------------|--------|-------------|-------------------------------|----|---------------|-------|-------------|
| + | 24 | 2903  | jmp.2_Missense_I   | NM_144696    | NP_653297    | Q5T1B0 | AXDN1_HUMAN | Glu-rich.                     | 0  | GTAATTGAACAT/ | 0.393 | rs78751980  |
| + | 8  | 1468  | e_Mutation_p.W4C   | NM_173533    | NP_775804    | Q8NAT2 | TDRD5_HUMAN |                               | 5  | TGTATGGAATTG/ | 0.403 |             |
| + | 14 | 2462  | p.D792N TDRD5_     | NM_173533    | NP_775804    | Q8NAT2 | TDRD5_HUMAN |                               | 5  | GTGATGATATTT  | 0.423 |             |
| + | 34 | 8886  | p.P970S CEP350_    | NM_014810    | NP_055625    | Q5VT06 | CE350_HUMAN |                               | 4  | TGTGTCCCAGAC  | 0.368 |             |
| + | 32 | 4735  | lgox.1_Missense_   | NM_000721    | NP_000712    | Q15878 | CAC1E_HUMAN | me=S2 of repeat IV. IV.       | 6  | CCCTGGAATGT/  | 0.478 |             |
| + | 42 | 5747  | s.S1749F CACNA_    | NM_000721    | NP_000712    | Q15878 | CAC1E_HUMAN | lasmic (Potential).           | 6  | AGCCTCTGACC/  | 0.478 |             |
| + | 18 | 2279  | e_Mutation_p.V49:  | NM_001357    | NP_001348    | Q08211 | DHX9_HUMAN  | case C-terminal.              | 2  | TGGAGTAACC/   | 0.388 |             |
| + | 25 | 3216  | X9_uc001gpt.2_Mi   | NM_001357    | NP_001348    | Q08211 | DHX9_HUMAN  |                               | 2  | AGGGCGTAATG/  | 0.393 |             |
| - | 14 | 2445  | l29A_uc001grb.1_   | NM_052966    | NP_443198    | Q9BZQ8 | NIBAN_HUMAN | Glu-rich.                     | 4  | FGGGCTCTTTT/  | 0.562 |             |
| + | 18 | 2996  | lrr.1_Missense_Mu  | NM_031935    | NP_114141    | Q96RW7 | HMCN1_HUMAN | like C2-type 6.               | 23 | AACGTCGGTGG   | 0.343 |             |
| - | 33 | 4924  |                    | NM_003292    | NP_003283    | P12270 | TPR_HUMAN   | Potential.                    | 7  | TGTGCGGAGCT/  | 0.408 |             |
| - | 4  | 510   |                    | NM_001994    | NP_001985    | P05160 | F13B_HUMAN  | Sushi 3.                      | 3  | TTCAGGAGCCA/  | 0.264 |             |
| - | 18 | 5449  | .2_Intron ASPM_u   | NM_018136    | NP_060606    | Q8IZT6 | ASPM_HUMAN  | IQ 6.                         | 6  | TACAAGATTCCC  | 0.373 |             |
| + | 2  | 700   | 31_uc010ppa.1_Rl   | NM_201253    | NP_957705    | P82279 | CRUM1_HUMAN | :GF-like 5; calcium-binding   | 9  | TGGATGAATGT/  | 0.473 |             |
| + | 6  | 1343  | B1_uc010ppb.1_M    | NM_201253    | NP_957705    | P82279 | CRUM1_HUMAN | GF-like 10; calcium-binding   | 9  | TTCCTCAAACCC  | 0.353 |             |
| + | 7  | 2366  | B1_uc010ppb.1_In   | NM_201253    | NP_957705    | P82279 | CRUM1_HUMAN | potential). Laminin G-like 2. | 9  | TGTCCGAACGC   | 0.478 |             |
| - | 8  | 2173  | lpgj.1_Missense_Mt | NM_014875    | NP_055690    | Q15058 | KIF14_HUMAN | kinesin-motor.                | 7  | TGGGTCAACAC/  | 0.388 | rs144936292 |
| - | 24 | 3207  |                    | NM_000069    | NP_000060    | Q13698 | CAC1S_HUMAN | Dihydropyridine binding (E    | 5  | AAGTCGCTGT/   | 0.602 |             |
| + | 6  | 1674  | p.E264K ATP2B4_    | NM_001684    | NP_001675    | P23634 | AT2B4_HUMAN | lasmic (Potential).           | 3  | TCATGGAAGGT   | 0.458 |             |
| + | 3  | 1109  | lrf.1_Missense_Mt  | NM_014858    | NP_055673    | O75069 | TMCC2_HUMAN |                               | 1  | TTCCTCCACCA/  | 0.687 |             |
| + | 16 | 2251  | p.E640K SRGAP2     | NM_015326    | NP_056141    | O75044 | FNBP2_HUMAN |                               | 0  | TAGACGGTACG/  | 0.562 |             |
| + | 2  | 305   | YRK3_uc001hei.2_   | NM_003582    | NP_003573    | O43781 | DYRK3_HUMAN |                               | 3  | CCCCTGTTCAA   | 0.398 |             |
| - | 7  | 1992  | z.2_Missense_Mu    | NM_002644    | NP_002635    | P01833 | PIGR_HUMAN  | cellular (Potential).         | 3  | AAAGCCTGGGA   | 0.537 |             |
| + | 4  | 758   | 2_uc009xch.2_Mis   | NM_001877    | NP_001868    | P20023 | CR2_HUMAN   | xtracellular (Potential).     | 8  | TGATTTCCCAAT  | 0.393 |             |
| + | 2  | 330   | g.1_Missense_Mu    | NM_000573    | NP_000564    | P17927 | CR1_HUMAN   | xtracellular (Potential).     | 3  | AGTTTCCCATTC  | 0.453 |             |
| + | 2  | 493   |                    | NM_015714    | NP_056529    | P27469 | G0S2_HUMAN  |                               | 0  | GCAAGCCCTGC   | 0.697 |             |
| - | 6  | 756   | lic.2_Missense_Mt  | NM_172362    | NP_758872    | O95259 | KCNH1_HUMAN | lasmic (Potential).           | 5  | CTGGGAAGGA    | 0.433 |             |
| + | 14 | 2193  | p.P585S DTL_uc     | NM_016448    | NP_057532    | Q9NZJ0 | DTL_HUMAN   |                               | 0  | TCAAGTCCGTAT  | 0.463 |             |
| + | 1  | 2013  | uc010pth.1_RNA     | NM_153606    | NP_705834    | Q8IYT1 | FA71A_HUMAN |                               | 5  | CCAACCTTACT/  | 0.552 |             |
| + | 2  | 553   | lkg.1_Missense_M   | NM_002763    | NP_002754    | Q92786 | PROX1_HUMAN |                               | 6  | TATTTCCAGCT/  | 0.483 |             |
| - | 44 | 9082  |                    | NM_206933    | NP_996816    | O75445 | USH2A_HUMAN | ential). Fibronectin type-III | 26 | TATATTCATAGGT | 0.343 |             |
| - | 4  | 1373  |                    | NM_024746    | NP_079022    | Q6UWX4 | HIPL2_HUMAN |                               | 1  | TATCCGGCCTCC  | 0.582 |             |
| - | 11 | 1674  | BP2_uc010puz.1_    | NM_001031685 | NP_001026855 | Q13625 | ASPP2_HUMAN |                               | 3  | ACGGACGCACT   | 0.428 |             |
| + | 5  | 478   | l_5'UTR GUK1_uc    | NM_000858    | NP_000849    | Q16774 | KGUA_HUMAN  | ylate kinase-like.            | 0  | CCAGGGAGGTG   | 0.632 |             |
| + | 63 | 16470 | p.E5476K OBSCN     | NM_001098623 | NP_001092093 | Q5VST9 | OBSCN_HUMAN |                               | 28 | AGCAGGAGAAA   | 0.607 |             |
| + | 1  | 998   |                    | NM_001004342 | NP_001004342 | Q6ZTA4 | TRI67_HUMAN | 3 box-type 2.                 | 4  | TGTGCAACCC/   | 0.672 |             |
| - | 13 | 4177  | hvf.2_Missense_M   | NM_020808    | NP_065859    | Q9P2F8 | SI1L2_HUMAN | Ser-rich.                     | 6  | TGAGAGGATAT   | 0.587 |             |
| + | 9  | 2560  | hvu.3_Missense_I   | NM_032435    | NP_115811    | Q5TCX8 | M3KL4_HUMAN |                               | 8  | AGCGGCTTCC    | 0.607 |             |
| - | 5  | 1539  | ks.1_RNA LYST_u    | NM_000081    | NP_000072    | Q99698 | LYST_HUMAN  |                               | 12 | AAACCAGCCAT/  | 0.373 |             |
| + | 73 | 10637 | z.1_Missense_Mu    | NM_001035    | NP_001026    | Q92736 | RYR2_HUMAN  |                               | 33 | AAGTACGAGATA  | 0.333 |             |
| + | 5  | 2523  |                    | NM_000740    | NP_000731    | P20309 | ACM3_HUMAN  | smic (By similarity).         | 5  | TTTTTCAACAAG  | 0.498 |             |
| + | 5  | 2374  | le.1_Missense_ML   | NM_020066    | NP_064450    | Q9NZ56 | FMN2_HUMAN  |                               | 12 | TGACAGCCTCA/  | 0.502 |             |
| + | 5  | 3146  | le.1_Missense_Mu   | NM_020066    | NP_064450    | Q9NZ56 | FMN2_HUMAN  | ro-rich. FH1.                 | 12 | AGCAGGAATAC   | 0.711 |             |
| + | 17 | 5363  | AN2_uc010pyg.1_I   | NM_020066    | NP_064450    | Q9NZ56 | FMN2_HUMAN  |                               | 12 | ACTCTGGAATTG  | 0.279 |             |
| + | 1  | 64    |                    | NM_001001914 | NP_001001914 | Q8NGZ4 | OR2G3_HUMAN | cellular (Potential).         | 1  | ACCCCTCGTCTG  | 0.493 |             |
| + | 6  | 1465  | lW3_uc001idp.1_Ir  | NM_015431    | NP_056246    | Q8NG06 | TRI58_HUMAN |                               | 7  | TCCAGGGATCAT  | 0.463 |             |
| + | 1  | 848   |                    | NM_017504    | NP_059974    | Q96R27 | OR2M4_HUMAN | Name=7; (Potential).          | 2  | CACCCCTATGCT  | 0.438 |             |



|   |    |                         |                    |              |               |             |             |                               |              |                 |       |
|---|----|-------------------------|--------------------|--------------|---------------|-------------|-------------|-------------------------------|--------------|-----------------|-------|
| - | 1  | 425                     |                    | NM_001004691 | NP_001004691  | Q8NG81      | OR2M7_HUMAN | Name=4; (Potential).          | 2            | ATAAGTCCACAA    | 0.478 |
| + | 1  | 613                     |                    | NM_001004696 | NP_001004696  | Q8NH00      | OR2T4_HUMAN | cellular (Potential).         | 1            | CCCGGGAGATT     | 0.498 |
| + | 1  | 16                      |                    | NM_001005495 | NP_001005495  | Q8NH03      | OR2T3_HUMAN | cellular (Potential).         | 1            | GGAATCAGACT     | 0.458 |
| + | 15 | 2373                    | ig.2_Missense_Mi   | NM_178150    | NP_835363     | Q8NFZ0      | FBX18_HUMAN |                               | 3            | CCGTACGGGTG     | 0.498 |
| - | 10 | 1505                    | p.D262N ITI5_ur    | NM_030569    | NP_085046     | Q86UX2      | ITI5_HUMAN  | VWFA.                         | 4            | TTTCATCGTAGAA   | 0.522 |
| + | 19 | 4685                    | iKIAA1217_uc001    | NM_019590    | NP_062536     | Q5T5P2      | SKT_HUMAN   |                               | 7            | AAGAAGGGACT     | 0.478 |
| + | 11 | 2893                    | sk.2_Missense_M    | NM_020752    | NP_065803     | Q5T848      | GP158_HUMAN | lasmic (Potential).           | 8            | AGAAATCACTCA    | 0.433 |
| + | 5  | 701                     | O3A_uc009xkq.1     | NM_017433    | NP_059129     | Q8NEV4      | MYO3A_HUMAN | rotein kinase.                | 18           | GAAAGGATTTCT    | 0.338 |
| + | 9  | 1437                    | q.2_Missense_Mu    | NM_001134366 | NP_0011127838 | Q05329      | DCE2_HUMAN  |                               | 2            | ATGATTCATCTC    | 0.408 |
| - | 4  | 2358                    |                    | NM_001034842 | NP_001030014  | Q3KNS1      | PTHD3_HUMAN |                               | 4            | CCCGGAAGAA      | 0.318 |
| - | 1  | 830                     |                    | NM_001034842 | NP_001030014  | Q3KNS1      | PTHD3_HUMAN |                               | 4            | CAGATCCTGCA     | 0.622 |
| - | 3  | 927                     | RP1_uc001iwz.2_    | NM_003873    | NP_003864     | O14786      | NRP1_HUMAN  | tracellular (Potential).      | 4            | GTATGGAAAATC    | 0.343 |
| + | 7  | 1156                    |                    | NM_052997    | NP_443723     | Q9BXX3      | AN30A_HUMAN |                               | 9            | CGTGGGCAGCA     | 0.408 |
| + | 34 | 3526                    |                    | NM_052997    | NP_443723     | Q9BXX3      | AN30A_HUMAN |                               | 9            | CACACCATCTT     | 0.398 |
| + | 3  | 708                     | _Mutation_p.S173   | NM_020975    | NP_066124     | P07949      | RET_HUMAN   | Extracellular (Potential).    | 451          | GCCCTCCTTCC     | 0.622 |
| - | 1  | 67                      |                    | NR_002726    |               |             |             |                               | 0            | GGAGTCGGGCT     | 0.572 |
| + | 3  | 492                     | PYR1_uc009xna.2    | NM_005972    | NP_005963     | P50391      | NPY4R_HUMAN | cellular (Potential).         | 2            | CCCTGGGCACC     | 0.517 |
| - | 1  | 222                     | RRC18_uc001jhe.1   | NM_001006939 | NP_001006940  | Q8N456      | LRC18_HUMAN | LRR 1.                        | 2            | AAGGCGCAGAA     | 0.507 |
| - | 4  | 266                     |                    | NM_001080520 | NP_001073989  | A6NNA5      | DRGX_HUMAN  |                               | 0            | CCCTTCTGTCT     | 0.547 |
| - | 8  | 1097                    | os.2_Missense_Mi   | NM_019893    | NP_063946     | Q9NR71      | ASAH2_HUMAN | renal (Potential).            | 0            | ACTCTCCTGTG     | 0.433 |
| - | 37 | 5652                    | DH15_uc010qht.1    | NM_001142769 | NP_001136241  | Q96QU1      | PCD15_HUMAN |                               | 13           | ACTTTCGCTAC     | 0.488 |
| - | 9  | 1320                    | p.Q309* PCDH15     | NM_033056    | NP_149045     | Q96QU1      | PCD15_HUMAN | Extracellular (Potential).    | 13           | GTCTCTGATCAAT   | 0.388 |
| - | 37 | 10597                   | K3_uc010qih.1_in   | NM_020987    | NP_066267     | Q12955      | ANK3_HUMAN  |                               | 19           | CTCCTCCTCGA     | 0.448 |
| - | 5  | 573                     | ip.1_Missense_Mu   | NM_032797    | NP_116186     | Q9BRQ8      | AIFM2_HUMAN |                               | 1            | GGACGGAGGGC     | 0.632 |
| + | 17 | 3176                    | _Mutation_p.E900   | NM_170744    | NP_734465     | Q8IZJ1      | UNC5B_HUMAN | nic (Potential). Death.       | 3            | TCTGGGAAGCT     | 0.607 |
| + | 6  | 801                     | rv.2_Missense_Mu   | NM_022124    | NP_071407     | Q9H251      | CAD23_HUMAN | Extracellular (Potential).    | 11           | GCATCCCTGAG     | 0.562 |
| + | 4  | 867                     | T3_uc009xqs.1_RI   | NM_152635    | NP_689848     | Q8WWZ8      | OIT3_HUMAN  | cium-binding (Potential).     | 2            | GAAGTGATGGC     | 0.488 |
| + | 4  | 244                     | 10qkx.1_5'UTR PL   | NM_002658    | NP_002649     | P00749      | UROK_HUMAN  | EGF-like.                     | 3            | TGACTGTCTAA     | 0.537 |
| + | 2  | 194                     | S24_uc001jzp.2_    | NM_001026    | NP_001017     | P62847      | RS24_HUMAN  |                               | 1            | GACTACTTCAG     | 0.363 |
| + | 2  | 398                     | _p.W57* OPN4_ur    | NM_033282    | NP_150598     | Q9UHM6      | OPN4_HUMAN  | cellular (Potential).         | 1            | GCCTGGGTCCC     | 0.478 |
| - | 6  | 895                     |                    | NM_144590    | NP_653191     | Q5VYY1      | ANR22_HUMAN |                               | 0            | ATCTCCGTGCA     | 0.403 |
| - | 7  | 924                     | utation_p.G225R    | NM_001613    | NP_001604     | P62736      | ACTA_HUMAN  |                               | 0            | CTACCGATGA      | 0.527 |
| - | 6  | 803                     | PA_uc010qnf.1_M    | NM_000235    | NP_000226     | P38571      | LICH_HUMAN  |                               | 0            | CCATAGGGCTA     | 0.478 |
| + | 2  | 777                     | i.3_Intron LIPA_uc | NM_001010987 | NP_001010987  | Q5T764      | IFT1B_HUMAN |                               | 0            | GACAGGAAGCT     | 0.433 |
| + | 1  | 307                     |                    | NM_006204    | NP_006195     | P51160      | PDE6C_HUMAN |                               | 4            | AGGTGGAGGAG     | 0.627 |
| + | 2  | 748                     |                    | NM_006204    | NP_006195     | P51160      | PDE6C_HUMAN | GAF 1.                        | 4            | CATCTGAATTTT    | 0.443 |
| + | 16 | 4799                    | o.E1373K PLCE1_    | NM_016341    | NP_057425     | Q9P212      | PLCE1_HUMAN |                               | 3            | CACAGGAGAAC     | 0.403 |
| - | 4  | 1185                    | i_p.L190F COX15    | NM_078470    | NP_510870     | Q7KZN9      | COX15_HUMAN | ical; (Potential).            | 1            | GACGAGGCCAC     | 0.458 |
| + | 4  | 765                     | R SEMA4G_uc00      | NM_017893    | NP_060363     | Q9NTN9      | SEM4G_HUMAN | ilar (Potential). Sema.       | 1            | AAAAAGGGAAA     | 0.507 |
| + | 10 | 4514                    | RC1_uc010qqj.1_    | NM_015062    | NP_055877     | Q5VV67      | PPRC1_HUMAN | g-rich. Ser-rich.             | 3            | cttgtctctcatctc | 0.443 |
| + | 7  | 1161                    |                    | NM_001008723 | NP_001008723  | Q5T655      | CC147_HUMAN | Potential.                    | 5            | AAGATCAAAG      | 0.393 |
| + | 5  | 926                     | ie_Mutation_p.S40  | NM_024889    | NP_079165     | Q5SXH7      | CJ081_HUMAN | PH.                           | 1            | GGGTCTCCTTC     | 0.413 |
| + | 11 | 1616                    | 10orf81_uc001las.  | NM_024889    | NP_079165     | Q5SXH7      | CJ081_HUMAN |                               | 1            | GCCCCCACGT      | 0.567 |
| + | 9  | 1163                    | e_Mutation_p.R28   | NM_198496    | NP_940898     | Q5GFL6      | VWA2_HUMAN  |                               | 5            | GAAAGAGAGTGT    | 0.498 |
| - | 10 | 1251_1252n_p.D347N ABLM | NM_002313          | NP_002304    | O14639        | ABLM1_HUMAN |             | 1                             | TAAATCCTTGTA | 0.416           |       |
| + | 12 | 1920                    | 1lcc.2_Missense_   | NM_020940    | NP_065991     | Q5W0V3      | F16B1_HUMAN |                               | 1            | GAAGATCCATTA    | 0.348 |
| + | 20 | 3607                    | ie_Mutation_p.G2   | NM_207303    | NP_997186     | Q5VV63      | ATRN1_HUMAN | e 2. Extracellular (Potential | 7            | CACAGGAAAAT     | 0.348 |

|   |    |      |                    |              |              |        |              |                               |     |               |       |             |
|---|----|------|--------------------|--------------|--------------|--------|--------------|-------------------------------|-----|---------------|-------|-------------|
| + | 20 | 3630 | æe_Mutation_p.G2'  | NM_207303    | NP_997186    | Q5VV63 | ATRN1_HUMAN  | e 2. Extracellular (Potential | 7   | ACTAAAGGAATAA | 0.323 |             |
| + | 3  | 357  |                    | NM_198515    | NP_940917    | P0C7W6 | CJ096_HUMAN  | Potential.                    | 2   | TGTCGTGAAAAA  | 0.338 |             |
| - | 4  | 1442 |                    | NM_173791    | NP_776152    | Q8NEN9 | PDZD8_HUMAN  | PDZ.                          | 0   | FAAGTCGATCTCC | 0.428 |             |
| - | 2  | 1213 | 9xyz.1_Missense_   | NM_014904    | NP_055719    | Q7L804 | RFIP2_HUMAN  |                               | 0   | CAAAGGAATCTA  | 0.388 |             |
| + | 19 | 2741 | fd.1_Missense_Mu   | NM_018117    | NP_060587    | Q9BZH6 | WDR11_HUMAN  |                               | 0   | ATGAACAAGAG   | 0.458 |             |
| + | 9  | 6748 | l1fz.2_Missense_l  | NM_206862    | NP_996744    | O95359 | TACC2_HUMAN  |                               | 10  | AAAAACCAGAGG  | 0.537 |             |
| + | 52 | 6845 | p.E2246K DMBT1     | NM_007329    | NP_015568    | Q9UGM3 | DMBT1_HUMAN  | ZP.                           | 7   | TCGAGGAAGTC   | 0.463 |             |
| - | 3  | 749  | p.P307S C10orf9    | NM_001004298 | NP_001004298 | Q96M02 | CJ090_HUMAN  |                               | 2   | CTCGGGAACCT   | 0.582 |             |
| + | 4  | 457  |                    | NM_002412    | NP_002403    | P16455 | MGMT_HUMAN   |                               | 2   | TGATTTCTTACCA | 0.498 |             |
| + | 1  | 845  |                    | NM_001127389 | NP_001120861 | F5GZ66 | F5GZ66_HUMAN |                               | 0   | CACCGGCGCGT   | 0.786 |             |
| + | 17 | 2683 |                    | NM_178537    | NP_848632    | Q76KP1 | B4GN4_HUMAN  | lenal (Potential).            | 1   | ACTTCGAGCGC   | 0.692 |             |
| - | 31 | 4256 |                    | NM_005961    | NP_005952    | Q6W4X9 | MUC6_HUMAN   | rich. Thr-rich.               | 1   | GTGGGGTTTGG   | 0.592 |             |
| + | 25 | 3430 |                    | NM_002457    | NP_002448    | Q02817 | MUC2_HUMAN   |                               | 2   | ACTATGAGCCA   | 0.622 |             |
| + | 1  | 451  |                    | NM_001001480 | NP_001001480 | Q701N2 | KRA55_HUMAN  | repeats of C-C-X-P.           | 1   | GGGGGGCTGTG   | 0.692 |             |
| + | 1  | 230  |                    | NM_001005172 | NP_001005172 | Q8NGK3 | O52K2_HUMAN  | Name=2; (Potential).          | 2   | TTCTCCTCTCAG  | 0.522 |             |
| + | 1  | 319  |                    | NM_001005171 | NP_001005171 | Q8NGK4 | O52K1_HUMAN  | Name=3; (Potential).          | 0   | TTCTTCACTCC   | 0.517 |             |
| + | 2  | 206  |                    | NM_152430    | NP_689643    | Q8TCB6 | O51E1_HUMAN  | ellular (Potential).          | 4   | CCTCCCTGGTT   | 0.488 |             |
| + | 1  | 902  |                    | NM_001001916 | NP_001001916 | Q8NH60 | O52J3_HUMAN  | lasmic (Potential).           | 3   | GATTCGAGAACC  | 0.378 | rs146387387 |
| - | 1  | 731  |                    | NM_001005164 | NP_001005164 | Q8NGJ4 | O52E2_HUMAN  | Name=6; (Potential).          | 3   | CATGTGAACCA   | 0.458 |             |
| - | 1  | 370  |                    | NM_001005160 | NP_001005160 | Q9H2C5 | O52A5_HUMAN  | lasmic (Potential).           | 4   | ATAGCGATCCAC  | 0.468 | rs143161168 |
| - | 2  | 687  | BG2_uc001maj.1_    | NM_000559    | NP_000550    | P69892 | HBG2_HUMAN   |                               | 1   | GGTGCCCTTGA   | 0.522 |             |
| - | 3  | 629  | æE1_uc001mam.1_    | NM_005330    | NP_005321    | P02100 | HBE_HUMAN    |                               | 0   | CATTCAGGGG    | 0.512 |             |
| - | 1  | 583  | _uc001mam.1_Int    | NM_001005288 | NP_001005288 | Q9H343 | O51I1_HUMAN  | ellular (Potential).          | 1   | AACATGGATGTC  | 0.443 |             |
| - | 1  | 343  | _uc001mam.1_Int    | NM_001005288 | NP_001005288 | Q9H343 | O51I1_HUMAN  | Name=3; (Potential).          | 1   | ATATGCCTGACT  | 0.453 |             |
| + | 1  | 886  | æ5_uc001mbq.1_l    | NM_001005174 | NP_001005174 | Q8NGI0 | O52N2_HUMAN  | Name=7; (Potential).          | 2   | TTTATGGAGTCA  | 0.383 |             |
| + | 4  | 1054 | 10rax.1_Translatic | NM_013250    | NP_037382    | Q9UL58 | ZN215_HUMAN  |                               | 0   | GCTCACGAACA   | 0.413 |             |
| + | 1  | 239  |                    | NM_014469    | NP_055284    | O75526 | HNRGT_HUMAN  | RRM.                          | 0   | ACCTCGAAACC   | 0.607 |             |
| - | 1  | 122  |                    | NM_001003745 | NP_001003745 | P58181 | O10A3_HUMAN  | Name=1; (Potential).          | 1   | CATTTCCCATCA  | 0.473 |             |
| - | 12 | 2288 | p.P457S STK33_     | NM_030906    | NP_112168    | Q9BYT3 | STK33_HUMAN  |                               | 7   | TTGAGGAAATT   | 0.378 |             |
| - | 1  | 1091 | p.E58K STK33_uc    | NM_030906    | NP_112168    | Q9BYT3 | STK33_HUMAN  |                               | 7   | TCTCTCCAGTGA  | 0.373 |             |
| - | 3  | 408  | p.R110C SCUBE2     | NM_020974    | NP_066025    | Q9NQ36 | SCUB2_HUMAN  | alcium-binding (Potential).   | 2   | TGCAACGATAAT  | 0.428 |             |
| + | 13 | 2072 |                    | NM_006108    | NP_006099    | Q9HCB6 | SPON1_HUMAN  | SP type-1 2.                  | 0   | GGTCGCCCTGC   | 0.652 |             |
| - | 10 | 949  | p.E312K PLEKHA     | NM_175058    | NP_778228    | Q6IQ23 | PKHA7_HUMAN  |                               | 3   | CATTCGTGAC    | 0.522 |             |
| - | 10 | 1293 | H1_uc009yhe.2_R    | NM_004179    | NP_004170    | P17752 | TPH1_HUMAN   |                               | 0   | CAGCTCATTCAT  | 0.443 |             |
| - | 17 | 2814 | æ22_uc001mpa.2_    | NM_173588    | NP_775859    | Q8N9C0 | IGS22_HUMAN  | onnectin type-III 2.          | 7   | ATAACTCGGAAT  | 0.552 | rs144833584 |
| - | 6  | 879  | C1_uc001msu.1_æ    | NM_181807    | NP_861523    | P59894 | DCDC1_HUMAN  | Doublecortin.                 | 1   | CTTCAGGTTCGA  | 0.428 |             |
| - | 7  | 1313 | æe_Mutation_p.G3i  | NM_024426    | NP_077744    | P19544 | WT1_HUMAN    | 1373fs*9(1) p.V306fs*10(1)    | 687 | CTACTCCAGGCA  | 0.527 |             |
| - | 13 | 1026 | ntw.1_Missense_l   | NM_001008391 | NP_001008392 | Q6ZRK6 | CCD73_HUMAN  | Potential.                    | 2   | CATTTCTTTTAC  | 0.264 |             |
| - | 11 | 2189 | ew.1_Missense_M    | NM_001001991 | NP_001001991 | Q6UXH9 | PAMR1_HUMAN  | peptidase S1.                 | 2   | TCTTTCAATCCA  | 0.478 |             |
| - | 2  | 415  | 1_5'Flank C11orf7z | NM_000536    | NP_000527    | P55895 | RAG2_HUMAN   |                               | 5   | AAGTGCGTGGG   | 0.428 |             |
| - | 4  | 1170 |                    | NM_003654    | NP_003645    | O43916 | CHST1_HUMAN  | lenal (Potential).            | 5   | AGGGTCGCACA   | 0.706 |             |
| + | 1  | 55   |                    | NM_001005512 | NP_001005512 | Q6IF82 | O4A47_HUMAN  | ellular (Potential).          | 2   | AGAATCCAAAG   | 0.418 |             |
| + | 2  | 959  | 9ymb.2_Missense    | NR_027044    |              |        |              |                               | 0   | TGAGGGTTGTG   | 0.463 |             |
| - | 1  | 288  |                    | NM_001005272 | NP_001005272 | Q8NH83 | OR4A5_HUMAN  | ellular (Pote p.M96I(1)       | 3   | TGGCCCATGCA   | 0.448 | rs148710182 |
| + | 1  | 4    |                    | NM_001004124 | NP_001004124 | Q8NGL7 | OR4P4_HUMAN  | ellular (Potential).          | 1   | CCATGGAAAAA   | 0.303 |             |
| - | 1  | 671  |                    | NM_001005491 | NP_001005491 | Q8NH19 | O10AG_HUMAN  | lasmic (Potential).           | 2   | CCTTCTCTGTC   | 0.408 |             |
| - | 1  | 472  |                    | NM_001005491 | NP_001005491 | Q8NH19 | O10AG_HUMAN  | ellular (Potential).          | 2   | AAAGGGCAAAA   | 0.393 | rs77704611  |

|   |    |           |                    |              |              |        |             |                              |    |               |       |             |
|---|----|-----------|--------------------|--------------|--------------|--------|-------------|------------------------------|----|---------------|-------|-------------|
| + | 1  | 19        |                    | NM_001005201 | NP_001005201 | Q8N146 | OR8H3_HUMAN | cellular (Potential).        | 2  | AGGAATGACACA  | 0.323 | rs148197076 |
| + | 1  | 739       |                    | NM_001005210 | NP_001005210 | Q6ZSA7 | LRC55_HUMAN | LRR 4.                       | 0  | GTGCATCCCCAG  | 0.627 |             |
| - | 6  | 928       |                    | NM_001062    | NP_001053    | P20061 | TCO1_HUMAN  |                              | 2  | CTTGAGAAATTI  | 0.448 |             |
| - | 1  | 41        | LC22A25_uc001m     | NM_199352    | NP_955384    | Q6T423 | S22AP_HUMAN | Name=1; (Potential).         | 4  | ATCTCCCCAGG   | 0.438 |             |
| + | 3  | 2352      | N3_uc001npx.2_lr   | NM_201428    | NP_958831    | O95197 | RTN3_HUMAN  |                              | 1  | TGAGCCTCTAG   | 0.398 |             |
| + | 2  | 522       |                    | NM_138471    | NP_612480    | Q9BUA3 | CK084_HUMAN |                              | 0  | GTGGCGCTGAG   | 0.637 |             |
| + | 1  | 693       | loaj.2_Missense_M  | NM_018484    | NP_060954    | Q9NSA0 | S22AB_HUMAN | cellular (Potential).        | 2  | GGAGCGAAGCT   | 0.682 |             |
| - | 21 | 3170      |                    | NM_015104    | NP_055919    | Q2TAZ0 | ATG2A_HUMAN |                              | 2  | GGTTGGGGCCA   | 0.692 |             |
| + | 2  | 425       | Job.1_Missense_M   | NM_001004326 | NP_001004326 | A6NK97 | S22AK_HUMAN | ical; (Potential).           | 1  | CGAGTCCGTCT   | 0.687 |             |
| - | 3  | 436       | ORO1B_uc001oll     | NM_020441    | NP_065174    | Q9BR76 | COR1B_HUMAN | WD 2.                        | 2  | CACCTCGCTTG   | 0.682 |             |
| + | 7  | 856       | ng.1_Missense_M    | NM_000852    | NP_000843    | P09211 | GSTP1_HUMAN | ST C-terminal.               | 1  | ACCTCCCCATC   | 0.587 |             |
| - | 13 | 1629      | _Site_p.Y487_splic | NM_001876    | NP_001867    | P50416 | CPT1A_HUMAN |                              | 2  | ACGTACTGTCA   | 0.443 |             |
| - | 1  | 901       |                    | NM_198923    | NP_944605    | Q8TDS7 | MRGRD_HUMAN | lasmic (Potential).          | 1  | CTCGCGAAGCG   | 0.677 |             |
| - | 17 | 3352      |                    | NM_015531    | NP_056346    | Q4AC94 | C2CD3_HUMAN |                              | 7  | CACTGGATTGA   | 0.388 |             |
| - | 4  | 975       | xf.1_Missense_M    | NM_004626    | NP_004617    | O96014 | WNT11_HUMAN |                              | 2  | ATTCTTCATGCAC | 0.587 |             |
| + | 28 | 3858_3859 | se_Mutation_p.S1   | NM_000260    | NP_000251    | Q13402 | MYO7A_HUMAN | MyTH4 1.                     | 4  | TCGTGTCTCTCT  | 0.629 |             |
| - | 13 | 1570      |                    | NM_182833    | NP_878253    | Q6W3E5 | GDPD4_HUMAN | tracellular (Potential).     | 1  | TCCTGGAGCAC   | 0.468 |             |
| + | 1  | 77        |                    | NM_003251    | NP_003242    | Q92748 | THRSP_HUMAN |                              | 1  | GGACCGGTATG   | 0.622 |             |
| + | 3  | 621       | i.E37K CCDC83_u    | NM_173556    | NP_775827    | Q8IWF9 | CCD83_HUMAN | Potential.                   | 1  | TAAAGGAAGATC  | 0.264 |             |
| + | 3  | 582       | pbw.1_Missense_M   | NM_001156474 | NP_001149946 | Q6ZN84 | CCD81_HUMAN |                              | 1  | GATTCCAGCA    | 0.338 |             |
| - | 8  | 1387      |                    | NM_020358    | NP_065091    | P0CI25 | TRI49_HUMAN | B30.2/SPRY.                  | 0  | AAGCCCAATTCC  | 0.438 |             |
| - | 4  | 405       | 3A4_uc001pdm.2_    | NM_152313    | NP_689526    | Q6YBV0 | S36A4_HUMAN | ical; (Potential).           | 3  | TGAACGAAATA   | 0.303 |             |
| + | 3  | 287       | r.p.Q63* CCDC67    | NM_181645    | NP_857596    | Q05D60 | CCD67_HUMAN |                              | 1  | TGGATCAGAAAC  | 0.343 |             |
| + | 14 | 1999      | e_Mutation_p.E55z  | NM_014361    | NP_055176    | O94779 | CNTN5_HUMAN | like C2-type 5.              | 8  | GAGGGGAAAAC   | 0.408 |             |
| - | 8  | 817       | ie_Mutation_p.W2l  | NM_152587    | NP_689800    | Q8NCR3 | CK065_HUMAN |                              | 1  | TCCTCCAGCTC   | 0.328 |             |
| - | 4  | 466       |                    | NM_006235    | NP_006226    | Q16633 | OBF1_HUMAN  |                              | 1  | ACCTTCCATGTC  | 0.642 |             |
| + | 20 | 1885      | 12_uc001pnw.2_F    | NM_017868    | NP_060338    | Q9H892 | TTC12_HUMAN |                              | 4  | GTTATCATGAAG  | 0.388 |             |
| - | 3  | 748       | M55A_uc001ppb.     | NM_152315    | NP_689528    | Q8N323 | FA55A_HUMAN |                              | 0  | AGCCTCACAGG   | 0.438 |             |
| - | 33 | 6334      |                    | NM_020693    | NP_065744    | Q8TD84 | DSCL1_HUMAN | lasmic (Potential).          | 8  | CCAGGTGTAG    | 0.617 |             |
| - | 2  | 199       | 1prt.1_5'UTR TMF   | NM_001077263 | NP_001070731 | Q9BYE2 | TMPSD_HUMAN | peats of A-S-P-A-[GLQR].     | 1  | GGCTGGAGATG   | 0.637 |             |
| - | 2  | 146       | 1prt.1_5'UTR TMF   | NM_001077263 | NP_001070731 | Q9BYE2 | TMPSD_HUMAN | 5 AA repeats of A-S-P-A-[C   | 1  | ATGCTCCAGCT   | 0.617 |             |
| + | 7  | 1477      | p.S447L IL10RA_    | NM_001558    | NP_001549    | Q13651 | I10R1_HUMAN | lasmic (Potential).          | 1  | AGAATCGCCCT   | 0.567 |             |
| + | 3  | 613       | L_uc001psz.1_Mi    | NM_005933    | NP_005924    | Q03164 | MLL1_HUMAN  |                              | 25 | TGTTTTCCCTC   | 0.413 |             |
| - | 6  | 2217      | al.2_Nonsense_M    | NM_182557    | NP_872363    | Q86UU0 | BCL9L_HUMAN | teraction with CTNNB1 (By    | 2  | TCGCTCAATGT   | 0.687 |             |
| - | 1  | 609       | V29_uc001pxa.2_I   | NM_012101    | NP_036233    | Q14134 | TRI29_HUMAN |                              | 4  | ACCGTAAAAAA   | 0.642 |             |
| + | 5  | 380       | 1S POU2F3_uc01l    | NM_014352    | NP_055167    | Q9UKI9 | PO2F3_HUMAN |                              | 2  | CCATCCGCTCC   | 0.572 |             |
| + | 8  | 1859      |                    | NM_005422    | NP_005413    | O75443 | TECTA_HUMAN | TIL 1.                       | 10 | GGCCTCGCGGA   | 0.662 |             |
| - | 1  | 781       |                    | NM_001004474 | NP_001004474 | Q8NGN2 | O10S1_HUMAN | Name=6; (Potential).         | 2  | CACCCAGTGA    | 0.607 |             |
| + | 24 | 3384      | Q CACNA1C_uc00     | NM_199460    | NP_955630    | Q13936 | CAC1C_HUMAN | =S4 of repeat III; (Potentia | 11 | ACTCAGGCCCC   | 0.592 |             |
| + | 47 | 6155      | Q CACNA1C_uc00     | NM_199460    | NP_955630    | Q13936 | CAC1C_HUMAN | lasmic (Potential).          | 11 | ATGACGAAATC   | 0.592 |             |
| - | 2  | 452       | ad.1_Missense_M    | NM_031474    | NP_113662    | Q9BQI9 | NRIP2_HUMAN |                              | 1  | GGTTTCCCTCC   | 0.572 |             |
| - | 17 | 2797      | p.L871R CHD4_u     | NM_001273    | NP_001264    | Q14839 | CHD4_HUMAN  | ase ATP-binding.             | 2  | TCTTCAGCCGAT  | 0.468 |             |
| - | 5  | 544       | BP_uc010sfg.1_lr   | NM_032489    | NP_115878    | Q8NEB7 | ACRBP_HUMAN |                              | 1  | GGGCTGGAAGG   | 0.572 |             |
| + | 1  | 79        |                    | NM_001080454 | NP_001073923 | POC7M7 | ACSM4_HUMAN |                              | 0  | AAGATCACCAG   | 0.463 |             |
| - | 4  | 505       | age.1_Missense_M   | NM_174941    | NP_777601    | Q9NR16 | C163B_HUMAN | tracellular (Potential).     | 11 | TGTTTCCATCC   | 0.443 |             |
| - | 16 | 3472      | .3_Intron CD163_u  | NM_004244    | NP_004235    | Q86VB7 | C163A_HUMAN |                              | 8  | AATTTTCTGAAAC | 0.398 |             |
| - | 5  | 661       | p.E163K CLEC4C     | NM_130441    | NP_569708    | Q8WTT0 | CLC4C_HUMAN | (Potential). C-type lectin.  | 3  | CATTTTCAATTGA | 0.423 |             |

|   |    |       |                   |              |              |        |                                            |    |               |       |             |
|---|----|-------|-------------------|--------------|--------------|--------|--------------------------------------------|----|---------------|-------|-------------|
| - | 1  | 51    | P_uc009zgl.2_5'U  | NM_002864    | NP_002855    |        |                                            | 5  | ATAAATGAAGAAC | 0.493 |             |
| - | 13 | 3022  |                   | NM_000834    | NP_000825    | Q13224 | NMDE2_HUMAN Iasmic (Potential).            | 12 | TTGTAGGATTTGC | 0.552 |             |
| - | 13 | 1627  |                   | NM_004963    | NP_004954    | P25092 | GUC2C_HUMAN Potential). Protein kinase.    | 6  | STATCTCGTCTTT | 0.473 |             |
| + | 11 | 2078  | cw.1_Missense_M   | NM_030667    | NP_109592    | Q16827 | PTPRO_HUMAN III 7. Extracellular (Potentia | 9  | GGCTCCGGAAA   | 0.408 |             |
| + | 6  | 667   | Mutation_p.R181   | NM_019844    | NP_062818    | Q9NPD5 | SO1B3_HUMAN Name=4; (Potential).           | 4  | TGCTTCGTGGC/  | 0.378 | rs143565471 |
| - | 12 | 2573  | p.Q776* PKP2_uc   | NM_004572    | NP_004563    | Q99959 | PKP2_HUMAN ARM 8.                          | 2  | TTTCTGGATGCC  | 0.493 |             |
| - | 9  | 1970  | p.E575K PKP2_uc   | NM_004572    | NP_004563    | Q99959 | PKP2_HUMAN                                 | 2  | TGCCTCCAGCT/  | 0.413 |             |
| + | 10 | 1138  | zjz.2_Missense_M  | NM_013377    | NP_037509    | Q6ZMN7 | PZRN4_HUMAN                                | 11 | AGTAGGACGTA   | 0.468 |             |
| - | 27 | 4103  | lrno.1_Missense_  | NM_025003    | NP_079279    | P59510 | ATS20_HUMAN SP type-1 10.                  | 19 | CTTCTCCCAA    | 0.398 |             |
| + | 4  | 1305  | p.E72K FAM113B    | NM_138371    | NP_612380    | Q96HM7 | F113B_HUMAN                                | 5  | AAAACGAAGT/   | 0.582 |             |
| - | 19 | 1340  | DL2A1_uc001rqv.2  | NM_001844    | NP_001835    | P02458 | CO2A1_HUMAN le-helical region.             | 2  | AGCACCTTCAG/  | 0.627 |             |
| - | 6  | 605   | rqv.2_Missense_M  | NM_001844    | NP_001835    | P02458 | CO2A1_HUMAN                                | 2  | CTTTTTCACCTT  | 0.542 |             |
| + | 13 | 2013  | p.P616S TROAP     | NM_005480    | NP_005471    | Q12815 | TROAP_HUMAN A approximate tandem rep       | 1  | GCCCTCCAGCA   | 0.652 |             |
| - | 4  | 356   |                   | NM_001037806 | NP_001032895 | Q9HCH0 | NCK5L_HUMAN Potential.                     | 1  | GTTCCTCGTTGG/ | 0.592 |             |
| - | 12 | 1310  | lrvs.2_Missense_M | NM_013277    | NP_037409    | Q9H0H5 | RGAP1_HUMAN ol-ester/DAG-type.             | 1  | GCAGGGAAGGG   | 0.468 |             |
| - | 10 | 1220  | l.2_Nonsense_Mul  | NM_016293    | NP_057377    | Q9UBW5 | BIN2_HUMAN                                 | 1  | GGTTCGGAGGA   | 0.592 |             |
| + | 10 | 1292  | 4A8_uc001ryp.1_   | NM_001039960 | NP_001035049 | Q2Y0W8 | S4A8_HUMAN ellular (Potential).            | 5  | CATGACGTAGCA  | 0.438 |             |
| - | 1  | 635   | lh.2_Missense_Mu  | NM_000424    | NP_000415    | P13647 | K2C5_HUMAN Head.                           | 0  | GGGGTCGATTT/  | 0.537 |             |
| - | 1  | 99    |                   | NM_033448    | NP_258259    | Q3SY84 | K2C71_HUMAN lead. Gly-rich.                | 2  | CAGCTCCCGAC   | 0.597 |             |
| - | 1  | 94    | av.1_Missense_Mt  | NM_006121    | NP_006112    | P04264 | K2C1_HUMAN  Gly/Phe/Ser-rich.              | 2  | CACCTTCGGTAC/ | 0.552 |             |
| - | 7  | 1317  | ni.2_Missense_Mt  | NM_175078    | NP_778253    | Q7Z794 | K2C1B_HUMAN Rod. Coil 2.                   | 1  | CAGGTCCTGCA/  | 0.612 |             |
| - | 2  | 658   | 79_uc001sba.2_5'  | NM_175834    | NP_787028    | Q5XKE5 | K2C79_HUMAN Rod. Coil 1B.                  | 4  | CTGAAGTCTGT/  | 0.617 |             |
| + | 1  | 561   |                   | NM_001005243 | NP_001005243 | Q8NGE7 | OR9K2_HUMAN ellular (Potential).           | 2  | TAGCATGACATT  | 0.433 |             |
| + | 2  | 629   | p.M70I PA2G4_u    | NM_006191    | NP_006182    | Q9UQ80 | PA2G4_HUMAN                                | 0  | GAATGAAGAA/   | 0.234 |             |
| + | 9  | 1065  | sqj.1_Missense_M  | NM_002898    | NP_002889    | Q15434 | RBMS2_HUMAN                                | 0  | TGCTTCGTATC/  | 0.453 |             |
| + | 2  | 1031  |                   | NM_005538    | NP_005529    | P55103 | INHBC_HUMAN                                | 0  | ATCTTCTCAAGC  | 0.577 |             |
| + | 10 | 2026  | rj.2_Missense_Mu  | NM_006654    | NP_006645    | Q8WU20 | FRS2_HUMAN                                 | 2  | CTGATCTGCC/   | 0.398 |             |
| - | 1  | 448   |                   | NM_201550    | NP_963844    | Q5BKY1 | LRC10_HUMAN                                | 0  | CGGGCGTAACT   | 0.607 |             |
| - | 10 | 1585  | lsvf.2_Missense_M | NM_032735    | NP_116124    | Q8N1M1 | BEST3_HUMAN Iasmic (Potential).            | 0  | AGCAGGATTT/   | 0.592 |             |
| - | 8  | 1674  | p.R269C PTPRR     | NM_002849    | NP_002840    | Q15256 | PTPRR_HUMAN phatase. Cytoplasmic (Pot      | 3  | TATAGCGATTTT  | 0.224 |             |
| - | 10 | 1759  |                   | NM_032148    | NP_115524    | Q96JW4 | S41A2_HUMAN Extracellular.                 | 2  | TCCTTTCCTTTC/ | 0.468 |             |
| - | 3  | 652   | tmv.2_Missense_M  | NM_001142345 | NP_001135817 | Q99788 | CML1_HUMAN Iasmic (Potential).             | 5  | CCAGGCGAACG   | 0.562 |             |
| - | 24 | 3988  | Mutation_p.G96E   | NM_002973    | NP_002964    | Q99700 | ATX2_HUMAN                                 | 2  | GGGACCGCCGG   | 0.557 |             |
| + | 18 | 1928  | le.1_Missense_Mu  | NM_001143854 | NP_001137326 | Q9Y2J0 | RP3A_HUMAN                                 | 7  | AAGATGAACGT   | 0.483 |             |
| - | 9  | 1480  | p.E329K TBX5_uc   | NM_181486    | NP_852259    | Q99593 | TBX5_HUMAN p.E329K(1)                      | 8  | ATTCTTCTCTGT  | 0.493 | rs142807139 |
| - | 19 | 2769  |                   | NM_173598    | NP_775869    | Q6VAB6 | KSR2_HUMAN                                 | 15 | GGTTTCGCTTTC/ | 0.498 |             |
| - | 17 | 1635  |                   | NM_006836    | NP_006827    | Q92616 | GCN1L_HUMAN                                | 4  | ACACAGTACAC/  | 0.338 |             |
| - | 5  | 1293  | .R396Q CLIP1_uc   | NM_002956    | NP_002947    | P30622 | CLIP1_HUMAN Potential.                     | 3  | CGTCCCGGGCC   | 0.622 |             |
| + | 46 | 4862  | TC1_uc010taf.1_In | NM_014708    | NP_055523    | P50748 | KNTC1_HUMAN                                | 10 | TTTCTCCTCCCC  | 0.368 |             |
| - | 1  | 114   | l81_uc001ucw.1_Li | NM_177551    | NP_808219    | Q8TDS4 | HCAR2_HUMAN ellular (Potential).           | 0  | CTTGCTATTTC   | 0.537 |             |
| - | 1  | 195   | l81_uc001ucw.1_Li | NM_006018    | NP_006009    | P49019 | HCAR3_HUMAN ellular (Potential).           | 2  | CTTGCTATTTC   | 0.532 |             |
| + | 6  | 1975  | p.H49Y ZNF664     | NM_152437    | NP_689650    | Q8N3J9 | ZN664_HUMAN C2H2-type 2.                   | 0  | CATATTCATTGGA | 0.353 |             |
| - | 5  | 1391  |                   | NM_006001    | NP_005992    | Q13748 | TBA3C_HUMAN                                | 5  | ATCTTTCACCTTC | 0.557 |             |
| - | 19 | 1580  | p.D380N TPTE2     | NM_199254    | NP_954863    | Q6XPS3 | TPTE2_HUMAN 2 tensin-type.                 | 0  | TCACATCATCATA | 0.333 |             |
| - | 4  | 993   | nr.3_Missense_Mu  | NM_014572    | NP_055387    | Q9NRM7 | LATS2_HUMAN                                | 10 | GTACGGCCGG    | 0.701 |             |
| - | 10 | 11921 | E3631K SACS_uc    | NM_014363    | NP_055178    | Q9NZJ4 | SACS_HUMAN                                 | 12 | GGAATTCATATAT | 0.388 |             |
| - | 10 | 7383  | S2118F SACS_uc    | NM_014363    | NP_055178    | Q9NZJ4 | SACS_HUMAN                                 | 12 | GAATGGGAATTT  | 0.353 |             |

|   |    |       |                   |              |              |        |                                            |      |                |       |
|---|----|-------|-------------------|--------------|--------------|--------|--------------------------------------------|------|----------------|-------|
| + | 5  | 495   | 0tcu.1_Missense_  | NM_018647    | NP_061117    | Q9NS68 | TNR19_HUMAN (Potential). TNFR-Cys 3.       | 2    | TCCTCCTTACG/   | 0.458 |
| + | 13 | 2009  | aa.2_Missense_M   | NM_001676    | NP_001667    | P54707 | AT12A_HUMAN lasmic (Potential).            | 6    | ATGATCGATCCCC  | 0.493 |
| + | 10 | 990   | se_Mutation_p.E3' | NM_031277    | NP_112567    | Q9BXT8 | RNF17_HUMAN                                | 2    | :CCCAAGAAAATC  | 0.269 |
| - | 1  | 1791  | p.G445E FAM123,   | NM_152704    | NP_689917    | Q8N7J2 | F123A_HUMAN                                | 4    | iGACTTCCGTCC/  | 0.622 |
| - | 2  | 596   | R12_uc010tdl.1_In | NM_005288    | NP_005279    | P47775 | GPR12_HUMAN Name=3; (Potential).           | 0    | iAGGCAGAGAAA   | 0.527 |
| - | 19 | 2479  | .T3_uc010tdn.1_M  | NM_004119    | NP_004110    | P36888 | FLT3_HUMAN e. Cytoplasmic (Potential).     | 8549 | AAATTCATTCC1   | 0.308 |
| + | 5  | 2951  |                   | NM_001033602 | NP_001028774 | Q5JR59 | MTUS2_HUMAN r microtubules. Mediates int   | 0    | TCATCTCCTAAGA  | 0.378 |
| - | 7  | 1415  |                   | NM_003045    | NP_003036    | P30825 | CTR1_HUMAN ical; (Potential).              | 0    | AGAGGGAGCCCC   | 0.617 |
| + | 2  | 199   | aba.2_Missense_IV | NM_130806    | NP_570718    | Q8WXD0 | RXFP2_HUMAN ellular (Potential).           | 0    | TCACTCCTTCATG  | 0.398 |
| + | 16 | 1666  | oa.2_Missense_Mt  | NM_130806    | NP_570718    | Q8WXD0 | RXFP2_HUMAN lasmic (Potential).            | 0    | iCATTCGACCTG/  | 0.453 |
| + | 22 | 9021  |                   | NM_000059    | NP_000050    | P51587 | BRCA2_HUMAN                                | 64   | AATAATCACAGG/  | 0.363 |
| + | 5  | 2871  |                   | NM_004795    | NP_004786    | Q9UEF7 | KLOT_HUMAN ellular (Potential).            | 3    | TCCCGGGCCCA    | 0.443 |
| - | 2  | 669   | e_Mutation_p.P10! | NM_001127217 | NP_001120689 | O15198 | SMAD9_HUMAN MH1.                           | 0    | CCAGCGGCTTC.   | 0.607 |
| - | 23 | 2622  | p.S778F POSTN_    | NM_006475    | NP_006466    | Q15063 | POSTN_HUMAN                                | 2    | ACTGAGAACGA/   | 0.308 |
| - | 3  | 1098  | p.R288K TRPC4_u   | NM_016179    | NP_057263    | Q9UBN4 | TRPC4_HUMAN Multimerization domain (By     | 6    | TTAGTCTTGCA/   | 0.388 |
| + | 1  | 3076  |                   | NM_207361    | NP_997244    | Q5SZK8 | FREM2_HUMAN :extracellular (Potential).    | 11   | iGACATCATGTG/  | 0.507 |
| - | 3  | 945   | p.D171N HTR2A_    | NM_000621    | NP_000612    | P28223 | 5HT2A_HUMAN smic (By similarity).          | 6    | CAAGATCACTTAC  | 0.453 |
| + | 1  | 2488  |                   | NR_003268    |              |        |                                            | 0    | ATTTTCCCCCC/   | 0.522 |
| - | 10 | 2684  | P7B_uc010tgu.1_   | NM_000053    | NP_000044    | P35670 | ATP7B_HUMAN lasmic (Potential).            | 3    | TTTCCCATCCAC   | 0.542 |
| + | 4  | 606   | gu.2_Missense_M   | NM_001098525 | NP_001091995 | Q8WWK9 | CKAP2_HUMAN                                | 2    | ATGATCCCCAA/   | 0.323 |
| - | 2  | 2248  | il.1_Missense_Mu  | NM_203487    | NP_982354    | Q9HC56 | PCDH9_HUMAN r (Potential). Cadherin 5.     | 6    | TTTTTTCGGTCC/  | 0.433 |
| - | 8  | 2083  | p.P406S DACH1_    | NM_080759    | NP_542937    | Q9UI36 | DACH1_HUMAN                                | 1    | iAGATGGAAAA/   | 0.468 |
| - | 2  | 383   |                   | NM_001071775 | NP_001065243 | Q08AG7 | MZT1_HUMAN                                 | 0    | iTAACCGATGATA  | 0.343 |
| - | 1  | 1188  |                   | NM_052910    | NP_443142    | Q96PX8 | SLIK1_HUMAN ilar (Potential). LRR 2.       | 5    | iGAAAAGCCCCC   | 0.448 |
| + | 4  | 570   | LDN10_uc010tii.1_ | NM_006984    | NP_008915    | P78369 | CLD10_HUMAN ical; (Potential).             | 1    | iAGCCTCACTGT   | 0.378 |
| + | 2  | 205   | lp.S64F CLYBL_u   | NM_206808    | NP_996531    | Q8N0X4 | CLYBL_HUMAN                                | 0    | TTCCATCCCTGA/  | 0.408 |
| - | 10 | 1477  | 8_splice TMTC4_u  | NM_001079669 | NP_001073137 | Q5T4D3 | TMTC4_HUMAN                                | 3    | TTGATACCTTTTT  | 0.498 |
| - | 4  | 578   | e_Mutation_p.R15! | NM_001079669 | NP_001073137 | Q5T4D3 | TMTC4_HUMAN                                | 3    | iCCTCCGGCCTT   | 0.612 |
| - | 2  | 733   | /M_uc001vps.2_5!  | NM_024089    | NP_076994    | Q6UW63 | KDEL1_HUMAN Filamin.                       | 1    | CCCTTGGGAATT   | 0.318 |
| - | 4  | 545   | P1_uc010tkc.1_M   | NM_024719    | NP_078995    | Q5TC63 | GRTP1_HUMAN ab-GAP TBC.                    | 0    | iCACTCCCTGGT   | 0.622 |
| - | 2  | 328   | iHL1_uc001vtp.1_: | NM_138430    | NP_612439    | Q8NDY3 | ARHL1_HUMAN                                | 0    | CTCCCGGTACA/   | 0.567 |
| + | 1  | 224   |                   | NM_001005483 | NP_001005483 | Q8NGD3 | OR4K5_HUMAN Name=2; (Potential).           | 2    | iGGCTTCTTTTG/  | 0.408 |
| + | 1  | 283   |                   | NM_001004063 | NP_001004063 | Q8NGD4 | OR4K1_HUMAN ellular (Potential).           | 3    | CTTTGAGGGT/    | 0.403 |
| + | 17 | 2782  | p.P403S RPGRIP    | NM_020366    | NP_065099    | Q96KN7 | RPGR1_HUMAN                                | 7    | AAGTTTCCCTAC/  | 0.443 |
| - | 11 | 1935  | H24_uc010akf.2_   | NM_022478    | NP_071923    | Q86UP0 | CAD24_HUMAN  Extracellular (Potential).    | 1    | AGGGCCCAGAG    | 0.572 |
| - | 32 | 4698  |                   | NM_002471    | NP_002462    | P13533 | MYH6_HUMAN Potential.                      | 4    | iGGGCTGACTGC   | 0.602 |
| + | 7  | 894   | y.1_Missense_Mut  | NM_001163484 | NP_001156956 | Q8TEB1 | DCA11_HUMAN WD 1.                          | 0    | iTGCCGTTTCC/   | 0.488 |
| - | 4  | 493   |                   | NM_001911    | NP_001902    | P08311 | CATG_HUMAN eptidase S1.                    | 2    | CTCCTCATGCT/   | 0.617 |
| - | 5  | 865   |                   | NM_199047    | NP_950248    | Q6SJ96 | TBPL2_HUMAN                                | 0    | AAAATCGAGGA/   | 0.473 |
| + | 26 | 3294  | e_Mutation_p.R10! | NM_014992    | NP_055807    | Q9Y4D1 | DAAM1_HUMAN DAD.                           | 1    | iGGAATCGCAAA   | 0.368 |
| + | 43 | 6795  | gl.2_Missense_Mu  | NM_015180    | NP_055995    | Q8WXH0 | SYNE2_HUMAN ytoplasmic (Potential).        | 14   | iAATTCCTCAAG/  | 0.398 |
| + | 99 | 18235 | n.2_Missense_Mu   | NM_015180    | NP_055995    | Q8WXH0 | SYNE2_HUMAN Cytoplasmic (Potential).       | 14   | iGATCGTTGGC/   | 0.388 |
| + | 1  | 280   |                   | NM_003813    | NP_003804    | Q9UKJ8 | ADA21_HUMAN                                | 2    | iACACAGATGAC/  | 0.512 |
| - | 2  | 1426  |                   | NM_003814    | NP_003805    | O43506 | ADA20_HUMAN :B. Extracellular (Potential). | 1    | GACCAAGCTCGT   | 0.418 |
| + | 14 | 1578  | S6_uc001xmy.3_IV  | NM_004296    | NP_004287    | P49758 | RGS6_HUMAN RGS.                            | 3    | TTCTACGATTCCCT | 0.473 |
| + | 10 | 1307  | o.R367C RBM25_u   | NM_021239    | NP_067062    | P49756 | RBM25_HUMAN eckle localization. Glu-rich   | 4    | gagaTCGTGACC/  | 0.214 |
| + | 18 | 2492  | :1_RNA PAPLN_u    | NM_173462    | NP_775733    | O95428 | PPN_HUMAN l/Kunitz inhibitor.              | 3    | iCTGTGGGCCAA   | 0.617 |



|   |    |         |                   |              |              |        |             |                              |    |               |       |
|---|----|---------|-------------------|--------------|--------------|--------|-------------|------------------------------|----|---------------|-------|
| + | 1  | 699     |                   | NM_019589    | NP_062535    | P49750 | YLPM1_HUMAN |                              | 3  | CCCTTCGCAGT   | 0.602 |
| - | 15 | 1983    | k.2_Missense_Mu   | NM_033116    | NP_149107    | Q8TD19 | NEK9_HUMAN  | RCC1 4.                      | 5  | TAGCAGCTGTGT  | 0.403 |
| + | 5  | 1057    | RXN3_uc010asv.1   | NM_004796    | NP_004787    | Q9Y4C0 | NRX3A_HUMAN | potential),Laminin G-like 3. | 10 | CAGGCGCACGC   | 0.557 |
| + | 2  | 1836    | td.2_Missense_Mt  | NM_013231    | NP_037363    | O43155 | FLRT2_HUMAN | lar (Potential),LRRCT.       | 4  | TGAATCTTTTGT  | 0.542 |
| - | 7  | 1994    | p.E518K KCNK10    | NM_021161    | NP_066984    | P57789 | KCNKA_HUMAN | lasmic (Potential).          | 5  | CAACTCAGCGT   | 0.502 |
| - | 43 | 6032    | d.2_Missense_Mu   | NM_183387    | NP_899243    | Q05BV3 | EMAL5_HUMAN | WD 29.                       | 3  | GTAATCGAATA   | 0.433 |
| - | 3  | 983     | p.S252F DDX24     | NM_020414    | NP_065147    | Q9GZR7 | DDX24_HUMAN | ase ATP-binding.             | 4  | CATCAGACTCA   | 0.552 |
| + | 24 | 2610    |                   | NM_058237    | NP_478144    | Q6NUP7 | PP4R4_HUMAN |                              | 4  | TGATTCATTCCG  | 0.403 |
| + | 3  | 1085    | nse_Mutation_p.R  | NM_000623    | NP_000614    | P30411 | BKRB2_HUMAN | ellular (Potential).         | 5  | TGCATCGCCTC   | 0.577 |
| + | 3  | 407     | p.S82F EML1_uc    | NM_004434    | NP_004425    | O00423 | EMAL1_HUMAN |                              | 5  | ACCATCCCCCTC  | 0.498 |
| + | 3  | 997     | se_Mutation_p.P3  | NM_001161476 | NP_001154948 | Q64LD2 | WDR25_HUMAN | WD 2.                        | 0  | GGGCTCCCTGT   | 0.622 |
| + | 34 | 7089    | H1_uc001ykt.1_f   | NM_001376    | NP_001367    | Q14204 | DYHC1_HUMAN | 2 (By similarity).           | 10 | TGGATCCAGAG   | 0.507 |
| + | 11 | 1210    |                   | NM_015156    | NP_055971    | Q9UKL0 | RCOR1_HUMAN | SANT 2.                      | 1  | TTCAGGCAATC   | 0.338 |
| + | 15 | 2351    | my.3_Missense_IV  | NM_001128918 | NP_001122390 | P27448 | MARK3_HUMAN |                              | 4  | CAGTCGTAGCA   | 0.567 |
| + | 35 | 4070    | on.3_Nonsense_M   | NM_153046    | NP_694591    | Q8NDG6 | TDRD9_HUMAN |                              | 3  | CGAGTGGAATC   | 0.488 |
| + | 12 | 3800    |                   | NM_015656    | NP_056471    | Q9ULI4 | KI26A_HUMAN |                              | 1  | TGGCTCCCCCC   | 0.697 |
| - | 7  | 5615    | px.2_Missense_M   | NM_138420    | NP_612429    | Q8IVF2 | AHNK2_HUMAN |                              | 1  | CGAACGACGGC   | 0.612 |
| + | 1  | 961     | KRN3_uc010ayi.1   | NM_005664    | NP_005655    | Q13064 | MKRN3_HUMAN |                              | 10 | CCCGGCTGCAT   | 0.647 |
| - | 1  | 891     |                   | NM_002487    | NP_002478    | Q99608 | NECD_HUMAN  | MAGE.                        | 0  | GATTCGCGGC    | 0.572 |
| - | 4  | 458_459 | v.2_Missense_Mu   | NM_000275    | NP_000266    | Q04671 | P_HUMAN     | lasmic (Potential).          | 5  | TGGATGGTAAAC  | 0.495 |
| + | 2  | 194     | ar.2_Missense_ML  | NM_001036    | NP_001027    | Q15413 | RYR3_HUMAN  | smic (By similarity).        | 10 | CCGAGGGACTT   | 0.547 |
| + | 6  | 566     | ar.2_Nonsense_ML  | NM_001036    | NP_001027    | Q15413 | RYR3_HUMAN  | oplasmic (By similarity).    | 10 | AAGTTCGAATTC  | 0.433 |
| + | 54 | 8088    | r.2_Missense_Mut  | NM_001036    | NP_001027    | Q15413 | RYR3_HUMAN  | nilarity),I4 X approximate r | 10 | TGCCGCGAGAGT  | 0.527 |
| - | 20 | 2457    | ise_Mutation_p.R7 | NM_004573    | NP_004564    | Q00722 | PLCB2_HUMAN | C2.                          | 8  | TGATTCGATAGC  | 0.577 |
| - | 16 | 1712    | G397R ATP8B4_u    | NM_024837    | NP_079113    | Q8TF62 | AT8B4_HUMAN | lasmic (Potential).          | 8  | TGTTCCCAATTC  | 0.398 |
| + | 7  | 1225    | ifz.1_Missense_ML | NM_013243    | NP_037375    | Q8WXD2 | SCG3_HUMAN  |                              | 1  | TTGAGGAACTC   | 0.383 |
| + | 1  | 1499    |                   | NM_001080534 | NP_001074003 | Q8NB66 | UN13C_HUMAN |                              | 7  | CAGCAGAATTC   | 0.388 |
| + | 29 | 6145    | 3C_uc002acm.2_!   | NM_001080534 | NP_001074003 | Q8NB66 | UN13C_HUMAN | C2 2.                        | 7  | CTGTTTCATGTGC | 0.428 |
| + | 2  | 1559    | fw.2_Missense_ML  | NM_032866    | NP_116255    | Q0VF96 | CGNL1_HUMAN | Head.                        | 11 | AGGAGGAGGAG   | 0.512 |
| + | 4  | 683     | ilv.2_Missense_ML | NM_032857    | NP_116246    | P83111 | LACTB_HUMAN |                              | 0  | TGATTTCCCATTT | 0.299 |
| - | 6  | 785     |                   | NM_194272    | NP_919248    | Q6ZRY4 | RBPS2_HUMAN |                              | 0  | TGGCAGTTGGG   | 0.622 |
| - | 20 | 4247    | P8_uc002aoz.2_f   | NM_130434    | NP_569118    | Q6V1X1 | DPP8_HUMAN  |                              | 1  | TACGTGATCCA   | 0.388 |
| + | 4  | 2007    | IAD6_uc002aqg.2_  | NM_005585    | NP_005576    | O43541 | SMAD6_HUMAN | MH2.                         | 1  | TACCTCAGGGC   | 0.667 |
| + | 9  | 1347    | p.A261T IQCH_uc   | NM_001031715 | NP_001026885 | Q86VS3 | IQCH_HUMAN  |                              | 4  | TTCGAGCCAAG   | 0.433 |
| + | 16 | 2467    | IQCH_uc002aqp.    | NM_001031715 | NP_001026885 | Q86VS3 | IQCH_HUMAN  |                              | 4  | AATTGGA AAAAG | 0.463 |
| + | 6  | 2386    |                   | NM_001031807 | NP_001026977 | P84550 | SKOR1_HUMAN |                              | 0  | CAGGCGAAGATC  | 0.522 |
| - | 26 | 3198    | b.2_Nonsense_ML   | NM_001004439 | NP_001004439 | Q9UKX5 | ITA11_HUMAN | ellular (Potential).         | 3  | TTGCCCCAGAT   | 0.582 |
| + | 12 | 1650    | ukf.1_Missense_M  | NM_017691    | NP_060161    | Q8IUZ0 | LRG49_HUMAN |                              | 1  | CTAATCTCTGGT  | 0.328 |
| - | 4  | 811     |                   | NM_001102658 | NP_001096128 | P0C5K7 | CT62_HUMAN  |                              | 0  | CACTTCATGGG   | 0.488 |
| + | 10 | 1086    | ke.1_Missense_IV  | NM_021819    | NP_068591    | Q9HAT1 | LMA1L_HUMAN | lenal (Potential).           | 0  | CAGATTCATCC   | 0.612 |
| + | 11 | 1164    | ke.1_Missense_M   | NM_021819    | NP_068591    | Q9HAT1 | LMA1L_HUMAN | lenal (Potential).           | 0  | TCCATGGACAG   | 0.607 |
| - | 18 | 3008    | ITS7_uc010und.1   | NM_014272    | NP_055087    | Q9UKP4 | ATS7_HUMAN  | TSP type-1 3.                | 0  | GGTTTCAGTAGC  | 0.687 |
| + | 12 | 1992    | p.I581S IL16_uc0  | NM_172217    | NP_757366    | Q14005 | IL16_HUMAN  |                              | 4  | TGACATCAGCA   | 0.627 |
| - | 12 | 2005    | G568E FSD2_uc     | NM_001007122 | NP_001007123 | A1L4K1 | FSD2_HUMAN  | B30.2/SPRY.                  | 1  | GATTTCCCATGA  | 0.527 |
| - | 5  | 2973    | is.1_Missense_Mu  | NM_001717    | NP_001708    | Q01954 | BNC1_HUMAN  | 2H2-type 6.                  | 3  | TGCAGCTGGT    | 0.502 |
| - | 4  | 536     | is.1_Nonsense_ML  | NM_001717    | NP_001708    | Q01954 | BNC1_HUMAN  |                              | 3  | CACCTTCTCTG   | 0.428 |
| + | 5  | 625     | ise_Mutation_p.Q7 | NM_003027    | NP_003018    | Q99963 | SH3G3_HUMAN | BAR.                         | 3  | CACCTCAGTTAC  | 0.333 |

rs141642509

|   |    |           |                   |              |              |        |             |                              |     |               |       |             |
|---|----|-----------|-------------------|--------------|--------------|--------|-------------|------------------------------|-----|---------------|-------|-------------|
| - | 19 | 2590      | _p.E788K NTRK3_   | NM_001012338 | NP_001012338 | Q16288 | NTRK3_HUMAN | Potential). Protein kinase.  | 281 | GTGGTCCCTCTC  | 0.542 |             |
| - | 2  | 268       | se_Mutation_p.S4  | NM_005928    | NP_005919    | Q08431 | MFGM_HUMAN  | EGF-like.                    | 1   | GTACGAGGGG    | 0.542 | rs145851768 |
| - | 13 | 1369      | p.R248C VPS33B    | NM_018668    | NP_061138    | Q9H267 | VP33B_HUMAN |                              | 2   | CAGCGGTGCT    | 0.562 | rs140237411 |
| + | 3  | 1855      | .2_5'Flank PIGQ_l | NM_145270    | NP_660313    | P0CG20 | CP011_HUMAN |                              | 1   | GCGTCCCACCC   | 0.697 |             |
| - | 3  | 461       |                   | NM_001025190 | NP_001020361 | Q96KJ4 | MSLNL_HUMAN |                              | 4   | TGCACGGGTAG   | 0.557 |             |
| - | 11 | 1151_1152 |                   | NM_020764    | NP_065815    | Q8WXD9 | CSK1_HUMAN  |                              | 2   | GATCTCCTCTGG  | 0.634 |             |
| + | 11 | 7006      | l.1_Missense_Mut  | NM_016333    | NP_057417    | Q9UQ35 | SRRM2_HUMAN | Ser-rich.                    | 4   | AAGCCGGCGGC   | 0.552 |             |
| - | 3  | 1028      | cvw.2_Missense_M  | NM_004380    | NP_004371    | Q92793 | CBP_HUMAN   | ction with SRCAP.            | 127 | CAAATGGACTT   | 0.498 |             |
| + | 5  | 529       |                   | NM_014692    | NP_055507    | O43304 | S14L5_HUMAN | REL/MSF1.                    | 0   | AGTCCACCCT    | 0.582 |             |
| - | 13 | 4267      | jyn.1_Missense_M  | NM_001134407 | NP_001127879 | Q12879 | NMDE1_HUMAN | lasmic (Potential).          | 45  | TCCGCAGGCAG   | 0.582 |             |
| - | 12 | 3114      | jyn.1_Missense_M  | NM_001134407 | NP_001127879 | Q12879 | NMDE1_HUMAN | lasmic (Potential).          | 45  | AGCCGGTCCGG   | 0.567 |             |
| - | 5  | 1067      |                   | NM_144674    | NP_653275    | Q96M29 | TEKT5_HUMAN | Potential.                   | 2   | GCCTCCACATC   | 0.557 |             |
| - | 4  | 557       | M18A_uc010uyu.    | NM_001079512 | NP_001072980 | A6NH52 | FA18A_HUMAN |                              | 0   | CATCTTCATCTAT | 0.498 |             |
| + | 9  | 1087      | vam.1_Missense_M  | NR_003569    |              |        |             |                              | 0   | CCTCGCCGTGC   | 0.572 |             |
| - | 51 | 9082      | L2767F SMG1_u     | NM_015092    | NP_055907    | Q96Q15 | SMG1_HUMAN  |                              | 16  | CTGAAGAGATT   | 0.483 |             |
| + | 14 | 2958      | jd.1_Missense_M   | NM_001105248 | NP_001098718 | Q6UXY8 | TMC5_HUMAN  | ical; (Potential).           | 1   | GGCTCCTCTCG   | 0.483 |             |
| - | 53 | 10430     | bd.1_Missense_M   | NM_017539    | NP_060009    | Q8TD57 | DYH3_HUMAN  |                              | 18  | AACATCGAAGG   | 0.527 |             |
| - | 52 | 8263      | bd.1_Missense_M   | NM_017539    | NP_060009    | Q8TD57 | DYH3_HUMAN  | k (By similarity).           | 18  | CATTCGTTCTC   | 0.597 |             |
| - | 37 | 5399      |                   | NM_017539    | NP_060009    | Q8TD57 | DYH3_HUMAN  | 2 (By similarity p.W1800*(1) | 18  | CAATCCAAATAG  | 0.403 |             |
| + | 9  | 1017      | 5A11_uc002dmt.2   | NM_052944    | NP_443176    | Q8WWX8 | SC5AB_HUMAN | ellular (Potential).         | 2   | TTCCGAGATCC   | 0.572 |             |
| + | 2  | 1755      |                   | NM_006040    | NP_006031    | Q9Y661 | HS3S4_HUMAN | renal (Potential).           | 2   | AGGGTGATAAA   | 0.468 |             |
| - | 4  | 784       | n_p.L81F XPO6_u   | NM_015171    | NP_055986    | Q96QU8 | XPO6_HUMAN  | ortin N-terminal.            | 2   | CAAAAGGAGTT   | 0.408 |             |
| - | 12 | 1258      | 12F CLN3_uc002    | NM_000086    | NP_000077    | Q13286 | CLN3_HUMAN  |                              | 0   | TCAGGGAAGTG   | 0.617 |             |
| - | 5  | 560       | uc010vef.1_RN     | NM_003586    | NP_003577    | Q14183 | DOC2A_HUMAN | C2 1.                        | 2   | CACGGGATTCAC  | 0.562 |             |
| - | 3  | 757       | l.yr.1_Missense_M | NM_033410    | NP_219363    | Q96H86 | ZN764_HUMAN |                              | 1   | CCCACGATGGA   | 0.667 |             |
| - | 3  | 1047      | 389_uc010bzy.2_5  | NM_138447    | NP_612456    | Q96CS4 | ZN689_HUMAN | 2H2-type 4.                  | 0   | CCTCCGGAAGC   | 0.607 |             |
| + | 25 | 5862      | se_Mutation_p.S1E | NM_006662    | NP_006653    | Q6ZRS2 | SRCAP_HUMAN | Pro-rich.                    | 4   | GGTTTCGGCAT   | 0.378 |             |
| + | 4  | 2161      |                   | NM_003414    | NP_003405    | Q14586 | ZN267_HUMAN | 2H2-type 12.                 | 4   | CATCAGAGAA    | 0.438 |             |
| + | 4  | 2173      |                   | NM_003414    | NP_003405    | Q14586 | ZN267_HUMAN |                              | 4   | TCATACTGGAG   | 0.453 |             |
| + | 4  | 2329      |                   | NM_003414    | NP_003405    | Q14586 | ZN267_HUMAN | 2H2-type 14.                 | 4   | CATCGGAGAA    | 0.433 | rs146914846 |
| + | 4  | 2341      |                   | NM_003414    | NP_003405    | Q14586 | ZN267_HUMAN |                              | 4   | TCATAGTGGAG   | 0.418 |             |
| - | 15 | 2537      | C12_uc002efa.1_   | NM_033226    | NP_150229    | Q96J65 | MRP9_HUMAN  |                              | 3   | CATCTTCTCTC   | 0.448 |             |
| - | 13 | 2225      | C12_uc002efa.1_   | NM_033226    | NP_150229    | Q96J65 | MRP9_HUMAN  | C transporter 1.             | 3   | GTCTGCCAGCA   | 0.632 |             |
| + | 5  | 2575      | uc010cbn.1_Intro  | NM_022162    | NP_071445    | Q9HC29 | NOD2_HUMAN  | LRR 2.                       | 4   | TCGCGGATAAC   | 0.408 | rs61755272  |
| + | 7  | 1455      | p.D306N MMP2_L    | NM_004530    | NP_004521    | P08253 | MMP2_HUMAN  | pe-II 3. Collagen-binding.   | 11  | ACTACGATGATC  | 0.572 |             |
| - | 4  | 589       | p.E162K CES1_uc   | NM_001025194 | NP_001020365 | P23141 | EST1_HUMAN  |                              | 0   | GTTTTTCATGGG  | 0.567 |             |
| + | 46 | 5536      | LRC5_uc002ekq.1   | NM_032206    | NP_115582    | Q86W13 | NLRC5_HUMAN |                              | 7   | TGCCCTGgaagta | 0.294 |             |
| + | 10 | 1563      | n_p.W205* SLC9A   | NM_004594    | NP_004585    | Q14940 | SL9A5_HUMAN |                              | 2   | AGGTGGGAGCA   | 0.597 |             |
| + | 18 | 1836      | p.G467R WWP2_l    | NM_007014    | NP_008945    | O00308 | WWP2_HUMAN  | HECT.                        | 6   | ATGCCGGAAGG   | 0.463 |             |
| + | 6  | 1558      | vlr.1_Missense_M  | NM_017990    | NP_060460    | Q8NCN5 | PDPR_HUMAN  |                              | 1   | CCTCCAAAATC   | 0.512 |             |
| - | 8  | 4598      | cl.2_Nonsense_M   | NM_006885    | NP_008816    | Q15911 | ZFH3_HUMAN  |                              | 4   | ATCTCGATCTGC  | 0.478 |             |
| - | 5  | 814       | 8B_uc010vmu.1_M   | NM_001011880 | NP_001011880 | Q6UXF7 | CL18B_HUMAN |                              | 0   | AGAGCGAACAC   | 0.612 |             |
| - | 4  | 409       | n.2_Missense_Mu   | NM_153486    | NP_705690    | Q86WU2 | LDHD_HUMAN  | inding PCMH-type.            | 0   | AGGATTCGGTCC  | 0.632 |             |
| - | 20 | 3529      | Ochc.1_Missense_  | NM_199355    | NP_955387    | Q8TE60 | ATS18_HUMAN | SP type-1 3.                 | 18  | GCTCAGGTCTG   | 0.602 |             |
| - | 9  | 1746      | ATS18_uc002ffe.1  | NM_199355    | NP_955387    | Q8TE60 | ATS18_HUMAN | ptidase M12B.                | 18  | CATACCAAGCT   | 0.393 |             |
| + | 9  | 1242      | fl.2_Missense_Mu  | NM_016373    | NP_057457    | Q9NZC7 | WVVOX_HUMAN | ith MAPT (By similarity).    | 0   | TGGGAGGGATC   | 0.547 |             |
| - | 7  | 1588      |                   | NM_152342    | NP_689555    | Q8N8U2 | CDYL2_HUMAN |                              | 1   | GAAAAGGGAGT   | 0.557 |             |

|   |    |                          |                    |              |              |            |                     |                             |              |               |             |             |
|---|----|--------------------------|--------------------|--------------|--------------|------------|---------------------|-----------------------------|--------------|---------------|-------------|-------------|
| + | 4  | 2069_2070H3_uc010vou.1_R | NM_020655          | NP_065706    | Q8WXH2       | JPH3_HUMAN | lasmic (Potential). | 2                           | CAGGAGGAGAAC | 0.653         |             |             |
| - | 4  | 465                      | NA_uc010cju.2_T    | NM_006224    | NP_006215    | Q00169     | PIPNA_HUMAN         | 1                           | ACAAACGTGGGT | 0.517         |             |             |
| + | 21 | 3233                     | _p.D335N USP6_u    | NM_004505    | NP_004496    | P35125     | UBP6_HUMAN          | 5                           | ATGAACGATGAC | 0.577         | rs145087393 |             |
| + | 36 | 5951                     | o.D1241N USP6_u    | NM_004505    | NP_004496    | P35125     | UBP6_HUMAN          | 5                           | TGGCTGACGCC  | 0.557         |             |             |
| - | 20 | 3222                     | LG4_uc010cly.2_h   | NM_001365    | NP_001356    | P78352     | DLG4_HUMAN          | 2                           | TGCCCGAGACA  | 0.687         |             |             |
| + | 41 | 6548                     |                    | NM_020877    | NP_065928    | Q9P225     | DYH2_HUMAN          | 2 (By similarity).          | 13           | AAACATGAACTC  | 0.587       |             |
| + | 50 | 7917                     |                    | NM_020877    | NP_065928    | Q9P225     | DYH2_HUMAN          |                             | 13           | TTCCATGATACC  | 0.522       |             |
| + | 6  | 624                      | 6B_uc002gix.2_5'   | NM_001080424 | NP_001073893 | O15054     | KDM6B_HUMAN         | Pro-rich.                   | 2            | CACTCCAAGAC   | 0.637       | rs141369717 |
| + | 10 | 1317                     | 6B_uc002gix.2_5'   | NM_001080424 | NP_001073893 | O15054     | KDM6B_HUMAN         | Pro-rich.                   | 2            | CATATCCATACCC | 0.642       |             |
| + | 6  | 976                      | jf.2_Nonsense_Mu   | NM_001005273 | NP_001005273 | Q12873     | CHD3_HUMAN          |                             | 1            | GCCCCGAGTG    | 0.522       |             |
| + | 2  | 350_351                  | l2gld.2_Missense_M | NM_173728    | NP_776089    | O94989     | ARHGF_HUMAN         | Pro-rich.                   | 3            | TTTTGCCCCCT   | 0.619       |             |
| - | 15 | 1918                     | lr.1_RNA PIK3R6_u  | NM_001010855 | NP_001010855 | Q5UE93     | PI3R6_HUMAN         |                             | 0            | CAGTTCAATGAC  | 0.468       |             |
| - | 34 | 4937                     | uc002gml.1_Intron  | NM_017533    | NP_060003    | Q9Y623     | MYH4_HUMAN          | Potential.                  | 13           | TCCTGATCTCAC  | 0.453       |             |
| - | 3  | 406                      |                    | NM_002470    | NP_002461    | P11055     | MYH3_HUMAN          | rosin head-like.            | 7            | ATGTGTAACGG   | 0.567       |             |
| + | 68 | 12994                    | o.R3527Q DNAH9     | NM_001372    | NP_001363    | Q9NYC9     | DYH9_HUMAN          |                             | 20           | TAGACGAGCCT   | 0.542       | rs147022425 |
| - | 6  | 2638                     |                    | NM_020787    | NP_065838    | Q9P2J8     | ZN624_HUMAN         | 2H2-type 21.                | 2            | GTACAGTAAGGC  | 0.343       |             |
| - | 3  | 411                      | sense_Mutation_p   | NM_012452    | NP_036584    | O14836     | TR13B_HUMAN         | ellular (Potential).        | 2            | TTCCCGAGTTG   | 0.532       |             |
| + | 3  | 956                      |                    | NM_207313    | NP_997196    | Q6IEE7     | T132E_HUMAN         | ellular (Potential).        | 1            | TGCCAGACCGG   | 0.677       |             |
| + | 5  | 1244                     |                    | NM_207313    | NP_997196    | Q6IEE7     | T132E_HUMAN         | ellular (Potential).        | 1            | ACTTTGAAATG   | 0.627       |             |
| - | 5  | 702                      | oh.1_Missense_M    | NM_007010    | NP_008941    | Q9Y2R4     | DDX52_HUMAN         | ase ATP-binding.            | 2            | AATAGGAATGCT  | 0.403       |             |
| + | 4  | 679                      | tv.2_Missense_M    | NM_003250    | NP_003241    | P10827     | THA_HUMAN           | ceptor. NR C4-type.         | 0            | ACTACCGCTGT   | 0.547       |             |
| - | 5  | 923                      |                    | NM_002280    | NP_002271    | Q92764     | KRT35_HUMAN         | Rod. Coil 2.                | 2            | CAGCTCCTCAC   | 0.507       |             |
| - | 7  | 1370                     |                    | NM_003771    | NP_003762    | O76013     | KRT36_HUMAN         | Tail.                       | 0            | TGGAGGAGATG   | 0.662       |             |
| - | 8  | 1514                     | e_Mutation_p.G41   | NM_021991    | NP_068831    | P14923     | PLAK_HUMAN          | ARM 5.                      | 5            | TGTGCCCGTGG   | 0.577       | rs151226851 |
| - | 5  | 995                      | p.T158M VAT1_uc    | NM_006373    | NP_006364    | Q99536     | VAT1_HUMAN          |                             | 0            | GGCCCGTCAGC   | 0.607       |             |
| - | 8  | 989                      | p.P231S GPATCH     | NM_001002909 | NP_001002909 | Q9UKJ3     | GPTC8_HUMAN         |                             | 4            | GACAGGAGCCT   | 0.463       |             |
| + | 2  | 323                      | ikx.1_Missense_M   | NM_003396    | NP_003387    | O14905     | WNT9B_HUMAN         |                             | 2            | GGCATGAGCGC   | 0.672       |             |
| + | 12 | 1980                     | iB3_uc010wkr.1_F   | NM_000212    | NP_000203    | P05106     | ITB3_HUMAN          | ellular (Potential).        | 6            | TAGACGAAAAAT  | 0.468       | rs70940817  |
| - | 10 | 939                      | lbd.1_Splice_Site  | NM_003726    | NP_003717    | Q86WV1     | SKAP1_HUMAN         |                             | 0            | TCATCTGGGG    | 0.333       |             |
| - | 31 | 2176                     |                    | NM_000088    | NP_000079    | P02452     | CO1A1_HUMAN         | le-helical region.          | 382          | ACGCTCGCCAG   | 0.642       |             |
| + | 4  | 483_484                  | sk.3_Missense_M    | NM_003786    | NP_003777    | O15438     | MRP3_HUMAN          | ame=4; (By similarity).     | 4            | CTTCGGGGGCTC  | 0.599       |             |
| + | 23 | 3358                     | C3_uc002isn.2_5'   | NM_003786    | NP_003777    | O15438     | MRP3_HUMAN          | -1 2. Helical; Name=14; (B  | 4            | TCAATTCCTCTT  | 0.542       |             |
| + | 20 | 6666                     | _p.P2328Q BPTF     | NM_182641    | NP_872579    | Q12830     | BPTF_HUMAN          |                             | 4            | AAATGCCAAATG  | 0.527       |             |
| - | 35 | 4633                     | z.2_Missense_Mu    | NM_080283    | NP_525022    | Q81UA7     | ABCA9_HUMAN         | C transporter 2.            | 6            | ACCTTCTGAC    | 0.607       |             |
| + | 3  | 295                      | ck.2_Missense_M    | NM_153209    | NP_694941    | Q2TAC6     | KIF19_HUMAN         | inesin-motor.               | 0            | CCGACGACATC   | 0.647       |             |
| - | 2  | 322                      |                    | NM_001080466 | NP_001073935 | A6NE02     | BTBDH_HUMAN         | BTB.                        | 0            | TGGCTCCTGCA   | 0.632       |             |
| - | 2  | 163                      |                    | NM_001080466 | NP_001073935 | A6NE02     | BTBDH_HUMAN         |                             | 0            | CAGCTCCTGCA   | 0.672       |             |
| - | 7  | 881                      | 63K CD300LF_uc     | NM_139018    | NP_620587    | Q8TDQ1     | CLM1_HUMAN          | lasmic (Potential).         | 1            | CGTTCTCTGAT   | 0.617       |             |
| - | 3  | 506                      | C17orf28_uc002jr   | NM_030630    | NP_085133    | Q8IV36     | CQ028_HUMAN         |                             | 0            | TGGACCAGAA    | 0.667       |             |
| - | 22 | 3462                     | p.E1100D EVPL_u    | NM_001988    | NP_001979    | Q92817     | EVPL_HUMAN          | us rod domain. Potential.   | 4            | ACTACCTCTTTC  | 0.597       |             |
| + | 4  | 869                      | _p.S90F TNRC6C     | NM_018996    | NP_061869    | Q9HCJ0     | TNR6C_HUMAN         | on with argonaute family pr | 2            | TGCTTCCAAC    | 0.527       |             |
| + | 2  | 285                      |                    | NM_178543    | NP_848638    | Q6UWV6     | ENPP7_HUMAN         |                             | 3            | ATATCGAGAACC  | 0.607       |             |
| + | 3  | 666                      |                    | NM_178543    | NP_848638    | Q6UWV6     | ENPP7_HUMAN         |                             | 3            | AGATGGTGCGG   | 0.652       |             |
| + | 15 | 2542                     | _p.D622N CCDC4C    | NM_017950    | NP_060420    | Q4G0X9     | CCD40_HUMAN         | Potential. p.D839D(1)       | 3            | ACAACGACCTG   | 0.527       |             |
| + | 5  | 1003                     | rud.1_RNA CARD     | NM_024110    | NP_077015    | Q9BXL6     | CAR14_HUMAN         | Potential.                  | 5            | AGGAGGAGAA    | 0.617       |             |
| - | 14 | 1591                     | 1_Missense_Muta    | NM_017921    | NP_060391    | Q8TAT6     | NPL4_HUMAN          |                             | 2            | GAAATGGATTTT  | 0.363       |             |
| + | 4  | 480                      | _p.S164F CLUL1_u   | NM_014410    | NP_055225    | Q15846     | CLUL1_HUMAN         |                             | 2            | AGATTCCTGGG   | 0.423       |             |

|   |    |           |                    |              |              |        |             |                            |    |               |       |             |
|---|----|-----------|--------------------|--------------|--------------|--------|-------------|----------------------------|----|---------------|-------|-------------|
| + | 6  | 847       |                    | NM_015295    | NP_056110    | A6NHR9 | SMHD1_HUMAN |                            | 0  | TATGTTCTGTCAC | 0.373 |             |
| - | 12 | 2150      | dlq.2_Missense_Mi  | NM_003803    | NP_003794    | P52179 | MYOM1_HUMAN |                            | 5  | :CGGATCCAGAG  | 0.433 |             |
| - | 1  | 422       | DLGAP1_uc002kn     | NM_004746    | NP_004737    | O14490 | DLGP1_HUMAN |                            | 4  | 3GGTGTGATAGC  | 0.682 |             |
| - | 56 | 8139      | ase_Mutation_p.A1  | NM_005559    | NP_005550    | P25391 | LAMA1_HUMAN |                            | 21 | CGGGAGCCAGC   | 0.542 |             |
| + | 1  | 481       |                    | NM_001105581 | NP_001099051 | A6NM36 | LRC30_HUMAN | LRR 4.                     | 2  | TCGCCGACCTC   | 0.572 |             |
| - | 1  | 609       | TEC_uc010xaj.1_F   | NM_001137671 | NP_001131143 | B2RU33 | POTEC_HUMAN |                            | 3  | TAAGGAGTTCG   | 0.592 |             |
| + | 34 | 4489      | jr.2_Missense_Mu   | NM_198129    | NP_937762    | Q16787 | LAMA3_HUMAN |                            | 11 | CAGCTCACATA   | 0.428 |             |
| + | 54 | 7062      | us.3_Missense_M    | NM_198129    | NP_937762    | Q16787 | LAMA3_HUMAN | n II and I. Potential.     | 11 | AGAACGAAGAC   | 0.478 | rs148831718 |
| + | 68 | 9012      | us.3_Missense_ML   | NM_198129    | NP_937762    | Q16787 | LAMA3_HUMAN |                            | 11 | GCTCACCACCTT  | 0.547 |             |
| + | 6  | 1287      | uu.2_Missense_M    | NM_001135993 | NP_001129465 | Q8N584 | TT39C_HUMAN |                            | 1  | TGGTATCATACTC | 0.423 |             |
| + | 4  | 505_506   |                    | NM_001942    | NP_001933    | Q02413 | DSG1_HUMAN  | r (Potential). Cadherin 1. | 7  | ATATGGGATCTT  | 0.386 |             |
| + | 8  | 1178      |                    | NM_001942    | NP_001933    | Q02413 | DSG1_HUMAN  | r (Potential). Cadherin 3. | 7  | GAAATGAATGA   | 0.279 |             |
| + | 4  | 356       | wr.2_Missense_Mt   | NM_177986    | NP_817123    | Q86SJ6 | DSG4_HUMAN  | Extracellular (Potential). | 8  | GATTCGATCAGA  | 0.333 | rs145443659 |
| + | 16 | 3211      | rr.2_Nonsense_Mu   | NM_177986    | NP_817123    | Q86SJ6 | DSG4_HUMAN  | lasmic (Potential).        | 8  | CATCTCGACAC   | 0.438 |             |
| - | 19 | 2666      |                    | NM_001080467 | NP_001073936 | Q9ULV0 | MYO5B_HUMAN | IQ 1. IQ 2.                | 5  | GCAGGGTTAAG   | 0.597 |             |
| + | 26 | 4459      | f.1_Missense_Mut   | NM_005215    | NP_005206    | P43146 | DCC_HUMAN   | lasmic (Potential).        | 17 | GGACCGAGGTT   | 0.478 |             |
| - | 10 | 1315      | lp.Q211* TCF4_u    | NM_003199    | NP_003190    | P15884 | ITF2_HUMAN  |                            | 2  | AGGCTGATTCAT  | 0.493 |             |
| - | 9  | 1050      |                    | NM_005570    | NP_005561    | P49257 | LMAN1_HUMAN | lenal (Potential).         | 1  | AATACGATTCTC  | 0.373 |             |
| - | 8  | 1217      | RPINB3_uc010dq     | NM_006919    | NP_008850    | P29508 | SPB3_HUMAN  |                            | 3  | TAGTTGAAGTAC  | 0.468 |             |
| + | 3  | 277       | ljq.1_Missense_M   | NM_005024    | NP_005015    | P48595 | SPB10_HUMAN |                            | 3  | ACAGAGACCAGC  | 0.274 |             |
| + | 6  | 661       | Jxew.1_Missense_   | NM_005024    | NP_005015    | P48595 | SPB10_HUMAN |                            | 3  | TTAAAGGAATCT  | 0.393 |             |
| - | 2  | 2330      |                    | NM_032160    | NP_115536    | Q8IZU8 | DSEL_HUMAN  |                            | 6  | CTAACCAATTTTC | 0.408 |             |
| + | 3  | 307       |                    | NM_001972    | NP_001963    | P08246 | ELNE_HUMAN  | eptidase S1.               | 1  | CCTCTCGCGGCC  | 0.687 |             |
| - | 7  | 1272      | 9orf29_uc002lyi.3_ | NM_001080543 | NP_001074012 | Q8WUQ7 | CS029_HUMAN |                            | 0  | CCCCTTGAACAC  | 0.632 |             |
| + | 16 | 1983      | RP2_uc010dua.2_    | NM_001001520 | NP_001001520 | Q7Z4V5 | HDGR2_HUMAN |                            | 0  | CCAAGGTGTGG   | 0.662 |             |
| + | 13 | 1289      | 0duj.1_Missense_l  | NM_152784    | NP_689997    | Q86XM0 | TM146_HUMAN | ellular (Potential).       | 3  | AGCTGGAATTG   | 0.428 |             |
| - | 2  | 538       | io.2_Missense_ML   | NM_002034    | NP_002025    | Q11128 | FUT5_HUMAN  | lenal (Potential).         | 0  | 3GACTCCATGCT  | 0.627 |             |
| - | 4  | 952       | on_p.R210Q MIR2    | NM_006087    | NP_006078    | P04350 | TBB4_HUMAN  |                            | 2  | GGCCCGGTAC    | 0.677 |             |
| - | 12 | 1462      |                    | NM_000064    | NP_000055    | P01024 | CO3_HUMAN   |                            | 5  | CCCCGGGTCTG   | 0.602 |             |
| + | 25 | 2387      | a.1_Missense_Mu    | NM_005428    | NP_005419    | P15498 | VAV_HUMAN   | SH2.                       | 16 | AGTCCCCTTCA   | 0.542 |             |
| - | 14 | 36955     |                    | NM_024690    | NP_078966    | Q8WXI7 | MUC16_HUMAN | tracellular (Potential).   | 57 | GGAGCCAGTGC   | 0.557 |             |
| - | 3  | 17768     |                    | NM_024690    | NP_078966    | Q8WXI7 | MUC16_HUMAN | xtracellular (Potential).  | 57 | 3TGGATCCTGTT  | 0.498 |             |
| - | 3  | 11255     |                    | NM_024690    | NP_078966    | Q8WXI7 | MUC16_HUMAN | xtracellular (Potential).  | 57 | 3AGATGCTCATC  | 0.428 |             |
| - | 1  | 4115      |                    | NM_024690    | NP_078966    | Q8WXI7 | MUC16_HUMAN | xtracellular (Potential).  | 57 | CAGGTGAAGAC   | 0.493 |             |
| + | 1  | 323       |                    | NM_001079935 | NP_001073404 | Q6IFN5 | O7E24_HUMAN | ellular (Potential).       | 1  | CAGCAGAGTCA   | 0.493 |             |
| + | 21 | 3279      | p.D999N SMARC      | NM_003072    | NP_003063    | P51532 | SMCA4_HUMAN | p.?(1)                     | 67 | AGTGCACATG    | 0.617 |             |
| + | 6  | 713       | dya.2_Missense_N   | NM_002743    | NP_002734    | P14314 | GLU2B_HUMAN |                            | 0  | 3AGAGTCCCTGC  | 0.577 |             |
| + | 4  | 1055      |                    | NM_152357    | NP_689570    | Q8IYI8 | ZN440_HUMAN | 2H2-type 6.                | 0  | ATGTTCTGATACA | 0.403 |             |
| + | 4  | 2033_2034 | e_Mutation_p.Q65   | NM_144566    | NP_653167    | Q9H0M5 | ZN700_HUMAN | 2H2-type 15.               | 0  | CCTTCAGATGCA  | 0.426 |             |
| + | 4  | 1515      | ym.1_Missense_M    | NM_001136501 | NP_001129973 | Q08AG5 | ZN844_HUMAN |                            | 0  | CTTCAGATCTG   | 0.423 |             |
| + | 4  | 1542      | ym.1_Missense_N    | NM_001136501 | NP_001129973 | Q08AG5 | ZN844_HUMAN |                            | 0  | GCATGGAAGGA   | 0.433 |             |
| + | 4  | 1602      | ym.1_Missense_N    | NM_001136501 | NP_001129973 | Q08AG5 | ZN844_HUMAN |                            | 0  | TCATTTTTCCAC  | 0.448 |             |
| + | 4  | 1710      | ym.1_Missense_N    | NM_001136501 | NP_001129973 | Q08AG5 | ZN844_HUMAN |                            | 0  | GCATGAAAGGA   | 0.413 |             |
| - | 4  | 1409      | 709_uc002mtx.3_l   | NM_144976    | NP_659413    | Q8TBZ8 | ZN564_HUMAN | 2H2-type 11.               | 1  | 3AGGCTCTACCA  | 0.433 |             |
| + | 5  | 676       |                    | NM_017682    | NP_060152    | Q8NFU1 | BEST2_HUMAN | ellular (Potential).       | 2  | CTCTTCACTATC  | 0.502 |             |
| + | 15 | 1795      |                    | NM_014975    | NP_055790    | Q9Y2H9 | MAST1_HUMAN | rotein kinase.             | 7  | CGCGCCCGAGG   | 0.657 |             |
| - | 3  | 291       | lp.G48E EMR3_u     | NM_032571    | NP_115960    | Q9BY15 | EMR3_HUMAN  | r (Potential). EGF-like 1. | 6  | GTATATCCATGGT | 0.398 |             |

|   |    |           |                   |              |              |        |              |                                |    |                 |       |
|---|----|-----------|-------------------|--------------|--------------|--------|--------------|--------------------------------|----|-----------------|-------|
| + | 7  | 801       |                   | NM_173483    | NP_775754    | Q6NT55 | CP4FN_HUMAN  |                                | 2  | AGTCTTCAGAAA'   | 0.458 |
| + | 1  | 854       |                   | NM_001004465 | NP_001004465 | Q8NGA5 | O10H4_HUMAN  | Name=7; (Potential).           | 2  | 'CACCCCCTTCC'   | 0.453 |
| - | 7  | 863       | 226_uc002nee.2_f  | NM_145046    | NP_659483    | Q96L12 | CALR3_HUMAN  | ite repeats. P-domain. 2-2.    | 0  | :CTTCTGGTTTCA   | 0.483 |
| - | 6  | 544       |                   | NM_001080421 | NP_001073890 | Q9UPW8 | UN13A_HUMAN  |                                | 3  | (CTCTCCAGGGC    | 0.632 |
| - | 8  | 1432      | ih.3_Missense_Mu  | NM_001098819 | NP_001092289 | Q08493 | PDE4C_HUMAN  |                                | 5  | 3TTGCTCCTCTC'   | 0.602 |
| - | 10 | 3312      | _Mutation_p.G105  | NM_014884    | NP_055699    | Q8IX01 | SUGP2_HUMAN  | G-patch.                       | 0  | :CTGCCCGTCAG'   | 0.557 |
| - | 7  | 2920      | _p.P925L SFRS14   | NM_014884    | NP_055699    | Q8IX01 | SUGP2_HUMAN  |                                | 0  | CGCCGGGAAGG     | 0.542 |
| + | 4  | 808       | nse_Mutation_p.F  | NM_017660    | NP_060130    | Q86YP4 | P66A_HUMAN   | Potential.                     | 0  | 'AGTTGCGGCAG    | 0.527 |
| + | 4  | 1534      |                   | NM_031218    | NP_112495    | P35789 | ZNF93_HUMAN  | :2H2-type 12.                  | 1  | 'AAAATTCATACTG  | 0.368 |
| - | 4  | 1505      |                   | NM_001159293 | NP_001152765 | C9JHM3 | C9JHM3_HUMAN |                                | 1  | TTATGTGTAGTAA   | 0.413 |
| - | 6  | 3352      | 208_uc002nqo.1_j  | NM_007153    | NP_009084    |        |              |                                | 7  | TTGTAGAGTTTCT   | 0.378 |
| - | 5  | 2403      | 208_uc002nqo.1_j  | NM_007153    | NP_009084    |        |              |                                | 7  | .TTACCTTATGTTT  | 0.373 |
| - | 4  | 1501      | 1_Intron ZNF208_  | NM_007153    | NP_009084    |        |              |                                | 7  | 'AGGGTGTCTCTC'  | 0.373 |
| - | 4  | 1333      | 1_Intron ZNF208_  | NM_007153    | NP_009084    |        |              |                                | 7  | 'AGGGTTTCTCTC'  | 0.383 |
| + | 4  | 1302      | cy.2_Missense_M   | NM_033468    | NP_258429    | Q9Y2Q1 | ZN257_HUMAN  | :2H2-type 8.                   | 0  | 'AGTGTGGAAAAG   | 0.373 |
| - | 3  | 1025      |                   | NM_001001411 | NP_001001411 | Q8N7Q3 | ZN676_HUMAN  | :2H2-type 3.                   | 0  | 3AGGATCGATTA'   | 0.363 |
| - | 6  | 2203      |                   | NM_001080409 | NP_001073878 |        |              |                                | 2  | :ATGTTTTCTAAG   | 0.343 |
| - | 5  | 605       |                   | NM_001080409 | NP_001073878 |        |              |                                | 2  | TTAAAAGCTTTGC   | 0.353 |
| - | 4  | 460       | rj.1_Missense_Mu  | NM_003430    | NP_003421    | Q05481 | ZNF91_HUMAN  |                                | 0  | TCATGTCCACAT'   | 0.353 |
| - | 4  | 1567      |                   | NM_138330    | NP_612203    | Q8TD23 | ZN675_HUMAN  | :2H2-type 12.                  | 2  | GATTGGATAAAA'   | 0.368 |
| - | 4  | 1635      | _p.R429K ZNF681_  | NM_138286    | NP_612143    | Q96N22 | ZN681_HUMAN  | :2H2-type 12.                  | 0  | TGAATTCCTTAT    | 0.358 |
| + | 4  | 878       |                   | NM_002295    | NP_002286    |        |              |                                | 0  | :AGATTCCTCTC'   | 0.542 |
| + | 2  | 1243      | dd.1_Missense_M   | NM_014717    | NP_055532    | O15090 | ZN536_HUMAN  |                                | 11 | :ACAAAAGACTCC   | 0.607 |
| + | 5  | 1810      | jq.1_Missense_Mu  | NM_194325    | NP_919306    | P17039 | ZNF30_HUMAN  | :2H2-type 13.                  | 2  | AAAATTCATACTC   | 0.438 |
| + | 3  | 549       | e_Mutation_p.E12' | NM_001037    | NP_001028    | Q07699 | SCN1B_HUMAN  | Potential). Ig-like C2-type.   | 2  | 3ACTACGAGTGC    | 0.562 |
| + | 3  | 684       | e_Mutation_p.S10' | NM_144694    | NP_653295    | Q96NI8 | ZN570_HUMAN  | KRAB.                          | 1  | 'GGTACTACTGGC'  | 0.413 |
| + | 9  | 2875      |                   | NM_015073    | NP_055888    | O60292 | SI1L3_HUMAN  | Rap-GAP.                       | 2  | 3CAAATCCGACG'   | 0.567 |
| + | 18 | 2370      | jb.1_Missense_Mu  | NM_004924    | NP_004915    | O43707 | ACTN4_HUMAN  | EF-hand 1.                     | 0  | 3AGTTCGGGGCG    | 0.637 |
| - | 10 | 1486_1487 | AE>IK RINL_uc01'  | NM_198445    | NP_940847    | Q6ZS11 | RINL_HUMAN   | VPS9.                          | 1  | GAGCTCCATAAG    | 0.624 |
| + | 7  | 780       | mr.2_Missense_Mu  | NM_006503    | NP_006494    | P43686 | PRS6B_HUMAN  |                                | 1  | 'GGTCCGGGATG'   | 0.562 |
| - | 5  | 927       | mv.2_Missense_M   | NM_001005851 | NP_001005851 | Q9Y6R6 | Z780B_HUMAN  | :2H2-type 5.                   | 2  | 'ACCACGATTAAP'  | 0.373 |
| - | 2  | 513_514   | 2onv.3_Missense_  | NM_013368    | NP_037500    | Q9UJW9 | SRTD3_HUMAN  |                                | 0  | 3CTCGGGGGGC'    | 0.663 |
| + | 12 | 1559      | 1_Missense_Mutat  | NM_001042544 | NP_001036009 | Q8N2S1 | LTBP4_HUMAN  | Pro-rich.                      | 1  | cccgatccccggccc | 0.463 |
| + | 7  | 1044      | nse_Mutation_p.S  | NM_021913    | NP_068713    | P30530 | UFO_HUMAN    | tential). Fibronectin type-III | 13 | 'CACCTCGCAAG    | 0.647 |
| + | 2  | 413       | 2orj.1_Nonsense_  | NM_004363    | NP_004354    | P06731 | CEAM5_HUMAN  | Ig-like 1.                     | 2  | 'GTGGTCGAGAG    | 0.453 |
| + | 27 | 2691      | 376L ARHGEF1_u    | NM_004706    | NP_004697    | Q92888 | ARHG1_HUMAN  |                                | 4  | 3CGGCCCTGA      | 0.682 |
| - | 2  | 478       | _p.G2E PSG8_uc'   | NM_182707    | NP_874366    | Q9UQ74 | PSG8_HUMAN   | g-like V-type.                 | 0  | TCACCTCCCATT'   | 0.473 |
| - | 2  | 332_333   | art_Site PSG8_uc' | NM_182707    | NP_874366    | Q9UQ74 | PSG8_HUMAN   | g-like V-type.                 | 0  | .TGTAATGTAATG'  | 0.416 |
| + | 6  | 1590      | _p.S421F ZNF221_  | NM_013359    | NP_037491    | Q9UK13 | ZN221_HUMAN  |                                | 1  | AAAATCCTTCA'    | 0.413 |
| - | 4  | 651       | 0eip.1_Missense_  | NM_001102597 | NP_001096067 | Q6UY09 | CEA20_HUMAN  | 2. Extracellular (Potential).  | 2  | :TTCTCGTGGT'    | 0.537 |
| + | 6  | 1426      | 2ozq.2_Missense_  | NM_001039213 | NP_001034302 | A7L112 | A7L112_HUMAN |                                | 1  | :CGTACAGTGC'    | 0.617 |
| + | 14 | 1692      | se_Mutation_p.P4  | NM_007056    | NP_008987    | Q8N2M8 | CLASR_HUMAN  | r-rich. Arg-rich.              | 0  | cagagcccTCGCC   | 0.438 |
| - | 6  | 816       |                   | NM_001824    | NP_001815    | P06732 | KCRM_HUMAN   | jen kinase C-terminal.         | 1  | AAACCTCCTTA'    | 0.572 |
| - | 2  | 372       | pcz.2_Nonsense_I  | NM_001080469 | NP_001073938 | Q6PJ61 | FBX46_HUMAN  |                                | 3  | 3GACTCGACCCT    | 0.642 |
| - | 4  | 1481      |                   | NM_002516    | NP_002507    | Q9UNW9 | NOVA2_HUMAN  |                                | 0  | 'CGTAGGTGACC'   | 0.562 |
| - | 15 | 3067      | 3H4_uc002pgb.1_f  | NM_015168    | NP_055983    | Q9UPT8 | ZC3H4_HUMAN  |                                | 6  | GCCGGGGTCC      | 0.726 |
| + | 14 | 1326      | /BL2_uc010emn.1   | NM_006666    | NP_006657    | Q9Y230 | RUVB2_HUMAN  |                                | 0  | 'GTCCCGCTCCA'   | 0.597 |



|   |    |           |                    |              |              |        |             |                                  |    |                  |       |             |
|---|----|-----------|--------------------|--------------|--------------|--------|-------------|----------------------------------|----|------------------|-------|-------------|
| - | 3  | 381       | D2_uc002pni.2_Mi   | NM_003598    | NP_003589    | Q15562 | TEAD2_HUMAN | TEA.                             | 3  | FGTTTTCGAGTTC    | 0.512 |             |
| + | 1  | 320       | Jyct.1_Missense_I  | NM_014441    | NP_055256    | Q9Y336 | SIGL9_HUMAN | (Potential). Ilg-like V-type.    | 1  | GTGGGGAGGAG      | 0.567 |             |
| - | 5  | 1806      | e_Mutation_p.I534  | NM_001136499 | NP_001129971 | Q6ZN19 | ZN841_HUMAN | :2H2-type 10.                    | 0  | GGTATGAATTCTC    | 0.398 |             |
| - | 4  | 2233_2234 | p.N652S ZNF28_t    | NM_006969    | NP_008900    | P17035 | ZNF28_HUMAN | :2H2-type 18.                    | 1  | CAAGGTTTGACA     | 0.406 |             |
| - | 5  | 1439      | k.1_Intron ZNF81E  | NM_001031665 | NP_001026835 | Q0VGE8 | ZN816_HUMAN | :2H2-type 6.                     | 0  | ATTTCTGACTGAA    | 0.398 |             |
| + | 4  | 1386      | rdw.1_Missense_IV  | NM_138374    | NP_612383    | Q96IR2 | ZN845_HUMAN | :2H2-type 8.                     | 0  | GCAGATGTCATCC    | 0.413 |             |
| + | 4  | 1553      | rdw.1_Missense_IV  | NM_138374    | NP_612383    | Q96IR2 | ZN845_HUMAN | :2H2-type 10.                    | 0  | TCAGACATCATCC    | 0.378 |             |
| + | 7  | 1680      | p.K354Q ZNF761     | NM_001008401 | NP_001008401 | Q86XN6 | ZN761_HUMAN |                                  | 1  | GAGAGAAACCT      | 0.368 |             |
| + | 6  | 1483      | eqr.1_Nonsense_I   | NM_018555    | NP_061025    | Q9NQX6 | ZN331_HUMAN | KRAB.                            | 6  | TTTCTCAGGAGC     | 0.517 |             |
| - | 3  | 762       | zqj.3_Missense_I   | NM_144687    | NP_653288    | P59046 | NAL12_HUMAN |                                  | 7  | GTCCCCGGCCT      | 0.647 |             |
| + | 3  | 266       | u_p.R40C MYADM     | NM_001020820 | NP_001018656 | Q96S97 | MYADM_HUMAN | MARVEL 1.                        | 1  | TCCTTCGCCTCG     | 0.667 |             |
| + | 11 | 1285      | S238F CNOT3_uc     | NM_014516    | NP_055331    | O75175 | CNOT3_HUMAN | Pro-rich.                        | 3  | CCCCTCCGGCC      | 0.687 |             |
| + | 4  | 696       | p.P203S LILRA2     | NM_001130917 | NP_001124389 | Q8N149 | LIRA2_HUMAN | (Potential). Ilg-like C2-type 2. | 1  | AACTCTCCCTATC    | 0.577 |             |
| + | 4  | 525       | LRA1_uc010yfh.1    | NM_006863    | NP_006854    | O75019 | LIRA1_HUMAN | 1. Extracellular (Potential).    | 3  | CCCTGGAGCTG      | 0.627 |             |
| + | 1  | 72        | zqid.2_Splice_Site | NM_004829    | NP_004820    | O76036 | NCTR1_HUMAN |                                  | 2  | CGTCGGTGAGT      | 0.607 |             |
| - | 5  | 1868      |                    | NM_176810    | NP_789780    | Q86W25 | NAL13_HUMAN |                                  | 9  | ATAATTCCTCCAT    | 0.408 |             |
| - | 5  | 820       | my.2_Missense_M    | NM_144690    | NP_653291    | Q96NG8 | ZN582_HUMAN | :2H2-type 2.                     | 4  | CAGAAATGAATATT   | 0.343 |             |
| - | 7  | 4532      | A.1365V PEG3_uc    | NM_001146186 | NP_001139658 | Q9GZU2 | PEG3_HUMAN  | Glu-rich.                        | 12 | GCAGCAGCCTCT     | 0.483 |             |
| + | 4  | 2391      |                    | NM_020903    | NP_065954    | Q9HBJ7 | UBP29_HUMAN |                                  | 11 | CTGTGCGAGGTT     | 0.468 | rs143453181 |
| + | 5  | 1589      | nse_Mutation_p.L   | NM_024691    | NP_078967    | Q96HQ0 | ZN419_HUMAN |                                  | 0  | TCACATTGGAG      | 0.428 |             |
| + | 5  | 1629      | nse_Mutation_p.L   | NM_024691    | NP_078967    | Q96HQ0 | ZN419_HUMAN | :2H2-type 10.                    | 0  | CAGATTGTTTAG     | 0.428 |             |
| - | 4  | 1609      | nse_Mutation_p.E   | NM_024833    | NP_079109    | Q8TAW3 | ZN671_HUMAN |                                  | 1  | CCTTTCCCAGT      | 0.493 | rs144165618 |
| - | 3  | 1206      | VF552_uc010yhg.1   | NM_024762    | NP_079038    | Q9H707 | ZN552_HUMAN | :2H2-type 7.                     | 0  | CAGTGTGAACTC     | 0.463 |             |
| + | 7  | 758       | PO_uc002qwx.2_M    | NM_000547    | NP_000538    | P07202 | PERT_HUMAN  | cellular (Potential).            | 20 | CAGATGATGAC      | 0.537 |             |
| + | 5  | 426       |                    | NM_018436    | NP_060906    | Q8N6M5 | ALLC_HUMAN  |                                  | 1  | CTCCTCGAGTG      | 0.547 | rs148726288 |
| + | 7  | 669       |                    | NM_018436    | NP_060906    | Q8N6M5 | ALLC_HUMAN  |                                  | 1  | ATTTTCCCAGGT     | 0.403 |             |
| + | 3  | 601       | e_Mutation_p.G7E   | NM_002149    | NP_002140    | P37235 | HPCL1_HUMAN | nd 2. 1 (Potential).             | 1  | CAACGGCGCAGC     | 0.597 | rs149639705 |
| - | 8  | 1428      | zrda.2_Splice_Site | NM_001002006 | NP_001002006 | Q96P26 | 5NT1B_HUMAN |                                  | 3  | CTAATACCTTCT     | 0.378 |             |
| - | 26 | 6612      |                    | NM_000384    | NP_000375    | P04114 | APOB_HUMAN  | parin-binding.                   | 27 | GGCATCATCTAA     | 0.294 |             |
| - | 15 | 1725      | OF_uc002rhi.2_5F   | NM_194248    | NP_919224    | Q9HC10 | OTOF_HUMAN  | lasmic (Potential).              | 7  | CTGGGCCCAGT      | 0.617 |             |
| + | 8  | 1904      |                    | NM_018158    | NP_060628    | Q9BWU0 | NADAP_HUMAN |                                  | 0  | TCATGTCAGAAA     | 0.368 |             |
| - | 1  | 745       |                    | NM_001029883 | NP_001025054 | A6NGG8 | CB071_HUMAN |                                  | 1  | ATCCTCCCTGAI     | 0.552 |             |
| - | 16 | 1779      | N13_uc002rnm.2     | NM_144575    | NP_653176    | Q6MZZ7 | CAN13_HUMAN |                                  | 2  | GTCCCCTGGAG      | 0.592 |             |
| - | 21 | 2392      |                    | NM_000379    | NP_000370    | P47989 | XDH_HUMAN   |                                  | 8  | GTCTTCATGGT      | 0.562 |             |
| - | 3  | 246_247   |                    | NM_000379    | NP_000370    | P47989 | XDH_HUMAN   | S ferredoxin-type.               | 8  | TACTTGAGAGGC     | 0.535 |             |
| - | 4  | 626       | z_Mutation_p.H82   | NM_015955    | NP_057039    | Q9Y316 | MEMO1_HUMAN |                                  | 2  | CACATGATGAG      | 0.378 |             |
| + | 14 | 1200      | p.S365L SLC30A1    | NM_017964    | NP_060434    | Q6NXT4 | ZNT6_HUMAN  | lasmic (Potential).              | 0  | AATTTTCATTTAA    | 0.408 |             |
| - | 9  | 3111      | XN1_uc002rxs.3_M   | NM_001135659 | NP_001129131 | P58400 | NRX1B_HUMAN |                                  | 2  | GAAATGATATGG     | 0.418 |             |
| - | 4  | 1732      | CL11A_uc010ypj.1   | NM_022893    | NP_075044    | Q9H165 | BC11A_HUMAN | Glu-rich.                        | 13 | Gctcctcctcctcttc | 0.433 |             |
| + | 2  | 860       | LC1A4_uc010fcv.2   | NM_003038    | NP_003029    | P43007 | SATT_HUMAN  | cellular (Potential).            | 1  | CTGTTTCCCTCC     | 0.274 |             |
| + | 5  | 1157      |                    | NM_019002    | NP_061875    | Q9NY74 | ETAA1_HUMAN |                                  | 4  | AAACCCACGAT      | 0.358 |             |
| + | 6  | 635       |                    | NM_019617    | NP_062563    | Q9NS71 | GKN1_HUMAN  |                                  | 1  | ACATTTCTTCTC     | 0.393 |             |
| - | 11 | 1598      | DD2_uc010fdt.1_M   | NM_001617    | NP_001608    | P35612 | ADDB_HUMAN  |                                  | 3  | CTGTTCTGTAG      | 0.468 |             |
| + | 5  | 525       | u_p.V135I ACTG2    | NM_001615    | NP_001606    | P63267 | ACTH_HUMAN  |                                  | 0  | ATGTACGTCGCC     | 0.448 |             |
| - | 11 | 2066      | rc.2_Missense_ML   | NM_133637    | NP_598376    | Q8TE96 | DQX1_HUMAN  |                                  | 2  | GAGCTCTGCGG      | 0.507 |             |
| - | 10 | 1958      | rc.2_Missense_ML   | NM_133637    | NP_598376    | Q8TE96 | DQX1_HUMAN  |                                  | 2  | AGTATCCTGAC      | 0.473 |             |
| + | 11 | 1650      | p.R549* CTNNA2     | NM_004389    | NP_004380    | P26232 | CTNA2_HUMAN |                                  | 9  | CAGCTCGAGTC      | 0.502 |             |

|   |     |         |                    |              |              |        |              |                                |     |                   |       |             |
|---|-----|---------|--------------------|--------------|--------------|--------|--------------|--------------------------------|-----|-------------------|-------|-------------|
| - | 4   | 778     | p.D89N ST3GAL5     | NM_003896    | NP_003887    | Q9UNP4 | SIAT9_HUMAN  | enial (Potential).             | 0   | AAACATCGAACTC     | 0.333 |             |
| - | 4   | 543     | asp.1_Missense_M   | NM_016618    | NP_057702    | Q9NPI7 | KRCC1_HUMAN  |                                | 1   | GAATTAACCTCTC     | 0.413 |             |
| - | 13  | 2553    |                    | NM_004836    | NP_004827    | Q9NZJ5 | E2AK3_HUMAN  | Potential). Protein kinase.    | 3   | CAAAGGAGTGC       | 0.458 |             |
| - | 5   | 1192    | aud.1_Missense_M   | NM_032788    | NP_116177    | Q96K75 | ZN514_HUMAN  | 2H2-type 3.                    | 0   | GAGACGAACTC       | 0.418 |             |
| + | 1   | 20      |                    | NM_001011717 | NP_001011717 | Q5H8A3 | NMS_HUMAN    |                                | 1   | ATCTTCGTCCC       | 0.552 |             |
| + | 2   | 182     | se_Mutation_p.W1   | NM_003855    | NP_003846    | Q13478 | IL18R_HUMAN  |                                | 3   | CCCTTTGGGTGC      | 0.343 |             |
| + | 8   | 961     | wd.1_Missense_I    | NM_003855    | NP_003846    | Q13478 | IL18R_HUMAN  | 3. Extracellular (Potential).  | 3   | ACAGGACTCCAC      | 0.408 |             |
| + | 10  | 1342    | wd.1_Missense_I    | NM_003855    | NP_003846    | Q13478 | IL18R_HUMAN  | oplasmic (Potential).          | 3   | CTGTGGAGATT       | 0.433 |             |
| + | 4   | 462     | D4_uc002tdu.2_5'   | NM_182588    | NP_872394    | Q7Z3J3 | RGPD4_HUMAN  |                                | 2   | CCCAGGAAGTC       | 0.323 |             |
| + | 11  | 1571    | i.2_5'UTR RGPD4    | NM_182588    | NP_872394    | Q7Z3J3 | RGPD4_HUMAN  |                                | 2   | CCAGCCACTTAC      | 0.318 |             |
| + | 2   | 539_540 | sense_Mutation_p.  | NM_001056    | NP_001047    | O00338 | ST1C2_HUMAN  |                                | 1   | CAACTGGAGCC       | 0.55  | rs140199800 |
| + | 20  | 5780    |                    | NM_006267    | NP_006258    | P49792 | RBP2_HUMAN   |                                | 18  | GTCAACCAAGG       | 0.358 |             |
| - | 4   | 239     | i.1_Missense_Mut   | NM_000576    | NP_000567    | P01584 | IL1B_HUMAN   |                                | 4   | AGATTCGTAGC       | 0.627 |             |
| + | 6   | 701     | Jyff.1_Splice_Site | NM_006770    | NP_006761    | Q9UEW3 | MARCO_HUMAN  |                                | 6   | TTCCAGGCCCT       | 0.542 |             |
| + | 10  | 1711    | t.3_Missense_Mut   | NM_005270    | NP_005261    | P10070 | GLI2_HUMAN   |                                | 13  | TCCAACGAGGTA      | 0.627 |             |
| + | 12  | 2029    | t.3_Missense_Mut   | NM_005270    | NP_005261    | P10070 | GLI2_HUMAN   |                                | 13  | GCAGCGAGCCC       | 0.662 |             |
| - | 17  | 1807    | t5_splice BIN1_uc  | NM_139343    | NP_647593    | O00499 | BIN1_HUMAN   |                                | 7   | GAGCTCTGGTG       | 0.672 |             |
| - | 15  | 2389    | of.1_Missense_Mu   | NM_000122    | NP_000113    | P19447 | ERCC3_HUMAN  |                                | 7   | TGCTCCGCGAT       | 0.582 |             |
| - | 3   | 673     |                    | NM_001099771 | NP_001093241 | A5A3E0 | POTEF_HUMAN  |                                | 5   | TGTCTTCATAGC      | 0.617 |             |
| - | 1   | 1178    |                    | NM_001077637 | NP_001071105 | Q53S08 | Q53S08_HUMAN |                                | 0   | AGCAATGATGAA      | 0.378 |             |
| - | 11  | 4665    |                    | NM_002299    | NP_002290    | P09848 | LPH_HUMAN    | ial). 4. 4 X approximate ref   | 13  | AGCTGCTGTTCT      | 0.512 |             |
| + | 2   | 70      | i.1_RNA THSD7B     | NM_001080427 | NP_001073896 |        |              |                                | 7   | CAGGAGACTGT       | 0.488 |             |
| - | 90  | 14533   |                    | NM_018557    | NP_061027    | Q9NZR2 | LRP1B_HUMAN  |                                | 50  | tacctggccttatataa | 0.08  |             |
| - | 8   | 1451    | e_Mutation_p.S29   | NM_014795    | NP_055610    | O60315 | ZEB2_HUMAN   | 2-type 4; atypical.            | 9   | TGTAGGAACCA       | 0.373 |             |
| + | 4   | 711     |                    | NM_004522    | NP_004513    | O60282 | KIF5C_HUMAN  | inesin-motor.                  | 1   | CCCATGATATCT      | 0.493 |             |
| - | 103 | 15219   | 2_Missense_Mutal   | NM_004543    | NP_004534    | P20929 | NEBU_HUMAN   | Nebulin 137.                   | 20  | TCTCCGGACGT       | 0.423 |             |
| + | 7   | 1395    | Ofoc.1_Missense_I  | NM_052917    | NP_443149    | Q8IUC8 | GLT13_HUMAN  | enial (Potential).             | 6   | GACAGGAGGAA       | 0.373 |             |
| + | 1   | 586     | .NT5_uc010zci.1_I  | NM_014568    | NP_055383    | Q7Z7M9 | GALT5_HUMAN  | enial (Potential).             | 4   | AGAGGGAAAGA       | 0.527 |             |
| - | 8   | 1076    | cl.1_Missense_Mu   | NM_004288    | NP_004279    | O60759 | CYTIP_HUMAN  |                                | 3   | ACTTCCCTTTC       | 0.502 |             |
| - | 31  | 4553    | .G1495E LY75_uc    | NM_002349    | NP_002340    | O60449 | LY75_HUMAN   | Potential). C-type lectin 9.   | 0   | AAGTTCCTTTTC      | 0.348 |             |
| - | 12  | 1844    | rs.2_Missense_Mu   | NM_002349    | NP_002340    | O60449 | LY75_HUMAN   | Potential). C-type lectin 3.   | 0   | GGGAAGCTGGC       | 0.428 |             |
| - | 3   | 1623    |                    | NM_018086    | NP_060556    | Q5HY92 | FIGN_HUMAN   |                                | 4   | AGAGAGGAGCT       | 0.517 |             |
| - | 3   | 1540    |                    | NM_018086    | NP_060556    | Q5HY92 | FIGN_HUMAN   |                                | 4   | CCAATGAATTTI      | 0.498 |             |
| - | 4   | 557     | on_p.P7L SLC38A    | NM_173512    | NP_775783    | Q08A16 | S38AB_HUMAN  | lasmic (Potential).            | 1   | CCAAGGAAACC       | 0.338 |             |
| - | 13  | 2186    | p.S565F SCN3A_I    | NM_006922    | NP_008853    | Q9NY46 | SCN3A_HUMAN  |                                | 10  | ACAGGAGGCCA       | 0.408 |             |
| + | 26  | 5071    | .W1594* SCN2A      | NM_001040142 | NP_001035232 | Q99250 | SCN2A_HUMAN  | 3 of repeat IV; (Potential). I | 8   | TTGGATGGAATA      | 0.333 |             |
| - | 16  | 3079    | p.E901K SCN1A      | NM_006920    | NP_008851    | P35498 | SCN1A_HUMAN  |                                | 13  | TAAATTCATATAT     | 0.323 |             |
| - | 11  | 1973    | p.S521F SCN1A      | NM_006920    | NP_008851    | P35498 | SCN1A_HUMAN  |                                | 13  | CCAAGGAAACC       | 0.493 |             |
| + | 8   | 6112    | a_Mutation_p.R18:  | NM_152381    | NP_689594    | A4UGR9 | XIRP2_HUMAN  |                                | 14  | TAGATCGTGAA       | 0.388 |             |
| + | 8   | 6820    | se_Mutation_p.E2C  | NM_152381    | NP_689594    | A4UGR9 | XIRP2_HUMAN  |                                | 14  | CAATGGAAAGG       | 0.418 |             |
| - | 48  | 9202    |                    | NM_004525    | NP_004516    | P98164 | LRP2_HUMAN   | s; A 23. Extracellular (Potent | 29  | TGAATTCATTTTC     | 0.468 |             |
| - | 10  | 1280    | lf.1_Missense_Mut  | NM_004525    | NP_004516    | P98164 | LRP2_HUMAN   | Extracellular (Potential).     | 29  | CAAATCCCCAT       | 0.423 |             |
| + | 6   | 1797    | ense_Mutation_p.l  | NM_144711    | NP_653312    | Q8NBE8 | KLH23_HUMAN  | Kelch 5.                       | 0   | AAAATGAATGG       | 0.418 | rs149127224 |
| + | 2   | 1374    | a_Mutation_p.W68   | NM_019558    | NP_062458    | P13378 | HXD8_HUMAN   | Homeobox.                      | 0   | AAATGGAAAAAC      | 0.502 |             |
| - | 8   | 1952    | ils.1_Missense_Mi  | NM_016953    | NP_058649    | Q9HCR9 | PDE11_HUMAN  | GAF 2.                         | 4   | AAAGTCGTTGAT      | 0.378 |             |
| + | 22  | 2707    | .E746K OSBPL6      | NM_032523    | NP_115912    | Q9BZF3 | OSBL6_HUMAN  |                                | 1   | TGAATGAAGTCC      | 0.448 |             |
| - | 299 | 90093   | i52N TTN_uc010zl   | NM_133378    | NP_596869    | Q8WZ42 | TITIN_HUMAN  |                                | 153 | GTCTCCTCTGC       | 0.478 |             |

|   |     |           |                    |              |              |        |             |     |               |       |
|---|-----|-----------|--------------------|--------------|--------------|--------|-------------|-----|---------------|-------|
| - | 281 | 81321     | '28R TTN_uc010zl   | NM_133378    | NP_596869    | Q8WZ42 | TITIN_HUMAN | 153 | CATTCCTTTGAT  | 0.453 |
| - | 275 | 78339     | '34N TTN_uc010zl   | NM_133378    | NP_596869    | Q8WZ42 | TITIN_HUMAN | 153 | TTAGATCATAAAC | 0.398 |
| - | 275 | 67530     | 31C TTN_uc010zl    | NM_133378    | NP_596869    | Q8WZ42 | TITIN_HUMAN | 153 | 3GTCACGAGCCA  | 0.473 |
| - | 275 | 63658     | 340E TTN_uc010zl   | NM_133378    | NP_596869    | Q8WZ42 | TITIN_HUMAN | 153 | ACCTCTCCTACA  | 0.403 |
| - | 267 | 59629     | _uc010zfi.1_Misse  | NM_133378    | NP_596869    | Q8WZ42 | TITIN_HUMAN | 153 | 'AAGCAGAGTCT  | 0.398 |
| - | 264 | 58748     | 203* TTN_uc010zl   | NM_133378    | NP_596869    | Q8WZ42 | TITIN_HUMAN | 153 | 'GGCTTCCAGCT  | 0.468 |
| - | 238 | 48616     | 826E TTN_uc010z    | NM_133378    | NP_596869    | Q8WZ42 | TITIN_HUMAN | 153 | FTGGTTCTTCT   | 0.378 |
| - | 228 | 46218     | _uc010zfi.1_Misse  | NM_133378    | NP_596869    | Q8WZ42 | TITIN_HUMAN | 153 | :GTTTTTCAATGA | 0.438 |
| - | 220 | 43909     | _uc010zfi.1_Misse  | NM_133378    | NP_596869    | Q8WZ42 | TITIN_HUMAN | 153 | 'ATTCTCCTCCAC | 0.398 |
| - | 191 | 37215     | .1_Missense_Mut    | NM_133378    | NP_596869    | Q8WZ42 | TITIN_HUMAN | 153 | CAATTCATACTT  | 0.408 |
| - | 188 | 36708     | .1_Missense_Mut    | NM_133378    | NP_596869    | Q8WZ42 | TITIN_HUMAN | 153 | 3AAGGGAGTGTA  | 0.398 |
| - | 179 | 34677     | .1_Missense_Mut    | NM_133378    | NP_596869    | Q8WZ42 | TITIN_HUMAN | 153 | 3AAGTTCGATTC  | 0.453 |
| - | 64  | 16107     | v_uc010zfi.1_Intro | NM_133378    | NP_596869    | Q8WZ42 | TITIN_HUMAN | 153 | AACCTCCAGAGA  | 0.393 |
| - | 63  | 15836     | N_uc010zfi.1_Intro | NM_133378    | NP_596869    | Q8WZ42 | TITIN_HUMAN | 153 | CTGCTTCATTACT | 0.408 |
| - | 47  | 11262     | N_uc010zfi.1_Intr  | NM_133378    | NP_596869    | Q8WZ42 | TITIN_HUMAN | 153 | 3CCCATCTTTGCT | 0.413 |
| - | 46  | 14103     | 'N_uc010zfi.1_Intr | NM_133379    | NP_596870    | Q8WZ42 | TITIN_HUMAN | 153 | CTGGATCTCCTA  | 0.378 |
| - | 46  | 11988     | 'N_uc010zfi.1_Intr | NM_133379    | NP_596870    | Q8WZ42 | TITIN_HUMAN | 153 | FTGTTCGGTTT   | 0.338 |
| - | 14  | 2565      | 1_Missense_Muta    | NM_133378    | NP_596869    | Q8WZ42 | TITIN_HUMAN | 153 | TTTGATCAGTAG  | 0.478 |
| - | 10  | 1517      |                    | NM_173648    | NP_775919    | Q6ZP82 | CC141_HUMAN | 10  | 3GCACTGAGGGT  | 0.433 |
| - | 7   | 700       |                    | NM_178123    | NP_835224    | Q86VW0 | SESD1_HUMAN | 1   | TATCACTCCATT  | 0.299 |
| - | 5   | 1097      | IF385B_uc002unl.   | NM_152520    | NP_689733    | Q569K4 | Z385B_HUMAN | 1   | 'AAAGCGAAGCT  | 0.353 |
| - | 3   | 253       | 3zfq.1_Missense_A  | NM_001003683 | NP_001003683 | P54750 | PDE1A_HUMAN | 3   | 3CATATTCATATT | 0.373 |
| + | 4   | 3889      |                    | NM_194250    | NP_919226    | Q7Z570 | Z804A_HUMAN | 11  | ACTATCCATCAC  | 0.358 |
| - | 7   | 891       |                    | NM_182521    | NP_872327    | Q8NEG5 | ZSWM2_HUMAN | 3   | FTAGTGATCTCC  | 0.323 |
| + | 48  | 3880      |                    | NM_000090    | NP_000081    | P02461 | CO3A1_HUMAN | 13  | 3GTTCTCGTAAA  | 0.398 |
| - | 54  | 4716      | rx.2_Missense_Mu   | NM_000393    | NP_000384    | P05997 | CO5A2_HUMAN | 2   | 3AACATCCACAG  | 0.453 |
| - | 22  | 2376      | sk.2_Missense_Mt   | NM_007315    | NP_009330    | P42224 | STAT1_HUMAN | 10  | TCAGGGGATTCT  | 0.448 |
| - | 42  | 7617      |                    | NM_018897    | NP_061720    | Q8WXX0 | DYH7_HUMAN  | 12  | 3ATCTTCAGGCC  | 0.408 |
| - | 41  | 7554      |                    | NM_018897    | NP_061720    | Q8WXX0 | DYH7_HUMAN  | 12  | 'AAGACGATTCCC | 0.428 |
| - | 41  | 7029      |                    | NM_018897    | NP_061720    | Q8WXX0 | DYH7_HUMAN  | 12  | TCATGGGTTTTT  | 0.433 |
| - | 36  | 6062      |                    | NM_018897    | NP_061720    | Q8WXX0 | DYH7_HUMAN  | 12  | TACTTACCGTAA  | 0.338 |
| + | 4   | 1570      | fr.2_Missense_ML   | NM_001204    | NP_001195    | Q13873 | BMPR2_HUMAN | 9   | 'AGGTCCACCTC  | 0.234 |
| + | 7   | 955       | p.E250K PARD3B     | NM_152526    | NP_689739    | Q8TEW8 | PAR3L_HUMAN | 4   | FTTCACGAAAATC | 0.348 |
| + | 5   | 5225      |                    | NM_020923    | NP_065974    | Q9HCK1 | ZDBF2_HUMAN | 3   | 3GCTGTGGATAT  | 0.393 |
| - | 7   | 542       |                    | NM_001099334 | NP_001092804 | Q0P641 | CB080_HUMAN | 1   | :TCGGGGAACCT  | 0.468 |
| - | 3   | 416       | 3b.2_Missense_Mt   | NM_079420    | NP_524144    | P05976 | MYL1_HUMAN  | 1   | 3GGTTTCCCAGA  | 0.408 |
| - | 23  | 2871_2872 | 3zji.1_Missense_M  | NM_005235    | NP_005226    | Q15303 | ERBB4_HUMAN | 33  | GCGTTGGAATTC  | 0.381 |
| - | 15  | 1895_1896 | p.A600T ERBB4      | NM_005235    | NP_005226    | Q15303 | ERBB4_HUMAN | 33  | GTTTGCCCCCTG  | 0.47  |
| + | 10  | 3008      |                    | NM_005876    | NP_005867    | Q15772 | SPEG_HUMAN  | 14  | GCTGTGCCGTG   | 0.622 |
| + | 37  | 8969      |                    | NM_005876    | NP_005867    | Q15772 | SPEG_HUMAN  | 14  | :GGGGCGAACGT  | 0.672 |
| - | 43  | 4784      |                    | NM_000092    | NP_000083    | P53420 | CO4A4_HUMAN | 11  | 3GGATTCGGGGA  | 0.582 |
| + | 8   | 788       | e_Mutation_p.G22   | NM_178821    | NP_849143    | Q8N136 | WDR69_HUMAN | 1   | TCACGGGGTCT   | 0.418 |
| - | 7   | 818       | _p.W257* SPHKAF    | NM_001142644 | NP_001136116 | Q2M3C7 | SPKAP_HUMAN | 10  | 3CAATTCATTCC  | 0.383 |
| + | 8   | 872_873   | qn.2_Intron SP14C  | NM_007237    | NP_009168    | Q13342 | LY10_HUMAN  | 0   | GCAACGGGATG   | 0.446 |
| + | 1   | 835       | 'vur.2_Intron UGT1 | NM_019077    | NP_061950    | Q9HAW7 | UD17_HUMAN  | 1   | 'GTCATCAGGGA  | 0.388 |
| + | 3   | 955       |                    | NM_001080504 | NP_001073973 | Q6ZP01 | RBM44_HUMAN | 4   | GAATATCATGAC  | 0.353 |
| - | 11  | 1089      | _p.L315F KIF1A_u   | NM_004321    | NP_004312    | Q12756 | KIF1A_HUMAN | 1   | CCGGAGGAGCC   | 0.567 |

|   |    |           |                                                               |              |              |        |             |    |              |       |             |
|---|----|-----------|---------------------------------------------------------------|--------------|--------------|--------|-------------|----|--------------|-------|-------------|
| + | 15 | 2286      | ml.2_Missense_Mi                                              | NM_032485    | NP_115874    | Q9UJA3 | MCM8_HUMAN  | 1  | CTTCCGTA     | 0.373 | rs141935061 |
| - | 5  | 2061      |                                                               | NM_152611    | NP_689824    | Q8WUT4 | LRRN4_HUMAN | 3  | GTAGCGGATCT  | 0.701 |             |
| + | 18 | 1847      | p.W615* PLCB1_u                                               | NM_015192    | NP_056007    | Q9NQ66 | PLCB1_HUMAN | 12 | GTTCTGGAATG  | 0.413 |             |
| + | 30 | 2980      | osplice PLCB4_u                                               | NM_182797    | NP_877949    | Q15147 | PLCB4_HUMAN | 15 | CAAAGGTACAG  | 0.333 |             |
| - | 3  | 1683      | o2wou.2_Intron FL                                             | NM_198391    | NP_938205    | Q9NZU0 | FLRT3_HUMAN | 1  | TGAGGGACTCC  | 0.458 |             |
| - | 7  | 721       | gci.1_Missense_M                                              | NM_024704    | NP_078980    | Q96L93 | KI16B_HUMAN | 8  | GTTTGGAATAA  | 0.398 |             |
| + | 6  | 1563_1564 | p.S186C CSR2E                                                 | NM_020536    | NP_065397    | Q9H8E8 | CSR2B_HUMAN | 6  | TTCTCTTGAG   | 0.52  |             |
| + | 2  | 778       | p.S242T PAX1_uc                                               | NM_006192    | NP_006183    | P15863 | PAX1_HUMAN  | 2  | CGCCGTCGCAG  | 0.667 |             |
| - | 14 | 1842      | p.P590S NINL_uc                                               | NM_025176    | NP_079452    | Q9Y2I6 | NINL_HUMAN  | 5  | ATCCGGGCTCC  | 0.687 |             |
| + | 1  | 63        | RG1B_uc010ztj.1_RNA FRG1B_uc010gdr.1_RNA                      |              |              |        |             | 0  | TGATACGTTGG  | 0.219 | rs62197050  |
| + | 3  | 222       | RG1B_uc010gdr.1_RNA FRG1B_uc010ztk.1_Missense_Mutation_p.A16T |              |              |        |             | 0  | ATGAAGCAGGG  | 0.373 |             |
| + | 3  | 1598      |                                                               | NM_001011718 | NP_001011718 | Q5GH72 | XKR7_HUMAN  | 3  | CAGGTCCTGC   | 0.682 |             |
| + | 22 | 2347      |                                                               | NM_020884    | NP_065935    | A7E2Y1 | MYH7B_HUMAN | 2  | GATCCGGATCT  | 0.632 |             |
| - | 2  | 1678      | _Missense_Mutatio                                             | NM_000557    | NP_000548    | P43026 | GDF5_HUMAN  | 0  | GAGTTCATCAG  | 0.597 |             |
| + | 16 | 1599      | wb.1_Missense_M                                               | NM_021931    | NP_068750    | Q9H5Z1 | DHX35_HUMAN | 3  | AGTCTCACGCA  | 0.473 |             |
| - | 16 | 2597      | _p.D824N PTPRT                                                | NM_007050    | NP_008981    | O14522 | PTPRT_HUMAN | 20 | TTTGTCGGCAG  | 0.557 |             |
| + | 8  | 870       | 2_Missense_Muta                                               | NM_015478    | NP_056293    | Q9Y468 | LMBL1_HUMAN | 0  | CTGGTCGTGGG  | 0.532 | rs143835872 |
| + | 2  | 1171      | R312S SEMG2_uc                                                | NM_003007    | NP_002998    | P04279 | SEMG1_HUMAN | 2  | GCCCAACGCAGT | 0.418 |             |
| + | 2  | 1198      | p.Q381K SEMG2                                                 | NM_003008    | NP_002999    | Q02383 | SEMG2_HUMAN | 1  | AAGAGCAAATA  | 0.388 |             |
| - | 6  | 943       | xsg.1_Missense_A                                              | NM_022829    | NP_073740    | Q8WWT9 | S13A3_HUMAN | 1  | GTCSCCGTAC   | 0.502 |             |
| - | 3  | 817_818   | _p.T156N SPATA2                                               | NM_001135773 | NP_001129245 | Q9UM82 | SPAT2_HUMAN | 2  | GGAGGGTCTCC  | 0.535 |             |
| - | 12 | 1157      | e_Mutation_p.S25f                                             | NM_006045    | NP_006036    | O75110 | ATP9A_HUMAN | 4  | AGTACGAAATCC | 0.552 |             |
| + | 2  | 1516      |                                                               | NM_173485    | NP_775756    | Q9NRE2 | TSH2_HUMAN  | 6  | CGTCTCGAAAC  | 0.557 |             |
| - | 3  | 1253      | p.N242H BMP7_u                                                | NM_001719    | NP_001710    | P18075 | BMP7_HUMAN  | 1  | CAGGTTGTGCC  | 0.637 |             |
| + | 5  | 543       |                                                               | NM_020673    | NP_065724    | Q9UL26 | RB22A_HUMAN | 0  | CATTTCAACAT  | 0.353 |             |
| + | 7  | 847_848   | ah.1_Nonsense_M                                               | NM_144498    | NP_653081    | Q9H1P3 | OSBL2_HUMAN | 2  | GAGCCCCGAGG  | 0.579 |             |
| + | 1  | 790       |                                                               | NM_002531    | NP_002522    | P30989 | NTR1_HUMAN  | 4  | CGCCGGCTGCC  | 0.687 |             |
| - | 16 | 4178      | is.1_Missense_Mu                                              | NM_033081    | NP_149072    | Q9BTC0 | DIDO1_HUMAN | 6  | CAGACGAAGCG  | 0.597 |             |
| + | 4  | 714       | _uc002yei.2_Misse                                             | NM_139317    | NP_647478    | Q96CA5 | BIRC7_HUMAN | 3  | CGTGGGAAGAA  | 0.672 |             |
| - | 7  | 2946      | yfl.1_Missense_M                                              | NM_001037335 | NP_001032412 | Q9BYK8 | PR285_HUMAN | 2  | CGTGCGAGGCA  | 0.697 |             |
| - | 8  | 573       | e_Mutation_p.E51                                              | NM_199261    | NP_954870    | P56180 | TPTE_HUMAN  | 5  | CATCTCAACTTC | 0.343 | rs141287188 |
| + | 15 | 2155      | cb.1_Missense_M                                               | NM_004540    | NP_004531    | O15394 | NCAM2_HUMAN | 4  | ATAAGGAAGAC  | 0.348 |             |
| - | 1  | 13        |                                                               | NM_012131    | NP_036263    | P56750 | CLD17_HUMAN | 2  | CAAGGGATAAA  | 0.478 |             |
| + | 5  | 647       | l1ado.1_Missense                                              | NM_178817    | NP_848932    | Q8TCY5 | MRAP_HUMAN  | 0  | CCCTCGTCAGG  | 0.602 |             |
| - | 1  | 196       | t_Site C21orf59_u                                             | NM_021254    | NP_067077    | P57076 | CU059_HUMAN | 0  | GCACCGTGAGC  | 0.682 |             |
| + | 3  | 1428      | _Mutation_p.S460f                                             | NM_138927    | NP_620305    | P18583 | SON_HUMAN   | 6  | ACCATCCATGG  | 0.617 |             |
| + | 38 | 5078      | tj.2_Missense_Mu                                              | NM_003024    | NP_003015    | Q15811 | ITSN1_HUMAN | 4  | TGGTTGAAGGC  | 0.557 |             |
| + | 6  | 768       | aeb.1_Missense_M                                              | NM_005128    | NP_005119    | Q9Y3R5 | DOP2_HUMAN  | 2  | GAAGTCTTTGCC | 0.403 |             |
| + | 4  | 1223      | _p.W307* KCNJ15                                               | NM_002243    | NP_002234    | Q99712 | IRK15_HUMAN | 6  | TACTGGGGTTT  | 0.463 |             |
| - | 21 | 4158      | CAM_uc002yyr.1_f                                              | NM_001389    | NP_001380    | O60469 | DSCAM_HUMAN | 11 | AAACTCGCTGA  | 0.453 |             |
| - | 20 | 4060      | CAM_uc002yyr.1_f                                              | NM_001389    | NP_001380    | O60469 | DSCAM_HUMAN | 11 | CCATGGAGGCT  | 0.577 |             |
| - | 9  | 2262      | CAM_uc002yyr.1_f                                              | NM_001389    | NP_001380    | O60469 | DSCAM_HUMAN | 11 | TGAAACTCAA   | 0.468 |             |
| + | 6  | 906       | RE_uc002zej.2_5'F                                             | NM_000383    | NP_000374    | O43918 | AIRE_HUMAN  | 1  | CAAGGGAGCCC  | 0.667 |             |
| - | 1  | 242       | .1_Intron C21orf29                                            | NM_181686    | NP_859014    | P59990 | KR121_HUMAN | 2  | GGAGGGAGCCC  | 0.647 |             |
| - | 3  | 400       | _Mutation_p.P54L                                              | NM_194255    | NP_919231    | P41440 | S19A1_HUMAN | 0  | GCACCGCGGTG  | 0.647 |             |
| + | 21 | 1703      | 6A2_uc002zhz.1_l                                              | NM_001849    | NP_001840    | P12110 | CO6A2_HUMAN | 8  | GAGGCGACTTT  | 0.557 | rs138276378 |
| + | 3  | 600       | e_Mutation_p.P47                                              | NM_006031    | NP_006022    | O95613 | PCNT_HUMAN  | 8  | ACCACCCACCA  | 0.547 |             |

|   |    |         |                                 |              |              |        |             |                          |    |               |       |             |
|---|----|---------|---------------------------------|--------------|--------------|--------|-------------|--------------------------|----|---------------|-------|-------------|
| - | 1  | 1078    |                                 | NM_014406    | NP_055221    | Q96SF2 | TCPQM_HUMAN |                          | 1  | TCGCTTCCTTTAC | 0.522 |             |
| - | 5  | 815     | NB1L_uc002zqf.1                 | NM_053004    | NP_443730    | Q9BYB4 | GNB1L_HUMAN |                          | 1  | AAATCTGAACCTC | 0.557 |             |
| - | 9  | 2067    | qy.2_Missense_Mi                | NM_001670    | NP_001661    | O00192 | ARVC_HUMAN  | ARM 6.                   | 1  | CCAGGGGCCCG   | 0.662 |             |
| - | 2  | 1475    | zru.2_Missense_M                | NM_023004    | NP_075380    | Q9BZR6 | RTN4R_HUMAN |                          | 0  | TGCGGGTGCGC   | 0.721 |             |
| + | 5  | 345     | 1_Missense_Muta                 | NM_012295    | NP_036427    | Q9Y6J0 | CABIN_HUMAN |                          | 5  | CAGTTTCATCCG  | 0.522 |             |
| + | 43 | 7424    | D18B_uc011aka.1                 | NM_032608    | NP_115997    | Q8IUG5 | MY18B_HUMAN |                          | 12 | CTGTGGACGATC  | 0.597 |             |
| + | 43 | 7449    | D18B_uc011aka.1                 | NM_032608    | NP_115997    | Q8IUG5 | MY18B_HUMAN |                          | 12 | CCCTGGAAAGG   | 0.597 |             |
| - | 15 | 2594    | wp.2_Missense_M                 | NM_004737    | NP_004728    | O95461 | LARGE_HUMAN | lenal (Potential).       | 3  | ACCTCCGGTCG   | 0.577 | rs145736519 |
| - | 4  | 645     | iaqe.2_Missense_I               | NM_001163857 | NP_001157329 | O43247 | EAN57_HUMAN |                          | 0  | AAATAGCCTTTTG | 0.542 |             |
| - | 2  | 208     | _p.E23K TMPRSS                  | NM_153609    | NP_705837    | Q8IU80 | TMP56_HUMAN | lasmic (Potential).      | 6  | CGGCTCCGCTT   | 0.662 |             |
| - | 2  | 192_193 | 2G6_uc003avb.2_                 | NM_003560    | NP_003551    | O60733 | PA2G6_HUMAN |                          | 1  | GGGTTAGAGAAC  | 0.594 |             |
| + | 30 | 3761    | Missense_Mutation               | NM_152513    | NP_689726    | Q5TIA1 | MEI1_HUMAN  |                          | 2  | GCCTTCCCCCT   | 0.602 |             |
| - | 16 | 1988    |                                 | NM_173050    | NP_766638    | Q8IWI4 | SCUB1_HUMAN |                          | 5  | AGCCCACAGG    | 0.622 |             |
| - | 22 | 2817    | AB6_uc010gzi.1_I                | NM_022785    | NP_073622    | Q5THR3 | EFCB6_HUMAN | EF-hand 9.               | 7  | GCGTCGAAGAA   | 0.438 |             |
| - | 2  | 245     | fw.1_Missense_M                 | NM_001009880 | NP_001009880 | Q6ICG6 | K0930_HUMAN |                          | 0  | AGTACGCCAGC   | 0.617 |             |
| - | 3  | 807     | aa.2_Missense_M                 | NM_058238    | NP_478679    | P56706 | WNT7B_HUMAN |                          | 1  | GCCCTCGGCTT   | 0.687 |             |
| - | 2  | 158     |                                 | NM_001080447 | NP_001073916 |        |             |                          | 2  | CATCCGGAATG   | 0.597 |             |
| + | 16 | 2287    | p.R602C CNTN6_t                 | NM_014461    | NP_055276    | Q9UQ52 | CNTN6_HUMAN | nectin type-III 1.       | 8  | AAATTCGTGTTG  | 0.393 | rs147761774 |
| + | 8  | 2054    | _p.P594S GRM7_t                 | NM_000844    | NP_000835    | Q14831 | GRM7_HUMAN  | Name=1; (Potential).     | 7  | GTGATTCCTGTC  | 0.547 |             |
| - | 2  | 268     | ova.1_Missense_M                | NM_173472    | NP_775743    | Q96PS1 | CC024_HUMAN |                          | 0  | ACTCTCATCCAC  | 0.537 |             |
| + | 2  | 802     | ft.2_Missense_Mu                | NM_001098213 | NP_001091683 | P35367 | HRH1_HUMAN  | Name=4; (Potential).     | 2  | TGTTTCTCTCT   | 0.542 |             |
| + | 10 | 2025    | xj.2_Missense_Mi                | NM_001162499 | NP_001155971 | O75155 | CAND2_HUMAN | HEAT 14.                 | 4  | GGCCTATTCTC   | 0.667 |             |
| + | 12 | 3239    | xj.2_Missense_Mu                | NM_001162499 | NP_001155971 | O75155 | CAND2_HUMAN | HEAT 23.                 | 4  | AGATCCGGCGG   | 0.582 |             |
| - | 36 | 5178    |                                 | NM_024923    | NP_079199    | Q8TEM1 | PO210_HUMAN | lenal (Probable).        | 11 | CAAAAGGATTTT  | 0.607 | rs137867919 |
| - | 25 | 3483    |                                 | NM_024923    | NP_079199    | Q8TEM1 | PO210_HUMAN | lenal (Probable).        | 11 | GTCCCGATGG    | 0.473 | rs149480023 |
| + | 12 | 723     | ef.1_RNA SLC6A6                 | NM_001134367 | NP_001127839 | P31641 | SC6A6_HUMAN | ellular (Potential).     | 1  | GCCTGGCCAC    | 0.537 |             |
| + | 2  | 926     | cdq.2_Missense_M                | NM_052953    | NP_443185    | Q96PB8 | LRC3B_HUMAN |                          | 4  | TAGCTGAAACC   | 0.448 |             |
| - | 13 | 1365    | ifj.2_Missense_Mutation_p.S322F |              |              | Q6ZWH5 | NEK10_HUMAN | p.E379K(1)               | 13 | AGAGGGATTTT   | 0.323 |             |
| + | 2  | 1963    |                                 | NM_001137674 | NP_001131146 | A6NHJ4 | ZN860_HUMAN | 2H2-type 9.              | 1  | GTAATTCATAAG  | 0.408 |             |
| + | 2  | 238     | TAC_uc011aya.1_I                | NM_003149    | NP_003140    | Q99469 | STAC_HUMAN  |                          | 4  | CAGCGAAGAC    | 0.532 |             |
| - | 12 | 4722    |                                 | NM_014831    | NP_055646    | O15050 | TRNK1_HUMAN |                          | 2  | TGCTTCGTAGA   | 0.557 |             |
| - | 15 | 2512    | p.P773L SCN5A_t                 | NM_198056    | NP_932173    | Q14524 | SCN5A_HUMAN |                          | 9  | AGTAGGGTCCG   | 0.532 |             |
| - | 27 | 5365    |                                 | NM_006514    | NP_006505    | Q9Y5Y9 | SCNAA_HUMAN |                          | 10 | CAGGTCCATCT   | 0.468 |             |
| - | 23 | 4136    |                                 | NM_014139    | NP_054858    | Q9UI33 | SCNBA_HUMAN |                          | 9  | CTGTTGGTTGA   | 0.358 |             |
| - | 1  | 456     |                                 | NM_014139    | NP_054858    | Q9UI33 | SCNBA_HUMAN |                          | 9  | GATTCGGTAGA   | 0.428 |             |
| - | 2  | 1513    | e_Mutation_p.R43                | NM_194293    | NP_919269    | Q702N8 | XIRP1_HUMAN |                          | 8  | CATCCCTCTGG   | 0.562 | rs149251137 |
| + | 13 | 1962    |                                 | NM_003241    | NP_003232    | P49221 | TGM4_HUMAN  |                          | 1  | CATCTCCTCAC   | 0.383 |             |
| + | 3  | 1504    |                                 | NM_001123041 | NP_001116513 | P41597 | CCR2_HUMAN  | lasmic (Potential).      | 2  | ACCAGAAAGA    | 0.493 |             |
| - | 9  | 1117    | .2_Missense_Muta                | NM_002343    | NP_002334    | P02788 | TRFL_HUMAN  |                          | 4  | CACCGGGGCA    | 0.667 |             |
| + | 5  | 8258    |                                 | NM_003458    | NP_003449    | Q9UPA5 | BSN_HUMAN   |                          | 8  | GGAGAGCCTGG   | 0.652 |             |
| + | 35 | 3571    | F123_uc003cxi.2_f               | NM_022064    | NP_071347    | Q5XP14 | RN123_HUMAN |                          | 7  | GGTGGTGGCC    | 0.582 |             |
| + | 6  | 2851    | se_Mutation_p.S2f               | NM_000839    | NP_000830    | Q14416 | GRM2_HUMAN  | lasmic (Potential).      | 1  | GTTCATCGCTTT  | 0.587 |             |
| + | 38 | 3274    |                                 | NM_018398    | NP_060868    | Q8IZS8 | CA2D3_HUMAN | ical; (Potential).       | 7  | AAGCCAGACA    | 0.517 |             |
| - | 11 | 2465    | rt.1_Missense_Mu                | NM_015576    | NP_056391    | O15083 | ERC2_HUMAN  | Potential.               | 2  | ATTCTCCACCTC  | 0.478 |             |
| - | 7  | 1817    | 22_uc003dht.1_5'l               | NM_015576    | NP_056391    | O15083 | ERC2_HUMAN  | Potential.               | 2  | TGTCCCTTCT    | 0.393 |             |
| - | 6  | 695     | diu.2_Missense_M                | NM_178504    | NP_848599    | Q6ZR08 | DYH12_HUMAN | n (By similarity).       | 2  | CTCCTTATCTTC  | 0.313 |             |
| - | 3  | 372     | RIG1_uc010hoa.2                 | NM_015541    | NP_056356    | Q96JA1 | LRIG1_HUMAN | ilar (Potential). LRR 3. | 5  | AAAGAGAGAGA   | 0.488 |             |



|   |    |      |                     |              |              |        |             |                          |    |               |       |           |
|---|----|------|---------------------|--------------|--------------|--------|-------------|--------------------------|----|---------------|-------|-----------|
| - | 15 | 2088 |                     | NM_020872    | NP_065923    | Q9P232 | CNTN3_HUMAN | nectin type-III 1.       | 5  | ATATTCCACCCA  | 0.438 |           |
| - | 7  | 990  | M86D_uc003dpq.      | NR_024241    |              |        |             |                          | 0  | TAGCTCGGTGG   | 0.652 |           |
| + | 1  | 704  |                     | NM_001005515 | NP_001005515 | A6NDH6 | O5H15_HUMAN | lasmic (Potential).      | 2  | TGTAAGGAAAG   | 0.418 |           |
| + | 1  | 432  |                     | NM_001005517 | NP_001005517 | A6NMS3 | OR5K4_HUMAN | Name=4; (Potential).     | 1  | CGGATGACCAC   | 0.468 |           |
| - | 5  | 3768 | on_p.K678 FILIP1    | NM_182909    | NP_878913    | Q4L180 | FIL1L_HUMAN |                          | 1  | TGTGTTTTGTTA  | 0.448 |           |
| + | 14 | 1814 | bik.1_Missense_IV   | NM_001690    | NP_001681    | P38606 | VATA_HUMAN  |                          | 3  | TTTCTCCATGA   | 0.299 |           |
| - | 7  | 1318 | D3_uc003ebb.1_In    | NM_000796    | NP_000787    | P35462 | DRD3_HUMAN  | Cytoplasmic.             | 4  | TTTTTCGAACTT  | 0.532 |           |
| + | 3  | 1592 |                     | NM_016298    | NP_057382    | Q9UH90 | FBX40_HUMAN |                          | 5  | CCACAGCGAGT   | 0.522 |           |
| + | 11 | 831  | A5_uc003egd.1_Ir    | NM_006810    | NP_006801    | Q14554 | PDIA5_HUMAN | hioiredoxin 1.           | 1  | CCAGTCCGCAG   | 0.612 |           |
| - | 8  | 1220 | _p.P240S SLCO2      | NM_005630    | NP_005621    | Q92959 | SO2A1_HUMAN | lasmic (Potential).      | 1  | GCATGGAAACCA  | 0.592 |           |
| - | 4  | 342  | 1_Missense_Muta     | NM_178554    | NP_848649    | Q8NBH2 | KY_HUMAN    |                          | 2  | TGACTTCCACAG  | 0.488 |           |
| + | 9  | 1301 | T3_uc010hug.2_f     | NM_031913    | NP_114119    | A0FGR9 | ESYT3_HUMAN | C2 1.                    | 0  | TGGAACGAAGTG  | 0.582 |           |
| + | 1  | 469  |                     | NM_152616    | NP_689829    | Q8IWZ5 | TRI42_HUMAN | Cys-rich.                | 7  | TGAGAGCCGCTC  | 0.562 |           |
| - | 38 | 6557 | ly.1_Missense_Mu    | NM_001184    | NP_001175    | Q13535 | ATR_HUMAN   | FAT.                     | 20 | TAGATCAATTGT  | 0.338 |           |
| - | 8  | 998  | vw.1_Missense_IV    | NM_020359    | NP_065092    | Q9NRY7 | PLS2_HUMAN  | llular (By similarity).  | 0  | TAGTTCTTTCA   | 0.343 |           |
| - | 6  | 6577 | _p.H220Y IGSF10     | NM_178822    | NP_849144    | Q6WRI0 | IGS10_HUMAN | like C2-type 8.          | 13 | TGGCATGAAATG  | 0.443 |           |
| - | 4  | 1395 |                     | NM_178822    | NP_849144    | Q6WRI0 | IGS10_HUMAN | like C2-type 1.          | 13 | TGGCCTCATCTC  | 0.448 |           |
| - | 3  | 1408 | fao.1_Missense_IV   | NM_004733    | NP_004724    | O00400 | ACATN_HUMAN | ellular (Potential).     | 4  | TATGTTCTTTGG  | 0.383 |           |
| - | 4  | 355  | se_Mutation_p.W1    | NM_024687    | NP_078963    | A8MT70 | ZBBX_HUMAN  |                          | 2  | TTCCCCATGGA   | 0.279 |           |
| - | 5  | 1014 | _p.G329E SERPIN     | NM_006217    | NP_006208    | O75830 | SPI2_HUMAN  |                          | 3  | TATTATCCAGAA  | 0.303 |           |
| - | 2  | 632  | ECOM_uc010hwn.      | NM_004991    | NP_004982    | Q03112 | EVI1_HUMAN  |                          | 14 | TAGCAGGAATGG  | 0.478 |           |
| - | 2  | 281  | wp.1_Nonsense_I     | NM_024727    | NP_079003    | Q6UY01 | LRC31_HUMAN |                          | 3  | TGATCTCCATT   | 0.383 |           |
| - | 5  | 698  | IC39_uc003fkn.2_    | NM_181426    | NP_852091    | Q9UFE4 | CCD39_HUMAN | Potential.               | 4  | TAAATTCGTTGT  | 0.308 |           |
| + | 19 | 2322 | T273* ATP11B_uc     | NM_014616    | NP_055431    | Q9Y2G3 | AT11B_HUMAN | lasmic (Potential).      | 3  | TAAATTCGAGAA  | 0.323 |           |
| + | 13 | 1778 | IAP2_uc003fuv.2_RNA |              |              |        |             |                          | 0  | TGAGGTGCACT   | 0.567 | rs6583274 |
| + | 13 | 1780 | IAP2_uc003fuv.2_RNA |              |              |        |             |                          | 0  | AGGTGCACTGG   | 0.567 | rs6583275 |
| - | 2  | 6966 | C4_uc003fvp.2_Inl   | NM_018406    | NP_060876    | Q99102 | MUC4_HUMAN  |                          | 0  | TGGATGCTGAG   | 0.572 |           |
| + | 2  | 247  | lbtu.1_Missense_I   | NM_152672    | NP_689885    | Q86UW1 | OSTA_HUMAN  |                          | 1  | TACACAGCAGAT  | 0.617 |           |
| - | 3  | 603  | 732_uc010ibb.1_Ir   | NM_001137608 | NP_001131080 | B4DXR9 | ZN732_HUMAN | ype 3; degenerate.       | 0  | ATTCTTCCACATG | 0.363 |           |
| + | 5  | 1197 | 141_uc003gab.2_I    | NM_003441    | NP_003432    | Q15928 | ZN141_HUMAN | C2H2-type 7.             | 0  | TCTACACATGTG  | 0.408 |           |
| + | 1  | 3043 |                     | NM_175918    | NP_787114    | Q8N1N5 | CRPAK_HUMAN |                          | 0  | TATGTGCCCATG  | 0.582 |           |
| - | 3  | 1399 | se_Mutation_p.S3    | NM_024511    | NP_078787    | Q68CZ6 | HAUS3_HUMAN | Potential.               | 4  | TCATATGATAACT | 0.299 |           |
| + | 8  | 871  | gfk.3_Missense_M    | NM_001122681 | NP_001116153 | P78314 | 3BP2_HUMAN  |                          | 1  | TGGCTGCTGAG   | 0.682 |           |
| + | 2  | 2000 | ivr.1_RNA RGS12     | NM_198229    | NP_937872    | O14924 | RGS12_HUMAN |                          | 1  | CGGCCGACCCA   | 0.577 |           |
| - | 10 | 1762 | KMIP1_uc011bwc.     | NM_144720    | NP_653321    | Q96N16 | JKIP1_HUMAN | with TYK2 and GABBR1. Pc | 4  | TGGCCTGGTACT  | 0.612 |           |
| + | 8  | 2151 | _p.S662F WFS1_u     | NM_001145853 | NP_001139325 | O76024 | WFS1_HUMAN  |                          | 2  | TCAACTCCACAC  | 0.617 |           |
| - | 1  | 1405 | 3_5'Flank TADA2B    | NM_153376    | NP_699207    | Q2M329 | CCD96_HUMAN |                          | 0  | TCTTTTCTTCCAC | 0.478 |           |
| + | 13 | 1678 | owi.1_Missense_IV   | NM_020777    | NP_065828    | Q96PQ0 | SORC2_HUMAN | renal (Potential).       | 2  | TTTGAGGAAGAG  | 0.577 |           |
| + | 6  | 1094 | p.R186Q CPZ_uc      | NM_001014447 | NP_001014447 | Q66K79 | CBPZ_HUMAN  |                          | 3  | TGAACCGAAATTT | 0.647 |           |
| + | 1  | 1570 |                     | NM_000798    | NP_000789    | P21918 | DRD5_HUMAN  | lasmic (Potential).      | 1  | TGCAATGAGCTC  | 0.577 |           |
| + | 2  | 271  | _p.S22N C1QTNF      | NM_001135171 | NP_001128643 | Q9BXJ2 | C1QT7_HUMAN |                          | 0  | TGCCAGTGGAC   | 0.507 |           |
| - | 2  | 768  | sr.1_Missense_Ml    | NM_015230    | NP_056045    | Q8WZ64 | ARAP2_HUMAN |                          | 3  | GCTTATCATCTG  | 0.423 |           |
| - | 3  | 1217 | _p.E213K BEND4      | NM_207406    | NP_997289    | Q6ZU67 | BEND4_HUMAN |                          | 0  | TGTGCTCCTGTC  | 0.438 |           |
| - | 1  | 160  |                     | NM_173536    | NP_775807    | Q8N1C3 | GBRG1_HUMAN |                          | 2  | TCAAAGGACCC   | 0.502 |           |
| - | 9  | 1943 | _p.V424I GABRA2     | NM_001114175 | NP_001107647 | P47869 | GBRA2_HUMAN | ical; (Probable).        | 4  | TAAAACTATTCT  | 0.393 |           |
| + | 9  | 1539 | aze.1_Missense_IV   | NM_000812    | NP_000803    | P18505 | GBRB1_HUMAN | lasmic (Probable).       | 2  | TGAGCGACCCCC  | 0.627 |           |
| + | 5  | 1039 | N2_uc003gyb.1_5     | NM_020846    | NP_065897    | Q9P270 | SLAI2_HUMAN |                          | 0  | TGCTCTGGCGC   | 0.338 |           |

|   |    |         |                   |              |              |        |             |                              |    |               |       |             |
|---|----|---------|-------------------|--------------|--------------|--------|-------------|------------------------------|----|---------------|-------|-------------|
| + | 5  | 1190    | gyb.1_Missense_Iv | NM_020846    | NP_065897    | Q9P270 | SLAI2_HUMAN |                              | 0  | CAATTCACCTCC  | 0.453 |             |
| + | 15 | 2076    | xzl.1_Missense_Mt | NM_025087    | NP_079363    | Q9H720 | PG2IP_HUMAN |                              | 3  | ATGCTGAACCTG  | 0.383 |             |
| + | 2  | 955     | RA_uc003haa.2_    | NM_133267    | NP_573574    | Q9BZM3 | GSX2_HUMAN  | Homeobox.                    | 0  | GACTCCGGAGG   | 0.537 |             |
| + | 21 | 2957    | bj.2_Missense_Mi  | NM_025009    | NP_079285    | Q66GS9 | CP135_HUMAN | Potential.                   | 5  | AGTTCGACTGG   | 0.388 |             |
| + | 15 | 2919    | _p.L916F LPHN3_   | NM_015236    | NP_056051    | Q9HAR2 | LPHN3_HUMAN | Name=2; (Potential).         | 18 | AGAACCTCTGC   | 0.458 |             |
| - | 9  | 795     | p.R248Q UBA6_uc   | NM_018227    | NP_060697    | A0AVT1 | UBA6_HUMAN  |                              | 0  | ATTTCTCGAAATG | 0.299 |             |
| - | 8  | 883     | IPRSS11A_uc003f   | NM_182606    | NP_872412    | Q6ZMR5 | TM11A_HUMAN | . Extracellular (Potential). | 1  | CTTTTCATTAAG  | 0.373 |             |
| + | 1  | 621     | hq.2_Missense_M   | NM_001074    | NP_001065    | P16662 | UD2B7_HUMAN |                              | 2  | CTCTTCTCTACG  | 0.388 |             |
| - | 2  | 869     | uc003hei.1_Intron | NM_001073    | NP_001064    | O75310 | UDB11_HUMAN |                              | 3  | GTAGGGGTTTGC  | 0.368 | rs138573352 |
| + | 13 | 1791    | p.C582R AFP_uc    | NM_001134    | NP_001125    | P02771 | FETA_HUMAN  | Albumin 3.                   | 1  | AGAAATGCCTGC  | 0.418 |             |
| - | 15 | 2581    |                   | NM_001042784 | NP_001036249 | Q5M9N0 | CD158_HUMAN | Potential.                   | 6  | CCACTTCCATAT  | 0.323 |             |
| + | 2  | 37      |                   | NM_006419    | NP_006410    | O43927 | CXL13_HUMAN |                              | 0  | CCACAGCCTGG   | 0.493 |             |
| - | 3  | 1218    | q HNRPDL_uc003f   | NM_031372    | NP_112740    | O14979 | HNRDL_HUMAN | RRM 1.                       | 1  | TCTTTCCCTTTT  | 0.393 |             |
| + | 3  | 572     |                   | NM_016323    | NP_057407    | Q9UII4 | HERC5_HUMAN | RCC1 1.                      | 9  | AAAAAATAATTC  | 0.279 |             |
| + | 4  | 727_728 |                   | NM_016323    | NP_057407    | Q9UII4 | HERC5_HUMAN | RCC1 2.                      | 9  | GAGTACCCTTGC  | 0.515 |             |
| - | 2  | 371     | o003hsi.2_Missens | NM_014883    | NP_055698    | O94988 | FA13A_HUMAN | Rho-GAP.                     | 2  | ATTCTCGGTGAC  | 0.428 |             |
| - | 2  | 2825    |                   | NM_198281    | NP_938022    | Q6ZVF9 | GRIN3_HUMAN |                              | 3  | GGGCAGGACGG   | 0.468 |             |
| + | 7  | 3217    | p.P352L MMRN1_    | NM_007351    | NP_031377    | Q13201 | MMRN1_HUMAN | EGF-like.                    | 4  | GCATCCGTGCC   | 0.413 |             |
| + | 8  | 1052    | 3htz.3_Nonsense_  | NM_001100427 | NP_001093897 | P52306 | GDS1_HUMAN  |                              | 3  | TACTGAGCTCA   | 0.368 |             |
| - | 29 | 3946    | cc.1_Missense_Mt  | NM_001813    | NP_001804    | Q02224 | CENPE_HUMAN | Potential.                   | 9  | CTCATGAAGCAC  | 0.313 |             |
| - | 1  | 646     |                   | NM_001059    | NP_001050    | P29371 | NK3R_HUMAN  | Name=3; (Potential).         | 7  | ACACAGCTGTG   | 0.527 |             |
| - | 10 | 1292    | 1_Missense_Muta   | NM_000204    | NP_000195    | P05156 | CFAI_HUMAN  | peptidase S1.                | 0  | GATTCCACTGG   | 0.443 |             |
| + | 1  | 616     |                   | NM_001977    | NP_001968    | Q07075 | AMPE_HUMAN  | ellular (Potential).         | 5  | ACTTTCGACTGC  | 0.612 | rs143343563 |
| + | 7  | 701_702 | 2_Nonsense_Muta   | NM_020961    | NP_066012    | Q9HCE5 | MTL14_HUMAN |                              | 0  | CCCTTAGAAGA   | 0.337 |             |
| + | 4  | 1520    | e_Mutation_p.E44  | NM_001128933 | NP_001122405 | Q9UMS6 | SYNP2_HUMAN |                              | 2  | CAAGCGAATCA   | 0.478 |             |
| + | 9  | 8054    | p.R983Q FAT4_u    | NM_024582    | NP_078858    | Q6V0I7 | FAT4_HUMAN  | Extracellular (Potential).   | 18 | CCCTCGAAAAA   | 0.348 |             |
| - | 18 | 1676    | jz.3_Missense_Mt  | NM_001102653 | NP_001096123 | Q01804 | OTUD4_HUMAN |                              | 3  | CTGGAGAAACT   | 0.488 |             |
| - | 2  | 401     | ie_Mutation_p.P11 | NM_178835    | NP_849157    | Q17R98 | ZN827_HUMAN |                              | 0  | TCAGGGGCTTG   | 0.582 |             |
| + | 2  | 813     | r_p.R41C EDNRA    | NM_001957    | NP_001948    | P25101 | EDNRA_HUMAN | ellular (Pote p.R41H(1)      | 2  | CTTTTCGTGGC   | 0.463 | rs139739379 |
| + | 16 | 2264    | LK2_uc003ilo.3_M  | NM_001040260 | NP_001035350 | Q8N568 | DCLK2_HUMAN | Pro-rich.                    | 3  | CAGTTCCTCCC   | 0.647 |             |
| - | 28 | 5014    | R173W LRBA_uc     | NM_006726    | NP_006717    | P50851 | LRBA_HUMAN  |                              | 7  | TAAGCCGATTAA  | 0.368 |             |
| - | 2  | 2143    |                   | NM_145720    | NP_663772    | Q8IY51 | TIGD4_HUMAN |                              | 1  | GCATCAGAAGTG  | 0.403 |             |
| + | 3  | 359     | r_p.P47L TLR2_uc  | NM_003264    | NP_003255    | O60603 | TLR2_HUMAN  | ellular (Potential).         | 3  | CATTCCTCAGC   | 0.493 |             |
| + | 2  | 821     | ior.2_Missense_Mi | NM_000910    | NP_000901    | P49146 | NPY2R_HUMAN | ellular (Potential).         | 3  | CTCTTACCTATAC | 0.488 |             |
| + | 4  | 1039    |                   | NM_006174    | NP_006165    | Q15761 | NPY5R_HUMAN | lasmic (Potential).          | 7  | ACACAGAAGAA   | 0.413 |             |
| - | 3  | 747     |                   | NM_001012414 | NP_001012414 | Q5EBN2 | TRI61_HUMAN | RING-type.                   | 1  | TAGATCCTTCCA  | 0.463 |             |
| + | 3  | 1123    | qx.1_Missense_Mt  | NM_152620    | NP_689833    | Q495X7 | TRI60_HUMAN | B30.2/SPRY.                  | 1  | TGTGCATATG    | 0.413 |             |
| + | 18 | 3054    | p.E826K TLL1_uc   | NM_012464    | NP_036596    | O43897 | TLL1_HUMAN  | CUB 4.                       | 7  | CTTGGGAAATCA  | 0.488 | rs150952504 |
| + | 18 | 3064    | p.A829V TLL1_uc   | NM_012464    | NP_036596    | O43897 | TLL1_HUMAN  | CUB 4.                       | 7  | CAGCGCCACTC   | 0.468 |             |
| - | 18 | 2783    |                   | NM_017631    | NP_060101    | Q8IY21 | DDX60_HUMAN | ase ATP-binding.             | 3  | AAAAACGATTCTC | 0.393 |             |
| - | 34 | 4804    |                   | NM_001012967 | NP_001012985 | Q5H9U9 | DDX6L_HUMAN |                              | 1  | ACTTGGGAAGCA  | 0.403 |             |
| - | 19 | 2787    | e_Mutation_p.R85  | NM_001012967 | NP_001012985 | Q5H9U9 | DDX6L_HUMAN | ase ATP-binding.             | 1  | TTGGCGATGAGC  | 0.363 |             |
| - | 15 | 2166    | p.D649N DDX60L    | NM_001012967 | NP_001012985 | Q5H9U9 | DDX6L_HUMAN |                              | 1  | TAAATCTTTCCG  | 0.299 |             |
| + | 6  | 1500    | p.R430Q PALLD_    | NM_016081    | NP_057165    | Q8WX93 | PALLD_HUMAN |                              | 1  | CTGCCGACCTG   | 0.393 | rs145571230 |
| + | 16 | 2889    | e_Mutation_p.R49  | NM_016081    | NP_057165    | Q8WX93 | PALLD_HUMAN |                              | 1  | AGGTCGAAGTC   | 0.393 |             |
| + | 5  | 2057    | irr.2_Missense_Mi | NM_014269    | NP_055084    | Q9UKF5 | ADA29_HUMAN | Extracellular (Potential).   | 16 | AATGTGATCTTC  | 0.448 |             |
| - | 3  | 856_857 |                   | NM_005429    | NP_005420    | P49767 | VEGFC_HUMAN |                              | 5  | AAACTCCTTCCC  | 0.475 |             |

|   |    |       |                    |              |              |        |             |                                |    |               |       |             |
|---|----|-------|--------------------|--------------|--------------|--------|-------------|--------------------------------|----|---------------|-------|-------------|
| + | 9  | 1805  | Z3_uc003ive.1_5'   | NM_001080477 | NP_001073946 | Q9P273 | TEN3_HUMAN  | Extracellular (Potential).     | 0  | GGGGTCGTGGC   | 0.512 |             |
| + | 3  | 1923  | X2_uc003iwa.1_5'   | NM_020225    | NP_064610    | Q9P2F5 | STOX2_HUMAN |                                | 0  | CGAGAGGATAC   | 0.527 |             |
| + | 4  | 1179  | n_p.L83F TLR3_u    | NM_003265    | NP_003256    | O15455 | TLR3_HUMAN  | Luminal (Potential).           | 5  | AGCACCTTAAC   | 0.348 |             |
| + | 4  | 345   | LKB1_uc011cld.1    | NM_000892    | NP_000883    | P03952 | KLKB1_HUMAN | Apple 1.                       | 1  | TACATCGAACAC  | 0.348 |             |
| + | 14 | 1707  | e_Mutation_p.E34   | NM_000892    | NP_000883    | P03952 | KLKB1_HUMAN | peptidase S1.                  | 1  | CAAATGAAGAA   | 0.328 |             |
| + | 12 | 1444  | i_p.P430S PAPD7    | NM_006999    | NP_008930    | Q5XG87 | PAPD7_HUMAN |                                | 1  | CTGTTCTTGC    | 0.542 |             |
| + | 22 | 2446  | jcu.1_Missense_Iv  | NM_005885    | NP_005876    | O60337 | MARH6_HUMAN | ellular (Potential).           | 2  | CAGACTCCTCTT  | 0.413 |             |
| - | 44 | 7306  |                    | NM_001369    | NP_001360    | Q8TE73 | DYH5_HUMAN  | 2 (By similarity).             | 31 | GAATTTCTGCTT  | 0.428 |             |
| - | 44 | 7300  |                    | NM_001369    | NP_001360    | Q8TE73 | DYH5_HUMAN  | 2 (By similarity).             | 31 | TGCTTCTTGAGC  | 0.423 |             |
| - | 38 | 6325  |                    | NM_001369    | NP_001360    | Q8TE73 | DYH5_HUMAN  | 1 (By similarity).             | 31 | GTTTTTCAGGGA  | 0.438 |             |
| - | 36 | 6062  |                    | NM_001369    | NP_001360    | Q8TE73 | DYH5_HUMAN  | 1 (By similarity).             | 31 | TGGTCTGAACAA  | 0.463 |             |
| - | 11 | 1405  | AH5_uc003jfe.1_F   | NM_001369    | NP_001360    | Q8TE73 | DYH5_HUMAN  | n (By similarity).             | 31 | GATTTTGTTTAAC | 0.308 |             |
| + | 8  | 1426  | ie_Mutation_p.P42  | NM_007118    | NP_009049    | O75962 | TRIO_HUMAN  |                                | 18 | ACCTTCCCTCAC  | 0.393 | rs139674608 |
| + | 4  | 412   |                    | NM_020227    | NP_064612    | Q9NQV7 | PRDM9_HUMAN | RAB-related.                   | 6  | TCACCGAAGGC   | 0.468 |             |
| + | 2  | 804   | m.2_Missense_Mt    | NM_178140    | NP_835260    | O15018 | PDZD2_HUMAN | PDZ 1.                         | 9  | ACTGCGGGATG   | 0.592 |             |
| + | 7  | 1084  | FLAM_uc003jle.1    | NM_152403    | NP_689616    | Q63HQ2 | EGFLA_HUMAN |                                | 7  | TCACCGACATGG  | 0.488 | rs147796862 |
| - | 10 | 1659  | .2_Missense_Mute   | NM_001127671 | NP_001121143 | P42702 | LIFR_HUMAN  | tential). Fibronectin type-III | 4  | TAATATCCTTCAC | 0.269 |             |
| - | 7  | 1020  |                    | NM_001737    | NP_001728    | P02748 | CO9_HUMAN   | MACPF.                         | 0  | CATCGCGATTTC  | 0.363 |             |
| - | 10 | 1327  | v.2_Missense_Mul   | NM_001343    | NP_001334    | P98082 | DAB2_HUMAN  |                                | 3  | TCGAGGAAGAG   | 0.443 |             |
| - | 39 | 4871  | lmi.3_Missense_Iv  | NM_173489    | NP_775760    | Q7Z745 | HTRB2_HUMAN |                                | 8  | AAAGGGAATGC   | 0.483 |             |
| - | 16 | 2552  | 1_Missense_Muta    | NM_000065    | NP_000056    | P13671 | CO6_HUMAN   | ment control factor I module   | 7  | TCAGATCCTGAT  | 0.368 |             |
| + | 9  | 947   | q.1_Missense_Mu    | NM_000163    | NP_000154    | P10912 | GHR_HUMAN   | : (Potential). Box 1 motif.    | 6  | CAGTTCAGTT    | 0.318 |             |
| + | 1  | 381   |                    | NM_006308    | NP_006299    | Q12988 | HSPB3_HUMAN |                                | 0  | CAAAATCCCACT  | 0.577 |             |
| - | 2  | 847   |                    | NM_152625    | NP_689838    | Q8N895 | ZN366_HUMAN |                                | 2  | GCTCTCCTGGG   | 0.652 |             |
| + | 18 | 2196  | izf.2_Missense_M   | NM_001080479 | NP_001073948 | Q8N1W1 | RGNEF_HUMAN |                                | 0  | CTGGTCTCTCC   | 0.483 |             |
| + | 2  | 2183  |                    | NM_153610    | NP_705838    | Q8N3K9 | CMYA5_HUMAN |                                | 9  | TCCATCACTGG   | 0.428 |             |
| + | 2  | 6184  |                    | NM_153610    | NP_705838    | Q8N3K9 | CMYA5_HUMAN |                                | 9  | GCCAGGAAAAA   | 0.428 |             |
| + | 2  | 6379  |                    | NM_153610    | NP_705838    | Q8N3K9 | CMYA5_HUMAN |                                | 9  | CATTGGAAAGAA  | 0.438 |             |
| + | 1  | 672   | uc011ctk.1_Intron  | NM_032567    | NP_115956    | Q9BXG8 | SPZ1_HUMAN  |                                | 1  | AAACAGGAGATG  | 0.358 |             |
| + | 7  | 1108  | R98_uc003kjt.2_5'  | NM_032119    | NP_115495    | Q8WXG9 | GPR98_HUMAN | Extracellular (Potential).     | 16 | TTTATTCATGAAT | 0.388 |             |
| + | 56 | 11828 | .G1617E GPR98      | NM_032119    | NP_115495    | Q8WXG9 | GPR98_HUMAN | ellular (Potential).           | 16 | CAGAGGAATTT   | 0.423 |             |
| + | 78 | 16748 | .S3257F GPR98      | NM_032119    | NP_115495    | Q8WXG9 | GPR98_HUMAN | ellular (Potential).           | 16 | TCATATCTCCAG  | 0.413 |             |
| - | 3  | 570   | nse_Mutation_p.P   | NM_001142483 | NP_001135955 | Q16612 | NP311_HUMAN |                                | 1  | GACAGGAAGTC   | 0.458 |             |
| + | 16 | 2858  | cl.1_Missense_Mu   | NM_005509    | NP_005500    | Q9Y485 | DMXL1_HUMAN | WD 7.                          | 2  | TCAATTCCTGTC  | 0.328 |             |
| - | 1  | 578   | h.1_Missense_Ml    | NM_020389    | NP_065122    | Q9HCX4 | TRPC7_HUMAN | lasmic (Potential).            | 0  | CGTGGGGCCGC   | 0.612 |             |
| + | 1  | 533   | 03lhc.1_Missense   | NM_018905    | NP_061728    | Q9Y5H9 | PCDA2_HUMAN | ellular (Potential).           | 4  | GTTTTCCCGAAT  | 0.488 |             |
| + | 1  | 104   | c003lhi.2_Intron P | NM_018908    | NP_061731    | Q9Y5H7 | PCDA5_HUMAN | r (Potential). Cadherin 1.     | 3  | GATCCCGGAGG   | 0.647 |             |
| + | 1  | 1900  | IA6_uc003lhn.2_I   | NM_018902    | NP_061725    | Q9Y511 | PCDAB_HUMAN | r (Potential). Cadherin 3.     | 1  | CTCCTGAAGTCC  | 0.527 |             |
| + | 1  | 526   |                    | NM_013340    | NP_037472    | Q9Y5F3 | PCDB1_HUMAN | Extracellular (Potential).     | 0  | GGGTTCACGTT   | 0.537 |             |
| + | 1  | 1024  | uc003lin.2_Intron  | NM_018937    | NP_061760    | Q9Y5E6 | PCDB3_HUMAN | r (Potential). Cadherin 3.     | 2  | TCAACGACAAC   | 0.478 |             |
| + | 1  | 148   | HB6_uc011dah.1_I   | NM_018939    | NP_061762    | Q9Y5E3 | PCDB6_HUMAN | r (Potential). Cadherin 1.     | 1  | .CAAAGGACCTG  | 0.502 |             |
| + | 1  | 2174  |                    | NM_018940    | NP_061763    | Q9Y5E2 | PCDB7_HUMAN | Extracellular (Potential).     | 6  | CTTCTCCAGC    | 0.692 |             |
| + | 1  | 1087  | IB16_uc003liv.2_5  | NM_019120    | NP_061993    | Q9UN66 | PCDB8_HUMAN | Extracellular (Potential).     | 4  | CAGGAGAAATTC  | 0.403 |             |
| + | 1  | 1571  |                    | NM_018933    | NP_061756    | Q9Y5F0 | PCDBD_HUMAN | r (Potential). Cadherin 5.     | 3  | TCCGCGAGAAC   | 0.602 |             |
| + | 1  | 107   | DHGA4_uc003ljq     | NM_018919    | NP_061742    | Q9Y5G7 | PCDG6_HUMAN | Extracellular (Potential).     | 1  | TATTCGAGGAG   | 0.657 |             |
| - | 3  | 2258  | p.Y714F PCDH1      | NM_002587    | NP_002578    | Q08174 | PCDH1_HUMAN | r (Potential). Cadherin 6.     | 5  | TGATATAGGGT   | 0.567 |             |
| - | 7  | 1485  | 3loh.3_Splice_Site | NM_004576    | NP_004567    | Q00005 | 2ABB_HUMAN  |                                | 2  | TCTATACCTGGT  | 0.483 |             |

|   |    |         |                     |              |              |        |             |                              |    |                |       |
|---|----|---------|---------------------|--------------|--------------|--------|-------------|------------------------------|----|----------------|-------|
| - | 3  | 754     | loh.3_Missense_IV   | NM_004576    | NP_004567    | Q00005 | 2ABB_HUMAN  |                              | 2  | :GGGTTTCATGGC' | 0.373 |
| - | 6  | 862     | y.1_Missense_Mut    | NM_000870    | NP_000861    | Q13639 | 5HT4R_HUMAN | smic (By similarity).        | 1  | :AGGCTCCTGCC   | 0.547 |
| + | 1  | 2438    |                     | NM_001099293 | NP_001092763 | Q2VIQ3 | KIF4B_HUMAN | RC1 (By similarity). Potenti | 1  | AGGAAGCCAAA'   | 0.463 |
| + | 1  | 2459    |                     | NM_001099293 | NP_001092763 | Q2VIQ3 | KIF4B_HUMAN | RC1 (By similarity). Potenti | 1  | :ATGACCTCCTTC  | 0.453 |
| - | 2  | 661     | vm.3_Missense_M     | NM_001100816 | NP_001094286 | O43513 | MED7_HUMAN  |                              | 0  | :AGGTCCAAGAAA  | 0.373 |
| + | 8  | 1613    | ODZ2_uc003l3r.3     | NM_001122679 | NP_001116151 |        |             |                              | 10 | :TGAAGCCCGTGT' | 0.502 |
| + | 9  | 1180    | n_p.M206 KCNIPI     | NM_001034837 | NP_001030009 | Q9NZI2 | KCIP1_HUMAN | ith KCND2 (By similarity).   | 2  | :ATCATGAGGTC'  | 0.468 |
| - | 16 | 1717    |                     | NM_005110    | NP_005101    | O94808 | GFPT2_HUMAN | SIS 2.                       | 2  | :GCAGCGATCTC'  | 0.527 |
| + | 3  | 482     | i_p.A45S CNOT6_     | NM_015455    | NP_056270    | Q9ULM6 | CNOT6_HUMAN |                              | 0  | TTAAGCGCATCT'  | 0.378 |
| - | 1  | 235     | IC2_uc003mte.2_li   | NM_148959    | NP_683762    | Q8NHY5 | HUS1B_HUMAN |                              | 0  | :CTTCCGAGACA'  | 0.692 |
| + | 2  | 339     | :P2L_uc011dim.1_    | NM_001040274 | NP_001035364 | Q5T4T6 | SYC2L_HUMAN |                              | 2  | :AGGAAGACAGGA' | 0.279 |
| - | 14 | 1434    | p.G404R FAM65B      | NM_014722    | NP_055537    | Q9Y4F9 | FA65B_HUMAN |                              | 1  | CCTTTCCATTTTC  | 0.453 |
| + | 1  | 257     | :2AA_uc003nfc.2_    | NM_170610    | NP_733759    | Q96A08 | H2B1A_HUMAN |                              | 1  | :CTACAGCAAGCA' | 0.512 |
| + | 11 | 1441    | p.G379S BTN3A3_     | NM_006994    | NP_008925    | O00478 | BT3A3_HUMAN | . Cytoplasmic (Potential).   | 0  | :AAAAAGGTTGG   | 0.483 |
| + | 1  | 23      | :uc003njq.2_5'Flanl | NM_021968    | NP_068803    | P62805 | H4_HUMAN    |                              | 2  | :AGCGCGGAAGG   | 0.627 |
| - | 4  | 1137    | nl.3_Missense_ML    | NM_001109809 | NP_001103279 | Q9NU63 | ZFP57_HUMAN |                              | 5  | :CCTGGGACCTG   | 0.557 |
| - | 2  | 635     | pd.2_Missense_M     | NM_025236    | NP_079512    | Q9H2S5 | RNF39_HUMAN |                              | 0  | :TTCTCATATCC   | 0.527 |
| - | 1  | 113     | ie_Mutation_p.E13   | NM_006778    | NP_006769    | Q9UDY6 | TRI10_HUMAN |                              | 0  | :GACTTCATCTGC  | 0.617 |
| + | 3  | 868     | st.2_Missense_ML    | NM_001077511 | NP_001070979 | Q9Y242 | TCF19_HUMAN |                              | 0  | :CCCCCTCGGAGT  | 0.562 |
| + | 3  | 560_561 | utation_p.116_117   | NM_005931    | NP_005922    | Q29980 | MICB_HUMAN  | cellular (Potential).        | 0  | ACTCAAGAATCC   | 0.525 |
| + | 8  | 1143    | nzf.1_Missense_IV   | NM_000500    | NP_000491    | P08686 | CP21A_HUMAN |                              | 0  | :TGCACGGCTGC   | 0.667 |
| - | 15 | 5498    |                     | NM_019105    | NP_061978    | P22105 | TENX_HUMAN  |                              | 0  | TATCATCCATAGC  | 0.602 |
| - | 6  | 381     | lpz.1_Missense_IV   | NM_006781    | NP_006772    | Q5SRN2 | CF010_HUMAN |                              | 1  | GGTTATCATATGA  | 0.279 |
| - | 9  | 1317    | odw.2_Missense_IV   | NM_004761    | NP_004752    | O15211 | RGL2_HUMAN  | Ras-GEF.                     | 6  | CTCTGGGAATAA   | 0.547 |
| + | 28 | 3857    |                     | NM_002224    | NP_002215    | Q14573 | ITPR3_HUMAN | lasmic (Potential).          | 19 | :AGATCCCCTATG' | 0.577 |
| + | 17 | 2104    | _p.V699 SCUBE3      | NM_152753    | NP_689966    | Q8IX30 | SCUB3_HUMAN |                              | 1  | :ACTCTGTAGATC  | 0.597 |
| + | 5  | 769     | lb.1_Missense_ML    | NM_145028    | NP_659465    | Q5T9G4 | CF081_HUMAN |                              | 1  | AAGAATGACCTT'  | 0.493 |
| + | 2  | 247     | 1_Missense_Muta     | NM_173558    | NP_775829    | Q7Z6J4 | FGD2_HUMAN  |                              | 3  | :CCCCAGAAGCA   | 0.612 |
| + | 76 | 11716   | isense_Mutation_p   | NM_001371    | NP_001362    |        |             |                              | 21 | :ATGTATCAGACG' | 0.507 |
| + | 4  | 719     | nsense_Mutation_p.S | NM_001010873 | NP_001010873 | Q5TGU0 | TSPO2_HUMAN | ical; (Potential).           | 0  | :ACCTAGCCTGG'  | 0.607 |
| - | 5  | 1155    | i_p.P37S TRERF1     | NM_033502    | NP_277037    | Q96PN7 | TREF1_HUMAN |                              | 5  | :GGAAGGGATAG'  | 0.637 |
| - | 2  | 643     | p.V166M CUL7_uc     | NM_014780    | NP_055595    | Q14999 | CUL7_HUMAN  |                              | 4  | :ACTCACGTCGG   | 0.612 |
| + | 1  | 4861    | e.2_Missense_Mu     | NM_001010870 | NP_001010870 | O60522 | TDRD6_HUMAN | Tudor 7.                     | 6  | :GCCATTCCTTCT' | 0.413 |
| + | 6  | 1335    | p.W416* GPR115_     | NM_153838    | NP_722580    | Q8IZF3 | GP115_HUMAN | tracellular (F p.W359*(1)    | 8  | :AGATGGGATGA'  | 0.453 |
| + | 5  | 1085    | :TR2_uc010jzv.2_l   | NM_001526    | NP_001517    | O43614 | OX2R_HUMAN  | lasmic (Potential).          | 6  | :CCCTGGAAACAT' | 0.493 |
| + | 8  | 1176    |                     | NM_207410    | NP_997293    | Q6UXV0 | GFRAL_HUMAN | ical; (Potential).           | 2  | :ACTGTGGAATC'  | 0.358 |
| - | 4  | 448     | MGCLL1_uc011dx      | NM_019036    | NP_061909    | Q8TB92 | HMGC2_HUMAN |                              | 4  | :TGTAGGAACTAT  | 0.313 |
| - | 1  | 1034    | cf.1_Missense_Mu    | NM_021073    | NP_066551    | P22003 | BMP5_HUMAN  |                              | 2  | :GGTCTCTTCTGC' | 0.522 |
| - | 10 | 1170    | c.1_Missense_Mut    | NM_001144769 | NP_001138241 | Q03001 | DYST_HUMAN  | 2. Actin-binding.            | 14 | :ACAGCAACAGTA' | 0.348 |
| + | 3  | 845     | :D6_uc003pdg.2_f    | NM_152731    | NP_689944    | Q5SZJ8 | BEND6_HUMAN | Potential.                   | 0  | :GGAAAGAAAAC'  | 0.378 |
| + | 10 | 2358    | sense_Mutation_p.   | NM_001031623 | NP_001026794 | Q9Y4E5 | ZN451_HUMAN |                              | 2  | GATTTTCCAGTA'  | 0.363 |
| + | 11 | 1897    | :Q5_uc010kat.2_lv   | NM_019842    | NP_062816    | Q9NR82 | KCNQ5_HUMAN |                              | 7  | :CCCACCACCTTA' | 0.403 |
| + | 5  | 994     | hq.2_Missense_ML    | NM_133493    | NP_598000    | Q6YHK3 | CD109_HUMAN |                              | 4  | TCATTTCCAAAAC' | 0.368 |
| - | 12 | 2496    | DL12A1_uc003phu     | NM_004370    | NP_004361    | Q99715 | COCA1_HUMAN | nectin type-III 4.           | 9  | :GTGTTCTCCTC'  | 0.433 |
| - | 10 | 1860    | DL12A1_uc003phu     | NM_004370    | NP_004361    | Q99715 | COCA1_HUMAN | VWFA 2.                      | 9  | GAATTCCTCAGT'  | 0.458 |
| - | 5  | 2992    | _p.M774 FILIP1_u    | NM_015687    | NP_056502    | Q7Z7B0 | FLIP1_HUMAN |                              | 4  | :CTTCTCATCCAT  | 0.507 |
| - | 4  | 1243    | e_Mutation_p.E27    | NM_001122769 | NP_001116241 | Q86VQ0 | LCA5_HUMAN  | Potential.                   | 0  | TATTTTCATCATG  | 0.333 |

rs140327995

rs79968708

|   |    |           |                                  |              |              |        |             |                               |   |                   |       |             |
|---|----|-----------|----------------------------------|--------------|--------------|--------|-------------|-------------------------------|---|-------------------|-------|-------------|
| - | 8  | 1491      | i_p.G322* IBTK_ur                | NM_015525    | NP_056340    | Q9P2D0 | IBTK_HUMAN  |                               | 4 | TTTCTCCATTGGC     | 0.353 |             |
| + | 17 | 2812      | p.V842G DOPEY1                   | NM_015018    | NP_055833    | Q5JWR5 | DOP1_HUMAN  |                               | 4 | CTGTGGTTATTAC     | 0.448 |             |
| - | 12 | 1419      | _p.P363L ME1_ucf                 | NM_002395    | NP_002386    | P48163 | MAOX_HUMAN  |                               | 2 | TTGACTGGATCA      | 0.428 |             |
| - | 20 | 1757      | se_Mutation_p.G3                 | NM_020320    | NP_064716    | Q5T160 | SYRM_HUMAN  |                               | 3 | TTCAATCCATTGC     | 0.328 |             |
| - | 6  | 574       | anc.2_Missense_M                 | NM_016021    | NP_057105    | Q9Y385 | UB2J1_HUMAN | lasmic (Potential).           | 0 | TCTCAGGAGTGC      | 0.388 |             |
| + | 11 | 2243      | e_Mutation_p.G14                 | NM_052904    | NP_443136    | Q96NJ5 | KLH32_HUMAN | Keich 6.                      | 4 | TCCAATGGAATAC     | 0.438 |             |
| - | 11 | 2351      | u.2_Missense_Mu                  | NM_005068    | NP_005059    | P81133 | SIM1_HUMAN  | inded C-terminal.             | 4 | GCATATCCAGTT      | 0.453 |             |
| + | 6  | 1148      | o.3_Missense_Mt                  | NM_021956    | NP_068775    | Q13002 | GRIK2_HUMAN | ellular (Potential).          | 5 | TGGAACGATTGC      | 0.413 |             |
| - | 9  | 995       | ivr.2_Missense_Mt                | NM_016262    | NP_057346    | Q9UJT0 | TBE_HUMAN   |                               | 1 | TGTTGAGGAAAA      | 0.333 |             |
| - | 6  | 1586      |                                  | NM_002031    | NP_002022    | P42685 | FRK_HUMAN   | rotein kinase.                | 6 | TCCACCTTAAAA      | 0.333 |             |
| + | 6  | 2028      | t.2_Missense_Mut                 | NM_001080976 | NP_001074445 | Q9UL01 | DSE_HUMAN   |                               | 1 | AGAGATGGTCTC      | 0.488 | rs141851816 |
| - | 1  | 1         | olice_Site GPRC6/                | NM_148963    | NP_683766    | Q5T6X5 | GPC6A_HUMAN |                               | 6 | TGAGTTTCATGTG     | 0.403 |             |
| + | 9  | 970       |                                  | NM_173560    | NP_775831    | Q8HWS3 | RFX6_HUMAN  |                               | 3 | TATCTCCTTCCC      | 0.348 |             |
| - | 11 | 2142_2143 |                                  | NM_005907    | NP_005898    | P33908 | MA1A1_HUMAN | ional (Potential).            | 4 | CAGGCCCATTTTC     | 0.361 |             |
| + | 6  | 619       | i_p.S53F PKIB_uc                 | NM_181794    | NP_861459    | Q9C010 | IPKB_HUMAN  |                               | 0 | TCTCTCCGTGA       | 0.473 |             |
| + | 3  | 1314      |                                  | NM_001010852 | NP_001010852 | Q5SYC1 | CLVS2_HUMAN | CRAL-TRIO.                    | 5 | ATGATTGAAGATC     | 0.408 |             |
| + | 5  | 1594      |                                  | NM_001010852 | NP_001010852 | Q5SYC1 | CLVS2_HUMAN | CRAL-TRIO.                    | 5 | TTCATCCTGAGAT     | 0.448 |             |
| - | 6  | 3437      | 174_uc003qbc.2_                  | NM_001012279 | NP_001012279 | Q5TF21 | CF174_HUMAN |                               | 6 | TCTCCTCGTCCA      | 0.637 |             |
| - | 4  | 827       | bt.1_Missense_Mt                 | NM_001010923 | NP_001010923 | Q8N1K5 | THMS1_HUMAN | CABIT 1.                      | 4 | TCTCTTCTTGTA      | 0.378 |             |
| + | 6  | 717       |                                  | NM_006208    | NP_006199    | P22413 | ENPP1_HUMAN | ase. Extracellular (Potential | 4 | CTTCTTCTGTG       | 0.398 |             |
| - | 4  | 542       | i.2_Intron IL22RA2               | NM_052962    | NP_443194    | Q969J5 | I2R2_HUMAN  |                               | 0 | TCCAGCATCCACTGGCT | 0     |             |
| - | 10 | 1930      |                                  | NM_153235    | NP_694967    | Q8N3L3 | TXLNB_HUMAN |                               | 2 | TGCATTGGGTTT      | 0.627 |             |
| + | 3  | 636       | _p.G188E ULBP2_                  | NM_025217    | NP_079493    | Q9BZM5 | N2DL2_HUMAN | lass 1 alpha-2 like.          | 0 | TAAATGGGAGACT     | 0.478 |             |
| + | 7  | 2388      | _p.P344L TULP4_u                 | NM_020245    | NP_064630    | Q9NRJ4 | TULP4_HUMAN |                               | 1 | TAGCAGCCCATCA     | 0.532 |             |
| + | 7  | 1056      | jw.1_Missense_Mt                 | NM_032532    | NP_115921    | Q4ZHG4 | FNDC1_HUMAN | nectin type-III 3.            | 8 | TCTCTGGAAAA       | 0.413 |             |
| + | 8  | 1194      | jw.1_Missense_Mt                 | NM_032532    | NP_115921    | Q4ZHG4 | FNDC1_HUMAN | nectin type-III 3.            | 8 | TGTATGAATTTTC     | 0.468 |             |
| + | 11 | 1000      | isy.1_Missense_M                 | NM_173516    | NP_775787    | Q8NA58 | PNDC1_HUMAN | lasmic (Potential).           | 0 | AGTACGATCAA       | 0.398 |             |
| + | 29 | 4473      | vc.1_Missense_Mt                 | NM_001040001 | NP_001035090 | P55196 | AFAD_HUMAN  | Potential.                    | 5 | TAGTCCGCACTC      | 0.567 |             |
| + | 2  | 993       | ense_Mutation_p.f                | NM_001098201 | NP_001091671 | Q99527 | GPFR_HUMAN  | ellular (Potential).          | 1 | TACACCGACGAG      | 0.657 |             |
| + | 25 | 3734      | o.2_Missense_Mu                  | NM_152744    | NP_689957    | Q7Z5N4 | SDK1_HUMAN  | nectin type-III 6.            | 6 | TGCGCGGATTCT      | 0.602 |             |
| + | 42 | 6134      | my.2_Nonsense_M                  | NM_152744    | NP_689957    | Q7Z5N4 | SDK1_HUMAN  |                               | 6 | TAGCTCAAGTGC      | 0.597 |             |
| - | 3  | 793       | BA1_uc011jxe.1_                  | NM_001037763 | NP_001032852 | Q2UY09 | COSA1_HUMAN | VWFA 1.                       | 3 | TGACAGCATCTT      | 0.373 |             |
| + | 10 | 1290      | _p.P373S HDAC9_                  | NM_058176    | NP_478056    | Q9UKV0 | HDAC9_HUMAN |                               | 5 | TGAGTTCCCTTA      | 0.343 |             |
| - | 17 | 1552      | 1jyl.1_Missense_M                | NM_012294    | NP_036426    | Q92565 | RPGF5_HUMAN |                               | 1 | TGCTATACTGGA      | 0.438 |             |
| - | 5  | 627       |                                  | NM_006547    | NP_006538    | O00425 | IF2B3_HUMAN | RRM 2.                        | 2 | TACAACCTGCAG      | 0.323 |             |
| - | 6  | 984       | olice_Site_p.R156                | NM_013293    | NP_037425    | Q13595 | TRA2A_HUMAN |                               | 1 | TACATTACCTGTAT    | 0.284 |             |
| - | 4  | 696       | _p.G60E TRA2A_u                  | NM_013293    | NP_037425    | Q13595 | TRA2A_HUMAN | RRM.                          | 1 | TCAAATCCTCGAC     | 0.373 |             |
| + | 6  | 859       | rr.3_Missense_Mu                 | NM_199136    | NP_954587    | A4D161 | CG046_HUMAN |                               | 0 | TTTCTTCATTAAG     | 0.279 |             |
| - | 2  | 609       | XAX3_uc003syk.2                  | NM_030661    | NP_109377    | O43365 | HXA3_HUMAN  | Pro-rich.                     | 2 | TGGCAGGGGTAG      | 0.393 |             |
| + | 16 | 1563      | ADCYAP1R1_uc0                    | NM_001118    | NP_001109    | P41586 | PACR_HUMAN  | lasmic (Potential).           | 1 | TGCTCTCCATCC      | 0.602 |             |
| + | 11 | 3338      | _p.S633F CCDC12                  | NM_194300    | NP_919276    | Q6ZRS4 | CC129_HUMAN |                               | 0 | TCAAATCCGTCT      | 0.522 |             |
| - | 9  | 1406      | _p.E373K PDE1C_                  | NM_005020    | NP_005011    | Q14123 | PDE1C_HUMAN | ytic (By similarity).         | 4 | TTTCTCTCGTATC     | 0.413 |             |
| - | 6  | 993       | _p.S235F PDE1C_                  | NM_005020    | NP_005011    | Q14123 | PDE1C_HUMAN |                               | 4 | TGAGGGGAAAG       | 0.468 |             |
| + | 3  | 418       | SR1_uc010kwv.1_                  | NM_207172    | NP_997055    | Q6W5P4 | NPSR1_HUMAN | Name=2; (Potential).          | 4 | TTTTCACAGGAC      | 0.388 |             |
| - | 9  | 905       |                                  | NM_015283    | NP_056098    | Q2PZ11 | D19L1_HUMAN | ical; (Potential).            | 0 | TCCAAGGAAGCA      | 0.343 |             |
| - | 14 | 1606      | o.1_RNA DPY19L2P1_uc010kwz.1_RNA |              |              |        |             |                               | 0 | TAGATCACTCAG      | 0.323 |             |
| + | 14 | 4413      | thj.2_Missense_Mt                | NM_003718    | NP_003709    | Q14004 | CDK13_HUMAN |                               | 5 | TCTTTGGATAAC      | 0.433 |             |



|   |    |           |                    |              |              |        |             |                              |       |                |       |             |
|---|----|-----------|--------------------|--------------|--------------|--------|-------------|------------------------------|-------|----------------|-------|-------------|
| - | 44 | 6588      | 1_Intron PKD1L1_   | NM_138295    | NP_612152    | Q8TDX9 | PK1L1_HUMAN | lasmic (Potential).          | 11    | ΓCTTTTCCAAGC/  | 0.507 |             |
| + | 9  | 1612      | p.G395S IKZF1_u    | NM_006060    | NP_006051    | Q13422 | IKZF1_HUMAN | 2H2-type 5.                  | 148   | ACATGGGCTGCC   | 0.602 |             |
| - | 7  | 1248      | 1_p.E355 COBL_u    | NM_015198    | NP_056013    | O75128 | COBL_HUMAN  |                              | 5     | ATCCTCAGTGCC   | 0.592 |             |
| + | 4  | 1558      |                    | NM_001159522 | NP_001152994 | A8MUV8 | ZN727_HUMAN | 2H2-type 11.                 | 0     | 3CAAAAACCTTTAC | 0.428 |             |
| - | 1  | 697       | C2_uc011kfa.1_Int  | NM_001306    | NP_001297    | O15551 | CLD3_HUMAN  | cellular (Potential).        | 0     | 3CGCCCATCTCG   | 0.706 |             |
| + | 23 | 1568      | zs.2_Missense_Mu   | NM_000501    | NP_001075224 | P15502 | ELN_HUMAN   | Ala-rich.                    | 5     | 3TGGCTCCTGGT   | 0.547 |             |
| + | 6  | 573       | F4H_uc003uae.1_    | NM_022170    | NP_071496    | Q15056 | IF4H_HUMAN  |                              | 0     | GCCTCCCTCC     | 0.612 |             |
| - | 13 | 3290      |                    | NM_001099415 | NP_001092885 | A8CG34 | P121C_HUMAN | side (Potential).            | 0     | CGAAGGAGAAG    | 0.657 |             |
| + | 4  | 597       | p.A145V ZP3_uc0    | NM_001110354 | NP_001103824 | P21754 | ZP3_HUMAN   | lular (Potential). ZP.       | 0     | TCAGCCACC      | 0.498 |             |
| - | 5  | 9347      | _Mutation_p.D302   | NM_033026    | NP_149015    | Q9Y6V0 | PCLO_HUMAN  |                              | 7     | TGTGTGAGTTC    | 0.398 |             |
| - | 5  | 8672      | _Mutation_p.V279   | NM_033026    | NP_149015    | Q9Y6V0 | PCLO_HUMAN  |                              | 7     | GGTCACTGTCT    | 0.433 |             |
| - | 3  | 2757      | iv.2_Missense_Mu   | NM_033026    | NP_149015    | Q9Y6V0 | PCLO_HUMAN  | Pro-rich.                    | 7     | CAGGTCGAGGT    | 0.438 |             |
| - | 2  | 1835      | iv.2_Missense_Mu   | NM_033026    | NP_149015    | Q9Y6V0 | PCLO_HUMAN  | n approximate repeats of P   | 7     | TGCTGGGCCAG    | 0.597 |             |
| - | 17 | 2744      |                    | NM_012431    | NP_036563    | O15041 | SEM3E_HUMAN | Lys-rich (basic).            | 3     | GGAACGGAGCT    | 0.448 |             |
| - | 14 | 1913      | hc.1_Missense_Mu   | NM_000927    | NP_000918    | P08183 | MDR1_HUMAN  | r 1. Cytoplasmic (Potential) | 7     | AATCTCATCCAT   | 0.443 |             |
| - | 3  | 616       | 1_p.D47N CYP51A    | NM_000786    | NP_000777    | Q16850 | CP51A_HUMAN |                              | 0     | 3CACATCGTATGC  | 0.378 |             |
| - | 3  | 2294      | mg.2_Missense_M    | NM_017654    | NP_060124    | Q5K651 | SAMD9_HUMAN |                              | 7     | TTCCTCTTTTG/   | 0.363 |             |
| - | 5  | 4116      | ID9L_uc003umk.1_   | NM_152703    | NP_689916    | Q8IVG5 | SAM9L_HUMAN |                              | 4     | GTAGAATAAGTTC  | 0.388 |             |
| - | 2  | 178       | 10ff.2_Missense_   | NM_001039372 | NP_001034461 | A8MVV5 | HECA2_HUMAN | cellular (Potential).        | 5     | GGACGGGTAGG    | 0.517 |             |
| - | 4  | 488       | 3umu.1_Missense_   | NM_001742    | NP_001733    | P30988 | CALCR_HUMAN | cellular (Potential).        | 9     | GCATTCGGTCA    | 0.388 | rs144560846 |
| + | 6  | 1750      | 3.H475Y ZKSCAN     | NM_003439    | NP_003430    | P17029 | ZKSC1_HUMAN | 2H2-type 5.                  | 3     | AGAATTCACACT   | 0.488 |             |
| - | 6  | 1412      | 3e_Mutation_p.E33  | NM_032924    | NP_116313    | P17036 | ZNF3_HUMAN  | 2H2-type 7 p.E369K(1)        | 1     | GATTCGTAGGC    | 0.468 |             |
| + | 14 | 2315      | 2AN_uc003uwl.2_F   | NM_003386    | NP_003377    | Q9Y493 | ZAN_HUMAN   | ate) (mucin-like domain). E  | 11    | AAAAACCCACCA   | 0.507 |             |
| - | 2  | 1447      | 1_p.D431N ACHE_    | NM_000665    | NP_000656    | P22303 | ACES_HUMAN  |                              | 2     | CACATCGCTCAC   | 0.667 |             |
| + | 3  | 7450      | C17_uc010lho.1_F   | NM_001040105 | NP_001035194 | Q685J3 | MUC17_HUMAN | ch. 59 X approximate tand    | 27    | CACCACGCCGG    | 0.522 |             |
| + | 3  | 7512      | C17_uc010lho.1_F   | NM_001040105 | NP_001035194 | Q685J3 | MUC17_HUMAN | 3 X approximate tandem re    | 27    | CACCTATGACC    | 0.493 | rs139444589 |
| + | 3  | 7514      | C17_uc010lho.1_F   | NM_001040105 | NP_001035194 | Q685J3 | MUC17_HUMAN | 3 X approximate tandem re    | 27    | ACCTATGACCAC   | 0.493 | rs147944556 |
| + | 3  | 11748     | C17_uc010lho.1_F   | NM_001040105 | NP_001035194 | Q685J3 | MUC17_HUMAN | cellular (Potential).        | 27    | CACCTCCTCTT    | 0.468 |             |
| + | 4  | 1711      | 1_Intron FBXL13_u  | NM_001031692 | NP_001026862 | Q8N6Y2 | LRC17_HUMAN |                              | 1     | AGTAGGATAAGC   | 0.313 |             |
| - | 8  | 1022      | 1199N FBXL13_uc    | NM_145032    | NP_659469    | Q8NEE6 | FXL13_HUMAN |                              | 0     | AAAAATCAATCT/  | 0.204 |             |
| + | 5  | 1017      | 1kli.1_Missense_M  | NM_031905    | NP_114111    | Q8N2F6 | ARM10_HUMAN |                              | 1     | CTGTTACCAATC   | 0.443 |             |
| - | 4  | 675       | ix.2_Missense_Mu   | NM_014377    | NP_055192    | Q99543 | DNJC2_HUMAN | J.                           | 1     | TTTAGTTATGCA   | 0.328 |             |
| - | 60 | 9915      | 1.2_Missense_Mut   | NM_005045    | NP_005036    | P78509 | RELN_HUMAN  | EGF-like 8.                  | 19    | GGAAGCTCTCG    | 0.393 |             |
| - | 28 | 4206      | 2_Missense_Mut     | NM_005045    | NP_005036    | P78509 | RELN_HUMAN  |                              | 19    | 3AGTTTCCTTCG   | 0.478 |             |
| - | 9  | 1394      | 3y.2_Splice_Site_p | NM_019042    | NP_061915    | Q96PZ0 | PUS7_HUMAN  |                              | 1     | TACCAACCTTCC   | 0.373 |             |
| - | 25 | 3746_3747 | 3v.2_Missense_Mu   | NM_002291    | NP_002282    | P07942 | LAMB1_HUMAN | inin EGF-like 13.            | 8     | AATGCCCTGGG    | 0.53  |             |
| - | 6  | 796       | 3ex.2_Missense_M   | NM_002291    | NP_002282    | P07942 | LAMB1_HUMAN | inin N-terminal.             | 8     | AGTCGGACGAT    | 0.433 |             |
| - | 30 | 4696      | p.D1538N LAMB4     | NM_007356    | NP_031382    | A4D0S4 | LAMB4_HUMAN | ential. Domain I.            | 8     | TTTCATCTGTCC1  | 0.393 |             |
| - | 25 | 3615      | 3kg.3_Missense_M   | NM_017954    | NP_060424    | Q86UW7 | CAPS2_HUMAN |                              | 2     | TGGATGAAAAG    | 0.333 |             |
| + | 37 | 6291      | a.3_Missense_Mu    | NM_001458    | NP_001449    | Q14315 | FLNC_HUMAN  | Filamin 18.                  | 12    | CAGACCCCTTC    | 0.617 |             |
| + | 8  | 1016      | 3voq.1_Nonsense_   | NM_178562    | NP_848657    | Q86UF1 | TSN33_HUMAN | lasmic (Potential).          | 1     | 3TGAATCAGATC/  | 0.532 |             |
| - | 10 | 4047      | 3.P1283L KIAA154   | NM_020910    | NP_065961    | Q9HCM3 | K1549_HUMAN |                              | 230   | 3TGCAGGCTGA    | 0.522 |             |
| - | 2  | 2529      | 3_p.S777F KIAA154  | NM_020910    | NP_065961    | Q9HCM3 | K1549_HUMAN |                              | 230   | AGAAAGAGGCC    | 0.522 |             |
| + | 8  | 957       | 3_p.E170K TBXAS1   | NM_001130966 | NP_001124438 | P24557 | THAS_HUMAN  | lasmic (Potential).          | 3     | TTCTTGAATTC    | 0.582 |             |
| - | 15 | 1860      |                    | NM_004333    | NP_004324    | P15056 | BRAF_HUMAN  | rotein kinas_R603>1(2) p.T   | 18290 | 3ATTTCACTGTAC  | 0.368 |             |
| + | 1  | 469       |                    | NM_016944    | NP_058640    | Q9NYW5 | TA2R4_HUMAN | cellular (Potential).        | 0     | 3CTTTTCCTGAAC  | 0.458 |             |
| + | 2  | 174       | 3.2_Intron uc003wa | NR_001296    |              |        |             |                              | 0     | CCTGTGAGGAG    | 0.547 |             |

|   |    |           |                   |              |              |        |             |                               |    |                   |       |
|---|----|-----------|-------------------|--------------|--------------|--------|-------------|-------------------------------|----|-------------------|-------|
| - | 12 | 1582      |                   | NM_000420    | NP_000411    | P23276 | KELL_HUMAN  | cellular (Potential).         | 4  | CCAGGGAAGGT       | 0.577 |
| - | 8  | 976       |                   | NM_000420    | NP_000411    | P23276 | KELL_HUMAN  | cellular (Potential).         | 4  | CCAGCTGATTCA      | 0.542 |
| + | 22 | 2612      | ctc.1_Missense_Mu | NM_000083    | NP_000074    | P35523 | CLCN1_HUMAN | oplasmic (By similarity).     | 5  | FGTTTTCACTCC      | 0.572 |
| + | 1  | 193       |                   | NM_012369    | NP_036501    | Q13607 | OR2F1_HUMAN | lasmic (Potential).           | 3  | CGATCAGACTGG      | 0.532 |
| + | 2  | 2691_2692 | _Mutation_p.S858  | NM_005435    | NP_005426    | Q12774 | ARHG5_HUMAN |                               | 2  | CAAGTCCAGGGC      | 0.589 |
| - | 2  | 112       |                   | NM_001080413 | NP_001073882 | O60393 | NOBOX_HUMAN |                               | 1  | CCACAGGAAATT      | 0.517 |
| - | 4  | 221       | TPK1_uc003wer.2   | NM_022445    | NP_071890    | Q9H3S4 | TPK1_HUMAN  |                               | 2  | TTAAAAGAGCTT      | 0.413 |
| + | 12 | 2309      |                   | NM_014141    | NP_054860    | Q9UHC6 | CNTP2_HUMAN | ential). Fibrinogen C-termin  | 11 | CGCCTTCCTGTG      | 0.448 |
| - | 4  | 750       |                   | NM_001001661 | NP_001001661 | Q6IV72 | ZN425_HUMAN |                               | 3  | CTGGACGAGTTT      | 0.517 |
| - | 6  | 2295      |                   | NM_015694    | NP_056509    | Q9ULD5 | ZN777_HUMAN | 2H2-type 5.                   | 1  | GGTGGCGCAGC       | 0.642 |
| - | 5  | 1463      |                   | NM_015694    | NP_056509    | Q9ULD5 | ZN777_HUMAN | Glu-rich.                     | 1  | CCAGTTCGCTGA      | 0.652 |
| + | 69 | 9659      |                   | NM_198455    | NP_940857    | A2VEC9 | SSPO_HUMAN  | SP type-1 11.                 | 0  | CCATCCACCGTGG     | 0.672 |
| + | 2  | 664       |                   | NM_175571    | NP_783161    | Q8ND71 | GIMA8_HUMAN |                               | 7  | CCATGAGGAAACA     | 0.517 |
| + | 4  | 1211      |                   | NM_175571    | NP_783161    | Q8ND71 | GIMA8_HUMAN |                               | 7  | CCCTGGAGAAAA      | 0.468 |
| + | 2  | 226       |                   | NM_153236    | NP_694968    | Q8NHV1 | GIMA7_HUMAN |                               | 2  | CCAGGAAATCTT      | 0.502 |
| - | 3  | 594       | IP6_uc003whm.2    | NM_024711    | NP_078987    | Q6P9H5 | GIMA6_HUMAN |                               | 3  | CTGTTTCCTGTT      | 0.542 |
| + | 7  | 989       | p.S183F UBE3C_u   | NM_014671    | NP_055486    | Q15386 | UBE3C_HUMAN |                               | 5  | CAATATTCTGATTT    | 0.343 |
| + | 4  | 465_466   | IM2_uc011kwi.1_l  | NM_003970    | NP_003961    | P54296 | MYOM2_HUMAN |                               | 6  | CTGGCCCACTTC      | 0.634 |
| - | 54 | 8753      | p.P2117L CSMD1    | NM_033225    | NP_150094    | Q96PZ7 | CSMD1_HUMAN | ar (Potential). Sushi 19.     | 25 | CCAGAGGGGCTA      | 0.552 |
| - | 52 | 8399      | _Mutation_p.S19   | NM_033225    | NP_150094    | Q96PZ7 | CSMD1_HUMAN | ar (Potential). Sushi 17.     | 25 | CTGCCCTCCAG       | 0.463 |
| - | 8  | 1444      |                   | NM_033225    | NP_150094    | Q96PZ7 | CSMD1_HUMAN | ar (Potential). Sushi 2.      | 25 | CCCAGGATCTG       | 0.383 |
| - | 3  | 360       | 1_2_5'UTR XKR5_u  | NM_207411    | NP_997294    | Q6UX68 | XKR5_HUMAN  |                               | 0  | AGAGTCGAAGG       | 0.597 |
| - | 4  | 6929      |                   | NM_178857    | NP_849188    | Q8IWN7 | RP1L1_HUMAN |                               | 8  | CCCTTCAGCCT       | 0.602 |
| - | 4  | 3782      |                   | NM_178857    | NP_849188    | Q8IWN7 | RP1L1_HUMAN |                               | 8  | GGACCCAAGGT       | 0.617 |
| - | 9  | 2790      | .2_Missense_Mut   | NM_005144    | NP_005135    | O43593 | HAIR_HUMAN  |                               | 2  | TTGATTCCTTCT      | 0.502 |
| + | 9  | 1275      | ie_Mutation_p.R3  | NM_001722    | NP_001713    | P05423 | RPC4_HUMAN  |                               | 0  | CAACACCGGTA       | 0.542 |
| - | 3  | 830       | uc003xdj.2_Intron | NM_002318    | NP_002309    | Q9Y4K0 | LOXL2_HUMAN |                               | 3  | CACCCAGGAATC      | 0.498 |
| + | 11 | 1074      | nse_Mutation_p.L  | NM_014265    | NP_055080    | Q9UKQ2 | ADA28_HUMAN | B. Extracellular (Potential). | 5  | CAATCTTCTTAGAC    | 0.358 |
| + | 16 | 1770      | ec.2_Missense_M   | NM_003817    | NP_003808    | Q9H2U9 | ADAM7_HUMAN | ar (Potential). Cys-rich.     | 5  | TCAGAGATGTCA      | 0.453 |
| - | 4  | 1546      |                   | NM_006158    | NP_006149    | P07196 | NFL_HUMAN   | subdomain B (acidic).         | 2  | ctctctgtcctctctcc | 0.403 |
| - | 3  | 1159      |                   | NM_007257    | NP_009188    | Q9UL42 | PNMA2_HUMAN |                               | 0  | ggctggagacagccc   | 0     |
| - | 4  | 938       |                   | NM_018310    | NP_060780    | Q9HAW0 | BRF2_HUMAN  |                               | 0  | CTCAGCCATCCG      | 0.582 |
| + | 7  | 833       | u.3_Nonsense_M    | NM_004674    | NP_004665    | Q9UBL3 | ASH2L_HUMAN |                               | 2  | TTGGATCAGGTA      | 0.348 |
| - | 38 | 4879      | VK1_uc003xoj.2_I  | NM_020476    | NP_065209    | P16157 | ANK1_HUMAN  | regulatory domain.            | 9  | CCACTCGTGAC       | 0.597 |
| - | 4  | 611       | ise_Mutation_p.E9 | NM_024593    | NP_078869    | Q9HAE3 | EFCB1_HUMAN | EF-hand 3.                    | 0  | TTATTTCAACCA      | 0.333 |
| - | 18 | 4810      | rf.3_Missense_M   | NM_014781    | NP_055596    | Q8TDY2 | RBCC1_HUMAN |                               | 11 | ACCTGGGAGTT       | 0.453 |
| + | 2  | 639       | 1_Missense_Mut    | NM_006269    | NP_006260    | P56715 | RP1_HUMAN   | oublecortin 2.                | 12 | CGACCCGAAGA       | 0.657 |
| + | 4  | 2922      | 1_uc011ldy.1_Intr | NM_006269    | NP_006260    | P56715 | RP1_HUMAN   |                               | 12 | TAAATCCATATCC     | 0.333 |
| + | 3  | 1332      |                   | NM_052898    | NP_443130    | Q5GH76 | XKR4_HUMAN  | ical; (Potential).            | 2  | GTGTTGACATGC      | 0.443 |
| + | 3  | 1572      |                   | NM_052898    | NP_443130    | Q5GH76 | XKR4_HUMAN  |                               | 2  | TTCTTTTATCCCC     | 0.527 |
| + | 2  | 2021      |                   | NM_017780    | NP_060250    | Q9P2D1 | CHD7_HUMAN  | Pro-rich.                     | 9  | CTGTCTCCAC        | 0.587 |
| + | 34 | 8064      |                   | NM_017780    | NP_060250    | Q9P2D1 | CHD7_HUMAN  |                               | 9  | AGCCACAAACG       | 0.542 |
| + | 10 | 1732      | LF1_uc003xyf.2_I  | NM_015170    | NP_055985    | Q8IWU6 | SULF1_HUMAN |                               | 7  | CAATATTCGTGTG     | 0.428 |
| + | 13 | 2074      | LF1_uc003xyf.2_I  | NM_015170    | NP_055985    | Q8IWU6 | SULF1_HUMAN |                               | 7  | AGACAGCCTGT       | 0.448 |
| - | 5  | 921       |                   | NM_153225    | NP_694957    | Q8IVN8 | RPESP_HUMAN |                               | 0  | GACACCGAGGA       | 0.363 |
| + | 3  | 358       | 1_p.D30N HNF4G    | NM_004133    | NP_004124    | Q14541 | HNF4G_HUMAN | ceptor. NR C4-type.           | 1  | GCTGTGATGGG       | 0.458 |
| + | 10 | 4672      | 1.E1474K ZFHx4_u  | NM_024721    | NP_078997    | Q86UP3 | ZFHx4_HUMAN |                               | 15 | AGAGCGAAACT       | 0.498 |

rs148346976

|   |    |       |                    |              |              |        |             |                                |     |               |       |
|---|----|-------|--------------------|--------------|--------------|--------|-------------|--------------------------------|-----|---------------|-------|
| + | 10 | 4937  | ns1562L ZFHx4_u    | NM_024721    | NP_078997    | Q86UP3 | ZFHx4_HUMAN | :2H2-type 12.                  | 15  | ATAATTCAGTTTC | 0.398 |
| + | 10 | 7831  | nsP2527S ZFHx4_u   | NM_024721    | NP_078997    | Q86UP3 | ZFHx4_HUMAN |                                | 15  | ACTCTCCGTTCT  | 0.507 |
| - | 2  | 89    | P12_uc003ycg.3_    | NM_001105281 | NP_001098751 | A6NFH5 | FBP12_HUMAN |                                | 0   | TCCTGCTGGCTT  | 0.348 |
| - | 9  | 979   | ense_Mutation_p.Sz | NM_001738    | NP_001729    | P00915 | CAH1_HUMAN  |                                | 2   | AAAATGAAGCTC  | 0.403 |
| - | 4  | 375   | ense_Mutation_p.E  | NM_001738    | NP_001729    | P00915 | CAH1_HUMAN  |                                | 2   | GAATTTCTTTGGC | 0.408 |
| - | 1  | 119   |                    | NM_019098    | NP_061971    | Q9NQW8 | CNGB3_HUMAN | lasmic (Potential).            | 3   | CCGACGAGAAC   | 0.423 |
| - | 1  | 420   |                    | NM_152418    | NP_689631    | Q8NA75 | DC4L2_HUMAN |                                | 1   | GGGTCGTCAGG   | 0.542 |
| + | 6  | 889   | ense_Mutation_p.F  | NM_052832    | NP_439897    | Q8TE54 | S26A7_HUMAN | ical; (Potential).             | 2   | AAATGCCATATAT | 0.398 |
| + | 36 | 6442  | iw.2_Missense_Mt   | NM_017890    | NP_060360    | Q7Z7G8 | VP13B_HUMAN |                                | 20  | AAAATTCATGGTC | 0.393 |
| + | 50 | 9364  | iw.2_Nonsense_M    | NM_017890    | NP_060360    | Q7Z7G8 | VP13B_HUMAN |                                | 20  | GACATCAGAAG   | 0.403 |
| - | 6  | 1678  | ie_Mutation_p.S50  | NM_013437    | NP_038465    | Q9Y561 | LRP12_HUMAN | lasmic (Potential).            | 0   | GCAAATGATCTTT | 0.363 |
| + | 8  | 1146  | ense_Mutation_p.C  | NM_012082    | NP_036214    | Q8WW38 | FOG2_HUMAN  | :2H2-type 3.                   | 5   | AGACTCAGAGG   | 0.502 |
| - | 2  | 1028  |                    | NM_139166    | NP_631905    | Q8N0Z2 | ABRA_HUMAN  |                                | 2   | CATCTCGTCTGT  | 0.473 |
| + | 15 | 1549  |                    | NM_177531    | NP_803875    | Q86W11 | PKHL1_HUMAN | ellular (Potential).           | 14  | AGTATCGAAATG  | 0.358 |
| + | 68 | 11010 |                    | NM_177531    | NP_803875    | Q86W11 | PKHL1_HUMAN | ellular (Potential).           | 14  | ATGAGGATTTTAC | 0.284 |
| - | 50 | 8000  | p.S2574F CSMD3     | NM_198123    | NP_937756    | Q7Z407 | CSMD3_HUMAN | ar (Potential);Sushi 14.       | 63  | CATAGGAAGAC   | 0.468 |
| + | 8  | 1290  | lila.1_Missense_M  | NM_173851    | NP_776250    | Q8IWU4 | ZNT8_HUMAN  | lasmic (Potential).            | 4   | AAATCTCCAGTTT | 0.507 |
| + | 45 | 5261  | yoz.2_Missense_M   | NM_021110    | NP_066933    | Q05707 | COEA1_HUMAN | ical region 2 (COL1).          | 12  | CACCTGGAGCC   | 0.652 |
| - | 1  | 83    | 3yqt.2_Missense_M  | NM_004306    | NP_004297    | P27216 | ANX13_HUMAN |                                | 3   | ATGACGATTGCC  | 0.353 |
| - | 42 | 3629  | liljo.1_Missense_M | NM_152888    | NP_690848    | Q8NFW1 | COMA1_HUMAN | ly-rich; Collagen-like 9.      | 13  | CCGGGATCCT    | 0.423 |
| + | 19 | 3112  |                    | NM_001702    | NP_001693    | O14514 | BAI1_HUMAN  | lasmic (Potential).            | 8   | GATTCGCTCAC   | 0.592 |
| - | 24 | 2842  | 3zkl.2_Missense_M  | NM_002839    | NP_002830    | P23468 | PTPRD_HUMAN | III 5; Extracellular (Potentia | 22  | ACTAGGAAGCTG  | 0.433 |
| - | 9  | 2055  | EM1_uc010mic.2_f   | NM_144966    | NP_659403    | Q5H8C1 | FREM1_HUMAN | CSPG 2.                        | 5   | GGAGTCGCTGT   | 0.527 |
| + | 2  | 206   | _p.R27C ADAMT5     | NM_001040272 | NP_001035362 | Q8N6G6 | ATL1_HUMAN  |                                | 5   | CCGCACGCTCC   | 0.582 |
| - | 1  | 3572  | uc003zrh.1_5 Flanl | NM_153809    | NP_722516    | Q8IZX4 | TAF1L_HUMAN |                                | 26  | GTGTTTCTGATC  | 0.493 |
| - | 5  | 497   | T1_uc003zxf.1_Rf   | NM_014450    | NP_055265    | Q9Y3P8 | SIT1_HUMAN  | lasmic (Potential).            | 0   | AGGAGGCCGCA   | 0.632 |
| - | 2  | 288   | 9orf128_uc011lpg   | NM_001012446 | NP_001012448 | A6H8Z2 | CI128_HUMAN |                                | 0   | GCTTCCATCTAC  | 0.507 |
| - | 4  | 1113  |                    | NM_015667    | NP_056482    | Q5VU36 | F75A5_HUMAN |                                | 0   | GCAAATAATTTAA | 0.438 |
| + | 44 | 5908  | p.S1883F VPS13f    | NM_033305    | NP_150648    | Q96RL7 | VP13A_HUMAN |                                | 10  | AAATTCCTTGG   | 0.338 |
| - | 2  | 499   |                    | NM_017594    | NP_060064    | Q96HU8 | DIRA2_HUMAN |                                | 0   | CACCTCGCGGC   | 0.577 |
| - | 9  | 2042  | ri.1_Missense_Mul  | NM_004560    | NP_004551    | Q01974 | ROR2_HUMAN  | Potential); Protein kinase.    | 20  | CAGGTCCTGT    | 0.592 |
| - | 3  | 2700  | lbq.1_Missense_M   | NM_133445    | NP_597702    | Q8TCU5 | NMD3A_HUMAN | lasmic (Potential).            | 7   | CAAATGGACTC   | 0.493 |
| - | 2  | 1670  | lbq.1_Missense_M   | NM_133445    | NP_597702    | Q8TCU5 | NMD3A_HUMAN | ellular (Potential).           | 7   | ATCTCCCAGCA   | 0.507 |
| + | 1  | 280   |                    | NM_001004483 | NP_001004483 | Q8NGS7 | O13C8_HUMAN | ellular (Potential).           | 2   | TTTCTTCTCTC   | 0.473 |
| + | 4  | 1743  | lwx.1_Missense_M   | NM_133465    | NP_597722    | Q8N8K9 | K1958_HUMAN |                                | 1   | CATGTCGGGCG   | 0.567 |
| + | 6  | 1051  | Ry_uc010muw.2_3    | NM_017688    | NP_060158    | Q5W0U4 | BSPRY_HUMAN | B30.2 SPRY.                    | 1   | GATTTTCGTTTC  | 0.617 |
| - | 8  | 2554  |                    | NM_014618    | NP_055433    | O60477 | DBC1_HUMAN  |                                | 8   | GTCGCCAATATC  | 0.572 |
| - | 1  | 658   | J2_uc004bmj.1_lr   | NM_001004451 | NP_001004451 | Q8NGS3 | OR1J1_HUMAN | lasmic (Potential).            | 2   | AAATGTACCAT/  | 0.483 |
| - | 1  | 893   |                    | NM_001004454 | NP_001004454 | Q8NGR8 | OR1L8_HUMAN | lasmic (Potential).            | 3   | CCCTGTTTCAGG  | 0.453 |
| + | 24 | 3982  | lbr.2_Missense_M   | NM_015635    | NP_056450    | Q14C86 | GAPD1_HUMAN |                                | 4   | CACCTGTTGTCC  | 0.413 |
| - | 4  | 487   | _NAC4_uc004bst.2   | NM_175039    | NP_778204    | Q9H4F1 | SIA7D_HUMAN | renal (Potential).             | 0   | GGGCTCGCGGA   | 0.632 |
| + | 3  | 172   | owq.1_Nonsense_M   | NM_015354    | NP_056169    | Q5SRE5 | NU188_HUMAN |                                | 7   | TACTACAAACCT  | 0.403 |
| - | 4  | 280   | ns.Q16* USP20_ucC  | NM_016520    | NP_057604    | Q9NZ63 | CI078_HUMAN |                                | 0   | CATCTGAAAGG   | 0.408 |
| + | 30 | 2924  |                    | NM_000093    | NP_000084    | P20908 | CO5A1_HUMAN | le-helical region.             | 11  | AGGGTCGCGGA   | 0.637 |
| - | 5  | 747   |                    | NM_182974    | NP_892019    | Q7Z4J2 | GL6D1_HUMAN | renal (Potential).             | 1   | CACCTCGTCTC   | 0.602 |
| - | 7  | 939   | lbe.2_Missense_M   | NM_001012415 | NP_001012415 | Q5JUK2 | SOLH1_HUMAN |                                | 2   | ACGCAGACCTG   | 0.617 |
| - | 11 | 1723  | CH1_uc004cia.1_5   | NM_017617    | NP_060087    | P46531 | NOTC1_HUMAN | GF-like 15; calcium-binding    | 856 | GTGGCAGGGGT   | 0.672 |

|   |    |      |                                                   |              |              |        |             |                               |    |               |       |             |
|---|----|------|---------------------------------------------------|--------------|--------------|--------|-------------|-------------------------------|----|---------------|-------|-------------|
| + | 42 | 5933 | coi.2_Missense_N                                  | NM_000718    | NP_000709    | Q00975 | CAC1B_HUMAN | lasmic (Potential).           | 6  | ACCAAGAGAGT   | 0.567 |             |
| + | 8  | 908  | F2RA_uc010ncu.2                                   | NM_001161529 | NP_001155001 | P15509 | CSF2R_HUMAN | cellular (Potential).         | 2  | TTAACGGAACCA  | 0.403 | rs137852353 |
| + | 6  | 975  | rf.1_Missense_Mul                                 | NM_004042    | NP_004033    | P54793 | ARSF_HUMAN  |                               | 2  | GGCACGAGATC   | 0.478 |             |
| + | 22 | 3306 | D1_uc010nen.2_N                                   | NM_003611    | NP_003602    | O75665 | OFD1_HUMAN  | interaction with SDCCAG8.     | 0  | TGGTCCAAGAA   | 0.353 |             |
| - | 7  | 913  | B11_uc010nes.1_I                                  | NM_080873    | NP_543149    | Q8WXH4 | ASB11_HUMAN | SOCS box.                     | 3  | TGGCTTGATGAC  | 0.488 |             |
| + | 7  | 763  |                                                   | NM_007220    | NP_009151    | Q9Y2D0 | CAH5B_HUMAN |                               | 0  | TCATTTGACCCT  | 0.512 |             |
| - | 4  | 494  | ifo.1_Missense_Mt                                 | NM_152780    | NP_689993    | Q96T17 | MA7D2_HUMAN |                               | 3  | ATGTCCTCCGG   | 0.587 |             |
| + | 12 | 1527 | _p.V442I PHEX_uc                                  | NM_000444    | NP_000435    | P78562 | PHEX_HUMAN  | cellular (Potential).         | 3  | AGGGCGTTCCG   | 0.433 |             |
| + | 1  | 1635 |                                                   | NM_182699    | NP_874358    | Q86TM3 | DDX53_HUMAN | case C-terminal.              | 3  | AAGCGGAAACA   | 0.373 |             |
| - | 13 | 1213 | se_Mutation_p.F3                                  | NM_001033583 | NP_001028755 | Q9Y305 | ACOT9_HUMAN |                               | 3  | AAAGAAAGAGC   | 0.403 |             |
| - | 4  | 1803 |                                                   | NM_030624    | NP_085127    | Q96M94 | KLH15_HUMAN | Kelch 4.                      | 2  | TCTGGGTTGTAT  | 0.473 |             |
| + | 2  | 1064 |                                                   | NM_173699    | NP_775970    | Q96M61 | MAGBI_HUMAN | MAGE.                         | 1  | ATACATGATACCC | 0.527 |             |
| + | 2  | 648  | EB6_uc010ngc.1_!                                  | NM_173523    | NP_775794    | Q8N7X4 | MAGB6_HUMAN |                               | 3  | AATATGATGTGC  | 0.498 |             |
| + | 2  | 943  |                                                   | NM_001099921 | NP_001093391 | A2A368 | MAGBG_HUMAN | MAGE.                         | 7  | CCACTGAAGAG   | 0.488 |             |
| + | 1  | 1956 |                                                   | NM_001013736 | NP_001013758 | Q5HY64 | FA47C_HUMAN |                               | 3  | CTCCCAATACT   | 0.642 | rs145580328 |
| - | 3  | 320  | _p.E92K CASK_uc                                   | NM_003688    | NP_003679    | O14936 | CSKP_HUMAN  | rotein kinase.                | 6  | CAATTCGAAAA   | 0.358 |             |
| - | 11 | 905  | ldjk.3_Missense_N                                 | NM_033518    | NP_277053    | Q8WUX1 | S38A5_HUMAN | cellular (Potential).         | 3  | GTTGAGTCCTTC  | 0.522 |             |
| + | 6  | 1598 | E434K CCNB3_uc                                    | NM_033031    | NP_149020    | Q8WWL7 | CCNB3_HUMAN |                               | 9  | CCCAGGAACCA   | 0.458 |             |
| - | 20 | 2822 |                                                   | NM_001013742 | NP_001013764 | Q5KSL6 | DGKK_HUMAN  |                               | 2  | TCTTCTCCATCAC | 0.453 |             |
| - | 5  | 1838 | sc.2_Nonsense_N                                   | NM_001111125 | NP_001104595 | Q5JU85 | IQEC2_HUMAN | Pro-rich.                     | 3  | CGCCCAGAAC    | 0.652 |             |
| - | 33 | 4337 | sn.2_Missense_M                                   | NM_031407    | NP_113584    | Q7Z6Z7 | HUWE1_HUMAN |                               | 17 | CCCGCGGGGAG   | 0.557 |             |
| + | 1  | 566  |                                                   | NM_015686    | NP_056501    | O75949 | F155B_HUMAN |                               | 2  | CCTTCCCGTG    | 0.592 |             |
| - | 3  | 3301 |                                                   | NM_001008537 | NP_001008537 | Q5QGS0 | K2022_HUMAN |                               | 15 | TGCCAGAAAGTA  | 0.478 |             |
| - | 25 | 6039 | i.K1898R ATRX_uc                                  | NM_000489    | NP_000480    | P46100 | ATRX_HUMAN  | Poly-Lys.                     | 30 | TCCCTTTTTC    | 0.318 |             |
| + | 9  | 2246 | 7A_uc004ecw.2_3'                                  | NM_000052    | NP_000043    | Q04656 | ATP7A_HUMAN | cellular (Potential).         | 0  | AACCTTCATTCT  | 0.388 |             |
| + | 3  | 903  | efc.3_Missense_M                                  | NM_033048    | NP_149037    | Q8N123 | CPXCR_HUMAN |                               | 3  | TATCAGAAAAAT  | 0.413 |             |
| - | 1  | 2802 | _p.R376C PCDH1E                                   | NM_020766    | NP_001098713 | Q8TAB3 | PCD19_HUMAN | Extracellular (Potential).    | 7  | GTCGCGATCAG   | 0.597 |             |
| - | 9  | 1314 | _p.E370K NOX1_uc                                  | NM_007052    | NP_008983    | Q9Y5S8 | NOX1_HUMAN  | type. Extracellular (Potentic | 1  | TGTTTCGAAAGC  | 0.463 |             |
| + | 15 | 2008 | h.1_Missense_Mu                                   | NM_001939    | NP_001930    | Q13474 | DRP2_HUMAN  |                               | 2  | TGGGTGAAGTG   | 0.507 |             |
| + | 4  | 784  | msz.1_Splice_Site_p.Q172_splice ALG13_uc011mta.1_ |              |              | Q9NP73 | ALG13_HUMAN |                               | 1  | GCAGGTAAAAAG  | 0.443 |             |
| - | 3  | 1281 | 4esz.2_Missense_                                  | NM_152692    | NP_689905    | Q96EU7 | C1GLC_HUMAN | renal (Potential).            | 0  | TATTTGGAGGTA  | 0.388 |             |
| - | 1  | 991  |                                                   | NM_138289    | NP_612146    | Q8TDG2 | ACTT1_HUMAN |                               | 5  | GGTCAGGTGCA   | 0.512 |             |
| + | 5  | 632  | num.1_Missense_                                   | NM_003399    | NP_003390    | O43895 | XPP2_HUMAN  |                               | 0  | ACTGGGAGCTC   | 0.542 |             |
| + | 10 | 1252 |                                                   | NM_003399    | NP_003390    | O43895 | XPP2_HUMAN  |                               | 0  | GAAATGATACCC  | 0.527 |             |
| - | 18 | 3903 | o.G1216E IGSF1_u                                  | NM_001555    | NP_001546    | Q8N6C5 | IGSF1_HUMAN | otential). Ig-like C2-type 12 | 5  | TAGTTTCCAATG  | 0.498 |             |
| - | 6  | 2076 | vf.1_Missense_Mt                                  | NM_031907    | NP_114113    | Q9BXU7 | UBP26_HUMAN |                               | 8  | CTGGTCATTCT   | 0.413 |             |
| + | 21 | 8611 | sb.1_Missense_Mt                                  | NM_153834    | NP_722576    | Q8IZF6 | GP112_HUMAN | lasmic (Potential).           | 12 | GAAAAGATTATC  | 0.333 |             |
| - | 17 | 2298 | _p.M485I ARHG6                                    | NM_004840    | NP_004831    | Q15052 | ARHG6_HUMAN |                               | 0  | ATAAGACATCCT  | 0.338 |             |
| - | 17 | 2195 | n.1_Missense_Mu                                   | NM_005369    | NP_005360    | P10911 | MCF2_HUMAN  | DH.                           | 2  | TGATTCGTTGCA  | 0.279 |             |
| - | 2  | 271  | NXC_uc004fbl.2_I                                  | NM_022661    | NP_073152    | Q9NY87 | SPNXC_HUMAN |                               | 0  | CTCGGGCGTGG   | 0.448 |             |
| + | 4  | 551  | EC1_uc010nsl.1_I                                  | NM_005462    | NP_005453    | O60732 | MAGC1_HUMAN |                               | 4  | CTGAGGGCGAC   | 0.582 |             |
| - | 3  | 907  |                                                   | NM_016249    | NP_057333    | Q9UBF1 | MAGC2_HUMAN | MAGE.                         | 2  | GAACTCACGGG   | 0.483 |             |
| - | 2  | 2513 | fb.2_Missense_M                                   | NM_173078    | NP_775101    | Q8IW52 | SLIK4_HUMAN | lasmic (Potential).           | 2  | AGGATCTGAAA   | 0.423 |             |
| - | 2  | 2142 | fb.2_Missense_M                                   | NM_173078    | NP_775101    | Q8IW52 | SLIK4_HUMAN | cellular (Potential).         | 2  | ATGGTGCAGAC   | 0.443 |             |
| - | 2  | 420  | fby.2_Missense_h                                  | NM_173078    | NP_775101    | Q8IW52 | SLIK4_HUMAN |                               | 2  | TTGTGGAAGAA   | 0.388 |             |
| - | 5  | 861  | l4ffl.2_Missense_N                                | NM_001011543 | NP_001011543 | P43363 | MAGAA_HUMAN | MAGE.                         | 0  | CTCCTTCAATTG  | 0.453 |             |
| + | 8  | 988  |                                                   | NM_018558    | NP_061028    | Q9UN88 | GBRT_HUMAN  | p.S323F(1)                    | 3  | ACATTTCTGTAT  | 0.443 |             |

|   |    |            |                    |              |              |        |             |                                |      |                  |       |                     |
|---|----|------------|--------------------|--------------|--------------|--------|-------------|--------------------------------|------|------------------|-------|---------------------|
| + | 9  | 1213       |                    | NM_018558    | NP_061028    | Q9UN88 | GBRT_HUMAN  |                                | 3    | TCAGCTCTCTCC     | 0.587 |                     |
| - | 3  | 1078       | AGEA12_uc004fgr    | NM_005367    | NP_005358    | P43365 | MAGAC_HUMAN | MAGE.                          | 1    | 'CCTGGGATGCG     | 0.572 |                     |
| - | 3  | 966        |                    | NM_005362    | NP_005353    | P43357 | MAGA3_HUMAN | MAGE.                          | 0    | \GTTTTCTGCA(     | 0.527 |                     |
| + | 5  | 826        |                    | NM_020061    | NP_064445    | P04000 | OPSR_HUMAN  | Cytoplasmic.                   | 0    | \AGAAGGAAGTG     | 0.572 |                     |
| + | 8  | 1908       |                    | NM_017514    | NP_059984    | P51805 | PLXA3_HUMAN | cellular (Potential).          | 3    | AGGCGGCGGCG      | 0.692 |                     |
| + | 12 | 2906_2908  | 9vqi.1_In_Frame_   | NM_001083621 | NP_001077090 | Q9NUA8 | ZBT40_HUMAN |                                | 1    | :CCCCAAGAAGA     | 0.517 |                     |
| + | 8  | 890_892    | r.R259del SFRS11   | NM_004768    | NP_004759    | Q05519 | SRS11_HUMAN | peats of R-R-S-R- S-R-S-       | 0    | iTTCTAGGAGGAC    | 0.3   |                     |
| + | 5  | 642_643    | l11A_uc001haf.2_f  | NM_014827    | NP_055642    | O75152 | ZC11A_HUMAN | 3H1-type 1.                    | 2    | ACTGCTATTTTT     | 0.371 |                     |
| - | 3  | 613        | pzb.1_Frame_Shif   | NM_001040151 | NP_001035241 | Q9NY72 | SCN3B_HUMAN | extracellular (Potential).     | 6    | 'CTTTACCGCCCT    | 0.587 |                     |
| + | 2  | 272        | HB2_uc010sfu.1_f   | NM_006331    | NP_006322    | Q92979 | NEP1_HUMAN  |                                | 0    | :CGTAGTTTATTG    | 0.569 | 857448;rs36063533   |
| + | 4  | 268_273    | J03ckr.2_In_Frame  | NM_001904    | NP_001895    | P35222 | CTNB1_HUMAN | del(1)(p.H24_G38del(1))p.Gc    | 3166 | ICTGGTGCCACT.    | 0.5   |                     |
| + | 6  | 1385       | lcam.1_Frame_Sh    | NM_001075    | NP_001066    | P36537 | UDB10_HUMAN |                                | 5    | CAGTGAAGCCCI     | 0.398 |                     |
| + | 11 | 2071_2072  | r.Q426fs POM121    | NM_172020    | NP_742017    | Q96HA1 | P121A_HUMAN | side (Potential).              | 0    | AACCCCAAGCC#     | 0.614 |                     |
| + | 4  | 766_768    | Q238del SMARCA     | NM_003070    | NP_003061    | P51531 | SMCA2_HUMAN | Poly-Gln.                      | 3    | cagcaacagcagcag  | 0.271 | rs070757;rs62639301 |
| + | 13 | 2110_2112  | r.E598del GRIN1_uc | NM_007327    | NP_015566    | Q05586 | NMDZ1_HUMAN | asmic (Potential).             | 1    | CAGCGAGGAGG      | 0.739 |                     |
| + | 12 | 2906_2908  | 9vqi.1_In_Frame_   | NM_001083621 | NP_001077090 | Q9NUA8 | ZBT40_HUMAN |                                | 1    | :CCCCAAGAAGA     | 0.517 |                     |
| + | 6  | 945_947    | n.2_RNA CHGA_u     | NM_001275    | NP_001266    | P10645 | CMGA_HUMAN  |                                | 2    | AGAGaagaggagga   | 0.557 |                     |
| - | 1  | 287_289    | 31_uc002fcw.3_In   | NM_001145667 | NP_001139139 | Q92896 | GSLG1_HUMAN | ar (Potential)                 | 2    | gttgctgtgctgctg  | 0.562 |                     |
| - | 13 | 1762_1764  | r.me_Del_p.S584d   | NM_013403    | NP_037535    | Q9NRL3 | STRN4_HUMAN | WD 3.                          | 0    | :CCGGGCTGCTG     | 0.7   |                     |
| - | 1  | 871_873    | r.S246del TCF20_u  | NM_005650    | NP_005641    | Q9UGU0 | TCF20_HUMAN | Ser-rich.                      | 5    | \AGGGAaggagga    | 0.438 |                     |
| + | 3  | 532        | ie.2_Frame_Shift_  | NM_014346    | NP_055161    | Q8WUA7 | TB22A_HUMAN |                                | 1    | :CCTCACCCCCC.    | 0.677 |                     |
| - | 25 | 3357       | r34_splice MAP3K   | NM_001001671 | NP_001001671 | Q6ZN16 | M3K15_HUMAN |                                | 7    | atttacctaaaaaaaa | 0.421 |                     |
| + | 20 | 4967       | laoj.2_Frame_Shif  | NM_015215    | NP_056030    | Q9Y6Y1 | CMTA1_HUMAN | IQ 2.                          | 9    | \TGAACAAAAAA/    | 0.473 |                     |
| - | 2  | 961        | p.D86fs PIK3R3_    | NM_003629    | NP_003620    | Q92569 | P55G_HUMAN  | SH2 1.                         | 0    | \AATATCCCCC/     | 0.353 |                     |
| - | 1  | 157_165    | rS_uc001dkd.2_5'l  | NM_004388    | NP_004379    | Q01459 | DIAC_HUMAN  |                                | 0    | AGCCgcagcgccag   | 0.589 |                     |
| - | 2  | 1126       | lft.1_Frame_Shif   | NM_030980    | NP_112242    | Q9H9L3 | I20L2_HUMAN | Exonuclease.                   | 2    | GTTGAGGGGGG      | 0.557 |                     |
| + | 16 | 4804       | rpmh.1_Frame_Shif  | NM_015172    | NP_055987    | Q9Y520 | PRC2C_HUMAN |                                | 0    | GGGATGAAAAAA     | 0.388 |                     |
| + | 7  | 1484_1486  | ie_Del_p.P386del   | NM_005807    | NP_005798    | Q92954 | PRG4_HUMAN  | ats of K-X-P-X-P-T-T-X.[17     | 1    | :ACCACTCCCAA.    | 0.65  | 095882;rs143141440  |
| - | 11 | 1639       | r010pqc.1_Frame_   | NM_021633    | NP_067646    | Q53G59 | KLH12_HUMAN | n with DVL3.[Kelch 5.          | 0    | 'CAAATCCCCC/     | 0.453 |                     |
| + | 1  | 753_754    | y.2_Intron DHDPS   | NM_001009997 | NP_001009997 | Q5T681 | CJ062_HUMAN | His-rich.                      | 0    | GCCAAATCACACA    | 0.545 |                     |
| + | 1  | 310_312    |                    | NM_178168    | NP_835462    | Q9H207 | O10A5_HUMAN | Name=3; (Potential).           | 3    | .TGTATTCTTCTT    | 0.517 |                     |
| - | 1  | 258        | rNA PIK3C2A_ucf    | NM_002645    | NP_002636    | O00443 | P3C2A_HUMAN | ction with clathrin.           | 10   | CTGTGCTTTTTT     | 0.398 |                     |
| + | 7  | 1983_1985  | lqtt.1_In_Frame_C  | NM_018416    | NP_060886    | Q9P0K8 | FOXJ2_HUMAN | Poly-Gln.                      | 5    | icctcaacagcagcag | 0.478 |                     |
| - | 3  | 314_315    |                    | NM_006248    | NP_006239    |        |             |                                | 0    | 'GGAGGTGGGGC     | 0.614 |                     |
| - | 2  | 1302       | raq.2_Frame_Shift  | NM_006143    | NP_006134    | Q15760 | GPR19_HUMAN | asmic (Potential).             | 1    | ACGTAGTTTTTTI    | 0.398 |                     |
| + | 4  | 669        | FAR2_uc009zjm.2    | NM_018099    | NP_060569    | Q96K12 | FACR2_HUMAN |                                | 0    | GGAGCCAAAAAA     | 0.388 |                     |
| + | 2  | 685_687    |                    | NM_145657    | NP_663632    | Q9H4S2 | GSX1_HUMAN  | Poly-Gly.                      | 1    | :CATCgtggcgggcg  | 0.463 |                     |
| + | 3  | 707_710    | vbk.2_Frame_Shif   | NM_015116    | NP_055931    | Q9Y2L9 | LRCH1_HUMAN | LRR 3.                         | 2    | :CGCCCTGCCTC     | 0.436 |                     |
| - | 5  | 1068       | p.L72fs DZIP1_u    | NM_198968    | NP_945319    | Q86YF9 | DZIP1_HUMAN |                                | 2    | GCGCTCAGCCG      | 0.662 |                     |
| - | 1  | 772_774    |                    | NM_001080396 | NP_001073865 | B1AL88 | F155A_HUMAN | Poly-Gln.                      | 1    | cgctgctctgctgctg | 0.404 |                     |
| - | 10 | 11252_1125 | r3_uc002fcl.2_In_F | NM_006885    | NP_008816    | Q15911 | ZFH3_HUMAN  | Poly-Gly.                      | 4    | GTACGAgcccgcg    | 0.394 |                     |
| - | 14 | 1600_1602  | rjca.2_In_Frame_C  | NM_017647    | NP_060117    | Q8IY81 | RRMJ3_HUMAN |                                | 1    | GGATTCTCCTCC     | 0.537 |                     |
| - | 5  | 1361_1363  |                    | NM_003655    | NP_003646    | O00257 | CBX4_HUMAN  | Interaction with BMI1.         | 2    | :GACGGCgtgtgtgg  | 0.507 | rs3833850           |
| + | 7  | 712_714    |                    | NM_001039887 | NP_001034976 | Q2NL68 | CS055_HUMAN | Ser-rich.                      | 1    | CCATCTCCTCC      | 0.631 |                     |
| + | 7  | 1058       | me_Shift_Del_p.Pz  | NM_021913    | NP_068713    | P30530 | UFO_HUMAN   | tential).[Fibronectin type-III | 13   | 'CGGTGCCCCCC     | 0.647 |                     |
| + | 14 | 2665_2666  | NRNPUL1_uc002c     | NM_007040    | NP_008971    | Q9BUJ2 | HNRL1_HUMAN | ecessary for interaction with  | 2    | GGTTACAACCCG     | 0.629 |                     |
| + | 1  | 96_98      | 2sda.2_In_Frame_   | NM_203437    | NP_982261    | Q6ULP2 | AFTIN_HUMAN |                                | 2    | :AGAGGATGATG     | 0.409 |                     |



|   |    |           |                     |              |              |        |             |                            |     |                    |       |                       |
|---|----|-----------|---------------------|--------------|--------------|--------|-------------|----------------------------|-----|--------------------|-------|-----------------------|
| + | 25 | 3447      | .mp.1_Frame_Shift   | NM_001017915 | NP_001017915 | Q92835 | SHIP1_HUMAN | Pro-rich.                  | 2   | :GCCGGCGGGG/       | 0.711 |                       |
| - | 4  | 308_310   | 002wle.2_RNA RA     | NM_170774    | NP_739580    | P50749 | RASF2_HUMAN |                            | 6   | TGCCAGGAGGA        | 0.611 |                       |
| + | 6  | 612_614   | 015_uc002zsr.2_In   | NM_001003891 | NP_001003891 | Q96RN5 | MED15_HUMAN | Poly-Gln.                  | 1   | :jgcgctacagcagcag  | 0.148 |                       |
| - | 30 | 4280_4282 |                     | NM_002473    | NP_002464    | P35579 | MYH9_HUMAN  | Potential.                 | 11  | :TTGGCCTCCTC(      | 0.65  |                       |
| - | 1  | 205_207   | rg.1_In_Frame_De    | NM_004628    | NP_004619    | Q01831 | XPC_HUMAN   | lu. Glu-rich (acidic).     | 3   | :TCACCCTCCTC(      | 0.734 | rs72561774            |
| - | 11 | 3554_3556 | .Q639del SATB1_u    | NM_002971    | NP_002962    | Q01826 | SATB1_HUMAN | Poly-Gln.                  | 4   | :CCGGTGCctgctgc    | 0.468 |                       |
| - | 7  | 2209_2211 | 1blc.1_In_Frame_    | NM_001017395 | NP_001017395 | O94876 | TMCC1_HUMAN | Potential.                 | 1   | :CCACCTGCTGC       | 0.581 |                       |
| - | 8  | 1759_1761 | 191DD>D DBR1_u      | NM_016216    | NP_057300    | Q9UK59 | DBR1_HUMAN  |                            | 0   | :TGCATCGTCAT(      | 0.251 | 0114751;rs2622736     |
| + | 42 | 6369_6371 | bnz.1_In_Frame_l    | NM_053002    | NP_443728    | Q86YW9 | MD12L_HUMAN | Gln-rich.                  | 7   | :GACCCAGCAGC       | 0.527 |                       |
| + | 1  | 3836_3837 |                     | NM_175918    | NP_787114    | Q8N1N5 | CRPAK_HUMAN |                            | 0   | CTGCTCACACGT       | 0.683 |                       |
| + | 1  | 3867_3868 |                     | NM_175918    | NP_787114    | Q8N1N5 | CRPAK_HUMAN |                            | 0   | CTGCTCACACGT       | 0.673 |                       |
| + | 1  | 3958_3959 |                     | NM_175918    | NP_787114    | Q8N1N5 | CRPAK_HUMAN | 9                          | 0   | CTGCTCACACAC       | 0.668 |                       |
| - | 7  | 944       |                     | NM_173536    | NP_775807    | Q8N1C3 | GBRG1_HUMAN | ellular (Probable).        | 2   | :AGGTCAAAAAA       | 0.294 |                       |
| - | 3  | 747_748   | 3_Shift_Ins_p.K74f  | NM_003948    | NP_003939    | Q92772 | CDKL2_HUMAN | rotein kinase.             | 7   | :CCATCGTTTTTT      | 0.322 |                       |
| - | 1  | 479_480   |                     | NM_001085377 | NP_001078846 | P23508 | CRCM_HUMAN  |                            | 1   | ctgccgctgccgccc    | 0.391 |                       |
| + | 4  | 461_462   | MRPS18B_uc011c      | NM_014046    | NP_054765    | Q9Y676 | RT18B_HUMAN |                            | 1   | TTGTTGGGAATC       | 0.401 |                       |
| - | 2  | 531_533   | rb.3_In_Frame_De    | NM_001134870 | NP_001128342 | Q6NYC8 | PHTNS_HUMAN | Poly-Gln.                  | 0   | :GTtgtt gtgctgct   | 0.547 |                       |
| + | 15 | 2548_2549 | p.R756fs SYNGAF     | NM_006772    | NP_006763    | Q96PV0 | SYGP1_HUMAN | inding (Potential).        | 4   | TGGCTCGCCTCC       | 0.594 |                       |
| - | 3  | 422_424   | ame_Del_p.40_41     | NM_007162    | NP_009093    | P19484 | TFEB_HUMAN  | y-Gln. Gln-rich.           | 1   | gctgctgtgctgctgctg | 0.547 | rs150746914           |
| + | 10 | 1627_1629 | 3ENP6_uc003pic.2    | NM_015571    | NP_056386    | Q9GZR1 | SENP6_HUMAN |                            | 6   | :CCAGTGATGAT(      | 0.296 |                       |
| + | 3  | 157       |                     | NM_001008395 | NP_001008396 | Q0VGL1 | CG059_HUMAN |                            | 0   | :CATCTGGGGAC       | 0.448 |                       |
| + | 7  | 1118_1119 | vuy.2_Frame_Shift   | NM_016019    | NP_057103    | Q9Y383 | LC7L2_HUMAN | Arg/Ser-rich.              | 0   | :AGAGAAGAGAGA      | 0.391 |                       |
| + | 3  | 834_835   | SCO2_uc003xgh.2     | NM_001017420 | NP_001017420 | Q56NI9 | ESCO2_HUMAN |                            | 1   | :TCAGTGAAAAAA      | 0.396 | rs80359852            |
| + | 14 | 1975      | _Splice_Site WDR6   | NM_145647    | NP_663622    | Q96DN5 | WDR67_HUMAN |                            | 1   | :TTACAGTTTTTT      | 0.322 |                       |
| + | 4  | 766_768   | Q238del SMARCA2     | NM_003070    | NP_003061    | P51531 | SMCA2_HUMAN | Poly-Gln.                  | 3   | cagcaacagcagcagcag | 0.271 | rs1070757;rs62639301  |
| + | 1  | 160_162   |                     | NM_001039792 | NP_001034881 | Q6UXD1 | HRCT1_HUMAN | ical; (Potential).         | 0   | :GCGGTCTctgctgct   | 0.601 |                       |
| + | 3  | 1021_1023 | 4bag.1_In_Frame_    | NM_006981    | NP_008912    | Q92570 | NR4A3_HUMAN | Poly-His.                  | 173 | tcacatcaccaccacc   | 0.483 |                       |
| - | 18 | 3468      | Y2F_uc011msq.1_     | NM_001522    | NP_001513    | P51841 | GUC2F_HUMAN | lasmic (Potential).        | 8   | :AAGCCTTTTTTT      | 0.418 |                       |
| + | 1  | 50        | Del_p.M1fs IQCC_1   | NM_018134    | NP_060604    | Q4KMZ1 | IQCC_HUMAN  |                            | 4   | :CCCATGGAGCC.      | 0.652 |                       |
| + | 7  | 1484_1486 | ie_Del_p.P386del    | NM_005807    | NP_005798    | Q92954 | PRG4_HUMAN  | ats of K-X-P-X-P-T-T-X.[17 | 1   | :ACCACTCCCAA       | 0.65  | 095882;rs143141440    |
| + | 2  | 452_454   | 34A_uc002rca.1_5'   | NM_145175    | NP_660158    | Q96KN4 | FA84A_HUMAN | Poly-His.                  | 1   | :GCCGCCACCAC       | 0.64  |                       |
| - | 1  | 479_480   |                     | NM_001085377 | NP_001078846 | P23508 | CRCM_HUMAN  |                            | 1   | ctgccgctgccgccc    | 0.391 |                       |
| - | 11 | 2666_2668 |                     | NM_015117    | NP_055932    | Q8IXZ2 | ZC3H3_HUMAN | Poly-Ser. p.S879F(1)       | 1   | :ggggatgaggaggag   | 0.552 | rs2272753;rs137878905 |
| + | 4  | 753       | zni.2_Frame_Shift   | NM_014874    | NP_055689    | O95140 | MFN2_HUMAN  | lasmic (Pote NA            | 1   | :GTGGCTTTTTTT      | 0.537 |                       |
| + | 8  | 5294      | .2_Intron PRDM2_    | NM_012231    | NP_036363    | Q13029 | PRDM2_HUMAN | NA                         | 1   | :GTCCCAAAAAAA      | 0.428 |                       |
| + | 3  | 345       | _Shift_Del_p.D62fs  | NM_018125    | NP_060595    | Q9HCE6 | ARGAL_HUMAN | NA                         | 3   | :ACAGACCCCCC       | 0.587 |                       |
| - | 4  | 4772      | _Shift_Del_p.Q118   | NM_024503    | NP_078779    | Q5T1R4 | ZEP3_HUMAN  | NA                         | 6   | :GGCTTGAAATA/      | 0.597 |                       |
| + | 4  | 741_743   |                     | NM_173642    | NP_775913    | Q8IXN7 | RIMKA_HUMAN | ATP-grasp. NA              | 0   | :TCCGGGTGGTG       | 0.542 |                       |
| + | 2  | 545_547   | 10okl.1_In_Frame    | NM_003780    | NP_003771    | O60909 | B4GT2_HUMAN | renal (Poten NA            | 2   | GCTGCTagcagca      | 0.616 | rs149892509           |
| + | 4  | 327_329   | 326_uc009wda.1_     | NM_182976    | NP_892021    | Q5BKZ1 | ZN326_HUMAN | il activation NA           | 1   | CACAGTGGTGG        | 0.409 |                       |
| - | 9  | 1607      | 0ovy.1_Frame_Sh     | NM_004696    | NP_004687    | O15374 | MOT5_HUMAN  | ical; (Potent NA           | 3   | :GGTACAAAAAA       | 0.388 |                       |
| - | 1  | 273_274   | _Shift_Del_p.P6fs l | NM_024408    | NP_077719    | Q04721 | NOTC2_HUMAN | NA                         | 27  | :GAGCGGGGCG(       | 0.663 |                       |
| + | 4  | 724       | 3_5'UTR NOTCH2      | NM_203458    | NP_982283    | Q7Z3S9 | NT2NL_HUMAN | EGF-like 4. NA             | 1   | :GGAAGTACCTG       | 0.498 |                       |
| + | 14 | 2499      | _Shift_Del_p.G778   | NM_019032    | NP_061905    | Q6UY14 | ATL4_HUMAN  | SP type-1 2 NA             | 2   | :AATTGGGGGG(       | 0.692 | rs149280379           |
| - | 1  | 643_645   | 3.E61del MCL1_uc    | NM_021960    | NP_068779    | Q07820 | MCL1_HUMAN  | PEST-like. NA              | 0   | :CTCGTCCTCCT(      | 0.635 |                       |
| - | 2  | 2734_2736 | wne.1_In_Frame_l    | NM_007113    | NP_009044    | Q07283 | TRHY_HUMAN  | 30 AA tandei NA            | 5   | :GTAGTCCTCC(       | 0.586 | rs143222885           |
| - | 4  | 1374_1375 |                     | NM_006617    | NP_006608    | P48681 | NEST_HUMAN  | Tail. NA                   | 6   | :GGAGCAGAGAC       | 0.649 |                       |

|   |    |                             |              |              |        |             |                |    |    |                 |       |             |
|---|----|-----------------------------|--------------|--------------|--------|-------------|----------------|----|----|-----------------|-------|-------------|
| - | 6  | 1004_1006X1A_uc001gcw.1_    | NM_177398    | NP_796372    | Q8TE12 | LMX1A_HUMAN | y-Gln.]Gln-ri  | NA | 5  | 3ATCTTGCTGCTC   | 0.567 |             |
| - | 11 | 1182_1192 MNAT2_uc001gqt    | NM_015039    | NP_055854    | Q9BZQ4 | NMNA2_HUMAN |                | NA | 1  | ATCCACAACATGC   | 0.578 |             |
| + | 5  | 701 z.2_RNA CR1L_uc         | NM_175710    | NP_783641    | Q2VPA4 | CR1L_HUMAN  | Sushi 3.       | NA | 0  | AGAGGGAAAAAAG   | 0.507 |             |
| - | 5  | 1798 AGT_uc009xf.2_F        | NM_000029    | NP_000020    | P01019 | ANGT_HUMAN  |                | NA | 0  | AGCTCAAAAAA     | 0.562 |             |
| - | 20 | 2528_2530 E813del SFBMT2_   | NM_001029880 | NP_001025051 | Q5VUG0 | SMBT2_HUMAN |                | NA | 8  | AGTCTCTCCTCC    | 0.596 |             |
| + | 16 | 3776_3778_p.E1094del KIAA   | NM_019590    | NP_062536    | Q5T5P2 | SKT_HUMAN   |                | NA | 7  | GGAGGAAGAAG     | 0.552 |             |
| - | 10 | 966_967_p.V188fs MPP7_u     | NM_173496    | NP_775767    | Q5T2T1 | MPP7_HUMAN  | PDZ.           | NA | 1  | CGTTGACTTCCC    | 0.351 |             |
| - | 2  | 2633_2635ie_Del.p.720_721:  | NM_020848    | NP_065899    | Q9P266 | K1462_HUMAN | Ser-rich.      | NA | 4  | CTCCTCActgctgct | 0.463 |             |
| - | 15 | 1912_p.K570fs FRMPD:        | NM_001018071 | NP_001018081 | Q68DX3 | FRPD2_HUMAN | FERM.          | NA | 1  | 3TGAACTTTTTTT   | 0.463 |             |
| + | 8  | 1926                        | NM_001077665 | NP_001071133 | Q5VW22 | AGAP6_HUMAN |                | NA | 1  | AGTCTTGGCCCC    | 0.527 |             |
| + | 25 | 3716_p.D924fs ZMIZ1_u       | NM_020338    | NP_065071    | Q9ULJ6 | ZMIZ1_HUMAN |                | NA | 4  | CTGGACCCCCC     | 0.557 |             |
| + | 10 | 2052                        | NM_015188    | NP_056003    | O60347 | TBC12_HUMAN | ab-GAP TBC     | NA | 0  | TTGGCCTTTTTTC   | 0.418 |             |
| - | 2  | 240_241_p.Shift_Del.p.P47f  | NM_001164    | NP_001155    | O00213 | APBB1_HUMAN |                | NA | 2  | TCCTTGGGTCCC    | 0.688 |             |
| - | 3  | 345_Drew.1_Frame_Shi        | NM_001001991 | NP_001001991 | Q6UXH9 | PAMR1_HUMAN |                | NA | 2  | AGGTACCCCCC     | 0.517 |             |
| - | 24 | 2496_2498 PC3_uc010rhl.1_l  | NM_000256    | NP_000247    | Q14896 | MYPC3_HUMAN | nectin type-   | NA | 3  | GTAGCTCTTCTT    | 0.601 |             |
| + | 18 | 2022_2023                   | NM_006133    | NP_006124    | Q9Y4D2 | DGLA_HUMAN  | lasmic (Pote   | NA | 3  | GCCTTCAATGAC    | 0.594 |             |
| + | 3  | 548_550_Drlo.1_In_Frame_C   | NM_004265    | NP_004256    | O95864 | FADS2_HUMAN | ical; (Potent  | NA | 2  | 3TTCTTCTCCTC    | 0.537 |             |
| + | 22 | 2657_2658l_5'Flank PACS1_u  | NM_006842    | NP_006833    | Q13435 | SF3B2_HUMAN |                | NA | 3  | TACAGCAAAAAA    | 0.515 |             |
| + | 1  | 356_358_RFN4_uc001ojq.1     | NM_024036    | NP_076941    | Q6PJG9 | LRFN4_HUMAN |                | NA | 0  | AGCTCCTGCTGC    | 0.719 |             |
| + | 3  | 321_323_me_Del.p.E98del     | NM_033388    | NP_203746    | Q8NAA4 | A16L2_HUMAN |                | NA | 0  | TGGCAGGAGGA     | 0.591 |             |
| - | 2  | 308_322_lprt.1_5'UTR TMP1   | NM_001077263 | NP_001070731 | Q9BYE2 | TMPSD_HUMAN | '-A-[GLQR].]   | NA | 1  | GGAGATGCCCG     | 0.67  |             |
| - | 17 | 2397                        | NM_004818    | NP_004809    | Q9BUQ8 | DDX23_HUMAN | case C-term    | NA | 6  | CTTTTGTGAGG     | 0.572 |             |
| + | 87 | 13755_13757                 | NM_002332    | NP_002323    | Q07954 | LRP1_HUMAN  | ical; (Potent  | NA | 22 | 3CTGTTGCTGCT    | 0.557 |             |
| + | 54 | 7280_7281                   | NM_014503    | NP_055318    | O75691 | UTP20_HUMAN |                | NA | 4  | TGGAGCAAAAAA    | 0.386 |             |
| + | 5  | 667_668_CHP_uc001tpp.2_     | NM_001143852 | NP_001137324 | Q9BT92 | TCHP_HUMAN  | with keratin   | NA | 1  | AAGAAGAAAAAA    | 0.48  |             |
| + | 7  | 784_786_T81_uc001tqj.2_RI   | NM_001143779 | NP_001137251 | Q8WYA0 | IFT81_HUMAN | Potential.     | NA | 1  | 3AGAGAGAAGAA    | 0.35  |             |
| + | 16 | 2686_2688ltn.1_In_Frame_I   | NM_004592    | NP_004583    | Q12872 | SFSWA_HUMAN | g/Ser-rich (f  | NA | 0  | CACGAGAAGAA     | 0.493 |             |
| + | 4  | 523_aaa.2_Frame_Shi         | NM_001676    | NP_001667    | P54707 | AT12A_HUMAN | ical; (Potent  | NA | 6  | ATGGTGGGGGG     | 0.587 |             |
| - | 5  | 2069_ne_Shift_Del.p.L5      | NM_183044    | NP_898865    | Q9Y252 | RNF6_HUMAN  |                | NA | 2  | TTAGTAAAAAAA    | 0.403 |             |
| - | 5  | 1432_ne_Shift_Del.p.R3      | NM_001142296 | NP_001135768 | Q8N0X7 | SPG20_HUMAN |                | NA | 0  | TACCTTTTTTCC    | 0.373 |             |
| - | 10 | 1917_1918_p.R637fs ZC3H13   | NM_015070    | NP_055885    | Q5T200 | ZC3HD_HUMAN | Arg/Ser-rich   | NA | 2  | CAACCTCTCTC     | 0.337 |             |
| - | 1  | 1020                        | NM_052910    | NP_443142    | Q96PX8 | SLIK1_HUMAN | xtracellular ( | NA | 5  | AGCCCTTTTTTT    | 0.463 |             |
| - | 3  | 1109                        | NM_000452    | NP_000443    | Q12908 | NTCP2_HUMAN | ical; (Potent  | NA | 4  | CGAGAGAAACC     | 0.398 |             |
| + | 8  | 3011_3013.Q981del MGA_uc    | NM_001080541 | NP_001074010 | Q8IW19 | MGAP_HUMAN  | Gln-rich.      | NA | 12 | GGCACAGCAGC     | 0.458 |             |
| - | 22 | 2847_2848_a-mir-2116 M1001C | NM_004998    | NP_004989    | Q12965 | MYO1E_HUMAN |                | NA | 3  | CTGAGGGACAC     | 0.559 |             |
| - | 17 | 1884                        | NM_022450    | NP_071895    | Q96CC6 | RHDF1_HUMAN | renal (Pote    | NA | 2  | 3CGCTGTTTTTG    | 0.597 |             |
| - | 8  | 1516_1518_269LL>L ABCA3_    | NM_001089    | NP_001080    | Q99758 | ABCA3_HUMAN | ical; (Potent  | NA | 16 | GCTGAGCAGCA     | 0.611 | rs145342500 |
| - | 10 | 895_NTAN1_uc010uzo.         | NM_173474    | NP_775745    | Q96AB6 | NTAN1_HUMAN |                | NA | 0  | CTTTCATTTTTT    | 0.383 |             |
| + | 9  | 1622_1633C100132247_ucC     | NM_001135865 | NP_001129337 | A8MRT5 | K220L_HUMAN | Pro-rich.      | NA | 0  | TCCACCCTCAGC    | 0.571 |             |
| + | 15 | 1993_1995>.S436del SLC5A1   | NM_052944    | NP_443176    | Q8VWX8 | SC5AB_HUMAN | lasmic (Pote   | NA | 2  | AGGCCAGCAGC     | 0.542 |             |
| + | 17 | 2641_hift_Del.p.R819fs      | NM_173201    | NP_775293    | O14983 | AT2A1_HUMAN | smic (By sin   | NA | 4  | GACCGCCCCC      | 0.657 |             |
| - | 2  | 423_425_2dxs.2_In_Frame     | NM_006110    | NP_006101    | O95400 | CD2B2_HUMAN |                | NA | 1  | CCCCCATCATC     | 0.532 |             |
| + | 13 | 3813_3815                   | NM_014712    | NP_055527    | O15047 | SET1A_HUMAN | Ser-rich.      | NA | 3  | Gctctctatctctct | 0.389 |             |
| + | 5  | 1317_1319>hx.2_In_Frame_D   | NM_024335    | NP_077311    | P78412 | IRX6_HUMAN  |                | NA | 6  | gaggaagaggagga  | 0.493 |             |
| + | 3  | 278_280_0vho.1_In_Frame_    | NM_020312    | NP_064708    | O75208 | COQ9_HUMAN  |                | NA | 1  | CGGCGAGGAGG     | 0.576 | rs149029279 |
| + | 12 | 3846_3848ie_Del.p.Q812del   | NM_006599    | NP_006590    | O94916 | NFAT5_HUMAN | Poly-Gln.      | NA | 0  | AATcaacagcagca  | 0.389 |             |
| - | 11 | 2790_2791D91B_uc002fuk.1_   | NM_018128    | NP_060598    | Q2NL82 | TSR1_HUMAN  |                | NA | 1  | CTCTTCTTGGC     | 0.475 |             |

|   |    |           |                                                             |              |              |        |             |                |    |    |                   |       |
|---|----|-----------|-------------------------------------------------------------|--------------|--------------|--------|-------------|----------------|----|----|-------------------|-------|
| + | 3  | 449_451   | 11_uc010vtw.1_In                                            | NM_175734    | NP_783861    | Q0P670 | CQ074_HUMAN | Arg-rich.      | NA | 0  | TGTTcgtcgccgcgr   | 0.424 |
| + | 8  | 912_914   | L222del CHRN1                                               | NM_000747    | NP_000738    | P11230 | ACHB_HUMAN  | ical; (Potent  | NA | 2  | GTTCTGCTGCT       | 0.498 |
| - | 15 | 2000_2002 | 15_uc002ghy.1_5'                                            | NM_004860    | NP_004851    | P51116 | FXR2_HUMAN  | Poly-Arg.      | NA | 0  | GTTACGGCGGGC      | 0.547 |
| - | 2  | 1324_1325 | glg.1_Frame_Shift                                           | NM_213597    | NP_998762    | Q6ZNG9 | KRBA2_HUMAN | Potential.     | NA | 0  | CAATTTCTAGCT      | 0.446 |
| + | 5  | 773_775   |                                                             | NM_178170    | NP_835464    | Q86SG6 | NEK8_HUMAN  |                | NA | 6  | CTCTGCATCCG       | 0.68  |
| - | 1  | 1572_1573 | 18A_uc010csa.1_                                             | NM_004740    | NP_004731    | O95411 | TIAF1_HUMAN |                | NA | 0  | TGGTCCACACAC      | 0.564 |
| + | 1  | 158_160   | ime_Del_p.K7del z                                           | NM_003457    | NP_003448    | O43670 | ZN207_HUMAN |                | NA | 0  | TCGCAAGAAGA/      | 0.542 |
| - | 7  | 912       | hifit_Del_p.P262fs                                          | NM_001256    | NP_001247    | P30260 | CDC27_HUMAN |                | NA | 5  | GTTTTTGGTTTAT     | 0.373 |
| - | 2  | 516_517   |                                                             | NM_004645    | NP_004636    | P38432 | COIL_HUMAN  |                | NA | 1  | CTCTTGTTTTTT      | 0.366 |
| - | 2  | 311_313   | 47EE>E TEX2_uc                                              | NM_018469    | NP_060939    | Q8IWB9 | TEX2_HUMAN  | Poly-Glu.      | NA | 1  | ccctctctctctctctc | 0.468 |
| - | 7  | 863       | p.P255fs FECH_u                                             | NM_000140    | NP_000131    | P22830 | HEMH_HUMAN  |                | NA | 1  | CAAGTGGAAAAA      | 0.413 |
| - | 8  | 583       | DENND1C_uc002                                               | NM_024898    | NP_079174    | Q8IV53 | DEN1C_HUMAN | DENN.          | NA | 1  | GGGTAGGGGGGG      | 0.672 |
| - | 23 | 2332      | nnh.2_Frame_Shif                                            | NM_001379    | NP_001370    | P26358 | DNMT1_HUMAN |                | NA | 6  | GTGCATTTTTTT      | 0.507 |
| - | 23 | 3693_3694 | lxe.2_Frame_Shift                                           | NM_003331    | NP_003322    | P29597 | TYK2_HUMAN  | otein kinase   | NA | 9  | ACCGTGGGGGG       | 0.48  |
| + | 1  | 529       |                                                             | NM_012377    | NP_036509    | O60412 | ORTC2_HUMAN | ellular (Pote  | NA | 3  | CGCACTTTTTTT      | 0.468 |
| - | 11 | 1320_1321 | nfg.1_Frame_Shift                                           | NM_033417    | NP_219485    | Q9BT25 | HAUS8_HUMAN |                | NA | 0  | GGAACGAGAGAC      | 0.495 |
| - | 2  | 503_504   |                                                             | NM_031310    | NP_112600    | Q9BX97 | PLVAP_HUMAN | ellular (Pote  | NA | 0  | GCTCTTGTTCAT      | 0.564 |
| - | 3  | 909       | _Shift_Del_p.l255f                                          | NM_014884    | NP_055699    | Q8IX01 | SUGP2_HUMAN |                | NA | 0  | TGGGTATTTTTTT     | 0.502 |
| + | 8  | 1243      | mw.3_Frame_Shif                                             | NM_153221    | NP_694953    | Q8IUL8 | CILP2_HUMAN |                | NA | 1  | TGCGACCCCCCG      | 0.647 |
| - | 10 | 1444      |                                                             | NM_021232    | NP_067055    | Q9UF12 | PROD2_HUMAN |                | NA | 2  | ACATACCCAGTC      | 0.582 |
| - | 3  | 1139_1141 | r.1_intron B3GNT8                                           | NM_198540    | NP_940942    | Q7Z7M8 | B3GN8_HUMAN | .Lumenal (F    | NA | 0  | AGGCCAGCAGC       | 0.631 |
| + | 2  | 1714_1715 | osk.3_Frame_Shif                                            | NM_022752    | NP_073589    | Q6ZN55 | ZN574_HUMAN | ype 10; dege   | NA | 0  | TCGCGCACACAC      | 0.609 |
| + | 14 | 3239_3241 | lxyo.1_In_Frame_I                                           | NM_014681    | NP_055496    | Q14147 | DHX34_HUMAN |                | NA | 5  | AGCTGGAGGAG       | 0.66  |
| - | 1  | 81_82     | K1_uc010ycg.1_R                                             | NM_002257    | NP_002248    | P06870 | KLK1_HUMAN  |                | NA | 0  | CCAGTCCCCCCC      | 0.653 |
| - | 4  | 472       | wl.2_Frame_Shift                                            | NM_001161748 | NP_001155220 | P55344 | LMIP_HUMAN  | ical; (Potent  | NA | 0  | CCCAGCCCAGG       | 0.607 |
| + | 6  | 841       | 2_Frame_Shift_De                                            | NM_002255    | NP_002246    | Q99706 | KI2L4_HUMAN |                | NA | 1  | GTCTCCAAAAAA/     | 0.532 |
| - | 11 | 1472_1474 | 1_In_Frame_Del_                                             | NM_015317    | NP_056132    | Q8TB72 | PUM2_HUMAN  | Ala-rich.      | NA | 1  | TCCAGCTGCTG       | 0.424 |
| - | 11 | 2183      | r113_uc010eyk.1_                                            | NM_001145168 | NP_001138640 | Q8IZF5 | GP113_HUMAN | tracellular (F | NA | 4  | ACCAACCCCCC       | 0.612 |
| - | 29 | 4736      | oezy.1_Frame_Sh                                             | NM_019024    | NP_061897    | Q9P2D3 | HTR5B_HUMAN |                | NA | 8  | ACTCTGAGCAC       | 0.438 |
| - | 2  | 234_236   | HX57_uc002rrg.2_                                            | NM_198963    | NP_945314    | Q6P158 | DHX57_HUMAN | Gly-rich.      | NA | 3  | gccacctccaccacca  | 0.384 |
| - | 12 | 966       | Shift_Del_p.P292fs                                          | NM_003618    | NP_003609    | Q8IVH8 | M4K3_HUMAN  |                | NA | 8  | TGATCTGGATTA      | 0.323 |
| - | 6  | 747_749   | l.2_In_Frame_Del                                            | NM_016079    | NP_057163    | Q9Y3E7 | CHMP3_HUMAN | T-interacting  | NA | 1  | CCTCTTCTCTCT      | 0.616 |
| - | 7  | 1136      | fos.2_Frame_Shift                                           | NM_002349    | NP_002340    | O60449 | LY75_HUMAN  | ellular (Pote  | NA | 0  | CTGAGTATGTCC      | 0.383 |
| + | 1  | 285       | iD10_uc010zdh.1_                                            | NM_006063    | NP_006054    | O60662 | KBTBA_HUMAN | BTB.           | NA | 0  | AGGCGAAAAAA/      | 0.388 |
| - | 8  | 1171_1172 | J2utu.2_Frame_St                                            | NM_012086    | NP_036218    | Q9Y5Q9 | TF3C3_HUMAN | TPR 6.         | NA | 7  | CTGAAGTTTTTT      | 0.337 |
| - | 16 | 2250_2251 | Shift_Del_p.L359f                                           | NM_173076    | NP_775099    | Q86UK0 | ABCAC_HUMAN |                | NA | 11 | TGATTGAGAATC      | 0.401 |
| + | 17 | 2335      | M8_uc010fj.2_In                                             | NM_024080    | NP_076985    | Q7Z2W7 | TRPM8_HUMAN | Name=3; (P     | NA | 4  | CCACACCCCCC       | 0.577 |
| + | 4  | 1257      | l.2_RNA PANK2_L                                             | NM_153638    | NP_705902    | Q9BZ23 | PANK2_HUMAN |                | NA | 0  | AGGAACTTTTTT      | 0.343 |
| + | 4  | 799_801   | lOzqz.1_Translatio                                          | NM_001819    | NP_001810    | P05060 | SCG1_HUMAN  | Poly-Glu.      | NA | 6  | GGATGAGGAGG       | 0.532 |
| + | 3  | 1075_1077 | i.1_intron GZF1_u                                           | NM_022482    | NP_071927    | Q9H116 | GZF1_HUMAN  |                | NA | 1  | gaggaagaggaggag   | 0.384 |
| + | 3  | 254_256   | FRG1B_uc010gdr.1_RNA FRG1B_uc010ztk.1_In_Frame_Del_p.G27del |              |              |        |             |                | NA | 0  | CAGCAGGAGAA/      | 0.355 |
| + | 1  | 369       | .2_intron SGK2_u                                            | NM_016276    | NP_057360    | Q9HBY8 | SGK2_HUMAN  |                | NA | 6  | CCTGTCCCCC        | 0.617 |
| + | 4  | 1167      | J02xpx.2_Frame_ξ                                            | NM_033421    | NP_219489    | Q969T3 | SNX21_HUMAN |                | NA | 2  | ACCACCCCCC        | 0.617 |
| - | 4  | 1934_1936 | 1aaq.1_In_Frame_                                            | NM_017798    | NP_060268    | Q9BYJ9 | YTHD1_HUMAN |                | NA | 2  | ACCACCTCTCT       | 0.557 |
| - | 5  | 757       |                                                             | NM_144659    | NP_653260    | Q9NV44 | CU077_HUMAN |                | NA | 0  | AGACACCCCCC       | 0.478 |
| + | 11 | 1903_1905 | 1A_uc002ywl.2_3                                             | NM_001396    | NP_001387    | Q13627 | DYR1A_HUMAN | Poly-His.      | NA | 4  | ccaccatcaccaccacc | 0.384 |
| + | 7  | 2031_2033 | 3atq.1_In_Frame_                                            | NM_001039141 | NP_001034230 | Q9H2D6 | TARA_HUMAN  |                | NA | 1  | AGAGCTCTCTC       | 0.596 |

rs66505238

rs142255283

|   |    |           |                    |              |              |        |             |                |    |    |                   |       |                   |
|---|----|-----------|--------------------|--------------|--------------|--------|-------------|----------------|----|----|-------------------|-------|-------------------|
| + | 13 | 1533_1535 | aus.2_In_Frame_I   | NM_012407    | NP_036539    | Q9NRD5 | PICK1_HUMAN | Poly-Glu.      | NA | 0  | AGATGGggaggag     | 0.562 |                   |
| + | 5  | 477_479   |                    | NM_001197    | NP_001188    | Q13323 | BIK_HUMAN   | Potential.) Hi | NA | 0  | tgctggcgctgctgctg | 0.562 |                   |
| - | 4  | 689       | _p.Q58fs PNPLA5    | NM_138814    | NP_620169    | Q7Z6Z6 | PLPL5_HUMAN |                | NA | 0  | GCTCTGGGGGC       | 0.567 |                   |
| + | 2  | 818_820   | tr.1_In_Frame_Del  | NM_014760    | NP_055575    | Q93075 | TATD2_HUMAN |                | NA | 2  | AATAACTCCTCC      | 0.635 |                   |
| - | 1  | 205_207   | rg.1_In_Frame_De   | NM_004628    | NP_004619    | Q01831 | XPC_HUMAN   | lu. Glu-rich ( | NA | 3  | TCACCCTCCTC       | 0.734 | rs72561774        |
| + | 5  | 819       | icko.2_Frame_Shif  | NM_001098414 | NP_001091884 | Q6ZSS3 | ZN621_HUMAN | 2H2-type 2     | NA | 1  | AACCACATTGG/      | 0.453 |                   |
| + | 26 | 3272      | _p.L944fs KIF15_t  | NM_020242    | NP_064627    | Q9NS87 | KIF15_HUMAN | Potential.     | NA | 1  | TATTCTGGATCTC     | 0.388 |                   |
| - | 14 | 1709_1710 | 3csi.1_Frame_Shif  | NM_001789    | NP_001780    | P30304 | MPIP1_HUMAN | Rhodanese.     | NA | 5  | GGCGATCTCTCT      | 0.515 |                   |
| + | 10 | 1926_1928 | ryj.2_5'UTR TREX   | NM_130384    | NP_569055    | Q8WXE1 | ATRIP_HUMAN |                | NA | 1  | CCCTCTGCTGC       | 0.547 |                   |
| + | 7  | 1043      | me_Shift_Del_p.G:  | NM_053002    | NP_443728    | Q86YW9 | MD12L_HUMAN |                | NA | 7  | CCTGGCCCCCC       | 0.582 |                   |
| + | 21 | 2524_2526 | lbuy.1_In_Frame_   | NM_000283    | NP_000274    | P35913 | PDE6B_HUMAN |                | NA | 0  | GAGAAGGAGGA       | 0.562 |                   |
| - | 1  | 340_348   |                    | NM_177998    | NP_819056    | Q7RTM1 | OTOP1_HUMAN | ical; (Potent  | NA | 3  | TCACACAGCAGC      | 0.727 | 245977;rs75328065 |
| + | 18 | 2813_2815 | 1_RNA CRMP1_u      | NM_153717    | NP_714928    | P57679 | EVC_HUMAN   |                | NA | 2  | CGCCCAGCAGC,      | 0.478 |                   |
| + | 4  | 469       | _p.P79fs ADAD1_    | NM_139243    | NP_640336    | Q96M93 | ADAD1_HUMAN |                | NA | 0  | TCCTCCAAAAAA      | 0.358 |                   |
| + | 2  | 458       | TU_uc011cggq.1_R   | NM_015693    | NP_056508    | Q9ULD6 | PDZD6_HUMAN |                | NA | 1  | TGCAATAAAAAA      | 0.358 |                   |
| + | 20 | 6410      | hm.2_Frame_Shift   | NM_178140    | NP_835260    | O15018 | PDZD2_HUMAN |                | NA | 9  | TCTCTGAACCC       | 0.612 |                   |
| - | 5  | 1175      | 61fs SLC45A2_uc    | NM_016180    | NP_057264    | Q9UMX9 | S45A2_HUMAN | ellular (Pote  | NA | 3  | TAGATGAGAAAC      | 0.448 | rs141120603       |
| + | 5  | 378_379   | k.1_Frame_Shift_l  | NM_006083    | NP_006074    | Q13123 | RED_HUMAN   |                | NA | 1  | AAATTGAGAGAG      | 0.46  |                   |
| + | 4  | 1770      | 3lnn.1_Frame_Shif  | NM_020768    | NP_065819    | Q68DU8 | KCD16_HUMAN |                | NA | 4  | GCAGCAAAAAA       | 0.468 |                   |
| - | 4  | 524       | 1_Splice_Site_p.N  | NM_016290    | NP_057374    | Q96RL1 | UIMC1_HUMAN |                | NA | 4  | ATATTTACATTCA     | 0.433 |                   |
| - | 5  | 1339      | _p.K176fs ZNF184   | NM_007149    | NP_009080    | Q99676 | ZN184_HUMAN |                | NA | 1  | GGCCTTTTTTC       | 0.408 |                   |
| + | 1  | 112       |                    | NM_030905    | NP_112167    | O76002 | OR2J2_HUMAN | ellular (Pote  | NA | 0  | ATGATTAAAAAA      | 0.358 |                   |
| - | 2  | 797_799   | l.1_intron PSORS   | NM_001264    | NP_001255    | Q15517 | CDSN_HUMAN  | Ser-rich.      | NA | 2  | TGGTCCACCAC       | 0.635 |                   |
| + | 14 | 2337_2338 | 3AT2_uc003nvc.3_   | NM_080686    | NP_542417    | P48634 | PRC2A_HUMAN | X 57 AA typ    | NA | 0  | CTCCACCCCCC       | 0.594 |                   |
| - | 5  | 372_374   | cw.3_In_Frame_De   | NM_003322    | NP_003313    | O00294 | TULP1_HUMAN | Poly-Glu.      | NA | 3  | tcctccttctcctc    | 0.389 |                   |
| - | 8  | 1152      | _p.K221fs ICK_uc0  | NM_016513    | NP_057597    | Q9UPZ9 | ICK_HUMAN   | rotein kinas   | NA | 5  | ATTACCTTTTTTG     | 0.502 |                   |
| + | 9  | 3342_3344 | 2_3'UTR GRM1_uc    | NM_000838    | NP_000829    | Q13255 | GRM1_HUMAN  | lasmic (Pote   | NA | 19 | CGTAGAGGAGG/      | 0.586 |                   |
| - | 10 | 1313_1314 |                    | NM_015718    | NP_056533    | Q9HBY0 | NOX3_HUMAN  | ical; (Potent  | NA | 1  | CAACGCACACAC      | 0.53  |                   |
| - | 8  | 1134      | _p.R163fs AGPAT4   | NM_020133    | NP_064518    | Q9NRZ5 | PLCD_HUMAN  |                | NA | 0  | CCGCCGGGGGG       | 0.627 |                   |
| - | 10 | 1122      | _p.E105fs SKAP2_   | NM_003930    | NP_003921    | O75563 | SKAP2_HUMAN |                | NA | 1  | TTCCTCCACTTI      | 0.398 |                   |
| + | 1  | 403_405   | uc003tbl.3_5'Flank | NM_002047    | NP_002038    | P41250 | SYG_HUMAN   |                | NA | 1  | CGCTCTGCTGC       | 0.749 |                   |
| + | 5  | 601_603   | 0kxo.2_In_Frame_   | NM_007252    | NP_009183    | P78424 | PO6F2_HUMAN | Gln-rich.      | NA | 1  | cagctccagcagcagc  | 0.365 |                   |
| - | 14 | 1383      | _p.I348fs DDC_uc   | NM_000790    | NP_000781    | P20711 | DDC_HUMAN   |                | NA | 2  | AGTGGATTTTTTI     | 0.502 |                   |
| - | 2  | 83_85     | _uc010lbj.1_In_Fri | NM_004603    | NP_004594    | Q16623 | STX1A_HUMAN | lasmic (Pote   | NA | 0  | AGCGACATCATC      | 0.586 |                   |
| + | 38 | 2779      | 1_intron COL1A2    | NM_000089    | NP_000080    | P08123 | CO1A2_HUMAN |                | NA | 9  | ATGGTCCCCCC       | 0.453 |                   |
| + | 42 | 6364      | .V2034fs TRRAP_    | NM_003496    | NP_003487    | Q9Y4A5 | TRRAP_HUMAN | ite nuclear k  | NA | 37 | GTCCGTGGATTI      | 0.517 |                   |
| + | 5  | 572       | ca.2_Frame_Shift_  | NM_015908    | NP_056992    | Q9BXP5 | SRRT_HUMAN  |                | NA | 2  | ATGCTGGGGGG       | 0.607 |                   |
| + | 15 | 4762_4763 | 3wem.2_Frame_Sl    | NM_005435    | NP_005426    | Q12774 | ARHG5_HUMAN | SH3.           | NA | 2  | FGCTGGAGGG        | 0.569 |                   |
| - | 5  | 987_989   |                    | NM_014729    | NP_055544    | O94900 | TOX_HUMAN   | lization sign  | NA | 4  | GGATCCTTCTTC      | 0.453 |                   |
| - | 2  | 136_138   | _Del_p.24_25AA>    | NM_078480    | NP_510965    | Q9UHX1 | PUF60_HUMAN | homodimer      | NA | 0  | accactgccgccgcc   | 0.404 |                   |
| - | 30 | 4625      | ae.1_Splice_Site_  | NM_201380    | NP_958782    | Q15149 | PLEC_HUMAN  |                | NA | 9  | CTGTACCTCCTC      | 0.621 |                   |
| - | 1  | 20_21     | 3ziz.1_Frame_Shif  | NM_134441    | NP_604390    | P04090 | REL2_HUMAN  |                | NA | 0  | AGGTGGAAAAAA      | 0.535 |                   |
| + | 2  | 2532      | 3zvv.2_Frame_Shi   | NM_203299    | NP_976044    | Q5VYM1 | C1131_HUMAN |                | NA | 0  | ATTATCCCCCC/      | 0.537 |                   |
| + | 1  | 417_419   | 8376_uc003zys.1_   | NM_001039792 | NP_001034881 | Q6UXD1 | HRCT1_HUMAN | His-rich.      | NA | 0  | acccccaccgccacca  | 0.389 | rs138232567       |
| - | 9  | 2947_2949 | R2_uc004ari.1_Inl  | NM_004560    | NP_004551    | Q01974 | ROR2_HUMAN  | lasmic (Pote   | NA | 20 | AGCTTCTCCTC       | 0.645 |                   |
| - | 24 | 2709_2710 | 1lxc.1_Frame_Shif  | NM_015258    | NP_056073    | Q5T1M5 | FKB15_HUMAN | Potential.     | NA | 3  | AGTTCTTGATG       | 0.495 |                   |
| - | 3  | 308       | 1.1_5'UTR FKBP1f   | NM_015258    | NP_056073    | Q5T1M5 | FKB15_HUMAN |                | NA | 3  | TGCTGTTTTTG       | 0.378 |                   |

|   |    |           |                     |              |              |        |             |                              |    |               |                  |       |             |
|---|----|-----------|---------------------|--------------|--------------|--------|-------------|------------------------------|----|---------------|------------------|-------|-------------|
| - | 26 | 2978      | p.Y312fs GOLGA'     | NM_004486    | NP_004477    | Q08379 | GOGA2_HUMAN | NA                           | 1  | :CCGGTAAAAAA/ | 0.562            |       |             |
| + | 11 | 1816_1818 | zv.2_In_Frame_D     | NM_005157    | NP_005148    | P00519 | ABL1_HUMAN  | n signal 1 (F                | NA | 817           | ΓGATCAAGAAGA/    | 0.616 |             |
| - | 2  | 873       | .1_RNA TTF1_ucl     | NM_007344    | NP_031370    | Q15361 | TTF1_HUMAN  | Poly-Lys.                    | NA | 4             | TTAGACTTTTTTTT   | 0.473 |             |
| + | 13 | 1980      | 512fs ADAMTS13_     | NM_139025    | NP_620594    | Q76LX8 | ATS13_HUMAN |                              | NA | 6             | AGTGGCCCCCG/     | 0.637 | rs75928689  |
| - | 33 | 6155_6156 |                     | NM_017617    | NP_060087    | P46531 | NOTC1_HUMAN | nic (Potentia                | NA | 856           | TTGTTAGCCCCG     | 0.604 |             |
| + | 13 | 2110_2112 | 598del GRIN1_uc     | NM_007327    | NP_015566    | Q05586 | NMDZ1_HUMAN | lasmic (Pote                 | NA | 1             | CAGCGAGGAGG      | 0.739 |             |
| - | 2  | 220       | ZBED1_uc004cqh      | NM_004729    | NP_004720    | O96006 | ZBED1_HUMAN |                              | NA | 0             | AGCTCTCCAGGC     | 0.597 |             |
| + | 4  | 621_623   | .2_In_Frame_Del_p   | NM_005676    | NP_005667    | P98175 | RBM10_HUMAN | Poly-Arg.                    | NA | 5             | CGTAGGCGGGC/     | 0.65  |             |
| - | 6  | 3494_3496 | OM4_uc004dpd.3      | NM_020717    | NP_065768    | Q9ULL8 | SHRM4_HUMAN | Glu-rich.                    | NA | 1             | GCAGctctctctctcc | 0.261 | rs3747282   |
| - | 1  |           |                     | NM_018159    | NP_060629    | Q96G61 | NUD11_HUMAN |                              | NA | 0             | :CTCGAGGCAGC     | 0.584 |             |
| - | 4  | 299       | 4drf.2_Frame_Shif   | NM_130776    | NP_570132    | Q8WTP9 | GAGD4_HUMAN |                              | NA | 0             | :ATTCAACCCCA/    | 0.423 |             |
| - | 3  | 274_276   | fen.2_Intron CD9E   | NM_031462    | NP_113650    | Q8TCZ2 | C99L2_HUMAN | ar (Potential                | NA | 3             | GGTTGTGGTGG/     | 0.552 |             |
| - | 5  | 593_595   | 004ffl.2_In_Frame_  | NM_001011543 | NP_001011543 | P43363 | MAGAA_HUMAN | Poly-Ser.                    | NA | 0             | GATAGCaggaggag   | 0.419 |             |
| + | 3  | 719_721   |                     | NM_153812    | NP_722519    | Q86YI8 | PHF13_HUMAN | ization signal (Probable).   |    | 0             | icaagctgaagaagaa | 0.498 |             |
| + | 1  | 1263_1265 |                     | NM_004455    | NP_004446    | Q92935 | EXTL1_HUMAN | lenal (Potential).           |    | 1             | :CCCTGCCTCCTC    | 0.606 |             |
| + | 20 | 5915      | l_p.G694fs ARID1,   | NM_006015    | NP_006006    | O14497 | ARI1A_HUMAN | p.G1848fs*6(3'               |    | 142           | TTGGTGGGGGG      | 0.582 | rs140055856 |
| + | 2  | 1028_1030 |                     | NM_005281    | NP_005272    | P46089 | GPR3_HUMAN  | lasmic (Potential).          |    | 1             | :CTGTCTGCTGC     | 0.522 |             |
| + | 9  | 2306      | p.K660fs USP1_u     | NM_001017415 | NP_001017415 | O94782 | UBP1_HUMAN  |                              |    | 1             | TTGAACAAAAAA/    | 0.373 |             |
| + | 7  | 1426_1427 | me_Shift_Del_p.H'   | NM_005012    | NP_005003    | Q01973 | ROR1_HUMAN  | xtracellular (Potential).    |    | 19            | ATCCCCACACAC     | 0.554 |             |
| - | 9  | 1232      | Shift_Del_p.M408'   | NM_005665    | NP_005656    | O60447 | EVI5_HUMAN  | Interaction with alpha-tubul |    | 2             | TTTTCATTTTTTTT   | 0.318 |             |
| + | 29 | 4304      | l.1_Frame_Shift_D   | NM_000642    | NP_000633    | P35573 | GDE_HUMAN   | glucanotransferase.          |    | 3             | TTATCCAAAAAA/    | 0.323 |             |
| + | 10 | 2124      | ova.1_Frame_Shif    | NM_001144937 | NP_001138409 | Q5VTL7 | FNDC7_HUMAN | nectin type-III 8.           |    | 2             | :TGTCCAAAAAA/    | 0.363 |             |
| - | 1  | 2523      |                     | NM_021794    | NP_068566    | Q9UKF2 | ADA30_HUMAN | lasmic (Potential).          |    | 3             | GGTTACTTTTTTT'   | 0.358 |             |
| - | 1  | 273_274   | _Shift_Del_p.P6fs l | NM_024408    | NP_077719    | Q04721 | NOTC2_HUMAN |                              |    | 27            | :GAGCGGGGCGC     | 0.663 |             |
| - | 11 | 1749      | 1elx.3_Frame_Shif   | NM_014644    | NP_055459    | Q5VU43 | MYOME_HUMAN | Potential.                   |    | 5             | :AGAGCAACAGC     | 0.383 |             |
| + | 14 | 2499      | _Shift_Del_p.G778'  | NM_019032    | NP_061905    | Q6UY14 | ATL4_HUMAN  | SP type-1 2.                 |    | 2             | :AATTTGGGGGG/    | 0.692 | rs149280379 |
| + | 6  | 739       | B4_uc001eyb.1_3     | NM_002796    | NP_002787    | P28070 | PSB4_HUMAN  |                              |    | 2             | :CACCGAAAAAG/    | 0.443 |             |
| - | 2  | 2734_2736 | wne.1_In_Frame_I    | NM_007113    | NP_009044    | Q07283 | TRHY_HUMAN  | 30 AA tandem repeats.        |    | 5             | :GTAGTCTCCTCC'   | 0.586 | rs143222885 |
| - | 3  | 1526_1527 | uc001ezv.2_Intron   | NM_001014342 | NP_001014364 | Q5D862 | FILA2_HUMAN | Ser-rich.                    |    | 17            | CTGAGCCAGACC     | 0.52  |             |
| - | 1  | 63        | :l_p.L13fs CD84_u   | NM_003874    | NP_003865    | Q9UIB8 | SLAF5_HUMAN |                              |    | 4             | :GTTTGACAGGCA/   | 0.448 |             |
| + | 3  | 338_340   |                     | NM_001102566 | NP_001096036 | A6NKN8 | PC4L1_HUMAN |                              |    | 0             | AGGCGGAGGAG      | 0.488 |             |
| - | 6  | 1004_1006 | X1A_uc001gcw.1_     | NM_177398    | NP_796372    | Q8TE12 | LMX1A_HUMAN | y-Gln. Gln-rich.             |    | 5             | :ATCTTGCTGCTC    | 0.567 |             |
| + | 4  | 474       | hpl.2_Frame_Shift   | NM_001136018 | NP_001129490 | P07099 | HYEP_HUMAN  |                              |    | 4             | :TGAAGCCCCCCC    | 0.627 |             |
| - | 3  | 615_616   |                     | NM_022735    | NP_073572    | Q9H3P7 | GCP60_HUMAN | ential. Glu-rich.            |    | 0             | :TTCACCTTTTTT    | 0.411 |             |
| - | 20 | 2528_2530 | E813del SFBMT2_     | NM_001029880 | NP_001025051 | Q5VUG0 | SMBT2_HUMAN |                              |    | 8             | :GTCTCTCCTCC'    | 0.596 |             |
| - | 4  | 3538_3539 | uc001iqp.1_RNA      | NM_207371    | NP_997254    | Q1XH10 | DLN1_HUMAN  | r-rich. Glu-rich.            |    | 1             | :GCTGCccccctctc  | 0.441 | rs138084841 |
| - | 2  | 2633_2635 | ie_De1_p.720_721:   | NM_020848    | NP_065899    | Q9P266 | K1462_HUMAN | Ser-rich.                    |    | 4             | CTCCTCActgctgct  | 0.463 |             |
| + | 7  | 559       | Shift_Del_p.K28fs l | NM_018063    | NP_060533    | Q9NRZ9 | HELLS_HUMAN |                              |    | 2             | :TGGCTAAAAAA/    | 0.214 |             |
| + | 1  | 754_755   | y.2_Intron DHDPS    | NM_001009997 | NP_001009997 | Q5T681 | CJ062_HUMAN | His-rich.                    |    | 0             | CCAATCACACAC     | 0.55  |             |
| + | 9  | 6800      | :001lfz.2_Frame_S   | NM_206862    | NP_996744    | O95359 | TACC2_HUMAN |                              |    | 10            | :AGAGACCCCCC     | 0.522 |             |
| + | 19 | 2126_2128 | .Q620del PTPRE_     | NM_006504    | NP_006495    | P23469 | PTPRE_HUMAN | hataase 2. Cytoplasmic (Po   |    | 1             | :CAGAAGCAGCA     | 0.65  |             |
| + | 13 | 1748      | 2_uc001ndg.3_RN     | NM_000506    | NP_000497    | P00734 | THRB_HUMAN  | h is also known as the TP5   |    | 3             | :ACAGTGGGGGA     | 0.522 |             |
| + | 3  | 548_550   | rlc.1_In_Frame_C    | NM_004265    | NP_004256    | O95864 | FADS2_HUMAN | ical; (Potential).           |    | 2             | :TTCCTCCTCCTC    | 0.537 |             |
| + | 5  | 886       | rlc.1_Frame_Shift   | NM_004265    | NP_004256    | O95864 | FADS2_HUMAN | lasmic (Potential).          |    | 2             | :GGCAGCCCATC/    | 0.527 |             |
| + | 16 | 2803      |                     | NM_005188    | NP_005179    | P22681 | CBL_HUMAN   | on with CD2AP. UBA.          |    | 149           | ATGGCCAAAAAC     | 0.507 |             |
| - | 22 | 3672_3674 | lqfl.2_In_Frame_C   | NM_020228    | NP_064613    | Q9NQV6 | PRD10_HUMAN | Poly-Thr.                    |    | 1             | :CCGTTGGTGGT/    | 0.547 |             |
| + | 7  | 948_950   | .L125del SLC39A4    | NM_173596    | NP_775867    | Q6ZMH5 | S39A5_HUMAN | lasmic (Potential).          |    | 2             | :ATCCCTGCTGC/    | 0.635 |             |



|   |    |             |                   |              |              |            |                    |                              |              |                  |       |             |
|---|----|-------------|-------------------|--------------|--------------|------------|--------------------|------------------------------|--------------|------------------|-------|-------------|
| + | 87 | 13755_13757 | NM_002332         | NP_002323    | Q07954       | LRP1_HUMAN | ical; (Potential). | 22                           | CTGTTGCTGCTG | 0.557            |       |             |
| + | 6  | 1576        | M19_uc009zru.1_   | NM_018279    | NP_060749    | Q96HH6     | TMM19_HUMAN        | ical; (Potential).           | 0            | TGGGGTTTTTGC     | 0.433 |             |
| - | 4  | 831         |                   | NM_173598    | NP_775869    | Q6VAB6     | KSR2_HUMAN         | Pro-rich.                    | 15           | TCCCCGGGGGC      | 0.682 | rs36028047  |
| + | 16 | 2686_2688   | tbn.1_In_Frame_I  | NM_004592    | NP_004583    | Q12872     | SFSWA_HUMAN        | g/Ser-rich (RS domain).      | 0            | CACGAGAAGAA      | 0.493 |             |
| + | 2  | 698         | RY_uc010tdw.1_Rf  | NM_023037    | NP_075463    | Q5TBA9     | FRY_HUMAN          |                              | 7            | TCCTCAAAGT       | 0.507 |             |
| + | 4  | 541         | 1_Frame_Shift_De  | NM_144595    | NP_653196    | Q8ND83     | SLA1_HUMAN         |                              | 2            | TCAGGAAAAAA      | 0.388 |             |
| + | 16 | 4738_4740   | 1xmv.2_In_Frame   | NM_015556    | NP_056371    | O43166     | SI1L1_HUMAN        | Ser-rich.                    | 4            | ccctctctctctctc  | 0.468 |             |
| + | 8  | 1064_1066   | K_uc001ygg.3_In   | NM_001099402 | NP_001092872 | O75909     | CCNK_HUMAN         | Poly-Gln.                    | 0            | AGCCAGCAGC       | 0.621 |             |
| + | 1  | 607_609     |                   | NM_003403    | NP_003394    | P25490     | TYY1_HUMAN         | Glu-rich (acidic).           | 0            | gtggggaggaggag   | 0.34  |             |
| + | 3  | 641         |                   | NM_001376    | NP_001367    | Q14204     | DYHC1_HUMAN        | n (By similarity).           | 10           | GGCTCTTTTTT      | 0.408 |             |
| + | 10 | 1137        | p.Q215fs ADAL_u   | NM_001159280 | NP_001152752 | Q6DHV7     | ADAL_HUMAN         |                              | 0            | AAACCAAAAAA      | 0.453 |             |
| - | 8  | 1516_1518   | 269LL>L ABCA3_    | NM_001089    | NP_001080    | Q99758     | ABCA3_HUMAN        | ical; (Potential).           | 16           | GCTGAGCAGCA      | 0.611 | rs145342500 |
| - | 1  | 295_296     | e_Ins_p.16_16G><  | NM_002094    | NP_002085    | P15170     | ERF3A_HUMAN        |                              | 3            | gtctgtcccgcgcgc  | 0.332 | rs71408216  |
| - | 3  | 553_555     | 20GG>G KIAA043    | NM_014647    | NP_055462    | Q9Y4F3     | LKAP_HUMAN         | Poly-Gly.                    | 0            | ACCGCCACCAC      | 0.532 |             |
| - | 2  | 423_425     | 2dxs.2_In_Frame   | NM_006110    | NP_006101    | O95400     | CD2B2_HUMAN        |                              | 1            | CCCCCATCATC      | 0.532 |             |
| + | 8  | 2801        |                   | NM_014712    | NP_055527    | O15047     | SET1A_HUMAN        |                              | 3            | GCTGGCCCCCC      | 0.642 |             |
| + | 9  | 1652        | TO_uc010cbz.2_F   | NM_001080432 | NP_001073901 | Q9C0B1     | FTO_HUMAN          |                              | 0            | CTGGGAAAAGG      | 0.483 |             |
| + | 5  | 1317_1319   | hx.2_In_Frame_D   | NM_024335    | NP_077311    | P78412     | IRX6_HUMAN         |                              | 6            | gaggaagaggaggag  | 0.493 |             |
| + | 3  | 278_280     | 0vho.1_In_Frame_  | NM_020312    | NP_064708    | O75208     | COQ9_HUMAN         |                              | 1            | CGGCAGGAGAG      | 0.576 | rs149029279 |
| - | 11 | 1150_1151   |                   | NM_001896    | NP_001887    | P19784     | CSK22_HUMAN        |                              | 1            | TCTGCACAAGG      | 0.54  |             |
| - | 1  | 625         | S8_uc010vpv.1_l   | NM_001214    | NP_001205    | O95177     | CP003_HUMAN        |                              | 0            | AGGGTCCAGGC      | 0.184 |             |
| - | 15 | 2000_2002   | 15_uc002ghy.1_5'  | NM_004860    | NP_004851    | P51116     | FXR2_HUMAN         | Poly-Arg.                    | 0            | GTTACGGCGGC      | 0.547 |             |
| - | 30 | 4166_4168   | E1388del MYH10_   | NM_005964    | NP_005955    | P35580     | MYH10_HUMAN        | Potential.                   | 2            | CTGGCCTCCTC      | 0.596 |             |
| + | 9  | 1849        | p.S175fs EPN2_uc  | NM_014964    | NP_055779    | O95208     | EPN2_HUMAN         | repeats of [DE]-P-W.         | 1            | ACTTCAAAAAA      | 0.393 |             |
| + | 1  | 158_160     | ime_Del_p.K7del z | NM_003457    | NP_003448    | O43670     | ZN207_HUMAN        |                              | 0            | TCGCAAGAAGA      | 0.542 |             |
| + | 5  | 1150        | 10_uc002hwx.1_f   | NM_021939    | NP_068758    | Q96AY3     | FKB10_HUMAN        |                              | 1            | GAGTCCCCCCC      | 0.632 |             |
| - | 10 | 1248        | 1_Intron BRCA1_   | NM_007294    | NP_009225    | P38398     | BRCA1_HUMAN        |                              | 52           | TCTACCTTTTTT     | 0.438 | rs80357618  |
| - | 7  | 912         | hift_Del_p.P262fs | NM_001256    | NP_001247    | P30260     | CDC27_HUMAN        |                              | 5            | GTTTTGGTTTAT     | 0.373 |             |
| - | 2  | 516_517     |                   | NM_004645    | NP_004636    | P38432     | COIL_HUMAN         |                              | 1            | CTCTGTTTTTT      | 0.366 |             |
| + | 15 | 2732_2734   | 2_uc002jae.2_5'F  | NM_006039    | NP_006030    | Q9UBG0     | MRC2_HUMAN         | Potential). C-type lectin 4. | 3            | CGGCACGACGA      | 0.645 |             |
| - | 2  | 1200_1202   | E351del CDC42E    | NM_012121    | NP_036253    | Q9H3Q1     | BORG4_HUMAN        |                              | 0            | TTTCATCTCCTC     | 0.64  |             |
| + | 8  | 988         | hift_Del_p.P267fs | NM_000213    | NP_000204    | P16144     | ITB4_HUMAN         | tracellular (Potential).     | 4            | GCCTTCCACTAT     | 0.647 |             |
| - | 24 | 2552        | p.N280fs OSBPL1   | NM_080597    | NP_542164    | Q9BXW6     | OSBL1_HUMAN        |                              | 4            | TATCATTTTTTT     | 0.393 |             |
| - | 5  | 837         | 0xjg.1_Frame_Shi  | NM_005490    | NP_005481    | Q9BRG2     | SH23A_HUMAN        |                              | 2            | TGTCGGGGGGG      | 0.657 |             |
| - | 11 | 1320_1321   | nfg.1_Frame_Shift | NM_033417    | NP_219485    | Q9BT25     | HAUS8_HUMAN        |                              | 0            | GAAACGAGAGAC     | 0.495 |             |
| + | 15 | 3946_3948   | nma.2_In_Frame_   | NM_004386    | NP_004377    | O14594     | NCAN_HUMAN         |                              | 4            | CGGCGaccaccac    | 0.468 |             |
| - | 4  | 491         | p.K134fs ZFP14_u  | NM_020917    | NP_065968    | Q9HCL3     | ZFP14_HUMAN        |                              | 1            | GTTCTTTTTCCC     | 0.363 |             |
| + | 2  | 648_650     | Jegn.1_In_Frame_  | NM_003407    | NP_003398    | P26651     | TTP_HUMAN          | P-P-P-P-G.                   | 1            | ACCTCACACC       | 0.685 |             |
| - | 6  | 472         | _p.P16fs C19orf47 | NM_178830    | NP_849152    | Q8N9M1     | CS047_HUMAN        |                              | 2            | CGCCTGGGGGG      | 0.612 |             |
| + | 12 | 1271_1273   | Q407del NUCB1_    | NM_006184    | NP_006175    | Q02818     | NUCB1_HUMAN        | ential. Poly-Gln.            | 0            | agcggaagcagcagc  | 0.522 |             |
| - | 1  | 90_92       | EC8_uc002pwu.2_   | NM_014442    | NP_055257    | Q9NYZ4     | SIGL8_HUMAN        |                              | 5            | agcaggggcagcagc  | 0.493 |             |
| + | 4  | 1303_1305   | 2qlt.2_In_Frame_I | NM_007279    | NP_009210    | P26368     | U2AF2_HUMAN        |                              | 1            | CACGAGAAGAA      | 0.645 |             |
| - | 11 | 1472_1474   | 1_In_Frame_Del_   | NM_015317    | NP_056132    | Q8TB72     | PUM2_HUMAN         | Ala-rich.                    | 1            | TCCAGCTGCTG      | 0.424 |             |
| - | 2  | 234_236     | HX57_uc002rrg.2_  | NM_198963    | NP_945314    | Q6P158     | DHX57_HUMAN        | Gly-rich.                    | 3            | gccacctccaccacca | 0.384 |             |
| + | 1  | 285         | D10_uc010zdh.1_   | NM_006063    | NP_006054    | O60662     | KBTBA_HUMAN        | BTB.                         | 0            | AGGCGAAAAAA      | 0.388 |             |
| + | 6  | 820         | Shift_Del_p.P197f | NM_025000    | NP_079276    | Q5H9S7     | DCA17_HUMAN        | ical; (Potential).           | 0            | TCTACCTTTTTC     | 0.343 |             |
| + | 3  | 1075_1077   | i.1_Intron GZF1_u | NM_022482    | NP_071927    | Q9H116     | GZF1_HUMAN         |                              | 1            | gaggaagaggaggag  | 0.384 |             |

|   |    |           |                    |              |              |        |              |                              |    |                   |       |                   |
|---|----|-----------|--------------------|--------------|--------------|--------|--------------|------------------------------|----|-------------------|-------|-------------------|
| - | 3  | 691_692   |                    | NM_005225    | NP_005216    | Q01094 | E2F1_HUMAN   | box. Potential.              | 0  | TTCTTGGA          | 0.589 |                   |
| + | 3  | 617_619   | me_Del_p.A96del    | NM_016434    | NP_057518    | Q9NZ71 | RTEL1_HUMAN  | ase ATP-binding.             | 0  | CAACGCTGCTG       | 0.645 |                   |
| - | 5  | 757       |                    | NM_144659    | NP_653260    | Q9NV44 | CU077_HUMAN  |                              | 0  | AGACACCCCC        | 0.478 |                   |
| + | 2  | 270_272   |                    | NM_004147    | NP_004138    | Q9Y295 | DRG1_HUMAN   | Poly-Gly.                    | 1  | AAAGGGTGGTG       | 0.409 |                   |
| + | 9  | 1570      | amt.2_Frame_Shif   | NM_012179    | NP_036311    | Q9Y311 | FBX7_HUMAN   |                              | 1  | CCCTTGACACC       | 0.502 |                   |
| + | 19 | 2312_2314 | 3b1c.2_In_Frame_l  | NM_014678    | NP_055493    | O75170 | PP6R2_HUMAN  |                              | 0  | CCCTTTGATGAT      | 0.616 |                   |
| + | 40 | 5548      | R1_uc011asu.1_In   | NM_001099952 | NP_001093422 | Q14643 | ITPR1_HUMAN  | lasmic (Potential).          | 21 | AGCCCCGGGGGA      | 0.522 |                   |
| + | 7  | 1453      | p.F219fs EDEM1_    | NM_014674    | NP_055489    | Q92611 | EDEM1_HUMAN  | lenal (Potential).           | 3  | AGGCCTTTTTTC      | 0.463 |                   |
| - | 1  | 205_207   | rg.1_In_Frame_De   | NM_004628    | NP_004619    | Q01831 | XPC_HUMAN    | lu. Glu-rich (acidic).       | 3  | TCACCCTCCTC       | 0.734 | rs72561774        |
| + | 11 | 1433      | 3cig.2_Frame_Shil  | NM_001106    | NP_001097    | Q13705 | AVR2B_HUMAN  | Potential). Protein kinase.  | 1  | CTTGTCGCGGG       | 0.597 |                   |
| - | 3  | 1288_1289 | NB1_uc003csx.2_    | NM_002673    | NP_002664    | O43157 | PLXB1_HUMAN  | ilar (Potential). Sema.      | 5  | TGAGCAGGCAT       | 0.629 |                   |
| - | 25 | 4571      | ae_Site_p.E1361_ε  | NM_053025    | NP_444253    | Q15746 | MYLK_HUMAN   |                              | 9  | GCTCTGGGGGC       | 0.624 | rs41431347        |
| - | 4  | 1041_1043 | itg.2_In_Frame_De  | NM_001017395 | NP_001017395 | O94876 | TMCC1_HUMAN  |                              | 1  | AGACATgcagcagc    | 0.404 |                   |
| - | 8  | 1759_1761 | 191DD>D DBR1_u     | NM_016216    | NP_057300    | Q9UK59 | DBR1_HUMAN   |                              | 0  | TGCATCGTCAT       | 0.251 | 0114751;rs2622736 |
| + | 21 | 2524_2526 | 1buy.1_In_Frame_   | NM_000283    | NP_000274    | P35913 | PDE6B_HUMAN  |                              | 0  | GAGAAGGAGGA       | 0.562 |                   |
| - | 1  | 340_348   |                    | NM_177998    | NP_819056    | Q7RTM1 | OTOP1_HUMAN  | ical; (Potential).           | 3  | TCACAGCAGC        | 0.727 | 245977;rs75328065 |
| + | 3  | 794       | p.F196fs C1QTNF    | NM_001135171 | NP_001128643 | Q9BXJ2 | C1QT7_HUMAN  | C1q.                         | 0  | GCTTTCCAGG        | 0.448 |                   |
| - | 4  | 1088_1090 | ty.2_In_Frame_De   | NM_001031732 | NP_001026902 | Q96MU7 | YTDC1_HUMAN  | Glu-rich.                    | 2  | tcttcttctctctctcc | 0.202 | rs141105019       |
| + | 11 | 2218      | D2_uc011cdg.1_Fr   | NM_000297    | NP_000288    | Q13563 | PKD2_HUMAN   | in. Cytoplasmic (Potential). | 1  | AACTGAAAAAA       | 0.348 |                   |
| - | 1  | 538_540   | C3_uc011cdn.1_In   | NM_153757    | NP_715638    | Q96NT1 | NP1L5_HUMAN  | Glu-rich.                    | 1  | actcttctctctctctc | 0.369 |                   |
| + | 8  | 1187_1189 | p.P363del NPNT_    | NM_001033047 | NP_001028219 | Q6UXI9 | NPNT_HUMAN   | Pro-rich.                    | 1  | TACTCCACCACC      | 0.522 |                   |
| + | 22 | 2560_2562 | cgc.1_In_Frame_L   | NM_001148    | NP_001139    | Q01484 | ANK2_HUMAN   |                              | 14 | AGGTCACCACC       | 0.443 |                   |
| + | 6  | 700       | ISC9_uc003ieb.2_   | NM_005033    | NP_005024    | Q06265 | EXOS9_HUMAN  | ARE binding.                 | 0  | TTGCTTTTTTC       | 0.358 |                   |
| - | 10 | 1909      | -10_uc011cnu.1_F   | NM_006727    | NP_006718    | Q9Y6N8 | CAD10_HUMAN  | Extracellular (Potential).   | 12 | AAACTGAAAAAA      | 0.313 |                   |
| - | 3  | 906       | ae_Shift_Del_p.K11 | NM_014423    | NP_055238    | Q9UHB7 | AFF4_HUMAN   | Ser-rich.                    | 5  | TGGCCTTTTTTC      | 0.512 |                   |
| + | 26 | 4712      | n.1_Frame_Shift_L  | NM_020690    | NP_065741    | Q8IWZ2 | Q8IWZ2_HUMAN |                              | 6  | TTGGGAAAAAA       | 0.423 |                   |
| + | 5  | 378_379   | k.1_Frame_Shift_I  | NM_006083    | NP_006074    | Q13123 | RED_HUMAN    |                              | 1  | AAATTGAGAGAG      | 0.46  |                   |
| - | 12 | 1346_1349 | Q322fs HNRNP-      | NM_005520    | NP_005511    | P31943 | HNRH1_HUMAN  | -rich approximate repeats.   | 0  | AGCTGCTGGCTG      | 0.5   |                   |
| - | 4  | 1510_1512 | Frame_Del_p.E3f    | NM_178012    | NP_821080    | Q9BVA1 | TBB2B_HUMAN  |                              | 1  | TCGCCCTCCTC       | 0.65  |                   |
| + | 14 | 2337_2338 | AT2_uc003nvc.3_    | NM_080686    | NP_542417    | P48634 | PRC2A_HUMAN  | X 57 AA type A repeats.      | 0  | CTCCACCCCCC       | 0.594 |                   |
| - | 5  | 372_374   | aw.3_In_Frame_De   | NM_003322    | NP_003313    | O00294 | TULP1_HUMAN  | Poly-Glu.                    | 3  | tctctcttctctctctc | 0.389 |                   |
| - | 3  | 1001      | _Shift_Del_p.K141  | NM_031922    | NP_114128    | Q96D71 | REPS1_HUMAN  |                              | 2  | GATCCCTTTTTC      | 0.478 |                   |
| + | 2  | 488_489   | l3ql.2_Frame_Shil  | NM_000838    | NP_000829    | Q13255 | GRM1_HUMAN   |                              | 19 | CTTTTGTTTTTT      | 0.644 |                   |
| - | 10 | 1313_1314 |                    | NM_015718    | NP_056533    | Q9HBY0 | NOX3_HUMAN   | ical; (Potential).           | 1  | CAACGCACACAC      | 0.53  |                   |
| - | 1  | 915_917   |                    | NM_033224    | NP_150093    | Q96QR8 | PURB_HUMAN   |                              | 0  | TCTTCGCCGCC       | 0.576 |                   |
| - | 2  | 390_392   | lkiw.1_In_Frame_I  | NM_015545    | NP_056360    | O75127 | PTCD1_HUMAN  |                              | 1  | AACTCTCCTCC       | 0.606 |                   |
| + | 5  | 572       | ca.2_Frame_Shift_  | NM_015908    | NP_056992    | Q9BXP5 | SRRT_HUMAN   |                              | 2  | ATGCTGGGGGG       | 0.607 |                   |
| - | 3  | 1170_1171 | EPLD_uc011klj.1_   | NM_198990    | NP_945341    | Q6IQ20 | NAPEP_HUMAN  |                              | 1  | CTGCGAAAAAA       | 0.46  | rs147416689       |
| + | 9  | 1390      | VT1_uc010ljj.1_Int | NM_021930    | NP_068749    | Q6NUQ1 | RINT1_HUMAN  | RINT1/TIP20.                 | 4  | CCACTGATATTC      | 0.388 |                   |
| + | 5  | 743       | _p.E17fs CBLL1_u   | NM_024814    | NP_079090    | Q75N03 | HAKAI_HUMAN  | RING-type.                   | 5  | ACATGAAAAAAA      | 0.269 |                   |
| + | 7  | 1118_1119 | vuy.2_Frame_Shifi  | NM_016019    | NP_057103    | Q9Y383 | LC7L2_HUMAN  | Arg/Ser-rich.                | 0  | AGAGAAGAGAG       | 0.391 |                   |
| + | 1  | 528       |                    | NM_001001656 | NP_001001656 | Q8NGU2 | OR9A4_HUMAN  | ellular (Potential).         | 1  | GAACAATTTTTTT     | 0.383 |                   |
| - | 3  | 436       |                    | NM_005431    | NP_005422    | O43543 | XRCC2_HUMAN  |                              | 2  | TACACAAAAAA       | 0.393 |                   |
| - | 5  | 3497_3498 |                    | NM_001080826 | NP_001074295 | Q86YV5 | SG223_HUMAN  | rotein kinase.               | 0  | gggagccggggcggg   | 0.609 | rs143409664       |
| - | 10 | 1506      | p.R384fs NBN_ucf   | NM_002485    | NP_002476    | O60934 | NBN_HUMAN    | r localization signal.       | 7  | GAGACCTTTTTTT     | 0.338 |                   |
| - | 45 | 6393_6394 | ks.1_Frame_Shift_  | NM_015902    | NP_056986    | O95071 | UBR5_HUMAN   |                              | 28 | CCCTCTTTTTT       | 0.381 |                   |
| + | 3  | 610_612   | ysi.2_In_Frame_D   | NM_002467    | NP_002458    | P01106 | MYC_HUMAN    | Poly-Gln.                    | 6  | TACCAGCAGC        | 0.611 | rs61752959        |

|   |    |           |                    |              |              |        |             |                               |     |                   |       |                              |
|---|----|-----------|--------------------|--------------|--------------|--------|-------------|-------------------------------|-----|-------------------|-------|------------------------------|
| - | 30 | 4625      | ae.1_Splice_Site_  | NM_201380    | NP_958782    | Q15149 | PLEC_HUMAN  |                               | 9   | CTGTACCTCCTC      | 0.621 |                              |
| - | 1  | 2084      | uc003zrh.1_RNA     | NM_153809    | NP_722516    | Q8IZX4 | TAF1L_HUMAN | p.K665fs*4(2)                 | 26  | TTGGCCTTTTTT      | 0.478 |                              |
| + | 1  | 417_419   | 8376_uc003zys.1    | NM_001039792 | NP_001034881 | Q6UXD1 | HRCT1_HUMAN | His-rich.                     | 0   | acccccaccgccacca  | 0.389 | rs138232567                  |
| - | 9  | 2947_2949 | R2_uc004ari.1_Inl  | NM_004560    | NP_004551    | Q01974 | ROR2_HUMAN  | lasmic (Potential).           | 20  | AGCCTTCCTCCT      | 0.645 |                              |
| - | 4  | 884_886   | Del_p.E251del EC   | NM_001393    | NP_001384    | O94769 | ECM2_HUMAN  | Poly-Glu.                     | 2   | cctctcatctctctctc | 0.399 | rs137929518                  |
| - | 3  | 459       |                    | NM_022755    | NP_073592    | Q9H8X2 | IPPK_HUMAN  |                               | 2   | ATGACATTTTTTCC    | 0.438 |                              |
| - | 22 | 6093      | rf.2_Frame_Shift_I | NM_002160    | NP_002151    | P24821 | TENA_HUMAN  | nectin type-III 15.           | 7   | TGCCCGGGGGGG      | 0.478 | rs148674204                  |
| + | 11 | 1816_1818 | bzv.2_In_Frame_D   | NM_005157    | NP_005148    | P00519 | ABL1_HUMAN  | n signal 1 (Potential). Poly- | 817 | GTATCAAGAAGA      | 0.616 |                              |
| - | 9  | 916_918   |                    | NM_003086    | NP_003077    | Q5SXM2 | SNPC4_HUMAN | TH myb-type 1.                | 0   | GCCGCTCCTCC       | 0.65  |                              |
| - | 40 | 5941      | hifl_Del_p.K1776fs | NM_004006    | NP_003997    | P11532 | DMD_HUMAN   | ction with SYNM (By similar   | 6   | GGTAATTTTTTT      | 0.358 |                              |
| - | 1  |           |                    | NM_018159    | NP_060629    | Q96G61 | NUD11_HUMAN |                               | 0   | CTCGAGGCAGC       | 0.584 |                              |
| + | 5  | 1012_1014 | W4elx.2_In_Frame_  | NM_207318    | NP_997201    | Q6PEV8 | F199X_HUMAN | Ser-rich.                     | 1   | GCGCCAGCAGC       | 0.567 |                              |
| + | 6  | 604_606   | eoz.2_In_Frame_I   | NM_001128173 | NP_001121645 | O75914 | PAK3_HUMAN  | Linker.                       | 10  | gaagaggaagaagaa   | 0.325 |                              |
| - | 2  | 574_575   | P_uc004esg.2_5F    | NM_024528    | NP_078804    | Q8N5F7 | NKAP_HUMAN  |                               | 2   | CCAATTCTCTCT      | 0.317 |                              |
| - | 3  | 274_276   | fen.2_Intron CD9E  | NM_031462    | NP_113650    | Q8TCZ2 | C99L2_HUMAN | ar (Potential). Poly-Thr.     | 3   | GGTTGTGGTGGT      | 0.552 |                              |
| - | 5  | 593_595   | 004ffl.2_In_Frame_ | NM_001011543 | NP_001011543 | P43363 | MAGAA_HUMAN | Poly-Ser.                     | 0   | GATAGCaggaggag    | 0.419 |                              |
| - | 4  | 601_603   |                    | NM_032656    | NP_116045    | Q8IY37 | DHX37_HUMAN | NA                            | 1   | ATTCCGActcctct    | 0.601 |                              |
| - | 1  | 1509_1511 |                    | NM_033132    | NP_149123    | Q96T25 | ZIC5_HUMAN  | Pro-rich.                     | 0   | ggcggtggcgcggc    | 0.493 |                              |
| + | 15 | 5011_5013 | 2kae.2_In_Frame_   | NM_001080519 | NP_001073988 | Q9P281 | BAHC1_HUMAN | NA                            | 1   | GGCCAAGAAGA       | 0.621 |                              |
| - | 9  | 1261_1263 | .E147del GTF2F1    | NM_002096    | NP_002087    | P35269 | T2FA_HUMAN  | Glu-rich.                     | 0   | Gccttctctctctctcc | 0.542 |                              |
| + | 2  | 428       | rk MYCN_uc010yji   | NM_005378    | NP_005369    | P04198 | MYCN_HUMAN  | NA                            | 5   | CTCGACCCCCC       | 0.657 |                              |
| + | 6  | 1052_1053 | c002sta.3_Frame_   | NM_018271    | NP_060741    | Q86YJ6 | THNS2_HUMAN | NA                            | 1   | AGACTTCTCTCT      | 0.545 |                              |
| + | 3  | 224_242   |                    | NM_001862    | NP_001853    | P10606 | COX5B_HUMAN | NA                            | 0   | CAAAGGGGAGC       | 0.397 |                              |
| - | 13 | 2025      | .W650fs CLTCL1_    | NM_007098    | NP_009029    | P53675 | CLH2_HUMAN  | gment. Heav                   | 5   | ACAAGCCACTGC      | 0.478 |                              |
| - | 6  | 1681_1683 | Q376del ARHGAP     | NM_025251    | NP_079527    | Q9C0H5 | RHG39_HUMAN | NA                            | 0   | ACTTCTGCTTGT      | 0.704 | rs77462981                   |
| - | 18 | 2477      | akk.2_Frame_Shif   | NM_001409    | NP_001400    | O75095 | MEGF6_HUMAN | EGF-like 12.                  | 1   | TGGCAGGGGGGC      | 0.697 |                              |
| + | 3  | 719_721   |                    | NM_153812    | NP_722519    | Q86YI8 | PHF13_HUMAN | ization signal (Probable).    | 0   | caagctgaagaagaa   | 0.498 |                              |
| + | 8  | 1246      |                    | NM_032283    | NP_115659    | Q9NUE0 | ZDH18_HUMAN |                               | 0   | CATGGTAGAGG       | 0.612 |                              |
| - | 1  | 702_704   |                    | NM_001080418 | NP_001073887 | O95886 | DLGP3_HUMAN | Poly-His.                     | 3   | CGGGACTggtggt     | 0.537 |                              |
| - | 7  | 905       | .K51fs TRIT1_uc0   | NM_017646    | NP_060116    | Q9H3H1 | MOD5_HUMAN  |                               | 1   | GTGCATTTTTCC      | 0.453 |                              |
| + | 20 | 3859_3861 | 9vwt.2_In_Frame_   | NM_002840    | NP_002831    | P10586 | PTPRF_HUMAN | cellular (Potential).         | 10  | AGCAGCGGCGG       | 0.631 |                              |
| - | 1  | 545       | 73fs HHLA3_uc01i   | NM_030816    | NP_110443    | Q8N6S4 | AN13C_HUMAN |                               | 0   | GCGCCGGGGGC       | 0.637 |                              |
| + | 2  | 286_288   | me_Del_p.Q49del    | NM_030965    | NP_112227    | Q9BVH7 | SIA7E_HUMAN | . Luminal (Potential).        | 2   | GCCCCgcagcag      | 0.581 | rs113832855                  |
| - | 4  | 488       | _p.D57fs GSTM3_    | NM_000849    | NP_000840    | P21266 | GSTM3_HUMAN | ST N-terminal.                | 0   | AAAGTCCAGGT       | 0.488 |                              |
| + | 4  | 780       | _p.L168fs VANGL1   | NM_138959    | NP_620409    | Q8TAA9 | VANG1_HUMAN | Name=2; (Potential).          | 1   | GGCACTTTTTTT      | 0.493 |                              |
| - | 2  | 1768      |                    | NM_001004432 | NP_001004432 | Q6UY18 | LIGO4_HUMAN | cellular (Potential).         | 1   | TCCAGAAAAAA       | 0.582 |                              |
| + | 11 | 2233      | _p.D350fs NPR1_u   | NM_000906    | NP_000897    | P16066 | ANPRA_HUMAN | Potential). Protein kinase.   | 7   | ACCGACCCCC        | 0.493 |                              |
| + | 3  | 712       | 2_uc009xch.2_Fra   | NM_001877    | NP_001868    | P20023 | CR2_HUMAN   | xtracellular (Potential).     | 8   | GCTGTCCCCC        | 0.398 |                              |
| + | 4  | 635_646   |                    | NM_001104548 | NP_001098018 |        |             |                               | 0   | gTagcagcagcagcag  | 0.283 | 30217;rs72359595;rs150848171 |
| - | 20 | 2967_2969 | :31QQ>Q INTS7_L    | NM_015434    | NP_056249    | Q9NVH2 | INT7_HUMAN  | Gln-rich.                     | 0   | GCGTTGCTGCT       | 0.443 |                              |
| - | 5  | 1798      | AGT_uc009xff.2_F   | NM_000029    | NP_000020    | P01019 | ANGT_HUMAN  |                               | 0   | AGCTCAAAAAA       | 0.562 |                              |
| + | 14 | 1676_1678 | xjw.1_In_Frame_C   | NM_003473    | NP_003464    | Q92783 | STAM1_HUMAN |                               | 2   | GCTACTGCTGC       | 0.493 |                              |
| - | 5  | 1489_1491 | _Del_p.445_446G    | NM_000124    | NP_000115    | Q03468 | ERCC6_HUMAN | Gly-rich.                     | 16  | CCGACCTCCTC       | 0.458 | rs4253047                    |
| + | 7  | 608       | el_p.G68fs PLAU_   | NM_002658    | NP_002649    | P00749 | UROK_HUMAN  | necting peptide.              | 3   | CCAGGAAAAAA       | 0.517 |                              |
| + | 4  | 878_879   | 010qoq.1_Frame_:   | NM_019084    | NP_061957    | Q5T5M9 | CCNJ_HUMAN  |                               | 1   | TGCTTGAAAAAG      | 0.441 |                              |
| - | 2  | 955_957   | :2_uc001mak.1_Ir   | NM_017481    | NP_059509    | Q9H347 | UBQL3_HUMAN |                               | 3   | TGGCTGGTGGT       | 0.537 | rs2234451                    |
| + | 2  | 732_733   | :01mcx.2_Frame_:   | NM_000543    | NP_000534    | P17405 | ASM_HUMAN   |                               | 0   | AAGCCGCCCC        | 0.624 | rs74053349                   |

|   |    |             |                    |              |              |             |              |                              |              |                  |       |                   |
|---|----|-------------|--------------------|--------------|--------------|-------------|--------------|------------------------------|--------------|------------------|-------|-------------------|
| - | 2  | 1347_1349   | NM_002233          | NP_002224    | P22459       | KCNA4_HUMAN | Poly-His.    | 4                            | GTGACTGGTGGT | 0.66             |       |                   |
| + | 2  | 423         | NM_152316          | NP_689529    | Q8N8R7       | CK046_HUMAN |              | 0                            | TTAGCCAAAAAA | 0.338            |       |                   |
| - | 16 | 1957        | NM_001008391       | NP_001008392 | Q6ZRK6       | CCD73_HUMAN |              | 2                            | ACAGGATTTTTT | 0.313            |       |                   |
| - | 8  | 778         | NM_004308          | NP_004299    | Q07960       | RHG01_HUMAN | SH3-binding. | 1                            | GGCAGGGGGGG  | 0.642            |       |                   |
| - | 17 | 2222        | MTA2_uc010rlx.1_   | NM_004739    | NP_004730    | O94776      | MTA2_HUMAN   | 2                            | CGCCTTACCTGC | 0.554            |       |                   |
| + | 14 | 1946        | T491fs KLC2_uc0    | NM_001134775 | NP_001128247 | Q9H0B6      | KLC2_HUMAN   | 0                            | GGGCACCCCCC  | 0.647            |       |                   |
| - | 5  | 631         | SP1_uc010rvi.1_lr  | NM_033292    | NP_150634    | P29466      | CASP1_HUMAN  | p.N205(1)                    | 2            | GTGAGATTTTTT     | 0.378 |                   |
| - | 2  | 308_322     | lprt.1_5'UTR TMPI  | NM_001077263 | NP_001070731 | Q9BYE2      | TMPSD_HUMAN  | '-A-[GLQR]. Cytoplasmic (F   | 1            | GGAGATGCCCG      | 0.67  |                   |
| - | 9  | 1657_1659   | 3_554PP>P FFFO1    | NM_080730    | NP_542768    | Q0D2I5      | IFFO1_HUMAN  | Poly-Pro.                    | 0            | GCTTGGCGGGC      | 0.601 | rs144019095       |
| + | 3  | 523_524     | _uc001qub.1_Intror | NM_016184    | NP_057268    | Q9UMR7      | CLC4A_HUMAN  | cellular (Potential).        | 0            | GTGTGTGAAAAA     | 0.332 |                   |
| + | 87 | 13755_13757 |                    | NM_002332    | NP_002323    | Q07954      | LRP1_HUMAN   | ical; (Potential).           | 22           | CTGTTGCTGCT      | 0.557 |                   |
| - | 7  | 596_597     | 3_Y221fs TMBIM4_   | NM_016056    | NP_057140    | Q9HC24      | TMBI4_HUMAN  |                              | 2            | CACTATAAAAAA     | 0.351 |                   |
| - | 6  | 1097        | me_Shift_Del_p.R:  | NM_198521    | NP_940923    | Q96LP6      | CL042_HUMAN  |                              | 2            | TGGGCGGGGGC      | 0.587 |                   |
| + | 13 | 1752_1756   | _Shift_Del_p.E98f  | NM_033121    | NP_149112    | Q8IZ07      | AN13A_HUMAN  |                              | 0            | TGGAGTCCAGC      | 0.449 |                   |
| + | 13 | 1903_1905   |                    | NM_194286    | NP_919262    | A7MD48      | SRRM4_HUMAN  | r-rich. Arg-rich.            | 2            | GGTACAGCAGC      | 0.532 |                   |
| - | 3  | 359         | PS33A_uc001uce     | NM_022916    | NP_075067    | Q96AX1      | VP33A_HUMAN  |                              | 1            | TCTGACAAAAAA     | 0.383 |                   |
| + | 46 | 8261_8262   | 0_uc001ujm.2_In    | NM_015409    | NP_056224    | Q96L91      | EP400_HUMAN  | ith ZNF42 (By similarity).   | 12           | gcagcaacagcagc   | 0.327 | rs111782215       |
| + | 4  | 341         |                    | NM_194318    | NP_919299    | Q6Y288      | B3GLT_HUMAN  | lenal (Potential).           | 2            | CAGTTAAAAAA      | 0.373 | rs141154947       |
| + | 20 | 3706_3707   | 3_A881fs LMO7_uc   | NM_015842    | NP_056667    | Q8VWW1      | LMO7_HUMAN   |                              | 5            | AGGCAGAGAG       | 0.386 |                   |
| - | 5  | 602_603     | uc010tki.1_5'Flank | NM_000820    | NP_000811    | Q14393      | GAS6_HUMAN   | alcium-binding (Potential).  | 4            | AGCCGGCCCCC      | 0.649 |                   |
| + | 5  | 648         | me_Shift_Del_p.E'  | NM_002791    | NP_002782    | P60900      | PSA6_HUMAN   |                              | 0            | CTTGAAAAAA       | 0.403 |                   |
| + | 36 | 3598        | _p.E1099fs KTN1    | NM_182926    | NP_891556    | Q86UP2      | KTN1_HUMAN   | (Potential). Potential.      | 7            | ATTTGAAAAAA      | 0.318 |                   |
| + | 37 | 5712        | gl.2_Frame_Shift   | NM_015180    | NP_055995    | Q8WXH0      | SYNE2_HUMAN  | lasmic (Potential).          | 14           | ATACCAAAAAA      | 0.318 |                   |
| + | 4  | 1996        | _p.Q522fs ZBTB1_   | NM_001123329 | NP_001116801 | Q9Y2K1      | ZBTB1_HUMAN  |                              | 1            | TATCCAAAAAA      | 0.378 |                   |
| - | 32 | 5066        |                    | NM_004667    | NP_004658    | O95714      | HERC2_HUMAN  |                              | 13           | TTCTATTTTTTC     | 0.398 |                   |
| + | 11 | 1696_1698   | 1znc.2_In_Frame_   | NM_181642    | NP_857593    | O43278      | SPIT1_HUMAN  |                              | 1            | CGGACACCACC      | 0.586 |                   |
| + | 4  | 6960        |                    | NM_002373    | NP_002364    | P78559      | MAP1A_HUMAN  |                              | 9            | TCCTGCTTCA       | 0.622 |                   |
| - | 7  | 1388_1389   | 3_G377fs SIN3A_u   | NM_015477    | NP_056292    | Q96ST3      | SIN3A_HUMAN  | on with REST (By similarity) | 5            | ATTGTCCAAACT     | 0.406 |                   |
| + | 25 | 3086        | 390_uc002cil.1_RN  | NM_145294    | NP_660337    | Q96KV7      | WDR90_HUMAN  |                              | 1            | CGGGGCCCCCC      | 0.657 |                   |
| + | 7  | 1037_1039   | 3_K238del UBN1_u   | NM_001079514 | NP_001072982 | Q9NPG3      | UBN1_HUMAN   | Lys-rich.                    | 2            | TAGGAGAAGAA      | 0.453 |                   |
| + | 28 | 3366        |                    | NM_014287    | NP_055102    | Q15155      | NOMO1_HUMAN  | cellular (Potential).        | 1            | CATTCCCCCC       | 0.473 |                   |
| + | 12 | 1805        | p.F559fs TMC7_uc   | NM_024847    | NP_079123    | Q7Z402      | TMC7_HUMAN   | ical; (Potential).           | 3            | AGACCTTTTTT      | 0.498 |                   |
| + | 19 | 2026        | POLR3E_uc002dk     | NM_018119    | NP_060589    | Q9NVU0      | RPC5_HUMAN   |                              | 2            | AGTTTCCCCC       | 0.562 |                   |
| - | 3  | 385_387     | P2_uc010byn.2_lr   | NM_024816    | NP_079092    | Q9H5N1      | RABE2_HUMAN  | gamma-Gln. Potential.        | 3            | AGTCCTGCTGC      | 0.527 |                   |
| + | 2  | 942         | Frame_Shift_Del_   | NM_145239    | NP_660282    | Q7Z6L0      | PRRT2_HUMAN  | ar (Potential). Pro-rich.    | 0            | TGGGGCCCCC       | 0.652 |                   |
| + | 16 | 2021_2023   | ne_Del_p.S561del   | NM_014329    | NP_055144    | Q6P2E9      | EDC4_HUMAN   | Ser-rich.                    | 4            | agcggtagcagcagc  | 0.458 |                   |
| + | 10 | 1188        | 3ss.1_Frame_Shift  | NM_053013    | NP_443739    | P13929      | ENOB_HUMAN   |                              | 1            | TGGCTGGGGGG      | 0.567 |                   |
| + | 13 | 2245_2247   | 3_K762del CHD3_u   | NM_001005273 | NP_001005273 | Q12873      | CHD3_HUMAN   | Poly-Lys.                    | 1            | GTATAAGAAGAA     | 0.488 |                   |
| - | 1  | 1572_1573   | 18A_uc010csa.1_:   | NM_004740    | NP_004731    | O95411      | TIAF1_HUMAN  |                              | 0            | TGGTCCACACAC     | 0.564 |                   |
| - | 5  | 891         |                    | NM_139285    | NP_644814    | Q8NHY3      | GA2L2_HUMAN  |                              | 2            | GGCCGGGGGC       | 0.597 | rs139867246       |
| - | 22 | 2927        | 3nn.2_Frame_Shif   | NM_198836    | NP_942133    | Q13085      | ACACA_HUMAN  |                              | 2            | ACATTGGGGGG      | 0.473 |                   |
| + | 4  | 641_642     | 3103_uc002ihp.1_£  | NM_213607    | NP_998772    | Q8IW40      | CC103_HUMAN  |                              | 1            | GGCAGAGAG        | 0.644 |                   |
| - | 5  | 1187_1189   | 3i.1_In_Frame_Del  | NM_007146    | NP_009077    | Q14119      | VEZF1_HUMAN  | Poly-Gln.                    | 2            | gttgtgtgtgctgctg | 0.305 | 731354;rs73995411 |
| - | 33 | 4884        | 3yn.1_Frame_Shift  | NM_032582    | NP_115971    | Q8NFA0      | UBP32_HUMAN  |                              | 5            | TTTGGTTTTTGT     | 0.423 |                   |
| + | 4  | 2243_2245   | .A552del TNRC6C    | NM_018996    | NP_061869    | Q9HCJ0      | TNR6C_HUMAN  | ith argonaute family protein | 2            | TAGTACTGCTGC     | 0.591 |                   |
| + | 7  | 895_897     | 02jyd.1_In_Frame   | NM_173626    | NP_775897    | Q86WA9      | S2611_HUMAN  | ical; (Potential).           | 0            | TGCATGCTGCT      | 0.675 |                   |
| + | 18 | 3129_3131   | 192_uc002kru.2_R   | NM_032142    | NP_115518    | E9PF99      | E9PF99_HUMAN |                              | 5            | AGCTCAGCAGC      | 0.527 |                   |

|   |    |           |                                                  |              |              |        |             |                             |    |                  |       |             |
|---|----|-----------|--------------------------------------------------|--------------|--------------|--------|-------------|-----------------------------|----|------------------|-------|-------------|
| + | 2  | 160       | ame_Shift_Del_p.l                                | NM_020474    | NP_065207    | Q10472 | GALT1_HUMAN | lenal (Potential).          | 2  | GTGATGAAAAAAA    | 0.383 |             |
| - | 5  | 1214_1216 | 2161del CXXC1_u                                  | NM_014593    | NP_055408    | Q9P0U4 | CXXC1_HUMAN | CXXC-type.                  | 2  | GTTTGATctgctgct  | 0.468 |             |
| - | 15 | 2001_2002 |                                                  | NM_000064    | NP_000055    | P01024 | CO3_HUMAN   |                             | 5  | TGCTCGTGAAGC     | 0.658 |             |
| + | 6  | 480       | 2mpe.3_Frame_Sh                                  | NM_020428    | NP_065161    | Q8IWA5 | CTL2_HUMAN  | cellular (Potential).       | 1  | TCGTGGAAAAATC    | 0.542 |             |
| + | 8  | 1249_1251 | 1.H387del NFIX_uc002mwf.2_In_Frame_Del_p.H357del | NM_000064    | NP_065161    | Q14938 | NFIX_HUMAN  |                             | 2  | TCGCTACCACCA     | 0.645 |             |
| - | 5  | 417_418   | B3_uc010eaf.2_RI                                 | NM_054113    | NP_473454    | Q96Q77 | CIB3_HUMAN  |                             | 1  | ACTCAGCCCCCC     | 0.564 |             |
| - | 11 | 1923      | 1:HERP_uc010xpg.                                 | NM_006387    | NP_006378    | Q8IWX8 | CHERP_HUMAN | Pro-rich.                   | 2  | TCCATGGGGGGG     | 0.672 |             |
| - | 11 | 1320_1321 | nfg.1_Frame_Shift                                | NM_033417    | NP_219485    | Q9BT25 | HAUS8_HUMAN |                             | 0  | TGAACGAGAGAG     | 0.495 |             |
| + | 2  | 140       | 1:CHA_uc002oqp.1_                                | NM_000709    | NP_000700    | P12694 | ODBA_HUMAN  |                             | 0  | CAGCACCCCCC      | 0.567 |             |
| + | 4  | 376       | 1:FRS16_uc002pan                                 | NM_007056    | NP_008987    | Q8N2M8 | CLASR_HUMAN |                             | 0  | CTACACCCCCC      | 0.612 |             |
| + | 4  | 656_658   | E183del KLC3_uc                                  | NM_177417    | NP_803136    | Q6P597 | KLC3_HUMAN  | Poly-Glu.                   | 1  | CAGCGAGGAGG      | 0.645 |             |
| - | 2  | 1402_1404 | 2per.3_In_Frame_                                 | NM_018215    | NP_060685    | Q86V59 | PNML1_HUMAN |                             | 0  | CTCACCTTCTTC     | 0.562 |             |
| - | 1  | 90_92     | EC8_uc002pwu.2_                                  | NM_014442    | NP_055257    | Q9NYZ4 | SIGL8_HUMAN |                             | 5  | agcaggggagcagc   | 0.493 |             |
| + | 11 | 1757_1759 | me_Del_p.L480del                                 | NM_006669    | NP_006660    | Q8NHL6 | LIRB1_HUMAN | ical; (Potent p.L479del(1)) | 3  | ctctactgctctctcc | 0.458 |             |
| - | 1  | 839_841   | ykm.1_In_Frame_                                  | NM_004036    | NP_004027    | O60266 | ADCY3_HUMAN |                             | 4  | TCTCTGCTGCTC     | 0.645 |             |
| - | 2  | 164       | T6B1_uc010yni.1_                                 | NM_001032377 | NP_001027549 | Q6IMI4 | ST6B1_HUMAN |                             | 3  | TTATACTTTTTTT    | 0.323 |             |
| - | 2  | 234_236   | HX57_uc002rrg.2_                                 | NM_198963    | NP_945314    | Q6P158 | DHX57_HUMAN | Gly-rich.                   | 3  | gccacctccaccacca | 0.384 |             |
| - | 3  | 1648_1650 | 102sit.3_In_Frame                                | NM_015470    | NP_056285    | Q9BXF6 | RFIP5_HUMAN |                             | 0  | GCCTTGGTGGTC     | 0.635 |             |
| - | 4  | 878       | ssp.1_Frame_Shift                                | NM_016618    | NP_057702    | Q9NPI7 | KRCC1_HUMAN | Lys-rich.                   | 1  | TGTGCCTTTTCC     | 0.428 |             |
| + | 6  | 1052_1053 | 3:002sta.3_Frame_                                | NM_018271    | NP_060741    | Q86YJ6 | THNS2_HUMAN |                             | 1  | TAGACTTCTCTCT    | 0.545 |             |
| - | 4  | 737_739   | 2:svr.2_In_Frame_                                | NM_017849    | NP_060319    | O75204 | TM127_HUMAN |                             | 0  | TCTTATGCTGCTC    | 0.557 |             |
| + | 3  | 224_242   |                                                  | NM_001862    | NP_001853    | P10606 | COX5B_HUMAN |                             | 0  | CCAAAGGGAGC      | 0.397 |             |
| - | 20 | 2077      | 1y.1_Frame_Shift_                                | NM_004543    | NP_004534    | P20929 | NEBU_HUMAN  | Nebulin 15.                 | 20 | TCTGGTTTTTGC     | 0.403 |             |
| - | 15 | 3165      | 1:vd.2_Frame_Shift                               | NM_152519    | NP_689732    | A0AUZ9 | CB067_HUMAN |                             | 3  | CACCTATTTTTTT    | 0.418 |             |
| + | 7  | 931       | 1_Frame_Shift_D                                  | NM_000578    | NP_000569    | P49279 | NRAM1_HUMAN | ical; (Potential).          | 4  | TGAAGCTTTTTTT    | 0.418 |             |
| + | 9  | 1386_1387 | p.S210fs FAM134                                  | NM_024293    | NP_077269    | Q8NC44 | F134A_HUMAN |                             | 2  | AGGGTCCCCCC      | 0.604 |             |
| - | 2  | 797       | 002wwn.2_Frame_                                  | NM_138578    | NP_612815    | Q07817 | B2CL1_HUMAN | BH1.                        | 2  | TAGGAGAAAAAG     | 0.542 |             |
| - | 2  | 361       | 1p.K64fs EIF2S2_                                 | NM_003908    | NP_003899    | P20042 | IF2B_HUMAN  |                             | 1  | TGCACCTTTTTTC    | 0.483 |             |
| + | 3  | 617_619   | me_Del_p.A96del                                  | NM_016434    | NP_057518    | Q9NZ71 | RTEL1_HUMAN | ase ATP-binding.            | 0  | TCAACGCTGCTG     | 0.645 |             |
| - | 10 | 1758      | 1:160_uc010gll.1_F                               | NM_015565    | NP_056380    | O94822 | LTN1_HUMAN  |                             | 0  | TTACCATTTTTTT    | 0.378 |             |
| + | 21 | 3378      | p.G704fs COL18A                                  | NM_130444    | NP_569711    | P39060 | COIA1_HUMAN | ical region 4 (COL4).       | 1  | CCTGGCCCCCC      | 0.692 |             |
| - | 4  | 542       | 1p.G31fs TBC1D                                   | NM_031937    | NP_114143    | Q9BXI6 | TB10A_HUMAN | ab-GAP TBC.                 | 1  | CGTGGCCCCCC      | 0.607 |             |
| + | 5  | 1337      | p.E279fs HMGXB                                   | NM_001003681 | NP_001003681 | Q9UGU5 | HMGX4_HUMAN |                             | 2  | TATAGTGAaaaaa    | 0.408 | rs76572304  |
| + | 12 | 1563      | aot.1_Frame_Shift                                | NM_015705    | NP_056520    | Q96HU1 | SGSM3_HUMAN |                             | 2  | TACCCAAAAAC      | 0.617 |             |
| + | 31 | 7059_7061 |                                                  | NM_001429    | NP_001420    | Q09472 | EP300_HUMAN | ction with NCOA2.           | 64 | TACCACAGCAGC     | 0.576 | rs111265631 |
| - | 11 | 1376      | 11axh.1_Frame_St                                 | NM_016141    | NP_057225    | Q9Y6G9 | DC1L1_HUMAN |                             | 1  | GATCAATTTTTTT    | 0.398 |             |
| + | 13 | 2437      | NKTR_uc003clq.1_                                 | NM_005385    | NP_005376    | P30414 | NKTR_HUMAN  | Arg/Ser-rich.               | 3  | TGTGGGAAAAAA     | 0.378 | rs150528581 |
| + | 4  | 842       | 1pk.1_Frame_Shift                                | NM_178329    | NP_847899    | P51677 | CCR3_HUMAN  | cellular (Potential).       | 8  | TCTGGGTTTTTGC    | 0.488 |             |
| - | 15 | 1367_1370 | QARS_uc003cvy.2                                  | NM_005051    | NP_005042    | P47897 | SYQ_HUMAN   |                             | 1  | TGCAGAGTGAGT     | 0.593 | rs144899098 |
| + | 14 | 2702_2703 | 1A3_uc010hon.1_f                                 | NM_005233    | NP_005224    | P29320 | EPHA3_HUMAN | Potential). Protein kinase. | 33 | TACTGGGAGAT      | 0.446 |             |
| + | 13 | 1521_1522 | p.T229fs ZPLD1_L                                 | NM_175056    | NP_778226    | Q8TCW7 | ZPLD1_HUMAN | acellular (Potential).      | 5  | TAAAACAAAGTA     | 0.351 | rs148150314 |
| + | 1  | 507_509   | me_Del_p.K22del                                  | NM_017548    | NP_060018    | Q9UKY7 | CDV3_HUMAN  | Poly-Lys.                   | 0  | TGGACAAGAAGA     | 0.325 |             |
| - | 9  | 782       | me_Shift_Del_p.R                                 | NM_178130    | NP_835231    | Q86XW9 | TXND6_HUMAN | NDK.                        | 5  | TGTACGGGGGCG     | 0.587 | rs80092642  |
| - | 10 | 1701_1703 | 1bpf.1_In_Frame_                                 | NM_014498    | NP_055313    | O00461 | GOLI4_HUMAN | rich. Luminal (Potential).  | 5  | TGCCACctgctgct   | 0.374 | rs61743912  |
| - | 28 | 3481_3482 | 3A3_uc003ftx.3_5                                 | NM_024524    | NP_078800    | Q9H7F0 | AT133_HUMAN |                             | 1  | TGACCAAAAAAA     | 0.381 |             |
| + | 21 | 2524_2526 | 1buy.1_In_Frame_                                 | NM_000283    | NP_000274    | P35913 | PDE6B_HUMAN |                             | 0  | TGAGAAGGAGGA     | 0.562 |             |
| - | 3  | 530_531   | 1UGDH_uc003gul.                                  | NM_003359    | NP_003350    | O60701 | UGDH_HUMAN  |                             | 4  | TGGTAGAAAAAA     | 0.297 |             |



|   |    |                            |                    |              |              |             |             |                                |      |                   |       |                       |
|---|----|----------------------------|--------------------|--------------|--------------|-------------|-------------|--------------------------------|------|-------------------|-------|-----------------------|
| - | 6  | 542                        | \D2_uc003gyu.2_I   | NM_001014446 | NP_001014446 | Q56VL3      | OCAD2_HUMAN | OCIA.                          | 0    | ATCTTCAAAAAA/     | 0.393 |                       |
| - | 3  | 416_418                    | .1_5'UTR NUP54_    | NM_017426    | NP_059122    | Q7Z3B4      | NUP54_HUMAN | ch. 9 X 2 AA repeats of F-G    | 2    | 'AGTTTGCTGCTC     | 0.394 |                       |
| + | 1  | 3100_3102 3igz.2_In_Frame_ | NM_032961          | NP_116586    | Q9P2E7       | PCD10_HUMAN |             | Cytoplasmic (Potential).       | 2    | GCCTCTGCTGC       | 0.581 |                       |
| - | 2  | 1076_1078                  | me_Del_p.P343de    | NM_178835    | NP_849157    | Q17R98      | ZN827_HUMAN | Pro-rich.                      | 0    | \GGGATTgtggtggt   | 0.35  |                       |
| - | 10 | 7220                       |                    | NM_005245    | NP_005236    | Q14517      | FAT1_HUMAN  | (Potential). Cadherin 21.      | 12   | FCTGAGTAGTGA      | 0.483 |                       |
| - | 7  | 919                        | AH5_uc003jfe.1_F   | NM_001369    | NP_001360    | Q8TE73      | DYH5_HUMAN  | . Stem (By similarity).        | 31   | AGAGTCTTTTTTTT    | 0.517 |                       |
| - | 3  | 473_475                    | 1_In_Frame_Del_f   | NM_016107    | NP_057191    | Q96KR1      | ZFR_HUMAN   | Ala-rich.                      | 0    | TGGGGGTGGGTG      | 0.483 |                       |
| - | 1  | 479_480                    |                    | NM_001085377 | NP_001078846 | P23508      | CRCM_HUMAN  |                                | 1    | ctgccgctgccgccgc  | 0.391 |                       |
| - | 1  | 991_993                    | Frame_Del_p.E29    | NM_020747    | NP_065798    | Q9ULD9      | ZN608_HUMAN | Potential.                     | 6    | 'GGCTCTCCTCC      | 0.522 |                       |
| + | 4  | 743                        | I3B_uc010jew.1_5'  | NM_016604    | NP_057688    | Q7LBC6      | KDM3B_HUMAN |                                | 11   | 'GCTTTGATCAGT     | 0.398 |                       |
| - | 3  | 512_514                    | 0jii.2_In_Frame_D  | NM_138379    | NP_612388    | Q96H15      | TIMD4_HUMAN | ar (Potential). Thr-rich.      | 2    | GGGCTTGTGT        | 0.537 |                       |
| - | 2  | 823                        | =IP2_uc003lwr.2_I  | NM_001001343 | NP_001001343 | Q8TBE3      | FNDC9_HUMAN |                                | 0    | 'CACCAACCCCC      | 0.582 |                       |
| - | 15 | 2057                       | BBR1_uc003nmu.:    | NM_001470    | NP_001461    | Q9UBS5      | GABR1_HUMAN | ellular (Potential).           | 7    | CAGCTGGGGGG       | 0.363 |                       |
| - | 1  | 156_157                    |                    | NM_032020    | NP_114409    | Q9BTY2      | FUCO2_HUMAN |                                | 1    | cggcggcggcagcag   | 0.599 |                       |
| + | 9  | 3753_3755                  | 2_3'UTR GRM1_uc    | NM_000838    | NP_000829    | Q13255      | GRM1_HUMAN  | dic). Cytoplasmic (Potentia    | 19   | CGCGGACGACG       | 0.65  |                       |
| + | 9  | 3846_3848                  | 2_3'UTR GRM1_uc    | NM_000838    | NP_000829    | Q13255      | GRM1_HUMAN  | dic). Cytoplasmic (Potentia    | 19   | GGAAGAGGAGG.      | 0.64  |                       |
| + | 6  | 1162                       | ilz.1_Frame_Shift_ | NM_003751    | NP_003742    | P55884      | EIF3B_HUMAN | ieraction with EIF3E. WD 1     | 0    | TCTATGGGGGG       | 0.478 |                       |
| - | 3  | 1548                       | uc003szu.1_5'Flan  | NM_014817    | NP_055632    | Q7L0X0      | TRIL_HUMAN  | lar (Potential). LRRCT.        | 0    | GGCCGGGGGG        | 0.662 |                       |
| + | 1  | 403_405                    | uc003tbl.3_5'Flank | NM_002047    | NP_002038    | P41250      | SYG_HUMAN   |                                | 1    | 'CGCTCTGCTGC      | 0.749 |                       |
| + | 30 | 5386_5387                  | kbi.1_Frame_Shift  | NM_015052    | NP_055867    | Q76N89      | HECW1_HUMAN | HECT.                          | 23   | GCTGTTAACAGC      | 0.505 |                       |
| + | 7  | 890_892                    | J3toi.3_In_Frame_  | NM_001100159 | NP_001093629 | Q8NEG2      | CG057_HUMAN |                                | 1    | GGTTGCAGCAG       | 0.473 |                       |
| - | 4  | 453_455                    | _Frame_Del_p.D9    | NM_016086    | NP_057170    | Q9Y6J8      | STYL1_HUMAN | Rhodanese.                     | 0    | TCTGAATCATCA'     | 0.389 |                       |
| - | 10 | 1091_1092                  | p.S339fs ABCB4_    | NM_018849    | NP_061337    | P21439      | MDR3_HUMAN  | ). ABC transmembrane typ       | 6    | GGATTGAAAAAA.     | 0.347 |                       |
| - | 7  | 1188                       | p.K237fs CYP51A    | NM_000786    | NP_000777    | Q16850      | CP51A_HUMAN |                                | 0    | ATAACATTTTTTT     | 0.398 |                       |
| + | 5  | 881                        | isk.2_Frame_Shift  | NM_153332    | NP_699163    | Q8IV48      | ERI1_HUMAN  | Exonuclease.                   | 0    | GGTACTAAAAAA/     | 0.328 |                       |
| + | 12 | 3531                       | uf.2_Frame_Shift   | NM_017780    | NP_060250    | Q9P2D1      | CHD7_HUMAN  | ase ATP-binding.               | 9    | TGGCCCTTTTTT/     | 0.418 |                       |
| + | 3  | 331                        | 'ame_Shift_Del_p.' | NM_052832    | NP_439897    | Q8TE54      | S26A7_HUMAN | lasmic (Potential).            | 2    | 'GCATACCCCC/      | 0.398 |                       |
| - | 23 | 3681_3682                  | p.K981fs RGS22_    | NM_015668    | NP_056483    | Q8NE09      | RGS22_HUMAN | Potential.                     | 7    | 'TGCCAATTTTTT     | 0.312 | rs7841915             |
| - | 45 | 6393_6394                  | ks.1_Frame_Shift   | NM_015902    | NP_056986    | O95071      | UBR5_HUMAN  |                                | 28   | 'CCCTCTTTTTT'     | 0.381 |                       |
| - | 11 | 2666_2668                  |                    | NM_015117    | NP_055932    | Q8IXZ2      | ZC3H3_HUMAN | Poly-Ser. p.S879F(1)           | 1    | ggggatgaggaggag   | 0.552 | rs2272753;rs137878905 |
| - | 2  | 331                        |                    | NM_015117    | NP_055932    | Q8IXZ2      | ZC3H3_HUMAN |                                | 1    | GCTGGCCCCCC       | 0.632 |                       |
| - | 6  | 1681_1683                  | Q376del ARHGAP     | NM_025251    | NP_079527    | Q9C0H5      | RHG39_HUMAN |                                | 0    | 'ACTTCTGCTTG      | 0.704 | rs77462981            |
| - | 7  | 2587                       | PIGO_uc003zwf.2    | NM_032634    | NP_116023    | Q8TEQ8      | PIGO_HUMAN  |                                | 3    | GAGACGGGGGG       | 0.662 | rs148341577           |
| + | 3  | 1021_1023                  | 4bag.1_In_Frame_   | NM_006981    | NP_008912    | Q92570      | NR4A3_HUMAN | Poly-His.                      | 173  | tcaccatcaccaccacc | 0.483 |                       |
| + | 10 | 1284_1286                  | 1bhp.2_In_Frame_   | NM_152786    | NP_689999    | Q8TAL5      | CI043_HUMAN | Gln-rich.                      | 0    | gcagcggcagcagca   | 0.438 |                       |
| - | 22 | 6093                       | rf.2_Frame_Shift_I | NM_002160    | NP_002151    | P24821      | TENA_HUMAN  | nectin type-III 15.            | 7    | TGCCGGGGGGG       | 0.478 | rs148674204           |
| - | 3  | 128_129                    | _Shift_Ins_p.K34fs | NM_016390    | NP_057474    | Q5T280      | CI114_HUMAN |                                | 0    | 'CTTCCATTTTTT     | 0.525 |                       |
| + | 43 | 5050                       |                    | NM_015354    | NP_056169    | Q5SRE5      | NU188_HUMAN |                                | 7    | 'GTGCACCCCG       | 0.587 |                       |
| + | 14 | 2226_2228                  | C9orf86_uc004cjl.1 | NM_024718    | NP_078994    | Q3YEC7      | PARF_HUMAN  | with CDKN2A. Lys-rich.         | 0    | 'CTaaggagaagaag   | 0.532 |                       |
| + | 13 | 2110_2112                  | E598del GRIN1_uc   | NM_007327    | NP_015566    | Q05586      | NMDZ1_HUMAN | lasmic (Potential).            | 1    | CAGCGAGGAGG       | 0.739 |                       |
| + | 7  | 563                        |                    | NM_005635    | NP_005626    | Q16384      | SSX1_HUMAN  |                                | 1169 | GACCCAAAAGG       | 0.493 |                       |
| - | 1  | 454_456                    | 33A_uc004efr.1_5   | NM_004538    | NP_004529    | Q99457      | NP1L3_HUMAN | Ser-rich.                      | 2    | jccactagtgtgctgct | 0.217 |                       |
| + | 2  | 431                        | \P36_uc004ewb.2    | NM_144967    | NP_659404    | Q6ZR18      | RHG36_HUMAN |                                | 3    | CCTTCATTTTTTT     | 0.542 |                       |
| - | 14 | 2723                       | p.A823fs IGSF1_u   | NM_001555    | NP_001546    | Q8N6C5      | IGSF1_HUMAN | 'otential). Ig-like C2-type 8. | 5    | 'ACTGGCCCG        | 0.488 |                       |
| + | 2  | 555                        | for.2_Frame_Shift  | NM_002025    | NP_002016    | P51816      | AFF2_HUMAN  |                                | 5    | 'CACTTAAAAAAA     | 0.378 |                       |
| + | 2  | 368                        | 3_5'Flank PNMA3_   | NM_013364    | NP_037496    | Q9UL41      | PNMA3_HUMAN |                                | 3    | ctggtgtggggggaac  | 0.07  |                       |
| - | 1  | 203                        | k PEX14_uc010oa    | NM_004401    | NP_004392    | O00273      | DFFA_HUMAN  | CIDE-N.                        | 0    | GAGGCGCCAC        | 0.706 |                       |

|   |    |                              |              |              |        |                                           |     |                   |       |             |
|---|----|------------------------------|--------------|--------------|--------|-------------------------------------------|-----|-------------------|-------|-------------|
| + | 67 | 12633_1263;Shift_Del_p.V335' | NM_015378    | NP_056193    | Q5THJ4 | VP13D_HUMAN                               | 5   | :AGTGTATAACT      | 0.465 |             |
| - | 23 | 3493_ayz.1_Frame_Shift       | NM_017940    | NP_060410    | Q3BBV0 | NBPF1_HUMAN NBPF 4.                       | 0   | :CTATGTCAACAG     | 0.488 |             |
| + | 12 | 2906_2908;9vqi.1_In_Frame_   | NM_001083621 | NP_001077090 | Q9NUA8 | ZBT40_HUMAN                               | 1   | :CCCCAAGAAGA      | 0.517 |             |
| + | 1  | 1263_1265                    | NM_004455    | NP_004446    | Q92935 | EXTL1_HUMAN enal (Potential).             | 1   | :CCTGCTCCTC       | 0.606 |             |
| + | 4  | 552_9vws.1_Frame_Sh          | NM_015284    | NP_056099    | Q5T011 | SZT2_HUMAN                                | 0   | :CTCTTCCCCC       | 0.572 |             |
| - | 2  | 836_01fs ZCCHC11_uc          | NM_015269    | NP_056084    | Q5TAX3 | TUT4_HUMAN                                | 3   | :TTTCTCCCCCTA     | 0.388 |             |
| - | 6  | 729_173_uc001dgi.3_5         | NM_001002912 | NP_001002912 | Q5RHP9 | CA173_HUMAN                               | 5   | :TTACTGGGAA       | 0.418 |             |
| - | 2  | 368_1ebp.1_Frame_St          | NM_019099    | NP_061972    | Q9NTI7 | CA183_HUMAN                               | 2   | :GTCCTGGGACC      | 0.622 |             |
| - | 12 | 1907_1908                    | NM_020205    | NP_064590    | Q6GQQ9 | OTU7B_HUMAN                               | 3   | :CTTCTTGAGCTT     | 0.55  |             |
| - | 2  | 3439_ene.1_Frame_Shift       | NM_007113    | NP_009044    | Q07283 | TRHY_HUMAN 30 AA tandem repeats.          | 5   | :ctcctgctgcacctc  | 0.174 |             |
| - | 6  | 1404_1406;V48del PVRL4_u     | NM_030916    | NP_112178    | Q96NY8 | PVRL4_HUMAN ical; (Potential).            | 2   | :TGAGCACCACC      | 0.571 |             |
| - | 12 | 2457_1gju.2_Splice_Site      | NM_172071    | NP_742068    | Q5TC82 | RC3H1_HUMAN                               | 2   | :TTGCTTACTTCT     | 0.277 |             |
| + | 7  | 1456_1457_Ins_p.378_379ins   | NM_005807    | NP_005798    | Q92954 | PRG4_HUMAN ats of K-X-P-X-P-T-T-X.[17     | 1   | :CTGCCACCACC      | 0.653 | rs149342058 |
| + | 7  | 1633_1634_Ins_p.435_436ins   | NM_005807    | NP_005798    | Q92954 | PRG4_HUMAN <-X-P-X-P-T-T-X.[24; appro     | 1   | :CCACCAAGTCTG     | 0.639 |             |
| - | 19 | 9180_9181;L1390fs ASPM_L     | NM_018136    | NP_060606    | Q8IZT6 | ASPM_HUMAN IQ 35.                         | 6   | :TAGCTAGATATTC    | 0.351 |             |
| - | 4  | 586_1p.l113fs TMEM9_         | NM_016456    | NP_057540    | Q9P0T7 | TMEM9_HUMAN ellular (Potential).          | 0   | :ACCTTGATGGTC     | 0.587 |             |
| - | 4  | 2151                         | NM_025179    | NP_079455    | O75051 | PLXA2_HUMAN ilar (Potential). Sema.       | 3   | :ACCATGGGGGG      | 0.592 |             |
| + | 5  | 950_FBXO28_uc010pv           | NM_015176    | NP_055991    | Q9NVF7 | FBX28_HUMAN                               | 5   | :AAACTGCTAGAC     | 0.473 |             |
| - | 19 | 2298_2299_p.C122fs DIP2C_t   | NM_014974    | NP_055789    | Q9Y2E4 | DIP2C_HUMAN                               | 7   | :AACTGCACACAC     | 0.54  |             |
| - | 14 | 1692                         | NM_015155    | NP_055970    | Q92615 | LAR4B_HUMAN                               | 3   | :TGTTTTCAAACA     | 0.413 |             |
| - | 10 | 1480_p.Q352fs GDI2_uc        | NM_001494    | NP_001485    | P50395 | GDIB_HUMAN                                | 0   | :CACCTGGCTTTC     | 0.453 |             |
| + | 4  | 508_Shift_Del_p.P24fs        | NM_001008213 | NP_001008214 | Q96CV9 | OPTN_HUMAN                                | 2   | :ATGGACCCCCC      | 0.557 |             |
| + | 5  | 1009_ljrp.2_Frame_Shift      | NM_170744    | NP_734465    | Q8IZJ1 | UNC5B_HUMAN e. Extracellular (Potential). | 3   | :TGCTCAAGAA       | 0.587 |             |
| - | 5  | 868_009xvi.2_RNA AR          | NM_032900    | NP_116289    | Q14CB8 | RHG19_HUMAN Rho-GAP.                      | 0   | :TCACATTTTTTC     | 0.378 |             |
| - | 2  | 441_1kov.2_Frame_Shi         | NM_018058    | NP_060528    | Q9NQ79 | CRAC1_HUMAN                               | 5   | :CCGCTGGGACC      | 0.507 |             |
| - | 3  | 1546_45_splice CHST15_       | NM_015892    | NP_056976    | Q7LFX5 | CHSTF_HUMAN                               | 1   | :GCCCTACCGAT      | 0.554 |             |
| + | 1  | 756_1uc001mam.1_Int          | NM_001004750 | NP_001004750 | Q9H340 | O51B6_HUMAN Name=6; (Potential).          | 2   | :GTCACTGTAGTI     | 0.443 |             |
| + | 25 | 8653_8655idel DNHD1_uc00'    | NM_144666    | NP_653267    | Q96M86 | DNHD1_HUMAN Glu-rich.                     | 2   | :AGAGTgaggagg     | 0.507 |             |
| - | 2  | 507_509                      | NM_003737    | NP_003728    | Q96JQ0 | PCD16_HUMAN                               | 5   | :AGCCCcagcagc     | 0.527 |             |
| - | 4  | 659_EIF4G2_uc001mjd          | NM_001418    | NP_001409    | P78344 | IF4G2_HUMAN MIF4G.                        | 2   | :CTCTTACTTTCC     | 0.433 |             |
| + | 7  | 1258_Shift_Del_p.V286fs      | NM_018393    | NP_060863    | Q9NUJ3 | T11L1_HUMAN                               | 0   | :CCAGTGGGGGG      | 0.542 |             |
| + | 30 | 3229_3KZ_uc009yky.1_'        | NM_001105540 | NP_001099010 | Q13574 | DGKZ_HUMAN                                | 3   | :TCCAGCCCCCC      | 0.649 | rs3832759   |
| + | 1  | 578_579                      | NM_001005200 | NP_001005200 | Q8N162 | OR8H2_HUMAN ellular (Potential).          | 2   | :TACATACAACAC     | 0.406 | rs147828358 |
| - | 12 | 2431_BP_uc009ymr.1_F         | NM_002556    | NP_002547    | P22059 | OSBP1_HUMAN                               | 1   | :AACATTCCATTTT    | 0.517 |             |
| - | 5  | 593_1N1_uc001nuk.2_F         | NM_015853    | NP_056937    | Q04323 | UBXN1_HUMAN nteraction with BRCA1.        | 0   | :CGGCCTTTTCC      | 0.537 |             |
| - | 2  | 598_600_1orf95_uc001nxs.:    | NM_001144936 | NP_001138408 | C9JLR9 | CK095_HUMAN Glu-rich.                     | 0   | :tctctctctctctctc | 0.532 |             |
| + | 9  | 2328_1p.l493fs SLC22A'       | NM_144585    | NP_653186    | Q96S37 | S22AC_HUMAN                               | 1   | :ACCATCCAAGA      | 0.602 |             |
| + | 7  | 801_2_5'Flank C11orf6        | NM_006442    | NP_006433    | Q14919 | NC2A_HUMAN Pro-rich.                      | 0   | :CTTTGCCCCCA      | 0.647 |             |
| + | 17 | 1651_45_splice CTTN_u        | NM_005231    | NP_005222    | Q14247 | SRC8_HUMAN                                | 1   | :CTTTTAGAGGAC     | 0.51  |             |
| - | 16 | 2389_1p.E489fs ARAP1_        | NM_001040118 | NP_001035207 | Q96P48 | ARAP1_HUMAN                               | 1   | :CTTTTCCAGGG      | 0.627 |             |
| + | 2  | 123_1_Shift_Del_p.L41f       | NM_025098    | NP_079374    | Q3SYC2 | MOGT2_HUMAN ical; (Potential).            | 2   | :GCCCTCTGTT       | 0.597 |             |
| - | 2  | 372_ozg.2_Frame_Shif         | NM_080491    | NP_536739    | Q9UQC2 | GAB2_HUMAN                                | 6   | :CTGTGCTCTCC      | 0.517 |             |
| - | 29 | 5622_1vb.1_Frame_Shift       | NM_001098816 | NP_001092286 | Q6N022 | TEN4_HUMAN ellular (Potential).           | 4   | :TGTCTGTATCAC     | 0.537 |             |
| + | 36 | 5710_5711_Shift_Del_p.L427f  | NM_000051    | NP_000042    | Q13315 | ATM_HUMAN                                 | 240 | :TTTTTAGAAGTA     | 0.317 |             |
| + | 3  | 2335_1L_uc001psz.1_Fr        | NM_005933    | NP_005924    | Q03164 | MLL1_HUMAN                                | 25  | :TCTCACCCCCC      | 0.453 |             |
| + | 7  | 1236_1237_ene_Shift_Del_p.V2 | NM_001655    | NP_001646    | P48444 | COPD_HUMAN MHD.                           | 0   | :GTGACGTAGGG      | 0.436 |             |
| - | 6  | 1503_1505.L1_uc001pwu.1_l    | NM_002855    | NP_002846    | Q15223 | PVRL1_HUMAN ytoplasmic (Potential).       | 0   | :CACCCGcctctc     | 0.576 |             |

|   |    |           |                    |              |              |        |             |                              |    |                   |       |             |
|---|----|-----------|--------------------|--------------|--------------|--------|-------------|------------------------------|----|-------------------|-------|-------------|
| - | 7  | 915       | 010sbo.1_5'Flank   | NM_003139    | NP_003130    | P08240 | SRPR_HUMAN  |                              | 0  | AGCTGCCCCCC       | 0.527 |             |
| - | 6  | 1100_1118 | 5A_uc010sbn.1_F    | NM_001042603 | NP_001036068 | P29375 | KDM5A_HUMAN |                              | 3  | AGCCCAACAACCT     | 0.342 |             |
| - | 9  | 1657_1659 | 554PP>P IFFO1      | NM_080730    | NP_542768    | Q0D2I5 | IFFO1_HUMAN | Poly-Pro.                    | 0  | GCTTGGCGGGC       | 0.601 | rs144019095 |
| - | 4  | 745_747   | i.1_intron PRB1_u  | NM_005039    | NP_005030    | P04280 | PRP1_HUMAN  | 2-P-[PAQ]-Q-[GE]-[GD]-[NI]   | 0  | TCCTGGAGGAG       | 0.611 |             |
| - | 4  | 946       | LRP6_uc010shl.1    | NM_002336    | NP_002327    | O75581 | LRP6_HUMAN  | ata-propeller 1. LDL-recept  | 12 | TCCATGGGAGAC      | 0.433 |             |
| - | 13 | 2119_2120 | 1rja.2_Frame_Shi   | NM_175861    | NP_787057    | Q8IUR5 | TMTC1_HUMAN | TPR 6.                       | 0  | GTCTTCCCAAGT      | 0.5   |             |
| - | 10 | 1940      |                    | NM_003482    | NP_003473    | O14686 | MLL2_HUMAN  | if S/P-P-P-E/P-E/A. Pro-rici | 41 | CAGGTGGGGGG       | 0.637 |             |
| - | 27 | 3380_3382 | i.2_intron SMARC   | NM_003075    | NP_003066    | Q8TAQ2 | SMRC2_HUMAN | Pro-rich.                    | 6  | GAGCAGGAGGA       | 0.591 |             |
| + | 11 | 1468_1469 | 1tron MDM2_uc00    | NM_002392    | NP_002383    | Q00987 | MDM2_HUMAN  | or interaction with USP2.    | 3  | ACAATCACAAGA      | 0.361 |             |
| + | 6  | 1196_1198 | me_Del_p.P402de    | NM_007007    | NP_008938    | Q16630 | CPSF6_HUMAN | Pro-rich.                    | 0  | TTCTTTCTCCAC      | 0.576 |             |
| - | 12 | 1471      | 0_splice NAP1L1_   | NM_139207    | NP_631946    | P55209 | NP1L1_HUMAN |                              | 2  | GCTTACATCATC      | 0.345 |             |
| - | 2  | 315       | yn.2_Frame_Shift   | NM_203394    | NP_976328    | Q96AV8 | E2F7_HUMAN  |                              | 3  | CATTTTCCCCATC     | 0.373 |             |
| + | 1  | 79        |                    | NM_001101421 | NP_001094891 | Q8N1T3 | MYO1H_HUMAN |                              | 0  | 3AATCTGCCTTT      | 0.537 |             |
| + | 11 | 1305      | _Shift_Del_p.A322  | NM_001114185 | NP_001107657 | Q03426 | KIME_HUMAN  |                              | 0  | CGGTGCCCCCG       | 0.662 |             |
| + | 9  | 1152      | 01trp.3_Frame_Sh   | NM_001082537 | NP_001076006 | Q2MV58 | TECT1_HUMAN |                              | 0  | :GTTCTGGGGAC.     | 0.398 |             |
| - | 6  | 1088      | vq.2_Frame_Shift_  | NM_181486    | NP_852259    | Q99593 | TBX5_HUMAN  | T-box.                       | 8  | GCTGTATTTTTTC     | 0.408 |             |
| - | 9  | 1164      | q.1_Splice_Site_p. | NM_007174    | NP_009105    | O14578 | CTRO_HUMAN  |                              | 10 | CTACTTACAGTT      | 0.398 |             |
| - | 5  | 948       | 1ufx.1_Frame_Shi   | NM_025140    | NP_079416    | Q53HC0 | CCD92_HUMAN |                              | 0  | :GCGATGGGGGC      | 0.682 | rs147939560 |
| + | 6  | 2495_2496 | p.T222fs ZNF664_   | NM_152437    | NP_689650    | Q8N3J9 | ZN664_HUMAN |                              | 0  | CCACACAGGAG       | 0.515 |             |
| - | 2  | 1065_1067 | _Intron SALL2_uc   | NM_005407    | NP_005398    | Q9Y467 | SALL2_HUMAN | Poly-Ser.                    | 3  | gaggaagaggaggag   | 0.512 |             |
| - | 7  | 1366      | p.P369fs CDH24_    | NM_022478    | NP_071923    | Q86UP0 | CAD24_HUMAN | r (Potential). Cadherin 3.   | 1  | :GCTCTGGGGCA      | 0.642 |             |
| - | 19 | 4033_4034 | uc001wiq.3_Fram    | NM_014977    | NP_055792    | Q9UKV3 | ACINU_HUMAN | Asp/Glu/Lys-rich.            | 4  | :TTTCTGAACGAT     | 0.421 |             |
| + | 2  | 231       |                    | NM_004094    | NP_004085    | P05198 | IF2A_HUMAN  | S1 motif.                    | 1  | :GAAATGGGGGC      | 0.279 |             |
| + | 1  | 607_609   |                    | NM_003403    | NP_003394    | P25490 | TYY1_HUMAN  | Glu-rich (acidic).           | 0  | ggtggcgaggaggag   | 0.34  |             |
| - | 11 | 1570_1571 | zqp.2_Frame_Shift  | NM_173500    | NP_775771    | Q6IQ55 | TTBK2_HUMAN |                              | 7  | :TCCTGGGGACG      | 0.361 |             |
| - | 18 | 2278      | a.1_RNA MYO5C_     | NM_018728    | NP_061198    | Q9NQX4 | MYO5C_HUMAN | osin head-like.              | 14 | ACCTCCTTTTTAT     | 0.493 |             |
| - | 4  | 629_630   | LN6_uc010ujz.1_    | NM_017882    | NP_060352    | Q9NWW5 | CLN6_HUMAN  |                              | 0  | CGGCTTGAGATT      | 0.614 |             |
| + | 5  | 471       | i.1_RNA FANCI_uc   | NM_001113378 | NP_001106849 | Q9NV11 | FANCI_HUMAN |                              | 2  | ATCTTTGGAGTT      | 0.393 |             |
| + | 7  | 1157      | _Shift_Del_p.K265  | NM_018671    | NP_061141    | Q9H3U1 | UN45A_HUMAN |                              | 2  | :GTGTCAAAAAA      | 0.562 |             |
| + | 8  | 947       | ame_Shift_Del_p.   | NM_000693    | NP_000684    | P47895 | AL1A3_HUMAN |                              | 4  | GAGCTGGGGGG       | 0.572 | rs142377552 |
| + | 3  | 1065      | gcb.3_Frame_Shift  | NM_001105248 | NP_001098718 | Q6UXY8 | TMC5_HUMAN  | ellular (Potential).         | 1  | :CTTACCAGAG       | 0.463 |             |
| + | 15 | 1993_1995 | s.S436del SLC5A1   | NM_052944    | NP_443176    | Q8VWX8 | SC5AB_HUMAN | asmic (Potential).           | 2  | AGGCCAGCAGC       | 0.542 |             |
| + | 25 | 5954      | g_Shift_Del_p.P16  | NM_006662    | NP_006653    | Q6ZRS2 | SRCAP_HUMAN | Pro-rich.                    | 4  | :CTGGTCCCCCC      | 0.612 |             |
| - | 6  | 3848      | rgn.1_Frame_Shift  | NM_015069    | NP_055884    | Q2M1K9 | ZN423_HUMAN | :2H2-type 27.                | 4  | :GATTTGGATCT      | 0.438 |             |
| - | 2  | 506_508   | ime_Del_p.S62del   | NM_002968    | NP_002959    | Q9NSC2 | SALL1_HUMAN | Poly-Ser.                    | 8  | :gcccgcgctgctgct  | 0.463 | rs13336129  |
| + | 5  | 1317_1319 | h.x.2_In_Frame_D   | NM_024335    | NP_077311    | P78412 | IRX6_HUMAN  |                              | 6  | gaggaagaggaggag   | 0.493 |             |
| - | 14 | 1166_1168 | h.2_In_Frame_Del   | NM_001297    | NP_001288    | Q14028 | CNGB1_HUMAN | cytoplasmic (Potential).     | 4  | lctctctctctctctct | 0.414 |             |
| + | 16 | 2002_2004 | ne_Del_p.S549del   | NM_014329    | NP_055144    | Q6P2E9 | EDC4_HUMAN  | Ser-rich.                    | 4  | CTCTCCagcagca     | 0.453 |             |
| - | 8  | 1497      | KL_uc002fdc.2_Inl  | NM_152649    | NP_689862    | Q8NB16 | MLKL_HUMAN  | rotein kinase.               | 2  | TTTCTCAACTC       | 0.423 |             |
| + | 1  | 90_92     |                    | NM_001005271 | NP_001005271 | Q12873 | CHD3_HUMAN  |                              | 1  | ggcgagaggaggag    | 0.305 |             |
| + | 13 | 2245_2247 | s.K762del CHD3_u   | NM_001005273 | NP_001005273 | Q12873 | CHD3_HUMAN  | Poly-Lys.                    | 1  | AGTATAAGAAAG      | 0.488 |             |
| + | 1  | 149       | iiif_Del_p.G11fs R | NM_016492    | NP_057576    | Q9HD47 | MOG1_HUMAN  |                              | 0  | :GTTCGGGGGCG      | 0.617 |             |
| - | 30 | 4166_4168 | E1388del MYH10_    | NM_005964    | NP_005955    | P35580 | MYH10_HUMAN | Potential.                   | 2  | :CTGGCTCTCTC      | 0.596 |             |
| + | 4  | 1276_1278 | SMCR7_uc010vxc     | NM_139162    | NP_631901    | Q96C03 | SMCR7_HUMAN |                              | 0  | :GGCGGCTGCTG      | 0.685 |             |
| + | 9  | 965_966   | p.E205fs MAP2K3_   | NM_145109    | NP_659731    | P46734 | MP2K3_HUMAN | rotein kinase.               | 0  | AGCCTGAGAGG       | 0.619 |             |
| - | 13 | 1600      | p.K465fs CCT6B_u   | NM_006584    | NP_006575    | Q92526 | TCPW_HUMAN  |                              | 1  | AAGTTGTTTTTTT     | 0.289 |             |
| + | 6  | 1122      | rfe.1_Frame_Shift  | NM_000964    | NP_000955    | P10276 | RARA_HUMAN  | gand-binding.                | 3  | :ACATTGACCTC1     | 0.572 |             |

|   |    |           |                      |              |              |        |             |                              |    |                |       |             |
|---|----|-----------|----------------------|--------------|--------------|--------|-------------|------------------------------|----|----------------|-------|-------------|
| - | 9  | 1271      | !hzi.3_Frame_Shift   | NM_012448    | NP_036580    | P51692 | STA5B_HUMAN |                              | 6  | CACCTGGGGGG    | 0.577 | rs144993426 |
| - | 11 | 1774_1775 | 3K14_uc010daj.1_     | NM_003954    | NP_003945    | Q99558 | M3K14_HUMAN | th ZFP91. Protein kinase.    | 8  | AGGGATGTAGTC   | 0.574 |             |
| - | 4  | 933       | !dbh.1_Frame_Shift   | NM_018952    | NP_061825    | P17509 | HXB6_HUMAN  | Homeobox.                    | 0  | CTCTCCTTTTTCC  | 0.602 |             |
| + | 20 | 2951      | !195_uc010wsb.1_     | NM_014738    | NP_055553    | Q12767 | K0195_HUMAN |                              | 1  | AGATCCCCC      | 0.612 |             |
| - | 13 | 2084      | !jqe.2_Frame_Shift   | NM_007292    | NP_009223    | Q15067 | ACOX1_HUMAN |                              | 1  | CGAATCAGAGT    | 0.408 | rs79605652  |
| + | 26 | 4173      | !P1237fs PTPRM_      | NM_002845    | NP_002836    | P28827 | PTPRM_HUMAN | phatase 2. Cytoplasmic (Po   | 6  | CTCTGCCCCCA    | 0.597 |             |
| - | 8  | 855       |                      | NM_005570    | NP_005561    | P49257 | LMAN1_HUMAN |                              | 1  | CTGGGCTTTTTT   | 0.294 |             |
| + | 4  | 1419_1420 |                      | NM_014913    | NP_055728    | Q6IQ32 | ADNP2_HUMAN | Pro-rich.                    | 8  | CTCATTCCCCC    | 0.644 |             |
| + | 14 | 1937      | 409fs HMHA1_uc0      | NM_012292    | NP_036424    | Q92619 | HMHA1_HUMAN |                              | 1  | TAGGTCCCCCG    | 0.662 |             |
| + | 8  | 1578_1579 | p.T432fs SMARC.      | NM_003072    | NP_003063    | P51532 | SMCA4_HUMAN | p.?(1)                       | 67 | TGGAGACAGCC    | 0.629 |             |
| - | 8  | 1346_1347 | 2mwy.3_Frame_Shift   | NM_001127221 | NP_001120693 | O00555 | CAC1A_HUMAN | lasmic (Potential).          | 2  | GTTCTCCACCC    | 0.45  |             |
| + | 10 | 1017_1018 | 3_5'Flank KIAA089    | NM_015329    | NP_056144    | Q9Y6X3 | SCC4_HUMAN  |                              | 0  | TGCTGGACTGC    | 0.639 |             |
| + | 11 | 1955_1956 | 0xqv.1_Frame_Shift   | NM_017660    | NP_060130    | Q86YP4 | P66A_HUMAN  |                              | 0  | TCCGTACCCAA    | 0.663 |             |
| - | 2  | 120_122   |                      | NM_000704    | NP_000695    | P20648 | ATP4A_HUMAN | lasmic (Potential).          | 1  | CCCGCCTTCTTC   | 0.601 |             |
| + | 8  | 1917      | p.S598fs CEACA       | NM_004363    | NP_004354    | P06731 | CEAM5_HUMAN | Ig-like 7.                   | 2  | CATTTCCCCC     | 0.547 |             |
| - | 3  | 1652      | p.A536fs DMWD_1      | NM_004943    | NP_004934    | Q09019 | DMWD_HUMAN  |                              | 0  | CTCTGCCCCCC    | 0.706 |             |
| + | 2  | 603_605   |                      | NM_014330    | NP_055145    | O75807 | PR15A_HUMAN | alization in the endoplasmic | 1  | TTTTGGATGATG   | 0.571 |             |
| - | 1  | 166_168   |                      | NM_178449    | NP_848544    | Q96A98 | TIP39_HUMAN |                              | 0  | CACCACcagcagc  | 0.596 |             |
| - | 10 | 2162_2163 | 27A5_uc002qtb.2_     | NM_012254    | NP_036386    | Q9Y2P5 | S27A5_HUMAN | lasmic (Probable).           | 0  | TCCCTCACACAC   | 0.604 |             |
| + | 7  | 1087_1088 | rbt.2_Frame_Shift    | NM_145693    | NP_663731    | Q14693 | LPIN1_HUMAN |                              | 4  | GAAATGCTTTGG   | 0.48  |             |
| + | 7  | 1477      | !BL5_uc002rid.2_F    | NM_021831    | NP_068603    | Q8NDL9 | CBPC5_HUMAN |                              | 2  | ACCATCCCCC     | 0.512 |             |
| + | 7  | 1438      | ov.2_Frame_Shift     | NM_206943    | NP_996826    | Q14766 | LTBP1_HUMAN |                              | 8  | TTTCTCTTAAC    | 0.363 |             |
| + | 8  | 1039      | Shift_Del_p.L75fs    | NM_001130482 | NP_001123954 | Q86Y07 | VRK2_HUMAN  | rotein kinase.               | 1  | TTATTTAGGAATT  | 0.279 |             |
| - | 7  | 654_655   | !1_uc002sgl.3_RN     | NM_022173    | NP_071505    | P31483 | TIA1_HUMAN  | RRM 2.                       | 0  | CCCTTAGACTTT   | 0.386 |             |
| + | 54 | 6461      | !Y5F_uc010fej.2_I    | NM_003494    | NP_003485    | O75923 | DYSF_HUMAN  | lasmic (Potential).          | 7  | TGGTTTACCTCC   | 0.493 |             |
| + | 1  | 147_152   | 2sjf.1_In_Frame_C    | NM_015120    | NP_055935    | Q8TCU4 | ALMS1_HUMAN | Glu-rich.                    | 9  | TAGCTggaggagg  | 0.403 | rs72319667  |
| - | 2  | 269       | !4C_uc002sxs.3_5     | NM_017789    | NP_060259    | Q9C0C4 | SEM4C_HUMAN |                              | 2  | ACTCACCCCA     | 0.607 |             |
| + | 22 | 3486_3487 | lyvq.1_Frame_Shift   | NM_015904    | NP_056988    | O60841 | IF2P_HUMAN  |                              | 3  | GTACATTTTTAA   | 0.401 |             |
| + | 1  | 253       | !3_Intron TMEM18     | NM_144632    | NP_653233    | Q6ZP80 | TM182_HUMAN |                              | 0  | TTTTTGGTGGC    | 0.383 |             |
| - | 3  | 1148      | !c002too.1_5'Flank   | NM_017969    | NP_060439    | Q96ST2 | IWS1_HUMAN  | pproximate tandem repeat     | 1  | TCCTTGGGGGA    | 0.557 |             |
| + | 11 | 1572      | p.K327fs ACVR2A      | NM_001616    | NP_001607    | P27037 | AVR2A_HUMAN | Potential). Protein kinase.  | 13 | TGCATAAAAAAA   | 0.368 |             |
| - | 15 | 2279      | !0zcx.1_Frame_Shift  | NM_014900    | NP_055715    | Q53SF7 | COBL1_HUMAN |                              | 3  | TCCCATCAAAAC   | 0.373 |             |
| - | 4  | 986       | Shift_Del_p.G87fs    | NM_022152    | NP_071435    | Q969X1 | TMBI1_HUMAN |                              | 0  | ACTCTCCAGGC    | 0.582 |             |
| + | 4  | 350       | p.L117fs RQCD1_      | NM_005444    | NP_005435    | Q92600 | RCD1_HUMAN  |                              | 2  | TCCCACTTTTTT   | 0.413 |             |
| - | 16 | 1630      | p.G552fs FARSB_      | NM_005687    | NP_005678    | Q9NSD9 | SYFB_HUMAN  |                              | 1  | ACATATCCCCC    | 0.453 |             |
| + | 20 | 2479      | p.Y783fs PSMD1_      | NM_002807    | NP_002798    | Q99460 | PSMD1_HUMAN |                              | 2  | TGGCTTATACCC   | 0.433 |             |
| + | 26 | 3123      | !_Shift_Del_p.F993   | NM_152879    | NP_690618    | Q16760 | DGKD_HUMAN  |                              | 5  | TAGCTTCGTCTC   | 0.597 |             |
| - | 7  | 745_746   | !0zpi.1_Frame_Shift  | NM_153269    | NP_695001    | Q9NUD7 | CT096_HUMAN | Potential.                   | 0  | GGTCTTCTCAAT   | 0.545 |             |
| + | 7  | 1231      | !mil.2_Frame_Shift   | NM_139321    | NP_647537    | O75882 | ATRN_HUMAN  | ar (Potential). Kelch 1.     | 2  | TGGCTTCCACTA   | 0.373 |             |
| + | 1  | 464_466   | !D3_uc010zrf.1_5'    | NM_014962    | NP_055777    | Q9Y2F9 | BTBD3_HUMAN | Poly-Ser.                    | 3  | AAATACcagcagc  | 0.335 |             |
| + | 1  | 27_29     |                      | NM_080826    | NP_543016    | B1AKI9 | ISM1_HUMAN  |                              | 0  | TGGCCGAgctgctg | 0.517 |             |
| - | 2  | 446_447   | !3CL2L1_uc002ww      | NM_138578    | NP_612815    | Q07817 | B2CL1_HUMAN |                              | 2  | TCACTAAACTGA   | 0.525 |             |
| + | 5  | 708       | p.E65fs TM9SF4_1     | NM_014742    | NP_055557    | Q92544 | TM9S4_HUMAN |                              | 2  | TGAAGGAAAAAG   | 0.557 |             |
| + | 4  | 755_756   |                      | NM_176812    | NP_789782    | Q9H444 | CHM4B_HUMAN |                              | 2  | CCTACCATCAAA   | 0.485 |             |
| + | 8  | 1393      | !02xiy.1_Frame_Shift | NM_020336    | NP_065069    | Q86X10 | RLGPB_HUMAN |                              | 2  | TACCACCCCCC    | 0.448 |             |
| + | 6  | 840_842   | me_Del_p.S121de      | NM_001048225 | NP_001041690 |        |             |                              | 0  | TCTAGGAcctctcc | 0.463 |             |
| + | 7  | 1184      | p.L300fs LSM14B      | NM_144703    | NP_653304    | Q9BX40 | LS14B_HUMAN | FFD box.                     | 0  | TAACTCAAGAC    | 0.547 |             |

|   |    |           |                                                                                                |              |              |        |             |                         |     |                   |       |                   |
|---|----|-----------|------------------------------------------------------------------------------------------------|--------------|--------------|--------|-------------|-------------------------|-----|-------------------|-------|-------------------|
| + | 1  | 216       | 3GR_uc002yxz.2_                                                                                | NM_007341    | NP_031367    | P55822 | SH3BG_HUMAN |                         | 0   | 'GTGTTGGGGGG      | 0.552 |                   |
| + | 38 | 8691_8692 | .NT_uc002zjj.2_Int                                                                             | NM_006031    | NP_006022    | O95613 | PCNT_HUMAN  | Potential.              | 8   | 'TCTGGAGAGAG      | 0.574 |                   |
| - | 10 | 847_849   | y.1_In_Frame_Del                                                                               | NM_005659    | NP_005650    | Q92890 | UFD1_HUMAN  |                         | 0   | 'CCCTTTCTTCT      | 0.512 |                   |
| + | 6  | 612_614   | y15_uc002zsr.2_In                                                                              | NM_001003891 | NP_001003891 | Q96RN5 | MED15_HUMAN | Poly-Gln.               | 1   | 'jggctacagcagc    | 0.148 |                   |
| - | 2  | 658       | ADORA2A_uc010guo.1_5'Flank ADORA2A_uc010gup.2_5'Flank ADORA2A_uc010guq.2_5'Flank ADORA2A_uc003 |              |              |        |             |                         | 0   | 'AGCATCAGGGGA     | 0.602 |                   |
| + | 7  | 3642      | atq.1_Frame_Shift                                                                              | NM_001039141 | NP_001034230 | Q9H2D6 | TARA_HUMAN  |                         | 1   | 'CTCCTCCCCAC      | 0.627 |                   |
| + | 3  | 267       | f32_uc003bca.2_5'                                                                              | NM_001002034 | NP_001002034 | Q6ICB4 | SESQ2_HUMAN | PH.                     | 0   | 'CACCTGGGGGG      | 0.632 |                   |
| + | 2  | 378_380   |                                                                                                | NM_033318    | NP_201575    | Q9H4I9 | CV032_HUMAN | Asp/Glu-rich.           | 1   | 'AGAGGATGATG      | 0.478 | rs141840500       |
| - | 1  | 5454_5456 | .Q1774del TCF20_                                                                               | NM_005650    | NP_005641    | Q9UGU0 | TCF20_HUMAN |                         | 5   | 'CCTTCTGCTGC      | 0.601 |                   |
| + | 17 | 2268      | N4_uc003bpe.2_F                                                                                | NM_175607    | NP_783200    | Q8IWW2 | CNTN4_HUMAN | nectin type-III 1.      | 7   | 'GGATTGGGGAG      | 0.522 |                   |
| - | 6  | 806       | ne_Shift_Del_p.P2                                                                              | NM_022094    | NP_071377    | Q96AQ7 | CIDEC_HUMAN |                         | 1   | 'CCCTTGGGGGG      | 0.607 |                   |
| + | 40 | 4041      | _Splice_Site_p.R1:                                                                             | NM_033084    | NP_149075    | Q9BXW9 | FACD2_HUMAN |                         | 4   | 'CCGGGTAAGAG      | 0.473 |                   |
| - | 1  | 270_272   | 3P5_uc003bzq.1_                                                                                | NM_004844    | NP_004835    | O60239 | 3BP5_HUMAN  | Glu-rich.               | 0   | 'tcccccttctctctc  | 0.522 |                   |
| - | 8  | 1568_1570 | 3cum.2_In_Frame                                                                                | NM_016453    | NP_057537    | Q9NZQ3 | SPN90_HUMAN |                         | 0   | 'CTGTCTGCATG      | 0.606 |                   |
| - | 10 | 1136_1137 |                                                                                                | NM_000884    | NP_000875    | P12268 | IMDH2_HUMAN |                         | 1   | 'CACCTTGACAC      | 0.569 |                   |
| - | 5  | 491       | p.G17fs QARS_uc                                                                                | NM_005051    | NP_005042    | P47897 | SYQ_HUMAN   |                         | 1   | 'ATTTTGCCATCT     | 0.517 |                   |
| + | 14 | 1647      | Jgm.2_Frame_Shift                                                                              | NM_006254    | NP_006245    | Q05655 | KPCD_HUMAN  | rotein kinase.          | 9   | 'TCAACGGGGGG      | 0.602 |                   |
| - | 17 | 3333      | dic.3_Frame_Shift                                                                              | NM_015224    | NP_056039    | Q9UK61 | CC063_HUMAN |                         | 5   | 'ATCACTACACAC     | 0.433 |                   |
| + | 7  | 1003      | 128_uc011bhc.1_I                                                                               | NM_032787    | NP_116176    | Q96K78 | GP128_HUMAN | ellular (Potential).    | 4   | 'TCTTTGGGTAA      | 0.368 |                   |
| - | 23 | 2582      | p.V764fs STAG1_                                                                                | NM_005862    | NP_005853    | Q8WVM7 | STAG1_HUMAN |                         | 2   | 'TCAATACCAACA     | 0.373 |                   |
| - | 1  | 150_152   | 94A_uc003eyh.2_                                                                                | NM_152394    | NP_689607    | Q7L0X2 | F194A_HUMAN | Glu-rich.               | 3   | 'ccaccttctctctctc | 0.232 |                   |
| + | 6  | 1672      | 2_Frame_Shift_De                                                                               | NM_207293    | NP_997176    | Q9NR56 | MBNL1_HUMAN |                         | 1   | 'TACTTCCCCCA      | 0.393 |                   |
| + | 5  | 440_441   | 03fcr.1_Intron QC                                                                              | NM_001042705 | NP_001036170 | Q1A5X6 | IQCJ_HUMAN  |                         | 0   | 'TCTTGGAGGTT      | 0.475 |                   |
| - | 26 | 3135_3137 |                                                                                                | NM_001041    | NP_001032    | P14410 | SUIS_HUMAN  | rase.}Lumenal.          | 14  | 'TTTTTGTGATATT    | 0.369 |                   |
| + | 2  | 210_212   |                                                                                                | NM_001145248 | NP_001138720 | C9JC47 | F157A_HUMAN | Gln-rich.               | 0   | 'GAACTGgcagcagc   | 0.399 |                   |
| + | 1  | 4021_4022 |                                                                                                | NM_175918    | NP_787114    | Q8N1N5 | CRPAK_HUMAN |                         | 0   | 'CCTGCTCACACC     | 0.653 |                   |
| - | 24 | 2669      | cg.1_Frame_Shift                                                                               | NM_181808    | NP_861524    | Q7Z5Q5 | DPOLN_HUMAN |                         | 4   | 'GGGGTGGGGGC      | 0.637 |                   |
| + | 11 | 1685_1686 | ie_Shift_Del_p.V4                                                                              | NM_001119    | NP_001110    | P35611 | ADDA_HUMAN  |                         | 1   | 'AGGTCCAGGAC      | 0.535 |                   |
| + | 8  | 2077      | p.L637fs WFS1_u                                                                                | NM_001145853 | NP_001139325 | O76024 | WFS1_HUMAN  | ical; (Potential).      | 2   | 'ATCCTGGTGTG      | 0.587 | rs145163802       |
| + | 2  | 830       |                                                                                                | NM_001080505 | NP_001073974 | A0PJX4 | SHSA3_HUMAN | lasmic (Potential).     | 2   | 'CACCTGGCTCA      | 0.637 |                   |
| + | 4  | 2960_2961 | p.N871fs REST_u                                                                                | NM_005612    | NP_005603    | Q13127 | REST_HUMAN  |                         | 9   | 'GAAAATTAAGA      | 0.441 |                   |
| + | 4  | 1178      | s MUC7_uc003hjf.:                                                                              | NM_001145006 | NP_001138478 | Q8TAX7 | MUC7_HUMAN  | 6.}Thr-rich.            | 4   | 'GTCTTCCCCAG      | 0.557 |                   |
| + | 1  | 1079      |                                                                                                | NM_020368    | NP_065101    | Q9NQZ2 | SAS10_HUMAN |                         | 0   | 'CACATGGACAT      | 0.428 |                   |
| + | 1  | 555       |                                                                                                | NM_031296    | NP_112586    | Q9H082 | RB33B_HUMAN |                         | 0   | 'GCGCTGGCCGC      | 0.607 | rs149649513       |
| + | 1  | 413_414   |                                                                                                | NM_004575    | NP_004566    | Q12837 | PO4F2_HUMAN |                         | 1   | 'iCtggtggtggcgcg  | 0.386 | 907220;rs72269802 |
| - | 12 | 2150      | ih.1_Frame_Shift                                                                               | NM_033632    | NP_361014    | Q969H0 | FBXW7_HUMAN | p.S668fs*26(1) p.S668   | 308 | 'CCACTCCCCCC      | 0.488 |                   |
| - | 21 | 4315      | l0iuq.1_Frame_Sh                                                                               | NM_030955    | NP_112217    | P58397 | ATS12_HUMAN | SP type-1 6.            | 9   | 'TATCTTGAAGCC     | 0.567 |                   |
| - | 15 | 2417      | 10iuq.1_Frame_St                                                                               | NM_030955    | NP_112217    | P58397 | ATS12_HUMAN | Spacer 1.               | 9   | 'TCAGGTAATATTT    | 0.463 |                   |
| - | 6  | 1177_1194 | AP2A_uc003j pz.2                                                                               | NM_003711    | NP_003702    | O14494 | LPP1_HUMAN  | lasmic (Potential).     | 2   | 'TTTCTTTAAAAG     | 0.381 |                   |
| + | 5  | 747       | p.L145fs SFRS12                                                                                | NM_139168    | NP_631907    | Q8WXA9 | SREK1_HUMAN |                         | 0   | 'AGTTTGGGAGC      | 0.403 |                   |
| + | 7  | 1194      | p.F311fs BDP1_u                                                                                | NM_018429    | NP_060899    | A6H8Y1 | BDP1_HUMAN  | Myb-like.               | 2   | 'GATATGTTTTTTT    | 0.294 |                   |
| + | 2  | 237_240   | p.K19fs AP3S1_L                                                                                | NM_001284    | NP_001275    | Q92572 | AP3S1_HUMAN |                         | 0   | 'ATCTAAGAGAGA     | 0.304 | rs80118146        |
| + | 8  | 2534      | p.C792fs PPARG                                                                                 | NM_133263    | NP_573570    | Q86YN6 | PRGC2_HUMAN |                         | 0   | 'CACTTGCTCTG      | 0.483 |                   |
| + | 4  | 546_547   | c.2_RNA GPX3_u                                                                                 | NM_002084    | NP_002075    | P22352 | GPX3_HUMAN  |                         | 0   | 'ACCAGGAGAGA      | 0.49  |                   |
| + | 1  | 1090_1093 |                                                                                                | NM_000679    | NP_000670    | P35368 | ADA1B_HUMAN | ame=6; (By similarity). | 1   | 'TTGTGCTGGCTA     | 0.485 |                   |
| - | 3  | 384_385   | l_p.S77fs SLU7_u                                                                               | NM_006425    | NP_006416    | O95391 | SLU7_HUMAN  |                         | 1   | 'TTTTTGAAGGAT     | 0.337 |                   |
| - | 2  | 171       | Shift_Del_p.G57fs                                                                              | NM_016391    | NP_057475    | Q9Y3C1 | NOP16_HUMAN |                         | 2   | 'GCCAACCCCAT      | 0.592 |                   |



|   |    |              |                    |              |              |        |             |                               |    |                   |       |             |
|---|----|--------------|--------------------|--------------|--------------|--------|-------------|-------------------------------|----|-------------------|-------|-------------|
| - | 6  | 1314         | _uc003mfd.1_Intrc  | NM_016290    | NP_057374    | Q96RL1 | UIMC1_HUMAN | AIR.                          | 4  | GCAAGCTTTTAAT     | 0.418 |             |
| + | 23 | 6934         | i.K1997fs NSD1_u   | NM_022455    | NP_071900    | Q96L73 | NSD1_HUMAN  | Pro-rich.                     | 3  | CTCTCCAAAAAA      | 0.517 | rs142030334 |
| + | 1  | 1122_1123    |                    | NM_001453    | NP_001444    | Q12948 | FOXC1_HUMAN | Poly-Gly.                     | 1  | gcagctgggcggcggc  | 0.49  | rs71807729  |
| + | 6  | 1502         | ljqy.1_Frame_Shift | NM_006298    | NP_006289    | Q15776 | ZN192_HUMAN | 2H2-type 5.                   | 0  | AGTGTGGGAAA       | 0.498 |             |
| - | 3  | 758          | npn.2_Frame_Shift  | NM_006778    | NP_006769    | Q9UDY6 | TRI10_HUMAN |                               | 0  | AGATCTCCCCAG      | 0.532 |             |
| + | 13 | 1843         | ru.2_Intron DDR1_  | NM_013993    | NP_054699    | Q08345 | DDR1_HUMAN  | Cytoplasmic (Potential).      | 9  | :CCGGGCCCCCC      | 0.682 |             |
| - | 8  | 922_924      | .1_In_Frame_Del_   | NM_006709    | NP_006700    | Q96KQ7 | EHMT2_HUMAN | Poly-Glu.                     | 1  | cctctcttctctctctc | 0.296 |             |
| + | 2  | 246          | oei.2_Frame_Shift  | NM_024165    | NP_077084    | O43189 | PHF1_HUMAN  |                               | 0  | CGCAGCCCCC        | 0.557 |             |
| + | 2  | 479          |                    | NM_152735    | NP_689948    | Q96C00 | ZBTB9_HUMAN | BTB.                          | 0  | 3CCTCTCCTTAC      | 0.557 |             |
| + | 7  | 1266         | _p.P268fs FOXP4_   | NM_001012426 | NP_001012426 | Q8IVH2 | FOXP4_HUMAN |                               | 1  | 3TCTCACCCCCC      | 0.677 |             |
| - | 65 | 11987_11988b | .l3838fs DST_uc    | NM_001144769 | NP_001138241 | Q03001 | DYST_HUMAN  | Spectrin 10.                  | 14 | 3TCATGATTTTAT     | 0.366 |             |
| - | 9  | 2112_2113    | p.K585fs FBXL4_u   | NM_012160    | NP_036292    | Q9UKA2 | FBXL4_HUMAN | LRR 9.                        | 2  | AGATCTTTACAA      | 0.332 |             |
| + | 1  | 939_941      | .G270del ARID1B_   | NM_017519    | NP_059989    | Q8NFD5 | ARI1B_HUMAN | Gly-rich.                     | 2  | ggcagcggaggagga   | 0.158 |             |
| - | 4  | 650          | 3sqc.2_Intron DAG  | NM_139179    | NP_631918    | Q8NCG7 | DGLB_HUMAN  | lasmic (Potential).           | 3  | 3ATTTTCCCCC       | 0.527 |             |
| - | 14 | 3432         |                    | NM_015204    | NP_056019    | Q9UPZ6 | THS7A_HUMAN | l. Extracellular (Potential). | 3  | 3AGCCATTTAGA      | 0.498 |             |
| - | 5  | 773          | kug.2_Frame_Shift  | NM_182762    | NP_877439    | Q6ZN28 | MACC1_HUMAN |                               | 3  | 3TACTCTGATGGC     | 0.423 |             |
| + | 8  | 2001_2002    | Shift_Ins_p.P420fs | NM_015570    | NP_056385    | Q8WXX7 | AUTS2_HUMAN |                               | 3  | 3cgccccacctcacatc | 0.134 |             |
| + | 5  | 1242_1243    | _p.H229fs DTX2_u   | NM_020892    | NP_065943    | Q86UW9 | DTX2_HUMAN  |                               | 2  | CCAGCACCCCC       | 0.649 | rs143934697 |
| - | 2  | 786          | .1_Intron CCDC14   | NM_006682    | NP_006673    | Q14314 | FGL2_HUMAN  | rogen C-terminal.             | 2  | 3AGCCTCCCCC       | 0.483 |             |
| + | 11 | 1177         | _p.l272fs ZNF277_  | NM_021994    | NP_068834    | Q9NRM2 | ZN277_HUMAN |                               | 4  | AATTTTATTCGGA     | 0.358 |             |
| + | 7  | 1118_1119    | vuy.2_Frame_Shift  | NM_016019    | NP_057103    | Q9Y383 | LC7L2_HUMAN | Arg/Ser-rich.                 | 0  | 3GAGAAGAGAGA      | 0.391 |             |
| - | 11 | 2513         | vyy.2_Splice_Site_ | NM_015310    | NP_056125    | Q9NYI0 | PSD3_HUMAN  |                               | 3  | ATACTTACTCTTC     | 0.323 |             |
| + | 5  | 542          | iyd.2_Frame_Shift  | NM_004133    | NP_004124    | Q14541 | HNF4G_HUMAN |                               | 1  | 3AGCACAGAA        | 0.433 |             |
| - | 6  | 468          | yhd.2_Frame_Shift  | NM_057749    | NP_477097    | O96020 | CCNE2_HUMAN |                               | 0  | CTCTCCTTTTTT      | 0.323 |             |
| - | 7  | 1565_1566    | 3yjk.1_Frame_Shift | NM_015435    | NP_056250    | Q9NV58 | RN19A_HUMAN |                               | 4  | ACCTGCTATGGC      | 0.386 |             |
| - | 7  | 1904         | _l_p.W584fs LRP12  | NM_013437    | NP_038465    | Q9Y561 | LRP12_HUMAN | lasmic (Potential).           | 0  | 3CGTTCCAATC       | 0.453 |             |
| + | 8  | 1139         | ae_Shift_Del_p.F1  | NM_012082    | NP_036214    | Q8WW38 | FOG2_HUMAN  | 2H2-type 3.                   | 5  | GGCTTCCAGAC       | 0.502 |             |
| - | 14 | 1846         | _p.P525fs EIF2C2_  | NM_012154    | NP_036286    | Q9UKV8 | AGO2_HUMAN  | Piwi.                         | 0  | 3CGCGGGGGGG       | 0.647 | rs148575703 |
| - | 4  | 773_774      | 3H_uc010mfk.1_5    | NM_198488    | NP_940890    | Q6ZRV2 | FA83H_HUMAN |                               | 3  | CAGTCCACCAGC      | 0.658 |             |
| - | 4  | 737_738      | _uc003zdk.1_3'UT   | NM_001024678 | NP_001019849 | Q50LG9 | LRC24_HUMAN |                               | 0  | GTACCTGTGAGG      | 0.634 |             |
| + | 1  | 568_569      |                    | NM_133497    | NP_598004    | Q8TDN2 | KCNV2_HUMAN | lasmic (Potential).           | 2  | 3GCTTCCCAAC       | 0.658 |             |
| + | 13 | 2023         | nlb.2_Frame_Shift  | NM_003995    | NP_003986    | P20594 | ANPRB_HUMAN | 3. Cytoplasmic (Potential).   | 3  | 3AACCTGATGAC      | 0.537 |             |
| + | 5  | 647          | ddo.2_Frame_Shift  | NM_000950    | NP_000941    | O14668 | TMG1_HUMAN  | ic (Potential). Poly-Pro.     | 2  | CCCCACCCCC        | 0.488 |             |
| - | 1  | 81           | 3OM4_uc004dpd.3    | NM_020717    | NP_065768    | Q9ULL8 | SHRM4_HUMAN | PDZ.                          | 1  | 3GGGTCCCCC        | 0.642 |             |
| - | 7  | 1047_1048    | RMT2B_uc004egt     | NM_024917    | NP_079193    | Q96GJ1 | TRM2_HUMAN  |                               | 1  | GACTTAATTTCT      | 0.426 |             |
| + | 3  | 1556_1558    | Q477del MAMLD1     | NM_005491    | NP_005482    | Q13495 | MAMD1_HUMAN | Poly-Gln.                     | 0  | 3cagcaacagcagca   | 0.433 |             |
| - | 1  | 203          | k PEX14_uc010oe    | NM_004401    | NP_004392    | O00273 | DFFA_HUMAN  | CIDE-N.                       | 0  | GAGGCGGCCAC       | 0.706 |             |
| + | 12 | 2906_2908    | 9vqi.1_In_Frame_   | NM_001083621 | NP_001077090 | Q9NUA8 | ZBT40_HUMAN |                               | 1  | :CCCCAAGAAGA      | 0.517 |             |
| + | 1  | 1263_1265    |                    | NM_004455    | NP_004446    | Q92935 | EXTL1_HUMAN | renal (Potential).            | 1  | 3CCTGCCTCCTC      | 0.606 |             |
| - | 31 | 5335         | 3E4DIP_uc001elm    | NM_014644    | NP_055459    | Q5VU43 | MYOME_HUMAN |                               | 5  | 3ATTCTGGGGAG      | 0.517 |             |
| + | 6  | 700          | hft_Del_p.F167fs   | NM_004425    | NP_004416    | Q16610 | ECM1_HUMAN  | roximate repeats. 1.          | 3  | GGCTTCCCCC        | 0.602 |             |
| - | 18 | 1926         | ib.1_Frame_Shift_  | NM_001668    | NP_001659    | P27540 | ARNT_HUMAN  |                               | 9  | CGGCGGGGGG        | 0.527 |             |
| - | 11 | 1604         | 3mr.1_Frame_Shift  | NM_001025603 | NP_001020774 | P48382 | RFX5_HUMAN  |                               | 1  | 3TTTCTTTTGG       | 0.537 |             |
| - | 4  | 261_262      | 01fpl.2_Frame_Sh   | NM_015590    | NP_056405    | Q5T310 | GPTC4_HUMAN |                               | 1  | 3TTGTTGAAGAC      | 0.545 |             |
| - | 6  | 1404_1406    | 3.V48del PVRL4_u   | NM_030916    | NP_112178    | Q96NY8 | PVRL4_HUMAN | ical; (Potential).            | 2  | 3TGAGCACCACC      | 0.571 |             |
| + | 20 | 6213         | 3A2_uc009www.2_    | NM_020318    | NP_064714    | Q9BXP8 | PAPP2_HUMAN | Sushi 5.                      | 16 | 3GTAATCCCCC       | 0.468 |             |
| + | 20 | 2516         | 3R_uc010pax.1_Inl  | NM_000254    | NP_000245    | Q99707 | METH_HUMAN  | inding N-terminal.            | 3  | TAAACCAAAAAA      | 0.279 |             |

|   |    |           |                              |              |              |        |             |                                                                  |    |                 |       |             |
|---|----|-----------|------------------------------|--------------|--------------|--------|-------------|------------------------------------------------------------------|----|-----------------|-------|-------------|
| - | 11 | 1419_1421 | .P386del ABI1_uc             | NM_005470    | NP_005461    | Q8IZP0 | ABI1_HUMAN  | Pro-rich.                                                        | 1  | CCACTGGTGGTC    | 0.478 |             |
| - | 9  | 1366      | Del_p.I412fs PARI            | NM_019619    | NP_062565    | Q8TEW0 | PAR3_HUMAN  |                                                                  | 1  | TGCCTATTTTTTT   | 0.433 |             |
| - | 8  | 1142_1144 | 250TT>T PCDH15               | NM_033056    | NP_149045    | Q96QU1 | PCD15_HUMAN | r (Potential).                                                   | 13 | GAGAGTGGTGG     | 0.438 | p.T250N(1)  |
| + | 10 | 1630      | STAMBPL1_uc001               | NM_020799    | NP_065850    | Q96FJ0 | STALP_HUMAN |                                                                  | 1  | CTTGTAACAAAA    | 0.423 |             |
| - | 13 | 1003      |                              | NM_024541    | NP_078817    | Q5T2E6 | CJ076_HUMAN |                                                                  | 0  | AAGTGCCAGAA     | 0.348 |             |
| - | 12 | 2578_2579 | rrf118_uc001lbc.1            | NM_018017    | NP_060487    | Q7Z3E2 | CJ118_HUMAN | Potential.                                                       | 2  | CTCTTTCAACAA    | 0.356 |             |
| - | 25 | 3386_3388 | Frame_Del_p.D83              | NM_030962    | NP_112224    | Q86WG5 | MTMRD_HUMAN |                                                                  | 3  | AGATACATCATC    | 0.355 |             |
| - | 5  | 7272      | IAK_uc001ntk.1_lr            | NM_001620    | NP_001611    | Q09666 | AHNK_HUMAN  |                                                                  | 19 | ATTTTTGGGTCC    | 0.458 |             |
| + | 4  | 523_524   | Shift_Del_p.P124fs           | NM_006388    | NP_006379    | Q92993 | KAT5_HUMAN  |                                                                  | 0  | TCTCCAGAGAGA    | 0.564 |             |
| + | 9  | 1355      | .R394fs NDUVF1               | NM_007103    | NP_009034    | P49821 | NDUV1_HUMAN |                                                                  | 1  | CGTGAGGGGGGG    | 0.632 |             |
| - | 6  | 1503_1505 | L1_uc001pwu.1_li             | NM_002855    | NP_002846    | Q15223 | PVRL1_HUMAN | Cytoplasmic (Potential).                                         | 0  | CCACCGCctcctct  | 0.576 |             |
| - | 4  | 605       | ON_uc001qdd.3_F              | NM_016952    | NP_058648    | Q4KMG0 | CDON_HUMAN  | Potential). Ig-like C2-type 2.                                   | 6  | AGCCATTTTCCC    | 0.458 |             |
| - | 3  | 440_442   |                              | NM_006248    | NP_006239    |        |             |                                                                  | 0  | TCCTGGAGGAG     | 0.601 |             |
| + | 4  | 1243_1245 |                              | NM_018169    | NP_060639    | Q9HCM1 | CL035_HUMAN |                                                                  | 2  | AAGACCTCCTC     | 0.414 | rs79406084  |
| + | 18 | 1613      | fs TENC1_uc001sl             | NM_170754    | NP_736610    | Q63HR2 | TENC1_HUMAN | Pro-rich.                                                        | 2  | GCAGACCCCCC     | 0.677 | rs142183380 |
| + | 23 | 5212_5213 | ccj.2_Frame_Shift            | NM_012291    | NP_036423    | Q14674 | ESPL1_HUMAN |                                                                  | 3  | GTGACTGTGTG     | 0.436 |             |
| + | 1  | 592       |                              | NM_001005497 | NP_001005497 | A6NL08 | O6C75_HUMAN | Name=5; (Potential).                                             | 3  | ATGGCATTTTTT    | 0.393 |             |
| - | 27 | 3380_3382 | i.2_Intron SMARC             | NM_003075    | NP_003066    | Q8TAQ2 | SMRC2_HUMAN | Pro-rich.                                                        | 6  | GAGCAGGAGGA     | 0.591 |             |
| - | 7  | 992       | .p.E243fs TMEM1              | NM_001130963 | NP_001124435 | O14524 | T194A_HUMAN |                                                                  | 0  | GTGTTCCAGGT     | 0.453 |             |
| + | 2  | 348       | sjAPEX1_uc001vx              | NM_001641    | NP_001632    | P27695 | APEX1_HUMAN | Association with rRNA, endoribonuclease                          | 4  | GTGGGAAAAAG     | 0.557 |             |
| + | 5  | 648       | me_Shift_Del_p.E             | NM_002791    | NP_002782    | P60900 | PSA6_HUMAN  |                                                                  | 0  | TCCTTAAAAAA     | 0.403 |             |
| - | 2  | 873_874   | 1xki.1_Frame_Shift           | NM_004926    | NP_004917    | Q07352 | TISB_HUMAN  |                                                                  | 1  | GGGTTATTGGTG    | 0.624 |             |
| + | 8  | 1064_1066 | AK_uc001ygg.3_In             | NM_001099402 | NP_001092872 | O75909 | CCNK_HUMAN  | Poly-Gln.                                                        | 0  | AGCCCAGCAGC     | 0.621 |             |
| + | 11 | 1696_1698 | 1znc.2_In_Frame_Shift        | NM_181642    | NP_857593    | O43278 | SPIT1_HUMAN |                                                                  | 1  | CGGACACCACC     | 0.586 |             |
| + | 4  | 271       |                              | NM_001013657 | NP_001013679 | Q6ZNW5 | VTC2_HUMAN  |                                                                  | 0  | TTGTTTATGGGC    | 0.507 |             |
| + | 15 | 1993_1995 | .S436del SLC5A1              | NM_052944    | NP_443176    | Q8WWX8 | SC5AB_HUMAN | Cytoplasmic (Potential).                                         | 2  | AGGCCAGCAGC     | 0.542 |             |
| + | 8  | 892       | 2dox.1_Frame_Shift           | NM_015202    | NP_056017    | O60303 | K0556_HUMAN |                                                                  | 8  | TCGTTCCCACC     | 0.512 |             |
| + | 25 | 5954      | Shift_Del_p.P16              | NM_006662    | NP_006653    | Q6ZRS2 | SRCAP_HUMAN | Pro-rich.                                                        | 4  | CTGGTCCCCCC     | 0.612 |             |
| + | 8  | 912_914   | .L222del CHNRB1              | NM_000747    | NP_000738    | P11230 | ACHB_HUMAN  | Pro-rich; (Potential).                                           | 2  | GTTCTGTGTGT     | 0.498 |             |
| + | 1  | 90_92     |                              | NM_001005271 | NP_001005271 | Q12873 | CHD3_HUMAN  |                                                                  | 1  | ggcgacgaggaggag | 0.305 |             |
| + | 10 | 2188_2189 | 2gjr.2_Frame_Shift           | NM_053051    | NP_444279    | Q8N137 | CNTRB_HUMAN | Pro-rich; (Potential). Associated for centrosome localization    | 2  | CTCGGAGAGAG     | 0.579 |             |
| + | 15 | 2070      | l_5'Flank TRAF4              | NM_178170    | NP_835464    | Q86SG6 | NEK8_HUMAN  | Pro-rich; (Potential). p.P703fs*10(1)                            | 6  | CCGGTCCCCCC     | 0.582 |             |
| + | 11 | 2096      | hue.2_Frame_Shift            | NM_007359    | NP_031385    | O15234 | CASC3_HUMAN | Pro-rich; (Potential). Associated in cytoplasmic stress granules | 1  | CTCTATCCCCCA    | 0.483 |             |
| - | 9  | 1271      | hzi.3_Frame_Shift            | NM_012448    | NP_036580    | P51692 | STA5B_HUMAN |                                                                  | 6  | CACCTGGGGGG     | 0.577 | rs144993426 |
| - | 6  | 674       | gd.2_Frame_Shift             | NM_014233    | NP_055048    | P17480 | UBF1_HUMAN  | HMG box 2.                                                       | 0  | CTGCTGGGGGG     | 0.597 |             |
| - | 2  | 169       | igd.2_Frame_Shift            | NM_014233    | NP_055048    | P17480 | UBF1_HUMAN  |                                                                  | 0  | GTTCTTCATGCA    | 0.468 |             |
| - | 9  | 1623_1625 |                              | NM_133373    | NP_588614    | Q8N3E9 | PLCD3_HUMAN |                                                                  | 3  | cctgcatcctcctct | 0.527 |             |
| + | 10 | 2507      | .R787fs CTDP1                | NM_004715    | NP_004706    | Q9Y5B0 | CTDP1_HUMAN |                                                                  | 0  | CGCCGGGGGGC     | 0.672 |             |
| + | 3  | 452       | Frame_Shift_Del_p            | NM_030924    | NP_112186    | Q5FVE4 | ACBG2_HUMAN |                                                                  | 1  | AATGGCAAAAA     | 0.413 |             |
| - | 1  | 625_627   | ixz.1_5'Flank LGI4           | NM_139284    | NP_644813    | Q8N135 | LGI4_HUMAN  |                                                                  | 1  | CAGCCAGCAGC     | 0.695 |             |
| + | 28 | 3926      | iu.2_Frame_Shift             | NM_000540    | NP_000531    | P21817 | RYR1_HUMAN  | Pro-rich; (Potential). 6 X approximate repeats.                  | 12 | ACACGCCCCCC     | 0.667 |             |
| + | 4  | 387_389   | 2qfw.2_In_Frame_Del_p.Q85del |              |              | Q96PV6 | LENG8_HUMAN | Poly-Gln.                                                        | 2  | CTTTGCAGCAG     | 0.532 |             |
| - | 2  | 511       | Shift_Del_p.R40fs            | NM_014795    | NP_055610    | O60315 | ZEB2_HUMAN  |                                                                  | 9  | GCACGGGGGGC     | 0.602 |             |
| - | 16 | 1860_1861 | 2uuu.1_Intron ANK            | NM_153697    | NP_710181    | Q8N8A2 | ANR44_HUMAN |                                                                  | 5  | GGTATGTGTGT     | 0.342 |             |
| + | 9  | 1518      | 20A1_uc002uzy.3              | NM_177538    | NP_803882    | Q6UW02 | CP20A_HUMAN |                                                                  | 0  | AAGTTCAAAAA     | 0.348 |             |
| + | 3  | 680       | LA4_uc010fty.1_In            | NM_005214    | NP_005205    | P16410 | CTLA4_HUMAN | Pro-rich; (Potential).                                           | 0  | GGGTTGTTTTT     | 0.478 |             |
| - | 17 | 2374_2376 | .Q659del TNS1                | NM_022648    | NP_072174    | Q9HBL0 | TENS1_HUMAN | Gln-rich.                                                        | 4  | GGCGAGgtgtgtg   | 0.562 |             |

|   |    |             |                    |              |              |        |              |                            |      |                   |       |             |
|---|----|-------------|--------------------|--------------|--------------|--------|--------------|----------------------------|------|-------------------|-------|-------------|
| + | 11 | 1399_1400   | zmp.1_Frame_Shi    | NM_001017915 | NP_001017915 | Q92835 | SHIP1_HUMAN  |                            | 2    | GTAACGCCCCCC      | 0.535 |             |
| - | 3  | 556         | _p.K61fs DSN1_uc   | NM_001145316 | NP_001138788 | Q9H410 | DSN1_HUMAN   |                            | 2    | CCCCCTTTTTTA      | 0.463 |             |
| - | 4  | 583         | AA7_uc002yby.1_f   | NM_002792    | NP_002783    | O14818 | PSA7_HUMAN   |                            | 0    | ACCTTCCAGGC       | 0.572 |             |
| - | 3  | 1084_1085   | p.G104fs TCFL5_u   | NM_006602    | NP_006593    | Q9UL49 | TCFL5_HUMAN  |                            | 1    | TACCTCCCACTT      | 0.46  |             |
| - | 15 | 1862_1864   |                    | NM_014227    | NP_055042    | Q9NY91 | SC5A4_HUMAN  | lasmic (Potential).        | 0    | AGGCTTCCTCT       | 0.502 |             |
| + | 2  | 378_380     |                    | NM_033318    | NP_201575    | Q9H4I9 | CV032_HUMAN  | Asp/Glu-rich.              | 1    | AGAGGATGATG       | 0.478 | rs141840500 |
| - | 7  | 811         | 03bfw.1_Frame_S    | NM_001009880 | NP_001009880 | Q6ICG6 | K0930_HUMAN  |                            | 0    | GCCCTGGGGGC       | 0.632 |             |
| - | 20 | 3224        | 3brg.1_Frame_Shi   | NM_014850    | NP_055665    | O43295 | SRGP2_HUMAN  |                            | 9    | CATCACCCCCC       | 0.557 |             |
| + | 2  | 195_197     | 4L2_uc003dbh.2_u   | NM_015106    | NP_055921    | Q9Y4B4 | ARIP4_HUMAN  |                            | 3    | gcggaagaggaggag   | 0.429 |             |
| + | 14 | 1647        | lgm.2_Frame_Shil   | NM_006254    | NP_006245    | Q05655 | KPCD_HUMAN   | rotein kinase.             | 9    | TCAACGGGGGG       | 0.602 |             |
| - | 3  | 2530        | Intron ABCA11P_u   | NM_133474    | NP_597731    | D9N162 | D9N162_HUMAN |                            | 1    | ACATTTGTAAAG      | 0.408 |             |
| + | 1  | 4021_4022   |                    | NM_175918    | NP_787114    | Q8N1N5 | CRPAK_HUMAN  |                            | 0    | CCTGCTCACACC      | 0.653 |             |
| + | 1  | 363_364     | NUDT9_uc010ikl.2   | NM_024047    | NP_076952    | Q9BW91 | NUDT9_HUMAN  |                            | 0    | CGGTGTCTCTCT      | 0.649 | rs151296797 |
| + | 22 | 2502        | 18_splice KIAA092  | NM_015196    | NP_056011    | A2VDJ0 | T131L_HUMAN  |                            | 2    | ATTGTGTAAGCAT     | 0.383 |             |
| - | 7  | 1606_1608   | lirc.1_In_Frame_u  | NM_020870    | NP_065921    | Q7Z6J0 | SH3R1_HUMAN  | Poly-Ala.                  | 3    | ATTCCAGCAGC       | 0.601 |             |
| - | 6  | 1177_1194   | AP2A_uc003j pz.2   | NM_003711    | NP_003702    | O14494 | LPP1_HUMAN   | lasmic (Potential).        | 2    | TTTCTTTAAAAAG     | 0.381 |             |
| + | 5  | 424         | JPH_uc010ixc.2_lr  | NM_022909    | NP_075060    | Q9H3R5 | CENPH_HUMAN  | Potential.                 | 1    | CACTTAAAAAA       | 0.323 |             |
| - | 3  | 491_492     | lcvb.1_Frame_Shi   | NM_031438    | NP_113626    | Q9BQG2 | NUD12_HUMAN  |                            | 0    | ATTATTTCTCTTT     | 0.386 | rs7734923   |
| + | 16 | 2438_2439   | C_uc003kpy.3_Frc   | NM_001127511 | NP_001120983 | P25054 | APC_HUMAN    | u-rich. ARM p.?(1)         | 2515 | TGGAATCTCTCA      | 0.381 |             |
| + | 2  | 237_240     | _p.K19fs AP3S1_L   | NM_001284    | NP_001275    | Q92572 | AP3S1_HUMAN  |                            | 0    | ATCTAAGAGAGA      | 0.304 | rs80118146  |
| - | 2  | 322_323     | :wp.1_Frame_Shifl  | NM_000943    | NP_000934    | P45877 | PPIC_HUMAN   | e cyclophilin-type.        | 1    | TTGCTAGAGCAA      | 0.361 | rs150587688 |
| + | 4  | 653         | F7_uc003kyx.2_5'l  | NM_003202    | NP_003193    | P36402 | TCF7_HUMAN   |                            | 0    | ATCAGCCCCC        | 0.572 |             |
| - | 22 | 12451       | FAT2_uc003lud.3_u  | NM_001447    | NP_001438    | Q9NYQ8 | FAT2_HUMAN   | lasmic (Potential).        | 6    | AGTCTGGGGGC       | 0.562 |             |
| - | 1  | 189_191     | lwl.2_In_Frame_D   | NM_032782    | NP_116171    | Q8TDQ0 | HAVR2_HUMAN  |                            | 0    | TAGTAGCAGCAC      | 0.291 |             |
| - | 6  | 1314        | _uc003mfd.1_Intrc  | NM_016290    | NP_057374    | Q96RL1 | UIMC1_HUMAN  | AIR.                       | 4    | CAAGCTTTTAAT      | 0.418 |             |
| + | 1  | 109_110     |                    | NM_016167    | NP_057251    | Q9UMY1 | NOL7_HUMAN   |                            | 0    | GCCTCGGAGG        | 0.728 |             |
| + | 15 | 3067_3069   | .H937del SYNGAF    | NM_006772    | NP_006763    | Q96PV0 | SYGP1_HUMAN  |                            | 4    | CTCcatcaccaccac   | 0.547 |             |
| - | 4  | 624         |                    | NM_001085480 | NP_001078949 | Q5T6X4 | F162B_HUMAN  |                            | 0    | GCTTTAGCCTGT      | 0.418 |             |
| + | 1  | 939_941     | .G270del ARID1B_   | NM_017519    | NP_059989    | Q8NFD5 | ARI1B_HUMAN  | Gly-rich.                  | 2    | ggcagcggaggagga   | 0.158 |             |
| + | 7  | 1285_1286   | .P401fs EIF3B_uc   | NM_003751    | NP_003742    | P55884 | EIF3B_HUMAN  | ieraction with EIF3E. WD 2 | 0    | TGACCCTCAGGC      | 0.51  |             |
| - | 4  | 864_866     |                    | NM_001002926 | NP_001002926 | Q3B726 | RPA43_HUMAN  | Lys-rich.                  | 1    | GCTTTTTCTCTT      | 0.433 |             |
| + | 1  | 403_405     | uc003tbl.3_5'Flank | NM_002047    | NP_002038    | P41250 | SYG_HUMAN    |                            | 1    | CGCTCTGCTGC       | 0.749 |             |
| - | 1  | 280         | thr.2_Frame_Shift  | NM_002192    | NP_002183    | P08476 | INHBA_HUMAN  |                            | 6    | TATAATCCAGCA      | 0.577 |             |
| + | 52 | 8006_8007   | .L2581fs TRRAP_u   | NM_003496    | NP_003487    | Q9Y4A5 | TRRAP_HUMAN  |                            | 37   | TTTCTGGACACT      | 0.495 |             |
| + | 2  | 178         | >8orf44_uc003xwq   | NM_019607    | NP_062553    | Q96CB5 | CH044_HUMAN  |                            | 0    | TATCTCAACCAGC     | 0.403 |             |
| - | 13 | 1698        | D2_uc003yqi.3_Rl   | NM_014109    | NP_054828    | Q6PL18 | ATAD2_HUMAN  |                            | 2    | TCGTCAAAAAA       | 0.413 |             |
| - | 6  | 1030        | ime_Shift_Del_p.K  | NM_004323    | NP_004314    | Q99933 | BAG1_HUMAN   | with PPP1R15A. BAG.        | 1    | TGAACCTTTTTT      | 0.358 |             |
| - | 4  | 454_455     | ar.1_5'UTR CIZ1_u  | NM_001131016 | NP_001124488 | Q9ULV3 | CIZ1_HUMAN   |                            | 4    | aaactggtccagctctt | 0     |             |
| + | 5  | 647         | ddo.2_Frame_Shif   | NM_000950    | NP_000941    | O14668 | TMG1_HUMAN   | ic (Potential). Poly-Pro.  | 2    | CCCCACCCCC        | 0.488 |             |
| - | 14 | 2238        | _Shift_Del_p.G663  | NM_031206    | NP_112483    | Q9Y4W2 | LAS1L_HUMAN  |                            | 4    | AGCTGCCCTGT       | 0.512 |             |
| - | 2  | 574_575     | .P_uc004esg.2_5'F  | NM_024528    | NP_078804    | Q8N5F7 | NKAP_HUMAN   |                            | 2    | CCAATTCTCTCT      | 0.317 |             |
| - | 7  | 811_812     | 1_Intron MST1P9_   | NR_002729    |              |        |              |                            | 0    | GTACGCCGCGC       | 0.649 |             |
| - | 3  | 1621_1622   | :CBL2_uc001dmr.2   | NM_001162536 | NP_001156008 | Q96E39 | RBMXL_HUMAN  | Ser-rich.                  | 0    | TAAGATGGCGGG      | 0.475 |             |
| - | 3  | 1756_1759   |                    | NM_001122965 | NP_001116437 | Q6XPR3 | RPTN_HUMAN   | Gln-rich.                  | 0    | GCCTTGCTGTCT      | 0.485 |             |
| + | 2  | 137_139     |                    | NM_000427    | NP_000418    | P23490 | LORI_HUMAN   |                            | 0    | gcggcggcagcggcg   | 0.207 | rs6661601   |
| - | 37 | 12084_12088 | K3_uc010qih.1_In   | NM_020987    | NP_066267    | Q12955 | ANK3_HUMAN   | Thr-rich.                  | 19   | ggtggcagtggtggtg  | 0.32  |             |
| - | 9  | 1499_1501   | XM2_uc001lhj.2_F   | NM_198148    | NP_937791    | Q8N436 | CPXM2_HUMAN  | Poly-Leu.                  | 2    | GCACCAGCAGC       | 0.626 |             |

|   |    |           |                                                                      |              |              |        |             |                            |    |     |                  |       |                     |
|---|----|-----------|----------------------------------------------------------------------|--------------|--------------|--------|-------------|----------------------------|----|-----|------------------|-------|---------------------|
| - | 10 | 1133_1134 | qfh.2_Frame_Shift                                                    | NM_001143835 | NP_001137307 | Q6P4R8 | NFRKB_HUMAN | Lys-rich.                  | NA | 3   | :TTAACCTTTTTT    | 0.441 |                     |
| + | 1  | 998       |                                                                      | NM_030979    | NP_112241    | Q9H361 | PABP3_HUMAN | RRM 4.                     | NA | 4   | :GGAAAGCGTTT     | 0.408 |                     |
| + | 7  | 4096_4098 |                                                                      | NM_015042    | NP_055857    | O15014 | ZN609_HUMAN | Poly-His.                  | NA | 3   | :CACACACCACC     | 0.576 |                     |
| + | 11 | 2629_2631 | l2gix.2_In_Frame_                                                    | NM_001080424 | NP_001073893 | O15054 | KDM6B_HUMAN | Pro-rich. Thr-ri           | NA | 2   | CGCCGTaccacc     | 0.369 |                     |
| + | 1  | 111_113   |                                                                      | NM_021175    | NP_066998    | P81172 | HEPC_HUMAN  |                            | NA | 1   | :CCTGCTCCTCC     | 0.64  |                     |
| + | 11 | 1043_1044 | V1C2_uc002rat.2_                                                     | NM_001039362 | NP_001034451 | Q8NEY4 | VATC2_HUMAN |                            | NA | 1   | :CGACAGAGAG      | 0.604 |                     |
| + | 3  | 173_174   | ij.1_RNA FRG1B_uc010gdr.1_RNA FRG1B_uc010ztk.1_5'UTR                 |              |              |        |             |                            | NA | 0   | TAGGGGAAAATG     | 0.322 |                     |
| + | 6  | 711_713   | l15_uc002zsr.2_In                                                    | NM_001003891 | NP_001003891 | Q96RN5 | MED15_HUMAN | Poly-Gln.                  | NA | 1   | :cagctccagcagcag | 0.187 |                     |
| - | 3  | 428_430   | _19DD>DJTFIP11_                                                      | NM_012143    | NP_036275    | Q9UBB9 | TFP11_HUMAN | Poly-Asp.                  | NA | 0   | GCTCGTCATCAT     | 0.532 | rs145794160         |
| + | 7  | 1453      | p.F219fs EDEM1_                                                      | NM_014674    | NP_055489    | Q92611 | EDEM1_HUMAN | lenal (Poten               | NA | 3   | :AGGCCTTTTTCC    | 0.463 |                     |
| + | 16 | 1633_1634 | el_p.R448fs FIP1L                                                    | NM_030917    | NP_112179    | Q6UN15 | FIP1_HUMAN  | ction with C               | NA | 2   | :CACCAGAGAGA     | 0.292 |                     |
| + | 1  | 514_515   |                                                                      | NM_015278    | NP_056093    | O94885 | SASH1_HUMAN | Pro-rich.                  | NA | 1   | cggagcctgagcccge | 0.381 |                     |
| - | 11 | 1327      | lxzp.2_Frame_Shif                                                    | NM_014393    | NP_055208    | Q9NUL3 | STAU2_HUMAN | DRBM 4.                    | NA | 0   | :CAGCATTTTTTT    | 0.328 |                     |
| - | 14 | 2236      | l3_Shift_Del_p.N28                                                   | NM_007126    | NP_009057    | P55072 | TERA_HUMAN  |                            | NA | 1   | AACACATTTTTTI    | 0.512 |                     |
| - | 18 | 2564_2566 | lsw.2_In_Frame_C                                                     | NM_015107    | NP_055922    | Q9UPP1 | PHF8_HUMAN  |                            | NA | 3   | :CGTTCTCCTCC     | 0.591 |                     |
| - | 1  | 1805_1806 |                                                                      | NM_003604    | NP_003595    | O14654 | IRS4_HUMAN  |                            | NA | 10  | CCTTTGCCCCCC     | 0.545 |                     |
| - | 3  | 274_276   | lfen.2_Intron CD9E                                                   | NM_031462    | NP_113650    | Q8TCZ2 | C99L2_HUMAN | ar (Potential              | NA | 3   | GGTTGTGGTGGT     | 0.552 |                     |
| + | 16 | 4351_4353 | v.1_In_Frame_Del                                                     | NM_006015    | NP_006006    | O14497 | ARI1A_HUMAN | Gln-rich. 334_R1335ins     | NA | 142 | :CCCCCgcagcagc   | 0.512 |                     |
| - | 9  | 1499_1501 | XM2_uc001lhj.2_F                                                     | NM_198148    | NP_937791    | Q8N436 | CPXM2_HUMAN | Poly-Leu.                  | NA | 2   | GCACCAGCAGC.     | 0.626 |                     |
| + | 1  | 55_56     |                                                                      | NM_021046    | NP_066384    | O75690 | KRA58_HUMAN |                            | NA | 0   | TCTGGAGGCTGT     | 0.649 | rs379698;rs72145325 |
| + | 1  | 998       |                                                                      | NM_030979    | NP_112241    | Q9H361 | PABP3_HUMAN | RRM 4.                     | NA | 4   | :GGAAAGCGTTT     | 0.408 |                     |
| + | 2  | 2046_2048 | l.L591del SLC24A                                                     | NM_004727    | NP_004718    | O60721 | NCKX1_HUMAN | ical; (Potential).         | NA | 0   | :GAGCCTGCTGC     | 0.547 |                     |
| + | 25 | 6010_6011 | l3_Shift_Ins_p.Q16                                                   | NM_006662    | NP_006653    | Q6ZRS2 | SRCAP_HUMAN | Pro-rich.                  | NA | 4   | :CGCAGCCCCCC     | 0.569 |                     |
| - | 15 | 2000_2002 | l15_uc002ghy.1_5'                                                    | NM_004860    | NP_004851    | P51116 | FXR2_HUMAN  | Poly-Arg.                  | NA | 0   | GTTACGGCGGC      | 0.547 |                     |
| + | 16 | 1978_1979 | S_uc010cnw.1_Fr                                                      | NM_012393    | NP_036525    | O15067 | PUR4_HUMAN  |                            | NA | 5   | :TGGCCAGGGGC     | 0.604 |                     |
| + | 1  | 111_113   |                                                                      | NM_021175    | NP_066998    | P81172 | HEPC_HUMAN  |                            | NA | 1   | :CCTGCTCCTCC     | 0.64  |                     |
| + | 9  | 1040      | _Shift_Del_p.P156l                                                   | NM_014516    | NP_055331    | O75175 | CNOT3_HUMAN |                            | NA | 3   | :TCCCCTCCAG      | 0.632 | rs36665             |
| + | 11 | 1043_1044 | V1C2_uc002rat.2_                                                     | NM_001039362 | NP_001034451 | Q8NEY4 | VATC2_HUMAN |                            | NA | 1   | :CGACAGAGAG      | 0.604 |                     |
| + | 3  | 171       | llice_Site FRG1B_uc010gdr.1_Splice_Site FRG1B_uc010ztk.1_Splice_Site |              |              |        |             |                            | NA | 0   | :ACTTAGGGGAA     | 0.318 | rs78710112          |
| + | 3  | 173_174   | ij.1_RNA FRG1B_uc010gdr.1_RNA FRG1B_uc010ztk.1_5'UTR                 |              |              |        |             |                            | NA | 0   | TAGGGGAAAATG     | 0.322 |                     |
| + | 42 | 6369_6371 | bnz.1_In_Frame_I                                                     | NM_053002    | NP_443728    | Q86YW9 | MD12L_HUMAN | Gln-rich.                  | NA | 7   | :GACCCAGCAGC     | 0.527 |                     |
| + | 1  | 4123_4124 |                                                                      | NM_175918    | NP_787114    | Q8N1N5 | CRPAK_HUMAN | raction with PAK1.         | NA | 0   | ACACACGTGCC      | 0.624 |                     |
| + | 16 | 1633_1634 | el_p.R448fs FIP1L                                                    | NM_030917    | NP_112179    | Q6UN15 | FIP1_HUMAN  | ction with CPSF1 and CST   | NA | 2   | :CACCAGAGAGA     | 0.292 |                     |
| + | 17 | 2312_2314 | uc003kgi.3_Intron                                                    | NM_003248    | NP_003239    | P35443 | TSP4_HUMAN  | rSP type-3 7.              | NA | 0   | GAGTGTGATGAT     | 0.562 |                     |
| + | 1  | 1731_1743 | uc003lin.2_5'Flank                                                   | NM_018937    | NP_061760    | Q9Y5E6 | PCDB3_HUMAN | r (Potential). Cadherin 6. | NA | 2   | CGGGCGGCTGA      | 0.709 |                     |
| - | 1  | 210_212   |                                                                      | NM_024807    | NP_079083    | Q5T2D2 | TRML2_HUMAN |                            | NA | 2   | GCCACAGCAGC.     | 0.631 |                     |
| - | 18 | 2564_2566 | lsw.2_In_Frame_C                                                     | NM_015107    | NP_055922    | Q9UPP1 | PHF8_HUMAN  |                            | NA | 3   | :CGTTCTCCTCC     | 0.591 |                     |
| + | 3  | 432_433   | lHACTR4_uc001b                                                       | NM_001048183 | NP_001041648 | Q8IZ21 | PHAR4_HUMAN |                            | NA | 0   | TGGAGGAAAAA      | 0.391 |                     |
| - | 5  | 924_925   | lIQ3_uc001dfz.3_f                                                    | NM_001105659 | NP_001099129 | A6PVS8 | LRIQ3_HUMAN |                            | NA | 2   | :CTGCTGTTTTTT    | 0.327 |                     |
| + | 10 | 2124      | ova.1_Frame_Shif                                                     | NM_001144937 | NP_001138409 | Q5VTL7 | FNDC7_HUMAN | onnectin type-III 8.       | NA | 2   | :GTCCAAAAAA      | 0.363 |                     |
| - | 1  | 643_645   | lE61del MCL1_uc                                                      | NM_021960    | NP_068779    | Q07820 | MCL1_HUMAN  | PEST-like.                 | NA | 0   | :CTCGTCCTCCT     | 0.635 |                     |
| - | 2  | 431       | lOqot.1_Frame_Shi                                                    | NM_020123    | NP_064508    | Q9HD45 | TM9S3_HUMAN |                            | NA | 0   | TGATACTTTTTTT    | 0.363 |                     |
| - | 15 | 2895_2897 | l229PP>P FNBP4_                                                      | NM_015308    | NP_056123    | Q8N3X1 | FNBP4_HUMAN | Pro-rich.                  | NA | 1   | gggtgtgaggaggag  | 0.32  |                     |
| - | 2  | 60        | lnton CASP5_uc0                                                      | NM_004347    | NP_004338    | P51878 | CASP5_HUMAN |                            | NA | 3   | TACGCCTTTTTTT    | 0.388 |                     |
| - | 9  | 1226      | lDX6_uc001puc.2                                                      | NM_004397    | NP_004388    | P26196 | DDX6_HUMAN  |                            | NA | 1   | :ATTCTGGGGGG     | 0.426 |                     |
| - | 3  | 314_315   |                                                                      | NM_006248    | NP_006239    |        |             |                            | NA | 0   | :GGAGGTGGGGC     | 0.614 |                     |
| + | 1  | 199_201   | lC13_uc010sop.1_                                                     | NM_017410    | NP_059106    | P31276 | HXC13_HUMAN | Gly-rich.                  | NA | 1   | :cggcatcggcggcg  | 0.498 |                     |

|   |    |           |                    |                                 |              |        |              |                                |      |                  |       |                         |
|---|----|-----------|--------------------|---------------------------------|--------------|--------|--------------|--------------------------------|------|------------------|-------|-------------------------|
| + | 1  | 592       |                    | NM_001005497                    | NP_001005497 | A6NL08 | O6C75_HUMAN  | Name=5; (Potential).           | 3    | ATGGCATTTTTTT    | 0.393 |                         |
| + | 4  | 646_648   | p.L194del TPCN1_   | NM_017901                       | NP_060371    | Q9ULQ1 | TPC1_HUMAN   | =S1 of repeat 1; (Potential).  | 3    | :GGCCCTGCTGC     | 0.64  |                         |
| - | 25 | 3416      | SBNO1_uc010taq     | NM_018183                       | NP_060653    | A3KN83 | SBNO1_HUMAN  |                                | 9    | :TTCCATTTTTTT    | 0.388 |                         |
| - | 25 | 5133      | LECTD1_uc001wrc    | NM_015382                       | NP_056197    | Q9ULT8 | HECD1_HUMAN  | Ser-rich.                      | 5    | :CTTACAAAACTC    | 0.468 |                         |
| - | 1  | 70_72     | .2_5'UTR NIPA1_u   | NM_144599                       | NP_653200    | Q7RTP0 | NIPA1_HUMAN  | cellular (Potential).          | 0    | TCCCCGgccgccg    | 0.626 |                         |
| - | 15 | 2121_2122 | p.R660fs SLTM_uc   | NM_024755                       | NP_079031    | Q9NWH9 | SLTM_HUMAN   | lu-rich. Potential.            | 1    | TTCCATTCTCTCT    | 0.431 |                         |
| + | 9  | 960_962   | ne_Del_p.E294del   | NM_001099661                    | NP_001093131 | B5ME19 | B5ME19_HUMAN |                                | 0    | GGATGAGGAGG      | 0.562 |                         |
| - | 3  | 385_387   | P2_uc010byn.2_lr   | NM_024816                       | NP_079092    | Q9H5N1 | RABE2_HUMAN  | γ-Gln. Potential.              | 3    | :AGTCCTGCTGC     | 0.527 |                         |
| + | 3  | 278_280   | 0vho.1_in_Frame_   | NM_020312                       | NP_064708    | O75208 | COQ9_HUMAN   |                                | 1    | CGGCGAGGAGG      | 0.576 | rs149029279             |
| + | 15 | 2170_2172 | p.E413del SLC9A5   | NM_004594                       | NP_004585    | Q14940 | SL9A5_HUMAN  |                                | 2    | .GTCTGAGGAGG     | 0.571 |                         |
| + | 12 | 3846_3848 | ie_Del_p.Q812del   | NM_006599                       | NP_006590    | O94916 | NFAT5_HUMAN  | Poly-Gln.                      | 0    | :AATcaacagcagcag | 0.389 |                         |
| + | 3  | 433       | l_p.T16fs KIAA01E  | NM_014615                       | NP_055430    | Q14687 | GSE1_HUMAN   |                                | 5    | :CAGCACCCCCCC    | 0.687 |                         |
| - | 9  | 1952      | a.3_RNA CCDC14     | NM_182568                       | NP_872374    |        |              |                                | 2    | :TTGTTCATCAGC    | 0.406 | rs66528329              |
| - | 9  | 2408_2410 | 0xvr.1_in_Frame_   | NM_015063                       | NP_055878    | Q9UPR5 | NAC2_HUMAN   | lasmic (Potential).            | 4    | :ACCCGTCTCCTC    | 0.616 |                         |
| - | 13 | 1581_1583 | _Frame_Del_p.S1'   | NM_015541                       | NP_056356    | Q96JA1 | LRIG1_HUMAN  | tial). lg-like C2-type 1. Poly | 5    | GGGAGCTGCTG      | 0.547 |                         |
| + | 20 | 7008_7009 | hm.2_Frame_Shift   | NM_178140                       | NP_835260    | O15018 | PDZD2_HUMAN  |                                | 9    | CCCCTCGGGGG      | 0.584 | rs138558075             |
| + | 7  | 1261      | ijlm.1_Frame_Shift | NM_003999                       | NP_003990    | Q99650 | OSMR_HUMAN   | cellular (Potential).          | 5    | :CAAAATAACTCA    | 0.333 |                         |
| + | 16 | 2912      | py.3_Frame_Shift   | NM_001127511                    | NP_001120983 | P25054 | APC_HUMAN    | Ser-rich. p.(?)                | 2515 | :AGTTCTCGTTCT    | 0.413 |                         |
| - | 3  | 512_514   | 0jii.2_in_Frame_D  | NM_138379                       | NP_612388    | Q96H15 | TIMD4_HUMAN  | ar (Potential). Thr-rich.      | 2    | :GGGCTTGTTGT     | 0.537 |                         |
| - | 3  | 444       | p.M121fs SLC17A2   | uc003nfl.2_Frame_Shift_Del_p.M1 | NP_000624    | O00624 | NPT3_HUMAN   |                                | 1    | CAAGCATTTTTTT    | 0.453 |                         |
| - | 1  | 523_524   |                    | NM_052967                       | NP_443199    | P35410 | MAS1L_HUMAN  | lasmic (Potential).            | 9    | AGAGGACACAC/     | 0.495 |                         |
| + | 7  | 1303_1304 | tron LOC285830_t   | NM_001098479                    | NP_001091949 | P30511 | HLAF_HUMAN   |                                | 0    | :ATCTTGTTTTTT    | 0.535 |                         |
| - | 1  | 210_212   |                    | NM_024807                       | NP_079083    | Q5T2D2 | TRML2_HUMAN  |                                | 2    | GCCACAGCAGC.     | 0.631 |                         |
| + | 26 | 3025_3026 | ime_Shift_Ins_p.D  | NM_015440                       | NP_056255    | Q6UB35 | C1TM_HUMAN   | hydrofolate synthetase.        | 4    | CCTGACAAAAAA     | 0.48  |                         |
| + | 8  | 2004_2005 | srz.2_Frame_Shift  | NM_014660                       | NP_055475    | O94880 | PHF14_HUMAN  |                                | 3    | TTGCAAGAGAGA     | 0.376 |                         |
| + | 3  | 342       | _uc011kby.1_Intror | NM_002541                       | NP_002532    | Q02218 | ODO1_HUMAN   |                                | 2    | :GGACATTTTTTT    | 0.577 |                         |
| - | 5  | 1204      | ,2_Frame_Shift_D   | NM_000466                       | NP_000457    | O43933 | PEX1_HUMAN   |                                | 2    | ACCTAATTTTTTT    | 0.353 |                         |
| + | 5  | 927_929   | 10ljz.1_in_Frame_l | NM_014491                       | NP_055306    | O15409 | FOXP2_HUMAN  | Gln-rich.                      | 8    | cagcaacagcagcag  | 0.172 |                         |
| - | 7  | 1105_1107 | r.2_in_Frame_Del   | NM_018660                       | NP_061130    | Q9H8N7 | ZN395_HUMAN  |                                | 0    | :CCTgcggcagcagc  | 0.507 | rs142343457             |
| + | 10 | 6394_6396 | p2061del ZFXH4_u   | NM_024721                       | NP_078997    | Q86UP3 | ZFXH4_HUMAN  | Pro-rich.                      | 15   | :accaccacctctctc | 0.286 |                         |
| - | 12 | 1824      | mdt.2_Frame_Shif   | NM_004519                       | NP_004510    | O43525 | KCNQ3_HUMAN  |                                | 5    | :CTTGAATTTTTTT   | 0.453 |                         |
| + | 5  | 647       | ddo.2_Frame_Shif   | NM_000950                       | NP_000941    | O14668 | TMG1_HUMAN   | ic (Potential). Poly-Pro.      | 2    | CCCCACCCCCCC     | 0.488 |                         |
| + | 4  | 1940_1942 | EC1_uc010nsl.1_l   | NM_005462                       | NP_005453    | O60732 | MAGC1_HUMAN  |                                | 4    | GAGCCCTCCTC/     | 0.567 |                         |
| + | 3  | 460_483   | PE104del SPRR3_    | NM_005416                       | NP_005407    | Q9UBC9 | SPRR3_HUMAN  | proximate tandem repeats       | 1    | TACACCAAGGTC     | 0.567 | l7;rs66616552;rs1970328 |
| + | 14 | 1901_1902 | F7L2_uc010qro.1    | NM_001146274                    | NP_001139746 | Q9NQB0 | TF7L2_HUMAN  | pecific activa p.R465C(1)      | 4    | TAGGAGAAAAAA     | 0.52  |                         |
| - | 2  | 1302      | raq.2_Frame_Shift  | NM_006143                       | NP_006134    | Q15760 | GPR19_HUMAN  | lasmic (Potential).            | 1    | ACGTAGTTTTTTT    | 0.398 |                         |
| - | 9  | 743_744   | Shift_Ins_p.A195fs | NM_001136015                    | NP_001129487 | P07355 | ANXA2_HUMAN  |                                | 1    | CCCGAGCATCTT     | 0.317 |                         |
| + | 8  | 929_930   | IP_uc002dcx.3_R    | NM_006985                       | NP_008916    | Q9UND3 | NPIP_HUMAN   | Pro-rich.                      | 0    | TCCCGAGTGTCT     | 0.559 |                         |
| + | 25 | 6010_6011 | 3_Shift_Ins_p.Q16  | NM_006662                       | NP_006653    | Q6ZRS2 | SRCAP_HUMAN  | Pro-rich.                      | 4    | :CGCAGCCCCCC     | 0.569 |                         |
| - | 3  | 797_798   | 5A10_uc002gut.1    | NM_001039999                    | NP_001035088 | A6ND36 | FA83G_HUMAN  |                                | 2    | GACGTTACTCTC     | 0.584 |                         |
| - | 9  | 1623_1625 |                    | NM_133373                       | NP_588614    | Q8N3E9 | PLCD3_HUMAN  |                                | 3    | cctgtcatcctcctc  | 0.527 |                         |
| - | 11 | 1313_1315 |                    | NM_001080421                    | NP_001073890 | Q9UPW8 | UN13A_HUMAN  | i-rich. Potential.             | 3    | TCAGGCAcctctct   | 0.433 |                         |
| + | 5  | 489_490   | i_p.Q50fs LILRB1_  | NM_006669                       | NP_006660    | Q8NHL6 | LIRB1_HUMAN  | 1. Extracellular (Potential).  | 3    | :TGTGAGGGGGG     | 0.579 |                         |
| + | 12 | 2844      |                    | NM_001011552                    | NP_001011552 | Q6AI14 | SL9A4_HUMAN  | lasmic (Potential).            | 3    | FGTCCAAAAAA/     | 0.473 |                         |
| - | 4  | 358       | UTR SYS1-DBNDI     | NM_014477                       | NP_055292    | Q9Y2B4 | T5G5_HUMAN   |                                | 1    | :TTTTGTTTATT     | 0.498 |                         |
| - | 10 | 1116      | p.N255fs ARFGAP    | NM_014570                       | NP_055385    | Q9NP61 | ARFG3_HUMAN  |                                | 1    | TCAACATTTTTTT    | 0.224 |                         |
| + | 1  | 513_515   |                    | NM_020846                       | NP_065897    | Q9P270 | SLAI2_HUMAN  | Poly-Glu.                      | 0    | GCTGGGAGGAG      | 0.754 |                         |



|   |     |           |                    |              |              |        |              |                                |      |                  |                |                          |  |
|---|-----|-----------|--------------------|--------------|--------------|--------|--------------|--------------------------------|------|------------------|----------------|--------------------------|--|
| + | 12  | 1499      | ne_Shift_Del_p.S   | NM_004100    | NP_004091    | O95677 | EYA4_HUMAN   |                                | 2    | AGTTCTGGGTC      | 0.458          |                          |  |
| + | 14  | 2077      | Y360fs BMP1_uc     | NM_006129    | NP_006120    | P13497 | BMP1_HUMAN   | CUB 3.                         | 3    | GAGTACCCCCC      | 0.602          |                          |  |
| - | 2   | 655       | _3'UTR CDKN2A_     | NM_000077    | NP_000068    | P42771 | CD2A1_HUMAN  | ) p.?(13) p.R128fs*12(3) p.    | 3678 | CCTCCGCGGC       | 0.597          |                          |  |
| + | 12  | 1615      | Shift_Del_p.K373fs | NM_005392    | NP_005383    | O75151 | PHF2_HUMAN   | -rich. Lys-rich.               | 1    | TGTCCAAAAAA      | 0.448          | rs76832193               |  |
| - | 7   | 7642      |                    | NM_015419    | NP_056234    | Q9NR99 | MXRA5_HUMAN  | like C2-type 9.                | 8    | ACAGTGATCCG      | 0.572          |                          |  |
| - | 3   | 730       | njg.1_5'UTR CXor   | NM_198279    | NP_938020    | A2AJT9 | CX023_HUMAN  |                                | 2    | TGGGAGGGAAT      | 0.498          |                          |  |
| + | 15  | 2016_2017 | 09zfl.1_3'UTR PTF  | NM_002831    | NP_002822    | P29350 | PTN6_HUMAN   | NA                             | 1    | GTTCCCTCAAGA     | 0.559          |                          |  |
| - | 4   | 505       | CKB_uc010awr.1_    | NM_001823    | NP_001814    | P12277 | KCRB_HUMAN   | gen kinase C                   | NA   | 0                | GGGGGAGGCAC    | 0.577                    |  |
| - | 2   | 424       | e_l.p.P9fs SECTM1  | NM_003004    | NP_002995    | Q8WVN6 | SCTM1_HUMAN  |                                | NA   | 0                | GGCCAGGGAAT    | 0.627                    |  |
| + | 9   | 2220      | p.Q690fs KIAA024   | NM_015349    | NP_056164    | Q6AI39 | K0240_HUMAN  |                                | NA   | 1                | AGGACAAAAAA    | 0.388                    |  |
| + | 12  | 1499      | ne_Shift_Del_p.S   | NM_004100    | NP_004091    | O95677 | EYA4_HUMAN   |                                | NA   | 2                | AGTTCTGGGTC    | 0.458                    |  |
| + | 32  | 5375_5377 |                    | NM_001040001 | NP_001035090 | P55196 | AFAD_HUMAN   |                                | NA   | 5                | TACAATgaggagga | 0.409                    |  |
| - | 3   | 730       | njg.1_5'UTR CXor   | NM_198279    | NP_938020    | A2AJT9 | CX023_HUMAN  |                                | NA   | 2                | TGGGAGGGAAT    | 0.498                    |  |
| + | 4   | 1234_1235 |                    | NM_000314    | NP_000305    | P60484 | PTEN_HUMAN   | hatase tensi'(2) p.Y68C(1)     | 2334 | GATATACAATCT     | 0.277          |                          |  |
| - | 1   | 106_108   | n_Frame_Del_p.L    | NM_139247    | NP_640340    | Q8NFM4 | ADCY4_HUMAN  | ical; (Potential).             | 3    | TCCCAGCAGC       | 0.7            |                          |  |
| + | 16  | 2611      | Shift_Del_p.I555fs | NM_001013703 | NP_001013725 | Q9P2K8 | E2AK4_HUMAN  | otein kinase 2.                | 4    | TCAACATTTTTT     | 0.358          |                          |  |
| + | 16  | 3292_3294 |                    | NM_001145011 | NP_001138483 | C9JH24 | C9JH24_HUMAN |                                | 0    | ACCTCTGCTGC      | 0.675          |                          |  |
| + | 15  | 2866      | p.K951fs USP43_1   | NM_153210    | NP_694942    | Q70EL4 | UBP43_HUMAN  |                                | 5    | ACTGGAAGGAG      | 0.547          |                          |  |
| - | 9   | 1016      | :18orf34_uc002kxc  | NM_001105528 | NP_001098998 | Q5BJE1 | CR034_HUMAN  | Potential.                     | 1    | CCTCCATTTTTT     | 0.318          |                          |  |
| - | 173 | 33412     | Shift_Del_p.K4691  | NM_133378    | NP_596869    | Q8WZ42 | TITIN_HUMAN  |                                | 153  | TCTTCTTAGGT      | 0.363          |                          |  |
| - | 27  | 3223      | t.2_RNA CLASP2_    | NM_015097    | NP_055912    | B2RTR1 | B2RTR1_HUMAN |                                | 4    | CACCCATTTTTT     | 0.343          |                          |  |
| - | 1   | 220_222   | 3_5'Flank TADA2B   | NM_153376    | NP_699207    | Q2M329 | CCD96_HUMAN  | Glu-rich.                      | 0    | CTTGCTCCTCC      | 0.729          |                          |  |
| + | 11  | 1154      | _p.*323fs LIAS_uc  | NM_006859    | NP_006850    | O43766 | LIAS_HUMAN   |                                | 0    | TCCTGAAAAATC     | 0.264          |                          |  |
| + | 25  | 3378      | 11csr.1_Frame_Sh   | NM_001080479 | NP_001073948 | Q8N1W1 | RGNEF_HUMAN  | PH.                            | 0    | ACCAGAAATAC      | 0.313          |                          |  |
| + | 1   | 403_405   | uc003tbl.3_5'Flank | NM_002047    | NP_002038    | P41250 | SYG_HUMAN    |                                | 1    | CGCTCTGCTGC      | 0.749          |                          |  |
| - | 3   | 534_536   | if.2_Intron TP53IN | NM_033285    | NP_150601    | Q96A56 | T5311_HUMAN  | Glu-rich.                      | 0    | CCTCCTTCTCT      | 0.458          |                          |  |
| - | 3   | 615_616   |                    | NM_022735    | NP_073572    | Q9H3P7 | GCP60_HUMAN  | ential. Glu-rich.              | 0    | TTCACCTTTTTT     | 0.411          |                          |  |
| + | 4   | 1234_1235 |                    | NM_000314    | NP_000305    | P60484 | PTEN_HUMAN   | hatase tensi'(2) p.Y68C(1)     | 2334 | GATATACAATCT     | 0.277          |                          |  |
| + | 1   | 515_516   |                    | NM_007129    | NP_009060    | O95409 | ZIC2_HUMAN   | l transcriptional activation o | 0    | CTCGCAGAATG      | 0.743          |                          |  |
| - | 6   | 961_963   | .E208del BEGAIN    | NM_001159531 | NP_001153003 | Q9BUH8 | BEGIN_HUMAN  |                                | 0    | TCGGCCTCCTC      | 0.724          |                          |  |
| - | 5   | 630       | _uc002cmq.1_5'Fl   | NM_002513    | NP_002504    | Q13232 | NDK3_HUMAN   |                                | 0    | CTGCGCGGAAC      | 0.652          |                          |  |
| - | 4   | 560_561   | PN1L_uc002fmi.2_   | NM_001080487 | NP_001073956 | A6NDY0 | EPAB2_HUMAN  | RRM.                           | 0    | CCCTTGGGGTG      | 0.564          |                          |  |
| + | 2   | 635_637   |                    | NM_033513    | NP_277048    | Q6ZTW0 | TPGS1_HUMAN  |                                | 1    | CTCGCCGCCCG      | 0.768          |                          |  |
| - | 1   | 593       |                    | NM_005325    | NP_005316    | Q02539 | H11_HUMAN    |                                | 2    | TTTGGGTTTTTT     | 0.483          |                          |  |
| - | 2   | 967       | \11_uc003syy.2_R   | NM_005523    | NP_005514    | P31270 | HXA11_HUMAN  | Homeobox.                      | 2    | TGTTAATTTTTT     | 0.448          |                          |  |
| - | 3   | 534_536   | if.2_Intron TP53IN | NM_033285    | NP_150601    | Q96A56 | T5311_HUMAN  | Glu-rich.                      | 0    | CCTCCTTCTCT      | 0.458          |                          |  |
| - | 7   | 4513      | 33H_uc010mfk.1_I   | NM_198488    | NP_940890    | Q6ZR2V | FA83H_HUMAN  |                                | 3    | :CCCCCTGCC       | 0.665          | 7;rs34283115;rs113442489 |  |
| - | 2   | 389_390   | 1bzw.1_Frame_Sh    | NM_005202    | NP_005193    | P25067 | CO8A2_HUMAN  | le-helical region.             | 1    | CCCTGGGGGAC      | 0.713          |                          |  |
| - | 2   | 598_600   | ime_Del_p.D166d    | NM_001164    | NP_001155    | O00213 | APBB1_HUMAN  | Glu-rich.                      | 2    | cctctctcatcatc   | 0.414          |                          |  |
| + | 8   | 875_876   | 1mpj.2_Frame_Sh    | NM_019028    | NP_061901    | Q8IUH4 | ZDH13_HUMAN  | ANK 6.                         | 0    | TATGGCTCTACA     | 0.332          |                          |  |
| - | 8   | 778       |                    | NM_004308    | NP_004299    | Q07960 | RHG01_HUMAN  | SH3-binding.                   | 1    | GGCAGGGGGG       | 0.642          |                          |  |
| - | 2   | 598_600   | 1orf95_uc001nxs.   | NM_001144936 | NP_001138408 | C9JLR9 | CK095_HUMAN  | Glu-rich.                      | 0    | ctctctctctctctct | 0.532          |                          |  |
| + | 2   | 327       |                    | NM_025057    | NP_079333    | Q8ND07 | CN045_HUMAN  |                                | 0    | CTTAAAGAAAAA     | 0.398          | rs61752569               |  |
| + | 4   | 389       | M_uc002lpn.1_Fra   | NM_002579    | NP_002570    | O75781 | PALM_HUMAN   | Potential.                     | 0    | TCAGAGGGGGA      | 0.667          |                          |  |
| - | 58  | 4279_4280 |                    | NM_015719    | NP_056534    | P25940 | CO5A3_HUMAN  | le-helical region.             | 10   | CCCTTGGGGCCA     | 0.584          |                          |  |
| + | 7   | 1953_1961 | atq.1_In_Frame_D   | NM_001039141 | NP_001034230 | Q9H2D6 | TARA_HUMAN   |                                | 1    | GCCTCCAGAAC      | 0.589          |                          |  |
| - | 1   | 135       | v.1_Intron LOC400  | NM_018280    | NP_060750    | Q9NV39 | CV026_HUMAN  | Pro-rich.                      | 0    | GGTTGGGGGG       | 0.751          |                          |  |

|   |    |             |                                                  |              |              |        |             |                            |    |    |                 |       |                          |
|---|----|-------------|--------------------------------------------------|--------------|--------------|--------|-------------|----------------------------|----|----|-----------------|-------|--------------------------|
| - | 2  | 306_307     | ame_Shift_Ins_p.K                                | NM_001024921 | NP_001020092 | P32969 | RL9_HUMAN   |                            |    | 1  | ACCCTCTTTTTT    | 0.431 |                          |
| + | 1  | 140         |                                                  | NM_016167    | NP_057251    | Q9UMY1 | NOL7_HUMAN  |                            |    | 0  | CTGTTGCTCGG     | 0.721 |                          |
| - | 3  | 444         | p.M121fs SLC17A2_uc003nfl.2_Frame_Shift_Del_p.M1 |              |              | O00624 | NPT3_HUMAN  |                            |    | 1  | CAAGCATTTTTT    | 0.453 |                          |
| + | 2  | 128_130     | p.L24del BTN2A2_                                 | NM_006995    | NP_008926    | Q8WVV5 | BT2A2_HUMAN |                            |    | 0  | CAGCCTCctctctc  | 0.483 |                          |
| + | 11 | 2081_2082   | kvv.1_Frame_Shift                                | NM_053043    | NP_444271    | Q96EV2 | RBM33_HUMAN | Pro-rich.                  |    | 1  | CTGCCACACAC     | 0.53  |                          |
| - | 7  | 4513        | 33H_uc010mfk.1_l                                 | NM_198488    | NP_940890    | Q6ZRV2 | FA83H_HUMAN |                            |    | 3  | CCCCCTGCC       | 0.665 | 7;rs34283115;rs113442489 |
| - | 4  | 773_774     | 3H_uc010mfk.1_5                                  | NM_198488    | NP_940890    | Q6ZRV2 | FA83H_HUMAN |                            |    | 3  | CAGTCCACCAGC    | 0.658 |                          |
| - | 6  | 1404_1406   | v.V48del PVRL4_u                                 | NM_030916    | NP_112178    | Q96NY8 | PVRL4_HUMAN | ical; (Potent              | NA | 2  | TGAGCACCACC     | 0.571 |                          |
| - | 1  | 205_207     | p.G10del KCNMA                                   | NM_001161352 | NP_001154824 | Q12791 | KCMA1_HUMAN | extracellular              | NA | 3  | cgctgctgccgccgc | 0.404 |                          |
| - | 14 | 2006_2008   | 21A_uc001rlz.2_l                                 | NM_017641    | NP_060111    | Q7Z4S6 | KI21A_HUMAN |                            | NA | 7  | TGTATctctctctcc | 0.281 |                          |
| + | 87 | 13755_13757 |                                                  | NM_002332    | NP_002323    | Q07954 | LRP1_HUMAN  | ical; (Potent              | NA | 22 | CTGTTGCTGCT     | 0.557 |                          |
| - | 54 | 7655_7657   | uc001tao.2_3'UT                                  | NM_025114    | NP_079390    | O15078 | CE290_HUMAN | Potential.                 | NA | 7  | GAATATTCTTCTT   | 0.31  |                          |
| + | 9  | 1622_1633   | OC100132247_uc0                                  | NM_001135865 | NP_001129337 | A8MRT5 | K220L_HUMAN | Pro-rich.                  | NA | 0  | TCCACCCTCAGC    | 0.571 |                          |
| + | 3  | 371_372     | 07_uc010csz.2_Fr                                 | NM_003457    | NP_003448    | O43670 | ZN207_HUMAN |                            | NA | 0  | CAGACATAGAGT    | 0.332 |                          |
| + | 11 | 1321        | om.1_Frame_Shift                                 | NM_000896    | NP_000887    | Q08477 | CP4F3_HUMAN |                            | NA | 3  | CAGTGTTTTTCG    | 0.622 |                          |
| + | 2  | 151_152     |                                                  | NM_020813    | NP_065864    | Q9BX82 | ZN471_HUMAN |                            | NA | 2  | GTAGTAAAAGTC    | 0.401 |                          |
| + | 7  | 817_819     |                                                  | NM_005049    | NP_005040    | Q15269 | PWP2_HUMAN  | Poly-Glu.                  | NA | 1  | gaggaagaggaggag | 0.527 |                          |
| - | 10 | 1116        | p.N255fs ARFGAP                                  | NM_014570    | NP_055385    | Q9NP61 | ARFG3_HUMAN |                            | NA | 1  | TCAACATTTTTTT   | 0.224 |                          |
| + | 1  | 355_357     |                                                  | NM_000297    | NP_000288    | Q13563 | PKD2_HUMAN  | Cytoplasmic                | NA | 1  | AGGCCgaggagg    | 0.498 |                          |
| + | 10 | 1175_1178   | p.E360fs HMGCR_                                  | NM_000859    | NP_000850    | P04035 | HMDH_HUMAN  | Linker.                    | NA | 1  | TTGAACAAACA     | 0.358 |                          |
| - | 6  | 1099_1101   | v.L118del CSNK1A                                 | NM_001892    | NP_001883    | P48729 | KC1A_HUMAN  | rotein kinase              | NA | 1  | TATCCTAATGATT   | 0.335 |                          |
| + | 1  | 1207_1208   | 1463_uc003xvh.2                                  | NM_152414    | NP_689627    | Q8NFJ8 | BHE22_HUMAN | Basic motif.               | NA | 0  | agcggcggcgagcag | 0.203 | 519836;rs34265378        |
| + | 3  | 719_721     |                                                  | NM_153812    | NP_722519    | Q86YI8 | PHF13_HUMAN | ization signal (Probable). |    | 0  | caagctgaagaagaa | 0.498 |                          |
| - | 28 | 4109        | ic001ayw.2_5'Flan                                | NM_017940    | NP_060410    | Q3BBV0 | NBPF1_HUMAN | NBPF 7.                    |    | 0  | GCAGGCAGGAG     | 0.478 |                          |
| + | 1  | 136_137     |                                                  | NM_001008740 | NP_001008740 | Q7Z6W1 | TMCO2_HUMAN |                            |    | 1  | TAGAGTCTCTCT    | 0.406 |                          |
| - | 2  | 938_939     | D1_uc001ctf.2_Fr                                 | NM_002525    | NP_002516    | O43847 | NRDC_HUMAN  |                            |    | 0  | CAGTAGTTTTTT    | 0.233 |                          |
| - | 4  | 884         | cxz.3_Frame_Shift                                | NM_001114108 | NP_001107580 | Q5TAA0 | TTC22_HUMAN | TPR 4.                     |    | 0  | TGTCCTTCCGC     | 0.652 |                          |
| + | 1  | 152         | ne_Shift_Del_p.E                                 | NM_001902    | NP_001893    | P32929 | CGL_HUMAN   |                            |    | 1  | GCAGGAAAAAG     | 0.547 |                          |
| + | 10 | 2124        | ova.1_Frame_Shift                                | NM_001144937 | NP_001138409 | Q5VTL7 | FNDC7_HUMAN | nectin type-III 8.         |    | 2  | CTGTCCAAAAAA    | 0.363 |                          |
| + | 2  | 1237_1238   | ftp.3_Frame_Shift                                | NM_002036    | NP_002027    | Q16570 | DUFFY_HUMAN | asmic (Potential).         |    | 2  | CCCTTGGAAGC     | 0.54  |                          |
| + | 4  | 220_221     | p.P11fs SDHC_uc                                  | NM_003001    | NP_002992    | Q99643 | C560_HUMAN  | al; (By similarity).       |    | 0  | CTCTTCCCATGG    | 0.376 |                          |
| + | 8  | 1233_1234   | 9wxs.2_Frame_Sf                                  | NM_000721    | NP_000712    | Q15878 | CAC1E_HUMAN | asmic (Potential).         |    | 6  | CCAAAGAGAGA     | 0.51  |                          |
| - | 2  | 1361_1363   | .2_Intron RGL1_u                                 | NM_203454    | NP_982279    | Q8WW27 | ABEC4_HUMAN |                            |    | 0  | TCCTTCTTCTT     | 0.419 | rs141411396              |
| + | 7  | 1327_1328   | Ins_p.333_334ins                                 | NM_005807    | NP_005798    | Q92954 | PRG4_HUMAN  | <-X-P-X-P-T-T-X.[11; appro |    | 1  | CCACCAAGTCTG    | 0.658 |                          |
| + | 12 | 1394        | Qpos.1_Frame_Sh                                  | NM_024420    | NP_077734    | P47712 | PA24A_HUMAN | PLA2c.                     |    | 3  | AGTGCCTTTTCC    | 0.353 |                          |
| - | 5  | 865         | lird.2_Frame_Shift                               | NM_022365    | NP_071760    | Q96KC8 | DNJC1_HUMAN | smic (By similarity).      |    | 1  | CCAGTCTTTTTT    | 0.303 |                          |
| + | 7  | 2382        | p.A555fs ZEB1_u                                  | NM_030751    | NP_110378    | P37275 | ZEB1_HUMAN  |                            |    | 5  | TGCGCAAAAAAC    | 0.413 |                          |
| - | 4  | 784         | l01jod.1_Frame_S                                 | NM_017987    | NP_060457    | Q8WXA3 | RUFY2_HUMAN | RUN.                       |    | 1  | GGCCATTTTTTT    | 0.398 |                          |
| + | 25 | 3716        | p.D924fs ZMIZ1_u                                 | NM_020338    | NP_065071    | Q9ULJ6 | ZMIZ1_HUMAN |                            |    | 4  | CTGACCCCCC      | 0.557 |                          |
| - | 3  | 1279_1281   | 172PP>PIPOLL_u                                   | NM_013274    | NP_037406    | Q9UGP5 | DPOLL_HUMAN |                            |    | 0  | GGTGGGAGGAG     | 0.591 |                          |
| - | 1  | 213         | .1_Intron TRIM22                                 | NM_001001922 | NP_001001922 | Q8NH56 | O52N5_HUMAN | Name=2; (Potential).       |    | 2  | ATGGCCAAAAAA    | 0.428 |                          |
| + | 1  | 525         |                                                  | NM_001003750 | NP_001003750 | Q8N0Y5 | OR8I2_HUMAN | ellular (Potential).       |    | 1  | CAATCATTTTTTT   | 0.443 | rs112181516              |
| - | 12 | 1314        | Splice_Site_p.C3E                                | NM_016931    | NP_058627    | Q9NPH5 | NOX4_HUMAN  |                            |    | 2  | GACTAAAAAA      | 0.292 | rs56022003               |
| - | 6  | 1503_1505   | L1_uc001pwu.1_l                                  | NM_002855    | NP_002846    | Q15223 | PVRL1_HUMAN | Cytoplasmic (Potential).   |    | 0  | CACCGCctctctc   | 0.576 |                          |
| - | 10 | 1133_1134   | qfh.2_Frame_Shift                                | NM_001143835 | NP_001137307 | Q6P4R8 | NFRKB_HUMAN | Lys-rich.                  |    | 3  | TTAACCTTTTTT    | 0.441 |                          |
| - | 3  | 257_259     |                                                  | NM_006248    | NP_006239    |        |             |                            |    | 0  | TCCTGGAGGAG     | 0.601 |                          |
| + | 4  | 669         | FAR2_uc009zjm.2                                  | NM_018099    | NP_060569    | Q96K12 | FACR2_HUMAN |                            |    | 0  | GAGCAAAAAAA     | 0.388 |                          |

|   |    |           |                     |              |              |        |             |                               |     |                    |       |                    |
|---|----|-----------|---------------------|--------------|--------------|--------|-------------|-------------------------------|-----|--------------------|-------|--------------------|
| - | 12 | 4127_4129 | w.2_In_Frame_De     | NM_004719    | NP_004710    | Q99590 | SCAFB_HUMAN | Pro-rich.                     | 0   | AGGGGGTGGTG        | 0.483 |                    |
| - | 7  | 1132      | .3_Frame_Shift_D    | NM_016357    | NP_057441    | Q9UHB6 | LIMA1_HUMAN |                               | 1   | TTCCCTGATGGG       | 0.428 |                    |
| - | 26 | 3234      | p.P1074fs SMARC     | NM_003075    | NP_003066    | Q8TAQ2 | SMRC2_HUMAN | Pro-rich.                     | 6   | GTCCAGGGGGGG       | 0.577 |                    |
| - | 3  | 471       | p.F144fs FBXO21_    | NM_033624    | NP_296373    | Q94952 | FBX21_HUMAN |                               | 1   | ATCCTCAAAAAA       | 0.373 |                    |
| + | 4  | 1848      | p.A605fs EP400_u    | NM_015409    | NP_056224    | Q96L91 | EP400_HUMAN |                               | 12  | TTCCCTGCACCG       | 0.632 |                    |
| - | 3  | 351       | lcr.1_Frame_Shift   | NM_022459    | NP_071904    | Q9C0E2 | XPO4_HUMAN  |                               | 3   | TACTTGGGCCCT       | 0.378 |                    |
| - | 10 | 3917      | I963fs SACS_uc0C    | NM_014363    | NP_055178    | Q9NZJ4 | SACS_HUMAN  |                               | 12  | CTTCAATTTTTT       | 0.383 |                    |
| - | 1  | 1994_1996 | o.1_In_Frame_De     | NM_183422    | NP_904358    | Q15714 | T22D1_HUMAN | Gln-rich.                     | 0   | gttggttgctgctgctg  | 0.409 | 613609;rs146722477 |
| + | 20 | 3706_3707 | o.A881fs LMO7_uc    | NM_015842    | NP_056667    | Q8WW11 | LMO7_HUMAN  |                               | 5   | AGGCAGAGAGAG       | 0.386 |                    |
| + | 2  | 931       | ie_Shift_Del_p.P3f  | NM_144778    | NP_659002    | Q5VZF2 | MBNL2_HUMAN | 3H1-type 1.                   | 0   | CTCATCCCCCA        | 0.413 |                    |
| - | 10 | 1212      | 1xae.2_Frame_Shi    | NM_006832    | NP_006823    | Q96AC1 | FERM2_HUMAN | FERM.JPH.                     | 0   | TCAGCTTTTTTC       | 0.343 |                    |
| + | 16 | 4738_4740 | 1xmv.2_In_Frame     | NM_015556    | NP_056371    | O43166 | SI1L1_HUMAN | Ser-rich.                     | 4   | ccctctctctctctctc  | 0.468 |                    |
| + | 11 | 1403_1404 | o.R399fs RBM25_u    | NM_021239    | NP_067062    | P49756 | RBM25_HUMAN | heckle localization. Glu-rich | 4   | jcggaagagagagag    | 0.173 |                    |
| - | 2  | 365_367   | c010twr.1_Intron ll | NM_020414    | NP_065147    | Q9GZR7 | DDX24_HUMAN | Poly-Glu.                     | 4   | TTTCCCTCCTCC       | 0.443 |                    |
| - | 7  | 1384      | p.A457fs C14orf4f   | NM_152592    | NP_689805    | Q6ZM33 | SYNE3_HUMAN | lasmic (Potential).           | 1   | CAGGGCCTTCC        | 0.652 |                    |
| + | 12 | 3276      |                     | NM_015656    | NP_056471    | Q9ULI4 | KI26A_HUMAN |                               | 1   | CCTGAGGGGGGG       | 0.682 |                    |
| + | 19 | 3218      | bbi.2_Frame_Shift   | NM_003246    | NP_003237    | P07996 | TSP1_HUMAN  | 3P C-terminal.                | 6   | TTTCTTCATCAAC      | 0.488 |                    |
| + | 4  | 840       | C4_uc001ztq.2_Fi    | NM_138423    | NP_612432    | Q6P4E1 | CASC4_HUMAN | (Potential). Potential.       | 1   | AATATTA AAAAGT     | 0.224 |                    |
| - | 17 | 3106      | o.K1025fs SPG11_    | NM_025137    | NP_079413    | Q96JI7 | SPTCS_HUMAN | ellular (Potential).          | 5   | TAACTCTTTTTTT      | 0.328 |                    |
| + | 2  | 214_216   | p.Q15del ARID3B_    | NM_006465    | NP_006456    | Q8IVW6 | ARI3B_HUMAN | Gln-rich.                     | 0   | CCACTTcagcagc      | 0.443 |                    |
| + | 29 | 4299_4300 | so.1_Frame_Shift    | NM_001271    | NP_001262    | O14647 | CHD2_HUMAN  |                               | 2   | CTGAAGAAAAAA       | 0.347 |                    |
| - | 2  | 667       | l_5'Flank IQCK_uc   | NM_001012991 | NP_001013009 | Q1ED39 | CP088_HUMAN | Lys-rich.                     | 0   | GGTGGATTTTTT       | 0.532 |                    |
| - | 3  | 385_387   | P2_uc010byn.2_Ir    | NM_024816    | NP_079092    | Q9H5N1 | RABE2_HUMAN | γ-Gln. Potential.             | 3   | AGTCCTGCTGC        | 0.527 |                    |
| + | 7  | 485       |                     | NM_013292    | NP_037424    | Q96A32 | MLRS_HUMAN  | EF-hand 3.                    | 0   | GCCTTCCCCCC        | 0.672 |                    |
| + | 3  | 278_280   | 0vho.1_In_Frame_    | NM_020312    | NP_064708    | O75208 | COQ9_HUMAN  |                               | 1   | CGGCAGGAGAGG       | 0.576 | rs149029279        |
| + | 5  | 2064_2065 | 02ewd.2_Frame_      | NM_133458    | NP_597715    | Q8TF47 | ZFP90_HUMAN | 2H2-type 12.                  | 1   | CTCCGAAAAAAA       | 0.411 |                    |
| + | 3  | 625       | .2_Frame_Shift_D    | NM_004937    | NP_004928    | O60931 | CTNS_HUMAN  | enal (Potential).             | 0   | TATCCTTTTTTCC      | 0.393 |                    |
| - | 10 | 1079_1081 | _63EE>E C17orf85    | NM_001114118 | NP_001107590 | Q53F19 | CQ085_HUMAN | Glu-rich.                     | 1   | tttctctctctctctctc | 0.379 |                    |
| - | 4  | 915       | o PHF23_uc010vt     | NM_024297    | NP_077273    | Q9BUL5 | PHF23_HUMAN |                               | 0   | GTATATCCCCCC       | 0.463 |                    |
| + | 2  | 3619_3620 |                     | NM_016239    | NP_057323    | Q9UKN7 | MYO15_HUMAN | osin head-like.               | 9   | CCCATCAGGGC        | 0.673 |                    |
| - | 8  | 1007      | p.W57fs MBTD1_u     | NM_017643    | NP_060113    | Q05BQ5 | MBTD1_HUMAN | MBT 1.                        | 2   | TTGACCAGAAG        | 0.378 |                    |
| - | 11 | 1158_1160 | i.2_In_Frame_Del_   | NM_017647    | NP_060117    | Q8IY81 | RRMJ3_HUMAN |                               | 1   | ccctctctctctctctc  | 0.463 |                    |
| + | 11 | 1393_1394 | o.G354fs RBBP8_u    | NM_002894    | NP_002885    | Q99708 | COM1_HUMAN  |                               | 3   | CCTGGGAAAAAA       | 0.361 |                    |
| + | 9  | 1222_1223 | 2lls.2_Frame_Shift  | NM_032649    | NP_116038    | Q96KN2 | CNDP1_HUMAN |                               | 0   | GAGATTCTAATG       | 0.455 |                    |
| - | 13 | 1148      | 3_uc002ltq.2_Frar   | NM_003200    | NP_003191    | P15923 | TFE2_HUMAN  |                               | 7   | GCCCTGGGGGG        | 0.642 |                    |
| + | 12 | 2166      | 0xqv.1_Frame_Sh     | NM_017660    | NP_060130    | Q86YP4 | P66A_HUMAN  |                               | 0   | CTCCTGGACAT        | 0.667 |                    |
| - | 4  | 572_574   |                     | NM_018263    | NP_060733    | Q76L83 | ASXL2_HUMAN | Ser-rich.                     | 1   | TACTACTGCTGC       | 0.463 |                    |
| - | 19 | 3112_3113 | rj.3_Frame_Shift_   | NM_005633    | NP_005624    | Q07889 | SOS1_HUMAN  |                               | 10  | TTGGGAGAGGC        | 0.347 |                    |
| + | 16 | 3077_3078 | sbz.2_Frame_Shift   | NM_015252    | NP_056067    | Q8NDI1 | EHBP1_HUMAN | Potential.                    | 2   | CAGCTGAGAGAC       | 0.426 |                    |
| - | 2  | 607       | GOLN2_uc002spt      | NM_006464    | NP_006455    | O43493 | TGON2_HUMAN | al). 14 X 14 AA tandem rept   | 0   | CTGCCTTTTTGC       | 0.562 |                    |
| + | 1  | 1032_1033 |                     | NM_207364    | NP_997247    | Q8TDV2 | GP148_HUMAN | lasmic (Potential).           | 1   | CCATCTTACCA        | 0.525 |                    |
| - | 20 | 2071_2072 | ny.1_Frame_Shift_   | NM_004543    | NP_004534    | P20929 | NEBU_HUMAN  | Nebulin 15.                   | 20  | TTTTTGGCCACC       | 0.411 |                    |
| + | 5  | 1589      | _Shift_Del_p.P43f   | NM_022826    | NP_073737    | Q9H992 | MARH7_HUMAN |                               | 0   | GTCCCTCCAGC        | 0.428 | rs1365803          |
| - | 1  | 244_246   | p.L13del PLA2R1_    | NM_007366    | NP_031392    | Q13018 | PLA2R_HUMAN |                               | 3   | CGCCCCcagcagc      | 0.601 |                    |
| - | 46 | 13588     | N_uc010zfi.1_Intri  | NM_133379    | NP_596870    | Q8WZ42 | TITIN_HUMAN |                               | 153 | TACCTTTTTTCC       | 0.348 | rs142304137        |
| + | 8  | 657_659   | me_Del_p.G111de     | NM_015575    | NP_056390    | Q6Y7W6 | PERQ2_HUMAN | Poly-Gly.                     | 7   | GACGAGGAGG         | 0.394 |                    |
| - | 1  | 1008_1009 | ITERFD2_uc010zc     | NM_182501    | NP_872307    | Q7Z6M4 | MTER2_HUMAN |                               | 1   | AGACCACACAC        | 0.45  |                    |

|   |    |           |                                                       |              |              |        |              |    |                  |       |
|---|----|-----------|-------------------------------------------------------|--------------|--------------|--------|--------------|----|------------------|-------|
| + | 4  | 1257      | i.2_RNA PANK2_u                                       | NM_153638    | NP_705902    | Q9BZ23 | PANK2_HUMAN  | 0  | AGGAACTTTTTT     | 0.343 |
| + | 4  | 651_654   | i.p.L92fs MCM8_u                                      | NM_032485    | NP_115874    | Q9UJA3 | MCM8_HUMAN   | 1  | :TCCTTTGATTGA    | 0.363 |
| + | 11 | 1053      | .p.P312fs C20orf7                                     | NM_024120    | NP_077025    | Q5TEU4 | CT007_HUMAN  | 0  | CCACCGGGGAA      | 0.323 |
| + | 2  | 85_86     | tj.1_RNA FRG1B_uc010gdr.1_RNA FRG1B_uc010ztk.1_Intron |              |              |        |              | 0  | VTGGAAAATATCT    | 0.342 |
| + | 4  | 1167      | J02xpx.2_Frame_ε                                      | NM_033421    | NP_219489    | Q969T3 | SNX21_HUMAN  | 2  | ACACCACCCCCC     | 0.617 |
| - | 7  | 1206      | .p.I184fs STAU1_u                                     | NM_017453    | NP_059347    | O95793 | STAU1_HUMAN  | 5  | :TTTTTGGATTCTA   | 0.433 |
| - | 3  | 2331      | ne_Shift_Del_p.P7                                     | NM_001098402 | NP_001091872 | Q9ULJ3 | ZN295_HUMAN  | 3  | TCCTTTGGTTTAC    | 0.438 |
| - | 1  | 4423_4424 |                                                       | NM_002430    | NP_002421    | Q10571 | MN1_HUMAN    | 10 | CGCCTGAAGGAT     | 0.703 |
| + | 5  | 1092      | .p.L98fs EDEM1_u                                      | NM_014674    | NP_055489    | Q92611 | EDEM1_HUMAN  | 3  | :CTCCTGGGGGA     | 0.532 |
| + | 9  | 1152      | ickz.3_Frame_Shif                                     | NM_001042646 | NP_001036111 | Q9UPV9 | TRAK1_HUMAN  | 1  | :CATCTGGGGGC     | 0.502 |
| - | 4  | 457_458   | I3diu.2_Frame_Sh                                      | NM_178504    | NP_848599    | Q6ZR08 | DYH12_HUMAN  | 2  | TCACTCCTTTTTT    | 0.248 |
| - | 2  | 196_197   |                                                       | NM_005130    | NP_005121    | Q14512 | FGFP1_HUMAN  | 0  | :CTTCACTTTTTT    | 0.525 |
| - | 4  | 2224_2225 |                                                       | NM_003263    | NP_003254    | Q15399 | TLR1_HUMAN   | 5  | CTTCACCCAGAA     | 0.426 |
| - | 3  | 747_748   | ε_Shift_Ins_p.K74f                                    | NM_003948    | NP_003939    | Q92772 | CDKL2_HUMAN  | 7  | ACATCGTTTTTTT    | 0.322 |
| + | 8  | 1279      | ike.1_Frame_Shift                                     | NM_001263    | NP_001254    | Q92903 | CDS1_HUMAN   | 4  | TTTGGATTTTTTT    | 0.308 |
| + | 4  | 994_996   | i.Q279del MMRN1_u                                     | NM_007351    | NP_031377    | Q13201 | MMRN1_HUMAN  | 4  | .GCTGAGCAGCA     | 0.448 |
| - | 9  | 844       | 9_splice EMCN_u                                       | NM_016242    | NP_057326    | Q9ULC0 | MUCEN_HUMAN  | 0  | TGTGCCTAGGAC     | 0.396 |
| + | 2  | 227       | 330_uc011chl.1_5'                                     | NM_014487    | NP_055302    | Q9Y3S2 | ZN330_HUMAN  | 0  | ATGCCTAAAAAA     | 0.353 |
| - | 21 | 2860_2861 | ijz.3_Frame_Shift                                     | NM_001102653 | NP_001096123 | Q01804 | OTUD4_HUMAN  | 3  | :CAGTTTCTCTCT    | 0.455 |
| - | 10 | 1831      | o.Q453fs LRBA_uc                                      | NM_006726    | NP_006717    | P50851 | LRBA_HUMAN   | 7  | :TACCTGGAGCA     | 0.388 |
| - | 10 | 1909      | -110_uc011cnu.1_f                                     | NM_006727    | NP_006718    | Q9Y6N8 | CAD10_HUMAN  | 12 | AAACTGAAAAAA     | 0.313 |
| + | 7  | 1394      |                                                       | NM_002439    | NP_002430    | P20585 | MSH3_HUMAN   | 4  | GGGACAAAAAA      | 0.348 |
| + | 26 | 4712      | n.1_Frame_Shift_I                                     | NM_020690    | NP_065741    | Q8IWZ2 | Q8IWZ2_HUMAN | 6  | TTGGGAAAAAA      | 0.423 |
| + | 4  | 930_932   | f25_uc011dfk.1_In_Frame_Del_p.S199del uc003mdu.1      |              |              | Q8NDZ2 | CE025_HUMAN  | 0  | agtaggagcagcagc  | 0.448 |
| + | 9  | 1351      | 3nag.1_Frame_Shi                                      | NM_030948    | NP_112210    | Q9C0D0 | PHAR1_HUMAN  | 0  | :TCTTACCACAC     | 0.473 |
| - | 8  | 966       | _Shift_Del_p.K224f                                    | NM_003472    | NP_003463    | P35659 | DEK_HUMAN    | 1  | :CTGTCTTTTTTG    | 0.373 |
| - | 15 | 2057      | BBR1_uc003nmu.1                                       | NM_001470    | NP_001461    | Q9UBS5 | GABR1_HUMAN  | 7  | CAGCTGGGGGG      | 0.363 |
| - | 3  | 577_578   | 11ebw.1_Frame_S                                       | NM_033515    | NP_277050    | Q8N392 | RHG18_HUMAN  | 3  | :TGTTTGTTTTTT    | 0.421 |
| - | 1  | 648_649   |                                                       | NM_001129895 | NP_001123367 | Q9UM08 | Q9UM08_HUMAN | 0  | :TTGGGAGGAGC     | 0.639 |
| + | 8  | 2132_2134 |                                                       | NM_138426    | NP_612435    | Q86VQ1 | GLC1_HUMAN   | 0  | :ATCCAGCAGC      | 0.562 |
| + | 10 | 1645      |                                                       | NM_007252    | NP_009183    | P78424 | PO6F2_HUMAN  | 1  | TCCTACCACAGC     | 0.488 |
| + | 3  | 342       | _uc011kby.1_Intror                                    | NM_002541    | NP_002532    | Q02218 | ODO1_HUMAN   | 2  | :GGACATTTTTTT    | 0.577 |
| - | 7  | 1188_1189 | .p.K237fs CYP51A                                      | NM_000786    | NP_000777    | Q16850 | CP51A_HUMAN  | 0  | :ATAACATTTTTT    | 0.396 |
| + | 8  | 1031      | .p.F215fs DYNC1                                       | NM_004411    | NP_004402    | O14576 | DC111_HUMAN  | 4  | GACATCTTTTTTC    | 0.383 |
| - | 6  | 959       | ivst.2_Frame_Shift                                    | NM_001008225 | NP_001008226 | O95628 | CNOT4_HUMAN  | 0  | CCTCATCCCCCA     | 0.393 |
| - | 1  | 151_153   | wnq.2_In_Frame_I                                      | NM_002847    | NP_002838    | Q92932 | PTPR2_HUMAN  | 7  | :agcagtagcagcagc | 0.478 |
| - | 4  | 6567_6573 |                                                       | NM_178857    | NP_849188    | Q8IWN7 | RP1L1_HUMAN  | 8  | :TACCTTCTGCCT    | 0.604 |
| - | 6  | 418_419   | ntron CCDC25_uc                                       | NM_018246    | NP_060716    | Q86WR0 | CCD25_HUMAN  | 0  | :ATGTCAGCTGTT    | 0.485 |
| + | 10 | 1740      | LF1_uc003xyf.2_F                                      | NM_015170    | NP_055985    | Q8IWU6 | SULF1_HUMAN  | 7  | TGTGCCTTTTTT     | 0.408 |
| + | 3  | 1173      |                                                       | NM_004770    | NP_004761    | Q92953 | KCNB2_HUMAN  | 7  | :ATCCTGGCCAT     | 0.458 |
| + | 9  | 1450_1451 | RRCC1_uc003ycx                                        | NM_033402    | NP_208325    | Q9C099 | LRCC1_HUMAN  | 0  | :ACCAAGAGAG      | 0.267 |
| + | 19 | 2164      | ame_Shift_Del_p.I                                     | NM_052832    | NP_439897    | Q8TE54 | S26A7_HUMAN  | 2  | AACCAATTTTTT     | 0.343 |
| - | 3  | 534_536   | if.2_Intron TP53IN                                    | NM_033285    | NP_150601    | Q96A56 | T531_HUMAN   | 0  | :CTCCTCTTCTT     | 0.458 |
| - | 8  | 962       | .1_Frame_Shift_D                                      | NM_015668    | NP_056483    | Q8NE09 | RGS22_HUMAN  | 7  | :GGTCTTTTTTTC    | 0.279 |
| + | 3  | 157_159   | ic.2_In_Frame_De                                      | NM_020189    | NP_064574    | Q9NPA8 | ENY2_HUMAN   | 0  | :GAGTTGCTGAG     | 0.345 |
| - | 2  | 473       | yny.2_Frame_Shift                                     | NM_014112    | NP_054831    | Q9UHF7 | TRPS1_HUMAN  | 7  | :GGTCTTTTTTTC    | 0.413 |
| - | 6  | 524       | 3yqt.2_Frame_Shi                                      | NM_004306    | NP_004297    | P27216 | ANX13_HUMAN  | 3  | CCAGGATTTTTT     | 0.413 |

rs139374902

|   |    |           |                    |              |              |        |              |               |    |               |                   |       |                    |
|---|----|-----------|--------------------|--------------|--------------|--------|--------------|---------------|----|---------------|-------------------|-------|--------------------|
| - | 3  | 757       | zif.1_Frame_Shift  | NM_152629    | NP_689842    | Q8NEA6 | GLIS3_HUMAN  |               | 1  | GCTGCGGGGAC   | 0.672             |       |                    |
| - | 20 | 2893      |                    | NM_006289    | NP_006280    | Q9Y490 | TLN1_HUMAN   |               | 13 | ACTTTCCCCTC   | 0.562             |       |                    |
| + | 6  | 1019_1020 | Shift_Del_p.Q191f  | NM_018360    | NP_060830    | Q9NUQ3 | TXLNG_HUMAN  | Potential.    | 1  | ACATCAGAGAGA  | 0.386             |       |                    |
| - | 13 | 1743_1744 | p.V523fs MAP7D2    | NM_152780    | NP_689993    | Q96T17 | MA7D2_HUMAN  |               | 3  | TTTTCCACACAC  | 0.446             |       |                    |
| - | 7  | 3967      | OM4_uc004dpd.3     | NM_020717    | NP_065768    | Q9ULL8 | SHRM4_HUMAN  | ASD2.         | 1  | TTTACCTTTTTTT | 0.448             |       |                    |
| - | 2  | 352_353   | MAGT1_uc004ect.1   | NM_032121    | NP_115497    | Q9H0U3 | MAGT1_HUMAN  |               | 1  | GCTTTCACAAGC  | 0.421             |       |                    |
| - | 6  | 1039      | amy.1_Frame_Shift  | NM_018301    | NP_060771    | Q96IZ5 | RBM41_HUMAN  | RRM.          | 1  | AGGTCCTTTTTTT | 0.433             |       |                    |
| + | 3  | 526       | nzo.1_Frame_Shift  | NM_001493    | NP_001484    | P31150 | GDIA_HUMAN   |               | 0  | AGGGGCCCCCT   | 0.577             |       |                    |
| - | 4  | 396_398   | _In_Frame_Del_p.   | NM_001042663 | NP_001036128 | O94827 | PKHG5_HUMAN  | Poly-Glu.     | NA | 1             | AGCTCTCCTCC       | 0.631 |                    |
| - | 2  | 1126      | 1fpt.1_Frame_Shift | NM_030980    | NP_112242    | Q9H9L3 | I20L2_HUMAN  | Exonuclease   | NA | 2             | GTTGAGGGGGG       | 0.557 |                    |
| - | 4  | 521       | hyru.1_RNA CORC    | NM_020441    | NP_065174    | Q9BR76 | COR1B_HUMAN  | WD 2.         | NA | 2             | ATGCCACATTC       | 0.592 |                    |
| - | 1  | 295_296   | e_Ins_p.16_16G>C   | NM_002094    | NP_002085    | P15170 | ERF3A_HUMAN  |               | NA | 3             | ctgctgctcccgccgc  | 0.332 | rs71408216         |
| - | 12 | 5661_5663 | 2_In_Frame_Del_    | NM_014071    | NP_054790    | Q14686 | NCOA6_HUMAN  | Gln-rich. C   | NA | 7             | TCATTgtgtgctgctgc | 0.498 | 895426;rs140426729 |
| - | 4  | 1934_1936 | 1aaq.1_In_Frame_   | NM_017798    | NP_060268    | Q9BYJ9 | YTHD1_HUMAN  |               | NA | 2             | ACCACCTCCTC       | 0.557 |                    |
| - | 3  | 428_430   | _19DD>D TFIP11_    | NM_012143    | NP_036275    | Q9UBB9 | TFP11_HUMAN  | Poly-Asp.     | NA | 0             | GCTCGTCATCAT      | 0.532 | rs145794160        |
| + | 3  | 743_744   | _103insS TPRXL_    | NR_002223    |              |        |              |               | NA | 0             | gcagctctagcagcag  | 0     | 895893;rs138518200 |
| + | 13 | 1713_1714 | _p.K518fs PAPD7    | NM_006999    | NP_008930    | Q5XG87 | PAPD7_HUMAN  |               | NA | 1             | AAAAAACACAC       | 0.653 |                    |
| + | 1  | 616_617   |                    | NM_021614    | NP_067627    | Q9H2S1 | KCNN2_HUMAN  |               | NA | 2             | CCGCTGCCGCC       | 0.658 | 1038013;rs34838882 |
| - | 7  | 739_740   | _uc009vlz.2_Intror | NM_003790    | NP_003781    | Q93038 | TNR25_HUMAN  | ical; (Potent | NA | 3             | GTGGCCCAAC        | 0.634 |                    |
| + | 2  | 287       | rn FDPS_uc001fke   | NM_002004    | NP_001995    | P14324 | FPPS_HUMAN   |               | NA | 0             | ACCCCGGGAGA       | 0.682 |                    |
| - | 7  | 924_926   | MARCH8_uc001jc     | NM_001002266 | NP_001002266 | Q5T0T0 | MARH8_HUMAN  |               | NA | 0             | CCTTGAGTCTCT      | 0.384 |                    |
| + | 3  | 372       | 1kce.3_Frame_St    | NM_032333    | NP_115709    | Q9BRX8 | CJ058_HUMAN  |               | NA | 0             | TATGGGAAAAAA      | 0.488 |                    |
| + | 1  | 354       | _uc001mam.1_Int    | NM_001004756 | NP_001004756 | B2RNI9 | B2RNI9_HUMAN |               | NA | 0             | CCACTCTTTTTTC     | 0.502 |                    |
| - | 3  | 345       | 0rew.1_Frame_Shi   | NM_001001991 | NP_001001991 | Q6UXH9 | PAMR1_HUMAN  |               | NA | 2             | AGGTACCCCCC       | 0.517 |                    |
| - | 3  | 635       | sfi.3_Frame_Shift  | NM_001127322 | NP_001120794 | P45973 | CBX5_HUMAN   |               | NA | 0             | TCTCTTTTTTTT      | 0.323 |                    |
| + | 3  | 353_355   | re_Del_p.D88del k  | NM_018559    | NP_061029    | Q8IXQ4 | K1704_HUMAN  | Poly-Asp.     | NA | 2             | atgatgacgatgatgc  | 0.286 | rs138421508        |
| - | 11 | 2527      |                    | NM_018353    | NP_060823    | Q6P0N0 | M18BP_HUMAN  |               | NA | 0             | TGGACTTTTTTT      | 0.373 |                    |
| + | 4  | 1996      | _p.Q522fs ZBTB1_   | NM_001123329 | NP_001116801 | Q9Y2K1 | ZBTB1_HUMAN  |               | NA | 1             | ATACCAAAAAAA      | 0.378 |                    |
| + | 8  | 929_930   | IP_uc002dcx.3_R    | NM_006985    | NP_008916    | Q9UND3 | NPIP_HUMAN   | Pro-rich.     | NA | 0             | TCCCGAGTGTCT      | 0.559 |                    |
| + | 12 | 1921_1923 | 1vc.1_In_Frame_D   | NM_016151    | NP_057235    | Q9UL54 | TAOK2_HUMAN  | Glu-rich.     | NA | 1             | gaggaagaggagga    | 0.483 |                    |
| - | 2  | 401       | exe.2_Frame_Shift  | NM_005652    | NP_005643    | Q15554 | TERF2_HUMAN  | H dimerizat   | NA | 1             | TCCTTCCCAAC       | 0.592 |                    |
| - | 8  | 1040      | RN_uc010exz.2_In   | NM_003162    | NP_003153    | O43815 | STRN_HUMAN   |               | NA | 1             | ACCCCTTTTTTC      | 0.388 |                    |
| + | 8  | 2678_2679 | ne_Shift_Ins_p.Q1  | NM_005876    | NP_005867    | Q15772 | SPEG_HUMAN   | Ig-like 3.    | NA | 14            | GTGCAGGGGGG       | 0.594 |                    |
| + | 2  | 364_365   | s_p.120fs DSTN_u   | NM_006870    | NP_006861    | P60981 | DEST_HUMAN   | ADF-H.        | NA | 2             | CTGTCATTTTTT      | 0.386 |                    |
| - | 6  | 827       | Shift_Del_p.A279f  | NM_178026    | NP_821158    | Q9UJ14 | GGT7_HUMAN   | ellular (Pote | NA | 1             | TTGGCCACAG        | 0.597 |                    |
| - | 1  | 204       |                    | NM_181607    | NP_853638    | Q8IUB9 | KR191_HUMAN  | repeats of C  | NA | 0             | CCTCCAAAGCC       | 0.507 |                    |
| - | 7  | 944       |                    | NM_173536    | NP_775807    | Q8N1C3 | GBRG1_HUMAN  | ellular (Prot | NA | 2             | AGGTCAAAAAA       | 0.294 |                    |
| - | 25 | 3483      | I1107fs SEC31A_u   | NM_001077207 | NP_001070675 | O94979 | SC31A_HUMAN  | ction with PI | NA | 8             | TGGTAATTTTTTT     | 0.388 |                    |
| + | 28 | 3960      | Shift_Del_p.Q1226i | NM_015183    | NP_055998    | O15021 | MAST4_HUMAN  |               | NA | 13            | CGCTGCAGAGC       | 0.682 |                    |
| + | 11 | 2230      |                    | NM_014899    | NP_055714    | O94955 | RHBT3_HUMAN  | action with F | NA | 2             | TCAGTCAAAAGC      | 0.328 |                    |
| - | 8  | 1188_1189 | na.3_Frame_Shift   | NM_018343    | NP_060813    | Q9BVS4 | RIOK2_HUMAN  | rotein kinas  | NA | 1             | ATTCTCTAGAC       | 0.416 |                    |
| - | 16 | 2124      | _Shift_Del_p.S640f | NM_016340    | NP_057424    | Q8TEU7 | RPGF6_HUMAN  |               | NA | 3             | GATTACTTTTTTT     | 0.368 |                    |
| - | 7  | 1188      | _p.K237fs CYP51A   | NM_000786    | NP_000777    | Q16850 | CP51A_HUMAN  |               | NA | 0             | ATAACATTTTTTT     | 0.398 |                    |
| + | 14 | 2475_2476 | 16_uc004brr.1_3'L  | NM_144965    | NP_659402    | Q8NEE8 | TTC16_HUMAN  |               | NA | 0             | TTCCACCAAGAC      | 0.609 | rs139597416        |
| + | 11 | 1489_1490 | A1B_uc011mfd.1_    | NM_000718    | NP_000709    | Q00975 | CAC1B_HUMAN  | lasmic (Pote  | NA | 6             | CTTCGCCCGC        | 0.609 |                    |
| + | 42 | 6439_6441 | 1dza.2_In_Frame_   | NM_005120    | NP_005111    | Q93074 | MED12_HUMAN  | Gln-rich.     | NA | 4             | catcgccgagcagca   | 0.256 |                    |
| + | 1  | 794       | I_5'Flank BCAP31   | NM_000033    | NP_000024    | P33897 | ABCD1_HUMAN  | nteraction w  | NA | 0             | TGGCTGGCAGC       | 0.667 | rs74315280         |



|   |    |           |                     |              |              |        |             |                           |     |                   |       |                   |
|---|----|-----------|---------------------|--------------|--------------|--------|-------------|---------------------------|-----|-------------------|-------|-------------------|
| - | 2  | 90        | ame.2_Frame_Shi     | NM_000983    | NP_000974    | P35268 | RL22_HUMAN  |                           | 0   | TGCTTCTTTTTT      | 0.398 |                   |
| + | 20 | 5915      | I_p.G694fs ARID1    | NM_006015    | NP_006006    | O14497 | ARI1A_HUMAN | p.G1848fs*6(3)            | 142 | TTGGTGGGGGG       | 0.582 | rs140055856       |
| + | 7  | 1312_1313 | ame_Shift_Ins_p.S   | NM_001048183 | NP_001041648 | Q8IZ21 | PHAR4_HUMAN | Pro-rich.                 | 0   | CTCCGTCCCCC       | 0.515 |                   |
| - | 8  | 1432      | P2_uc001dmy.1_F     | NM_207398    | NP_997281    | Q8N8V2 | GBP7_HUMAN  |                           | 2   | TTGTGCCCCC        | 0.438 |                   |
| - | 9  | 1607_1608 | 0ovy.1_Frame_Sh     | NM_004696    | NP_004687    | O15374 | MOT5_HUMAN  | ical; (Potential).        | 3   | TGTACAAAAA        | 0.391 |                   |
| - | 2  | 1361_1363 | .2_Intron RGL1_u    | NM_203454    | NP_982279    | Q8WW27 | ABEC4_HUMAN |                           | 0   | FCCTTTCTTCTT      | 0.419 | rs141411396       |
| + | 22 | 2922_2924 |                     | NM_018085    | NP_060555    | Q96P70 | IPO9_HUMAN  |                           | 2   | gaggaagaggaggag   | 0.33  |                   |
| + | 5  | 2142_2143 | 33A_uc010qev.1_l    | NM_006974    | NP_008905    | Q06730 | ZN33A_HUMAN | :2H2-type 12.             | 3   | ACATCAGAGAAC      | 0.391 |                   |
| - | 7  | 924_926   | MARCH8_uc001jc      | NM_001002266 | NP_001002266 | Q5T0T0 | MARH8_HUMAN |                           | 0   | CTTGAGTCTCT       | 0.384 |                   |
| + | 9  | 6800      | :001lfz.2_Frame_S   | NM_206862    | NP_996744    | O95359 | TACC2_HUMAN |                           | 10  | AGAGACCCCC        | 0.522 |                   |
| + | 1  | 303_304   |                     | NM_001005197 | NP_001005197 | Q8NGM9 | OR8D4_HUMAN | Name=3; (Potential).      | 1   | CAGCTGTTTTTT      | 0.436 | rs79561639        |
| + | 13 | 1588      | .1_3'UTR GLB1L3     | NM_001080407 | NP_001073876 | Q8NCI6 | GLBL3_HUMAN |                           | 1   | TGTATCCCCC        | 0.602 |                   |
| - | 3  | 314_315   |                     | NM_006248    | NP_006239    |        |             |                           | 0   | GGAGGTGGGG        | 0.614 |                   |
| - | 3  | 189_191   |                     | NM_006248    | NP_006239    |        |             |                           | 0   | GAGGAGATGGG       | 0.557 |                   |
| + | 4  | 669       | FAR2_uc009zjm.2     | NM_018099    | NP_060569    | Q96K12 | FACR2_HUMAN |                           | 0   | GAGCCAAAAA        | 0.388 |                   |
| - | 9  | 1715_1735 | ia.v.1_Splice_Site_ | NM_006121    | NP_006112    | P04264 | K2C1_HUMAN  | y/Ser-rich. Tail.         | 2   | gctgctacctccggagc | 0     | 529359;rs61226348 |
| - | 3  | 635       | sfi.3_Frame_Shift   | NM_001127322 | NP_001120794 | P45973 | CBX5_HUMAN  |                           | 0   | TCTCTTTTTTTT      | 0.323 |                   |
| + | 1  | 306_308   |                     | NM_001005280 | NP_001005280 | Q8NGE5 | O10A7_HUMAN | Name=3; (Potential).      | 4   | ATGTACTTCTTC      | 0.414 |                   |
| + | 3  | 227       | nk MARS_uc001st     | NM_004990    | NP_004981    | P56192 | SYMC_HUMAN  |                           | 5   | CAGATATTTTTT      | 0.488 |                   |
| + | 6  | 694       | ssy.1_Frame_Shift   | NM_007199    | NP_009130    | Q9Y616 | IRAK3_HUMAN | rotein kinase.            | 8   | AGGAGAAAAA        | 0.303 |                   |
| + | 8  | 1314      | C3_uc009zsm.2_l     | NM_181783    | NP_861448    | Q6ZXV5 | TMTC3_HUMAN | ical; (Potential).        | 1   | CGAACCTTTTTT      | 0.303 |                   |
| + | 15 | 1554      | P1_uc009zsu.1_3'    | NM_007062    | NP_008993    | Q13610 | PWP1_HUMAN  |                           | 0   | GGCCCTTTTGGC      | 0.373 |                   |
| - | 8  | 694       | E2_uc001ume.2_lr    | NM_199254    | NP_954863    | Q6XPS3 | TPTE2_HUMAN | ical; (Potential).        | 0   | ATGTCAAAAAA       | 0.303 |                   |
| - | 10 | 3917      | I963fs SACS_uc0C    | NM_014363    | NP_055178    | Q9NZJ4 | SACS_HUMAN  |                           | 12  | CTTCAATTTTTT      | 0.383 |                   |
| - | 5  | 1432      | ne_Shift_DeL_p.R:3  | NM_001142296 | NP_001135768 | Q8N0X7 | SPG20_HUMAN |                           | 0   | TACCTTTTTTCC      | 0.373 |                   |
| + | 3  | 353_355   | re_DeL_p.D88del P   | NM_018559    | NP_061029    | Q8IXQ4 | K1704_HUMAN | Poly-Asp.                 | 2   | atgatgacgatgatgc  | 0.286 | rs138421508       |
| - | 9  | 1177_1178 | p.I309fs DIAPH3     | NM_001042517 | NP_001035982 | Q9NSV4 | DIAP3_HUMAN | GBD/FH3.                  | 2   | TGTCAATTTTTT      | 0.322 |                   |
| + | 7  | 1388_1390 | Site TOX4_uc010t    | NM_014828    | NP_055643    | O94842 | TOX4_HUMAN  | Pro-rich. Poly-Ala.       | 1   | AGCAGCTGCTG       | 0.581 |                   |
| - | 11 | 2527      |                     | NM_018353    | NP_060823    | Q6P0N0 | M18BP_HUMAN |                           | 0   | TGGGACTTTTTT      | 0.373 |                   |
| - | 2  | 1971_1972 | Shift_Ins_p.K585    | NM_001040108 | NP_001035197 | Q9UHC1 | MLH3_HUMAN  |                           | 2   | TAGATCTTTTTT      | 0.356 |                   |
| - | 7  | 1217_1219 | 339SS>S FOXN3       | NM_001085471 | NP_001078940 | O00409 | FOXN3_HUMAN |                           | 3   | GGCTGAGGAGG       | 0.65  | rs139532153       |
| - | 2  | 365_367   | c010twr.1_Intron I  | NM_020414    | NP_065147    | Q9GZR7 | DDX24_HUMAN | Poly-Glu.                 | 4   | TTTCCCTCCTCC      | 0.443 |                   |
| - | 5  | 539_540   | _Shift_Ins_p.I75fs  | NM_014226    | NP_055041    | Q9UQ07 | MOK_HUMAN   | rotein kinase.            | 4   | GCATAATTTTTT      | 0.322 | rs145834415       |
| + | 7  | 998       |                     | NM_033223    | NP_150092    | Q99928 | GBRG3_HUMAN |                           | 0   | GGATCAAAAAAC      | 0.338 |                   |
| - | 12 | 2045_2061 | p.A607fs DMXL2_     | NM_015263    | NP_056078    | Q8TDJ6 | DMXL2_HUMAN | WD 5.                     | 9   | TACTACTGTGGC      | 0.438 | rs139505079       |
| + | 7  | 2928_2930 | 10ujg.1_In_Frame    | NM_004727    | NP_004718    | O60721 | NCKX1_HUMAN | ic (Potential). Poly-Glu. | 0   | gaggaagaggaggag   | 0.281 |                   |
| + | 10 | 2359      | p.S379fs BLM_ucC    | NM_000057    | NP_000048    | P54132 | BLM_HUMAN   | ase ATP-binding.          | 6   | TATATCAAAAAA      | 0.269 |                   |
| + | 33 | 4739_4740 | so.1_Frame_Shift    | NM_001271    | NP_001262    | O14647 | CHD2_HUMAN  |                           | 2   | TCCAATgaaaaa      | 0.158 |                   |
| + | 30 | 3476_3478 | L1022del ITGAL_u    | NM_002209    | NP_002200    | P20701 | ITAL_HUMAN  | ical; (Potential).        | 10  | GGGGCTGCTG        | 0.601 |                   |
| + | 2  | 171       | lccz.1_Frame_Shil   | NM_002987    | NP_002978    | Q92583 | CCL17_HUMAN |                           | 1   | CTCCTGGGGGC       | 0.662 |                   |
| + | 2  | 393_395   |                     | NM_018019    | NP_060489    | Q9NWA0 | MED9_HUMAN  | Potential.                | 0   | CGAACAGCAGC       | 0.581 |                   |
| - | 2  | 1200_1202 | .E351del CDC42E     | NM_012121    | NP_036253    | Q9H3Q1 | BORG4_HUMAN |                           | 0   | TTTCATCCTCCTC     | 0.64  |                   |
| - | 2  | 140       | DeL_p.P27fs SIRT6   | NM_016539    | NP_057623    | Q8N6T7 | SIRT6_HUMAN |                           | 1   | CCTCGGGGGGG       | 0.642 |                   |
| + | 3  | 1121_1123 | 002ppb.2_5'Flank    | NM_012099    | NP_036231    | O15446 | RPA34_HUMAN | Poly-Lys.                 | 4   | TGCGGAAGAAG       | 0.581 |                   |
| - | 7  | 1091      | ime_Shift_DeL_p.F   | NM_002539    | NP_002530    | P11926 | DCOR_HUMAN  |                           | 1   | TATGTCAAAAC       | 0.473 |                   |
| + | 12 | 1349      | RE_uc002rit.2_Frc   | NM_199194    | NP_954664    | Q9NXR7 | BRE_HUMAN   | UEV-like 2.               | 3   | AGGCCAAAAAA       | 0.448 |                   |
| - | 4  | 596       | lynd.1_5'Flank FAI  | NM_015475    | NP_056290    | Q8NCA5 | FA98A_HUMAN |                           | 1   | TCTTACTTTTTT      | 0.338 |                   |

|   |    |           |                   |              |              |        |             |                                |    |                  |       |
|---|----|-----------|-------------------|--------------|--------------|--------|-------------|--------------------------------|----|------------------|-------|
| + | 12 | 2381      | ruw.2_Frame_Shif  | NM_001430    | NP_001421    | Q99814 | EPAS1_HUMAN |                                | 2  | TCCATGGGGGG      | 0.612 |
| + | 1  | 96_98     | 2sda.2_In_Frame_  | NM_203437    | NP_982261    | Q6ULP2 | AFTIN_HUMAN |                                | 2  | AGAGGATGATG      | 0.409 |
| + | 19 | 2649      | lice_Site_p.V850_ | NM_001024457 | NP_001019628 | Q68DN6 | RGPD1_HUMAN |                                | 0  | ttttttAGTTGCAAC  | 0.312 |
| - | 6  | 1386      | p.M392fs REV1_ur  | NM_016316    | NP_057400    | Q9UBZ9 | REV1_HUMAN  |                                | 2  | TTTTTCATTTTTTTT  | 0.348 |
| - | 1  | 128       | ime_Shift_Del_p.P | NM_001087    | NP_001078    | Q13685 | AAMP_HUMAN  |                                | 1  | CCAGTGGGGGGG     | 0.617 |
| + | 4  | 350       | p.L117fs RQCD1_   | NM_005444    | NP_005435    | Q92600 | RCD1_HUMAN  |                                | 2  | TCCCACTTTTTTT    | 0.413 |
| - | 29 | 3477_3478 | vul.2_Frame_Shift | NM_018218    | NP_060688    | Q9NVE5 | UBP40_HUMAN |                                | 3  | ATCTTGTTTTTTT    | 0.317 |
| + | 4  | 1257      | l.2_RNA PANK2_l   | NM_153638    | NP_705902    | Q9BZ23 | PANK2_HUMAN |                                | 0  | AGGAACTTTTTTT    | 0.343 |
| - | 14 | 2158_2159 | p.K662fs ZMYNC    | NM_012408    | NP_036540    | Q9ULU4 | PKCB1_HUMAN |                                | 5  | TTGGGCTTTTTTT    | 0.49  |
| - | 23 | 2501      |                   | NM_014258    | NP_055073    | Q9BX26 | SYCP2_HUMAN |                                | 5  | TCACCATTTTTTT    | 0.323 |
| - | 7  | 789_791   |                   | NM_016449    | NP_057533    | Q6PGQ1 | CV043_HUMAN | Asp-rich.                      | 1  | CCTGGGcatcatca   | 0.261 |
| + | 7  | 686_688   | Del_p.E197del SH  | NM_018957    | NP_061830    | Q9Y3L3 | 3BP1_HUMAN  | BAR.                           | 1  | CTGAAGGAGGA      | 0.498 |
| + | 12 | 3912      | layn.3_Frame_Shi  | NM_001162501 | NP_001155973 | Q9UPQ9 | TNR6B_HUMAN |                                | 0  | TTATTTCCCCCCC    | 0.448 |
| - | 5  | 2710_2711 | rs_p.K325fs FILIP | NM_182909    | NP_878913    | Q4L180 | FIL1L_HUMAN | Potential.                     | 1  | ATTTAGTTTTTTT    | 0.406 |
| - | 6  | 1009      |                   | NM_013363    | NP_037495    | Q9UKZ9 | PCOC2_HUMAN |                                | 3  | GGCAGTTTTTTTT    | 0.383 |
| - | 3  | 1028      | 168_uc010iah.2_5  | NM_152617    | NP_689830    | Q8IYW5 | RN168_HUMAN | Glu-rich.                      | 0  | TTGCCTTTTTTTC    | 0.448 |
| + | 8  | 1111      | lgp.1_Frame_Shift | NM_182982    | NP_892027    | P32298 | GRK4_HUMAN  | rotein kinase.                 | 1  | AGCTACAAAAAA     | 0.393 |
| - | 25 | 3567      | tx.1_Frame_Shift  | NM_002913    | NP_002904    | P35251 | RFC1_HUMAN  |                                | 4  | TCGAACTTTTTTC    | 0.388 |
| + | 4  | 1196_1198 | rs.E415del SEC24B | NM_006323    | NP_006314    | O95487 | SC24B_HUMAN | Poly-Glu.                      | 3  | gaggaagaggaggag  | 0.369 |
| - | 8  | 596_598   | 3ijz.3_In_Frame_I | NM_001102653 | NP_001096123 | Q01804 | OTUD4_HUMAN |                                | 3  | ACATCAGCAGC      | 0.34  |
| - | 1  | 113_114   |                   | NM_001100389 | NP_001093859 | Q8IY95 | TM192_HUMAN | lasmic (Potential).            | 1  | ATCCTGCCCCCC     | 0.698 |
| - | 7  | 1154      |                   | NM_016107    | NP_057191    | Q96KR1 | ZFR_HUMAN   |                                | 0  | AGCTTCTTTTTT     | 0.348 |
| + | 10 | 2028_2030 | MNB1_uc011cxb.    | NM_005573    | NP_005564    | P20700 | LMNB1_HUMAN | be involved in chromatin l     | 2  | AGAAGAGGAGG      | 0.325 |
| + | 9  | 1679      | uc003kwr.3_Intron | NM_003059    | NP_003050    | Q9H015 | S22A4_HUMAN | lame=12; (Potential).          | 0  | TCACCCTTTTTTT    | 0.418 |
| - | 1  | 346_348   | 3lew.1_In_Frame_I | NM_004883    | NP_004874    | O14511 | NRG2_HUMAN  | Poly-Ser.                      | 6  | cgctctgctgctgctg | 0.291 |
| + | 15 | 2605_2606 | 3lly.2_Frame_Shif | NM_018989    | NP_061862    | Q9P2N5 | RBM27_HUMAN | Potential.                     | 3  | GTGCTTAAAAAA     | 0.351 |
| - | 2  | 531_533   | rb.3_In_Frame_De  | NM_001134870 | NP_001128342 | Q6NYC8 | PHTNS_HUMAN | Poly-Gln.                      | 0  | GTtggttgctgctgct | 0.547 |
| - | 1  | 210_212   |                   | NM_024807    | NP_079083    | Q5T2D2 | TRML2_HUMAN |                                | 2  | GCCACAGCAGC      | 0.631 |
| + | 7  | 1266      | p.P268fs FOXP4    | NM_001012426 | NP_001012426 | Q8IVH2 | FOXP4_HUMAN |                                | 1  | TCTCACCCCCCC     | 0.677 |
| + | 15 | 2788      | p.K847fs GRIK2_l  | NM_021956    | NP_068775    | Q13002 | GRIK2_HUMAN | lasmic (Potential).            | 5  | AATCCAAAAAAA     | 0.348 |
| - | 13 | 1854      | rk.2_Frame_Shift  | NM_002037    | NP_002028    | P06241 | FYN_HUMAN   | rotein kinase.                 | 7  | GGTCCTTTTTTTC    | 0.562 |
| + | 5  | 726       | /ISP3_uc003pvo.2  | NM_003880    | NP_003871    | O95389 | WISP3_HUMAN |                                | 0  | TTTGAAAAAAA      | 0.333 |
| - | 5  | 2400      |                   | NM_001012279 | NP_001012279 | Q5TF21 | CF174_HUMAN | Potential.                     | 6  | FGAGCCTTTTTTT    | 0.294 |
| - | 7  | 1235_1236 | edm.1_Frame_Shi   | NM_000416    | NP_000407    | P15260 | INGR1_HUMAN | lasmic (Potential).            | 1  | AAGAACTCTCTC     | 0.431 |
| + | 26 | 3025_3026 | ime_Shift_Ins_p.D | NM_015440    | NP_056255    | Q6UB35 | C1TM_HUMAN  | hydrofolate synthetase.        | 4  | CCTGACAAAAAA     | 0.48  |
| + | 6  | 694_695   | p.L112fs ZDHC4    | NM_001134388 | NP_001127860 | Q9NPG8 | ZDHC4_HUMAN | ical; (Potential).             | 2  | AACCTGTTTTTTT    | 0.45  |
| + | 3  | 443       | l10ktk.1_Frame_Sl | NM_173565    | NP_775836    | B2RC85 | R10B2_HUMAN |                                | 3  | AACCCAAAAAAC     | 0.468 |
| - | 5  | 684_685   | Del_p.E93fs OSB   | NM_015550    | NP_056365    | Q9H4L5 | OSBL3_HUMAN | PH.                            | 1  | CAGCTTCTCTCT     | 0.5   |
| + | 21 | 3687_3689 | E707del AEBP1_l   | NM_001129    | NP_001120    | Q8IUX7 | AEBP1_HUMAN | y). Glu-rich. Interaction with | 0  | gaggaagaggaggag  | 0.468 |
| - | 2  | 458       |                   | NM_032936    | NP_116325    | Q9H2L4 | TMM60_HUMAN |                                | 0  | CCAGGCTTTTTTT    | 0.408 |
| - | 27 | 3637      | rs.K1180fs ABCB4  | NM_018849    | NP_061337    | P21439 | MDR3_HUMAN  | 2. Cytoplasmic (By similarit   | 6  | CTCTGTTTTTTG     | 0.418 |
| - | 10 | 1091_1092 | p.S339fs ABCB4    | NM_018849    | NP_061337    | P21439 | MDR3_HUMAN  | 3). ABC transmembrane typ      | 6  | GGATTGAAAAAA     | 0.347 |
| - | 7  | 1188      | p.K237fs CYP51A   | NM_000786    | NP_000777    | Q16850 | CP51A_HUMAN |                                | 0  | ATAACATTTTTTT    | 0.398 |
| + | 14 | 1294_1295 | p.Q359fs CCDC1    | NM_017667    | NP_060137    | Q96JG6 | CC132_HUMAN |                                | 0  | TATGGCAGGTTT     | 0.272 |
| + | 10 | 1383_1384 |                   | NM_014916    | NP_055731    | Q8IWU2 | LMTK2_HUMAN | rotein kinase.                 | 16 | TCATTAGAGAGA     | 0.495 |
| + | 28 | 3202      | 3_Intron GATS_uc  | NM_012447    | NP_036579    | Q9UJ98 | STAG3_HUMAN |                                | 8  | ATTTTCCCCCCC     | 0.547 |
| + | 1  | 528       |                   | NM_001001656 | NP_001001656 | Q8NGU2 | OR9A4_HUMAN | ellular (Potential).           | 1  | GAACAATTTTTTT    | 0.383 |

rs140810598

|   |    |             |                    |              |              |        |             |                            |     |                     |       |                              |
|---|----|-------------|--------------------|--------------|--------------|--------|-------------|----------------------------|-----|---------------------|-------|------------------------------|
| - | 3  | 436         |                    | NM_005431    | NP_005422    | O43543 | XRCC2_HUMAN |                            | 2   | TACACCAAAAAA        | 0.393 |                              |
| + | 11 | 2081_2082   | kvv.1_Frame_Shift  | NM_053043    | NP_444271    | Q96EV2 | RBM33_HUMAN | Pro-rich.                  | 1   | CTGCCACACAC         | 0.53  |                              |
| - | 15 | 2035        |                    | NM_001010906 | NP_001010906 | Q68CJ6 | SLIP_HUMAN  |                            | 2   | AGGAAATTTTTT        | 0.453 |                              |
| - | 7  | 1563        | xon.3_Frame_Shift  | NM_001099412 | NP_001092882 | Q92794 | MYST3_HUMAN | tion with RUNX1-1.         | 7   | ACCTGTTTTTTG        | 0.398 |                              |
| - | 6  | 1263        | p.M308fs PCMTD     | NM_052937    | NP_443169    | Q96MG8 | PCMD1_HUMAN |                            | 0   | tcctctccatttttcatcc | 0.284 |                              |
| - | 7  | 735_736     | p.K193fs PTPLAD    | NM_001010915 | NP_001010915 | Q5VWC8 | HACD4_HUMAN | ic (Potential). Poly-Lys.  | 1   | ATCTTCTTTTTT        | 0.371 |                              |
| + | 2  | 306         | i NDOR1_uc011m     | NM_014434    | NP_055249    | Q9UHB4 | NDOR1_HUMAN | avodoxin-like.             | 0   | GGAGACCCCCC         | 0.527 |                              |
| + | 9  | 1017_1019   |                    | NM_173493    | NP_775764    | Q8IV76 | PASD1_HUMAN | Poly-Ala.                  | 3   | FGAACCCgctgctg      | 0.355 |                              |
| - | 14 | 4550        |                    | NM_000132    | NP_000123    | P00451 | FA8_HUMAN   | B.                         | 11  | AGGTTATTTTTT        | 0.413 |                              |
| - | 3  | 478_479     | ocj.1_Frame_Shift  | NR_026567    |              |        |             |                            | 0   | ACAGCCAGCTGA        | 0.663 | rs141324796                  |
| + | 1  | 1337_1339   |                    | NM_207334    | NP_997217    | Q6ZT52 | FA43B_HUMAN |                            | 0   | gaggacgaggaggag     | 0.567 |                              |
| - | 1  | 702_704     |                    | NM_001080418 | NP_001073887 | O95886 | DLGP3_HUMAN | Poly-His.                  | 3   | CGGGACTgggtggt      | 0.537 |                              |
| - | 9  | 1732_1734   | ows.1_In_Frame_    | NM_015906    | NP_056990    | Q9UPN9 | TRI33_HUMAN | Poly-Thr.                  | 11  | TGTTGTGTGTGT        | 0.429 |                              |
| + | 5  | 713         | oyy.1_Frame_Shift  | NM_006099    | NP_006090    | Q9Y6X2 | PIAS3_HUMAN | PINIT.                     | 1   | TATTTTCCCCC         | 0.463 |                              |
| - | 13 | 1861        | opac.1_Intron NBF  | NM_017940    | NP_060410    | Q86T75 | NBPF8_HUMAN | NBPF 3.                    | 0   | TCCTCCTTTTTC        | 0.463 |                              |
| + | 1  | 171_176     |                    | NM_178356    | NP_848133    | Q5TA78 | LCE4A_HUMAN | Cys-rich.                  | 0   | GGCTGTGGTTGC        | 0.578 | 269814;rs74871420;rs79268808 |
| - | 11 | 2245_2247   | H700del PBXIP1_    | NM_020524    | NP_065385    | Q96AQ6 | PBIP1_HUMAN | His-rich.                  | 1   | CCCCGGTGGTG         | 0.64  | rs143592003                  |
| - | 6  | 1004_1006   | X1A_uc001gcv.1_    | NM_177398    | NP_796372    | Q8TE12 | LMX1A_HUMAN | y-Gln. Gln-rich.           | 5   | ATCTTGCTGCTC        | 0.567 |                              |
| + | 16 | 4804        | omh.1_Frame_Shift  | NM_015172    | NP_055987    | Q9Y520 | PRC2C_HUMAN |                            | 0   | GGGATGAAAAAA        | 0.388 |                              |
| + | 7  | 1456_1457   | _Ins_p.378_379ins  | NM_005807    | NP_005798    | Q92954 | PRG4_HUMAN  | ats of K-X-P-X-P-T-T-X. 17 | 1   | CTGACCCACC          | 0.653 | rs149342058                  |
| + | 7  | 1574_1576   | ie_Del_p.T418del   | NM_005807    | NP_005798    | Q92954 | PRG4_HUMAN  | ats of K-X-P-X-P-T-T-X. 21 | 1   | GCACCCACCAC         | 0.645 |                              |
| - | 2  | 805         | hlg.3_Frame_Shift  | NM_018040    | NP_060510    | Q9NW75 | GPTC2_HUMAN |                            | 1   | GGTCTGGTTCTG        | 0.313 |                              |
| + | 37 | 10073_10075 | S3343fs OBSCN      | NM_001098623 | NP_001092093 | Q5VST9 | OBSCN_HUMAN | Ig-like 33.                | 28  | TACTCGTGTGTG        | 0.584 |                              |
| - | 20 | 2528_2530   | E813del SFBMT2_    | NM_001029880 | NP_001025051 | Q5VUG0 | SMBT2_HUMAN |                            | 8   | GTCTCTCCTCC         | 0.596 |                              |
| - | 25 | 3723        | _Shift_Del_p.D11   | NM_033056    | NP_149045    | Q96QU1 | PCD15_HUMAN | Extracellular (Potential). | 13  | GGAAATCAGCTT        | 0.388 | rs138363888                  |
| + | 25 | 3716        | p.D924fs ZMIZ1_    | NM_020338    | NP_065071    | Q9ULJ6 | ZMIZ1_HUMAN |                            | 4   | CTGACCCCCC          | 0.557 |                              |
| + | 3  | 410_412     | ame_Del_p.I75del   | NM_017787    | NP_060257    | Q9NX94 | OPA1L_HUMAN | ical; (Potential).         | 1   | TGGACCATCATC        | 0.606 |                              |
| - | 6  | 626         |                    | NM_005961    | NP_005952    | Q6W4X9 | MUC6_HUMAN  |                            | 1   | TTGCTGGGGTC         | 0.703 | rs1721287;rs63405860         |
| + | 25 | 8653_8655   | idel DNHD1_uc00    | NM_144666    | NP_653267    | Q96M86 | DNHD1_HUMAN | Glu-rich.                  | 2   | GAGAGTgaggagg       | 0.507 |                              |
| + | 8  | 961         | p.Y171fs PRMT3_    | NM_005788    | NP_005779    | O60678 | ANM3_HUMAN  |                            | 0   | TATATACCAAAAT       | 0.353 |                              |
| - | 24 | 2496_2498   | PC3_uc010rhl.1_    | NM_000256    | NP_000247    | Q14896 | MYPC3_HUMAN | onnectin type-III 1.       | 3   | GTAGCTTCTCTT        | 0.601 |                              |
| + | 5  | 886         | rlo.1_Frame_Shift  | NM_004265    | NP_004256    | O95864 | FADS2_HUMAN | lasmic (Potential).        | 2   | GGCAGCCCATC         | 0.527 |                              |
| - | 4  | 1598_1600   | .2_Intron C11orf95 | NM_001144936 | NP_001138408 | C9JLR9 | CK095_HUMAN | rich. Glu-rich.            | 0   | CACCCCActcctct      | 0.547 |                              |
| - | 2  | 598_600     | 1orf95_uc001nxs.   | NM_001144936 | NP_001138408 | C9JLR9 | CK095_HUMAN | Glu-rich.                  | 0   | tcctcttctcctcctc    | 0.532 |                              |
| + | 1  | 166         |                    | NM_003977    | NP_003968    | O00170 | AIP_HUMAN   |                            | 0   | GATCCAAAAAC         | 0.597 |                              |
| + | 3  | 285         | zaa.1_Frame_Shift  | NM_000073    | NP_000064    | P09693 | CD3G_HUMAN  | ilar (Potential). Ig-like. | 0   | GAAATAAAAAAA        | 0.403 |                              |
| + | 9  | 1502_1504   |                    | NM_005188    | NP_005179    | P22681 | CBL_HUMAN   | Glu-rich (ac)(1) p.E366_K  | 149 | AAATTATGATGAT       | 0.473 |                              |
| - | 9  | 1657_1659   | 3_554PP>P IFFO1    | NM_080730    | NP_542768    | Q0D215 | IFFO1_HUMAN | Poly-Pro.                  | 0   | GCTTGGCGGGC         | 0.601 | rs144019095                  |
| - | 10 | 2162_2163   |                    | NM_001733    | NP_001724    | P00736 | C1R_HUMAN   | eptidase S1.               | 0   | CTCCTCCATCTC        | 0.5   |                              |
| - | 3  | 441_442     | i.1_Intron PRB1_u  | NM_005039    | NP_005030    | P04280 | PRP1_HUMAN  | -[PAQ]-Q-[GE]-[GD]-[NKS]   | 0   | TTTCTGGAGGT         | 0.604 |                              |
| - | 3  | 812_814     |                    | NM_006248    | NP_006239    |        |             |                            | 0   | TCCTGGAGGAG         | 0.606 |                              |
| - | 3  | 502_503     |                    | NM_006248    | NP_006239    |        |             |                            | 0   | TTTCTGGAGGT         | 0.594 |                              |
| - | 3  | 319_320     |                    | NM_006248    | NP_006239    |        |             |                            | 0   | TTTCTGGAGGT         | 0.614 |                              |
| - | 3  | 314_315     |                    | NM_006248    | NP_006239    |        |             |                            | 0   | GGAGGTGGGGC         | 0.614 |                              |
| - | 3  | 257_259     |                    | NM_006248    | NP_006239    |        |             |                            | 0   | TCCTGGAGGAG         | 0.601 |                              |
| - | 4  | 730_731     | p.P215fs IFLTD1_L  | NM_152590    | NP_689803    | Q8N9Z9 | ILFT1_HUMAN |                            | 3   | TGTTTGAAGGA         | 0.371 |                              |
| + | 4  | 669         | FAR2_uc009zjm.2    | NM_018099    | NP_060569    | Q96K12 | FACR2_HUMAN |                            | 0   | GAGCCAAAAAA         | 0.388 |                              |

|   |    |           |                    |              |              |        |             |                              |      |                  |       |             |
|---|----|-----------|--------------------|--------------|--------------|--------|-------------|------------------------------|------|------------------|-------|-------------|
| + | 11 | 1121      | 0slz.1_Frame_Shif  | NM_000725    | NP_000716    | P54284 | CACB3_HUMAN |                              | 0    | CTCCCGGGGGA      | 0.617 |             |
| + | 2  | 347       |                    | NM_005430    | NP_005421    | P04628 | WNT1_HUMAN  |                              | 1    | AGACTCCAAGA      | 0.562 |             |
| + | 2  | 157       | 40B_uc001ruq.1_f   | NM_001031698 | NP_001026868 | Q6NWW9 | PR40B_HUMAN | Pro-rich.                    | 5    | AGCTATCCCCC      | 0.607 |             |
| + | 27 | 4928      |                    | NM_002332    | NP_002323    | Q07954 | LRP1_HUMAN  | ntial). LDL-receptor class E | 22   | TGTACGGGGGG      | 0.587 | rs139915490 |
| - | 5  | 654_655   | _Shift_Del_p.L39fs | NM_139207    | NP_631946    | P55209 | NP1L1_HUMAN |                              | 2    | TTTTTGGAGAGC     | 0.381 |             |
| - | 6  | 1097      | me_Shift_Del_p.R:  | NM_198521    | NP_940923    | Q96LP6 | CL042_HUMAN |                              | 2    | TGGCGGGGGGC      | 0.587 |             |
| - | 9  | 986       |                    | NM_001031701 | NP_001026871 | Q86UY8 | NT5D3_HUMAN |                              | 3    | CTCTTCCCAAC      | 0.418 |             |
| + | 35 | 3471_3472 | TC1_uc010taf.1_In  | NM_014708    | NP_055523    | P50748 | KNTC1_HUMAN |                              | 10   | AATTGCTATTTCT    | 0.406 |             |
| - | 25 | 3416      | SBNO1_uc010taq     | NM_018183    | NP_060653    | A3KN83 | SBNO1_HUMAN |                              | 9    | CTCCATTTTTTT     | 0.388 |             |
| + | 1  | 998       |                    | NM_030979    | NP_112241    | Q9H361 | PABP3_HUMAN | RRM 4.                       | 4    | GGAAAGCGTTT      | 0.408 |             |
| + | 1  | 1058      |                    | NM_030979    | NP_112241    | Q9H361 | PABP3_HUMAN | RRM 4.                       | 4    | GCAGCAAAGGG      | 0.428 |             |
| - | 5  | 2069      | ne_Shift_Del_p.L5  | NM_183044    | NP_898865    | Q9Y252 | RNF6_HUMAN  |                              | 2    | TTAGTAAAAAAA     | 0.403 |             |
| + | 8  | 1137_1138 | uqw.2_Frame_Shif   | NM_006646    | NP_006637    | Q9UPY6 | WASF3_HUMAN | Poly-Pro.                    | 1    | AGCCGCCCCCC      | 0.678 | rs141429361 |
| + | 3  | 707_710   | vbk.2_Frame_Shif   | NM_015116    | NP_055931    | Q9Y2L9 | LRCH1_HUMAN | LRR 3.                       | 2    | CGCCCTGCCTC      | 0.436 |             |
| + | 20 | 3706_3707 | 0.A881fs LMO7_uc   | NM_015842    | NP_056667    | Q8WWI1 | LMO7_HUMAN  |                              | 5    | AGGCAGAGAG       | 0.386 |             |
| - | 3  | 184       | 1zfl.2_5'Flank TRF | NM_002420    | NP_002411    | Q7Z4N2 | TRPM1_HUMAN | ellular (Potential).         | 4    | GCAGAGGGGGC      | 0.507 |             |
| + | 7  | 1140_1142 | ame_Del_p.L345d    | NM_024505    | NP_078781    | Q96PH1 | NOX5_HUMAN  | oreductase. Helical; (Potei  | 2    | CGCTCTGCTGC      | 0.626 |             |
| - | 2  | 438_440   | ir.3_In_Frame_Del  | NM_002693    | NP_002684    | P54098 | DPOG1_HUMAN | Poly-Gln.                    | 2    | igtgtgtgtgtgtgt  | 0.458 |             |
| - | 2  | 423_425   | 0dxxs.2_In_Frame   | NM_006110    | NP_006101    | O95400 | CD2B2_HUMAN |                              | 1    | CCCCCATCATC      | 0.532 |             |
| - | 2  | 508_509   | ae_Ins_p.62_63ins  | NM_002968    | NP_002959    | Q9NSC2 | SALL1_HUMAN | Poly-Gly.                    | 8    | jccgccgcgctgtgc  | 0.46  | rs113614842 |
| + | 8  | 759       | p.G77fs PLD2_uc    | NM_002663    | NP_002654    | O14939 | PLD2_HUMAN  | PH.                          | 5    | TTCTCTGGCCTC     | 0.617 |             |
| - | 1  | 143_145   | HX33_uc010clf.2_   | NM_020162    | NP_064547    | Q9H6R0 | DHX33_HUMAN |                              | 2    | CCGGCCTCCTC      | 0.724 |             |
| + | 8  | 912_914   | 0.L222del CHRN1    | NM_000747    | NP_000738    | P11230 | ACHB_HUMAN  | ical; (Potential).           | 2    | GTTCTGTGTGT      | 0.498 |             |
| + | 1  | 90_92     |                    | NM_001005271 | NP_001005271 | Q12873 | CHD3_HUMAN  |                              | 1    | ggcgacgaggaggag  | 0.305 |             |
| + | 13 | 2245_2247 | 0.K762del CHD3_u   | NM_001005273 | NP_001005273 | Q12873 | CHD3_HUMAN  | Poly-Lys.                    | 1    | GTATAAGAAGA      | 0.488 |             |
| + | 4  | 1276_1278 | SMCR7_uc010vxc     | NM_139162    | NP_631901    | Q96C03 | SMCR7_HUMAN |                              | 0    | GGCGGTGTGTG      | 0.685 |             |
| + | 6  | 1142_1143 | WSB1_uc002gze.1    | NM_015626    | NP_056441    | Q9Y6I7 | WSB1_HUMAN  | WD 5.                        | 0    | CATCTTATGATA     | 0.391 |             |
| + | 3  | 202_204   | 10crt.2_In_Frame   | NM_003170    | NP_003161    | Q7KZ85 | SPT6H_HUMAN | Asp/Glu-rich.                | 3    | AGATGAGGAGG      | 0.453 |             |
| + | 1  | 158_160   | ime_Del_p.K7del z  | NM_003457    | NP_003448    | O43670 | ZN207_HUMAN |                              | 0    | TCGCAAGAAGA      | 0.542 |             |
| + | 10 | 1539      |                    | NM_001254    | NP_001245    | Q99741 | CDC6_HUMAN  |                              | 3    | GATGGTAACAG      | 0.428 |             |
| - | 1  | 96_98     | 2_5'Flank TMEM9    | NM_000421    | NP_000412    | P13645 | K1C10_HUMAN | lead. Gly-rich.              | 0    | ctccacatctctctct | 0.409 |             |
| - | 5  | 975_976   |                    | NM_012285    | NP_036417    | Q9UQ05 | KCNH4_HUMAN | lasmic (Potential).          | 1    | CGAGACCCCCC      | 0.604 |             |
| + | 8  | 1687      | _T2_uc010dbo.2_F   | NM_022167    | NP_071450    | Q9H1B5 | XYLT2_HUMAN | renal (Potential).           | 1    | AGTACCCCCC       | 0.602 |             |
| + | 1  | 488_490   | E148del BPTF_uc    | NM_182641    | NP_872579    | Q12830 | BPTF_HUMAN  | Glu-rich.                    | 4    | gtctccgaggaggag  | 0.473 |             |
| + | 14 | 1870_1871 | 0.Q561fs ITGB4_u   | NM_000213    | NP_000204    | P16144 | ITB4_HUMAN  | tial). Cysteine-rich tandem  | 4    | CGCAGTGTGTG      | 0.604 | rs121912463 |
| - | 6  | 817       | p.Q195fs SS18_u    | NM_001007559 | NP_001007560 | Q15532 | SSXT_HUMAN  | Gln-rich.                    | 1884 | CTCTGTACCCA      | 0.423 |             |
| + | 8  | 995       | VDR7_uc002lgl.1_   | NM_015285    | NP_056100    | Q9Y4E6 | WDR7_HUMAN  |                              | 3    | GGACCGGGGGG      | 0.418 |             |
| - | 4  | 1782      |                    | NM_052947    | NP_443179    | Q86TB3 | ALPK2_HUMAN |                              | 14   | AGTCCTTCCCC      | 0.522 |             |
| + | 2  | 143_144   | CCDC159_uc010      | NM_001080503 | NP_001073972 | P0C716 | CC159_HUMAN |                              | 1    | CTCTGGAGCGT      | 0.639 | rs142796564 |
| - | 5  | 915_916   | _Ins_p.Q261fs ECS  | NM_016581    | NP_057665    | Q9BQ95 | ECSIT_HUMAN |                              | 1    | GGGCTGGGGG       | 0.584 |             |
| - | 3  | 330       | _Shift_Del_p.P38fs | NM_025249    | NP_079525    | Q9H0B3 | K1683_HUMAN |                              | 2    | TGAGCGGGGGC      | 0.622 | rs116770984 |
| - | 1  | 207_208   | oad.1_Frame_Shif   | NM_198538    | NP_940940    | Q6UWP8 | SBSN_HUMAN  |                              | 1    | CCCACCTCTCT      | 0.579 |             |
| + | 2  | 648_650   | Jegn.1_In_Frame    | NM_003407    | NP_003398    | P26651 | TTP_HUMAN   | P-P-P-P-G.                   | 1    | ACCTCACCACC      | 0.685 |             |
| + | 13 | 1226_1228 | Frame_Del_p.S32:   | NM_007056    | NP_008987    | Q8N2M8 | CLASR_HUMAN | r-rich. Arg-rich.            | 0    | CGCCGctctctcc    | 0.522 |             |
| + | 4  | 656_658   | E183del KLC3_uc    | NM_177417    | NP_803136    | Q6P597 | KLC3_HUMAN  | Poly-Glu.                    | 1    | CAGCGAGGAGG      | 0.645 |             |
| + | 8  | 2997      | l2phi.3_Frame_Sh   | NM_015711    | NP_056526    | Q9NZM4 | GSCR1_HUMAN | Poly-Pro.                    | 3    | CAGCACCCCCC      | 0.672 |             |
| + | 5  | 2209_2210 | 0c002pxc.1_5'Flan  | NM_007147    | NP_009078    | Q9Y473 | ZN175_HUMAN |                              | 0    | ACACTAGAGAGA     | 0.436 |             |

|   |    |           |                                                |              |              |        |              |                               |    |                 |       |                   |
|---|----|-----------|------------------------------------------------|--------------|--------------|--------|--------------|-------------------------------|----|-----------------|-------|-------------------|
| + | 16 | 2225      | OT3_uc002qdk.1_                                | NM_014516    | NP_055331    | O75175 | CNOT3_HUMAN  | Pro-rich.                     | 3  | GTACCTCCCCCG    | 0.617 | rs145720928       |
| - | 1  | 324_326   |                                                | NM_012344    | NP_036476    | O95665 | NTR2_HUMAN   | Name=2; (Potential).          | 0  | CGACCAGCAGC     | 0.591 |                   |
| - | 1  | 1978_1980 | IF3C_uc010ykr.1_                               | NM_002254    | NP_002245    | O14782 | KIF3C_HUMAN  | -Asn. Potential.              | 4  | CGGTGGTTGTTG    | 0.621 |                   |
| - | 4  | 596       | ynd.1_5'Flank FAI                              | NM_015475    | NP_056290    | Q8NCA5 | FA98A_HUMAN  |                               | 1  | CTCTACTTTTTTT   | 0.338 |                   |
| + | 13 | 1538      | 1_uc002txn.2_Fr                                | NM_018151    | NP_060621    | Q5UIP0 | RIF1_HUMAN   |                               | 15 | CCTTCCTTTTTTT   | 0.343 |                   |
| - | 11 | 1904_1905 | p.F546fs FN1_uc                                | NM_212482    | NP_997647    | P02751 | FINC_HUMAN   | ding. Fibronectin type-I 8.   | 13 | CTGACCGAAGC/    | 0.49  |                   |
| + | 7  | 931       | .1_Frame_Shift_D                               | NM_000578    | NP_000569    | P49279 | NRAM1_HUMAN  | ical; (Potential).            | 4  | AGAAAGCTTTTTTT  | 0.418 |                   |
| - | 33 | 5621_5622 | IR375_hsa-mir-37                               | NM_194302    | NP_919278    | Q6ZU64 | CC108_HUMAN  | Glu-rich.                     | 4  | TCCTTCTCGTCC    | 0.604 |                   |
| + | 2  | 1083_1085 |                                                | NM_024893    | NP_079169    | Q9H7V2 | SYNG1_HUMAN  | cytoplasmic (Potential).      | 0  | ATGTGGAGGAGC    | 0.547 |                   |
| - | 4  | 1604      |                                                | NM_052846    | NP_443078    | Q9NT22 | EMIL3_HUMAN  |                               | 1  | CCCCACCCCCC     | 0.637 |                   |
| - | 3  | 293       | C3_uc002xph.1_F                                | NM_080614    | NP_542181    | Q8IUB2 | WFDC3_HUMAN  | WAP 2.                        | 0  | ATACCCTTAGGA/   | 0.527 |                   |
| - | 2  | 597       | Shift_Del_p.Q166f                              | NM_020436    | NP_065169    | Q9UJQ4 | SALL4_HUMAN  |                               | 2  | CTCCTGGGGGG     | 0.577 |                   |
| - | 1  | 119       |                                                | NM_181619    | NP_853650    | Q3LI58 | KR211_HUMAN  |                               | 1  | aaaccacagccata  | 0.134 |                   |
| - | 3  | 356       | N2_uc003apl.1_R                                | NM_012473    | NP_036605    | Q99757 | THIOM_HUMAN  | Thioredoxin.                  | 0  | ATCTTGCAGGG     | 0.552 |                   |
| + | 7  | 2100_2108 | atq.1_In_Frame_D                               | NM_001039141 | NP_001034230 | Q9H2D6 | TARA_HUMAN   |                               | 1  | GCCTCCAGAAC     | 0.579 |                   |
| + | 5  | 474       | 2_3'UTR POLR2F_                                | NM_021974    | NP_068809    | P61218 | RPAB2_HUMAN  |                               | 1  | AGACTGGGGGG     | 0.512 |                   |
| - | 13 | 2272_2274 | p.2_In_Frame_Del                               | NM_001098504 | NP_001091974 | Q92841 | DDX17_HUMAN  | Poly-Pro.                     | 4  | ggagggggaggagg  | 0.36  |                   |
| + | 2  | 1222      | gxy.2_Frame_Shif                               | NM_002409    | NP_002400    | Q09327 | MGAT3_HUMAN  | lenal (Potential).            | 0  | CGTCCTTTTCC     | 0.642 |                   |
| + | 3  | 406_408   | me_Del_p.E76del                                | NM_012324    | NP_036456    | Q13387 | JIP2_HUMAN   | Glu-rich (acidic).            | 3  | gaggaagaggaggag | 0.483 |                   |
| - | 1  | 205_207   | rg.1_In_Frame_De                               | NM_004628    | NP_004619    | Q01831 | XPC_HUMAN    | lu. Glu-rich (acidic).        | 3  | TCACCCTCCTC     | 0.734 | rs72561774        |
| - | 27 | 3223      | t.2_RNA CLASP2_                                | NM_015097    | NP_055912    | B2RTR1 | B2RTR1_HUMAN |                               | 4  | CACCCATTTTTTT   | 0.343 |                   |
| - | 9  | 2297      |                                                | NM_022842    | NP_073753    | Q9H5V8 | CDCP1_HUMAN  | lasmic (Potential).           | 3  | GAAACTTTTTTTG   | 0.468 |                   |
| - | 11 | 2929      | _p.S552fs MAP4_u                               | NM_002375    | NP_002366    | P27816 | MAP4_HUMAN   |                               | 3  | CTCTTGGACCC     | 0.577 |                   |
| - | 18 | 2397_2399 | cwp.2_In_Frame_I                               | NM_003363    | NP_003354    | Q13107 | UBP4_HUMAN   |                               | 4  | TGTGGTCTCTT     | 0.532 |                   |
| + | 2  | 195_197   | 4L2_uc003dbh.2_                                | NM_015106    | NP_055921    | Q9Y4B4 | ARIP4_HUMAN  |                               | 3  | jcggaagaggaggag | 0.429 |                   |
| - | 24 | 2792      | hif_Del_p.P714fs                               | NM_002218    | NP_002209    | Q14624 | ITIH4_HUMAN  |                               | 3  | CTCCCGGGGGC     | 0.582 | rs140372968       |
| - | 2  | 584_586   |                                                | NM_016206    | NP_057290    | A8MV65 | VGLL3_HUMAN  |                               | 0  | TGTcttctcctctcc | 0.394 |                   |
| + | 1  | 277_278   |                                                | NM_001005514 | NP_001005514 | A6NHG9 | O5H14_HUMAN  | ellular (Potential).          | 1  | TGATATCTCTC     | 0.391 |                   |
| + | 7  | 1308      | _Shift_Del_p.P256f                             | NM_001627    | NP_001618    | Q13740 | CD166_HUMAN  | otential). Ig-like C2-type 1. | 3  | CCACCAAAAAA     | 0.408 |                   |
| + | 3  | 425_426   | 2_uc003eeo.2_In                                | NM_018456    | NP_060926    | Q96CJ1 | EAF2_HUMAN   |                               | 0  | CACTGTAAAAAA    | 0.243 |                   |
| + | 1  | 1441      |                                                | NM_002563    | NP_002554    | P47900 | P2RY1_HUMAN  | ellular (Potential).          | 1  | CACCTGTTACG/    | 0.537 |                   |
| - | 3  | 530_531   | UGDH_uc003gul.                                 | NM_003359    | NP_003350    | O60701 | UGDH_HUMAN   |                               | 4  | TGGTAGAAAAAA    | 0.297 |                   |
| - | 6  | 542       | AD2_uc003gyu.2_I                               | NM_001014446 | NP_001014446 | Q56VL3 | OCAD2_HUMAN  | OCIA.                         | 0  | ATCTTCAAAAAA/   | 0.393 |                   |
| + | 3  | 351       |                                                | NM_006583    | NP_006574    | O14718 | OPSX_HUMAN   | Name=3; (Potential).          | 1  | TGAATATTTTTTT   | 0.393 |                   |
| - | 17 | 2126      | .2_Frame_Shift_D                               | NM_144643    | NP_653244    | Q96NL6 | SCLT1_HUMAN  | Potential.                    | 5  | TTGGCTTTTTTTT   | 0.353 |                   |
| - | 8  | 596_598   | 3ijz.3_In_Frame_I                              | NM_001102653 | NP_001096123 | Q01804 | OTUD4_HUMAN  |                               | 3  | ACATCAGCAGC/    | 0.34  |                   |
| + | 20 | 2289_2291 | 10isc.2_In_Frame_                              | NM_021942    | NP_068761    | Q72392 | CD041_HUMAN  |                               | 0  | CCAGGGAGGAG/    | 0.463 |                   |
| + | 20 | 6893_6895 | jhm.2_In_Frame_I                               | NM_178140    | NP_835260    | O15018 | PDZD2_HUMAN  | Ser-rich.                     | 9  | GGCGTCTCCTC     | 0.527 | 744453;rs75551718 |
| + | 7  | 1394      |                                                | NM_002439    | NP_002430    | P20585 | MSH3_HUMAN   |                               | 4  | GGGACAAAAAA/    | 0.348 |                   |
| + | 2  | 237_240   | _p.K19fs AP3S1_L                               | NM_001284    | NP_001275    | Q92572 | AP3S1_HUMAN  |                               | 0  | ATCTAAGAGAGA    | 0.304 | rs80118146        |
| + | 3  | 465       | L21_uc003lbc.2_f                               | NM_012159    | NP_036291    | Q9UKT6 | FXL21_HUMAN  |                               | 1  | ACCTTGGGCTT     | 0.428 |                   |
| - | 20 | 2629_2630 | 2_Intron BRD8_uc                               | NM_139199    | NP_631938    | Q9H0E9 | BRD8_HUMAN   |                               | 1  | TACAAAGAGAGA    | 0.505 |                   |
| - | 3  | 326       |                                                | NM_145266    | NP_660309    | Q8WVJ2 | NUDC2_HUMAN  |                               | 0  | TCCTCTAAAAAA    | 0.282 |                   |
| + | 5  | 668_670   | mdf.1_In_Frame_                                | NM_006650    | NP_006641    | Q6PUV4 | CPLX2_HUMAN  |                               | 1  | GGACGAGGAGG     | 0.645 |                   |
| + | 7  | 2110      | rf25_uc003mdr.3_RNA C5orf25_uc003mdv.2_Frame_S |              |              | Q8NDZ2 | CE025_HUMAN  |                               | 0  | AGTCCTTTTCC     | 0.488 |                   |
| - | 2  | 159       | _Shift_Del_p.L9fs                              | NM_018303    | NP_060773    | Q96KP1 | EXOC2_HUMAN  | IPT/TIG.                      | 7  | CAAAAGGGGGG     | 0.483 |                   |
| + | 1  | 422_423   | AN4_uc011dlb.1_                                | NM_001007531 | NP_001007532 | Q5M9Q1 | NKAPL_HUMAN  |                               | 2  | TGAAGGAGAGAC    | 0.535 |                   |



|   |    |           |                    |              |              |         |             |                              |    |                      |       |             |
|---|----|-----------|--------------------|--------------|--------------|---------|-------------|------------------------------|----|----------------------|-------|-------------|
| + | 4  | 957       | nkz.2_Frame_Shif   | NM_032507    | NP_115896    | Q96JS3  | PGBD1_HUMAN |                              | 4  | 'CCAGGAAAAAA'        | 0.502 |             |
| - | 2  | 381_382   | nnl.3_Frame_Shif   | NM_001109809 | NP_001103279 | Q9NU63  | ZFP57_HUMAN | KRAB.                        | 5  | 'TTCTTAAAGGTT'       | 0.525 |             |
| + | 5  | 799       | i_uc003nnz.3_Frar  | NM_002127    | NP_002118    | P17693  | HLAG_HUMAN  | ar (Potential). Alpha-3.     | 4  | 'TCAGACCCCCC'        | 0.537 |             |
| - | 5  | 1557_1559 | '6_377EE>E DAX>    | NM_001350    | NP_001341    | Q9UER7  | DAXX_HUMAN  | ial. Necessary for interacti | 23 | 'tcttcttctctctctctcc | 0.251 |             |
| + | 1  | 499_501   | ε_Del_p.17_18LL>   | NM_006586    | NP_006577    | Q9BT09  | CNPY3_HUMAN |                              | 1  | 'CTTCCCTtgctgctg     | 0.606 |             |
| - | 8  | 1152      | p.K221fs ICK_uc0   | NM_016513    | NP_057597    | Q9UPZ9  | ICK_HUMAN   | rotein kinase.               | 5  | 'ATTACCTTTTTTTG      | 0.502 |             |
| + | 9  | 1431      | X43_uc011dyn.1_F   | NM_018665    | NP_061135    | Q9NXZ2  | DDX43_HUMAN | ase ATP-binding.             | 4  | 'AGCTTAAAAAA'        | 0.323 |             |
| - | 3  | 477       | ΔLC17A5_uc011dy    | NM_012434    | NP_036566    | Q9NRA2  | S17A5_HUMAN | ical; (Potential).           | 6  | 'GCCATAAAAAAA'       | 0.423 |             |
| + | 22 | 2625_2626 | jb.3_Frame_Shift_  | NM_003318    | NP_003309    | P33981  | TTK_HUMAN   | p.R838fs*4(3)                | 11 | 'CTTTTGAAAAAA'       | 0.302 |             |
| + | 11 | 1515      | _p.K287fs C6orf16  | NM_001031743 | NP_001026913 | Q81YR0  | CF165_HUMAN |                              | 1  | 'AGGCCAAAAAA'        | 0.269 |             |
| - | 1  | 195_197   | job.1_In_Frame_I   | NM_145331    | NP_663304    | O43318  | M3K7_HUMAN  | Poly-Ser.                    | 6  | 'AGACGAGGAGG         | 0.655 |             |
| - | 7  | 1235_1236 | edm.1_Frame_Shi    | NM_000416    | NP_000407    | P15260  | INGR1_HUMAN | lasmic (Potential).          | 1  | 'AAGAACTCTCTC        | 0.431 |             |
| - | 1  | 307_309   |                    | NM_175747    | NP_786923    | Q7RTU3  | OLIG3_HUMAN | Poly-His.                    | 0  | 'tgggtggtggcggtg     | 0.488 |             |
| + | 2  | 498       | uc003qid.1_5'Flanl | NM_015439    | NP_056254    | Q8IWP9  | CC28A_HUMAN |                              | 0  | 'ATGCCAAAAAA'        | 0.413 |             |
| + | 9  | 3753_3755 | 2_3'UTR GRM1_uc    | NM_000838    | NP_000829    | Q13255  | GRM1_HUMAN  | dic). Cytoplasmic (Potentia  | 19 | 'CGCGGACGACG         | 0.65  |             |
| + | 26 | 3025_3026 | ime_Shift_Ins_p.D  | NM_015440    | NP_056255    | Q6UB35  | C1TM_HUMAN  | hydrofolate synthetase.      | 4  | 'CCTGACAAAAAA'       | 0.48  |             |
| + | 6  | 694_695   | p.L112fs ZDHC4     | NM_001134388 | NP_001127860 | Q9NPG8  | ZDHC4_HUMAN | ical; (Potential).           | 2  | 'AACCTGTTTTTT        | 0.45  |             |
| + | 4  | 1034_1036 |                    | NM_001159279 | NP_001152751 |         |             |                              | 2  | 'CCGCTCTTCAA'        | 0.419 |             |
| - | 5  | 964       | 2_Intron GPC2_uc   | NM_152742    | NP_689955    | Q8N158  | GPC2_HUMAN  |                              | 2  | 'GGGGACCCCCC         | 0.642 |             |
| - | 9  | 2023_2025 |                    | NM_022574    | NP_072096    | O75420  | PERQ1_HUMAN | Poly-Glu.                    | 2  | 'AGGTTCTCTCT'        | 0.675 | rs142340746 |
| + | 5  | 927_929   | 10 jz.1_In_Frame_I | NM_014491    | NP_055306    | O15409  | FOXP2_HUMAN | Gln-rich.                    | 8  | 'cagcaacagcagcag     | 0.172 |             |
| - | 7  | 1685_1687 | 1kvs.1_In_Frame_   | NM_007349    | NP_031375    | Q6ZW49  | PAX1_HUMAN  | Gln-rich.                    | 5  | 'TTTGCATctgctgct'    | 0.227 |             |
| + | 11 | 2081_2082 | kvv.1_Frame_Shif   | NM_053043    | NP_444271    | Q96EV2  | RBM33_HUMAN | Pro-rich.                    | 1  | 'CTGCCACACAC         | 0.53  |             |
| + | 4  | 381       | _p.K105fs MCPH1    | NM_024596    | NP_078872    | Q8NEM0  | MCPH1_HUMAN |                              | 2  | 'CTAATTAAAAAA'       | 0.274 |             |
| - | 4  | 4130_4131 |                    | NM_178857    | NP_849188    | Q8IWN7  | RP1L1_HUMAN |                              | 8  | 'ATTGCACCTCTT'       | 0.297 |             |
| - | 7  | 1394_1395 | ss.2_Frame_Shift   | NM_139167    | NP_631906    | Q96LD1  | SGCZ_HUMAN  | ellular (Potential).         | 3  | 'CCTTCTGTAGAT        | 0.505 |             |
| + | 3  | 289_290   | l_p.S58fs ERLIN2   | NM_007175    | NP_009106    | O94905  | ERLN2_HUMAN | renal (Potential).           | 0  | 'ACATCATATAAG'       | 0.515 |             |
| - | 4  | 3431      | ame_Shift_Del_p.k  | NM_001002814 | NP_001002814 | Q6WKZ4  | RFIP1_HUMAN |                              | 3  | 'TGTGGCTTTTTT'       | 0.542 |             |
| - | 18 | 3959      | .E1139fs MYST3_u   | NM_001099412 | NP_001092882 | Q92794  | MYST3_HUMAN |                              | 7  | 'TGGCTCAAGAG'        | 0.428 |             |
| - | 20 | 3283_3284 | Shift_Del_p.Q419f  | NM_006421    | NP_006412    | Q9Y6D6  | BIG1_HUMAN  |                              | 8  | 'AATCTTGTAGAC'       | 0.337 |             |
| + | 17 | 2019      | me_Shift_Del_p.F:  | NM_052832    | NP_439897    | Q8TE54  | S26A7_HUMAN | otoplasmic (Potential).      | 2  | 'TTTACCTTTTTTC       | 0.403 |             |
| + | 2  | 969       |                    | NM_030788    | NP_110415    | Q9H295  | TM7S4_HUMAN | ical; (Potential).           | 4  | 'CATCTGGGTGC         | 0.468 |             |
| - | 13 | 1698      | D2_uc003yqi.3_Rl   | NM_014109    | NP_054828    | Q6PL18  | ATAD2_HUMAN |                              | 2  | 'TCGTCAAAAAA'        | 0.413 |             |
| + | 28 | 3908      | uc003yqy.1_Intron  | NM_001039112 | NP_001034201 | Q2WVGJ9 | FR1L6_HUMAN | lasmic (Potential).          | 11 | 'AAGGGAAAAAA'        | 0.388 |             |
| - | 12 | 2033      |                    | NM_152888    | NP_690848    | Q8NFW1  | COMA1_HUMAN | ly-rich. Collagen-like 2.    | 13 | 'CACCCTTTTCCC        | 0.463 |             |
| - | 30 | 4625      | ae.1_Splice_Site_  | NM_201380    | NP_958782    | Q15149  | PLEC_HUMAN  |                              | 9  | 'CTGTACCTCTCT'       | 0.621 |             |
| + | 2  | 492_493   | p.F109fs GRINA_u   | NM_001009184 | NP_001009184 | Q7Z429  | GRINA_HUMAN | Pro-rich.                    | 1  | 'CCCCTTCCCCC         | 0.683 |             |
| + | 11 | 1303_1304 | p.C375fs ADAMTS    | NM_001040272 | NP_001035362 | Q8N6G6  | ATL1_HUMAN  | SP type-1 2.                 | 5  | 'CGTGTGGGGGC'        | 0.584 |             |
| - | 7  | 1190_1192 | kh.1_5'UTR VCP_    | NM_007126    | NP_009057    | P55072  | TERA_HUMAN  |                              | 1  | 'GATCAAGAAGAA'       | 0.463 |             |
| - | 17 | 2544_2546 | :841del RALGDS_    | NM_006266    | NP_006257    | Q12967  | GNDS_HUMAN  | ociating. Poly-Glu.          | 3  | 'CCGGCTCCTCC'        | 0.606 | rs35200098  |
| + | 13 | 2110_2112 | E598del GRIN1_uc   | NM_007327    | NP_015566    | Q05586  | NMDZ1_HUMAN | lasmic (Potential).          | 1  | 'CAGCGAGGAGG         | 0.739 |             |
| - | 4  | 458_459   |                    | NM_138462    | NP_612471    | Q96E35  | ZMY19_HUMAN |                              | 1  | 'CCACGCCCCCC'        | 0.634 |             |
| - | 9  | 1366      | R3B_uc004cpf.2_!   | NM_013239    | NP_037371    | Q9Y5P8  | P2R3B_HUMAN | EF-hand.                     | 0  | 'TCGGTGTTTTTT'       | 0.567 |             |
| - | 1  | 581       | 1L2_uc011mqj.1_I   | NM_021963    | NP_068798    | Q9ULW6  | NP1L2_HUMAN |                              | 1  | 'CCACCTTTTTTC        | 0.498 |             |
| - | 1  | 1805_1806 |                    | NM_003604    | NP_003595    | O14654  | IRS4_HUMAN  |                              | 10 | 'CCTTTGCCCCCC        | 0.545 |             |
| + | 20 | 3644      | me_Shift_Del_p.A:  | NM_001001344 | NP_001001344 | Q16720  | AT2B3_HUMAN | lasmic (Potential).          | 1  | 'CCGGGCCCCCC         | 0.587 | rs149428057 |
| - | 5  | 924_925   | ΔIQ3_uc001dfz.3_f  | NM_001105659 | NP_001099129 | A6PVS8  | LRIQ3_HUMAN |                              | 2  | 'CTGCTGTTTTTT'       | 0.327 |             |

|   |    |           |                   |              |              |        |              |                              |    |                 |       |                    |
|---|----|-----------|-------------------|--------------|--------------|--------|--------------|------------------------------|----|-----------------|-------|--------------------|
| + | 2  | 286_288   | me_Del_p.Q49del   | NM_030965    | NP_112227    | Q9BVH7 | SIA7E_HUMAN  | Luminal (Potential).         | 2  | GCCCCgcagcag    | 0.581 | rs113832855        |
| - | 7  | 878       | otn.1_Frame_Shift | NM_000350    | NP_000341    | P78363 | ABCA4_HUMAN  | Extracellular.               | 12 | AGTGTGGGAAG     | 0.368 |                    |
| + | 5  | 713       | oyy.1_Frame_Shift | NM_006099    | NP_006090    | Q9Y6X2 | PIAS3_HUMAN  | PINIT.                       | 1  | TATTTTCCCCCA    | 0.463 |                    |
| - | 13 | 1861      | Opac.1_Intron NBF | NM_017940    | NP_060410    | Q86T75 | NBPF6_HUMAN  | NBPF 3.                      | 0  | TCCTCCTTTTTC    | 0.463 |                    |
| - | 2  | 3390_3392 | vne.1_In_Frame_C  | NM_007113    | NP_009044    | Q07283 | TRHY_HUMAN   | 30 AA tandem repeats.        | 5  | ggcgcttctcttccc | 0.241 |                    |
| + | 9  | 1814_1815 | 1_Frame_Shift_De  | NM_170707    | NP_733821    | P02545 | LMNA_HUMAN   | Tail.                        | 2  | GGCTGCGGGA      | 0.624 | rs149339264        |
| - | 1  | 356_358   |                   | NM_030916    | NP_112178    | Q96NY8 | PVRL4_HUMAN  |                              | 2  | CAGTAGCAGCA     | 0.512 |                    |
| + | 7  | 1210_1211 | _Ins_p.294_295ins | NM_005807    | NP_005798    | Q92954 | PRG4_HUMAN   | K-X-P-X-P-T-T-X; approx      | 1  | CCACCAAGTCTG    | 0.634 |                    |
| - | 8  | 1247      |                   | NM_001618    | NP_001609    | P09874 | PARP1_HUMAN  |                              | 10 | TCTTCTGGGGGG    | 0.502 |                    |
| + | 1  | 255       |                   | NM_001004698 | NP_001004698 | A6NFC9 | OR2W5_HUMAN  |                              | 3  | AACCTGGGGGG     | 0.532 |                    |
| - | 1  | 2290      | vw.1_RNA PGR_u    | NM_000926    | NP_000917    | P06401 | PRGR_HUMAN   | ulating, Pro-Rich.           | 4  | TGAGGCCGAGT     | 0.622 |                    |
| - | 23 | 3960      | qie.1_Frame_Shift | NM_001042603 | NP_001036068 | P29375 | KDM5A_HUMAN  | PHD-type 2.                  | 3  | GATCCTTTTTTT    | 0.478 |                    |
| - | 3  | 539_541   |                   | NM_006248    | NP_006239    |        |              |                              | 0  | GGACTTGTGTG     | 0.596 |                    |
| - | 2  | 1302      | raq.2_Frame_Shift | NM_006143    | NP_006134    | Q15760 | GPR19_HUMAN  | lasmic (Potential).          | 1  | ACGTAGTTTTTT    | 0.398 |                    |
| + | 9  | 808_809   | ame_Shift_Del_p   | NM_020183    | NP_064568    | Q8WYA1 | BMAL2_HUMAN  |                              | 2  | AAGTTCACAGTA    | 0.396 |                    |
| - | 15 | 2654      | vfj.2_Frame_Shift | NM_012141    | NP_036273    | Q9UL03 | INT6_HUMAN   |                              | 2  | FGGTCCTTTTCC    | 0.398 |                    |
| + | 3  | 540_541   | lka.1_Frame_Shift | NM_005561    | NP_005552    | P11279 | LAMP1_HUMAN  | ntial); First luminal domain | 2  | CTTCTGACCCCA    | 0.436 |                    |
| + | 3  | 1978      | _p.L550fs ZNF828  | NM_001164144 | NP_001157616 | Q96JM3 | ZN828_HUMAN  | quired for the attachment o  | 2  | TGCCCTTTTTC     | 0.517 |                    |
| + | 9  | 960_962   | ne_Del_p.E294del  | NM_001099661 | NP_001093131 | B5ME19 | B5ME19_HUMAN |                              | 0  | GGATGAGGAGG     | 0.562 |                    |
| + | 2  | 942       | Frame_Shift_Del_  | NM_145239    | NP_660282    | Q726L0 | PRRT2_HUMAN  | ar (Potential); Pro-rich.    | 0  | TGGGGCCCCCC     | 0.652 |                    |
| - | 14 | 1558      | lc002hkz.1_5'Flan | NM_001001417 | NP_001001417 | Q8IZP1 | TBC3A_HUMAN  |                              | 0  | ATGGCGGAACCA    | 0.642 |                    |
| - | 2  | 513       | BXO17_uc002okf    | NM_024907    | NP_079183    | Q96EF6 | FBX17_HUMAN  | FBA.                         | 0  | CTCCGCAGGAG     | 0.532 |                    |
| - | 3  | 316       | _p.P92fs HS1BP3   | NM_022460    | NP_071905    | Q53T59 | H1BP3_HUMAN  | PX.                          | 1  | GTAGTGGGGGG     | 0.537 | rs77941615         |
| + | 30 | 3643_3645 | k.2_In_Frame_De   | NM_003494    | NP_003485    | O75923 | DYSF_HUMAN   | ic (Potential); Arg-rich.    | 7  | CCTTCGCGCGC     | 0.655 |                    |
| + | 6  | 1148      |                   | NM_173511    | NP_775782    | Q6P1L5 | F117B_HUMAN  |                              | 1  | TCCACCCCCC      | 0.488 |                    |
| + | 1  | 182_184   | 'P_uc002vsr.2_5'F | NM_001632    | NP_001623    | P05187 | PPB1_HUMAN   |                              | 1  | CCCTGCAtgtgctg  | 0.542 |                    |
| + | 1  | 270_272   | 2wil.2_In_Frame_  | NM_139321    | NP_647537    | O75882 | ATRN_HUMAN   | Leu-rich.                    | 2  | GGCCACGgtgctg   | 0.424 |                    |
| - | 32 | 3210_3211 |                   | NM_014258    | NP_055073    | Q9BX26 | SYCP2_HUMAN  |                              | 5  | TTTATAGTTTTTT   | 0.327 |                    |
| - | 5  | 575_592   | RT_uc002yry.2_In  | NM_000819    | NP_000810    | P22102 | PUR2_HUMAN   | similarity); ATP-grasp.      | 1  | GACCACTGGCCT    | 0.422 |                    |
| + | 8  | 833_835   | zek.2_In_Frame_   | NM_002626    | NP_002617    | P17858 | K6PL_HUMAN   |                              | 0  | CTGAACATCATC    | 0.655 |                    |
| - | 4  | 571_573   | i.1_RNA PTTG1IP   | NM_004339    | NP_004330    | P53801 | PTTG_HUMAN   | Cytoplasmic (Potential).     | 1  | TCCTGCAGCAGC    | 0.616 |                    |
| - | 15 | 2101      | _p.V281fs TOP3B   | NM_003935    | NP_003926    | Q95985 | TOP3B_HUMAN  |                              | 1  | GAGCACCAGCT     | 0.642 |                    |
| - | 3  | 591       | _p.G163fs DDX17   | NM_001098504 | NP_001091974 | Q92841 | DDX17_HUMAN  |                              | 4  | CATCTCCCCCC     | 0.378 |                    |
| + | 2  | 1890      | i.3_Intron SYNGR1 | NM_006116    | NP_006107    | Q15750 | TAB1_HUMAN   |                              | 1  | TGGGACCCCCC     | 0.592 |                    |
| + | 2  | 1293_1295 | y.3_RNA LNP1_uc   | NM_001085451 | NP_001078920 | A1A4G5 | LNP1_HUMAN   | Poly-Asp.                    | 0  | ACAAGATGATG     | 0.507 |                    |
| + | 10 | 1570_1572 | 3fns.2_In_Frame_  | NM_198241    | NP_937884    | Q04637 | IF4G1_HUMAN  | Poly-Glu.                    | 7  | GAAATGgaagaag   | 0.443 |                    |
| - | 2  | 1333      |                   | NM_004488    | NP_004479    | P40197 | GPV_HUMAN    | lar (Potential); LRRCT.      | 3  | AGCCACCCAG      | 0.756 |                    |
| + | 7  | 528_529   | _p.C62fs TMEM17   | NM_032326    | NP_115702    | Q9BSA9 | TM175_HUMAN  | ical; (Potential).           | 0  | TGTTCTGTGTGT    | 0.406 |                    |
| + | 1  | 3102_3103 |                   | NM_175918    | NP_787114    | Q8N1N5 | CRPAK_HUMAN  | 1                            | 0  | CACACATGCCCA    | 0.644 | rs144787346        |
| + | 1  | 3561_3562 |                   | NM_175918    | NP_787114    | Q8N1N5 | CRPAK_HUMAN  | 5                            | 0  | CTGCTCACACGT    | 0.658 |                    |
| - | 8  | 1326      | Del_p.T164fs NOP  | NM_003703    | NP_003694    | P78316 | NOP14_HUMAN  |                              | 1  | TCTCTGGTAGC     | 0.537 |                    |
| + | 16 | 4429_4430 | _p.G527fs RGS12   | NM_198229    | NP_937872    | O14924 | RGS12_HUMAN  |                              | 1  | ATTGGGAAAAA     | 0.332 |                    |
| + | 3  | 338_339   |                   | NM_021225    | NP_067048    | Q99935 | PROL1_HUMAN  | Pro-rich.                    | 1  | TGACTCAAGACT    | 0.495 |                    |
| - | 11 | 1436_1438 | hnj.2_In_Frame_D  | NM_001077207 | NP_001070675 | O94979 | SC31A_HUMAN  | ction with SEC13.            | 8  | ATGGTGCTGCTG    | 0.448 | 843621;rs140634448 |
| + | 29 | 7437_7438 | jcl.1_Frame_Shift | NM_005509    | NP_005500    | Q9Y485 | DMXL1_HUMAN  |                              | 2  | ACTGGCGGTTAA    | 0.421 | rs17144964         |
| + | 1  | 1338_1340 |                   | NM_001453    | NP_001444    | Q12948 | FOXC1_HUMAN  | Poly-Gly.                    | 1  | GAGTCAcggggcg   | 0.537 |                    |
| - | 4  | 1405_1407 | .E433del TUBB2A   | NM_001069    | NP_001060    | Q13885 | TBB2A_HUMAN  |                              | 1  | TGCCCTCTCTC     | 0.532 |                    |

|   |    |                                                                  |              |              |        |                                           |    |                  |       |                       |
|---|----|------------------------------------------------------------------|--------------|--------------|--------|-------------------------------------------|----|------------------|-------|-----------------------|
| - | 4  | 1510_1512_Frame_Del_p.E3f                                        | NM_178012    | NP_821080    | Q9BVA1 | TBB2B_HUMAN                               | 1  | :TCGCCCTCCTC     | 0.65  |                       |
| + | 5  | 770_774_11dme.1_Intron HLA-J_uc003nou.3_RNA HLA-J_uc003nov.3_RNA |              |              |        |                                           | 0  | CTGACTTCTCTT     | 0.488 |                       |
| - | 5  | 559                                                              | NM_000846    | NP_000837    | P09210 | GSTA2_HUMAN ST C-terminal.                | 1  | :TTTTTCAAAGGC    | 0.433 |                       |
| - | 5  | 501                                                              | NM_145740    | NP_665683    | P08263 | GSTA1_HUMAN ST C-terminal.                | 1  | :TAGCGATTTTTT    | 0.433 |                       |
| - | 8  | 1152_p.K221fs ICK_uc0                                            | NM_016513    | NP_057597    | Q9UPZ9 | ICK_HUMAN rotein kinase.                  | 5  | ATTACCTTTTTTTG   | 0.502 |                       |
| + | 5  | 1030_1031 pre.2_Frame_Shif                                       | NM_001198    | NP_001189    | O75626 | PRDM1_HUMAN                               | 56 | AGGACCTCTACC     | 0.475 |                       |
| + | 26 | 3025_3026 ime_Shift_Ins_p.D                                      | NM_015440    | NP_056255    | Q6UB35 | C1TM_HUMAN hydrofolate synthetase.        | 4  | CCTGACAAAAAA     | 0.48  |                       |
| + | 6  | 695_p.F113fs ZDHC4                                               | NM_001134388 | NP_001127860 | Q9NPG8 | ZDHC4_HUMAN ical; (Potential).            | 2  | AACCTGTTTTTTT    | 0.453 |                       |
| + | 10 | 1740_LF1_uc003xyf.2_F                                            | NM_015170    | NP_055985    | Q8IWU6 | SULF1_HUMAN                               | 7  | TGTGCCTTTTTT     | 0.408 |                       |
| + | 17 | 2351_gr.1_RNA INTS8_i                                            | NM_017864    | NP_060334    | Q75QN2 | INT8_HUMAN                                | 0  | :TTTAATAAAAAACA  | 0.363 |                       |
| - | 11 | 2666_2668                                                        | NM_015117    | NP_055932    | Q8IXZ2 | ZC3H3_HUMAN Poly-Ser. p.S879F(1)          | 1  | iggggatgaggaggag | 0.552 | rs2272753;rs137878905 |
| + | 8  | 1061_OFD1_uc004cvs.3                                             | NM_003611    | NP_003602    | O75665 | OFD1_HUMAN Potential.                     | 0  | :GAAGCAAAAAA     | 0.299 |                       |
| + | 20 | 2671_2673 E837del CNKSR2                                         | NM_014927    | NP_055742    | Q8WXI2 | CNKR2_HUMAN ential. Poly-Glu.             | 2  | jaggaagaggaggag  | 0.379 |                       |
| - | 14 | 4550                                                             | NM_000132    | NP_000123    | P00451 | FA8_HUMAN B.                              | 11 | AGGTTATTTTTTT    | 0.413 |                       |
| + | 5  | 533_k PUSL1_uc010ny                                              | NM_153339    | NP_699170    | Q8N0Z8 | PUSL1_HUMAN                               | 1  | GGAAGCCGCC       | 0.716 |                       |
| + | 3  | 360_ijf.1_Nonsense_Mt                                            | NM_007033    | NP_008964    | O15258 | RER1_HUMAN ical; (Potential).             | 0  | :ATGATTCGAGTT    | 0.522 |                       |
| - | 49 | 6990_sc.2_Missense_Mt                                            | NM_004958    | NP_004949    | P42345 | MTOR_HUMAN PI3K/PI4K.                     | 29 | TGACGGCATGCT     | 0.567 |                       |
| + | 11 | 2509_asi.1_Nonsense_M                                            | NM_020780    | NP_065831    | Q9P2K9 | PTHD2_HUMAN xellular (Potential).         | 7  | :TGTCCAGGAG      | 0.652 |                       |
| + | 3  | 512_.2_Missense_Mut                                              | NM_033182    | NP_149438    | Q9H4M3 | FBX44_HUMAN FBA.                          | 1  | :TTACTTCATATTA   | 0.527 |                       |
| + | 4  | 897_aug.1_Missense_M                                             | NM_001103170 | NP_001096640 | Q5VUY0 | ADCL3_HUMAN                               | 0  | :TCTGGGAAAAAG    | 0.478 |                       |
| - | 1  | 370_0obf.1_Missense_M                                            | NM_001146181 | NP_001139653 | B7ZW38 | B7ZW38_HUMAN                              | 0  | TTTCCTCGGTTT     | 0.483 |                       |
| - | 1  | 273                                                              | NM_001136561 | NP_001130033 | B2RXH8 | B2RXH8_HUMAN                              | 0  | TTTTCTCCTTATC    | 0.478 |                       |
| - | 10 | 1420_F1_uc001ayz.1_5'                                            | NM_017940    | NP_060410    | Q3BBV0 | NBPF1_HUMAN NBPF 1.                       | 0  | :AGCCTCCTCAA     | 0.438 |                       |
| + | 6  | 656                                                              | NM_016183    | NP_057267    | Q9UKD2 | MRT4_HUMAN                                | 0  | :TTTCACTGTGAC    | 0.587 |                       |
| - | 8  | 603_604_bew.2_Missense_M                                         | NM_002885    | NP_002876    | P47736 | RPGP1_HUMAN                               | 3  | CTTGAGTGAGAA     | 0.604 |                       |
| + | 11 | 1401_AL3_uc009vrc.2_M                                            | NM_020448    | NP_065181    | Q6P499 | NPAL3_HUMAN                               | 0  | TTTGAGCCCTAT     | 0.448 |                       |
| - | 9  | 1071_ble.3_Missense_M                                            | NM_000437    | NP_000428    | Q99487 | PAFA2_HUMAN                               | 2  | GGCACATATCTT     | 0.483 |                       |
| - | 4  | 960_n_p.T281 ZNF683                                              | NM_173574    | NP_775845    | Q8IZ20 | ZN683_HUMAN                               | 0  | :AGTCGGTTGGG     | 0.647 |                       |
| + | 9  | 861_p.S255F KPNA6_                                               | NM_012316    | NP_036448    | O60684 | IMA7_HUMAN ARM 5.                         | 0  | :ACTGTCTCGCC     | 0.507 |                       |
| + | 2  | 1044_p.P395L GJA4_uc                                             | NM_002060    | NP_002051    | P35212 | CXA4_HUMAN lasmic (Potential).            | 1  | :AAAAACCCCAAA    | 0.582 |                       |
| - | 4  | 395_sax.1_Missense_M                                             | NM_000760    | NP_000751    | Q99062 | CSF3R_HUMAN x. Extracellular (Potential). | 3  | CCTGCCCCCGG      | 0.602 |                       |
| + | 11 | 1439                                                             | NM_015284    | NP_056099    | Q5T011 | SZT2_HUMAN                                | 0  | :GGCTTCCCAGAA    | 0.562 |                       |
| + | 7  | 1020_ALH_uc001cpv.2_In                                           | NM_001441    | NP_001432    | O00519 | FAAH1_HUMAN smic (By similarity).         | 2  | :CTTGCCCTTCA     | 0.662 |                       |
| + | 3  | 764                                                              | NM_182532    | NP_872338    | Q8N0U2 | TMM61_HUMAN                               | 0  | :GGGATGCCCTG     | 0.637 |                       |
| + | 11 | 1803                                                             | NM_000562    | NP_000553    | P07357 | CO8A_HUMAN rSP type-1 2.                  | 3  | CAGGAAAGGAG      | 0.572 |                       |
| - | 44 | 3706_.E1142K COL11A1                                             | NM_001854    | NP_001845    | P12107 | COBA1_HUMAN le-helical region.            | 12 | CAATTTACACCTC    | 0.318 |                       |
| + | 7  | 2014_v.3_Missense_Mu                                             | NM_172212    | NP_757351    | P09603 | CSF1_HUMAN lasmic (Potential).            | 1  | ATTCTCCCTTGG     | 0.637 |                       |
| - | 11 | 1869_p.P567S OVGP1_                                              | NM_002557    | NP_002548    | Q12889 | OVGP1_HUMAN                               | 5  | CCTGGGGTGAG      | 0.517 |                       |
| + | 7  | 1205_p.P342S MAGI3_i                                             | NM_001142782 | NP_001136254 | Q5TCQ9 | MAGI3_HUMAN WW 2.                         | 6  | :AGCTTCCATTATC   | 0.328 |                       |
| - | 6  | 1367_sau.2_Missense_Mt                                           | NM_205848    | NP_995320    | Q5T7P8 | SYT6_HUMAN mic (Potential). C2 2.         | 5  | :ATTGTGGCCCA     | 0.592 |                       |
| + | 11 | 951_se_Mutation_p.E2                                             | NM_003176    | NP_003167    | Q15431 | SYCP1_HUMAN Potential.                    | 1  | GATTATGAAAAAA    | 0.229 |                       |
| - | 29 | 4314                                                             | NM_206996    | NP_996879    | Q6Q759 | SPG17_HUMAN                               | 6  | :CAATGGGGTCA     | 0.398 |                       |
| - | 28 | 5279                                                             | NM_024408    | NP_077719    | Q04721 | NOTC2_HUMAN ion (NRR). Extracellular (P   | 27 | :AGTGGCTTCTG     | 0.443 |                       |
| + | 23 | 2720_010oyd.1_Missens                                            | NM_001037675 | NP_001032764 | Q3BBV1 | NBPFK_HUMAN NBPF 7.                       | 0  | :TGATGGATGATG    | 0.463 | rs28736716            |
| + | 1  | 282                                                              | NM_017860    | NP_060330    | Q9BUN1 | CA056_HUMAN                               | 0  | :TGGCCGACGCC     | 0.657 |                       |
| - | 14 | 2518_s.Q694E POGZ_uc                                             | NM_015100    | NP_055915    | Q723K3 | POGZ_HUMAN                                | 3  | :CTTCTGGATGCT    | 0.557 |                       |
| - | 8  | 1274_RC_uc010pdo.1_N                                             | NM_005060    | NP_005051    | P51449 | RORG_HUMAN gand-binding.                  | 2  | AGGCTCGGAAC      | 0.552 |                       |

|   |    |           |                                                 |              |              |        |             |                            |      |                   |       |             |
|---|----|-----------|-------------------------------------------------|--------------|--------------|--------|-------------|----------------------------|------|-------------------|-------|-------------|
| - | 2  | 3373      | e.1_Missense_Mu                                 | NM_007113    | NP_009044    | Q07283 | TRHY_HUMAN  | 30 AA tandem repeats.      | 5    | gttcctctcagcagctg | 0.224 |             |
| - | 3  | 754       |                                                 | NM_001122965 | NP_001116437 | Q6XPR3 | RPTN_HUMAN  | Gln-rich.                  | 0    | 'CACACCGATTTA     | 0.413 |             |
| - | 3  | 9949      |                                                 | NM_002016    | NP_002007    | P20930 | FILA_HUMAN  | grin 20. Ser-rich.         | 16   | iGTGGCGGGATC      | 0.567 |             |
| - | 3  | 566       | uc001ezv.2_Intron                               | NM_001014342 | NP_001014364 | Q5D862 | FILA2_HUMAN | Ser-rich.                  | 17   | fACCTTGTCTTCC     | 0.493 |             |
| + | 1  | 40        |                                                 | NM_178354    | NP_848131    | Q5T754 | LCE1F_HUMAN | Pro-rich.                  | 0    | \GCCcctcccaagtg   | 0.358 |             |
| + | 3  | 268       | l_5'Flank PEAR1_                                | NM_001080471 | NP_001073940 | Q5VY43 | PEAR1_HUMAN | EMI.                       | 3    | 'GCTCCCCTCAG,     | 0.672 |             |
| + | 3  | 681       | 1C_uc001frv.2_5'L                               | NM_001765    | NP_001756    | P29017 | CD1C_HUMAN  | cellular (Potential).      | 4    | \AGAAGGCTTCT'     | 0.463 |             |
| - | 1  | 864       |                                                 | NM_001004476 | NP_001004476 | Q6IF99 | O10K2_HUMAN | Name=7; (Potential).       | 1    | ATAAATCATTGGG     | 0.333 | rs137874220 |
| - | 1  | 460       |                                                 | NM_001004467 | NP_001004467 | Q5JRS4 | O10J3_HUMAN | Name=4; (Potential).       | 2    | 'GCCAAGGCCAA'     | 0.507 |             |
| + | 15 | 5371      | \A2_uc009www.2_                                 | NM_020318    | NP_064714    | Q9BXP8 | PAPP2_HUMAN | Sushi 1.                   | 16   | CTTGATCATGCT'     | 0.507 |             |
| - | 3  | 772       | e_Mutation_p.P18'                               | NM_004319    | NP_004310    | O14525 | ASTN1_HUMAN |                            | 15   | GCTGCGGGACC       | 0.612 |             |
| + | 34 | 7491      | _p.P505S CEP350_                                | NM_014810    | NP_055625    | Q5VT06 | CE350_HUMAN |                            | 4    | fTTGCTCCTAAAC     | 0.338 |             |
| + | 1  | 406       | jpx.2_Missense_IV                               | NM_002293    | NP_002284    | P11047 | LAMC1_HUMAN | inin N-terminal.           | 5    | \GCGCTGCATGC'     | 0.522 |             |
| + | 22 | 3592      | p.V1093A LAMC2_                                 | NM_005562    | NP_005553    | Q13753 | LAMC2_HUMAN | omain II and I.            | 3    | \TGCGGTACAA'      | 0.483 |             |
| + | 10 | 3451      | _p.S644F NAV1_u'                                | NM_020443    | NP_065176    | Q8NEY1 | NAV1_HUMAN  |                            | 4    | \CCTGTCCCTGG'     | 0.622 |             |
| + | 5  | 1182_1183 | _p.G242* LAX1_uc                                | NM_017773    | NP_060243    | Q8IWW1 | LAX1_HUMAN  | lasmic (Potential).        | 2    | GCAATGGAGAAC      | 0.5   |             |
| - | 7  | 1500      |                                                 | NM_030952    | NP_112214    | Q9H093 | NUAK2_HUMAN |                            | 5    | fAGTAGCCAGAC'     | 0.642 |             |
| - | 15 | 1908      | w.2_Missense_ML                                 | NM_006893    | NP_008824    | P41214 | EIF2D_HUMAN |                            | 0    | TCGAGGGAGCT'      | 0.532 |             |
| + | 3  | 381       | ijh.2_Missense_M                                | NM_001030287 | NP_001025458 | P18847 | ATF3_HUMAN  |                            | 0    | fAGCCCCTGAAG      | 0.438 |             |
| + | 11 | 1592_1593 | l.R431W CAPN9_u                                 | NM_006615    | NP_006606    | O14815 | CAN9_HUMAN  | Domain III.                | 1    | ATTACCCGGTGA      | 0.495 |             |
| - | 1  | 68        | \F2BP2_uc001hwl                                 | NM_182972    | NP_892017    | Q7Z5L9 | I2BP2_HUMAN |                            | 0    | CTGCCGCCGGG       | 0.647 |             |
| + | 5  | 3220      | e.1_Missense_Mul                                | NM_020066    | NP_064450    | Q9NZ56 | FMN2_HUMAN  | ro-rich. FH1.              | 12   | \TACCCCTCCCG'     | 0.711 |             |
| + | 5  | 3352      | e.1_Missense_Mul                                | NM_020066    | NP_064450    | Q9NZ56 | FMN2_HUMAN  | ro-rich. FH1.              | 12   | \TACCCCTCCCG'     | 0.731 |             |
| - | 7  | 1172      | n.3_Missense_Mutation_p.P139A PLD5_uc001hzo.1_M | NM_001004734 | NP_001004734 | Q8N7P1 | PLD5_HUMAN  |                            | 6    | \GATAGGCAGGT,     | 0.483 |             |
| - | 1  | 392       |                                                 | NM_001004734 | NP_001004734 | A6ND48 | O14I1_HUMAN | lasmic (Potential).        | 0    | \CGGCTCTGTATT     | 0.517 |             |
| + | 12 | 1255      | P_uc009xhs.1_Mis                                | NM_002627    | NP_002618    | Q01813 | K6PP_HUMAN  |                            | 3    | \AGATCCCAAAG'     | 0.602 |             |
| + | 3  | 778       | xig.2_Missense_M                                | NM_178150    | NP_835363    | Q8NFZ0 | FBX18_HUMAN |                            | 3    | \CCTCCCGGTGG      | 0.423 |             |
| + | 3  | 372_373   | _p.P91F MCM10_                                  | NM_182751    | NP_877428    | Q7L590 | MCM10_HUMAN |                            | 3    | AAGTTCCCGCAT      | 0.485 |             |
| - | 23 | 2732      | j.2_RNA NEBL_uc                                 | NM_006393    | NP_006384    | O76041 | NEBL_HUMAN  | Nebulin 22.                | 2    | AAATATGATTTTG     | 0.388 |             |
| - | 1  | 225       |                                                 | NM_001034842 | NP_001030014 | Q3KNS1 | PTHD3_HUMAN |                            | 4    | \ACTCCGATTCCT     | 0.687 |             |
| - | 2  | 1455      | nse_Mutation_p.G                                | NM_020848    | NP_065899    | Q9P266 | K1462_HUMAN |                            | 4    | TCCTCCATGAGC      | 0.522 |             |
| + | 2  |           |                                                 | NR_024524    |              |        |             |                            | 0    | \GATGGTGAGAC'     | 0.333 |             |
| - | 5  | 1593      | NF33B_uc001jag.'                                | NM_006955    | NP_008886    | Q06732 | ZN33B_HUMAN |                            | 0    | TTATCTCCTATGT     | 0.393 |             |
| + | 9  | 924       | _p.V194M RASFF.                                 | NM_032023    | NP_114412    | Q9H2L5 | RASF4_HUMAN |                            | 1    | TGGGCGTGGAA       | 0.582 |             |
| + | 3  | 1189      | \fq.1_Missense_M                                | NM_014696    | NP_055511    | O60269 | GRIN2_HUMAN |                            | 0    | \CAGTCCGTCC       | 0.672 |             |
| + | 12 | 1865      | y.1_Missense_Mul                                | NM_020549    | NP_065574    | P28329 | CLAT_HUMAN  |                            | 3    | \CATCAGATCGG'     | 0.612 |             |
| - | 10 | 1438      | _p.E439K CTNNA3                                 | NM_001127384 | NP_001120856 | Q9UI47 | CTNA3_HUMAN |                            | 8    | \ATCTTCATTTGT     | 0.308 |             |
| + | 37 | 5425      |                                                 | NM_022124    | NP_071407    | Q9H251 | CAD23_HUMAN | Extracellular (Potential). | 11   | \CACCTTCCGCA'     | 0.572 |             |
| - | 22 | 2827      | xl.1_Missense_Mu                                | NM_001161352 | NP_001154824 | Q12791 | KCMA1_HUMAN | lasmic (Potential).        | 3    | \GTACTCAATAG'     | 0.498 |             |
| + | 6  | 1308      |                                                 | NM_000314    | NP_000305    | P60484 | PTEN_HUMAN  | atase tensifs*5(1) p.H93C  | 2334 | \AAGACCATAACC     | 0.338 |             |
| - | 17 | 2003      |                                                 | NM_022451    | NP_071896    | Q8WTT2 | NOC3L_HUMAN |                            | 1    | \ATTTGGAAGAA'     | 0.383 |             |
| - | 9  | 1080_1081 | uk.1_Missense_M                                 | NM_022451    | NP_071896    | Q8WTT2 | NOC3L_HUMAN |                            | 1    | \TTTAAGGAAACT     | 0.376 |             |
| - | 1  | 103       | C8_uc010qob.1_5'                                | NM_000770    | NP_000761    | P10632 | CP2C8_HUMAN |                            | 0    | \CAAAAAGGTTCC     | 0.453 |             |
| - | 4  | 1353      | .00093_uc001kqk.                                | NM_015221    | NP_056036    | Q6XZF7 | DNMBP_HUMAN |                            | 6    | GGGATGAAAAG'      | 0.527 |             |
| - | 2  | 582       |                                                 | NM_001308    | NP_001299    | P15169 | CBPN_HUMAN  | Catalytic.                 | 4    | \TTCCGGAACCT'     | 0.602 | rs146812654 |
| - | 4  | 860       |                                                 | NM_000102    | NP_000093    | P05093 | CP17A_HUMAN |                            | 0    | \TTTTCCAGGGT'     | 0.383 |             |
| + | 17 | 2548      | .CS3_uc010qqz.1_                                | NM_014978    | NP_055793    | Q9UPU3 | SORC3_HUMAN | renal (Potential).         | 10   | \CAATCCAGCAT'     | 0.453 |             |

|   |    |      |                   |              |              |        |              |                                |  |    |               |       |             |
|---|----|------|-------------------|--------------|--------------|--------|--------------|--------------------------------|--|----|---------------|-------|-------------|
| - | 1  | 441  | iC2_uc009xxx.2_lr | NR_026715    |              |        |              |                                |  | 0  | 3CCAGGTGCCCC  | 0.537 |             |
| + | 4  | 374  | RNA HABP2_uc01    | NM_004132    | NP_004123    | Q14520 | HABP2_HUMAN  | EGF-like 1.                    |  | 3  | TCGTCCATGGG,  | 0.537 |             |
| + | 26 | 3119 | R506* DMBT1_uc0   | NM_007329    | NP_015568    | Q9UGM3 | DMBT1_HUMAN  | SRCR 8.                        |  | 7  | AGGGCCGAGTG   | 0.567 |             |
| - | 8  | 1611 | DD_uc001lrm.1_M   | NM_145886    | NP_665893    | Q9HB75 | PIDD_HUMAN   | ZU5 2.                         |  | 0  | AGACTCGACGA   | 0.672 |             |
| - | 13 | 1394 | .1_Nonsense_Mut   | NM_199292    | NP_954986    | P07101 | TY3H_HUMAN   |                                |  | 0  | TGACTGGTACG   | 0.627 |             |
| - | 1  | 28   |                   | NM_001005164 | NP_001005164 | Q8NGJ4 | O5E2_HUMAN   | cellular (Potential).          |  | 3  | GGGGTGAAACT   | 0.498 |             |
| - | 9  | 1419 | o.P30S MRV11_ucl  | NM_001100167 | NP_001093637 | Q9Y6F6 | MRV11_HUMAN  |                                |  | 3  | TCTCGGCAGAG   | 0.677 |             |
| - | 3  | 803  | e_Mutation_p.R15  | NM_024514    | NP_078790    | Q6VVX0 | CP2R1_HUMAN  |                                |  | 2  | CGCTTCTGTTG/  | 0.378 |             |
| + | 14 | 3375 | AV2_uc001mpt.2_l  | NM_145117    | NP_660093    | Q8IVL1 | NAV2_HUMAN   |                                |  | 6  | GAATCCCTGT/   | 0.537 |             |
| - | 2  | 2065 |                   | NM_002233    | NP_002224    | P22459 | KCNA4_HUMAN  |                                |  | 4  | TGCAGGACTGG   | 0.498 |             |
| + | 21 | 2481 | k.1_Missense_Mut  | NM_001105540 | NP_001099010 | Q13574 | DGKZ_HUMAN   |                                |  | 3  | TCCCGGTGCAG   | 0.687 |             |
| + | 1  | 362  |                   | NM_001005275 | NP_001005275 | Q8NGL6 | O4A15_HUMAN  | cellular (Potential).          |  | 2  | CATTTCTTTCA   | 0.388 |             |
| + | 1  | 838  |                   | NM_001001967 | NP_001001967 | Q8NGL4 | OR5DD_HUMAN  | Name=7; (Potential).           |  | 3  | TGTTTTACACAC  | 0.378 | rs150799318 |
| - | 1  | 278  |                   | NM_001004058 | NP_001004058 | Q8NH50 | OR8K5_HUMAN  | cellular (Potential).          |  | 4  | TAATAGGAAATAC | 0.398 |             |
| + | 7  | 811  |                   | NM_000139    | NP_000130    | Q01362 | FCERB_HUMAN  | lasmic (Potential).            |  | 1  | CAGGGGAAATG   | 0.418 |             |
| + | 5  | 544  |                   | NM_017716    | NP_060186    | Q9NXJ0 | M4A12_HUMAN  | ical; (Potential).             |  | 0  | GCCTGGGAATG   | 0.423 |             |
| - | 2  | 2551 | AB_uc001nuc.2_5'  | NM_030628    | NP_085131    | Q6P9B9 | INT5_HUMAN   |                                |  | 2  | CCTCGGGGGGC   | 0.647 |             |
| + | 5  | 972  | v.1_RNA TSGA10l   | NM_152762    | NP_689975    | Q3SY00 | T10IP_HUMAN  |                                |  | 0  | CCAAGGAGCTG   | 0.632 |             |
| + | 3  | 757  | nse_Mutation_p.A  | NM_138768    | NP_620123    | Q96EZ4 | MYEOV_HUMAN  |                                |  | 0  | CTGGAGCTGGT/  | 0.652 |             |
| + | 3  | 1325 | _p.W380L NEU3_L   | NM_006656    | NP_006647    | A8K327 | A8K327_HUMAN |                                |  | 2  | CTGCTGGTCCC/  | 0.562 |             |
| + | 4  | 680  | xb.2_Missense_M   | NM_032564    | NP_115953    | Q96PD7 | DGAT2_HUMAN  | lasmic (Potential).            |  | 0  | TACTTTCCCATCC | 0.527 |             |
| + | 32 | 4584 | se_Mutation_p.A14 | NM_000260    | NP_000251    | Q13402 | MYO7A_HUMAN  | FERM 1.                        |  | 4  | TCGCCGCCAC    | 0.617 |             |
| + | 47 | 6648 | e_Mutation_p.P208 | NM_000260    | NP_000251    | Q13402 | MYO7A_HUMAN  | FERM 2.                        |  | 4  | ACTTCCCTGAG   | 0.522 |             |
| + | 2  | 500  |                   | NM_001098672 | NP_001092142 | Q6MZM0 | HPHL1_HUMAN  | e 1.1 Extracellular (Potential |  | 3  | TCATTCATTTAA  | 0.458 |             |
| - | 5  | 422  | se_Mutation_p.D68 | NM_152587    | NP_689800    | Q8NCR3 | CK065_HUMAN  |                                |  | 1  | GATGATCATTTT  | 0.358 |             |
| + | 8  | 1234 | i.1_3'UTR LAYN_u  | NM_178834    | NP_849156    | Q6UX15 | LAYN_HUMAN   | lasmic (Potential).            |  | 0  | AAAGCGAAGCT/  | 0.507 |             |
| - | 5  | 1094 | ppd.2_Missense_M  | NM_001077639 | NP_001071107 | Q6UWF7 | FA55D_HUMAN  |                                |  | 4  | ATTCTCTTTCAT  | 0.403 |             |
| + | 2  | 458  | se_Mutation_p.S27 | NM_019854    | NP_062828    | Q9NR22 | ANM8_HUMAN   | H3-binding 1.                  |  | 5  | CCCCCTCCAG    | 0.652 |             |
| - | 5  | 906  | p.G112R EFCAB4    | NM_032680    | NP_116069    | Q9BSW2 | EFC4B_HUMAN  | EF-hand 2.                     |  | 2  | AAATCCAGTAGT  | 0.532 |             |
| + | 7  | 1766 | u.2_Missense_ML   | NM_002286    | NP_002277    | P18627 | LAG3_HUMAN   | lasmic (Potential).            |  | 0  | TTACACCTTGG/  | 0.602 |             |
| - | 25 | 3205 | p.R73Q A2M_uc0    | NM_000014    | NP_000005    | P01023 | A2MG_HUMAN   |                                |  | 5  | CATATCGCTCC/  | 0.318 |             |
| - | 1  | 335  | H1_uc001qzc.2_lr  | NM_023922    | NP_076411    | Q9NYV8 | T2R14_HUMAN  | lasmic (Potential).            |  | 0  | AAATTGGCTATCT | 0.348 |             |
| + | 6  | 927  | 1467_uc009zhx.1_  | NM_020853    | NP_065904    | A2RU67 | K1467_HUMAN  | p.R302*(1)                     |  | 3  | TGGGTCGACCT/  | 0.507 |             |
| - | 3  | 424  |                   | NM_182558    | NP_872364    |        |              |                                |  | 0  | GGGAACGATTCC  | 0.453 | rs143075618 |
| + | 21 | 2889 | nse_Mutation_p.D8 | NM_004570    | NP_004561    | O75747 | P3C2G_HUMAN  | PI3K/PI4K.                     |  | 21 | GGAGATGATCTT/ | 0.368 |             |
| + | 21 | 2895 | nse_Mutation_p.R8 | NM_004570    | NP_004561    | O75747 | P3C2G_HUMAN  | PI3K/PI4K.                     |  | 21 | TATCTTCGTGAG/ | 0.363 |             |
| + | 1  | 679  | Z1_uc001rdw.3_5'  | NM_033328    | NP_201585    | Q96KX2 | CAZA3_HUMAN  |                                |  | 2  | TAAATGGATTTT  | 0.383 |             |
| - | 14 | 1921 |                   | NM_021957    | NP_068776    | P54840 | GYS2_HUMAN   |                                |  | 2  | GAACCGCTGT/   | 0.408 |             |
| + | 5  | 751  | _Mutation_p.R167  | NM_152438    | NP_689651    | Q96FC9 | DDX11_HUMAN  | Helicase ATP-binding.          |  | 3  | AGAAAGAGAGA   | 0.612 |             |
| - | 1  | 325  |                   | NM_001040436 | NP_001035526 | Q9Y2Z4 | SYYM_HUMAN   | HIGH region.                   |  | 0  | TATGAACCGAGT/ | 0.622 |             |
| + | 10 | 1191 | n.1_Missense_ML   | NM_001843    | NP_001834    | Q12860 | CNTN1_HUMAN  | like C2-type 4.                |  | 9  | CCATCCCTACA/  | 0.483 |             |
| - | 2  | 619  | nse_Mutation_p.E1 | NM_007210    | NP_009141    | Q8NCL4 | GALT6_HUMAN  | renal (Potential).             |  | 2  | CTTTTCTGGG/   | 0.577 |             |
| + | 7  | 1068 | F81_uc001sac.2_lr | NM_002284    | NP_002275    | O43790 | KRT86_HUMAN  | Rod. Coil 2.                   |  | 1  | GCACGGGGAGA   | 0.602 |             |
| - | 2  | 586  | 72_uc010sns.1_M   | NM_001146225 | NP_001139697 | Q14CN4 | K2C72_HUMAN  | inker 1. Rod.                  |  | 6  | TGCAGTTGTTC/  | 0.567 |             |
| + | 17 | 1715 | _p.R88C NCKAP1l   | NM_005337    | NP_005328    | P55160 | NCKPL_HUMAN  |                                |  | 4  | CATCTTCGTATCT | 0.393 |             |
| + | 24 | 4326 |                   | NM_002332    | NP_002323    | Q07954 | LRP1_HUMAN   | cellular (Potential).          |  | 22 | CAAAGGAGACT/  | 0.597 |             |
| - | 3  | 238  | te DCTN2_uc001s   | NM_006400    | NP_006391    | Q13561 | DCTN2_HUMAN  |                                |  | 1  | TCTCTCTGCAA/  | 0.488 |             |



|   |    |           |                   |              |              |        |             |                             |      |                |       |
|---|----|-----------|-------------------|--------------|--------------|--------|-------------|-----------------------------|------|----------------|-------|
| - | 5  | 963       | 77_splice B4GALN  | NM_001478    | NP_001469    | Q00973 | B4GN1_HUMAN |                             | 0    | CTCTCACCTGGT/  | 0.532 |
| - | 8  | 2400      | ik.3_Missense_Mu  | NM_013244    | NP_037376    | Q9UBM8 | MGT4C_HUMAN | lenal (Potential).          | 3    | ATTTTCAAATAC,  | 0.343 |
| - | 6  | 1160      |                   | NM_145913    | NP_666018    | Q8N695 | SC5A8_HUMAN | ical; (Potential).          | 0    | CACCGTAGATG/   | 0.388 |
| + | 27 | 3226      | l0vs.1_Missense_  | NM_206820    | NP_996556    | Q00872 | MYPC1_HUMAN |                             | 4    | ACTTTTGATTTCT  | 0.358 |
| + | 3  | 419       |                   | NM_017564    | NP_060034    | Q8WWW8 | STAB2_HUMAN | ellular (Potential).        | 14   | GGTCAGAACAT/   | 0.493 |
| + | 4  | 454       |                   | NM_001101421 | NP_001094891 | Q8N1T3 | MYO1H_HUMAN |                             | 0    | GAAATGCCAGA/   | 0.383 |
| - | 2  | 810       | u.2_Missense_Mul  | NM_138451    | NP_612460    | Q96DY2 | IQCD_HUMAN  |                             | 1    | GAGGCGGTCTC    | 0.522 |
| - | 15 | 1928      | p.P595Q RBM19_1   | NM_001146699 | NP_001140171 | Q9Y4C8 | RBM19_HUMAN | RRM 4.                      | 6    | CTGCCGGGAGC    | 0.632 |
| + | 13 | 2435      | VF10_uc001tyq.3_  | NM_014868    | NP_055683    | Q8N5U6 | RNF10_HUMAN |                             | 2    | CTGCTCCTCTG/   | 0.512 |
| + | 1  | 43        | D8_uc001uex.2_5'  | NM_020382    | NP_065115    | Q9NQR1 | SETD8_HUMAN |                             | 0    | GAGCCATGGCT/   | 0.667 |
| - | 9  | 2808      | 1uia.2_Missense_  | NM_133448    | NP_597705    | Q14C87 | T132D_HUMAN | ellular (Potential).        | 14   | TTTTTGGGCCCTT/ | 0.522 |
| - | 4  | 1462      | nr.3_Missense_ML  | NM_014572    | NP_055387    | Q9NRM7 | LATS2_HUMAN |                             | 10   | GGACGGAGGTG    | 0.721 |
| - | 3  | 387       | .T3_uc010tdn.1_M  | NM_004119    | NP_004110    | P36888 | FLT3_HUMAN  | ellular (Potential).        | 8549 | GACAGGAAATG    | 0.498 |
| + | 9  | 970       | ua.1_Missense_M   | NM_000059    | NP_000050    | P51587 | BRCA2_HUMAN |                             | 64   | TATCGCTTCTGT   | 0.308 |
| + | 3  | 838       | ao.2_Missense_Mi  | NM_152719    | NP_689932    | Q8NA61 | SPERT_HUMAN | Potential.                  | 2    | GGAGGAGAATC/   | 0.677 |
| - | 9  | 995       | ise_Mutation_p.R2 | NM_152720    | NP_689933    | P51956 | NEK3_HUMAN  | ith VAV2. Protein kinase.   | 2    | GCCTCGAGAGA/   | 0.478 |
| - | 3  | 661       | i.N39S THSD1_uc   | NM_018676    | NP_061146    | Q9NS62 | THSD1_HUMAN | ellular (Potential).        | 4    | TGTCGTTGCTT/   | 0.433 |
| + | 2  | 165       | isense_Mutation_f | NM_024808    | NP_079084    | Q6PGQ7 | BORA_HUMAN  |                             | 0    | AAACTCCAGGA,   | 0.348 |
| + | 15 | 3853_3854 |                   | NM_000123    | NP_000114    | P28715 | ERCC5_HUMAN |                             | 7    | AGCTCCCGTGA/   | 0.485 |
| - | 49 | 4668      | 4A1_uc010agl.2_l  | NM_001845    | NP_001836    | P02462 | CO4A1_HUMAN | ilagen IV NC1.              | 6    | ATTTCTGTGATGC  | 0.507 |
| + | 2  | 1169      | g.2_Missense_Mut  | NM_005537    | NP_005528    | Q9UK53 | ING1_HUMAN  |                             | 1    | CCGCACGCCGGC   | 0.672 |
| + | 9  | 1320      | a.1_RNA POTEG_    | NM_001005356 | NP_001005356 | Q6S5H5 | POTEG_HUMAN |                             | 1    | GACCGGAAGTA    | 0.358 |
| + | 1  | 344       |                   | NM_001004723 | NP_001004723 | Q8NGD1 | OR4N2_HUMAN | Name=3; (Potential).        | 4    | TACTCCTTGTTG1  | 0.507 |
| + | 2  | 383       |                   | NM_022360    | NP_071755    | P56851 | EP3B_HUMAN  |                             | 1    | GATATGGGTCCAC  | 0.408 |
| - | 26 | 3419      | wan.2_Missense_l  | NM_007192    | NP_009123    | Q9Y5B9 | SP16H_HUMAN |                             | 0    | GCCCCGAACTG    | 0.507 |
| + | 9  | 5542      |                   | NM_025081    | NP_079357    | Q9P2P1 | NYNRI_HUMAN | grase catalytic.            | 3    | CCCTGCCTTTG/   | 0.627 |
| - | 3  | 671       | A1_uc001wqa.2_5   | NM_002515    | NP_002506    | P51513 | NOVA1_HUMAN |                             | 5    | ATTTTTCTGCA/   | 0.438 |
| + | 2  | 1273      | i.2_Missense_Mut  | NM_001173    | NP_001025226 | Q13017 | RHG05_HUMAN |                             | 5    | AAGAGCTTTTA/   | 0.313 |
| + | 4  | 798       | iy.1_Missense_Mu  | NM_054024    | NP_473365    | Q96PC5 | MIA2_HUMAN  |                             | 2    | TGTGTGAAAGT/   | 0.428 |
| + | 1  | 624       | id.1_Missense_ML  | NM_031914    | NP_114120    | Q17RD7 | SYT16_HUMAN |                             | 1    | CGGAGGAAGAG    | 0.463 |
| - | 32 | 6041      | VE26_uc001xkc.3   | NM_015346    | NP_056161    | Q68DK2 | ZFY26_HUMAN |                             | 11   | CTCTGGGTTGG'   | 0.582 |
| + | 15 | 4505      | xmv.2_Missense_l  | NM_015556    | NP_056371    | O43166 | SI1L1_HUMAN | Ser-rich.                   | 4    | GGACCGGAAAA    | 0.552 |
| + | 15 | 4547      | xmv.2_Missense_l  | NM_015556    | NP_056371    | O43166 | SI1L1_HUMAN | Ser-rich.                   | 4    | CAAGGCCAAG/    | 0.537 |
| - | 10 | 1119      | tion_p.P256S NUM  | NM_001005743 | NP_001005743 | P49757 | NUMB_HUMAN  |                             | 4    | AATTGGAGCATC   | 0.532 |
| - | 4  | 1207      | i_p.E336* STON2_  | NM_033104    | NP_149095    | Q8WXE9 | STON2_HUMAN |                             | 5    | CTCCTCAAAGA/   | 0.502 |
| - | 4  | 981       | _p.P180L KCNK1C   | NM_021161    | NP_066984    | P57789 | KCNKA_HUMAN | p.P175P(1)                  | 5    | TGCTCGGAGCA    | 0.393 |
| - | 3  | 538       |                   | NM_001010854 | NP_001010854 | Q86TV6 | TTC7B_HUMAN |                             | 2    | TCACCCGCAGC    | 0.567 |
| - | 7  | 1093      | 12_splice FBLN5_1 | NM_006329    | NP_006320    | Q9UBX5 | FBLN5_HUMAN |                             | 6    | CACATCTGTGG/   | 0.527 |
| + | 1  | 175       | CL1B_uc010avj.2   | NM_004918    | NP_004909    | O95988 | TCL1B_HUMAN |                             | 1    | GTAGGGAATGG/   | 0.677 |
| - | 3  | 459       | fb.3_Missense_ML  | NM_001098725 | NP_001092195 | P56279 | TCL1A_HUMAN |                             | 1    | GCAGCAGCTCG,   | 0.552 |
| + | 14 | 3425      | p.G1093C TECPR:   | NM_014844    | NP_055659    | O15040 | TCPR2_HUMAN |                             | 3    | CCTCGGCAAG     | 0.507 |
| + | 4  | 578       | _p.A93T C14orf18  | NM_001008404 | NP_001008404 | Q8N912 | CN180_HUMAN |                             | 0    | TCAGGGGTGAG    | 0.662 |
| - | 7  | 14744     | px.2_Missense_M   | NM_138420    | NP_612429    | Q8IVF2 | AHNK2_HUMAN |                             | 1    | TTTGGGGGACT/   | 0.498 |
| - | 4  | 503       | DT14_uc001yqi.2_l | NM_177533    | NP_803877    | O95848 | NUD14_HUMAN | idix hydrolase.             | 1    | CCAAGTGGTAG    | 0.597 |
| + | 1  | 2978      |                   | NM_018958    | NP_061831    | Q9NZP6 | CO002_HUMAN |                             | 8    | TGTCATCTTGC/   | 0.498 |
| + | 5  | 1393      | _p.Q224R ARHGAI   | NM_014783    | NP_055598    | Q6P4F7 | RHGBA_HUMAN | Rho-GAP.                    | 6    | ATTACAGGCTG/   | 0.358 |
| + | 35 | 4835      | ir.2_Missense_Mul | NM_001036    | NP_001027    | Q15413 | RYR3_HUMAN  | eats. Cytoplasmic (By simil | 10   | CCAGCTCTTC'    | 0.607 |

rs141733272

|   |    |           |                   |              |              |        |             |                              |    |               |       |             |
|---|----|-----------|-------------------|--------------|--------------|--------|-------------|------------------------------|----|---------------|-------|-------------|
| + | 4  | 471       | zkl.2_Missense_M  | NM_001013703 | NP_001013725 | Q9P2K8 | E2AK4_HUMAN |                              | 4  | AGCCCCCTCCC   | 0.473 |             |
| - | 9  | 880       | 'LA2G4F_uc001zp   | NM_213600    | NP_998765    | Q68DD2 | PA24F_HUMAN |                              | 4  | :CCCCCTCGCCCA | 0.622 |             |
| + | 2  | 209       | fw.2_Missense_M   | NM_032866    | NP_116255    | Q0VF96 | CGNL1_HUMAN | ZIM (By similarity).         | 11 | :GTATTCGGGTCC | 0.507 |             |
| + | 2  | 1022      | fw.2_Missense_Mt  | NM_032866    | NP_116255    | Q0VF96 | CGNL1_HUMAN | Head.                        | 11 | :TGGATGATCAGC | 0.522 |             |
| - | 10 | 1763      | _p.T373A NARG2_   | NM_024611    | NP_078887    | Q659A1 | NARG2_HUMAN |                              | 2  | :AGATGTTTTCA/ | 0.328 |             |
| + | 12 | 1662      | _p.A287T IQCH_uc  | NM_001031715 | NP_001026885 | Q86VS3 | IQCH_HUMAN  |                              | 4  | :CTGAAGCTGTA  | 0.383 |             |
| - | 2  | 622       | zcg.2_Missense_M  | NM_020447    | NP_065180    | Q5XKK7 | CO017_HUMAN |                              | 0  | :AGACCTTTTCC  | 0.602 |             |
| + | 3  | 720       | z.3_RNA IL16_uc0  | NM_172217    | NP_757366    | Q14005 | IL16_HUMAN  |                              | 4  | :AAAGCCTGGAA  | 0.423 |             |
| + | 9  | 1338      | ql.2_Missense_Mt  | NM_033544    | NP_291022    | A6NED2 | RCCD1_HUMAN | RCC1 4.                      | 0  | :TAAGCAACTCC/ | 0.488 |             |
| + | 11 | 1567      | bok.2_Missense_M  | NM_018349    | NP_060819    | Q6DN12 | MCTP2_HUMAN | C2 3.                        | 3  | :GAACTCCCTGA/ | 0.388 |             |
| + | 14 | 3578      | ij.2_Missense_Mu  | NM_005632    | NP_005623    | O75808 | CAN15_HUMAN |                              | 2  | :CCCCCACTCA/  | 0.697 | rs151328571 |
| - | 4  | 473       | {123W CCDC78_u    | NM_001031737 | NP_001026907 | A2IDD5 | CCD78_HUMAN |                              | 1  | :TGCCCGGGGAT  | 0.622 | rs144406163 |
| + | 35 | 6540      | _p.D793N CACNA    | NM_021098    | NP_066921    | O95180 | CAC1H_HUMAN | lasmic (Potential).          | 2  | :CAGCCGACGAG  | 0.741 |             |
| + | 17 | 2378_2379 |                   | NM_016111    | NP_057195    | Q9Y4R8 | TELO2_HUMAN |                              | 0  | :GTGGCCGGCC/  | 0.649 |             |
| - | 2  | 298       |                   | NM_001080524 | NP_001073993 | A8MZG2 | CP090_HUMAN |                              | 0  | :CCAGGCTGTGC  | 0.677 |             |
| - | 10 | 2704      | uyn.1_Missense_M  | NM_001134407 | NP_001127879 | Q12879 | NMDE1_HUMAN | cellular (Potential).        | 45 | TCAGGCTGACC/  | 0.463 |             |
| + | 23 | 4218      | zg.1_Intron SRCA  | NM_006662    | NP_006653    | Q6ZRS2 | SRCAP_HUMAN | Pro-rich.                    | 4  | :TTCTTCGACCC  | 0.667 |             |
| + | 18 | 1751      | zu.3_Missense_Mu  | NM_000293    | NP_000284    | Q93100 | KPBB_HUMAN  |                              | 3  | ATTTATCGCATT  | 0.343 |             |
| + | 2  | 221       | ze_Mutation_p.V5C | NM_024922    | NP_079198    | Q6UWW8 | EST3_HUMAN  |                              | 5  | :TGGCGTGAAG   | 0.632 | rs149175900 |
| + | 1  | 416       |                   | NM_002153    | NP_002144    | P37059 | DHB2_HUMAN  | 3 (By similarity).           | 2  | :TGGATCAGAAG  | 0.468 |             |
| - | 4  | 803       | c.3_Missense_Mu   | NM_001122890 | NP_001116362 | Q6P531 | GGT6_HUMAN  | cellular (Potential).        | 1  | :TGGCTCGGGCC  | 0.652 |             |
| + | 7  | 1051      | -BG_uc010cmw.2    | NM_001040    | NP_001031    | P04278 | SHBG_HUMAN  | minin G-like p.0?(1) p.?(1)  | 0  | :CCTTAACCTCTC | 0.547 |             |
| + | 75 | 11502     | am.1_Missense_M   | NM_020877    | NP_065928    | Q9P225 | DYH2_HUMAN  | 6 (By similarity).           | 13 | :TGGAGGATTC/  | 0.597 |             |
| - | 23 | 2834      | uc002gml.1_Intron | NM_017533    | NP_060003    | Q9Y623 | MYH4_HUMAN  | Potential.                   | 13 | :CACATCTTTCC  | 0.373 |             |
| - | 17 | 2062      | uc002gml.1_Intron | NM_017533    | NP_060003    | Q9Y623 | MYH4_HUMAN  | rosin head-like.             | 13 | :TGACACTGTCT  | 0.308 |             |
| - | 13 | 1325      | uc002gml.1_Intron | NM_017533    | NP_060003    | Q9Y623 | MYH4_HUMAN  | rosin head-like.             | 13 | :CTCTGGGATAG  | 0.453 |             |
| + | 3  | 1886      |                   | NM_021012    | NP_066292    | Q14500 | IRK12_HUMAN | smic (By similarity).        | 4  | :GGACGGAGACC  | 0.657 |             |
| - | 2  | 739       | _p.P194L MYO18A   | NM_078471    | NP_510880    | Q92614 | MY18A_HUMAN |                              | 0  | GCTCAGGGGCT   | 0.687 |             |
| - | 7  | 2864      | _p.D808N SLFN11   | NM_001104588 | NP_001098058 | Q7Z7L1 | SLN11_HUMAN |                              | 3  | :AACATCCTTTGC | 0.468 | rs71366434  |
| - | 1  | 665       |                   | NM_000286    | NP_000277    | O00623 | PEX12_HUMAN | lasmic (Potential).          | 0  | :TGGCTGGTCAT  | 0.502 |             |
| - | 3  | 603       |                   | NM_019010    | NP_061883    | P35900 | K1C20_HUMAN | Coil 1B. Rod.                | 3  | ATCTGTTTTATGT | 0.388 |             |
| + | 8  | 1204      | C25_uc010cxs.1_I  | NM_031421    | NP_113609    | Q96NG3 | TTC25_HUMAN | TPR 6.                       | 1  | TGCCAGAGTTG   | 0.443 |             |
| + | 11 | 1338      | _p.P348S ATP6V0   | NM_001130021 | NP_001123493 | Q93050 | VPP1_HUMAN  | lasmic (Potential).          | 1  | ATAAATCCAGGT/ | 0.294 |             |
| + | 4  | 565       | J938_uc002ibf.3_E | NM_005854    | NP_005845    | O60895 | RAMP2_HUMAN | ical; (Potential).           | 0  | :AGTATGGAGGA/ | 0.592 |             |
| + | 14 | 1668      | f.1_Missense_Mut  | NM_006178    | NP_006169    | P46459 | NSF_HUMAN   |                              | 1  | :ATGGGGAGCTG  | 0.448 |             |
| - | 14 | 1899      | LL6_uc002ioc.2_A  | NM_001130918 | NP_001124390 | Q8N841 | TTLL6_HUMAN |                              | 0  | CGTGGGAGCCT   | 0.507 |             |
| + | 4  | 703       |                   | NM_023079    | NP_075567    | Q9H832 | UBE2Z_HUMAN |                              | 0  | GGAGCCCAGCC   | 0.542 |             |
| + | 2  | 2306      | dbu.2_Missense_M  | NM_175575    | NP_783165    | Q8TEU8 | WFKN2_HUMAN | NTR.                         | 3  | :GCATGGCCATG  | 0.632 |             |
| + | 4  | 959       | ddd.2_Missense_M  | NM_014906    | NP_055721    | Q8WY54 | PPM1E_HUMAN | PP2C-like.                   | 5  | :GGGGAGTAGAT  | 0.502 |             |
| + | 23 | 3724      | mutation_p.Q179*  | NM_006039    | NP_006030    | Q9UBG0 | MRC2_HUMAN  | cellular (Potential).        | 3  | :TCTGCCAGAAG  | 0.642 |             |
| - | 2  | 163       |                   | NM_181449    | NP_852114    | Q496F6 | CLM2_HUMAN  | . Extracellular (Potential). | 4  | TTGTACATGCTC  | 0.542 |             |
| - | 15 | 2501      | sense_Mutation_p. | NM_024421    | NP_077739    | Q08554 | DSC1_HUMAN  | lasmic (Potential).          | 4  | :TGCTTCTAAAA  | 0.303 |             |
| + | 7  | 879       |                   | NM_001943    | NP_001934    | Q14126 | DSG2_HUMAN  | r (Potential). Cadherin 2.   | 9  | :TGCAGGAACAC/ | 0.403 |             |
| - | 1  | 1630      | VAL2_uc002lco.2   | NM_016427    | NP_057511    | Q8IYF1 | ELOA2_HUMAN |                              | 4  | TAGCCGAATCCC  | 0.547 | rs150911848 |
| + | 3  | 1282      | lr.1_Missense_Mu  | NM_005215    | NP_005206    | P43146 | DCC_HUMAN   | cellular (Potential).        | 17 | TTTTATCAGGTAT | 0.373 |             |
| - | 4  | 1254      |                   | NM_052947    | NP_443179    | Q86TB3 | ALPK2_HUMAN |                              | 14 | :GCAGGTTCCTT  | 0.453 |             |
| + | 4  | 5021      | qu.1_Missense_Mt  | NM_017757    | NP_060227    | Q9C0G0 | ZN407_HUMAN |                              | 2  | AAAAGCCGTTTA  | 0.507 |             |

|   |    |           |                                                |              |              |        |             |    |               |       |             |
|---|----|-----------|------------------------------------------------|--------------|--------------|--------|-------------|----|---------------|-------|-------------|
| - | 10 | 1746      | δ_uc010xfv.1_Intrc                             | NM_005481    | NP_005472    | Q9Y2X0 | MED16_HUMAN | 0  | :AGAGCGAGGCC  | 0.667 |             |
| + | 1  | 37_38     | sense_Mutation_p.                              | NM_024100    | NP_077005    | Q9BV38 | WDR18_HUMAN | 1  | :GCGCCCATGGA  | 0.728 |             |
| + | 4  | 1232      | wq.2_Missense_M                                | NM_024967    | NP_079243    | Q9HAH1 | ZN556_HUMAN | 3  | :TTGGTCCTCAT  | 0.468 |             |
| + | 4  | 1386      | ra.1_Missense_Mt                               | NM_173480    | NP_775751    | Q68EA5 | ZNF57_HUMAN | 3  | GAGGACGCACA   | 0.438 | rs148390269 |
| - | 31 | 4924      | rw.2_Missense_Mt                               | NM_002850    | NP_002841    | Q13332 | PTPRS_HUMAN | 4  | :CGTTGGGTATT  | 0.627 |             |
| - | 14 | 1837      | xc.2_Missense_Mt                               | NM_000635    | NP_000626    | P48378 | RFX2_HUMAN  | 6  | GGGCCGCCTGC   | 0.657 |             |
| + | 10 | 1081      | r_p.S296F EMR1_                                | NM_001974    | NP_001965    | Q14246 | EMR1_HUMAN  | 5  | :AGGTCTCCTTTT | 0.383 |             |
| - | 58 | 7459      | e.2_Missense_Mu                                | NM_032447    | NP_115823    | Q75N90 | FBN3_HUMAN  | 11 | :CTGGTGGTGTCT | 0.567 |             |
| - | 84 | 43654     | wj.2_Missense_Mt                               | NM_024690    | NP_078966    | Q8WXI7 | MUC16_HUMAN | 57 | :TCTTCTCTTCTT | 0.587 |             |
| - | 33 | 38726     | :16_uc010xki.1_5'                              | NM_024690    | NP_078966    | Q8WXI7 | MUC16_HUMAN | 57 | :AGGATGGAGTCT | 0.478 |             |
| - | 28 | 38225     |                                                | NM_024690    | NP_078966    | Q8WXI7 | MUC16_HUMAN | 57 | :AGGTCCCAGGA  | 0.498 |             |
| - | 5  | 521       | ise_Mutation_p.I3i                             | NM_152289    | NP_689502    | Q8N587 | ZN561_HUMAN | 1  | TTTGTATCCCACT | 0.338 |             |
| + | 4  | 1515      | ym.1_Missense_M                                | NM_001136501 | NP_001129973 | Q08AG5 | ZN844_HUMAN | 0  | :CTTCAGATCTGT | 0.423 |             |
| + | 4  | 1710      | ym.1_Missense_IV                               | NM_001136501 | NP_001129973 | Q08AG5 | ZN844_HUMAN | 0  | :GCATGAAAGGA  | 0.413 |             |
| + | 8  | 1511      |                                                | NM_004843    | NP_004834    | Q6UWB1 | I27RA_HUMAN | 0  | :CCTGGAGAAAC  | 0.632 |             |
| + | 16 | 3739      | p.S971L NWD1_uc002nev.3_Missense_Mutation_p.S9 |              |              | Q149M9 | NWD1_HUMAN  | 7  | :AAGATCGGTGCT | 0.507 |             |
| - | 28 | 3580      |                                                | NM_001080421 | NP_001073890 | Q9UPW8 | UN13A_HUMAN | 3  | :TAGACGATGCTT | 0.562 |             |
| - | 23 | 3098_3099 |                                                | NM_001080421 | NP_001073890 | Q9UPW8 | UN13A_HUMAN | 3  | TCAATCCGCAGC  | 0.569 |             |
| + | 5  | 1011      | cf.2_Missense_Mu                               | NM_002911    | NP_002902    | Q92900 | RENT1_HUMAN | 2  | :AGATCCCCTCC  | 0.657 |             |
| - | 7  | 2699      |                                                | NM_001080409 | NP_001073878 |        |             | 2  | GTCGAGAAATTG  | 0.353 | rs55891931  |
| - | 6  | 2463      |                                                | NM_001080409 | NP_001073878 |        |             | 2  | AATTAGCTTATGT | 0.378 |             |
| - | 2  | 821       |                                                | NM_006003    | NP_005994    | P47985 | UCRI_HUMAN  | 0  | :GGCAAGGGCAC  | 0.478 |             |
| - | 3  | 269       | ntu.3_Missense_M                               | NM_001126335 | NP_001119807 | P82251 | BAT1_HUMAN  | 1  | TGGGGGAAACG   | 0.602 |             |
| + | 10 | 931       | 010xsh.1_Missens                               | NM_002151    | NP_002142    | P05981 | HEPS_HUMAN  | 2  | :CCACGGTCTGC  | 0.662 |             |
| - | 26 | 3370      | IS1_uc010eem.1_                                | NM_004646    | NP_004637    | O60500 | NPHN_HUMAN  | 5  | :AGTGTCCCCTCT | 0.602 |             |
| - | 18 | 2335      |                                                | NM_004646    | NP_004637    | O60500 | NPHN_HUMAN  | 5  | :TTCTCCCTGGAC | 0.572 |             |
| - | 5  | 1194      | 5B_uc002ofr.1_Nc                               | NM_152279    | NP_689492    | Q52M93 | Z585B_HUMAN | 1  | :TACCTGAAGTTC | 0.388 |             |
| + | 14 | 1584      | PERG_uc002oif.3                                | NM_021185    | NP_067008    | Q6ZRH7 | CTSRG_HUMAN | 2  | :TGCAGCTCTAA  | 0.532 |             |
| + | 7  | 1274      | xp.3_Missense_M                                | NM_181845    | NP_862828    | Q8N7M2 | ZN283_HUMAN | 0  | CTTGCTAAACATC | 0.398 |             |
| - | 6  | 1502_1503 | p.G11R ZNF229_                                 | NM_014518    | NP_055333    | Q9UJW7 | ZN229_HUMAN | 4  | GAACCCCTTTCC  | 0.515 |             |
| + | 7  | 1020      | o.G301E KLC3_uc                                | NM_177417    | NP_803136    | Q6P597 | KLC3_HUMAN  | 1  | :CTATGGGAAGCC | 0.657 |             |
| - | 1  | 469       |                                                | NM_015649    | NP_056464    | Q8IU81 | I2BP1_HUMAN | 0  | GGTCCGCGCCC   | 0.706 |             |
| - | 5  | 1342      |                                                | NM_017708    | NP_060178    | Q2M2I3 | FA83E_HUMAN | 1  | CCCACGGAGGT   | 0.667 |             |
| - | 16 | 2379      | im.2_Missense_Mt                               | NM_002103    | NP_002094    | P13807 | GYS1_HUMAN  | 2  | :TGGCCGTGTCC  | 0.701 |             |
| + | 12 | 1413      | p.P241S MED25_                                 | NM_030973    | NP_112235    | Q71SY5 | MED25_HUMAN | 1  | :TCATCCCCCAG  | 0.687 |             |
| + | 4  | 293       | se_Mutation_p.E9C                              | NM_003121    | NP_003112    | Q01892 | SPIB_HUMAN  | 2  | :ACCTCGAACTGT | 0.642 |             |
| - | 17 | 2246      | sw.1_Missense_IV                               | NM_016148    | NP_057232    | Q9Y566 | SHAN1_HUMAN | 2  | :TTGGCGGATCA  | 0.602 |             |
| + | 1  | 634       |                                                | NM_001506    | NP_001497    | O75388 | GPR32_HUMAN | 1  | :TGGAGGGACAC  | 0.552 |             |
| - | 6  | 864       | p.R216G KLK5_uc                                | NM_001077491 | NP_001070959 | Q9Y337 | KLK5_HUMAN  | 0  | :GCACCTTTTCTC | 0.507 |             |
| + | 4  | 2891      | dw.1_Missense_M                                | NM_138374    | NP_612383    | Q96IR2 | ZN845_HUMAN | 0  | :CTTCCGTCACA  | 0.363 | rs150688663 |
| - | 5  | 1012      | p.L301F LIRB5_                                 | NM_006840    | NP_006831    | O75023 | LIRB5_HUMAN | 2  | :GGAGAGGTTGT  | 0.692 |             |
| + | 6  | 1069      | p.P304L NLRP2_                                 | NM_017852    | NP_060322    | Q9NX02 | NALP2_HUMAN | 2  | :GTTACCCAAGGC | 0.662 |             |
| + | 4  | 2352      |                                                | NM_020903    | NP_065954    | Q9HBJ7 | UBP29_HUMAN | 11 | AAGATGGAGGG   | 0.483 |             |
| + | 8  | 966       | f39_uc010eym.1_I                               | NM_145038    | NP_659475    | Q96MC2 | CC164_HUMAN | 0  | :AGATTCTTGAGC | 0.279 |             |
| - | 4  | 542       |                                                | NM_000348    | NP_000339    | P31213 | S5A2_HUMAN  | 0  | TATTCCCATTC   | 0.403 |             |
| - | 23 | 3675      | j.3_Missense_Mut                               | NM_005633    | NP_005624    | Q07889 | SOS1_HUMAN  | 10 | :TAAGGGAGGGC  | 0.502 |             |
| - | 5  | 856       | rzj.2_Missense_Mt                              | NM_004105    | NP_004096    | Q12805 | FBLN3_HUMAN | 6  | TGCACTCGTCTA  | 0.443 |             |

|   |     |           |                    |              |              |        |             |                                |     |               |       |
|---|-----|-----------|--------------------|--------------|--------------|--------|-------------|--------------------------------|-----|---------------|-------|
| - | 1   | 199       | \_uc002sbn.3_5'U   | NM_032180    | NP_115556    | Q3B820 | F161A_HUMAN |                                | 3   | 3GTCTTCGCGTT  | 0.652 |
| - | 19  | 3333_3334 | >_2_Missense_Mut   | NM_016316    | NP_057400    | Q9UBZ9 | REV1_HUMAN  |                                | 2   | :CCTGCCTTTGTC | 0.5   |
| + | 3   | 314       | 81_splice DBI_uc0  | NM_001079862 | NP_001073331 | P07108 | ACBP_HUMAN  |                                | 0   | GAAAGGTAATTG  | 0.443 |
| + | 10  | 1026      | J2tvn.2_Missense_  | NM_018460    | NP_060930    | Q53QZ3 | RHG15_HUMAN | Rho-GAP.                       | 2   | AAAATTCCACAG  | 0.428 |
| - | 46  | 6081      |                    | NM_004543    | NP_004534    | P20929 | NEBU_HUMAN  | Nebulin 51.                    | 20  | GTCTGGGTGCTC  | 0.433 |
| - | 8   | 709       | p.D196A CACNB4     | NM_000726    | NP_000717    | O00305 | CACB4_HUMAN |                                | 2   | \CAACATCGTAAC | 0.473 |
| + | 27  | 5801      | ANC1_uc010fon.2    | NM_033394    | NP_203752    | Q9C0D5 | TANC1_HUMAN |                                | 3   | AAGCCACAGG    | 0.423 |
| - | 22  | 3716      | ip.2_Nonsense_Mt   | NM_013450    | NP_038478    | Q9UIF8 | BAZ2B_HUMAN | DDT.                           | 4   | :CTCTTGAAGAA  | 0.428 |
| - | 2   | 483       | uci.2_Missense_M   | NM_033272    | NP_150375    | Q9NS40 | KCNH7_HUMAN | lasmic (Potential).            | 5   | CTCTCTTCTGA   | 0.423 |
| - | 28  | 6398      | y.2_Missense_Mul   | NM_006922    | NP_008853    | Q9NY46 | SCN3A_HUMAN |                                | 10  | CATAGGAAGGAC  | 0.358 |
| - | 50  | 9967      |                    | NM_004525    | NP_004516    | P98164 | LRP2_HUMAN  | ; B 30. Extracellular (Potent  | 29  | TTCTCTCAATGAC | 0.413 |
| + | 6   | 470       | PIG_uc002ufb.2_n   | NM_004792    | NP_004783    | Q13427 | PPIG_HUMAN  | e cyclophilin-type.            | 3   | GAAATGGACGAC  | 0.264 |
| + | 12  | 1396      | fe.1_Missense_Mt   | NM_032523    | NP_115912    | Q9BZF3 | OSBL6_HUMAN |                                | 1   | :CAGTTCGCTTG  | 0.423 |
| - | 275 | 76663     | 175N TTN_uc010z    | NM_133378    | NP_596869    | Q8WZ42 | TITIN_HUMAN |                                | 153 | \TAGTAATAGGAA | 0.378 |
| - | 46  | 15324     | 'N_uc010zfi.1_Intr | NM_133379    | NP_596870    | Q8WZ42 | TITIN_HUMAN |                                | 153 | :AACTTCCCCTA/ | 0.433 |
| - | 46  | 14285     | 'N_uc010zfi.1_Intr | NM_133379    | NP_596870    | Q8WZ42 | TITIN_HUMAN |                                | 153 | :TCCACCATAGT/ | 0.328 |
| - | 8   | 1447      | ftt.2_Nonsense_Mt  | NM_018256    | NP_060726    | Q9GZL7 | WDR12_HUMAN | or nucleolar localization.     | 0   | TGGTCGATTTGT  | 0.388 |
| - | 6   | 1228      | ftt.2_Missense_Mu  | NM_018256    | NP_060726    | Q9GZL7 | WDR12_HUMAN | nt for nucleolar localization. | 0   | \AGCACTCAATA/ | 0.378 |
| - | 21  | 3081      | e_Mutation_p.G63i  | NM_173076    | NP_775099    | Q86UK0 | ABCAC_HUMAN |                                | 11  | TTACTTCCAAG/  | 0.388 |
| + | 11  | 1378      | su.3_Splice_Site_j | NM_001631    | NP_001622    | P09923 | PPBI_HUMAN  |                                | 1   | :TACCAGGGAGC/ | 0.716 |
| - | 1   | 316       | T1A6_uc002vuu.2    | NM_001001394 | NP_001001394 | Q8WWF6 | DNJB3_HUMAN |                                | 0   | :CTCCGCCCCCG  | 0.647 |
| - | 19  | 6623      | \.G1907D COL6A3    | NM_004369    | NP_004360    | P12111 | CO6A3_HUMAN | I region. Collagen-like 2.     | 18  | CCAGACCATCC/  | 0.408 |
| + | 2   | 211       |                    | NM_153325    | NP_697020    | Q8N687 | DB125_HUMAN |                                | 3   | GCATTTCTCTGTG | 0.363 |
| + | 26  | 2537      | p.L813F PLCB4_u    | NM_182797    | NP_877949    | Q15147 | PLCB4_HUMAN |                                | 15  | ATTTCCCTTCGA/ | 0.413 |
| - | 5   | 996       | nj.2_Missense_Mt   | NM_020341    | NP_065074    | Q9P286 | PAK7_HUMAN  | Linker.                        | 23  | :ATAGAGACTCT/ | 0.493 |
| + | 3   | 712       | zf.1_RNA CBFA2I    | NM_005093    | NP_005084    | O43439 | MTG8R_HUMAN | Pro-rich.                      | 2   | GAGGACCGAGG   | 0.502 |
| - | 4   | 810       |                    | NM_016470    | NP_057554    | Q9NX31 | CT111_HUMAN |                                | 0   | :CAAGGGAGGGA  | 0.532 |
| + | 2   | 3898      |                    | NM_173485    | NP_775756    | Q9NRE2 | TSH2_HUMAN  |                                | 6   | 3GTCTCCAGAAA  | 0.502 |
| - | 16  | 2011      | /fa.1_Missense_M   | NM_172107    | NP_742105    | O43526 | KCNQ2_HUMAN | lasmic (Potential).            | 2   | :CAGCTCCGCC/  | 0.697 |
| - | 13  | 1054      | 'TE_uc002yir.1_Mi  | NM_199261    | NP_954870    | P56180 | TPTE_HUMAN  | hatase tensin-type.            | 5   | 3TGATCGCCTT/  | 0.323 |
| + | 1   | 176       | .1_Intron C21orf29 | NM_198695    | NP_941968    | P60410 | KR108_HUMAN | repeats of C-C-X(3). 1.        | 2   | GCTGCGAGCCC   | 0.672 |
| + | 30  | 6640      | j.2_Missense_Mut   | NM_006031    | NP_006022    | O95613 | PCNT_HUMAN  |                                | 8   | ATTCTCCCATT/  | 0.507 |
| - | 9   | 1431      | ise_Mutation_p.G1  | NM_001136213 | NP_001129685 | Q6S545 | POTEH_HUMAN |                                | 1   | 3TACTCCGTGC/  | 0.358 |
| - | 1   | 1554_1555 |                    | NM_014406    | NP_055221    | Q96SF2 | TCPQM_HUMAN |                                | 1   | TGGGCCCTTCC/  | 0.495 |
| - | 2   | 1185      | ru.2_Missense_Mt   | NM_023004    | NP_075380    | Q9BZR6 | RTN4R_HUMAN |                                | 0   | :AGCGGCTCCTC  | 0.652 |
| + | 12  | 1099      | aeo.2_Splice_Site  | NM_133455    | NP_597712    | Q96A84 | EMID1_HUMAN |                                | 0   | ACACAGGGACT/  | 0.627 |
| + | 17  | 2613      | p.S762L MTMR3_     | NM_021090    | NP_066576    | Q13615 | MTMR3_HUMAN |                                | 5   | GTCTCTCACAGG/ | 0.577 |
| + | 17  | 1316      | EPDC5_uc003alt.2   | NM_014662    | NP_055477    | O75140 | DEPD5_HUMAN |                                | 8   | 3ATTCTCGTCTG/ | 0.458 |
| + | 3   | 831       | ny.2_Missense_Mt   | NM_014310    | NP_055125    | Q96D21 | RHES_HUMAN  | 1 GNB1, GNB2 and GNB3.         | 3   | \GTACGGTGACG  | 0.627 |
| - | 16  | 4134      | iCP6_uc010har.1_   | NM_020461    | NP_065194    | Q96RT7 | GCP6_HUMAN  | 'AA tandem repeats.            | 4   | :CCGGGTGGGAC  | 0.622 |
| + | 27  | 3631      | 'R1_uc011asu.1_J   | NM_001099952 | NP_001093422 | Q14643 | ITPR1_HUMAN | lasmic (Potential).            | 21  | 3AGGTGCTCCAG  | 0.567 |
| + | 11  | 1508      | lice_Site_p.D338_  | NM_153461    | NP_703191    | Q8NAC3 | I17RC_HUMAN |                                | 2   | 3TGACGTAAGT/  | 0.642 |
| + | 19  | 4398      | \.H1387Y FGD5_u    | NM_152536    | NP_689749    | Q6ZNL6 | FGD5_HUMAN  | PH 2.                          | 5   | ATTTTTCACCTT/ | 0.423 |
| - | 5   | 940       | 385D_uc010hfb.1_   | NM_024697    | NP_078973    | Q9H6B1 | Z385D_HUMAN | Thr-rich.                      | 5   | TTTTTTCCACTT/ | 0.468 |
| - | 4   | 3099      |                    | NM_014831    | NP_055646    | O15050 | TRNK1_HUMAN |                                | 2   | 3TAAATCCACCA/ | 0.433 |
| + | 13  | 1722      | p.P479H VILL_ucC   | NM_015873    | NP_056957    | O15195 | VILL_HUMAN  |                                | 0   | \GCCCCCCACT   | 0.597 |
| + | 11  | 1697_1698 | .1_Missense_Muta   | NM_007335    | NP_031361    | Q9Y238 | DLEC1_HUMAN |                                | 9   | GTTTTCCCAAAA  | 0.564 |

rs145066767

|   |    |           |                   |              |              |        |             |                              |    |               |       |             |
|---|----|-----------|-------------------|--------------|--------------|--------|-------------|------------------------------|----|---------------|-------|-------------|
| - | 27 | 4685      |                   | NM_006514    | NP_006505    | Q9Y5Y9 | SCNA_HUMAN  | IV.                          | 10 | GGAAGTGACTTA  | 0.473 |             |
| + | 11 | 1900      | 10hhw.2_Missense  | NM_015460    | NP_056275    | Q8NFW9 | MYRIP_HUMAN | actin-binding.               | 5  | CTGTACGAGTTA  | 0.493 |             |
| + | 13 | 1715      | kz.3_Missense_M   | NM_001042646 | NP_001036111 | Q9UPV9 | TRAK1_HUMAN | n with HGS.JPotential.       | 1  | GCTGAGGCGGC   | 0.642 |             |
| - | 2  | 996       | R3_uc003cpg.1_In  | NM_001295    | NP_001286    | P32246 | CCR1_HUMAN  | lasmic (Potential).          | 3  | CTTCCGGAACC   | 0.587 |             |
| + | 1  | 190       | _5'Flank KIF9_uc  | NM_025010    | NP_079286    | O94889 | KLH18_HUMAN |                              | 0  | TCGCTAGTCGC   | 0.662 |             |
| + | 5  | 3100      |                   | NM_003458    | NP_003449    | Q9UPA5 | BSN_HUMAN   |                              | 8  | ACCTCTCCACC   | 0.647 |             |
| + | 1  | 364       |                   | NM_001005515 | NP_001005515 | A6NDH6 | O5H15_HUMAN | lasmic (Potential).          | 2  | TATGATCGTATC  | 0.378 |             |
| + | 5  | 2430      | _p.G729R COL8A1   | NM_001850    | NP_001841    | P27658 | CO8A1_HUMAN | helical region (NC1).        | 0  | FATCCGGGCAG   | 0.463 |             |
| + | 4  | 424       | ense_Mutation_p.P | NM_007072    | NP_009003    | Q9UM44 | HLA2_HUMAN  | -like V-type 1.              | 1  | AAGATCCCAGAT  | 0.408 |             |
| + | 1  | 263       | GSF11_uc010hqs    | NM_152539    | NP_689752    | Q96M34 | CC030_HUMAN |                              | 2  | ACGGAGTAGCT   | 0.502 |             |
| - | 2  | 156       | on_p.S4F PARP9_   | NM_001146102 | NP_001139574 | Q8IXQ6 | PARP9_HUMAN | p.S4S(1)                     | 4  | CCATGGAAAAG   | 0.418 |             |
| + | 2  | 318       | _p.E54K FAIM_uc   | NM_001033032 | NP_001028204 | Q9NVQ4 | FAIM1_HUMAN |                              | 0  | AAGATCGAATTT  | 0.363 |             |
| - | 8  | 1212      | p.H295Y PLSCR4_   | NM_001128305 | NP_001121777 | Q9NRQ2 | PLS4_HUMAN  | smic (By similarity).        | 0  | GAAGTGAATGT   | 0.428 | rs138186262 |
| - | 9  | 1411      | _p.L195F SLC2A2_  | NM_000340    | NP_000331    | P11168 | GTR2_HUMAN  | lasmic (Potential).          | 2  | AAAGAGAGAACC  | 0.403 |             |
| - | 4  | 445       | 3F10_uc003fie.2_I | NM_003810    | NP_003801    | P50591 | TNF10_HUMAN | ellular (Potential).         | 5  | GACCTTTTCT    | 0.403 |             |
| + | 4  | 581       | CNMB2_uc003jff.2  | NM_181361    | NP_852006    | Q9Y691 | KCMB2_HUMAN | ellular (Potential).         | 1  | GGACCGAAGAG   | 0.483 |             |
| + | 3  | 657       |                   | NM_004443    | NP_004434    | P54753 | EPHB3_HUMAN | ellular (Potential).         | 11 | ATGAATCCCATC  | 0.557 |             |
| + | 8  | 1183      | _2_Missense_Mut   | NM_003722    | NP_003713    | Q9H3D4 | P63_HUMAN   | ction with H p.S365L(1)      | 12 | AGTTTCGGACA   | 0.537 | rs147148566 |
| - | 8  | 1856      | :GC1A_uc011bxp.   | NM_013261    | NP_037393    | Q9UBK2 | PRGC1_HUMAN | Arg/Ser-rich.                | 8  | ATCGGGAACAC   | 0.458 |             |
| - | 5  | 1022      |                   | NM_000730    | NP_000721    | P32238 | CCKAR_HUMAN | lasmic (Potential).          | 4  | TGCTGCTGCTG   | 0.602 |             |
| - | 2  | 540       | _p.D54A TLR10_u   | NM_030956    | NP_112218    | Q9BXR5 | TLR10_HUMAN | ilar (Potential). LRR 2.     | 2  | ATAAATCCAGTC  | 0.448 |             |
| + | 2  | 928       |                   | NM_001080505 | NP_001073974 | A0PJX4 | SHSA3_HUMAN | lasmic (Potential).          | 2  | TCAGTCCAGTT   | 0.557 |             |
| - | 6  | 1266      | zc.1_Nonsense_M   | NM_001114175 | NP_001107647 | P47869 | GBRA2_HUMAN | ellular (Probable).          | 4  | TAAGTCCAAATAT | 0.363 |             |
| - | 14 | 1960      | zg.1_Missense_M   | NM_006587    | NP_006578    | Q9Y5Q5 | CORIN_HUMAN | ntial). LDL-receptor class / | 2  | ACATTCACAAA   | 0.373 |             |
| - | 3  | 345       | gyu.2_Missense_M  | NM_001014446 | NP_001014446 | Q56VL3 | OCAD2_HUMAN | OCIA.                        | 0  | TTTCTTCTGAC   | 0.383 |             |
| - | 5  | 1070      | 3haf.3_Missense_M | NM_001126328 | NP_001119800 | Q8TBB1 | LNX1_HUMAN  |                              | 4  | TGGTAATTCACC  | 0.408 |             |
| + | 21 | 3565      | _p.R1131Q LPHN3_  | NM_015236    | NP_056051    | Q9HAR2 | LPHN3_HUMAN | lasmic (Potential).          | 18 | AGGTACGAAAAG  | 0.373 |             |
| + | 5  | 1325      | am.1_Missense_M   | NM_001075    | NP_001066    | P36537 | UDB10_HUMAN |                              | 5  | ATTAATGATCCTT | 0.383 |             |
| + | 1  | 388       | hq.2_Missense_M   | NM_001074    | NP_001065    | P16662 | UD2B7_HUMAN |                              | 2  | CAGGAAATCATC  | 0.303 |             |
| - | 22 | 4180      | _p.T1104A ANKRD   | NM_032217    | NP_115593    | O75179 | ANR17_HUMAN | ANK 24.                      | 10 | TGGAGTGTCC    | 0.393 |             |
| - | 1  | 1471      |                   | NM_033214    | NP_149991    | Q14410 | GLPK2_HUMAN |                              | 4  | TCGTTCCATCCT  | 0.512 |             |
| + | 21 | 2857      | jm.1_Missense_M   | NM_016323    | NP_057407    | Q9UII4 | HERC5_HUMAN | HECT.                        | 9  | TCCACCCGAAAC  | 0.328 |             |
| - | 14 | 2564      |                   | NM_003728    | NP_003719    | O95185 | UNC5C_HUMAN | lasmic (Potential).          | 4  | TTCTCCTTCCAC  | 0.522 |             |
| + | 21 | 3625      | :1_Missense_Mut   | NM_001963    | NP_001954    | P01133 | EGF_HUMAN   | lasmic (Potential).          | 4  | CTACAGGTGAC   | 0.552 |             |
| - | 4  | 877       | X2_uc010iml.2_In  | NM_153426    | NP_700475    | Q99697 | PITX2_HUMAN | Homeobox.                    | 0  | CAGCTCCTGGA   | 0.612 | rs1051887   |
| - | 25 | 7081      |                   | NM_017639    | NP_060109    | Q6V1P9 | PCD23_HUMAN | Cadherin 21.                 | 4  | TCCATGAGTGAC  | 0.388 |             |
| - | 3  | 424       | ix.2_Missense_M   | NM_017639    | NP_060109    | Q6V1P9 | PCD23_HUMAN | Cadherin 1.                  | 4  | TACCCCATCCTT  | 0.333 |             |
| + | 7  | 1266      | _p.I236F CLCN3_   | NM_001829    | NP_001820    | P51790 | CLCN3_HUMAN |                              | 3  | TCATCATCAGAC  | 0.363 |             |
| - | 1  | 38        |                   | NM_080874    | NP_543150    | Q8VWX0 | ASB5_HUMAN  |                              | 2  | ACGGCCGATTTT  | 0.443 |             |
| + | 15 | 2831      | ie.1_Missense_Mu  | NM_001080477 | NP_001073946 | Q9P273 | TEN3_HUMAN  | ellular (Potential).         | 0  | GGATTCATGG    | 0.433 |             |
| - | 5  | 667       | ju.1_Missense_Mu  | NM_001042625 | NP_001036090 | Q8VWF8 | CAPSL_HUMAN | EF-hand 4.                   | 1  | CAATGGATGCG   | 0.488 |             |
| - | 19 | 2337      | 3jmi.3_Nonsense_  | NM_173489    | NP_775760    | Q72745 | HTRB2_HUMAN |                              | 8  | GCTTTCCAAAG   | 0.244 |             |
| - | 3  | 385       | rf34_uc011cpx.1_I | NM_198566    | NP_940968    | Q96MH7 | CE034_HUMAN |                              | 1  | ATGTGGAACCA   | 0.383 |             |
| + | 22 | 3419      | _2_Missense_Muta  | NM_012343    | NP_036475    | Q13423 | NNTM_HUMAN  | chondrial matrix.            | 3  | ACAATCCAATCT  | 0.428 |             |
| + | 16 | 2029      | cqi.1_Missense_M  | NM_015360    | NP_056175    | P42285 | SK2L2_HUMAN |                              | 2  | AAAAATCCTTCTA | 0.378 |             |
| + | 28 | 5305_5306 | Mutation_p.P167   | NM_015183    | NP_055998    | O15021 | MAST4_HUMAN |                              | 13 | TGACCCCAAGCT  | 0.624 |             |
| + | 1  | 672       | uc011ctk.1_Intron | NM_032567    | NP_115956    | Q9BXG8 | SPZ1_HUMAN  |                              | 1  | AACAGGAGATG   | 0.358 |             |



|   |    |           |                    |              |              |        |             |      |               |       |             |
|---|----|-----------|--------------------|--------------|--------------|--------|-------------|------|---------------|-------|-------------|
| - | 3  | 682       | ense_Mutation_p.   | NM_001142483 | NP_001135955 | Q16612 | NP311_HUMAN | 1    | ATTAAAAAAGT   | 0.423 |             |
| + | 9  | 1897      | kuz.2_Missense_Iv  | NM_014031    | NP_054750    | Q9Y2P4 | S27A6_HUMAN | 0    | TATTGGAAATGT  | 0.343 |             |
| - | 13 | 1344      | SL6_uc003kvz.1_    | NM_015256    | NP_056071    | Q9UKU0 | ACSL6_HUMAN | 3    | TTACCTGAATCT  | 0.453 |             |
| + | 1  | 2530      |                    | NM_018930    | NP_061753    | Q9UN67 | PCDBA_HUMAN | 2    | AGGGTGAAGAA   | 0.428 |             |
| + | 1  | 630       | DHGA2_uc011dao     | NM_018915    | NP_061738    | Q9Y5H1 | PCDG2_HUMAN | 3    | CGCCAGGATTC   | 0.458 |             |
| + | 1  | 1936      | DHGA2_uc011dac     | NM_018915    | NP_061738    | Q9Y5H1 | PCDG2_HUMAN | 3    | AGAGCCCGGCT   | 0.662 |             |
| + | 1  | 1416      | ljs.1_intron PCDH  | NM_032088    | NP_114477    | Q9Y5G5 | PCDG8_HUMAN | 0    | GCTCAGCCCA    | 0.572 | rs143622391 |
| + | 12 | 2365      | se_Mutation_p.G5f  | NM_001114183 | NP_001107655 | P42261 | GRIA1_HUMAN | 6    | AGCAGGATCTA   | 0.493 |             |
| - | 7  | 928       |                    | NM_032782    | NP_116171    | Q8TDQ0 | HAVR2_HUMAN | 0    | GTTTTCTTCTGA  | 0.468 |             |
| + | 4  | 855       | l11_uc003lxf.1_5'F | NM_173491    | NP_775762    | P83369 | LSM11_HUMAN | 0    | TCTTCCCTGCA   | 0.587 |             |
| + | 10 | 1353      | RP_uc011dev.1_3    | NM_014211    | NP_055026    | O00591 | GBRP_HUMAN  | 1    | ACAATGAAAACC  | 0.403 |             |
| - | 10 | 1007_1008 | 0jkt.2_Missense_I  | NM_173465    | NP_775736    | Q86Y22 | CONA1_HUMAN | 2    | GCTCTCCTTTGG  | 0.46  |             |
| - | 2  | 96        | te PECl_uc003mw    | NM_206836    | NP_996667    | O75521 | ECI2_HUMAN  | 0    | TGACCTGCAGA   | 0.403 |             |
| - | 8  | 2028      | e_Mutation_p.P35:  | NM_000332    | NP_000323    | P54253 | ATX1_HUMAN  | 4    | GTGAGGAACCG   | 0.677 |             |
| - | 5  | 2732      | p.P641S ZNF184_    | NM_007149    | NP_009080    | Q99676 | ZN184_HUMAN | 1    | GTAGGGTTTTTT  | 0.428 |             |
| - | 10 | 5242      | IC1_uc011dmp.1_    | NM_014641    | NP_055456    | Q14676 | MDC1_HUMAN  | 4    | CTATTTGTCTCTG | 0.587 |             |
| + | 12 | 1855      | AT2_uc003nvc.3_I   | NM_080686    | NP_542417    | P48634 | PRC2A_HUMAN | 0    | CACCTCCAGCA   | 0.627 |             |
| - | 10 | 1521      | p.P397S BAT3_uc    | NM_004639    | NP_004630    | P46379 | BAG6_HUMAN  | 0    | GGGAGGTGCCT   | 0.622 |             |
| + | 6  | 952       | _p.P69S LY6G6D_    | NM_001003693 | NP_001003693 | Q5SQ64 | LY66F_HUMAN | 2    | AACATCCAGCC   | 0.562 |             |
| + | 7  | 1195      | Missense_Mutatio   | NM_000063    | NP_000054    | P06681 | CO2_HUMAN   | 2    | TGAACGACAAC   | 0.498 |             |
| - | 21 | 7550      |                    | NM_019105    | NP_061978    | P22105 | TENX_HUMAN  | 0    | CCGCCGTCCC    | 0.657 |             |
| - | 14 | 5291      |                    | NM_019105    | NP_061978    | P22105 | TENX_HUMAN  | 0    | CTCAGGAACCG   | 0.662 |             |
| - | 5  | 987       | 0jud.1_intron HLA  | NM_002118    | NP_002109    | P28068 | DMB_HUMAN   | 0    | CCCAGGAAGAG   | 0.443 |             |
| - | 10 | 1231      | lft.1_Missense_Mu  | NM_001145776 | NP_001139248 | Q13451 | FKBP5_HUMAN | 1    | CAAGGCCTAG    | 0.423 |             |
| + | 10 | 1308      | D2_uc011dtv.1_I    | NM_173558    | NP_775829    | Q7Z6J4 | FGD2_HUMAN  | 3    | CTGATGGATGC   | 0.652 |             |
| - | 6  | 989       | 2_RNA TMEM151f     | NM_020745    | NP_065796    | Q5JTZ9 | SYAM_HUMAN  | 1    | GTGTGCGGATG   | 0.642 |             |
| - | 1  | 1258      |                    | NM_138733    | NP_620061    | P07205 | PGK2_HUMAN  | 1    | CAGTGTCCATT   | 0.507 |             |
| - | 2  | 307       | al.1_Missense_Mi   | NM_052872    | NP_443104    | Q96PD4 | IL17F_HUMAN | 1    | GGGAGGTGGAG   | 0.418 |             |
| + | 5  | 1155      |                    | NM_001010872 | NP_001010872 | Q5T0W9 | FA83B_HUMAN | 6    | TAAATGAACATG  | 0.348 |             |
| - | 21 | 2225      | utation_p.G50R C   | NM_030820    | NP_110447    | Q96P44 | COLA1_HUMAN | 2    | CATCCCTTGA    | 0.313 |             |
| + | 11 | 1617      | .2_3'UTR SMAP1_    | NM_001044305 | NP_001037770 | Q8IYB5 | SMAP1_HUMAN | 0    | GCTCATCAGGT   | 0.488 |             |
| - | 4  | 917       | hz.2_Missense_M    | NM_015687    | NP_056502    | Q7Z7B0 | FLIP1_HUMAN | 4    | TAACTCGTATAC  | 0.507 |             |
| + | 8  | 4359      | ense_Mutation_p.F  | NM_001137667 | NP_001131139 | Q9UKL3 | C8AP2_HUMAN | 2    | AGGTCCATCTC   | 0.388 |             |
| + | 1  | 532       |                    | NM_032602    | NP_115991    | Q969M2 | CXA10_HUMAN | 0    | TATATTCTCTATG | 0.448 |             |
| + | 20 | 5579      | i.2_Missense_Mut   | NM_001624    | NP_001615    | Q9Y4K1 | AIM1_HUMAN  | 9    | CAGTATGATCAA  | 0.403 |             |
| + | 17 | 2197      |                    | NM_173560    | NP_775831    | Q8HWS3 | RFX6_HUMAN  | 3    | AGCCCCACTCC   | 0.512 |             |
| - | 4  | 479       | .1_RNA GOPC_uc     | NM_002944    | NP_002935    | P08922 | ROS_HUMAN   | 25   | GTACTTCTCTTT  | 0.473 |             |
| + | 2  | 451       | .3_intron TFB1M_   | NM_001001346 | NP_001001346 | P56880 | CLD20_HUMAN | 0    | CACAGCCACTC   | 0.522 |             |
| - | 12 | 2923      | ic.1_Missense_Mu   | NM_018059    | NP_060529    | Q96JH8 | RADIL_HUMAN | 7    | AGTCGGGGTCC   | 0.711 |             |
| - | 1  | 620       |                    | NM_175886    | NP_787082    | P21108 | PRPS3_HUMAN | 1    | CAATGGAGGTC   | 0.463 |             |
| + | 4  | 643       | r_p.E52K CREB5_    | NM_182898    | NP_878901    | Q02930 | CREB5_HUMAN | 2    | AGCACGAGTTC   | 0.557 |             |
| + | 14 | 1300      | orf10_uc003tho.1_  | NM_024728    | NP_079004    | Q9HAC7 | CG010_HUMAN | 2    | GATACGATGAC   | 0.567 |             |
| + | 6  | 1150      | _p.S182L HECW1_    | NM_015052    | NP_055867    | Q76N89 | HECW1_HUMAN | 23   | AAACTCGGCAG   | 0.408 |             |
| - | 4  | 947       | 4_uc003tmx.2_Intr  | NM_004749    | NP_004740    | Q969Z0 | TBRG4_HUMAN | 0    | GCAAGGGCAGC   | 0.607 |             |
| - | 13 | 1078_1079 | p.G238R TNS3_uc    | NM_022748    | NP_073585    | Q68CZ2 | TENS3_HUMAN | 4    | ATCTCCCTTCAG  | 0.515 |             |
| + | 23 | 3035      | _p.G885E EGFR_u    | NM_005228    | NP_005219    | P00533 | EGFR_HUMAN  | 9571 | GAAAGGAGAAC   | 0.532 |             |
| - | 15 | 1860      | _p.R595Q ABCBC4_   | NM_018849    | NP_061337    | P21439 | MDR3_HUMAN  | 6    | CATTCGGACC    | 0.488 | rs144398632 |

|   |    |           |                    |              |              |         |             |                             |       |               |       |
|---|----|-----------|--------------------|--------------|--------------|---------|-------------|-----------------------------|-------|---------------|-------|
| - | 3  | 356       | img.2_Missense_I   | NM_017654    | NP_060124    | Q5K651  | SAMD9_HUMAN | SAM.                        | 7     | AAATTTCCCTGT  | 0.368 |
| + | 18 | 2329      | p.S707F TRRAP_     | NM_003496    | NP_003487    | Q9Y4A5  | TRRAP_HUMAN |                             | 37    | AGCTCTCCAACC  | 0.468 |
| - | 1  | 701       |                    | NM_001005276 | NP_001005276 | Q8NHA4  | O2AE1_HUMAN | lasmic (Potential).         | 0     | GCATTTCTCTTG  | 0.502 |
| + | 31 | 5890      | lwl.2_RNA ZAN_ur   | NM_003386    | NP_003377    | Q9Y493  | ZAN_HUMAN   | extracellular (Potential).  | 11    | ACCTGCAAACCC  | 0.632 |
| + | 3  | 11710     | C17_uc010lho.1_F   | NM_001040105 | NP_001035194 | Q685J3  | MUC17_HUMAN | cellular (Potential).       | 27    | CACCTTCCAAC   | 0.468 |
| - | 6  | 938       | AT3_uc010lhr.2_I   | NM_178176    | NP_835470    | Q86VF5  | MOGT3_HUMAN |                             | 2     | AGCTTCTTGAAC  | 0.577 |
| - | 56 | 9314      | .:2_Missense_Mut   | NM_005045    | NP_005036    | P78509  | RELN_HUMAN  |                             | 19    | FGATTTCTGCTC  | 0.448 |
| + | 6  | 2477      | 8splice PIK3CG_    | NM_002649    | NP_002640    | P48736  | PK3CG_HUMAN |                             | 38    | CTTACAGATTGA  | 0.363 |
| - | 13 | 1665      | ves.2_Missense_Iv  | NM_000111    | NP_000102    | P40879  | S26A3_HUMAN | ical; (Potential).          | 4     | CTAACCCGAGT   | 0.448 |
| + | 3  | 555       | ivjz.2_Missense_Iv | NM_002851    | NP_002842    | P23471  | PTPRZ_HUMAN | tial). Alpha-carbonic anhyd | 9     | AAATATCCAACA  | 0.299 |
| - | 3  | 1041      | .p.A118T SLC13A    | NM_012450    | NP_036582    | Q9UKG4  | S13A4_HUMAN | ical; (Potential).          | 0     | CTTGGCTCCGG   | 0.602 |
| - | 20 | 5852      | p.L1869F KIAA154   | NM_020910    | NP_065961    | Q9HCM3  | K1549_HUMAN |                             | 230   | GAGGAGCTCTC   | 0.622 |
| - | 15 | 1860      |                    | NM_004333    | NP_004324    | P15056  | BRAF_HUMAN  | rotein kinas_R603>1(2) p.T  | 18290 | GATTTCACTGT   | 0.368 |
| - | 7  | 1067      |                    | NM_001080392 | NP_001073861 | A4D1U4  | LCHN_HUMAN  |                             | 1     | TGTGAGCACTG   | 0.582 |
| + | 2  | 429       |                    | NM_178829    | NP_849151    | Q96L11  | CG034_HUMAN |                             | 0     | CAGGAGGGGCA   | 0.542 |
| + | 14 | 1651      | .c.1_Missense_Mu   | NM_000083    | NP_000074    | P35523  | CLCN1_HUMAN |                             | 5     | TACCTGGGGGC   | 0.443 |
| + | 3  | 603       | 3bp.3_Missense_I   | NM_001128431 | NP_001121903 | Q15043  | S39AE_HUMAN | cellular (Potential).       | 0     | GCAGACGGAGG   | 0.652 |
| + | 45 | 4716      | 3xei.2_Nonsense_I  | NM_024940    | NP_079216    | Q9H7D0  | DOCK5_HUMAN | DHR-2.                      | 3     | CCAACGAGAGG   | 0.562 |
| + | 4  | 2555      | 1_uc011ldy.1_Intr  | NM_006269    | NP_006260    | P56715  | RP1_HUMAN   |                             | 12    | TGTTTCTCTCAC  | 0.299 |
| + | 19 | 2108      | .p.F694S PREX2_    | NM_024870    | NP_079146    | Q70Z35  | PREX2_HUMAN | PDZ 2.                      | 17    | GAGGATTTGGCC  | 0.453 |
| + | 10 | 4867      | .R1539C ZFXH4_u    | NM_024721    | NP_078997    | Q86UP3  | ZFXH4_HUMAN |                             | 15    | CCATCTCGTCCA  | 0.388 |
| - | 3  | 1107      | lydr.1_Missense_Iv | NM_138817    | NP_620172    | Q8TCU3  | S7A13_HUMAN | Name=9; (Potential).        | 1     | TGTAATGGAGG   | 0.348 |
| - | 15 | 2419      | .:1_Missense_Mut   | NM_015668    | NP_056483    | Q8NE09  | RGS22_HUMAN |                             | 7     | CTTTTCTGTGTG  | 0.413 |
| - | 2  | 890       | v74_uc003ymx.2_    | NM_153015    | NP_694560    | Q96NL1  | TMM74_HUMAN |                             | 4     | TGTTTCGACGAT  | 0.507 |
| + | 12 | 1638      | uc003yqx.1_Intron  | NM_001039112 | NP_001034201 | Q2WVGJ9 | FR1L6_HUMAN | lasmic (Potential).         | 11    | AATGAGGAATTT  | 0.363 |
| - | 7  | 833       | ie_Mutation_p.S12  | NM_015912    | NP_056996    | Q49AJ0  | F135B_HUMAN |                             | 9     | CTGAGGAAGTC   | 0.473 |
| - | 3  | 363       | se_Mutation_p.S11  | NM_023078    | NP_075566    | Q53H96  | P5CR3_HUMAN |                             | 0     | TGAGAGACACC   | 0.622 |
| + | 7  | 1050_1051 | f.3_Missense_Mut   | NM_173831    | NP_776192    | Q96C28  | ZN707_HUMAN | 2H2-type 3.                 | 1     | AAGACCCGCTC   | 0.629 |
| + | 4  | 385       | 33_uc011lmh.1_Int  | NM_033439    | NP_254274    | O95760  | IL33_HUMAN  |                             | 0     | CTTCATGATTCA  | 0.498 |
| - | 1  | 5058      | uc003zrh.1_5'Flanl | NM_153809    | NP_722516    | Q8IZX4  | TAF1L_HUMAN |                             | 26    | TGGGTCAATTGG  | 0.443 |
| - | 1  | 754       | .M77T GBA2_uc01    | NM_020944    | NP_065995    | Q9HCG7  | GBA2_HUMAN  | cellular (Potential).       | 4     | TAGCCCATAGCT  | 0.537 |
| - | 8  | 1253      |                    | NM_015225    | NP_056040    | Q8WUY3  | PRUN2_HUMAN |                             | 0     | GAGGGGGGCAC   | 0.517 |
| + | 12 | 1490      | _Mutation_p.A331'  | NM_005392    | NP_005383    | O75151  | PHF2_HUMAN  |                             | 1     | CAAAGCCGCTC   | 0.602 |
| + | 6  | 828       | .h.1_Missense_Mt   | NM_032558    | NP_115947    | Q5SR56  | HIAL1_HUMAN | ical; (Potential).          | 2     | ATTGGAGCATAT  | 0.562 |
| - | 4  | 1182      | od.3_Missense_Mu   | NM_001127610 | NP_001121082 | Q14032  | BAAT_HUMAN  |                             | 3     | CCCCAGGGTAA   | 0.527 |
| - | 1  | 689       |                    | NM_001001919 | NP_001001919 | Q8NGS5  | O13C4_HUMAN | lasmic (Potential).         | 1     | TGGCCGAGTTC   | 0.418 |
| + | 58 | 5072_5073 | 2_RNA COL27A1_     | NM_032888    | NP_116277    | Q8IZC6  | CORA1_HUMAN | lar collagen NC1.           | 4     | CTGAGGGACC    | 0.594 |
| + | 3  | 1156      | .p.R249* TLR4_u    | NM_138554    | NP_612564    | O00206  | TLR4_HUMAN  | cellular (Potential).       | 16    | GAATTCGATTAC  | 0.363 |
| + | 4  | 1237      | .v.1_Missense_Mu   | NM_054107    | NP_473448    | Q8NGS2  | OR1J2_HUMAN | lasmic (Potential).         | 5     | ATATGTCACCTC  | 0.428 |
| + | 1  | 589       |                    | NM_001004457 | NP_001004457 | Q8NGR9  | OR1N2_HUMAN | cellular (Potential).       | 4     | GATTGTGATCCTA | 0.532 |
| + | 11 | 2972      | v.2_Missense_Mut   | NM_005157    | NP_005148    | P00519  | ABL1_HUMAN  | -binding). Pro-rich.        | 817   | ATCCTCGGCC    | 0.662 |
| + | 18 | 3205      |                    | NM_006059    | NP_006050    | Q9Y6N6  | LAMC3_HUMAN | omain II and I.             | 3     | GGAGGGGTGGC   | 0.612 |
| - | 8  | 2368      | RHGAP6_uc004cu     | NM_013427    | NP_038286    | O43182  | RHG06_HUMAN | Rho-GAP.                    | 2     | CTGTTCTCTCG   | 0.532 |
| + | 1  | 1902      |                    | NM_018094    | NP_060564    | Q8IYD1  | ERF3B_HUMAN |                             | 1     | TAATCTCTTGG   | 0.413 |
| - | 3  | 594       |                    | NM_001006938 | NP_001006939 | Q6IPX3  | TCAL6_HUMAN |                             | 1     | ACACATCTCCAC  | 0.488 |
| + | 4  | 1349      | img.1_Missense_I   | NM_152423    | NP_689636    | Q5H9M0  | MUML1_HUMAN |                             | 4     | AAGATGAAAAG   | 0.408 |
| - | 11 | 1699      | su.1_Missense_M    | NM_014289    | NP_055104    | Q9Y6Q1  | CAN6_HUMAN  |                             | 6     | GCCACGAGCCA   | 0.423 |

|   |    |         |                   |              |              |        |              |                               |     |               |       |
|---|----|---------|-------------------|--------------|--------------|--------|--------------|-------------------------------|-----|---------------|-------|
| + | 5  | 915     | IA3_uc004ets.3_R  | NM_007325    | NP_015564    | P42263 | GRIA3_HUMAN  | cellular (Potential).         | 5   | TTGAAGAAATGC  | 0.443 |
| - | 3  | 462     |                   | NM_001013403 | NP_001013421 | Q5JRM2 | CX066_HUMAN  | cytoplasmic (Potential).      | 0   | GTATGGATGGC   | 0.418 |
| + | 5  | 533     | k PUSL1_uc010ny   | NM_153339    | NP_699170    | Q8N0Z8 | PUSL1_HUMAN  |                               | 1   | GGAAGCCGCC    | 0.716 |
| + | 3  | 360     | ijf.1_Nonsense_Mt | NM_007033    | NP_008964    | O15258 | RER1_HUMAN   | ical; (Potential).            | 0   | ATGATTCGAGTT  | 0.522 |
| - | 22 | 2406    | asb.2_Missense_M  | NM_001001998 | NP_001001998 | Q01780 | EXOSX_HUMAN  |                               | 1   | TGGGTCGCTTG   | 0.488 |
| - | 28 | 4232    |                   | NM_004958    | NP_004949    | P42345 | MTOR_HUMAN   |                               | 29  | CAGGGGGCCCT   | 0.527 |
| + | 11 | 2509    | asi.1_Nonsense_M  | NM_020780    | NP_065831    | Q9P2K9 | PTHD2_HUMAN  | cellular (Potential).         | 7   | TGTCCAGGAG    | 0.652 |
| + | 3  | 512     | .2_Missense_Mut   | NM_033182    | NP_149438    | Q9H4M3 | FBX44_HUMAN  | FBA.                          | 1   | TTACTTCATATTA | 0.527 |
| + | 4  | 897     | aug.1_Missense_M  | NM_001103170 | NP_001096640 | Q5VUY0 | ADCL3_HUMAN  |                               | 0   | TCTGGGAAAAG   | 0.478 |
| - | 1  | 370     | oobf.1_Missense_M | NM_001146181 | NP_001139653 | B7ZW38 | B7ZW38_HUMAN |                               | 0   | TTTCTCGGTTT   | 0.483 |
| - | 1  | 273     |                   | NM_001136561 | NP_001130033 | B2RXH8 | B2RXH8_HUMAN |                               | 0   | TTTTCTCCTTATC | 0.478 |
| - | 10 | 1420    | F1_uc001ayz.1_5'  | NM_017940    | NP_060410    | Q3BBV0 | NBPF1_HUMAN  | NBPF 1.                       | 0   | AGCCTCCTCAA   | 0.438 |
| + | 5  | 506     |                   | NM_016233    | NP_057317    | Q9ULW8 | PADI3_HUMAN  |                               | 2   | TGTGACCGTGAT  | 0.602 |
| + | 15 | 1710    |                   | NM_016233    | NP_057317    | Q9ULW8 | PADI3_HUMAN  |                               | 2   | GAAGCGGGAGC   | 0.592 |
| - | 66 | 9774    | bk.1_Missense_Mt  | NM_020765    | NP_065816    | Q5T4S7 | UBR4_HUMAN   |                               | 25  | TGGCTGTAACC   | 0.587 |
| + | 6  | 656     |                   | NM_016183    | NP_057267    | Q9UKD2 | MRT4_HUMAN   |                               | 0   | TTTCACTGTGAC  | 0.587 |
| + | 5  | 842     | qb.2_Missense_Mt  | NM_032264    | NP_115640    | Q9H094 | NBPF3_HUMAN  | Potential.                    | 2   | ACCCAGTTAAG   | 0.502 |
| - | 8  | 603_604 | bew.2_Missense_M  | NM_002885    | NP_002876    | P47736 | RPGP1_HUMAN  |                               | 3   | CTTGAGTGAGAA  | 0.604 |
| + | 11 | 1401    | AL3_uc009vrc.2_M  | NM_020448    | NP_065181    | Q6P499 | NPAL3_HUMAN  |                               | 0   | TTTGAGCCCTAT  | 0.448 |
| - | 4  | 960     | n_p.T281 ZNF683   | NM_173574    | NP_775845    | Q8IZ20 | ZN683_HUMAN  |                               | 0   | AGTCGGTTGGG   | 0.647 |
| + | 9  | 861     | p.S255F KPN6_     | NM_012316    | NP_036448    | O60684 | IMA7_HUMAN   | ARM 5.                        | 0   | TACTGTCTCGCC  | 0.507 |
| - | 3  | 1255    |                   | NM_018207    | NP_060677    | Q9BVG3 | TRI62_HUMAN  | Potential.                    | 0   | GCGTGCGGGCC   | 0.667 |
| + | 2  | 1044    | p.P395L GJA4_uc   | NM_002060    | NP_002051    | P35212 | CXA4_HUMAN   | lasmic (Potential).           | 1   | AAAAACCCCAA   | 0.582 |
| - | 4  | 395     | ax.1_Missense_M   | NM_000760    | NP_000751    | Q99062 | CSF3R_HUMAN  | extracellular (Potential).    | 3   | CCTGCCCCCGG   | 0.602 |
| - | 2  | 269     | ba.1_Missense_M   | NM_000831    | NP_000822    | Q13003 | GRIK3_HUMAN  | cellular (Potential).         | 7   | CGTCCGCATAC   | 0.502 |
| - | 4  | 792     | PO1_uc009vfv.1_Ir | NM_001038633 | NP_001033722 | Q2MKA7 | RSPO1_HUMAN  |                               | 0   | AAGCCGCATAG   | 0.642 |
| - | 13 | 2296    | n.1_RNA EPHA10    | NM_001099439 | NP_001092909 | Q5JZY3 | EPHAA_HUMAN  | Potential) Protein kinase.    | 8   | CGTGCCGCTGT   | 0.622 |
| + | 1  | 3841    | i.1_Intron MACF1_ | NM_015038    | NP_055853    | O94854 | K0754_HUMAN  | Ala-rich.12.                  | 0   | AGCCACCTCC    | 0.721 |
| - | 3  | 589     | se_Mutation_p.T1C | NM_148960    | NP_683763    | Q8N6F1 | CLD19_HUMAN  | ical; (Potential).            | 0   | TCAAAGTGACAG  | 0.607 |
| + | 3  | 268     | p.R75C MPL_ucC    | NM_005373    | NP_005364    | P40238 | TPOR_HUMAN   | cellular (Potential).         | 363 | AGCCCGTGCT    | 0.597 |
| + | 11 | 1439    |                   | NM_015284    | NP_056099    | Q5T011 | SZT2_HUMAN   |                               | 0   | GGTCCCAGAC    | 0.562 |
| + | 6  | 889     | T2_uc001coy.1_5   | NM_015112    | NP_055927    | Q6P0Q8 | MAST2_HUMAN  |                               | 11  | CTTTGGACAG    | 0.488 |
| + | 7  | 1020    | \H_uc001cpv.2_In  | NM_001441    | NP_001432    | O00519 | FAAH1_HUMAN  | smic (By similarity).         | 2   | CTTGCCCTTCA   | 0.662 |
| + | 11 | 1398    | AH_uc001cpv.2_R   | NM_001441    | NP_001432    | O00519 | FAAH1_HUMAN  | smic (By similarity).         | 2   | GTCTCGGTAAG   | 0.577 |
| + | 11 | 1803    |                   | NM_000562    | NP_000553    | P07357 | CO8A_HUMAN   | SP type-1 2.                  | 3   | CAGGAAAGGAG   | 0.572 |
| - | 14 | 1971    | r.1_Nonsense_Mu   | NM_021080    | NP_066566    | O75553 | DAB1_HUMAN   |                               | 3   | GGGCTGGTCGG   | 0.557 |
| + | 9  | 975     | df.2_Missense_M   | NM_001077700 | NP_001071168 | Q8N108 | MIER1_HUMAN  | eraction with HDAC1.          | 1   | ATATTTCTTAAAG | 0.343 |
| + | 4  | 786     | sf.2_Missense_Mu  | NM_017734    | NP_060204    | Q9NP74 | PALMD_HUMAN  |                               | 3   | TGAGCGGACA    | 0.333 |
| - | 44 | 3706    | .E1142K COL11A1   | NM_001854    | NP_001845    | P12107 | COBA1_HUMAN  | le-helical region.            | 12  | CAATTTCACCTC  | 0.318 |
| - | 6  | 956     | dvm.2_Missense_M  | NM_013386    | NP_037518    | Q6NUK1 | SCMC1_HUMAN  | chondrial matrix (Potential). | 1   | CGAGCGGATAC   | 0.393 |
| + | 7  | 2014    | v.3_Missense_Mu   | NM_172212    | NP_757351    | P09603 | CSF1_HUMAN   | lasmic (Potential).           | 1   | ATTCTCCCTTGG  | 0.637 |
| - | 11 | 1869    | p.P567S OVGP1_    | NM_002557    | NP_002548    | Q12889 | OVGP1_HUMAN  |                               | 5   | CCTGGGTGAG    | 0.517 |
| - | 2  | 589     | bv.1_Missense_M   | NM_004980    | NP_004971    | Q9UK17 | KCND3_HUMAN  | lasmic (Potential).           | 3   | CTGCCGCTTGT   | 0.682 |
| + | 7  | 1205    | p.P342S MAGI3_I   | NM_001142782 | NP_001136254 | Q5TCQ9 | MAGI3_HUMAN  | VW 2.                         | 6   | AGCTTCCATTATC | 0.328 |
| - | 13 | 1883    | ff.1_Missense_Mu  | NM_000036    | NP_000027    | P23109 | AMPD1_HUMAN  |                               | 4   | CTCACCTTTTTT  | 0.418 |
| + | 11 | 951     | se_Mutation_p.E2  | NM_003176    | NP_003167    | Q15431 | SYCP1_HUMAN  | Potential.                    | 1   | GATTATGAAAAA  | 0.229 |
| - | 29 | 4314    |                   | NM_206996    | NP_996879    | Q6Q759 | SPG17_HUMAN  |                               | 6   | CAATGGGGTCA   | 0.398 |

rs138012325

|   |    |           |                    |              |              |        |             |                              |    |                |       |             |
|---|----|-----------|--------------------|--------------|--------------|--------|-------------|------------------------------|----|----------------|-------|-------------|
| + | 3  | 714       | enm.1_Intron TXN   | NM_006472    | NP_006463    | Q9H3M7 | TXNIP_HUMAN |                              | 2  | ACTGGGTGAAG    | 0.428 |             |
| - | 8  | 1274      | RC_uc010pdo.1_IV   | NM_005060    | NP_005051    | P51449 | RORG_HUMAN  | gand-binding.                | 2  | AGGCTCGGAAC    | 0.552 |             |
| - | 3  | 754       |                    | NM_001122965 | NP_001116437 | Q6XPR3 | RPTN_HUMAN  | Gln-rich.                    | 0  | CACACCGATTTA   | 0.413 |             |
| - | 3  | 566       | uc001ezv.2_Intron  | NM_001014342 | NP_001014364 | Q5D862 | FILA2_HUMAN | Ser-rich.                    | 17 | ACCTTGTCTTCC   | 0.493 |             |
| + | 1  | 40        |                    | NM_178354    | NP_848131    | Q5T754 | LCE1F_HUMAN | Pro-rich.                    | 0  | AGCCcctcccaagt | 0.358 |             |
| - | 7  | 1460      |                    | NM_020699    | NP_065750    | Q8WXI9 | P66B_HUMAN  | CR2.                         | 0  | CTTACCTTGGC    | 0.423 |             |
| - | 2  | 287       | 3A1_uc001fdk.2_IV  | NM_014437    | NP_055252    | Q9NY26 | S39A1_HUMAN | ical; (Potential).           | 0  | GGTGAGCACCA    | 0.647 |             |
| + | 2  | 779       | _uc001fkl.2_5'Flan | NM_001105203 | NP_001098673 | Q9BVN2 | RUSC1_HUMAN |                              | 2  | GCAACGCCCTG    | 0.622 |             |
| + | 3  | 268       | l_5'Flank PEAR1_   | NM_001080471 | NP_001073940 | Q5VY43 | PEAR1_HUMAN | EMI.                         | 3  | GCTCCCTCAG     | 0.672 |             |
| + | 15 | 2067      | fqk.1_Splice_Site  | NM_001080471 | NP_001073940 | Q5VY43 | PEAR1_HUMAN |                              | 3  | CCAGCGTATGT    | 0.622 |             |
| + | 3  | 681       | 1C_uc001frv.2_5'L  | NM_001765    | NP_001756    | P29017 | CD1C_HUMAN  | ellular (Potential).         | 4  | AGAAGGCTTCT    | 0.463 |             |
| - | 1  | 864       |                    | NM_001004476 | NP_001004476 | Q6IF99 | O10K2_HUMAN | Name=7; (Potential).         | 1  | ATAAATCATTGGC  | 0.333 | rs137874220 |
| + | 1  | 931       |                    | NM_001005184 | NP_001005184 | Q8NGW6 | OR6K6_HUMAN | Name=7; (Potential).         | 1  | CTCCCTTTTTC    | 0.438 |             |
| - | 1  | 460       |                    | NM_001004467 | NP_001004467 | Q5JRS4 | O10J3_HUMAN | Name=4; (Potential).         | 2  | GCCAAGGCCAA    | 0.507 |             |
| - | 6  | 824       | _p.H144Y COPA_t    | NM_004371    | NP_004362    | P53621 | COPA_HUMAN  | WD 4.                        | 2  | GGGGTGGAAC     | 0.468 |             |
| + | 15 | 5371      | 2A2_uc009www.2_    | NM_020318    | NP_064714    | Q9BXP8 | PAPP2_HUMAN | Sushi 1.                     | 16 | CTTGATCATGCT   | 0.507 |             |
| - | 3  | 772       | e_Mutation_p.P18   | NM_004319    | NP_004310    | O14525 | ASTN1_HUMAN |                              | 15 | GCTGCGGGACC    | 0.612 |             |
| + | 34 | 7491      | _p.P505S CEP350    | NM_014810    | NP_055625    | Q5VT06 | CE350_HUMAN |                              | 4  | TTGCTCCTAAAC   | 0.338 |             |
| + | 2  | 923       |                    | NM_020950    | NP_066001    | Q5VZ46 | K1614_HUMAN |                              | 4  | TGGGCGCTGGG    | 0.627 |             |
| + | 5  | 1415      | 3_Mutation_p.V71f  | NM_020950    | NP_066001    | Q5VZ46 | K1614_HUMAN |                              | 4  | TCGCACGTGCGC   | 0.701 |             |
| + | 22 | 3592      | p.V1093A LAMC2_    | NM_005562    | NP_005553    | Q13753 | LAMC2_HUMAN | omain II and I.              | 3  | CTGGGGTTACAA   | 0.483 |             |
| - | 8  | 2173      | ypj.1_Missense_Mt  | NM_014875    | NP_055690    | Q15058 | KIF14_HUMAN | inesin-motor.                | 7  | TGGGTGCATCAC   | 0.388 | rs144936292 |
| + | 10 | 3451      | _p.S644F NAV1_u    | NM_020443    | NP_065176    | Q8NEY1 | NAV1_HUMAN  |                              | 4  | CCTGTCCCTGG    | 0.622 |             |
| + | 4  | 1341      | _p.A153T ATP2B4_   | NM_001684    | NP_001675    | P23634 | AT2B4_HUMAN | ical; (Potential).           | 3  | AGGGGGCAGCC    | 0.502 |             |
| + | 5  | 1182_1183 | _p.G242* LAX1_uc   | NM_017773    | NP_060243    | Q8IWV1 | LAX1_HUMAN  | lasmic (Potential).          | 2  | GCAATGGAGAAC   | 0.5   |             |
| + | 20 | 3030      | _p.S805* ZC3H11/   | NM_014827    | NP_055642    | O75152 | ZC11A_HUMAN |                              | 2  | AGCTATCAGAAA   | 0.378 |             |
| - | 7  | 1500      |                    | NM_030952    | NP_112214    | Q9H093 | NUAK2_HUMAN |                              | 5  | AGTAGCCAGAC    | 0.642 |             |
| + | 2  | 234       | ie_Mutation_p.R3E  | NM_001910    | NP_001901    | P14091 | CATE_HUMAN  |                              | 1  | GGCACGGAGCC    | 0.557 |             |
| - | 15 | 1908      | w.2_Missense_Mt    | NM_006893    | NP_008824    | P41214 | EIF2D_HUMAN |                              | 0  | TCGAGGGAGCT    | 0.532 |             |
| + | 3  | 381       | qjh.2_Missense_M   | NM_001030287 | NP_001025458 | P18847 | ATF3_HUMAN  |                              | 0  | AGCCCTGAAG     | 0.438 |             |
| + | 1  | 1922      | uc010pth.1_RNA     | NM_153606    | NP_705834    | Q8IYT1 | FA71A_HUMAN |                              | 5  | CTCTCACAAATC   | 0.557 |             |
| + | 17 | 5064      | 3.V1674M OBSCN     | NM_001098623 | NP_001092093 | Q5VST9 | OBSCN_HUMAN | Ig-like 17.                  | 28 | TGCGCGTGGAG    | 0.677 |             |
| + | 5  | 3220      | e.1_Missense_Mu    | NM_020066    | NP_064450    | Q9NZ56 | FMN2_HUMAN  | ro-rich. FH1.                | 12 | TACCCCTCCG     | 0.711 |             |
| + | 5  | 3352      | e.1_Missense_Mu    | NM_020066    | NP_064450    | Q9NZ56 | FMN2_HUMAN  | ro-rich. FH1.                | 12 | TACCCCTCCG     | 0.731 |             |
| - | 4  | 1462      | 695_uc009xgt.1_I   | NM_020394    | NP_065127    | Q8IW36 | ZN695_HUMAN | 2H2-type 11.                 | 0  | ACATTCATCACA   | 0.368 |             |
| + | 1  | 26        |                    | NM_001004696 | NP_001004696 | Q8NH00 | OR2T4_HUMAN | ellular (Potential).         | 1  | GGCCAGCCACA    | 0.483 | rs140989725 |
| - | 1  | 392       |                    | NM_001004734 | NP_001004734 | A6ND48 | O1411_HUMAN | lasmic (Potential).          | 0  | CGGCTCTGTATT   | 0.517 |             |
| + | 3  | 778       | xig.2_Missense_M   | NM_178150    | NP_835363    | Q8NFZ0 | FBX18_HUMAN |                              | 3  | CCTCCGGTGG     | 0.423 |             |
| + | 3  | 607       | KFB3_uc010qaw.     | NM_004566    | NP_004557    | Q16875 | F263_HUMAN  | phofructo-2-kinase.          | 3  | AGTATCGCCGG    | 0.507 |             |
| - | 9  | 1524      | HS1_uc001imi.2_I   | NM_012247    | NP_036379    | P49903 | SPS1_HUMAN  |                              | 1  | GGCCCGGGTG     | 0.418 |             |
| - | 9  | 1342      | 3ito.2_Missense_   | NM_145698    | NP_663736    | Q5T8D3 | ACBD5_HUMAN |                              | 0  | TCTCCGGTGT     | 0.453 |             |
| - | 2  | 1455      | nse_Mutation_p.G   | NM_020848    | NP_065899    | Q9P266 | K1462_HUMAN |                              | 4  | TCCTCCATGAGC   | 0.522 |             |
| - | 7  | 1541      | _p.G340R NRP1_u    | NM_003873    | NP_003864    | O14786 | NRP1_HUMAN  | . Extracellular (Potential). | 4  | TGTCCCGACAG    | 0.488 |             |
| + | 7  | 794       |                    | NM_052997    | NP_443723    | Q9BXX3 | AN30A_HUMAN |                              | 9  | CTTGGCGGAAA    | 0.423 |             |
| + | 2  |           |                    | NR_024524    |              |        |             |                              | 0  | GATGGTGAGAC    | 0.333 |             |
| - | 10 | 1438      | _p.E439K CTNNA3    | NM_001127384 | NP_001120856 | Q9UI47 | CTNA3_HUMAN |                              | 8  | ATCTTCATTTGT   | 0.308 |             |
| + | 15 | 1877      | PL1_uc009xqk.2_F   | NM_003901    | NP_003892    | O95470 | SGPL1_HUMAN | lasmic (Potential).          | 0  | CAGCACCGACA    | 0.502 |             |

|   |    |           |                   |              |              |        |              |                            |    |               |       |             |
|---|----|-----------|-------------------|--------------|--------------|--------|--------------|----------------------------|----|---------------|-------|-------------|
| - | 3  | 685       | _p.P179T DNAJB1   | NM_017626    | NP_060096    | Q9NXW2 | DJB12_HUMAN  | J.                         | 0  | ACCAGGTGCGT   | 0.562 |             |
| - | 22 | 2827      | xl.1_Missense_Mu  | NM_001161352 | NP_001154824 | Q12791 | KCMA1_HUMAN  | lasmic (Potential).        | 3  | GTAAGTCAATAG  | 0.498 |             |
| + | 22 | 3133      | rn_p.I730T ZMIZ1_ | NM_020338    | NP_065071    | Q9ULJ6 | ZMIZ1_HUMAN  |                            | 4  | AGATGATCATGC  | 0.632 |             |
| - | 17 | 2003      |                   | NM_022451    | NP_071896    | Q8WTT2 | NOC3L_HUMAN  |                            | 1  | ATTGGGAAGAA   | 0.383 |             |
| - | 9  | 1080_1081 | uk.1_Missense_M   | NM_022451    | NP_071896    | Q8WTT2 | NOC3L_HUMAN  |                            | 1  | TTTAAGGAAACT  | 0.376 |             |
| - | 1  | 103       | C8_uc010qob.1_5'  | NM_000770    | NP_000761    | P10632 | CP2C8_HUMAN  |                            | 0  | CAAAAAGGTTCC  | 0.453 |             |
| - | 4  | 1353      | .00093_uc001kqk.  | NM_015221    | NP_056036    | Q6XZF7 | DNMBP_HUMAN  |                            | 6  | GGGATGAAAAG   | 0.527 |             |
| - | 2  | 582       |                   | NM_001308    | NP_001299    | P15169 | CBPN_HUMAN   | Catalytic.                 | 4  | GTTCCGGAACT   | 0.602 | rs146812654 |
| - | 4  | 860       |                   | NM_000102    | NP_000093    | P05093 | CP17A_HUMAN  |                            | 0  | TTTTTCCAGGGT  | 0.383 |             |
| + | 17 | 2548      | .CS3_uc010qqz.1_  | NM_014978    | NP_055793    | Q9UPU3 | SORC3_HUMAN  | renal (Potential).         | 10 | CAATCCAGCAT   | 0.453 |             |
| + | 4  | 374       | RNA HABP2_uc01    | NM_004132    | NP_004123    | Q14520 | HABP2_HUMAN  | EGF-like 1.                | 3  | TCGTCATGGG    | 0.537 |             |
| + | 18 | 2490      | lfd.1_Missense_Mt | NM_018117    | NP_060587    | Q9BZH6 | WDR11_HUMAN  | WD 7.                      | 0  | AAGTTGGGTGA   | 0.408 |             |
| + | 26 | 3119      | R506* DMBT1_uc0   | NM_007329    | NP_015568    | Q9UGM3 | DMBT1_HUMAN  | SRCR 8.                    | 7  | AGGGCCGAGTG   | 0.567 |             |
| - | 3  | 365       | ASSF7_uc001lqb.:  | NM_173573    | NP_775844    | Q8IXW0 | CK035_HUMAN  |                            | 1  | TGGGCGGAAGC   | 0.662 |             |
| + | 14 | 2107      | RF1_uc010qwe.1_   | NM_020901    | NP_065952    | Q9P1Y6 | PHRF1_HUMAN  |                            | 0  | ATGTCGCAGTG   | 0.592 |             |
| - | 8  | 1611      | DD_uc001lrm.1_M   | NM_145886    | NP_665893    | Q9HB75 | PIDD_HUMAN   | ZU5 2.                     | 0  | AGACTCGACGA   | 0.672 |             |
| - | 4  | 564       |                   | NM_004420    | NP_004411    | Q13202 | DUS8_HUMAN   |                            | 0  | CATGGGTAGCA   | 0.652 |             |
| - | 13 | 1394      | .1_Nonsense_Mut:  | NM_199292    | NP_954986    | P07101 | TY3H_HUMAN   |                            | 0  | TGACTGGTACG   | 0.627 |             |
| - | 19 | 2935      | p.A976T TRPM5_    | NM_014555    | NP_055370    | Q9NZQ8 | TRPM5_HUMAN  | lasmic (Potential).        | 4  | CATGGCGATGA   | 0.602 |             |
| - | 1  | 576       |                   | NM_001005238 | NP_001005238 | Q8NGK0 | O51G2_HUMAN  | cellular (Potential).      | 2  | ACAGGCCAATTT  | 0.448 |             |
| - | 1  | 28        |                   | NM_001005164 | NP_001005164 | Q8NGJ4 | O52E2_HUMAN  | cellular (Potential).      | 3  | GGGGTGAAACT   | 0.498 |             |
| - | 9  | 1969      | p.R409C TRIM3_L   | NM_006458    | NP_006449    | O75382 | TRIM3_HUMAN  | NHL 2.                     | 5  | TGAGCGTCCCT   | 0.582 |             |
| - | 9  | 1419      | p.P30S MRV11_uc0  | NM_001100167 | NP_001093637 | Q9Y6F6 | MRV11_HUMAN  |                            | 3  | TCTCGGCAGAG   | 0.677 |             |
| - | 3  | 803       | e_Mutation_p.R15  | NM_024514    | NP_078790    | Q6VVX0 | CP2R1_HUMAN  |                            | 2  | GCTTTCTGTTG   | 0.378 |             |
| - | 30 | 3808      |                   | NM_000352    | NP_000343    | Q09428 | ABCC8_HUMAN  | pe-1 2. Cytoplasmic (By si | 1  | GTATTTCGAGAA  | 0.542 |             |
| - | 7  | 740       | se_Mutation_p.P1f | NM_006292    | NP_006283    | Q99816 | TS101_HUMAN  |                            | 0  | GAGAAGGGTAC   | 0.428 |             |
| + | 14 | 3375      | AV2_uc001mpt.2_   | NM_145117    | NP_660093    | Q8IVL1 | NAV2_HUMAN   |                            | 6  | GGAATCCCTGT   | 0.537 |             |
| - | 2  | 2065      |                   | NM_002233    | NP_002224    | P22459 | KCNA4_HUMAN  |                            | 4  | TGCAGGACTGG   | 0.498 |             |
| - | 3  | 764       | p.R102W LMO2_L    | NM_001142316 | NP_001135788 | P25791 | RBTN2_HUMAN  | l zinc-binding 2.          | 1  | CACCCGCATTG   | 0.478 | rs150071797 |
| + | 7  | 1675      |                   | NM_005456    | NP_005447    | Q9UQF2 | JIP1_HUMAN   | SH3.                       | 4  | GCCTCGACACG   | 0.577 |             |
| + | 1  | 362       |                   | NM_001005275 | NP_001005275 | Q8NGL6 | O4A15_HUMAN  | cellular (Potential).      | 2  | CATTTCTTTCA   | 0.388 |             |
| + | 1  | 838       |                   | NM_001001967 | NP_001001967 | Q8NGL4 | OR5DD_HUMAN  | Name=7; (Potential).       | 3  | TGTTTTACACAG  | 0.378 | rs150799318 |
| - | 1  | 278       |                   | NM_001004058 | NP_001004058 | Q8NH50 | OR8K5_HUMAN  | cellular (Potential).      | 4  | TAATAGGAAATAC | 0.398 |             |
| + | 1  | 757       |                   | NM_001005205 | NP_001005205 | Q8NGP2 | OR8J1_HUMAN  | Name=6; (Potential).       | 2  | TTTATGGGACAT  | 0.363 |             |
| + | 7  | 811       |                   | NM_000139    | NP_000130    | Q01362 | FCERB_HUMAN  | lasmic (Potential).        | 1  | CAGGGGAAATG   | 0.418 |             |
| + | 5  | 544       |                   | NM_017716    | NP_060186    | Q9NXJ0 | M4A12_HUMAN  | ical; (Potential).         | 0  | GCCTGGGAATG   | 0.423 |             |
| + | 5  | 844       | o.1_Missense_Mu   | NM_004265    | NP_004256    | Q95864 | FADS2_HUMAN  | lasmic (Potential).        | 2  | ATCCCAGATGTG  | 0.562 |             |
| - | 2  | 2551      | AB_uc001nuc.2_5'  | NM_030628    | NP_085131    | Q6P9B9 | INT5_HUMAN   |                            | 2  | CCTCGGGGGGC   | 0.647 |             |
| + | 2  | 406       | ilent_p.L128L SAF | NM_005146    | NP_005137    | O43290 | SNUT1_HUMAN  |                            | 1  | TCCAGCTGCCA   | 0.517 |             |
| + | 3  | 757       | nse_Mutation_p.A  | NM_138768    | NP_620123    | Q96EZ4 | MYEOV_HUMAN  |                            | 0  | CTGGAGCTGGT   | 0.652 |             |
| + | 3  | 1325      | p.W380L NEU3_L    | NM_006656    | NP_006647    | A8K327 | A8K327_HUMAN |                            | 2  | CTGCTGGTCCC   | 0.562 |             |
| - | 4  | 2365      |                   | NM_033063    | NP_149052    | Q96JE9 | MAP6_HUMAN   | Pro-rich.                  | 0  | TTGCTGGTACT   | 0.522 |             |
| + | 4  | 680       | xb.2_Missense_M   | NM_032564    | NP_115953    | Q96PD7 | DGAT2_HUMAN  | lasmic (Potential).        | 0  | TACTTTCCCATCC | 0.527 |             |
| + | 47 | 6648      | e_Mutation_p.P20f | NM_000260    | NP_000251    | Q13402 | MYO7A_HUMAN  | FERM 2.                    | 4  | ACTTCCCTGAG   | 0.522 |             |
| - | 32 | 7160      | p.R458W ODZ4_ur   | NM_001098816 | NP_001092286 | Q6N022 | TEN4_HUMAN   | ilar (Potential). YD 19.   | 4  | GAGCCGTGCAC   | 0.592 |             |
| + | 2  | 350       | PRSS23_uc010rts.  | NM_007173    | NP_009104    | O95084 | PRS23_HUMAN  |                            | 2  | AGTCTACCCTCA  | 0.532 |             |
| + | 2  | 978       |                   | NM_000372    | NP_000363    | P14679 | TYRO_HUMAN   | telanosome (Potential).    | 3  | ACGGCGTAATCC  | 0.468 | rs61754375  |



|   |    |      |                   |              |              |        |             |                           |      |                |       |             |
|---|----|------|-------------------|--------------|--------------|--------|-------------|---------------------------|------|----------------|-------|-------------|
| + | 2  | 500  |                   | NM_001098672 | NP_001092142 | Q6MZM0 | HPHL1_HUMAN | extracellular (Potential) | 3    | GTCATTCATTTAA  | 0.458 |             |
| - | 5  | 422  | se_Mutation_p.D6  | NM_152587    | NP_689800    | Q8NCR3 | CK065_HUMAN |                           | 1    | .GATGATCATTTT  | 0.358 |             |
| + | 4  | 622  |                   | NM_198498    | NP_940900    | Q8IXP5 | CK053_HUMAN |                           | 0    | CTGGGGCTCAC    | 0.622 |             |
| + | 8  | 1234 | s.1_3'UTR LAYN_u  | NM_178834    | NP_849156    | Q6UX15 | LAYN_HUMAN  | lasmic (Potential).       | 0    | :AAAGCGAAGCT   | 0.507 |             |
| - | 5  | 1094 | ppd.2_Missense_A  | NM_001077639 | NP_001071107 | Q6UWF7 | FA55D_HUMAN |                           | 4    | ATTTCTCTTTCAT  | 0.403 |             |
| - | 1  | 586  |                   | NM_001004474 | NP_001004474 | Q8NGN2 | O10S1_HUMAN | ellular (Potential).      | 2    | :AGGGGGTATGT   | 0.572 |             |
| + | 7  | 1766 | u.2_Missense_ML   | NM_002286    | NP_002277    | P18627 | LAG3_HUMAN  | lasmic (Potential).       | 0    | TTTCACCTTTGG   | 0.602 |             |
| - | 25 | 3205 | p.R73Q A2M_uc0    | NM_000014    | NP_000005    | P01023 | A2MG_HUMAN  |                           | 5    | CCATATCGCTCC   | 0.318 |             |
| - | 1  | 335  | H1_uc001qzc.2_Ir  | NM_023922    | NP_076411    | Q9NYV8 | T2R14_HUMAN | lasmic (Potential).       | 0    | AAATTTGGCTATCT | 0.348 |             |
| + | 6  | 927  | 1467_uc009zhx.1   | NM_020853    | NP_065904    | A2RU67 | K1467_HUMAN | p.R302*(1)                | 3    | :TGGGTCGACCT   | 0.507 |             |
| - | 3  | 424  |                   | NM_182558    | NP_872364    |        |             |                           | 0    | GGGAACGATTCC   | 0.453 | rs143075618 |
| + | 21 | 2889 | ase_Mutation_p.D  | NM_004570    | NP_004561    | O75747 | P3C2G_HUMAN | PI3K/PI4K.                | 21   | GGAGATGATCTT   | 0.368 |             |
| + | 21 | 2895 | ase_Mutation_p.R  | NM_004570    | NP_004561    | O75747 | P3C2G_HUMAN | PI3K/PI4K.                | 21   | ATCTTCGTCAG    | 0.363 |             |
| + | 1  | 679  | Z1_uc001rdw.3_5'  | NM_033328    | NP_201585    | Q96KX2 | CAZA3_HUMAN |                           | 2    | CTAAATGGATTTT  | 0.383 |             |
| - | 1  | 325  |                   | NM_001040436 | NP_001035526 | Q9Y2Z4 | SYYM_HUMAN  | HIGH region.              | 0    | :ATGAAGCGAGT   | 0.622 |             |
| + | 10 | 1191 | n.1_Missense_ML   | NM_001843    | NP_001834    | Q12860 | CNTN1_HUMAN | like C2-type 4.           | 9    | CCATCCCTACA    | 0.483 |             |
| - | 2  | 1273 |                   | NM_001008223 | NP_001008224 | Q86Z23 | C1QL4_HUMAN | C1q.                      | 0    | :CGCGTCCTGAG   | 0.642 |             |
| + | 15 | 2952 | mj.1_Missense_ML  | NM_012284    | NP_036416    | Q9ULD8 | KCNH3_HUMAN | lasmic (Potential).       | 0    | GGGAAGGACTG    | 0.662 |             |
| + | 36 | 4462 | lt.2_Missense_Mul | NM_173602    | NP_775873    | Q9P265 | DIP2B_HUMAN |                           | 6    | GGACAGGATAC    | 0.527 |             |
| - | 15 | 1527 | C11A2_uc001rxh.1  | NM_000617    | NP_000608    | P49281 | NRAM2_HUMAN | lasmic (Potential).       | 1    | :CAATCCGCCAG   | 0.443 |             |
| - | 7  | 1513 | yl.1_Missense_M   | NM_007210    | NP_009141    | Q8NCL4 | GALT6_HUMAN | renal (Potential).        | 2    | :CAGGCGCACTT   | 0.542 |             |
| - | 2  | 619  | ase_Mutation_p.E1 | NM_007210    | NP_009141    | Q8NCL4 | GALT6_HUMAN | renal (Potential).        | 2    | :CTTTCTCTGGG   | 0.577 |             |
| + | 7  | 1068 | G81_uc001sac.2_Ir | NM_002284    | NP_002275    | O43790 | KRT86_HUMAN | Rod. Coil 2.              | 1    | GCACGGGGAGA    | 0.602 |             |
| - | 2  | 586  | 72_uc010sns.1_M   | NM_001146225 | NP_001139697 | Q14CN4 | K2C72_HUMAN | inker 1. Rod.             | 6    | :TGCAAGTTGTC   | 0.567 |             |
| + | 17 | 1715 | p.R88C NCKAP1l    | NM_005337    | NP_005328    | P55160 | NCKPL_HUMAN |                           | 4    | CATCTTCGATCT   | 0.393 |             |
| + | 2  | 314  | RBB3_uc010sqc.1   | NM_001982    | NP_001973    | P21860 | ERBB3_HUMAN | ellular (Potential).      | 8    | .CCGGCGATGCT   | 0.542 |             |
| + | 3  | 271  |                   | NM_032786    | NP_116175    | Q96K80 | ZC3HA_HUMAN | Gly-rich.                 | 0    | :CCAGTGGGGCA   | 0.647 |             |
| + | 24 | 4326 |                   | NM_002332    | NP_002323    | Q07954 | LRP1_HUMAN  | ellular (Potential).      | 22   | .CAAAGGAGACT   | 0.597 |             |
| - | 3  | 238  | te DCTN2_uc001s   | NM_006400    | NP_006391    | Q13561 | DCTN2_HUMAN |                           | 1    | :TCCTCCTGCCA   | 0.488 |             |
| + | 3  | 1541 | zs.1_Missense_ML  | NM_152588    | NP_689801    | Q8N394 | TMTC2_HUMAN |                           | 2    | CTTTGCATCCA    | 0.398 |             |
| - | 8  | 2400 | ik.3_Missense_Mu  | NM_013244    | NP_037376    | Q9UBM8 | MGT4C_HUMAN | renal (Potential).        | 3    | :ATTTTCAAATAC  | 0.343 |             |
| - | 6  | 1162 |                   | NM_145913    | NP_666018    | Q8N695 | SC5A8_HUMAN | ical; (Potential).        | 0    | :GACACCGTAGA   | 0.388 |             |
| + | 27 | 3226 | l0svs.1_Missense_ | NM_206820    | NP_996556    | Q00872 | MYPC1_HUMAN |                           | 4    | GACTTTGATTTCT  | 0.358 |             |
| - | 13 | 1680 |                   | NM_000277    | NP_000268    | P00439 | PH4H_HUMAN  |                           | 4    | :TGGCAGCAAAG   | 0.458 | rs5030857   |
| + | 3  | 419  |                   | NM_017564    | NP_060034    | Q8VWQ8 | STAB2_HUMAN | ellular (Potential).      | 14   | :GGTCAGAACAT   | 0.493 |             |
| - | 2  | 810  | u.2_Missense_Mul  | NM_138451    | NP_612460    | Q96DY2 | IQCD_HUMAN  |                           | 1    | :GAGGCGGTCTC   | 0.522 | rs141733272 |
| + | 13 | 2435 | VF10_uc001tyq.3_  | NM_014868    | NP_055683    | Q8N5U6 | RNF10_HUMAN |                           | 2    | :CTGCTCCTCTG   | 0.512 |             |
| + | 13 | 1547 | RX7_uc001tzip.2_I | NM_002562    | NP_002553    | Q99572 | P2RX7_HUMAN |                           | 5    | CTCCCATCTC     | 0.597 |             |
| + | 1  | 43   | D8_uc001uex.2_5'  | NM_020382    | NP_065115    | Q9NQR1 | SETD8_HUMAN |                           | 0    | :GAGCCATGGCT   | 0.667 |             |
| - | 9  | 2808 | l1uia.2_Missense_ | NM_133448    | NP_597705    | Q14C87 | T132D_HUMAN | ellular (Potential).      | 14   | TTTTTGGGCCTT   | 0.522 |             |
| + | 28 | 5773 | _uc001ujm.2_Miss  | NM_015409    | NP_056224    | Q96L91 | EP400_HUMAN | case C-terminal.          | 12   | :TGCCAGCAGTG   | 0.423 |             |
| - | 4  | 1462 | nr.3_Missense_ML  | NM_014572    | NP_055387    | Q9NRM7 | LATS2_HUMAN |                           | 10   | GGACGGAGGTG    | 0.721 |             |
| - | 3  | 387  | .T3_uc010tdn.1_M  | NM_004119    | NP_004110    | P36888 | FLT3_HUMAN  | ellular (Potential).      | 8549 | :GACAGGAAATG   | 0.498 |             |
| + | 43 | 6248 | RY_uc010tdw.1_Rf  | NM_023037    | NP_075463    | Q5TBA9 | FRY_HUMAN   |                           | 7    | :AGGCGGCTGTG   | 0.408 |             |
| + | 9  | 970  | ua.1_Missense_M   | NM_000059    | NP_000050    | P51587 | BRCA2_HUMAN |                           | 64   | TTATCGCTTCTGT  | 0.308 |             |
| - | 9  | 1731 | .A429G ELF1_ucl   | NM_172373    | NP_758961    | P32519 | ELF1_HUMAN  |                           | 1    | :TGCTGGCTATA   | 0.448 |             |
| + | 3  | 838  | ao.2_Missense_ML  | NM_152719    | NP_689932    | Q8NA61 | SPERT_HUMAN | Potential.                | 2    | GGAGGAGAATC    | 0.677 |             |

|   |    |           |                   |              |              |        |             |                             |    |              |       |             |
|---|----|-----------|-------------------|--------------|--------------|--------|-------------|-----------------------------|----|--------------|-------|-------------|
| - | 9  | 995       | ise_Mutation_p.R2 | NM_152720    | NP_689933    | P51956 | NEK3_HUMAN  | with VAV2. Protein kinase.  | 2  | GCCTCGAGAGA  | 0.478 |             |
| - | 3  | 661       | i.N39S THSD1_uc   | NM_018676    | NP_061146    | Q9NS62 | THSD1_HUMAN | cellular (Potential).       | 4  | GTGTCGTTGCTT | 0.433 |             |
| + | 2  | 165       | sense_Mutation_f  | NM_024808    | NP_079084    | Q6PGQ7 | BORA_HUMAN  |                             | 0  | AAACTCCAGGA  | 0.348 |             |
| - | 4  | 618       | e_Mutation_p.A17  | NM_001079669 | NP_001073137 | Q5T4D3 | TMTC4_HUMAN | ical; (Potential).          | 3  | GCAGCGCGGCC  | 0.612 |             |
| + | 15 | 3853_3854 |                   | NM_000123    | NP_000114    | P28715 | ERCC5_HUMAN |                             | 7  | AGCTCCCCTGTA | 0.485 |             |
| - | 8  | 890       | 2_5'Flank GAS6_l  | NM_000820    | NP_000811    | Q14393 | GAS6_HUMAN  | alcium-binding (Potential). | 4  | CACAGCGGCC   | 0.662 | rs78824256  |
| + | 9  | 1320      | a.1_RNA POTEG_    | NM_001005356 | NP_001005356 | Q6S5H5 | POTEG_HUMAN |                             | 1  | GCACGGAAAGTA | 0.358 |             |
| + | 1  | 344       |                   | NM_001004723 | NP_001004723 | Q8NGD1 | OR4N2_HUMAN | Name=3; (Potential).        | 4  | TACTCCTTGTTG | 0.507 |             |
| + | 2  | 383       |                   | NM_022360    | NP_071755    | P56851 | EP3B_HUMAN  |                             | 1  | GTATGGGTCCAC | 0.408 |             |
| - | 26 | 3419      | wan.2_Missense_l  | NM_007192    | NP_009123    | Q9Y5B9 | SP16H_HUMAN |                             | 0  | GGCCCGAACTG  | 0.507 |             |
| - | 35 | 5099      |                   | NM_000257    | NP_000248    | P12883 | MYH7_HUMAN  | Potential.                  | 4  | GTCGTCGTTGG  | 0.612 |             |
| - | 8  | 1363      | M1_uc010tog.1_In  | NM_000359    | NP_000350    | P22735 | TGM1_HUMAN  |                             | 3  | ATGTCATGTTG  | 0.572 |             |
| + | 9  | 5542      |                   | NM_025081    | NP_079357    | Q9P2P1 | NYNRI_HUMAN | grase catalytic.            | 3  | CCCTGCCTTTG  | 0.627 |             |
| - | 3  | 671       | A1_uc001wqa.2_5   | NM_002515    | NP_002506    | P51513 | NOVA1_HUMAN |                             | 5  | ATTTTTCTGCA  | 0.438 |             |
| + | 2  | 1273      | i.2_Missense_Mut  | NM_001173    | NP_001025226 | Q13017 | RHG05_HUMAN |                             | 5  | AAGAGCTTTTA  | 0.313 |             |
| + | 4  | 798       | iy.1_Missense_Mu  | NM_054024    | NP_473365    | Q96PC5 | MIA2_HUMAN  |                             | 2  | TTGTTGAAAGT  | 0.428 |             |
| + | 1  | 624       | id.1_Missense_ML  | NM_031914    | NP_114120    | Q17RD7 | SYT16_HUMAN |                             | 1  | CGGAGGAAGAG  | 0.463 |             |
| - | 32 | 6041      | VE26_uc001xkc.3   | NM_015346    | NP_056161    | Q68DK2 | ZFY26_HUMAN |                             | 11 | CTCTGGGTTGG  | 0.582 |             |
| + | 15 | 4547      | xmv.2_Missense_l  | NM_015556    | NP_056371    | O43166 | SI1L1_HUMAN | Ser-rich.                   | 4  | CAAGAGCCAA   | 0.537 |             |
| + | 2  | 251       | ense_Mutation_p.F | NM_015604    | NP_056419    | Q8WV16 | DCAF4_HUMAN |                             | 3  | GAGACGACAT   | 0.473 |             |
| - | 10 | 1119      | tion_p.P256S NUM  | NM_001005743 | NP_001005743 | P49757 | NUMB_HUMAN  |                             | 4  | AATTGGAGCAT  | 0.532 |             |
| - | 4  | 981       | _p.P180L KCNK1C   | NM_021161    | NP_066984    | P57789 | KCNKA_HUMAN | p.P175P(1)                  | 5  | GTCTCGGAGCA  | 0.393 |             |
| + | 17 | 2431      | wy.2_Missense_M   | NM_024824    | NP_079100    | Q6PJT7 | ZC3HE_HUMAN |                             | 3  | TCAGCGAATAG  | 0.333 | rs144843433 |
| - | 29 | 4951      | p.R142W CCDC8i    | NM_001080414 | NP_001073883 | Q9P219 | DAPLE_HUMAN |                             | 3  | TTCCCGGGGCA  | 0.687 |             |
| - | 7  | 1093      | 12_splice FBLN5_l | NM_006329    | NP_006320    | Q9UBX5 | FBLN5_HUMAN |                             | 6  | CACATCTGTGG  | 0.527 |             |
| + | 1  | 2978      |                   | NM_018958    | NP_061831    | Q9NZP6 | CO002_HUMAN |                             | 8  | GTGCATCTTGC  | 0.498 |             |
| + | 35 | 4835      | ir.2_Missense_Mul | NM_001036    | NP_001027    | Q15413 | RYR3_HUMAN  | eats. Cytoplasmic (By simil | 10 | CCCAGCTCTTC  | 0.607 |             |
| + | 4  | 471       | zkl.2_Missense_M  | NM_001013703 | NP_001013725 | Q9P2K8 | E2AK4_HUMAN |                             | 4  | AGCCCCCTCCC  | 0.473 |             |
| - | 9  | 880       | LA2G4F_uc001zp    | NM_213600    | NP_998765    | Q68DD2 | PA24F_HUMAN |                             | 4  | CCCCTCGCCCA  | 0.622 |             |
| + | 2  | 209       | fw.2_Missense_M   | NM_032866    | NP_116255    | Q0VF96 | CGNL1_HUMAN | ZIM (By similarity).        | 11 | GTATTCGGGTCC | 0.507 |             |
| + | 2  | 1022      | fw.2_Missense_Mi  | NM_032866    | NP_116255    | Q0VF96 | CGNL1_HUMAN | Head.                       | 11 | TGGATGATCAG  | 0.522 |             |
| + | 9  | 2590      | _Mutation_p.R770  | NM_017610    | NP_060080    | Q6ZNA4 | RN111_HUMAN | Pro-rich.                   | 2  | ATGAACGCCCC  | 0.438 |             |
| + | 4  | 1109      |                   | NM_015042    | NP_055857    | O15014 | ZN609_HUMAN |                             | 3  | CCGGGGTAGAG  | 0.493 |             |
| + | 12 | 1662      | p.A287T IQCH_uc   | NM_001031715 | NP_001026885 | Q86VS3 | IQCH_HUMAN  |                             | 4  | CTGAAGCTGTA  | 0.383 |             |
| - | 15 | 2612      | _p.T79M TLE3_uc   | NM_005078    | NP_005069    | Q04726 | TLE3_HUMAN  | WD 1.                       | 2  | GCCTCGTGGGG  | 0.657 |             |
| + | 3  | 720       | s.3_RNA IL16_uc0  | NM_172217    | NP_757366    | Q14005 | IL16_HUMAN  |                             | 4  | AAAGCCTGGAA  | 0.423 |             |
| + | 12 | 1830      | _Mutation_p.R527C | NM_172217    | NP_757366    | Q14005 | IL16_HUMAN  |                             | 4  | CGGGCGGCCA   | 0.552 |             |
| - | 16 | 2032      | 587W AP3B2_uc0    | NM_004644    | NP_004635    | Q13367 | AP3B2_HUMAN |                             | 5  | GTCCCGGTCTA  | 0.602 |             |
| - | 4  | 1566      | is.1_Missense_Mu  | NM_001717    | NP_001708    | Q01954 | BNC1_HUMAN  |                             | 3  | GACTGCGGTAG  | 0.532 |             |
| + | 12 | 2586      | p.T455M BLM_uc    | NM_000057    | NP_000048    | P54132 | BLM_HUMAN   | ase ATP-bin p.T830M(1)      | 6  | TCTTACGGCCA  | 0.443 |             |
| + | 8  | 1251      | _p.R379H MAN2A    | NM_006122    | NP_006113    | P49641 | MA2A2_HUMAN | renal (Potential).          | 3  | TGGGCGCATCA  | 0.567 |             |
| + | 9  | 1338      | ql.2_Missense_Mi  | NM_033544    | NP_291022    | A6NED2 | RCCD1_HUMAN | RCC1 4.                     | 0  | ATAAGCAACTCC | 0.488 |             |
| + | 11 | 1567      | bok.2_Missense_l  | NM_018349    | NP_060819    | Q6DN12 | MCTP2_HUMAN | C2 3.                       | 3  | GAACTCCCTGA  | 0.388 |             |
| + | 35 | 6540      | _p.D793N CACNA    | NM_021098    | NP_066921    | O95180 | CAC1H_HUMAN | lasmic (Potential).         | 2  | CAGCCGACGAG  | 0.741 |             |
| + | 17 | 2378_2379 |                   | NM_016111    | NP_057195    | Q9Y4R8 | TELO2_HUMAN |                             | 0  | GTGGCCGGCC   | 0.649 |             |
| - | 2  | 298       |                   | NM_001080524 | NP_001073993 | A8MZG2 | CP090_HUMAN |                             | 0  | CCAGGCTGTGC  | 0.677 |             |
| + | 14 | 1391      | jh.2_Missense_Mi  | NM_020686    | NP_065737    | P80404 | GABT_HUMAN  |                             | 1  | ATGCAGCCCAT  | 0.632 |             |

|   |    |       |                   |              |              |        |             |                              |    |               |       |             |
|---|----|-------|-------------------|--------------|--------------|--------|-------------|------------------------------|----|---------------|-------|-------------|
| - | 10 | 2704  | uyn.1_Missense_A  | NM_001134407 | NP_001127879 | Q12879 | NMDE1_HUMAN | cellular (Potential).        | 45 | TCAGGCTGACC   | 0.463 |             |
| + | 8  | 696   | 0uyu.1_RNA FAM    | NM_002484    | NP_002475    | P53384 | NUBP1_HUMAN |                              | 2  | TCATCGGGGTG   | 0.542 |             |
| - | 18 | 2475  | p.2_Missense_Mu   | NM_033266    | NP_150296    | Q76MJ5 | ERN2_HUMAN  | cytoplasmic (Potential).     | 6  | GGTGGCTGCCA   | 0.582 |             |
| + | 23 | 4218  | zg.1_Intron SRCA  | NM_006662    | NP_006653    | Q6ZRS2 | SRCAP_HUMAN | Pro-rich.                    | 4  | TTCTTCGACCC   | 0.667 |             |
| + | 18 | 1751  | u.3_Missense_Mu   | NM_000293    | NP_000284    | Q93100 | KPBB_HUMAN  |                              | 3  | ATTTATCGCATT  | 0.343 |             |
| + | 5  | 1838  | p.G280* CES2_u    | NM_003869    | NP_003860    | O00748 | EST2_HUMAN  |                              | 0  | ACTTTGGAGGC   | 0.582 |             |
| - | 1  | 602   | vjt.1_Missense_M  | NM_001082486 | NP_001075955 | Q96AP0 | ACD_HUMAN   |                              | 1  | CGAACCTGCCA   | 0.687 |             |
| + | 1  | 416   |                   | NM_002153    | NP_002144    | P37059 | DHB2_HUMAN  | (By similarity).             | 2  | TGGATCAGAAG   | 0.468 |             |
| + | 5  | 761   | ii.2_Missense_Mut | NM_003119    | NP_003110    | Q9UQ90 | SPG7_HUMAN  | intermembrane (Potential).   | 0  | CAAGCGAACAG   | 0.398 |             |
| + | 10 | 1658  | AFAH1B1_uc010v    | NM_000430    | NP_000421    | P43034 | LIS1_HUMAN  | dynein and dynactin. WD 6    | 1  | CTACGCGTATGG  | 0.458 |             |
| + | 7  | 1051  | HBG_uc010cmw.2    | NM_001040    | NP_001031    | P04278 | SHBG_HUMAN  | minin G-like p.0?(1) p.?(1)  | 0  | CTTAACCTCTC   | 0.547 |             |
| + | 75 | 11502 | am.1_Missense_M   | NM_020877    | NP_065928    | Q9P225 | DYH2_HUMAN  | 6 (By similarity).           | 13 | TGGAGGATTCA   | 0.597 |             |
| + | 82 | 12748 |                   | NM_020877    | NP_065928    | Q9P225 | DYH2_HUMAN  |                              | 13 | CATACCCCTCAC  | 0.473 |             |
| - | 23 | 2834  | uc002gml.1_Intron | NM_017533    | NP_060003    | Q9Y623 | MYH4_HUMAN  | Potential.                   | 13 | GCATCTTTCCCT  | 0.373 |             |
| - | 13 | 1325  | uc002gml.1_Intron | NM_017533    | NP_060003    | Q9Y623 | MYH4_HUMAN  | rosin head-like.             | 13 | CTCTGGGATAG   | 0.453 |             |
| + | 4  | 530   | 0vvi.1_Missense_  | NM_003010    | NP_003001    | P45985 | MP2K4_HUMAN | rotein kinase R154W(2) p.?(  | 58 | GAATCGGAGTA   | 0.363 |             |
| - | 31 | 4573  | INCOR1_uc010vw    | NM_006311    | NP_006302    | O75376 | NCOR1_HUMAN | action with ETO.             | 5  | GGAACGCACGG   | 0.522 |             |
| - | 20 | 2494  | i.1_Missense_Mut  | NM_002018    | NP_002009    | Q13045 | FLII_HUMAN  | ction with ACTL6A.           | 2  | ATGGCGTGGCC   | 0.711 |             |
| + | 3  | 1886  |                   | NM_021012    | NP_066292    | Q14500 | IRK12_HUMAN | smic (By similarity).        | 4  | GGACGGAGACC   | 0.657 |             |
| - | 2  | 739   | p.P194L MYO18A    | NM_078471    | NP_510880    | Q92614 | MY18A_HUMAN |                              | 0  | GCTCAGGGGCT   | 0.687 |             |
| - | 2  | 595   | .1_Intron NF1_ucC | NM_006495    | NP_006486    | P34910 | EV12B_HUMAN | cellular (Potential).        | 2  | TGTTGAGTAAAA  | 0.428 | rs139629091 |
| - | 7  | 2864  | p.D808N SLFN11    | NM_001104588 | NP_001098058 | Q727L1 | SLN11_HUMAN |                              | 3  | CAACATCCTTTGC | 0.468 | rs71366434  |
| - | 3  | 603   |                   | NM_019010    | NP_061883    | P35900 | K1C20_HUMAN | Coil 1B. Rod.                | 3  | ATCTGTTTTATGT | 0.388 |             |
| + | 8  | 1204  | C25_uc010cxs.1_I  | NM_031421    | NP_113609    | Q96NG3 | TTC25_HUMAN | TPR 6.                       | 1  | TGCCAGAGTTGC  | 0.443 |             |
| + | 4  | 448   | rys.2_Missense_M  | NM_001001349 | NP_001001349 | Q9NYR9 | KBRS2_HUMAN | all GTPase-like.             | 1  | GCAGCGGCGTC   | 0.582 |             |
| + | 11 | 1338  | p.P348S ATP6V0    | NM_001130021 | NP_001123493 | Q93050 | VPP1_HUMAN  | lasmic (Potential).          | 1  | ATAAATCCAGGT  | 0.294 |             |
| + | 4  | 565   | J938_uc002ibf.3_E | NM_005854    | NP_005845    | O60895 | RAMP2_HUMAN | ical; (Potential).           | 0  | AGTATGGAGGA   | 0.592 |             |
| - | 5  | 593   | e_Mutation_p.P134 | NM_005374    | NP_005365    | Q14168 | MPP2_HUMAN  |                              | 0  | CGGGAGGTACA   | 0.632 |             |
| - | 14 | 1899  | LL6_uc002ioc.2_N  | NM_001130918 | NP_001124390 | Q8N841 | TLL6_HUMAN  |                              | 0  | CGTGGGAGCCT   | 0.507 |             |
| + | 2  | 2306  | dbu.2_Missense_M  | NM_175575    | NP_783165    | Q8TEU8 | WFKN2_HUMAN | NTR.                         | 3  | GCATGGCCATG   | 0.632 |             |
| + | 1  | 51    | i_5'Flank MBTD1_  | NM_016001    | NP_057085    | Q9Y5J1 | UTP18_HUMAN |                              | 0  | AACGATGCCGCC  | 0.706 |             |
| - | 2  | 526   | l2iuk.3_Missense_ | NM_018286    | NP_060756    | Q9NV29 | TM100_HUMAN | ical; (Potential).           | 0  | CCGCGGTGACC   | 0.527 |             |
| + | 4  | 959   | ddd.2_Missense_M  | NM_014906    | NP_055721    | Q8WY54 | PPM1E_HUMAN | PP2C-like.                   | 5  | GGGGAGTAGAT   | 0.502 |             |
| + | 23 | 3724  | utation_p.Q179*   | NM_006039    | NP_006030    | Q9UBG0 | MRC2_HUMAN  | cellular (Potential).        | 3  | TCTGCCAGAAG   | 0.642 |             |
| - | 3  | 342   | p.R67C ABCA9_     | NM_080283    | NP_525022    | Q8IUA7 | ABCA9_HUMAN |                              | 6  | TACACGTCCCA   | 0.368 | rs150105567 |
| - | 2  | 163   |                   | NM_181449    | NP_852114    | Q496F6 | CLM2_HUMAN  | . Extracellular (Potential). | 4  | TTGTACATGCT   | 0.542 |             |
| - | 4  | 732   | jqe.2_Nonsense_M  | NM_007292    | NP_009223    | Q15067 | ACOX1_HUMAN |                              | 1  | GCCTCGAAGGT   | 0.443 | rs118204093 |
| + | 16 | 5305  | ae.2_Missense_M   | NM_001080519 | NP_001073988 | Q9P281 | BAHC1_HUMAN |                              | 1  | AGAGGGCCACG   | 0.716 |             |
| - | 4  | 676   | vvd.1_Missense_M  | NM_006907    | NP_008838    | P32322 | P5CR1_HUMAN |                              | 0  | ACACGGTGGCC   | 0.647 |             |
| + | 1  | 343   |                   | NM_018949    | NP_061822    | Q9UKP6 | UR2R_HUMAN  | cellular (Potential).        | 1  | CCAAGGAGTGG   | 0.637 |             |
| + | 7  | 879   |                   | NM_001943    | NP_001934    | Q14126 | DSG2_HUMAN  | r (Potential). Cadherin 2.   | 9  | TGCAGGAACAC   | 0.403 |             |
| - | 1  | 1630  | VAL2_uc002lco.2   | NM_016427    | NP_057511    | Q8IYF1 | ELOA2_HUMAN |                              | 4  | TAGCCGAATCCC  | 0.547 | rs150911848 |
| + | 3  | 1282  | lr.1_Missense_Mu  | NM_005215    | NP_005206    | P43146 | DCC_HUMAN   | cellular (Potential).        | 17 | TTTTATCAGGTAT | 0.373 |             |
| - | 4  | 1254  |                   | NM_052947    | NP_443179    | Q86TB3 | ALPK2_HUMAN |                              | 14 | GCAGGTTCCTT   | 0.453 |             |
| + | 4  | 5021  | qu.1_Missense_M   | NM_017757    | NP_060227    | Q9C0G0 | ZN407_HUMAN |                              | 2  | AAAAGCCGTTTA  | 0.507 |             |
| + | 3  | 3608  | a.2_Missense_Mu   | NM_171999    | NP_741996    | Q9BXA9 | SALL3_HUMAN |                              | 4  | AGCTCGGGCAA   | 0.582 |             |
| + | 1  | 37_38 | sense_Mutation_p. | NM_024100    | NP_077005    | Q9BV38 | WDR18_HUMAN |                              | 1  | CGGCCCATGGA   | 0.728 |             |

|   |    |           |                   |              |              |        |              |                                |    |                |       |
|---|----|-----------|-------------------|--------------|--------------|--------|--------------|--------------------------------|----|----------------|-------|
| + | 4  | 372       | r_p.R89* GPX4_ur  | NM_002085    | NP_002076    | P36969 | GPX4_HUMAN   |                                | 0  | :ACGCCCGATAC   | 0.647 |
| + | 4  | 1232      | wq_2_Missense_M   | NM_024967    | NP_079243    | Q9HAH1 | ZN556_HUMAN  | C2H2-type 8.                   | 3  | :TTGGTCCTCAT   | 0.468 |
| - | 4  | 470       | FS10_uc002mkk.1   | NM_030957    | NP_112219    | Q9H324 | ATS10_HUMAN  |                                | 4  | GCCCGCGCGCT    | 0.682 |
| - | 84 | 43654     | wj_2_Missense_Mt  | NM_024690    | NP_078966    | Q8WXI7 | MUC16_HUMAN  | lasmic (Potential).            | 57 | :TCCTTCTTCTT   | 0.587 |
| - | 28 | 38225     |                   | NM_024690    | NP_078966    | Q8WXI7 | MUC16_HUMAN  | ellular (Potential).           | 57 | :AGGTCCCAGGA   | 0.498 |
| - | 3  | 21530     |                   | NM_024690    | NP_078966    | Q8WXI7 | MUC16_HUMAN  | ch. Extracellular (Potential). | 57 | :TGGGAGGAGGT   | 0.522 |
| - | 3  | 19546     |                   | NM_024690    | NP_078966    | Q8WXI7 | MUC16_HUMAN  | xtracellular (Potential).      | 57 | :TGTTTGGGTGG   | 0.507 |
| + | 7  | 1272      | ε_3_Missense_Mut  | NM_032497    | NP_115886    | Q9BR84 | ZN559_HUMAN  |                                | 1  | ATGGTGGAGAG    | 0.383 |
| - | 3  | 351       | η_p.E73* ECSIT_   | NM_016581    | NP_057665    | Q9BQ95 | ECSIT_HUMAN  |                                | 1  | :GTCCTCAAAGG   | 0.657 |
| - | 1  | 89        |                   | NM_006563    | NP_006554    | Q13351 | KLF1_HUMAN   | Pro-rich.                      | 0  | :TGGAGGGCAAG   | 0.652 |
| + | 5  | 686       | mwa_1_Nonsense_   | NM_005053    | NP_005044    | P54725 | RD23A_HUMAN  | UBA 1.                         | 1  | CCCACCGAGCC    | 0.647 |
| + | 1  | 180       |                   | NM_001145160 | NP_001138632 | P67936 | TPM4_HUMAN   | By similarity.                 | 13 | CGACCGCGCGG    | 0.652 |
| - | 28 | 3580      |                   | NM_001080421 | NP_001073890 | Q9UPW8 | UN13A_HUMAN  | MHD1.                          | 3  | :TAGACGATGCTT  | 0.562 |
| - | 23 | 3098_3099 |                   | NM_001080421 | NP_001073890 | Q9UPW8 | UN13A_HUMAN  |                                | 3  | TCAATCCGCAGC   | 0.569 |
| - | 4  | 1076      |                   | NM_001159293 | NP_001152765 | C9JHM3 | C9JHM3_HUMAN |                                | 1  | :TAAGGATAGAG   | 0.413 |
| - | 4  | 1019      |                   | NM_001159293 | NP_001152765 | C9JHM3 | C9JHM3_HUMAN |                                | 1  | TCTCCAGTATGA   | 0.413 |
| + | 5  | 1464      | ιpk_2_Missense_M  | NM_025189    | NP_079465    | Q9H8G1 | ZN430_HUMAN  |                                | 2  | :TTCATACTGGAC  | 0.383 |
| + | 4  | 731       |                   | NM_020855    | NP_065906    | Q9P255 | ZN492_HUMAN  | C2H2-type 1.                   | 0  | :GAATTCATAGTG  | 0.338 |
| - | 6  | 2463      |                   | NM_001080409 | NP_001073878 |        |              |                                | 2  | AATTAGCTTATGT  | 0.378 |
| - | 2  | 821       |                   | NM_006003    | NP_005994    | P47985 | UCRI_HUMAN   | Rieske.                        | 0  | :GGCAAGGCAC    | 0.478 |
| - | 3  | 269       | ntu_3_Missense_M  | NM_001126335 | NP_001119807 | P82251 | BAT1_HUMAN   | ellular (Potential).           | 1  | TGGGGGAAACG    | 0.602 |
| + | 9  | 828       | νissense_Mutator  | NM_002151    | NP_002142    | P05981 | HEPS_HUMAN   | (Potential). Peptidase S1.     | 2  | :TCTCCGGGGAC   | 0.672 |
| + | 10 | 931       | 010xsh.1_Missens  | NM_002151    | NP_002142    | P05981 | HEPS_HUMAN   | (Potential). Peptidase S1.     | 2  | CCACGGTCTGC    | 0.662 |
| + | 8  | 878       | ρ_p.Q59K USF2_u   | NM_003367    | NP_003358    | Q15853 | USF2_HUMAN   | -loop-helix motif.             | 0  | :TCGTCCAGCTT   | 0.612 |
| + | 4  | 465       | ιM42_uc002oap.2   | NM_024321    | NP_077297    | Q9BTD8 | RBM42_HUMAN  |                                | 0  | :TGATCGGAGTC   | 0.597 |
| + | 8  | 1203      | ρp_2_Nonsense_M   | NM_024321    | NP_077297    | Q9BTD8 | RBM42_HUMAN  | tion with HNRNPK (By sim       | 0  | GGAGTGGGATG    | 0.617 |
| - | 26 | 3370      | IS1_uc010eem.1_   | NM_004646    | NP_004637    | O60500 | NPHN_HUMAN   | lasmic (Potential).            | 5  | :AGTGTCCCCT    | 0.602 |
| - | 18 | 2335      |                   | NM_004646    | NP_004637    | O60500 | NPHN_HUMAN   | 7. Extracell p.G779*(1)        | 5  | :TTCTCCCTGGAC  | 0.572 |
| - | 5  | 1194      | 5B_uc002ofr.1_Nc  | NM_152279    | NP_689492    | Q52M93 | Z585B_HUMAN  | C2H2-type 6.                   | 1  | :TACCTGAAGTTC  | 0.388 |
| + | 7  | 1379      | xp_3_Missense_M   | NM_181845    | NP_862828    | Q8N7M2 | ZN283_HUMAN  |                                | 0  | :ATACTGGTAAG   | 0.378 |
| - | 6  | 1502_1503 | ρ_p.G11R ZNF229_  | NM_014518    | NP_055333    | Q9UJW7 | ZN229_HUMAN  | C2H2-type 2.                   | 4  | GAACCCCTTCC    | 0.515 |
| + | 7  | 1020      | ρ.G301E KLC3_uc   | NM_177417    | NP_803136    | Q6P597 | KLC3_HUMAN   | TPR 3.                         | 1  | :CTATGGGAAGCC  | 0.657 |
| - | 20 | 2877      | ρ.R878W SYMPK_    | NM_004819    | NP_004810    | Q92797 | SYMPK_HUMAN  |                                | 1  | :ATCCCGGACCC   | 0.632 |
| + | 2  | 548       | C2_uc010xyu.1_In  | NM_014601    | NP_055416    | Q9NZN4 | EHD2_HUMAN   |                                | 2  | TGGCCGTCATG    | 0.652 |
| - | 5  | 1342      |                   | NM_017708    | NP_060178    | Q2M2I3 | FA83E_HUMAN  |                                | 1  | CCCACGGAGGT    | 0.667 |
| - | 1  | 166       |                   | NM_178449    | NP_848544    | Q96A98 | TIP39_HUMAN  |                                | 0  | ACCACcagcagcaç | 0.597 |
| + | 12 | 1413      | ρ.P241S MED25_    | NM_030973    | NP_112235    | Q71S55 | MED25_HUMAN  | 16. Interaction with CREB      | 1  | :TCATCCCCCAG   | 0.687 |
| + | 4  | 293       | se_Mutation_ρ.E9C | NM_003121    | NP_003112    | Q01892 | SPIB_HUMAN   |                                | 2  | :ACCTCGAACTG   | 0.642 |
| + | 4  | 262       |                   | NM_004533    | NP_004524    | Q14324 | MYPC2_HUMAN  | like C2-type 1.                | 1  | :CAGTGGTCGTG   | 0.582 |
| - | 17 | 2246      | ρsw.1_Missense_M  | NM_016148    | NP_057232    | Q9Y566 | SHAN1_HUMAN  | PDZ.                           | 2  | :TTGGCGGATCA   | 0.602 |
| + | 1  | 634       |                   | NM_001506    | NP_001497    | O75388 | GPR32_HUMAN  | ellular (Potential).           | 1  | :TGGAGGGACAC   | 0.552 |
| - | 5  | 1468      | NF614_uc010epj.2  | NM_025040    | NP_079316    | Q8N883 | ZN614_HUMAN  | C2H2-type 5.                   | 5  | :ATAGCGCTTCAT  | 0.428 |
| + | 6  | 1175      |                   | NM_001099694 | NP_001093164 | Q96N58 | ZN578_HUMAN  |                                | 0  | :ACACTGGTGAG   | 0.418 |
| + | 4  | 2891      | dw.1_Missense_M   | NM_138374    | NP_612383    | Q96IR2 | ZN845_HUMAN  | :2H2-type 26.                  | 0  | :CTTCGTCACA    | 0.363 |
| - | 5  | 1012      | ρ_p.L301F LIRB5_  | NM_006840    | NP_006831    | O75023 | LIRB5_HUMAN  | 3. Extracellular (Potential).  | 2  | :GGAGAGGTTGT   | 0.692 |
| + | 6  | 1069      | ρ.P304L NLRP2_ι   | NM_017852    | NP_060322    | Q9NX02 | NALP2_HUMAN  | NACHT.                         | 2  | :GTTACCCAAGG   | 0.662 |
| + | 4  | 607       | C2qkk.1_Missense  | NM_032701    | NP_116090    | Q86Y97 | SV422_HUMAN  | SET.                           | 0  | :CAACGGGGCCA   | 0.597 |

rs150688663

|   |     |           |                    |              |              |        |             |                               |     |              |       |             |
|---|-----|-----------|--------------------|--------------|--------------|--------|-------------|-------------------------------|-----|--------------|-------|-------------|
| + | 2   | 1180      | _Mutation_p.R155   | NM_016535    | NP_057619    | Q9P0T4 | ZN581_HUMAN | C2H2-type 3.                  | 0   | CTTCCGGGATG  | 0.672 |             |
| + | 4   | 2352      |                    | NM_020903    | NP_065954    | Q9HBJ7 | UBP29_HUMAN |                               | 11  | AAGATGGAGGG  | 0.483 |             |
| + | 4   | 1003      |                    | NM_080657    | NP_542388    | Q8WXG1 | RSAD2_HUMAN |                               | 0   | TGCTTGGTGCC  | 0.393 |             |
| - | 21  | 2268      | AS_uc002rcd.1_R    | NM_015909    | NP_056993    | A2RRP1 | NBAS_HUMAN  |                               | 4   | AACCATGGTAAG | 0.408 |             |
| + | 4   | 655       | mm.1_Nonsense_     | NM_199280    | NP_954974    | Q6ZUX3 | F179A_HUMAN |                               | 4   | GGGACCAGCCC  | 0.607 |             |
| - | 4   | 542       |                    | NM_000348    | NP_000339    | P31213 | S5A2_HUMAN  | ical; (Potential).            | 0   | TATCCCATTCCC | 0.403 |             |
| - | 23  | 3675      | j.3_Missense_Mut   | NM_005633    | NP_005624    | Q07889 | SOS1_HUMAN  |                               | 10  | TAAGGAGGGG   | 0.502 |             |
| - | 5   | 856       | r.zj.2_Missense_Mt | NM_004105    | NP_004096    | Q12805 | FBLN3_HUMAN | alcium-binding (Potential).   | 6   | TGCACTCGTCTA | 0.443 |             |
| - | 1   | 199       | \_uc002sbn.3_5'U   | NM_032180    | NP_115556    | Q3B820 | F161A_HUMAN |                               | 3   | TCTCTTCGCGTT | 0.652 |             |
| + | 14  | 1816      | nb.1_Missense_Mi   | NM_004263    | NP_004254    | O95754 | SEM4F_HUMAN | ellular (Potential).          | 4   | CAGAACGTCCA  | 0.527 |             |
| - | 10  | 1540      | rn.2_Missense_Mt   | NM_003203    | NP_003194    | P16383 | GCF_HUMAN   |                               | 2   | AACAAAATATTC | 0.318 |             |
| - | 19  | 3333_3334 | :.2_Missense_Mut   | NM_016316    | NP_057400    | Q9UBZ9 | REV1_HUMAN  |                               | 2   | CCTGCCTTTGTC | 0.5   |             |
| + | 2   | 490       | z.2_Missense_Mut   | NM_012455    | NP_036587    | Q8NDX1 | PSD4_HUMAN  |                               | 2   | GACAAGATGCT  | 0.637 |             |
| + | 2   | 494       | z.2_Missense_Mut   | NM_012455    | NP_036587    | Q8NDX1 | PSD4_HUMAN  |                               | 2   | AGATGCTCCTC  | 0.637 |             |
| + | 10  | 1026      | J2tvn.2_Missense_  | NM_018460    | NP_060930    | Q53QZ3 | RHG15_HUMAN | Rho-GAP.                      | 2   | AAATTCCACAG  | 0.428 |             |
| - | 46  | 6081      |                    | NM_004543    | NP_004534    | P20929 | NEBU_HUMAN  | Nebulin 51.                   | 20  | GTCTGGGTGCT  | 0.433 |             |
| - | 8   | 709       | p.D196A CACNB4     | NM_000726    | NP_000717    | O00305 | CACB4_HUMAN |                               | 2   | CAACATCGTAAC | 0.473 |             |
| - | 22  | 3716      | ip.2_Nonsense_Mt   | NM_013450    | NP_038478    | Q9UIF8 | BAZ2B_HUMAN | DDT.                          | 4   | CTCTTGAAGAA  | 0.428 |             |
| - | 2   | 483       | uci.2_Missense_M   | NM_033272    | NP_150375    | Q9NS40 | KCNH7_HUMAN | lasmic (Potential).           | 5   | CCTCTTCTG    | 0.423 |             |
| - | 28  | 6398      | y.2_Missense_Mul   | NM_006922    | NP_008853    | Q9NY46 | SCN3A_HUMAN |                               | 10  | CATAGGAAGGAC | 0.358 |             |
| - | 49  | 9282      |                    | NM_004525    | NP_004516    | P98164 | LRP2_HUMAN  | ; A 23. Extracellular (Potent | 29  | CCTCTCGTCGCT | 0.468 | rs148612649 |
| + | 6   | 470       | PIG_uc002ufb.2_n   | NM_004792    | NP_004783    | Q13427 | PPIG_HUMAN  | e cyclophilin-type.           | 3   | GAAATGGACGAC | 0.264 |             |
| + | 5   | 753       | ifqf.1_Missense_M  | NM_025000    | NP_079276    | Q5H9S7 | DCA17_HUMAN |                               | 0   | CTCAGCAGTGG  | 0.353 |             |
| + | 12  | 1396      | fe.1_Missense_Mt   | NM_032523    | NP_115912    | Q9BZF3 | OSBL6_HUMAN |                               | 1   | CAGTTCGCTTG  | 0.423 |             |
| - | 307 | 93765     | 76M TTN_uc010zf    | NM_133378    | NP_596869    | Q8WZ42 | TITIN_HUMAN |                               | 153 | FGATCACGGTAT | 0.428 |             |
| - | 288 | 85204     | 22Q TTN_uc010zf    | NM_133378    | NP_596869    | Q8WZ42 | TITIN_HUMAN |                               | 153 | CTAACTCGGAAT | 0.448 |             |
| - | 275 | 76663     | 175N TTN_uc010z    | NM_133378    | NP_596869    | Q8WZ42 | TITIN_HUMAN |                               | 153 | TAGTAATAGGAA | 0.378 |             |
| - | 46  | 15324     | N_uc010zfi.1_Intr  | NM_133379    | NP_596870    | Q8WZ42 | TITIN_HUMAN |                               | 153 | CAACTCCCCTA  | 0.433 |             |
| - | 46  | 14285     | N_uc010zfi.1_Intr  | NM_133379    | NP_596870    | Q8WZ42 | TITIN_HUMAN |                               | 153 | CTCCACCATAGT | 0.328 |             |
| - | 3   | 331       |                    | NM_173648    | NP_775919    | Q6ZP82 | CC141_HUMAN | Potential.                    | 10  | CAGCCGAAGGA  | 0.468 | rs146458136 |
| - | 8   | 1447      | ftt.2_Nonsense_Mi  | NM_018256    | NP_060726    | Q9GZL7 | WDR12_HUMAN | or nucleolar localization.    | 0   | TGGTCGATTTGT | 0.388 |             |
| + | 7   | 1002      | ase_Mutation_p.Sz  | NM_005759    | NP_005750    | Q9NYB9 | ABI2_HUMAN  | Pro-rich.                     | 0   | TCGGAGCAGCA  | 0.473 |             |
| - | 21  | 3081      | z_Mutation_p.G63i  | NM_173076    | NP_775099    | Q86UK0 | ABCAC_HUMAN |                               | 11  | TTACTTCCAAG  | 0.388 |             |
| - | 17  | 2034      | kx.1_Missense_Mt   | NM_024506    | NP_078782    | Q6UWU2 | GLB1L_HUMAN |                               | 0   | GTTGAGGGCTC  | 0.483 |             |
| - | 8   | 1012      | x.1_Missense_Mur   | NM_024506    | NP_078782    | Q6UWU2 | GLB1L_HUMAN |                               | 0   | ATGGCCCATGG  | 0.493 |             |
| - | 13  | 1836      | p.A493S PTPRN_     | NM_002846    | NP_002837    | Q16849 | PTPRN_HUMAN | ical; (Potential).            | 4   | CAGGGCCACCA  | 0.652 |             |
| + | 11  | 1378      | su.3_Splice_Site_i | NM_001631    | NP_001622    | P09923 | PPBI_HUMAN  |                               | 1   | TACCAGGGAGC  | 0.716 |             |
| - | 1   | 316       | T1A6_uc002vuu.2    | NM_001001394 | NP_001001394 | Q8VWF6 | DNJB3_HUMAN |                               | 0   | CTCCGCCCCCG  | 0.647 |             |
| - | 19  | 6623      | \.G1907D COL6A3    | NM_004369    | NP_004360    | P12111 | CO6A3_HUMAN | I region. Collagen-like 2.    | 18  | CCAGACCATCC  | 0.408 |             |
| + | 2   | 259       |                    | NM_005855    | NP_005846    | O60894 | RAMP1_HUMAN | ellular (Potential).          | 0   | TACCACAGTTC  | 0.617 |             |
| + | 8   | 1405      | z_Mutation_p.R17i  | NM_018226    | NP_060696    | Q9HAU8 | RNPL1_HUMAN |                               | 2   | CTGCCGGGCAG  | 0.642 |             |
| + | 3   | 487       |                    | NM_032515    | NP_115904    | Q9UMX3 | BOK_HUMAN   | BH3.                          | 1   | TGATCCGGGCC  | 0.637 | rs146987702 |
| + | 2   | 211       |                    | NM_153325    | NP_697020    | Q8N687 | DB125_HUMAN |                               | 3   | GCATTTCTGTG  | 0.363 |             |
| + | 4   | 578       |                    | NM_003245    | NP_003236    | Q08188 | TGM3_HUMAN  |                               | 9   | TATGCCGGCATC | 0.453 | rs138092626 |
| - | 2   | 1078      | ntron UBOX5_uc0i   | NM_021826    | NP_068598    | Q7L8L6 | FAKD5_HUMAN |                               | 0   | ACTTTGCGGCCT | 0.393 |             |
| + | 9   | 1714      | il.2_Missense_Mul  | NM_139321    | NP_647537    | O75882 | ATRN_HUMAN  | ar (Potential). Kelch 4.      | 2   | TATACCAGATG  | 0.433 |             |
| + | 26  | 2537      | p.L813F PLCB4_t    | NM_182797    | NP_877949    | Q15147 | PLCB4_HUMAN |                               | 15  | ATTTCCCTTCGA | 0.413 |             |



|   |    |                           |                                                       |              |              |        |              |                                |     |               |       |             |
|---|----|---------------------------|-------------------------------------------------------|--------------|--------------|--------|--------------|--------------------------------|-----|---------------|-------|-------------|
| - | 5  | 996                       | nj.2_Missense_Mt                                      | NM_020341    | NP_065074    | Q9P286 | PAK7_HUMAN   | Linker.                        | 23  | ATAGAGACTCTT  | 0.493 |             |
| + | 5  | 722                       |                                                       | NM_002862    | NP_002853    | P11216 | PYGB_HUMAN   |                                | 2   | TCTACGGACGCA  | 0.637 |             |
| + | 2  | 71                        | tj.1_RNA FRG1B_uc010gdr.1_RNA FRG1B_uc010ztk.1_Intron |              |              |        |              |                                | 0   | CTGAAATCTGG   | 0.353 |             |
| + | 12 | 3677                      | eb.2_Missense_Mt                                      | NM_015338    | NP_056153    | Q8IXJ9 | ASXL1_HUMAN  |                                | 248 | GGCCAGTACTG   | 0.577 |             |
| + | 14 | 1793                      | l0gef.2_RNA DNM                                       | NM_006892    | NP_008823    | Q9UBC3 | DNM3B_HUMAN  | e PRC2/EED-EZH2 compli         | 5   | TTGCAGCAACA   | 0.582 |             |
| + | 3  | 712                       | zf.1_RNA CBFA2I                                       | NM_005093    | NP_005084    | O43439 | MTG8R_HUMAN  | Pro-rich.                      | 2   | GAGGACCGAGG   | 0.502 |             |
| + | 13 | 1445                      | G1_uc010zwe.1_I                                       | NM_182811    | NP_877963    | P19174 | PLCG1_HUMAN  | 'I-PLC X-box.                  | 8   | AGCCCGTGGAG   | 0.572 |             |
| - | 24 | 3542                      | i.R1139W PTPRT_                                       | NM_007050    | NP_008981    | O14522 | PTPRT_HUMAN  | phatase 1. Cytoplasmic (Po     | 20  | GGCCCGGAGCT   | 0.567 |             |
| - | 4  | 810                       |                                                       | NM_016470    | NP_057554    | Q9NX31 | CT111_HUMAN  |                                | 0   | CAAGGGAGGGGA  | 0.532 |             |
| - | 11 | 1575                      | _p.H468Y ZMYNC                                        | NM_012408    | NP_036540    | Q9ULU4 | PKCB1_HUMAN  |                                | 5   | CGTGTGCACAG   | 0.597 |             |
| + | 2  | 3898                      |                                                       | NM_173485    | NP_775756    | Q9NRE2 | TSH2_HUMAN   |                                | 6   | GTCTCCAGAAA   | 0.502 |             |
| + | 9  | 1050                      | p.E237K RAE1_uc                                       | NM_003610    | NP_003601    | P78406 | RAE1L_HUMAN  |                                | 0   | GTATCGAGGGG   | 0.413 |             |
| + | 10 | 1624                      | .D22N CDH26_uc                                        | NM_177980    | NP_817089    | Q8IXH8 | CAD26_HUMAN  | r (Potential). Cadherin 4.     | 4   | GCGTCGACAAA   | 0.378 | rs144761668 |
| - | 13 | 1054                      | TE_uc002yir.1_Mi                                      | NM_199261    | NP_954870    | P56180 | TPTE_HUMAN   | hatase tensin-type.            | 5   | TGTATCGCCTT   | 0.323 |             |
| - | 2  | 625                       | AM_uc002yir.1_f                                       | NM_001389    | NP_001380    | O60469 | DSCAM_HUMAN  | potential). Ig-like C2-type 1. | 11  | GGTACCATCTG   | 0.587 |             |
| + | 16 | 2137                      |                                                       | NM_005049    | NP_005040    | Q15269 | PWP2_HUMAN   |                                | 1   | GAGTCGCGATA   | 0.537 | rs150290645 |
| + | 1  | 176                       | .1_Intron C21orf29                                    | NM_198695    | NP_941968    | P60410 | KR108_HUMAN  | repeats of C-C-X(3). 1.        | 2   | GCTGCGAGCCC   | 0.672 |             |
| + | 30 | 6640                      | j.2_Missense_Mut                                      | NM_006031    | NP_006022    | O95613 | PCNT_HUMAN   |                                | 8   | ATTCTCCCATTCA | 0.507 |             |
| - | 9  | 1431                      | ise_Mutation_p.G1                                     | NM_001136213 | NP_001129685 | Q6S545 | POTEH_HUMAN  |                                | 1   | TACTTCCGTGC   | 0.358 |             |
| - | 1  | 1554_1555                 |                                                       | NM_014406    | NP_055221    | Q96SF2 | TCPQM_HUMAN  |                                | 1   | TGGGCCCTTCCA  | 0.495 |             |
| + | 12 | 1099                      | aeo.2_Splice_Site                                     | NM_133455    | NP_597712    | Q96A84 | EMID1_HUMAN  |                                | 0   | ACACAGGGACTC  | 0.627 |             |
| + | 17 | 2613                      | _p.S762L MTMR3_                                       | NM_021090    | NP_066576    | Q13615 | MTMR3_HUMAN  |                                | 5   | GTTTCTCACAGG  | 0.577 |             |
| + | 12 | 2704                      | sense_Mutation_p                                      | NM_001017437 | NP_001017437 | Q569K6 | CC157_HUMAN  |                                | 1   | CCCCACCTCGG   | 0.682 |             |
| + | 17 | 1316                      | EPDC5_uc003alt.2                                      | NM_014662    | NP_055477    | O75140 | DEPD5_HUMAN  |                                | 8   | TTCGTCGCTGC   | 0.458 |             |
| + | 6  | 670                       | V1_uc003anp.2_I                                       | NM_005488    | NP_005479    | O60784 | TOM1_HUMAN   |                                | 1   | TGTGGGCACTG   | 0.592 |             |
| + | 3  | 831                       | ny.2_Missense_Mt                                      | NM_014310    | NP_055125    | Q96D21 | RHES_HUMAN   | GNB1, GNB2 and GNB3.           | 3   | GTACGGTGACG   | 0.627 |             |
| - | 39 | 5729                      |                                                       | NM_002473    | NP_002464    | P35579 | MYH9_HUMAN   | Potential.                     | 11  | TGCAGGCTGCC   | 0.617 |             |
| + | 7  | 1568                      | atq.1_Missense_M                                      | NM_001039141 | NP_001034230 | Q9H2D6 | TARA_HUMAN   |                                | 1   | CCTGCGCCCA    | 0.582 |             |
| + | 9  | 961                       | DSL_uc003ayr.3_I                                      | NM_000026    | NP_000017    | P30566 | PUR8_HUMAN   |                                | 1   | GCGTTCAGAAC   | 0.507 |             |
| + | 5  | 515                       | aq.1_Missense_I                                       | NM_001469    | NP_001460    | P12956 | XRCC6_HUMAN  |                                | 5   | TGTGGGTCTGT   | 0.473 |             |
| + | 8  | 673                       | z.2_Missense_Mu                                       | NM_014509    | NP_055324    | Q9H4I8 | SEHL2_HUMAN  |                                | 0   | AGTGGGGGAG    | 0.498 | rs148540655 |
| + | 2  | 434                       | tron SETMAR_uc                                        | NM_006515    | NP_006506    | Q53H47 | SETMR_HUMAN  | lysine N-methyltransferas      | 1   | TGTGCCGATGC   | 0.463 |             |
| + | 27 | 3631                      | R1_uc011asu.1_I                                       | NM_001099952 | NP_001093422 | Q14643 | ITPR1_HUMAN  | asmic (Potential).             | 21  | AGGTGCTCCAG   | 0.567 |             |
| - | 3  | 960                       |                                                       | NM_000916    | NP_000907    | P30559 | OXYR_HUMAN   | ellular (Potential).           | 0   | CCAGGCGGCAC   | 0.642 |             |
| + | 13 | 1481                      | p.R455H ATG7_uc                                       | NM_006395    | NP_006386    | Q95352 | ATG7_HUMAN   |                                | 1   | AGCCCGCAGAG   | 0.537 |             |
| + | 13 | 3398                      | xj.2_Missense_Mu                                      | NM_001162499 | NP_001155971 | O75155 | CAND2_HUMAN  | HEAT 24.                       | 4   | AGGACGGGCTG   | 0.577 |             |
| + | 19 | 4398                      | o.H1387Y FGD5_u                                       | NM_152536    | NP_689749    | Q6ZNL6 | FGD5_HUMAN   | PH 2.                          | 5   | ATTTTTCACCTT  | 0.423 |             |
| + | 10 | 1899                      |                                                       | NM_003884    | NP_003875    | Q92831 | KAT2B_HUMAN  |                                | 3   | AGGCGGCAAGG   | 0.493 |             |
| + | 15 | 1278                      | XL2_uc011axp.1_I                                      | NM_012157    | NP_036289    | Q9UKC9 | FBXL2_HUMAN  |                                | 1   | CTCCCGTCAACC  | 0.517 |             |
| - | 7  | 1045                      | SP2_uc010hgb.2_                                       | NM_015097    | NP_055912    | B2RTR1 | B2RTR1_HUMAN |                                | 4   | CATACCGCCTG   | 0.284 |             |
| - | 12 | 6279                      |                                                       | NM_014831    | NP_055646    | O15050 | TRNK1_HUMAN  |                                | 2   | GTGGCGATACA   | 0.587 |             |
| - | 4  | 3099                      |                                                       | NM_014831    | NP_055646    | O15050 | TRNK1_HUMAN  |                                | 2   | TAAATCCACCA   | 0.433 |             |
| + | 13 | 1722                      | p.P479H VILL_uc                                       | NM_015873    | NP_056957    | O15195 | VILL_HUMAN   |                                | 0   | GCCCCCCTACT   | 0.597 |             |
| + | 11 | 1697_1698.1_Missense_Muta | NM_007335                                             | NP_031361    | Q9Y238       | Q9Y238 | DLEC1_HUMAN  |                                | 9   | GTTTTCCCAAAA  | 0.564 |             |
| - | 27 | 4685                      |                                                       | NM_006514    | NP_006505    | Q9Y5Y9 | SCNAA_HUMAN  | IV.                            | 10  | GAAAGTACTTA   | 0.473 |             |
| + | 11 | 1900                      | 10hhw.2_Missense                                      | NM_015460    | NP_056275    | Q8NFW9 | MYRIP_HUMAN  | ctin-binding.                  | 5   | TGTACGAGTTA   | 0.493 |             |
| + | 13 | 1715                      | zk.3_Missense_M                                       | NM_001042646 | NP_001036111 | Q9UPV9 | TRAK1_HUMAN  | n with HGS. Potential.         | 1   | GCTGAGGCGGC   | 0.642 |             |

|   |     |       |                   |              |              |        |              |                              |    |               |       |             |
|---|-----|-------|-------------------|--------------|--------------|--------|--------------|------------------------------|----|---------------|-------|-------------|
| - | 3   | 370   | w.2_Intron ANO10  | NM_018075    | NP_060545    | Q9NW15 | ANO10_HUMAN  | lasmic (Potential).          | 2  | AGTTCTGATTTTC | 0.358 |             |
| - | 2   | 996   | R3_uc003cpg.1_in  | NM_001295    | NP_001286    | P32246 | CCR1_HUMAN   | lasmic (Potential).          | 3  | ACTTCCGGAACC  | 0.587 |             |
| + | 1   | 190   | _5'Flank KIF9_uc  | NM_025010    | NP_079286    | O94889 | KLH18_HUMAN  |                              | 0  | TTCCTAGTCGC   | 0.662 |             |
| - | 102 | 7659  |                   | NM_000094    | NP_000085    | Q02388 | CO7A1_HUMAN  | Cell attachment site (Pote   | 11 | CTCCCCGAGGT   | 0.602 |             |
| + | 5   | 3100  |                   | NM_003458    | NP_003449    | Q9UPA5 | BSN_HUMAN    |                              | 8  | ACCTCTCCCACC  | 0.647 |             |
| + | 20  | 3692  | dt.1_Missense_Mu  | NM_015512    | NP_056327    | Q9P2D7 | DYH1_HUMAN   | n (By similarity).           | 3  | CGAGAGCATCAC  | 0.612 |             |
| + | 67  | 11003 | ldv.2_Missense_M  | NM_015512    | NP_056327    | Q9P2D7 | DYH1_HUMAN   |                              | 3  | ACCTGCCAACCT  | 0.582 |             |
| + | 10  | 1699  | z.2_Missense_Mu   | NM_016483    | NP_057567    | Q9BWX1 | PHF7_HUMAN   |                              | 1  | AGTGTGAGGAGT  | 0.582 |             |
| - | 20  | 3024  | lqd.2_Intron ROB  | NM_002941    | NP_002932    | Q9Y6N7 | ROBO1_HUMAN  | lasmic (Potential).          | 2  | AAGACGGGACT   | 0.343 |             |
| + | 1   | 364   |                   | NM_001005515 | NP_001005515 | A6NDH6 | O5H15_HUMAN  | lasmic (Potential).          | 2  | TATGATCGCTATC | 0.378 |             |
| + | 5   | 2430  | p.G729R COL8A1    | NM_001850    | NP_001841    | P27658 | CO8A1_HUMAN  | helical region (NC1).        | 0  | FATGCCGGGCAG  | 0.463 |             |
| + | 4   | 424   | nse_Mutation_p.P  | NM_007072    | NP_009003    | Q9UM44 | HLA2_HUMAN   | -like V-type 1.              | 1  | AAGATCCCAGAT  | 0.408 |             |
| + | 1   | 263   | GSF11_uc010hqs    | NM_152539    | NP_689752    | Q96M34 | CC030_HUMAN  |                              | 2  | ACGGAGTAGCT   | 0.502 |             |
| - | 2   | 156   | n_p.S4F PARP9_    | NM_001146102 | NP_001139574 | Q8IXQ6 | PARP9_HUMAN  | p.S4S(1)                     | 4  | CCATGGAAAAG   | 0.418 |             |
| - | 28  | 4962  | lb.1_Missense_M   | NM_015103    | NP_055918    | Q9Y4D7 | PLXD1_HUMAN  | lasmic (Potential).          | 1  | AGTCCCGAAGG   | 0.647 |             |
| + | 2   | 318   | p.E54K FAIM_uc    | NM_001033032 | NP_001028204 | Q9NVQ4 | FAIM1_HUMAN  |                              | 0  | AAGATCGAATTT  | 0.363 |             |
| - | 8   | 1120  |                   | NM_173653    | NP_775924    | Q8IVB4 | SL9A9_HUMAN  | ical; (Potential).           | 3  | GGCCGGTTTCC   | 0.493 |             |
| - | 8   | 1212  | p.H295Y PLSCR4    | NM_001128305 | NP_001121777 | Q9NRQ2 | PLS4_HUMAN   | smic (By similarity).        | 0  | GAAGTGAATGT   | 0.428 | rs138186262 |
| + | 39  | 5976  | 12L_uc011bnz.1_I  | NM_053002    | NP_443728    | Q86YW9 | MD12L_HUMAN  | Gln-rich.                    | 7  | ACCCCGTGCTA   | 0.587 |             |
| - | 4   | 2338  |                   | NM_178822    | NP_849144    | Q6WRI0 | IGS10_HUMAN  |                              | 13 | TGGGGGTGGGC   | 0.507 |             |
| - | 9   | 1411  | p.L195F SLC2A2_   | NM_000340    | NP_000331    | P11168 | GTR2_HUMAN   | lasmic (Potential).          | 2  | AAAGAGAGAACC  | 0.403 |             |
| - | 4   | 445   | SF10_uc003fie.2_I | NM_003810    | NP_003801    | P50591 | TNF10_HUMAN  | ellular (Potential).         | 5  | GACCTTTTCT    | 0.403 |             |
| - | 5   | 1412  | ow.1_Missense_Mi  | NM_001146276 | NP_001139748 | Q6PIU2 | NCEH1_HUMAN  | renal (Potential).           | 0  | GCCAGCTAGTG   | 0.493 |             |
| + | 4   | 581   | CNMB2_uc003ff.2   | NM_181361    | NP_852006    | Q9Y691 | KCMB2_HUMAN  | ellular (Potential).         | 1  | GGACCGAAGAG   | 0.483 |             |
| + | 1   | 1768  | 3foc.2_Missense_I | NM_144635    | NP_653236    | Q6UXB0 | F131A_HUMAN  |                              | 1  | GGCTCGCTTTG   | 0.448 |             |
| + | 3   | 657   |                   | NM_004443    | NP_004434    | P54753 | EPHB3_HUMAN  | ellular (Potential).         | 11 | TGAATCCCATCC  | 0.557 |             |
| + | 8   | 1183  | o.2_Missense_Mut  | NM_003722    | NP_003713    | Q9H3D4 | P63_HUMAN    | ction with H p.S365L(1)      | 12 | AGTTTCGGACA   | 0.537 | rs147148566 |
| + | 6   | 897   | l.1_Missense_Mut  | NM_002182    | NP_002173    | Q9NPH3 | IL1AP_HUMAN  | ellular (Potential).         | 1  | TGACTGTAAGG   | 0.328 |             |
| - | 22  | 15657 | bth.1_Missense_M  | NM_018406    | NP_060876    | Q99102 | MUC4_HUMAN   |                              | 0  | TGACCGAGGCG   | 0.572 |             |
| - | 3   | 2319  | tron ABCA11P_uc   | NM_133474    | NP_597731    | D9N162 | D9N162_HUMAN |                              | 1  | AAAGGATTGCGC  | 0.403 |             |
| - | 3   | 2300  | tron ABCA11P_uc   | NM_133474    | NP_597731    | D9N162 | D9N162_HUMAN |                              | 1  | AAAGGCTTTGCG  | 0.408 |             |
| + | 6   | 1110  | p.P236L PIGG_uc0  | NM_001127178 | NP_001120650 | Q5H8A4 | PIGG_HUMAN   | renal (Potential).           | 4  | CTTACCGATTCC  | 0.448 |             |
| - | 3   | 459   | n.2_Missense_Mi   | NM_001347    | NP_001338    | P52824 | DGKQ_HUMAN   | l-ester/DAG-type 2.          | 1  | GTGAGCCCCC    | 0.677 |             |
| - | 4   | 761   | ney.3_Missense_M  | NM_020972    | NP_066023    | Q9HCC9 | LST2_HUMAN   |                              | 3  | GTCCCGCAGCG   | 0.647 |             |
| - | 8   | 1856  | 'GC1A_uc011bxp.'  | NM_013261    | NP_037393    | Q9UBK2 | PRGC1_HUMAN  | Arg/Ser-rich.                | 8  | ATCGGGAACAC   | 0.458 |             |
| - | 2   | 540   | _p.D54A TLR10_u   | NM_030956    | NP_112218    | Q9BXR5 | TLR10_HUMAN  | ilar (Potential). LRR 2.     | 2  | ATAAATCCAGTC  | 0.448 |             |
| + | 2   | 928   |                   | NM_001080505 | NP_001073974 | A0PJX4 | SHSA3_HUMAN  | lasmic (Potential).          | 2  | TAGTTCCAGTT   | 0.557 |             |
| - | 6   | 1266  | zc.1_Nonsense_M   | NM_001114175 | NP_001107647 | P47869 | GBRA2_HUMAN  | ellular (Probable).          | 4  | TAAGTCCAAATAT | 0.363 |             |
| - | 14  | 1960  | zg.1_Missense_Mi  | NM_006587    | NP_006578    | Q9Y5Q5 | CORIN_HUMAN  | ntial). LDL-receptor class / | 2  | ACATTTCCCAAA  | 0.373 |             |
| - | 3   | 345   | gyu.2_Missense_M  | NM_001014446 | NP_001014446 | Q56VL3 | OCAD2_HUMAN  | OCIA.                        | 0  | TTTCTTCTGAC   | 0.383 |             |
| - | 5   | 1070  | hxaf.3_Missense_M | NM_001126328 | NP_001119800 | Q8TBB1 | LNX1_HUMAN   |                              | 4  | TGTAATTTTACC  | 0.408 |             |
| + | 21  | 3565  | p.R1131Q LPHN3_   | NM_015236    | NP_056051    | Q9HAR2 | LPHN3_HUMAN  | lasmic (Potential).          | 18 | AGGTACGAAAAG  | 0.373 |             |
| + | 5   | 1325  | am.1_Missense_M   | NM_001075    | NP_001066    | P36537 | UDB10_HUMAN  |                              | 5  | ATTAATGATCCTT | 0.383 |             |
| + | 1   | 388   | hq.2_Missense_M   | NM_001074    | NP_001065    | P16662 | UD2B7_HUMAN  |                              | 2  | ACAGGAATCATC  | 0.303 |             |
| + | 4   | 965   | . MUC7_uc003hfj.2 | NM_001145006 | NP_001138478 | Q8TAX7 | MUC7_HUMAN   | 3. Thr-rich.                 | 4  | TCCACCATCTT   | 0.582 |             |
| - | 4   | 508   | _Nonsense_Mutatic | NM_000583    | NP_000574    | P02774 | VTDB_HUMAN   | Albumin 1.                   | 3  | CTTTCTGTTCCAC | 0.532 |             |
| - | 22  | 4180  | _p.T1104A ANKRD   | NM_032217    | NP_115593    | O75179 | ANR17_HUMAN  | ANK 24.                      | 10 | TGAGGTGTTCC   | 0.393 |             |

|   |    |           |                   |              |              |         |             |                            |    |               |       |             |
|---|----|-----------|-------------------|--------------|--------------|---------|-------------|----------------------------|----|---------------|-------|-------------|
| - | 15 | 2229      | r.2_RNA PPEF2_u   | NM_006239    | NP_006230    | O14830  | PPE2_HUMAN  |                            | 4  | CTTGACTCCAG   | 0.542 |             |
| - | 1  | 1471      |                   | NM_033214    | NP_149991    | Q14410  | GLPK2_HUMAN |                            | 4  | ATCGTTCCATCCT | 0.512 |             |
| + | 21 | 2857      | dm.1_Missense_M   | NM_016323    | NP_057407    | Q9UII4  | HERC5_HUMAN | HECT.                      | 9  | TCCACCCCGAAC  | 0.328 |             |
| - | 14 | 2564      |                   | NM_003728    | NP_003719    | O95185  | UNC5C_HUMAN | lasmic (Potential).        | 4  | CTTCTCCTTCCA  | 0.522 |             |
| + | 21 | 3625      | .1_Missense_Mut   | NM_001963    | NP_001954    | P01133  | EGF_HUMAN   | lasmic (Potential).        | 4  | CTACAGGTGAC   | 0.552 |             |
| + | 10 | 1918      |                   | NM_001977    | NP_001968    | Q07075  | AMPE_HUMAN  |                            | 5  | ATCTTAGGCAAC  | 0.343 |             |
| - | 4  | 877       | X2_uc010iml.2_In  | NM_153426    | NP_700475    | Q99697  | PITX2_HUMAN | Homeobox.                  | 0  | CAGCTCCTGGA   | 0.612 | rs1051887   |
| + | 9  | 8053      | p.R983* FAT4_u    | NM_024582    | NP_078858    | Q6V0I7  | FAT4_HUMAN  | Extracellular (Potential). | 18 | GCCCTCGAAAA   | 0.343 |             |
| + | 6  | 514       |                   | NM_153702    | NP_714913    | Q8IZ81  | ELMD2_HUMAN | ELMO.                      | 1  | GCCACGAAGA    | 0.373 |             |
| - | 25 | 7081      |                   | NM_017639    | NP_060109    | Q6V1P9  | PCD23_HUMAN | Cadherin 21.               | 4  | TTCCATGAGTGA  | 0.388 |             |
| - | 3  | 424       | x.2_Missense_Mt   | NM_017639    | NP_060109    | Q6V1P9  | PCD23_HUMAN | Cadherin 1.                | 4  | TTACCCCATCCT  | 0.333 |             |
| + | 7  | 1266      | p.l236F CLCN3_    | NM_001829    | NP_001820    | P51790  | CLCN3_HUMAN |                            | 3  | TTCCATCATCAGA | 0.363 |             |
| - | 6  | 785       | p.1_Missense_Mu   | NM_080874    | NP_543150    | Q8WWWX0 | ASB5_HUMAN  | ANK 6.                     | 2  | TATCTGCTCCAA  | 0.408 |             |
| - | 1  | 38        |                   | NM_080874    | NP_543150    | Q8WWWX0 | ASB5_HUMAN  |                            | 2  | ACGGCCGATTTT  | 0.443 |             |
| + | 15 | 2831      | e.1_Missense_Mu   | NM_001080477 | NP_001073946 | Q9P273  | TEN3_HUMAN  | ellular (Potential).       | 0  | FGGATTCATGG   | 0.433 |             |
| + | 3  | 2405      | wa.1_Missense_M   | NM_020225    | NP_064610    | Q9P2F5  | STOX2_HUMAN |                            | 0  | GTGACCGTGGAA  | 0.562 |             |
| + | 11 | 1685      | p.P369L FAM149    | NM_015398    | NP_056213    | A5PLN7  | F149A_HUMAN |                            | 1  | CCCCCGCTAG    | 0.537 | rs141878617 |
| + | 1  | 900       |                   | NM_024563    | NP_078839    |         |             |                            | 0  | ATGCAGTCAAC   | 0.418 |             |
| - | 5  | 667       | ju.1_Missense_Mt  | NM_001042625 | NP_001036090 | Q8WWF8  | CAPSL_HUMAN | EF-hand 4.                 | 1  | GCAATGGATGCG  | 0.488 |             |
| + | 15 | 2479      | 3jle.1_Missense_N | NM_152403    | NP_689616    | Q63HQ2  | EGFLA_HUMAN | minin G-like 2.            | 7  | TGGAGGGAATG   | 0.443 |             |
| - | 19 | 2337      | 3jmi.3_Nonsense_  | NM_173489    | NP_775760    | Q7Z745  | HTRB2_HUMAN |                            | 8  | GGCTTCCAAAG   | 0.244 |             |
| - | 3  | 385       | f34_uc011cpx.1_I  | NM_198566    | NP_940968    | Q96MH7  | CE034_HUMAN |                            | 1  | ATGTGGAACCA   | 0.383 |             |
| + | 16 | 2029      | cqi.1_Missense_M  | NM_015360    | NP_056175    | P42285  | SK2L2_HUMAN |                            | 2  | AAAAATCCTCTA  | 0.378 |             |
| + | 28 | 5305_5306 | Mutation_p.P167   | NM_015183    | NP_055998    | O15021  | MAST4_HUMAN |                            | 13 | TGACCCCAAGCT  | 0.624 |             |
| + | 18 | 4678      | p.S1459N ZFYVE    | NM_001105251 | NP_001098721 | Q7Z3T8  | ZFY16_HUMAN |                            | 0  | TTGTAGTGCTG   | 0.358 |             |
| + | 24 | 3125      | e_Mutation_p.V83  | NM_002890    | NP_002881    | P20936  | RASA1_HUMAN |                            | 5  | ATTGCGTGGCT   | 0.448 |             |
| - | 34 | 3872      |                   | NM_014639    | NP_055454    | Q6PGP7  | TTC37_HUMAN |                            | 4  | CAACTCGAGAC   | 0.373 |             |
| + | 18 | 1412      | _uc011cut.1_Non:  | NM_001042443 | NP_001035908 | P20810  | ICAL_HUMAN  |                            | 5  | ACAGTCAGCACC  | 0.537 |             |
| - | 3  | 682       | sense_Mutation_p. | NM_001142483 | NP_001135955 | Q16612  | NP311_HUMAN |                            | 1  | ATTAAAAAAAGT  | 0.423 |             |
| - | 2  | 1108      | LOX_uc011cwk.1_   | NM_002317    | NP_002308    | P28300  | LYOX_HUMAN  | yl-oxidase li p.L245Q(1)   | 1  | GGCCAGACAGT   | 0.612 |             |
| + | 9  | 1897      | kuz.2_Missense_N  | NM_014031    | NP_054750    | Q9Y2P4  | S27A6_HUMAN |                            | 0  | TATTGGAATGT   | 0.343 |             |
| + | 3  | 1580      |                   | NM_175856    | NP_787052    | Q70JA7  | CHSS3_HUMAN | renal (Potential).         | 3  | CTACCGCAGAG   | 0.468 | rs142677541 |
| - | 13 | 1344      | SL6_uc003kvz.1_   | NM_015256    | NP_056071    | Q9UKU0  | ACSL6_HUMAN | lasmic (Potential).        | 3  | TTACCTGAATCT  | 0.453 |             |
| - | 16 | 2053      | de.2_Missense_M   | NM_004134    | NP_004125    | P38646  | GRP75_HUMAN |                            | 0  | CATTCGAACAC   | 0.453 |             |
| + | 1  | 2530      |                   | NM_018930    | NP_061753    | Q9UN67  | PCDBA_HUMAN | lasmic (Potential).        | 2  | AGGGTGAAGAA   | 0.428 |             |
| + | 1  | 630       | DHGA2_uc011dao    | NM_018915    | NP_061738    | Q9Y5H1  | PCDG2_HUMAN | r (Potential). Cadherin 2. | 3  | CGCCAGGATTC   | 0.458 |             |
| + | 1  | 1936      | DHGA2_uc011dac    | NM_018915    | NP_061738    | Q9Y5H1  | PCDG2_HUMAN | r (Potential). Cadherin 6. | 3  | AGAGCCCGGCT   | 0.662 |             |
| + | 1  | 1416      | ljs.1_Intron PCDH | NM_032088    | NP_114477    | Q9Y5G5  | PCDG8_HUMAN | r (Potential). Cadherin 2. | 0  | GCTCAGCCCA    | 0.572 | rs143622391 |
| - | 1  | 3019      |                   | NM_016580    | NP_057664    | Q9NPG4  | PCD12_HUMAN | Extracellular (Potential). | 3  | TGTCAGTGCC    | 0.602 |             |
| + | 4  | 671       | 2A_uc011dcr.1_Int | NM_000405    | NP_000396    | P17900  | SAP3_HUMAN  |                            | 0  | CTACCGCATAG   | 0.577 | rs104893892 |
| + | 12 | 2365      | se_Mutation_p.G5  | NM_001114183 | NP_001107655 | P42261  | GRIA1_HUMAN | ellular (Potential).       | 6  | AGCAGGATCTA   | 0.493 |             |
| - | 7  | 928       |                   | NM_032782    | NP_116171    | Q8TDQ0  | HAVR2_HUMAN | lasmic (Potential).        | 0  | GTTTTCTTCTGA  | 0.468 |             |
| + | 4  | 855       | l11_uc003lxf.1_5F | NM_173491    | NP_775762    | P83369  | LSM11_HUMAN |                            | 0  | TCTTCCCTGCA   | 0.587 |             |
| + | 10 | 1353      | RP_uc011dev.1_3   | NM_014211    | NP_055026    | O00591  | GBRP_HUMAN  | lasmic (Potential).        | 1  | ACAATGAAACC   | 0.403 |             |
| - | 1  | 1323      | 2_uc003mcn.1_5f   | NM_003714    | NP_003705    | O76061  | STC2_HUMAN  |                            | 3  | CAGCCGCTCGG   | 0.512 |             |
| - | 4  | 400       |                   | NM_005110    | NP_005101    | O94808  | GFPT2_HUMAN | imidotransferase type-2.   | 2  | TGACAGCACTG   | 0.572 |             |
| - | 6  | 855       | p.A172V GNB2L     | NM_006098    | NP_006089    | P63244  | GBLP_HUMAN  | WD 6.                      | 0  | TGGCAGCACAC   | 0.512 |             |

|   |    |           |                   |              |              |        |             |                              |      |               |       |             |
|---|----|-----------|-------------------|--------------|--------------|--------|-------------|------------------------------|------|---------------|-------|-------------|
| - | 8  | 2028      | e_Mutation_p.P35: | NM_000332    | NP_000323    | P54253 | ATX1_HUMAN  |                              | 4    | GTGAGGAACCG   | 0.677 |             |
| + | 9  | 1205      | icn.1_Missense_M  | NM_153042    | NP_694587    | Q8NB78 | KDM1B_HUMAN |                              | 1    | GGTACTCGGTGA  | 0.512 | rs148006516 |
| - | 5  | 2732      | _p.P641S ZNF184_  | NM_007149    | NP_009080    | Q99676 | ZN184_HUMAN |                              | 1    | GTAGGGTTTTT   | 0.428 |             |
| + | 6  | 1036      | nt_p.L346L HLA-A  | NM_002116    | NP_002107    | P30443 | 1A01_HUMAN  | lasmic (Potential).          | 2    | ACACTCAGGCT   | 0.512 |             |
| - | 10 | 5242      | IC1_uc011dmp.1_   | NM_014641    | NP_055456    | Q14676 | MDC1_HUMAN  | with the PRKDC complex.      | 4    | CTATTTGTCTCTG | 0.587 |             |
| + | 2  | 226       | n_p.Q5R MICB_uc   | NM_005931    | NP_005922    | Q29980 | MICB_HUMAN  | cellular (Potential).        | 0    | GTCCCAGGATG   | 0.522 |             |
| + | 12 | 1855      | T2_uc003nvc.3_n   | NM_080686    | NP_542417    | P48634 | PRC2A_HUMAN | peats. 2 X type B repeats.   | 0    | CACCTCCAGCA   | 0.627 |             |
| - | 10 | 1521      | p.P397S BAT3_uc   | NM_004639    | NP_004630    | P46379 | BAG6_HUMAN  | 9 AA approximate repeats.    | 0    | GGGAGGTGCCT   | 0.622 |             |
| + | 6  | 952       | _p.P69S LY6G6D_   | NM_001003693 | NP_001003693 | Q5SQ64 | LY66F_HUMAN |                              | 2    | AACATCCAGCC   | 0.562 |             |
| + | 7  | 1195      | Missense_Mutatio  | NM_000063    | NP_000054    | P06681 | CO2_HUMAN   | VWFA.                        | 2    | TGAACGACAAC   | 0.498 |             |
| - | 21 | 7550      |                   | NM_019105    | NP_061978    | P22105 | TENX_HUMAN  | nectin type-III 17.          | 0    | CCGCCGTCCC    | 0.657 |             |
| - | 14 | 5291      |                   | NM_019105    | NP_061978    | P22105 | TENX_HUMAN  | nectin type-III 10.          | 0    | CTCAGGAACCG   | 0.662 |             |
| - | 5  | 987       | 0jud.1_Intron HLA | NM_002118    | NP_002109    | P28068 | DMB_HUMAN   | lasmic (Potential).          | 0    | CCCAGGAAGAG   | 0.443 |             |
| + | 10 | 1308      | D2_uc011dtv.1_n   | NM_173558    | NP_775829    | Q7Z6J4 | FGD2_HUMAN  | PH 1.                        | 3    | CTGATGGATGC   | 0.652 |             |
| + | 5  | 378       | J10jyy.1_Missense | NM_018426    | NP_060896    | Q5T3F8 | TM63B_HUMAN |                              | 3    | TGACCCGGTATG  | 0.607 |             |
| + | 10 | 1104      | divn.1_Missense_n | NM_007058    | NP_008989    | Q9UMQ6 | CAN11_HUMAN | alpain catalytic.            | 2    | AGGACGGGGAC   | 0.632 |             |
| + | 11 | 1625      | fw.1_Missense_n   | NM_005588    | NP_005579    | Q16819 | MEP1A_HUMAN | tracellular (Potential).     | 3    | GTTCACTACCTC  | 0.527 |             |
| - | 2  | 307       | al.1_Missense_Mi  | NM_052872    | NP_443104    | Q96PD4 | IL17F_HUMAN |                              | 1    | GGGAGGTGGAG   | 0.418 |             |
| - | 2  | 301       | V3_uc011dwu.1_lr  | NM_002388    | NP_002379    | P25205 | MCM3_HUMAN  |                              | 3    | CTCACCGGTTA   | 0.502 |             |
| - | 2  | 635       |                   | NM_001003760 | NP_001003760 | Q9H511 | KLH31_HUMAN |                              | 1    | TCTCCCGTATCA  | 0.373 |             |
| + | 5  | 1155      |                   | NM_001010872 | NP_001010872 | Q5T0W9 | FA83B_HUMAN |                              | 6    | TAAATGAACATG  | 0.348 |             |
| - | 21 | 2225      | utation_p.G50R C  | NM_030820    | NP_110447    | Q96P44 | COLA1_HUMAN |                              | 2    | CATCCCTTGA    | 0.313 |             |
| + | 11 | 1617      | .2_3'UTR SMAP1_   | NM_001044305 | NP_001037770 | Q8IYB5 | SMAP1_HUMAN |                              | 0    | GCTCATCAGGT   | 0.488 |             |
| - | 4  | 917       | hz.2_Missense_M   | NM_015687    | NP_056502    | Q7Z7B0 | FLIP1_HUMAN |                              | 4    | TAACTCGTATAC  | 0.507 |             |
| + | 8  | 4359      | ense_Mutation_p.F | NM_001137667 | NP_001131139 | Q9UKL3 | C8AP2_HUMAN |                              | 2    | AGGTCCATCTC   | 0.388 |             |
| + | 1  | 532       |                   | NM_032602    | NP_115991    | Q969M2 | CXA10_HUMAN | ical; (Potential).           | 0    | TATATTCTCTATG | 0.448 |             |
| + | 20 | 5579      | i.2_Missense_Mut  | NM_001624    | NP_001615    | Q9Y4K1 | AIM1_HUMAN  | in B-type lectin.            | 9    | CAGTATGATCAA  | 0.403 |             |
| + | 3  | 1283      | OXO3_uc011ean.1   | NM_201559    | NP_963853    | O43524 | FOXO3_HUMAN |                              | 6    | GTGGCCGCCCTG  | 0.607 | rs145756480 |
| - | 36 | 5308      | p.G1660* LAMA4_   | NM_001105206 | NP_001098676 | Q16363 | LAMA4_HUMAN | minin G-like 5.              | 9    | TCAATCCAATATT | 0.383 |             |
| + | 17 | 2197      |                   | NM_173560    | NP_775831    | Q8HWS3 | RFX6_HUMAN  |                              | 3    | AGCCCCACTCC   | 0.512 |             |
| - | 4  | 479       | .1_RNA GOPC_uc    | NM_002944    | NP_002935    | P08922 | ROS_HUMAN   | cellular (Potential).        | 25   | GTACTTCTCTTT  | 0.473 |             |
| + | 2  | 552       | se_Mutation_p.R2  | NM_000165    | NP_000156    | P17302 | CXA1_HUMAN  | lasmic (Potential).          | 2    | GATGCGAAAGG   | 0.443 |             |
| + | 12 | 1690      | YNJ2_uc011efn.1_  | NM_003898    | NP_003889    | O15056 | SYNJ2_HUMAN | ytic (By similarity).        | 1    | GGAACGTGAAC   | 0.582 |             |
| + | 2  | 263       | IF25_uc003qwl.1_  | NM_030615    | NP_085118    | Q9UIL4 | KIF25_HUMAN | inesin-motor.                | 2    | CCCAGATGACA   | 0.582 |             |
| + | 2  | 101       | q GPR146_uc003s   | NM_138445    | NP_612454    | Q96CH1 | GP146_HUMAN | cellular (Potential).        | 1    | TCAACGGCACA   | 0.687 |             |
| - | 12 | 2923      | ic.1_Missense_Mu  | NM_018059    | NP_060529    | Q96JH8 | RADIL_HUMAN | Pro-rich.                    | 7    | AGTCGGGGTCC   | 0.711 |             |
| + | 2  | 329       | 2_uc003snx.2_Intr | NM_015610    | NP_056425    | Q9Y4P8 | WIPI2_HUMAN |                              | 2    | TGGCCGTCGCG   | 0.388 |             |
| - | 1  | 620       |                   | NM_175886    | NP_787082    | P21108 | PRPS3_HUMAN |                              | 1    | CAATGGAGGTC   | 0.463 |             |
| + | 4  | 643       | r_p.E52K CREB5_   | NM_182898    | NP_878901    | Q02930 | CREB5_HUMAN |                              | 2    | AGCACGAGTTC   | 0.557 |             |
| + | 14 | 1300      | rf10_uc003tho.1_  | NM_024728    | NP_079004    | Q9HAC7 | CG010_HUMAN |                              | 2    | GATACGATGAC   | 0.567 |             |
| + | 6  | 1150      | _p.S182L HECW1_   | NM_015052    | NP_055867    | Q76N89 | HECW1_HUMAN |                              | 23   | AAACTCGGCAG   | 0.408 |             |
| - | 4  | 947       | 4_uc003tmx.2_Intr | NM_004749    | NP_004740    | Q969Z0 | TBRG4_HUMAN |                              | 0    | GCAAGGGCAGC   | 0.607 |             |
| - | 13 | 1078_1079 | p.G238R TNS3_uc   | NM_022748    | NP_073585    | Q68CZ2 | TENS3_HUMAN | 2 tensin-type.               | 4    | ATCTCCCTTCCAG | 0.515 |             |
| + | 23 | 3035      | p.G885E EGFR_u    | NM_005228    | NP_005219    | P00533 | EGFR_HUMAN  | Potential). Protein kinase.  | 9571 | GAAAGGAGAAC   | 0.532 |             |
| + | 1  | 941       | .1_Intron CLDN4_  | NM_001305    | NP_001296    | O14493 | CLD4_HUMAN  | lasmic (Potential).          | 0    | TGCCCGCTCTG   | 0.627 |             |
| - | 10 | 2107      | dy.1_Missense_Mi  | NM_012301    | NP_036433    | Q86UL8 | MAGI2_HUMAN | PDZ 3.                       | 11   | CAATAGTGAAG   | 0.517 |             |
| - | 15 | 1860      | p.R595Q ABC4_     | NM_018849    | NP_061337    | P21439 | MDR3_HUMAN  | 1. Cytoplasmic (By similarit | 6    | CATTCGGACC    | 0.488 | rs144398632 |

|   |    |           |                    |              |              |        |             |                             |       |                |       |             |
|---|----|-----------|--------------------|--------------|--------------|--------|-------------|-----------------------------|-------|----------------|-------|-------------|
| - | 3  | 356       | img.2_Missense_I   | NM_017654    | NP_060124    | Q5K651 | SAMD9_HUMAN | SAM.                        | 7     | AAATTTCCCTGT   | 0.368 |             |
| + | 18 | 2329      | p.S707F TRRAP_     | NM_003496    | NP_003487    | Q9Y4A5 | TRRAP_HUMAN |                             | 37    | AGCTCTCCAACC   | 0.468 |             |
| - | 1  | 701       |                    | NM_001005276 | NP_001005276 | Q8NHA4 | O2AE1_HUMAN | lasmic (Potential).         | 0     | GCATTTCTCTTGC  | 0.502 |             |
| + | 14 | 2378      | 'AN_uc003uwl.2_F   | NM_003386    | NP_003377    | Q9Y493 | ZAN_HUMAN   | ate) (mucin-like domain). E | 11    | AAAAACCCACCA   | 0.522 |             |
| + | 14 | 2798      | 'AN_uc003uwl.2_F   | NM_003386    | NP_003377    | Q9Y493 | ZAN_HUMAN   | ate) (mucin-like domain). E | 11    | AAAAACTCACCA   | 0.502 |             |
| + | 31 | 5890      | lwl.2_RNA ZAN_ur   | NM_003386    | NP_003377    | Q9Y493 | ZAN_HUMAN   | extracellular (Potential).  | 11    | ACCTGCAAACCC   | 0.632 |             |
| + | 4  | 498       | '9_uc003uwr.2_5'l  | NM_020246    | NP_064631    | Q9BXP2 | S12A9_HUMAN | lasmic (Potential).         | 0     | GGGCAGCATTG    | 0.463 |             |
| + | 3  | 11710     | C17_uc010lho.1_F   | NM_001040105 | NP_001035194 | Q685J3 | MUC17_HUMAN | ellular (Potential).        | 27    | CACTTCCAACCA   | 0.468 |             |
| - | 6  | 938       | 'AT3_uc010lhr.2_l  | NM_178176    | NP_835470    | Q86VF5 | MOGT3_HUMAN |                             | 2     | AGCTTCTTGAAC   | 0.577 |             |
| - | 56 | 9314      | ..2_Missense_Mut   | NM_005045    | NP_005036    | P78509 | RELN_HUMAN  |                             | 19    | FGATTTCTGCTCC  | 0.448 |             |
| + | 6  | 2477      | '8splice PIK3CG_   | NM_002649    | NP_002640    | P48736 | PK3CG_HUMAN |                             | 38    | CTTACAGATTGA   | 0.363 |             |
| - | 13 | 1665      | ves.2_Missense_Iv  | NM_000111    | NP_000102    | P40879 | S26A3_HUMAN | ical; (Potential).          | 4     | CTAACCCGAGT    | 0.448 |             |
| - | 12 | 1571      | ves.2_Missense_Iv  | NM_000111    | NP_000102    | P40879 | S26A3_HUMAN | ical; (Potential).          | 4     | CAAACCTGCATCA  | 0.358 |             |
| + | 3  | 555       | ivjz.2_Missense_Iv | NM_002851    | NP_002842    | P23471 | PTPRZ_HUMAN | tial). Alpha-carbonic anhyd | 9     | AAATATCCAACAT  | 0.299 |             |
| - | 3  | 1041      | _p.A118T SLC13A    | NM_012450    | NP_036582    | Q9UKG4 | S13A4_HUMAN | ical; (Potential).          | 0     | CTTGGCTCCGG    | 0.602 |             |
| - | 20 | 5852      | p.L1869F KIAA154   | NM_020910    | NP_065961    | Q9HCM3 | K1549_HUMAN |                             | 230   | GAGGAGCTCTCT   | 0.622 |             |
| - | 15 | 1860      |                    | NM_004333    | NP_004324    | P15056 | BRAF_HUMAN  | rotein kinas_R603>1(2)) p.T | 18290 | CAATTTCACTGTAC | 0.368 |             |
| + | 2  | 429       |                    | NM_178829    | NP_849151    | Q96L11 | CG034_HUMAN |                             | 0     | CAGGAGGGGCCA   | 0.542 |             |
| + | 1  | 466       |                    | NM_001001667 | NP_001001667 | Q8N148 | OR6V1_HUMAN | Name=4; (Potential).        | 1     | ATGGTACCCACT   | 0.572 |             |
| + | 12 | 1480      | 'N1_uc011ktc.1_In  | NM_000083    | NP_000074    | P35523 | CLCN1_HUMAN | al; (By similarity).        | 5     | TCTTCGTCATGA   | 0.502 | rs139158852 |
| + | 14 | 1651      | ..c.1_Missense_Mu  | NM_000083    | NP_000074    | P35523 | CLCN1_HUMAN |                             | 5     | TACCTGGGGGGC   | 0.443 |             |
| - | 5  | 1013      | _p.P238S KCNH2_    | NM_000238    | NP_000229    | Q12809 | KCNH2_HUMAN | lasmic (Potential).         | 4     | TTGGGGAATCT    | 0.587 |             |
| - | 4  | 388       | on_p.T75I ENTPD    | NM_004901    | NP_004892    | Q9Y227 | ENTP4_HUMAN | ional (Potential).          | 2     | TGTCGGTAACTC   | 0.438 |             |
| + | 45 | 4716      | 'xci.2_Nonsense_I  | NM_024940    | NP_079216    | Q9H7D0 | DOCK5_HUMAN | DHR-2.                      | 3     | CCAACGAGAGG    | 0.562 |             |
| - | 10 | 2478      | _p.D654N WHSC1l    | NM_023034    | NP_075447    | Q9BZ95 | NSD3_HUMAN  |                             | 1     | TAGAATCGGAGT   | 0.418 |             |
| - | 18 | 1985      | ck.1_Missense_Mi   | NM_001464    | NP_001455    | Q99965 | ADAM2_HUMAN | ar (Potential). EGF-like.   | 2     | TATGAAGCACTAC  | 0.378 | rs147069631 |
| + | 4  | 2555      | '1_uc011ldy.1_Intr | NM_006269    | NP_006260    | P56715 | RP1_HUMAN   |                             | 12    | TGTTTCTCTCAC   | 0.299 |             |
| + | 19 | 2108      | _p.F694S PREX2_    | NM_024870    | NP_079146    | Q70Z35 | PREX2_HUMAN | PDZ 2.                      | 17    | GGGATTTGGGCC   | 0.453 |             |
| + | 10 | 4867      | .R1539C ZFHx4_u    | NM_024721    | NP_078997    | Q86UP3 | ZFHx4_HUMAN |                             | 15    | CCATCTCGTCCA   | 0.388 |             |
| - | 3  | 1107      | lydr.1_Missense_Iv | NM_138817    | NP_620172    | Q8TCU3 | S7A13_HUMAN | Name=9; (Potential).        | 1     | TGTAATGGAG     | 0.348 |             |
| - | 15 | 2419      | ..1_Missense_Mut   | NM_015668    | NP_056483    | Q8NE09 | RGS22_HUMAN |                             | 7     | CTTTTCTCTGTTG  | 0.413 |             |
| - | 2  | 890       | v74_uc003ymx.2_    | NM_153015    | NP_694560    | Q96NL1 | TMM74_HUMAN |                             | 4     | TGTTTCGACGAT   | 0.507 |             |
| - | 7  | 833       | ie_Mutation_p.S12  | NM_015912    | NP_056996    | Q49AJ0 | F135B_HUMAN |                             | 9     | CTGAGGAAGTCC   | 0.473 |             |
| - | 4  | 918       | _p.E204K SLC45A    | NM_001080431 | NP_001073900 | Q5BKX6 | S45A4_HUMAN |                             | 2     | CTCCTCGTCGAT   | 0.662 |             |
| - | 3  | 363       | se_Mutation_p.S11  | NM_023078    | NP_075566    | Q53H96 | P5CR3_HUMAN |                             | 0     | TCAGAGACACC    | 0.622 |             |
| + | 7  | 1050_1051 | f.3_Missense_Mut   | NM_173831    | NP_776192    | Q96C28 | ZN707_HUMAN | C2H2-type 3.                | 1     | AAGACC GCCTC   | 0.629 |             |
| - | 21 | 2928      | 'CRIB_uc003yzo.1   | NM_015356    | NP_056171    | Q14160 | SCRIB_HUMAN | ion with ARHGEF7.           | 5     | TGTTTATGCTG    | 0.682 |             |
| - | 16 | 1494      | lfl.2_Missense_Mu  | NM_178564    | NP_848659    | Q9NSY0 | NRBP2_HUMAN |                             | 2     | CTGCCGGTGCA    | 0.736 |             |
| + | 4  | 385       | '3_uc011lmh.1_Int  | NM_033439    | NP_254274    | Q95760 | IL33_HUMAN  |                             | 0     | CTTCATGATTCAT  | 0.498 |             |
| + | 8  | 1029      | _p.W301* ADAMT     | NM_001040272 | NP_001035362 | Q8N6G6 | ATL1_HUMAN  |                             | 5     | CCGATGGAGGG    | 0.468 |             |
| - | 1  | 5058      | uc003zrh.1_5'Flanl | NM_153809    | NP_722516    | Q8IZX4 | TAF1L_HUMAN |                             | 26    | TGGGTCAATTGG   | 0.443 |             |
| - | 1  | 754       | .M77T GBA2_uc01    | NM_020944    | NP_065995    | Q9HCG7 | GBA2_HUMAN  | ellular (Potential).        | 4     | TAGCCATAGCT    | 0.537 |             |
| - | 8  | 1253      |                    | NM_015225    | NP_056040    | Q8WUY3 | PRUN2_HUMAN |                             | 0     | GAGGGGGGCAC    | 0.517 |             |
| + | 12 | 1490      | _Mutation_p.A331'  | NM_005392    | NP_005383    | Q75151 | PHF2_HUMAN  |                             | 1     | CAAAGCCGTCCT   | 0.602 |             |
| + | 6  | 828       | ..h.1_Missense_Mi  | NM_032558    | NP_115947    | Q5SR56 | HAL1_HUMAN  | ical; (Potential).          | 2     | ATTGGAGCATAT   | 0.562 |             |
| - | 4  | 1182      | ..d.3_Missense_Mu  | NM_001127610 | NP_001121082 | Q14032 | BAAT_HUMAN  |                             | 3     | CCCCAGGGTAA    | 0.527 |             |
| + | 4  | 527       |                    | NM_019592    | NP_062538    | Q5VTR2 | BRE1A_HUMAN |                             | 8     | TGACCGAGAGAT   | 0.468 |             |



|   |    |           |                    |              |              |        |             |                                |     |               |       |             |
|---|----|-----------|--------------------|--------------|--------------|--------|-------------|--------------------------------|-----|---------------|-------|-------------|
| - | 1  | 555       |                    | NM_006686    | NP_006677    | Q9Y614 | ACL7B_HUMAN |                                | 1   | CTCCGCTACT    | 0.622 |             |
| - | 2  | 775       |                    | NM_001012993 | NP_001013011 | Q5JZ5  | CI152_HUMAN |                                | 0   | CCATCGATTCTG  | 0.552 |             |
| - | 9  | 965       | p.E215K FKBP15     | NM_015258    | NP_056073    | Q5T1M5 | FKB15_HUMAN | ase FKBP-type.                 | 3   | CACCTCGAACAC  | 0.468 |             |
| + | 58 | 5072_5073 | 2_RNA COL27A1      | NM_032888    | NP_116277    | Q8IZC6 | CORA1_HUMAN | lar collagen NC1.              | 4   | CTGCAGGGACC   | 0.594 |             |
| + | 3  | 1156      | p.R249* TLR4_u     | NM_138554    | NP_612564    | O00206 | TLR4_HUMAN  | ellular (Potential).           | 16  | GAATTCGGATTAC | 0.363 |             |
| + | 4  | 1237      | v.1_Missense_Mu    | NM_054107    | NP_473448    | Q8NGS2 | OR1J2_HUMAN | lasmic (Potential).            | 5   | ATATGTCACCCTC | 0.428 |             |
| + | 1  | 589       |                    | NM_001004457 | NP_001004457 | Q8NGR9 | OR1N2_HUMAN | ellular (Potential).           | 4   | FATTGTGATCCTA | 0.532 |             |
| + | 7  | 794       | s.R223Q FAM125B    | NM_033446    | NP_258257    | Q9H7P6 | F125B_HUMAN |                                | 0   | CACCCGGACGG   | 0.562 |             |
| + | 11 | 2972      | v.2_Missense_Mut   | NM_005157    | NP_005148    | P00519 | ABL1_HUMAN  | n-binding. Pro-rich.           | 817 | ATCCTCGGCC    | 0.662 |             |
| + | 18 | 3205      |                    | NM_006059    | NP_006050    | Q9Y6N6 | LAMC3_HUMAN | omain II and I.                | 3   | GGAGGGGTGGC   | 0.612 |             |
| + | 7  | 1147      | c.1_Missense_Mu    | NM_002957    | NP_002948    | P19793 | RXRA_HUMAN  | gand-binding.                  | 2   | CCACCCGGCTG   | 0.682 |             |
| + | 3  | 277       | sense_Mutation_f   | NM_080877    | NP_543153    | Q8N130 | NPT2C_HUMAN | lasmic (Potential).            | 0   | GGACCTCCAGT   | 0.617 |             |
| - | 5  | 443       | sense_Mutation_p.F | NM_006089    | NP_006080    | Q9UQR0 | SCML2_HUMAN | MBT 1.                         | 0   | CAGTCGTAACCA  | 0.448 |             |
| + | 11 | 1313      | p.G377E CNKSR      | NM_014927    | NP_055742    | Q8WXI2 | CNKR2_HUMAN | DUF1170.                       | 2   | TCAAGGAAGAC   | 0.313 |             |
| + | 1  | 1902      |                    | NM_018094    | NP_060564    | Q8IYD1 | ERF3B_HUMAN |                                | 1   | TAATCTCCTTGG  | 0.413 |             |
| - | 2  | 421       |                    | NM_152424    | NP_689637    | Q5JTC6 | F123B_HUMAN | p.0?(40)                       | 112 | CCTACCTGGGC   | 0.527 |             |
| + | 37 | 5411      | Onle.1_RNA TAF1    | NM_138923    | NP_620278    | P21675 | TAF1_HUMAN  | idic tail). Protein kinase 2.  | 17  | CGGTGGGGAGC   | 0.517 |             |
| + | 5  | 1035      | dm.1_Missense_M    | NM_152630    | NP_689843    | Q8NEK8 | FA46D_HUMAN |                                | 2   | AGGTGGTGGCC   | 0.438 |             |
| - | 3  | 594       |                    | NM_001006938 | NP_001006939 | Q6IPX3 | TCAL6_HUMAN |                                | 1   | CACATCTCCAC   | 0.488 |             |
| + | 4  | 1349      | mg.1_Missense_M    | NM_152423    | NP_689636    | Q5H9M0 | MUML1_HUMAN |                                | 4   | AAGATGAAAAGT  | 0.408 |             |
| - | 11 | 1699      | su.1_Missense_M    | NM_014289    | NP_055104    | Q9Y6Q1 | CAN6_HUMAN  |                                | 6   | GCCACGAGCCA   | 0.423 |             |
| + | 5  | 915       | IA3_uc004ets.3_R   | NM_007325    | NP_015564    | P42263 | GRIA3_HUMAN | ellular (Potential).           | 5   | TTGAAGAAATGC  | 0.443 |             |
| - | 3  | 462       |                    | NM_001013403 | NP_001013421 | Q5JRM2 | CX066_HUMAN | ytoplasmic (Potential).        | 0   | GTATGGATGGC   | 0.418 |             |
| + | 33 | 5728      |                    | NM_017514    | NP_059984    | P51805 | PLXA3_HUMAN | lasmic (Potential).            | 3   | TTGTCCGGAAGC  | 0.597 |             |
| - | 10 | 1309      | za.1_Missense_M    | NM_018216    | NP_060686    | Q9NVE7 | PANK4_HUMAN |                                | 3   | CGTGTCCGGCA   | 0.642 |             |
| + | 5  | 1387      |                    | NM_004285    | NP_004276    | O95479 | G6PE_HUMAN  | 1-dehydrogenase.               | 0   | GGATCTTGTC    | 0.612 |             |
| + | 7  | 1606      | E4B_uc010oai.1_lr  | NM_001105562 | NP_001099032 | O95155 | UBE4B_HUMAN |                                | 4   | TTCCCGTGCAC   | 0.587 |             |
| + | 10 | 1261      |                    | NM_021933    | NP_068752    | Q5JXC2 | MIIP_HUMAN  |                                | 1   | ATCCAGGCCCTC  | 0.642 |             |
| + | 6  | 1170      | av.1_Missense_M    | NM_032880    | NP_116269    | Q96ID5 | IGS21_HUMAN |                                | 4   | CACACAGAGAAC  | 0.672 |             |
| + | 18 | 4770      | e_Mutation_p.A10   | NM_006015    | NP_006006    | O14497 | ARI1A_HUMAN |                                | 142 | CTCTGCACCCCA  | 0.597 |             |
| - | 3  | 810       | d.2_Missense_Mu    | NM_014654    | NP_055469    | O75056 | SDC3_HUMAN  | ntial). Ser/Thr-rich (mucin-li | 2   | TGGCCGGGAGG   | 0.716 |             |
| + | 2  | 125       | i4_uc001bxv.1_5F   | NM_005268    | NP_005259    | O95377 | CXB5_HUMAN  | lasmic (Potential).            | 1   | AGGGACTCCTG   | 0.463 |             |
| + | 4  | 990       | IB2_uc001bzd.1_l   | NM_178548    | NP_848643    | Q6VUC0 | AP2E_HUMAN  |                                | 0   | CCTCCGAGGT    | 0.642 |             |
| - | 14 | 2305      | SLC6A9_uc010okr    | NM_201649    | NP_964012    | P48067 | SC6A9_HUMAN | lasmic (Potential).            | 0   | TATCCGGGAGTC  | 0.677 | rs2286246   |
| - | 8  | 1454      | oj.1_Missense_M    | NM_014762    | NP_055577    | Q15392 | DHC24_HUMAN |                                | 1   | CGGGCTCCCA    | 0.567 |             |
| - | 1  | 1704      | _5'Flank uc010oo   | NM_002228    | NP_002219    | P05412 | JUN_HUMAN   |                                | 0   | CAGCCGGGGT    | 0.716 |             |
| - | 1  | 703       | cj.1_Missense_M    | NM_012152    | NP_036284    | Q9UBY5 | LPAR3_HUMAN | lasmic (Potential).            | 5   | ATGCGGAGACA   | 0.517 |             |
| - | 7  | 1142      | '3_uc001dmu.2_M    | NM_018284    | NP_060754    | Q9H0R5 | GBP3_HUMAN  |                                | 2   | GACTGCGTTCT   | 0.512 | rs113485304 |
| + | 3  | 675       | dnn.2_Missense_M   | NM_001134479 | NP_001127951 | Q7L1W4 | LRC8D_HUMAN |                                | 2   | TGGAAGCAGCC   | 0.502 |             |
| - | 2  | 634_635   |                    | NM_006492    | NP_006483    | O95076 | ALX3_HUMAN  | Homeobox.                      | 0   | CTCCGGGCAT    | 0.594 | rs121908168 |
| + | 12 | 1522      | vkt.1_Missense_M   | NM_001102663 | NP_001096133 |        |             |                                | 0   | ATGTTATTCGAC  | 0.478 |             |
| + | 7  | 726       | M1_uc009wmn.2_     | NM_024041    | NP_076946    | Q9BWG6 | SCNM1_HUMAN |                                | 4   | AGATGGACGAG   | 0.383 |             |
| - | 3  | 1023      |                    | NM_001122965 | NP_001116437 | Q6XPR3 | RPTN_HUMAN  | Gln-rich.                      | 0   | CTGACTGTAGTC  | 0.507 | rs12117644  |
| - | 3  | 6751      |                    | NM_002016    | NP_002007    | P20930 | FILA_HUMAN  | ich. Filaggrin 13.             | 16  | TCCCGGGGCC    | 0.577 |             |
| - | 3  | 4489      |                    | NM_002016    | NP_002007    | P20930 | FILA_HUMAN  | Ser-rich.                      | 16  | CTGACCGTCTTC  | 0.577 |             |
| - | 6  | 2406      | i.2_Missense_Mu    | NM_001111    | NP_001102    | P55265 | DSRAD_HUMAN | DRBM 3.                        | 6   | GGAGCGGCGT    | 0.542 |             |
| - | 2  | 843       | 2_Missense_Muta    | NM_001111    | NP_001102    | P55265 | DSRAD_HUMAN |                                | 6   | TATGACCGTCTG  | 0.522 |             |

|   |    |       |                    |              |              |        |             |                                |    |                  |       |             |
|---|----|-------|--------------------|--------------|--------------|--------|-------------|--------------------------------|----|------------------|-------|-------------|
| + | 4  | 895   | ey.1_Intron HCN3   | NM_020897    | NP_065948    | Q9P1Z3 | HCN3_HUMAN  | cellular (Potential).          | 2  | GGGCCGCCAGT      | 0.592 | rs137875525 |
| - | 2  | 688   |                    | NM_001093725 | NP_001087194 | A1L020 | MEX3A_HUMAN | KH 2.                          | 0  | GGGCACCCGCA      | 0.627 |             |
| - | 4  | 401   | msb.1_Missense_M   | NM_178229    | NP_839943    | Q86VI3 | IQGA3_HUMAN | CH.                            | 6  | ATAGCCAAAAG      | 0.463 |             |
| - | 3  | 452   | o.L98F FCRL5_uc    | NM_031281    | NP_112571    | Q96RD9 | FCRL5_HUMAN | potential). Ig-like C2-type 1. | 6  | AAATCCAAGTG      | 0.468 |             |
| + | 7  | 866   |                    | NM_201563    | NP_963857    |        |             |                                | 0  | CAATTCCACTG      | 0.502 |             |
| - | 13 | 4119  |                    | NM_000130    | NP_000121    | P12259 | FA5_HUMAN   | ndem repeats of [TNP]-L-S      | 6  | GGCTGAGGTCT      | 0.512 |             |
| + | 6  | 563   |                    | NM_139240    | NP_640333    | O95561 | CA105_HUMAN |                                | 1  | AAATCCAGACT      | 0.373 |             |
| - | 2  | 868   | p.E263K TNR_uc     | NM_003285    | NP_003276    | Q92752 | TENR_HUMAN  | Cys-rich.                      | 11 | CAGTTCCTGCG      | 0.637 |             |
| + | 3  | 2723  | e_Mutation_p.R52   | NM_020318    | NP_064714    | Q9BXP8 | PAPP2_HUMAN | stalloprotease.                | 16 | CCTCGGGGAG       | 0.537 |             |
| + | 2  | 849   | px.2_Missense_Mt   | NM_002293    | NP_002284    | P11047 | LAMC1_HUMAN | inin N-terminal.               | 5  | CAGGAGGGGAC      | 0.577 |             |
| - | 3  | 1109  | ie_Mutation_p.Q34  | NM_015375    | NP_056190    | Q6XUX3 | DUSTY_HUMAN |                                | 1  | CACCTGGTGAG      | 0.522 |             |
| + | 6  | 610   | .H101Y SMYD2_u     | NM_020197    | NP_064582    | Q9NRG4 | SMYD2_HUMAN | SET.                           | 1  | CTTTCTCATTTGC    | 0.338 |             |
| - | 4  | 1398  | cf.2_Missense_Mt   | NM_024804    | NP_079080    | Q96BR6 | ZN669_HUMAN | 2H2-type 8.                    | 0  | TCTTTCGTGGAC     | 0.423 |             |
| - | 20 | 2446  | p.L172F DIP2C_u    | NM_014974    | NP_055789    | Q9Y2E4 | DIP2C_HUMAN |                                | 7  | GACGAGGCCCT      | 0.617 |             |
| - | 6  | 1762  |                    | NM_018702    | NP_061172    | Q9NS39 | RED2_HUMAN  | to I editase.                  | 3  | AATATCGATCGC     | 0.527 |             |
| - | 11 | 1377  | e_Mutation_p.S42E  | NM_001029880 | NP_001025051 | Q5VUG0 | SMBT2_HUMAN | MBT 4.                         | 8  | CAACGGAGGCC      | 0.517 |             |
| - | 4  | 4714  | uc001iqp.1_Intron  | NM_207371    | NP_997254    | Q1XH10 | DLN1_HUMAN  |                                | 1  | ATCATCCAGTG      | 0.423 |             |
| - | 14 | 2669  | uc001iwf.2_5'Flank | NM_025209    | NP_079485    | Q9H2F5 | EPC1_HUMAN  |                                | 4  | ACCTTGAAACT      | 0.433 |             |
| + | 34 | 3410  |                    | NM_052997    | NP_443723    | Q9BXX3 | AN30A_HUMAN | Potential.                     | 9  | TAAAGGGGCATC     | 0.333 |             |
| - | 3  | 1599  | sense_Mutation_p.  | NM_001098208 | NP_001091678 | P52597 | HNRPF_HUMAN |                                | 0  | TATACGCCCA       | 0.552 |             |
| - | 37 | 11068 | K3_uc010qih.1_In   | NM_020987    | NP_066267    | Q12955 | ANK3_HUMAN  |                                | 19 | TCTCTCAACAA      | 0.473 |             |
| + | 9  | 1470  | B3_uc001kdu.2_IV   | NM_007078    | NP_009009    | O75112 | LDB3_HUMAN  |                                | 1  | CTGCGGAGCCT      | 0.468 |             |
| - | 6  | 1976  | p.E260K MMRN2      | NM_024756    | NP_079032    | Q9H8L6 | MMRN2_HUMAN |                                | 1  | CACCTCCTCC       | 0.731 |             |
| + | 9  | 1103  |                    | NM_001010939 | NP_001010939 | Q5W064 | LIPJ_HUMAN  |                                | 1  | CATTGGAGTCA      | 0.348 |             |
| - | 1  | 1710  |                    | NR_002319    |              |        |             |                                | 0  | CTTCTTAAATACC    | 0.498 |             |
| + | 4  | 775   | ig.2_Missense_Mt   | NM_004088    | NP_004079    | P04053 | TDT_HUMAN   | teraction with DNTTIP2.        | 1  | TCTGCCATTCA      | 0.438 |             |
| - | 6  | 1286  |                    | NM_000102    | NP_000093    | P05093 | CP17A_HUMAN |                                | 0  | TGGGGGATGA       | 0.622 |             |
| + | 12 | 2030  |                    | NM_014978    | NP_055793    | Q9UPU3 | SORC3_HUMAN | Luminal (Potential).           | 10 | ACATGGAGACA      | 0.443 |             |
| + | 12 | 1486  | th.2_Missense_Mt   | NM_005308    | NP_005299    | P34947 | GRK5_HUMAN  | rotein kinase.                 | 3  | CAAGTCCATCT      | 0.642 |             |
| + | 8  | 1349  | i.1_Intron WDR11   | NM_018117    | NP_060587    | Q9BZH6 | WDR11_HUMAN | WD 3.                          | 0  | ATGCAGCCGCC      | 0.473 |             |
| + | 4  | 2702  | ase_Mutation_p.P7  | NM_206862    | NP_996744    | O95359 | TACC2_HUMAN |                                | 10 | ACATCCCCCC       | 0.637 |             |
| + | 29 | 3624  | G674E DMBT1_uc     | NM_007329    | NP_015568    | Q9UGM3 | DMBT1_HUMAN | SRCR 9.                        | 7  | CCCAGGAAATG      | 0.602 |             |
| - | 1  | 655   |                    | NM_001012708 | NP_001012726 | Q6L8H2 | KRA53_HUMAN | 4 repeats of C-C-X-P.          | 2  | ggaacagcagggttgc | 0.1   |             |
| + | 1  | 928   |                    | NM_001004751 | NP_001004751 | Q8NGF3 | O51D1_HUMAN | lasmic (Potential).            | 0  | ACCAAAGAGATC     | 0.493 |             |
| - | 1  | 793   | 32_uc001mak.1_Ir   | NM_001005289 | NP_001005289 | Q8NGJ2 | O52H1_HUMAN | Name=6; (Potential).           | 2  | GGAGAAAAGG       | 0.502 |             |
| - | 3  | 867   | 1_5'Flank APBB1    | NM_001164    | NP_001155    | O00213 | APBB1_HUMAN | WW.                            | 2  | CAGCCGGCAGG      | 0.632 |             |
| + | 22 | 2595  | PFIBP2_uc010rbe    | NM_003621    | NP_003612    | Q8ND30 | LIPB2_HUMAN | SAM 3.                         | 4  | AGTATGCACCCA     | 0.517 |             |
| - | 15 | 3017  | p.P524L ST5_uc0    | NM_213618    | NP_998783    | P78524 | ST5_HUMAN   | DENN.                          | 1  | GGGTGGGACAG      | 0.647 |             |
| - | 19 | 3478  | p.R418G DENND5     | NM_015213    | NP_056028    | Q6IQ26 | DEN5A_HUMAN |                                | 1  | ATGGCCTCTCAT     | 0.617 |             |
| + | 22 | 2878  |                    | NM_014633    | NP_055448    | Q6PD62 | CTR9_HUMAN  | Lys-rich.                      | 2  | TTTAGCGTTCTAA    | 0.333 |             |
| - | 12 | 1884  | cy.1_Missense_Mt   | NM_000352    | NP_000343    | Q09428 | ABCC8_HUMAN | ilarity). ABC transmembrar     | 1  | TGTGACCAAGAT.    | 0.612 |             |
| + | 5  | 892   | nuc.2_Missense_M   | NM_001077242 | NP_001070710 | Q96QD5 | DEPD7_HUMAN |                                | 2  | GCTCTGGCAG       | 0.413 |             |
| + | 8  | 1113  | AT_uc009ykc.1_Rf   | NM_001752    | NP_001743    | P04040 | CATA_HUMAN  |                                | 3  | GCATTGAGGCC.     | 0.488 |             |
| + | 3  | 946   | OGKZ_uc001ncl.2    | NM_001105540 | NP_001099010 | Q13574 | DGKZ_HUMAN  |                                | 3  | CCGGAGTACAG      | 0.677 | rs141189455 |
| - | 12 | 1002  | p.M144I MTCH2      | NM_014342    | NP_055157    | Q9Y6C9 | MTCH2_HUMAN |                                | 0  | TGTAGCATGCAC     | 0.269 |             |
| + | 1  | 19    |                    | NM_001005200 | NP_001005200 | Q8N162 | OR8H2_HUMAN | cellular (Potential).          | 2  | AGGAATAACACA     | 0.343 | rs61746549  |
| - | 16 | 2188  | _5'Flank TNKS1Bf   | NM_003146    | NP_003137    | Q08945 | SSRP1_HUMAN | Ser-rich.                      | 2  | GCGTGATTCT       | 0.498 |             |

|   |    |      |                    |              |              |        |             |                                 |    |                |       |             |
|---|----|------|--------------------|--------------|--------------|--------|-------------|---------------------------------|----|----------------|-------|-------------|
| - | 3  | 790  | n_p.A80V FADS1_    | NM_013402    | NP_037534    | O60427 | FADS1_HUMAN | ical; (Potential).              | 1  | .GCACCGCACAG   | 0.562 |             |
| - | 6  | 1566 | ay.3_Missense_Mt   | NM_005609    | NP_005600    | P11217 | PYGM_HUMAN  |                                 | 2  | ˆCATTGGGAGCCˆ  | 0.622 |             |
| - | 22 | 2510 |                    | NM_017525    | NP_059995    | Q6DT37 | MRCKG_HUMAN |                                 | 4  | ˆCATGCCTTGTGˆ  | 0.647 |             |
| - | 1  | 155  | mt.1_Nonsense_M    | NM_015104    | NP_055919    | Q2TAZ0 | ATG2A_HUMAN |                                 | 2  | ˆCCGCTCTTTCAˆ  | 0.642 |             |
| + | 9  | 1710 | *1L1_uc001oep.1_   | NM_001099409 | NP_001092879 | Q8N3D4 | EH1L1_HUMAN |                                 | 1  | GCCCCAGCGG     | 0.682 |             |
| + | 12 | 1151 | J4Q BBS1_uc001c    | NM_024649    | NP_078925    | Q8NFJ9 | BBS1_HUMAN  |                                 | 1  | TGGCCGGTACGˆ   | 0.562 |             |
| + | 7  | 818  | SH3_uc001okl.2_    | NM_017857    | NP_060327    | Q8TE77 | SSH3_HUMAN  |                                 | 1  | ˆAGGCAGCTCTAˆ  | 0.622 |             |
| - | 10 | 1757 | sense_Mutation_p.  | NM_004910    | NP_004901    | O00562 | PITM1_HUMAN |                                 | 3  | ˆATGAGGTGGCCˆ  | 0.647 |             |
| + | 1  | 351  |                    | NM_001012710 | NP_001012728 | Q6L8G5 | KR510_HUMAN | ˆ repeats of C-C-X-P.           | 1  | TGGGGGCTCCAˆ   | 0.677 |             |
| - | 1  | 901  |                    | NM_001005285 | NP_001005285 | A6NND4 | O2AT4_HUMAN | ˆ lasmic (Potential).           | 1  | TTACATCCCTGTˆ  | 0.483 |             |
| + | 2  | 602  |                    | NM_015516    | NP_056331    | Q8WUA8 | TSK_HUMAN   | LRR 4.                          | 0  | ˆAGTCCGGGAGˆ   | 0.637 | rs143993207 |
| - | 6  | 1042 | tj.1_Missense_Mul  | NM_001162951 | NP_001156423 | Q9HCH5 | SYTL2_HUMAN |                                 | 3  | ˆTCTAGGAAAAGˆ  | 0.473 |             |
| + | 1  | 699  |                    | NM_001008781 | NP_001008781 | Q8TDW7 | FAT3_HUMAN  | ˆ Extracellular (Potential).    | 5  | ˆGGTATGATCTGˆ  | 0.388 |             |
| - | 6  | 880  | lrv.1_Missense_M   | NM_004347    | NP_004338    | P51878 | CASP5_HUMAN |                                 | 3  | ACATCCGGTTTTˆ  | 0.488 |             |
| + | 17 | 1830 | ˆ1L2_uc009zdg.1_   | NM_138342    | NP_612351    | Q8IW92 | GLBL2_HUMAN |                                 | 3  | ACATTACCTGCTˆ  | 0.537 |             |
| - | 9  | 1038 |                    | NM_020373    | NP_065106    | Q9NQ90 | ANO2_HUMAN  | ˆ lasmic (Potential).           | 7  | GTCATTCATATCCˆ | 0.483 |             |
| + | 5  | 682  | ˆPS7A_uc001qqi.2   | NM_001164094 | NP_001157566 | Q9UBW8 | CSN7A_HUMAN | ˆ PCI.                          | 1  | ˆCCAGCGCAACCˆ  | 0.602 |             |
| + | 1  | 104  |                    | NM_001080454 | NP_001073923 | P0C7M7 | ACSM4_HUMAN |                                 | 0  | ˆGACTCTTGCTGˆ  | 0.473 |             |
| - | 3  | 276  |                    | NM_006248    | NP_006239    |        |             |                                 | 0  | ˆGGGTGGTCCTTˆ  | 0.612 |             |
| + | 1  | 565  | Z1_uc001rdw.3_5    | NM_033328    | NP_201585    | Q96KX2 | CAZA3_HUMAN | p.G136A(1)                      | 2  | ˆAAAAGGAAATTCˆ | 0.403 |             |
| - | 33 | 2300 | ˆL2A1_uc001rqv.2   | NM_001844    | NP_001835    | P02458 | CO2A1_HUMAN | ˆ le-helical region.            | 2  | ˆGCCACGTTCAˆ   | 0.637 |             |
| - | 9  | 1371 | ˆj CCNT1_uc009zk   | NM_001240    | NP_001231    | O60563 | CCNT1_HUMAN |                                 | 6  | ˆAGTCCGATGACˆ  | 0.463 | rs113480935 |
| + | 13 | 1843 | ˆp.C559Y TROAP_    | NM_005480    | NP_005471    | Q12815 | TROAP_HUMAN | ˆ ate tandem repeats. Cys-ri    | 1  | ˆGTCCTGCTGTACˆ | 0.597 |             |
| - | 10 | 1367 | ˆi.2_Missense_Mut  | NM_016293    | NP_057377    | Q9UBW5 | BIN2_HUMAN  | ˆ Pro-rich.                     | 1  | ˆAGAGGCTGTAGˆ  | 0.622 |             |
| + | 25 | 5531 | ˆj.2_Missense_Mul  | NM_012291    | NP_036423    | Q14674 | ESPL1_HUMAN |                                 | 3  | ˆAGCCCGGCCCTˆ  | 0.607 |             |
| - | 1  | 188  | ˆe_Mutation_p.R28  | NM_003075    | NP_003066    | Q8TAQ2 | SMRC2_HUMAN |                                 | 6  | ˆCAGCCGCACGTˆ  | 0.438 |             |
| + | 12 | 1684 | ˆsqk.1_Nonsense_M  | NM_173596    | NP_775867    | Q6ZMH5 | S39A5_HUMAN | ˆ ical; (Potential).            | 2  | ˆTCCCTGGGTGTˆ  | 0.652 |             |
| - | 10 | 1690 | ˆsru.1_Missense_M  | NM_001478    | NP_001469    | Q00973 | B4GN1_HUMAN | ˆ enal (Potential).             | 0  | GTGGTGGAAGCˆ   | 0.677 |             |
| + | 6  | 780  | ˆse_Mutation_p.P2ˆ | NM_006812    | NP_006803    | Q13438 | OS9_HUMAN   |                                 | 1  | ˆCTGCACCGCAGˆ  | 0.617 |             |
| + | 10 | 2051 | ˆe_Mutation_p.A48ˆ | NM_181861    | NP_863651    | O14727 | APAF_HUMAN  |                                 | 3  | ˆCATGGCCAGTCˆ  | 0.378 |             |
| + | 8  | 852  | ˆp.R209Q GAS2L3_   | NM_174942    | NP_777602    | Q86XJ1 | GA2L3_HUMAN | GAR.                            | 1  | ˆCTGTGGCATGˆ   | 0.398 | rs147048300 |
| - | 8  | 2022 |                    | NM_004075    | NP_004066    | Q16526 | CRY1_HUMAN  | ˆ - mediated transcription (B   | 3  | ˆAATCTGCATCAˆ  | 0.383 |             |
| + | 7  | 946  | HP_uc001tpp.2_M    | NM_001143852 | NP_001137324 | Q9BT92 | TCHP_HUMAN  | ˆ Glu-rich. Interaction with ke | 1  | ˆCCTCCGGCAGˆ   | 0.567 |             |
| + | 21 | 3240 | ˆSite_p.A1045_spli | NM_025247    | NP_079523    | Q6JQN1 | ACD10_HUMAN |                                 | 2  | ˆTGCCAGGCCCTˆ  | 0.632 |             |
| - | 10 | 1602 |                    | NM_173598    | NP_775869    | Q6VAB6 | KSR2_HUMAN  | ˆ Pro-rich.                     | 15 | GTAGGGGAGAAˆ   | 0.652 |             |
| + | 4  | 429  | ˆ51_uc001ujy.3_5f  | NM_024078    | NP_076983    | Q9BV14 | NOC4L_HUMAN |                                 | 0  | ˆTGGAAGGAGCGˆ  | 0.652 |             |
| - | 25 | 2973 | ˆxq.1_RNA POLE_L   | NM_006231    | NP_006222    | Q07864 | DPOE1_HUMAN |                                 | 8  | ˆTTCGCCCGCGCˆ  | 0.517 | rs142563997 |
| - | 2  | 798  |                    | NM_021954    | NP_068773    | Q9Y6H8 | CXA3_HUMAN  | ˆ ical; (Potential).            | 1  | ˆCCACCGCCAGCˆ  | 0.647 |             |
| - | 17 | 2645 | ˆsa.3_Missense_M   | NM_002019    | NP_002010    | P17948 | VGFR1_HUMAN | ˆ lasmic (Potential).           | 24 | CAGAAGAAGACTˆ  | 0.383 |             |
| + | 29 | 4869 | ˆi.2_Missense_Mu   | NM_015678    | NP_056493    | Q8NFP9 | NBEA_HUMAN  |                                 | 11 | ˆCATAGGATGATAˆ | 0.343 |             |
| + | 1  | 249  | ˆp.A50T COG3_uc    | NM_031431    | NP_113619    | Q96JB2 | COG3_HUMAN  |                                 | 2  | ˆCGGCGGCAGACˆ  | 0.692 |             |
| + | 1  | 1837 |                    | NR_003268    |              |        |             |                                 | 0  | TCCAGGGGGAGˆ   | 0.532 |             |
| - | 4  | 714  | ˆlorf1_uc010tgm.1_ | NM_020456    | NP_065189    | Q5W111 | SPRY7_HUMAN | ˆ 330.2 SPRY.                   | 0  | ˆATGCTGGACAAˆ  | 0.328 |             |
| + | 11 | 2091 | ˆp.Y435H TDRD3_    | NM_030794    | NP_110421    | Q9H7E2 | TDRD3_HUMAN |                                 | 2  | GTAGATTATAATAˆ | 0.338 |             |
| - | 7  | 1921 | ˆ.1_Intron DACH1_  | NM_080759    | NP_542937    | Q9UI36 | DACH1_HUMAN |                                 | 1  | ˆCCCAGGAAGTAˆ  | 0.408 |             |
| - | 1  | 28   | ˆ1vpk.2_Missense_  | NM_001010977 | NP_001010977 | Q5VZV1 | MT21C_HUMAN |                                 | 0  | ˆCTGCGGGAGCˆ   | 0.577 |             |
| - | 11 | 1783 | ˆ1_3'UTR TOX4_uc   | NM_019852    | NP_062826    | Q86U44 | MTA70_HUMAN |                                 | 2  | ˆTGAACCGTCAˆ   | 0.458 |             |

|   |    |           |                    |              |              |        |              |                             |    |               |       |
|---|----|-----------|--------------------|--------------|--------------|--------|--------------|-----------------------------|----|---------------|-------|
| + | 2  | 753       | se_Mutation_p.W1   | NM_001126339 | NP_001119811 | Q9BU02 | THTPA_HUMAN  |                             | 0  | GTGCCTGGAAGC  | 0.617 |
| - | 10 | 1318_1319 | yv.2_Missense_Mt   | NM_002863    | NP_002854    | P06737 | PYGL_HUMAN   |                             | 1  | TCGAGGGAGCAC  | 0.485 |
| - | 7  | 1244      | fz.1_Missense_Mt   | NM_139318    | NP_647479    | Q8NCM2 | KCNH5_HUMAN  | cellular (Potential).       | 9  | TATGGAGTCCCA  | 0.468 |
| + | 2  | 208       | i.1_5'UTR CHURC    | NM_002028    | NP_002019    | P49356 | FNTB_HUMAN   | PFTB 2.                     | 1  | ACAAATCCTTGA  | 0.393 |
| + | 17 | 2513      | HH1_uc001xjn.1_I   | NM_020715    | NP_065766    | Q9ULM0 | PKHH1_HUMAN  | PH 2.                       | 0  | ACCACCTCACAC  | 0.582 |
| + | 34 | 6934      | rf.1_Missense_Mu   | NM_014982    | NP_055797    | Q96RV3 | PCX1_HUMAN   | Ser-rich.                   | 1  | FGCCATCATCCAT | 0.572 |
| + | 15 | 4426      | xmv.2_Missense_I   | NM_015556    | NP_056371    | O43166 | SI1L1_HUMAN  | Ser-rich.                   | 4  | AAGTGGCACCC   | 0.602 |
| + | 2  | 521       |                    | NM_001037162 | NP_001032239 | Q315F7 | ACOT6_HUMAN  |                             | 0  | TCGATGATCTAC  | 0.403 |
| + | 2  | 413       | vj.1_5'Flank VIPAF | NM_012111    | NP_036243    | O95433 | AHSA1_HUMAN  |                             | 0  | GGAGCGTCAAA   | 0.423 |
| - | 14 | 2305      | rf145_uc010asz.1   | NM_152446    | NP_689659    | Q6ZU80 | CE128_HUMAN  | Potential.                  | 0  | CTGTTCGTGTTT  | 0.413 |
| - | 4  | 1555      | 1ybp.2_Missense    | NM_001002860 | NP_001002860 | Q9P203 | BTBD7_HUMAN  |                             | 1  | GATGAGAACTC   | 0.408 |
| + | 24 | 3343      | 1409_uc001ybs.1    | NM_020818    | NP_065869    | Q9P2D8 | UNC79_HUMAN  |                             | 17 | TCCAGCTCTCG   | 0.463 |
| + | 23 | 2726      | qv.2_Missense_M    | NM_015197    | NP_056012    | Q86VP3 | PACS2_HUMAN  |                             | 1  | TGCGGGGTGAG   | 0.617 |
| - | 16 | 1840      | rv.2_Missense_Mu   | NM_000275    | NP_000266    | Q04671 | P_HUMAN      | plasmic (Potential).        | 5  | CCTCCCCAGC    | 0.657 |
| - | 30 | 3534      | .2_Missense_Muta   | NM_004573    | NP_004564    | Q00722 | PLCB2_HUMAN  | Potential.                  | 8  | ATGTGGGAGTTG  | 0.368 |
| + | 4  | 771       |                    | NM_002373    | NP_002364    | P78559 | MAP1A_HUMAN  |                             | 9  | GACTACTGCAG   | 0.542 |
| - | 73 | 13664     |                    | NM_003922    | NP_003913    | Q15751 | HERC1_HUMAN  | HECT.                       | 19 | CAGGCGGAGGT   | 0.468 |
| - | 8  | 3729      |                    | NM_005477    | NP_005468    | Q9Y3Q4 | HCN4_HUMAN   | plasmic (Potential).        | 6  | GCGCCTTGTGG   | 0.726 |
| - | 1  | 399       | bfd.3_Missense_IV  | NM_004049    | NP_004040    | Q16548 | B2LA1_HUMAN  |                             | 1  | GCACTTGGTTGA  | 0.393 |
| - | 2  | 776       |                    | NM_032246    | NP_115622    | Q6ZN04 | MEX3B_HUMAN  |                             | 2  | TGGGCGGCCCA   | 0.662 |
| + | 6  | 642       |                    | NM_152336    | NP_689549    | Q96MI9 | CBPC4_HUMAN  |                             | 0  | TGGCAGCACAG   | 0.622 |
| + | 5  | 506       | i.1_RNA FANCI_uc   | NM_001113378 | NP_001106849 | Q9NV11 | FANCI_HUMAN  |                             | 2  | GGCTACGAAAA   | 0.378 |
| + | 2  | 1004      | jq.1_Missense_IV   | NM_001039958 | NP_001035047 | Q0VG99 | MESP2_HUMAN  |                             | 0  | ACTGCAGCCTC   | 0.637 |
| - | 2  | 553       |                    | NM_001009606 | NP_001009606 | C9JH64 | C9JH64_HUMAN |                             | 0  | GTCCACGGGGC   | 0.716 |
| - | 10 | 1021      |                    | NM_020764    | NP_065815    | Q8WXD9 | CSK1_HUMAN   | SH3.                        | 2  | GATTGCCCGTC   | 0.672 |
| - | 4  | 554       | S22_uc002crz.1_I   | NM_022119    | NP_071402    | Q9GZN4 | BSSP4_HUMAN  | peptidase S1.               | 1  | CATCAGGTAGG   | 0.587 |
| - | 6  | 1528      | KMYT1_uc002csp     | NM_004203    | NP_004194    | Q99640 | PMYT1_HUMAN  |                             | 1  | CCCGCGGCTGC   | 0.692 |
| + | 3  | 456       | e_Mutation_p.R82   | NM_004221    | NP_004212    | P24001 | IL32_HUMAN   |                             | 1  | AGGACGTGGAC   | 0.557 |
| + | 4  | 1183      |                    | NM_139170    | NP_631909    | Q8IYS4 | CP071_HUMAN  |                             | 1  | AGTCAGCTCCC   | 0.657 |
| + | 11 | 1531      | j.2_Missense_Mut   | NM_000246    | NP_000237    | P33076 | C2TA_HUMAN   | NACHT.                      | 1  | CTGCAGGATCT   | 0.612 |
| - | 12 | 2367      | dbg.1_Missense_M   | NM_015914    | NP_056998    | Q6PKC3 | TXD11_HUMAN  | thioredoxin 2.              | 0  | GCAGGGAAAAA   | 0.408 |
| - | 10 | 1183      | lbt.2_Missense_Mi  | NM_001130007 | NP_001123479 | P15170 | ERF3A_HUMAN  |                             | 3  | ACAAAAGATTAT  | 0.373 |
| + | 8  | 1029      | p.P285L ABCC1_L    | NM_004996    | NP_004987    | P33527 | MRP1_HUMAN   | Cytoplasmic.                | 4  | CCAGCCGAAAG   | 0.557 |
| + | 7  | 1520      | fy.2_Missense_ML   | NM_016524    | NP_057608    | Q9BSW7 | SYT17_HUMAN  | C2 2.                       | 1  | AAGTCCCCCAAC  | 0.458 |
| - | 2  | 676       | vaw.1_Missense_M   | NM_001002911 | NP_001002911 | Q6DWJ6 | GP139_HUMAN  | cellular (Potential).       | 2  | GTCTTCAGTCC   | 0.517 |
| - | 19 | 2099      | ARHGAP17_uc002     | NM_001006634 | NP_001006635 | Q68EM7 | RHG17_HUMAN  | Pro-rich.                   | 0  | GTGGCTTTGGT   | 0.692 |
| + | 8  | 1100      | 39_splice IL21R_uc | NM_181078    | NP_851564    | Q9HBE5 | IL21R_HUMAN  |                             | 4  | CAAGGTGAGCT   | 0.647 |
| - | 16 | 2708      | lou.2_Missense_IV  | NM_001520    | NP_001511    | Q12789 | TF3C1_HUMAN  |                             | 5  | TGGGGGGATGT   | 0.562 |
| - | 3  | 500       | 1A2_uc002dqh.1_S   | NM_177528    | NP_803564    | P50226 | ST1A2_HUMAN  |                             | 0  | GGTGCTGGAG    | 0.627 |
| - | 8  | 1697      | 10B_uc002dxt.2     | NM_015527    | NP_056342    | Q4KMP7 | TB10B_HUMAN  |                             | 0  | GGCGAGCAGG    | 0.602 |
| - | 12 | 1846      | rfg.1_Missense_M   | NM_173502    | NP_775773    | Q5K4E3 | POLS2_HUMAN  | peptidase S1 3.             | 1  | CCACTGGAGCA   | 0.682 |
| - | 6  | 2470      |                    | NM_153029    | NP_694574    | O75113 | N4BP1_HUMAN  |                             | 0  | GTA CTGCAGCA  | 0.527 |
| - | 7  | 704       | je.1_Missense_Mu   | NM_013263    | NP_037395    | Q9NP11 | BRD7_HUMAN   | Bromo.                      | 0  | TCTCTGGTTTAT  | 0.333 |
| - | 7  | 1433      | p.T416M TOX3_uc    | NM_001080430 | NP_001073899 | O15405 | TOX3_HUMAN   |                             | 0  | TGGTCTGCC     | 0.453 |
| - | 2  | 466       |                    | NM_001796    | NP_001787    | P55286 | CADH8_HUMAN  | er (Potential). Cadherin 1. | 9  | CTCTCCAGGAC   | 0.423 |
| - | 2  | 1501      | uc002erg.1_5'UTR   | NM_033309    | NP_171608    | Q6UX72 | B3GN9_HUMAN  | renal (Potential).          | 0  | TGCAGCGACAG   | 0.622 |
| - | 19 | 3238      | 1chc.1_Missense_   | NM_199355    | NP_955387    | Q8TE60 | ATS18_HUMAN  | SP type-1 2.                | 18 | TACTCCATTCAC  | 0.463 |

rs145687578

|   |    |           |                   |                                |              |        |             |                                |   |              |       |             |
|---|----|-----------|-------------------|--------------------------------|--------------|--------|-------------|--------------------------------|---|--------------|-------|-------------|
| + | 8  | 1544      | vnw.1_Missense_A  | NM_178452                      | NP_848547    | Q8NEP3 | DAAF1_HUMAN | Pro-rich.                      | 0 | GTGGAGGTTAAA | 0.602 |             |
| - | 16 | 2469      | r_p.R700Q TRPV3   | NM_145068                      | NP_659505    | Q8NET8 | TRPV3_HUMAN | lasmic (Potential).            | 4 | CCATCCGGAAT  | 0.532 |             |
| - | 8  | 1246_1247 | 1_RNA TRPV3_uc    | NM_145068                      | NP_659505    | Q8NET8 | TRPV3_HUMAN | lasmic (Potential).            | 4 | AAGTCCCTCGGC | 0.579 |             |
| + | 1  | 2119      | 3_Intron ITGAE_u  | NM_031965                      | NP_114171    | Q8TF76 | HASP_HUMAN  | rotein kinase.                 | 0 | AACGGGATGGG  | 0.502 |             |
| - | 2  | 1159      |                   | NM_032530                      | NP_115919    | Q96JF6 | ZN594_HUMAN | 2H2-type 8.                    | 3 | TGTGCGCCAC   | 0.463 |             |
| + | 2  | 124       |                   | NM_153230                      | NP_694962    | Q8N4B4 | FBX39_HUMAN |                                | 2 | GGATGGACGAA  | 0.507 | rs143419082 |
| - | 4  | 433       | ovup.1_5'Flank HE | NM_032580                      | NP_115969    | Q9BYE0 | HES7_HUMAN  | Pro-rich.                      | 0 | GGATGGGCGCG  | 0.766 |             |
| - | 3  | 1096      | way.1_Missense_N  | NM_018182                      | NP_060652    | Q8WU58 | CQ063_HUMAN |                                | 1 | CGTCTGGCAA   | 0.587 |             |
| + | 14 | 1434      | OT1_uc002hgx.2    | NM_018307                      | NP_060777    | Q8IXI2 | MIRO1_HUMAN | intermembrane (Potential).     | 4 | CGAGCTGTTACA | 0.368 |             |
| + | 6  | 783       | p.G257S RHBDL3    | NM_138328                      | NP_612201    | P58872 | RHBL3_HUMAN | ical; (Potential).             | 1 | TGGCCCGTGT   | 0.647 |             |
| - | 2  | 207       | Start_Site DDX52  | NM_007010                      | NP_008941    | Q9Y2R4 | DDX52_HUMAN |                                | 2 | CACACCTGGGA  | 0.413 |             |
| + | 7  | 872       | tf.2_Missense_Mu  | NM_199321                      | NP_955353    | Q6X784 | ZPBP2_HUMAN |                                | 1 | AGATCGAATAG  | 0.353 |             |
| - | 14 | 1644      | se_Mutation_p.S4  | NM_014815                      | NP_055630    | O75448 | MED24_HUMAN |                                | 1 | TCCCAGACAGC  | 0.582 |             |
| - | 7  | 1275      |                   | NM_181534                      | NP_853512    | Q7Z3Z0 | K1C25_HUMAN | Tail.                          | 2 | CAGATCCATAAT | 0.318 |             |
| - | 1  | 104       |                   | NM_004138                      | NP_004129    | O76009 | KT33A_HUMAN | Head.                          | 0 | GGGGGGCACAC  | 0.642 |             |
| + | 16 | 3241      | .D738N CCDC56     | NM_032387                      | NP_115763    | Q96J92 | WNK4_HUMAN  |                                | 7 | AGAGCGACCGT  | 0.607 |             |
| - | 12 | 1638      | .R477H HDAC5_L    | NM_005474                      | NP_005465    | Q9UQL6 | HDAC5_HUMAN |                                | 1 | CCACACGTTCA  | 0.652 | rs143851045 |
| - | 28 | 2938      | 2B_uc002igu.1_3'  | NM_000419                      | NP_000410    | P08514 | ITA2B_HUMAN | ellular (Potential).           | 3 | GCAACGCATAG  | 0.627 |             |
| + | 1  | 1004      |                   | NM_001466                      | NP_001457    | Q14332 | FZD2_HUMAN  | Name=2; (Potential).           | 3 | GGTGTCTGGTGG | 0.602 |             |
| - | 14 | 1520      | p.C385S EFTUD2    | NM_004247                      | NP_004238    | Q15029 | U5S1_HUMAN  |                                | 1 | TTTTGCGAGACC | 0.547 |             |
| + | 10 | 1329      | p.A417P ABCC3_L   | NM_003786                      | NP_003777    | O15438 | MRP3_HUMAN  | ity); ABC transmembrane t      | 4 | TGGATGCCCAG  | 0.552 |             |
| + | 3  | 371       | .G40R NME1_uc0    | NM_002512                      | NP_002503    | P22392 | NDKB_HUMAN  | tion with AKAP13.              | 0 | CAGATGGGGTCT | 0.493 |             |
| + | 4  | 327       |                   | NM_153228                      | NP_694960    | Q8N957 | ANKF1_HUMAN |                                | 2 | CCAAACGCCTG  | 0.453 |             |
| + | 11 | 1958      |                   | NM_000502                      | NP_000493    | P11678 | PERE_HUMAN  |                                | 2 | CTTTTGCCTGGG | 0.517 | rs144768455 |
| - | 2  | 360       |                   | NM_000334                      | NP_000325    | P35499 | SCN4A_HUMAN |                                | 3 | GAGTACGATGA  | 0.473 |             |
| + | 9  | 701       | !GS9_uc002jfd.2_I | NM_003835                      | NP_003826    | O75916 | RGS9_HUMAN  |                                | 4 | TGGAATGGACAA | 0.463 |             |
| + | 2  | 783       | .C9A3R1_uc002jfc  | NM_004252                      | NP_004243    | O14745 | NHRF1_HUMAN | PDZ 2.                         | 0 | CTCCCGGCTG   | 0.612 |             |
| - | 20 | 3094      | p.E953K RECQL4    | NM_004259                      | NP_004250    | O94762 | RECQ5_HUMAN |                                | 3 | AGCTTCGCTCT  | 0.627 |             |
| - | 18 | 3385      | rl.3_Missense_Mu  | NM_022066                      | NP_071349    | Q9C0C9 | UBE2O_HUMAN |                                | 5 | CCACGCGGATC  | 0.577 |             |
| - | 16 | 3092      | e_Mutation_p.L53f | NM_025090                      | NP_079366    | Q9P275 | UBP36_HUMAN |                                | 5 | ACCAAGACCTTC | 0.582 |             |
| - | 4  | 831       | 2_Missense_Muta   | NM_001159772                   | NP_001153244 | Q8WVQ1 | CANT1_HUMAN | renal (Potential).             | 0 | TAGCCCTTTTTC | 0.577 |             |
| + | 27 | 2444      | !D_uc002kgb.1_Mi  | NM_005993                      | NP_005984    | Q9BTW9 | TBCD_HUMAN  |                                | 0 | TGACTCGCTGT  | 0.632 |             |
| - | 9  | 936       | kod.1_Missense_A  | NM_001042388                   | NP_001035847 | Q8TF05 | PP4R1_HUMAN | HEAT 8.                        | 1 | ATTTCAGCACAA | 0.408 |             |
| + | 2  | 867       | XNDC2_uc002koh    | NM_001098529                   | NP_001091999 | Q86VQ3 | TXND2_HUMAN | repeat of Q-P-K-X-G-D-I-P.     | 2 | TCAGAAAAAGCC | 0.547 | rs146821851 |
| + | 12 | 3446      | xq.2_Missense_Mi  | NM_030632                      | NP_085135    | Q9C0F0 | ASXL3_HUMAN |                                | 3 | TGCCTCCTCCG  | 0.478 |             |
| + | 12 | 5622      | q.2_Missense_Mu   | NM_030632                      | NP_085135    | Q9C0F0 | ASXL3_HUMAN |                                | 3 | TAAAGGGGTGC  | 0.458 |             |
| - | 16 | 2029      | x.1_Missense_Mu   | NM_003199                      | NP_003190    | P15884 | ITF2_HUMAN  |                                | 2 | AACCGAACCT   | 0.602 |             |
| - | 1  | 135       | p.A37T SERPINB3   | uc010dqb.2_Missense_Mutation_r | P48594       | P48594 | SPB4_HUMAN  |                                | 3 | TAAATGCTGATG | 0.418 |             |
| + | 9  | 1262      | h.2_Missense_Mut  | NM_001143818                   | NP_001137290 | P05120 | PAI2_HUMAN  |                                | 2 | CATACCCAGTT  | 0.418 |             |
| + | 2  | 2441      | ra.2_Missense_Mi  | NM_171999                      | NP_741996    | Q9BXA9 | SALL3_HUMAN |                                | 4 | GGACGCGGCCA  | 0.657 |             |
| + | 10 | 1567      |                   | NM_182973                      | NP_892018    | Q72410 | TMPS9_HUMAN | Potential). Peptidase S1 2.    | 2 | TGAAGGAAGGG  | 0.677 |             |
| + | 4  | 1371      | la.1_Missense_Mi  | NM_173480                      | NP_775751    | Q68EA5 | ZNF57_HUMAN | 2H2-type 9.                    | 3 | ATTCCGAGGTC  | 0.428 | rs149690257 |
| - | 4  | 840       | !lx.2_Missense_N  | NM_174983                      | NP_778148    | Q6NUT3 | CS028_HUMAN | ical; (Potential).             | 2 | CACCACCAGCA  | 0.701 |             |
| - | 2  | 390       |                   | NM_030662                      | NP_109587    | P36507 | MP2K2_HUMAN |                                | 0 | GTCGAAGTTCCA | 0.572 |             |
| + | 6  | 2302      | .l.2_Missense_Mut | NM_020209                      | NP_064594    | Q96IW2 | SHD_HUMAN   | SH2.                           | 0 | CAGGAGCAGCC  | 0.662 |             |
| - | 1  | 38        |                   | NM_001080523                   | NP_001073992 | A6NEK1 | ARRD5_HUMAN |                                | 0 | TGGGGGGTTGG  | 0.527 |             |
| - | 11 | 1492      | ow.2_Missense_Mi  | NM_002850                      | NP_002841    | Q13332 | PTPRS_HUMAN | III 1. Extracellular (Potentia | 4 | TGTGCGGGTGA  | 0.697 |             |



|   |    |         |                   |              |              |        |                                           |    |               |       |
|---|----|---------|-------------------|--------------|--------------|--------|-------------------------------------------|----|---------------|-------|
| + | 2  | 294     | ie_Mutation_p.R57 | NM_020533    | NP_065394    | Q9GZU1 | MCLN1_HUMAN                               | 1  | AGTTTCGAGCC/  | 0.617 |
| - | 3  | 17776   |                   | NM_024690    | NP_078966    | Q8WXI7 | MUC16_HUMAN xtracellular (Potential).     | 57 | CCATTTCTGTGG/ | 0.493 |
| + | 1  | 217     |                   | NM_001079935 | NP_001073404 | Q6IFN5 | O7E24_HUMAN Name=2; (Potential).          | 1  | CCCACCTCCAC/  | 0.572 |
| + | 4  | 1348    | e_Mutation_p.H42  | NM_144566    | NP_653167    | Q9H0M5 | ZN700_HUMAN C2H2-type 7.                  | 0  | CGATATCATGAAA | 0.443 |
| - | 5  | 684     |                   | NM_001080404 | NP_001073873 | C9JN71 | ZN878_HUMAN C2H2-type 3.                  | 0  | GGAAAACCTGAA  | 0.403 |
| + | 4  | 1515    | ym.1_Missense_M   | NM_001136501 | NP_001129973 | Q08AG5 | ZN844_HUMAN                               | 0  | CTTCAGATCTG/  | 0.423 |
| - | 4  | 1577    | 709_uc002mtx.3_l  | NM_144976    | NP_659413    | Q8TBZ8 | ZN564_HUMAN C2H2-type 13.                 | 1  | AAGGCTTTACCA/ | 0.388 |
| - | 6  | 1110    | nwl.3_Missense_l  | NM_017722    | NP_060192    | Q9NXH9 | TRM1_HUMAN                                | 2  | CGTGGCAGGCC/  | 0.642 |
| - | 9  | 1482    | mwy.3_Missense_   | NM_001127221 | NP_001120693 | O00555 | CAC1A_HUMAN lasmic (Potential).           | 2  | AAAGGGATGCC   | 0.567 |
| - | 10 | 1716    | BP1_uc002nft.1_F  | NM_031941    | NP_114147    | Q8N6Y0 | USBP1_HUMAN                               | 1  | TGCCCGTTCC/   | 0.687 |
| - | 17 | 3293    | O8_uc010eap.2_F   | NM_020959    | NP_066010    | Q9HCE9 | ANO8_HUMAN xellular (Potential).          | 3  | TGGGCGGTGAG   | 0.682 |
| - | 10 | 1171    | 46_splice COMP_l  | NM_000095    | NP_000086    | P49747 | COMP_HUMAN                                | 0  | GCTCACGGTCC/  | 0.687 |
| - | 1  | 381_382 | 5'Flank NDUFA13_  | NM_032037    | NP_114426    | Q9BXA6 | TSSK6_HUMAN rotein kinase.                | 1  | GTCCGGGGGCC/  | 0.614 |
| - | 4  | 827     | pc.1_Missense_M   | NM_001076675 | NP_001070143 | Q68DY1 | ZN626_HUMAN                               | 1  | GTTCCTCTCCA/  | 0.393 |
| - | 18 | 2674    | ee.1_Missense_M   | NM_000704    | NP_000695    | P20648 | ATP4A_HUMAN enal (Potential).             | 1  | ATTGCCGTGAAG  | 0.453 |
| - | 2  | 789     | _Missense_Mutati  | NM_152658    | NP_689871    | Q8NA92 | THAP8_HUMAN THAP-type.                    | 0  | GGAGGGCACTG   | 0.657 |
| - | 5  | 2544    | 5B_uc002ofr.1_Mi  | NM_152279    | NP_689492    | Q52M93 | Z585B_HUMAN C2H2-type 21.                 | 1  | CTGATGAACAC   | 0.458 |
| + | 8  | 2763    |                   | NM_015073    | NP_055888    | O60292 | SI1L3_HUMAN Rap-GAP.                      | 2  | TTGTCCGAGTCC/ | 0.592 |
| - | 1  | 230     |                   | NM_001080468 | NP_001073937 | Q0VAF6 | SYCN_HUMAN                                | 0  | TGGCCCACTTG/  | 0.662 |
| + | 4  | 612     | ie_Mutation_p.P1E | NM_017592    | NP_060062    | Q9NX70 | MED29_HUMAN                               | 2  | CTGTGCCAAGG/  | 0.632 |
| - | 6  | 2022    | ense_Mutation_p.( | NM_001010880 | NP_001010880 | O75290 | Z780A_HUMAN C2H2-type 16.                 | 0  | AATAAGTTGCAT/ | 0.403 |
| + | 27 | 5805    | p.G1907S SPTBN    | NM_020971    | NP_066022    | Q9H254 | SPTN4_HUMAN Spectrin 16.                  | 5  | TATGCCGGTGAA  | 0.687 |
| + | 7  | 1112    | YP2B6_uc010xvu.   | NM_000767    | NP_000758    | P20813 | CP2B6_HUMAN                               | 2  | GTGCCCAACATT/ | 0.542 |
| + | 7  | 1055    | YP2S1_uc010xvx.   | NM_030622    | NP_085125    | Q96SQ9 | CP2S1_HUMAN                               | 1  | TGAATCGGGAG   | 0.657 |
| + | 4  | 879     |                   | NM_002483    | NP_002474    | P40199 | CEAM6_HUMAN like C2-type 2.               | 1  | TTTCCCCCTCA/  | 0.527 |
| - | 12 | 1509    | H4_uc002pgb.1_l   | NM_015168    | NP_055983    | Q9UPT8 | ZC3H4_HUMAN                               | 6  | ATCCTCGGCAC/  | 0.617 |
| - | 18 | 1766    | b.1_RNA LIG1_uc   | NM_000234    | NP_000225    | P18858 | DNL11_HUMAN                               | 3  | TGCCCCGGGTG   | 0.557 |
| - | 3  | 792     |                   | NM_017708    | NP_060178    | Q2M2I3 | FA83E_HUMAN                               | 1  | GCCGTCCAGCA/  | 0.657 |
| - | 11 | 1337    | t.1_RNA FUZ_uc0   | NM_025129    | NP_079405    | Q9BT04 | FUZZY_HUMAN Leu-rich.                     | 0  | CATGCAGAGTG   | 0.592 |
| + | 4  | 1385    | dw.1_Missense_M   | NM_138374    | NP_612383    | Q96IR2 | ZN845_HUMAN C2H2-type 8.                  | 0  | TCAGATGTCA/   | 0.408 |
| + | 7  | 1196    | _p.P286S LILRB1_  | NM_006669    | NP_006660    | Q8NHL6 | LIRB1_HUMAN 3. Extracellular (Potential). | 3  | TGGGCCCTGTG/  | 0.632 |
| + | 3  | 684     | _p.Q21E LILRB4_   | NM_006847    | NP_006838    | Q8NHJ6 | LIRB4_HUMAN 1. Extracellular (Potential). | 3  | GGTCACAGCCC   | 0.607 |
| - | 9  | 1214    | _p.P326S PPP1R1   | NM_017607    | NP_060077    | Q9BZL4 | PP12C_HUMAN                               | 2  | CGGCGGGGAGG   | 0.612 |
| + | 5  | 431     | _p.S89L ZNF583_   | NM_001159860 | NP_001153332 | Q96ND8 | ZN583_HUMAN                               | 1  | AATTTTCATCAA/ | 0.313 |
| + | 8  | 1226    | _p.G224D ZNF274   | NM_133502    | NP_598009    | Q96GC6 | ZN274_HUMAN                               | 1  | CGAGGGCACCA   | 0.632 |
| - | 27 | 3894    |                   | NM_004850    | NP_004841    | O75116 | ROCK2_HUMAN                               | 4  | ACCTGGAAACCC/ | 0.418 |
| + | 4  | 388     | p.G124D KRTCAP    | NM_173853    | NP_776252    | Q53RY4 | KCP3_HUMAN                                | 0  | CAACGGTGGCC   | 0.617 |
| + | 1  | 754     |                   | NM_005413    | NP_005404    | O95343 | SIX3_HUMAN                                | 0  | GCGGCCGCCCA   | 0.637 |
| + | 7  | 1353    |                   | NM_001430    | NP_001421    | Q99814 | EPAS1_HUMAN PAS 2.                        | 2  | AGAACATGACC/  | 0.413 |
| + | 5  | 431     |                   | NM_032118    | NP_115494    | Q9H977 | WDR54_HUMAN WD 1.                         | 0  | TGCCCGGGGAA   | 0.577 |
| + | 17 | 2173    | _uc002suk.2_Splik | NM_144707    | NP_653308    | Q8N271 | PROM2_HUMAN                               | 1  | TTGTGGTCAGT/  | 0.582 |
| + | 4  | 716     | RAP_uc010fiz.2_l  | NM_003853    | NP_003844    | O95256 | I18RA_HUMAN xellular (Potential).         | 5  | AGTAACGACCTA/ | 0.438 |
| - | 10 | 891     | .R270C UXS1_uc    | NM_025076    | NP_079352    | Q8NBZ7 | UXS1_HUMAN enal (Potential).              | 2  | CATGCGTGGCC/  | 0.607 |
| + | 3  | 571     | n_p.S14N INSIG2_  | NM_016133    | NP_057217    | Q9Y5U4 | INSI2_HUMAN                               | 2  | TGCCAGTGCTG/  | 0.393 |
| + | 21 | 1957    | _p.E611* EPB41L5  | NM_020909    | NP_065960    | Q9HCM4 | E41L5_HUMAN                               | 1  | CCAAAGAGTCT/  | 0.388 |
| + | 13 | 4402    | t.3_Nonsense_Mut  | NM_005270    | NP_005261    | P10070 | GLI2_HUMAN                                | 13 | AGGATGGAGGC   | 0.672 |
| - | 8  | 1279    | _uc002uds.1_Mis   | NM_002977    | NP_002968    | Q15858 | SCN9A_HUMAN l.                            | 13 | AAAGGAGAGCA   | 0.328 |

|   |    |       |                    |              |              |        |             |                                |      |              |       |             |
|---|----|-------|--------------------|--------------|--------------|--------|-------------|--------------------------------|------|--------------|-------|-------------|
| + | 8  | 1017  | se_Mutation_p.T32  | NM_002610    | NP_002601    | Q15118 | PDK1_HUMAN  | stidine kinase.                | 4    | ATGTACGCTGG  | 0.358 |             |
| + | 2  | 858   |                    | NM_002148    | NP_002139    | P28358 | HXD10_HUMAN |                                | 1    | CACTGCAAAGA  | 0.398 |             |
| - | 80 | 20445 | v_uc010zjf.1_Intro | NM_133378    | NP_596869    | Q8WZ42 | TITIN_HUMAN |                                | 153  | .GGAAGGAGGCA | 0.488 |             |
| - | 46 | 11869 | .P3815L TTN_uc0    | NM_133437    | NP_597681    | Q8WZ42 | TITIN_HUMAN |                                | 153  | CTCTGTGGAAA  | 0.478 |             |
| - | 39 | 9510  | .E3050K TTN_uc0    | NM_133378    | NP_596869    | Q8WZ42 | TITIN_HUMAN |                                | 153  | ACAGTTCCTGGT | 0.418 |             |
| - | 13 | 1585  | frt.2_Missense_Mt  | NM_005795    | NP_005786    | Q16602 | CALRL_HUMAN | Name=6; (Potential).           | 4    | CAATGCCAAGC  | 0.443 |             |
| + | 8  | 907   | sr.2_Missense_Mi   | NM_001130158 | NP_001123630 | O43795 | MYO1B_HUMAN | osin head-like.                | 8    | CTGAAGAGCTC  | 0.303 |             |
| - | 18 | 2403  |                    | NM_018897    | NP_061720    | Q8WXX0 | DYH7_HUMAN  | n (By similarity).             | 12   | AAGACGAAGATA | 0.403 |             |
| + | 29 | 3653  | .R1180Q CPS1_u     | NM_001875    | NP_001866    | P31327 | CPSM_HUMAN  | ATP-grasp 2.                   | 13   | GGCCCCGAGAAG | 0.423 |             |
| + | 13 | 1504  | .p.P169L VIL1_uc   | NM_007127    | NP_009058    | P09327 | VIL1_HUMAN  | Core.                          | 1    | GGTCCCAATGG  | 0.542 |             |
| + | 6  | 1220  | vt.2_Missense_Mt   | NM_001037131 | NP_001032208 | Q9UPQ3 | AGAP1_HUMAN | all GTPase-like.               | 3    | FACTACGAGACG | 0.537 |             |
| - | 11 | 1563  | CA1_uc002vwa.1_    | NM_024726    | NP_079002    | Q86XH1 | IQCA1_HUMAN | Lys-rich.                      | 1    | TGGGCGCTCCC  | 0.473 |             |
| - | 11 | 1952  | se_Mutation_p.L38  | NM_006037    | NP_006028    | P56524 | HDAC4_HUMAN |                                | 6    | GGAAAAGGGAG  | 0.667 |             |
| + | 18 | 2084  |                    | NM_001001891 | NP_001001891 | Q6IWH7 | ANO7_HUMAN  | cellular (Potential).          | 3    | AGGTCCTCATC  | 0.652 |             |
| - | 6  | 541   | D1_uc002wmd.3_     | NM_019593    | NP_062539    | Q9NPB8 | GPCP1_HUMAN | CBM20.                         | 0    | CTCCATCGTCAA | 0.313 |             |
| + | 5  | 1194  | rn_p.S63* CSRPE    | NM_020536    | NP_065397    | Q9H8E8 | CSR2B_HUMAN |                                | 6    | CCGTTCCAGGTG | 0.478 |             |
| - | 1  | 171   |                    | NM_001899    | NP_001890    | P01036 | CYTS_HUMAN  |                                | 1    | ATTGAGGTCTG  | 0.572 |             |
| + | 15 | 1673  | .p.P453L ITCH_uc   | NM_031483    | NP_113671    | Q96J02 | ITCH_HUMAN  | VW 4.                          | 6    | GAATTCATATTT | 0.348 |             |
| + | 35 | 7689  | ve.1_Missense_Mt   | NM_007186    | NP_009117    | Q9BV73 | CP250_HUMAN | Potential.                     | 5    | GGAGAGGACAG  | 0.483 | rs144859303 |
| + | 18 | 2123  | we.1_Missense_M    | NM_182811    | NP_877963    | P19174 | PLCG1_HUMAN | SH2 2.                         | 8    | TCAGGTGGTACC | 0.652 |             |
| - | 7  | 1265  | lgj.2_Missense_Mt  | NM_007050    | NP_008981    | O14522 | PTPRT_HUMAN | tential). Fibronectin type-III | 20   | GAGGAGCACTC  | 0.577 |             |
| + | 1  | 148   | IC9_uc002xoy.2_II  | NM_080753    | NP_542791    | Q9H1F0 | WF10A_HUMAN |                                | 0    | CAAGAAGAGGA  | 0.587 |             |
| - | 2  | 2409  | us.1_Nonsense_M    | NM_004975    | NP_004966    | Q14721 | KCNB1_HUMAN | lasmic (Potential).            | 2    | CGCCTCAAAGT  | 0.572 |             |
| + | 4  | 987   | I_Missense_Mutat   | NM_032527    | NP_115916    | Q8N5A5 | ZGPAT_HUMAN |                                | 0    | ACTGCGCACAG  | 0.637 |             |
| - | 18 | 1404  | TE_uc002yir.1_Mi   | NM_199261    | NP_954870    | P56180 | TPTE_HUMAN  | hatase tensin-type.            | 5    | TAGTTCCTGTTC | 0.323 |             |
| - | 1  | 238   |                    | NM_001085455 | NP_001078924 | Q3LI83 | KR241_HUMAN |                                | 0    | ATTTGCGAGTT  | 0.532 |             |
| - | 15 | 1919  | nd.2_Missense_Mi   | NM_000819    | NP_000810    | P22102 | PUR2_HUMAN  | AIRS.                          | 1    | GATCTCGTCCC  | 0.488 |             |
| + | 4  | 455   | aeb.1_Missense_N   | NM_005128    | NP_005119    | Q9Y3R5 | DOP2_HUMAN  |                                | 2    | TGCTGCTCACC  | 0.612 |             |
| + | 6  | 694   | zed.3_Missense_N   | NM_004649    | NP_004640    | P30042 | ES1_HUMAN   |                                | 1    | TGGCAAAGTGGC | 0.627 |             |
| + | 1  | 157   | .1_Intron C21orf29 | NM_198692    | NP_941965    | P60412 | KR10B_HUMAN | AA repeats of C-C-X(3).        | 1    | GCTGCGCCCCG  | 0.697 |             |
| + | 1  | 220   | .1_Intron C21orf29 | NM_198697    | NP_941970    | P60328 | KR123_HUMAN | AA approximate repeats.        | 1    | TGCCCGTGAGC  | 0.647 |             |
| - | 5  | 655   | .p.R204L FTCD_u    | NM_006657    | NP_006648    | O95954 | FTCD_HUMAN  | ise C-subdomain (By simila     | 2    | GCTCCCGCAGG  | 0.657 | rs144080295 |
| + | 22 | 4462  | .2_Missense_Mut    | NM_006031    | NP_006022    | O95613 | PCNT_HUMAN  | Potential.                     | 8    | TCGCGGGTGTG  | 0.557 |             |
| - | 2  | 330   | 70_uc002zxs.2_5f   | NM_013378    | NP_037510    | Q9UKI3 | VPRE3_HUMAN | Ig-like.                       | 0    | ATCGGGGATGT  | 0.602 |             |
| + | 14 | 2389  |                    | NM_019601    | NP_062547    | Q9UGT4 | SUSD2_HUMAN | cellular (Potential).          | 1    | AGGACGCAGCT  | 0.657 |             |
| + | 7  | 687   | VF185_uc003akc.2   | NM_152267    | NP_689480    | Q96GF1 | RN185_HUMAN |                                | 0    | CTGTCCCTGGG  | 0.517 | rs61743577  |
| + | 2  | 1072  | pxy.2_Missense_Mi  | NM_002409    | NP_002400    | Q09327 | MGAT3_HUMAN | renal (Potential).             | 0    | CTTCCCGCCCG  | 0.672 |             |
| + | 16 | 1986  | iot.1_Missense_Mi  | NM_015705    | NP_056520    | Q96HU1 | SGSM3_HUMAN | RUN.                           | 2    | TTATATCGAGAG | 0.637 |             |
| + | 24 | 4398  |                    | NM_001429    | NP_001420    | Q09472 | EP300_HUMAN |                                | 64   | TGGAAGTAAAA  | 0.428 |             |
| - | 1  | 771   | .p.R213W TCF20_t   | NM_005650    | NP_005641    | Q9UGU0 | TCF20_HUMAN | Ser-rich.                      | 5    | GGCCGCTGCA   | 0.498 |             |
| - | 16 | 4134  | ICP6_uc010har.1_   | NM_020461    | NP_065194    | Q96RT7 | GCP6_HUMAN  | 'AA tandem repeats.            | 4    | CCGGGTGGGAC  | 0.622 | rs145066767 |
| - | 25 | 4218  | .p.T163M PLXNB2    | NM_012401    | NP_036533    | O15031 | PLXB2_HUMAN | lasmic (Potential).            | 6    | AGAGCGTGTGC  | 0.527 |             |
| + | 14 | 1293  | ls.3_RNA NCAPH     | NM_152299    | NP_689512    | Q6IBW4 | CNDH2_HUMAN |                                | 2    | TGAGGTCCTGTG | 0.607 |             |
| - | 20 | 3128  | brg.1_Missense_N   | NM_014850    | NP_055665    | O43295 | SRGP2_HUMAN |                                | 9    | GCCTCGCTGT   | 0.572 |             |
| - | 17 | 2493  | ense_Mutation_p.\  | NM_003615    | NP_003606    | Q9Y6M7 | S4A7_HUMAN  | cellular (Potential).          | 5    | GAATACACCAC  | 0.338 |             |
| + | 4  | 289   | J03ckr.2_Missense  | NM_001904    | NP_001895    | P35222 | CTNB1_HUMAN | 7del(1) p.S45_S47>C(1) p.      | 3166 | CTCCTTCTCTG  | 0.502 | rs121913407 |
| + | 3  | 780   | e_Mutation_p.G20   | NM_001296    | NP_001287    | O00590 | CCBP2_HUMAN | cellular (Potential).          | 5    | TCGGCGGGCAT  | 0.532 |             |

|   |    |       |                    |              |              |        |              |                            |    |               |       |             |
|---|----|-------|--------------------|--------------|--------------|--------|--------------|----------------------------|----|---------------|-------|-------------|
| - | 3  | 437   | on.2_Missense_M    | NM_022842    | NP_073753    | Q9H5V8 | CDCP1_HUMAN  | cellular (Potential).      | 3  | GGCCTGACATA   | 0.488 |             |
| - | 19 | 2704  | icqy.2_Missense_M  | NM_001134878 | NP_001128350 | Q9HAQ2 | KIF9_HUMAN   |                            | 1  | GCACCCATGAG   | 0.592 |             |
| - | 2  | 310   | am.1_Missense_M    | NM_000581    | NP_000572    | P07203 | GPX1_HUMAN   |                            | 1  | TGCACGGGAAG   | 0.617 |             |
| + | 6  | 10564 |                    | NM_003458    | NP_003449    | Q9UPA5 | BSN_HUMAN    |                            | 8  | AGCCCTCATCC   | 0.652 |             |
| - | 2  | 158   | n_p.T50I CDHR4_    | NM_001007540 | NP_001007541 | A6H8M9 | CDHR4_HUMAN  | cellular (Potential).      | 0  | TGGGTGTGGGC   | 0.572 |             |
| + | 15 | 1284  |                    | NM_004947    | NP_004938    | Q8IZD9 | DOCK3_HUMAN  | DHR-1.                     | 0  | ATATCCGCAAT   | 0.463 |             |
| + | 1  | 2544  |                    | NM_013286    | NP_037418    | Q8NDT2 | RB15B_HUMAN  | stein-Barr virus BMLF1. SP | 0  | GCCCGGTCTGC   | 0.637 |             |
| + | 17 | 2860  | .3_Missense_Mut    | NM_007184    | NP_009115    | Q9Y2I1 | NISCH_HUMAN  |                            | 4  | CCAACCGTGGC   | 0.647 |             |
| - | 14 | 2750  | RC2_uc003dht.1_    | NM_015576    | NP_056391    | O15083 | ERC2_HUMAN   | Potential.                 | 2  | TTTTTCGGCCAC  | 0.537 |             |
| + | 6  | 1056  |                    | NM_022072    | NP_071355    | Q9H649 | NSUN3_HUMAN  |                            | 1  | GGCTCTTAGTG   | 0.458 |             |
| + | 10 | 1013  | _p.C60F ZPLD1_     | NM_175056    | NP_778226    | Q8TCW7 | ZPLD1_HUMAN  | acellular (Potential).     | 5  | CTATTGTGGAG   | 0.363 |             |
| - | 7  | 1150  | _Mutation_p.N32    | NM_170780    | NP_740750    | Q8TD46 | MO2R1_HUMAN  | asmic (Potential).         | 3  | ACCTTGTTTGTA  | 0.378 |             |
| + | 3  | 470   | PH_uc011bjb.1_     | NM_001125    | NP_001116    | P54922 | ADPRH_HUMAN  |                            | 1  | ACACAGTGATG   | 0.542 |             |
| - | 29 | 5197  | _Missense_Mutati   | NM_053025    | NP_444253    | Q15746 | MYLK_HUMAN   | rotein kinase.             | 9  | GTAGCCGATGG   | 0.562 | rs143900788 |
| + | 6  | 1557  |                    | NM_024768    | NP_079044    | Q9HA90 | CCD48_HUMAN  | Potential.                 | 0  | GTGGACGTGCT   | 0.627 |             |
| + | 2  | 201   | _Mutation_p.A411   | NM_152395    | NP_689608    | Q96DE0 | NUD16_HUMAN  | idix hydrolase.            | 0  | CTGCCCTTTC    | 0.677 |             |
| - | 7  | 1114  | wp.1_Missense_M    | NM_024727    | NP_079003    | Q6UY01 | LRC31_HUMAN  | LRR 5.                     | 3  | TGGCTGATAAAT  | 0.393 |             |
| + | 8  | 1553  | hwy.1_Missense_M   | NM_207015    | NP_996898    | Q58DX5 | NADL2_HUMAN  | cellular (Potential).      | 1  | AGACCGAACTA   | 0.408 |             |
| + | 14 | 1380  | o.R367Q FXR1_uc    | NM_005087    | NP_005078    | P51114 | FXR1_HUMAN   | binding RGG-box.           | 1  | GGGTCGAGGTC   | 0.488 |             |
| + | 3  | 809   | B5_uc003fmq.2_5    | NM_003907    | NP_003898    | Q13144 | EI2BE_HUMAN  |                            | 5  | ACTTCTTCTGC   | 0.463 |             |
| - | 3  | 3308  | tron ABCA11P_uc    | NM_133474    | NP_597731    | D9N162 | D9N162_HUMAN |                            | 1  | AAAGGTTTTGCC  | 0.418 |             |
| + | 4  | 1357  | 417S TACC3_uc      | NM_006342    | NP_006333    | Q9Y6A5 | TACC3_HUMAN  |                            | 2  | TCATCCCGTTCC  | 0.622 |             |
| + | 2  | 1093  | PZ_uc003gll.2_R    | NM_080819    | NP_543009    | Q96P69 | GPR78_HUMAN  | asmic (Potential).         | 6  | TGTGCGGCAGC   | 0.637 |             |
| - | 10 | 4958  | dr.1_Missense_Mu   | NM_148894    | NP_683692    | Q8NFC6 | BOD1L_HUMAN  |                            | 6  | CACTTCCCT     | 0.488 |             |
| - | 3  | 654   |                    | NR_027277    |              |        |              |                            | 0  | CTTGAGGTGT    | 0.597 |             |
| - | 6  | 1433  | _p.R457Q UGT2A     | NM_006798    | NP_006789    | Q9Y4X1 | UD2A1_HUMAN  | cellular (Potential).      | 1  | CTGCTCGATCC   | 0.448 |             |
| - | 12 | 2203  |                    | NM_003619    | NP_003610    | P56730 | NETR_HUMAN   | eptidase S1.               | 1  | CGGGTCGATAC   | 0.463 |             |
| + | 5  | 6445  | p.1_Missense_Mut   | NM_024582    | NP_078858    | Q6V0I7 | FAT4_HUMAN   | Extracellular (Potential). | 18 | ATCAATGATAACA | 0.378 |             |
| + | 13 | 2668  | _p.G776D PLK4_uc   | NM_014264    | NP_055079    | O00444 | PLK4_HUMAN   |                            | 0  | ACCTGGTAGTA   | 0.353 |             |
| - | 10 | 2044  |                    | NM_015130    | NP_055945    | Q6ZT07 | TBCD9_HUMAN  | ab-GAP TBC.                | 1  | GAAAAGCATAAC  | 0.398 |             |
| + | 5  | 1666  | ie_Mutation_p.T37  | NM_032557    | NP_115946    | Q8NB14 | UBP38_HUMAN  |                            | 5  | CAATTAACAGAAT | 0.333 |             |
| - | 25 | 6607  |                    | NM_017639    | NP_060109    | Q6V1P9 | PCD23_HUMAN  | Cadherin 19.               | 4  | ATTGACATCAAC  | 0.488 | rs141059888 |
| + | 13 | 2782  |                    | NM_020840    | NP_065891    | Q9P278 | FNIP2_HUMAN  | tion with PRKAA1.          | 0  | TGGCTGGTGCC   | 0.592 |             |
| + | 24 | 5570  |                    | NM_001080477 | NP_001073946 | Q9P273 | TEN3_HUMAN   | cellular (Potential).      | 0  | ATGACGGACAGC  | 0.478 |             |
| - | 6  | 4183  |                    | NM_005245    | NP_005236    | Q14517 | FAT1_HUMAN   | (Potential) Cadherin 11.   | 12 | GAGGGCGACCA   | 0.428 |             |
| + | 3  | 624   | _p.V127I ZFP42_    | NM_174900    | NP_777560    | Q96MM3 | ZFP42_HUMAN  | p.V127fs*0(1)              | 2  | AAGGGGTAAG    | 0.418 |             |
| - | 11 | 2003  | m.2_Missense_Mut   | NM_001343    | NP_001334    | P98082 | DAB2_HUMAN   |                            | 3  | CAGGAGCACTT   | 0.517 |             |
| - | 3  | 297   | jnt.2_RNA CCL28_   | NM_148672    | NP_683513    | Q9NRJ3 | CCL28_HUMAN  |                            | 2  | TGTGCGGGCTG   | 0.403 |             |
| + | 5  | 1553  |                    | NM_005921    | NP_005912    | Q13233 | M3K1_HUMAN   | SWIM-type.                 | 2  | TGCACGTGGAA   | 0.348 |             |
| + | 10 | 3318  |                    | NM_152405    | NP_689618    | Q8N9B5 | JMY_HUMAN    | WH2.                       | 0  | AGGGGTAAGT    | 0.408 |             |
| + | 2  | 2755  |                    | NM_153610    | NP_705838    | Q8N3K9 | CMYA5_HUMAN  |                            | 9  | TACACCCCTT    | 0.468 |             |
| + | 31 | 6929  | _Mutation_p.D12I   | NM_032119    | NP_115495    | Q8WXG9 | GPR98_HUMAN  | cellular (Potential).      | 16 | TAAATGACAGC   | 0.488 |             |
| + | 5  | 1573  | _uc003kmr.2_RNA    | NM_022350    | NP_071745    | Q6P179 | ERAP2_HUMAN  | renal (Potential).         | 0  | CTATGCATCCCC  | 0.423 |             |
| + | 12 | 1893  | o.R571H DMXL1_     | NM_005509    | NP_005500    | Q9Y485 | DMXL1_HUMAN  |                            | 2  | TACCCGTTCCA   | 0.358 | rs138186062 |
| - | 40 | 5639  |                    | NM_001999    | NP_001990    | P35556 | FBN2_HUMAN   |                            | 15 | TACCTACCCATGC | 0.458 |             |
| + | 11 | 1812  | yo.1_Missense_Mu   | NM_005733    | NP_005724    | O95235 | KI20A_HUMAN  | inesin-motor.              | 0  | GGCCGCTGTA    | 0.512 |             |
| + | 1  | 815   | J3lhh.1_Intron PCI | NM_018909    | NP_061732    | Q9UN73 | PCDA6_HUMAN  | Extracellular (Potential). | 2  | TTATCAGACTGA  | 0.408 |             |

|   |    |      |                    |              |              |        |             |                                        |       |               |       |             |
|---|----|------|--------------------|--------------|--------------|--------|-------------|----------------------------------------|-------|---------------|-------|-------------|
| + | 1  | 806  | CDHA5_uc003lhk.    | NM_018911    | NP_061734    | Q9Y5H6 | PCDA8_HUMAN | Extracellular (Potential).             | 2     | TGATCCGGATG/  | 0.378 | rs525886    |
| + | 1  | 266  | i.2_intron PCDHA6  | NM_018903    | NP_061726    | Q9UN75 | PCDAC_HUMAN | Extracellular (Potential).             | 0     | TGGGCCGCATC/  | 0.652 |             |
| + | 1  | 1600 | ika.1_intron PCDF  | NM_018914    | NP_061737    | Q9Y5H2 | PCDGB_HUMAN | Extracellular (Potential). Cadherin 4. | 0     | ACAACGATAAC/  | 0.537 |             |
| - | 22 | 3569 | jhd.2_Missense_M   | NM_002609    | NP_002600    | P09619 | PGFRB_HUMAN | Transmembrane (Potential).             | 17    | CTCGTCAGCAA   | 0.537 |             |
| - | 16 | 2339 | NIP1_uc003ltg.2_f  | NM_006058    | NP_006049    | Q15025 | TNIP1_HUMAN | Pro-rich.                              | 2     | GAGTGGGGGCG   | 0.662 |             |
| + | 2  | 474  |                    | NM_000811    | NP_000802    | Q16445 | GBRA6_HUMAN | Extracellular (Probable).              | 12    | ACAATCGGCTGC  | 0.493 |             |
| + | 29 | 7954 | i.3_Missense_Mut   | NM_001122679 | NP_001116151 |        |             |                                        | 10    | ACGGCAGGACT   | 0.627 |             |
| - | 19 | 3097 |                    | NM_005990    | NP_005981    | O94804 | STK10_HUMAN | Potential.                             | 8     | CTCCCCTTCT    | 0.587 |             |
| - | 11 | 1208 | e.Mutation_p.R34   | NM_005451    | NP_005442    | Q9NR12 | PDLI7_HUMAN | zinc-binding 2.                        | 1     | GTTCCGGATGG/  | 0.617 | rs147300820 |
| - | 1  | 39   | ii.3_intron DOK3_u | NM_024872    | NP_079148    | Q7L591 | DOK3_HUMAN  |                                        | 0     | GGCACGCGCGT   | 0.711 |             |
| - | 5  | 947  | p.R217L RASGEF     | NM_175062    | NP_778232    | Q8N431 | RGF1C_HUMAN | Ras-GEF.                               | 1     | TGTGCCCGAGC   | 0.627 |             |
| + | 2  | 106  | 32* PRSS16_uc01    | NM_005865    | NP_005856    | Q9NQE7 | TSSP_HUMAN  |                                        | 5     | TGGGTGAGCAC   | 0.632 |             |
| - | 4  | 1073 | 3nb.2_Missense_f   | NM_001135216 | NP_001128688 | Q96LW9 | ZN323_HUMAN |                                        | 2     | TGCCTTGCTGT/  | 0.428 |             |
| - | 6  | 592  | 2X6_uc010jrg.1_R   | NM_182701    | NP_874360    | P59796 | GPX6_HUMAN  |                                        | 5     | AGTTCACGCGG   | 0.527 |             |
| - | 2  | 413  | qg.1_Nonsense_M    | NM_018643    | NP_061113    | Q9NP99 | TREM1_HUMAN | (Potential). Ig-like V-type.           | 1     | AGGCTGGTAGA   | 0.537 |             |
| - | 5  | 1303 | p.G86E TRERF1      | NM_033502    | NP_277037    | Q96PN7 | TREF1_HUMAN | Gln-rich.                              | 5     | GTCCTCCCTGC/  | 0.602 |             |
| + | 11 | 1334 |                    | NM_032538    | NP_115927    | Q5TCY1 | TTBK1_HUMAN |                                        | 9     | GTCCCGGGAGA   | 0.662 |             |
| + | 10 | 1678 | ous.2_Missense_M   | NM_153320    | NP_696961    | Q9Y694 | S22A7_HUMAN |                                        | 0     | AGGACGTGGAG   | 0.577 |             |
| - | 7  | 922  |                    | NM_020750    | NP_065801    | Q9HAV4 | XPO5_HUMAN  |                                        | 4     | GACACCCAGTC.  | 0.463 |             |
| + | 25 | 3710 | .2_intron RIMS1_u  | NM_014989    | NP_055804    | Q86UR5 | RIMS1_HUMAN |                                        | 10    | AAAACATCCTGC  | 0.517 |             |
| - | 33 | 5780 | pht.2_Missense_M   | NM_004370    | NP_004361    | Q99715 | COCA1_HUMAN | nectin type-III 14.                    | 9     | CTGACGAGGAT   | 0.448 |             |
| - | 4  | 535  | p.E129K PPIL6_u    | NM_173672    | NP_775943    | Q8IXY8 | PPIL6_HUMAN | with cyclophilin-type.                 | 0     | GACCTCAAAAA/  | 0.303 |             |
| - | 11 | 1329 | ash.1_Missense_M   | NM_001013836 | NP_001013858 | Q9Y6D9 | MD1L1_HUMAN | Potential.                             | 2     | GGTGACGGCGC   | 0.582 |             |
| - | 8  | 1449 |                    | NM_032415    | NP_115791    | Q9BXL7 | CAR11_HUMAN | Potential.                             | 50    | CTTGAGCTCCA/  | 0.542 |             |
| - | 3  | 985  | kw.1_Missense_M    | NM_005924    | NP_005915    | P50222 | MEOX2_HUMAN | Homeobox.                              | 2     | TTTGGAACCAAG. | 0.418 |             |
| + | 3  | 651  | kw.1_RNA INMT      | NM_006774    | NP_006765    | O95050 | INMT_HUMAN  |                                        | 0     | ATTTTCCTGCG1  | 0.597 |             |
| + | 8  | 1328 | e.Mutation_p.K272  | NM_198428    | NP_940820    | Q3SYG4 | PTHB1_HUMAN |                                        | 5     | CCTTAAGGATAA  | 0.373 |             |
| + | 15 | 2020 |                    | NM_133468    | NP_597725    | Q8N8U9 | BMPER_HUMAN | TIL.                                   | 3     | TGTACGATACCT  | 0.507 |             |
| - | 5  | 3605 | ID9L_uc003umk.1    | NM_152703    | NP_689916    | Q8IVG5 | SAM9L_HUMAN |                                        | 4     | CACAGGAATGT.  | 0.383 |             |
| + | 19 | 1812 | p.D532Y CCDC1      | NM_017667    | NP_060137    | Q96JG6 | CC132_HUMAN |                                        | 0     | CACAGTGATGTT/ | 0.378 |             |
| + | 59 | 9150 | V.2963M TRRAP_u    | NM_003496    | NP_003487    | Q9Y4A5 | TRRAP_HUMAN | FAT.                                   | 37    | CCATCGTGTCT/  | 0.418 |             |
| - | 11 | 1147 | 3A5_uc003urs.2_l   | NM_000765    | NP_000756    | P24462 | CP3A7_HUMAN |                                        | 1     | CAGTATCATAGG1 | 0.378 |             |
| + | 3  | 3880 | C17_uc010lho.1_f   | NM_001040105 | NP_001035194 | Q685J3 | MUC17_HUMAN | chain 19.159 X approximate t           | 27    | TGAAGGAAGTA/  | 0.502 |             |
| - | 12 | 1772 | llhs.2_Missense_M  | NM_001084    | NP_001075    | O60568 | PLOD3_HUMAN |                                        | 2     | AGCGGGCGTAG   | 0.701 |             |
| + | 13 | 1787 | izo.2_Missense_M   | NM_152892    | NP_690852    | Q9UFC0 | LRWD1_HUMAN |                                        | 1     | ATGGTCGTCCA/  | 0.726 |             |
| - | 14 | 1850 | z.2_Missense_M     | NM_005045    | NP_005036    | P78509 | RELN_HUMAN  |                                        | 19    | AGGGAGAACAG/  | 0.438 |             |
| + | 2  | 1878 | p.W598* PIK3CG     | NM_002649    | NP_002640    | P48736 | PK3CG_HUMAN |                                        | 38    | GAAATGGGGAC.  | 0.438 |             |
| + | 12 | 2792 | p.A887T MET_uc     | NM_000245    | NP_000236    | P08581 | MET_HUMAN   | Extracellular (Potential).             | 159   | CTGAAGCAGTT/  | 0.368 |             |
| - | 3  | 805  | ja.2_Missense_M    | NM_003391    | NP_003382    | P09544 | WNT2_HUMAN  | p.R169C(1)                             | 7     | TGCGCGGGCAA   | 0.438 | rs149362965 |
| - | 25 | 3561 | kg.3_Missense_M    | NM_017954    | NP_060424    | Q86UW7 | CAPS2_HUMAN |                                        | 2     | GCAACACTGAA.  | 0.348 |             |
| - | 16 | 2858 | nse.Mutation_p.R   | NM_015689    | NP_056504    | Q9ULE3 | DEN2A_HUMAN | dDENN.                                 | 4     | .GAAGCGGACAA. | 0.602 |             |
| - | 15 | 1860 |                    | NM_004333    | NP_004324    | P15056 | BRAF_HUMAN  | serine/threonine kinase_R603>I(2) p.T  | 18290 | ATTTCACTGTAC  | 0.368 |             |
| + | 5  | 705  | 1_intron uc010loj. | NR_001296    |              |        |             |                                        | 0     | GCAATGGACAG   | 0.493 | rs143538588 |
| + | 3  | 5449 | p.H411Y ABP1_u     | NM_001091    | NP_001082    | P19801 | ABP1_HUMAN  |                                        | 6     | CGGTCCATTATC  | 0.577 |             |
| - | 4  | 5590 |                    | NM_178857    | NP_849188    | Q8IWN7 | RP1L1_HUMAN |                                        | 8     | TCCCCCAACTC/  | 0.572 |             |
| - | 6  | 829  | nse.Mutation_p.E   | NM_001083537 | NP_001077006 | Q8N7N1 | F86B1_HUMAN |                                        | 0     | TAGCTCGGTGG   | 0.647 |             |
| + | 11 | 1110 | se.Mutation_p.H1   | NM_014265    | NP_055080    | Q9UKQ2 | ADA28_HUMAN | Extracellular (Potential).             | 5     | TGGGCCACAAC   | 0.433 |             |

|   |    |           |                    |              |              |        |              |                                |    |              |       |             |
|---|----|-----------|--------------------|--------------|--------------|--------|--------------|--------------------------------|----|--------------|-------|-------------|
| - | 6  | 1535      | M35_uc010lup.1_3'  | NM_171982    | NP_741983    | Q9UPQ4 | TRI35_HUMAN  | 330.2/SPRY.                    | 0  | :ACTGATGTGCA | 0.632 |             |
| + | 4  | 4548      | P1_uc011ldy.1_Intr | NM_006269    | NP_006260    | P56715 | RP1_HUMAN    |                                | 12 | FGGAATCTTTTG | 0.378 |             |
| + | 4  | 534       |                    | NM_001077619 | NP_001071087 | Q14CS0 | UBX2B_HUMAN  |                                | 2  | AAAATCAGCTG  | 0.289 |             |
| + | 11 | 1454      | var.2_Missense_Mi  | NM_004133    | NP_004124    | Q14541 | HNF4G_HUMAN  |                                | 1  | AAGCATCAGTCA | 0.413 |             |
| + | 10 | 9004      | i.P2918S ZFHx4_u   | NM_024721    | NP_078997    | Q86UP3 | ZFHx4_HUMAN  |                                | 15 | AGCAATCCCTTT | 0.493 |             |
| + | 15 | 2546      | p.G783R RIMS2_     | NM_014677    | NP_055492    | Q9UQ26 | RIMS2_HUMAN  |                                | 15 | ATGACCGGACAT | 0.388 | rs147193181 |
| + | 8  | 1215      | nse_Mutation_p.E   | NM_012082    | NP_036214    | Q8WW38 | FOG2_HUMAN   |                                | 5  | ACATGGAACAC  | 0.502 |             |
| - | 1  | 706       |                    | NM_001081675 | NP_001075144 | Q2WJ6  | KLH38_HUMAN  | BACK.                          | 0  | TGGGTGGATGT  | 0.547 |             |
| - | 1  | 445       | ndt.2_Missense_IV  | NM_004519    | NP_004510    | O43525 | KCNQ3_HUMAN  |                                | 5  | GTCGCGGCCGC  | 0.716 |             |
| - | 13 | 2881      | M135B_uc003yva     | NM_015912    | NP_056996    | Q49AJ0 | F135B_HUMAN  |                                | 9  | CTTTGGGGTTT  | 0.463 |             |
| - | 1  | 4272      |                    | NM_031308    | NP_112598    | P58107 | EPIPL_HUMAN  | Plectin 25.                    | 2  | CGCAGCGCTCC  | 0.607 |             |
| - | 9  | 1176      | PLAH_uc003zat.1    | NM_017570    | NP_060040    | O14841 | OPLA_HUMAN   |                                | 0  | AGAGGCCAGAC  | 0.647 |             |
| - | 21 | 3290      | uc011llh.1_5'Flank | NM_013432    | NP_038460    | Q96HA7 | TONSL_HUMAN  | LRR 1.                         | 0  | GGGCAGCCACC  | 0.682 |             |
| + | 2  | 245       | p.V30M GPT_uc0l    | NM_005309    | NP_005300    | P24298 | ALAT1_HUMAN  |                                | 2  | CGCGTGTGCGG  | 0.672 |             |
| - | 20 | 1927      | p.E396K PTPRD_     | NM_002839    | NP_002830    | P23468 | PTPRD_HUMAN  | III 1. Extracellular (Potentia | 22 | AGTTTCGCTGG  | 0.542 |             |
| + | 22 | 2685      | zoh.1_Missense_f   | NM_017794    | NP_060264    | Q5VW36 | K1797_HUMAN  |                                | 10 | GCTTTGGAGGA  | 0.378 |             |
| - | 1  | 1261      |                    | NR_023917    |              |        |              |                                | 0  | TACTCCCTTTTC | 0.398 |             |
| - | 14 | 1897      | r.1_RNA SEMA4D     | NM_006378    | NP_006369    | Q92854 | SEM4D_HUMAN  | tracellular (Potential).       | 2  | CTGTGCTGACA  | 0.507 |             |
| - | 14 | 2727      | e_Mutation_p.R67   | NM_017746    | NP_060216    | Q9NXF1 | TEX10_HUMAN  | ical; (Potential).             | 2  | GACTCGAGGCA  | 0.567 | rs146070264 |
| - | 3  | 391       | _NAC4_uc004bst.2   | NM_175039    | NP_778204    | Q9H4F1 | SIA7D_HUMAN  | renal (Potential).             | 0  | GTGGTCCAGGC  | 0.642 |             |
| + | 4  | 939       |                    | NM_006059    | NP_006050    | Q9Y6N6 | LAMC3_HUMAN  | inin EGF-like 1.               | 3  | AGTGGCGCCCC  | 0.667 |             |
| + | 36 | 3276_3277 |                    | NM_000093    | NP_000084    | P20908 | CO5A1_HUMAN  | le-helical region.             | 11 | GGGCCCCCTG   | 0.589 |             |
| + | 9  | 1388      | A1B_uc011mfd.1_    | NM_000718    | NP_000709    | Q00975 | CAC1B_HUMAN  | lasmic (Potential).            | 6  | TGGACGGTAGG  | 0.602 |             |
| + | 44 | 6227      | oi.2_Missense_M    | NM_000718    | NP_000709    | Q00975 | CAC1B_HUMAN  | lasmic (Potential).            | 6  | CCCAGCGGCC   | 0.697 |             |
| + | 5  | 951       | mij.1_Missense_IV  | NM_014728    | NP_055543    | Q14CM0 | FRPD4_HUMAN  | PDZ.                           | 13 | ATACTCCTCACT | 0.393 |             |
| + | 1  | 877       | _5'Flank MAGEB1    | NM_002367    | NP_002358    | O15481 | MAGB4_HUMAN  | MAGE.                          | 1  | GTGATCCCCCA  | 0.502 |             |
| + | 15 | 2563      | r22_uc010ngv.2_l   | NM_152632    | NP_689845    | Q6ZTR5 | CX022_HUMAN  |                                | 3  | ACCCAGTGGAC  | 0.393 |             |
| - | 2  | 362       | dgi.3_Missense_IV  | NM_176819    | NP_789789    | Q9H7Y0 | CX036_HUMAN  |                                | 1  | GATAAGAAAGC  | 0.483 |             |
| + | 3  | 589       | e_Mutation_p.E19   | NM_003173    | NP_003164    | O43463 | SUV91_HUMAN  | Pre-SET.                       | 0  | GCTGCGAGTGC  | 0.637 |             |
| + | 7  | 845       | ense_Mutation_p.   | NM_001032382 | NP_001027554 | O60828 | PQBP1_HUMAN  |                                | 1  | GTCACAGGAC   | 0.642 |             |
| + | 10 | 3968      | p.R120C CCNB3      | NM_033031    | NP_149020    | Q8WWL7 | CCNB3_HUMAN  |                                | 9  | CACCTCGTGTG  | 0.463 |             |
| - | 72 | 11618     | p.R2547Q HUWE1     | NM_031407    | NP_113584    | Q7Z6Z7 | HUWE1_HUMAN  |                                | 17 | TAGCCCGGCGC  | 0.537 |             |
| - | 1  | 51        | _RNA EDA2R_uc0     | NM_021783    | NP_068555    | Q9HAV5 | TNR27_HUMAN  | . Extracellular (Potential).   | 1  | ACACCGTCCCC  | 0.493 | rs144036451 |
| - | 2  | 801       | CC6L_uc004eap.1    | NM_017669    | NP_060139    | Q2NKX8 | ERC6L_HUMAN  | ase ATP-binding.               | 3  | GATGAGGTTTTT | 0.413 | rs140524285 |
| - | 2  | 341       |                    | NM_001012755 | NP_001012773 | Q5H9E4 | MCAR6_HUMAN  | Solcar 1.                      | 0  | TTGCCGGAACA  | 0.498 |             |
| + | 5  | 410       | P14_uc004esf.2_li  | NM_178813    | NP_848928    | Q86UN6 | AKA28_HUMAN  |                                | 0  | GTGTTTCTAAAA | 0.353 |             |
| - | 1  | 164       |                    | NM_001013628 | NP_001013650 | Q5VW00 | DC122_HUMAN  |                                | 7  | GCGTCGCCGGC  | 0.741 |             |
| + | 16 | 2536      |                    | NM_173493    | NP_775764    | Q8IV76 | PASD1_HUMAN  |                                | 3  | CGAGGGACCTC  | 0.532 |             |
| + | 20 | 3656      | nse_Mutation_p.P   | NM_001001344 | NP_001001344 | Q16720 | AT2B3_HUMAN  | ic (Potential). Poly-Pro.      | 1  | GCCCCGTCCC   | 0.602 |             |
| + | 10 | 1022      | Z_uc004fib.2_Miss  | NM_000116    | NP_000107    | Q16635 | TAZ_HUMAN    |                                | 0  | TGATCGGGGAG  | 0.637 |             |
| + | 4  | 1440      |                    | NM_017514    | NP_059984    | P51805 | PLXA3_HUMAN  | tracellular (Potential).       | 3  | CTACCGCCAG   | 0.657 |             |
| + | 17 | 2494      | p.E690K SCNN1C     | NM_002978    | NP_002969    |        |              |                                | 0  | CAGCCGAAGAG  | 0.672 |             |
| - | 2  | 824       |                    | NM_020710    | NP_065761    | Q8N1G4 | LRC47_HUMAN  |                                | 2  | CTTCCCGCCAC  | 0.433 |             |
| + | 5  | 986       | p.E245D DFFB_L     | NM_004402    | NP_004393    | O76075 | DFFB_HUMAN   |                                | 0  | CGGAAGGCTG   | 0.672 |             |
| + | 20 | 2657      | p.P816S PIK3CD_    | NM_005026    | NP_005017    | O00329 | PK3CD_HUMAN  | PI3K/PI4K.                     | 7  | GCCTCCCCACC  | 0.602 |             |
| - | 1  | 373       | lOobf.1_Missense_  | NM_001146181 | NP_001139653 | B7ZW38 | B7ZW38_HUMAN |                                | 0  | CGTTTCTCGG   | 0.483 |             |
| + | 4  | 436       | _Mutation_p.G119I  | NM_004070    | NP_004061    | P51800 | CLCKA_HUMAN  |                                | 1  | CTCTGGAGGTG  | 0.602 |             |



|   |    |         |                    |              |              |        |             |                                 |    |                |       |             |
|---|----|---------|--------------------|--------------|--------------|--------|-------------|---------------------------------|----|----------------|-------|-------------|
| - | 6  | 582     | lice_Site_p.G109   | NM_003760    | NP_003751    | O43432 | IF4G3_HUMAN |                                 | 1  | 3CGTTCCTAAAA   | 0.428 |             |
| + | 5  | 891     | b.2_Missense_Mt    | NM_032264    | NP_115640    | Q9H094 | NBPF3_HUMAN | Potential.                      | 2  | TTGAATCAGCATC  | 0.567 |             |
| - | 64 | 8502    | d.2_Missense_Mt    | NM_005529    | NP_005520    | P98160 | PGBM_HUMAN  | ike C2-type 13.                 | 9  | CACCGGGGACG    | 0.647 |             |
| + | 3  | 1229    | .R319H PDIK1L_u    | NM_152835    | NP_690048    | Q8N165 | PDK1L_HUMAN | rotein kinase.                  | 0  | GGATCGTCCAG    | 0.378 |             |
| + | 1  | 120     |                    | NM_006142    | NP_006133    | P31947 | 1433S_HUMAN |                                 | 0  | AGGCCGAACGC    | 0.602 |             |
| - | 2  | 666     |                    | NM_052943    | NP_443175    | Q96A09 | FA46B_HUMAN |                                 | 1  | GTGGCGTGATC    | 0.607 |             |
| + | 3  | 700     | 3TB8A_uc001bvm.    | NM_001040441 | NP_001035531 | Q96BR9 | ZBT8A_HUMAN | BTB.                            | 0  | TTTCTCCCCTG    | 0.423 |             |
| + | 3  | 488     |                    | NM_017629    | NP_060099    | Q9HCK5 | AGO4_HUMAN  |                                 | 1  | TTGGACGGGAT    | 0.343 |             |
| - | 3  | 402_403 | bw.3_Missense_M    | NM_001099439 | NP_001092909 | Q5JZY3 | EPHAA_HUMAN | ellular (Potential).            | 8  | TGAACTGCAGTT   | 0.614 |             |
| + | 23 | 2790    | _uc001cdc.1_5'U1   | NM_012090    | NP_036222    | Q9UPN3 | MACF1_HUMAN |                                 | 16 | ACGCAGTCCAG    | 0.483 |             |
| + | 1  | 311     |                    | NM_001008740 | NP_001008740 | Q7Z6W1 | TMCO2_HUMAN |                                 | 1  | GAAACGAAGTAT   | 0.323 |             |
| - | 8  | 960     | 1cim.2_Nonsense    | NM_006824    | NP_006815    | Q99848 | EBP2_HUMAN  |                                 | 0  | GCCTTTCTCTT    | 0.488 |             |
| + | 16 | 3255    | se_Mutation_p.RE   | NM_002840    | NP_002831    | P10586 | PTPRF_HUMAN | III 7. Extracellular (Potentia  | 10 | ACACCCGCTTTA   | 0.592 |             |
| + | 9  | 1138    |                    | NM_178134    | NP_835235    | Q86W10 | CP4Z1_HUMAN | enial (Potential).              | 1  | 3CACCGGTAGTA   | 0.473 |             |
| - | 3  | 1083    | se_Mutation_p.R1   | NM_003189    | NP_003180    | P17542 | TAL1_HUMAN  |                                 | 1  | 3GTCTCCTCTTC   | 0.577 |             |
| + | 42 | 5452    | ADL_uc0009wag.2_   | NM_176877    | NP_795352    | Q8NI35 | INADL_HUMAN |                                 | 4  | ACCACCTTGGT    | 0.443 |             |
| + | 7  | 1486    | ense_Mutation_p.f  | NM_005012    | NP_005003    | Q01973 | ROR1_HUMAN  | xtracellular (Potential).       | 19 | ACTGCCGCAAC    | 0.527 |             |
| - | 3  | 185     |                    | NM_000329    | NP_000320    | Q16518 | RPE65_HUMAN |                                 | 1  | 3ACATCGAAGG    | 0.522 | rs61751282  |
| - | 8  | 490     | te_p.174_splice SL | NM_152697    | NP_689910    | Q8NCS7 | CTL5_HUMAN  |                                 | 4  | 3CAGATCTGTGA   | 0.378 |             |
| + | 17 | 2779    | VPD2_uc010ovr.1    | NM_004037    | NP_004028    | Q01433 | AMPD2_HUMAN |                                 | 3  | 3TCACCGGAATC   | 0.612 |             |
| - | 2  | 767     | 3bv.1_Missense_M   | NM_004980    | NP_004971    | Q9UK17 | KCND3_HUMAN | lasmic (Potential).             | 3  | 3AGAAGTTGAGC   | 0.612 |             |
| - | 3  | 611     |                    | NM_205848    | NP_995320    | Q577P8 | SYT6_HUMAN  | lasmic (Potential).             | 5  | 3GATCGGCCAA    | 0.572 |             |
| + | 2  | 370     | _p.G114E CD2_ucf   | NM_001767    | NP_001758    | P06729 | CD2_HUMAN   | -3 (CD58) binding region 2.     | 1  | 3AAAAGGAAAAA   | 0.308 |             |
| - | 3  | 644_645 | VGCS2_uc001eie.    | NM_005518    | NP_005509    | P54868 | HMCS2_HUMAN |                                 | 2  | 3TAGACGGCAATC  | 0.475 |             |
| - | 34 | 7295    |                    | NM_024408    | NP_077719    | Q04721 | NOTC2_HUMAN | lasmic (Potential).             | 27 | 3CAAACGGGCCA   | 0.622 |             |
| - | 32 | 6161    |                    | NM_024408    | NP_077719    | Q04721 | NOTC2_HUMAN | nic (Potential). ANK 4.         | 27 | 3CATCCGCTTC    | 0.527 |             |
| + | 10 | 1256    |                    | NM_012113    | NP_036245    | Q9ULX7 | CAH14_HUMAN | lasmic (Potential).             | 1  | 3GATTCGGTGAG   | 0.323 | rs150286906 |
| + | 3  | 401     | 68S ECM1_uc001     | NM_004425    | NP_004416    | Q16610 | ECM1_HUMAN  |                                 | 3  | 3GCCCTCCCTTTC  | 0.572 |             |
| - | 3  | 1840    |                    | NM_001008536 | NP_001008536 | Q5QJ38 | TCHL1_HUMAN |                                 | 2  | 3GTATCTGGGTTA  | 0.537 |             |
| - | 3  | 528     |                    | NM_001122965 | NP_001116437 | Q6XPR3 | RPTN_HUMAN  | Gln-rich.                       | 0  | 3GGAATCTCTGT   | 0.517 |             |
| - | 4  | 1527    |                    | NM_006617    | NP_006608    | P48681 | NEST_HUMAN  | Tail.                           | 6  | 3CCAAGGAGGCA   | 0.627 |             |
| - | 36 | 4743    | _p.T651A ARHGEF    | NM_014784    | NP_055599    | O15085 | ARHGB_HUMAN |                                 | 9  | 3GGGTGTCAGGT   | 0.637 |             |
| - | 7  | 1468    | 3hw.1_Missense_M   | NM_031281    | NP_112571    | Q96RD9 | FCRL5_HUMAN | 3potential). Ig-like C2-type 4. | 6  | 3TCAGAGAGAAG   | 0.582 |             |
| - | 3  | 324     | 3L4_uc010phy.1_F   | NM_031282    | NP_112572    | Q96PJ5 | FCRL4_HUMAN | 3potential). Ig-like C2-type 1. | 4  | CTCCCCAGTAGT   | 0.517 |             |
| - | 6  | 1075    | se_Mutation_p.T3z  | NM_052938    | NP_443170    | Q96LA6 | FCRL1_HUMAN | ical; (Potential).              | 7  | CCACGGTGCGT    | 0.458 |             |
| + | 3  | 714     | 1C_uc001frv.2_5'L  | NM_001765    | NP_001756    | P29017 | CD1C_HUMAN  | ellular (Potential).            | 4  | TAGATTTACTGAC  | 0.478 |             |
| + | 5  | 890     | sz.1_Missense_Mi   | NM_001004310 | NP_001004310 | Q6DN72 | FCRL6_HUMAN | 3. Extracellular (Potential).   | 3  | 3TGCTCCAGAG    | 0.557 |             |
| - | 5  | 1615    | _p.P524S IGSF8_u   | NM_052868    | NP_443100    | Q969P0 | IGSF8_HUMAN | 4. Extracellular (Potential).   | 0  | TCGGGGCCCCA    | 0.672 |             |
| - | 7  | 963     | 3254* NR113_uc0C   | NM_001077480 | NP_001070948 | Q14994 | NR113_HUMAN |                                 | 2  | 3TTTTCGTAGTG   | 0.527 | rs144211465 |
| + | 4  | 673     | gbp.2_Missense_M   | NM_007240    | NP_009171    | Q9UNI6 | DUS12_HUMAN |                                 | 1  | 3CAAGTGATAGAA  | 0.318 |             |
| - | 12 | 2869    | u.1_Missense_Mu    | NM_003285    | NP_003276    | Q92752 | TENR_HUMAN  | 3nectin type-III 7.             | 11 | TGATTTTCGTATTC | 0.532 |             |
| - | 10 | 2617    | u.1_Missense_Mu    | NM_003285    | NP_003276    | Q92752 | TENR_HUMAN  | 3nectin type-III 6.             | 11 | 3GACAGCCACAA   | 0.552 |             |
| - | 8  | 1388    | vj.2_Splice_Site_J | NM_006469    | NP_006460    | Q9Y6Y0 | NS1BP_HUMAN |                                 | 5  | 3GTGTACCTGCA   | 0.403 |             |
| + | 7  | 1183    | _Mutation_p.P285   | NM_005807    | NP_005798    | Q92954 | PRG4_HUMAN  | K-X-P-X-P-T-T-X. 4; approx      | 1  | 3CACCCCCAAG    | 0.637 |             |
| + | 7  | 1369    | _Mutation_p.P347   | NM_005807    | NP_005798    | Q92954 | PRG4_HUMAN  | ats of K-X-P-X-P-T-T-X. 12      | 1  | 3CACCCCCAAG    | 0.652 |             |
| + | 17 | 2841    | 2_Missense_Muta    | NM_000573    | NP_000564    | P17927 | CR1_HUMAN   | ar (Potential). Sushi 14.       | 3  | CATGCGACCCC    | 0.512 |             |
| - | 9  | 1406    | 3CH2_uc009xdq.1    | NM_018040    | NP_060510    | Q9NW75 | GPCT2_HUMAN |                                 | 1  | 3TCCCGTGCA     | 0.383 | rs144624552 |

|   |    |           |                    |              |              |        |             |                               |    |                 |       |             |
|---|----|-----------|--------------------|--------------|--------------|--------|-------------|-------------------------------|----|-----------------|-------|-------------|
| + | 8  | 4116_4117 |                    | NM_032890    | NP_116279    | Q96F81 | DISP1_HUMAN |                               | 0  | 3TCGAGGGCTTT    | 0.564 |             |
| + | 91 | 20050     | sr.1_Missense_Mu   | NM_001098623 | NP_001092093 | Q5VST9 | OBSCN_HUMAN | otein kinase 1.               | 28 | 3TGACCGTGCCA    | 0.627 |             |
| + | 8  | 1174_1175 | G251K MTR_uc01     | NM_000254    | NP_000245    | Q99707 | METH_HUMAN  | Hcy-binding.                  | 3  | CTCATGGAGAAC    | 0.465 |             |
| + | 25 | 3044      | x.1_Missense_Mu    | NM_000254    | NP_000245    | Q99707 | METH_HUMAN  | B12-binding.                  | 3  | AGCTCCGAGAT     | 0.443 |             |
| + | 6  | 1175      | W3_uc001idp.1_lr   | NM_015431    | NP_056246    | Q8NG06 | TRI58_HUMAN | 330.2/SPRY.                   | 7  | GCCATCTCCTG,    | 0.567 |             |
| + | 6  | 1073      | i.1_Missense_Mul   | NM_030664    | NP_109589    | Q96BW5 | PTER_HUMAN  |                               | 2  | GGGCTGTGAAG     | 0.413 |             |
| - | 4  | 1575      |                    | NM_001034842 | NP_001030014 | Q3KNS1 | PTHD3_HUMAN | Helical; (Potential).         | 4  | ACTGCCGCTTTT    | 0.423 |             |
| - | 7  | 575       | r47M ZNF438_uc0    | NM_182755    | NP_877432    | Q7Z4V0 | ZN438_HUMAN |                               | 2  | TGGACGTTAGG,    | 0.468 |             |
| - | 12 | 1664      | nr.3_Missense_ML   | NM_133376    | NP_596867    | P05556 | ITB1_HUMAN  | I).I. Cysteine-rich tandem r  | 2  | FGTCTTCACTGT    | 0.418 |             |
| + | 7  | 1054      |                    | NM_052997    | NP_443723    | Q9BXX3 | AN30A_HUMAN |                               | 9  | CGTGGCCAGCA/    | 0.423 |             |
| + | 2  | 187       | F4_uc009xmn.2_!    | NM_032023    | NP_114412    | Q9H2L5 | RASF4_HUMAN |                               | 1  | CAAGTCCATTC/    | 0.537 |             |
| + | 3  | 383       | N2_uc010qfq.1_5'   | NM_014696    | NP_055511    | O60269 | GRIN2_HUMAN |                               | 0  | GGCGGACCCA      | 0.697 | rs149580948 |
| + | 4  | 615       | lation_Start_Site  | NM_012207    | NP_036339    | P31942 | HNRH3_HUMAN | Gly-rich.                     | 2  | TGGGCGTGGA/     | 0.438 |             |
| + | 25 | 3558      | AR1_uc010qjb.1_F   | NM_018237    | NP_060707    | Q8IX12 | CCAR1_HUMAN |                               | 7  | AGAATGGTGCC.    | 0.274 |             |
| + | 7  | 889       | p.A267V HK1_uc0    | NM_000188    | NP_000179    | P19367 | HXK1_HUMAN  | Regulatory.                   | 1  | GGGAGCCTTTG     | 0.522 |             |
| - | 2  | 418       |                    | NM_022146    | NP_071429    | Q9GZQ6 | NPFF1_HUMAN | lasmic (Potential).           | 0  | CTTTCCACAG      | 0.572 |             |
| + | 9  | 1625      | p.2_Missense_Mu    | NM_170744    | NP_734465    | Q8IZJ1 | UNC5B_HUMAN | ical; (Potential).            | 3  | TGGCGGTGGGG     | 0.622 |             |
| + | 37 | 5403      |                    | NM_022124    | NP_071407    | Q9H251 | CAD23_HUMAN | Extracellular (Potential).    | 11 | TCGTGCGAGGC     | 0.582 | rs56043301  |
| + | 5  | 1262      | p.L229V SH2D4B     | NM_207372    | NP_997255    | Q5SQS7 | SH24B_HUMAN |                               | 0  | CGGCTGCGCG      | 0.512 |             |
| - | 12 | 1412      | p.S405F GPAM_u     | NM_020918    | NP_065969    | Q9HCL2 | GPAT1_HUMAN |                               | 2  | TTAAGGAAATC     | 0.443 |             |
| + | 6  | 1174      | F7L2_uc001lah.2    | NM_001146274 | NP_001139746 | Q9NQB0 | TF7L2_HUMAN | ction with MAD2L2. Pro-ric    | 4  | CAGCCGACGTA     | 0.592 |             |
| + | 4  | 317       | PRP1_uc001lcn.2    | NM_006229    | NP_006220    | P54315 | LIPR1_HUMAN |                               | 2  | CAAAGGAGATG/    | 0.478 |             |
| - | 8  | 892       | ss.1_Nonsense_!    | NM_022063    | NP_071346    | Q9H8W3 | F204A_HUMAN |                               | 0  | TTTTCGGGCAGC    | 0.368 |             |
| - | 19 | 3423      | p.M1059L EIF3A_u   | NM_003750    | NP_003741    | Q14152 | EIF3A_HUMAN | DE]-[DE]-R-[SEVGFPILV]-[      | 0  | ATCCATGCCTCC    | 0.627 |             |
| + | 4  | 560       | nse_Mutation_p.E   | NM_206862    | NP_996744    | O95359 | TACC2_HUMAN |                               | 10 | TGCCAGCCTGG     | 0.557 |             |
| - | 12 | 2103      | 2_uc001lhj.2_Splic | NM_198148    | NP_937791    | Q8N436 | CPXM2_HUMAN |                               | 2  | CAGACCTGCCA/    | 0.498 |             |
| + | 8  | 1598      | p.L431F RIC8A_u    | NM_021932    | NP_068751    | Q9NPQ8 | RIC8A_HUMAN |                               | 0  | GGGGCCTCATG     | 0.597 |             |
| + | 8  | 1400      | e_Mutation_p.D45   | NM_025092    | NP_079368    | Q32M88 | ATHL1_HUMAN | p.R429Q(1)                    | 3  | CCCCGACGAG      | 0.607 |             |
| - | 3  | 557       |                    | NM_001012709 | NP_001012727 | Q6L8H1 | KRA54_HUMAN | repeats of C-C-X-P.           | 0  | AGCCACAGCCC     | 0.672 |             |
| - | 2  | 263       |                    | NR_001589    |              |        |             |                               | 0  | CGAAGGAGATC/    | 0.493 |             |
| + | 4  | 723       | GGA4_uc001mcn.2    | NM_001037329 | NP_001032406 | Q8IV77 | CNGA4_HUMAN | lasmic (Potential).           | 1  | CGGACCCCGCG     | 0.577 |             |
| + | 17 | 2930      |                    | NM_006108    | NP_006099    | Q9HCB6 | SPON1_HUMAN | rSP type-1 6.                 | 0  | caagaaggagatcag | 0.234 |             |
| - | 5  | 918       | ws.1_Missense_M    | NM_145803    | NP_665802    | Q9Y4K3 | TRAF6_HUMAN | h TAX1BP1. TRAF-type 1.       | 1  | ATGCAGCACAG     | 0.378 |             |
| + | 1  | 825       |                    | NM_001001955 | NP_001001955 | Q8NGP0 | OR4CD_HUMAN | Name=7; (Potential).          | 4  | CACTATGATAACT   | 0.363 |             |
| - | 26 | 3464      |                    | NM_001923    | NP_001914    | Q16531 | DBB1_HUMAN  | with CDT1 and CUL4A.          | 4  | CTTCGCTCGG      | 0.512 |             |
| + | 4  | 520       | AK_uc009ynm.1_!    | NM_015533    | NP_056348    | Q3LXA3 | DHAK_HUMAN  | DhaK.                         | 0  | GGGCAGCATCC     | 0.652 |             |
| - | 5  | 866       | sn.2_Missense_Mi   | NM_021727    | NP_068373    | Q9Y5Q0 | FADS3_HUMAN | lasmic (Potential).           | 2  | CGGGCGCCACC     | 0.647 |             |
| - | 28 | 3223      |                    | NM_017525    | NP_059995    | Q6DT37 | MRCKG_HUMAN |                               | 4  | CCGGGTCTTG      | 0.687 |             |
| + | 11 | 1473      | v.3_RNA MUS81_u    | NM_025128    | NP_079404    | Q96NY9 | MUS81_HUMAN |                               | 0  | GTTCGTCCAC,     | 0.637 |             |
| - | 16 | 3286      |                    | NM_006946    | NP_008877    | O15020 | SPTN2_HUMAN | Spectrin 8.                   | 4  | GCTGCGCAAGA,    | 0.687 |             |
| - | 17 | 2911      | oly.2_Missense_M   | NM_004910    | NP_004901    | O00562 | PITM1_HUMAN |                               | 3  | CGTGCGTTTTCC    | 0.692 |             |
| + | 14 | 3237      | g.2_Missense_Mu    | NM_002335    | NP_002326    | O75197 | LRP5_HUMAN  | eta-propeller 4. Extracellula | 7  | CTGAGCGGGGA     | 0.662 |             |
| + | 20 | 4241      | ig.2_Missense_Mu   | NM_002335    | NP_002326    | O75197 | LRP5_HUMAN  | ical; (Potential).            | 7  | CGGGCCGTCA      | 0.602 |             |
| - | 8  | 987       | p.G273S CPT1A_u    | NM_001876    | NP_001867    | P50416 | CPT1A_HUMAN | lasmic (Potential).           | 2  | GTTCGGGCTC      | 0.418 | rs144347513 |
| - | 21 | 4534      | lopz.2_Missense_   | NM_012309    | NP_036441    | Q9UPX8 | SHAN2_HUMAN |                               | 5  | GGCAGCGCGT      | 0.592 |             |
| - | 13 | 1262      | E2A_uc001osn.2_l   | NM_002599    | NP_002590    | O00408 | PDE2A_HUMAN | GAF 1.                        | 4  | GGTCAGTGCC      | 0.567 |             |
| - | 34 | 4511      | ss.2_Missense_Mi   | NM_001040118 | NP_001035207 | Q96P48 | ARAP1_HUMAN |                               | 1  | GGTCCGGGTG      | 0.617 |             |

|   |    |       |                   |               |              |        |             |    |                 |       |             |
|---|----|-------|-------------------|---------------|--------------|--------|-------------|----|-----------------|-------|-------------|
| - | 16 | 4009  | n.2_Missense_Mu   | NM_016578     | NP_057662    | Q96T23 | RSF1_HUMAN  | 4  | TTTGGGGGATG     | 0.542 |             |
| - | 4  | 842   | g.2_Missense_Mu   | NM_080491     | NP_536739    | Q9UQC2 | GAB2_HUMAN  | 6  | TGAGGCTGCC      | 0.572 |             |
| + | 13 | 2488  | uc001pen.1_Intr   | NM_001098672  | NP_001092142 | Q6MZM0 | HPHL1_HUMAN | 3  | AAATTGGATTGG    | 0.423 |             |
| + | 14 | 2047  | e.p.E570_splice   | CNM_014361    | NP_055176    | O94779 | CNTN5_HUMAN | 8  | AAAGGTAAGAC     | 0.378 |             |
| + | 3  | 974   | gv.2_Missense_M   | NM_001130145  | NP_001123617 | P46937 | YAP1_HUMAN  | 3  | AGGACCCCAAG     | 0.483 |             |
| + | 7  | 1022  |                   | NM_015191     | NP_056006    | Q9H0K1 | SIK2_HUMAN  | 3  | TTCTGCGACTG     | 0.438 |             |
| - | 7  | 781   | .P228S ALG9_u     | CNM_001077690 | NP_001071158 | Q9H6U8 | ALG9_HUMAN  | 2  | GAATGGCCAGC     | 0.453 |             |
| + | 3  | 433   | .O2_uc001poz.2    | lNM_015523    | NP_056338    | Q9Y3B8 | ORN_HUMAN   | 0  | TTGGTGTAAAG     | 0.458 |             |
| - | 5  | 1110  | ppd.2_Missense_   | lNM_001077639 | NP_001071107 | Q6UWF7 | FA55D_HUMAN | 4  | TCATTCCAAAC     | 0.413 |             |
| + | 8  | 1231  | sv.2_Missense_M   | lNM_004788    | NP_004779    | Q14139 | UBE4A_HUMAN | 5  | AGGAGGCCAAC     | 0.463 |             |
| + | 9  | 1192  | aw.1_Missense_M   | lNM_014619    | NP_055434    | Q16099 | GRIK4_HUMAN | 3  | GCCCTGCGGTAA    | 0.577 |             |
| - | 25 | 3829  | zda.1_RNA NCAF    | NM_015261     | NP_056076    | P42695 | CNDD3_HUMAN | 5  | GGGGAACCTGT     | 0.443 |             |
| + | 11 | 3053  | .3_intron WNK1    | lNM_018979    | NP_061852    | Q9H4A3 | WNK1_HUMAN  | 23 | AACTCCTCATGT    | 0.532 |             |
| - | 3  | 133   | .p.R24C MLF2_u    | lNM_005439    | NP_005430    | Q15773 | MLF2_HUMAN  | 1  | CTGACGGTGAA     | 0.542 |             |
| - | 2  | 916   |                   | NM_020634     | NP_065685    | Q9NR23 | GDF3_HUMAN  | 6  | TCCATGGCAGT     | 0.527 |             |
| - | 12 | 1500  | k.1_Missense_Mu   | NM_000014     | NP_000005    | P01023 | A2MG_HUMAN  | 5  | CATGGGCTCAA     | 0.512 |             |
| + | 2  | 575   | rad.2_Missense_   | lNM_138723    | NP_620049    | Q9BZR8 | B2L14_HUMAN | 1  | AGATTCGCACAC    | 0.512 |             |
| + | 1  | 416   |                   | NR_003932     |              |        |             | 0  | AGCCTGCAAGA     | 0.567 |             |
| + | 5  | 840   | 1467_uc009zhx.1   | NM_020853     | NP_065904    | A2RU67 | K1467_HUMAN | 3  | GTGTTTCGAGAC    | 0.448 |             |
| - | 6  | 576   | GDIB_uc001rcp.1   | NM_001175     | NP_001166    | P52566 | GDIR2_HUMAN | 0  | AACTGGAGTGA     | 0.522 |             |
| - | 16 | 2179  | isit.1_Missense_M | NM_014802     | NP_055617    | Q86YS7 | K0528_HUMAN | 4  | TGAGCGTTGCC     | 0.353 |             |
| - | 2  | 574   |                   | NM_001080406  | NP_001073875 | A8MTZ7 | CL071_HUMAN | 0  | GCTGGCGGTTG     | 0.493 |             |
| - | 53 | 4445  | 2A1_uc009zkw.2_F  | NM_001844     | NP_001835    | P02458 | CO2A1_HUMAN | 2  | TGCCCGGATCT     | 0.587 |             |
| + | 1  | 61    |                   | NM_012404     | NP_036536    | O95626 | AN32D_HUMAN | 2  | TGAAAGAACTT     | 0.458 |             |
| + | 1  | 563   | ismv.1_Missense_  | NM_014033     | NP_054752    | Q9H8H3 | MET7A_HUMAN | 0  | TGGGTGCAGGG     | 0.552 |             |
| - | 13 | 1477  | A5_uc010sow.1_F   | NM_002205     | NP_002196    | P08648 | ITA5_HUMAN  | 2  | GGATATCCATTG    | 0.562 |             |
| + | 2  | 275   | 1_5'UTR PDE1B     | lNM_000924    | NP_000915    | Q01064 | PDE1B_HUMAN | 2  | TTCGGTCTCTG     | 0.637 |             |
| + | 1  | 402   |                   | NM_054105     | NP_473446    | Q9NZP2 | OR6C2_HUMAN | 2  | ATCATGAACAAC    | 0.453 |             |
| + | 2  | 434   | sqo.1_Missense_M  | NM_207344     | NP_997227    | Q8WW59 | SPRY4_HUMAN | 0  | TGATCGTTCCTC    | 0.562 |             |
| + | 2  | 756   | 'H4_uc009zpj.2_5' | NM_007224     | NP_009155    | O95158 | NXP4_HUMAN  | 0  | GCTGGGGATGG     | 0.756 |             |
| + | 3  | 432   | m.2_Missense_Mu   | NM_006812     | NP_006803    | Q13438 | OS9_HUMAN   | 1  | GTTATGGACGC     | 0.433 |             |
| - | 4  | 1826  | sqx.2_Missense_   | lNM_178539    | NP_848634    | Q8N3H0 | F19A2_HUMAN | 1  | ATTCTTCTCCCTC   | 0.413 |             |
| + | 5  | 1405  |                   | NM_013381     | NP_037513    | Q9UKU6 | TRHDE_HUMAN | 3  | AAGACGTGTGG     | 0.403 |             |
| + | 12 | 1734  | yu.2_Splice_Site  | NM_001135805  | NP_001129277 | P21579 | SYT1_HUMAN  | 6  | TTTCAGAAAGTC    | 0.453 |             |
| - | 49 | 6990  | lice_Site_p.E1276 | NM_025114     | NP_079390    | O15078 | CE290_HUMAN | 7  | GTTTCCTATCATI   | 0.279 |             |
| - | 1  | 1060  |                   | NM_152638     | NP_689851    | Q8TC90 | CL012_HUMAN | 2  | GCTGACGCTCC     | 0.647 |             |
| + | 35 | 4540  |                   | NM_014503     | NP_055318    | O75691 | UTP20_HUMAN | 4  | ATTAAGAAATGC    | 0.318 |             |
| - | 39 | 5876  | tr.1_Missense_M   | lNM_001109662 | NP_001103132 |        |             | 2  | TGCAGGCTCGA     | 0.547 |             |
| - | 12 | 1700  | 1tts.2_Missense_  | lNM_001109662 | NP_001103132 |        |             | 2  | CATCCGCCATG     | 0.478 |             |
| + | 4  | 771   | .p.Q180* RNFT2    | lNM_001109903 | NP_001103373 | Q96EX2 | RNFT2_HUMAN | 0  | TGCTTTCAGCAT    | 0.637 |             |
| + | 2  | 556   | uc001tfx.2_Intron | NM_178499     | NP_848594    | Q8IWA6 | CCD60_HUMAN | 3  | CATCAGGTCCCA    | 0.443 |             |
| + | 1  | 76    |                   | NM_004373     | NP_004364    | P12074 | CX6A1_HUMAN | 0  | GTCCCGCCAC      | 0.662 | rs139069733 |
| + | 8  | 1106  | p.R326C ACADS     | lNM_000017    | NP_000008    | P16219 | ACADS_HUMAN | 2  | CTGGCGCGCT      | 0.637 | rs140853839 |
| - | 10 | 1434  | uek.1_Missense_   | lNM_020845    | NP_065896    | Q9BZ72 | PITM2_HUMAN | 3  | TGGTGCCTCCG     | 0.647 |             |
| + | 66 | 11390 | 110_uc001ufu.3_5  | NM_207437     | NP_997320    | Q8IVF4 | DYH10_HUMAN | 6  | ACTTTGGGCAA     | 0.453 |             |
| + | 1  | 262   | .A41V SFRS8_uc    | lNM_004592    | NP_004583    | Q12872 | SFSWA_HUMAN | 0  | CTATGCCTGCA     | 0.672 |             |
| - | 43 | 5944  | LE_uc001ukr.1_N   | NM_006231     | NP_006222    | Q07864 | DPOE1_HUMAN | 8  | GATtctccgctcttc | 0.313 |             |

|   |    |         |                          |              |              |         |             |                              |    |               |       |             |
|---|----|---------|--------------------------|--------------|--------------|---------|-------------|------------------------------|----|---------------|-------|-------------|
| + | 7  | 1209    | p.R152* SPATA13          | NM_153023    | NP_694568    | Q96N96  | SPT13_HUMAN | DH.                          | 3  | TATATCCGACAGT | 0.363 |             |
| - | 11 | 3143    | p.E829K TRPC4_u          | NM_016179    | NP_057263    | Q9UBN4  | TRPC4_HUMAN | and ITPR3. Cytoplasmic (P    | 6  | AATCTTCGTGGG  | 0.433 |             |
| - | 2  | 570     |                          | NM_005780    | NP_005771    | Q9Y693  | LHFP_HUMAN  |                              | 4  | ATGGCAGCACAA  | 0.527 |             |
| - | 8  | 1314    | p.S290L ELF1_uc          | NM_172373    | NP_758961    | P32519  | ELF1_HUMAN  |                              | 1  | AATAGCGATGGA  | 0.418 |             |
| - | 41 | 5090    |                          | NM_015058    | NP_055873    | A3KMH1  | K0564_HUMAN |                              | 6  | TAGCTTGATGTC  | 0.423 |             |
| + | 13 | 1489    | v.1_Missense_Mut         | NM_031431    | NP_113619    | Q96JB2  | COG3_HUMAN  |                              | 2  | AGAGCGGCTCG   | 0.458 |             |
| - | 14 | 3347    | Missense Mutation p.E999 | NM_000053    | NP_000044    | P35670  | ATP7B_HUMAN | intrinsic (Potential).       | 3  | GGCCTCCGCAG   | 0.627 |             |
| + | 15 | 1060    | p.S277N SCELS_uc         | NM_144777    | NP_659001    | O95171  | SCELS_HUMAN | in tandem repeats.[3.        | 5  | AATAGTACCCCG  | 0.388 |             |
| + | 6  | 1154    | POTEG_uc010ahc           | NM_001005356 | NP_001005356 | Q6S5H5  | POTEG_HUMAN |                              | 1  | ATAAAAGTCTCTT | 0.214 |             |
| - | 8  | 721_722 | p.1_Missense_Mut         | NM_002471    | NP_002462    | P13533  | MYH6_HUMAN  | in protein head-like.        | 4  | ATGGTCTCCAG   | 0.609 |             |
| - | 6  | 632     |                          | NM_016049    | NP_057133    | Q9Y3B6  | F158A_HUMAN |                              | 0  | CTGCCGTGACTT  | 0.547 |             |
| - | 4  | 805     | lq.2_RNA RIPK3_u         | NM_006871    | NP_006862    | Q9Y572  | RIPK3_HUMAN | in protein kinase.           | 4  | TGTGGAGGCCT   | 0.582 |             |
| + | 5  | 1985    | r.1_Missense_Mut         | NM_004554    | NP_004545    | Q14934  | NFAC4_HUMAN | RHD.                         | 3  | GTTCCGGGTAC   | 0.602 |             |
| - | 11 | 1799    | p.D470N RALGAP           | NM_014990    | NP_055805    | Q6GYQ0  | RGPA1_HUMAN |                              | 4  | ATGGTCTGTGAC  | 0.343 |             |
| + | 4  | 1684    | ny.1_Missense_Mut        | NM_054024    | NP_473365    | Q96PC5  | MIA2_HUMAN  |                              | 2  | AGAAACTGGAG   | 0.308 |             |
| + | 5  | 1858    |                          | NM_054024    | NP_473365    | Q96PC5  | MIA2_HUMAN  |                              | 2  | ACCATCAGTAG   | 0.393 |             |
| - | 21 | 2002    | sense Mutation p.        | NM_004713    | NP_004704    | O60524  | NEMF_HUMAN  |                              | 0  | AGGGAGGAAGA   | 0.294 |             |
| - | 2  | 810     |                          | NM_005982    | NP_005973    | Q15475  | SIX1_HUMAN  |                              | 0  | TGTTCTCCCTAA  | 0.428 |             |
| - | 32 | 6484    | p.D2144N SPTB_u          | NM_001024858 | NP_001020029 | P11277  | SPTB1_HUMAN |                              | 11 | TCTCATCCCCAG  | 0.647 |             |
| - | 13 | 2508    | YVE26_uc001xkc           | NM_015346    | NP_056161    | Q68DK2  | ZFY26_HUMAN |                              | 11 | TTGTACTTTCCA  | 0.453 |             |
| + | 8  | 3051    | r.3_Intron PCNX_u        | NM_014982    | NP_055797    | Q96RV3  | PCX1_HUMAN  |                              | 1  | ATAGGCGGTAGC  | 0.463 |             |
| + | 4  | 253     | f80_uc001yrn.2_5'        | NM_001311    | NP_001302    | P50238  | CRIP1_HUMAN | in zinc-binding.             | 0  | AGCACGAAGGC   | 0.572 |             |
| + | 19 | 3414    | lbi.2_Missense_Mut       | NM_003246    | NP_003237    | P07996  | TSP1_HUMAN  | in C-terminal.               | 6  | GGAACGCCCTG   | 0.592 |             |
| + | 17 | 2709    | Missense Mutation p.G58E | NM_001013703 | NP_001013725 | Q9P2K8  | E2AK4_HUMAN | in protein kinase 2.         | 4  | AGACAGGAGAC   | 0.353 |             |
| - | 8  | 1406    | i.2_5'UTR CDAN1          | NM_138477    | NP_612486    | Q8IWIY9 | CDAN1_HUMAN |                              | 2  | AGACAGCTTGA   | 0.458 |             |
| - | 19 | 4139    | i.G1336R TP53BP          | NM_005657    | NP_005648    | Q12888  | TP53B_HUMAN |                              | 7  | TTTCCCTGAGC   | 0.572 |             |
| + | 6  | 1030    | 2A1_uc010uex.1_u         | NM_000338    | NP_000329    | Q13621  | S12A1_HUMAN | in calcium (Potential).      | 2  | ATGGCTGTTGCT  | 0.413 | rs137853158 |
| - | 33 | 4383    |                          | NM_000138    | NP_000129    | P35555  | FBN1_HUMAN  | in 22; calcium-binding.      | 3  | ACCCGGGACTGT  | 0.403 |             |
| + | 7  | 1301    | ljp.1_Missense_Mut       | NM_002755    | NP_002746    | Q02750  | MP2K1_HUMAN | in protein kinase. Pro-rich. | 0  | ATGTTGGGTGCT  | 0.612 |             |
| - | 18 | 3188    | p.K271R TLE3_uc          | NM_005078    | NP_005069    | Q04726  | TLE3_HUMAN  | in WD 5.                     | 2  | CAGGCTTGGTG   | 0.632 |             |
| - | 2  | 871     | sense Mutation p.R1      | NM_006901    | NP_008832    | B2RTY4  | MYO9A_HUMAN |                              | 3  | ATCATCCTGCGAC | 0.433 | rs148320227 |
| + | 5  | 773     | M202_uc002aur.2_u        | NM_001080462 | NP_001073931 | A6NGA9  | TM202_HUMAN |                              | 2  | FGGAATCTCTAAC | 0.458 |             |
| + | 2  | 761     |                          | NM_000761    | NP_000752    | P05177  | CP1A2_HUMAN |                              | 4  | CTCCGGGAAC    | 0.567 |             |
| + | 15 | 1657    | p.G400R PSTPIP1          | NM_003978    | NP_003969    | O43586  | PPIP1_HUMAN | in SH3.                      | 1  | GGAACGGGCAG   | 0.637 |             |
| + | 7  | 3273    | 13_uc002blu.1_Mi         | NM_007200    | NP_009131    | Q12802  | AKP13_HUMAN |                              | 9  | TGGGGGCAGAG   | 0.597 |             |
| + | 5  | 2017    |                          | NM_198526    | NP_940928    | Q8N1W2  | ZN710_HUMAN |                              | 1  | ACTTCGAGGAG   | 0.577 |             |
| + | 4  | 702     | sc.1_RNA LRRK1_u         | NM_024652    | NP_078928    | Q38SD2  | LRRK1_HUMAN | in ANK 2.                    | 12 | FGCAGCGTATT   | 0.567 |             |
| + | 21 | 3386    | b.1_RNA LRRK1_u          | NM_024652    | NP_078928    | Q38SD2  | LRRK1_HUMAN |                              | 12 | GCTTCGTTCCCT  | 0.542 |             |
| + | 16 | 2311    |                          | NM_016111    | NP_057195    | Q9Y4R8  | TELO2_HUMAN |                              | 0  | AGACCCAGCGG   | 0.677 |             |
| + | 12 | 1501    | p.E455K MAPK8l           | NM_015133    | NP_055948    | Q9UPT6  | JIP3_HUMAN  | in Potential.                | 3  | GGGGCGAGTTG   | 0.532 |             |
| - | 3  | 506     | i3_uc002cmu.2_M          | NM_080861    | NP_543137    | Q6PJ21  | SPSB3_HUMAN | in 330.2 SPRY.               | 0  | AGACGGGAGAG   | 0.662 |             |
| - | 3  | 390     |                          | NM_005061    | NP_005052    | Q92901  | RL3L_HUMAN  |                              | 0  | CGCCGGCACT    | 0.637 |             |
| - | 7  | 744     |                          | NM_020764    | NP_065815    | Q8WDX9  | CSK11_HUMAN | in ANK 6.                    | 2  | CAGCCGACCA    | 0.657 |             |
| - | 6  | 886     | crz.1_Missense_Mut       | NM_022119    | NP_071402    | Q9GZN4  | BSSP4_HUMAN | in 3-peptidase S1.           | 1  | GTAGACCCGGG   | 0.726 |             |
| - | 6  | 868     | crz.1_Missense_Mut       | NM_022119    | NP_071402    | Q9GZN4  | BSSP4_HUMAN | in 3-peptidase S1.           | 1  | GCGCTCGGCAC   | 0.721 |             |
| + | 6  | 1148    | uc002ctj.1_Intron        | NM_022468    | NP_071913    | Q9NPA2  | MMP25_HUMAN |                              | 0  | GGCCTCGCCCA   | 0.652 |             |
| - | 1  | 1069    | jr.2_3'UTR TIGD7         | NM_033208    | NP_149985    | Q6NT04  | TIGD7_HUMAN | in CENPB-type.               | 0  | AACACGGGCTG   | 0.507 |             |

|   |    |           |                     |              |              |        |             |     |               |       |             |
|---|----|-----------|---------------------|--------------|--------------|--------|-------------|-----|---------------|-------|-------------|
| - | 15 | 3227_3228 | vw.2_Missense_M     | NM_004380    | NP_004371    | Q92793 | CBP_HUMAN   | 127 | GGATCGGGCTCA  | 0.599 | rs144649776 |
| - | 13 | 4336      | G1263E GRIN2A_1     | NM_001134407 | NP_001127879 | Q12879 | NMDE1_HUMAN | 45  | GCTCCCCGGTG   | 0.522 |             |
| - | 6  | 1877      | 0uyn.1_Splice_Site  | NM_001134407 | NP_001127879 | Q12879 | NMDE1_HUMAN | 45  | AAATTGCTGTAA  | 0.219 |             |
| + | 3  | 409       | IP2_uc010uyp.1_I    | NM_024997    | NP_079273    | Q5U623 | MCAF2_HUMAN | 0   | TAGGACGACTG   | 0.373 | rs75885887  |
| - | 11 | 2499      | ense_Mutation_p.F   | NM_014647    | NP_055462    | Q9Y4F3 | LKAP_HUMAN  | 0   | CAAGCGGGGAT   | 0.383 |             |
| + | 3  | 463       | dfp.2_Missense_IV   | NM_024847    | NP_079123    | Q7Z402 | TMC7_HUMAN  | 3   | ACAAATGAAGTA  | 0.443 |             |
| + | 3  | 1212      | jb.3_Missense_Mt    | NM_001105248 | NP_001098718 | Q6UXY8 | TMC5_HUMAN  | 1   | CAGATCATTTTC  | 0.493 | rs148290322 |
| - | 3  | 745       | !2_uc002dht.3_Int   | NM_173475    | NP_775746    | Q8IWE4 | DCNL3_HUMAN | 2   | TTCCCGATGCAC  | 0.478 |             |
| + | 5  | 368       | se_Mutation_p.R7    | NM_018119    | NP_060589    | Q9NVU0 | RPC5_HUMAN  | 2   | TTGCCGCAGCA   | 0.617 | rs145630346 |
| + | 6  | 807       | me.2_Missense_M     | NM_212535    | NP_997700    | P05771 | KPCB_HUMAN  | 9   | CCGATCCCCAA   | 0.423 |             |
| + | 34 | 7929      | CAP_uc002dzg.1_     | NM_006662    | NP_006653    | Q6ZRS2 | SRCAP_HUMAN | 4   | cgctccAGCCCAA | 0.274 |             |
| + | 2  | 1614      |                     | NM_014699    | NP_055514    | O15015 | ZN646_HUMAN | 2   | AGCTCCCCTGC   | 0.602 |             |
| + | 35 | 7605      | p.P2466S CHD9_t     | NM_025134    | NP_079410    | Q3L8U1 | CHD9_HUMAN  | 7   | GAATTCCTGAT   | 0.388 |             |
| + | 18 | 2886      | !_Mutation_p.R63    | NM_005611    | NP_005602    | Q08999 | RBL2_HUMAN  | 5   | GGCCCGGAGCC   | 0.413 |             |
| - | 4  | 882       | gq.2_Missense_M     | NM_018124    | NP_060594    | Q6PCD5 | RFWD3_HUMAN | 3   | TTTGGGGAGGG   | 0.279 |             |
| - | 35 | 5723      | !_1_5'UTR PKD1L2    | NM_052892    | NP_443124    | Q7Z442 | PK1L2_HUMAN | 3   | CATAGGGGCTC   | 0.572 |             |
| + | 3  | 462       | hfg.1_Missense_M    | NM_002661    | NP_002652    | P16885 | PLCG2_HUMAN | 8   | CTCAGTTCGTC   | 0.498 |             |
| - | 12 | 2603      | CCHC14_uc002fkb     | NM_015144    | NP_055959    | Q8WYQ9 | ZCH14_HUMAN | 2   | CTGGGTCCCCG   | 0.657 |             |
| - | 13 | 1281      | p.T396M CAMKK       | NM_172206    | NP_757343    | Q8N5S9 | KKCC1_HUMAN | 1   | ATTCTCGTCTCG  | 0.567 |             |
| - | 10 | 1401      | fxz.3_Missense_IV   | NM_014520    | NP_055335    | Q9BQG0 | MBB1A_HUMAN | 2   | CAGCCGGAACA   | 0.493 |             |
| - | 9  | 874       | ATA2_uc002gai.1_    | NM_015099    | NP_055914    | O94983 | CMTA2_HUMAN | 1   | TCGGGGCTCCA   | 0.592 |             |
| + | 2  | 992       |                     | NM_153230    | NP_694962    | Q8N4B4 | FBX39_HUMAN | 2   | TGAACGGATCAT  | 0.542 |             |
| + | 6  | 592       |                     | NM_014716    | NP_055531    | Q15027 | ACAP1_HUMAN | 3   | CTGGCGGGGGG   | 0.637 |             |
| + | 30 | 4186      | rt.2_Missense_Mt    | NM_003170    | NP_003161    | Q7KZ85 | SPT6H_HUMAN | 3   | AGAACCACCTG   | 0.517 |             |
| + | 1  | 1431      | p.H392Y LRRC37      | NM_052888    | NP_443120    | Q96QE4 | LR37B_HUMAN | 2   | CTCCTCATCCA   | 0.522 |             |
| + | 6  | 1999      | p.R581H LRRC37      | NM_052888    | NP_443120    | Q96QE4 | LR37B_HUMAN | 2   | CAATCGCAATCC  | 0.323 |             |
| - | 7  | 1895      | !_Mutation_p.P411   | NM_025248    | NP_079524    | Q9C0H9 | SRCN1_HUMAN | 0   | CTGGCGGCCCG   | 0.706 |             |
| - | 6  | 1050      |                     | NM_181537    | NP_853515    | Q7Z3Y8 | K1C27_HUMAN | 0   | AGTTACTCTCG   | 0.522 |             |
| - | 4  | 459       | hzi.3_Missense_M    | NM_012448    | NP_036580    | P51692 | STA5B_HUMAN | 6   | TCATACGTGTT   | 0.537 |             |
| - | 10 | 3464      | ron BRCA1_uc01C     | NM_007294    | NP_009225    | P38398 | BRCA1_HUMAN | 52  | ATTTTGCCCTC   | 0.373 |             |
| + | 3  | 603       | !gj.2_Missense_M    | NM_001144825 | NP_001138297 | Q59EK9 | RUN3A_HUMAN | 0   | GTGAGCAGCA    | 0.612 |             |
| + | 17 | 2226      | !_Mutation_p.D25    | NM_005892    | NP_005883    | O95466 | FMNL_HUMAN  | 1   | AGAGTGATTTTC  | 0.597 |             |
| + | 4  | 732       | kx.1_Missense_Mt    | NM_003396    | NP_003387    | O14905 | WNT9B_HUMAN | 2   | GTTCCGTGAGA   | 0.637 |             |
| + | 11 | 1780      | !B3_uc010wkr.1_F    | NM_000212    | NP_000203    | P05106 | ITB3_HUMAN  | 6   | CTGTACCACGC   | 0.607 |             |
| + | 6  | 1557      |                     | NM_013351    | NP_037483    | Q9UL17 | TBX21_HUMAN | 0   | GTTCCGCCCTA   | 0.677 |             |
| - | 6  | 637       | PL7_uc002ilw.1_5'   | NM_145798    | NP_665741    | Q9BZF2 | OSBL7_HUMAN | 0   | CCAGCGGTGG    | 0.627 | rs148584339 |
| + | 6  | 1241      | ic002ivr.1_Missense | NM_018896    | NP_061496    | O43497 | CAC1G_HUMAN | 1   | CGCGGGGACG    | 0.617 |             |
| - | 13 | 1728      | tf.2_Missense_Mu    | NM_001130528 | NP_001124000 | O60271 | JIP4_HUMAN  | 5   | CCATTCTACTC   | 0.413 |             |
| + | 1  | 259       | !P1_uc002ivr.2_5'   | NM_012374    | NP_036506    | Q15615 | OR4D1_HUMAN | 1   | TCCTCCATGAG   | 0.512 |             |
| - | 18 | 3198      | !s.1_Missense_Mu    | NM_198393    | NP_938207    | Q8IWB6 | TEX14_HUMAN | 17  | TGAAGCTTCCA   | 0.378 |             |
| - | 3  | 191       | D3P2_uc010woz.1_RNA |              |              |        |             | 0   | AGCTCGGTGTC   | 0.602 |             |
| - | 15 | 1969      |                     | NM_001433    | NP_001424    | O75460 | ERN1_HUMAN  | 9   | TCATCCGATTCT  | 0.587 |             |
| - | 2  | 439       | !_p.A89V TEX2_uc    | NM_018469    | NP_060939    | Q8IWB9 | TEX2_HUMAN  | 1   | AGGCAGCAGGG   | 0.582 |             |
| - | 4  | 732_733   | 1_RNA MRPL38_1      | NM_032478    | NP_115867    | Q96DV4 | RM38_HUMAN  | 1   | GACTCGGGGCA   | 0.609 |             |
| - | 4  | 1702      | !_Mutation_p.G43    | NM_032134    | NP_115510    | Q9H0J4 | QRIC2_HUMAN | 5   | CTGCCAGGTT    | 0.507 |             |
| + | 2  | 142       | !R2_uc002juv.1_!    | NM_004710    | NP_004701    | O43760 | SNG2_HUMAN  | 0   | TTGATCGTGTCT  | 0.612 |             |
| + | 7  | 1024      | nse_Mutation_p.A!   | NM_024419    | NP_077733    | Q32NB8 | PGPS1_HUMAN | 0   | ATGCAGCAGCT   | 0.532 |             |



|   |    |       |                                                 |              |              |        |             |                                |    |               |       |             |
|---|----|-------|-------------------------------------------------|--------------|--------------|--------|-------------|--------------------------------|----|---------------|-------|-------------|
| + | 26 | 7690  |                                                 | NM_001080519 | NP_001073988 | Q9P281 | BAHC1_HUMAN | BAH.                           | 1  | AGGTCGTGGCG   | 0.672 |             |
| + | 6  | 935   | p.G265S KIAA080                                 | NM_015210    | NP_056025    | Q9Y4B5 | CC165_HUMAN | Potential.                     | 0  | :CCTTCGGTGAC  | 0.642 |             |
| + | 1  | 653   |                                                 | NM_005913    | NP_005904    | P33032 | MC5R_HUMAN  | lasmic (Potential).            | 6  | 'CAAGCGGATCG' | 0.617 | rs146841229 |
| + | 7  | 818   | !lv.2_Splice_Site_                              | NM_138443    | NP_612452    | Q96CS2 | HAUS1_HUMAN |                                | 1  | ATGCCCGTAATA/ | 0.328 |             |
| + | 2  | 810   | lbx.2_Missense_M                                | NM_145055    | NP_659492    | Q96B23 | CR025_HUMAN |                                | 2  | 3GTCCCATCTG   | 0.532 | rs62096535  |
| + | 5  | 723   | d.2_Missense_Mul                                | NM_002396    | NP_002387    | P23368 | MAOM_HUMAN  |                                | 0  | ATGTTAAGGTAC  | 0.353 |             |
| - | 2  | 840   | h.1_Missense_Mul                                | NM_003927    | NP_003918    | Q9UBB5 | MBD2_HUMAN  | MBD.                           | 0  | 'AACTGCTGAGA' | 0.393 |             |
| + | 25 | 3444  | p.A1077T KIAA141                                | NM_020854    | NP_065905    | Q9P260 | K1468_HUMAN |                                | 6  | :CTAACGCAGAA' | 0.413 |             |
| - | 8  | 1221  | p.G312R NETO1_                                  | NM_138966    | NP_620416    | Q8TDF5 | NETO1_HUMAN | ss A. Extracellular (Potentic  | 4  | :GAGTCCATTGC/ | 0.388 |             |
| - | 7  | 878   | APK3_uc002lzd.1_                                | NM_001348    | NP_001339    | O43293 | DAPK3_HUMAN | rotein kinase.                 | 7  | 'TTCTCCGCTCG' | 0.617 |             |
| + | 3  | 295   | if.1_Missense_Mu                                | NM_024333    | NP_077309    | Q9BTV5 | FSD1_HUMAN  | Potential.                     | 1  | 3ACCTCGAAGCA  | 0.577 |             |
| - | 3  | 605   | l4_uc010dub.1_5'f                               | NM_001080400 | NP_001073869 | Q96Q06 | PLIN4_HUMAN | roximate tandem repeat. 4      | 0  | :CTTTGGCCAAG  | 0.602 |             |
| + | 9  | 1036  | 3.R233W PNPLA6_                                 | NM_006702    | NP_006693    | Q8IY17 | PLPL6_HUMAN | cytoplasmic (Potential).       | 3  | CCCAGCGGACC   | 0.687 |             |
| - | 18 | 2430  |                                                 | NM_020196    | NP_064581    | Q9HCS7 | SYF1_HUMAN  |                                | 4  | 3GGAGGCGTCAC  | 0.677 |             |
| + | 8  | 1155  | 345V CLEC4M_uc                                  | NM_001144910 | NP_001138382 | Q9H2X3 | CLC4M_HUMAN | (Probable). C-type lectin.     | 1  | 'ACTGTGCGGAAT | 0.512 |             |
| - | 4  | 416   | TS10_uc002mkk.1_                                | NM_030957    | NP_112219    | Q9H324 | ATS10_HUMAN |                                | 4  | GTGGTCCACGC/  | 0.662 |             |
| - | 3  | 25754 |                                                 | NM_024690    | NP_078966    | Q8WXI7 | MUC16_HUMAN | ch. Extracellular (Potential). | 57 | 'AGGTTGTTGTT' | 0.502 |             |
| + | 3  | 527   | 3M1_uc010dxn.2_1                                | NM_199141    | NP_954592    | Q86X55 | CARM1_HUMAN |                                | 0  | 'GGAGCGGTCTG  | 0.642 |             |
| + | 4  | 1515  | ym.1_Missense_M                                 | NM_001136501 | NP_001129973 | Q08AG5 | ZN844_HUMAN |                                | 0  | :CTTCAGATCTG/ | 0.423 |             |
| - | 4  | 985   |                                                 | NM_005815    | NP_005806    | Q9Y2A4 | ZN443_HUMAN | 2H2-type 5.                    | 1  | 'AAAAGGAAAGG  | 0.373 |             |
| - | 2  | 268   | on_p.T4 ZNF709_                                 | NM_152601    | NP_689814    | Q8N972 | ZN709_HUMAN | KRAB.                          | 0  | 'CAAAGTTTCTT' | 0.438 |             |
| - | 5  | 841   |                                                 | NM_020714    | NP_065765    | Q9ULM2 | ZN490_HUMAN | 2H2-type 3.                    | 0  | GTTTCGAAAGG/  | 0.423 |             |
| + | 4  | 1316  | _p.L362V SYDE1_                                 | NM_033025    | NP_149014    | Q6ZW31 | SYDE1_HUMAN | Rho-GAP.                       | 2  | GAGGGCTGCGG   | 0.682 |             |
| + | 6  | 918   |                                                 | NM_024074    | NP_076979    | Q9H6F2 | TM38A_HUMAN | lasmic (Potential).            | 3  | 'GCATTCGGCCA' | 0.642 | rs147713228 |
| + | 10 | 2692  | _p.S622F NWD1_uc002nev.3_Missense_Mutation_p.S5 |              |              | Q149M9 | NWD1_HUMAN  |                                | 7  | :GATTCCTGCCC  | 0.597 |             |
| + | 5  | 772   | ihu.2_Missense_M                                | NM_015683    | NP_056498    | Q8TBH0 | ARRD2_HUMAN |                                | 1  | .CAACGGCTCCA' | 0.652 |             |
| + | 5  | 1319  | _p.K300T ZNF431_                                | NM_133473    | NP_597730    | Q8TF32 | ZN431_HUMAN | 2H2-type 8.                    | 2  | AACATAAAAGAA  | 0.348 |             |
| - | 3  | 1913  |                                                 | NM_001001411 | NP_001001411 | Q8N7Q3 | ZN676_HUMAN |                                | 0  | 'TGTAGGGTTTCT | 0.418 |             |
| - | 7  | 2699  |                                                 | NM_001080409 | NP_001073878 |        |             |                                | 2  | GTCGAGAAATTG  | 0.353 | rs55891931  |
| - | 1  | 667   | z.1_5'Flank LGI4_1                              | NM_139284    | NP_644813    | Q8N135 | LGI4_HUMAN  |                                | 1  | 'CTTTCCTTTGC  | 0.682 |             |
| + | 3  | 203   | AP33_uc002obt.1_                                | NM_052948    | NP_443180    | O14559 | RHG33_HUMAN |                                | 4  | :CTCCTCGAGGC  | 0.607 |             |
| + | 2  | 1314  |                                                 | NM_024509    | NP_078785    | Q9BTN0 | LRFN3_HUMAN | xtracellular (Potential).      | 0  | :TGGGCGAGGAC  | 0.736 |             |
| - | 3  | 581   |                                                 | NM_001864    | NP_001855    | P24310 | CX7A1_HUMAN | ial matrix (By similarity).    | 0  | TACAACGGGATG  | 0.657 |             |
| - | 6  | 2557  | _p.C508R ZNF569_                                | NM_152484    | NP_689697    | Q5MCW4 | ZN569_HUMAN | 2H2-type 18.                   | 3  | 'GCCCACTCAA'  | 0.413 |             |
| + | 6  | 512   | _p.R24W ZNF793_                                 | NM_001013659 | NP_001013681 | Q6ZN11 | ZN793_HUMAN | KRAB.                          | 0  | 'GGCACCGGCTG  | 0.473 |             |
| - | 4  | 1888  | :0_uc002ogq.2_Int                               | NM_016536    | NP_057620    | Q7Z3V5 | ZN571_HUMAN | 2H2-type 17.                   | 0  | 3GACATCTAAAG  | 0.373 |             |
| + | 48 | 7908  | _Mutation_p.R259                                | NM_000540    | NP_000531    | P21817 | RYR1_HUMAN  | 6 X approximate repeats.       | 12 | :GGGTCGTTGCG  | 0.557 |             |
| - | 18 | 2640  | _p.P799L ATP1A3_                                | NM_152296    | NP_689509    | P13637 | AT1A3_HUMAN | lasmic (Potential).            | 2  | :TCCGGGGGTTCT | 0.627 |             |
| - | 12 | 1653  | p.A470V ATP1A3_                                 | NM_152296    | NP_689509    | P13637 | AT1A3_HUMAN | lasmic (Potential).            | 2  | 'CGGGGGCACCC  | 0.617 |             |
| - | 9  | 1166  | p.A308T ATP1A3_                                 | NM_152296    | NP_689509    | P13637 | AT1A3_HUMAN | lasmic (Potential).            | 2  | :CTTGGCGGTCA' | 0.488 |             |
| - | 15 | 1795  | vp.1_Missense_Mi                                | NM_006297    | NP_006288    | P18887 | XRCC1_HUMAN | BRCT 2.                        | 7  | CCGCCGCTCGT/  | 0.582 |             |
| + | 2  | 1333  |                                                 | NM_019612    | NP_062558    | Q6NXR0 | IIGP5_HUMAN |                                | 3  | :AGGACGCCCAG  | 0.647 |             |
| - | 4  | 1112  | _p.G338D ZNF45_1                                | NM_003425    | NP_003416    | Q02386 | ZNF45_HUMAN | 2H2-type 7.                    | 1  | :TCTTGCCACAT/ | 0.463 |             |
| - | 5  | 345   |                                                 | NM_138568    | NP_612635    | Q2M3D2 | EX3L2_HUMAN |                                | 1  | :CACACGCTGCT/ | 0.632 |             |
| - | 6  | 2154  | xyr.1_Missense_A                                | NM_015063    | NP_055878    | Q9UPR5 | NAC2_HUMAN  | lasmic (Potential).            | 4  | 3ATTGAGTAGCA/ | 0.587 |             |
| + | 4  | 765   | e_Mutation_p.P36                                | NM_014601    | NP_055416    | Q9NZN4 | EHD2_HUMAN  |                                | 2  | .CTTCCCGGCCG' | 0.607 |             |
| + | 3  | 250   | Site TRPM4_uc002                                | NM_017636    | NP_060106    | Q8TD43 | TRPM4_HUMAN | lasmic (Potential).            | 2  | :TGACCGTGTGG  | 0.701 |             |

|   |     |           |                                                 |              |              |        |             |                               |     |                |       |             |
|---|-----|-----------|-------------------------------------------------|--------------|--------------|--------|-------------|-------------------------------|-----|----------------|-------|-------------|
| - | 2   | 304       |                                                 | NM_021733    | NP_068379    | Q9UJT2 | TSKS_HUMAN  |                               | 2   | AGTCTGTCCCC    | 0.637 |             |
| + | 7   | 801       | IED25_uc002ppx.1                                | NM_030973    | NP_112235    | Q71SY5 | MED25_HUMAN | Pro-rich.                     | 1   | CTCCCGCCGCA    | 0.662 |             |
| + | 4   | 752       | NF766_uc002pyt.1                                | NM_001010851 | NP_001010851 | Q5HY98 | ZN766_HUMAN | ype 2; degenerate.            | 0   | AGAATTCGTACAC  | 0.438 |             |
| - | 3   | 1274      | ?qj.3_Missense_M                                | NM_144687    | NP_653288    | P59046 | NAL12_HUMAN | NACHT.                        | 7   | CAGACGGTGGGA   | 0.547 |             |
| + | 5   | 763       | LRA1_uc010yfh.1                                 | NM_006863    | NP_006854    | O75019 | LIRA1_HUMAN | 2. Extracellular (Potential). | 3   | GTGGTCGTACA    | 0.572 | rs151320443 |
| + | 3   | 301       | r.1_Missense_Mut                                | NM_002000    | NP_001991    | P24071 | FCAR_HUMAN  | ellular (Potential).          | 2   | CAAATCGAGTC    | 0.498 |             |
| + | 6   | 613       | p.P152L NLRP2_u                                 | NM_017852    | NP_060322    | Q9NX02 | NALP2_HUMAN |                               | 2   | CTGGCCTGGAG    | 0.512 |             |
| + | 17  | 2241_2242 | p.S671F BRSK1_u                                 | NM_032430    | NP_115806    | Q8TDC3 | BRSK1_HUMAN |                               | 6   | CCCCTCCGTCT    | 0.639 |             |
| - | 2   | 1005      |                                                 | NM_152600    | NP_689813    | Q8NAF0 | ZN579_HUMAN | 2H2-type 5.                   | 0   | GACGGCGCGGT    | 0.741 |             |
| + | 10  | 3184      | g.2_Missense_Mu                                 | NM_176811    | NP_789781    | Q86W28 | NALP8_HUMAN |                               | 13  | CACGGGAAAAA    | 0.512 |             |
| + | 3   | 2002      | i47_uc002qpm.3_u                                | NM_001023561 | NP_001018855 | O43361 | ZN749_HUMAN |                               | 0   | ACGGCGTTATG    | 0.433 | rs148572975 |
| + | 3   | 1762      | p.R593C ZNF211                                  | NM_198855    | NP_942152    | Q13398 | ZN211_HUMAN | 2H2-type 11.                  | 2   | AACACCGCAGA    | 0.453 | rs12979532  |
| + | 3   | 1610      | JF776_uc002qqa.2                                | NM_173632    | NP_775903    | Q68D11 | ZN776_HUMAN | ype 10; degenerate.           | 1   | AGTGTGGAGAA    | 0.448 |             |
| + | 9   | 1384      | rs.1_Missense_Mt                                | NM_133502    | NP_598009    | Q96GC6 | ZN274_HUMAN | KRAB 2.                       | 1   | CACAGAGGACC    | 0.607 |             |
| + | 2   | 344       | _p.G76A ZNF446                                  | NM_017908    | NP_060378    | Q9NWS9 | ZN446_HUMAN | SCAN box.                     | 1   | CCTGGGCACAC    | 0.672 |             |
| - | 2   | 141       | 3REF1_uc010eyr.                                 | NM_006569    | NP_006560    | Q99674 | CGRE1_HUMAN |                               | 1   | ACATCCTTCTC    | 0.547 |             |
| + | 7   | 940       | rjn.2_Missense_M                                | NM_187841    | NP_912730    | Q9BYV2 | TRI54_HUMAN | COS.                          | 1   | TCACCGTAAGG    | 0.652 | rs142922734 |
| + | 12  | 1105      | _p.V347I GCKR_u                                 | NM_001486    | NP_001477    | Q14397 | GCKR_HUMAN  | SIS 2.                        | 2   | ATGGAGTAGAG    | 0.552 |             |
| - | 4   | 373       | JPY30_uc002rob.1                                | NM_032574    | NP_115963    | Q9C005 | DPY30_HUMAN |                               | 0   | AGTTGGCAAAG    | 0.398 |             |
| + | 2   | 515       |                                                 | NM_206943    | NP_996826    | Q14766 | LTBP1_HUMAN |                               | 8   | AGGGCGGTGCT    | 0.562 |             |
| + | 18  | 1926      |                                                 | NM_032208    | NP_115584    | Q9H6X2 | ANTR1_HUMAN | ic (Potential). Pro-rich.     | 4   | ccctccccgccccc | 0.109 |             |
| + | 7   | 2382      | se_Mutation_p.C6                                | NM_014497    | NP_055312    | Q14966 | ZN638_HUMAN | RRM 1.                        | 4   | ATGGTTGTAAG    | 0.338 |             |
| - | 9   | 1025      |                                                 | NM_003584    | NP_003575    | O75319 | DUS11_HUMAN |                               | 1   | CAGGAGGAGGG    | 0.423 |             |
| + | 4   | 1926      | yuy.1_Missense_M                                | NM_020184    | NP_064569    | Q6P4Q7 | CNNM4_HUMAN |                               | 3   | CGGCCGACTAC    | 0.592 |             |
| - | 6   | 1623      | !tdr.2_Missense_M                               | NM_001142351 | NP_001135823 | Q96JF0 | SIAT2_HUMAN | renal (Potential).            | 11  | CAAATCCCCCTC   | 0.592 |             |
| + | 17  | 3241      | s.S641C PSD4_uc                                 | NM_012455    | NP_036587    | Q8NDX1 | PSD4_HUMAN  |                               | 2   | ACTCGAGCCCG    | 0.632 |             |
| + | 16  | 1687      | yq.1_Missense_Mi                                | NM_001029996 | NP_001025167 | Q4G0U5 | PCDP1_HUMAN |                               | 0   | CTGTTTCGTGAA   | 0.403 |             |
| + | 3   | 731       | Jflu.2_Missense_M                               | NM_130773    | NP_570129    | Q8WYK1 | CNTP5_HUMAN | Extracellular (Potential).    | 10  | AACAAGAAGAC    | 0.453 |             |
| - | 17  | 2777      |                                                 | NM_001099771 | NP_001093241 | A5A3E0 | POTEF_HUMAN | Actin-like.                   | 5   | CAGCTCGTTGT    | 0.572 |             |
| + | 10  | 2302      | ISD7B_uc002tvb.2                                | NM_001080427 | NP_001073896 |        |             |                               | 7   | TATATCGGCAAC   | 0.373 |             |
| + | 12  | 4410      | BD5_uc002two.2_u                                | NM_018328    | NP_060798    | Q9P267 | MBD5_HUMAN  |                               | 5   | TGTCAAGTGGCG   | 0.512 |             |
| - | 6   | 1184      | _p.P227T MMADH1                                 | NM_015702    | NP_056517    | Q9H3L0 | MMAD_HUMAN  |                               | 2   | ATGATGGGTCAA   | 0.328 |             |
| - | 54  | 7621      |                                                 | NM_004543    | NP_004534    | P20929 | NEBU_HUMAN  | Nebulin 66.                   | 20  | CTCACATCACTC   | 0.299 |             |
| - | 3   | 511       | lf.1_Missense_Mut                               | NM_004525    | NP_004516    | P98164 | LRP2_HUMAN  | s A 2. Extracellular (Potenti | 29  | TTGACGTTTCATC  | 0.478 | rs138682237 |
| + | 11  | 1079      | 2uhe.1_Missense_M                               | NM_001378    | NP_001369    | Q13409 | DC112_HUMAN | WD 1.                         | 1   | AGATGCCCTC     | 0.398 |             |
| + | 11  | 1081      | 2uhe.1_Missense_M                               | NM_001378    | NP_001369    | Q13409 | DC112_HUMAN | WD 1.                         | 1   | ATGCCCTCATC    | 0.403 |             |
| - | 10  | 1256      | s.2_Missense_Mut                                | NM_004882    | NP_004873    | Q86X95 | CIR1_HUMAN  | r-rich (RS domain).           | 1   | TTCTCCGGCTC    | 0.522 |             |
| + | 4   | 905       | 2umj.3_Splice_Site                              | NM_001042702 | NP_001036167 | Q0ZLH3 | PJVK_HUMAN  |                               | 0   | TGCGGGTAAAC    | 0.438 |             |
| - | 301 | 90916     | 26L TTN_uc010zf                                 | NM_133378    | NP_596869    | Q8WZ42 | TITIN_HUMAN |                               | 153 | CTTCTGGACTG    | 0.507 |             |
| - | 42  | 10108     | _uc010zjf.1_Miss                                | NM_133378    | NP_596869    | Q8WZ42 | TITIN_HUMAN |                               | 153 | AAAGCGTGTAT    | 0.468 |             |
| - | 6   | 1060      | 1_Missense_Mutation_p.R279W TTN_uc010zjf.1_Miss | NM_133378    | NP_596869    | Q8WZ42 | TITIN_HUMAN |                               | 153 | CTGCCGAGCCA    | 0.587 | rs138060032 |
| - | 62  | 11626     | iti.3_Missense_Mt                               | NM_018897    | NP_061720    | Q8WXX0 | DYH7_HUMAN  |                               | 12  | GGCTTGGGTAG    | 0.398 |             |
| - | 35  | 5758      |                                                 | NM_018897    | NP_061720    | Q8WXX0 | DYH7_HUMAN  |                               | 12  | TATTTCGAGTTC   | 0.358 | rs13034775  |
| + | 14  | 1368      | 1_5'UTR AOX1_u                                  | NM_001159    | NP_001150    | Q06278 | ADO_HUMAN   |                               | 6   | AGTGGGAATTT    | 0.483 |             |
| + | 31  | 5155      | izs.3_Nonsense_M                                | NM_001114132 | NP_001107604 | Q6ZS30 | NBEL1_HUMAN |                               | 2   | AAAATCAGGATC   | 0.393 |             |
| - | 3   | 459       |                                                 | NM_006891    | NP_008822    | P07320 | CRGD_HUMAN  | a crystallin 'Greek key' 3.   | 0   | GAAGCGGTCCT    | 0.567 |             |
| - | 8   | 1272      | ZF2_uc010fuw.2_h                                | NM_016260    | NP_057344    | Q9UKS7 | IKZF2_HUMAN |                               | 0   | TGCTAATGGGT    | 0.502 |             |

|   |    |           |                    |              |              |        |              |                                |    |                |       |                    |
|---|----|-----------|--------------------|--------------|--------------|--------|--------------|--------------------------------|----|----------------|-------|--------------------|
| - | 44 | 4901      |                    | NM_000092    | NP_000083    | P53420 | CO4A4_HUMAN  | le-helical region.             | 11 | :CCCTCCTGCCA'  | 0.512 |                    |
| + | 1  | 1058      |                    | NM_152614    | NP_689827    | Q53QW1 | CB057_HUMAN  |                                | 1  | GGTGGGAAGCG    | 0.662 |                    |
| - | 9  | 4402      | p.A766T COL6A3     | NM_004369    | NP_004360    | P12111 | CO6A3_HUMAN  | '. Nonhelical region.          | 18 | :GTCTGCGTTCC'  | 0.607 | rs112181324        |
| - | 6  | 816       | pv.1_Missense_M    | NM_198216    | NP_937859    | P14678 | RSMB_HUMAN   | eat-rich region.               | 1  | :TTCCCGGAGGG   | 0.607 |                    |
| + | 8  | 899       | wv.1_Missense_Mt   | NM_080751    | NP_542789    | Q8TDI7 | TMC2_HUMAN   | ellular (Potential).           | 3  | GCCTCGGGCTG    | 0.428 |                    |
| + | 4  | 1212      | zrf.1_Missense_M   | NM_014962    | NP_055777    | Q9Y2F9 | BTBD3_HUMAN  |                                | 3  | :TTGTGGTTTTTC  | 0.443 |                    |
| + | 11 | 1051      | 2woz.2_Missense    | NM_080676    | NP_542407    | A1Z1Q3 | MACD2_HUMAN  | Glu-rich.                      | 0  | :ACGGTCCAGAG   | 0.413 |                    |
| + | 5  | 2248      | s.S553L ZNF133_u   | NM_003434    | NP_003425    | P52736 | ZN133_HUMAN  |                                | 2  | AACCTTCGGATT   | 0.502 | rs148089989        |
| - | 1  | 157       |                    | NM_001322    | NP_001313    | P09228 | CYTT_HUMAN   |                                | 0  | GTGAAGGGCAC    | 0.592 |                    |
| + | 5  | 688       | r341_uc010geq.2_   | NM_032819    | NP_116208    | Q9BYN7 | ZN341_HUMAN  |                                | 2  | :CAGTGCTGCTG'  | 0.562 |                    |
| + | 14 | 1577      | p.R421Q ITCH_uc    | NM_031483    | NP_113671    | Q96J02 | ITCH_HUMAN   | ed for interaction with FYN.   | 6  | :ACACACGAATTAC | 0.398 |                    |
| + | 2  | 216       | 0zv.1_Missense_l   | NM_030877    | NP_110517    | Q8WYA6 | CTBL1_HUMAN  |                                | 2  | :CTATCGGGAAG   | 0.517 |                    |
| + | 19 | 2393      | ve.1_Missense_Mi   | NM_182811    | NP_877963    | P19174 | PLCG1_HUMAN  |                                | 8  | :TCAACGAGGAG   | 0.557 |                    |
| - | 2  | 300       | ggj.2_Missense_M   | NM_007050    | NP_008981    | O14522 | PTPRT_HUMAN  | lar (Potential). MAM.          | 20 | :AGTTGCTGTAG'  | 0.507 |                    |
| + | 3  | 596       | 1_Missense_Mutat   | NM_024034    | NP_076939    | Q96MZ0 | GD1L1_HUMAN  | ST C-terminal.                 | 1  | :AGTACGCCACG'  | 0.597 |                    |
| - | 2  | 337       |                    | NM_001080472 | NP_001073941 | Q8N6M3 | FITM2_HUMAN  | lasmic (Potential).            | 2  | :AGTTGGTGAGG'  | 0.567 |                    |
| + | 2  | 559       | G2_uc010ggz.2_lr   | NM_003007    | NP_002998    | P04279 | SEMG1_HUMAN  |                                | 2  | :TGTGGGTTTCA'  | 0.438 |                    |
| + | 25 | 3427      | lzyf.1_Missense_N  | NM_006420    | NP_006411    | Q9Y6D5 | BIG2_HUMAN   |                                | 4  | TGTCCGCTGGC    | 0.502 | rs151045115        |
| + | 5  | 1032      | oxn.1_Missense_M   | NM_001033521 | NP_001028693 | Q05048 | CSTF1_HUMAN  | WD 4.                          | 1  | :TGTACGTAATCG  | 0.398 | rs140246355        |
| - | 7  | 761       |                    | NM_002772    | NP_002763    | P98073 | ENTK_HUMAN   | lar (Potential). CUB 1.        | 8  | GTTTTGGATAATC  | 0.368 |                    |
| + | 3  | 359       | se_Mutation_p.K8:  | NM_001186    | NP_001177    | O14867 | BACH1_HUMAN  | BTB.                           | 2  | :ACAGTTAAAGGA' | 0.318 |                    |
| - | 1  | 610       |                    | NM_001085455 | NP_001078924 | Q3LI83 | KR241_HUMAN  | ]- [NRTS]-[SNTG]-X-[QHR        | 0  | CTGTTGGAAATA'  | 0.418 |                    |
| - | 21 | 4197      | AM_uc002y.1_f      | NM_001389    | NP_001380    | O60469 | DSCAM_HUMAN  | III 4. Extracellular (Potentia | 11 | :GTTGGGAATTC'  | 0.488 |                    |
| - | 13 | 1918      | p.P175L C2CD2_u    | NM_015500    | NP_056315    | Q9Y426 | CU025_HUMAN  |                                | 1  | :TGGCGGGGCA'   | 0.687 |                    |
| + | 21 | 2720      | 3_5'Flank C21orf33 | NM_005049    | NP_005040    | Q15269 | PWP2_HUMAN   |                                | 1  | :AGTTTCCAAGC'  | 0.577 |                    |
| - | 4  | 639       | ef.2_Missense_Mt   | NM_015259    | NP_056074    | O75144 | ICOSL_HUMAN  | Potential). Ig-like C2-type.   | 0  | :GTACACGTTGG'  | 0.577 |                    |
| + | 15 | 2305      | gpt.1_Missense_M   | NM_003307    | NP_003298    | O94759 | TRPM2_HUMAN  | lasmic (Potential).            | 3  | :AGGACGAAGAG   | 0.627 | rs150593294        |
| + | 5  | 601       | 11aga.1_Missense   | NM_206962    | NP_996845    | P55345 | ANM2_HUMAN   | with RB1 (By similarity).      | 1  | :GGACACGTGGC   | 0.557 |                    |
| - | 1  | 1033      |                    | NM_014406    | NP_055221    | Q96SF2 | TCPQM_HUMAN  |                                | 1  | GGGCCGTTGCT'   | 0.502 | rs147789853        |
| - | 6  | 1189      | 34_uc010gqs.1_3'l  | NM_001037814 | NP_001032903 | Q2WGN9 | GAB4_HUMAN   |                                | 2  | :CATGGGCACAC.  | 0.562 |                    |
| - | 2  | 702       | lZzqh.2_Missense   | NM_024627    | NP_078903    | Q7L3V2 | CV029_HUMAN  |                                | 0  | :CCCAGGAGACG   | 0.637 |                    |
| + | 2  | 501       | MIR1306_hsa-mir-1  | NM_022720    | NP_073557    | Q8WYQ5 | DGCR8_HUMAN  | nd retention. Necessary for    | 0  | :TGGACGTTGGC'  | 0.597 |                    |
| + | 2  | 1147      | IR1_uc002zwt.2_lr  | NM_002073    | NP_002064    | P19086 | GNAZ_HUMAN   | (By similarity).               | 2  | TGGGGGGGCGAC   | 0.572 |                    |
| + | 8  | 1025      | 2A11_uc002zyo.3    | NM_001024938 | NP_001020109 | Q9BYW1 | GTR11_HUMAN  | ellular (Potential).           | 1  | :AGCGAAGATCC   | 0.642 |                    |
| + | 9  | 2747      | i_p.V814I CYTSA_   | NM_015330    | NP_056145    | Q69YQ0 | CYTSA_HUMAN  |                                | 0  | :ATGCCGTTGAG'  | 0.438 | rs139167350        |
| - | 13 | 2507      | sense_Mutation_p   | NM_012143    | NP_036275    | Q9UBB9 | TFP11_HUMAN  |                                | 0  | CCGGTTCATGAT.  | 0.463 |                    |
| - | 11 | 1188_1189 | n_p.K416E CHEK:    | NM_007194    | NP_009125    | O96017 | CHK2_HUMAN   | rotein kinase73E(2) p.S372     | 20 | AATCTTGGAGTG   | 0.416 | 470496;rs146546850 |
| + | 14 | 2143      | i_Mutation_p.R698  | NM_006932    | NP_008863    | P53814 | SMTN_HUMAN   |                                | 3  | :GGGGCGGGC'    | 0.687 | rs141334834        |
| - | 4  | 1082      |                    | NM_015715    | NP_056530    | Q9NZ20 | PA2G3_HUMAN  |                                | 0  | :GCTTGGACCCT   | 0.672 |                    |
| - | 8  | 817       | ion_p.R87C BPIL2   | NM_174932    | NP_777592    | Q8NFO6 | BPIL2_HUMAN  |                                | 2  | :GCTGCGTTCTG'  | 0.488 | rs149674580        |
| + | 4  | 1254      |                    | NM_138435    | NP_612444    | Q8NEG4 | FA83F_HUMAN  |                                | 1  | GCCCCCGTGG     | 0.657 |                    |
| + | 2  | 269       | _Site_p.Q18_splicr | NM_017590    | NP_060060    | Q9UGR2 | Z3H7B_HUMAN  |                                | 1  | :ATTAGTAAGCC   | 0.592 |                    |
| - | 33 | 5283      | p.T518M PLXNB2     | NM_012401    | NP_036533    | O15031 | PLXB2_HUMAN  | lasmic (Potential).            | 6  | GCTCCGTGCGC'   | 0.622 |                    |
| + | 22 | 4337      | p.R893K SHANK3     | NM_001080420 | NP_001073889 | F2Z3L0 | F2Z3L0_HUMAN |                                | 1  | :CTTAGGGGACC   | 0.682 |                    |
| + | 14 | 1774      | _p.P518L CNTN4_    | NM_175607    | NP_783200    | Q8IWW2 | CNTN4_HUMAN  | like C2-type 6.                | 7  | TTTACCGTGCC'   | 0.423 |                    |
| - | 2  | 386       |                    | NM_198560    | NP_940962    | Q7Z7J7 | LHPL4_HUMAN  | ical; (Potential).             | 3  | GATGGCGAAGC.   | 0.627 |                    |
| + | 4  | 698       | v.1_Missense_Mut   | NM_000060    | NP_000051    | P43251 | BTD_HUMAN    | :N hydrolase.                  | 0  | :ATGTCGTGTTCA' | 0.458 |                    |

|   |    |         |                    |              |              |        |             |                               |     |               |       |             |
|---|----|---------|--------------------|--------------|--------------|--------|-------------|-------------------------------|-----|---------------|-------|-------------|
| - | 11 | 3581    | _p.Q648* SATB1_u   | NM_002971    | NP_002962    | Q01826 | SATB1_HUMAN |                               | 4   | CTGCTGCTGTG   | 0.483 |             |
| + | 13 | 2073    |                    | NM_178862    | NP_849193    | Q8TCJ2 | STT3B_HUMAN |                               | 0   | ATTCGGGTAAGA  | 0.383 |             |
| + | 2  | 2024    |                    | NM_001137674 | NP_001131146 | A6NHJ4 | ZN860_HUMAN | :2H2-type 10.                 | 1   | CTTCCGTCACA   | 0.403 | rs143925165 |
| + | 11 | 1475    | ae_Mutation_p.S40  | NM_015442    | NP_056257    | Q9H9A5 | CNOTA_HUMAN |                               | 2   | GACTTCTGAAC   | 0.313 |             |
| + | 3  | 847     | 10hiv.1_Missense_  | NM_031200    | NP_112477    | P51686 | CCR9_HUMAN  | Name=5; (Potential).          | 3   | GTCATGGCTTG   | 0.493 |             |
| + | 12 | 2292    | o10hvj.2_5'UTR T   | NM_130384    | NP_569055    | Q8WXE1 | ATRIP_HUMAN |                               | 1   | TGCCGGGGGTC   | 0.607 |             |
| - | 8  | 846     | _Mutation_p.R234   | NM_004567    | NP_004558    | Q16877 | F264_HUMAN  | -2,6-bisphosphatase.          | 1   | GCCCCGAGGGG   | 0.652 |             |
| - | 16 | 2295    | ae_Mutation_p.E80  | NM_006677    | NP_006668    | O94966 | UBP19_HUMAN | lasmic (Potential).           | 7   | TACTTCGCTCG   | 0.542 |             |
| - | 8  | 1082    | vt_uc003cwy.2_M    | NM_000481    | NP_000472    | P48728 | GCST_HUMAN  |                               | 1   | GCCTCCGCTGC   | 0.597 |             |
| + | 6  | 10538   |                    | NM_003458    | NP_003449    | Q9UPA5 | BSN_HUMAN   |                               | 8   | TGGAGCGACTTC  | 0.642 |             |
| - | 14 | 1940    |                    | NM_003335    | NP_003326    | P41226 | UBA7_HUMAN  |                               | 2   | CAGAAGCTGCA   | 0.617 |             |
| + | 53 | 5661    |                    | NM_004947    | NP_004938    | Q8IZD9 | DOCK3_HUMAN |                               | 0   | TGGACGGCAGC   | 0.617 |             |
| + | 3  | 378     | 1.3_Intron IQCF2_u | NM_203424    | NP_982248    | Q8IXL9 | IQCF2_HUMAN | IQ 2.                         | 0   | TGTGGCGTGTG   | 0.597 | rs140755124 |
| - | 12 | 1585    | _p.R363W PCBP4_    | NM_033010    | NP_127503    | P57723 | PCBP4_HUMAN |                               | 0   | CTGCCGCTCAG   | 0.652 |             |
| - | 16 | 2140    | on_p.R710* PBRN    | NM_181042    | NP_060635    | Q86U86 | PB1_HUMAN   | Bromo 5. p.R710fs*13(1,       | 140 | ACTTCGAATTT   | 0.438 |             |
| + | 3  | 358     | on_p.A2V PRKCD_    | NM_006254    | NP_006245    | Q05655 | KPCD_HUMAN  | C2.                           | 9   | CATGGCGCCGT   | 0.687 |             |
| - | 12 | 1553    | 7_uc003dkv.1_Mis   | NM_198463    | NP_940865    | Q6ZVT6 | CC067_HUMAN |                               | 0   | CTCTTTTAGATC  | 0.438 | rs144152554 |
| + | 5  | 1365    | BO2_uc011bgj.1_f   | NM_002942    | NP_002933    | Q9HCK4 | ROBO2_HUMAN | 3. Extracellular (Potential). | 11  | AAGAAGCTGTAG  | 0.403 |             |
| - | 3  | 1133    |                    | NM_016206    | NP_057290    | A8MV65 | VGLL3_HUMAN |                               | 0   | GGATGGATCCAC  | 0.473 |             |
| - | 6  | 492     | .24_uc003dvi.1_3   | NM_000986    | NP_000977    | P83731 | RL24_HUMAN  |                               | 0   | GGGGAGCTGAA   | 0.358 | rs1804331   |
| - | 6  | 991     |                    | NM_018010    | NP_060480    | Q9NWB7 | IFT57_HUMAN |                               | 3   | GTTGCGGTAGT   | 0.383 |             |
| + | 18 | 4100    | _p.S1230L PHLDE    | NM_001134438 | NP_001127910 | Q86SQ0 | PHLB2_HUMAN | PH.                           | 6   | CCCATCGCCAG   | 0.423 |             |
| - | 4  | 1126    | BTB20_uc003eb1.    | NM_015642    | NP_056457    | Q9HC78 | ZBT20_HUMAN |                               | 5   | AGCCCGGGGCT   | 0.617 |             |
| + | 7  | 2821    | aw.3_Missense_M    | NM_000388    | NP_000379    | P41180 | CASR_HUMAN  | Name=6; (Potential).          | 7   | TTCATCGTCTGG  | 0.527 |             |
| + | 60 | 8988    | ik.2_Missense_Mu   | NM_001024660 | NP_001019831 | O60229 | KALRN_HUMAN |                               | 6   | CTCCCGCCTAG   | 0.552 |             |
| + | 2  | 344     | _p.D39G ROPN1E     | NM_001012337 | NP_001012337 | Q9BZX4 | ROP1B_HUMAN | R11a.                         | 0   | GGCCCGAGTACG  | 0.632 |             |
| + | 28 | 5054    | ijh.2_Missense_M   | NM_032242    | NP_115618    | Q9UIW2 | PLXA1_HUMAN | lasmic (Potential).           | 3   | CACACCGGGGC   | 0.632 |             |
| + | 14 | 2857    | _uc003epw.1_Intr   | NM_001063    | NP_001054    | P02787 | TRFE_HUMAN  | ansferrin-like 2.             | 2   | TATGAGTGGAGT  | 0.507 |             |
| - | 13 | 2043    | eqb.3_Missense_M   | NM_005630    | NP_005621    | Q92959 | SO2A1_HUMAN | ellular (Potential).          | 1   | CTCGCTCCCC    | 0.607 |             |
| + | 1  | 964     | iC22D2_uc003exx    | NM_014779    | NP_055594    | O75157 | T22D2_HUMAN |                               | 1   | CACAGCAGTA    | 0.617 |             |
| - | 4  | 1891    |                    | NM_178822    | NP_849144    | Q6WRI0 | IGS10_HUMAN | like C2-type 2.               | 13  | ATATTCTTAATGT | 0.413 |             |
| - | 17 | 2090    | _p.S656F DHX36_    | NM_020865    | NP_065916    | Q9H2U1 | DHX36_HUMAN |                               | 1   | TTATGGAGAGT   | 0.338 |             |
| - | 6  | 1091    | _p.V272L PLCH1_    | NM_001130960 | NP_001124432 | Q4KWH8 | PLCH1_HUMAN |                               | 4   | AAGAACATTTT   | 0.289 |             |
| - | 14 | 2231    | 49_uc011bpd.1_A    | NM_178824    | NP_849146    | Q8IV35 | WDR49_HUMAN |                               | 3   | TCTGGTTCTTTC  | 0.433 |             |
| - | 4  | 1064    | 11bpt.1_Intron uc0 | NM_020949    | NP_066000    | Q8TBB6 | S7A14_HUMAN |                               | 5   | CCAGCCGTGGG   | 0.502 |             |
| - | 7  | 998     | OC39_uc003fkn.2_   | NM_181426    | NP_852091    | Q9UFE4 | CCD39_HUMAN |                               | 4   | ATGCCGTTCTAC  | 0.358 |             |
| + | 4  | 749_750 | utation_p.17_18W   | NM_004721    | NP_004712    | O43283 | M3K13_HUMAN |                               | 3   | ACTTGGGAAGTG  | 0.525 |             |
| - | 23 | 2671    | v4_uc010hzi.2_Spl  | NM_032279    | NP_115655    | Q4VNC1 | AT134_HUMAN |                               | 2   | GAGCCTGAAAG   | 0.468 |             |
| + | 20 | 4085    | iA_uc011bvm.1_M    | NM_003704    | NP_003695    | P78312 | F193A_HUMAN |                               | 3   | GACCCGACAAA   | 0.507 |             |
| - | 10 | 5032    | dr.1_Missense_Mu   | NM_148894    | NP_683692    | Q8NFC6 | BOD1L_HUMAN |                               | 6   | TGGCTTCGATTT  | 0.468 |             |
| - | 2  | 281     |                    | NM_005130    | NP_005121    | Q14512 | FGFP1_HUMAN |                               | 0   | GTTCCCGGGCC   | 0.493 |             |
| + | 10 | 1436    | xs.1_Missense_M    | NM_018323    | NP_060793    | Q8TCG2 | P4K2B_HUMAN | PI3K/PI4K.                    | 4   | GAGACGGGAAG   | 0.408 |             |
| + | 8  | 978     | grn.3_Nonsense_I   | NM_024936    | NP_079212    | Q9H5U6 | ZCHC4_HUMAN |                               | 2   | TTTCTGGATTTTC | 0.338 |             |
| + | 5  | 1249    | _p.R205C KLHL5_    | NM_015990    | NP_057074    | Q96PQ7 | KLHL5_HUMAN |                               | 1   | GCGTCCGTCAT   | 0.388 |             |
| - | 31 | 3141    | p.G196E ATP8A1_    | NM_006095    | NP_006086    | Q9Y2Q0 | AT8A1_HUMAN | ellular (Potential).          | 3   | CATTTCCAAATC  | 0.398 |             |
| + | 4  | 745     |                    | NM_001080476 | NP_001073945 | A8MXD5 | GRCR1_HUMAN |                               | 1   | TTTCTCCATGCT  | 0.478 |             |
| - | 8  | 1149    | izr.1_Missense_M   | NM_022832    | NP_073743    | P62068 | UBP46_HUMAN |                               | 1   | AAGCCGTGAC    | 0.363 |             |

|   |    |      |                    |              |              |        |             |                                |    |                |       |             |
|---|----|------|--------------------|--------------|--------------|--------|-------------|--------------------------------|----|----------------|-------|-------------|
| - | 3  | 735  | 3haf.3_Missense_I  | NM_001126328 | NP_001119800 | Q8TBB1 | LNX1_HUMAN  |                                | 4  | GGGAGGGAGCC    | 0.607 |             |
| + | 1  | 54   | ihe.2_Missense_IV  | NM_006947    | NP_008878    | O76094 | SRP72_HUMAN |                                | 1  | CGGCGGCAGCG    | 0.632 |             |
| - | 14 | 2661 | ah.1_Missense_Mi   | NM_004439    | NP_004430    | P54756 | EPHA5_HUMAN | Potential). Protein kinase.    | 24 | .GTACCCGGGAA   | 0.428 |             |
| - | 1  | 348  | 2A3_uc010ihp.1_I   | NM_024743    | NP_079019    | Q6UWM9 | UD2A3_HUMAN | cellular (Potential).          | 2  | .TAACTGATTGCC  | 0.348 |             |
| - | 2  | 833  | _p.W126* UGT2B4    | NM_021139    | NP_066962    | P06133 | UD2B4_HUMAN |                                | 2  | .AAATCCCAGTAC  | 0.423 |             |
| - | 4  | 463  | se_Mutation_p.V1   | NM_000583    | NP_000574    | P02774 | VTDB_HUMAN  | Albumin 1.                     | 3  | iGTGAACGGGGA   | 0.493 |             |
| - | 27 | 5236 | ihgq.2_Missense_I  | NM_032217    | NP_115593    | O75179 | ANR17_HUMAN |                                | 10 | TTGCTACTGTTA   | 0.383 |             |
| + | 2  | 331  |                    | NM_015393    | NP_056208    | Q6UWI2 | PARM1_HUMAN | cellular (Potential).          | 1  | .TTTCTCTCCG    | 0.473 |             |
| - | 10 | 1190 | _p.R348Q RASGE     | NM_152545    | NP_689758    | Q0VAM2 | RGF1B_HUMAN | Ras-GEF.                       | 0  | GCTGTTCCGATAA  | 0.343 |             |
| + | 13 | 1911 | ej.1_Missense_Mu   | NM_000253    | NP_000244    | P55157 | MTP_HUMAN   | Vitellogenin.                  | 4  | .CAATCCATCCTA  | 0.413 |             |
| - | 2  | 369  | rk.1_Missense_Mt   | NM_021833    | NP_068605    | P25874 | UCP1_HUMAN  | Solcar 1.                      | 1  | .GGACCGTGTCTG  | 0.577 | rs143645398 |
| + | 7  | 691  | _p.H108Y IL15_uc   | NM_000585    | NP_000576    | P40933 | IL15_HUMAN  |                                | 0  | AGTATTCATGATA  | 0.363 |             |
| + | 6  | 1619 | rh.2_Missense_Mt   | NM_001130067 | NP_001123539 | Q9C040 | TRIM2_HUMAN | NHL 1.                         | 1  | ATTTGATCTTTCC  | 0.537 |             |
| - | 8  | 1437 | F1_uc010iqw.1_Inl  | NM_138386    | NP_612395    | Q96HR8 | NAF1_HUMAN  |                                | 2  | GATTATTTTGTCT  | 0.383 |             |
| - | 7  | 1003 | on_p.R261H DDX1    | NM_001012967 | NP_001012985 | Q5H9U9 | DDX6L_HUMAN |                                | 1  | .GAACACGCTGG   | 0.398 |             |
| + | 5  | 1359 | Jirr.2_Missense_M  | NM_014269    | NP_055084    | Q9UKF5 | ADA29_HUMAN | IB. Extracellular (Potential). | 16 | TTGTTAATATAGT  | 0.333 |             |
| - | 7  | 1129 | zk.1_Missense_Mu   | NM_173553    | NP_775824    | Q8N7C3 | TRIMM_HUMAN | 330.2/SPRY.                    | 2  | .GTCTCCATTTGC  | 0.458 |             |
| + | 3  | 349  | lO_uc011cna.1_M    | NM_007118    | NP_009049    | O75962 | TRIO_HUMAN  | CRAL-TRIO.                     | 18 | TGATTCCCAGG    | 0.453 |             |
| + | 2  | 451  | rd.1_Missense_Mt   | NM_004932    | NP_004923    | P55285 | CADH6_HUMAN | p.G42A(1)                      | 7  | .CTCTGGAAACA   | 0.493 |             |
| + | 20 | 5301 | m.2_Missense_Mt    | NM_178140    | NP_835260    | O15018 | PDZD2_HUMAN |                                | 9  | .CACTCCGAGAG   | 0.582 |             |
| + | 10 | 1366 |                    | NM_032637    | NP_116026    | Q13309 | SKP2_HUMAN  |                                | 4  | GTATTTTTGTATG  | 0.328 |             |
| + | 32 | 6361 | kk.3_Splice_Site_I | NM_133433    | NP_597677    | Q6KC79 | NIPBL_HUMAN |                                | 9  | .AAAACGTGAGT   | 0.318 |             |
| - | 3  | 580  | lB_uc011cpy.1_Mi   | NM_198449    | NP_940851    | Q6PCB8 | EMB_HUMAN   | Potential). Ig-like V-type 1.  | 0  | .TATTCTCAAGTTC | 0.368 |             |
| + | 17 | 3393 | p.V1044I BDP1_uc   | NM_018429    | NP_060899    | A6H8Y1 | BDP1_HUMAN  | -M-E-T-D-L-K-X-T-G-R- E-       | 2  | .GAGAAGTATCC   | 0.458 |             |
| - | 2  | 134  | ie_Mutation_p.D31  | NM_015566    | NP_056381    | Q9Y6X4 | F169A_HUMAN |                                | 0  | AGGGTCCCCAC    | 0.383 |             |
| - | 10 | 1414 | _p.P289L POC5_uc   | NM_001099271 | NP_001092741 | Q8NA72 | POC5_HUMAN  |                                | 1  | .TCGGAGGAGCT   | 0.507 |             |
| + | 3  | 750  | _p.V132I VCAN_uc   | NM_004385    | NP_004376    | P13611 | CSPG2_HUMAN | g-like V-type.                 | 16 | .GTGACGTCATG   | 0.522 |             |
| - | 3  | 321  | kkp.2_Missense_IV  | NM_001145678 | NP_001139150 | Q8IV33 | K0825_HUMAN |                                | 0  | .TCCAGGAAATG   | 0.308 |             |
| + | 20 | 2667 | kkk.2_Missense_IV  | NM_032290    | NP_115666    | Q9BQI6 | ANR32_HUMAN | ANK 2.                         | 2  | TGCAACGTTGTC   | 0.458 |             |
| + | 4  | 381  | 81B_uc010jbe.1_5   | NM_152548    | NP_689761    | Q96LP2 | FA81B_HUMAN |                                | 2  | .GAGAGGTCAGC   | 0.502 |             |
| - | 15 | 1551 | 3kpp.1_Missense_I  | NM_022140    | NP_071423    | Q9HCS5 | E41LA_HUMAN |                                | 1  | .TGGGGAATTG    | 0.512 |             |
| - | 19 | 2915 | kkrv.3_Missense_IV | NM_020796    | NP_065847    | Q9H2E6 | SEM6A_HUMAN | lasmic (Potential).            | 2  | .GTTGCCGGGAG   | 0.612 |             |
| - | 52 | 7010 |                    | NM_001999    | NP_001990    | P35556 | FBN2_HUMAN  | 36; calcium-binding.           | 15 | .TCCGTCGGTGT   | 0.413 |             |
| + | 8  | 1832 | kuz.2_Missense_IV  | NM_014031    | NP_054750    | Q9Y2P4 | S27A6_HUMAN |                                | 0  | GGACCGTACTGC   | 0.373 |             |
| + | 6  | 1014 | rj.1_Intron WNT8A  | NM_058244    | NP_490645    | Q9H1J5 | WNT8A_HUMAN |                                | 4  | ACTGCGCACGCT   | 0.512 |             |
| + | 12 | 1926 | yo.1_Missense_Mt   | NM_005733    | NP_005724    | O95235 | KI20A_HUMAN | kinesin-motor.                 | 0  | .AGGCCGTTCCCT  | 0.488 |             |
| + | 1  | 1445 | :DHA7_uc003ihq.2   | NM_018904    | NP_061727    | Q9Y5I0 | PCDAD_HUMAN | Extracellular (Potential).     | 6  | GGACGCGGACG    | 0.667 |             |
| + | 1  | 2159 |                    | NM_018940    | NP_061763    | Q9Y5E2 | PCDB7_HUMAN | Extracellular (Potential).     | 6  | .GCTCCTGGTGG   | 0.706 |             |
| + | 1  | 713  | l_Intron PCDHGB2   | NM_003735    | NP_003726    | O60330 | PCDGC_HUMAN | r (Potential). Cadherin 2.     | 4  | .TCATCGTGCAA   | 0.582 |             |
| + | 6  | 1408 | _uc010jgf.2_Misser | NM_001130029 | NP_001123501 | Q8NC24 | RELL2_HUMAN |                                | 0  | .TGGCTCCCCCA   | 0.642 |             |
| - | 12 | 3187 | _p.R559Q SH3TC2    | NM_024577    | NP_078853    | Q8TF17 | S3TC2_HUMAN | TPR 4.                         | 2  | .GGTCCGATAAA   | 0.557 | rs140666774 |
| + | 4  | 766  | EL2_uc011dca.1_3   | NM_152407    | NP_689620    | Q8TAA5 | GRPE2_HUMAN |                                | 1  | .TTGCCCGAGTG   | 0.512 |             |
| + | 5  | 842  | _p.S228F PPARGC    | NM_133263    | NP_573570    | Q86YN6 | PRGC2_HUMAN |                                | 0  | .GGACTCCCTAG   | 0.672 |             |
| - | 21 | 2615 |                    | NM_000440    | NP_000431    | P16499 | PDE6A_HUMAN |                                | 2  | .TGGCCGACTGC   | 0.408 |             |
| - | 20 | 2956 | F1R_uc010jhc.2_R   | NM_005211    | NP_005202    | P07333 | CSF1R_HUMAN | lasmic (Potential).            | 54 | .CACCCGCTCTC   | 0.632 |             |
| + | 5  | 805  | .A225T GALNT10_    | NM_198321    | NP_938080    | Q86SR1 | GLT10_HUMAN | main A. Lumenal (Potential     | 2  | TGGGGGCCTCA    | 0.542 |             |
| - | 4  | 649  |                    | NM_032782    | NP_116171    | Q8TDQ0 | HAVR2_HUMAN | cellular (Potential).          | 0  | ATCAGGGAGGCT   | 0.333 |             |



|   |    |           |                      |              |              |        |             |                            |    |                |       |             |
|---|----|-----------|----------------------|--------------|--------------|--------|-------------|----------------------------|----|----------------|-------|-------------|
| + | 7  | 989       | _p.P174L GABRA1      | NM_000806    | NP_000797    | P14867 | GBRA1_HUMAN | cellular (Probable).       | 3  | ACTTCCCTATGG   | 0.378 | rs138145692 |
| - | 36 | 4917      | _j.2_Missense_Mut    | NM_003062    | NP_003053    | O75094 | SLIT3_HUMAN | CTCK.                      | 4  | CCACTGGAAGAC   | 0.637 |             |
| + | 13 | 2372_2373 |                      | NM_133369    | NP_588610    | Q6ZN44 | UNC5A_HUMAN | plasmic (Potential).       | 1  | CATACCAAGGT    | 0.658 |             |
| - | 15 | 1591      | _j3mhm.2_Missense    | NM_016222    | NP_057306    | Q9UJV9 | DDX41_HUMAN | case C-terminal.           | 0  | GCGCCCGGTGC    | 0.607 |             |
| - | 3  | 982       | _jlm.1_Missense_M    | NM_018434    | NP_060904    | Q86XS8 | GOLI_HUMAN  | cellular (Potential).      | 3  | CAGCCACGGCTG   | 0.383 |             |
| - | 5  | 655       | _P2L_uc011dim.1_I    | NM_004752    | NP_004743    | O75603 | GCM2_HUMAN  |                            | 3  | CTTCTGCCTAGA   | 0.398 |             |
| + | 3  | 265       | _S49L SLC17A4_uc     | NM_005495    | NP_005486    | Q9Y2C5 | S17A4_HUMAN |                            | 1  | ATTTTTCAATTTA  | 0.478 |             |
| + | 1  | 27        |                      | NM_001732    | NP_001723    | Q13410 | BT1A1_HUMAN |                            | 2  | ATGGCAGTTTTCT  | 0.547 |             |
| + | 18 | 1890      | _se_Mutation_p.P5E   | NM_001025091 | NP_001020262 | Q8NE71 | ABCF1_HUMAN |                            | 2  | CAGGCCCTGAG    | 0.562 |             |
| + | 3  | 260       | _K2B_uc003nvs.1_C    | NM_021221    | NP_067044    | Q8NDX9 | LY65B_HUMAN | UPAR/Ly6.                  | 0  | CCAACACCTACT   | 0.532 |             |
| - | 6  | 1008      | _j.2_intron C6orf27_ | NM_025258    | NP_079534    | Q9Y334 | G7C_HUMAN   |                            | 3  | CCCTCGGTGGC    | 0.602 |             |
| + | 7  | 1141      | _Missense_Mutatio    | NM_000063    | NP_000054    | P06681 | CO2_HUMAN   | VWFA.                      | 2  | CTGAGCGTTGCC   | 0.517 |             |
| - | 2  | 1000      | _j.5'Flank ATF6B_t   | NM_022110    | NP_071393    | Q9UIM3 | FKBPL_HUMAN |                            | 0  | CTGGGGGTAAAG   | 0.592 |             |
| + | 7  | 730_731   | _FL8_uc003oac.1_I    | NM_030652    | NP_085155    | Q99944 | EGFL8_HUMAN | Potential.                 | 0  | CAGCGCTGGAC    | 0.619 |             |
| + | 5  | 398       | _NDR46_uc010juo.     | NM_014260    | NP_055075    | O15212 | PFDF6_HUMAN |                            | 0  | CAGCTTCGGGAT   | 0.547 |             |
| + | 58 | 8169      | _f125_uc003oez.1_    | NM_002224    | NP_002215    | Q14573 | ITPR3_HUMAN | plasmic (Potential).       | 19 | CTAGATGACGGAC  | 0.617 |             |
| + | 8  | 1100      | _C2_uc011dtv.1_5'L   | NM_173558    | NP_775829    | Q7Z6J4 | FGD2_HUMAN  |                            | 3  | CCCTCGAGGACC   | 0.632 |             |
| - | 5  | 634_635   |                      | NM_006653    | NP_006644    | O43559 | FRS3_HUMAN  |                            | 2  | TCGAGGGAGGT    | 0.475 |             |
| + | 8  | 870       | _j3_uc003orv.1_Miss  | NM_138572    | NP_612639    | Q7Z7C8 | TAF8_HUMAN  |                            | 1  | TGTCGGGTAGC    | 0.537 |             |
| - | 6  | 862       | _b.2_Missense_Mu     | NM_023932    | NP_076421    | Q6UY11 | DLK2_HUMAN  | GF-like 6; calcium-binding | 0  | GGCGGCTGGCA    | 0.612 |             |
| + | 2  | 354       | _vx.1_Missense_M     | NM_152732    | NP_689945    | Q9H1X1 | RSPH9_HUMAN |                            | 2  | TCATACGAATATC  | 0.527 | rs150021750 |
| - | 7  | 2039      | _df.1_Missense_Mu    | NM_021073    | NP_066551    | P22003 | BMP5_HUMAN  |                            | 2  | TTCTATATTTTTCT | 0.343 |             |
| + | 5  | 615       | _pje.2_Missense_M    | NM_000056    | NP_000047    | P21953 | ODBB_HUMAN  |                            | 0  | CTATCCGGTCCC   | 0.483 | rs79761867  |
| - | 3  | 657       | _pou.2_Missense_M    | NM_001143957 | NP_001137429 | Q9BZJ6 | GPR63_HUMAN | cellular (Potential).      | 2  | TCACGGTCAAGC   | 0.433 |             |
| + | 2  | 462       |                      | NM_021620    | NP_067633    | Q9H4Q3 | PRD13_HUMAN | SET.                       | 0  | CAGATGGATAGG   | 0.617 |             |
| - | 3  | 526       | _jvt.2_Missense_M    | NM_001105206 | NP_001098676 | Q16363 | LAMA4_HUMAN |                            | 9  | CGGTGTGAAAGA   | 0.423 |             |
| + | 4  | 664       | _p.R79H FAM26D_      | NM_153036    | NP_694581    | Q5JW98 | FA26D_HUMAN |                            | 0  | CATCCGCATTC    | 0.463 |             |
| + | 9  | 954       |                      | NM_002269    | NP_002260    | O15131 | IMA5_HUMAN  | ARM 5.                     | 4  | CAGACGTGTGT    | 0.408 |             |
| + | 2  | 472       |                      | NM_175057    | NP_778227    | Q96R19 | TAAR9_HUMAN | Name=4; (Potential).       | 0  | TTTCTGGTTCT    | 0.423 |             |
| + | 12 | 1915      |                      | NM_020340    | NP_065073    | Q5TH69 | BIG3_HUMAN  | SEC7.                      | 2  | CTAGCCGATGAAC  | 0.567 | rs147532213 |
| + | 3  | 1305      | _e_Mutation_p.T3T    | NM_015093    | NP_055908    | Q9NYJ8 | TAB2_HUMAN  |                            | 0  | CAAAATCGGATG   | 0.493 |             |
| - | 6  | 554       | _jO3qrb.2_Translati  | NM_032861    | NP_116250    | Q96JX3 | SRAC1_HUMAN |                            | 0  | CTTCCGTAGGAC   | 0.453 | rs148861818 |
| + | 6  | 1120      | _jqt.2_Missense_M    | NM_003057    | NP_003048    | O15245 | S22A1_HUMAN | plasmic (Potential).       | 0  | CTGTCCGCACG    | 0.592 |             |
| + | 8  | 1725      | _p.R437W HEATR2      | NM_017802    | NP_060272    | Q86Y56 | HEAT2_HUMAN |                            | 1  | TGGAGCGGGTG    | 0.637 |             |
| + | 2  | 1291      | _ense_Mutation_p.v   | NM_001098201 | NP_001091671 | Q99527 | GPER_HUMAN  | cellular (Potential).      | 1  | CCATGCCACC     | 0.622 |             |
| - | 8  | 1075      | _f27_uc003smh.3_C    | NM_152743    | NP_689956    | Q6PJG6 | BRAT1_HUMAN |                            | 0  | CTCTGCCGCTCC   | 0.682 |             |
| - | 25 | 3818      |                      | NM_032415    | NP_115791    | Q9BXL7 | CAR11_HUMAN | ylate kinase-like.         | 50 | CCGATCTTGCT    | 0.647 |             |
| - | 1  | 1967      | _DIL_uc011jwd.1_Ir   | NM_020144    | NP_064529    | Q9NRJ5 | PAPOB_HUMAN |                            | 1  | CTGAGGAATAC    | 0.453 |             |
| - | 2  | 263       | _ion.3_Missense_M    | NM_024963    | NP_079239    | Q96ME1 | FXL18_HUMAN | F-box.                     | 3  | CTTCCGACAGG    | 0.527 |             |
| + | 6  | 1625      |                      | NM_138426    | NP_612435    | Q86VQ1 | GLC11_HUMAN |                            | 0  | AGGAGCGCAGC    | 0.537 | rs145682662 |
| - | 18 | 3960      |                      | NM_015204    | NP_056019    | Q9UPZ6 | THS7A_HUMAN | Extracellular (Potential). | 3  | CCCTTCTACT     | 0.413 |             |
| + | 13 | 1837      | _i76_splice ABCB5_   | NM_178559    | NP_848654    | Q2M3G0 | ABCB5_HUMAN |                            | 6  | TTTATAAGATAGC  | 0.333 |             |
| - | 2  | 1102      | _uc003szc.1_5'Flanl  | NM_000522    | NP_000513    | P31271 | HXA13_HUMAN | Homeobox.                  | 1  | TCGTCTGGGCT    | 0.433 |             |
| + | 11 | 1153      |                      | NM_016616    | NP_057700    | Q8N427 | TXND3_HUMAN |                            | 3  | CAGCCAGGTT     | 0.448 |             |
| - | 4  | 514       |                      | NM_032014    | NP_114403    | Q96EL2 | RT24_HUMAN  |                            | 0  | TTGGAGGTGGA    | 0.478 |             |
| - | 6  | 831       | _itron POLM_uc003    | NM_013284    | NP_037416    | Q9NP87 | DPOLM_HUMAN |                            | 3  | CACACCGACCC    | 0.602 |             |
| - | 17 | 2375      | _ng.2_Missense_M     | NM_033054    | NP_149043    | B011T2 | MYO1G_HUMAN |                            | 4  | GTCTCCGGAAC    | 0.677 |             |

|   |    |           |                    |              |              |        |             |                              |       |               |       |             |
|---|----|-----------|--------------------|--------------|--------------|--------|-------------|------------------------------|-------|---------------|-------|-------------|
| - | 8  | 1094      | sense_Mutation_p   | NM_033054    | NP_149043    | B011T2 | MYO1G_HUMAN | osin head-like.              | 4     | GGGGTGTGGCC   | 0.647 |             |
| + | 11 | 1993      |                    | NM_021116    | NP_066939    | Q08828 | ADCY1_HUMAN |                              | 6     | TCACCCGGGTC   | 0.552 |             |
| - | 8  | 1329_1330 | c.2_Missense_Mu    | NM_015198    | NP_056013    | O75128 | COBL_HUMAN  |                              | 5     | CCTGCGGGGCT   | 0.629 |             |
| + | 1  | 1880      |                    | NM_003508    | NP_003499    | O00144 | FZD9_HUMAN  | lasmic (Potential).          | 1     | GGGCCCGGGCC   | 0.657 |             |
| + | 20 | 1275      | ELN_uc003tr.2_Ir   | NM_000501    | NP_001075224 | P15502 | ELN_HUMAN   | Ala-rich.                    | 5     | GCATTCCTACTT  | 0.627 |             |
| + | 6  | 880       |                    | NM_001099435 | NP_001092905 | A6NIY4 | SPDE5_HUMAN |                              | 0     | CGCTCGGTTCC   | 0.587 |             |
| - | 6  | 561       | z.1_Missense_Mu    | NM_005338    | NP_005329    | O00291 | HIP1_HUMAN  |                              | 8     | TTTCTCCAGCTC  | 0.552 |             |
| + | 2  | 1463      | .E120K GRM3_uc     | NM_000840    | NP_000831    | Q14832 | GRM3_HUMAN  | ellular (Potential).         | 13    | TGGATGAAGCT   | 0.433 |             |
| - | 15 | 1844      | _p.R590* ABCB4_    | NM_018849    | NP_061337    | P21439 | MDR3_HUMAN  | 1. Cytoplasmic (By similarit | 6     | CAGTCGGTGTG   | 0.488 |             |
| + | 4  | 989       |                    | NM_019004    | NP_061877    | Q9P2G1 | AKIB1_HUMAN |                              | 1     | TCTCACGGGATC  | 0.368 |             |
| + | 18 | 1399      | 1A2_uc011kib.1_li  | NM_000089    | NP_000080    | P08123 | CO1A2_HUMAN |                              | 9     | CCAAGGGTGTCT  | 0.453 | rs72656391  |
| - | 7  | 807       | _p.A206S SLC25/    | NM_014251    | NP_055066    | Q9UJS0 | CMC2_HUMAN  |                              | 4     | AGCAGCCTCAA   | 0.308 |             |
| - | 6  | 1131      | e_Mutation_p.R23   | NM_032924    | NP_116313    | P17036 | ZNF3_HUMAN  | 2H2-type 3.                  | 1     | TCCTCCGATGC   | 0.498 |             |
| + | 4  | 494       | Igt.2_Intron GATS_ | NM_024070    | NP_076975    | Q6DKI7 | PVRIG_HUMAN | ical; (Potential).           | 2     | AGGGACCCCGG   | 0.637 |             |
| + | 16 | 3566      | ZAN_uc003uwl.2_f   | NM_003386    | NP_003377    | Q9Y493 | ZAN_HUMAN   | extracellular (Potential).   | 11    | TGGGACACACA   | 0.617 |             |
| + | 3  | 4732      | C17_uc010lho.1_F   | NM_001040105 | NP_001035194 | Q685J3 | MUC17_HUMAN | ch.J59 X approximate tand    | 27    | TGACGGTACCA   | 0.488 |             |
| + | 3  | 12373     | C17_uc010lho.1_F   | NM_001040105 | NP_001035194 | Q685J3 | MUC17_HUMAN | ellular (Potential).         | 27    | CCCCACGGTGA   | 0.537 | rs150141937 |
| - | 10 | 1287      | _uc003var.2_RNA    | NM_145032    | NP_659469    | Q8NEE6 | FXL13_HUMAN | LRR 3.                       | 0     | GCATCGTCTGT   | 0.463 |             |
| - | 55 | 9102      | z.2_Missense_Mut   | NM_005045    | NP_005036    | P78509 | RELN_HUMAN  | BNR 14.                      | 19    | CATCGGTAGAG   | 0.527 |             |
| - | 52 | 5968      | fw.2_Missense_M    | NM_014705    | NP_055520    | Q8N1I0 | DOCK4_HUMAN | Pro-rich.                    | 4     | GGGGCGGAGTC   | 0.711 |             |
| - | 1  | 162       |                    | NM_002711    | NP_002702    | Q16821 | PPR3A_HUMAN |                              | 34    | AACCTCGTCTAC  | 0.378 |             |
| + | 6  | 745       | R_uc011knq.1_5'l   | NM_000492    | NP_000483    | P13569 | CFTR_HUMAN  | rtial). ABC transmembrane    | 5     | TCGCTCCTTTG   | 0.473 | rs121908803 |
| - | 2  | 2083      |                    | NM_005302    | NP_005293    | O15354 | GPR37_HUMAN | lasmic (Potential).          | 3     | CCCTCGGGTAC   | 0.433 |             |
| - | 11 | 1259      | ense_Mutation_p.C  | NM_018077    | NP_060547    | Q9NW13 | RBM28_HUMAN | RRM 3.                       | 2     | GAACTGGGCAA   | 0.448 |             |
| - | 31 | 5721      | /qz.3_Missense_M   | NM_020911    | NP_065962    | Q9HCM2 | PLXA4_HUMAN | lasmic (Potential).          | 1     | AGGTATGCGTTC  | 0.507 |             |
| - | 15 | 3086      |                    | NM_020911    | NP_065962    | Q9HCM2 | PLXA4_HUMAN |                              | 1     | AGTGTCTGTGT   | 0.617 |             |
| - | 15 | 1860      |                    | NM_004333    | NP_004324    | P15056 | BRAF_HUMAN  | rotein kinase_R603>(2) p.T   | 18290 | GATTTCACTGTAC | 0.368 |             |
| - | 3  | 750       | xc.3_Missense_Mu   | NM_001001317 | NP_001001317 | Q8IYP2 | PRS58_HUMAN | peptidase S1.                | 0     | AGATATCACACA  | 0.433 |             |
| + | 23 | 3014      | tc.1_Missense_Mu   | NM_000083    | NP_000074    | P35523 | CLCN1_HUMAN | smic (By similarity).        | 5     | CTCGCATCCA    | 0.617 |             |
| + | 1  | 796       |                    | NM_001004685 | NP_001004685 | O95006 | OR2F2_HUMAN | ellular (Potential).         | 4     | CTGGTCCCTCA   | 0.493 |             |
| + | 12 | 1482_1483 | d.1_Missense_Mu    | NM_007188    | NP_009119    | Q9NUT2 | ABCB8_HUMAN |                              | 3     | TGCGTCCCAAA   | 0.649 |             |
| + | 16 | 1907      | J3wpt.2_Missense   | NM_014629    | NP_055444    | O15013 | ARHGA_HUMAN | DH.                          | 1     | CACTAGCAGAG   | 0.483 |             |
| + | 10 | 1280      |                    | NM_016353    | NP_057437    | Q9UIJ5 | ZDHC2_HUMAN |                              | 0     | TTCCAACCTTGC  | 0.373 | rs2904682   |
| - | 3  | 1848      | .2_Missense_Mute   | NM_005144    | NP_005135    | O43593 | HAIR_HUMAN  |                              | 2     | GCCGCGTGGAC   | 0.662 |             |
| - | 7  | 482       | _p.E81K BIN3_uc    | NM_018688    | NP_061158    | Q9NQY0 | BIN3_HUMAN  | AR. Potential.               | 0     | CTGTTCCCGCC   | 0.612 |             |
| - | 9  | 1143      |                    | NM_003844    | NP_003835    | O00220 | TR10A_HUMAN | lasmic (Potential).          | 6     | AGTGGGTGTCAG  | 0.532 |             |
| - | 1  | 834       | fe.1_Missense_M    | NM_000680    | NP_000671    | P35348 | ADA1A_HUMAN | smic (By similarity).        | 5     | GGTAGCGCAGC   | 0.617 |             |
| + | 3  | 497       | ense_Mutation_p.f  | NM_001135726 | NP_001129198 | Q6NT76 | HMBX1_HUMAN |                              | 1     | GGACCGTCTTG   | 0.438 |             |
| - | 6  | 3688      | 3xkn.1_Missense    | NM_001002814 | NP_001002814 | Q6WKZ4 | RFIP1_HUMAN | FIP-RBD.                     | 3     | CCGAGGGGCTC   | 0.448 |             |
| + | 2  | 272       | 2L_uc003xku.3_5'l  | NM_004674    | NP_004665    | Q9UBL3 | ASH2L_HUMAN |                              | 2     | TAAGCGGTGGC   | 0.343 |             |
| - | 7  | 1312      | xrf.3_Missense_M   | NM_014781    | NP_055596    | Q8TDY2 | RBCC1_HUMAN |                              | 11    | AAGATTCGTTAG  | 0.418 | rs140425456 |
| + | 2  | 605       | r.1_Missense_Mutr  | NM_006269    | NP_006260    | P56715 | RP1_HUMAN   |                              | 12    | GCCCCCACGG    | 0.692 |             |
| - | 11 | 1481      | cr.3_Missense_Mu   | NM_020361    | NP_065094    | Q8N4T0 | CBPA6_HUMAN |                              | 2     | TGGGAGTAAAA   | 0.428 |             |
| + | 39 | 4771      |                    | NM_024870    | NP_079146    | Q70Z35 | PREX2_HUMAN |                              | 17    | TGGGAGTCAGA   | 0.478 |             |
| - | 3  | 393       | ALB1_uc011lge.1    | NM_004929    | NP_004920    | P05937 | CALB1_HUMAN | EF-hand 2.                   | 1     | TTTTCCATCATC  | 0.289 |             |
| + | 55 | 10130     | iw.2_Missense_Mu   | NM_017890    | NP_060360    | Q7Z7G8 | VP13B_HUMAN |                              | 20    | GCAGTTGTGT    | 0.398 |             |
| + | 16 | 2600      | R1_uc010mch.2_f    | NM_018002    | NP_060472    | Q8N573 | OXR1_HUMAN  | TLD.                         | 0     | AATTTGCGCTTC  | 0.323 |             |

|   |    |      |                    |              |              |        |             |                               |    |                    |       |             |
|---|----|------|--------------------|--------------|--------------|--------|-------------|-------------------------------|----|--------------------|-------|-------------|
| - | 2  | 1111 |                    | NM_139166    | NP_631905    | Q8N0Z2 | ABRA_HUMAN  | with actin (By similarity).   | 2  | 'GGCACGCATGA'      | 0.453 |             |
| + | 5  | 3023 | p.G281S FAM83A     | NM_032899    | NP_116288    | Q86UY5 | FA83A_HUMAN | Ser-rich.                     | 4  | TCAGCGGCCGC        | 0.741 |             |
| + | 9  | 1053 |                    | NM_001039112 | NP_001034201 | Q2WJG9 | FR1L6_HUMAN | toplasmic (Potential).        | 11 | 'TTGTGGAGGTC'      | 0.493 |             |
| + | 3  | 1274 | kx.1_Missense_Mt   | NM_198572    | NP_940974    | Q76KD6 | SPERI_HUMAN |                               | 2  | 'ACCTCGTACCT'      | 0.622 |             |
| + | 2  | 70   | CK5_uc003zcg.2_f   | NM_174922    | NP_777582    | Q3MIX3 | ADCK5_HUMAN |                               | 1  | 'AGGTGCAGCTC'      | 0.582 |             |
| - | 2  | 398  | f82_uc003zqb.2_5   | NM_024828    | NP_079104    | Q9H8G2 | CI082_HUMAN |                               | 0  | 'CAGTCAGGTCC'      | 0.343 |             |
| - | 1  | 2962 | lc003zrh.1_5'Flanl | NM_153809    | NP_722516    | Q8IZX4 | TAF1L_HUMAN |                               | 26 | 'AGCAATGAAGG'      | 0.473 |             |
| - | 6  | 1009 | ense_Mutation_p.A  | NM_033655    | NP_387504    | Q9BZ76 | CNTP3_HUMAN | potential). Laminin G-like 1. | 1  | 'CAGGAGCAATA'      | 0.498 |             |
| + | 13 | 1340 | b.1_RNA TMC1_u     | NM_138691    | NP_619636    | Q8TDI8 | TMC1_HUMAN  | cellular (Potential).         | 1  | 'CAATTGGATGGA'     | 0.403 |             |
| - | 8  | 2869 |                    | NM_015225    | NP_056040    | Q8WUY3 | PRUN2_HUMAN |                               | 0  | 'ATCTACCTTTTC'     | 0.398 |             |
| - | 1  | 357  |                    | NM_016848    | NP_058544    | Q92529 | SHC3_HUMAN  |                               | 4  | 'CGACCGATGTC'      | 0.562 |             |
| + | 7  | 1643 | c.2_Missense_Mut   | NM_006648    | NP_006639    | Q9Y3S1 | WNK2_HUMAN  |                               | 12 | CTGGCCCGCGC        | 0.647 |             |
| + | 2  | 227  | iaxl.1_Missense_Iv | NM_003275    | NP_003266    | P28289 | TMOD1_HUMAN |                               | 0  | 'CAGACGAGAAC'      | 0.473 | rs141454774 |
| - | 11 | 1543 | nuc.1_Missense_I   | NM_001080398 | NP_001073867 |        |             |                               | 0  | AGAGCGGAGGA'       | 0.413 |             |
| - | 3  | 417  | 4bjg.2_Missense_   | NM_005118    | NP_005109    | O95150 | TNF15_HUMAN | cellular (Potential).         | 0  | 'CTTACCTGTCA'      | 0.438 |             |
| + | 54 | 7209 | p.E2346K SPTAN     | NM_003127    | NP_003118    | Q13813 | SPTA2_HUMAN | EF-hand 2.                    | 10 | 'AAGGGGAACCT'      | 0.567 |             |
| + | 11 | 1306 | wz.2_Intron FAM7C  | NM_032809    | NP_116198    | Q7L4E1 | FA73B_HUMAN |                               | 1  | TCTTCGGGAAAC       | 0.582 |             |
| + | 5  | 1165 |                    | NM_006059    | NP_006050    | Q9Y6N6 | LAMC3_HUMAN | inin EGF-like 2.              | 3  | 'CTGCCGTGACC'      | 0.637 | rs45505601  |
| + | 18 | 2063 | w.2_Missense_Mu    | NM_007171    | NP_009102    | Q9Y6A1 | POMT1_HUMAN |                               | 1  | 'TCCGACGGCGA'      | 0.428 | rs150899645 |
| - | 5  | 618  | VTPD2_uc004ckx.    | NM_203468    | NP_982293    | Q9Y5L3 | ENTP2_HUMAN | cellular (Potential).         | 0  | 'CCACCGGCCCA'      | 0.677 |             |
| + | 6  | 1104 | la.3_Missense_Mt   | NM_207309    | NP_997192    | Q3KQV9 | UAP1L_HUMAN |                               | 1  | 'TGGCTGTGAAG'      | 0.532 |             |
| - | 7  | 854  | py.1_Missense_M    | NM_004192    | NP_004183    | O95671 | ASML_HUMAN  |                               | 0  | GAGTGGGCTCC'       | 0.706 |             |
| - | 2  | 2156 | ED1_uc004cqh.1     | NM_004729    | NP_004720    | O96006 | ZBED1_HUMAN |                               | 0  | 'CACTCCGGGCG'      | 0.672 |             |
| + | 12 | 2514 | iid.1_Missense_Mt  | NM_001830    | NP_001821    | P51793 | CLCN4_HUMAN | smic (By similarity).         | 5  | 'GCGGCGCATCC'      | 0.592 |             |
| + | 3  | 1158 |                    | NM_016562    | NP_057646    | Q9NYK1 | TLR7_HUMAN  | ar (Potential). LRR 12.       | 5  | TCTCCCCAGCC'       | 0.398 |             |
| - | 6  | 1334 | v.2_Nonsense_Mu    | NM_002641    | NP_002632    | P37287 | PIGA_HUMAN  | lasmic (Potential).           | 0  | 'CAGTCGTTGTG'      | 0.483 |             |
| - | 28 | 3808 | i.1_3'UTR PDHA1    | NM_001001671 | NP_001001671 | Q6ZN16 | M3K15_HUMAN |                               | 7  | GCAGCCGCAAC'       | 0.408 |             |
| + | 1  | 119  | l.5'Flank MAGEB1   | NM_002367    | NP_002358    | O15481 | MAGB4_HUMAN |                               | 1  | 'TGCCCGTGAGA'      | 0.572 |             |
| - | 5  | 685  | ch.1_Missense_Mt   | NM_006307    | NP_006298    | P78539 | SRPX_HUMAN  | HYR.                          | 0  | 'ACACCCGGACT'      | 0.433 | rs111307887 |
| - | 13 | 1681 |                    | NM_004229    | NP_004220    | O60244 | MED14_HUMAN | EBF1. Interaction with STP    | 4  | 'TTATCGTAGGC'      | 0.368 |             |
| + | 14 | 2438 | 512H DDX3X_ucC     | NM_001356    | NP_001347    | O00571 | DDX3X_HUMAN | case C-terminal.              | 6  | 'ACATCGTATTGC'     | 0.373 |             |
| - | 4  | 293  | n_p.L67F SSX3_uc   | NM_021014    | NP_066294    | Q99909 | SSX3_HUMAN  | RAB-related.                  | 0  | 'TGGGAGGATGG'      | 0.353 |             |
| + | 4  | 504  | ldmu.2_Missense_   | NM_024859    | NP_079135    | Q9H6Y5 | MAGIX_HUMAN | PDZ.                          | 0  | TGGCCGTGCGC        | 0.632 |             |
| - | 42 | 4992 | nip.2_Missense_M   | NM_005183    | NP_005174    | O60840 | CAC1F_HUMAN | ic (Potential). Poly-Glu.     | 6  | gccccctcttctctctc' | 0.383 |             |
| - | 29 | 3606 | nip.2_Missense_M   | NM_005183    | NP_005174    | O60840 | CAC1F_HUMAN | ismic (Potential). IV.        | 6  | 'ACACACGATACT'     | 0.562 |             |
| + | 1  | 132  |                    | NM_198512    | NP_940914    | Q6ZPD8 | DG2L6_HUMAN |                               | 1  | 'GGAGGGCCTCC'      | 0.463 |             |
| - | 1  | 1962 | a.1_Intron RGAG4   | NM_001024455 | NP_001019626 | Q5HYW3 | RGAG4_HUMAN |                               | 3  | 'CTGTGCGGCGA'      | 0.587 |             |
| - | 29 | 6830 | .R2262C ODZ1_u     | NM_014253    | NP_055068    | Q9UKZ4 | TEN1_HUMAN  | tracellular (Potential).      | 23 | 'GACACGTCGCC'      | 0.448 |             |
| + | 5  | 650  | p.D139N MST4_uc    | NM_016542    | NP_057626    | Q9P289 | MST4_HUMAN  | rotein kinase.                | 9  | 'CCATTTGATGAG'     | 0.343 |             |
| + | 5  | 2930 | nwr.1_Missense_I   | NM_032539    | NP_115928    | Q9H156 | SLIK2_HUMAN | lasmic (Potential).           | 7  | ACGCCGAAAGG'       | 0.428 | rs147278885 |
| + | 3  | 1123 |                    | NM_005364    | NP_005355    | P43361 | MAGA8_HUMAN | MAGE.                         | 0  | 'CATTTCTTACCC'     | 0.577 | rs45578531  |
| + | 2  | 110  | myi.1_Missense_I   | NM_007150    | NP_009081    | O15231 | ZN185_HUMAN |                               | 3  | 'AATAACGTTCTC'     | 0.582 |             |
| - | 8  | 2180 | .R548W PDZD4_u     | NM_032512    | NP_115901    | Q76G19 | PDZD4_HUMAN |                               | 1  | 'CAGCCGATCTCC'     | 0.677 |             |
| + | 13 | 2695 |                    | NM_017514    | NP_059984    | P51805 | PLXA3_HUMAN | Extracellular (Potential).    | 3  | 'CCCCGCATCA'       | 0.667 |             |
| + | 22 | 4071 |                    | NM_017514    | NP_059984    | P51805 | PLXA3_HUMAN | lasmic (Potential).           | 3  | 'ACTACCGGACT'      | 0.627 |             |
| + | 17 | 2494 | p.E690K SCNN1C     | NM_002978    | NP_002969    |        |             |                               | 0  | CAGCCGAAAGAG'      | 0.672 |             |
| + | 5  | 986  | p.E245D DFFB_L     | NM_004402    | NP_004393    | O76075 | DFFB_HUMAN  |                               | 0  | 'CGGAAAGGCTG'      | 0.672 |             |

|   |    |           |                    |              |              |        |              |                                |      |               |       |             |
|---|----|-----------|--------------------|--------------|--------------|--------|--------------|--------------------------------|------|---------------|-------|-------------|
| + | 20 | 2657      | p.P816S PIK3CD_    | NM_005026    | NP_005017    | O00329 | PK3CD_HUMAN  | PI3K/PI4K.                     | 7    | GCCTCCCCACC   | 0.602 |             |
| - | 5  | 367       | p.V103A C1orf127   | NM_173507    | NP_775778    | B7ZLG7 | B7ZLG7_HUMAN |                                | 1    | ATGTGAACTAAG  | 0.502 |             |
| - | 1  | 373       | I0obf.1_Missense_  | NM_001146181 | NP_001139653 | B7ZW38 | B7ZW38_HUMAN |                                | 0    | CGTTTTCTCGG   | 0.483 |             |
| + | 4  | 436       | _Mutation_p.G119I  | NM_004070    | NP_004061    | P51800 | CLCKA_HUMAN  |                                | 1    | CTCTGGAGGTG   | 0.602 |             |
| + | 7  | 1662      | p.R353H PAX7_ur    | NM_002584    | NP_002575    | P23759 | PAX7_HUMAN   |                                | 203  | AGCCCCCACA    | 0.667 |             |
| - | 6  | 582       | alice_Site_p.G109  | NM_003760    | NP_003751    | O43432 | IF4G3_HUMAN  |                                | 1    | CGTTCCATAAAA  | 0.428 |             |
| + | 1  | 480       | uc010of1.1_RNA     | NM_006142    | NP_006133    | P31947 | 1433S_HUMAN  |                                | 0    | CCACCCGGTGAC  | 0.622 |             |
| + | 3  | 700       | TB8A_uc001bvm.     | NM_001040441 | NP_001035531 | Q96BR9 | ZBT8A_HUMAN  | BTB.                           | 0    | TTTCTCCCCTG   | 0.423 |             |
| - | 3  | 402_403   | bw.3_Missense_M    | NM_001099439 | NP_001092909 | Q5JZY3 | EPHAA_HUMAN  | cellular (Potential).          | 8    | TGAACTGCAGTT  | 0.614 |             |
| + | 1  | 311       |                    | NM_001008740 | NP_001008740 | Q7Z6W1 | TMCO2_HUMAN  |                                | 1    | GAAACGAAGTAT  | 0.323 |             |
| - | 8  | 960       | icim.2_Nonsense_   | NM_006824    | NP_006815    | Q99848 | EBP2_HUMAN   |                                | 0    | AGCCTTTCTCTT  | 0.488 |             |
| + | 2  | 189       | ciy.2_Missense_Mi  | NM_001255    | NP_001246    | Q12834 | CDC20_HUMAN  |                                | 0    | GGCAGCGCAAA   | 0.692 |             |
| + | 9  | 1138      |                    | NM_178134    | NP_835235    | Q86W10 | CP4Z1_HUMAN  | renal (Potential).             | 1    | CACCCGGTAGTA  | 0.473 |             |
| - | 27 | 2854      |                    | NM_015306    | NP_056121    | Q9UPU5 | UBP24_HUMAN  |                                | 13   | GGCTGGATCAGT  | 0.348 |             |
| + | 42 | 5452      | ADL_uc009wag.2_    | NM_176877    | NP_795352    | Q8NI35 | INADL_HUMAN  |                                | 4    | ACCACCTTGGT   | 0.443 |             |
| + | 6  | 1003      |                    | NM_032437    | NP_115813    | A8K855 | EFCB7_HUMAN  |                                | 0    | TGTCAGCAACCA  | 0.378 |             |
| - | 3  | 185       |                    | NM_000329    | NP_000320    | Q16518 | RPE65_HUMAN  |                                | 1    | CACATCGAAGG   | 0.522 | rs61751282  |
| - | 8  | 490       | te_p.174_splice SL | NM_152697    | NP_689910    | Q8NCS7 | CTL5_HUMAN   |                                | 4    | CAGATCTGTGA   | 0.378 |             |
| - | 2  | 767       | sbv.1_Missense_IV  | NM_004980    | NP_004971    | Q9UK17 | KCND3_HUMAN  | plasmic (Potential).           | 3    | AGAAGTTGAGC   | 0.612 |             |
| - | 3  | 435       |                    | NM_002524    | NP_002515    | P01111 | RASN_HUMAN   | GTP. i) p.Q61P(21) f           | 2607 | TTCTTGTCCAGC  | 0.458 | rs121913254 |
| + | 2  | 370       | p.G114E CD2_ucf    | NM_001767    | NP_001758    | P06729 | CD2_HUMAN    | -3 (CD58) binding region 2.    | 1    | AAAAGGAAAAA   | 0.308 |             |
| - | 3  | 644_645   | VGCS2_uc001eie.    | NM_005518    | NP_005509    | P54868 | HMCS2_HUMAN  |                                | 2    | TAGACGGCAATC  | 0.475 |             |
| - | 32 | 6161      |                    | NM_024408    | NP_077719    | Q04721 | NOTC2_HUMAN  | nic (Potential). ANK 4.        | 27   | CACATCCGCTTC  | 0.527 |             |
| - | 5  | 660       |                    | NR_024442    |              |        |              |                                | 0    | CAGATGCTCAGC  | 0.498 |             |
| + | 3  | 401       | 68S ECM1_uc001     | NM_004425    | NP_004416    | Q16610 | ECM1_HUMAN   |                                | 3    | GCCCTCCCTTTC  | 0.572 |             |
| - | 2  | 3473      | e.1_Missense_Mu    | NM_007113    | NP_009044    | Q07283 | TRHY_HUMAN   | 30 AA tandem repeats.          | 5    | TCTCCGGTTCC   | 0.174 | rs113946258 |
| - | 3  | 528       |                    | NM_001122965 | NP_001116437 | Q6XPR3 | RPTN_HUMAN   | Gln-rich.                      | 0    | GGGAATCTCTGT  | 0.517 |             |
| - | 4  | 1527      |                    | NM_006617    | NP_006608    | P48681 | NEST_HUMAN   | Tail.                          | 6    | CCAAGGAGGCA   | 0.627 |             |
| + | 13 | 1561      | p.V201A NTRK1_u    | NM_002529    | NP_002520    | P04629 | NTRK1_HUMAN  | plasmic (Potential).           | 17   | AGGTGTTCAACC  | 0.567 |             |
| - | 36 | 4743      | p.T651A ARHGEF     | NM_014784    | NP_055599    | O15085 | ARHGB_HUMAN  |                                | 9    | GGGTGTCAGGT   | 0.637 |             |
| - | 7  | 1468      | hw.1_Missense_IV   | NM_031281    | NP_112571    | Q96RD9 | FCRL5_HUMAN  | potential). Ig-like C2-type 4. | 6    | TCAGAGAGAAG   | 0.582 |             |
| + | 3  | 714       | 1C_uc001frv.2_5'L  | NM_001765    | NP_001756    | P29017 | CD1C_HUMAN   | cellular (Potential).          | 4    | TAGATTTACTGAC | 0.478 |             |
| + | 6  | 1254      | .L95F CD1E_uc00    | NM_030893    | NP_112155    | P15812 | CD1E_HUMAN   |                                | 3    | ACATTTCTTCTC  | 0.328 |             |
| + | 5  | 890       | sz.1_Missense_Mi   | NM_001004310 | NP_001004310 | Q6DN72 | FCRL6_HUMAN  | 3. Extracellular (Potential).  | 3    | TGTCTCCAGAG   | 0.557 |             |
| - | 7  | 963       | R254* NR1I3_uc0C   | NM_001077480 | NP_001070948 | Q14994 | NR1I3_HUMAN  |                                | 2    | TTTTCGTAGTG   | 0.527 | rs144211465 |
| + | 4  | 673       | gbp.2_Missense_I   | NM_007240    | NP_009171    | Q9UNI6 | DUS12_HUMAN  |                                | 1    | CAAGTGATAGAA  | 0.318 |             |
| - | 12 | 2869      | u.1_Missense_Mu    | NM_003285    | NP_003276    | Q92752 | TENR_HUMAN   | nectin type-III 7.             | 11   | TGATTTTCGATT  | 0.532 |             |
| + | 7  | 1744      | _Mutation_p.P472   | NM_005807    | NP_005798    | Q92954 | PRG4_HUMAN   | peats of K-X-P-X-P-T-T-X       | 1    | CCACTCCAAGC   | 0.637 |             |
| + | 8  | 4116_4117 |                    | NM_032890    | NP_116279    | Q96F81 | DISP1_HUMAN  |                                | 0    | TCGAGGGCTTT   | 0.564 |             |
| + | 2  | 541       | C1_uc010pwr.1_IV   | NM_018662    | NP_061132    | Q9NRI5 | DISC1_HUMAN  | ction with MAP1A.              | 1    | GCGAGCCTGCA   | 0.642 |             |
| + | 8  | 1174_1175 | G251K MTR_uc01     | NM_000254    | NP_000245    | Q99707 | METH_HUMAN   | Hcy-binding.                   | 3    | TCATGGAGAAC   | 0.465 |             |
| + | 6  | 1175      | W3_uc001idp.1_Ir   | NM_015431    | NP_056246    | Q8NG06 | TRI58_HUMAN  | 330.2/SPRY.                    | 7    | CCATCTCCTG    | 0.567 |             |
| + | 3  | 356       |                    | NM_175911    | NP_787107    | Q8N349 | OR2LD_HUMAN  | cellular (Potential).          | 4    | AATCACACTTCA  | 0.289 |             |
| + | 7  | 1054      |                    | NM_052997    | NP_443723    | Q9BXX3 | AN30A_HUMAN  |                                | 9    | CGTGGCCAGCA   | 0.423 |             |
| + | 2  | 187       | IF4_uc009xmn.2_!   | NM_032023    | NP_114412    | Q9H2L5 | RASF4_HUMAN  |                                | 1    | CAAGTCCATTC   | 0.537 |             |
| + | 3  | 383       | N2_uc010qfq.1_5'   | NM_014696    | NP_055511    | O60269 | GRIN2_HUMAN  |                                | 0    | GCGCGACCCA    | 0.697 | rs149580948 |
| + | 7  | 889       | p.A267V HK1_uc0    | NM_000188    | NP_000179    | P19367 | HXK1_HUMAN   | Regulatory.                    | 1    | GAGAGCTTTG    | 0.522 |             |

|   |    |         |                    |              |              |        |             |                               |    |                  |       |
|---|----|---------|--------------------|--------------|--------------|--------|-------------|-------------------------------|----|------------------|-------|
| - | 2  | 418     |                    | NM_022146    | NP_071429    | Q9GZQ6 | NPFF1_HUMAN | lasmic (Potential).           | 0  | ACCTTTCCACAG     | 0.572 |
| - | 12 | 1412    | p.S405F GPAM_u     | NM_020918    | NP_065969    | Q9HCL2 | GPAT1_HUMAN |                               | 2  | FTTAAGGAAAATC    | 0.443 |
| + | 4  | 317     | PRP1_uc001 cn.2_   | NM_006229    | NP_006220    | P54315 | LIPR1_HUMAN |                               | 2  | CAAAGGAGATG      | 0.478 |
| + | 1  | 427     |                    | NM_001001480 | NP_001001480 | Q701N2 | KRA55_HUMAN | \ repeats of C-C-X-P.         | 1  | CTGTGGCTCCT      | 0.692 |
| - | 2  | 263     |                    | NR_001589    |              |        |             |                               | 0  | CGAAGGAGATC      | 0.493 |
| + | 2  | 674     | 08T OLFML1_uc0     | NM_198474    | NP_940876    | Q6UWY5 | OLFL1_HUMAN | Potential.                    | 2  | GAGAGGCTGAC      | 0.473 |
| + | 17 | 2930    |                    | NM_006108    | NP_006099    | Q9HCB6 | SPON1_HUMAN | SP type-1 6.                  | 0  | icaagaaggagatcag | 0.234 |
| + | 10 | 1713    | p.S482N CRY2_u     | NM_021117    | NP_066940    | Q49AN0 | CRY2_HUMAN  |                               | 1  | TGGCAGCATGA      | 0.567 |
| + | 1  | 825     |                    | NM_001001955 | NP_001001955 | Q8NGP0 | OR4CD_HUMAN | Name=7; (Potential).          | 4  | CACTATGATAACT    | 0.363 |
| - | 1  | 94      |                    | NM_001005272 | NP_001005272 | Q8NH83 | OR4A5_HUMAN | Name=1; (Potential).          | 3  | GTATGTGAGTA      | 0.433 |
| + | 2  | 1367    |                    | NM_004111    | NP_004102    | P39748 | FEN1_HUMAN  |                               | 1  | GAGCCGCCAAG      | 0.547 |
| + | 20 | 4241    | g.2_Missense_Mu    | NM_002335    | NP_002326    | O75197 | LRP5_HUMAN  | ical; (Potential).            | 7  | CGGGCCCGTCA      | 0.602 |
| + | 13 | 2488    | uc001 pen.1_Intror | NM_001098672 | NP_001092142 | Q6MZM0 | HPHL1_HUMAN | e 5. Extracellular (Potential | 3  | AATTGGATTGG      | 0.423 |
| + | 14 | 2047    | e.p.E570_splice C  | NM_014361    | NP_055176    | O94779 | CNTN5_HUMAN |                               | 8  | AAAGGTAAGAC      | 0.378 |
| + | 3  | 974     | gv.2_Missense_M    | NM_001130145 | NP_001123617 | P46937 | YAP1_HUMAN  | WW 1.                         | 3  | AGGACCCCAGG      | 0.483 |
| - | 25 | 3829    | zda.1_RNA NCAF     | NM_015261    | NP_056076    | P42695 | CNDD3_HUMAN |                               | 5  | GGGGAAC TTGT     | 0.443 |
| - | 2  | 916     |                    | NM_020634    | NP_065685    | Q9NR23 | GDF3_HUMAN  |                               | 6  | TCCATGGCAGT      | 0.527 |
| + | 5  | 840     | 1467_uc009zhx.1_   | NM_020853    | NP_065904    | A2RU67 | K1467_HUMAN |                               | 3  | GTGTTTCGAGAC     | 0.448 |
| - | 6  | 576     | GDIB_uc001 rcp.1_  | NM_001175    | NP_001166    | P52566 | GDIR2_HUMAN |                               | 0  | AACTGGAGTGA      | 0.522 |
| + | 1  | 61      |                    | NM_012404    | NP_036536    | O95626 | AN32D_HUMAN | LRR 1.                        | 2  | TGAAAGAACTT      | 0.458 |
| - | 1  | 194     | p.S59A KRT8_uc     | NM_002273    | NP_002264    | P05787 | K2C8_HUMAN  | ead. Ser-rich.                | 2  | GCGGGAACCGG      | 0.662 |
| - | 13 | 1477    | A5_uc010sow.1_F    | NM_002205    | NP_002196    | P08648 | ITA5_HUMAN  | tential). Potential. FG-GAP   | 2  | GGATATCCATTG     | 0.562 |
| + | 2  | 275     | 1_5'UTR PDE1B_u    | NM_000924    | NP_000915    | Q01064 | PDE1B_HUMAN | lin-binding (Potential).      | 2  | TTCGGTCTCTG      | 0.637 |
| + | 1  | 402     |                    | NM_054105    | NP_473446    | Q9NZP2 | OR6C2_HUMAN | lasmic (Potential).           | 2  | ATCATGAACAAC     | 0.453 |
| + | 2  | 756     | H4_uc009zpj.2_5'   | NM_007224    | NP_009155    | O95158 | NXPH4_HUMAN | (linker domain).              | 0  | GCTGGGGATGG      | 0.756 |
| + | 3  | 432     | m.2_Missense_Mu    | NM_006812    | NP_006803    | Q13438 | OS9_HUMAN   | PRKCSH.                       | 1  | GTTATGGACGC      | 0.433 |
| - | 4  | 1826    | sqx.2_Missense_M   | NM_178539    | NP_848634    | Q8N3H0 | F19A2_HUMAN |                               | 1  | ATTCTTCTCCCTC    | 0.413 |
| + | 12 | 1734    | yu.2_Splice_Site_  | NM_001135805 | NP_001129277 | P21579 | SYT1_HUMAN  |                               | 6  | TTCAGAAAAGTC     | 0.453 |
| + | 35 | 4540    |                    | NM_014503    | NP_055318    | O75691 | UTP20_HUMAN |                               | 4  | ATTAAGAAATGC     | 0.318 |
| - | 7  | 1477    | pi.1_Missense_Mu   | NM_021625    | NP_067638    | Q9HBA0 | TRPV4_HUMAN | lasmic (Potential).           | 4  | ACTTGTCCCGC      | 0.607 |
| + | 4  | 771     | p.Q180* RNFT2_     | NM_001109903 | NP_001103373 | Q96EX2 | RNFT2_HUMAN | ellular (Potential).          | 0  | GTCTTCAGCAT      | 0.637 |
| + | 2  | 556     | uc001 bx.2_Intron  | NM_178499    | NP_848594    | Q8IWA6 | CCD60_HUMAN |                               | 3  | CATCAGGTCCC      | 0.443 |
| + | 7  | 1042    | D2_uc001 udy.1_M   | NM_024623    | NP_078899    | Q6N063 | OGFD2_HUMAN |                               | 1  | AGGAGCCCGCC      | 0.657 |
| + | 66 | 11390   | H10_uc001 ufu.3_5  | NM_207437    | NP_997320    | Q8IVF4 | DYH10_HUMAN |                               | 6  | ACTTTGGGCAA      | 0.453 |
| + | 7  | 793     | iF3_uc001 uqw.2_I  | NM_006646    | NP_006637    | Q9UPY6 | WASF3_HUMAN | Potential.                    | 1  | CCACCGTGAG       | 0.468 |
| - | 11 | 3143    | p.E829K TRPC4_u    | NM_016179    | NP_057263    | Q9UBN4 | TRPC4_HUMAN | and ITPR3. Cytoplasmic (P     | 6  | ATCTTCGTGGG      | 0.433 |
| - | 14 | 3347    | s_Mutation_p.E999  | NM_000053    | NP_000044    | P35670 | ATP7B_HUMAN | lasmic (Potential).           | 3  | GGCCTCCGCAG      | 0.627 |
| - | 1  | 797     |                    | NM_001004714 | NP_001004714 | Q8NH42 | OR4KD_HUMAN | ellular (Potential).          | 2  | TACCGAGTATC      | 0.383 |
| - | 8  | 721_722 | p.1_Missense_Mu    | NM_002471    | NP_002462    | P13533 | MYH6_HUMAN  | rosin head-like.              | 4  | TGGTCTCCAG       | 0.609 |
| - | 11 | 1799    | c.D470N RALGAP,    | NM_014990    | NP_055805    | Q6GYQ0 | RGPA1_HUMAN |                               | 4  | ATGGTCTGTGAC     | 0.343 |
| + | 4  | 1684    | ny.1_Missense_Mu   | NM_054024    | NP_473365    | Q96PC5 | MIA2_HUMAN  |                               | 2  | AGAAACTGGAG      | 0.308 |
| + | 4  | 1376    | '1_splice MUDENC   | NM_018229    | NP_060699    | Q9H0R1 | MUDEN_HUMAN |                               | 1  | TTTTTAGTCCC      | 0.294 |
| - | 2  | 810     |                    | NM_005982    | NP_005973    | Q15475 | SIX1_HUMAN  |                               | 0  | TGTTCTCCCTAA     | 0.428 |
| - | 13 | 2508    | YVE26_uc001 xkc.   | NM_015346    | NP_056161    | Q68DK2 | ZFY26_HUMAN |                               | 11 | TGTACTTTCCA      | 0.453 |
| + | 5  | 499     | 0asq.1_Missense_   | NM_020431    | NP_065164    | Q9P1W3 | TM63C_HUMAN |                               | 0  | GACTTCCTTGG      | 0.517 |
| - | 91 | 14028   | bi.2_Missense_Mu   | NM_004667    | NP_004658    | O95714 | HERC2_HUMAN | HECT.                         | 13 | GCAAATTCATGG     | 0.532 |
| + | 17 | 2709    | s_Mutation_p.G586  | NM_001013703 | NP_001013725 | Q9P2K8 | E2AK4_HUMAN | otein kinase 2.               | 4  | AGACAGGAGAC      | 0.353 |



|   |    |           |                     |              |              |        |             |     |               |       |             |
|---|----|-----------|---------------------|--------------|--------------|--------|-------------|-----|---------------|-------|-------------|
| - | 8  | 1406      | 2_5'UTR CDAN1       | NM_138477    | NP_612486    | Q8IWI9 | CDAN1_HUMAN | 2   | AGACAGCTTGA   | 0.458 |             |
| - | 19 | 4139      | G1336R TP53BP       | NM_005657    | NP_005648    | Q12888 | TP53B_HUMAN | 7   | TTCCCTGAGC    | 0.572 |             |
| + | 5  | 773       | M202_uc002aur.2     | NM_001080462 | NP_001073931 | A6NGA9 | TM202_HUMAN | 2   | FGGAATCTCTAAC | 0.458 |             |
| + | 10 | 1821      | Mutation_p.E56C     | NM_002499    | NP_002490    | Q92859 | NEO1_HUMAN  | 1   | GTGGGAAACAC   | 0.438 |             |
| - | 17 | 1874      | Mutation_p.N17K u   | NR_027024    |              |        |             | 0   | AGCAGATTCAC   | 0.622 |             |
| + | 5  | 2017      |                     | NM_198526    | NP_940928    | Q8N1W2 | ZN710_HUMAN | 1   | ACTTCGAGGAG   | 0.577 |             |
| + | 9  | 1988      | p.2_Missense_Mul    | NR_003659    |              |        |             | 0   | AGAAGAAGCAG   | 0.662 | rs141089280 |
| - | 3  | 506       | i3_uc002cmu.2_M     | NM_080861    | NP_543137    | Q6PJ21 | SPSB3_HUMAN | 0   | AGACGGGAGAG   | 0.662 |             |
| - | 6  | 868       | prz.1_Missense_M    | NM_022119    | NP_071402    | Q9GZN4 | BSSP4_HUMAN | 1   | GCGCTCGGCAC   | 0.721 |             |
| - | 15 | 3227_3228 | cvw.2_Missense_N    | NM_004380    | NP_004371    | Q92793 | CBP_HUMAN   | 127 | GGATCGGGGCTC  | 0.599 | rs144649776 |
| - | 13 | 4336      | G1263E GRIN2A_i     | NM_001134407 | NP_001127879 | Q12879 | NMDE1_HUMAN | 45  | GCTCCCCGGTG   | 0.522 |             |
| + | 3  | 1212      | jb.3_Missense_Mt    | NM_001105248 | NP_001098718 | Q6UXY8 | TMC5_HUMAN  | 1   | CAGATCATTTTC  | 0.493 | rs148290322 |
| + | 6  | 807       | me.2_Missense_M     | NM_212535    | NP_997700    | P05771 | KPCB_HUMAN  | 9   | CCGATCCCCAAA  | 0.423 |             |
| + | 2  | 1614      |                     | NM_014699    | NP_055514    | O15015 | ZN646_HUMAN | 2   | AGCTCCCCTGC   | 0.602 |             |
| + | 35 | 7605      | p.P2466S CHD9_t     | NM_025134    | NP_079410    | Q3L8U1 | CHD9_HUMAN  | 7   | GAATTCCTGAT   | 0.388 |             |
| - | 13 | 1670      | p.Q533* CDH16_t     | NM_004062    | NP_004053    | O75309 | CAD16_HUMAN | 3   | ACTCTGCACCA   | 0.637 |             |
| + | 1  | 2620      | LEKHG4_uc010ce      | NM_015432    | NP_056247    | Q58EX7 | PKHG4_HUMAN | 2   | GTTTCAGGGAT   | 0.597 |             |
| - | 4  | 882       | gq.2_Missense_M     | NM_018124    | NP_060594    | Q6PCD5 | RFWD3_HUMAN | 3   | TTTGGGGAGGG   | 0.279 |             |
| - | 35 | 5723      | i.1_5'UTR PKD1L2    | NM_052892    | NP_443124    | Q7Z442 | PK1L2_HUMAN | 3   | CATAGGGGCTC   | 0.572 |             |
| + | 3  | 462       | hfg.1_Missense_M    | NM_002661    | NP_002652    | P16885 | PLCG2_HUMAN | 8   | CTCAGTTCGTC   | 0.498 |             |
| - | 13 | 1281      | p.T396M CAMKK       | NM_172206    | NP_757343    | Q8N5S9 | KKCC1_HUMAN | 1   | ATTCTCGTCTCG  | 0.567 |             |
| + | 2  | 992       |                     | NM_153230    | NP_694962    | Q8N4B4 | FBX39_HUMAN | 2   | TGAACGGATCAT  | 0.542 |             |
| - | 3  | 617       |                     | NM_031898    | NP_114104    | Q9BXF9 | TEKT3_HUMAN | 2   | ATTTTGGGTTG   | 0.393 |             |
| + | 6  | 696       | p.D115G MAP2K3      | NM_145109    | NP_659731    | P46734 | MP2K3_HUMAN | 0   | TCATGGACACAT  | 0.567 |             |
| + | 30 | 4186      | rt.2_Missense_Mt    | NM_003170    | NP_003161    | Q7KZ85 | SPT6H_HUMAN | 3   | AGAACCACCTG   | 0.517 |             |
| + | 1  | 1431      | p.H392Y LRRC37      | NM_052888    | NP_443120    | Q96QE4 | LR37B_HUMAN | 2   | CTCCTCATCCAC  | 0.522 |             |
| + | 13 | 1263      | nse_Mutation_p.R:   | NM_006804    | NP_006795    | Q14849 | STAR3_HUMAN | 0   | TGTCGGGTGAG   | 0.617 | rs140920637 |
| - | 6  | 1050      |                     | NM_181537    | NP_853515    | Q7Z3Y8 | K1C27_HUMAN | 0   | GTTACTCTCGG   | 0.522 |             |
| - | 10 | 3464      | ron BRCA1_uc01C     | NM_007294    | NP_009225    | P38398 | BRCA1_HUMAN | 52  | ATTTTGGCCCTC  | 0.373 |             |
| + | 20 | 3131      | j.1_Missense_Mut    | NM_004941    | NP_004932    | Q14562 | DHX8_HUMAN  | 4   | TCATAGGCCCA   | 0.473 |             |
| + | 17 | 2226      | Mutation_p.D25      | NM_005892    | NP_005883    | O95466 | FMNL_HUMAN  | 1   | TGAGTGATTTTC  | 0.597 |             |
| + | 6  | 1241      | ic002irv.1_Missense | NM_018896    | NP_061496    | O43497 | CAC1G_HUMAN | 1   | CGCGGGGACG    | 0.617 |             |
| - | 13 | 1728      | tf.2_Missense_Mu    | NM_001130528 | NP_001124000 | O60271 | JIP4_HUMAN  | 5   | CCATTCTACTC   | 0.413 |             |
| - | 2  | 553       | G9_uc002itd.2_M     | NM_001130528 | NP_001124000 | O60271 | JIP4_HUMAN  | 5   | AGTCCTTTTTTT  | 0.313 |             |
| + | 1  | 259       | P1_uc002ivn.2_5'    | NM_012374    | NP_036506    | Q15615 | OR4D1_HUMAN | 1   | TCCTCCATGAG   | 0.512 |             |
| - | 4  | 732_733   | 1_RNA MRPL38_i      | NM_032478    | NP_115867    | Q96DV4 | RM38_HUMAN  | 1   | GACTCGGGGCA   | 0.609 |             |
| + | 4  | 688       | ent_p.R164R TMC     | NM_152468    | NP_689681    | Q8IU68 | TMC8_HUMAN  | 0   | CTCTTCGGCAC   | 0.692 |             |
| - | 9  | 1633      | n.1_Missense_Mu     | NM_001792    | NP_001783    | P19022 | CADH2_HUMAN | 4   | CTCAGGAACTT   | 0.483 |             |
| - | 5  | 416       | 2ft.2_Missense_M    | NM_001143829 | NP_001137301 | Q9H2F9 | CCD68_HUMAN | 1   | AGGATCCATTT   | 0.358 | rs148275303 |
| - | 8  | 1221      | p.G312R NETO1_      | NM_138966    | NP_620416    | Q8TDF5 | NETO1_HUMAN | 4   | GAGTCCATTGC   | 0.388 |             |
| - | 1  | 204       | 5A41_uc010dut.2_    | NM_173637    | NP_775908    | Q8N5S1 | S2541_HUMAN | 0   | CAGgatgggggtg | 0.408 |             |
| + | 8  | 1155      | 345V CLEC4M_uc      | NM_001144910 | NP_001138382 | Q9H2X3 | CLC4M_HUMAN | 1   | ACTGTGCGGAAT  | 0.512 |             |
| - | 4  | 416       | TS10_uc002mkk.1     | NM_030957    | NP_112219    | Q9H324 | ATS10_HUMAN | 4   | GTGGTCCACGC   | 0.662 |             |
| - | 3  | 25754     |                     | NM_024690    | NP_078966    | Q8WXI7 | MUC16_HUMAN | 57  | AGGTTGTTGTT   | 0.502 |             |
| - | 25 | 2545      | nh.2_Missense_Mi    | NM_001379    | NP_001370    | P26358 | DNMT1_HUMAN | 6   | CTGCCGTTGC    | 0.582 |             |
| + | 4  | 1515      | ym.1_Missense_M     | NM_001136501 | NP_001129973 | Q08AG5 | ZN844_HUMAN | 0   | CTTCAGATCTG   | 0.423 |             |
| + | 4  | 1602      | ym.1_Missense_N     | NM_001136501 | NP_001129973 | Q08AG5 | ZN844_HUMAN | 0   | TCATTTTTCCAC  | 0.448 |             |

|   |     |           |                                                  |              |              |        |             |                               |     |               |       |             |
|---|-----|-----------|--------------------------------------------------|--------------|--------------|--------|-------------|-------------------------------|-----|---------------|-------|-------------|
| - | 2   | 268       | on_p.T4  ZNF709_                                 | NM_152601    | NP_689814    | Q8N972 | ZN709_HUMAN | KRAB.                         | 0   | ACAAAGGTTTCT  | 0.438 |             |
| - | 5   | 841       |                                                  | NM_020714    | NP_065765    | Q9ULM2 | ZN490_HUMAN | 2H2-type 3.                   | 0   | GTTTCGAAAGG   | 0.423 |             |
| - | 20  | 3316      | ao.1_Missense_M                                  | NM_000435    | NP_000426    | Q9UM47 | NOTC3_HUMAN | (Potential), EGF-like 27.     | 21  | TCACAGTGGCT   | 0.657 |             |
| + | 10  | 2692      | p.S622F NWD1_uc002nev.3_Missense_Mutation_p.S5   |              |              | Q149M9 | NWD1_HUMAN  |                               | 7   | GATTTCCCTGCC  | 0.597 |             |
| + | 5   | 1319      | _p.K300T ZNF431_                                 | NM_133473    | NP_597730    | Q8TF32 | ZN431_HUMAN | 2H2-type 8.                   | 2   | AACATAAAAGAA  | 0.348 |             |
| - | 1   | 667       | z.1_5'Flank LGI4_u                               | NM_139284    | NP_644813    | Q8N135 | LGI4_HUMAN  |                               | 1   | CTTTCCCTTTGC  | 0.682 |             |
| - | 6   | 2557      | _p.C508R ZNF569_                                 | NM_152484    | NP_689697    | Q5MCW4 | ZN569_HUMAN | 2H2-type 18.                  | 3   | GGCCACTCAA    | 0.413 |             |
| - | 4   | 1888      | o_uc002ogq.2_Int                                 | NM_016536    | NP_057620    | Q7Z3V5 | ZN571_HUMAN | 2H2-type 17.                  | 0   | GCACATCTAAAG  | 0.373 |             |
| + | 14  | 1443      | oe.2_Missense_M                                  | NM_138392    | NP_612401    | Q8TBC3 | SHKB1_HUMAN | WD 4.                         | 2   | GCATGATTTCCA  | 0.612 |             |
| - | 7   | 1144      | n_p.K302N CARDi                                  | NM_014959    | NP_055774    | Q9Y2G2 | CARD8_HUMAN |                               | 0   | CATTACTTTTCAG | 0.418 |             |
| - | 1   | 166       |                                                  | NM_178449    | NP_848544    | Q96A98 | TIP39_HUMAN |                               | 0   | ACCACcagcagca | 0.597 |             |
| + | 6   | 1161      |                                                  | NM_001099694 | NP_001093164 | Q96N58 | ZN578_HUMAN | 2H2-type 3.                   | 0   | CCATCGTAGATC  | 0.433 |             |
| + | 4   | 1386      | rdw.1_Missense_M                                 | NM_138374    | NP_612383    | Q96IR2 | ZN845_HUMAN | 2H2-type 8.                   | 0   | GCAGATGTCATC  | 0.413 |             |
| + | 5   | 763       | LRA1_uc010yfh.1_                                 | NM_006863    | NP_006854    | O75019 | LIRA1_HUMAN | 2. Extracellular (Potential). | 3   | GTGGTCGTACA   | 0.572 | rs151320443 |
| + | 11  | 1707      | g_Mutation_p.G45i                                | NM_006669    | NP_006660    | Q8NHL6 | LIRB1_HUMAN | cellular (Potential).         | 3   | CTGGGAAGGC    | 0.308 |             |
| + | 3   | 301       | r.1_Missense_Mut                                 | NM_002000    | NP_001991    | P24071 | FCAR_HUMAN  | cellular (Potential).         | 2   | CAAATCGAGTC   | 0.498 |             |
| + | 6   | 613       | _p.P152L NLRP2_u                                 | NM_017852    | NP_060322    | Q9NX02 | NALP2_HUMAN |                               | 2   | CTGGCCTGGAG   | 0.512 |             |
| + | 17  | 2241_2242 | p.S671F BRSK1_u                                  | NM_032430    | NP_115806    | Q8TDC3 | BRSK1_HUMAN |                               | 6   | CCCCTCCGTCT   | 0.639 |             |
| + | 10  | 3184      | g.2_Missense_Mu                                  | NM_176811    | NP_789781    | Q86W28 | NALP8_HUMAN |                               | 13  | CACGGGAAAAA   | 0.512 |             |
| + | 8   | 1520      |                                                  | NM_016441    | NP_057525    | Q9NZV1 | CRIM1_HUMAN | 1. Extracellular (Potential). | 3   | TTGTCGGACCT   | 0.398 |             |
| - | 31  | 3342      | rob.1_Missense_M                                 | NM_133259    | NP_573566    | P42704 | LPPRC_HUMAN | PPR 16.                       | 3   | TGTGGTCTCC    | 0.428 |             |
| + | 18  | 1926      |                                                  | NM_032208    | NP_115584    | Q9H6X2 | ANTR1_HUMAN | ic (Potential), Pro-rich.     | 4   | ccctccccgcccc | 0.109 |             |
| + | 7   | 1806      | wf.2_Missense_Mi                                 | NM_212481    | NP_997646    | Q03989 | ARI5A_HUMAN |                               | 0   | TTGCCCGGCCT   | 0.642 |             |
| - | 6   | 1623      | tdr.2_Missense_M                                 | NM_001142351 | NP_001135823 | Q96JF0 | SIAT2_HUMAN | renal (Potential).            | 11  | CAAATCCCCCT   | 0.592 |             |
| + | 3   | 533       | lki.1_Missense_M                                 | NM_153214    | NP_694946    | Q53RD9 | FBLN7_HUMAN | Sushi.                        | 2   | CCCCGCAGAC    | 0.542 |             |
| + | 17  | 3241      | o.S641C PSD4_uc                                  | NM_012455    | NP_036587    | Q8NDX1 | PSD4_HUMAN  |                               | 2   | ACTCGAGCCCG   | 0.632 |             |
| + | 3   | 731       | flu.2_Missense_M                                 | NM_130773    | NP_570129    | Q8WYK1 | CNTP5_HUMAN | Extracellular (Potential).    | 10  | AACAAGAAGAC   | 0.453 |             |
| - | 17  | 2777      |                                                  | NM_001099771 | NP_001093241 | A5A3E0 | POTEF_HUMAN | Actin-like.                   | 5   | CAGCTCGTTGT   | 0.572 |             |
| + | 10  | 2302      | ISD7B_uc002vb.2                                  | NM_001080427 | NP_001073896 |        |             |                               | 7   | TATATCGGCAAC  | 0.373 |             |
| - | 8   | 1118      |                                                  | NM_004688    | NP_004679    | Q13287 | NMI_HUMAN   |                               | 0   | TGCCTTCCATT   | 0.353 |             |
| - | 54  | 7621      |                                                  | NM_004543    | NP_004534    | P20929 | NEBU_HUMAN  | Nebulin 66.                   | 20  | TCACATCACTC   | 0.299 |             |
| + | 11  | 1079      | zue.1_Missense_                                  | NM_001378    | NP_001369    | Q13409 | DC1I2_HUMAN | WD 1.                         | 1   | AGATGCCCTC    | 0.398 |             |
| + | 11  | 1081      | zue.1_Missense_                                  | NM_001378    | NP_001369    | Q13409 | DC1I2_HUMAN | WD 1.                         | 1   | ATGCCCTCATC   | 0.403 |             |
| - | 301 | 90916     | 26L TTN_uc010zf                                  | NM_133378    | NP_596869    | Q8WZ42 | TITIN_HUMAN |                               | 153 | CTTCTGGACTG   | 0.507 |             |
| - | 42  | 10108     | _uc010zfq.1_Misse                                | NM_133378    | NP_596869    | Q8WZ42 | TITIN_HUMAN |                               | 153 | AAAGCGTGTAT   | 0.468 |             |
| - | 6   | 1060      | 1_Missense_Mutation_p.R279W TTN_uc010zfq.1_Missi |              |              | Q8WZ42 | TITIN_HUMAN |                               | 153 | CTGCCGAGCCA   | 0.587 | rs138060032 |
| - | 62  | 11626     | ti.3_Missense_Mi                                 | NM_018897    | NP_061720    | Q8WXX0 | DYH7_HUMAN  |                               | 12  | GGCTTGGGTAG   | 0.398 |             |
| - | 35  | 5758      |                                                  | NM_018897    | NP_061720    | Q8WXX0 | DYH7_HUMAN  |                               | 12  | TATTTTCGAGTT  | 0.358 | rs13034775  |
| + | 14  | 1368      | 1_5'UTR AOX1_u                                   | NM_001159    | NP_001150    | Q06278 | ADO_HUMAN   |                               | 6   | AGTGGGAATTT   | 0.483 |             |
| + | 31  | 5155      | z.3_Nonsense_M                                   | NM_001114132 | NP_001107604 | Q6ZS30 | NBEL1_HUMAN |                               | 2   | AAAATCAGGATC  | 0.393 |             |
| + | 55  | 8392      | p.E1328K NBEAL1                                  | NM_001114132 | NP_001107604 | Q6ZS30 | NBEL1_HUMAN |                               | 2   | GAAACTGAATAT  | 0.378 |             |
| - | 8   | 1272      | ZF2_uc010fuw.2_h                                 | NM_016260    | NP_057344    | Q9UKS7 | IKZF2_HUMAN |                               | 0   | TGCTAATGGGT   | 0.502 |             |
| - | 4   | 1470      | h.1_Missense_Mu                                  | NM_024536    | NP_078812    | Q8IZ52 | CHSS2_HUMAN | renal (Potential).            | 0   | CCCACGCAGTG   | 0.672 |             |
| + | 1   | 1058      |                                                  | NM_152614    | NP_689827    | Q53QW1 | CB057_HUMAN |                               | 1   | GGTGGGAAGCG   | 0.662 |             |
| - | 9   | 4402      | p.A766T COL6A3                                   | NM_004369    | NP_004360    | P12111 | CO6A3_HUMAN | r. Nonhelical region.         | 18  | GTCTGCGTTCC   | 0.607 | rs112181324 |
| - | 1   | 263       | ie_Mutation_p.A12                                | NM_001122962 | NP_001116434 | Q5JXA9 | SIRB2_HUMAN |                               | 0   | AGTGGCCAGG    | 0.622 |             |
| + | 11  | 1051      | 2woz.2_Missense_                                 | NM_080676    | NP_542407    | A1Z1Q3 | MACD2_HUMAN | Glu-rich.                     | 0   | ACGGTCCAGAG   | 0.413 |             |

|   |    |           |                    |              |              |        |             |                                |     |               |       |                    |
|---|----|-----------|--------------------|--------------|--------------|--------|-------------|--------------------------------|-----|---------------|-------|--------------------|
| - | 1  | 157       |                    | NM_001322    | NP_001313    | P09228 | CYTT_HUMAN  |                                | 0   | GTGAAGGGCAC   | 0.592 |                    |
| - | 2  | 337       |                    | NM_001080472 | NP_001073941 | Q8N6M3 | FITM2_HUMAN | lasmic (Potential).            | 2   | AGTTGGTGAGG   | 0.567 |                    |
| - | 7  | 761       |                    | NM_002772    | NP_002763    | P98073 | ENTK_HUMAN  | lar (Potential). CUB 1.        | 8   | GTTTTGGATAATC | 0.368 |                    |
| + | 3  | 359       | se_Mutation_p.K8:  | NM_001186    | NP_001177    | O14867 | BACH1_HUMAN | BTB.                           | 2   | ACAGTTAAAGGA  | 0.318 |                    |
| - | 1  | 610       |                    | NM_001085455 | NP_001078924 | Q3LI83 | KR241_HUMAN | ]- [NRTS]-[SNTG]-X-[QHR        | 0   | CTGTTGGAAATA  | 0.418 |                    |
| - | 21 | 4197      | DAM_uc002yvr.1_f   | NM_001389    | NP_001380    | O60469 | DSCAM_HUMAN | III 4. Extracellular (Potentia | 11  | GTGGGGAATTC   | 0.488 |                    |
| + | 21 | 2720      | 5'Flank C21orf3    | NM_005049    | NP_005040    | Q15269 | PWP2_HUMAN  |                                | 1   | AGTTTCCAAGC   | 0.577 |                    |
| + | 15 | 2305      | gpt.1_Missense_M   | NM_003307    | NP_003298    | O94759 | TRPM2_HUMAN | lasmic (Potential).            | 3   | AGGACGAAGAG   | 0.627 | rs150593294        |
| + | 9  | 1143      | p.G217S SLC25A1    | NM_031481    | NP_113669    | Q9H1K4 | GHC2_HUMAN  |                                | 0   | TCGCCGGTAAAG  | 0.527 |                    |
| - | 2  | 702       | 2zqh.2_Missense    | NM_024627    | NP_078903    | Q7L3V2 | CV029_HUMAN |                                | 0   | CCCAGGAGACG   | 0.637 |                    |
| - | 4  | 826       | 6610_uc011aim.1    | NM_080764    | NP_542942    | Q86YH2 | Z280B_HUMAN |                                | 2   | TCTTGATGTTCT  | 0.413 |                    |
| - | 13 | 2507      | sense_Mutation_p   | NM_012143    | NP_036275    | Q9UBB9 | TFP11_HUMAN |                                | 0   | CCGGTTCATGAT  | 0.463 |                    |
| - | 11 | 1188_1189 | n_p.K416E CHEK1    | NM_007194    | NP_009125    | O96017 | CHK2_HUMAN  | rotein kinase 73E(2) p.S372    | 20  | AATCTTGGAGTG  | 0.416 | 470496;rs146546850 |
| - | 4  | 1082      |                    | NM_015715    | NP_056530    | Q9NZ20 | PA2G3_HUMAN |                                | 0   | CGCTTGGACCCCT | 0.672 |                    |
| - | 10 | 1490      | se_Mutation_p.Q4:  | NM_003560    | NP_003551    | O60733 | PA2G6_HUMAN |                                | 1   | ATCCTGTAGTTC  | 0.617 |                    |
| + | 4  | 1254      |                    | NM_138435    | NP_612444    | Q8NEG4 | FA83F_HUMAN |                                | 1   | GCCCCCGTGG    | 0.657 |                    |
| + | 41 | 5683      | R1_uc011asu.1_l    | NM_001099952 | NP_001093422 | Q14643 | ITPR1_HUMAN | lasmic (Potential).            | 21  | GTGACCGAGTG   | 0.547 |                    |
| + | 11 | 1475      | ie_Mutation_p.S40  | NM_015442    | NP_056257    | Q9H9A5 | CNOTA_HUMAN |                                | 2   | GACTTCTGAAC   | 0.313 |                    |
| + | 3  | 847       | 10hiv.1_Missense   | NM_031200    | NP_112477    | P51686 | CCR9_HUMAN  | Name=5; (Potential).           | 3   | GTGATGGCTTG   | 0.493 |                    |
| - | 14 | 1700      | csi.1_Nonsense_M   | NM_001789    | NP_001780    | P30304 | MPIP1_HUMAN | Rhodanese.                     | 5   | TCTCTCACATA   | 0.507 |                    |
| - | 16 | 2140      | on_p.R710* PBRN    | NM_181042    | NP_060635    | Q86U86 | PB1_HUMAN   | Bromo 5. p.R710fs*13(1,        | 140 | ACTTCGAATTTT  | 0.438 |                    |
| + | 3  | 358       | on_p.A2V PRKCD     | NM_006254    | NP_006245    | Q05655 | KPCD_HUMAN  | C2.                            | 9   | CATGGCGCCGT   | 0.687 |                    |
| - | 7  | 868       | _p.A20V ACTR8      | NM_022899    | NP_075050    | Q9H981 | ARP8_HUMAN  |                                | 2   | AGGTGGCACAC   | 0.493 |                    |
| - | 23 | 4446      | f63_uc003dic.3_Mi  | NM_015224    | NP_056039    | Q9UK61 | CC063_HUMAN |                                | 5   | CTGAATCCAGAG  | 0.338 |                    |
| - | 12 | 1553      | 7_uc003dkv.1_Mis   | NM_198463    | NP_940865    | Q6ZVT6 | CC067_HUMAN |                                | 0   | CTCTTTTAGATC  | 0.438 | rs144152554        |
| + | 5  | 1365      | BO2_uc011bgj.1_f   | NM_002942    | NP_002933    | Q9HCK4 | ROBO2_HUMAN | 3. Extracellular (Potential).  | 11  | AAGAAGCTGTAG  | 0.403 |                    |
| - | 3  | 1133      |                    | NM_016206    | NP_057290    | A8MV65 | VGLL3_HUMAN |                                | 0   | GGATGGATCCAC  | 0.473 |                    |
| - | 6  | 492       | .24_uc003dvi.1_3'l | NM_000986    | NP_000977    | P83731 | RL24_HUMAN  |                                | 0   | GGGGAGCTGAA   | 0.358 | rs1804331          |
| + | 9  | 2863      | dvg.2_Nonsense_I   | NM_001134438 | NP_001127910 | Q86SQ0 | PHLB2_HUMAN |                                | 6   | GGGGAAAGGG    | 0.368 |                    |
| + | 18 | 4100      | _p.S1230L PHLDE    | NM_001134438 | NP_001127910 | Q86SQ0 | PHLB2_HUMAN | PH.                            | 6   | CCCATCGCCAG   | 0.423 |                    |
| + | 13 | 2737      | _p.G707S BOC_uc    | NM_033254    | NP_150279    | Q9BWW1 | BOC_HUMAN   | ellular (Potential).           | 6   | TACAGCGGTCGC  | 0.622 |                    |
| + | 14 | 2857      | _uc003epw.1_Intr   | NM_001063    | NP_001054    | P02787 | TRFE_HUMAN  | ansferrin-like 2.              | 2   | ATGAGTGGAGT   | 0.507 |                    |
| - | 13 | 2043      | eqb.3_Missense_M   | NM_005630    | NP_005621    | Q92959 | SO2A1_HUMAN | ellular (Potential).           | 1   | CTCGCCTCCCC   | 0.607 |                    |
| - | 4  | 1891      |                    | NM_178822    | NP_849144    | Q6WRI0 | IGS10_HUMAN | like C2-type 2.                | 13  | ATATTCTTAATGT | 0.413 |                    |
| - | 17 | 2090      | _p.S656F DHX36     | NM_020865    | NP_065916    | Q9H2U1 | DHX36_HUMAN |                                | 1   | CTTATGGAGAGT  | 0.338 |                    |
| - | 6  | 1091      | _p.V272L PLCH1     | NM_001130960 | NP_001124432 | Q4KWH8 | PLCH1_HUMAN |                                | 4   | CAAGAACATTTT  | 0.289 |                    |
| - | 14 | 2231      | R49_uc011bpd.1_L   | NM_178824    | NP_849146    | Q8IV35 | WDR49_HUMAN |                                | 3   | TCTGGTTCTTTC  | 0.433 |                    |
| - | 7  | 998       | IC39_uc003fkn.2    | NM_181426    | NP_852091    | Q9UFE4 | CCD39_HUMAN |                                | 4   | ATGCCGTTCTAC  | 0.358 |                    |
| + | 4  | 749_750   | atation_p.17_18W   | NM_004721    | NP_004712    | O43283 | M3K13_HUMAN |                                | 3   | ACTTGGGAAGTG  | 0.525 |                    |
| + | 8  | 978       | grn.3_Nonsense_I   | NM_024936    | NP_079212    | Q9H5U6 | ZCHC4_HUMAN |                                | 2   | TTTCTGGATTTTC | 0.338 |                    |
| - | 31 | 3141      | p.G196E ATP8A1     | NM_006095    | NP_006086    | Q9Y2Q0 | AT8A1_HUMAN | ellular (Potential).           | 3   | CATTTCCAAATG  | 0.398 |                    |
| + | 4  | 745       |                    | NM_001080476 | NP_001073945 | A8MXD5 | GRCR1_HUMAN |                                | 1   | TTTCTCCATGCT  | 0.478 |                    |
| - | 8  | 1149      | izr.1_Missense_M   | NM_022832    | NP_073743    | P62068 | UBP46_HUMAN |                                | 1   | AGAGCCGTGAC   | 0.363 |                    |
| - | 3  | 735       | 3haf.3_Missense_I  | NM_001126328 | NP_001119800 | Q8TBB1 | LNX1_HUMAN  |                                | 4   | GGGAGGGAGCC   | 0.607 |                    |
| - | 1  | 348       | T2A3_uc010ihp.1_I  | NM_024743    | NP_079019    | Q6UWM9 | UD2A3_HUMAN | ellular (Potential).           | 2   | TAACTGATTGCC  | 0.348 |                    |
| - | 2  | 833       | _p.W126* UGT2B4    | NM_021139    | NP_066962    | P06133 | UD2B4_HUMAN |                                | 2   | AAATCCCAGTAC  | 0.423 |                    |
| + | 2  | 331       |                    | NM_015393    | NP_056208    | Q6UWI2 | PARM1_HUMAN | ellular (Potential).           | 1   | TTTCTTCCG     | 0.473 |                    |

|   |    |           |                   |              |              |        |             |                               |    |               |       |             |
|---|----|-----------|-------------------|--------------|--------------|--------|-------------|-------------------------------|----|---------------|-------|-------------|
| + | 13 | 1911      | aj.1_Missense_Mu  | NM_000253    | NP_000244    | P55157 | MTP_HUMAN   | Vitellogenin.                 | 4  | ACAATCCATCCTA | 0.413 |             |
| + | 1  | 3292      | gz.2_Missense_M   | NM_032961    | NP_116586    | Q9P2E7 | PCD10_HUMAN | lasmic (Potential).           | 2  | CTATCAGGTATGC | 0.602 |             |
| + | 7  | 691       | _p.H108Y IL15_uc  | NM_000585    | NP_000576    | P40933 | IL15_HUMAN  |                               | 0  | AGTATTCATGATA | 0.363 |             |
| + | 2  | 1033      | _p.G114D EDNRA    | NM_001957    | NP_001948    | P25101 | EDNRA_HUMAN | Name=2; (Potential).          | 2  | GAATGGCCCCCA  | 0.423 |             |
| + | 6  | 1619      | rh.2_Missense_Mt  | NM_001130067 | NP_001123539 | Q9C040 | TRIM2_HUMAN | NHL 1.                        | 1  | ATTTGATCTTTCC | 0.537 |             |
| + | 5  | 1359      | hrr.2_Missense_M  | NM_014269    | NP_055084    | Q9UKF5 | ADA29_HUMAN | B. Extracellular (Potential). | 16 | TTGTTAATATAGT | 0.333 |             |
| - | 7  | 1129      | zk.1_Missense_Mt  | NM_173553    | NP_775824    | Q8N7C3 | TRIMM_HUMAN | 330.2/SPRY.                   | 2  | FGTCTCCATTTGC | 0.458 |             |
| + | 4  | 396       | RR_uc010isy.2_In  | NM_020731    | NP_065782    | A9YTQ3 | AHRR_HUMAN  | PAS.                          | 2  | GAAGGCTGCTG   | 0.632 |             |
| + | 3  | 349       | IO_uc011cna.1_M   | NM_007118    | NP_009049    | O75962 | TRIO_HUMAN  | CRAL-TRIO.                    | 18 | TGATTCCCAGG   | 0.453 |             |
| + | 2  | 451       | id.1_Missense_Mt  | NM_004932    | NP_004923    | P55285 | CADH6_HUMAN | p.G42A(1)                     | 7  | GCTCTGAAACA   | 0.493 |             |
| + | 10 | 1366      |                   | NM_032637    | NP_116026    | Q13309 | SKP2_HUMAN  |                               | 4  | GTATTTTTGTATG | 0.328 |             |
| - | 10 | 1549      | 1_Nonsense_Mut    | NM_000065    | NP_000056    | P13671 | CO6_HUMAN   | MACPF.                        | 7  | GCTTCCACCTC   | 0.418 |             |
| - | 3  | 580       | fB_uc011cpy.1_Mi  | NM_198449    | NP_940851    | Q6PCB8 | EMB_HUMAN   | Potential). Ig-like V-type 1. | 0  | FATTCTCAAGTTG | 0.368 |             |
| + | 17 | 3393      | p.V1044 BDP1_uc   | NM_018429    | NP_060899    | A6H8Y1 | BDP1_HUMAN  | -M-E-T-D-L-K-X-T-G-R- E-      | 2  | GAGAAGTATCC   | 0.458 |             |
| - | 3  | 321       | kkp.2_Missense_M  | NM_001145678 | NP_001139150 | Q8IV33 | K0825_HUMAN |                               | 0  | CTCCAGGAAATG  | 0.308 |             |
| + | 4  | 381       | 81B_uc010jbe.1_5  | NM_152548    | NP_689761    | Q96LP2 | FA81B_HUMAN |                               | 2  | GAGAGGTCAGC   | 0.502 |             |
| + | 11 | 2530      | _Mutation_p.R844  | NM_015288    | NP_056103    | Q9NQC1 | JADE2_HUMAN |                               | 0  | GGTCCGCATGG   | 0.657 |             |
| + | 1  | 1445      | DHA7_uc003lhq.2   | NM_018904    | NP_061727    | Q9Y5I0 | PCDAD_HUMAN | Extracellular (Potential).    | 6  | GGACGCGGACG   | 0.667 |             |
| + | 6  | 1408      | uc010jgf.2_Misser | NM_001130029 | NP_001123501 | Q8NC24 | RELL2_HUMAN |                               | 0  | TGGCTCCCCCA   | 0.642 |             |
| + | 5  | 842       | _p.S228F PPARG    | NM_133263    | NP_573570    | Q86YN6 | PRGC2_HUMAN |                               | 0  | GGACTCCCTAG   | 0.672 |             |
| - | 4  | 649       |                   | NM_032782    | NP_116171    | Q8TDQ0 | HAVR2_HUMAN | ellular (Potential).          | 0  | ATCAGGGAGGCT  | 0.333 |             |
| + | 7  | 989       | _p.P174L GABRA1   | NM_000806    | NP_000797    | P14867 | GBRA1_HUMAN | ellular (Probable).           | 3  | ACTTCCATATGG  | 0.378 | rs138145692 |
| + | 13 | 2372_2373 |                   | NM_133369    | NP_588610    | Q6ZN44 | UNC5A_HUMAN | lasmic (Potential).           | 1  | ATCACCAAGGT   | 0.658 |             |
| - | 11 | 1588      | sz.2_Missense_Mt  | NM_002115    | NP_002106    | P52790 | HXK3_HUMAN  | Catalytic. p.A499V(1)         | 7  | GAACCGCAGCC   | 0.682 |             |
| + | 1  | 41        | ED9_uc010jko.2_F  | NM_017510    | NP_059980    | Q9BVK6 | TMED9_HUMAN |                               | 0  | GCCCCGCGCCG   | 0.726 |             |
| - | 9  | 1301      | b.1_Nonsense_Mt   | NM_000129    | NP_000120    | P00488 | F13A_HUMAN  |                               | 6  | CTTGCCAGCCT   | 0.478 |             |
| - | 5  | 655       | P2L_uc011dim.1_I  | NM_004752    | NP_004743    | O75603 | GCM2_HUMAN  |                               | 3  | TTCTGCCTAGAA  | 0.398 |             |
| + | 3  | 265       | S49L SLC17A4_uc   | NM_005495    | NP_005486    | Q9Y2C5 | S17A4_HUMAN |                               | 1  | ATTTTTCAATTTA | 0.478 |             |
| + | 18 | 1890      | se_Mutation_p.P56 | NM_001025091 | NP_001020262 | Q8NE71 | ABCF1_HUMAN |                               | 2  | AGGCCCTGAG    | 0.562 |             |
| + | 25 | 3286      | _p.Y883C VARS2    | NM_020442    | NP_065175    | Q5ST30 | SYVM_HUMAN  |                               | 4  | CCCCTACCCCA   | 0.667 |             |
| + | 3  | 260       | Q2B_uc003nvs.1_C  | NM_021221    | NP_067044    | Q8NDX9 | LY65B_HUMAN | UPAR/Ly6.                     | 0  | CAACACCTACT   | 0.532 |             |
| + | 7  | 730_731   | FL8_uc003oac.1_I  | NM_030652    | NP_085155    | Q99944 | EGFL8_HUMAN | Potential.                    | 0  | GACGCGCTGGA   | 0.619 |             |
| - | 1  | 807       |                   | NR_001444    |              |        |             |                               | 0  | GACAGGAGGCA   | 0.577 |             |
| + | 58 | 8169      | f125_uc003oez.1_  | NM_002224    | NP_002215    | Q14573 | ITPR3_HUMAN | lasmic (Potential).           | 19 | TAGATGACGGA   | 0.617 |             |
| + | 8  | 1100      | Q2_uc011dtv.1_5'L | NM_173558    | NP_775829    | Q726J4 | FGD2_HUMAN  |                               | 3  | CCCTCGAGGACC  | 0.632 |             |
| - | 5  | 634_635   |                   | NM_006653    | NP_006644    | O43559 | FRS3_HUMAN  |                               | 2  | TCGAGGGAGGT   | 0.475 |             |
| + | 2  | 354       | vx.1_Missense_Mt  | NM_152732    | NP_689945    | Q9H1X1 | RSPH9_HUMAN |                               | 2  | TCATACGAATATC | 0.527 | rs150021750 |
| - | 1  | 603       |                   | NM_138733    | NP_620061    | P07205 | PGK2_HUMAN  |                               | 1  | GCCAAAAGCAT   | 0.458 |             |
| - | 3  | 501       | rp.1_Nonsense_M   | NM_014611    | NP_055426    | Q9NU22 | MDN1_HUMAN  |                               | 10 | ACTCTCTAGGA   | 0.398 |             |
| - | 3  | 657       | pou.2_Missense_M  | NM_001143957 | NP_001137429 | Q9BZJ6 | GPR63_HUMAN | ellular (Potential).          | 2  | TCACGGTCAAG   | 0.433 |             |
| + | 2  | 462       |                   | NM_021620    | NP_067633    | Q9H4Q3 | PRD13_HUMAN | SET.                          | 0  | GAGTGGATAGG   | 0.617 |             |
| + | 2  | 269       | F25_uc003qwl.1_I  | NM_030615    | NP_085118    | Q9UIL4 | KIF25_HUMAN | inesin-moto p.W3C(1)          | 2  | TGACATGGACC   | 0.602 |             |
| - | 1  | 1967      | DIL_uc011jwd.1_Ir | NM_020144    | NP_064529    | Q9NRJ5 | PAPOB_HUMAN |                               | 1  | GTGAGGAATAC   | 0.453 |             |
| - | 18 | 3960      |                   | NM_015204    | NP_056019    | Q9UPZ6 | THS7A_HUMAN | ?. Extracellular (Potential). | 3  | GCTTCTCACT    | 0.413 |             |
| + | 13 | 1837      | i76_splice ABCB5  | NM_178559    | NP_848654    | Q2M3G0 | ABCB5_HUMAN |                               | 6  | TTTATAAGATAGC | 0.333 |             |
| - | 3  | 1811      | uc003szu.1_5'Flan | NM_014817    | NP_055632    | Q7L0X0 | TRIL_HUMAN  | ellular (Potential).          | 0  | CTTAGGGCGC    | 0.736 |             |
| - | 17 | 2375      | ng.2_Missense_Mt  | NM_033054    | NP_149043    | B011T2 | MYO1G_HUMAN |                               | 4  | GTCTCCGGAAC   | 0.677 |             |

|   |    |                            |                    |              |              |             |             |                                |              |               |       |             |
|---|----|----------------------------|--------------------|--------------|--------------|-------------|-------------|--------------------------------|--------------|---------------|-------|-------------|
| - | 8  | 1329_1330:c.2_Missense_Mu  | NM_015198          | NP_056013    | O75128       | COBL_HUMAN  |             | 5                              | CCTGCGGGGCTC | 0.629         |       |             |
| - | 6  | 641                        | ε_Mutation_p.R18   | NM_006213    | NP_006204    | Q16816      | PHKG1_HUMAN | rotein kinase.                 | 1            | GGTCCCGGTGC   | 0.537 |             |
| + | 1  | 1880                       |                    | NM_003508    | NP_003499    | O00144      | FZD9_HUMAN  | lasmic (Potential).            | 1            | GGGCCCGGGCC   | 0.657 |             |
| + | 20 | 1275                       | ELN_uc003tr.2_Ir   | NM_000501    | NP_001075224 | P15502      | ELN_HUMAN   | Ala-rich.                      | 5            | GCATTCCTACTTA | 0.627 |             |
| - | 2  | 846                        | ERF_uc011khm.1     | NM_006980    | NP_008911    | Q99551      | MTERF_HUMAN |                                | 0            | TTCTCTCACTGT  | 0.393 |             |
| + | 18 | 1399                       | 1A2_uc011kib.1_Ii  | NM_000089    | NP_000080    | P08123      | CO1A2_HUMAN |                                | 9            | CCAAGGGTGCT   | 0.453 | rs72656391  |
| - | 16 | 1808_1809:14_uc003uvi.2_RN | NM_002319          | NP_002310    | O75427       | LRCH4_HUMAN | CH.         | 2                              | CACATGGATGAA | 0.668         |       |             |
| - | 18 | 2210                       | κL13_uc003var.2_   | NM_145032    | NP_659469    | Q8NEE6      | FXL13_HUMAN | LRR 15.                        | 0            | CATATCTGACAG  | 0.418 |             |
| - | 1  | 162                        |                    | NM_002711    | NP_002702    | Q16821      | PPR3A_HUMAN |                                | 34           | AACCTCGTCTAC  | 0.378 |             |
| + | 6  | 745                        | R_uc011knq.1_5'l   | NM_000492    | NP_000483    | P13569      | CFTR_HUMAN  | rtial). ABC transmembrane      | 5            | ATCGCTCCTTTG  | 0.473 | rs121908803 |
| - | 31 | 5721                       | ιqz.3_Missense_M   | NM_020911    | NP_065962    | Q9HCM2      | PLXA4_HUMAN | lasmic (Potential).            | 1            | AGGTATGCGTTC  | 0.507 |             |
| - | 15 | 3086                       |                    | NM_020911    | NP_065962    | Q9HCM2      | PLXA4_HUMAN |                                | 1            | AGTGTCTGTGT   | 0.617 |             |
| - | 15 | 1860                       |                    | NM_004333    | NP_004324    | P15056      | BRAF_HUMAN  | rotein kinas_R603>I(2) p.T     | 18290        | GATTTCACTGTAC | 0.368 |             |
| - | 3  | 750                        | xc.3_Missense_Mt   | NM_001001317 | NP_001001317 | Q8IYP2      | PRS58_HUMAN | peptidase S1.                  | 0            | AGATATCACACA  | 0.433 |             |
| + | 23 | 3014                       | tc.1_Missense_Mu   | NM_000083    | NP_000074    | P35523      | CLCN1_HUMAN | smic (By similarity).          | 5            | CCCTGCGATCCA  | 0.617 |             |
| + | 1  | 796                        |                    | NM_001004685 | NP_001004685 | O95006      | OR2F2_HUMAN | ellular (Potential).           | 4            | CTGGTCCCTCA   | 0.493 |             |
| + | 12 | 1482_1483:rd.1_Missense_Mu | NM_007188          | NP_009119    | Q9NUT2       | ABCB8_HUMAN |             | 3                              | TGCGTCCCCAA  | 0.649         |       |             |
| + | 10 | 1280                       |                    | NM_016353    | NP_057437    | Q9UIJ5      | ZDHC2_HUMAN |                                | 0            | TTCCAACCTTGC  | 0.373 | rs2904682   |
| + | 4  | 364                        | 60B2_uc011kyy.1    | NM_022749    | NP_073586    | Q86V87      | F16B2_HUMAN |                                | 0            | GCATGCGGCAG   | 0.672 |             |
| - | 9  | 1143                       |                    | NM_003844    | NP_003835    | O00220      | TR10A_HUMAN | lasmic (Potential).            | 6            | AGTGGGGTCAG   | 0.532 |             |
| - | 6  | 3688                       | 3xkn.1_Missense_   | NM_001002814 | NP_001002814 | Q6WKZ4      | RFIP1_HUMAN | FIP-RBD.                       | 3            | GCCGAGGGGCTC  | 0.448 |             |
| + | 12 | 1080                       | DAM18_uc010lwx.    | NM_014237    | NP_055052    | Q9Y3Q7      | ADA18_HUMAN | B. Extracellular (Potential).  | 6            | AACTGCAGCATC  | 0.353 |             |
| + | 2  | 605                        | ι.1_Missense_Mut   | NM_006269    | NP_006260    | P56715      | RP1_HUMAN   |                                | 12           | GCCCCCACGG    | 0.692 |             |
| + | 55 | 10130                      | iw.2_Missense_Mt   | NM_017890    | NP_060360    | Q7Z7G8      | VP13B_HUMAN |                                | 20           | GCAGGTTGTGT   | 0.398 |             |
| - | 6  | 2235                       |                    | NM_000127    | NP_000118    | Q16394      | EXT1_HUMAN  | renal (Potential).             | 4            | GGGGGTCACCG   | 0.527 |             |
| + | 9  | 1053                       |                    | NM_001039112 | NP_001034201 | Q2WJ9       | FR1L6_HUMAN | toplasmic (Potential).         | 11           | TTGTGGAGGTC   | 0.493 |             |
| - | 1  | 2962                       | ιc003zrh.1_5'Flanl | NM_153809    | NP_722516    | Q8IZX4      | TAF1L_HUMAN |                                | 26           | AGCAATGAAGG   | 0.473 |             |
| + | 13 | 1340                       | b.1_RNA TMC1_u     | NM_138691    | NP_619636    | Q8TDI8      | TMC1_HUMAN  | ellular (Potential).           | 1            | CAATTGGATGGA  | 0.403 |             |
| - | 8  | 2869                       |                    | NM_015225    | NP_056040    | Q8WUY3      | PRUN2_HUMAN |                                | 0            | ATCTACCTTTTC  | 0.398 |             |
| + | 7  | 1643                       | ι.2_Missense_Mut   | NM_006648    | NP_006639    | Q9Y3S1      | WNK2_HUMAN  |                                | 12           | CTGGCCCGCGC   | 0.647 |             |
| + | 22 | 3334                       | ε_Mutation_p.L101  | NM_001042551 | NP_001036016 | O95347      | SMC2_HUMAN  | Potential.                     | 9            | AAAATTCTTACA  | 0.308 |             |
| - | 14 | 2042                       |                    | NM_005502    | NP_005493    | O95477      | ABCA1_HUMAN | Extracellular.                 | 17           | AGGACCAGGGT   | 0.478 |             |
| - | 3  | 615                        |                    | NM_014334    | NP_055149    | Q9P0K9      | CI004_HUMAN | DOMON.                         | 0            | TCTTACCATTTTC | 0.383 |             |
| - | 11 | 1543                       | ιuc.1_Missense_M   | NM_001080398 | NP_001073867 |             |             | 0                              | AGAGCGGAGGA  | 0.413         |       |             |
| - | 8  | 800                        |                    | NM_003086    | NP_003077    | Q5SXM2      | SNPC4_HUMAN | Myb-like 1.                    | 0            | ATCTTCTCCAG   | 0.577 |             |
| + | 4  | 394                        | ι2C_uc004cmg.1_!   | NM_006088    | NP_006079    | P68371      | TBB2C_HUMAN |                                | 1            | GTGCTGGGAAC   | 0.557 |             |
| - | 7  | 854                        | ιpy.1_Missense_M   | NM_004192    | NP_004183    | O95671      | ASML_HUMAN  |                                | 0            | GAGTGGGCTCC   | 0.706 |             |
| + | 4  | 532                        |                    | NM_173695    | NP_775966    | Q8N9S7      | CX059_HUMAN |                                | 1            | CAGCACAGACC   | 0.408 |             |
| - | 29 | 3606                       | nip.2_Missense_M   | NM_005183    | NP_005174    | O60840      | CAC1F_HUMAN | ismic (Potential). IV.         | 6            | ACACACGATACT  | 0.562 |             |
| + | 1  | 132                        |                    | NM_198512    | NP_940914    | Q6ZPD8      | DG2L6_HUMAN |                                | 1            | GGAGGGCCTCC   | 0.463 |             |
| - | 3  | 510                        | ir.2_Missense_Mul  | NM_001159560 | NP_001153032 | Q5H9J7      | BEX5_HUMAN  |                                | 1            | GAACCGTTCCA   | 0.488 |             |
| + | 5  | 650                        | p.D139N MST4_uc    | NM_016542    | NP_057626    | Q9P289      | MST4_HUMAN  | rotein kinase.                 | 9            | CCATTTGATGAG  | 0.343 |             |
| + | 3  | 1123                       |                    | NM_005364    | NP_005355    | P43361      | MAGA8_HUMAN | MAGE.                          | 0            | GCATTCCTACCC  | 0.577 | rs45578531  |
| - | 6  | 659                        | ε_Mutation_p.R17   | NM_000425    | NP_000416    | P32004      | L1CAM_HUMAN | potential). Ig-like C2-type 2. | 9            | TCACCGCTCG    | 0.612 | rs137852521 |
| + | 9  | 1768                       |                    | NM_198576    | NP_940978    | O00468      | AGRIN_HUMAN | Kazal-like 6.                  | 3            | GCACACGTACC   | 0.687 |             |
| + | 3  | 599                        | _5'Flank CPSF3L_   | NM_001029885 | NP_001025056 | Q5TA50      | GLTD1_HUMAN |                                | 0            | AGCTGCGGATC   | 0.652 |             |
| - | 1  | 344                        | n_p.R7G SSU72_ι    | NM_014188    | NP_054907    | Q9NP77      | SSU72_HUMAN |                                | 0            | CACCCGACGG    | 0.701 |             |



|   |    |       |                   |              |              |        |              |                             |    |              |       |
|---|----|-------|-------------------|--------------|--------------|--------|--------------|-----------------------------|----|--------------|-------|
| - | 22 | 2132  | CDK11B            | NM_033486    | NP_277021    | P21127 | CD11B_HUMAN  | protein kinase.             | 1  | CGAAGCGCTTG  | 0.622 |
| + | 5  | 523   | Missense_Mut      | NM_007033    | NP_008964    | O15258 | RER1_HUMAN   |                             | 0  | CCGCCCTTCA   | 0.483 |
| - | 11 | 1393  | Missense_Mut      | NM_018216    | NP_060686    | Q9NVE7 | PANK4_HUMAN  |                             | 3  | TGCGCGCTTCA  | 0.642 |
| - | 3  | 317   | ENO1              | NM_001428    | NP_001419    | P06733 | ENOA_HUMAN   | inized by CAR antibodies.   | 4  | TATAGCGAGTCT | 0.557 |
| + | 3  | 1254  | Missense_Mut      | NM_020780    | NP_065831    | Q9P2K9 | PTHD2_HUMAN  | cellular (Potential).       | 7  | GCCATGACTCA  | 0.592 |
| + | 6  | 980   | Missense_Mut      | NM_014874    | NP_055689    | O95140 | MFN2_HUMAN   | plasmic (Potential).        | 1  | TGCCCGCAGCC  | 0.572 |
| + | 2  | 265   |                   | NM_021933    | NP_068752    | Q5JXC2 | MIIP_HUMAN   |                             | 1  | CTGTGCGGCGG  | 0.632 |
| + | 26 | 6358  | Splice_Variant    | NM_015378    | NP_056193    | Q5THJ4 | VP13D_HUMAN  |                             | 5  | TCCCAGGAATC  | 0.517 |
| + | 10 | 2032  |                   | NM_015164    | NP_055979    | Q8IWE5 | PKHM2_HUMAN  |                             | 1  | GTTCCGAGAAA  | 0.592 |
| + | 12 | 10412 | Missense_Mut      | NM_015001    | NP_055816    | Q96T58 | MINT_HUMAN   | Pro-rich.                   | 15 | GCCTCGCCTCC  | 0.647 |
| - | 8  | 1276  | Missense_Mut      | NM_003443    | NP_003434    | Q13105 | ZBT17_HUMAN  | 2H2-type 2.                 | 0  | CGCCGGGTCC   | 0.677 |
| + | 7  | 755   | Mutation_p.S19    | NM_018125    | NP_060595    | Q9HCE6 | ARGAL_HUMAN  |                             | 3  | AGTGTCTTCC   | 0.592 |
| - | 3  | 920   |                   | NM_152232    | NP_689418    | Q8TE23 | TS1R2_HUMAN  | cellular (Potential).       | 4  | CGGTGCGATGG  | 0.637 |
| - | 1  | 1002  | uc001bdg.2        | NM_018584    | NP_061054    | Q7Z7J9 | CK2N1_HUMAN  | domain (By similarity).     | 0  | GATCTGGCCC   | 0.692 |
| + | 7  | 1048  | Mutation_p.R23    | NM_005839    | NP_005830    | Q8IYB3 | SRRM1_HUMAN  | rich.Arg-rich.              | 3  | GACCCGACCAC  | 0.502 |
| - | 2  | 323   | p.F79L            | NM_020485    | NP_065231    | P18577 | RHCE_HUMAN   | ical; (Potential).          | 0  | AGTTGAAGGC   | 0.597 |
| - | 2  | 191   | Missense_Mut      | NM_004814    | NP_004805    | Q96DI7 | SNR40_HUMAN  |                             | 0  | TGGAGGTCCCT  | 0.493 |
| + | 6  | 1349  | Mutation_p.Q35    | NM_022753    | NP_073590    | Q96BU1 | S1PBP_HUMAN  |                             | 0  | ATATGCAGCAC  | 0.443 |
| - | 4  | 1496  |                   | NM_001080418 | NP_001073887 | O95886 | DLGP3_HUMAN  |                             | 3  | GGCTCCGCATG  | 0.697 |
| - | 7  | 1808  | uc001byr.2_R      | NM_005066    | NP_005057    | P23246 | SFPQ_HUMAN   | Poly-Arg.                   | 8  | TTCTACGTCGT  | 0.433 |
| + | 11 | 1522  | Mutation_p.G36    | NM_012199    | NP_036331    | Q9UL18 | AGO1_HUMAN   |                             | 3  | TGCGGGGAAA   | 0.562 |
| - | 2  | 1778  | Missense_Mut      | NM_005202    | NP_005193    | P25067 | CO8A2_HUMAN  | helical region (NC1).       | 1  | CACGGCATGCC  | 0.627 |
| - | 15 | 2685  | RNA EPHA10        | NM_001099439 | NP_001092909 | Q5JZY3 | EPHAA_HUMAN  | Potential). Protein kinase. | 8  | GGGGTGGA     | 0.607 |
| - | 1  | 346   | uc001chk.2_5      | NM_032257    | NP_115633    | Q9H0C1 | ZMY12_HUMAN  | MYND-type.                  | 1  | CACCCGCTCGG  | 0.622 |
| + | 5  | 610   | R177Q             | NM_001034024 | NP_001029196 | Q9NPF5 | DMAP1_HUMAN  | SANT.                       | 0  | TGACCCGGTATG | 0.507 |
| - | 14 | 2030  | Missense_Mut      | NM_003738    | NP_003729    | Q9Y6C5 | PTC2_HUMAN   | plasmic (Potential).        | 18 | GATAGCGGGCG  | 0.607 |
| - | 3  | 287   | H2_uc010olg.1_5'  | NM_003738    | NP_003729    | Q9Y6C5 | PTC2_HUMAN   | cellular (Potential).       | 18 | TCACCCGGCTG  | 0.607 |
| - | 14 | 1860  | sense_Mutation_p. | NM_024602    | NP_078878    | Q5T447 | HECD3_HUMAN  | HECT.                       | 0  | GGTTGGGTACAT | 0.557 |
| + | 5  | 695   | uc001cpv.2_R      | NM_001441    | NP_001432    | O00519 | FAAH1_HUMAN  | plasmic (By similarity).    | 2  | AGACCGTGAAC  | 0.657 |
| + | 3  | 527   | G11B_uc010onj.1   | NM_024646    | NP_078922    | Q9C0D3 | ZY11B_HUMAN  |                             | 4  | ACTTGATGCCA  | 0.483 |
| - | 5  | 498   | Missense_Mut      | NM_002370    | NP_002361    | P61326 | MGN_HUMAN    |                             | 0  | ATCCAATAAGAC | 0.378 |
| + | 7  | 1332  |                   | NM_006252    | NP_006243    | P54646 | AAPK2_HUMAN  |                             | 6  | TTTACCGAGCT  | 0.383 |
| + | 11 | 1972  | Missense_Mut      | NM_001285    | NP_001276    | A8K7I4 | CLCA1_HUMAN  |                             | 1  | ATATTGCCCAAG | 0.493 |
| + | 1  | 217   | D5_uc001dpo.2_!   | NM_206886    | NP_996769    | Q5T9S5 | CCD18_HUMAN  |                             | 5  | AATGTAGTCCCC | 0.726 |
| - | 5  | 1017  | Missense_Mut      | NM_001439    | NP_001430    | Q9UBQ6 | EXTL2_HUMAN  | renal (Potential).          | 1  | TGCTCTGAAAT  | 0.398 |
| - | 6  | 1214  | OL11A1_uc001dur   | NM_001854    | NP_001845    | P12107 | COBA1_HUMAN  | helical region.             | 12 | TTACCTCCGTCT | 0.433 |
| + | 12 | 2317  |                   | NM_001010898 | NP_001010898 | Q9H1V8 | S6A17_HUMAN  | name=12; (Potential).       | 2  | CATGGCACTCC  | 0.657 |
| + | 1  | 2401  | sense_Mutation_p. | NM_022768    | NP_073605    | Q96T37 | RBM15_HUMAN  |                             | 3  | TGGGGGACAG   | 0.542 |
| - | 2  | 1686  | NA2_uc009wfw.2    | NM_004974    | NP_004965    | P16389 | KCNA2_HUMAN  | Segment S6; (Potential).    | 1  | CACCTGCAATCC | 0.512 |
| - | 1  | 472   |                   | NM_021794    | NP_068566    | Q9UKF2 | ADA30_HUMAN  |                             | 3  | CTTGGTATGTA  | 0.498 |
| + | 32 | 4104  | uc010oyl.1_Int    | NM_001039703 | NP_001034792 | A6NDV3 | A6NDV3_HUMAN |                             | 0  | TGCTGGATGAG  | 0.478 |
| - | 3  | 1114  | th.2_Splice_Site  | NM_014849    | NP_055664    | Q7L0J3 | SV2A_HUMAN   |                             | 7  | AGGCCTGGAAG  | 0.572 |
| - | 2  | 424   |                   | NM_020205    | NP_064590    | Q6GQQ9 | OTU7B_HUMAN  |                             | 3  | CTCGCGCTAGC  | 0.458 |
| - | 2  | 134   | .1_5'UTR CTSK_u   | NM_000396    | NP_000387    | P43235 | CATK_HUMAN   |                             | 1  | CTTGAGCCCCC  | 0.493 |
| + | 2  | 858   |                   | NM_020770    | NP_065821    | Q9P2M7 | CING_HUMAN   | ts with ZO-2. Head.         | 3  | CTCTAGCACAAA | 0.587 |
| - | 3  | 1061  |                   | NM_016190    | NP_057274    | Q9UBG3 | CRNN_HUMAN   | Gln-rich.                   | 3  | TGGATCTCAGT  | 0.602 |
| + | 1  | 127   |                   | NM_012437    | NP_036569    | O95295 | SNAPN_HUMAN  |                             | 0  | TGGCGGGCCC   | 0.706 |

rs17853564

|   |    |      |                    |              |              |        |             |                               |    |                   |       |             |
|---|----|------|--------------------|--------------|--------------|--------|-------------|-------------------------------|----|-------------------|-------|-------------|
| + | 7  | 717  | .R206W ADAM15_     | NM_207197    | NP_997080    | Q13444 | ADA15_HUMAN |                               | 6  | AGAGGCGGGATC      | 0.587 |             |
| + | 2  | 1041 | 11_uc010pgq.1_lr   | NM_152280    | NP_689493    | Q9BT88 | SYT11_HUMAN | mic (Potential). C2 1.        | 2  | TTGGCGAGGTC       | 0.552 |             |
| + | 1  | 329  | 1C_uc001frv.2_5F   | NM_001765    | NP_001756    | P29017 | CD1C_HUMAN  |                               | 4  | TTCTTCTCCAC       | 0.458 |             |
| + | 1  | 86   |                    | NM_001005184 | NP_001005184 | Q8NGW6 | OR6K6_HUMAN | ellular (Potential).          | 1  | GTTGACGGCCA       | 0.433 | rs142721506 |
| - | 2  | 467  |                    | NM_002241    | NP_002232    | P78508 | IRK10_HUMAN | llular (By similarity).       | 1  | AGGGGGTGTGG       | 0.582 |             |
| - | 2  | 167  | 1_p.A41V IGSF8_u   | NM_052868    | NP_443100    | Q969P0 | IGSF8_HUMAN | 1. Extracellular (Potential). | 0  | TGCCAGCCACG       | 0.617 |             |
| + | 9  | 1271 | 1_p.T225I ATP1A2   | NM_000702    | NP_000693    | P50993 | AT1A2_HUMAN | lasmic (Potential).           | 7  | CTCACCCAGA        | 0.607 |             |
| - | 4  | 697  | in.2_Missense_Mu   | NM_003874    | NP_003865    | Q9UIB8 | SLAF5_HUMAN | ellular (Potential).          | 4  | CAACCCGGTGT       | 0.483 |             |
| - | 4  | 342  | iF1_uc001fxj.2_Int | NM_007122    | NP_009053    | P22415 | USF1_HUMAN  |                               | 3  | AAGACGTACTT       | 0.552 |             |
| - | 9  | 1776 | _5'Flank ARHGAP:   | NM_030916    | NP_112178    | Q96NY8 | PVRL4_HUMAN | lasmic (Potential).           | 2  | GGCCCGTAGGG       | 0.597 | rs138257801 |
| - | 9  | 1698 | _5'Flank ARHGAP:   | NM_030916    | NP_112178    | Q96NY8 | PVRL4_HUMAN | lasmic (Potential).           | 2  | GGCCCGCCAG        | 0.582 | rs139761589 |
| + | 5  | 502  | LB_uc001gbl.2_Mi   | NM_001002901 | NP_001002901 | Q6BAA4 | FCRLB_HUMAN | like C2-type 1.               | 0  | GGGGAGCACCC       | 0.572 |             |
| + | 7  | 773  | q.1_Missense_Mu    | NM_007348    | NP_031374    | P18850 | ATF6A_HUMAN | lasmic (Potential).           | 3  | TGCTGTCTCAG       | 0.498 |             |
| + | 7  | 1048 | 1AP_uc010pks.1_l   | NM_014697    | NP_055512    | O75052 | CAPON_HUMAN |                               | 3  | ATGCGGTGGAG       | 0.592 |             |
| - | 7  | 1275 |                    | NM_005814    | NP_005805    | Q99795 | GPA33_HUMAN | lasmic (Potential).           | 0  | ATTACGCCCAG       | 0.612 | rs139067139 |
| - | 5  | 689  | f112_uc001ggj.2_l  | NM_000450    | NP_000441    | P16581 | LYAM2_HUMAN | xtracellular (Potential).     | 5  | GTTCACAACGT       | 0.413 |             |
| + | 12 | 1324 | 05_splice C1orf12: | NM_025063    | NP_079339    | Q5TGP6 | CA129_HUMAN |                               | 1  | TGGCGGTAATA       | 0.413 |             |
| + | 2  | 1146 | 1L13_uc001gib.2_l  | NM_015935    | NP_057019    | Q8N6R0 | MTL13_HUMAN |                               | 1  | TGGGGAGTGTG       | 0.657 |             |
| - | 19 | 3731 | 1.1_Missense_Mut   | NM_003285    | NP_003276    | Q92752 | TENR_HUMAN  | rogen C-terminal.             | 11 | GTGATCCTGTGT      | 0.572 |             |
| + | 3  | 751  | 3A_uc010pnd.1_li   | NM_022371    | NP_071766    | Q9H497 | TOR3A_HUMAN |                               | 1  | CGCCACGTTCC       | 0.597 | rs146717666 |
| + | 10 | 1228 |                    | NM_015602    | NP_056417    | Q5JTV8 | TOIP1_HUMAN | lear (Potential).             | 2  | GAACCGGTGGT       | 0.433 |             |
| - | 6  | 1195 |                    | NM_032360    | NP_115736    | Q9BR61 | ACBD6_HUMAN |                               | 1  | CCTACCCTAAAA      | 0.373 |             |
| + | 11 | 1594 | se_Mutation_p.R4f  | NM_004736    | NP_004727    | Q9UBH6 | XPR1_HUMAN  | mic (Potential). EXS.         | 0  | CGATATCGAGAC      | 0.468 |             |
| - | 1  | 235  | start_Site ASPM_u  | NM_018136    | NP_060606    | Q8IZT6 | ASPM_HUMAN  |                               | 6  | ccccctctggatctctt | 0.005 |             |
| + | 14 | 1638 |                    | NM_018085    | NP_060555    | Q96P70 | IPO9_HUMAN  |                               | 2  | CACAGCCCCCA       | 0.502 |             |
| - | 9  | 2838 |                    | NM_025179    | NP_079455    | O75051 | PLXA2_HUMAN | ellular (Potential).          | 3  | GATCCGGCCCTC      | 0.562 |             |
| - | 8  | 1728 | ic.2_Missense_Mu   | NM_172362    | NP_758872    | O95259 | KCNH1_HUMAN | lasmic (Potential).           | 5  | GTCCCGAACAC       | 0.463 |             |
| + | 2  | 708  | kg.1_Missense_Mi   | NM_002763    | NP_002754    | Q92786 | PROX1_HUMAN |                               | 6  | TTGGCAGGCCT       | 0.512 |             |
| + | 4  | 484  | ie_Mutation_p.I64f | NM_016121    | NP_057205    | Q9Y597 | KCTD3_HUMAN | BTB.                          | 3  | ATATTTATTGATA     | 0.264 |             |
| - | 3  | 1332 | _p.R42W DUSP10     | NM_007207    | NP_009138    | Q9Y6W6 | DUS10_HUMAN | protein phosphatase.          | 2  | CTGCCGAGGT        | 0.488 |             |
| - | 2  | 759  | ph.2_Missense_Mi   | NM_002221    | NP_002212    | P27987 | IP3KB_HUMAN |                               | 5  | GCACGTTCTGC       | 0.672 |             |
| + | 2  | 667  | f69_uc010pvw.1_5   | NM_001010867 | NP_001010867 | Q5T440 | CAF17_HUMAN |                               | 0  | AGCACGCATGG       | 0.692 |             |
| + | 8  | 790  | CE_uc010pxr.1_M    | NM_003193    | NP_003184    | Q15813 | TBCE_HUMAN  | LRR 3.                        | 0  | TGCTGCGGTGT       | 0.507 | rs75832955  |
| + | 1  | 1940 | se_Mutation_p.R48: | NM_006352    | NP_006343    | Q99592 | ZN238_HUMAN | C2H2-type 4.                  | 5  | CGAGCGCAGGT       | 0.602 |             |
| + | 2  | 449  | co.3_Missense_Mi   | NM_152609    | NP_689822    | Q6PJW8 | CNST_HUMAN  |                               | 0  | TGACAGCGTGG       | 0.468 |             |
| + | 8  | 1270 | co.3_Missense_Mu   | NM_152609    | NP_689822    | Q6PJW8 | CNST_HUMAN  |                               | 0  | TACTAGTGTCTC      | 0.413 |             |
| + | 1  | 512  |                    | NM_001004698 | NP_001004698 | A6NFC9 | OR2W5_HUMAN |                               | 3  | TGGACGTCGCA       | 0.562 | rs145513251 |
| - | 3  | 282  | ih.2_RNA ASB13_    | NM_024701    | NP_078977    | Q8WXX3 | ASB13_HUMAN | ANK 2.                        | 1  | GCGAGCATCCA       | 0.577 |             |
| + | 10 | 1224 | iin.2_Missense_M   | NM_153498    | NP_705718    | Q8IU85 | KCC1D_HUMAN | Ser-rich.                     | 2  | GGACAGTTCAA       | 0.473 |             |
| + | 2  | 643  | inse_Mutation_p.R  | NM_024670    | NP_078946    | Q9H511 | SUV92_HUMAN | SET.                          | 3  | CTTTTCCAATA       | 0.428 |             |
| + | 8  | 1590 | ie_Mutation_p.S26  | NM_032812    | NP_116201    | Q6UX71 | PXDC2_HUMAN | ellular (Potential).          | 4  | CATTCGCGCTG       | 0.323 |             |
| + | 12 | 1608 | p.G509S ARMC3_     | NM_173081    | NP_775104    | Q5W041 | ARMC3_HUMAN | ARM 12.                       | 0  | TGCTGGTGAC        | 0.532 |             |
| - | 3  | 505  | p.T113R AB11_ucC   | NM_005470    | NP_005461    | Q8IZP0 | AB11_HUMAN  |                               | 1  | TTGTTGTCAAA       | 0.328 |             |
| - | 7  | 2138 | o.C568Y ZNF438_l   | NM_182755    | NP_877432    | Q7Z4V0 | ZN438_HUMAN | C2H2-type 3.                  | 2  | GCACAACACATG      | 0.478 |             |
| + | 7  | 794  |                    | NM_052997    | NP_443723    | Q9BXX3 | AN30A_HUMAN |                               | 9  | CTTGGCGGAAA       | 0.423 |             |
| + | 7  | 1118 |                    | NM_052997    | NP_443723    | Q9BXX3 | AN30A_HUMAN |                               | 9  | AAATTATGAGTCC     | 0.428 |             |
| + | 1  | 134  | 0gev.1_Splice_Sit  | NM_006974    | NP_008905    | Q06730 | ZN33A_HUMAN |                               | 3  | TGGGGTAAGCC       | 0.652 |             |

|   |    |      |                                                                                          |  |  |  |  |    |               |       |             |
|---|----|------|------------------------------------------------------------------------------------------|--|--|--|--|----|---------------|-------|-------------|
| + | 5  | 599  | 1izo.1_RNA HSD17B7P2_uc001izp.1_Missense_Mutation_p.N173S                                |  |  |  |  | 0  | :TCGCAATGCAAC | 0.453 | rs2257765   |
| - | 3  | 1103 | 2_Mutation_p.R206 NM_001098208 NP_001091678 P52597 HNRPF_HUMAN                           |  |  |  |  | 0  | :TGGCCGCTGCA  | 0.582 |             |
| + | 3  | 397  | jbl.2_intron TMEM NM_001123376 NP_001116848 A0PK05 TMM72_HUMAN                           |  |  |  |  | 0  | :GGCCATCTGCT  | 0.587 |             |
| - | 4  | 601  | T15_uc001jeb.2_1 NM_031912 NP_114118 Q9BQS2 SYT15_HUMAN mic (Potential). C2 1.           |  |  |  |  | 0  | CAGCCGCCCA    | 0.612 |             |
| - | 1  | 1894 | NM_002900 NP_002891 P10745 RET3_HUMAN nate tandem repeats. 2.                            |  |  |  |  | 2  | GACCGGCACGG   | 0.677 |             |
| - | 18 | 3816 | qgr.1_Missense_M NM_000124 NP_000115 Q03468 ERCC6_HUMAN                                  |  |  |  |  | 16 | 3GAATTCGAGTT  | 0.448 |             |
| - | 2  | 555  | p.R134Q PGBD3_ NM_000124 NP_000115 Q03468 ERCC6_HUMAN                                    |  |  |  |  | 16 | ACCGACCATA    | 0.537 |             |
| - | 1  | 521  | 4 TMEM26_uc001j NM_178505 NP_848600 Q6ZUK4 TMM26_HUMAN ical; (Potential).                |  |  |  |  | 0  | :TGAGCGCAGTC  | 0.642 |             |
| - | 8  | 1218 | ise_Mutation_p.R3 NM_022079 NP_071362 Q5GLZ8 HERC4_HUMAN RCC1 6.                         |  |  |  |  | 3  | :TTACCGTCCAC  | 0.383 |             |
| - | 22 | 4723 | kk.1_Missense_Mt NM_152586 NP_689799 Q70EL1 UBP54_HUMAN                                  |  |  |  |  | 6  | :TGGCAGTGTAG  | 0.522 |             |
| + | 23 | 3298 | 2_Mutation_p.R286 NM_004922 NP_004913 P53992 SC24C_HUMAN                                 |  |  |  |  | 3  | :CTTACGGGCAC  | 0.468 |             |
| + | 7  | 2889 | p.R752L PLCE1_1 NM_016341 NP_057425 Q9P212 PLCE1_HUMAN Ras-GEF.                          |  |  |  |  | 3  | ACAACGAGTGG   | 0.408 |             |
| + | 6  | 890  | qny.1_Missense_M NM_000769 NP_000760 P33261 CP2CJ_HUMAN                                  |  |  |  |  | 6  | TGGAGCTGGGA   | 0.433 |             |
| + | 23 | 3268 | NM_000392 NP_000383 Q92887 MRP2_HUMAN -1 2. Helical; Name=13; (B)                        |  |  |  |  | 1  | :CATTTCTGGAG  | 0.433 |             |
| - | 9  | 2874 | nse_Mutation_p.R: NM_015221 NP_056036 Q6XZF7 DNMBP_HUMAN DH.                             |  |  |  |  | 6  | GGTAACGCATTA  | 0.433 |             |
| - | 10 | 1082 | NM_001278 NP_001269 O15111 IKKA_HUMAN                                                    |  |  |  |  | 7  | TTTCACGCTCAA  | 0.383 |             |
| - | 5  | 1122 | wm.1_Missense_M NM_016112 NP_057196 Q9P0L9 PK2L1_HUMAN xellular (Potential).             |  |  |  |  | 4  | :GTGGTATGTCC  | 0.552 |             |
| - | 3  | 1377 | NM_001085398 NP_001078867 P0CAT3 TLXNB_HUMAN                                             |  |  |  |  | 0  | :CCATGGCCTCT  | 0.662 |             |
| + | 10 | 1950 | p.K573R NOLC1_1 NM_004741 NP_004732 Q14978 NOLC1_HUMAN lization signal (Potential).      |  |  |  |  | 1  | GAAAAAGCGCG   | 0.502 |             |
| - | 17 | 3591 | .R391W PSD_uc001 NM_002779 NP_002770 A5PKW4 PSD1_HUMAN                                   |  |  |  |  | 3  | :CTTCCGCCGCC  | 0.692 |             |
| - | 6  | 563  | p.R78T ACTR1A_1 NM_005736 NP_005727 P61163 ACTZ_HUMAN                                    |  |  |  |  | 1  | :TGGTCTGCTCT  | 0.542 |             |
| + | 3  | 466  | nse_Mutation_p.R96 NM_017787 NP_060257 Q9NX94 OPA1_HUMAN                                 |  |  |  |  | 1  | :GCACCGCCTTC  | 0.562 |             |
| - | 16 | 2157 | 10orf79_uc001kxx NM_025145 NP_079421 Q8NDM7 WDR96_HUMAN WD 9.                            |  |  |  |  | 0  | :CTGGTGAGAAT  | 0.403 |             |
| + | 6  | 845  | 11_uc010qrc.1_M NM_005962 NP_005953 P50539 MX11_HUMAN                                    |  |  |  |  | 0  | TGGGAGTGACG   | 0.468 |             |
| + | 8  | 1363 | 7L2_uc001lah.2_M NM_001146274 NP_001139746 Q9NQB0 TF7L2_HUMAN ction with MAD2L2. Pro-ric |  |  |  |  | 4  | :TGACCGTCAAT  | 0.522 |             |
| + | 3  | 918  | NM_198514 NP_940916 Q8NBF2 NHLC2_HUMAN NHL 1.                                            |  |  |  |  | 1  | GTTACTGATAGAT | 0.353 |             |
| + | 2  | 547  | el.2_Missense_Mu NM_004281 NP_004272 O95817 BAG3_HUMAN                                   |  |  |  |  | 2  | :CTAGGGAAGGC  | 0.572 |             |
| + | 4  | 962  | nse_Mutation_p.S: NM_206862 NP_996744 O95359 TACC2_HUMAN                                 |  |  |  |  | 10 | :AATGTCGCCAG  | 0.582 |             |
| + | 4  | 5521 | ise_Mutation_p.S17 NM_206862 NP_996744 O95359 TACC2_HUMAN                                |  |  |  |  | 10 | :GTGCGTCCGGT  | 0.607 |             |
| + | 8  | 883  | 1_intron DHX32_u NM_016567 NP_057651 Q9P287 BCCIP_HUMAN                                  |  |  |  |  | 2  | :TTCACGGGGGC  | 0.433 |             |
| - | 5  | 621  | NM_004092 NP_004083 P30084 ECHM_HUMAN                                                    |  |  |  |  | 0  | :CTTCCCAACAG  | 0.627 |             |
| - | 4  | 308  | 109ybn.2_Missense NM_001143764 NP_001137236 Q8N0S2 SYCE1_HUMAN Potential.                |  |  |  |  | 1  | GCTTTCTTTTTTC | 0.498 |             |
| + | 7  | 846  | p.A238T PHRF1_1 NM_020901 NP_065952 Q9P1Y6 PHRF1_HUMAN                                   |  |  |  |  | 0  | :TTGCCGCTGGT  | 0.627 |             |
| - | 13 | 2017 | 1.1_5'Flank CDHR5 NM_021924 NP_068743 Q9HBB8 CDHR5_HUMAN epeats. Extracellular (Poter    |  |  |  |  | 0  | :TCCTGGCTCTG  | 0.632 |             |
| - | 13 | 1897 | 3ycc.2_Missense_M NM_021924 NP_068743 Q9HBB8 CDHR5_HUMAN tem repeats. 2. Extracellule    |  |  |  |  | 0  | :CCCACCGGGTG  | 0.672 | rs139590704 |
| + | 13 | 1892 | A2_uc009yco.1_R NM_012305 NP_036437 O94973 AP2A2_HUMAN                                   |  |  |  |  | 0  | :GGAACGCAGAC  | 0.652 |             |
| - | 31 | 6815 | NM_005961 NP_005952 Q6W4X9 MUC6_HUMAN r-rich. Thr-rich.                                  |  |  |  |  | 1  | :TGGCCGTGGTC  | 0.612 |             |
| - | 2  | 233  | SD_uc009yda.1_F NM_001909 NP_001900 P07339 CATD_HUMAN                                    |  |  |  |  | 0  | GGTCCGGCGGA   | 0.622 |             |
| + | 1  | 422  | 32_uc001mak.1_lr NM_001005162 NP_001005162 Q8NGF0 O52B6_HUMAN lasmic (Potential).        |  |  |  |  | 1  | :TGACCCTATGT  | 0.517 |             |
| - | 1  | 751  | 45_uc001mbq.1_lr NM_001005168 NP_001005168 Q6IFG1 O52E8_HUMAN Name=6; (Potential).       |  |  |  |  | 2  | TAAACCAATATC  | 0.408 |             |
| - | 1  | 764  | NM_001146033 NP_001139505 P0C7T3 O56A5_HUMAN Name=6; (Potential).                        |  |  |  |  | 0  | :CTGTGGTGAAG  | 0.488 |             |
| + | 15 | 1937 | p.Q606K ZNF143_1 NM_003442 NP_003433 P52747 ZN143_HUMAN                                  |  |  |  |  | 0  | :GCACCCAGATT  | 0.483 |             |
| - | 7  | 1007 | 34_splICE COPB1_1 NM_016451 NP_057535 P53618 COPB_HUMAN                                  |  |  |  |  | 2  | :CAGACCTGGAG  | 0.388 |             |
| - | 15 | 2222 | nf.2_Missense_Mt NM_001145819 NP_001139291 P35712 SOX6_HUMAN                             |  |  |  |  | 3  | :GTCTCCGAGAC  | 0.453 |             |
| + | 32 | 6672 | p.G1165D NAV2_1 NM_182964 NP_892009 Q8IVL1 NAV2_HUMAN TP (Potential).                    |  |  |  |  | 6  | :CAGCGCACTG   | 0.567 |             |
| - | 1  | 248  | NM_022725 NP_073562 Q9NP18 FANCF_HUMAN                                                   |  |  |  |  | 1  | :CCGCCAAAGC   | 0.667 |             |
| - | 4  | 1264 | .1_intron MUC15_1 NM_145650 NP_663625 Q8N387 MUC15_HUMAN lasmic (Potential).             |  |  |  |  | 3  | TATACAGAAGTAC | 0.383 |             |

|   |    |       |                   |              |              |        |                                           |   |               |       |
|---|----|-------|-------------------|--------------|--------------|--------|-------------------------------------------|---|---------------|-------|
| - | 2  | 1252  | uc009yiz.2_Intro  | NM_001143816 | NP_001137288 | P23560 | BDNF_HUMAN                                | 0 | CTCGGCGGGCA   | 0.552 |
| + | 2  | 418   | .1_Intron DGKZ_u  | NM_001105540 | NP_001099010 | Q13574 | DGKZ_HUMAN                                | 3 | TACCACCGTGG   | 0.657 |
| + | 2  | 127   | 2_uc001ndg.3_RN   | NM_000506    | NP_000497    | P00734 | THRB_HUMAN                                | 3 | GTGTTCTGGC    | 0.657 |
| + | 5  | 890   | 32_uc001nee.2_Inl | NM_000107    | NP_000098    | Q92466 | DDB2_HUMAN                                | 3 | GGACGGCAAAG   | 0.572 |
| + | 1  | 861   |                   | NM_001005496 | NP_001005496 | Q8NGK9 | OR5DG_HUMAN Name=7; (Potential).          | 5 | TTGTTGAATCC   | 0.403 |
| - | 1  | 283   |                   | NM_001004746 | NP_001004746 | Q8NGG2 | OR5T2_HUMAN Name=2; (Potential).          | 2 | TTTGTGGAGCT   | 0.393 |
| - | 5  | 725   |                   | NM_005142    | NP_005133    | P27352 | IF_HUMAN                                  | 2 | AGGCCAGTACTG  | 0.358 |
| - | 4  | 589   |                   | NM_014502    | NP_055317    | Q9UMS4 | PRP19_HUMAN                               | 1 | TTCTCGGGCAG   | 0.582 |
| + | 2  | 666   |                   | NM_138471    | NP_612480    | Q9BUA3 | CK084_HUMAN                               | 0 | TGAGAGCTGAG   | 0.587 |
| + | 6  | 1098  | 3_RNA KCNK4_uc    | NM_033310    | NP_201567    | Q9NYG8 | KCNK4_HUMAN lasmic (Potential).           | 0 | TGCGAGTAGTG   | 0.642 |
| + | 2  | 1396  | nv.1_Missense_M   | NM_013299    | NP_037431    |        |                                           | 0 | AGGACGTACCC   | 0.622 |
| + | 17 | 1927  | p.A321T POLA2_u   | NM_002689    | NP_002680    | Q14181 | DPOA2_HUMAN                               | 0 | TTTACGCACAGC  | 0.493 |
| + | 6  | 789   | rot.1_Missense_M  | NM_005146    | NP_005137    | O43290 | SNUT1_HUMAN                               | 1 | FTTGGTGTCAAGC | 0.602 |
| - | 3  | 395   | e_Site RIN1_uc01  | NM_004292    | NP_004283    | Q13671 | RIN1_HUMAN                                | 3 | AACGTCTGCAA   | 0.637 |
| + | 10 | 931   | TN3_uc010rpi.1_F  | NM_001104    | NP_001095    | Q08043 | ACTN3_HUMAN Spectrin 1.                   | 0 | GGATCCGCCGC   | 0.647 |
| - | 17 | 3692  |                   | NM_006946    | NP_008877    | O15020 | SPTN2_HUMAN Spectrin 9.                   | 4 | CATCAGCAGCC   | 0.557 |
| + | 8  | 738   | 10C_uc001okz.2_   | NM_198517    | NP_940919    | Q8IV04 | TB10C_HUMAN ab-GAP TBC.                   | 0 | CGCACGTGCAC   | 0.697 |
| + | 5  | 1074  | nse_Mutation_p.E  | NM_020811    | NP_065862    | A5YM72 | CRNS1_HUMAN                               | 0 | TGGTGGAGGCT   | 0.657 |
| + | 4  | 277   | FS8_uc009ysb.1_I  | NM_002496    | NP_002487    | O00217 | NDUS8_HUMAN                               | 1 | AGCCCGCACCC   | 0.652 |
| - | 11 | 2418  | 1onn.1_Missense_  | NM_017635    | NP_060105    | Q4FZB7 | SV421_HUMAN                               | 3 | GCCTACGAAGA   | 0.383 |
| - | 9  | 1123  | p.P318R CPT1A_    | NM_001876    | NP_001867    | P50416 | CPT1A_HUMAN lasmic (Potential).           | 2 | CTCCTGGGATC   | 0.483 |
| - | 3  | 1251  | oop.3_Missense_N  | NM_001098515 | NP_001091985 | Q96AM1 | MRGRF_HUMAN lasmic (Potential).           | 0 | CCCTCCCGGCC   | 0.687 |
| + | 16 | 2548  | L817P C11orf30_u  | NM_020193    | NP_064578    | Q7Z589 | EMSY_HUMAN                                | 6 | TGACCTGAGTC   | 0.388 |
| + | 45 | 6453  | e_Mutation_p.R20z | NM_000260    | NP_000251    | Q13402 | MYO7A_HUMAN FERM 2.                       | 4 | TGCTCGGGGAG   | 0.637 |
| + | 2  | 433   |                   | NM_153696    | NP_710163    | Q9HBA9 | FOH1B_HUMAN                               | 6 | GAATACGCTTAT  | 0.328 |
| + | 5  | 728   |                   | NM_153696    | NP_710163    | Q9HBA9 | FOH1B_HUMAN                               | 6 | TGGGAGGTCAC   | 0.418 |
| + | 4  | 546   | p.N146S NAALAD    | NM_005467    | NP_005458    | Q9Y3Q0 | NALD2_HUMAN ellular (Potential).          | 2 | TTACAAATATTGT | 0.328 |
| + | 18 | 11029 | li.3_Missense_Mul | NM_001008781 | NP_001008781 | Q8TDW7 | FAT3_HUMAN ellular (Potential).           | 5 | CCGGCGCACCC   | 0.587 |
| + | 11 | 2520  | pfc.2_Missense_M  | NM_130847    | NP_570899    | Q8IY63 | AMOL1_HUMAN                               | 2 | AGACAGACTCC   | 0.502 |
| + | 12 | 2797  | pfc.2_Missense_M  | NM_130847    | NP_570899    | Q8IY63 | AMOL1_HUMAN                               | 2 | CAGCAGCACAC   | 0.672 |
| + | 9  | 1228  | ifz.2_Missense_M  | NM_014361    | NP_055176    | O94779 | CNTN5_HUMAN                               | 8 | TGGGAGAATATC  | 0.368 |
| + | 2  | 788   | G140W YAP1_uc     | NM_001130145 | NP_001123617 | P46937 | YAP1_HUMAN                                | 3 | CTCCTGGGACA   | 0.542 |
| - | 1  | 70    | on_p.A8V MMP7_u   | NM_002423    | NP_002414    | P09237 | MMP7_HUMAN                                | 1 | CACACGACAC    | 0.552 |
| - | 16 | 3055  | p.P888S ARHGAP    | NM_020809    | NP_065860    | Q9P2F6 | RHG20_HUMAN                               | 5 | TGGGGGTAATA   | 0.488 |
| - | 5  | 829   |                   | NM_017589    | NP_060059    | Q9NY30 | BTG4_HUMAN                                | 0 | GCATAGCAGGC   | 0.557 |
| + | 9  | 1385  | ol.2_Missense_M   | NM_006028    | NP_006019    | O95264 | 5HT3B_HUMAN ellular (Potential).          | 0 | GGGGCGGCGTG   | 0.493 |
| + | 2  | 131   | utation_p.A10V P  | NM_002572    | NP_002563    | P68402 | PA1B2_HUMAN                               | 1 | CAGCAGTATTCC  | 0.408 |
| + | 6  | 687   | qg.2_Missense_M   | NM_001040455 | NP_001035545 | Q8NBJ9 | SIDT2_HUMAN ellular (Potential).          | 0 | AACAACGTAGCC  | 0.592 |
| - | 9  | 1276  |                   | NM_004716    | NP_004707    | Q16549 | PCSK7_HUMAN xtracellular (Potential).     | 0 | CATGCGTCCCT   | 0.567 |
| - | 12 | 2701  |                   | NM_020693    | NP_065744    | Q8TD84 | DSCL1_HUMAN otential).Ig-like C2-type 9.  | 8 | TTGGTGGCGATG  | 0.642 |
| - | 7  | 1701  | rzi.1_Missense_M  | NM_012101    | NP_036233    | Q14134 | TRI29_HUMAN                               | 4 | TTGTCAAGATTC  | 0.612 |
| + | 13 | 1615  | rw.1_Missense_M   | NM_014619    | NP_055434    | Q16099 | GRIK4_HUMAN ellular (Potential).          | 3 | TGACCGCTACG   | 0.547 |
| - | 9  | 1967  | yp.2_Missense_M   | NM_006597    | NP_006588    | P11142 | HSP7C_HUMAN                               | 8 | GAGGAGCTCCA   | 0.507 |
| + | 6  | 760   | p.A184G VVA5A_    | NM_001130142 | NP_001123614 | O00534 | VMA5A_HUMAN                               | 2 | TGGTCGCCACCA  | 0.502 |
| + | 2  | 168   | e_5'Flank SIAE_uc | NM_017425    | NP_059121    | Q15506 | SP17_HUMAN                                | 0 | ACTACCGAATTC  | 0.423 |
| + | 9  | 1588  |                   | NM_022370    | NP_071765    | Q96MS0 | ROBO3_HUMAN 5. Extracellular (Potential). | 2 | TTGGTCTCTCC   | 0.607 |
| + | 1  | 691   | 2_3'UTR HEPACA    | NM_001037558 | NP_001032647 | Q6WQI6 | HEPN1_HUMAN                               | 0 | TCCTATGAAGTC  | 0.488 |

|   |    |       |                                                                                                    |              |              |        |             |                               |    |                  |       |             |
|---|----|-------|----------------------------------------------------------------------------------------------------|--------------|--------------|--------|-------------|-------------------------------|----|------------------|-------|-------------|
| + | 4  | 354   | OX2_uc010sba.1_I                                                                                   | NM_022062    | NP_071345    | Q96KN3 | PKNX2_HUMAN |                               | 3  | CGATGATGGCC/     | 0.662 |             |
| - | 2  | 511   | .CRV1_uc001qco.2                                                                                   | NM_001612    | NP_001603    | P26436 | ASPX_HUMAN  | peats of S-E-H-[GA]-S.        | 0  | GTGCTCGGCCA      | 0.517 |             |
| - | 5  | 843   | p.R161H KIRREL                                                                                     | NM_032531    | NP_115920    | Q8IZU9 | KIRR3_HUMAN | 2. Extracellular (Potential). | 3  | CCGCACGCAGC      | 0.652 |             |
| + | 9  | 1176  | _p.L207F LOC100288778_uc010sdf.1_Missense_Mutation_p.L207F LOC100288778_uc010sdg.1_Missense_Mutati |              |              |        |             |                               | 0  | CCACTTGATGTC/    | 0.607 |             |
| - | 19 | 2158  | \CNA2D4_uc009zr                                                                                    | NM_172364    | NP_758952    | Q7Z3S7 | CA2D4_HUMAN | ellular (Potential).          | 1  | GGTGTCTGCTGA     | 0.478 |             |
| + | 1  | 1081  |                                                                                                    | NM_002235    | NP_002226    | P17658 | KCNA6_HUMAN |                               | 3  | TGGCCGGCGAG      | 0.622 |             |
| + | 2  | 451   | ev.1_Missense_M                                                                                    | NM_001769    | NP_001760    | P21926 | CD9_HUMAN   | lasmic (Potential).           | 1  | TGCCGGTCAAA/     | 0.632 |             |
| + | 12 | 1523  | sew.1_Missense_M                                                                                   | NM_018173    | NP_060643    | Q3KR16 | PKHG6_HUMAN | PH.                           | 2  | TGCTGGAGAAG/     | 0.592 |             |
| - | 11 | 1896  | _p.T486I ZNF384                                                                                    | NM_001135734 | NP_001129206 | Q8TF68 | ZN384_HUMAN |                               | 8  | TGACAGTGAGG      | 0.582 |             |
| - | 3  | 119   | qqg.1_Missense_I                                                                                   | NM_153685    | NP_710152    | Q8IYJ0 | CL053_HUMAN |                               | 0  | AGGGAGGAGGT      | 0.672 |             |
| - | 13 | 3381  | ge.1_Missense_M                                                                                    | NM_174941    | NP_777601    | Q9NR16 | C163B_HUMAN | Extracellular (Potential).    | 11 | CCAGCCGCGGG      | 0.617 | rs149805278 |
| - | 2  | 285   | raq.2_Missense_Iv                                                                                  | NM_006143    | NP_006134    | Q15760 | GPR19_HUMAN | ellular (Potential).          | 1  | TGGCTGTTTCA/     | 0.468 |             |
| - | 3  | 424   |                                                                                                    | NM_182558    | NP_872364    |        |             |                               | 0  | GGAACGATTCC      | 0.453 | rs143075618 |
| + | 2  | 412   | _p.Q68R C12orf72                                                                                   | NM_001135864 | NP_001129336 | Q8IXQ9 | MET20_HUMAN |                               | 0  | AATCCAGTTGC/     | 0.552 |             |
| + | 4  | 751   | GD4_uc010ske.1_                                                                                    | NM_139241    | NP_640334    | Q96M96 | FGD4_HUMAN  | nt-binding (By similarity).   | 3  | CCAACGGTGTA      | 0.483 |             |
| - | 13 | 1821  |                                                                                                    | NM_004818    | NP_004809    | Q9BUQ8 | DDX23_HUMAN | ase ATP-binding.              | 6  | TGTCTGGCTTC      | 0.527 |             |
| - | 12 | 1347  | _p.M335I LMBR1L                                                                                    | NM_018113    | NP_060583    | Q6UX01 | LMBRL_HUMAN | ellular (Potential).          | 1  | ACCTGCATGCC/     | 0.617 |             |
| - | 19 | 2503  | rut.1_Missense_Mi                                                                                  | NM_175736    | NP_783863    | Q8IVF7 | FMNL3_HUMAN | FH2.                          | 4  | CTTGACGGAAG/     | 0.547 |             |
| + | 21 | 2981  | ryo.2_Missense_N                                                                                   | NM_001039960 | NP_001035049 | Q2Y0W8 | S4A8_HUMAN  | ellular (Potential).          | 5  | TGCCCGCAAAG      | 0.507 | rs146086054 |
| + | 10 | 1541  | 81_uc001sac.2_5'                                                                                   | NM_002284    | NP_002275    | O43790 | KRT86_HUMAN | Tail.                         | 1  | ACGCCTGCGCC/     | 0.672 |             |
| - | 9  | 1523  |                                                                                                    | NM_004693    | NP_004684    | O95678 | K2C75_HUMAN | Tail.                         | 0  | GTAGCCGCTGC      | 0.627 |             |
| - | 6  | 1268  | \T8_uc009zml.1_I                                                                                   | NM_002273    | NP_002264    | P05787 | K2C8_HUMAN  | Rod. Coil 2.                  | 2  | GGTGGCGATCT/     | 0.667 |             |
| - | 9  | 1097  | is.3_Nonsense_Mi                                                                                   | NM_015665    | NP_056480    | Q9NRG9 | AAA5_HUMAN  | WD 4.                         | 1  | TACCAGAAAG/      | 0.562 | rs121918547 |
| + | 11 | 1588  | R2_uc009zmy.1_3                                                                                    | NM_020547    | NP_065434    | Q16671 | AMHR2_HUMAN | Potential) Protein kinase.    | 2  | AGCAGCGCCTG/     | 0.597 |             |
| - | 8  | 1229  | i.P84S MMP19_uc                                                                                    | NM_002429    | NP_002420    | Q99542 | MMP19_HUMAN | mopexin-like 2.               | 1  | CTTGGGGAAGC/     | 0.458 |             |
| + | 12 | 1237  | e_Mutation_p.R32                                                                                   | NM_001345    | NP_001336    | P23743 | DGKA_HUMAN  |                               | 4  | TGCTCCGGGAT      | 0.602 |             |
| - | 10 | 1254  | i_Mutation_p.P289                                                                                  | NM_004077    | NP_004068    | O75390 | CISY_HUMAN  |                               | 0  | TATCGCGGATCA/    | 0.413 |             |
| - | 18 | 2324  |                                                                                                    | NM_003920    | NP_003911    | Q9UNS1 | TIM_HUMAN   |                               | 8  | TGTGGGCACTA      | 0.493 | rs138087467 |
| - | 5  | 446   | 2_RNA TAC3_uc0                                                                                     | NM_013251    | NP_037383    | Q9UHF0 | TKNK_HUMAN  |                               | 2  | TGGCTGGACGC      | 0.502 |             |
| + | 81 | 12924 |                                                                                                    | NM_002332    | NP_002323    | Q07954 | LRP1_HUMAN  | Extracellular (Potential).    | 22 | TGACCGCAAGA      | 0.642 |             |
| - | 4  | 526   |                                                                                                    | NM_000619    | NP_000610    | P01579 | IFNG_HUMAN  |                               | 0  | GTTCATGTATTGC    | 0.433 |             |
| + | 9  | 1732  | _p.E578G CPSF6_                                                                                    | NM_007007    | NP_008938    | Q16630 | CPSF6_HUMAN | uclear targeting. Arg-rich.   | 0  | gaccgagagcgtgacc | 0.353 |             |
| + | 2  | 977   | C2_uc001szs.1_M                                                                                    | NM_152588    | NP_689801    | Q8N394 | TMTC2_HUMAN | ical; (Potential).            | 2  | TATGCAGCATGT     | 0.478 |             |
| - | 1  | 1649  |                                                                                                    | NM_152638    | NP_689851    | Q8TC90 | CL012_HUMAN |                               | 2  | TAAACAGTTAAAC    | 0.368 |             |
| - | 10 | 1578  | _p.A412G SART3_                                                                                    | NM_014706    | NP_055521    | Q15020 | SART3_HUMAN |                               | 1  | TAAAGGCGGCC      | 0.458 |             |
| + | 53 | 7398  | \CB_uc001tod.2_F                                                                                   | NM_001093    | NP_001084    | O00763 | ACACB_HUMAN |                               | 8  | TGGCCGTGGAC      | 0.622 |             |
| - | 68 | 11872 |                                                                                                    | NM_001109662 | NP_001103132 |        |             |                               | 2  | CGGTACCTGCT/     | 0.617 |             |
| - | 28 | 4117  |                                                                                                    | NM_001109662 | NP_001103132 |        |             |                               | 2  | TGTGGCTCGGG      | 0.542 |             |
| - | 11 | 1276  | 24A6_uc001tva.2_                                                                                   | NM_024959    | NP_079235    | Q6J4K2 | NCKX6_HUMAN | ellular (Potential).          | 1  | GGCCGTTTCC       | 0.622 |             |
| - | 8  | 1223  |                                                                                                    | NM_015335    | NP_056150    | Q71F56 | MD13L_HUMAN |                               | 8  | GACTGGGTTTC      | 0.418 |             |
| - | 7  | 885   |                                                                                                    | NM_015335    | NP_056150    | Q71F56 | MD13L_HUMAN |                               | 8  | CCATCCGAACA/     | 0.428 |             |
| - | 4  | 1241  |                                                                                                    | NM_019086    | NP_061959    | Q8N0Z9 | VSI10_HUMAN | 3. Extracellular (Potential). | 0  | GCAGCTGGCGC/     | 0.522 |             |
| - | 45 | 5710  | \A1405V CIT_uc0                                                                                    | NM_007174    | NP_009105    | O14578 | CTRO_HUMAN  |                               | 10 | AGGACGCCAAG      | 0.607 |             |
| - | 5  | 602   | RPLP0_uc001txr.2                                                                                   | NM_053275    | NP_444505    | P05388 | RLA0_HUMAN  |                               | 1  | GCACAGTGACT      | 0.532 |             |
| + | 3  | 869   | yw.2_Missense_M                                                                                    | NM_001033677 | NP_001028849 | Q9NZU7 | CABP1_HUMAN | EF-hand 2.                    | 1  | TATCGAACTG/      | 0.512 |             |
| - | 2  | 651   | ci.1_Missense_Mu                                                                                   | NM_002956    | NP_002947    | P30622 | CLIP1_HUMAN | Ser-rich.                     | 3  | GAGGCGTAGCT/     | 0.507 |             |
| - | 1  | 451   | \PH9_uc010tam.1                                                                                    | NM_022782    | NP_073619    | Q99550 | MPP9_HUMAN  |                               | 0  | CAGGAGAAATG/     | 0.353 |             |



|   |    |      |                    |              |              |        |              |                           |    |               |       |             |
|---|----|------|--------------------|--------------|--------------|--------|--------------|---------------------------|----|---------------|-------|-------------|
| + | 20 | 2787 |                    | NM_012463    | NP_036595    | Q9Y487 | VPP2_HUMAN   | lasmic (Potential).       | 2  | CTTTCATCAAAGT | 0.348 |             |
| - | 3  | 1334 |                    | NM_133448    | NP_597705    | Q14C87 | T132D_HUMAN  | cellular (Potential).     | 14 | GGCTCGCACGC   | 0.552 |             |
| + | 3  | 852  | ijh.2_Missense_Mt  | NM_025215    | NP_079491    | Q9Y606 | TRUA_HUMAN   |                           | 2  | TCAGGCTGTATT  | 0.517 |             |
| + | 5  | 1374 | ih.2_Missense_Mu   | NM_025215    | NP_079491    | Q9Y606 | TRUA_HUMAN   |                           | 2  | TGGTGGCCCTG   | 0.622 |             |
| - | 39 | 5422 | ukr.1_Missense_M   | NM_006231    | NP_006222    | Q07864 | DPOE1_HUMAN  |                           | 8  | GGCACCTGAAG   | 0.552 |             |
| + | 5  | 1614 | NF10_uc001ulq.2_   | NM_015394    | NP_056209    | P21506 | ZNF10_HUMAN  | 2H2-type 6.               | 3  | CAGAGCACACA   | 0.438 |             |
| - | 2  | 423  |                    | NM_004004    | NP_003995    | P29033 | CXB2_HUMAN   | cellular (Potential).     | 0  | GATGGGGAAGT   | 0.592 |             |
| + | 18 | 1777 | xq.1_Missense_Mu   | NM_175605    | NP_783195    | Q13099 | IFT88_HUMAN  | TPR 6.                    | 1  | GTGCAGCTGCA   | 0.343 |             |
| - | 10 | 3641 | .E871Q SACS_ucl    | NM_014363    | NP_055178    | Q9NZJ4 | SACS_HUMAN   |                           | 12 | ATTCTCAAGGA   | 0.348 |             |
| + | 1  | 4159 |                    | NM_207361    | NP_997244    | Q5SZK8 | FREM2_HUMAN  | extracellular p.G1284G(1) | 11 | CAGATGGGAAG   | 0.408 |             |
| - | 3  | 337  | itez.1_Missense_Iv | NM_145286    | NP_660329    | Q8TAV4 | STML3_HUMAN  | lasmic (Potential).       | 1  | GATGCGTCCCA   | 0.473 | rs139159531 |
| - | 1  | 200  |                    | NM_198849    | NP_942146    | Q8IW03 | SIAH3_HUMAN  |                           | 2  | TGTGGGGTTGA   | 0.542 |             |
| - | 13 | 2328 | l8_uc010acm.2_M    | NM_025113    | NP_079389    | Q9H714 | CM018_HUMAN  |                           | 0  | CAGCAGCCCTT   | 0.542 |             |
| - | 11 | 2011 | p.S334L C13orf18   | NM_025113    | NP_079389    | Q9H714 | CM018_HUMAN  |                           | 0  | ATGCACGACTCT  | 0.517 |             |
| - | 1  | 363  | Rp1_uc001vni.2_Ir  | NM_178861    | NP_849192    | Q8IZP6 | R113B_HUMAN  |                           | 3  | CAGCGGTGGCC   | 0.692 |             |
| + | 24 | 2025 |                    | NM_001846    | NP_001837    | P08572 | CO4A2_HUMAN  | le-helical region.        | 6  | AGGCCGCGATG   | 0.632 |             |
| + | 29 | 2682 |                    | NM_001846    | NP_001837    | P08572 | CO4A2_HUMAN  | le-helical region.        | 6  | AGGCCTTCCCG   | 0.692 |             |
| + | 2  | 1117 | g.2_Missense_Mu    | NM_005537    | NP_005528    | Q9UK53 | ING1_HUMAN   |                           | 1  | TGGGCGACGAC   | 0.662 |             |
| + | 19 | 2304 | l1A_uc001vsm.1_I   | NM_015205    | NP_056020    | P98196 | AT11A_HUMAN  | lasmic (Potential).       | 4  | CAGCGGGAGCC   | 0.657 |             |
| + | 1  | 53   | igr.1_Missense_Mt  | NM_003891    | NP_003882    | P22891 | PROZ_HUMAN   |                           | 0  | TCTCTCGCCCTC  | 0.607 |             |
| + | 4  | 330  | jr.1_Missense_Mu   | NM_003891    | NP_003882    | P22891 | PROZ_HUMAN   | EGF-like 1.               | 0  | CTGGGGCTACA   | 0.607 |             |
| + | 9  | 831  | .1.2_Missense_Mut  | NM_001008895 | NP_001008895 | Q13619 | CUL4A_HUMAN  |                           | 3  | GACAGAGTAATC  | 0.413 |             |
| - | 8  | 1061 | u.2_Missense_Mu    | NM_138376    | NP_612385    | Q8N0Z6 | TTC5_HUMAN   |                           | 1  | TGACGGCACCG   | 0.527 |             |
| + | 2  | 457  | vyl.1_Missense_M   | NM_002934    | NP_002925    | P10153 | RNAS2_HUMAN  |                           | 1  | ACCACGCAAAC   | 0.458 |             |
| + | 17 | 3783 | 10357_uc010aij.2   | NM_018071    | NP_060541    | Q8TER5 | ARH40_HUMAN  | DH.                       | 0  | GCAGAGACCTG   | 0.622 |             |
| + | 4  | 581  |                    | NM_020366    | NP_065099    | Q96KN7 | RPGR1_HUMAN  |                           | 7  | ACCCAGTGAAC   | 0.423 |             |
| - | 2  | 349  |                    | NM_001344    | NP_001335    | P61803 | DAD1_HUMAN   |                           | 1  | GCTCTGGGGAG   | 0.418 |             |
| - | 11 | 1223 | r_p.R308* RBM23    | NM_001077351 | NP_001070819 | Q86U06 | RBM23_HUMAN  |                           | 1  | CAGTCGCTCAG   | 0.547 |             |
| + | 3  | 625  | se_Mutation_p.G6   | NM_182908    | NP_878912    | Q13268 | DHRS2_HUMAN  | NADP (By similarity).     | 2  | GGGACGGGGCC   | 0.647 |             |
| + | 11 | 1328 | r.1_Missense_Mut   | NM_001163484 | NP_001156956 | Q8TEB1 | DCA11_HUMAN  |                           | 0  | TGGGTGCACTG   | 0.562 |             |
| + | 2  | 150  | np.2_RNA IRF9_u    | NM_006084    | NP_006075    | Q00978 | IRF9_HUMAN   |                           | 1  | ACGCTGCACCC   | 0.567 |             |
| - | 2  | 319  | RIPK3_uc010toi.1   | NM_006871    | NP_006862    | Q9Y572 | RIPK3_HUMAN  | rotein kinase p.R37R(1)   | 4  | CGCCCGGAACA   | 0.627 |             |
| + | 8  | 2971 | ml.2_Missense_Mt   | NM_004274    | NP_004265    | Q13023 | AKAP6_HUMAN  |                           | 21 | GTACAGCGAGC   | 0.443 |             |
| - | 4  | 1936 |                    | NM_203301    | NP_976046    | Q7Z6M2 | FBX33_HUMAN  |                           | 0  | TGAGTGATTCG   | 0.443 |             |
| - | 1  | 292  | 14orf104_uc001w    | NM_018139    | NP_060609    | Q9NVR5 | KTU_HUMAN    |                           | 0  | CGGGTGACACGA  | 0.711 |             |
| + | 8  | 601  | qw.1_Missense_M    | NM_002806    | NP_002797    | P62333 | PRS10_HUMAN  |                           | 1  | GAGCCGTGCT    | 0.289 |             |
| - | 17 | 1632 | apo.2_Missense_Iv  | NM_174978    | NP_777638    | Q08AQ4 | Q08AQ4_HUMAN |                           | 4  | TTCTTGCAAGT   | 0.279 |             |
| - | 25 | 5456 | r.R1801H SPTB_u    | NM_000347    | NP_000338    | P11277 | SPTB1_HUMAN  | Spectrin 15.              | 11 | AGTAGCGGTGC   | 0.652 |             |
| + | 6  | 1775 | JT8_uc001xir.3_Rl  | NM_178155    | NP_835368    | Q9BYC5 | FUT8_HUMAN   | renal (Potential).        | 1  | TCAGCGGAGAA   | 0.373 |             |
| + | 2  | 362  | 010aqz.2_Translat  | NM_014734    | NP_055549    | Q92537 | K0247_HUMAN  |                           | 3  | TTGCCGTGGCC   | 0.478 |             |
| - | 7  | 2138 | _p.A85T ZFYVE1     | NM_021260    | NP_067083    | Q9HBF4 | ZFYV1_HUMAN  |                           | 1  | TTTTGCGAGAC   | 0.512 |             |
| + | 4  | 407  | l25_uc010ttu.1_M   | NM_021239    | NP_067062    | P49756 | RBM25_HUMAN  |                           | 4  | TGGGCGCAAGA   | 0.378 | rs143840737 |
| + | 6  | 720  | se_Mutation_p.V1i  | NM_182476    | NP_872282    | Q9Y2Z9 | COQ6_HUMAN   |                           | 0  | CCGGAGTACGG   | 0.493 |             |
| + | 1  | 500  |                    | NM_019589    | NP_062535    | P49750 | YLPM1_HUMAN  | Pro-rich.                 | 3  | AACACCAGATG   | 0.667 |             |
| - | 1  | 857  | X2_uc001xqq.1_Ii   | NM_001080408 | NP_001073877 | Q3B8N5 | PROX2_HUMAN  |                           | 0  | AGGCAGCCAAA   | 0.577 |             |
| - | 2  | 3239 | e_Mutation_p.P10i  | NM_001040108 | NP_001035197 | Q9UHC1 | MLH3_HUMAN   |                           | 2  | CTACCGGATTC   | 0.393 |             |
| + | 4  | 579  | 1xtc.1_Missense_I  | NM_033426    | NP_219494    | Q9C0C6 | K1737_HUMAN  |                           | 0  | CACCTGTACCA   | 0.512 |             |

|   |    |      |                                                   |              |              |        |              |                               |   |               |       |             |
|---|----|------|---------------------------------------------------|--------------|--------------|--------|--------------|-------------------------------|---|---------------|-------|-------------|
| + | 4  | 991  | xtc.1_Missense_I                                  | NM_033426    | NP_219494    | Q9C0C6 | K1737_HUMAN  |                               | 0 | :AGACAGCACTC  | 0.567 |             |
| - | 4  | 998  | 2_uc010asx.2_3'U                                  | NM_000793    | NP_000784    | Q92813 | IOD2_HUMAN   |                               | 1 | :GCTCCAGAAGC  | 0.557 |             |
| - | 7  | 1544 | _p.D10N C14orf10                                  | NM_017970    | NP_060440    | Q9H7Z3 | CN102_HUMAN  |                               | 3 | :GCTGTCGGGTT  | 0.552 |             |
| + | 5  | 500  | LM1_uc010atr.1_F                                  | NM_006888    | NP_008819    | P62158 | CALM_HUMAN   | EF-hand 3.[3.                 | 1 | AATGGTTATATCA | 0.398 |             |
| + | 6  | 1901 | _p.S508R RIN3_uc                                  | NM_024832    | NP_079108    | Q8TB24 | RIN3_HUMAN   |                               | 3 | :CTGAGCTTTGC  | 0.592 |             |
| - | 6  | 588  | _p.S84P BEGAIN                                    | NM_001159531 | NP_001153003 | Q9BUH8 | BEGIN_HUMAN  |                               | 0 | :ATCCGAGGGCA  | 0.672 |             |
| + | 9  | 1799 |                                                   | NM_015656    | NP_056471    | Q9ULI4 | KI26A_HUMAN  | inysin-motor.                 | 1 | :CCGACGCAGCT  | 0.701 |             |
| + | 4  | 250  | f80_uc001yrm.2_5'                                 | NM_001311    | NP_001302    | P50238 | CRIP1_HUMAN  |                               | 0 | TTGCAGCACGA   | 0.567 |             |
| - | 19 | 2892 | :2P2_uc001yvo.3_5'Flank HERC2P2_uc001yvp.3_Intron |              |              |        |              |                               | 0 | CTCCATGAGGC   | 0.493 |             |
| + | 2  | 308  |                                                   | NM_207444    | NP_997327    | Q8NAA6 | CO053_HUMAN  |                               | 0 | GCTGGGTCCAA   | 0.483 |             |
| + | 3  | 1668 | bp.1_Missense_Mi                                  | NM_014952    | NP_055767    | Q8TBE0 | BAHD1_HUMAN  |                               | 0 | :TAGCCCGTGCG  | 0.667 |             |
| + | 9  | 1110 | _p.A272T RAD51_                                   | NM_002875    | NP_002866    | Q06609 | RAD51_HUMAN  |                               | 0 | :TGGTAGCTCAA  | 0.453 |             |
| - | 19 | 2419 | :80_uc010ucu.1_F                                  | NM_017553    | NP_060023    | Q9ULG1 | INO80_HUMAN  | erved components INO80        | 4 | :CATGTGTAAGCC | 0.373 |             |
| + | 13 | 1291 | _p.C628Y JMJD7                                    | NM_001114633 | NP_001108105 | P0C869 | PA24B_HUMAN  | PLA2c.                        | 1 | :AAGCTGCTTCA  | 0.483 |             |
| + | 16 | 1675 | _p.R756H JMJD7-f                                  | NM_001114633 | NP_001108105 | P0C869 | PA24B_HUMAN  | PLA2c.                        | 1 | GGACCGCTGGG   | 0.637 |             |
| + | 8  | 1117 | e_Mutation_p.L29:                                 | NM_014444    | NP_055259    | Q9UGJ1 | GCP4_HUMAN   |                               | 3 | :TGAACCTGACT  | 0.433 |             |
| + | 10 | 1319 | e_Mutation_p.A32E                                 | NM_017434    | NP_059130    | Q9NRD9 | DUOX1_HUMAN  | oxidase activity. Extracellu  | 8 | :TGGCGGCCTCT  | 0.572 |             |
| - | 55 | 6987 | N1_uc010beo.1_R                                   | NM_000138    | NP_000129    | P35555 | FBN1_HUMAN   | 38; calcium-binding.          | 3 | :CACATCGGAAG  | 0.458 |             |
| - | 10 | 1051 | :xm.2_Missense_I                                  | NM_152647    | NP_689860    | Q96M60 | CO033_HUMAN  |                               | 1 | AACAATCAGGAT. | 0.254 |             |
| - | 13 | 1223 | :8B4_uc010ufd.1_I                                 | NM_024837    | NP_079113    | Q8TF62 | AT8B4_HUMAN  | lasmic (Potential).           | 8 | :CTTCCGGTCCC  | 0.393 |             |
| + | 5  | 1019 | AQP9_uc010ugx.'                                   | NM_020980    | NP_066190    | O43315 | AQP9_HUMAN   | ellular (Potential).          | 1 | :AGACCTGAGTC  | 0.557 |             |
| + | 4  | 834  | e_Mutation_p.G76                                  | NM_000236    | NP_000227    | P11150 | LIPC_HUMAN   |                               | 1 | :AGTGCGGCTTC  | 0.473 |             |
| + | 6  | 1634 |                                                   | NM_032857    | NP_116246    | P83111 | LACTB_HUMAN  |                               | 0 | TCAATAGCACCG  | 0.378 |             |
| + | 8  | 710  | iih.1_Missense_Mi                                 | NM_016530    | NP_057614    | Q92930 | RAB8B_HUMAN  |                               | 2 | :TTGCTCGCTAC  | 0.458 |             |
| - | 5  | 652  | :6A_uc002amu.1_                                   | NM_032231    | NP_115607    | Q9H5X1 | FA96A_HUMAN  |                               | 0 | :CACTCGCTCTT  | 0.413 |             |
| + | 1  | 184  | OX5_uc002aro.2_                                   | NM_024505    | NP_078781    | Q96PH1 | NOX5_HUMAN   | acts with the C-terminal cat: | 2 | :TGCCGGCTTATC | 0.632 |             |
| - | 18 | 3110 | _p.S245L TLE3_uc                                  | NM_005078    | NP_005069    | Q04726 | TLE3_HUMAN   | WD 5.                         | 2 | :CCAGCGAGAAG  | 0.622 |             |
| - | 16 | 2933 | _p.L186P TLE3_uc                                  | NM_005078    | NP_005069    | Q04726 | TLE3_HUMAN   | WD 3.                         | 2 | TGTGCAGGTCC   | 0.592 |             |
| - | 7  | 1174 | :R325Q STOML1_                                    | NM_004809    | NP_004800    | Q9UBI4 | STML1_HUMAN  | nic (Potential). SCP2.        | 1 | :GGGGCCGCAGC  | 0.642 |             |
| - | 2  | 1104 | :cu.1_Missense_M                                  | NM_032808    | NP_116197    | Q96FE5 | LIGO1_HUMAN  | lar (Potential). LRR 11.      | 2 | :ATTCTCCAGTC  | 0.652 |             |
| - | 18 | 3032 | ITS7_uc010und.1_                                  | NM_014272    | NP_055087    | Q9UKP4 | ATS7_HUMAN   |                               | 0 | :ACAGGTACATC  | 0.662 |             |
| + | 2  | 148  | :unk.1_Missense_                                  | NM_015206    | NP_056021    | Q9UPX6 | K1024_HUMAN  |                               | 4 | AATACCGTTTCT  | 0.478 |             |
| + | 7  | 567  | n.1_Missense_Mu                                   | NM_000137    | NP_000128    | P16930 | FAAA_HUMAN   |                               | 0 | :TGGCCGTGCCT  | 0.527 |             |
| - | 4  | 1733 | :s.1_Missense_Mu                                  | NM_001717    | NP_001708    | Q01954 | BNC1_HUMAN   |                               | 3 | CAGCTTCTTCT   | 0.458 |             |
| - | 7  | 804  | A WDR73_uc010u                                    | NM_032856    | NP_116245    | Q6P4I2 | WDR73_HUMAN  |                               | 0 | :CTGAGCTCACA  | 0.617 |             |
| + | 7  | 3273 | 13_uc002blu.1_Mi                                  | NM_007200    | NP_009131    | Q12802 | AKP13_HUMAN  |                               | 9 | TGGGGGCAGAG   | 0.597 |             |
| - | 11 | 1962 |                                                   | NM_001150    | NP_001141    | P15144 | AMPN_HUMAN   | ular. Metalloprotease.        | 4 | :CCGTGCTGGTA  | 0.597 |             |
| + | 8  | 1199 | L13_uc002bpe.1_I                                  | NM_001029964 | NP_001025135 | A6NNM8 | TTL13_HUMAN  | TTL.                          | 0 | TGTCCGGGATGC  | 0.522 |             |
| - | 12 | 1647 | :o.2_Missense_Mu                                  | NM_003981    | NP_003972    | O43663 | PRC1_HUMAN   | atured, Arg/Lys rich.         | 2 | TGGCCGTAGCA   | 0.517 |             |
| + | 30 | 4362 | :c.1_Missense_Mut                                 | NM_001271    | NP_001262    | O14647 | CHD2_HUMAN   |                               | 2 | GGGGGTGGAA    | 0.408 |             |
| - | 10 | 1476 | 2bvx.1_Missense_                                  | NM_139057    | NP_620688    | Q8TE56 | ATS17_HUMAN  | Disintegrin.                  | 3 | :TGCCCGGCAGC  | 0.582 | rs144488545 |
| - | 5  | 593  | _p.T123M TM2D3_                                   | NM_078474    | NP_510883    | Q9BRN9 | TM2D3_HUMAN  | ical; (Potential).            | 1 | :AGCCGTAGAC   | 0.393 |             |
| - | 4  | 506  | :xj.2_Missense_Mi                                 | NM_078474    | NP_510883    | Q9BRN9 | TM2D3_HUMAN  |                               | 1 | :GCACCGTGACG  | 0.498 | rs144526936 |
| + | 7  | 1578 | 3P_uc002cdp.2_I                                   | NR_003659    |              |        |              |                               | 0 | :CCTGCCCGGCA  | 0.582 |             |
| + | 2  | 1428 | KN1_uc002chs.1_                                   | NM_053284    | NP_444514    | Q96NZ8 | WFKN1_HUMAN  | 'Kunitz inhibitor 2.          | 0 | :GCAACGGCAAC  | 0.731 |             |
| + | 19 | 1877 | lation_p.A383T RF                                 | NM_138769    | NP_620124    | Q8IX11 | MIRO2_HUMAN  | type IV membrane protein;     | 1 | :TGGCCGCAGTC  | 0.642 |             |
| + | 4  | 982  | :c010bra.1_5'Flanl                                | NM_024042    | NP_076947    | Q9UJH8 | METR_N_HUMAN |                               | 0 | CCTGCGAGGTG   | 0.672 |             |

|   |    |      |                   |              |              |        |             |                              |     |               |       |
|---|----|------|-------------------|--------------|--------------|--------|-------------|------------------------------|-----|---------------|-------|
| - | 7  | 1487 |                   | NM_001025190 | NP_001020361 | Q96KJ4 | MSLNL_HUMAN |                              | 4   | CCATCCTGCC,   | 0.756 |
| + | 22 | 2511 | rv.1_Missense_Mu  | NM_000548    | NP_000539    | P49815 | TSC2_HUMAN  | p.E793fs*9(1)                | 10  | TGCCAGCCAGT   | 0.632 |
| - | 15 | 4689 | t.1_Missense_Mut  | NM_001009944 | NP_001009944 | P98161 | PKD1_HUMAN  | ar (Potential). PKD 10.      | 3   | GGGGCGCCAC    | 0.652 |
| + | 1  | 1034 |                   | NM_020982    | NP_066192    | O95484 | CLD9_HUMAN  | ellular (Potential).         | 0   | TGGTGGCCAG    | 0.667 |
| + | 1  | 411  |                   | NR_002169    |              |        |             |                              | 0   | TGACCGCTTTG   | 0.512 |
| - | 22 | 4045 | vw.2_Missense_Iv  | NM_004380    | NP_004371    | Q92793 | CBP_HUMAN   | Cys/His-rich.                | 127 | ATCAACGAAAC   | 0.512 |
| - | 2  | 2032 |                   | NM_001116    | NP_001107    | O60503 | ADCY9_HUMAN | tential). Guanylate cyclase  | 6   | GATGCCGCAA    | 0.557 |
| - | 2  | 1162 |                   | NM_001116    | NP_001107    | O60503 | ADCY9_HUMAN | ellular (Potential).         | 6   | TGGCCGTAAGG   | 0.582 |
| - | 20 | 2119 | uxh.1_Missense_I  | NM_024535    | NP_078811    | P57737 | CORO7_HUMAN | WD 7.                        | 0   | ACTCCGGGGCC   | 0.647 |
| + | 4  | 431  | ws.3_Missense_I   | NM_001127206 | NP_001120678 | P30519 | HMOX2_HUMAN |                              | 0   | GGAGCGCAACA   | 0.562 |
| + | 11 | 1828 | g.2_Missense_Mul  | NM_000246    | NP_000237    | P33076 | C2TA_HUMAN  | NACHT.                       | 1   | TTTGAGCTGTCC  | 0.627 |
| - | 14 | 3097 | uzv.1_Missense_I  | NM_014647    | NP_055462    | Q9Y4F3 | LKAP_HUMAN  |                              | 0   | TTCTAACTTTC   | 0.478 |
| - | 14 | 1716 | dx.2_Missense_Mi  | NM_002474    | NP_002465    | P35749 | MYH11_HUMAN | osin head-like.              | 15  | TTCTCTCGTCCAC | 0.572 |
| + | 16 | 2222 | vl.2_Missense_Mu  | NM_004996    | NP_004987    | P33527 | MRP1_HUMAN  | ter 1. ATP 1. Cytoplasmic.   | 4   | GCTGCGGAAAG   | 0.612 |
| - | 2  | 874  | vav.1_Missense_Iv | NM_016235    | NP_057319    | Q9NZH0 | GPC5B_HUMAN | ellular (Potential).         | 3   | GCCGAAGAGGT,  | 0.607 |
| - | 13 | 3651 |                   | NM_024675    | NP_078951    | Q86YC2 | PALB2_HUMAN | RAD51 and BRCA2. WD 6        | 11  | TGGGAGGAGGC   | 0.458 |
| - | 1  | 284  | e_Mutation_p.P39  | NM_033266    | NP_150296    | Q76MJ5 | ERN2_HUMAN  |                              | 6   | GCCAGGTCCCT   | 0.741 |
| + | 4  | 1052 | uc002drl.2_Misse  | NM_001145795 | NP_001139267 | Q9NRF2 | SH2B1_HUMAN | ! phosphorylation) (By simil | 2   | CTGGCGGGGCT   | 0.647 |
| + | 4  | 443  | p.S72N KIF22_uc   | NM_007317    | NP_015556    | Q14807 | KIF22_HUMAN | inesin-motor.                | 0   | GGGACGCCCAG   | 0.602 |
| + | 7  | 899  | '_uc010vdz.1_RN   | NM_005115    | NP_005106    | Q14764 | MVP_HUMAN   | MVP 5. p.P272L(1)            | 4   | TTGTGCCCATCA  | 0.642 |
| + | 7  | 1298 | _uc002dvc.1_Miss  | NM_016151    | NP_057235    | Q9UL54 | TAOK2_HUMAN | rotein kinase.               | 1   | TTGGTTCTGCGT  | 0.557 |
| + | 2  | 2768 |                   | NM_014699    | NP_055514    | O15015 | ZN646_HUMAN | :2H2-type 14.                | 2   | ACTGTGGGCAT   | 0.612 |
| - | 15 | 2361 | fig.1_Missense_Mi | NM_173502    | NP_775773    | Q5K4E3 | POLS2_HUMAN | eptidase S1 3.               | 1   | GGCGGTGTCTG   | 0.637 |
| - | 6  | 678  | Jvfg.1_Missense_I | NM_022744    | NP_073581    | Q96GQ5 | CP058_HUMAN |                              | 2   | ATGTTGTTCCCT  | 0.637 |
| - | 3  | 561  | ETO2_uc002ees.    | NM_018092    | NP_060562    | Q8NC67 | NETO2_HUMAN | lar (Potential). CUB 1.      | 0   | TTGGCGAAGCA   | 0.383 |
| + | 11 | 1818 | NP2_uc002efj.1_   | NM_031490    | NP_113678    | Q86WA8 | LONP2_HUMAN |                              | 0   | TGGCCGTGAAG   | 0.483 |
| - | 2  | 545  | _RNA SIAH1_uc00   | NM_003031    | NP_003022    | Q8IUQ4 | SIAH1_HUMAN | AH-type. SBD.                | 1   | ATTACAGCATCC  | 0.468 |
| - | 1  | 498  |                   | NM_004352    | NP_004343    | P23435 | CBLN1_HUMAN |                              | 0   | ACAGAGATGCC   | 0.627 |
| - | 5  | 1149 | gn.1_Missense_M   | NM_015069    | NP_055884    | Q2M1K9 | ZN423_HUMAN | :2H2-type 6.                 | 4   | GGCGGTGAGC    | 0.607 |
| - | 3  | 508  | p.L108F TOX3_uc   | NM_001080430 | NP_001073899 | O15405 | TOX3_HUMAN  |                              | 0   | AGGGAGGTCCA   | 0.483 |
| + | 1  | 729  | 3_Intron LPCAT2   | NM_032330    | NP_115706    | Q96L46 | CPNS2_HUMAN | EF-hand 4.                   | 0   | GGTCCGCCTGG   | 0.438 |
| + | 45 | 5444 | LRC5_uc002ekq.1   | NM_032206    | NP_115582    | Q86WI3 | NLRC5_HUMAN |                              | 7   | GCTCCCGCTGC   | 0.617 |
| - | 2  | 1321 |                   | NM_020807    | NP_065858    | Q9P2F9 | ZN319_HUMAN | :2H2-type 5.                 | 0   | ACAGCGTGCCAC  | 0.607 |
| + | 2  | 337  | se_Mutation_p.P6  | NM_001160305 | NP_001153777 | Q8TBK2 | SETD6_HUMAN | SET.                         | 1   | 3GTGCCGCGGG   | 0.682 |
| - | 1  | 106  | Ovim.1_Translatio | NM_002080    | NP_002071    | P00505 | AATM_HUMAN  |                              | 2   | GGACCGTAGGA   | 0.716 |
| + | 5  | 634  | e_Mutation_p.S18  | NM_024922    | NP_079198    | Q6UWW8 | EST3_HUMAN  |                              | 5   | CCCAGCACTGG   | 0.587 |
| - | 3  | 1479 | KIAA0895L_uc00    | NM_001040715 | NP_001035805 | Q68EN5 | K895L_HUMAN |                              | 0   | CAGCGCAGCCC   | 0.587 |
| + | 12 | 4264 | cef.2_Missense_I  | NM_015432    | NP_056247    | Q58EX7 | PKHG4_HUMAN |                              | 2   | TGTTGGCAGAG   | 0.527 |
| - | 8  | 1220 |                   | NM_013304    | NP_037436    | Q8WTX9 | ZDHC1_HUMAN |                              | 0   | GGCCGCATCT    | 0.627 |
| - | 8  | 1097 | FBP1_uc002fce.2_  | NM_031293    | NP_112583    | Q8TBY8 | PMFBP_HUMAN | Potential.                   | 2   | GTGCTTCAGTA   | 0.512 |
| - | 19 | 3119 | 1L2_uc002fgg.1_I  | NM_052892    | NP_443124    | Q72442 | PK1L2_HUMAN | racellular (Potential).      | 3   | TGACTCGAAGC   | 0.562 |
| + | 13 | 1273 | ng.1_Nonsense_M   | NM_002661    | NP_002652    | P16885 | PLCG2_HUMAN | 'I-PLC X-box.                | 8   | TGGTGGACGC    | 0.577 |
| + | 13 | 1279 | ng.1_Missense_Mi  | NM_002661    | NP_002652    | P16885 | PLCG2_HUMAN | 'I-PLC X-box.                | 8   | GACGCGGACTA   | 0.557 |
| - | 8  | 1185 | se_Mutation_p.P3  | NM_017740    | NP_060210    | Q9NXF8 | ZDHC7_HUMAN |                              | 1   | GGGGGCCCCC    | 0.572 |
| - | 9  | 6220 | _Mutation_p.T192  | NM_013275    | NP_037407    | Q6UB99 | ANR11_HUMAN | Pro-rich.                    | 6   | CGCCGTCGCC    | 0.692 |
| + | 18 | 1694 | ckc.2_Missense_   | NM_015085    | NP_055900    | Q684P5 | RPGP2_HUMAN |                              | 1   | CAACAGCATGG,  | 0.667 |
| - | 7  | 1845 | _p.L438V TRPV1_   | NM_080706    | NP_542437    | Q8NER1 | TRPV1_HUMAN | ical; (Potential).           | 1   | GACGAGGAAGT   | 0.582 |

|   |    |      |                    |              |              |        |             |                                |     |                  |       |             |
|---|----|------|--------------------|--------------|--------------|--------|-------------|--------------------------------|-----|------------------|-------|-------------|
| - | 16 | 2484 | _p.T778M ATP2A3    | NM_174955    | NP_777615    | Q93084 | AT2A3_HUMAN | nal (By similarity).           | 5   | ATTGCCGTGAGG     | 0.642 |             |
| - | 18 | 2535 | _p.R834* ANKFY1    | NM_016376    | NP_057460    | Q9P2R3 | ANFY1_HUMAN |                                | 3   | TGTCTCGTACAT     | 0.537 |             |
| - | 3  | 488  | z.2_Missense_Mu    | NM_005022    | NP_005013    | P07737 | PROF1_HUMAN |                                | 0   | AGACACCTTCTT     | 0.552 |             |
| - | 16 | 2884 | _p.A925T CAMTA     | NM_015099    | NP_055914    | O94983 | CMTA2_HUMAN |                                | 1   | TGTCAGCGTCC      | 0.577 | rs142999940 |
| - | 4  | 343  |                    | NM_016041    | NP_057125    | Q9GZP9 | DERL2_HUMAN |                                | 0   | AGGATACGGTCA     | 0.428 |             |
| + | 6  | 571  | zgf.1_Missense_I   | NM_203415    | NP_981960    | Q8TE02 | DERP6_HUMAN |                                | 0   | TGACAGCTCCT      | 0.537 |             |
| + | 7  | 1091 | .V311M TNK1_uc0    | NM_003985    | NP_003976    | Q13470 | TNK1_HUMAN  | rotein kinase.                 | 3   | TTGGGGTGACG      | 0.672 |             |
| + | 3  | 423  | 11_uc010vtw.1_in   | NM_175734    | NP_783861    | Q0P670 | CQ074_HUMAN |                                | 0   | ATCACAGTAGCA     | 0.423 |             |
| - | 4  | 1839 | hd.3_Missense_Mi   | NM_001128833 | NP_001122305 | Q9P1Z0 | ZBTB4_HUMAN | Pro-rich.                      | 4   | TGGCTGCAGGC      | 0.667 | rs144969522 |
| + | 48 | 7656 |                    | NM_020877    | NP_065928    | Q9P225 | DYH2_HUMAN  | 3 (By similarity).             | 13  | GGAGTCGCTTC      | 0.587 |             |
| + | 11 | 1561 | e_Mutation_p.R52   | NM_153210    | NP_694942    | Q70EL4 | UBP43_HUMAN |                                | 5   | AGGAGCGAGCG      | 0.577 |             |
| - | 30 | 4176 | _Missense_Mutatic  | NM_001100112 | NP_001093582 | Q9UKX2 | MYH2_HUMAN  | Potential.                     | 14  | TTCCCGCAGCA      | 0.547 |             |
| + | 8  | 904  | lvvi.1_Missense_IV | NM_003010    | NP_003001    | P45985 | MP2K4_HUMAN | rotein kinase.(3)p.A279T       | 58  | CAAGCGCATCA      | 0.428 |             |
| - | 3  | 430  | iq.1_Missense_ML   | NM_018127    | NP_060597    | Q9BQ52 | RN22_HUMAN  |                                | 0   | TGCATTCGTGTC     | 0.418 |             |
| - | 4  | 952  | e_Mutation_p.P13   | NM_006470    | NP_006461    | O95361 | TRI16_HUMAN | 3 box-type 2.                  | 3   | GGGCAGGGCAC      | 0.572 |             |
| - | 5  | 744  | n.2_3'UTR UNC11    | NM_005148    | NP_005139    | Q13432 | U119A_HUMAN |                                | 0   | CAGCCGGTCAT      | 0.612 |             |
| + | 7  | 806  | crt.2_Missense_Mi  | NM_003170    | NP_003161    | Q7KZ85 | SPT6H_HUMAN | Asp/Glu-rich.                  | 3   | AGGAAGAGTATG     | 0.468 |             |
| - | 3  | 660  | se_Mutation_p.T1   | NM_001017368 | NP_001017368 | Q8WZ73 | RFFL_HUMAN  |                                | 0   | CTGGGTGAGGA      | 0.597 |             |
| - | 5  | 956  |                    | NM_139285    | NP_644814    | Q8NHY3 | GA2L2_HUMAN |                                | 2   | TGATGGTCATTG     | 0.617 |             |
| + | 7  | 633  | F15_uc002hkc.2_f   | NM_139215    | NP_631961    | Q92804 | RBP56_HUMAN | Gly/Ser/Tyr-rich.              | 35  | AGGGAGGAGGT      | 0.428 |             |
| + | 11 | 1785 | z_Mutation_p.L26F  | NM_005937    | NP_005928    | P55198 | AF17_HUMAN  |                                | 6   | CCGCCTCAGCC      | 0.687 |             |
| + | 6  | 902  | B2_uc010cwb.2_f    | NM_004448    | NP_004439    | P04626 | ERBB2_HUMAN | ellular (Potential).           | 143 | GTGCCGGTGGC      | 0.647 |             |
| + | 5  | 773  | vc.2_Missense_ML   | NM_005310    | NP_005301    | Q14451 | GRB7_HUMAN  | as-associating.                | 5   | TGGGCGGAGAT      | 0.597 |             |
| + | 3  | 929  |                    | NM_001552    | NP_001543    | P22692 | IBP4_HUMAN  | oglobulin type-1.              | 0   | CGACCCGAACG      | 0.667 |             |
| - | 1  | 520  |                    | NM_033059    | NP_149048    | Q9BYQ6 | KR411_HUMAN | C-[GIKRQVHEL]-[SPTR]-[         | 0   | GACGCAGGcagc     | 0.323 | rs141357429 |
| - | 1  | 216  |                    | NM_033188    | NP_149445    | Q9BYR2 | KRA45_HUMAN | [GRQVCHIEK]-[SPTR]-[V          | 0   | igagatgcagcagtag | 0.274 |             |
| - | 1  | 215  |                    | NM_032524    | NP_115913    | Q9BYR3 | KRA44_HUMAN | f C-C-[GRQVCH]-[SPT]-[V        | 0   | GCAGGTGGTCC      | 0.667 |             |
| - | 8  | 1326 | P_uc010wfs.1_Int   | NM_000422    | NP_000413    | Q04695 | K1C17_HUMAN | Tail.                          | 2   | TACCCTGCA        | 0.632 |             |
| + | 3  | 395  | 1_3'UTR GRN_uc     | NM_002087    | NP_002078    | P28799 | GRN_HUMAN   |                                | 5   | GGGTGGCCCTC      | 0.582 |             |
| - | 11 | 1005 | 2B_uc002igu.1_5'   | NM_000419    | NP_000410    | P08514 | ITA2B_HUMAN | Extracellular (Potential).     | 3   | GACAGCCACTG      | 0.562 |             |
| + | 11 | 1425 | AT1_uc002iia.2_RI  | NM_021079    | NP_066565    | P30419 | NMT1_HUMAN  |                                | 0   | GGCATAGGGGA      | 0.517 |             |
| + | 17 | 2372 | _p.R534H KPNB1     | NM_002265    | NP_002256    | Q14974 | IMB1_HUMAN  |                                | 3   | GTGCCGTGCC       | 0.468 |             |
| - | 45 | 3406 |                    | NM_000088    | NP_000079    | P02452 | CO1A1_HUMAN | (Potential), Triple-helical re | 382 | GTCACCACGGG      | 0.582 |             |
| + | 16 | 2602 | BPAP_uc002iqz.2    | NM_032133    | NP_115509    | Q8TBZ2 | MYBPP_HUMAN |                                | 6   | GAGATGTGATT      | 0.537 |             |
| + | 9  | 2435 | c002irv.1_Nonsen   | NM_018896    | NP_061496    | O43497 | CAC1G_HUMAN | lasmic (Potential).            | 1   | TGACTCAGACA      | 0.652 |             |
| - | 9  | 1610 |                    | NM_000250    | NP_000241    | P05164 | PERM_HUMAN  |                                | 4   | GGTACGTGGGC      | 0.567 |             |
| - | 1  | 435  |                    | NM_001080439 | NP_001073908 | Q4G112 | HSF5_HUMAN  | By similarity.                 | 3   | CATTGCCTGCC      | 0.652 |             |
| - | 1  | 1134 | 1_5'Flank SEPT4    | NM_001038704 | NP_001033793 | Q8NEP4 | CQ047_HUMAN |                                | 1   | CCCTGCGGCCA      | 0.542 |             |
| - | 20 | 3540 | _p.L714F HEATR6    | NM_022070    | NP_071353    | Q6AI08 | HEAT6_HUMAN |                                | 2   | TGGGAGTGCCC      | 0.498 |             |
| + | 25 | 4393 | ANC2_uc002jao.3    | NM_025185    | NP_079461    | Q9HCD6 | TANC2_HUMAN |                                | 2   | TCCAGCTCAC       | 0.602 |             |
| - | 8  | 695  |                    | NM_001433    | NP_001424    | O75460 | ERN1_HUMAN  | renal (Potential).             | 9   | AGACATCTCTGT     | 0.507 |             |
| - | 17 | 2378 | _p.D423Y SMURF     | NM_022739    | NP_073576    | Q9HAU4 | SMUF2_HUMAN | HECT.                          | 4   | CTTCATCAAAAA     | 0.458 |             |
| - | 3  | 2773 | 37A3_uc010wqf.1    | NM_199340    | NP_955372    | O60309 | L37A3_HUMAN | ellular (Potential).           | 0   | TGGAAGCTGAG      | 0.517 |             |
| - | 1  | 117  | D12_uc002jz.2_5    | NM_002816    | NP_002807    | O00232 | PSD12_HUMAN |                                | 0   | GCGCCGTGAG       | 0.677 |             |
| + | 24 | 8268 | gg.2_Missense_ML   | NM_182641    | NP_872579    | Q12830 | BPTF_HUMAN  |                                | 4   | GAAACTAAGA       | 0.388 |             |
| + | 3  | 1194 | z_uc002jhb.1_5'    | NM_014960    | NP_055775    | Q96EG1 | ARSG_HUMAN  |                                | 1   | CACTGGGATAA      | 0.547 |             |
| - | 29 | 4300 | ie_Mutation_p.G1   | NM_080282    | NP_525021    | Q8WWZ4 | ABCAA_HUMAN |                                | 4   | CATTTCCACTT      | 0.259 |             |

|   |    |       |                   |              |              |        |             |    |              |       |             |
|---|----|-------|-------------------|--------------|--------------|--------|-------------|----|--------------|-------|-------------|
| + | 6  | 1450  | rrq.1_Missense_Mi | NM_178233    | NP_839947    | Q7RTS5 | OTOP3_HUMAN | 1  | CCGAGGGCCTG  | 0.657 |             |
| + | 13 | 1642  | p.R466H KIAA019   | NM_014738    | NP_055553    | Q12767 | K0195_HUMAN | 1  | CACCCGCTCTT  | 0.637 |             |
| - | 14 | 1991  | vsc.1_Missense_Iv | NM_020753    | NP_065804    | Q8WXE0 | CSK12_HUMAN | 1  | TGGCCGCACGT  | 0.642 |             |
| - | 4  | 508   | jra.2_Missense_Mi | NM_052916    | NP_443148    | Q96PX1 | RN157_HUMAN | 1  | CCTGGCAATAC  | 0.483 |             |
| - | 9  | 1555  | _p.S497F UBE2O_   | NM_022066    | NP_071349    | Q9C0C9 | UBE2O_HUMAN | 5  | TGGCAGAGGAG  | 0.562 |             |
| - | 8  | 1753  | se_Mutation_p.L39 | NM_018414    | NP_060884    | Q9NSC7 | SIA7A_HUMAN | 0  | AGTGAGCAGCA  | 0.577 |             |
| - | 5  | 1724  |                   | NM_003655    | NP_003646    | O00257 | CBX4_HUMAN  | 2  | GGCCTCGGCTG  | 0.488 |             |
| - | 2  | 259   |                   | NM_019020    | NP_061893    | Q8TBP0 | TBC16_HUMAN | 0  | CCGGCGGGTGC  | 0.672 |             |
| - | 33 | 5785  | N_uc002kdv.1_5'F  | NM_004104    | NP_004095    | P49327 | FAS_HUMAN   | 1  | ACCAGCGATGA  | 0.632 | rs139792253 |
| + | 29 | 2702  | e_Mutation_p.D18  | NM_005993    | NP_005984    | Q9BTW9 | TBCD_HUMAN  | 0  | TGGACGACTAC  | 0.567 |             |
| - | 18 | 2930  | DM1_uc002klq.2_Ir | NM_003803    | NP_003794    | P52179 | MYOM1_HUMAN | 5  | TGGCGGGGAGG  | 0.557 |             |
| - | 3  | 295   | A70V EPB41L3_uc   | NM_012307    | NP_036439    | Q9Y2J2 | E41L3_HUMAN | 5  | TGGCAGCAAAC  | 0.403 |             |
| - | 35 | 6092  | .1_intron KIAA163 | NM_020964    | NP_066015    | Q9HCE0 | EPG5_HUMAN  | 0  | GCTTGAGGCCA  | 0.438 |             |
| - | 5  | 1565  | lbo.1_Missense_Iv | NM_020964    | NP_066015    | Q9HCE0 | EPG5_HUMAN  | 0  | AACACCAGCGG  | 0.428 |             |
| - | 7  | 1254  | cy.1_Missense_Mu  | NM_013305    | NP_037437    | O15466 | SIA8E_HUMAN | 3  | GCCGCCGCCAC  | 0.647 |             |
| - | 2  | 273   |                   | NM_145020    | NP_659457    | Q96M91 | CCD11_HUMAN | 3  | TCAAGCGATCC  | 0.468 |             |
| - | 5  | 4930  | rk.1_Missense_Mi  | NM_052947    | NP_443179    | Q86TB3 | ALPK2_HUMAN | 14 | CTCAACTATGTC | 0.458 |             |
| - | 3  | 450   | se_Mutation_p.K1  | NM_021153    | NP_066976    | Q9H159 | CAD19_HUMAN | 2  | TCAAGCTTCTG  | 0.433 |             |
| - | 2  | 3764  |                   | NM_032160    | NP_115536    | Q8IZU8 | DSEL_HUMAN  | 6  | TTCCTCAGCC   | 0.428 |             |
| - | 3  | 1024  |                   | NM_001044369 | NP_001037834 | Q0P6D2 | FA69C_HUMAN | 0  | CTGCGCTCCGC  | 0.488 |             |
| - | 2  | 1947  | sr.1_Missense_Mu  | NM_020695    | NP_065746    | Q8N1G1 | REXO1_HUMAN | 0  | GATCCGCAGGC  | 0.612 |             |
| - | 2  | 822   | sr.1_Missense_Mu  | NM_020695    | NP_065746    | Q8N1G1 | REXO1_HUMAN | 0  | GTGCCGGGCCG  | 0.692 |             |
| + | 6  | 550   | _p.S59N HMG20B_   | NM_006339    | NP_006330    | Q9P0W2 | HM20B_HUMAN | 0  | CTCGAGCTCTG  | 0.622 |             |
| - | 2  | 281   | lzd.1_Missense_M  | NM_001348    | NP_001339    | O43293 | DAPK3_HUMAN | 7  | CCTCCGCTCG   | 0.627 |             |
| - | 3  | 1385  | I4_uc010dub.1_5'F | NM_001080400 | NP_001073869 | Q96Q06 | PLIN4_HUMAN | 0  | TCGCAGCACCG  | 0.582 |             |
| - | 29 | 4601  | v.2_Missense_Mut  | NM_002850    | NP_002841    | Q13332 | PTPRS_HUMAN | 4  | GACACCGGTAG  | 0.607 |             |
| - | 10 | 1145  | ow.2_Missense_M   | NM_002850    | NP_002841    | Q13332 | PTPRS_HUMAN | 4  | AGTCCTTGACA  | 0.622 |             |
| - | 15 | 1581  | mdz.2_Nonsense_   | NM_007322    | NP_015561    | Q9H6Z4 | RANB3_HUMAN | 1  | CAGTCGCAGGC  | 0.617 |             |
| - | 2  | 148   | I.2_5'UTR DENND   | NM_024898    | NP_079174    | Q8IV53 | DEN1C_HUMAN | 1  | AGGCCGCTTCG  | 0.617 |             |
| + | 2  | 328   |                   | NM_003811    | NP_003802    | P41273 | TNFL9_HUMAN | 1  | GGTGGCCAAA   | 0.577 |             |
| - | 41 | 4955  | 2_Missense_Muta   | NM_000064    | NP_000055    | P01024 | CO3_HUMAN   | 5  | TCGGGCCAGTG  | 0.612 |             |
| + | 13 | 1466  | e_Mutation_p.W41  | NM_004240    | NP_004231    | Q15642 | CIP4_HUMAN  | 1  | GGCGTGGCTGG  | 0.672 |             |
| + | 5  | 585   | 41_splice ZNF557_ | NM_001044388 | NP_001037853 | Q8N988 | ZN557_HUMAN | 2  | CTTTAGGGCTTC | 0.587 |             |
| - | 9  | 1185  |                   | NM_020196    | NP_064581    | Q9HCS7 | SYF1_HUMAN  | 4  | GAAGGGGTCCA  | 0.562 |             |
| - | 4  | 453   | vq.2_Missense_M   | NM_021155    | NP_066978    | Q9NNX6 | CD209_HUMAN | 1  | TCAGCCGGGTC  | 0.567 |             |
| - | 3  | 25945 |                   | NM_024690    | NP_078966    | Q8WXI7 | MUC16_HUMAN | 57 | FGCTCTCTGGTA | 0.532 |             |
| - | 11 | 1303  | pd.2_Missense_M   | NM_005498    | NP_005489    | Q9Y6Q5 | AP1M2_HUMAN | 2  | CCAGGGCAGGG  | 0.582 |             |
| + | 7  | 599   | npe.3_Nonsense_   | NM_020428    | NP_065161    | Q8IWA5 | CTL2_HUMAN  | 1  | TGCTTCAAGAT  | 0.597 |             |
| - | 26 | 3274  | xlq.1_Missense_M  | NM_020812    | NP_065863    | Q96HP0 | DOCK6_HUMAN | 3  | GGGAGGTGGTG  | 0.607 |             |
| + | 4  | 1602  | ym.1_Missense_Iv  | NM_001136501 | NP_001129973 | Q08AG5 | ZN844_HUMAN | 0  | TCATTTTTCCAC | 0.448 |             |
| + | 12 | 1392  | rvk.2_Missense_M  | NM_014975    | NP_055790    | Q9Y2H9 | MAST1_HUMAN | 7  | TTTGTGGAGCGC | 0.567 |             |
| - | 20 | 3381  | wy.3_Missense_Iv  | NM_001127221 | NP_001120693 | O00555 | CAC1A_HUMAN | 2  | TGGCCGGGTGG  | 0.582 |             |
| + | 12 | 1684  | F15_uc002mxu.2_   | NM_138353    | NP_612362    | Q66K64 | DCA15_HUMAN | 1  | TGGTCATGAAG  | 0.667 |             |
| - | 6  | 1170  | sense_Mutation_p. | NM_001008701 | NP_001008701 | O94910 | LPHN1_HUMAN | 5  | GCTCACCACCA  | 0.637 |             |
| - | 6  | 665   | X39_uc010dzl.2_F  | NM_005804    | NP_005795    | O00148 | DX39A_HUMAN | 0  | CCCGCCGCATG  | 0.627 |             |
| - | 11 | 1572  | _p.P423L EMR3_u   | NM_032571    | NP_115960    | Q9BY15 | EMR3_HUMAN  | 6  | CAGCGGGAACG  | 0.522 |             |
| - | 14 | 2313  | _p.L83F RASAL3_   | NM_022904    | NP_075055    | Q86YV0 | RASL3_HUMAN | 0  | CACAAGCACAG  | 0.612 |             |



|   |    |       |                                                |              |              |        |              |                       |    |              |       |             |
|---|----|-------|------------------------------------------------|--------------|--------------|--------|--------------|-----------------------|----|--------------|-------|-------------|
| + | 1  | 25    |                                                | NM_001004466 | NP_001004466 | Q8NGA6 | O10H5_HUMAN  | cellular (Potential). | 1  | ACCTCCGTGTCT | 0.572 |             |
| + | 3  | 1064  |                                                | NM_016270    | NP_057354    | Q9Y5W3 | KLF2_HUMAN   |                       | 0  | GCACACGGGCC  | 0.622 |             |
| + | 11 | 2916  | p.Q697K NWD1_uc002nev.3_Missense_Mutation_p.Q6 |              |              | Q149M9 | NWD1_HUMAN   |                       | 7  | TATGCCAACAGC | 0.612 |             |
| - | 1  | 90    | nhx.1_Missense_M                               | NM_005535    | NP_005526    | P42701 | I12R1_HUMAN  |                       | 1  | GGGGGACCACC  | 0.672 |             |
| - | 3  | 491   | _p.P140L LASS1_                                | NM_021267    | NP_067090    | P27539 | GDF1_HUMAN   |                       | 0  | TGCCCGGCGTC  | 0.617 |             |
| + | 11 | 1172  | 392_uc010ecd.2_f                               | NM_015329    | NP_056144    | Q9Y6X3 | SCC4_HUMAN   |                       | 0  | CCATGCAGCAC  | 0.552 |             |
| - | 4  | 1319  |                                                | NM_001159293 | NP_001152765 | C9JHM3 | C9JHM3_HUMAN |                       | 1  | AGGACCAGTTG  | 0.418 |             |
| - | 4  | 743   | pc.1_Missense_M                                | NM_001076675 | NP_001070143 | Q68DY1 | ZN626_HUMAN  |                       | 1  | GTTCCTCCCA   | 0.363 |             |
| + | 2  | 903   | _p.P336L ZNF493_                               | NM_175910    | NP_787106    | Q6ZR52 | ZN493_HUMAN  | type 7; degenerate.   | 1  | AACCCCTACTA  | 0.348 | rs142651314 |
| + | 2  | 1049  | _p.A385T ZNF493_                               | NM_175910    | NP_787106    | Q6ZR52 | ZN493_HUMAN  | 2H2-type 9.           | 1  | GCAAAGCCTTT  | 0.363 |             |
| - | 5  | 1807  | 208_uc002nqo.1_j                               | NM_007153    | NP_009084    |        |              |                       | 7  | GTGTAGTAAGGC | 0.383 |             |
| - | 4  | 1122  | _p.R258T ZNF681_                               | NM_138286    | NP_612143    | Q96N22 | ZN681_HUMAN  | type 6; degenerate.   | 0  | TATGTCTGGTAA | 0.378 |             |
| + | 5  | 467   | iso.2_Missense_M                               | NM_001238    | NP_001229    | P24864 | CCNE1_HUMAN  | p.R95W(1)             | 2  | AGCCTCGGATTA | 0.547 |             |
| - | 2  | 2859  |                                                | NM_020856    | NP_065907    | Q63HK5 | TSH3_HUMAN   | leobox; atypical.     | 8  | CATCCGCTCCTG | 0.587 |             |
| + | 1  | 126   | PI_uc010xrw.1_Mi                               | NM_000175    | NP_000166    | P06744 | G6P1_HUMAN   |                       | 2  | GGACCCCCAGT  | 0.657 |             |
| + | 16 | 1517  | PI_uc010xrw.1_Mi                               | NM_000175    | NP_000166    | P06744 | G6P1_HUMAN   |                       | 2  | GAAATCGCCCA  | 0.527 |             |
| + | 5  | 652   | dq.1_Missense_M                                | NM_194325    | NP_919306    | P17039 | ZNF30_HUMAN  |                       | 2  | AAGATGATACA  | 0.299 |             |
| + | 5  | 1445  |                                                | NM_144689    | NP_653290    | Q8TAQ5 | ZN420_HUMAN  | 2H2-type 10.          | 0  | CATCAGAGAAT  | 0.413 |             |
| + | 95 | 13979 | i.2_Missense_Mut.                              | NM_000540    | NP_000531    | P21817 | RYR1_HUMAN   |                       | 12 | GGGCCGGAGAG  | 0.622 |             |
| - | 3  | 610   | e_Mutation_p.L67                               | NM_001533    | NP_001524    | P14866 | HNRPL_HUMAN  | RRM 2.                | 0  | GGTTCAGGATG  | 0.542 |             |
| + | 19 | 3705  | KHG2_uc002olj.2_                               | NM_022835    | NP_073746    | Q9H7P9 | PKHG2_HUMAN  | Pro-rich.             | 4  | CAACGCCCCAC  | 0.587 |             |
| - | 6  | 2952  |                                                | NM_003890    | NP_003881    | Q9Y6R7 | FCGBP_HUMAN  | VWFD 2.               | 9  | CCAGTCATAAG  | 0.597 |             |
| + | 9  | 1302  | YYP2B6_uc010xvu                                | NM_000767    | NP_000758    | P20813 | CP2B6_HUMAN  |                       | 2  | CCACAGGGAAG  | 0.567 |             |
| + | 1  | 201   | sense_Mutation_p.                              | NM_021913    | NP_068713    | P30530 | UFO_HUMAN    |                       | 13 | GTGGCGGTGCC  | 0.726 |             |
| - | 5  | 591   | 1_Intron BCKDHA_                               | NM_020158    | NP_064543    | Q9NQT4 | EXOS5_HUMAN  |                       | 0  | CTTCCGTCCCA  | 0.582 |             |
| + | 5  | 1254  | ZNF155_uc010xv                                 | NM_003445    | NP_003436    | Q12901 | ZN155_HUMAN  | 2H2-type 7.           | 2  | GTGTGGAAAAG  | 0.418 |             |
| + | 5  | 821   | 284_uc010ejd.2_f                               | NM_001037813 | NP_001032902 | Q2VY69 | ZN284_HUMAN  |                       | 0  | AGAAACGCTATA | 0.408 |             |
| + | 15 | 1731  | ba.1_Missense_Mutation_p.D576N                 |              |              | Q96L34 | MARK4_HUMAN  |                       | 3  | TCCGGGACCCGG | 0.662 |             |
| - | 2  | 483   |                                                | NM_000960    | NP_000951    | P43119 | PI2R_HUMAN   | lasmic (Potential).   | 0  | GTAGGGGTGGC  | 0.692 |             |
| + | 1  | 3440  |                                                | NM_004491    | NP_004482    | Q9NRY4 | RHG35_HUMAN  |                       | 1  | AGGGCGCAAGC  | 0.557 |             |
| - | 8  | 923   | \_uc002phc.1_Mis                               | NM_003827    | NP_003818    | P54920 | SNA_A_HUMAN  |                       | 0  | CCGCCTGAAG   | 0.602 |             |
| + | 6  | 1364  | _p.H236Y EHD2_t                                | NM_014601    | NP_055416    | Q9NZN4 | EHD2_HUMAN   |                       | 2  | AGTTTCACTCG  | 0.632 |             |
| - | 13 | 1238  | i1_uc010xzf.1_Mis                              | NM_000234    | NP_000225    | P18858 | DNL1_HUMAN   |                       | 3  | CGGCTGCCTCAC | 0.687 |             |
| + | 3  | 1139  |                                                | NM_000836    | NP_000827    | O15399 | NMDE4_HUMAN  | cellular (Potential). | 6  | GCGCCAGAAC   | 0.642 |             |
| - | 4  | 852   | C1_uc010ema.2_l                                | NM_001217    | NP_001208    | O75493 | CAH11_HUMAN  |                       | 0  | TTCCCGGAGC   | 0.547 |             |
| + | 2  | 1012  | ic.2_Missense_Mu                               | NM_001097638 | NP_001091107 | Q10981 | FUT2_HUMAN   | renal (Potential).    | 1  | CGGGCGGAGAC  | 0.557 | rs144269088 |
| - | 3  | 224   | 2_uc002pkt.2_Intr                              | NM_001190    | NP_001181    | O15382 | BCAT2_HUMAN  |                       | 1  | GTGGTCGGTAA  | 0.592 |             |
| - | 19 | 2565  | uc002pkw.1_Miss                                | NM_020904    | NP_065955    | Q9H4M7 | PKHA4_HUMAN  |                       | 3  | AACCCGCTCCCI | 0.443 |             |
| + | 3  | 322   | _p.G50S CCDC15!                                | NM_144688    | NP_653289    | Q8N6L0 | CC155_HUMAN  |                       | 2  | GGACAGGTGGT  | 0.642 |             |
| + | 8  | 1134  | iyas.1_Missense_l                              | NM_153329    | NP_699160    | Q8IZ83 | A16A1_HUMAN  |                       | 1  | GGCCGTGGAC   | 0.682 |             |
| + | 16 | 1902  | _p.A404P MED25_                                | NM_030973    | NP_112235    | Q71SY5 | MED25_HUMAN  | with RARA. Pro-rich.  | 1  | CAGGTGCCCT   | 0.726 |             |
| + | 11 | 1378  | _D1_uc010enx.2_f                               | NM_002691    | NP_002682    | P28340 | DPOD1_HUMAN  |                       | 2  | GCAGACGGGCC  | 0.622 |             |
| - | 2  | 175   |                                                | NM_001080457 | NP_001073926 | Q9NT99 | LR4B_HUMAN   |                       | 2  | GGGCGGCAGC   | 0.716 |             |
| + | 6  | 1236  |                                                | NM_001099694 | NP_001093164 | Q96N58 | ZN578_HUMAN  | 2H2-type 4.           | 0  | CTTACATGCC   | 0.423 |             |
| + | 6  | 1320  |                                                | NM_001099694 | NP_001093164 | Q96N58 | ZN578_HUMAN  | 2H2-type 5.           | 0  | CTTAGATGCC   | 0.388 |             |
| + | 7  | 619   | 3start_Site ZNF761_                            | NM_001008401 | NP_001008401 | Q86XN6 | ZN761_HUMAN  | KRAB.                 | 1  | ATGCACGATGA  | 0.368 | rs143107546 |
| + | 4  | 717   | 5'Flank TSEN34_u                               | NM_024075    | NP_076980    | Q9BSV6 | SEN34_HUMAN  |                       | 0  | CTGGCGTGCC   | 0.652 |             |

|   |    |      |                    |              |              |        |             |                                |      |              |       |
|---|----|------|--------------------|--------------|--------------|--------|-------------|--------------------------------|------|--------------|-------|
| - | 4  | 629  | ifi.2_Missense_Mu  | NM_012276    | NP_036408    | P59901 | LIRA4_HUMAN | potential). Ig-like C2-type 2. | 2    | AATGTACCCCTG | 0.572 |
| - | 5  | 1646 | n.1_Missense_Mu    | NM_003180    | NP_003171    | O00445 | SYT5_HUMAN  | mic (Potential). C2 1.         | 0    | AGTCGTACACCG | 0.647 |
| - | 19 | 2421 | SAPS1_uc002qjv     | NM_014931    | NP_055746    | Q9UPN7 | PP6R1_HUMAN | Pro-rich.                      | 0    | TCGGGGGCTGG  | 0.687 |
| - | 5  | 844  | iv.2_Missense_Mt   | NM_014931    | NP_055746    | Q9UPN7 | PP6R1_HUMAN | ction with PPP6C.              | 0    | TCGACGGGTGG  | 0.577 |
| + | 9  | 1977 | lt.2_Missense_Mu   | NM_007279    | NP_009210    | P26368 | U2AF2_HUMAN | RRM 2.                         | 1    | AGTACGTGGAC  | 0.627 |
| - | 5  | 1865 | b.2_Missense_Mu    | NM_145007    | NP_659444    | P59045 | NAL11_HUMAN | NACHT.                         | 6    | TGGCAGTAAGTC | 0.512 |
| + | 3  | 1106 |                    | NM_021216    | NP_067039    | Q9NQZ8 | ZNF71_HUMAN | 2H2-type 6.                    | 1    | ACCAGCGCACG  | 0.662 |
| - | 10 | 2127 | 27A5_uc002qtb.2_   | NM_012254    | NP_036386    | Q9Y2P5 | S27A5_HUMAN | lasmic (Probable).             | 0    | GGGCCGGAAGG  | 0.592 |
| - | 24 | 4166 | o.Q1111H MYT1L_    | NM_015025    | NP_055840    | Q9UL68 | MYT1L_HUMAN | Potential.                     | 6    | TCGTCTCGTGTG | 0.532 |
| + | 1  | 1106 |                    | NM_002236    | NP_002227    | Q9H3M0 | KCNF1_HUMAN |                                | 1    | TCCCCGAGCTG  | 0.672 |
| + | 11 | 1483 | fv.3_Missense_M    | NM_020134    | NP_064519    | Q9BPU6 | DPYL5_HUMAN |                                | 2    | CAGCCGGGGGC  | 0.617 |
| - | 3  | 613  | r.kj.2_Missense_M  | NM_144631    | NP_653232    | Q8N8E2 | ZN513_HUMAN | Gly-rich.                      | 1    | CACCCGGCCCT  | 0.706 |
| + | 1  | 5386 | 1_5'Flank ZNF512_  | NM_032266    | NP_115642    | Q68DN1 | CB016_HUMAN | m repeat of P-S-E-R-S-H-F      | 1    | CCTCTGAGAGA  | 0.527 |
| + | 4  | 667  | /mm.1_Missense_    | NM_199280    | NP_954974    | Q6ZUX3 | F179A_HUMAN |                                | 4    | TGGTGCCTCCTC | 0.617 |
| - | 9  | 2724 |                    | NM_004304    | NP_004295    | Q9UM73 | ALK_HUMAN   | xtracellular (Potential).      | 1218 | CCTACCTGTCA  | 0.517 |
| - | 5  | 680  |                    | NM_019024    | NP_061897    | Q9P2D3 | HTR5B_HUMAN |                                | 8    | CTGCACATCGA  | 0.393 |
| + | 9  | 1384 |                    | NM_005400    | NP_005391    | Q02156 | KPCE_HUMAN  |                                | 10   | AGTCCGGCAAG  | 0.587 |
| + | 16 | 2805 |                    | NM_000251    | NP_000242    | P43246 | MSH2_HUMAN  |                                | 55   | AGAGACAGAAC  | 0.468 |
| + | 16 | 3277 | rx.2_Missense_M    | NM_003128    | NP_003119    | Q01082 | SPTB2_HUMAN | Spectrin 7.                    | 8    | TTGAGGCAAAG  | 0.652 |
| + | 15 | 1559 | DLG_uc002sak.2_l   | NM_022894    | NP_075045    | Q9BWT3 | PAPOG_HUMAN |                                | 2    | TTTTCGGAGAGT | 0.299 |
| + | 8  | 855  | p.V285L MDH1_u     | NM_005917    | NP_005908    | P40925 | MDHC_HUMAN  |                                | 2    | AGTTTGTGTCC  | 0.378 |
| + | 4  | 626  |                    | NM_014181    | NP_054900    | Q3ZCW2 | LEGL_HUMAN  | Galectin.                      | 0    | GTGTTACAGAT  | 0.473 |
| - | 13 | 978  | _uc010fet.2_Silent | NM_144579    | NP_653180    | Q8TD22 | SFXN5_HUMAN |                                | 1    | GGGGCGTGCCT  | 0.682 |
| + | 10 | 1261 | o.R345W CCT7_uc    | NM_006429    | NP_006420    | Q99832 | TCPH_HUMAN  |                                | 0    | CAGAGCGGTCC  | 0.547 |
| + | 4  | 439  | _p.L106P ACTG2_    | NM_001615    | NP_001606    | P63267 | ACTH_HUMAN  |                                | 0    | CCTGCTCACAG  | 0.527 |
| + | 1  | 52   | ?_uc002slo.2_RNA   | NM_022492    | NP_071937    | Q49AM3 | TTC31_HUMAN |                                | 0    | GGGGCGGATCA  | 0.562 |
| + | 3  | 511  | ue.1_Missense_M    | NM_021088    | NP_066574    | Q9BSG1 | ZNF2_HUMAN  | KRAB.                          | 0    | CATTCGAAGAC  | 0.453 |
| + | 8  | 1310 | yl.1_5'UTR VWA3    | NM_144992    | NP_659429    | Q502W6 | VWA3B_HUMAN |                                | 6    | CTGCAGCACGC  | 0.602 |
| - | 7  | 1338 | _p.D418N TBC1D8    | NM_001102426 | NP_001095896 | O95759 | TBCD8_HUMAN |                                | 3    | GGTGTCTAGT   | 0.602 |
| + | 10 | 1400 | ct.2_Missense_Mu   | NM_003854    | NP_003845    | Q9HB29 | ILRL2_HUMAN | oplasmic (Potential).          | 2    | ATTCGGCAGAG  | 0.458 |
| + | 3  | 655  | Missense_Mutation  | NM_001056    | NP_001047    | O00338 | ST1C2_HUMAN |                                | 1    | GGGACGTGGAG  | 0.468 |
| + | 2  | 682  | ice_Site BCL2L11_  | NM_138621    | NP_619527    | O43521 | B2L11_HUMAN |                                | 0    | AATGGGTAAGCA | 0.488 |
| - | 1  | 1659 |                    | NR_002826    |              |        |             |                                | 0    | GCCGCAGGACC  | 0.637 |
| + | 1  | 1046 |                    | NM_001508    | NP_001499    | O43194 | GPR39_HUMAN | cellular (Potential).          | 0    | GCAACCGTCC   | 0.632 |
| + | 13 | 2774 | ISD7B_uc002tvb.2   | NM_001080427 | NP_001073896 |        |             |                                | 7    | AGACAGCAAAG  | 0.498 |
| + | 14 | 2941 | D7B_uc010zbj.1_l   | NM_001080427 | NP_001073896 |        |             |                                | 7    | GGTCTTGCAGT  | 0.403 |
| + | 12 | 4241 | BD5_uc002two.2_    | NM_018328    | NP_060798    | Q9P267 | MBD5_HUMAN  |                                | 5    | CTTCCGTAGATC | 0.502 |
| + | 3  | 394  | wz.2_RNA LYPD6_    | NM_194317    | NP_919298    | Q86Y78 | LYPD6_HUMAN | UPAR/Ly6.                      | 0    | CTCCAGACATC  | 0.463 |
| - | 5  | 424  |                    | NM_004543    | NP_004534    | P20929 | NEBU_HUMAN  | Nebulin 1.                     | 20   | TTGAAGGATCC  | 0.483 |
| - | 2  | 163  | _p.R14M CACNB4     | NM_000726    | NP_000717    | O00305 | CACB4_HUMAN |                                | 2    | TCAACCTGCTCC | 0.662 |
| - | 3  | 659  | fof.2_Intron ACVR  | NM_145259    | NP_660302    | Q8NER5 | ACV1C_HUMAN | lasmic (Potential).            | 7    | ACTGTCGACCC  | 0.483 |
| + | 27 | 5229 | .R1647C SCN2A_     | NM_001040142 | NP_001035232 | Q99250 | SCN2A_HUMAN | name=S4 of repeat IV; (Pol     | 8    | GGATCCGCACG  | 0.493 |
| + | 5  | 853  | i6PC2_uc010fpv.2_  | NM_021176    | NP_066999    | Q9NQR9 | G6PC2_HUMAN | renal (Potential).             | 1    | CACCACGCCCTT | 0.522 |
| + | 30 | 3673 | B3B_uc002ufz.2_M   | NM_138995    | NP_620482    | Q8WXR4 | MYO3B_HUMAN |                                | 19   | TGGCCGTACAC  | 0.453 |
| + | 7  | 731  | _p.V54I HAT1_uc    | NM_003642    | NP_003633    | O14929 | HAT1_HUMAN  |                                | 2    | CGACCGTAGGC  | 0.438 |
| + | 3  | 556  | dy.1_Missense_Mt   | NM_001079818 | NP_001073286 | P23229 | ITA6_HUMAN  | r (Potential). FG-GAP 2.       | 2    | GGTCACCGTCC  | 0.522 |
| + | 2  | 153  | A7_uc010zej.1_S    | NM_145810    | NP_665809    | Q9BWT1 | CDCA7_HUMAN |                                | 1    | TTCAGCAGAA   | 0.348 |

rs17036055

|   |     |       |                    |              |              |        |             |                            |     |              |       |
|---|-----|-------|--------------------|--------------|--------------|--------|-------------|----------------------------|-----|--------------|-------|
| - | 8   | 827   | ujr.2_RNA ATF2_u   | NM_001880    | NP_001871    | P15336 | ATF2_HUMAN  |                            | 3   | AGGTACTGCCT  | 0.438 |
| + | 1   | 352   |                    | NM_152945    | NP_694453    | Q8IUH3 | RBM45_HUMAN | RRM 1.                     | 0   | AGTGCATGGCC  | 0.652 |
| - | 230 | 46720 | 194F TTN_uc010z    | NM_133378    | NP_596869    | Q8WZ42 | TITIN_HUMAN |                            | 153 | GTGGGGATGGG  | 0.418 |
| - | 225 | 45481 | I_uc010zfi.1_Miss  | NM_133378    | NP_596869    | Q8WZ42 | TITIN_HUMAN |                            | 153 | CAGGCGGTCTC  | 0.438 |
| - | 46  | 12490 | .A4022V TTN_uc0    | NM_133437    | NP_597681    | Q8WZ42 | TITIN_HUMAN |                            | 153 | TGAGCGCACTT  | 0.478 |
| - | 46  | 16876 | N_uc010zfi.1_Intr  | NM_133379    | NP_596870    | Q8WZ42 | TITIN_HUMAN |                            | 153 | AATTTTCCATCT | 0.413 |
| - | 16  | 2923  | p.K854R TTN_uc0    | NM_133378    | NP_596869    | Q8WZ42 | TITIN_HUMAN |                            | 153 | ACTTCTTTTTTC | 0.547 |
| - | 20  | 2995  | _p.R421* CWC22_    | NM_020943    | NP_065994    | Q9HCG8 | CWC22_HUMAN |                            | 0   | TCTTCGCCGGT  | 0.348 |
| + | 11  | 2639  | iFA2_uc010zfo.1_I  | NM_001130445 | NP_001123917 | P28290 | SSFA2_HUMAN |                            | 2   | TTACCTATAAGT | 0.448 |
| - | 1   | 477   |                    | NM_005259    | NP_005250    | O14793 | GDF8_HUMAN  |                            | 1   | TTTCCGTTGTAG | 0.438 |
| - | 3   | 762   | _p.E82G KCTD18_    | NM_152387    | NP_689600    | Q6PI47 | KCD18_HUMAN |                            | 1   | TTTTGCTCATCT | 0.438 |
| + | 3   | 679   | D28_uc010ftx.2_IV  | NM_006139    | NP_006130    | P10747 | CD28_HUMAN  | ical; (Potential).         | 0   | AGCCCTTTTGGC | 0.443 |
| + | 20  | 3233  | nse_Mutation_p.P   | NM_152526    | NP_689739    | Q8TEW8 | PAR3L_HUMAN |                            | 4   | CCATCCACTGG  | 0.433 |
| + | 5   | 489   | ank NDUFS1_uc0     | NM_001037663 | NP_001032752 | P24534 | EF1B_HUMAN  |                            | 0   | TTACAGGAAAGT | 0.358 |
| + | 5   | 4932  |                    | NM_020923    | NP_065974    | Q9HCK1 | ZDBF2_HUMAN |                            | 3   | ATATCAGCTGTA | 0.388 |
| - | 13  | 2739  | dt.2_Missense_Mi   | NM_152519    | NP_689732    | A0AUZ9 | CB067_HUMAN |                            | 3   | GCTCCCATAGTC | 0.398 |
| - | 11  | 1388  | _p.S312F USP37_    | NM_020935    | NP_065986    | Q86T82 | UBP37_HUMAN |                            | 5   | TAACAGAAAGAC | 0.438 |
| + | 7   | 679   | _p.R227S RQCD1_    | NM_005444    | NP_005435    | Q92600 | RCD1_HUMAN  |                            | 2   | CTGCCGCTCTG  | 0.428 |
| - | 8   | 4430  | t.2_Missense_Mut   | NM_001105537 | NP_001099007 | P52746 | ZN142_HUMAN | :2H2-type 21.              | 4   | ACAGCGGGAAC  | 0.657 |
| + | 3   | 456   | TLL4_uc010fvx.2_   | NM_014640    | NP_055455    | Q14679 | TLL4_HUMAN  |                            | 3   | AGTACCTGCCA  | 0.562 |
| - | 9   | 3269  | zli.1_Missense_M   | NM_015311    | NP_056126    | O75147 | OBSL1_HUMAN | Ig-like 8.                 | 0   | TGACAGTGAAG  | 0.632 |
| + | 5   | 844   | 3_Missense_Muta    | NM_005070    | NP_005061    | P48751 | B3A3_HUMAN  | Cytoplasmic.               | 5   | GGTGGGCCAC   | 0.637 |
| - | 40  | 4435  |                    | NM_000092    | NP_000083    | P53420 | CO4A4_HUMAN | le-helical region.         | 11  | ATCTCCAGGTG  | 0.542 |
| - | 28  | 2861  |                    | NM_000092    | NP_000083    | P53420 | CO4A4_HUMAN | le-helical region.         | 11  | ACCCCTTTTCA  | 0.498 |
| - | 9   | 4723  | o.2_Intron SPHKAF  | NM_001142644 | NP_001136116 | Q2M3C7 | SPKAP_HUMAN |                            | 10  | CCAGATCCATA  | 0.448 |
| + | 1   | 169   | l2vur.2_Intron UGT | NM_019077    | NP_061950    | Q9HAW7 | UD17_HUMAN  |                            | 1   | TGGTCGTAGTC  | 0.547 |
| - | 14  | 6298  | _p.P1799S COL6A3   | NM_004369    | NP_004360    | P12111 | CO6A3_HUMAN | 0. Nonhelical region.      | 18  | CAGGGGCGCTGT | 0.493 |
| - | 5   | 1100  | _Intron ANKMY1_u   | NM_016552    | NP_057636    | Q9P2S6 | ANKY1_HUMAN |                            | 1   | CTTTGCGTCCG  | 0.567 |
| - | 21  | 2106  | _p.E663K KIF1A_u   | NM_004321    | NP_004312    | Q12756 | KIF1A_HUMAN | Potential.                 | 1   | CTCCTCCCGCT  | 0.721 |
| + | 3   | 912   | dn.2_Missense_Mi   | NM_021158    | NP_066981    | Q96RU7 | TRIB3_HUMAN | rotein kinase.             | 2   | ACGCCCTTTTCA | 0.672 |
| + | 12  | 1925  | M6_uc010gal.1_In   | NM_198994    | NP_945345    | O95932 | TGM3L_HUMAN |                            | 4   | TGGCAGTTACA  | 0.597 |
| + | 16  | 1622  | _p.R381Q VPS16_    | NM_022575    | NP_072097    | Q9H269 | VPS16_HUMAN |                            | 4   | TGCACGAGCCT  | 0.592 |
| - | 6   | 662   | oorf27_uc002wjh.   | NM_001039140 | NP_001034229 | Q9GZN8 | CT027_HUMAN |                            | 0   | GCCGTGGTGCC  | 0.662 |
| + | 13  | 1679  |                    | NM_002862    | NP_002853    | P11216 | PYGB_HUMAN  |                            | 2   | TGCTGCCGCTG  | 0.617 |
| - | 4   | 369   | lL_uc010gdo.1_5'   | NM_025176    | NP_079452    | Q9Y2I6 | NINL_HUMAN  |                            | 5   | TGGAGGGATGG  | 0.572 |
| - | 2   | 793   | l2wvn.2_Missense   | NM_138578    | NP_612815    | Q07817 | B2CL1_HUMAN | BH1.                       | 2   | AAAAAGGCCA   | 0.537 |
| + | 12  | 2773  | eb.2_Missense_Mi   | NM_015338    | NP_056153    | Q8IXJ9 | ASXL1_HUMAN |                            | 248 | TCATCCGGAT   | 0.562 |
| - | 5   | 918   | lgec.2_Missense_   | NM_080616    | NP_542183    | Q96MY1 | CT112_HUMAN |                            | 0   | CCATCTCCATG  | 0.642 |
| + | 3   | 458   | lzp.1_Missense_I   | NM_014902    | NP_055717    | Q9Y2H0 | DLGP4_HUMAN |                            | 3   | CAGCCGCCCCC  | 0.711 |
| - | 3   | 1562  | dm.2_Missense_I    | NM_014657    | NP_055472    | O43156 | TTI1_HUMAN  |                            | 0   | GAGTTCCAACG  | 0.498 |
| + | 12  | 1198  | wb.1_Missense_M    | NM_021931    | NP_068750    | Q9H5Z1 | DHX35_HUMAN | case C-terminal.           | 3   | TGGTCGTAGTC  | 0.507 |
| - | 7   | 1785  | hk.1_Missense_Mi   | NM_021248    | NP_067071    | Q9UJ99 | CAD22_HUMAN | r (Potential). Cadherin 4. | 5   | GCCGGCGTCT   | 0.622 |
| + | 30  | 4284  | lzyf.1_Missense_I  | NM_006420    | NP_006411    | Q9Y6D5 | BIG2_HUMAN  |                            | 4   | AATCGTGTTC   | 0.463 |
| + | 11  | 1214  | oA8_uc010gic.2_I   | NM_015266    | NP_056081    | Q9Y2E8 | SL9A8_HUMAN |                            | 1   | CTACACGCACC  | 0.552 |
| - | 3   | 1734  |                    | NM_002237    | NP_002228    | Q9UIX4 | KCNG1_HUMAN | lasmic (Potential).        | 2   | CCCTCCGGAAC  | 0.572 |
| + | 2   | 240   | l1_uc010zzm.1_5'   | NM_002591    | NP_002582    | P35558 | PCKGC_HUMAN |                            | 1   | CCAGGCAGTGA  | 0.582 |
| - | 3   | 409   | lzzp.1_Missense_I  | NM_153360    | NP_699191    | Q8NCL9 | APCDL_HUMAN |                            | 1   | GGCGGGGTCA   | 0.677 |

rs148452586

rs143701351

|   |    |      |                    |              |              |        |              |                               |    |               |       |
|---|----|------|--------------------|--------------|--------------|--------|--------------|-------------------------------|----|---------------|-------|
| + | 3  | 851  | _p.C161F EDN3_u    | NM_000114    | NP_000105    | P14138 | EDN3_HUMAN   | ndothelin-like.               | 1  | CGCTTGTGTGG   | 0.562 |
| + | 5  | 477  | ion_p.T80M OSBP    | NM_144498    | NP_653081    | Q9H1P3 | OSBL2_HUMAN  |                               | 2  | AGATCACGATGC  | 0.602 |
| + | 13 | 1503 | p.R422Q OSBPL2     | NM_144498    | NP_653081    | Q9H1P3 | OSBL2_HUMAN  |                               | 2  | AGCACGGAGGG   | 0.617 |
| + | 4  | 510  | M1_uc002yco.2_f    | NM_007002    | NP_008933    | Q16186 | ADRM1_HUMAN  | Gly-rich.                     | 0  | GCAGCGGCCAC   | 0.607 |
| - | 10 | 1391 |                    | NM_005560    | NP_005551    | O15230 | LAMA5_HUMAN  | inin EGF-like 3.              | 3  | CAGGTCTCGC    | 0.657 |
| + | 34 | 3714 | 1aav.1_Splice_Site | NM_020882    | NP_065933    | Q9P218 | COKA1_HUMAN  |                               | 1  | CCACAGCACAC   | 0.662 |
| - | 9  | 3705 | yfl.1_Missense_Mi  | NM_001037335 | NP_001032412 | Q9BYK8 | PR285_HUMAN  |                               | 2  | TGTGCCGCTCC   | 0.706 |
| - | 5  | 550  |                    | NM_020713    | NP_065764    | Q96KM6 | Z512B_HUMAN  |                               | 0  | GGGTCGGTCCA   | 0.632 |
| + | 6  | 872  | _p.P66L NCAM2_     | NM_004540    | NP_004531    | O15394 | NCAM2_HUMAN  | 3. Extracellular (Potential). | 4  | AGTGCCGCCAG   | 0.423 |
| + | 11 | 1320 | P16_uc011acm.1_    | NM_006447    | NP_006438    | Q9Y5T5 | UBP16_HUMAN  |                               | 4  | ATGCAGAAGCTG  | 0.323 |
| + | 5  | 614  |                    | NM_005441    | NP_005432    | Q13112 | CAF1B_HUMAN  | WD 3.                         | 2  | ATGCAGCAAAG   | 0.343 |
| - | 5  | 373  | zfx.2_Missense_M   | NM_003343    | NP_003334    | P60604 | UB2G2_HUMAN  |                               | 4  | CATGGGGTCAT   | 0.627 |
| - | 14 | 2285 | nk.1_Missense_M    | NM_015241    | NP_056056    | Q7RTP6 | MICA3_HUMAN  |                               | 0  | CTGGCTATCAG   | 0.532 |
| - | 4  | 458  | T2_uc002zyx.3_f    | NM_000854    | NP_000845    | P0CG30 | GSTT2_HUMAN  | ST C-terminal.                | 0  | CCTCGGGCACC   | 0.637 |
| + | 13 | 2244 |                    | NM_019601    | NP_062547    | Q9UGT4 | SUSD2_HUMAN  | tracellular (Potential).      | 1  | CCAACGGACAA   | 0.627 |
| + | 19 | 2321 | _p.S667G SGSM1     | NM_001039948 | NP_001035037 | Q2NKK1 | SGSM1_HUMAN  | ab-GAP TBC.                   | 5  | TGCACAGCGAC   | 0.642 |
| - | 1  | 1524 |                    | NM_002430    | NP_002421    | Q10571 | MN1_HUMAN    |                               | 10 | GCAGGCATGGG   | 0.711 |
| + | 4  | 2181 | H_uc003afp.2_5_f   | NM_021076    | NP_066554    | P12036 | NFH_HUMAN    | S-P-[AEPV]-[EAK]-[AEVK]       | 0  | CAAAGTCCCTC   | 0.557 |
| - | 9  | 981  | n.1_Missense_Mul   | NM_014303    | NP_055118    | O00541 | PESC_HUMAN   |                               | 0  | CCCATCGGTGG   | 0.607 |
| + | 3  | 380  | NF185_uc003akc.2   | NM_152267    | NP_689480    | Q96GF1 | RN185_HUMAN  | RING-type.                    | 0  | AGTTGGCCGTG   | 0.458 |
| - | 15 | 2020 | h.1_Missense_ML    | NM_002473    | NP_002464    | P35579 | MYH9_HUMAN   | osin head-like.               | 11 | TGTGGCGATGT   | 0.587 |
| + | 3  | 508  | utation_p.R28H M   | NM_001161572 | NP_001155044 | Q9ULX9 | MAFF_HUMAN   | Basic motif.                  | 0  | GCGCCGCACAC   | 0.682 |
| - | 13 | 1970 | xp.2_Missense_M    | NM_001098504 | NP_001091974 | Q92841 | DDX17_HUMAN  |                               | 4  | TGGACTTCATP   | 0.517 |
| + | 7  | 905  | e_Mutation_p.R19   | NM_031488    | NP_113676    | Q969R5 | LMBL2_HUMAN  |                               | 3  | CCCACGGAGTG   | 0.537 |
| + | 22 | 2759 | H7B_uc010gyl.1_f   | NM_017590    | NP_060060    | Q9UGR2 | Z3H7B_HUMAN  | C2H2-type.                    | 1  | CTGGCGCAAGA   | 0.637 |
| + | 9  | 1256 | aq.1_Missense_M    | NM_001469    | NP_001460    | P12956 | XRCC6_HUMAN  | Ku.                           | 5  | TTCAGCATTG    | 0.488 |
| + | 3  | 186  | _uc011apk.1_Intro  | NM_152613    | NP_689826    | Q6ICG8 | WBP2L_HUMAN  | GRAM.                         | 2  | ATACCCGGTAA   | 0.378 |
| - | 7  | 1128 | CYP2D7P1_uc010     | NR_002570    |              |        |              |                               | 0  | TGCCCTATCAC   | 0.607 |
| - | 19 | 2484 |                    | NM_173050    | NP_766638    | Q8IWY4 | SCUB1_HUMAN  | CUB.                          | 5  | CGCCGCCGCAG   | 0.677 |
| - | 16 | 2121 |                    | NM_173050    | NP_766638    | Q8IWY4 | SCUB1_HUMAN  |                               | 5  | CGTTGCGGGCA   | 0.642 |
| + | 5  | 1453 | _p.G81C NUP50_     | NM_007172    | NP_009103    | Q9UKX7 | NUP50_HUMAN  |                               | 0  | ACAGTGGTGAA   | 0.358 |
| + | 6  | 769  | zy.2_Missense_M    | NM_006953    | NP_008884    | O75631 | UPK3A_HUMAN  | lasmic (Potential).           | 0  | AGGCTGTTCCC   | 0.597 |
| + | 1  | 131  |                    | NM_001082967 | NP_001076436 | Q7Z5A7 | F19A5_HUMAN  |                               | 1  | ATCGCCAGGA    | 0.423 |
| - | 7  | 992  | _uc003bkh.2_Siler  | NM_032019    | NP_114408    | Q969S8 | HDA10_HUMAN  | one deacetylase.              | 0  | CTCTCGCAGGA   | 0.547 |
| - | 11 | 984  | s.S131T MAPK11_f   | NM_002751    | NP_002742    | Q15759 | MK11_HUMAN   |                               | 2  | ACTGGCTGAAG   | 0.617 |
| - | 25 | 4139 | p.R137C PLXNB2     | NM_012401    | NP_036533    | O15031 | PLXB2_HUMAN  | lasmic (Potential).           | 6  | GGCGCGGGCCG   | 0.662 |
| - | 19 | 3113 | 1_5Flank PLXNB2    | NM_012401    | NP_036533    | O15031 | PLXB2_HUMAN  | Extracellular (Potential).    | 6  | CGTGACGTTGA   | 0.701 |
| - | 5  | 739  | _uc011asa.1_Miss   | NM_001145137 | NP_001138609 | Q92523 | CPT1B_HUMAN  | lasmic (Potential).           | 2  | GGGGCGCACAG   | 0.542 |
| + | 14 | 1717 | ibnf.1_Missense_M  | NM_001080420 | NP_001073889 | F2Z3L0 | F2Z3L0_HUMAN |                               | 1  | CTACGACAGC    | 0.632 |
| + | 14 | 1736 | ibnf.1_Missense_M  | NM_001080420 | NP_001073889 | F2Z3L0 | F2Z3L0_HUMAN |                               | 1  | ACACAGGTACG   | 0.627 |
| + | 2  | 1852 | fF1_uc003bps.1_f   | NM_020873    | NP_065924    | Q6UXX5 | LRRN1_HUMAN  | ellular (Potential).          | 1  | CTGCGTGAGA    | 0.488 |
| - | 3  | 1082 |                    | NM_000916    | NP_000907    | P30559 | OXYR_HUMAN   | lasmic (Potential).           | 0  | CAGGCGGTCCG   | 0.706 |
| + | 1  | 227  | ibvy.1_Missense_M  | NM_014229    | NP_055044    | P48066 | S6A11_HUMAN  | Name=1; (Potential).          | 4  | TGGCCGGGGAC   | 0.537 |
| + | 3  | 212  | :50_splice MKRN2   | NM_014160    | NP_054879    | Q9H000 | MKRN2_HUMAN  |                               | 0  | TTGTTTAGATATG | 0.572 |
| - | 10 | 1412 | p.R118C RAF1_uc    | NM_002880    | NP_002871    | P04049 | RAF1_HUMAN   |                               | 14 | TCCACGAGGCC   | 0.413 |
| + | 8  | 1197 | xj.2_Missense_ML   | NM_001162499 | NP_001155971 | O75155 | CAND2_HUMAN  | HEAT 9.                       | 4  | TCATCCGCGCT   | 0.627 |
| + | 16 | 2930 | ex.1_Missense_ML   | NM_144633    | NP_653234    | Q96L42 | KCNH8_HUMAN  | lasmic (Potential).           | 5  | GCACAGCACTC   | 0.522 |

|   |    |      |                    |              |              |        |             |                              |    |               |       |             |
|---|----|------|--------------------|--------------|--------------|--------|-------------|------------------------------|----|---------------|-------|-------------|
| + | 3  | 341  | 3cei.2_Nonsense_   | NM_001040432 | NP_001035522 | Q504Y3 | ZCPW2_HUMAN | CW-type.                     | 2  | AACCATGGTACT  | 0.363 |             |
| - | 3  | 2038 |                    | NM_033403    | NP_208382    | Q9C098 | DCLK3_HUMAN | rotein kinase.               | 9  | TTGGGGTCCCA   | 0.413 |             |
| + | 5  | 570  | se_Mutation_p.R1C  | NM_173826    | NP_776187    | Q8N3R3 | CC023_HUMAN |                              | 3  | GATTTTCGAGCA  | 0.303 |             |
| + | 2  | 344  |                    | NM_144638    | NP_653239    | Q69YG0 | TMM42_HUMAN | ical; (Potential).           | 0  | CCTCAGCTCGG1  | 0.498 |             |
| + | 9  | 1124 |                    | NM_003241    | NP_003232    | P49221 | TGM4_HUMAN  |                              | 1  | TGGACGCAACG   | 0.627 |             |
| - | 3  | 413  | S45_uc011bam.1_    | NM_199183    | NP_954652    | Q7R7Y3 | PRS45_HUMAN | peptidase S1.                | 0  | TCATGTCCCCC   | 0.537 |             |
| + | 28 | 4485 | Site_p.Q813_splict | NM_015175    | NP_055990    | Q6ZNJ1 | NBEL2_HUMAN |                              | 1  | CCACAGCAAAAC  | 0.642 |             |
| + | 40 | 6669 | AL2_uc010hjn.1_    | NM_015175    | NP_055990    | Q6ZNJ1 | NBEL2_HUMAN | BEACH.                       | 1  | ATGCAGCAGGC   | 0.602 |             |
| + | 2  | 1700 | REX1_uc010hjj.2_   | NM_033629    | NP_338599    | Q9NSU2 | TREX1_HUMAN |                              | 0  | GCTGGCAGCGC   | 0.632 |             |
| - | 23 | 3117 |                    | NM_000094    | NP_000085    | Q02388 | CO7A1_HUMAN | (NC1). Fibronectin type-III  | 11 | ATGCCTCAGGA   | 0.597 |             |
| - | 11 | 1340 | cuc.1_Missense_Iv  | NM_003365    | NP_003356    | P31930 | QCR1_HUMAN  |                              | 0  | CAATCCGGCTT   | 0.617 |             |
| - | 5  | 846  | p.G109C DALRD3     | NM_001009996 | NP_001009996 | Q5D0E6 | DALD3_HUMAN |                              | 0  | GCAGCCGCCTG   | 0.517 |             |
| + | 2  | 890  |                    | NM_203370    | NP_976248    | Q96EL1 | CC054_HUMAN |                              | 0  | CATGCCACCT    | 0.627 |             |
| - | 2  | 315  | D10_uc003dah.1_    | NM_015896    | NP_056980    | O75800 | ZMY10_HUMAN |                              | 5  | AATGGGCTCGC   | 0.597 |             |
| - | 12 | 1293 | dap.2_Missense_I   | NM_006030    | NP_006021    | Q9NY47 | CA2D2_HUMAN | tracellular (Potential).     | 1  | CGTCCGGTTTG   | 0.582 |             |
| + | 1  | 422  |                    | NM_080865    | NP_543141    | Q9BZJ7 | GPR62_HUMAN | Name=1; (Potential).         | 1  | GGGGGCACTGC   | 0.677 |             |
| + | 58 | 9616 | H1_uc003ddv.2_5    | NM_015512    | NP_056327    | Q9P2D7 | DYH1_HUMAN  | Potential.                   | 3  | GCCGAGCTGGC   | 0.662 |             |
| + | 51 | 5329 | 1_5'UTR STAB1_L    | NM_015136    | NP_055951    | Q9NY15 | STAB1_HUMAN | lar (Potential). FAS1 6.     | 9  | GCCCTGCTTCT   | 0.637 |             |
| + | 56 | 6065 | se_Mutation_p.C1:  | NM_015136    | NP_055951    | Q9NY15 | STAB1_HUMAN | tential). Laminin EGF-like 5 | 9  | CTGTGCCGTTCT  | 0.642 |             |
| - | 10 | 1533 | lbev.1_Missense_I  | NM_019555    | NP_062455    | Q9NR81 | ARHG3_HUMAN |                              | 1  | GCCCGCAGCA    | 0.507 |             |
| + | 1  | 470  | liv.2_Missense_Mt  | NM_177966    | NP_808881    | Q6L8Q7 | PDE12_HUMAN |                              | 0  | TGAGCCGGCTC   | 0.672 |             |
| + | 1  | 240  | djd.1_Missense_Iv  | NM_007159    | NP_009090    | Q14BN4 | SLMAP_HUMAN | omes (By similarity). Cyto   | 0  | CCGCCGAACCT   | 0.602 |             |
| + | 36 | 6176 | _Mutation_p.R198   | NM_001457    | NP_001448    | O75369 | FLNB_HUMAN  | with the cytoplasmic tail of | 19 | CCGCCGAGCCA   | 0.577 |             |
| + | 43 | 7348 | ense_Mutation_p.I  | NM_001457    | NP_001448    | O75369 | FLNB_HUMAN  | Interaction with INPPL1.     | 19 | GACTCGAAGGG   | 0.592 | rs142023538 |
| - | 4  | 970  |                    | NM_000097    | NP_000088    | P36551 | HEM6_HUMAN  |                              | 0  | GACAGCGTCTT   | 0.433 |             |
| - | 39 | 5615 |                    | NM_014981    | NP_055796    | Q9Y2K3 | MYH15_HUMAN | Potential.                   | 7  | GTCTCGGGCT    | 0.547 |             |
| - | 5  | 850  | ib.1_Missense_Mu   | NM_000796    | NP_000787    | P35462 | DRD3_HUMAN  | Cytoplasmic.                 | 4  | CTGTCCCCTGC   | 0.562 |             |
| - | 9  | 1909 | e_Mutation_p.T32:  | NM_001146156 | NP_001139628 | P49841 | GSK3B_HUMAN | rotein kinase.               | 2  | GTGGGATTCGG   | 0.418 |             |
| - | 19 | 6137 | d.2_Missense_Mu    | NM_199420    | NP_955452    | O75417 | DPOLQ_HUMAN |                              | 11 | GAGTCGGCTCC   | 0.438 |             |
| + | 12 | 1901 | _p.R359K PARP15    | NM_001113523 | NP_001106995 | Q460N3 | PAR15_HUMAN | ARP catalytic.               | 5  | TGGGAGAAAGC   | 0.478 |             |
| + | 60 | 9012 | ik.2_Missense_Mu   | NM_001024660 | NP_001019831 | O60229 | KALRN_HUMAN |                              | 6  | ACGTCGCAAGC   | 0.552 | rs144099513 |
| - | 3  | 649  |                    | NM_002213    | NP_002204    | P18084 | ITB5_HUMAN  | ellular (Potential).         | 2  | CCGGAGGTTCA   | 0.592 |             |
| - | 2  | 162  | iko.1_Missense_M   | NM_001003794 | NP_001003794 | Q99685 | MGLL_HUMAN  |                              | 0  | TGGGGGAACCT   | 0.522 |             |
| + | 7  | 1705 | SEC_uc003ekj.2_3   | NM_021937    | NP_068756    | P57772 | SELB_HUMAN  |                              | 1  | TGGCCGTGGGG   | 0.647 |             |
| + | 14 | 1554 | ib.2_Missense_Mu   | NM_016128    | NP_057212    | Q9Y678 | COPG_HUMAN  |                              | 4  | GCATGAGGAGG   | 0.552 |             |
| + | 6  | 755  | elv.2_Missense_M   | NM_020187    | NP_064572    | Q96FZ2 | CC037_HUMAN |                              | 1  | AGGCAGTTTCT   | 0.468 |             |
| + | 4  | 850  |                    | NM_000539    | NP_000530    | P08100 | OPSD_HUMAN  | Cytoplasmic.                 | 0  | CAACCCGCATGG  | 0.622 |             |
| - | 5  | 1084 | 1_Missense_Muta    | NM_001017395 | NP_001017395 | O94876 | TMCC1_HUMAN |                              | 1  | CAACCGTTCCA   | 0.478 |             |
| + | 34 | 6467 | ani.3_Nonsense_Iv  | NM_001102608 | NP_001096078 | A6NMZ7 | CO6A6_HUMAN | . Nonhelical region.         | 8  | CTTGGCCGAATT  | 0.443 |             |
| - | 1  | 462  | 2_5'Flank UBA5_L   | NM_032169    | NP_115545    | Q709F0 | ACD11_HUMAN |                              | 1  | TAGGTAGGCTCT  | 0.587 |             |
| + | 20 | 3509 | _uc003epw.1_Intrc  | NM_001063    | NP_001054    | P02787 | TRFE_HUMAN  | ansferrin-like 2.            | 2  | GTATGCGAACT   | 0.498 |             |
| - | 1  | 402  | ib6_uc011blu.1_5'  | NM_016577    | NP_057661    | Q9NRW1 | RAB6B_HUMAN |                              | 1  | ATTCCTAAAATC1 | 0.388 |             |
| + | 3  | 572  | f72_uc011bmr.1_3   | NM_001040061 | NP_001035150 | Q6ZUU3 | CC072_HUMAN |                              | 0  | CGGGAGAGAAT   | 0.627 |             |
| + | 8  | 3198 | _p.S739N ZBTB38    | NM_001080412 | NP_001073881 | Q8NAP3 | ZBT38_HUMAN |                              | 3  | CAGCAGCAACC   | 0.522 |             |
| + | 10 | 958  | 03eua.1_Missense   | NM_006506    | NP_006497    | Q15283 | RASA2_HUMAN |                              | 6  | ACTACGTGCTT   | 0.368 |             |
| - | 2  | 528  | ns.1_Missense_M    | NM_015472    | NP_056287    | Q9GZV5 | WWTR1_HUMAN |                              | 4  | TGACGGCAGGG   | 0.413 |             |
| + | 10 | 1378 |                    | NM_001004316 | NP_001004316 | Q6ZMV7 | LEKR1_HUMAN |                              | 0  | TGTCAACAGATA  | 0.328 |             |



|   |    |      |                    |              |              |        |             |                                |    |               |       |             |
|---|----|------|--------------------|--------------|--------------|--------|-------------|--------------------------------|----|---------------|-------|-------------|
| - | 5  | 765  |                    | NM_206963    | NP_996846    | P49788 | TIG1_HUMAN  | cellular (Potential).          | 0  | CAAAATCAATTGT | 0.254 |             |
| - | 2  | 262  | C5_uc010hxm.2_     | NM_005688    | NP_005679    | O15440 | MRP5_HUMAN  |                                | 4  | TTACGGTCTCT   | 0.443 | rs146572786 |
| + | 7  | 932  | p.R141Q PSMD2_     | NM_002808    | NP_002799    | Q13200 | PSMD2_HUMAN |                                | 0  | AGGCCGGCATG   | 0.517 |             |
| + | 12 | 1678 | RD_uc003fof.2_M    | NM_003741    | NP_003732    | Q9H2X0 | CHRD_HUMAN  | CHRD 3.                        | 3  | CAGGAGGACAC   | 0.612 |             |
| + | 1  | 44   | 003fqv.2_5'UTR E   | NM_001967    | NP_001958    | Q14240 | IF4A2_HUMAN |                                | 4  | CATGTCTGGTG   | 0.577 |             |
| + | 6  | 841  | i.1_Missense_Mut   | NM_002182    | NP_002173    | Q9NPH3 | IL1AP_HUMAN | potential). Ig-like C2-type 2. | 1  | CACATGTGTTG   | 0.353 |             |
| + | 5  | 1038 | 3fsv.2_Splice_Site | NM_174908    | NP_777568    | Q8IVM0 | CCD50_HUMAN |                                | 0  | ATGGAGGTAACA  | 0.383 |             |
| - | 3  | 447  | p.N55S TFRC_ucl    | NM_003234    | NP_003225    | P02786 | TFR1_HUMAN  | in SH3BP4. Cytoplasmic (P      | 3  | TGACATTGGCC   | 0.423 |             |
| - | 6  | 576  | wh.2_Missense_M    | NM_005017    | NP_005008    | P49585 | PCY1A_HUMAN | lytic (Potential).             | 0  | GACTGCGTCAT   | 0.532 |             |
| - | 8  | 1304 | rt.2_Missense_Mul  | NM_203314    | NP_976059    | Q02338 | BDH_HUMAN   |                                | 1  | TGACAGCATCG   | 0.572 |             |
| + | 1  | 3222 |                    | NM_175918    | NP_787114    | Q8N1N5 | CRPAK_HUMAN |                                | 0  | TGCTCACATGT   | 0.647 |             |
| + | 1  | 3663 |                    | NM_175918    | NP_787114    | Q8N1N5 | CRPAK_HUMAN | 6                              | 0  | CGTGCCGATGC   | 0.672 |             |
| - | 13 | 1664 | N_uc010ich.1_Intr  | NM_181808    | NP_861524    | Q7Z5Q5 | DPOLN_HUMAN |                                | 4  | GTTACCTTTTTC  | 0.313 |             |
| + | 38 | 4952 |                    | NM_002111    | NP_002102    | P42858 | HD_HUMAN    |                                | 4  | ATGAAGACAAG   | 0.493 |             |
| + | 12 | 3960 | _p.S218N RGS12_    | NM_198229    | NP_937872    | O14924 | RGS12_HUMAN | RBD 1.                         | 1  | AGACAGTAGCA   | 0.587 |             |
| - | 9  | 1472 | p.N361D PPP2R2     | NM_020416    | NP_065149    | Q9Y2T4 | 2ABG_HUMAN  | WD 6.                          | 4  | GGTGTCCGAT    | 0.647 |             |
| - | 1  | 982  | 3_5'Flank TADA2B   | NM_153376    | NP_699207    | Q2M329 | CCD96_HUMAN | Potential.                     | 0  | CTCCTGGTGGT   | 0.622 |             |
| + | 15 | 3447 | A1040T SH3TC1_     | NM_018986    | NP_061859    | Q8TE82 | S3TC1_HUMAN |                                | 3  | AGCGGCTGGA    | 0.637 |             |
| - | 8  | 1386 | se_Mutation_p.P32  | NM_001290    | NP_001281    | O43679 | LDB2_HUMAN  |                                | 0  | TGGCGGGAGGT   | 0.542 |             |
| + | 13 | 1594 |                    | NM_015907    | NP_056991    | P28838 | AMPL_HUMAN  |                                | 0  | AGTGGGCACAT   | 0.453 |             |
| - | 7  | 1124 | gqn.1_Missense_M   | NM_145290    | NP_660333    | Q8IWK6 | GP125_HUMAN | ilar (Potential). Ig-like.     | 1  | ATTCATCGTTT   | 0.378 | rs138542858 |
| - | 4  | 734  | p.R31W GPR125_     | NM_145290    | NP_660333    | Q8IWK6 | GP125_HUMAN | ilar (Potential). LRR 4.       | 1  | CAGCCGAACCA   | 0.353 | rs147434497 |
| - | 9  | 2017 | GC1A_uc003gqt.2    | NM_013261    | NP_037393    | Q9UBK2 | PRGC1_HUMAN | Arg/Ser-rich.                  | 8  | TTACCTGGGCC   | 0.473 |             |
| + | 11 | 1338 | !BPJ_uc003gsa.1_   | NM_005349    | NP_005340    | Q06330 | SUH_HUMAN   | IPT/TIG.                       | 3  | GGGACGTAGCA   | 0.363 |             |
| - | 5  | 1442 | ah.1_Missense_Mt   | NM_004439    | NP_004430    | P54756 | EPHA5_HUMAN | III 1. Extrac p.R417Q(1)       | 24 | TTGCCGGGGAA   | 0.493 |             |
| + | 5  | 554  | i.S146N SLC4A4_    | NM_001098484 | NP_001091954 | Q9Y6R1 | S4A4_HUMAN  | lasmic (Potential).            | 5  | ATGGAGCAAGC   | 0.443 |             |
| - | 5  | 924  | bc.1_Missense_M    | NM_173827    | NP_776188    | Q8N8Q8 | COX18_HUMAN | ical; (Potential).             | 0  | GTACCCTTGCA   | 0.413 | rs138323566 |
| - | 26 | 5015 | hgq.2_Missense_M   | NM_032217    | NP_115593    | O75179 | ANR17_HUMAN | Ser-rich.                      | 10 | CTTACGACTG    | 0.463 |             |
| - | 3  | 1083 | n.1_Missense_Mul   | NM_020803    | NP_065854    | Q9P2G9 | KLHL8_HUMAN |                                | 0  | ATGGCAGCATT   | 0.418 |             |
| + | 5  | 376  | .2_Intron SPP1_uc  | NM_001040058 | NP_001035147 | P10451 | OSTP_HUMAN  |                                | 1  | TTAAACAAGAG   | 0.398 |             |
| + | 26 | 3189 | 3_uc011cdo.1_Mis   | NM_014606    | NP_055421    | Q15034 | HERC3_HUMAN | HECT.                          | 4  | CAGCGGGGAGG   | 0.577 |             |
| + | 1  | 899  |                    | NM_005172    | NP_005163    | Q92858 | ATOH1_HUMAN |                                | 0  | GGACAGCGCCC   | 0.607 | rs142131282 |
| - | 8  | 1309 | p.I404M UNC5C_     | NM_003728    | NP_003719    | O95185 | UNC5C_HUMAN | ical; (Potential).             | 4  | ACTGCTATCAC   | 0.438 |             |
| - | 16 | 2459 | es.1_Missense_Mi   | NM_005908    | NP_005899    | O00462 | MANBA_HUMAN |                                | 1  | GTGGTAGTTGG   | 0.557 |             |
| + | 18 | 2057 | p.A653T ANK2_uc    | NM_001148    | NP_001139    | Q01484 | ANK2_HUMAN  | ANK 19.                        | 14 | ATGGAGCAGAG   | 0.438 |             |
| + | 9  | 1595 | ey.2_Missense_Mi   | NM_145207    | NP_660208    | Q8NB90 | SPAT5_HUMAN |                                | 0  | ATGCTGCTCTC   | 0.428 |             |
| + | 1  | 1940 | 10_uc003igz.2_Mi   | NM_032961    | NP_116586    | Q9P2E7 | PCD10_HUMAN | Extracellular (Potential).     | 2  | GCGCGGCGCCC   | 0.622 |             |
| + | 7  | 1958 | ie_Mutation_p.S47  | NM_032557    | NP_115946    | Q8NB14 | UBP38_HUMAN |                                | 5  | TATTATCTTTAA  | 0.284 |             |
| + | 4  | 649  | se_Mutation_p.L7C  | NM_001040876 | NP_001035809 | P61221 | ABCE1_HUMAN | 3 ferredoxin-type 2.           | 1  | CGCCTTATCAAT  | 0.303 |             |
| + | 7  | 1018 |                    | NM_033393    | NP_203751    | Q9C0D6 | FHDC1_HUMAN | FH2.                           | 2  | AATGCAGTAGGA  | 0.303 |             |
| + | 18 | 3224 |                    | NM_014247    | NP_055062    | Q9Y4G8 | RPGF2_HUMAN |                                | 4  | ATGCCCAAATG   | 0.443 |             |
| - | 1  | 815  | r.1_Intron KLHL2_  | NM_000167    | NP_000158    |        | CLCN3_HUMAN | oplasmic (By similarity).      | 0  | AAAGTCTAAGT   | 0.418 |             |
| + | 12 | 2820 | p.V754M CLCN3_     | NM_001829    | NP_001820    | P51790 | CLCN3_HUMAN | oplasmic (By similarity).      | 3  | AGATCGTGGTG   | 0.488 |             |
| + | 3  | 1789 | X2_uc003iwa.1_5'   | NM_020225    | NP_064610    | Q9P2F5 | STOX2_HUMAN |                                | 0  | CGGCACACGCT   | 0.443 |             |
| + | 3  | 3984 | va.1_Missense_Mi   | NM_020225    | NP_064610    | Q9P2F5 | STOX2_HUMAN |                                | 0  | CAGCAGCAGCA   | 0.552 |             |
| - | 4  | 1231 |                    | NM_020040    | NP_064424    | Q99867 | TBB4Q_HUMAN |                                | 0  | GCTCTGGCCT    | 0.557 |             |
| - | 37 | 5027 | o.P1692L RICTOR    | NM_152756    | NP_689969    | Q6R327 | RICTR_HUMAN |                                | 10 | GACACGGAAGT   | 0.338 | rs77464125  |

|   |    |      |                    |              |              |        |             |                               |    |                |       |
|---|----|------|--------------------|--------------|--------------|--------|-------------|-------------------------------|----|----------------|-------|
| - | 29 | 3471 | 3jmi.3_Missense_I  | NM_173489    | NP_775760    | Q7Z745 | HTRB2_HUMAN | HEAT 10.                      | 8  | ATTACCTTAGCTA  | 0.413 |
| + | 1  | 564  | uc003joq.1_5'Flanl | NM_002202    | NP_002193    | P61371 | ISL1_HUMAN  |                               | 3  | ATGGGAGATCCA   | 0.527 |
| + | 2  | 1158 | 3A1_uc003jou.2_lr  | NM_015946    | NP_057030    | Q9BRX2 | PELO_HUMAN  |                               | 0  | GGGCAGCAACC    | 0.617 |
| + | 20 | 1993 | ih.3_Missense_Mu   | NM_001136034 | NP_001129506 | Q9NQI0 | DDX4_HUMAN  | case C-terminal.              | 2  | 3CAGAGCAATTT   | 0.358 |
| + | 2  | 299  |                    | NM_001029875 | NP_001025046 | Q6MZT1 | R7BP_HUMAN  |                               | 0  | GGCCCGTCAGG    | 0.493 |
| + | 3  | 344  | 7BP_uc011cqu.1_f   | NM_001029875 | NP_001025046 | Q6MZT1 | R7BP_HUMAN  |                               | 0  | AAGATGGTGAGA   | 0.453 |
| - | 21 | 3468 | o.2_RNA ADAMT5     | NM_197941    | NP_922932    | Q9UKP5 | ATS6_HUMAN  | SP type-1 2.                  | 0  | 3GCTTACTGTCA   | 0.438 |
| - | 4  | 1409 | c003tq.2_RNA AC    | NM_197941    | NP_922932    | Q9UKP5 | ATS6_HUMAN  |                               | 0  | 3ATGTCGTTGTTG  | 0.398 |
| + | 17 | 3393 | p.V1044I BDP1_u    | NM_018429    | NP_060899    | A6H8Y1 | BDP1_HUMAN  | -M-E-T-D-L-K-X-T-G-R-E-       | 2  | 3GAGAAAGTATCC  | 0.458 |
| - | 9  | 989  | iz.1_Missense_Mu   | NM_018268    | NP_060738    | Q9HAD4 | WDR41_HUMAN | WD 4.                         | 0  | 3AAACTCAAATCT  | 0.438 |
| + | 2  | 6593 |                    | NM_153610    | NP_705838    | Q8N3K9 | CMYA5_HUMAN |                               | 9  | AGAAAGGAATTT   | 0.453 |
| - | 4  | 988  | kin.2_Missense_M   | NM_001884    | NP_001875    | P10915 | HPLN1_HUMAN | Link 2.                       | 5  | 3AGCCCGCATCA   | 0.557 |
| + | 2  | 1004 | nw.1_Missense_M    | NM_005575    | NP_005566    | Q9UIQ6 | LCAP_HUMAN  | cellular (Potential).         | 4  | 3CATGGGCACAG   | 0.463 |
| - | 5  | 672  |                    | NM_173666    | NP_775937    | Q8NBA8 | DTWD2_HUMAN |                               | 0  | TGCATCCGAATT   | 0.313 |
| + | 28 | 7106 | 3l.1_Missense_Mul  | NM_005509    | NP_005500    | Q9Y485 | DMXL1_HUMAN |                               | 2  | CTGGCGAGGAA    | 0.378 |
| + | 6  | 1407 | CAIP_uc010jcu.2_   | NM_005460    | NP_005451    | Q9Y6H5 | SNCAP_HUMAN | ANK 2.                        | 2  | 3AGTGCCTACGC   | 0.403 |
| + | 8  | 1145 | MD3_uc011cwx.1_    | NM_023927    | NP_076416    | Q96HH9 | GRAM3_HUMAN |                               | 1  | 3CAGACCGCCCT   | 0.393 |
| - | 9  | 746  | _p.G164S BRD8_L    | NM_139199    | NP_631938    | Q9H0E9 | BRD8_HUMAN  |                               | 1  | 3GACACCTGTAC   | 0.527 |
| + | 4  | 937  | P156L FAM53C_u     | NM_001135647 | NP_001129119 | Q9NYF3 | FA53C_HUMAN |                               | 1  | 3TGGGCCCGCAGC  | 0.677 |
| + | 4  | 498  | se_Mutation_p.V1:  | NM_001903    | NP_001894    | P35221 | CTNA1_HUMAN | TNNB1. Involved in homod      | 11 | 3CTGCTGTTACCC  | 0.468 |
| + | 1  | 241  | 003lhf.2_Intron PC | NM_018907    | NP_061730    | Q9UN74 | PCDA4_HUMAN | Extracellular (Potential).    | 6  | GGGCCGCATCG    | 0.662 |
| + | 1  | 1957 | 03lhf.2_Intron PCC | NM_018907    | NP_061730    | Q9UN74 | PCDA4_HUMAN | Extracellular (Potential).    | 6  | 3CGCGCGCATCC   | 0.672 |
| + | 1  | 755  | 3B16_uc003liv.2_5  | NM_019120    | NP_061993    | Q9UN66 | PCDB8_HUMAN | Extracellular (Potential).    | 4  | 3TGGCAGGAAAT   | 0.502 |
| + | 1  | 1744 | 3ljq.1_Intron PCDf | NM_018920    | NP_061743    | Q9Y5G6 | PCDG7_HUMAN | r (Potential). Cadherin 6.    | 0  | GCTCCGCAGAG    | 0.632 |
| + | 1  | 1820 | Intron PCDHGB4_    | NM_018927    | NP_061750    | Q9Y5F8 | PCDGJ_HUMAN | r (Potential). Cadherin 5.    | 2  | ACAACGCACCC    | 0.711 |
| + | 1  | 1793 | 1_Intron PCDHGB-   | NM_003735    | NP_003726    | O60330 | PCDGC_HUMAN | r (Potential). Cadherin 5.    | 4  | 3CGCCCTCAGC    | 0.622 |
| + | 7  | 728  | p.S231R ARHGAF     | NM_015071    | NP_055886    | Q9UNA1 | RHG26_HUMAN |                               | 1  | 3ATTAGCATAACAG | 0.473 |
| + | 4  | 504  | p.R155H TCERG1     | NM_006706    | NP_006697    | O14776 | TCRG1_HUMAN | VW 1.                         | 2  | 3GACACGTGAAT   | 0.313 |
| - | 2  | 2255 |                    | NM_001012301 | NP_001012301 | Q5FYB1 | ARSI_HUMAN  |                               | 2  | 3GAAAAGGATCC   | 0.537 |
| - | 8  | 811  | 3nse_Mutation_p.E  | NM_003118    | NP_003109    | P09486 | SPRC_HUMAN  | EF-hand.                      | 1  | 3ATGCTCCATGG   | 0.607 |
| + | 1  | 557  |                    | NR_024356    |              |        |             |                               | 0  | 3CGCCCGCGATC   | 0.662 |
| - | 13 | 1819 |                    | NM_001017995 | NP_001017995 | A1X283 | SPD2B_HUMAN |                               | 4  | 3GCCCGGAGCT    | 0.662 |
| + | 7  | 1132 | kg.1_Missense_M    | NM_133369    | NP_588610    | Q6ZN44 | UNC5A_HUMAN | ical; (Potential).            | 1  | 3TGGCCGTCTGC   | 0.622 |
| + | 13 | 1809 | lfu.1_Missense_Mi  | NM_002011    | NP_002002    | P22455 | FGFR4_HUMAN | 3. Cytoplasmic (Potential).   | 16 | 3TGTACGTGATCC  | 0.716 |
| - | 9  | 899  | _p.R162H DDX41_    | NM_016222    | NP_057306    | Q9UJV9 | DDX41_HUMAN | ase ATP-binding.              | 0  | 3CGCAGCGCAGG   | 0.657 |
| - | 18 | 2687 |                    | NM_014244    | NP_055059    | O95450 | ATS2_HUMAN  | SP type-1 2.                  | 4  | GGGCGGCACAG    | 0.642 |
| + | 2  | 1522 | 3kn.1_Missense_M   | NM_014757    | NP_055572    | Q92585 | MAML1_HUMAN |                               | 6  | 3CACCCGGGCAC   | 0.657 |
| - | 4  | 396  | :003mwc.2_5'UTR    | NM_206836    | NP_996667    | O75521 | ECI2_HUMAN  | ACB.                          | 0  | 3ATGAAGGACTC   | 0.483 |
| - | 2  | 201  | 3n_p.K25R PECI_L   | NM_206836    | NP_996667    | O75521 | ECI2_HUMAN  | ACB.                          | 0  | 3GATCCTTTTTC   | 0.398 |
| - | 5  | 602  | 3m.2_Missense_Mi   | NM_016495    | NP_057579    | Q9P0N9 | TBCD7_HUMAN | ab-GAP TBC.                   | 1  | 3CTGGGGCAAGG   | 0.483 |
| + | 5  | 655  | 32_uc011djb.1_Mi:  | NM_006366    | NP_006357    | P40123 | CAP2_HUMAN  |                               | 1  | 3TCAGCGAAAGC   | 0.473 |
| + | 9  | 875  | p.P234Q CDKAL1     | NM_017774    | NP_060244    | Q5VV42 | CDKAL_HUMAN |                               | 2  | GTTATCCAATTG   | 0.323 |
| - | 2  | 632  | 3L_uc003ndq.2_M    | NM_000948    | NP_000939    | P01236 | PRL_HUMAN   |                               | 0  | GGCATCGGGCA    | 0.587 |
| + | 4  | 978  | 3kk.1_Missense_M   | NM_007048    | NP_008979    | O00481 | BT3A1_HUMAN | 2. Extracellular (Potential). | 2  | 3ATGCAGTAGCA   | 0.547 |
| + | 4  | 837  | -A-E_uc011dmh.1_   | NM_005516    | NP_005507    | P13747 | HLAE_HUMAN  | 3ha-3. Extracellular (Potent  | 5  | GGGCAGCTGTG    | 0.622 |
| - | 10 | 2331 | 3nj.1_Missense_Mi  | NM_005275    | NP_005266    | P36915 | GNL1_HUMAN  |                               | 3  | 3CTGGCGGATAG   | 0.602 |
| - | 5  | 412  | 2_5'Flank VARS_u   | NM_021177    | NP_067000    | Q9Y333 | LSM2_HUMAN  |                               | 0  | 3CGTATCGGACC   | 0.512 |

rs141578236

|   |    |         |                                  |              |              |        |             |                              |    |              |       |             |
|---|----|---------|----------------------------------|--------------|--------------|--------|-------------|------------------------------|----|--------------|-------|-------------|
| + | 3  | 563     | rf.2_Missense_Mu                 | NM_001710    | NP_001701    | P00751 | CFAB_HUMAN  |                              | 1  | AGTGC GGACAG | 0.632 |             |
| + | 43 | 6133    | ey.2_Missense_Mi                 | NM_002224    | NP_002215    | Q14573 | ITPR3_HUMAN | lasmic (Potential).          | 19 | TCACCGCACTG  | 0.592 |             |
| + | 6  | 872     | _p.R278H DEF6_u                  | NM_022047    | NP_071330    | Q9H4E7 | DEFI6_HUMAN | PH.                          | 0  | AAAGCGCTGCA  | 0.657 |             |
| + | 8  | 1519    | ftb.1_Missense_M                 | NM_006238    | NP_006229    | Q03181 | PPARD_HUMAN | gand-binding.                | 1  | AGATGGCTGAC  | 0.602 |             |
| - | 8  | 806     | kw.3_Missense_Mi                 | NM_003322    | NP_003313    | O00294 | TULP1_HUMAN |                              | 3  | TTGCCCTTTTGA | 0.597 |             |
| - | 5  | 715     | i.2_Intron TRERF1                | NM_033502    | NP_277037    | Q96PN7 | TREF1_HUMAN |                              | 5  | TTGGCGAGGCC  | 0.577 |             |
| + | 4  | 357     | 23_uc003owo.2_f                  | NM_153246    | NP_694978    | Q8N319 | CF223_HUMAN |                              | 0  | CGGATGTCGCG  | 0.602 |             |
| + | 19 | 1760    | se_Mutation_p.G4                 | NM_018426    | NP_060896    | Q5T3F8 | TM63B_HUMAN | ical; (Potential).           | 3  | ACAACGGCGCC  | 0.632 |             |
| - | 4  | 1165    | 2_Intron TMEM151                 | NM_182539    | NP_872345    | Q5JU00 | TCTE1_HUMAN | LRR 2.                       | 4  | CACACGCAGGC  | 0.607 | rs146631063 |
| + | 2  | 618     |                                  | NM_014936    | NP_055751    | Q9Y6X5 | ENPP4_HUMAN | ellular (Potential).         | 4  | TATTTGGGTGA  | 0.423 |             |
| - | 5  | 845     | wx.1_Missense_M                  | NM_021814    | NP_068586    | Q9NYP7 | ELOV5_HUMAN |                              | 0  | CTTGCGCAGGA  | 0.488 |             |
| + | 5  | 1320    | k.2_Missense_Mut                 | NM_001704    | NP_001695    | O60242 | BAI3_HUMAN  | . Extracellular (Potential). | 50 | AGGTGAATCTG  | 0.423 |             |
| - | 6  | 856     | A1_uc003pff.3_5'                 | NM_001851    | NP_001842    | P20849 | CO9A1_HUMAN |                              | 4  | TCAAACGGGAG  | 0.463 |             |
| + | 10 | 1355    | 2_5'Flank PPI6_u                 | NM_003080    | NP_003071    | O60906 | NSMA_HUMAN  |                              | 0  | AGGCTCGCTGG  | 0.647 |             |
| - | 3  | 556     | 186_uc003pub.2_                  | NM_001123364 | NP_001116836 | Q5JXM2 | CF186_HUMAN |                              | 0  | TCACCTAAGG   | 0.438 |             |
| - | 19 | 2764    | _p.R812* LAMA4_                  | NM_001105206 | NP_001098676 | Q16363 | LAMA4_HUMAN | omain II and I.              | 9  | CTCTCGGATCC  | 0.502 | rs148409597 |
| + | 3  | 577     |                                  | NM_001029858 | NP_001025029 | Q5T1Q4 | S35F1_HUMAN |                              | 1  | ATTTTACGACGA | 0.378 |             |
| + | 3  | 644     | au.2_Missense_Mi                 | NM_030963    | NP_112225    | Q9NTX7 | RN146_HUMAN | WWE.                         | 1  | TGGACGTCGCA  | 0.388 |             |
| + | 20 | 2346    | on_p.L630F EYA4                  | NM_004100    | NP_004091    | O95677 | EYA4_HUMAN  |                              | 2  | TGGCTCTCCAC  | 0.328 |             |
| - | 7  | 1665    | hk.2_Missense_Mi                 | NM_014432    | NP_055247    | Q9UHF4 | I20RA_HUMAN | lasmic (Potential).          | 4  | CCGCACAAATG  | 0.512 |             |
| - | 1  | 75      | 1_5'Flank PEX3_u                 | NM_182503    | NP_872309    | Q7Z6V5 | ADAT2_HUMAN |                              | 0  | TTGCAGCTGGC  | 0.697 |             |
| - | 9  | 2297    | _p.A633V SHPRH                   | NM_001042683 | NP_001036148 | Q149N8 | SHPRH_HUMAN |                              | 3  | ATTTCAGCACAG | 0.403 |             |
| + | 7  | 755     | p.P220S RBM16_u                  | NM_014892    | NP_055707    | Q9UPN6 | SCAF8_HUMAN |                              | 0  | GCTTACCTGAT  | 0.448 |             |
| - | 1  | 561     | _p.A124V RSPH3_                  | NM_031924    | NP_114130    | Q86UC2 | RSPH3_HUMAN |                              | 2  | TGGGCGCTAAG  | 0.652 |             |
| + | 17 | 3672    | 1_RNA MAP3K4_                    | NM_005922    | NP_005913    | Q9Y6R4 | M3K4_HUMAN  |                              | 9  | CACCTCGGAGCA | 0.408 |             |
| + | 2  | 142     | qwr.1_Missense_M                 | NM_022138    | NP_071421    | Q9H3U7 | SMOC2_HUMAN | Kazal-like.                  | 1  | ATTGTAGCTTGG | 0.448 |             |
| + | 7  | 1069    | sjr.1_Missense_Mi                | NM_017781    | NP_060251    | Q8TAV3 | CP2W1_HUMAN |                              | 0  | CTCCACGAGGT  | 0.726 |             |
| + | 11 | 1307    | _p.V94M TTYH3_u                  | NM_025250    | NP_079526    | Q9C0H2 | TTYH3_HUMAN | ellular (Potential).         | 0  | ACTACGTGCAAC | 0.642 |             |
| + | 13 | 1647    | p.E207G TTYH3_u                  | NM_025250    | NP_079526    | Q9C0H2 | TTYH3_HUMAN | lasmic (Potential).          | 0  | CTGTGAGAACA  | 0.652 |             |
| - | 24 | 3634    |                                  | NM_032415    | NP_115791    | Q9BXL7 | CAR11_HUMAN | ylate kinase-like.           | 50 | ACACCCGGATG  | 0.592 |             |
| - | 27 | 8433    |                                  | NM_001080495 | NP_001073964 | O15417 | TNC18_HUMAN |                              | 0  | CCTGCGCGGAA  | 0.637 |             |
| - | 3  | 1329    | ion.3_Missense_M                 | NM_024963    | NP_079239    | Q96ME1 | FXL18_HUMAN | LRR 7.                       | 3  | GACGCAGCCGG  | 0.572 |             |
| + | 5  | 709     | 24_uc011jwp.1_M                  | NM_032172    | NP_115548    | Q9H9J4 | UBP42_HUMAN |                              | 5  | ACCAAGAAGAT  | 0.413 |             |
| - | 2  | 830     |                                  | NM_001037163 | NP_001032240 | Q7Z4H9 | SIPAR_HUMAN |                              | 0  | CAACACCACTG  | 0.612 |             |
| - | 10 | 1088    | a.2_Missense_Mu                  | NM_004080    | NP_004071    | Q9Y6T7 | DGKB_HUMAN  |                              | 12 | TTTGGACTTCA  | 0.448 |             |
| + | 7  | 1397    | HR_uc003stt.3_R                  | NM_001621    | NP_001612    | P35869 | AHR_HUMAN   |                              | 3  | CACCTCAGTTG  | 0.373 |             |
| - | 11 | 1402    | 26A_uc003svn.3_                  | NM_032581    | NP_115970    | Q9BYI3 | HYCC1_HUMAN |                              | 1  | TGACCGTCTGT  | 0.438 |             |
| + | 12 | 1671    | _p.A458T MPP6_u                  | NM_016447    | NP_057531    | Q9NZW5 | MPP6_HUMAN  | ylate kinase-like.           | 0  | TTGCGGCTCCG  | 0.423 |             |
| - | 8  | 1083    | 03tjx.2_Intron POI               | NM_013284    | NP_037416    | Q9NP87 | DPOLM_HUMAN | NA binding (By similarity).  | 3  | GTCCACGTGAT  | 0.652 |             |
| + | 1  | 1334    |                                  | NR_003595    |              |        |             |                              | 0  | GCGGAAGACAA  | 0.458 |             |
| + | 4  | 647     | ae_Mutation_p.I216               | NM_182633    | NP_872439    | Q8N859 | ZN713_HUMAN |                              | 2  | CAGCATCAAACA | 0.343 |             |
| + | 4  | 365_366 | f.1_Missense_Mul                 | NM_001483    | NP_001474    | O75323 | NIPS2_HUMAN |                              | 1  | TATGGCGAGCAC | 0.406 |             |
| + | 4  | 1013    |                                  | NM_001159279 | NP_001152751 |        |             |                              | 2  | AAGAATGTGGC  | 0.423 |             |
| + | 4  | 995     |                                  | NM_001159524 | NP_001152996 | P0CB33 | ZN735_HUMAN | 2H2-type 7.                  | 0  | TGGCAAAGCCT  | 0.428 |             |
| - | 4  | 640     | 3tzc.2_Missense_I                | NM_148912    | NP_683710    | Q8NFV4 | ABHDB_HUMAN |                              | 0  | GGAGCGGGGCA  | 0.552 |             |
| - | 2  | 656     | c.3_5'UTR POM121C_uc003udl.1_RNA |              |              | A8CG34 | P121C_HUMAN | and nuclear pore complex.    | 0  | CCCCGGACAG   | 0.527 |             |
| - | 1  |         | POM121C_uc003udk.3_Intron        |              |              | A8CG34 | P121C_HUMAN |                              | 0  | TCACCTGCATA  | 0.458 |             |

|   |    |       |                    |              |              |        |             |                              |       |               |       |             |
|---|----|-------|--------------------|--------------|--------------|--------|-------------|------------------------------|-------|---------------|-------|-------------|
| - | 2  | 879   | .1_Intron CCDC14   | NM_006682    | NP_006673    | Q14314 | FGL2_HUMAN  | rogen C-terminal.            | 2     | AATCCCTTCTG/  | 0.458 |             |
| - | 17 | 2258  | o.R740W SEMA3C     | NM_152754    | NP_689967    | O95025 | SEM3D_HUMAN | Lys-rich (basic).            | 5     | CTCCGCTTCTC/  | 0.507 |             |
| - | 2  | 444   | ERF_uc011khm.1     | NM_006980    | NP_008911    | Q99551 | MTERF_HUMAN |                              | 0     | GAGTACGTGTTA/ | 0.413 |             |
| + | 46 | 11474 | o.T3373M AKAP9     | NM_005751    | NP_005742    | Q99996 | AKAP9_HUMAN |                              | 26    | CTTTCACGGATC/ | 0.532 |             |
| + | 8  | 780   | _Mutation_p.G191   | NM_003496    | NP_003487    | Q9Y4A5 | TRRAP_HUMAN |                              | 37    | ATGGTTGGTATG/ | 0.448 |             |
| + | 4  | 465   | F6_uc011kji.1_5'Fl | NM_152755    | NP_689968    | Q8N129 | CNPY4_HUMAN |                              | 0     | CATGGCAACAC/  | 0.542 |             |
| + | 1  | 553   | .1_5'Flank ZCWP    | NM_019606    | NP_062552    | Q7L2J0 | MEPCE_HUMAN | Gly-rich.                    | 1     | CGGGGGCAAGA/  | 0.672 |             |
| + | 1  | 926   | .1_5'Flank ZCWP    | NM_019606    | NP_062552    | Q7L2J0 | MEPCE_HUMAN |                              | 1     | CACCAGCAGCA/  | 0.647 |             |
| - | 7  | 973   | i.2_RNA LRCH4_L    | NM_002319    | NP_002310    | O75427 | LRCH4_HUMAN |                              | 2     | TGCCACTATCA/  | 0.602 |             |
| + | 36 | 6688  | .w1.2_RNA ZAN_u    | NM_003386    | NP_003377    | Q9Y493 | ZAN_HUMAN   | ellular (Potential).         | 11    | TGGGAGGTCTC/  | 0.662 |             |
| + | 45 | 8224  | .h.2_RNA ZAN_uc    | NM_003386    | NP_003377    | Q9Y493 | ZAN_HUMAN   | extracellular (Potential).   | 11    | TGTGTGAGCCC/  | 0.632 |             |
| - | 2  | 1550  | \CHE_uc003uxg.2    | NM_000665    | NP_000656    | P22303 | ACES_HUMAN  |                              | 2     | TGGAAGCACGG/  | 0.652 |             |
| + | 3  | 6600  | C17_uc010lho.1_F   | NM_001040105 | NP_001035194 | Q685J3 | MUC17_HUMAN | ch.[59 X approximate tand    | 27    | CTTCAACAAC/   | 0.483 | rs147644870 |
| + | 3  | 6777  | C17_uc010lho.1_F   | NM_001040105 | NP_001035194 | Q685J3 | MUC17_HUMAN | 3 X approximate tandem re    | 27    | CTTTCAGCAAC/  | 0.498 |             |
| - | 4  | 960   | ixz.1_Missense_M   | NM_198571    | NP_940973    | Q8N8M0 | CG052_HUMAN |                              | 1     | GATGGTCCCGC/  | 0.726 |             |
| - | 1  | 1261  | .2_Intron CADPS2   | NM_139175    | NP_631914    | Q8WVZ7 | RN133_HUMAN |                              | 1     | CTGCAGGAGAA/  | 0.403 |             |
| - | 12 | 1454  | 64_splice RBM28    | NM_018077    | NP_060547    | Q9NW13 | RBM28_HUMAN |                              | 2     | ACTCACAGCCT/  | 0.498 |             |
| + | 5  | 572   | e_Mutation_p.S79I  | NM_001868    | NP_001859    | P15085 | CBPA1_HUMAN |                              | 1     | GGGCAGTAAGC/  | 0.622 |             |
| - | 2  | 1182  | .p.A318V PLXNA4    | NM_020911    | NP_065962    | Q9HCM2 | PLXA4_HUMAN | ilar (Potential). Sema.      | 1     | CCCCCGCTTTG/  | 0.582 |             |
| - | 3  | 405   | t1B1_uc003vrq.1_L  | NM_001628    | NP_001619    | P15121 | ALDR_HUMAN  |                              | 3     | CCAGTGAATAA/  | 0.552 |             |
| - | 15 | 1860  |                    | NM_004333    | NP_004324    | P15056 | BRAF_HUMAN  | rotein kinas_R603>(2))p.T    | 18290 | ATTTCACTGTAC/ | 0.368 |             |
| + | 33 | 4064  |                    | NM_004668    | NP_004659    | O43451 | MGA_HUMAN   | se.  Lumenal (Potential).    | 2     | GGAGGATGACC/  | 0.493 |             |
| + | 15 | 2948  | bt.2_Missense_Mt   | NM_004445    | NP_004436    | O15197 | EPHB6_HUMAN | Potential). Protein kinase.  | 19    | GGCCGCAAGT/   | 0.687 |             |
| + | 6  | 803   | cta.1_Missense_M   | NM_032982    | NP_116764    | P42575 | CASP2_HUMAN |                              | 3     | ATTTGCGTCTGC/ | 0.527 |             |
| + | 1  | 355   |                    | NM_001001659 | NP_001001659 | Q96R47 | O2A14_HUMAN | Name=3; (Potential).         | 0     | ATGTCCTATGAT/ | 0.483 |             |
| - | 4  | 1101  | .p.G285R ZNF786    | NM_152411    | NP_689624    | Q8N393 | ZN786_HUMAN |                              | 4     | CGGCCCTCCC/   | 0.716 |             |
| + | 5  | 860   | 1_uc003wga.2_Rt    | NM_032534    | NP_115923    | A5PL33 | KRBA1_HUMAN |                              | 2     | TCTCCCATCAC/  | 0.612 |             |
| + | 43 | 6245  |                    | NM_198455    | NP_940857    | A2VEC9 | SSPO_HUMAN  | F5/8 type C.                 | 0     | TGCATCGTCCC/  | 0.672 |             |
| + | 53 | 7674  |                    | NM_198455    | NP_940857    | A2VEC9 | SSPO_HUMAN  | rSP type-1 5.                | 0     | GATGGGCCAT/   | 0.662 |             |
| + | 4  | 773   | .p.R152P REPIN1    | NM_013400    | NP_037532    | Q9BWE0 | REPI1_HUMAN | C2H2-type 2.                 | 1     | CTTTCGCCATG/  | 0.677 |             |
| - | 11 | 1411  | .rjo.1_Missense_Mt | NM_007189    | NP_009120    | Q9UG63 | ABCF2_HUMAN | er 2. ATP 2 (By similarity). | 1     | CCCTGCTCCATI/ | 0.507 |             |
| + | 1  | 314   | .p.T52M uc003wlt   | NM_024012    | NP_076917    | P47898 | 5HT5A_HUMAN | ame=2; (By similarity).      | 3     | TGGCCGTCTCG/  | 0.687 |             |
| + | 5  | 763   | me.2_Missense_M    | NM_053043    | NP_444271    | Q96EV2 | RBM33_HUMAN | Glu-rich.                    | 1     | CAAATCTGATG/  | 0.408 |             |
| + | 15 | 3442  | on_p.T835M RBM3    | NM_053043    | NP_444271    | Q96EV2 | RBM33_HUMAN |                              | 1     | GGTGACGCTGA/  | 0.657 |             |
| - | 49 | 7853  | .p.T1817M CSMD1    | NM_033225    | NP_150094    | Q96PZ7 | CSMD1_HUMAN | extracellular (Potential).   | 25    | TGGCGTGAGG/   | 0.463 |             |
| - | 2  | 581   |                    | NM_178857    | NP_849188    | Q8IWN7 | RP1L1_HUMAN |                              | 8     | TGGCCGCGCTG/  | 0.637 |             |
| - | 2  | 1386  | .p.A305V EGR3_u    | NM_004430    | NP_004421    | Q06889 | EGR3_HUMAN  | C2H2-type 3.                 | 0     | TGCGCGCAAAC/  | 0.647 |             |
| + | 5  | 752   | SF10C_uc011kzr.1   | NM_003841    | NP_003832    | O14798 | TR10C_HUMAN | TAPE 2.                      | 0     | AATGAACACCA/  | 0.602 | rs61736405  |
| + | 2  | 180   | lea.1_Nonsense_M   | NM_003817    | NP_003808    | Q9H2U9 | ADAM7_HUMAN | ellular (Potential).         | 5     | TCTTGGAGTAC/  | 0.403 |             |
| + | 26 | 2799  | .p.Y664C PTK2B     | NM_173174    | NP_775266    | Q14289 | FAK2_HUMAN  | rotein kinase.               | 5     | GACTACGACCA/  | 0.647 |             |
| + | 6  | 599   | lce.1_Missense_I   | NM_021623    | NP_067636    | Q9HB19 | PKHA2_HUMAN |                              | 0     | GGCCTACCCA/   | 0.562 |             |
| - | 3  | 294   | xt.2_Nonsense_Mt   | NM_000930    | NP_000921    | P00750 | TPA_HUMAN   |                              | 2     | GAATCGGGCAT/  | 0.582 |             |
| - | 85 | 12013 | y_Mutation_p.H39E  | NM_006904    | NP_008835    | P78527 | PRKDC_HUMAN | PI3K/PI4K.                   | 34    | TGGGTGTACCA/  | 0.498 |             |
| + | 13 | 1116  | ITG1_uc010lxz.1_L  | NM_018967    | NP_061840    | Q9NSN8 | SNTG1_HUMAN |                              | 5     | TCTCTGCTGAA/  | 0.433 |             |
| - | 17 | 3153  | DNL_uc003xqt.3_F   | NM_144651    | NP_653252    | A1KZ92 | PXDNL_HUMAN |                              | 2     | AGGCAGCCAGT/  | 0.592 |             |
| + | 3  | 617   | S1_uc010lyh.2_5'L  | NM_024831    | NP_079107    | Q96RS0 | TGS1_HUMAN  |                              | 3     | TGACAGCAAAG/  | 0.423 |             |
| + | 3  | 2005  |                    | NM_004770    | NP_004761    | Q92953 | KCNB2_HUMAN | lasmic (Potential).          | 7     | AGCCGGAGAG/   | 0.527 |             |

|   |    |      |                    |              |              |        |                                       |     |               |       |
|---|----|------|--------------------|--------------|--------------|--------|---------------------------------------|-----|---------------|-------|
| + | 10 | 8022 | C2590W ZFHx4_u     | NM_024721    | NP_078997    | Q86UP3 | ZFHx4_HUMAN                           | 15  | AATTGCAGTGAA  | 0.473 |
| + | 10 | 8675 | .T2808M ZFHx4_u    | NM_024721    | NP_078997    | Q86UP3 | ZFHx4_HUMAN                           | 15  | TTAATACGGCAAT | 0.473 |
| + | 7  | 1051 | 13_uc003ydf.1_Inl  | NM_198584    | NP_940986    | Q8N1Q1 | CAH13_HUMAN                           | 0   | AGGGTGAAGCA   | 0.463 |
| + | 11 | 1496 | Splice_Site_p.M4C  | NM_052832    | NP_439897    | Q8TE54 | S26A7_HUMAN                           | 2   | CATGGTACGGT   | 0.343 |
| + | 6  | 829  | jq.1_RNA INTS8_u   | NM_017864    | NP_060334    | Q75QN2 | INT8_HUMAN                            | 0   | AAACTGAGAGT   | 0.373 |
| + | 2  | 1161 |                    | NM_020697    | NP_065748    | Q9ULS6 | KCNS2_HUMAN =Segment S3; (Potential). | 1   | CCCCCTTTTAC   | 0.537 |
| - | 15 | 2581 | nt.2_Nonsense_M    | NM_198123    | NP_937756    | Q7Z407 | CSMD3_HUMAN lar (Potential). CUB 4.   | 63  | CAATCGCAGTAT  | 0.408 |
| + | 16 | 1533 | _p.S491N FAM91A    | NM_144963    | NP_659400    | Q658Y4 | F91A1_HUMAN                           | 2   | TTGCAGCAGAG   | 0.473 |
| + | 1  | 497  | uc003yrb.2_5'Flanl | NM_007218    | NP_009149    | Q8WU17 | RN139_HUMAN ical; (Potential).        | 1   | GCATCGTGCTC   | 0.647 |
| + | 3  | 835  | i.2_Missense_Mut   | NM_002467    | NP_002458    | P01106 | MYC_HUMAN                             | 6   | TGGGAGGAGAC   | 0.607 |
| - | 3  | 931  |                    | NM_152888    | NP_690848    | Q8NFW1 | COMA1_HUMAN yly-Ala. VWFA.            | 13  | CGCCGCGCGCT   | 0.721 |
| - | 9  | 1518 | _p.R560C TRAPP     | NM_001160372 | NP_001153844 | Q96Q05 | TPPC9_HUMAN                           | 2   | CAAACGCATCT   | 0.522 |
| - | 2  | 286  | _p.R149P TRAPP     | NM_001160372 | NP_001153844 | Q96Q05 | TPPC9_HUMAN                           | 2   | GGACTCGCTGG   | 0.572 |
| - | 8  | 1368 | ae.1_Missense_Mt   | NM_201380    | NP_958782    | Q15149 | PLEC_HUMAN ar 1. Actin-binding.       | 9   | GCGGGGCATGG   | 0.687 |
| + | 3  | 621  | c003zce.1_Misser   | NM_024531    | NP_078807    | Q9HAB3 | RFT3_HUMAN ical; (Potential).         | 0   | GAGTGCCCTGC   | 0.652 |
| - | 19 | 2978 | uc011llh.1_5'Flank | NM_013432    | NP_038460    | Q96HA7 | TONSL_HUMAN                           | 0   | GTGGGGCCAGC   | 0.706 |
| - | 6  | 1723 | p.R438W ZNF34_u    | NM_030580    | NP_085057    | Q8IZ26 | ZNF34_HUMAN :2H2-type 12.             | 0   | GTGCCGGAAGG   | 0.582 |
| - | 4  | 608  | au.2_Missense_Mt   | NM_001029976 | NP_001025147 | P17020 | ZNF16_HUMAN                           | 5   | CCCCATGGCAG   | 0.552 |
| + | 1  | 203  | gu.1_Missense_M    | NM_021951    | NP_068770    | Q9Y5R6 | DMRT1_HUMAN                           | 1   | CCTCACGCCCC   | 0.711 |
| + | 2  | 598  |                    | NM_212558    | NP_997723    | Q68D42 | TM215_HUMAN                           | 0   | GGTCCGCAAA    | 0.597 |
| + | 4  | 422  | am.1_Missense_M    | NM_012144    | NP_036276    | Q9UI46 | DNAI1_HUMAN                           | 0   | CACACGCACCC   | 0.498 |
| + | 2  | 185  | l3zvr.2_Missense_  | NM_015297    | NP_056112    | Q9UPV7 | K1045_HUMAN                           | 1   | TGGGGGTGTTG   | 0.552 |
| - | 5  | 1333 | e_Mutation_p.E31   | NM_032634    | NP_116023    | Q8TEQ8 | PIGO_HUMAN                            | 3   | CACCTCTGGT    | 0.527 |
| + | 13 | 1587 | zwr.2_Nonsense_M   | NM_006377    | NP_006368    | O14795 | UN13B_HUMAN                           | 5   | ACAGTCACTGG   | 0.522 |
| + | 18 | 2490 | zwr.2_Missense_M   | NM_006377    | NP_006368    | O14795 | UN13B_HUMAN                           | 5   | GGGGGAGGAGA   | 0.527 |
| - | 56 | 7726 |                    | NM_006289    | NP_006280    | Q9Y490 | TLN1_HUMAN                            | 13  | GCAGCTGGGC    | 0.517 |
| - | 3  | 418  | ense_Mutation_p.l  | NM_005476    | NP_005467    | Q9Y223 | GLCNE_HUMAN glucosamine 2-epimerase.  | 0   | TGTTAATGTCA   | 0.443 |
| + | 4  | 518  | jh.2_Missense_Mt   | NM_006914    | NP_008845    | Q92753 | RORB_HUMAN rge (Potential).           | 4   | GGCACGTCATT   | 0.542 |
| + | 6  | 1218 | Splice_Site TLE4   | NM_007005    | NP_008936    | O60756 | BCE1_HUMAN                            | 5   | TGGGGTACGTC   | 0.468 |
| - | 12 | 1990 | CCHC6_uc004aot.    | NM_024617    | NP_078893    | Q5VYS8 | TUT7_HUMAN P-associated 1.            | 2   | CAATGCGCTTT   | 0.368 |
| - | 4  | 991  | tion_p.P287L ECM   | NM_001393    | NP_001384    | O94769 | ECM2_HUMAN LRRNT.                     | 2   | TGGGAGGAGCA   | 0.458 |
| + | 3  | 698  | P4_uc010msh.2_l    | NM_014282    | NP_055097    | Q5JVS0 | HABP4_HUMAN                           | 1   | TGAGAGGACGT   | 0.488 |
| + | 3  | 1172 | ag.1_Missense_M    | NM_006981    | NP_008912    | Q92570 | NR4A3_HUMAN                           | 173 | GGCCTCCCCC    | 0.721 |
| + | 1  | 676  |                    | NM_006687    | NP_006678    | Q9Y615 | ACL7A_HUMAN                           | 0   | CTACGTGGTC    | 0.622 |
| - | 6  | 913  | nuc.1_Missense_M   | NM_001080398 | NP_001073867 |        |                                       | 0   | CTGCTGTGGCT   | 0.408 |
| + | 2  | 764  | lwx.1_Missense_M   | NM_133465    | NP_597722    | Q8N8K9 | K1958_HUMAN                           | 1   | AGCAATGATGC   | 0.473 |
| + | 4  | 657  | nse_Mutation_p.R   | NM_000177    | NP_000168    | P06396 | GELS_HUMAN ielsolin-like 2.           | 3   | GGTCCGTGCCA   | 0.592 |
| - | 19 | 1611 | 1A_uc004boa.1_M    | NM_020946    | NP_065997    | Q8TEH3 | DEN1A_HUMAN                           | 2   | GGGGGCGCAGC   | 0.622 |
| - | 4  | 766  | ion_p.R145C MAP    | NM_001006617 | NP_001006618 | Q9BPZ7 | SIN1_HUMAN :tion with MAP3K2.         | 4   | TAGGCGTACAG   | 0.393 |
| - | 5  | 630  | p.T130M FAM129I    | NM_022833    | NP_073744    | Q96TA1 | NIBL1_HUMAN PH.                       | 0   | TTGCCGTGGTC   | 0.577 |
| + | 6  | 843  | _p.L252F DNM1_u    | NM_004408    | NP_004399    | Q05193 | DYN1_HUMAN                            | 2   | GCCTTGGCTGC   | 0.552 |
| + | 1  | 179  |                    | NM_021619    | NP_067632    | Q9H4Q4 | PRD12_HUMAN                           | 0   | CGGCCGCTGGC   | 0.677 |
| + | 8  | 1528 |                    | NM_006059    | NP_006050    | Q9Y6N6 | LAMC3_HUMAN iinin EGF-like 4.         | 3   | TGGCTGCAGCA   | 0.592 |
| - | 5  | 660  | ED27_uc011mco.1    | NM_004269    | NP_004260    | Q6P2C8 | MED27_HUMAN                           | 1   | TTTACTATTGTC  | 0.443 |
| - | 5  | 715  | l22_uc004cdd.2_3   | NM_133640    | NP_598395    | Q15528 | MED22_HUMAN                           | 1   | AGAGTCTGTGT   | 0.642 |
| - | 3  | 1118 | C2_uc010nbh.2_5    | NM_144653    | NP_653254    | Q96BF6 | NACC2_HUMAN                           | 0   | TGGCAGGTAGG   | 0.662 |
| - | 5  | 684  |                    | NM_181701    | NP_859052    | Q6ZRP7 | QSOX2_HUMAN                           | 1   | TGCTTCAAAGA   | 0.527 |

rs150617780



|   |    |      |                    |              |              |        |             |                                |     |               |       |
|---|----|------|--------------------|--------------|--------------|--------|-------------|--------------------------------|-----|---------------|-------|
| + | 11 | 1254 | p.G286R PMPCA      | NM_015160    | NP_055975    | Q10713 | MPPA_HUMAN  |                                | 0   | TGGGCGGAACCC  | 0.552 |
| + | 4  | 929  | Missense_Mutator   | NM_014172    | NP_054891    | Q9NRX4 | PHP14_HUMAN |                                | 0   | AGCACGCCATT   | 0.617 |
| - | 22 | 2676 | EXD3_uc010ncf.1    | NM_017820    | NP_060290    | Q8N9H8 | MUT7_HUMAN  |                                | 0   | AGCACCCGAGC   | 0.682 |
| + | 25 | 3569 | oe.2_Missense_M    | NM_024757    | NP_079033    | Q9H9B1 | EHMT1_HUMAN | with histone H3.1 SET.         | 3   | ATCTCGACAATA  | 0.502 |
| + | 29 | 4589 | p.A1012T CACNA     | NM_000718    | NP_000709    | Q00975 | CAC1B_HUMAN | 1 of repeat IV; (Potential). I | 6   | ATGATAGCCCTC  | 0.562 |
| - | 7  | 1106 | nha.1_Missense_I   | NM_013239    | NP_037371    | Q9Y5P8 | P2R3B_HUMAN |                                | 0   | VTGCCGCCTCC   | 0.637 |
| - | 8  | 1280 | SD_uc004cqz.1_In   | NM_001669    | NP_001660    | P51689 | ARSD_HUMAN  |                                | 0   | CGGGAGCACCC   | 0.632 |
| + | 2  | 133  |                    | NM_001011719 | NP_001011719 | Q5FYA8 | ARSH_HUMAN  |                                | 1   | GTGAGGCTTACC  | 0.502 |
| - | 3  | 503  | se_Mutation_p.D9   | NM_012080    | NP_036212    | Q08623 | HDHD1_HUMAN |                                | 0   | TCGGGGTCATC   | 0.572 |
| + | 6  | 926  | cyd.2_Missense_I   | NM_001037540 | NP_001032629 | Q9UN30 | SCML1_HUMAN |                                | 3   | ATGGTGCAACG   | 0.537 |
| + | 12 | 1584 | yn.2_Missense_Mt   | NM_003159    | NP_003150    | O76039 | CDKL5_HUMAN |                                | 6   | GAACCCGCACT   | 0.463 |
| - | 17 | 2181 | iczj.1_Missense_IV | NM_001001671 | NP_001001671 | Q6ZN16 | M3K15_HUMAN | rotein kinase.                 | 7   | FATTGCGGTGCT  | 0.453 |
| - | 1  | 1213 |                    | NM_153270    | NP_695002    | Q8N239 | KLH34_HUMAN | BACK.                          | 1   | CAAAGCGGACA   | 0.677 |
| + | 1  | 542  |                    | NM_019886    | NP_063939    | Q9NS84 | CHST7_HUMAN | ienal (Potential).             | 3   | TTAACCAGCACC  | 0.632 |
| - | 6  | 617  | dit.2_Missense_M   | NM_006962    | NP_008893    | P17025 | ZN182_HUMAN | KRAB.                          | 3   | AAAATGGGATTTI | 0.488 |
| + | 14 | 1206 | _Missense_Mutati   | NM_006044    | NP_006035    | Q9UBN7 | HDAC6_HUMAN | ne deacetylase 1.              | 4   | TGCTCATGGGTI  | 0.597 |
| + | 1  | 804  |                    | NM_181532    | NP_853510    | Q7Z444 | RASE_HUMAN  |                                | 5   | AAACACGGCAA   | 0.622 |
| - | 6  | 555  | p.Y186H TIMM17I    | NM_005834    | NP_005825    | O60830 | TI17B_HUMAN |                                | 1   | TGTGTAGCGAG   | 0.592 |
| + | 7  | 893  | ise_Mutation_p.A2  | NM_001032382 | NP_001027554 | O60828 | PQBP1_HUMAN |                                | 1   | CACAGCAGCTG   | 0.637 |
| - | 5  | 3101 | lw.1_Missense_Mt   | NM_004979    | NP_004970    | Q9NSA2 | KCND1_HUMAN | lasmic (Potential).            | 3   | GCGGCCACCCG   | 0.657 |
| - | 25 | 2401 |                    | NM_020137    | NP_064522    | Q4V328 | GRAP1_HUMAN | Potential.                     | 3   | TCTCCCGAAGG   | 0.587 |
| - | 4  | 348  | se_Mutation_p.R5   | NM_001029896 | NP_001025067 | Q9Y484 | WIPI4_HUMAN |                                | 1   | TGGAGCGGTGC   | 0.607 |
| - | 1  | 171  |                    | NM_015698    | NP_056513    | Q92917 | GPKOW_HUMAN |                                | 2   | ACTCCCTCCCT   | 0.627 |
| + | 2  | 243  | 4dpi.3_Missense_   | NM_153183    | NP_694853    | Q8NFP7 | NUD10_HUMAN |                                | 0   | CCAGACACGGA   | 0.677 |
| + | 13 | 1323 | IL3L_uc004dti.2_R  | NM_019067    | NP_061940    | Q9NVN8 | GNL3L_HUMAN |                                | 1   | CAGCGGAAGA    | 0.507 |
| + | 1  | 2518 |                    | NM_007157    | NP_009088    | P98169 | ZXDB_HUMAN  |                                | 0   | TCTTTGGACAGC  | 0.473 |
| - | 2  | 865  |                    | NM_152424    | NP_689637    | Q5JTC6 | F123B_HUMAN | p.0?(40)                       | 112 | CTCTCAGGCC    | 0.577 |
| - | 15 | 1564 | ipg.1_Missense_IV  | NM_002547    | NP_002538    | O60890 | OPHN1_HUMAN | Rho-GAP.                       | 2   | AAAAAAGGCATI  | 0.388 |
| + | 1  | 206  | l12_uc004dyz.2_M   | NM_005120    | NP_005111    | Q93074 | MED12_HUMAN |                                | 4   | TGGCGGCCTTC   | 0.677 |
| + | 8  | 1290 | RN1_uc011mpt.1_I   | NM_052957    | NP_443189    | Q96QF7 | ACRC_HUMAN  | Asp/Ser-rich.                  | 3   | TCGGAAGCTCCC  | 0.552 |
| + | 8  | 1292 | RN1_uc011mpt.1_I   | NM_052957    | NP_443189    | Q96QF7 | ACRC_HUMAN  | Asp/Ser-rich.                  | 3   | GGAAGCTCCCG   | 0.557 |
| - | 2  | 333  | XCR3_uc011mpx.     | NM_001504    | NP_001495    | P49682 | CXCR3_HUMAN | lasmic (Potential).            | 3   | GGTGTGCGGTGC  | 0.672 |
| - | 1  | 1402 | en.2_Missense_Mt   | NM_001163541 | NP_001157013 | Q86VE3 | SATL1_HUMAN | Gln-rich.                      | 2   | CTGTTTGGTTCT  | 0.572 |
| + | 6  | 1243 | l_p.P191Q DACH2    | NM_053281    | NP_444511    | Q96NX9 | DACH2_HUMAN |                                | 5   | CAGTCCACTCTC  | 0.403 |
| - | 8  | 2011 | Y2F_uc011msq.1_    | NM_001522    | NP_001513    | P51841 | GUC2F_HUMAN | ε. Cytoplasmic (Potential).    | 8   | ATCTCCAAGGG   | 0.373 |
| - | 1  | 1303 |                    | NM_138289    | NP_612146    | Q8TDG2 | ACTT1_HUMAN |                                | 5   | CCACAGATGTC   | 0.468 |
| - | 10 | 1278 | Jnrf.1_Missense_I  | NM_017666    | NP_060136    | Q8ND82 | Z280C_HUMAN | 2H2-type 2.                    | 3   | GTGTGTGTACTC  | 0.438 |
| + | 4  | 344  |                    | NM_016024    | NP_057108    | Q9Y388 | RBMX2_HUMAN | RRM.                           | 4   | TGGCCGTCGAC   | 0.443 |
| - | 5  | 854  | wf.2_Missense_Mt   | NM_001555    | NP_001546    | Q8N6C5 | IGSF1_HUMAN | 2. Extracellular (Potential).  | 5   | GGGAGCATCT    | 0.542 |
| - | 2  | 1044 |                    | NM_001009615 | NP_001009615 | Q5MJ10 | SPXN2_HUMAN |                                | 1   | CCTCCTGTGAA   | 0.517 |
| - | 8  | 1581 | o.A348V PDZD4_u    | NM_032512    | NP_115901    | Q76G19 | PDZD4_HUMAN |                                | 1   | TGGCCGCCAGG   | 0.632 |
| - | 22 | 3754 | _NA_uc010nuu.1_I   | NM_001110556 | NP_001110426 | P21333 | FLNA_HUMAN  | Filamin 10.                    | 6   | CAGCCGGGGGC   | 0.642 |
| - | 17 | 2731 | u.1_Missense_Mu    | NM_001110556 | NP_001110426 | P21333 | FLNA_HUMAN  | Filamin 6.                     | 6   | ATTGCGGATGAT  | 0.622 |
| + | 9  | 764  | nb.2_Missense_M    | NM_024332    | NP_077308    | P46736 | BRCC3_HUMAN |                                | 6   | CACTATCGGGAA  | 0.448 |
| - | 25 | 3879 | o5_uc001ama.1_R    | NM_015557    | NP_056372    | Q8TDI0 | CHD5_HUMAN  |                                | 12  | ATGGCCGCATCG  | 0.572 |
| + | 15 | 2067 | p.G632D PER3_u     | NM_016831    | NP_058515    | P56645 | PER3_HUMAN  | ing domain (By similarity).    | 3   | ATGCGGTTACA   | 0.507 |
| + | 17 | 2900 | p.A910T PER3_u     | NM_016831    | NP_058515    | P56645 | PER3_HUMAN  |                                | 3   | GGGAGGCACAA   | 0.527 |

|   |    |       |                      |              |              |        |             |                                |    |                |       |
|---|----|-------|----------------------|--------------|--------------|--------|-------------|--------------------------------|----|----------------|-------|
| + | 7  | 1050  | apx.2_Missense_I     | NM_032315    | NP_115691    | Q9BSK2 | S2533_HUMAN | Solcar 3.                      | 0  | :GGCGCGCCTGC   | 0.498 |
| + | 2  | 256   | P7_uc009vms.2_F      | NM_052960    | NP_443192    | Q96R05 | RET7_HUMAN  |                                | 0  | FGAAATTTAAAGT  | 0.333 |
| + | 11 | 1266  | bb.1_Missense_Mi     | NM_000302    | NP_000293    | Q02809 | PLOD1_HUMAN |                                | 3  | :CAACAGCCTGC   | 0.637 |
| + | 17 | 2189  | atw.2_Missense_M     | NM_015378    | NP_056193    | Q5THJ4 | VP13D_HUMAN |                                | 5  | :GATGCAGACCA/  | 0.473 |
| - | 7  | 794   | 1_Intron MST1P9_     | NR_002729    |              |        |             |                                | 0  | :TATTGGCTGTG/  | 0.617 |
| - | 13 | 1599  | ody.1_Nonsense_h     | NM_016287    | NP_057371    | Q5SSJ5 | HP1B3_HUMAN | Lys-rich.                      | 2  | CCGCTGGGCAG    | 0.552 |
| - | 7  | 1532  |                      | NM_004091    | NP_004082    | Q14209 | E2F2_HUMAN  | ctivation (Potential).         | 4  | GCCTCCAAGGG    | 0.652 |
| - | 1  | 77    | isolation_Start_Site | NM_020485    | NP_065231    | P18577 | RHCE_HUMAN  |                                | 0  | :TGTCCGCTCTC/  | 0.592 |
| + | 15 | 1641  | es.1_Missense_M      | NM_020451    | NP_065184    | Q9NZV5 | SELN_HUMAN  |                                | 2  | :CTGCCTGCCCA/  | 0.637 |
| + | 2  | 257   | lice_Site PDIK1L_u   | NM_152835    | NP_690048    | Q8N165 | PDK1L_HUMAN |                                | 0  | TTTCCAGAAACC   | 0.418 |
| - | 6  | 1651  | p.E228Q AHDC1_       | NM_001029882 | NP_001025053 | Q5TGY3 | AHDC1_HUMAN | Pro-rich.                      | 1  | :AGGCTCTGGGG   | 0.647 |
| - | 33 | 4936  | _Mutation_p.S111E    | NM_001703    | NP_001694    | O60241 | BAI2_HUMAN  | lasmic (Potential).            | 13 | :AGGGCTGGGCT   | 0.378 |
| + | 10 | 1367  |                      | NM_017629    | NP_060099    | Q9HCK5 | AGO4_HUMAN  |                                | 1  | :ATTGTTGTCCAC/ | 0.428 |
| + | 4  | 738   | 1bzu.2_Missense_     | NM_017825    | NP_060295    | Q9NX46 | ARHL2_HUMAN |                                | 1  | :AGTCCGCTTGT/  | 0.602 |
| + | 6  | 1472  | cbc.1_Missense_h     | NM_025079    | NP_079355    | Q5D1E8 | ZC12A_HUMAN |                                | 2  | :CATTGGCTCCC   | 0.657 |
| + | 30 | 3809  | 89_splice MACF1_     | NM_012090    | NP_036222    | Q9UPN3 | MACF1_HUMAN |                                | 16 | :CCACAGCACTG/  | 0.448 |
| + | 61 | 17263 | u.R80H MACF1_uc      | NM_033044    | NP_149033    | Q9UPN3 | MACF1_HUMAN | tail (By similarity). GAR.     | 16 | FGGTCCGTATTCT  | 0.438 |
| - | 14 | 2065  | 35_splice FOXJ3_u    | NM_014947    | NP_055762    | Q9UPW0 | FOXJ3_HUMAN |                                | 2  | :CTTACCTGCC/   | 0.428 |
| + | 5  | 1075  |                      | NM_173642    | NP_775913    | Q8IXN7 | RIMKA_HUMAN |                                | 0  | :TGGCTGTCTCTC/ | 0.532 |
| + | 7  | 1289  | ense_Mutation_p.     | NM_152498    | NP_689711    | Q96MR6 | WDR65_HUMAN | WD 5.                          | 1  | :ACTCAGCACCC.  | 0.488 |
| + | 10 | 1279  |                      | NM_015284    | NP_056099    | Q5T011 | SZT2_HUMAN  |                                | 0  | :GTGGGGCTCCC   | 0.557 |
| + | 21 | 2930  |                      | NM_015284    | NP_056099    | Q5T011 | SZT2_HUMAN  |                                | 0  | GCACCGCGCAG    | 0.562 |
| + | 15 | 1518  | c.1_Missense_Mut     | NM_006845    | NP_006836    | Q99661 | KIF2C_HUMAN | inesin-motor.                  | 1  | :TTCCTCCCCTC/  | 0.522 |
| + | 5  | 765   | p.S171N CYP4X1_      | NM_178033    | NP_828847    | Q8N118 | CP4X1_HUMAN |                                | 2  | TTGCAGCACTC/   | 0.498 |
| + | 5  | 570   |                      | NM_006252    | NP_006243    | P54646 | AAPK2_HUMAN | rotein kinase.                 | 6  | TCAGATGGTGAA   | 0.308 |
| + | 2  | 261   | FGGY_uc001czj.3_     | NM_018291    | NP_060761    | Q96C11 | FGGY_HUMAN  |                                | 1  | :TGGACGTTGGA   | 0.502 |
| - | 1  | 93    | i11_uc010oqo.1_5     | NM_017768    | NP_060238    | Q9H9A6 | LR40_HUMAN  |                                | 1  | AACCAGCGCGG    | 0.597 |
| + | 11 | 1972  | ls.1_Missense_Mu     | NM_001285    | NP_001276    | A8K7I4 | CLCA1_HUMAN |                                | 1  | :ATATTCCGCCAAC | 0.493 |
| + | 5  | 441   | a.1_Intron ZNF326    | NM_182976    | NP_892021    | Q5BKZ1 | ZN326_HUMAN | al activation (By similarity). | 1  | :ACAAAGCCGCT   | 0.507 |
| + | 4  | 536   |                      |              |              | P26439 | 3BHS2_HUMAN |                                | 2  | :TGTCCGTCGTC   | 0.512 |
| + | 4  | 1599  | HFE2_uc001enk.2      | NM_213653    | NP_998818    | Q6ZVN8 | RGMC_HUMAN  |                                | 1  | ITTGCAATCAGTA  | 0.463 |
| + | 27 | 3191  | 08_splice ITGA10_    | NM_003637    | NP_003628    | O75578 | ITA10_HUMAN |                                | 8  | :CTGTTAGAATGG  | 0.522 |
| - | 3  | 3458  | uc001ezv.2_5'Flanl   | NM_002016    | NP_002007    | P20930 | FILA_HUMAN  | Ser-rich.                      | 16 | :CTTGTCTTCGT/  | 0.602 |
| - | 17 | 1909  | in_p.G592V THBS      | NM_007112    | NP_009043    | P49746 | TSP3_HUMAN  | rSP type-3 6.                  | 5  | :CATCCCCATCG   | 0.512 |
| - | 3  | 442   | FcRL5_uc010phw.      | NM_031281    | NP_112571    | Q96RD9 | FCRL5_HUMAN | otential). Ig-like C2-type 1.  | 6  | :GCACAGGGCTA/  | 0.458 |
| - | 3  | 210   |                      | NM_005894    | NP_005885    | O43866 | CD5L_HUMAN  |                                | 1  | :CACTCCAGATG/  | 0.597 |
| + | 2  | 751   |                      | NM_004983    | NP_004974    | Q92806 | IRK9_HUMAN  | smic (By similarity).          | 2  | :AGCCACGCTCG   | 0.652 |
| + | 1  | 351   |                      | NM_001231    | NP_001222    | P31415 | CASQ1_HUMAN |                                | 1  | CAGGGGTACAG/   | 0.552 |
| - | 23 | 2777  | rv.3_Missense_Mu     | NM_004371    | NP_004362    | P53621 | COPA_HUMAN  |                                | 2  | :CTGGAGCAGCT   | 0.433 |
| - | 4  | 582   | 5_uc010plr.1_RNv     | NM_000130    | NP_000121    | P12259 | FA5_HUMAN   | l.1. Plastocyanin-like 1.      | 6  | :ATTCTCGGCTC/  | 0.512 |
| + | 27 | 7445  | 2L2_uc010pmi.1_I     | NM_015172    | NP_055987    | Q9Y520 | PRC2C_HUMAN | Gln-rich.                      | 0  | :ATGGACACAAG   | 0.408 |
| + | 5  | 985   | p.G80D KLHL20_       | NM_014458    | NP_055273    | Q9Y2M5 | KLH20_HUMAN | BACK.                          | 1  | GGTCGGCACAG    | 0.373 |
| + | 38 | 9718  | u.G1247E CEP350      | NM_014810    | NP_055625    | Q5VT06 | CE350_HUMAN |                                | 4  | :GCAGGGGAGAA   | 0.463 |
| - | 6  | 995   |                      | NM_000069    | NP_000060    | Q13698 | CAC1S_HUMAN | ellular (Potential). l.        | 5  | :CCATTGATGGT/  | 0.617 |
| - | 2  | 764   |                      | NM_002479    | NP_002470    | P15173 | MYOG_HUMAN  |                                | 2  | CGCTGGGCACC    | 0.607 |
| + | 4  | 957   | xcw.2_Missense_I     | NM_019605    | NP_062551    | Q9NUC0 | SRTD4_HUMAN |                                | 2  | :GCCAGATACTC/  | 0.363 |
| - | 4  | 578   | opte.1_Missense_h    | NM_018252    | NP_060722    | Q9H813 | TM206_HUMAN | ellular (Potential).           | 1  | :TCAGAGGAGGA   | 0.542 |

rs145625079

|   |    |      |                                                           |              |              |        |              |                               |    |               |       |             |
|---|----|------|-----------------------------------------------------------|--------------|--------------|--------|--------------|-------------------------------|----|---------------|-------|-------------|
| - | 2  | 2213 | ih.2_Missense_Mt                                          | NM_002221    | NP_002212    | P27987 | IP3KB_HUMAN  |                               | 5  | GGTGCCTCAG    | 0.562 | rs34777857  |
| + | 4  | 821  | .1_Intron ZNF678                                          | NM_178549    | NP_848644    | F5GXA7 | F5GXA7_HUMAN |                               | 1  | AATGTGGCAAAG  | 0.333 | rs145397350 |
| + | 26 | 7101 | 3CN_uc001hsp.1_                                           | NM_001098623 | NP_001092093 | Q5VST9 | OBSCN_HUMAN  | Ig-like 23.                   | 28 | TCCACGCAGAG   | 0.607 |             |
| - | 14 | 2314 |                                                           | NM_005646    | NP_005637    | Q13395 | TARB1_HUMAN  |                               | 3  | TACCCCTTTTCC  | 0.398 |             |
| + | 5  | 538  | BCE_uc010pxr.1_                                           | NM_003193    | NP_003184    | Q15813 | TBCE_HUMAN   |                               | 0  | GTGCAGTAAGT   | 0.438 |             |
| + | 13 | 6345 |                                                           | NM_018012    | NP_060482    | Q2KJY2 | KI26B_HUMAN  |                               | 3  | CAGGCGTCCGC   | 0.602 |             |
| + | 1  | 635  | L13_uc001ids.2_                                           | NM_001001963 | NP_001001963 | Q8NGY9 | OR2L8_HUMAN  | Name=5; (Potential).          | 2  | TCATTGGTATTT  | 0.498 |             |
| + | 1  | 383  |                                                           | NM_001013355 | NP_001013373 | Q5TZ20 | OR2G6_HUMAN  | lasmic (Potential).           | 3  | CTGCCGGCCAC   | 0.597 |             |
| - | 6  | 976  | .p.Q206R SEPHS                                            | NM_012247    | NP_036379    | P49903 | SPS1_HUMAN   |                               | 1  | CCACCTGTGTC   | 0.522 |             |
| - | 22 | 2874 | 3xf.1_Missense_IV                                         | NM_018027    | NP_060497    | Q9P2Q2 | FRM4A_HUMAN  |                               | 3  | 3CCTCGATGTAC  | 0.527 |             |
| + | 7  | 794  |                                                           | NM_052997    | NP_443723    | Q9BXX3 | AN30A_HUMAN  |                               | 9  | CTTGGCGGAAA   | 0.423 |             |
| + | 7  | 1156 |                                                           | NM_052997    | NP_443723    | Q9BXX3 | AN30A_HUMAN  |                               | 9  | CGTGGGCAGCA   | 0.408 |             |
| + | 5  | 599  | 1izo.1_RNA HSD17B7P2_uc001izp.1_Missense_Mutation_p.N173S |              |              |        |              |                               | 0  | TCGCAATGCAAC  | 0.453 | rs2257765   |
| + | 2  | 262  | .p.D55N ALOX5_                                            | NM_000698    | NP_000689    | P09917 | LOX5_HUMAN   | PLAT.                         | 2  | CATACGACGTG   | 0.448 |             |
| - | 6  | 1923 | oi.2_Intron PARG_                                         | NM_003631    | NP_003622    | Q86W56 | PARG_HUMAN   |                               | 2  | AACATACCTTCA  | 0.433 |             |
| + | 13 | 2023 | .p.I645T HK1_uc0                                          | NM_000188    | NP_000179    | P19367 | HXK1_HUMAN   | Catalytic.                    | 1  | ATGCGATAAAAAC | 0.368 |             |
| + | 18 | 1564 | Ijqc.1_Missense_I                                         | NM_005203    | NP_005194    | Q5TAT6 | CODA1_HUMAN  | 3).Triple-helical region 2 (( | 1  | 3GATGAAGGTCA  | 0.597 |             |
| + | 11 | 1730 | .p.R580Q ADAMT                                            | NM_080722    | NP_542453    | Q8WXS8 | ATS14_HUMAN  | SP type-1 1.                  | 6  | CAGCCGGAGCT   | 0.667 |             |
| + | 21 | 2962 | _Mutation_p.R176                                          | NM_004922    | NP_004913    | P53992 | SC24C_HUMAN  |                               | 3  | ATGACCGTGCCT  | 0.498 |             |
| + | 2  | 165  | 'S24_uc001jzp.2_                                          | NM_001026    | NP_001017    | P62847 | RS24_HUMAN   |                               | 1  | 3TATCCGCACTAC | 0.383 |             |
| - | 19 | 2370 | .p.R210Q IDE_uc0                                          | NM_004969    | NP_004960    | P14735 | IDE_HUMAN    |                               | 3  | 3TATACCGAACCA | 0.428 |             |
| - | 2  | 142  | 5'Flank ZDHHC16                                           | NM_016046    | NP_057130    | Q9Y3B2 | EXOS1_HUMAN  |                               | 0  | GACAGCCGGCA   | 0.577 |             |
| + | 2  | 67   | 31_uc001lcn.2_Sp                                          | NM_006229    | NP_006220    | P54315 | LIPR1_HUMAN  |                               | 2  | 3CAAAGGTAAGA  | 0.498 |             |
| + | 4  | 2654 | ase_Mutation_p.P7                                         | NM_206862    | NP_996744    | O95359 | TACC2_HUMAN  |                               | 10 | CGGGCGCGCGT   | 0.617 |             |
| + | 14 | 1498 | .p.L407M PTPRE_                                           | NM_006504    | NP_006495    | P23469 | PTPRE_HUMAN  | lasmic (Potential).           | 1  | CCTCCCTGGAG   | 0.592 |             |
| - | 19 | 2149 | .p.V765F ADAM8_uc009ybi.2_Missense_Mutation_p.C           |              |              | P78325 | ADAM8_HUMAN  |                               | 3  | GTAGACAGGAA   | 0.652 |             |
| - | 13 | 1897 | 3ycc.2_Missense_I                                         | NM_021924    | NP_068743    | Q9HBB8 | CDHR5_HUMAN  | 3em repeats. 2. Extracellul   | 0  | 3CCCACCGGGTG  | 0.672 | rs139590704 |
| - | 6  | 1257 | .p.P226L LRDD_uc                                          | NM_145886    | NP_665893    | Q9HB75 | PIDD_HUMAN   | ZU5 1.                        | 0  | CATGAGGACCC   | 0.706 |             |
| + | 48 | 9956 | b.2_Missense_Mu                                           | NM_017511    | NP_059981    | Q9HC84 | MUC5B_HUMAN  | 3pproximate tandem repeat     | 0  | 3ACCACACCCA   | 0.637 |             |
| - | 7  | 1607 | e_Mutation_p.R23                                          | NM_018073    | NP_060543    | Q6AZZ1 | TRI68_HUMAN  | 330.2/SPRY.                   | 1  | GAGGCGCCCAG   | 0.522 |             |
| - | 8  | 1636 | .p.L426P FAM160                                           | NM_001098794 | NP_001092264 | Q8N612 | F16A2_HUMAN  |                               | 2  | 3GAACAAGATACC | 0.507 |             |
| - | 1  | 593  |                                                           | NM_003696    | NP_003687    | O95222 | OR6A2_HUMAN  | lasmic (Potential).           | 5  | ATAGCAGATGGC  | 0.532 |             |
| - | 2  | 541  |                                                           | NM_020646    | NP_065697    | Q9NQ33 | ASCL3_HUMAN  |                               | 0  | CTTTTCCAGGGT  | 0.433 |             |
| - | 11 | 1923 | 3V11_uc001miz.2_                                          | NM_001100167 | NP_001093637 | Q9Y6F6 | MRV11_HUMAN  | p.R486C(1)                    | 3  | 3TTTGCAGCA    | 0.498 | rs116772600 |
| - | 7  | 1060 | miz.2_Missense_I                                          | NM_001100167 | NP_001093637 | Q9Y6F6 | MRV11_HUMAN  |                               | 3  | 3ATGGCGGGCCA  | 0.622 |             |
| + | 11 | 1458 |                                                           | NM_014633    | NP_055448    | Q6PD62 | CTR9_HUMAN   | TPR 8.                        | 2  | 3GAACAGCAACA  | 0.458 |             |
| - | 18 | 3234 | rk.3_Missense_Mu                                          | NM_018490    | NP_060960    | Q9BXB1 | LGR4_HUMAN   | lasmic (Potential).           | 1  | GTCTGAGACAA   | 0.512 |             |
| + | 4  | 478  | _Mutation_p.K86R                                          | NM_005693    | NP_005684    | Q13133 | NR1H3_HUMAN  |                               | 3  | 3GAAAAGGGGC   | 0.567 |             |
| - | 10 | 1179 | hm.1_Missense_M                                           | NM_001025596 | NP_001020767 | Q92879 | CELF1_HUMAN  |                               | 3  | 3CAGCAGACCA   | 0.557 |             |
| + | 1  | 403  |                                                           | NM_001004701 | NP_001004701 | Q8NGL9 | OR4CG_HUMAN  | lasmic (Potential).           | 2  | 3TCATAAGCCAGT | 0.507 |             |
| - | 1  | 846  | .NR_uc001njn.3_F                                          | NM_005161    | NP_005152    | P35414 | APJ_HUMAN    | lasmic (Potential).           | 6  | 3TGGCCTCACGA  | 0.637 |             |
| - | 5  | 622  |                                                           | NM_006093    | NP_006084    | Q9Y2Y8 | PRG3_HUMAN   | 3-type lectin.                | 0  | 3TCCACAGGAAC  | 0.557 |             |
| - | 3  | 426  |                                                           | NM_006093    | NP_006084    | Q9Y2Y8 | PRG3_HUMAN   |                               | 0  | 3CACCTTGAGC   | 0.532 |             |
| - | 10 | 1524 | p.H383Y SF1_uc0                                           | NM_004630    | NP_004621    | Q15637 | SF01_HUMAN   | Pro-rich.                     | 3  | 3TCCATGCATGCC | 0.617 |             |
| - | 1  | 163  |                                                           | NM_138456    | NP_612465    | Q8N1L9 | BATF2_HUMAN  |                               | 1  | 3TCTGGGTCAGC  | 0.597 |             |
| + | 2  | 584  |                                                           | NM_006779    | NP_006770    | O14613 | BORG1_HUMAN  |                               | 0  | 3GGCAGTGGCG   | 0.617 |             |
| + | 4  | 966  | fq.2_Missense_Mt                                          | NM_004561    | NP_004552    | O14753 | OVOL1_HUMAN  | 32H2-type 4.                  | 1  | 3TGAGGAGTGGC  | 0.622 |             |

|   |    |      |                   |              |              |        |              |                              |     |                  |       |             |
|---|----|------|-------------------|--------------|--------------|--------|--------------|------------------------------|-----|------------------|-------|-------------|
| - | 2  | 620  | ogw.2_Missense_   | NM_033036    | NP_149025    | Q96A11 | G3ST3_HUMAN  | lenal (Potential).           | 1   | GGCCGGCTCGC      | 0.701 |             |
| + | 3  | 2048 | ri.2_3'UTR RBM4_  | NM_006328    | NP_006319    | Q96PK6 | RBM14_HUMAN  |                              | 3   | 'ACCGTCGCCTG     | 0.587 |             |
| + | 4  | 981  | e_Mutation_p.R19  | NM_018043    | NP_060513    | Q5XXA6 | ANO1_HUMAN   | lasmic (Potential).          | 2   | TCTCCCGGAG,      | 0.517 |             |
| + | 13 | 1176 | on_p.F287L CTTN   | NM_005231    | NP_005222    | Q14247 | SRC8_HUMAN   | actin 7; truncated.          | 1   | 'GCAACCTTTGAG    | 0.557 |             |
| + | 6  | 884  | IT_uc009yta.2_RN  | NM_145309    | NP_660352    | Q96E66 | LRC51_HUMAN  | LRRCT.                       | 0   | 'AGACCGCACCA'    | 0.552 |             |
| - | 19 | 2794 | p.P624S ARAP1_    | NM_001040118 | NP_001035207 | Q96P48 | ARAP1_HUMAN  |                              | 1   | 'GTAGGGTAGGC'    | 0.662 |             |
| + | 3  | 1044 |                   | NM_153614    | NP_705842    | P59910 | DJB13_HUMAN  |                              | 0   | 'GTGAAAAGGTGT'   | 0.498 |             |
| - | 26 | 5318 | 3_uc001out.2_Spl  | NM_015531    | NP_056346    | Q4AC94 | C2CD3_HUMAN  |                              | 7   | ATAGCCTATTAAG    | 0.279 |             |
| - | 19 | 2481 | K XRRRA1_uc001o   | NM_182969    | NP_892014    | Q6P2D8 | XRRRA1_HUMAN |                              | 1   | '3CCGTTCTGTCC,   | 0.587 |             |
| + | 9  | 1799 | rs.1_Missense_Mu  | NM_007256    | NP_009187    | O94956 | SO2B1_HUMAN  | cellular (Potential).        | 2   | 'GATTGCGGGCA'    | 0.642 | rs146532688 |
| + | 11 | 1396 | im.1_Missense_Mt  | NM_000260    | NP_000251    | Q13402 | MYO7A_HUMAN  | osin head-like.              | 4   | '3CACCCCTATCA'   | 0.672 |             |
| + | 1  | 426  | 311_uc009yuu.2_Ir | NM_173039    | NP_766627    | Q8NBQ7 | AQP11_HUMAN  | Name=1; (Potential).         | 0   | GCTGTGCGGTGG     | 0.701 |             |
| + | 2  | 433  |                   | NM_153696    | NP_710163    | Q9HBA9 | FOH1B_HUMAN  |                              | 6   | 'AGAATACGCTTAT   | 0.328 |             |
| + | 1  | 229  |                   | NM_017516    | NP_059986    | Q14964 | RB39A_HUMAN  | 3 (By similarity).           | 0   | CGGCGGGACAG      | 0.741 |             |
| + | 1  | 203  | uc001pnh.2_5'Flar | NM_031938    | NP_114144    | Q9BYV7 | BCDO2_HUMAN  |                              | 0   | 'GCTCCAGGTA'     | 0.488 |             |
| + | 6  | 716  | qg.2_Missense_Mi  | NM_001040455 | NP_001035545 | Q8NBJ9 | SIDT2_HUMAN  | cellular (Potential).        | 0   | '3ACGATGACCAA'   | 0.567 |             |
| + | 15 | 2390 |                   | NM_005188    | NP_005179    | P22681 | CBL_HUMAN    | 3D2AP. Asp/Glu-rich (acidic  | 149 | 'TCCAGGTGAAG'    | 0.463 |             |
| - | 24 | 3608 | o.A1159V NFRKB_   | NM_001143835 | NP_001137307 | Q6P4R8 | NFRKB_HUMAN  |                              | 3   | ACAGCAGCATTC     | 0.612 |             |
| + | 8  | 966  | se_Mutation_p.R2  | NM_014384    | NP_055199    | Q9UKU7 | ACAD8_HUMAN  |                              | 0   | 'TGTCCGGAAGC,    | 0.612 | rs121908422 |
| + | 5  | 1881 | :TM2_uc001qju.2_  | NM_001039029 | NP_001034118 | Q8N967 | LRTM2_HUMAN  | lasmic (Potential).          | 1   | AGGGCGAGCAC      | 0.662 |             |
| - | 7  | 926  | dy.1_Missense_Mt  | NM_152640    | NP_689853    | Q8IZD4 | DCP1B_HUMAN  |                              | 1   | '3GGTGAGTGTCT    | 0.473 |             |
| - | 15 | 2361 | p.G726S CHD4_u    | NM_001273    | NP_001264    | Q14839 | CHD4_HUMAN   |                              | 2   | 'CAGGCCCTCCA'    | 0.522 |             |
| - | 4  | 548  | PHB2_uc001qse.    | NM_001144831 | NP_001138303 | Q99623 | PHB2_HUMAN   |                              | 3   | 'GAGCATTGGGT'    | 0.547 |             |
| + | 3  | 488  |                   | NM_001080454 | NP_001073923 | P0C7M7 | ACSM4_HUMAN  |                              | 0   | 'GGCCAAGTGCA'    | 0.562 |             |
| - | 4  | 1067 | 1raj.1_Missense_  | NM_018050    | NP_060520    | Q9H8J5 | MANS1_HUMAN  | xtracellular (Potential).    | 0   | '3TTACAGGTGGA'   | 0.562 |             |
| - | 32 | 3952 | o.E1311G ABCC9_   | NM_005691    | NP_005682    | O60706 | ABCC9_HUMAN  | lasmic (Potential).          | 6   | 'TGATCTCCCTTI    | 0.398 |             |
| - | 13 | 1821 |                   | NM_004818    | NP_004809    | Q9BUQ8 | DDX23_HUMAN  | ase ATP-binding.             | 6   | '3TGCTGGCTTC'    | 0.527 |             |
| + | 3  | 699  | zmd.2_Missense_I  | NM_021934    | NP_068753    | Q9BSB4 | ATGA1_HUMAN  |                              | 0   | 'TCGTGCCCTGC'    | 0.572 |             |
| - | 5  | 992  |                   | NM_175053    | NP_778223    | Q7RTS7 | K2C74_HUMAN  | Rod. Coil 2.                 | 2   | GCATGCGGACCT     | 0.592 |             |
| - | 2  | 643  | ifr.3_Nonsense_Mt | NM_006163    | NP_006154    | Q16621 | NFE2_HUMAN   | 3d for interaction with MAP1 | 0   | 'TGGCTCACTTGC    | 0.512 |             |
| - | 2  | 441  | .A74V ITGA7_uc0   | NM_001144996 | NP_001138468 | Q13683 | ITA7_HUMAN   | Extracellular (Potential).   | 5   | GGGGAGCACCC      | 0.627 |             |
| + | 41 | 6960 |                   | NM_002332    | NP_002323    | Q07954 | LRP1_HUMAN   | Extracellular (Potential).   | 22  | TGGCGGGTGCC      | 0.687 |             |
| + | 2  | 675  |                   | NM_031479    | NP_113667    | P58166 | INHBE_HUMAN  |                              | 3   | GGAGGCGCCAA      | 0.617 | rs145766269 |
| + | 8  | 1182 | u.2_Missense_Mu   | NM_001135805 | NP_001129277 | P21579 | SYT1_HUMAN   | 3hospholipid binding (Probe  | 6   | 'TGCCCGCCTTG     | 0.423 |             |
| + | 1  | 193  | p.2_RNA C12orf2E  | NM_001009894 | NP_001009894 | Q8N999 | CL029_HUMAN  |                              | 0   | 'AAATGCCGTGTG    | 0.642 |             |
| + | 5  | 897  | iPT1_uc001tip.1_  | NM_020244    | NP_064629    | Q8WUD6 | CHPT1_HUMAN  |                              | 0   | 'ATTGAAGATCCT    | 0.313 |             |
| - | 9  | 1211 | p.A166G FOXN4_    | NM_213596    | NP_998761    | Q96NZ1 | FOXN4_HUMAN  |                              | 2   | 'GATGTGCCTGG'    | 0.701 |             |
| + | 13 | 1846 | E3B_uc001too.1_f  | NM_130466    | NP_569733    | Q7Z3V4 | UBE3B_HUMAN  |                              | 4   | 'CCACGCACAG      | 0.572 |             |
| - | 4  | 583  | C12orf76_uc010s   | NM_207435    | NP_997318    | Q8N812 | CL076_HUMAN  |                              | 1   | 'CTTTCAGCAAAG'   | 0.512 |             |
| + | 7  | 725  | T81_uc001tqj.2_RI | NM_001143779 | NP_001137251 | Q8WYAO | IFT81_HUMAN  | Potential.                   | 1   | '3AGACAGCTCAG    | 0.363 |             |
| - | 44 | 6746 | ttr.1_Missense_Mi | NM_001109662 | NP_001103132 |        |              |                              | 2   | '3AGGGATGtcatcat | 0.428 |             |
| - | 31 | 4702 |                   | NM_001109662 | NP_001103132 |        |              |                              | 2   | GGCGCCAGTAC'     | 0.478 |             |
| + | 7  | 1775 |                   | NM_004416    | NP_004407    | Q86Y01 | DTX1_HUMAN   |                              | 4   | 'GACGGGTACGC,    | 0.647 |             |
| + | 3  | 654  |                   | NM_012240    | NP_036372    | Q9Y6E7 | SIRT4_HUMAN  | 3tylase sirtuin-type.        | 0   | '3AGCAAGTCCGG    | 0.557 |             |
| - | 19 | 2763 | i.2_Missense_Mut  | NM_032590    | NP_115979    | Q8NHM5 | KDM2B_HUMAN  |                              | 2   | GCGCGGAGGG       | 0.716 |             |
| - | 17 | 2783 | VM2_uc001uek.1_   | NM_020845    | NP_065896    | Q9BZ72 | PITM2_HUMAN  | DDHD.                        | 3   | GGTGGTGGGGC      | 0.687 |             |
| - | 1  | 451  | 3PH9_uc010tam.1   | NM_022782    | NP_073619    | Q99550 | MPP9_HUMAN   |                              | 0   | '3CAGGAGAAATG'   | 0.353 |             |

|   |    |      |                    |              |              |        |              |                              |    |                   |       |             |
|---|----|------|--------------------|--------------|--------------|--------|--------------|------------------------------|----|-------------------|-------|-------------|
| - | 4  | 752  | ltbd.1_Missense_I  | NM_005505    | NP_005496    | Q8WTV0 | SCRB1_HUMAN  | cellular (Potential).        | 1  | TTCCGCCGAGGG      | 0.547 |             |
| - | 20 | 2258 | LE_uc009zyu.1_I    | NM_006231    | NP_006222    | Q07864 | DPOE1_HUMAN  |                              | 8  | TTCCACCTTGGT      | 0.577 |             |
| + | 4  | 489  | AM5_uc010tbr.1_F   | NM_018663    | NP_061133    | Q9NR77 | PXMP2_HUMAN  | isomal (Potential).          | 0  | TCGCCGCCAAG       | 0.597 | rs142063460 |
| - | 10 | 1053 | ct.1_Missense_ML   | NM_152726    | NP_689939    | Q81YU8 | EFHA1_HUMAN  |                              | 0  | GTGACAGCACGA      | 0.328 |             |
| - | 1  | 165  | TR2A_uc010acr.2    | NM_000621    | NP_000612    | P28223 | 5HT2A_HUMAN  | llular (By similarity).      | 6  | AGCTCAAAGAAG      | 0.388 |             |
| + | 1  | 298  |                    | NM_001507    | NP_001498    | O43193 | MLTR_HUMAN   | cellular (Potential).        | 0  | TCTGGCGCTCG       | 0.687 |             |
| + | 7  | 1609 | p.P223T SETDB2     | NM_031915    | NP_114121    | Q96T68 | SETB2_HUMAN  |                              | 2  | AATTACCCAAAG      | 0.378 |             |
| - | 3  | 522  | nse_Mutation_p.A   | NM_020121    | NP_064506    | Q9NYU1 | UGGG2_HUMAN  |                              | 3  | AATAGCTGGGG       | 0.358 | rs143906515 |
| - | 1  | 743  |                    | NM_001080396 | NP_001073865 | B1AL88 | F155A_HUMAN  | Poly-Gln.                    | 1  | ggtgcccgtgctgctgc | 0.353 |             |
| - | 42 | 3714 | 4A1_uc010agl.2_I   | NM_001845    | NP_001836    | P02462 | CO4A1_HUMAN  | le-helical region.           | 6  | CGCTCCCGGCTA      | 0.577 |             |
| - | 1  | 261  |                    | NM_017817    | NP_060287    | Q9NX57 | RAB20_HUMAN  | (By similarity).             | 0  | CGCAGCTCTTC       | 0.657 |             |
| + | 13 | 2358 |                    | NM_017905    | NP_060375    | Q6UWJ1 | TMCO3_HUMAN  |                              | 0  | CACGAGGTGTG       | 0.602 |             |
| + | 34 | 3602 | 16B_uc001wtk.2_    | NM_138360    | NP_612369    | Q8ND23 | LR16B_HUMAN  |                              | 5  | GGACAGCACAG       | 0.607 |             |
| + | 4  | 995  | RS1_uc001woj.1_ξ   | NM_174913    | NP_777573    | Q86U38 | CN021_HUMAN  |                              | 4  | TCGCGGTTCTC       | 0.502 |             |
| + | 13 | 2375 | M_uc001wwe.3_M     | NM_020937    | NP_065988    | Q81YD8 | FANCM_HUMAN  |                              | 7  | ATTTTATAGGCC      | 0.413 |             |
| - | 1  | 412  |                    | NM_080746    | NP_542784    | Q96L21 | RL10L_HUMAN  |                              | 1  | TGTCAGCCCCA       | 0.542 |             |
| - | 6  | 2155 | p.Q460* TRIM9_L    | NM_015163    | NP_055978    | Q9C026 | TRIM9_HUMAN  | onectin type-III.            | 3  | TGGCTGTTTCC       | 0.532 |             |
| - | 5  | 1615 | ah.2_Missense_M    | NM_001160148 | NP_001153620 | Q8NEL9 | DDHD1_HUMAN  |                              | 2  | CAAGAGTAAGT       | 0.323 |             |
| + | 1  | 660  | Otsa.1_Intron uc0C | NM_006255    | NP_006246    | P24723 | KPCL_HUMAN   |                              | 6  | CCTTCGAGGGT       | 0.627 |             |
| + | 3  | 539  | IPP5_uc001xjb.1_I  | NM_022474    | NP_071919    | Q8N3R9 | MPP5_HUMAN   | th PARD6B (By similarity).   | 1  | TTGATCACCAC       | 0.463 |             |
| + | 20 | 3119 | ty.1_Missense_Mu   | NM_173462    | NP_775733    | O95428 | PPN_HUMAN    | like C2-type 1.              | 3  | GCCGCGACTCC       | 0.647 | rs145618706 |
| + | 1  | 923  |                    | NM_017791    | NP_060261    | Q9UPI3 | FLVC2_HUMAN  | ical; (Potential).           | 0  | TGGTGGGCCAG       | 0.627 |             |
| - | 2  | 1211 | sd.2_Nonsense_M    | NM_003239    | NP_003230    | P10600 | TGFB3_HUMAN  |                              | 2  | CAGTTCGTCTA       | 0.532 |             |
| - | 4  | 736  |                    | NM_004863    | NP_004854    | O15270 | SPTC2_HUMAN  |                              | 2  | TATTCCGTGCA       | 0.418 |             |
| - | 22 | 3989 |                    | NM_001080414 | NP_001073883 | Q9P219 | DAPLE_HUMAN  | Potential.                   | 3  | GGCCTGCCAG        | 0.627 |             |
| + | 2  | 343  | L_uc001ygu.2_Mis   | NM_016337    | NP_057421    | Q9UI08 | EVL_HUMAN    | WH1.                         | 3  | CAGCCGGATCA       | 0.507 |             |
| + | 5  | 738  | PP2R5C_uc001yi     | NM_002719    | NP_002710    | Q13362 | 2A5G_HUMAN   |                              | 2  | CCTACATCAGA       | 0.428 |             |
| + | 12 | 2390 |                    | NM_015656    | NP_056471    | Q9ULI4 | KI26A_HUMAN  |                              | 1  | CGGTGGGGCGG       | 0.697 |             |
| - | 1  | 113  |                    | NM_207379    | NP_997262    | Q6ZVK1 | T179A_HUMAN  |                              | 0  | GTGGCCGTTCT       | 0.642 |             |
| + | 1  | 582  | n_p.E36* MKRN3     | NM_005664    | NP_005655    | Q13064 | MKRN3_HUMAN  |                              | 10 | TCTGTGAGCCC       | 0.687 |             |
| - | 2  | 162  | ense_Mutation_p.l  | NM_003134    | NP_003125    | P37108 | SRP14_HUMAN  |                              | 0  | CTTCTCAAGGT       | 0.637 |             |
| + | 2  | 366  | p.S92N MGa_uc      | NM_001080541 | NP_001074010 | Q8IW9  | MGAP_HUMAN   | T-box.                       | 12 | TCGAAGCACAG       | 0.388 |             |
| + | 15 | 5172 | GA_uc010uda.1_I    | NM_001164273 | NP_001157745 | Q8IW9  | MGAP_HUMAN   | Thr-rich.                    | 12 | AACCACTGGGA       | 0.488 |             |
| - | 2  | 310  | DAN1_uc010bcx.     | NM_138477    | NP_612486    | Q8IWY9 | CDAN1_HUMAN  |                              | 2  | CGGGAGGACGC       | 0.741 |             |
| - | 15 | 1900 | un.2_Missense_M    | NM_014080    | NP_054799    | Q9NRD8 | DUOX2_HUMAN  | -like; mediates peroxidase . | 5  | AGGGTGCACT        | 0.562 |             |
| - | 6  | 1293 | p.R193* GATM_u     | NM_001482    | NP_001473    | P50440 | GATM_HUMAN   |                              | 0  | TGGTCGGTCA        | 0.403 |             |
| + | 18 | 2473 | p.A753T SLC12A     | NM_000338    | NP_000329    | Q13621 | S12A1_HUMAN  |                              | 2  | TGGCGGCAGAC       | 0.458 |             |
| - | 16 | 1697 | .T392P ATP8B4_u    | NM_024837    | NP_079113    | Q8TF62 | AT8B4_HUMAN  | lasmic (Potential).          | 8  | CTATTGTTATGGT     | 0.408 |             |
| - | 2  | 235  |                    | NM_001007595 | NP_001007596 | A6NLJ0 | C2C4B_HUMAN  |                              | 0  | CGGCGGGATGC       | 0.721 |             |
| + | 7  | 1033 | exp.2_Missense_I   | NM_025055    | NP_079331    | Q8N5R6 | CCD33_HUMAN  |                              | 5  | CCCAGGGTCAG       | 0.637 |             |
| + | 2  | 2886 | p.R856W C15orf3ξ   | NM_015492    | NP_056307    | Q6ZR16 | CO039_HUMAN  |                              | 0  | TCCCTCGGCTG       | 0.682 |             |
| + | 4  | 467  |                    | NM_001101404 | NP_001094874 | A6NKC9 | SH2D7_HUMAN  |                              | 0  | CACCCGGGGCC       | 0.617 |             |
| + | 6  | 520  | p.V115M IDH3A      | NM_005530    | NP_005521    | P50213 | IDH3A_HUMAN  |                              | 0  | GAGTCGTGCAG       | 0.552 |             |
| - | 4  | 550  | 2bjj.2_Missense_I  | NM_199330    | NP_955362    | Q9NSB8 | HOME2_HUMAN  | Potential.                   | 0  | AGGTCTCGATTT      | 0.423 |             |
| + | 7  | 754  | .G14V LRRC28_u     | NM_144598    | NP_653199    | Q86X40 | LRRC28_HUMAN | LRR 8.                       | 0  | ATTAGGTCGATC      | 0.338 |             |
| + | 8  | 1648 | p.Q25H PDIA2_uc    | NM_006849    | NP_006840    | Q13087 | PDIA2_HUMAN  |                              | 2  | TCCAGGTGAG        | 0.716 |             |
| + | 8  | 1793 | p.E189G RAB11FI    | NM_014700    | NP_055515    | O75154 | RFIP3_HUMAN  | :F-binding domain (ABD).     | 0  | CGGTGAGCAAC       | 0.652 |             |



|   |    |      |                    |              |              |        |              |                            |    |              |       |
|---|----|------|--------------------|--------------|--------------|--------|--------------|----------------------------|----|--------------|-------|
| - | 11 | 1678 | 4F1_uc010bri.2_M   | NM_022773    | NP_073610    | Q96S06 | LMF1_HUMAN   | lenal (Potential).         | 0  | CCACGGTCCCT  | 0.677 |
| + | 7  | 790  | _p.R93K NUBP2_     | NM_012225    | NP_036357    | Q9Y5Y2 | NUBP2_HUMAN  |                            | 0  | CATGAGGACCC  | 0.667 |
| - | 18 | 3411 |                    | NM_020764    | NP_065815    | Q8WXD9 | CSK11_HUMAN  | Pro-rich.                  | 2  | GATGCGCCTCT  | 0.682 |
| + | 5  | 1032 | 2cpp.2_Missense_   | NM_001374    | NP_001365    | Q92874 | DNSL2_HUMAN  |                            | 0  | TGTGCGGGCGC  | 0.682 |
| + | 4  | 659  |                    | NM_032575    | NP_115964    | Q9BZE0 | GLIS2_HUMAN  |                            | 0  | TGCGGGGTACT  | 0.607 |
| + | 4  | 1023 |                    | NM_014117    | NP_054836    | Q14CZ0 | CP072_HUMAN  |                            | 1  | GTGGATCGAAT  | 0.438 |
| + | 3  | 336  | 6P1_uc010vam.1_    | NR_003569    |              |        |              |                            | 0  | CCCCAGAATTC  | 0.567 |
| - | 5  | 672  | gx.2_Nonsense_IV   | NM_001007240 | NP_001007241 | P55259 | GP2_HUMAN    | EGF-like.                  | 4  | CTCCTCGGGGC  | 0.577 |
| - | 53 | 9586 | bd.1_Missense_M    | NM_017539    | NP_060009    | Q8TD57 | DYH3_HUMAN   | 5 (By similarity).         | 18 | GGTGATCATGA  | 0.473 |
| + | 6  | 728  | uc002dsc.2_Intron  | NM_014387    | NP_055202    | O43561 | LAT_HUMAN    | lasmic (Potential).        | 0  | GGTGGGAGTC   | 0.607 |
| - | 1  | 112  | Jyr.1_Missense_M   | NM_033410    | NP_219363    | Q96H86 | ZN764_HUMAN  |                            | 1  | GTCCCGGGGAG  | 0.726 |
| + | 12 | 1447 | 1_Mutation_p.G45C  | NM_000632    | NP_000623    | P11215 | ITAM_HUMAN   | Extracellular (Potential). | 1  | CAAGGCACCC   | 0.567 |
| + | 3  | 254  | D_uc010cap.1_Mis   | NM_005353    | NP_005344    | Q13349 | ITAD_HUMAN   | r (Potential). FG-GAP 1.   | 1  | GCGCAGCTGCC  | 0.652 |
| - | 3  | 206  |                    | NM_001001436 | NP_001001436 | Q6PH81 | CP087_HUMAN  |                            | 0  | TCTGTTCGCC   | 0.378 |
| - | 2  | 2252 | 1_Mutation_p.R644  | NM_002968    | NP_002959    | Q9NSC2 | SALL1_HUMAN  | 2H2-type 4.                | 8  | AGCCCGCCAC   | 0.547 |
| - | 2  | 444  | e_Mutation_p.G41   | NM_002968    | NP_002959    | Q9NSC2 | SALL1_HUMAN  |                            | 8  | AAGTGCCGCTG  | 0.463 |
| - | 2  | 1707 |                    | NM_020807    | NP_065858    | Q9P2F9 | ZN319_HUMAN  | 2H2-type 9.                | 0  | GCGCCGGTGCC  | 0.642 |
| + | 11 | 1756 |                    | NM_001795    | NP_001786    | P33151 | CADH5_HUMAN  | Extracellular (Potential). | 6  | ACACGGCCAAC  | 0.572 |
| + | 1  | 363  | odu.2_Missense_IV  | NM_144673    | NP_653274    | Q8TAZ6 | CKLF2_HUMAN  |                            | 1  | GGGGTGTGCGC  | 0.542 |
| - | 1  | 386  | 0vjt.1_Missense_IV | NM_001082486 | NP_001075955 | Q96AP0 | ACD_HUMAN    |                            | 1  | GGATGCTGGCC  | 0.672 |
| + | 6  | 1077 | _A2G15_uc010vlf.   | NM_012320    | NP_036452    | Q8NCC3 | PAG15_HUMAN  |                            | 1  | GCCTCTATGGT  | 0.567 |
| + | 15 | 1914 | ewt.3_Missense_IV  | NM_032830    | NP_116219    | Q969X6 | CIR1A_HUMAN  |                            | 0  | TGCATCATTGAC | 0.423 |
| + | 12 | 4695 | 1_Mutation_p.A10E  | NM_006599    | NP_006590    | O94916 | NFAT5_HUMAN  |                            | 0  | TTGCAGCACCC  | 0.428 |
| - | 9  | 1549 | in_p.T4I RFWD3_U   | NM_018124    | NP_060594    | Q6PCD5 | RFWD3_HUMAN  |                            | 3  | TGGCAGTACTC  | 0.433 |
| + | 3  | 751  | 1B_uc010vng.1_Ir   | NM_014940    | NP_055755    | Q7L1V2 | MON1B_HUMAN  |                            | 0  | TGACCGCCCTG  | 0.587 |
| + | 18 | 1601 | 0cke.2_Missense_   | NM_015085    | NP_055900    | Q684P5 | RPGP2_HUMAN  |                            | 1  | CGTACGCAGCC  | 0.642 |
| - | 11 | 1542 | 2RX5_uc002fwj.2_   | NM_002561    | NP_002552    | Q93086 | P2RX5_HUMAN  | lasmic (Potential).        | 0  | TACCTGTGGG   | 0.667 |
| - | 13 | 1720 | o.R276M C17orf85   | NM_001114118 | NP_001107590 | Q53F19 | CQ085_HUMAN  |                            | 1  | GCGCCCTGTGA  | 0.502 |
| - | 11 | 2247 | clo.2_Missense_M   | NM_014804    | NP_055619    | Q2KHM9 | K0753_HUMAN  | Potential.                 | 0  | CTTGGCTTTTAA | 0.388 |
| + | 3  | 1271 | 11_uc010vtw.1_In   | NM_175734    | NP_783861    | Q0P670 | CQ074_HUMAN  |                            | 0  | TGACTACCTCTC | 0.667 |
| - | 6  | 1086 | se_Mutation_p.S2I  | NM_002616    | NP_002607    | O15534 | PER1_HUMAN   |                            | 9  | CTGCTGAGGCC  | 0.627 |
| + | 2  | 972  |                    | NM_004822    | NP_004813    | O95631 | NET1_HUMAN   | inin EGF-like 1.           | 0  | GCAACGGCCAC  | 0.706 |
| - | 14 | 1462 | _Mutation_p.R445I  | NM_001100112 | NP_001093582 | Q9UKX2 | MYH2_HUMAN   | rosin head-li p.R445H(1)   | 14 | TGATGCGGGCA  | 0.473 |
| + | 29 | 5998 | o.2_Missense_ML    | NM_001372    | NP_001363    | Q9NYC9 | DYH9_HUMAN   | .1 (By similarity).        | 20 | CTATGCTGGCC  | 0.488 |
| + | 10 | 806  | ID26_uc002gpb.3_   | NM_178571    | NP_848666    | Q86UD7 | TBC26_HUMAN  | ab-GAP TBC.                | 0  | TGGGCTACCAC  | 0.592 |
| - | 6  | 1320 |                    | NM_020787    | NP_065838    | Q9P2J8 | ZN624_HUMAN  |                            | 2  | TTTCTCACCATI | 0.388 |
| + | 14 | 1909 | p.R618Q MPRIIP_U   | NM_201274    | NP_958431    | Q6WCQ1 | MPRIIP_HUMAN | ction with RHOA.           | 0  | GGACCGAGGCC  | 0.657 |
| + | 10 | 1579 | 1_Mutation_p.D40I  | NM_001037330 | NP_001032407 | Q309B1 | TR16L_HUMAN  | 330.2/SPRY.                | 0  | AGTATGATTCC  | 0.498 |
| + | 6  | 980  | p.R261G RNRF12_    | NM_007148    | NP_009079    | Q7Z5V9 | Q7Z5V9_HUMAN |                            | 2  | AAACAAGGATC  | 0.617 |
| - | 31 | 4936 | 1_Mutation_p.R113  | NM_078471    | NP_510880    | Q92614 | MY18A_HUMAN  | Potential.                 | 0  | CATCCGACTC   | 0.557 |
| - | 21 | 2716 | nn.2_Missense_ML   | NM_198836    | NP_942133    | Q13085 | ACACA_HUMAN  |                            | 2  | GTGCCGTGCTC  | 0.458 |
| - | 7  | 948  | sv.1_Missense_Mu   | NM_014815    | NP_055630    | O75448 | MED24_HUMAN  |                            | 1  | GACTCCGGAGC  | 0.587 |
| - | 1  | 452  |                    | NM_030966    | NP_112228    | Q8IUG1 | KRA13_HUMAN  |                            | 0  | GCCTCGGGCT   | 0.662 |
| - | 1  | 520  |                    | NM_033059    | NP_149048    | Q9BYQ6 | KR411_HUMAN  | C-[GIKRQVHEL]-[SPTR]-[     | 0  | GACGCAGGcagc | 0.323 |
| - | 1  | 430  | vfr.1_Missense_ML  | NM_153490    | NP_705694    | P13646 | K1C13_HUMAN  | Coil 1A.[Rod.              | 5  | GCGCGCACCT   | 0.527 |
| + | 1  | 536  | .1_5'UTR WNK4_U    | NM_032387    | NP_115763    | Q96J92 | WNK4_HUMAN   |                            | 7  | TGGCCGATACC  | 0.607 |
| - | 3  | 460  | 0wis.1_Missense_I  | NM_032376    | NP_115752    | Q96IK0 | TM101_HUMAN  | ical; (Potential).         | 2  | AACACCTGGCC  | 0.607 |

rs141357429

|   |    |      |                    |              |              |        |             |                              |   |                |       |             |
|---|----|------|--------------------|--------------|--------------|--------|-------------|------------------------------|---|----------------|-------|-------------|
| - | 7  | 1240 |                    | NM_133373    | NP_588614    | Q8N3E9 | PLCD3_HUMAN | 'I-PLC X-box.                | 3 | TCCTGGGCAA     | 0.652 |             |
| - | 2  | 509  | ae.3_Missense_Mt   | NM_006807    | NP_006798    | P83916 | CBX1_HUMAN  |                              | 0 | CTCCACTTTCT    | 0.448 |             |
| - | 2  | 881  |                    | NM_002144    | NP_002135    | P14653 | HXB1_HUMAN  |                              | 1 | iCTTCGGGGGAG   | 0.652 |             |
| + | 11 | 933  | m.1_Missense_Mt    | NM_138962    | NP_620412    | Q96DH6 | MSI2H_HUMAN | Poly-Ala.                    | 2 | TGGCAGCAGCG    | 0.627 | rs144586096 |
| - | 9  | 1610 |                    | NM_000250    | NP_000241    | P05164 | PERM_HUMAN  |                              | 4 | GGTACGTGGGC    | 0.567 |             |
| + | 15 | 1377 | o.S419N BCAS3_u    | NM_001099432 | NP_001092902 | Q9H6U6 | BCAS3_HUMAN | WD 3.                        | 5 | GGTCAGTACTC1   | 0.463 |             |
| + | 15 | 2787 | i2_uc002 ae.2_5'F  | NM_006039    | NP_006030    | Q9UBG0 | MRC2_HUMAN  | Potential). C-type lectin 4. | 3 | iCAGTGGGTGGC   | 0.662 |             |
| + | 12 | 1860 | e_Mutation_p.Y52   | NM_025185    | NP_079461    | Q9HCD6 | TANC2_HUMAN |                              | 2 | AGGCTTACATC    | 0.423 |             |
| + | 19 | 3325 | p.R1011H TANC2     | NM_025185    | NP_079461    | Q9HCD6 | TANC2_HUMAN | ANK 8.                       | 2 | .GGCCGCACTC    | 0.512 |             |
| - | 5  | 2478 | o.R776W TEX2_uc    | NM_018469    | NP_060939    | Q8IWB9 | TEX2_HUMAN  |                              | 1 | CTGCCGCACGC    | 0.632 |             |
| + | 1  | 659  | o.Y200H BPTF_uc    | NM_182641    | NP_872579    | Q12830 | BPTF_HUMAN  |                              | 4 | GTACCTACAGC    | 0.597 |             |
| + | 3  | 1194 | oG_uc002 hb.1_5'l  | NM_014960    | NP_055775    | Q96EG1 | ARSG_HUMAN  |                              | 1 | CACTGGGATAA    | 0.547 |             |
| - | 10 | 1554 |                    | NM_080284    | NP_525023    | Q8N139 | ABCA6_HUMAN |                              | 7 | CAGAGGGATGC    | 0.373 |             |
| + | 4  | 2562 | p.N654K TNRC6C     | NM_018996    | NP_061869    | Q9HCJ0 | TNR6C_HUMAN | on with argonaute family pr  | 2 | ACAACTGGGG     | 0.512 |             |
| - | 9  | 1353 |                    | NM_178493    | NP_848588    | Q6P988 | NOTUM_HUMAN |                              | 0 | CAGCCGACGGC    | 0.692 |             |
| + | 2  | 272  | i_p.V46M PSMG2     | NM_020232    | NP_064617    | Q969U7 | PSMG2_HUMAN |                              | 0 | oCTGAAGGTATG   | 0.323 |             |
| - | 15 | 2487 | mi.3_Missense_Mu   | NM_001941    | NP_001932    | Q14574 | DSC3_HUMAN  | lasmic (Potential).          | 4 | AATGGTTTCTC    | 0.502 |             |
| + | 1  | 17   | 1_Missense_Muta    | NM_018255    | NP_060725    | Q6IA86 | ELP2_HUMAN  |                              | 4 | TGGTGGCACCC    | 0.612 |             |
| - | 18 | 3365 | _5'UTR KIAA1632    | NM_020964    | NP_066015    | Q9HCE0 | EPG5_HUMAN  |                              | 0 | .GTGTAGGAACA   | 0.517 |             |
| + | 4  | 564  | !fk.3_Nonsense_M   | NM_007195    | NP_009126    | Q9UNA4 | POLI_HUMAN  | UmuC.                        | 3 | AGACTACAGCA    | 0.373 |             |
| + | 20 | 3545 | i236_uc002 mj.2_f  | NM_007345    | NP_031371    | Q9UL36 | ZN236_HUMAN |                              | 4 | TTTACCGAGG     | 0.532 |             |
| - | 9  | 1524 | _Mutation_p.S447   | NM_005481    | NP_005472    | Q9Y2X0 | MED16_HUMAN |                              | 0 | AAGGTGAGAGG    | 0.682 |             |
| - | 9  | 713  | .2_Missense_Mute   | NM_003200    | NP_003191    | P15923 | TFE2_HUMAN  |                              | 7 | TGCCACGTAGA    | 0.692 |             |
| - | 29 | 4046 | e_Mutation_p.R12   | NM_138813    | NP_620168    | O60423 | AT8B3_HUMAN | lasmic (Potential).          | 0 | oCCTCCGCAGA    | 0.557 |             |
| - | 2  | 925  | odsw.1_Intron uc0  | NM_001101391 | NP_001094861 | P0C6S8 | LIGO3_HUMAN | ilar (Potential). LRR 8.     | 0 | GCCGCAGCGCG    | 0.726 |             |
| - | 1  | 244  | wa.1_Missense_M    | NM_032737    | NP_116126    | Q03252 | LMNB2_HUMAN | Coil 1A. Rod.                | 2 | oGAGCCGGTCTG   | 0.562 |             |
| + | 4  | 1554 | ia.1_Missense_Mt   | NM_173480    | NP_775751    | Q68EA5 | ZNF57_HUMAN | i2H2-type 11.                | 3 | GAGGATGCACA    | 0.443 |             |
| + | 6  | 400  | o6_uc010 dtg.2_Mis | NM_024760    | NP_079036    | Q9H808 | TLE6_HUMAN  |                              | 1 | oGACATCATGGC   | 0.637 |             |
| + | 3  | 362  | _p.G99R MPND_u     | NM_032868    | NP_116257    | Q8N594 | MPND_HUMAN  |                              | 1 | .TGCAGGGGAAG   | 0.642 |             |
| + | 19 | 2954 | p.G944S KDM4B_     | NM_015015    | NP_055830    | O94953 | KDM4B_HUMAN |                              | 1 | CGGGGGGTCAC    | 0.716 |             |
| - | 16 | 2529 |                    | NM_014649    | NP_055464    | Q14151 | SAFB2_HUMAN | Interacts with SAFB1.        | 0 | .GCCCCGGTCTC   | 0.587 |             |
| - | 2  | 446  | ense_Mutation_p.F  | NM_001097641 | NP_001091110 | P21217 | FUT3_HUMAN  | enal (Potential).            | 0 | oCTTAGGGTTGG   | 0.627 |             |
| + | 13 | 1493 | p.R385H PNPLA6     | NM_006702    | NP_006693    | Q8IY17 | PLPL6_HUMAN | lasmic (Potential).          | 3 | oCCCCGCTCCG    | 0.537 |             |
| - | 10 | 1355 | wr.1_Missense_M    | NM_152476    | NP_689689    | Q96MR9 | ZN560_HUMAN | i2H2-type 3.                 | 6 | oTTTTGCCACAG   | 0.418 |             |
| + | 10 | 1068 | e_Mutation_p.A30   | NM_146387    | NP_666499    | Q9BYD3 | RM04_HUMAN  | p.A306fs>4(1)                | 1 | .CCCAGCGGCCA   | 0.657 |             |
| - | 7  | 1168 | _p.E79Q TYK2_uc    | NM_003331    | NP_003322    | P29597 | TYK2_HUMAN  | FERM.                        | 9 | oCGCTCGAGTG    | 0.677 |             |
| - | 2  | 251  | i_p.H73Y RTBDN_    | NM_001080997 | NP_001074466 | Q9BSG5 | RTBDN_HUMAN |                              | 0 | oATGGTGTGCTC   | 0.632 |             |
| + | 16 | 2266 | _p.G706S PKN1_u    | NM_002741    | NP_002732    | Q16512 | PKN1_HUMAN  | rotein kinase.               | 8 | CGGCCGGTGGG    | 0.642 |             |
| + | 16 | 2817 | oB_uc010 xpi.1_Mi  | NM_015260    | NP_056075    | O75182 | SIN3B_HUMAN |                              | 2 | oCTGCTAGGGAG   | 0.657 |             |
| - | 3  | 1952 | _p.K579R KIAA168   | NM_025249    | NP_079525    | Q9H0B3 | K1683_HUMAN |                              | 2 | oTGATCTTCCCC   | 0.572 |             |
| + | 4  | 1547 |                    | NM_031218    | NP_112495    | P35789 | ZNF93_HUMAN |                              | 1 | oAGAGAAACCCT.  | 0.368 |             |
| + | 4  | 1631 |                    | NM_031218    | NP_112495    | P35789 | ZNF93_HUMAN |                              | 1 | oAGAGAAACCCT.  | 0.358 |             |
| + | 4  | 1449 | co.2_Missense_M    | NM_003429    | NP_003420    | Q03923 | ZNF85_HUMAN | ype 11; degenerate.          | 1 | oAAAACCTACTG   | 0.323 |             |
| + | 2  | 903  | _p.P336L ZNF493    | NM_175910    | NP_787106    | Q6ZR52 | ZN493_HUMAN | ype 7; degenerate.           | 1 | oAACCCCTACTA   | 0.348 | rs142651314 |
| - | 5  | 2403 | o8_uc002 nqo.1_l   | NM_007153    | NP_009084    |        |             |                              | 7 | .TTACCTTATGTTT | 0.373 |             |
| + | 4  | 1578 | icy.2_Missense_Mi  | NM_033468    | NP_258429    | Q9Y2Q1 | ZN257_HUMAN | i2H2-type 11.                | 0 | oTAACCACTCTTC  | 0.408 |             |
| - | 4  | 1355 | _p.K336Q ZNF681_   | NM_138286    | NP_612143    | Q96N22 | ZN681_HUMAN | i2H2-type 9.                 | 0 | oGGACTTGTTAA   | 0.403 | rs1852431   |

|   |    |       |                    |              |              |        |             |                               |     |               |       |             |
|---|----|-------|--------------------|--------------|--------------|--------|-------------|-------------------------------|-----|---------------|-------|-------------|
| - | 2  | 2509  |                    | NM_020856    | NP_065907    | Q63HK5 | TSH3_HUMAN  |                               | 8   | TTGCCGGGGCT   | 0.532 |             |
| + | 4  | 2466  | rn.1_Missense_Mi   | NM_001136156 | NP_001129628 | Q8TCN5 | ZN507_HUMAN |                               | 5   | ACTTCTAATGAGC | 0.378 |             |
| + | 5  | 652   | dq.1_Missense_M    | NM_194325    | NP_919306    | P17039 | ZNF30_HUMAN |                               | 2   | AAAGATGATACA/ | 0.299 |             |
| + | 2  | 343   | ea.2_Missense_M    | NM_005306    | NP_005297    | O15552 | FFAR2_HUMAN | Name=3; (Potential).          | 1   | TTTTTGGCTTCT/ | 0.617 |             |
| - | 9  | 1353  | NL_uc010xuo.1_M    | NM_198445    | NP_940847    | Q6ZS11 | RINL_HUMAN  | VPS9.                         | 1   | TAGACATCTCTGC | 0.682 |             |
| - | 14 | 1754  | ic002ole.1_Silent_ | NM_019088    | NP_061961    | Q8N7H5 | PAF1_HUMAN  |                               | 1   | ACTATCAGCTTC  | 0.567 |             |
| - | 1  | 206   | IA MED29_uc010x    | NM_019088    | NP_061961    | Q8N7H5 | PAF1_HUMAN  |                               | 1   | CTCCCGCTGGG   | 0.687 |             |
| - | 6  | 2952  |                    | NM_003890    | NP_003881    | Q9Y6R7 | FCGBP_HUMAN | VWFD 2.                       | 9   | TCCAGTCATAAGT | 0.597 |             |
| - | 3  | 1231  |                    | NM_144685    | NP_653286    | Q8NE63 | HIPK4_HUMAN | rotein kinase.                | 2   | GAGGTCGGCGT   | 0.607 |             |
| - | 5  | 755   | se_Mutation_p.E4   | NM_000762    | NP_000753    | P11509 | CP2A6_HUMAN |                               | 2   | AGTCTCCAGC    | 0.542 |             |
| + | 7  | 952   | 2F1_uc010xvv.1_    | NM_000774    | NP_000765    | P24903 | CP2F1_HUMAN |                               | 0   | TGGCGGCACCA/  | 0.582 |             |
| - | 4  | 527   | 0ejp.1_Missense_   | NM_001102597 | NP_001096067 | Q6UY09 | CEA20_HUMAN | 2. Extracellular (Potential). | 2   | TGGCAACACCAG  | 0.498 |             |
| + | 6  | 1364  | _p.H236Y EHD2_t    | NM_014601    | NP_055416    | Q9NZN4 | EHD2_HUMAN  |                               | 2   | TAGTTTCACTCG  | 0.632 |             |
| + | 2  | 240   | _2_5'Flank NOSIP_t | NM_000951    | NP_000942    | O14669 | TMG2_HUMAN  |                               | 1   | TGAGGAGACAGA  | 0.468 |             |
| + | 1  | 245   | '2A1_uc002ppo.2_   | NM_014203    | NP_055018    | O95782 | AP2A1_HUMAN |                               | 2   | TGCGGGGGCTC   | 0.706 |             |
| + | 17 | 2110  | _p.L473P MED25_    | NM_030973    | NP_112235    | Q71SY5 | MED25_HUMAN | 1 with RARA. Pro-rich.        | 1   | GGGCCTGGGGC   | 0.726 |             |
| + | 19 | 2429  | _p.Q835H MYH14_    | NM_024729    | NP_079005    | Q7Z406 | MYH14_HUMAN | rosin head-like.              | 1   | GCCCAGCTGGA   | 0.647 |             |
| - | 3  | 303   | H2_uc002prv.3_Ir   | NM_004851    | NP_004842    | O96009 | NAPSA_HUMAN |                               | 0   | TTCCCAGCCCAA  | 0.547 |             |
| + | 7  | 976   | se_Mutation_p.A2:  | NM_007121    | NP_009052    | P55055 | NR1H2_HUMAN | -binding (Potential).         | 0   | TGGCGGCCCAA   | 0.607 |             |
| - | 5  | 888   | i77_uc010ydf.1_5'  | NM_023074    | NP_075562    | Q9BS31 | ZN649_HUMAN | 2H2-type 2.                   | 3   | TACACACGTGG   | 0.488 |             |
| - | 5  | 2929  | _p.N909D ZNF841_   | NM_001136499 | NP_001129971 | Q6ZN19 | ZN841_HUMAN |                               | 0   | TACATTGAGTTT  | 0.318 |             |
| - | 3  | 1808  |                    | NM_198457    | NP_940859    | Q6ZNG1 | ZN600_HUMAN | 2H2-type 13.                  | 0   | TACAGCGAAAGG  | 0.443 |             |
| + | 5  | 806   | 'ek.1_Missense_M   | NM_015629    | NP_056444    | Q8WWY3 | PRP31_HUMAN |                               | 1   | TATCCGCACGG   | 0.577 | rs147725190 |
| + | 3  | 2269  | _p.S674R ZNF304_   | NM_020657    | NP_065708    | Q9HCX3 | ZN304_HUMAN | 2H2-type 16.                  | 1   | TAGAAGCTCCCA  | 0.478 |             |
| - | 3  | 640   |                    | NM_001037160 | NP_001032237 | Q717R9 | CYS1_HUMAN  |                               | 0   | TGATGCTCGCC   | 0.667 |             |
| - | 2  | 811   |                    | NM_012344    | NP_036476    | O95665 | NTR2_HUMAN  | lasmic (Potential).           | 0   | TGCCCGGGGTA   | 0.612 | rs151252387 |
| - | 2  | 481   | xu.1_Missense_Mi   | NM_002381    | NP_002372    | O15232 | MATN3_HUMAN | VWFA.                         | 0   | TGTGTAGGCCTC  | 0.567 |             |
| + | 13 | 2131  | D_uc010eyw.2_Int   | NM_004341    | NP_004332    | P27708 | PYR1_HUMAN  | rate synthase). CPSase A.     | 10  | TGACCAGCAC    | 0.532 |             |
| - | 3  | 952   | rkj.2_Missense_Mi  | NM_144631    | NP_653232    | Q8N8E2 | ZN513_HUMAN |                               | 1   | TGGGAGGCCGG   | 0.672 |             |
| + | 6  | 623   | F512_uc010yix.1_I  | NM_032434    | NP_115810    | Q96ME7 | ZN512_HUMAN |                               | 1   | TGGGAGGAAGA   | 0.423 |             |
| + | 5  | 579   | .2_Missense_Mut    | NM_053276    | NP_444506    | Q6UXI7 | VITRN_HUMAN | LCCL.                         | 2   | CCAACGGTGTCC  | 0.428 |             |
| + | 1  | 414   | fam.1_Missense_I   | NM_152390    | NP_689603    | Q8NBL3 | TM178_HUMAN | ellular (Potential).          | 0   | TACCCCTCATCC  | 0.383 |             |
| - | 31 | 3372  | ob.1_Missense_M    | NM_133259    | NP_573566    | P42704 | LPPRC_HUMAN | PPR 17.                       | 3   | TGGCAGCATCG   | 0.433 |             |
| + | 9  | 1012  | _p.E337A MDH1_u    | NM_005917    | NP_005908    | P40925 | MDHC_HUMAN  |                               | 2   | TAAAGAACTGA   | 0.353 |             |
| - | 1  | 38    |                    | NM_000682    | NP_000673    | P18089 | ADA2B_HUMAN | ame=1; (By similarity).       | 3   | TGGCCGCTGTG   | 0.677 |             |
| - | 17 | 2209  | Jfhz.2_Nonsense_   | NM_001115016 | NP_001108488 | Q9P2N6 | K1310_HUMAN | Ser-rich.                     | 0   | TCCACTGAAGGG  | 0.592 |             |
| + | 10 | 2061  |                    | NM_003048    | NP_003039    | Q9UBY0 | SL9A2_HUMAN | lasmic (Potential).           | 8   | TCCCGGCGGAC   | 0.493 | rs144961744 |
| + | 2  | 438   | fki.1_Missense_M   | NM_153214    | NP_694946    | Q53RD9 | FBLN7_HUMAN |                               | 2   | TATCCGCCACA   | 0.682 |             |
| + | 4  | 869   |                    | NM_198581    | NP_940983    | P61129 | ZC3H6_HUMAN |                               | 4   | TGTAACACGGTC  | 0.363 |             |
| + | 17 | 1997  | _p.G482W UGGT1_    | NM_020120    | NP_064505    | Q9NYU2 | UGGG1_HUMAN |                               | 1   | ATTTTGGGGATT  | 0.393 |             |
| - | 14 | 3223  | 'AP5_uc002ttq.2_I  | NM_207363    | NP_997246    | O14513 | NCKP5_HUMAN |                               | 0   | TAAAGTGCTGGT  | 0.592 |             |
| - | 12 | 4696  |                    | NM_002299    | NP_002290    | P09848 | LPH_HUMAN   | ial). 4_ 4 X approximate ref  | 13  | GGGCAGTGCCA   | 0.502 |             |
| - | 7  | 1843  |                    | NM_002299    | NP_002290    | P09848 | LPH_HUMAN   | ial). 4_ 4 X approximate repe | 13  | TCTCTGGAGAC/  | 0.592 | rs145074769 |
| + | 5  | 561   | _p.L144R KYNU_ur   | NM_003937    | NP_003928    | Q16719 | KYNU_HUMAN  |                               | 2   | ATCTTCTAATGGT | 0.308 |             |
| + | 8  | 1511  | 'foc.1_Missense_A  | NM_052917    | NP_443149    | Q8IUC8 | GLT13_HUMAN | main B. Lumenal (Potential    | 6   | TATCTGGGGTGC  | 0.383 |             |
| - | 1  | 779   |                    | NM_152275    | NP_689488    | Q86WT1 | TT30A_HUMAN | TPR 3.                        | 0   | ATGCAGCTTCAT/ | 0.557 |             |
| - | 46 | 16876 | 'N_uc010zfi.1_Intr | NM_133379    | NP_596870    | Q8WZ42 | TITIN_HUMAN |                               | 153 | AATTTTCCATCTT | 0.413 |             |

|   |    |      |                   |              |              |        |             |                              |    |                |       |             |
|---|----|------|-------------------|--------------|--------------|--------|-------------|------------------------------|----|----------------|-------|-------------|
| - | 22 | 2442 | sk.2_Missense_Mt  | NM_007315    | NP_009330    | P42224 | STAT1_HUMAN |                              | 10 | :CTTCCTTTGGCC  | 0.458 |             |
| - | 1  | 616  |                   | NM_004657    | NP_004648    | O95810 | SDPR_HUMAN  |                              | 2  | :GAGGTCATTCTC  | 0.592 |             |
| - | 14 | 2633 |                   | NM_213589    | NP_998754    | Q70E73 | RAPH1_HUMAN |                              | 10 | :TGGGTGGTGCA   | 0.602 |             |
| + | 12 | 1985 | p.E593G PARD3B    | NM_152526    | NP_689739    | Q8TEW8 | PAR3L_HUMAN |                              | 4  | :GCCAGAGAGAC   | 0.488 |             |
| + | 5  | 7038 |                   | NM_020923    | NP_065974    | Q9HCK1 | ZDBF2_HUMAN |                              | 3  | :GGCGAAGAGAA   | 0.463 |             |
| - | 20 | 3352 | js.2_Missense_Mt  | NM_022648    | NP_072174    | Q9HBL0 | TENS1_HUMAN |                              | 4  | :GTTTCAGGCCC   | 0.652 |             |
| - | 45 | 5249 | voa.2_Missense_Mt | NM_014689    | NP_055504    | Q96BY6 | DOC10_HUMAN | DHR-2.                       | 2  | :TTCATCTGAGCT  | 0.527 |             |
| - | 20 | 2581 | rob.2_Missense_IV | NM_014689    | NP_055504    | Q96BY6 | DOC10_HUMAN | DHR-1.                       | 2  | :AGAGCCTCCTTC  | 0.408 |             |
| + | 3  | 512  | I6L1_uc002vub.2_  | NM_030803    | NP_110430    | Q676U5 | A16L1_HUMAN | Potential.                   | 0  | :GAAATGGCCCA   | 0.463 |             |
| - | 15 | 2138 | mt.1_Missense_Mt  | NM_018218    | NP_060688    | Q9NVE5 | UBP40_HUMAN |                              | 3  | :ATGCCCGTCCAA  | 0.502 |             |
| - | 1  | 288  | ng.1_Missense_Mt  | NM_001485    | NP_001476    | P52951 | GBX2_HUMAN  |                              | 0  | :GCTGGGGATCT   | 0.642 |             |
| - | 10 | 1402 | CA1_uc002vwa.1_   | NM_024726    | NP_079002    | Q86XH1 | IQCA1_HUMAN | Lys-rich.                    | 1  | :TTTTTCATCCAG  | 0.313 |             |
| - | 10 | 1331 | R2_uc010znw.1_IV  | NM_022817    | NP_073728    | O15055 | PER2_HUMAN  | PAS 2.                       | 2  | :AGCACTGGGGTT  | 0.552 |             |
| + | 2  | 177  |                   | NM_001040445 | NP_001035535 | Q9Y576 | ASB1_HUMAN  |                              | 0  | :GTGATCATCCGC  | 0.557 |             |
| + | 5  | 1149 |                   | NM_002081    | NP_002072    | P35052 | GPC1_HUMAN  |                              | 1  | :CGGGTGTGGAG   | 0.627 |             |
| + | 17 | 1955 |                   | NM_001001891 | NP_001001891 | Q6IWH7 | ANO7_HUMAN  | cellular (Potential).        | 3  | :ACCCAGGCAAC   | 0.562 |             |
| + | 2  | 205  |                   | NM_173821    | NP_776182    | Q14D33 | CB085_HUMAN |                              | 1  | :TCCGGGGACCT   | 0.682 |             |
| + | 5  | 1022 | il.2_Nonsense_Mt  | NM_139321    | NP_647537    | O75882 | ATRN_HUMAN  | cellular (Potential).        | 2  | :CTTCTCAGACTC  | 0.388 |             |
| + | 1  | 310  | I10gbd.1_RNA PAI  | NM_153638    | NP_705902    | Q9BZ23 | PANK2_HUMAN |                              | 0  | :CTGCCGCGGAG   | 0.736 |             |
| - | 1  | 92   |                   | NM_033176    | NP_149416    | Q9H2Z4 | NKX24_HUMAN |                              | 0  | :GCCGCTGAACT   | 0.522 |             |
| + | 1  | 797  |                   | NM_001052    | NP_001043    | P31391 | SSR4_HUMAN  | plasmic (Potential).         | 1  | :TGCGCGCTGGC   | 0.627 |             |
| - | 11 | 830  |                   | NM_080675    | NP_542406    | Q8TC36 | SUN5_HUMAN  | SUN.                         | 1  | :GTGTCACGTTG   | 0.522 |             |
| + | 2  | 477  | !OCR_uc010zuw.1   | NM_006404    | NP_006395    | Q9UNN8 | EPCR_HUMAN  | cellular (Potential).        | 0  | :CGTGCGCCTGG   | 0.498 |             |
| - | 2  | 138  | on_p.L8F SCAND1   | NM_033630    | NP_361012    | P57086 | SCND1_HUMAN |                              | 0  | :GCCGCCAAGAT   | 0.667 |             |
| - | 4  | 530  |                   | NM_015474    | NP_056289    | Q9Y3Z3 | SAMH1_HUMAN |                              | 0  | :GATTTCGGACGAC | 0.393 |             |
| + | 11 | 1849 | wj.1_Missense_Mt  | NM_002466    | NP_002457    | P10244 | MYBB_HUMAN  |                              | 5  | :GGACTTGAAGG   | 0.627 |             |
| - | 5  | 601  | JA_uc010ggt.2_Rf  | NM_000022    | NP_000013    | P00813 | ADA_HUMAN   |                              | 3  | :TGGGCTGGTGG   | 0.692 |             |
| - | 4  | 518  | UTR SYS1-DBNDI    | NM_014477    | NP_055292    | Q9Y2B4 | T53G5_HUMAN |                              | 1  | :TTGCCGCCAAT   | 0.507 |             |
| - | 1  | 989  | qj.3_5'Flank CTSA | NM_080749    | NP_542787    | Q9BR09 | NEUL2_HUMAN | NHR.                         | 0  | :AAGGCGCACGC   | 0.637 |             |
| + | 14 | 1841 |                   | NM_017895    | NP_060365    | Q96GQ7 | DDX27_HUMAN |                              | 2  | :CAAGGTGAGCA   | 0.463 |             |
| - | 7  | 1082 |                   | NM_004776    | NP_004767    | O43286 | B4GT5_HUMAN | renal (Potential).           | 1  | :CCACCCCAACCC  | 0.443 |             |
| + | 2  | 322  | sense_Mutation_p  | NM_015266    | NP_056081    | Q9Y2E8 | SL9A8_HUMAN |                              | 1  | :CGACCCTGGC    | 0.577 |             |
| - | 3  | 1743 | p.R465C SPATA2    | NM_001135773 | NP_001129245 | Q9UM82 | SPAT2_HUMAN |                              | 2  | :TGGGGCGTTGC   | 0.597 |             |
| - | 4  | 570  | MEM189_uc010gfil  | NM_199203    | NP_954673    | Q13404 | UB2V1_HUMAN |                              | 0  | :GTCCCCGTTGG   | 0.612 |             |
| + | 7  | 2554 | ze.1_Missense_Mt  | NM_001164116 | NP_001157588 | Q9NQ75 | CASS4_HUMAN |                              | 3  | :AGCAACACACG   | 0.617 |             |
| - | 2  | 330  | P1_uc002xyp.2_Ini | NM_030776    | NP_110403    | Q9H171 | ZBP1_HUMAN  | DRADA 1.                     | 2  | :GATTCTTTGTTCT | 0.617 |             |
| + | 9  | 1019 | L1_uc002ybz.1_R   | NM_198935    | NP_945173    | O75177 | CREST_HUMAN | Gln-rich.                    | 2  | :GTGCCGCGCAG   | 0.662 | rs142989416 |
| + | 3  | 206  |                   | NM_020882    | NP_065933    | Q9P218 | COKA1_HUMAN | nectin type-III 1.           | 1  | :TGGCTGTGCTG   | 0.622 |             |
| - | 4  | 1814 |                   | NM_003489    | NP_003480    | P48552 | NRIP1_HUMAN |                              | 0  | :TTTCCTCAAAAAT | 0.368 |             |
| - | 5  | 803  | p.N229S SYNJ1_t   | NM_003895    | NP_003886    | O43426 | SYNJ1_HUMAN | SAC.                         | 5  | :CAAAATTGGCA   | 0.338 |             |
| + | 5  | 709  | X2_uc011aer.1_Rf  | NM_002463    | NP_002454    | P20592 | MX2_HUMAN   |                              | 2  | :TGGCCGGGGCA   | 0.587 |             |
| - | 4  | 555  | ef.2_Missense_Mt  | NM_015259    | NP_056074    | O75144 | ICOSL_HUMAN | Potential). Ig-like C2-type. | 0  | :GACGGGCACGC   | 0.577 |             |
| + | 19 | 1649 | 6A2_uc002zhz.1_I  | NM_001849    | NP_001840    | P12110 | CO6A2_HUMAN | le-helical region.           | 8  | :GAGGAGCACCC   | 0.637 |             |
| - | 1  | 61   | Ogqs.1_Translatio | NM_001037814 | NP_001032903 | Q2WGN9 | GAB4_HUMAN  |                              | 2  | :AGGGCGTTGCT   | 0.677 |             |
| - | 26 | 5641 | _Mutation_p.T167  | NM_015241    | NP_056056    | Q7RTP6 | MICA3_HUMAN |                              | 0  | :AGGGGTGCTG    | 0.647 |             |
| - | 26 | 5101 | _Mutation_p.P149  | NM_015241    | NP_056056    | Q7RTP6 | MICA3_HUMAN |                              | 0  | :CCAAGGGCAGC   | 0.706 |             |
| + | 5  | 686  | _Mutation_p.G19   | NM_013373    | NP_037505    | Q9ULC8 | ZDHC8_HUMAN | ical; (Potential).           | 2  | :TGGCCGCGCTC   | 0.632 |             |

|   |    |      |                    |              |              |        |             |                              |      |               |       |
|---|----|------|--------------------|--------------|--------------|--------|-------------|------------------------------|------|---------------|-------|
| - | 6  | 1625 | ih.1_Missense_Mt   | NM_032775    | NP_116164    | Q53GT1 | KLH22_HUMAN | Kelch 5.                     | 1    | GTATCCGGCATC  | 0.587 |
| + | 2  | 145  |                    | NM_001144931 | NP_001138403 |        |             |                              | 0    | TGACGGTACGG   | 0.667 |
| + | 30 | 5012 | zzl.1_Missense_M   | NM_012295    | NP_036427    | Q9Y6J0 | CABIN_HUMAN |                              | 5    | CCATGCTTCAGC  | 0.647 |
| - | 5  | 1142 | T5_uc002zzq.3_M    | NM_004121    | NP_004112    | P36269 | GGT5_HUMAN  | cellular (Potential).        | 3    | GCATCTGGCCC   | 0.637 |
| + | 6  | 816  | _169P EWSR1_uc     | NM_005243    | NP_005234    | Q01844 | EWS_HUMAN   | ), 31 X approximate tandem   | 3254 | CAGCCTAGGAT   | 0.502 |
| + | 2  | 672  | afc.1_Missense_IV  | NM_152236    | NP_689422    | Q99501 | GA2L1_HUMAN |                              | 0    | CCTCGTGCAGT   | 0.701 |
| + | 5  | 684  |                    | NM_182527    | NP_872333    | Q86V35 | CABP7_HUMAN | IV membrane protein; (Pc     | 0    | CATTGCGGCCA   | 0.647 |
| + | 11 | 1206 | M1_uc003anp.2_1    | NM_005488    | NP_005479    | O60784 | TOM1_HUMAN  |                              | 1    | CTGGTCGACTG   | 0.602 |
| + | 3  | 308  |                    | NM_002305    | NP_002296    | P09382 | LEG1_HUMAN  | oside binding. Galectin.     | 0    | GGGGGACCGAG   | 0.657 |
| - | 2  | 477  |                    | NM_145912    | NP_666017    | Q8NET5 | NFAM1_HUMAN | (Potential). Ig-like V-type. | 0    | CAGGATGAAGG   | 0.572 |
| + | 1  | 191  | 'ANX2_uc003bjo.3   | NM_052839    | NP_443071    | Q96RD6 | PANX2_HUMAN | ical; (Potential).           | 1    | CATCCTGCTGG   | 0.577 |
| - | 9  | 1211 | 1_Missense_Mutat   | NM_001145137 | NP_001138609 | Q92523 | CPT1B_HUMAN | lasmic (Potential).          | 2    | CGCCCTCATAG   | 0.612 |
| + | 2  | 500  | itron SETMAR_uc    | NM_006515    | NP_006506    | Q53H47 | SETMR_HUMAN | ysine N-methyltransferase.   | 1    | TGTTCAAGACG   | 0.453 |
| - | 15 | 1968 | p.R303P RAF1_uc    | NM_002880    | NP_002871    | P04049 | RAF1_HUMAN  | rotein kinase.               | 14   | GCATTCGGATC   | 0.478 |
| + | 6  | 872  |                    | NM_015141    | NP_055956    | Q8N335 | GPD1L_HUMAN | bstrate binding.             | 0    | AGGGCGGAACC   | 0.617 |
| - | 3  | 1953 |                    | NM_033403    | NP_208382    | Q9C098 | DCLK3_HUMAN | rotein kinase.               | 9    | CTCATTTCGCTC  | 0.408 |
| - | 3  | 3882 | iv.2_Missense_Mu   | NM_014159    | NP_054878    | Q9BYW2 | SETD2_HUMAN |                              | 32   | CATAGCTACTGTC | 0.473 |
| + | 1  | 169  | _Mutation_p.V715A  | NM_033629    | NP_338599    | Q9NSU2 | TREX1_HUMAN |                              | 0    | ACTGCGTGGAG   | 0.607 |
| + | 5  | 3338 |                    | NM_003458    | NP_003449    | Q9UPA5 | BSN_HUMAN   | Potential.                   | 8    | GACCCGCGGG    | 0.657 |
| + | 37 | 3738 |                    | NM_004947    | NP_004938    | Q8IZD9 | DOCK3_HUMAN | DHR-2.                       | 0    | TATATCCGCTACA | 0.428 |
| + | 12 | 2339 | nv.2_Missense_Mt   | NM_000333    | NP_000324    | O15265 | ATX7_HUMAN  |                              | 0    | TGGCAGCAGCC   | 0.537 |
| - | 1  | 21   | 3dmh.1_5'Flank A   | NM_182920    | NP_891550    | Q9P2N4 | ATS9_HUMAN  |                              | 4    | TCCCACCCCTC   | 0.751 |
| - | 3  | 577  | G2_uc011bhe.1_5'   | NM_016247    | NP_057331    | Q9BZV3 | IMPG2_HUMAN | cellular (Potential).        | 3    | GATCCCCAAAAA  | 0.403 |
| + | 5  | 1187 | obj.1_Missense_M   | NM_001125    | NP_001116    | P54922 | ADPRH_HUMAN |                              | 1    | GAGCCTTTTTTC  | 0.547 |
| + | 4  | 1516 | iw.3_Missense_ML   | NM_000388    | NP_000379    | P41180 | CASR_HUMAN  | cellular (Potential).        | 7    | GTGGCGACAGG   | 0.493 |
| - | 13 | 2844 | C14_uc010hrt.2_1   | NM_022757    | NP_073594    | Q49A88 | CCD14_HUMAN |                              | 0    | ACGTTGAAAAC   | 0.443 |
| + | 1  | 785  |                    | NM_032242    | NP_115618    | Q9UIW2 | PLXA1_HUMAN | tracellular (Potential).     | 3    | TCGTGCGGCTC   | 0.602 |
| + | 10 | 1709 | M2_uc010hsl.2_F    | NM_004526    | NP_004517    | P49736 | MCM2_HUMAN  | MCM.                         | 4    | GGGGGCGTCCG   | 0.617 |
| - | 11 | 1272 | Y_uc011blx.1_Mis   | NM_178554    | NP_848649    | Q8NBH2 | KY_HUMAN    |                              | 2    | GTACACCTCCA   | 0.532 |
| - | 2  | 691  | err.1_Nonsense_M   | NM_173543    | NP_775814    | Q8IYY4 | DZ1L_HUMAN  |                              | 2    | CAGCTGGGCAA   | 0.662 |
| + | 7  | 1345 | etm.2_Missense_IV  | NM_022131    | NP_071414    | Q9H4D0 | CSTN2_HUMAN | cellular (Potential).        | 7    | TGGATGAAACAC  | 0.562 |
| + | 15 | 2280 | om.1_Missense_M    | NM_003875    | NP_003866    | P49915 | GUA_A_HUMAN |                              | 3    | CTGGTATACCTC  | 0.383 |
| - | 3  | 789  | 11bpt.1_Intron uc0 | NM_020949    | NP_066000    | Q8TBB6 | S7A14_HUMAN |                              | 5    | AGTCAAACATG   | 0.562 |
| + | 1  | 44   | 003fqv.2_5'UTR EI  | NM_001967    | NP_001958    | Q14240 | IF4A2_HUMAN |                              | 4    | CATGTCTGGTG   | 0.577 |
| - | 3  | 1518 | 732_uc010ibb.1_1   | NM_001137608 | NP_001131080 | B4DXR9 | ZN732_HUMAN | :2H2-type 14.                | 0    | CACATTCGTAAGC | 0.398 |
| + | 12 | 1836 | 06_splice TBC1D1   | NM_001113361 | NP_001106832 | Q9P2M4 | TBC14_HUMAN |                              | 2    | GATTGGTAAGAC  | 0.408 |
| + | 12 | 2682 | Q785* SH3TC1_u     | NM_018986    | NP_061859    | Q8TE82 | S3TC1_HUMAN |                              | 3    | AGGACCAGGAG   | 0.687 |
| - | 10 | 6986 | dr.1_Missense_Mu   | NM_148894    | NP_683692    | Q8NFC6 | BOD1L_HUMAN |                              | 6    | TGGCGGTGTCA   | 0.557 |
| + | 1  | 2314 | _p.V389I PCDH7_    | NM_002589    | NP_002580    | O60245 | PCDH7_HUMAN | r (Potential). Cadherin 4.   | 4    | AGGACGTTCTG   | 0.622 |
| - | 4  | 2469 |                    | NM_001024611 | NP_001019782 | Q68CR7 | LRG66_HUMAN |                              | 3    | TGCCCGGAAAC   | 0.463 |
| - | 3  | 408  |                    | NM_002704    | NP_002695    | P02775 | CXCL7_HUMAN |                              | 4    | GGGAGCATCTG   | 0.428 |
| + | 17 | 2400 | 58_splice FRAS1_   | NM_025074    | NP_079350    | Q86XX4 | FRAS1_HUMAN |                              | 5    | AAAGGTATCGTI  | 0.478 |
| + | 25 | 3502 | iw.2_Missense_Mu   | NM_025074    | NP_079350    | Q86XX4 | FRAS1_HUMAN | tracellular (Potential).     | 5    | CCGCTGCAAAG   | 0.512 |
| + | 2  | 1212 |                    | NM_152618    | NP_689831    | Q6ZW61 | BBS12_HUMAN |                              | 2    | TGTCAGTATCTA  | 0.403 |
| - | 2  | 1993 | 4L3_uc011chd.1_1   | NM_018717    | NP_061187    | Q96JK9 | MAML3_HUMAN |                              | 1    | GGACAGCACAG   | 0.562 |
| + | 2  | 6593 |                    | NM_153610    | NP_705838    | Q8N3K9 | CMYA5_HUMAN |                              | 9    | AGAAAGGAATTT  | 0.453 |
| + | 3  | 500  | ksn.2_Missense_1   | NM_182761    | NP_877438    | A1A519 | F170A_HUMAN |                              | 1    | CTCTCCCGCT    | 0.483 |

rs149580968



|   |    |      |                    |              |              |        |             |                              |    |                |       |             |
|---|----|------|--------------------|--------------|--------------|--------|-------------|------------------------------|----|----------------|-------|-------------|
| + | 1  | 178  |                    | NM_016048    | NP_057132    | Q96CN7 | ISOC1_HUMAN |                              | 0  | :AGAAGTTCCTC/  | 0.602 |             |
| + | 4  | 1161 |                    | NM_032289    | NP_115665    | Q9BQI7 | PSD2_HUMAN  | SEC7.                        | 1  | :GGCACGCCGTC   | 0.652 |             |
| + | 15 | 2163 | _p.A623P SLC4A9    | NM_031467    | NP_113655    | Q96Q91 | B3A4_HUMAN  | al) Membrane (anion exch.    | 1  | :TTGGAGCCAAC/  | 0.597 |             |
| + | 3  | 1513 | igh.1_Missense_Iv  | NM_080670    | NP_542401    | Q96G79 | S35A4_HUMAN | (Potential) Leu-rich.        | 0  | :AGGCACTAAATG/ | 0.592 |             |
| + | 1  | 1385 | I03hc.1_Missense   | NM_018905    | NP_061728    | Q9Y5H9 | PCDA2_HUMAN | Extracellular (Potential).   | 4  | :TGACCCGACGG   | 0.632 |             |
| + | 1  | 1279 | :DHA7_uc003lhq.2   | NM_018904    | NP_061727    | Q9Y5I0 | PCDAD_HUMAN | Extracellular (Potential).   | 6  | :TGACCCGCGCGG  | 0.657 |             |
| + | 1  | 101  | GA8_uc003lkd.1_I   | NM_018928    | NP_061751    | Q9Y5F7 | PCDGL_HUMAN | Extracellular (Potential).   | 4  | :iCTACCCGGTCC/ | 0.552 |             |
| - | 16 | 2252 | _p.P695L DIAPH1_   | NM_005219    | NP_005210    | O60610 | DIAP1_HUMAN | FH1.                         | 1  | GAGGAGGTGGG    | 0.642 |             |
| - | 8  | 1310 | _p.L188P CSNK1A    | NM_001892    | NP_001883    | P48729 | KC1A_HUMAN  | rotein kinase.               | 1  | :FGCCTCAGATAC/ | 0.373 |             |
| + | 10 | 1532 | tion_p.G308D uc0   | NM_198321    | NP_938080    | Q86SR1 | GLT10_HUMAN | ential) Ricin B-type lectin. | 2  | :TGTGGGCACAG/  | 0.607 |             |
| + | 2  | 925  | c.1_Intron SAP30L  | NM_024632    | NP_078908    | Q9HAJ7 | SP30L_HUMAN |                              | 0  | :AGACAAGTGAC   | 0.423 |             |
| - | 4  | 750  | P1_uc003map.2_I    | NM_004137    | NP_004128    | Q16558 | KCMB1_HUMAN | ellular (Potential).         | 2  | :CGGCCCGGGCC   | 0.577 |             |
| - | 14 | 1474 |                    | NM_005110    | NP_005101    | O94808 | GFPT2_HUMAN | SIS 1.                       | 2  | :AGTCGGTCTCG   | 0.701 |             |
| - | 10 | 1823 | 7M SLC22A23_uc     | NM_015482    | NP_056297    | A1A5C7 | S22AN_HUMAN | ical; (Potential).           | 1  | :ATGAGCGTgcag/ | 0.453 |             |
| - | 2  | 632  | RL_uc003ndq.2_M    | NM_000948    | NP_000939    | P01236 | PRL_HUMAN   |                              | 0  | :GGCATCGGGCA/  | 0.587 |             |
| - | 2  | 507  | 0jrf.1_Intron ZSCA | NM_001012455 | NP_001012458 | Q3MJ62 | ZSC23_HUMAN | SCAN box.                    | 0  | :GCTGTCTGACC/  | 0.582 |             |
| + | 3  | 727  | _p.R652Q CFB_uc/   | NM_001710    | NP_001701    | P00751 | CFAB_HUMAN  | Sushi 2.                     | 1  | :TGGCCGATGGA/  | 0.587 |             |
| + | 8  | 1279 | u.1_5'Flank SLC3!  | NM_001077516 | NP_001070984 | Q92504 | S39A7_HUMAN | ical; (Potential).           | 1  | :TGACAGCAGTAC  | 0.552 |             |
| + | 16 | 2027 |                    | NM_002224    | NP_002215    | Q14573 | ITPR3_HUMAN | lasmic (Potential).          | 19 | :CAACCCGAAGC/  | 0.612 |             |
| - | 1  | 119  | I_5'Flank LEMD2_   | NM_181336    | NP_851853    | Q8NC56 | LEMD2_HUMAN | LEM.                         | 1  | :iCGGGCGCAGCT  | 0.741 |             |
| + | 16 | 2054 | D2_uc011dtv.1_Mi   | NM_173558    | NP_775829    | Q7Z6J4 | FGD2_HUMAN  | PH 2.                        | 3  | :GGAGCTGAAGG   | 0.682 |             |
| + | 18 | 2383 | ox.2_Missense_Mi   | NM_015345    | NP_056160    | Q86T65 | DAAM2_HUMAN | FH2.                         | 3  | :GTGCTGACCCG   | 0.577 |             |
| - | 4  | 2494 | 318_uc003ouw.2_    | NM_014345    | NP_055160    | Q5VUA4 | ZN318_HUMAN |                              | 7  | :GGTGGGATACA/  | 0.527 |             |
| - | 5  | 1620 | 3ovj.1_Missense_N  | NM_001012974 | NP_001012992 | Q5JTD7 | CF154_HUMAN | LRR 7.                       | 0  | :TGCTGTTCTCAC  | 0.547 |             |
| - | 13 | 1577 |                    | NM_020750    | NP_065801    | Q9HAV4 | XPO5_HUMAN  |                              | 4  | :TAGTTTTGGGATC | 0.438 |             |
| + | 2  | 541  | j.2_RNA SPATS1_    | NM_145026    | NP_659463    | Q496A3 | SPAS1_HUMAN |                              | 1  | :AACACCCTCTG/  | 0.433 |             |
| + | 1  | 1342 | ze.2_Missense_Mi   | NM_001010870 | NP_001010870 | O60522 | TDRD6_HUMAN |                              | 6  | :TCCTTCAGAGC/  | 0.468 |             |
| - | 35 | 5963 | ai.2_Missense_Mu   | NM_138694    | NP_619639    | P08F94 | PKHD1_HUMAN | ellular (Potential).         | 44 | :TGGCGTCTCA/   | 0.428 | rs140996978 |
| - | 6  | 856  | 3A1_uc003pff.3_5'  | NM_001851    | NP_001842    | P20849 | CO9A1_HUMAN |                              | 4  | :TCAAACCTGGAG/ | 0.463 |             |
| - | 22 | 2762 | HIP_uc011dyp.1_A   | NM_017934    | NP_060404    | Q8WWQ0 | PHIP_HUMAN  |                              | 6  | :TTACCTAGAACT  | 0.363 |             |
| - | 6  | 740  | _p.R137W ME1_uc    | NM_002395    | NP_002386    | P48163 | MAOX_HUMAN  |                              | 2  | :CTGCCGTAGTC/  | 0.269 | rs141363376 |
| + | 6  | 834  | _Mutation_p.S165F  | NM_014942    | NP_055757    | Q9Y2G4 | ANKR6_HUMAN | ANK 5.                       | 3  | :CCGGGTCCCGC   | 0.542 |             |
| - | 16 | 2607 | ej USP45_uc003pf   | NM_001080481 | NP_001073950 | Q70EL2 | UBP45_HUMAN |                              | 2  | :CCAGCCTTAA/   | 0.323 |             |
| - | 6  | 961  | _p.G218R LAMA4_    | NM_001105206 | NP_001098676 | Q16363 | LAMA4_HUMAN | inin EGF-like 3.             | 9  | :GAATCCGGTGG/  | 0.483 |             |
| + | 46 | 6788 | io.2_Missense_Mi   | NM_000426    | NP_000417    | P24043 | LAMA2_HUMAN | inin G-like 1.               | 10 | :ACTCATATTGGTA | 0.373 |             |
| + | 3  | 2160 | Okfi.2_Missense_A  | NM_052913    | NP_443145    | Q86VY9 | T200A_HUMAN | lasmic (Potential).          | 1  | :AGGGATATATGA/ | 0.458 |             |
| + | 3  | 1688 |                    | NM_016217    | NP_057301    | Q9UBI9 | HDC_HUMAN   |                              | 0  | :GGATGGCAGCT/  | 0.552 |             |
| - | 10 | 1883 |                    | NM_153235    | NP_694967    | Q8N3L3 | TXLNB_HUMAN |                              | 2  | :iAGGGAGGTTCA  | 0.602 |             |
| + | 3  | 583  | n_p.P58T GPR12/    | NM_020455    | NP_065188    | Q86SQ4 | GP126_HUMAN | tracellular (Potential).     | 1  | :GCTACCCTAAC/  | 0.502 |             |
| + | 3  | 208  | r72_uc010kie.1_Ir  | NM_138785    | NP_620140    | Q9NU53 | CF072_HUMAN | ellular (Potential).         | 0  | :TTAAGGTTGTTC  | 0.318 |             |
| - | 5  | 738  | M231I KATNA1_uc    | NM_007044    | NP_008975    | O75449 | KTNA1_HUMAN |                              | 1  | :TCGGGCATCCA/  | 0.388 |             |
| - | 1  | 561  | _p.A124V RSPH3_    | NM_031924    | NP_114130    | Q86UC2 | RSPH3_HUMAN |                              | 2  | :TGGGCGCTAAG   | 0.652 |             |
| - | 10 | 1674 | qte.1_Missense_M   | NM_003058    | NP_003049    | O15244 | S22A2_HUMAN | ical; (Potential).           | 2  | :AAGCACGCCCTG  | 0.393 | rs140033522 |
| - | 1  | 88   | uc003quy.1_5'Flan  | NM_145169    | NP_660152    | Q8WV19 | SFT2A_HUMAN | lasmic (Potential).          | 1  | :CTGCGCAGTCA/  | 0.731 |             |
| - | 38 | 5418 | i1_uc003skm.1_5'I  | NM_001080453 | NP_001073922 | Q8N201 | INT1_HUMAN  |                              | 0  | :CTCATCGTCCC/  | 0.697 |             |
| + | 25 | 3948 | o.2_Missense_Mu    | NM_152744    | NP_689957    | Q7Z5N4 | SDK1_HUMAN  | onectin type-III 6.          | 6  | :GGGCCGGACGC   | 0.647 |             |
| + | 3  | 860  | _p.A121T FOXX1_    | NM_001037165 | NP_001032242 | P85037 | FOXX1_HUMAN |                              | 2  | :TTGCAGCAAAG/  | 0.662 |             |

|   |    |       |                                  |              |              |        |             |                             |       |               |       |             |
|---|----|-------|----------------------------------|--------------|--------------|--------|-------------|-----------------------------|-------|---------------|-------|-------------|
| - | 8  | 1276  | nse_Mutation_p.V                 | NM_139179    | NP_631918    | Q8NCG7 | DGLB_HUMAN  | lasmic (Potential).         | 3     | ACCACAACAGAC  | 0.572 |             |
| + | 4  | 315   | tp.1_Missense_Mi                 | NM_019005    | NP_061878    | Q9NXC5 | MIO_HUMAN   |                             | 0     | VTGAGCGGTACC  | 0.338 |             |
| + | 5  | 902   | POLR2J4_uc010k                   | NM_175064    | NP_778234    | Q8NFV5 | SPDE1_HUMAN | Arg-rich.                   | 1     | TGAACCCGAGG   | 0.552 |             |
| - | 18 | 2530  | rg.2_Missense_Mt                 | NM_033054    | NP_149043    | B011T2 | MYO1G_HUMAN |                             | 4     | GGCCCCGCCACC  | 0.637 |             |
| + | 9  | 1526  | p.S366N IKZF1_uc                 | NM_006060    | NP_006051    | Q13422 | IKZF1_HUMAN |                             | 148   | GGTCAGCACCA   | 0.662 |             |
| - | 12 | 1420  | zb.2_Missense_Mt                 | NM_005311    | NP_005302    | Q13322 | GRB10_HUMAN |                             | 6     | CTTACCCTCCA   | 0.642 |             |
| - | 8  | 1138  | .E165K TYW1B_u                   | NM_001145440 | NP_001138912 | Q6NUM6 | TYW1B_HUMAN |                             | 0     | CCTCTCCCTCG   | 0.418 |             |
| - | 2  | 656   | c.3_5'UTR POM121C_uc003udl.1_RNA |              |              | A8CG34 | P121C_HUMAN | and nuclear pore complex.   | 0     | .CCCCCGGACAG  | 0.527 |             |
| - | 6  | 526   | I20A_uc003ueb.1_                 | NM_031925    | NP_114131    | Q9BXJ8 | T120A_HUMAN | ical; (Potential).          | 0     | ATGATGGTGAGG  | 0.637 |             |
| + | 2  | 314   | .1_5'UTR CDK14_                  | NM_012395    | NP_036527    | O94921 | CDK14_HUMAN |                             | 4     | TATAGCTTTGAA  | 0.313 |             |
| + | 2  | 1188  |                                  | NM_001040152 | NP_001035242 | Q86TG7 | PEG10_HUMAN | or interaction with ALK1.   | 1     | AGCTCGCAAGC   | 0.647 |             |
| - | 3  | 651   |                                  | NM_001185    | NP_001176    | P25311 | ZA2G_HUMAN  |                             | 2     | TTGCCCGTCCA   | 0.542 | rs146685912 |
| + | 3  | 379   | '51_uc003uve.1_5'                | NM_173564    | NP_775835    | Q6ZVC0 | CG051_HUMAN |                             | 1     | ACCCCTGCCGC   | 0.731 |             |
| + | 9  | 1552  | 11kka.1_Missense_                | NM_033506    | NP_277041    | O75426 | FBX24_HUMAN | RCC1.                       | 4     | .CTCCTGGTGC   | 0.682 |             |
| - | 23 | 4008  |                                  | NM_022574    | NP_072096    | O75420 | PERQ1_HUMAN |                             | 2     | TGCCCTCCCCG   | 0.677 |             |
| + | 3  | 8506  | C17_uc010lho.1_F                 | NM_001040105 | NP_001035194 | Q685J3 | MUC17_HUMAN | ch.159 X approximate tand   | 27    | TGTCAACCACAC  | 0.493 |             |
| - | 2  | 895   |                                  | NM_003378    | NP_003369    | O15240 | VGf_HUMAN   |                             | 0     | ggggccggggccg | 0.557 |             |
| - | 4  | 859   | .xz.1_Missense_M                 | NM_198571    | NP_940973    | Q8N8M0 | CG052_HUMAN |                             | 1     | AGAAGGTGCCA   | 0.741 |             |
| - | 11 | 1667  | D3_uc010lhs.2_5'                 | NM_001084    | NP_001075    | O60568 | PLOD3_HUMAN |                             | 2     | .GGATACGCAGG  | 0.667 | rs137857342 |
| - | 2  | 261   |                                  | NM_138403    | NP_612412    | Q9BUA6 | MYL10_HUMAN |                             | 2     | .TTCTCGGTGCC  | 0.597 |             |
| - | 20 | 3239  | og.3_RNA DPY19L                  | NR_003561    |              |        |             |                             | 0     | TTGACACTTGC   | 0.373 |             |
| - | 1  | 689   | lDUS4L_uc003ve                   | NM_181733    | NP_859422    | Q9UP83 | COG5_HUMAN  |                             | 4     | .GGACTGTAGCT  | 0.667 |             |
| + | 14 | 2483  | q.1_Missense_Mu                  | NM_000492    | NP_000483    | P13569 | CFTR_HUMAN  | lasmic (Potential).         | 5     | ACATTCACCGAA  | 0.498 |             |
| - | 2  | 1018  | lt.2_Missense_Mut                | NM_000845    | NP_000836    | O00222 | GRM8_HUMAN  | cellular (Potential).       | 23    | VTCTGGGTGAAG  | 0.493 |             |
| - | 2  | 211   | '1B1_uc003vrq.1_1                | NM_001628    | NP_001619    | P15121 | ALDR_HUMAN  |                             | 3     | .CATGGGCACAG  | 0.587 |             |
| - | 15 | 3764  | d.3_Missense_Mu                  | NM_022740    | NP_073577    | Q9H2X6 | HIPK2_HUMAN | bitory domain (AID).        | 7     | TATATGTAAGGGT | 0.418 |             |
| - | 15 | 1860  |                                  | NM_004333    | NP_004324    | P15056 | BRAF_HUMAN  | rotein kinase_R603>1(2))p.T | 18290 | GATTTCACTGTAC | 0.368 |             |
| - | 15 | 1935  | .p.A595V EZH2_uc                 | NM_004456    | NP_004447    | Q15910 | EZH2_HUMAN  | Cys-rich.                   | 183   | CAGCGGCTCCA   | 0.527 |             |
| + | 36 | 5351  |                                  | NM_198455    | NP_940857    | A2VEC9 | SSPO_HUMAN  | rSP type-1 2.               | 0     | GGGCCGCACCT   | 0.657 |             |
| + | 6  | 603   | e_Mutation_p.R17                 | NM_024596    | NP_078872    | Q8NEM0 | MCPH1_HUMAN |                             | 2     | AGAAGAGATTAC  | 0.333 |             |
| - | 1  | 1358  | .1_Intron FAM66D                 | NM_201402    | NP_958804    | Q6R6M4 | U17L2_HUMAN |                             | 3     | ACTTTTCTGACG  | 0.478 |             |
| + | 7  | 1226  | ixbp.3_Missense_I                | NM_001128431 | NP_001121903 | Q15043 | S39AE_HUMAN | lasmic (Potential).         | 0     | TCATCGATGGCC  | 0.542 |             |
| + | 30 | 3152  | e_Mutation_p.E78                 | NM_173174    | NP_775266    | Q14289 | FAK2_HUMAN  |                             | 5     | .AGGAGGAGGAC  | 0.567 |             |
| + | 5  | 1387  | qgb.1_Missense_M                 | NM_016240    | NP_057324    | Q6AZY7 | SCAR3_HUMAN | cellular (Potential).       | 4     | .GGGAGCGCTTC  | 0.597 |             |
| - | 1  | 182   |                                  | NR_003129    |              |        |             |                             | 0     | GGCCACACACA   | 0.592 |             |
| + | 5  | 1359  |                                  | NM_147189    | NP_671722    | Q8TC76 | F110B_HUMAN |                             | 1     | .CTTCGGGAGT   | 0.697 |             |
| + | 2  | 899   | iu.1_Missense_Mu                 | NM_024721    | NP_078997    | Q86UP3 | ZFHx4_HUMAN |                             | 15    | .CTGGGCATCTG  | 0.468 |             |
| + | 44 | 8156  | iw.2_Missense_Mt                 | NM_017890    | NP_060360    | Q7Z7G8 | VP13B_HUMAN |                             | 20    | TTGGGGCAACT   | 0.433 |             |
| + | 58 | 11285 | iw.2_Missense_Mt                 | NM_017890    | NP_060360    | Q7Z7G8 | VP13B_HUMAN |                             | 20    | GGACCGGCTCT   | 0.637 |             |
| + | 62 | 10245 |                                  | NM_177531    | NP_803875    | Q86W11 | PKHL1_HUMAN | cellular (Potential).       | 14    | CCAACCGAGTC   | 0.383 |             |
| - | 1  | 191   |                                  | NM_024094    | NP_076999    | Q9BVC3 | DCC1_HUMAN  |                             | 1     | CGGCCGCATTC   | 0.731 |             |
| + | 29 | 3809  | yoz.2_Missense_M                 | NM_021110    | NP_066933    | Q05707 | COEA1_HUMAN | VWFA 2.                     | 12    | TTGGCAGTAAG   | 0.438 |             |
| + | 3  | 2781  |                                  | NM_014943    | NP_055758    | Q9Y6X8 | ZHX2_HUMAN  |                             | 2     | .CTCTCGGAAGA  | 0.532 |             |
| - | 4  | 791   | {G1_uc010mef.2_5                 | NM_001135242 | NP_001128714 | Q92597 | NDRG1_HUMAN |                             | 4     | .AACTTACGGTT  | 0.557 |             |
| + | 14 | 2539  | .p.G715V DENND                   | NM_014957    | NP_055772    | A2RUS2 | DEND3_HUMAN |                             | 1     | .GCCAGGCTACT  | 0.468 |             |
| - | 2  | 850   |                                  | NM_005293    | NP_005284    | Q99678 | GPR20_HUMAN | Name=6; (Potential).        | 1     | .CGGTGAAGCAG  | 0.682 |             |
| + | 23 | 3554  |                                  | NM_001702    | NP_001693    | O14514 | BAI1_HUMAN  | lasmic (Potential).         | 8     | .CATCACGGACA  | 0.662 |             |

|   |    |      |                           |              |              |        |             |                                |   |               |       |             |
|---|----|------|---------------------------|--------------|--------------|--------|-------------|--------------------------------|---|---------------|-------|-------------|
| - | 4  | 608  | u.2_Missense_Mt           | NM_001029976 | NP_001025147 | P17020 | ZNF16_HUMAN |                                | 5 | CCCCATGGCAG   | 0.552 |             |
| + | 7  | 1440 |                           | NM_000550    | NP_000541    | P17643 | TYRP1_HUMAN |                                | 1 | AATTTAGATATAT | 0.328 |             |
| - | 1  | 1175 | v.2_Intron KLHL9_         | NM_018847    | NP_061335    | Q9P2J3 | KLHL9_HUMAN | BACK.                          | 4 | GAAAGCACAA    | 0.408 |             |
| - | 3  | 1346 | e_Mutation_p.R44!         | NM_012166    | NP_036298    | Q9UK96 | FBX10_HUMAN | PbH1 3.                        | 5 | CTTGCGGATGA   | 0.602 |             |
| - | 16 | 2519 | ahy.2_Missense_I          | NM_001007471 | NP_001007472 | Q9HCF6 | TRPM3_HUMAN | lasmic (Potential).            | 9 | CATGTCGGTGAC  | 0.632 |             |
| + | 5  | 1579 |                           | NM_194320    | NP_919301    | Q14929 | ZN169_HUMAN | :2H2-type 10.                  | 2 | AGTGTGGGCGT   | 0.567 | rs150911311 |
| + | 3  | 5415 | .R1557H ZNF462_           | NM_021224    | NP_067047    | Q96JM2 | ZN462_HUMAN | :2H2-type 16.                  | 5 | CATCCGCAAAG   | 0.557 |             |
| - | 47 | 5570 |                           | NM_001080398 | NP_001073867 |        |             |                                | 0 | AGCTCCTTTTCC  | 0.453 |             |
| - | 21 | 4211 | A1278V AKNA_uc            | NM_030767    | NP_110394    | Q7Z591 | AKNA_HUMAN  |                                | 6 | CAGGCGCATAG   | 0.637 |             |
| - | 3  | 512  | 3XW2_uc004bkm.            | NM_012164    | NP_036296    | Q9UKT8 | FBXW2_HUMAN |                                | 4 | CAGTGCAAAGC   | 0.438 |             |
| - | 3  | 442  | _NAC4_uc004bst.           | NM_175039    | NP_778204    | Q9H4F1 | SIA7D_HUMAN | lenal (Potential).             | 0 | ACTGAAGTGAC   | 0.512 |             |
| - | 4  | 1019 |                           | NM_006336    | NP_006327    | Q7Z7L7 | ZER1_HUMAN  |                                | 1 | CGGCCGCAGCA   | 0.612 |             |
| + | 21 | 2477 | p.L756M USP20_            | NM_001110303 | NP_001103773 | Q9Y2K6 | UBP20_HUMAN | DUSP 1.                        | 2 | TCATCCTGCCC   | 0.627 |             |
| + | 13 | 1375 | zs.1_Missense_Mt          | NM_003934    | NP_003925    | Q96I24 | FUBP3_HUMAN |                                | 1 | ATAGATGAGAA   | 0.567 |             |
| + | 10 | 1410 | nzj.1_Missense_I          | NM_013318    | NP_037450    | Q5JSZ5 | PRC2B_HUMAN |                                | 0 | CCCTCAGCCAC   | 0.607 |             |
| - | 7  | 2217 | F1_uc004cbm.2_N           | NM_007344    | NP_031370    | Q15361 | TTF1_HUMAN  | Myb-like 2.                    | 4 | CTACCCAAGAT   | 0.418 |             |
| + | 20 | 3025 | i861R ADAMTS13            | NM_139025    | NP_620594    | Q76LX8 | ATS13_HUMAN |                                | 6 | GTGTCGGGATG   | 0.642 |             |
| + | 2  | 479  |                           | NM_000787    | NP_000778    | P09172 | DOPO_HUMAN  | ntragranular (Potential).      | 4 | ACCCCAAGGATT  | 0.592 |             |
| - | 3  | 345  | y.2_5'UTR FBXW            | NM_018998    | NP_061871    | Q969U6 | FBXW5_HUMAN |                                | 0 | TGGCCGCTGCG   | 0.682 |             |
| + | 16 | 2627 | .S766N GRIN1_uc           | NM_007327    | NP_015566    | Q05586 | NMDZ1_HUMAN | ellular (Potential).           | 1 | AGACAGCCCTT   | 0.652 |             |
| + | 11 | 1632 |                           | NM_015456    | NP_056271    | Q8WX92 | NELFB_HUMAN |                                | 0 | AAATTTGCCCTT  | 0.612 |             |
| + | 4  | 359  | uc010ncq.2_Silent_p.T210T |              |              |        |             |                                | 0 | GGGACGCTACA   | 0.592 |             |
| - | 16 | 1159 | p.T308I GPR64_            | NM_001079858 | NP_001073327 | Q8IZP9 | GPR64_HUMAN | ellular (Potential).           | 0 | CATGGGTTTGG   | 0.577 |             |
| + | 18 | 2054 | p.C617* PHEX_uc           | NM_000444    | NP_000435    | P78562 | PHEX_HUMAN  | ellular (Potential).           | 3 | AAAATGCATGAT  | 0.363 |             |
| - | 1  | 794  |                           | NM_001017930 | NP_001017930 | A6NGE4 | DC8L1_HUMAN | WD 1. p.R227P(1)               | 4 | CTGCCGCACCC   | 0.512 |             |
| - | 61 | 9335 | _Missense_Mutatic         | NM_004006    | NP_003997    | P11532 | DMD_HUMAN   | Spectrin 22.                   | 6 | CTCGACGGCCA   | 0.423 | rs143426249 |
| + | 1  | 721  |                           | NM_001013736 | NP_001013758 | Q5HY64 | FA47C_HUMAN |                                | 3 | CCACCTGGAGC   | 0.637 |             |
| - | 1  | 163  | dgv.1_Missense_I          | NM_032591    | NP_115980    | Q96T83 | SL9A7_HUMAN |                                | 2 | TGGCGCTGCTG   | 0.582 |             |
| + | 10 | 1053 | n.1_Missense_Mu           | NM_012280    | NP_036412    | Q9UET6 | RRMJ1_HUMAN |                                | 0 | AGCTCCTATGAT  | 0.572 |             |
| + | 11 | 1258 | n.1_Missense_Mu           | NM_012280    | NP_036412    | Q9UET6 | RRMJ1_HUMAN |                                | 0 | TCAGTGCCACA   | 0.617 |             |
| - | 14 | 1780 | lnip.2_Missense_I         | NM_005183    | NP_005174    | O60840 | CAC1F_HUMAN | :=S2 of repeat II; (Potential  | 6 | CCACCGTGAAC   | 0.532 |             |
| + | 3  | 218  | IL3L_uc004dti.2_R         | NM_019067    | NP_061940    | Q9NVN8 | GNL3L_HUMAN | or nucleolar localization.     | 1 | TACCCTCAGGTA  | 0.453 |             |
| + | 7  | 539  | IL3L_uc004dti.2_R         | NM_019067    | NP_061940    | Q9NVN8 | GNL3L_HUMAN |                                | 1 | GTGGAATACTCT  | 0.532 |             |
| + | 12 | 2555 | RO_uc011mok.1_I           | NM_001039705 | NP_001034794 | Q12816 | TROP_HUMAN  | proximate tandem repeats.      | 1 | TGGCATGCCTTG  | 0.542 |             |
| + | 6  | 1102 | uq.2_Missense_M           | NM_016656    | NP_057740    | Q5VZM2 | RRAGB_HUMAN |                                | 0 | CTGATTATATGCT | 0.398 |             |
| - | 13 | 1513 | _4_uc004ege.3_M           | NM_080737    | NP_542775    | Q96C24 | SYTL4_HUMAN | C2 1.                          | 2 | TCATCAGCATAGC | 0.537 |             |
| + | 1  | 576  |                           | NM_001031834 | NP_001027004 | P0C0E4 | RB40L_HUMAN | SOCS box.                      | 2 | TGCTGCGGCAC   | 0.587 |             |
| + | 4  | 1265 |                           | NM_017416    | NP_059112    | Q9NP60 | IRPL2_HUMAN | 2. Extracellular (Potential).  | 3 | TAAAAAGTCCG   | 0.423 |             |
| + | 4  | 2662 | ard.1_Missense_M          | NM_021946    | NP_068765    | Q5H9F3 | BCORL_HUMAN |                                | 7 | GTGCCGGGCAG   | 0.617 |             |
| + | 11 | 2821 | b.1_Missense_Mu           | NM_002025    | NP_002016    | P51816 | AFF2_HUMAN  |                                | 5 | ACCTATTCTGT   | 0.458 |             |
| + | 3  | 991  | _XNB3_uc010nuk.           | NM_005393    | NP_005384    | Q9ULL4 | PLXB3_HUMAN | ilar (Potential). Sema.        | 1 | ACCAACCTGTAC  | 0.612 |             |
| + | 29 | 5008 | NB3_uc011mzd.1            | NM_005393    | NP_005384    | Q9ULL4 | PLXB3_HUMAN | lasmic (Potential).            | 1 | GCCAGGTCCCA   | 0.537 |             |
| - | 21 | 2944 | .G946S L1CAM_L            | NM_000425    | NP_000416    | P32004 | L1CAM_HUMAN | tential). Fibronectin type-III | 9 | CACGCCGTTGT   | 0.711 |             |
| - | 7  | 1393 | ve.1_Missense_Mt          | NM_080612    | NP_542179    | Q8WWW8 | GAB3_HUMAN  |                                | 1 | TGGCCGTGCTA   | 0.488 |             |
| - | 19 | 1803 | p.R307C ACAP3_            | NM_030649    | NP_085152    | Q96P50 | ACAP3_HUMAN |                                | 0 | TGGCGGGAAC    | 0.667 |             |
| - | 4  | 496  | K4_uc010nza.1_Ir          | NM_018216    | NP_060686    | Q9NVE7 | PANK4_HUMAN |                                | 3 | ATGGGGGATGT   | 0.532 |             |
| + | 21 | 3619 | 3E4B_uc010oaj.1           | NM_001105562 | NP_001099032 | O95155 | UBE4B_HUMAN |                                | 4 | TACCTTCCCTGAT | 0.458 |             |

|   |    |         |                   |              |              |        |             |                               |    |               |       |             |
|---|----|---------|-------------------|--------------|--------------|--------|-------------|-------------------------------|----|---------------|-------|-------------|
| + | 4  | 966     |                   | NM_001012276 | NP_001012276 | Q5VWM4 | PRAM8_HUMAN |                               | 0  | GCCTTGAGATG   | 0.552 |             |
| + | 5  | 805     | M1_uc001axg.1_N   | NM_017556    | NP_060026    | Q8WUP2 | FBL1_HUMAN  | Pro-rich.                     | 1  | GGAGGCTCCTG   | 0.667 |             |
| + | 7  | 884     | iki.1_Missense_Mt | NM_014663    | NP_055478    | O75164 | KDM4A_HUMAN | JmjC.                         | 1  | TCCGCCACAAG   | 0.388 |             |
| - | 9  | 1667    | u.1_RNA C1orf16   | NM_001004303 | NP_001004303 | Q5VWT5 | CA168_HUMAN |                               | 5  | TCATCTGAATTT  | 0.458 |             |
| - | 3  | 429     | _p.R59Q C8B_uc    | NM_000066    | NP_000057    | P07358 | CO8B_HUMAN  | receptor class A.             | 4  | GCACATCGCACT  | 0.483 |             |
| - | 10 | 1481    | 73_uc001dgi.3_Mi  | NM_001002912 | NP_001002912 | Q5RHP9 | CA173_HUMAN | Glu-rich.                     | 5  | GCCTCTCCTTTC  | 0.413 |             |
| + | 6  | 1139    | HN2_uc001div.2_   | NM_012302    | NP_036434    | O95490 | LPHN2_HUMAN | otential). Olfactomedin-like  | 9  | GCGGAGTCCTC   | 0.393 |             |
| - | 10 | 1919    | _p.P443S TGFB     | NM_003243    | NP_003234    | Q03167 | TGBR3_HUMAN | acellular (Potential).        | 3  | GGTAGGATCCA   | 0.537 |             |
| - | 36 | 3107    | _p.P942L COL11A   | NM_001854    | NP_001845    | P12107 | COBA1_HUMAN | le-helical region.            | 12 | GTCACGGGAAT   | 0.388 |             |
| + | 21 | 3815    | 1.1_3'UTR MAGI3   | NM_001142782 | NP_001136254 | Q5TCQ9 | MAGI3_HUMAN |                               | 6  | AAGTAGAAAATG  | 0.408 |             |
| - | 3  | 460     |                   | NM_152380    | NP_689593    | Q96SF7 | TBX15_HUMAN | T-box.                        | 2  | ATGTGGATCTAC  | 0.443 |             |
| - | 7  | 1015    | _p.T175A C1orf43  | NM_001098616 | NP_001092086 | Q9BWL3 | CA043_HUMAN |                               | 0  | ACTGAGTTAGGT  | 0.507 |             |
| + | 6  | 1992    | ion_p.P119L RUS   | NM_001105203 | NP_001098673 | Q9BVN2 | RUSC1_HUMAN | RUN.                          | 2  | AGCCCCGCTGA   | 0.642 |             |
| + | 1  | 274     |                   | NM_001231    | NP_001222    | P31415 | CASQ1_HUMAN |                               | 1  | AGACAGGATGG   | 0.632 |             |
| - | 4  | 314     |                   | NM_001013625 | NP_001013647 | Q5VTH2 | CA192_HUMAN |                               | 0  | CCCTTGAGTAA   | 0.478 |             |
| + | 6  | 918     |                   | NM_018122    | NP_060592    | Q6PI48 | SYDM_HUMAN  |                               | 2  | CTCTTCGGTTG   | 0.323 |             |
| + | 2  | 123     |                   | NM_020950    | NP_066001    | Q5VZ46 | K1614_HUMAN |                               | 4  | AGGGCCCAAGA   | 0.612 |             |
| + | 46 | 6392    | s.S1964F CACNA    | NM_000721    | NP_000712    | Q15878 | CAC1E_HUMAN | lasmic (Potential).           | 6  | CAATCCACGGT   | 0.587 |             |
| - | 32 | 4698    | zl.1_Missense_Mu  | NM_017596    | NP_060066    | O75037 | KI21B_HUMAN | WD 4.                         | 6  | GGTGACCGTCA   | 0.622 |             |
| + | 13 | 1162    | b.2_RNA LGR6_uc   | NM_001017403 | NP_001017403 | Q9HBX8 | LGR6_HUMAN  | xtracellular ( p.E388K(1)     | 10 | CTGGGAAATTC   | 0.647 | rs143455603 |
| - | 4  | 839     | iz.2_Missense_Mu  | NM_002644    | NP_002635    | P01833 | PIGR_HUMAN  | 2. Extracellular (Potential). | 3  | GCAGAGATACT   | 0.502 |             |
| - | 10 | 1627    |                   | NM_018040    | NP_060510    | Q9NW75 | GPTC2_HUMAN | G-patch.                      | 1  | TAGAGGAAATC   | 0.473 |             |
| - | 4  | 796     | w.1_Missense_Mu   | NM_003268    | NP_003259    | O60602 | TLR5_HUMAN  | ilar (Potential). LRR 2.      | 4  | CAGTCCCTGA    | 0.403 |             |
| - | 14 | 1632    | 13_uc001hug.3_A   | NM_024525    | NP_078801    | Q8NBP0 | TTC13_HUMAN |                               | 2  | ATGCGGCCAAA   | 0.468 |             |
| + | 5  | 1075    | hvy.1_Missense_M  | NM_173508    | NP_775779    | Q8IY50 | S35F3_HUMAN | ical; (Potential).            | 2  | TGCATTCTATT   | 0.418 |             |
| - | 9  | 2113    | d.2_Missense_Mu   | NM_002508    | NP_002499    | P14543 | NID1_HUMAN  | EGF-like 2.                   | 2  | GCAGGGATTCT   | 0.562 |             |
| + | 36 | 4966    |                   | NM_001035    | NP_001026    | Q92736 | RYR2_HUMAN  | ilarity). 4 X approximate rej | 33 | GCCAAGGCTGG   | 0.527 |             |
| + | 3  | 235     | i_p.P33S NLRP3    | NM_001079821 | NP_001073289 | Q96P20 | NALP3_HUMAN | DAPIN.                        | 26 | ACTATCCTCCC   | 0.547 |             |
| + | 1  | 481     |                   | NM_001001914 | NP_001001914 | Q8NGZ4 | OR2G3_HUMAN | ellular (Potential).          | 1  | CATGCAACTTTT  | 0.488 |             |
| - | 14 | 1773    |                   | NM_001081    | NP_001072    | O60494 | CUBN_HUMAN  | CUB 1.                        | 19 | CCATTTCTTAAAT | 0.403 |             |
| - | 3  | 455     | os.2_Missense_Mt  | NM_019893    | NP_063946    | Q9NR71 | ASAH2_HUMAN | renal (Potential).            | 0  | CTGTTCGATTGC  | 0.473 |             |
| + | 10 | 2170    |                   | NM_032199    | NP_115575    | Q14865 | ARI5B_HUMAN |                               | 4  | ACCCCTTTGA    | 0.552 |             |
| + | 2  | 1481    | jmx.3_Intron CTN  | NM_178011    | NP_821079    | Q86VH5 | LRRT3_HUMAN | ellular (Potential).          | 3  | CTTGCTGGGAAT  | 0.423 |             |
| + | 5  | 1062    | C19_uc009xus.1_I  | NM_000772    | NP_000763    | P33260 | CP2CI_HUMAN |                               | 5  | TATTGGAGAGA   | 0.338 |             |
| + | 2  | 417     | 42F C10orf137_uc  | NM_015608    | NP_056423    | Q3B7T1 | EDRF1_HUMAN |                               | 10 | TATTTCTTGAC   | 0.388 |             |
| + | 14 | 2283    | u.3_Missense_Mu   | NM_025092    | NP_079368    | Q32M88 | ATHL1_HUMAN |                               | 3  | GGTTCTCCCA    | 0.612 |             |
| + | 47 | 6781    | b.2_Missense_Mu   | NM_017511    | NP_059981    | Q9HC84 | MUC5B_HUMAN | in repeats.  Cys-rich subdo   | 0  | GAGGGACGTT    | 0.602 |             |
| + | 1  | 370     |                   | NM_001001480 | NP_001001480 | Q701N2 | KRA55_HUMAN | repeats of C-C-X-P.           | 1  | TGGCTCCTGTG   | 0.697 |             |
| + | 8  | 1186    | p.R144G KCNQ1     | NM_000218    | NP_000209    | P51787 | KCNQ1_HUMAN | lasmic (Potential).           | 1  | AGCAGAGGCAG   | 0.602 |             |
| + | 2  | 246     | 8_uc001lwy.2_Nor  | NM_183233    | NP_899056    | Q96B11 | S22AI_HUMAN |                               | 3  | GGGACCAGGGC   | 0.652 |             |
| - | 1  | 871     |                   | NM_001004758 | NP_001004758 | Q8NGJ8 | O51S1_HUMAN | Name=7; (Potential).          | 4  | TGGAGGAAGAA   | 0.448 |             |
| - | 1  | 483_484 |                   | NM_001005329 | NP_001005329 | Q8NGJ6 | O51A4_HUMAN | Name=4; (Potential).          | 3  | AAAGGAAGGC    | 0.436 |             |
| - | 1  | 329     | _uc001mam.1_Int   | NM_001005288 | NP_001005288 | Q9H343 | O5111_HUMAN | Name=3; (Potential).          | 1  | TGAAGGAGAAA   | 0.443 |             |
| - | 1  | 1304    | 32_uc001mak.1_Ir  | NM_145053    | NP_659490    | Q8IYU4 | UBQLN_HUMAN |                               | 3  | TTGAAGAGAAA   | 0.507 |             |
| - | 1  | 344     | .1_Intron TRIM22  | NM_001001922 | NP_001001922 | Q8NH56 | O52N5_HUMAN | Name=3; (Potential).          | 2  | TGAACCCATGA   | 0.493 | rs143745000 |
| + | 13 | 2012    | ym.2_Missense_I   | NM_001142307 | NP_001135779 | P32780 | TF2H1_HUMAN |                               | 0  | GGCACTTATG    | 0.463 |             |
| - | 2  | 485     | mri.1_Missense_N  | NM_030771    | NP_110398    | Q96HJ3 | CCD34_HUMAN |                               | 0  | CCCATGGTGTG   | 0.418 |             |

|   |    |                             |                   |              |              |        |             |    |               |       |             |
|---|----|-----------------------------|-------------------|--------------|--------------|--------|-------------|----|---------------|-------|-------------|
| + | 2  | 146                         | rf74_uc001mwx.1   | NM_138787    | NP_620142    | Q86VG3 | CK074_HUMAN | 0  | AAATTCCTTAATT | 0.358 |             |
| - | 4  | 1035                        |                   | NM_003654    | NP_003645    | O43916 | CHST1_HUMAN | 5  | GAGGTCGCGGC   | 0.662 |             |
| - | 5  | 1046                        | .1_Intron RAPSN_  | NM_005055    | NP_005046    | Q13702 | RAPSN_HUMAN | 1  | GATCTCGGTCAI  | 0.652 |             |
| + | 1  | 586                         |                   | NM_001004708 | NP_001004708 | Q8NGJ1 | OR4D6_HUMAN | 1  | GCTTTGGAGCTT  | 0.527 |             |
| - | 5  | 15458_15454AK_uc001ntk.1_lr |                   | NM_001620    | NP_001611    | Q09666 | AHNK_HUMAN  | 19 | AGGCTGGCATCA  | 0.441 |             |
| + | 5  | 352                         | v.1_RNA TSGA10I   | NM_152762    | NP_689975    | Q3SY00 | T10IP_HUMAN | 0  | GCTCCCTTCC    | 0.662 |             |
| - | 3  | 566                         | HA3_uc010rj.1_n   | NM_182904    | NP_878907    | Q7Z4N8 | P4HA3_HUMAN | 1  | GAGCCGTTTGG   | 0.507 |             |
| + | 2  | 113                         | n_p.E5D C11orf6i  | NM_024684    | NP_078960    | Q9H7C9 | CK067_HUMAN | 0  | GCTGAAATTGC   | 0.378 |             |
| - | 22 | 3614                        |                   | NM_001098816 | NP_001092286 | Q6N022 | TEN4_HUMAN  | 4  | GATTTCTCTCTC  | 0.582 |             |
| - | 2  | 1005                        | p.T194A TRPC6_    | NM_004621    | NP_004612    | Q9Y210 | TRPC6_HUMAN | 4  | GCTGGTTGCTA   | 0.463 |             |
| - | 6  | 5135                        | z.1_Missense_Mu   | NM_015065    | NP_055880    | Q8NEV8 | EXPH5_HUMAN | 5  | CAGTAATGGGG   | 0.453 |             |
| - | 9  | 937                         | P28_uc001poi.2_5  | NM_020886    | NP_065937    | Q96RU2 | UBP28_HUMAN | 7  | GTTACGAACCC   | 0.358 |             |
| + | 3  | 556                         |                   | NM_182495    | NP_872301    | Q96DL1 | FA55B_HUMAN | 1  | GGCCAGGATGT   | 0.552 |             |
| - | 7  | 1417                        | 1pri.1_Missense_l | NM_020693    | NP_065744    | Q8TD84 | DSCL1_HUMAN | 8  | AGGACGAGACG   | 0.682 |             |
| + | 1  | 650                         |                   | NM_001001965 | NP_001001965 | Q8NGN0 | OR4D5_HUMAN | 1  | GCGATCGTACA   | 0.517 | rs138187932 |
| + | 10 | 1311                        | p.E368K VWA5A_    | NM_001130142 | NP_001123614 | O00534 | VMA5A_HUMAN | 2  | GCACTGAAATC   | 0.522 |             |
| - | 1  | 158                         |                   | NM_012378    | NP_036510    | Q15620 | OR8B8_HUMAN | 1  | AGTGAGAGTTG   | 0.478 |             |
| + | 2  | 1064                        | p.V134I NTM_uc    | NM_016522    | NP_057606    | Q9P121 | NTRI_HUMAN  | 6  | TGCAAGGTAGG   | 0.552 |             |
| - | 7  | 1237                        | dy.1_Missense_Mt  | NM_152640    | NP_689853    | Q8IZD4 | DCP1B_HUMAN | 1  | GAGCTCTGCTG   | 0.572 |             |
| - | 1  | 46                          | Osge.1_Missense_  | NM_174941    | NP_777601    | Q9NR16 | C163B_HUMAN | 11 | GCCACGATTTT   | 0.378 |             |
| + | 3  | 660                         |                   | NM_024865    | NP_079141    | Q9H9S0 | NANOG_HUMAN | 0  | GAGATGAAATC   | 0.373 |             |
| - | 1  | 206                         | _RC3_uc010shc.1   | NM_002261    | NP_002252    | Q07444 | NKG2E_HUMAN | 3  | GCAATCCCTTGAT | 0.348 |             |
| - | 6  | 855                         | _p.P279S ABCC9_   | NM_005691    | NP_005682    | O60706 | ABCC9_HUMAN | 6  | GATTTGGATGATC | 0.353 |             |
| - | 2  | 655                         | _10_uc009zju.1_5' | NM_198992    | NP_945343    | Q6XYQ8 | SYT10_HUMAN | 2  | GCTTTTCAATTT  | 0.398 |             |
| - | 35 | 5221                        |                   | NM_025003    | NP_079279    | P59510 | ATS20_HUMAN | 19 | ATAAATCTAAAG  | 0.303 |             |
| - | 1  | 82                          |                   | NM_025003    | NP_079279    | P59510 | ATS20_HUMAN | 19 | GCTGGGTGGA    | 0.652 |             |
| - | 2  | 1381                        | i7L_uc001rns.3_M  | NM_001098615 | NP_001092085 | Q9H0K6 | PUS7L_HUMAN | 1  | GTTTCTCTCTTG  | 0.348 |             |
| - | 11 | 893                         | qv.2_Missense_M   | NM_001844    | NP_001835    | P02458 | CO2A1_HUMAN | 2  | GATGGGACCCT   | 0.478 |             |
| - | 5  | 654                         |                   | NM_014470    | NP_055285    | Q92730 | RND1_HUMAN  | 1  | GATGGATGCC    | 0.552 |             |
| - | 6  | 1186                        |                   | NM_033045    | NP_149034    | Q9NSB2 | KRT84_HUMAN | 1  | GATCTCGTTCC   | 0.547 | rs145550883 |
| - | 2  | 616                         |                   | NM_005555    | NP_005546    | P04259 | K2C6B_HUMAN | 2  | GAGAACCTTGT   | 0.537 |             |
| - | 2  | 948                         |                   | NM_005554    | NP_005545    | P02538 | K2C6A_HUMAN | 5  | GTCCTCCACCA   | 0.542 |             |
| + | 1  | 478                         |                   | NM_001005497 | NP_001005497 | A6NL08 | O6C75_HUMAN | 3  | GTAATGCTTCTGC | 0.438 |             |
| + | 8  | 877                         | q.2_Missense_Mul  | NM_005269    | NP_005260    | P08151 | GLI1_HUMAN  | 15 | GGAAGGAGTTC   | 0.597 |             |
| + | 3  | 336                         | n_p.P85L MSRB3_   | NM_198080    | NP_932346    | Q8IXL7 | MSRB3_HUMAN | 2  | GAACTCCATTGT  | 0.318 |             |
| - | 2  | 335                         | va.3_Missense_Mt  | NM_002837    | NP_002828    | P23467 | PTPRB_HUMAN | 3  | ACTGTTCTCTCT  | 0.458 |             |
| - | 1  | 734                         |                   | NM_152638    | NP_689851    | Q8TC90 | CL012_HUMAN | 2  | GAAATTCAGAA   | 0.647 |             |
| + | 6  | 935                         | zth.1_Missense_M  | NM_152435    | NP_689648    | Q96NU7 | HUTI_HUMAN  | 1  | AACTGGGAGCG   | 0.483 |             |
| - | 3  | 291                         | .2_RNA MMAB_uc    | NM_052845    | NP_443077    | Q96EY8 | MMAB_HUMAN  | 0  | GTTCTCTGTG    | 0.393 |             |
| - | 9  | 620                         | k.2_Missense_Mut  | NM_002150    | NP_002141    | P32754 | HPPD_HUMAN  | 0  | GAGACCATCT    | 0.582 |             |
| - | 14 | 1485                        | _p.V214I ZCHC8    | NM_017612    | NP_060082    | Q6NZY4 | ZCHC8_HUMAN | 0  | GTTGTACTCCA   | 0.413 |             |
| + | 11 | 739                         | au.1_Missense_M   | NM_001516    | NP_001507    | Q13889 | TF2H3_HUMAN | 0  | ATCAGAGATCTC  | 0.393 |             |
| - | 8  | 1272                        | _p.C278G RIMBP2   | NM_015347    | NP_056162    | O15034 | RIMB2_HUMAN | 11 | GACGCACTGCA   | 0.627 |             |
| - | 3  | 338                         |                   | NM_006001    | NP_005992    | Q13748 | TBA3C_HUMAN | 5  | GATCTTCTTCC   | 0.522 |             |
| + | 10 | 1663                        | pw.2_Missense_Mt  | NM_006646    | NP_006637    | Q9UPY6 | WASF3_HUMAN | 1  | GTTCCGGGCGC   | 0.617 |             |
| - | 2  | 666                         | r12_uc010tdl.1_5' | NM_005288    | NP_005279    | P47775 | GPR12_HUMAN | 0  | GAAATGGTACGT  | 0.577 |             |
| + | 42 | 6907                        | n_p.R27Q NBEA_1   | NM_015678    | NP_056493    | Q8NFP9 | NBEA_HUMAN  | 11 | GAAACCGAAGTA  | 0.343 |             |



|   |    |           |                   |              |              |        |             |                            |    |                  |       |
|---|----|-----------|-------------------|--------------|--------------|--------|-------------|----------------------------|----|------------------|-------|
| - | 10 | 1246      | z.2_Missense_Mu   | NM_052867    | NP_443099    | Q8IZF0 | NALCN_HUMAN | lasmic (Potential).        | 16 | CATCTTCATGAA     | 0.448 |
| - | 5  | 1085      | p.A232V NOVA1_    | NM_002515    | NP_002506    | P51513 | NOVA1_HUMAN | p.A256D(1)                 | 5  | ACATTGGCATAAC    | 0.458 |
| + | 7  | 903       | vt.2_Missense_Mi  | NM_173159    | NP_071406    | Q8IXF0 | NPAS3_HUMAN |                            | 2  | TCAAATCATCAGC    | 0.478 |
| - | 16 | 2499      | p.V703A RALGAP    | NM_014990    | NP_055805    | Q6GYQ0 | RGPA1_HUMAN |                            | 4  | GTCCAACCTCTC     | 0.413 |
| + | 9  | 1025_1026 |                   | NM_002687    | NP_002678    | Q9H307 | PININ_HUMAN | ential. Glu-rich.          | 1  | AAGAGGGTAAGC     | 0.351 |
| - | 9  | 1304      | L1_uc001wxz.2_Ir  | NM_004196    | NP_004187    | Q00532 | CDKL1_HUMAN |                            | 2  | aggagggggatgcctc | 0     |
| - | 11 | 2661      | IH5_uc001xfy.2_3' | NM_139318    | NP_647479    | Q8NCM2 | KCNH5_HUMAN | lasmic (Potential).        | 9  | GTCACCTTTTGT     | 0.507 |
| - | 5  | 557       | nse_Mutation_p.P  | NM_015346    | NP_056161    | Q68DK2 | ZFY26_HUMAN |                            | 11 | GCCTTGGATTTCC    | 0.572 |
| - | 8  | 785       | ri.1_Missense_Mu  | NM_012074    | NP_036206    | Q92784 | DPF3_HUMAN  |                            | 1  | FATTGGGAATGAC    | 0.512 |
| - | 5  | 516       | ri.1_Missense_Mu  | NM_012074    | NP_036206    | Q92784 | DPF3_HUMAN  |                            | 1  | TTCTTCGCTTGC     | 0.448 |
| + | 5  | 1298      | RXN3_uc010asv.1   | NM_004796    | NP_004787    | Q9Y4C0 | NRX3A_HUMAN | ellular (Potential).       | 10 | .CGGATGAGTGC     | 0.567 |
| - | 3  | 1347      | 1ycu.3_Missense_  | NM_016186    | NP_057270    | Q9UK55 | ZPI_HUMAN   |                            | 3  | CCATTTCCCTGG     | 0.502 |
| - | 3  | 980       | RPINA1_uc010au    | NM_000295    | NP_000286    | P01009 | A1AT_HUMAN  |                            | 1  | CCCTTCACGGTG     | 0.542 |
| - | 2  | 828       | ydg.2_Missense_f  | NM_175739    | NP_783866    | Q86WD7 | SPA9_HUMAN  |                            | 2  | AATGTGGTTTCA     | 0.388 |
| + | 3  | 612       |                   | NM_003246    | NP_003237    | P07996 | TSP1_HUMAN  | SP N-terminal.             | 6  | GTGAAGAAGCT      | 0.582 |
| + | 9  | 1879      |                   | NM_019074    | NP_061947    | Q9NR61 | DLL4_HUMAN  | ellular (Potential).       | 2  | GTCCCCCGTGG      | 0.652 |
| + | 1  | 775       |                   | NM_001080534 | NP_001074003 | Q8NB66 | UN13C_HUMAN |                            | 7  | AAACAGAACTT      | 0.463 |
| + | 8  | 3781      | acl.2_Missense_M  | NM_001080534 | NP_001074003 | Q8NB66 | UN13C_HUMAN | C2 1.                      | 7  | ATTTTTGGAAAT     | 0.313 |
| + | 24 | 5650      |                   | NM_001080534 | NP_001074003 | Q8NB66 | UN13C_HUMAN |                            | 7  | CAATGGATGCA      | 0.338 |
| + | 2  | 1600      | rh.2_Missense_M   | NM_015322    | NP_056137    | Q9UK73 | FEM1B_HUMAN |                            | 0  | AAGGCCTTATAC     | 0.418 |
| - | 3  | 989       |                   | NM_001897    | NP_001888    | Q6UVK1 | CSPG4_HUMAN | obular or compact configur | 3  | CCACGGAGATT      | 0.607 |
| + | 21 | 2806      | b.1_Missense_Mi   | NM_004136    | NP_004127    | P48200 | IREB2_HUMAN |                            | 0  | AAAGATCATTTG     | 0.368 |
| + | 11 | 1430      | G3_uc010uud.1_F   | NM_032039    | NP_114428    | Q9H0X4 | ITFG3_HUMAN | ellular (Potential).       | 1  | CCTAGCCCTCC      | 0.672 |
| - | 2  | 469       |                   | NM_001013658 | NP_001013680 | Q96A99 | PTX4_HUMAN  |                            | 0  | GCTGTGGACGA      | 0.736 |
| + | 4  | 546       | se_Mutation_p.I12 | NM_004996    | NP_004987    | P33527 | MRP1_HUMAN  | Cytoplasmic.               | 4  | TTTTAATTCAGCT    | 0.383 |
| - | 19 | 2721      |                   | NM_017539    | NP_060009    | Q8TD57 | DYH3_HUMAN  | n (By similarity).         | 18 | TGTCCTCCACAT     | 0.458 |
| + | 17 | 3624      | e_Mutation_p.P82i | NM_006910    | NP_008841    | Q7Z6E9 | RBBP6_HUMAN |                            | 4  | TTTTCTCCAGAG     | 0.418 |
| + | 1  | 71        |                   | NM_144602    | NP_653203    | Q8WTQ4 | CP078_HUMAN |                            | 1  | CTGAAGGATTTA     | 0.532 |
| - | 7  | 820       | e_Mutation_p.P25  | NM_000512    | NP_000503    | P34059 | GALNS_HUMAN |                            | 2  | AGAAGGGTTTGC     | 0.602 |
| - | 5  | 540       | e_Mutation_p.P15  | NM_000512    | NP_000503    | P34059 | GALNS_HUMAN |                            | 2  | CAGGGGGTGGA      | 0.567 |
| - | 2  | 885       | l TRPV1_uc010vi   | NM_080706    | NP_542437    | Q8NER1 | TRPV1_HUMAN | nic (Potential). ANK 1.    | 1  | CGGCTTCAAAGA     | 0.567 |
| - | 6  | 1220      | k.1_Missense_Mu   | NM_015113    | NP_055928    | O43149 | ZZEF1_HUMAN | DOC.                       | 4  | CAGACTTCTTAA     | 0.483 |
| - | 11 | 1743      | cb.2_Missense_M   | NM_020162    | NP_064547    | Q9H6R0 | DHX33_HUMAN |                            | 2  | AATTCTCTTTGC     | 0.358 |
| - | 6  | 775       | nse_Mutation_p.P  | NM_020360    | NP_065093    | Q9NRY6 | PLS3_HUMAN  | smic (By similarity).      | 0  | GAAGGGGATGC      | 0.612 |
| + | 1  | 67        | 2R_uc010cog.1_f   | NM_004246    | NP_004237    | O95838 | GLP2R_HUMAN | ellular (Potential).       | 3  | TCCACGAGCTG      | 0.647 |
| + | 9  | 1907      | bj.2_Missense_Mi  | NM_003593    | NP_003584    | O15353 | FOXN1_HUMAN |                            | 1  | ATCTTCGATGCC     | 0.612 |
| - | 3  | 617       |                   | NM_001045    | NP_001036    | P31645 | SC6A4_HUMAN | lasmic (Potential).        | 4  | AACTCCGTTTTC     | 0.502 |
| - | 3  | 402       | nse_Mutation_p.C  | NM_152781    | NP_689994    | A2RTY3 | CQ066_HUMAN |                            | 3  | CAGGTCGTGCC      | 0.512 |
| - | 8  | 1386      | P_uc010wfs.1_Inti | NM_000422    | NP_000413    | Q04695 | K1C17_HUMAN | Tail.                      | 2  | GGGAGGAGATG      | 0.652 |
| - | 12 | 1651      | o.1_Missense_Mu   | NM_005374    | NP_005365    | Q14168 | MPP2_HUMAN  | ylate kinase-like.         | 0  | ATATCCACTCTC     | 0.617 |
| + | 26 | 3423      | c010dag.2_IntronI | NM_005892    | NP_005883    | O95466 | FMNL_HUMAN  | DAD.                       | 1  | AGACGGTGCCC      | 0.582 |
| - | 5  | 1746      | ikd.2_Missense_M  | NM_015443    | NP_056258    | Q7Z3B3 | K1267_HUMAN |                            | 2  | AGACAGGCTGA      | 0.343 |
| - | 15 | 2627      | s.1_Missense_Mu   | NM_198393    | NP_938207    | Q8IWB6 | TEX14_HUMAN |                            | 17 | TTTTCCAGGGT      | 0.423 |
| + | 26 | 3881_3882 | rug.1_Missense_M  | NM_020761    | NP_065812    | Q8N122 | RPTOR_HUMAN | WD 1.                      | 6  | CGTCCCCTCTC      | 0.559 |
| + | 1  | 471       | AL_uc010dkz.2_In  | NM_020412    | NP_065145    | Q7LBR1 | CHM1B_HUMAN |                            | 0  | TGGACAAATTC      | 0.517 |
| + | 1  | 59        |                   | NM_005913    | NP_005904    | P33032 | MC5R_HUMAN  | ellular (Potential).       | 6  | GGCAACCTTT       | 0.463 |
| + | 14 | 1990      |                   | NM_005925    | NP_005916    | Q16820 | MEP1B_HUMAN | ellular (Potential).       | 2  | AGGCTCCACCC      | 0.463 |

rs147158339

|   |     |           |                                                    |              |              |        |             |                                |     |                   |       |
|---|-----|-----------|----------------------------------------------------|--------------|--------------|--------|-------------|--------------------------------|-----|-------------------|-------|
| - | 5   | 696       | 2_uc010dnf.2_3'U                                   | NM_002930    | NP_002921    | Q99578 | RIT2_HUMAN  |                                | 1   | AGCCATGAAAAG      | 0.423 |
| + | 20  | 3706      | p.R868K DCC_uc                                     | NM_005215    | NP_005206    | P43146 | DCC_HUMAN   | tential), Fibronectin type-III | 17  | CTTCAGGACTC       | 0.388 |
| - | 8   | 1143      | p.E332K SERPINI                                    | NM_002974    | NP_002965    | P48594 | SPB4_HUMAN  |                                | 3   | ATAATTCGACTAC     | 0.463 |
| + | 6   | 689       | Met.1_Missense_M                                   | NM_001040147 | NP_001035237 | O75635 | SPB7_HUMAN  |                                | 3   | ATCTCCCAAGG       | 0.408 |
| - | 6   | 820       | p.S178F NETO1_                                     | NM_138966    | NP_620416    | Q8TDF5 | NETO1_HUMAN | tracellular (Potential).       | 4   | CTTCGGAACCG       | 0.428 |
| + | 2   | 1120      |                                                    | NM_173481    | NP_775752    | Q8IVT2 | CS021_HUMAN |                                | 1   | AGGGCGCCCGT       | 0.682 |
| + | 13  | 1539      | s.G432D FSD1_uc                                    | NM_024333    | NP_077309    | Q9BTV5 | FSD1_HUMAN  | 330.2/SPRY.                    | 1   | GTATGGTGTGG       | 0.677 |
| - | 11  | 1183      | p.G382E SEMA6E                                     | NM_032108    | NP_115484    | Q9H3T3 | SEM6B_HUMAN | lar (Potential), Sema.         | 1   | GCATCCCCGGG       | 0.612 |
| + | 2   | 924       | Met.1_Missense_M                                   | NM_014686    | NP_055501    | O15063 | K0355_HUMAN |                                | 1   | CGGGTCCAAGC       | 0.627 |
| + | 10  | 2221      | efi.2_Missense_Mutation_p.E373G uc010efj.2_Missens |              |              | Q3ZCX4 | ZN568_HUMAN |                                | 2   | ATGTGAAAAGG       | 0.448 |
| - | 5   | 717       | S85B_uc002ofr.1_I                                  | NM_152279    | NP_689492    | Q52M93 | Z585B_HUMAN |                                | 1   | TTTTTCTCCTGT      | 0.393 |
| - | 1   | 688       |                                                    | NM_020862    | NP_065913    | Q9P244 | LRFN1_HUMAN | tracellular (Potential).       | 2   | GAAGAGCCCGT       | 0.667 |
| + | 27  | 3502_3503 | se_Mutation_p.P4                                   | NM_001042544 | NP_001036009 | Q8N2S1 | LTBP4_HUMAN | Pro-rich.                      | 1   | GCCGACCCAGC       | 0.693 |
| - | 3   | 574       | S_G4_uc002owb.2_                                   | NM_002780    | NP_002771    | Q00888 | PSG4_HUMAN  | like C2-type 1.                | 1   | CCCTGGGATTTA      | 0.532 |
| + | 3   | 311       | ie_Mutation_p.Q54                                  | NM_001007270 | NP_001007271 | Q9H840 | GEM17_HUMAN |                                | 1   | AATCCAGGAG        | 0.627 |
| + | 2   | 232       | pgk.1_Missense_M                                   | NM_018485    | NP_060955    | Q9P296 | C5ARL_HUMAN | ellular (Potential).           | 1   | ACGATTCTGTCA      | 0.607 |
| + | 4   | 379       | p.P69S CCDC15                                      | NM_144688    | NP_653289    | Q8N6L0 | CC155_HUMAN |                                | 2   | AGGGCCCCCAG       | 0.642 |
| + | 14  | 1964      | e_Mutation_p.E54                                   | NM_006669    | NP_006660    | Q8NHL6 | LIRB1_HUMAN | lasmic (Potential).            | 3   | AGCCTGAGGAT       | 0.612 |
| - | 5   | 1190      | ne.2_Missense_M                                    | NM_022103    | NP_071386    | Q5HYK9 | ZN667_HUMAN | C2H2-type 6.                   | 1   | AGGGTGAAATC       | 0.388 |
| - | 11  | 1775      | 61T ZIM2_uc002qi                                   | NM_015363    | NP_056178    | Q9NZV7 | ZIM2_HUMAN  |                                | 3   | GCAGGCTCTCT       | 0.483 |
| + | 3   | 362       |                                                    | NM_182626    | NP_872432    | Q96LS8 | CB048_HUMAN |                                | 0   | tttctaaggggatgaga | 0     |
| - | 4   | 459       | dx.2_Missense_M                                    | NM_022460    | NP_071905    | Q53T59 | H1BP3_HUMAN | PX.                            | 1   | CCCTGGGGATC       | 0.557 |
| - | 26  | 7173      |                                                    | NM_000384    | NP_000375    | P04114 | APOB_HUMAN  |                                | 27  | CTACTTCATACCT     | 0.378 |
| - | 16  | 2333      | i.1_RNA ATAD2B_                                    | NM_017552    | NP_060022    | Q9ULI0 | ATD2B_HUMAN |                                | 1   | AGTGGTCTTATG      | 0.448 |
| + | 1   | 331       | 7L_uc010ymf.1_5'                                   | NM_018158    | NP_060628    | Q9BWU0 | NADAP_HUMAN |                                | 0   | CTTACCATCGC       | 0.522 |
| - | 38  | 5970_5971 | ADA_uc002rsx.3_N                                   | NM_001083953 | NP_001077422 | Q6YHU6 | THADA_HUMAN |                                | 3   | ACCATCCTTTGA      | 0.525 |
| - | 10  | 1796      | p.M512I FSHR_u                                     | NM_000145    | NP_000136    | P23945 | FSHR_HUMAN  | Name=6; (Potential).           | 8   | ATGGCCATGCG       | 0.527 |
| + | 10  | 7466      | g.2_Missense_Mu                                    | NM_015120    | NP_055935    | Q8TCU4 | ALMS1_HUMAN |                                | 9   | TGTTTCACCCAA      | 0.448 |
| + | 12  | 1129      | s.R335* EPB41L5_                                   | NM_020909    | NP_065960    | Q9HCM4 | E41L5_HUMAN |                                | 1   | TCTCATCGATCA      | 0.378 |
| + | 6   | 1253      | flu.2_Missense_M                                   | NM_130773    | NP_570129    | Q8WYK1 | CNTP5_HUMAN | 1. Extracellular (Potential).  | 10  | AGGGCGAGACG       | 0.562 |
| - | 17  | 2633      |                                                    | NM_001099771 | NP_001093241 | A5A3E0 | POTEF_HUMAN | Actin-like.                    | 5   | GCCCCCATCAT       | 0.622 |
| - | 1   | 1637      |                                                    | NR_002826    |              |        |             |                                | 0   | CAGCTCCGGGA       | 0.642 |
| - | 73  | 12143     |                                                    | NM_018557    | NP_061027    | Q9NZR2 | LRP1B_HUMAN | tial), LDL-receptor class A    | 50  | TATTTCTGCATC      | 0.383 |
| + | 9   | 1760      | i.2_Missense_Mut                                   | NM_018328    | NP_060798    | Q9P267 | MBD5_HUMAN  |                                | 5   | GTTTTCATGGAC      | 0.448 |
| - | 123 | 17284     | s.G2121E NEB_uc                                    | NM_004543    | NP_004534    | P20929 | NEBU_HUMAN  |                                | 20  | GATTTTCCTTTCT     | 0.403 |
| + | 3   | 1180      | IJ3_uc010zce.1_3'                                  | NM_002239    | NP_002230    | P48549 | IRK3_HUMAN  | smic (By similarity).          | 2   | TTTTTCTCTGTA      | 0.388 |
| - | 22  | 4263      | uc002udp.2_Intror                                  | NM_002977    | NP_002968    | Q15858 | SCN9A_HUMAN | III.                           | 13  | GGAAGGAATTG       | 0.353 |
| - | 309 | 99378     | lissense_Mutation_                                 | NM_133378    | NP_596869    | Q8WZ42 | TITIN_HUMAN |                                | 153 | ACCTTCGTTTAT      | 0.418 |
| - | 292 | 87727     | s63E TTN_uc010zi                                   | NM_133378    | NP_596869    | Q8WZ42 | TITIN_HUMAN |                                | 153 | CTCCTCCGCTCT      | 0.527 |
| - | 275 | 74985     | s16A TTN_uc010z                                    | NM_133378    | NP_596869    | Q8WZ42 | TITIN_HUMAN |                                | 153 | CCCATGTTACTA      | 0.483 |
| - | 181 | 35412     | .1_Missense_Mut                                    | NM_133378    | NP_596869    | Q8WZ42 | TITIN_HUMAN | p.E5233K(1)                    | 153 | CATATTCGCCTT      | 0.428 |
| - | 42  | 10036     | _uc010zfi.1_Misse                                  | NM_133378    | NP_596869    | Q8WZ42 | TITIN_HUMAN |                                | 153 | ACCAGGAAATTT      | 0.527 |
| - | 13  | 2269      | 1_Missense_Muta                                    | NM_133378    | NP_596869    | Q8WZ42 | TITIN_HUMAN |                                | 153 | CTTGCTAGTAG       | 0.368 |
| + | 7   | 2914      | p.Q934L SGOL2_                                     | NM_152524    | NP_689737    | Q562F6 | SGOL2_HUMAN |                                | 4   | ATGTCCAAGAAA      | 0.279 |
| + | 3   | 646       | D28_uc010ftx.2_M                                   | NM_006139    | NP_006130    | P10747 | CD28_HUMAN  | ellular (Potential).           | 0   | TTTGTCCAAGT       | 0.438 |
| - | 2   | 300       |                                                    | NM_006891    | NP_008822    | P07320 | CRGD_HUMAN  | a crystallin 'Greek key' 2.    | 0   | ATAGTCGGCGC       | 0.657 |
| + | 13  | 1433      | s_Mutation_p.S44C                                  | NM_001875    | NP_001866    | P31327 | CPSM_HUMAN  |                                | 13  | CTGTGCCATTG       | 0.373 |

rs1363752

|   |    |       |                   |              |              |        |             |                                |    |              |       |             |
|---|----|-------|-------------------|--------------|--------------|--------|-------------|--------------------------------|----|--------------|-------|-------------|
| + | 11 | 1230  | _p.Q78K VIL1_uc   | NM_007127    | NP_009058    | P09327 | VIL1_HUMAN  | Core.                          | 1  | CTGCCAGCAG   | 0.567 |             |
| - | 11 | 4921  | _Mutation_p.R15   | NM_001142644 | NP_001136116 | Q2M3C7 | SPKAP_HUMAN |                                | 10 | TGGCTCGGAGC  | 0.542 |             |
| + | 12 | 1514  | yc.2_Missense_Mi  | NM_000751    | NP_000742    | Q07001 | ACHD_HUMAN  |                                | 3  | TTCCTGGGGAC  | 0.617 |             |
| + | 9  | 1048  | fye.1_Missense_M  | NM_005199    | NP_005190    | P07510 | ACHG_HUMAN  | lasmic (Potential).            | 0  | GAGGGTCCGC   | 0.617 |             |
| + | 2  | 256   |                   | NM_173821    | NP_776182    | Q14D33 | CB085_HUMAN |                                | 1  | GGACAGGGCCA  | 0.706 |             |
| - | 7  | 1194  | gji.2_Missense_M  | NM_007050    | NP_008981    | O14522 | PTPRT_HUMAN | tential). Fibronectin type-III | 20 | TGTGGTCTCTC  | 0.557 |             |
| - | 2  | 861   | hk.1_Missense_M   | NM_021248    | NP_067071    | Q9UJ99 | CAD22_HUMAN | r (Potential). Cadherin 1.     | 5  | GATGAACTCCG  | 0.632 |             |
| - | 9  |       |                   |              |              | P56180 | TPTE_HUMAN  |                                | 5  | ATTTTACCTAGC | 0.299 | rs4041777   |
| + | 6  | 770   | yxz.2_Missense_Iv | NM_007341    | NP_031367    | P55822 | SH3BG_HUMAN | u-rich (acidic).               | 0  | AAGATTCTAGG  | 0.493 |             |
| - | 25 | 4734  | AM_uc002yvr.1_f   | NM_001389    | NP_001380    | O60469 | DSCAM_HUMAN | III 5. Extracellular (Potentia | 11 | TGATTGGAAAA  | 0.488 |             |
| + | 9  | 1092  | zbi.2_Missense_M  | NM_018964    | NP_061837    | P57057 | GLPT_HUMAN  | ical; (Potential).             | 0  | GCCTGGAGCCA  | 0.592 |             |
| - | 1  | 469   | .1_Intron C21orf2 | NM_198688    | NP_941961    | P60371 | KR106_HUMAN | \ repeats of C-C-X(3).         | 0  | GCAGGGGGAGG  | 0.602 |             |
| - | 2  | 331   | 4R_uc002zru.2_5'  | NM_023004    | NP_075380    | Q9BZR6 | RTN4R_HUMAN | LRRNT.                         | 0  | CTGGGGGCAGC  | 0.667 |             |
| - | 18 | 2565  | B1_uc003af1.2_Mi  | NM_001127    | NP_001118    | Q10567 | AP1B1_HUMAN |                                | 2  | GCAGGGAGATC  | 0.657 |             |
| - | 4  | 887   | _p.S103F LARGE    | NM_004737    | NP_004728    | O95461 | LARGE_HUMAN | ienal (Potential).             | 3  | CCATGGAGTAG  | 0.672 |             |
| - | 6  | 1043  | ssense_Mutation_  | NR_002570    |              |        |             |                                | 0  | TGGTCAAGGTG  | 0.627 | rs1800754   |
| - | 31 | 4207  |                   | NM_024923    | NP_079199    | Q8TEM1 | PO210_HUMAN | ienal (Probable).              | 11 | GGTAGGAAACA  | 0.572 | rs147706980 |
| + | 1  | 2110  | k.1_Missense_Mu   | NM_152536    | NP_689749    | Q6ZNL6 | FGD5_HUMAN  |                                | 5  | GGAGAACAAAT  | 0.517 |             |
| - | 5  | 1039  | p.V170A UBP1_uc   | NM_014517    | NP_055332    | Q9NZI7 | UBIP1_HUMAN |                                | 2  | AATTCAACCGCA | 0.358 |             |
| - | 12 | 4842  |                   | NM_014831    | NP_055646    | O15050 | TRNK1_HUMAN |                                | 2  | CATTTCTTCTC  | 0.493 |             |
| - | 13 | 1066  | 2_uc003cgr.2_Intr | NM_006309    | NP_006300    | Q9Y608 | LRRF2_HUMAN | -binding. Ser-rich.            | 1  | GACCATAAGGGT | 0.358 |             |
| - | 11 | 1388  | lx.2_Missense_Mu  | NM_020707    | NP_065758    | Q9HCP6 | HHATL_HUMAN |                                | 3  | CAATTCGTGCTA | 0.577 |             |
| - | 3  | 478   | DA_uc010hku.2_5'  | NM_001664    | NP_001655    | P61586 | RHOA_HUMAN  |                                | 2  | TCAGGCGATCAT | 0.493 |             |
| + | 19 | 2720  | _p.M853L CACNA    | NM_001128840 | NP_001122312 | Q01668 | CAC1D_HUMAN | lasmic (Potential).            | 11 | TGAACATGAAG  | 0.428 | rs138798164 |
| + | 1  | 189   | rf26_uc003dtk.1_f | NM_032359    | NP_115735    | Q9BQ75 | CC026_HUMAN |                                | 1  | CGACTGGAGCA  | 0.662 |             |
| + | 4  | 2336  |                   | NM_016298    | NP_057382    | Q9UH90 | FBX40_HUMAN |                                | 5  | CGTCTCCTAAA  | 0.488 |             |
| + | 1  | 226   | lbn.1_Nonsense_I  | NM_021082    | NP_066568    | Q16348 | S15A2_HUMAN |                                | 1  | CACCTCGACCA  | 0.502 |             |
| - | 6  | 784   | fk.2_Missense_Mi  | NM_005241    | NP_005232    | Q03112 | EV11_HUMAN  | MAPK9, SMAD3 and prob:         | 14 | CCGACGAAGTG  | 0.552 |             |
| + | 2  | 211   | z.2_Missense_Mul  | NM_003722    | NP_003713    | Q9H3D4 | P63_HUMAN   | ription activation.            | 12 | CATGTCCCAGA  | 0.373 |             |
| + | 4  | 1205  | P366L TACC3_uc    | NM_006342    | NP_006333    | Q9Y6A5 | TACC3_HUMAN |                                | 2  | GCCTCCCTTGA  | 0.602 |             |
| - | 1  | 387   | 2A3_uc010ihp.1_I  | NM_024743    | NP_079019    | Q6UWM9 | UD2A3_HUMAN | ellular (Potential).           | 2  | AAGTTCCTCTT  | 0.338 |             |
| + | 2  | 689   |                   | NM_015393    | NP_056208    | Q6UWI2 | PARM1_HUMAN | ellular (Potential).           | 1  | CATCTCCCCTC  | 0.572 |             |
| - | 1  | 413   |                   | NM_032693    | NP_116082    | Q9BSU3 | NAA11_HUMAN | etyltransferase.               | 2  | TGGTCCATCAG  | 0.557 |             |
| + | 5  | 966   | n_p.L78F ARHGAI   | NM_001025616 | NP_001020787 | Q8N264 | RHG24_HUMAN | Rho-GAP.                       | 0  | AGGGTCTCTTT  | 0.488 |             |
| + | 7  | 978   |                   | NM_004967    | NP_004958    | P21815 | SIAL_HUMAN  |                                | 0  | CCATATGAAGAT | 0.478 |             |
| + | 2  | 687   | 190A_uc010ikv.2   | NM_001145065 | NP_001138537 | Q9C0I3 | F190A_HUMAN |                                | 2  | GACATTCTGTTG | 0.368 |             |
| - | 2  | 183   | R38C ADH1A_uc     | NM_000667    | NP_000658    | P07327 | ADH1A_HUMAN |                                | 2  | AATACGAACTTC | 0.348 |             |
| - | 7  | 582   |                   | NM_000669    | NP_000660    | P00326 | ADH1G_HUMAN |                                | 0  | CAGGGGCGAG   | 0.522 |             |
| + | 9  | 10628 | _p.P1841L FAT4_u  | NM_024582    | NP_078858    | Q6V0I7 | FAT4_HUMAN  | Extracellular (Potential).     | 18 | AAGTCCCTTTA  | 0.498 |             |
| - | 1  | 2501  | .1_Intron PCDH18  | NM_019035    | NP_061908    | Q9HCL0 | PCD18_HUMAN | ical; (Potential).             | 5  | CCTAAGGAAATA | 0.423 |             |
| - | 7  | 1247  | p.R258K LRBA_uc   | NM_006726    | NP_006717    | P50851 | LRBA_HUMAN  |                                | 7  | TGTTCTGAAA   | 0.323 |             |
| - | 15 | 2172  | p.G578V FSTL5_u   | NM_020116    | NP_064501    | Q8N475 | FSTL5_HUMAN |                                | 8  | CATCCCCTG    | 0.413 |             |
| - | 6  | 1287  | 3iq.1_Missense_Iv | NM_017923    | NP_060393    | Q8TCQ1 | MARH1_HUMAN | ING-CH-type.                   | 2  | AAAGCGCAGTG  | 0.527 | rs146337383 |
| + | 8  | 688   | irn.2_Nonsense_Iv | NM_007193    | NP_009124    | Q9UJ72 | ANX10_HUMAN | Annexin 3.                     | 0  | CTATGGGAAGC  | 0.502 |             |
| + | 12 | 2015  | kb.1_Missense_M   | NM_017423    | NP_059119    | Q86SF2 | GALT7_HUMAN | ectin. Lumenal (Potential).    | 1  | AGTAAAACGAC  | 0.363 |             |
| + | 12 | 1865  | _p.L330S SNX25    | NM_031953    | NP_114159    | Q9H3E2 | SNX25_HUMAN | PX.                            | 5  | GAATTTACACCC | 0.403 |             |
| - | 10 | 1686  |                   | NM_003966    | NP_003957    | Q13591 | SEM5A_HUMAN | tracellular (Potential).       | 2  | TGGCGCTCAGG  | 0.602 |             |

|   |    |           |                     |              |              |        |                                            |    |                    |       |             |
|---|----|-----------|---------------------|--------------|--------------|--------|--------------------------------------------|----|--------------------|-------|-------------|
| - | 2  | 198       | z.1_5'UTR CTNNE     | NM_001332    | NP_001323    | Q9UQB3 | CTND2_HUMAN                                | 8  | GGTCTGGAACA        | 0.493 |             |
| - | 62 | 10543     | \H5_uc003jfc.2_5'   | NM_001369    | NP_001360    | Q8TE73 | DYH5_HUMAN                                 | 31 | ATCTTTCTTTTTC      | 0.413 |             |
| - | 40 | 6625      |                     | NM_001369    | NP_001360    | Q8TE73 | DYH5_HUMAN                                 | 31 | CTCATCAATCTA       | 0.373 |             |
| - | 7  | 1557      | p.E394K CDH18_t     | NM_004934    | NP_004925    | Q13634 | CAD18_HUMAN r (Potential). Cadherin 4.     | 7  | CATTTTCGTAGAC      | 0.433 |             |
| + | 12 | 1107      | _p.S233L RAI14_t    | NM_015577    | NP_056392    | Q9P0K7 | RAI14_HUMAN                                | 1  | AGGAATCGGTAT       | 0.313 |             |
| - | 4  | 542       | JGT3A1_uc011cor.    | NM_152404    | NP_689617    | Q6NUS8 | UD3A1_HUMAN ellular (Potential).           | 3  | TTATATCCTTTCT      | 0.303 |             |
| + | 10 | 1905      | _p.R370C SLC1A3     | NM_004172    | NP_004163    | P43003 | EAA1_HUMAN                                 | 0  | .GGGATCGCCTC       | 0.547 |             |
| + | 2  | 293       |                     | NM_138453    | NP_612462    | Q96E17 | RAB3C_HUMAN region (By similarity).        | 2  | GGATCGATTTCA       | 0.408 |             |
| - | 22 | 3708      | o.2_RNA ADAMT5      | NM_197941    | NP_922932    | Q9UKP5 | ATS6_HUMAN SP type-1 4.                    | 0  | CCAAGCCACC         | 0.453 |             |
| + | 20 | 4120      | R98_uc003kjt.2_5'   | NM_032119    | NP_115495    | Q8WXG9 | GPR98_HUMAN ellular (Potential).           | 16 | GTTAATCCAAAA       | 0.463 |             |
| - | 1  | 511       | TC_uc003kql.3_Int   | NM_032028    | NP_114417    | Q9BXA7 | TSSK1_HUMAN rotein kinase.                 | 5  | CAGGGCTCCCC        | 0.557 |             |
| + | 5  | 1117      | ITS19_uc003kvc.1    | NM_133638    | NP_598377    | Q8TE59 | ATS19_HUMAN ptidase M12B.                  | 9  | AATCTTCGTGTG       | 0.294 |             |
| - | 5  | 712       |                     | NM_015082    | NP_055897    | Q6MZW2 | FSTL4_HUMAN                                | 2  | TGTCTCCTTCT        | 0.577 |             |
| - | 6  | 1192      | loh.3_Missense_IV   | NM_004576    | NP_004567    | Q00005 | 2ABB_HUMAN WD 4.                           | 2  | CACCTCCGTGA        | 0.562 |             |
| - | 9  | 1051      | oo.2_Missense_M     | NM_001387    | NP_001378    | Q14195 | DPYL3_HUMAN                                | 1  | AGTCCGGAGTA        | 0.567 |             |
| + | 4  | 588       | RA6_uc003lyv.2_5'   | NM_000811    | NP_000802    | Q16445 | GBRA6_HUMAN ellular (Probable).            | 12 | TTTTCCGCCCAG       | 0.408 |             |
| + | 15 | 2754      | lzt.3_Splice_Site_J | NM_001122679 | NP_001116151 |        |                                            | 10 | TTCTCAGCTTGG       | 0.507 |             |
| + | 2  | 250       | tion_p.P62L MIR12   | NM_173664    | NP_775935    | Q8N8L6 | ARL10_HUMAN                                | 1  | GCAGCCCAGAG        | 0.701 |             |
| - | 12 | 1673      | i9_splice RASGEF    | NM_175062    | NP_778232    | Q8N431 | RGF1C_HUMAN                                | 1  | ACTCACCTTAG        | 0.507 |             |
| - | 7  | 998       | AJMAK_uc010jou.     | NM_005906    | NP_005897    | P20794 | MAK_HUMAN rotein kinase.                   | 3  | GAATAGCTTCAT       | 0.428 |             |
| - | 4  | 4456_4457 |                     | NM_052923    | NP_443155    | Q6R2W3 | SCND3_HUMAN                                | 1  | agagaatccggtctca   | 0     | rs140560647 |
| - | 4  | 3499      |                     | NM_052923    | NP_443155    | Q6R2W3 | SCND3_HUMAN                                | 1  | atttaaattccaaaccac | 0     |             |
| + | 1  | 600       |                     | NM_030905    | NP_112167    | O76002 | OR2J2_HUMAN ellular (Potential).           | 0  | TTCTGGGTACCC       | 0.478 |             |
| + | 9  | 1269      | 1_Missense_Mutat    | NM_013993    | NP_054699    | Q08345 | DDR1_HUMAN ellular (Potential).            | 9  | AGTGCCCTTGC        | 0.667 |             |
| - | 22 | 7854      |                     | NM_019105    | NP_061978    | P22105 | TENX_HUMAN nectin type-III 18.             | 0  | TGAAGGAGTCA        | 0.692 |             |
| + | 2  | 409       | I3obi.2_Splice_Site | NM_019111    | NP_061984    | P01903 | DRA_HUMAN                                  | 2  | CAATGGTACCTC       | 0.463 |             |
| - | 52 | 4075      | se_Mutation_p.P1    | NM_080680    | NP_542411    | P13942 | COBA2_HUMAN le-helical region.             | 5  | CCGAGGGCCAC        | 0.602 |             |
| - | 7  | 1749      | b.2_Missense_Mu     | NM_001142883 | NP_001136355 | Q96PC2 | IP6K3_HUMAN                                | 0  | GGATATCCTGCAC      | 0.478 |             |
| + | 11 | 1235      | h.2_RNA GLP1R_      | NM_002062    | NP_002053    | P43220 | GLP1R_HUMAN Name=7; (Potential).           | 5  | CACCTCCTTCC        | 0.527 |             |
| + | 2  | 241       | ML4_uc003oqd.2_     | NM_198153    | NP_937796    | Q6UXN2 | TRML4_HUMAN g-like V-type.                 | 1  | CAAGAGAGGGC        | 0.537 |             |
| + | 1  | 3325      | e.2_Nonsense_Mu     | NM_001010870 | NP_001010870 | O60522 | TDRD6_HUMAN                                | 6  | TACCAGAAGAAC       | 0.373 |             |
| + | 6  | 1150      | _p.L355V GPR115_    | NM_153838    | NP_722580    | Q8IZF3 | GP115_HUMAN ellular (Potential).           | 8  | CAACCTTGGGG        | 0.473 |             |
| + | 2  | 268       |                     | NM_001010872 | NP_001010872 | Q5T0W9 | FA83B_HUMAN                                | 6  | GGAACGAGTTT        | 0.383 |             |
| + | 2  | 237       |                     | NM_207410    | NP_997293    | Q6UXV0 | GFRAL_HUMAN ellular (Potential).           | 2  | TGCAATGATTCA       | 0.318 |             |
| + | 4  | 1963      | Jxm.1_Missense_I    | NM_020931    | NP_065982    | Q9HCI6 | K1586_HUMAN                                | 0  | ATAAATTAATGC       | 0.264 |             |
| - | 27 | 1961      | _p.G174E COL9A1     | NM_001851    | NP_001842    | P20849 | CO9A1_HUMAN elical region (COL2).          | 4  | GAATTTCCCATCT      | 0.423 |             |
| - | 11 | 1175      | COL9A1_uc003pff.    | NM_001851    | NP_001842    | P20849 | CO9A1_HUMAN elical region (COL3).          | 4  | CTTTTGACCCA        | 0.388 |             |
| + | 34 | 5092      | ogg.2_Missense_I    | NM_014989    | NP_055804    | Q86UR5 | RIMS1_HUMAN                                | 10 | TCCCCTCACCCC       | 0.512 |             |
| - | 1  | 86        | F1A1_uc003phh.2_    | NM_001402    | NP_001393    | P68104 | EF1A1_HUMAN (By similarity).               | 0  | CGAATCTACGT        | 0.423 |             |
| - | 2  | 3738      | _p.Q59* CNR1_uc     | NM_001160260 | NP_001153732 | P21554 | CNR1_HUMAN ellular (Potential).            | 2  | CTCTTGGGAGG        | 0.453 |             |
| - | 5  | 940       | xi.1_Missense_Mu    | NM_001040179 | NP_001035269 | Q969V1 | MCHR2_HUMAN Name=5; (Potential).           | 8  | TAGAGGGAAAA        | 0.279 |             |
| + | 18 | 2506      |                     | NM_173560    | NP_775831    | Q8HWS3 | RFX6_HUMAN                                 | 3  | GGCTCGGATCA        | 0.428 |             |
| - | 9  | 2354      |                     | NM_001042475 | NP_001035940 | Q5SZL2 | CF204_HUMAN Potential.                     | 1  | AGGATCTTTCT        | 0.323 |             |
| + | 4  | 837       | as.1_Missense_M     | NM_032784    | NP_116173    | Q9BXY4 | RSPO3_HUMAN TSP type-1.                    | 0  | AGCATCCTTCA        | 0.453 |             |
| - | 12 | 2397      | ou.1_Missense_Mu    | NM_002844    | NP_002835    | Q15262 | PTPRK_HUMAN tential). Fibronectin type-III | 8  | GGTTCCCGGG         | 0.542 |             |
| + | 19 | 2044      | qbu.2_Missense_I    | NM_032438    | NP_115814    | Q96JM7 | LMBL3_HUMAN                                | 6  | CTCTTCCCCTG        | 0.348 |             |
| - | 13 | 1756      | p.R477K SAMDM3_     | NM_001017373 | NP_001017373 | Q8N6K7 | SAMDM3_HUMAN                               | 1  | TCAATCCTAAAT       | 0.413 |             |

|   |    |       |                   |              |              |        |             |                              |       |                |       |             |
|---|----|-------|-------------------|--------------|--------------|--------|-------------|------------------------------|-------|----------------|-------|-------------|
| - | 7  | 1084  | kgh.2_Missense_M  | NM_022568    | NP_072090    | Q9H2A2 | AL8A1_HUMAN |                              | 4     | AGAGCTCTCTTG,  | 0.463 |             |
| + | 6  | 1352  | qe.2_Missense_M   | NM_012454    | NP_036586    | Q8IVF5 | TIAM2_HUMAN |                              | 4     | AAATTCCTTGCT   | 0.433 |             |
| + | 18 | 4911  | o.E1547K ARID1B_  | NM_017519    | NP_059989    | Q8NFD5 | ARI1B_HUMAN | Pro-rich.                    | 2     | GAAGGGAGATC,   | 0.512 |             |
| + | 34 | 5543  |                   | NM_001040001 | NP_001035090 | P55196 | AFAD_HUMAN  |                              | 5     | TGACATTCAGGC   | 0.418 |             |
| - | 41 | 5823  | km.1_Missense_M   | NM_001080453 | NP_001073922 | Q8N201 | INT1_HUMAN  |                              | 0     | CAGGAAGCAGC    | 0.682 |             |
| + | 20 | 3092  | o.2_Missense_Mu   | NM_152744    | NP_689957    | Q7Z5N4 | SDK1_HUMAN  | nectin type-III 4.           | 6     | ATCTTGGACACA'  | 0.423 |             |
| + | 8  | 911   | oe.1_Missense_Mu  | NM_031414    | NP_113602    | Q9BXU1 | STK31_HUMAN |                              | 9     | ATAGGGAAAGTT   | 0.323 |             |
| - | 2  | 904   | A3_uc003syk.2_5'  | NM_002141    | NP_002132    | Q00056 | HXA4_HUMAN  |                              | 1     | AGGCCGAATTG    | 0.398 |             |
| + | 4  | 871   | _p.S89F HECW1_    | NM_015052    | NP_055867    | Q76N89 | HECW1_HUMAN |                              | 23    | CTATTCATCGG    | 0.592 |             |
| - | 5  | 569   | r_p.P126L VOPP1   | NM_030796    | NP_110423    | Q96AW1 | VOPP1_HUMAN | cytoplasmic (Potential).     | 0     | CGACAGGGTTC,   | 0.632 |             |
| + | 5  | 1216  |                   | NM_153363    | NP_699194    | Q8IYX0 | ZN679_HUMAN | 2H2-type 6.                  | 1     | CAAGAGAATTC,   | 0.408 |             |
| + | 11 | 1750  | 3tvz.2_Missense_M | NM_022479    | NP_071924    | Q6IS24 | GLTL3_HUMAN | ectin.[Lumenal (Potential).  | 7     | TCTCCCGCAGC'   | 0.627 |             |
| - | 7  | 12903 | p.P4205L PCLO_u   | NM_033026    | NP_149015    | Q9Y6V0 | PCLO_HUMAN  |                              | 7     | FGAATAGGTGAA,  | 0.383 |             |
| + | 2  | 1152  | o.G16E GRM3_uc    | NM_000840    | NP_000831    | Q14832 | GRM3_HUMAN  |                              | 13    | AAAGGGATTTT    | 0.398 |             |
| - | 3  | 1046  | FEAP4_uc003ujt.2  | NM_024636    | NP_078912    | Q687X5 | STEA4_HUMAN | oxidoreductase.              | 0     | TAATATCGAATAG  | 0.428 |             |
| + | 12 | 1524  | _p.C379Y DYNC1    | NM_004411    | NP_004402    | O14576 | DC111_HUMAN | WD 3.                        | 4     | AATGTGTTCTCT   | 0.433 |             |
| - | 2  | 346   |                   | NM_018842    | NP_061330    | Q9UHR4 | BI2L1_HUMAN | IMD.                         | 1     | AATTTCCGAGCC   | 0.299 |             |
| - | 1  | 493   | _p.G113S ACHE_u   | NM_000665    | NP_000656    | P22303 | ACES_HUMAN  |                              | 2     | GGTGCCCTCAA,   | 0.597 |             |
| + | 6  | 853   | R_uc011knq.1_5'   | NM_000492    | NP_000483    | P13569 | CFTR_HUMAN  | rtial).[ABC transmembrane    | 5     | GGCTAGGGAGA'   | 0.433 |             |
| + | 1  | 1022  |                   | NM_012281    | NP_036413    | Q9NZV8 | KCND2_HUMAN | :NIP2.[Cytoplasmic (Potent   | 5     | GGGTGGATGCC'   | 0.612 |             |
| - | 1  | 638   | PS2_uc010lkq.2_   | NM_198085    | NP_932351    | Q8N7C7 | RN148_HUMAN | PA.                          | 0     | ACATGGGAAATA'  | 0.448 |             |
| - | 8  | 686   | GA14_uc003vqa.2   | NM_018718    | NP_061188    | Q9BYV8 | CEP41_HUMAN | Rhodanese.                   | 0     | TACATATTCAG,   | 0.368 |             |
| + | 17 | 3000  | ub.2_Missense_M   | NM_015905    | NP_056989    | O15164 | TIF1A_HUMAN |                              | 8     | CCTGTTCTCTA,   | 0.323 |             |
| - | 15 | 1860  |                   | NM_004333    | NP_004324    | P15056 | BRAF_HUMAN  | rotein kinase_R603>1(2)]p.T  | 18290 | ATTTCACTGTAC   | 0.368 |             |
| - | 1  | 719   |                   | NM_176817    | NP_789787    | P59533 | T2R38_HUMAN | lasmic (Potential).          | 2     | CAGAAGAAACC,   | 0.458 |             |
| - | 4  | 617   | TRPV6_uc010lou.   | NM_018646    | NP_061116    | Q9H1D0 | TRPV6_HUMAN | cytoplasmic (Potential).     | 2     | GGGCTCGCACC    | 0.572 | rs150734746 |
| - | 7  | 1114  | bz.2_Missense_Mi  | NM_019841    | NP_062815    | Q9NQA5 | TRPV5_HUMAN | lasmic (Potential).          | 6     | GGAGTCGATCT'   | 0.557 |             |
| + | 5  | 682   | LCN1_uc010lox.1   | NM_000083    | NP_000074    | P35523 | CLCN1_HUMAN |                              | 5     | TACTTCGTGGG'   | 0.507 | rs143506735 |
| + | 1  | 840   |                   | NM_012369    | NP_036501    | Q13607 | OR2F1_HUMAN | ellular (Potential).         | 3     | CCAGTCCCTCT'   | 0.478 |             |
| + | 3  | 4687  | _p.E157K ABP1_u   | NM_001091    | NP_001082    | P19801 | ABP1_HUMAN  |                              | 6     | TGCAGGAAGCC    | 0.602 |             |
| - | 4  | 690   | ense_Mutation_p.  | NM_173833    | NP_776194    | Q6ZMJ2 | SCAR5_HUMAN | ellular (Potential).         | 2     | GCGCGCCTGG     | 0.577 |             |
| - | 7  | 854   |                   | NM_000637    | NP_000628    | P00390 | GSHR_HUMAN  |                              | 5     | CTTAGAACCCAC   | 0.413 |             |
| + | 7  | 762   | 2_uc010lwz.1_Intr | NM_194294    | NP_919270    | Q6ZQW0 | I23O2_HUMAN |                              | 2     | CTGGGGGAGAG,   | 0.478 |             |
| - | 17 | 2585  | JNL_uc003xqt.3_F  | NM_144651    | NP_653252    | A1KZ92 | PXDNL_HUMAN |                              | 2     | CGCCCATCCGA'   | 0.662 |             |
| - | 5  | 541   |                   | NM_144651    | NP_653252    | A1KZ92 | PXDNL_HUMAN | LRR 5.                       | 2     | TCTAATCTCAGA'  | 0.433 |             |
| + | 4  | 1274  | 1_uc011ldy.1_Intr | NM_006269    | NP_006260    | P56715 | RP1_HUMAN   |                              | 12    | AAAGTCGATCAT   | 0.408 |             |
| + | 4  | 2679  | 1_uc011ldy.1_Intr | NM_006269    | NP_006260    | P56715 | RP1_HUMAN   |                              | 12    | TGGCATCTGGGT   | 0.333 |             |
| + | 10 | 1775  | ense_Mutation_p.C | NM_184085    | NP_908973    | Q9BYV6 | TRI55_HUMAN |                              | 5     | CCCTCCAGGGA'   | 0.468 |             |
| - | 4  | 588   | PA6_uc003xxs.2_M  | NM_020361    | NP_065094    | Q8N4T0 | CBPA6_HUMAN |                              | 2     | TGAAGATCTTCTA' | 0.383 |             |
| + | 2  | 620   |                   | NM_004770    | NP_004761    | Q92953 | KCNB2_HUMAN | lasmic (Potential).          | 7     | TAAACAGGAAGA   | 0.507 |             |
| + | 1  | 339   |                   | NM_003301    | NP_003292    | P34981 | TRFR_HUMAN  | Name=3; (Potential).         | 3     | ATTTGGGAATTA'  | 0.463 |             |
| + | 46 | 7005  |                   | NM_177531    | NP_803875    | Q86W11 | PKHL1_HUMAN | ular (Potential).[G8 1.      | 14    | TGGACTCGCTTG'  | 0.383 | rs73309320  |
| - | 48 | 7683  | o.E2468D CSMD3    | NM_198123    | NP_937756    | Q7Z407 | CSMD3_HUMAN | xtracellular (Potential).    | 63    | ATCAAATTCCTT   | 0.328 |             |
| - | 38 | 6280  | nt.2_Missense_Mi  | NM_198123    | NP_937756    | Q7Z407 | CSMD3_HUMAN | ar (Potential).[CUB 11.      | 63    | AAGATGAAATCC   | 0.274 |             |
| + | 22 | 3001  | uc003yqy.1_Intron | NM_001039112 | NP_001034201 | Q2WVG9 | FR1L6_HUMAN | lasmic (Potential).          | 11    | TGAGCCCCCA     | 0.488 |             |
| - | 61 | 4742  | ljo.1_Missense_M  | NM_152888    | NP_690848    | Q8NFW1 | COMA1_HUMAN | y-rich.[Collagen-like 14.    | 13    | TGTAGTCTTGG'   | 0.602 |             |
| - | 40 | 5798  | .G1289E PTPRD_    | NM_002839    | NP_002830    | P23468 | PTPRD_HUMAN | l).[Tyrosine-protein phosphi | 22    | TGAGATCCTTCTA' | 0.388 |             |



|   |    |         |                                                 |              |              |        |             |                               |      |                |       |             |
|---|----|---------|-------------------------------------------------|--------------|--------------|--------|-------------|-------------------------------|------|----------------|-------|-------------|
| - | 2  | 384     | IKN2A_uc010miu.2                                | NM_000077    | NP_000068    | P42771 | CD2A1_HUMAN | ANK 2. 1 p.V28_V51de          | 3678 | :CACTCGGGCGC   | 0.677 | rs121913387 |
| - | 1  | 2639    | uc003zrh.1_5'Flanl                              | NM_153809    | NP_722516    | Q8IZX4 | TAF1L_HUMAN |                               | 26   | :GCTTTTTTATAT  | 0.453 |             |
| - | 1  | 637     |                                                 | NM_019897    | NP_063950    | Q9NQN1 | OR2S1_HUMAN | cellular (Potential).         | 1    | :GTGATGAAATG1  | 0.473 |             |
| + | 2  | 121_122 | aah.1_Missense_M                                | NM_014907    | NP_055722    | Q5SYB0 | FRPD1_HUMAN |                               | 9    | :CTTCGGCGCTC   | 0.525 | rs146611803 |
| - | 4  | 1896    |                                                 | NM_001145196 | NP_001138668 | Q5VVP1 | F75A6_HUMAN |                               | 0    | :GTCCCGAAGCT1  | 0.542 | rs138779714 |
| + | 21 | 2415    | akq.3_Missense_M                                | NM_033305    | NP_150648    | Q96RL7 | VP13A_HUMAN |                               | 10   | :AGCTGCTTTAC1  | 0.323 |             |
| - | 6  | 679     | wo.1_Missense_M                                 | NM_014930    | NP_055745    | Q9Y2H8 | ZN510_HUMAN |                               | 0    | :AGCTACATGCA1  | 0.333 |             |
| - | 1  | 208     |                                                 | NM_001001956 | NP_001001956 | Q8NGT0 | O13C9_HUMAN | Name=2; (Potential).          | 0    | :GATGTCCAAGA1  | 0.478 |             |
| + | 2  | 193     | TGS1_uc004bmf.1                                 | NM_000962    | NP_000953    | P23219 | PGH1_HUMAN  |                               | 2    | :CGCTCCCCGTC   | 0.672 |             |
| + | 27 | 2939    | wu.2_Nonsense_M                                 | NM_015354    | NP_056169    | Q5SRE5 | NU188_HUMAN |                               | 7    | :AAGATCGATAC1  | 0.547 |             |
| + | 15 | 3182    | p.P626S BAT2L1_                                 | NM_013318    | NP_037450    | Q5JSZ5 | PRC2B_HUMAN |                               | 0    | :TTCCCCCATG1   | 0.562 |             |
| - | 3  | 436     |                                                 | NM_006753    | NP_006744    | O75683 | SURF6_HUMAN |                               | 1    | :CAGTCGCTGTC1  | 0.632 |             |
| - | 2  | 240     | 110_uc011mee.1_Missense_Mutation_p.D61N LCN10_1 | NM_015419    | NP_056234    | Q6JVE6 | LCN10_HUMAN |                               | 1    | :CTTGTCCCTGGC  | 0.647 |             |
| - | 5  | 3009    |                                                 | NM_015419    | NP_056234    | Q9NR99 | MXRA5_HUMAN |                               | 8    | :GTGACGATCCA1  | 0.502 |             |
| + | 2  | 115     | Intron ARHGAP6_                                 | NM_001142    | NP_001133    | Q99217 | AMELX_HUMAN |                               | 0    | :TTTTGCCATGC1  | 0.403 |             |
| - | 5  | 1109    | se_Mutation_p.P11                               | NM_002641    | NP_002632    | P37287 | PIGA_HUMAN  | plasmic (Potential).          | 0    | :CTCAGGAATTC1  | 0.373 |             |
| + | 5  | 825     | PS2_uc010nfr.2_5                                | NM_206923    | NP_996806    | O15391 | TYY2_HUMAN  |                               | 2    | :CATTTGCAACT1  | 0.343 |             |
| + | 2  | 692     |                                                 | NM_173699    | NP_775970    | Q96M61 | MAGBI_HUMAN | MAGE.                         | 1    | :TGGATCCCATC1  | 0.438 |             |
| + | 1  | 277     |                                                 | NM_000531    | NP_000522    | P00480 | OTC_HUMAN   |                               | 2    | :TTCATGGTTTCG  | 0.383 |             |
| - | 4  | 568     | orf38_uc004dev.1_                               | NM_144970    | NP_659407    | Q8TB03 | CX038_HUMAN |                               | 1    | :TCAGAAAATTTT  | 0.358 |             |
| - | 10 | 1213    | ITMR8_uc004dvt.1                                | NM_017677    | NP_060147    | Q96EF0 | MTMR8_HUMAN | ularin phosphatase.           | 4    | :TTTGGGAAAAC1  | 0.343 |             |
| + | 4  | 928     | p.P229H EDA_uc0                                 | NM_001399    | NP_001390    | Q92838 | EDA_HUMAN   | (Potential). Collagen-like.   | 3    | :ACCCCTGGCC1   | 0.453 |             |
| - | 3  | 4825    |                                                 | NM_001008537 | NP_001008537 | Q5QGS0 | K2022_HUMAN |                               | 15   | :GTTTTCCATTGC  | 0.453 |             |
| + | 2  | 512     |                                                 | NM_005296    | NP_005287    | Q99677 | LPAR4_HUMAN | cellular (Potential).         | 3    | :ATGATTCCTTCA1 | 0.403 |             |
| + | 5  | 352     | OL_uc010nmp.2_1                                 | NM_198450    | NP_940852    | Q6UXV4 | APOOL_HUMAN |                               | 0    | :TCTCCGAAAAT1  | 0.338 |             |
| + | 6  | 1339    | ifa.2_Missense_M                                | NM_019117    | NP_061990    | Q9C0H6 | KLHL4_HUMAN |                               | 5    | :TGAAACCAGTTC  | 0.378 |             |
| + | 13 | 2432    | imj.3_Missense_M                                | NM_018015    | NP_060485    | Q6NSI4 | CX057_HUMAN |                               | 3    | :AACCATGAGATA1 | 0.269 |             |
| - | 2  | 439     |                                                 | NM_031273    | NP_112563    | Q9BXU2 | TX13B_HUMAN |                               | 1    | :CTGTTCTTGA1   | 0.567 |             |
| - | 11 | 2623    |                                                 | NM_020721    | NP_065772    | Q9ULL0 | K1210_HUMAN |                               | 5    | :TCTGAGAGGCA1  | 0.453 |             |
| - | 2  | 438     | ie.3_Missense_M                                 | NM_001421    | NP_001412    | Q99607 | ELF4_HUMAN  |                               | 1    | :CCATCCCGTTGC  | 0.527 |             |
| - | 5  | 737     | mf.2_Missense_M                                 | NM_001555    | NP_001546    | Q8N6C5 | IGSF1_HUMAN | 2. Extracellular (Potential). | 5    | :CATATCCCTCTT1 | 0.502 |             |
| + | 4  | 1601    | EC1_uc010nsl.1_1                                | NM_005462    | NP_005453    | O60732 | MAGC1_HUMAN |                               | 4    | :GTTTTCCCCAG1  | 0.458 |             |
| + | 15 | 1663    | 1R1_uc004fcl.3_Mi                               | NM_002024    | NP_002015    | Q06787 | FMR1_HUMAN  | tion with RANBP9.             | 3    | :ATAGGAACTAAT1 | 0.388 |             |
| + | 3  | 739     | p.Q195* MAGEA4                                  | NM_002362    | NP_002353    | P43358 | MAGA4_HUMAN | MAGE.                         | 3    | :AATAATCAGATC1 | 0.547 |             |
| - | 3  | 993     |                                                 | NM_005362    | NP_005353    | P43357 | MAGA3_HUMAN | MAGE.                         | 0    | :GCCGGGACCTC1  | 0.527 |             |
| + | 26 | 4744    |                                                 | NM_017514    | NP_059984    | P51805 | PLXA3_HUMAN | plasmic (Potential).          | 3    | :GCGTCCCAAAG1  | 0.607 |             |
| - | 18 | 6092    | 1_Missense_Muta                                 | NM_000132    | NP_000123    | P00451 | FA8_HUMAN   | 3. Plastocyanin-like 6.       | 11   | :GAATAGAATGG1  | 0.403 |             |
| - | 6  | 1023    | p.P286L TMLHE_                                  | NM_018196    | NP_060666    | Q9NVH6 | TMLH_HUMAN  |                               | 1    | :CCTCAGGTGCC1  | 0.418 |             |
| - | 19 | 1803    | p.R307C ACAP3_1                                 | NM_030649    | NP_085152    | Q96P50 | ACAP3_HUMAN |                               | 0    | :TCGGCGGAACT1  | 0.667 |             |
| - | 4  | 496     | K4_uc010nza.1_1r                                | NM_018216    | NP_060686    | Q9NVE7 | PANK4_HUMAN |                               | 3    | :ATGGGGGATGT1  | 0.532 |             |
| + | 9  | 1355    | p.D383N PIK3CD_                                 | NM_005026    | NP_005017    | O00329 | PK3CD_HUMAN |                               | 7    | :TCTGCGACCTGC1 | 0.617 | rs149331749 |
| + | 21 | 3619    | 3E4B_uc010oaj.1_                                | NM_001105562 | NP_001099032 | O95155 | UBE4B_HUMAN |                               | 4    | :ACCTTCCCTGAT1 | 0.458 |             |
| - | 4  | 1248    |                                                 | NM_001146344 | NP_001139816 | O60813 | PRA11_HUMAN | LRR 6.                        | 0    | :CCATGCAGATG1  | 0.532 | rs143004725 |
| + | 4  | 966     |                                                 | NM_001012276 | NP_001012276 | Q5VWM4 | PRAM8_HUMAN |                               | 0    | :CCTTGAGATGC1  | 0.552 |             |
| + | 5  | 805     | M1_uc001axg.1_M                                 | NM_017556    | NP_060026    | Q8WUP2 | FBL1_HUMAN  | Pro-rich.                     | 1    | :GGAGGCTCCTG1  | 0.667 |             |
| - | 8  | 949     | 1_Intron MST1P9_                                | NR_002729    |              |        |             |                               | 0    | :GTTCCAGCAGA1  | 0.662 | rs1806514   |
| + | 3  | 519     | n_p.L63P PIGV_uc                                | NM_017837    | NP_060307    | Q9NUD9 | PIGV_HUMAN  | renal (Potential).            | 1    | :CGGCCTGTCTC1  | 0.552 |             |

|   |    |      |                    |              |              |        |             |                               |      |               |       |             |
|---|----|------|--------------------|--------------|--------------|--------|-------------|-------------------------------|------|---------------|-------|-------------|
| + | 6  | 682  | p.A160V SYTL1_u    | NM_032872    | NP_116261    | Q8IYJ3 | SYTL1_HUMAN |                               | 1    | GGAGGCGTCCC   | 0.612 |             |
| + | 1  | 4075 | i.1_intron MACF1_u | NM_015038    | NP_055853    | O94854 | K0754_HUMAN | Ala-rich.[8.                  | 0    | AGCCACCTCC    | 0.726 | rs783822    |
| - | 7  | 1547 | .2_intron PPIE_uc  | NM_001720    | NP_001711    | P34820 | BMP8B_HUMAN |                               | 0    | GCGGTGCTTGC   | 0.632 |             |
| + | 7  | 884  | ki.1_Missense_Mu   | NM_014663    | NP_055478    | O75164 | KDM4A_HUMAN | JmjC.                         | 1    | TCCGCCACAAG   | 0.388 |             |
| + | 3  | 765  |                    | NM_057176    | NP_476517    | Q8WZ55 | BSND_HUMAN  | lasmic (Potential).           | 2    | GGGAAAGACG    | 0.612 |             |
| - | 9  | 1667 | u.1_RNA C1orf16i   | NM_001004303 | NP_001004303 | Q5VWT5 | CA168_HUMAN |                               | 5    | TCATCTGAATTT  | 0.458 |             |
| - | 3  | 429  | _p.R59Q C8B_uc     | NM_000066    | NP_000057    | P07358 | CO8B_HUMAN  | receptor class A.             | 4    | GCATCTCGACT   | 0.483 |             |
| - | 10 | 1481 | 73_uc001dgi.3_Mi   | NM_001002912 | NP_001002912 | Q5RHP9 | CA173_HUMAN | Glu-rich.                     | 5    | GCCTCTCCTTTC  | 0.413 |             |
| + | 6  | 1139 | HN2_uc001div.2_    | NM_012302    | NP_036434    | O95490 | LPHN2_HUMAN | otential). Olfactomedin-like  | 9    | GCGGAGTCCCTC  | 0.393 |             |
| - | 10 | 1919 | _p.P443S TGFBRL    | NM_003243    | NP_003234    | Q03167 | TGBR3_HUMAN | acellular (Potential).        | 3    | GGTAGGATCCA   | 0.537 |             |
| + | 6  | 428  | DC76_uc009wea      | NM_019083    | NP_061956    | Q9NUP7 | TRM13_HUMAN | Potential.                    | 1    | TCTACACTTAAAC | 0.373 |             |
| - | 36 | 3107 | _p.P942L COL11A    | NM_001854    | NP_001845    | P12107 | COBA1_HUMAN | le-helical region.            | 12   | GTCCAGGGAAT   | 0.388 |             |
| + | 10 | 5328 |                    | NM_001408    | NP_001399    | Q9HCU4 | CELR2_HUMAN | otential). Laminin G-like 2.  | 8    | GGCCCGTGGCT   | 0.672 | rs142723500 |
| + | 21 | 3815 | 1.1_3'UTR MAGI3    | NM_001142782 | NP_001136254 | Q5TCQ9 | MAGI3_HUMAN |                               | 6    | AAGTAGAAAATG  | 0.408 |             |
| - | 3  | 435  |                    | NM_002524    | NP_002515    | P01111 | RASN_HUMAN  | GTP. i) p.Q61P(21) f          | 2607 | TTCTTGTCCAG   | 0.458 | rs121913254 |
| - | 3  | 460  |                    | NM_152380    | NP_689593    | Q96SF7 | TBX15_HUMAN | T-box.                        | 2    | ATGTGGATCTAC  | 0.443 |             |
| - | 5  | 1313 |                    | NM_001047980 | NP_001041445 | P0C2Y1 | NBPF7_HUMAN | NBPF 1.                       | 2    | TTGAATAAGTGA  | 0.468 |             |
| - | 1  | 80   | 2AC_uc001etd.2_    | NM_003528    | NP_003519    | Q16778 | H2B2E_HUMAN |                               | 1    | AGCCCTTTTAC   | 0.537 |             |
| - | 3  | 883  |                    | NM_016190    | NP_057274    | Q9UBG3 | CRNN_HUMAN  | Gln-rich.                     | 3    | CGTGGTCTCA    | 0.612 | rs3814301   |
| - | 3  | 862  |                    | NM_016190    | NP_057274    | Q9UBG3 | CRNN_HUMAN  | Gln-rich.                     | 3    | TCTGGTCATTGC  | 0.602 |             |
| - | 7  | 1015 | _p.T175A C1orf43   | NM_001098616 | NP_001092086 | Q9BWL3 | CA043_HUMAN |                               | 0    | ACTGAGTTAGGT  | 0.507 |             |
| - | 7  | 1100 | CLK2_uc001fjx.2_   | NM_003993    | NP_003984    | P49760 | CLK2_HUMAN  | rotein kinase.                | 0    | AAGGCATGTG    | 0.567 |             |
| + | 6  | 1992 | ion_p.P119L RUS1   | NM_001105203 | NP_001098673 | Q9BVN2 | RUSC1_HUMAN | RUN.                          | 2    | AGCCCGCTGA    | 0.642 |             |
| + | 1  | 274  |                    | NM_001231    | NP_001222    | P31415 | CASQ1_HUMAN |                               | 1    | AGACAGGATGG   | 0.632 |             |
| - | 4  | 314  |                    | NM_001013625 | NP_001013647 | Q5VTH2 | CA192_HUMAN |                               | 0    | CCCTTGAGTAA   | 0.478 |             |
| + | 5  | 1928 |                    | NM_001080426 | NP_001073895 | Q5VZP5 | DUS27_HUMAN |                               | 3    | GTCTATGGCAA   | 0.642 |             |
| + | 6  | 918  |                    | NM_018122    | NP_060592    | Q6PI48 | SYDM_HUMAN  |                               | 2    | CTCTTCGGTTG   | 0.323 |             |
| + | 2  | 123  |                    | NM_020950    | NP_066001    | Q5VZ46 | K1614_HUMAN |                               | 4    | AGGGCCCAAGA   | 0.612 |             |
| + | 46 | 6392 | 3.S1964F CACNA1    | NM_000721    | NP_000712    | Q15878 | CAC1E_HUMAN | lasmic (Potential).           | 6    | TCATCCAGGT    | 0.587 |             |
| - | 32 | 4698 | z1.1_Missense_Mu   | NM_017596    | NP_060066    | O75037 | KI21B_HUMAN | WD 4.                         | 6    | GGTGACCGTCA   | 0.622 |             |
| + | 13 | 1162 | b.2_RNA LGR6_uc    | NM_001017403 | NP_001017403 | Q9HBX8 | LGR6_HUMAN  | xtracellular ( p.E388K(1)     | 10   | TCTGGGAAATTC  | 0.647 | rs143455603 |
| - | 4  | 839  | z.2_Missense_Mu    | NM_002644    | NP_002635    | P01833 | PIGR_HUMAN  | 2. Extracellular (Potential). | 3    | GCAGAGATACT   | 0.502 |             |
| - | 10 | 1627 |                    | NM_018040    | NP_060510    | Q9NW75 | GPTC2_HUMAN | G-patch.                      | 1    | TAGAGGAAATCC  | 0.473 |             |
| - | 4  | 796  | w.1_Missense_Mu    | NM_003268    | NP_003259    | O60602 | TLR5_HUMAN  | ilar (Potential). LRR 2.      | 4    | CAGTCCCTGA    | 0.403 |             |
| - | 16 | 2384 |                    | NM_001618    | NP_001609    | P09874 | PARP1_HUMAN | P alpha-helical.              | 10   | TCAGGTTGTA    | 0.562 |             |
| - | 14 | 1632 | 13_uc001hug.3_1    | NM_024525    | NP_078801    | Q8NBPO | TTC13_HUMAN |                               | 2    | ATGCGGCCAAA   | 0.468 |             |
| + | 5  | 1075 | hvy.1_Missense_Mu  | NM_173508    | NP_775779    | Q8IY50 | S35F3_HUMAN | ical; (Potential).            | 2    | TGCATTCTATT   | 0.418 |             |
| - | 9  | 2113 | d.2_Missense_Mu    | NM_002508    | NP_002499    | P14543 | NID1_HUMAN  | EGF-like 2.                   | 2    | GCAGGATTCTC   | 0.562 |             |
| + | 36 | 4966 |                    | NM_001035    | NP_001026    | Q92736 | RYR2_HUMAN  | ilarity). 4 X approximate rep | 33   | GCCAAGGCTGG   | 0.527 |             |
| + | 3  | 235  | _p.P33S NLRP3      | NM_001079821 | NP_001073289 | Q96P20 | NALP3_HUMAN | DAPIN.                        | 26   | ACTATCCTCCC   | 0.547 |             |
| + | 1  | 481  |                    | NM_001001914 | NP_001001914 | Q8NGZ4 | OR2G3_HUMAN | ellular (Potential).          | 1    | ATGCAACTTTT   | 0.488 |             |
| + | 1  | 788  |                    | NM_001005495 | NP_001005495 | Q8NH03 | OR2T3_HUMAN | Name=6; (Potential).          | 1    | CTACACCTACAT  | 0.542 |             |
| - | 7  | 2002 |                    | NM_018702    | NP_061172    | Q9NS39 | RED2_HUMAN  | to I editase.                 | 3    | GGACGCCGTCC   | 0.682 |             |
| + | 12 | 1590 | R1C3_uc001ihr.2    | NM_001353    | NP_001344    | Q04828 | AK1C1_HUMAN | IP (By similarity).           | 2    | CAAGCGAACCC   | 0.597 | rs140396306 |
| + | 10 | 1991 |                    | NM_018706    | NP_061176    | Q96HY7 | DHTK1_HUMAN |                               | 2    | GTTCCTAGAGG   | 0.478 |             |
| - | 14 | 1773 |                    | NM_001081    | NP_001072    | O60494 | CUBN_HUMAN  | CUB 1.                        | 19   | CCATTCTTAAAT  | 0.403 |             |
| + | 14 | 1925 | NB2_uc001ipw.2_    | NM_201596    | NP_963890    | Q08289 | CACB2_HUMAN |                               | 3    | GTGCAACAAGC   | 0.552 |             |

|   |    |             |                    |              |              |        |             |                                 |      |               |       |             |
|---|----|-------------|--------------------|--------------|--------------|--------|-------------|---------------------------------|------|---------------|-------|-------------|
| + | 11 | 1796        | e_Mutation_p.E33   | NM_032812    | NP_116201    | Q6UX71 | PXDC2_HUMAN | ar (Potential). Thr-rich.       | 4    | CCAGTGGAAACT  | 0.423 |             |
| + | 7  | 794         |                    | NM_052997    | NP_443723    | Q9BXX3 | AN30A_HUMAN |                                 | 9    | CTTGGCGGAAA   | 0.423 |             |
| + | 3  | 1179        |                    | NM_199459    | NP_955629    | Q711Q0 | CJ071_HUMAN |                                 | 0    | TCATGGAATGC   | 0.527 |             |
| - | 3  | 455         | os.2_Missense_Mt   | NM_019893    | NP_063946    | Q9NR71 | ASAH2_HUMAN | lenal (Potential).              | 0    | CTGTTTCGATTGC | 0.473 |             |
| + | 10 | 2170        |                    | NM_032199    | NP_115575    | Q14865 | ARI5B_HUMAN |                                 | 4    | ACCCCCTTTGA   | 0.552 |             |
| + | 2  | 1481        | imx.3_Intron CTNB  | NM_178011    | NP_821079    | Q86VH5 | LRRT3_HUMAN | ellular (Potential).            | 3    | CTTGCTGGGAAT  | 0.423 |             |
| + | 6  | 1401        |                    | NM_000314    | NP_000305    | P60484 | PTEN_HUMAN  | atase tensi p.Y27_N212>         | 2334 | ATTCACTGTAAAC | 0.408 | rs121909223 |
| + | 5  | 1062        | C19_uc009xus.1_l   | NM_000772    | NP_000763    | P33260 | CP2C1_HUMAN |                                 | 5    | TATTGGAGAGA   | 0.338 |             |
| + | 1  | 1222        |                    | NM_000684    | NP_000675    | P08588 | ADRB1_HUMAN | smic (By similarity).           | 0    | CTGCCGACGCC   | 0.701 |             |
| + | 2  | 417         | 42F C10orf137_uc   | NM_015608    | NP_056423    | Q3B7T1 | EDRF1_HUMAN |                                 | 10   | TATTTCTTGGAC  | 0.388 |             |
| + | 14 | 2283        | u.3_Missense_Mu    | NM_025092    | NP_079368    | Q32M88 | ATHL1_HUMAN |                                 | 3    | GGGTTCTCCA    | 0.612 |             |
| + | 47 | 6781        | b.2_Missense_Mu    | NM_017511    | NP_059981    | Q9HC84 | MUC5B_HUMAN | in repeats. Cys-rich subdo      | 0    | GAGGGGACGTT   | 0.602 |             |
| - | 1  | 542         |                    | NM_001012708 | NP_001012726 | Q6L8H2 | KRA53_HUMAN | A repeats of C-C-X-P.           | 2    | GGGAGCAGCTG   | 0.388 |             |
| + | 1  | 370         |                    | NM_001001480 | NP_001001480 | Q701N2 | KRA55_HUMAN | \ repeats of C-C-X-P.           | 1    | TGGCTCCTGTG   | 0.697 |             |
| + | 8  | 1186        | p.R144G KCNQ1_     | NM_000218    | NP_000209    | P51787 | KCNQ1_HUMAN | lasmic (Potential).             | 1    | AGCAGAGGCAG   | 0.602 |             |
| + | 2  | 246         | 8_uc001lwy.2_Nor   | NM_183233    | NP_899056    | Q96BI1 | S22A1_HUMAN |                                 | 3    | GGGACCAGGGC   | 0.652 |             |
| - | 1  | 871         |                    | NM_001004758 | NP_001004758 | Q8NGJ8 | O51S1_HUMAN | Name=7; (Potential).            | 4    | TGGAGGAAGAA   | 0.448 |             |
| - | 1  | 483_484     |                    | NM_001005329 | NP_001005329 | Q8NGJ6 | O51A4_HUMAN | Name=4; (Potential).            | 3    | AAAAGGAAGGC   | 0.436 |             |
| - | 1  | 329         | _uc001mam.1_Int    | NM_001005288 | NP_001005288 | Q9H343 | O51I1_HUMAN | Name=3; (Potential).            | 1    | TGAAGGAGAAA   | 0.443 |             |
| - | 1  | 1304        | 32_uc001mak.1_Ir   | NM_145053    | NP_659490    | Q8IYU4 | UBQLN_HUMAN |                                 | 3    | TTGAAGAGAAA   | 0.507 |             |
| - | 1  | 344         | .1_Intron TRIM22_  | NM_001001922 | NP_001001922 | Q8NH56 | O52N5_HUMAN | Name=3; (Potential).            | 2    | TGAACCCATGA   | 0.493 | rs143745000 |
| + | 13 | 2012        | ym.2_Missense_f    | NM_001142307 | NP_001135779 | P32780 | TF2H1_HUMAN |                                 | 0    | GGGCACTTATG   | 0.463 |             |
| - | 2  | 485         | mri.1_Missense_M   | NM_030771    | NP_110398    | Q96HJ3 | CCD34_HUMAN |                                 | 0    | CCCATGGTGCA   | 0.418 |             |
| + | 2  | 146         | rf74_uc001mwx.1    | NM_138787    | NP_620142    | Q86VG3 | CK074_HUMAN |                                 | 0    | AAATTCCTTAAT  | 0.358 |             |
| - | 4  | 1035        |                    | NM_003654    | NP_003645    | O43916 | CHST1_HUMAN | lenal (Potential).              | 5    | GAGGTCGCGGC   | 0.662 |             |
| + | 20 | 2395        | k.1_Missense_Mu    | NM_001105540 | NP_001099010 | Q13574 | DGKZ_HUMAN  |                                 | 3    | GACGTCGTTGG   | 0.657 |             |
| - | 5  | 1046        | .1_Intron RAPSN_   | NM_005055    | NP_005046    | Q13702 | RAPSN_HUMAN | TPR 6.                          | 1    | GATCTCGGTCA   | 0.652 |             |
| + | 1  | 986         |                    | NM_001004702 | NP_001004702 | Q8NH37 | OR4C3_HUMAN | lasmic (Potential).             | 1    | TTACATGGTAAG  | 0.328 |             |
| - | 1  | 1122        | _NR_uc001njn.3_F   | NM_005161    | NP_005152    | P35414 | APJ_HUMAN   | lasmic (Potential).             | 6    | TTGGCGCATGA   | 0.627 |             |
| + | 1  | 586         |                    | NM_001004708 | NP_001004708 | Q8NGJ1 | OR4D6_HUMAN | Name=5; (Potential).            | 1    | CTTTGGGACTT   | 0.527 |             |
| - | 5  | 15458_15459 | AK_uc001ntk.1_Ir   | NM_001620    | NP_001611    | Q09666 | AHNK_HUMAN  |                                 | 19   | AGGCTGGCATCA  | 0.441 |             |
| + | 5  | 352         | v.1_RNA TSGA10I    | NM_152762    | NP_689975    | Q3SY00 | T10IP_HUMAN |                                 | 0    | CTTCCCTTCCA   | 0.662 |             |
| - | 1  | 2139        |                    | NM_020404    | NP_065137    | Q9HCU0 | CD248_HUMAN | ical; (Potential).              | 3    | GTACACGATGC   | 0.602 |             |
| - | 3  | 566         | iHA3_uc010rrj.1_I  | NM_182904    | NP_878907    | Q7Z4N8 | P4HA3_HUMAN |                                 | 1    | GAGCCGTTTGG   | 0.507 |             |
| + | 8  | 637         | i09yuo.1_Nonsens   | NM_018367    | NP_060837    | Q9NUN7 | ACER3_HUMAN | ical; (Potential).              | 0    | ATACATCATTGG  | 0.318 |             |
| + | 2  | 113         | on_p.E5D C11orf6i  | NM_024684    | NP_078960    | Q9H7C9 | CK067_HUMAN |                                 | 0    | CCCTGAAATTC   | 0.378 |             |
| - | 17 | 2082        | yp.2_Intron INTS4_ | NM_033547    | NP_291025    | Q96HW7 | INT4_HUMAN  |                                 | 2    | AATACAAAGGG   | 0.478 |             |
| - | 22 | 3614        |                    | NM_001098816 | NP_001092286 | Q6N022 | TEN4_HUMAN  | ellular (Potential).            | 4    | GATTTCTCCTC   | 0.582 |             |
| - | 2  | 1005        | p.T194A TRPC6_     | NM_004621    | NP_004612    | Q9Y210 | TRPC6_HUMAN | lasmic (Potential).             | 4    | GCTGGTTGCTA   | 0.463 |             |
| - | 6  | 5135        | z.1_Missense_Mu    | NM_015065    | NP_055880    | Q8NEV8 | EXPH5_HUMAN |                                 | 5    | CAGTAATGGGG   | 0.453 |             |
| - | 9  | 937         | P28_uc001poi.2_5   | NM_020886    | NP_065937    | Q96RU2 | UBP28_HUMAN |                                 | 7    | TTCACGAACCC   | 0.358 |             |
| + | 3  | 556         |                    | NM_182495    | NP_872301    | Q96DL1 | FA55B_HUMAN |                                 | 1    | GGCCAGGATGT   | 0.552 |             |
| - | 7  | 1417        | 1pri.1_Missense_A  | NM_020693    | NP_065744    | Q8TD84 | DSCL1_HUMAN | potential). Ilg-like C2-type 5. | 8    | AGGACGAGACG   | 0.682 |             |
| - | 2  | 206         | 1)prt.1_5'UTR TMF  | NM_001077263 | NP_001070731 | Q9BYE2 | TMPSD_HUMAN | peats of A-S-P-A-[GLQR].        | 1    | ATGCCTGGGCT   | 0.637 |             |
| - | 2  | 203         | 1)prt.1_5'UTR TMF  | NM_001077263 | NP_001070731 | Q9BYE2 | TMPSD_HUMAN | peats of A-S-P-A-[GLQR].        | 1    | CTGGGCTGGA    | 0.632 |             |
| + | 1  | 650         |                    | NM_001001965 | NP_001001965 | Q8NGN0 | OR4D5_HUMAN | Name=5; (Potential).            | 1    | GGATCGTACA    | 0.517 | rs138187932 |
| + | 10 | 1311        | p.E368K VWA5A_     | NM_001130142 | NP_001123614 | O00534 | VMA5A_HUMAN | VWFA.                           | 2    | GCACTGAAATC   | 0.522 |             |

|   |    |           |                   |              |              |        |             |                                |    |                |       |             |
|---|----|-----------|-------------------|--------------|--------------|--------|-------------|--------------------------------|----|----------------|-------|-------------|
| - | 1  | 158       |                   | NM_012378    | NP_036510    | Q15620 | OR8B8_HUMAN | lasmic (Potential).            | 1  | AGTGAGAGTTG    | 0.478 |             |
| + | 2  | 1064      | r_p.V134 NTM_uc   | NM_016522    | NP_057606    | Q9P121 | NTRI_HUMAN  |                                | 6  | TGCAAGGTAGG    | 0.552 |             |
| - | 7  | 1237      | dy.1_Missense_Mi  | NM_152640    | NP_689853    | Q8IZD4 | DCP1B_HUMAN |                                | 1  | AGAGCTCTGCTG   | 0.572 |             |
| - | 1  | 46        | 0sge.1_Missense_  | NM_174941    | NP_777601    | Q9NR16 | C163B_HUMAN |                                | 11 | GCCACGAGTTTT   | 0.378 |             |
| + | 3  | 660       |                   | NM_024865    | NP_079141    | Q9H9S0 | NANOG_HUMAN | Homeobox.                      | 0  | AGAAATGAAATC   | 0.373 |             |
| - | 1  | 206       | _RC3_uc010shc.1   | NM_002261    | NP_002252    | Q07444 | NKG2E_HUMAN | lasmic (Potential).            | 3  | CAATCCCTTGAT   | 0.348 |             |
| - | 3  | 630       |                   | NM_006248    | NP_006239    |        |             |                                | 0  | CTTTCCTGGAG    | 0.592 |             |
| - | 6  | 855       | _p.P279S ABCC9_   | NM_005691    | NP_005682    | O60706 | ABCC9_HUMAN | lasmic (Potential).            | 6  | ATTTGGATGATC   | 0.353 |             |
| - | 2  | 655       | '10_uc009zju.1_5' | NM_198992    | NP_945343    | Q6XYQ8 | SYT10_HUMAN | lasmic (Potential).            | 2  | GCTTTTCATTTT   | 0.398 |             |
| - | 35 | 5221      |                   | NM_025003    | NP_079279    | P59510 | ATS20_HUMAN |                                | 19 | ATAAATCTAAAG   | 0.303 |             |
| - | 1  | 82        |                   | NM_025003    | NP_079279    | P59510 | ATS20_HUMAN |                                | 19 | CTGGGGTGGGA    | 0.652 |             |
| - | 2  | 1381      | i7L_uc001rns.3_M  | NM_001098615 | NP_001092085 | Q9H0K6 | PUS7L_HUMAN |                                | 1  | TTTCTCTCTTG    | 0.348 |             |
| - | 11 | 893       | rqq.2_Missense_M  | NM_001844    | NP_001835    | P02458 | CO2A1_HUMAN | le-helical region.             | 2  | CATGGGACCCT    | 0.478 |             |
| - | 5  | 654       |                   | NM_014470    | NP_055285    | Q92730 | RND1_HUMAN  |                                | 1  | GATGGATGCC     | 0.552 |             |
| - | 6  | 1186      |                   | NM_033045    | NP_149034    | Q9NSB2 | KRT84_HUMAN | Rod. Coil 2.                   | 1  | GATCTCGTTCC    | 0.547 | rs145550883 |
| - | 2  | 616       |                   | NM_005555    | NP_005546    | P04259 | K2C6B_HUMAN | Coil 1A. Rod.                  | 2  | CAGAACCTTGT    | 0.537 |             |
| - | 2  | 948       |                   | NM_005554    | NP_005545    | P02538 | K2C6A_HUMAN | Coil 1B. Rod.                  | 5  | GTCCTCCACCA    | 0.542 |             |
| + | 1  | 478       |                   | NM_001005497 | NP_001005497 | A6NL08 | O6C75_HUMAN | Name=4; (Potential).           | 3  | ATATGCTTCTGC   | 0.438 |             |
| + | 8  | 877       | q.2_Missense_Mu   | NM_005269    | NP_005260    | P08151 | GLI1_HUMAN  |                                | 15 | GGAAGGAGTTC    | 0.597 |             |
| + | 3  | 336       | n_p.P85L MSRB3_   | NM_198080    | NP_932346    | Q8IXL7 | MSRB3_HUMAN |                                | 2  | AACTCCATTGT    | 0.318 |             |
| - | 2  | 335       | va.3_Missense_Mi  | NM_002837    | NP_002828    | P23467 | PTPRB_HUMAN | III 1. Extracellular (Potentia | 3  | ACTGTTCTCTCT   | 0.458 |             |
| - | 1  | 734       |                   | NM_152638    | NP_689851    | Q8TC90 | CL012_HUMAN |                                | 2  | GAATTTCCAGAA   | 0.647 |             |
| + | 6  | 935       | zth.1_Missense_M  | NM_152435    | NP_689648    | Q96NU7 | HUT1_HUMAN  |                                | 1  | AACTGGGAGCG    | 0.483 |             |
| + | 12 | 1507      |                   | NM_017564    | NP_060034    | Q8WWQ8 | STAB2_HUMAN | lar (Potential). FAS1 1.       | 14 | TTGCTGGTCAG    | 0.378 |             |
| - | 3  | 291       | .2_RNA MMAB_uc    | NM_052845    | NP_443077    | Q96EY8 | MMAB_HUMAN  |                                | 0  | TTTCTCCTGTG    | 0.393 |             |
| - | 10 | 1584      | tqp.3_Missense_M  | NM_016238    | NP_057322    | Q9UJX3 | APC7_HUMAN  | TPR 7.                         | 0  | TCCATTGCCTCC   | 0.517 |             |
| + | 8  | 1819      |                   | NM_006187    | NP_006178    | Q9Y6K5 | OAS3_HUMAN  | AS domain 2.                   | 1  | AGGGCGAGCAT.   | 0.557 |             |
| - | 9  | 620       | k.2_Missense_Mut  | NM_002150    | NP_002141    | P32754 | HPPD_HUMAN  |                                | 0  | GGACACCATCT    | 0.582 |             |
| - | 14 | 1485      | _p.V214 ZCHC8     | NM_017612    | NP_060082    | Q6NZY4 | ZCHC8_HUMAN |                                | 0  | TGGTACCTCCA    | 0.413 |             |
| - | 2  | 614       | AP1_uc001uep.2    | NM_004642    | NP_004633    | O14519 | CDKA1_HUMAN |                                | 0  | AGACGTTGCC     | 0.622 |             |
| + | 11 | 739       | au.1_Missense_M   | NM_001516    | NP_001507    | Q13889 | TF2H3_HUMAN |                                | 0  | ATCAGAGATCTC   | 0.393 |             |
| - | 8  | 1272      | _p.C278G RIMBP2   | NM_015347    | NP_056162    | O15034 | RIMB2_HUMAN | nectin type-III 1.             | 11 | GACGCACTGCA    | 0.627 |             |
| - | 3  | 338       |                   | NM_006001    | NP_005992    | Q13748 | TBA3C_HUMAN |                                | 5  | ATCTTCTCTCC    | 0.522 |             |
| + | 10 | 1663      | pw.2_Missense_Mi  | NM_006646    | NP_006637    | Q9UPY6 | WASF3_HUMAN |                                | 1  | TGTCCCGGCGC    | 0.617 |             |
| - | 2  | 666       | R12_uc010tdl.1_5' | NM_005288    | NP_005279    | P47775 | GPR12_HUMAN | lasmic (Potential).            | 0  | GAATGGTACGTC   | 0.577 |             |
| + | 42 | 6907      | n_p.R27Q NBEA_1   | NM_015678    | NP_056493    | Q8NFP9 | NBEA_HUMAN  |                                | 11 | AAACCGAAGTA    | 0.343 |             |
| - | 2  | 748       | B_uc010aez.1_Mi   | NM_001122659 | NP_001116131 | P24530 | EDNRB_HUMAN | ellular (Potential).           | 0  | CTCTGCCAGCA    | 0.463 |             |
| - | 10 | 1246      | sz.2_Missense_Mu  | NM_052867    | NP_443099    | Q8IZF0 | NALCN_HUMAN | lasmic (Potential).            | 16 | CATCTTCATGAA   | 0.448 |             |
| - | 5  | 1085      | _p.A232V NOVA1_   | NM_002515    | NP_002506    | P51513 | NOVA1_HUMAN | p.A256D(1)                     | 5  | ACATTGGCATAAC  | 0.458 |             |
| + | 7  | 903       | vt.2_Missense_Mi  | NM_173159    | NP_071406    | Q8IXF0 | NPAS3_HUMAN |                                | 2  | TCAAATCATCAG   | 0.478 |             |
| - | 16 | 2499      | p.V703A RALGAP    | NM_014990    | NP_055805    | Q6GYQ0 | RGPA1_HUMAN |                                | 4  | GTCCAACTCCTC   | 0.413 |             |
| + | 9  | 1025_1026 |                   | NM_002687    | NP_002678    | Q9H307 | PININ_HUMAN | ential. Glu-rich.              | 1  | AGAGGGTAAGC    | 0.351 |             |
| - | 9  | 1304      | L1_uc001wxz.2_1r  | NM_004196    | NP_004187    | Q00532 | CDKL1_HUMAN |                                | 2  | agggggggatgctc | 0     |             |
| - | 11 | 2661      | IH5_uc001xfy.2_3' | NM_139318    | NP_647479    | Q8NCM2 | KCNH5_HUMAN | lasmic (Potential).            | 9  | GTCACTTTTGT    | 0.507 |             |
| - | 5  | 557       | nse_Mutation_p.P  | NM_015346    | NP_056161    | Q68DK2 | ZFY26_HUMAN |                                | 11 | TCCTGGATTTC    | 0.572 |             |
| - | 8  | 785       | ri.1_Missense_Mu  | NM_012074    | NP_036206    | Q92784 | DPF3_HUMAN  |                                | 1  | FATTGGGAATGAC  | 0.512 |             |
| - | 5  | 516       | ri.1_Missense_Mu  | NM_012074    | NP_036206    | Q92784 | DPF3_HUMAN  |                                | 1  | TTCTTCGCTTGC   | 0.448 |             |

|   |    |           |                    |              |              |        |             |                            |    |              |       |             |
|---|----|-----------|--------------------|--------------|--------------|--------|-------------|----------------------------|----|--------------|-------|-------------|
| + | 5  | 1298      | RXN3_uc010asv.1    | NM_004796    | NP_004787    | Q9Y4C0 | NRX3A_HUMAN | cellular (Potential).      | 10 | CGGATGAGTGC  | 0.567 |             |
| - | 3  | 1347      | 1ycu.3_Missense_   | NM_016186    | NP_057270    | Q9UK55 | ZPI_HUMAN   |                            | 3  | CCATTCCTTGG  | 0.502 |             |
| - | 3  | 980       | RPINA1_uc010au     | NM_000295    | NP_000286    | P01009 | A1AT_HUMAN  |                            | 1  | CC TTCACGGTG | 0.542 |             |
| - | 2  | 828       | ydg.2_Missense_I   | NM_175739    | NP_783866    | Q86WD7 | SPA9_HUMAN  |                            | 2  | AATGTGGTTCA  | 0.388 |             |
| - | 2  | 617       | 3RF1_uc010axg.1    | NM_001519    | NP_001510    | Q92994 | TF3B_HUMAN  |                            | 4  | GCAGGGTCTGC  | 0.592 |             |
| - | 1  | 104       |                    | NM_002487    | NP_002478    | Q99608 | NECD_HUMAN  |                            | 0  | CAGATCCTTACT | 0.647 |             |
| + | 3  | 612       |                    | NM_003246    | NP_003237    | P07996 | TSP1_HUMAN  | 3P N-terminal.             | 6  | TGGAAGAAGCT  | 0.582 |             |
| + | 9  | 1879      |                    | NM_019074    | NP_061947    | Q9NR61 | DLL4_HUMAN  | cellular (Potential).      | 2  | GTTCCCCGTGG  | 0.652 |             |
| + | 1  | 775       |                    | NM_001080534 | NP_001074003 | Q8NB66 | UN13C_HUMAN |                            | 7  | AAACAGAACTT  | 0.463 |             |
| + | 8  | 3781      | lacl.2_Missense_Iv | NM_001080534 | NP_001074003 | Q8NB66 | UN13C_HUMAN | C2 1.                      | 7  | ATTTTTGAAATI | 0.313 |             |
| + | 24 | 5650      |                    | NM_001080534 | NP_001074003 | Q8NB66 | UN13C_HUMAN |                            | 7  | CAATGGATGCA  | 0.338 |             |
| + | 2  | 1600      | irh.2_Missense_M   | NM_015322    | NP_056137    | Q9UK73 | FEM1B_HUMAN |                            | 0  | AAGGCCTTATAC | 0.418 |             |
| - | 3  | 989       |                    | NM_001897    | NP_001888    | Q6UVK1 | CSPG4_HUMAN | obular or compact configur | 3  | CCACGGAGATT  | 0.607 |             |
| + | 21 | 2806      | rb.1_Missense_Mt   | NM_004136    | NP_004127    | P48200 | IREB2_HUMAN |                            | 0  | AAAGATCATTTG | 0.368 |             |
| + | 22 | 3205      | unn.1_Missense_A   | NM_018689    | NP_061159    | Q8WUJ3 | K1199_HUMAN |                            | 3  | GGTCCGGCACC  | 0.582 |             |
| + | 11 | 1430      | G3_uc010uud.1_F    | NM_032039    | NP_114428    | Q9H0X4 | ITFG3_HUMAN | cellular (Potential).      | 1  | CCTAGCCCTCC  | 0.672 |             |
| - | 2  | 469       |                    | NM_001013658 | NP_001013680 | Q96A99 | PTX4_HUMAN  |                            | 0  | GCTGTGGACGA  | 0.736 |             |
| + | 4  | 546       | se_Mutation_p.I12  | NM_004996    | NP_004987    | P33527 | MRP1_HUMAN  | Cytoplasmic.               | 4  | TTTAATTCAGCT | 0.383 |             |
| - | 19 | 2721      |                    | NM_017539    | NP_060009    | Q8TD57 | DYH3_HUMAN  | n (By similarity).         | 18 | TGTCCTCCACAT | 0.458 |             |
| + | 17 | 3624      | e_Mutation_p.P82i  | NM_006910    | NP_008841    | Q7Z6E9 | RBBP6_HUMAN |                            | 4  | TTTCTCCAGAG  | 0.418 |             |
| + | 1  | 291       | _Missense_Mutatic  | NM_173201    | NP_775293    | O14983 | AT2A1_HUMAN | smic (By similarity).      | 4  | AGAAATACGGCC | 0.547 |             |
| + | 1  | 71        |                    | NM_144602    | NP_653203    | Q8WTQ4 | CP078_HUMAN |                            | 1  | CTGAAGGATTTA | 0.532 |             |
| + | 1  | 11        | ank IRX5_uc010cc   | NM_005853    | NP_005844    | P78411 | IRX5_HUMAN  |                            | 0  | CTATCCGCAGG  | 0.627 |             |
| - | 6  | 681_682   | p.G130F CNOT1_     | NM_016284    | NP_057368    | A5YKK6 | CNOT1_HUMAN |                            | 6  | CAAGGCCAAAA  | 0.351 | rs113031066 |
| - | 7  | 820       | e_Mutation_p.P25   | NM_000512    | NP_000503    | P34059 | GALNS_HUMAN |                            | 2  | AGAAGGGTTTG  | 0.602 |             |
| - | 5  | 540       | e_Mutation_p.P15   | NM_000512    | NP_000503    | P34059 | GALNS_HUMAN |                            | 2  | CAGGGGGTGGA  | 0.567 |             |
| + | 12 | 1666      | ..1_RNA SPG7_uc    | NM_003119    | NP_003110    | Q9UQ90 | SPG7_HUMAN  | trial matrix (Potential).  | 0  | ACGCCGTGGAG  | 0.627 | rs147706568 |
| - | 2  | 885       | IL TRPV1_uc010vi   | NM_080706    | NP_542437    | Q8NER1 | TRPV1_HUMAN | nic (Potential). ANK 1.    | 1  | CGGCTTCAAAGA | 0.567 |             |
| - | 6  | 1220      | dk.1_Missense_Mu   | NM_015113    | NP_055928    | O43149 | ZZEF1_HUMAN | DOC.                       | 4  | CAGACTCTTAA  | 0.483 |             |
| - | 11 | 1743      | gcb.2_Missense_M   | NM_020162    | NP_064547    | Q9H6R0 | DHX33_HUMAN |                            | 2  | AATTCTCTTTGC | 0.358 | rs147158339 |
| - | 6  | 775       | nse_Mutation_p.P   | NM_020360    | NP_065093    | Q9NRY6 | PLS3_HUMAN  | smic (By similarity).      | 0  | GGAAGGGATGC  | 0.612 |             |
| + | 25 | 4093      | Missense_Mutatio   | NM_001005273 | NP_001005273 | Q12873 | CHD3_HUMAN  |                            | 1  | TGGACCCTGAC  | 0.507 |             |
| + | 1  | 67        | P2R_uc010cog.1_f   | NM_004246    | NP_004237    | O95838 | GLP2R_HUMAN | cellular (Potential).      | 3  | TCCACGAGCTG  | 0.647 |             |
| + | 2  | 1186      |                    | NM_016239    | NP_057323    | Q9UKN7 | MYO15_HUMAN | rosin head-like.           | 9  | .CCCGCCGAGG  | 0.637 |             |
| + | 9  | 1907      | bj.2_Missense_Mi   | NM_003593    | NP_003584    | O15353 | FOXN1_HUMAN |                            | 1  | ATCTTCGATGCC | 0.612 |             |
| - | 3  | 617       |                    | NM_001045    | NP_001036    | P31645 | SC6A4_HUMAN | lasmic (Potential).        | 4  | AACTCCGTTTT  | 0.502 |             |
| - | 3  | 402       | nse_Mutation_p.C   | NM_152781    | NP_689994    | A2RTY3 | CQ066_HUMAN |                            | 3  | CAGGTCGTGCC  | 0.512 |             |
| + | 5  | 659       | nse_Mutation_p.S'  | NM_133264    | NP_573571    | Q8TF74 | WIPF2_HUMAN |                            | 3  | AGACAGCAGCC  | 0.617 |             |
| - | 8  | 1386      | P_uc010wfs.1_Int   | NM_000422    | NP_000413    | Q04695 | K1C17_HUMAN | Tail.                      | 2  | GGGAGGAGATG  | 0.652 |             |
| - | 12 | 1651      | o.1_Missense_Mu    | NM_005374    | NP_005365    | Q14168 | MPP2_HUMAN  | ylate kinase-like.         | 0  | ATATCCACTCT  | 0.617 |             |
| + | 26 | 3423      | c010dag.2_IntronI  | NM_005892    | NP_005883    | O95466 | FMNL_HUMAN  | DAD.                       | 1  | AGACGGTGCCC  | 0.582 |             |
| + | 6  | 1302      | APT_uc002ijx.3_In  | NM_016835    | NP_058519    | P10636 | TAU_HUMAN   |                            | 1  | CATTTCCAGGG  | 0.622 |             |
| - | 5  | 1746      | ikd.2_Missense_M   | NM_015443    | NP_056258    | Q7Z3B3 | K1267_HUMAN |                            | 2  | AGACAGGCTGA  | 0.343 |             |
| - | 15 | 2627      | s.1_Missense_Mu    | NM_198393    | NP_938207    | Q8IWB6 | TEX14_HUMAN |                            | 17 | TTTTCCAGGGT  | 0.423 |             |
| - | 4  | 831       | 2_Missense_Muta    | NM_001159772 | NP_001153244 | Q8WVQ1 | CANT1_HUMAN | renal (Potential).         | 0  | TAGCCCTTTTT  | 0.577 |             |
| + | 26 | 3881_3882 | rug.1_Missense_M   | NM_020761    | NP_065812    | Q8N122 | RPTOR_HUMAN | WD 1.                      | 6  | CGTCCCCTCT   | 0.559 |             |
| + | 1  | 471       | AL_uc010dkz.2_In   | NM_020412    | NP_065145    | Q7LBR1 | CHM1B_HUMAN |                            | 0  | TGACAAATTC   | 0.517 |             |



|   |    |           |                    |              |              |        |             |                                |    |                   |       |
|---|----|-----------|--------------------|--------------|--------------|--------|-------------|--------------------------------|----|-------------------|-------|
| + | 1  | 59        |                    | NM_005913    | NP_005904    | P33032 | MC5R_HUMAN  | cellular (Potential).          | 6  | GGGCAACCTTT       | 0.463 |
| + | 14 | 1990      |                    | NM_005925    | NP_005916    | Q16820 | MEP1B_HUMAN | cellular (Potential).          | 2  | AGGCTCCACCC       | 0.463 |
| - | 5  | 696       | 2_uc010dnf.2_3'U   | NM_002930    | NP_002921    | Q99578 | RIT2_HUMAN  |                                | 1  | GCCATGAAAAG       | 0.423 |
| + | 20 | 3706      | p.R868K DCC_uc     | NM_005215    | NP_005206    | P43146 | DCC_HUMAN   | tential). Fibronectin type-III | 17 | CTTCAGGACTC       | 0.388 |
| - | 8  | 1143      | p.E332K SERPINI    | NM_002974    | NP_002965    | P48594 | SPB4_HUMAN  |                                | 3  | ATAATTCGACTAC     | 0.463 |
| + | 6  | 689       | Met.1_Missense_M   | NM_001040147 | NP_001035237 | O75635 | SPB7_HUMAN  |                                | 3  | ATCTCCCAAGG       | 0.408 |
| - | 6  | 820       | p.S178F NETO1_     | NM_138966    | NP_620416    | Q8TDF5 | NETO1_HUMAN | tracellular (Potential).       | 4  | CTTCGGAACCG       | 0.428 |
| + | 4  | 1262      | a.1_Missense_Mt    | NM_173480    | NP_775751    | Q68EA5 | ZNF57_HUMAN | 2H2-type 8.                    | 3  | GGAAAGCCTTC       | 0.443 |
| + | 13 | 1539      | i.G432D FSD1_uc    | NM_024333    | NP_077309    | Q9BTV5 | FSD1_HUMAN  | 330.2/SPRY.                    | 1  | GTATGGTGTGG       | 0.677 |
| - | 11 | 1183      | p.G382E SEMA6E     | NM_032108    | NP_115484    | Q9H3T3 | SEM6B_HUMAN | ilar (Potential). Sema.        | 1  | GCATCCCGGGG       | 0.612 |
| + | 4  | 1710      | ym.1_Missense_M    | NM_001136501 | NP_001129973 | Q08AG5 | ZN844_HUMAN |                                | 0  | GCATGAAAGGA       | 0.413 |
| + | 6  | 441       | 2mzl.3_Splice_Site | NM_032433    | NP_115809    | Q96JL9 | ZN333_HUMAN |                                | 3  | GGCAGGGGGCC       | 0.602 |
| - | 11 | 1300      |                    | NM_001080421 | NP_001073890 | Q9UPW8 | UN13A_HUMAN | i-rich. Potential.             | 3  | ctctctctctccagctc | 0.433 |
| + | 4  | 456       | p.M5K ZNF431_      | NM_133473    | NP_597730    | Q8TF32 | ZN431_HUMAN | KRAB.                          | 2  | GTGGATGAACC       | 0.418 |
| - | 4  | 1122      | p.R258T ZNF681_    | NM_138286    | NP_612143    | Q96N22 | ZN681_HUMAN | ype 6; degenerate.             | 0  | TATGTCTGGTAA      | 0.378 |
| - | 2  | 147       | 81_uc002nrj.3_Int  | NM_138286    | NP_612143    | Q96N22 | ZN681_HUMAN |                                | 0  | ATGGTTCCTGA       | 0.284 |
| + | 2  | 924       | Jedk.1_Missense_   | NM_014686    | NP_055501    | O15063 | K0355_HUMAN |                                | 1  | CGGGTCCAAGC       | 0.627 |
| + | 3  | 368       | odk.2_Missense_M   | NM_001749    | NP_001740    | P04632 | CPNS1_HUMAN |                                | 0  | GCAGCGAGGCG       | 0.657 |
| - | 5  | 717       | 585B_uc002ofr.1_I  | NM_152279    | NP_689492    | Q52M93 | Z585B_HUMAN |                                | 1  | TTTTTCTCCTGT      | 0.393 |
| - | 1  | 688       |                    | NM_020862    | NP_065913    | Q9P244 | LRFN1_HUMAN | tracellular (Potential).       | 2  | GAAGAGCCCGT       | 0.667 |
| + | 27 | 3502_3503 | se_Mutation_p.P4   | NM_001042544 | NP_001036009 | Q8N2S1 | LTBP4_HUMAN | Pro-rich.                      | 1  | GCCGACCCAGC       | 0.693 |
| + | 3  | 311       | ie_Mutation_p.Q54  | NM_001007270 | NP_001007271 | Q9H840 | GEM17_HUMAN |                                | 1  | AATCCAGGAG        | 0.627 |
| + | 2  | 232       | pgk.1_Missense_M   | NM_018485    | NP_060955    | Q9P296 | C5ARL_HUMAN | cellular (Potential).          | 1  | ACGATTCTGTCA      | 0.607 |
| + | 4  | 379       | p.P69S CCDC15      | NM_144688    | NP_653289    | Q8N6L0 | CC155_HUMAN |                                | 2  | AGGGCCCCCAG       | 0.642 |
| + | 4  | 507       | 131 ALDH16A1_u     | NM_153329    | NP_699160    | Q8IZ83 | A16A1_HUMAN |                                | 1  | GGGCTGTTCGA       | 0.627 |
| + | 4  | 943       | d.2_Missense_Mu    | NM_012068    | NP_036200    | Q9Y2D1 | ATF5_HUMAN  | on with PTP4A1 (By similar     | 2  | caccacccccccgcq   | 0.488 |
| + | 5  | 954       | e_Mutation_p.H28   | NM_001130917 | NP_001124389 | Q8N149 | LIRA2_HUMAN | 3. Extracellular (Potential).  | 1  | CCTCCACGGG        | 0.647 |
| + | 14 | 1964      | e_Mutation_p.E54   | NM_006669    | NP_006660    | Q8NHL6 | LIRB1_HUMAN | lasmic (Potential).            | 3  | AGCCTGAGGAT       | 0.612 |
| - | 5  | 1190      | ne.2_Missense_Mt   | NM_022103    | NP_071386    | Q5HYK9 | ZN667_HUMAN | 2H2-type 6.                    | 1  | GGGGTAAATC        | 0.388 |
| - | 11 | 1775      | 61T ZIM2_uc002qi   | NM_015363    | NP_056178    | Q9NZV7 | ZIM2_HUMAN  |                                | 3  | GCAGGCTCTCT       | 0.483 |
| + | 4  | 746       |                    | NM_020903    | NP_065954    | Q9HBJ7 | UBP29_HUMAN |                                | 11 | AATTGACAAAAC      | 0.358 |
| + | 28 | 3290      | zi.2_Missense_Mu   | NM_003887    | NP_003878    | O43150 | ASAP2_HUMAN | SH3.                           | 0  | AGATTGGCCAC       | 0.403 |
| + | 3  | 362       |                    | NM_182626    | NP_872432    | Q96LS8 | CB048_HUMAN |                                | 0  | tttctaaggggatgaga | 0     |
| - | 4  | 459       | dx.2_Missense_M    | NM_022460    | NP_071905    | Q53T59 | H1BP3_HUMAN | PX.                            | 1  | CCCTGGGGATC       | 0.557 |
| - | 26 | 7173      |                    | NM_000384    | NP_000375    | P04114 | APOB_HUMAN  |                                | 27 | CTACTTCATACCT     | 0.378 |
| - | 16 | 2333      | i.1_RNA ATAD2B_    | NM_017552    | NP_060022    | Q9ULI0 | ATD2B_HUMAN |                                | 1  | GTGGTCTTATG       | 0.448 |
| + | 1  | 331       | 7L_uc010ymf.1_5'   | NM_018158    | NP_060628    | Q9BWU0 | NADAP_HUMAN |                                | 0  | CTTACCATCGC       | 0.522 |
| + | 11 | 1919      |                    | NM_016441    | NP_057525    | Q9NZV1 | CRIM1_HUMAN | xtracellular (Potential).      | 3  | GTGCCGGGAAT       | 0.592 |
| - | 38 | 5970_5971 | \DA_uc002rsx.3_M   | NM_001083953 | NP_001077422 | Q6YHU6 | THADA_HUMAN |                                | 3  | ACCATCCTTTGA      | 0.525 |
| - | 10 | 1796      | p.M512I FSHR_u     | NM_000145    | NP_000136    | P23945 | FSHR_HUMAN  | Name=6; (Potential).           | 8  | ATGGCCATGCG       | 0.527 |
| + | 10 | 7466      | g.2_Missense_Mu    | NM_015120    | NP_055935    | Q8TCU4 | ALMS1_HUMAN |                                | 9  | TGTTTCACCCAA      | 0.448 |
| + | 12 | 1129      | o.R335* EPB41L5_   | NM_020909    | NP_065960    | Q9HCM4 | E41L5_HUMAN |                                | 1  | TCTCATCGATCA      | 0.378 |
| + | 6  | 1253      | flu.2_Missense_M   | NM_130773    | NP_570129    | Q8WYK1 | CNTP5_HUMAN | 1. Extracellular (Potential).  | 10 | AGGGCGAGACG       | 0.562 |
| - | 17 | 2633      |                    | NM_001099771 | NP_001093241 | A5A3E0 | POTEF_HUMAN | Actin-like.                    | 5  | GCCCCCATCAT       | 0.622 |
| - | 1  | 1637      |                    | NR_002826    |              |        |             |                                | 0  | CAGCTCCGGGA       | 0.642 |
| - | 73 | 12143     |                    | NM_018557    | NP_061027    | Q9NZR2 | LRP1B_HUMAN | ntial). LDL-receptor class A   | 50 | TTATTTCTGCATC     | 0.383 |
| + | 9  | 1760      | i.2_Missense_Mut   | NM_018328    | NP_060798    | Q9P267 | MBD5_HUMAN  |                                | 5  | GTTCATGGAC        | 0.448 |

|   |     |       |                    |              |              |        |             |                                |     |               |       |
|---|-----|-------|--------------------|--------------|--------------|--------|-------------|--------------------------------|-----|---------------|-------|
| - | 123 | 17284 | o.G2121E NEB_uc    | NM_004543    | NP_004534    | P20929 | NEBU_HUMAN  |                                | 20  | GATTTTCCTTTCT | 0.403 |
| + | 3   | 1180  | IJ3_uc010zce.1_3'  | NM_002239    | NP_002230    | P48549 | IRK3_HUMAN  | smic (By similarity).          | 2   | TTTTTTCCTGTA  | 0.388 |
| - | 22  | 4263  | uc002udp.2_Intror  | NM_002977    | NP_002968    | Q15858 | SCN9A_HUMAN | III.                           | 13  | GGAAGGAATTG   | 0.353 |
| + | 1   | 425   | p.S76N DLX1_uc     | NM_178120    | NP_835221    | P56177 | DLX1_HUMAN  |                                | 0   | GGTCAGCAGCC   | 0.672 |
| - | 309 | 99378 | lissense_Mutation_ | NM_133378    | NP_596869    | Q8WZ42 | TITIN_HUMAN |                                | 153 | ACCTTCGTTTAT  | 0.418 |
| - | 292 | 87727 | 63E TTN_uc010zl    | NM_133378    | NP_596869    | Q8WZ42 | TITIN_HUMAN |                                | 153 | CTCCTCCGCTT   | 0.527 |
| - | 275 | 74985 | 516A TTN_uc010z    | NM_133378    | NP_596869    | Q8WZ42 | TITIN_HUMAN |                                | 153 | CCCATGTTACTA  | 0.483 |
| - | 181 | 35412 | .1_Missense_Mute   | NM_133378    | NP_596869    | Q8WZ42 | TITIN_HUMAN | p.E5233K(1)                    | 153 | CATATTCGCCTT  | 0.428 |
| - | 42  | 10036 | _uc010zjf.1_Misse  | NM_133378    | NP_596869    | Q8WZ42 | TITIN_HUMAN |                                | 153 | ACCAGGAAATTT  | 0.527 |
| - | 28  | 6502  | TN_uc010zjf.1_Mi   | NM_133378    | NP_596869    | Q8WZ42 | TITIN_HUMAN |                                | 153 | CATCAGATCCTT  | 0.463 |
| - | 13  | 2269  | 1_Missense_Muta    | NM_133378    | NP_596869    | Q8WZ42 | TITIN_HUMAN |                                | 153 | GCTTGCTAGTAC  | 0.368 |
| + | 7   | 2914  | p.Q934L SGOL2_     | NM_152524    | NP_689737    | Q562F6 | SGOL2_HUMAN |                                | 4   | ATGTCCAAGAAA  | 0.279 |
| + | 3   | 646   | D28_uc010ftx.2_M   | NM_006139    | NP_006130    | P10747 | CD28_HUMAN  | ellular (Potential).           | 0   | TTTGTCCAAGT   | 0.438 |
| - | 2   | 300   |                    | NM_006891    | NP_008822    | P07320 | CRGD_HUMAN  | a crystallin 'Greek key' 2.    | 0   | ATAGTCGCCCGC  | 0.657 |
| + | 13  | 1433  | 3_Mutation_p.S44C  | NM_001875    | NP_001866    | P31327 | CPSM_HUMAN  |                                | 13  | CTCTGTCCATTG  | 0.373 |
| + | 11  | 1230  | _p.Q78K VIL1_uc    | NM_007127    | NP_009058    | P09327 | VIL1_HUMAN  | Core.                          | 1   | CTGCCCAGCAG   | 0.567 |
| - | 11  | 4921  | 3_Mutation_p.R15C  | NM_001142644 | NP_001136116 | Q2M3C7 | SPKAP_HUMAN |                                | 10  | TGGCTCGGAGC   | 0.542 |
| + | 12  | 1514  | yc.2_Missense_Mi   | NM_000751    | NP_000742    | Q07001 | ACHD_HUMAN  |                                | 3   | TTCCCTGGGGAC  | 0.617 |
| + | 9   | 1048  | fye.1_Missense_M   | NM_005199    | NP_005190    | P07510 | ACHG_HUMAN  | lasmic (Potential).            | 0   | GAGGGGTCCGC   | 0.617 |
| + | 1   | 835   | _p.P118L GPR35_    | NM_005301    | NP_005292    | Q9HC97 | GPR35_HUMAN | ellular (Potential).           | 3   | CACGCCGCTGT   | 0.642 |
| - | 5   | 635   | wtu.2_Missense_n   | NM_178312    | NP_842564    | Q9BX51 | GGTL1_HUMAN |                                | 1   | CGTGACGTTGG   | 0.622 |
| - | 10  | 4975  | aw.2_Missense_M    | NM_014071    | NP_054790    | Q14686 | NCOA6_HUMAN | n. NCOA6IP-binding region      | 7   | ATCACCATGCT   | 0.542 |
| - | 7   | 1194  | gij.2_Missense_M   | NM_007050    | NP_008981    | O14522 | PTPRT_HUMAN | ential). Fibronectin type-III  | 20  | TGTGGGTCTCT   | 0.557 |
| - | 2   | 861   | hk.1_Missense_M    | NM_021248    | NP_067071    | Q9UJ99 | CAD22_HUMAN | r (Potential). Cadherin 1.     | 5   | GATGAACTCCG   | 0.632 |
| - | 3   | 480   | GE_uc002yiw.1_R    | NM_182482    | NP_872288    |        |             |                                | 0   | CTTTCAGGAGC   | 0.388 |
| + | 6   | 770   | yxz.2_Missense_n   | NM_007341    | NP_031367    | P55822 | SH3BG_HUMAN | u-rich (acidic).               | 0   | AAGATTCCTAGG  | 0.493 |
| - | 25  | 4734  | CAM_uc002yir.1_f   | NM_001389    | NP_001380    | O60469 | DSCAM_HUMAN | III 5. Extracellular (Potentia | 11  | TGATTGGAAAA   | 0.488 |
| + | 9   | 1092  | zbi.2_Missense_M   | NM_018964    | NP_061837    | P57057 | GLPT_HUMAN  | ical; (Potential).             | 0   | GCCTGGAGCCA   | 0.592 |
| - | 1   | 469   | .1_Intron C21orf29 | NM_198688    | NP_941961    | P60371 | KR106_HUMAN | l repeats of C-C-X(3).         | 0   | GCAGGGGGAGG   | 0.602 |
| - | 2   | 331   | 4R_uc002zru.2_5'   | NM_023004    | NP_075380    | Q9BZR6 | RTN4R_HUMAN | LRRNT.                         | 0   | CTGGGGGCAGC   | 0.667 |
| - | 18  | 2565  | B1_uc003af1.2_Mi   | NM_001127    | NP_001118    | Q10567 | AP1B1_HUMAN |                                | 2   | GCAGGGAGATC   | 0.657 |
| - | 4   | 887   | _p.S103F LARGE_    | NM_004737    | NP_004728    | O95461 | LARGE_HUMAN | renal (Potential).             | 3   | CCATGGAGTAG   | 0.672 |
| - | 15  | 1894  | _p.R231C SBF1_u    | NM_002972    | NP_002963    | O95248 | MTMR5_HUMAN |                                | 0   | GTTGCCACAAA   | 0.627 |
| - | 31  | 4207  |                    | NM_024923    | NP_079199    | Q8TEM1 | PO210_HUMAN | renal (Probable).              | 11  | GGTAGGAAACA   | 0.572 |
| + | 1   | 2110  | rk.1_Missense_Mu   | NM_152536    | NP_689749    | Q6ZNL6 | FGD5_HUMAN  |                                | 5   | CGAGAACAAAT   | 0.517 |
| - | 5   | 1039  | p.V170A UBP1_uc    | NM_014517    | NP_055332    | Q9NZ17 | UBIP1_HUMAN |                                | 2   | AATTCAACCGCA  | 0.358 |
| - | 12  | 4842  |                    | NM_014831    | NP_055646    | O15050 | TRNK1_HUMAN |                                | 2   | CATTTCTTCTC   | 0.493 |
| - | 13  | 1066  | 2_uc003cgr.2_Intr  | NM_006309    | NP_006300    | Q9Y608 | LRRF2_HUMAN | -binding. Ser-rich.            | 1   | GACCATAAGGGT  | 0.358 |
| - | 11  | 1388  | lx.2_Missense_Mu   | NM_020707    | NP_065758    | Q9HCP6 | HHATL_HUMAN |                                | 3   | CAATTCGTGCTA  | 0.577 |
| - | 12  | 6025  | e_Mutation_p.E20I  | NM_014159    | NP_054878    | Q9BYW2 | SETD2_HUMAN |                                | 32  | CACTCTCCACA   | 0.443 |
| - | 3   | 478   | DA_uc010hku.2_5'   | NM_001664    | NP_001655    | P61586 | RHOA_HUMAN  |                                | 2   | TCAGGCGATCAT  | 0.493 |
| + | 25  | 4430  |                    | NM_015512    | NP_056327    | Q9P2D7 | DYH1_HUMAN  | n (By similarity).             | 3   | CTACCCCTCCAC  | 0.602 |
| + | 19  | 2720  | _p.M853L CACNA     | NM_001128840 | NP_001122312 | Q01668 | CAC1D_HUMAN | lasmic (Potential).            | 11  | TTGAACATGAAG  | 0.428 |
| - | 11  | 1461  |                    | NM_020872    | NP_065923    | Q9P232 | CNTN3_HUMAN | like C2-type 5.                | 5   | CTCCATCGTTTA  | 0.318 |
| + | 1   | 189   | rf26_uc003dtk.1_f  | NM_032359    | NP_115735    | Q9BQ75 | CC026_HUMAN |                                | 1   | CGACTGGAGCA   | 0.662 |
| + | 4   | 2336  |                    | NM_016298    | NP_057382    | Q9UH90 | FBX40_HUMAN |                                | 5   | CGTCTCCTAAA   | 0.488 |
| + | 1   | 226   | lbn.1_Nonsense_l   | NM_021082    | NP_066568    | Q16348 | S15A2_HUMAN |                                | 1   | CACCTCGACCA   | 0.502 |

rs147706980

rs138798164

|   |    |       |                    |              |              |        |             |                               |    |               |       |             |
|---|----|-------|--------------------|--------------|--------------|--------|-------------|-------------------------------|----|---------------|-------|-------------|
| + | 4  | 1112  |                    | NM_001080440 | NP_001073909 | A6NHN0 | OTOL1_HUMAN | C1q.                          | 0  | CCAAGGGAATT/  | 0.468 |             |
| - | 6  | 784   | fk.2_Missense_Mt   | NM_005241    | NP_005232    | Q03112 | EV11_HUMAN  | MAPK9, SMAD3 and prob:        | 14 | CCGACGAAGTG   | 0.552 |             |
| + | 2  | 211   | z.2_Missense_Mul   | NM_003722    | NP_003713    | Q9H3D4 | P63_HUMAN   | cription activation.          | 12 | CATGTCCCAGA/  | 0.373 |             |
| - | 3  | 10394 | h.1_5'Flank MUC4   | NM_018406    | NP_060876    | Q99102 | MUC4_HUMAN  |                               | 0  | AACAGGGGTGG   | 0.592 |             |
| - | 2  | 6986  | C4_uc003fvp.2_Inl  | NM_018406    | NP_060876    | Q99102 | MUC4_HUMAN  |                               | 0  | AAGAGAGGTGG   | 0.587 |             |
| - | 3  | 919   | JA_uc003gbz.2_Inl  | NM_213613    | NP_998778    | Q9H2B4 | S26A1_HUMAN | ical; (Potential).            | 1  | GGTGGCGACAC   | 0.687 | rs144893723 |
| + | 4  | 1205  | P366L TACC3_ucC    | NM_006342    | NP_006333    | Q9Y6A5 | TACC3_HUMAN |                               | 2  | GCCTCCCTTGA/  | 0.602 |             |
| + | 2  | 79    |                    | NM_001040448 | NP_001035538 | P59861 | DB131_HUMAN |                               | 0  | GCTAATGATGAAT | 0.308 |             |
| - | 1  | 387   | T2A3_uc010ihp.1_   | NM_024743    | NP_079019    | Q6UWM9 | UD2A3_HUMAN | ellular (Potential).          | 2  | AAGTTCCTCTT/  | 0.338 |             |
| + | 2  | 689   |                    | NM_015393    | NP_056208    | Q6UWI2 | PARM1_HUMAN | ellular (Potential).          | 1  | GATCTCCCCTC/  | 0.572 |             |
| - | 1  | 413   |                    | NM_032693    | NP_116082    | Q9BSU3 | NAA11_HUMAN | cetyltransferase.             | 2  | TGGTCCATCAG   | 0.557 |             |
| + | 5  | 966   | n_p.L78F ARHGAI    | NM_001025616 | NP_001020787 | Q8N264 | RHG24_HUMAN | Rho-GAP.                      | 0  | AGGGTCTCTTT/  | 0.488 |             |
| + | 5  | 1454  |                    | NM_014208    | NP_055023    | Q9NZW4 | DSPP_HUMAN  | Asp/Ser-rich.                 | 1  | TGACAGCAATA/  | 0.403 |             |
| + | 7  | 978   |                    | NM_004967    | NP_004958    | P21815 | SIAL_HUMAN  |                               | 0  | CCCTATGAAGAT/ | 0.478 |             |
| + | 2  | 687   | 190A_uc010ikv.2_   | NM_001145065 | NP_001138537 | Q9C0I3 | F190A_HUMAN |                               | 2  | GACATTCTGTTG/ | 0.368 |             |
| - | 7  | 582   |                    | NM_000669    | NP_000660    | P00326 | ADH1G_HUMAN |                               | 0  | CAGGGGCGAG/   | 0.522 |             |
| + | 9  | 10628 | p.P1841L FAT4_u    | NM_024582    | NP_078858    | Q6V0I7 | FAT4_HUMAN  | Extracellular (Potential).    | 18 | AGGTCCCTTTA/  | 0.498 |             |
| - | 1  | 2501  | .1_Intron PCDH18   | NM_019035    | NP_061908    | Q9HCL0 | PCD18_HUMAN | ical; (Potential).            | 5  | CCTAAGGAAATA  | 0.423 |             |
| - | 7  | 1247  | p.R258K LRBA_uc    | NM_006726    | NP_006717    | P50851 | LRBA_HUMAN  |                               | 7  | TGGTCTCGAAA/  | 0.323 |             |
| - | 15 | 2172  | p.G578V FSTL5_u    | NM_020116    | NP_064501    | Q8N475 | FSTL5_HUMAN |                               | 8  | CATCCCCTACTG/ | 0.413 |             |
| - | 6  | 1287  | 3iq.1_Missense_N   | NM_017923    | NP_060393    | Q8TCQ1 | MARH1_HUMAN | ING-CH-type.                  | 2  | AAAGCGCAGTG   | 0.527 | rs146337383 |
| + | 8  | 688   | irn.2_Nonsense_N   | NM_007193    | NP_009124    | Q9UJ72 | ANX10_HUMAN | Annexin 3.                    | 0  | CTATGGGAAGC/  | 0.502 |             |
| + | 12 | 2015  | kb.1_Missense_M    | NM_017423    | NP_059119    | Q86SF2 | GALT7_HUMAN | ectin. Lumenal (Potential).   | 1  | AGTAAACGAC/   | 0.363 |             |
| + | 12 | 1865  | u_p.L330S SNX25_   | NM_031953    | NP_114159    | Q9H3E2 | SNX25_HUMAN | PX.                           | 5  | GAATTTACACCC  | 0.403 |             |
| - | 10 | 1686  |                    | NM_003966    | NP_003957    | Q13591 | SEM5A_HUMAN | tracellular (Potential).      | 2  | TGGCGCTCAGG   | 0.602 |             |
| - | 2  | 198   | z.1_5'UTR CTNNC    | NM_001332    | NP_001323    | Q9UQB3 | CTND2_HUMAN |                               | 8  | TGGTCTGGAACA  | 0.493 |             |
| - | 75 | 13103 | fc.2_Missense_Mu   | NM_001369    | NP_001360    | Q8TE73 | DYH5_HUMAN  |                               | 31 | CCACCGCCTCC   | 0.577 |             |
| - | 40 | 6625  |                    | NM_001369    | NP_001360    | Q8TE73 | DYH5_HUMAN  |                               | 31 | CTCATCAATCT/  | 0.373 |             |
| - | 7  | 1557  | p.E394K CDH18_u    | NM_004934    | NP_004925    | Q13634 | CAD18_HUMAN | r (Potential). Cadherin 4.    | 7  | CATTTTCGTAGAC | 0.433 |             |
| + | 12 | 1107  | _p.S233L RAI14_u   | NM_015577    | NP_056392    | Q9P0K7 | RAI14_HUMAN |                               | 1  | AGGAATCGGTAT  | 0.313 |             |
| - | 4  | 542   | JGT3A1_uc011cor.   | NM_152404    | NP_689617    | Q6NUS8 | UD3A1_HUMAN | ellular (Potential).          | 3  | TATATCCTTTCT  | 0.303 |             |
| + | 10 | 1905  | _p.R370C SLC1A3    | NM_004172    | NP_004163    | P43003 | EAA1_HUMAN  |                               | 0  | GGATCGCCTC/   | 0.547 |             |
| - | 9  | 1338  |                    | NM_006622    | NP_006613    | Q9NYY3 | PLK2_HUMAN  |                               | 4  | AGATCTTTTCT/  | 0.353 |             |
| + | 2  | 293   |                    | NM_138453    | NP_612462    | Q96E17 | RAB3C_HUMAN | region (By similarity).       | 2  | GGATCGATTTCT/ | 0.408 |             |
| - | 22 | 3708  | o.2_RNA ADAMT5     | NM_197941    | NP_922932    | Q9UKP5 | ATS6_HUMAN  | TSP type-1 4.                 | 0  | CCAAAGCCACC/  | 0.453 |             |
| - | 13 | 1512  | _p.P430L FAM169    | NM_015566    | NP_056381    | Q9Y6X4 | F169A_HUMAN |                               | 0  | TACGTGGGGTC/  | 0.373 |             |
| + | 1  | 816   | uc011ctk.1_RNA     | NM_032567    | NP_115956    | Q9BXG8 | SPZ1_HUMAN  | notif (By similarity).        | 1  | AAACAGCAGATG  | 0.353 |             |
| + | 20 | 4120  | R98_uc003kjt.2_5'l | NM_032119    | NP_115495    | Q8WXG9 | GPR98_HUMAN | ellular (Potential).          | 16 | GTTAATCCAAAAT | 0.463 |             |
| - | 1  | 511   | C_uc003kql.3_Int   | NM_032028    | NP_114417    | Q9BXA7 | TSSK1_HUMAN | rotein kinase.                | 5  | CAGGGCTCCCCI/ | 0.557 |             |
| + | 5  | 1117  | ITS19_uc003kvc.1   | NM_133638    | NP_598377    | Q8TE59 | ATS19_HUMAN | ptidase M12B.                 | 9  | AATCTTCGTGTG  | 0.294 |             |
| - | 5  | 712   |                    | NM_015082    | NP_055897    | Q6MZW2 | FSTL4_HUMAN |                               | 2  | TGTCTCCTTCTI  | 0.577 |             |
| + | 14 | 2091  | 3ldi.2_Missense_N  | NM_001903    | NP_001894    | P35221 | CTNA1_HUMAN |                               | 11 | TAGCTGGCCAG/  | 0.542 |             |
| + | 1  | 1192  |                    | NR_001280    |              |        |             |                               | 0  | ACCTTAGAAAAT/ | 0.473 |             |
| - | 6  | 1192  | loh.3_Missense_N   | NM_004576    | NP_004567    | Q00005 | 2ABB_HUMAN  | WD 4.                         | 2  | CACCTCCGTGA/  | 0.562 |             |
| - | 9  | 1051  | oo.2_Missense_M    | NM_001387    | NP_001378    | Q14195 | DPYL3_HUMAN |                               | 1  | AGTCCGGAGTA/  | 0.567 |             |
| - | 9  | 1800  | jhd.2_Missense_N   | NM_002609    | NP_002600    | P09619 | PGFRB_HUMAN | otential). Ig-like C2-type 5. | 17 | TGTTCCGGCTGG/ | 0.597 |             |
| + | 4  | 588   | RA6_uc003lyv.2_5'  | NM_000811    | NP_000802    | Q16445 | GBRA6_HUMAN | ellular (Probable).           | 12 | TTTTCCGCCAG/  | 0.408 |             |

|   |    |           |                     |              |              |        |             |                               |    |                    |               |
|---|----|-----------|---------------------|--------------|--------------|--------|-------------|-------------------------------|----|--------------------|---------------|
| + | 15 | 2754      | lzt.3_Splice_Site_  | NM_001122679 | NP_001116151 |        |             |                               | 10 | TTCTCAGCTTGG       | 0.507         |
| + | 2  | 250       | tion_p.P62L MIR1    | NM_173664    | NP_775935    | Q8N8L6 | ARL10_HUMAN |                               | 1  | GCAGCCCGAGG        | 0.701         |
| - | 12 | 1673      | i9_splice RASGEF    | NM_175062    | NP_778232    | Q8N431 | RGF1C_HUMAN |                               | 1  | ACTCACCTTAG        | 0.507         |
| + | 1  | 470       |                     | NM_001453    | NP_001444    | Q12948 | FOXC1_HUMAN | Fork-head.                    | 1  | ACCCGGACTCCT       | 0.622         |
| + | 23 | 4640      | P_uc003mxq.1_Inl    | NM_004415    | NP_004406    | P15924 | DESP_HUMAN  | us rod domain. Potential.     | 9  | ACAAGTCACTC        | 0.463         |
| - | 7  | 998       | A MAK_uc010jou.     | NM_005906    | NP_005897    | P20794 | MAK_HUMAN   | rotein kinase.                | 3  | GAATAGCTTCAT       | 0.428         |
| + | 4  | 3169      | EP1_uc011diq.1_F    | NM_002114    | NP_002105    | P15822 | ZEP1_HUMAN  |                               | 6  | AGAACCTGAGC        | 0.463         |
| - | 4  | 4456_4457 |                     | NM_052923    | NP_443155    | Q6R2W3 | SCND3_HUMAN |                               | 1  | agagaatccggtctca   | 0 rs140560647 |
| - | 4  | 3499      |                     | NM_052923    | NP_443155    | Q6R2W3 | SCND3_HUMAN |                               | 1  | atttaaattccaaaccac | 0             |
| + | 1  | 600       |                     | NM_030905    | NP_112167    | O76002 | OR2J2_HUMAN | ellular (Potential).          | 0  | TTCTGGGTACCC       | 0.478         |
| - | 10 | 5112      | C1_uc011dmp.1_A     | NM_014641    | NP_055456    | Q14676 | MDC1_HUMAN  | with the PRKDC complex.       | 4  | CCTGCCCTTAG        | 0.582         |
| + | 9  | 1269      | 1_Missense_Mutat    | NM_013993    | NP_054699    | Q08345 | DDR1_HUMAN  | ellular (Potential).          | 9  | AGTGCCCTTG         | 0.667         |
| - | 22 | 7854      |                     | NM_019105    | NP_061978    | P22105 | TENX_HUMAN  | nectin type-III 18.           | 0  | TGAAGGAGTCA        | 0.692         |
| + | 2  | 409       | I3obi.2_Splice_Site | NM_019111    | NP_061984    | P01903 | DRA_HUMAN   |                               | 2  | AATGGTACCTC        | 0.463         |
| - | 52 | 4075      | se_Mutation_p.P1    | NM_080680    | NP_542411    | P13942 | COBA2_HUMAN | le-helical region.            | 5  | CCGAGGGCCAC        | 0.602         |
| - | 1  | 807       |                     | NR_001444    |              |        |             |                               | 0  | GACAGGAGGCA        | 0.577         |
| - | 7  | 1749      | b.2_Missense_Mu     | NM_001142883 | NP_001136355 | Q96PC2 | IP6K3_HUMAN |                               | 0  | GATATCCTGCAC       | 0.478         |
| + | 11 | 1235      | h.2_RNA GLP1R_      | NM_002062    | NP_002053    | P43220 | GLP1R_HUMAN | Name=7; (Potential).          | 5  | CACCTCCTTCC        | 0.527         |
| + | 2  | 241       | ML4_uc003oqd.2_     | NM_198153    | NP_937796    | Q6UXN2 | TRML4_HUMAN | g-like V-type.                | 1  | CAAGAGAGGGC        | 0.537         |
| - | 3  | 1244      | 318_uc003ouw.2_     | NM_014345    | NP_055160    | Q5VUA4 | ZN318_HUMAN |                               | 7  | ATTATGTCCACCT      | 0.483         |
| + | 11 | 2316      | LH_uc011dvl.1_R     | NM_006502    | NP_006493    | Q9Y253 | POLH_HUMAN  |                               | 2  | AAACCCCAAGG        | 0.498         |
| + | 1  | 3325      | e.2_Nonsense_Mt     | NM_001010870 | NP_001010870 | O60522 | TDRD6_HUMAN |                               | 6  | TACCAGAAGAAC       | 0.373         |
| + | 6  | 1150      | p.L355V GPR115_     | NM_153838    | NP_722580    | Q8IZF3 | GP115_HUMAN | ellular (Potential).          | 8  | CAACCTTGGGG        | 0.473         |
| + | 2  | 268       |                     | NM_001010872 | NP_001010872 | Q5T0W9 | FA83B_HUMAN |                               | 6  | GGAACGAGTTT        | 0.383         |
| + | 2  | 237       |                     | NM_207410    | NP_997293    | Q6UXV0 | GFRAL_HUMAN | ellular (Potential).          | 2  | TGCAATGATTCA       | 0.318         |
| + | 4  | 1963      | ixm.1_Missense_I    | NM_020931    | NP_065982    | Q9HC16 | K1586_HUMAN |                               | 0  | ATAAATTTAATGC      | 0.264         |
| - | 27 | 1961      | p.G174E COL9A1      | NM_001851    | NP_001842    | P20849 | CO9A1_HUMAN | elical region (COL2).         | 4  | AAATTTCCCATCT      | 0.423         |
| - | 11 | 1175      | COL9A1_uc003pff.    | NM_001851    | NP_001842    | P20849 | CO9A1_HUMAN | elical region (COL3).         | 4  | CCTTTGACCCA        | 0.388         |
| + | 34 | 5092      | og.2_Missense_A     | NM_014989    | NP_055804    | Q86UR5 | RIMS1_HUMAN |                               | 10 | TCCCTCACCC         | 0.512         |
| - | 1  | 86        | F1A1_uc003phh.2_    | NM_001402    | NP_001393    | P68104 | EF1A1_HUMAN | (By similarity).              | 0  | CGAATCTACGTC       | 0.423         |
| - | 2  | 3738      | p.Q59* CNR1_uc      | NM_001160260 | NP_001153732 | P21554 | CNR1_HUMAN  | ellular (Potential).          | 2  | CTCTTGAAGG         | 0.453         |
| + | 18 | 2506      |                     | NM_173560    | NP_775831    | Q8HWS3 | RFX6_HUMAN  |                               | 3  | GGCTCGGATCA        | 0.428         |
| - | 9  | 2354      |                     | NM_001042475 | NP_001035940 | Q5SZL2 | CF204_HUMAN | Potential.                    | 1  | AGGCATCTTCT        | 0.323         |
| - | 2  | 1204      | p.D166N FAM184      | NM_024581    | NP_078857    | Q8NB25 | F184A_HUMAN |                               | 7  | AAGATCAGCTTC       | 0.378         |
| + | 4  | 837       | as.1_Missense_M     | NM_032784    | NP_116173    | Q9BXY4 | RSPO3_HUMAN | TSP type-1.                   | 0  | AGCATCCTTCAC       | 0.453         |
| - | 12 | 2397      | ou.1_Missense_M     | NM_002844    | NP_002835    | Q15262 | PTPRK_HUMAN | tential) Fibronectin type-III | 8  | GGTTTCCCGGG        | 0.542         |
| + | 19 | 2044      | qbu.2_Missense_A    | NM_032438    | NP_115814    | Q96JM7 | LMBL3_HUMAN |                               | 6  | CTTCTTCCCTG        | 0.348         |
| - | 13 | 1756      | p.R477K SAM3        | NM_001017373 | NP_001017373 | Q8N6K7 | SAMD3_HUMAN |                               | 1  | TCAATCCTAAAT       | 0.413         |
| - | 7  | 1084      | kgh.2_Missense_A    | NM_022568    | NP_072090    | Q9H2A2 | AL8A1_HUMAN |                               | 4  | GAGCTCTCTTG        | 0.463         |
| - | 2  | 780       | uc003qky.1_Intron   | NM_032145    | NP_115521    | Q8TB52 | FBX30_HUMAN |                               | 3  | CAGCAGCCAAA        | 0.403         |
| + | 6  | 1352      | qe.2_Missense_M     | NM_012454    | NP_036586    | Q8IVF5 | TIAM2_HUMAN |                               | 4  | AAATTCCTTGCT       | 0.433         |
| + | 18 | 4911      | .E1547K ARID1B_     | NM_017519    | NP_059989    | Q8NFD5 | ARI1B_HUMAN | Pro-rich.                     | 2  | GAAAGGAGATC        | 0.512         |
| + | 34 | 5543      |                     | NM_001040001 | NP_001035090 | P55196 | AFAD_HUMAN  |                               | 5  | TGACATTCAAGC       | 0.418         |
| - | 41 | 5823      | km.1_Missense_M     | NM_001080453 | NP_001073922 | Q8N201 | INT1_HUMAN  |                               | 0  | CAGGAAGCAGC        | 0.682         |
| + | 20 | 3092      | o.2_Missense_Mu     | NM_152744    | NP_689957    | Q7Z5N4 | SDK1_HUMAN  | nectin type-III 4.            | 6  | ATCTTGACACA        | 0.423         |
| + | 6  | 873       | I5_uc010ksp.2_Sp    | NM_014855    | NP_055670    | O43299 | K0415_HUMAN |                               | 1  | CACAGGTGTGC        | 0.701         |
| + | 8  | 911       | ie.1_Missense_Mu    | NM_031414    | NP_113602    | Q9BXU1 | STK31_HUMAN |                               | 9  | ATAGGAAAGTT        | 0.323         |

|   |    |       |                   |              |              |         |             |       |               |       |             |
|---|----|-------|-------------------|--------------|--------------|---------|-------------|-------|---------------|-------|-------------|
| - | 2  | 904   | A3_uc003syk.2_5'  | NM_002141    | NP_002132    | Q00056  | HXA4_HUMAN  | 1     | AGGCCGAATTG   | 0.398 |             |
| + | 4  | 871   | _p.S89F HECW1_    | NM_015052    | NP_055867    | Q76N89  | HECW1_HUMAN | 23    | CTATTCATCGC   | 0.592 |             |
| - | 5  | 569   | _p.P126L VOPP1    | NM_030796    | NP_110423    | Q96AW1  | VOPP1_HUMAN | 0     | CGACAGGGTTC   | 0.632 |             |
| + | 5  | 1216  |                   | NM_153363    | NP_699194    | Q8IYX0  | ZN679_HUMAN | 1     | ACAAGAGAATTC  | 0.408 |             |
| + | 11 | 1750  | tvz.2_Missense_I  | NM_022479    | NP_071924    | Q6IS24  | GLTL3_HUMAN | 7     | TCCTCCGCAGC   | 0.627 |             |
| - | 7  | 12903 | p.P4205L PCLO_u   | NM_033026    | NP_149015    | Q9Y6V0  | PCLO_HUMAN  | 7     | FGAATAGGTGAA  | 0.383 |             |
| + | 2  | 1152  | .G16E GRM3_uc     | NM_000840    | NP_000831    | Q14832  | GRM3_HUMAN  | 13    | AAAGGGATTTT   | 0.398 |             |
| - | 3  | 1046  | FEAP4_uc003ujt.2  | NM_024636    | NP_078912    | Q687X5  | STEA4_HUMAN | 0     | TAATATCGAATAG | 0.428 |             |
| + | 12 | 1524  | _p.C379Y DYNC1    | NM_004411    | NP_004402    | O14576  | DC111_HUMAN | 4     | AATGTGTTCTCT  | 0.433 |             |
| - | 2  | 346   |                   | NM_018842    | NP_061330    | Q9UHR4  | BI2L1_HUMAN | 1     | AATTTCCGAGCC  | 0.299 |             |
| - | 1  | 493   | _p.G113S ACHE_u   | NM_000665    | NP_000656    | P22303  | ACES_HUMAN  | 2     | GGTGCCCTCAA   | 0.597 |             |
| - | 4  | 571   | n_p.L29F NRCAM    | NM_001037132 | NP_001032209 | Q92823  | NRCAM_HUMAN | 5     | ATCAAGAGGTAC  | 0.458 |             |
| + | 6  | 853   | R_uc011knq.1_5'l  | NM_000492    | NP_000483    | P13569  | CFTR_HUMAN  | 5     | GGCTAGGGAGA   | 0.433 |             |
| + | 1  | 1022  |                   | NM_012281    | NP_036413    | Q9NZV8  | KCND2_HUMAN | 5     | GGGTGGATGCC   | 0.612 |             |
| - | 1  | 638   | PS2_uc010lkq.2_   | NM_198085    | NP_932351    | Q8N7C7  | RN148_HUMAN | 0     | ACATGGGAAATA  | 0.448 |             |
| - | 8  | 686   | GA14_uc003vqa.4   | NM_018718    | NP_061188    | Q9BYV8  | CEP41_HUMAN | 0     | TACATATCAAG   | 0.368 |             |
| + | 17 | 3000  | ub.2_Missense_M   | NM_015905    | NP_056989    | O15164  | TIF1A_HUMAN | 8     | CCTGTTCTCTA   | 0.323 |             |
| - | 15 | 1860  |                   | NM_004333    | NP_004324    | P15056  | BRAF_HUMAN  | 18290 | ATTTCACTGTAC  | 0.368 |             |
| - | 1  | 719   |                   | NM_176817    | NP_789787    | P59533  | T2R38_HUMAN | 2     | CAGAAGAAACC   | 0.458 |             |
| - | 4  | 617   | TRPV6_uc010lou.   | NM_018646    | NP_061116    | Q9H1D0  | TRPV6_HUMAN | 2     | GGCTCGCACC    | 0.572 | rs150734746 |
| - | 7  | 1114  | bz.2_Missense_M   | NM_019841    | NP_062815    | Q9NQA5  | TRPV5_HUMAN | 6     | GGAGTCGATCT   | 0.557 |             |
| + | 1  | 934   |                   | NM_001001667 | NP_001001667 | Q8N148  | OR6V1_HUMAN | 1     | GCAAGGCACA    | 0.542 |             |
| + | 5  | 682   | LCN1_uc010lox.1   | NM_000083    | NP_000074    | P35523  | CLCN1_HUMAN | 5     | TACTTCGTGGG   | 0.507 | rs143506735 |
| + | 1  | 840   |                   | NM_012369    | NP_036501    | Q13607  | OR2F1_HUMAN | 3     | CCAGTCCCTCT   | 0.478 |             |
| + | 3  | 4687  | _p.E157K ABP1_u   | NM_001091    | NP_001082    | P19801  | ABP1_HUMAN  | 6     | TGCAGGAAGCC   | 0.602 |             |
| + | 5  | 707   | SF10C_uc011kzr.1  | NM_003841    | NP_003832    | O14798  | TR10C_HUMAN | 0     | AATGAACACCA   | 0.557 |             |
| - | 4  | 690   | ense_Mutation_p.  | NM_173833    | NP_776194    | Q6ZMJ2  | SCAR5_HUMAN | 2     | GCGCGCCTGG    | 0.577 |             |
| - | 7  | 854   |                   | NM_000637    | NP_000628    | P00390  | GSHR_HUMAN  | 5     | CTTAGAACCCAC  | 0.413 |             |
| + | 7  | 762   | 2_uc010lwz.1_Intr | NM_194294    | NP_919270    | Q6ZQW0  | I23O2_HUMAN | 2     | CTGGGGGAGAG   | 0.478 |             |
| - | 17 | 2585  | JNL_uc003xqt.3_F  | NM_144651    | NP_653252    | A1KZ92  | PXDNL_HUMAN | 2     | CGCCCATCCGA   | 0.662 |             |
| - | 5  | 541   |                   | NM_144651    | NP_653252    | A1KZ92  | PXDNL_HUMAN | 2     | CTAATCTCAGA   | 0.433 |             |
| + | 4  | 1274  | 1_uc011ldy.1_Intr | NM_006269    | NP_006260    | P56715  | RP1_HUMAN   | 12    | AAAGTCGATCAT  | 0.408 |             |
| + | 4  | 2679  | 1_uc011ldy.1_Intr | NM_006269    | NP_006260    | P56715  | RP1_HUMAN   | 12    | TGGCATCTGGGT  | 0.333 |             |
| + | 10 | 1775  | nse_Mutation_p.C  | NM_184085    | NP_908973    | Q9BYV6  | TRI55_HUMAN | 5     | CCCTCCAGGGA   | 0.468 |             |
| - | 4  | 588   | PA6_uc003xss.2_I  | NM_020361    | NP_065094    | Q8N4T0  | CBPA6_HUMAN | 2     | GAAGATCTTCTA  | 0.383 |             |
| + | 2  | 620   |                   | NM_004770    | NP_004761    | Q92953  | KCNB2_HUMAN | 7     | AAACAGGAAGA   | 0.507 |             |
| - | 9  | 985   | s.1_Missense_Mu   | NM_015902    | NP_056986    | O95071  | UBR5_HUMAN  | 28    | TTCACGTAACAC  | 0.453 |             |
| + | 1  | 339   |                   | NM_003301    | NP_003292    | P34981  | TRFR_HUMAN  | 3     | ATTTGGGAATTA  | 0.463 |             |
| + | 46 | 7005  |                   | NM_177531    | NP_803875    | Q86W11  | PKHL1_HUMAN | 14    | GACTCGCTTG    | 0.383 | rs73309320  |
| - | 48 | 7683  | .E2468D CSMD3     | NM_198123    | NP_937756    | Q72407  | CSMD3_HUMAN | 63    | ATCAAATTCCTT  | 0.328 |             |
| - | 38 | 6280  | nt.2_Missense_M   | NM_198123    | NP_937756    | Q72407  | CSMD3_HUMAN | 63    | AAGATGAAATCC  | 0.274 |             |
| + | 22 | 3001  | uc003yqy.1_Intron | NM_001039112 | NP_001034201 | Q2WVGJ9 | FR1L6_HUMAN | 11    | TGAGCCCCCA    | 0.488 |             |
| - | 61 | 4742  | ljo.1_Missense_M  | NM_152888    | NP_690848    | Q8NFW1  | COMA1_HUMAN | 13    | GTAGTCCTTGG   | 0.602 |             |
| - | 2  | 682   | _p.E281G TRAPP    | NM_001160372 | NP_001153844 | Q96Q05  | TPPC9_HUMAN | 2     | TTTTCTCAAACC  | 0.532 |             |
| - | 17 | 2211  | e_Mutation_p.V64  | NM_012154    | NP_036286    | Q9UKV8  | AGO2_HUMAN  | 0     | TCCCAACCTTCC  | 0.622 |             |
| - | 40 | 5798  | .G1289E PTPRD_    | NM_002839    | NP_002830    | P23468  | PTPRD_HUMAN | 22    | CGATCCTTCTA   | 0.388 |             |
| + | 23 | 3714  | _p.V12311 CNTLN   | NM_017738    | NP_060208    | Q9NXG0  | CNTLN_HUMAN | 1     | CTCCTAGTATCAA | 0.348 |             |



|   |    |         |                                                 |              |              |        |             |                                |      |   |              |       |             |
|---|----|---------|-------------------------------------------------|--------------|--------------|--------|-------------|--------------------------------|------|---|--------------|-------|-------------|
| - | 2  | 384     | IKN2A_uc010miu.2                                | NM_000077    | NP_000068    | P42771 | CD2A1_HUMAN | ANK 2. 1.1.1.1                 | 3678 | C | CACTCGGGCGC  | 0.677 | rs121913387 |
| - | 1  | 2639    | uc003zrh.1_5Flanl                               | NM_153809    | NP_722516    | Q8IZX4 | TAF1L_HUMAN |                                | 26   | G | GCTTTTTTATAT | 0.453 |             |
| - | 1  | 637     |                                                 | NM_019897    | NP_063950    | Q9NQN1 | OR2S1_HUMAN | cellular (Potential).          | 1    | T | GATGGAAATG   | 0.473 |             |
| + | 2  | 121_122 | aah.1_Missense_M                                | NM_014907    | NP_055722    | Q5SYB0 | FRPD1_HUMAN |                                | 9    | C | CTTCGGCGCTC  | 0.525 | rs146611803 |
| + | 21 | 2415    | akq.3_Missense_M                                | NM_033305    | NP_150648    | Q96RL7 | VP13A_HUMAN |                                | 10   | A | AGCTGCTTAC   | 0.323 |             |
| - | 5  | 1086    |                                                 | NM_017561    | NP_060031    | A1L443 | FA22F_HUMAN | Pro-rich.                      | 0    | T | TGGGCCTTGGT  | 0.706 |             |
| - | 6  | 679     | wo.1_Missense_M                                 | NM_014930    | NP_055745    | Q9Y2H8 | ZN510_HUMAN |                                | 0    | A | GCTACATGCA   | 0.333 |             |
| - | 1  | 208     |                                                 | NM_001001956 | NP_001001956 | Q8NGT0 | O13C9_HUMAN | Name=2; (Potential).           | 0    | G | GATGTCCAAGA  | 0.478 |             |
| + | 2  | 193     | TGS1_uc004bmf.1                                 | NM_000962    | NP_000953    | P23219 | PGH1_HUMAN  |                                | 2    | C | GCTCCCCGTC   | 0.672 |             |
| + | 27 | 2939    | wu.2_Nonsense_M                                 | NM_015354    | NP_056169    | Q5SRE5 | NU188_HUMAN |                                | 7    | A | AAGATCGATAC  | 0.547 |             |
| + | 15 | 3182    | p.P626S BAT2L1_                                 | NM_013318    | NP_037450    | Q5JSZ5 | PRC2B_HUMAN |                                | 0    | T | TCCCCCATG    | 0.562 |             |
| - | 3  | 436     |                                                 | NM_006753    | NP_006744    | O75683 | SURF6_HUMAN |                                | 1    | C | AGTCGCTGTC   | 0.632 |             |
| + | 4  | 699     | sense_Mutation_p.                               | NM_016034    | NP_057118    | Q9Y399 | RT02_HUMAN  |                                | 0    | T | TGGCCGTGAGA  | 0.607 |             |
| - | 2  | 240     | l10_uc011mee.1_Missense_Mutation_p.D61N LCN10_1 |              |              | Q6JVE6 | LCN10_HUMAN |                                | 1    | C | TGTCCCTGGC   | 0.647 |             |
| - | 5  | 3009    |                                                 | NM_015419    | NP_056234    | Q9NR99 | MXRA5_HUMAN |                                | 8    | T | GTGACGATCCA  | 0.502 |             |
| + | 2  | 115     | Intron ARHGAP6_                                 | NM_001142    | NP_001133    | Q99217 | AMELX_HUMAN |                                | 0    | C | TTTTGCCATGC  | 0.403 |             |
| - | 5  | 1109    | se_Mutation_p.P11                               | NM_002641    | NP_002632    | P37287 | PIGA_HUMAN  | plasmic (Potential).           | 0    | C | CTCAGGAATTC  | 0.373 |             |
| + | 5  | 825     | PS2_uc010nfr.2_5                                | NM_206923    | NP_996806    | O15391 | TYY2_HUMAN  |                                | 2    | C | ATTTGCAACTT  | 0.343 |             |
| + | 10 | 1102    |                                                 | NM_001415    | NP_001406    | P41091 | IF2G_HUMAN  |                                | 1    | T | GTGCAGTCGGA  | 0.423 |             |
| + | 2  | 692     |                                                 | NM_173699    | NP_775970    | Q96M61 | MAGBI_HUMAN | MAGE.                          | 1    | T | TGGATCCCATC  | 0.438 |             |
| + | 1  | 1557    |                                                 | NM_001013736 | NP_001013758 | Q5HY64 | FA47C_HUMAN |                                | 3    | T | AGCCTTCTGAG  | 0.612 | rs141294322 |
| + | 1  | 277     |                                                 | NM_000531    | NP_000522    | P00480 | OTC_HUMAN   |                                | 2    | C | TTCATGGTTCCG | 0.383 |             |
| - | 4  | 568     | orf38_uc004dev.1_                               | NM_144970    | NP_659407    | Q8TB03 | CX038_HUMAN |                                | 1    | T | CAGAAAAATTT  | 0.358 |             |
| + | 3  | 272     | M3_uc004dkg.2_I                                 | NM_006743    | NP_006734    | P98179 | RBM3_HUMAN  | RRM.                           | 1    | C | CTCAGCGTCC   | 0.552 |             |
| - | 10 | 1213    | ITMR8_uc004dvt.1                                | NM_017677    | NP_060147    | Q96EF0 | MTMR8_HUMAN | ularin phosphatase.            | 4    | T | TTGGGAAAAC   | 0.343 |             |
| + | 4  | 928     | p.P229H EDA_uc0                                 | NM_001399    | NP_001390    | Q92838 | EDA_HUMAN   | (Potential). Collagen-like.    | 3    | T | ACCCCTGGCC   | 0.453 |             |
| + | 11 | 1892    | p.S185G DLG3_uc                                 | NM_021120    | NP_066943    | Q92796 | DLG3_HUMAN  | SH3.                           | 2    | T | GCCAAGCCAG   | 0.522 |             |
| - | 3  | 4825    |                                                 | NM_001008537 | NP_001008537 | Q5QGS0 | K2022_HUMAN |                                | 15   | G | TTTTCCATTG   | 0.453 |             |
| + | 2  | 512     |                                                 | NM_005296    | NP_005287    | Q99677 | LPAR4_HUMAN | cellular (Potential).          | 3    | A | TATTCCTTCA   | 0.403 |             |
| + | 5  | 352     | OL_uc010nmp.2_I                                 | NM_198450    | NP_940852    | Q6UXV4 | APOOL_HUMAN |                                | 0    | T | CTCCGAAAAT   | 0.338 |             |
| + | 6  | 1339    | afa.2_Missense_M                                | NM_019117    | NP_061990    | Q9C0H6 | KLHL4_HUMAN |                                | 5    | T | GAAACCAGTT   | 0.378 |             |
| + | 13 | 2432    | mj.3_Missense_M                                 | NM_018015    | NP_060485    | Q6NSI4 | CX057_HUMAN |                                | 3    | A | CCATGAGATA   | 0.269 |             |
| - | 2  | 439     |                                                 | NM_031273    | NP_112563    | Q9BXU2 | TX13B_HUMAN |                                | 1    | C | CTGTTCTTGA   | 0.567 |             |
| - | 11 | 2623    |                                                 | NM_020721    | NP_065772    | Q9ULL0 | K1210_HUMAN |                                | 5    | T | CTGAGAGGCA   | 0.453 |             |
| - | 2  | 438     | ae.3_Missense_M                                 | NM_001421    | NP_001412    | Q99607 | ELF4_HUMAN  |                                | 1    | C | CATCCCCTTGC  | 0.527 |             |
| - | 5  | 737     | af.2_Missense_M                                 | NM_001555    | NP_001546    | Q8N6C5 | IGSF1_HUMAN | 2.1 Extracellular (Potential). | 5    | C | TATCCCTCTT   | 0.502 |             |
| + | 4  | 1601    | EC1_uc010nsl.1_I                                | NM_005462    | NP_005453    | O60732 | MAGC1_HUMAN |                                | 4    | T | TTTTCCCAG    | 0.458 |             |
| + | 15 | 1663    | IR1_uc004fcl.3_Mi                               | NM_002024    | NP_002015    | Q06787 | FMR1_HUMAN  | tion with RANBP9.              | 3    | A | TAGGAACTAAT  | 0.388 |             |
| + | 3  | 739     | p.Q195* MAGEA2                                  | NM_002362    | NP_002353    | P43358 | MAGA4_HUMAN | MAGE.                          | 3    | A | AATAATCAGATC | 0.547 |             |
| - | 3  | 993     |                                                 | NM_005362    | NP_005353    | P43357 | MAGA3_HUMAN | MAGE.                          | 0    | G | CCGGGGACCT   | 0.527 |             |
| + | 26 | 4744    |                                                 | NM_017514    | NP_059984    | P51805 | PLXA3_HUMAN | plasmic (Potential).           | 3    | G | CGTCCCAAAG   | 0.607 |             |
| - | 18 | 6092    | 1_Missense_Muta                                 | NM_000132    | NP_000123    | P00451 | FA8_HUMAN   | 3.1 Plastocyanin-like 6.       | 11   | T | GATAGAATGG   | 0.403 |             |
| - | 6  | 1023    | p.P286L TMLHE_                                  | NM_018196    | NP_060666    | Q9NVH6 | TMLH_HUMAN  |                                | 1    | C | CTCAGGTGCC   | 0.418 |             |
| + | 12 | 1867    | 5 Flank PLEKHN1_                                | NM_198317    | NP_938073    | Q6TDP4 | KLH17_HUMAN | on with F-actin (By similarit  | 0    | C | GACGGTAGCT   | 0.647 |             |
| + | 6  | 817     | a_Mutation_p.R24f                               | NM_022114    | NP_071397    | Q9HAZ2 | PRD16_HUMAN | 2-type 1; atypical.            | 7    | C | CTGGGGCGCC   | 0.632 |             |
| + | 2  | 520     | apv.2_Nonsense_M                                | NM_025106    | NP_079382    | Q96BD6 | SPSB1_HUMAN | 330.2 SPRY.                    | 0    | A | GACCGATCG    | 0.562 |             |
| + | 9  | 1083    | p.D290E PEX14_I                                 | NM_004565    | NP_004556    | O75381 | PEX14_HUMAN |                                | 1    | C | GGGATGGGC    | 0.582 |             |

|   |    |           |                    |              |              |        |              |                               |    |               |       |             |
|---|----|-----------|--------------------|--------------|--------------|--------|--------------|-------------------------------|----|---------------|-------|-------------|
| + | 8  | 1273      |                    | NM_015207    | NP_056022    | Q5T2D3 | OTUD3_HUMAN  |                               | 0  | GAACACGCAGG   | 0.552 |             |
| - | 18 | 2156      | se_Mutation_p.S6f  | NM_001397    | NP_001388    | P42892 | ECE1_HUMAN   | ellular (Potential).          | 3  | GGAGCGAGTGC   | 0.552 |             |
| - | 61 | 7974      | id.2_Missense_Mu   | NM_005529    | NP_005520    | P98160 | PGBM_HUMAN   | ike C2-type 12.               | 9  | AGGTCTGCCCT   | 0.632 |             |
| + | 7  | 896       | A3B_uc009vqf.2_I   | NM_007352    | NP_031378    | P08861 | CEL3B_HUMAN  | peptidase S1.                 | 1  | TTCATTGACTGG, | 0.607 |             |
| + | 15 | 2713_2714 |                    | NM_020526    | NP_065387    | P29322 | EPHA8_HUMAN  | Potential). Protein kinase.   | 13 | GGCTGCCCCCA   | 0.673 |             |
| + | 4  | 1126      | lrvy.1_Missense_Iv | NM_020379    | NP_065112    | Q9NR34 | MA1C1_HUMAN  | lenal (Potential).            | 1  | FACATCGGGGGA  | 0.423 |             |
| - | 6  | 2965      | sz.1_Missense_Ml   | NM_001029882 | NP_001025053 | Q5TGY3 | AHDC1_HUMAN  | Gly-rich.                     | 1  | CCGCCGGAAGC   | 0.677 |             |
| + | 6  | 847       | p.G105D EIF3I_u    | NM_003757    | NP_003748    | Q13347 | EIF3I_HUMAN  |                               | 1  | TGGGGGCAACA   | 0.547 |             |
| + | 4  | 391       | p.G85R LCK_uc01    | NM_005356    | NP_005347    | P06239 | LCK_HUMAN    | SH3.                          | 6  | AGAAGGGGGAA   | 0.617 |             |
| - | 21 | 3392      | byw.2_Missense_    | NM_024874    | NP_079150    | Q8IZA0 | K319L_HUMAN  | lasmic (Potential).           | 2  | CCTCCGCGGG    | 0.637 |             |
| + | 4  | 336       | o01cfy.3_Nonsen:   | NM_001142588 | NP_001136060 | Q13952 | NFYC_HUMAN   |                               | 3  | TTTGATCAGTTTC | 0.413 |             |
| - | 4  | 5294      | e_Mutation_p.P13l  | NM_024503    | NP_078779    | Q5T1R4 | ZEP3_HUMAN   |                               | 6  | TGGGGGTTCTC   | 0.562 |             |
| + | 22 | 4241      | wt.2_Missense_M    | NM_002840    | NP_002831    | P10586 | PTPRF_HUMAN  | lasmic (Potential).           | 10 | CGATCGGACTG,  | 0.587 |             |
| - | 3  | 355       | ob.2_Missense_M    | NM_181697    | NP_859048    | Q06830 | PRDX1_HUMAN  | Thioredoxin.                  | 0  | CGTTCGGGTCT   | 0.458 |             |
| + | 2  | 541       | .1_RNA PCSK9_u     | NM_174936    | NP_777596    | Q8NBP7 | PCSK9_HUMAN  |                               | 4  | TGAAGGAGGAG   | 0.622 |             |
| + | 3  | 706       | li.3_Missense_Mul  | NM_005012    | NP_005003    | Q01973 | ROR1_HUMAN   | Extracellular (Potential).    | 19 | AGCCCCGGAGC   | 0.572 |             |
| - | 6  | 1673      | lose.1_RNA COL2    | NM_152890    | NP_690850    | Q17RW2 | COOA1_HUMAN  |                               | 5  | GTTGACCTGGG   | 0.308 |             |
| - | 27 | 3017_3018 | M1_uc001dob.3_     | NM_001017975 | NP_001017975 | A2PYH4 | HFM1_HUMAN   | SEC63.                        | 0  | CAAAGGGGGGA   | 0.257 |             |
| - | 6  | 1160      | _p.V190I TGFB3     | NM_003243    | NP_003234    | Q03167 | TGBR3_HUMAN  | ellular (Potential).          | 3  | GTGTACTTCTC   | 0.458 |             |
| - | 4  | 679       |                    | NM_144988    | NP_659425    | Q96F25 | ALG14_HUMAN  | lasmic (Potential).           | 0  | TACACCGATTTG  | 0.408 |             |
| - | 10 | 1257      |                    | NM_000110    | NP_000101    | Q12882 | DPYD_HUMAN   |                               | 8  | CTCAGGGACAG   | 0.408 |             |
| - | 2  | 1097      |                    | NM_020703    | NP_065754    | Q86WK6 | AMGO1_HUMAN  | xtracellular (Potential).     | 2  | CTGCCGATACT   | 0.517 |             |
| - | 15 | 1382      | _Mutation_p.R414   | NM_133181    | NP_573444    | Q8TE67 | ES8L3_HUMAN  |                               | 3  | TCCCCGCCTAA   | 0.572 |             |
| + | 1  | 2401      | sense_Mutation_p.  | NM_022768    | NP_073605    | Q96T37 | RBM15_HUMAN  |                               | 3  | TGGGGGGACAG   | 0.542 |             |
| + | 3  | 584       | _Mutation_p.R20;   | NM_001688    | NP_001679    | P24539 | AT5F1_HUMAN  |                               | 0  | AAAGTTCGTTATC | 0.438 |             |
| + | 6  | 475       | 1A_uc001ebl.2_Iv   | NM_002884    | NP_002875    | P62834 | RAP1A_HUMAN  |                               | 0  | TGAGCGAGTAG   | 0.383 | rs139066408 |
| + | 2  | 445       | _uc010owp.1_5'Fl   | NM_022836    | NP_073747    | Q9H816 | DCR1B_HUMAN  |                               | 0  | TGACC GTAACC  | 0.468 |             |
| + | 19 | 1806      | se_Mutation_p.E5k  | NM_003176    | NP_003167    | Q15431 | SYCP1_HUMAN  | Potential.                    | 1  | CACAGGAAACA   | 0.239 |             |
| + | 4  | 506       |                    | NM_152367    | NP_689580    | Q8N8X9 | MB213_HUMAN  |                               | 0  | TGGCCGGGTAC.  | 0.587 |             |
| + | 18 | 2989      | a-mir-942 MI0005;  | NM_003594    | NP_003585    | Q9UNY4 | TTF2_HUMAN   |                               | 1  | AGAGAGCACCA   | 0.478 |             |
| - | 19 | 2691      |                    | NM_206996    | NP_996879    | Q6Q759 | SPG17_HUMAN  |                               | 6  | TTTTCTCATTCAT | 0.318 |             |
| + | 4  | 466       |                    |              |              | P26439 | 3BHS2_HUMAN  |                               | 2  | AAGATCAAGCTC  | 0.473 |             |
| + | 76 | 9465      | 3PF10_uc010oyl.1   | NM_001039703 | NP_001034792 | A6NDV3 | A6NDV3_HUMAN |                               | 0  | ATGAGAAAGGG   | 0.493 |             |
| - | 1  | 143       | t2AC_uc001etd.2_   | NM_003528    | NP_003519    | Q16778 | H2B2E_HUMAN  |                               | 1  | CTTTGCGGGTGT  | 0.572 |             |
| - | 3  | 1161      |                    | NM_001122965 | NP_001116437 | Q6XPR3 | RPTN_HUMAN   | Gln-rich.                     | 0  | GTAGTGGGAAC   | 0.473 |             |
| - | 33 | 4690      | p.H449Y NUP210l    | NM_207308    | NP_997191    | Q5VU65 | P210L_HUMAN  |                               | 11 | TGTCATGAAAAA  | 0.428 |             |
| - | 8  | 2697      | i.2_Missense_Mut   | NM_001111    | NP_001102    | P55265 | DSRAD_HUMAN  |                               | 6  | AGGGAGCTGTG   | 0.567 |             |
| - | 3  | 130       | CR2L2_uc009wsp.;   | NM_030764    | NP_110391    | Q96LA5 | FCRL2_HUMAN  | 1. Extracellular (Potential). | 2  | AGGGGCCACACA  | 0.498 | rs144041840 |
| + | 9  | 2232      | V_uc010pmx.1_3'l   | NM_022093    | NP_071376    | Q9UQP3 | TENN_HUMAN   | nectin type-III 6.            | 9  | AGACAGGTAAG   | 0.557 |             |
| - | 8  | 1716      | _Mutation_p.E50;   | NM_004319    | NP_004310    | O14525 | ASTN1_HUMAN  |                               | 15 | CCATTCGTTCC   | 0.493 |             |
| + | 1  | 1132      |                    | NM_016545    | NP_057629    | Q5VY09 | IER5_HUMAN   |                               | 1  | CCGCCGGAACT   | 0.498 |             |
| - | 28 | 3413      | o.R1051K KCNT2_    | NM_198503    | NP_940905    | Q6UVM3 | KCNT2_HUMAN  | lasmic (Potential).           | 7  | TGTTTCTTCGAC  | 0.358 |             |
| + | 2  | 1192      |                    | NM_004767    | NP_004758    | O60883 | ETBR2_HUMAN  | Name=6; (Potential).          | 2  | AGAACGTCTGC   | 0.627 |             |
| - | 2  | 921       | hha.3_Missense_I   | NM_025179    | NP_079455    | O75051 | PLXA2_HUMAN  | ilar (Potential). Sema.       | 3  | GTGGACGGTCA   | 0.607 |             |
| - | 5  | 823       | EK2_uc001his.3_Iv  | NM_002497    | NP_002488    | P51955 | NEK2_HUMAN   | rotein kinase.                | 3  | TTTTCCAGCG/   | 0.343 |             |
| - | 3  | 614       | 47_uc001hrf.2_5'F  | NM_023007    | NP_075383    | Q9H9V9 | JMJD4_HUMAN  | JmjC.                         | 0  | AGTCGGACGAG   | 0.612 |             |
| - | 7  | 1416      | k TRIM17_uc001h    | NM_016102    | NP_057186    | Q9Y577 | TRI17_HUMAN  | 330.2/SPRY.                   | 1  | AGGCCGTCTGG   | 0.637 |             |

|   |    |         |                    |              |              |        |              |                             |      |                |       |             |
|---|----|---------|--------------------|--------------|--------------|--------|--------------|-----------------------------|------|----------------|-------|-------------|
| + | 1  | 935     |                    | NM_001004342 | NP_001004342 | Q6ZTA4 | TRI67_HUMAN  | 3 box-type 2.               | 4    | :GGCCCGCAAGT   | 0.711 |             |
| - | 44 | 10178   | si.2_Missense_Mut  | NM_000081    | NP_000072    | Q99698 | LYST_HUMAN   | BEACH.                      | 12   | :AAGACGAGGAT   | 0.448 |             |
| + | 1  | 659     |                    | NM_001004690 | NP_001004690 | A3KFT3 | OR2M5_HUMAN  | lasmic (Potential).         | 3    | :ATGCTCGAGTTAT | 0.423 | rs148081072 |
| + | 16 | 1717    | rs.1_Missense_Mu   | NM_002627    | NP_002618    | Q01813 | K6PP_HUMAN   |                             | 3    | :TCACCGACGTA/  | 0.602 |             |
| - | 2  | 297     | seense_Mutation_p. | NM_031453    | NP_113641    | Q9H098 | F107B_HUMAN  |                             | 4    | :TTTCTGAGGCC   | 0.393 |             |
| - | 55 | 8753    | UBN_uc009xjr.1_N   | NM_001081    | NP_001072    | O60494 | CUBN_HUMAN   | CUB 21.                     | 19   | :GAAGACGGCAG   | 0.577 |             |
| + | 12 | 1205    | DSS1_uc010qdf.1    | NM_014317    | NP_055132    | Q5T2R2 | DPS1_HUMAN   |                             | 0    | :ATGAAGCAATA/  | 0.423 |             |
| - | 4  | 1153    | 1iwc.1_Missense_   | NM_018287    | NP_060757    | Q8IWW6 | RHG12_HUMAN  | WW 1.                       | 0    | :AGGAGGTTTCC   | 0.448 |             |
| + | 11 | 1661    | p.R489H ALOX5_     | NM_000698    | NP_000689    | P09917 | LOX5_HUMAN   | ipoxygenase.                | 2    | :GGCCCGCAAGT   | 0.692 |             |
| + | 4  | 897     | pp.2_Missense_Mi   | NM_012238    | NP_036370    | Q96EB6 | SIRT1_HUMAN  | tylase sirtuin-type.        | 0    | :ATGCTCGCCTTG  | 0.378 |             |
| + | 21 | 4038    | YPN_uc009xpt.2_I   | NM_032578    | NP_115967    | Q86TC9 | MYPN_HUMAN   | action with ACTN.           | 5    | :GCTACGGATCT   | 0.488 |             |
| + | 17 | 2242    | nse_Mutation_p.P   | NM_033100    | NP_149091    | Q96JP9 | CDHR1_HUMAN  | lasmic (Potential).         | 1    | :CTGCGCCCCGC   | 0.567 |             |
| + | 17 | 2496    | nse_Mutation_p.M   | NM_033100    | NP_149091    | Q96JP9 | CDHR1_HUMAN  | lasmic (Potential).         | 1    | :ACTATGGGAAG   | 0.567 |             |
| + | 6  | 978     |                    | NM_004329    | NP_004320    | P36894 | BMR1A_HUMAN  |                             | 8    | :CATAGGTAGGT   | 0.433 |             |
| + | 6  | 1417    |                    | NM_000314    | NP_000305    | P60484 | PTEN_HUMAN   | atase tensiip.K128fs*47(1   | 2334 | :AAAGGGACGAA   | 0.413 | rs121909218 |
| - | 9  | 875     | _Mutation_p.E210   | NM_013314    | NP_037446    | Q8WV28 | BLNK_HUMAN   | Pro-rich.                   | 2    | :GGTTTCCCAGG   | 0.587 |             |
| - | 13 | 1782    | pot.1_Missense_M   | NM_020123    | NP_064508    | Q9HD45 | TM9S3_HUMAN  | ical; (Potential).          | 0    | :ATGCAGCAGAG   | 0.333 |             |
| - | 2  | 450_451 | AP19_uc001kmy.2    | NM_003061    | NP_003052    | O75093 | SLIT1_HUMAN  | LRR 1.                      | 4    | :AGTTCCCTGGA   | 0.619 |             |
| + | 5  | 2935    | RC1_uc010qqj.1_M   | NM_015062    | NP_055877    | Q5VV67 | PPRC1_HUMAN  | Pro-rich.                   | 3    | :CACCCCTCTCT   | 0.622 |             |
| + | 9  | 1278    | rx.2_Missense_Mu   | NM_016169    | NP_057253    | Q9UMX1 | SUFU_HUMAN   | p.S377fs*7(1)               | 7    | :AGTCCGGAGCC   | 0.587 |             |
| - | 13 | 1550    | I08L ABLIM1_uc0    | NM_002313    | NP_002304    | O14639 | ABLM1_HUMAN  |                             | 1    | :TGGACGGCTCA   | 0.473 |             |
| + | 23 | 3826    | se_Mutation_p.S27  | NM_207303    | NP_997186    | Q5VV63 | ATRN1_HUMAN  | ellular (Potential).        | 7    | :ATATATCAATTAA | 0.279 |             |
| + | 17 | 1982    | iT1_uc009xzz.1_M   | NM_007329    | NP_015568    | Q9UGM3 | DMBT1_HUMAN  | SRCR 5.                     | 7    | :GCACCGTGTGT   | 0.597 |             |
| + | 2  | 847     |                    | NM_003577    | NP_003568    | Q5T230 | UTF1_HUMAN   |                             | 0    | :ACACCGCCCTG   | 0.378 |             |
| + | 5  | 687     |                    | NM_030783    | NP_110410    | Q9BVG9 | PTSS2_HUMAN  | ellular (Potential).        | 0    | :ACTACGGGGGA   | 0.612 |             |
| - | 1  | 602     |                    | NM_001005161 | NP_001005161 | Q8NGK2 | O52B4_HUMAN  | Name=5; (Potential).        | 0    | :AAAACCCATAC   | 0.373 |             |
| + | 1  | 451     | _uc001mam.1_Int    | NM_001004756 | NP_001004756 | B2RNI9 | B2RNI9_HUMAN |                             | 0    | :CTGGCCAGCAA   | 0.527 |             |
| - | 1  | 327     | .1_Intron TRIM22   | NM_001001922 | NP_001001922 | Q8NH56 | O52N5_HUMAN  | Name=3; (Potential).        | 2    | :AACATCTGGGC   | 0.488 |             |
| - | 6  | 1482    | rf16_uc001mhc.3_   | NM_020643    | NP_065694    | Q9NQ32 | CK016_HUMAN  |                             | 2    | :GACTCCGCTTT   | 0.537 |             |
| + | 12 | 1675    | p.R256Q TEAD1_     | NM_021961    | NP_068780    | P28347 | TEAD1_HUMAN  | ral activation (Potential). | 0    | :ATACCGAATAAA  | 0.373 |             |
| + | 1  | 766     | E3B_uc010rcr.1_M   | NM_000922    | NP_000913    | Q13370 | PDE3B_HUMAN  |                             | 0    | :CACCCGGACCA/  | 0.687 |             |
| - | 1  | 376     | mri.1_Missense_M   | NM_030771    | NP_110398    | Q96HJ3 | CCD34_HUMAN  |                             | 0    | :GCTCGCCACTT   | 0.557 |             |
| - | 10 | 1641    | ew.1_Missense_M    | NM_001001991 | NP_001001991 | Q6UXH9 | PAMR1_HUMAN  | eptidase S1.                | 2    | :CATCCCGGTCA   | 0.527 |             |
| + | 3  | 390     | rik.1_Missense_M   | NM_001004704 | NP_001004704 | Q8NH72 | OR4C6_HUMAN  | Name=1; (Potential).        | 2    | :ATCTACTTATTGT | 0.393 |             |
| - | 6  | 874     | q.1_Missense_Mu    | NM_003146    | NP_003137    | Q08945 | SSRP1_HUMAN  |                             | 2    | :CTCCCGGAAGA   | 0.527 |             |
| + | 5  | 1801    | se_Mutation_p.R12  | NM_015457    | NP_056272    | Q9C0B5 | ZDHC5_HUMAN  |                             | 1    | :GGTCCGCACGG   | 0.517 | rs141814126 |
| + | 4  | 540     |                    | NM_023945    | NP_076434    | Q9H3V2 | MS4A5_HUMAN  | ellular (Potential).        | 2    | :CTACCAAATA    | 0.353 |             |
| + | 20 | 2933    |                    | NM_006133    | NP_006124    | Q9Y4D2 | DGLA_HUMAN   | lasmic (Potential).         | 3    | :CGAGAGCCCCA   | 0.627 |             |
| + | 14 | 1854    | ym.2_Missense_M    | NM_178443    | NP_848537    | Q86UX7 | URP2_HUMAN   |                             | 1    | :AAGACGAGATC/  | 0.632 |             |
| - | 20 | 3263    | 9ypw.2_5'Flank R   | NM_005609    | NP_005600    | P11217 | PYGM_HUMAN   | p.R816G(1)                  | 2    | :GGTGGGTGAC    | 0.622 | rs143177272 |
| - | 9  | 1423    | p.P349L SF1_uc0    | NM_004630    | NP_004621    | Q15637 | SF01_HUMAN   | Pro-rich.                   | 3    | :TGGCGGGAGCA   | 0.642 |             |
| - | 28 | 3151    |                    | NM_017525    | NP_059995    | Q6DT37 | MRCKG_HUMAN  | PH.                         | 4    | :CCCCTGCTCT/   | 0.697 |             |
| + | 13 | 1552    | dg.1_Nonsense_M    | NM_005186    | NP_005177    | P07384 | CAN1_HUMAN   | Domain III.                 | 1    | :ACCTGCGAGAG   | 0.642 |             |
| + | 13 | 1330    | 84* BBS1_uc001oi   | NM_024649    | NP_078925    | Q8NFJ9 | BBS1_HUMAN   |                             | 1    | :CACTGCGAGAG   | 0.602 |             |
| - | 21 | 3553    | lopz.2_Missense_   | NM_012309    | NP_036441    | Q9UPX8 | SHAN2_HUMAN  |                             | 5    | :GCCACCCACGA   | 0.677 |             |
| - | 3  | 667     | IE3_uc009yvk.2_N   | NM_001014811 | NP_001014811 | Q16798 | MAON_HUMAN   |                             | 1    | :TAGGCGGTGAC   | 0.587 |             |
| + | 18 | 2602    | gb.2_Missense_M    | NM_014361    | NP_055176    | O94779 | CNTN5_HUMAN  | nectin type-III 1.          | 8    | :CTATTGGGACAC  | 0.468 |             |

|   |    |           |                   |              |              |        |                                             |    |               |       |             |
|---|----|-----------|-------------------|--------------|--------------|--------|---------------------------------------------|----|---------------|-------|-------------|
| - | 7  | 865       |                   | NM_002426    | NP_002417    | P39900 | MMP12_HUMAN                                 | 0  | GTCAGGATTTGC  | 0.403 |             |
| - | 3  | 297       | .R87W MPZL3_uc    | NM_198275    | NP_938016    | Q6UUV2 | MPZL3_HUMAN g-like V-type.                  | 0  | AAATCCGATCCC  | 0.413 |             |
| - | 4  | 1023      | p.T284M PVRL1_u   | NM_002855    | NP_002846    | Q15223 | PVRL1_HUMAN 3potential). Ig-like C2-type 2. | 0  | ACTTACGTGGTC  | 0.577 |             |
| + | 8  | 447       | 10rzn.1_Missense_ | NM_015313    | NP_056128    | Q9NZN5 | ARHG_C_HUMAN PDZ.                           | 7  | GGGACGCCAC    | 0.502 |             |
| - | 4  | 353       | ibj.1_Missense_Mi | NM_212555    | NP_997720    | Q6UY27 | PATE2_HUMAN                                 | 0  | FACTATGATCACA | 0.453 |             |
| - | 24 | 3376      | r.R1082C NFRKB_   | NM_001143835 | NP_001137307 | Q6P4R8 | NFRKB_HUMAN                                 | 3  | CAAGCGAAAAG   | 0.552 |             |
| + | 19 | 4441      | p.R1065C WNK1_    | NM_018979    | NP_061852    | Q9H4A3 | WNK1_HUMAN                                  | 23 | TTAGACGTGCC   | 0.468 |             |
| + | 10 | 1733      | _uc001qkn.2_Miss  | NM_199460    | NP_955630    | Q13936 | CAC1C_HUMAN lasmic (Potential).             | 11 | AGTCCCGTCAAC  | 0.597 |             |
| + | 9  | 944       | i_p.L180V TEAD4_  | NM_003213    | NP_003204    | Q15561 | TEAD4_HUMAN                                 | 0  | FCCAAGCTCTGG  | 0.677 |             |
| + | 1  | 973       |                   | NM_002235    | NP_002226    | P17658 | KCNA6_HUMAN                                 | 3  | CGGGGGCTGCT   | 0.667 |             |
| - | 28 | 4488      | vF_uc010set.1_Int | NM_000552    | NP_000543    | P04275 | VWF_HUMAN site for platelet glycoprotein    | 12 | CCACCGGGATC   | 0.597 | rs61750079  |
| - | 30 | 3892      | p.A302V A2M_uc0   | NM_000014    | NP_000005    | P01023 | A2MG_HUMAN                                  | 5  | ACAGAGCATGG   | 0.478 |             |
| - | 5  | 807       | n.2_Intron GSG1_u | NM_001080555 | NP_001074024 | Q2KHT4 | GSG1_HUMAN ical; (Potential).               | 0  | CTCACCTGACA   | 0.567 |             |
| + | 10 | 2042      | cw.1_Missense_Mi  | NM_030667    | NP_109592    | Q16827 | PTPRO_HUMAN xellular (Potential).           | 9  | TGACAGCTCTA   | 0.473 |             |
| - | 21 | 3055      | p.E173K ADAMT5    | NM_025003    | NP_079279    | P59510 | ATS20_HUMAN TSP type-1 4.                   | 19 | AAAATTCATTGC  | 0.403 |             |
| - | 2  | 233       |                   | NM_025003    | NP_079279    | P59510 | ATS20_HUMAN                                 | 19 | AGTGGGTTCCG   | 0.617 |             |
| + | 13 | 1773      | p.V480M ANO6_u    | NM_001025356 | NP_001020527 | Q4KMQ2 | ANO6_HUMAN xellular (Potential).            | 2  | TCTCGGTGTTT   | 0.438 |             |
| + | 10 | 1301      | ARID2_uc009zkh.1  | NM_152641    | NP_689854    | Q68CP9 | ARID2_HUMAN                                 | 10 | TTGACAAAAA    | 0.368 |             |
| + | 11 | 1150      | slz.1_Missense_M  | NM_000725    | NP_000716    | P54284 | CACB3_HUMAN                                 | 0  | TGACCGTACAG   | 0.607 |             |
| - | 31 | 6284      |                   | NM_003482    | NP_003473    | O14686 | MLL2_HUMAN                                  | 41 | TCTTACGGGCT   | 0.662 |             |
| - | 5  | 754       | E138Q LMBR1L_u    | NM_018113    | NP_060583    | Q6UX01 | LMBRL_HUMAN lasmic (Potential).             | 1  | GCCCTCAGACT   | 0.328 |             |
| - | 2  | 143       | iB7_uc010snz.1_F  | NM_000889    | NP_000880    | P26010 | ITB7_HUMAN xellular (Potential).            | 8  | GGGATCTTGGC   | 0.562 |             |
| - | 8  | 1305      | p.R274C RARG_u    | NM_000966    | NP_000957    | P13631 | RARG_HUMAN gand-binding.                    | 4  | GATACGCAGCA   | 0.597 |             |
| + | 24 | 5343      | j.2_Missense_Mul  | NM_012291    | NP_036423    | Q14674 | ESPL1_HUMAN                                 | 3  | TCTCGCTTCAG   | 0.542 |             |
| + | 2  | 466       |                   | NM_021191    | NP_067014    | Q9HD90 | NDF4_HUMAN                                  | 4  | AAAATGAGGTG   | 0.398 |             |
| + | 1  | 593       |                   | NM_001005243 | NP_001005243 | Q8NGE7 | OR9K2_HUMAN xellular (Potential).           | 2  | TCGGGCTGTTG   | 0.393 |             |
| + | 1  | 49        |                   | NM_001005518 | NP_001005518 | A6NJZ3 | O6C65_HUMAN xellular (Potential).           | 0  | TTTACAGATAACC | 0.323 |             |
| - | 5  | 824       | P19_uc001sid.2_F  | NM_002429    | NP_002420    | Q99542 | MMP19_HUMAN                                 | 1  | GCCCTCGTAGA   | 0.622 |             |
| + | 2  | 233       | zog.2_Missense_M  | NM_002868    | NP_002859    | P61020 | RAB5B_HUMAN                                 | 0  | TATTACGTTTTGT | 0.478 |             |
| + | 10 | 1308      | sqk.1_Missense_M  | NM_173596    | NP_775867    | Q6ZMH5 | S39A5_HUMAN lasmic (Potential).             | 2  | CAGGGGCTCAG   | 0.582 |             |
| - | 17 | 2813      | se_Mutation_p.R8  | NM_001127460 | NP_001120932 | Q504Q3 | PAN2_HUMAN                                  | 6  | CATCGGAATGG   | 0.428 |             |
| - | 17 | 1771_1772 | sxi.3_Missense_M  | NM_032606    | NP_115995    | Q9BXY5 | CAYP2_HUMAN EF-hand 3.                      | 2  | ATAAAGGCCTAA  | 0.243 |             |
| - | 3  | 1664      | p.G507E USP44_u   | NM_001042403 | NP_001035862 | Q9H0E7 | UBP44_HUMAN                                 | 3  | CTTTTCCACTGC  | 0.393 |             |
| + | 15 | 1913      |                   | NM_017564    | NP_060034    | Q8WWQ8 | STAB2_HUMAN lar (Potential). FAS1 2.        | 14 | CCTTTCTCCAG   | 0.423 |             |
| + | 6  | 587       | tlq.2_Missense_M  | NM_018082    | NP_060552    | Q9NW08 | RPC2_HUMAN                                  | 2  | CGAGGCAGCC    | 0.463 |             |
| + | 3  | 1958      | p.M479I BTBD11    | NM_001018072 | NP_001018082 | A6QL63 | BTBD1_HUMAN                                 | 3  | CAAATGGAATG   | 0.577 |             |
| - | 3  | 544       | RAP_uc009zvv.2    | NM_006768    | NP_006759    | Q72569 | BRAP_HUMAN                                  | 1  | ACGGAGAATCTC  | 0.413 |             |
| - | 13 | 1750      | iNO1_uc001ueu.2   | NM_018183    | NP_060653    | A3KN83 | SBNO1_HUMAN                                 | 9  | CATTCTGTGCTC  | 0.443 |             |
| - | 11 | 1650      | rRB1_uc010tbd.1   | NM_005505    | NP_005496    | Q8WTV0 | SCRB1_HUMAN lasmic (Potential).             | 1  | CTTGCTCCGG    | 0.647 |             |
| - | 8  | 2346_2347 | se_Mutation_p.D6z | NM_178006    | NP_821074    | Q9Y3M8 | STA13_HUMAN Rho-GAP.                        | 4  | AGGTCCCGGA    | 0.465 |             |
| - | 11 | 2780      | PC4_uc010abw.2    | NM_016179    | NP_057263    | Q9UBN4 | TRPC4_HUMAN and ITPR3. Cytoplasmic (P       | 6  | TCTATGAAATA   | 0.443 |             |
| + | 3  | 5613      |                   | NM_207361    | NP_997244    | Q5SZK8 | FREM2_HUMAN  Extracellular (Potential).     | 11 | AATTGGGCATG   | 0.343 |             |
| + | 26 | 3603      | C3A_uc001vco.2    | NM_001079673 | NP_001073141 | Q9Y2H6 | FND3A_HUMAN nectin type-III 9.              | 2  | GTCCCGACTCT   | 0.438 | rs142361918 |
| - | 1  | 466       | i_p.P15S DACH1_   | NM_080759    | NP_542937    | Q9UI36 | DACH1_HUMAN                                 | 1  | AGGGGGGACCA   | 0.622 |             |
| - | 35 | 4952      | ev.2_Missense_Mi  | NM_015057    | NP_055872    | O75592 | MYCB2_HUMAN                                 | 14 | TTCACGGAAGC   | 0.413 |             |
| - | 13 | 2057      | g.1_Missense_Mu   | NM_000359    | NP_000350    | P22735 | TGM1_HUMAN                                  | 3  | CACACGGTCCG   | 0.622 | rs144517528 |
| - | 7  | 952       | p.R2W ADCY4_u     | NM_139247    | NP_640340    | Q8NFM4 | ADCY4_HUMAN lasmic (Potential).             | 3  | GATCCGCATGC   | 0.572 |             |

|   |    |       |                    |              |              |        |              |                               |     |               |       |             |
|---|----|-------|--------------------|--------------|--------------|--------|--------------|-------------------------------|-----|---------------|-------|-------------|
| + | 4  | 1833  | ml.2_Nonsense_M    | NM_004274    | NP_004265    | Q13023 | AKAP6_HUMAN  |                               | 21  | ΓCACTTGAGCCT  | 0.438 |             |
| - | 1  | 1830  |                    | NM_001012706 | NP_001012724 | A1A4T8 | CN182_HUMAN  |                               | 0   | CGGTTCGTGAA   | 0.537 |             |
| - | 6  | 1263  | h.1_Nonsense_Mt    | NM_021818    | NP_068590    | Q9H4B6 | SAV1_HUMAN   | RAH.   Potential.             | 1   | CTTTCCGGTTTT  | 0.343 |             |
| - | 3  | 273   | lxae.2_Missense_I  | NM_006832    | NP_006823    | Q96AC1 | FERM2_HUMAN  |                               | 0   | CTTCAGAAAGC   | 0.408 |             |
| - | 3  | 1275  | arj.2_Missense_M   | NM_021260    | NP_067083    | Q9HBF4 | ZFYV1_HUMAN  |                               | 1   | GGGTCGGGGAC   | 0.493 |             |
| + | 2  | 584   | S_uc010asi.2_Mi    | NM_005252    | NP_005243    | P01100 | FOS_HUMAN    |                               | 3   | GGAGGGGCAAG   | 0.632 |             |
| - | 5  | 2740  | p.V847M STON2_     | NM_033104    | NP_149095    | Q8WXE9 | STON2_HUMAN  | MHD.                          | 5   | TCTCAGCTGG    | 0.507 |             |
| + | 2  | 620   |                    | NR_015340    |              |        |              |                               | 2   | TTCTGGGATCTG  | 0.672 |             |
| + | 11 | 1480  | _p.R376Q TRAF3_    | NM_145725    | NP_663777    | Q13114 | TRAF3_HUMAN  |                               | 3   | GGCTCGGAACA   | 0.672 |             |
| + | 10 | 1887  | 0txz.1_Missense_I  | NM_006291    | NP_006282    | Q03169 | TNAP2_HUMAN  |                               | 1   | ATCATTGCCTGC  | 0.637 |             |
| - | 7  | 5530  | ox.2_Missense_Mt   | NM_138420    | NP_612429    | Q8IVF2 | AHNK2_HUMAN  |                               | 1   | CAGCCGCACAC   | 0.622 |             |
| - | 88 | 13671 | zbi.2_Missense_Mi  | NM_004667    | NP_004658    | O95714 | HERC2_HUMAN  | HECT.                         | 13  | CGGCCGGGCTG   | 0.632 |             |
| - | 48 | 7734  | zbg.1_Missense_IV  | NM_004667    | NP_004658    | O95714 | HERC2_HUMAN  | p.A2543V(1)                   | 13  | CAACAGCACCA   | 0.333 | rs139970998 |
| + | 8  | 1072  |                    | NM_033510    | NP_277045    | A7MBM2 | DISP2_HUMAN  |                               | 2   | CCAGCGGACAG   | 0.637 |             |
| + | 20 | 2440  | LA2G4B_uc010bc     | NM_001114633 | NP_001108105 | P0C869 | PA24B_HUMAN  | PLA2c.                        | 1   | CAGGCCCCACT   | 0.622 |             |
| - | 3  | 313   | adf.1_Missense_IV  | NM_015617    | NP_056432    | Q9Y3Y4 | PYGO1_HUMAN  | Pro-rich.                     | 2   | TTGACGAAGGT   | 0.443 | rs144572806 |
| - | 8  | 1998  | :RC1_uc010bgt.1_   | NM_003922    | NP_003913    | Q15751 | HERC1_HUMAN  | RCC1 5.                       | 19  | CTTTGCGAATG   | 0.373 |             |
| - | 11 | 1726  | 2apj.3_Missense_I  | NM_005848    | NP_005839    | Q7Z401 | MYCPP_HUMAN  | DENN.                         | 4   | GAGAGGAACAT   | 0.413 |             |
| + | 14 | 1932  | ukf.1_Missense_M   | NM_017691    | NP_060161    | Q8IUZ0 | LRC49_HUMAN  |                               | 1   | TGATTTCCATTCT | 0.368 |             |
| + | 2  | 700   | h.1_Missense_Mul   | NM_005545    | NP_005536    | O14498 | ISLR_HUMAN   | LRR 4.                        | 4   | CCCGCAGCGCC   | 0.612 |             |
| + | 7  | 825   | _p.V160I ZFAND6    | NM_019006    | NP_061879    | Q6FIF0 | ZFAN6_HUMAN  | AN1-type.                     | 0   | GTGGTGACAC    | 0.373 |             |
| + | 8  | 927   | se_Mutation_p.I17: | NM_003027    | NP_003018    | Q99963 | SH3G3_HUMAN  | on with ARC (By similarity).  | 3   | GAAATATCAGCT  | 0.463 |             |
| + | 3  | 675   | AN_uc010upp.1_     | NM_013227    | NP_037359    | E7EX88 | E7EX88_HUMAN |                               | 3   | CTATCAGGAC    | 0.617 |             |
| - | 6  | 905   | G_uc002boa.2_R     | NM_016321    | NP_057405    | Q9UBD6 | RHCG_HUMAN   | ical; (Potential).            | 1   | CGGTACCCACG   | 0.617 |             |
| - | 17 | 2606  |                    | NM_001150    | NP_001141    | P15144 | AMPN_HUMAN   | ular; Metalloprotease.        | 4   | GAGACCATCT    | 0.592 |             |
| - | 9  | 1170  | c.1_Missense_Mut   | NM_002168    | NP_002159    | P48735 | IDHP_HUMAN   |                               | 711 | GGGCCGGCCCT   | 0.667 |             |
| + | 10 | 2648  | 2ckt.2_Missense_I  | NM_021098    | NP_066921    | O95180 | CAC1H_HUMAN  | :=S1 of repeat II; (Potential | 2   | CATCATGATGGC  | 0.662 |             |
| + | 35 | 6837  | _p.P892S CACNA     | NM_021098    | NP_066921    | O95180 | CAC1H_HUMAN  | lasmic (Potential).           | 2   | AACCCCTGCG    | 0.721 |             |
| - | 4  | 685   | sense_Mutation_p   | NM_002952    | NP_002943    | P15880 | RS2_HUMAN    |                               | 0   | CTCTGCGCACG   | 0.647 |             |
| + | 7  | 628   | .3_uc010bsc.1_Mi   | NM_006453    | NP_006444    | Q12788 | TBL3_HUMAN   | WD 3.                         | 0   | ATGCCGCCATC   | 0.677 |             |
| - | 23 | 8898  | e_Mutation_p.V28:  | NM_001009944 | NP_001009944 | P98161 | PKD1_HUMAN   | ellular (Potential).          | 3   | CACAACGGAGT   | 0.682 | rs145532417 |
| - | 23 | 8672  | g_Mutation_p.D28:  | NM_001009944 | NP_001009944 | P98161 | PKD1_HUMAN   | ular (Potential); REJ.        | 3   | ACCACGTCACT   | 0.622 |             |
| + | 7  | 985   | _p.E313K E4F1_uc   | NM_004424    | NP_004415    | Q66K89 | E4F1_HUMAN   |                               | 1   | CAGGCGAGCCT   | 0.592 |             |
| - | 6  | 856   | crz.1_Missense_M   | NM_022119    | NP_071402    | Q9GZN4 | BSSP4_HUMAN  | eptidase S1.                  | 1   | GCCCTCGCCCC   | 0.701 |             |
| - | 14 | 1704  | TRAP1_uc010uxf     | NM_016292    | NP_057376    | Q12931 | TRAP1_HUMAN  |                               | 1   | ACGAAGGTGCA   | 0.562 |             |
| - | 25 | 2614  | _p.A612T CORO7_    | NM_024535    | NP_078811    | P57737 | CORO7_HUMAN  |                               | 0   | CACAGCCGTGT   | 0.617 |             |
| + | 6  | 685   |                    | NM_014692    | NP_055507    | O43304 | S14L5_HUMAN  | REL1/MSF1.                    | 0   | TGAATGAGCTC   | 0.627 |             |
| + | 3  | 317   | AT_uc010buh.2_In   | NM_020686    | NP_065737    | P80404 | GABT_HUMAN   |                               | 1   | AAGTCCCAGGG   | 0.478 |             |
| - | 3  | 721   | .3_Intron CPPED    | NM_018340    | NP_060810    | Q9BRF8 | CPPED_HUMAN  |                               | 0   | GTGCTGGAAGA   | 0.592 |             |
| - | 44 | 7483  | p.R2234* SMG1_u    | NM_015092    | NP_055907    | Q96Q15 | SMG1_HUMAN   | PI3K/PI4K.                    | 16  | CATTGAAAAAG   | 0.373 |             |
| - | 3  | 272   | _p.T48M UMOD_t     | NM_003361    | NP_003352    | P07911 | UROM_HUMAN   | EGF-like 1.                   | 2   | ACGTCGTAACG   | 0.612 |             |
| - | 4  | 564   | se_Mutation_p.S11  | NM_001888    | NP_001879    | Q14894 | CRYM_HUMAN   |                               | 0   | TAAAGGAGAAC   | 0.527 |             |
| + | 8  | 1435  |                    | NM_000336    | NP_000327    | P51168 | SCNNB_HUMAN  | llular (By similarity).       | 7   | GGACTTCCCAG   | 0.617 |             |
| + | 6  | 2696  | p.S608L TNRC6A_    | NM_014494    | NP_055309    | Q8NDV7 | TNR6A_HUMAN  | ction with EIF2C1 and EIF2    | 2   | AAACTCAAGGA   | 0.468 |             |
| + | 2  | 1570  |                    | NM_006040    | NP_006031    | Q9Y661 | HS3S4_HUMAN  | renal (Potential).            | 2   | CAAGGGTTCC    | 0.512 |             |
| + | 12 | 1512  | _Missense_Mutati   | NM_001142448 | NP_001135920 | Q9H2V7 | SPNS1_HUMAN  |                               | 0   | AGTTCGGGGCT   | 0.652 |             |
| + | 3  | 1559  | C5_uc002eca.3_In   | NM_001105247 | NP_001098717 | Q96C12 | ARMC5_HUMAN  | ARM 5.                        | 1   | CAACTCCCAG    | 0.652 |             |



|   |    |      |                                           |              |              |        |              |                            |    |                    |       |             |
|---|----|------|-------------------------------------------|--------------|--------------|--------|--------------|----------------------------|----|--------------------|-------|-------------|
| + | 1  | 108  | :5A2_uc010car.2_I                         | NM_003041    | NP_003032    | P31639 | SC5A2_HUMAN  | ical; (Potential).         | 1  | TCATTGCTGCAT/      | 0.587 |             |
| + | 4  | 495  |                                           | NM_144602    | NP_653203    | Q8WTQ4 | CP078_HUMAN  |                            | 1  | :ATTCCGTCGCAG/     | 0.493 |             |
| + | 9  | 1401 | ij.2_Missense_Mut                         | NM_005611    | NP_005602    | Q08999 | RBL2_HUMAN   | \. Pocket; binds E1A.      | 5  | `GAGTCGTCTTC/      | 0.453 |             |
| + | 2  | 612  | aid.2_Missense_M                          | NM_133368    | NP_588609    | Q96DX4 | RSPRY_HUMAN  |                            | 1  | GTAATACGGACT/      | 0.502 |             |
| + | 3  | 422  | _uc010vjt.1_5'Flan                        | NM_016948    | NP_058644    | Q9NPB6 | PAR6A_HUMAN  | with PRKCI and PRKCZ.      | 1  | CTCTGCAGCGG/       | 0.617 |             |
| - | 11 | 1503 | _p.P437S RANBP                            | NM_020850    | NP_065901    | Q6VN20 | RBP10_HUMAN  |                            | 1  | :GTTGGGGTAGT/      | 0.602 |             |
| + | 3  | 480  | 33Q TSNAXIP1_uc                           | NM_018430    | NP_060900    | Q2TAA8 | TXIP1_HUMAN  |                            | 0  | CTACCCGAAGC/       | 0.592 |             |
| + | 5  | 1931 | 2ewd.2_Missense_                          | NM_133458    | NP_597715    | Q8TF47 | ZFP90_HUMAN  | :2H2-type 10.              | 1  | :GAACCCCACT/       | 0.438 |             |
| - | 10 | 1599 |                                           | NM_005652    | NP_005643    | Q15554 | TERF2_HUMAN  | b-type. H-T-H motif.       | 1  | GGTCCGCCAGC/       | 0.443 |             |
| + | 10 | 995  | i_Mutation_p.D34E                         | NM_145059    | NP_659496    | Q8N0W3 | FUK_HUMAN    |                            | 1  | :TTCGCGATCAG/      | 0.642 |             |
| + | 23 | 3135 | .G1032D FUK_uc                            | NM_145059    | NP_659496    | Q8N0W3 | FUK_HUMAN    |                            | 1  | :AGGCGGTGGAC/      | 0.622 |             |
| + | 3  | 268  | DT7_uc010vnrj.1_Ir                        | NM_001105663 | NP_001099133 | P0C024 | NUDT7_HUMAN  | idix hydrolase.            | 2  | GAAGGGCCCTT/       | 0.418 |             |
| - | 5  | 717  | se_Mutation_p.P1                          | NM_020947    | NP_065998    | Q6P9B6 | K1609_HUMAN  |                            | 2  | :ATGGGGGACCC/      | 0.562 |             |
| + | 4  | 1322 | L36_uc010chl.2_Ir                         | NM_024731    | NP_079007    | Q8N4N3 | KLH36_HUMAN  | Kelch 2.                   | 2  | TGCCTCCATCG/       | 0.567 |             |
| - | 19 | 2787 | p.G918S ANKFY1                            | NM_016376    | NP_057460    | Q9P2R3 | ANFY1_HUMAN  | ANK 17.                    | 3  | TGAGCCTGCTTC/      | 0.438 |             |
| + | 10 | 970  | fym.2_Missense_I                          | NM_004313    | NP_004304    | P32121 | ARRB2_HUMAN  | ction with TRAF6.          | 0  | :GCACCCCCAG/       | 0.567 |             |
| + | 27 | 4402 |                                           | NM_020877    | NP_065928    | Q9P225 | DYH2_HUMAN   | n (By similarity).         | 13 | :CATCCGAAGC/       | 0.517 | rs146287609 |
| - | 12 | 1662 | ER1_uc010vur.1_M                          | NM_002616    | NP_002607    | O15534 | PER1_HUMAN   |                            | 9  | TGGGGGCCGGG/       | 0.657 |             |
| + | 13 | 3051 | p.D966N MYOCD                             | NM_153604    | NP_705832    | Q8IZQ8 | MYCD_HUMAN   |                            | 5  | :ACATCGATTTCC/     | 0.517 |             |
| + | 9  | 1614 | p.G272S ALDH3A2                           | NM_000382    | NP_000373    | P51648 | AL3A2_HUMAN  | ical; (Potential).         | 2  | :AACTCGGTCTC/      | 0.473 |             |
| - | 9  | 1113 | 277N SLC47A2_uc                           | NM_152908    | NP_690872    | Q86VL8 | S47A2_HUMAN  | ellular (Potential).       | 0  | :GGAAGCTCCCG/      | 0.647 |             |
| - | 1  | 124  |                                           | NM_032854    | NP_116243    | Q6QEF8 | CORO6_HUMAN  |                            | 0  | TGACGGCACAG/       | 0.587 |             |
| + | 9  | 981  | p.R289H RHBDL3                            | NM_138328    | NP_612201    | P58872 | RHBL3_HUMAN  | ical; (Potential).         | 1  | GGGCCGTGTGG/       | 0.662 |             |
| - | 12 | 1410 | _E1_uc002hiz.1_M                          | NM_018096    | NP_060566    | Q9NVX2 | NLE1_HUMAN   | WD 8.                      | 4  | TCAACAGCATAT/      | 0.592 |             |
| - | 1  | 427  |                                           | NM_031960    | NP_114166    | Q9BYQ9 | KRA48_HUMAN  | >:[IKRQVHEC]-[SPRT]-[S1    | 0  | :ggagatgctgcagctgg | 0.124 |             |
| + | 20 | 3104 | g.1_Missense_Mut                          | NM_004941    | NP_004932    | Q14562 | DHX8_HUMAN   |                            | 4  | :TATCCATGCTGT/     | 0.502 |             |
| - | 23 | 3095 | f.1_Missense_Mut                          | NM_005474    | NP_005465    | Q9UQL6 | HDAC5_HUMAN  | one deacetylase.           | 1  | AAACCCGGCGG/       | 0.572 |             |
| - | 5  | 965  | e_Mutation_p.T30K                         | NM_002055    | NP_002046    | P14136 | GFAP_HUMAN   | Coil 2B. Rod.              | 2  | :TCACCGTGCCG/      | 0.716 |             |
| - | 13 | 1723 | LL6_uc002ioc.2_M                          | NM_001130918 | NP_001124390 | Q8N841 | TLL6_HUMAN   |                            | 0  | TTCTTTCTCACT/      | 0.527 |             |
| + | 2  | 329  | se_Mutation_p.L5F                         | NM_006151    | NP_006142    | P22079 | PERL_HUMAN   |                            | 2  | GTCTTTCTCCAT/      | 0.488 |             |
| + | 8  | 1319 | se_Mutation_p.E2                          | NM_006151    | NP_006142    | P22079 | PERL_HUMAN   |                            | 2  | :ACCAGGAGGTC/      | 0.617 |             |
| - | 8  | 3242 | p.A429V RNF43_I                           | NM_017763    | NP_060233    | Q68DV7 | RNF43_HUMAN  | lasmic (Potential).        | 1  | :AAGCAGCAGGG/      | 0.657 |             |
| - | 5  | 735  | .1_Missense_Mut                           | NM_004574    | NP_004565    | O43236 | SEPT4_HUMAN  |                            | 0  | GAGCCGCAGCC/       | 0.532 |             |
| - | 13 | 1718 | m.1_Missense_Mu                           | NM_032582    | NP_115971    | Q8NFA0 | UBP32_HUMAN  | DUSP.                      | 5  | :TTTACCCTGCC/      | 0.333 | rs147383770 |
| - | 2  | 688  | iddt.2_Missense_M                         | NM_001915    | NP_001906    | P49447 | CY561_HUMAN  | ntial). Cytochrome b561.   | 1  | :GATGACGAGCG/      | 0.617 |             |
| + | 4  | 1088 | wqx.1_Missense_M                          | NM_181790    | NP_861455    | Q7Z601 | GP142_HUMAN  | Name=6; (Potential).       | 4  | :CATCACCACAC/      | 0.667 |             |
| - | 18 | 3635 | wsc.1_Missense_M                          | NM_020753    | NP_065804    | Q8WXE0 | CSK12_HUMAN  | Pro-rich.                  | 1  | :AGACTCGCCAG/      | 0.692 |             |
| - | 23 | 3913 | ie_Mutation_p.A516T DNAH17_uc002jvs.2_RNA |              |              |        |              |                            | 9  | :AAAGGCGACTAC/     | 0.537 |             |
| - | 5  | 386  | cs.2_Missense_Mu                          | NM_014740    | NP_055555    | P38919 | IF4A3_HUMAN  | ase ATP-binding.           | 1  | :TTCACGAACCT/      | 0.393 |             |
| - | 23 | 3117 | 1_Missense_Muta                           | NM_014984    | NP_055799    | Q9UPN4 | AZ11_HUMAN   |                            | 4  | CTGCCGCACAA/       | 0.697 |             |
| - | 5  | 442  |                                           | NM_016286    | NP_057370    | Q7Z4W1 | DCXR_HUMAN   |                            | 0  | :AGTTACTGCCCC/     | 0.438 |             |
| + | 30 | 4802 | i.D1446E PTPRM                            | NM_002845    | NP_002836    | P28827 | PTPRM_HUMAN  | phatase 2. Cytoplasmic (Po | 6  | :GTCGACCTCCT/      | 0.418 |             |
| - | 9  | 957  | kod.1_Missense_M                          | NM_001042388 | NP_001035847 | Q8TF05 | PP4R1_HUMAN  | HEAT 8.                    | 1  | :CACATGAAACCC/     | 0.413 |             |
| + | 37 | 6670 | nse_Mutation_p.Si                         | NM_032142    | NP_115518    | E9PF99 | E9PF99_HUMAN |                            | 5  | CTAATTCCTCCT/      | 0.328 |             |
| - | 4  | 1704 | CO1_uc002kti.1_F                          | NM_052911    | NP_443143    | Q5FWF5 | ESCO1_HUMAN  |                            | 0  | :TTTTCGGGACCA/     | 0.413 |             |
| + | 15 | 2780 | nz.1_Missense_M                           | NM_025135    | NP_079411    | Q2V2M9 | FHOD3_HUMAN  | FH2.                       | 8  | :CCATCCGTTTG/      | 0.502 |             |
| + | 8  | 1279 | i_Mutation_p.E332                         | NM_014772    | NP_055587    | O43310 | CTIF_HUMAN   |                            | 0  | TTCCCGAGCGC/       | 0.562 |             |

|   |    |       |                                                |              |              |        |              |                                |    |               |       |             |
|---|----|-------|------------------------------------------------|--------------|--------------|--------|--------------|--------------------------------|----|---------------|-------|-------------|
| + | 4  | 1315  |                                                | NM_015879    | NP_056963    | O43173 | SIA8C_HUMAN  | lenal (Potential).             | 2  | TTGTATGGATTTT | 0.423 |             |
| + | 8  | 1144  | n_p.E201K SERPI                                | NM_001143818 | NP_001137290 | P05120 | PAI2_HUMAN   |                                | 2  | CCAGATGAAATTC | 0.413 |             |
| + | 3  | 651   | p.R109K CDH7_u                                 | NM_033646    | NP_387450    | Q9ULB5 | CADH7_HUMAN  | r (Potential). Cadherin 1.     | 4  | CAAGAGACTGG   | 0.498 |             |
| - | 24 | 3115  | TN_uc010xfb.1_IV                               | NM_173630    | NP_775901    | Q86VV8 | RTTN_HUMAN   |                                | 8  | ACACCCGGCTTC/ | 0.418 |             |
| - | 5  | 354   | o.P96L TCF3_uc0                                | NM_003200    | NP_003191    | P15923 | TFE2_HUMAN   |                                | 7  | GTCCCGGTCCC.  | 0.637 |             |
| + | 4  | 469   | p.R131H C19orf36                               | NM_001039846 | NP_001034935 | Q1ZYL8 | IZUM4_HUMAN  |                                | 0  | GCACCCGTGTG   | 0.672 |             |
| - | 9  | 909   |                                                | NM_198492    | NP_940894    | Q6UXB4 | CLC4G_HUMAN  | (Potential). C-type lectin.    | 0  | TTCTCGCTGTC/  | 0.627 |             |
| + | 10 | 1161  | sS4_uc002mji.2_M                               | NM_024552    | NP_078828    | Q9HA82 | CERS4_HUMAN  | TLC.                           | 1  | CTTTTCCCACC/  | 0.567 |             |
| - | 5  | 35849 |                                                | NM_024690    | NP_078966    | Q8WXI7 | MUC16_HUMAN  | xtracellular (Potential).      | 57 | CTGAAGAGCTG/  | 0.498 |             |
| - | 3  | 22243 |                                                | NM_024690    | NP_078966    | Q8WXI7 | MUC16_HUMAN  | ch. Extracellular (Potential). | 57 | AGTGGTTGATG   | 0.478 |             |
| - | 3  | 20990 |                                                | NM_024690    | NP_078966    | Q8WXI7 | MUC16_HUMAN  | xtracellular (Potential).      | 57 | ATGTGGAACA/   | 0.463 |             |
| - | 1  | 9472  |                                                | NM_024690    | NP_078966    | Q8WXI7 | MUC16_HUMAN  | xtracellular (Potential).      | 57 | AGGCTCCTCT/   | 0.493 |             |
| - | 1  | 7184  |                                                | NM_024690    | NP_078966    | Q8WXI7 | MUC16_HUMAN  | ch. Extracellular (Potential). | 57 | TGGGGGAAGT/   | 0.473 |             |
| - | 19 | 3002  | e.2_Missense_Mu                                | NM_003331    | NP_003322    | P29597 | TYK2_HUMAN   | otein kinase 1.                | 9  | CGTCAGCAAGA/  | 0.582 |             |
| + | 4  | 1934  | e_Mutation_p.C62                               | NM_144566    | NP_653167    | Q9H0M5 | ZN700_HUMAN  | :2H2-type 14.                  | 0  | CAGTTGTGCCT/  | 0.483 |             |
| - | 2  | 67    |                                                | NM_001105578 | NP_001099048 | Q6PIF2 | SYCE2_HUMAN  |                                | 0  | CTGCGGTTCCCT  | 0.612 |             |
| - | 3  | 645   | mwy.3_Missense_                                | NM_001127221 | NP_001120693 | O00555 | CAC1A_HUMAN  | s=S2 of repeat I; (Potential)  | 2  | ATGTTCTGTGT/  | 0.478 |             |
| + | 12 | 2270  | ing.1_Missense_M                               | NM_023072    | NP_075560    | Q9H7M6 | ZSWM4_HUMAN  |                                | 2  | GGTGCCTGGC    | 0.607 | rs139232826 |
| + | 3  | 464   | maf.2_Missense_l                               | NM_012114    | NP_036246    | P31944 | CASPE_HUMAN  |                                | 4  | ACCATGAAAAG/  | 0.542 |             |
| + | 1  | 121   |                                                | NM_001004713 | NP_001004713 | O60431 | OR111_HUMAN  | Name=1; (Potential).           | 3  | ATCATTGGAATC  | 0.483 |             |
| - | 5  | 973   | Y26_uc002nee.2_l                               | NM_024881    | NP_079157    | Q96K37 | S35E1_HUMAN  | ical; (Potential).             | 2  | CAGGACGTTGG   | 0.597 |             |
| + | 6  | 1318  | p.R164H NWD1_uc002nev.3_Missense_Mutation_p.R/ | NM_005234    | NP_005225    | Q149M9 | NWD1_HUMAN   | WD 1.                          | 7  | GATCCGCCACC.  | 0.622 | rs61737596  |
| - | 2  | 457   |                                                | NM_005234    | NP_005225    | P10588 | NR2F6_HUMAN  | ceptor. NR C4-type.            | 0  | TGAGACGGCAG   | 0.627 |             |
| + | 8  | 2360  | cc.1_Missense_Mt                               | NM_004386    | NP_004377    | O14594 | NCAN_HUMAN   |                                | 4  | ATATCCCGGGT   | 0.597 |             |
| + | 4  | 1702  |                                                | NM_031218    | NP_112495    | P35789 | ZNF93_HUMAN  | :2H2-type 14.                  | 1  | AAAATTCATACTA | 0.358 |             |
| - | 4  | 935   |                                                | NM_001159293 | NP_001152765 | C9JHM3 | C9JHM3_HUMAN |                                | 1  | TCTCCACTATGA/ | 0.403 |             |
| - | 4  | 1447  | p.K353E ZNF708_                                | NM_021269    | NP_067092    | P17019 | ZN708_HUMAN  |                                | 6  | GTTTCTTCCAG   | 0.343 |             |
| - | 4  | 1110  | 1_Intron ZNF208_                               | NM_007153    | NP_009084    |        |              |                                | 7  | GAAGGCTTTGC/  | 0.413 |             |
| + | 4  | 1398  |                                                | NM_020855    | NP_065906    | Q9P255 | ZN492_HUMAN  | :2H2-type 9.                   | 0  | ATAAGAGAATTC/ | 0.378 |             |
| + | 3  | 2263  | rn.1_Missense_Mt                               | NM_001136156 | NP_001129628 | Q8TCN5 | ZN507_HUMAN  |                                | 5  | CCATCGACAGA/  | 0.493 | rs143809236 |
| + | 6  | 956   | r_p.V230I KCTD1/                               | NM_001129994 | NP_001123466 | Q96S11 | KCD15_HUMAN  |                                | 1  | ACTCGGTACAG/  | 0.692 |             |
| + | 5  | 2103  |                                                | NM_144689    | NP_653290    | Q8TAQ5 | ZN420_HUMAN  | :2H2-type 18.                  | 0  | TCACATCTTTCTC | 0.433 |             |
| + | 11 | 3705  |                                                | NM_015073    | NP_055888    | O60292 | SI1L3_HUMAN  |                                | 2  | AGCAGGAAAGC   | 0.622 |             |
| + | 66 | 10022 | iv.1_Missense_Mt                               | NM_000540    | NP_000531    | P21817 | RYR1_HUMAN   |                                | 12 | TGCCCGCCGGC   | 0.642 |             |
| + | 2  | 1002  | gn.1_Missense_Mt                               | NM_003407    | NP_003398    | P26651 | TTP_HUMAN    |                                | 1  | CCGGCGACTCC   | 0.617 |             |
| + | 5  | 840   | r.1_Intron CYP2S1                              | NM_030622    | NP_085125    | Q96SQ9 | CP2S1_HUMAN  |                                | 1  | TGCTTCGGGCC/  | 0.652 |             |
| + | 14 | 1385  | IF8_uc002otl.3_5f                              | NM_173633    | NP_775904    | Q8NBT3 | TM145_HUMAN  |                                | 0  | GGAACGTGACG   | 0.667 |             |
| - | 3  | 617   | e_Mutation_p.A13                               | NM_005619    | NP_005610    | O75298 | RTN2_HUMAN   |                                | 3  | GAGGCGCGGTG   | 0.682 |             |
| - | 26 | 3819  | 6A_uc002pdm.2_ξ                                | NM_004819    | NP_004810    | Q92797 | SYMPK_HUMAN  |                                | 1  | CTCCCGGAAAT/  | 0.602 |             |
| + | 6  | 683   |                                                | NM_015603    | NP_056418    | Q9Y3X0 | CCDC9_HUMAN  | Potential.                     | 0  | GGAGCGGCGCA   | 0.567 |             |
| + | 7  | 2811  | _p.E722K NLRP4_                                | NM_134444    | NP_604393    | Q96MN2 | NALP4_HUMAN  |                                | 15 | TGCTGCGAATAC. | 0.512 |             |
| + | 9  | 1149  | zi.2_Missense_Mu                               | NM_003887    | NP_003878    | O43150 | ASAP2_HUMAN  | Potential.                     | 0  | AGCTTCGAGATA/ | 0.408 |             |
| + | 31 | 5695  | bp.1_Missense_Mt                               | NM_014668    | NP_055483    | Q4ZG55 | GREB1_HUMAN  |                                | 1  | GTGCCCGGAC.   | 0.647 |             |
| + | 3  | 1154  | aw.2_Missense_Mt                               | NM_002252    | NP_002243    | Q9BQ31 | KCNS3_HUMAN  | =Segment S2; (Potential).      | 4  | TCACCGGGGAG   | 0.517 |             |
| - | 19 | 3050  | _p.M869I PUM2_u                                | NM_015317    | NP_056132    | Q8TB72 | PUM2_HUMAN   | A-HD. Pumilio 8.               | 1  | TTCAGCCATATC/ | 0.413 |             |
| - | 3  | 360   | _p.E107K HS1BP3                                | NM_022460    | NP_071905    | Q53T59 | H1BP3_HUMAN  | PX.                            | 1  | CTCTCCCGGA/   | 0.562 |             |
| - | 26 | 7584  |                                                | NM_000384    | NP_000375    | P04114 | APOB_HUMAN   |                                | 27 | GGTGTCTGTAC   | 0.418 |             |

|   |     |           |                                                               |              |              |        |             |    |              |       |             |
|---|-----|-----------|---------------------------------------------------------------|--------------|--------------|--------|-------------|----|--------------|-------|-------------|
| - | 4   | 436       | n_p.T58 POMC_u                                                | NM_001035256 | NP_001030333 | P01189 | COLI_HUMAN  | 1  | TTGGGAGTCTCG | 0.692 |             |
| + | 8   | 1472      | iP1_uc002rpk.2_M                                              | NM_013392    | NP_037524    | Q9UHY1 | NRBP_HUMAN  | 3  | ACAACGGACTC  | 0.582 |             |
| - | 2   | 224       | Flank GPN1_uc01                                               | NM_024584    | NP_078860    | Q6ZUS5 | CC121_HUMAN | 0  | TTTCCGCTGGG  | 0.433 |             |
| + | 3   | 473       |                                                               | NM_030915    | NP_112177    | Q53QV2 | LBH_HUMAN   | 0  | TCCAGGAGGAT  | 0.567 |             |
| - | 3   | 428       | _p.K61R NLRC4_u                                               | NM_021209    | NP_067032    | Q9NPP4 | NLRC4_HUMAN | 6  | AAACCTTTTTC  | 0.398 |             |
| + | 10  | 1945      | v.2_Nonsense_Mu                                               | NM_206943    | NP_996826    | Q14766 | LTBP1_HUMAN | 8  | AGCTATCGATG  | 0.378 |             |
| + | 7   | 961       | _p.E112K RASGRF                                               | NM_170672    | NP_733772    | Q8IV61 | GRP3_HUMAN  | 5  | GATATGAAAAAC | 0.443 |             |
| - | 8   | 902       | RS7_uc010ynp.1_                                               | NM_001031684 | NP_001026854 | Q16629 | SRSF7_HUMAN | 0  | GGAACGACTAA  | 0.378 |             |
| - | 5   | 955       | HX57_uc002rrg.2_                                              | NM_198963    | NP_945314    | Q6P158 | DHX57_HUMAN | 3  | ATTGCGGAATC  | 0.343 |             |
| - | 3   | 1662      | 2sit.3_Missense_I                                             | NM_015470    | NP_056285    | Q9BXF6 | RFIP5_HUMAN | 0  | CGCTCCGACTT  | 0.637 |             |
| + | 5   | 479       | _p.A132S REG3G                                                | NM_198448    | NP_940850    | Q6UW15 | REG3G_HUMAN | 0  | ACTTTGCATGGC | 0.507 |             |
| - | 6   | 1221      | svl.2_Missense_IV                                             | NM_020151    | NP_064536    | Q9NQZ5 | STAR7_HUMAN | 0  | GGGACGGATAA  | 0.468 |             |
| - | 34  | 4974      | JP200_uc010yuj.1                                              | NM_014014    | NP_054733    | O75643 | U520_HUMAN  | 10 | CAGGCGTCGCT  | 0.577 |             |
| - | 15  | 2643      | EMA4C_uc002sxt                                                | NM_017789    | NP_060259    | Q9C0C4 | SEM4C_HUMAN | 2  | CCTCGGGGTTG  | 0.652 |             |
| + | 7   | 1009      | 70_uc002sye.1_Mi                                              | NM_001079    | NP_001070    | P43403 | ZAP70_HUMAN | 6  | CTGCTCCACA   | 0.706 |             |
| - | 5   | 739       |                                                               | NM_004854    | NP_004845    | O43529 | CHSTA_HUMAN | 1  | CTTTGGGAGTC  | 0.498 |             |
| - | 4   | 909       | ise_Mutation_p.T1                                             | NM_152515    | NP_689728    | Q8IYA6 | CKP2L_HUMAN | 0  | GAAACCGCTCT  | 0.403 |             |
| - | 7   | 1049      | ise_Mutation_p.H2                                             | NM_025181    | NP_079457    | Q8WV83 | S35F5_HUMAN | 0  | TGCATGACTTG  | 0.388 |             |
| + | 13  | 3842      | it.3_Missense_Mu                                              | NM_005270    | NP_005261    | P10070 | GLI2_HUMAN  | 13 | CTGCAGCAACA  | 0.627 |             |
| + | 18  | 2418      | .2_Missense_Mut                                               | NM_004522    | NP_004513    | O60282 | KIF5C_HUMAN | 1  | TCCAGGATAAG  | 0.413 |             |
| - | 116 | 16579     | _Mutation_p.R188                                              | NM_004543    | NP_004534    | P20929 | NEBU_HUMAN  | 20 | TAGTACGCAGG  | 0.299 | rs16830171  |
| + | 6   | 1148      | _p.R194Q GALNT1                                               | NM_052917    | NP_443149    | Q8IUC8 | GLT13_HUMAN | 6  | TCTTCGAGGAG  | 0.423 |             |
| - | 10  | 1412      | P4_uc010fpb.2_5'l                                             | NM_001935    | NP_001926    | P27487 | DPP4_HUMAN  | 3  | TGTATGGAAGTT | 0.393 |             |
| + | 4   | 539       | z.2_Missense_Mut                                              | NM_138995    | NP_620482    | Q8WXR4 | MYO3B_HUMAN | 19 | AGCAATGATCTC | 0.493 |             |
| - | 2   | 711       | K1_uc002ugp.2_M                                               | NM_012290    | NP_036422    | Q9UKI8 | TLK1_HUMAN  | 1  | TGCAACTGCCCC | 0.393 |             |
| + | 1   | 134       | zew.1_Missense_I                                              | NM_021193    | NP_067016    | P35452 | HXD12_HUMAN | 0  | CTACCCGCGCG  | 0.706 |             |
| - | 6   | 688       | VKRD44_uc002uu                                                | NM_153697    | NP_710181    | Q8N8A2 | ANR44_HUMAN | 5  | CACGCCGGTCC  | 0.418 |             |
| + | 2   | 1180      | uv.3_Missense_Mt                                              | NM_001114661 | NP_001108133 | Q15111 | PLCL1_HUMAN | 2  | CCACCCGCGTG  | 0.373 |             |
| + | 2   | 539       | _p.S98P GPBAR1                                                | NM_170699    | NP_733800    | Q8TDU6 | GPBAR_HUMAN | 1  | TCTCTCCCTCG  | 0.637 |             |
| + | 13  | 1975      |                                                               | NM_032726    | NP_116115    | Q9BRC7 | PLCD4_HUMAN | 3  | TATTCCGCCAG  | 0.532 |             |
| - | 14  | 2162_2163 | p.G602R PTPRN_                                                | NM_002846    | NP_002837    | Q16849 | PTPRN_HUMAN | 4  | TGTCCCGTGGA  | 0.663 | rs145338513 |
| + | 17  | 3001      | wm.2_Missense_I                                               | NM_005070    | NP_005061    | P48751 | B3A3_HUMAN  | 5  | CCTGCGCAAGT  | 0.637 |             |
| - | 7   | 2775      | _p.L910F SPHKAF                                               | NM_001142644 | NP_001136116 | Q2M3C7 | SPKAP_HUMAN | 10 | AGGAAGCAGCA  | 0.483 |             |
| - | 21  | 3119      | IP12_uc002vpy.1_                                              | NM_004238    | NP_004229    | Q14669 | TRIPC_HUMAN | 9  | CAGTCGTTTTT  | 0.398 |             |
| + | 1   | 286       |                                                               | NM_152614    | NP_689827    | Q53QW1 | CB057_HUMAN | 1  | ACGGCCAGAAG  | 0.532 |             |
| + | 13  | 1288      | FARP2_uc010zor.                                               | NM_014808    | NP_055623    | Q94887 | FARP2_HUMAN | 3  | CATTCCCGAG   | 0.478 |             |
| + | 9   | 1283      |                                                               | NM_003245    | NP_003236    | Q08188 | TGM3_HUMAN  | 9  | ATGCCGACCGC  | 0.562 |             |
| + | 7   | 1017      | al.1_Missense_Mu                                              | NM_198994    | NP_945345    | Q95932 | TGM3L_HUMAN | 4  | CGGGCGGACCC  | 0.612 | rs148376598 |
| - | 5   | 1033      | l.1_Intron VSX1_u                                             | NM_014588    | NP_055403    | Q9NZR4 | VSX1_HUMAN  | 0  | CCTGCCGGGCA  | 0.592 |             |
| - | 24  | 4051      | _p.S977F NINL_uc                                              | NM_025176    | NP_079452    | Q9Y216 | NINL_HUMAN  | 5  | AGTCCGACTTC  | 0.567 |             |
| + | 2   | 91        | tj.1_RNA FRG1B_uc010gdr.1_RNA FRG1B_uc010ztk.1_Intron         |              |              |        |             | 0  | AATATCTTGTA  | 0.333 | rs137871677 |
| + | 3   | 187       | FRG1B_uc010gdr.1_RNA FRG1B_uc010ztk.1_Missense_Mutation_p.L4S |              |              |        |             | 0  | TTTGTTGGCT   | 0.353 |             |
| + | 3   | 189       | FRG1B_uc010gdr.1_RNA FRG1B_uc010ztk.1_Missense_Mutation_p.A5T |              |              |        |             | 0  | TGTTGGCCTCA  | 0.353 |             |
| + | 1   | 135       |                                                               | NM_153324    | NP_697019    | Q8N688 | DB123_HUMAN | 0  | TCTATCCCAGC  | 0.537 |             |
| + | 15  | 1934      | tz.1_Missense_Mu                                              | NM_006892    | NP_008823    | Q9UBC3 | DNM3B_HUMAN | 5  | GCGGCGCCGGA  | 0.637 |             |
| - | 6   | 675       | _Missense_Mutatir                                             | NM_018217    | NP_060687    | Q9BV94 | EDEM2_HUMAN | 0  | CTGCCGTACAG  | 0.542 |             |
| + | 14  | 1592      | uc002xjn.1_Intron                                             | NM_003286    | NP_003277    | P11387 | TOP1_HUMAN  | 7  | TCGGCGGCTGA  | 0.468 |             |

|   |    |           |                    |              |              |        |             |                            |     |               |       |             |
|---|----|-----------|--------------------|--------------|--------------|--------|-------------|----------------------------|-----|---------------|-------|-------------|
| - | 4  | 646       |                    | NM_016470    | NP_057554    | Q9NX31 | CT111_HUMAN |                            | 0   | ACTTGGGTAGCG  | 0.498 |             |
| + | 8  | 1104      | 2_RNA PABPC1L_     | NM_001124756 | NP_001118228 | Q4VXU2 | PAP1L_HUMAN | RRM 4.                     | 1   | 3TTTTTCCTCCC  | 0.587 |             |
| - | 2  | 399       | se_Mutation_p.R17  | NM_001135773 | NP_001129245 | Q9UM82 | SPAT2_HUMAN |                            | 2   | ACTTCCGAAATAA | 0.552 | rs77667957  |
| - | 6  | 1341      | se_Mutation_p.R3   | NM_018197    | NP_060667    | Q9NPA5 | ZF64A_HUMAN | ZH2-type 6.                | 2   | GCTTCCGGAGG   | 0.582 |             |
| - | 2  | 233       | B46_uc002ygu.2_    | NM_025224    | NP_079500    | Q86UZ6 | ZBT46_HUMAN |                            | 2   | GGGACGTGATT   | 0.572 |             |
| - | 7  | 1031      |                    | NM_198996    | NP_945347    | Q6XZB0 | LIP1_HUMAN  |                            | 2   | GCCTAAGAGGTC  | 0.303 |             |
| + | 2  | 266       | se_Mutation_p.V5   | NM_001186    | NP_001177    | O14867 | BACH1_HUMAN | BTB.                       | 2   | GGTCCGTGCTG   | 0.522 | rs149732438 |
| - | 13 | 2310      | _p.V616M GRIK1_    | NM_000830    | NP_000821    | P39086 | GRIK1_HUMAN | lasmic (Potential).        | 3   | CACCACGTCTG   | 0.448 |             |
| + | 13 | 1136      | _p.G298D PDE9A_    | NM_002606    | NP_002597    | O76083 | PDE9A_HUMAN | ytic (By similarity).      | 2   | ATCCCGGCTACA  | 0.498 |             |
| - | 3  | 378       | v.3_Missense_Mul   | NM_000071    | NP_000062    | P35520 | CBS_HUMAN   |                            | 0   | GGGCCGGATCC   | 0.667 |             |
| - | 3  | 1589      | 2zii.2_Missense_IV | NM_001142854 | NP_001136326 | Q9H0A9 | CU056_HUMAN |                            | 1   | AGTCTCTCTCTG  | 0.662 |             |
| - | 1  | 450       | TEH_uc002zlh.1_5   | NM_001136213 | NP_001129685 | Q6S545 | POTEH_HUMAN |                            | 1   | ATCTTGCTCCTG  | 0.607 |             |
| + | 1  | 1646      | _R14_uc002zou.2_   | NM_053006    | NP_443732    | Q96PF2 | TSSK2_HUMAN |                            | 1   | GAGCTGAGGTG   | 0.617 |             |
| - | 2  | 868       | 4R_uc002zru.2_5'   | NM_023004    | NP_075380    | Q9BZR6 | RTN4R_HUMAN | LRR 7.                     | 0   | GTCACGGAAGG   | 0.647 |             |
| - | 2  | 75        | zue.2_Missense_M   | NM_004173    | NP_004164    | O43246 | CTR4_HUMAN  |                            | 2   | CCCCCGGCCA    | 0.652 |             |
| + | 14 | 1912      | _p.P490L NF2_uc0   | NM_000268    | NP_000259    | P35240 | MERL_HUMAN  | p.P490fs*25(2) p.P483fs*   | 728 | AGCACCGTTGC   | 0.463 |             |
| + | 7  | 1702_1703 | ense_Mutation_p.F  | NM_030758    | NP_110385    | Q969R2 | OSBP2_HUMAN |                            | 2   | GGCCGGGAGC    | 0.609 |             |
| - | 3  | 497       | 03K PIK3IP1_uc0    | NM_052880    | NP_443112    | Q96FE7 | P3IP1_HUMAN | ellular (Potential).       | 1   | GGTACCTGGAC   | 0.736 |             |
| - | 3  | 486       | aqe.2_Nonsense_    | NM_001163857 | NP_001157329 | O43247 | EAN57_HUMAN |                            | 0   | TGGCTGAGCCC   | 0.622 |             |
| + | 15 | 1983      | _Mutation_p.V536M  | NM_013365    | NP_037497    | Q9UJY5 | GGA1_HUMAN  | GAE.                       | 3   | CCGACGTGCTG   | 0.622 |             |
| + | 2  | 425       |                    | NM_004286    | NP_004277    | O00178 | GTPB1_HUMAN |                            | 1   | GATGCGGAGAG   | 0.393 | rs11547402  |
| - | 4  | 282       | xc.2_Nonsense_M    | NM_175709    | NP_783640    | O95931 | CBX7_HUMAN  | Chromo.                    | 1   | TGCTCGGTCTC   | 0.592 |             |
| + | 18 | 4668      | _n.3_Nonsense_M    | NM_001162501 | NP_001155973 | Q9UPQ9 | TNR6B_HUMAN |                            | 0   | TGCCATGGAAG   | 0.413 |             |
| - | 3  | 317       | lye.1_Missense_M   | NM_020831    | NP_065882    | Q969V6 | MKL1_HUMAN  | on with SCAI and ACTB (B   | 5   | GCTCCGATCTC   | 0.473 |             |
| - | 2  | 199       | se_Mutation_p.V3   | NM_032311    | NP_115687    | Q9BY77 | PDIP3_HUMAN |                            | 0   | CCCAACTCGAG   | 0.502 |             |
| - | 15 | 1805      |                    | NM_173050    | NP_766638    | Q8IWY4 | SCUB1_HUMAN |                            | 5   | TGCTCGTTCCC   | 0.537 |             |
| - | 1  | 286       | v.1_RNA LOC4005    | NM_018280    | NP_060750    | Q9NV39 | CV026_HUMAN | Pro-rich.                  | 0   | ACGGAGGACGG   | 0.756 |             |
| - | 12 | 2029      |                    | NM_001080447 | NP_001073916 |        |             |                            | 2   | CGGGAGCTCCA   | 0.677 |             |
| - | 4  | 720       | _p.E26K IL5RA_uc   | NM_000564    | NP_000555    | Q01344 | IL5RA_HUMAN | ellular (Potential).       | 1   | CTTTTCATCAGG  | 0.348 |             |
| + | 5  | 668       | uc003bru.2_Transl  | NM_001080517 | NP_001073986 | Q9C0A6 | SETD5_HUMAN |                            | 2   | ACGCTGTGGAG   | 0.567 |             |
| - | 16 | 2769      | vw.2_Missense_M    | NM_001001331 | NP_001001331 | Q01814 | AT2B2_HUMAN | lasmic (Potential).        | 6   | CAATTCGCTCC   | 0.488 |             |
| - | 34 | 4761      |                    | NM_024923    | NP_079199    | Q8TEM1 | PO210_HUMAN | renal (Probable).          | 11  | GTAGCGGGCCA   | 0.443 |             |
| - | 13 | 2448      | _p.V589M XPC_uc0   | NM_004628    | NP_004619    | Q01831 | XPC_HUMAN   | NA; required for formation | 3   | GGCCACGCGGT   | 0.592 |             |
| + | 10 | 3411      | _p.V1101I FGD5_u   | NM_152536    | NP_689749    | Q6ZNL6 | FGD5_HUMAN  |                            | 5   | ACAGCGTCCGG   | 0.627 |             |
| - | 9  | 882       | eq.1_Missense_M    | NM_207359    | NP_997242    | Q6ZQY3 | GADL1_HUMAN |                            | 0   | AGCTCCAACA    | 0.438 |             |
| + | 2  | 679_680   | _Missense_Mutatio  | NM_002468    | NP_002459    | Q99836 | MYD88_HUMAN | e domain (By similarity).  | 94  | GATGACCCCTC   | 0.525 |             |
| + | 12 | 1499      | _kz.3_Missense_M   | NM_001042646 | NP_001036111 | Q9UPV9 | TRAK1_HUMAN | action with HGS.           | 1   | CGGCTCCAACC   | 0.572 |             |
| - | 4  | 517       | _p.R145W CCDC13_   | NM_144719    | NP_653320    | Q8IYE1 | CCD13_HUMAN | Potential.                 | 1   | CAGCCGGTTCT   | 0.512 |             |
| - | 3  | 654       | 1_uc003cpf.2_Mis   | NM_005283    | NP_005274    | P46094 | XCR1_HUMAN  | Name=4; (Potential).       | 1   | GCAGCGGAGGG   | 0.597 |             |
| + | 4  | 415       | .H82N PTPN23_uc    | NM_015466    | NP_056281    | Q9H3S7 | PTN23_HUMAN | BRO1.                      | 3   | TGGCCCATGAG   | 0.582 |             |
| - | 4  | 1671      | ro.3_Intron CSPG   | NM_006574    | NP_006565    | O95196 | CSPG5_HUMAN | lasmic (Potential).        | 2   | ATGGGGGAGC    | 0.517 |             |
| + | 5  | 8215      |                    | NM_003458    | NP_003449    | Q9UPA5 | BSN_HUMAN   |                            | 8   | GATCGTCAGG    | 0.652 |             |
| + | 43 | 7072      |                    | NM_015512    | NP_056327    | Q9P2D7 | DYH1_HUMAN  | 3 (By similarity).         | 3   | TGACAGCAAG    | 0.582 |             |
| + | 51 | 8239      | H1_uc003ddv.2_5'   | NM_015512    | NP_056327    | Q9P2D7 | DYH1_HUMAN  | 4 (By similarity).         | 3   | ACAACGTCTTA   | 0.537 |             |
| - | 16 | 2626      | aj.1_Missense_Mul  | NM_003157    | NP_003148    | P51957 | NEK4_HUMAN  |                            | 1   | CAAACGTACCT   | 0.249 | rs147140852 |
| + | 4  | 590       | _p.E79D PRKCD_     | NM_006254    | NP_006245    | Q05655 | KPCD_HUMAN  | C2.                        | 9   | GAGGACCCAGT   | 0.592 |             |
| + | 1  | 695       | BO2_uc011bgj.1_f   | NM_002942    | NP_002933    | Q9HCK4 | ROBO2_HUMAN |                            | 11  | ATGTTGGGTTG   | 0.373 |             |

|   |    |       |                   |              |              |        |              |                               |    |               |       |             |
|---|----|-------|-------------------|--------------|--------------|--------|--------------|-------------------------------|----|---------------|-------|-------------|
| + | 4  | 784   |                   | NM_173824    | NP_776185    | Q5JPI3 | CC038_HUMAN  |                               | 0  | AGAATCCTTTTCT | 0.393 |             |
| + | 3  | 1130  | rp.1_Missense_Mu  | NM_001080448 | NP_001073917 | Q9UF33 | EPHA6_HUMAN  | cellular (Potential).         | 16 | ACAGGATATGAA  | 0.343 |             |
| - | 7  | 614   | inh.1_Missense_M  | NM_014429    | NP_055244    | Q86VD1 | MORC1_HUMAN  |                               | 8  | TTAAATGGGGAG  | 0.343 |             |
| + | 16 | 3136  | h.R840W BOC_uc    | NM_033254    | NP_150279    | Q9BWW1 | BOC_HUMAN    | cellular (Potential).         | 6  | TAGAGCGGCCG   | 0.617 |             |
| - | 4  | 466   | BTB20_uc003ebl.   | NM_015642    | NP_056457    | Q9HC78 | ZBT20_HUMAN  |                               | 5  | CTGCTCGTTGAC  | 0.597 |             |
| + | 3  | 623   | o.2_RNA C3orf1_L  | NM_016589    | NP_057673    | Q9NPL8 | TIDC1_HUMAN  | ical; (Potential).            | 0  | CTGGCGCTGGG   | 0.398 | rs142096113 |
| + | 9  | 1301  | rT3_uc010hug.2_F  | NM_031913    | NP_114119    | A0FGR9 | ESYT3_HUMAN  | C2.1.                         | 0  | GGAACGAAGTG   | 0.582 |             |
| - | 17 | 2298  | nm.1_Missense_M   | NM_000935    | NP_000926    | O00469 | PLOD2_HUMAN  |                               | 2  | ATATACGGCTATC | 0.358 |             |
| + | 4  | 580   | _p.G45E AGTR1_    | NM_031850    | NP_114038    | P30556 | AGTR1_HUMAN  | Name=1; (Potential).          | 0  | TATTTGGAAACAC | 0.353 |             |
| - | 7  | 1559  | _uc003ewz.2_Nor   | NM_000096    | NP_000087    | P00450 | CERU_HUMAN   | in-like 3. F5/8 type A.2.     | 1  | CTTTTCGATTTGT | 0.453 |             |
| - | 1  | 333   | _uc003ewz.2_Mis   | NM_000096    | NP_000087    | P00450 | CERU_HUMAN   | 1. Plastocyanin-like 1.       | 1  | ATAATTCGAATG  | 0.353 |             |
| - | 19 | 2433  | _p.E743K ZBBX_u   | NM_024687    | NP_078963    | A8MT70 | ZBBX_HUMAN   | Potential.                    | 2  | GTAATTCCTTTTC | 0.328 |             |
| - | 13 | 2579  | o.R851C PHC3_uc   | NM_024947    | NP_079223    | Q8NDX5 | PHC3_HUMAN   |                               | 2  | ACGACGGCCAC   | 0.423 |             |
| - | 7  | 1210  | _p.R128* SLC2A2_  | NM_000340    | NP_000331    | P11168 | GTR2_HUMAN   | lasmic (Potential).           | 2  | CTGTCCGGTAGC  | 0.418 | rs121909743 |
| + | 13 | 2196  | _p.P332L EIF2B5_  | NM_003907    | NP_003898    | Q13144 | EI2BE_HUMAN  | W2.                           | 5  | TTCCCGCTTG/   | 0.527 |             |
| + | 7  | 930   | _Mutation_p.R260  | NM_018358    | NP_060828    | Q9NUQ8 | ABCF3_HUMAN  | C transporter 1.              | 4  | GCTACGGAGGG/  | 0.602 |             |
| + | 2  | 199   | z.2_Missense_Mut  | NM_003722    | NP_003713    | Q9H3D4 | P63_HUMAN    | ription activation.           | 12 | TTACCGATCCAC  | 0.373 |             |
| - | 3  | 319   |                   | NM_198505    | NP_940907    | Q4VNC0 | AT135_HUMAN  |                               | 11 | ATTCTTCCCACT  | 0.408 |             |
| - | 13 | 1981  |                   | NM_018385    | NP_060855    | Q9H089 | LSG1_HUMAN   |                               | 0  | AGTTACAGGAT   | 0.438 |             |
| - | 3  | 9356  | C4_uc003fvp.2_Inl | NM_018406    | NP_060876    | Q99102 | MUC4_HUMAN   |                               | 0  | GGAAAGGCTGG   | 0.602 |             |
| - | 3  | 3298  | ron ABCA11P_ucC   | NM_133474    | NP_597731    | D9N162 | D9N162_HUMAN |                               | 1  | CCACATTCTCC/  | 0.413 |             |
| - | 3  | 1955  | ron ABCA11P_uc0   | NM_133474    | NP_597731    | D9N162 | D9N162_HUMAN |                               | 1  | GCCACGATCTT/  | 0.378 |             |
| + | 5  | 1505  | Site ZBTB49_uc01  | NM_145291    | NP_660334    | Q6ZSB9 | ZBT49_HUMAN  | 2H2-type 2.                   | 2  | TACGACGGCATT  | 0.408 |             |
| + | 19 | 2574  | .V728 CC2D2A_u    | NM_001080522 | NP_001073991 | Q9P2K1 | C2D2A_HUMAN  |                               | 3  | AGGGAGTTGGA   | 0.418 |             |
| + | 16 | 1798  | as.1_Missense_Mu  | NM_004787    | NP_004778    | O94813 | SLIT2_HUMAN  | LRRNT 3.                      | 11 | CACATCCCCAG   | 0.448 |             |
| - | 11 | 1866  | iqn.1_Missense_M  | NM_145290    | NP_660333    | Q8IWK6 | GP125_HUMAN  | cellular (Potential).         | 1  | CTGTTGAATAAA  | 0.488 |             |
| + | 12 | 2071  | IN7_uc003gvi.3_3' | NM_024677    | NP_078953    |        |              |                               | 0  | CTGCAGCCAAG   | 0.428 |             |
| - | 2  | 240   | o.1_RNA NMU_uc    | NM_006681    | NP_006672    | P48645 | NMU_HUMAN    |                               | 0  | TGTAATCCTTGAC | 0.308 |             |
| - | 6  | 1370  |                   | NM_001076    | NP_001067    | P54855 | UDB15_HUMAN  |                               | 0  | TAATTCATGAC/  | 0.363 |             |
| + | 5  | 1203  | cam.1_Missense_I  | NM_001075    | NP_001066    | P36537 | UDB10_HUMAN  | p.P393S(1)                    | 5  | GCATTCATTGT   | 0.448 |             |
| + | 3  | 962   | _p.L141F RUFY3_   | NM_014961    | NP_055776    | Q7L099 | RUFY3_HUMAN  | RUN.                          | 0  | CTTTTCTCGGAC  | 0.259 |             |
| + | 5  | 608   | LB_uc003hgu.3_M   | NM_000477    | NP_000468    | P02768 | ALBU_HUMAN   | Albumin 1.                    | 6  | GAACTCCTTTTC  | 0.353 |             |
| - | 13 | 2312  |                   | NM_001042784 | NP_001036249 | Q5M9N0 | CD158_HUMAN  | Potential.                    | 6  | CGATCCTTCC/   | 0.294 |             |
| + | 16 | 2894  | PAQR3_uc003hln.   | NM_198892    | NP_942595    | Q9NSY1 | BMP2K_HUMAN  |                               | 1  | AATGTACAAGAA  | 0.478 |             |
| - | 8  | 1011  | _p.G237E AGXT2L   | NM_031279    | NP_112569    | Q8TBG4 | AT2L1_HUMAN  |                               | 1  | GTTCCTCCATT   | 0.468 |             |
| + | 11 | 2152  | _p.R525H EGF_uc   | NM_001963    | NP_001954    | P01133 | EGF_HUMAN    | s B 7. Extracellular (Potenti | 4  | TTGGCCGTAGAT  | 0.453 |             |
| - | 9  | 2573  | 3T4_uc010imw.2_f  | NM_022569    | NP_072091    | Q9H3R1 | NDST4_HUMAN  | eparan sulfate N-sulfotransf  | 4  | AACTTCTCTCAA  | 0.318 |             |
| + | 1  | 3845  |                   | NM_024582    | NP_078858    | Q6V0I7 | FAT4_HUMAN   | Extracellular (Potential).    | 18 | CCTATTCCTTG   | 0.363 |             |
| + | 8  | 7405  | e_Mutation_p.H76  | NM_024582    | NP_078858    | Q6V0I7 | FAT4_HUMAN   | (Potential). Cadherin 24.     | 18 | AGCATCACCCA   | 0.453 |             |
| + | 17 | 13949 | _p.S2891L FAT4_u  | NM_024582    | NP_078858    | Q6V0I7 | FAT4_HUMAN   | lasmic (Potential).           | 18 | AATTTCAATCCA  | 0.498 |             |
| - | 5  | 764   | mm.3_Missense_A   | NM_004564    | NP_004555    | O75879 | GATB_HUMAN   |                               | 0  | TGTTCCGCTGG   | 0.532 | rs145476419 |
| + | 11 | 2396  |                   | NM_033393    | NP_203751    | Q9C0D6 | FHDC1_HUMAN  |                               | 2  | CATCTCGGACAC  | 0.622 |             |
| + | 5  | 960   | _p.D134N CLCN3_   | NM_001829    | NP_001820    | P51790 | CLCN3_HUMAN  | al; (By similarity).          | 3  | CTGCCGATTGG   | 0.418 |             |
| + | 11 | 2189  | e.1_Missense_Mu   | NM_001080477 | NP_001073946 | Q9P273 | TEN3_HUMAN   | r (Potential). EGF-like 7.    | 0  | GTGCCGAGCAC   | 0.617 |             |
| + | 2  | 585   |                   | NM_207352    | NP_997235    | Q6ZWL3 | CP4V2_HUMAN  |                               | 0  | CTGGGTCGGGC   | 0.423 |             |
| - | 9  | 978   | nk.1_Missense_M   | NM_017755    | NP_060225    | Q08J23 | NSUN2_HUMAN  |                               | 1  | CCCGGTGTTG    | 0.468 | rs149296511 |
| - | 2  | 565   | oe.3_5'Flank MTRF | NM_024091    | NP_076996    | Q14CZ7 | FAKD3_HUMAN  |                               | 4  | CCATCCTTTTTT  | 0.418 |             |



|   |    |            |                    |              |              |        |             |                            |    |               |       |             |
|---|----|------------|--------------------|--------------|--------------|--------|-------------|----------------------------|----|---------------|-------|-------------|
| + | 11 | 2205       |                    | NM_020227    | NP_064612    | Q9NQV7 | PRDM9_HUMAN | 2H2-type 7.                | 6  | TTAGCTGGCAG   | 0.617 |             |
| + | 11 | 2236       |                    | NM_020227    | NP_064612    | Q9NQV7 | PRDM9_HUMAN | 2H2-type 7.                | 6  | .GAGGACACACA  | 0.602 | rs111488757 |
| + | 2  | 645        | iLC1A3_uc010iuy.4  | NM_004172    | NP_004163    | P43003 | EAA1_HUMAN  | ical; (Potential).         | 0  | TCACCCTGTGTC  | 0.418 | rs143571478 |
| + | 3  | 2111       | A1_uc003jou.2_lr   | NM_015946    | NP_057030    | Q9BRX2 | PELO_HUMAN  |                            | 0  | CTGACCAAGAGC  | 0.438 |             |
| + | 2  | 5636       |                    | NM_153610    | NP_705838    | Q8N3K9 | CMYA5_HUMAN |                            | 9  | AGTTTTCACTTAT | 0.333 |             |
| + | 5  | 821        | SGRF2_uc003kxh     | NM_006909    | NP_008840    | O14827 | RGRF2_HUMAN | DH.                        | 12 | CTCGGTATGG    | 0.498 |             |
| + | 4  | 857        | yo.1_Missense_M    | NM_005733    | NP_005724    | O95235 | KI20A_HUMAN | inesin-motor.              | 0  | ACAGGTTCCACC  | 0.473 |             |
| + | 1  | 1384       | 03lhf.2_intron PCE | NM_018907    | NP_061730    | Q9UN74 | PCDA4_HUMAN | Extracellular (Potential). | 6  | CGCGCGAGACG   | 0.617 |             |
| + | 1  | 2321       | DHA7_uc003lhq.4    | NM_018904    | NP_061727    | Q9Y5I0 | PCDAD_HUMAN | XP 2.[6 X 4 AA repeats c   | 6  | TCAGTCCCAGCC  | 0.567 |             |
| + | 19 | 1840       | p.T602M ARHGAF     | NM_015071    | NP_055886    | Q9UNA1 | RHG26_HUMAN | Ser-rich.                  | 1  | CTGACGCTCT    | 0.597 | rs146092149 |
| + | 6  | 747        | 3lrz.2_Splice_Site | NM_001135243 | NP_001128715 | Q13428 | TCOF_HUMAN  |                            | 3  | TGGAGGTAATT   | 0.617 |             |
| - | 3  | 331        | .2_5'UTR CCDC6     | NM_015621    | NP_056436    | A6NI79 | CCD69_HUMAN | Potential.                 | 2  | CTTTTCTCTCTC  | 0.502 |             |
| + | 6  | 1440       | NIPAL4_uc011ddq    | NM_001099287 | NP_001092757 | Q0D2K0 | NIPA4_HUMAN | lasmic (Potential).        | 0  | AGAACGTCTCT   | 0.493 |             |
| + | 49 | 5220       | e_Mutation_p.A12   | NM_004946    | NP_004937    | Q92608 | DOCK2_HUMAN |                            | 7  | AGAAAGCAGCT   | 0.577 |             |
| + | 9  | 1803       | p.P459Q RIPK1_t    | NM_003804    | NP_003795    | Q13546 | RIPK1_HUMAN | tion with SQSTM1.          | 5  | GCCACCAACAG   | 0.413 |             |
| + | 10 | 3620       | p.S1077L RREB1     | NM_001003698 | NP_001003698 | Q92766 | RREB1_HUMAN |                            | 11 | ATCCTCGGCC    | 0.627 |             |
| + | 1  | 811_812    |                    | NM_030905    | NP_112167    | O76002 | OR2J2_HUMAN | lasmic (Potential).        | 0  | TTCAGAAAGTGT  | 0.45  |             |
| + | 4  | 482        | i_Mutation_p.G36L  | NM_001517    | NP_001508    | Q92759 | TF2H4_HUMAN |                            | 3  | GAGCGCCTCC    | 0.582 |             |
| - | 10 | 874        | 5_uc003nvz.1_Spli  | NM_021160    | NP_066983    | O95870 | ABHGA_HUMAN |                            | 0  | TCACCTAGGAAC  | 0.597 |             |
| - | 10 | 1733_1734  | RS_uc011doi.1_R    | NM_006295    | NP_006286    | P26640 | SYVC_HUMAN  |                            | 3  | TCCAAGGAGCTC  | 0.594 |             |
| - | 21 | 7671       |                    | NM_019105    | NP_061978    | P22105 | TENX_HUMAN  | nectin type-III 17.        | 0  | ACACCGGGCCC   | 0.637 |             |
| - | 2  | 467        | se_Mutation_p.S8f  | NM_016593    | NP_057677    | Q9NYL5 | CP39A_HUMAN |                            | 1  | TTTTTGGATTTTA | 0.323 |             |
| + | 6  | 908        | e_Mutation_p.G23   | NM_153839    | NP_722581    | Q8IZF7 | GP111_HUMAN | ellular (Potential).       | 1  | ACATTGGAAAA   | 0.398 |             |
| - | 6  | 921        |                    | NM_152688    | NP_689901    | Q5VWX1 | KHDR2_HUMAN | Pro-rich.                  | 11 | TGCTCCCCGAC   | 0.607 |             |
| + | 13 | 2596       | i_Missense_Mutati  | NM_001162529 | NP_001156001 | Q9P2D6 | F135A_HUMAN |                            | 1  | AGAAATCATTGT  | 0.353 |             |
| - | 56 | 8558       | ht.2_Missense_M    | NM_004370    | NP_004361    | Q99715 | COCA1_HUMAN | n (COL2) with 1 imperfecti | 9  | GAGTCCATTGGC  | 0.488 |             |
| + | 7  | 1040       | 60_splice DOPEY1   | NM_015018    | NP_055833    | Q5JWR5 | DOP1_HUMAN  |                            | 4  | AGTCAGGTAAAA  | 0.373 |             |
| + | 1  | 268        |                    | NM_021620    | NP_067633    | Q9H4Q3 | PRD13_HUMAN | SET.                       | 0  | TGCACGGAGCC   | 0.692 |             |
| - | 1  | 205        | .1_RNA GOPC_uc     | NM_002944    | NP_002935    | P08922 | ROS_HUMAN   |                            | 25 | AATGTTCTTCATC | 0.383 |             |
| - | 5  | 1614       | bt.1_Missense_M    | NM_001010923 | NP_001010923 | Q8N1K5 | THMS1_HUMAN | CABIT 2.                   | 4  | AACCTCTTCC    | 0.443 |             |
| + | 10 | 1892       | he.2_Missense_M    | NM_020455    | NP_065188    | Q86SQ4 | GP126_HUMAN | ellular (Potential).       | 1  | GGAAGGAAAAA   | 0.393 |             |
| + | 3  | 446        |                    | NM_025218    | NP_079494    | Q9BZM6 | N2DL1_HUMAN | lass I alpha-2 like.       | 1  | GACACGGCAGA   | 0.517 |             |
| + | 3  | 1031       | R265H OPRM1_u      | NM_000914    | NP_000905    | P35372 | OPRM_HUMAN  | lasmic (Potential).        | 1  | TGTCCGCATGC   | 0.502 |             |
| + | 29 | 5994       | TIAM2_uc011efl.1   | NM_012454    | NP_036586    | Q8IVF5 | TIAM2_HUMAN |                            | 4  | TGATGACCACC   | 0.527 |             |
| - | 13 | 1951       | .1_Missense_Mut    | NM_003379    | NP_003370    | P15311 | EZRI_HUMAN  | ction with SCYL3.          | 1  | CGATCGCTGC    | 0.607 |             |
| - | 8  | 1148       | Mutation_p.A305S   | NM_030752    | NP_110379    | P17987 | TCPA_HUMAN  |                            | 1  | CATAGCACCAG   | 0.408 |             |
| + | 3  | 1338       | LL2_uc011egr.1_R   | NM_031949    | NP_114155    | Q9BWV7 | TLL2_HUMAN  | TTL.                       | 3  | TTTACTTAAATGC | 0.433 |             |
| + | 12 | 1767       | wc.1_Missense_M    | NM_001040001 | NP_001035090 | P55196 | AFAD_HUMAN  |                            | 5  | TAGTGGGACAG   | 0.413 |             |
| + | 14 | 1562       | e_Mutation_p.V40   | NM_001130965 | NP_001124437 | O94901 | SUN1_HUMAN  | ear space. Potential.      | 0  | GACACGTGAAG   | 0.483 |             |
| - | 7  | 1678       | LL2_uc003ski.3_E   | NM_182924    | NP_891554    | Q8IY33 | MILK2_HUMAN |                            | 1  | CGAAGGGAGGC   | 0.627 | rs146347352 |
| + | 7  | 1457       | na.1_Missense_Mi   | NM_001037165 | NP_001032242 | P85037 | FOCK1_HUMAN |                            | 2  | TGGCGTGCTC    | 0.667 |             |
| + | 15 | 3196       | wq.1_Missense_M    | NM_032172    | NP_115548    | Q9H9J4 | UBP42_HUMAN | Arg-rich.                  | 5  | GACACGGGAGC   | 0.726 |             |
| - | 11 | 1625       | p.L446F PDE1C_     | NM_005020    | NP_005011    | Q14123 | PDE1C_HUMAN | ytic (By similarity).      | 4  | TGGAGGTCCC    | 0.443 |             |
| + | 17 | 2432       | i_Mutation_p.T393  | NM_031449    | NP_113637    | Q8NF64 | ZMIZ2_HUMAN | Pro-rich.                  | 5  | CCCAACCTTGT   | 0.632 |             |
| + | 54 | 14090_1409 | CA13_uc010kyl.1_   | NM_152701    | NP_689914    | Q86UQ4 | ABCAD_HUMAN |                            | 10 | TACTCTCCAAG   | 0.391 |             |
| - | 6  | 626        | e_Mutation_p.L17   | NM_006213    | NP_006204    | Q16816 | PHKG1_HUMAN | rotein kinase.             | 1  | TGTTGAGTTGT   | 0.527 |             |
| + | 2  | 526        | 3udv.1_Missense_   | NM_001040456 | NP_001035546 | Q6NTF9 | RHBD2_HUMAN |                            | 0  | CCACGTCGGT    | 0.612 |             |

|   |    |       |                    |              |              |        |             |                              |     |               |       |             |
|---|----|-------|--------------------|--------------|--------------|--------|-------------|------------------------------|-----|---------------|-------|-------------|
| - | 10 | 13870 | S4527R PCLO_uc     | NM_033026    | NP_149015    | Q9Y6V0 | PCLO_HUMAN  |                              | 7   | TCTCCACTATGT  | 0.378 |             |
| - | 2  | 501   | iw.1_Missense_Mt   | NM_015545    | NP_056360    | O75127 | PTCD1_HUMAN |                              | 1   | CTCCGGTTCCA   | 0.542 |             |
| - | 2  | 1375  | e_Mutation_p.R12   | NM_024637    | NP_078913    | Q96RP7 | G3ST4_HUMAN | enal (Potential).            | 3   | TGGGCGGTAGC   | 0.612 | rs116867043 |
| + | 4  | 1252  | ve.1_Missense_M    | NM_173564    | NP_775835    | Q6ZVC0 | CG051_HUMAN | Pro-rich.                    | 1   | CCAAGGAGCCA   | 0.687 |             |
| + | 2  | 249   | se_Mutation_p.R14  | NM_024653    | NP_078929    | Q9H875 | PKR11_HUMAN | RNA-binding (By similarity). | 1   | TGTCCGAGATG   | 0.279 |             |
| + | 13 | 1678  | kmc.1_Missense_I   | NM_000441    | NP_000432    | O43511 | S26A4_HUMAN | cellular (Potential).        | 7   | TGTTTACGTGTA  | 0.373 |             |
| - | 32 | 4954  | _p.R1624* LAMB4    | NM_007356    | NP_031382    | A4D0S4 | LAMB4_HUMAN | ential. Domain I.            | 8   | TGATCGCTGCT   | 0.453 |             |
| + | 21 | 4123  | i30_splice MET_uc  | NM_000245    | NP_000236    | P08581 | MET_HUMAN   |                              | 159 | GAAACAGATATG  | 0.423 |             |
| - | 8  | 2538  | RM8_uc003vit.2_M   | NM_000845    | NP_000836    | O00222 | GRM8_HUMAN  | cellular (Potential).        | 23  | AATGTCACACTT  | 0.468 |             |
| + | 5  | 587   | F1_uc011kpa.1_5'l  | NM_005011    | NP_005002    | Q16656 | NRF1_HUMAN  |                              | 1   | GGTGCGTAAGT   | 0.557 |             |
| - | 8  | 2211  |                    | NM_020911    | NP_065962    | Q9HCM2 | PLXA4_HUMAN | tracellular (Potential).     | 1   | ACTTACGAATTG  | 0.512 |             |
| + | 3  | 663   |                    | NM_020299    | NP_064695    | O60218 | AK1BA_HUMAN |                              | 5   | CACAGGGATTC   | 0.507 | rs146306673 |
| - | 10 | 1892  | rst.2_Missense_Mt  | NM_001008225 | NP_001008226 | O95628 | CNOT4_HUMAN |                              | 0   | TGGCGGGAGAT   | 0.453 |             |
| + | 15 | 4802  | wem.2_Missense_    | NM_005435    | NP_005426    | Q12774 | ARHG5_HUMAN | SH3.                         | 2   | TGGTTTCTGTG   | 0.572 |             |
| + | 5  | 740   | 1_uc003wga.2_Rf    | NM_032534    | NP_115923    | A5PL33 | KRBA1_HUMAN |                              | 2   | TCTCCGAGGCC   | 0.622 |             |
| + | 7  | 889   | PO_uc010lpl.1_5'L  | NM_198455    | NP_940857    | A2VEC9 | SSPO_HUMAN  | VWFD 1.                      | 0   | TGGGGTCTGTG   | 0.632 |             |
| - | 3  | 915   | vhm.2_Missense_I   | NM_024711    | NP_078987    | Q6P9H5 | GIMA6_HUMAN |                              | 3   | CCTCCGGGTG    | 0.622 |             |
| + | 10 | 1852  | .R495Q ACCN3_u     | NM_004769    | NP_004760    | Q9UHC3 | ACCN3_HUMAN | lasmic (Potential).          | 2   | CCATCGAACCC   | 0.632 |             |
| + | 3  | 680   | i8_uc003xcf.2_Mis  | NM_001013842 | NP_001013864 | Q8NAV2 | CH058_HUMAN |                              | 1   | GTCTTCGCTAT   | 0.647 |             |
| - | 18 | 2362  |                    | NM_001010906 | NP_001010906 | Q68CJ6 | SLIP_HUMAN  |                              | 2   | CATCCCCTGG    | 0.512 |             |
| + | 6  | 393   | M18_uc010lww.2_    | NM_014237    | NP_055052    | Q9Y3Q7 | ADA18_HUMAN |                              | 6   | AGTAGAATCTTC  | 0.294 |             |
| + | 4  | 3992  | 21_uc011ldy.1_Intr | NM_006269    | NP_006260    | P56715 | RP1_HUMAN   |                              | 12  | TTTTTTCTAGTC  | 0.408 |             |
| - | 5  | 1153  |                    | NM_000780    | NP_000771    | P22680 | CP7A1_HUMAN |                              | 1   | TGTCCGGATGT   | 0.348 | rs149291486 |
| + | 3  | 301   | lly.1_Nonsense_IV  | NM_052958    | NP_443190    | Q49A92 | CH034_HUMAN |                              | 1   | AAGCTATGATAA  | 0.343 |             |
| + | 9  | 1120  | /hu.1_Missense_IV  | NM_014754    | NP_055569    | P48651 | PTSS1_HUMAN |                              | 1   | TACTACGCTTACC | 0.418 |             |
| + | 1  | 345   |                    | NM_003301    | NP_003292    | P34981 | TRFR_HUMAN  | Name=3; (Potential).         | 3   | GAATTAATGCATC | 0.463 |             |
| + | 16 | 1825  |                    | NM_022045    | NP_071328    | Q96DY7 | MTBP_HUMAN  | ith MDM2 (By similarity).    | 3   | AGGGTCTCTCGG  | 0.398 |             |
| + | 21 | 3311  | lja.1_Missense_M   | NM_016018    | NP_057102    | A8MW92 | P20L1_HUMAN |                              | 2   | CTTAAACGCCAC  | 0.423 |             |
| + | 2  | 240   | 3PR172A_uc003z     | NM_024531    | NP_078807    | Q9HAB3 | RFT3_HUMAN  | ical; (Potential).           | 0   | GGTCAATGGGA   | 0.662 | rs141698844 |
| - | 14 | 2235  |                    | NM_004260    | NP_004251    | O94761 | RECQ4_HUMAN | case C-terminal.             | 4   | GGCACGACCTT   | 0.662 |             |
| + | 1  | 271   |                    | NM_002170    | NP_002161    | P32881 | IFNA8_HUMAN |                              | 0   | TCTCCATGAG    | 0.473 |             |
| - | 2  | 403   | uc004ags.1_RNA     | NM_153237    | NP_694969    | Q8N6L7 | CI071_HUMAN |                              | 0   | AGGCCTCTCTC   | 0.522 |             |
| - | 5  | 1143  |                    | NM_004297    | NP_004288    | O95837 | GNA14_HUMAN |                              | 2   | TTCGATCGTI    | 0.453 |             |
| + | 18 | 2648  | p.G717E PHF2_uc    | NM_005392    | NP_005383    | O75151 | PHF2_HUMAN  |                              | 1   | GAATGGGGGTG   | 0.637 |             |
| - | 9  | 2182  | _p.R668C TBC1D2    | NM_018421    | NP_060891    | Q9BYX2 | TBD2A_HUMAN | ab-GAP TBC.                  | 3   | TGGCGGGCAG    | 0.667 | rs147662482 |
| + | 9  | 1108  | 73_splice HSDL2_I  | NM_032303    | NP_115679    | Q6YN16 | HSDL2_HUMAN |                              | 0   | TCCGGTAAGG    | 0.418 |             |
| + | 3  | 428   | 2_RNA COL27A1_     | NM_032888    | NP_116277    | Q8IZC6 | CORA1_HUMAN | i-like. TSP N-terminal.      | 4   | CCGGCGCTCAG   | 0.677 |             |
| - | 14 | 1826  | _p.W599* C5_uc0'   | NM_001735    | NP_001726    | P01031 | CO5_HUMAN   |                              | 2   | CCACCCAGGAA   | 0.448 |             |
| - | 17 | 1676  | c004buh.2_Misser   | NM_004486    | NP_004477    | Q08379 | GOGA2_HUMAN | Potential.                   | 1   | AAATCCGCTCTC  | 0.612 |             |
| - | 3  | 334   | SEC16A_uc010nb     | NM_014866    | NP_055681    | O15027 | SC16A_HUMAN | action with SEC23A. Pro-ri   | 0   | AGACGGGACCG   | 0.567 |             |
| - | 1  | 512   |                    | NM_031297    | NP_112587    | Q9H0X6 | RN208_HUMAN |                              | 0   | CCCGGAAGAA    | 0.672 |             |
| + | 1  | 474   |                    | NM_152577    | NP_689790    | Q8N7E2 | ZN645_HUMAN |                              | 2   | AGCTCGAAAAC   | 0.448 |             |
| - | 4  | 1769  |                    | NM_030624    | NP_085127    | Q96M94 | KLH15_HUMAN | Kelch 4.                     | 2   | AGATTCGAAAG   | 0.473 |             |
| + | 2  | 568   | EB6_uc010ngc.1_!   | NM_173523    | NP_775794    | Q8N7X4 | MAGB6_HUMAN | Ser-rich.                    | 3   | TTCATGATG     | 0.537 |             |
| + | 2  | 574   | EB6_uc010ngc.1_!   | NM_173523    | NP_775794    | Q8N7X4 | MAGB6_HUMAN | Ser-rich.                    | 3   | TGATGTCTCCG   | 0.532 |             |
| + | 7  | 1025  | nse_Mutation_p.D   | NM_005676    | NP_005667    | P98175 | RBM10_HUMAN | lanBP2-type.                 | 5   | TAGGACTGG     | 0.507 |             |
| + | 9  | 1648  | oq.1_Missense_Mt   | NM_000084    | NP_000075    | P51795 | CLCN5_HUMAN | al; (By similarity).         | 4   | AGTGCAGTTC    | 0.488 |             |

|   |    |           |                                                  |              |              |        |              |                              |      |               |       |
|---|----|-----------|--------------------------------------------------|--------------|--------------|--------|--------------|------------------------------|------|---------------|-------|
| - | 22 | 3460      | oe.1_Missense_Mt                                 | NM_006306    | NP_006297    | Q14683 | SMC1A_HUMAN  | sp-rich (DA-box).            | 6    | CTCCCCGCCTG   | 0.577 |
| + | 4  | 894       | r.p.V95I NLGN3_u                                 | NM_018977    | NP_061850    | Q9NZ94 | NLGN3_HUMAN  | cellular (Potential).        | 1    | TCATCGTCATCA  | 0.537 |
| - | 3  | 4938      |                                                  | NM_001008537 | NP_001008537 | Q5QGS0 | K2022_HUMAN  |                              | 15   | CGGTCCGTTAT   | 0.453 |
| + | 3  | 299       | jw.3_Missense_Mt                                 | NM_001080425 | NP_001073894 | Q9NWD9 | BEX4_HUMAN   |                              | 1    | AAAACGAAGGA   | 0.532 |
| + | 4  | 731       | rsz.1_Nonsense_Mutation_p.R155* ALG13_uc011mta.1 |              |              | Q9NP73 | ALG13_HUMAN  | OTU.                         | 1    | TGTTTTCGAAAG  | 0.443 |
| - | 5  | 1273      | p.G398E KLHL13_u                                 | NM_033495    | NP_277030    | Q9P2N7 | KLH13_HUMAN  | Keich 2.                     | 2    | GTTTTTCTTTTT  | 0.433 |
| - | 14 | 2498      | p.D811N JODZ1_u                                  | NM_014253    | NP_055068    | Q9UKZ4 | TEN1_HUMAN   | cellular (Potential).        | 23   | CTCACCTCCAT   | 0.443 |
| + | 5  | 418       | ur.2_Missense_Mu                                 | NM_000276    | NP_000267    | Q01968 | OCRL_HUMAN   |                              | 4    | AAATTCGGGTT   | 0.423 |
| + | 14 | 1549      | p.R433S FMR1_uc                                  | NM_002024    | NP_002015    | Q06787 | FMR1_HUMAN   | tion with RANBP9.            | 3    | CAAATCGTACA   | 0.448 |
| - | 3  | 518       | p.A55V CSAG1_u                                   | NM_005367    | NP_005358    | P43365 | MAGAC_HUMAN  |                              | 1    | CGGCAGCAGGC   | 0.622 |
| + | 1  | 927       | _p.E54K PCDH11                                   | NM_032973    | NP_116755    | Q9BZA8 | PC11Y_HUMAN  | r (Potential) Cadherin 1.    | 0    | GAGAAGAAATT   | 0.463 |
| + | 2  | 590       |                                                  | NM_002760    | NP_002751    |        |              |                              | 0    | ATCCCGACGTC   | 0.577 |
| - | 3  | 304       | adf.2_Missense_M                                 | NM_003327    | NP_003318    | P43489 | TNR4_HUMAN   | . Extracellular (Potential). | 0    | TGGCCGTGCAC   | 0.697 |
| + | 9  | 1083      | p.D290E PEX14_u                                  | NM_004565    | NP_004556    | O75381 | PEX14_HUMAN  |                              | 1    | GGGGATGGGCA   | 0.582 |
| - | 78 | 10851     | jd.2_Missense_Mt                                 | NM_005529    | NP_005520    | P98160 | PGBM_HUMAN   | ike C2-type 22.              | 9    | TGTCAGGAGTG   | 0.592 |
| - | 61 | 7974      | jd.2_Missense_Mu                                 | NM_005529    | NP_005520    | P98160 | PGBM_HUMAN   | ike C2-type 12.              | 9    | AGGTCTGCCCT   | 0.632 |
| + | 4  | 391       | p.G85R LCK_uc01                                  | NM_005356    | NP_005347    | P06239 | LCK_HUMAN    | SH3.                         | 6    | AGAAGGGGGAA   | 0.617 |
| - | 14 | 2619      | h.1_RNA EPHA10                                   | NM_001099439 | NP_001092909 | Q5JZY3 | EPHAA_HUMAN  | Potential) Protein kinase.   | 8    | AGGCCGCTCCC   | 0.602 |
| + | 4  | 336       | o01cfy.3_Nonsen                                  | NM_001142588 | NP_001136060 | Q13952 | NFYC_HUMAN   |                              | 3    | TTTGATCAGTTT  | 0.413 |
| + | 2  | 541       | .1_RNA PCSK9_u                                   | NM_174936    | NP_777596    | Q8NBP7 | PCSK9_HUMAN  |                              | 4    | TGAAGGAGGAG   | 0.622 |
| - | 27 | 3017_3018 | Fm1_uc001dob.3_u                                 | NM_001017975 | NP_001017975 | A2PYH4 | HFM1_HUMAN   | SEC63.                       | 0    | CAAAGGGGGGA   | 0.257 |
| - | 10 | 1257      |                                                  | NM_000110    | NP_000101    | Q12882 | DPYD_HUMAN   |                              | 8    | CTCAGGGACAG   | 0.408 |
| + | 3  | 584       | g_Mutation_p.R20                                 | NM_001688    | NP_001679    | P24539 | AT5F1_HUMAN  |                              | 0    | AAAGTTCGTTAT  | 0.438 |
| + | 19 | 1806      | se_Mutation_p.E5                                 | NM_003176    | NP_003167    | Q15431 | SYCP1_HUMAN  | Potential.                   | 1    | CACAGGAAACA   | 0.239 |
| - | 19 | 2691      |                                                  | NM_206996    | NP_996879    | Q6Q759 | SPG17_HUMAN  |                              | 6    | TTTTCTCATTCAT | 0.318 |
| + | 4  | 466       |                                                  |              |              | P26439 | 3BHS2_HUMAN  |                              | 2    | AAGATCAAGCT   | 0.473 |
| + | 76 | 9459      | 3PF10_uc010oyl.1                                 | NM_001039703 | NP_001034792 | A6NDV3 | A6NDV3_HUMAN |                              | 0    | TGCTGGATGAG   | 0.483 |
| + | 13 | 2422      | uc010ozk.1_5'UTF                                 | NM_017940    | NP_060410    | A6NDV3 | A6NDV3_HUMAN |                              | 0    | CCGGACAAGTC   | 0.587 |
| - | 3  | 1161      |                                                  | NM_001122965 | NP_001116437 | Q6XPR3 | RPTN_HUMAN   | Gln-rich.                    | 0    | GTAGTGGGAAC   | 0.473 |
| - | 33 | 4690      | p.H449Y NUP210L                                  | NM_207308    | NP_997191    | Q5VU65 | P210L_HUMAN  |                              | 11   | TGTCATGAAAAA  | 0.428 |
| + | 9  | 2232      | v_uc010pmx.1_3'l                                 | NM_022093    | NP_071376    | Q9UQP3 | TENN_HUMAN   | onnectin type-III 6.         | 9    | AGACAGGTAAG   | 0.557 |
| - | 8  | 1716      | g_Mutation_p.E50                                 | NM_004319    | NP_004310    | O14525 | ASTN1_HUMAN  |                              | 15   | CCATTCGTTCC   | 0.493 |
| + | 18 | 2070      | _p.V538I CAPN2_u                                 | NM_001748    | NP_001739    | P17655 | CAN2_HUMAN   | n IV. EF-hand 2. 2.          | 5    | TCGACGTTGAC   | 0.418 |
| - | 3  | 614       | 47_uc001hrf.2_5'F                                | NM_023007    | NP_075383    | Q9H9V9 | JMJD4_HUMAN  | JmjC.                        | 0    | AGTCGGACGAG   | 0.612 |
| + | 1  | 127       |                                                  | NM_001001914 | NP_001001914 | Q8NGZ4 | OR2G3_HUMAN  | Name=1; (Potential).         | 1    | GGAAACTTCACC  | 0.443 |
| + | 1  | 659       |                                                  | NM_001004690 | NP_001004690 | A3KFT3 | OR2M5_HUMAN  | lasmic (Potential).          | 3    | TGCTCGAGTTAT  | 0.423 |
| + | 21 | 2894      |                                                  | NM_002216    | NP_002207    | P19823 | ITIH2_HUMAN  |                              | 3    | GTTTGGAAACGG  | 0.488 |
| + | 6  | 1417      |                                                  | NM_000314    | NP_000305    | P60484 | PTEN_HUMAN   | atase tensi p.K128fs*47(1    | 2334 | AAAGGACGAA    | 0.413 |
| - | 1  | 3044      |                                                  | NR_002319    |              |        |              |                              | 0    | GGGAGCCCAC    | 0.547 |
| - | 9  | 875       | _Mutation_p.E210                                 | NM_013314    | NP_037446    | Q8WV28 | BLNK_HUMAN   | Pro-rich.                    | 2    | GTTTTCCAGG    | 0.587 |
| + | 1  | 2998      |                                                  | NM_015652    | NP_056467    | Q8N655 | CJ012_HUMAN  |                              | 2    | TGGCAGTGATG   | 0.488 |
| - | 2  | 450_451   | AP19_uc001kmy.2                                  | NM_003061    | NP_003052    | O75093 | SLIT1_HUMAN  | LRR 1.                       | 4    | AGTTCCCTGGA   | 0.619 |
| + | 5  | 2935      | RC1_uc010qqj.1_b                                 | NM_015062    | NP_055877    | Q5VV67 | PPRC1_HUMAN  | Pro-rich.                    | 3    | CACCCCTCCT    | 0.622 |
| - | 1  | 341       | IC2_uc009xxx.2_lr                                | NR_026715    |              |        |              |                              | 0    | GATGCAGTCAA   | 0.592 |
| + | 23 | 3826      | ie_Mutation_p.S27                                | NM_207303    | NP_997186    | Q5VV63 | ATRN1_HUMAN  | cellular (Potential).        | 7    | ATATATCAATTAA | 0.279 |
| - | 7  | 555       | INO9_uc010qvv.1                                  | NM_001012302 | NP_001012302 | A1A5B4 | ANO9_HUMAN   | lasmic (Potential).          | 4    | GTCCTCCCCC    | 0.647 |
| - | 1  | 602       |                                                  | NM_001005161 | NP_001005161 | Q8NGK2 | O52B4_HUMAN  | Name=5; (Potential).         | 0    | AAAACCCATAC   | 0.373 |

rs148081072

rs121909218

|   |    |           |                   |              |              |        |             |                                |            |    |                     |       |
|---|----|-----------|-------------------|--------------|--------------|--------|-------------|--------------------------------|------------|----|---------------------|-------|
| - | 1  | 659       |                   | NM_001003745 | NP_001003745 | P58181 | O10A3_HUMAN | lasmic (Pote                   | p.R220*(1) | 1  | '\GAACTCGAATG'      | 0.448 |
| - | 2  | 1300      | S_uc009yiz.2_Intr | NM_001143816 | NP_001137288 | P23560 | BDNF_HUMAN  |                                |            | 0  | 'CTGCTGCCGTT/       | 0.552 |
| + | 9  | 1689      | n.1_Missense_Mu   | NM_003682    | NP_003673    | Q8WXG6 | MADD_HUMAN  | dDENN.                         |            | 11 | '\ATTCCGCCAAC'      | 0.522 |
| + | 3  | 390       | rik.1_Missense_M  | NM_001004704 | NP_001004704 | Q8NH72 | OR4C6_HUMAN | Name=1; (Potential).           |            | 2  | 'ATCTACTTATTGT      | 0.393 |
| - | 5  | 6119      | IAK_uc001ntk.1_Ir | NM_001620    | NP_001611    | Q09666 | AHNK_HUMAN  |                                |            | 19 | 'ACATCCACATCC'      | 0.502 |
| + | 4  | 526       |                   | NM_199337    | NP_955369    | Q7Z7N9 | T179B_HUMAN |                                |            | 0  | '\ATGCTGAAGTG/      | 0.483 |
| - | 21 | 3553      | l1opz.2_Missense_ | NM_012309    | NP_036441    | Q9UPX8 | SHAN2_HUMAN |                                |            | 5  | '\GCCACCCACGA       | 0.677 |
| - | 7  | 865       |                   | NM_002426    | NP_002417    | P39900 | MMP12_HUMAN |                                |            | 0  | 'GTCAGGATTTGC       | 0.403 |
| - | 24 | 4338      |                   | NM_020693    | NP_065744    | Q8TD84 | DSCL1_HUMAN | III 5. Extracellular (Potentia |            | 8  | 'GGGCTGGTCCG        | 0.642 |
| + | 2  | 690       | uf.2_Missense_Mt  | NM_001716    | NP_001707    | P32302 | CXCR5_HUMAN | ellular (Potential).           |            | 1  | '\AAGGCCATCAC       | 0.577 |
| - | 6  | 2266      | al.2_Missense_ML  | NM_182557    | NP_872363    | Q86UU0 | BCL9L_HUMAN | teraction with CTNNB1 (By      |            | 2  | 'CTGGGGGCCCC        | 0.672 |
| - | 4  | 353       | ibj.1_Missense_Mt | NM_212555    | NP_997720    | Q6UY27 | PATE2_HUMAN |                                |            | 0  | '\ACTATGATCACA      | 0.453 |
| - | 24 | 3376      | l.R1082C NFRKB_   | NM_001143835 | NP_001137307 | Q6P4R8 | NFRKB_HUMAN |                                |            | 3  | '\CAAGCGAAAAG       | 0.552 |
| + | 3  | 191       | C77_uc010sdp.1_I  | NM_032358    | NP_115734    | Q9BR77 | CCD77_HUMAN |                                |            | 1  | '\CTTTACCCCAAC      | 0.363 |
| - | 5  | 807       | n.2_Intron GSG1_I | NM_001080555 | NP_001074024 | Q2KHT4 | GSG1_HUMAN  | ical; (Potential).             |            | 0  | '\CTCACCTGACA'      | 0.567 |
| - | 23 | 3357      | p.E273D ADAMT     | NM_025003    | NP_079279    | P59510 | ATS20_HUMAN | SP type-1 6.                   |            | 19 | 'ACTAGCTTCATG'      | 0.383 |
| - | 21 | 3055      | p.E173K ADAMT     | NM_025003    | NP_079279    | P59510 | ATS20_HUMAN | SP type-1 4.                   |            | 19 | 'AAAATTCATTGC'      | 0.403 |
| + | 13 | 1773      | p.V480M ANO6_u    | NM_001025356 | NP_001020527 | Q4KMQ2 | ANO6_HUMAN  | ellular (Potential).           |            | 2  | '\CTCTCGGTGTTT      | 0.438 |
| - | 2  | 143       | iB7_uc010snz.1_F  | NM_000889    | NP_000880    | P26010 | ITB7_HUMAN  | ellular (Potential).           |            | 8  | '\GGGATCTTGGC'      | 0.562 |
| + | 2  | 466       |                   | NM_021191    | NP_067014    | Q9HD90 | NDF4_HUMAN  |                                |            | 4  | '\AAAATGAGGTG/      | 0.398 |
| + | 1  | 593       |                   | NM_001005243 | NP_001005243 | Q8NGE7 | OR9K2_HUMAN | ellular (Potential).           |            | 2  | '\TCGGGCTGTTG/      | 0.393 |
| + | 1  | 49        |                   | NM_001005518 | NP_001005518 | A6NJZ3 | O6C65_HUMAN | ellular (Potential).           |            | 0  | '\TTTACAGATAACC     | 0.323 |
| - | 17 | 1771_1772 | sxi.3_Missense_M  | NM_032606    | NP_115995    | Q9BXY5 | CAYP2_HUMAN | EF-hand 3.                     |            | 2  | '\ATAAAGGCCTAA      | 0.243 |
| - | 3  | 1664      | p.G507E USP44_I   | NM_001042403 | NP_001035862 | Q9H0E7 | UBP44_HUMAN |                                |            | 3  | '\CTTTTCCACTGC      | 0.393 |
| + | 6  | 824       |                   | NM_198520    | NP_940922    | Q6ZTY8 | CL063_HUMAN |                                |            | 7  | '\TTGCCGAAATT'      | 0.308 |
| + | 12 | 2027      | lzx.2_Nonsense_M  | NM_139319    | NP_647480    | Q8NDX2 | VGLU3_HUMAN | lasmic (Potential).            |            | 3  | '\TTGATGAGGAA'      | 0.438 |
| + | 15 | 1913      |                   | NM_017564    | NP_060034    | Q8WWQ8 | STAB2_HUMAN | lar (Potential). FAS1 2.       |            | 14 | '\CCTTTCTCCAG/      | 0.423 |
| + | 3  | 1958      | p.M479I BTBD11_   | NM_001018072 | NP_001018082 | A6QL63 | BTBDB_HUMAN |                                |            | 3  | '\CAAATGGAATG'      | 0.577 |
| - | 14 | 2543      |                   | NM_015335    | NP_056150    | Q71F56 | MD13L_HUMAN |                                |            | 8  | '\TGAGCGCAGAG'      | 0.443 |
| + | 6  | 518       |                   | NM_207437    | NP_997320    | Q8IVF4 | DYH10_HUMAN | n (By similarity).             |            | 6  | '\TGGGAGTCACA'      | 0.428 |
| - | 8  | 2346_2347 | se_Mutation_p.D6z | NM_178006    | NP_821074    | Q9Y3M8 | STA13_HUMAN | Rho-GAP.                       |            | 4  | '\GAGTCCCAGG/       | 0.465 |
| - | 11 | 2780      | PC4_uc010abw.2_   | NM_016179    | NP_057263    | Q9UBN4 | TRPC4_HUMAN | and ITPR3. Cytoplasmic (P      |            | 6  | '\GTCTATGAAATA      | 0.443 |
| + | 3  | 5613      |                   | NM_207361    | NP_997244    | Q5SZK8 | FREM2_HUMAN | Extracellular (Potential).     |            | 11 | '\AATTGGGCATG'      | 0.343 |
| - | 8  | 1153      |                   | NM_012345    | NP_036477    | Q9UHK0 | NUFP1_HUMAN |                                |            | 0  | '\TGAAAAGACTGC      | 0.448 |
| - | 1  | 743       |                   | NM_001080396 | NP_001073865 | B1AL88 | F155A_HUMAN | Poly-Gln.                      |            | 1  | '\gctgccgctgctgctgc | 0.353 |
| + | 6  | 644       | p.E186K ATP11A_   | NM_015205    | NP_056020    | P98196 | AT11A_HUMAN | lasmic (Potential).            |            | 4  | '\ATGGAGAATCC/      | 0.552 |
| - | 1  | 82        | R5A_uc010tpk.1_!  | NM_080664    | NP_542395    | Q96FN9 | DTD2_HUMAN  |                                |            | 0  | '\AGCCATGGCTT/      | 0.706 |
| - | 3  | 273       | lxae.2_Missense_I | NM_006832    | NP_006823    | Q96AC1 | FERM2_HUMAN |                                |            | 0  | '\TCTTCAGAAGC'      | 0.408 |
| + | 2  | 1732      | mu.2_Missense_M   | NM_015556    | NP_056371    | Q43166 | SI1L1_HUMAN |                                |            | 4  | '\TGGCAGTACTT'      | 0.423 |
| + | 2  | 620       |                   | NR_015340    |              |        |             |                                |            | 2  | '\TCTGGGATCTG'      | 0.672 |
| + | 21 | 3726      | '2_uc001ypc.2_Mi  | NM_022489    | NP_071934    | Q27J81 | INF2_HUMAN  |                                |            | 0  | '\TCTCCGAGGAT'      | 0.687 |
| - | 8  | 1054      | se_Mutation_p.Q2' | NM_002420    | NP_002411    | Q7Z4N2 | TRPM1_HUMAN | ellular (Potential).           |            | 4  | '\GAAGCTGTCCC'      | 0.338 |
| + | 20 | 2440      | LA2G4B_uc010bc    | NM_001114633 | NP_001108105 | P0C869 | PA24B_HUMAN | PLA2c.                         |            | 1  | '\CAGGCCCCACT       | 0.622 |
| - | 15 | 3759      | nse_Mutation_p.L' | NM_173500    | NP_775771    | Q6IQ55 | TTBK2_HUMAN |                                |            | 7  | '\AGAAAAGGTCT       | 0.418 |
| - | 11 | 1726      | 2apj.3_Missense_I | NM_005848    | NP_005839    | Q7Z401 | MYCPP_HUMAN | DENN.                          |            | 4  | '\GAGAGGAACAT/      | 0.413 |
| + | 14 | 1932      | ukf.1_Missense_M  | NM_017691    | NP_060161    | Q8IUZ0 | LRC49_HUMAN |                                |            | 1  | '\TGATTCCATTCT      | 0.368 |
| - | 23 | 3531      | _Missense_Mutatic | NM_006901    | NP_008832    | B2RTY4 | MYO9A_HUMAN |                                |            | 3  | '\GCGGAGCACCT'      | 0.453 |

rs138622461

|   |    |       |                      |              |              |        |              |                                |    |                 |       |
|---|----|-------|----------------------|--------------|--------------|--------|--------------|--------------------------------|----|-----------------|-------|
| + | 2  | 700   | h.1_Missense_Mut     | NM_005545    | NP_005536    | O14498 | ISLR_HUMAN   | LRR 4.                         | 4  | CCCGCGACGCC     | 0.612 |
| + | 8  | 927   | se_Mutation_p.I17:   | NM_003027    | NP_003018    | Q99963 | SH3G3_HUMAN  | on with ARC (By similarity).   | 3  | AGAAATATCAGCT   | 0.463 |
| + | 3  | 675   | AN_uc010upp.1_f      | NM_013227    | NP_037359    | E7EX88 | E7EX88_HUMAN |                                | 3  | CCCTATCAGGAC/   | 0.617 |
| + | 10 | 2648  | 2ckt.2_Missense_f    | NM_021098    | NP_066921    | O95180 | CAC1H_HUMAN  | =S1 of repeat II; (Potential   | 2  | CATCATGATGGC/   | 0.662 |
| + | 35 | 6837  | _p.P892S CACNA       | NM_021098    | NP_066921    | O95180 | CAC1H_HUMAN  | lasmic (Potential).            | 2  | AACCCCTGCG      | 0.721 |
| - | 23 | 8672  | se_Mutation_p.D28:   | NM_001009944 | NP_001009944 | P98161 | PKD1_HUMAN   | ular (Potential). REJ.         | 3  | ACCACGCTACT/    | 0.622 |
| + | 11 | 6782  | l.1_Missense_Mut     | NM_016333    | NP_057417    | Q9UQ35 | SRRM2_HUMAN  | rich. Ser-rich.                | 4  | CAGGCGTTCTG     | 0.542 |
| - | 25 | 2614  | _p.A612T CORO7_      | NM_024535    | NP_078811    | P57737 | CORO7_HUMAN  |                                | 0  | CACAGCCGTGT/    | 0.617 |
| + | 3  | 317   | AT_uc010buh.2_In     | NM_020686    | NP_065737    | P80404 | GABT_HUMAN   |                                | 1  | AAGTCCCAGGG     | 0.478 |
| + | 5  | 481   | uh.2_Missense_M      | NM_020686    | NP_065737    | P80404 | GABT_HUMAN   |                                | 1  | CCCATAGGTAA     | 0.473 |
| - | 1  | 397   |                      | NM_015092    | NP_055907    | Q96Q15 | SMG1_HUMAN   | with SMG8 and SMG9.            | 16 | cgccgctgcTCAGC  | 0.627 |
| - | 4  | 564   | se_Mutation_p.S1:    | NM_001888    | NP_001879    | Q14894 | CRYM_HUMAN   |                                | 0  | TAAAGGAGAAC     | 0.527 |
| + | 6  | 2696  | p.S608L TNRC6A_      | NM_014494    | NP_055309    | Q8NDV7 | TNR6A_HUMAN  | ction with EIF2C1 and EIF:     | 2  | AAACTTCAAGGA    | 0.468 |
| + | 2  | 1570  |                      | NM_006040    | NP_006031    | Q9Y661 | HS3S4_HUMAN  | ional (Potential).             | 2  | CAAGGGGTTCC     | 0.512 |
| - | 10 | 1379  | uc010vct.1_Intron    | NM_003321    | NP_003312    | P49411 | EFTU_HUMAN   |                                | 1  | CTGCCGCAAGA     | 0.547 |
| - | 1  | 165   | R762_hsa-mir-762     | NM_004765    | NP_004756    | Q8WUZO | BCL7C_HUMAN  |                                | 0  | GCTCCGGGTCT     | 0.453 |
| + | 7  | 761   | r.2_RNA C16orf58     | NM_003041    | NP_003032    | P31639 | SC5A2_HUMAN  | ellular (Potential).           | 1  | CAGCCGTGGGA     | 0.662 |
| + | 12 | 1793  | SLC9A5_uc010vji      | NM_004594    | NP_004585    | Q14940 | SL9A5_HUMAN  |                                | 2  | TGGCAGTGGAG     | 0.592 |
| + | 10 | 1401  | nsense_Mutation_p    | NM_018430    | NP_060900    | Q2TAA8 | TXIP1_HUMAN  |                                | 0  | AGAGCGCTGGC     | 0.647 |
| + | 2  | 786   | set.2_Missense_M     | NM_006742    | NP_006733    | P11801 | KPSH1_HUMAN  | rotein kinase.                 | 0  | ATGGCGTCCGC     | 0.587 |
| - | 3  | 228   |                      | NM_001907    | NP_001898    | P40313 | CTRL_HUMAN   | eptidase S1.                   | 0  | GGGCAGCAGTG     | 0.662 |
| + | 5  | 1931  | ewd.2_Missense_      | NM_133458    | NP_597715    | Q8TF47 | ZFP90_HUMAN  | :2H2-type 10.                  | 1  | GAACCCACACT/    | 0.438 |
| + | 3  | 268   | T7_uc010vnj.1_Ir     | NM_001105663 | NP_001099133 | P0C024 | NUDT7_HUMAN  | idix hydrolase.                | 2  | GAAGGGCCCTC/    | 0.418 |
| + | 4  | 1322  | L36_uc010chl.2_Ir    | NM_024731    | NP_079007    | Q8N4N3 | KLH36_HUMAN  | Kelch 2.                       | 2  | TGCCTCCATCG/    | 0.567 |
| - | 19 | 2787  | p.G918S ANKFY1       | NM_016376    | NP_057460    | Q9P2R3 | ANFY1_HUMAN  | ANK 17.                        | 3  | TGAGCCTGCTTC    | 0.438 |
| + | 4  | 520   |                      | NM_000697    | NP_000688    | P18054 | LOX12_HUMAN  | ipoxygenase.                   | 1  | GACCCGTAAGG     | 0.502 |
| + | 13 | 3051  | p.D966N MYOCD_       | NM_153604    | NP_705832    | Q8IZQ8 | MYCD_HUMAN   |                                | 5  | ACATCGATTTCC    | 0.517 |
| - | 1  | 355   |                      | NM_031960    | NP_114166    | Q9BYQ9 | KRA48_HUMAN  | KQRVHEC]- [SPRT]-[STC          | 0  | ctggacacacagcag | 0.204 |
| - | 1  | 457   |                      | NM_033059    | NP_149048    | Q9BYQ6 | KR411_HUMAN  | -[GIKRQVHEL]- [SPTR]-[S'       | 0  | ggatgctgcagctgg | 0.129 |
| - | 13 | 1723  | LL6_uc002loc.2_f     | NM_001130918 | NP_001124390 | Q8N841 | TLL6_HUMAN   |                                | 0  | TTCTTCTCACT/    | 0.527 |
| + | 8  | 1319  | se_Mutation_p.E2     | NM_006151    | NP_006142    | P22079 | PERL_HUMAN   |                                | 2  | ACCAGGAGGTC     | 0.617 |
| + | 1  | 508   | l.D149E BPTF_uc      | NM_182641    | NP_872579    | Q12830 | BPTF_HUMAN   | rich. Asp-rich.                | 4  | gaggaCGGCGAC/   | 0.448 |
| + | 4  | 1088  | wqx.1_Missense_f     | NM_181790    | NP_861455    | Q7Z601 | GP142_HUMAN  | Name=6; (Potential).           | 4  | CCATCACCACAC    | 0.667 |
| - | 9  | 957   | kod.1_Missense_f     | NM_001042388 | NP_001035847 | Q8TF05 | PP4R1_HUMAN  | HEAT 8.                        | 1  | CCATGAAACCC/    | 0.413 |
| + | 37 | 6670  | nsense_Mutation_p.Si | NM_032142    | NP_115518    | E9PF99 | E9PF99_HUMAN |                                | 5  | CTAATTCCTCT/    | 0.328 |
| + | 4  | 1315  |                      | NM_015879    | NP_056963    | O43173 | SIA8C_HUMAN  | ional (Potential).             | 2  | TTGATGGATTTT    | 0.423 |
| + | 8  | 1144  | n_p.E201K SERPI      | NM_001143818 | NP_001137290 | P05120 | PAI2_HUMAN   |                                | 2  | CAGATGAAATTC    | 0.413 |
| + | 3  | 651   | p.R109K CDH7_u       | NM_033646    | NP_387450    | Q9ULB5 | CADH7_HUMAN  | r (Potential). Cadherin 1.     | 4  | CAAGAGACTGG     | 0.498 |
| - | 27 | 3673  | TN_uc010xfb.1_M      | NM_173630    | NP_775901    | Q86VV8 | RTTN_HUMAN   |                                | 8  | TGACAGCAGTC/    | 0.398 |
| + | 23 | 2744  | A6_uc002mgr.1_M      | NM_006702    | NP_006693    | Q8IY17 | PLPL6_HUMAN  | lasmic (Potential).            | 3  | CACCCGTATCG     | 0.662 |
| + | 10 | 1161  | S4_uc002mji.2_M      | NM_024552    | NP_078828    | Q9HA82 | CERS4_HUMAN  | TLC.                           | 1  | CTCTTCCCACCC/   | 0.567 |
| - | 5  | 35849 |                      | NM_024690    | NP_078966    | Q8WXI7 | MUC16_HUMAN  | xtracellular (Potential).      | 57 | CTGAAGAGCTG/    | 0.498 |
| - | 3  | 20990 |                      | NM_024690    | NP_078966    | Q8WXI7 | MUC16_HUMAN  | xtracellular (Potential).      | 57 | ATGTGGAACA/     | 0.463 |
| - | 1  | 9472  |                      | NM_024690    | NP_078966    | Q8WXI7 | MUC16_HUMAN  | xtracellular (Potential).      | 57 | AGGCTCCTCT/     | 0.493 |
| - | 1  | 7184  |                      | NM_024690    | NP_078966    | Q8WXI7 | MUC16_HUMAN  | ch. Extracellular (Potential). | 57 | TGGGGGAAGTG/    | 0.473 |
| - | 8  | 1152  |                      | NM_015719    | NP_056534    | P25940 | COSA3_HUMAN  | nhelical region.               | 10 | TGCCCGGAAGT/    | 0.537 |
| - | 3  | 645   | mwy.3_Missense_      | NM_001127221 | NP_001120693 | O00555 | CAC1A_HUMAN  | =S2 of repeat I; (Potential)   | 2  | ATGGTTCTGTGT/   | 0.478 |

rs147076757



|   |    |           |                   |              |              |        |             |                              |     |               |       |
|---|----|-----------|-------------------|--------------|--------------|--------|-------------|------------------------------|-----|---------------|-------|
| + | 3  | 464       | af_2_Missense_M   | NM_012114    | NP_036246    | P31944 | CASPE_HUMAN |                              | 4   | ACCATGAAAAG   | 0.542 |
| - | 3  | 420       | t_Site ILVBL_uc01 | NM_006844    | NP_006835    | A1L0T0 | ILVBL_HUMAN |                              | 2   | CGCCCGTGACC   | 0.622 |
| + | 8  | 2360      | cc.1_Missense_Mt  | NM_004386    | NP_004377    | O14594 | NCAN_HUMAN  |                              | 4   | TATCCCGGGT    | 0.597 |
| + | 4  | 1702      |                   | NM_031218    | NP_112495    | P35789 | ZNF93_HUMAN | :2H2-type 14.                | 1   | AAAATTCATACTA | 0.358 |
| - | 4  | 1464      | p.N439 ZNF43_uc   | NM_003423    | NP_003414    | P17038 | ZNF43_HUMAN | :2H2-type 10.                | 2   | ATTCTGTTATGTT | 0.383 |
| - | 4  | 1110      | 1_Intron ZNF208_  | NM_007153    | NP_009084    |        |             |                              | 7   | GAAGGCTTTGC   | 0.413 |
| + | 5  | 2103      |                   | NM_144689    | NP_653290    | Q8TAQ5 | ZN420_HUMAN | :2H2-type 18.                | 0   | GCATCTTTCTC   | 0.433 |
| + | 11 | 3705      |                   | NM_015073    | NP_055888    | O60292 | SI1L3_HUMAN |                              | 2   | AGCAGGAAAGC   | 0.622 |
| + | 66 | 10022     | iv.1_Missense_Mt  | NM_000540    | NP_000531    | P21817 | RYR1_HUMAN  |                              | 12  | TGCCCGCCGGC   | 0.642 |
| + | 3  | 219       |                   | NM_001042507 | NP_001035972 | P47929 | LEG7_HUMAN  | Galectin.                    | 0   | AGCAAGGCTCC   | 0.667 |
| + | 3  | 1369      | 2pbp.2_5'Flank C  | NM_012099    | NP_036231    | O15446 | RPA34_HUMAN |                              | 4   | GCAAAAGGGGA   | 0.557 |
| - | 5  | 2086      | ydj.1_Missense_M  | NM_001102657 | NP_001096127 | Q6ZNA1 | ZN836_HUMAN | :2H2-type 13.                | 0   | TTATGAATTGAAA | 0.383 |
| + | 7  | 2811      | _p.E722K NLRP4_   | NM_134444    | NP_604393    | Q96MN2 | NALP4_HUMAN |                              | 15  | TGCTGCGAATAC  | 0.512 |
| + | 31 | 5695      | bp.1_Missense_Mi  | NM_014668    | NP_055483    | Q4ZG55 | GREB1_HUMAN |                              | 1   | GTGCCCGGAC    | 0.647 |
| - | 3  | 360       | _p.E107K HS1BP3   | NM_022460    | NP_071905    | Q53T59 | H1BP3_HUMAN | PX.                          | 1   | CTCTCCCGGA    | 0.562 |
| - | 26 | 7584      |                   | NM_000384    | NP_000375    | P04114 | APOB_HUMAN  |                              | 27  | GGTGTCCTGTAC  | 0.418 |
| + | 3  | 473       |                   | NM_030915    | NP_112177    | Q53QV2 | LBH_HUMAN   |                              | 0   | TCCAGGAGGAT   | 0.567 |
| + | 10 | 1945      | v.2_Nonsense_Mu   | NM_206943    | NP_996826    | Q14766 | LTBP1_HUMAN | alcium-binding p.R649*(1)    | 8   | AGCTATCGATGT  | 0.378 |
| + | 7  | 961       | _p.E112K RASGRF   | NM_170672    | NP_733772    | Q8IV61 | GRP3_HUMAN  | rminal Ras-GEF.              | 5   | GATATGAAAAAC  | 0.443 |
| - | 5  | 955       | -X57_uc002rrg.2_  | NM_198963    | NP_945314    | Q6P158 | DHX57_HUMAN |                              | 3   | ATTGCGGAATC   | 0.343 |
| + | 5  | 738       |                   | NR_003683    |              |        |             |                              | 0   | AAGGAATCGCT   | 0.388 |
| - | 2  | 959       | j.1_Intron CTNNA2 | NM_178839    | NP_849161    | Q86UE6 | LRRT1_HUMAN | Luminal (Potential).         | 5   | GGCGCGGAAG    | 0.582 |
| - | 15 | 2643      | EMA4C_uc002sxt    | NM_017789    | NP_060259    | Q9C0C4 | SEM4C_HUMAN | lasmic (Potential).          | 2   | CCTCGGGGTTG   | 0.652 |
| + | 7  | 1009      | 70_uc002sye.1_Mi  | NM_001079    | NP_001070    | P43403 | ZAP70_HUMAN | terdomain B.                 | 6   | CTGCTCCACA    | 0.706 |
| - | 5  | 739       |                   | NM_004854    | NP_004845    | O43529 | CHSTA_HUMAN | ble). Luminal (Potential).   | 1   | CTTTGGGAGTC   | 0.498 |
| - | 7  | 1049      | se_Mutation_p.H2  | NM_025181    | NP_079457    | Q8WV83 | S35F5_HUMAN |                              | 0   | TGCATGACTTG   | 0.388 |
| - | 26 | 5146      | nl.1_Missense_Mt  | NM_018557    | NP_061027    | Q9NZR2 | LRP1B_HUMAN | ntial). LDL-receptor class B | 50  | AGAAAAGAATTC  | 0.249 |
| + | 18 | 2418      | .2_Missense_Mut   | NM_004522    | NP_004513    | O60282 | KIF5C_HUMAN |                              | 1   | TCCAGGATAAG   | 0.413 |
| + | 6  | 1148      | _p.R194Q GALNT1   | NM_052917    | NP_443149    | Q8IUC8 | GLT13_HUMAN | tial). Catalytic subdomain A | 6   | TCTTCGAGGAG   | 0.423 |
| - | 1  | 470       | sense_Mutation_p. | NM_020711    | NP_065762    | Q8TAM6 | ERMIN_HUMAN |                              | 2   | GTTGAGCAGCA   | 0.423 |
| - | 10 | 1412      | P4_uc010fpb.2_5'l | NM_001935    | NP_001926    | P27487 | DPP4_HUMAN  | ellular (Potential).         | 3   | GTATGGAAGTTC  | 0.393 |
| + | 4  | 539       | .2_Missense_Mut   | NM_138995    | NP_620482    | Q8WXR4 | MYO3B_HUMAN | rotein kinase.               | 19  | AGCAATGATCTC  | 0.493 |
| + | 1  | 134       | zew.1_Missense_I  | NM_021193    | NP_067016    | P35452 | HXD12_HUMAN |                              | 0   | CTACCCGCGGC   | 0.706 |
| - | 46 | 13657     | .K4411T TTN_uc0   | NM_133437    | NP_597681    | Q8WZ42 | TITIN_HUMAN |                              | 153 | TTGAACTTTTCAT | 0.378 |
| + | 11 | 2073      | SFA2_uc010zfo.1_  | NM_001130445 | NP_001123917 | P28290 | SSFA2_HUMAN |                              | 2   | AGCAGCAGTTG   | 0.473 |
| + | 4  | 2269      |                   | NM_194250    | NP_919226    | Q72570 | Z804A_HUMAN |                              | 11  | GAAACAGAAAAG  | 0.323 |
| - | 61 | 11484     | ti.3_Missense_Mt  | NM_018897    | NP_061720    | Q8WXX0 | DYH7_HUMAN  |                              | 12  | TCAGTAACTTATT | 0.383 |
| + | 12 | 5211      | g.1_Missense_Mu   | NM_002374    | NP_002365    | P11137 | MAP2_HUMAN  |                              | 17  | CTCCTGCGACTC  | 0.502 |
| - | 9  | 1370      | se_Mutation_p.P4  | NM_001144889 | NP_001138361 | Q6PIS1 | S23A3_HUMAN | ellular (Potential).         | 0   | GCAGTGGGATG   | 0.552 |
| - | 14 | 2162_2163 | p.G602R PTPRN_    | NM_002846    | NP_002837    | Q16849 | PTPRN_HUMAN | lasmic (Potential).          | 4   | TGTCCCGTGGA   | 0.663 |
| - | 3  | 327       | 'TPRN_uc002via.2  | NM_002846    | NP_002837    | Q16849 | PTPRN_HUMAN | ellular (Potential).         | 4   | TTGGAGAAGTGC  | 0.567 |
| + | 1  | 286       |                   | NM_152614    | NP_689827    | Q53QW1 | CB057_HUMAN |                              | 1   | ACGGCCAGAAG   | 0.532 |
| + | 22 | 2615      | e_Mutation_p.E76  | NM_015575    | NP_056390    | Q6Y7W6 | PERQ2_HUMAN | r-rich. Glu-rich.            | 7   | AGGAAGAACTC   | 0.468 |
| + | 4  | 829       | NL_uc010fyw.2_5'  | NM_194312    | NP_919288    | Q6ZVH7 | ESPNL_HUMAN | ANK 8.                       | 1   | GGGGCCACGG    | 0.657 |
| - | 17 | 2257      | _p.R677C HDLBP_   | NM_203346    | NP_976221    | Q00341 | VIGLN_HUMAN | KH 8.                        | 4   | GGAGCGGATCAC  | 0.587 |
| + | 13 | 1288      | FARP2_uc010zor.   | NM_014808    | NP_055623    | O94887 | FARP2_HUMAN |                              | 3   | CATCCCCGAGC   | 0.478 |
| - | 24 | 4051      | _p.S977F NINL_uc  | NM_025176    | NP_079452    | Q9Y216 | NINL_HUMAN  | Potential.                   | 5   | GGTCGGACTTC   | 0.567 |

rs145338513

|   |    |           |                                                       |              |              |        |              |    |                   |       |                   |
|---|----|-----------|-------------------------------------------------------|--------------|--------------|--------|--------------|----|-------------------|-------|-------------------|
| + | 2  | 91        | tj.1_RNA FRG1B_uc010gdr.1_RNA FRG1B_uc010ztk.1_Intron |              |              |        |              | 0  | AATATCTTGGTA      | 0.333 | rs137871677       |
| + | 1  | 135       |                                                       | NM_153324    | NP_697019    | Q8N688 | DB123_HUMAN  | 0  | TCTTATCCCAGC      | 0.537 |                   |
| + | 8  | 1104      | 2_RNA PABPC1L_                                        | NM_001124756 | NP_001118228 | Q4VXU2 | PAP1L_HUMAN  | 1  | 3TTTTTCTCCCC      | 0.587 |                   |
| + | 2  | 1198      | p.Q381K SEMG2_                                        | NM_003008    | NP_002999    | Q02383 | SEMG2_HUMAN  | 1  | 3AAGAGCAAATA      | 0.388 |                   |
| + | 1  | 986       |                                                       | NM_178457    | NP_848552    | Q5JPB2 | ZN831_HUMAN  | 14 | GGATGCCAAGG       | 0.721 |                   |
| - | 1  | 87        | .GE_uc002yix.2_R                                      | NM_182482    | NP_872288    |        |              | 0  | acgagccacggtgttac | 0     |                   |
| - | 7  | 1031      |                                                       | NM_198996    | NP_945347    | Q6XZB0 | LIP1_HUMAN   | 2  | TCCTAAGAGGTC      | 0.303 |                   |
| - | 1  | 211       |                                                       | NM_181617    | NP_853648    | Q3LI59 | KR212_HUMAN  | 0  | TGGTCGGTAGC       | 0.279 | rs147814118       |
| + | 20 | 1590      | issense_Mutation_                                     | NM_148175    | NP_680480    | Q13356 | PPIL2_HUMAN  | 2  | AGCGAGCAGCA       | 0.612 |                   |
| + | 7  | 1702_1703 | ense_Mutation_p.F                                     | NM_030758    | NP_110385    | Q969R2 | OSBP2_HUMAN  | 2  | GGCCGGGAGC        | 0.609 |                   |
| - | 3  | 497       | 03K PIK3IP1_uc0                                       | NM_052880    | NP_443112    | Q96FE7 | P3IP1_HUMAN  | 1  | GGTACCTGGAC       | 0.736 |                   |
| - | 3  | 486       | aqe.2_Nonsense_                                       | NM_001163857 | NP_001157329 | O43247 | EAN57_HUMAN  | 0  | TGGCTGAGCCC       | 0.622 |                   |
| + | 18 | 4668      | n.3_Nonsense_M                                        | NM_001162501 | NP_001155973 | Q9UPQ9 | TNR6B_HUMAN  | 0  | TGCCATGGAAAG      | 0.413 |                   |
| - | 3  | 317       | yye.1_Missense_M                                      | NM_020831    | NP_065882    | Q969V6 | MKL1_HUMAN   | 5  | GCTCCGATCTC       | 0.473 |                   |
| - | 10 | 5302      | arc.1_Missense_M                                      | NM_014246    | NP_055061    | Q9NYQ6 | CELR1_HUMAN  | 11 | CACCCGCAACC       | 0.587 |                   |
| - | 4  | 720       | p.E26K IL5RA_uc                                       | NM_000564    | NP_000555    | Q01344 | IL5RA_HUMAN  | 1  | TCTTTTCATCAGC     | 0.348 |                   |
| - | 16 | 2769      | vw.2_Missense_M                                       | NM_001001331 | NP_001001331 | Q01814 | AT2B2_HUMAN  | 6  | CAATTCGCTCC       | 0.488 |                   |
| - | 9  | 882       | 3q.1_Missense_Mt                                      | NM_207359    | NP_997242    | Q6ZQY3 | GADL1_HUMAN  | 0  | AGCTCCCAACA       | 0.438 |                   |
| + | 2  | 679_680   | Missense_Mutatio                                      | NM_002468    | NP_002459    | Q99836 | MYD88_HUMAN  | 94 | GATGACCCCTC       | 0.525 |                   |
| + | 12 | 1499      | ikz.3_Missense_M                                      | NM_001042646 | NP_001036111 | Q9UPV9 | TRAK1_HUMAN  | 1  | CGGCTCCAACC       | 0.572 |                   |
| - | 14 | 4030      | al.1_Missense_Mu                                      | NM_024513    | NP_078789    | Q9BQS8 | FYCO1_HUMAN  | 1  | CGTCCGGTGGC       | 0.517 |                   |
| - | 4  | 1671      | ro.3_Intron CSPG                                      | NM_006574    | NP_006565    | O95196 | CSPG5_HUMAN  | 2  | ATGGGGGGAGC       | 0.517 |                   |
| - | 3  | 457       |                                                       | NM_012234    | NP_036366    | Q8N488 | RYBP_HUMAN   | 0  | TGCTTCACTAGC      | 0.368 |                   |
| + | 1  | 695       | BO2_uc011bgj.1_f                                      | NM_002942    | NP_002933    | Q9HCK4 | ROBO2_HUMAN  | 11 | ATGTTCCGGTTG      | 0.373 |                   |
| + | 4  | 784       |                                                       | NM_173824    | NP_776185    | Q5JPI3 | CC038_HUMAN  | 0  | GAATCCTTTTCT      | 0.393 |                   |
| + | 3  | 1130      | rp.1_Missense_Mt                                      | NM_001080448 | NP_001073917 | Q9UF33 | EPHA6_HUMAN  | 16 | CAGGATATGAA       | 0.343 |                   |
| - | 7  | 614       | ihn.1_Missense_M                                      | NM_014429    | NP_055244    | Q86VD1 | MORC1_HUMAN  | 8  | TAAATGGGGAG       | 0.343 |                   |
| + | 9  | 1301      | T3_uc010hug.2_f                                       | NM_031913    | NP_114119    | A0FGR9 | ESYT3_HUMAN  | 0  | GGAACGAAGTG       | 0.582 |                   |
| + | 4  | 580       | p.G45E AGTR1_                                         | NM_031850    | NP_114038    | P30556 | AGTR1_HUMAN  | 0  | TATTTGGAAACAC     | 0.353 |                   |
| - | 6  | 1355      | uc003ewz.2_Mis                                        | NM_000096    | NP_000087    | P00450 | CERU_HUMAN   | 1  | 3CTCCACCGGA       | 0.418 |                   |
| - | 1  | 333       | uc003ewz.2_Mis                                        | NM_000096    | NP_000087    | P00450 | CERU_HUMAN   | 1  | ATAATCCAATG       | 0.353 |                   |
| - | 19 | 2433      | p.E743K ZBBX_u                                        | NM_024687    | NP_078963    | A8MT70 | ZBBX_HUMAN   | 2  | GTAATCTTTTTTC     | 0.328 |                   |
| - | 3  | 319       |                                                       | NM_198505    | NP_940907    | Q4VNC0 | AT135_HUMAN  | 11 | ATTCTTCCCACT      | 0.408 |                   |
| - | 8  | 1079      | 3A3_uc003ftz.1_5'                                     | NM_024524    | NP_078800    | Q9H7F0 | AT133_HUMAN  | 1  | TGCTCCACAGT       | 0.333 |                   |
| - | 3  | 12755     | l1bth.1_Intron MUC                                    | NM_018406    | NP_060876    | Q99102 | MUC4_HUMAN   | 0  | GGTGACAGGAA       | 0.582 |                   |
| - | 3  | 1350      | 732_uc010ibb.1_1r                                     | NM_001137608 | NP_001131080 | B4DXR9 | ZN732_HUMAN  | 0  | CACATTTGTAAGC     | 0.418 |                   |
| - | 3  | 1955      | ron ABCA11P_uc0                                       | NM_133474    | NP_597731    | D9N162 | D9N162_HUMAN | 1  | TGCCACGATCTT      | 0.378 |                   |
| + | 11 | 1639      | G452R FAM193A_                                        | NM_003704    | NP_003695    | P78312 | F193A_HUMAN  | 3  | CAGCCGGAGCC       | 0.502 |                   |
| + | 16 | 1798      | rs.1_Missense_Mu                                      | NM_004787    | NP_004778    | O94813 | SLIT2_HUMAN  | 11 | CACATTCGCCAG      | 0.448 |                   |
| - | 11 | 1866      | iqn.1_Missense_M                                      | NM_145290    | NP_660333    | Q8IWK6 | GP125_HUMAN  | 1  | CTGTTGAATAAA      | 0.488 |                   |
| + | 12 | 2071      | IN7_uc003gvi.3_3'                                     | NM_024677    | NP_078953    |        |              | 0  | CTGCAGCCAAG       | 0.428 |                   |
| - | 2  | 240       | .1_RNA NMU_uc                                         | NM_006681    | NP_006672    | P48645 | NMU_HUMAN    | 0  | TGTAATCCTTGA      | 0.308 |                   |
| - | 6  | 1370      |                                                       | NM_001076    | NP_001067    | P54855 | UDB15_HUMAN  | 0  | TAATTTTCATGAC     | 0.363 |                   |
| + | 5  | 1203      | cam.1_Missense_I                                      | NM_001075    | NP_001066    | P36537 | UDB10_HUMAN  | 5  | GCATTCATTGT       | 0.448 | p.P393S(1)        |
| + | 3  | 962       | p.L141F RUFY3_                                        | NM_014961    | NP_055776    | Q7L099 | RUFY3_HUMAN  | 0  | CTTTTCTCGGAC      | 0.259 |                   |
| + | 5  | 608       | LB_uc003hgu.3_N                                       | NM_000477    | NP_000468    | P02768 | ALBU_HUMAN   | 6  | GAACTCCTTTTC      | 0.353 | Albumin 1.        |
| + | 12 | 1444      | p.Q258H USO1_ur                                       | NM_003715    | NP_003706    | O60763 | USO1_HUMAN   | 3  | TGGCCAGTTATT      | 0.383 | 8. Globular head. |

|   |    |             |                                                 |              |              |        |             |                             |     |                |       |             |
|---|----|-------------|-------------------------------------------------|--------------|--------------|--------|-------------|-----------------------------|-----|----------------|-------|-------------|
| - | 13 | 2312        |                                                 | NM_001042784 | NP_001036249 | Q5M9N0 | CD158_HUMAN | Potential.                  | 6   | GCAGATCCTTCC/  | 0.294 |             |
| - | 5  | 665         |                                                 | NM_174952    | NP_777612    | Q8N412 | CD037_HUMAN |                             | 0   | FATAGTCGTGGG/  | 0.269 | rs147933911 |
| - | 8  | 1011        | _p.G237E AGXT2L                                 | NM_031279    | NP_112569    | Q8TBG4 | AT2L1_HUMAN |                             | 1   | GTGTTTCCCATTC  | 0.468 |             |
| - | 9  | 2573        | 5T4_uc010mw.2_f                                 | NM_022569    | NP_072091    | Q9H3R1 | NDST4_HUMAN | paran sulfate N-sulfotransf | 4   | AACTTCCCTCAA/  | 0.318 |             |
| + | 1  | 3845        |                                                 | NM_024582    | NP_078858    | Q6V0I7 | FAT4_HUMAN  | Extracellular (Potential).  | 18  | CCTATTCCTTTG   | 0.363 |             |
| + | 8  | 7405        | e_Mutation_p.H76                                | NM_024582    | NP_078858    | Q6V0I7 | FAT4_HUMAN  | (Potential). Cadherin 24.   | 18  | AGCATCACCCA/   | 0.453 |             |
| + | 17 | 13949       | _p.S2891L FAT4_u                                | NM_024582    | NP_078858    | Q6V0I7 | FAT4_HUMAN  | lasmic (Potential).         | 18  | AATTTTCAATCCA  | 0.498 |             |
| + | 19 | 3303        | 39_splice TLL1_uc                               | NM_012464    | NP_036596    | O43897 | TLL1_HUMAN  |                             | 7   | ACAGGTCAGCA/   | 0.368 |             |
| + | 12 | 2360        | re.1_Missense_Mu                                | NM_001080477 | NP_001073946 | Q9P273 | TEN3_HUMAN  | ellular (Potential).        | 0   | GTGACGTAGCC/   | 0.517 |             |
| + | 2  | 585         |                                                 | NM_207352    | NP_997235    | Q6ZWL3 | CP4V2_HUMAN |                             | 0   | CTGGGTCGGGC/   | 0.423 |             |
| - | 10 | 8199        |                                                 | NM_005245    | NP_005236    | Q14517 | FAT1_HUMAN  | (Potential). Cadherin 24.   | 12  | AAAGAAAGTGA/   | 0.378 |             |
| + | 2  | 5636        |                                                 | NM_153610    | NP_705838    | Q8N3K9 | CMYA5_HUMAN |                             | 9   | AGTTTTCACTTAT  | 0.333 |             |
| + | 1  | 389         | tron SLC22A4_ucf                                | NM_003059    | NP_003050    | Q9H015 | S22A4_HUMAN | ellular (Potential).        | 0   | CGGCCGCGAGG/   | 0.746 |             |
| + | 1  | 1384        | 03lhf.2_intron PCE                              | NM_018907    | NP_061730    | Q9UN74 | PCDA4_HUMAN | Extracellular (Potential).  | 6   | CGCGCGAGACG/   | 0.617 |             |
| + | 1  | 2321        | 3DHA7_uc003lhq.4                                | NM_018904    | NP_061727    | Q9Y5I0 | PCDAD_HUMAN | XXP 2.[6 X 4 AA repeats c   | 6   | CAGTCCCAGCC/   | 0.567 |             |
| + | 1  | 1511        |                                                 | NM_018930    | NP_061753    | Q9UN67 | PCDBA_HUMAN | Extracellular (Potential).  | 2   | CAATGACAACG/   | 0.587 |             |
| - | 5  | 857         | ense_Mutation_p.S                               | NM_022481    | NP_071926    | Q8WWN8 | ARAP3_HUMAN |                             | 7   | TGGGCGATAAG/   | 0.607 | rs144278581 |
| - | 3  | 331         | .2_5'UTR CCDC6f                                 | NM_015621    | NP_056436    | A6NI79 | CCD69_HUMAN | Potential.                  | 2   | GTTTTCTCTCTC   | 0.502 |             |
| + | 7  | 2110        | rf25_uc003mdr.3_RNA C5orf25_uc003mdv.2_Missense | NM_001003698 | NP_001003698 | Q8NDZ2 | CE025_HUMAN |                             | 0   | AGTCTTTTTC/    | 0.488 |             |
| + | 10 | 3620        | _p.S1077L RREB1_                                | NM_001003698 | NP_001003698 | Q92766 | RREB1_HUMAN |                             | 11  | ATCCTCGGCC/    | 0.627 |             |
| + | 1  | 811_812     |                                                 | NM_030905    | NP_112167    | O76002 | OR2J2_HUMAN | lasmic (Potential).         | 0   | TTCAGAAAGTGT/  | 0.45  |             |
| - | 10 | 1733_1734   | RS_uc011doi.1_R                                 | NM_006295    | NP_006286    | P26640 | SYVC_HUMAN  |                             | 3   | TCCAAGGAGCTC/  | 0.594 |             |
| - | 2  | 467         | se_Mutation_p.S8f                               | NM_016593    | NP_057677    | Q9NYL5 | CP39A_HUMAN |                             | 1   | TTTTGGATTTTA   | 0.323 |             |
| + | 6  | 908         | e_Mutation_p.G23                                | NM_153839    | NP_722581    | Q8IZF7 | GP111_HUMAN | ellular (Potential).        | 1   | AACATTGGAAAA/  | 0.398 |             |
| + | 3  | 732         |                                                 | NM_003221    | NP_003212    | Q92481 | AP2B_HUMAN  |                             | 0   | CAGCGCATGA/    | 0.333 |             |
| - | 6  | 921         |                                                 | NM_152688    | NP_689901    | Q5VWX1 | KHDR2_HUMAN | Pro-rich.                   | 11  | TGCTTCCCGGAC/  | 0.607 |             |
| + | 13 | 2596        | _Missense_Mutati                                | NM_001162529 | NP_001156001 | Q9P2D6 | F135A_HUMAN |                             | 1   | GGAAATCATTGT/  | 0.353 |             |
| - | 56 | 8558        | ht.2_Missense_M                                 | NM_004370    | NP_004361    | Q99715 | COCA1_HUMAN | on (COL2) with 1 imperfecti | 9   | GAGTCCATTGG/   | 0.488 |             |
| - | 1  | 205         | .1_RNA GOPC_uc                                  | NM_002944    | NP_002935    | P08922 | ROS_HUMAN   |                             | 25  | AATGTTCTTCATC/ | 0.383 |             |
| - | 5  | 1614        | bt.1_Missense_M                                 | NM_001010923 | NP_001010923 | Q8N1K5 | THMS1_HUMAN | CABIT 2.                    | 4   | AACCTCCTTCC/   | 0.443 |             |
| + | 10 | 1892        | he.2_Missense_M                                 | NM_020455    | NP_065188    | Q86SQ4 | GP126_HUMAN | ellular (Potential).        | 1   | GGAAGGAAAAA/   | 0.393 |             |
| + | 29 | 5975        | l TIAM2_uc011efl.                               | NM_012454    | NP_036586    | Q8IVF5 | TIAM2_HUMAN |                             | 4   | ACATCCTGAGC/   | 0.537 |             |
| + | 12 | 1767        | wc.1_Missense_M                                 | NM_001040001 | NP_001035090 | P55196 | AFAD_HUMAN  |                             | 5   | TAGTGGGACAG/   | 0.413 |             |
| - | 7  | 1678        | LL2_uc003ski.3_E                                | NM_182924    | NP_891554    | Q8IY33 | MILK2_HUMAN |                             | 1   | CGAAGGGAGGC/   | 0.627 | rs146347352 |
| + | 17 | 2432        | _Mutation_p.T393                                | NM_031449    | NP_113637    | Q8NF64 | ZMIZ2_HUMAN | Pro-rich.                   | 5   | CCCAACCCTTG/   | 0.632 |             |
| - | 1  | 908         |                                                 | NM_033224    | NP_150093    | Q96QR8 | PURB_HUMAN  |                             | 0   | GCCGCCGCTGC/   | 0.587 |             |
| + | 54 | 14090_14093 | CA13_uc010kyt.1_                                | NM_152701    | NP_689914    | Q86UQ4 | ABCAD_HUMAN |                             | 10  | TACTCTCCAAG/   | 0.391 |             |
| - | 6  | 626         | e_Mutation_p.L17f                               | NM_006213    | NP_006204    | Q16816 | PHKG1_HUMAN | rotein kinase.              | 1   | ATGTTGAGTTTG/  | 0.527 |             |
| + | 5  | 1255        | an.2_Missense_M                                 | NM_003388    | NP_003379    | Q9UDT6 | CLIP2_HUMAN |                             | 3   | TGTCAGCACTG/   | 0.632 |             |
| - | 10 | 13870       | S4527R PCLO_ucf                                 | NM_033026    | NP_149015    | Q9Y6V0 | PCLO_HUMAN  |                             | 7   | TCTCCACTATGT/  | 0.378 |             |
| + | 9  | 1090        | u.2_Missense_Mu                                 | NM_021151    | NP_066974    | Q9UKG9 | OCTC_HUMAN  |                             | 3   | ATAGCAGTCCAC/  | 0.353 |             |
| + | 4  | 1252        | ve.1_Missense_M                                 | NM_173564    | NP_775835    | Q6ZVC0 | CG051_HUMAN | Pro-rich.                   | 1   | CCAAGGAGCCA/   | 0.687 |             |
| + | 3  | 6600        | C17_uc010lho.1_F                                | NM_001040105 | NP_001035194 | Q685J3 | MUC17_HUMAN | ch.[59 X approximate tand   | 27  | TTCACAACACT/   | 0.483 | rs147644870 |
| + | 21 | 4123        | i30_splice MET_uc                               | NM_000245    | NP_000236    | P08581 | MET_HUMAN   |                             | 159 | GAAACAGATATG/  | 0.423 |             |
| - | 8  | 2538        | M8_uc003vlt.2_M                                 | NM_000845    | NP_000836    | O00222 | GRM8_HUMAN  | ellular (Potential).        | 23  | AATGTCACACT/   | 0.468 |             |
| + | 3  | 663         |                                                 | NM_020299    | NP_064695    | O60218 | AK1BA_HUMAN |                             | 5   | CACAGGGATTC/   | 0.507 | rs146306673 |
| + | 15 | 4802        | wem.2_Missense_                                 | NM_005435    | NP_005426    | Q12774 | ARHG5_HUMAN | SH3.                        | 2   | GTTTTCTGTG/    | 0.572 |             |

|   |    |      |                   |              |              |        |             |     |                |       |             |
|---|----|------|-------------------|--------------|--------------|--------|-------------|-----|----------------|-------|-------------|
| - | 3  | 915  | vhm.2_Missense_I  | NM_024711    | NP_078987    | Q6P9H5 | GIMA6_HUMAN | 3   | 'CCTTCCGGGTG,  | 0.622 |             |
| - | 18 | 2362 |                   | NM_001010906 | NP_001010906 | Q68CJ6 | SLIP_HUMAN  | 2   | 'CATCCCCCTGG   | 0.512 |             |
| + | 4  | 3992 | 1_uc011ldy.1_Intr | NM_006269    | NP_006260    | P56715 | RP1_HUMAN   | 12  | 'TTTTTCTAGTC   | 0.408 |             |
| + | 2  | 467  | n_p.A46V GRHL2_   | NM_024915    | NP_079191    | Q6ISB3 | GRHL2_HUMAN | 3   | 'GACAGCAGCCA'  | 0.547 |             |
| + | 1  | 209  |                   | NM_024410    | NP_077721    | Q14990 | ODFP1_HUMAN | 2   | 'CACACGGTGCC'  | 0.507 | rs117958007 |
| + | 1  | 345  |                   | NM_003301    | NP_003292    | P34981 | TRFR_HUMAN  | 3   | 'GAATTAATGCATC | 0.463 |             |
| + | 16 | 1825 |                   | NM_022045    | NP_071328    | Q96DY7 | MTBP_HUMAN  | 3   | 'AGGGTCCTCGG   | 0.398 |             |
| + | 10 | 2457 |                   | NM_003129    | NP_003120    | Q14534 | ERG1_HUMAN  | 2   | 'CTTTCTGTGTAA' | 0.388 |             |
| + | 1  | 271  |                   | NM_002170    | NP_002161    | P32881 | IFNA8_HUMAN | 0   | 'TCCTCCATGAG,  | 0.473 |             |
| - | 6  | 1225 | se_Mutation_p.A2z | NM_005476    | NP_005467    | Q9Y223 | GLCNE_HUMAN | 0   | 'TGTCAGCATCC'  | 0.393 |             |
| + | 1  | 474  |                   | NM_152577    | NP_689790    | Q8N7E2 | ZN645_HUMAN | 2   | 'AGCTCGAAAAC   | 0.448 |             |
| - | 3  | 4938 |                   | NM_001008537 | NP_001008537 | Q5QGS0 | K2022_HUMAN | 15  | 'CGGTCGGTTAT   | 0.453 |             |
| - | 5  | 1273 | p.G398E KLHL13_   | NM_033495    | NP_277030    | Q9P2N7 | KLH13_HUMAN | 2   | 'GTTTTCTTTTT'  | 0.433 |             |
| + | 5  | 418  | ur.2_Missense_Mu  | NM_000276    | NP_000267    | Q01968 | OCRL_HUMAN  | 4   | 'AAATTCGGGTT'  | 0.423 |             |
| + | 1  | 927  | _p.E54K PCDH11'   | NM_032973    | NP_116755    | Q9BZA8 | PC11Y_HUMAN | 0   | 'GAGAAGAAATT'  | 0.463 |             |
| - | 4  | 389  | r_p.R78L KIAA17E  | NM_001080484 | NP_001073953 | Q9C0B2 | K1751_HUMAN | 1   | 'TCTGCCGCAGG   | 0.502 |             |
| - | 4  | 1018 | ad.1_Missense_Iv  | NM_024980    | NP_079256    | Q5UAW9 | GP157_HUMAN | 0   | 'AGAGAGAGAAG,  | 0.607 |             |
| + | 16 | 1818 | KA_uc010obw.1_A   | NM_004070    | NP_004061    | P51800 | CLCKA_HUMAN | 1   | 'AGATATCCCCTG' | 0.557 |             |
| - | 20 | 3350 | .E752K EIF4G3_u   | NM_003760    | NP_003751    | O43432 | IF4G3_HUMAN | 1   | 'ACCTTCGTCCA'  | 0.448 |             |
| + | 4  | 768  | ib.2_Missense_Mt  | NM_032264    | NP_115640    | Q9H094 | NBPF3_HUMAN | 2   | 'TTGCAGAGGAG   | 0.552 |             |
| + | 2  | 344  | RHD_uc001bkb.2_   | NM_016124    | NP_057208    | Q02161 | RHD_HUMAN   | 1   | 'TGGACGGCTTC'  | 0.577 |             |
| - | 11 | 1079 | o.F27Y UBXN11_u   | NM_183008    | NP_892120    | Q5T124 | UBX11_HUMAN | 1   | 'AGGGAAGAAG    | 0.582 |             |
| + | 20 | 6984 | _p.A1050V ARID1v  | NM_006015    | NP_006006    | O14497 | ARI1A_HUMAN | 142 | 'CCTTGCCGCCA'  | 0.642 |             |
| + | 8  | 1440 | _p.A266V HCRTR1   | NM_001525    | NP_001516    | O43613 | OX1R_HUMAN  | 1   | 'CAGCGCTGCCA   | 0.592 |             |
| + | 2  | 288  | r_p.R41C ZSCAN2   | NM_145238    | NP_660281    | P17040 | ZSC20_HUMAN | 4   | 'AGGACCGTGGC   | 0.597 |             |
| - | 64 | 9804 | m.1_Missense_Mt   | NM_052896    | NP_443128    | Q7Z408 | CSMD2_HUMAN | 12  | 'CTCCCGGCAG    | 0.502 | rs149656829 |
| - | 55 | 8419 | m.1_Missense_Mt   | NM_052896    | NP_443128    | Q7Z408 | CSMD2_HUMAN | 12  | 'GTACCGCACC,   | 0.597 | rs149704396 |
| - | 9  | 1231 | m.1_Missense_M    | NM_052896    | NP_443128    | Q7Z408 | CSMD2_HUMAN | 12  | 'CACCTCGGCAG,  | 0.632 |             |
| - | 2  | 567  |                   | NM_152374    | NP_689587    | Q8TAB5 | CA216_HUMAN | 1   | 'TTGGAGCTCGG   | 0.567 |             |
| - | 6  | 1692 | 4_uc001cdm.2_Mi   | NM_003819    | NP_003810    | Q13310 | PABP4_HUMAN | 0   | 'GTGCACGGCCT'  | 0.398 |             |
| + | 4  | 599  | _p.R102Q ZNF642   | NM_198494    | NP_940896    | Q49AA0 | ZN642_HUMAN | 0   | 'ATACCGAGAGG'  | 0.458 | rs145832267 |
| - | 4  | 586  | c001cnh.2_Misser  | NM_012222    | NP_036354    | Q9UIF7 | MUTYH_HUMAN | 0   | 'ATATGCCCGCC'  | 0.632 |             |
| + | 6  | 1127 | 5'Flank MUTYH_u   | NM_025077    | NP_079353    | Q96GM8 | TOE1_HUMAN  | 1   | 'TAATCCGAGCC'  | 0.552 |             |
| + | 14 | 3698 | cp.2_Missense_M   | NM_004799    | NP_004790    | O95405 | ZFYV9_HUMAN | 8   | 'GTGTGTACAG'   | 0.423 |             |
| - | 3  | 438  |                   | NM_023077    | NP_075565    | Q96BR5 | SELR1_HUMAN | 0   | 'TGGCCTTTCCC,  | 0.537 |             |
| - | 3  | 986  |                   | NM_147193    | NP_671726    | Q8NBF1 | GLIS1_HUMAN | 1   | 'CCTTCCGGCAG   | 0.657 |             |
| - | 3  | 383  | r_p.E44K C8B_ucC  | NM_000066    | NP_000057    | P07358 | CO8B_HUMAN  | 4   | 'GACTTCCTTGTC  | 0.498 |             |
| + | 12 | 1845 | opc.1_Missense_M  | NM_014787    | NP_055602    | O75061 | AUX1_HUMAN  | 3   | 'CACCACGCCGC   | 0.537 |             |
| + | 16 | 1775 | C7_uc009wbg.2_I   | NM_020794    | NP_065845    | Q96NW7 | LRRC7_HUMAN | 14  | 'TAAATCTGTTC'  | 0.338 |             |
| - | 11 | 1844 | 73_uc001dgi.3_Mi  | NM_001002912 | NP_001002912 | Q5RHP9 | CA173_HUMAN | 5   | 'TCTCTTTTTCAG  | 0.403 |             |
| + | 6  | 919  | ls.1_Missense_Mt  | NM_001285    | NP_001276    | A8K714 | CLCA1_HUMAN | 1   | 'AGCAAATCAA'   | 0.373 |             |
| + | 9  | 1380 | dly.2_Nonsense_I  | NM_016009    | NP_057093    | Q9Y371 | SHLB1_HUMAN | 0   | 'GAAACCAGAAG   | 0.388 |             |
| - | 15 | 1954 | RHGAP29_uc001v    | NM_004815    | NP_004806    | Q52LW3 | RHG29_HUMAN | 11  | 'TATAAAGGAAGC  | 0.358 |             |
| + | 4  | 263  | na.1_Missense_Mi  | NM_001040033 | NP_001035122 | P19397 | CD53_HUMAN  | 0   | 'CTTTGGGATCT'  | 0.483 |             |
| + | 23 | 2095 | se_Mutation_p.G6z | NM_003176    | NP_003167    | Q15431 | SYCP1_HUMAN | 1   | 'AAAAGGTACAG'  | 0.254 |             |
| - | 11 | 1315 | nu.1_Missense_M   | NM_001232    | NP_001223    | O14958 | CASQ2_HUMAN | 1   | 'AAGATCGTCAT'  | 0.403 |             |
| - | 25 | 3982 | 4DIP_uc001elm.3   | NM_014644    | NP_055459    | Q5VU43 | MYOME_HUMAN | 5   | 'CTCCTGGAGAT'  | 0.507 |             |

|   |    |       |                    |              |              |        |              |                               |    |                 |       |
|---|----|-------|--------------------|--------------|--------------|--------|--------------|-------------------------------|----|-----------------|-------|
| - | 3  | 474   | uc001eln.3_Mist    | NM_014644    | NP_055459    | Q5VU43 | MYOME_HUMAN  |                               | 5  | CCTTTTCACCAC    | 0.433 |
| + | 29 | 3792  | IO_uc010oyl.1_Intr | NM_001039703 | NP_001034792 | A6NDV3 | A6NDV3_HUMAN |                               | 0  | ACCCACCATGCA    | 0.453 |
| + | 76 | 9445  | 3PF10_uc010oyl.1   | NM_001039703 | NP_001034792 | A6NDV3 | A6NDV3_HUMAN |                               | 0  | GCTCAGCAGGG     | 0.463 |
| - | 9  | 1214  | R276Q LASS2_u      | NM_181746    | NP_859530    | Q96G23 | CERS2_HUMAN  | Helical; (Potential).         | 0  | CCAGTCGGGTG     | 0.512 |
| + | 2  | 1046  |                    | NM_001025231 | NP_001020402 | Q5T749 | KPRP_HUMAN   | Pro-rich.                     | 5  | AGATTTCTCTCC    | 0.632 |
| - | 4  | 472   | A6_uc001fbw.1_5'   | NM_002962    | NP_002953    | P33763 | S10A5_HUMAN  | high affinity (Potential).    | 0  | CTGGTCGCTGT     | 0.547 |
| + | 4  | 1026  | HCN3_uc010pfz.     | NM_020897    | NP_065948    | Q9P1Z3 | HCN3_HUMAN   | Segment S6; (Potential).      | 2  | FGCTACGCCATG    | 0.607 |
| - | 6  | 1103  | _3_uc009wsn.2_In   | NM_052939    | NP_443171    | Q96P31 | FCRL3_HUMAN  | cellular (Potential).         | 4  | TCCTTTTTTTGAT   | 0.547 |
| + | 12 | 2169  | TP1A4_uc001fvq.2   | NM_144699    | NP_653300    | Q13733 | AT1A4_HUMAN  | lasmic (Potential).           | 4  | TTCTGCTTCTTG    | 0.468 |
| - | 6  | 1046  | 244_uc009wtp.2_F   | NM_016382    | NP_057466    | Q9BZW8 | CD244_HUMAN  | lasmic (Potential).           | 1  | TCCAGGAAAAAG    | 0.502 |
| - | 12 | 2250  | p.G481E ARHGAF     | NM_001025598 | NP_001020769 | Q7Z6I6 | RHG30_HUMAN  |                               | 3  | CCCTCTCCCTCC    | 0.587 |
| + | 7  | 845   | np.A221T NIT1_     | NM_005600    | NP_005591    | Q86X76 | NIT1_HUMAN   | N hydrolase.                  | 0  | CAGCAGCACAG     | 0.572 |
| - | 2  | 220   | wux.1_Missense_I   | NM_178550    | NP_848645    | Q86UF4 | CA110_HUMAN  | Potential.                    | 0  | TCCAATCAAA      | 0.433 |
| + | 4  | 551   | K2_uc010plb.1_Inl  | NM_012474    | NP_036606    | Q9BZX2 | UCK2_HUMAN   |                               | 1  | GAGACAGTTACT    | 0.547 |
| + | 6  | 977   | jeq.2_Missense_M   | NM_003953    | NP_003944    | O95297 | MPZL1_HUMAN  | lasmic (Potential).           | 2  | AGTCAGAGTCT     | 0.443 |
| - | 7  | 1179  | nse_Mutation_p.K:  | NM_000655    | NP_000646    | P14151 | LYAM1_HUMAN  | cellular (Potential).         | 0  | ACCTCTTAATC     | 0.393 |
| - | 13 | 1918  | YL3_uc001ggt.2_M   | NM_181093    | NP_851607    | Q8IZE3 | PACE1_HUMAN  | action with EZR.              | 2  | GGGCTCGCAGT     | 0.473 |
| + | 9  | 1572  | i_Mutation_p.G47E  | NM_002021    | NP_002012    | Q01740 | FMO1_HUMAN   |                               | 1  | CCCAGGAAAAAT    | 0.507 |
| - | 22 | 3130  | vwe.2_Missense_I   | NM_178527    | NP_848622    | Q5TAH2 | S9A11_HUMAN  | cNMP.                         | 2  | GATTCCTGTGT     | 0.303 |
| + | 8  | 1565  | lg.2_Nonsense_Mi   | NM_021165    | NP_066988    | Q9C0B6 | FAM5B_HUMAN  |                               | 6  | CTGGTGGAACC     | 0.512 |
| + | 7  | 477   | rf49_uc001glv.1_F  | NM_032126    | NP_115502    | Q5T0J7 | CA049_HUMAN  |                               | 0  | AAAGGAGCAGC     | 0.557 |
| + | 16 | 1712  | _p.E317K C1orf12   | NM_144696    | NP_653297    | Q5T1B0 | AXDN1_HUMAN  |                               | 0  | AAGAAGAGTTT     | 0.368 |
| - | 2  | 300   | nv.1_Missense_M    | NM_002928    | NP_002919    | O15492 | RGS16_HUMAN  |                               | 1  | TCTTGCTGTGT     | 0.537 |
| + | 71 | 11181 |                    | NM_031935    | NP_114141    | Q96RW7 | HMCN1_HUMAN  | like C2-type 35.              | 23 | CCCCACCTGTAA    | 0.413 |
| + | 11 | 1793  |                    | NM_000186    | NP_000177    | P08603 | CFAH_HUMAN   | Sushi 9.                      | 6  | aatgccagaactaaa | 0.249 |
| + | 2  | 205   | R2_uc001gtr.1_In   | NM_005666    | NP_005657    | P36980 | FHR2_HUMAN   | Sushi 1.                      | 3  | CATTTTCCAAG     | 0.348 |
| + | 8  | 1276  |                    | NM_030787    | NP_110414    | Q9BXR6 | FHR5_HUMAN   | Sushi 6.                      | 2  | TGTAGAAAAAAG    | 0.348 |
| + | 12 | 4160  | se_Mutation_p.S1:  | NM_201253    | NP_957705    | P82279 | CRUM1_HUMAN  | cellular (Potential).         | 9  | TGATCTCCGACA    | 0.428 |
| - | 29 | 4657  | qv.1_Missense_Mi   | NM_002646    | NP_002637    | O00750 | P3C2B_HUMAN  | PX.                           | 7  | TCTCTCGCATC     | 0.532 |
| - | 2  | 1032  |                    | NM_173854    | NP_776253    | Q8IVJ1 | S41A1_HUMAN  |                               | 2  | GCCCCGAGACT     | 0.652 |
| - | 10 | 1663  | MB3_uc001hhh.2_I   | NM_001017402 | NP_001017402 | Q13751 | LAMB3_HUMAN  | inin EGF-like 3.              | 6  | CTGCGGGTTGG     | 0.652 |
| - | 6  | 926   | lpte.1_Missense_I  | NM_018252    | NP_060722    | Q9H813 | TM206_HUMAN  | cellular (Potential).         | 1  | CTTCCCGCCCA     | 0.562 |
| + | 7  | 694   | ATA17_uc001hli.2   | NM_138796    | NP_620151    | Q96L03 | SPT17_HUMAN  |                               | 1  | AAGCGCCCGTT     | 0.408 |
| - | 6  | 395   | _uc010pvd.1_Intr   | NM_002533    | NP_002524    | O15381 | NVL_HUMAN    |                               | 2  | FCATGTGATTTGC   | 0.353 |
| - | 9  | 1304  | 130331_uc010pyc    | NM_021186    | NP_067009    | Q12836 | ZP4_HUMAN    | acellular (Potential).        | 3  | GTCCCTGAGG      | 0.532 |
| + | 12 | 2875  | _p.S430L KIF26B_   | NM_018012    | NP_060482    | Q2KJY2 | KI26B_HUMAN  |                               | 3  | CAGCTCGTCCG     | 0.652 |
| + | 3  | 893   | o.3_Missense_Mu    | NM_152609    | NP_689822    | Q6PJW8 | CNST_HUMAN   |                               | 0  | GCAGTCTCTGT     | 0.453 |
| - | 32 | 6364  | TF1_uc009xgs.1_    | NM_015446    | NP_056261    | Q8WYP5 | ELYS_HUMAN   | lear localization (By similar | 7  | GGAGAAAAATAA    | 0.433 |
| + | 16 | 1687  | rs.1_Missense_Mu   | NM_002627    | NP_002618    | Q01813 | K6PP_HUMAN   |                               | 3  | GCATCGGGGCA     | 0.642 |
| + | 13 | 1658  |                    | NM_002216    | NP_002207    | P19823 | ITIH2_HUMAN  |                               | 3  | GCTCCGGAATG     | 0.408 |
| - | 8  | 2208  |                    | NM_001010924 | NP_001010924 | Q5VUB5 | F1711_HUMAN  | lasmic (Potential).           | 4  | TACTTCCGTTCC    | 0.532 |
| - | 55 | 8723  | UBN_uc009xjr.1_I   | NM_001081    | NP_001072    | O60494 | CUBN_HUMAN   | CUB 21.                       | 19 | GATAACGGGACA    | 0.552 |
| - | 43 | 6540  |                    | NM_001081    | NP_001072    | O60494 | CUBN_HUMAN   | CUB 15.                       | 19 | GTGGAGAACAC     | 0.383 |
| - | 1  | 818   |                    | NM_001034842 | NP_001030014 | Q3KNS1 | PTH3_HUMAN   |                               | 4  | CGCGCGTCCA      | 0.627 |
| + | 7  | 767   |                    | NM_052997    | NP_443723    | Q9BXX3 | AN30A_HUMAN  |                               | 9  | TGCAGGAACAC     | 0.348 |
| + | 7  | 860   |                    | NM_052997    | NP_443723    | Q9BXX3 | AN30A_HUMAN  |                               | 9  | CTTGGTGAAAA     | 0.502 |
| + | 15 | 1949  | PRKG1_uc009xow     | NM_001098512 | NP_001091982 | Q13976 | KGP1_HUMAN   | rotein kinase.                | 6  | GCAAAAATGC      | 0.313 |

rs140492850

rs150488625



|   |    |           |                   |              |              |        |             |                               |    |              |       |             |
|---|----|-----------|-------------------|--------------|--------------|--------|-------------|-------------------------------|----|--------------|-------|-------------|
| + | 18 | 2460      | sj_1_Missense_Mu  | NM_001080512 | NP_001073981 | Q9H694 | BICC1_HUMAN |                               | 4  | CGAAATGGAAT  | 0.458 |             |
| + | 3  | 772       | ε_Mutation_p.S19  | NM_032578    | NP_115967    | Q86TC9 | MYPN_HUMAN  | action with CARP.             | 5  | AAAACAGCTCCA | 0.448 |             |
| + | 7  | 1220      | ow_1_Missense_M   | NM_004728    | NP_004719    | Q9NR30 | DDX21_HUMAN | ase ATP-binding.              | 3  | TGCAACTTGCC  | 0.368 |             |
| + | 25 | 3447      | p.V640M CDH23_    | NM_022124    | NP_071407    | Q9H251 | CAD23_HUMAN | Extracellular (Potential).    | 11 | ACGACGTGGGC  | 0.657 |             |
| + | 6  | 944       | STAMBPL1_uc001    | NM_020799    | NP_065850    | Q96FJ0 | STALP_HUMAN |                               | 1  | FAGAATCGGAGC | 0.443 | rs148096389 |
| - | 4  | 649       | εense_Mutation_p. | NM_000770    | NP_000761    | P10632 | CP2C8_HUMAN |                               | 0  | ATCGTTTCTGG  | 0.388 |             |
| - | 3  | 688       | kmp_2_Missense_   | NM_152309    | NP_689522    | Q6ZUJ8 | BCAP_HUMAN  | DBB.                          | 5  | CACAGCGAATG  | 0.547 |             |
| - | 27 | 3026      |                   | NM_003061    | NP_003052    | O75093 | SLIT1_HUMAN |                               | 4  | CACACTTGGCC  | 0.542 |             |
| + | 14 | 2260      | _43_uc010qpu.1_l  | NM_017893    | NP_060363    | Q9NTN9 | SEM4G_HUMAN | Potential). Ig-like C2-type.  | 1  | TTACAGATGCA  | 0.627 |             |
| - | 6  | 1917      | .2_Missense_Mute  | NM_013274    | NP_037406    | Q9UGP5 | DPOLL_HUMAN |                               | 0  | GTTCCAGGAAG  | 0.572 |             |
| + | 25 | 3838      |                   | NM_014976    | NP_055791    | Q14690 | RRP5_HUMAN  | S1 motif 11.                  | 7  | CTTCCCCTTTC  | 0.557 |             |
| - | 4  | 467       | εe_Mutation_p.T13 | NM_024928    | NP_079204    | Q9H668 | STN1_HUMAN  | OB.                           | 1  | GGATCGTGCC   | 0.458 |             |
| + | 4  | 4130      | εe_Mutation_p.S12 | NM_206862    | NP_996744    | O95359 | TACC2_HUMAN |                               | 10 | TGTTTCTCTGC  | 0.592 |             |
| - | 3  | 1405      | _p.V298I CHST15   | NM_015892    | NP_056976    | Q7LFX5 | CHSTF_HUMAN | ienal (Potential).            | 1  | GCGGACGATTC  | 0.547 |             |
| + | 14 | 1916      |                   | NM_198075    | NP_932341    | Q8IYG6 | LRC56_HUMAN |                               | 1  | CGACAGACCTG  | 0.687 |             |
| + | 20 | 2240      | _p.E620K EPS8L2   | NM_022772    | NP_073609    | Q9H6S3 | ES8L2_HUMAN |                               | 1  | AGGAGGAGCTG  | 0.677 |             |
| + | 44 | 14641     |                   | NM_002457    | NP_002448    | Q02817 | MUC2_HUMAN  | VWFC 1.                       | 2  | CCACGGAGGTC  | 0.622 |             |
| + | 39 | 4906      | ltb_2_Missense_Mi | NM_017511    | NP_059981    | Q9HC84 | MUC5B_HUMAN | VWFD 3.                       | 0  | GGACCTTCCGC  | 0.652 |             |
| + | 3  | 426       | _p.V70M SLC22A    | NM_183233    | NP_899056    | Q96B11 | S22A1_HUMAN | ical; (Potential).            | 3  | TCGGGGTGCTG  | 0.637 |             |
| - | 1  | 543       | .1_Intron HBE1_uc | NM_033180    | NP_149420    | Q9Y5P1 | O51B2_HUMAN | ællular (Potential).          | 3  | AAAATGAAAAAA | 0.398 |             |
| - | 1  | 519       |                   | NM_153444    | NP_703145    | Q8WZ92 | OR5P2_HUMAN | ællular (Potential).          | 5  | CAGAAAAAATG  | 0.383 |             |
| + | 6  | 689       | sk_1_Nonsense_M   | NM_018222    | NP_060692    | Q9NVD7 | PARVA_HUMAN |                               | 3  | CCATCCAAGTG  | 0.498 |             |
| - | 7  | 946       | in_p.P140L PTPN   | NM_006906    | NP_008837    | P54829 | PTN5_HUMAN  |                               | 2  | TGGGTGGCTCT  | 0.632 |             |
| - | 16 | 2715      |                   | NM_031217    | NP_112494    | Q8NI77 | KI18A_HUMAN |                               | 2  | TACGTCTGCA   | 0.318 |             |
| + | 10 | 1835      | _p.L514F EXT2_uc  | NM_207122    | NP_997005    | Q93063 | EXT2_HUMAN  | ienal (Potential).            | 5  | ATTCTCTCTGG  | 0.383 |             |
| - | 5  | 854       | 4BRA1_uc001ncv.   | NM_017749    | NP_060219    | Q9C0C7 | AMRA1_HUMAN | WD 3.                         | 3  | GACTCCAGTCC  | 0.567 |             |
| - | 9  | 861_862   |                   | NM_004308    | NP_004299    | Q07960 | RHG01_HUMAN | Rho-GAP.                      | 1  | AGTCTCCCTGAC | 0.653 |             |
| + | 7  | 674       | 2_uc001ndg.3_RN   | NM_000506    | NP_000497    | P00734 | THR_B_HUMAN |                               | 3  | CATTGGAGCAG  | 0.607 |             |
| - | 30 | 4725      | uc001ndl.2_RNA    | NM_002334    | NP_002325    | O75096 | LRP4_HUMAN  | ntial). LDL-receptor class B  | 4  | CTGCGGGTAT   | 0.498 |             |
| + | 6  | 941       | 32_uc001nee.2_In  | NM_000107    | NP_000098    | Q92466 | DDB2_HUMAN  | WD 3.                         | 3  | TGTGGCCCTGA  | 0.542 |             |
| - | 1  | 52        |                   | NM_001004743 | NP_001004743 | Q8NGP3 | OR5M9_HUMAN | ællular (Potential).          | 4  | CTGACGACAGG  | 0.428 |             |
| - | 1  | 188       |                   | NM_001005489 | NP_001005489 | Q8NGF7 | OR5BH_HUMAN | Name=2; (P p.N63S(1)          | 3  | ACAGTTACTG   | 0.468 |             |
| + | 8  | 1093      | Mutation_p.Q308*  | NM_053023    | NP_444251    | Q96JP5 | ZFP91_HUMAN |                               | 1  | CAATCCAGTAT  | 0.408 |             |
| - | 8  | 1323      |                   | NM_001062    | NP_001053    | P20061 | TCO1_HUMAN  |                               | 2  | TGGTTCGCCTC  | 0.527 | rs140632800 |
| + | 6  | 1197      | na.1_Missense_M   | NM_017670    | NP_060140    | Q96FW1 | OTUB1_HUMAN | OTU.                          | 1  | TGGACGGACTG  | 0.657 |             |
| + | 9  | 781       | ph.1_Missense_M   | NM_000932    | NP_000923    | Q01970 | PLCB3_HUMAN |                               | 2  | TCAACGAAGTG  | 0.622 |             |
| - | 17 | 3820      |                   | NM_006946    | NP_008877    | O15020 | SPTN2_HUMAN | Spectrin 9.                   | 4  | TTCCCGAATCTI | 0.557 |             |
| + | 8  | 1808      | 5_uc009ysg.2_5'l  | NM_002335    | NP_002326    | O75197 | LRP5_HUMAN  | ctor class B 10. Extracellula | 7  | CAGCCGGGACC  | 0.622 |             |
| + | 14 | 4730      |                   | NM_014786    | NP_055601    | Q96PE2 | ARHG_HUMAN  |                               | 0  | TCCGTGCTGCA  | 0.726 |             |
| + | 5  | 1272      |                   | NM_153614    | NP_705842    | P59910 | DJB13_HUMAN |                               | 0  | CTCCACCATCA  | 0.527 |             |
| - | 15 | 2086      | r_p.V595I DLG2_u  | NM_001364    | NP_001355    | Q15700 | DLG2_HUMAN  | SH3.                          | 6  | GATGACCCCA   | 0.468 | rs149247541 |
| + | 1  | 216       |                   | NM_001098672 | NP_001092142 | Q6MZM0 | HPHL1_HUMAN |                               | 3  | TCTGGGCTGG   | 0.502 |             |
| + | 17 | 3150      | v.2_3'UTR GRIA4_  | NM_000829    | NP_000820    | P48058 | GRIA4_HUMAN | lasmic (Potential).           | 8  | ACCTACCATAA  | 0.493 |             |
| - | 12 | 2600_2601 |                   | NM_020693    | NP_065744    | Q8TD84 | DSCL1_HUMAN | otential). Ig-like C2-type 9. | 8  | TAGCTCCTTCGC | 0.639 |             |
| + | 3  | 411       | sbq.1_5'UTR FOX   | NM_017547    | NP_060017    | Q96CU9 | FXRD1_HUMAN |                               | 0  | CATTGCCTGAG  | 0.488 |             |
| + | 8  | 900       | sense_Mutation_p. | NM_017547    | NP_060017    | Q96CU9 | FXRD1_HUMAN |                               | 0  | AATGCGCCATT  | 0.642 |             |
| + | 5  | 670       | _p.V149I LTBR_uc  | NM_002342    | NP_002333    | P36941 | TNR3_HUMAN  | (Potential). TNFR-Cys 3.      | 2  | ACTGGTCCCC   | 0.637 | rs145130663 |

|   |    |           |                                |              |              |        |                                         |    |               |       |
|---|----|-----------|--------------------------------|--------------|--------------|--------|-----------------------------------------|----|---------------|-------|
| - | 2  | 101       | DA_uc001quq.1_1                | NM_020661    | NP_065712    | Q9GZX7 | AICDA_HUMAN                             | 2  | CCTCCGGTTCA   | 0.473 |
| + | 1  | 114       |                                | NM_144670    | NP_653271    | A8K2U0 | A2ML1_HUMAN                             | 3  | CAGCTCCTTCTA  | 0.507 |
| - | 3  | 510       | B4_uc001qzf.1_Inl              | NM_006249    | NP_006240    | Q04118 | PRB3_HUMAN [PQS]-P-[PS]-Q-[GE]-G-N-     | 1  | CGGACGAGGGC   | 0.647 |
| - | 13 | 3619      |                                | NM_000834    | NP_000825    | Q13224 | NMDE2_HUMAN lasmic (Potential).         | 12 | CGTGCTCCCAG   | 0.582 |
| + | 21 | 2437_2438 | MP_uc001rgi.2_R                | NM_006152    | NP_006143    | Q12912 | LRMP_HUMAN enal (Potential).            | 2  | TGTGGATGCCGC  | 0.495 |
| - | 12 | 963_964   | _Mutation_p.R215               | NM_002733    | NP_002724    | P54619 | AAKG1_HUMAN CBS 4.                      | 1  | AGTCGGTGAAC   | 0.54  |
| - | 5  | 1439      |                                | NM_002272    | NP_002263    | B4DRS2 | B4DRS2_HUMAN                            | 6  | CTCCTCGTACTC  | 0.592 |
| + | 6  | 979       | 2_Nonsense_Mute                | NM_199187    | NP_954657    | P05783 | K1C18_HUMAN 2. Rod. Necessary for inter | 1  | CAGTCCAGTCC   | 0.572 |
| + | 19 | 2765      | .2_Missense_Mut                | NM_170754    | NP_736610    | Q63HR2 | TENC1_HUMAN Pro-rich.                   | 2  | GGAGCCGGTGT   | 0.627 |
| + | 8  | 1153      | my.1_Missense_M                | NM_020547    | NP_065434    | Q16671 | AMHR2_HUMAN Potential) Protein kinase.  | 2  | TGCTCCCTGGC   | 0.577 |
| - | 2  | 800       |                                | NM_020370    | NP_065103    | Q9NQ55 | GPR84_HUMAN lasmic (Potential).         | 2  | GGAACGACCA    | 0.582 |
| - | 2  | 232       | KIAA0748_uc010:                | NM_001098815 | NP_001092285 | A2RU30 | K0748_HUMAN                             | 2  | GATCTGGGACA   | 0.597 |
| + | 1  | 539       |                                | NM_054104    | NP_473445    | Q9NZP0 | OR6C3_HUMAN xellular (Potential).       | 1  | ATTTTCCCCTCT  | 0.403 |
| + | 8  | 1102      | id.1_Missense_Mu               | NM_022465    | NP_071910    | Q9H2S9 | IKZF4_HUMAN                             | 1  | TCGATCGTCTGC  | 0.512 |
| + | 3  | 466       |                                | NM_032786    | NP_116175    | Q96K80 | ZC3HA_HUMAN 3H1-type 2.                 | 0  | AATTGCCGTTTC  | 0.542 |
| - | 8  | 1724      | ase_Mutation_p.R2              | NM_001127460 | NP_001120932 | Q504Q3 | PAN2_HUMAN                              | 6  | ATTGCGCAGCC   | 0.537 |
| + | 2  | 261       |                                | NM_003725    | NP_003716    | O14756 | H17B6_HUMAN 3 (By similarity).          | 2  | TGGATGCACGA   | 0.617 |
| + | 6  | 1531_1532 | _p.G411E SLC16A                | NM_004731    | NP_004722    | O60669 | MOT2_HUMAN ical; (Potential).           | 1  | CTGTGGGGCTAT  | 0.391 |
| - | 2  | 290       | uc001srx.2_Intron              | NM_001099676 | NP_001093146 | Q8IXR9 | CL056_HUMAN                             | 0  | ATTCTCTATCTG  | 0.328 |
| - | 12 | 2411      | _Mutation_p.R53                | NM_182767    | NP_877499    | Q9H2J7 | S6A15_HUMAN Name=12; (Potential).       | 3  | GCGACGAACA    | 0.443 |
| - | 2  | 1403      |                                | NM_005447    | NP_005438    | O75901 | RASF9_HUMAN                             | 1  | TATTCTTTTGCTT | 0.398 |
| - | 3  | 1396      | JM_uc001tbn.2_R1               | NM_002345    | NP_002336    | P51884 | LUM_HUMAN                               | 2  | TAAGAGTGACTT  | 0.353 |
| - | 19 | 1999      | _Mutation_p.R36C               | NM_002108    | NP_002099    | P42357 | HUTH_HUMAN                              | 3  | GGGACGTAGAA   | 0.473 |
| + | 47 | 6341      |                                | NM_014503    | NP_055318    | O75691 | UTP20_HUMAN                             | 4  | GCTTCCCCCA    | 0.493 |
| + | 8  | 1016      | swi.1_Splice_Site              | NM_003211    | NP_003202    | Q13569 | TDG_HUMAN                               | 6  | ATTCTAGCTCTC  | 0.323 |
| + | 3  | 1266      |                                | NM_007076    | NP_009007    | Q9BVA6 | FICD_HUMAN Fido.                        | 0  | ACTCCCGTCTG   | 0.562 |
| + | 8  | 840       | xn.1_Missense_Mutation_p.D998N |              |              | Q8N1T3 | MYO1H_HUMAN                             | 0  | TTTTCGCACTC   | 0.368 |
| - | 2  | 151       | rs.2_Missense_Mt               | NM_016301    | NP_057385    | Q9UHW5 | GPN3_HUMAN                              | 0  | CAGACCGGTTG   | 0.522 |
| + | 14 | 1843      | .1.3_Missense_Mut              | NM_001082537 | NP_001076006 | Q2MV58 | TECT1_HUMAN                             | 0  | AGGCTGCCTTT   | 0.512 |
| + | 8  | 2023      | sf.2_Missense_Mu               | NM_005475    | NP_005466    | Q9UQQ2 | SH2B3_HUMAN                             | 1  | ACTACGAAATG   | 0.592 |
| - | 17 | 1995      | un.1_Nonsense_M                | NM_004658    | NP_004649    | O95294 | RASL1_HUMAN PH.                         | 4  | TTCTGAAACAAT  | 0.637 |
| - | 17 | 3495      |                                | NM_015335    | NP_056150    | Q71F56 | MD13L_HUMAN                             | 8  | ATGAAAGCCCG   | 0.463 |
| - | 6  | 1379      | SL_uc001tzk.1_3'l              | NM_003733    | NP_003724    | Q15646 | OASL_HUMAN biquitin-like 2.             | 1  | TCAGACCCAGG   | 0.552 |
| - | 2  | 162_163   | ay.2_Missense_Mu               | NM_006549    | NP_006540    | Q96RR4 | KKCC2_HUMAN                             | 3  | GCGGCCCGGTT   | 0.668 |
| + | 17 | 2814      |                                | NM_144668    | NP_653269    | Q8TBY9 | WDR66_HUMAN WD 9.                       | 2  | CCACCCGAACG   | 0.522 |
| - | 2  | 425       | _Mutation_p.R39C               | NM_019625    | NP_062571    | Q9NP78 | ABCB9_HUMAN                             | 0  | GTGGCGGATGT   | 0.602 |
| + | 2  | 397       | IP35_uc009zxx.2_               | NM_022717    | NP_073208    | Q16560 | U1SBP_HUMAN RRM.                        | 0  | GGCTACGCCT    | 0.507 |
| + | 12 | 1728      |                                | NM_012463    | NP_036595    | Q9Y487 | VPP2_HUMAN lasmic (Potential).          | 2  | GCCACCCACCC   | 0.532 |
| + | 19 | 3024      | p.W542* DNAH10                 | NM_207437    | NP_997320    | Q8IVF4 | DYH10_HUMAN n (By similarity).          | 6  | TCTCTGGAAT    | 0.383 |
| + | 1  | 554       |                                | NM_001136103 | NP_001129575 | Q8N3T6 | T132C_HUMAN xellular (Potential).       | 1  | GTCCATGGACC   | 0.667 |
| + | 10 | 1193      | ij.1_Missense_Mu               | NM_004764    | NP_004755    | Q96J94 | PIWL1_HUMAN PAZ.                        | 2  | CAAGAGAAGGC   | 0.547 |
| - | 19 | 3298      |                                | NM_015347    | NP_056162    | O15034 | RIMB2_HUMAN                             | 11 | TCTTCTTCTGT   | 0.308 |
| + | 2  | 132       |                                | NM_152325    | NP_689538    | Q8N6G2 | CM026_HUMAN                             | 3  | ATTACGCCTA    | 0.373 |
| - | 5  | 608       | D13_uc001uux.2_                | NM_178006    | NP_821074    | Q9Y3M8 | STA13_HUMAN                             | 4  | GCAGCGTGTAG   | 0.572 |
| - | 1  | 1204      | IA_uc010tee.1_Intr             | NM_005584    | NP_005575    | Q13394 | MB211_HUMAN                             | 2  | AGGAGTGGCAC   | 0.642 |
| - | 8  | 819       | se_Mutation_p.S2               | NM_013338    | NP_037470    | Q9Y673 | ALG5_HUMAN enal (Potential).            | 0  | GAGATGAAACC   | 0.448 |
| - | 2  | 239       |                                | NM_198849    | NP_942146    | Q8IW03 | SIAH3_HUMAN                             | 2  | AGTGACGGCGC   | 0.443 |

rs61740514

|   |     |         |                   |              |              |         |             |                          |    |               |       |             |
|---|-----|---------|-------------------|--------------|--------------|---------|-------------|--------------------------|----|---------------|-------|-------------|
| - | 14  | 4304    | _p.S17F ZC3H13_   | NM_015070    | NP_055885    | Q5T200  | ZC3HD_HUMAN |                          | 2  | CTCTCGGATTTA  | 0.408 |             |
| + | 1   | 2386    |                   | NR_003268    |              |         |             |                          | 0  | ATTTTCCACCAAC | 0.517 |             |
| + | 5   | 737     | e_Mutation_p.G13  | NM_052950    | NP_443182    | Q96P53  | WDFY2_HUMAN | WD 3.                    | 0  | GCACAGGACAG   | 0.532 |             |
| - | 6   | 2191    | m.1_Missense_Mt   | NM_020866    | NP_065917    | Q9NR64  | KLHL1_HUMAN | Keich 1.                 | 0  | CCATTCTCCTA   | 0.343 |             |
| - | 8   | 2044    | _p.S393P DACH1_   | NM_080759    | NP_542937    | Q9UI36  | DACH1_HUMAN |                          | 1  | TTAGAGAGAGTT  | 0.443 |             |
| - | 6   | 762     | _Missense_Mutati  | NM_024546    | NP_078822    | Q5W0B1  | RN219_HUMAN | Potential.               | 2  | GAGGCGATTGG   | 0.383 |             |
| + | 1   | 541     |                   | NM_153456    | NP_703157    | Q8IZP7  | H6ST3_HUMAN | lenal (Potential).       | 2  | TGGAGCAGCCT   | 0.607 |             |
| + | 2   | 784     |                   | NM_153456    | NP_703157    | Q8IZP7  | H6ST3_HUMAN | lenal (Potential).       | 2  | TGAGCGAGTGG   | 0.478 |             |
| + | 13  | 1709    |                   | NM_003291    | NP_003282    | P29144  | TPP2_HUMAN  |                          | 2  | ACCTCCGAGAT   | 0.443 |             |
| + | 2   | 452     | vyc.2_Missense_   | NM_006683    | NP_006674    | Q14507  | EP3A_HUMAN  |                          | 0  | GTGGCGTAGAT   | 0.433 | rs146022737 |
| - | 2   | 2221    | :510C SALL2_uc0   | NM_005407    | NP_005398    | Q9Y467  | SALL2_HUMAN | 2H2-type 3.              | 3  | AAGGCGTAGGG   | 0.572 |             |
| - | 21  | 2403    |                   | NM_000257    | NP_000248    | P12883  | MYH7_HUMAN  | ing. Myosin head-like.   | 4  | CGGCCTTGAAG   | 0.592 |             |
| - | 12  | 1946    | g.1_Missense_Mu   | NM_000359    | NP_000350    | P22735  | TGM1_HUMAN  |                          | 3  | TGTGCGGCGGC   | 0.562 |             |
| - | 12  | 1784    | g.1_Missense_Mu   | NM_000359    | NP_000350    | P22735  | TGM1_HUMAN  |                          | 3  | CTTCCGCTCTG   | 0.617 |             |
| - | 4   | 2006    |                   | NM_203301    | NP_976046    | Q7Z6M2  | FBX33_HUMAN |                          | 0  | AAAAGCTAAATC  | 0.358 |             |
| + | 5   | 861     | _p.R110C PRPF3    | NM_017922    | NP_060392    | Q86UA1  | PRP39_HUMAN | HAT 4.                   | 2  | TATGATCGTATC  | 0.388 |             |
| + | 107 | 19669   | . SYNE2_uc001xg   | NM_015180    | NP_055995    | Q8WXH0  | SYNE2_HUMAN | lasmic (Potential).      | 14 | TGTTCCCCCTG   | 0.502 |             |
| + | 16  | 3061    | . R1052H PLEKHC   | NM_015549    | NP_056364    | A1L390  | PKHG3_HUMAN |                          | 1  | GGCCCGCCAGT   | 0.632 |             |
| - | 2   | 803     | se_Mutation_p.G1  | NM_183002    | NP_892114    | P57103  | NAC3_HUMAN  |                          | 7  | CAGCCCAAATC   | 0.542 |             |
| - | 9   | 906     | t_Mutation_p.R18  | NM_001005743 | NP_001005743 | P49757  | NUMB_HUMAN  |                          | 4  | TGACACGGAATG  | 0.448 |             |
| - | 19  | 2103    | aub.1_Missense_   | NM_024764    | NP_079040    | Q9H7T0  | CTSRB_HUMAN |                          | 5  | TCTTCTATATC   | 0.403 |             |
| + | 11  | 909     | n_p.M276I SLC24   | NM_153646    | NP_705932    | Q8NFF2  | NCKX4_HUMAN | ellular (Potential).     | 3  | ATTATGAGCTCC  | 0.532 |             |
| - | 1   | 412_413 | R20_uc010txu.1_5  | NM_001017963 | NP_001017963 | P07900  | HS90A_HUMAN |                          | 7  | GGCGGGACAG    | 0.698 |             |
| - | 14  | 3041    | R13B_uc010awv.1   | NM_015316    | NP_056131    | Q96KQ4  | ASPP1_HUMAN | ANK 1.                   | 1  | CCCTTCGTCGT   | 0.617 |             |
| + | 14  | 1404    | TA1_uc001yrb.2_   | NM_004689    | NP_004680    | Q13330  | MTA1_HUMAN  | A-type; atypical.        | 2  | GTATTCCTGGG   | 0.493 |             |
| - | 111 |         |                   |              |              |         |             |                          | 0  | ACTGCGTCTTTC  | 0.527 | rs144392595 |
| - | 10  | 1158    | A2_uc010ayv.2_in  | NM_000275    | NP_000266    | Q04671  | P_HUMAN     | lasmic (Potential).      | 5  | TGTCACGATCT   | 0.547 |             |
| + | 11  | 1915    | at.1_Nonsense_M   | NM_005503    | NP_005494    | Q99767  | APBA2_HUMAN | PDZ 1.                   | 0  | AGTCGAGCTG    | 0.637 |             |
| - | 10  | 1624    | AN1_uc001zqk.2_!  | NM_138477    | NP_612486    | Q8IWIY9 | CDAN1_HUMAN |                          | 2  | AAGCCGAACAA   | 0.522 |             |
| - | 6   | 1064    |                   | NM_005926    | NP_005917    | P55081  | MFAP1_HUMAN |                          | 1  | CTTCTCGATCTT  | 0.418 |             |
| + | 3   | 493     |                   | NM_024908    | NP_079184    | Q9H967  | WDR76_HUMAN |                          | 0  | ATTTTTCGGGAT  | 0.343 | rs139119504 |
| - | 10  | 1178    | e_Mutation_p.R10  | NM_002112    | NP_002103    | P19113  | DCHS_HUMAN  |                          | 6  | AGAGCGAAACCC  | 0.547 |             |
| - | 25  | 3830    | aw.1_Missense_Mt  | NM_017672    | NP_060142    | Q96QT4  | TRPM7_HUMAN | lasmic (Potential).      | 10 | GAATGAAATTTG  | 0.333 |             |
| - | 10  | 1186    | gb.1_RNA MYO5C    | NM_018728    | NP_061198    | Q9NQX4  | MYO5C_HUMAN | osin head-like.          | 14 | TCATCCTCCTTC  | 0.582 |             |
| + | 2   | 738     | fw.2_Missense_Mt  | NM_032866    | NP_116255    | Q0VF96  | CGNL1_HUMAN | Head.                    | 11 | CAGCTCCGTGG   | 0.542 |             |
| - | 7   | 1068    | NIP2_uc010uhb.1_  | NM_004330    | NP_004321    | Q12982  | BNIP2_HUMAN | CRAL-TRIO.               | 1  | CCTTCTATCAATT | 0.303 |             |
| - | 4   | 528     | ense_Mutation_p.: | NM_024611    | NP_078887    | Q659A1  | NARG2_HUMAN |                          | 2  | AACGAGAGAAAC  | 0.398 |             |
| + | 7   | 585     | X22_uc002ana.1_:  | NM_024798    | NP_079074    | Q96L94  | SNX22_HUMAN |                          | 0  | GCCCAGATAAAC  | 0.577 |             |
| - | 2   | 189     |                   | NM_003613    | NP_003604    | O75339  | CILP1_HUMAN |                          | 7  | TTGGTCCCACC   | 0.552 |             |
| - | 2   | 2126    |                   | NM_005477    | NP_005468    | Q9Y3Q4  | HCN4_HUMAN  | ir; Name=Segment S4; (Po | 6  | GAAGCGGACAA   | 0.537 |             |
| + | 2   | 1475    |                   | NM_005576    | NP_005567    | Q08397  | LOXL1_HUMAN | yl-oxidase like.         | 0  | TGTGCAAGCAT   | 0.572 |             |
| + | 2   | 1012    | h.1_Missense_Mul  | NM_005545    | NP_005536    | O14498  | ISLR_HUMAN  | Ig-like.                 | 4  | AGGATGGTGCC   | 0.652 |             |
| + | 2   | 435     |                   | NM_025055    | NP_079331    | Q8N5R6  | CCD33_HUMAN |                          | 5  | AGAGGAGCCCC   | 0.433 |             |
| + | 6   | 948     | 2axp.2_Missense_  | NM_025055    | NP_079331    | Q8N5R6  | CCD33_HUMAN |                          | 5  | CTTCTCCGGG    | 0.582 |             |
| + | 2   | 521     | _p.V107A ARID3B   | NM_006465    | NP_006456    | Q8IVW6  | ARI3B_HUMAN |                          | 0  | TGAAGTTGCAG   | 0.517 |             |
| - | 4   | 562     | _p.D38N CIB2_uc   | NM_006383    | NP_006374    | O75838  | CIB2_HUMAN  | EF-hand 1.               | 0  | ACCATCCTCGG   | 0.532 |             |
| + | 4   | 520     | _p.S58N ZFAND6    | NM_019006    | NP_061879    | Q6FIF0  | ZFAN6_HUMAN | Ser-rich.                | 0  | TGGCAGTGTGC   | 0.413 |             |

|   |    |           |                   |              |              |        |             |                               |    |               |       |             |
|---|----|-----------|-------------------|--------------|--------------|--------|-------------|-------------------------------|----|---------------|-------|-------------|
| + | 10 | 1242      | _p.P119S AGBL1_   | NM_152336    | NP_689549    | Q96MI9 | CBPC4_HUMAN |                               | 0  | AAAAATCCTGGAC | 0.478 |             |
| - | 7  | 956       |                   | NM_000326    | NP_000317    | P12271 | RLBP1_HUMAN | CRAL-TRIO.                    | 1  | TTGAGTTTCCTCA | 0.468 |             |
| + | 6  | 1571      | e_Mutation_p.S48  | NM_145728    | NP_663780    | O15061 | SYNEM_HUMAN | Tail.                         | 4  | TTGCTTCGGAAA  | 0.532 |             |
| + | 2  | 321       | _5'Flank SNRNP2f  | NM_024571    | NP_078847    | Q9BV90 | SNR25_HUMAN |                               | 0  | TAATGCGTAAGTC | 0.512 |             |
| + | 32 | 3154      | p.V1017L BAIAP3   | NM_003933    | NP_003924    | O94812 | BAIP3_HUMAN | C2 2.                         | 1  | TGATCGTGGAGC  | 0.627 |             |
| - | 3  | 299       | q.2_Missense_Mu   | NM_001037125 | NP_001032202 | Q9H9P5 | UNKL_HUMAN  | C3H1-type 1.                  | 0  | TTAGGGACACCTC | 0.607 |             |
| - | 2  | 353       | 2ctw.1_Intron ZSC | NM_032805    | NP_116194    | Q96SZ4 | ZSC10_HUMAN |                               | 1  | TTGCACGGGGAC  | 0.562 |             |
| - | 10 | 1198      | e_Mutation_p.D30  | NM_144605    | NP_653206    | Q8IYM1 | SEP12_HUMAN |                               | 1  | TAGAATCGTCATC | 0.662 |             |
| - | 22 | 4862      |                   | NM_002705    | NP_002696    | O60437 | PEPL_HUMAN  | Potential.                    | 6  | TTTCCGTCGCTC  | 0.552 | rs145419671 |
| + | 8  | 799_800   | g.2_Missense_Mul  | NM_000246    | NP_000237    | P33076 | C2TA_HUMAN  |                               | 1  | AATCTCCCTGAG  | 0.515 |             |
| + | 10 | 1143      | ch.2_Missense_Mi  | NM_014048    | NP_054767    | Q9ULH7 | MKL2_HUMAN  |                               | 5  | TGCCTGCTCCAG  | 0.527 |             |
| + | 29 | 4325      | r.2_Missense_Mur  | NM_004996    | NP_004987    | P33527 | MRP1_HUMAN  | Reporter 2. Cytoplasmic.      | 4  | TGTTCCCTCCGA  | 0.552 |             |
| + | 4  | 609       | ffy.2_Missense_Mi | NM_016524    | NP_057608    | Q9BSW7 | SYT17_HUMAN |                               | 1  | TAGACGCTCGT   | 0.577 |             |
| - | 19 | 2803      |                   | NM_017539    | NP_060009    | Q8TD57 | DYH3_HUMAN  | n (By similarity).            | 18 | ACTTATCGATCTT | 0.488 |             |
| + | 2  | 1372      |                   | NM_006040    | NP_006031    | Q9Y661 | HS3S4_HUMAN | lenal (Potential).            | 2  | TTGCTTCCTGGAC | 0.542 |             |
| + | 2  | 1001      | on APOB48R_uc0    | NM_018690    | NP_061160    | Q0VD83 | APOBR_HUMAN | Glu-rich.                     | 0  | TGGACAGCCTCG  | 0.716 |             |
| + | 16 | 4270      | _Intron TAOK2_uc0 | NM_016151    | NP_057235    | Q9UL54 | TAOK2_HUMAN |                               | 1  | TTGGCACGGGCC  | 0.682 |             |
| - | 2  | 390       | dxs.2_Missense_f  | NM_006110    | NP_006101    | O95400 | CD2B2_HUMAN |                               | 1  | TCCAAGAGTGT   | 0.522 |             |
| - | 3  | 1032      |                   | NM_001080417 | NP_001073886 | Q9UEG4 | ZN629_HUMAN | C2H2-type 5.                  | 0  | TGGTCCGAGCTG  | 0.637 |             |
| + | 4  | 749       | C1_uc002ebo.2_5'  | NM_001008274 | NP_001008275 | Q6ZMU5 | TRI72_HUMAN |                               | 0  | TTGGGGAGGCAG  | 0.667 |             |
| + | 6  | 908       | m.2_Missense_Mi   | NM_133443    | NP_597700    | Q8TD30 | ALAT2_HUMAN |                               | 2  | TGGAACCCCA    | 0.542 |             |
| + | 16 | 1653      | su.3_Missense_Mi  | NM_000293    | NP_000284    | Q93100 | KPBB_HUMAN  |                               | 3  | TGGAGCTTGTGA  | 0.378 |             |
| + | 1  | 267       | _p.R80W SLC12A:   | NM_001126108 | NP_001119580 | P55017 | S12A3_HUMAN | lasmic (Potential).           | 3  | TAGCCCGGAAG   | 0.488 |             |
| + | 2  | 105       |                   | NM_002990    | NP_002981    | O00626 | CCL22_HUMAN |                               | 0  | TACATGGAAGAC  | 0.642 |             |
| - | 6  | 939       | u.R109W KIFC3_u   | NM_005550    | NP_005541    | Q9BVG8 | KIFC3_HUMAN | Potential.                    | 3  | TGCCCGCAGGC   | 0.677 |             |
| + | 10 | 2799      |                   | NM_002428    | NP_002419    | P51511 | MMP15_HUMAN | cellular (Pote p.G609R(1)     | 3  | TGACGGGGGCA   | 0.701 |             |
| + | 6  | 784       |                   | NM_001950    | NP_001941    | Q16254 | E2F4_HUMAN  |                               | 1  | TCCCTACGTCCA  | 0.597 | rs142389152 |
| - | 1  | 525       | lvt.1_Missense_M  | NM_001082486 | NP_001075955 | Q96AP0 | ACD_HUMAN   |                               | 1  | TCTCTCGGAAGAC | 0.741 |             |
| - | 6  | 921       |                   | NM_000229    | NP_000220    | P04180 | LCAT_HUMAN  |                               | 0  | TGAAGCGTTGGA  | 0.572 |             |
| - | 62 | 10515     |                   | NM_032821    | NP_116210    | Q4G0P3 | HYDIN_HUMAN |                               | 2  | TACGAGGCCTC   | 0.562 |             |
| - | 3  | 645       | gq.2_Nonsense_M   | NM_018124    | NP_060594    | Q6PCD5 | RFWD3_HUMAN |                               | 3  | TACCTGAAAGT   | 0.413 |             |
| + | 6  | 897       | u.R146Q CNTNAP    | NM_033401    | NP_207837    | Q9C0A0 | CNTP4_HUMAN | (Potential), F5/8 type C.     | 2  | TATGCGAATCG   | 0.408 |             |
| + | 11 | 1818      | _p.P405L CNTNAF   | NM_033401    | NP_207837    | Q9C0A0 | CNTP4_HUMAN | potential), Laminin G-like 2. | 2  | TTGCTCCTGTGCT | 0.478 |             |
| - | 2  | 579       |                   | NM_003791    | NP_003782    | Q14703 | MBTP1_HUMAN |                               | 2  | TTCTTTCCAGTC  | 0.453 |             |
| + | 8  | 1355      | 'AFAH1B1_uc010v   | NM_000430    | NP_000421    | P43034 | LIS1_HUMAN  | on with dynein and dynactin   | 1  | TGGTCGTAGCA   | 0.498 |             |
| + | 10 | 1275      | _p.R228C CTNS_u   | NM_004937    | NP_004928    | O60931 | CTNS_HUMAN  | lasmic (Potential).           | 0  | TCCAGCGCGGT   | 0.682 |             |
| - | 6  | 1001      |                   | NM_002558    | NP_002549    | P51575 | P2RX1_HUMAN | cellular (Potential).         | 2  | TGAAAAGAGTG   | 0.622 |             |
| - | 3  | 515       | O1_uc010vsi.1_3'  | NM_182566    | NP_872372    | Q725L0 | VMO1_HUMAN  |                               | 1  | TACAGCGGAAGC  | 0.657 |             |
| - | 5  | 979       | uc002gcb.2_Misse  | NM_020162    | NP_064547    | Q9H6R0 | DHX33_HUMAN | case C-terminal.              | 2  | TACAGAGGAAGG  | 0.607 |             |
| + | 3  | 523       | ghe.2_Missense_f  | NM_000937    | NP_000928    | P24928 | RPB1_HUMAN  |                               | 1  | TTTACGTGGGC   | 0.542 |             |
| + | 34 | 5403      |                   | NM_020877    | NP_065928    | Q9P225 | DYH2_HUMAN  | .1 (By similarity).           | 13 | TTGCACCGAGGG  | 0.582 |             |
| - | 39 | 5741      |                   | NM_003802    | NP_003793    | Q9UKX3 | MYH13_HUMAN | Potential.                    | 6  | TCCCTGCCTCTTG | 0.587 |             |
| + | 27 | 5721      | so.2_Missense_Mi  | NM_001372    | NP_001363    | Q9NYC9 | DYH9_HUMAN  | .1 (By similarity).           | 20 | TGGGCCGCGCA   | 0.627 |             |
| - | 9  | 2166      | nse_Mutation_p.S: | NM_006470    | NP_006461    | O95361 | TRI16_HUMAN | B30.2/SPRY.                   | 3  | TCTTGAAAGCC   | 0.512 |             |
| + | 1  | 1858      |                   | NM_144775    | NP_658988    | Q8TEV9 | SMCR8_HUMAN |                               | 1  | TGTTTCGACCC   | 0.473 |             |
| + | 9  | 874       | _p.L169F PRPSAF   | NM_002767    | NP_002758    | O60256 | KPRB_HUMAN  |                               | 1  | TGACTTGGTGGA  | 0.582 |             |
| + | 13 | 1240_1241 | sense_Mutation_p  | NM_018242    | NP_060712    | Q96FL8 | S47A1_HUMAN | ical; (Potential).            | 0  | TGTTTCCACCT   | 0.431 |             |

|   |    |           |                                                 |              |              |              |             |                            |     |               |       |             |
|---|----|-----------|-------------------------------------------------|--------------|--------------|--------------|-------------|----------------------------|-----|---------------|-------|-------------|
| + | 4  | 1224      | e_Mutation_p.S27                                | NM_001033553 | NP_001028725 | Q5M775       | CYTSB_HUMAN | Ser-rich.                  | 0   | :TGGGAGTCCC   | 0.488 |             |
| + | 3  | 1304      |                                                 | NM_021012    | NP_066292    | Q14500       | IRK12_HUMAN | smic (By similarity).      | 4   | :CAACGCCGTGG  | 0.612 |             |
| - | 4  | 597       | se_Mutation_p.D1                                | NM_005148    | NP_005139    | Q13432       | U119A_HUMAN |                            | 0   | :GAAGTCGAAGC  | 0.557 |             |
| - | 3  | 458       | ro.2_Missense_Mt                                | NM_005165    | NP_005156    | P09972       | ALDOC_HUMAN |                            | 1   | :GCCACGACGA   | 0.517 | rs139497270 |
| - | 21 | 3315      | 2_5'Flnk ALDOC_                                 | NM_006461    | NP_006452    | Q96R06       | SPAG5_HUMAN | Potential.                 | 1   | :GGTAAGGTGGG  | 0.542 |             |
| - | 2  | 277       | _p.G28E SEZ6_uc                                 | NM_178860    | NP_849191    | Q53EL9       | SEZ6_HUMAN  | cellular (Potential).      | 2   | :CTTCCCCACG   | 0.582 |             |
| + | 53 | 8180      | se_Mutation_p.Q8                                | NM_001042492 | NP_001035957 | P21359       | NF1_HUMAN   |                            | 330 | :GATCCAGGCGC  | 0.403 |             |
| - | 10 | 814       | it.2_Missense_Mul                               | NM_018428    | NP_060898    | Q9NYH9       | UTP6_HUMAN  |                            | 1   | :CAATCGAAAGC  | 0.333 | rs146623373 |
| - | 10 | 1686      | w.1_RNA MMP28_                                  | NM_024302    | NP_077278    | Q9H239       | MMP28_HUMAN | mopexin-like 4.            | 1   | :TGATGGAGCCA  | 0.677 |             |
| + | 7  | 1368      | _p.S358F CASC3_                                 | NM_007359    | NP_031385    | O15234       | CASC3_HUMAN |                            | 1   | :GACTTCTGTGA  | 0.572 |             |
| + | 1  | 235_236   |                                                 | NM_031961    | NP_114167    | Q9BYQ4       | KRA92_HUMAN | -C-[RQVSGE]-[SPTQ]-[T/     | 1   | :TGCTGCCAGCC  | 0.644 |             |
| - | 3  | 534       | rn.2_Missense_Mt                                | NM_002277    | NP_002268    | Q15323       | K1H1_HUMAN  | Rod. Coil 1B.              | 0   | :CAGACCGTTGA  | 0.597 |             |
| - | 6  | 1637      |                                                 | NM_006771    | NP_006762    | O76015       | KRT38_HUMAN | Coil 2. Rod.               | 2   | :GGTCCGGTAC   | 0.552 |             |
| - | 1  | 115       |                                                 | NM_002278    | NP_002269    | Q14532       | K1H2_HUMAN  | Head.                      | 0   | :CGGGGGCAGCT  | 0.612 |             |
| + | 1  | 450       | J586_uc002ibx.2_!                               | NR_002773    |              |              |             |                            | 0   | :CCAAGGCTGCA  | 0.657 |             |
| + | 3  | 312       | HX8_uc010wig.1_                                 | NM_004941    | NP_004932    | Q14562       | DHX8_HUMAN  |                            | 4   | :AGGATTCTCTTA | 0.433 |             |
| + | 5  | 811       | ie_Mutation_p.E21                               | NM_032133    | NP_115509    | Q8TBZ2       | MYBPP_HUMAN |                            | 6   | :CTGCTGAAGGA  | 0.522 |             |
| + | 8  | 936       | 02itm.2_Missense_                               | NM_002512    | NP_002503    | P22392       | NDKB_HUMAN  |                            | 0   | :AGGCCGAGTGA  | 0.527 |             |
| + | 6  | 657       |                                                 | NM_153228    | NP_694960    | Q8N957       | ANKF1_HUMAN | Potential.                 | 2   | :GCCTGGAAGC   | 0.468 |             |
| + | 9  | 1533      |                                                 | NM_000502    | NP_000493    | P11678       | PERE_HUMAN  |                            | 2   | :TGTTCCGCTTG  | 0.592 |             |
| - | 17 | 2197      | ix.3_Splice_Site_                               | NM_001005207 | NP_001005207 | O94972       | TRI37_HUMAN |                            | 7   | :CATTACCTGCG  | 0.428 |             |
| + | 6  | 504       | nse_Mutation_p.P                                | NM_001099432 | NP_001092902 | Q9H6U6       | BCAS3_HUMAN |                            | 5   | :TGCTCCACAGT  | 0.413 |             |
| - | 10 | 785       | 10woz.1_RNA uc010wpb.1_5'Flnk                   |              |              |              |             |                            | 0   | :GCTGTGAAATC  | 0.572 |             |
| - | 24 | 5295      |                                                 | NM_000334    | NP_000325    | P35499       | SCN4A_HUMAN | IQ.                        | 3   | :GTGCCGGCGGT  | 0.642 |             |
| - | 13 | 1959      | _p.D594N ABCA8_                                 | NM_007168    | NP_009099    | O94911       | ABCA8_HUMAN | C transporter 1.           | 3   | :CTTTATCCACTT | 0.333 |             |
| - | 30 | 4441      | se_Mutation_p.P1E                               | NM_080282    | NP_525021    | Q8WWZ4       | ABCAA_HUMAN |                            | 4   | :GTTTGGAGCAG  | 0.423 |             |
| + | 5  | 589       | ijp.2_Nonsense_N                                | NM_018658    | NP_061128    | Q9NPI9       | IRK16_HUMAN | smic (By similarity).      | 3   | :GAAGACGATTA  | 0.453 |             |
| + | 2  | 174       | rn_p.V8 RAB37_u                                 | NM_001006638 | NP_001006639 | Q96AX2       | RAB37_HUMAN | (By similarity).           | 1   | :CAGGCGTCGGC  | 0.567 |             |
| - | 2  | 994       | ro.1_Missense_M                                 | NM_173477    | NP_775748    | Q495M9       | USH1G_HUMAN |                            | 2   | :GAGCGGGGCTC  | 0.706 |             |
| - | 7  | 1224_1225 | wtb.1_Missense_I                                | NM_002766    | NP_002757    | Q14558       | KPRA_HUMAN  |                            | 1   | :TACATGGCAACT | 0.347 |             |
| + | 3  | 924       |                                                 | NM_178543    | NP_848638    | Q6UWV6       | ENPP7_HUMAN |                            | 3   | :TCAAGGACGCC  | 0.597 |             |
| + | 4  | 3302      |                                                 | NM_020914    | NP_065965    | Q9HCF4       | ALO17_HUMAN |                            | 21  | :GGCTTCGTGAC  | 0.507 |             |
| + | 10 | 1951      | _p.W197* RPTOR_                                 | NM_020761    | NP_065812    | Q8N122       | RPTOR_HUMAN |                            | 6   | :GCCTGGGACCT  | 0.612 |             |
| + | 11 | 1220      | p.A372V GPS1_uc                                 | NM_004127    | NP_004118    | Q13098       | CSN1_HUMAN  | PCI.                       | 1   | :GGCAGCCTTCA  | 0.632 |             |
| + | 6  | 625       | _p.A102S USP14_                                 | NM_005151    | NP_005142    | P54578       | UBP14_HUMAN |                            | 2   | :GGTATGCAGGT  | 0.378 |             |
| - | 13 | 1717      | s.1_Intron EPB41L                               | NM_012307    | NP_036439    | Q9Y2J2       | E41L3_HUMAN | ctin-binding (Potential).  | 5   | :TGGACGGCTCA  | 0.577 |             |
| - | 11 | 1022      | _p.F288I L3MBTL                                 | NM_173464    | NP_775735    | Q8NA19       | LMBL4_HUMAN | MBT 3.                     | 3   | :TTTTAAAACTTT | 0.323 |             |
| + | 14 | 1612      | 76_splice ARHGAP28_uc002kne.2_Splice_Site_p.M47 |              | B4DXL2       | B4DXL2_HUMAN |             |                            | 1   | :GAATGGTAAGA  | 0.284 |             |
| - | 58 | 8363      | il.2_Missense_Mut                               | NM_005559    | NP_005550    | P25391       | LAMA1_HUMAN | minin G-like 4.            | 21  | :CTGATGAGCCA  | 0.552 |             |
| + | 3  | 748       | dkv.2_Missense_N                                | NM_002845    | NP_002836    | P28827       | PTPRM_HUMAN | tracellular (Potential).   | 6   | :GAGAGCCACC   | 0.458 |             |
| + | 5  | 397       |                                                 | NM_021074    | NP_066552    | P19404       | NDUV2_HUMAN |                            | 1   | :CCAATGAGAGT  | 0.328 |             |
| - | 9  | 1299      | vi.3_Missense_Mu                                | NM_001941    | NP_001932    | Q14574       | DSC3_HUMAN  | Extracellular (Potential). | 4   | :TTAAATCCTTAT | 0.308 |             |
| - | 8  | 1452      | vk.3_Missense_Mt                                | NM_024422    | NP_077740    | Q02487       | DSC2_HUMAN  | r (Potential). Cadherin 2. | 3   | :GACAAAATACT  | 0.313 |             |
| + | 8  | 1077      |                                                 | NM_001942    | NP_001933    | Q02413       | DSG1_HUMAN  | r (Potential). Cadherin 3. | 7   | :TGCTCGAGATTA | 0.328 |             |
| + | 12 | 1937      | vr.2_Missense_Mu                                | NM_177986    | NP_817123    | Q86SJ6       | DSG4_HUMAN  | cellular (Poten p.A601V(1) | 8   | :TGCCGCGGGCA  | 0.507 |             |
| + | 14 | 2281      | uc002kwv.3_Intron                               | NM_001943    | NP_001934    | Q14126       | DSG2_HUMAN  | lasmic (Potential).        | 9   | :GAAAGGAAGTA  | 0.512 |             |
| + | 11 | 1436      | xq.2_Missense_Mt                                | NM_030632    | NP_085135    | Q9C0F0       | ASXL3_HUMAN |                            | 3   | :GAGACTAGTATC | 0.393 |             |



|   |    |             |                   |              |              |        |             |                                |    |                |       |
|---|----|-------------|-------------------|--------------|--------------|--------|-------------|--------------------------------|----|----------------|-------|
| + | 11 | 1914        | <q.2_Missense_Mt  | NM_030632    | NP_085135    | Q9C0F0 | ASXL3_HUMAN | Ser-rich.                      | 3  | :AGAGGGAGCCT   | 0.483 |
| - | 1  | 1111        | VAL2_uc002lco.2_  | NM_145653    | NP_663628    | Q8NG57 | ELOA3_HUMAN |                                | 0  | :GGGAGGTCATG   | 0.617 |
| - | 27 | 3827        | ea.2_Missense_Mi  | NM_001080467 | NP_001073936 | Q9ULV0 | MYO5B_HUMAN | Potential.                     | 5  | :GTTCCGCCTGC   | 0.498 |
| + | 13 | 2601        | _p.E520K DCC_ucl  | NM_005215    | NP_005206    | P43146 | DCC_HUMAN   | tential). Fibronectin type-III | 17 | :AGATGGAAACA   | 0.428 |
| - | 8  | 1009        | _p.R304* FECH_u   | NM_000140    | NP_000131    | P22830 | HEMH_HUMAN  |                                | 1  | :CAGTCGGTAGG   | 0.493 |
| + | 7  | 1010        |                   | NM_152721    | NP_689934    | Q6PKX4 | DOK6_HUMAN  |                                | 3  | :TCACTCGTCAG   | 0.438 |
| - | 11 | 1464        | o.1_5'UTR RTTN_u  | NM_173630    | NP_775901    | Q86VV8 | RTTN_HUMAN  |                                | 8  | :CACAAAGCATCA  | 0.473 |
| + | 3  | 519         |                   | NM_004359    | NP_004350    | P49427 | UB2R1_HUMAN |                                | 0  | GAGCGGGGAGC    | 0.642 |
| + | 13 | 1834        | sb.1_Missense_Mi  | NM_019112    | NP_061985    | Q8IZY2 | ABCA7_HUMAN | llular (By similarity).        | 9  | :CCATATCCGTGC  | 0.697 |
| + | 27 | 4496        | vc.1_Missense_Mt  | NM_032482    | NP_115871    | Q8TEK3 | DOT1L_HUMAN |                                | 4  | CGGCTCCGTGG    | 0.726 |
| + | 4  | 1228        | wn.3_Missense_M   | NM_152791    | NP_690004    | Q8NEP9 | ZN555_HUMAN | C2H2-type 8.                   | 1  | TTATCCCCAGTC   | 0.463 |
| - | 16 | 1764        | 02_splice TLE2_u  | NM_003260    | NP_003251    | Q04725 | TLE2_HUMAN  |                                | 0  | CGGTTCTGGGG    | 0.617 |
| - | 3  | 1937        | l4_uc010dub.1_5'f | NM_001080400 | NP_001073869 | Q96Q06 | PLIN4_HUMAN | roximate tandem repeat.[17     | 0  | :CTGTCCGCATA   | 0.572 |
| + | 14 | 1733        | n_p.F513L EMR1_   | NM_001974    | NP_001965    | Q14246 | EMR1_HUMAN  | ilar (Potential). Ser/Thr-rich | 5  | :ATCCTTTGGCTG  | 0.443 |
| - | 40 | 39365_39366 | C16_uc010dwj.2_ε  | NM_024690    | NP_078966    | Q8WXI7 | MUC16_HUMAN |                                | 57 | :AACTGGAGATT   | 0.515 |
| - | 3  | 28000       |                   | NM_024690    | NP_078966    | Q8WXI7 | MUC16_HUMAN | ch. Extracellular (Potential). | 57 | :ATGTGAGAACAT  | 0.468 |
| - | 3  | 19028       |                   | NM_024690    | NP_078966    | Q8WXI7 | MUC16_HUMAN | xtracellular (Potential).      | 57 | GAGGTGAACGAC   | 0.488 |
| - | 3  | 15362       |                   | NM_024690    | NP_078966    | Q8WXI7 | MUC16_HUMAN | xtracellular (Potential).      | 57 | :TCAGGGAAGGT   | 0.478 |
| - | 10 | 1817        | wr.1_Missense_M   | NM_152476    | NP_689689    | Q96MR9 | ZN560_HUMAN | C2H2-type 7.                   | 6  | :GAGTTCGCATG   | 0.408 |
| - | 6  | 1212        | _p.P267L ZNF561   | NM_152289    | NP_689502    | Q8N587 | ZN561_HUMAN |                                | 1  | :TCATAGGGTTTT  | 0.418 |
| - | 29 | 2307        |                   | NM_015719    | NP_056534    | P25940 | CO5A3_HUMAN | le-helical region.             | 10 | :CACATCGCCCT   | 0.627 |
| + | 2  | 59          | t.1_Missense_Mut  | NM_001040664 | NP_001035754 | Q9NQ55 | SSF1_HUMAN  |                                | 2  | :GCTCCGCAACC   | 0.726 |
| - | 1  | 204         | snse_Mutation_p.F | NM_007065    | NP_008996    | Q16543 | CDC37_HUMAN |                                | 0  | :CCAGCGGAAGA   | 0.632 |
| + | 4  | 719         |                   | NM_152357    | NP_689570    | Q8IYI8 | ZN440_HUMAN | C2H2-type 2.                   | 0  | :TGTTCGAAGAC   | 0.393 |
| + | 4  | 1651        | ym.1_Missense_M   | NM_001136501 | NP_001129973 | Q08AG5 | ZN844_HUMAN |                                | 0  | :AAAACCCATGAC  | 0.413 |
| + | 9  | 978         | _p.V301M GCDH_u   | NM_000159    | NP_000150    | Q92947 | GCDH_HUMAN  |                                | 0  | :GGGGCGTGCTT   | 0.647 |
| + | 12 | 2239        | xng.1_Missense_M  | NM_023072    | NP_075560    | Q9H7M6 | ZSWM4_HUMAN |                                | 2  | :TGAACGTAATG   | 0.617 |
| - | 3  | 1199        | C26_uc002nee.2_f  | NM_004831    | NP_004822    | O95402 | MED26_HUMAN | Pro-rich.                      | 2  | :GTGACGGCACC   | 0.682 |
| + | 5  | 1472        | ixpn.1_Intron ANK | NM_152363    | NP_689576    | Q8NAG6 | ANKL1_HUMAN | LEM.                           | 0  | :TGCTCCTGGTT   | 0.572 |
| - | 11 | 1540        |                   | NM_001080421 | NP_001073890 | Q9UPW8 | UN13A_HUMAN |                                | 3  | :CTCCTCGTCCT   | 0.667 |
| + | 7  | 1236        | ihu.2_Missense_M  | NM_015683    | NP_056498    | Q8TBH0 | ARRD2_HUMAN |                                | 1  | :AGGACCCCGAC   | 0.632 |
| - | 7  | 2677        | _p.T844M SFRS14   | NM_014884    | NP_055699    | Q8IX01 | SUGP2_HUMAN |                                | 0  | :ATGACGTGAAA   | 0.473 |
| - | 8  | 1113        | ase_Mutation_p.G  | NM_172231    | NP_757386    | Q8IWZ8 | SUGP1_HUMAN | Pro-rich.                      | 0  | :CTTCCCGGGGG   | 0.672 |
| + | 4  | 835         | se_Mutation_p.K1  | NM_021047    | NP_066385    | O75346 | ZN253_HUMAN | C2H2-type 3.                   | 0  | :ATAAGAAAATTC  | 0.403 |
| + | 4  | 837         | se_Mutation_p.I17 | NM_021047    | NP_066385    | O75346 | ZN253_HUMAN | C2H2-type 3.                   | 0  | :AGAAAATTCATA  | 0.398 |
| + | 4  | 1046        |                   | NM_031218    | NP_112495    | P35789 | ZNF93_HUMAN |                                | 1  | :AGAGCCCTACG   | 0.373 |
| - | 4  | 827         | pc.1_Missense_M   | NM_001076675 | NP_001070143 | Q68DY1 | ZN626_HUMAN |                                | 1  | :GTTTCTCTCCA   | 0.393 |
| + | 4  | 1725        | oco.2_Missense_M  | NM_003429    | NP_003420    | Q03923 | ZNF85_HUMAN |                                | 1  | :TCATACTGGAG   | 0.353 |
| - | 5  | 1789        | 208_uc002nqo.1_l  | NM_007153    | NP_009084    |        |             |                                | 7  | :ACCTTAATAAAG  | 0.398 |
| - | 4  | 916         | 1_Intron ZNF208_  | NM_007153    | NP_009084    |        |             |                                | 7  | :TGTAGGATTCT   | 0.358 |
| - | 4  | 1086        | rj.1_Missense_Mu  | NM_003430    | NP_003421    | Q05481 | ZNF91_HUMAN | C2H2-type 7.                   | 0  | :ATTCTTCACATT  | 0.388 |
| - | 4  | 1136        | _p.H263Y ZNF681_  | NM_138286    | NP_612143    | Q96N22 | ZN681_HUMAN | ype 6; degenerate.             | 0  | :CAGTATGAATTAT | 0.388 |
| - | 3  | 359         | 681_uc002nrj.3_M  | NM_138286    | NP_612143    | Q96N22 | ZN681_HUMAN | KRAB.                          | 0  | :GGGTTCCGGCCA  | 0.418 |
| + | 19 | 3054        | nuh.1_Missense_M  | NM_018025    | NP_060495    | Q9BRR8 | GPTC1_HUMAN |                                | 1  | :CAGACGTGTCG   | 0.498 |
| + | 4  | 485         |                   | NM_032346    | NP_115722    | Q9BRP1 | PDD2L_HUMAN |                                | 1  | :TGCCAGCAGTG   | 0.587 |
| - | 2  | 784         | z.1_5'Flank LGI4_ | NM_139284    | NP_644813    | Q8N135 | LGI4_HUMAN  | LRR 1.                         | 1  | :GGTGACTCCCG   | 0.607 |
| + | 22 | 4762        |                   | NM_014727    | NP_055542    | Q9UMN6 | MLL4_HUMAN  |                                | 11 | :AATACGGGGAT   | 0.607 |

|   |    |           |                     |                            |              |        |             |                               |    |               |       |             |
|---|----|-----------|---------------------|----------------------------|--------------|--------|-------------|-------------------------------|----|---------------|-------|-------------|
| + | 15 | 2322      | 651F KIRREL2_uc     | NM_199180                  | NP_954649    | Q6UWL6 | KIRR2_HUMAN | lasmic (Pote p.L704L(1)       | 3  | CGCGTCTCCAG   | 0.562 |             |
| + | 14 | 1768      | p.E545K APLP1_u     | NM_005166                  | NP_005157    | P51693 | APLP1_HUMAN | cellular (Potential).         | 2  | CGCTGGAACAG   | 0.338 |             |
| - | 11 | 1439      | p.R126W NFKBID      | NM_139239                  | NP_640332    | Q8NI38 | IKBD_HUMAN  |                               | 0  | GGCCCGCAGCA   | 0.701 |             |
| + | 11 | 1232      | iu.2_Missense_Mt    | NM_000540                  | NP_000531    | P21817 | RYR1_HUMAN  | plasmic. MIR 5.               | 12 | TGCGGCTCGGC   | 0.393 |             |
| - | 3  | 459       | xuj.1_Missense_M    | NM_006149                  | NP_006140    | P56470 | LEG4_HUMAN  | Galectin 1.                   | 2  | ACTTCCC GCCC  | 0.582 |             |
| - | 8  | 657       | p.R133C SIRT2_u     | NM_012237                  | NP_036369    | Q8IXJ6 | SIRT2_HUMAN | tylase sirtuin-type.          | 0  | CAGGCGCATGA   | 0.582 |             |
| + | 3  | 194       |                     | NM_013268                  | NP_037400    | Q9UHV8 | PP13_HUMAN  | Galectin.                     | 1  | TTGCC TTCGTT  | 0.512 |             |
| - | 7  | 3507      | e_Mutation_p.R94    | NM_181882                  | NP_870998    | Q9BXM0 | PRAX_HUMAN  |                               | 2  | FGGCACGATCAC  | 0.632 |             |
| - | 7  | 2893      | e_Mutation_p.K73    | NM_181882                  | NP_870998    | Q9BXM0 | PRAX_HUMAN  |                               | 2  | CCATTTTAGCGC  | 0.627 |             |
| + | 10 | 1593      |                     | NM_015125                  | NP_055940    | Q96RK0 | CIC_HUMAN   | Pro-rich.                     | 11 | GCCCCCGGATC   | 0.627 |             |
| - | 5  | 1174      | jj.3_Missense_Mu    | NM_182707                  | NP_874366    | Q9UQ74 | PSG8_HUMAN  | like C2-type 3.               | 0  | GTGGGTTAGAG   | 0.463 |             |
| - | 2  | 191       | ise_Mutation_p.W34* | PSG11_uc002ovm.1_Nonsense_ |              | Q00889 | PSG6_HUMAN  |                               | 2  | AAGTTCAGAA    | 0.483 |             |
| - | 2  | 231       |                     | NM_145296                  | NP_660339    | Q8NFZ8 | CADM4_HUMAN | . Extracellular (Potential).  | 0  | TCTGCCGGGCT   | 0.453 |             |
| + | 5  | 670       | n_p.V60I ZNF225_    | NM_013362                  | NP_037494    | Q9UK10 | ZN225_HUMAN |                               | 0  | TTACGTAAGAC   | 0.423 |             |
| - | 4  | 1867      |                     | NM_145056                  | NP_659493    | Q96B18 | DACT3_HUMAN |                               | 0  | TGGCGGGGCTI   | 0.622 |             |
| + | 3  | 1239      | ic.1_Missense_Mt    | NM_014681                  | NP_055496    | Q14147 | DHX34_HUMAN | ase ATP-binding.              | 5  | TGTTGCCACG    | 0.587 |             |
| + | 2  | 603       | D2_uc010xyu.1_In    | NM_014601                  | NP_055416    | Q9NZN4 | EHD2_HUMAN  |                               | 2  | GGACCCGGACA   | 0.602 | rs144834998 |
| + | 5  | 951       |                     | NM_031485                  | NP_113673    | Q9BQ67 | GRWD1_HUMAN | WD 1.                         | 1  | ACATCCACCTC   | 0.642 |             |
| - | 9  | 914       |                     | NM_001080434               | NP_001073903 |        |             |                               | 6  | GGTCAGAGGTC   | 0.687 |             |
| - | 7  | 1135      | LEKHA4_uc010er      | NM_020904                  | NP_065955    | Q9H4M7 | PKHA4_HUMAN | Pro-rich.                     | 3  | CTTCCGGTGT    | 0.692 |             |
| + | 4  | 221       | BL2_uc002pls.1_F    | NM_006666                  | NP_006657    | Q9Y230 | RUVB2_HUMAN |                               | 0  | TTGCCGGTCGG   | 0.652 |             |
| + | 5  | 2407      | p.H724Y ZNF473_     | NM_001006656               | NP_001006657 | Q8WTR7 | ZN473_HUMAN | :2H2-type 15.                 | 2  | GAATTCACCTAC  | 0.512 |             |
| - | 3  | 1368      |                     | NM_001080457               | NP_001073926 | Q9NT99 | LRC4B_HUMAN | Potential). Ilg-like C2-type. | 2  | GCGCACGCGGT   | 0.637 |             |
| - | 22 | 3585      | sw.1_Missense_M     | NM_016148                  | NP_057232    | Q9Y566 | SHAN1_HUMAN | Poly-Gly.                     | 2  | CGCTCCCGTG    | 0.473 |             |
| + | 5  | 782       |                     | NM_007147                  | NP_009078    | Q9Y473 | ZN175_HUMAN |                               | 0  | CATTTTAGAAG   | 0.393 |             |
| - | 6  | 385       | 10ydp.1_Missense    | NM_030972                  | NP_112234    | Q8N823 | ZN611_HUMAN |                               | 1  | CAAGCGTCCC    | 0.388 | rs141987068 |
| - | 5  | 411       | qbg.1_Missense_M    | NM_182609                  | NP_872415    | Q86XU0 | ZN677_HUMAN | KRAB.                         | 1  | ATAATTCCTTT   | 0.348 |             |
| + | 4  | 1151      | .2_Intron ZNF765_   | NR_003699                  |              |        |             |                               | 0  | CTTACGAATGTC  | 0.388 | rs61743769  |
| + | 1  | 73        |                     | NM_001012728               | NP_001012746 | A6NFQ7 | DPRX_HUMAN  |                               | 0  | GATCTTCGTAAC  | 0.507 | rs148896232 |
| - | 4  | 1216_1217 | p.E381K NLRP7_u     | NM_206828                  | NP_996611    | Q8WX94 | NALP7_HUMAN | NACHT.                        | 3  | GTCCTCCCCTT   | 0.683 |             |
| + | 5  | 2459      | p.F604L NLRP4_      | NM_134444                  | NP_604393    | Q96MN2 | NALP4_HUMAN |                               | 15 | TCCTTTTCTGGC  | 0.428 |             |
| + | 3  | 1043      | tg.2_Missense_Mt    | NM_176811                  | NP_789781    | Q86W28 | NALP8_HUMAN | NACHT.                        | 13 | ACGATGCTTCC   | 0.502 |             |
| - | 7  | 4528      | E1364K PEG3_uc      | NM_001146186               | NP_001139658 | Q9GZU2 | PEG3_HUMAN  | Glu-rich.                     | 12 | AGCCTCTACGT   | 0.478 |             |
| - | 7  | 2577      | p.E713D PEG3_u      | NM_001146186               | NP_001139658 | Q9GZU2 | PEG3_HUMAN  |                               | 12 | CACTTTCAAG    | 0.408 |             |
| - | 3  | 2631      | c.2_Intron ZNF814_  | NM_001144989               | NP_001138461 | B7Z6K7 | ZN814_HUMAN | :2H2-type 21.                 | 0  | TGTGAAACTGG   | 0.413 |             |
| - | 7  | 1679      | hp.1_Missense_M     | NM_025027                  | NP_079303    | Q8WXB4 | ZN606_HUMAN |                               | 2  | AAATAAAGATAT  | 0.338 |             |
| + | 3  | 1281      | p.R359C TTC15_u     | NM_016030                  | NP_057114    | Q8WVT3 | TTC15_HUMAN |                               | 4  | TGCTTCGCTTTC  | 0.393 |             |
| + | 8  | 1161      | zqt.2_Missense_M    | NM_014746                  | NP_055561    | P50876 | R144A_HUMAN |                               | 2  | CTCCGGGCAT    | 0.468 |             |
| - | 32 | 3747      | e_Mutation_p.R31    | NM_015909                  | NP_056993    | A2RRP1 | NBAS_HUMAN  |                               | 4  | GATCCGATCAG   | 0.478 |             |
| + | 5  | 946       | mm.1_Missense_I     | NM_199280                  | NP_954974    | Q6ZUX3 | F179A_HUMAN |                               | 4  | TACCGGGGAGC   | 0.622 |             |
| - | 9  | 1095      | mp.1_Missense_M     | NM_144575                  | NP_653176    | Q6MZZ7 | CAN13_HUMAN | alpain catalytic.             | 2  | CCGTTTCTTATC  | 0.443 |             |
| - | 29 | 2238      | p.F695Y MAP4K3_     | NM_003618                  | NP_003609    | Q8IVH8 | M4K3_HUMAN  | CNH.                          | 8  | ATAGGAAAATCT  | 0.333 |             |
| - | 18 | 2907      | p.S801F AAK1_uc     | NM_014911                  | NP_055726    | Q2M2I8 | AAK1_HUMAN  |                               | 0  | GAAGAGAAGTG   | 0.408 |             |
| + | 5  | 685       | se_Mutation_p.R7    | NM_002357                  | NP_002348    | Q05195 | MAD1_HUMAN  |                               | 0  | GATCCGGATGG   | 0.597 |             |
| + | 6  | 825       | e_Mutation_p.R12    | NM_002357                  | NP_002348    | Q05195 | MAD1_HUMAN  |                               | 0  | ACGAGCGGGGC   | 0.557 |             |
| - | 4  | 1256      |                     | NM_017880                  | NP_060350    | Q9NWW7 | CB042_HUMAN |                               | 0  | CAGATACTTCATC | 0.378 |             |
| - | 16 | 2591      | D2_uc002sha.2_In    | NM_001617                  | NP_001608    | P35612 | ADDB_HUMAN  | ith calmodulin (Potential).   | 3  | GTTCGGAATTC   | 0.527 |             |

|   |     |           |                     |              |              |        |                                                            |     |              |       |
|---|-----|-----------|---------------------|--------------|--------------|--------|------------------------------------------------------------|-----|--------------|-------|
| - | 3   | 472       | DD2_uc010fdt.1_1    | NM_001617    | NP_001608    | P35612 | ADDB_HUMAN                                                 | 3   | TCTCTTCGCTCA | 0.617 |
| - | 3   | 1622      | 2sit.3_Missense_M   | NM_015470    | NP_056285    | Q9BXF6 | RFIP5_HUMAN                                                | 0   | ATCCCGGGGCT  | 0.647 |
| + | 4   | 399       | e_Mutation_p.G1C    | NM_198448    | NP_940850    | Q6UW15 | REG3G_HUMAN C-type lectin.                                 | 0   | AGATTGGGCTCC | 0.562 |
| - | 1   | 292       | lank ELMOD3_uc      | NM_017750    | NP_060220    | Q6NUM9 | RETST_HUMAN                                                | 2   | CTTCGGAGAAA  | 0.597 |
| + | 6   | 705       | .1_Intron SMYD1_    | NM_198274    | NP_938015    | Q8NB12 | SMYD1_HUMAN SET.                                           | 4   | GAATTGAGCTCC | 0.502 |
| - | 14  | 2381_2382 | 2382>.G716S AFF3_uc | NM_002285    | NP_002276    | P51826 | AFF3_HUMAN                                                 | 6   | ACTGCCCCCGTT | 0.624 |
| + | 20  | 2874      | e_Mutation_p.G11    | NM_182588    | NP_872394    | Q7Z3J3 | RGPD4_HUMAN                                                | 2   | AACCAGGAAATC | 0.408 |
| + | 5   | 938       | JLT1C4_uc002teb.    | NM_006588    | NP_006579    | O75897 | ST1C4_HUMAN                                                | 0   | GGGAAGCCAAA  | 0.463 |
| - | 12  | 1682      | .Q449H EDAR_uc      | NM_022336    | NP_071731    | Q9UNE0 | EDAR_HUMAN cytoplasmic (Potential).                        | 1   | CTCAATCTGCAC | 0.572 |
| + | 7   | 1670      |                     | NM_001099289 | NP_001092759 | Q8TEJ3 | SH3R3_HUMAN                                                | 1   | CAGTGGGAGTC  | 0.682 |
| + | 4   | 993_994   | 2toz.2_Intron LIME  | NM_001161415 | NP_001154887 | Q13304 | GPR17_HUMAN cellular (Potential).                          | 0   | CATTTGGGGAA  | 0.589 |
| + | 12  | 1367      | .p.G272R UGGT1_     | NM_020120    | NP_064505    | Q9NYU2 | UGGG1_HUMAN                                                | 1   | ATCAATGGACTT | 0.328 |
| + | 3   | 868       | SD7B_uc002tvb.2     | NM_001080427 | NP_001073896 |        |                                                            | 7   | FGCCTTCAAGAT | 0.443 |
| + | 17  | 3445      | D7B_uc010zjb.1_I    | NM_001080427 | NP_001073896 |        |                                                            | 7   | CTGAATGAAAA  | 0.453 |
| - | 39  | 7123      |                     | NM_018557    | NP_061027    | Q9NZR2 | LRP1B_HUMAN cytoplasmic (Potential),LDL-receptor class B   | 50  | TATTTTCTAAAT | 0.353 |
| - | 7   | 1985      | 21B_uc010fml.1_In   | NM_018557    | NP_061027    | Q9NZR2 | LRP1B_HUMAN                                                | 50  | TTCTTACCCTGC | 0.363 |
| + | 10  | 1355      | m.1_Missense_ML     | NM_033394    | NP_203752    | Q9C0D5 | TANC1_HUMAN                                                | 3   | TTTGCTCCCTAC | 0.333 |
| - | 33  | 6080      | ip.2_Missense_Mu    | NM_013450    | NP_038478    | Q9UIF8 | BAZ2B_HUMAN                                                | 4   | CTGTGCAGCAC  | 0.358 |
| + | 7   | 992       | C4A10_uc002uby.:    | NM_022058    | NP_071341    | Q6U841 | S4A10_HUMAN cytoplasmic (Potential).                       | 5   | TGTGTTGAAAA  | 0.373 |
| + | 3   | 837       |                     | NM_006898    | NP_008829    | P31249 | HXD3_HUMAN Homeobox.                                       | 0   | TGTGCCGGCCG  | 0.592 |
| - | 253 | 54771     | 378K TTN_uc010z     | NM_133378    | NP_596869    | Q8WZ42 | TITIN_HUMAN                                                | 153 | CACTTTCCCCAC | 0.398 |
| - | 230 | 46884     | 9249 TTN_uc010:     | NM_133378    | NP_596869    | Q8WZ42 | TITIN_HUMAN                                                | 153 | CTCTACAGCAG  | 0.368 |
| - | 27  | 4965      | TTN_uc010zjf.1_1    | NM_133378    | NP_596869    | Q8WZ42 | TITIN_HUMAN                                                | 153 | GTGTACCCGTAG | 0.378 |
| - | 5   | 708       | .p.N152Y STAT4_L    | NM_003151    | NP_003142    | Q14765 | STAT4_HUMAN                                                | 9   | CACTGTTTTAAT | 0.408 |
| + | 3   | 285       | 110ziu.1_5'Flank E  | NM_001037663 | NP_001032752 | P24534 | EF1B_HUMAN cytoplasmic (Potential),ST C-terminal.          | 0   | GTGCCAGCCCA  | 0.468 |
| - | 17  | 2465      | e_Mutation_p.P43    | NM_173076    | NP_775099    | Q86UK0 | ABCAC_HUMAN                                                | 11  | TTTTGGCCTCT  | 0.383 |
| + | 4   | 838       | .p.A205T CXCR2_     | NM_001557    | NP_001548    | P25025 | CXCR2_HUMAN cellular (Potential).                          | 2   | ATACAGCAAAC  | 0.542 |
| + | 32  | 2737      | utation_p.G859R C   | NM_000091    | NP_000082    | Q01955 | CO4A3_HUMAN cytoplasmic (Potential),le-helical region.     | 3   | CACCAGGAATC  | 0.483 |
| + | 46  | 4279      | ation_p.G1373R C    | NM_000091    | NP_000082    | Q01955 | CO4A3_HUMAN cytoplasmic (Potential),le-helical region.     | 3   | TGCAGGGAGAA  | 0.542 |
| - | 12  | 5064      | e_Mutation_p.H16    | NM_001142644 | NP_001136116 | Q2M3C7 | SPKAP_HUMAN                                                | 10  | CTGCATGGAAGA | 0.483 |
| - | 4   | 812       | ase_Mutation_p.G    | NM_152527    | NP_689740    | Q7RTX9 | MOT14_HUMAN cellular (Potential).                          | 6   | ACCTGCCCCACC | 0.612 |
| + | 7   | 731       | IND_uc010fyc.2_1    | NM_000751    | NP_000742    | Q07001 | ACHD_HUMAN cellular (Potential),p.R243H(1)                 | 3   | TCATCCGCGCG  | 0.612 |
| - | 10  | 1429      | mt.1_Missense_ML    | NM_018218    | NP_060688    | Q9NVE5 | UBP40_HUMAN                                                | 3   | CTGTTCATATC  | 0.413 |
| + | 4   | 335       | ense_Mutation_p.F   | NM_024080    | NP_076985    | Q7Z2W7 | TRPM8_HUMAN cytoplasmic (Potential).                       | 4   | AAATTTCTACCC | 0.468 |
| + | 14  | 1790      | Jfyj.2_Splice_Site  | NM_024080    | NP_076985    | Q7Z2W7 | TRPM8_HUMAN                                                | 4   | AAAAAGACCAG  | 0.358 |
| + | 14  | 1857      | .p.P424S MLPH_u     | NM_024101    | NP_077006    | Q9BV36 | MELPH_HUMAN                                                | 1   | CTGTGCCCTAT  | 0.468 |
| + | 17  | 2055      | 2vyf.2_Missense_M   | NM_015650    | NP_056465    | Q8TDR0 | MIPT3_HUMAN SC1-interaction domain.                        | 1   | AGCCCTTAAAG  | 0.478 |
| - | 3   | 1535_1536 | bs.2_Missense_M     | NM_015963    | NP_057047    | Q8WY91 | THAP4_HUMAN                                                | 0   | CGGCTCCAGGT  | 0.594 |
| - | 2   | 432       | .p.R123* SIRPG_L    | NM_018556    | NP_061026    | Q9P1W8 | SIRPG_HUMAN cytoplasmic (Potential),Ig-like V-type.        | 1   | CTTTTCGAAACT | 0.498 |
| + | 11  | 1746      | al.1_Missense_Mu    | NM_198994    | NP_945345    | Q95932 | TGM3L_HUMAN                                                | 4   | AGAAGAGAATCC | 0.448 |
| - | 6   | 834       | pv.1_Missense_M     | NM_198216    | NP_937859    | P14678 | RSMB_HUMAN cytoplasmic (Potential),leat-rich region.       | 1   | CAGGGGGAGGA  | 0.572 |
| + | 8   | 1463      | il.2_Missense_Mut   | NM_139321    | NP_647537    | O75882 | ATRN_HUMAN cellular (Potential).                           | 2   | TGGCCGAGTGG  | 0.448 |
| + | 6   | 553       |                     | NM_001009608 | NP_001009608 | Q5VYV7 | CT094_HUMAN                                                | 0   | TCAGTCGTGAT  | 0.318 |
| + | 1   | 621       | Mutation_p.L27F E   | NM_014962    | NP_055777    | Q9Y2F9 | BTBD3_HUMAN                                                | 3   | CAGAATCTCAGT | 0.473 |
| - | 2   | 497       |                     | NM_001008693 | NP_001008693 | Q5W186 | CST9_HUMAN                                                 | 1   | AGGAAAGCTGA  | 0.527 |
| + | 12  | 3229      | eb.2_Missense_ML    | NM_015338    | NP_056153    | Q8IXJ9 | ASXL1_HUMAN                                                | 248 | CTGCTCCACC   | 0.542 |
| + | 2   | 388       | Jgee.2_RNA DNM      | NM_006892    | NP_008823    | Q9UBC3 | DNM3B_HUMAN cytoplasmic (Potential),with DNMT1 and DNMT3A. | 5   | TCCTCGTCAACC | 0.642 |

rs148419172

|   |    |           |                    |              |               |        |                                         |     |              |       |             |
|---|----|-----------|--------------------|--------------|---------------|--------|-----------------------------------------|-----|--------------|-------|-------------|
| + | 11 | 1181      |                    | NM_182658    | NP_872599     | P59826 | LPLC3_HUMAN                             | 4   | CTCCCTCGGCTA | 0.572 | rs79150816  |
| + | 9  | 1675      | T2_uc002wzf.1_R    | NM_005093    | NP_005084     | O43439 | MTG8R_HUMAN                             | 2   | TCAGATCGTGAA | 0.532 |             |
| - | 3  | 2028      | dk.2_intron CPNE   | NM_152838    | NP_690051     | Q9NTZ6 | RBM12_HUMAN                             | 3   | ACTTACGTGCA  | 0.398 |             |
| + | 4  | 545       | Jggc.2_Missense_   | NM_015568    | NP_056383     | Q96T49 | PP16B_HUMAN ANK 1.                      | 3   | GAAGCTGTCTCC | 0.597 |             |
| + | 4  | 617       | o.1_Missense_Mu    | NM_182811    | NP_877963     | P19174 | PLCG1_HUMAN hand. Potential.            | 8   | TGATCGGAAT   | 0.582 |             |
| + | 7  | 815       | iy.2_Missense_Mu   | NM_006282    | NP_006273     | Q13043 | STK4_HUMAN rotein kinase.               | 2   | TCCTCCACATT  | 0.393 |             |
| + | 2  | 1081      | G2_uc010ggz.2_lr   | NM_003007    | NP_002998     | P04279 | SEMG1_HUMAN 3 AA repeat 2.              | 2   | GCCAAAAGGCA  | 0.393 |             |
| - | 4  | 592       | UTR SYS1-DBNDI     | NM_014477    | NP_055292     | Q9Y2B4 | T5G5_HUMAN                              | 1   | GACTCCAGGGT  | 0.537 |             |
| + | 22 | 2975      | xrb.2_Missense_lv  | NM_001134771 | NP_001128243  | Q9H2X9 | S12A5_HUMAN lasmic (Potential).         | 5   | GGAGAAAGAA   | 0.572 |             |
| + | 2  | 405       |                    | NM_005985    | NP_005976     | O95863 | SNAI1_HUMAN                             | 1   | CTTCGTCTTCT  | 0.642 |             |
| - | 2  | 1981      | 2_intron SALL4_u   | NM_020436    | NP_065169     | Q9UJQ4 | SALL4_HUMAN 2H2-type 5.                 | 2   | GGCACGAATGC  | 0.522 |             |
| + | 4  | 950       | lzzi.1_Missense_lv | NM_003222    | NP_003213     | Q92754 | AP2C_HUMAN                              | 1   | TCAGCTCTACGT | 0.532 |             |
| - | 74 | 10328     |                    | NM_005560    | NP_005551     | O15230 | LAMA5_HUMAN minin G-like 4.             | 3   | AGGCCGGGAGC  | 0.697 |             |
| - | 16 | 5737      | s.1_Missense_Mu    | NM_033081    | NP_149072     | Q9BTC0 | DIDO1_HUMAN Pro-rich.                   | 6   | GGGGCCCTCTGC | 0.617 |             |
| - | 3  | 640       | fb.1_Missense_Mi   | NM_172107    | NP_742105     | O43526 | KCNQ2_HUMAN lasmic (Potential).         | 2   | GCCACGGTACC  | 0.617 |             |
| - | 9  | 5610      | fl.1_Missense_Mu   | NM_001037335 | NP_001032412  | Q9BYK8 | PR285_HUMAN                             | 2   | GACCCCGGTCC  | 0.721 |             |
| - | 2  | 291       | ID10_uc002yhn.2_   | NM_080621    | NP_542188     | Q9BYL1 | SAM10_HUMAN                             | 0   | GGGTCCGGCAG  | 0.637 |             |
| + | 2  | 295       | yim.3_Missense_f   | NM_018257    | NP_060727     | Q9NV79 | PCMD2_HUMAN                             | 0   | GACAGGTTTCA  | 0.428 |             |
| - | 21 | 1708      | TE_uc002yir.1_Mi   | NM_199261    | NP_954870     | P56180 | TPTE_HUMAN 2 tensin-type.               | 5   | CTAATGAAATAG | 0.328 |             |
| - | 18 | 2439      | h.1_Missense_Mu    | NM_000484    | NP_000475     | P05067 | A4_HUMAN tial). Interaction with G(o)-a | 1   | GTGGCGCTCT   | 0.478 |             |
| - | 3  | 348       | rwo.2_Missense_l   | NM_002240    | NP_002231     | P48051 | IRK6_HUMAN me=M1; (By similarity).      | 1   | GTAAACCATGA  | 0.483 |             |
| - | 1  | 5803_5804 | E2_uc002yyx.2_lr   | NM_182832    | NP_878252     | Q8WY50 | PLAC4_HUMAN                             | 0   | gtgaACGTGTCC | 0.317 |             |
| - | 13 | 1949_1950 | p.L186F C2CD2_u    | NM_015500    | NP_056315     | Q9Y426 | CU025_HUMAN                             | 1   | GCAAGGGATGC  | 0.698 |             |
| - | 3  | 2795      | zy.3_Missense_M    | NM_001098402 | NP_001091872  | Q9ULJ3 | ZN295_HUMAN                             | 3   | AGAGGAATCTT  | 0.488 |             |
| + | 13 | 1716      | uc002zap.2_Miss    | NM_004915    | NP_004906     | P45844 | ABCG1_HUMAN i. ABC transmembrane type   | 3   | GCTGTTTGCCG  | 0.647 |             |
| - | 14 | 2400      |                    | NM_173354    | NP_775490     | P57059 | SIK1_HUMAN                              | 7   | CCAGGGGCTCA  | 0.692 |             |
| + | 1  | 222       | .1_intron C21orf2  | NM_198695    | NP_941968     | P60410 | KR108_HUMAN repeats of C-C-X(3). 3.     | 2   | CTGTGCCCCAG  | 0.662 |             |
| + | 9  | 837       | _p.P304L PCBP3_    | NM_020528    | NP_065389     | P57721 | PCBP3_HUMAN                             | 1   | CTCACCCGGAT  | 0.512 |             |
| - | 7  | 1325      | _p.A167T GNB1L_    | NM_053004    | NP_443730     | Q9BYB4 | GNB1L_HUMAN WD 6.                       | 1   | GCCCCGGGCCA  | 0.687 |             |
| + | 5  | 2125      | l1aiz.1_RNA LOC    | NM_153615    | NP_705843     | Q8IZJ4 | RGDSR_HUMAN Ras-GEF.                    | 1   | TCATCGTCTCT  | 0.572 |             |
| - | 1  | 529       | iT5_uc002zzq.3_lv  | NM_004121    | NP_004112     | P36269 | GGT5_HUMAN xellular (Potential).        | 3   | CTGGGGGCCAC  | 0.657 |             |
| + | 5  | 451       |                    | NM_000496    | NP_000487     | P43320 | CRBB2_HUMAN a crystallin 'Greek key' 3. | 0   | ACGCCCATGGC  | 0.493 |             |
| - | 9  | 976       | n.1_Missense_Mu    | NM_014303    | NP_055118     | O00541 | PESC_HUMAN                              | 0   | CGGTGGGAAAC  | 0.622 |             |
| - | 4  | 443       | .2_5'UTR BPIL2_u   | NM_174932    | NP_777592     | Q8NFO6 | BPIL2_HUMAN                             | 2   | TCATTCGGGTT  | 0.493 | rs78469100  |
| + | 3  | 895       | iny.2_Missense_M   | NM_014310    | NP_055125     | Q96D21 | RHES_HUMAN 1 GNB1, GNB2 and GNB3.       | 3   | GGCATGGTCTC  | 0.647 |             |
| - | 5  | 1339      | ense_Mutation_p.l  | NM_024955    | NP_079231     | Q8IWF2 | FXRD2_HUMAN                             | 2   | GAGCCGGTGAA  | 0.627 | rs143694562 |
| - | 3  | 1460      |                    | NM_052906    | NP_443138     | Q5R3F8 | LRFN6_HUMAN xtracellular (Potential).   | 2   | GCAGCGGGTAG  | 0.667 |             |
| + | 7  | 2024      | atq.1_Missense_M   | NM_001039141 | NP_001034230  | Q9H2D6 | TARA_HUMAN                              | 1   | ACAATCCCAGA  | 0.587 |             |
| - | 2  | 1066      | axe.2_Missense_lv  | NM_002608    | NP_002599     | P01127 | PDGFB_HUMAN                             | 373 | CTCGGGAATG   | 0.597 |             |
| + | 5  | 671       | RVG_uc010ggr.1_    | NM_001137605 | NP_0011131077 | Q9HBIO | PARVG_HUMAN CH 1.                       | 0   | TATTCGGTAAG  | 0.562 | rs147016590 |
| + | 1  | 1017      |                    | NM_138433    | NP_612442     | Q96G42 | KLD7B_HUMAN                             | 1   | AGGGGGGCCGC  | 0.756 |             |
| + | 2  | 835       | sg.2_Missense_M    | NM_004634    | NP_004625     | P55201 | BRPF1_HUMAN ith MYST3 and MYST4.        | 3   | CTACTCCCAAG  | 0.547 |             |
| + | 6  | 738       | lbyl.1_Missense_lv | NM_024334    | NP_077310     | Q9BTV4 | TMM43_HUMAN ienal (Potential).          | 1   | ACTTCGACCGA  | 0.498 | rs150425166 |
| + | 5  | 503       | _p.G138R C3orf19   | NM_016474    | NP_057558     | Q6PII3 | CC019_HUMAN                             | 0   | AGGCAGGAGAA  | 0.473 |             |
| + | 2  | 357       | p.1_5'Flank METTI  | NM_033083    | NP_149074     | Q96JC9 | EAF1_HUMAN                              | 1   | CACCTCCTGTG  | 0.373 |             |
| - | 10 | 3465      | _p.H577L SATB1_u   | NM_002971    | NP_002962     | Q01826 | SATB1_HUMAN                             | 4   | GCCATGGTGA   | 0.483 |             |
| + | 10 | 1904      | hex.1_Missense_lv  | NM_144633    | NP_653234     | Q96L42 | KCNH8_HUMAN /toplasmic (Potential).     | 5   | AACCTCTTCTC  | 0.502 |             |

|   |    |           |                                                  |              |              |        |               |       |                |       |
|---|----|-----------|--------------------------------------------------|--------------|--------------|--------|---------------|-------|----------------|-------|
| - | 8  | 947       | _p.L325V NEK10_uc010hfj.2_Missense_Mutation_p.L2 | Q6ZWH5       | NEK10_HUMAN  | 13     | TCTTTAAAATGTC | 0.284 |                |       |
| - | 16 | 2074      | j.1_Missense_Mut                                 | NM_000404    | NP_000395    | P16278 | BGAL_HUMAN    | 1     | 'GGAGGGATGAT   | 0.498 |
| + | 2  | 256       | TAC_uc011aya.1_l                                 | NM_003149    | NP_003140    | Q99469 | STAC_HUMAN    | 4     | 'TGCAAGCACAC.  | 0.537 |
| - | 12 | 6541      |                                                  | NM_014831    | NP_055646    | O15050 | TRNK1_HUMAN   | 2     | 'AACAGAGCAGG   | 0.542 |
| - | 3  | 423       | se_Mutation_p.P7i                                | NM_147129    | NP_667340    | Q60I27 | AL2CL_HUMAN   | 5     | 'AGTCCGGGTAA   | 0.627 |
| + | 20 | 2813      | N23_uc011bax.1_l                                 | NM_015466    | NP_056281    | Q9H3S7 | PTN23_HUMAN   | 3     | 'TCCTCCCCCGC   | 0.672 |
| - | 18 | 2668      | wf.1_Missense_Mi                                 | NM_002292    | NP_002283    | P55268 | LAMB2_HUMAN   | 3     | 'TCAGTGAACCTT  | 0.597 |
| - | 17 | 2316      | wp.2_Missense_M                                  | NM_003363    | NP_003354    | Q13107 | UBP4_HUMAN    | 4     | 'TCCGAGTTTCA   | 0.512 |
| + | 5  | 2867      |                                                  | NM_003458    | NP_003449    | Q9UPA5 | BSN_HUMAN     | 8     | 'GGCTACCGATG   | 0.622 |
| + | 9  | 1067      | cyk.2_Missense_Iv                                | NM_004186    | NP_004177    | Q13275 | SEM3F_HUMAN   | 2     | 'GAGCCCCGCGG   | 0.602 |
| + | 19 | 2371      | cyk.2_Missense_Iv                                | NM_004186    | NP_004177    | Q13275 | SEM3F_HUMAN   | 2     | 'CAACGCCTCCT   | 0.682 |
| - | 6  | 549       | 03dap.2_Splice_Si                                | NM_006030    | NP_006021    | Q9NY47 | CA2D2_HUMAN   | 1     | 'TCGTCTGCAG    | 0.552 |
| + | 32 | 5501      |                                                  | NM_015512    | NP_056327    | Q9P2D7 | DYH1_HUMAN    | 3     | 'CAGCTCCCAGG   | 0.438 |
| + | 6  | 655       | k.1_Missense_Mu                                  | NM_002217    | NP_002208    | Q06033 | ITIH3_HUMAN   | 3     | 'CCAACGACCTC   | 0.532 |
| + | 18 | 1893      | l1bfa.1_Missense_                                | NM_007159    | NP_009090    | Q14BN4 | SLMAP_HUMAN   | 0     | 'TCTCCGGGAGG   | 0.418 |
| + | 37 | 6358      | e_Mutation_p.V20z                                | NM_001457    | NP_001448    | O75369 | FLNB_HUMAN    | 19    | 'CTACCGTGCCTC  | 0.542 |
| - | 14 | 1846      | nse_Mutation_p.R                                 | NM_015541    | NP_056356    | Q96JA1 | LRIG1_HUMAN   | 5     | 'TGGTCCGGATG   | 0.562 |
| + | 4  | 1813      | ofv.1_Missense_M                                 | NM_032505    | NP_115894    | Q8NFY9 | KBTB8_HUMAN   | 4     | 'TGAATGTGCTG1  | 0.438 |
| - | 14 | 1392      | ense_Mutation_p.l                                | NM_015123    | NP_055938    | Q9Y2L6 | FRM4B_HUMAN   | 4     | 'TGAAGGAATTT   | 0.363 |
| + | 3  | 322       |                                                  | NM_032359    | NP_115735    | Q9BQ75 | CC026_HUMAN   | 1     | 'ACAACCAAAGG/  | 0.239 |
| + | 5  | 1205      | ipn.2_Missense_Iv                                | NM_145037    | NP_659474    | Q969Y0 | FA55C_HUMAN   | 3     | 'TCCACCCCAGT   | 0.458 |
| - | 36 | 5224      |                                                  | NM_014981    | NP_055796    | Q9Y2K3 | MYH15_HUMAN   | 7     | 'TCTTTCTGTTGC  | 0.527 |
| - | 5  | 564       | 2PA4_uc011bhp.1                                  | NM_018189    | NP_060659    | Q7L190 | DPPA4_HUMAN   | 1     | 'GAGGAAGAGCC   | 0.498 |
| - | 7  | 5569      | eal.2_Missense_M                                 | NM_001009899 | NP_001009899 | Q68DE3 | K2018_HUMAN   | 3     | 'CACACGACCCT   | 0.423 |
| - | 7  | 3914      | eal.2_Missense_Iv                                | NM_001009899 | NP_001009899 | Q68DE3 | K2018_HUMAN   | 3     | 'ACAATGATGCTT  | 0.463 |
| - | 1  | 615       | e_Mutation_p.L16                                 | NM_022135    | NP_071418    | Q9HBU9 | POPD2_HUMAN   | 1     | 'AGAGAGCAGCA   | 0.527 |
| + | 11 | 1151      | _p.V330I ABTB1_L                                 | NM_172027    | NP_742024    | Q969K4 | ABTB1_HUMAN   | 0     | 'TGAGCGTCGCC   | 0.647 |
| - | 4  | 1118      | _p.P228L GATA2_L                                 | NM_001145661 | NP_001139133 | P23769 | GATA2_HUMAN   | 15    | 'GCAGGGGACTG   | 0.632 |
| + | 2  | 217       | _p.R43W ACPP_u                                   | NM_001099    | NP_001090    | P15309 | PPAP_HUMAN    | 1     | 'TGTTCGCGCAT   | 0.428 |
| + | 1  | 332       |                                                  | NM_003571    | NP_003562    | Q13515 | BFSP2_HUMAN   | 0     | 'TGGGTGCATAG   | 0.662 |
| - | 11 | 1801_1802 | _p.P434S SLCO2L                                  | NM_005630    | NP_005621    | Q92959 | SO2A1_HUMAN   | 1     | 'CAGGGGACAGC   | 0.559 |
| + | 5  | 1320      | 31_uc011bly.1_3'U                                | NM_004441    | NP_004432    | P54762 | EPHB1_HUMAN   | 30    | 'AGACCGCCGGA   | 0.612 |
| + | 4  | 1101      | _p.Y321H HPS3_u                                  | NM_032383    | NP_115759    | Q969F9 | HPS3_HUMAN    | 6     | 'CCATTTACCAG/  | 0.478 |
| - | 1  | 306       | '_uc003ewz.2_Nor                                 | NM_000096    | NP_000087    | P00450 | CERU_HUMAN    | 1     | 'TCGCCCAGGCT   | 0.373 |
| - | 5  | 1055      | e_Mutation_p.N21z                                | NM_033169    | NP_149359    | O75752 | B3GL1_HUMAN   | 1     | 'GGAATAATTATCA | 0.353 |
| - | 18 | 2116      | _p.F598Y ZBBX_u                                  | NM_024687    | NP_078963    | A8MT70 | ZBBX_HUMAN    | 2     | 'AAAATAAAGAATC | 0.308 |
| - | 9  | 2292      | 'OM_uc003ffk.2_In                                | NM_005241    | NP_005232    | Q03112 | EV11_HUMAN    | 14    | 'ATCAGGCAGTT   | 0.313 |
| - | 8  | 1103      | q.1_Missense_Mu                                  | NM_024947    | NP_079223    | Q8NDX5 | PHC3_HUMAN    | 2     | 'TGGGGGTGGGT   | 0.488 |
| + | 4  | 947       | B5_uc003fmq.2_5                                  | NM_003907    | NP_003898    | Q13144 | EI2BE_HUMAN   | 5     | 'CAACTCGTTGC   | 0.483 |
| + | 4  | 583       | .R148Q DVL3_ucC                                  | NM_004423    | NP_004414    | Q92997 | DVL3_HUMAN    | 3     | 'ACGCCGAGGG    | 0.617 |
| - | 3  | 586       | _p.P153S TBCCD'                                  | NM_018138    | NP_060608    | Q9NVR7 | TBCC1_HUMAN   | 2     | 'GTCAGGAGACT   | 0.408 |
| + | 5  | 852       | b.2_Missense_Mu                                  | NM_003722    | NP_003713    | Q9H3D4 | P63_HUMAN     | 12    | 'TCAACGAGGGT/  | 0.498 |
| - | 2  | 75        |                                                  | NM_004488    | NP_004479    | P40197 | GPV_HUMAN     | 3     | 'GGCGCGCAGA    | 0.667 |
| - | 8  | 1174      |                                                  | NM_018385    | NP_060855    | Q9H089 | LSG1_HUMAN    | 0     | 'AGCTGGGAGAT   | 0.478 |
| - | 16 | 1953      | zy.2_Missense_Mi                                 | NM_003234    | NP_003225    | P02786 | TFR1_HUMAN    | 3     | 'CGCAAAAACAG/  | 0.229 |
| + | 3  | 1280      |                                                  | NM_198565    | NP_940967    | Q86YC3 | LR33_HUMAN    | 3     | 'CTGCACCTGGC   | 0.657 |
| + | 5  | 1113      | 141_uc003gab.2_l                                 | NM_003441    | NP_003432    | Q15928 | ZN141_HUMAN   | 0     | 'CTACAAATGTG/  | 0.398 |

rs138744399

rs113994055



|   |    |           |                   |              |              |        |             |    |                  |       |             |
|---|----|-----------|-------------------|--------------|--------------|--------|-------------|----|------------------|-------|-------------|
| - | 12 | 1750      | sense_Mutation_p  | NM_003703    | NP_003694    | P78316 | NOP14_HUMAN | 1  | :GAAGTCGGAAG     | 0.527 |             |
| - | 3  | 3536      |                   | NM_053042    | NP_444270    | Q9C0D4 | Z518B_HUMAN | 4  | TTTTATGAAC TTT   | 0.418 |             |
| - | 8  | 1628      | :GC1A_uc011b xp.  | NM_013261    | NP_037393    | Q9UBK2 | PRGC1_HUMAN | 8  | AGTCCTGAATTT/    | 0.428 |             |
| - | 2  | 299       |                   | NM_001358    | NP_001349    | O43143 | DHX15_HUMAN | 1  | :TATCACGTTCTC    | 0.363 | rs145564625 |
| - | 13 | 2324_2325 | rv.2_Missense_Mi  | NM_015187    | NP_056002    | Q68CR1 | SE1L3_HUMAN | 0  | ATCCTCCGTCTC     | 0.49  |             |
| + | 1  | 651       | i.1_Missense_Mut  | NM_175737    | NP_783864    | Q86Z14 | KLOTB_HUMAN | 1  | FGCTTAGAAACA/    | 0.413 |             |
| + | 8  | 1615      | vi.3_Missense_Mt  | NM_024677    | NP_078953    |        |             | 0  | :TGCTACCTCGT/    | 0.303 |             |
| - | 9  | 1470      | p.E390K KDR_uc    | NM_002253    | NP_002244    | P35968 | VGFR2_HUMAN | 33 | :CTCTTCACTCA/    | 0.408 |             |
| + | 1  | 203       | n_p.M10 LPHN3_    | NM_015236    | NP_056051    | Q9HAR2 | LPHN3_HUMAN | 18 | TTTCATGATGCTC    | 0.363 |             |
| - | 8  | 823       |                   | NM_182502    | NP_872308    | Q86T26 | TM11B_HUMAN | 1  | TTTTCTAGAGG      | 0.323 |             |
| + | 4  | 1524      | n_p.Q15* SHROO    | NM_020859    | NP_065910    | Q8TF72 | SHRM3_HUMAN | 3  | GGCACCAAAGC      | 0.473 |             |
| + | 37 | 5395      | _p.R1652K FRAS    | NM_025074    | NP_079350    | Q86XX4 | FRAS1_HUMAN | 5  | CCGAAGGCCCGA     | 0.493 |             |
| + | 10 | 1747      | iu.1_Missense_Mt  | NM_001510    | NP_001501    | O43424 | GRID2_HUMAN | 6  | AAATACGGAAGC/    | 0.393 |             |
| + | 1  | 111       |                   | NM_005390    | NP_005381    | P29803 | ODPAT_HUMAN | 1  | :CAGAAATCAGC     | 0.537 |             |
| - | 9  | 981       |                   | NM_000669    | NP_000660    | P00326 | ADH1G_HUMAN | 0  | TCTGGGAATCA/     | 0.448 |             |
| + | 7  | 1536      | i_p.F320 EGF_uc   | NM_001963    | NP_001954    | P01133 | EGF_HUMAN   | 4  | FGTGCTTTTGG/     | 0.398 |             |
| + | 7  | 776       | o.V226M ANK2_uc   | NM_001148    | NP_001139    | Q01484 | ANK2_HUMAN  | 14 | ATGATGGTGAAT/    | 0.353 |             |
| - | 7  | 995       | ine.2_Missense_M  | NM_018699    | NP_061169    | Q9NQX1 | PRDM5_HUMAN | 2  | :CTCAAAACTAC/    | 0.478 |             |
| + | 7  | 875       | _p.E215K ADAD1_   | NM_139243    | NP_640336    | Q96M93 | ADAD1_HUMAN | 0  | GTTAAAGAAAGA     | 0.323 |             |
| - | 1  | 126       | :TA5_uc003iez.3_5 | NM_007083    | NP_009014    | P53370 | NUDT6_HUMAN | 0  | CTGTGCGCCCG/     | 0.711 |             |
| + | 1  | 1846      |                   | NM_024582    | NP_078858    | Q6V0I7 | FAT4_HUMAN  | 18 | :ACAACGGAACA/    | 0.547 |             |
| + | 11 | 11909     | p.G2233E FAT4_u   | NM_024582    | NP_078858    | Q6V0I7 | FAT4_HUMAN  | 18 | GCTTTGGAAAA/     | 0.289 |             |
| + | 11 | 1277      | iu.2_Missense_Mu  | NM_001039717 | NP_001034806 | Q0P651 | CD029_HUMAN | 1  | AAGTCGCAACCC     | 0.388 |             |
| + | 10 | 1337      |                   | NM_057175    | NP_476516    | Q9BXJ9 | NAA15_HUMAN | 2  | TTAAACCCAATC     | 0.323 |             |
| - | 7  | 792       | 10A7_uc010ipa.2_  | NM_001029998 | NP_001025169 | Q0GE19 | NTCP7_HUMAN | 0  | GAGAGGAACCA/     | 0.353 |             |
| + | 11 | 2576      |                   | NM_033393    | NP_203751    | Q9C0D6 | FHDC1_HUMAN | 2  | :TCCTGCCCCCG     | 0.622 |             |
| - | 15 | 3677      |                   | NM_017639    | NP_060109    | Q6V1P9 | PCD23_HUMAN | 4  | CCAAGGACAG/      | 0.378 |             |
| - | 14 | 3434      |                   | NM_017639    | NP_060109    | Q6V1P9 | PCD23_HUMAN | 4  | :TCAGTCGCCGG     | 0.463 |             |
| - | 5  | 1053      | e_Mutation_p.G33  | NM_000508    | NP_000499    | P02671 | FIBA_HUMAN  | 3  | :AGCTTCCAGTA/    | 0.567 |             |
| - | 2  | 224       |                   | NM_001334    | NP_001325    | P43234 | CATO_HUMAN  | 0  | :ACTGGGAAATA/    | 0.333 |             |
| + | 3  | 1539      | qx.1_Missense_Mt  | NM_152620    | NP_689833    | Q495X7 | TRI60_HUMAN | 1  | :GAACAGATCCC     | 0.353 |             |
| - | 12 | 1360      | p.D404N SPOCK3    | NM_016950    | NP_058646    | Q9BQ16 | TICN3_HUMAN | 3  | tcataatcgtctcatc | 0.075 |             |
| - | 11 | 1737      |                   | NM_017631    | NP_060101    | Q8IY21 | DDX60_HUMAN | 3  | :TTATACCTCTTTA   | 0.348 |             |
| + | 6  | 722       |                   | NM_004477    | NP_004468    | Q14331 | FRG1_HUMAN  | 0  | AGAAATGATCA/     | 0.363 |             |
| - | 10 | 1771      | RLR_uc003jji.1_In | NM_000949    | NP_000940    | P16471 | PRLR_HUMAN  | 3  | CATGTTGAACAT     | 0.532 |             |
| + | 3  | 372       | se_Mutation_p.E9! | NM_002185    | NP_002176    | P16871 | IL7RA_HUMAN | 5  | TCATCGAGACA/     | 0.383 |             |
| - | 7  | 1400      | _p.A402V UGT3A2   | NM_174914    | NP_777574    | Q3SY77 | UD3A2_HUMAN | 6  | :CTGCCGCGGAC     | 0.562 |             |
| + | 6  | 919       | jib.1_Missense_M  | NM_152403    | NP_689616    | Q63HQ2 | EGFLA_HUMAN | 7  | :AGATGGACTCC/    | 0.507 |             |
| - | 7  | 1803      |                   | NM_021072    | NP_066550    | O60741 | HCN1_HUMAN  | 1  | :CTATTCGATCTA    | 0.378 |             |
| + | 1  | 315       |                   | NM_006308    | NP_006299    | Q12988 | HSPB3_HUMAN | 0  | :GAGGAAAACCA/    | 0.567 |             |
| + | 8  | 844       | iCR_uc003kdq.2_!  | NM_000859    | NP_000850    | P04035 | HMDH_HUMAN  | 1  | :AGGGTCGTCCA/    | 0.413 |             |
| + | 2  | 9180      |                   | NM_153610    | NP_705838    | Q8N3K9 | CMYA5_HUMAN | 9  | TTCAGAACTGA      | 0.323 |             |
| - | 7  | 832       | u.1_Missense_Mut  | NM_032042    | NP_114431    | Q8WUF8 | F172A_HUMAN | 0  | GCTTCGGCTTTTC    | 0.328 |             |
| + | 5  | 683       | 81B_uc010jbe.1_5  | NM_152548    | NP_689761    | Q96LP2 | FA81B_HUMAN | 2  | :GAGATCTTCGAC    | 0.433 |             |
| - | 9  | 1351      | jbi.1_Missense_Mi | NM_000439    | NP_000430    | P29120 | NEC1_HUMAN  | 2  | :AGCCGAGGTG      | 0.557 |             |
| + | 2  | 127       | ae_Mutation_p.S10 | NM_001744    | NP_001735    | Q16566 | KCC4_HUMAN  | 5  | :CTGTCTCCGCC     | 0.597 |             |
| + | 12 | 1311      | bv.2_Missense_Mi  | NM_001744    | NP_001735    | Q16566 | KCC4_HUMAN  | 5  | AGTTAAAGGTGC     | 0.527 |             |

|   |    |      |                    |              |              |        |             |                              |   |               |       |
|---|----|------|--------------------|--------------|--------------|--------|-------------|------------------------------|---|---------------|-------|
| + | 2  | 627  | _p.R132Q PRR16_    | NM_016644    | NP_057728    | Q569H4 | PRR16_HUMAN | Pro-rich.                    | 3 | TTCTACGAAATGC | 0.493 |
| - | 1  | 371  | ense_Mutation_p.6  | NM_001182    | NP_001173    | P49419 | AL7A1_HUMAN |                              | 3 | :GGCCTCCCCAG  | 0.652 |
| + | 2  | 184  |                    | NM_207408    | NP_997291    | Q6ZNM6 | CE048_HUMAN |                              | 1 | AAACATGATATTC | 0.303 |
| - | 6  | 945  |                    | NM_198282    | NP_938023    | Q86WV6 | TM173_HUMAN | lasmic (Potential).          | 1 | :AGCATGGTCAC  | 0.557 |
| - | 12 | 1518 | _p.R459H HARS_1    | NM_002109    | NP_002100    | P12081 | SYHC_HUMAN  |                              | 2 | ACTGAACGGAGC  | 0.552 |
| + | 1  | 1028 | .2_Intron PCDHA6   | NM_018903    | NP_061726    | Q9UN75 | PCDAC_HUMAN | Extracellular (Potential).   | 0 | ACAGGTGAAATT/ | 0.378 |
| + | 1  | 1928 | .2_Intron PCDHA6   | NM_018903    | NP_061726    | Q9UN75 | PCDAC_HUMAN | Extracellular (Potential).   | 0 | 3CTGACTCCGGC  | 0.677 |
| + | 1  | 388  | uc003lin.2_intron  | NM_018937    | NP_061760    | Q9Y5E6 | PCDB3_HUMAN | r (Potential). Cadherin 1.   | 2 | 3ACCATTCTCCG  | 0.418 |
| + | 1  | 2365 | uc003lin.2_5'Flank | NM_018937    | NP_061760    | Q9Y5E6 | PCDB3_HUMAN | lasmic (Potential).          | 2 | :CCAGTTTCAGG/ | 0.453 |
| + | 1  | 647  | IB16_uc003liv.2_5  | NM_019120    | NP_061993    | Q9UN66 | PCDB8_HUMAN | Extracellular (Potential).   | 4 | CGTTTCCTCTGA  | 0.438 |
| + | 1  | 1895 | '_5'Flank PCDHB1   | NM_019120    | NP_061993    | Q9UN66 | PCDB8_HUMAN | Extracellular (Potential).   | 4 | ITGGCTCCGCGC  | 0.721 |
| - | 1  | 736  |                    | NM_031947    | NP_114153    | Q9BXI2 | ORNT2_HUMAN | e=4; (Potential). Solcar 2.  | 1 | AGAAAAAGAAAT/ | 0.453 |
| + | 1  | 1972 | q.1_intron PCDHC   | NM_018924    | NP_061747    | Q9Y5G1 | PCDGF_HUMAN | r (Potential). Cadherin 6.   | 0 | :CCACCGTCATG  | 0.617 |
| + | 3  | 481  | iP1_uc003lmj.1_lr  | NM_030571    | NP_085048    | Q9BT67 | NFIP1_HUMAN | lasmic (Potential).          | 0 | ACTATCCCTTTGC | 0.428 |
| + | 4  | 1779 | nn.1_Missense_M    | NM_020768    | NP_065819    | Q68DU8 | KCD16_HUMAN |                              | 4 | AAAAAGCTGTT/  | 0.448 |
| + | 8  | 1520 | _p.P473S TCERG1    | NM_006706    | NP_006697    | O14776 | TCRG1_HUMAN | Glu-rich.                    | 2 | 3AGGATCCTAAA  | 0.403 |
| - | 3  | 244  | '_Mutation_p.S27L  | NM_000870    | NP_000861    | Q13639 | 5HT4R_HUMAN | ame=1; (By similarity).      | 1 | CCGTCGAGAGA   | 0.537 |
| + | 13 | 1381 | lqc.1_Missense_I   | NM_014945    | NP_055760    | O94929 | ABLM3_HUMAN |                              | 3 | 3GTACATAGACT  | 0.627 |
| + | 2  | 558  |                    | NM_014228    | NP_055043    | Q99884 | SC6A7_HUMAN | Name=1; (Potential).         | 0 | GGCGCTTCCCC   | 0.602 |
| - | 6  | 1903 | 3M_uc011dcl.1_Int  | NM_052860    | NP_443092    | Q96RE9 | ZN300_HUMAN |                              | 2 | 3TTTCTCTCCTG  | 0.433 |
| + | 11 | 1581 | 2A_uc011dcs.1_In   | NM_078483    | NP_510968    | Q7Z2H8 | S36A1_HUMAN | lame=11; (Potential).        | 1 | ATGAGGCTCTCT/ | 0.552 |
| - | 2  | 410  | 3lw1.2_Missense_I  | NM_032782    | NP_116171    | Q8TDQ0 | HAVR2_HUMAN | . Extracellular (Potential). | 0 | :CTTTGCGGAAAT | 0.473 |
| + | 25 | 2731 | _p.R865W CYFIP2_   | NM_001037333 | NP_001032410 | Q96F07 | CYFP2_HUMAN |                              | 0 | TTGTGCGGACT   | 0.473 |
| + | 1  | 597  |                    | NM_000679    | NP_000670    | P35368 | ADA1B_HUMAN | smic (By similarity).        | 1 | TCATCGATCGC   | 0.617 |
| - | 7  | 1411 | se_Mutation_p.P3C  | NM_024565    | NP_078841    | Q8IV13 | CCNJL_HUMAN |                              | 0 | CAAGGGCTGCAC  | 0.622 |
| - | 3  | 661  | 3NMB1_uc003mar     | NM_004137    | NP_004128    | Q16558 | KCMB1_HUMAN | ellular (Potential).         | 2 | :ACAGCCCACCT  | 0.592 |
| + | 4  | 773  | on_p.E71K KCNIP    | NM_001034837 | NP_001030009 | Q9NZI2 | KCIP1_HUMAN | ind 1; degenerate.           | 2 | 3TCAACGAAGAC  | 0.547 |
| - | 14 | 1516 | 03mhm.2_Missens    | NM_016222    | NP_057306    | Q9UJV9 | DDX41_HUMAN | case C-terminal.             | 0 | GGCAGGGAAGT   | 0.577 |
| + | 5  | 612  |                    | NM_014594    | NP_055409    | Q86Y25 | Z354C_HUMAN |                              | 1 | ATTGGGGAAAA   | 0.353 |
| - | 16 | 2631 | _p.R41Q TBC1D5     | NM_198868    | NP_942568    | Q66K14 | TBC9B_HUMAN |                              | 2 | :GTTCCCGGAAC  | 0.647 |
| - | 12 | 1446 | lc.2_Missense_Mu   | NM_002752    | NP_002743    | P45984 | MK09_HUMAN  |                              | 4 | TGATCGATGAAC  | 0.483 |
| - | 18 | 2044 |                    | NM_005110    | NP_005101    | O94808 | GFPT2_HUMAN | SIS 2.                       | 2 | :CGCTCAGGATG  | 0.527 |
| - | 7  | 1220 | _p.R177C TRIM7_1   | NM_203293    | NP_976038    | Q9C029 | TRIM7_HUMAN | 330.2/SPRY.                  | 3 | :GACGCGGGTGT  | 0.697 |
| - | 3  | 321  | se_Mutation_p.R6   | NM_018303    | NP_060773    | Q96KP1 | EXOC2_HUMAN | IPT/TIG.                     | 7 | CCACTCGACATA  | 0.423 |
| - | 10 | 1358 | ib.1_Missense_Mu   | NM_000129    | NP_000120    | P00488 | F13A_HUMAN  |                              | 6 | AGGCGGGGCCA   | 0.512 |
| + | 4  | 2241 | EP1_uc011diq.1_F   | NM_002114    | NP_002105    | P15822 | ZEP1_HUMAN  |                              | 6 | 3TGAGTCCACCA  | 0.512 |
| - | 3  | 342  | djz.1_Missense_I   | NM_006632    | NP_006623    | O00476 | NPT4_HUMAN  |                              | 0 | AGGAATCATTGAC | 0.433 |
| + | 2  | 319  | se_Mutation_p.P3E  | NM_024493    | NP_077819    | Q9BRR0 | ZKSC3_HUMAN |                              | 2 | 3GTTTTCCAGT/  | 0.607 |
| - | 1  | 880  |                    | NM_030903    | NP_112165    | Q9Y3N9 | OR2W1_HUMAN | lasmic (Potential).          | 3 | CCTATTTCTTAA  | 0.423 |
| + | 4  | 729  | '_3'UTR MOG_uc0    | NM_206809    | NP_996532    | Q16653 | MOG_HUMAN   | lasmic (Potential).          | 1 | TTTAGGAAAAC   | 0.493 |
| - | 8  | 1177 | R10_uc010jsc.1_5   | NM_002714    | NP_002705    | Q96QC0 | PP1RA_HUMAN | with TOX4 (By similarity).   | 4 | :GGAACGGAAC   | 0.567 |
| + | 3  | 612  | B_uc011dos.1_3'L   | NM_001710    | NP_001701    | P00751 | CFAB_HUMAN  | Sushi 2.                     | 1 | :AGAACGGGGAA  | 0.532 |
| - | 2  | 1831 | dz.2_5'Flank TAPE  | NM_005453    | NP_005444    | O15209 | ZBT22_HUMAN | 32H2-type 3.                 | 1 | :GTCCTCGGTGG  | 0.647 |
| + | 8  | 2033 | rf.1_Missense_Mu   | NM_002263    | NP_002254    | Q9BW19 | KIFC1_HUMAN | inesin-motor.                | 0 | GGCCCGCACAG   | 0.607 |
| + | 4  | 467  | _p.R154Q SCUBE1    | NM_152753    | NP_689966    | Q8IX30 | SCUB3_HUMAN |                              | 1 | CCAGCGGCCAG   | 0.612 |
| + | 5  | 1562 | ib.2_Intron PI16_u | NM_153370    | NP_699201    | Q6UXB8 | PI16_HUMAN  | ellular (Potential).         | 0 | CCACGGGTGGG   | 0.617 |
| + | 10 | 1104 | 3vn.1_Missense_I   | NM_007058    | NP_008989    | Q9UMQ6 | CAN11_HUMAN | ilpain catalytic.            | 2 | :AGGACGGGGAC  | 0.632 |

rs145371121

|   |    |           |                                  |              |              |        |              |                             |    |               |       |
|---|----|-----------|----------------------------------|--------------|--------------|--------|--------------|-----------------------------|----|---------------|-------|
| - | 8  | 1072      | se_Mutation_p.M2f                | NM_001098518 | NP_001091988 | Q8IZF2 | GP116_HUMAN  | racellular (Potential).     | 2  | 3TAGTCCATTTTC | 0.353 |
| - | 2  | 615       |                                  | NM_014452    | NP_055267    | O75509 | TNR21_HUMAN  | (Potential). TNFR-Cys 1.    | 0  | GGCCGGTGGCA   | 0.547 |
| + | 2  | 214       |                                  | NM_207410    | NP_997293    | Q6UXV0 | GFRAL_HUMAN  | cellular (Potential).       | 2  | 3TTGGAGAGTAA  | 0.328 |
| - | 7  | 839       | 98L HMGCLL1_u                    | NM_019036    | NP_061909    | Q8TB92 | HMGCL1_HUMAN |                             | 4  | TTTTGCGGTGTA  | 0.318 |
| - | 40 | 6556_6557 | S1_uc011ebi.1_R                  | NM_002944    | NP_002935    | P08922 | ROS_HUMAN    | 3. Cytoplasmic (Potential). | 25 | 3GCCTTCCCCTC  | 0.436 |
| - | 1  | 89        | i.2_5'UTR VNN3_u                 | NM_078625    | NP_523239    |        |              |                             | 0  | TTTGAAAAATGT  | 0.358 |
| - | 11 | 1157      | CEF1_uc003qpw.4                  | NM_015553    | NP_056368    | Q8WWN9 | ICEF1_HUMAN  |                             | 0  | TAGTCGAAGGTC  | 0.383 |
| - | 7  | 1655      | LL2_uc003ski.3_E                 | NM_182924    | NP_891554    | Q8IY33 | MILK2_HUMAN  |                             | 1  | 3GAGACGAGGAC  | 0.622 |
| + | 2  | 1036      | md.2_Missense_I                  | NM_018641    | NP_061111    | Q9NRB3 | CHSTC_HUMAN  | lenal (Potential).          | 1  | TCCTTCGCCAAC  | 0.677 |
| - | 6  | 1125      |                                  | NM_032415    | NP_115791    | Q9BXL7 | CAR11_HUMAN  | Potential.                  | 50 | ATTCCTCCTCCA  | 0.483 |
| + | 7  | 1012      | 0415_uc010ksp.2_                 | NM_014855    | NP_055670    | O43299 | K0415_HUMAN  |                             | 1  | 3TAACCACGCGT  | 0.682 |
| - | 14 | 2156      | V1_uc003ssw.3_I                  | NM_004956    | NP_004947    | P50549 | ETV1_HUMAN   |                             | 35 | 3GCCTTCGTTGT  | 0.478 |
| - | 2  | 195_196   | xy.1_Missense_M                  | NM_006408    | NP_006399    | O95994 | AGR2_HUMAN   |                             | 0  | GGAATTTTCTCC  | 0.47  |
| + | 51 | 8334      |                                  | NM_003777    | NP_003768    | Q96DT5 | DYH11_HUMAN  |                             | 15 | TCAGAGAAGAA   | 0.363 |
| + | 6  | 518       | ie.1_Missense_Mu                 | NM_031414    | NP_113602    | Q9BXU1 | STK31_HUMAN  |                             | 9  | 3ACATTCCTTCT  | 0.328 |
| - | 9  | 952       | 8_splice SKAP2_L                 | NM_003930    | NP_003921    | O75563 | SKAP2_HUMAN  |                             | 1  | CCATATCTATAA  | 0.294 |
| - | 1  | 397_398   |                                  | NM_001126493 | NP_001119965 |        |              |                             | 0  | GCCTTCTTTCAC  | 0.485 |
| + | 2  | 490       | _p.G62R AQP1_u                   | NM_198098    | NP_932766    | P29972 | AQP1_HUMAN   | al; Name=Helix 4.           | 0  | 3TCATCGGGACC  | 0.652 |
| - | 13 | 1588      | 3.1_RNA DPY19L2P1_uc010kwz.1_RNA |              |              |        |              |                             | 0  | 3GTGGTCTGAAAC | 0.219 |
| - | 1  | 908       |                                  | NM_033224    | NP_150093    | Q96QR8 | PURB_HUMAN   |                             | 0  | GCCGCCGCTGC   | 0.587 |
| + | 1  | 401       | 3start_Site VSTM2f               | NM_182546    | NP_872352    | Q8TAG5 | VTM2A_HUMAN  |                             | 0  | 3CCTTTTGGAA   | 0.483 |
| + | 4  | 968       |                                  | NM_001159279 | NP_001152751 |        |              |                             | 2  | 3CTAACTACAAG  | 0.408 |
| + | 4  | 993       |                                  | NM_001159279 | NP_001152751 |        |              |                             | 2  | 3AGAGAAACCTC  | 0.413 |
| + | 4  | 1002      |                                  | NM_001159279 | NP_001152751 |        |              |                             | 2  | 3CTACACATGTG  | 0.428 |
| + | 4  | 997       |                                  | NM_001159524 | NP_001152996 | P0CB33 | ZN735_HUMAN  | 32H2-type 7.                | 0  | 3GCAAAGCCTTT  | 0.428 |
| + | 7  | 1696      | vx.3_Missense_M                  | NM_015570    | NP_056385    | Q8WXX7 | AUTS2_HUMAN  |                             | 3  | 3AGCTCCTTCTC  | 0.632 |
| + | 10 | 2031      | fj.3_Missense_Mu                 | NM_020892    | NP_065943    | Q86UW9 | DTX2_HUMAN   |                             | 2  | TATTACGGTTCC  | 0.577 |
| - | 7  | 1113      | _p.F202Y SEMA3i                  | NM_006379    | NP_006370    | Q99985 | SEM3C_HUMAN  | Sema.                       | 1  | 3CAGAGAAAAGC  | 0.328 |
| - | 7  | 960_961   | n.1_Nonsense_M                   | NM_000601    | NP_000592    | P14210 | HGF_HUMAN    | Kringle 2.                  | 4  | CGGCTGGCCATC  | 0.475 |
| + | 11 | 1260      | e_Mutation_p.R22                 | NM_001142327 | NP_001135799 | Q9Y222 | DMTF1_HUMAN  | 3CND3 (By similarity). HTH  | 2  | 3CTGAACGAGTC  | 0.478 |
| + | 23 | 2332      | _p.S705F CCDC1                   | NM_017667    | NP_060137    | Q96JG6 | CC132_HUMAN  |                             | 0  | 3GGAATCCTTGT  | 0.403 |
| - | 17 | 1953      | _p.R589 SLC25A                   | NM_014251    | NP_055066    | Q9UJS0 | CMC2_HUMAN   | ical; Name=6; (Potential).  | 4  | 3GGATCGAAATA  | 0.338 |
| - | 3  | 293       | _p.G59E CYP3A5                   | NM_000777    | NP_000768    | P20815 | CP3A5_HUMAN  |                             | 0  | 3ATTTTCCATAC  | 0.413 |
| - | 4  | 420       | 3uvz.2_RNA uc00                  | NM_016188    | NP_057272    | O94805 | ACL6B_HUMAN  |                             | 1  | 3TTTGCTGTAGG  | 0.602 |
| + | 14 | 2461      | 3AN_uc003uwl.2_F                 | NM_003386    | NP_003377    | Q9Y493 | ZAN_HUMAN    | ate) (mucin-like domain). E | 11 | 3AAAAACCCACC  | 0.522 |
| + | 14 | 2470      | 3AN_uc003uwl.2_F                 | NM_003386    | NP_003377    | Q9Y493 | ZAN_HUMAN    | ate) (mucin-like domain). E | 11 | 3CCATCTCCCA   | 0.522 |
| + | 14 | 2489      | AN_uc003uwl.2_F                  | NM_003386    | NP_003377    | Q9Y493 | ZAN_HUMAN    | ate) (mucin-like domain). E | 11 | 3ACCATCCCCA   | 0.532 |
| - | 13 | 2683      | _p.L638R EPHB4                   | NM_004444    | NP_004435    | P54760 | EPHB4_HUMAN  | Potential). Protein kinase. | 15 | 3GGCAAGGTAC   | 0.587 |
| + | 3  | 3876      | C17_uc010lho.1_F                 | NM_001040105 | NP_001035194 | Q685J3 | MUC17_HUMAN  | ch.19.159 X approximate ti  | 27 | 3TAGTGAAGGA   | 0.498 |
| - | 2  | 316       | 3zm.2_Missense_I                 | NM_017621    | NP_060091    | Q9NXW9 | ALKB4_HUMAN  |                             | 0  | 3TCCTCGTCCA   | 0.642 |
| - | 20 | 2460      | ves.2_Missense_I                 | NM_000111    | NP_000102    | P40879 | S26A3_HUMAN  |                             | 4  | 3GTAATCCTCCAT | 0.333 |
| - | 30 | 4558      | _p.E1492K LAMB4                  | NM_007356    | NP_031382    | A4D0S4 | LAMB4_HUMAN  | Domain I.                   | 8  | 3GTTTTCTCTT   | 0.398 |
| - | 52 | 5974      | 3fw.2_Missense_M                 | NM_014705    | NP_055520    | Q8N110 | DOCK4_HUMAN  | Pro-rich.                   | 4  | 3TGACGGGGGC   | 0.716 |
| - | 4  | 3120      |                                  | NM_002711    | NP_002702    | Q16821 | PPR3A_HUMAN  |                             | 34 | ACTAATCCTTCAT | 0.403 |
| - | 4  | 2443      |                                  | NM_002711    | NP_002702    | Q16821 | PPR3A_HUMAN  |                             | 34 | 3CGTGATTCCTT  | 0.378 |
| - | 4  | 2441      |                                  | NM_002711    | NP_002702    | Q16821 | PPR3A_HUMAN  |                             | 34 | 3TGATTCCTTTT  | 0.373 |
| + | 7  | 612       | se_Mutation_p.H1f                | NM_019071    | NP_061944    | Q9NXR8 | ING3_HUMAN   |                             | 1  | ACAGATCATATTC | 0.299 |

|   |    |           |                   |              |              |        |             |                            |       |                |       |             |
|---|----|-----------|-------------------|--------------|--------------|--------|-------------|----------------------------|-------|----------------|-------|-------------|
| + | 41 | 7167      | a.3_Missense_Mut  | NM_001458    | NP_001449    | Q14315 | FLNC_HUMAN  | Filamin 21.                | 12    | GGGCCGGAGGC    | 0.677 |             |
| + | 10 | 1548      | p.R384Q IRF5_uc   | NM_002200    | NP_002191    | Q13568 | IRF5_HUMAN  |                            | 0     | .GCAGCGGTTGC   | 0.592 |             |
| + | 20 | 2111      | _p.A691T FAM40B   | NM_020704    | NP_065755    | Q9ULQ0 | FA40B_HUMAN |                            | 0     | AAATCGGCACCA   | 0.438 |             |
| - | 21 | 4124      |                   | NM_020911    | NP_065962    | Q9HCM2 | PLXA4_HUMAN | lasmic (Potential).        | 1     | iGATGTCCGTCTC  | 0.562 |             |
| + | 2  | 529       |                   | NM_020299    | NP_064695    | O60218 | AK1BA_HUMAN |                            | 5     | GAAGCGGGAGG    | 0.517 |             |
| + | 11 | 1965      | iv.2_Missense_Mu  | NM_173569    | NP_775840    | Q6ZU65 | UBN2_HUMAN  |                            | 2     | GTGGATGCAGGC   | 0.348 |             |
| - | 19 | 2660      | M1D_uc010Ing.2_   | NM_030647    | NP_085150    | Q6ZMT4 | KDM7_HUMAN  |                            | 1     | GAAGGAAGTTT    | 0.483 |             |
| - | 15 | 1860      |                   | NM_004333    | NP_004324    | P15056 | BRAF_HUMAN  | rotein kinase_R603>(2) p.T | 18290 | ATTTCCTACTGTAC | 0.368 |             |
| - | 1  | 170       |                   | NM_176817    | NP_789787    | P59533 | T2R38_HUMAN | Name=1; (Potential).       | 2     | GAAACCCCACT    | 0.463 |             |
| - | 4  | 759       | xc.3_Missense_Mu  | NM_001001317 | NP_001001317 | Q8IYP2 | PRS58_HUMAN | peptidase S1.              | 0     | GCTCTTTGTCTA   | 0.353 |             |
| - | 4  | 734       | bz.2_Missense_Mu  | NM_019841    | NP_062815    | Q9NQA5 | TRPV5_HUMAN | lasmic (Potential).        | 6     | .GGTTGCGGGGA   | 0.627 |             |
| + | 1  | 373       | uc003wda.2_Intr   | NM_177437    | NP_803186    | P59551 | T2R60_HUMAN | lasmic (Potential).        | 6     | iCTACCTTCACCC  | 0.498 |             |
| + | 9  | 1777      | DN3_uc003wip.2_   | NM_004769    | NP_004760    | Q9UHC3 | ACCN3_HUMAN | lasmic (Potential).        | 2     | TCCTGGGATATT   | 0.612 |             |
| - | 21 | 3602      | p.S463F CSMD1_    | NM_033225    | NP_150094    | Q96PZ7 | CSMD1_HUMAN | xtracellular (Potential).  | 25    | AGCAGGAAAAAC   | 0.557 |             |
| - | 2  | 460       |                   | NM_001080826 | NP_001074295 | Q86YV5 | SG223_HUMAN |                            | 0     | ACAGCGAGAAT    | 0.642 |             |
| - | 3  | 439       |                   | NM_004686    | NP_004677    | Q9Y216 | MTMR7_HUMAN |                            | 1     | iGGCATCCGGTA   | 0.433 |             |
| + | 18 | 2079      | xbw.3_Missense_   | NM_005775    | NP_005766    | O60504 | VINEX_HUMAN |                            | 0     | .CCAGACCCAGG   | 0.657 |             |
| + | 2  | 424       | 7_uc003xdp.2_RN   | NM_016612    | NP_057696    | Q9NYZ2 | MFRN1_HUMAN | Solcar 1.                  | 0     | iGAGCCCTCAAG   | 0.522 |             |
| + | 2  | 286       |                   | NM_004095    | NP_004086    | Q13541 | 4EBP1_HUMAN |                            | 0     | .CACCCCAAGG    | 0.562 |             |
| + | 6  | 682       | ny.2_Missense_Mu  | NM_032336    | NP_115712    | Q9BRT9 | SLD5_HUMAN  |                            | 1     | iTGGACCTCTTT   | 0.507 |             |
| - | 29 | 3512      | IK1_uc003xoj.2_M  | NM_020476    | NP_065209    | P16157 | ANK1_HUMAN  |                            | 9     | .TGGGCGGTGG    | 0.657 |             |
| - | 8  | 1917      | lxpe.2_Missense_  | NM_006749    | NP_006740    | Q08357 | S20A2_HUMAN | lasmic (Potential).        | 2     | GGGCCGATGAG    | 0.602 |             |
| - | 23 | 4432      | DNL_uc003xqt.3_F  | NM_144651    | NP_653252    | A1KZ92 | PXDNL_HUMAN | VWFC.                      | 2     | AGGTTCCCTTC    | 0.517 |             |
| - | 17 | 3339_3340 | DNL_uc003xqt.3_F  | NM_144651    | NP_653252    | A1KZ92 | PXDNL_HUMAN |                            | 2     | iGAACGAAGGT    | 0.495 |             |
| + | 2  | 494       | S1_uc010lyh.2_Inl | NM_024831    | NP_079107    | Q96RS0 | TGS1_HUMAN  |                            | 3     | GGATCGAAAAT    | 0.313 |             |
| - | 2  | 419       | ta.3_Missense_Mu  | NM_006211    | NP_006202    | P01210 | PENK_HUMAN  |                            | 4     | TCCATTTCTTCA   | 0.498 |             |
| + | 2  | 700       | /S1_uc003xui.2_Ir | NM_173519    | NP_775790    | Q8IUQ0 | CLVS1_HUMAN | CRAL-TRIO.                 | 5     | iATGGTTCCTCC   | 0.483 |             |
| + | 5  | 744       | _uc003yam.2_Miss  | NM_015886    | NP_056970    | O43692 | PI15_HUMAN  |                            | 3     | CAATTCATACTT   | 0.428 |             |
| - | 8  | 763       | ase_Mutation_p.S1 | NM_001738    | NP_001729    | P00915 | CAH1_HUMAN  |                            | 2     | GGGATGAAGGA    | 0.428 |             |
| - | 1  | 825       |                   | NM_172239    | NP_758439    | Q8IX06 | GOR_HUMAN   | R1-125 epitope.            | 0     | CACAGCGGCC     | 0.662 |             |
| - | 4  | 1072      | no.2_Missense_M   | NM_001146    | NP_001137    | Q15389 | ANGP1_HUMAN | Potential.                 | 7     | TCCTTCCATTT    | 0.313 |             |
| - | 26 | 2712      | _p.P706L ASAP1_   | NM_018482    | NP_060952    | Q9ULH1 | ASAP1_HUMAN | Pro-rich.                  | 4     | iGTTTAGGAAGA   | 0.294 |             |
| - | 9  | 2438      | Y8_uc010mds.2_I   | NM_001115    | NP_001106    | P40145 | ADCY8_HUMAN | ical; (Potential).         | 6     | GTATTGCCGTGA   | 0.353 |             |
| + | 20 | 4326      | v.2_Missense_Mut  | NM_003235    | NP_003226    | P01266 | THYG_HUMAN  |                            | 15    | iGGACCACTTT    | 0.567 |             |
| + | 21 | 3531      | iywa.1_Missense_  | NM_014957    | NP_055772    | A2RUS2 | DEND3_HUMAN | WD 2.                      | 1     | CTCTTCTCTGAG   | 0.577 |             |
| - | 2  | 174       |                   | NM_205545    | NP_991108    | Q6UXB3 | LYPD2_HUMAN | UPAR/Ly6.                  | 0     | .TGTGGCTCCG    | 0.637 |             |
| - | 4  | 689       | c003yxj.2_Missen  | NM_000497    | NP_000488    | P15538 | C11B1_HUMAN |                            | 3     | GACCTCCAGGG    | 0.607 |             |
| - | 7  | 2023      |                   | NM_015117    | NP_055932    | Q8IXZ2 | ZC3H3_HUMAN |                            | 1     | CCCTGCGCTGC    | 0.677 |             |
| + | 2  | 240       | 3PR172A_uc003z    | NM_024531    | NP_078807    | Q9HAB3 | RFT3_HUMAN  | ical; (Potential).         | 0     | .GGTCAATGGGA   | 0.662 | rs141698844 |
| - | 3  | 1516      |                   | NM_003923    | NP_003914    | O75593 | FOXH1_HUMAN | raction domain (SID).      | 0     | iGGCCACCCCC    | 0.612 |             |
| + | 5  | 563       | i.V136M GPT_uc0   | NM_005309    | NP_005300    | P24298 | ALAT1_HUMAN |                            | 2     | iAGGACGTGGCC   | 0.647 |             |
| + | 23 | 2901      | OCK8_uc010mgw.    | NM_203447    | NP_982272    | Q8NF50 | DOCK8_HUMAN |                            | 6     | .CGATCGAACT    | 0.463 |             |
| - | 15 | 2467      | e_Mutation_p.R36  | NM_007126    | NP_009057    | P55072 | TERA_HUMAN  |                            | 1     | .AAGCAGCTGG    | 0.512 |             |
| - | 4  | 1620      |                   | NM_001145196 | NP_001138668 | Q5VVP1 | F75A6_HUMAN |                            | 0     | iGGAGAGAGCTT   | 0.478 |             |
| + | 3  | 1718      | p.3_Missense_Mu   | NM_024945    | NP_079221    | Q9H9A7 | RMI1_HUMAN  |                            | 0     | .AGCCATTCttaa  | 0.284 |             |
| + | 11 | 2058      | try.1_Missense_M  | NM_001010895 | NP_001010895 | Q5T890 | RAD26_HUMAN | case C-terminal.           | 0     | iTATGGCGTCTG   | 0.403 |             |
| - | 1  | 671       |                   | NM_001001919 | NP_001001919 | Q8NGS5 | O13C4_HUMAN | lasmic (Potential).        | 1     | .AGATGGTGTAG   | 0.408 |             |

|   |    |         |                    |              |              |        |             |                               |    |                |       |             |
|---|----|---------|--------------------|--------------|--------------|--------|-------------|-------------------------------|----|----------------|-------|-------------|
| + | 2  | 518     | lwx.1_Missense_IV  | NM_133465    | NP_597722    | Q8N8K9 | K1958_HUMAN |                               | 1  | 'GTAACCGGACC,  | 0.483 |             |
| - | 5  | 1323    | p.E408K ASTN2_     | NM_198187    | NP_937830    | O75129 | ASTN2_HUMAN | lasmic (Potential).           | 9  | 3AGTTTCATCGTC  | 0.537 |             |
| + | 11 | 1761    | lbcz.1_Missense_I  | NM_007018    | NP_008949    | Q7Z7A1 | CNTRL_HUMAN | Potential.                    | 0  | 'AAGTCGTTTGG/  | 0.358 |             |
| - | 5  | 453     | se_Mutation_p.R74  | NM_004099    | NP_004090    | P27105 | STOM_HUMAN  | lasmic (Potential).           | 0  | 'AACCGCGGTAAT/ | 0.443 |             |
| + | 4  | 664     | bns.2_Missense_IV  | NM_016035    | NP_057119    | Q9Y3A0 | COQ4_HUMAN  |                               | 0  | 3GATTTTCGACATC | 0.597 |             |
| + | 7  | 965_966 | _p.R297* SPTAN1    | NM_003127    | NP_003118    | Q13813 | SPTA2_HUMAN | Spectrin 4.                   | 10 | 'TTGGCCGAGAC   | 0.48  |             |
| + | 13 | 1315    | zs.1_Missense_Mu   | NM_003934    | NP_003925    | Q96I24 | FUBP3_HUMAN | KH 4.                         | 1  | 'ACCTGCGGAGA   | 0.607 |             |
| - | 10 | 1159    |                    | NM_013379    | NP_037511    | Q9UHL4 | DPP2_HUMAN  |                               | 0  | 'GCGGAGCTCGT   | 0.667 |             |
| - | 1  | 170     | lmer.1_Missense_   | NM_013366    | NP_037498    | Q9UJX6 | ANC2_HUMAN  |                               | 1  | CGGCGGCACCA    | 0.721 |             |
| + | 5  | 499     | se_Mutation_p.     | NM_080877    | NP_543153    | Q8N130 | NPT2C_HUMAN | cellular (Potential).         | 0  | 'AAGTGGCCGGA   | 0.647 |             |
| - | 4  | 306     | v.1_RNA FAM9B_1    | NM_205849    | NP_995321    | Q8IZU0 | FAM9B_HUMAN |                               | 0  | 'TTTTATCCATTTT | 0.274 |             |
| + | 9  | 1385    | mij.1_Missense_M   | NM_014728    | NP_055543    | Q14CM0 | FRPD4_HUMAN | FERM.                         | 13 | 'AAAGATCCAATT  | 0.393 |             |
| - | 7  | 1167    | P7_uc004cxu.2_M    | NM_002893    | NP_002884    | Q16576 | RBBP7_HUMAN |                               | 2  | 3TGTGCGCATCC   | 0.498 |             |
| + | 37 | 4399    |                    | NM_016937    | NP_058633    | P09884 | DPOLA_HUMAN |                               | 3  | 3TTGTGCCGTGA   | 0.507 |             |
| + | 1  | 876     |                    | NM_001013736 | NP_001013758 | Q5HY64 | FA47C_HUMAN |                               | 3  | 'CTCCAAGACTC   | 0.607 |             |
| + | 19 | 3304    | fc.2_Nonsense_M    | NM_001039590 | NP_001034679 | Q93008 | USP9X_HUMAN |                               | 6  | 3TAGTTCGATTTT  | 0.408 |             |
| + | 3  | 393     | loq.1_Missense_IV  | NM_000084    | NP_000075    | P51795 | CLCN5_HUMAN | smic (By similarity).         | 4  | TTAATTCACAGTC  | 0.363 |             |
| + | 4  | 701     | nk.1_Nonsense_I    | NM_177433    | NP_803182    | Q9UNF1 | MAGD2_HUMAN |                               | 3  | 'GTGGCCGAAGG   | 0.587 |             |
| - | 7  | 1300    | lyo.2_Missense_M   | NM_032803    | NP_116192    | Q8WY07 | CTR3_HUMAN  | lasmic (Potential).           | 2  | GGGTGCGTGTG    | 0.557 |             |
| + | 16 | 2489    | lyz.2_Nonsense_IV  | NM_005120    | NP_005111    | Q93074 | MED12_HUMAN |                               | 4  | 'AGCAGCGAGAT   | 0.537 |             |
| + | 1  | 1198    |                    | NM_020932    | NP_065983    | Q9HCI5 | MAGE1_HUMAN | Pro-rich.                     | 6  | 'GCACCTCCGTG   | 0.701 |             |
| + | 4  | 1789    | eh.1_Missense_Mu   | NM_021118    | NP_066941    | P35663 | CYLC1_HUMAN |                               | 5  | TCAATGAAAAAG   | 0.418 |             |
| + | 5  | 972     | '11_uc004eeq.2_M   | NM_021998    | NP_068838    | Q9Y462 | ZN711_HUMAN |                               | 4  | 'TAGTGGATGATC  | 0.313 |             |
| - | 3  | 1271    | p.E306K ARMCX2     | NM_177949    | NP_808818    | Q7L311 | ARMX2_HUMAN |                               | 6  | 'CAGTTCGTCTA   | 0.587 |             |
| - | 1  | 419     |                    | NM_001002916 | NP_001002916 | Q7Z2G1 | H2BWT_HUMAN |                               | 1  | 3TGATGGTCTGG   | 0.647 |             |
| + | 11 | 2788    |                    | NM_017416    | NP_059112    | Q9NP60 | IRPL2_HUMAN | lasmic (Potential).           | 3  | 'CCAAAGAGCTT/  | 0.408 |             |
| - | 2  | 353     | Y2F_uc011msq.1_    | NM_001522    | NP_001513    | P51841 | GUC2F_HUMAN |                               | 8  | 'CAAGGCCATGG   | 0.572 |             |
| - | 5  | 2180    | om.1_Missense_M    | NM_012471    | NP_036603    | Q9UL62 | TRPC5_HUMAN | lasmic (Potential).           | 1  | ACATTTCCTTAAT  | 0.443 |             |
| + | 6  | 1653    | e_Mutation_p.A30   | NM_000868    | NP_000859    | P28335 | 5HT2C_HUMAN | smic (By similarity).         | 3  | 'GAAAAGCTTCG/  | 0.438 |             |
| + | 12 | 1660    |                    | NM_007231    | NP_009162    | Q9UN76 | S6A14_HUMAN |                               | 3  | 'GAGGTGGATAT   | 0.363 |             |
| - | 18 | 3313    | 'W1082* ODZ1_u     | NM_014253    | NP_055068    | Q9UKZ4 | TEN1_HUMAN  | cellular (Potential).         | 23 | CTTGTCCAAGC.   | 0.448 |             |
| + | 9  | 1158    | 'k.1_Missense_Mu   | NM_001015877 | NP_001015877 | Q8IWS0 | PHF6_HUMAN  | ype 2; degenerate.            | 1  | 'GTCACGAGGAA   | 0.348 |             |
| - | 4  | 1143    | p.R171C FGF13_L    | NM_004114    | NP_004105    | Q92913 | FGF13_HUMAN |                               | 3  | 3CTGACGGTATA   | 0.398 |             |
| + | 7  | 887     |                    | NM_018558    | NP_061028    | Q9UN88 | GBRT_HUMAN  | ical; (Potential).            | 3  | TTGGATGAACTA   | 0.443 |             |
| - | 13 | 2123    | 'K1_uc004fjt.1_Mis | NM_001569    | NP_001560    | P51617 | IRAK1_HUMAN |                               | 9  | 'GCTGTCCAGGG   | 0.637 |             |
| + | 2  | 247     |                    | NM_004699    | NP_004690    | Q14320 | FA50A_HUMAN |                               | 1  | 'GTTCTCTGCGC.  | 0.622 |             |
| + | 2  | 583     |                    | NM_017514    | NP_059984    | P51805 | PLXA3_HUMAN | tracellular (Potential).      | 3  | 'CCACCGCAAGG   | 0.667 |             |
| - | 4  | 389     | 'p.R78L KIAA17E    | NM_001080484 | NP_001073953 | Q9C0B2 | K1751_HUMAN |                               | 1  | 'TCTGCCGCAGG   | 0.502 |             |
| - | 4  | 1018    | 'ad.1_Missense_IV  | NM_024980    | NP_079256    | Q5UAW9 | GP157_HUMAN | lasmic (Potential).           | 0  | 'AGAGAGAGAAG.  | 0.607 |             |
| + | 18 | 2269    | _Mutation_p.R710   | NM_015378    | NP_056193    | Q5THJ4 | VP13D_HUMAN |                               | 5  | 'CCGTGCGGCTG   | 0.428 | rs139539467 |
| + | 16 | 1818    | KA_uc010obw.1_L    | NM_004070    | NP_004061    | P51800 | CLCKA_HUMAN | CBS 1.                        | 1  | 3AGTATCCCCTG   | 0.557 |             |
| + | 4  | 768     | 'b.2_Missense_Mu   | NM_032264    | NP_115640    | Q9H094 | NBPF3_HUMAN | Potential.                    | 2  | 'TTGCAGAGGAG   | 0.552 |             |
| - | 3  | 930     |                    | NM_004091    | NP_004082    | Q14209 | E2F2_HUMAN  | per. DEF box. Potential.      | 4  | 'GATGCGCCGCT   | 0.592 |             |
| - | 4  | 459     | 'i.1_Missense_Mut  | NM_001127621 | NP_001121093 | Q14376 | GALE_HUMAN  |                               | 0  | 3ACCGCCATAAA   | 0.552 |             |
| + | 13 | 1921    | e_Mutation_p.P53   | NM_005839    | NP_005830    | Q8IYB3 | SRRM1_HUMAN | is and matrix localization. A | 3  | 'CCTCTCTCTC    | 0.537 |             |
| + | 13 | 1933    | e_Mutation_p.R54   | NM_005839    | NP_005830    | Q8IYB3 | SRRM1_HUMAN | is and matrix localization. A | 3  | 'ACGGCGCAGGA   | 0.532 | rs78787676  |
| - | 11 | 1079    | 'F27Y UBXN11_u     | NM_183008    | NP_892120    | Q5T124 | UBX11_HUMAN | SEP.                          | 1  | 'AGGAAAGAAG    | 0.582 |             |



|   |    |       |                   |              |              |        |                             |                               |      |                 |       |             |
|---|----|-------|-------------------|--------------|--------------|--------|-----------------------------|-------------------------------|------|-----------------|-------|-------------|
| + | 20 | 6984  | _p.A1050V ARID1   | NM_006015    | NP_006006    | O14497 | ARI1A_HUMAN                 |                               | 142  | icCTTGCCGCCA    | 0.642 |             |
| + | 2  | 288   | _p.R41C ZSCAN2    | NM_145238    | NP_660281    | P17040 | ZSC20_HUMAN                 |                               | 4    | AGGACCGTGGC     | 0.597 |             |
| - | 9  | 1231  | km.1_Missense_M   | NM_052896    | NP_443128    | Q7Z408 | CSMD2_HUMAN ar (Potential). | Sushi 2.                      | 12   | CACCTCGGCAG     | 0.632 |             |
| + | 4  | 599   | _p.R102Q ZNF642   | NM_198494    | NP_940896    | Q49AA0 | ZN642_HUMAN                 | KRAB.                         | 0    | ATACCGAGAGG     | 0.458 | rs145832267 |
| + | 10 | 1725  | ense_Mutation_p.  | NM_152498    | NP_689711    | Q96MR6 | WDR65_HUMAN                 | WD 8.                         | 1    | ATGGTGCCTGTGT   | 0.463 |             |
| + | 15 | 2893  | C1orf175_uc010oc  | NM_001039464 | NP_001034553 | Q68CQ1 | HEAT8_HUMAN                 |                               | 0    | TGGGCCGTGTG     | 0.647 |             |
| - | 3  | 383   | _p.E44K C8B_uc    | NM_000066    | NP_000057    | P07358 | CO8B_HUMAN                  | SP type-1.                    | 4    | GACTTCCTTGTG    | 0.498 |             |
| + | 16 | 1775  | C7_uc009wbg.2_li  | NM_020794    | NP_065845    | Q96NW7 | LRRC7_HUMAN                 |                               | 14   | TAAATCTGTTC     | 0.338 |             |
| - | 11 | 1844  | 73_uc001dgi.3_Mi  | NM_001002912 | NP_001002912 | Q5RHP9 | CA173_HUMAN                 | Glu-rich.                     | 5    | TCTCTTTTTCAG    | 0.403 |             |
| + | 6  | 919   | ls.1_Missense_Mt  | NM_001285    | NP_001276    | A8K7I4 | CLCA1_HUMAN                 |                               | 1    | AAGCAAATCAA     | 0.373 |             |
| + | 9  | 1380  | dly.2_Nonsense_f  | NM_016009    | NP_057093    | Q9Y371 | SHLB1_HUMAN                 | SH3.                          | 0    | GAAACCAGAAG     | 0.388 |             |
| - | 15 | 1954  | RHGAP29_uc001     | NM_004815    | NP_004806    | Q52LW3 | RHG29_HUMAN                 |                               | 11   | TATAAAGGAAGC    | 0.358 |             |
| + | 4  | 263   | wa.1_Missense_Mi  | NM_001040033 | NP_001035122 | P19397 | CD53_HUMAN                  | ical; (Potential).            | 0    | CTTTGGGACTT     | 0.483 |             |
| - | 3  | 435   |                   | NM_002524    | NP_002515    | P01111 | RASN_HUMAN                  | GTP. ) p.Q61P(21) r           | 2607 | TTCCTGTCCAG     | 0.458 | rs121913254 |
| + | 23 | 2095  | ie_Mutation_p.G6z | NM_003176    | NP_003167    | Q15431 | SYCP1_HUMAN                 | Potential.                    | 1    | AAAAGGTACAG     | 0.254 |             |
| - | 11 | 1315  | wu.1_Missense_M   | NM_001232    | NP_001223    | O14958 | CASQ2_HUMAN                 |                               | 1    | AAGATCGTCAT     | 0.403 |             |
| - | 25 | 4713  |                   | NM_024408    | NP_077719    | Q04721 | NOTC2_HUMAN (NRR).          | LNR 2. Extracellula           | 27   | CGACCGTGTG      | 0.517 |             |
| - | 25 | 3982  | 4DIP_uc001elm.3   | NM_014644    | NP_055459    | Q5VU43 | MYOME_HUMAN                 | Potential.                    | 5    | CTCCTGGAGAT     | 0.507 |             |
| - | 3  | 474   | uc001eln.3_Mis    | NM_014644    | NP_055459    | Q5VU43 | MYOME_HUMAN                 |                               | 5    | CCTTTTACCAC     | 0.433 |             |
| + | 14 | 1889  | 10_uc010oyi.1_Int | NM_001039703 | NP_001034792 | A6NDV3 | A6NDV3_HUMAN                |                               | 0    | TCCACGCTCAC     | 0.453 | rs61816394  |
| + | 11 | 1769  | se_Mutation_p.S2  | NM_007259    | NP_009190    | Q9NRW7 | VPS45_HUMAN                 |                               | 2    | ACACAGCAGCA     | 0.443 |             |
| + | 8  | 877   | xn.2_Missense_Mi  | NM_002810    | NP_002801    | P55036 | PSMD4_HUMAN                 |                               | 0    | TGGCCGCACTG     | 0.547 |             |
| + | 2  | 247   |                   | NM_178428    | NP_848515    | Q5TA79 | LCE2A_HUMAN                 | Cys-rich.                     | 0    | GTGGCGGCTGC     | 0.687 |             |
| + | 2  | 1046  |                   | NM_001025231 | NP_001020402 | Q5T749 | KPRP_HUMAN                  | Pro-rich.                     | 5    | AGATTCCTCCC     | 0.632 |             |
| + | 9  | 1007  | p.R329H DCST1_u   | NM_152494    | NP_689707    | Q5T197 | DCST1_HUMAN                 | ellular (Potential).          | 2    | GTGCCGAATC      | 0.592 |             |
| - | 19 | 3609  | Mutation_p.R28    | NM_014215    | NP_055030    | P14616 | INSRR_HUMAN                 | Potential). Protein kinase.   | 20   | GTTGCGGGCTG     | 0.512 |             |
| - | 6  | 1103  | _3_uc009wsn.2_In  | NM_052939    | NP_443171    | Q96P31 | FCRL3_HUMAN                 | ellular (Potential).          | 4    | TCCTTTTTTGT     | 0.547 |             |
| + | 12 | 2169  | TP1A4_uc001fvq.2  | NM_144699    | NP_653300    | Q13733 | AT1A4_HUMAN                 | lasmic (Potential).           | 4    | TTCTGCTTCTG     | 0.468 |             |
| - | 6  | 1046  | 244_uc009wtp.2_F  | NM_016382    | NP_057466    | Q9BZW8 | CD244_HUMAN                 | lasmic (Potential).           | 1    | TCCAGGAAAAG     | 0.502 |             |
| - | 12 | 2250  | p.G481E ARHGAF    | NM_001025598 | NP_001020769 | Q7Z616 | RHG30_HUMAN                 |                               | 3    | CTCTCCCTCC      | 0.587 |             |
| + | 3  | 651   | 1AP_uc010pks.1_I  | NM_014697    | NP_055512    | O75052 | CAPON_HUMAN                 | PID.                          | 3    | AAGAAGAAAAA     | 0.448 |             |
| - | 2  | 220   | wux.1_Missense_I  | NM_178550    | NP_848645    | Q86UF4 | CA110_HUMAN                 | Potential.                    | 0    | TCCAAATCAAA     | 0.433 |             |
| + | 6  | 977   | jeq.2_Missense_M  | NM_003953    | NP_003944    | O95297 | MPZL1_HUMAN                 | lasmic (Potential).           | 2    | AGTCAGAGTCT     | 0.443 |             |
| + | 9  | 1572  | Mutation_p.G47E   | NM_002021    | NP_002012    | Q01740 | FMO1_HUMAN                  |                               | 1    | CCCAGGAAAAT     | 0.507 |             |
| - | 22 | 3130  | vwe.2_Missense_I  | NM_178527    | NP_848622    | Q5TAH2 | S9A11_HUMAN                 | cNMP.                         | 2    | GATTCCTTGTG     | 0.303 |             |
| + | 8  | 1565  | lg.2_Nonsense_Mi  | NM_021165    | NP_066988    | Q9C0B6 | FAM5B_HUMAN                 |                               | 6    | CTGGTGGAAC      | 0.512 |             |
| + | 7  | 477   | rf49_uc001glv.1_F | NM_032126    | NP_115502    | Q5T0J7 | CA049_HUMAN                 |                               | 0    | AAAGGAGCAGC     | 0.557 |             |
| + | 2  | 495   |                   | NM_014864    | NP_055679    | O75063 | XYLK_HUMAN                  | renal (Potential).            | 3    | TGCGAGCCCAG     | 0.582 |             |
| + | 16 | 1712  | _p.E317K C1orf12  | NM_144696    | NP_653297    | Q5T1B0 | AXDN1_HUMAN                 |                               | 0    | AAGAAGAGTTT     | 0.368 |             |
| + | 71 | 11181 |                   | NM_031935    | NP_114141    | Q96RW7 | HMCN1_HUMAN                 | ike C2-type 35.               | 23   | CCCACCTGTAA     | 0.413 |             |
| + | 11 | 1793  |                   | NM_000186    | NP_000177    | P08603 | CFAH_HUMAN                  | Sushi 9.                      | 6    | aatgccagaactaaa | 0.249 |             |
| + | 2  | 205   | rR2_uc001gtr.1_In | NM_005666    | NP_005657    | P36980 | FHR2_HUMAN                  | Sushi 1.                      | 3    | CATTTTCCAAG     | 0.348 |             |
| + | 8  | 1276  |                   | NM_030787    | NP_110414    | Q9BXR6 | FHR5_HUMAN                  | Sushi 6.                      | 2    | TGTAGAAAAAAG    | 0.348 |             |
| + | 12 | 4160  | se_Mutation_p.S1: | NM_201253    | NP_957705    | P82279 | CRUM1_HUMAN                 | ellular (Potential).          | 9    | TGATCTCGACA     | 0.428 |             |
| - | 53 | 10838 |                   | NM_206933    | NP_996816    | O75445 | USH2A_HUMAN                 | II 19. Extracellular (Potenti | 26   | GTCTCGCCCA      | 0.443 |             |
| + | 7  | 694   | ATA17_uc001hli.2  | NM_138796    | NP_620151    | Q96L03 | SPT17_HUMAN                 |                               | 1    | AAGCGCCGTT      | 0.408 |             |
| + | 5  | 1575  | .Y336H TGFB2_u    | NM_003238    | NP_003229    | P61812 | TGFB2_HUMAN                 |                               | 0    | CGGCCTATTGC     | 0.448 |             |

|   |    |         |                     |              |              |        |              |                               |    |                |       |
|---|----|---------|---------------------|--------------|--------------|--------|--------------|-------------------------------|----|----------------|-------|
| + | 1  | 48      | _uc001hls.3_5'UTR   | NM_138794    | NP_620149    | Q5VWZ2 | LYPL1_HUMAN  |                               | 0  | .TGGCGGCTGCG   | 0.662 |
| - | 6  | 395     | _uc010pvd.1_intr    | NM_002533    | NP_002524    | O15381 | NVL_HUMAN    |                               | 2  | .FCATGTGATTTGC | 0.353 |
| - | 12 | 2614    | .2_intron NID1_uc   | NM_002508    | NP_002499    | P14543 | NID1_HUMAN   | alcium-binding (Potential).   | 2  | .GCAACGGAAGC   | 0.572 |
| - | 9  | 1304    | 130331_uc010pyc     | NM_021186    | NP_067009    | Q12836 | ZP4_HUMAN    | acellular (Potential).        | 3  | .GTCCCCTGAGG   | 0.532 |
| - | 2  | 653     | .2_RNA OPN3_uc      | NM_014322    | NP_055137    | Q9H1Y3 | OPN3_HUMAN   | Name=4; (Potential).          | 0  | .GTGCTCCTGCC   | 0.537 |
| + | 3  | 893     | .3_Missense_Mu      | NM_152609    | NP_689822    | Q6PJW8 | CNST_HUMAN   |                               | 0  | .GFCAGTCTCTGT  | 0.453 |
| - | 32 | 6364    | .TF1_uc009xgs.1_    | NM_015446    | NP_056261    | Q8WYP5 | ELYS_HUMAN   | lear localization (By similar | 7  | .GGAGAAAAATAA  | 0.433 |
| + | 1  | 943     |                     | NM_001013355 | NP_001013373 | Q5TZ20 | OR2G6_HUMAN  | lasmic (Potential).           | 3  | .GCCACAAGGAC   | 0.488 |
| + | 15 | 6938    | .iik.2_Missense_Mt  | NM_017782    | NP_060252    | Q5VWN6 | CJ018_HUMAN  |                               | 2  | .GAATCTCGGAAT  | 0.338 |
| + | 2  | 232     | .1ind.2_5'UTR HSF   | NM_016299    | NP_057383    | Q0VDF9 | HSP7E_HUMAN  |                               | 5  | .ATGCCGGTGAC   | 0.403 |
| - | 8  | 2208    |                     | NM_001010924 | NP_001010924 | Q5VUB5 | F1711_HUMAN  | lasmic (Potential).           | 4  | .TACTTCCGTTCC  | 0.532 |
| + | 7  | 767     |                     | NM_052997    | NP_443723    | Q9BXX3 | AN30A_HUMAN  |                               | 9  | .TGCAGGAACAC   | 0.348 |
| + | 2  | 279     | .l bl.2_intron TMEN | NM_001123376 | NP_001116848 | A0PK05 | TMM72_HUMAN  | ical; (Potential).            | 0  | .TCGGCGTGGGC   | 0.547 |
| - | 8  | 2011    | .2_intron PARG_u    | NM_003631    | NP_003622    | Q86W56 | PARG_HUMAN   |                               | 2  | .TTCTGCTTCTTC  | 0.318 |
| + | 15 | 1949    | .PRKG1_uc009xov     | NM_001098512 | NP_001091982 | Q13976 | KGP1_HUMAN   | rotein kinase.                | 6  | .GCCAAAAATGC   | 0.313 |
| + | 18 | 2460    | .j.1_Missense_Mu    | NM_001080512 | NP_001073981 | Q9H694 | BICC1_HUMAN  |                               | 4  | .CGAAATGGAAT   | 0.458 |
| + | 3  | 772     | .e_Mutation_p.S19f  | NM_032578    | NP_115967    | Q86TC9 | MYPN_HUMAN   | action with CARP.             | 5  | .AAACAGCTCCA   | 0.448 |
| - | 1  | 534     |                     | NM_003956    | NP_003947    | O95992 | CH25H_HUMAN  |                               | 0  | .ACTGCGTTGCCA  | 0.582 |
| - | 4  | 649     | .iense_Mutation_p.  | NM_000770    | NP_000761    | P10632 | CP2C8_HUMAN  |                               | 0  | .ATCGTTTCTGG   | 0.388 |
| - | 27 | 3026    |                     | NM_003061    | NP_003052    | O75093 | SLIT1_HUMAN  |                               | 4  | .CACACTTGGCC   | 0.542 |
| + | 14 | 2260    | .43_uc010qpu.1_l    | NM_017893    | NP_060363    | Q9NTN9 | SEM4G_HUMAN  | Potential). Ig-like C2-type.  | 1  | .TTACAGATGCA   | 0.627 |
| - | 6  | 1917    | .2_Missense_Mute    | NM_013274    | NP_037406    | Q9UGP5 | DPOLL_HUMAN  |                               | 0  | .GTTCCAGGAAG   | 0.572 |
| - | 4  | 429     |                     | NM_006993    | NP_008924    | O75607 | NPM3_HUMAN   |                               | 0  | .GTGCCGCCCAG   | 0.617 |
| + | 5  | 486     | .p.R74Q NFKB2_      | NM_001077494 | NP_001070962 | Q00653 | NFKB2_HUMAN  | RHD.                          | 3  | .GGCCGAAAGA    | 0.597 |
| + | 25 | 3838    |                     | NM_014976    | NP_055791    | Q14690 | RRP5_HUMAN   | S1 motif 11.                  | 7  | .CCTTCCCCTTTC  | 0.557 |
| - | 7  | 1399    | .t_Mutation_p.R251  | NM_000141    | NP_000132    | P21802 | FGFR2_HUMAN  | ellular (Pote p.R251Q(1)      | 96 | .GCGATCGCTCT   | 0.562 |
| + | 4  | 4130    | .se_Mutation_p.S1z  | NM_206862    | NP_996744    | O95359 | TACC2_HUMAN  |                               | 10 | .TGTTTCTCTGC   | 0.592 |
| + | 8  | 1393    |                     | NM_002775    | NP_002766    | Q92743 | HTRA1_HUMAN  | PDZ.                          | 0  | .TACCCAGCAG    | 0.498 |
| + | 1  | 845     |                     | NM_001127389 | NP_001120861 | F5GZ66 | F5GZ66_HUMAN |                               | 0  | .CACCGCGCGT    | 0.786 |
| + | 14 | 1916    |                     | NM_198075    | NP_932341    | Q8IYG6 | LRC56_HUMAN  |                               | 1  | .CGACAGACCTG   | 0.687 |
| + | 44 | 14641   |                     | NM_002457    | NP_002448    | Q02817 | MUC2_HUMAN   | VWFC 1.                       | 2  | .CCACGGAGGTC   | 0.622 |
| + | 39 | 4906    | .l b.2_Missense_Mi  | NM_017511    | NP_059981    | Q9HC84 | MUC5B_HUMAN  | VWFD 3.                       | 0  | .GGACCTTCCGC   | 0.652 |
| + | 48 | 9914    | .b.2_Missense_Mu    | NM_017511    | NP_059981    | Q9HC84 | MUC5B_HUMAN  | pproximate tandem repeat      | 0  | .CCCAGGGACGG   | 0.642 |
| - | 1  | 543     | .1_intron HBE1_uc   | NM_033180    | NP_149420    | Q9Y5P1 | O51B2_HUMAN  | ellular (Potential).          | 3  | .AAAATGAAAAAA  | 0.398 |
| + | 1  | 742     | _uc001mam.1_Int     | NM_001004754 | NP_001004754 | Q9H344 | O51I2_HUMAN  | Name=6; (Potential).          | 4  | .TGCGTGTACTTC  | 0.493 |
| - | 1  | 519     |                     | NM_153444    | NP_703145    | Q8WZ92 | OR5P2_HUMAN  | ellular (Potential).          | 5  | .CAGAAAAAATG   | 0.383 |
| + | 6  | 689     | .k.1_Nonsense_M     | NM_018222    | NP_060692    | Q9NVD7 | PARVA_HUMAN  |                               | 3  | .CCATCCAAGTC   | 0.498 |
| + | 8  | 1496    | _Mutation_p.D366    | NM_018393    | NP_060863    | Q9NUJ3 | T11L1_HUMAN  |                               | 0  | .AGGCCGACTTT   | 0.527 |
| + | 10 | 1835    | .p.L514F EXT2_uc    | NM_207122    | NP_997005    | Q93063 | EXT2_HUMAN   | renal (Potential).            | 5  | .ATTCTCTCTGG   | 0.383 |
| - | 5  | 854     | .4BRA1_uc001ncv.;   | NM_017749    | NP_060219    | Q9C0C7 | AMRA1_HUMAN  | WD 3.                         | 3  | .GACTCCAGTCC   | 0.567 |
| - | 4  | 650     | .ncv.2_Missense_f   | NM_017749    | NP_060219    | Q9C0C7 | AMRA1_HUMAN  | WD 2.                         | 3  | .ATGGAGTACGG   | 0.478 |
| - | 9  | 861_862 |                     | NM_004308    | NP_004299    | Q07960 | RHG01_HUMAN  | Rho-GAP.                      | 1  | .AGTCTCCCTGAC  | 0.653 |
| + | 7  | 674     | .2_uc001ndg.3_RN    | NM_000506    | NP_000497    | P00734 | THRB_HUMAN   |                               | 3  | .CATTGGAGCAG   | 0.607 |
| + | 6  | 941     | .32_uc001nee.2_In   | NM_000107    | NP_000098    | Q92466 | DDB2_HUMAN   | WD 3.                         | 3  | .GTGGCCCTGA    | 0.542 |
| + | 2  | 199     | .rD5_uc010riq.1_5'  | NM_032681    | NP_116070    | Q9BSJ1 | SPRY5_HUMAN  | RING-type.                    | 0  | .TTGCCGGCCCT   | 0.512 |
| - | 1  | 52      |                     | NM_001004743 | NP_001004743 | Q8NGP3 | OR5M9_HUMAN  | ellular (Potential).          | 4  | .CTGACGACAGG   | 0.428 |
| - | 1  | 188     |                     | NM_001005489 | NP_001005489 | Q8NGF7 | OR5BH_HUMAN  | Name=2; (P p.N63S(1)          | 3  | .ACAGGTACTG    | 0.468 |

rs149395795

|   |    |           |                                |              |              |        |              |                                |    |               |       |
|---|----|-----------|--------------------------------|--------------|--------------|--------|--------------|--------------------------------|----|---------------|-------|
| + | 8  | 1093      | Mutation_p.Q308*               | NM_053023    | NP_444251    | Q96JP5 | ZFP91_HUMAN  |                                | 1  | CCAATCCAGTATC | 0.408 |
| - | 5  | 806       | 'CE_uc001nrb.2_F               | NM_152718    | NP_689931    | Q96DN2 | VWCE_HUMAN   | alcium-binding (Potential).    | 1  | :TGTGGCGGTCG  | 0.458 |
| + | 8  | 815       | TN3_uc010rpi.1_F               | NM_001104    | NP_001095    | Q08043 | ACTN3_HUMAN  |                                | 0  | CGGGGCTGAGC   | 0.597 |
| - | 17 | 3820      |                                | NM_006946    | NP_008877    | O15020 | SPTN2_HUMAN  | Spectrin 9.                    | 4  | FTTCCCGAATCTT | 0.557 |
| + | 14 | 4730      |                                | NM_014786    | NP_055601    | Q96PE2 | ARHG_HUMAN   |                                | 0  | :TCCGTCGCTGA  | 0.726 |
| + | 5  | 1272      |                                | NM_153614    | NP_705842    | P59910 | DJB13_HUMAN  |                                | 0  | :CTCCACCATCA  | 0.527 |
| + | 1  | 216       |                                | NM_001098672 | NP_001092142 | Q6MZM0 | HPHL1_HUMAN  |                                | 3  | 'GTCTGGGCTGG  | 0.502 |
| - | 6  | 1178      | hp.2_Missense_M                | NM_025208    | NP_079484    | Q9GZP0 | PDGFD_HUMAN  |                                | 2  | :TGTAACGCTTG  | 0.458 |
| + | 17 | 3150      | v.2_3'UTR GRIA4_               | NM_000829    | NP_000820    | P48058 | GRIA4_HUMAN  | lasmic (Potential).            | 8  | 3ACCTACCATAA  | 0.493 |
| + | 2  | 86        |                                | NM_000040    | NP_000031    | P02656 | APOC3_HUMAN  |                                | 0  | :TGGCGCTCCTG  | 0.647 |
| - | 12 | 2600_2601 |                                | NM_020693    | NP_065744    | Q8TD84 | DSCL1_HUMAN  | potential). Ig-like C2-type 9. | 8  | TAGCTCCTTCGC  | 0.639 |
| + | 4  | 733       | KLUB_uc010sgl.1                | NM_020734    | NP_065785    | Q9ULI2 | RIMKB_HUMAN  | p. ATP (By similarity).        | 0  | :TACGCGGGGTC  | 0.363 |
| + | 1  | 114       |                                | NM_144670    | NP_653271    | A8K2U0 | A2ML1_HUMAN  |                                | 3  | AGCTCCTTCTA   | 0.507 |
| - | 13 | 3619      |                                | NM_000834    | NP_000825    | Q13224 | NMDE2_HUMAN  | lasmic (Potential).            | 12 | CGTGCTCCCAG   | 0.582 |
| + | 21 | 2437_2438 | MP_uc001rgi.2_R                | NM_006152    | NP_006143    | Q12912 | LRMP_HUMAN   | lenal (Potential).             | 2  | TGTGGATGCCGC  | 0.495 |
| - | 12 | 963_964   | _Mutation_p.R215               | NM_002733    | NP_002724    | P54619 | AAKG1_HUMAN  | CBS 4.                         | 1  | AGTCGGTGAAC   | 0.54  |
| - | 5  | 1439      |                                | NM_002272    | NP_002263    | B4DRS2 | B4DRS2_HUMAN |                                | 6  | CTCCTCGTACTC  | 0.592 |
| + | 6  | 979       | 2_Nonsense_Mute                | NM_199187    | NP_954657    | P05783 | K1C18_HUMAN  | 2. Rod. Necessary for inter    | 1  | :CAGTCCAGTCC  | 0.572 |
| + | 8  | 1153      | my.1_Missense_M                | NM_020547    | NP_065434    | Q16671 | AMHR2_HUMAN  | Potential). Protein kinase.    | 2  | :TGCTCCCTGGC  | 0.577 |
| - | 2  | 232       | KIAA0748_uc010                 | NM_001098815 | NP_001092285 | A2RU30 | K0748_HUMAN  |                                | 2  | :GATCTGGGACA  | 0.597 |
| + | 1  | 539       |                                | NM_054104    | NP_473445    | Q9NZP0 | OR6C3_HUMAN  | ellular (Potential).           | 1  | ATTTTCCCCTCT  | 0.403 |
| + | 7  | 1064      | . RAB5B_uc001siv               | NM_001798    | NP_001789    | P24941 | CDK2_HUMAN   | rotein kinase.                 | 2  | :GATTTCGGCCA  | 0.522 |
| + | 8  | 1102      | jd.1_Missense_Mu               | NM_022465    | NP_071910    | Q9H2S9 | IKZF4_HUMAN  |                                | 1  | :TCGATCGTCTG  | 0.512 |
| - | 9  | 1236      | _p.T324M TMEM1                 | NM_001130963 | NP_001124435 | O14524 | T194A_HUMAN  |                                | 0  | TTGGCGTGAGG   | 0.433 |
| - | 7  | 828       | n_p.A83T STAT6_                | NM_003153    | NP_003144    | P42226 | STAT6_HUMAN  |                                | 4  | :TTTGGCTGCCT  | 0.632 |
| + | 6  | 1531_1532 | _p.G411E SLC16A                | NM_004731    | NP_004722    | O60669 | MOT2_HUMAN   | ical; (Potential).             | 1  | CTGTGGGGCTAT  | 0.391 |
| - | 2  | 290       | uc001srx.2_Intron              | NM_001099676 | NP_001093146 | Q8IXR9 | CL056_HUMAN  |                                | 0  | ATTTCTCTATCTG | 0.328 |
| + | 6  | 1126      | e_Mutation_p.P37               | NM_007007    | NP_008938    | Q16630 | CPSF6_HUMAN  | Pro-rich.                      | 0  | :AGCTCCTCCTC  | 0.627 |
| - | 2  | 1403      |                                | NM_005447    | NP_005438    | O75901 | RASF9_HUMAN  |                                | 1  | TATTCTTTTGCTT | 0.398 |
| - | 3  | 1396      | JM_uc001tbn.2_R                | NM_002345    | NP_002336    | P51884 | LUM_HUMAN    |                                | 2  | TAAGAGTGACTI  | 0.353 |
| + | 8  | 840       | xn.1_Missense_Mutation_p.D998N |              |              | Q8N1T3 | MYO1H_HUMAN  |                                | 0  | :TTTTCGACACTC | 0.368 |
| + | 14 | 1843      | i.3_Missense_Mut               | NM_001082537 | NP_001076006 | Q2MV58 | TECT1_HUMAN  |                                | 0  | AGGCTGCCTTTT  | 0.512 |
| + | 8  | 2023      | sf.2_Missense_Mu               | NM_005475    | NP_005466    | Q9UQQ2 | SH2B3_HUMAN  |                                | 1  | 3ACTACGAAATG  | 0.592 |
| - | 17 | 1995      | un.1_Nonsense_M                | NM_004658    | NP_004649    | O95294 | RASL1_HUMAN  | PH.                            | 4  | :TTCTCGAACAAT | 0.637 |
| - | 17 | 3495      |                                | NM_015335    | NP_056150    | Q71F56 | MD13L_HUMAN  |                                | 8  | ATGTAAGCCCG   | 0.463 |
| + | 2  | 397       | IP35_uc009zxx.2_               | NM_022717    | NP_073208    | Q16560 | U1SBP_HUMAN  | RRM.                           | 0  | :GGGCTACGCCT  | 0.507 |
| + | 19 | 3024      | p.W542* DNAH10                 | NM_0207437   | NP_997320    | Q8IVF4 | DYH10_HUMAN  | n (By similarity).             | 6  | :TCTCTGGAAT   | 0.383 |
| + | 9  | 3108      | 1uhf.1_Missense_               | NM_052907    | NP_443139    | Q14DG7 | T132B_HUMAN  | lasmic (Potential).            | 19 | :TCCTCCCAGAG  | 0.478 |
| + | 10 | 1193      | ij.1_Missense_Mu               | NM_004764    | NP_004755    | Q96J94 | PIWL1_HUMAN  | PAZ.                           | 2  | CAAGAGAAGGC   | 0.547 |
| - | 19 | 3298      |                                | NM_015347    | NP_056162    | O15034 | RIMB2_HUMAN  |                                | 11 | CTCTTCTTCTGT  | 0.308 |
| - | 1  | 1204      | :A_uc010tee.1_Intr             | NM_005584    | NP_005575    | Q13394 | MB211_HUMAN  |                                | 2  | :AGGAGTGGCAC  | 0.642 |
| - | 8  | 819       | se_Mutation_p.S2               | NM_013338    | NP_037470    | Q9Y673 | ALG5_HUMAN   | lenal (Potential).             | 0  | :GAGATGAAAAC  | 0.448 |
| - | 14 | 4304      | _p.S17F ZC3H13_                | NM_015070    | NP_055885    | Q5T200 | ZC3HD_HUMAN  |                                | 2  | CTCTCGGATTTA  | 0.408 |
| + | 1  | 2386      |                                | NR_003268    |              |        |              |                                | 0  | :TTTTCCACCAAG | 0.517 |
| - | 6  | 2191      | m.1_Missense_M                 | NM_020866    | NP_065917    | Q9NR64 | KLHL1_HUMAN  | Kelch 1.                       | 0  | :CCATTCTCCTA  | 0.343 |
| - | 8  | 2044      | _p.S393P DACH1_                | NM_080759    | NP_542937    | Q9UI36 | DACH1_HUMAN  |                                | 1  | TTAGAGAGAGTT  | 0.443 |
| - | 10 | 2772      | :IN1_uc001wir.3_N              | NM_014977    | NP_055792    | Q9UKV3 | ACINU_HUMAN  |                                | 4  | :GCAGCGAGCTC  | 0.458 |

rs61740514

|   |    |         |                    |              |              |        |             |                              |     |                |       |             |
|---|----|---------|--------------------|--------------|--------------|--------|-------------|------------------------------|-----|----------------|-------|-------------|
| - | 21 | 2403    |                    | NM_000257    | NP_000248    | P12883 | MYH7_HUMAN  | ling. Myosin head-like.      | 4   | :CGGCCTTGAAG   | 0.592 |             |
| - | 2  | 369     | DHRS1_uc001wol     | NM_138452    | NP_612461    | Q96LJ7 | DHRS1_HUMAN |                              | 0   | :GTAACCTGTGGC  | 0.592 |             |
| - | 18 | 3003    | vsI.2_Missense_Mi  | NM_013448    | NP_038476    | Q9NRL2 | BAZ1A_HUMAN | ion with SMARCA5.            | 7   | TATCGTCTATACA  | 0.418 |             |
| - | 4  | 2006    |                    | NM_203301    | NP_976046    | Q7Z6M2 | FBX33_HUMAN |                              | 0   | :AAAAGCTAAATC  | 0.358 |             |
| + | 5  | 861     | _p.R110C PRPF39    | NM_017922    | NP_060392    | Q86UA1 | PRP39_HUMAN | HAT 4.                       | 2   | :ATGATCGTATTC  | 0.388 |             |
| - | 8  | 1045    | ΔA0831_uc001xbw    | NM_014924    | NP_055739    | Q6ZNE5 | BAKOR_HUMAN |                              | 0   | :ATTTTCGCCAC/  | 0.289 |             |
| - | 2  | 803     | se_Mutation_p.G1   | NM_183002    | NP_892114    | P57103 | NAC3_HUMAN  |                              | 7   | :CAGCCCAAATC   | 0.542 |             |
| - | 19 | 2103    | Δaub.1_Missense_   | NM_024764    | NP_079040    | Q9H7T0 | CTSRB_HUMAN |                              | 5   | :TCTTCTATATC   | 0.403 |             |
| + | 11 | 909     | n_p.M276 SLC24     | NM_153646    | NP_705932    | Q8NFF2 | NCKX4_HUMAN | ellular (Potential).         | 3   | :ATTATGAGCTCC  | 0.532 |             |
| - | 1  | 412_413 | R20_uc010txu.1_5   | NM_001017963 | NP_001017963 | P07900 | HS90A_HUMAN |                              | 7   | :GGCGGGACAG    | 0.698 |             |
| + | 8  | 2008    | Δylr.2_Missense_   | NM_018335    | NP_060805    | A8K0R7 | ZN839_HUMAN |                              | 2   | :CAATGGGAGCG   | 0.542 |             |
| - | 32 | 4775    |                    | NM_006035    | NP_006026    | Q9Y5S2 | MRCKB_HUMAN |                              | 11  | :GTTGAGGAGGT   | 0.602 |             |
| + | 14 | 1404    | TA1_uc001yrb.2_Δ   | NM_004689    | NP_004680    | Q13330 | MTA1_HUMAN  | A-type; atypical.            | 2   | :GTATTCCTGGGC  | 0.493 |             |
| + | 1  | 851     | 43_splice ARHGAL   | NM_014783    | NP_055598    | Q6P4F7 | RHGBA_HUMAN |                              | 6   | :ATAGGGGTAAGT  | 0.463 |             |
| - | 3  | 1602    | ck.1_Missense_M    | NM_007223    | NP_009154    | Q14439 | GP176_HUMAN | lasmic (Potential).          | 6   | :GGTCCGGAGCG   | 0.577 |             |
| - | 6  | 1064    |                    | NM_005926    | NP_005917    | P55081 | MFAP1_HUMAN |                              | 1   | CTTCTCGATCTT   | 0.418 |             |
| + | 3  | 493     |                    | NM_024908    | NP_079184    | Q9H967 | WDR76_HUMAN |                              | 0   | :ATTTTCGGGAT   | 0.343 | rs139119504 |
| - | 10 | 1178    | e_Mutation_p.R10   | NM_002112    | NP_002103    | P19113 | DCHS_HUMAN  |                              | 6   | AGAGCGAAACCC   | 0.547 |             |
| - | 25 | 3830    | Δw.1_Missense_Mt   | NM_017672    | NP_060142    | Q96QT4 | TRPM7_HUMAN | lasmic (Potential).          | 10  | GAATGAAATTTG   | 0.333 |             |
| - | 10 | 1186    | gb.1_RNA MYO5C     | NM_018728    | NP_061198    | Q9NQX4 | MYO5C_HUMAN | osin head-like.              | 14  | TCATCCTCCTTC/  | 0.582 |             |
| + | 2  | 738     | Δfw.2_Missense_Mi  | NM_032866    | NP_116255    | Q0VF96 | CGNL1_HUMAN | Head.                        | 11  | :CAGCTCCGTGG   | 0.542 |             |
| - | 7  | 1068    | NIP2_uc010uhb.1_   | NM_004330    | NP_004321    | Q12982 | BNIP2_HUMAN | CRAL-TRIO.                   | 1   | :CTTCTATCAATT  | 0.303 |             |
| - | 4  | 528     | Δense_Mutation_p.: | NM_024611    | NP_078887    | Q659A1 | NARG2_HUMAN |                              | 2   | :AACGAGAGAAA   | 0.398 |             |
| + | 7  | 585     | X22_uc002ana.1_:   | NM_024798    | NP_079074    | Q96L94 | SNX22_HUMAN |                              | 0   | :GCCCAGATAAAC  | 0.577 |             |
| - | 2  | 189     |                    | NM_003613    | NP_003604    | O75339 | CILP1_HUMAN |                              | 7   | TTGGTCCCCACC   | 0.552 |             |
| + | 2  | 1475    |                    | NM_005576    | NP_005567    | Q08397 | LOXL1_HUMAN | yl-oxidase like.             | 0   | :VTGTGCAAGCATC | 0.572 |             |
| + | 2  | 1012    | h.1_Missense_Mut   | NM_005545    | NP_005536    | O14498 | ISLR_HUMAN  | Ig-like.                     | 4   | :AGGATGGTGCC   | 0.652 |             |
| + | 2  | 435     |                    | NM_025055    | NP_079331    | Q8N5R6 | CCD33_HUMAN |                              | 5   | :AGAGGAGCCCC   | 0.433 |             |
| + | 6  | 948     | Δaxp.2_Missense_   | NM_025055    | NP_079331    | Q8N5R6 | CCD33_HUMAN |                              | 5   | :CTTCTCCGGGC   | 0.582 |             |
| + | 2  | 521     | _p.V107A ARID3B    | NM_006465    | NP_006456    | Q81VW6 | ARI3B_HUMAN |                              | 0   | :TGAAGTTCGAC/  | 0.517 |             |
| - | 4  | 562     | _p.D38N CIB2_ucl   | NM_006383    | NP_006374    | O75838 | CIB2_HUMAN  | EF-hand 1.                   | 0   | :ACCATCCTCGG.  | 0.532 |             |
| + | 4  | 1973    | 592_uc010upb.1_    | NM_014630    | NP_055445    | Q92610 | ZN592_HUMAN |                              | 6   | :GAAAAGGCTG    | 0.572 |             |
| + | 10 | 1242    | _p.P119S AGBL1_    | NM_152336    | NP_689549    | Q96MI9 | CBPC4_HUMAN |                              | 0   | :AAAATCCTGGAC  | 0.478 |             |
| - | 7  | 956     |                    | NM_000326    | NP_000317    | P12271 | RLBP1_HUMAN | CRAL-TRIO.                   | 1   | TTGAGTTTCCTC/  | 0.468 |             |
| - | 4  | 490     | 5orf38_uc002bou.:  | NM_182616    | NP_872422    | P59780 | AP3S2_HUMAN |                              | 0   | :CGGGCGTGAGC   | 0.632 |             |
| + | 7  | 1670    | Δ3A1_uc010boc.1_   | NM_013272    | NP_037404    | Q9UIG8 | SO3A1_HUMAN | ir (Potential). Kazal-like.  | 1   | CAGATGGCATCA   | 0.463 |             |
| - | 7  | 2054    | Δq.1_Missense_Mt   | NM_003502    | NP_003493    | O15169 | AXIN1_HUMAN | F111.  Interaction with PPP; | 2   | :TCTCCGATCCT   | 0.617 |             |
| - | 3  | 299     | q.2_Missense_Mu    | NM_001037125 | NP_001032202 | Q9H9P5 | UNKL_HUMAN  | Δ3H1-type 1.                 | 0   | :TAGGGACACCT   | 0.607 |             |
| + | 4  | 682     | ΔPK8IP3_uc002crr   | NM_015133    | NP_055948    | Q9UPT6 | JIP3_HUMAN  |                              | 3   | :AGGTCGGAGGA   | 0.393 |             |
| - | 27 | 9714    | _t_Mutation_p.R316 | NM_001009944 | NP_001009944 | P98161 | PKD1_HUMAN  | toplasmic (Potential).       | 3   | :GATCCGGAAGA   | 0.657 |             |
| - | 4  | 581     | cpI.1_Missense_M   | NM_182563    | NP_872369    | Q6PL45 | CP079_HUMAN | BRICHOS.                     | 1   | :TCTCCGATCA    | 0.692 |             |
| - | 2  | 353     | 2ctw.1_Intron ZSC  | NM_032805    | NP_116194    | Q96SZ4 | ZSC10_HUMAN |                              | 1   | :TGCACGGGGAC   | 0.562 |             |
| - | 15 | 3134    | cww.2_Missense_Δ   | NM_004380    | NP_004371    | Q92793 | CBP_HUMAN   |                              | 127 | CCACCGAGGAG    | 0.532 |             |
| - | 10 | 1198    | e_Mutation_p.D30   | NM_144605    | NP_653206    | Q8IYM1 | SEP12_HUMAN |                              | 1   | :AGAATCGTCATC  | 0.662 |             |
| + | 8  | 799_800 | g.2_Missense_Mut   | NM_000246    | NP_000237    | P33076 | C2TA_HUMAN  |                              | 1   | AATCTCCTGAG    | 0.515 |             |
| + | 10 | 1143    | ch.2_Missense_Mt   | NM_014048    | NP_054767    | Q9ULH7 | MKL2_HUMAN  |                              | 5   | :GCCTGCTCCAG   | 0.527 |             |
| + | 29 | 4325    | ΔI.2_Missense_Mu   | NM_004996    | NP_004987    | P33527 | MRP1_HUMAN  | porter 2. Cytoplasmic.       | 4   | :GTTCCCTCGGA   | 0.552 |             |

|   |    |           |                   |              |              |        |             |                               |    |                |       |             |
|---|----|-----------|-------------------|--------------|--------------|--------|-------------|-------------------------------|----|----------------|-------|-------------|
| - | 1  | 397       |                   | NM_015092    | NP_055907    | Q96Q15 | SMG1_HUMAN  | with SMG8 and SMG9.           | 16 | cgccgctgcTCAGC | 0.627 |             |
| - | 19 | 2803      |                   | NM_017539    | NP_060009    | Q8TD57 | DYH3_HUMAN  | n (By similarity).            | 18 | ACTTATCGATCTT  | 0.488 |             |
| + | 4  | 2011      |                   | NM_006539    | NP_006530    | O60359 | CCG3_HUMAN  |                               | 0  | :GGACCCCTCA    | 0.567 |             |
| + | 2  | 1372      |                   | NM_006040    | NP_006031    | Q9Y661 | HS3S4_HUMAN | lenal (Potential).            | 2  | VTGTTCTCTGGAC  | 0.542 |             |
| + | 2  | 1001      | on APOB48R_uc0    | NM_018690    | NP_061160    | Q0VD83 | APOBR_HUMAN | Glu-rich.                     | 0  | :GGACAGCCTCG   | 0.716 |             |
| - | 2  | 390       | dxs.2_Missense_M  | NM_006110    | NP_006101    | O95400 | CD2B2_HUMAN |                               | 1  | :CCAAGAGTGT    | 0.522 |             |
| + | 3  | 499       | BXL19_uc002eaa    | NM_001099784 | NP_001093254 | Q6PCT2 | FXL19_HUMAN | PHD-type.                     | 4  | :GGAGTGACAA    | 0.607 |             |
| + | 4  | 749       | C1_uc002ebo.2_5'  | NM_001008274 | NP_001008275 | Q6ZMU5 | TRI72_HUMAN |                               | 0  | :TGGGGGAGCAG   | 0.667 |             |
| + | 4  | 2173      |                   | NM_003414    | NP_003405    | Q14586 | ZN267_HUMAN |                               | 4  | :TCATACTGGAG   | 0.453 |             |
| + | 4  | 2329      |                   | NM_003414    | NP_003405    | Q14586 | ZN267_HUMAN | :2H2-type 14.                 | 4  | :ACATCGGAGAA   | 0.433 | rs146914846 |
| + | 2  | 105       |                   | NM_002990    | NP_002981    | O00626 | CCL22_HUMAN |                               | 0  | :ACATGGAAGAC   | 0.642 |             |
| - | 29 | 3000      | dh.2_Missense_M   | NM_001297    | NP_001288    | Q14028 | CNGB1_HUMAN | (Potential). cAMP (By simil   | 4  | :AGAGCGAAGCC   | 0.562 |             |
| + | 10 | 2799      |                   | NM_002428    | NP_002419    | P51511 | MMP15_HUMAN | ellular (Pote p.G609R(1)      | 3  | :GGACGGGGGCA   | 0.701 |             |
| - | 1  | 525       | lvjt.1_Missense_M | NM_001082486 | NP_001075955 | Q96AP0 | ACD_HUMAN   |                               | 1  | :TCCTCGGAAGA   | 0.741 |             |
| - | 62 | 10515     |                   | NM_032821    | NP_116210    | Q4G0P3 | HYDIN_HUMAN |                               | 2  | :CACGAGGCCTC   | 0.562 |             |
| - | 3  | 645       | gg.2_Nonsense_M   | NM_018124    | NP_060594    | Q6PCD5 | RFWD3_HUMAN |                               | 3  | :CACCTGAAAGT   | 0.413 |             |
| + | 6  | 897       | o.R146Q CNTNAP    | NM_033401    | NP_207837    | Q9C0A0 | CNTP4_HUMAN | (Potential). F5/8 type C.     | 2  | :AATGCGAATCG   | 0.408 |             |
| + | 11 | 1818      | p.P405L CNTNAF    | NM_033401    | NP_207837    | Q9C0A0 | CNTP4_HUMAN | potential). Laminin G-like 2. | 2  | :TGCTCTCTGCT   | 0.478 |             |
| - | 2  | 579       |                   | NM_003791    | NP_003782    | Q14703 | MBTP1_HUMAN |                               | 2  | :TCTTTTCCAGTC  | 0.453 |             |
| + | 12 | 1170      | hy.2_Missense_M   | NM_014861    | NP_055676    | O75185 | AT2C2_HUMAN | ellular (Potential).          | 2  | :TCATCGTGAAG   | 0.582 |             |
| - | 6  | 1001      |                   | NM_002558    | NP_002549    | P51575 | P2RX1_HUMAN | ellular (Potential).          | 2  | :TGAAAAGAGTG   | 0.622 |             |
| - | 3  | 515       | O1_uc010vsi.1_3'  | NM_182566    | NP_872372    | Q7Z5L0 | VMO1_HUMAN  |                               | 1  | :ACAGCGGAAGC   | 0.657 |             |
| - | 5  | 979       | uc002gcb.2_Misse  | NM_020162    | NP_064547    | Q9H6R0 | DHX33_HUMAN | case C-terminal.              | 2  | :ACAGAGGAAGG   | 0.607 |             |
| + | 9  | 1391      | .1_splice DNAH2_1 | NM_020877    | NP_065928    | Q9P225 | DYH2_HUMAN  |                               | 13 | :GTGCAGGTTCC   | 0.592 |             |
| + | 8  | 1249      | if.2_Missense_Mul | NM_001005273 | NP_001005273 | Q12873 | CHD3_HUMAN  |                               | 1  | :TGGCCGGGGAG   | 0.438 |             |
| + | 24 | 3931      | Missense_Mutatio  | NM_001005273 | NP_001005273 | Q12873 | CHD3_HUMAN  |                               | 1  | :CCATCGCTCGG   | 0.512 |             |
| - | 39 | 5741      |                   | NM_003802    | NP_003793    | Q9UKX3 | MYH13_HUMAN | Potential.                    | 6  | :CCTGCCTCTTG   | 0.587 |             |
| + | 27 | 5721      | o.2_Missense_M    | NM_001372    | NP_001363    | Q9NYC9 | DYH9_HUMAN  | 1 (By similarity).            | 20 | :TGGCCGCGCA    | 0.627 |             |
| - | 9  | 2166      | nse_Mutation_p.S  | NM_006470    | NP_006461    | O95361 | TRI16_HUMAN | 330.2/SPRY.                   | 3  | :CTTGAAAGCC    | 0.512 |             |
| - | 5  | 542       | 2_uc010cpr.2_Intr | NM_001082968 | NP_001076437 | Q6ZVM7 | TM1L2_HUMAN | VHS.                          | 0  | :TGCTCGAAAGG   | 0.512 |             |
| + | 13 | 1240_1241 | sense_Mutation_p  | NM_018242    | NP_060712    | Q96FL8 | S47A1_HUMAN | ical; (Potential).            | 0  | :TGTTTCCCACCT  | 0.431 |             |
| + | 3  | 1063      |                   | NM_021012    | NP_066292    | Q14500 | IRK12_HUMAN | llular (By similarity).       | 4  | :GGGGCCGCACA   | 0.652 |             |
| + | 3  | 1304      |                   | NM_021012    | NP_066292    | Q14500 | IRK12_HUMAN | smic (By similarity).         | 4  | :CAACGCCGTGG   | 0.612 |             |
| - | 6  | 941       | p.A182S PIGS_uc   | NM_033198    | NP_149975    | Q96S52 | PIGS_HUMAN  | lenal (Potential).            | 4  | :CTGGCCACCT    | 0.587 |             |
| - | 21 | 3315      | 2_5'Flank ALDOC_  | NM_006461    | NP_006452    | Q96R06 | SPAG5_HUMAN | Potential.                    | 1  | :GGTAAGGTGGG   | 0.542 |             |
| - | 2  | 277       | p.G28E SEZ6_uc    | NM_178860    | NP_849191    | Q53E19 | SEZ6_HUMAN  | ellular (Potential).          | 2  | :CTTTCCCACGC   | 0.582 |             |
| - | 10 | 814       | it.2_Missense_Mul | NM_018428    | NP_060898    | Q9NYH9 | UTP6_HUMAN  |                               | 1  | :CAATCGAAAGC   | 0.333 | rs146623373 |
| - | 10 | 1686      | w.1_RNA MMP28_    | NM_024302    | NP_077278    | Q9H239 | MMP28_HUMAN | mopexin-like 4.               | 1  | :TGATGGAGCCA   | 0.677 |             |
| - | 20 | 2875      | w.2_Intron MYO19  | NM_001163735 | NP_001157207 | Q96H55 | MYO19_HUMAN | rosin head-like.              | 1  | :TCTGCGCCTGG   | 0.587 |             |
| + | 7  | 1368      | p.S358F CASC3_    | NM_007359    | NP_031385    | O15234 | CASC3_HUMAN |                               | 1  | :GACTTCTGTGA   | 0.572 |             |
| - | 1  | 393       |                   | NM_033059    | NP_149048    | Q9BYQ6 | KR411_HUMAN | IKRQVHEL]-[SPTR]-[ST          | 0  | :gcagcagctggac | 0.129 |             |
| + | 1  | 235_236   |                   | NM_031961    | NP_114167    | Q9BYQ4 | KRA92_HUMAN | -C-[RQVSGE]-[SPTQ]-[T/        | 1  | :TGCTGCCAGCC   | 0.644 |             |
| - | 1  | 115       |                   | NM_002278    | NP_002269    | Q14532 | K1H2_HUMAN  | Head.                         | 0  | :CGGGGGCAGCT   | 0.612 |             |
| + | 1  | 450       | J586_uc002ibx.2_! | NR_002773    |              |        |             |                               | 0  | :CCAAGGCTGCA   | 0.657 |             |
| + | 3  | 312       | HX8_uc010wig.1_   | NM_004941    | NP_004932    | Q14562 | DHX8_HUMAN  |                               | 4  | :AGGATTCTTTAT  | 0.433 |             |
| - | 2  | 639       |                   | NM_025237    | NP_079513    | Q9BQB4 | SOST_HUMAN  |                               | 0  | :GGCGGGGGCC    | 0.552 |             |
| + | 5  | 811       | ie_Mutation_p.E21 | NM_032133    | NP_115509    | Q8TBZ2 | MYBPP_HUMAN |                               | 6  | :CTGCTGAAGGA   | 0.522 |             |



|   |    |               |                                                  |              |              |        |              |                                 |    |               |       |             |
|---|----|---------------|--------------------------------------------------|--------------|--------------|--------|--------------|---------------------------------|----|---------------|-------|-------------|
| + | 6  | 657           |                                                  | NM_153228    | NP_694960    | Q8N957 | ANKF1_HUMAN  | Potential.                      | 2  | GCCTGGAAAGC   | 0.468 |             |
| - | 1  | 520           | /25_uc010dcj.2_5'                                | NM_005082    | NP_005073    | Q14258 | TRI25_HUMAN  |                                 | 3  | GCGGCGCAACA   | 0.632 |             |
| - | 20 | 4470          | o.P1140L BZRAP1                                  | NM_004758    | NP_004749    | O95153 | RIMB1_HUMAN  |                                 | 3  | AGCCCGGACAG   | 0.677 | rs142431736 |
| + | 3  | 735           | l1E_uc010ddd.2_li                                | NM_014906    | NP_055721    | Q8WY54 | PPM1E_HUMAN  |                                 | 5  | GGCCCGTTCTG   | 0.468 |             |
| + | 6  | 504           | nse_Mutation_p.P                                 | NM_001099432 | NP_001092902 | Q9H6U6 | BCAS3_HUMAN  |                                 | 5  | TGCTCCACAGT   | 0.413 |             |
| - | 10 | 785           | 10woz.1_RNA uc010wpb.1_5'Flank                   |              |              |        |              |                                 | 0  | GCTGTGAAATC   | 0.572 |             |
| - | 11 | 1291          |                                                  | NM_001433    | NP_001424    | O75460 | ERN1_HUMAN   | lenal (Potential).              | 9  | AATCAGCAGGA   | 0.393 |             |
| + | 11 | 4553          | o.2_Nonsense_Mut                                 | NM_182641    | NP_872579    | Q12830 | BPTF_HUMAN   |                                 | 4  | ACTACCGAGAT   | 0.423 |             |
| - | 13 | 1959          | p.D594N ABCA8                                    | NM_007168    | NP_009099    | O94911 | ABCA8_HUMAN  | C transporter 1.                | 3  | CTTTATCCACTTC | 0.333 |             |
| - | 30 | 4441          | se_Mutation_p.P1E                                | NM_080282    | NP_525021    | Q8WWZ4 | ABCA4_HUMAN  |                                 | 4  | GTTTGAGAGCAG  | 0.423 |             |
| - | 2  | 994           | rro.1_Missense_M                                 | NM_173477    | NP_775748    | Q495M9 | USH1G_HUMAN  |                                 | 2  | GAGCGGGGCTC   | 0.706 |             |
| - | 7  | 1224_1225     | wtb.1_Missense_I                                 | NM_002766    | NP_002757    | Q14558 | KPRA_HUMAN   |                                 | 1  | TACATGGCAACT  | 0.347 |             |
| + | 3  | 924           |                                                  | NM_178543    | NP_848638    | Q6UWV6 | ENPP7_HUMAN  |                                 | 3  | TCAAGGACGCC   | 0.597 |             |
| + | 4  | 3302          |                                                  | NM_020914    | NP_065965    | Q9HCF4 | ALO17_HUMAN  |                                 | 21 | GGCTTCGTGAC   | 0.507 |             |
| + | 10 | 1951          | p.W197* RPTOR                                    | NM_020761    | NP_065812    | Q8N122 | RPTOR_HUMAN  |                                 | 6  | GCCTGGGACCT   | 0.612 |             |
| - | 11 | 1022          | p.F288I L3MBTL2                                  | NM_173464    | NP_775735    | Q8NA19 | LMBL4_HUMAN  | MBT 3.                          | 3  | TTTTAAAACTTT  | 0.323 |             |
| + | 14 | 1612          | 76_splice ARHGAP28_uc002kne.2_Splice_Site_p.M47f |              |              | B4DXL2 | B4DXL2_HUMAN |                                 | 1  | GAAATGGTAAGA  | 0.284 |             |
| - | 58 | 8363          | il.2_Missense_Mut                                | NM_005559    | NP_005550    | P25391 | LAMA1_HUMAN  | minin G-like 4.                 | 21 | GCTGATGAGCCA  | 0.552 |             |
| + | 3  | 748           | dkv.2_Missense_M                                 | NM_002845    | NP_002836    | P28827 | PTPRM_HUMAN  | tracellular (Potential).        | 6  | GAGAGCCACC    | 0.458 |             |
| - | 9  | 1299          | vi.3_Missense_Mu                                 | NM_001941    | NP_001932    | Q14574 | DSC3_HUMAN   | Extracellular (Potential).      | 4  | TTAAATCCTTATC | 0.308 |             |
| - | 8  | 1452          | vk.3_Missense_Mt                                 | NM_024422    | NP_077740    | Q02487 | DSC2_HUMAN   | r (Potential). Cadherin 2.      | 3  | GACCAAAATACT  | 0.313 |             |
| + | 8  | 1077          |                                                  | NM_001942    | NP_001933    | Q02413 | DSG1_HUMAN   | r (Potential). Cadherin 3.      | 7  | TGCTCGAGATTA  | 0.328 |             |
| + | 12 | 1937          | vr.2_Missense_Mu                                 | NM_177986    | NP_817123    | Q86SJ6 | DSG4_HUMAN   | ellular (Potential). p.A601V(1) | 8  | TGCCCGGGCA    | 0.507 |             |
| + | 14 | 2281          | uc002kvw.3_Intron                                | NM_001943    | NP_001934    | Q14126 | DSG2_HUMAN   | lasmic (Potential).             | 9  | GAAAGGAAGTA   | 0.512 |             |
| + | 11 | 1436          | q.2_Missense_Mt                                  | NM_030632    | NP_085135    | Q9C0F0 | ASXL3_HUMAN  |                                 | 3  | GACTAGTATCT   | 0.393 |             |
| + | 11 | 1914          | q.2_Missense_Mt                                  | NM_030632    | NP_085135    | Q9C0F0 | ASXL3_HUMAN  | Ser-rich.                       | 3  | GAGGGAGCCT    | 0.483 |             |
| - | 1  | 1111          | VAL2_uc002lco.2_                                 | NM_145653    | NP_663628    | Q8NG57 | ELOA3_HUMAN  |                                 | 0  | GGGAGTCATG    | 0.617 |             |
| - | 27 | 3827          | ea.2_Missense_Mi                                 | NM_001080467 | NP_001073936 | Q9ULV0 | MYO5B_HUMAN  | Potential.                      | 5  | GTCCGCCTGC    | 0.498 |             |
| + | 13 | 2601          | p.E520K DCC_uc                                   | NM_005215    | NP_005206    | P43146 | DCC_HUMAN    | ential). Fibronectin type-III   | 17 | GATGGAAACA    | 0.428 |             |
| - | 8  | 1009          | p.R304* FECH_u                                   | NM_000140    | NP_000131    | P22830 | HEMH_HUMAN   |                                 | 1  | CAGTCGGTAGG   | 0.493 |             |
| + | 16 | 2225          |                                                  | NM_194449    | NP_919431    | O60346 | PHLP1_HUMAN  | PP2C-like.                      | 0  | TGTCCGGTGAAT  | 0.537 |             |
| + | 7  | 1010          |                                                  | NM_152721    | NP_689934    | Q6PKX4 | DOK6_HUMAN   |                                 | 3  | TCACTCGTCAG   | 0.438 |             |
| + | 21 | 2439          | .1_Nonsense_Mut                                  | NM_198531    | NP_940933    | O43861 | ATP9B_HUMAN  | lasmic (Potential).             | 3  | CATTCGAAGG    | 0.473 | rs147932692 |
| + | 13 | 1834          | sb.1_Missense_Mi                                 | NM_019112    | NP_061985    | Q8IZY2 | ABCA7_HUMAN  | llular (By similarity).         | 9  | CCATCCCGTGC   | 0.697 |             |
| + | 27 | 4496          | vc.1_Missense_Mt                                 | NM_032482    | NP_115871    | Q8TEK3 | DOT1L_HUMAN  |                                 | 4  | CGGCTCCGTGG   | 0.726 |             |
| - | 3  | 259           | lvj.1_Missense_M                                 | NM_144616    | NP_653217    | Q96MG2 | JSPR1_HUMAN  | r with CACNA1S (By simila       | 1  | CTGGGTCCCC    | 0.612 |             |
| + | 4  | 1262          | ra.1_Missense_Mt                                 | NM_173480    | NP_775751    | Q68EA5 | ZNF57_HUMAN  | 2H2-type 8.                     | 3  | GGAAAGCCTTC   | 0.443 |             |
| + | 4  | 1322          | ra.1_Missense_Mt                                 | NM_173480    | NP_775751    | Q68EA5 | ZNF57_HUMAN  | 2H2-type 9.                     | 3  | CAGCTCTATAAA  | 0.438 |             |
| + | 4  | 1490          | ra.1_Missense_Mt                                 | NM_173480    | NP_775751    | Q68EA5 | ZNF57_HUMAN  | 2H2-type 11.                    | 3  | CAGCTCCATAAA  | 0.443 |             |
| - | 16 | 1764          | 02_splice TLE2_u                                 | NM_003260    | NP_003251    | Q04725 | TLE2_HUMAN   |                                 | 0  | CGTTCTGGGG    | 0.617 |             |
| - | 3  | 1937          | l4_uc010dub.1_5'f                                | NM_001080400 | NP_001073869 | Q96Q06 | PLIN4_HUMAN  | roximate tandem repeat.[17      | 0  | CTGTCGCGATA   | 0.572 |             |
| - | 9  | 1050          |                                                  | NM_000064    | NP_000055    | P01024 | CO3_HUMAN    |                                 | 5  | GATGACGGTGG   | 0.612 |             |
| + | 14 | 1733          | n_p.F513L EMR1                                   | NM_001974    | NP_001965    | Q14246 | EMR1_HUMAN   | ilar (Potential). Ser/Thr-rich  | 5  | TCCTTTGGCTG   | 0.443 |             |
| - | 40 | 39365_3936C16 | uc010dwj.2_E                                     | NM_024690    | NP_078966    | Q8WXI7 | MUC16_HUMAN  |                                 | 57 | AACTGGAGTT    | 0.515 |             |
| - | 3  | 28000         |                                                  | NM_024690    | NP_078966    | Q8WXI7 | MUC16_HUMAN  | ch. Extracellular (Potential).  | 57 | ATGTGAGAACAT  | 0.468 |             |
| - | 3  | 19028         |                                                  | NM_024690    | NP_078966    | Q8WXI7 | MUC16_HUMAN  | xtracellular (Potential).       | 57 | GAGGTGAACGA   | 0.488 |             |
| - | 3  | 15362         |                                                  | NM_024690    | NP_078966    | Q8WXI7 | MUC16_HUMAN  | xtracellular (Potential).       | 57 | TCAGGGAAGGT   | 0.478 |             |

|   |    |           |                                                |              |              |        |             |                            |    |                |       |             |
|---|----|-----------|------------------------------------------------|--------------|--------------|--------|-------------|----------------------------|----|----------------|-------|-------------|
| - | 10 | 1817      | wr.1_Missense_M                                | NM_152476    | NP_689689    | Q96MR9 | ZN560_HUMAN | 2H2-type 7.                | 6  | FGAGTTCGCATG   | 0.408 |             |
| - | 6  | 1212      | _p.P267L ZNF561                                | NM_152289    | NP_689502    | Q8N587 | ZN561_HUMAN |                            | 1  | TCATAGGGTTTTA  | 0.418 |             |
| - | 29 | 2307      |                                                | NM_015719    | NP_056534    | P25940 | CO5A3_HUMAN | le-helical region.         | 10 | CCACATCGCCCT   | 0.627 |             |
| - | 1  | 204       | ense_Mutation_p.F                              | NM_007065    | NP_008996    | Q16543 | CDC37_HUMAN |                            | 0  | CCAGCGGAAGA    | 0.632 |             |
| - | 2  | 613       | or.1_Missense_M                                | NM_012289    | NP_036421    | Q14145 | KEAP1_HUMAN |                            | 17 | GTGGAGGACAC    | 0.582 |             |
| + | 4  | 539       | e_Mutation_p.R43                               | NM_022737    | NP_073574    | Q96GM1 | LPPR2_HUMAN |                            | 1  | CCAGCCGAGTG    | 0.627 |             |
| - | 6  | 1455      |                                                | NM_138783    | NP_620138    | Q96CK0 | ZN653_HUMAN | 2H2-type 1.                | 0  | GCAGTGAACA     | 0.692 |             |
| + | 4  | 719       |                                                | NM_152357    | NP_689570    | Q81Y18 | ZN440_HUMAN | 2H2-type 2.                | 0  | TGTTCAAGAC     | 0.393 |             |
| + | 4  | 1515      | ym.1_Missense_M                                | NM_001136501 | NP_001129973 | Q08AG5 | ZN844_HUMAN |                            | 0  | CTTCAGATCTG    | 0.423 |             |
| + | 4  | 1710      | ym.1_Missense_IV                               | NM_001136501 | NP_001129973 | Q08AG5 | ZN844_HUMAN |                            | 0  | GCATGAAAGGA    | 0.413 |             |
| + | 5  | 1472      | ixpn.1_Intron ANK                              | NM_152363    | NP_689576    | Q8NAG6 | ANKL1_HUMAN | LEM.                       | 0  | TTGCTCCTGGTT   | 0.572 |             |
| - | 11 | 1540      |                                                | NM_001080421 | NP_001073890 | Q9UPW8 | UN13A_HUMAN |                            | 3  | CTCCTCGTCCT    | 0.667 |             |
| + | 7  | 1236      | ahu.2_Missense_IV                              | NM_015683    | NP_056498    | Q8TBH0 | ARRD2_HUMAN |                            | 1  | AGGACCCCGAC    | 0.632 |             |
| + | 4  | 1046      |                                                | NM_031218    | NP_112495    | P35789 | ZNF93_HUMAN |                            | 1  | GAAGCCCTACG    | 0.373 |             |
| - | 4  | 1649      | pc.1_Missense_M                                | NM_001076675 | NP_001070143 | Q68DY1 | ZN626_HUMAN | ype 12; degenerate.        | 1  | ATTCTCTCATGTC  | 0.398 | rs71332197  |
| - | 4  | 916       | 1_Intron ZNF208_                               | NM_007153    | NP_009084    |        |             |                            | 7  | TTGTAGGATTTCT  | 0.358 |             |
| - | 4  | 1136      | _p.H263Y ZNF681_                               | NM_138286    | NP_612143    | Q96N22 | ZN681_HUMAN | ype 6; degenerate.         | 0  | CAGTATGAATTAT  | 0.388 |             |
| + | 17 | 1926      | Y19L3_uc002nti.1                               | NM_207325    | NP_997208    | Q6ZPD9 | D19L3_HUMAN |                            | 4  | TGGCCGGAGTC    | 0.537 |             |
| + | 6  | 946       |                                                | NM_032346    | NP_115722    | Q9BRP1 | PDD2L_HUMAN |                            | 1  | TGCCAGCACTG    | 0.433 | rs141281403 |
| - | 2  | 784       | z.1_5'Flank LGI4_                              | NM_139284    | NP_644813    | Q8N135 | LGI4_HUMAN  | LRR 1.                     | 1  | GGTGACTCCCG    | 0.607 |             |
| + | 15 | 2322      | 651F KIRREL2_uc                                | NM_199180    | NP_954649    | Q6UWL6 | KIRR2_HUMAN | lasmic (Pote p.L704L(1)    | 3  | CGCTCTCCAG     | 0.562 |             |
| + | 14 | 1768      | _p.E545K APLP1_u                               | NM_005166    | NP_005157    | P51693 | APLP1_HUMAN | ellular (Potential).       | 2  | CGCTGGAACAG    | 0.338 |             |
| + | 11 | 1232      | iu.2_Missense_Ml                               | NM_000540    | NP_000531    | P21817 | RYR1_HUMAN  | plasmic. MIR 5.            | 12 | TGCGGCTCGGC    | 0.393 |             |
| - | 3  | 459       | xuj.1_Missense_IV                              | NM_006149    | NP_006140    | P56470 | LEG4_HUMAN  | Galectin 1.                | 2  | ACTTCCCGCCC    | 0.582 |             |
| - | 8  | 657       | _p.R133C SIRT2_u                               | NM_012237    | NP_036369    | Q8IXJ6 | SIRT2_HUMAN | tylase sirtuin-type.       | 0  | CAGGCGCATGA    | 0.582 |             |
| + | 3  | 194       |                                                | NM_013268    | NP_037400    | Q9UHV8 | PP13_HUMAN  | Galectin.                  | 1  | TTGCCTTCCGT    | 0.512 |             |
| - | 7  | 3507      | _e_Mutation_p.R94                              | NM_181882    | NP_870998    | Q9BXM0 | PRAX_HUMAN  |                            | 2  | FGGACGATCAC    | 0.632 |             |
| - | 7  | 2893      | _e_Mutation_p.K73f                             | NM_181882    | NP_870998    | Q9BXM0 | PRAX_HUMAN  |                            | 2  | CCATTTAGCGC    | 0.627 |             |
| + | 9  | 1159      | TRTC2_uc010xwe.                                | NM_001040283 | NP_001035373 | Q8IXT2 | DMRTD_HUMAN |                            | 0  | TGGCCGTCTGGC   | 0.572 |             |
| - | 3  | 1701      | _uc002ots.1_Misse                              | NM_005357    | NP_005348    | Q05469 | LIPS_HUMAN  |                            | 2  | CAGGCGTGAAC    | 0.607 | rs143861703 |
| - | 5  | 1174      | _j.3_Missense_Mu                               | NM_182707    | NP_874366    | Q9UQ74 | PSG8_HUMAN  | like C2-type 3.            | 0  | GTGGTTAGAG     | 0.463 |             |
| - | 2  | 191       | _se_Mutation_p.W34* PSG11_uc002ovm.1_Nonsense_ |              |              | Q00889 | PSG6_HUMAN  |                            | 2  | AAGTCCAGAA     | 0.483 |             |
| - | 2  | 496       | _se_Mutation_p.G                               | NM_002780    | NP_002771    | Q00888 | PSG4_HUMAN  | g-like V-type.             | 1  | TCCTCCAGTCC    | 0.498 |             |
| - | 2  | 231       |                                                | NM_145296    | NP_660339    | Q8NFZ8 | CADM4_HUMAN | Extracellular (Potential). | 0  | TCTGCCGGGCT    | 0.453 |             |
| - | 4  | 1867      |                                                | NM_145056    | NP_659493    | Q96B18 | DACT3_HUMAN |                            | 0  | TGGCGGGGCT     | 0.622 |             |
| + | 5  | 951       |                                                | NM_031485    | NP_113673    | Q9BQ67 | GRWD1_HUMAN | WD 1.                      | 1  | ACATCCACCTC    | 0.642 |             |
| - | 9  | 914       |                                                | NM_001080434 | NP_001073903 |        |             |                            | 6  | GGTCAGAGGTC    | 0.687 |             |
| - | 1  | 166       |                                                | NM_178449    | NP_848544    | Q96A98 | TIP39_HUMAN |                            | 0  | ACCACcagcagcag | 0.597 |             |
| + | 8  | 1029      | V1_uc002pqa.2_R                                | NM_017432    | NP_059128    | Q86YD1 | PTOV1_HUMAN | ction with FLOT1.          | 0  | TCTACGTGAAC    | 0.657 |             |
| + | 5  | 2407      | _p.H724Y ZNF473_                               | NM_001006656 | NP_001006657 | Q8WTR7 | ZN473_HUMAN | 2H2-type 15.               | 2  | GAATTCACCTCAC  | 0.512 |             |
| - | 22 | 3585      | _sw.1_Missense_IV                              | NM_016148    | NP_057232    | Q9Y566 | SHAN1_HUMAN | Poly-Gly.                  | 2  | CGCCTCCCGTG    | 0.473 |             |
| + | 5  | 782       |                                                | NM_007147    | NP_009078    | Q9Y473 | ZN175_HUMAN |                            | 0  | CATTTAGAAG#    | 0.393 |             |
| - | 5  | 2254      | _ydj.1_Missense_M                              | NM_001102657 | NP_001096127 | Q6ZNA1 | ZN836_HUMAN | 2H2-type 15.               | 0  | TTATGATTTGAAA  | 0.408 |             |
| - | 5  | 2235      | _rdj.1_Missense_Ml                             | NM_001102657 | NP_001096127 | Q6ZNA1 | ZN836_HUMAN | 2H2-type 15.               | 0  | ACTGTCAATTGAA  | 0.423 |             |
| - | 4  | 2233_2234 | _p.N652S ZNF28_u                               | NM_006969    | NP_008900    | P17035 | ZNF28_HUMAN | 2H2-type 18.               | 1  | CAAGGTTTGACA   | 0.406 |             |
| - | 5  | 411       | _qbg.1_Missense_IV                             | NM_182609    | NP_872415    | Q86XU0 | ZN677_HUMAN | KRAB.                      | 1  | ATAATTCCTCTT   | 0.348 |             |
| + | 4  | 1553      | _rdw.1_Missense_IV                             | NM_138374    | NP_612383    | Q96IR2 | ZN845_HUMAN | 2H2-type 10.               | 0  | TCAAGACATCAT   | 0.378 |             |

|   |     |           |                    |              |              |        |             |                              |     |               |       |             |
|---|-----|-----------|--------------------|--------------|--------------|--------|-------------|------------------------------|-----|---------------|-------|-------------|
| + | 7   | 1834      | p.R405L ZNF761_    | NM_001008401 | NP_001008401 | Q86XN6 | ZN761_HUMAN | C2H2-type 9.                 | 1   | CTAGACGTCATAC | 0.393 |             |
| + | 7   | 1848      | p.Q410K ZNF761_    | NM_001008401 | NP_001008401 | Q86XN6 | ZN761_HUMAN |                              | 1   | CGAGAGCAACCT  | 0.393 | rs146851069 |
| + | 1   | 73        |                    | NM_001012728 | NP_001012746 | A6NFQ7 | DPRX_HUMAN  |                              | 0   | GATCTTCGTAACA | 0.507 | rs148896232 |
| - | 4   | 1217      | p.E381K NLRP7_L    | NM_206828    | NP_996611    | Q8WX94 | NALP7_HUMAN | NACHT.                       | 3   | CGTCTCCCCCT   | 0.687 |             |
| + | 5   | 2459      | p.F604L NLRP4_     | NM_134444    | NP_604393    | Q96MN2 | NALP4_HUMAN |                              | 15  | CTCTTTCTGGC   | 0.428 |             |
| + | 3   | 1043      | tg_2_Missense_Mi   | NM_176811    | NP_789781    | Q86W28 | NALP8_HUMAN | NACHT.                       | 13  | ACGATGCTTCC   | 0.502 |             |
| - | 7   | 4528      | E1364K PEG3_uc     | NM_001146186 | NP_001139658 | Q9GZU2 | PEG3_HUMAN  | Glu-rich.                    | 12  | CAGCCTCTACGT  | 0.478 |             |
| - | 7   | 2577      | p.E713D PEG3_L     | NM_001146186 | NP_001139658 | Q9GZU2 | PEG3_HUMAN  |                              | 12  | TCACCTTCAAG   | 0.408 |             |
| + | 5   | 1421      | nse_Mutation_p.T   | NM_024691    | NP_078967    | Q96HQ0 | ZN419_HUMAN |                              | 0   | TCACACTGGAG   | 0.433 |             |
| + | 5   | 1461      | nse_Mutation_p.F   | NM_024691    | NP_078967    | Q96HQ0 | ZN419_HUMAN | C2H2-type 8.                 | 0   | CAGATCTTTAG   | 0.423 |             |
| - | 7   | 1679      | hp_1_Missense_M    | NM_025027    | NP_079303    | Q8WXB4 | ZN606_HUMAN |                              | 2   | AAATAAAAGATA  | 0.338 |             |
| + | 3   | 1281      | p.R359C TTC15_u    | NM_016030    | NP_057114    | Q8WVT3 | TTC15_HUMAN |                              | 4   | CTGCTTCGCTTTC | 0.393 |             |
| + | 22  | 4093      | p.1_Missense_Mt    | NM_014668    | NP_055483    | Q4ZG55 | GREB1_HUMAN |                              | 1   | CAGCTCGTGTA   | 0.672 |             |
| + | 5   | 688       | sense_Mutation_p   | NM_181713    | NP_859064    | P68543 | UBX2A_HUMAN | SEP.                         | 0   | TCACCGTCAAC   | 0.323 | rs13386425  |
| + | 2   | 383       | iBL5_uc002rid.2_L  | NM_021831    | NP_068603    | Q8NDL9 | CBPC5_HUMAN |                              | 2   | TCAACGTGTGG   | 0.527 |             |
| + | 5   | 946       | mm.1_Missense_I    | NM_199280    | NP_954974    | Q6ZUX3 | F179A_HUMAN |                              | 4   | CACCGGGGAGC   | 0.622 |             |
| - | 9   | 1095      | np.1_Missense_M    | NM_144575    | NP_653176    | Q6MZZ7 | CAN13_HUMAN | pain catalytic.              | 2   | CCTTTCTTATC   | 0.443 |             |
| - | 29  | 2238      | p.F695Y MAP4K3_    | NM_003618    | NP_003609    | Q8IVH8 | M4K3_HUMAN  | CNH.                         | 8   | ATAGGAAAATCT  | 0.333 |             |
| - | 16  | 2591      | D2_uc002sha.2_L    | NM_001617    | NP_001608    | P35612 | ADDB_HUMAN  | with calmodulin (Potential). | 3   | GTCGGAATTTTC  | 0.527 |             |
| - | 3   | 472       | DD2_uc010ftd.1_L   | NM_001617    | NP_001608    | P35612 | ADDB_HUMAN  |                              | 3   | TCTCTCGCTCA   | 0.617 |             |
| - | 3   | 1245      | l2sit.3_Missense_I | NM_015470    | NP_056285    | Q9BXF6 | RFIP5_HUMAN |                              | 0   | AGAGCGAAGAG   | 0.622 |             |
| + | 4   | 399       | e_Mutation_p.G1C   | NM_198448    | NP_940850    | Q6UW15 | REG3G_HUMAN | C-type lectin.               | 0   | CATTGGGCTCC   | 0.562 |             |
| - | 2   | 782       | OLN2_uc002spb.     | NM_006464    | NP_006455    | O43493 | TGON2_HUMAN | 1), 8, 14 X 14 AA tandem re  | 0   | CGTAGGGCTGT   | 0.597 |             |
| - | 2   | 777       | OLN2_uc002spb.     | NM_006464    | NP_006455    | O43493 | TGON2_HUMAN | 1), 8, 14 X 14 AA tandem re  | 0   | CGCTGTCTTTT   | 0.592 |             |
| - | 1   | 292       | lank ELMOD3_uc     | NM_017750    | NP_060220    | Q6NUM9 | RETST_HUMAN |                              | 2   | CTTCGGAGAAA   | 0.597 |             |
| + | 21  | 1829      | _Mutation_p.R178   | NM_017952    | NP_060422    | Q96EY7 | PTCD3_HUMAN | PPR 10.                      | 1   | CTGGGAGAACTC  | 0.448 |             |
| + | 6   | 705       | .1_Intron SMYD1_   | NM_198274    | NP_938015    | Q8NB12 | SMYD1_HUMAN | SET.                         | 4   | GAATTGAGCTCC  | 0.502 |             |
| + | 5   | 534       | uq.2_Missense_M    | NM_013434    | NP_038462    | Q9Y2W7 | CSEN_HUMAN  | EF-hand 2.                   | 3   | TGATGCGGACG   | 0.622 |             |
| - | 14  | 2381_2382 | p.G716S AFF3_uc    | NM_002285    | NP_002276    | P51826 | AFF3_HUMAN  |                              | 6   | ACTGCCCCCGTT  | 0.624 |             |
| + | 20  | 2874      | e_Mutation_p.G11   | NM_182588    | NP_872394    | Q7Z3J3 | RGPD4_HUMAN |                              | 2   | CACAGGAAATC   | 0.408 |             |
| + | 5   | 938       | JLT1C4_uc002teb.   | NM_006588    | NP_006579    | O75897 | ST1C4_HUMAN |                              | 0   | GGGAAGCCAAA   | 0.463 |             |
| - | 12  | 1682      | p.Q449H EDAR_uc    | NM_022336    | NP_071731    | Q9UNE0 | EDAR_HUMAN  | cytoplasmic (Potential).     | 1   | CTCAATCTGCAC  | 0.572 |             |
| + | 7   | 1670      |                    | NM_001099289 | NP_001092759 | Q8TEJ3 | SH3R3_HUMAN |                              | 1   | CAGTGGGAGTC   | 0.682 |             |
| + | 4   | 993_994   | 2toz.2_Intron LIME | NM_001161415 | NP_001154887 | Q13304 | GPR17_HUMAN | cellular (Potential).        | 0   | CATTTGGGGAA   | 0.589 |             |
| + | 12  | 1367      | p.G272R UGGT1_     | NM_020120    | NP_064505    | Q9NYU2 | UGGG1_HUMAN |                              | 1   | CTCAATGGACTTC | 0.328 |             |
| + | 3   | 868       | SD7B_uc002vb.2     | NM_001080427 | NP_001073896 |        |             |                              | 7   | CGCCTTCAAGAT  | 0.443 |             |
| + | 17  | 3445      | D7B_uc010zjb.1_I   | NM_001080427 | NP_001073896 |        |             |                              | 7   | CTGAATGAAAAT  | 0.453 |             |
| - | 39  | 7123      |                    | NM_018557    | NP_061027    | Q9NZR2 | LRP1B_HUMAN | ntial), LDL-receptor class B | 50  | TATTTTCTTAAAT | 0.353 |             |
| - | 7   | 1985      | p1B_uc010fnl.1_In  | NM_018557    | NP_061027    | Q9NZR2 | LRP1B_HUMAN |                              | 50  | TTCTTACCCTGC  | 0.363 |             |
| - | 112 | 16168     | .2_Missense_Muta   | NM_004543    | NP_004534    | P20929 | NEBU_HUMAN  | Nebulin 145.                 | 20  | CTGACTGCTCGG  | 0.383 |             |
| + | 10  | 1355      | m.1_Missense_Mt    | NM_033394    | NP_203752    | Q9C0D5 | TANC1_HUMAN |                              | 3   | CTTGCTCCCTAC  | 0.333 |             |
| - | 8   | 1347      | e_Mutation_p.A33   | NM_013450    | NP_038478    | Q9UIF8 | BAZ2B_HUMAN |                              | 4   | CAGACGCAAGA   | 0.448 |             |
| + | 7   | 992       | C4A10_uc002uby.:   | NM_022058    | NP_071341    | Q6U841 | S4A10_HUMAN | plasmic (Potential).         | 5   | TGTGTTGAAAAT  | 0.373 |             |
| - | 16  | 1919      | b.2_Missense_Mu    | NM_001935    | NP_001926    | P27487 | DPP4_HUMAN  | cellular (Potential).        | 3   | CGACACTTTCC   | 0.458 |             |
| + | 3   | 837       |                    | NM_006898    | NP_008829    | P31249 | HXD3_HUMAN  | Homeobox.                    | 0   | TGTCCCGCCG    | 0.592 |             |
| - | 253 | 54771     | 378K TTN_uc010z    | NM_133378    | NP_596869    | Q8WZ42 | TITIN_HUMAN |                              | 153 | CATTTTCCCCAC  | 0.398 |             |
| - | 27  | 4965      | TTN_uc010zjf.1_L   | NM_133378    | NP_596869    | Q8WZ42 | TITIN_HUMAN |                              | 153 | CGTTACCCGTAG  | 0.378 |             |

|   |    |           |                                                            |              |              |        |             |                              |     |               |       |             |
|---|----|-----------|------------------------------------------------------------|--------------|--------------|--------|-------------|------------------------------|-----|---------------|-------|-------------|
| + | 7  | 995       | VAJC10_uc002uoz                                            | NM_018981    | NP_061854    | Q8IXB1 | DJC10_HUMAN | thioredoxin 1.               | 4   | TTTGCCGAATG/  | 0.378 |             |
| - | 5  | 708       | p.N152Y STAT4_u                                            | NM_003151    | NP_003142    | Q14765 | STAT4_HUMAN |                              | 9   | CACTGTTTTTAAT | 0.408 |             |
| - | 17 | 2465      | e_Mutation_p.P43                                           | NM_173076    | NP_775099    | Q86UK0 | ABCAC_HUMAN |                              | 11  | TTTTGGCCTCTC  | 0.383 |             |
| + | 10 | 1828      | ense_Mutation_p.F                                          | NM_018089    | NP_060559    | Q9H8Y5 | ANKZ1_HUMAN | ANK 2.                       | 2   | TGGTTCGTCTG/  | 0.542 |             |
| + | 32 | 2737      | utation_p.G859R C                                          | NM_000091    | NP_000082    | Q01955 | CO4A3_HUMAN | le-helical region.           | 3   | CACCAGGAATTC  | 0.483 |             |
| + | 46 | 4279      | tation_p.G1373R C                                          | NM_000091    | NP_000082    | Q01955 | CO4A3_HUMAN | le-helical region.           | 3   | TGCAGGGAGAA   | 0.542 |             |
| - | 12 | 5064      | e_Mutation_p.H16/                                          | NM_001142644 | NP_001136116 | Q2M3C7 | SPKAP_HUMAN |                              | 10  | TGCATGGAAGA   | 0.483 |             |
| - | 4  | 812       | ase_Mutation_p.G                                           | NM_152527    | NP_689740    | Q7RTX9 | MOT14_HUMAN | ellular (Potential).         | 6   | ACTGCCCACC/   | 0.612 |             |
| - | 10 | 1429      | mt.1_Missense_Mi                                           | NM_018218    | NP_060688    | Q9NVE5 | UBP40_HUMAN |                              | 3   | CTGTTC AATATC | 0.413 |             |
| + | 4  | 335       | ense_Mutation_p.F                                          | NM_024080    | NP_076985    | Q7Z2W7 | TRPM8_HUMAN | lasmic (Potential).          | 4   | AAATTCCTACCC  | 0.468 |             |
| + | 14 | 1790      | fyj.2_Splice_Site                                          | NM_024080    | NP_076985    | Q7Z2W7 | TRPM8_HUMAN |                              | 4   | AAAAAGACCAG/  | 0.358 |             |
| + | 14 | 1857      | _p.P424S MLPH_u                                            | NM_024101    | NP_077006    | Q9BV36 | MELPH_HUMAN |                              | 1   | CTGTGCCCTAT/  | 0.468 |             |
| + | 17 | 2055      | 2vyf.2_Missense_M                                          | NM_015650    | NP_056465    | Q8TDR0 | MIPT3_HUMAN | SC1-interaction domain.      | 1   | AGCCCTTAAAG/  | 0.478 |             |
| - | 3  | 1535_1536 | bs.2_Missense_M                                            | NM_015963    | NP_057047    | Q8WY91 | THAP4_HUMAN |                              | 0   | CGCTCCAGGTC   | 0.594 |             |
| - | 2  | 432       | _p.R123* SIRPG_u                                           | NM_018556    | NP_061026    | Q9P1W8 | SIRPG_HUMAN | (Potential). Ig-like V-type. | 1   | CTTTTCGAAACT/ | 0.498 |             |
| + | 11 | 1746      | al.1_Missense_Mu                                           | NM_198994    | NP_945345    | O95932 | TGM3L_HUMAN |                              | 4   | AGAAGAGAATCC  | 0.448 | rs148419172 |
| + | 1  | 621       | Mutation_p.L27F E                                          | NM_014962    | NP_055777    | Q9Y2F9 | BTBD3_HUMAN |                              | 3   | CAGAATCTCAG/  | 0.473 |             |
| - | 2  | 497       |                                                            | NM_001008693 | NP_001008693 | Q5W186 | CST9_HUMAN  |                              | 1   | AGGAAAGCTGA/  | 0.527 |             |
| + | 1  | 58        | j.1_Intron FRG1B_uc010gdr.1_Intron FRG1B_uc010ztk.1_Intron |              |              |        |             |                              | 0   | TCCAGGTGAGC   | 0.289 | rs75468660  |
| + | 2  | 78        | tj.1_RNA FRG1B_uc010gdr.1_RNA FRG1B_uc010ztk.1_Intron      |              |              |        |             |                              | 0   | TCTGGCTATGGA  | 0.348 |             |
| + | 12 | 3229      | eb.2_Missense_Mi                                           | NM_015338    | NP_056153    | Q8IXJ9 | ASXL1_HUMAN |                              | 248 | CTGCTCCCACC/  | 0.542 |             |
| + | 9  | 1675      | T2_uc002wzf.1_R                                            | NM_005093    | NP_005084    | O43439 | MTG8R_HUMAN |                              | 2   | TGATCGTGAA/   | 0.532 |             |
| - | 8  | 930       | c002xdu.1_Missen                                           | NM_021100    | NP_066923    | Q9Y697 | NFS1_HUMAN  |                              | 2   | TACCCCGCTCC   | 0.617 |             |
| + | 4  | 545       | Jggc.2_Missense_                                           | NM_015568    | NP_056383    | Q96T49 | PP16B_HUMAN | ANK 1.                       | 3   | GAAGCTGCTCC   | 0.597 |             |
| + | 7  | 815       | ly.2_Missense_Mu                                           | NM_006282    | NP_006273    | Q13043 | STK4_HUMAN  | rotein kinase.               | 2   | TCTCTCCACAT/  | 0.393 |             |
| + | 2  | 1081      | G2_uc010ggz.2_Ir                                           | NM_003007    | NP_002998    | P04279 | SEMG1_HUMAN | 3 AA repeat 2.               | 2   | GCCAAAAGGCA   | 0.393 |             |
| - | 4  | 592       | UTR SYS1-DBNDI                                             | NM_014477    | NP_055292    | Q9Y2B4 | T5G5_HUMAN  |                              | 1   | GACTCCAGGGT   | 0.537 |             |
| + | 2  | 1629      | zgx.1_Missense_M                                           | NM_080752    | NP_542790    | Q96MP5 | ZSWM3_HUMAN |                              | 2   | CAGACGCACAG   | 0.577 | rs139419541 |
| + | 22 | 2975      | xrb.2_Missense_M                                           | NM_001134771 | NP_001128243 | Q9H2X9 | S12A5_HUMAN | lasmic (Potential).          | 5   | GGAGAAAGAAT/  | 0.572 |             |
| + | 36 | 5049      | 2yaf.1_Missense_M                                          | NM_006420    | NP_006411    | Q9Y6D5 | BIG2_HUMAN  |                              | 4   | ATTACGAGCAG/  | 0.473 |             |
| + | 2  | 405       |                                                            | NM_005985    | NP_005976    | O95863 | SNAI1_HUMAN |                              | 1   | CTTCGTCTTCT/  | 0.642 |             |
| - | 2  | 1981      | 2_Intron SALL4_u                                           | NM_020436    | NP_065169    | Q9UJQ4 | SALL4_HUMAN | C2H2-type 5.                 | 2   | GGCACGAATGC   | 0.522 |             |
| + | 4  | 950       | lzzi.1_Missense_M                                          | NM_003222    | NP_003213    | Q92754 | AP2C_HUMAN  |                              | 1   | TCAGCTCTACGT/ | 0.532 |             |
| - | 74 | 10328     |                                                            | NM_005560    | NP_005551    | O15230 | LAMA5_HUMAN | minin G-like 4.              | 3   | AGGCCGGGAGC   | 0.697 |             |
| - | 16 | 5737      | s.1_Missense_Mu                                            | NM_033081    | NP_149072    | Q9BTC0 | DIDO1_HUMAN | Pro-rich.                    | 6   | GGGCCCTCTGC   | 0.617 |             |
| + | 2  | 207       | 2yim.3_Missense_                                           | NM_018257    | NP_060727    | Q9NV79 | PCMD2_HUMAN |                              | 0   | TGGGCGGTGCT/  | 0.378 |             |
| + | 2  | 295       | 'yim.3_Missense_M                                          | NM_018257    | NP_060727    | Q9NV79 | PCMD2_HUMAN |                              | 0   | GCAGGCTTTC/   | 0.428 |             |
| - | 21 | 1708      | TTE_uc002yir.1_Mi                                          | NM_199261    | NP_954870    | P56180 | TPTE_HUMAN  | 2 tensin-type.               | 5   | CTAATGAAATAG  | 0.328 |             |
| - | 13 | 1949_1950 | p.L186F C2CD2_u                                            | NM_015500    | NP_056315    | Q9Y426 | CU025_HUMAN |                              | 1   | GC AAGGATGC   | 0.698 |             |
| - | 3  | 2795      | zy.3_Missense_M                                            | NM_001098402 | NP_001091872 | Q9ULJ3 | ZN295_HUMAN |                              | 3   | AGAGGAATCTTC  | 0.488 |             |
| + | 13 | 1716      | _uc002zap.2_Miss                                           | NM_004915    | NP_004906    | P45844 | ABCG1_HUMAN | i, ABC transmembrane type    | 3   | GCTGTTTGCCG/  | 0.647 |             |
| + | 9  | 837       | _p.P304L PCBP3_                                            | NM_020528    | NP_065389    | P57721 | PCBP3_HUMAN |                              | 1   | CTCACCCGGAT/  | 0.512 |             |
| + | 26 | 3278      | 2A_uc011afz.1_Mi                                           | NM_015151    | NP_055966    | Q14689 | DIP2A_HUMAN |                              | 2   | CGCGGCTCTGA   | 0.572 |             |
| - | 1  | 529       | iT5_uc002zqz.3_M                                           | NM_004121    | NP_004112    | P36269 | GGT5_HUMAN  | ellular (Potential).         | 3   | CTGGGGGCCAC   | 0.657 |             |
| - | 9  | 976       | n.1_Missense_Mu                                            | NM_014303    | NP_055118    | O00541 | PESC_HUMAN  |                              | 0   | CGGTGGGAAAC   | 0.622 |             |
| - | 8  | 1094      | ISD_uc011alr.1_M                                           | NM_014338    | NP_055153    | Q9UG56 | PISD_HUMAN  |                              | 3   | GGGACGCCCT    | 0.577 |             |
| - | 4  | 443       | .2_5'UTR BPIL2_u                                           | NM_174932    | NP_777592    | Q8NFO6 | BPIL2_HUMAN |                              | 2   | TCATTCGGGTT/  | 0.493 | rs78469100  |

|   |    |           |                                                 |              |               |        |             |                               |     |               |       |             |
|---|----|-----------|-------------------------------------------------|--------------|---------------|--------|-------------|-------------------------------|-----|---------------|-------|-------------|
| + | 3  | 895       | iny.2_Missense_M                                | NM_014310    | NP_055125     | Q96D21 | RHES_HUMAN  | GNB1, GNB2 and GNB3.          | 3   | GGCATGGTCTCC  | 0.647 |             |
| - | 5  | 1339      | ense_Mutation_p.l                               | NM_024955    | NP_079231     | Q8IWF2 | FXRD2_HUMAN |                               | 2   | GAGCCGGTGAA   | 0.627 | rs143694562 |
| + | 7  | 2024      | atq.1_Missense_M                                | NM_001039141 | NP_001034230  | Q9H2D6 | TARA_HUMAN  |                               | 1   | ACAATCCCAGA   | 0.587 |             |
| - | 2  | 1066      | axe.2_Missense_M                                | NM_002608    | NP_002599     | P01127 | PDGFB_HUMAN |                               | 373 | CCTCGGAATG    | 0.597 |             |
| + | 11 | 2092      | aye.2_Missense_M                                | NM_021096    | NP_066919     | Q9P0X4 | CAC1I_HUMAN | smic (Potential),III.         | 2   | TCTTCGACTAC   | 0.567 |             |
| + | 5  | 671       | RVG_uc010gzc.1                                  | NM_001137605 | NP_0011131077 | Q9HBI0 | PARVG_HUMAN | CH 1.                         | 0   | TATTCCGTAAGT  | 0.562 | rs147016590 |
| - | 10 | 1997      |                                                 | NM_012401    | NP_036533     | O15031 | PLXB2_HUMAN | ellular (Potential).          | 6   | GCTCACGCAGG   | 0.662 |             |
| + | 1  | 1017      |                                                 | NM_138433    | NP_612442     | Q96G42 | KLD7B_HUMAN |                               | 1   | AGGGGGGCCCG   | 0.756 |             |
| + | 2  | 835       | sg.2_Missense_M                                 | NM_004634    | NP_004625     | P55201 | BRPF1_HUMAN | with MYST3 and MYST4.         | 3   | CTACTCCCAAG   | 0.547 |             |
| + | 2  | 357       | p.1_5'Flank METTL                               | NM_033083    | NP_149074     | Q96JC9 | EAF1_HUMAN  |                               | 1   | CACCTCCTGTG   | 0.373 |             |
| - | 10 | 3465      | p.H577L SATB1_u                                 | NM_002971    | NP_002962     | Q01826 | SATB1_HUMAN |                               | 4   | CGCCATGGTGA   | 0.483 |             |
| + | 10 | 1904      | hex.1_Missense_M                                | NM_144633    | NP_653234     | Q96L42 | KCNH8_HUMAN | toplasmic (Potential).        | 5   | AACCTCTTCTC   | 0.502 |             |
| - | 8  | 947       | p.L325V NEK10_uc010hfj.2_Missense_Mutation_p.L2 |              |               | Q6ZWH5 | NEK10_HUMAN |                               | 13  | TCTTTAAAATGTC | 0.284 |             |
| - | 16 | 2074      | j.1_Missense_Mut                                | NM_000404    | NP_000395     | P16278 | BGAL_HUMAN  |                               | 1   | GGAGGATGAT    | 0.498 |             |
| + | 2  | 256       | TAC_uc011aya.1_l                                | NM_003149    | NP_003140     | Q99469 | STAC_HUMAN  |                               | 4   | TGCAAGCACAC   | 0.537 |             |
| - | 12 | 6541      |                                                 | NM_014831    | NP_055646     | O15050 | TRNK1_HUMAN |                               | 2   | AACAGAGCAGG   | 0.542 |             |
| - | 12 | 6087      |                                                 | NM_014831    | NP_055646     | O15050 | TRNK1_HUMAN |                               | 2   | GAAACCGAAAT   | 0.478 |             |
| - | 18 | 2668      | wf.1_Missense_M                                 | NM_002292    | NP_002283     | P55268 | LAMB2_HUMAN | inin EGF-like 6.              | 3   | TCAGTGAACCTT  | 0.597 |             |
| - | 17 | 2316      | wp.2_Missense_M                                 | NM_003363    | NP_003354     | Q13107 | UBP4_HUMAN  |                               | 4   | TCCGAGTTTCA   | 0.512 |             |
| + | 9  | 1067      | cyk.2_Missense_M                                | NM_004186    | NP_004177     | Q13275 | SEM3F_HUMAN | Sema.                         | 2   | GAGCCCCGCGC   | 0.602 |             |
| + | 19 | 2371      | cyk.2_Missense_M                                | NM_004186    | NP_004177     | Q13275 | SEM3F_HUMAN |                               | 2   | CAACGCCCTCCT  | 0.682 |             |
| - | 6  | 549       | 03dap.2_Splice_Si                               | NM_006030    | NP_006021     | Q9NY47 | CA2D2_HUMAN |                               | 1   | TCGTCCTGCAG   | 0.552 |             |
| - | 5  | 356       | 3dbg.1_Splice_Site                              | NM_014703    | NP_055518     | Q9Y4B6 | VPRBP_HUMAN |                               | 2   | CGACCTACCA    | 0.443 |             |
| + | 32 | 5501      |                                                 | NM_015512    | NP_056327     | Q9P2D7 | DYH1_HUMAN  | 1 (By similarity).            | 3   | CAGCTCCCAGG   | 0.438 |             |
| + | 6  | 655       | k.1_Missense_Mu                                 | NM_002217    | NP_002208     | Q06033 | ITIH3_HUMAN |                               | 3   | CCAACGACCTCC  | 0.532 |             |
| - | 21 | 2977      | nse_Mutation_p.R                                | NM_001005159 | NP_001005159  | Q9UJH3 | SMBT1_HUMAN | SAM.                          | 1   | TGAACCGCACA   | 0.418 |             |
| - | 11 | 1264      | p.A83V LRIG1_uc                                 | NM_015541    | NP_056356     | Q96JA1 | LRIG1_HUMAN | ar (Potential),LRR 15.        | 5   | TGATCGCATTCC  | 0.433 |             |
| + | 4  | 1813      | ofv.1_Missense_M                                | NM_032505    | NP_115894     | Q8NFY9 | KBTB8_HUMAN | Kelch 5.                      | 4   | TGAATGTGCTG1  | 0.438 |             |
| - | 14 | 1392      | ense_Mutation_p.l                               | NM_015123    | NP_055938     | Q9Y2L6 | FRM4B_HUMAN |                               | 4   | TGAAGGAATTT   | 0.363 |             |
| - | 17 | 2325      | p.E668K FOXP1                                   | NM_032682    | NP_116071     | Q9H334 | FOXP1_HUMAN |                               | 2   | CATCTTCGTAATC | 0.478 |             |
| + | 5  | 1205      | ipn.2_Missense_M                                | NM_145037    | NP_659474     | Q969Y0 | FA55C_HUMAN |                               | 3   | TCCACCCAGT    | 0.458 |             |
| - | 36 | 5224      |                                                 | NM_014981    | NP_055796     | Q9Y2K3 | MYH15_HUMAN | Potential.                    | 7   | TCTTTCTGTTGC  | 0.527 |             |
| - | 5  | 564       | 2PA4_uc011bhp.1                                 | NM_018189    | NP_060659     | Q7L190 | DPPA4_HUMAN |                               | 1   | GAGGAAGAGCC   | 0.498 |             |
| - | 7  | 3914      | eal.2_Missense_M                                | NM_001009899 | NP_001009899  | Q68DE3 | K2018_HUMAN |                               | 3   | ACAATGATGCTT  | 0.463 |             |
| + | 16 | 5119      | RP14_uc003efr.2_                                | NM_017554    | NP_060024     | Q460N5 | PAR14_HUMAN | ARP catalytic.                | 6   | TGCCGGCTCCG   | 0.493 |             |
| + | 2  | 293       |                                                 | NM_015720    | NP_056535     | Q9NZ53 | PDXL2_HUMAN | ellular (Potential).          | 2   | GTCTCGGATTC   | 0.582 |             |
| - | 4  | 1118      | p.P228L GATA2_u                                 | NM_001145661 | NP_001139133  | P23769 | GATA2_HUMAN |                               | 15  | GCAGGGGACTG   | 0.632 |             |
| + | 22 | 2922      | smq.2_Missense_M                                | NM_052989    | NP_443715     | Q9HBG6 | IF122_HUMAN |                               | 2   | ATGCCGTGGCG   | 0.527 |             |
| + | 2  | 217       | p.R43W ACPP_u                                   | NM_001099    | NP_001090     | P15309 | PPAP_HUMAN  |                               | 1   | TGTTTCGGCAT   | 0.428 |             |
| - | 11 | 1801_1802 | p.P434S SLCO2                                   | NM_005630    | NP_005621     | Q92959 | SO2A1_HUMAN | ellular (Potential).          | 1   | CAGGGGACAGC   | 0.559 |             |
| + | 5  | 1320      | 31_uc011bly.1_3'U                               | NM_004441    | NP_004432     | P54762 | EPHB1_HUMAN | tential),Fibronectin type-III | 30  | AGACCGCCGGA   | 0.612 |             |
| + | 4  | 1101      | p.Y321H HPS3_u                                  | NM_032383    | NP_115759     | Q969F9 | HPS3_HUMAN  |                               | 6   | CCATTTACCAGA  | 0.478 |             |
| - | 1  | 306       | '_uc003ewz.2_Nor                                | NM_000096    | NP_000087     | P00450 | CERU_HUMAN  |                               | 1   | TCGCCCAGGCT   | 0.373 |             |
| - | 5  | 1055      | 3_Mutation_p.N21                                | NM_033169    | NP_149359     | O75752 | B3GL1_HUMAN | renal (Potential).            | 1   | GGAATAATTATCA | 0.353 |             |
| - | 18 | 2116      | p.F598Y ZBBX_u                                  | NM_024687    | NP_078963     | A8MT70 | ZBBX_HUMAN  |                               | 2   | AAATAAAGAATC  | 0.308 |             |
| + | 7  | 1246      | 3ffb.3_Missense_M                               | NM_001122752 | NP_001116224  | Q99574 | NEUS_HUMAN  |                               | 1   | GCTCAGAAGCT   | 0.373 |             |
| - | 9  | 2292      | OM_uc003ffk.2_In                                | NM_005241    | NP_005232     | Q03112 | EV11_HUMAN  |                               | 14  | ATCAGGCAGTTC  | 0.313 |             |



|   |    |           |                    |              |              |        |             |                                |     |                 |       |
|---|----|-----------|--------------------|--------------|--------------|--------|-------------|--------------------------------|-----|-----------------|-------|
| - | 3  | 586       | _p.P153S TBCCD     | NM_018138    | NP_060608    | Q9NVR7 | TBCC1_HUMAN |                                | 2   | IGTCAGGAGACT    | 0.408 |
| + | 5  | 852       | b.2_Missense_Mu    | NM_003722    | NP_003713    | Q9H3D4 | P63_HUMAN   |                                | 12  | TCAACGAGGGT/    | 0.498 |
| - | 8  | 1174      |                    | NM_018385    | NP_060855    | Q9H089 | LSG1_HUMAN  |                                | 0   | AGCTGGGAGAT/    | 0.478 |
| - | 16 | 1953      | zy.2_Missense_Mt   | NM_003234    | NP_003225    | P02786 | TFR1_HUMAN  | cellular (Potential).          | 3   | CGAAAAACAG/     | 0.229 |
| + | 3  | 1280      |                    | NM_198565    | NP_940967    | Q86YC3 | LRC33_HUMAN | ar (Potential). LRR 13.        | 3   | CTGCACCTGGC     | 0.657 |
| - | 22 | 3227      | se_Mutation_p.D1   | NM_005255    | NP_005246    | O14976 | GAK_HUMAN   |                                | 4   | GAAGTCGGCGC     | 0.627 |
| + | 9  | 1412      |                    | NM_053044    | NP_444272    | P83110 | HTRA3_HUMAN | PDZ.                           | 1   | CATCCAAGATG/    | 0.647 |
| - | 3  | 3536      |                    | NM_053042    | NP_444270    | Q9C0D4 | Z518B_HUMAN |                                | 4   | TTTTATGAAC/     | 0.418 |
| - | 8  | 1628      | GC1A_uc011bxp.     | NM_013261    | NP_037393    | Q9UBK2 | PRGC1_HUMAN |                                | 8   | AGTCCTGAAT/     | 0.428 |
| - | 13 | 2324_2325 | rv.2_Missense_Mi   | NM_015187    | NP_056002    | Q68CR1 | SE1L3_HUMAN | Sel1-like 3.                   | 0   | ATCCTCCGTCTC    | 0.49  |
| + | 1  | 651       | i.1_Missense_Mut   | NM_175737    | NP_783864    | Q86Z14 | KLOTB_HUMAN | ntial). Glycosyl hydrolase-    | 1   | FGCTTAGAAACA/   | 0.413 |
| - | 9  | 1470      | p.E390K KDR_uc     | NM_002253    | NP_002244    | P35968 | VGFR2_HUMAN | 4.  Extracellular (Potential). | 33  | CTCTTCACTCA/    | 0.408 |
| + | 1  | 203       | n_p.M10 LPHN3_     | NM_015236    | NP_056051    | Q9HAR2 | LPHN3_HUMAN |                                | 18  | TTTCATGATGCTC   | 0.363 |
| - | 8  | 823       |                    | NM_182502    | NP_872308    | Q86T26 | TM11B_HUMAN |                                | 1   | TTTTCTAGAGG     | 0.323 |
| + | 4  | 1524      | n_p.Q15* SHROO     | NM_020859    | NP_065910    | Q8TF72 | SHRM3_HUMAN |                                | 3   | GGCACAAAGC      | 0.473 |
| + | 37 | 5395      | _p.R1652K FRAS     | NM_025074    | NP_079350    | Q86XX4 | FRAS1_HUMAN | extracellular (Potential).     | 5   | CCGAGGCCCA/     | 0.493 |
| + | 10 | 1747      | fu.1_Missense_ML   | NM_001510    | NP_001501    | O43424 | GRID2_HUMAN | cellular (Potential).          | 6   | AATACGGAAGC/    | 0.393 |
| + | 1  | 111       |                    | NM_005390    | NP_005381    | P29803 | ODPAT_HUMAN |                                | 1   | CAGAAATCAGC     | 0.537 |
| - | 9  | 981       |                    | NM_000669    | NP_000660    | P00326 | ADH1G_HUMAN |                                | 0   | TCTGGGAATCA/    | 0.448 |
| + | 5  | 818       | p.G171C GAR1_u     | NM_018983    | NP_061856    | Q9NY12 | GAR1_HUMAN  | RGG-box 2.                     | 0   | aagagggtggcag   | 0.264 |
| + | 7  | 1536      | _p.F320I EGF_uc    | NM_001963    | NP_001954    | P01133 | EGF_HUMAN   | g (Potential). Extracellular   | 4   | GTGCTTTTTGG/    | 0.398 |
| + | 7  | 776       | o.V226M ANK2_uc    | NM_001148    | NP_001139    | Q01484 | ANK2_HUMAN  |                                | 14  | TGATGGTGAAT/    | 0.353 |
| + | 33 | 4222      | i50_splice ANK2_u  | NM_001148    | NP_001139    | Q01484 | ANK2_HUMAN  |                                | 14  | TGGAGGTACTG     | 0.323 |
| - | 7  | 995       | ine.2_Missense_M   | NM_018699    | NP_061169    | Q9NQX1 | PRDM5_HUMAN | 2-type 3; atypical.            | 2   | CTCAAAACTAC/    | 0.478 |
| + | 7  | 875       | _p.E215K ADAD1_    | NM_139243    | NP_640336    | Q96M93 | ADAD1_HUMAN |                                | 0   | GTTAAAGAAAGA    | 0.323 |
| + | 11 | 11909     | p.G2233E FAT4_u    | NM_024582    | NP_078858    | Q6V0I7 | FAT4_HUMAN  | Extracellular (Potential).     | 18  | GCTTTGGAAAA/    | 0.289 |
| + | 10 | 1337      |                    | NM_057175    | NP_476516    | Q9BXJ9 | NAA15_HUMAN |                                | 2   | GTTAACCCCAATC   | 0.323 |
| - | 7  | 792       | 10A7_uc010ipa.2    | NM_001029998 | NP_001025169 | Q0GE19 | NTCP7_HUMAN | ical; (Potential).             | 0   | GAGAGGAACCA/    | 0.353 |
| - | 15 | 3677      |                    | NM_017639    | NP_060109    | Q6V1P9 | PCD23_HUMAN | Cadherin 10.                   | 4   | CCAAAGGACAG/    | 0.378 |
| - | 5  | 1053      | e_Mutation_p.G33   | NM_000508    | NP_000499    | P02671 | FIBA_HUMAN  | By similarity.                 | 3   | AGCTTCCAGTA/    | 0.567 |
| - | 2  | 224       |                    | NM_001334    | NP_001325    | P43234 | CATO_HUMAN  |                                | 0   | ACTGGGAAATA/    | 0.333 |
| + | 3  | 1539      | qx.1_Missense_Mt   | NM_152620    | NP_689833    | Q495X7 | TRI60_HUMAN | 330.2/SPRY.                    | 1   | GAACAGATTCCC    | 0.353 |
| - | 12 | 1360      | p.D404N SPOCK3     | NM_016950    | NP_058646    | Q9BQ16 | TICN3_HUMAN | Asp-rich.                      | 3   | tcataatctgtctc/ | 0.075 |
| - | 11 | 1737      |                    | NM_017631    | NP_060101    | Q8IY21 | DDX60_HUMAN |                                | 3   | TTATACCTCTTTA   | 0.348 |
| + | 27 | 3231      | Disc.2_Splice_Site | NM_021942    | NP_068761    | Q7Z392 | CD041_HUMAN |                                | 0   | TGCAGGTAGCG     | 0.373 |
| + | 6  | 722       |                    | NM_004477    | NP_004468    | Q14331 | FRG1_HUMAN  |                                | 0   | AGAAATGATCA/    | 0.363 |
| - | 8  | 1113      | .1_Missense_Muta   | NM_023924    | NP_076413    | Q9H8M2 | BRD9_HUMAN  |                                | 0   | GAACCGTTGA      | 0.637 |
| - | 10 | 1771      | RLR_uc003jji.1_In  | NM_000949    | NP_000940    | P16471 | PRLR_HUMAN  | lasmic (Potential).            | 3   | CATGTTGAACAT    | 0.532 |
| + | 3  | 372       | se_Mutation_p.E9!  | NM_002185    | NP_002176    | P16871 | IL7RA_HUMAN | cellular (Potential).          | 5   | TCATCGAGACAA/   | 0.383 |
| + | 6  | 919       | jlb.1_Missense_M   | NM_152403    | NP_689616    | Q63HQ2 | EGFLA_HUMAN | nectin type-III 2.             | 7   | AGATGGACTCC/    | 0.507 |
| + | 5  | 613       | 2_Missense_Muta    | NM_003432    | NP_003423    | P52739 | ZN131_HUMAN |                                | 0   | CTTCTGCCAAG/    | 0.463 |
| - | 7  | 1803      |                    | NM_021072    | NP_066550    | O60741 | HCN1_HUMAN  | lasmic (Potential).            | 1   | CTATTCTGATCTA   | 0.378 |
| + | 1  | 315       |                    | NM_006308    | NP_006299    | Q12988 | HSPB3_HUMAN |                                | 0   | GAGGAAAACCA/    | 0.567 |
| + | 9  | 1617      | jvd.2_Missense_M   | NM_181523    | NP_852664    | P27986 | P85A_HUMAN  | SH2 1. p.?(1)                  | 101 | CAGACGGGACC     | 0.373 |
| + | 5  | 6732      | ix.1_Missense_ML   | NM_005909    | NP_005900    | P46821 | MAP1B_HUMAN |                                | 5   | TCCCCGGGAGA     | 0.577 |
| + | 8  | 844       | iCR_uc003kdq.2_I   | NM_000859    | NP_000850    | P04035 | HMDH_HUMAN  |                                | 1   | AGGGTCTCCA/     | 0.413 |
| + | 2  | 9180      |                    | NM_153610    | NP_705838    | Q8N3K9 | CMYA5_HUMAN |                                | 9   | TTCAGAAACTGA    | 0.323 |

|   |    |                           |                    |              |              |                                       |                                         |             |               |       |             |
|---|----|---------------------------|--------------------|--------------|--------------|---------------------------------------|-----------------------------------------|-------------|---------------|-------|-------------|
| + | 1  | 672                       | uc011ctk.1_intron  | NM_032567    | NP_115956    | Q9BXG8                                | SPZ1_HUMAN                              | 1           | AAACAGGAGATG  | 0.358 |             |
| - | 7  | 832                       | 1.1_Missense_Mut   | NM_032042    | NP_114431    | Q8WUF8                                | F172A_HUMAN                             | 0           | GCTTCGGCTTTTC | 0.328 |             |
| + | 5  | 683                       | 81B_uc010jbe.1_5   | NM_152548    | NP_689761    | Q96LP2                                | FA81B_HUMAN                             | 2           | AGATCTTCGAC   | 0.433 |             |
| - | 9  | 1351                      | jbi.1_Missense_Mi  | NM_000439    | NP_000430    | P29120                                | NEC1_HUMAN Catalytic.                   | 2           | AGGCCGAGGTG   | 0.557 |             |
| + | 12 | 1311                      | bv.2_Missense_Mi   | NM_001744    | NP_001735    | Q16566                                | KCC4_HUMAN                              | 5           | AGTTAAAGGTGC  | 0.527 |             |
| - | 1  | 371                       | ense_Mutation_p.(  | NM_001182    | NP_001173    | P49419                                | AL7A1_HUMAN                             | 3           | GGCCTCCCCAG   | 0.652 |             |
| + | 2  | 184                       |                    | NM_207408    | NP_997291    | Q6ZNM6                                | CE048_HUMAN                             | 1           | AAACATGATATTC | 0.303 |             |
| + | 1  | 1028                      | .2_intron PCDHA6   | NM_018903    | NP_061726    | Q9UN75                                | PCDAC_HUMAN  Extracellular (Potential). | 0           | ACAGGTGAAATT/ | 0.378 |             |
| + | 1  | 1928                      | .2_intron PCDHA6   | NM_018903    | NP_061726    | Q9UN75                                | PCDAC_HUMAN  Extracellular (Potential). | 0           | CTGACTCCGGC   | 0.677 |             |
| + | 1  | 388                       | uc003lin.2_intron  | NM_018937    | NP_061760    | Q9Y5E6                                | PCDB3_HUMAN r (Potential). Cadherin 1.  | 2           | ACCATTCTCCG   | 0.418 |             |
| + | 1  | 2365                      | uc003lin.2_5'Flank | NM_018937    | NP_061760    | Q9Y5E6                                | PCDB3_HUMAN lasmic (Potential).         | 2           | CCAGTTTCAGG/  | 0.453 |             |
| + | 1  | 647                       | 1B16_uc003liv.2_5  | NM_019120    | NP_061993    | Q9UN66                                | PCDB8_HUMAN  Extracellular (Potential). | 4           | CTTTCTCTGTA   | 0.438 |             |
| + | 1  | 1895                      | '_5'Flank PCDHB1   | NM_019120    | NP_061993    | Q9UN66                                | PCDB8_HUMAN  Extracellular (Potential). | 4           | TGGCTCCGCGC   | 0.721 |             |
| - | 1  | 736                       |                    | NM_031947    | NP_114153    | Q9BXI2                                | ORNT2_HUMAN e=4; (Potential). Solcar 2. | 1           | AGAAAAGAAAT/  | 0.453 |             |
| + | 1  | 1489                      | DHGB2_uc003ljs.1   | NM_003736    | NP_003727    | Q9UN71                                | PCDGG_HUMAN  Extracellular (Potential). | 0           | AGCAGCGGGAG   | 0.622 |             |
| + | 3  | 481                       | iP1_uc003lmj.1_lr  | NM_030571    | NP_085048    | Q9BT67                                | NFIP1_HUMAN lasmic (Potential).         | 0           | CTATCCCTTTGC  | 0.428 |             |
| + | 4  | 1779                      | nn.1_Missense_M    | NM_020768    | NP_065819    | Q68DU8                                | KCD16_HUMAN                             | 4           | AAAAAGCTGTT/  | 0.448 |             |
| + | 8  | 1520                      | p.P473S TCERG1     | NM_006706    | NP_006697    | O14776                                | TCRG1_HUMAN Glu-rich.                   | 2           | AGATCCTAA     | 0.403 |             |
| - | 3  | 244                       | '_Mutation_p.S27L  | NM_000870    | NP_000861    | Q13639                                | 5HT4R_HUMAN ame=1; (By similarity).     | 1           | CCGTCGAGAGA   | 0.537 |             |
| + | 13 | 1381                      | lqc.1_Missense_N   | NM_014945    | NP_055760    | O94929                                | ABLM3_HUMAN                             | 3           | GTACATAGACT   | 0.627 |             |
| + | 4  | 518                       |                    | NM_001001669 | NP_001001669 | A1IGU5                                | ARH37_HUMAN DH.                         | 0           | AGGCGGTGGTG   | 0.597 |             |
| + | 2  | 558                       |                    | NM_014228    | NP_055043    | Q99884                                | SC6A7_HUMAN Name=1; (Potential).        | 0           | GCGCTTCCCC    | 0.602 |             |
| - | 6  | 1903                      | 3M_uc011dcl.1_Int  | NM_052860    | NP_443092    | Q96RE9                                | ZN300_HUMAN                             | 2           | TTTCTCTCCTG   | 0.433 |             |
| + | 11 | 1581                      | 2A_uc011dcs.1_In   | NM_078483    | NP_510968    | Q722H8                                | S36A1_HUMAN Name=11; (Potential).       | 1           | TGAGGCTCTCT/  | 0.552 |             |
| + | 9  | 1489                      | tion_p.V294M uc0   | NM_198321    | NP_938080    | Q86SR1                                | GLT10_HUMAN enal (Potential).           | 2           | CACCCGTGGAG   | 0.274 | rs117925322 |
| + | 1  | 597                       |                    | NM_000679    | NP_000670    | P35368                                | ADA1B_HUMAN smic (By similarity).       | 1           | GCCATCGATCGC  | 0.617 |             |
| - | 3  | 661                       | 2NMB1_uc003mar     | NM_004137    | NP_004128    | Q16558                                | KCMB1_HUMAN ellular (Potential).        | 2           | ACAGCCCACCT   | 0.592 |             |
| + | 4  | 773                       | on_p.E71K KCNIP    | NM_001034837 | NP_001030009 | Q9NZI2                                | KCIP1_HUMAN ind 1; degenerate.          | 2           | TCAACGAAGAC   | 0.547 | rs145371121 |
| - | 14 | 1516                      | 03mhm.2_Missens    | NM_016222    | NP_057306    | Q9UJV9                                | DDX41_HUMAN case C-terminal.            | 0           | GGCAGGGAAGT   | 0.577 |             |
| + | 5  | 612                       |                    | NM_014594    | NP_055409    | Q86Y25                                | Z354C_HUMAN                             | 1           | ATTGGGGAAAA   | 0.353 |             |
| - | 18 | 2044                      |                    | NM_005110    | NP_005101    | O94808                                | GFPT2_HUMAN SIS 2.                      | 2           | CGCTCAGGATG   | 0.527 |             |
| - | 7  | 1220                      | p.R177C TRIM7_t    | NM_203293    | NP_976038    | Q9C029                                | TRIM7_HUMAN 330.2/SPRY.                 | 3           | GACCGGGGTGT   | 0.697 |             |
| + | 5  | 1776                      | ua.2_Missense_N    | NM_020135    | NP_064520    | Q96S55                                | WRIP1_HUMAN                             | 2           | AGGGAGGAGAG   | 0.607 |             |
| + | 4  | 2241                      | EP1_uc011diq.1_F   | NM_002114    | NP_002105    | P15822                                | ZEP1_HUMAN                              | 6           | TGAGTCCACCA   | 0.512 |             |
| + | 2  | 319                       | se_Mutation_p.P3E  | NM_024493    | NP_077819    | Q9BRR0                                | ZKSC3_HUMAN                             | 2           | GTTTTCCCAGT/  | 0.607 |             |
| - | 1  | 880                       |                    | NM_030903    | NP_112165    | Q9Y3N9                                | OR2W1_HUMAN lasmic (Potential).         | 3           | CCTATTTCTTAA  | 0.423 |             |
| + | 4  | 729                       | '_3'UTR MOG_uc     | NM_206809    | NP_996532    | Q16653                                | MOG_HUMAN lasmic (Potential).           | 1           | TTTAGGAAAAC   | 0.493 |             |
| - | 7  | 1214                      | 10_uc003npr.2_I    | NM_006778    | NP_006769    | Q9UDY6                                | TRI10_HUMAN 330.2/SPRY.                 | 0           | CACGTTGCAGC   | 0.662 |             |
| + | 14 | 1795                      | p.R311Q SKIV2L_    | NM_006929    | NP_008860    | Q15477                                | SKIV2_HUMAN ase ATP-binding.            | 4           | CAGGCGGCTGA/  | 0.577 |             |
| - | 5  | 777                       | cc.2_Missense_Mi   | NM_001093728 | NP_001087197 | Q8WWWU5                               | TCP11_HUMAN                             | 5           | GTCCGTAATG    | 0.478 | rs146246778 |
| + | 2  | 1017                      | lj.1_RNA BRPF3_t   | NM_015695    | NP_056510    | Q9ULD4                                | BRPF3_HUMAN                             | 2           | CCTCCGGCCT    | 0.597 |             |
| + | 6  | 2254                      | lj.1_RNA BRPF3_t   | NM_015695    | NP_056510    | Q9ULD4                                | BRPF3_HUMAN                             | 2           | CCACCGAGCAG   | 0.408 |             |
| + | 5  | 1562                      | ib.2_intron PI16_u | NM_153370    | NP_699201    | Q6UXB8                                | PI16_HUMAN ellular (Potential).         | 0           | CCACGGGTGGG   | 0.617 |             |
| - | 8  | 1072                      | se_Mutation_p.M2E  | NM_001098518 | NP_001091988 | Q8IZF2                                | GP116_HUMAN racellular (Potential).     | 2           | TAGTCCATTTTC  | 0.353 |             |
| - | 11 | 1407                      | dwl.1_Missense_N   | NM_153840    | NP_722582    | Q5T601                                | GP110_HUMAN ellular (Potential).        | 3           | GTAACCGTGAG   | 0.443 |             |
| + | 2  | 214                       |                    | NM_207410    | NP_997293    | Q6UXV0                                | GFRAL_HUMAN ellular (Potential).        | 2           | TGGAGAGTAA    | 0.328 |             |
| - | 40 | 6556_6557)S1_uc011ebi.1_R | NM_002944          | NP_002935    | P08922       | ROS_HUMAN e. Cytoplasmic (Potential). | 25                                      | GCTTCCCCTC1 | 0.436         |       |             |

|   |    |         |                                  |              |              |        |             |                             |       |               |       |             |
|---|----|---------|----------------------------------|--------------|--------------|--------|-------------|-----------------------------|-------|---------------|-------|-------------|
| - | 1  | 89      | i.2_5'UTR VNN3_u                 | NM_078625    | NP_523239    |        |             |                             | 0     | TTTGAAAAATGT  | 0.358 |             |
| + | 11 | 1393    |                                  | NM_000301    | NP_000292    | P00747 | PLMN_HUMAN  | Kringle 4.                  | 4     | CCAGCGTCAGG   | 0.502 |             |
| - | 7  | 1655    | LL2_uc003ski.3_ε                 | NM_182924    | NP_891554    | Q81Y33 | MILK2_HUMAN |                             | 1     | GAGACGAGGAC   | 0.622 |             |
| - | 6  | 1125    |                                  | NM_032415    | NP_115791    | Q9BXL7 | CAR11_HUMAN | Potential.                  | 50    | ATTCCTCCTCCA  | 0.483 |             |
| - | 14 | 2156    | V1_uc003ssw.3_IV                 | NM_004956    | NP_004947    | P50549 | ETV1_HUMAN  |                             | 35    | GCCTTCGTTGTA  | 0.478 |             |
| - | 2  | 195_196 | xy.1_Missense_Mt                 | NM_006408    | NP_006399    | O95994 | AGR2_HUMAN  |                             | 0     | GGAATTTTCTCC  | 0.47  |             |
| + | 51 | 8334    |                                  | NM_003777    | NP_003768    | Q96DT5 | DYH11_HUMAN |                             | 15    | TCAGAGAAGAA   | 0.363 |             |
| + | 6  | 518     | ε.1_Missense_Mu                  | NM_031414    | NP_113602    | Q9BXU1 | STK31_HUMAN |                             | 9     | CACATTCCTTCT  | 0.328 |             |
| - | 9  | 952     | 8_splice SKAP2_u                 | NM_003930    | NP_003921    | O75563 | SKAP2_HUMAN |                             | 1     | CCATATCTATAAA | 0.294 |             |
| - | 1  | 397_398 |                                  | NM_001126493 | NP_001119965 |        |             |                             | 0     | GCCTTCTTTTCC  | 0.485 |             |
| - | 13 | 1588    | o.1_RNA DPY19L2P1_uc010kwz.1_RNA |              |              |        |             |                             | 0     | GTGGTCTGAAAC  | 0.219 |             |
| - | 2  | 583     | e_Mutation_p.T61                 | NM_001637    | NP_001628    | P28039 | AOAH_HUMAN  | apoin B-type.               | 1     | GGACCGTCGAG   | 0.507 | rs148515077 |
| + | 11 | 2850    | kbi.1_Missense_M                 | NM_015052    | NP_055867    | Q76N89 | HECW1_HUMAN |                             | 23    | AGTCGGTACCC   | 0.662 |             |
| + | 4  | 376     | .1_5'UTR DBNL_u                  | NM_001014436 | NP_001014436 | Q9UJU6 | DBNL_HUMAN  | ADF-H.                      | 1     | TGTGCGGAAGG   | 0.622 |             |
| + | 2  | 242     | inc.2_Missense_M                 | NM_005856    | NP_005847    | O60896 | RAMP3_HUMAN | cellular (Potential).       | 0     | TGTCCGAGTTC   | 0.602 |             |
| + | 1  | 401     | Start_Site VSTM2f                | NM_182546    | NP_872352    | Q8TAG5 | VTM2A_HUMAN |                             | 0     | CCCTTTTGGAA   | 0.483 |             |
| + | 7  | 1696    | vx.3_Missense_Mt                 | NM_015570    | NP_056385    | Q8WXX7 | AUTS2_HUMAN |                             | 3     | AGCTCCTTCTC   | 0.632 |             |
| - | 7  | 1113    | _p.F202Y SEMA3i                  | NM_006379    | NP_006370    | Q99985 | SEM3C_HUMAN | Sema.                       | 1     | CAGAGAAAAGC   | 0.328 |             |
| - | 7  | 960_961 | n.1_Nonsense_Mt                  | NM_000601    | NP_000592    | P14210 | HGF_HUMAN   | Kringle 2.                  | 4     | CGGCTGGCCATC  | 0.475 |             |
| - | 10 | 1073    |                                  | NM_000722    | NP_000713    | P54289 | CA2D1_HUMAN | lar (Potential). VWFA.      | 6     | ATGTTCCGATCA  | 0.348 |             |
| + | 23 | 2332    | _p.S705F CCDC1                   | NM_017667    | NP_060137    | Q96JG6 | CC132_HUMAN |                             | 0     | CGGAATCCTTGT  | 0.403 |             |
| - | 3  | 293     | _p.G59E CYP3A5                   | NM_000777    | NP_000768    | P20815 | CP3A5_HUMAN |                             | 0     | ATTTTTCCATACT | 0.413 |             |
| + | 2  | 342     |                                  | NM_005837    | NP_005828    | O75817 | POP7_HUMAN  |                             | 1     | GCTTCCCAGCC   | 0.607 |             |
| - | 13 | 2683    | _p.L638R EPHB4                   | NM_004444    | NP_004435    | P54760 | EPHB4_HUMAN | Potential). Protein kinase. | 15    | CGGCAAGGTAC   | 0.587 |             |
| + | 8  | 1241    | _Mutation_p.R103                 | NM_020246    | NP_064631    | Q9BXP2 | S12A9_HUMAN | lasmic (Potential).         | 0     | CCTCCCGCATC   | 0.632 | rs143596115 |
| + | 3  | 3876    | C17_uc010lho.1_F                 | NM_001040105 | NP_001035194 | Q685J3 | MUC17_HUMAN | ch. 19. 59 X approximate t  | 27    | CTAGTGAAGGA   | 0.498 |             |
| + | 3  | 6600    | C17_uc010lho.1_F                 | NM_001040105 | NP_001035194 | Q685J3 | MUC17_HUMAN | ch. 59 X approximate tand   | 27    | CTTCAACAACCT  | 0.483 | rs147644870 |
| + | 3  | 7335    | C17_uc010lho.1_F                 | NM_001040105 | NP_001035194 | Q685J3 | MUC17_HUMAN | ch. 59 X approximate tand   | 27    | CACCTGTCACC   | 0.517 |             |
| + | 3  | 9432    | C17_uc010lho.1_F                 | NM_001040105 | NP_001035194 | Q685J3 | MUC17_HUMAN | ch. 50. 59 X approximate t  | 27    | CTTCAACAACCT  | 0.498 |             |
| - | 20 | 2460    | ves.2_Missense_IV                | NM_000111    | NP_000102    | P40879 | S26A3_HUMAN |                             | 4     | GTAACTCCTCCAT | 0.333 |             |
| - | 30 | 4558    | _p.E1492K LAMB4                  | NM_007356    | NP_031382    | A4D0S4 | LAMB4_HUMAN | Domain I.                   | 8     | CGTTTTCTCTT   | 0.398 |             |
| - | 52 | 5974    | fw.2_Missense_M                  | NM_014705    | NP_055520    | Q8N110 | DOCK4_HUMAN | Pro-rich.                   | 4     | TGTACGGGGGC   | 0.716 |             |
| - | 4  | 3120    |                                  | NM_002711    | NP_002702    | Q16821 | PPR3A_HUMAN |                             | 34    | ACTAATCCTTCAT | 0.403 |             |
| - | 4  | 2443    |                                  | NM_002711    | NP_002702    | Q16821 | PPR3A_HUMAN |                             | 34    | ACGTGATTCCTT  | 0.378 |             |
| - | 4  | 2441    |                                  | NM_002711    | NP_002702    | Q16821 | PPR3A_HUMAN |                             | 34    | GTGATTCCTTTT  | 0.373 |             |
| + | 7  | 612     | se_Mutation_p.H1ε                | NM_019071    | NP_061944    | Q9NXR8 | ING3_HUMAN  |                             | 1     | ACAGATCATATTC | 0.299 |             |
| - | 5  | 1244    | _p.V61M CADPS2                   | NM_017954    | NP_060424    | Q86UW7 | CAPS2_HUMAN |                             | 2     | TACCACGTCGG   | 0.388 |             |
| - | 5  | 2076    | ivly.1_Missense_IV               | NM_176814    | NP_789784    | Q2TB10 | ZN800_HUMAN |                             | 1     | ACCGACGTCAG   | 0.373 |             |
| + | 41 | 7167    | a.3_Missense_Mut                 | NM_001458    | NP_001449    | Q14315 | FLNC_HUMAN  | Filamin 21.                 | 12    | GGGCCGGAGGC   | 0.677 |             |
| + | 20 | 2111    | _p.A691T FAM40B                  | NM_020704    | NP_065755    | Q9ULQ0 | FA40B_HUMAN |                             | 0     | AATCGGCACCA   | 0.438 |             |
| - | 21 | 4124    |                                  | NM_020911    | NP_065962    | Q9HCM2 | PLXA4_HUMAN | lasmic (Potential).         | 1     | GATGTCCGTCTC  | 0.562 |             |
| - | 19 | 2660    | M1D_uc010lng.2_                  | NM_030647    | NP_085150    | Q6ZMT4 | KDM7_HUMAN  |                             | 1     | GAAAGGAGTTT   | 0.483 |             |
| - | 15 | 1860    |                                  | NM_004333    | NP_004324    | P15056 | BRAF_HUMAN  | rotein kinas_R603>l(2)) p.T | 18290 | TATTTCACTGTAC | 0.368 |             |
| - | 7  | 1067    |                                  | NM_001080392 | NP_001073861 | A4D1U4 | LCHN_HUMAN  |                             | 1     | TGTGAGCACTG   | 0.582 |             |
| - | 1  | 170     |                                  | NM_176817    | NP_789787    | P59533 | T2R38_HUMAN | Name=1; (Potential).        | 2     | GAAACCCACT    | 0.463 |             |
| - | 4  | 759     | xc.3_Missense_Mt                 | NM_001001317 | NP_001001317 | Q8IYP2 | PRS58_HUMAN | eptidase S1.                | 0     | GCTCTTTGTCTA  | 0.353 |             |
| + | 11 | 1333    | tc.1_Missense_Mt                 | NM_000083    | NP_000074    | P35523 | CLCN1_HUMAN |                             | 5     | TGGCTGGAGAG   | 0.463 |             |

|   |    |           |                   |              |              |        |             |                           |    |               |       |             |
|---|----|-----------|-------------------|--------------|--------------|--------|-------------|---------------------------|----|---------------|-------|-------------|
| + | 1  | 373       | uc003wda.2_Intror | NM_177437    | NP_803186    | P59551 | T2R60_HUMAN | lasmic (Potential).       | 6  | ICTACCTTCACCC | 0.498 |             |
| - | 4  | 825       |                   | NM_001001661 | NP_001001661 | Q6IV72 | ZN425_HUMAN | 2H2-type 2.               | 3  | TTCTCAGACTCA  | 0.577 |             |
| + | 9  | 1777      | DN3_uc003wip.2_I  | NM_004769    | NP_004760    | Q9UHC3 | ACCN3_HUMAN | lasmic (Potential).       | 2  | TCCTGGGATATT  | 0.612 |             |
| + | 3  | 1150      |                   | NM_018941    | NP_061764    | Q9UBY8 | CLN8_HUMAN  |                           | 3  | GCTGCGGAAGA   | 0.592 |             |
| - | 21 | 3602      | p.S463F CSMD1_    | NM_033225    | NP_150094    | Q96PZ7 | CSMD1_HUMAN | xtracellular (Potential). | 25 | AGCAGGAAAAAC  | 0.557 |             |
| - | 3  | 439       |                   | NM_004686    | NP_004677    | Q9Y216 | MTMR7_HUMAN |                           | 1  | GGCATCCGGTA   | 0.433 |             |
| + | 13 | 1652      | p.G502R PIWIL2_   | NM_018068    | NP_060538    | Q8TC59 | PIWL2_HUMAN |                           | 1  | TGACCGGAATCC  | 0.468 | rs138817329 |
| + | 18 | 2079      | xbw.3_Missense_I  | NM_005775    | NP_005766    | O60504 | VINEX_HUMAN |                           | 0  | CCAGACCCAGG   | 0.657 |             |
| + | 2  | 424       | 7_uc003xdp.2_RN   | NM_016612    | NP_057696    | Q9NYZ2 | MFRN1_HUMAN | Solcar 1.                 | 0  | GAGCCCTCAAG   | 0.522 |             |
| + | 19 | 2124      | p.G377R DOCK5_    | NM_024940    | NP_079216    | Q9H7D0 | DOCK5_HUMAN | DHR-1.                    | 3  | ATGGAGGAGAG   | 0.333 |             |
| + | 24 | 2474      | p.L556M PTK2B_    | NM_173174    | NP_775266    | Q14289 | FAK2_HUMAN  | rotein kinase.            | 5  | ACATCCTGGTG   | 0.572 |             |
| + | 2  | 286       |                   | NM_004095    | NP_004086    | Q13541 | 4EBP1_HUMAN |                           | 0  | CACCCCAAGG    | 0.562 |             |
| - | 8  | 1917      | ixpe.2_Missense_I | NM_006749    | NP_006740    | Q08357 | S20A2_HUMAN | lasmic (Potential).       | 2  | GGGCCGATGAG   | 0.602 |             |
| - | 23 | 4432      | DNL_uc003xqt.3_F  | NM_144651    | NP_653252    | A1KZ92 | PXDNL_HUMAN | VWFC.                     | 2  | AGGTTCCCTTC   | 0.517 |             |
| - | 17 | 3339_3340 | DNL_uc003xqt.3_F  | NM_144651    | NP_653252    | A1KZ92 | PXDNL_HUMAN |                           | 2  | GAAACGAAGGT   | 0.495 |             |
| - | 2  | 419       | ta.3_Missense_Mt  | NM_006211    | NP_006202    | P01210 | PENK_HUMAN  |                           | 4  | TCCATTTCTTCA  | 0.498 |             |
| + | 2  | 700       | /S1_uc003xui.2_Ir | NM_173519    | NP_775790    | Q8IUQ0 | CLVS1_HUMAN | CRAL-TRIO.                | 5  | ATGGGTTCCCC   | 0.483 |             |
| + | 5  | 744       | uc003yam.2_Miss   | NM_015886    | NP_056970    | O43692 | PI15_HUMAN  |                           | 3  | CAATTCATACTT  | 0.428 |             |
| - | 8  | 763       | ise_Mutation_p.S1 | NM_001738    | NP_001729    | P00915 | CAH1_HUMAN  |                           | 2  | GGGATGAAGGA   | 0.428 |             |
| - | 15 | 1862      | cs.1_Missense_Mu  | NM_015902    | NP_056986    | O95071 | UBR5_HUMAN  |                           | 28 | ATGGTGGAGGA   | 0.378 |             |
| - | 26 | 2712      | _p.P706L ASAP1_   | NM_018482    | NP_060952    | Q9ULH1 | ASAP1_HUMAN | Pro-rich.                 | 4  | GTTTAGGAAGA   | 0.294 |             |
| - | 9  | 2438      | Y8_uc010mds.2_I   | NM_001115    | NP_001106    | P40145 | ADCY8_HUMAN | ical; (Potential).        | 6  | TATTGCCGTGA   | 0.353 |             |
| + | 20 | 4326      | v.2_Missense_Mut  | NM_003235    | NP_003226    | P01266 | THYG_HUMAN  |                           | 15 | GGGACCACTTT   | 0.567 |             |
| + | 21 | 3531      | iywa.1_Missense_  | NM_014957    | NP_055772    | A2RUS2 | DEND3_HUMAN | WD 2.                     | 1  | TCTTCTCTGAG   | 0.577 |             |
| - | 2  | 174       |                   | NM_205545    | NP_991108    | Q6UXB3 | LYPD2_HUMAN | UPAR/Ly6.                 | 0  | TGTGGGCTCCG   | 0.637 |             |
| - | 5  | 939       | c003yxj.2_Missen  | NM_000497    | NP_000488    | P15538 | C11B1_HUMAN |                           | 3  | CAGTGAGTTCC   | 0.622 |             |
| - | 4  | 689       | c003yxj.2_Missen  | NM_000497    | NP_000488    | P15538 | C11B1_HUMAN |                           | 3  | GACCTCCAGGG   | 0.607 |             |
| - | 6  | 737       | se_Mutation_p.R22 | NM_023078    | NP_075566    | Q53H96 | P5CR3_HUMAN |                           | 0  | TGAGCGCAGCT   | 0.697 |             |
| - | 3  | 1516      |                   | NM_003923    | NP_003914    | O75593 | FOXH1_HUMAN | eraction domain (SID).    | 0  | GGCCACCCCCC   | 0.612 |             |
| - | 4  | 1620      |                   | NM_001145196 | NP_001138668 | Q5VVP1 | F75A6_HUMAN |                           | 0  | GGAGAGAGCTT   | 0.478 |             |
| - | 2  | 688       |                   | NM_001163    | NP_001154    | Q02410 | APBA1_HUMAN |                           | 1  | CTCGCGTGCT    | 0.687 |             |
| + | 3  | 1718      | p.3_Missense_Mu   | NM_024945    | NP_079221    | Q9H9A7 | RMI1_HUMAN  |                           | 0  | AGCCATTCttaa  | 0.284 |             |
| + | 2  | 243       | se.2_RNA C9orf89_ | NM_032310    | NP_115686    | Q96LW7 | BINCA_HUMAN | CARD.                     | 0  | TGGGCGCTTGA   | 0.557 | rs117047073 |
| - | 1  | 671       |                   | NM_001001919 | NP_001001919 | Q8NGS5 | O13C4_HUMAN | lasmic (Potential).       | 1  | AGATGGTGTAG   | 0.408 |             |
| - | 5  | 1323      | p.E408K ASTN2_    | NM_198187    | NP_937830    | O75129 | ASTN2_HUMAN | lasmic (Potential).       | 9  | AGTTTCATCGT   | 0.537 |             |
| + | 2  | 215       | wa.2_Missense_I   | NM_138777    | NP_620132    | Q96E11 | RRFM_HUMAN  |                           | 3  | AGACAGTGCAT   | 0.478 |             |
| + | 4  | 664       | bus.2_Missense_I  | NM_016035    | NP_057119    | Q9Y3A0 | COQ4_HUMAN  |                           | 0  | GGATTTGACAT   | 0.597 |             |
| + | 7  | 965_966   | _p.R297* SPTAN1   | NM_003127    | NP_003118    | Q13813 | SPTA2_HUMAN | Spectrin 4.               | 10 | TTGGCCGAGAC   | 0.48  |             |
| + | 5  | 499       | ense_Mutation_p.  | NM_080877    | NP_543153    | Q8N130 | NPT2C_HUMAN | ellular (Potential).      | 0  | AAGTGGCCGGA   | 0.647 |             |
| - | 2  | 191       |                   | NM_015419    | NP_056234    | Q9NR99 | MXRA5_HUMAN |                           | 8  | CACCACGGAGA   | 0.622 |             |
| - | 4  | 306       | v.1_RNA FAM9B_    | NM_205849    | NP_995321    | Q8IZU0 | FAM9B_HUMAN |                           | 0  | TTTTATCCATTT  | 0.274 |             |
| + | 9  | 1385      | mij.1_Missense_M  | NM_014728    | NP_055543    | Q14CM0 | FRPD4_HUMAN | FERM.                     | 13 | AAAGATCCAAT   | 0.393 |             |
| + | 8  | 786       | yn.2_Missense_Mt  | NM_003159    | NP_003150    | O76039 | CDKL5_HUMAN | rotein kinase.            | 6  | GTATCGGTCCC   | 0.408 |             |
| + | 17 | 2144      | ys.2_Missense_Mt  | NM_006240    | NP_006231    | O14829 | PPE1_HUMAN  |                           | 0  | TACAAGAGGCA   | 0.373 |             |
| + | 37 | 4399      |                   | NM_016937    | NP_058633    | P09884 | DPOLA_HUMAN |                           | 3  | TGTGCGGTGA    | 0.507 |             |
| + | 1  | 876       |                   | NM_001013736 | NP_001013758 | Q5HY64 | FA47C_HUMAN |                           | 3  | CTCCAAGACT    | 0.607 |             |
| - | 10 | 775       | p.T137R GRIPAP1   | NM_020137    | NP_064522    | Q4V328 | GRAP1_HUMAN | Potential.                | 3  | TTTCTGTCTGCA  | 0.507 |             |

|   |     |           |                                           |              |              |        |             |                              |       |               |       |
|---|-----|-----------|-------------------------------------------|--------------|--------------|--------|-------------|------------------------------|-------|---------------|-------|
| + | 3   | 393       | loq.1_Missense_IV                         | NM_000084    | NP_000075    | P51795 | CLCN5_HUMAN | smic (By similarity).        | 4     | TTAATTCACAGTC | 0.363 |
| - | 9   | 1187      | _p.G362S ABCB7                            | NM_004299    | NP_004290    | O75027 | ABCB7_HUMAN | ne type-1. Helical; (Potenti | 1     | TTAAACCGACAC  | 0.398 |
| + | 4   | 1789      | eh.1_Missense_Mi                          | NM_021118    | NP_066941    | P35663 | CYLC1_HUMAN |                              | 5     | TCAATGAAAAAG  | 0.418 |
| + | 5   | 972       | '11_uc004eeq.2_M                          | NM_021998    | NP_068838    | Q9Y462 | ZN711_HUMAN |                              | 4     | TAGTGGATGATG  | 0.313 |
| - | 1   | 419       |                                           | NM_001002916 | NP_001002916 | Q7Z2G1 | H2BWT_HUMAN |                              | 1     | TGATGGTCTGG   | 0.647 |
| + | 11  | 2788      |                                           | NM_017416    | NP_059112    | Q9NP60 | IRPL2_HUMAN | lasmic (Potential).          | 3     | TCCAAAGAGCTT  | 0.408 |
| - | 2   | 878       | Y2F_uc011msq.1_                           | NM_001522    | NP_001513    | P51841 | GUC2F_HUMAN | ellular (Potential).         | 8     | TGGCTGTATGC   | 0.532 |
| - | 2   | 353       | Y2F_uc011msq.1_                           | NM_001522    | NP_001513    | P51841 | GUC2F_HUMAN |                              | 8     | CAAGGCCATGG   | 0.572 |
| - | 5   | 2180      | om.1_Missense_M                           | NM_012471    | NP_036603    | Q9UL62 | TRPC5_HUMAN | lasmic (Potential).          | 1     | ACATTTCTTAAT  | 0.443 |
| + | 6   | 1653      | e_Mutation_p.A30                          | NM_000868    | NP_000859    | P28335 | 5HT2C_HUMAN | smic (By similarity).        | 3     | TGAAAAGCTTCG  | 0.438 |
| + | 12  | 1660      |                                           | NM_007231    | NP_009162    | Q9UN76 | S6A14_HUMAN |                              | 3     | TAGAGGTGGATAT | 0.363 |
| - | 18  | 3313      | o.W1082* ODZ1_u                           | NM_014253    | NP_055068    | Q9UKZ4 | TEN1_HUMAN  | ellular (Potential).         | 23    | TGTGTTCCAAGC  | 0.448 |
| + | 4   | 2104      | EC1_uc010nsl.1_l                          | NM_005462    | NP_005453    | O60732 | MAGC1_HUMAN |                              | 4     | TCCCATGTCTCC  | 0.572 |
| - | 2   | 420       | fbby.2_Missense_l                         | NM_173078    | NP_775101    | Q8IW52 | SLIK4_HUMAN |                              | 2     | TGTGTCGAAGAA  | 0.388 |
| + | 7   | 887       |                                           | NM_018558    | NP_061028    | Q9UN88 | GBRT_HUMAN  | ical; (Potential).           | 3     | TGGATGAACATA  | 0.443 |
| + | 2   | 247       |                                           | NM_004699    | NP_004690    | Q14320 | FA50A_HUMAN |                              | 1     | TGTTCTCTGCGC  | 0.622 |
| + | 5   | 557       | n.2_Missense_Mu                           | NM_001215    | NP_001206    | P23280 | CAH6_HUMAN  |                              | 2     | TATACAGCAACT  | 0.498 |
| + | 1   | 4118      | i.1_Intron MACF1_                         | NM_015038    | NP_055853    | O94854 | K0754_HUMAN | 9. Ala-rich.                 | 0     | TGCGCTCCCCAG  | 0.726 |
| - | 17  | 932       | cfi.1_Missense_Mt                         | NM_001852    | NP_001843    | Q14055 | CO9A2_HUMAN | lical region 3 (COL3).       | 2     | TGCCACGAATAC  | 0.622 |
| + | 14  | 1698      | wkt.1_Missense_M                          | NM_001102663 | NP_001096133 |        |             |                              | 0     | TAGCTGCTGGAG  | 0.488 |
| + | 6   | 818       |                                           | NM_002001    | NP_001992    | P12319 | FCERA_HUMAN | lasmic (Potential).          | 5     | TAAACCAGGAAAG | 0.383 |
| + | 2   | 439       | _p.D114N ALOX5_                           | NM_000698    | NP_000689    | P09917 | LOX5_HUMAN  | PLAT.                        | 2     | TGAGGGATGGAC  | 0.582 |
| + | 14  | 2035      | y.1_Missense_Mut                          | NM_020549    | NP_065574    | P28329 | CLAT_HUMAN  |                              | 3     | TCACTGCGGGAG  | 0.572 |
| + | 17  | 2097      | PRKG1_uc009xow                            | NM_001098512 | NP_001091982 | Q13976 | KGP1_HUMAN  | kinase C-terminal.           | 6     | TACACCTCTATA  | 0.333 |
| - | 6   | 1433      | ij.1_RNA TMEM2E                           | NM_178505    | NP_848600    | Q6ZUK4 | TMM26_HUMAN |                              | 0     | TAGCCCCGCAAAA | 0.582 |
| - | 5   | 1915      | xyz.1_Missense_l                          | NM_014904    | NP_055719    | Q7L804 | RFIP2_HUMAN | 1A, subcellular location, en | 0     | TGGGCGTTTCT   | 0.423 |
| + | 3   | 577       | R2D_uc001lkt.2_5                          | NM_018461    | NP_060931    | Q66LE6 | 2ABD_HUMAN  |                              | 1     | TAAGACGAAGAT  | 0.368 |
| + | 1   | 637       | _uc001mam.1_Int                           | NM_001004757 | NP_001004757 | Q8NH59 | O51Q1_HUMAN | Name=5; (Potential).         | 1     | TGGATCCTCTG   | 0.498 |
| - | 2   | 1441      | 16_uc010sqx.1_5'                          | NM_014830    | NP_055645    | O15060 | ZBT39_HUMAN |                              | 1     | TCCGATTTTCAGC | 0.552 |
| - | 6   | 1717_1718 | nse_Mutation_p.R                          | NM_019600    | NP_062546    | Q32MH5 | K1370_HUMAN |                              | 0     | TAACTCCTAAACA | 0.401 |
| - | 4   | 621       | <DC2_uc002eyb.2_RNA PDXDC2_uc002eyc.2_RNA |              |              |        |             |                              | 0     | TGTTCTTTGGCG  | 0.363 |
| + | 47  | 7485      |                                           | NM_020877    | NP_065928    | Q9P225 | DYH2_HUMAN  | 3 (By similarity).           | 13    | TCTAAGGACATG  | 0.517 |
| + | 2   | 487       | .1_Intron CNP_uc                          | NM_033133    | NP_149124    | P09543 | CN37_HUMAN  |                              | 0     | TGCCGGGACATC  | 0.602 |
| - | 4   | 392       |                                           | NM_002634    | NP_002625    | P35232 | PHB_HUMAN   |                              | 0     | TGGTGAAGATGC  | 0.527 |
| - | 8   | 915       | _p.L219R SBNO2_                           | NM_014963    | NP_055778    | Q9Y2G9 | SBNO2_HUMAN |                              | 0     | TGGACAGTGTG   | 0.657 |
| - | 284 | 82270     | 44E TTN_uc010zl                           | NM_133378    | NP_596869    | Q8WZ42 | TITIN_HUMAN |                              | 153   | TCCAATCCATTT  | 0.413 |
| - | 25  | 2584      | p.R822Q KIF1A_u                           | NM_004321    | NP_004312    | Q12756 | KIF1A_HUMAN | Potential.                   | 1     | TCTCCCGCATC   | 0.652 |
| + | 10  | 1244      | _p.A325T RTEL1_                           | NM_016434    | NP_057518    | Q9NZ71 | RTEL1_HUMAN |                              | 0     | TGAGCGCGGAC   | 0.662 |
| - | 21  | 3384      | EMA5B_uc003egt                            | NM_001031702 | NP_001026872 | Q9P283 | SEM5B_HUMAN | ellular (Potential).         | 7     | TAGTCGGTGGCC  | 0.632 |
| - | 3   | 501       | L39L_uc003frf.1_F                         | NM_052969    | NP_443201    | Q96EH5 | RL39L_HUMAN |                              | 0     | TGACCCAGCTTG  | 0.418 |
| - | 18  | 3142      | _p.D470N EVC2_u                           | NM_147127    | NP_667338    | Q86UK5 | LBN_HUMAN   | Potential.                   | 5     | TCTGGTCTCCA   | 0.642 |
| - | 146 | 26926     | l_uc003qou.3_Mis                          | NM_182961    | NP_892006    | Q8NF91 | SYNE1_HUMAN | space (Potential). KASH.     | 45    | TAGAGGCACAG   | 0.552 |
| - | 12  | 1832      | g.1_Missense_Mul                          | NM_000168    | NP_000159    | P10071 | GLI3_HUMAN  | C2H2-type 4.                 | 19    | TACCTTCGTGCT  | 0.473 |
| - | 16  | 2319      |                                           | NM_012431    | NP_036563    | O15041 | SEM3E_HUMAN | l-like C2-type.              | 3     | TGACGTCTTTC   | 0.368 |
| - | 15  | 1860      |                                           | NM_004333    | NP_004324    | P15056 | BRAF_HUMAN  | rotein kinase_R603>I(2)) p.T | 18290 | TATTTCACTGTAC | 0.368 |
| - | 5   | 817       | _T3_uc011nf.1_Mi                          | NM_004529    | NP_004520    | P42568 | AF9_HUMAN   | Poly-Ser.                    | 3     | TCTGCTGCTGCTG | 0.164 |
| - | 2   | 143       | _5'Flank COQ4_u                           | NM_015679    | NP_056494    | O95900 | TRUB2_HUMAN |                              | 1     | TAGGAGCGGGAG  | 0.368 |

rs116097791

rs144255879



|   |    |         |                      |              |              |        |             |                              |    |                   |       |             |
|---|----|---------|----------------------|--------------|--------------|--------|-------------|------------------------------|----|-------------------|-------|-------------|
| + | 4  | 614     | 3P5_uc010ncq.2_3'UTR |              |              |        |             |                              | 0  | AGTCCACCAGC       | 0.517 | rs77284214  |
| + | 1  | 1543    |                      | NM_001136234 | NP_001129706 |        |             |                              | 1  | jctgctgctgctgctc  | 0.104 |             |
| + | 42 | 6425    | za.2_Nonsense_lv     | NM_005120    | NP_005111    | Q93074 | MED12_HUMAN | Gln-rich.                    | 4  | agcagcagcagctacca | 0.264 |             |
| + | 2  | 457     |                      | NM_207422    | NP_997305    | Q56UQ5 | TPT1L_HUMAN |                              | 1  | AGGTGGAAGGC       | 0.512 |             |
| - | 8  | 1138    | AA0562_uc001akz      | NM_014704    | NP_055519    | O60308 | CE104_HUMAN | Potential.                   | 0  | CCACGGCACAG       | 0.498 |             |
| + | 16 | 2279    | ni.2_Missense_Mu     | NM_014874    | NP_055689    | O95140 | MFN2_HUMAN  | Name=1; (Potential).         | 1  | FGGCTCCTTGA       | 0.642 |             |
| - | 3  | 530     |                      | NM_001146344 | NP_001139816 | O60813 | PRA11_HUMAN |                              | 0  | AAAGTTCTACAA      | 0.498 |             |
| + | 1  | 112     | na.2_intron CD52_    | NM_001803    | NP_001794    | P31358 | CD52_HUMAN  |                              | 0  | CTTCCTCTTC        | 0.522 |             |
| + | 5  | 1036    |                      | NM_031459    | NP_113647    | P58004 | SESN2_HUMAN |                              | 7  | TGCCCCAGG         | 0.622 |             |
| - | 4  | 1204    | sd.2_Missense_Mu     | NM_014654    | NP_055469    | O75056 | SDC3_HUMAN  | cellular (Potential).        | 2  | CTACGAGCAC        | 0.637 |             |
| - | 2  | 945     | de.Mutation_p.Q29    | NM_144569    | NP_653170    | Q6ZMY3 | SPOC1_HUMAN |                              | 6  | CTGGCTGGGGC       | 0.642 |             |
| + | 6  | 977     | sense.Mutation_p     | NM_018056    | NP_060526    | Q9GZU3 | TM39B_HUMAN |                              | 0  | AGATTCCTCAA       | 0.587 |             |
| - | 52 | 7819    | am.1_Missense_Mu     | NM_052896    | NP_443128    | Q7Z408 | CSMD2_HUMAN | extracellular (Potential).   | 12 | ATGCTACTGACA      | 0.473 |             |
| - | 45 | 6887    | p.F2284L CSMD2_      | NM_052896    | NP_443128    | Q7Z408 | CSMD2_HUMAN | ar (Potential). CUB 13.      | 12 | CCGGAGAAAGC       | 0.313 |             |
| - | 25 | 3961    | p.G1351E CSMD2_      | NM_052896    | NP_443128    | Q7Z408 | CSMD2_HUMAN | tracellular (Potential).     | 12 | CTTACCCAATGC      | 0.577 |             |
| - | 8  | 1265    | aa.1_Missense_Mu     | NM_000831    | NP_000822    | Q13003 | GRIK3_HUMAN | cellular (Potential).        | 7  | ACAATTCGTCCA      | 0.498 |             |
| - | 4  | 4823    | de.Mutation_p.H12    | NM_024503    | NP_078779    | Q5T1R4 | ZEP3_HUMAN  |                              | 6  | AGATGGAGTT        | 0.607 |             |
| - | 12 | 2458    | DC1_uc001dek.3_      | NM_001114120 | NP_001107592 | Q5TB30 | DEP1A_HUMAN |                              | 0  | CGTGGTTGGAA       | 0.353 |             |
| - | 2  | 426     | P2_uc001dmy.1_F      | NM_004120    | NP_004111    | P32456 | GBP2_HUMAN  | (By similarity).             | 1  | GGTAGGATTTG       | 0.542 |             |
| + | 4  | 950     |                      | NM_001010898 | NP_001010898 | Q9H1V8 | S6A17_HUMAN | Name=3; (Potential).         | 2  | GGGTGGAGCAT       | 0.577 |             |
| - | 7  | 1579    |                      | NM_001047980 | NP_001041445 | P0C2Y1 | NBPF7_HUMAN | NBPF 2.                      | 2  | CTCCGGGGAGT       | 0.483 |             |
| + | 2  | 232     | HD1L_uc009wjh.2_     | NM_004284    | NP_004275    | Q86WJ1 | CHD1L_HUMAN |                              | 6  | ACTGGCTCGCC       | 0.507 |             |
| - | 3  | 2464    | ic001ezv.2_5'Flanl   | NM_002016    | NP_002007    | P20930 | FILA_HUMAN  | Ser-rich.                    | 16 | CCCTGTCCATC       | 0.567 |             |
| - | 2  | 843     | 2_Missense_Muta      | NM_001111    | NP_001102    | P55265 | DSRAD_HUMAN |                              | 6  | TATGACCGTCTG      | 0.522 |             |
| - | 1  | 491     |                      | NM_001005185 | NP_001005185 | Q8NGY5 | OR6N1_HUMAN | cellular (Potential).        | 1  | GGCGTAAATC        | 0.502 |             |
| + | 10 | 2380    |                      | NM_022093    | NP_071376    | Q9UQP3 | TENN_HUMAN  | nectin type-III 6.           | 9  | GGTGGGAAGG        | 0.647 |             |
| + | 3  | 907     | 1_uc010ppa.1_RN      | NM_201253    | NP_957705    | P82279 | CRUM1_HUMAN | g (Potential). Extracellular | 9  | GGGATCACTGT       | 0.512 |             |
| + | 4  | 419     | 1_intron PTPRC_u     | NM_002838    | NP_002829    | P08575 | PTPRC_HUMAN | cellular (Potential).        | 12 | ATACTCCACCC       | 0.423 |             |
| + | 9  | 1208    | p.Q316Q CTSE_u       | NM_001910    | NP_001901    | P14091 | CATE_HUMAN  |                              | 1  | CTCCAGCTGGG       | 0.542 |             |
| + | 4  | 856     | _p.E267K RASSF       | NM_182663    | NP_872604    | Q8WWW0 | RASF5_HUMAN |                              | 1  | TCAAGGAGGTG       | 0.592 |             |
| + | 9  | 1388    | io.3_Missense_Mu     | NM_152609    | NP_689822    | Q6PJW8 | CNST_HUMAN  |                              | 0  | CAGTCCCTGCT       | 0.488 |             |
| + | 6  | 1162    | W3_uc001idp.1_lr     | NM_015431    | NP_056246    | Q8NG06 | TRI58_HUMAN | 330.2/SPRY p.E372K(1)        | 7  | AGGGGAAACC        | 0.562 | rs143805378 |
| + | 1  | 698_699 |                      | NM_001005471 | NP_001005471 | Q8NHC8 | OR2T6_HUMAN | asmic (Potential).           | 3  | GAAAGGGAGGA       | 0.51  |             |
| - | 1  | 577     |                      | NM_001001964 | NP_001001964 | Q8NH01 | O2T11_HUMAN | Name=5; (Potential).         | 1  | AGTTTCATACAA      | 0.483 |             |
| + | 12 | 1778    | P11_uc001kef.2_li    | NM_133447    | NP_597704    | Q8TF27 | AGA11_HUMAN | PH.                          | 0  | CTGCGCACCC        | 0.473 |             |
| - | 7  | 1385    | 01kg1.2_Missense_    | NM_213606    | NP_998771    | Q6ZSM3 | MOT12_HUMAN | ical; (Potential).           | 1  | GCAGAGCCCAT       | 0.463 |             |
| + | 6  | 3472    | lklq.2_Missense_l    | NM_014803    | NP_055618    | Q6AHZ1 | Z518A_HUMAN |                              | 1  | AGATGTGAGAG       | 0.373 |             |
| - | 7  | 1170    |                      | NM_032211    | NP_115587    | Q96JB6 | LOXL4_HUMAN | SRCR 3.                      | 5  | GGTCCACCTG        | 0.682 |             |
| + | 20 | 2992    | CS3_uc010qqz.1_      | NM_014978    | NP_055793    | Q9UPU3 | SORC3_HUMAN | renal (Potential).           | 10 | AGTTCATTGT        | 0.448 |             |
| + | 8  | 842     |                      | NM_000936    | NP_000927    | P16233 | LIPP_HUMAN  |                              | 3  | TAGACGGAATC       | 0.398 | rs62623373  |
| - | 5  | 521     | llu.2_Missense_M     | NM_173572    | NP_775843    | Q5SR76 | CJ093_HUMAN |                              | 1  | GTGACGATATCC      | 0.527 |             |
| + | 5  | 532     |                      | NM_206893    | NP_996776    | Q96PG2 | M4A10_HUMAN | cellular (Potential).        | 2  | AGGATCTCTTT       | 0.512 |             |
| - | 2  | 1247    | l_5'Flank BRMS1_     | NM_006876    | NP_006867    | O43505 | B3GN1_HUMAN | renal (Potential).           | 0  | ACCTTCGTTCA       | 0.473 |             |
| + | 2  | 517     | ense.Mutation_p.F    | NM_002896    | NP_002887    | Q9BWF3 | RBM4_HUMAN  | RRM 1.                       | 1  | CTGCCCGGG         | 0.493 |             |
| - | 10 | 2304    | p.G726S CD163_l      | NM_004244    | NP_004235    | Q86VB7 | C163A_HUMAN | extracellular (Potential).   | 8  | AGCGACCTCCTC      | 0.458 |             |
| + | 13 | 2713    | ve.2_Missense_Mu     | NM_004426    | NP_004417    | P78364 | PHC1_HUMAN  |                              | 2  | CTCGGTTGCG        | 0.537 |             |
| - | 3  | 1091    | ju.1_Missense_Mu     | NM_198992    | NP_945343    | Q6XYQ8 | SYT10_HUMAN | mic (Potential). C2 1.       | 2  | AAGTCTCTGTG       | 0.358 |             |

|   |    |         |                                                |              |              |        |             |                                |    |                |       |
|---|----|---------|------------------------------------------------|--------------|--------------|--------|-------------|--------------------------------|----|----------------|-------|
| - | 8  | 2299    |                                                | NM_005164    | NP_005155    | Q9UBJ2 | ABCD2_HUMAN | 3C transporter.                | 6  | ACTTATGATAAAA  | 0.368 |
| + | 1  | 82      | Mutation_p.H28Y L                              | NM_152641    | NP_689854    | Q68CP9 | ARID2_HUMAN | ARID.                          | 10 | TCCACCACAGC/   | 0.677 |
| - | 39 | 11948   |                                                | NM_003482    | NP_003473    | O14686 | MLL2_HUMAN  | Gln-rich.                      | 41 | AGTAAAGTTCGA/  | 0.333 |
| - | 51 | 6918    |                                                | NM_006836    | NP_006827    | Q92616 | GCN1L_HUMAN |                                | 4  | .CCACGGAGGGC   | 0.622 |
| - | 11 | 1438    | p.S414L KDM2B_t                                | NM_032590    | NP_115979    | Q8NHM5 | KDM2B_HUMAN |                                | 2  | iTGGGTGAAGTG   | 0.542 |
| - | 12 | 1570    | 33A_uc001ucc.2_                                | NM_022916    | NP_075067    | Q96AX1 | VP33A_HUMAN |                                | 1  | ACATACGATATGT  | 0.527 |
| + | 4  | 942     | h.2_Missense_Mu                                | NM_025215    | NP_079491    | Q9Y606 | TRUA_HUMAN  |                                | 2  | 3GCCAGGTGGTA   | 0.557 |
| - | 5  | 1217    |                                                | NM_006001    | NP_005992    | Q13748 | TBA3C_HUMAN |                                | 5  | CAGGCGAGCCC    | 0.647 |
| - | 3  | 1055    | p.K168E GJB6_uc                                | NM_006783    | NP_006774    | O95452 | CXB6_HUMAN  | cellular (Potential).          | 1  | ACATTTCAACAC   | 0.443 |
| + | 3  | 243     |                                                | NM_144578    | NP_653179    | Q8NDC0 | MISSL_HUMAN | Pro-rich.                      | 0  | .CAAAACCTGGC/  | 0.517 |
| + | 8  | 1945    | ss.1_Missense_Ml                               | NM_001024218 | NP_001019389 | Q9NQX3 | GEPH_HUMAN  | 1 GABARAP (By similarity).     | 2  | TCAGGCTACAT/   | 0.498 |
| + | 3  | 910     | p.N155S PCNX_t                                 | NM_014982    | NP_055797    | Q96RV3 | PCX1_HUMAN  |                                | 1  | AAGCAACCAGG    | 0.483 |
| + | 8  | 809     | LL5_uc010ask.1_1                               | NM_015072    | NP_055887    | Q6EMB2 | TTL5_HUMAN  | TTL.                           | 3  | CCCTGGAAGAG    | 0.398 |
| + | 25 | 3125    | r.2_Missense_Mut                               | NM_001036    | NP_001027    | Q15413 | RYR3_HUMAN  | c (By similarity).[4 X approx  | 10 | CCCCTCTGGTG    | 0.453 |
| - | 2  | 268     | u.2_Missense_Mut                               | NM_033503    | NP_277038    | Q96LC9 | BMF_HUMAN   |                                | 1  | iTGGGTCGAAGG   | 0.622 |
| - | 17 | 1881    |                                                | NM_178034    | NP_828848    | Q86XP0 | PA24D_HUMAN | PLA2c.                         | 2  | iGGCCTGCCTG    | 0.677 |
| + | 12 | 2313    | te.2_Nonsense_Mi                               | NM_024817    | NP_079093    | Q6ZMP0 | THSD4_HUMAN | 1SP type-1 3.                  | 2  | CGACTGGACCT    | 0.637 |
| + | 2  | 2182    | unk.1_Missense_f                               | NM_015206    | NP_056021    | Q9UPX6 | K1024_HUMAN |                                | 4  | AAAGCCTCTTC/   | 0.547 |
| - | 2  | 367     | p.L67P FSD2_uc                                 | NM_001007122 | NP_001007123 | A1L4K1 | FSD2_HUMAN  |                                | 1  | CTTGAAGGTCT/   | 0.443 |
| + | 17 | 1568    | _Missense_Mutatic                              | NM_138769    | NP_620124    | Q8IX11 | MIRO2_HUMAN | rial intermembrane (Potenti    | 1  | AGTCCTTTGCA/   | 0.632 |
| + | 6  | 1507    | n_p.N40S ZNF263                                | NM_005741    | NP_005732    | O14978 | ZN263_HUMAN | 2H2-type 1.                    | 4  | ACTCAAACCTAAT  | 0.478 |
| - | 13 | 4513    | G1322E GRIN2A_u                                | NM_001134407 | NP_001127879 | Q12879 | NMDE1_HUMAN | lasmic (Potential).            | 45 | AATTTCCCTCCA/  | 0.527 |
| + | 11 | 1514    |                                                | NM_017888    | NP_060358    | Q6NUN0 | ACSM5_HUMAN |                                | 2  | iGGACCAGGCTC   | 0.483 |
| + | 15 | 1913    | p.D405N SLC5A1                                 | NM_052944    | NP_443176    | Q8WWX8 | SC5AB_HUMAN | lasmic (Potential).            | 2  | GTCACGACCCC/   | 0.577 |
| + | 1  | 114_115 | B3_uc010cja.1_R                                | NM_006086    | NP_006077    | Q13509 | TBB3_HUMAN  |                                | 3  | AGATCGGGGCC/   | 0.347 |
| + | 32 | 7129    |                                                | NM_016239    | NP_057323    | Q9UKN7 | MYO15_HUMAN | Tail.                          | 9  | CGGCTGGACCG    | 0.602 |
| - | 5  | 1584    |                                                | NM_001145045 | NP_001138517 | P0CG31 | Z286B_HUMAN | 2H2-type 8.                    | 0  | TTTTCCACATTC   | 0.388 |
| + | 1  | 285     | L3_uc002hit.2_5F                               | NM_017559    | NP_060029    | Q8TC99 | FNDC8_HUMAN | p.N68I(1)                      | 2  | CATCAACCTACT   | 0.284 |
| - | 3  | 336     | _16_uc002hkm.2_f                               | NM_004590    | NP_004581    | O15467 | CCL16_HUMAN |                                | 0  | ITGGGATCCTTG.  | 0.507 |
| - | 14 | 1865    | hrl.1_Missense_M                               | NM_000723    | NP_000714    | Q02641 | CACB1_HUMAN |                                | 2  | AGTAGCGGGCC    | 0.647 |
| - | 1  | 181     |                                                | NM_033062    | NP_149051    | Q9BYR5 | KRA42_HUMAN | C-C-[GRQVS]-[SPT]-[VS          | 0  | iGTCTGCAGCAG   | 0.677 |
| + | 4  | 479     | ocze.1_Missense_                               | NM_145041    | NP_659478    | Q96A25 | T106A_HUMAN |                                | 0  | GCATTCCTATGC   | 0.572 |
| + | 3  | 705     | i.1_3'UTR ARMC7                                | NM_024585    | NP_078861    | Q9H6L4 | ARMC7_HUMAN | ARM 2.                         | 1  | TCCAGAGCTG/    | 0.632 |
| + | 9  | 1427    | jth.2_Missense_M                               | NM_198955    | NP_945193    | Q3V5L5 | MGT5B_HUMAN | renal (Potential).             | 3  | iTGTTTCGTGAG   | 0.622 |
| + | 14 | 2094    |                                                | NM_005925    | NP_005916    | Q16820 | MEP1B_HUMAN | lasmic (Potential).            | 2  | AAATATCGTGAA/  | 0.408 |
| - | 21 | 3916    | i32_uc010xcr.1_Sf                              | NM_020964    | NP_066015    | Q9HCE0 | EPG5_HUMAN  |                                | 0  | iTTTGATACCTTCA | 0.433 |
| + | 7  | 1794    | p.E251K DCC_uc                                 | NM_005215    | NP_005206    | P43146 | DCC_HUMAN   | potential). Ig-like C2-type 4. | 17 | iTGGGTGAAATC   | 0.438 |
| - | 5  | 2855    | ik.1_Missense_Mu                               | NM_052947    | NP_443179    | Q86TB3 | ALPK2_HUMAN |                                | 14 | iCCGTCTTGC     | 0.428 |
| - | 11 | 1263    | p.V409M SEMA6E                                 | NM_032108    | NP_115484    | Q9H3T3 | SEM6B_HUMAN | ilar (Potential). Sema.        | 1  | .GGGCACCGCCT   | 0.652 |
| - | 8  | 892     |                                                | NM_032447    | NP_115823    | Q75N90 | FBN3_HUMAN  |                                | 11 | GGCCCGGTAGT    | 0.383 |
| - | 3  | 21008   |                                                | NM_024690    | NP_078966    | Q8WXI7 | MUC16_HUMAN | xtracellular (Potential).      | 57 | CAGAGGAAACA/   | 0.458 |
| - | 1  | 6323    |                                                | NM_024690    | NP_078966    | Q8WXI7 | MUC16_HUMAN | ch. Extracellular (Potential). | 57 | iTTGTGGAATCC/  | 0.488 |
| + | 10 | 2692    | p.S622F NWD1_uc002nev.3_Missense_Mutation_p.S5 | NM_001098819 | NP_001092289 | Q149M9 | NWD1_HUMAN  |                                | 7  | iGATTCCTGCC/   | 0.597 |
| - | 2  | 132     | 1_uc010xp.1_5'l                                | NM_031941    | NP_114147    | Q8N6Y0 | USBP1_HUMAN |                                | 1  | GGCCCGCGTGG    | 0.632 |
| - | 13 | 2081    | o.R249Q PDE4C_t                                | NM_001098819 | NP_001092289 | Q08493 | PDE4C_HUMAN |                                | 5  | iGGATTCGGTCG   | 0.378 |
| + | 19 | 2420    | dd.2_Missense_M                                | NM_173636    | NP_775907    | O43379 | WDR62_HUMAN |                                | 0  | iGCCACCCAGG    | 0.453 |
| - | 3  | 1425    |                                                | NM_003890    | NP_003881    | Q9Y6R7 | FCGBP_HUMAN | VWFD 1.                        | 9  | GGCGGGCAGA     | 0.677 |

rs147637076

rs138686141

|   |     |           |                   |              |              |        |             |                                |     |               |       |             |
|---|-----|-----------|-------------------|--------------|--------------|--------|-------------|--------------------------------|-----|---------------|-------|-------------|
| - | 5   | 506       | oo.2_Missense_N   | NM_004756    | NP_004747    | Q9Y6R0 | NUMBL_HUMAN | PID.                           | 5   | TCACGGACTTTT  | 0.652 |             |
| + | 1   | 550       | r54_uc002oox.1_!  | NM_004596    | NP_004587    | P09012 | SNRPA_HUMAN |                                | 4   | CCCGAGACCCG   | 0.498 |             |
| - | 4   | 855_856   | o.E160K PSG9_uc   | NM_002784    | NP_002775    | Q00887 | PSG9_HUMAN  | like C2-type 2.                | 2   | ATTCTCCCTGGG  | 0.51  |             |
| + | 2   | 654       | lyct.1_Missense_N | NM_014441    | NP_055256    | Q9Y336 | SIGL9_HUMAN | potential). lg-like C2-type 1. | 1   | CTCCTCGGTGTC  | 0.657 | rs141688796 |
| - | 3   | 1129      | _p.R240Q SIGLEC   | NM_053003    | NP_443729    | Q96PQ1 | SIG12_HUMAN | 1. Extracellular (Potential).  | 5   | TGAGTCGGACAC  | 0.602 |             |
| + | 3   | 1399      | tg.2_Missense_Mt  | NM_176811    | NP_789781    | Q86W28 | NALP8_HUMAN | NACHT.                         | 13  | ACTTTTCCAGAA  | 0.473 |             |
| - | 11  | 2299      | r113_uc010eyk.1_  | NM_001145168 | NP_001138640 | Q8IZF5 | GP113_HUMAN | cellular (Potential).          | 4   | GGGTTCTTCCG   | 0.627 |             |
| + | 7   | 1007      | _p.P253L SPTBN1   | NM_003128    | NP_003119    | Q01082 | SPTB2_HUMAN | 2. Actin-binding.              | 8   | GGACCCCGAAG   | 0.423 |             |
| + | 7   | 865       |                   | NM_031283    | NP_112573    | Q9HCS4 | TF7L1_HUMAN | Pro-rich.                      | 3   | TCCTCCCGGTG   | 0.612 |             |
| + | 11  | 1213      | se_Mutation_p.T1f | NM_001135021 | NP_001128493 | Q96FG2 | ELMD3_HUMAN | ELMO.                          | 2   | GCTGACCCGGCT  | 0.547 |             |
| + | 3   | 224       | 1A_uc002sqv.2_5!  | NM_017952    | NP_060422    | Q96EY7 | PTCD3_HUMAN |                                | 1   | CATTAGGGATTG  | 0.284 |             |
| - | 2   | 151       | _p.R11Q ST6GAL:   | NM_001142351 | NP_001135823 | Q96JF0 | SIAT2_HUMAN | lasmic (Potential).            | 11  | GCATTCGTTGT   | 0.507 |             |
| - | 4   | 371       | h.1_Missense_Mul  | NM_000576    | NP_000567    | P01584 | IL1B_HUMAN  |                                | 4   | TGAAGGAAAG    | 0.532 |             |
| - | 4   | 527       | se_Mutation_p.P5f | NM_013450    | NP_038478    | Q9UIF8 | BAZ2B_HUMAN |                                | 4   | AAACGGTTGAT   | 0.433 |             |
| + | 27  | 5425      | p.T1712I SCN2A_   | NM_001040142 | NP_001035232 | Q99250 | SCN2A_HUMAN | IV.                            | 8   | TACAACCTCTGC  | 0.458 |             |
| - | 225 | 45318     | _uc010zfi.1_Misse | NM_133378    | NP_596869    | Q8WZ42 | TITIN_HUMAN |                                | 153 | AATTTCCCCAC   | 0.473 |             |
| - | 75  | 19126     | uc010zfi.1_Intro  | NM_133378    | NP_596869    | Q8WZ42 | TITIN_HUMAN |                                | 153 | TGATTCGCATC   | 0.408 | rs72648969  |
| - | 2   | 1412      |                   | NM_004657    | NP_004648    | O95810 | SDPR_HUMAN  |                                | 2   | CCCTGGAGGTC   | 0.577 |             |
| + | 20  | 2263_2264 | _p.R277K AOX1_L   | NM_001159    | NP_001150    | Q06278 | ADO_HUMAN   |                                | 6   | AGAAAGGAAACT  | 0.426 |             |
| + | 26  | 2973      | _p.E514K AOX1_u   | NM_001159    | NP_001150    | Q06278 | ADO_HUMAN   |                                | 6   | TACAAGGAAATC  | 0.368 |             |
| + | 11  | 2663      | 0fvx.2_Missense_  | NM_014640    | NP_055455    | Q14679 | TTL4_HUMAN  | TTL.                           | 3   | TTGACCTGCGG   | 0.488 |             |
| - | 8   | 2241      | nj.2_Missense_Mu  | NM_020341    | NP_065074    | Q9P286 | PAK7_HUMAN  | rotein kinase.                 | 23  | CCCTGTGAATCA  | 0.443 |             |
| - | 2   | 776       | xcb.1_Missense_N  | NM_178468    | NP_848563    | Q9BQN1 | FA83C_HUMAN |                                | 2   | GAGGTCCATCT   | 0.647 |             |
| - | 3   | 2822      | dk.2_intron CPNE  | NM_152838    | NP_690051    | Q9NTZ6 | RBM12_HUMAN | RRM 3.                         | 3   | AAAGGGCATGT   | 0.353 |             |
| + | 11  | 1414      | Jggc.2_Missense_  | NM_015568    | NP_056383    | Q96T49 | PP16B_HUMAN |                                | 3   | CTACTCTCCGAA  | 0.567 |             |
| - | 5   | 521       | C3_uc002xph.1_In  | NM_080614    | NP_542181    | Q8IUB2 | WFDC3_HUMAN | WAP 3.                         | 0   | TATGCCCTGGC   | 0.547 |             |
| + | 6   | 2719      | 'Flank GHRLOS_u   | NM_014760    | NP_055575    | Q93075 | TATD2_HUMAN |                                | 2   | CCTCCCTCGCC/  | 0.622 |             |
| + | 6   | 2721      | 5'Flank GHRLOS_   | NM_014760    | NP_055575    | Q93075 | TATD2_HUMAN |                                | 2   | TCCCTCGCCAG/  | 0.617 | rs150215933 |
| + | 3   | 300       | _p.S95N MOBP_uc   | NM_182935    | NP_891980    | Q13875 | MOBP_HUMAN  |                                | 2   | AACAGCCGCC    | 0.667 |             |
| - | 11  | 1701      |                   | NM_003500    | NP_003491    | Q99424 | ACOX2_HUMAN |                                | 0   | CTTACCTTACTC  | 0.597 | rs145582569 |
| - | 6   | 1088      | oy.2_Missense_Ml  | NM_001015887 | NP_001015887 | Q5DX21 | IGS11_HUMAN | lasmic (Potential).            | 0   | CATTAGGAATTT  | 0.323 |             |
| - | 9   | 1787      | ojg.1_Missense_M  | NM_153002    | NP_694547    | Q8NFN8 | GP156_HUMAN | lasmic (Potential).            | 2   | TGTAAGGGCTA/  | 0.602 |             |
| - | 16  | 4783      | xd.2_Missense_Ml  | NM_199420    | NP_955452    | O75417 | DPOLQ_HUMAN |                                | 11  | ATCATTGGAAC/  | 0.333 |             |
| - | 9   | 1581      | wp.1_Missense_N   | NM_024727    | NP_079003    | Q6UY01 | LR31_HUMAN  |                                | 3   | TCTAAACCATT   | 0.448 |             |
| - | 3   | 10637     | h.1_5'Flank MUC4  | NM_018406    | NP_060876    | Q99102 | MUC4_HUMAN  |                                | 0   | AGGAAGAGGGG   | 0.597 |             |
| - | 5   | 820       | zh.1_Missense_Mi  | NM_006587    | NP_006578    | Q9Y5Q5 | CORIN_HUMAN | ular (Potential). FZ 1.        | 2   | TCTAAACTGGG/  | 0.468 |             |
| + | 32  | 5717      | p.S1727F PTPN1f   | NM_080683    | NP_542414    | Q12923 | PTN13_HUMAN | Poly-Ser.                      | 6   | TGCTTCTCTAC   | 0.393 |             |
| + | 3   | 378       | ise_Mutation_p.P5 | NM_001033047 | NP_001028219 | Q6UXI9 | NPNT_HUMAN  | EGF-like 1.                    | 1   | CACAGCTGTGT   | 0.388 |             |
| - | 7   | 866       | e.1_Missense_Mul  | NM_176824    | NP_789794    | Q8IWZ6 | BBS7_HUMAN  |                                | 1   | GAATTTCCCACT  | 0.338 |             |
| - | 17  | 1850      | hn.1_Missense_Mi  | NM_003866    | NP_003857    | O15327 | INP4B_HUMAN |                                | 2   | TAGTTGATTGAT  | 0.383 |             |
| - | 14  | 2299      | o.R609W LRBA_uc   | NM_006726    | NP_006717    | P50851 | LRBA_HUMAN  |                                | 7   | TCTCCGAATGG   | 0.418 |             |
| - | 6   | 1580      | _p.M230I LRP2BP   | NM_018409    | NP_060879    | Q9P2M1 | LR2BP_HUMAN | Sel1-like 5.                   | 0   | AAATTTTCATCTA | 0.308 |             |
| - | 2   | 1212      | o.1_Missense_Mut  | NM_005245    | NP_005236    | Q14517 | FAT1_HUMAN  | cellular (Potential).          | 12  | GAGTTCCTTTAT  | 0.458 |             |
| - | 12  | 2291      | w.1_Missense_Mu   | NM_016279    | NP_057363    | Q9ULB4 | CADH9_HUMAN | lasmic (Potential).            | 9   | ATTTTCCACAG   | 0.418 |             |
| + | 2   | 465       | 'ELD2_uc003jwr.1  | NM_001038603 | NP_001033692 | Q8N4S9 | MALD2_HUMAN | lasmic (Potential).            | 0   | AAAGATCCCTACC | 0.542 |             |
| - | 2   | 287       | rRAP3_uc003llo.1  | NM_022481    | NP_071926    | Q8WWW8 | ARAP3_HUMAN |                                | 7   | CCAGGGAGCCC   | 0.642 |             |
| - | 1   | 313       |                   | NM_001080516 | NP_001073985 | A6NFK2 | GRCR2_HUMAN |                                | 0   | GTAAATCGTTGA/ | 0.498 |             |

|   |    |      |                   |              |              |        |             |                                |       |                |       |             |
|---|----|------|-------------------|--------------|--------------|--------|-------------|--------------------------------|-------|----------------|-------|-------------|
| + | 16 | 3055 | se_Mutation_p.S8' | NM_001114183 | NP_001107655 | P42261 | GRIA1_HUMAN | lasmic (Potential).            | 6     | 'CAGTTCAGGGA'  | 0.622 | rs144882662 |
| + | 49 | 5154 | e_Mutation_p.E11i | NM_004946    | NP_004937    | Q92608 | DOCK2_HUMAN |                                | 7     | 'TGCCTGAGGTC   | 0.587 |             |
| - | 4  | 1055 | 2A23_uc003mvp.1   | NM_015482    | NP_056297    | A1A5C7 | S22AN_HUMAN | ical; (Potential).             | 1     | 'GGAAGGGGCAC   | 0.662 |             |
| - | 3  | 537  | _A-DRB5_uc003ot   | NM_002125    | NP_002116    | Q30154 | DRB5_HUMAN  | eta-2. Extracellular (Potenti  | 0     | 'ATTCTGAATCAC  | 0.552 |             |
| + | 8  | 884  | plice_Site GLP1R_ | NM_002062    | NP_002053    | P43220 | GLP1R_HUMAN |                                | 5     | 'TCTTAGGTGTT'  | 0.617 |             |
| + | 6  | 1041 | _p.E238K MDFI_u   | NM_005586    | NP_005577    | Q99750 | MDFI_HUMAN  | Cys-rich.                      | 0     | 'GCATGGAGTGC'  | 0.672 |             |
| - | 4  | 502  | pai.2_Missense_M  | NM_138694    | NP_619639    | P08F94 | PKHD1_HUMAN | potential). IPT/TIG 1; atypica | 44    | 'ACAGGGAACAC'  | 0.507 |             |
| + | 5  | 1539 |                   | NM_001010872 | NP_001010872 | Q5T0W9 | FA83B_HUMAN |                                | 6     | 'ATATCCGCTTTT  | 0.408 |             |
| - | 3  | 677  | se_Mutation_p.D1  | NM_030820    | NP_110447    | Q96P44 | COLA1_HUMAN | VWFA.                          | 2     | 'GTCATCTTGGG   | 0.443 |             |
| - | 5  | 965  | VL4_uc011dyt.1_li | NM_022726    | NP_073563    | Q9GZR5 | ELOV4_HUMAN |                                | 2     | 'GTATCGTTTCC'  | 0.343 |             |
| + | 17 | 2230 |                   | NM_173560    | NP_775831    | Q8HWS3 | RFX6_HUMAN  |                                | 3     | 'ACACCGAGCAT'  | 0.527 |             |
| - | 10 | 1976 |                   | NM_153235    | NP_694967    | Q8N3L3 | TXLNB_HUMAN |                                | 2     | 'GCTCCAGGAC'   | 0.622 |             |
| + | 12 | 1641 | se_Mutation_p.G   | NM_015440    | NP_056255    | Q6UB35 | C1TM_HUMAN  | hydrofolate synthetase.        | 4     | 'CCAAGGACCGA   | 0.488 |             |
| - | 3  | 625  | IAD1L1_uc010ksj.: | NM_013393    | NP_037525    | Q9UI43 | RRMJ2_HUMAN |                                | 1     | 'TTTGACTTCCAC  | 0.512 |             |
| - | 5  | 1154 | p.K373T ACTB_uc   | NM_001101    | NP_001092    | P60709 | ACTB_HUMAN  |                                | 0     | 'AGCATTTCGCG'  | 0.512 |             |
| + | 9  | 1187 | _p.R210C OGDH_    | NM_002541    | NP_002532    | Q02218 | ODO1_HUMAN  |                                | 2     | 'ATCAATCGTGTC' | 0.557 |             |
| - | 9  | 1391 | _p.S305F CYP51A   | NM_000786    | NP_000777    | Q16850 | CP51A_HUMAN |                                | 0     | 'TGGGAGAAACA   | 0.413 |             |
| - | 7  | 627  | n_p.V134I CYP3A   | NM_017460    | NP_059488    | P08684 | CP3A4_HUMAN |                                | 4     | 'AAAGACGCTGA   | 0.448 |             |
| - | 15 | 1860 |                   | NM_004333    | NP_004324    | P15056 | BRAF_HUMAN  | rotein kinase_R603>1(2) p.T    | 18290 | 'ATTTCACTGTAC  | 0.368 |             |
| + | 1  | 662  | uc003wda.2_Intror | NM_177437    | NP_803186    | P59551 | T2R60_HUMAN | lasmic (Potential).            | 6     | 'TCTGGGAAGAC'  | 0.458 |             |
| + | 1  | 829  | 61_uc003wgx.2_I   | NM_138434    | NP_612443    | Q96FA7 | CG029_HUMAN |                                | 1     | 'CCATGGGGGCC'  | 0.542 |             |
| - | 45 | 7153 | _p.Q1647* CSMD1   | NM_033225    | NP_150094    | Q96PZ7 | CSMD1_HUMAN | ar (Potential). CUB 13.        | 25    | 'GAGCTGAAATG'  | 0.338 |             |
| - | 2  | 91   |                   | NM_001033018 | NP_001028190 | Q30KP8 | DB136_HUMAN |                                | 0     | 'AGGTGCGAACTT  | 0.458 |             |
| + | 2  | 522  | r.1_Missense_Mut  | NM_006269    | NP_006260    | P56715 | RP1_HUMAN   |                                | 12    | 'CCC CGGCCCT   | 0.706 |             |
| - | 2  | 477  | _p.S146T JPH1_uc  | NM_020647    | NP_065698    | Q9HDC5 | JPH1_HUMAN  | ic (Potential). MORN 5.        | 1     | 'GCACGCTCTGG   | 0.687 |             |
| - | 1  | 673  | yr.1_Missense_M   | NM_138817    | NP_620172    | Q8TCU3 | S7A13_HUMAN | ellular (Potential).           | 1     | 'TAAATCGTTCT'  | 0.413 |             |
| - | 10 | 940  | p.R285K ENPP2_u   | NM_001040092 | NP_001035181 | Q13822 | ENPP2_HUMAN |                                | 7     | 'ATATTCTCCGCT  | 0.428 |             |
| - | 25 | 3413 | 0_splice KIAA019  | NM_014846    | NP_055661    | Q12768 | STRUM_HUMAN |                                | 2     | 'TACTCACCTTAT  | 0.443 |             |
| - | 6  | 846  | RC6_uc003ytl.2_R  | NM_012472    | NP_036604    | Q86X45 | LRRC6_HUMAN |                                | 2     | 'TTCAGGAGTAA'  | 0.403 |             |
| - | 3  | 981  | RPIN_uc003zbb.2_  | NM_030974    | NP_112236    | Q9H0F6 | SHRPN_HUMAN | iation (By similarity).        | 1     | 'TCCAGGGGCTC'  | 0.627 |             |
| + | 4  | 334  | i.2_RNA ADCK5_L   | NM_174922    | NP_777582    | Q3MIX3 | ADCK5_HUMAN |                                | 1     | 'AGGTGCGCCTG   | 0.637 |             |
| - | 23 | 2707 | 3zkl.2_Missense_M | NM_002839    | NP_002830    | P23468 | PTPRD_HUMAN | III 4. Extracellular (Potentia | 22    | 'CGAAGGAATTC'  | 0.478 |             |
| - | 1  | 436  |                   | NM_002175    | NP_002166    | P01568 | IFN21_HUMAN |                                | 2     | 'CTCTTCCACCC'  | 0.468 |             |
| - | 1  | 490  | .1_5'UTR PAX5_u   | NM_016734    | NP_057953    | Q02548 | PAX5_HUMAN  | p.?(9)                         | 147   | 'CCTGTCTCTGCT  | 0.547 |             |
| - | 4  | 434  |                   | NM_000035    | NP_000026    | P05062 | ALDOB_HUMAN |                                | 1     | 'TGTTCTGCAAC   | 0.408 |             |
| - | 10 | 876  | P3N3_uc010mtu.2_  | NM_002829    | NP_002820    | P26045 | PTN3_HUMAN  | FERM.                          | 3     | 'ACTTACCAAGGA' | 0.343 |             |
| - | 2  | 422  | _p.L57F PHF19_u   | NM_015651    | NP_056466    | Q5T6S3 | PHF19_HUMAN |                                | 2     | 'CCCGAGGTAGT'  | 0.562 |             |
| - | 4  | 532  | L_uc004bna.2_3'l  | NM_005388    | NP_005379    | Q13371 | PHLP_HUMAN  |                                | 0     | 'CTCTTCCATTCC  | 0.478 |             |
| - | 9  | 1270 | b.2_Missense_Mu   | NM_021804    | NP_068576    | Q9BYF1 | ACE2_HUMAN  | ellular (Potential).           | 3     | 'GAGAGTCGTCCA  | 0.408 |             |
| - | 6  | 1131 | ID2_uc010nfb.2_lr | NM_153346    | NP_699177    | Q8NDZ0 | BEND2_HUMAN |                                | 5     | 'TAATTTCCCATTA | 0.294 |             |
| + | 13 | 1511 |                   | NM_001654    | NP_001645    | P10398 | ARAF_HUMAN  | rotein kinase.                 | 7     | 'GCGGGGCCCAG   | 0.627 |             |
| - | 5  | 1372 | w.2_Missense_Mu   | NM_183353    | NP_899196    | Q9NVW2 | RNF12_HUMAN |                                | 2     | 'AACCTCCTCGT'  | 0.458 |             |
| - | 3  | 942  | hpd.2_Missense_   | NM_000354    | NP_000345    | P05543 | THBG_HUMAN  |                                | 0     | 'AAATGAAAAAC   | 0.428 |             |
| + | 16 | 2728 | C4_uc004emp.3_I   | NM_017752    | NP_060222    | Q0IIM8 | TBC8B_HUMAN |                                | 4     | 'GGGCTCATTCT'  | 0.408 |             |
| - | 1  | 901  |                   | NM_005634    | NP_005625    | P41225 | SOX3_HUMAN  |                                | 1     | 'GTAGCGGTGCA'  | 0.448 |             |
| + | 4  | 416  | EC1_uc010nsl.1_   | NM_005462    | NP_005453    | O60732 | MAGC1_HUMAN |                                | 4     | 'CTGAGAGCGAC'  | 0.587 | rs147626195 |
| + | 3  | 958  | r.2_Nonsense_Mul  | NM_002025    | NP_002016    | P51816 | AFF2_HUMAN  |                                | 5     | 'GTGGTCACGTG   | 0.468 |             |

|   |    |           |                    |              |              |        |             |                              |    |               |       |             |
|---|----|-----------|--------------------|--------------|--------------|--------|-------------|------------------------------|----|---------------|-------|-------------|
| + | 5  | 506       | mutation_p.N99S[S  | NM_001363    | NP_001354    | O60832 | DKC1_HUMAN  |                              | 0  | CTCTAACCCTC   | 0.453 |             |
| + | 6  | 2110      |                    | NM_152228    | NP_689414    | Q7RTX0 | TS1R3_HUMAN | cellular (Potential).        | 0  | CCCTCCCGCCG   | 0.706 | rs142424158 |
| + | 16 | 2279      | ni.2_Missense_Mu   | NM_014874    | NP_055689    | O95140 | MFN2_HUMAN  | Name=1; (Potential).         | 1  | FGGCTCCTTGA   | 0.642 |             |
| - | 3  | 530       |                    | NM_001146344 | NP_001139816 | O60813 | PRA11_HUMAN |                              | 0  | AAAGTTCTACAA  | 0.498 |             |
| + | 1  | 112       | na.2_intron CD52_  | NM_001803    | NP_001794    | P31358 | CD52_HUMAN  |                              | 0  | CTCTCCTTCC    | 0.522 |             |
| + | 5  | 1036      |                    | NM_031459    | NP_113647    | P58004 | SESN2_HUMAN |                              | 7  | TGCCCCCAAGG   | 0.622 |             |
| - | 4  | 1204      | sd.2_Missense_Mu   | NM_014654    | NP_055469    | O75056 | SDC3_HUMAN  | cellular (Potential).        | 2  | CTACGAGCACC   | 0.637 |             |
| + | 6  | 977       | sense_Mutation_p   | NM_018056    | NP_060526    | Q9GZU3 | TM39B_HUMAN |                              | 0  | GAGTTCCTCAA   | 0.587 |             |
| - | 52 | 7819      | tm.1_Missense_Mu   | NM_052896    | NP_443128    | Q7Z408 | CSMD2_HUMAN | extracellular (Potential).   | 12 | ATGCTACTGACA  | 0.473 |             |
| - | 45 | 6887      | p.F2284L CSMD2_    | NM_052896    | NP_443128    | Q7Z408 | CSMD2_HUMAN | ar (Potential). CUB 13.      | 12 | CCGGAGAAAGC   | 0.313 |             |
| - | 25 | 3961      | p.G1351E CSMD2     | NM_052896    | NP_443128    | Q7Z408 | CSMD2_HUMAN | tracellular (Potential).     | 12 | CTTACCCAATGC  | 0.577 |             |
| - | 13 | 2155      | sa.1_Missense_Mu   | NM_000831    | NP_000822    | Q13003 | GRIK3_HUMAN | cellular (Potential).        | 7  | GTCATCAGCAG   | 0.547 |             |
| - | 8  | 1265      | sa.1_Missense_Mu   | NM_000831    | NP_000822    | Q13003 | GRIK3_HUMAN | cellular (Potential).        | 7  | ACAATTCGTCCA  | 0.498 |             |
| + | 3  | 1362      | orf175_uc010oof.1  | NM_001039464 | NP_001034553 | Q68CQ1 | HEAT8_HUMAN | Ser-rich.                    | 0  | TTCAGCGACAC   | 0.562 |             |
| - | 12 | 2458      | DC1_uc001dek.3_    | NM_001114120 | NP_001107592 | Q5TB30 | DEP1A_HUMAN |                              | 0  | CGTGGTTGGAA   | 0.353 |             |
| - | 2  | 426       | P2_uc001dmy.1_F    | NM_004120    | NP_004111    | P32456 | GBP2_HUMAN  | (By similarity).             | 1  | GGTAGGATTTG   | 0.542 |             |
| - | 44 | 6129      | qi.1_Missense_Mu   | NM_000350    | NP_000341    | P78363 | ABCA4_HUMAN | porter 2. Cytoplasmic.       | 12 | GACTTCAGAAA   | 0.438 |             |
| + | 4  | 950       |                    | NM_001010898 | NP_001010898 | Q9H1V8 | S6A17_HUMAN | Name=3; (Potential).         | 2  | GGGTGAGCAT    | 0.577 |             |
| + | 5  | 531       | wge.1_Missense_I   | NM_181643    | NP_857594    | Q8TCI5 | CA088_HUMAN |                              | 2  | AATTTGGATCTC  | 0.418 |             |
| - | 7  | 1579      |                    | NM_001047980 | NP_001041445 | P0C2Y1 | NBPF7_HUMAN | NBPF 2.                      | 2  | CTCCGGGGAGT   | 0.483 |             |
| - | 2  | 297       | IUDT17_uc001eof.   | NM_001012758 | NP_001012776 | P0C025 | NUD17_HUMAN | idix hydrolase.              | 0  | AATGACGGCCA   | 0.647 |             |
| + | 2  | 232       | HD1L_uc009wjh.2_   | NM_004284    | NP_004275    | Q86WJ1 | CHD1L_HUMAN |                              | 6  | ACTGGCTCGCC   | 0.507 |             |
| + | 12 | 1487      | vkt.1_Missense_M   | NM_001102663 | NP_001096133 |        |             |                              | 0  | AAAGAGCCTGA   | 0.473 |             |
| - | 3  | 2464      | uc001ezv.2_5'Flanl | NM_002016    | NP_002007    | P20930 | FILA_HUMAN  | Ser-rich.                    | 16 | CCCTGTCCATC   | 0.567 |             |
| - | 24 | 3138      | p.D116Y ARHGEL     | NM_014784    | NP_055599    | O15085 | ARHGB_HUMAN |                              | 9  | CAGATCATCCT   | 0.572 |             |
| + | 10 | 2380      |                    | NM_022093    | NP_071376    | Q9UQP3 | TENN_HUMAN  | nectin type-III 6.           | 9  | GGTGGGGAAGG   | 0.647 |             |
| - | 2  | 838       | p.E253K TNR_ucf    | NM_003285    | NP_003276    | Q92752 | TENR_HUMAN  | -like 3. Cys-rich.           | 11 | CTCTTCACAGA   | 0.622 |             |
| + | 14 | 2405      |                    | NM_000186    | NP_000177    | P08603 | CFAH_HUMAN  | Sushi 12.                    | 6  | CAGAAATTTTAC  | 0.418 |             |
| + | 3  | 907       | 1_uc010ppa.1_RN    | NM_201253    | NP_957705    | P82279 | CRUM1_HUMAN | g (Potential). Extracellular | 9  | GGGATCACTGT   | 0.512 |             |
| + | 4  | 419       | 1_intron PTPRC_u   | NM_002838    | NP_002829    | P08575 | PTPRC_HUMAN | cellular (Potential).        | 12 | ATACTTCCACCC  | 0.423 |             |
| - | 3  | 464       | hat.1_Missense_M   | NM_198447    | NP_940849    | Q6ZVE7 | GOT1A_HUMAN | renal (Potential).           | 0  | AGAATCCGTAG   | 0.552 |             |
| + | 9  | 1208      | p.Q316Q CTSE_u     | NM_001910    | NP_001901    | P14091 | CATE_HUMAN  |                              | 1  | CTCCAGCTGGG   | 0.542 |             |
| + | 4  | 856       | p.E267K RASSF1     | NM_182663    | NP_872604    | Q8WWW0 | RASF5_HUMAN |                              | 1  | TCAAGGAGGTG   | 0.592 |             |
| - | 2  | 502       |                    | NM_152485    | NP_689698    | Q96LT6 | CA074_HUMAN |                              | 1  | AATCTCAAGGAT  | 0.507 |             |
| + | 13 | 4051      | A3_uc001hnm.2_M    | NM_198551    | NP_940953    | Q5JRA6 | MIA3_HUMAN  | Cytoplasmic (Potential).     | 5  | GCCATCGGGTT   | 0.383 |             |
| + | 9  | 1388      | uo.3_Missense_Mu   | NM_152609    | NP_689822    | Q6PJW8 | CNST_HUMAN  |                              | 0  | CAGTCCCTGCT   | 0.488 |             |
| + | 6  | 1162      | W3_uc001idp.1_Ir   | NM_015431    | NP_056246    | Q8NG06 | TRI58_HUMAN | B30.2/SPRY p.E372K(1)        | 7  | AGGGGGAAACC   | 0.562 | rs143805378 |
| + | 1  | 698_699   |                    | NM_001005471 | NP_001005471 | Q8NH8  | OR2T6_HUMAN | lasmic (Potential).          | 3  | GAGGGGAGGA    | 0.51  |             |
| - | 1  | 577       |                    | NM_001001964 | NP_001001964 | Q8NH01 | O2T11_HUMAN | Name=5; (Potential).         | 1  | AGTTTCATACAA  | 0.483 |             |
| - | 12 | 1700_1701 | F692_uc001ifd.1_I  | NM_017865    | NP_060335    | Q9BU19 | ZN692_HUMAN |                              | 0  | TGGACCTGAGC   | 0.604 |             |
| + | 10 | 1740      | dig.2_Missense_M   | NM_178150    | NP_835363    | Q8NFZ0 | FBX18_HUMAN |                              | 3  | AGGGTGGATTC   | 0.453 |             |
| - | 10 | 1117      | p.S306F FRMPD:     | NM_001018071 | NP_001018081 | Q68DX3 | FRPD2_HUMAN |                              | 1  | AAATAGGATTTCC | 0.323 |             |
| - | 2  | 372       | rf.3_Missense_Mu   | NM_001083116 | NP_001076585 | P14222 | PERF_HUMAN  | MACPF.                       | 3  | GGTCCGTCCGG   | 0.697 | rs142059134 |
| + | 6  | 503       | e_Mutation_p.G16f  | NM_033100    | NP_149091    | Q96JP9 | CDHR1_HUMAN | Extracellular (Potential).   | 1  | TGGAGGGAGTG   | 0.612 |             |
| - | 7  | 1385      | 01kgl.2_Missense_  | NM_213606    | NP_998771    | Q6ZSM3 | MOT12_HUMAN | ical; (Potential).           | 1  | GCAGAGCCCAT   | 0.463 |             |
| - | 3  | 459       | ense_Mutation_p.f  | NM_000770    | NP_000761    | P10632 | CP2C8_HUMAN |                              | 0  | GATCTCCTTCC   | 0.488 |             |
| + | 6  | 3472      | lklq.2_Missense_L  | NM_014803    | NP_055618    | Q6AHZ1 | Z518A_HUMAN |                              | 1  | AGATGTGAGAG   | 0.373 |             |



|   |    |           |                    |              |              |        |              |                               |     |                 |       |             |
|---|----|-----------|--------------------|--------------|--------------|--------|--------------|-------------------------------|-----|-----------------|-------|-------------|
| - | 7  | 1170      |                    | NM_032211    | NP_115587    | Q96JB6 | LOXL4_HUMAN  | SRCR 3.                       | 5   | 'GGTTCACCTG'    | 0.682 |             |
| + | 20 | 2992      | CS3_uc010qqz.1_    | NM_014978    | NP_055793    | Q9UPU3 | SORC3_HUMAN  | lenal (Potential).            | 10  | 'AGTTCATTTG'    | 0.448 |             |
| + | 8  | 842       |                    | NM_000936    | NP_000927    | P16233 | LIPP_HUMAN   |                               | 3   | 'ATAGACGGAATC'  | 0.398 | rs62623373  |
| + | 8  | 807       | e_Mutation_p.G26   | NM_006541    | NP_006532    | O76003 | GLRX3_HUMAN  | lutaredoxin 2.                | 0   | 'ATGTGGATTCA'   | 0.299 |             |
| - | 5  | 521       | llu.2_Missense_M   | NM_173572    | NP_775843    | Q5SR76 | CJ093_HUMAN  |                               | 1   | 'GTGACGATATCC'  | 0.527 |             |
| + | 1  | 835       |                    | NM_001127389 | NP_001120861 | F5GZ66 | F5GZ66_HUMAN |                               | 0   | 'CCTTCGCCAC'    | 0.776 | rs150899513 |
| - | 12 | 2132      | lissense_Mutation  | NM_145886    | NP_665893    | Q9HB75 | PIDD_HUMAN   |                               | 0   | 'GCCCTCGAACA'   | 0.677 |             |
| + | 5  | 532       |                    | NM_206893    | NP_996776    | Q96PG2 | M4A10_HUMAN  | ellular (Potential).          | 2   | 'AGGATCTCTTTC'  | 0.512 |             |
| - | 8  | 1303      | rp.2_Missense_Mi   | NM_001136040 | NP_001129512 | Q8N684 | CPSF7_HUMAN  |                               | 1   | 'GGACACGGCAA'   | 0.517 |             |
| - | 2  | 1247      | l_5'Flank BRMS1_   | NM_006876    | NP_006867    | O43505 | B3GN1_HUMAN  | lenal (Potential).            | 0   | 'ACCTTCGTTCA'   | 0.473 |             |
| + | 2  | 517       | ense_Mutation_p.F  | NM_002896    | NP_002887    | Q9BWF3 | RBM4_HUMAN   | RRM 1.                        | 1   | 'CCTGCCCCGGG'   | 0.493 |             |
| - | 11 | 1274      |                    | NM_006946    | NP_008877    | O15020 | SPTN2_HUMAN  | Spectrin 1.                   | 4   | 'CCAGCCGCTCC'   | 0.672 |             |
| - | 21 | 2765      | l1opz.2_Missense_  | NM_012309    | NP_036441    | Q9UPX8 | SHAN2_HUMAN  | Pro-rich.                     | 5   | 'GGGACGGGGGC'   | 0.587 |             |
| + | 17 | 5357      |                    | NM_014786    | NP_055601    | Q96PE2 | ARHG_HUMAN   |                               | 0   | 'CAGGTATCTGA'   | 0.473 |             |
| + | 27 | 3762      | e_Mutation_p.R11   | NM_000260    | NP_000251    | Q13402 | MYO7A_HUMAN  | MyTH4 1.                      | 4   | 'TCCTGCGGCCA'   | 0.577 |             |
| + | 10 | 1970      | uc001pen.1_Intror  | NM_001098672 | NP_001092142 | Q6MZM0 | HPHL1_HUMAN  | e 4. Extracellular (Potential | 3   | 'GGCATCCCTTC'   | 0.383 |             |
| + | 29 | 4622      | lpke.1_Splice_Site | NM_000051    | NP_000042    | Q13315 | ATM_HUMAN    |                               | 240 | 'TTTCTAGGATTCC' | 0.274 |             |
| + | 8  | 879       | g.2_Missense_Mt    | NM_001040455 | NP_001035545 | Q8NBJ9 | SIDT2_HUMAN  | ellular (Potential).          | 0   | 'AAACCTGTCA'    | 0.532 |             |
| + | 2  | 354       | 4_uc010sca.1_5'F   | NM_021978    | NP_068813    | Q9Y5Y6 | ST14_HUMAN   | lasmic (Pote p.R54C(1)        | 5   | 'GGGGCGCTGGC'   | 0.607 |             |
| - | 25 | 2774      |                    | NM_020373    | NP_065106    | Q9NQ90 | ANO2_HUMAN   | ellular (Pote p.R902H(1)      | 7   | 'CCAGACGGGCG'   | 0.507 |             |
| - | 10 | 2304      | p.G726S CD163_t    | NM_004244    | NP_004235    | Q86VB7 | C163A_HUMAN  | extracellular (Potential).    | 8   | 'ACGACCTCCTC'   | 0.458 |             |
| - | 3  | 305       | zt.2_Missense_Mu   | NM_002723    | NP_002714    | P10163 | PRB4_HUMAN   | 'R]-[PR]-P-Q-G-G-N-Q-[PS      | 1   | 'GGGACCTGGGG'   | 0.602 | rs1063751   |
| - | 3  | 1091      | ju.1_Missense_Mt   | NM_198992    | NP_945343    | Q6XYQ8 | SYT10_HUMAN  | mic (Potential). C2 1.        | 2   | 'AAGTTCCTGTG'   | 0.358 |             |
| - | 8  | 2299      |                    | NM_005164    | NP_005155    | Q9UBJ2 | ABCD2_HUMAN  | 3C transporter.               | 6   | 'ACTTATGATAAAA' | 0.368 |             |
| + | 4  | 324       | nn.1_Missense_M    | NM_001843    | NP_001834    | Q12860 | CNTN1_HUMAN  | like C2-type 1.               | 9   | 'CCAGCCCTTTC'   | 0.428 |             |
| - | 1  | 82        |                    | NM_025003    | NP_079279    | P59510 | ATS20_HUMAN  |                               | 19  | 'CCTGGGGTGGA'   | 0.652 |             |
| + | 1  | 82        | utation_p.H28Y L   | NM_152641    | NP_689854    | Q68CP9 | ARID2_HUMAN  | ARID.                         | 10  | 'TCCACCACAGC'   | 0.677 |             |
| + | 4  | 1242      | p.E51K FAM113B     | NM_138371    | NP_612380    | Q96HM7 | F113B_HUMAN  |                               | 5   | 'GCGAGGAAGTC'   | 0.617 |             |
| + | 26 | 2868_2869 | p.S472F NCKAP1     | NM_005337    | NP_005328    | P55160 | NCKPL_HUMAN  |                               | 4   | 'TTTCTCCTCCCA'  | 0.416 |             |
| + | 1  | 226       |                    | NM_002469    | NP_002460    | P23409 | MYF6_HUMAN   |                               | 1   | 'CAGCGGAGAGG'   | 0.622 |             |
| + | 13 | 3257      | ab.1_Missense_Mi   | NM_001079910 | NP_001073379 | Q96JM4 | LRIQ1_HUMAN  | LRR 8.                        | 6   | 'TTCAACTGTGG'   | 0.308 |             |
| + | 3  | 369       | Site C12orf23_uc0  | NM_152261    | NP_689474    | Q8WUH6 | CL023_HUMAN  |                               | 0   | 'TTTTTAGGAGATC' | 0.323 |             |
| - | 8  | 1363      | q.2_Nonsense_Mu    | NM_181486    | NP_852259    | Q99593 | TBX5_HUMAN   |                               | 8   | 'GTATTGGGACC'   | 0.577 |             |
| - | 51 | 6918      |                    | NM_006836    | NP_006827    | Q92616 | GCN1L_HUMAN  |                               | 4   | 'CCACGGAGGGC'   | 0.622 |             |
| - | 12 | 1570      | 33A_uc001ucc.2_    | NM_022916    | NP_075067    | Q96AX1 | VP33A_HUMAN  |                               | 1   | 'ACATACGATATGT' | 0.527 |             |
| - | 1  | 943       | 81_uc001ucw.1_l    | NM_006018    | NP_006009    | P49019 | HCAR3_HUMAN  | ellular (Potential).          | 2   | 'TCTGCGTGCCC'   | 0.537 |             |
| - | 5  | 1217      |                    | NM_006001    | NP_005992    | Q13748 | TBA3C_HUMAN  |                               | 5   | 'CAGGCGAGCCC'   | 0.647 |             |
| - | 3  | 1055      | p.K168E GJB6_uc    | NM_006783    | NP_006774    | O95452 | CXB6_HUMAN   | ellular (Potential).          | 1   | 'ACATTTCAACAC'  | 0.443 |             |
| - | 1  | 409       | A_uc010tee.1_Int   | NM_005584    | NP_005575    | Q13394 | MB211_HUMAN  |                               | 2   | 'GCAGCGTTGGT'   | 0.373 |             |
| - | 3  | 1121      |                    | NM_000452    | NP_000443    | Q12908 | NTCP2_HUMAN  | ical; (Potential).            | 4   | 'AAACAGGAACA'   | 0.393 |             |
| - | 3  | 797       | p.R126C ZNF219     | NM_016423    | NP_057507    | Q9P2Y4 | ZN219_HUMAN  | p.R126R(1)                    | 1   | 'CGCGCGCTCTT'   | 0.721 |             |
| - | 34 | 5016      |                    | NM_000257    | NP_000248    | P12883 | MYH7_HUMAN   | Potential.                    | 4   | 'CCTCGGCGGCC'   | 0.597 |             |
| + | 3  | 243       |                    | NM_144578    | NP_653179    | Q8NDC0 | MISSL_HUMAN  | Pro-rich.                     | 0   | 'CAAACCTGGCC'   | 0.517 |             |
| + | 3  | 275       |                    | NM_002306    | NP_002297    | P17931 | LEG3_HUMAN   | peats of Y-P-G-X(3)-P- G-     | 0   | 'CCTATCCTGGG'   | 0.662 |             |
| + | 3  | 910       | p.N155S PCNX_t     | NM_014982    | NP_055797    | Q96RV3 | PCX1_HUMAN   |                               | 1   | 'AAGCAACCAGG'   | 0.483 |             |
| + | 5  | 3218      | PM1_uc001xql.3_F   | NM_019589    | NP_062535    | P49750 | YLP1_HUMAN   | Arg-rich.                     | 3   | 'ACACACGGGAT'   | 0.493 |             |
| + | 8  | 809       | LL5_uc010ask.1_h   | NM_015072    | NP_055887    | Q6EMB2 | TLL5_HUMAN   | TTL.                          | 3   | 'CCCTGGAAGAG'   | 0.398 |             |

|   |    |           |                   |              |              |         |             |                                |    |                |       |
|---|----|-----------|-------------------|--------------|--------------|---------|-------------|--------------------------------|----|----------------|-------|
| + | 16 | 2086      | ybs.1_Missense_M  | NM_020818    | NP_065869    | Q9P2D8  | UNC79_HUMAN | p.I654_H670del(                | 17 | :GGGGGGATCCC   | 0.448 |
| - | 4  | 1604      | gb.2_Missense_M   | NM_138576    | NP_612808    | Q9C0K0  | BC11B_HUMAN | 2H2-type 2.                    | 10 | :TGCGCCGGTGC   | 0.652 |
| + | 75 | 13614     |                   | NM_001376    | NP_001367    | Q14204  | DYHC1_HUMAN |                                | 10 | :TCAGCGAGAGG   | 0.612 |
| + | 25 | 3125      | r.2_Missense_Mut  | NM_001036    | NP_001027    | Q15413  | RYR3_HUMAN  | c (By similarity). 4 X approx  | 10 | :CCCGTCTGGTG   | 0.453 |
| - | 2  | 268       | u.2_Missense_Mut  | NM_033503    | NP_277038    | Q96LC9  | BMF_HUMAN   |                                | 1  | :TGGGTCGAAGG   | 0.622 |
| + | 23 | 7980      | z.1_Missense_Mut  | NM_001164273 | NP_001157745 | Q8IWI9  | MGAP_HUMAN  |                                | 12 | :GACTCCGCAAG   | 0.433 |
| + | 9  | 1219      | sa.2_Missense_Mi  | NM_017705    | NP_060175    | Q9NXX6  | MPRG_HUMAN  | lasmic (Potential).            | 2  | :GGAAGGAATGG   | 0.498 |
| + | 12 | 2313      | te.2_Nonsense_Mi  | NM_024817    | NP_079093    | Q6ZMP0  | THSD4_HUMAN | SP type-1 3.                   | 2  | :CGACTGGACCT   | 0.637 |
| + | 2  | 1531      | h.1_Nonsense_Mu   | NM_005545    | NP_005536    | O14498  | ISLR_HUMAN  |                                | 4  | :TGGGCCAAAGC   | 0.617 |
| + | 2  | 2182      | unk.1_Missense_M  | NM_015206    | NP_056021    | Q9UPX6  | K1024_HUMAN |                                | 4  | :AAAGCCTCTTC   | 0.547 |
| - | 2  | 367       | _p.L67P FSD2_uc   | NM_001007122 | NP_001007123 | A1L4K1  | FSD2_HUMAN  |                                | 1  | :CTTGAAGGTCT   | 0.443 |
| + | 17 | 1568      | _Missense_Mutatic | NM_138769    | NP_620124    | Q8IXI1  | MIRO2_HUMAN | rial intermembrane (Potenti    | 1  | :AGTCCTTTGCA   | 0.632 |
| + | 6  | 1507      | n_p.N40S ZNF263   | NM_005741    | NP_005732    | O14978  | ZN263_HUMAN | 2H2-type 1.                    | 4  | :ACTCAAACCTAA  | 0.478 |
| + | 7  | 1444      | _p.A369T UBN1_u   | NM_001079514 | NP_001072982 | Q9NPG3  | UBN1_HUMAN  |                                | 2  | :AGCTGGCTCAG   | 0.577 |
| - | 13 | 4513      | G1322E GRIN2A_u   | NM_001134407 | NP_001127879 | Q12879  | NMDE1_HUMAN | lasmic (Potential).            | 45 | :AATTTCCCTCCA  | 0.527 |
| + | 11 | 1514      |                   | NM_017888    | NP_060358    | Q6NUN0  | ACSM5_HUMAN |                                | 2  | :GGACCAGACTC   | 0.483 |
| - | 7  | 984       | _p.W258* ACSM2E   | NM_182617    | NP_872423    | Q68CK6  | ACS2B_HUMAN |                                | 5  | :TATGGTCCACAT  | 0.443 |
| + | 15 | 1913      | _p.D405N SLC5A1   | NM_052944    | NP_443176    | Q8WVWX8 | SC5AB_HUMAN | lasmic (Potential).            | 2  | :GTCACGACCCC   | 0.577 |
| - | 2  | 371       | lou.2_Nonsense_M  | NM_001520    | NP_001511    | Q12789  | TF3C1_HUMAN |                                | 5  | :GCCCTGGATGC   | 0.463 |
| - | 1  | 298       | avq.1_Missense_M  | NM_024939    | NP_079215    | Q9H6T0  | ESRP2_HUMAN |                                | 1  | :CCGCCGTAGCC   | 0.413 |
| - | 3  | 669       | _p.L83F SMPD3_    | NM_018667    | NP_061137    | Q9NY59  | NSMA2_HUMAN | ical; (Potential).             | 1  | :GAAGAGAAAGC   | 0.642 |
| - | 10 | 1600      |                   | NM_005652    | NP_005643    | Q15554  | TERF2_HUMAN | b-type. H-T-H motif.           | 1  | :TGGTCCGCCAG   | 0.438 |
| + | 12 | 5035      | _Mutation_p.M12C  | NM_006599    | NP_006590    | O94916  | NFAT5_HUMAN |                                | 0  | :ATACCATGGCTA  | 0.299 |
| + | 4  | 485       | :NTNAP4_uc002fe   | NM_033401    | NP_207837    | Q9C0A0  | CNTP4_HUMAN | (Potential). F5/8 type C.      | 2  | :ATGATCCTCTTC  | 0.473 |
| - | 5  | 762       | _p.G68S FBXO31_   | NM_024735    | NP_079011    | Q5XUX0  | FBX31_HUMAN |                                | 1  | :CCCGCCGGACA   | 0.557 |
| - | 4  | 284       | :D_uc002ff.1_5'Fl | NM_002461    | NP_002452    | P53602  | MVD1_HUMAN  |                                | 0  | :CCTCCGCTTCC   | 0.697 |
| + | 1  | 114_115   | 3B3_uc010cja.1_R  | NM_006086    | NP_006077    | Q13509  | TBB3_HUMAN  |                                | 3  | :AGATCGGGGCCA  | 0.347 |
| + | 37 | 5690      | _Mutation_p.S181  | NM_001005273 | NP_001005273 | Q12873  | CHD3_HUMAN  | r interaction with PCNT.       | 1  | :CCTCTCCAAGG   | 0.607 |
| + | 32 | 7129      |                   | NM_016239    | NP_057323    | Q9UKN7  | MYO15_HUMAN | Tail.                          | 9  | :CGGCTGGACCG   | 0.602 |
| - | 5  | 1584      |                   | NM_001145045 | NP_001138517 | P0CG31  | Z286B_HUMAN | 2H2-type 8.                    | 0  | :TTTTCCACATTC  | 0.388 |
| + | 1  | 285       | L3_uc002hit.2_5'F | NM_017559    | NP_060029    | Q8TC99  | FNDC8_HUMAN | p.N68I(1)                      | 2  | :CATCAACCTACT  | 0.284 |
| - | 3  | 336       | _16_uc002hkm.2_f  | NM_004590    | NP_004581    | O15467  | CCL16_HUMAN |                                | 0  | :TGGGATCCTTG   | 0.507 |
| - | 14 | 1884      | nn.2_Missense_Mi  | NM_198836    | NP_942133    | Q13085  | ACACA_HUMAN | in carboxylation.              | 2  | :GTTTTCTCCCCA  | 0.393 |
| - | 1  | 196       | 39_uc010wfm.1_5   | NM_213656    | NP_998821    | Q6A163  | K1C39_HUMAN | Head.                          | 0  | :CCAGGAATTC    | 0.502 |
| + | 4  | 479       | ocze.1_Missense_  | NM_145041    | NP_659478    | Q96A25  | T106A_HUMAN |                                | 0  | :CATTCCCTATGC  | 0.572 |
| - | 4  | 450       | :37A2_uc002ikn.1_ | NM_016632    | NP_057716    | Q8IVW1  | ARL17_HUMAN |                                | 0  | :TGCCGGTGACCC  | 0.403 |
| + | 1  | 2104      | uc010wna.1_RNA    | NM_032559    | NP_115948    | Q8N4N8  | KIF2B_HUMAN | Potential.                     | 8  | :AAAATTGATGCTC | 0.458 |
| + | 11 | 1305      | le_p.P300_spliceI | NM_005486    | NP_005477    | O75674  | TM1L1_HUMAN |                                | 1  | :CCCCCGTAAGT   | 0.318 |
| + | 13 | 2750_2751 | pm.1_Missense_M   | NM_030779    | NP_110406    | Q9H252  | KCNH6_HUMAN | lasmic (Potential).            | 1  | :CCCCAGGGCTTT  | 0.619 |
| + | 8  | 1106      | gl.2_Missense_Mu  | NM_002266    | NP_002257    | P52292  | IMA2_HUMAN  | ing site (minor) (By similarit | 2  | :ATCAGATGAACA  | 0.438 |
| + | 4  | 1291      | vqx.1_Missense_M  | NM_181790    | NP_861455    | Q72601  | GP142_HUMAN | lasmic (Potential).            | 4  | :ATCCACGATGCC  | 0.607 |
| + | 3  | 705       | i.1_3'UTR ARMC7_  | NM_024585    | NP_078861    | Q9H6L4  | ARMC7_HUMAN | ARM 2.                         | 1  | :TCCCAGAGCTGA  | 0.632 |
| + | 7  | 849       | g.3_Missense_Mu   | NM_001258    | NP_001249    | Q00526  | CDK3_HUMAN  | rotein kinase.                 | 1  | :GCCAGAGGGCA   | 0.582 |
| + | 9  | 1427      | jth.2_Missense_M  | NM_198955    | NP_945193    | Q3V5L5  | MGT5B_HUMAN | lenal (Potential).             | 3  | :ATGTTTCGTGAG  | 0.622 |
| - | 10 | 1985      | TEC_uc010xaj.1_F  | NM_001137671 | NP_001131143 | B2RU33  | POTEC_HUMAN | Potential.                     | 3  | :ATACCTCAGAAAT | 0.269 |
| - | 10 | 1973      | TEC_uc010xaj.1_F  | NM_001137671 | NP_001131143 | B2RU33  | POTEC_HUMAN | Potential.                     | 3  | :TCATTTCTTTTTC | 0.284 |
| + | 15 | 2956      | ip.1_Missense_Mu  | NM_001942    | NP_001933    | Q02413  | DSG1_HUMAN  | ential). Desmoglein repeat     | 7  | :ATCCTAGAGAGT  | 0.468 |

|   |     |           |                                                 |              |              |        |             |                                |     |                   |       |             |
|---|-----|-----------|-------------------------------------------------|--------------|--------------|--------|-------------|--------------------------------|-----|-------------------|-------|-------------|
| + | 14  | 2094      |                                                 | NM_005925    | NP_005916    | Q16820 | MEP1B_HUMAN | lasmic (Potential).            | 2   | AAATATCGTGAA/     | 0.408 |             |
| - | 8   | 1490      | _Mutation_p.E347k                               | NM_003787    | NP_003778    | O94818 | NOL4_HUMAN  |                                | 3   | AGTTTTCATCTAC     | 0.478 |             |
| - | 7   | 2067      | 'kzj.2_Missense_IV                              | NM_012319    | NP_036451    | Q13433 | S39A6_HUMAN | lasmic (Potential).            | 2   | AGTGGCGACGC       | 0.318 |             |
| + | 7   | 1794      | _p.E251K DCC_uc                                 | NM_005215    | NP_005206    | P43146 | DCC_HUMAN   | otential).  g-like C2-type 4.  | 17  | iTGGCTGAAAATC     | 0.438 |             |
| - | 5   | 2855      | ik.1_Missense_Mu                                | NM_052947    | NP_443179    | Q86TB3 | ALPK2_HUMAN |                                | 14  | rGCCGTCTTGC       | 0.428 |             |
| - | 2   | 220       | _p.N65S SERPINB3_uc010dqb.2_Missense_Mutation_f |              |              | P48594 | SPB4_HUMAN  |                                | 3   | iTGGTGTCTCTC      | 0.428 |             |
| - | 2   | 1244      |                                                 | NM_032160    | NP_115536    | Q8IZU8 | DSEL_HUMAN  |                                | 6   | 'ATGGGGGAGCT'     | 0.383 |             |
| - | 4   | 363       | uc010dvi.1_5'Flanl                              | NM_020196    | NP_064581    | Q9HCS7 | SYF1_HUMAN  | HAT 3.                         | 4   | TAGCCACAGACC      | 0.657 |             |
| - | 3   | 21008     |                                                 | NM_024690    | NP_078966    | Q8WXI7 | MUC16_HUMAN | xtracellular (Potential).      | 57  | 'CAGAGGAAACA'     | 0.458 |             |
| - | 1   | 6323      |                                                 | NM_024690    | NP_078966    | Q8WXI7 | MUC16_HUMAN | ch. Extracellular (Potential). | 57  | 'TTGTGGAATCC/     | 0.488 |             |
| - | 2   | 333       | n_p.R16L ICAM3_                                 | NM_002162    | NP_002153    | P32942 | ICAM3_HUMAN | otential).  g-like C2-type 1.  | 3   | \GGATCCGACTG      | 0.552 |             |
| - | 4   | 1744      | 3_uc002msz.1_Mi                                 | NM_001080411 | NP_001073880 | Q8N7K0 | ZN433_HUMAN | :2H2-type 14.                  | 0   | TCCTTCATGAT/      | 0.443 |             |
| + | 1   | 143       | xf.2_Missense_Ml                                | NM_001031727 | NP_001026897 | Q9BV20 | MTNA_HUMAN  |                                | 1   | GAGCCGCTACG/      | 0.537 |             |
| + | 10  | 2692      | _p.S622F NWD1_uc002nev.3_Missense_Mutation_p.S5 |              |              | Q149M9 | NWD1_HUMAN  |                                | 7   | iGATTCCTGCC       | 0.597 |             |
| - | 13  | 2081      | o.R249Q PDE4C_t                                 | NM_001098819 | NP_001092289 | Q08493 | PDE4C_HUMAN |                                | 5   | rGGATTCGGTCG      | 0.378 |             |
| + | 19  | 2420      | dd.2_Missense_M                                 | NM_173636    | NP_775907    | O43379 | WDR62_HUMAN |                                | 0   | iGCCACCCAGG       | 0.453 |             |
| - | 5   | 506       | oo.2_Missense_IV                                | NM_004756    | NP_004747    | Q9Y6R0 | NUMBL_HUMAN | PID.                           | 5   | 'TCACGGACTTTC     | 0.652 |             |
| + | 1   | 550       | rf54_uc002oox.1_!                               | NM_004596    | NP_004587    | P09012 | SNRPA_HUMAN |                                | 4   | 'CCCGAGACCCG      | 0.498 |             |
| - | 2   | 253       | on_p.L41Q PSG5_                                 | NM_002781    | NP_002772    | Q15238 | PSG5_HUMAN  | g-like V-type.                 | 3   | iGTGGCAGGGCT      | 0.468 |             |
| - | 4   | 855_856   | o.E160K PSG9_uc                                 | NM_002784    | NP_002775    | Q00887 | PSG9_HUMAN  | like C2-type 2.                | 2   | ATTCTCCCTGGG      | 0.51  |             |
| - | 1   | 1154      | J2peu.1_Silent_p.l                              | NM_020709    | NP_065760    | Q9ULN7 | PNML2_HUMAN |                                | 1   | 'ACTGCCTAACCC     | 0.637 |             |
| - | 9   | 2649      | xyr.1_Missense_M                                | NM_015063    | NP_055878    | Q9UPR5 | NAC2_HUMAN  | . Helical; (Potential).        | 4   | 'GCCCAGGGCAA      | 0.602 |             |
| + | 1   | 58        |                                                 | NM_033068    | NP_149059    | Q9BZG2 | PPAT_HUMAN  |                                | 0   | 'tgcgtgctggtgctgc | 0.622 |             |
| + | 2   | 654       | lyct.1_Missense_IV                              | NM_014441    | NP_055256    | Q9Y336 | SIGL9_HUMAN | otential).  g-like C2-type 1.  | 1   | iCTCCTCGGTGC      | 0.657 | rs141688796 |
| - | 3   | 1129      | _p.R240Q SIGLEC                                 | NM_053003    | NP_443729    | Q96PQ1 | SIG12_HUMAN | 1. Extracellular (Potential).  | 5   | TGAGTCGGACAC      | 0.602 |             |
| + | 7   | 2416      | oqr.1_Missense_M                                | NM_018555    | NP_061025    | Q9NQX6 | ZN331_HUMAN | :2H2-type 8.                   | 6   | 'CTCACGAATG/      | 0.507 |             |
| + | 4   | 621       | 010esf.2_Missens                                | NM_013289    | NP_037421    | P43629 | KI3L1_HUMAN | otential).  g-like C2-type 2.  | 5   | 'ATGATGCTTGCC     | 0.547 |             |
| + | 3   | 1399      | tg.2_Missense_Ml                                | NM_176811    | NP_789781    | Q86W28 | NALP8_HUMAN | NACHT.                         | 13  | ACTTTTCCAGAA/     | 0.473 |             |
| - | 11  | 2299      | o113_uc010eyk.1_                                | NM_001145168 | NP_001138640 | Q8IZF5 | GP113_HUMAN | ellular (Potential).           | 4   | 'GGGTTCTTCCG      | 0.627 |             |
| + | 7   | 900       | se_Mutation_p.R2(                               | NM_015701    | NP_056516    | Q96DZ1 | ERLEC_HUMAN |                                | 2   | iGCCCAGATCAA      | 0.378 |             |
| - | 3   | 329       | i_p.R40K TPRKB_                                 | NM_016058    | NP_057142    | Q9Y3C4 | TPRKB_HUMAN |                                | 2   | \GAGTTCTTGTC'     | 0.353 |             |
| + | 7   | 865       |                                                 | NM_031283    | NP_112573    | Q9HCS4 | TF7L1_HUMAN | Pro-rich.                      | 3   | 'TCCTCCCGGTG'     | 0.612 |             |
| + | 3   | 224       | 1A_uc002sqv.2_5'i                               | NM_017952    | NP_060422    | Q96EY7 | PTCD3_HUMAN |                                | 1   | 'CATTAGGGATTG     | 0.284 |             |
| - | 2   | 1056      | _p.E313K ST6GAL:                                | NM_001142351 | NP_001135823 | Q96JF0 | SIAT2_HUMAN | renal (Potential).             | 11  | 'TATTTCTCGCC      | 0.667 |             |
| - | 2   | 151       | _p.R11Q ST6GAL:                                 | NM_001142351 | NP_001135823 | Q96JF0 | SIAT2_HUMAN | lasmic (Potential).            | 11  | \GCATTCGTTGT(     | 0.507 |             |
| - | 4   | 371       | h.1_Missense_Mul                                | NM_000576    | NP_000567    | P01584 | IL1B_HUMAN  |                                | 4   | 'TGAAGGGAAG,      | 0.532 |             |
| - | 19  | 3556      |                                                 | NM_018383    | NP_060853    | Q9C0J8 | WDR33_HUMAN |                                | 0   | iACCAGGAAAC       | 0.567 |             |
| - | 4   | 527       | se_Mutation_p.P5f                               | NM_013450    | NP_038478    | Q9UIF8 | BAZ2B_HUMAN |                                | 4   | 'AAACGGTTGAT(     | 0.433 |             |
| + | 27  | 5425      | _p.T1712 SCN2A_                                 | NM_001040142 | NP_001035232 | Q99250 | SCN2A_HUMAN | IV.                            | 8   | 'TACACCTCTGC      | 0.458 |             |
| - | 8   | 1706      | 'STKD1_uc002uex                                 | NM_024622    | NP_078898    | Q53R41 | FAKD1_HUMAN |                                | 4   | 'GGCTTCAATTCC     | 0.418 |             |
| - | 3   | 1016      |                                                 | NM_001080458 | NP_001073927 | Q03828 | EVX2_HUMAN  |                                | 2   | GGAAGGGGTAG       | 0.522 |             |
| - | 225 | 45318     | _uc010zfi.1_Miss                                | NM_133378    | NP_596869    | Q8WZ42 | TITIN_HUMAN |                                | 153 | 'AATTTCCCACC      | 0.473 |             |
| - | 75  | 19126     | v_uc010zfi.1_Intro                              | NM_133378    | NP_596869    | Q8WZ42 | TITIN_HUMAN |                                | 153 | iTGATTCGCATCC     | 0.408 | rs72648969  |
| - | 46  | 13470     | .E4349K TTN_uc0                                 | NM_133437    | NP_597681    | Q8WZ42 | TITIN_HUMAN |                                | 153 | 'AACCTCCTCAG      | 0.453 |             |
| - | 46  | 14139     | 'N_uc010zfi.1_Intr                              | NM_133379    | NP_596870    | Q8WZ42 | TITIN_HUMAN |                                | 153 | iCTGTTCCCTAG'     | 0.373 |             |
| - | 2   | 1412      |                                                 | NM_004657    | NP_004648    | O95810 | SDPR_HUMAN  |                                | 2   | 'CCCTGGAGGTC      | 0.577 |             |
| + | 20  | 2263_2264 | _p.R277K AOX1_L                                 | NM_001159    | NP_001150    | Q06278 | ADO_HUMAN   |                                | 6   | AGAAAGGAAACT      | 0.426 |             |

|   |    |       |                                                       |              |              |        |             |                            |    |                  |       |             |
|---|----|-------|-------------------------------------------------------|--------------|--------------|--------|-------------|----------------------------|----|------------------|-------|-------------|
| + | 26 | 2973  | p.E514K AOX1_u                                        | NM_001159    | NP_001150    | Q06278 | ADO_HUMAN   |                            | 6  | TACAAGGAAATTC    | 0.368 |             |
| + | 10 | 1862  | xm.1_Missense_I                                       | NM_032974    | NP_116756    | Q92851 | CASPA_HUMAN |                            | 6  | CAATGGAAATCA     | 0.512 |             |
| + | 11 | 2663  | Ofvx.2_Missense_                                      | NM_014640    | NP_055455    | Q14679 | TTL4_HUMAN  | TTL.                       | 3  | FTTGACCTGCGG     | 0.488 |             |
| - | 1  | 421   | Is.1_Missense_Mu                                      | NM_003590    | NP_003581    | Q13618 | CUL3_HUMAN  |                            | 4  | GGTGTCTTCCC      | 0.602 | rs2969802   |
| - | 3  | 1640  | Jojo.1_Missense_I                                     | NM_182501    | NP_872307    | Q7Z6M4 | MTER2_HUMAN |                            | 1  | cattgtcatcctcatt | 0.224 |             |
| - | 8  | 2241  | nj.2_Missense_Mu                                      | NM_020341    | NP_065074    | Q9P286 | PAK7_HUMAN  | rotein kinase.             | 23 | CCCTGTGAATCA     | 0.443 |             |
| - | 8  | 2152  | ie_Mutation_p.W2                                      | NM_032501    | NP_115890    | Q9NUB1 | ACS2L_HUMAN |                            | 2  | ACTCCCAGGCC      | 0.527 |             |
| + | 2  | 127   | tj.1_RNA FRG1B_uc010gdr.1_RNA FRG1B_uc010ztk.1_Intron |              |              |        |             |                            | 0  | ATTCAGATGCAA     | 0.333 |             |
| - | 2  | 776   | xcb.1_Missense_I                                      | NM_178468    | NP_848563    | Q9BQN1 | FA83C_HUMAN |                            | 2  | GAGGTCCATCT      | 0.647 |             |
| - | 3  | 2822  | dk.2_Intron CPNE                                      | NM_152838    | NP_690051    | Q9NTZ6 | RBM12_HUMAN | RRM 3.                     | 3  | FAAAGGGCATGT     | 0.353 |             |
| + | 11 | 1414  | Jggc.2_Missense_                                      | NM_015568    | NP_056383    | Q96T49 | PP16B_HUMAN |                            | 3  | CTACTCTCCGAA     | 0.567 |             |
| - | 5  | 521   | C3_uc002xph.1_In                                      | NM_080614    | NP_542181    | Q8IUB2 | WFDC3_HUMAN | WAP 3.                     | 0  | TATGCCCTGGC      | 0.547 |             |
| - | 3  | 1323  |                                                       | NM_080617    | NP_542184    | Q9NTU7 | CBLN4_HUMAN | C1q.                       | 4  | CTTCTCCAGTTI     | 0.453 |             |
| - | 21 | 3392  | TCL1_uc011agu.1                                       | NM_007098    | NP_009029    | P53675 | CLH2_HUMAN  | gment. Heavy chain arm.    | 5  | ACACAGCAGGC      | 0.527 |             |
| + | 6  | 2719  | 5'Flank GHRLOS_t                                      | NM_014760    | NP_055575    | Q93075 | TATD2_HUMAN |                            | 2  | CCTCCCTCGCC      | 0.622 |             |
| + | 6  | 2721  | 5'Flank GHRLOS_                                       | NM_014760    | NP_055575    | Q93075 | TATD2_HUMAN |                            | 2  | TCCCTCGCCAG      | 0.617 | rs150215933 |
| + | 6  | 574   | vl.1_Missense_Mu                                      | NM_133625    | NP_598328    | Q92777 | SYN2_HUMAN  |                            | 2  | TCCTTGAGATT      | 0.433 |             |
| - | 20 | 3063  | ense_Mutation_p.l                                     | NM_003615    | NP_003606    | Q9Y6M7 | S4A7_HUMAN  | ellular (Potential).       | 5  | TTGTTCCCTGC      | 0.433 |             |
| - | 11 | 1701  |                                                       | NM_003500    | NP_003491    | Q99424 | ACOX2_HUMAN |                            | 0  | CTTACCTTACTC     | 0.597 | rs145582569 |
| - | 10 | 1127  | hob.2_Missense_I                                      | NM_003848    | NP_003839    | Q96I99 | SUCB2_HUMAN |                            | 2  | AGTTGACGATAC     | 0.448 | rs115935149 |
| - | 5  | 780   | p.R12W KIAA152                                        | NM_020890    | NP_065941    | Q8TCG1 | CIP2A_HUMAN |                            | 3  | GTGCCGACAAA      | 0.299 |             |
| - | 6  | 1088  | oy.2_Missense_Ml                                      | NM_001015887 | NP_001015887 | Q5DX21 | IGS11_HUMAN | lasmic (Potential).        | 0  | CATTAGGAATTC     | 0.323 |             |
| - | 9  | 1787  | ojg.1_Missense_M                                      | NM_153002    | NP_694547    | Q8NFN8 | GP156_HUMAN | lasmic (Potential).        | 2  | TGTAAGGGGCTA     | 0.602 |             |
| - | 9  | 1417  |                                                       | NM_199420    | NP_955452    | O75417 | DPOLQ_HUMAN | case C-terminal.           | 11 | AGGCTCCTTCAA     | 0.378 |             |
| + | 8  | 899   | bjn.1_Missense_M                                      | NM_021082    | NP_066568    | Q16348 | S15A2_HUMAN |                            | 1  | CTGAAGGAAACA     | 0.338 |             |
| - | 13 | 2948  |                                                       | NM_022776    | NP_073613    | Q9BXB4 | OSB11_HUMAN |                            | 5  | TATTTTCCAAAGT    | 0.358 |             |
| - | 3  | 1977  | uc003ekl.1_5'Flan                                     | NM_153330    | NP_699161    | Q8NHS0 | DNJB8_HUMAN |                            | 0  | CAGGCCACCAA      | 0.637 |             |
| - | 8  | 1344  | 1257_uc003elh.1_                                      | NM_020741    | NP_065792    | Q9ULG3 | K1257_HUMAN |                            | 0  | TGACGGCCAGC      | 0.592 |             |
| - | 9  | 1581  | wp.1_Missense_I                                       | NM_024727    | NP_079003    | Q6UY01 | LRC31_HUMAN |                            | 3  | CTAAACCATT       | 0.448 |             |
| - | 3  | 12753 | l1bth.1_Intron MUC                                    | NM_018406    | NP_060876    | Q99102 | MUC4_HUMAN  | Ser-rich.                  | 0  | TGACAGGAAGA      | 0.587 |             |
| - | 3  | 941   |                                                       | NM_025163    | NP_079439    | Q86VD9 | PIGZ_HUMAN  | ical; (Potential).         | 3  | GGGCTGCCCCA      | 0.612 | rs149492566 |
| + | 1  | 31    |                                                       | NM_001040448 | NP_001035538 | P59861 | DB131_HUMAN |                            | 0  | GAGTCCTTTCC      | 0.368 |             |
| + | 30 | 3352  | s.1_Missense_Mut                                      | NM_004787    | NP_004778    | O94813 | SLIT2_HUMAN | EGF-like 4.                | 11 | AGCACGATTC       | 0.483 |             |
| + | 15 | 1255  | iet.1_Missense_M                                      | NM_013367    | NP_037499    | Q9UJX5 | APC4_HUMAN  |                            | 5  | CAAAAATATGAAC    | 0.343 |             |
| - | 5  | 820   | zh.1_Missense_Mi                                      | NM_006587    | NP_006578    | Q9Y5Q5 | CORIN_HUMAN | ular (Potential). FZ 1.    | 2  | TTCTAAACTGGG     | 0.468 |             |
| + | 16 | 2235  | ztl.1_Missense_Mi                                     | NM_025087    | NP_079363    | Q9H720 | PG2IP_HUMAN |                            | 3  | AATTATGAAAACA    | 0.259 |             |
| - | 33 | 5653  |                                                       | NM_014991    | NP_055806    | Q8IZQ1 | WDFY3_HUMAN |                            | 3  | AGCATCTCGGT      | 0.458 |             |
| + | 32 | 5717  | p.S1727F PTPN13                                       | NM_080683    | NP_542414    | Q12923 | PTN13_HUMAN | Poly-Ser.                  | 6  | TGCTTCTCTAC      | 0.393 |             |
| + | 3  | 378   | ise_Mutation_p.P5                                     | NM_001033047 | NP_001028219 | Q6UXI9 | NPNT_HUMAN  | EGF-like 1.                | 1  | CACAGCTGTGT      | 0.388 |             |
| - | 7  | 1075  | ID_uc003icl.2_RN                                      | NM_014822    | NP_055637    | O94855 | SC24D_HUMAN | Pro-rich.                  | 0  | CCCTGGATCTGA     | 0.478 |             |
| - | 7  | 866   | e.1_Missense_Mul                                      | NM_176824    | NP_789794    | Q8IWZ6 | BBS7_HUMAN  |                            | 1  | GAATTTCCCACT     | 0.338 |             |
| + | 13 | 1451  | i_Mutation_p.R223                                     | NM_015312    | NP_056127    | Q2LD37 | K1109_HUMAN |                            | 12 | CCCCGAATATC      | 0.378 |             |
| - | 17 | 1850  | hn.1_Missense_Mi                                      | NM_003866    | NP_003857    | O15327 | INP4B_HUMAN |                            | 2  | TAGTTGATTGAT     | 0.383 |             |
| - | 14 | 2299  | o.R609W LRBA_uc                                       | NM_006726    | NP_006717    | P50851 | LRBA_HUMAN  |                            | 7  | CTCCGAATGG       | 0.418 |             |
| + | 12 | 1881  | p.D114N ETFDH_I                                       | NM_004453    | NP_004444    | Q16134 | ETFD_HUMAN  |                            | 3  | AGTTTTGACCTC     | 0.438 |             |
| + | 12 | 1920  | p.E127K ETFDH_                                        | NM_004453    | NP_004444    | Q16134 | ETFD_HUMAN  |                            | 3  | ATCATGAACATG     | 0.468 |             |
| + | 8  | 1646  | Z3_uc003ive.1_5'l                                     | NM_001080477 | NP_001073946 | Q9P273 | TEN3_HUMAN  | r (Potential). EGF-like 1. | 0  | GTTTTCCAGGA      | 0.408 |             |

|   |    |           |                   |              |              |         |             |                                |    |               |       |             |
|---|----|-----------|-------------------|--------------|--------------|---------|-------------|--------------------------------|----|---------------|-------|-------------|
| - | 6  | 1580      | _p.M230 LRP2BP    | NM_018409    | NP_060879    | Q9P2M1  | LR2BP_HUMAN | Sel1-like 5.                   | 0  | AAATTCATCTTA  | 0.308 |             |
| - | 2  | 1212      | o.1_Missense_Mut  | NM_005245    | NP_005236    | Q14517  | FAT1_HUMAN  | cellular (Potential).          | 12 | GAGTTCCTTTAT  | 0.458 |             |
| + | 4  | 796       |                   | NM_007277    | NP_009208    | O60645  | EXOC3_HUMAN |                                | 0  | AAATTGACAGGC  | 0.517 |             |
| + | 2  | 770       |                   | NM_024337    | NP_077313    | P78414  | IRX1_HUMAN  |                                | 2  | GCGACCAGAGC   | 0.667 |             |
| + | 13 | 1949      |                   | NM_015325    | NP_056140    | Q9Y2F5  | K0947_HUMAN |                                | 2  | TGAACCAGACC   | 0.388 |             |
| - | 71 | 12215     | fc.2_Missense_Mu  | NM_001369    | NP_001360    | Q8TE73  | DYH5_HUMAN  | 6 (By similarity).             | 31 | ATGATGGAATCTC | 0.517 |             |
| - | 27 | 4193      |                   | NM_001369    | NP_001360    | Q8TE73  | DYH5_HUMAN  | n (By similarity).             | 31 | GTATATGTGATG  | 0.313 |             |
| + | 31 | 4632      | IO_uc003jfh.1_Mis | NM_007118    | NP_009049    | O75962  | TRIO_HUMAN  | PH 1.                          | 18 | GAGTTGGGTGT   | 0.393 |             |
| + | 3  | 965       |                   | NM_012304    | NP_036436    | Q9UJT9  | FBXL7_HUMAN |                                | 3  | CGGGCGAGACC   | 0.662 |             |
| + | 11 | 2037      |                   | NM_020227    | NP_064612    | Q9NQV7  | PRDM9_HUMAN | 2H2-type 5.                    | 6  | TTAGCCGGCAG   | 0.622 | rs111393391 |
| - | 12 | 2291      | iv.1_Missense_Mu  | NM_016279    | NP_057363    | Q9ULB4  | CADH9_HUMAN | lasmic (Potential).            | 9  | ATTTTCCCACAG  | 0.418 |             |
| - | 7  | 1200      |                   | NM_016279    | NP_057363    | Q9ULB4  | CADH9_HUMAN | Extracellular (Potential).     | 9  | CTTAAAGTATAGA | 0.328 |             |
| + | 10 | 1903      | d.1_Missense_Mu   | NM_004932    | NP_004923    | P55285  | CADH6_HUMAN | r (Potential). Cadherin 5.     | 7  | GTTTTCTTTGGC  | 0.413 |             |
| + | 1  | 671       | iz.1_Intron NPR3_ | NM_000908    | NP_000899    | P17342  | ANPRC_HUMAN | cellular (Potential).          | 2  | TGGGACCTGCC   | 0.701 |             |
| - | 6  | 900       |                   | NM_001737    | NP_001728    | P02748  | CO9_HUMAN   | MACPF.                         | 0  | AAACCGAAAACT  | 0.323 |             |
| + | 2  | 465       | ELD2_uc003jwr.1   | NM_001038603 | NP_001033692 | Q8N4S9  | MALD2_HUMAN | lasmic (Potential).            | 0  | AAGATCCCTACC  | 0.542 |             |
| + | 8  | 5143      | i.2_Intron VCAN_u | NM_004385    | NP_004376    | P13611  | CSPG2_HUMAN | GAG-beta.                      | 16 | TGTTTCAGAGG/  | 0.428 |             |
| - | 6  | 957       | ie_Mutation_p.R1E | NM_001239    | NP_001230    | P51946  | CCNH_HUMAN  |                                | 3  | CAAGTCTGTTC   | 0.294 |             |
| - | 20 | 2359      |                   | NM_014639    | NP_055454    | Q6PGP7  | TTC37_HUMAN | TPR 12.                        | 4  | CTTTTTCTATGTA | 0.284 |             |
| - | 13 | 2337      |                   | NM_180991    | NP_851322    | Q6ZQN7  | SO4C1_HUMAN | name=12; (Potential).          | 4  | AAATCCATTGAA  | 0.308 |             |
| + | 11 | 2215      | kuz.2_Missense_M  | NM_014031    | NP_054750    | Q9Y2P4  | S27A6_HUMAN |                                | 0  | CCAGGGAACCT   | 0.338 |             |
| - | 11 | 2476      | ise_Mutation_p.E7 | NM_020389    | NP_065122    | Q9HCX4  | TRPC7_HUMAN | lasmic (Potential).            | 0  | ATTTTTCTCAAC  | 0.478 |             |
| - | 10 | 1342_1343 | lp.2_Missense_M   | NM_004598    | NP_004589    | Q08629  | TICN1_HUMAN |                                | 1  | AAATCCCTGAG   | 0.505 | rs139421454 |
| - | 5  | 930       | o.2_Missense_Mu   | NM_001496    | NP_001487    | O60609  | GFRA3_HUMAN |                                | 1  | CAGGCGTGATC   | 0.318 |             |
| + | 1  | 975       |                   | NM_013340    | NP_037472    | Q9Y5F3  | PCDB1_HUMAN | Extracellular (Potential).     | 0  | ATGGAGAAGTT   | 0.463 |             |
| + | 1  | 2541      |                   | NM_018933    | NP_061756    | Q9Y5F0  | PCDBD_HUMAN | lasmic (Potential).            | 3  | TACAAGGAAATTC | 0.443 |             |
| + | 1  | 2351      | dal.1_Missense_M  | NM_018934    | NP_061757    | Q9Y5E9  | PCDBE_HUMAN | lasmic (Potential).            | 1  | TATGGGGGAAA   | 0.373 |             |
| + | 1  | 1024      | jfx.1_Intron PCDH | NM_018923    | NP_061746    | Q9Y5G2  | PCDGE_HUMAN | r (Potential). Cadherin 3.     | 0  | ACAACGATTGTC  | 0.443 |             |
| - | 2  | 287       | RAP3_uc003llo.1   | NM_022481    | NP_071926    | Q8WWN8  | ARAP3_HUMAN |                                | 7  | CCAGGAGGCC    | 0.642 |             |
| - | 1  | 313       |                   | NM_001080516 | NP_001073985 | A6NFK2  | GRCR2_HUMAN |                                | 0  | FGTAATCGTTGA/ | 0.498 |             |
| - | 4  | 1058      | isense_Mutation_p | NM_014790    | NP_055605    | Q96AA8  | JKIP2_HUMAN | Potential.                     | 2  | CAGTTCCTTTTC  | 0.423 |             |
| + | 15 | 2714      | .1_Intron FBXO38  | NM_205836    | NP_995308    | Q6PIJ6  | FBX38_HUMAN |                                | 6  | CCCTCGGAGGC   | 0.572 |             |
| + | 16 | 3055      | se_Mutation_p.S8  | NM_001114183 | NP_001107655 | P42261  | GRIA1_HUMAN | lasmic (Potential).            | 6  | CAGTTCAGGGA   | 0.622 | rs144882662 |
| - | 2  | 1523      | p.S489F PWWP2/    | NM_001130864 | NP_001124336 | Q96N64  | PWP2A_HUMAN |                                | 0  | TCAGAGAAGAG   | 0.522 |             |
| + | 49 | 5154      | e_Mutation_p.E11i | NM_004946    | NP_004937    | Q92608  | DOCK2_HUMAN |                                | 7  | TGCCTGAGGTC.  | 0.587 |             |
| - | 6  | 991       | ition_p.H63Y MG   | NM_014275    | NP_055090    | Q9UQ53  | MGT4B_HUMAN | renal (Potential).             | 0  | GGAATGGATCTC  | 0.632 |             |
| - | 4  | 1055      | 2A23_uc003mvp.1   | NM_015482    | NP_056297    | A1A5C7  | S22AN_HUMAN | ical; (Potential).             | 1  | GGAAGGGGCAC   | 0.662 |             |
| + | 3  | 337       | bh.2_Missense_M   | NM_004233    | NP_004224    | Q01151  | CD83_HUMAN  | (Potential). Ig-like V-type.   | 0  | TATTGGAGGG    | 0.507 |             |
| - | 6  | 695       | se_Mutation_p.C1  | NM_005074    | NP_005065    | Q14916  | NPT1_HUMAN  | ical; (Potential).             | 4  | AGATTCACAGAT/ | 0.368 |             |
| - | 3  | 537       | A-DRB5_uc003ot    | NM_002125    | NP_002116    | Q30154  | DRB5_HUMAN  | eta-2. Extracellular (Potenti  | 0  | ATTCTGAATCAC  | 0.552 |             |
| + | 8  | 884       | plice_Site GLP1R_ | NM_002062    | NP_002053    | P43220  | GLP1R_HUMAN |                                | 5  | TCTTAGGTGTTT  | 0.617 |             |
| + | 6  | 1041      | p.E238K MDFI_u    | NM_005586    | NP_005577    | Q99750  | MDFI_HUMAN  | Cys-rich.                      | 0  | GCATGGAGTGC   | 0.672 |             |
| - | 4  | 502       | pai.2_Missense_M  | NM_138694    | NP_619639    | P08F94  | PKHD1_HUMAN | potential). IPT/TIG 1; atypica | 44 | ACAGGGAACAC   | 0.507 |             |
| + | 5  | 1539      |                   | NM_001010872 | NP_001010872 | Q5T0W9  | FA83B_HUMAN |                                | 6  | TATATCCGCTTTT | 0.408 |             |
| - | 3  | 677       | se_Mutation_p.D1  | NM_030820    | NP_110447    | Q96P44  | COLA1_HUMAN | VWFA.                          | 2  | GTCATCTTGGG.  | 0.443 |             |
| - | 20 | 2514      | p.1_Missense_Mu   | NM_017934    | NP_060404    | Q8WWWQ0 | PHIP_HUMAN  |                                | 6  | CTTTTGGAAACA  | 0.323 |             |
| - | 5  | 965       | VL4_uc011dyt.1_l  | NM_022726    | NP_073563    | Q9GZR5  | ELOV4_HUMAN |                                | 2  | GATATCGTTTCC/ | 0.343 |             |



|   |    |         |                   |              |              |        |             |                                |       |               |       |             |
|---|----|---------|-------------------|--------------|--------------|--------|-------------|--------------------------------|-------|---------------|-------|-------------|
| + | 12 | 1542    | uc010kcd.2_Mis    | NM_014942    | NP_055757    | Q9Y2G4 | ANKR6_HUMAN |                                | 3     | GCAAGGATGGG   | 0.517 |             |
| - | 17 | 3102    | ai.1_Missense_Mu  | NM_006828    | NP_006819    | Q8N3C0 | HELC1_HUMAN |                                | 6     | TCATCCGTACAT  | 0.343 |             |
| - | 3  | 418     | ense_Mutation_p.F | NM_198081    | NP_932347    | Q8N228 | SCML4_HUMAN |                                | 1     | GAAACCGAGAC   | 0.562 |             |
| - | 13 | 1530    | p.S426L CDK19_u   | NM_015076    | NP_055891    | Q9BWU1 | CDK19_HUMAN | Ser-rich.                      | 4     | GAGACGAGGAA   | 0.587 |             |
| + | 17 | 2230    |                   | NM_173560    | NP_775831    | Q8HWS3 | RFX6_HUMAN  |                                | 3     | ACACCGAGCATC  | 0.527 |             |
| + | 3  | 686     | .L2_uc003pxo.2_Ir | NM_182645    | NP_872586    | Q8N8G2 | VGLL2_HUMAN |                                | 1     | CCGCGCACTCG   | 0.746 |             |
| + | 12 | 1641    | ense_Mutation_p.G | NM_015440    | NP_056255    | Q6UB35 | C1TM_HUMAN  | hydrofolate synthetase.        | 4     | CCAAGGACCGA   | 0.488 |             |
| - | 3  | 625     | IAD1L1_uc010ksj.  | NM_013393    | NP_037525    | Q9UI43 | RRMJ2_HUMAN |                                | 1     | TTTGACTTCCA   | 0.512 |             |
| - | 17 | 1637    | a.2_Missense_Mu   | NM_004080    | NP_004071    | Q9Y6T7 | DGKB_HUMAN  | DAGKc.                         | 12    | CATCACGGAAAA  | 0.368 |             |
| - | 5  | 657     | .MY2_uc010ktz.2_  | NM_020319    | NP_064715    | Q8IV38 | ANKY2_HUMAN |                                | 1     | TTGGCTCTTTATC | 0.438 |             |
| + | 6  | 438     | e.1_Missense_Mu   | NM_031414    | NP_113602    | Q9BXU1 | STK31_HUMAN | Tudor.                         | 9     | TAAATCGATCTG  | 0.358 |             |
| - | 1  | 510     |                   | NM_000162    | NP_000153    | P35557 | HXK4_HUMAN  |                                | 4     | CTTCTCCTTCTT  | 0.562 |             |
| + | 6  | 623     | .F1_uc011kck.1_M  | NM_006060    | NP_006051    | Q13422 | IKZF1_HUMAN | 2H2-type 2 p.?(74)             | 148   | CGGGGCCTCAT   | 0.602 |             |
| + | 12 | 1698    | W1_uc011kef.1_M   | NM_018264    | NP_060734    | Q9NV66 | TYW1_HUMAN  |                                | 1     | CAATTTCTGCG   | 0.423 |             |
| + | 10 | 1129    | o.1_Missense_Mu   | NM_033107    | NP_149098    | A4D1E9 | GTPBA_HUMAN |                                | 0     | CACTTCATAAG   | 0.368 |             |
| - | 5  | 4043    | ID9L_uc003umk.1_  | NM_152703    | NP_689916    | Q8IVG5 | SAM9L_HUMAN |                                | 4     | ATATTTCACTCTC | 0.378 |             |
| + | 4  | 586     | kib.1_Missense_M  | NM_000089    | NP_000080    | P08123 | CO1A2_HUMAN |                                | 9     | ATAGAGGACCA   | 0.368 |             |
| - | 7  | 627     | n_p.V134I CYP3A   | NM_017460    | NP_059488    | P08684 | CP3A4_HUMAN |                                | 4     | AAAGACGCTGA   | 0.448 |             |
| - | 1  | 620     |                   | NM_002711    | NP_002702    | Q16821 | PPR3A_HUMAN | CBM21.                         | 34    | ATAAGGAGGAA   | 0.333 |             |
| + | 7  | 1318    | u_p.T291A C7orf5  | NM_024913    | NP_079189    | A4D0V7 | CG058_HUMAN |                                | 9     | ATTCGACGGGC   | 0.418 |             |
| - | 15 | 1860    |                   | NM_004333    | NP_004324    | P15056 | BRAF_HUMAN  | rotein kinase_R603>1(2))p.T    | 18290 | ATTTCACTGTAC  | 0.368 |             |
| + | 1  | 662     | uc003wda.2_Intror | NM_177437    | NP_803186    | P59551 | T2R60_HUMAN | lasmic (Potential).            | 6     | TCTGGGAAGAC   | 0.458 |             |
| - | 4  | 1890    | p.R548C ZNF786    | NM_152411    | NP_689624    | Q8N393 | ZN786_HUMAN | 2H2-type 10.                   | 4     | CACGCGCAAGT   | 0.642 |             |
| - | 5  | 551_552 |                   | NM_001040135 | NP_001035225 | Q9C0K3 | ARP3C_HUMAN |                                | 0     | ACTTCTGGGGAT  | 0.411 | rs28634863  |
| + | 1  | 829     | 61_uc003wgx.2_I   | NM_138434    | NP_612443    | Q96FA7 | CG029_HUMAN |                                | 1     | CCATGGGGGCC   | 0.542 |             |
| - | 45 | 7153    | p.Q1647* CSMD1    | NM_033225    | NP_150094    | Q96PZ7 | CSMD1_HUMAN | ar (Potential). CUB 13.        | 25    | GAGCTGAAATG   | 0.338 |             |
| + | 7  | 1123    | p.G218R SH2D4A    | NM_022071    | NP_071354    | Q9H788 | SH24A_HUMAN |                                | 0     | CCCTCGGGGCC   | 0.537 |             |
| + | 3  | 272     | xgb.1_Missense_M  | NM_016240    | NP_057324    | Q6AZY7 | SCAR3_HUMAN | lasmic (Potential).            | 4     | CAGCCGCTGCC   | 0.622 |             |
| + | 2  | 522     | .1_Missense_Mut   | NM_006269    | NP_006260    | P56715 | RP1_HUMAN   |                                | 12    | CCCGCGGCCCT   | 0.706 |             |
| - | 2  | 477     | p.S146T JPH1_uc   | NM_020647    | NP_065698    | Q9HDC5 | JPH1_HUMAN  | ic (Potential). MORN 5.        | 1     | GCACGCTCTGG   | 0.687 |             |
| - | 1  | 673     | ydr.1_Missense_M  | NM_138817    | NP_620172    | Q8TCU3 | S7A13_HUMAN | ellular (Potential).           | 1     | TGAAATCGTTCT  | 0.413 |             |
| - | 3  | 986     |                   | NM_203390    | NP_976324    | Q8IXT5 | RB12B_HUMAN |                                | 0     | GTTTTCGAAAA   | 0.403 |             |
| + | 7  | 1001    | p.P301S POP1_uc   | NM_001145860 | NP_001139332 | Q99575 | POP1_HUMAN  |                                | 2     | AAATATCCAGAC  | 0.512 |             |
| - | 1  | 508     |                   | NM_139166    | NP_631905    | Q8N0Z2 | ABRA_HUMAN  |                                | 2     | GCTGTGGAGGA   | 0.587 |             |
| - | 10 | 940     | p.R285K ENPP2_u   | NM_001040092 | NP_001035181 | Q13822 | ENPP2_HUMAN |                                | 7     | ATATTCTCCGCT  | 0.428 |             |
| + | 18 | 2258    |                   | NM_022045    | NP_071328    | Q96DY7 | MTBP_HUMAN  | ith MDM2 (By similarity).      | 3     | GAGATCTAAAG   | 0.363 |             |
| - | 25 | 3413    | 0_splice KIAA019  | NM_014846    | NP_055661    | Q12768 | STRUM_HUMAN |                                | 2     | TACTCACCTTAT  | 0.443 |             |
| - | 6  | 846     | RC6_uc003ytl.2_R  | NM_012472    | NP_036604    | Q86X45 | LRRC6_HUMAN |                                | 2     | TTCAGGAGTAA   | 0.403 |             |
| - | 3  | 981     | RPIN_uc003zbb.2_  | NM_030974    | NP_112236    | Q9H0F6 | SHRPN_HUMAN | ciation (By similarity).       | 1     | TTCCAGGGCTC   | 0.627 |             |
| - | 1  | 1338    | _5'Flank DOCK8_u  | NM_152569    | NP_689782    | Q5T8R8 | CI066_HUMAN |                                | 1     | GGGCTCCCCCG   | 0.607 |             |
| + | 1  | 256     |                   | NM_017913    | NP_060383    | Q7L3B6 | CD37L_HUMAN | elf-association.               | 0     | CTCGGGCCGAG   | 0.687 |             |
| - | 1  | 2808    | p.A581S RANBP6    | NM_012416    | NP_036548    | O60518 | RNBP6_HUMAN | HEAT 6.                        | 3     | AGCAGCAGCTT   | 0.418 |             |
| - | 23 | 2707    | 3zkl.2_Missense_M | NM_002839    | NP_002830    | P23468 | PTPRD_HUMAN | III 4. Extracellular (Potentia | 22    | CGAAGGAATTC   | 0.478 |             |
| - | 1  | 436     |                   | NM_002175    | NP_002166    | P01568 | IFN21_HUMAN |                                | 2     | CTCTTCCACCC   | 0.468 |             |
| + | 2  | 1059    |                   | NM_212558    | NP_997723    | Q68D42 | TM215_HUMAN |                                | 0     | ACCACGAGACC   | 0.488 | rs147544032 |
| - | 3  | 564_565 | pt.2_Missense_M   | NM_001039803 | NP_001034892 | Q8IZL9 | CDK20_HUMAN | rotein kinase.                 | 1     | CAGATCCGACAC  | 0.599 | rs139270796 |
| + | 7  | 1254    | sh.2_Missense_M   | NM_014282    | NP_055097    | Q5JVS0 | HABP4_HUMAN |                                | 1     | TGGGCGTGGAG   | 0.552 | rs141094261 |

|   |    |       |                                                 |              |              |        |              |                            |     |               |       |             |
|---|----|-------|-------------------------------------------------|--------------|--------------|--------|--------------|----------------------------|-----|---------------|-------|-------------|
| - | 4  | 434   |                                                 | NM_000035    | NP_000026    | P05062 | ALDOB_HUMAN  |                            | 1   | TGTTCTGCAAC   | 0.408 |             |
| - | 2  | 422   | _p.L57F PHF19_u                                 | NM_015651    | NP_056466    | Q5T6S3 | PHF19_HUMAN  |                            | 2   | CCCGAGGTAGT   | 0.562 |             |
| - | 4  | 532   | L_uc004bna.2_3'                                 | NM_005388    | NP_005379    | Q13371 | PHLP_HUMAN   |                            | 0   | TCCTTCCATTCC  | 0.478 |             |
| - | 3  | 284   | _uc004brb.1_5'Fla                               | NM_000976    | NP_000967    | P30050 | RL12_HUMAN   |                            | 0   | CTCTGTTCTGAA  | 0.502 |             |
| - | 9  | 1270  | b.2_Missense_Mu                                 | NM_021804    | NP_068576    | Q9BYF1 | ACE2_HUMAN   | cellular (Potential).      | 3   | GAAAGTCGTCCA  | 0.408 |             |
| - | 6  | 1131  | ID2_uc010nfb.2_Ir                               | NM_153346    | NP_699177    | Q8NDZ0 | BEND2_HUMAN  |                            | 5   | TAATTTCCCATTA | 0.294 |             |
| - | 6  | 650   | p.P159S MAP7D2                                  | NM_152780    | NP_689993    | Q96T17 | MA7D2_HUMAN  |                            | 3   | AAGAGGGCCAA   | 0.443 |             |
| - | 1  | 2311  |                                                 | NM_153270    | NP_695002    | Q8N239 | KLH34_HUMAN  | Kelch 6.                   | 1   | CGTTGCGGGTAC  | 0.692 |             |
| + | 1  | 2650  |                                                 | NM_001013736 | NP_001013758 | Q5HY64 | FA47C_HUMAN  |                            | 3   | GTGCAGAGCAA   | 0.458 |             |
| - | 2  | 2527  |                                                 | NM_152424    | NP_689637    | Q5JTC6 | F123B_HUMAN  | p.0?(40)                   | 112 | ATCTTCAGGGG   | 0.512 |             |
| - | 5  | 1372  | w.2_Missense_Mu                                 | NM_183353    | NP_899196    | Q9NVW2 | RNF12_HUMAN  |                            | 2   | AACCTCCTCGT   | 0.458 |             |
| - | 3  | 942   | npd.2_Missense_                                 | NM_000354    | NP_000345    | P05543 | THBG_HUMAN   |                            | 0   | AAATGGAAAAC   | 0.428 |             |
| + | 16 | 2728  | C4_uc004emp.3_I                                 | NM_017752    | NP_060222    | Q0IIM8 | TBC8B_HUMAN  |                            | 4   | GGGCTCATTCT   | 0.408 |             |
| + | 27 | 3429  | p.Y1054F ALG13_uc011mta.1_Missense_Mutation_p.Y |              |              | Q9NP73 | ALG13_HUMAN  |                            | 1   | CTCATTATGTACC | 0.393 |             |
| + | 31 | 3359  | qq.2_Missense_M                                 | NM_144658    | NP_653259    | Q5JSL3 | DOC11_HUMAN  |                            | 3   | CAGATTCAAATC  | 0.299 |             |
| + | 2  | 295   | I_5'Flank LOC100:                               | NM_001152    | NP_001143    | P05141 | ADT2_HUMAN   | Solcar 1.                  | 1   | GGTCCGTATTC   | 0.512 |             |
| - | 1  | 1146  |                                                 | NM_138289    | NP_612146    | Q8TDG2 | ACTT1_HUMAN  |                            | 5   | CACTTCCTTCAT  | 0.493 |             |
| + | 7  | 752   | num.1_Missense_                                 | NM_003399    | NP_003390    | O43895 | XPP2_HUMAN   |                            | 0   | AGTTATGATCTG  | 0.507 |             |
| + | 5  | 1249  | p.R242C ZNF449_                                 | NM_152695    | NP_689908    | Q6P9G9 | ZN449_HUMAN  | C2H2-type 2.               | 2   | TCCTTCGTAGTT  | 0.433 |             |
| - | 19 | 2219  | P11C_uc004fba.2                                 | NM_173694    | NP_775965    | Q8NB49 | AT11C_HUMAN  | lasmic (Potential).        | 8   | CAATGGTTTTTC  | 0.408 |             |
| + | 4  | 551   | EC1_uc010nsl.1_I                                | NM_005462    | NP_005453    | O60732 | MAGC1_HUMAN  |                            | 4   | CTGAGGGCGAC   | 0.582 |             |
| + | 3  | 958   | r.2_Nonsense_Mul                                | NM_002025    | NP_002016    | P51816 | AFF2_HUMAN   |                            | 5   | GTGGTCACGTG   | 0.468 |             |
| - | 9  | 1523  | u.1_Missense_Mu                                 | NM_001110556 | NP_001104026 | P21333 | FLNA_HUMAN   | Filamin 2.                 | 6   | TCGTGCCCATG   | 0.682 |             |
| + | 5  | 506   | utation_p.N99S S                                | NM_001363    | NP_001354    | O60832 | DKC1_HUMAN   |                            | 0   | CTCTAACCCCT   | 0.453 |             |
| - | 2  | 720   |                                                 | NM_171998    | NP_741995    | Q96DA2 | RB39B_HUMAN  |                            | 0   | CTACTTCATGCC  | 0.483 |             |
| - | 1  | 436   |                                                 | NM_171998    | NP_741995    | Q96DA2 | RB39B_HUMAN  |                            | 0   | TGGCTCGATCTC  | 0.622 |             |
| - | 13 | 1569  | p.V301M NOC2L_                                  | NM_015658    | NP_056473    | Q9Y3T9 | NOC2L_HUMAN  |                            | 2   | GATCACGGAGA   | 0.637 |             |
| - | 8  | 883   | _p.R72Q NOC2L_I                                 | NM_015658    | NP_056473    | Q9Y3T9 | NOC2L_HUMAN  |                            | 2   | TGTGCCGAGC    | 0.622 |             |
| + | 17 | 2883  |                                                 | NM_198576    | NP_940978    | O00468 | AGRIN_HUMAN  | Kazal-like 9.              | 3   | CATACGGCAAC   | 0.627 |             |
| + | 5  | 944   |                                                 | NM_138705    | NP_619650    | Q8TD86 | CALL6_HUMAN  | band 4. Potential.         | 0   | CATCGACTATC   | 0.632 |             |
| - | 18 | 2317  | wkz.1_Missense_M                                | NM_001080484 | NP_001073953 | Q9C0B2 | K1751_HUMAN  |                            | 1   | CTCCTCCTCT    | 0.697 |             |
| - | 14 | 1977  | kk.2_Missense_Mi                                | NM_001409    | NP_001400    | O75095 | MEGF6_HUMAN  | EGF-like 10.               | 1   | GCAGCGGCAGG   | 0.582 |             |
| + | 9  | 1094  |                                                 | NM_015215    | NP_056030    | Q9Y6Y1 | CMTA1_HUMAN  |                            | 9   | AGGGGGGTACG   | 0.617 |             |
| + | 2  | 215   | 6_uc009vmn.2_Int                                | NM_001215    | NP_001206    | P23280 | CAH6_HUMAN   |                            | 2   | CTGAAGGGGC    | 0.602 |             |
| + | 5  | 1212  | .R167C UBE4B_u                                  | NM_001105562 | NP_001099032 | O95155 | UBE4B_HUMAN  |                            | 4   | CTTCCGTGTCT   | 0.463 |             |
| + | 27 | 3098  | qz.2_Nonsense_M                                 | NM_015074    | NP_055889    | O60333 | KIF1B_HUMAN  |                            | 3   | ACGACCGATCCC  | 0.532 |             |
| - | 11 | 1360  |                                                 | NM_006610    | NP_006601    | O00187 | MASP2_HUMAN  | peptidase S1.              | 4   | CCCTCCATATAT  | 0.448 |             |
| + | 8  | 1255  | ri.2_Missense_Mu                                | NM_014874    | NP_055689    | O95140 | MFN2_HUMAN   | lasmic (Potential).        | 1   | AGCCCAGGTAC   | 0.567 |             |
| + | 6  | 791   | Jobc.1_Missense_                                | NM_001243    | NP_001234    | P28908 | TNR8_HUMAN   | cellular (Potential).      | 5   | TGCCAGCACCA   | 0.622 | rs151315213 |
| + | 19 | 4402  | p.R1421C VPS13C                                 | NM_015378    | NP_056193    | Q5THJ4 | VP13D_HUMAN  |                            | 5   | GTGACCGTCTG   | 0.488 | rs148968489 |
| + | 63 | 12049 | S13D_uc001atx.2_                                | NM_015378    | NP_056193    | Q5THJ4 | VP13D_HUMAN  |                            | 5   | ACCTCCATGAA   | 0.358 |             |
| + | 3  | 1466  |                                                 | NM_001080830 | NP_001074299 | O95522 | PRA12_HUMAN  |                            | 3   | TCAGGGTGGAT   | 0.498 |             |
| + | 4  | 1385  |                                                 | NM_023013    | NP_075389    | O95521 | PRAM1_HUMAN  |                            | 0   | ATTGGGAGATC   | 0.572 |             |
| - | 1  | 474   |                                                 | NM_001136561 | NP_001130033 | B2RXH8 | B2RXH8_HUMAN |                            | 0   | TGCTGGGAAAC   | 0.517 |             |
| - | 14 | 2254  | obr.1_Missense_M                                | NM_003443    | NP_003434    | Q13105 | ZBT17_HUMAN  | MYC. Interaction with HCFC | 0   | CTGTGCTGCC    | 0.652 | rs148819837 |
| - | 2  | 412   | I_5'Flank ARHGEF                                | NM_153213    | NP_694945    | Q8IW93 | ARHGJ_HUMAN  |                            | 3   | TCCCCCGCTG    | 0.682 |             |
| - | 20 | 2417  | ense_Mutation_p.f                               | NM_022089    | NP_071372    | Q9NQ11 | AT132_HUMAN  | lasmic (Potential).        | 4   | GATGGGGTCC    | 0.627 |             |

|   |    |           |                    |              |              |        |             |                         |    |               |       |
|---|----|-----------|--------------------|--------------|--------------|--------|-------------|-------------------------|----|---------------|-------|
| + | 7  | 1452      | av.1_Missense_Mi   | NM_032880    | NP_116269    | Q96ID5 | IGS21_HUMAN | Ig-like 2.              | 4  | 3TAGGGGACACA  | 0.582 |
| - | 45 | 6630_6631 | se_Mutation_p.A14  | NM_020765    | NP_065816    | Q5T4S7 | UBR4_HUMAN  |                         | 25 | ACCTTCGCTTTA  | 0.436 |
| - | 33 | 4680      | m.1_Missense_Mt    | NM_020765    | NP_065816    | Q5T4S7 | UBR4_HUMAN  |                         | 25 | ACAGCAGCATTAT | 0.473 |
| + | 4  | 593       | .2_Missense_Muta   | NM_017765    | NP_060235    | Q6ZP29 | PQLC2_HUMAN | 1.Helical; (Potential). | 0  | TTGGCGGAGAC   | 0.617 |
| - | 14 | 1585      | ico.1_Missense_M   | NM_181719    | NP_859070    | Q5TGY1 | TMCO4_HUMAN |                         | 0  | CCCTCCGGAAA   | 0.502 |
| - | 5  | 586       | oda.1_Missense_h   | NM_001161729 | NP_001155201 | P14555 | PA2GA_HUMAN |                         | 0  | TAGGTCGCTCTTG | 0.458 |
| - | 3  | 313       | oda.1_Missense_l   | NM_001161729 | NP_001155201 | P14555 | PA2GA_HUMAN |                         | 0  | CTGTCTGCTCAAC | 0.552 |
| - | 68 | 9092      | iqd.2_Splice_Site  | NM_005529    | NP_005520    | P98160 | PGBM_HUMAN  |                         | 9  | ACTCACGGTAG   | 0.652 |
| + | 13 | 1720      | igj.2_Missense_Mt  | NM_015013    | NP_055828    | O60341 | KDM1A_HUMAN | 1.ethylase activity.    | 2  | ATCAAGAGACA   | 0.383 |
| - | 13 | 1232      | nse_Mutation_p.R:  | NM_017707    | NP_060177    | Q8TDY4 | ASAP3_HUMAN | PH.                     | 3  | CGTCCGGTTGT   | 0.677 |
| - | 3  | 976       |                    | NM_004091    | NP_004082    | Q14209 | E2F2_HUMAN  | 1.box.Potential.        | 4  | TTCTTGC GGATG | 0.602 |
| + | 11 | 1401      | p.R447Q GRHL3_     | NM_021180    | NP_067003    | Q8TE85 | GRHL3_HUMAN |                         | 1  | CCCTCGGCCAG   | 0.632 |
| + | 1  | 65        | 3S CNKSR1_uc0i     | NM_006314    | NP_006305    | Q969H4 | CNKR1_HUMAN |                         | 2  | TGGAACCGGTA   | 0.637 |
| + | 12 | 1727      | TC1_uc001bnp.1_    | NM_015023    | NP_055838    | Q8N5D0 | WDTC1_HUMAN | TPR 2.                  | 2  | CCATGCTTTATC  | 0.552 |
| + | 2  | 753       |                    | NM_005281    | NP_005272    | P46089 | GPR3_HUMAN  | 1.asmic (Potential).    | 1  | GCATCGTCTGCT  | 0.587 |
| - | 2  | 434       | NA MATN1_uc001     | NM_002379    | NP_002370    | P21941 | MATN1_HUMAN | 1.VWFA 1.               | 1  | TGCATCGCCGA   | 0.617 |
| - | 5  | 514       | _p.V126L NKAIN1    | NM_024522    | NP_078798    | Q4KMZ8 | NKAI1_HUMAN | 1.asmic (Potential).    | 1  | GAACTTTGCT    | 0.627 |
| - | 6  | 864       | OL16A1_uc001btl.   | NM_001856    | NP_001847    | Q07092 | COGA1_HUMAN | 1.P N-terminal.         | 8  | CCAACGCAAGT   | 0.637 |
| - | 16 | 2893      | in_p.R780C BAI2_   | NM_001703    | NP_001694    | O60241 | BAI2_HUMAN  | 1.ellular (Potential).  | 13 | GGGGCGCACAC   | 0.627 |
| - | 10 | 2291      | o.R745W SPOCD1     | NM_144569    | NP_653170    | Q6ZMY3 | SPOC1_HUMAN |                         | 6  | GTCCCGCTGAA   | 0.368 |
| - | 5  | 1840      |                    | NM_018207    | NP_060677    | Q9BVG3 | TRI62_HUMAN | 1.330.2/SPRY.           | 0  | GCTCCGTGCAG   | 0.592 |
| - | 3  | 1272      |                    | NM_018207    | NP_060677    | Q9BVG3 | TRI62_HUMAN | 1.Potential.            | 0  | CTGCTCGATGTC  | 0.672 |
| + | 2  | 419       | xt.2_Missense_Mt   | NM_032884    | NP_116273    | Q6P1W5 | CA094_HUMAN |                         | 0  | CAGCAGGCAGG   | 0.577 |
| - | 3  | 576       | bw.3_Missense_M    | NM_001099439 | NP_001092909 | Q5JZY3 | EPHAA_HUMAN | 1.ellular (Potential).  | 8  | GTCGCCCTGCG   | 0.687 |
| + | 7  | 731       | P11L_uc010oil.1_f  | NM_016037    | NP_057121    | Q9Y3A2 | UTP11_HUMAN |                         | 0  | TTGTTCGTTATTG | 0.398 |
| + | 14 | 1573      | cda.1_Splice_Site  | NM_012090    | NP_036222    | Q9UPN3 | MACF1_HUMAN |                         | 16 | AGGCTGTAAGT   | 0.418 |
| + | 1  | 3841      | i.1_Intron MACF1_  | NM_015038    | NP_055853    | O94854 | K0754_HUMAN | 1.Ala-rich.1.2.         | 0  | AGCCACCTCC    | 0.721 |
| + | 4  | 528       | in.2_Intron CCDC3  | NM_001080850 | NP_001074319 | Q5VVM6 | CCD30_HUMAN |                         | 0  | CAGAGGAACTC   | 0.299 |
| + | 15 | 2538      | q.2_Missense_Mut   | NM_005424    | NP_005415    | P35590 | TIE1_HUMAN  | 1.asmic (Potential).    | 7  | TACCCGGCGGC   | 0.607 |
| + | 11 | 1472      |                    | NM_015284    | NP_056099    | Q5T011 | SZT2_HUMAN  |                         | 0  | GACCCGGTGTC   | 0.592 |
| + | 47 | 6587      | J467_uc001cjl.1_5  | NM_015284    | NP_056099    | Q5T011 | SZT2_HUMAN  |                         | 0  | CGCCCGCAGGT   | 0.567 |
| - | 5  | 737       | 9_uc009vxd.2_Rf    | NM_201649    | NP_964012    | P48067 | SC6A9_HUMAN |                         | 0  | CATAGCCCACT   | 0.478 |
| + | 4  | 426       | okt.1_Missense_M   | NM_001034024 | NP_001029196 | Q9NPF5 | DMAP1_HUMAN |                         | 0  | GGCGACGTGCA   | 0.572 |
| + | 10 | 1348      | ym.2_Missense_M    | NM_000779    | NP_000770    | P13584 | CP4B1_HUMAN |                         | 2  | CCGACCTGAG    | 0.582 |
| + | 4  | 551       | p.R167Q CYP4A2     | NM_001010969 | NP_001010969 | Q5TCH4 | CP4AM_HUMAN |                         | 4  | TGTACGAGTGA   | 0.567 |
| - | 4  | 1208      | AL1_uc001cay.2_h   | NM_003189    | NP_003180    | P17542 | TAL1_HUMAN  | 1.-loop-helix motif.    | 1  | CTTGCGGAGCT   | 0.567 |
| + | 2  | 399       | _p.S61N ELAVL4_1   | NM_021952    | NP_068771    | P26378 | ELAV4_HUMAN |                         | 2  | TGACAGCAAAA   | 0.463 |
| + | 8  | 1127      | nr.1_Missense_Mt   | NM_153703    | NP_714914    | Q725L7 | PODN_HUMAN  | LRR 10.                 | 2  | TGGACGCGAAT   | 0.602 |
| - | 4  | 1390      |                    | NM_147193    | NP_671726    | Q8NBF1 | GLIS1_HUMAN | 1.C2H2-type 3.          | 1  | CAGCGTGAGAA   | 0.627 |
| + | 8  | 944       | p.V166M ACOT11     | NM_015547    | NP_056362    | Q8WXI4 | ACO11_HUMAN | 1.zyme A hydrolase 2.   | 1  | CCATCGTGAA    | 0.597 |
| - | 2  | 481       |                    | NM_152268    | NP_689481    | Q7L3T8 | SYPM_HUMAN  |                         | 2  | CCCACGGTTG    | 0.557 |
| - | 6  | 769       | m.1_Nonsense_M     | NM_002227    | NP_002218    | P23458 | JAK1_HUMAN  | FERM.                   | 61 | GTCTCGAATAG   | 0.498 |
| - | 11 | 1844      | 73_uc001dgi.3_Mi   | NM_001002912 | NP_001002912 | Q5RHP9 | CA173_HUMAN | 1.Glu-rich.             | 5  | TCTCTTTTTCAG  | 0.403 |
| - | 10 | 1690      | 73_uc001dgi.3_Mi   | NM_001002912 | NP_001002912 | Q5RHP9 | CA173_HUMAN | 1.Glu-rich.             | 5  | TATTTTCTGGTC  | 0.358 |
| - | 2  | 722       | uc001dla.1_5'Flanl | NM_003921    | NP_003912    | O95999 | BCL10_HUMAN |                         | 2  | GGGACGGTGCG   | 0.726 |
| - | 8  | 1565      | P2_uc001dmy.1_F    | NM_004120    | NP_004111    | P32456 | GBP2_HUMAN  |                         | 1  | GAGACGGTAAC   | 0.443 |
| - | 27 | 4218      |                    | NM_000350    | NP_000341    | P78363 | ABCA4_HUMAN | 1.Cytoplasmic.          | 12 | GAAATCCTTGT   | 0.607 |

rs148324464

rs145929825

rs148564902

rs139645585

|   |    |      |                      |              |              |        |             |    |               |       |             |
|---|----|------|----------------------|--------------|--------------|--------|-------------|----|---------------|-------|-------------|
| - | 13 | 1706 | RHGAP29_uc001c       | NM_004815    | NP_004806    | Q52LW3 | RHG29_HUMAN | 11 | FGTAAACTGTCTC | 0.438 |             |
| - | 8  | 792  | γz.3_Missense_Mt     | NM_001839    | NP_001830    | Q15417 | CNN3_HUMAN  | 0  | CCACCGGCTGT   | 0.448 |             |
| - | 1  | 96   | FM3_uc001dvi.2_l     | NM_058170    | NP_477518    | Q96PB7 | NOE3_HUMAN  | 3  | AGCGCCAAGCT   | 0.547 |             |
| - | 40 | 3380 | γ.G1033E COL11A      | NM_001854    | NP_001845    | P12107 | COBA1_HUMAN | 12 | CTGGTCCATCT   | 0.378 |             |
| + | 19 | 2588 | g.1_Missense_Mur     | NM_020775    | NP_065826    | Q6UXG2 | K1324_HUMAN | 5  | TCGCGTCAGG    | 0.532 |             |
| + | 8  | 915  | ao.2_Missense_Mt     | NM_004000    | NP_003991    | Q15782 | CH3L2_HUMAN | 1  | CCACCGTGGGG   | 0.577 | rs140247314 |
| + | 8  | 1832 | vhg.1_Missense_Iv    | NM_006699    | NP_006690    | O60476 | MA1A2_HUMAN | 0  | ATGGATCGTCCA  | 0.333 |             |
| - | 2  | 316  | ehg.2_Missense_I     | NM_017686    | NP_060156    | Q9NXN4 | GDAP2_HUMAN | 2  | AAGGTGCACCT   | 0.398 |             |
| - | 3  | 532  |                      | NM_001080470 | NP_001073939 | Q5TEC3 | ZN697_HUMAN | 1  | AAGTACGGGAG   | 0.682 |             |
| - | 1  | 754  |                      | NM_001047980 | NP_001041445 | P0C2Y1 | NBPF7_HUMAN | 2  | GGGGCGCAATT   | 0.483 |             |
| - | 11 | 2088 | p.C611Y NOTCH2       | NM_024408    | NP_077719    | Q04721 | NOTC2_HUMAN | 27 | CTGTAACATTC   | 0.542 |             |
| - | 1  | 242  |                      | NM_001123068 | NP_001116540 | A2BFH1 | PAL4G_HUMAN | 0  | CTATTAGGGTGT  | 0.468 |             |
| + | 12 | 1397 | i_RNA NBPF9_uc       | NM_001037675 | NP_001032764 | Q3BBV1 | NBPFK_HUMAN | 0  | ACGATGACAATC  | 0.423 |             |
| + | 4  | 1320 | -IFE2_uc001enk.2     | NM_213653    | NP_998818    | Q6ZVN8 | RGMC_HUMAN  | 1  | AGAGCGCAATC   | 0.542 |             |
| + | 15 | 1818 | sb.1_Missense_M      | NM_173638    | NP_775909    | Q8N660 | NBPFH_HUMAN | 0  | TAGATGTTATTC  | 0.473 |             |
| - | 20 | 2194 | b.1_Missense_Mur     | NM_001668    | NP_001659    | P27540 | ARNT_HUMAN  | 9  | TTGGGGCACCA   | 0.547 |             |
| - | 8  | 940  | p.R266Q ARNT_u       | NM_001668    | NP_001659    | P27540 | ARNT_HUMAN  | 9  | CTCATTCGGCAA  | 0.438 |             |
| - | 3  | 5923 |                      | NM_002016    | NP_002007    | P20930 | FILA_HUMAN  | 16 | CTCTGTCTTCGT  | 0.567 |             |
| + | 3  | 296  | l_p.G49E SPRR3_      | NM_005416    | NP_005407    | Q9UBC9 | SPRR3_HUMAN | 1  | ACCTGGAAACA   | 0.547 |             |
| + | 14 | 2579 | p.G466S NPR1_u       | NM_000906    | NP_000897    | P16066 | ANPRA_HUMAN | 7  | AGGCTGGTGAC   | 0.602 |             |
| - | 7  | 1245 |                      | NM_020699    | NP_065750    | Q8WXI9 | P66B_HUMAN  | 0  | GTGGCGAGGAC   | 0.522 |             |
| + | 7  | 2065 | _uc001fgg.1_3'UT     | NM_025207    | NP_079483    | Q8NFF5 | FAD1_HUMAN  | 3  | ACATACCGTCCA  | 0.607 |             |
| - | 9  | 1107 | _p.R362W THBS3       | NM_007112    | NP_009043    | P49746 | TSP3_HUMAN  | 5  | GGCCCGGCAT    | 0.597 | rs35484178  |
| + | 2  | 848  | _uc001fkl.2_5'Flar   | NM_001105203 | NP_001098673 | Q9BVN2 | RUSC1_HUMAN | 2  | CAGGATCTCCCT  | 0.567 |             |
| - | 21 | 4514 | N4L_uc001fmb.3       | NM_001037533 | NP_001032622 | Q3T8J9 | GON4L_HUMAN | 3  | ATCTTCTCATC   | 0.478 |             |
| + | 5  | 1108 | T LMNA_uc010pc       | NM_170707    | NP_733821    | P02545 | LMNA_HUMAN  | 2  | TTGGGGCTGCC   | 0.637 |             |
| + | 15 | 1966 | p.G336E NTRK1_u      | NM_002529    | NP_002520    | P04629 | NTRK1_HUMAN | 17 | TGCGGGGATGG   | 0.642 |             |
| + | 18 | 2517 | γk.1_Missense_Mt     | NM_001080471 | NP_001073940 | Q5VY43 | PEAR1_HUMAN | 3  | TGGACGGCTCC   | 0.607 |             |
| - | 11 | 2622 | sm.2_Missense_M      | NM_031281    | NP_112571    | Q96RD9 | FCRL5_HUMAN | 6  | ATTGTGCGCCT   | 0.557 |             |
| - | 29 | 4223 |                      | NM_003126    | NP_003117    | P02549 | SPTA1_HUMAN | 8  | GGGAGCCTCTG   | 0.483 |             |
| + | 1  | 1263 |                      | NR_024151    |              |        |             | 0  | CCACTCGCATC   | 0.607 |             |
| + | 5  | 1541 | p.R389Q POGK_u       | NM_017542    | NP_060012    | Q9P215 | POGK_HUMAN  | 1  | CTTCCGGGGCC   | 0.393 |             |
| + | 2  | 135  |                      | NM_002995    | NP_002986    | P47992 | XCL1_HUMAN  | 0  | CCCAGCGACTG   | 0.468 |             |
| + | 8  | 1827 | N_uc010pmx.1_Inl     | NM_022093    | NP_071376    | Q9UQP3 | TENN_HUMAN  | 9  | ACCAAGAGACC   | 0.602 |             |
| + | 7  | 1364 | p.R101Q FAM5B_       | NM_021165    | NP_066988    | Q9C0B6 | FAM5B_HUMAN | 6  | TGACCGGTTCC   | 0.567 |             |
| - | 3  | 933  | l ANGPTL1_uc001      | NM_004673    | NP_004664    | Q95841 | ANGL1_HUMAN | 0  | CAGTTGGGAAA   | 0.388 |             |
| - | 2  | 100  | C_uc001grz.2_5'Fl    | NM_002597    | NP_002588    | P20941 | PHOS_HUMAN  | 1  | TCCTCCAAACT   | 0.318 |             |
| + | 12 | 4303 | ise_Mutation_p.R1    | NM_201253    | NP_957705    | P82279 | CRUM1_HUMAN | 9  | GCTCCCGAGTG   | 0.532 |             |
| - | 8  | 2173 | γpj.1_Missense_Mt    | NM_014875    | NP_055690    | Q15058 | KIF14_HUMAN | 7  | TGGGTCAATCAC  | 0.388 | rs144936292 |
| - | 18 | 3003 | zl.1_Nonsense_M      | NM_017596    | NP_060066    | O75037 | KI21B_HUMAN | 6  | TTACCGGGCAG   | 0.647 |             |
| + | 11 | 1286 | IA4_uc010pqf.1_5'UTR |              |              | O75335 | LIPA4_HUMAN | 5  | TCAGCGGGACC   | 0.642 |             |
| - | 16 | 2551 | HA6_uc009xau.1       | NM_014935    | NP_055750    | Q9Y2H5 | PKHA6_HUMAN | 4  | CTCTGGGGGTG   | 0.517 |             |
| - | 6  | 753  | ibv.1_Missense_M     | NM_005057    | NP_005048    | Q15291 | RBBP5_HUMAN | 1  | CTTCCGGGGCA   | 0.383 |             |
| + | 3  | 1142 | γrf.1_Missense_Mt    | NM_014858    | NP_055673    | O75069 | TMCC2_HUMAN | 1  | CGACGCGAGCA   | 0.677 |             |
| + | 4  | 503  | z.2_RNA CR1L_uc      | NM_175710    | NP_783641    | Q2VPA4 | CR1L_HUMAN  | 0  | GATACCGACTC   | 0.343 |             |
| - | 29 | 5946 | IA2_uc001hgy.2_5     | NM_025179    | NP_079455    | O75051 | PLXA2_HUMAN | 3  | TCATGGATGCT   | 0.572 |             |
| + | 9  | 1388 |                      | NM_016343    | NP_057427    | P49454 | CENPF_HUMAN | 13 | ACAGCTTCTT    | 0.532 |             |

|   |    |       |                     |              |              |        |             |                               |    |                |       |             |
|---|----|-------|---------------------|--------------|--------------|--------|-------------|-------------------------------|----|----------------|-------|-------------|
| - | 63 | 13784 |                     | NM_206933    | NP_996816    | O75445 | USH2A_HUMAN | II 30. Extracellular (Potenti | 26 | :TTGGAGGTTTCC  | 0.453 |             |
| + | 8  | 831   | 'ATA17_uc001hli.2   | NM_138796    | NP_620151    | Q96L03 | SPT17_HUMAN |                               | 1  | :CAATCGATGAG   | 0.468 |             |
| - | 8  | 849   | :2_RNA RAB3GAF      | NM_012414    | NP_036546    | Q9H2M9 | RBGPR_HUMAN |                               | 1  | :AGCACGAAGAG   | 0.299 | rs144569017 |
| + | 3  | 1284  |                     | NM_021958    | NP_068777    | Q14774 | HLX_HUMAN   | Homeobox.                     | 2  | :GAAGCGTTCATC  | 0.562 |             |
| - | 7  | 1103  | 42C TP53BP2_uc      | NM_001031685 | NP_001026855 | Q13625 | ASPP2_HUMAN |                               | 3  | GAGGCGATCAAC   | 0.488 |             |
| + | 4  | 1572  | d.1_Missense_Mu     | NM_014777    | NP_055592    | Q14146 | URB2_HUMAN  |                               | 3  | :CTGTGCTCCAGC  | 0.572 |             |
| + | 6  | 1702  |                     | NM_001004342 | NP_001004342 | Q6ZTA4 | TRI67_HUMAN | onectin type-III.             | 4  | ACGACGGTGCCG   | 0.632 |             |
| - | 10 | 3555  | rvf.2_Missense_M    | NM_020808    | NP_065859    | Q9P2F8 | SI1L2_HUMAN |                               | 6  | CCCGCCGGGTC    | 0.522 |             |
| - | 7  | 2978  | 1L2_uc001hvf.2_5'   | NM_020808    | NP_065859    | Q9P2F8 | SI1L2_HUMAN |                               | 6  | TACTTACTACTAA  | 0.393 |             |
| - | 5  | 1565  | u.2_RNA PCNXL2      | NM_014801    | NP_055616    | A6NKB5 | PCX2_HUMAN  |                               | 2  | :ACAGGGAACAC   | 0.577 |             |
| - | 5  | 965   | u.2_RNA PCNXL2      | NM_014801    | NP_055616    | A6NKB5 | PCX2_HUMAN  |                               | 2  | :ACCCTCGGATC   | 0.498 |             |
| - | 30 | 4744  |                     | NM_005646    | NP_005637    | Q13395 | TARB1_HUMAN |                               | 3  | :ACAAACGTCCA   | 0.458 |             |
| + | 1  | 905   | :L13_uc001ids.2_li  | NM_001001963 | NP_001001963 | Q8NGY9 | OR2L8_HUMAN | lasmic (Potential).           | 2  | :GACACGAGTGA   | 0.473 |             |
| + | 1  | 28    | :L13_uc001ids.2_li  | NM_001004491 | NP_001004491 | Q8NG84 | O2AK2_HUMAN | ellular (Potential).          | 2  | CCTTTGATATTTT  | 0.189 |             |
| + | 1  | 120   |                     | NM_001004690 | NP_001004690 | A3KFT3 | OR2M5_HUMAN | Name=1; (Potential).          | 3  | :TTCATGGGAAA   | 0.522 |             |
| + | 1  | 571   |                     | NM_017504    | NP_059974    | Q96R27 | OR2M4_HUMAN | ellular (Potential).          | 2  | :GCACAGAAACA   | 0.408 |             |
| - | 1  | 47    |                     | NM_001004692 | NP_001004692 | Q8NG77 | O2T12_HUMAN | ellular (Potential).          | 3  | TGGTTAAAGAGT   | 0.448 |             |
| - | 5  | 667   | ion_p.R167K ZNF     | NM_017865    | NP_060335    | Q9BU19 | ZN692_HUMAN |                               | 0  | :GAGTCCCTCTCA  | 0.507 |             |
| - | 4  | 1118  | p.A336D TUBB8_      | NM_177987    | NP_817124    | Q3ZCM7 | TBB8_HUMAN  |                               | 1  | TGGATGGCCGTA   | 0.532 |             |
| - | 21 | 2617  | p.V229M DIP2C_u     | NM_014974    | NP_055789    | Q9Y2E4 | DIP2C_HUMAN |                               | 7  | :AGCCACGATCA   | 0.647 |             |
| - | 3  | 274   | uc009xhk.1_Silent   | NM_014974    | NP_055789    | Q9Y2E4 | DIP2C_HUMAN |                               | 7  | :CCGGCGTTCTT   | 0.572 |             |
| - | 3  | 370   | h.2_RNA ASB13_      | NM_024701    | NP_078977    | Q8WXX3 | ASB13_HUMAN | ANK 3.                        | 1  | :CCTTGGCCCCCG  | 0.662 |             |
| - | 4  | 616   | i.1_intron IL2RA_u  | NM_000417    | NP_000408    | P01589 | IL2RA_HUMAN | xtracellular (Potential).     | 2  | :CTGGACGCACT   | 0.532 |             |
| + | 3  | 1738  |                     | NM_031923    | NP_114129    | Q5VVG9 | TAF3_HUMAN  | Lys-rich.                     | 1  | GAATTTCTTAAAG  | 0.264 |             |
| + | 7  | 2716  |                     | NM_031923    | NP_114129    | Q5VVG9 | TAF3_HUMAN  | PHD-type.                     | 1  | :AGATGCAGTGG   | 0.507 |             |
| - | 8  | 1223  |                     | NM_001010924 | NP_001010924 | Q5VUB5 | F1711_HUMAN | lasmic (Potential).           | 4  | :TTCGCCGCCCG   | 0.617 |             |
| - | 53 | 8393  | JBN_uc009xjr.1_M    | NM_001081    | NP_001072    | O60494 | CUBN_HUMAN  | CUB 20.                       | 19 | AGTCACGACCAC   | 0.428 |             |
| + | 5  | 581   | ivu.3_Missense_M    | NM_030751    | NP_110378    | P37275 | ZEB1_HUMAN  | 2H2-type 1.                   | 5  | CCTGTCCATATTC  | 0.318 |             |
| - | 19 | 2551  | AP12_uc001iwc.1     | NM_018287    | NP_060757    | Q8IWW6 | RHG12_HUMAN | Rho-GAP.                      | 0  | :GACTCGCTGTCT  | 0.413 |             |
| - | 14 | 2618  | p.E693K NRP1_uc     | NM_003873    | NP_003864    | O14786 | NRP1_HUMAN  | ular (Potential). MAM.        | 4  | :ATTTCGTCAGC   | 0.493 | rs139081795 |
| - | 1  | 79    |                     | NM_031866    | NP_114072    | Q9H461 | FZD8_HUMAN  |                               | 0  | :CCGCAGCGCCC   | 0.647 |             |
| + | 5  | 958   | i TMMEM72_uc009x    | NM_001123376 | NP_001116848 | A0PK05 | TMM72_HUMAN |                               | 0  | :ACGACACCCA    | 0.602 |             |
| - | 7  | 1704  | L1_uc009xmu.2_N     | NM_001128324 | NP_001121796 | Q86XD8 | ANUB1_HUMAN |                               | 0  | :TTTACCAGAG    | 0.418 |             |
| - | 4  | 3617  |                     | NM_002900    | NP_002891    | P10745 | RET3_HUMAN  | nate tandem repeats. 4.       | 2  | :CCTCCCAATG    | 0.622 |             |
| - | 4  | 3602  |                     | NM_002900    | NP_002891    | P10745 | RET3_HUMAN  | nate tandem repeats. 4.       | 2  | GGGCCCGGCC     | 0.612 |             |
| + | 4  | 2435  |                     | NM_199459    | NP_955629    | Q711Q0 | CJ071_HUMAN |                               | 0  | :acacacacacaca | 0.433 |             |
| + | 14 | 2036  | y.1_Missense_Mut    | NM_020549    | NP_065574    | P28329 | CLAT_HUMAN  |                               | 3  | :ACTGCGGGAGC   | 0.577 | rs114545628 |
| - | 7  | 1360  | ron uc001jin.2_Intr | NM_001077685 | NP_001071153 | Q5VUJ5 | AGAP7_HUMAN | PH.                           | 0  | :TTGGACCCATG   | 0.547 |             |
| - | 37 | 11059 | K3_uc010qih.1_In    | NM_020987    | NP_066267    | Q12955 | ANK3_HUMAN  |                               | 19 | :AAAATCCCTCTT  | 0.463 |             |
| - | 4  | 878   | ij.1_RNA TMMEM2E    | NM_178505    | NP_848600    | Q6ZUK4 | TMM26_HUMAN | ical; (Potential).            | 0  | :CTCGAGTGATCC  | 0.438 |             |
| + | 1  | 240   | qip.1_Missense_M    | NM_030759    | NP_110386    | Q96F24 | NRBF2_HUMAN |                               | 0  | :TGAAGGACCC    | 0.637 |             |
| + | 12 | 2244  | 'PN_uc009xpt.2_N    | NM_032578    | NP_115967    | Q86TC9 | MYPN_HUMAN  |                               | 5  | :CTAAGGAGTTTC  | 0.453 |             |
| + | 14 | 2676  | rp.2_Missense_Mu    | NM_170744    | NP_734465    | Q8IZJ1 | UNC5B_HUMAN | lasmic (Potential).           | 3  | :GAAACCGCTAA   | 0.617 |             |
| - | 14 | 2065  | iy.2_Missense_Mu    | NM_007265    | NP_009196    | O95905 | SGT1_HUMAN  |                               | 1  | AGCTATAGGATT   | 0.463 |             |
| - | 7  | 742   | n_p.A242V USP54     | NM_152586    | NP_689799    | Q70EL1 | UBP54_HUMAN |                               | 6  | :TGGGAGCATTC   | 0.468 |             |
| - | 7  | 727   | i_p.R237H USP54     | NM_152586    | NP_689799    | Q70EL1 | UBP54_HUMAN |                               | 6  | :ACACACGGCGA   | 0.468 |             |
| - | 31 | 4141  |                     | NM_007055    | NP_008986    | O14802 | RPC1_HUMAN  |                               | 0  | :ATTCCCATGATC  | 0.453 |             |



|   |    |      |                     |              |              |        |             |                           |   |              |       |             |
|---|----|------|---------------------|--------------|--------------|--------|-------------|---------------------------|---|--------------|-------|-------------|
| + | 1  | 387  | uc010qls.1_5'Flanl  | NM_001099692 | NP_001093162 | Q6IS14 | IF5AL_HUMAN |                           | 0 | ACCTTCGTCTCC | 0.547 |             |
| - | 3  | 1383 | nc.1_Missense_Mu    | NM_001017924 | NP_001017924 | A6NDA9 | LRIT2_HUMAN |                           | 2 | ACGTGCCTCTAC | 0.617 |             |
| + | 2  | 406  | i.3_Intron LIPA_ucl | NM_001010987 | NP_001010987 | Q5T764 | IFT1B_HUMAN | TPR 2.                    | 0 | CATGGGCAGAT  | 0.473 |             |
| + | 13 | 1562 | o.R362H HELLS_u     | NM_018063    | NP_060533    | Q9NRZ9 | HELLS_HUMAN |                           | 2 | GAACCGTACAA  | 0.338 |             |
| - | 7  | 978  | M1_uc009xuv.2_3     | NM_020992    | NP_066272    | O00151 | PDLI1_HUMAN | zinc-binding.             | 0 | TGGTGCCACAG  | 0.537 |             |
| + | 9  | 1402 | g.2_Missense_Mu     | NM_004088    | NP_004079    | P04053 | TDT_HUMAN   | interaction with DNTTIP2. | 1 | GCCTCGTCAAAC | 0.483 | rs151142894 |
| - | 13 | 1484 | h.1_Missense_Mu     | NM_003061    | NP_003052    | O75093 | SLIT1_HUMAN | LRR 11.                   | 4 | ACAGGGAGAGC  | 0.587 |             |
| - | 13 | 1668 | ou.1_Missense_M     | NM_015179    | NP_055994    | Q5JTH9 | RRP12_HUMAN |                           | 3 | ACCTTCCTCATC | 0.478 |             |
| - | 18 | 1868 | e_Mutation_p.Q38    | NM_022362    | NP_071757    | Q96T76 | MMS19_HUMAN |                           | 0 | AGCATTGGGGTG | 0.527 |             |
| + | 1  | 122  | 2A_uc010qoy.1_Ir    | NM_018425    | NP_060895    | Q9BTU6 | P4K2A_HUMAN |                           | 2 | CCCCTCGGGCT  | 0.776 |             |
| - | 3  | 975  |                     | NM_003015    | NP_003006    | Q5T4F7 | SFRP5_HUMAN | NTR.                      | 1 | CTTTGCGGCC   | 0.592 |             |
| + | 20 | 2883 |                     | NM_000392    | NP_000383    | Q92887 | MRP2_HUMAN  | smic (By similarity).     | 1 | TAGCCGCAGGT  | 0.483 |             |
| + | 3  | 1075 | e_Mutation_p.R33    | NM_032429    | NP_115805    | Q9BRK4 | LZTS2_HUMAN | Potential.                | 4 | GAGACCGGGAG  | 0.632 |             |
| + | 9  | 1324 | _p.V98I TMEM18C     | NM_024789    | NP_079065    | Q14CX5 | TM180_HUMAN |                           | 1 | ACCGCGTCTTC  | 0.612 |             |
| + | 19 | 3734 | .1_Nonsense_Mut     | NM_014720    | NP_055535    | Q9H2G2 | SLK_HUMAN   |                           | 8 | CCACCGGATCA  | 0.438 |             |
| - | 5  | 440  | i_p.P91S COL17A     | NM_000494    | NP_000485    | Q9UMD9 | COHA1_HUMAN | Helical region (NC        | 5 | GTTGGGCAGAG  | 0.517 |             |
| + | 9  | 1459 |                     | NM_001008723 | NP_001008723 | Q5T655 | CC147_HUMAN | Potential.                | 5 | GGAGCGTGACC  | 0.498 |             |
| - | 5  | 325  | EP1_uc001kyq.1_     | NM_020383    | NP_065116    | Q9NQW7 | XPP1_HUMAN  |                           | 4 | TGGCTGTGCC   | 0.478 |             |
| + | 12 | 1186 | _p.P405S ACSL5_     | NM_203379    | NP_976313    | Q9ULC5 | ACSL5_HUMAN | asmonic (Potential).      | 3 | TGTTTCCC CGC | 0.507 |             |
| - | 13 | 1573 | :16F ABLM1_uc0      | NM_002313    | NP_002304    | O14639 | ABLM1_HUMAN |                           | 1 | AGGGAGAGGGG  | 0.507 |             |
| - | 12 | 1444 | p.R411W ABLM1_      | NM_002313    | NP_002304    | O14639 | ABLM1_HUMAN |                           | 1 | GGACCGATGGA  | 0.552 |             |
| + | 6  | 1387 | se_Mutation_p.L3    | NM_207303    | NP_997186    | Q5VV63 | ATRN1_HUMAN | ar (Potential). Kelch 1.  | 7 | GGTCCTAAAGT  | 0.328 |             |
| + | 12 | 2315 |                     | NM_207303    | NP_997186    | Q5VV63 | ATRN1_HUMAN | tracellular (Potential).  | 7 | TCTTGGGAATC  | 0.358 |             |
| + | 6  | 1247 |                     | NM_002775    | NP_002766    | Q92743 | HTRA1_HUMAN | PDZ.                      | 0 | GCCAAAGGTAG  | 0.537 |             |
| - | 15 | 2044 | _p.A544V ADAM1      | NM_003474    | NP_003465    | O43184 | ADA12_HUMAN | ar (Potential). Cys-rich. | 9 | CAGGGCAGGT   | 0.463 |             |
| + | 27 | 2799 | un.1_Missense_Mu    | NM_001380    | NP_001371    | Q14185 | DOCK1_HUMAN |                           | 9 | TCTCCGACCG   | 0.483 |             |
| - | 1  | 332  |                     | NM_152311    | NP_689524    | Q8NCR9 | CLRN3_HUMAN |                           | 1 | CCCACGAAAAA  | 0.383 |             |
| - | 3  | 558  | oc.1_Missense_Mu    | NM_173575    | NP_775846    | Q86UX6 | ST32C_HUMAN | rotein kinase.            | 5 | CTCCCGAAGA   | 0.582 |             |
| + | 3  | 302  |                     | NM_178537    | NP_848632    | Q76KP1 | B4GN4_HUMAN | enial (Potential).        | 1 | GGGGGGGCTG   | 0.597 |             |
| + | 3  | 578  |                     | NM_007183    | NP_009114    | Q9Y446 | PKP3_HUMAN  | p.G168G(1)                | 1 | AGCGCGGTGGG  | 0.716 |             |
| - | 10 | 2000 | AF1_uc009yfc.1_F    | NM_021008    | NP_066288    | O75398 | DEAF1_HUMAN | Pro-rich.                 | 0 | GTGCCCTTTG   | 0.557 |             |
| + | 1  | 439  |                     | NM_001001480 | NP_001001480 | Q701N2 | KRA55_HUMAN | \ repeats of C-C-X-P.     | 1 | TGGGGGTCCA   | 0.692 |             |
| + | 1  | 451  |                     | NM_001001480 | NP_001001480 | Q701N2 | KRA55_HUMAN | \ repeats of C-C-X-P.     | 1 | GGGGGTGTGT   | 0.692 |             |
| - | 6  | 662  | 5_uc010qxr.1_Mis    | NM_001130520 | NP_001123992 | O14628 | ZN195_HUMAN | Spacer.                   | 0 | TATGCCCTGCT  | 0.353 |             |
| - | 3  | 332  | 1_5'UTR CHRNA1      | NM_020402    | NP_065135    | Q9GZZ6 | ACH10_HUMAN | ellular (Potential).      | 1 | CATCTGTCCAC  | 0.552 | rs138195713 |
| - | 1  | 368  |                     | NM_001005177 | NP_001005177 | Q8NGF1 | O52R1_HUMAN | Name=1; (Potential).      | 1 | ATATTTCCAACA | 0.522 |             |
| - | 1  | 11   |                     | NM_001005238 | NP_001005238 | Q8NGK0 | O51G2_HUMAN | ellular (Potential).      | 2 | GGATCCCAGG   | 0.547 |             |
| - | 1  | 660  | .1_Intron HBE1_uc   | NM_033180    | NP_149420    | Q9Y5P1 | O51B2_HUMAN | Name=5; (Potential).      | 3 | TAAAGAGATC   | 0.398 |             |
| + | 1  | 712  | _uc001mam.1_Int     | NM_001004757 | NP_001004757 | Q8NH59 | O51Q1_HUMAN | asmonic (Potential).      | 1 | GACTCCGTGCC  | 0.488 |             |
| - | 3  | 862  | p.S168N FAM160      | NM_001098794 | NP_001092264 | Q8N612 | F16A2_HUMAN |                           | 2 | GGCTACTGGGC  | 0.597 |             |
| + | 4  | 1055 | 15_uc010rax.1_5'    | NM_013250    | NP_037382    | Q9UL58 | ZN215_HUMAN |                           | 0 | CTCAGAACAG   | 0.408 |             |
| + | 2  | 664  | fd.2_RNA SYT9_u     | NM_175733    | NP_783860    | Q86SS6 | SYT9_HUMAN  | asmonic (Potential).      | 3 | AGACGGGATC   | 0.602 |             |
| + | 1  | 371  | 37R OLFML1_uc0      | NM_198474    | NP_940876    | Q6UWY5 | OLFL1_HUMAN |                           | 2 | TTCGAGGAGCT  | 0.567 |             |
| + | 16 | 1872 | ense_Mutation_p.F   | NM_003621    | NP_003612    | Q8ND30 | LIPB2_HUMAN |                           | 4 | TAAACGGAATC  | 0.453 |             |
| - | 1  | 233  |                     | NM_001003745 | NP_001003745 | P58181 | O10A3_HUMAN | ellular (Potential).      | 1 | CAGCGTAATG   | 0.448 | rs150971423 |
| - | 22 | 3808 | _p.V528I DENND5     | NM_015213    | NP_056028    | Q6IQ26 | DEN5A_HUMAN | RUN 2.                    | 1 | GACTACTTCAT  | 0.463 |             |
| + | 5  | 766  | L2_uc010rci.1_Mi    | NM_014632    | NP_055447    | O94851 | MICA2_HUMAN | p.R160H(1)                | 2 | GTATTCGCCAA  | 0.483 |             |

|   |    |      |                                                   |              |              |        |             |                                |    |              |       |
|---|----|------|---------------------------------------------------|--------------|--------------|--------|-------------|--------------------------------|----|--------------|-------|
| + | 9  | 1210 | 1_p.S101L TEAD1                                   | NM_021961    | NP_068780    | P28347 | TEAD1_HUMAN | ctivation (Potential). Pro-ric | 0  | GTGCATCGGCC  | 0.567 |
| + | 18 | 2012 | NTL_uc001mkt.2                                    | NM_001178    | NP_001169    | O00327 | BMAL1_HUMAN |                                | 0  | TTCTCCAGGAG  | 0.498 |
| - | 19 | 3308 | cw.1_Missense_M                                   | NM_002645    | NP_002636    | O00443 | P3C2A_HUMAN | p.R1081*(1)                    | 10 | TGTACTCGTTCC | 0.333 |
| - | 5  | 610  |                                                   | NM_003476    | NP_003467    | P50461 | CSRP3_HUMAN | I zinc-binding 2.              | 0  | AAGTTCCCCATC | 0.478 |
| - | 1  | 62   | 1mri.1_Missense_I                                 | NM_030771    | NP_110398    | Q96HJ3 | CCD34_HUMAN |                                | 0  | CCGCCGCCAC   | 0.706 |
| - | 14 | 2535 |                                                   | NM_031217    | NP_112494    | Q8NI77 | KI18A_HUMAN |                                | 2  | TTGTTCCGGGTA | 0.318 |
| + | 3  | 628  |                                                   | NM_152316    | NP_689529    | Q8N8R7 | CK046_HUMAN |                                | 0  | ATTTACGAATCC | 0.368 |
| + | 1  | 1718 | nun.1_Missense_M                                  | NM_012194    | NP_036326    | Q6ZVL6 | CK041_HUMAN |                                | 2  | ATTCCGTGTCT  | 0.483 |
| - | 2  | 361  | kd.1_Missense_Mt                                  | NM_198381    | NP_938195    | Q9UKW6 | ELF5_HUMAN  | PNT.                           | 1  | AGGCAGGGTAG  | 0.552 |
| + | 11 | 2229 |                                                   | NM_005456    | NP_005447    | Q9UQF2 | JIP1_HUMAN  | PID.                           | 4  | AGTCCGTGGGG  | 0.632 |
| - | 10 | 1459 | 2_uc001ndv.1_5'F                                  | NM_016223    | NP_057307    | Q9UKS6 | PACN3_HUMAN | SH3.                           | 0  | CAGCGTAGTCA  | 0.617 |
| + | 23 | 3789 | yn.1_Intron MAD                                   | NM_003682    | NP_003673    | Q8WXG6 | MADD_HUMAN  | Ser-rich.                      | 11 | GCACCGTGGTAC | 0.517 |
| - | 4  | 1057 | 3TBD4_uc001nfz.2                                  | NM_016506    | NP_057590    | Q9NVX7 | KBTB4_HUMAN | Kelch 2.                       | 2  | GCGCCGTGGGA  | 0.587 |
| - | 6  | 1010 | 3160_uc009ylw.2_I                                 | NM_015231    | NP_056046    | Q12769 | NU160_HUMAN |                                | 7  | ACATTCGTAGTT | 0.403 |
| + | 1  | 886  |                                                   | NM_001004727 | NP_001004727 | Q8NGF9 | OR4X2_HUMAN | lasmic (Potential).            | 0  | FGGATTAGGACA | 0.438 |
| + | 4  | 379  | 1nni.1_Missense_Mutation_p.M11 GLYATL1_uc001nnj.1 |              |              | Q969I3 | GLYL1_HUMAN |                                | 1  | CAGAATGATCTT | 0.433 |
| + | 8  | 942  | L1_uc001nni.1_Missense_Mutation_p.G189E GLYATL1   |              |              | Q969I3 | GLYL1_HUMAN |                                | 1  | GCGAGGGAAGA  | 0.502 |
| + | 8  | 1124 | L1_uc001nni.1_Nonsense_Mutation_p.R250* GLYATL1   |              |              | Q969I3 | GLYL1_HUMAN |                                | 1  | ATGGTGCGATAC | 0.458 |
| + | 8  | 1584 | r.2_Intron CD6_uc                                 | NM_006725    | NP_006716    | P30203 | CD6_HUMAN   | lasmic (Potential).            | 1  | TCAACCGGTCC  | 0.587 |
| - | 6  | 1023 | _p.P340S CPSF7                                    | NM_001136040 | NP_001129512 | Q8N684 | CPSF7_HUMAN | Pro-rich.                      | 1  | TGGGGGGAAGA  | 0.567 |
| - | 5  | 589  | _p.T198M EEF1G                                    | NM_001404    | NP_001395    | P26641 | EF1G_HUMAN  | ST C-terminal.                 | 0  | TCCTCGTCTTC  | 0.473 |
| + | 2  | 238  | 1_p.E46G TAF6L_u                                  | NM_006473    | NP_006464    | Q9Y6J9 | TAF6L_HUMAN |                                | 3  | GAGAGAGGCCA  | 0.582 |
| - | 6  | 942  | om.2_Missense_M                                   | NM_004254    | NP_004245    | Q8TCC7 | S22A8_HUMAN | lasmic (Potential).            | 3  | TCGAGGACTTT  | 0.572 |
| + | 3  | 636  | 1nxd.2_Missense                                   | NM_033101    | NP_149092    | Q96DT0 | LEG12_HUMAN | Galectin 1.                    | 2  | ACCCTCGCTTC  | 0.622 |
| + | 3  | 824  | N3_uc001npx.2_Ir                                  | NM_201428    | NP_958831    | O95197 | RTN3_HUMAN  |                                | 1  | CAGAAACCACT  | 0.408 |
| - | 41 | 5838 | A_uc001obw.2_Mi                                   | NM_015104    | NP_055919    | Q2TAZ0 | ATG2A_HUMAN |                                | 2  | TGGACGTGGCC  | 0.701 |
| - | 2  | 112  | 11orf85_uc001ocd.                                 | NM_001037225 | NP_001032302 | Q3KP22 | CK085_HUMAN |                                | 0  | ACCTCGTCTCT  | 0.383 |
| + | 7  | 815  |                                                   | NM_006782    | NP_006773    | O95159 | ZFPL1_HUMAN | lasmic (Potential).            | 1  | ATGATACGCGGG | 0.597 |
| + | 17 | 1964 | _p.P333L POLA2_u                                  | NM_002689    | NP_002680    | Q14181 | DPOA2_HUMAN |                                | 0  | CATCCCGTCAG  | 0.512 |
| + | 6  | 974  |                                                   | NM_032223    | NP_115599    | Q9H6A9 | PCX3_HUMAN  |                                | 0  | GGACAGCCCCC  | 0.647 |
| - | 9  | 1094 | p.A310V FIBP_uc                                   | NM_198897    | NP_942600    | O43427 | FIBP_HUMAN  |                                | 1  | GAACCGCACGT  | 0.597 |
| - | 2  | 375  | 3L1_uc010ros.1_Ir                                 | NM_005438    | NP_005429    | P15407 | FOSL1_HUMAN |                                | 0  | GGTAAGTCTCT  | 0.617 |
| - | 2  | 1337 | L_5'Flank BRMS1                                   | NM_006876    | NP_006867    | O43505 | B3GN1_HUMAN | lenal (Potential).             | 0  | CTGGCGATATAC | 0.507 |
| + | 8  | 1207 | p.R324H PELI3_u                                   | NM_145065    | NP_659502    | Q8N2H9 | PELI3_HUMAN |                                | 1  | TGGCCGCACAG  | 0.731 |
| - | 1  | 676  | S_uc001oir.2_5'Fl                                 | NM_018219    | NP_060689    | Q9NVE4 | CCD87_HUMAN |                                | 2  | TGAACGTCCCA  | 0.617 |
| + | 3  | 261  | S_uc001ois.2_5'Fl                                 | NM_005125    | NP_005116    | O14618 | CCS_HUMAN   | HMA.                           | 0  | GCAGGCGGTAC  | 0.617 |
| - | 12 | 1631 | uc001ojp.1_Miss                                   | NM_022172    | NP_071504    | P11498 | PYC_HUMAN   |                                | 4  | GACAAACGGGT  | 0.622 |
| - | 2  | 307  | _p.V40M PITPNM                                    | NM_004910    | NP_004901    | O00562 | PITM1_HUMAN |                                | 3  | CTCCACGCCGC  | 0.642 |
| - | 2  | 269  | mn.2_Missense_M                                   | NM_181843    | NP_862826    | Q8WV74 | NUDT8_HUMAN | ox. Nudix hydrolase.           | 0  | TTCCCGCAGGG  | 0.647 |
| - | 3  | 259  | 5332_uc001omu.3                                   | NR_024249    |              |        |             |                                | 0  | GCCCGCTGGTG  | 0.627 |
| - | 12 | 1583 | ik.2_Missense_Mu                                  | NM_001277    | NP_001268    | P35790 | CHKA_HUMAN  |                                | 2  | TCACACCCCAA  | 0.582 |
| + | 6  | 1345 | 5_uc009ysg.2_5'l                                  | NM_002335    | NP_002326    | O75197 | LRP5_HUMAN  | eta-propeller 2. Extracellular | 7  | CGGTGACTGGG  | 0.667 |
| - | 8  | 1032 | p.R288W CPT1A                                     | NM_001876    | NP_001867    | P50416 | CPT1A_HUMAN | lasmic (Potential).            | 2  | CTCCCGGTCCA  | 0.343 |
| + | 3  | 1042 | nse_Mutation_p.R                                  | NM_138768    | NP_620123    | Q96EZ4 | MYEOV_HUMAN |                                | 0  | GGCGCGAATG   | 0.612 |
| + | 8  | 709  | p.R168Q CTTN_u                                    | NM_005231    | NP_005222    | Q14247 | SRC8_HUMAN  | Cortactin 3.                   | 1  | CGACCGAGTAG  | 0.597 |
| - | 9  | 1577 | ql.2_Missense_Mt                                  | NM_001163817 | NP_001157289 | Q9UBM7 | DHCR7_HUMAN |                                | 2  | GCAGCGGTGGG  | 0.667 |
| - | 5  | 1825 | rrz.1_Missense_Ml                                 | NM_004705    | NP_004696    | O43422 | P52K_HUMAN  |                                | 3  | TGAGGTACCA   | 0.438 |

rs146063063

|   |    |       |                    |              |              |        |              |                                |    |                     |       |             |
|---|----|-------|--------------------|--------------|--------------|--------|--------------|--------------------------------|----|---------------------|-------|-------------|
| + | 21 | 3955  | loxn.2_Missense_I  | NM_020193    | NP_064578    | Q7Z589 | EMSY_HUMAN   |                                | 6  | :CAGCTCCAATG        | 0.468 |             |
| - | 6  | 1328  | g.2_Missense_Mt    | NM_080491    | NP_536739    | Q9UQC2 | GAB2_HUMAN   |                                | 6  | :TGCCGATCGG         | 0.478 |             |
| + | 9  | 4996  |                    | NM_001008781 | NP_001008781 | Q8TDW7 | FAT3_HUMAN   | Extracellular (Potential).     | 5  | :CATTTCGGTCA        | 0.438 |             |
| + | 23 | 12640 | ii.3_Missense_Mut  | NM_001008781 | NP_001008781 | Q8TDW7 | FAT3_HUMAN   | lasmic (Potential).            | 5  | :CATCCCGTTCC        | 0.652 |             |
| - | 8  | 1312  |                    | NM_178127    | NP_835228    | Q86XS5 | ANGL5_HUMAN  | rogen C-terminal.              | 1  | :AACTGGTATTTT       | 0.274 |             |
| + | 10 | 1620  | w.2_Missense_Mu    | NM_000829    | NP_000820    | P48058 | GRIA4_HUMAN  | ellular (Potential).           | 8  | FGGAATGATATGC       | 0.358 |             |
| - | 7  | 1025  | lrwj.1_Missense_Iv | NM_002716    | NP_002707    | P30154 | 2AAB_HUMAN   | HEAT 8.                        | 0  | GGGCAGCAGCT         | 0.408 |             |
| + | 5  | 834   | no.2_Missense_Iv   | NM_001076682 | NP_001070150 | P13591 | NCAM1_HUMAN  | 2. Extracellular (Potential).  | 1  | TAGTCCGATTCAI       | 0.502 |             |
| + | 2  | 716   | p.R151Q ZBTB16_    | NM_006006    | NP_005997    | Q05516 | ZBT16_HUMAN  |                                | 2  | :GGCTCGGTACC        | 0.607 |             |
| + | 2  | 977   | p.V238A ZBTB16_    | NM_006006    | NP_005997    | Q05516 | ZBT16_HUMAN  |                                | 2  | TGGGGTGGCTG         | 0.637 |             |
| - | 3  | 340   | i5D_uc001ppd.2_ε   | NM_001077639 | NP_001071107 | Q6UWF7 | FA55D_HUMAN  |                                | 4  | :GGGAATAAGGA        | 0.398 |             |
| + | 3  | 2607  | .L_uc001psz.1_No   | NM_005933    | NP_005924    | Q03164 | MLL1_HUMAN   |                                | 25 | :AAGATCGAGAT        | 0.303 |             |
| + | 11 | 1498  | p.G437R HINFP_1    | NM_015517    | NP_056332    | Q9BQA5 | HINFP_HUMAN  | action with NPAT.              | 4  | :AGCCAGGACGT        | 0.587 |             |
| + | 12 | 1762  | ar.2_Missense_Mt   | NM_022169    | NP_071452    | Q9H172 | ABCG4_HUMAN  | /pe-2. Helical; Name=3; (Pr    | 2  | :CTGACGTGCC         | 0.542 |             |
| - | 6  | 1568  | zi.1_Missense_Mt   | NM_012101    | NP_036233    | Q14134 | TRI29_HUMAN  |                                | 4  | :TGCCGGACCC         | 0.537 |             |
| + | 46 | 6429  | p.D963N SORL1_     | NM_003105    | NP_003096    | Q92673 | SORL1_HUMAN  | tential). Fibronectin type-III | 15 | :TGACGATGAG         | 0.478 | rs144806633 |
| - | 1  | 320   |                    | NM_001004474 | NP_001004474 | Q8NGN2 | O10S1_HUMAN  | ellular (Potential).           | 2  | CAAAGGAGATC.        | 0.547 |             |
| + | 12 | 2017  | 2_5'Flank ROBO3_   | NM_022370    | NP_071765    | Q96MS0 | ROBO3_HUMAN  | III 1. Extracellular (Potentia | 2  | :ATGGCGTGCA         | 0.587 |             |
| - | 7  | 2958  | ie_Mutation_p.V24  | NM_014758    | NP_055573    | Q92543 | SNX19_HUMAN  |                                | 4  | :TGGCACGGCTG        | 0.557 |             |
| + | 29 | 4016  | l CACNA1C_uc00     | NM_199460    | NP_955630    | Q13936 | CAC1C_HUMAN  | ismic (Potential). IV.         | 11 | :GGTACGTGGTC.       | 0.592 |             |
| + | 1  | 532   | ik.3_Missense_Mu   | NM_002527    | NP_002518    | P20783 | NTF3_HUMAN   |                                | 1  | AGTACTCGGTAT        | 0.577 |             |
| - | 13 | 1721  | t.1_Missense_Mut   | NM_000552    | NP_000543    | P04275 | VWF_HUMAN    | VWFD 2.                        | 12 | GAGCGCACGG.         | 0.677 |             |
| - | 8  | 1218  | i.2_Intron ZNF384_ | NM_001135734 | NP_001129206 | Q8TF68 | ZN384_HUMAN  | 2H2-type 4.                    | 8  | :GGATACGGAGG        | 0.617 |             |
| - | 4  | 251   | l_p.A63V MLF2_u    | NM_005439    | NP_005430    | Q15773 | MLF2_HUMAN   |                                | 1  | :AGACAGCTCCA        | 0.463 |             |
| + | 9  | 1297  | p.R313Q PTPN6_     | NM_002831    | NP_002822    | P29350 | PTN6_HUMAN   | protein phosphatase.           | 1  | CACCCGAGAGG         | 0.622 |             |
| + | 12 | 1600  |                    | NM_001080454 | NP_001073923 | P0C7M7 | ACSM4_HUMAN  |                                | 0  | TTAACTCTTGAA        | 0.368 |             |
| - | 31 | 4204  | o.S406F A2M_uc0    | NM_000014    | NP_000005    | P01023 | A2MG_HUMAN   |                                | 5  | :TTAGGGGAGATT       | 0.448 |             |
| - | 3  | 637   | B4_uc001qzf.1_Inl  | NM_006249    | NP_006240    | Q04118 | PRB3_HUMAN   | [PQS]-P-[PS]-Q-[GE]-G-N-       | 1  | :CCGACGAGGTC        | 0.637 | rs28628341  |
| + | 1  | 372   |                    | NR_003932    |              |        |              |                                | 0  | :AAAGCGGATGG        | 0.597 |             |
| - | 13 | 4539  |                    | NM_000834    | NP_000825    | Q13224 | NMDE2_HUMAN  | lasmic (Potential).            | 12 | :ACAGGGGTTGG        | 0.532 |             |
| + | 25 | 3607  | rcy.1_Missense_M   | NM_030667    | NP_109592    | Q16827 | PTPRO_HUMAN  | al). Tyrosine-protein phosph   | 9  | :ACAGGAACATTC.      | 0.443 |             |
| - | 15 | 2044  | _uc001rew.2_3'UTI  | NM_032941    | NP_116559    | P46063 | RECQ1_HUMAN  |                                | 2  | :AATGGTAGCAT        | 0.348 |             |
| - | 5  | 636   | _p.E206* ABCC9_    | NM_005691    | NP_005682    | O60706 | ABCC9_HUMAN  | lasmic (Potential).            | 6  | :GTCTTCAGGAG        | 0.358 |             |
| - | 3  | 466   | m.2_Missense_Mt    | NM_198966    | NP_945317    | P12272 | PTHR_HUMAN   |                                | 1  | :TCGCCGTAATC        | 0.468 |             |
| + | 3  | 1566  |                    | NM_032834    | NP_116223    | Q5BKT4 | AG10A_HUMAN  | ellular (Potential).           | 1  | :AATTCGTTACT        | 0.348 |             |
| - | 19 | 2650  | ise_Mutation_p.RE  | NM_017641    | NP_060111    | Q7Z4S6 | KI21A_HUMAN  |                                | 7  | CTTGCCGACGA         | 0.443 |             |
| - | 8  | 2299  |                    | NM_005164    | NP_005155    | Q9UBJ2 | ABCD2_HUMAN  | 3C transporter.                | 6  | ACTTATGATAAAA       | 0.368 |             |
| + | 49 | 7449  | .R1281Q LRRK2_1    | NM_198578    | NP_940980    | Q5S007 | LRRK2_HUMAN  |                                | 24 | :TCGTCGACTTA        | 0.398 |             |
| + | 11 | 1201  | t.1_Missense_Mut   | NM_016488    | NP_057572    | Q8NEY8 | PPHLN_HUMAN  |                                | 2  | aacccccgaaacga      | 0.01  |             |
| + | 15 | 4460  | p.P943L ARID2_u    | NM_152641    | NP_689854    | Q68CP9 | ARID2_HUMAN  |                                | 10 | :AGTCCCGACTC        | 0.458 |             |
| - | 5  | 632   | _p.G78E SLC38A4    | NM_018018    | NP_060488    | Q96916 | S38A4_HUMAN  | lasmic (Potential).            | 4  | :ACATTCCAAAG        | 0.428 |             |
| + | 4  | 1696  | rpq.2_Missense_I   | NM_138371    | NP_612380    | Q96HM7 | F113B_HUMAN  | Pro-rich.                      | 5  | :jccctcctccctccATTC | 0.249 |             |
| - | 5  | 921   | 3EF3_uc009zkr.2_   | NM_001098532 | NP_001092002 | A8K2G5 | A8K2G5_HUMAN |                                | 4  | :AGCTTCGGCCA        | 0.657 |             |
| - | 1  | 1178  | _p.P173L ADCY6_    | NM_015270    | NP_056085    | Q43306 | ADCY6_HUMAN  |                                | 0  | GGGCGGGTGCC         | 0.647 |             |
| - | 2  | 490   | _uc001rtj.1_5'Flan | NM_018113    | NP_060583    | Q6UX01 | LMBRL_HUMAN  | l. Cytoplasmic (Potential).    | 1  | :GGTGAACAGC         | 0.522 |             |
| - | 9  | 750   | 3_Mutation_p.T15E  | NM_012306    | NP_036438    | Q9BWQ8 | FAIM2_HUMAN  | ical; (Potential).             | 3  | :GGCCGTGATG         | 0.652 |             |
| - | 10 | 1010  | i.2_Missense_Mut   | NM_016293    | NP_057377    | Q9UBW5 | BIN2_HUMAN   | Potential.                     | 1  | :CTATTCCTCCTC       | 0.532 |             |

|   |    |      |                   |              |              |        |             |                               |    |                |       |             |
|---|----|------|-------------------|--------------|--------------|--------|-------------|-------------------------------|----|----------------|-------|-------------|
| + | 8  | 1404 | o.R374Q ACVRL1_   | NM_000020    | NP_000011    | P37023 | ACVL1_HUMAN | Potential). Protein kinase.   | 2  | 'CAAGCGGTACA'  | 0.617 |             |
| - | 5  | 1181 | h.2_Missense_Mu   | NM_000424    | NP_000415    | P13647 | K2C5_HUMAN  | Rod. Coil 2.                  | 0  | 'CTCAGCGATGA'  | 0.577 |             |
| - | 4  | 836  |                   | NM_033448    | NP_258259    | Q3SY84 | K2C71_HUMAN | Coil 1B. Rod.                 | 2  | 'GGATTCCACCTT' | 0.527 |             |
| - | 5  | 445  | rD3_uc010snw.1_   | NM_032840    | NP_116229    | Q8NCJ5 | SPRY3_HUMAN | 330.2/SPRY.                   | 1  | 'GTCCCCGGAGT'  | 0.567 |             |
| + | 30 | 6227 | Flank PFDN5_uc0l  | NM_012291    | NP_036423    | Q14674 | ESPL1_HUMAN |                               | 3  | 'GCATCGTGCTC'  | 0.622 |             |
| + | 2  | 731  |                   | NM_173860    | NP_776272    | P31275 | HXC12_HUMAN | Homeobox.                     | 1  | 'GCGCCGGAGGC'  | 0.522 |             |
| + | 11 | 1100 | CKAP1L_uc010soj   | NM_005337    | NP_005328    | P55160 | NCKPL_HUMAN |                               | 4  | 'AACGGCGGCAA'  | 0.517 |             |
| - | 1  | 327  | i.2_5'UTR RDH16_  | NM_003708    | NP_003699    | O75452 | RDH16_HUMAN | ity). Cytoplasmic (Potential  | 0  | 'AGCCTCGTGCA'  | 0.602 |             |
| + | 41 | 6984 |                   | NM_002332    | NP_002323    | Q07954 | LRP1_HUMAN  | Extracellular (Potential).    | 22 | 'GTACCGGGGCC'  | 0.697 |             |
| + | 16 | 2138 | rb.1_Missense_Mu  | NM_006313    | NP_006304    | Q9Y4E8 | UBP15_HUMAN |                               | 3  | 'AAAAACGATTGT' | 0.373 |             |
| + | 6  | 1096 | _p.P228L TMEM5_   | NM_014254    | NP_055069    | Q9Y2B1 | TMEM5_HUMAN | ellular (Potential).          | 0  | 'GTGCCCGGTGCG' | 0.458 |             |
| - | 3  | 436  | q.1_Missense_Mu   | NM_002076    | NP_002067    | P15586 | GNS_HUMAN   |                               | 1  | 'AGAGAGCACTT'  | 0.448 |             |
| + | 12 | 2745 | z.1_RNA HELB_u    | NM_033647    | NP_387467    | Q8NG08 | HELB_HUMAN  |                               | 2  | 'GGGCCGCCAGC'  | 0.532 | rs149917565 |
| + | 15 | 1978 | rp.2_Missense_Mu  | NM_014515    | NP_055330    | Q9NZN8 | CNOT2_HUMAN |                               | 0  | 'TTAACCGTGATT' | 0.358 |             |
| + | 3  | 885  |                   | NM_031435    | NP_113623    | Q9H0W7 | THAP2_HUMAN |                               | 1  | 'AGCTATGCCTTT' | 0.348 |             |
| + | 15 | 3484 | ub.1_Missense_Mu  | NM_014903    | NP_055718    | Q8IVL0 | NAV3_HUMAN  | Ser-rich.                     | 17 | 'TGCGCGGAAGT'  | 0.478 |             |
| - | 12 | 2538 | i_Mutation_p.P57E | NM_182767    | NP_877499    | Q9H2J7 | S6A15_HUMAN | lasmic (Potential).           | 3  | 'CGCTCGGTATT'  | 0.443 |             |
| - | 1  | 285  | tbg.2_Missense_M  | NM_001682    | NP_001673    | P20020 | AT2B1_HUMAN | lasmic (Potential).           | 3  | 'GAGCCCGCAGC'  | 0.443 |             |
| - | 1  | 904  |                   | NM_152638    | NP_689851    | Q8TC90 | CL012_HUMAN |                               | 2  | 'GGTAGGAGTGG'  | 0.716 |             |
| + | 10 | 2315 |                   | NM_005761    | NP_005752    | O60486 | PLXC1_HUMAN | ellular (Potential).          | 3  | 'TACCCGGGCATC' | 0.408 |             |
| + | 12 | 1486 |                   | NM_014503    | NP_055318    | O75691 | UTP20_HUMAN |                               | 4  | 'CTCTGGCCATT'  | 0.418 |             |
| + | 4  | 533  | sense_Mutation_p. | NM_018413    | NP_060883    | Q9NPF2 | CHSTB_HUMAN | lenal (Potential).            | 0  | 'GATCGGCGGGG'  | 0.567 |             |
| + | 14 | 1501 | t.2_Missense_Mut  | NM_213594    | NP_998759    | Q33E94 | RFX4_HUMAN  | ary for dimerization.         | 1  | 'CCAATGAGCTC'  | 0.448 |             |
| - | 12 | 2555 |                   | NM_004075    | NP_004066    | Q16526 | CRY1_HUMAN  |                               | 3  | 'AGGACGTTTCC'  | 0.398 |             |
| + | 3  | 299  | NP1_uc009zuu.1_   | NM_007062    | NP_008993    | Q13610 | PWP1_HUMAN  |                               | 0  | 'GGCACGCCCAA'  | 0.517 |             |
| + | 3  | 1014 |                   | NM_007076    | NP_009007    | Q9BVA6 | FICD_HUMAN  | Fido.                         | 0  | 'GCGACGTGCTG'  | 0.612 |             |
| - | 2  | 694  | M119_uc001tnf.2_  | NM_181724    | NP_859075    | Q4V9L6 | TM119_HUMAN | lasmic (Potential).           | 1  | 'GCGGCCAAGAT'  | 0.627 |             |
| + | 2  | 218  | _p.R22H DAO_ucf   | NM_001917    | NP_001908    | P14920 | OXDA_HUMAN  |                               | 2  | 'TGAGCGCTACC'  | 0.622 |             |
| + | 13 | 2142 | xc.2_Missense_Mu  | NM_001093    | NP_001084    | O00763 | ACACB_HUMAN | in carboxylation.             | 8  | 'ATTTCGGAGC'   | 0.512 |             |
| + | 26 | 3882 | xc.2_Missense_Mu  | NM_001093    | NP_001084    | O00763 | ACACB_HUMAN |                               | 8  | 'GTACGGCCAC'   | 0.597 |             |
| + | 9  | 1123 | HP_uc001tpp.2_N   | NM_001143852 | NP_001137324 | Q9BT92 | TCHP_HUMAN  | Glu-rich. Interaction with ke | 1  | 'TGCCGATGTG'   | 0.662 |             |
| + | 5  | 698  | ense_Mutation_p.F | NM_033121    | NP_149112    | Q8IZ07 | AN13A_HUMAN |                               | 0  | 'TCTGTGCGATCT' | 0.458 |             |
| - | 16 | 1991 | iq.3_Missense_Mu  | NM_024072    | NP_076977    | Q8TDD1 | DDX54_HUMAN |                               | 3  | 'CTTCGGCCCA'   | 0.662 |             |
| - | 3  | 948  |                   | NM_138451    | NP_612460    | Q96DY2 | IQCD_HUMAN  |                               | 1  | 'CCAGCGAGATC'  | 0.607 |             |
| - | 13 | 1442 | _p.D213N TAOK3_   | NM_016281    | NP_057365    | Q9H2K8 | TAOK3_HUMAN | Ser-rich.                     | 6  | 'GTCATCGTGCA'  | 0.502 |             |
| + | 2  | 500  | se_Mutation_p.R1E | NM_207311    | NP_997194    | Q6ZP65 | BICR1_HUMAN | Potential.                    | 2  | 'AGAACCGAGAAC' | 0.463 |             |
| + | 9  | 1015 | 'RX7_uc001tzip.2_ | NM_002562    | NP_002553    | Q99572 | P2RX7_HUMAN |                               | 5  | 'AGAAACGGACT'  | 0.448 |             |
| - | 5  | 749  | l_splice CAMKK2_  | NM_006549    | NP_006540    | Q96RR4 | KKCC2_HUMAN |                               | 3  | 'ACTCACGTGGA'  | 0.488 |             |
| + | 5  | 577  | lzxh.2_Missense_  | NM_001080825 | NP_001074294 | A0PK00 | T120B_HUMAN | ical; (Potential).            | 0  | 'GTGCCGTGGCA'  | 0.612 |             |
| + | 31 | 3198 | lk.1_Missense_Mu  | NM_003959    | NP_003950    | O75146 | HIP1R_HUMAN |                               | 1  | 'GCGTGGCCCCC'  | 0.682 |             |
| + | 9  | 1126 |                   | NM_207437    | NP_997320    | Q8IVF4 | DYH10_HUMAN | n (By similarity).            | 6  | 'GCCATGATGAG'  | 0.577 |             |
| + | 18 | 2793 | p.R465Q DNAH10_   | NM_207437    | NP_997320    | Q8IVF4 | DYH10_HUMAN | n (By similarity).            | 6  | 'TGTCGGGAATTC' | 0.428 |             |
| + | 18 | 2121 | 'ACS_uc009zyh.2_  | NM_023928    | NP_076417    | Q86V21 | AACS_HUMAN  |                               | 3  | 'TTGCCGTCAAA'  | 0.532 |             |
| + | 4  | 1236 |                   | NM_052907    | NP_443139    | Q14DG7 | T132B_HUMAN | ellular (Potential).          | 19 | 'TCTCCGAGATC'  | 0.522 |             |
| - | 2  | 731  |                   | NM_133448    | NP_597705    | Q14C87 | T132D_HUMAN | ellular (Potential).          | 14 | 'GCCCGCAGGA'   | 0.537 | rs138159153 |
| - | 35 | 4573 | _p.A314V POLE_u   | NM_006231    | NP_006222    | Q07864 | DPOE1_HUMAN |                               | 8  | 'CGGATGCCCTG'  | 0.597 |             |
| + | 2  | 248  | lAM5_uc001uku.2_  | NM_138575    | NP_612642    | Q96HS1 | PGAM5_HUMAN |                               | 0  | 'CGTGCGGAAGA'  | 0.498 | rs142758535 |

|   |     |       |                                                  |              |              |        |              |                                |    |               |       |             |
|---|-----|-------|--------------------------------------------------|--------------|--------------|--------|--------------|--------------------------------|----|---------------|-------|-------------|
| + | 3   | 559   | i_p.V38M ZNF10_uc001ulq.2_Missense_Mutation_p.V3 | Q14587       | ZN268_HUMAN  | 1      | AGATCGTGTAC/ | 0.438                          |    |               |       |             |
| + | 5   | 1442  | NF10_uc001ulq.2_                                 | NM_015394    | NP_056209    | P21506 | ZNF10_HUMAN  | 2H2-type 4.                    | 3  | CAGCTGGTTCT/  | 0.418 |             |
| + | 5   | 1574  | NF10_uc001ulq.2_                                 | NM_015394    | NP_056209    | P21506 | ZNF10_HUMAN  |                                | 3  | AGAAACCCTATG. | 0.428 |             |
| + | 10  | 2059  | 1umg.2_Nonsense                                  | NM_017520    | NP_059990    | Q99549 | MPP8_HUMAN   | ANK 3.                         | 0  | ATCGTACGACTC/ | 0.443 |             |
| - | 1   | 397   | ij.1_RNA PSPC1_u                                 | NM_001042414 | NP_001035879 | Q8WXF1 | PSPC1_HUMAN  |                                | 1  | CTTGAGGAAAC   | 0.652 |             |
| + | 4   | 477   | aaa.2_Missense_M                                 | NM_001676    | NP_001667    | P54707 | AT12A_HUMAN  | lasmic (Potential).            | 6  | CACCCCTCCCA/  | 0.577 |             |
| - | 5   | 878   | ip.2_Missense_ML                                 | NM_183044    | NP_898865    | Q9Y252 | RNF6_HUMAN   |                                | 2  | TTGTTTCGCCTAC | 0.423 | rs138864245 |
| + | 1   | 2169  |                                                  | NM_001033602 | NP_001028774 | Q5JR59 | MTUS2_HUMAN  | teraction with MAPRE1.         | 0  | TGCCAACCTCT/  | 0.552 |             |
| - | 5   | 808   | RD13_uc001uux.2_                                 | NM_178006    | NP_821074    | Q9Y3M8 | STA13_HUMAN  |                                | 4  | GCTGACGAGTG/  | 0.602 | rs146112751 |
| - | 4   | 1190  | PC4_uc010abw.2_                                  | NM_016179    | NP_057263    | Q9UBN4 | TRPC4_HUMAN  | lasmic (Potential).            | 6  | GCCTGGAAACT/  | 0.458 |             |
| - | 4   | 728   | _p.R119* ELF1_uc                                 | NM_172373    | NP_758961    | P32519 | ELF1_HUMAN   |                                | 1  | TTATTCGTTTTTC | 0.363 |             |
| - | 11  | 2825  | p.V890M ATP7B_u                                  | NM_000053    | NP_000044    | P35670 | ATP7B_HUMAN  | lasmic (Potential).            | 3  | GCCCCACGTGGG  | 0.443 |             |
| + | 5   | 431   | vjr.2_Missense_Mt                                | NM_006002    | NP_005993    | P15374 | UCHL3_HUMAN  |                                | 0  | AGAACGAGCCA   | 0.398 | rs11555620  |
| + | 20  | 3690  | o.R876K LMO7_uc                                  | NM_015842    | NP_056667    | Q8WWI1 | LMO7_HUMAN   |                                | 5  | GCAAAGGGCCA   | 0.383 |             |
| - | 2   | 1732  | ij.2_Nonsense_Mt                                 | NM_005842    | NP_005833    | O43597 | SPY2_HUMAN   | PR. Cys-rich.                  | 2  | CCATCGTGTAC/  | 0.473 |             |
| - | 20  | 3034  | se_Mutation_p.E2                                 | NM_198968    | NP_945319    | Q86YF9 | DZIP1_HUMAN  |                                | 2  | GATTCGCTTCC   | 0.547 |             |
| + | 9   | 1028  | k.1_Nonsense_ML                                  | NM_002271    | NP_002262    | O00410 | IPO5_HUMAN   |                                | 3  | GACTGGGCAA    | 0.418 |             |
| - | 25  | 3060  |                                                  | NM_052867    | NP_443099    | Q8IZF0 | NALCN_HUMAN  | :S3 of repeat III; (Potential) | 16 | TATGTCATTACT  | 0.358 |             |
| + | 22  | 2575  | rqu.1_Missense_M                                 | NM_015011    | NP_055826    | Q9Y6X6 | MYO16_HUMAN  | sin head-like 1.               | 10 | AAGTGAATGT    | 0.368 |             |
| - | 27  | 2107  | 4A1_uc010agl.2_l                                 | NM_001845    | NP_001836    | P02462 | CO4A1_HUMAN  | le-helical region.             | 6  | CTTGGGGACCT/  | 0.542 |             |
| + | 27  | 3201  | l_Mutation_p.S10E                                | NM_015205    | NP_056020    | P98196 | AT11A_HUMAN  | ical; (Potential).             | 4  | GGGTCGCTGC    | 0.418 |             |
| + | 8   | 957   | jr.1_Missense_Mu                                 | NM_003891    | NP_003882    | P22891 | PROZ_HUMAN   | peptidase S1.                  | 0  | CACCGCGCTG    | 0.637 |             |
| + | 1   | 597   |                                                  | NM_001005500 | NP_001005500 | Q8NGD0 | OR4M1_HUMAN  | Name=5; (Potential).           | 0  | GTGATGATCTG   | 0.478 |             |
| - | 24  | 3503  | .1_RNA TEP1_ucC                                  | NM_007110    | NP_009041    | Q99973 | TEP1_HUMAN   |                                | 5  | CAGCCGTTGCA/  | 0.637 |             |
| + | 5   | 1749  | he.2_Missense_Mt                                 | NM_014045    | NP_054764    | Q7Z4F1 | LRP10_HUMAN  | s A 4. Extracellular (Potenti  | 1  | GATTGCCAGC/   | 0.607 |             |
| - | 17  | 3858  | IN1_uc001wir.3_M                                 | NM_014977    | NP_055792    | Q9UKV3 | ACINU_HUMAN  | Asp/Glu/Lys-rich.              | 4  | TTGATCGGGAA/  | 0.567 |             |
| - | 2   | 788   | vjb.2_Missense_M                                 | NM_020834    | NP_065885    | Q8IX15 | HOMEZ_HUMAN  |                                | 0  | GTAGGGGAATG/  | 0.527 |             |
| + | 2   | 694   | R84C CMTM5_ucC                                   | NM_138460    | NP_612469    | Q96DZ9 | CKLF5_HUMAN  | MARVEL.                        | 0  | ACCAGCGCTTCC  | 0.557 | rs147365003 |
| - | 12  | 1169  |                                                  | NM_000257    | NP_000248    | P12883 | MYH7_HUMAN   | rosin head-like.               | 4  | GATGGCGCTG    | 0.547 |             |
| - | 4   | 1786  | e_Mutation_p.R29                                 | NM_032452    | NP_115828    | Q96J6  | JPH4_HUMAN   | lasmic (Potential).            | 2  | GCGCCGATCTG/  | 0.637 |             |
| + | 35  | 3746  | wlk.2_Missense_M                                 | NM_138360    | NP_612369    | Q8ND23 | LR16B_HUMAN  |                                | 5  | ACGACGCAGGT.  | 0.542 |             |
| - | 3   | 679   | A1_uc001wqa.2_5                                  | NM_002515    | NP_002506    | P51513 | NOVA1_HUMAN  |                                | 5  | TTTCTCGAATTT/ | 0.438 |             |
| + | 6   | 563   | o.S181C SIP1_uc0                                 | NM_003616    | NP_003607    | O14893 | GEMI2_HUMAN  |                                | 0  | TTGCTTAGTATTC | 0.259 |             |
| + | 3   | 2013  | aa.2_Missense_Mt                                 | NM_152447    | NP_689660    | Q96NI6 | LRFN5_HUMAN  | lar (Potential). LRRCT.        | 8  | TGGCCGCTACT/  | 0.468 |             |
| - | 1   | 1774  |                                                  | NM_001012706 | NP_001012724 | A1A4T8 | CN182_HUMAN  |                                | 0  | TCTTCTCCAAC   | 0.493 |             |
| - | 10  | 2866  |                                                  | NM_015163    | NP_055978    | Q9C026 | TRIM9_HUMAN  | B30.2/SPRY.                    | 3  | GAAGTCGGGGA/  | 0.602 |             |
| + | 6   | 1121  |                                                  | NM_021255    | NP_067078    | Q9HAT8 | PELI2_HUMAN  |                                | 1  | TTAACGCCGCC/  | 0.577 |             |
| + | 15  | 1459  | xdq.2_Missense_M                                 | NM_002892    | NP_002883    | P29374 | ARI4A_HUMAN  |                                | 6  | CCGTTTCGGCAA  | 0.323 |             |
| - | 11  | 2806  | IH5_uc001xfy.2_3'                                | NM_139318    | NP_647479    | Q8NCM2 | KCNH5_HUMAN  | ibly) (By similarity). Cytope  | 9  | GTCTCTTTGAC/  | 0.512 |             |
| - | 11  | 2474  | IH5_uc001xfy.2_3'                                | NM_139318    | NP_647479    | Q8NCM2 | KCNH5_HUMAN  | lasmic (Potential).            | 9  | CCTTTTCCATTT/ | 0.453 |             |
| + | 28  | 3736  | jl.2_Missense_Mu                                 | NM_015180    | NP_055995    | Q8WXH0 | SYNE2_HUMAN  | lasmic (Potential).            | 14 | TGCTCGCTGGA/  | 0.294 |             |
| + | 105 | 19221 | VE2_uc010aqa.2_l                                 | NM_015180    | NP_055995    | Q8WXH0 | SYNE2_HUMAN  | Cytoplasmic (Potential).       | 14 | TCCACCGCTAC   | 0.587 |             |
| + | 2   | 1571  | hk.3_Missense_Mt                                 | NM_021979    | NP_068814    | P54652 | HSP72_HUMAN  |                                | 1  | GCACCGGTAAG   | 0.562 |             |
| - | 24  | 5086  | o.V1678M SPTB_u                                  | NM_000347    | NP_000338    | P11277 | SPTB1_HUMAN  | Spectrin 14.                   | 11 | GCCACGCTCT    | 0.557 |             |
| - | 9   | 1981  | sq.2_Missense_Mt                                 | NM_003861    | NP_003852    | Q96JK2 | DCAF5_HUMAN  |                                | 2  | GCGCCGATGG    | 0.552 |             |
| - | 2   | 477   |                                                  | NM_001105579 | NP_001099049 | AGNDD5 | SYN1L_HUMAN  |                                | 0  | CTTGTCTCTCCC  | 0.697 |             |
| + | 26  | 3047  | se_Mutation_p.H5:                                | NM_015072    | NP_055887    | Q6EMB2 | TLL5_HUMAN   |                                | 3  | GCTACATCCCC   | 0.517 |             |



|   |    |           |                   |              |              |        |              |                                |    |                |       |             |
|---|----|-----------|-------------------|--------------|--------------|--------|--------------|--------------------------------|----|----------------|-------|-------------|
| + | 3  | 542       | e_Mutation_p.R15  | NM_004452    | NP_004443    | A2VDJ2 | A2VDJ2_HUMAN |                                | 2  | 3CCTGCCGCTTC   | 0.577 |             |
| - | 5  | 1305      | iEL1_uc010tvf.1_l | NM_015305    | NP_056120    | Q9UNK9 | ANGE1_HUMAN  |                                | 4  | :CCGGCGTGGG    | 0.592 |             |
| + | 6  | 703       | iss.2_Missense_M  | NM_145870    | NP_665877    | O43708 | MAAL_HUMAN   | ST C-terminal.                 | 0  | TTAACGGTGAG    | 0.577 |             |
| - | 4  | 452       | e_Mutation_p.R94  | NM_152446    | NP_689659    | Q6ZU80 | CE128_HUMAN  |                                | 0  | ATAAACGTTGAC   | 0.368 |             |
| + | 4  | 460       | 2_Missense_Muta   | NM_024824    | NP_079100    | Q6PJT7 | ZC3HE_HUMAN  |                                | 3  | CAACTGGTAAG    | 0.299 |             |
| - | 11 | 4302      | uif.1_Missense_Mt | NM_004239    | NP_004230    | Q15643 | TRIPB_HUMAN  | Potential.                     | 13 | CTATTTTCGATGT  | 0.333 | rs145498019 |
| + | 6  | 1509      | _p.A378T RIN3_uc  | NM_024832    | NP_079108    | Q8TB24 | RIN3_HUMAN   | Pro-rich.                      | 3  | GGACAGCCAAA    | 0.627 |             |
| - | 19 | 3166      | _p.S985L DICER1_  | NM_030621    | NP_085124    | Q9UPY3 | DICER_HUMAN  | PAZ.                           | 5  | ACCTTGAAGATC   | 0.468 |             |
| - | 9  | 2616      |                   | NM_024734    | NP_079010    | Q96JQ2 | CLMN_HUMAN   |                                | 0  | GCTGTCCATGG    | 0.557 |             |
| + | 4  | 329       | ygn.1_Missense_l  | NM_006668    | NP_006659    | Q9Y6A2 | CP46A_HUMAN  |                                | 0  | GTACCGTGCGC    | 0.537 |             |
| - | 3  | 371       | ι RAGE_uc001yin.  | NM_014226    | NP_055041    | Q9UQ07 | MOK_HUMAN    | rotein kinase.                 | 4  | CTCTCGTAGGT    | 0.378 | rs141604419 |
| + | 9  | 1184      | on.3_Missense_Mt  | NM_153046    | NP_694591    | Q8NDG6 | TDRD9_HUMAN  | case C-terminal.               | 3  | GGAGCGAAGCA    | 0.408 |             |
| + | 13 | 4020      | 196S KIAA0284_u   | NM_001112726 | NP_001106197 | Q9Y4F5 | K0284_HUMAN  |                                | 1  | ccccggccccgggA | 0.552 |             |
| + | 7  | 1036      | l.1_Missense_Mut  | NM_138790    | NP_620145    | Q96BZ4 | PLD4_HUMAN   |                                | 2  | ATGGGGTGCC     | 0.607 |             |
| - | 7  | 3148      | ypx.2_Missense_l  | NM_138420    | NP_612429    | Q8IVF2 | AHNK2_HUMAN  |                                | 1  | CGATACCCCGA    | 0.607 |             |
| - | 4  | 314       | DT14_uc001yqi.2_l | NM_177533    | NP_803877    | O95848 | NUD14_HUMAN  | rdix hydrolase.                | 1  | TCACCCGCATAC   | 0.682 |             |
| - | 17 | 2359      | Mutation_p.D462N  | NM_001519    | NP_001510    | Q92994 | TF3B_HUMAN   |                                | 4  | CCCACCGTTGC    | 0.607 |             |
| - | 7  | 915       | zba.2_Missense_l  | NM_000814    | NP_000805    | P28472 | GBRB3_HUMAN  | ical; (Probable).              | 5  | AGAATCGTTATC   | 0.408 |             |
| - | 61 | 9538      |                   | NM_004667    | NP_004658    | O95714 | HERC2_HUMAN  | RCC1 9.                        | 13 | ATCACCATTTTG   | 0.483 |             |
| + | 3  | 296       | _p.E65K TMC05A    | NM_152453    | NP_689666    | Q8N6Q1 | TMC5A_HUMAN  | Potential.                     | 1  | AGTGGGAGAAG    | 0.522 |             |
| - | 11 | 1569      | .2_Intron RASGRF  | NM_005739    | NP_005730    | O95267 | GRP1_HUMAN   |                                | 2  | TTTTTTGGATCAC  | 0.448 |             |
| + | 12 | 1518      | _p.R365H IVD_ucf  | NM_002225    | NP_002216    | P26440 | IVD_HUMAN    |                                | 1  | GGCCCGCTTTC    | 0.512 |             |
| + | 15 | 5980      | xt.1_Missense_Mu  | NM_170589    | NP_733468    | Q8NG31 | CASC5_HUMAN  | ation and for interaction with | 5  | TTACCGACCCA    | 0.383 |             |
| + | 30 | 4013      | PKBP1_uc010udb    | NM_001128608 | NP_001122080 | O60336 | MABP1_HUMAN  |                                | 10 | CGTCTCGGCCT    | 0.627 |             |
| - | 33 | 6085      | -4310 MI0015840_  | NM_016642    | NP_057726    | Q9NRC6 | SPTN5_HUMAN  | Spectrin 16.                   | 2  | GTCACGCACCT    | 0.667 |             |
| - | 3  | 415       |                   | NM_001080490 | NP_001073959 | Q3MJ16 | PA24E_HUMAN  |                                | 0  | CTTACCGTGGG    | 0.502 |             |
| - | 20 | 2842      | AN1_uc001zqk.2_   | NM_138477    | NP_612486    | Q8IWY9 | CDAN1_HUMAN  |                                | 2  | GTCTCCCCCTT    | 0.627 |             |
| - | 7  | 980       | zp.2_Nonsense_M   | NM_173500    | NP_775771    | Q6IQ55 | TTBK2_HUMAN  | rotein kinase.                 | 7  | AGCTCGAGGCT    | 0.418 |             |
| + | 4  | 2743      |                   | NM_002373    | NP_002364    | P78559 | MAP1A_HUMAN  |                                | 9  | TGAGCCGGAGG    | 0.557 |             |
| + | 4  | 5518      |                   | NM_002373    | NP_002364    | P78559 | MAP1A_HUMAN  |                                | 9  | TTGAGGGGCA     | 0.582 |             |
| + | 10 | 1592_1593 | TT1B_uc001zsd.3_  | NM_020990    | NP_066270    | P12532 | KCRU_HUMAN   |                                | 0  | GTCTGGAGAG     | 0.5   |             |
| - | 30 | 4051      | in.2_Missense_Mt  | NM_014080    | NP_054799    | Q9NRD8 | DUOX2_HUMAN  | ential). FAD-binding FR-tyr    | 5  | TCACTCCTGGA    | 0.592 |             |
| + | 19 | 2758      | _Mutation_p.A744  | NM_153618    | NP_705871    | Q8NFY4 | SEM6D_HUMAN  | lasmic (Potential).            | 4  | ATGGAGCTTCA    | 0.522 |             |
| - | 9  | 1170      | _p.A307T CYP19A   | NM_031226    | NP_112503    | P11511 | CP19A_HUMAN  |                                | 3  | AGGAGCTGCGA    | 0.398 |             |
| + | 3  | 585       | _p.D122N GLDN_u   | NM_181789    | NP_861454    | Q6ZM13 | GLDN_HUMAN   | Potential). Collagen-like 1.   | 2  | TTGAGGACCTT    | 0.502 |             |
| - | 32 | 7991      | y.1_Missense_Mut  | NM_015263    | NP_056078    | Q8TDJ6 | DMXL2_HUMAN  |                                | 9  | TTATTCGAAGA    | 0.303 |             |
| - | 38 | 4833      | 10uga.1_RNA uc0f  | NM_018728    | NP_061198    | Q9NQX4 | MYO5C_HUMAN  | Dilute.                        | 14 | CAGGCCGTCTT    | 0.592 |             |
| + | 3  | 936       | gd.2_Missense_M   | NM_004751    | NP_004742    | O95395 | GCNT3_HUMAN  | renal (Potential).             | 2  | GTGTCCATGTG    | 0.443 |             |
| - | 4  | 605       |                   | NM_003613    | NP_003604    | O75339 | CILP1_HUMAN  |                                | 7  | CTTACCTGGTG    | 0.612 |             |
| - | 8  | 934       | o.G190R MEGF11    | NM_032445    | NP_115821    | A6BM72 | MEGF11_HUMAN |                                | 1  | TGTCCCTGGTG    | 0.567 |             |
| + | 12 | 2092      | p.A610T DIS3L_uc  | NM_001143688 | NP_001137160 | Q8TF46 | DI3L1_HUMAN  |                                | 2  | GGTCCGCAAAA    | 0.547 |             |
| + | 15 | 2696      | _p.R811K DIS3L_u  | NM_001143688 | NP_001137160 | Q8TF46 | DI3L1_HUMAN  |                                | 2  | ACCAAGGTATGT   | 0.323 |             |
| + | 4  | 686       | x.1_Missense_Mu   | NM_016166    | NP_057250    | O75925 | PIAS1_HUMAN  | PINIT.                         | 2  | AGTACAGGTCC    | 0.353 |             |
| + | 25 | 3884      | _p.Q1248* NEO1_   | NM_002499    | NP_002490    | Q92859 | NEO1_HUMAN   | lasmic (Potential).            | 1  | CCCAGCGTAAG    | 0.458 |             |
| + | 4  | 479       | bjb.2_Missense_M  | NM_001042367 | NP_001035826 | Q7Z4M0 | COO60_HUMAN  |                                | 1  | CTGATGGAAC     | 0.537 |             |
| + | 12 | 1229      | _p.P349L CSK_ucf  | NM_001127190 | NP_001120662 | P41240 | CSK_HUMAN    | rotein kinase.                 | 3  | GCTGCCAGTCA    | 0.652 |             |
| + | 14 | 1537      | e_Mutation_p.L50f | NM_021819    | NP_068591    | Q9HAT1 | LMA1L_HUMAN  | lasmic (Potential).            | 0  | GGCCCTGGGG     | 0.627 |             |

|   |    |           |                   |              |              |        |             |                            |    |               |       |             |
|---|----|-----------|-------------------|--------------|--------------|--------|-------------|----------------------------|----|---------------|-------|-------------|
| - | 1  | 1318      |                   | NM_017793    | NP_060263    | Q9BUL9 | RPP25_HUMAN |                            | 0  | GATGGGGATTCC  | 0.672 |             |
| + | 2  | 1064      | unk.1_Missense_M  | NM_015206    | NP_056021    | Q9UPX6 | K1024_HUMAN |                            | 4  | ACGAAAGCTTAG, | 0.522 |             |
| - | 3  | 1423      | k.2_Intron DET1_u | NM_001144074 | NP_001137546 | Q7L5Y6 | DET1_HUMAN  |                            | 2  | ICTTACCGGCGC  | 0.448 |             |
| + | 1  | 217       | CTP2_uc010bok.2   | NM_018349    | NP_060819    | Q6DN12 | MCTP2_HUMAN |                            | 3  | ICTCTCTGTGTC  | 0.582 |             |
| + | 8  | 1833      | ion.2_Missense_M  | NM_000875    | NP_000866    | P08069 | IGF1R_HUMAN | nectin type-III 1.         | 8  | ATATCCGTGGG   | 0.557 |             |
| + | 21 | 4026      | n.2_Missense_Mu   | NM_000875    | NP_000866    | P08069 | IGF1R_HUMAN | lasmic (Potential).        | 8  | AGGCCGAGAAC   | 0.682 |             |
| + | 6  | 2412      | e_Mutation_p.F76  | NM_145728    | NP_663780    | O15061 | SYNEM_HUMAN | Tail.                      | 4  | AGAGTTTTCCGT  | 0.572 |             |
| - | 12 | 1385      | DF1_uc010utz.1_f  | NM_022450    | NP_071895    | Q96CC6 | RHDF1_HUMAN | ical; (Potential).         | 2  | GTGCACGAAGG   | 0.672 |             |
| + | 5  | 1870      |                   | NM_005632    | NP_005623    | O75808 | CAN15_HUMAN | lpain catalytic.           | 2  | GCTTCCCCCGG   | 0.647 |             |
| + | 3  | 796       | 192W STUB1_uc0    | NM_003961    | NP_003952    | O75783 | RHBL1_HUMAN |                            | 0  | ACGTTGGGTGA   | 0.632 |             |
| - | 6  | 1453      | 3XL16_uc002cjb.2  | NM_153350    | NP_699181    | Q8N461 | FXL16_HUMAN | LRR 6.                     | 0  | GGAGGTGCTTC   | 0.642 |             |
| - | 3  | 896       |                   | NM_001013658 | NP_001013680 | Q96A99 | PTX4_HUMAN  | Pentaxin.                  | 0  | CCGTGCGGACC   | 0.662 | rs61751878  |
| + | 3  | 872       | vg.1_Missense_Mt  | NM_016111    | NP_057195    | Q9Y4R8 | TELO2_HUMAN |                            | 0  | CGTCCGGGTGC   | 0.667 |             |
| + | 15 | 1604      | R290H TBL3_uc0    | NM_006453    | NP_006444    | Q12788 | TBL3_HUMAN  | WD 10.                     | 0  | GGACCGCACGG   | 0.637 |             |
| + | 22 | 2522      | v.1_Missense_Mu   | NM_000548    | NP_000539    | P49815 | TSC2_HUMAN  | p.E793fs*9(1)              | 10 | GCGTCGTGGCC   | 0.622 |             |
| + | 23 | 2727      | v.1_Missense_Mu   | NM_000548    | NP_000539    | P49815 | TSC2_HUMAN  |                            | 10 | CCTGCCGTACA   | 0.657 | rs138527121 |
| + | 42 | 5414      | vw.1_Missense_M   | NM_000548    | NP_000539    | P49815 | TSC2_HUMAN  |                            | 10 | TGCACCCTCCG   | 0.642 |             |
| - | 44 | 12237     | p.R4009C MIR1     | NM_001009944 | NP_001009944 | P98161 | PKD1_HUMAN  | lasmic (Potential).        | 3  | CTGGCGCACGA   | 0.677 |             |
| - | 24 | 9004      | e_Mutation_p.H29  | NM_001009944 | NP_001009944 | P98161 | PKD1_HUMAN  | ellular (Potential).       | 3  | GGTAGTGGCCT   | 0.672 |             |
| - | 12 | 2031      | p.P382L ABCA3_    | NM_001089    | NP_001080    | Q99758 | ABCA3_HUMAN |                            | 16 | TGACGGGACTC   | 0.642 |             |
| + | 11 | 7425_7426 | i.1_Missense_Mut  | NM_016333    | NP_057417    | Q9UQ35 | SRRM2_HUMAN | rich. Ser-rich.            | 4  | ACAGCCCCAGCT  | 0.634 |             |
| + | 11 | 8042      | i.1_Missense_Mut  | NM_016333    | NP_057417    | Q9UQ35 | SRRM2_HUMAN | Ser-rich.                  | 4  | CCCTGCCCTGC   | 0.647 |             |
| + | 2  | 682       | JF213_uc010bth.2  | NM_004220    | NP_004211    | O14771 | ZN213_HUMAN | SCAN box.                  | 0  | AGCTGCGTACC   | 0.657 |             |
| + | 2  | 799       | F213_uc010bth.2   | NM_004220    | NP_004211    | O14771 | ZN213_HUMAN | SCAN box.                  | 0  | CTGTGCGCTTG   | 0.642 |             |
| + | 6  | 2268      | p.R294W ZNF263    | NM_005741    | NP_005732    | O14978 | ZN263_HUMAN | 2H2-type 8.                | 4  | GCCATCGGATT   | 0.478 |             |
| + | 3  | 307       | IAT15_uc010uxc.1  | NM_001083601 | NP_001077070 | Q9H7X0 | NAT15_HUMAN | etyltransferase.           | 0  | GCCACGATGAC   | 0.627 |             |
| + | 9  | 869       | N1_uc002cxb.2_f   | NM_001142290 | NP_001135762 | O60291 | MGRN1_HUMAN |                            | 2  | TGGACCGGGTC   | 0.572 |             |
| + | 11 | 1698      | v.1_Missense_Mu   | NM_018723    | NP_061193    | Q9NWB1 | RFOX1_HUMAN |                            | 0  | GGAGGGATCTT   | 0.488 |             |
| - | 1  | 571       |                   | NM_144674    | NP_653275    | Q96M29 | TEKT5_HUMAN | Potential.                 | 2  | GTTCTGGTTCT   | 0.612 |             |
| + | 24 | 3240      | 2dap.2_Missense_  | NM_015226    | NP_056041    | Q2KHT3 | CL16A_HUMAN |                            | 2  | TGAGCGTCGAA   | 0.706 |             |
| - | 7  | 940       | dbg.1_Missense_M  | NM_015914    | NP_056998    | Q6PKC3 | TXD11_HUMAN |                            | 0  | CTAGGTAATCTC  | 0.383 |             |
| + | 4  | 746       | va.2_Missense_M   | NM_005236    | NP_005227    | Q92889 | XPF_HUMAN   | ucine-zipper 1.            | 10 | CCCATCGCTTG   | 0.333 |             |
| - | 16 | 2024      | C6_uc010bov.2_f   | NM_001171    | NP_001162    | O95255 | MRP6_HUMAN  | nsporter 1. Cytoplasmic (B | 3  | TGGACCGACAA   | 0.632 | rs72653780  |
| + | 8  | 1200      | ssense_Mutation_j | NM_024847    | NP_079123    | Q7Z402 | TMC7_HUMAN  | lasmic (Potential).        | 3  | CAATACGCATTT  | 0.413 |             |
| + | 1  | 1347      | IPL2_uc002dft.2_ε | NM_001034841 | NP_001030013 | Q3MIP1 | IPIL2_HUMAN | lasmic (Potential).        | 2  | AGGGCGCCTGT   | 0.652 | rs145325211 |
| + | 5  | 983       | fy.2_Missense_Mu  | NM_016524    | NP_057608    | Q9BSW7 | SYT17_HUMAN | C2 1.                      | 1  | CCCACGATGGC   | 0.612 |             |
| - | 1  | 120       | TL9_uc002dji.2_In | NM_005849    | NP_005840    | O95976 | IGSF6_HUMAN |                            | 0  | CTTACCGACAC   | 0.393 | rs143387566 |
| + | 13 | 1400      | v_uc002dji.2_Miss | NM_144672    | NP_653273    | Q7RTW8 | OTOAN_HUMAN |                            | 3  | TGAAACGCAAG   | 0.582 |             |
| + | 12 | 994       | p.D280N POLR3E    | NM_018119    | NP_060589    | Q9NVU0 | RPC5_HUMAN  |                            | 2  | TGGCCGATCAG   | 0.642 |             |
| + | 3  | 580       | _uc010byo.1_Miss  | NM_001770    | NP_001761    | P15391 | CD19_HUMAN  | ellular (Potential).       | 3  | TCCGTGTCTCC   | 0.647 |             |
| + | 2  | 834       | v_uc002dtn.2_Mis  | NM_001030288 | NP_001025459 | P16150 | LEUK_HUMAN  | ellular (Potential).       | 2  | GATGTCTCCAAC  | 0.592 |             |
| - | 6  | 1127      | P226L SEZ6L2_uc   | NM_201575    | NP_963869    | Q6UXD5 | SE6L2_HUMAN | xtracellular (Potential).  | 2  | GGCCGGCCGG    | 0.637 |             |
| - | 3  | 909       | 389_uc010bzy.2_5  | NM_138447    | NP_612456    | Q96CS4 | ZN689_HUMAN | 2H2-type 2.                | 0  | TGCCCGCCGGT   | 0.587 |             |
| + | 16 | 5370      |                   | NM_014712    | NP_055527    | O15047 | SET1A_HUMAN |                            | 3  | CTCAACGAGCTC  | 0.468 |             |
| + | 6  | 1002      |                   | NM_001008274 | NP_001008275 | Q6ZMU5 | TRI72_HUMAN |                            | 0  | CCCACCGCCC    | 0.617 |             |
| + | 30 | 3551      | AX_uc002ebt.2_In  | NM_000887    | NP_000878    | P20702 | ITAX_HUMAN  | lasmic (Potential).        | 4  | CCAGTGAGAAA   | 0.552 |             |
| - | 5  | 527       | PS35_uc002eee.2   | NM_018206    | NP_060676    | Q96QK1 | VPS35_HUMAN |                            | 0  | TCAAGGGATGT   | 0.393 |             |

|   |    |           |                                                  |              |              |        |             |                            |    |              |       |             |
|---|----|-----------|--------------------------------------------------|--------------|--------------|--------|-------------|----------------------------|----|--------------|-------|-------------|
| - | 5  | 3207      | gn.1_Missense_M                                  | NM_015069    | NP_055884    | Q2M1K9 | ZN423_HUMAN | :2H2-type 23.              | 4  | GCAGCGAAGGG  | 0.617 |             |
| + | 2  | 558       | i_p.A97V ADCY7_                                  | NM_001114    | NP_001105    | P51828 | ADCY7_HUMAN | ical; (Potential).         | 1  | CTTGGCGCTGC  | 0.642 |             |
| - | 13 | 1731      | q.2_Missense_Mu                                  | NM_001143685 | NP_001137157 | Q6NT32 | EST5A_HUMAN |                            | 0  | CTGTCCGAGGC  | 0.527 |             |
| + | 2  | 286       | 3_uc002ejg.2_3'U                                 | NM_005954    | NP_005945    | P25713 | MT3_HUMAN   | Beta.                      | 0  | CTGCGCGGACT  | 0.647 |             |
| + | 16 | 2066      | 79_splice SLC12A                                 | NM_001126108 | NP_001119580 | P55017 | S12A3_HUMAN |                            | 3  | TCATCGTGAGT  | 0.428 |             |
| - | 16 | 2264_2265 | on_p.550_551SR-                                  | NM_005550    | NP_005541    | Q9BVG8 | KIFC3_HUMAN | inesin-motor.              | 3  | AGGCGGCTGCC  | 0.693 |             |
| - | 5  | 694       | m.1_Missense_Mu                                  | NM_002080    | NP_002071    | P00505 | AATM_HUMAN  |                            | 2  | CACAGCGCCTG  | 0.488 |             |
| + | 7  | 1488      | p.R175W HSF4_u                                   | NM_001040667 | NP_001035757 | Q9ULV5 | HSF4_HUMAN  | oblic repeat HR-A/B.       | 0  | CACTTCGGCAG  | 0.637 |             |
| + | 16 | 2393      | _p.S482L SLC9A                                   | NM_004594    | NP_004585    | Q14940 | SL9A5_HUMAN |                            | 2  | GTCCTCGGAAA  | 0.607 |             |
| + | 2  | 230       | _uc010vjt.1_5'Flar                               | NM_016948    | NP_058644    | Q9NPB6 | PAR6A_HUMAN | PRKCI and PRKCI.OPR        | 1  | TGCTCGGGGCG  | 0.667 |             |
| - | 2  | 468       | .E133K NIP7_uc0                                  | NM_032382    | NP_115758    | Q96MW5 | COG8_HUMAN  |                            | 1  | CTCCTCGGCTT  | 0.398 |             |
| - | 8  | 777       | ezk.1_Missense_M                                 | NM_138383    | NP_612392    | Q765P7 | MTSSL_HUMAN | IMD.                       | 1  | CATGTCGTTGAC | 0.667 |             |
| - | 46 | 7449      |                                                  | NM_032821    | NP_116210    | Q4G0P3 | HYDIN_HUMAN |                            | 2  | CCCTTCACTGT  | 0.478 |             |
| + | 8  | 789       | .A156V KIAA0174_uc002fbn.1_Missense_Mutation_p./ |              |              | P53990 | IST1_HUMAN  | teraction with CHMP1A an   | 1  | GGAAGCCCCAC  | 0.393 |             |
| + | 18 | 2747      | mp.1_Missense_M                                  | NM_014003    | NP_054722    | Q92620 | PRP16_HUMAN | case C-terminal.           | 1  | ATGGCGTTCCG  | 0.507 |             |
| + | 2  | 360       |                                                  | NM_020927    | NP_065978    | Q9HCJ6 | VAT1L_HUMAN |                            | 1  | GGTGCGACAAG  | 0.443 |             |
| - | 1  | 85        |                                                  | NM_001080442 | NP_001073911 | A6NNN8 | S38A8_HUMAN | ical; (Potential).         | 0  | GACAGCGCCCA  | 0.642 |             |
| - | 12 | 1699      | :CHC14_uc002fkb                                  | NM_015144    | NP_055959    | Q8WYQ9 | ZCH14_HUMAN |                            | 2  | CATGGCGCTGC  | 0.557 | rs141001038 |
| - | 1  | 150       |                                                  | NM_001739    | NP_001730    | P35218 | CAH5A_HUMAN |                            | 0  | CCATCGCCCTG  | 0.512 |             |
| + | 2  | 126       | TRAPPC2L_uc00                                    | NM_016209    | NP_057293    | Q9UL33 | TPC2L_HUMAN |                            | 0  | AGAACGAGCTG  | 0.562 |             |
| + | 3  | 473       | _p.G141S SPIRE2                                  | NM_032451    | NP_115827    | Q8WWL2 | SPIR2_HUMAN | KIND.                      | 1  | ACAGCGGCTGC  | 0.711 |             |
| + | 7  | 844       | 8_uc010vpq.1_Mi                                  | NM_207514    | NP_997397    | Q6ZN54 | DEFI8_HUMAN |                            | 1  | TGTGAGCTCCA  | 0.567 |             |
| - | 21 | 3394      |                                                  | NM_006445    | NP_006436    | Q6P2Q9 | PRP8_HUMAN  |                            | 6  | GATGCGATCAA  | 0.507 |             |
| - | 2  | 812       | d.1_Missense_Mu                                  | NM_017575    | NP_060045    | Q86US8 | EST1A_HUMAN | n with telomeric DNA.      | 4  | GTAGCGATTCC  | 0.652 | rs147212426 |
| - | 7  | 1301      | V1_uc010vru.1_5'                                 | NM_013276    | NP_037408    | Q9UJH6 | SHPK_HUMAN  |                            | 1  | AGCCCGGGTCA  | 0.647 |             |
| - | 4  | 703       | ie_Mutation_p.A11                                | NM_002561    | NP_002552    | Q93086 | P2RX5_HUMAN | ellular (Potential).       | 0  | TAACCGCTTCC  | 0.647 |             |
| - | 13 | 1562      |                                                  | NM_002208    | NP_002199    | P38570 | ITAE_HUMAN  | Extracellular (Potential). | 4  | CACGGCCCCA   | 0.577 |             |
| - | 4  | 802       | c.3_Nonsense_Mu                                  | NM_001122890 | NP_001116362 | Q6P531 | GGT6_HUMAN  | ellular (Potential).       | 1  | GGCTCGGGCCC  | 0.652 |             |
| + | 25 | 3114      | sn.1_Missense_Mi                                 | NM_153827    | NP_722549    | Q8N4C8 | MINK1_HUMAN | teraction wi p.E973V(1)    | 6  | GGCAGCCCTAG  | 0.587 |             |
| + | 22 | 2910      |                                                  | NM_006612    | NP_006603    | O43896 | KIF1C_HUMAN | Potential.                 | 2  | CCCTCGGGGAC  | 0.642 |             |
| - | 3  | 931       | 72B_uc010ckw.2                                   | NM_001104577 | NP_001098047 | Q9NWF4 | RFT_HUMAN   |                            | 0  | TGCCCGGGGCC  | 0.662 | rs137937212 |
| - | 11 | 1609      | NUP88_uc010cle.1                                 | NM_002532    | NP_002523    | Q99567 | NUP88_HUMAN |                            | 1  | CAAAGGAATCTG | 0.463 |             |
| + | 9  | 1447      | lit.1_Missense_Mu                                | NM_181844    | NP_862827    | Q8N143 | BCL6B_HUMAN |                            | 1  | AACACGGAGCT  | 0.632 |             |
| - | 26 | 4211      | JURL4_uc002gfy.1                                 | NM_032442    | NP_115818    | Q96JN8 | NEUL4_HUMAN |                            | 2  | GTACCTGAGGTI | 0.572 |             |
| + | 3  | 731       | EM102_uc002ggy.                                  | NM_178518    | NP_848613    | Q8N9M5 | TM102_HUMAN | ellular (Potential).       | 0  | CGAACCCCCA   | 0.572 |             |
| - | 4  | 1554      | hd.3_Missense_Mi                                 | NM_001128833 | NP_001122305 | Q9P1Z0 | ZBTB4_HUMAN | Pro-rich.                  | 4  | CCTCGGGGCT   | 0.662 |             |
| + | 7  | 1328      | ghe.2_Missense_M                                 | NM_000937    | NP_000928    | P24928 | RPB1_HUMAN  |                            | 1  | CCGTACTGTCA  | 0.607 |             |
| + | 14 | 2479      |                                                  | NM_000937    | NP_000928    | P24928 | RPB1_HUMAN  |                            | 1  | ATGCCCGAGAC  | 0.502 |             |
| + | 70 | 10747     | nm.1_Missense_M                                  | NM_020877    | NP_065928    | Q9P225 | DYH2_HUMAN  | 5 (By similarity).         | 13 | TGCATACCTCCA | 0.607 |             |
| - | 13 | 1060      | IAB3_uc010vul.1                                  | NM_004732    | NP_004723    | O43448 | KCAB3_HUMAN |                            | 1  | ACTCGGAGAC   | 0.577 |             |
| + | 18 | 3369      | _p.R817Q CNTR                                    | NM_053051    | NP_444279    | Q8N137 | CNTRB_HUMAN | centrosome localization.   | 2  | GCTCGGGGCT   | 0.582 |             |
| - | 8  | 797       | 5_uc002glu.3_5'U                                 | NM_014308    | NP_055123    | Q8WYR1 | PI3R5_HUMAN |                            | 5  | ATCCCCGATGC  | 0.617 |             |
| - | 23 | 3018      | uc002gml.1_Intron                                | NM_002472    | NP_002463    | P13535 | MYH8_HUMAN  | Potential.                 | 11 | GTTCTCCGTGG  | 0.393 |             |
| - | 30 | 4267      | uc002gml.1_Intron                                | NM_017533    | NP_060003    | Q9Y623 | MYH4_HUMAN  | Potential.                 | 13 | TGTGCGCTGGA  | 0.527 |             |
| - | 16 | 1892      | uc002gml.1_Intron                                | NM_017533    | NP_060003    | Q9Y623 | MYH4_HUMAN  | rosin head-like.           | 13 | AGCCCGCGATG  | 0.552 |             |
| - | 12 | 1124      | uc002gml.1_Intron                                | NM_017533    | NP_060003    | Q9Y623 | MYH4_HUMAN  | rosin head-like.           | 13 | CCACAGCACTC  | 0.468 |             |
| - | 15 | 1649      | uc002gml.1_Intron                                | NM_005963    | NP_005954    | P12882 | MYH1_HUMAN  | rosin head-like.           | 21 | CAGGTCCATCC  | 0.448 |             |

|   |    |       |                    |              |              |        |              |                              |    |               |       |
|---|----|-------|--------------------|--------------|--------------|--------|--------------|------------------------------|----|---------------|-------|
| - | 24 | 3189  | _Missense_Mutati   | NM_001100112 | NP_001093582 | Q9UKX2 | MYH2_HUMAN   | Potential.                   | 14 | TTTGTCTCCTC   | 0.478 |
| - | 26 | 3670  |                    | NM_002470    | NP_002461    | P11055 | MYH3_HUMAN   | Potential.                   | 7  | CTATCCGCATGC  | 0.597 |
| - | 13 | 1426  |                    | NM_002470    | NP_002461    | P11055 | MYH3_HUMAN   | rosin head-like.             | 7  | AGCTTCGTATCC/ | 0.383 |
| + | 58 | 11298 | 2gnf.2_Missense_I  | NM_001372    | NP_001363    | Q9NYC9 | DYH9_HUMAN   |                              | 20 | CCATCCGCGGG   | 0.502 |
| + | 7  | 972   | i_p.L225I MYOCD    | NM_153604    | NP_705832    | Q8IZQ8 | MYCD_HUMAN   |                              | 5  | AGGGGCTTGGC   | 0.582 |
| - | 27 | 3803  | .S1095L NCOR1_u    | NM_006311    | NP_006302    | O75376 | NCOR1_HUMAN  | action with ETO.             | 5  | ATTCTCGAAATG/ | 0.498 |
| + | 11 | 1965  | oz.2_Missense_Mt   | NM_016113    | NP_057197    | Q9Y5S1 | TRPV2_HUMAN  | lasmic (Potential).          | 1  | CCTGCGGGACC   | 0.622 |
| + | 3  | 1256  | n.1_Missense_Mu    | NM_030665    | NP_109590    | Q7Z5J4 | RAI1_HUMAN   | Gln-rich.                    | 2  | AGCGGGTCCAC   | 0.527 |
| - | 3  | 423   | 4T1_uc010vxt.1_5'  | NM_004169    | NP_004160    | P34896 | GLYC_HUMAN   |                              | 1  | GGCCCCGGGTAC  | 0.478 |
| - | 5  | 539   | AP4_uc002gvs.2_    | NM_002404    | NP_002395    | P55083 | MFAP4_HUMAN  | rogen C-terminal.            | 0  | TGCCCCGCCAT/  | 0.627 |
| + | 6  | 974   | p.E259K RNFB12_    | NM_007148    | NP_009079    | Q7Z5V9 | Q7Z5V9_HUMAN |                              | 2  | GCAGGGAAACA   | 0.612 |
| - | 3  | 444   | 90L SLC47A2_uc0    | NM_152908    | NP_690872    | Q86VL8 | S47A2_HUMAN  | lasmic (Potential).          | 0  | ATGCCGAAGAC/  | 0.567 |
| - | 1  | 395   | '22L ALDH3A1_uc    | NM_001135168 | NP_001128640 | P30838 | AL3A1_HUMAN  |                              | 2  | GCAGCGGACGG   | 0.697 |
| + | 12 | 3085  | 99_splice CYTSB    | NM_001033553 | NP_001028725 | Q5M775 | CYTSB_HUMAN  |                              | 0  | ATGCGGTAAGG/  | 0.527 |
| - | 2  | 756   | EZ6_uc002hdq.1_    | NM_178860    | NP_849191    | Q53EL9 | SEZ6_HUMAN   | xtracellular (Potential).    | 2  | TCCAGGACCT/   | 0.642 |
| - | 2  | 337   | _p.P48L SEZ6_uc    | NM_178860    | NP_849191    | Q53EL9 | SEZ6_HUMAN   | xellular (Potential).        | 2  | GCTCAGGTGTG/  | 0.577 |
| + | 19 | 2589  | _p.Q651K TAOK1_    | NM_020791    | NP_065842    | Q7L7X3 | TAOK1_HUMAN  | Potential.                   | 4  | AGTGCCAGGTT   | 0.443 |
| + | 3  | 1123  | e_Mutation_p.R12   | NM_001304    | NP_001295    | O75976 | CBPD_HUMAN   | ntial). Carboxypeptidase-lik | 2  | AACAATCGTGAG  | 0.398 |
| + | 5  | 953   | 2hgo.2_Missense_   | NM_032932    | NP_116321    | Q86YS3 | RFIP4_HUMAN  | ubcellular location, homo-   | 1  | CCAACGTCTAC   | 0.552 |
| - | 22 | 2933  |                    | NM_015194    | NP_056009    | O94832 | MYO1D_HUMAN  |                              | 3  | TCTTCCCCTGC/  | 0.597 |
| + | 2  | 224   |                    | NM_002988    | NP_002979    | P55774 | CCL18_HUMAN  |                              | 0  | GTGCCCAAGC    | 0.552 |
| + | 9  | 1274  | _p.T342I GGNBP2    | NM_024835    | NP_079111    | Q9H3C7 | GGNB2_HUMAN  |                              | 2  | GATGACCGTGG/  | 0.274 |
| - | 27 | 3478  | in.2_Missense_Mu   | NM_198836    | NP_942133    | Q13085 | ACACA_HUMAN  |                              | 2  | TTATGGCGAAGC  | 0.368 |
| - | 10 | 1141  | in.2_Missense_Mt   | NM_198836    | NP_942133    | Q13085 | ACACA_HUMAN  | in. ATP (Potential). ATP-gra | 2  | TCCCTCCTCCT/  | 0.378 |
| + | 10 | 1122  | 2_Intron MLLT6_uc  | NM_005937    | NP_005928    | P55198 | AF17_HUMAN   |                              | 6  | GTACTCCAAGC/  | 0.602 |
| - | 2  | 294   |                    | NM_001008777 | NP_001008777 | Q5MNV8 | FBX47_HUMAN  |                              | 0  | TGAGCCAAGGG   | 0.358 |
| + | 13 | 1530  | B7_uc010cwc.2_N    | NM_005310    | NP_005301    | Q14451 | GRB7_HUMAN   |                              | 5  | CCACCGCACCC   | 0.607 |
| - | 3  | 341   |                    | NM_001838    | NP_001829    | P32248 | CCR7_HUMAN   | lasmic (Potential).          | 1  | TATCCGGTCATG/ | 0.547 |
| - | 5  | 959   |                    | NM_181539    | NP_853517    | Q7Z3Y9 | K1C26_HUMAN  | Rod. Coil 2.                 | 0  | TAATTCGGTCAC  | 0.448 |
| - | 6  | 1316  |                    | NM_000223    | NP_000214    | Q99456 | K1C12_HUMAN  | Rod. Coil 2.                 | 1  | GCAGGCGGCGG   | 0.632 |
| - | 1  | 244   |                    | NM_000223    | NP_000214    | Q99456 | K1C12_HUMAN  | lead. Gly-rich.              | 1  | ACTCCGGAGC/   | 0.602 |
| - | 1  | 61    |                    | NM_000223    | NP_000214    | Q99456 | K1C12_HUMAN  | Head.                        | 1  | GGTGCGCACTG   | 0.577 |
| - | 1  | 514   | uc002hwo.1_RNA     | NM_003770    | NP_003761    | O76014 | KRT37_HUMAN  | Rod. Coil 1B.                | 1  | TTGTACGGGAAG  | 0.597 |
| - | 7  | 1377  |                    | NM_002278    | NP_002269    | Q14532 | K1H2_HUMAN   | Tail.                        | 0  | AGCAAGGCATG   | 0.647 |
| + | 2  | 593   | '10_uc002hwx.1_5   | NM_021939    | NP_068758    | Q96AY3 | FKB10_HUMAN  | ise FKBP-type 1.             | 1  | TGGTGGCCATC/  | 0.617 |
| - | 4  | 1316  | 4DC_uc002hze.3_I   | NM_032484    | NP_115873    | Q8N2G8 | GHDC_HUMAN   |                              | 0  | GGCCCCGAGGG   | 0.652 |
| + | 11 | 1482  | JBG2_uc002ias.2_   | NM_016437    | NP_057521    | Q9NRH3 | TBG2_HUMAN   |                              | 1  | GTTCGTAAGG/   | 0.512 |
| - | 19 | 5483  | A1_uc002icu.2_Nc   | NM_007294    | NP_009225    | P38398 | BRCA1_HUMAN  | p.R1751*(1)                  | 52 | TGCTCGCTTTG/  | 0.463 |
| - | 5  | 388   | iplice_Site_p.D74_ | NM_001932    | NP_001923    | Q13368 | MPP3_HUMAN   |                              | 2  | GCTTACGTCTC/  | 0.542 |
| + | 14 | 1650  | f.1_Nonsense_Mu    | NM_006178    | NP_006169    | P46459 | NSF_HUMAN    |                              | 1  | TTACTCGAGTT/  | 0.458 |
| + | 6  | 855   | BP1_uc010dbj.2_I   | NM_006546    | NP_006537    | Q9NZI8 | IF2B1_HUMAN  |                              | 1  | CTCTCGGGGTC/  | 0.657 |
| - | 2  | 234   | orf67_uc002iuq.2_  | NM_001085430 | NP_001078899 | Q0P5P2 | CQ067_HUMAN  |                              | 0  | TACCCGCATT/   | 0.498 |
| - | 2  | 212   | orf67_uc002iuq.2_  | NM_001085430 | NP_001078899 | Q0P5P2 | CQ067_HUMAN  |                              | 0  | GAAATCGGGTT   | 0.493 |
| + | 1  | 602   |                    | NM_001004707 | NP_001004707 | P58180 | OR4D2_HUMAN  | Name=5; (Potential).         | 2  | GATCTCCAACAC  | 0.512 |
| - | 17 | 3582  | _p.P844L BZRAP1    | NM_004758    | NP_004749    | O95153 | RIMB1_HUMAN  | onectin type-III 2.          | 3  | TGCCGGGCACC/  | 0.642 |
| - | 7  | 970   | xa.3_Missense_Mi   | NM_001005207 | NP_001005207 | O94972 | TRI37_HUMAN  | Potential.                   | 7  | GCTCATCTTTTG/ | 0.353 |
| + | 13 | 1128  | iyw.3_Missense_N   | NM_001099432 | NP_001092902 | Q9H6U6 | BCAS3_HUMAN  |                              | 5  | TGACAGTGATG/  | 0.418 |

rs138169839

rs80357123

|   |    |      |                                |              |              |        |             |                               |    |                 |       |             |
|---|----|------|--------------------------------|--------------|--------------|--------|-------------|-------------------------------|----|-----------------|-------|-------------|
| - | 9  | 1653 | zp.2_Missense_Mt               | NM_005121    | NP_005112    | Q9UHV7 | MED13_HUMAN |                               | 2  | :CATTTCGGTGCC   | 0.458 |             |
| - | 8  | 1284 | izp.2_Missense_M               | NM_005121    | NP_005112    | Q9UHV7 | MED13_HUMAN |                               | 2  | :TTCTTCGCATAC   | 0.363 |             |
| - | 6  | 464  | 10woz.1_RNA uc010wpa.1_5'Flank |              |              |        |             |                               | 0  | :TTCTCAATGTT    | 0.552 |             |
| + | 2  | 303  | :E_uc010wpi.1_Mit              | NM_000789    | NP_000780    | P12821 | ACE_HUMAN   | Peptidase M2 1.               | 4  | :GTTTGGCGGAGG   | 0.617 |             |
| - | 2  | 186  | se_Mutation_p.R4               | NM_002059    | NP_002050    | P01242 | SOM2_HUMAN  |                               | 3  | :GGCGCGGAGCA    | 0.562 |             |
| + | 4  | 821  | rx.1_Missense_M                | NM_181790    | NP_861455    | Q7Z601 | GP142_HUMAN | asmlc (Potential).            | 4  | :AGGCCCGACCC    | 0.662 |             |
| + | 14 | 1967 |                                | NM_001080419 | NP_001073888 | Q9C0B0 | UNK_HUMAN   |                               | 0  | :CCCTCCCCTCA    | 0.602 |             |
| - | 7  | 955  | :5_uc002jpx.2_5'Fl             | NM_032478    | NP_115867    | Q96DV4 | RM38_HUMAN  |                               | 1  | :CACCCGGTTAC    | 0.617 |             |
| - | 19 | 2032 | sense_Mutation_p.              | NM_052916    | NP_443148    | Q96PX1 | RN157_HUMAN |                               | 1  | :GGCGTGGGCAT    | 0.597 |             |
| - | 11 | 1022 | ira.2_Missense_M               | NM_052916    | NP_443148    | Q96PX1 | RN157_HUMAN |                               | 1  | :GGAAGGCTGTG    | 0.512 |             |
| - | 4  | 1486 | :Mutation_p.R36                | NM_032134    | NP_115510    | Q9H0J4 | QRIC2_HUMAN | Gln-rich.                     | 5  | :ccagccggaccaaa | 0.139 | rs143499534 |
| - | 4  | 608  |                                | NM_001008528 | NP_001008528 | P84157 | MXRA7_HUMAN |                               | 0  | :CACGTCGCCGT    | 0.577 |             |
| + | 4  | 521  | :1_uc002jvn.2_5'Fl             | NM_024419    | NP_077733    | Q32NB8 | PGPS1_HUMAN |                               | 0  | :CTCACGAGGTA    | 0.537 |             |
| - | 3  | 381  | :2_Intron LGALS3I              | NM_005567    | NP_005558    | Q08380 | LG3BP_HUMAN | SRCR.                         | 4  | :GTTCTCGAAGC    | 0.657 | rs11548453  |
| - | 6  | 1583 | i.2_Missense_Mut               | NM_001159772 | NP_001153244 | Q8WVQ1 | CANT1_HUMAN | lenal (Potential).            | 0  | :GAAGCGCCCGT    | 0.547 |             |
| + | 4  | 2591 |                                | NM_020914    | NP_065965    | Q9HCF4 | ALO17_HUMAN |                               | 21 | :ATGACGACAGC    | 0.502 |             |
| - | 3  | 669  |                                | NM_178520    | NP_848615    | Q8N8V8 | TM105_HUMAN | ical; (Potential).            | 1  | :AGGCTGTGAAC    | 0.597 |             |
| - | 7  | 1231 | :p.R22H P4HB_uc                | NM_000918    | NP_000909    | P07237 | PDIA1_HUMAN |                               | 0  | :GGAAGCGGTGG    | 0.652 |             |
| + | 5  | 645  | :p.G155E TBCD_u                | NM_005993    | NP_005984    | Q9BTW9 | TBCD_HUMAN  |                               | 0  | :TGACGGGAACC    | 0.468 |             |
| - | 4  | 427  | :F1_uc002kkv.3_M               | NM_017512    | NP_059982    | Q7L5Y1 | ENOF1_HUMAN |                               | 1  | :TAGGACGGCCG    | 0.502 |             |
| - | 23 | 3834 | iq.2_Missense_Mt               | NM_003803    | NP_003794    | P52179 | MYOM1_HUMAN | like C2-type 3.               | 5  | :ACTCGGACTTT    | 0.413 |             |
| - | 9  | 822  | :p.R221H L3MBTL                | NM_173464    | NP_775735    | Q8NA19 | LMBL4_HUMAN | MBT 2.                        | 3  | :GTAAGCGATCT    | 0.393 |             |
| - | 8  | 1335 | :p.R233W MPPE1_                | NM_023075    | NP_075563    | Q53F39 | MPPE1_HUMAN |                               | 0  | :ACACCGGCTGG    | 0.637 |             |
| + | 3  | 519  | :Ib.1_Missense_M               | NM_014214    | NP_055029    | O14732 | IMPA2_HUMAN |                               | 2  | :CGACCCCATCG    | 0.562 |             |
| + | 11 | 1402 |                                | NM_005925    | NP_005916    | Q16820 | MEP1B_HUMAN | ilar (Potential). MATH.       | 2  | :CCCTCCATTTTA   | 0.408 |             |
| + | 14 | 2116 |                                | NM_005925    | NP_005916    | Q16820 | MEP1B_HUMAN | asmlc (Potential).            | 2  | :AAATCGACCAA    | 0.383 |             |
| + | 12 | 5363 | q.2_Missense_Mu                | NM_030632    | NP_085135    | Q9C0F0 | ASXL3_HUMAN |                               | 3  | :GATTGGGAGCC    | 0.517 |             |
| + | 6  | 911  | :p.S197L SLC14A                | NM_007163    | NP_009094    | Q15849 | UT2_HUMAN   |                               | 4  | :GTTCTCGGAGA    | 0.532 |             |
| + | 16 | 2290 | lbe.2_Missense_M               | NM_007163    | NP_009094    | Q15849 | UT2_HUMAN   | ical; (Potential).            | 4  | :TGCCCGTGTTC    | 0.557 |             |
| - | 9  | 1225 | la.1_Missense_Mt               | NM_004671    | NP_004662    | O75928 | PIAS2_HUMAN | P-RING-type.                  | 4  | :GGCATGGGATT    | 0.438 |             |
| - | 16 | 2272 | ac.1_Missense_Mt               | NM_001080467 | NP_001073936 | Q9ULV0 | MYO5B_HUMAN | :e. Actin-binding (Potential) | 5  | :CTCATCGTTGG    | 0.577 |             |
| + | 2  | 638  |                                | NM_015879    | NP_056963    | O43173 | SIA8C_HUMAN | lenal (Potential).            | 2  | :TAATCGGACAG    | 0.368 |             |
| - | 4  | 423  |                                | NM_133459    | NP_597716    | Q6UXH8 | CCBE1_HUMAN |                               | 3  | :TCATATCGGTATC  | 0.512 | rs115982879 |
| - | 4  | 618  | ky.1_Missense_Mt               | NM_138966    | NP_620416    | Q8TDF5 | NETO1_HUMAN | tracellular (Potential).      | 4  | :TATTGGAGAAA    | 0.373 |             |
| + | 2  | 2389 | ra.2_Missense_Mu               | NM_171999    | NP_741996    | Q9BXA9 | SALL3_HUMAN |                               | 4  | :AGCTACGATGAC   | 0.662 | rs143920432 |
| + | 7  | 1906 |                                | NM_001194    | NP_001185    | Q9UL51 | HCN2_HUMAN  | rtoplasmic (Potential).       | 0  | :CCGCCGCACGG    | 0.726 |             |
| - | 5  | 857  | Mutation_p.A225T               | NM_005481    | NP_005472    | Q9Y2X0 | MED16_HUMAN | WD 2.                         | 0  | :CGACGGCTGTC    | 0.692 |             |
| - | 3  | 408  | te REEP6_uc010x                | NM_017573    | NP_060043    | Q6UW60 | PCSK4_HUMAN |                               | 0  | :CACCACGACAG    | 0.682 | rs143050585 |
| - | 5  | 566  | :p.A182T MBD3_u                | NM_003926    | NP_003917    | O95983 | MBD3_HUMAN  |                               | 3  | :GCTGGCGATGG    | 0.667 |             |
| - | 20 | 2446 | e_Mutation_p.E70               | NM_138813    | NP_620168    | O60423 | AT8B3_HUMAN | asmlc (Potential).            | 0  | :GTCCTCGATGG    | 0.627 |             |
| - | 4  | 1044 | :l2lue.2_Missense_             | NM_001130111 | NP_001123583 | Q96GS6 | F18A1_HUMAN |                               | 0  | :TGAGCGGCGAG    | 0.607 |             |
| - | 18 | 2280 | :p.S595L AP3D1_u               | NM_003938    | NP_003929    | O14617 | AP3D1_HUMAN |                               | 0  | :ATGGCGAGCTC    | 0.652 |             |
| - | 3  | 787  | xgy.1_Missense_M               | NM_144564    | NP_653165    | Q9BRY0 | S39A3_HUMAN | ical; (Potential).            | 0  | :GGCCGACAGC     | 0.721 |             |
| + | 2  | 579  | cp.2_Missense_Mu               | NM_205843    | NP_995315    | P08651 | NFIC_HUMAN  | CTF/NF-I.                     | 0  | :TGCCCGTCAAG    | 0.687 |             |
| - | 13 | 1987 | :p.R393C LONP1_                | NM_004793    | NP_004784    | P36776 | LONM_HUMAN  |                               | 0  | :CATACGGTCTCC   | 0.662 |             |
| - | 17 | 1915 | mdz.2_Missense_I               | NM_007322    | NP_015561    | Q9H6Z4 | RANB3_HUMAN |                               | 1  | :CGGTCGTCTGC    | 0.706 |             |
| - | 10 | 1039 |                                | NM_003685    | NP_003676    | Q92945 | FUBP2_HUMAN | Gly-rich.                     | 1  | :CAAAGCCGCCT    | 0.637 |             |



|   |    |       |                   |              |              |        |             |                                |    |                  |       |             |
|---|----|-------|-------------------|--------------|--------------|--------|-------------|--------------------------------|----|------------------|-------|-------------|
| - | 2  | 393   | 5A41_uc010dut.2_  | NM_173637    | NP_775908    | Q8N5S1 | S2541_HUMAN | ical; Name=1; (Potential).     | 0  | :CGCCCCGGCCA     | 0.612 |             |
| - | 4  | 1345  | on_p.S341N MIR2:  | NM_006087    | NP_006078    | P04350 | TBB4_HUMAN  |                                | 2  | :TGTGCTCTCGC     | 0.627 |             |
| - | 3  | 418   | D3A_uc010xjg.1_I  | NM_005490    | NP_005481    | Q9BRG2 | SH23A_HUMAN | SH2.                           | 2  | GGGCTGTGGGT      | 0.647 |             |
| + | 8  | 1096  | p.N211S ZNF557_   | NM_001044388 | NP_001037853 | Q8N988 | ZN557_HUMAN | C2H2-type 3.                   | 2  | :ATGCAATGACTG    | 0.453 |             |
| + | 5  | 982   | rf45_uc010xjo.1_5 | NM_198534    | NP_940936    | Q8NA69 | CS045_HUMAN |                                | 0  | :GTGACGGCCTC     | 0.587 |             |
| + | 1  | 60    | 10dvs.2_Translati | NM_001144910 | NP_001138382 | Q9H2X3 | CLC4M_HUMAN |                                | 1  | :AGAGGGTGGA      | 0.507 |             |
| + | 3  | 2470  | 1_5'Flank MAP2K7  | NM_025061    | NP_079337    | Q6NSJ5 | LRC8E_HUMAN |                                | 2  | :AGTGGCGGACA     | 0.552 | rs145323217 |
| - | 22 | 2791  |                   | NM_032447    | NP_115823    | Q75N90 | FBN3_HUMAN  | TB 5.                          | 11 | ACTCATCTCAT      | 0.647 |             |
| + | 4  | 517   | :S4_uc002mji.2_5' | NM_024552    | NP_078828    | Q9HA82 | CERS4_HUMAN |                                | 1  | GAGCCGGTGGC      | 0.582 |             |
| - | 9  | 1000  | ikh.2_Nonsense_N  | NM_012335    | NP_036467    | O00160 | MYO1F_HUMAN | osin head-like.                | 3  | :CACTCGGGCGT     | 0.612 |             |
| - | 5  | 33544 |                   | NM_024690    | NP_078966    | Q8WXI7 | MUC16_HUMAN | xtracellular (Potential).      | 57 | 3AATTGGAATAG     | 0.507 |             |
| - | 3  | 11903 |                   | NM_024690    | NP_078966    | Q8WXI7 | MUC16_HUMAN | xtracellular (Potential).      | 57 | :TGGAGGAGCTG     | 0.458 |             |
| - | 1  | 1382  |                   | NM_024690    | NP_078966    | Q8WXI7 | MUC16_HUMAN | xtracellular (Potential).      | 57 | :TACCTGGACTT     | 0.522 |             |
| - | 8  | 1009  | ws.2_Missense_M   | NM_024106    | NP_077011    | Q9BUY5 | ZN426_HUMAN |                                | 1  | :TITTTTCTCCATT   | 0.388 |             |
| - | 3  | 502   |                   | NM_133452    | NP_597709    | Q8IY67 | RAVR1_HUMAN | RRM 1.                         | 1  | :GCACCGACAGT     | 0.672 |             |
| - | 19 | 3023  | te.2_Missense_Mu  | NM_003331    | NP_003322    | P29597 | TYK2_HUMAN  |                                | 9  | :AGTCCGGGTTTC    | 0.572 | rs1140385   |
| - | 4  | 715   | 3_uc002msz.1_Mi   | NM_001080411 | NP_001073880 | Q8N7K0 | ZN433_HUMAN | C2H2-type 2.                   | 0  | TTGAATGGGAAA     | 0.388 |             |
| - | 7  | 989   | lyv.1_Missense_M  | NM_000528    | NP_000519    | O00754 | MA2B1_HUMAN |                                | 6  | :ATACCGGCCCTC    | 0.527 |             |
| + | 2  | 189   | nuw.2_Missense_I  | NM_004317    | NP_004308    | O43681 | ASNA_HUMAN  |                                | 2  | :TGGCAGTCCAG     | 0.537 |             |
| + | 8  | 735   | e_Mutation_p.D22  | NM_000159    | NP_000150    | Q92947 | GCDH_HUMAN  |                                | 0  | :TGGCCGATCTG     | 0.622 |             |
| + | 9  | 1293  | _uc002mvz.1_5'Fi  | NM_004343    | NP_004334    | P27797 | CALR_HUMAN  | in. Asp/Glu/Lys-rich.          | 1  | gggaagatgaggagga | 0.348 |             |
| - | 4  | 619   | tation_p.S108L uc | NM_001008701 | NP_001008701 | O94910 | LPHN1_HUMAN | in. Extracellular (Potential). | 5  | :CATCCGAGCCG     | 0.587 |             |
| + | 35 | 5703  | nfj.1_Missense_Mt | NM_004145    | NP_004136    | Q13459 | MYO9B_HUMAN | ho-GAP Tail.                   | 1  | :TCTTCGCACCC     | 0.647 |             |
| + | 5  | 1640  | p.A544V MAP1S_    | NM_018174    | NP_060644    | Q66K74 | MAP1S_HUMAN | tubule-organizing center loc   | 1  | :CCGGGCAGCCT     | 0.662 |             |
| + | 5  | 894   | ihu.2_Missense_M  | NM_015683    | NP_056498    | Q8TBH0 | ARRD2_HUMAN |                                | 1  | GCCCCGGGCAG      | 0.701 |             |
| - | 3  | 1624  |                   | NM_001001411 | NP_001001411 | Q8N7Q3 | ZN676_HUMAN | C2H2-type 10.                  | 0  | :AGTAAGGCTTG     | 0.438 |             |
| + | 4  | 1512  |                   | NM_020855    | NP_065906    | Q9P255 | ZN492_HUMAN | C2H2-type 11.                  | 0  | :CAAATGTGAAG     | 0.373 |             |
| + | 3  | 552   | xrn.1_Nonsense_N  | NM_001136156 | NP_001129628 | Q8TCN5 | ZN507_HUMAN |                                | 5  | :TAATCCAGTCAC    | 0.438 |             |
| + | 4  | 389   | 123_uc002ntz.1_5  | NM_152266    | NP_689479    | Q9BTP7 | FAP24_HUMAN |                                | 0  | :TAGTCGTTGAA     | 0.418 |             |
| + | 6  | 2893  |                   | NM_014727    | NP_055542    | Q9UMN6 | MLL4_HUMAN  | CXXC-type.                     | 11 | :TGGCTCGATGT     | 0.622 |             |
| + | 12 | 1646  | p.S503N APLP1_t   | NM_005166    | NP_005157    | P51693 | APLP1_HUMAN | ellular (Potential).           | 2  | GGGCAGCAGCG      | 0.587 |             |
| + | 14 | 1874  | dd.2_Nonsense_M   | NM_173636    | NP_775907    | O43379 | WDR62_HUMAN | WD 9.                          | 0  | :ACATCCAGATG     | 0.627 |             |
| + | 30 | 4013  | ld.2_Missense_Mt  | NM_173636    | NP_775907    | O43379 | WDR62_HUMAN |                                | 0  | :CCCCCGTGGAT     | 0.682 | rs144440621 |
| + | 4  | 1839  | p.G106R ZNF146_   | NM_007145    | NP_009076    | Q15072 | OZF_HUMAN   | C2H2-type 4.                   | 0  | :ATTGCGGGAAA     | 0.418 | rs145747574 |
| - | 6  | 1552  | 345_uc002oez.2_I  | NM_001037232 | NP_001032309 | Q3KNS6 | ZN829_HUMAN | C2H2-type 9.                   | 0  | :GATGTCGAGTA     | 0.403 |             |
| + | 6  | 1444  | o.1_Missense_Mut  | NM_181786    | NP_861451    | P10072 | HKR1_HUMAN  | C2H2-type 4.                   | 2  | :TGGCGTGGCT      | 0.527 |             |
| + | 2  | 140   | :527_uc010xtq.1_F | NM_032453    | NP_115829    | Q8NB42 | ZN527_HUMAN |                                | 2  | :CATGTCCCAGG     | 0.433 |             |
| - | 6  | 689   | du.1_Missense_M   | NM_004647    | NP_004638    | Q92782 | DPF1_HUMAN  |                                | 0  | :CATACGGCTTG     | 0.612 |             |
| + | 5  | 599   | i.1_Intron FAM98C | NM_174905    | NP_777565    | Q17RN3 | FA98C_HUMAN |                                | 1  | :CTCTGCCCCCA     | 0.587 |             |
| + | 68 | 10427 | iv.1_Missense_Mt  | NM_000540    | NP_000531    | P21817 | RYR1_HUMAN  |                                | 12 | :CGGAGGAGCTG     | 0.682 |             |
| - | 13 | 1044  | ense_Mutation_p.F | NM_012237    | NP_036369    | Q8IXJ6 | SIRT2_HUMAN | tylase sirtuin-type.           | 0  | CAGGCGAGGGG      | 0.657 |             |
| - | 3  | 588   | 3XO17_uc002okf.1  | NM_024907    | NP_079183    | Q96EF6 | FBX17_HUMAN | FBA.                           | 0  | :GCACCGGTGTT     | 0.582 |             |
| + | 4  | 602   | jl.2_Missense_Mui | NM_001004318 | NP_001004318 | Q6ZNF0 | PAPL_HUMAN  |                                | 0  | :TTTATCGCTGT     | 0.652 |             |
| + | 2  | 570   | M50_uc002olt.1_F  | NM_001001563 | NP_001001563 | Q3ZCQ8 | TIM50_HUMAN |                                | 1  | GAGCCGCGGGA      | 0.612 |             |
| + | 7  | 723   | mt.2_Missense_M   | NM_178544    | NP_848639    | Q86UE3 | ZN546_HUMAN |                                | 3  | TCAATTGCAGAC     | 0.313 |             |
| - | 7  | 4462  | _Mutation_p.A125  | NM_181882    | NP_870998    | Q9BXM0 | PRAX_HUMAN  |                                | 2  | TGGGGGCTGCA      | 0.697 |             |
| + | 29 | 3760  | i_p.V127M LTBP4_  | NM_001042544 | NP_001036009 | Q8N2S1 | LTBP4_HUMAN | alcium-binding (Potential).    | 1  | :CAGACGTGGAC     | 0.502 |             |

|   |    |      |                                                        |              |              |        |             |    |                 |       |             |
|---|----|------|--------------------------------------------------------|--------------|--------------|--------|-------------|----|-----------------|-------|-------------|
| + | 2  | 295  | ehh.1_Missense_Mutation_p.S96F CYP2B7P1_uc002opq.2_RNA |              |              |        |             | 2  | :CTTCTCTGGCC    | 0.627 |             |
| + | 8  | 1086 | '2F1_uc010xvv.1_                                       | NM_000774    | NP_000765    | P24903 | CP2F1_HUMAN | 0  | :ACCGCGGGCC     | 0.667 |             |
| + | 4  | 505  | ense_Mutation_p.l                                      | NM_000709    | NP_000700    | P12694 | ODBA_HUMAN  | 0  | :GTACCGGGAGG    | 0.582 |             |
| - | 9  | 1237 | se_Mutation_p.P2E                                      | NM_019884    | NP_063937    | P49840 | GSK3A_HUMAN | 4  | :CTGGCGGCGTT    | 0.582 |             |
| - | 3  | 612  | xwj.1_Missense_Iv                                      | NM_002573    | NP_002564    | Q15102 | PA1B3_HUMAN | 0  | :GGCCCGGATGT    | 0.562 |             |
| + | 14 | 1334 | IF8_uc002otl.3_5F                                      | NM_173633    | NP_775904    | Q8NBT3 | TM145_HUMAN | 0  | :GACCCGGAGGG    | 0.617 |             |
| + | 9  | 2203 | tm.3_Missense_Iv                                       | NM_001410    | NP_001401    | Q7Z7M0 | MEGF8_HUMAN | 1  | :TGGTGGCAGCG    | 0.637 |             |
| - | 4  | 829  | t1_uc002oty.2_MiE                                      | NM_001712    | NP_001703    | P13688 | CEAM1_HUMAN | 2  | :TGGGGGTGTCC    | 0.562 |             |
| - | 4  | 1015 | uj.3_Missense_Mi                                       | NM_182707    | NP_874366    | Q9UQ74 | PSG8_HUMAN  | 0  | :FAGGGTCTGTT    | 0.498 |             |
| + | 8  | 814  | R_uc010xpx.1_M                                         | NM_000164    | NP_000155    | P48546 | GIPR_HUMAN  | 1  | :AGGGCGTCTAC    | 0.687 |             |
| - | 14 | 2106 | p.A621T SYMPK_                                         | NM_004819    | NP_004810    | Q92797 | SYMPK_HUMAN | 1  | :CCAGCGAAGG     | 0.642 |             |
| - | 2  | 445  | per.3_Missense_I                                       | NM_018215    | NP_060685    | Q86V59 | PNML1_HUMAN | 0  | :ggggagaggacccc | 0     |             |
| - | 6  | 1810 | pfq.2_Missense_Iv                                      | NM_005628    | NP_005619    | Q15758 | AAAT_HUMAN  | 0  | :CTGCGGCCACG    | 0.607 |             |
| + | 1  | 2288 |                                                        | NM_004491    | NP_004482    | Q9NRY4 | RHG35_HUMAN | 1  | :CTAAGCGTAACT   | 0.433 |             |
| + | 2  | 3763 |                                                        | NM_004491    | NP_004482    | Q9NRY4 | RHG35_HUMAN | 1  | :CTGTCTGTGACT   | 0.443 |             |
| + | 14 | 3049 | yo.1_Missense_M                                        | NM_014681    | NP_055496    | Q14147 | DHX34_HUMAN | 5  | :TCAGTCCCTCC    | 0.642 |             |
| - | 1  | 150  |                                                        | NM_003167    | NP_003158    | Q06520 | ST2A1_HUMAN | 2  | :GAAATCGTCCG    | 0.468 |             |
| + | 4  | 1069 | n.1_5'Flank FGF2'                                      | NM_019113    | NP_061986    | Q9NSA1 | FGF21_HUMAN | 1  | :CCTGCCACTAC    | 0.692 |             |
| - | 9  | 1083 | p.R309Q BCAT2_t                                        | NM_001190    | NP_001181    | O15382 | BCAT2_HUMAN | 1  | :GGATTCGGTGC    | 0.652 |             |
| + | 5  | 521  | \X_uc010xzx.1_Rf                                       | NM_138761    | NP_620116    | Q07812 | BAX_HUMAN   | 3  | :GGGCTGGATCC    | 0.448 |             |
| - | 3  | 828  | c.2_Intron CGB7_t                                      | NM_033142    | NP_149133    | P01233 | CGHB_HUMAN  | 0  | :CCCCGGGAGTC    | 0.627 | rs142903731 |
| + | 13 | 1700 | g.2_Missense_Mt                                        | NM_152359    | NP_689572    | Q8TCG5 | CPT1C_HUMAN | 3  | :CAGACGGCCAC    | 0.612 |             |
| - | 23 | 6275 | sw.1_Missense_M                                        | NM_016148    | NP_057232    | Q9Y566 | SHAN1_HUMAN | 2  | :GTCCGGGGGCA    | 0.667 |             |
| - | 3  | 479  | ie_Mutation_p.E14                                      | NM_017509    | NP_059979    | Q9H2R5 | KLK15_HUMAN | 2  | :AGGCTCGTTGT    | 0.687 |             |
| - | 7  | 946  | p.G243D KLK5_uc                                        | NM_001077491 | NP_001070959 | Q9Y337 | KLK5_HUMAN  | 0  | :AAATCACCCCTGC  | 0.343 |             |
| - | 3  | 248  | vl.2_Missense_Mu                                       | NM_001161748 | NP_001155220 | P55344 | LMIP_HUMAN  | 0  | :AGGATCATGAAC   | 0.587 |             |
| + | 6  | 1161 |                                                        | NM_001099694 | NP_001093164 | Q96N58 | ZN578_HUMAN | 0  | :CCATCGTAGATC   | 0.433 |             |
| - | 5  | 659  | ak.1_Intron ZNF81                                      | NM_001031665 | NP_001026835 | Q0VGE8 | ZN816_HUMAN | 0  | :TTCAACTTCTTG   | 0.398 |             |
| + | 1  | 788  |                                                        | NM_173856    | NP_776255    | Q8NFX6 | VN1R2_HUMAN | 0  | :CAAATGGAGCA    | 0.418 |             |
| + | 7  | 1715 | eqr.1_Missense_M                                       | NM_018555    | NP_061025    | Q9NQX6 | ZN331_HUMAN | 6  | :ACAGCGCTCCA    | 0.428 |             |
| - | 10 | 1139 | n.1_Missense_Mu                                        | NM_002287    | NP_002278    | Q6GTX8 | LAIR1_HUMAN | 4  | :GGACTCGGCCA    | 0.602 |             |
| + | 6  | 747  | splice_Site_p.G21                                      | NM_002255    | NP_002246    | Q99706 | KI2L4_HUMAN | 1  | :CTCCAGGTATCC   | 0.468 |             |
| + | 6  | 771  | id.2_Missense_Mu                                       | NM_004829    | NP_004820    | O76036 | NCTR1_HUMAN | 2  | :AGAAAGGTAAG    | 0.498 |             |
| - | 13 | 2497 | ense_Mutation_p.l                                      | NM_002842    | NP_002833    | Q9HD43 | PTPRH_HUMAN | 4  | :CTGACGTGGTC    | 0.552 | rs143797290 |
| + | 6  | 1337 | r.R201Q U2AF2_u                                        | NM_013301    | NP_037433    | Q9BWC9 | CC106_HUMAN | 0  | :GTCGCGGGCCT    | 0.667 |             |
| + | 2  | 557  | d.2_Missense_Mu                                        | NM_001130072 | NP_001123544 | Q9Y6I3 | EPN1_HUMAN  | 0  | :CTGGCGTCACG    | 0.592 |             |
| + | 5  | 476  |                                                        | NM_020813    | NP_065864    | Q9BX82 | ZN471_HUMAN | 2  | :GCTATGGACTTC   | 0.368 |             |
| - | 7  | 4738 | E1434Q PEG3_uc                                         | NM_001146186 | NP_001139658 | Q9GZU2 | PEG3_HUMAN  | 12 | :CTCTTCTTCTGC   | 0.547 |             |
| - | 5  | 1009 |                                                        | NM_052882    | NP_443114    | Q96PE6 | ZIM3_HUMAN  | 2  | :GCTTCCACTTCT   | 0.433 |             |
| + | 4  | 1230 |                                                        | NM_152677    | NP_689890    | Q8NAM6 | ZSCA4_HUMAN | 1  | :AGACTTCCCAAG   | 0.443 |             |
| + | 3  | 803  | yh.1_Missense_I                                        | NM_181846    | NP_862829    | P10073 | ZSC22_HUMAN | 1  | :CCAGCGTGGCC    | 0.517 |             |
| - | 3  | 542  | DAM17_uc010exb                                         | NM_003183    | NP_003174    | P78536 | ADA17_HUMAN | 2  | :AACCAACCACG1   | 0.438 |             |
| + | 4  | 554  | se_Mutation_p.Y1                                       | NM_182625    | NP_872431    | Q17RS7 | GEN_HUMAN   | 8  | :TCCTTTATGGGC   | 0.408 |             |
| - | 9  | 1797 | DH14_uc002rcx.3                                        | NM_033253    | NP_150278    | Q96P26 | 5NT1B_HUMAN | 3  | :TTGTCCGTACA    | 0.473 |             |
| - | 5  | 811  | _p.S176L NT5C1B                                        | NM_001002006 | NP_001002006 | Q96P26 | 5NT1B_HUMAN | 3  | :TGGCGGAATAT    | 0.662 |             |
| + | 8  | 988  | hv.3_Missense_M                                        | NM_020134    | NP_064519    | Q9BPU6 | DPYL5_HUMAN | 2  | :TGCCACGCTGA    | 0.522 |             |
| - | 11 | 1207 | r.R365W IFT172_t                                       | NM_015662    | NP_056477    | Q9UG01 | IF172_HUMAN | 2  | :AAGCCGATTAG1   | 0.493 |             |

|   |    |       |                   |              |              |        |             |                               |    |               |       |
|---|----|-------|-------------------|--------------|--------------|--------|-------------|-------------------------------|----|---------------|-------|
| + | 34 | 2336  | j.1_Missense_Mut  | NM_153021    | NP_694566    | Q6P1J6 | PLB1_HUMAN  | ate repeats. Extracellular (F | 9  | GGACGGCTCCC   | 0.522 |
| + | 1  | 269   |                   | NM_016441    | NP_057525    | Q9NZV1 | CRIM1_HUMAN | al. Extracellular (Potential) | 3  | CGGCACCTTCG   | 0.667 |
| + | 3  | 597   | AIN6_uc002rrb.2_l | NM_024775    | NP_079051    | Q8WXD5 | GEMI6_HUMAN |                               | 0  | TTGAAGGACATC  | 0.398 |
| + | 15 | 1857  | q.2_Missense_Mu   | NM_020744    | NP_065795    | Q9BTC8 | MTA3_HUMAN  |                               | 2  | AGTCCGAAACA   | 0.478 |
| + | 8  | 1621  | _p.S513F PLEKHF   | NM_172069    | NP_742066    | Q8IVE3 | PKHH2_HUMAN |                               | 3  | TATTTTCCTATGA | 0.458 |
| + | 4  | 545   | oa.1_Missense_Mi  | NM_022437    | NP_071882    | Q9H221 | ABCG8_HUMAN | er. Cytoplasmic (Potential).  | 4  | CGTGCCGACG    | 0.627 |
| + | 9  | 1459  | C7A_uc010fbc.2_l  | NM_020458    | NP_065191    | Q9ULT0 | TTC7A_HUMAN |                               | 2  | GAGCCGGGTGC   | 0.592 |
| + | 5  | 595   | pt.1_Missense_Mu  | NM_014562    | NP_055377    | P32242 | OTX1_HUMAN  |                               | 2  | AGTGCGGGAGA   | 0.647 |
| + | 5  | 1332  | LC1A4_uc010fcv.2  | NM_003038    | NP_003029    | P43007 | SATT_HUMAN  | ical; (Potential).            | 1  | CATTTGCGACAG  | 0.488 |
| + | 6  | 867   | f.2_Missense_Mut  | NM_173545    | NP_775816    | Q8IW19 | APLF_HUMAN  |                               | 2  | AGCAAGGAAGA   | 0.363 |
| + | 11 | 2213  | sew.2_Missense_l  | NM_001007231 | NP_001007232 | P42331 | RHG25_HUMAN | Potential.                    | 4  | GCTCCCGGGAC   | 0.507 |
| - | 3  | 584   | p.R178Q CYP26B    | NM_019885    | NP_063938    | Q9NR63 | CP26B_HUMAN |                               | 2  | GCACCCGGATG   | 0.617 |
| + | 20 | 11897 | .W3885* ALMS1_l   | NM_015120    | NP_055935    | Q8TCU4 | ALMS1_HUMAN |                               | 9  | TTCTTGGTCAG   | 0.418 |
| - | 4  | 895   | .1_uc002smc.2_5f  | NM_133637    | NP_598376    | Q8TE96 | DQX1_HUMAN  |                               | 2  | CACCCGATCAG   | 0.522 |
| + | 18 | 2739  | ysg.1_Missense_l  | NM_004389    | NP_004380    | P26232 | CTNA2_HUMAN |                               | 9  | CTCCAGAGAAG   | 0.483 |
| + | 7  | 914   | gk.2_Missense_Mi  | NM_005911    | NP_005902    | P31153 | METK2_HUMAN |                               | 0  | TGGACGCAAAA   | 0.453 |
| - | 31 | 5043  | ytb.1_Missense_M  | NM_015425    | NP_056240    | O95602 | RPA1_HUMAN  |                               | 3  | TTGGTCGCATAG  | 0.493 |
| - | 5  | 759   | PS5_uc010yud.1    | NM_031902    | NP_114108    | P82675 | RT05_HUMAN  |                               | 3  | CTTTCGGTCCC   | 0.532 |
| - | 3  | 345   | nse_Mutation_p.C  | NM_207328    | NP_997211    | Q6NUI2 | GPAT2_HUMAN |                               | 0  | ACTTCCCCAGG   | 0.587 |
| - | 6  | 1221  | svl.2_Missense_l  | NM_020151    | NP_064536    | Q9NQZ5 | STAR7_HUMAN | START.                        | 0  | GGGACGGATAA   | 0.468 |
| - | 34 | 4971  | JP200_uc010yuj.1  | NM_014014    | NP_054733    | O75643 | U520_HUMAN  | ase C-terminal 2.             | 10 | GCGTCGCTCCA   | 0.572 |
| - | 11 | 1314  |                   | NM_005735    | NP_005726    | P42025 | ACTY_HUMAN  |                               | 1  | TAGCACGGGAG   | 0.542 |
| - | 5  | 404   | _YG1_uc010yvo.1   | NM_174898    | NP_777558    | Q8N1E2 | LYG1_HUMAN  |                               | 0  | AGCACGAACTC   | 0.463 |
| + | 11 | 1310  | vt.1_Missense_Mi  | NM_002518    | NP_002509    | Q99743 | NPAS2_HUMAN | PAC.                          | 4  | AGCCCAGATTC   | 0.607 |
| - | 5  | 909   | _2_uc002tcx.2_Mi  | NM_201557    | NP_963851    | Q14192 | FHL2_HUMAN  | l zinc-binding 3.             | 1  | TCCTGCAGGCG   | 0.607 |
| + | 8  | 2147  | e.2_Missense_Mu   | NM_012455    | NP_036587    | Q8NDX1 | PSD4_HUMAN  | SEC7.                         | 2  | GGAACGGGAGC   | 0.602 |
| + | 19 | 2130  | _p.R554Q DPP10_   | NM_020868    | NP_065919    | Q8N608 | DPP10_HUMAN | ellular (Potential).          | 10 | GGACCGAAACC   | 0.284 |
| + | 16 | 2879  | Jflu.2_Nonsense_l | NM_130773    | NP_570129    | Q8WYK1 | CNTP5_HUMAN | 3. Extracellular (Potential). | 10 | TTCATTCGACTC  | 0.289 |
| - | 9  | 2194  | 'S1_uc010yyl.1_Rl | NM_017969    | NP_060439    | Q96ST2 | IWS1_HUMAN  | ilis N-terminal.              | 1  | CTTGAGTGCA    | 0.438 |
| + | 1  | 207   | l.1_Intron UGGT1_ | NM_020120    | NP_064505    | Q9NYU2 | UGGG1_HUMAN |                               | 1  | CGGTGCGTGTG   | 0.721 |
| + | 2  | 438   | _p.G83E FAM123    | NM_152698    | NP_689911    | Q8N944 | F123C_HUMAN |                               | 3  | CTGTGGAGCCA   | 0.652 |
| + | 8  | 1144  | nse_Mutation_p.R  | NM_001100623 | NP_001094093 | Q96CS7 | PKHB2_HUMAN |                               | 2  | CTATCGAGACA   | 0.517 |
| - | 14 | 4185  | AP5_uc002ttq.2_l  | NM_207363    | NP_997246    | O14513 | NCKP5_HUMAN |                               | 0  | CTTTGGCGCCAT  | 0.532 |
| - | 14 | 2784  | AP5_uc002ttq.2_l  | NM_207363    | NP_997246    | O14513 | NCKP5_HUMAN |                               | 0  | TGGAGGTATTT   | 0.463 |
| + | 13 | 1859  |                   | NM_002410    | NP_002401    | Q09328 | MGT5A_HUMAN | renal (Potential).            | 3  | TCATCGGGCGG   | 0.438 |
| - | 4  | 478   | M163_uc002tty.2_  | NM_030923    | NP_112185    | Q8TC26 | TM163_HUMAN |                               | 0  | GTAACGCCACAC  | 0.512 |
| - | 57 | 10031 |                   | NM_018557    | NP_061027    | Q9NZR2 | LRP1B_HUMAN | ellular (Potential).          | 50 | GATCAGCAAGA   | 0.333 |
| - | 53 | 9391  |                   | NM_018557    | NP_061027    | Q9NZR2 | LRP1B_HUMAN | ntial). LDL-receptor class A  | 50 | CATTTTCATCAC  | 0.388 |
| - | 7  | 1889  | 1B_uc010fnl.1_In  | NM_018557    | NP_061027    | Q9NZR2 | LRP1B_HUMAN | ntial). LDL-receptor class E  | 50 | AGATCCGGTCA   | 0.413 |
| - | 5  | 1024  | of.2_Missense_Mi  | NM_145259    | NP_660302    | Q8NER5 | ACV1C_HUMAN | l. Cytoplasmic (Potential).   | 7  | AAGTTCCATTATC | 0.313 |
| + | 23 | 3980  | om.1_Missense_l   | NM_033394    | NP_203752    | Q9C0D5 | TANC1_HUMAN | ANK 10.                       | 3  | GAGCCGTGATC   | 0.607 |
| - | 7  | 994   | l_Mutation_p.R28  | NM_152528    | NP_689741    | Q8N9V3 | WSDU1_HUMAN | WD 7.                         | 0  | CAGACCTGGTG   | 0.294 |
| - | 26 | 5005  | nse_Mutation_p.Q1 | NM_006922    | NP_008853    | Q9NY46 | SCN3A_HUMAN |                               | 10 | TTTCTGAGGTT   | 0.388 |
| + | 9  | 1417  | _p.S376F SCN2A_   | NM_001040142 | NP_001035232 | Q99250 | SCN2A_HUMAN | l.                            | 8  | TTTTGTCTTATT  | 0.403 |
| + | 7  | 1458  | ldg.2_Missense_l  | NM_024969    | NP_079245    | Q8WYN3 | CSRN3_HUMAN | Glu-rich.                     | 5  | TAGCACGCAAA   | 0.418 |
| - | 2  | 355   | 3_5'Flank SCN1A_  | NM_006920    | NP_008851    | P35498 | SCN1A_HUMAN | l.                            | 13 | GAAAGGGAGTTA  | 0.353 |
| - | 70 | 13081 |                   | NM_004525    | NP_004516    | P98164 | LRP2_HUMAN  | ellular (Potential).          | 29 | CCTTTTCCTTAG  | 0.398 |

rs149806578

|   |     |           |                   |              |              |        |             |                               |     |                |       |             |
|---|-----|-----------|-------------------|--------------|--------------|--------|-------------|-------------------------------|-----|----------------|-------|-------------|
| - | 56  | 11128     |                   | NM_004525    | NP_004516    | P98164 | LRP2_HUMAN  | ; A 29. Extracellular (Potent | 29  | 'AAACTGGCCCG'  | 0.542 |             |
| - | 54  | 10709     |                   | NM_004525    | NP_004516    | P98164 | LRP2_HUMAN  | (Potential). EGF-like 13.     | 29  | 'GAAGGGTGCGG'  | 0.537 |             |
| - | 23  | 3691      | f.1_Nonsense_Mul  | NM_004525    | NP_004516    | P98164 | LRP2_HUMAN  | ; A 11. Extracellular (Potent | 29  | 'ACATCGATGATT' | 0.398 |             |
| + | 15  | 2188      | o.1_Missense_Mu   | NM_001079818 | NP_001073286 | P23229 | ITA6_HUMAN  | cellular (Potential).         | 2   | 'GTGTACCAGAAC' | 0.378 |             |
| - | 307 | 98674     | o10zfi.1_Missense | NM_133378    | NP_596869    | Q8WZ42 | TITIN_HUMAN |                               | 153 | 'ATACCTTCTCAT' | 0.373 |             |
| - | 293 | 88087     | o83H TTN_uc010zfi | NM_133378    | NP_596869    | Q8WZ42 | TITIN_HUMAN |                               | 153 | 'TGACACGTGTCC' | 0.483 |             |
| - | 246 | 50929     | o97D TTN_uc010zfi | NM_133378    | NP_596869    | Q8WZ42 | TITIN_HUMAN |                               | 153 | 'AGAAACCTTTCC' | 0.393 |             |
| - | 10  | 1567_1568 |                   | NM_173648    | NP_775919    | Q6ZP82 | CC141_HUMAN |                               | 10  | 'ATAAGTGCTGAG' | 0.446 |             |
| - | 4   | 337       | ense_Mutation_p.C | NM_001003683 | NP_001003683 | P54750 | PDE1A_HUMAN |                               | 3   | 'AGTCTGAATGT'  | 0.353 |             |
| - | 9   | 1848      |                   | NM_182521    | NP_872327    | Q8NEG5 | ZSWM2_HUMAN |                               | 3   | 'CATTTTCGTGTA' | 0.338 |             |
| + | 20  | 3701      | 'AR_uc002uqx.1_F  | NM_144708    | NP_653309    | Q7Z5J8 | ANKAR_HUMAN |                               | 4   | 'TCATTCGTATAA' | 0.368 |             |
| + | 7   | 1424      | p.G242S INPP1_u   | NM_001128928 | NP_001122400 | P49441 | INPP_HUMAN  |                               | 2   | 'GAAACGGCAGT'  | 0.463 | rs140787085 |
| + | 3   | 1378      |                   | NM_017694    | NP_060164    | Q6ZSS7 | MFSD6_HUMAN | ical; (Potential).            | 2   | 'ACATCGAAGTG'  | 0.567 |             |
| + | 20  | 2405      | '1B_uc002usr.2_M  | NM_001130158 | NP_001123630 | O43795 | MYO1B_HUMAN | IQ 1.                         | 8   | 'TCGGGGGTGGA'  | 0.418 |             |
| + | 12  | 3558      | PR2_uc010ftr.2_In | NM_001204    | NP_001195    | Q13873 | BMPR2_HUMAN | lasmic (Potential).           | 9   | 'GTGACAGTCACC' | 0.448 |             |
| + | 12  | 1900      | p.E565K PARD3B    | NM_152526    | NP_689739    | Q8TEW8 | PAR3L_HUMAN | PDZ 3.                        | 4   | 'ACCACGAAGCT'  | 0.473 |             |
| - | 13  | 1497      | zis.1_Missense_M  | NM_005006    | NP_004997    | P28331 | NDUS1_HUMAN |                               | 1   | 'TCCCGAAGCA'   | 0.378 |             |
| - | 6   | 674       | p.T200M LANCL1    | NM_001136574 | NP_001130046 | O43813 | LANC1_HUMAN |                               | 0   | 'TTGCCGTGAAG'  | 0.403 | rs141178650 |
| - | 8   | 1089_1090 | p.P331K ERBB4_    | NM_005235    | NP_005226    | Q15303 | ERBB4_HUMAN | extracellular (Potential).    | 33  | 'CTTTTGGGCAA'  | 0.376 |             |
| + | 6   | 588       | 'f62_uc002vhs.2_I | NM_198559    | NP_940961    | Q7Z7H3 | CB062_HUMAN |                               | 0   | 'CCTGGCGGCGG'  | 0.582 |             |
| - | 7   | 931       | 'if.2_Nonsense_M  | NM_020935    | NP_065986    | Q86T82 | UBP37_HUMAN | D-box 3.                      | 5   | 'CTTTTCGAAATG' | 0.363 |             |
| + | 2   | 672       |                   | NM_025216    | NP_079492    | Q9GZT5 | WN10A_HUMAN |                               | 2   | 'CCGGCGGCAGA'  | 0.607 |             |
| - | 11  | 1528      | ense_Mutation_p.F | NM_194302    | NP_919278    | Q6ZU64 | CC108_HUMAN |                               | 4   | 'GGAGCGCTCCC'  | 0.577 |             |
| + | 9   | 1300      | 'vkh.2_Missense_M | NM_018089    | NP_060559    | Q9H8Y5 | ANKZ1_HUMAN |                               | 2   | 'AGAAGCCTACT'  | 0.453 |             |
| - | 4   | 702       | 200H TUBA4B_uc    | NM_006000    | NP_005991    | P68366 | TBA4A_HUMAN |                               | 3   | 'GGTTGCGGCGG'  | 0.557 |             |
| + | 4   | 771       | .1_Intron KIAA148 | NM_020864    | NP_065915    | Q9P242 | K1486_HUMAN |                               | 3   | 'AAATCCGAACA'  | 0.507 |             |
| + | 11  | 980       | 40L_uc010fxo.1_Ir | NM_138402    | NP_612411    | Q9H930 | LY10L_HUMAN | SAND.                         | 1   | 'CTGTGGATTTTC' | 0.423 |             |
| + | 2   | 271       | 'P_uc002vsr.2_5'F | NM_001632    | NP_001623    | P05187 | PPB1_HUMAN  |                               | 1   | 'GGAACCGCGAG'  | 0.632 |             |
| + | 7   | 964       | 'P_uc002vsr.2_5'F | NM_001632    | NP_001623    | P05187 | PPB1_HUMAN  |                               | 1   | 'GTGCCCGGTAT'  | 0.677 |             |
| + | 18  | 2163      | 3_Missense_Mutat  | NM_015575    | NP_056390    | Q6Y7W6 | PERQ2_HUMAN | Gln-rich.                     | 7   | 'GGAACGACTGA'  | 0.428 |             |
| + | 28  | 3370      | e_Mutation_p.V10' | NM_152879    | NP_690618    | Q16760 | DGKD_HUMAN  |                               | 5   | 'GCCTCGTGACC'  | 0.522 |             |
| + | 1   | 177       | UGT1A7_uc002vu    | NM_007120    | NP_009051    | P22310 | UD14_HUMAN  |                               | 1   | 'TGCGGGAGCTC'  | 0.597 |             |
| + | 7   | 767       | 'M8_uc010fyj.2_5' | NM_024080    | NP_076985    | Q7Z2W7 | TRPM8_HUMAN | lasmic (Potential).           | 4   | 'TTATGGATGAC'  | 0.398 |             |
| + | 12  | 1527      | 'vyf.2_Missense_M | NM_015650    | NP_056465    | Q8TDR0 | MIPT3_HUMAN | interaction domain.           | 1   | 'CTCCCGGGTCC'  | 0.507 |             |
| + | 2   | 705       | dn.2_Missense_M   | NM_021158    | NP_066981    | Q96RU7 | TRIB3_HUMAN |                               | 2   | 'CCTCCGTCTTC'  | 0.667 |             |
| + | 4   | 1015      | p.R219C SIRPA_u   | NM_001040022 | NP_001035111 | P78324 | SHPS1_HUMAN | 1. Extracellular (Potential). | 1   | 'TGACCCGCGAG'  | 0.587 |             |
| + | 9   | 1712      | p.T451M SIRPA_u   | NM_001040022 | NP_001035111 | P78324 | SHPS1_HUMAN | lasmic (Potential).           | 1   | 'CCACACGGAGT'  | 0.582 |             |
| + | 9   | 1280      | al.1_Missense_Mu  | NM_198994    | NP_945345    | Q95932 | TGM3L_HUMAN |                               | 4   | 'ACGAGGATGAG'  | 0.597 |             |
| + | 9   | 1087      | 'ow.1_Nonsense_M  | NM_080751    | NP_542789    | Q8TDI7 | TMC2_HUMAN  | lasmic (Potential).           | 3   | 'TCATTCGATCGT' | 0.552 | rs143970919 |
| - | 10  | 937       | 'p.P310S IDH3B_u  | NM_006899    | NP_008830    | O43837 | IDH3B_HUMAN |                               | 0   | 'AAATGGGTGCC'  | 0.597 |             |
| - | 11  | 1602      | 'M1_uc010gas.2_I  | NM_019609    | NP_062555    | Q96SM3 | CPXM1_HUMAN |                               | 4   | 'ACGGGGTGCGA'  | 0.597 |             |
| + | 4   | 392       | se_Mutation_p.P6  | NM_033453    | NP_258412    | Q9BY32 | ITPA_HUMAN  |                               | 1   | 'GGCTCCCGGCG'  | 0.567 |             |
| + | 6   | 1286      | 'utation_p.Q58* C | NM_021873    | NP_068659    | P30305 | MPIP2_HUMAN |                               | 5   | 'ACTCCAGGCGG'  | 0.667 |             |
| - | 3   | 524       | 'u.2_Missense_Mu  | NM_017545    | NP_060015    | Q9UJM8 | HAOX1_HUMAN | xy acid dehydrogenase.        | 3   | 'CCAGACGGTTG'  | 0.448 | rs143166500 |
| + | 27  | 2643      | 'p.S848L PLCB4_u  | NM_182797    | NP_877949    | Q15147 | PLCB4_HUMAN |                               | 15  | 'TTATCAGATCC'  | 0.348 |             |
| + | 4   | 1819      | 'zrf.1_Missense_M | NM_014962    | NP_055777    | Q9Y2F9 | BTBD3_HUMAN |                               | 3   | 'CATGACAGAAG'  | 0.493 |             |
| + | 17  | 1698      | 'p.R459C XRN2_u   | NM_012255    | NP_036387    | Q9H0D6 | XRN2_HUMAN  |                               | 1   | 'AATCCGTCCGG'  | 0.408 | rs34008581  |

|   |    |      |                   |              |              |        |             |                                |     |               |       |             |
|---|----|------|-------------------|--------------|--------------|--------|-------------|--------------------------------|-----|---------------|-------|-------------|
| + | 6  | 1870 | i_p.R90C GZF1_u   | NM_022482    | NP_071927    | Q9H116 | GZF1_HUMAN  | 2H2-type 9.                    | 1   | :GCCACCGCCGC  | 0.632 | rs139522387 |
| - | 2  | 522  |                   | NM_001008693 | NP_001008693 | Q5W186 | CST9_HUMAN  |                                | 1   | :ATGCAGCATCCA | 0.537 |             |
| - | 6  | 1950 | :_2_intron ACSS1_ | NM_032501    | NP_115890    | Q9NUB1 | ACS2L_HUMAN |                                | 2   | AAGGACGCTGG   | 0.567 |             |
| + | 3  | 487  |                   | NM_033118    | NP_149109    | Q9H1R3 | MYLK2_HUMAN |                                | 6   | GGGTGGGCAAG   | 0.632 |             |
| + | 17 | 2167 | _Mutation_p.V554  | NM_006892    | NP_008823    | Q9UBC3 | DNM3B_HUMAN |                                | 5   | GAACCGTGAAG   | 0.502 |             |
| + | 2  | 162  | 1_uc010geq.2_Spl  | NM_032819    | NP_116208    | Q9BYN7 | ZN341_HUMAN |                                | 2   | :ATTGGGTGAGT  | 0.577 |             |
| + | 31 | 6322 | ve.1_Missense_Mt  | NM_007186    | NP_009117    | Q9BV73 | CP250_HUMAN | lu-rich. Potential.            | 5   | :CCAGGCCCTGG  | 0.607 |             |
| + | 12 | 1549 | xew.2_Missense_Mt | NM_012156    | NP_036288    | Q9H4G0 | E41L1_HUMAN |                                | 3   | :ATGGCGAGTCT  | 0.592 |             |
| - | 16 | 1049 | vq.1_Missense_Mt  | NM_032013    | NP_114402    | Q9UGV2 | NDRG3_HUMAN |                                | 1   | :GAGCCGAGTCA  | 0.532 |             |
| + | 1  | 21   |                   | NM_080628    | NP_542195    | A0PJX2 | CT118_HUMAN |                                | 0   | :GCCTCCGCTGG  | 0.622 |             |
| - | 4  | 512  |                   | NM_015474    | NP_056289    | Q9Y3Z3 | SAMH1_HUMAN |                                | 0   | :GTGGAGCTCAA  | 0.398 |             |
| + | 16 | 1602 | wb.1_Missense_M   | NM_021931    | NP_068750    | Q9H5Z1 | DHX35_HUMAN |                                | 3   | :CTCACGCAGTA  | 0.473 |             |
| + | 9  | 929  | 270C PLCG1_uc0    | NM_182811    | NP_877963    | P19174 | PLCG1_HUMAN |                                | 8   | :TTGATCGCCTC  | 0.602 |             |
| + | 22 | 2657 | ve.1_Missense_Mt  | NM_182811    | NP_877963    | P19174 | PLCG1_HUMAN | SH3.                           | 8   | :ACTACGTGGAAC | 0.592 |             |
| - | 3  | 3013 | e_Mutation_p.V87  | NM_015035    | NP_055850    | Q9H4I2 | ZHX3_HUMAN  | homeobox 5.                    | 3   | :CTTGACCTGCT  | 0.562 |             |
| - | 17 | 2708 | d.2_Missense_Mu   | NM_032221    | NP_115597    | Q8TD26 | CHD6_HUMAN  | case C-terminal.               | 14  | GAACCGGTCGA   | 0.537 |             |
| - | 7  | 1055 | gj.2_Missense_Mt  | NM_007050    | NP_008981    | O14522 | PTPRT_HUMAN | tential). Fibronectin type-III | 20  | :AATGGCGGTGG  | 0.512 |             |
| + | 1  | 49   |                   | NM_002638    | NP_002629    | P19957 | ELAF_HUMAN  |                                | 0   | :TGATCGTGGTG  | 0.572 |             |
| + | 15 | 1949 | .C12A5_uc002xrb.  | NM_001134771 | NP_001128243 | Q9H2X9 | S12A5_HUMAN | lasmic (Potential).            | 5   | :TCCTGGGCATG  | 0.557 |             |
| - | 3  | 764  | _Missense_Mutati  | NM_173179    | NP_775271    | Q9NQQ7 | S35C2_HUMAN |                                | 1   | :CACACGGGCC   | 0.632 |             |
| + | 5  | 1695 |                   | NM_030777    | NP_110404    | O95528 | GTR10_HUMAN | lasmic (Potential).            | 1   | :GTACAGCCGCA  | 0.602 |             |
| + | 12 | 1494 | o.2_Missense_Mu   | NM_005244    | NP_005235    | O00167 | EYA2_HUMAN  |                                | 1   | :GCGGCGTGGAC  | 0.612 |             |
| - | 15 | 2623 | rND8_uc002xtb.1_  | NM_012408    | NP_036540    | Q9ULU4 | PKCB1_HUMAN |                                | 5   | GGGCCGGGGCC   | 0.677 |             |
| + | 9  | 1155 | m.2_Missense_Mt   | NM_181659    | NP_858045    | Q9Y6Q9 | NCOA3_HUMAN |                                | 5   | :AGAAACGCTACT | 0.294 |             |
| - | 16 | 6139 | s.1_Missense_Mu   | NM_033081    | NP_149072    | Q9BTC0 | DIDO1_HUMAN | Pro-rich.                      | 6   | :CCTGGGACCTG  | 0.577 |             |
| - | 15 | 3625 | lt.1_Missense_Mu  | NM_033081    | NP_149072    | Q9BTC0 | DIDO1_HUMAN |                                | 6   | :GAAGCGGATCA  | 0.502 |             |
| - | 3  | 769  | lv.1_Missense_Mu  | NM_033081    | NP_149072    | Q9BTC0 | DIDO1_HUMAN | lization signal (Potential).   | 6   | :CCTGCGAAGGC  | 0.602 |             |
| + | 6  | 629  | _p.G60S ARFGAP    | NM_018209    | NP_060679    | Q8N6T3 | ARFG1_HUMAN |                                | 1   | :ACCTCGGCTCC  | 0.602 | rs148044740 |
| - | 5  | 921  | _p.P274S EEF1A2_  | NM_001958    | NP_001949    | Q05639 | EF1A2_HUMAN |                                | 0   | GCCCCGGCCGA   | 0.672 |             |
| + | 15 | 2128 | rF6_uc002yhp.2_lr | NM_012469    | NP_036601    | O94906 | PRP6_HUMAN  | HAT 6.                         | 2   | :AGTCCGAGAAT  | 0.662 |             |
| + | 9  | 1139 | r25_uc002yhz.1_M  | NM_013396    | NP_037528    | Q9UHP3 | UBP25_HUMAN |                                | 5   | :TGGGAGTACTT  | 0.333 |             |
| + | 6  | 871  | _p.P66S NCAM2_    | NM_004540    | NP_004531    | O15394 | NCAM2_HUMAN | 3. Extracellular (Potential).  | 4   | :CAGTGCCGCCA  | 0.423 |             |
| + | 10 | 1497 | rf.2_Missense_Mu  | NM_005239    | NP_005230    | P15036 | ETS2_HUMAN  | ETS.                           | 4   | GACGTCGGGGA   | 0.582 |             |
| - | 12 | 1283 | .1_5'UTR BRWD1_   | NM_018963    | NP_061836    | Q9NSI6 | BRWD1_HUMAN | WD 5.                          | 4   | :TTACCAGTACAC | 0.328 |             |
| + | 8  | 1647 | R345Q BACE2_uc    | NM_012105    | NP_036237    | Q9Y5Z0 | BACE2_HUMAN | ellular (Potential).           | 2   | :TTACCAGTTCG  | 0.517 |             |
| - | 8  | 1936 |                   | NM_020639    | NP_065690    | P57078 | RIPK4_HUMAN |                                | 7   | :GTTGACGTCCG  | 0.687 |             |
| - | 3  | 1536 | aa.3_Missense_M   | NM_001098402 | NP_001091872 | Q9ULJ3 | ZN295_HUMAN |                                | 3   | :TGCCGAGGGG   | 0.562 |             |
| + | 19 | 3464 | DL1_uc002zag.1_   | NM_001004416 | NP_001004416 | Q5DIDO | UROL1_HUMAN | llular (Potential). ZP.        | 3   | :CCTGACGGAGT  | 0.572 |             |
| + | 3  | 256  | 02zdx.2_Missens   | NM_020132    | NP_064517    | Q9NRZ7 | PLCC_HUMAN  | lasmic (Potential).            | 0   | :AGTTCGTGCTG  | 0.642 |             |
| - | 4  | 535  | ol.3_Missense_Mt  | NM_016335    | NP_057419    | O43272 | PROD_HUMAN  |                                | 1   | :TTATTCGTGCCT | 0.622 |             |
| - | 14 | 2624 | qy.2_Missense_Mt  | NM_001670    | NP_001661    | O00192 | ARVC_HUMAN  | ARM 10.                        | 1   | :GATTTTCGTGGA | 0.682 | rs144187900 |
| + | 7  | 1153 | nse_Mutation_p.R  | NM_003073    | NP_003064    | Q12824 | SNF5_HUMAN  | A. 2. 2 X apr) p.L266_*386     | 407 | GCATCCGGGGA   | 0.542 |             |
| - | 3  | 333  | l.2_RNA GSTT1_u   | NM_000853    | NP_000844    | P30711 | GSTT1_HUMAN | ST C-terminal.                 | 1   | CACACGGGCAC   | 0.622 |             |
| + | 13 | 2896 | il_uc011akd.1_Mi  | NM_021115    | NP_066938    | Q9BYH1 | SE6L1_HUMAN | xtracellular (Potential).      | 6   | :ACCATCCGCTGC | 0.557 |             |
| - | 4  | 547  | p.G33S TBC1D10.   | NM_031937    | NP_114143    | Q9BXI6 | TB10A_HUMAN | ab-GAP TBC.                    | 1   | :TCACCCGTGGC  | 0.612 |             |
| - | 10 | 1597 |                   | NM_005877    | NP_005868    | Q15459 | SF3A1_HUMAN |                                | 5   | :CTCACCGATCT  | 0.512 |             |
| - | 2  | 889  | gwa.1_RNA DUSP    | NM_152511    | NP_689724    | Q8NEJ0 | DUS18_HUMAN | protein phosphatase.           | 0   | GTGGGCGTCCA   | 0.592 |             |



|   |    |       |                    |              |              |        |             |                               |    |                |       |             |
|---|----|-------|--------------------|--------------|--------------|--------|-------------|-------------------------------|----|----------------|-------|-------------|
| + | 2  | 1140  | R283H RFPL3S_u     | NM_001098535 | NP_001092005 | O75679 | RFPL3_HUMAN |                               | 1  | :AGTCCGTCCTG(  | 0.458 |             |
| - | 9  | 1224  |                    | NM_014306    | NP_055121    | Q9Y3I0 | RTCB_HUMAN  |                               | 0  | :CTTTCCGTCCA(  | 0.498 |             |
| - | 8  | 1045  | h.1_Missense_Mu    | NM_002473    | NP_002464    | P35579 | MYH9_HUMAN  | rosin head-like.              | 11 | :AGGTCCGTTCTT( | 0.537 |             |
| - | 13 | 1384  | p.T423M EIF3D_u    | NM_003753    | NP_003744    | O15371 | EIF3D_HUMAN |                               | 1  | :GCTCCGTGGCA   | 0.562 |             |
| - | 3  | 673   |                    | NM_006078    | NP_006069    | Q9Y698 | CCG2_HUMAN  |                               | 0  | :GTGTCGAGTTT(  | 0.562 |             |
| + | 7  | 1827  | atq.1_Missense_M   | NM_001039141 | NP_001034230 | Q9H2D6 | TARA_HUMAN  |                               | 1  | :TCCCAATAGAG(  | 0.587 |             |
| + | 7  | 2067  | atq.1_Missense_M   | NM_001039141 | NP_001034230 | Q9H2D6 | TARA_HUMAN  |                               | 1  | :ACCCACAAACAT( | 0.582 |             |
| + | 2  | 155   | 2_5'UTR POLR2F     | NM_021974    | NP_068809    | P61218 | RPAB2_HUMAN |                               | 1  | :GCGACGACTTT(  | 0.408 |             |
| - | 2  | 1340  | vt.1_Missense_Mu   | NM_004981    | NP_004972    | P48050 | IRK4_HUMAN  | smic (By similarity).         | 0  | :CATCCGGATGA(  | 0.682 |             |
| + | 30 | 5452  |                    | NM_001429    | NP_001420    | Q09472 | EP300_HUMAN | or E1A adenovirus. ZZ-type    | 64 | :TGTCTGTGAGG(  | 0.572 |             |
| + | 3  | 421   | gyr.2_Missense_M   | NM_145733    | NP_663786    | Q9UH03 | SEPT3_HUMAN |                               | 0  | GGAACCGGGAG    | 0.572 |             |
| - | 10 | 1323  | p.V396M NAGA_u     | NM_000262    | NP_000253    | P17050 | NAGAB_HUMAN |                               | 1  | :CATCACTACCC(  | 0.552 |             |
| + | 3  | 376   | e.2_Missense_Mu    | NM_014346    | NP_055161    | Q8WUA7 | TB22A_HUMAN |                               | 1  | :ATGAGCTCCTG   | 0.647 |             |
| - | 11 | 1339  |                    | NM_001080447 | NP_001073916 |        |             |                               | 2  | :GCTGCGGCCCA   | 0.662 |             |
| + | 2  | 998   | p.R199H PANX2_u    | NM_052839    | NP_443071    | Q96RD6 | PANX2_HUMAN | lasmic (Potential).           | 1  | GACGCGCCGGC.   | 0.562 |             |
| + | 8  | 1808  | ky.2_Missense_Mu   | NM_031454    | NP_113642    | Q9BVL4 | SELO_HUMAN  |                               | 0  | :AGCACGTGCCG   | 0.652 |             |
| - | 9  | 888   | 3bkl.1_Missense_M  | NM_002969    | NP_002960    | P53778 | MK12_HUMAN  | rotein kinase.                | 0  | CAGCCGGAGGC    | 0.667 | rs141322209 |
| + | 7  | 643   | ation_p.G177R W    | NM_017584    | NP_060054    | Q9UGB7 | MIOX_HUMAN  |                               | 0  | :AGTCCGGGATG   | 0.582 |             |
| + | 16 | 1431  | i.R436H MTMR14_u   | NM_001077525 | NP_001070993 | Q8NCE2 | MTMRE_HUMAN |                               | 1  | GGACCGTGGCA    | 0.562 |             |
| - | 7  | 1428  | sy.2_Missense_Mu   | NM_006354    | NP_006345    | O75528 | TADA3_HUMAN |                               | 0  | TGCCCCGTGAG    | 0.507 |             |
| - | 5  | 628   | ion_p.A173V CIDE   | NM_022094    | NP_071377    | Q96AQ7 | CIDEC_HUMAN |                               | 1  | :AAGTCGCCTC(   | 0.502 |             |
| + | 9  | 1376  | xj.2_Missense_Mu   | NM_001162499 | NP_001155971 | O75155 | CAND2_HUMAN | HEAT 10.                      | 4  | :TGCAGCGGCAC   | 0.647 |             |
| - | 13 | 1765  | iRIP2_uc011avh.1   | NM_001080423 | NP_001073892 | Q9C0E4 | GRIP2_HUMAN | PDZ 4.                        | 1  | :AGGCTCGATGA   | 0.567 |             |
| + | 8  | 822   | rf19_uc010hej.2_lr | NM_016474    | NP_057558    | Q6PII3 | CC019_HUMAN |                               | 0  | :GGCCCGGCAAC   | 0.423 |             |
| + | 6  | 3156  | p.A1016T FGD5_u    | NM_152536    | NP_689749    | Q6ZNL6 | FGD5_HUMAN  | DH.                           | 5  | :TGGCAGCTGCT   | 0.582 |             |
| - | 7  | 995   | ation_p.R112Q St   | NM_004844    | NP_004835    | O60239 | 3BP5_HUMAN  |                               | 0  | :ATCCCGGAGGC   | 0.597 |             |
| + | 2  | 497   | M8_uc010hfu.2_lr   | NM_178868    | NP_849199    | Q8IZV2 | CKLF8_HUMAN | MARVEL.                       | 0  | :GGTCCCCGCAT   | 0.502 |             |
| - | 12 | 1716  | icfr.3_Missense_M  | NM_014517    | NP_055332    | Q9NZI7 | UBIP1_HUMAN |                               | 2  | :TAAGTCGGCAC(  | 0.368 |             |
| + | 16 | 2296  | p.A719V PDCD6IF    | NM_013374    | NP_037506    | Q8WUM4 | PDC6I_HUMAN | i EIAV p9. Self-association.  | 2  | :CATTGCCAGAG.  | 0.328 |             |
| + | 7  | 820   | AC_uc011aya.1_lr   | NM_003149    | NP_003140    | Q99469 | STAC_HUMAN  |                               | 4  | :ATCCAGAAAATG  | 0.373 |             |
| - | 8  | 3732  |                    | NM_014831    | NP_055646    | O15050 | TRNK1_HUMAN |                               | 2  | TCTTAACGAACA   | 0.408 |             |
| + | 23 | 3313  | se_Mutation_p.L11  | NM_007335    | NP_031361    | Q9Y238 | DLEC1_HUMAN |                               | 9  | :AGGAGCTCCGC   | 0.592 |             |
| + | 8  | 1093  | cig.2_Missense_M   | NM_001106    | NP_001097    | Q13705 | AVR2B_HUMAN | Potential). Protein kinase.   | 1  | :CCCACGGACAG   | 0.562 |             |
| - | 27 | 4780  |                    | NM_006514    | NP_006505    | Q9Y5Y9 | SCNAA_HUMAN | er; Name=S4 of repeat IV; (   | 10 | :TGTGCGGATCC   | 0.532 |             |
| - | 5  | 1977  | cjh.2_Missense_M   | NM_033027    | NP_149016    | Q96S65 | CSRN1_HUMAN |                               | 5  | ACACCGGCACA(   | 0.557 |             |
| - | 2  | 175   | _p.P24L HIGD1A_u   | NM_001099669 | NP_001093139 | Q9Y241 | HIG1A_HUMAN | mic (Potential). HIG1.        | 0  | :ATGAAGGAAGG(  | 0.383 |             |
| - | 5  | 1261  |                    | NM_022842    | NP_073753    | Q9H5V8 | CDCP1_HUMAN | ellular (Potential).          | 3  | :ACACACGAAAC(  | 0.502 | rs148426340 |
| - | 6  | 4845  | iv.2_Nonsense_Mu   | NM_014159    | NP_054878    | Q9BYW2 | SETD2_HUMAN | SET.                          | 32 | :GTTTCGTGCATA  | 0.388 |             |
| - | 3  | 1911  | qv.2_Nonsense_M    | NM_014159    | NP_054878    | Q9BYW2 | SETD2_HUMAN |                               | 32 | :TAATCGATTTGA  | 0.313 | rs148810823 |
| + | 9  | 1399  | jav.1_Missense_M   | NM_025010    | NP_079286    | Q94889 | KLH18_HUMAN | Kelch 3.                      | 0  | :CTGGGGTTACA   | 0.517 | rs139615876 |
| + | 3  | 302   | i.R44H PTPN23_u    | NM_015466    | NP_056281    | Q9H3S7 | PTN23_HUMAN | BRO1.                         | 3  | :CCTCCGCAAGT(  | 0.637 |             |
| + | 10 | 1378  | ass.2_Missense_M   | NM_207102    | NP_996985    | Q6X9E4 | FBW12_HUMAN | WD 5.                         | 0  | :CATCCGAGAAC   | 0.507 | rs140417083 |
| - | 94 | 7178  |                    | NM_000094    | NP_000085    | Q02388 | CO7A1_HUMAN | le-helical region.            | 11 | :AGGGAGGCCCA   | 0.612 |             |
| - | 9  | 1167  |                    | NM_000094    | NP_000085    | Q02388 | CO7A1_HUMAN | i (NC1). Fibronectin type-III | 11 | :AGTCCGTGCCA(  | 0.642 |             |
| - | 55 | 12371 | 3cuk.2_Missense_M  | NM_001407    | NP_001398    | Q9NYQ7 | CELR3_HUMAN |                               | 11 | :TGACAGCATCA(  | 0.547 |             |
| - | 12 | 6148  | _Mutation_p.P202   | NM_001407    | NP_001398    | Q9NYQ7 | CELR3_HUMAN | ial). EGF-like 5; calcium-bir | 11 | GAGGTGGGCAG    | 0.667 |             |
| - | 1  | 441   | 52_uc003cwm.2_5    | NM_198562    | NP_940964    | Q6ZUJ4 | CC062_HUMAN |                               | 0  | :AGCAGCAAAG    | 0.582 |             |

|   |    |         |                  |              |              |        |             |                               |    |               |       |             |
|---|----|---------|------------------|--------------|--------------|--------|-------------|-------------------------------|----|---------------|-------|-------------|
| - | 3  | 461_462 | (1_uc011bcm.1_3' | NM_000581    | NP_000572    | P07203 | GPX1_HUMAN  |                               | 1  | AGGAAGGCGA    | 0.639 |             |
| + | 19 | 2249    | .w.1_Missense_Mt | NM_001640    | NP_001631    | P13798 | ACPH_HUMAN  |                               | 1  | ACATCGCCTCC   | 0.577 |             |
| + | 17 | 1652    |                  | NM_004947    | NP_004938    | Q8IZD9 | DOCK3_HUMAN | DHR-1.                        | 0  | TATTCACGAGCT  | 0.483 |             |
| + | 50 | 5383    |                  | NM_004947    | NP_004938    | Q8IZD9 | DOCK3_HUMAN |                               | 0  | ATACCGGGACCA  | 0.537 |             |
| - | 14 | 2258    | BP_uc003dbf.1_5' | NM_014703    | NP_055518    | Q9Y4B6 | VRBPB_HUMAN |                               | 2  | ATACTGGATATTC | 0.463 |             |
| + | 2  | 511     | ARP3_uc003dbz.2  | NM_005485    | NP_005476    | Q9Y6F1 | PARP3_HUMAN |                               | 1  | GAATCCGCGTGG  | 0.627 |             |
| - | 2  | 3519    | .2_Missense_Mut  | NM_017442    | NP_059138    | Q9NR96 | TLR9_HUMAN  | oplasmic (Potential).         | 4  | CCTTGCGGTCC   | 0.701 |             |
| - | 11 | 1481    | .p.V390M NT5DC2  | NM_022908    | NP_075059    | Q9H857 | NT5D2_HUMAN |                               | 0  | GAGCACGCGGG   | 0.647 |             |
| - | 13 | 1661    | k.2_Missense_Mu  | NM_052859    | NP_443091    | Q96AA3 | RFT1_HUMAN  |                               | 1  | CAGTGCCTCTGC  | 0.552 |             |
| + | 2  | 309     | TF_uc003dob.2_M  | NM_198159    | NP_937802    | O75030 | MITF_HUMAN  |                               | 2  | TCATGCGTGAG   | 0.597 |             |
| - | 15 | 2100    |                  | NM_020872    | NP_065923    | Q9P232 | CNTN3_HUMAN | nectin type-III 1.            | 5  | CAACCCGAAATT  | 0.418 |             |
| + | 22 | 4046    | BO2_uc011bgk.1   | NM_002942    | NP_002933    | Q9HCK4 | ROBO2_HUMAN | asmic (Potential).            | 11 | CTGTTCGAGGC   | 0.517 |             |
| + | 7  | 1790    | e_Mutation_p.R52 | NM_005233    | NP_005224    | P29320 | EPHA3_HUMAN | ential), Fibronectin type-III | 33 | CAGCCGCAAGT   | 0.458 |             |
| - | 2  | 459     | 2_5'UTR PROS1_   | NM_000313    | NP_000304    | P07225 | PROS_HUMAN  |                               | 1  | ACGACGCTTCC   | 0.358 |             |
| - | 12 | 1675    | he.1_Missense_Mi | NM_016247    | NP_057331    | Q9BZV3 | IMPG2_HUMAN | ellular (Potential).          | 3  | CTGCCGGGGTG   | 0.473 |             |
| - | 5  | 857     | hb.1_Missense_ML | NM_000796    | NP_000787    | P35462 | DRD3_HUMAN  | Cytoplasmic.                  | 4  | AGGAGCTCTGT   | 0.562 |             |
| - | 3  | 563     | bb.1_Missense_Mi | NM_000796    | NP_000787    | P35462 | DRD3_HUMAN  | ilical; Name=1.               | 4  | GGCCATTGCCG   | 0.622 |             |
| - | 4  | 595     | BTB20_uc003ebl.: | NM_015642    | NP_056457    | Q9HC78 | ZBT20_HUMAN | BTB.                          | 5  | GATGTCGCTGT   | 0.612 |             |
| + | 2  | 114     | PK1B_uc003ecd.2  | NM_006952    | NP_008883    | O75841 | UPK1B_HUMAN | asmic (Potential).            | 0  | CTGTTCTGTTGC  | 0.393 |             |
| + | 5  | 1122    | jb.1_Missense_M  | NM_001125    | NP_001116    | P54922 | ADPRH_HUMAN |                               | 1  | TGCCCCCATGA   | 0.577 |             |
| - | 9  | 1847    | vg.1_Missense_M  | NM_153002    | NP_694547    | Q8NFN8 | GP156_HUMAN | asmic (Potential).            | 2  | AGGGTGCAGAG   | 0.617 |             |
| + | 4  | 467     | bji.1_Missense_M | NM_014980    | NP_055795    | Q9Y2K9 | STB5L_HUMAN |                               | 9  | CATGAAAGTGG   | 0.373 |             |
| + | 3  | 442     |                  | NM_016298    | NP_057382    | Q9UH90 | FBX40_HUMAN | TRAF-type. p.R78H(1)          | 5  | TGTCCCGCCAC   | 0.597 | rs137929409 |
| + | 3  | 778     |                  | NM_016298    | NP_057382    | Q9UH90 | FBX40_HUMAN |                               | 5  | CTAATGGGGAG   | 0.493 |             |
| + | 14 | 2577    | p.R817Q KALRN_   | NM_001024660 | NP_001019831 | O60229 | KALRN_HUMAN |                               | 6  | AGAACGGAAGC   | 0.552 |             |
| + | 16 | 3118    |                  | NM_032242    | NP_115618    | Q9UIW2 | PLXA1_HUMAN |                               | 3  | ITCCAGCGGTG   | 0.627 |             |
| + | 47 | 5590    |                  | NM_015268    | NP_056083    | O75165 | DJC13_HUMAN |                               | 2  | GACATCGAGTA   | 0.333 |             |
| + | 12 | 2448    | qu.2_Missense_Mi | NM_004441    | NP_004432    | P54762 | EPHB1_HUMAN | Potential), F p.R743Q(1)      | 30 | GCATCGGGACC   | 0.552 |             |
| + | 2  | 754     | esi.3_Missense_M | NM_012219    | NP_036351    | O14807 | RASM_HUMAN  |                               | 4  | TGGACGGTGAG   | 0.493 |             |
| - | 6  | 1603    |                  | NM_001184    | NP_001175    | Q13535 | ATR_HUMAN   |                               | 20 | CAACAGCAATTC  | 0.388 |             |
| + | 11 | 2084    | .p.Q616* TRPC1_  | NM_003304    | NP_003295    | P48995 | TRPC1_HUMAN |                               | 2  | GCCTTTCAGTTG  | 0.363 |             |
| + | 4  | 1110    | p.G324S HPS3_uc  | NM_032383    | NP_115759    | Q969F9 | HPS3_HUMAN  |                               | 6  | AGACCGGTAAG   | 0.483 |             |
| - | 6  | 1413    | .uc003ewz.2_Mis  | NM_000096    | NP_000087    | P00450 | CERU_HUMAN  | in-like 3, F5/8 type A 2.     | 1  | CAGAGGGAGCA   | 0.403 |             |
| + | 1  | 1722    | iC22D2_uc003exx  | NM_014779    | NP_055594    | O75157 | T22D2_HUMAN |                               | 1  | GAGTGCCCCCG   | 0.736 |             |
| + | 1  | 162     | FSD1_uc011bow.1  | NM_022736    | NP_073573    | Q9H3U5 | MFS1_HUMAN  | ical; (Potential).            | 0  | CTTTTGGTGCT   | 0.652 |             |
| - | 17 | 2298    | l80_uc003fdd.1_M | NM_020800    | NP_065851    | Q9P2H3 | IFT80_HUMAN |                               | 1  | CCATAGCAGCT   | 0.343 |             |
| - | 4  | 957     |                  | NM_031955    | NP_114161    | Q9BXB7 | SPT16_HUMAN |                               | 3  | TTGACGAAGAT   | 0.348 | rs141658177 |
| + | 7  | 2074    | ip.1_Missense_Mu | NM_014932    | NP_055747    | Q8N2Q7 | NLGN1_HUMAN | ellular (Potential).          | 7  | TTAGTGACCCA   | 0.328 |             |
| + | 14 | 1320    | .R347Q FXR1_uc   | NM_005087    | NP_005078    | P51114 | FXR1_HUMAN  |                               | 1  | CAGCCGACATC   | 0.542 |             |
| + | 15 | 1527    | p.R416H FXR1_uc  | NM_005087    | NP_005078    | P51114 | FXR1_HUMAN  | Poly-Arg.                     | 1  | TAACCGTCGTAC  | 0.443 |             |
| - | 11 | 1204    | ce MCF2L2_uc011  | NM_015078    | NP_055893    | Q86YR7 | MF2L2_HUMAN |                               | 5  | GGCTCTGCAA    | 0.602 |             |
| - | 15 | 2233    | p.R218C ABCC5_   | NM_005688    | NP_005679    | O15440 | MRP5_HUMAN  | C transporter 1.              | 4  | CTGGCGCTGCC   | 0.597 |             |
| + | 9  | 1083    | e_Mutation_p.T31 | NM_018358    | NP_060828    | Q9NUQ8 | ABCF3_HUMAN | C transporter 1.              | 4  | CTTTACCCTA    | 0.527 |             |
| - | 8  | 1163    | d.1_Missense_Mu  | NM_005787    | NP_005778    | Q92685 | ALG3_HUMAN  |                               | 0  | CCAGCGTGACG   | 0.577 |             |
| + | 11 | 1720    | .p.G443E ECE2_u  | NM_014693    | NP_055508    | O60344 | ECE2_HUMAN  | loethelin-converting enzyme   | 4  | TTTGGGGTCCC   | 0.498 |             |
| + | 24 | 3694    | _Mutation_p.R117 | NM_198241    | NP_937884    | Q04637 | IF4G1_HUMAN |                               | 7  | GTGAACGGGGA   | 0.597 |             |
| + | 24 | 3707    | _Mutation_p.R117 | NM_198241    | NP_937884    | Q04637 | IF4G1_HUMAN |                               | 7  | GGACCGTGGGG   | 0.627 |             |

|   |    |      |                                 |              |              |        |             |                               |             |              |             |             |
|---|----|------|---------------------------------|--------------|--------------|--------|-------------|-------------------------------|-------------|--------------|-------------|-------------|
| - | 15 | 1839 | p.R555H CLCN2_1                 | NM_004366    | NP_004357    | P51788 | CLCN2_HUMAN | smic (By similarity).         | 0           | GGTGGCGGCC   | 0.627       |             |
| + | 1  | 385  | qr.2_Missense_Mu                | NM_001102416 | NP_001095886 | P01042 | KNG1_HUMAN  | Cystatin 1.                   | 1           | GTACCGCATAAC | 0.403       |             |
| + | 8  | 1489 | i.1_Missense_Mut                | NM_005578    | NP_005569    | Q93052 | LPP_HUMAN   | l zinc-binding 1.             | 165         | CAGGCCGCTGT  | 0.483       |             |
| - | 7  | 763  | s_Mutation_p.S21E               | NM_032279    | NP_115655    | Q4VNC1 | AT134_HUMAN | lasmic (Potential).           | 2           | TTCATAAAACC  | 0.338       |             |
| + | 3  | 784  |                                 | NM_198565    | NP_940967    | Q86YC3 | LRC33_HUMAN | ilar (Potential). LRR 7.      | 3           | CACGCGGCTGC  | 0.642       |             |
| + | 6  | 587  | _Mutation_p.R189                | NM_033029    | NP_149018    | Q96KR4 | LMLN_HUMAN  |                               | 1           | TCTACCGTGGG  | 0.502       |             |
| + | 21 | 2541 | uy.1_Missense_Mt                | NM_000283    | NP_000274    | P35913 | PDE6B_HUMAN |                               | 0           | AGAGGGTGGCA  | 0.552       |             |
| + | 1  | 3709 |                                 | NM_175918    | NP_787114    | Q8N1N5 | CRPAK_HUMAN | 7                             | GTCCCGCCTGC | 0.682        | rs143316662 |             |
| + | 29 | 3795 |                                 | NM_002111    | NP_002102    | P42858 | HD_HUMAN    |                               | 4           | TGATACCTCAG  | 0.358       |             |
| + | 2  | 948  | bvr.1_RNA RGS12                 | NM_198229    | NP_937872    | O14924 | RGS12_HUMAN |                               | 1           | TGGGCGCTCGC  | 0.607       |             |
| - | 7  | 663  | _p.L188F CRMP1                  | NM_001313    | NP_001304    | Q14194 | DPYL1_HUMAN |                               | 2           | TTAAGGAAGG   | 0.428       |             |
| - | 3  | 1005 |                                 | NM_053042    | NP_444270    | Q9C0D4 | Z518B_HUMAN | 2H2-type 1.                   | 4           | CCTTCGTATAC  | 0.398       |             |
| - | 8  | 1429 |                                 | NM_018176    | NP_060646    | Q8N0V4 | LGI2_HUMAN  | EAR 5.                        | 0           | GACCCGGGAGT  | 0.522       |             |
| + | 1  | 2873 | _p.S575N PCDH7_                 | NM_002589    | NP_002580    | O60245 | PCDH7_HUMAN | Extracellular (Potential).    | 4           | GGCAGCACTA   | 0.493       |             |
| + | 6  | 1197 |                                 | NM_016531    | NP_057615    | P57682 | KLF3_HUMAN  |                               | 2           | AAAAACCCCTAC | 0.353       |             |
| + | 3  | 314  |                                 | NM_017581    | NP_060051    | Q9UGM1 | ACHA9_HUMAN | ellular (Potential).          | 7           | AGTACGATGGC  | 0.483       |             |
| - | 5  | 1990 | gve.2_RNA RBM4                  | NM_001098634 | NP_001092104 | A0AV96 | RBM47_HUMAN |                               | 3           | AATTCGGCACC  | 0.473       |             |
| + | 4  | 385  | _p.H16Y UCHL1_                  | NM_004181    | NP_004172    | P09936 | UCHL1_HUMAN |                               | 2           | TATTACGCAC   | 0.443       |             |
| - | 14 | 2355 | t.1_Missense_Mut                | NM_002253    | NP_002244    | P35968 | VGFR2_HUMAN | 7. Extracellular (Potential). | 33          | GACTTCGATGC  | 0.448       |             |
| + | 7  | 767  | RP72_uc003hbw.1                 | NM_006947    | NP_008878    | O76094 | SRP72_HUMAN | TPR 3.                        | 1           | GAACAGAGGAG  | 0.398       |             |
| - | 8  | 1284 | can.1_Missense_Mutation_p.S299L |              |              | P36537 | UDB10_HUMAN |                               | 5           | TACTCGACATT  | 0.383       |             |
| - | 3  | 979  | _p.S175L UGT2B4                 | NM_021139    | NP_066962    | P06133 | UD2B4_HUMAN |                               | 2           | CCATCGACCCC  | 0.373       |             |
| - | 3  | 920  | _p.E155D UGT2B4                 | NM_021139    | NP_066962    | P06133 | UD2B4_HUMAN |                               | 2           | TCCATTTCTGT  | 0.363       |             |
| + | 9  | 1205 | LB_uc003hgu.3_n                 | NM_000477    | NP_000468    | P02768 | ALBU_HUMAN  | Albumin 2.                    | 6           | ACATATGAAACC | 0.388       | rs76593094  |
| - | 4  | 392  | 0iik.1_Missense_f               | NM_201431    | NP_958834    | Q6ZTQ3 | RASF6_HUMAN |                               | 2           | AGCATTCTTCA  | 0.348       |             |
| - | 3  | 315  |                                 | NM_002416    | NP_002407    | Q07325 | CXCL9_HUMAN |                               | 1           | CAACCACTGT   | 0.318       |             |
| - | 24 | 3432 |                                 | NM_001042784 | NP_001036249 | Q5M9N0 | CD158_HUMAN | Potential.                    | 6           | CTGATCATTGAA | 0.328       |             |
| - | 11 | 1500 | cg.1_Nonsense_M                 | NM_006259    | NP_006250    | Q13237 | KGP2_HUMAN  | rotein kinase.                | 7           | ATGCTCCTGCT  | 0.408       |             |
| + | 3  | 294  | e_Mutation_p.G43                | NM_014606    | NP_055421    | Q15034 | HERC3_HUMAN | RCC1 1.                       | 4           | TGGGGGAAACC  | 0.542       |             |
| - | 2  | 817  |                                 | NM_198281    | NP_938022    | Q6ZVF9 | GRIN3_HUMAN |                               | 3           | CTGGGGATTGC  | 0.552       |             |
| + | 6  | 2635 | VRN1_uc011cds.1                 | NM_007351    | NP_031377    | Q13201 | MMRN1_HUMAN | Potential.                    | 4           | AGATTTCCAAAA | 0.333       |             |
| + | 9  | 1325 | _p.A67S PDLIM5_                 | NM_006457    | NP_006448    | Q96HC4 | PDLI5_HUMAN |                               | 2           | ACTCAGCTTTG  | 0.478       |             |
| - | 3  | 406  |                                 | NM_145244    | NP_660287    | Q96D03 | DDT4L_HUMAN |                               | 1           | GCTTTGATTTGC | 0.453       |             |
| + | 3  | 2665 | ET2_uc010iip.1_M                | NM_001127208 | NP_001120680 | Q6N021 | TET2_HUMAN  | Gln-rich.                     | 733         | GACTTTTCTCT  | 0.393       |             |
| - | 6  | 825  | se_Mutation_p.P91               | NM_001163435 | NP_001156907 | Q8TEA7 | TBCK_HUMAN  | rotein kinase.                | 5           | CGAGGGATACC  | 0.373       |             |
| - | 10 | 1487 |                                 | NM_005443    | NP_005434    | O43252 | PAPS1_HUMAN | yl-sulfate kinase.            | 1           | TCATACGCCAC  | 0.547       |             |
| + | 4  | 654  | CH_uc010iily.2_5'U              | NM_005327    | NP_005318    | Q16836 | HCDH_HUMAN  |                               | 1           | CTGGCCTCCAT  | 0.502       |             |
| - | 3  | 646  | ml.2_5'UTR PITX2                | NM_153426    | NP_700475    | Q99697 | PITX2_HUMAN |                               | 0           | TCAACGGCCG   | 0.667       |             |
| - | 6  | 995  | aw.2_Missense_M                 | NM_018392    | NP_060862    | Q6ZU11 | YD002_HUMAN |                               | 0           | TGATTCGACT   | 0.373       | rs150615137 |
| - | 10 | 2627 | ST4_uc010imw.2_f                | NM_022569    | NP_072091    | Q9H3R1 | NDST4_HUMAN | paran sulfate N-sulfotransf   | 4           | AAAAGTCCATAT | 0.338       |             |
| + | 4  | 1193 | e_Mutation_p.L43I               | NM_019050    | NP_061923    | Q70EK8 | UBP53_HUMAN |                               | 4           | TGCTTCTTAATA | 0.353       |             |
| - | 16 | 2129 | e_Mutation_p.V59I               | NM_018699    | NP_061169    | Q9NQX1 | PRDM5_HUMAN |                               | 2           | AGCTACACCAT  | 0.413       |             |
| - | 12 | 2817 | ef.2_Missense_Mu                | NM_001130698 | NP_001124170 | Q13507 | TRPC3_HUMAN | ellular (Potential).          | 2           | GCTGGGATTA   | 0.378       |             |
| - | 1  | 851  | 3_uc011cgz.1_Intrc              | NM_019035    | NP_061908    | Q9HCL0 | PCD18_HUMAN | r (Potential). Cadherin 2.    | 5           | GAAATCGAGTC  | 0.433       |             |
| - | 2  | 1327 | NF150_uc003iip.1                | NM_020724    | NP_065775    | Q9ULK6 | RN150_HUMAN | ical; (Potential).            | 1           | CCATCGGAGGG  | 0.423       |             |
| + | 3  | 493  | _p.A125T TRIM2_1                | NM_001130067 | NP_001123539 | Q9C040 | TRIM2_HUMAN |                               | 1           | GCAACGCTGAG  | 0.577       |             |
| + | 10 | 1553 |                                 | NM_000824    | NP_000815    | P48167 | GLRB_HUMAN  | lasmic (Probable).            | 2           | GGAATCTCAG   | 0.408       |             |

|   |    |      |                    |              |              |        |             |                             |      |               |       |             |
|---|----|------|--------------------|--------------|--------------|--------|-------------|-----------------------------|------|---------------|-------|-------------|
| + | 14 | 2843 | se_Mutation_p.G10  | NM_001083619 | NP_001077088 | P42262 | GRIA2_HUMAN | cellular (Potential).       | 4    | GTGCGGCAGCG   | 0.468 |             |
| + | 4  | 1083 | e_Mutation_p.P146  | NM_012464    | NP_036596    | O43897 | TLL1_HUMAN  |                             | 7    | GAGTTCCCAGAC  | 0.423 |             |
| + | 5  | 2981 | irr.2_Missense_Mut | NM_014269    | NP_055084    | Q9UKF5 | ADA29_HUMAN | );[4].[9 X 9 AA approximate | 16   | AAACCTCGGGTG  | 0.577 | rs144239698 |
| + | 15 | 2276 | p.R412Q SNX25_     | NM_031953    | NP_114159    | Q9H3E2 | SNX25_HUMAN |                             | 5    | ACTTCGAGGAA   | 0.378 |             |
| - | 2  | 257  |                    | NM_005958    | NP_005949    | P48039 | MTR1A_HUMAN | Name=2; (Potential).        | 5    | GGTACGGATAA   | 0.502 |             |
| + | 12 | 2082 | uc003jbb.1_5'Flanl | NM_007277    | NP_009208    | O60645 | EXOC3_HUMAN |                             | 0    | AAGACGTGGAC   | 0.617 |             |
| - | 2  | 323  | S6_uc003jcy.2_5'   | NM_032479    | NP_115868    | Q9P0J6 | RM36_HUMAN  |                             | 0    | ACCACCGACCC   | 0.562 |             |
| - | 17 | 3077 | ND2_uc011cmz.1_    | NM_001332    | NP_001323    | Q9UQB3 | CTND2_HUMAN | ARM 9.                      | 8    | CTTGGCGTCT    | 0.512 |             |
| - | 6  | 666  | uc011cmy.1_Intror  | NM_001332    | NP_001323    | Q9UQB3 | CTND2_HUMAN |                             | 8    | GGTTGCTATGG   | 0.592 |             |
| - | 2  | 198  | z.1_5'UTR CTNNE    | NM_001332    | NP_001323    | Q9UQB3 | CTND2_HUMAN |                             | 8    | GGTCTGGAACA   | 0.493 |             |
| - | 28 | 4541 |                    | NM_001369    | NP_001360    | Q8TE73 | DYH5_HUMAN  | n (By similarity).          | 31   | AGGGTGGTTATC  | 0.463 |             |
| + | 3  | 253  | IO_uc011cna.1_M    | NM_007118    | NP_009049    | O75962 | TRIO_HUMAN  | CRAL-TRIO.                  | 18   | ATAAACGTGGA   | 0.408 |             |
| + | 3  | 330  |                    | NM_020227    | NP_064612    | Q9NQV7 | PRDM9_HUMAN | RAB-related.                | 6    | AAAACCTCGCTA  | 0.438 |             |
| + | 11 | 2370 |                    | NM_020227    | NP_064612    | Q9NQV7 | PRDM9_HUMAN | 2H2-type 9.                 | 6    | GGCTTTAGCAAT  | 0.592 |             |
| + | 11 | 2373 |                    | NM_020227    | NP_064612    | Q9NQV7 | PRDM9_HUMAN | 2H2-type 9.                 | 6    | TTTAGCAATAAG  | 0.592 | rs58979818  |
| - | 13 | 1494 | p.R442C MTMR1      | NM_001040446 | NP_001035536 | Q9C011 | MTMRC_HUMAN | ularin phosphatase.         | 1    | CTGGCGGAGAT   | 0.498 |             |
| + | 31 | 4603 | p.V984M SPEF2_     | NM_024867    | NP_079143    | Q9C093 | SPEF2_HUMAN |                             | 4    | ATTTGGTGACCC  | 0.358 |             |
| - | 14 | 1225 | p.R401C RICTOR     | NM_152756    | NP_689969    | Q6R327 | RICTR_HUMAN |                             | 10   | CATTACGAATAA  | 0.269 |             |
| + | 2  | 669  | uc003joq.1_5'Flanl | NM_002202    | NP_002193    | P61371 | ISL1_HUMAN  | I zinc-binding 1.           | 3    | ATGCGGCATGT   | 0.418 |             |
| + | 3  | 369  | A2_uc011cqc.1_5'   | NM_002203    | NP_002194    | P17301 | ITA2_HUMAN  | Extracellular (Potential).  | 1    | AGAACCGAATG   | 0.358 |             |
| - | 10 | 1155 | 3jqt.2_Missense_M  | NM_024669    | NP_078945    | Q3KP44 | ANR55_HUMAN |                             | 1    | GGGCCGACTGC   | 0.502 |             |
| + | 14 | 3476 |                    | NM_005921    | NP_005912    | Q13233 | M3K1_HUMAN  |                             | 2    | CCCATCTGTACC  | 0.463 |             |
| - | 11 | 1004 |                    | NM_014473    | NP_055288    | Q9UNQ2 | DIMT1_HUMAN |                             | 1    | CCATGGAACGGC  | 0.353 |             |
| + | 17 | 1842 | p.V575L MAST4_     | NM_015183    | NP_055998    | O15021 | MAST4_HUMAN | rotein kinase.              | 13   | GATGCGTGCCA   | 0.463 |             |
| + | 5  | 6470 | ix.1_Missense_Mu   | NM_005909    | NP_005900    | P46821 | MAP1B_HUMAN |                             | 5    | AAGCCCGTCAG   | 0.478 |             |
| + | 13 | 1780 | RGNEF_uc010izf.2   | NM_001080479 | NP_001073948 | Q8N1W1 | RGNEF_HUMAN |                             | 0    | CTTATCGGAGCC  | 0.378 |             |
| + | 15 | 2093 | 2_Missense_Mutal   | NM_000859    | NP_000850    | P04035 | HMDH_HUMAN  | Catalytic.                  | 1    | ATCCGTTTCCA   | 0.353 |             |
| + | 3  | 820  | e_Mutation_p.D15   | NM_018046    | NP_060516    | Q8N302 | AGGF1_HUMAN |                             | 3    | GTAACCGATAGA  | 0.353 |             |
| + | 3  | 1808 | w.1_Missense_Mu    | NM_152405    | NP_689618    | Q8N9B5 | JMY_HUMAN   |                             | 0    | AAGCTCACATG   | 0.373 |             |
| + | 4  | 1890 | v.1_Missense_Mut   | NM_152405    | NP_689618    | Q8N9B5 | JMY_HUMAN   |                             | 0    | TGATCGAATGCC  | 0.363 |             |
| + | 11 | 1685 | ie_Mutation_p.S35  | NM_002890    | NP_002881    | P20936 | RASA1_HUMAN | PH.                         | 5    | ATCTCAGTGAT   | 0.323 |             |
| - | 3  | 926  | p.V85M MEF2C_      | NM_002397    | NP_002388    | Q06413 | MEF2C_HUMAN | I-type (Potential).         | 7    | CTCCACGATGT   | 0.542 |             |
| + | 4  | 497  | R98_uc003kjt.2_5'  | NM_032119    | NP_115495    | Q8WXG9 | GPR98_HUMAN | ellular (Potential).        | 16   | CTGTACTGTGA   | 0.249 |             |
| - | 22 | 2169 | ie_Mutation_p.S25  | NM_022140    | NP_071423    | Q9HCS5 | E41LA_HUMAN |                             | 1    | CATCCGAAGAA   | 0.393 |             |
| + | 7  | 1069 | p.R230H APC_uc     | NM_001127511 | NP_001120983 | P25054 | APC_HUMAN   | i-rich. Potential.          | 2515 | TACTTCGTATACC | 0.303 |             |
| + | 12 | 1876 | 'C_uc003kpy.3_Mi   | NM_001127511 | NP_001120983 | P25054 | APC_HUMAN   | Leu-rich. .R499*(2)) p.?(   | 2515 | AAGACGATATGC  | 0.368 |             |
| + | 11 | 944  | e_Mutation_p.K29   | NM_000414    | NP_000405    | P51659 | DHB4_HUMAN  | acyl-CoA dehydrogenase.     | 2    | CTGGAAGAAGA   | 0.488 |             |
| - | 17 | 2349 | p.R565H CEP120     | NM_153223    | NP_694955    | Q8N960 | CE120_HUMAN | Potential.                  | 1    | CCCTACGGATA   | 0.428 | rs74938108  |
| + | 3  | 2155 |                    | NM_175856    | NP_787052    | Q70JA7 | CHSS3_HUMAN | renal (Potential).          | 3    | TGTATGTTGAC   | 0.428 |             |
| - | 3  | 495  | f.1_Missense_Mut   | NM_007054    | NP_008985    | Q9Y496 | KIF3A_HUMAN | inesin-motor.               | 1    | TAGCTCGAACA   | 0.373 |             |
| - | 11 | 1730 | IL3_uc011cyd.1_In  | NM_017415    | NP_059111    | Q9UH77 | KLHL3_HUMAN | Kelch 3.                    | 0    | GCCGCGTGTTC   | 0.597 |             |
| - | 15 | 1840 | O3ide.2_Translatio | NM_004134    | NP_004125    | P38646 | GRP75_HUMAN |                             | 0    | AACTGTTCTCT   | 0.368 |             |
| + | 2  | 909  | et.2_Missense_Mu   | NM_016463    | NP_057547    | Q7LFL8 | CXXC5_HUMAN |                             | 1    | AGTCCGACTTC   | 0.662 |             |
| + | 3  | 1410 | lgh.1_Missense_M   | NM_080670    | NP_542401    | Q96G79 | S35A4_HUMAN | (Potential). Leu-rich.      | 0    | CTTTTGGTGTG   | 0.587 |             |
| + | 1  | 1256 | p.S419L PCDHA1     | NM_018900    | NP_061723    | Q9Y5I3 | PCDA1_HUMAN | Extracellular (Potential).  | 1    | CCGTGCGGTCT   | 0.627 |             |
| + | 1  | 1861 | CDHA1_uc003lgz.:   | NM_018900    | NP_061723    | Q9Y5I3 | PCDA1_HUMAN | Extracellular (Potential).  | 1    | GCATCCCGTTC   | 0.657 |             |
| + | 1  | 1867 | hd.2_Intron PCDH   | NM_018906    | NP_061729    | Q9Y5H8 | PCDA3_HUMAN | Extracellular (Potential).  | 8    | CGTTTCGCGTG   | 0.662 |             |

|   |    |       |                    |              |              |        |             |                                             |    |                  |       |
|---|----|-------|--------------------|--------------|--------------|--------|-------------|---------------------------------------------|----|------------------|-------|
| + | 1  | 1526  | CDHA5_uc003lhk.    | NM_018911    | NP_061734    | Q9Y5H6 | PCDA8_HUMAN | Extracellular (Potential).                  | 2  | TCATTCGGTGCA     | 0.687 |
| + | 1  | 1229  | CDHA6_uc003lhn.    | NM_018901    | NP_061724    | Q9Y5I2 | PCDAA_HUMAN | Extracellular (Potential).                  | 5  | TGGACAGCGCTC     | 0.632 |
| + | 1  | 975   |                    | NM_013340    | NP_037472    | Q9Y5F3 | PCDB1_HUMAN | Extracellular (Potential).                  | 0  | TATGGAGAAGTT     | 0.463 |
| + | 1  | 1564  | uc003lin.2_5'Flank | NM_018937    | NP_061760    | Q9Y5E6 | PCDB3_HUMAN | Extracellular (Potential).                  | 2  | TACTACGAGGCC     | 0.692 |
| + | 1  | 1978  |                    | NM_018938    | NP_061761    | Q9Y5E5 | PCDB4_HUMAN | Extracellular (Potential).                  | 3  | TACGTGCTCCTG     | 0.692 |
| + | 1  | 1358  | ah.1_Missense_Mu   | NM_018939    | NP_061762    | Q9Y5E3 | PCDB6_HUMAN | Extracellular (Potential).                  | 1  | TAACTCTCTACA     | 0.592 |
| + | 1  | 1564  | HB16_uc010jfw.1_   | NM_020957    | NP_066008    | Q9NRJ7 | PCDBG_HUMAN | Extracellular (Potential).                  | 2  | TAAAAGGAAATG     | 0.373 |
| + | 1  | 2096  | daj.1_Missense_Mu  | NM_018931    | NP_061754    | Q9Y5F2 | PCDBB_HUMAN | Extracellular (Potential).                  | 6  | TGTCTTCGCTCT     | 0.682 |
| - | 1  | 2952  |                    | NM_016580    | NP_057664    | Q9NPG4 | PCD12_HUMAN | Extracellular (Potential).                  | 3  | TATTCACAAGCA     | 0.612 |
| - | 2  | 398   |                    | NM_001080516 | NP_001073985 | A6NFK2 | GRCR2_HUMAN |                                             | 0  | TGGGTTCTGAATG    | 0.403 |
| + | 7  | 1518  | l27Q SH3RF2_ucC    | NM_152550    | NP_689763    | Q8TEC5 | SH3R2_HUMAN | SH3 3.                                      | 2  | TCGGCCGAGTCG     | 0.612 |
| + | 8  | 1689  | _uc011dbm.1_5'UT   | NM_152550    | NP_689763    | Q8TEC5 | SH3R2_HUMAN |                                             | 2  | TCAAATCCGCTCT    | 0.567 |
| - | 9  | 1721  | jhd.2_Nonsense_Mu  | NM_002609    | NP_002600    | P09619 | PGFRB_HUMAN | Extracellular (Potential).                  | 17 | TCACTCGGACAG     | 0.617 |
| - | 5  | 709   | _Mutation_p.R146C  | NM_001025071 | NP_001020242 | P62263 | RS14_HUMAN  |                                             | 1  | TACGGCCGACCCC    | 0.522 |
| - | 23 | 12797 | AT2_uc003lud.3_N   | NM_001447    | NP_001438    | Q9NYQ8 | FAT2_HUMAN  | Cytoplasmic (Potential).                    | 6  | CAGGCCTCCCT      | 0.647 |
| - | 2  | 1615  | .3_Intron PWWP2/   | NM_001130864 | NP_001124336 | Q96N64 | PWP2A_HUMAN |                                             | 0  | TGAAGGGGCTCT     | 0.542 |
| - | 2  | 469   | 3lyf.1_Missense_Mu | NM_022090    | NP_071373    | Q8IZ13 | CE054_HUMAN |                                             | 1  | Tgttctcgacatggca | 0     |
| + | 19 | 3562  | t.3_Missense_Mut   | NM_001122679 | NP_001116151 |        |             |                                             | 10 | ACAAAGGCACTC     | 0.582 |
| + | 26 | 5704  | t.3_Missense_Mut:  | NM_001122679 | NP_001116151 |        |             |                                             | 10 | TGAGCGAGAGAGG    | 0.607 |
| - | 25 | 2998  | g.2_Missense_Mut   | NM_003062    | NP_003053    | O75094 | SLIT3_HUMAN | LRRCT 4.                                    | 4  | TACAGTGGAGTG     | 0.622 |
| + | 11 | 1714  | eq.1_Nonsense_Mu   | NM_017785    | NP_060255    | Q96EA4 | SPDLY_HUMAN |                                             | 2  | TTTTATCGATTAC    | 0.443 |
| - | 2  | 2309  |                    | NM_052899    | NP_443131    | Q7Z2K8 | GRIN1_HUMAN |                                             | 2  | TAGGGGGACCA      | 0.637 |
| + | 10 | 1138  |                    | NM_003052    | NP_003043    | Q06495 | NPT2A_HUMAN | Extracellular (Potential).                  | 1  | TCTACCGGACC      | 0.627 |
| - | 3  | 245   | 2_uc003mgn.3_5'    | NM_000505    | NP_000496    | P00748 | FA12_HUMAN  | Connexin type-II.                           | 0  | TTGCCCGCCCT      | 0.602 |
| + | 6  | 623   | jq.2_Missense_Mu   | NM_002082    | NP_002073    | P43250 | GRK6_HUMAN  | Transmembrane terminal.                     | 3  | TGAGCGTGGCC      | 0.632 |
| + | 3  | 316   | ED9_uc010jko.2_F   | NM_017510    | NP_059980    | Q9BVK6 | TMED9_HUMAN | Lumenal (Potential).                        | 0  | TGCTCCGAGGGC     | 0.527 |
| - | 16 | 1887  | p.R585C EXOC2_     | NM_018303    | NP_060773    | Q96KP1 | EXOC2_HUMAN |                                             | 7  | TGCAACGTACTCC    | 0.463 |
| + | 23 | 4099  | P_uc003mxq.1_Inl   | NM_004415    | NP_004406    | P15924 | DESP_HUMAN  | Transmembrane rod domain.                   | 9  | TAAAACGCCCTCT    | 0.498 |
| - | 7  | 1339  | RNA TFAP2A_uc0     | NM_003220    | NP_003211    | P05549 | AP2A_HUMAN  | Transmembrane span-helix), dimerization.    | 1  | TGGCCGTGAGT      | 0.617 |
| - | 8  | 2881  | g_Mutation_p.R63   | NM_000332    | NP_000323    | P54253 | ATX1_HUMAN  | Transmembrane  USP7. RNA-binding. AXH       | 4  | TGGCTCGGTGC      | 0.572 |
| - | 8  | 951   | ation_Start_Site   | NM_000332    | NP_000323    | P54253 | ATX1_HUMAN  |                                             | 4  | TCTCCACGGTGA     | 0.527 |
| + | 7  | 1312  |                    | NM_001732    | NP_001723    | Q13410 | BT1A1_HUMAN | Cytoplasmic (Potential).                    | 2  | TATCAGGAGACAT    | 0.517 |
| + | 5  | 941   | G_uc003nzn.3_Mi    | NM_002127    | NP_002118    | P17693 | HLAG_HUMAN  | Transmembrane ntial). Ig-like C1-type. Alph | 4  | TAGCTCGTGGAG     | 0.627 |
| + | 1  | 492   | 2_5'Flank TRIM10_  | NM_033229    | NP_150232    | Q9C019 | TRI15_HUMAN |                                             | 0  | TCAACCCCGTCC     | 0.627 |
| - | 1  | 58    | l.2_Missense_Mut   | NM_002341    | NP_002332    | Q06643 | TNFC_HUMAN  | Cytoplasmic (Potential).                    | 0  | TGGAAACCCCTC     | 0.642 |
| + | 3  | 223   | C2B_uc003hvs.1_3   | NM_021221    | NP_067044    | Q8NDX9 | LY65B_HUMAN | UPAR/Ly6.                                   | 0  | TGTGGACAGTAC     | 0.502 |
| - | 20 | 1661  | p.C511F BAT5_uc    | NM_021160    | NP_066983    | Q95870 | ABHGA_HUMAN |                                             | 0  | TGGTGCACTGA      | 0.577 |
| - | 1  | 106   | LC44A4_uc011dor    | NM_025257    | NP_079533    | Q53GD3 | CTL4_HUMAN  | Cytoplasmic (Potential).                    | 4  | TCTACCGTAGG      | 0.662 |
| + | 29 | 3874  | .1_Missense_Mut:   | NM_007293    | NP_009224    | P0C0L4 | CO4A_HUMAN  |                                             | 0  | TGCTTTCAGGAG     | 0.672 |
| - | 27 | 9446  |                    | NM_019105    | NP_061978    | P22105 | TENX_HUMAN  | Transmembrane nectin type-III 23.           | 0  | TGCCCTCGGGAA     | 0.667 |
| - | 6  | 884   |                    | NM_002120    | NP_002111    | P13765 | DOB_HUMAN   | Cytoplasmic (Potential).                    | 1  | TGAGACCTGGA      | 0.572 |
| - | 2  | 331   | 3oc.1_Missense_M   | NM_080680    | NP_542411    | P13942 | COBA2_HUMAN | Transmembrane 3P N-terminal.                | 5  | TCCGGAGCACAT     | 0.592 |
| - | 15 | 1741  | ln.1_Missense_Mu   | NM_022553    | NP_072047    | Q8N1B4 | VPS52_HUMAN |                                             | 5  | TGCGCGTGTGA      | 0.537 |
| + | 7  | 902   | 3AP1_uc010juy.2_   | NM_006772    | NP_006763    | Q96PV0 | SYGP1_HUMAN | PH.                                         | 4  | TGTCTCGGGCCG     | 0.507 |
| - | 2  | 213   | ..1_5'Flank C6orf1 | NM_032340    | NP_115716    | Q9BRT2 | CF125_HUMAN |                                             | 0  | TAGTCTCGTACA     | 0.483 |
| - | 7  | 1569  | b.2_Missense_Mu    | NM_001142883 | NP_001136355 | Q96PC2 | IP6K3_HUMAN |                                             | 0  | TGTGAGGATGG      | 0.552 |
| - | 15 | 1067  | D42N CPNE5_ucC     | NM_020939    | NP_065990    | Q9HCH3 | CPNE5_HUMAN | VWFA.                                       | 1  | TGAAATCAATGG     | 0.592 |

rs146377978



|   |    |           |                    |              |              |        |             |    |              |       |             |
|---|----|-----------|--------------------|--------------|--------------|--------|-------------|----|--------------|-------|-------------|
| + | 60 | 9013      |                    | NM_001371    | NP_001362    |        |             | 21 | AAACAGATTTCA | 0.363 |             |
| + | 1  | 555       | ε_Mutation_p.G36I  | NM_006586    | NP_006577    | Q9BT09 | CNPY3_HUMAN | 1  | AGGCCGGAGCT  | 0.602 |             |
| - | 4  | 1019      | ζ_Intron TMEM151   | NM_182539    | NP_872345    | Q5JU00 | TCTE1_HUMAN | 4  | TTGCTTCGGGTC | 0.537 |             |
| - | 19 | 2563      | ζ_Intron TMEM151   | NM_020745    | NP_065796    | Q5JTZ9 | SYAM_HUMAN  | 1  | GGCACGCCGCT  | 0.587 |             |
| + | 11 | 1473      | ΔAG_uc010jzt.2_R   | NM_014464    | NP_055279    | Q9UJW2 | TINAG_HUMAN | 4  | CATGGGGAGAG  | 0.403 |             |
| + | 5  | 1011      |                    | NM_001010872 | NP_001010872 | Q5T0W9 | FA83B_HUMAN | 6  | GAAAAGCCCTC  | 0.428 |             |
| + | 5  | 2599      |                    | NM_001010872 | NP_001010872 | Q5T0W9 | FA83B_HUMAN | 6  | ATCTCCTAGAAC | 0.393 |             |
| + | 39 | 2651      |                    | NM_001858    | NP_001849    | Q14993 | COJA1_HUMAN | 4  | ACCCCGGTCTCT | 0.323 |             |
| + | 7  | 1109      |                    | NM_024576    | NP_078852    | Q5TC84 | OGRL1_HUMAN | 0  | CGCCTCGAAAA  | 0.468 |             |
| + | 14 | 2184      | Δkat.2_Splice_Site | NM_019842    | NP_062816    | Q9NR82 | KCNQ5_HUMAN | 7  | TTCTAGGTACAC | 0.408 |             |
| - | 5  | 1472      |                    | NM_138441    | NP_612450    | Q8N884 | M21D1_HUMAN | 0  | TACATACGTGAA | 0.413 |             |
| - | 26 | 4924      | ph2.2_Missense_M   | NM_004370    | NP_004361    | Q99715 | COCA1_HUMAN | 9  | AGGTTCCCAAAA | 0.403 |             |
| - | 14 | 2945      | ΔA1_uc003pht.2_    | NM_004370    | NP_004361    | Q99715 | COCA1_HUMAN | 9  | AGCAGATGTCC  | 0.393 |             |
| - | 13 | 1926      |                    | NM_001563    | NP_001554    | Q17R60 | IMPG1_HUMAN | 3  | GAGCTCGGTAC  | 0.458 |             |
| + | 2  | 396       |                    | NM_031469    | NP_113657    | Q9UJC5 | SH3L2_HUMAN | 0  | ATGGCGACCGA  | 0.468 |             |
| + | 3  | 369       | b.3_Missense_Mu    | NM_003318    | NP_003309    | P33981 | TTK_HUMAN   | 11 | CGCTTCCCCCA  | 0.348 |             |
| + | 8  | 2621      |                    | NM_015021    | NP_055836    | O60281 | ZN292_HUMAN | 4  | CAGAACACAGCA | 0.398 |             |
| - | 92 | 15463     |                    | NM_014611    | NP_055426    | Q9NU22 | MDN1_HUMAN  | 10 | GCACACGCTCA  | 0.478 |             |
| - | 61 | 9580      |                    | NM_014611    | NP_055426    | Q9NU22 | MDN1_HUMAN  | 10 | CCTGCCGCCGG  | 0.622 | rs142328599 |
| - | 21 | 3021      | o.1_Missense_Mu    | NM_014611    | NP_055426    | Q9NU22 | MDN1_HUMAN  | 10 | GGCCCGGCACA  | 0.502 |             |
| + | 5  | 1422      |                    | NM_024641    | NP_078917    | Q5SR19 | MANEA_HUMAN | 3  | ATTACCGTCTCT | 0.408 |             |
| + | 7  | 1529      | 3317R KLHL32_uc    | NM_052904    | NP_443136    | Q96NJ5 | KLH32_HUMAN | 4  | CAGGAGGGGAA  | 0.577 |             |
| + | 5  | 1654      | re.2_Missense_Mt   | NM_001198    | NP_001189    | O75626 | PRDM1_HUMAN | 56 | CAGATGGAGCC  | 0.677 |             |
| - | 5  | 996       | dr.2_Missense_Mt   | NM_022765    | NP_073602    | Q8TDZ2 | MICA1_HUMAN | 3  | GGTGCCTCCAT  | 0.547 |             |
| - | 13 | 1922      | p.A531V LAMA4_     | NM_001105206 | NP_001098676 | Q16363 | LAMA4_HUMAN | 9  | AGTCCGCAGAT  | 0.443 |             |
| - | 3  | 515       | p.R48Q HDAC2_      | NM_001527    | NP_001518    | Q92769 | HDAC2_HUMAN | 4  | TTGACCGTAGA  | 0.348 |             |
| - | 3  | 830       | p.Q270* GPRC6/     | NM_148963    | NP_683766    | Q5T6X5 | GPC6A_HUMAN | 6  | AACCTGGGCTT  | 0.363 |             |
| + | 11 | 1103      |                    | NM_173560    | NP_775831    | Q8HWS3 | RFX6_HUMAN  | 3  | ACATAAGAAATT | 0.308 |             |
| - | 43 | 7110      | ΔS1_uc011ebi.1_R   | NM_002944    | NP_002935    | P08922 | ROS_HUMAN   | 25 | CTTCTTCTCTCA | 0.473 |             |
| - | 2  | 1244      | p.R179Q FAM184     | NM_024581    | NP_078857    | Q8NB25 | F184A_HUMAN | 7  | TTTTTCGTAAAA | 0.393 |             |
| + | 1  | 274       | ΔL_uc003pzq.2_RNA  |              |              | Q8TC41 | RN217_HUMAN | 0  | TGGACGTGCTG  | 0.701 |             |
| - | 2  | 509       | Missense_Mutation  | NM_002844    | NP_002835    | Q15262 | PTPRK_HUMAN | 8  | CTGGTGGTAAT  | 0.438 |             |
| - | 14 | 1787      | _Site_p.S179_splic | NM_004830    | NP_004821    | Q9ULK4 | MED23_HUMAN | 3  | AACATACCTCAT | 0.373 |             |
| - | 13 | 1991      | iv.2_Missense_Mu   | NM_003980    | NP_003971    | Q14244 | MAP7_HUMAN  | 0  | CCTGCCGGACC  | 0.567 |             |
| - | 7  | 950       | Δkgs.2_Missense_I  | NM_003980    | NP_003971    | Q14244 | MAP7_HUMAN  | 0  | GGAACGAATGT  | 0.527 |             |
| - | 3  | 1001      | e_Mutation_p.K14   | NM_031922    | NP_114128    | Q96D71 | REPS1_HUMAN | 2  | ATCCCTTTTTC  | 0.478 |             |
| + | 2  | 185       | t.1_RNA VTA1_uc    | NM_016485    | NP_057569    | Q9NP79 | VTA1_HUMAN  | 0  | AATGTCGCAAAT | 0.299 |             |
| - | 9  | 6940_6941 |                    | NM_006734    | NP_006725    | P31629 | ZEP2_HUMAN  | 6  | CCTTTGGGTATC | 0.465 |             |
| - | 5  | 3987      |                    | NM_006734    | NP_006725    | P31629 | ZEP2_HUMAN  | 6  | TTGCCGCACCA  | 0.562 |             |
| - | 10 | 1572      |                    | NM_173515    | NP_775786    | Q6P9H4 | CNKR3_HUMAN | 4  | ACCGGGGAGAG  | 0.483 |             |
| + | 8  | 1183      | p.G83R SYNJ2_u     | NM_003898    | NP_003889    | O15056 | SYNJ2_HUMAN | 1  | CAAAGGGGGAG  | 0.582 |             |
| + | 8  | 2810      | p.V485I TULP4_u    | NM_020245    | NP_064630    | Q9NRJ4 | TULP4_HUMAN | 1  | AGTTCGTATC   | 0.632 |             |
| + | 9  | 977       | se_Mutation_p.G2   | NM_007045    | NP_008976    | O95684 | FR1OP_HUMAN | 1  | TGGCGGAGGCC  | 0.453 |             |
| - | 1  | 901       |                    | NM_005299    | NP_005290    | O00270 | GPR31_HUMAN | 0  | GCCTCGGAGGG  | 0.592 | rs148093951 |
| + | 2  | 365       | GPR146_uc003sj>    | NM_138445    | NP_612454    | Q96CH1 | GP146_HUMAN | 1  | GGAGTGTGGGC  | 0.652 |             |
| - | 3  | 1613      | on.3_Missense_M    | NM_024963    | NP_079239    | Q96ME1 | FXL18_HUMAN | 3  | GTTGCGGATGG  | 0.662 |             |
| + | 4  | 590       | 42_uc011jwp.1_Mi   | NM_032172    | NP_115548    | Q9H9J4 | UBP42_HUMAN | 5  | TATGATGTGTAC | 0.378 |             |

|   |    |           |                    |              |              |        |             |                              |       |                  |       |             |
|---|----|-----------|--------------------|--------------|--------------|--------|-------------|------------------------------|-------|------------------|-------|-------------|
| + | 7  | 862       |                    | NM_001163941 | NP_001157413 | Q2M3G0 | ABCB5_HUMAN |                              | 6     | 'ACCCTAGTGACT'   | 0.448 |             |
| + | 8  | 1294      | uh.2_Missense_Mt   | NM_178559    | NP_848654    | Q2M3G0 | ABCB5_HUMAN | ABC transmembrane type       | 6     | 'TTCTGGGGACA'    | 0.299 |             |
| + | 10 | 1310      | e.1_Missense_Mut   | NM_031414    | NP_113602    | Q9BXU1 | STK31_HUMAN |                              | 9     | 'ATAATATGGGCA'   | 0.383 |             |
| + | 8  | 1754      | DC129_uc011kae     | NM_194300    | NP_919276    | Q6ZRS4 | CC129_HUMAN |                              | 0     | 'AAATGGGTAAAC'   | 0.473 |             |
| - | 4  | 2367      | L9_uc011kai.1_Int  | NM_015483    | NP_056298    | Q8IY47 | KBTB2_HUMAN | Kelch 5.                     | 0     | 'GTACACGTTTCCAG' | 0.468 |             |
| + | 1  | 820       | uc003tfl.2_Intron  | NM_181791    | NP_861456    | Q7Z602 | GP141_HUMAN | Name=7; (Potential).         | 3     | 'TAACAGCAATT'    | 0.388 |             |
| + | 4  | 254       | BE2D4_uc003tjb.1   | NM_015983    | NP_057067    | Q9Y2X8 | UB2D4_HUMAN |                              | 0     | 'CACTTTCTACAC'   | 0.502 |             |
| + | 3  | 276       | 360R DBNL_uc01     | NM_001014436 | NP_001014436 | Q9JUJ6 | DBNL_HUMAN  | ADF-H.                       | 1     | 'ACAGCGGGAAG'    | 0.577 |             |
| + | 8  | 1377      | 5'Flank AEBP1_u    | NM_001129    | NP_001120    | Q8IUX7 | AEBP1_HUMAN |                              | 0     | 'GGGCAGTGGGAG'   | 0.627 |             |
| + | 16 | 2266      | Mutation_p.R22     | NM_001129    | NP_001120    | Q8IUX7 | AEBP1_HUMAN | with PTEN (By similarity).   | 0     | 'TGTGCGCAGCC'    | 0.632 |             |
| + | 9  | 1180      | nq.2_RNA CCM2_     | NM_031443    | NP_113631    | Q9BSQ5 | CCM2_HUMAN  |                              | 0     | 'GGACAGCCGCA'    | 0.592 |             |
| - | 27 | 4153      |                    | NM_138295    | NP_612152    | Q8TDX9 | PK1L1_HUMAN | ular (Potential). REJ.       | 11    | 'AAAGCCTAGCTC'   | 0.493 |             |
| + | 51 | 13664     | CA13_uc010kyt.1_   | NM_152701    | NP_689914    | Q86UQ4 | ABCAD_HUMAN | ical; (Potential).           | 10    | 'CTTTTCGGGTATC'  | 0.483 |             |
| - | 7  | 1201      | _p.P339L COBL_t    | NM_015198    | NP_056013    | O75128 | COBL_HUMAN  | Pro-rich.                    | 5     | 'GTGGAGGGGGA'    | 0.532 |             |
| - | 7  | 874       |                    | NM_207366    | NP_997249    | Q6ZU15 | SEP14_HUMAN |                              | 0     | 'GCACTTCATCTGT'  | 0.428 |             |
| + | 4  | 980       |                    | NM_001159279 | NP_001152751 |        |             |                              | 2     | 'AGAATTCATACTC'  | 0.408 |             |
| + | 7  | 1198      | 3tvz.2_Missense_I  | NM_022479    | NP_071924    | Q6IS24 | GLTL3_HUMAN | lenal (Potential).           | 7     | 'CTCTTCGCGTTT'   | 0.537 |             |
| + | 1  | 1170      |                    | NM_003508    | NP_003499    | O00144 | FZD9_HUMAN  | ellular (Potential).         | 1     | 'CTGCACGCTGG'    | 0.657 |             |
| + | 1  | 98        | 3 ELN_uc003tzt.2_  | NM_000501    | NP_001075224 | P15502 | ELN_HUMAN   |                              | 5     | 'ATGGCGGGTCTC'   | 0.507 |             |
| + | 18 | 1041      | 3 ELN_uc003tzt.2_  | NM_000501    | NP_001075224 | P15502 | ELN_HUMAN   |                              | 5     | 'TCCACAGGAGC'    | 0.567 |             |
| + | 5  | 717       | n_p.R56Q LAT2_u    | NM_032464    | NP_115853    | Q9GZY6 | NTAL_HUMAN  | lasmic (Potential).          | 0     | 'GTCCCGGACCT'    | 0.612 |             |
| + | 17 | 2508      | p.G508D CCDC14     | NM_020879    | NP_065930    | Q8IYE0 | CC146_HUMAN | Potential.                   | 2     | 'TCAGGGCTGCA'    | 0.512 |             |
| - | 6  | 10547     | _p.R3420* PCLO_u   | NM_033026    | NP_149015    | Q9Y6V0 | PCLO_HUMAN  |                              | 7     | 'TCCTCGGACTT'    | 0.428 |             |
| - | 17 | 1977      | p.T646M SEMA3C     | NM_152754    | NP_689967    | O95025 | SEM3D_HUMAN | l-like C2-type p.T646M(1)    | 5     | 'TATTCCGTTTTG'   | 0.408 | rs139389337 |
| - | 26 | 3506      | .R1137W ABCB4_     | NM_018849    | NP_061337    | P21439 | MDR3_HUMAN  | 2. Cytoplasmic p.I1144T(1)   | 6     | 'AACCCGGCTGT'    | 0.473 |             |
| - | 20 | 2798      | hc.1_Nonsense_M    | NM_000927    | NP_000918    | P08183 | MDR1_HUMAN  | smembrane type-1 2.          | 7     | 'GGATCGGAAAA'    | 0.552 |             |
| + | 2  | 417       | 11khj.1_Missense   | NM_001039706 | NP_001034795 | A5D8W1 | CG063_HUMAN |                              | 1     | 'TCCTCGAAGAG'    | 0.333 | rs145263721 |
| + | 12 | 981       | C132_uc003umr.2_   | NM_017667    | NP_060137    | Q96JG6 | CC132_HUMAN |                              | 0     | 'ACACCGTGTTT'    | 0.363 |             |
| - | 11 | 1786      | _p.S427F ASNS_u    | NM_133436    | NP_597680    | P08243 | ASNS_HUMAN  | agine synthetase.            | 1     | 'TAATAGGAAGAA'   | 0.343 |             |
| - | 2  | 358       | iw.1_Missense_Mt   | NM_015545    | NP_056360    | O75127 | PTCD1_HUMAN |                              | 1     | 'TGGCCGTGGAG'    | 0.622 |             |
| + | 7  | 1916      | _p.V598I ZKSCAN    | NM_145102    | NP_659570    | Q9Y2L8 | ZKSC5_HUMAN | C2H2-type 6.                 | 1     | 'AGCGCGTCCAC'    | 0.517 | rs4729542   |
| + | 4  | 578       | uc011kjm.1_5'Flan  | NM_001004351 | NP_001004351 | A6NKU9 | SPDE3_HUMAN |                              | 0     | 'ATGCCGTCCTCA'   | 0.547 |             |
| + | 3  | 797       | ixr.2_Missense_Mt  | NM_030961    | NP_112223    | Q9BRZ2 | TRI56_HUMAN | 3 box-type 2.                | 3     | 'GCTGTGCAGAG'    | 0.701 |             |
| - | 5  | 471       | kl CLDN15_uc003i   | NM_016068    | NP_057152    | Q9Y3D6 | FIS1_HUMAN  | ical; (Potential).           | 0     | 'TCCCACGATGG'    | 0.662 |             |
| - | 4  | 327       | sense_Mutation_p.  | NM_022777    | NP_073614    | Q9H7X7 | RABL5_HUMAN |                              | 0     | 'GGGCCGCCAG'     | 0.458 |             |
| + | 24 | 4482      | 1_uc011kkn.1_Intr  | NM_181552    | NP_853530    | P39880 | CUX1_HUMAN  |                              | 8     | 'AGGCCCGCAAC'    | 0.716 |             |
| + | 4  | 638       | uzm.2_5'Flank LR   | NM_152892    | NP_690852    | Q9UFC0 | LRWD1_HUMAN |                              | 1     | 'CCAGCGGACT'     | 0.627 |             |
| - | 14 | 1983      | rex.2_Missense_M   | NM_002291    | NP_002282    | P07942 | LAMB1_HUMAN | inin IV type B.              | 8     | 'GGTGGCAAAGT'    | 0.557 |             |
| - | 15 | 1913      | ey.2_Missense_Mt   | NM_007356    | NP_031382    | A4D0S4 | LAMB4_HUMAN | inin IV type B.              | 8     | 'TGACAGCAAATC'   | 0.493 |             |
| - | 4  | 1284      | se_Mutation_p.R1   | NM_015723    | NP_056538    | Q9NP80 | PLPL8_HUMAN |                              | 2     | 'GGGACGAGAAA'    | 0.408 |             |
| + | 1  | 543       |                    | NR_002144    |              |        |             |                              | 0     | 'GGCCAGGAAGC'    | 0.602 |             |
| + | 4  | 605       | .R49Q CALD1_uc     | NM_033138    | NP_149129    | Q05682 | CALD1_HUMAN | odulin-binding (By similarit | 0     | 'GGAACGGCTGC'    | 0.577 |             |
| - | 15 | 1859_1860 |                    | NM_004333    | NP_004324    | P15056 | BRAF_HUMAN  | rotein kinase_R603>I(2) p.T  | 18290 | 'ATTTCACTGTAG'   | 0.366 | rs121913378 |
| - | 7  | 736       | n_p.R179H CLEC     | NM_013252    | NP_037384    | Q9NY25 | CLC5A_HUMAN | . Extracellular (Potential). | 0     | 'TCCTCGCGTAG'    | 0.408 |             |
| + | 5  | 705       | 1_Intron uc010loj. | NR_001296    |              |        |             |                              | 0     | 'GCAATGGACAG'    | 0.493 | rs143538588 |
| - | 15 | 2143      | _p.R429W TRPV6_    | NM_018646    | NP_061116    | Q9H1D0 | TRPV6_HUMAN | lasmic (Potential).          | 2     | 'GATCCGCTGCC'    | 0.557 |             |
| + | 1  | 436       |                    | NM_012369    | NP_036501    | Q13607 | OR2F1_HUMAN | lasmic (Potential).          | 3     | 'CCTGCGATACTC'   | 0.552 | rs141056144 |

|   |    |      |                    |              |              |        |             |                                   |    |               |       |
|---|----|------|--------------------|--------------|--------------|--------|-------------|-----------------------------------|----|---------------|-------|
| + | 4  | 1198 | p.Q294* REPIN1_    | NM_013400    | NP_037532    | Q9BWE0 | REPI1_HUMAN | 2H2-type 6.                       | 1  | CCCTCCAGTGT   | 0.527 |
| + | 3  | 1651 | 3743_uc003whg.2_   | NM_173680    | NP_775951    | Q96BV0 | ZN775_HUMAN | 2H2-type 11.                      | 0  | CGGCCCGGCT    | 0.721 |
| + | 4  | 1423 | A1_uc010lqp.1_5'F  | NM_138400    | NP_612409    | Q5C9Z4 | NOM1_HUMAN  | MIF4G.                            | 0  | GTCATTGCCCAT  | 0.443 |
| - | 60 | 9769 | G2456S CSMD1_      | NM_033225    | NP_150094    | Q96PZ7 | CSMD1_HUMAN | extracellular (Potential).        | 25 | GTAACCGTCCA   | 0.567 |
| - | 1  | 721  |                    | NM_004225    | NP_004216    | Q9Y4C4 | MFHA1_HUMAN |                                   | 0  | GGGGGAGGCG    | 0.582 |
| + | 2  | 751  | p.G249D TNKS_u     | NM_003747    | NP_003738    | O95271 | TNKS1_HUMAN | ANK 2.                            | 7  | TGAGGTCTCA    | 0.443 |
| + | 7  | 1101 | se_Mutation_p.R31  | NM_004462    | NP_004453    | P37268 | FDFT_HUMAN  |                                   | 0  | AGATTCGGAAAC  | 0.448 |
| - | 9  | 3313 | wl.1_Missense_Mt   | NM_182643    | NP_872584    | Q96QB1 | RHG07_HUMAN |                                   | 7  | TCGGTCGTTGT   | 0.582 |
| - | 1  | 173  | ltg.1_Missense_Mt  | NM_021020    | NP_066300    | Q9Y250 | LZTS1_HUMAN |                                   | 1  | ACTGCGAAGCC   | 0.642 |
| - | 8  | 1454 | .2_Missense_Mut    | NM_139278    | NP_644807    | Q8N145 | LGI3_HUMAN  | EAR 4.                            | 1  | CAGCCGTGGCT   | 0.627 |
| + | 4  | 750  | BS3_uc011kzk.1_    | NM_005775    | NP_005766    | O60504 | VINEX_HUMAN | SoHo.                             | 0  | CCCCGATCCG    | 0.632 |
| + | 5  | 1660 | RHOBTB2_uc011      | NM_015178    | NP_055993    | Q9BYZ6 | RHBT2_HUMAN | BTB 1.                            | 2  | GCAACGGAACA   | 0.612 |
| - | 9  | 1153 | dm.2_Missense_M    | NM_004901    | NP_004892    | Q9Y227 | ENTP4_HUMAN | renal (Potential).                | 2  | CATTGCCACCA   | 0.423 |
| + | 4  | 1033 | 10ltz.2_RNA SLC    | NM_016612    | NP_057696    | Q9NYZ2 | MFRN1_HUMAN | Solcar 3.                         | 0  | TCAACGGCCTG   | 0.577 |
| + | 11 | 1128 | se_Mutation_p.H1   | NM_014265    | NP_055080    | Q9UKQ2 | ADA28_HUMAN | Extracellular (Potential).        | 5  | ATGTTTCATGAC  | 0.458 |
| + | 3  | 2559 | p.K624N NEFM_u     | NM_005382    | NP_005373    | P07197 | NFM_HUMAN   | Tail.                             | 1  | GAAAAGAAGGG   | 0.338 |
| - | 40 | 5512 | az.1_Missense_Mt   | NM_015254    | NP_056069    | Q9NQT8 | KI13B_HUMAN |                                   | 0  | TTCTCAGGGTTC  | 0.692 |
| + | 12 | 2043 | se_Mutation_p.S2   | NM_013964    | NP_039258    | Q02297 | NRG1_HUMAN  | plasmic (Potential).              | 0  | ATGACAGTAACA  | 0.552 |
| + | 27 | 3298 |                    | NM_001031836 | NP_001027006 | A8MYU2 | KCNU1_HUMAN | plasmic (Potential).              | 1  | CATTCAGACACA  | 0.388 |
| + | 19 | 3208 | vy.2_Missense_Mt   | NM_032777    | NP_116166    | Q96PE1 | GP124_HUMAN | plasmic (Potential).              | 5  | GGCTACGCTTA   | 0.637 |
| + | 6  | 901  | p.R196C LETM2_     | NM_144652    | NP_653253    | Q2VYF4 | LETM2_HUMAN | mitochondrial matrix (Potential). | 0  | TAGATCGCCCT   | 0.502 |
| + | 12 | 1382 | se_Mutation_p.S1   | NM_001556    | NP_001547    | O14920 | IKKB_HUMAN  |                                   | 7  | GATCTCCCACC   | 0.408 |
| - | 5  | 551  | lcw.1_Missense_M   | NM_004198    | NP_004189    | Q15825 | ACHA6_HUMAN | Extracellular.                    | 0  | TTGATGATCAAA  | 0.363 |
| + | 19 | 2597 | rf.2_RNA KIAA014   | NM_001080394 | NP_001073863 | Q14159 | K0146_HUMAN |                                   | 0  | GTTTGCCGCGG   | 0.592 |
| + | 5  | 1125 | _p.I214K YTHDF3    | NM_152758    | NP_689971    | Q7Z739 | YTHD3_HUMAN |                                   | 0  | CTCCTATAAAAC  | 0.488 |
| + | 2  | 244  | lorf44_uc003xwq.1  | NM_019607    | NP_062553    | Q96CB5 | CH044_HUMAN |                                   | 0  | ACTTCGAAAAAC  | 0.294 |
| + | 9  | 1085 | yb.2_Missense_M    | NM_052958    | NP_443190    | Q49A92 | CH034_HUMAN |                                   | 1  | ATACTCCATTCTC | 0.328 |
| + | 5  | 871  | _p.D52N SULF1_     | NM_015170    | NP_055985    | Q8IWU6 | SULF1_HUMAN |                                   | 7  | CCGATGATCAAC  | 0.468 |
| + | 22 | 3283 | on_p.G856R SULF1   | NM_015170    | NP_055985    | Q8IWU6 | SULF1_HUMAN |                                   | 7  | ATGGAGGAAGC   | 0.328 |
| - | 6  | 740  | zh.1_Missense_Mt   | NM_000971    | NP_000962    | P18124 | RL7_HUMAN   |                                   | 0  | FGTTGATCTGGT  | 0.428 |
| - | 2  | 933  | p.R298H JPH1_uc    | NM_020647    | NP_065698    | Q9HDC5 | JPH1_HUMAN  | ic (Potential). MORN 6.           | 1  | TGAGCGCTCG    | 0.542 |
| - | 3  | 710  | p.V90M TPD52_u     | NM_001025252 | NP_001020423 | P55327 | TPD52_HUMAN |                                   | 1  | TGTCACGTCTT   | 0.443 |
| - | 5  | 334  | _t_Mutation_p.R107 | NM_024699    | NP_078975    | Q8TCF1 | ZFAN1_HUMAN | AN1-type 2.                       | 1  | CCATTCGAGGC   | 0.413 |
| + | 7  | 1054 | 13_uc003ydf.1_Int  | NM_198584    | NP_940986    | Q8N1Q1 | CAH13_HUMAN |                                   | 0  | GTAAGCAGCA    | 0.473 |
| - | 4  | 739  | ec.2_Missense_Mt   | NM_005941    | NP_005932    | P51512 | MMP16_HUMAN | cellular (Potential).             | 8  | CACGGCGAATAG  | 0.373 |
| - | 9  | 1093 | CH17_uc011lqp.1_   | NM_004063    | NP_004054    | Q12864 | CAD17_HUMAN | ic (Potential). Cadherin 3.       | 6  | CCAGCGGATATC  | 0.413 |
| - | 24 | 5336 | 1429_uc010maz.1_   | NM_015496    | NP_056311    | Q69YN4 | VIR_HUMAN   |                                   | 2  | CCCACGACCTC   | 0.478 |
| + | 20 | 2500 | r.1_RNA INTS8_uc   | NM_017864    | NP_060334    | Q75QN2 | INT8_HUMAN  |                                   | 0  | TATATTACAGCTC | 0.269 |
| + | 6  | 1223 | id.2_Missense_Mt   | NM_002380    | NP_002371    | O00339 | MATN2_HUMAN | EGF-like 3.                       | 2  | CGGATGTGAAC   | 0.428 |
| - | 1  | 171  | '10_uc011lhj.1_5'F | NM_005655    | NP_005646    | Q13118 | KLF10_HUMAN |                                   | 0  | GAGAGGCACCG   | 0.453 |
| - | 7  | 1618 | no.2_Nonsense_M    | NM_001146    | NP_001137    | Q15389 | ANGP1_HUMAN | rogen C-terminal.                 | 7  | GGCTCGGTTCC   | 0.428 |
| - | 3  | 375  | _p.V131M EIF3H_u   | NM_003756    | NP_003747    | O15372 | EIF3H_HUMAN | MPN.                              | 3  | GCCCACGTGAA   | 0.438 |
| - | 2  | 600  | 3F11B_uc010mdc.    | NM_002546    | NP_002537    | O00300 | TR11B_HUMAN | TNFR-Cys 2.                       | 2  | CTTGACGTA     | 0.577 |
| - | 6  | 1049 |                    | NM_003184    | NP_003175    | Q6P1X5 | TAF2_HUMAN  |                                   | 6  | ATGTATGGATCTA | 0.353 |
| + | 7  | 961  |                    | NM_015137    | NP_055952    | Q14156 | EFR3A_HUMAN |                                   | 5  | ATGCTGTTAGAC  | 0.378 |
| - | 15 | 2240 | tdt.2_Missense_M   | NM_004519    | NP_004510    | O43525 | KCNQ3_HUMAN |                                   | 5  | TCCTCTTCTTCT  | 0.532 |
| + | 3  | 237  |                    | NM_003235    | NP_003226    | P01266 | THYG_HUMAN  | globulin type-1 1.                | 15 | AGAACGACGGC   | 0.637 |

|   |    |       |                    |              |              |        |             |     |              |       |                                |
|---|----|-------|--------------------|--------------|--------------|--------|-------------|-----|--------------|-------|--------------------------------|
| - | 13 | 2173  | M135B_uc003yva     | NM_015912    | NP_056996    | Q49AJ0 | F135B_HUMAN | 9   | AGAGTTCCTCTC | 0.527 |                                |
| - | 2  | 191   | slation_Start_Site | NM_015912    | NP_056996    | Q49AJ0 | F135B_HUMAN | 9   | TCAACCGTTCTC | 0.323 |                                |
| - | 2  | 565   |                    | NM_005293    | NP_005284    | Q99678 | GPR20_HUMAN | 1   | AGCGGCGGGAC  | 0.692 | lasmic (Potential).            |
| - | 2  | 227   |                    | NM_003695    | NP_003686    | Q14210 | LY6D_HUMAN  | 0   | ACCCACCTGTG  | 0.637 |                                |
| - | 7  | 1158  | p.R100Q CYP11B     | NM_000497    | NP_000488    | P15538 | C11B1_HUMAN | 3   | CCACTCGCTCC  | 0.602 |                                |
| - | 3  | 259   | p.G75S TSTA3_1     | NM_003313    | NP_003304    | Q13630 | FCL_HUMAN   | 1   | CAGGCCCCCCA  | 0.552 |                                |
| - | 32 | 11511 | e.1_Missense_Mu    | NM_201380    | NP_958782    | Q15149 | PLEC_HUMAN  | 9   | GCGGCGCACGT  | 0.607 | Globular 2.                    |
| + | 2  | 273   | GPR172A_uc003z     | NM_024531    | NP_078807    | Q9HAB3 | RFT3_HUMAN  | 0   | GGTCAAAGAGC  | 0.647 |                                |
| + | 7  | 2525  | gp.1_Missense_M    | NM_015158    | NP_055973    | Q14678 | KANK1_HUMAN | 4   | AAGTGCGGTCT  | 0.537 |                                |
| - | 28 | 3305  | p.F819L UBAP2_1    | NM_018449    | NP_060919    | Q5T6F2 | UBAP2_HUMAN | 3   | TGTAGGAATGGT | 0.652 |                                |
| + | 15 | 1923  | se_Mutation_p.R4E  | NM_021111    | NP_066934    | O95980 | RECK_HUMAN  | 3   | CTACCCGCCTT  | 0.473 |                                |
| + | 4  | 870   | se_Mutation_p.R2   | NM_032226    | NP_115602    | Q8N3Z6 | ZCHC7_HUMAN | 3   | CCCAGCGGTAC  | 0.368 |                                |
| + | 5  | 751   |                    | NM_015110    | NP_055925    | Q8IY18 | SMC5_HUMAN  | 3   | AAATATCACTGT | 0.368 | Potential.                     |
| - | 9  | 1337  | ic.1_Nonsense_Mt   | NM_017662    | NP_060132    | Q9BX84 | TRPM6_HUMAN | 8   | AATTTGAAAAAC | 0.383 | lasmic (Potential).            |
| + | 32 | 3653  | _Mutation_p.M113   | NM_033305    | NP_150648    | Q96RL7 | VP13A_HUMAN | 10  | TACATGGATGCA | 0.318 |                                |
| - | 4  | 1516  | p.R458* KIF27_u    | NM_017576    | NP_060046    | Q86VH2 | KIF27_HUMAN | 5   | TCCTCGAAATG  | 0.463 |                                |
| - | 9  | 2126  | ri.1_Missense_Mu   | NM_004560    | NP_004551    | Q01974 | ROR2_HUMAN  | 20  | ATCGGCGGCAT  | 0.567 | Potential) Protein kinase.     |
| + | 30 | 3090  |                    | NM_001855    | NP_001846    | P39059 | COFA1_HUMAN | 6   | CCGTCCGACCA  | 0.493 | ical region 6 (NC6).           |
| - | 2  | 131   | ibd.3_Missense_M   | NM_001127610 | NP_001121082 | Q14032 | BAAT_HUMAN  | 3   | CACAGGGGTAG  | 0.443 | rs147241373                    |
| - | 2  | 455   | uc004bbl.1_5'Flan  | NM_032342    | NP_115718    | Q9BRR3 | CI125_HUMAN | 0   | AAGTCGGTGAC  | 0.582 |                                |
| - | 1  | 909   |                    | NM_006686    | NP_006677    | Q9Y614 | ACL7B_HUMAN | 1   | GAGCTCGTAGT  | 0.632 |                                |
| - | 17 | 2405  | vc.1_Missense_Mt   | NM_003640    | NP_003631    | O95163 | ELP1_HUMAN  | 7   | AAAGCGACACC  | 0.408 |                                |
| - | 38 | 8148  | ty.2_Missense_Mt   | NM_153366    | NP_699197    | Q4LDE5 | SVEP1_HUMAN | 7   | GATGGAACCT   | 0.458 | Sushi 20.                      |
| - | 25 | 3708  | se_Mutation_p.W11  | NM_173521    | NP_775792    | Q5VXU9 | CI084_HUMAN | 2   | TCTTTCCAGTAC | 0.363 |                                |
| + | 2  | 319   | nuw.2_Missense_I   | NM_017688    | NP_060158    | Q5W0U4 | BSPRY_HUMAN | 1   | CGGACGTCCTG  | 0.458 |                                |
| + | 7  | 929   | hp.2_Missense_M    | NM_152786    | NP_689999    | Q8TAL5 | CI043_HUMAN | 0   | AACACGAGTAG  | 0.473 | rs148106673                    |
| + | 21 | 2967  | p.E259K RGS3_L     | NM_144488    | NP_652759    | P49796 | RGS3_HUMAN  | 3   | TGATCGAGACG  | 0.532 |                                |
| + | 6  | 2059  | 2_Intron COL27A1   | NM_032888    | NP_116277    | Q8IZC6 | CORA1_HUMAN | 4   | CCCACGATGGG  | 0.522 | Triple-helical region.         |
| - | 13 | 3143  | uc004bir.3_Miss    | NM_030767    | NP_110394    | Q7Z591 | AKNA_HUMAN  | 6   | TCTGCCGGAGA  | 0.602 |                                |
| - | 3  | 1794  | f.2_Missense_Mut   | NM_002160    | NP_002151    | P24821 | TENA_HUMAN  | 7   | GCGGCCGTGCT  | 0.587 | EGF-like 11.                   |
| - | 20 | 3522  | se_Mutation_p.R1   | NM_198187    | NP_937830    | O75129 | ASTN2_HUMAN | 9   | GCTTCGACCAG  | 0.512 | Potential) Fibronectin type-II |
| + | 1  | 888   |                    | NM_001005234 | NP_001005234 | Q8NH93 | OR1L3_HUMAN | 1   | GACATGAAACG  | 0.363 | lasmic (Potential).            |
| - | 7  | 1011  | nww.2_Missense_I   | NM_002721    | NP_002712    | O00743 | PPP6_HUMAN  | 2   | ACAACGATAGC  | 0.403 |                                |
| + | 10 | 1948  | p.S541L GAPVD1     | NM_015635    | NP_056450    | Q14C86 | GAPD1_HUMAN | 4   | GCTTCGGATGC  | 0.373 | rs139685989                    |
| + | 3  | 177   | se_Mutation_p.R3E  | NM_030914    | NP_112176    | Q9BTM9 | URM1_HUMAN  | 0   | CATCCGGAAC   | 0.527 |                                |
| + | 11 | 1034  | p.R249Q FUBP3_     | NM_003934    | NP_003925    | Q96I24 | FUBP3_HUMAN | 1   | GATCGGTGTC   | 0.532 | KH 3.                          |
| + | 4  | 529   | p.L140F C9orf9_L   | NM_018956    | NP_061829    | Q96E40 | CI009_HUMAN | 0   | TGAGCTCATC   | 0.617 | p.?(1)                         |
| + | 4  | 428   | se_Mutation_p.A1C  | NM_017586    | NP_060056    | Q9UGQ2 | FLOWR_HUMAN | 0   | GATGGCGGTCC  | 0.637 | ical; (Potential).             |
| + | 3  | 463   | cfc.1_Missense_M   | NM_002957    | NP_002948    | P19793 | RXRA_HUMAN  | 2   | ACCCCGTCAGC  | 0.627 | ating (By similarity).         |
| - | 12 | 1731  |                    | NM_181701    | NP_859052    | Q6ZRP7 | QSOX2_HUMAN | 1   | GTTGTCGCGGC  | 0.582 |                                |
| + | 5  | 459   | CA_uc010nbl.2_Mi   | NM_015160    | NP_055975    | Q10713 | MPPA_HUMAN  | 0   | GTATGCTGTGT  | 0.577 |                                |
| - | 4  | 3958  | w.2_Missense_Mu    | NM_014866    | NP_055681    | O15027 | SC16A_HUMAN | 0   | GGGCTCGGGAT  | 0.642 | oplasmic reticulum localizati  |
| - | 5  | 865   |                    | NM_017617    | NP_060087    | P46531 | NOTC1_HUMAN | 856 | TACGCGCCTGT  | 0.622 |                                |
| - | 1  | 490   | '_5'Flank NDOR1_   | NM_053045    | NP_444273    | Q969S6 | TM203_HUMAN | 0   | GACCGTAAGT   | 0.602 | ical; (Potential).             |
| + | 12 | 1571  | ies.1_Missense_M   | NM_014434    | NP_055249    | Q9UHB4 | NDOR1_HUMAN | 0   | CTGCCGTGGC   | 0.597 |                                |
| + | 4  | 569   | cmg.1_Missense_M   | NM_006088    | NP_006079    | P68371 | TBB2C_HUMAN | 1   | GATCCGGGAGG  | 0.597 |                                |
| - | 6  | 787   |                    | NM_138462    | NP_612471    | Q96E35 | ZMY19_HUMAN | 1   | GCAGGCCCCAC  | 0.607 | MYND-type.                     |

|   |    |           |                      |              |              |        |             |                              |    |                   |       |             |
|---|----|-----------|----------------------|--------------|--------------|--------|-------------|------------------------------|----|-------------------|-------|-------------|
| + | 4  | 1084      | 3P5_uc010ncq.2_3'UTR |              |              |        |             |                              | 0  | TTCCCCGACAAC      | 0.512 | rs147421666 |
| - | 13 | 1856      | Mutation_p.G506D     | NM_004192    | NP_004183    | O95671 | ASML_HUMAN  | ASMT-like.                   | 0  | TCCTTGCCCTTCA     | 0.642 |             |
| - | 7  | 8087      |                      | NM_015419    | NP_056234    | Q9NR99 | MXRA5_HUMAN | like C2-type 11.             | 8  | GGTTATGATACTC     | 0.632 |             |
| + | 3  | 182       |                      | NM_016562    | NP_057646    | Q9NYK1 | TLR7_HUMAN  |                              | 5  | CTTATCCTTTTTTA    | 0.353 |             |
| + | 7  | 919       | p.T196M GLRA2        | NM_001118885 | NP_001112357 | P23416 | GLRA2_HUMAN | cellular (Probable).         | 2  | GTACACGATGA       | 0.383 |             |
| - | 7  | 958       | B11_uc010nes.1_I     | NM_080873    | NP_543149    | Q8WXH4 | ASB11_HUMAN | SOCS box.                    | 3  | TAGGAGGAATC       | 0.493 | rs145057594 |
| + | 1  | 161       | 11mjr.1_Translator   | NM_000444    | NP_000435    | P78562 | PHEx_HUMAN  |                              | 3  | AACCACGAAAA       | 0.517 |             |
| + | 1  | 2193      |                      | NM_001013736 | NP_001013758 | Q5HY64 | FA47C_HUMAN |                              | 3  | ATCTCTGCCCGC      | 0.637 |             |
| - | 4  | 308       | p.R72C SSX3_uc       | NM_021014    | NP_066294    | Q99909 | SSX3_HUMAN  | RAB-related.                 | 0  | TATTACGCATGA      | 0.398 |             |
| - | 5  | 1038      | v.2_Missense_Mut     | NM_017602    | NP_060072    | Q96G74 | OTUD5_HUMAN | OTU.                         | 1  | TAAACGAATG        | 0.512 |             |
| - | 23 | 4030      | ion_p.R1099H KDI     | NM_004187    | NP_004178    | P41229 | KDM5C_HUMAN |                              | 18 | TGGTGCACGC        | 0.607 |             |
| - | 8  | 1292      |                      | NM_198510    | NP_940912    | Q6UXX5 | ITH5L_HUMAN | VWFA.                        | 6  | TATACCCTGTGG      | 0.592 |             |
| - | 13 | 1413      | p.R256W PFKFB1       | NM_002625    | NP_002616    | P16118 | F261_HUMAN  | -2,6-bisphosphatase.         | 1  | TCTCCGGTGTG       | 0.557 |             |
| + | 4  | 1379      | xe.2_Missense_Mt     | NM_004429    | NP_004420    | P98172 | EFNB1_HUMAN | cellular (Potential).        | 0  | TGGGGCTCCC        | 0.572 | rs149648624 |
| + | 16 | 1830      | ipl.1_Missense_Mt    | NM_017711    | NP_060181    | Q9HCC8 | GDPD2_HUMAN | asmic (Potential).           | 2  | AACAGCAGTG        | 0.537 |             |
| + | 37 | 5403      | p.R1735H MED12       | NM_005120    | NP_005111    | Q93074 | MED12_HUMAN | tion with CTNNB1 and GLI:    | 4  | GGCCCGCGCC        | 0.642 |             |
| + | 8  | 1294      | RN1_uc011mpt.1_I     | NM_052957    | NP_443189    | Q96QF7 | ACRC_HUMAN  | Asp/Ser-rich.                | 3  | AAGCTCCCGAC       | 0.557 |             |
| - | 1  | 1012      | mqj.1_Missense_M     | NM_021963    | NP_068798    | Q9ULW6 | NP1L2_HUMAN | u-rich (acidic).             | 1  | TCTCTCTCTCTCTCTCT | 0.323 |             |
| + | 21 | 4226      |                      | NM_000052    | NP_000043    | Q04656 | ATP7A_HUMAN | asmic (Potential).           | 0  | AGGATTCGGATA      | 0.343 |             |
| - | 2  | 4825      | n.2_Missense_Mut     | NM_032441    | NP_115817    | Q5H9K5 | ZMAT1_HUMAN |                              | 1  | TTCCTGTGCTT       | 0.383 |             |
| + | 5  | 4379      | R1193Q GPRASP        | NM_014710    | NP_055525    | Q5JY77 | GASP1_HUMAN | PRD1-binding.                | 2  | TATTCCGAGATTC     | 0.368 |             |
| + | 13 | 2484      | mqj.3_Missense_M     | NM_018015    | NP_060485    | Q6NSI4 | CX057_HUMAN |                              | 3  | ATATTCGAACATC     | 0.398 |             |
| - | 23 | 1989      | nsn.1_Missense_M     | NM_001847    | NP_001838    | Q14031 | CO4A6_HUMAN | le-helical region.           | 8  | CACGGGGTCCA       | 0.547 |             |
| - | 22 | 1731      | nsn.1_Missense_M     | NM_001847    | NP_001838    | Q14031 | CO4A6_HUMAN | le-helical region.           | 8  | TTCTTTCTTTGC      | 0.512 |             |
| - | 8  | 2020_2021 | Y2F_uc011msq.1_      | NM_001522    | NP_001513    | P51841 | GUC2F_HUMAN | cytoplasmic (Potential).     | 8  | GGTCTCCAAAAT      | 0.376 |             |
| - | 8  | 2011      | Y2F_uc011msq.1_      | NM_001522    | NP_001513    | P51841 | GUC2F_HUMAN | cytoplasmic (Potential).     | 8  | TCTCCAAGGG        | 0.373 |             |
| + | 2  | 665       | MEM164_uc010np       | NM_032227    | NP_115603    | Q5U3C3 | TM164_HUMAN | ical; (Potential).           | 3  | TAGACCGTCATC      | 0.522 |             |
| + | 3  | 464       |                      | NM_001004308 | NP_001004308 | Q6ZR62 | ZCH16_HUMAN |                              | 1  | AATCATCATCTAC     | 0.468 |             |
| - | 1  | 390       |                      | NM_001145718 | NP_001139190 | P0C2W7 | CT47B_HUMAN |                              | 0  | TGGCACCATGTC      | 0.751 |             |
| - | 1  | 387       |                      | NM_001145718 | NP_001139190 | P0C2W7 | CT47B_HUMAN |                              | 0  | TACCATGTCGCT      | 0.741 |             |
| + | 7  | 701       | ur.2_Missense_Mu     | NM_000276    | NP_000267    | Q01968 | OCRL_HUMAN  |                              | 4  | TCCCACCTCCAC      | 0.348 |             |
| + | 15 | 1750      | ur.2_Missense_Mu     | NM_000276    | NP_000267    | Q01968 | OCRL_HUMAN  |                              | 4  | TTAGCGCCCTC       | 0.393 |             |
| + | 9  | 4480      | avc.1_Missense_M     | NM_021946    | NP_068765    | Q5H9F3 | BCORL_HUMAN | ANK 1.                       | 7  | TATGCTGGCTAC      | 0.567 |             |
| - | 1  | 427       |                      | NM_016521    | NP_057605    | Q5H9I0 | TFDP3_HUMAN | Potential.                   | 1  | AAAGACGGCAC       | 0.582 |             |
| + | 2  | 586       | R61C FAM122C_t       | NM_138819    | NP_620174    | Q6P4D5 | F222C_HUMAN |                              | 0  | TTCGACGCTCT       | 0.303 |             |
| + | 1  | 1527      |                      | NM_003413    | NP_003404    | O60481 | ZIC3_HUMAN  | Nuclear localization signal. | 3  | TGCCCGTTCTG       | 0.582 |             |
| + | 17 | 2020      | p.R565C FMR1_uc      | NM_002024    | NP_002015    | Q06787 | FMR1_HUMAN  | tion with RANBP9.            | 3  | TAAATCGTAAC       | 0.433 |             |
| + | 21 | 4345      | p.1_Missense_Mut     | NM_002025    | NP_002016    | P51816 | AFF2_HUMAN  |                              | 5  | TACAGCATGA        | 0.498 |             |
| - | 4  | 724       | se_Mutation_p.R7?    | NM_032508    | NP_115897    | Q8NFB2 | T185A_HUMAN |                              | 1  | TGTGACCTGTCA      | 0.328 |             |
| + | 3  | 1731      | p.P527L MAMLD1       | NM_005491    | NP_005482    | Q13495 | MAMD1_HUMAN |                              | 0  | TGAGCCGGGTC       | 0.592 |             |
| + | 2  | 944       | 3_5'Flank PNMA3_     | NM_013364    | NP_037496    | Q9UL41 | PNMA3_HUMAN |                              | 3  | Taaagaggcgaggctg  | 0     |             |
| - | 16 | 3170      |                      | NM_005334    | NP_005325    | P51610 | HCFC1_HUMAN | TB17; Interaction with GAE   | 2  | TGGTGTGACA        | 0.652 |             |
| - | 18 | 2317      | vkz.1_Missense_M     | NM_001080484 | NP_001073953 | Q9C0B2 | K1751_HUMAN |                              | 1  | TCTCTCTCTCTCT     | 0.697 |             |
| + | 22 | 4128      | .CH2_uc001ajj.1_3    | NM_014638    | NP_055453    | O75038 | PLCH2_HUMAN |                              | 5  | GGGAGGGACAC       | 0.667 |             |
| - | 11 | 1360      |                      | NM_006610    | NP_006601    | O00187 | MASP2_HUMAN | eptidase S1.                 | 4  | TCCCTCCATATAT     | 0.448 |             |
| + | 13 | 1557      | TNFRSF8_uc001e       | NM_001243    | NP_001234    | P28908 | TNR8_HUMAN  |                              | 5  | TCAACGGTAAGT      | 0.577 |             |
| + | 50 | 10145     | p.T3310M VPS13D      | NM_015378    | NP_056193    | Q5THJ4 | VP13D_HUMAN |                              | 5  | TCTGCACGATGA      | 0.483 |             |



|   |    |         |                   |              |              |        |              |                               |    |               |       |             |
|---|----|---------|-------------------|--------------|--------------|--------|--------------|-------------------------------|----|---------------|-------|-------------|
| + | 3  | 1466    |                   | NM_001080830 | NP_001074299 | O95522 | PRA12_HUMAN  |                               | 3  | 3TCAGGGTGGAT  | 0.498 |             |
| + | 4  | 1385    |                   | NM_023013    | NP_075389    | O95521 | PRAM1_HUMAN  |                               | 0  | ATTGGGAGATC   | 0.572 |             |
| + | 3  | 350_351 |                   | NM_001013641 | NP_001013663 | A0PJX8 | TMM82_HUMAN  | Leu-rich.                     | 2  | GCCTCCCTGG#   | 0.678 |             |
| - | 2  | 412     | I_5'Flank ARHGEF  | NM_153213    | NP_694945    | Q8IW93 | ARHGJ_HUMAN  |                               | 3  | ATCCCCCGCTG   | 0.682 |             |
| + | 7  | 1452    | av.1_Missense_Mi  | NM_032880    | NP_116269    | Q96ID5 | IGS21_HUMAN  | Ig-like 2.                    | 4  | TAGGGGACACA   | 0.582 |             |
| + | 1  | 65      | 3S CNKSR1_uc0l    | NM_006314    | NP_006305    | Q969H4 | CNKR1_HUMAN  |                               | 2  | TGGAACCGGTA   | 0.637 |             |
| - | 11 | 1662    | p.E506Q FGR_uc0   | NM_005248    | NP_005239    | P09769 | FGR_HUMAN    | rotein kinase.                | 2  | TACTCGAAGG    | 0.627 |             |
| - | 5  | 514     | _p.V126L NKAIN1   | NM_024522    | NP_078798    | Q4KMZ8 | NKAI1_HUMAN  | lasmic (Potential).           | 1  | TAAACACTTTGC  | 0.627 |             |
| + | 7  | 1170    | DC_uc001bww.2_n   | NM_052998    | NP_443724    | Q96A70 | ADC_HUMAN    |                               | 2  | TGGGTGTGAGG   | 0.557 |             |
| - | 3  | 576     | bw.3_Missense_M   | NM_001099439 | NP_001092909 | Q5JZY3 | EPHAA_HUMAN  | ellular (Potential).          | 8  | TTCGCCCTGCG   | 0.687 |             |
| + | 5  | 785     |                   | NM_005857    | NP_005848    | O75844 | FACE1_HUMAN  |                               | 0  | AAATTGGGGGTG  | 0.348 |             |
| - | 6  | 691     | g.2_Nonsense_M    | NM_014947    | NP_055762    | Q9UPW0 | FOXJ3_HUMAN  | Fork-head.                    | 2  | TATGTCGTATGG  | 0.313 |             |
| + | 4  | 528     | in.2_Intron CCDC3 | NM_001080850 | NP_001074319 | Q5VVM6 | CCD30_HUMAN  |                               | 0  | CAGAGGAAGCTC  | 0.299 |             |
| + | 7  | 1135    |                   | NM_004559    | NP_004550    | P67809 | YBOX1_HUMAN  |                               | 5  | AGGGCGGGGCT   | 0.542 |             |
| - | 5  | 737     | 9_uc009vxd.2_Rf   | NM_201649    | NP_964012    | P48067 | SC6A9_HUMAN  |                               | 0  | CATAGCCCACTC  | 0.478 |             |
| + | 10 | 1348    | ym.2_Missense_M   | NM_000779    | NP_000770    | P13584 | CP4B1_HUMAN  |                               | 2  | CCGACCTGAG    | 0.582 |             |
| - | 4  | 1208    | L1_uc001cay.2_n   | NM_003189    | NP_003180    | P17542 | TAL1_HUMAN   | -loop-helix motif.            | 1  | CTTGCGGAGCTG  | 0.567 |             |
| - | 5  | 498     | ont.1_Missense_N  | NM_002370    | NP_002361    | P61326 | MGN_HUMAN    |                               | 0  | ATCCAATAAGAC  | 0.378 |             |
| - | 5  | 1627    |                   | NM_147193    | NP_671726    | Q8NBF1 | GLIS1_HUMAN  | localization signal (Potentic | 1  | CTTACGCACCTC  | 0.637 | rs59283679  |
| - | 2  | 558     |                   | NM_152268    | NP_689481    | Q7L3T8 | SYPM_HUMAN   |                               | 2  | TTCCTCGTGAG   | 0.522 |             |
| - | 11 | 1844    | 73_uc001dgi.3_Mi  | NM_001002912 | NP_001002912 | Q5RHP9 | CA173_HUMAN  | Glu-rich.                     | 5  | TCTCTTTTTCAG  | 0.403 |             |
| - | 10 | 1690    | 73_uc001dgi.3_Mi  | NM_001002912 | NP_001002912 | Q5RHP9 | CA173_HUMAN  | Glu-rich.                     | 5  | TATTTTCTGGTC  | 0.358 |             |
| - | 27 | 4218    |                   | NM_000350    | NP_000341    | P78363 | ABCA4_HUMAN  | Cytoplasmic.                  | 12 | TGAAGTCCTTGT  | 0.607 |             |
| - | 1  | 96      | FM3_uc001dui.2_I  | NM_058170    | NP_477518    | Q96PB7 | NOE3_HUMAN   |                               | 3  | AGCGCCAAGCT   | 0.547 |             |
| - | 40 | 3380    | 3.G1033E COL11A   | NM_001854    | NP_001845    | P12107 | COBA1_HUMAN  | le-helical region.            | 12 | TCTGGTCCATCT  | 0.378 |             |
| + | 7  | 4763    |                   | NM_001408    | NP_001399    | Q9HCU4 | CELR2_HUMAN  | potential). Laminin G-like 1. | 8  | TGCACCGTGCCT  | 0.627 | rs144272839 |
| - | 8  | 1324    | adm.2_Missense_N  | NM_006608    | NP_006599    | Q9UMS5 | PHTF1_HUMAN  |                               | 1  | CTCCTACGCAAT  | 0.413 |             |
| + | 8  | 1832    | vhg.1_Missense_N  | NM_006699    | NP_006690    | O60476 | MA1A2_HUMAN  | renal (Potential).            | 0  | TGGATCGTCCA   | 0.333 |             |
| + | 9  | 994     | uc010oyd.1_Intron | NM_001037675 | NP_001032764 | Q3BBV1 | NBPFK_HUMAN  |                               | 0  | TCAATTGAGAAA  | 0.468 |             |
| + | 2  | 231     | 1_Intron NBPF10   | NM_001039703 | NP_001034792 | A6NDV3 | A6NDV3_HUMAN |                               | 0  | AAAGACCTCATA  | 0.527 |             |
| + | 78 | 9695    | 3PF10_uc010oyl.1  | NM_001039703 | NP_001034792 | A6NDV3 | A6NDV3_HUMAN |                               | 0  | TAAAGAGCCTGA  | 0.473 |             |
| + | 2  | 302     |                   | NM_016074    | NP_057158    | Q9Y3E2 | BOLA1_HUMAN  |                               | 1  | CGGTCCCGCCT   | 0.677 |             |
| - | 3  | 5923    |                   | NM_002016    | NP_002007    | P20930 | FILA_HUMAN   | Ser-rich.                     | 16 | TCTGTCTTCGT   | 0.567 |             |
| - | 3  | 4937    | R1486H ASH1L_u    | NM_018489    | NP_060959    | Q9NR48 | ASH1L_HUMAN  |                               | 11 | TGTGACGGTGC   | 0.502 |             |
| + | 15 | 1966    | p.G336E NTRK1_u   | NM_002529    | NP_002520    | P04629 | NTRK1_HUMAN  | Potential). Protein kinase.   | 17 | TGCGGGGATGG   | 0.642 |             |
| + | 11 | 1749    | 1fyg.2_5'Flank PP | NM_001014443 | NP_001014443 | Q9UK80 | UBP21_HUMAN  |                               | 5  | TCTCGAATCCTCC | 0.398 |             |
| + | 10 | 1364    | g.2_Missense_Mu   | NM_001014796 | NP_001014796 | Q16832 | DDR2_HUMAN   | ellular (Potential).          | 6  | TTTTAAAGGAGG  | 0.507 |             |
| + | 2  | 915     | 0794_uc001gdd.2   | NM_001005214 | NP_001005214 | Q8N7C0 | LR52_HUMAN   | lasmic (Potential).           | 1  | AGGACGAGGCC   | 0.572 |             |
| + | 8  | 1827    | N_uc010pmx.1_Inl  | NM_022093    | NP_071376    | Q9UQP3 | TENN_HUMAN   | nectin type-III 4.            | 9  | TACCAAGAGACC  | 0.602 |             |
| + | 38 | 5408    | 1gox.1_Nonsense_  | NM_000721    | NP_000712    | Q15878 | CAC1E_HUMAN  | Cytoplasmic (Potential).      | 6  | TCTCTGGGCAC   | 0.602 |             |
| + | 16 | 3105    |                   | NM_002293    | NP_002284    | P11047 | LAMC1_HUMAN  | inin EGF-like 10.             | 5  | TACATCCGACCC  | 0.532 |             |
| - | 4  | 341     |                   | NM_014176    | NP_054895    | Q9NPD8 | UBE2T_HUMAN  |                               | 0  | TAAATCGGATCT  | 0.343 | rs149154798 |
| - | 16 | 2551    | HA6_uc009xau.1    | NM_014935    | NP_055750    | Q9Y2H5 | PKHA6_HUMAN  |                               | 4  | TCTGGGGGTG    | 0.517 |             |
| - | 29 | 5946    | IA2_uc001hgy.2_5  | NM_025179    | NP_079455    | O75051 | PLXA2_HUMAN  | lasmic (Potential).           | 3  | TGCATGGATGCT  | 0.572 |             |
| + | 12 | 2449    |                   | NM_016343    | NP_057427    | P49454 | CENPF_HUMAN  | Potential.                    | 13 | TATGCCGAATATC | 0.428 |             |
| + | 11 | 1282    | ub.1_Missense_M   | NM_016121    | NP_057205    | Q9Y597 | KCTD3_HUMAN  | WD 3.                         | 3  | TCTCTGCTGGAT  | 0.308 |             |
| + | 8  | 831     | ATA17_uc001hli.2  | NM_138796    | NP_620151    | Q96L03 | SPT17_HUMAN  |                               | 1  | TCAATCGATGAG  | 0.468 |             |

|   |    |           |                                                   |              |              |        |              |   |               |       |             |
|---|----|-----------|---------------------------------------------------|--------------|--------------|--------|--------------|---|---------------|-------|-------------|
| - | 5  | 704       | o.R172Q TAF1A_u                                   | NM_139352    | NP_647603    | Q15573 | TAF1A_HUMAN  | 0 | TTTCCCGGAAC   | 0.383 | rs145721552 |
| - | 2  | 1211      | _p.L235F AGT_uc                                   | NM_000029    | NP_000020    | P01019 | ANGT_HUMAN   | 0 | TGGGAGGACCA   | 0.592 |             |
| - | 5  | 1565      | u.2_RNA PCNXL2                                    | NM_014801    | NP_055616    | A6NKB5 | PCX2_HUMAN   | 2 | ACAGGGAACAC   | 0.577 |             |
| + | 1  | 538       | L13_uc001ids.2_li                                 | NM_001001963 | NP_001001963 | Q8NGY9 | OR2L8_HUMAN  | 2 | GTGATGTCCCA   | 0.473 |             |
| + | 1  | 905       | L13_uc001ids.2_li                                 | NM_001001963 | NP_001001963 | Q8NGY9 | OR2L8_HUMAN  | 2 | GACACGAGTGA   | 0.473 |             |
| + | 1  | 28        | L13_uc001ids.2_li                                 | NM_001004491 | NP_001004491 | Q8NG84 | O2AK2_HUMAN  | 2 | CCTTTGATATTT  | 0.189 |             |
| + | 1  | 120       |                                                   | NM_001004690 | NP_001004690 | A3KFT3 | OR2M5_HUMAN  | 3 | TTTCATGGGAAA  | 0.522 |             |
| + | 1  | 571       |                                                   | NM_017504    | NP_059974    | Q96R27 | OR2M4_HUMAN  | 2 | GCACAGAAACA   | 0.408 |             |
| - | 1  | 47        |                                                   | NM_001004692 | NP_001004692 | Q8NG77 | O2T12_HUMAN  | 3 | GGTTAAAGAGT   | 0.448 |             |
| - | 5  | 667       | ion_p.R167K ZNF                                   | NM_017865    | NP_060335    | Q9BU19 | ZN692_HUMAN  | 0 | GAGTCCTCTCA   | 0.507 |             |
| - | 7  | 736       | TRM1_uc001igu.1_Missense_Mutation_p.T259M PITRI   |              |              | E7ES23 | E7ES23_HUMAN | 1 | CGTACGTGAAG   | 0.393 |             |
| + | 7  | 2716      |                                                   | NM_031923    | NP_114129    | Q5VWG9 | TAF3_HUMAN   | 1 | AGATGCAGTGG   | 0.507 |             |
| + | 6  | 1671      | ie_Mutation_p.A27                                 | NM_019590    | NP_062536    | Q5T5P2 | SKT_HUMAN    | 7 | CATTGCATATCA  | 0.507 |             |
| + | 5  | 581       | ivu.3_Missense_M                                  | NM_030751    | NP_110378    | P37275 | ZEB1_HUMAN   | 5 | CCTGTCCATATTC | 0.318 |             |
| + | 18 | 2515      | ij.1_Missense_Mu                                  | NM_001080512 | NP_001073981 | Q9H694 | BICC1_HUMAN  | 4 | CCTAAGCGTAAA  | 0.433 |             |
| + | 12 | 2244      | PN_uc009xpt.2_n                                   | NM_032578    | NP_115967    | Q86TC9 | MYPN_HUMAN   | 5 | CCTAAGGAGTTTC | 0.453 |             |
| + | 1  | 100       | qnu.1_Missense_M                                  | NM_181745    | NP_859529    | Q5NUL3 | O3FA1_HUMAN  | 0 | CCTGCGCAGCC   | 0.701 |             |
| - | 13 | 1484      | rh.1_Missense_Mu                                  | NM_003061    | NP_003052    | O75093 | SLIT1_HUMAN  | 4 | ACAGGAGAGC    | 0.587 |             |
| - | 16 | 2001      | RP12_uc010qou.1                                   | NM_015179    | NP_055994    | Q5JTH9 | RRP12_HUMAN  | 3 | TTACCTGCCACT  | 0.592 |             |
| - | 18 | 1868      | ae_Mutation_p.Q38                                 | NM_022362    | NP_071757    | Q96T76 | MMS19_HUMAN  | 0 | AGCATTGGGTG   | 0.527 |             |
| - | 4  | 688       | sn.2_Missense_Mt                                  | NM_024895    | NP_079171    | Q9H5P4 | PDZD7_HUMAN  | 3 | GCAGCGGCTG    | 0.627 |             |
| - | 4  | 773       | _p.L255F SORCS1                                   | NM_052918    | NP_443150    | Q8WY21 | SORC1_HUMAN  | 2 | GATCAATAAACTC | 0.388 |             |
| + | 12 | 1186      | _p.P405S ACSL5_                                   | NM_203379    | NP_976313    | Q9ULC5 | ACSL5_HUMAN  | 3 | TGTTTCCCGCGC  | 0.507 |             |
| - | 19 | 3422_3423 | p.M1059L EIF3A_u                                  | NM_003750    | NP_003741    | Q14152 | EIF3A_HUMAN  | 0 | ATCCATGCCTCG  | 0.629 |             |
| + | 6  | 1247      |                                                   | NM_002775    | NP_002766    | Q92743 | HTRA1_HUMAN  | 0 | GCCAAAGGTAG   | 0.537 |             |
| - | 1  | 332       |                                                   | NM_152311    | NP_689524    | Q8NCR9 | CLRN3_HUMAN  | 1 | CCCACGAAAAA   | 0.383 |             |
| + | 5  | 609       |                                                   | NM_002412    | NP_002403    | P16455 | MGMT_HUMAN   | 2 | TGGCCGTGAAG   | 0.667 |             |
| - | 4  | 734       | oc.1_Nonsense_Mi                                  | NM_173575    | NP_775846    | Q86UX6 | ST32C_HUMAN  | 5 | CATCTCGCAGAT  | 0.632 |             |
| + | 3  | 578       |                                                   | NM_007183    | NP_009114    | Q9Y446 | PKP3_HUMAN   | 1 | AGCGCGGTGGG   | 0.716 |             |
| - | 2  | 230       | SD_uc009yda.1_F                                   | NM_001909    | NP_001900    | P07339 | CATD_HUMAN   | 0 | CCGGCGGATGG   | 0.617 |             |
| + | 2  | 1063      |                                                   | NM_152430    | NP_689643    | Q8TCB6 | O51E1_HUMAN  | 4 | ATCCTTCGACTT  | 0.463 |             |
| - | 1  | 368       |                                                   | NM_001005177 | NP_001005177 | Q8NGF1 | O52R1_HUMAN  | 1 | ATATTTCCAACAA | 0.522 |             |
| - | 1  | 77        |                                                   | NM_000518    | NP_000509    | P68871 | HBB_HUMAN    | 1 | GACAGATTCTC   | 0.507 | rs35198910  |
| + | 1  | 712       | _uc001mam.1_Int                                   | NM_001004757 | NP_001004757 | Q8NH59 | O51Q1_HUMAN  | 1 | GACTCCGTGCC   | 0.488 |             |
| + | 2  | 664       | fd.2_RNA SYT9_u                                   | NM_175733    | NP_783860    | Q86SS6 | SYT9_HUMAN   | 3 | AGACGGGGATC   | 0.602 |             |
| - | 2  | 806       |                                                   | NM_198516    | NP_940918    | Q6P9A2 | GLTL4_HUMAN  | 0 | CAGGCGGTCCG   | 0.657 |             |
| + | 18 | 2012      | NTL_uc001mkt.2_                                   | NM_001178    | NP_001169    | O00327 | BMAL1_HUMAN  | 0 | TTCTCCAGGAG   | 0.498 |             |
| - | 9  | 1410      | _p.R295W PTPN5                                    | NM_006906    | NP_008837    | P54829 | PTN5_HUMAN   | 2 | GTACCGGTTCTI  | 0.577 |             |
| - | 5  | 610       |                                                   | NM_003476    | NP_003467    | P50461 | CSRP3_HUMAN  | 0 | AAGTTCCCATC   | 0.478 |             |
| - | 12 | 2669      | F8_uc001mpn.3_n                                   | NM_024680    | NP_078956    | A0AVK6 | E2F8_HUMAN   | 1 | GAGCCGGGCTG   | 0.527 |             |
| - | 10 | 1893      | F8_uc001mpn.3_n                                   | NM_024680    | NP_078956    | A0AVK6 | E2F8_HUMAN   | 1 | ACTTTCTGTCTC  | 0.473 |             |
| - | 2  | 361       | kd.1_Missense_Mt                                  | NM_198381    | NP_938195    | Q9UKW6 | ELF5_HUMAN   | 1 | AGGCAGGGTAG   | 0.552 |             |
| + | 2  | 376       | -CNTF_uc010rkm.                                   | NM_000614    | NP_000605    | P26441 | CNTF_HUMAN   | 1 | ATTTTACCCCAAC | 0.483 |             |
| + | 4  | 379       | 1nni.1_Missense_Mutation_p.M1I GLYATL1_uc001nnj.1 |              |              | Q969I3 | GLYL1_HUMAN  | 1 | CAGAATGATCT/  | 0.433 |             |
| - | 6  | 942       | om.2_Missense_M                                   | NM_004254    | NP_004245    | Q8TCC7 | S22A8_HUMAN  | 3 | TCGAGGACTTT   | 0.572 |             |
| + | 3  | 824       | N3_uc001npx.2_lr                                  | NM_201428    | NP_958831    | O95197 | RTN3_HUMAN   | 1 | CAGAAACCACT   | 0.408 |             |
| + | 8  | 1042      | cj.2_Missense_Mu                                  | NM_013306    | NP_037438    | Q9NRS6 | SNX15_HUMAN  | 1 | GACCCGACCCT   | 0.622 |             |

|   |    |       |                     |              |              |        |             |                              |     |               |       |
|---|----|-------|---------------------|--------------|--------------|--------|-------------|------------------------------|-----|---------------|-------|
| - | 6  | 1225  | lodr.1_Missense_M   | NM_001077241 | NP_001070709 | Q8N413 | S2545_HUMAN | ε=6; (Potential).            | 0   | AGGCGCGGGCA   | 0.617 |
| - | 6  | 1325  | p.Q93E RIN1_uc0     | NM_004292    | NP_004283    | Q13671 | RIN1_HUMAN  | 1-3 protein binding region.  | 3   | GCCCTGCAGCT   | 0.711 |
| + | 11 | 1045  | εe_Mutation_p.L47   | NM_018161    | NP_060631    | Q6IA69 | NADE_HUMAN  |                              | 2   | TTTGCCCTCTCG  | 0.597 |
| + | 11 | 4247  |                     | NM_014786    | NP_055601    | Q96PE2 | ARHG_HUMAN  |                              | 0   | ACTGCGGGACC   | 0.657 |
| - | 6  | 1328  | εg.2_Missense_Mt    | NM_080491    | NP_536739    | Q9UQC2 | GAB2_HUMAN  |                              | 6   | TGTCCGATCGG   | 0.478 |
| + | 4  | 546   | p.N146S NAALAD.     | NM_005467    | NP_005458    | Q9Y3Q0 | NALD2_HUMAN | cellular (Potential).        | 2   | TTACAAATATTGT | 0.328 |
| + | 4  | 566   | p.A153S NAALAD.     | NM_005467    | NP_005458    | Q9Y3Q0 | NALD2_HUMAN | cellular (Potential).        | 2   | TATAATGCTTTCT | 0.348 |
| - | 5  | 787   | εy.vz.2_Missense_I  | NM_012124    | NP_036256    | Q9UHD1 | CHRD1_HUMAN | AA1 and HSP90AB1 (By si      | 0   | GTTTTAGGGAGC  | 0.279 |
| + | 9  | 4996  |                     | NM_001008781 | NP_001008781 | Q8TDW7 | FAT3_HUMAN  | Extracellular (Potential).   | 5   | CCATTTCCGTCAC | 0.438 |
| - | 1  | 684   | p.D147E CCDC82      | NM_024725    | NP_079001    | Q8N4S0 | CCD82_HUMAN |                              | 1   | CTGATCATCCTC  | 0.318 |
| - | 1  | 918   | vw.1_RNA PGR_u      | NM_000926    | NP_000917    | P06401 | PRGR_HUMAN  | ulating, Pro-Rich.           | 4   | GGAAGAGTAGCC  | 0.647 |
| - | 8  | 1312  |                     | NM_178127    | NP_835228    | Q86XS5 | ANGL5_HUMAN | rogen C-terminal.            | 1   | AACTGGTATTTT  | 0.274 |
| + | 10 | 1620  | w.2_Missense_Mu     | NM_000829    | NP_000820    | P48058 | GRIA4_HUMAN | cellular (Potential).        | 8   | FGGAATGATATGC | 0.358 |
| - | 3  | 340   | ε5D_uc001ppd.2_ε    | NM_001077639 | NP_001071107 | Q6UWF7 | FA55D_HUMAN |                              | 4   | GGGAATAAGGAC  | 0.398 |
| - | 2  | 236   | ε1prt.1_5'UTR TMF   | NM_001077263 | NP_001070731 | Q9BYE2 | TMPSD_HUMAN | toplasmic (Potential).       | 1   | TGTGCCAGCT    | 0.677 |
| + | 4  | 794   | εj.2_RNA FOXR1_L    | NM_181721    | NP_859072    | Q6PIV2 | FOXR1_HUMAN | Fork-head.                   | 1   | CAGTTCCCCCTC  | 0.632 |
| - | 4  | 383   | qhi.2_Missense_IV   | NM_001037305 | NP_001032382 | Q9P016 | THYN1_HUMAN |                              | 0   | TAGTTACGAACA  | 0.488 |
| + | 6  | 908   | εp.R183Q GLB1L      | NM_001080407 | NP_001073876 | Q8NCI6 | GLBL3_HUMAN |                              | 1   | CCCCCGTTAC    | 0.567 |
| - | 19 | 3040  | εp.R893* KDM5A      | NM_001042603 | NP_001036068 | P29375 | KDM5A_HUMAN |                              | 3   | GCAGTCGTGGTA  | 0.468 |
| - | 12 | 2041  | εp.R619Q CHD4_u     | NM_001273    | NP_001264    | Q14839 | CHD4_HUMAN  | Chromo 2.                    | 2   | GGATTCGGTGG   | 0.507 |
| + | 12 | 1600  |                     | NM_001080454 | NP_001073923 | P0C7M7 | ACSM4_HUMAN |                              | 0   | TTAACTCTTGAA  | 0.368 |
| + | 2  | 294   | MKLB_uc010sgl.1     | NM_020734    | NP_065785    | Q9ULI2 | RIMKB_HUMAN |                              | 0   | CAGATCGTCGC   | 0.453 |
| - | 31 | 4204  | εs.S406F A2M_uc0    | NM_000014    | NP_000005    | P01023 | A2MG_HUMAN  |                              | 5   | TTAGGGGAGATT  | 0.448 |
| + | 5  | 884   | ε/6_uc001raa.1_5'L  | NM_001987    | NP_001978    | P41212 | ETV6_HUMAN  |                              | 250 | GGTCCCCCCTG   | 0.632 |
| - | 1  | 718   |                     | NM_018654    | NP_061124    | Q9NZD1 | GPC5D_HUMAN | Name=7; (Potential).         | 0   | GACCGGTCGT    | 0.557 |
| - | 13 | 4539  |                     | NM_000834    | NP_000825    | Q13224 | NMDE2_HUMAN | lasmic (Potential).          | 12  | ACAGGGGTTGG   | 0.532 |
| - | 9  | 1231  |                     | NM_004963    | NP_004954    | P25092 | GUC2C_HUMAN | cellular (Potential).        | 6   | CTGGACCGTCA   | 0.448 |
| + | 25 | 3607  | εrcy.1_Missense_M   | NM_030667    | NP_109592    | Q16827 | PTPRO_HUMAN | al). Tyrosine-protein phosph | 9   | ACAGGAACATTC  | 0.443 |
| - | 8  | 1412  |                     | NM_021957    | NP_068776    | P54840 | GSY2_HUMAN  |                              | 2   | GTTTTCGCACT   | 0.383 |
| + | 2  | 215   | εiSF8_uc009zjd.1_   | NM_007211    | NP_009142    | Q8NHQ8 | RASF8_HUMAN |                              | 0   | GGCCGGTGAC    | 0.502 |
| - | 8  | 2299  |                     | NM_005164    | NP_005155    | Q9UBJ2 | ABCD2_HUMAN | 3C transporter.              | 6   | ACTTATGATAAAA | 0.368 |
| + | 22 | 2970  | εε_Mutation_p.R57ε  | NM_198578    | NP_940980    | Q5S007 | LRRK2_HUMAN |                              | 24  | GAAAAAGAAAAA  | 0.289 |
| - | 4  | 646   | p.A120V PRICKLE     | NM_001144881 | NP_001138353 | Q96MT3 | PRIC1_HUMAN | PET.                         | 4   | TGACTGCTCTGC  | 0.522 |
| + | 13 | 1648  | εe_Mutation_p.L6F   | NM_152641    | NP_689854    | Q68CP9 | ARID2_HUMAN | type winged-helix.           | 10  | AAATACCTCTCG  | 0.333 |
| + | 15 | 4460  | εp.P943L ARID2_u    | NM_152641    | NP_689854    | Q68CP9 | ARID2_HUMAN |                              | 10  | AGTTCCCGACT   | 0.458 |
| - | 1  | 1180  | εp.A174T ADCY6_     | NM_015270    | NP_056085    | Q43306 | ADCY6_HUMAN |                              | 0   | GCGGCGGGTG    | 0.652 |
| - | 2  | 490   | ε_uc001rtj.1_5'Flan | NM_018113    | NP_060583    | Q6UX01 | LMBRL_HUMAN | l). Cytoplasmic (Potential). | 1   | GGTGAACTCAG   | 0.522 |
| - | 2  | 1327  |                     | NM_001008223 | NP_001008224 | Q86Z23 | C1QL4_HUMAN | C1q.                         | 0   | GCCCACGTCCA   | 0.602 |
| - | 10 | 1010  | εi.2_Missense_Mut   | NM_016293    | NP_057377    | Q9UBW5 | BIN2_HUMAN  | Potential.                   | 1   | CTATTCCTCCTC  | 0.532 |
| + | 27 | 5980  | εuc001rzb.1_5'Flanl | NM_014191    | NP_055006    | Q9UQD0 | SCN8A_HUMAN |                              | 7   | GAGAAAAAGA    | 0.522 |
| - | 9  | 1654  |                     | NM_033045    | NP_149034    | Q9NSB2 | KRT84_HUMAN | Tail.                        | 1   | GGCTCCACCCA   | 0.706 |
| - | 4  | 836   |                     | NM_033448    | NP_258259    | Q3SY84 | K2C71_HUMAN | Coil 1B. Rod.                | 2   | GATTCCACCTI   | 0.527 |
| - | 2  | 208   | εp.R22W CALCO       | NM_020898    | NP_065949    | Q9P1Z2 | CACO1_HUMAN | εrminal AD (CTNNB1 bindir    | 1   | GGTCCGGGCTA   | 0.527 |
| + | 50 | 8607  |                     | NM_002332    | NP_002323    | Q07954 | LRP1_HUMAN  | εA 15. Extracellular (Potent | 22  | CTGGACGTGTG   | 0.622 |
| + | 88 | 13934 |                     | NM_002332    | NP_002323    | Q07954 | LRP1_HUMAN  | Interaction with MAFB (By :  | 22  | TGGACGTGAC    | 0.602 |
| + | 18 | 2924  |                     | NM_013381    | NP_037513    | Q9UKU6 | TRHDE_HUMAN | cellular (Potential).        | 3   | TGGTGTACAG    | 0.269 |
| - | 6  | 639   |                     | NM_001321    | NP_001312    | Q16527 | CSRP2_HUMAN | Gly-rich.                    | 1   | CCCTGCTCCTT   | 0.433 |

rs141905136

|   |    |           |                   |              |              |        |              |                               |    |                |       |             |
|---|----|-----------|-------------------|--------------|--------------|--------|--------------|-------------------------------|----|----------------|-------|-------------|
| + | 18 | 2290      |                   | NM_017988    | NP_060458    | Q6P3W7 | SCYL2_HUMAN  | with clathrin is necessary fo | 6  | CTTCACTTCTGT   | 0.393 |             |
| + | 14 | 1501      | t.2_Missense_Mut  | NM_213594    | NP_998759    | Q33E94 | RFX4_HUMAN   | ary for dimerization.         | 1  | CCCAATGAGCTC   | 0.448 |             |
| - | 5  | 1461      | M4_uc001tmq.2_l   | NM_012406    | NP_036538    | Q9UKN5 | PRDM4_HUMAN  |                               | 2  | TACATGACCTGT   | 0.468 |             |
| + | 9  | 964       | _Mutation_p.C256  | NM_032663    | NP_116052    | Q70CQ3 | UBP30_HUMAN  | lasmic (Potential).           | 1  | CAACTGTACAA    | 0.507 |             |
| + | 2  | 379       | loc.2_Missense_M  | NM_001093    | NP_001084    | O00763 | ACACB_HUMAN  |                               | 8  | CGGTCGGCGGA    | 0.632 |             |
| - | 11 | 2578      |                   | NM_000620    | NP_000611    | P29475 | NOS1_HUMAN   |                               | 7  | GGTCCTTCCAC    | 0.507 |             |
| + | 3  | 331       |                   | NM_176818    | NP_789788    | O43716 | GATCL_HUMAN  |                               | 0  | GCGTCGTGGAG    | 0.463 |             |
| + | 9  | 1263      | lufq.1_Missense_M | NM_012463    | NP_036595    | Q9Y487 | VPP2_HUMAN   | lasmic (Potential).           | 2  | ACCTGCGCCGG    | 0.537 |             |
| + | 9  | 1126      |                   | NM_207437    | NP_997320    | Q8IVF4 | DYH10_HUMAN  | n (By similarity).            | 6  | GCCATGATGAG    | 0.577 |             |
| - | 18 | 2473      |                   | NM_032656    | NP_116045    | Q8IY37 | DHX37_HUMAN  |                               | 1  | TTGTCGGCTCA    | 0.652 |             |
| + | 5  | 1574      | NF10_uc001ulq.2_  | NM_015394    | NP_056209    | P21506 | ZNF10_HUMAN  |                               | 3  | AGAAACCCATG    | 0.428 |             |
| + | 1  | 2169      |                   | NM_001033602 | NP_001028774 | Q5JR59 | MTUS2_HUMAN  | teraction with MAPRE1.        | 0  | TGCCAACCTCT    | 0.552 |             |
| + | 4  | 325       | ltdr.1_Missense_M | NM_001629    | NP_001620    | P20292 | AL5AP_HUMAN  | Helical.                      | 0  | TGCTGCGTTTG    | 0.438 |             |
| + | 11 | 4303      |                   | NM_000059    | NP_000050    | P51587 | BRCA2_HUMAN  |                               | 64 | TATTTACTGATCA  | 0.328 | rs80359424  |
| - | 5  | 808       | RD13_uc001uux.2_  | NM_178006    | NP_821074    | Q9Y3M8 | STA13_HUMAN  |                               | 4  | GCTGACGAGTG    | 0.602 | rs146112751 |
| - | 2  | 1248      | se_Mutation_p.A3l | NM_000053    | NP_000044    | P35670 | ATP7B_HUMAN  | ytoplasmic (Potential).       | 3  | CAATGGCAATC    | 0.562 |             |
| + | 20 | 3690      | o.R876K LMO7_uc   | NM_015842    | NP_056667    | Q8WW11 | LMO7_HUMAN   |                               | 5  | GCAAAGGGCCA    | 0.383 |             |
| + | 13 | 1536      | _p.S366P IPO5_uc  | NM_002271    | NP_002262    | O00410 | IPO5_HUMAN   |                               | 3  | TGCATTCCATT    | 0.408 |             |
| + | 1  | 478       | oagj.2_Missense_M | NM_006573    | NP_006564    | Q9Y275 | TN13B_HUMAN  | cellular (Potential).         | 0  | TGGCCGCCCTG    | 0.662 |             |
| + | 22 | 2575      | rqu.1_Missense_M  | NM_015011    | NP_055826    | Q9Y6X6 | MYO16_HUMAN  | ysin head-like 1.             | 10 | CAAGTGAATGT    | 0.368 |             |
| - | 27 | 2107      | 4A1_uc010agl.2_l  | NM_001845    | NP_001836    | P02462 | CO4A1_HUMAN  | le-helical region.            | 6  | CTTGGGGACCT    | 0.542 |             |
| - | 12 | 1886      | P1_uc010tlg.1_Mi  | NM_007110    | NP_009041    | Q99973 | TEP1_HUMAN   | TROVE.                        | 5  | CTGACGGCTTA    | 0.488 |             |
| - | 4  | 774       |                   | NM_017807    | NP_060277    | Q9NPF4 | OSGEP_HUMAN  |                               | 0  | AGTATGCAATCA   | 0.453 |             |
| - | 2  | 788       | vjb.2_Missense_M  | NM_020834    | NP_065885    | Q8IX15 | HOMEZ_HUMAN  |                               | 0  | GTAGGGGAATG    | 0.527 |             |
| - | 4  | 1786      | e_Mutation_p.R29  | NM_032452    | NP_115828    | Q96JJ6 | JPH4_HUMAN   | lasmic (Potential).           | 2  | GCGCCGATCTG    | 0.637 |             |
| - | 3  | 679       | A1_uc001wqa.2_5   | NM_002515    | NP_002506    | P51513 | NOVA1_HUMAN  |                               | 5  | TTTCTCGAATTT   | 0.438 |             |
| - | 11 | 2806      | IH5_uc001xfy.2_3' | NM_139318    | NP_647479    | Q8NCM2 | KCNH5_HUMAN  | ibly) (By similarity). Cyto   | 9  | GTCTCTTTGAC    | 0.512 |             |
| - | 11 | 2474      | IH5_uc001xfy.2_3' | NM_139318    | NP_647479    | Q8NCM2 | KCNH5_HUMAN  | lasmic (Potential).           | 9  | CCTTTTCCATTT   | 0.453 |             |
| - | 3  | 484       | s.2_Missense_Mut  | NM_000347    | NP_000338    | P11277 | SPTB1_HUMAN  | 1. Actin-binding.             | 11 | CAGGCGGTGGT    | 0.612 |             |
| + | 2  | 305       |                   | NM_004094    | NP_004085    | P05198 | IF2A_HUMAN   | S1 motif.                     | 1  | AAGCGTATCC     | 0.403 |             |
| - | 7  | 1863      | tua.1_Missense_M  | NM_203309    | NP_976054    |        |              |                               | 1  | GGCTGGTGGCA    | 0.418 |             |
| - | 29 | 4672      |                   | NM_000428    | NP_000419    | Q14767 | LTBP2_HUMAN  | TB 3.                         | 2  | GTTCCGGCCCA    | 0.662 | rs150484024 |
| + | 1  | 620       |                   | NM_019589    | NP_062535    | P49750 | YLPM1_HUMAN  | Pro-rich.                     | 3  | ACATGCCCCCA    | 0.627 |             |
| - | 9  | 1791      | _p.R92H C14orf10  | NM_017970    | NP_060440    | Q9H7Z3 | CN102_HUMAN  |                               | 3  | GGTACCGGAA     | 0.557 | rs149932737 |
| + | 12 | 2980      | 349M KIAA0284_u   | NM_001112726 | NP_001106197 | Q9Y4F5 | K0284_HUMAN  |                               | 1  | GGAGACGGCCC    | 0.677 |             |
| + | 13 | 4020      | 196S KIAA0284_u   | NM_001112726 | NP_001106197 | Q9Y4F5 | K0284_HUMAN  |                               | 1  | ccccggccccgggA | 0.552 |             |
| + | 1  | 77        | oar.2_Missense_M  | NM_001036    | NP_001027    | Q15413 | RYR3_HUMAN   | smic (By similarity).         | 10 | TGGCCGAAGGG    | 0.706 |             |
| + | 36 | 5673      | r.2_Nonsense_Mu   | NM_001036    | NP_001027    | Q15413 | RYR3_HUMAN   | eats. Cytoplasmic (By simil   | 10 | CCGCTCACCC     | 0.557 |             |
| + | 5  | 1272      | _p.D401Y C15orf5  | NM_175741    | NP_786883    | Q86Y26 | NUT_HUMAN    |                               | 30 | TATGTTGACATC   | 0.587 |             |
| + | 3  | 296       | _p.E65K TMC05A    | NM_152453    | NP_689666    | Q8N6Q1 | TMC5A_HUMAN  | Potential.                    | 1  | AGTGGGAGAAG    | 0.522 |             |
| + | 26 | 7032      | bt.1_Missense_M   | NM_170589    | NP_733468    | Q8NG31 | CASC5_HUMAN  | ation and for interaction wit | 5  | CATCTGTACCAT   | 0.378 |             |
| + | 4  | 3112      |                   | NM_002373    | NP_002364    | P78559 | MAP1A_HUMAN  |                               | 9  | TGAAGCTACGC    | 0.552 |             |
| + | 10 | 1592_1593 | IT1B_uc001zsd.3_  | NM_020990    | NP_066270    | P12532 | KCRU_HUMAN   |                               | 0  | GTCTGGAGAG     | 0.5   |             |
| - | 30 | 4051      | in.2_Missense_M   | NM_014080    | NP_054799    | Q9NRD8 | DUOX2_HUMAN  | ential). FAD-binding FR-ty    | 5  | TCACTCCTGGA    | 0.592 |             |
| - | 2  | 572       |                   | NM_138356    | NP_612365    | Q7M4L6 | SHF_HUMAN    |                               | 1  | GCCCCGGAGAC    | 0.662 |             |
| - | 4  | 605       |                   | NM_003613    | NP_003604    | O75339 | CILP1_HUMAN  |                               | 7  | CTTACCTGGTG    | 0.612 |             |
| + | 15 | 2696      | _p.R811K DIS3L_u  | NM_001143688 | NP_001137160 | Q8TF46 | DIS3L1_HUMAN |                               | 2  | ACCAAGGTATGT   | 0.323 |             |

|   |    |           |                   |              |              |        |             |                            |    |                 |       |
|---|----|-----------|-------------------|--------------|--------------|--------|-------------|----------------------------|----|-----------------|-------|
| - | 17 | 1874      | mutation_p.N17K u | NR_027024    |              |        |             |                            | 0  | AGCAGATTCAC     | 0.622 |
| + | 4  | 1322      |                   | NM_152259    | NP_689472    | Q7Z2Z1 | TICRR_HUMAN |                            | 7  | GTGACAGCCCC     | 0.493 |
| + | 6  | 2412      | e_Mutation_p.F76  | NM_145728    | NP_663780    | O15061 | SYNEM_HUMAN | Tail.                      | 4  | AGAGTTTTCCGT    | 0.572 |
| + | 1  | 343       |                   | NM_001001674 | NP_001001674 | Q8NGB8 | O4F15_HUMAN | Name=3; (Potential).       | 0  | GTGCTGCTCATA    | 0.453 |
| + | 2  | 280       | r_p.V60M PIGQ_u   | NM_148920    | NP_683721    | Q9BRB3 | PIGQ_HUMAN  |                            | 1  | GTGGCGTGGCC     | 0.701 |
| - | 6  | 1453      | 3XL16_uc002cjb.2  | NM_153350    | NP_699181    | Q8N461 | FXL16_HUMAN | LRR 6.                     | 0  | GGAGGTGCTTC     | 0.642 |
| - | 20 | 8061      | _Mutation_p.V261E | NM_001009944 | NP_001009944 | P98161 | PKD1_HUMAN  | ular (Potential). REJ.     | 3  | CAGCACGGTGA     | 0.647 |
| + | 11 | 7425_7426 | 1.1_Missense_Mut  | NM_016333    | NP_057417    | Q9UQ35 | SRRM2_HUMAN | rich. Ser-rich.            | 4  | ACAGCCCCAGCT    | 0.634 |
| + | 11 | 1698      | v.1_Missense_Mu   | NM_018723    | NP_061193    | Q9NWB1 | RFOX1_HUMAN |                            | 0  | GGAGGGATCTT     | 0.488 |
| - | 1  | 571       |                   | NM_144674    | NP_653275    | Q96M29 | TEKT5_HUMAN | Potential.                 | 2  | GTTTCTGGTTCT    | 0.612 |
| - | 7  | 940       | dbg.1_Missense_M  | NM_015914    | NP_056998    | Q6PKC3 | TXD11_HUMAN |                            | 0  | CTAGGTAATCTC    | 0.383 |
| + | 4  | 746       | wa.2_Missense_M   | NM_005236    | NP_005227    | Q92889 | XPF_HUMAN   | ucine-zipper 1.            | 10 | CCCATCGCTTG     | 0.333 |
| - | 40 | 6739      | wa.2_Missense_IV  | NM_015092    | NP_055907    | Q96Q15 | SMG1_HUMAN  |                            | 16 | GGTCCGCCCA      | 0.438 |
| - | 1  | 397       |                   | NM_015092    | NP_055907    | Q96Q15 | SMG1_HUMAN  | with SMG8 and SMG9.        | 16 | cgccgctgcTCAGC  | 0.627 |
| + | 3  | 580       | _uc010byo.1_Miss  | NM_001770    | NP_001761    | P15391 | CD19_HUMAN  | cellular (Potential).      | 3  | TCCGTGTCTCC     | 0.647 |
| + | 8  | 783       | r_p.V236I TGFB1I  | NM_001042454 | NP_001035919 | O43294 | TGF1_HUMAN  | l zinc-binding 1.          | 0  | ACTTCGTTTGGC    | 0.657 |
| - | 5  | 527       | PS35_uc002eee.2   | NM_018206    | NP_060676    | Q96QK1 | VPS35_HUMAN |                            | 0  | TCAAGGGATGT     | 0.393 |
| + | 2  | 558       | r_p.A97V ADCY7_   | NM_001114    | NP_001105    | P51828 | ADCY7_HUMAN | ical; (Potential).         | 1  | CTTGGCGCTGC     | 0.642 |
| - | 16 | 2264_2265 | on_p.550_551SR>   | NM_005550    | NP_005541    | Q9BVG8 | KIFC3_HUMAN | inesin-motor.              | 3  | AGGCGGCTGCC     | 0.693 |
| + | 8  | 1052      | i.E327K CES3_uc   | NM_024922    | NP_079198    | Q6UWW8 | EST3_HUMAN  |                            | 5  | CCAAGGAAGTC     | 0.537 |
| - | 14 | 2616      | 27_splice KCTD1E  | NM_001100915 | NP_001094385 | Q17RG1 | KCD19_HUMAN |                            | 1  | ACATACCCACAC    | 0.562 |
| + | 1  | 840       | PT_uc002eun.3_I   | NM_020457    | NP_065190    | Q96EK4 | THA11_HUMAN | Ala-rich.                  | 0  | CAGCCGACAGG     | 0.667 |
| + | 3  | 289       | C4_uc002eut.1_3'l | NM_198443    | NP_940845    | Q496H8 | NRN1L_HUMAN |                            | 1  | CTGTCCGGAGG     | 0.572 |
| + | 8  | 1346      | p.1_Intron DHX38_ | NM_014003    | NP_054722    | Q92620 | PRP16_HUMAN |                            | 1  | TGGACGAGGGC     | 0.562 |
| - | 2  | 3245      | IX3_uc002fcl.2_In | NM_006885    | NP_008816    | Q15911 | ZFH3_HUMAN  |                            | 4  | GGCCTCGGCGG     | 0.567 |
| - | 2  | 2063      | IX3_uc002fcl.2_In | NM_006885    | NP_008816    | Q15911 | ZFH3_HUMAN  | Poly-Glu.                  | 4  | cttctctccgctctc | 0.318 |
| + | 2  | 360       |                   | NM_020927    | NP_065978    | Q9HCJ6 | VAT1L_HUMAN |                            | 1  | GGTGCACAAG      | 0.443 |
| + | 2  | 327       | hfg.1_Missense_M  | NM_002661    | NP_002652    | P16885 | PLCG2_HUMAN | PH.                        | 8  | CCGCTGACAAG     | 0.627 |
| - | 4  | 476       | C_uc010vnz.1_5'U  | NM_005679    | NP_005670    | Q15572 | TAF1C_HUMAN |                            | 1  | GGTCCCGGGCA     | 0.672 |
| + | 4  | 314       | p.E62Q USP10_uc   | NM_005153    | NP_005144    | Q14694 | UBP10_HUMAN | tion with p53/TP53.        | 0  | GAATTCGATTT     | 0.398 |
| + | 3  | 796       | orf97_uc010vpz.1  | NM_001013672 | NP_001013694 | Q6ZQX7 | CQ097_HUMAN | tandem repeat of A-L-K-G-  | 1  | CCCGAGGCTCT     | 0.711 |
| - | 11 | 1335      | isu.2_Missense_M  | NM_152346    | NP_689559    | Q8N370 | LAT4_HUMAN  |                            | 0  | CTGCCGGTCCC     | 0.607 |
| - | 26 | 4231      |                   | NM_006445    | NP_006436    | Q6P2Q9 | PRP8_HUMAN  |                            | 6  | TGGCTGTATGTA    | 0.512 |
| - | 13 | 1562      |                   | NM_002208    | NP_002199    | P38570 | ITAE_HUMAN  | Extracellular (Potential). | 4  | ACACGGCCCA      | 0.577 |
| + | 21 | 2630      | sn.1_Missense_M   | NM_153827    | NP_722549    | Q8N4C8 | MINK1_HUMAN |                            | 6  | TGGACGAGGCC     | 0.642 |
| - | 11 | 1609      | NUP88_uc010cle.1  | NM_002532    | NP_002523    | Q99567 | NUP88_HUMAN |                            | 1  | CAAAGGAATCT     | 0.463 |
| - | 6  | 841       | th.1_Missense_M   | NM_053285    | NP_444515    | Q969V4 | TEKT1_HUMAN |                            | 2  | GGATTCGATCC     | 0.537 |
| + | 4  | 498       |                   | NM_000697    | NP_000688    | P18054 | LOX12_HUMAN | ipoxygenase.               | 1  | GGTTACCCCTG     | 0.448 |
| - | 11 | 2069      | i88_splice NEURL  | NM_032442    | NP_115818    | Q96JN8 | NEUL4_HUMAN |                            | 2  | CTCACCCACG      | 0.642 |
| + | 26 | 3472      | p.V687M PFAS_uc   | NM_012393    | NP_036525    | O15067 | PUR4_HUMAN  | imidotransferase type-1.   | 5  | GTGGCGTGGCC     | 0.622 |
| - | 9  | 1022      | r.1_RNA PIK3R6_u  | NM_001010855 | NP_001010855 | Q5UE93 | PI3R6_HUMAN |                            | 0  | CCGCGGGACCC     | 0.706 |
| - | 23 | 3018      | uc002gml.1_Intron | NM_002472    | NP_002463    | P13535 | MYH8_HUMAN  | Potential.                 | 11 | GTTCTCCGTGG     | 0.393 |
| - | 34 | 5023      | uc002gml.1_Intron | NM_017533    | NP_060003    | Q9Y623 | MYH4_HUMAN  | Potential.                 | 13 | CTGGCGTTGG      | 0.453 |
| - | 16 | 1892      | uc002gml.1_Intron | NM_017533    | NP_060003    | Q9Y623 | MYH4_HUMAN  | rosin head-like.           | 13 | AGCCGGCGATG     | 0.552 |
| - | 30 | 4172      | uc002gml.1_Intron | NM_005963    | NP_005954    | P12882 | MYH1_HUMAN  | Potential.                 | 21 | TAGCTCGGCT      | 0.592 |
| - | 15 | 1649      | uc002gml.1_Intron | NM_005963    | NP_005954    | P12882 | MYH1_HUMAN  | rosin head-like.           | 21 | CAGGTCCATCC     | 0.448 |
| - | 24 | 3189      | _Missense_Mutatir | NM_001100112 | NP_001093582 | Q9UKX2 | MYH2_HUMAN  | Potential.                 | 14 | TGTGCTCTCTC     | 0.478 |



|   |    |      |                   |              |              |        |              |                             |    |                   |       |             |
|---|----|------|-------------------|--------------|--------------|--------|--------------|-----------------------------|----|-------------------|-------|-------------|
| + | 7  | 972  | i_p.L225I MYOCD   | NM_153604    | NP_705832    | Q8IZQ8 | MYCD_HUMAN   |                             | 5  | :AGGGGCTTGGC      | 0.582 |             |
| + | 6  | 974  | p.E259K RNFI12    | NM_007148    | NP_009079    | Q7Z5V9 | Q7Z5V9_HUMAN |                             | 2  | :GCAGGGAAACA      | 0.612 |             |
| - | 1  | 395  | '22L ALDH3A1_uc   | NM_001135168 | NP_001128640 | P30838 | AL3A1_HUMAN  |                             | 2  | GCAGCGGACGG       | 0.697 |             |
| + | 2  | 420  | 1_Intron WSB1_uc  | NM_015626    | NP_056441    | Q9Y6I7 | WSB1_HUMAN   | WD 1.                       | 0  | :TGGTCGTGAAA      | 0.403 |             |
| + | 8  | 1518 | \RM1_uc002hbe.1   | NM_015077    | NP_055892    | Q6SZW1 | SARM1_HUMAN  |                             | 0  | :CGACCGCAGCA      | 0.657 |             |
| - | 5  | 1363 | ε.1_3'UTR SLC46/  | NM_080669    | NP_542400    | Q96NT5 | PCFT_HUMAN   | ical; (Potential).          | 0  | :GAAACCCCTTCA     | 0.562 |             |
| - | 2  | 756  | EZ6_uc002hdq.1_   | NM_178860    | NP_849191    | Q53EL9 | SEZ6_HUMAN   | xtracellular (Potential).   | 2  | :TCCAGGACCTC      | 0.642 |             |
| - | 2  | 337  | _p.P48L SEZ6_uc   | NM_178860    | NP_849191    | Q53EL9 | SEZ6_HUMAN   | xellular (Potential).       | 2  | GCTCAGGTGTG       | 0.577 |             |
| + | 13 | 1498 | rbf.1_Missense_Mi | NM_020791    | NP_065842    | Q7L7X3 | TAOK1_HUMAN  |                             | 4  | :TAATCGAGAAC      | 0.398 |             |
| + | 1  | 902  | 5B_uc010ctg.2_5'F | NM_052857    | NP_443089    | Q96NB3 | ZN830_HUMAN  |                             | 1  | :ATTTCCGAAGCC     | 0.502 |             |
| - | 5  | 923  |                   | NM_139285    | NP_644814    | Q8NHY3 | GA2L2_HUMAN  |                             | 2  | CATCCTGTACCC      | 0.587 |             |
| + | 2  | 224  |                   | NM_002988    | NP_002979    | P55774 | CCL18_HUMAN  |                             | 0  | :GTGCCCAAGC       | 0.552 |             |
| + | 10 | 1122 | 2_Intron MLLT6_uc | NM_005937    | NP_005928    | P55198 | AF17_HUMAN   |                             | 6  | :GTACTCCAAGC      | 0.602 |             |
| + | 15 | 1796 | 37_uc010cwc.2_M   | NM_005310    | NP_005301    | Q14451 | GRB7_HUMAN   | SH2.                        | 5  | :TGAACCGCGGC      | 0.667 |             |
| - | 5  | 959  |                   | NM_181539    | NP_853517    | Q7Z3Y9 | K1C26_HUMAN  | Rod. Coil 2.                | 0  | :TAATTCGGTCAC     | 0.448 |             |
| + | 1  | 284  |                   | NM_033061    | NP_149050    |        |              |                             | 0  | :agctgctgcaagcccc | 0.199 |             |
| - | 1  | 469  |                   | NM_031854    | NP_114060    | Q9BQ66 | KR412_HUMAN  | f C-C-[GRQVIL]-[SPTR]- [V   | 0  | :ctggggcgccagcag  | 0.144 | rs146088137 |
| - | 12 | 1566 | gg.3_Missense_Mi  | NM_000342    | NP_000333    | P02730 | B3AT_HUMAN   | exchange). Helical; (Potent | 3  | :AGGCTTCCTCAA     | 0.612 |             |
| + | 14 | 1650 | f.1_Nonsense_Mu   | NM_006178    | NP_006169    | P46459 | NSF_HUMAN    |                             | 1  | :TACTCGAGTT       | 0.458 |             |
| - | 6  | 1045 | RN2_uc002imf.2_1  | NM_138355    | NP_612364    | Q96FV2 | SCRN2_HUMAN  |                             | 1  | :CGTGGCGGTA       | 0.597 |             |
| + | 3  | 760  | ise_Mutation_p.Gz | NM_003110    | NP_003101    | Q02086 | SP2_HUMAN    |                             | 0  | :GGCGGCAATG       | 0.632 |             |
| - | 5  | 530  |                   | NM_002634    | NP_002625    | P35232 | PHB_HUMAN    |                             | 0  | :AAGGTCGTCGC      | 0.587 |             |
| + | 10 | 840  | _p.V201M MSI2_u   | NM_138962    | NP_620412    | Q96DH6 | MSI2_H_HUMAN |                             | 2  | :ACTTCGTGGCG      | 0.537 |             |
| + | 1  | 602  |                   | NM_001004707 | NP_001004707 | P58180 | OR4D2_HUMAN  | Name=5; (Potential).        | 2  | :GATCTCCAACAC     | 0.512 |             |
| - | 1  | 768  | 1_5'Flank SEPT4_  | NM_001038704 | NP_001033793 | Q8NEP4 | CQ047_HUMAN  |                             | 1  | :TAGTCGTAATTC     | 0.512 | rs142981278 |
| - | 7  | 970  | xa.3_Missense_Mi  | NM_001005207 | NP_001005207 | O94972 | TRI37_HUMAN  | Potential.                  | 7  | GCTCATCTTTTG      | 0.353 |             |
| - | 6  | 1737 | _Mutation_p.D538K | NM_001100875 | NP_001094345 | Q8NA82 | MARHA_HUMAN  |                             | 0  | :CTGAGTCTGAG      | 0.428 |             |
| - | 5  | 734  | dds.2_Nonsense_   | NM_001100875 | NP_001094345 | Q8NA82 | MARHA_HUMAN  |                             | 0  | :ACTGCTGTTTCT     | 0.532 |             |
| - | 25 | 3575 |                   | NM_080284    | NP_525023    | Q8N139 | ABCA6_HUMAN  | ical; (Potential).          | 7  | :AAAGAAGTAAA      | 0.289 |             |
| + | 7  | 1215 |                   | NM_178160    | NP_835454    | Q7RTS6 | OTOP2_HUMAN  | ical; (Potential).          | 4  | :GTGCCGCCCTG      | 0.637 |             |
| + | 12 | 1983 | _p.P337L MFSD11   | NM_024311    | NP_077287    | O43934 | MFS11_HUMAN  |                             | 1  | :TGCTCCTGTTA      | 0.463 |             |
| - | 3  | 381  | .2_Intron LGALS3I | NM_005567    | NP_005558    | Q08380 | LG3BP_HUMAN  | SRCR.                       | 4  | :GTTCTCGAAGC      | 0.657 | rs11548453  |
| + | 5  | 1374 | wuf.1_Missense_M  | NM_020761    | NP_065812    | Q8N122 | RPTOR_HUMAN  |                             | 6  | :CCCGTCGATCT      | 0.542 |             |
| + | 29 | 4248 | _p.R990Q RPTOR    | NM_020761    | NP_065812    | Q8N122 | RPTOR_HUMAN  | WD 3.                       | 6  | :CGTCCGGATCT      | 0.627 |             |
| + | 10 | 1283 | _p.T392I BAIAP2_  | NM_017451    | NP_059345    | Q9UQB8 | BAIP2_HUMAN  | SH3.                        | 0  | :CAGCACCCCTC      | 0.617 |             |
| - | 12 | 1416 | _p.A412T NPLOC4   | NM_017921    | NP_060391    | Q8TAT6 | NPL4_HUMAN   |                             | 2  | :CTTGGCGTAGC      | 0.493 |             |
| - | 23 | 3834 | lq.2_Missense_Mi  | NM_003803    | NP_003794    | P52179 | MYOM1_HUMAN  | like C2-type 3.             | 5  | :ACTCGGACTTT      | 0.413 |             |
| + | 3  | 519  | lb.1_Missense_M   | NM_014214    | NP_055029    | O14732 | IMPA2_HUMAN  |                             | 2  | :CGACCCATCG       | 0.562 |             |
| + | 56 | 7254 | cus.3_Missense_M  | NM_198129    | NP_937762    | Q16787 | LAMA3_HUMAN  | minin G-like 1.             | 11 | :CTGTCCCATG       | 0.458 |             |
| - | 15 | 2468 | mi.3_Missense_Mu  | NM_001941    | NP_001932    | Q14574 | DSC3_HUMAN   | lasmic (Potential).         | 4  | :ATTTTTCATTCT     | 0.443 |             |
| + | 11 | 1402 |                   | NM_005925    | NP_005916    | Q16820 | MEP1B_HUMAN  | ilar (Potential). MATH.     | 2  | :CCCTCCATTTTA     | 0.408 |             |
| + | 12 | 5363 | q.2_Missense_Mu   | NM_030632    | NP_085135    | Q9C0F0 | ASXL3_HUMAN  |                             | 3  | :GATTGGGAGCC      | 0.517 |             |
| - | 4  | 423  |                   | NM_133459    | NP_597716    | Q6UXH8 | CCBE1_HUMAN  |                             | 3  | :TCATATCGGTATC    | 0.512 | rs115982879 |
| + | 25 | 3468 | p.F1085L KIAA14f  | NM_020854    | NP_065905    | Q9P260 | K1468_HUMAN  |                             | 6  | :ATGAGTGTAAG      | 0.393 |             |
| - | 4  | 618  | ky.1_Missense_Mi  | NM_138966    | NP_620416    | Q8TDF5 | NETO1_HUMAN  | xtracellular (Potential).   | 4  | :TATTGGAGAAA      | 0.373 |             |
| + | 2  | 89   |                   | NM_002777    | NP_002768    | P24158 | PRTN3_HUMAN  |                             | 1  | :AGGTGCTGCC       | 0.726 |             |
| + | 4  | 1228 | wn.3_Missense_M   | NM_152791    | NP_690004    | Q8NEP9 | ZN555_HUMAN  | 2H2-type 8.                 | 1  | :TTATCCCCAGTC     | 0.463 |             |

|   |    |       |                                                         |              |              |        |             |                                |    |               |       |
|---|----|-------|---------------------------------------------------------|--------------|--------------|--------|-------------|--------------------------------|----|---------------|-------|
| + | 8  | 1195  | p.T369M NFIC_uc                                         | NM_205843    | NP_995315    | P08651 | NFIC_HUMAN  |                                | 0  | CTACGACGTCCA' | 0.647 |
| + | 1  | 60    | 10dvs.2_Translati                                       | NM_001144910 | NP_001138382 | Q9H2X3 | CLC4M_HUMAN |                                | 1  | AGAGGGTGGAA   | 0.507 |
| - | 22 | 2791  |                                                         | NM_032447    | NP_115823    | Q75N90 | FBN3_HUMAN  | TB 5.                          | 11 | ACTCATCCTCATC | 0.647 |
| - | 3  | 22655 |                                                         | NM_024690    | NP_078966    | Q8WXI7 | MUC16_HUMAN | ch. Extracellular (Potential). | 57 | CTGGAAGTTCCA  | 0.478 |
| - | 3  | 11903 |                                                         | NM_024690    | NP_078966    | Q8WXI7 | MUC16_HUMAN | xtracellular (Potential).      | 57 | TGGAGGAGCTG   | 0.458 |
| - | 5  | 772   |                                                         | NM_015719    | NP_056534    | P25940 | CO5A3_HUMAN | nhelical region.               | 10 | iCTGCCGGTGCC  | 0.572 |
| + | 6  | 778   | AM129C_uc002ng                                          | NM_173544    | NP_775815    | Q86XR2 | NIBL2_HUMAN |                                | 0  | GCACAGCATGCC  | 0.637 |
| + | 16 | 2515  | b.1_RNA PIK3R2_                                         | NM_005027    | NP_005018    | O00459 | P85B_HUMAN  | SH2 2.                         | 6  | AGCACTGCGTCA  | 0.677 |
| - | 21 | 2740  | ank GMIP_uc010xr                                        | NM_016573    | NP_057657    | Q9P107 | GMIP_HUMAN  |                                | 1  | ACCGCCCCGGG   | 0.632 |
| + | 4  | 1631  |                                                         | NM_031218    | NP_112495    | P35789 | ZNF93_HUMAN |                                | 1  | AGAGAAACCCCT  | 0.358 |
| - | 5  | 1776  | 208_uc002nqo.1_I                                        | NM_007153    | NP_009084    |        |             |                                | 7  | TTTTGCCACATT  | 0.393 |
| + | 4  | 1512  |                                                         | NM_020855    | NP_065906    | Q9P255 | ZN492_HUMAN | :2H2-type 11.                  | 0  | CAAATGTGAAG   | 0.373 |
| + | 5  | 1631  | .R376W CHST8_t                                          | NM_001127895 | NP_001121367 | Q9H2A9 | CHST8_HUMAN | ienal (Potential).             | 4  | AGGACCGGCAC   | 0.617 |
| + | 10 | 2483  |                                                         | NM_014686    | NP_055501    | O15063 | K0355_HUMAN |                                | 1  | CATCCCGGTTCT  | 0.463 |
| - | 8  | 1201  | IA_uc010eee.1_5'                                        | NM_000704    | NP_000695    | P20648 | ATP4A_HUMAN | lasmic (Potential).            | 1  | TGAGAGTCCCT   | 0.582 |
| + | 14 | 1874  | dd.2_Nonsense_IV                                        | NM_173636    | NP_775907    | O43379 | WDR62_HUMAN | WD 9.                          | 0  | ACATCCAGATG   | 0.627 |
| + | 2  | 140   | 527_uc010xtq.1_F                                        | NM_032453    | NP_115829    | Q8NB42 | ZN527_HUMAN |                                | 2  | CATGTCCCAGG   | 0.433 |
| + | 20 | 2530  | jb.1_Missense_ML                                        | NM_004924    | NP_004915    | O43707 | ACTN4_HUMAN | nd 2. 2 (Potential).           | 0  | TAGCGGCCTTG   | 0.607 |
| + | 7  | 723   | imt.2_Missense_M                                        | NM_178544    | NP_848639    | Q86UE3 | ZN546_HUMAN |                                | 3  | TCAATTGCAGAC  | 0.313 |
| + | 2  | 295   | lehh.1_Missense_Mutation_p.S96F CYP2B7P1_uc002opq.2_RNA |              |              |        |             |                                | 2  | CTTCTCTGGCC   | 0.627 |
| + | 8  | 1214  |                                                         | NM_000766    | NP_000757    | Q16696 | CP2AD_HUMAN |                                | 3  | AGACCCAGGT    | 0.547 |
| + | 37 | 7093  | t_Mutation_p.R17E                                       | NM_001410    | NP_001401    | Q7Z7M0 | MEGF8_HUMAN | ellular (Potential).           | 1  | GTGCCGCCCTG   | 0.662 |
| - | 4  | 1015  | uj.3_Missense_ML                                        | NM_182707    | NP_874366    | Q9UQ74 | PSG8_HUMAN  | like C2-type 2.                | 0  | TAGGGTCTGT    | 0.498 |
| - | 4  | 531   | ibu.1_Missense_M                                        | NM_001983    | NP_001974    | P07992 | ERCC1_HUMAN |                                | 2  | CATAGTCGGGAA  | 0.617 |
| + | 11 | 1096  | R_uc010xxp.1_M                                          | NM_000164    | NP_000155    | P48546 | GIPR_HUMAN  | lasmic (Potential).            | 1  | GCTGCCGGGAT   | 0.602 |
| - | 2  | 445   | per.3_Missense_M                                        | NM_018215    | NP_060685    | Q86V59 | PNML1_HUMAN |                                | 0  | ggggagaggacc  | 0     |
| + | 14 | 3049  | yo.1_Missense_M                                         | NM_014681    | NP_055496    | Q14147 | DHX34_HUMAN |                                | 5  | TCAGTCCCTCC   | 0.642 |
| - | 1  | 150   |                                                         | NM_003167    | NP_003158    | Q06520 | ST2A1_HUMAN |                                | 2  | GAAATCGTCCG   | 0.468 |
| + | 4  | 1069  | n.1_5'Flank FGF2'                                       | NM_019113    | NP_061986    | Q9NSA1 | FGF21_HUMAN |                                | 1  | CTGCCACTACC   | 0.692 |
| - | 6  | 1021  | LEKHA4_uc010en                                          | NM_020904    | NP_065955    | Q9H4M7 | PKHA4_HUMAN |                                | 3  | AGTCGTCCCCC   | 0.657 |
| + | 17 | 2100  | _D1_uc010enx.2_f                                        | NM_002691    | NP_002682    | P28340 | DPOD1_HUMAN |                                | 2  | CCCTCCGGCGC   | 0.667 |
| + | 25 | 3047  |                                                         | NM_004533    | NP_004524    | Q14324 | MYPC2_HUMAN | onnectin type-III 3.           | 1  | CGTGGGCAATG   | 0.542 |
| - | 3  | 479   | ie_Mutation_p.E14                                       | NM_017509    | NP_059979    | Q9H2R5 | KLK15_HUMAN | eptidase S1.                   | 2  | AGGCTCGTTGT   | 0.687 |
| - | 7  | 946   | p.G243D KLK5_uc                                         | NM_001077491 | NP_001070959 | Q9Y337 | KLK5_HUMAN  | eptidase S1.                   | 0  | GAATCACCCCTGC | 0.343 |
| - | 3  | 248   | vi.2_Missense_Mu                                        | NM_001161748 | NP_001155220 | P55344 | LMIP_HUMAN  | ical; (Potential).             | 0  | AGGATCATGAAC  | 0.587 |
| - | 5  | 1840  | rdj.1_Missense_ML                                       | NM_001102657 | NP_001096127 | Q6ZNA1 | ZN836_HUMAN | :2H2-type 10.                  | 0  | TTCTCCGATGCC  | 0.413 |
| + | 6  | 1161  |                                                         | NM_001099694 | NP_001093164 | Q96N58 | ZN578_HUMAN | :2H2-type 3.                   | 0  | CCATCGTAGATC  | 0.433 |
| + | 1  | 788   |                                                         | NM_173856    | NP_776255    | Q8NFX6 | VN1R2_HUMAN | ellular (Potential).           | 0  | CAAATGGAGCA   | 0.418 |
| + | 3  | 284   | ation_p.V8L ZIK1_t                                      | NM_001010879 | NP_001010879 | Q3SY52 | ZIK1_HUMAN  | KRAB.                          | 2  | CCCTTGATGCC   | 0.493 |
| + | 4  | 1230  |                                                         | NM_152677    | NP_689890    | Q8NAM6 | ZSCA4_HUMAN |                                | 1  | AGACTTCCCAAG  | 0.443 |
| + | 2  | 716   | 1_Intron TRIM28_                                        | NM_005762    | NP_005753    | Q13263 | TIF1B_HUMAN | BCC domain.                    | 3  | AGGCTGCCACC   | 0.577 |
| - | 3  | 542   | DAM17_uc010exb                                          | NM_003183    | NP_003174    | P78536 | ADA17_HUMAN |                                | 2  | AACCAACCACG1  | 0.438 |
| + | 31 | 5696  | bp.1_Missense_M                                         | NM_014668    | NP_055483    | Q4ZG55 | GREB1_HUMAN |                                | 1  | TGCCCGGACA    | 0.652 |
| + | 4  | 554   | se_Mutation_p.Y1I                                       | NM_182625    | NP_872431    | Q17RS7 | GEN_HUMAN   | I-domain.                      | 8  | TCCTTTATGGGC  | 0.408 |
| + | 8  | 1621  | _p.S513F PLEKHF                                         | NM_172069    | NP_742066    | Q8IVE3 | PKHH2_HUMAN |                                | 3  | TATTTTCTATGA  | 0.458 |
| - | 1  | 19    | n CCDC142_uc00                                          | NM_032779    | NP_116168    | Q17RM4 | CC142_HUMAN |                                | 1  | TGAACGTTTCG   | 0.607 |
| + | 6  | 578   | _p.A165T REG3G                                          | NM_198448    | NP_940850    | Q6UW15 | REG3G_HUMAN | :2-type lectin.                | 0  | GTGATGCAAAG   | 0.498 |

rs140896123

rs34299689

|   |     |           |                    |              |              |        |             |                                |     |               |       |
|---|-----|-----------|--------------------|--------------|--------------|--------|-------------|--------------------------------|-----|---------------|-------|
| + | 18  | 2739      | ysg.1_Missense_I   | NM_004389    | NP_004380    | P26232 | CTNA2_HUMAN |                                | 9   | CTCCAGAGAAG   | 0.483 |
| + | 12  | 2074      | p.V583M KDM3A_     | NM_018433    | NP_060903    | Q9Y4C1 | KDM3A_HUMAN |                                | 5   | ATGGTGTGTTGC  | 0.318 |
| - | 2   | 194       | v4C_uc002sxxg.3_5  | NM_017789    | NP_060259    | Q9C0C4 | SEM4C_HUMAN |                                | 2   | CCTTGCTGCCA   | 0.637 |
| - | 5   | 404       | _YG1_uc010yvo.1_   | NM_174898    | NP_777558    | Q8N1E2 | LYG1_HUMAN  |                                | 0   | AGCACGAAGCTC  | 0.463 |
| + | 8   | 2147      | e.2_Missense_Mu    | NM_012455    | NP_036587    | Q8NDX1 | PSD4_HUMAN  | SEC7.                          | 2   | GGAACGGGAGC   | 0.602 |
| + | 16  | 2879      | Jflu.2_Nonsense_I  | NM_130773    | NP_570129    | Q8WYK1 | CNTP5_HUMAN | 3. Extracellular (Potential).  | 10  | TTCATTCGACTC  | 0.289 |
| + | 45  | 6147      | _p.R142* MYO7B_    | NM_001080527 | NP_001073996 | Q6PIF6 | MYO7B_HUMAN | FERM 2.                        | 2   | TCAACCGACATC  | 0.667 |
| - | 14  | 2784      | AP5_uc002ttq.2_li  | NM_207363    | NP_997246    | O14513 | NCKP5_HUMAN |                                | 0   | FGGGAGGTATTT  | 0.463 |
| - | 53  | 9391      |                    | NM_018557    | NP_061027    | Q9NZR2 | LRP1B_HUMAN | ntial). LDL-receptor class A   | 50  | CATTTTCATCAC  | 0.388 |
| - | 5   | 1024      | of.2_Missense_Mt   | NM_145259    | NP_660302    | Q8NER5 | ACV1C_HUMAN | 3. Cytoplasmic (Potential).    | 7   | AAGTTCATTATC  | 0.313 |
| - | 6   | 822       | 3B6_uc010zccq.1_l  | NM_000888    | NP_000879    | P18564 | ITB6_HUMAN  | ilar (Potential). VWFA.        | 3   | CACTCACAAAG   | 0.458 |
| + | 9   | 1417      | _p.S376F SCN2A_    | NM_001040142 | NP_001035232 | Q99250 | SCN2A_HUMAN | I.                             | 8   | TTTTGTCTTATT  | 0.403 |
| - | 2   | 355       | 3_5'Flank SCN1A_   | NM_006920    | NP_008851    | P35498 | SCN1A_HUMAN | I.                             | 13  | GAAGGGAGTTA   | 0.353 |
| + | 8   | 8564      | _p.A2674V XIRP2_   | NM_152381    | NP_689594    | A4UGR9 | XIRP2_HUMAN |                                | 14  | ATCAGCACCAA   | 0.378 |
| - | 70  | 13081     |                    | NM_004525    | NP_004516    | P98164 | LRP2_HUMAN  | ellular (Potential).           | 29  | CCTTTTCCTTAG  | 0.398 |
| - | 56  | 11128     |                    | NM_004525    | NP_004516    | P98164 | LRP2_HUMAN  | 3 A 29. Extracellular (Potent  | 29  | AAACTGGCCCG   | 0.542 |
| + | 14  | 1637      | 3B_uc002ufz.2_Mi   | NM_138995    | NP_620482    | Q8WXR4 | MYO3B_HUMAN | rosin head-like.               | 19  | 3GAAATGATGTTI | 0.433 |
| + | 6   | 698       | zfe.1_Missense_M   | NM_032523    | NP_115912    | Q9BZF3 | OSBL6_HUMAN | PH.                            | 1   | GCAGCGTTTTTI  | 0.363 |
| - | 307 | 98674     | J10zfi.1_Missense  | NM_133378    | NP_596869    | Q8WZ42 | TITIN_HUMAN |                                | 153 | 3ATACCTTCTCAT | 0.373 |
| - | 246 | 50929     | i97D TTN_uc010zi   | NM_133378    | NP_596869    | Q8WZ42 | TITIN_HUMAN |                                | 153 | 3AGAAACCTTTTC | 0.393 |
| - | 10  | 1567_1568 |                    | NM_173648    | NP_775919    | Q6ZP82 | CC141_HUMAN |                                | 10  | ATAAGTGCTGAG  | 0.446 |
| - | 4   | 337       | ense_Mutation_p.C  | NM_001003683 | NP_001003683 | P54750 | PDE1A_HUMAN |                                | 3   | 3AGTCTGAATGT  | 0.353 |
| + | 12  | 1900      | p.E565K PARD3B_    | NM_152526    | NP_689739    | Q8TEW8 | PAR3L_HUMAN | PDZ 3.                         | 4   | 3ACCACGAAGCT. | 0.473 |
| + | 13  | 1432      | _p.V361I ATIC_uci  | NM_004044    | NP_004035    | P31939 | PUR9_HUMAN  |                                | 29  | 3TCATCGTAGCC. | 0.473 |
| + | 4   | 1068      |                    | NM_006522    | NP_006513    | Q9Y6F9 | WNT6_HUMAN  |                                | 3   | 3ACCTCCTCTAC  | 0.746 |
| + | 2   | 470       | G_uc010fwh.1_5'l   | NM_005876    | NP_005867    | Q15772 | SPEG_HUMAN  |                                | 14  | CAGCACCCCCA   | 0.607 |
| + | 12  | 1876      | nj.2_Nonsense_M    | NM_004457    | NP_004448    | O95573 | ACSL3_HUMAN | lasmic (Potential).            | 2   | 3GGATACGGGCT  | 0.522 |
| - | 6   | 614       |                    | NM_020830    | NP_065881    | Q8IWB7 | WDFY1_HUMAN | WD 4.                          | 1   | 3AACACGTGTTC  | 0.428 |
| - | 4   | 1477      | ense_Mutation_p.v  | NM_152527    | NP_689740    | Q7RTX9 | MOT14_HUMAN | ical; (Potential).             | 6   | 3TATGACGCCCA  | 0.423 |
| + | 11  | 980       | 40L_uc010fxo.1_lr  | NM_138402    | NP_612411    | Q9H930 | LY10L_HUMAN | SAND.                          | 1   | 3CTGTGGATTTTC | 0.423 |
| + | 1   | 177       | UGT1A7_uc002vu     | NM_007120    | NP_009051    | P22310 | UD14_HUMAN  |                                | 1   | TGCGGGAGCTC   | 0.597 |
| + | 7   | 767       | 'M8_uc010fyj.2_5'l | NM_024080    | NP_076985    | Q7Z2W7 | TRPM8_HUMAN | lasmic (Potential).            | 4   | 3TTATGGATGAC  | 0.398 |
| - | 19  | 3133      | v.1_Missense_Mu    | NM_022817    | NP_073728    | O15055 | PER2_HUMAN  | Pro-rich.                      | 2   | GGCCCGGGTGG   | 0.667 |
| + | 21  | 2468      |                    | NM_014808    | NP_055623    | O94887 | FARP2_HUMAN | PH 1.                          | 3   | GCTGTACACAAC  | 0.517 |
| + | 2   | 941       | HC3_uc002wdg.2_    | NM_033089    | NP_149080    | Q9NUD5 | ZCHC3_HUMAN |                                | 0   | CCAGGGGGGAGG  | 0.632 |
| + | 3   | 499       | _p.A47T SIRPA_uc   | NM_001040022 | NP_001035111 | P78324 | SHP51_HUMAN | . Extracellular (Potential).   | 1   | 3TTGACAGTGGA  | 0.562 |
| + | 9   | 1280      | al.1_Missense_Mu   | NM_198994    | NP_945345    | O95932 | TGM3L_HUMAN |                                | 4   | 3ACGAGGATGAG. | 0.597 |
| + | 4   | 392       | se_Mutation_p.P6   | NM_033453    | NP_258412    | Q9BY32 | ITPA_HUMAN  |                                | 1   | 3GGCTCCCCGGC  | 0.567 |
| - | 11  | 1439      | wlh.1_Missense_I   | NM_005116    | NP_005107    | Q9UGH3 | S23A2_HUMAN |                                | 2   | 3GAAGCACGCCT  | 0.552 |
| + | 27  | 2643      | p.S848L PLCB4_     | NM_182797    | NP_877949    | Q15147 | PLCB4_HUMAN |                                | 15  | 3TTTATCAGATCC | 0.348 |
| + | 9   | 1233      | p.V286M PCSK2_     | NM_002594    | NP_002585    | P16519 | NEC2_HUMAN  | Catalytic.                     | 7   | 3TCTACGTGTGG  | 0.682 |
| + | 3   | 487       |                    | NM_033118    | NP_149109    | Q9H1R3 | MYLK2_HUMAN |                                | 6   | GGGTGGGCAAG   | 0.632 |
| - | 10  | 5002      | aw.2_Missense_M    | NM_014071    | NP_054790    | Q14686 | NCOA6_HUMAN | n. NCOA6IP-binding region      | 7   | TGACATCGTTAT  | 0.537 |
| + | 31  | 6322      | ve.1_Missense_Mt   | NM_007186    | NP_009117    | Q9BV73 | CP250_HUMAN | 3lu-rich. Potential.           | 5   | CCAGGCCCTGG   | 0.607 |
| + | 9   | 929       | 270C PLCG1_uc0     | NM_182811    | NP_877963    | P19174 | PLCG1_HUMAN |                                | 8   | 3TTGATCGCCTC  | 0.602 |
| - | 7   | 1055      | gj.2_Missense_Mt   | NM_007050    | NP_008981    | O14522 | PTPRT_HUMAN | tential). Fibronectin type-III | 20  | 3AATGGCGTGG   | 0.512 |
| + | 3   | 351       | r_p.G61S TOX2_u    | NM_001098798 | NP_001092268 | Q96NM4 | TOX2_HUMAN  | iptional activation (By simil  | 1   | 3CCAACGGTCTG  | 0.652 |

rs149806578

|   |    |         |                  |              |              |        |              |                               |    |               |       |             |
|---|----|---------|------------------|--------------|--------------|--------|--------------|-------------------------------|----|---------------|-------|-------------|
| + | 6  | 951     | .wm.1_Missense_M | NM_024034    | NP_076939    | Q96MZ0 | GD1L1_HUMAN  | ST C-terminal.                | 1  | :CAGCCGGCCCA  | 0.607 |             |
| + | 3  | 518     | Mutation_p.V132M | NM_024331    | NP_077307    | Q9BTX7 | TTPAL_HUMAN  | CRAL-TRIO.                    | 1  | :TCACCGTGCTG  | 0.557 |             |
| + | 15 | 1949    | .C12A5_uc002xrb. | NM_001134771 | NP_001128243 | Q9H2X9 | S12A5_HUMAN  | lasmic (Potential).           | 5  | TCCTGGGCATG   | 0.557 |             |
| - | 2  | 808     | Mutation_p.R23f  | NM_020436    | NP_065169    | Q9UJQ4 | SALL4_HUMAN  |                               | 2  | GGATGCGGATC   | 0.627 |             |
| + | 4  | 464     |                  | NM_020673    | NP_065724    | Q9UL26 | RB22A_HUMAN  |                               | 0  | AGTTTCGTGCC   | 0.343 |             |
| - | 16 | 6139    | s.1_Missense_Mu  | NM_033081    | NP_149072    | Q9BTC0 | DIDO1_HUMAN  | Pro-rich.                     | 6  | CCTGGGACCTG   | 0.577 |             |
| - | 4  | 1612    | aaq.1_Missense_M | NM_017798    | NP_060268    | Q9BYJ9 | YTHD1_HUMAN  | YTH.                          | 2  | ATTGACGCTGA   | 0.602 | rs147453582 |
| - | 1  | 433     |                  | NM_001085455 | NP_001078924 | Q3LI83 | KR241_HUMAN  |                               | 0  | CATTTTCGAGTG  | 0.353 |             |
| - | 30 | 3707    | J2yqg.2_Missense | NM_003895    | NP_003886    | O43426 | SYNJ1_HUMAN  | Pro-rich.                     | 5  | GGAATCGTCTAC  | 0.438 | rs145937537 |
| + | 1  | 728     | jf.1_Missense_Mu | NM_053277    | NP_444507    | Q96NY7 | CLIC6_HUMAN  | NG- [VIM]-[DEQ]-A-[EAG]       | 2  | GCGGAGGGGCC   | 0.761 |             |
| - | 19 | 2659    | yzp.2_Missense_M | NM_022115    | NP_071398    | P57071 | PRD15_HUMAN  |                               | 0  | CTTGTCGCCGT   | 0.547 |             |
| - | 10 | 1210    | ol.3_Missense_ML | NM_016335    | NP_057419    | O43272 | PROD_HUMAN   |                               | 1  | ACTCCGCTGC    | 0.622 |             |
| - | 2  | 305     | acx.2_Missense_M | NM_003595    | NP_003586    | O60704 | TPST2_HUMAN  | lenal (Potential).            | 1  | CAGGCCGCATG   | 0.697 |             |
| - | 4  | 462     |                  | NM_001887    | NP_001878    | P53674 | CRBB1_HUMAN  | crystallin 'Greek key' 2.     | 1  | TGCGGTAGCTG   | 0.607 |             |
| + | 7  | 1967    | akv.1_Missense_M | NM_001017437 | NP_001017437 | Q569K6 | CC157_HUMAN  | Potential.                    | 1  | GCCCCGTGTCTG  | 0.662 |             |
| - | 3  | 272     | n.3_Nonsense_ML  | NM_014338    | NP_055153    | Q9UG56 | PISD_HUMAN   |                               | 3  | CTCTCGCTCCC   | 0.582 |             |
| + | 11 | 1446    | Mutation_p.R40f  | NM_006739    | NP_006730    | P33992 | MCM5_HUMAN   | MCM.                          | 1  | GATGCGAGAAG   | 0.542 | rs151176258 |
| + | 7  | 2067    | atq.1_Missense_M | NM_001039141 | NP_001034230 | Q9H2D6 | TARA_HUMAN   |                               | 1  | CCCCACAACAT   | 0.582 |             |
| + | 22 | 2741    | H7B_uc010gyl.1_M | NM_017590    | NP_060060    | Q9UGR2 | Z3H7B_HUMAN  | C2H2-type.                    | 1  | GGGCTACCACT   | 0.637 |             |
| - | 7  | 730     | J3bfw.1_Missense | NM_001009880 | NP_001009880 | Q6ICG6 | K0930_HUMAN  |                               | 0  | GCCACGCTCA    | 0.662 |             |
| - | 2  | 314     | J1_uc011arm.1_Mi | NM_139202    | NP_631941    | Q15049 | MLC1_HUMAN   |                               | 1  | GATCCGGTCA    | 0.627 |             |
| + | 8  | 914     |                  | NM_001080420 | NP_001073889 | F2Z3L0 | F2Z3L0_HUMAN |                               | 1  | CTTCCGTGGAG   | 0.587 |             |
| - | 6  | 539     | _uc003bnn.1_Miss | NM_001130922 | NP_001124394 | Q9UNT1 | RBL2B_HUMAN  |                               | 0  | TATAGGTGACT   | 0.502 |             |
| + | 1  | 1888    | k.1_Missense_Mu  | NM_152536    | NP_689749    | Q6ZNL6 | FGD5_HUMAN   |                               | 5  | CTCTGGGAGTT   | 0.562 |             |
| - | 26 | 2913    | .1_Missense_Muta | NM_015199    | NP_056014    | O15084 | ANR28_HUMAN  |                               | 1  | GCTCGCTTGG    | 0.323 | rs149481554 |
| + | 2  | 497     | M8_uc010hfu.2_M  | NM_178868    | NP_849199    | Q8IZV2 | CKLF8_HUMAN  | MARVEL.                       | 0  | GGTCCCCGCAT   | 0.502 |             |
| - | 23 | 2605    | gb.2_RNA CLASP   | NM_015097    | NP_055912    | B2RTR1 | B2RTR1_HUMAN |                               | 4  | AATACGACTGC   | 0.468 |             |
| + | 16 | 2296    | p.A719V PDCD6IF  | NM_013374    | NP_037506    | Q8WUM4 | PDC6_HUMAN   | EIAV p9. Self-association.    | 2  | CATTGCCAGAG   | 0.328 |             |
| - | 2  | 175     | _p.P24L HIGD1A   | NM_001099669 | NP_001093139 | Q9Y241 | HIG1A_HUMAN  | mic (Potential). HIG1.        | 0  | ATGAAGGAAGG   | 0.383 |             |
| - | 2  | 970     | mr.1_Missense_M  | NM_032806    | NP_116195    | Q8NAT1 | AGO61_HUMAN  |                               | 2  | GCTCACGTTCA   | 0.557 |             |
| - | 3  | 1911    | qv.2_Nonsense_M  | NM_014159    | NP_054878    | Q9BYW2 | SETD2_HUMAN  |                               | 32 | TAAATCGATTTGA | 0.313 | rs148810823 |
| + | 8  | 1285    | jav.1_Missense_M | NM_025010    | NP_079286    | O94889 | KLH18_HUMAN  | Kelch 3.                      | 0  | TCTACGTCTGT   | 0.592 |             |
| - | 12 | 6148    | _Mutation_p.P202 | NM_001407    | NP_001398    | Q9NYQ7 | CELR3_HUMAN  | ial). EGF-like 5; calcium-bir | 11 | GAGGTGGGCAG   | 0.667 |             |
| - | 3  | 461_462 | (1_uc011bcm.1_3' | NM_000581    | NP_000572    | P07203 | GPX1_HUMAN   |                               | 1  | AGGAAGGCGA    | 0.639 |             |
| - | 8  | 1151    | vT_uc003cwy.2_M  | NM_000481    | NP_000472    | P48728 | GCST_HUMAN   |                               | 1  | TGGTACCCTCC   | 0.617 |             |
| + | 3  | 1859    |                  | NM_004393    | NP_004384    | Q14118 | DAG1_HUMAN   | )-glycosylated at seven site  | 2  | GTATTGACACC   | 0.592 |             |
| - | 14 | 2258    | BP_uc003dbf.1_5' | NM_014703    | NP_055518    | Q9Y4B6 | VPRBP_HUMAN  |                               | 2  | ATACTGGATATTC | 0.463 |             |
| + | 2  | 133     | CTK_uc003ddn.2_  | NM_145262    | NP_660305    | Q8IVS8 | GLCTK_HUMAN  |                               | 0  | TGGCCGAGGCC   | 0.657 |             |
| - | 9  | 1293    | .R395W TKT_uc0   | NM_001135055 | NP_001128527 | P29401 | TKT_HUMAN    |                               | 2  | GCCCCGCGTGA   | 0.627 |             |
| - | 10 | 967     | na.2_Missense_M  | NM_017563    | NP_060033    | Q8NFM7 | I17RD_HUMAN  | ellular (Potential).          | 0  | CCCACGGGGAG   | 0.468 | rs150457965 |
| - | 2  | 268     | oa.2_Missense_M  | NM_015541    | NP_056356    | Q96JA1 | LRIG1_HUMAN  | ilar (Potential). LRR 1.      | 5  | CAGCAGGGTCA   | 0.458 |             |
| - | 15 | 2100    |                  | NM_020872    | NP_065923    | Q9P232 | CNTN3_HUMAN  | nectin type-III 1.            | 5  | CAACCCGAAATT  | 0.418 |             |
| + | 22 | 4046    | BO2_uc011bgk.1_  | NM_002942    | NP_002933    | Q9HCK4 | ROBO2_HUMAN  | lasmic (Potential).           | 11 | CTGTTGAGGCC   | 0.517 |             |
| + | 10 | 838     |                  | NM_020202    | NP_064587    | Q9NQR4 | NIT2_HUMAN   | N hydrolase.                  | 1  | AATACGCCAGC   | 0.423 |             |
| - | 13 | 1775    | _C9A10_uc010hqc  | NM_183061    | NP_898884    | Q4G0N8 | S9A10_HUMAN  |                               | 5  | AGAGACGCCTG   | 0.358 |             |
| - | 5  | 857     | jb.1_Missense_ML | NM_000796    | NP_000787    | P35462 | DRD3_HUMAN   | Cytoplasmic.                  | 4  | AGGAGCTCTGT   | 0.562 |             |
| - | 3  | 563     | bb.1_Missense_M  | NM_000796    | NP_000787    | P35462 | DRD3_HUMAN   | ilical; Name=1.               | 4  | GCCATTGCCG    | 0.622 |             |

|   |    |      |                    |              |              |        |             |                             |      |               |       |             |
|---|----|------|--------------------|--------------|--------------|--------|-------------|-----------------------------|------|---------------|-------|-------------|
| + | 5  | 1122 | ojb.1_Missense_M   | NM_001125    | NP_001116    | P54922 | ADPRH_HUMAN |                             | 1    | ATGCCCCCATGA' | 0.577 |             |
| + | 3  | 442  |                    | NM_016298    | NP_057382    | Q9UH90 | FBX40_HUMAN | TRAF-type. p.R78H(1)        | 5    | ATGTCCCGCCAC. | 0.597 | rs137929409 |
| + | 3  | 778  |                    | NM_016298    | NP_057382    | Q9UH90 | FBX40_HUMAN |                             | 5    | ACTAATGGGGAG, | 0.493 |             |
| - | 11 | 2266 | _p.Q389* ADCY5_    | NM_183357    | NP_899200    | O95622 | ADCY5_HUMAN | lasmic (Potential).         | 4    | TACCTGCTTGG/  | 0.602 |             |
| - | 19 | 2274 | nse_Mutation_p.G   | NM_012190    | NP_036322    | O75891 | AL1L1_HUMAN | de dehydrogenase.           | 4    | TACATCCCCTTC/ | 0.537 |             |
| + | 11 | 2084 | _p.Q616* TRPC1_    | NM_003304    | NP_003295    | P48995 | TRPC1_HUMAN |                             | 2    | AGCTTTCAGTTG/ | 0.363 |             |
| - | 8  | 1116 | i3_splice PLSCR4_  | NM_001128305 | NP_001121777 | Q9NRQ2 | PLS4_HUMAN  |                             | 0    | TGACCTGGAAAT/ | 0.378 |             |
| - | 6  | 1413 | _uc003ewz.2_Mis    | NM_000096    | NP_000087    | P00450 | CERU_HUMAN  | in-like 3. F5/8 type A 2.   | 1    | CAGAGGGAGCA'  | 0.403 |             |
| + | 23 | 3394 | i.1_intron P2RY12_ | NM_053002    | NP_443728    | Q86YW9 | MD12L_HUMAN |                             | 7    | GGATGCGGACG   | 0.512 |             |
| - | 4  | 1799 |                    | NM_001038705 | NP_001033794 | Q86SP6 | GP149_HUMAN | lasmic (Potential).         | 6    | ATAGGGTTTTCC/ | 0.453 |             |
| - | 10 | 1753 | opf.1_Missense_Mi  | NM_014498    | NP_055313    | O00461 | GOLI4_HUMAN | rich. Luminal (Potential).  | 5    | GCGGCCGGCCCC  | 0.418 |             |
| + | 8  | 1344 | _p.L359F SAMD7_    | NM_182610    | NP_872416    | Q7Z3H4 | SAMD7_HUMAN | SAM.                        | 1    | AACTTTGCCATT/ | 0.348 |             |
| + | 19 | 2264 | fhz.3_Missense_M   | NM_022763    | NP_073600    | Q53EP0 | FND3B_HUMAN | nectin type-III 5.          | 3    | CATCGGAAAGT/  | 0.502 |             |
| - | 4  | 957  |                    | NM_031955    | NP_114161    | Q9BXB7 | SPT16_HUMAN |                             | 3    | TTGACGAAGAT/  | 0.348 | rs141658177 |
| + | 5  | 1262 | _p.R320H NLGN1_    | NM_014932    | NP_055747    | Q8N2Q7 | NLGN1_HUMAN | cellular (Potential).       | 7    | TAAACCGTTGGA  | 0.423 | rs143069241 |
| + | 10 | 1791 |                    | NM_006218    | NP_006209    | P42336 | PK3CA_HUMAN | PI3K helical5 p.E5457(19)   | 3553 | CACTGAGCAGG.  | 0.353 | rs121913274 |
| + | 18 | 2309 |                    | NM_003940    | NP_003931    | Q92995 | UBP13_HUMAN | UBA 2.                      | 1    | TCAGCGAAATC/  | 0.408 |             |
| - | 11 | 1204 | ce MCF2L2_uc011    | NM_015078    | NP_055893    | Q86YR7 | MF2L2_HUMAN |                             | 5    | GGCTCCTGCAA   | 0.602 |             |
| + | 11 | 1720 | _p.G443E ECE2_u    | NM_014693    | NP_055508    | O60344 | ECE2_HUMAN  | othelin-converting enzyme   | 4    | TTTGGGGTCCC   | 0.498 |             |
| - | 6  | 1067 | ic.2_Missense_Mu   | NM_001346    | NP_001337    | P49619 | DGKG_HUMAN  | EF-hand 1.                  | 5    | TATCCTGAGGC/  | 0.537 |             |
| - | 2  | 3765 | C4_uc003fvp.2_Inl  | NM_018406    | NP_060876    | Q99102 | MUC4_HUMAN  | Ser-rich.                   | 0    | AGGTGGCGTGA   | 0.582 |             |
| - | 14 | 1715 | k.1_Missense_Mut   | NM_005255    | NP_005246    | O14976 | GAK_HUMAN   | hatase tensin-type.         | 4    | GTGCACGACGC.  | 0.592 |             |
| - | 7  | 663  | _p.L188F CRMP1_    | NM_001313    | NP_001304    | Q14194 | DPYL1_HUMAN |                             | 2    | TTAAGGAAGG    | 0.428 |             |
| + | 6  | 1197 |                    | NM_016531    | NP_057615    | P57682 | KLF3_HUMAN  |                             | 2    | AAAAAACCTAC.  | 0.353 |             |
| + | 3  | 314  |                    | NM_017581    | NP_060051    | Q9UGM1 | ACHA9_HUMAN | cellular (Potential).       | 7    | AGTACGATGGC/  | 0.483 |             |
| + | 4  | 385  | _p.H16Y UCHL1_     | NM_004181    | NP_004172    | P09936 | UCHL1_HUMAN |                             | 2    | TTATTCACGCAC  | 0.443 |             |
| - | 16 | 2225 | p.H572R CORIN_u    | NM_006587    | NP_006578    | Q9Y5Q5 | CORIN_HUMAN | ilar (Potential). SRCR.     | 2    | CATGGTGTCTC   | 0.453 |             |
| + | 21 | 2954 | .2_Missense_Mute   | NM_000222    | NP_000213    | P10721 | KIT_HUMAN   | lasmic (Pote p.R956Q(1))    | 5118 | TGTGCGGATCA.  | 0.532 | rs139694927 |
| - | 3  | 920  | _p.E155D UGT2B4    | NM_021139    | NP_066962    | P06133 | UD2B4_HUMAN |                             | 2    | TTCATTTCTCTG1 | 0.363 |             |
| + | 9  | 1205 | .LB_uc003hgu.3_M   | NM_000477    | NP_000468    | P02768 | ALBU_HUMAN  | Albumin 2.                  | 6    | ACATATGAAACC/ | 0.388 | rs76593094  |
| - | 4  | 392  | oik.1_Missense_M   | NM_201431    | NP_958834    | Q6ZTQ3 | RASF6_HUMAN |                             | 2    | AGCATTCTTCA/  | 0.348 |             |
| - | 2  | 197  |                    | NM_002619    | NP_002610    | P02776 | PLF4_HUMAN  |                             | 0    | TGGGACGGACC   | 0.607 |             |
| - | 3  | 315  |                    | NM_002416    | NP_002407    | Q07325 | CXCL9_HUMAN |                             | 1    | CACCAACCTGT'  | 0.318 |             |
| - | 2  | 817  |                    | NM_198281    | NP_938022    | Q6ZVF9 | GRIN3_HUMAN |                             | 3    | CTGGGGATTGC/  | 0.552 |             |
| + | 6  | 2635 | VRN1_uc011cds.1    | NM_007351    | NP_031377    | Q13201 | MMRN1_HUMAN | Potential.                  | 4    | AGATTTCCAAAA. | 0.333 |             |
| + | 4  | 677  | 03htd.3_Missense   | NM_020159    | NP_064544    | Q9H4L7 | SMRCD_HUMAN |                             | 4    | CACGTAGAAATG. | 0.234 |             |
| + | 3  | 2665 | ET2_uc010ilp.1_M   | NM_001127208 | NP_001120680 | Q6N021 | TET2_HUMAN  | Gln-rich.                   | 733  | AGACTTTTCTCT/ | 0.393 |             |
| + | 4  | 654  | CH_uc010ily.2_5'U  | NM_005327    | NP_005318    | Q16836 | HCDH_HUMAN  |                             | 1    | CTGGCCTCCAT   | 0.502 |             |
| - | 10 | 2627 | ST4_uc010imw.2_I   | NM_022569    | NP_072091    | Q9H3R1 | NDST4_HUMAN | paran sulfate N-sulfotransf | 4    | AAAAGTCCATAT/ | 0.338 |             |
| + | 4  | 1193 | e_Mutation_p.L43I  | NM_019050    | NP_061923    | Q70EK8 | UBP53_HUMAN |                             | 4    | TGCTTCTTAATA  | 0.353 |             |
| - | 12 | 2817 | af.2_Missense_Mu   | NM_001130698 | NP_001124170 | Q13507 | TRPC3_HUMAN | cellular (Potential).       | 2    | GCTGGGATTCA/  | 0.378 |             |
| - | 3  | 1070 |                    | NM_003013    | NP_003004    | Q96HF1 | SFRP2_HUMAN | NTR.                        | 2    | CTTCTGCCACC/  | 0.607 |             |
| - | 10 | 956  | _p.P289L PLRG1_    | NM_002669    | NP_002660    | O43660 | PLRG1_HUMAN | WD 3.                       | 0    | TTGTGGGGTGC.  | 0.373 |             |
| + | 10 | 1553 |                    | NM_000824    | NP_000815    | P48167 | GLRB_HUMAN  | lasmic (Probable).          | 2    | GGAAATCTCAG/  | 0.408 |             |
| + | 22 | 4224 |                    | NM_014247    | NP_055062    | Q9Y4G8 | RPGF2_HUMAN |                             | 4    | ATAGCACAAAGT/ | 0.463 |             |
| + | 4  | 1083 | _Mutation_p.P14K   | NM_012464    | NP_036596    | O43897 | TLL1_HUMAN  |                             | 7    | GAGTCCCAGAC/  | 0.423 |             |
| - | 18 | 2076 | iwu.1_Splice_Site_ | NM_001995    | NP_001986    | P33121 | ACSL1_HUMAN |                             | 2    | CATACCTGCAC/  | 0.468 |             |



|   |    |      |                     |              |              |        |              |                            |    |               |       |
|---|----|------|---------------------|--------------|--------------|--------|--------------|----------------------------|----|---------------|-------|
| - | 2  | 257  |                     | NM_005958    | NP_005949    | P48039 | MTR1A_HUMAN  | Name=2; (Potential).       | 5  | GGTACGGATAA   | 0.502 |
| + | 7  | 1211 | _p.A358E ADAMT      | NM_139056    | NP_620687    | Q8TE57 | ATS16_HUMAN  | ptidase M12B.              | 8  | .CCACGCAGACC  | 0.483 |
| - | 21 | 3514 | ND2_uc011cmz.1_     | NM_001332    | NP_001323    | Q9UQB3 | CTND2_HUMAN  |                            | 8  | CTATACAAAGTT  | 0.343 |
| - | 6  | 666  | _uc011cmz.1_Intr    | NM_001332    | NP_001323    | Q9UQB3 | CTND2_HUMAN  |                            | 8  | GGTTGCTATGG   | 0.592 |
| - | 4  | 1027 | DH12_uc003jgk.2_    | NM_004061    | NP_004052    | P55289 | CAD12_HUMAN  | r (Potential). Cadherin 2. | 2  | 'AGGTCGGGTCA' | 0.403 |
| + | 3  | 330  |                     | NM_020227    | NP_064612    | Q9NQV7 | PRDM9_HUMAN  | RAB-related.               | 6  | AAAACGCTATG   | 0.438 |
| + | 3  | 1310 | _p.R308C PDZD2_     | NM_178140    | NP_835260    | O15018 | PDZD2_HUMAN  |                            | 9  | ACAACGCCCGC   | 0.493 |
| + | 31 | 4603 | _p.V984M SPEF2_     | NM_024867    | NP_079143    | Q9C093 | SPEF2_HUMAN  |                            | 4  | ATTTGGTGACCA  | 0.358 |
| + | 28 | 5864 | _c.3_Nonsense_Mu    | NM_133433    | NP_597677    | Q6KC79 | NIPBL_HUMAN  | HEAT 1.                    | 9  | CTGTTCGAACA   | 0.328 |
| - | 28 | 3314 | _c.R1007* NUP155_   | NM_153485    | NP_705618    | O75694 | NU155_HUMAN  |                            | 1  | CATTCGGACTA   | 0.378 |
| + | 4  | 1867 |                     | NM_153361    | NP_699192    | Q8IY84 | NIM1_HUMAN   |                            | 9  | GGTGCCATACC   | 0.498 |
| + | 11 | 1745 | _f.2_Missense_Mut   | NM_012343    | NP_036475    | Q13423 | NNTM_HUMAN   |                            | 3  | ATCTAGCCTTTTC | 0.507 |
| - | 10 | 1155 | _3jqt.2_Missense_N  | NM_024669    | NP_078945    | Q3KP44 | ANR55_HUMAN  |                            | 1  | GGGCCGACTGC   | 0.502 |
| - | 11 | 1004 |                     | NM_014473    | NP_055288    | Q9UNQ2 | DIMT1_HUMAN  |                            | 1  | CCATGGAACGGC  | 0.353 |
| + | 3  | 1808 | _w.1_Missense_Mu    | NM_152405    | NP_689618    | Q8N9B5 | JMY_HUMAN    |                            | 0  | AAGCTCACATG   | 0.373 |
| - | 4  | 799  |                     | NM_001962    | NP_001953    | P52803 | EFNA5_HUMAN  |                            | 0  | AACACGATCAT   | 0.328 |
| + | 11 | 944  | _e.Mutation_p.K29   | NM_000414    | NP_000405    | P51659 | DHB4_HUMAN   | acyl-CoA dehydrogenase.    | 2  | CTGGAAGAAGA   | 0.488 |
| + | 7  | 1459 | _p.R423W SLC22A     | NM_003060    | NP_003051    | O76082 | S22A5_HUMAN  | lasmic (Potential).        | 0  | TGCCCCGGCGC   | 0.542 |
| - | 12 | 1754 | _D8_uc003lch.2_Mi   | NM_139199    | NP_631938    | Q9H0E9 | BRD8_HUMAN   |                            | 1  | TCTCATCGCCTT  | 0.473 |
| + | 5  | 1560 | V364M FAM53C_L      | NM_001135647 | NP_001129119 | Q9NYF3 | FA53C_HUMAN  | p.V364V(1)                 | 1  | GGGCTGTGCGG   | 0.612 |
| + | 1  | 1861 | _DHA1_uc003lgz.2_   | NM_018900    | NP_061723    | Q9Y5I3 | PCDA1_HUMAN  | Extracellular (Potential). | 1  | GCATCCCCTTC   | 0.657 |
| + | 1  | 1867 | _hd.2_Intron PCDH   | NM_018906    | NP_061729    | Q9Y5H8 | PCDA3_HUMAN  | Extracellular (Potential). | 8  | CGTTTCGCGTG   | 0.662 |
| + | 1  | 1229 | _DHA6_uc003lhn.2_   | NM_018901    | NP_061724    | Q9Y5I2 | PCDAA_HUMAN  | Extracellular (Potential). | 5  | GGACAGCGCTC   | 0.632 |
| + | 1  | 975  |                     | NM_013340    | NP_037472    | Q9Y5F3 | PCDB1_HUMAN  | Extracellular (Potential). | 0  | ATGGAGAAGTT   | 0.463 |
| + | 1  | 1564 | _uc003lin.2_5'Flank | NM_018937    | NP_061760    | Q9Y5E6 | PCDB3_HUMAN  | r (Potential). Cadherin 5. | 2  | ACTACGAGGCC   | 0.692 |
| + | 1  | 1564 | _HB16_uc010jfw.1_   | NM_020957    | NP_066008    | Q9NRJ7 | PCDBG_HUMAN  | ellular (Potential).       | 2  | AAAAGGAAATG   | 0.373 |
| + | 1  | 2096 | _daj.1_Missense_N   | NM_018931    | NP_061754    | Q9Y5F2 | PCDBB_HUMAN  | ical; (Potential).         | 6  | TGCTTCGCTCT   | 0.682 |
| - | 1  | 3690 |                     | NM_016580    | NP_057664    | Q9NPG4 | PCD12_HUMAN  | lasmic (Potential).        | 3  | ATTACGCAGCG   | 0.622 |
| + | 8  | 1689 | _uc011dbm.1_5'UT    | NM_152550    | NP_689763    | Q8TEC5 | SH3R2_HUMAN  |                            | 2  | CAAAATCCGCTT  | 0.567 |
| + | 19 | 3562 | _t.3_Missense_Mut   | NM_001122679 | NP_001116151 |        |              |                            | 10 | ACAAAGGCACTC  | 0.582 |
| - | 2  | 2309 |                     | NM_052899    | NP_443131    | Q7Z2K8 | GRIN1_HUMAN  |                            | 2  | CAGGGGACCA    | 0.637 |
| - | 8  | 2959 | _mhu.2_Missense_I   | NM_019057    | NP_061930    | E9PET5 | E9PET5_HUMAN |                            | 0  | .CACTGAAGCTG  | 0.577 |
| + | 6  | 928  | _uc003mix.2_Miss    | NM_031266    | NP_112556    | Q99729 | ROAA_HUMAN   | RRM 2.                     | 0  | TTAGTGTGAGAT  | 0.557 |
| - | 11 | 1224 | _INRNPH1_uc003r     | NM_005520    | NP_005511    | P31943 | HNRH1_HUMAN  |                            | 0  | 'GTGTTCTGAAAT | 0.418 |
| + | 4  | 1474 | _EP1_uc011diq.1_F   | NM_002114    | NP_002105    | P15822 | ZEP1_HUMAN   |                            | 6  | AGAGCGACCCT   | 0.398 |
| + | 7  | 1312 |                     | NM_001732    | NP_001723    | Q13410 | BT1A1_HUMAN  | . Cytoplasmic (Potential). | 2  | ATCAGGAGACAT  | 0.517 |
| - | 11 | 1481 | _3nmu.3_Missense_   | NM_001470    | NP_001461    | Q9UBS5 | GABR1_HUMAN  | ellular (Potential).       | 7  | AGAGACGCTCC   | 0.428 |
| + | 1  | 492  | _2_5'Flank TRIM10_  | NM_033229    | NP_150232    | Q9C019 | TRI15_HUMAN  |                            | 0  | CAACCCCGTCC   | 0.627 |
| - | 1  | 58   | _l.2_Missense_Mut   | NM_002341    | NP_002332    | Q06643 | TNFC_HUMAN   | lasmic (Potential).        | 0  | .GGGAACCCCTC  | 0.642 |
| + | 29 | 3874 | _c.1_Missense_Mut   | NM_007293    | NP_009224    | P0C0L4 | CO4A_HUMAN   |                            | 0  | 'TGCTTCACGAG  | 0.672 |
| - | 50 | 3887 | _ise.Mutation_p.S1  | NM_080680    | NP_542411    | P13942 | COBA2_HUMAN  | le-helical region.         | 5  | CTGGAGATCCT   | 0.547 |
| + | 3  | 586  | _B_uc011dqu.1_5'F   | NM_001077516 | NP_001070984 | Q92504 | S39A7_HUMAN  | ical; (Potential).         | 1  | TTATCCCGTGC   | 0.547 |
| - | 7  | 1569 | _b.2_Missense_Mu    | NM_001142883 | NP_001136355 | Q96PC2 | IP6K3_HUMAN  |                            | 0  | .GTGAGGATGCG  | 0.552 |
| - | 15 | 1067 | _D42N CPNE5_uc      | NM_020939    | NP_065990    | Q9HCH3 | CPNE5_HUMAN  | VWFA.                      | 1  | TGAAATCAATGG  | 0.592 |
| + | 60 | 9013 |                     | NM_001371    | NP_001362    |        |              |                            | 21 | AAACAGATTTC   | 0.363 |
| - | 10 | 1687 | _u.1_Missense_Mu    | NM_007162    | NP_009093    | P19484 | TFEB_HUMAN   |                            | 1  | .GGCTGCTGGCC  | 0.667 |
| - | 4  | 1181 | _p.A252T SLC35B2    | NM_178148    | NP_835361    | Q8TB61 | S35B2_HUMAN  |                            | 2  | .ACATCGGGAGC  | 0.582 |

|   |    |           |                                                |              |              |        |             |                              |       |                |       |             |
|---|----|-----------|------------------------------------------------|--------------|--------------|--------|-------------|------------------------------|-------|----------------|-------|-------------|
| - | 4  | 1019      | 2_intron TMEM151                               | NM_182539    | NP_872345    | Q5JU00 | TCTE1_HUMAN |                              | 4     | TTGCTTCGGGTC   | 0.537 |             |
| + | 11 | 1473      | ΔAG_uc010jzt.2_R                               | NM_014464    | NP_055279    | Q9UJW2 | TINAG_HUMAN |                              | 4     | TATGGGGAGAG    | 0.403 |             |
| + | 2  | 124       |                                                | NM_001010872 | NP_001010872 | Q5T0W9 | FA83B_HUMAN |                              | 6     | TGGAGACCTCAT   | 0.388 |             |
| + | 5  | 1011      |                                                | NM_001010872 | NP_001010872 | Q5T0W9 | FA83B_HUMAN |                              | 6     | TGAAAAGCCCTC   | 0.428 |             |
| + | 5  | 2599      |                                                | NM_001010872 | NP_001010872 | Q5T0W9 | FA83B_HUMAN |                              | 6     | TATCTCCTAGAAC  | 0.393 |             |
| + | 7  | 804       | sense_Mutation_p.                              | NM_001031623 | NP_001026794 | Q9Y4E5 | ZN451_HUMAN | 2H2-type 1.                  | 2     | TGGTTCGATCAC   | 0.353 |             |
| + | 14 | 2184      | Δkat.2_Splice_Site                             | NM_019842    | NP_062816    | Q9NR82 | KCNQ5_HUMAN |                              | 7     | TCTTAGGTACAC   | 0.408 |             |
| + | 13 | 2196      | p.R666Q MT01_u                                 | NM_133645    | NP_598400    | Q9Y2Z2 | MT01_HUMAN  |                              | 6     | TCAACGAAGAC    | 0.423 |             |
| - | 14 | 2945      | ΔA1_uc003pht.2_                                | NM_004370    | NP_004361    | Q99715 | COCA1_HUMAN | nectin type-III 6.           | 9     | TAGCAGATGTCC   | 0.393 |             |
| - | 13 | 1926      |                                                | NM_001563    | NP_001554    | Q17R60 | IMPG1_HUMAN | SEA 2.                       | 3     | TGAGCTCGGTAC   | 0.458 |             |
| + | 3  | 1240      | p.Q102K TPBG_u                                 | NM_006670    | NP_006661    | Q13641 | TPBG_HUMAN  | ilar (Potential). LRR 1.     | 1     | TGCAACCAGCTG   | 0.721 |             |
| + | 2  | 705       | Δm.2_Missense_M                                | NM_153362    | NP_699193    | Q8N3Z0 | PRS35_HUMAN | peptidase S1.                | 1     | TAGGGAGTAAAA   | 0.478 |             |
| + | 1  | 611       | Δp.V19M NT5E_u                                 | NM_002526    | NP_002517    | P21589 | 5NTD_HUMAN  |                              | 4     | TGCGCGGTGCTG   | 0.701 |             |
| + | 11 | 1103      |                                                | NM_173560    | NP_775831    | Q8HWS3 | RFX6_HUMAN  |                              | 3     | TACATAAGAAATT  | 0.308 |             |
| - | 9  | 1071      | ΔNC1_uc003pyx.1_                               | NM_020755    | NP_065806    | Q9NRX5 | SERC1_HUMAN | lasmic (Potential).          | 1     | TAGTACGGATG    | 0.323 |             |
| + | 7  | 718       | ΔD52L1_uc003pzy                                | NM_003287    | NP_003278    | Q16890 | TPD53_HUMAN |                              | 0     | TAGGCGGTACG    | 0.478 |             |
| - | 2  | 1052      |                                                | NM_145176    | NP_660159    | Q8TD20 | GTR12_HUMAN | ical; (Potential).           | 1     | TGTTGGGCCAC    | 0.418 |             |
| + | 4  | 4928      | Δ_Mutation_p.R146                              | NM_005100    | NP_005091    | Q02952 | AKA12_HUMAN |                              | 8     | TGTACGTACAG    | 0.448 |             |
| - | 78 | 14481     | Δou.3_Nonsense_M                               | NM_182961    | NP_892006    | Q8NF91 | SYNE1_HUMAN | lasmic (Potential).          | 45    | TGGTCTGCCCG    | 0.393 |             |
| + | 7  | 975       | Δjw.1_Missense_M                               | NM_032532    | NP_115921    | Q4ZHG4 | FNDC1_HUMAN | nectin type-III 3.           | 8     | TAGGACGAATTG   | 0.488 |             |
| - | 37 | 5719      |                                                | NM_005577    | NP_005568    | P08519 | APOA_HUMAN  | peptidase S1.                | 6     | TCCCTGAGGACC   | 0.502 |             |
| + | 29 | 4793      | Δc.1_Missense_M                                | NM_001040001 | NP_001035090 | P55196 | AFAD_HUMAN  | Potential.                   | 5     | TGCCCGAGGAG    | 0.483 |             |
| - | 11 | 1683      | ΔR27_uc003qwy.2_Missense_Mutation_p.S261L WDR2 | NM_001073922 | NP_001073922 | A2RRH5 | WDR27_HUMAN |                              | 1     | TACACGATCCG    | 0.547 |             |
| - | 23 | 3210      | Δp.1_Missense_M                                | NM_001080453 | NP_001073922 | Q8N201 | INT1_HUMAN  |                              | 0     | TAGAGGCAGGC    | 0.692 |             |
| + | 4  | 1273      | p.V109M FSCN1_u                                | NM_003088    | NP_003079    | Q16658 | FSCN1_HUMAN |                              | 1     | TATCATCGTGTCC  | 0.617 |             |
| + | 8  | 1294      | Δh.2_Missense_M                                | NM_178559    | NP_848654    | Q2M3G0 | ABCB5_HUMAN | i. ABC transmembrane type    | 6     | TCTCTGGGGACA   | 0.299 |             |
| + | 5  | 971       |                                                | NM_003777    | NP_003768    | Q96DT5 | DYH11_HUMAN | n (By similarity).           | 15    | TAGCAGCTATTTT  | 0.388 |             |
| + | 10 | 1310      | e.1_Missense_Mu                                | NM_031414    | NP_113602    | Q9BXU1 | STK31_HUMAN |                              | 9     | TATAATATGGGCA  | 0.383 |             |
| + | 8  | 1322      |                                                | NM_002047    | NP_002038    | P41250 | SYG_HUMAN   |                              | 1     | TTTTCTGCTGCTG  | 0.398 |             |
| - | 3  | 703       | p.K167* KIAA089                                | NM_001100425 | NP_001093895 | Q8NCT3 | K0895_HUMAN |                              | 0     | TAGGCTTTGGCT   | 0.408 |             |
| + | 4  | 254       | ΔBE2D4_uc003tjb.1                              | NM_015983    | NP_057067    | Q9Y2X8 | UB2D4_HUMAN |                              | 0     | TACTTTCTTACAC  | 0.502 |             |
| - | 7  | 874       |                                                | NM_207366    | NP_997249    | Q6ZU15 | SEP14_HUMAN |                              | 0     | TCACTTCATCTGT  | 0.428 |             |
| - | 5  | 1584      |                                                | NM_033273    | NP_150376    | Q96JC4 | ZN479_HUMAN | 2H2-type 10.                 | 4     | TACATTTGTAGG   | 0.453 |             |
| - | 4  | 2184      |                                                | NM_015852    | NP_056936    | Q03924 | ZN117_HUMAN |                              | 1     | TCTCCACTATGA   | 0.363 |             |
| + | 7  | 1198      | Δ3tvz.2_Missense_I                             | NM_022479    | NP_071924    | Q6IS24 | GLTL3_HUMAN | renal (Potential).           | 7     | TCTCTTCGCGTT   | 0.537 |             |
| + | 6  | 1216      | Δuap.2_Missense_I                              | NM_016328    | NP_057412    | Q9UHL9 | GT2D1_HUMAN |                              | 4     | TAGACACCTTCC   | 0.657 |             |
| - | 6  | 10547     | p.R3420* PCLO_u                                | NM_033026    | NP_149015    | Q9Y6V0 | PCLO_HUMAN  |                              | 7     | TCTCTCGGACTT   | 0.428 |             |
| - | 2  | 1266      | Δv.2_Missense_M                                | NM_033026    | NP_149015    | Q9Y6V0 | PCLO_HUMAN  |                              | 7     | TGCCCGAGCTGT   | 0.552 |             |
| - | 11 | 1786      | p.S427F ASNS_u                                 | NM_133436    | NP_597680    | P08243 | ASNS_HUMAN  | agine synthetase.            | 1     | TAAATAGGAAGAA  | 0.343 |             |
| - | 21 | 2788      | Δ_Mutation_p.P90                               | NM_007356    | NP_031382    | A4D0S4 | LAMB4_HUMAN | inin EGF-like 8.             | 8     | TAGAAGGATTTCT  | 0.438 |             |
| + | 12 | 1790      | ΔR_uc011knq.1_5                                | NM_000492    | NP_000483    | P13569 | CFTR_HUMAN  | otential). ABC transporter 1 | 5     | TCAACGAGCAA    | 0.338 | rs121909044 |
| + | 12 | 3708      | Δ2_intron PTPRZ1                               | NM_002851    | NP_002842    | P23471 | PTPRZ_HUMAN | ellular (Potential).         | 9     | TCTGCTCATACCA  | 0.403 |             |
| + | 4  | 338       | Δp.D16N ASB15_u                                | NM_080928    | NP_563616    | Q8WXX1 | ASB15_HUMAN |                              | 3     | TAGTTATGATATTC | 0.353 |             |
| + | 1  | 543       |                                                | NR_002144    |              |        |             |                              | 0     | TGCCAGGAAGC    | 0.602 |             |
| + | 6  | 1768      | Δ1_intron CALD1_u                              | NM_033138    | NP_149129    | Q05682 | CALD1_HUMAN |                              | 0     | TAAAAGGGAGAAC  | 0.403 |             |
| - | 2  | 1298      | Δ1_5'Flank PARP1                               | NM_022750    | NP_073587    | Q9H0J9 | PAR12_HUMAN |                              | 3     | TAGATTGGCATA   | 0.512 |             |
| - | 15 | 1859_1860 |                                                | NM_004333    | NP_004324    | P15056 | BRAF_HUMAN  | rotein kinase_R603>I(2) p.T  | 18290 | TATTTCACTGTAG  | 0.366 | rs121913378 |

|   |    |           |                   |              |              |        |             |                                |     |               |       |             |
|---|----|-----------|-------------------|--------------|--------------|--------|-------------|--------------------------------|-----|---------------|-------|-------------|
| + | 13 | 1606      |                   | NM_004668    | NP_004659    | O43451 | MGA_HUMAN   | (Potential) Maltase.           | 2   | CTTTTTCACAATC | 0.363 |             |
| + | 23 | 3268      | il.1_Missense_Mut | NM_198455    | NP_940857    | A2VEC9 | SSPO_HUMAN  | VWFD 3.                        | 0   | ATGGGGTGAGC   | 0.642 |             |
| + | 5  | 876       | C3_uc003wvv.2_I   | NM_006765    | NP_006756    | Q13454 | TUSC3_HUMAN | ical; (Potential).             | 3   | CAACTTGGAGTT  | 0.398 |             |
| - | 8  | 1470      | i.2_Missense_Mut  | NM_139278    | NP_644807    | Q8N145 | LGI3_HUMAN  | EAR 4.                         | 1   | AGCTGCTGGAC   | 0.612 |             |
| + | 11 | 1128      | ise_Mutation_p.H1 | NM_014265    | NP_055080    | Q9UKQ2 | ADA28_HUMAN | 'B. Extracellular (Potential). | 5   | ATGTTTCATGAC  | 0.458 |             |
| + | 3  | 2559      | p.K624N NEFM_u    | NM_005382    | NP_005373    | P07197 | NFM_HUMAN   | Tail.                          | 1   | GAAAAGAAGGG   | 0.338 |             |
| + | 27 | 3298      |                   | NM_001031836 | NP_001027006 | A8MYU2 | KCNU1_HUMAN | lasmic (Potential).            | 1   | CATTCAGACACA  | 0.388 |             |
| + | 6  | 901       | p.R196C LETM2_    | NM_144652    | NP_653253    | Q2VYF4 | LETM2_HUMAN | ondrial matrix (Potential).    | 0   | TAGATCGCCCT   | 0.502 |             |
| + | 12 | 1382      | se_Mutation_p.S1  | NM_001556    | NP_001547    | O14920 | IKKB_HUMAN  |                                | 7   | GATCTCCCCAC   | 0.408 |             |
| - | 5  | 551       | lcw.1_Missense_M  | NM_004198    | NP_004189    | Q15825 | ACHA6_HUMAN | Extracellular.                 | 0   | TTGATGATCAAA  | 0.363 |             |
| - | 20 | 4148      | fb.1_Missense_Mu  | NM_006540    | NP_006531    | Q15596 | NCOA2_HUMAN |                                | 16  | CCATTCGGGGT   | 0.512 |             |
| + | 13 | 2305      | iR1_uc010mch.2_I  | NM_018002    | NP_060472    | Q8N573 | OXR1_HUMAN  | TLD.                           | 0   | TATCCATGGACT  | 0.368 |             |
| - | 4  | 621       | .1_intron SAMD12  | NM_207506    | NP_997389    | Q8N810 | SAM12_HUMAN |                                | 1   | CCATCCATCCA   | 0.423 |             |
| - | 6  | 1049      |                   | NM_003184    | NP_003175    | Q6P1X5 | TAF2_HUMAN  |                                | 6   | ATGTATGGATCTA | 0.353 |             |
| - | 15 | 2240      | tdt.2_Missense_M  | NM_004519    | NP_004510    | O43525 | KCNQ3_HUMAN |                                | 5   | CCCTCTTCTCT   | 0.532 |             |
| - | 13 | 2173      | M135B_uc003yva    | NM_015912    | NP_056996    | Q49AJ0 | F135B_HUMAN |                                | 9   | AGATTCTCTCT   | 0.527 |             |
| - | 7  | 1158      | p.R100Q CYP11B    | NM_000497    | NP_000488    | P15538 | C11B1_HUMAN |                                | 3   | CCACTCGCTCC   | 0.602 |             |
| - | 5  | 627       | AH_uc003zat.1_5'I | NM_017570    | NP_060040    | O14841 | OPLA_HUMAN  |                                | 0   | ATGCCTCGAGAT  | 0.677 |             |
| + | 6  | 632       | i.2_RNA ADCK5_L   | NM_174922    | NP_777582    | Q3MIX3 | ADCK5_HUMAN | rotein kinase.                 | 1   | GGCCCTCCCCC   | 0.637 |             |
| - | 1  | 263       | TR APTX_uc003zt   | NM_175072    | NP_778242    | Q7Z2E3 | APTX_HUMAN  | ; with ADPRT and NCL.          | 1   | CGCTTCCAAATG  | 0.468 |             |
| - | 28 | 3305      | p.F819L UBAP2_U   | NM_018449    | NP_060919    | Q5T6F2 | UBAP2_HUMAN |                                | 3   | TGTAGGAATGG   | 0.652 |             |
| + | 12 | 4678      | SC2_uc003zwx.3_   | NM_014806    | NP_055621    | Q8N2Y8 | RUSC2_HUMAN | SH3.                           | 1   | TCCTACGAGTG   | 0.642 |             |
| - | 2  | 1001_1002 |                   | NM_001163    | NP_001154    | Q02410 | APBA1_HUMAN | rc-18-1 binding.               | 1   | CGTCGGAGCG    | 0.713 |             |
| + | 5  | 751       |                   | NM_015110    | NP_055925    | Q8IY18 | SMC5_HUMAN  | Potential.                     | 3   | AAATATCACTGT  | 0.368 |             |
| - | 9  | 1337      | ic.1_Nonsense_Mt  | NM_017662    | NP_060132    | Q9BX84 | TRPM6_HUMAN | lasmic (Potential).            | 8   | AATTTGAAAAAG  | 0.383 |             |
| - | 5  | 445       | nsc.1_Missense_M  | NM_000197    | NP_000188    | P37058 | DHB3_HUMAN  |                                | 0   | CCATTCGACAT   | 0.388 |             |
| + | 5  | 1847      | ag.1_Missense_M   | NM_006981    | NP_008912    | Q92570 | NR4A3_HUMAN |                                | 173 | AGGTCGTCTGC   | 0.458 |             |
| - | 2  | 131       | ibd.3_Missense_M  | NM_001127610 | NP_001121082 | Q14032 | BAAT_HUMAN  |                                | 3   | CACAGGGGTAG   | 0.443 | rs147241373 |
| + | 3  | 917       | n_p.V58I ZNF462_  | NM_021224    | NP_067047    | Q96JM2 | ZN462_HUMAN |                                | 5   | CGCCCGTATCA   | 0.507 |             |
| + | 6  | 531       | orf6_uc010mtr.2_F | NM_017832    | NP_060302    | Q9NX38 | CI006_HUMAN |                                | 1   | AGTTGTGTTACC  | 0.363 |             |
| + | 6  | 558       | orf6_uc010mtr.2_F | NM_017832    | NP_060302    | Q9NX38 | CI006_HUMAN |                                | 1   | GTAAGAAGCATAA | 0.368 |             |
| - | 38 | 8148      | ty.2_Missense_Mi  | NM_153366    | NP_699197    | Q4LDE5 | SVEP1_HUMAN | Sushi 20.                      | 7   | GGATGGAACCT   | 0.458 |             |
| - | 47 | 5534      |                   | NM_001080398 | NP_001073867 |        |             |                                | 0   | TTGTCGGACCT   | 0.418 | rs145249965 |
| - | 25 | 3708      | g_Mutation_p.W11  | NM_173521    | NP_775792    | Q5VXU9 | CI084_HUMAN |                                | 2   | TCTTTCCAGTAC  | 0.363 |             |
| - | 20 | 4079      | A1234V AKNA_uc    | NM_030767    | NP_110394    | Q7Z591 | AKNA_HUMAN  |                                | 6   | ACCCCGCCTGC   | 0.632 |             |
| + | 2  | 1320      | iTN2_uc004bjt.1_I | NM_001099679 | NP_001093149 | Q13049 | TRI32_HUMAN | NHL 1.                         | 3   | TAGTCGCTGACC  | 0.493 |             |
| + | 11 | 1817      | mf.1_Missense_M   | NM_000962    | NP_000953    | P23219 | PGH1_HUMAN  |                                | 2   | GACGCCACAC    | 0.562 |             |
| + | 1  | 888       |                   | NM_001005234 | NP_001005234 | Q8NH93 | OR1L3_HUMAN | lasmic (Potential).            | 1   | GACATGAAACGC  | 0.363 |             |
| - | 4  | 788       | nse_Mutation_p.A  | NM_001100588 | NP_001094058 | Q9HBD1 | RC3H2_HUMAN |                                | 4   | GACAGCGGCC    | 0.478 |             |
| - | 7  | 1011      | nww.2_Missense_I  | NM_002721    | NP_002712    | O00743 | PPP6_HUMAN  |                                | 2   | ACAACGATAGC   | 0.403 |             |
| + | 10 | 1948      | p.S541L GAPVD1    | NM_015635    | NP_056450    | Q14C86 | GAPD1_HUMAN |                                | 4   | GCTTCGGATGC   | 0.373 | rs139685989 |
| + | 7  | 1267      | zv.2_Missense_Mu  | NM_005157    | NP_005148    | P00519 | ABL1_HUMAN  | rotein kinase.                 | 817 | CCGACGTCTGG   | 0.507 |             |
| - | 22 | 3059      | i_uc011mcq.1_M    | NM_000368    | NP_000359    | Q92574 | TSC1_HUMAN  | Potential. p.?(1)              | 14  | CGGCCTGCAGC   | 0.448 |             |
| - | 6  | 880       |                   | NM_138462    | NP_612471    | Q96E35 | ZMY19_HUMAN |                                | 1   | ATGCTGGAAGG   | 0.647 |             |
| + | 41 | 5895      | coi.2_Missense_M  | NM_000718    | NP_000709    | Q00975 | CAC1B_HUMAN | lasmic (Potential).            | 6   | AGATTCCACCT   | 0.592 |             |
| + | 3  | 493       | XD1_uc011mgx.1_   | NM_018390    | NP_060860    | Q9NUJ7 | PLCX1_HUMAN | 'I-PLC X-box.                  | 0   | CGCAGGAGGAG   | 0.622 |             |
| + | 3  | 536       | XD1_uc011mgx.1_   | NM_018390    | NP_060860    | Q9NUJ7 | PLCX1_HUMAN | 'I-PLC X-box.                  | 0   | GCCCTGCATCA   | 0.637 |             |

|   |    |         |                   |              |              |        |             |                               |    |               |       |             |
|---|----|---------|-------------------|--------------|--------------|--------|-------------|-------------------------------|----|---------------|-------|-------------|
| - | 7  | 8087    |                   | NM_015419    | NP_056234    | Q9NR99 | MXRA5_HUMAN | like C2-type 11.              | 8  | GGTTATGATACTC | 0.632 |             |
| + | 3  | 182     |                   | NM_016562    | NP_057646    | Q9NYK1 | TLR7_HUMAN  |                               | 5  | CTTATCCTTTTTA | 0.353 |             |
| - | 5  | 683     | SB9_uc010ner.2_l  | NM_001031739 | NP_001026909 | Q96DX5 | ASB9_HUMAN  | ANK 4.                        | 0  | CACGTGGCCTG   | 0.453 |             |
| - | 7  | 958     | B11_uc010nes.1_l  | NM_080873    | NP_543149    | Q8WXH4 | ASB11_HUMAN | SOCS box.                     | 3  | ATAGGAGGAATC  | 0.493 | rs145057594 |
| + | 5  | 494     | yn.2_Missense_Mi  | NM_003159    | NP_003150    | O76039 | CDKL5_HUMAN | rotein kinase.                | 6  | TTCGTCGGAGG   | 0.383 |             |
| + | 3  | 246     | lv.1_Missense_Mt  | NM_173357    | NP_775493    |        |             |                               | 0  | ATGAAATTCCTGC | 0.408 |             |
| - | 56 | 8018    | sn.2_Missense_Mt  | NM_031407    | NP_113584    | Q7Z6Z7 | HUWE1_HUMAN |                               | 17 | GGGTGAGACGA   | 0.587 |             |
| - | 8  | 1292    |                   | NM_198510    | NP_940912    | Q6UXX5 | ITH5L_HUMAN | VWFA.                         | 6  | ATACCCTGTGG   | 0.592 |             |
| - | 20 | 3235    | se_Mutation_p.R1  | NM_201599    | NP_963893    | Q14202 | ZMYM3_HUMAN |                               | 1  | GTCCCGGGAGC   | 0.537 |             |
| + | 8  | 952     | RN1_uc011mpt.1_l  | NM_052957    | NP_443189    | Q96QF7 | ACRC_HUMAN  | Asp/Ser-rich.                 | 3  | CCGACGACAAAC  | 0.473 |             |
| + | 8  | 1294    | RN1_uc011mpt.1_l  | NM_052957    | NP_443189    | Q96QF7 | ACRC_HUMAN  | Asp/Ser-rich.                 | 3  | AAGCTCCCAGC   | 0.557 |             |
| - | 30 | 6839    | l.E2165K ATRX_uc  | NM_000489    | NP_000480    | P46100 | ATRX_HUMAN  | case C-terminal.              | 30 | TAAGCTCATTA   | 0.393 |             |
| - | 7  | 928     | utation_p.R241H   | NM_007052    | NP_008983    | Q9Y5S8 | NOX1_HUMAN  | tase. Extracellular (Potenti  | 1  | ACTTGCAGAGGA  | 0.498 | rs35242502  |
| - | 22 | 1731    | sn.1_Missense_IV  | NM_001847    | NP_001838    | Q14031 | CO4A6_HUMAN | le-helical region.            | 8  | TTCTTCTTTTGC  | 0.512 |             |
| + | 3  | 464     |                   | NM_001004308 | NP_001004308 | Q6ZR62 | ZCH16_HUMAN |                               | 1  | AATCATCATCTAC | 0.468 |             |
| + | 4  | 511     |                   | NM_173798    | NP_776159    | Q6PEW1 | ZCH12_HUMAN |                               | 1  | CCGGCCGGCTGA  | 0.493 |             |
| + | 13 | 1621    | e_Mutation_p.T45  | NM_018666    | NP_061136    | Q9NXZ1 | SAGE1_HUMAN |                               | 3  | CATTACTCACAC  | 0.448 |             |
| + | 17 | 2020    | l.R565C FMR1_uc   | NM_002024    | NP_002015    | Q06787 | FMR1_HUMAN  | tion with RANBP9.             | 3  | AAGATCGTAAC   | 0.433 |             |
| + | 2  | 3807    | fqm.1_Missense_I  | NM_032973    | NP_116755    | Q9BZA8 | PC11Y_HUMAN | lasmic (Potential).           | 0  | TTTCTGACTGT   | 0.458 |             |
| - | 13 | 1636    | vkz.1_Missense_IV | NM_001080484 | NP_001073953 | Q9C0B2 | K1751_HUMAN |                               | 1  | CAGCCGCTCCA   | 0.642 |             |
| + | 9  | 1378    |                   | NM_015215    | NP_056030    | Q9Y6Y1 | CMTA1_HUMAN |                               | 9  | TGATGGGGAGC   | 0.642 |             |
| - | 9  | 686     | bew.2_Missense_   | NM_002885    | NP_002876    | P47736 | RPGP1_HUMAN |                               | 3  | AGATGGGGATG   | 0.592 |             |
| + | 3  | 376     | _Missense_Mutati  | NM_005839    | NP_005830    | Q8IYB3 | SRRM1_HUMAN | toplasmic accumulation. Nt    | 3  | GCCTTGATAAC   | 0.338 |             |
| - | 11 | 1603    | p.S486Y FGR_uc    | NM_005248    | NP_005239    | P09769 | FGR_HUMAN   | rotein kinase.                | 2  | ACAGGGATGCT   | 0.592 |             |
| + | 3  | 1183    |                   | NM_018053    | NP_060523    | Q9H6D3 | XKR8_HUMAN  |                               | 0  | GCTGCCTCAGA   | 0.577 |             |
| + | 10 | 1288    | ogj.1_Missense_IV | NM_022164    | NP_071447    | Q9GZM7 | TINAL_HUMAN |                               | 0  | TGAGCCTTGGG   | 0.567 |             |
| + | 29 | 5117    | e_Mutation_p.P16  | NM_015112    | NP_055927    | Q6P0Q8 | MAST2_HUMAN |                               | 11 | CCATCCCTCCT   | 0.632 |             |
| - | 3  | 692     | lGBL4_uc001crv.1  | NM_024603    | NP_078879    | Q7L4P6 | BEND5_HUMAN | Potential.                    | 1  | AGCTTCTTGGC   | 0.607 |             |
| - | 1  | 389_390 | ddy.2_Missense_IV | NM_001018067 | NP_001018077 | Q8NC51 | PAIRB_HUMAN |                               | 1  | CTGGGGGGCAC   | 0.634 |             |
| - | 6  | 867     |                   | NM_002053    | NP_002044    | P32455 | GBP1_HUMAN  |                               | 2  | GTTTCATCTTTT  | 0.303 |             |
| - | 24 | 3451    | lE4DIP_uc001elm.  | NM_014644    | NP_055459    | Q5VU43 | MYOME_HUMAN |                               | 5  | CTCAAGGCAAA   | 0.493 |             |
| + | 10 | 2038    | lKRD35_uc010oyx   | NM_144698    | NP_653299    | Q8N283 | ANR35_HUMAN | Potential.                    | 5  | AGAGGGAGCTA   | 0.612 |             |
| + | 11 | 1550    | p.E419* SNX27_l   | NM_030918    | NP_112180    | Q96L92 | SNX27_HUMAN |                               | 3  | TGCATGAGTGC   | 0.418 |             |
| + | 2  | 1053    |                   | NM_001025231 | NP_001020402 | Q5T749 | KPRP_HUMAN  | Pro-rich.                     | 5  | CTCCCGTGCTC   | 0.637 | rs147332234 |
| - | 4  | 451     |                   | NM_052891    | NP_443123    | Q96LB9 | PGRP3_HUMAN |                               | 4  | ATAAGGCAGCA   | 0.512 |             |
| + | 20 | 2176    |                   | NM_020452    | NP_065185    | P98198 | AT8B2_HUMAN | lasmic (Potential).           | 2  | TGACGGATGAC   | 0.562 |             |
| - | 3  | 635     | l.2_Intron SLAMF  | NM_033438    | NP_254273    | Q96A28 | SLAF9_HUMAN | l. Extracellular (Potential). | 1  | TATCCCCCCGG   | 0.577 |             |
| - | 3  | 541     |                   | NM_005717    | NP_005708    | O15511 | ARPC5_HUMAN |                               | 0  | CAGACGGGCTC   | 0.338 | rs144388879 |
| - | 5  | 732     | l.1_Intron FAM129 | NM_052966    | NP_443198    | Q9BZQ8 | NIBAN_HUMAN |                               | 4  | AGCCTCGTGA    | 0.582 |             |
| + | 6  | 1075    | SD4_uc010prt.1_R  | NM_181644    | NP_857595    | Q8N468 | MFSD4_HUMAN |                               | 3  | TTCCGCCTTCG   | 0.627 |             |
| + | 7  | 1238    | m.2_RNA KCNK2     | NM_001017425 | NP_001017425 | Q95069 | KCNK2_HUMAN | ed for basal channel activit  | 0  | TCCAGCGGGCC   | 0.547 |             |
| - | 54 | 11020   |                   | NM_206933    | NP_996816    | O75445 | USH2A_HUMAN | ential). Fibro p.R3545W(1)    | 26 | TCCCCGAAAAC   | 0.383 | rs145718329 |
| + | 18 | 4537    | m.2_Missense_Mu   | NM_198551    | NP_940953    | Q5JRA6 | MIA3_HUMAN  | ic (Potential). Potential.    | 5  | GACTGGAAGAT   | 0.403 |             |
| - | 1  | 256     |                   | NM_001005487 | NP_001005487 | Q8NGZ3 | O13G1_HUMAN | ellular (Potential).          | 1  | TATTTTCTGATGT | 0.488 |             |
| + | 2  | 292     |                   | NM_002216    | NP_002207    | P19823 | ITIH2_HUMAN |                               | 3  | AAATTTCAATTGC | 0.318 |             |
| - | 4  | 723     |                   | NM_000242    | NP_000233    | P11226 | MBL2_HUMAN  | C-type lectin.                | 1  | AATCTTCATCAG  | 0.488 |             |
| - | 2  | 672     |                   | NM_001308    | NP_001299    | P15169 | CBPN_HUMAN  | Catalytic.                    | 4  | GGCAGCAGCCA   | 0.572 |             |

|   |    |           |                    |              |              |        |             |                                |    |               |       |             |
|---|----|-----------|--------------------|--------------|--------------|--------|-------------|--------------------------------|----|---------------|-------|-------------|
| + | 1  | 337       |                    | NM_001005172 | NP_001005172 | Q8NGK3 | O52K2_HUMAN | Name=3; (Potential).           | 2  | TCATGGAGTCA   | 0.522 |             |
| - | 2  | 95        |                    | NM_054030    | NP_473371    | Q96LB1 | MRGX2_HUMAN | cellular (Potential).          | 1  | TGGTTGGATCCA  | 0.453 |             |
| + | 6  | 1128      | nuc.2_Missense_M   | NM_001077242 | NP_001070710 | Q96QD5 | DEPD7_HUMAN |                                | 2  | AGCTCCTTCTA   | 0.333 |             |
| - | 10 | 2118      | _p.R500Q SLC1A2    | NM_004171    | NP_004162    | P43004 | EAA2_HUMAN  |                                | 3  | GCACTCGATGCT  | 0.443 |             |
| + | 1  | 593       |                    | NM_001005275 | NP_001005275 | Q8NGL6 | O4A15_HUMAN | cellular (Potential).          | 2  | CTGTGGACCCA   | 0.423 |             |
| - | 1  | 585       |                    | NM_001005489 | NP_001005489 | Q8NGF7 | OR5BH_HUMAN | Name=5; (Potential).           | 3  | AAGAATCAACTC  | 0.373 |             |
| + | 4  | 328       | n_p.P14L POU2F1    | NM_014352    | NP_055167    | Q9UKI9 | PO2F3_HUMAN |                                | 2  | AGAAACCAAATG  | 0.517 |             |
| - | 4  | 798       | B4_uc001qzf.1_inl  | NM_006249    | NP_006240    | Q04118 | PRB3_HUMAN  | PQS]-P-[PS]-Q-[GE]-G-N-[       | 1  | GTTACCTTCTTC  | 0.607 |             |
| - | 5  | 629       | ion_p.E118K END    | NM_006025    | NP_006016    | P21128 | ENDOU_HUMAN |                                | 3  | GTCTTCTCTCTC  | 0.507 |             |
| - | 1  | 150       |                    | NM_004693    | NP_004684    | O95678 | K2C75_HUMAN | ily-rich. Head.                | 0  | CACTCCCTGCT   | 0.672 |             |
| - | 6  | 604       |                    | NM_006741    | NP_006732    | Q13522 | PPR1A_HUMAN | ion with PPP1R15A.             | 0  | CTCTCTCGTGAG  | 0.542 |             |
| + | 2  | 1126      |                    | NM_021191    | NP_067014    | Q9HD90 | NDF4_HUMAN  |                                | 4  | CTTATGAGGGC   | 0.498 |             |
| + | 2  | 702       |                    | NM_004416    | NP_004407    | Q86Y01 | DTX1_HUMAN  | WWE 2.                         | 4  | CTACGATATGGA  | 0.622 |             |
| - | 17 | 3262      | rn.1_Missense_Mi   | NM_000620    | NP_000611    | P29475 | NOS1_HUMAN  | avodoxin-like.                 | 7  | TTTGGGAGTCA   | 0.572 |             |
| + | 2  | 48        | iNORD102_uc001i    | NM_000982    | NP_000973    | P46778 | RL21_HUMAN  |                                | 0  | AATGACGAACA   | 0.418 |             |
| - | 5  | 275       | tion_p.S28F NDRK   | NM_201540    | NP_963834    | Q9UN36 | NDRG2_HUMAN |                                | 2  | CCACAGAGTGA   | 0.567 |             |
| + | 20 | 2723      | ybs.1_Nonsense_I   | NM_020818    | NP_065869    | Q9P2D8 | UNC79_HUMAN | p.W880*(1)                     | 17 | GACTGGAAGAT   | 0.488 |             |
| + | 15 | 1659      |                    | NM_152327    | NP_689540    | Q96M32 | KAD7_HUMAN  |                                | 1  | ACCTTCTGAG    | 0.527 |             |
| + | 8  | 996       | g_Mutation_p.G18f  | NM_001112726 | NP_001106197 | Q9Y4F5 | K0284_HUMAN |                                | 1  | GGGGCGGAGCG   | 0.622 |             |
| - | 7  | 840       | zba.2_Missense_N   | NM_000814    | NP_000805    | P28472 | GBRB3_HUMAN | cellular (Probable).           | 5  | GTGACAGTCGA   | 0.433 |             |
| - | 8  | 1068      | 19A1_uc001zzb.2_   | NM_031226    | NP_112503    | P11511 | CP19A_HUMAN |                                | 3  | ATTCTTCCAGTTT | 0.388 |             |
| + | 9  | 1405      | iz.1_Missense_Mu   | NM_013243    | NP_037375    | Q8WXD2 | SCG3_HUMAN  |                                | 1  | TTGGATGAAATG  | 0.313 | rs137873046 |
| - | 2  | 1308      |                    | NM_004498    | NP_004489    | Q9UBC0 | HNF6_HUMAN  | Homeobox.                      | 0  | AGCATCTGTGA   | 0.453 |             |
| - | 9  | 2813      |                    | NM_003613    | NP_003604    | O75339 | CILP1_HUMAN |                                | 7  | TGCCCATGCTAA  | 0.547 | rs149553691 |
| - | 7  | 1430      |                    | NM_002833    | NP_002824    | P43378 | PTN9_HUMAN  | protein phosphatase.           | 2  | TGTCTTCATATTC | 0.478 |             |
| - | 13 | 2759      | bla.2_Missense_M   | NM_144572    | NP_653173    | Q9UPU7 | TBD2B_HUMAN | p.D903N(1)                     | 3  | CGCGTCGGTTC   | 0.617 | rs117285325 |
| - | 5  | 323       | ll.1_Intron CTSH_u | NM_148979    | NP_683880    | P09668 | CATH_HUMAN  |                                | 3  | TTCAGCAAAGC1  | 0.343 |             |
| - | 2  | 146       | yh.2_RNA NAGP/     | NM_016256    | NP_057340    | Q9UK23 | NAGPA_HUMAN | renal (Potential).             | 0  | GCGCGGTGG     | 0.766 |             |
| + | 9  | 1323      | 'eih.2_Nonsense_I  | NM_001043    | NP_001034    | P23975 | SC6A2_HUMAN | Name=8; (Potential).           | 8  | TTCTGGGCTGT   | 0.532 |             |
| - | 3  | 354       | ase_Mutation_p.Ef  | NM_032821    | NP_116210    | Q4G0P3 | HYDIN_HUMAN |                                | 2  | GAGTTCGATGAT  | 0.468 |             |
| - | 26 | 2903      | _p.S379L WDR59_    | NM_030581    | NP_085058    | Q6PJI9 | WDR59_HUMAN |                                | 2  | TGGACGATCCCC  | 0.622 |             |
| - | 21 | 3330      | fhh.2_Missense_M   | NM_003791    | NP_003782    | Q14703 | MBTP1_HUMAN | renal (Potential).             | 2  | ACCTGGGCGCC   | 0.532 |             |
| - | 5  | 1133      | xa.2_Missense_M    | NM_002275    | NP_002266    | P19012 | K1C15_HUMAN | Rod. Coil 2.                   | 0  | CTGGATCATTTCT | 0.592 |             |
| - | 1  | 643       | P_uc010wfs.1_Int   | NM_000226    | NP_000217    | P35527 | K1C9_HUMAN  | Rod. Linker 1.                 | 3  | AGGTCCCTTCT   | 0.478 |             |
| - | 17 | 3209      | _p.P720S BZRAP1    | NM_004758    | NP_004749    | O95153 | RIMB1_HUMAN |                                | 3  | TGATGGGCTCA   | 0.687 |             |
| - | 18 | 2499      | m.2_Missense_Mu    | NM_020748    | NP_065799    | Q9H0H0 | INT2_HUMAN  |                                | 3  | GAATCTCCGTC   | 0.368 |             |
| - | 9  | 1840      | zp.2_Missense_Mu   | NM_005121    | NP_005112    | Q9UHV7 | MED13_HUMAN |                                | 2  | ATTGAGGTGGG   | 0.413 |             |
| - | 6  | 465       | se_Mutation_p.E4k  | NM_001009905 | NP_001009905 | Q67FW5 | B3GNL_HUMAN |                                | 2  | TCGTTTCGGTGG  | 0.562 | rs151094014 |
| - | 1  | 827       | TEC_uc010xaj.1_F   | NM_001137671 | NP_001131143 | B2RU33 | POTEC_HUMAN |                                | 3  | GCTGTCGTCGT   | 0.607 |             |
| + | 8  | 1073      |                    | NM_001944    | NP_001935    | P32926 | DSG3_HUMAN  | Extracellular (Potential).     | 9  | ACTGATCCTAGA  | 0.348 |             |
| + | 2  | 850       | C_uc010xdr.1_5'U   | NM_005215    | NP_005206    | P43146 | DCC_HUMAN   | potential). Ig-like C2-type 1. | 17 | TGAAAGGAAGC   | 0.483 |             |
| + | 25 | 4255      | if.1_Missense_Mul  | NM_005215    | NP_005206    | P43146 | DCC_HUMAN   | lasmic (Potential).            | 17 | GAGGTCGCTGG   | 0.517 |             |
| - | 10 | 1357_1358 | _p.P225L TCF4_u    | NM_003199    | NP_003190    | P15884 | ITF2_HUMAN  |                                | 2  | ACTGTGGAATAT  | 0.505 |             |
| - | 3  | 967       | m.3_Missense_Mu    | NM_006566    | NP_006557    | Q15762 | CD226_HUMAN | 2. Extracellular (Potential).  | 0  | GAGGTCGATCTC  | 0.512 |             |
| - | 32 | 5206      | rw.2_Missense_Mu   | NM_002850    | NP_002841    | Q13332 | PTPRS_HUMAN | lasmic (Potential).            | 4  | GCGTCGGGCA    | 0.627 |             |
| + | 20 | 2605      | 850_splice SAFB_   | NM_002967    | NP_002958    | Q15424 | SAFB1_HUMAN |                                | 3  | CTTCCAGGTGG   | 0.627 |             |
| - | 5  | 478       | i.2_5'UTR TIMM44   | NM_006351    | NP_006342    | O43615 | TIM44_HUMAN |                                | 1  | GCGCCGACTGC   | 0.607 |             |



|   |    |       |                    |              |              |        |             |                                |     |                  |       |
|---|----|-------|--------------------|--------------|--------------|--------|-------------|--------------------------------|-----|------------------|-------|
| - | 3  | 13372 |                    | NM_024690    | NP_078966    | Q8WXI7 | MUC16_HUMAN | xtracellular (Potential).      | 57  | CTGTTTGGGTGG     | 0.458 |
| + | 7  | 1330  | ε.3_Missense_Mut   | NM_032497    | NP_115886    | Q9BR84 | ZN559_HUMAN |                                | 1   | AGCCCTTTTGTG     | 0.388 |
| - | 4  | 394   |                    | NM_001105578 | NP_001099048 | Q6PIF2 | SYCE2_HUMAN |                                | 0   | CTTTTCTCTGGA     | 0.428 |
| - | 2  | 339   | no.1_Missense_M    | NM_001008701 | NP_001008701 | O94910 | LPHN1_HUMAN |                                | 5   | GACGGCGGTGA      | 0.677 |
| - | 12 | 1953  | ao.1_Missense_M    | NM_000435    | NP_000426    | Q9UM47 | NOTC3_HUMAN | GF-like 16; calcium-binding    | 21  | GGTTGCTGGCA      | 0.582 |
| + | 1  | 524   |                    | NM_001004466 | NP_001004466 | Q8NGA6 | O10H5_HUMAN | ellular (Potential).           | 1   | AGATCCACCATT     | 0.602 |
| + | 1  | 526   |                    | NM_001004466 | NP_001004466 | Q8NGA6 | O10H5_HUMAN | ellular (Potential).           | 1   | ATCCACCATTTT     | 0.602 |
| + | 12 | 2149  | xqv.1_Nonsense_I   | NM_017660    | NP_060130    | Q86YP4 | P66A_HUMAN  |                                | 0   | ACCGCCAGCGA      | 0.657 |
| + | 4  | 1624  |                    | NM_031218    | NP_112495    | P35789 | ZNF93_HUMAN |                                | 1   | ATACTGGAGAG      | 0.353 |
| + | 7  | 600   | p.Y137H SUPT5H     | NM_001111020 | NP_001104490 | O00267 | SPT5H_HUMAN |                                | 4   | GAGTATTACATG     | 0.587 |
| - | 31 | 14440 |                    | NM_003890    | NP_003881    | Q9Y6R7 | FCGBP_HUMAN |                                | 9   | ACTCAGGGGCC      | 0.657 |
| - | 5  | 1028  | oejp.1_Missense_   | NM_001102597 | NP_001096067 | Q6UY09 | CEA20_HUMAN | potential). lg-like C2-type 3. | 2   | CTCAGGGGCT       | 0.557 |
| - | 7  | 2429  | p.L785I NLRP7_L    | NM_206828    | NP_996611    | Q8WX94 | NALP7_HUMAN |                                | 3   | TTTGAGGACAT      | 0.527 |
| + | 1  | 218   |                    | NM_001105569 | NP_001099039 | A6NI15 | MSGN1_HUMAN |                                | 1   | CGGCGGGGCCA      | 0.632 |
| - | 12 | 1879  | UM2_uc010jyj.1_I   | NM_015317    | NP_056132    | Q8TB72 | PUM2_HUMAN  | Ser-rich.                      | 1   | GACTTGAGAGC      | 0.463 |
| + | 3  | 272   |                    | NM_019617    | NP_062563    | Q9NS71 | GKN1_HUMAN  | BRICHOS.                       | 1   | CAACGGATGGG      | 0.373 |
| - | 3  | 576   | p.P49S EDAR_uc     | NM_022336    | NP_071731    | Q9UNE0 | EDAR_HUMAN  | Extracellular (Potential).     | 1   | ACACGGGGGGC      | 0.627 |
| - | 8  | 3123  | _Mutation_p.R918   | NM_025052    | NP_079328    | Q56UN5 | YSK4_HUMAN  |                                | 5   | TATATCCTGAGCC    | 0.398 |
| - | 8  | 1520  | p.W438* PLA2R1     | NM_007366    | NP_031392    | Q13018 | PLA2R_HUMAN | Potential). C-type lectin 2.   | 3   | CAATCCATGTTI     | 0.338 |
| + | 7  | 1133  | p.S372F XIRP2_L    | NM_152381    | NP_689594    | A4UGR9 | XIRP2_HUMAN |                                | 14  | AAAGTCTGCCC      | 0.378 |
| + | 4  | 811   | ufi.1_Missense_Mt  | NM_144711    | NP_653312    | Q8NBE8 | KLH23_HUMAN | BACK.                          | 0   | AGGAATCTCGAA     | 0.373 |
| - | 46 | 16617 | N_uc010zfi.1_Intr  | NM_133379    | NP_596870    | Q8WZ42 | TITIN_HUMAN |                                | 153 | TCCCCGACAGA      | 0.408 |
| + | 27 | 3702  | nv.2_Missense_Mt   | NM_000885    | NP_000876    | P13612 | ITA4_HUMAN  | ical; (Potential).             | 6   | TAGTGATTATTT     | 0.313 |
| - | 42 | 3058  | frx.2_Missense_M   | NM_000393    | NP_000384    | P05997 | CO5A2_HUMAN |                                | 2   | CCGCGAGTCTC      | 0.577 |
| - | 3  | 972   |                    | NM_005259    | NP_005250    | O14793 | GDF8_HUMAN  |                                | 1   | CAGCATCGTGAT     | 0.418 |
| + | 37 | 9014  |                    | NM_005876    | NP_005867    | Q15772 | SPEG_HUMAN  | otein kinase 2.                | 14  | CAAGCGGCGGG      | 0.647 |
| + | 1  | 338   | ruq.3_Intron UGT1  | NM_021027    | NP_066307    | O60656 | UD19_HUMAN  |                                | 5   | AAGCACAAGTA      | 0.353 |
| - | 3  | 299   | cox.2_Missense_M   | NM_181510    | NP_852611    | Q8IUAO | WFDC8_HUMAN | WAP 1.                         | 0   | GTATTCCTTGCA     | 0.478 |
| + | 6  | 770   | op.1_Missense_Mt   | NM_001794    | NP_001785    | P55283 | CADH4_HUMAN | Extracellular (Potential).     | 6   | GACATGAATGG      | 0.607 |
| - | 69 | 9465  |                    | NM_005560    | NP_005551    | O15230 | LAMA5_HUMAN | minin G-like 3.                | 3   | GGCGAAGGAAG      | 0.682 |
| - | 15 | 1763  |                    | NM_002772    | NP_002763    | P98073 | ENTK_HUMAN  | lar (Potentia p.D578N(1)       | 8   | CTACATCGTTAA     | 0.308 |
| - | 1  | 160   |                    | NM_181617    | NP_853648    | Q3LI59 | KR212_HUMAN |                                | 0   | gcagagcogtatccac | 0.169 |
| + | 42 | 5564  | p.P1820L TTC3_u    | NM_001001894 | NP_001001894 | P53804 | TTC3_HUMAN  |                                | 9   | AAGCCCTGTGG      | 0.587 |
| + | 6  | 724   | yxz.2_Missense_M   | NM_007341    | NP_031367    | P55822 | SH3BG_HUMAN | u-rich (acidic).               | 0   | AGGAGGAGGAA      | 0.453 |
| + | 1  | 745   | .1_Intron C21orf29 | NM_181688    | NP_859016    | P60014 | KR10A_HUMAN |                                | 0   | GTTTTCCCTCC      | 0.682 |
| + | 22 | 3086  | p.Y922H SGSM1      | NM_001039948 | NP_001035037 | Q2NKQ1 | SGSM1_HUMAN | ab-GAP TBC.                    | 5   | TCGGCTATGTCC     | 0.473 |
| - | 2  | 1321  | CP6_uc010has.1     | NM_020461    | NP_065194    | Q96RT7 | GCP6_HUMAN  |                                | 4   | ACTGGGAATCA      | 0.597 |
| + | 1  | 2373  | rk.1_Missense_Mu   | NM_152536    | NP_689749    | Q6ZNL6 | FGD5_HUMAN  |                                | 5   | TCCTGCCCTTGT     | 0.547 |
| - | 16 | 2419  | wf.1_Missense_Mi   | NM_002292    | NP_002283    | P55268 | LAMB2_HUMAN | inin IV type B.                | 3   | AGTAGGGAGTC      | 0.547 |
| - | 16 | 3618  | ε_Mutation_p.P10C  | NM_016247    | NP_057331    | Q9BZV3 | IMPG2_HUMAN | otif involved in chondroitin   | 3   | GAAGGGACTCT      | 0.323 |
| - | 16 | 3582  | ie_Mutation_p.L99  | NM_016247    | NP_057331    | Q9BZV3 | IMPG2_HUMAN | involved in chondroitin sulf   | 3   | TTGGAGAGTCC      | 0.413 |
| + | 25 | 3307  | lby.1_Missense_I   | NM_052989    | NP_443715    | Q9HBG6 | IF122_HUMAN |                                | 2   | AAAGTCCATTG      | 0.617 |
| - | 8  | 936   | p.P153S MRPL3      | NM_007208    | NP_009139    | P09001 | RM03_HUMAN  |                                | 0   | TCAGGCATTTI      | 0.353 |
| + | 5  | 1141  | hvn.2_Missense_M   | NM_207365    | NP_997248    | Q6P093 | ADCL2_HUMAN |                                | 0   | AACATGATCTC      | 0.383 |
| + | 8  | 1467  | bru.1_Missense_M   | NM_004721    | NP_004712    | O43283 | M3K13_HUMAN | rotein kinase.                 | 3   | TTTTTCGGCAG      | 0.408 |
| - | 21 | 15410 | nse_Mutation_p.G   | NM_018406    | NP_060876    | Q99102 | MUC4_HUMAN  |                                | 0   | GCTCCCAGAG       | 0.612 |
| + | 15 | 1782  | p.W624* LMLN_uc    | NM_033029    | NP_149018    | Q96KR4 | LMLN_HUMAN  |                                | 1   | TGGCTGGATTC      | 0.512 |

rs144960846

|   |    |       |                    |              |              |        |             |                                |       |               |       |
|---|----|-------|--------------------|--------------|--------------|--------|-------------|--------------------------------|-------|---------------|-------|
| + | 5  | 2931  | 28M RGS12_uc00:    | NM_198229    | NP_937872    | O14924 | RGS12_HUMAN |                                | 1     | .GTTGACGGGCG  | 0.692 |
| + | 1  | 1684  |                    | NM_000798    | NP_000789    | P21918 | DRD5_HUMAN  | lasmic (Potential).            | 1     | ACGAGGAGGAG   | 0.577 |
| - | 3  | 881   | m.1_Missense_Mu    | NM_020803    | NP_065854    | Q9P2G9 | KLHL8_HUMAN |                                | 0     | 'GGAGGGATGAA  | 0.438 |
| - | 7  | 1179  | uM13A_uc003hsh.    | NM_014883    | NP_055698    | O94988 | FA13A_HUMAN |                                | 2     | TCTGCTGAATTC/ | 0.458 |
| - | 6  | 840   | ε_Mutation_p.E25i  | NM_000667    | NP_000658    | P07327 | ADH1A_HUMAN |                                | 2     | TCATTTCTTTTAC | 0.463 |
| - | 39 | 6365  | ε_Mutation_p.S19i  | NM_001813    | NP_001804    | Q02224 | CENPE_HUMAN | Potential.                     | 9     | 'TCAGGCTTTTCC | 0.408 |
| + | 38 | 5438  | 3_Intron ANK2_uc   | NM_001148    | NP_001139    | Q01484 | ANK2_HUMAN  |                                | 14    | 3AAGATGAACAG/ | 0.507 |
| + | 8  | 1869  | Y1A3_uc003ioz.2_   | NM_000856    | NP_000847    | Q02108 | GCYA3_HUMAN |                                | 4     | 'TGGAGGAGGAG  | 0.532 |
| + | 15 | 3047  | _Mutation_p.S816L  | NM_001083619 | NP_001077088 | P42262 | GRIA2_HUMAN | lasmic (Potential).            | 4     | AGAATTCACAGA  | 0.403 |
| - | 2  | 218   | se_Mutation_p.R4i  | NM_031900    | NP_114106    | Q9BYV1 | AGT2_HUMAN  |                                | 4     | GCATTCTGGGCT  | 0.438 |
| + | 20 | 4902  | c.3_Missense_Mut   | NM_133433    | NP_597677    | Q6KC79 | NIPBL_HUMAN |                                | 9     | 3CAAGAGGAGTT  | 0.308 |
| - | 8  | 1883  |                    | NM_021072    | NP_066550    | O60741 | HCN1_HUMAN  | lasmic (Potential).            | 1     | 3GATTTCTGTCTC | 0.418 |
| - | 11 | 1697  | rd.2_Intron IL6ST_ | NM_002184    | NP_002175    | P40189 | IL6RB_HUMAN | tential). Fibronectin type-III | 2     | 'TTAAATAGGTGC | 0.373 |
| + | 2  | 314   | 'AF2_uc003jso.3_   | NM_174889    | NP_777549    | Q8N183 | MIMIT_HUMAN |                                | 0     | 3ACTATGAAGCAC | 0.318 |
| + | 4  | 781   | p.S160F ZFYVE1f    | NM_001105251 | NP_001098721 | Q7Z3T8 | ZFY16_HUMAN |                                | 0     | 3AGATTCCTTGAT | 0.348 |
| + | 3  | 1142  | nsse_Mutation_p.R  | NM_182761    | NP_877438    | A1A519 | F170A_HUMAN |                                | 1     | 3CCTGAGGAGAT  | 0.343 |
| + | 11 | 2080  | kuz.2_Missense_h   | NM_014031    | NP_054750    | Q9Y2P4 | S27A6_HUMAN |                                | 0     | 'TACAGGAAAAA/ | 0.289 |
| + | 1  | 2392  | A6_uc003lhn.2_li   | NM_018902    | NP_061725    | Q9Y511 | PCDAB_HUMAN | r (Potential). Cadherin 5.     | 1     | ACGCGGAGAGC   | 0.706 |
| + | 1  | 2583  | A7_uc003lhq.2_lr   | NM_018898    | NP_061721    | Q9H158 | PCDC1_HUMAN | lasmic (Potential).            | 5     | GGAAAAGGGGAT  | 0.453 |
| + | 1  | 927   |                    | NM_001099293 | NP_001092763 | Q2VIQ3 | KIF4B_HUMAN | inesin-motor.                  | 1     | 3GGATCGTCTAA/ | 0.438 |
| + | 33 | 3868  | lws.2_Missense_h   | NM_001037333 | NP_001032410 | Q96F07 | CYFP2_HUMAN |                                | 0     | 'AGCCACCCATC  | 0.522 |
| + | 2  | 182   | L1_uc003mkn.1_3    | NM_145867    | NP_665874    | Q16873 | LTC4S_HUMAN | Lumenal.                       | 0     | CTCGGCGCGCA/  | 0.726 |
| - | 2  | 621   | C90A_uc010jpf.2_   | NM_001031713 | NP_001026883 | Q96AQ8 | CC90A_HUMAN |                                | 0     | 3GAAGTAGAGTT  | 0.453 |
| - | 4  | 708   | jp.1_RNA NOTCI     | NM_004557    | NP_004548    | Q99466 | NOTC4_HUMAN | r (Potential). EGF-like 4.     | 22    | 'CACAGGCATGG  | 0.612 |
| - | 51 | 3976  | se_Mutation_p.P1   | NM_080680    | NP_542411    | P13942 | COBA2_HUMAN | le-helical region.             | 5     | 'TGGTGGCCCTG  | 0.627 |
| + | 7  | 1464  | NF8_uc011dtx.1_h   | NM_003958    | NP_003949    | O76064 | RNF8_HUMAN  | RING-type.                     | 1     | TCTGCTCCTACT  | 0.433 |
| + | 25 | 2627  | e_Mutation_p.P52   | NM_015255    | NP_056070    | Q8IWW8 | UBR2_HUMAN  |                                | 4     | 'ACCTCCGGTGT  | 0.398 |
| + | 6  | 1014  | AG_uc010jzt.2_in   | NM_014464    | NP_055279    | Q9UJW2 | TINAG_HUMAN |                                | 4     | 'GCATCGATAGG  | 0.428 |
| + | 6  | 1656  | t.2_Missense_Mut   | NM_001080976 | NP_001074445 | Q9UL01 | DSE_HUMAN   |                                | 1     | 'TTTCCCAGCT   | 0.453 |
| + | 4  | 310   | se_Mutation_p.W8   | NM_000265    | NP_000256    | P14598 | NCF1_HUMAN  | PX.                            | 1     | 'AAGTGGTTTGAC | 0.677 |
| - | 22 | 15233 |                    | NM_033026    | NP_149015    | Q9Y6V0 | PCLO_HUMAN  |                                | 7     | 'CTGTCCCATCT  | 0.323 |
| + | 48 | 7282  | 3.S2340L TRRAP_    | NM_003496    | NP_003487    | Q9Y4A5 | TRRAP_HUMAN | action with TP53.              | 37    | 'AAAATCACCAG/ | 0.532 |
| - | 13 | 1698  | z.2_Missense_Mut   | NM_005045    | NP_005036    | P78509 | RELN_HUMAN  |                                | 19    | 3AATAGGAAAGG  | 0.433 |
| - | 3  | 392   | cv.2_Missense_M    | NM_182691    | NP_872633    | P78362 | SRPK2_HUMAN |                                | 6     | 'TGGATGATATCC | 0.353 |
| - | 14 | 2404  | vkg.3_Missense_h   | NM_017954    | NP_060424    | Q86UW7 | CAPS2_HUMAN |                                | 2     | CTCTTTATCTCC  | 0.289 |
| - | 7  | 616   | ue.2_Missense_M    | NM_001139456 | NP_001132928 | Q8N434 | SVOPL_HUMAN | ical; (Potential).             | 0     | 'GACGCGAATGA  | 0.612 |
| - | 15 | 1860  |                    | NM_004333    | NP_004324    | P15056 | BRAF_HUMAN  | rotein kinase_R603>I(2)) p.T   | 18290 | 3ATTTCACTGTAC | 0.368 |
| + | 44 | 5117  |                    | NM_004668    | NP_004659    | O43451 | MGA_HUMAN   | se. Lumenal (Potential).       | 2     | 'CCAGGTTGTGC  | 0.522 |
| + | 8  | 1315  | v1_uc003wga.2_RI   | NM_032534    | NP_115923    | A5PL33 | KRBA1_HUMAN |                                | 2     | 'GGAAAAGGGGT  | 0.627 |
| + | 5  | 1841  | nsse_Mutation_p.K  | NM_020844    | NP_065895    | Q9P272 | K1456_HUMAN |                                | 0     | 'GAAAAAGAGAG  | 0.433 |
| + | 19 | 2184  | ec.2_Missense_Mi   | NM_003817    | NP_003808    | Q9H2U9 | ADAM7_HUMAN | lasmic (Pote p.R691H(1)        | 5     | 'TAGTTCGTTACC | 0.373 |
| - | 6  | 830   | c.1_Missense_Mu    | NM_001007243 | NP_001007244 | P49675 | STAR_HUMAN  | START.                         | 1     | 'ATGTTCCCAGAG | 0.617 |
| - | 6  | 1341  | 3xpe.2_Missense_   | NM_006749    | NP_006740    | Q08357 | S20A2_HUMAN | ical; (Potential).             | 2     | 'TGAGGGCTATG  | 0.517 |
| - | 15 | 2726  | xrf.3_Missense_M   | NM_014781    | NP_055596    | Q8TDY2 | RBCC1_HUMAN |                                | 11    | 3CTAATGAATCCA | 0.348 |
| + | 4  | 3434  | 3.P1042L ZFHx4_1   | NM_024721    | NP_078997    | Q86UP3 | ZFHx4_HUMAN |                                | 15    | 'GAATCCCGAAT  | 0.483 |
| - | 3  | 616   | 3H_uc010mfk.1_5    | NM_198488    | NP_940890    | Q6ZRV2 | FA83H_HUMAN |                                | 3     | 'CATCTCATCCAC | 0.622 |
| - | 26 | 5586  | izlk.2_RNA FREM'   | NM_144966    | NP_659403    | Q5H8C1 | FREM1_HUMAN | CSPG 12.                       | 5     | 'CTGATCGTCTC  | 0.458 |

rs143755972

|   |     |             |                                                  |              |              |        |             |                            |     |                 |       |             |
|---|-----|-------------|--------------------------------------------------|--------------|--------------|--------|-------------|----------------------------|-----|-----------------|-------|-------------|
| - | 1   | 110         | sense_Mutation_p.                                | NM_001001790 | NP_001001790 | Q8N4H5 | TOM5_HUMAN  |                            | 0   | CGGAACATCGC     | 0.627 |             |
| - | 26  | 3875        | 1_intron TRPM6                                   | NM_017662    | NP_060132    | Q9BX84 | TRPM6_HUMAN | lasmic (Potential).        | 8   | AGATCCTGCA      | 0.468 |             |
| - | 3   | 710         | 1_5'UTR IKBKAP                                   | NM_003640    | NP_003631    | O95163 | ELP1_HUMAN  |                            | 7   | CTCTGGGAGAA     | 0.453 |             |
| + | 1   | 1462        | T1_uc011mei.1_5'                                 | NM_001080482 | NP_001073951 | C9J069 | CI172_HUMAN |                            | 0   | AAGCCGGCGC      | 0.751 |             |
| + | 1   | 1465        | T1_uc011mei.1_5'                                 | NM_001080482 | NP_001073951 | C9J069 | CI172_HUMAN |                            | 0   | GCCGGCGCCCG     | 0.751 |             |
| + | 4   | 425         | rf173_uc011mev.1_Missense_Mutation_p.R138H C9orf |              |              | Q8N7X2 | CI173_HUMAN |                            | 1   | TGGCCGCAGGC     | 0.622 | rs73668205  |
| + | 4   | 736         | lhh.2_Missense_M                                 | NM_005676    | NP_005667    | P98175 | RBM10_HUMAN | Poly-Glu.                  | 5   | aggaggaggatgagg | 0.522 |             |
| - | 4   | 459         | 1_p.I121V PSMD10                                 | NM_002814    | NP_002805    | O75832 | PSD10_HUMAN | nteraction with RELA.      | 1   | AGCGATCTGGA     | 0.448 |             |
| + | 1   | 1669        |                                                  | NM_012084    | NP_036216    | P49448 | DHE4_HUMAN  |                            | 1   | CCTGGGATTGG     | 0.468 |             |
| - | 5   | 804_805     | ladb.2_Missense_                                 | NM_004195    | NP_004186    | Q9Y5U5 | TNR18_HUMAN | lasmic (Potential).        | 0   | CTCTTCTCGGC     | 0.713 |             |
| + | 7   | 1329        | _p.S140F PLCH2                                   | NM_014638    | NP_055453    | O75038 | PLCH2_HUMAN | l-PLC X-box.               | 5   | CATGTCCCAGT     | 0.627 |             |
| + | 2   | 367         | inv.2_Missense_M                                 | NM_138697    | NP_619642    | Q7RTX1 | TS1R1_HUMAN | ellular (Potential).       | 3   | TGCCAGGGCAA     | 0.587 |             |
| - | 4   | 1505        |                                                  | NM_018948    | NP_061821    | Q9UJM3 | ERRFI_HUMAN |                            | 1   | CGCCTCCATTT     | 0.438 |             |
| - | 19  | 3038        | ix.1_Missense_Mu                                 | NM_012102    | NP_036234    | Q9P2R6 | RERE_HUMAN  | Pro-rich.                  | 2   | TGGGAGCCTGC     | 0.692 |             |
| - | 11  | 1214        |                                                  | NM_207420    | NP_997303    | Q6PXP3 | GTR7_HUMAN  | lasmic (Potential).        | 0   | CGGTCTCACC      | 0.657 |             |
| + | 21  | 2082        | _p.G601D KIF1B_L                                 | NM_015074    | NP_055889    | O60333 | KIF1B_HUMAN |                            | 3   | CATGGGTAATA     | 0.423 |             |
| - | 7   | 928         |                                                  | NM_006610    | NP_006601    | O00187 | MASP2_HUMAN | Sushi 1.                   | 4   | CATCGGATAAG     | 0.507 |             |
| + | 4   | 1430        |                                                  | NM_023013    | NP_075389    | O95521 | PRAM1_HUMAN |                            | 0   | TGAGGGAAGTC     | 0.562 |             |
| + | 2   | 580         | N_uc010obp.1_5'F                                 | NM_015001    | NP_055816    | Q96T58 | MINT_HUMAN  | ich. By similarity.        | 15  | CACGAGAAGGA     | 0.468 |             |
| - | 14  | 2283        | _p.D69N ARHGFEF                                  | NM_153213    | NP_694945    | Q8IW93 | ARHGJ_HUMAN | SH3.                       | 3   | TACTACCTTCCC    | 0.622 | rs146123988 |
| - | 3   | 718         | 1_5'Flank ARHGFEF                                | NM_153213    | NP_694945    | Q8IW93 | ARHGJ_HUMAN |                            | 3   | AGCGCTCCGC      | 0.657 |             |
| - | 23  | 3415        | yz.1_Missense_Mu                                 | NM_017940    | NP_060410    | Q3BBV0 | NBPF1_HUMAN | NBPF 4.                    | 0   | TTCAGGAGGAA     | 0.512 |             |
| - | 2   | 140         | azy.2_Missense_M                                 | NM_002403    | NP_002394    | P55001 | MFAP2_HUMAN |                            | 0   | GCGAGCTCTCA     | 0.607 |             |
| - | 1   | 92          |                                                  | NM_152232    | NP_689418    | Q8TE23 | TS1R2_HUMAN | ellular (Potential).       | 4   | ATCCCAGGCA      | 0.582 |             |
| - | 101 | 14704_14704 | w.1_Missense_Mu                                  | NM_020765    | NP_065816    | Q5T4S7 | UBR4_HUMAN  |                            | 25  | TCCCCGGCCTCC    | 0.554 |             |
| - | 8   | 926         | uc010ocy.1_Silent                                | NM_201252    | NP_957704    |        |             |                            | 0   | CAGCCGGCTCC     | 0.607 |             |
| + | 10  | 1330        | _p.A303V ALPL_uc                                 | NM_000478    | NP_000469    | P05186 | PPBT_HUMAN  |                            | 5   | CCGGGCCATCG     | 0.607 |             |
| + | 13  | 3825        | _uc001bmv.1_Mis                                  | NM_006015    | NP_006006    | O14497 | ARI1A_HUMAN |                            | 142 | AACCAGCAGTT     | 0.532 |             |
| + | 15  | 2270        | TC1_uc001bnp.1_                                  | NM_015023    | NP_055838    | Q8N5D0 | WDTC1_HUMAN | WD 7.                      | 2   | AAGGGATGAG      | 0.592 |             |
| + | 2   | 535         |                                                  | NM_000911    | NP_000902    | P41143 | OPRD_HUMAN  | Name=2; (Potential).       | 2   | GCTGGCCACCA     | 0.478 |             |
| + | 5   | 617         | ogj.1_Missense_M                                 | NM_022164    | NP_071447    | Q9GZM7 | TINAL_HUMAN |                            | 0   | CAGCGCTTCT      | 0.592 |             |
| + | 3   | 262         | ouj.2_Missense_M                                 | NM_175852    | NP_787048    | P40222 | TXLNA_HUMAN |                            | 2   | GTCTGGGGCCC     | 0.567 |             |
| - | 9   | 1616        | .1_Missense_Mute                                 | NM_198040    | NP_932157    | Q8IXK0 | PHC2_HUMAN  |                            | 1   | CCTGCCTTCT      | 0.607 |             |
| - | 22  | 3480        | _p.L1191F CSMD2                                  | NM_052896    | NP_443128    | Q7Z408 | CSMD2_HUMAN | lar (Potential). CUB 7.    | 12  | CTTGAGGACAT     | 0.423 |             |
| - | 3   | 472         | sense_Mutation_p                                 | NM_024874    | NP_079150    | Q8IZA0 | K319L_HUMAN | extracellular (Potential). | 2   | AGAGGTGATTTT    | 0.512 |             |
| - | 9   | 884         | _p.P173S MKNK1                                   | NM_003684    | NP_003675    | Q9BUB5 | MKNK1_HUMAN | rotein kinase.             | 2   | TTCTGGTTTCAG    | 0.358 |             |
| + | 5   | 580         | ayvm.2_Splice_Site                               | NM_000779    | NP_000770    | P13584 | CP4B1_HUMAN |                            | 2   | CTCCAGGACAA     | 0.562 |             |
| + | 17  | 2286        | cp.2_Missense_Mu                                 | NM_001037341 | NP_001032418 | Q07343 | PDE4B_HUMAN |                            | 3   | AGGGACACAG      | 0.483 |             |
| + | 13  | 954         | SGIP1_uc001dct.2                                 | NM_032291    | NP_115667    | Q9BQI5 | SGIP1_HUMAN | Pro-rich.                  | 3   | CACTGGAAGTA     | 0.403 |             |
| + | 19  | 1895        | dct.2_Missense_M                                 | NM_032291    | NP_115667    | Q9BQI5 | SGIP1_HUMAN |                            | 3   | CACTCTCCTC      | 0.433 |             |
| - | 7   | 1242        | aywbk.2_Missense_                                | NM_030816    | NP_110443    | Q8N6S4 | AN13C_HUMAN |                            | 0   | CCTCATGATGAT    | 0.343 |             |
| + | 12  | 1435        |                                                  | NM_033055    | NP_149044    | Q96MC6 | HIAT1_HUMAN | ellular (Potential).       | 0   | CAGGAGAGGCC     | 0.448 |             |
| + | 19  | 2562        | g.1_Missense_Mu                                  | NM_020775    | NP_065826    | Q6UXG2 | K1324_HUMAN | ellular (Potential).       | 5   | CTGCAGTTCTG     | 0.537 |             |
| + | 3   | 346         |                                                  | NM_032414    | NP_115790    | P58294 | PROK1_HUMAN |                            | 0   | CCATGGACTTG     | 0.527 |             |
| - | 19  | 2708        | _p.P717S CSDE1                                   | NM_001007553 | NP_001007554 | O75534 | CSDE1_HUMAN |                            | 1   | TCGAGGAGCTG     | 0.498 |             |
| + | 5   | 891         |                                                  | NM_001767    | NP_001758    | P06729 | CD2_HUMAN   | ic (Potential). Pro-rich.  | 1   | CTGGTCATCGT     | 0.587 |             |
| + | 5   | 990         |                                                  | NM_001767    | NP_001758    | P06729 | CD2_HUMAN   | ic (Potential). Pro-rich.  | 1   | AAGTTCACCA      | 0.582 |             |

|   |    |      |                                               |              |              |        |             |                              |    |               |       |
|---|----|------|-----------------------------------------------|--------------|--------------|--------|-------------|------------------------------|----|---------------|-------|
| + | 9  | 1948 | hfg.1_Nonsense_M                              | NM_006699    | NP_006690    | O60476 | MA1A2_HUMAN | lenal (Potential).           | 0  | AGCATGGTTGATC | 0.373 |
| - | 9  | 1305 |                                               | NM_206996    | NP_996879    | Q6Q759 | SPG17_HUMAN |                              | 6  | TGGTGGAGCTT   | 0.448 |
| - | 8  | 1366 | hj.1_Missense_Mt                              | NM_152380    | NP_689593    | Q96SF7 | TBX15_HUMAN |                              | 2  | GCCAGGCAACG   | 0.567 |
| - | 30 | 5567 |                                               | NM_024408    | NP_077719    | Q04721 | NOTC2_HUMAN |                              | 27 | TCAGCCTGAAAC  | 0.517 |
| - | 41 | 7084 | 4DIP_uc001elm.3                               | NM_014644    | NP_055459    | Q5VU43 | MYOME_HUMAN |                              | 5  | CACAGGGATGT   | 0.572 |
| - | 39 | 6670 | 4DIP_uc001elm.3                               | NM_014644    | NP_055459    | Q5VU43 | MYOME_HUMAN |                              | 5  | GAGACCAGAG    | 0.517 |
| - | 36 | 6154 | DE4DIP_uc001eln                               | NM_014644    | NP_055459    | Q5VU43 | MYOME_HUMAN | Potential.                   | 5  | TTCCACCTTCTC  | 0.542 |
| - | 3  | 412  | DE4DIP_uc001elr                               | NM_014644    | NP_055459    | Q5VU43 | MYOME_HUMAN |                              | 5  | AAAAGCTGTCA   | 0.398 |
| + | 4  | 1293 | HFE2_uc001enk.2                               | NM_213653    | NP_998818    | Q6ZVN8 | RGMC_HUMAN  |                              | 1  | CCCTCCAAGTC   | 0.572 |
| + | 10 | 4593 | r.1_Missense_Mut                              | NM_004326    | NP_004317    | O00512 | BCL9_HUMAN  | Pro-rich.                    | 6  | GAATGGGACTA   | 0.597 |
| + | 6  | 1002 | 9wlv.2_Nonsense                               | NM_019032    | NP_061905    | Q6UY14 | ATL4_HUMAN  |                              | 2  | GAGCCAGGCC    | 0.642 |
| + | 9  | 1210 | ejBNIPL_uc009wr                               | NM_138278    | NP_612122    | Q7Z465 | BNIP1_HUMAN |                              | 0  | AGACAGTGAGT   | 0.458 |
| - | 7  | 1315 | z_uc010pdc.1_Mi                               | NM_015100    | NP_055915    | Q7Z3K3 | POGZ_HUMAN  |                              | 3  | CACCACTGGCC   | 0.507 |
| - | 2  | 1755 |                                               | NM_001004432 | NP_001004432 | Q6UY18 | LIGO4_HUMAN | cellular (Potential).        | 1  | GCCCTGGGATC   | 0.587 |
| - | 3  | 1483 |                                               | NM_001122965 | NP_001116437 | Q6XPR3 | RPTN_HUMAN  | Gln-rich.                    | 0  | AGTGGGAACTC   | 0.512 |
| - | 3  | 2572 | uc001ezv.2_5'Flanl                            | NM_002016    | NP_002007    | P20930 | FILA_HUMAN  | Ser-rich.                    | 16 | TGACCCCGGGT   | 0.582 |
| - | 3  | 528  |                                               | NM_014624    | NP_055439    | P06703 | S10A6_HUMAN | EF-hand 2, 2.                | 1  | ATACTCCTGGA   | 0.493 |
| + | 6  | 1653 | 7A3_uc009won.2                                | NM_024330    | NP_077306    | Q5K4L6 | S27A3_HUMAN |                              | 1  | CTCCAGGTTGG   | 0.592 |
| - | 3  | 591  |                                               | NM_020699    | NP_065750    | Q8WXI9 | P66B_HUMAN  |                              | 0  | TTCTCGCTCTC   | 0.408 |
| + | 16 | 1597 |                                               | NM_020452    | NP_065185    | P98198 | AT8B2_HUMAN | lasmic (Potential).          | 2  | CCCTGGTCACC   | 0.572 |
| - | 2  | 200  | BAP1_uc001ffj.3_Intron GBAP1_uc001ffe.3_5'UTR |              |              |        |             |                              | 0  | ATGATGCTTACC  | 0.562 |
| - | 18 | 2492 | 4L_uc001fmb.3_5'                              | NM_001037533 | NP_001032622 | Q3T8J9 | GON4L_HUMAN |                              | 3  | TGTGGCCAGAA   | 0.428 |
| - | 5  | 815  | C1orf85_uc009wr                               | NM_144580    | NP_653181    | Q8WVB7 | NCUG1_HUMAN | lenal (Potential).           | 2  | CTGGTCCAAC    | 0.592 |
| - | 5  | 358  | 1fpl.2_Missense_M                             | NM_015590    | NP_056405    | Q5T3I0 | GPTC4_HUMAN |                              | 1  | GTTGGCTTGG    | 0.458 |
| - | 38 | 5185 | _uc001fq.2_Miss                               | NM_014784    | NP_055599    | O15085 | ARHGB_HUMAN |                              | 9  | GGGGGCTCATG   | 0.607 |
| - | 1  | 803  |                                               | NM_001004467 | NP_001004467 | Q5JRS4 | O10J3_HUMAN | cellular (Pote p.S268F(1))   | 2  | CCAGGGAAC     | 0.532 |
| - | 23 | 2793 | v.3_Missense_Mu                               | NM_004371    | NP_004362    | P53621 | COPA_HUMAN  |                              | 2  | TGATAGGTGCAC  | 0.428 |
| + | 2  | 110  | Opjo.1_Missense_I                             | NM_021181    | NP_067004    | Q9NQ25 | SLAF7_HUMAN | cellular (Potential).        | 3  | CGTTCCGTTG    | 0.498 |
| + | 6  | 937  | Opjo.1_Missense_M                             | NM_021181    | NP_067004    | Q9NQ25 | SLAF7_HUMAN | lasmic (Potential).          | 3  | CTGTGGAAATA   | 0.368 |
| + | 4  | 790  | 3_Mutation_p.A247                             | NM_002348    | NP_002339    | Q9HBG7 | LY9_HUMAN   | cellular (Potential).        | 1  | AGGAGCCTCCA   | 0.602 |
| - | 5  | 515  |                                               | NM_001013625 | NP_001013647 | Q5VTH2 | CA192_HUMAN |                              | 0  | GGGACCTGGA    | 0.527 |
| + | 2  | 1720 | aq.2_Missense_Mt                              | NM_002155    | NP_002146    | P17066 | HSP76_HUMAN |                              | 1  | TGCAGGACTTC   | 0.602 |
| - | 3  | 345  | _p.G67D CD247_L                               | NM_198053    | NP_932170    | P20963 | CD3Z_HUMAN  | ic (Potential), TAM 1.       | 0  | TTCTGGCCCTGC  | 0.627 |
| + | 4  | 565  | 2_uc010pmd.1_5'                               | NM_001460    | NP_001451    | Q99518 | FMO2_HUMAN  |                              | 1  | GCCACCACATT   | 0.488 |
| + | 7  | 1234 | p.S163N KLHL20_                               | NM_014458    | NP_055273    | Q9Y2M5 | KLH20_HUMAN | Kelch 1.                     | 1  | AATGAGCAAAAC  | 0.458 |
| + | 9  | 1207 |                                               | NM_018122    | NP_060592    | Q6PI48 | SYDM_HUMAN  |                              | 2  | TATCGAGATG    | 0.338 |
| - | 12 | 3364 | g.3_Missense_Mu                               | NM_007314    | NP_009298    | P42684 | ABL2_HUMAN  | tin-binding (By similarity). | 14 | CCAGAGCTGCC   | 0.577 |
| + | 5  | 733  | _p.E181Q XPR1_u                               | NM_004736    | NP_004727    | Q9UBH6 | XPR1_HUMAN  | lasmic (Potential).          | 0  | ACGTAGAGGTG   | 0.398 |
| + | 28 | 3846 | pt.2_Missense_Mu                              | NM_001357    | NP_001348    | Q08211 | DHX9_HUMAN  | NTD.                         | 2  | TAGAGGCAACT   | 0.582 |
| + | 21 | 3420 | p.A1036T LAMC2_                               | NM_005562    | NP_005553    | Q13753 | LAMC2_HUMAN | al, Domain II and I.         | 3  | TGACAGCAGATC  | 0.522 |
| + | 7  | 2992 | 3_Mutation_p.L888                             | NM_005807    | NP_005798    | Q92954 | PRG4_HUMAN  |                              | 1  | TACTCTTGCA    | 0.353 |
| - | 19 | 2641 |                                               | NM_003292    | NP_003283    | P12270 | TPR_HUMAN   | Potential.                   | 7  | AATTTCTGCTCT  | 0.308 |
| - | 12 | 1591 | p.1_Missense_Mul                              | NM_003292    | NP_003283    | P12270 | TPR_HUMAN   | Potential.                   | 7  | TTGGCTTCCA    | 0.383 |
| - | 8  | 1553 | ot.1_Missense_Mt                              | NM_199051    | NP_950252    | Q76B58 | FAM5C_HUMAN |                              | 5  | TGTGCAGGGCA   | 0.622 |
| - | 8  | 1356 |                                               | NM_001994    | NP_001985    | P05160 | F13B_HUMAN  | Sushi 7.                     | 3  | GCAACGAGATA   | 0.413 |
| - | 22 | 2449 | ND1B_uc010ppf.1                               | NM_001142795 | NP_001136267 | Q6P3S1 | DEN1B_HUMAN |                              | 0  | AAGTCGATGAAT  | 0.423 |
| + | 12 | 1446 | Opqf.1_Splice_Site_p.Q42_splice               |              |              | O75335 | LIPA4_HUMAN |                              | 5  | GCCAGGTACCT   | 0.602 |

|   |    |                          |                                                 |              |              |        |             |                               |    |                 |       |             |
|---|----|--------------------------|-------------------------------------------------|--------------|--------------|--------|-------------|-------------------------------|----|-----------------|-------|-------------|
| - | 11 | 1255                     | _p.L149F CHIT1_u                                | NM_003465    | NP_003456    | Q13231 | CHIT1_HUMAN |                               | 0  | TGGAAGACCTG     | 0.572 |             |
| + | 5  | 1582                     | p.G375D LAX1_uc                                 | NM_017773    | NP_060243    | Q8IWV1 | LAX1_HUMAN  | lasmic (Potential).           | 2  | GCCTGGCACTC     | 0.483 |             |
| - | 3  | 1950                     | _p.P521L LRRN2_                                 | NM_006338    | NP_006329    | O75325 | LRRN2_HUMAN | cellular (Potential).         | 2  | TGCCTGGCTGG     | 0.617 |             |
| + | 16 | 2269                     | _p.A558V CNTN2_                                 | NM_005076    | NP_005067    | Q02246 | CNTN2_HUMAN | nectin type-III 1.            | 1  | CAATGCCGAGA     | 0.517 |             |
| - | 1  | 594                      |                                                 | NM_203376    | NP_976310    | Q6P7N7 | TMM81_HUMAN | tracellular (Potential).      | 0  | CATACTCTGAG     | 0.468 |             |
| + | 9  | 1312                     |                                                 | NM_000715    | NP_000706    | P04003 | C4BPA_HUMAN | Sushi 6.                      | 3  | ATAATGGTAAAT    | 0.383 |             |
| + | 12 | 1966                     |                                                 | NM_000715    | NP_000706    | P04003 | C4BPA_HUMAN |                               | 3  | ACAATCCACTT     | 0.413 |             |
| + | 14 | 2443                     | .2_Missense_Mute                                | NM_000573    | NP_000564    | P17927 | CR1_HUMAN   | extracellular (Potential).    | 3  | TCACCCGGGC/     | 0.577 |             |
| + | 8  | 1412                     | ccu.1_Missense_IV                               | NM_014388    | NP_055203    | Q68CQ4 | DIEXF_HUMAN |                               | 0  | TCCTCGGATATC    | 0.463 |             |
| + | 7  | 872                      | OR3_uc010psw.1                                  | NM_018254    | NP_060724    | Q9P2K3 | RCOR3_HUMAN |                               | 1  | GTAGTCCCAATC    | 0.418 |             |
| + | 11 | 2735                     | _p.T647I RPS6KC                                 | NM_012424    | NP_036556    | Q96S38 | KS6C1_HUMAN | otein kinase 2.               | 8  | AACCAACTTCTT    | 0.368 | rs144436274 |
| + | 2  | 792                      | g.1_Missense_Mt                                 | NM_002763    | NP_002754    | Q92786 | PROX1_HUMAN |                               | 6  | TAATTCGGGGT/    | 0.498 |             |
| - | 63 | 13946                    |                                                 | NM_206933    | NP_996816    | O75445 | USH2A_HUMAN | II 30. Extracellular (Potenti | 26 | AGGAGACTCAAA    | 0.512 |             |
| - | 10 | 2038                     | kv.2_Missense_Mt                                | NM_206933    | NP_996816    | O75445 | USH2A_HUMAN | e 1. Extracellular (Potential | 26 | GCAGCGATCAC     | 0.368 |             |
| - | 2  | 347                      | se_Mutation_p.S3f                               | NM_001438    | NP_001429    | P62508 | ERR3_HUMAN  |                               | 2  | TGAAGAGCCAC/    | 0.562 |             |
| + | 6  | 1092                     | un.1_Splice_Site_                               | NM_018650    | NP_061120    | Q9P0L2 | MARK1_HUMAN |                               | 10 | GGCAGGTATGG/    | 0.368 |             |
| + | 12 | 1549                     | _p.G364E CAPN2_                                 | NM_001748    | NP_001739    | P17655 | CAN2_HUMAN  | Domain III.                   | 5  | AAGTGGGCAGA/    | 0.498 |             |
| - | 12 | 2590                     | 09xes.2_Splice_Si                               | NM_003607    | NP_003598    | Q5VT25 | MRCKA_HUMAN |                               | 11 | ATTTTACCTTATT   | 0.274 |             |
| + | 10 | 3174                     | sn.2_Missense_Mt                                | NM_001098623 | NP_001092093 | Q5VST9 | OBSCN_HUMAN | Ig-like 10.                   | 28 | AGCAGGCAGGC     | 0.577 |             |
| - | 1  | 390                      |                                                 | NM_020808    | NP_065859    | Q9P2F8 | SI1L2_HUMAN |                               | 6  | CCTTGCTCTCA/    | 0.522 |             |
| + | 1  | 305                      |                                                 | NM_003272    | NP_003263    | O60478 | G137B_HUMAN | lasmic (Potential).           | 0  | ACCGCCACAAG/    | 0.587 |             |
| + | 28 | 3364                     |                                                 | NM_001035    | NP_001026    | Q92736 | RYR2_HUMAN  | 4 X approximate repeats. B    | 33 | GCACCGGGGAA     | 0.517 |             |
| + | 89 | 12001                    | oya.1_Splice_Site_                              | NM_001035    | NP_001026    | Q92736 | RYR2_HUMAN  |                               | 33 | TTTCAGGATTCC    | 0.343 |             |
| - | 8  | 1292                     | n.3_Missense_Mutation_p.D179N PLD5_uc001hzo.1_M |              |              | Q8N7P1 | PLD5_HUMAN  |                               | 6  | GGGATCAGTTT/    | 0.383 |             |
| - | 3  | 384                      | 1ibx.2_Missense_                                | NM_020394    | NP_065127    | Q8IW36 | ZN695_HUMAN | KRAB.                         | 0  | CTTCTCTGTG/     | 0.468 |             |
| + | 1  | 790                      |                                                 | NM_001001918 | NP_001001918 | Q8NH7C | O14CZ_HUMAN | cellular (Potential).         | 3  | CGATACCTGCA/    | 0.458 |             |
| - | 5  | 1015                     | lpzq.1_Missense_I                               | NM_030645    | NP_085148    | Q7L8J4 | 3BP5L_HUMAN |                               | 0  | CTGCTCAGCCA     | 0.632 |             |
| + | 12 | 2045                     | orf18_uc001iik.2_I                              | NM_017782    | NP_060252    | Q5VWN6 | CJ018_HUMAN |                               | 2  | AGAACCCAGAA/    | 0.373 |             |
| + | 3  | 828                      | xig.2_Missense_M                                | NM_178150    | NP_835363    | Q8NFZ0 | FBX18_HUMAN |                               | 3  | GGAGGGAGATC     | 0.498 |             |
| + | 2  | 412                      | 009xja.2_Missense                               | NM_006023    | NP_006014    | O75794 | CD123_HUMAN |                               | 1  | TGAACTCTGG/     | 0.303 |             |
| - | 6  | 831                      |                                                 | NM_001010924 | NP_001010924 | Q5VUB5 | F1711_HUMAN | cellular (Potential).         | 4  | GGGGGGCAATC     | 0.557 |             |
| - | 55 | 8690                     | JBN_uc009xjr.1_M                                | NM_001081    | NP_001072    | O60494 | CUBN_HUMAN  | CUB 21.                       | 19 | AGTGGCTAGCA/    | 0.532 |             |
| - | 8  | 1108                     | 1ird.2_Splice_Site                              | NM_022365    | NP_071760    | Q96KC8 | DNJC1_HUMAN |                               | 1  | CTGTCTAAAA/     | 0.254 |             |
| + | 34 | 5011                     | .1_Intron MYO3A_                                | NM_017433    | NP_059129    | Q8NEV4 | MYO3A_HUMAN |                               | 18 | CTGGACCAAA/     | 0.348 |             |
| - | 5  | 742                      | ARMC4_uc001itz.2                                | NM_018076    | NP_060546    | Q5T2S8 | ARMC4_HUMAN |                               | 6  | GGTTTTCTTTTC    | 0.308 |             |
| - | 7  | 1690                     | p.P419S ZNF438_I                                | NM_182755    | NP_877432    | Q7Z4V0 | ZN438_HUMAN |                               | 2  | TTGGGATCAT/     | 0.403 |             |
| - | 14 | 2213                     | mr.3_Missense_ML                                | NM_133376    | NP_596867    | P05556 | ITB1_HUMAN  | cellular (Potential).         | 2  | CTTCTCCTTAC/    | 0.443 |             |
| - | 37 | 6921                     | K3_uc010qih.1_In                                | NM_020987    | NP_066267    | Q12955 | ANK3_HUMAN  |                               | 19 | TGAGTCTCTTC/    | 0.403 |             |
| + | 2  | 605                      | ljmx.3_Intron CTN                               | NM_178011    | NP_821079    | Q86VH5 | LRRT3_HUMAN |                               | 3  | TATATAGCCCC/    | 0.408 |             |
| + | 5  | 682                      | ljrv.2_Missense_M                               | NM_022124    | NP_071407    | Q9H251 | CAD23_HUMAN | Extracellular (Potential).    | 11 | GTTCACCGTGG/    | 0.617 |             |
| + | 45 | 6448                     |                                                 | NM_022124    | NP_071407    | Q9H251 | CAD23_HUMAN | Extracellular (Potential).    | 11 | GTTCAGGTGTCA    | 0.627 |             |
| + | 13 | 1975                     | _Mutation_p.T599                                | NM_004922    | NP_004913    | P53992 | SC24C_HUMAN |                               | 3  | TATACCAGGT/     | 0.512 |             |
| + | 18 | 4553                     | .E1062K MYST4_                                  | NM_012330    | NP_036462    | Q8WYB5 | MYST4_HUMAN | Poly-Glu.                     | 16 | ggaagaggaagagge | 0.234 |             |
| + | 2  | 398                      | jwy.1_Missense_M                                | NM_144660    | NP_653261    | Q96LT4 | SAMD8_HUMAN |                               | 0  | TGACCCCTTTC/    | 0.438 |             |
| + | 10 | 1739                     | lkew.2_Splice_Site                              | NM_004670    | NP_004661    | O95340 | PAPS2_HUMAN |                               | 2  | CAGAGGTGAGC     | 0.507 |             |
| - | 5  | 1701_170232W PANK1_uc001 |                                                 | NM_148977    | NP_683878    | Q8TE04 | PANK1_HUMAN |                               | 0  | GCCCGGGCGCA/    | 0.49  | rs140753322 |
| - | 6  | 773                      | uk.1_Missense_M                                 | NM_022451    | NP_071896    | Q8WTT2 | NOC3L_HUMAN |                               | 1  | TTCTGGATCTG/    | 0.348 | rs138770211 |



|   |    |       |                   |              |              |        |              |                               |     |               |       |
|---|----|-------|-------------------|--------------|--------------|--------|--------------|-------------------------------|-----|---------------|-------|
| + | 10 | 1563  | i.1_Intron WDR11_ | NM_018117    | NP_060587    | Q9BZH6 | WDR11_HUMAN  |                               | 0   | ACATCCCAGAG   | 0.428 |
| + | 9  | 7514  | _p.S89F TACC2_u   | NM_206862    | NP_996744    | O95359 | TACC2_HUMAN  | SPAZ.                         | 10  | ATCCTCTAAGAC  | 0.522 |
| - | 13 | 2319  | XM2_uc001lhj.2_F  | NM_198148    | NP_937791    | Q8N436 | CPXM2_HUMAN  |                               | 2   | TTAATGCCTTCTA | 0.423 |
| - | 2  | 213   |                   | NM_004092    | NP_004083    | P30084 | ECHM_HUMAN   |                               | 0   | CAACCCACGG    | 0.512 |
| + | 21 | 2339  | _p.E653K EPS8L2   | NM_022772    | NP_073609    | Q9H6S3 | ES8L2_HUMAN  |                               | 1   | AGCTGGAAGAA   | 0.632 |
| + | 29 | 3575  | ltb.2_Missense_Mi | NM_017511    | NP_059981    | Q9HC84 | MUC5B_HUMAN  | VWFD 2.                       | 0   | GCAGGCCATCC   | 0.692 |
| + | 7  | 897   | _Missense_Mutatio | NM_138567    | NP_612634    | Q8NBV8 | SYT8_HUMAN   | toplasmic (Potential).        | 1   | ACGTGCCCAGC   | 0.667 |
| + | 3  | 459   | ib.1_Missense_Mu  | NM_004314    | NP_004305    | P52961 | NAR1_HUMAN   |                               | 0   | TCCTGGCCTAC   | 0.677 |
| + | 3  | 816   | ib.1_Missense_Mu  | NM_004314    | NP_004305    | P52961 | NAR1_HUMAN   |                               | 0   | GAGAGGAAGAG   | 0.607 |
| - | 1  | 1211  | 32_uc001mak.1_Ir  | NM_145053    | NP_659490    | Q81YU4 | UBQLN_HUMAN  |                               | 3   | GGGTGAAGAC    | 0.483 |
| - | 1  | 382   |                   | NM_001004490 | NP_001004490 | A6NM03 | O2AG2_HUMAN  | lasmic (Potential).           | 4   | AGGATGACAAA   | 0.522 |
| - | 6  | 560   |                   | NM_198185    | NP_937828    |        |              |                               | 0   | GCCACCTGAAA   | 0.473 |
| + | 6  | 1472  | ht.2_Missense_Mt  | NM_003390    | NP_003381    | P30291 | WEE1_HUMAN   | rotein kinase.                | 5   | GATCTCCTTTTG  | 0.363 |
| + | 3  | 575   | ense_Mutation_p.  | NM_001025389 | NP_001020560 | Q01432 | AMPD3_HUMAN  |                               | 2   | AAGATGATTCCG  | 0.532 |
| - | 3  | 568   | in_p.I73L CYP2R1  | NM_024514    | NP_078790    | Q6VVX0 | CP2R1_HUMAN  |                               | 2   | GGTTATGTTTG   | 0.328 |
| - | 20 | 2869  | i_p.S55T PLEKHA   | NM_175058    | NP_778228    | Q6IQ23 | PKHA7_HUMAN  |                               | 3   | CACAGATGTGT   | 0.677 |
| + | 3  | 426   | i_p.L20F BBOX1_u  | NM_003986    | NP_003977    | O75936 | BODG_HUMAN   |                               | 1   | GATCCTCTGG    | 0.498 |
| - | 11 | 1677  |                   | NM_031217    | NP_112494    | Q8NI77 | KI18A_HUMAN  |                               | 2   | CTCCTCCCTCC   | 0.403 |
| - | 4  | 1092  | 3_Mutation_p.S29  | NM_024426    | NP_077744    | P19544 | WT1_HUMAN    | p.D299Y(1) p.D299fs           | 687 | GCTGGGATGTC   | 0.368 |
| + | 2  | 738   | _p.G56E PDHX_u    | NM_003477    | NP_003468    | O00330 | ODPX_HUMAN   | ipoyl-binding.                | 1   | AGAAGGAAACA   | 0.363 |
| - | 2  | 735   | on_p.T39I SLC1A2  | NM_004171    | NP_004162    | P43004 | EAA2_HUMAN   | ical; (Potential).            | 3   | TCAGGTGAGC    | 0.622 |
| + | 6  | 1413  | 73_splice EXT2_uc | NM_207122    | NP_997005    | Q93063 | EXT2_HUMAN   |                               | 5   | AAGAGTGGGT    | 0.428 |
| - | 27 | 4008  |                   | NM_002334    | NP_002325    | O75096 | LRP4_HUMAN   | ntial), LDL-receptor class B  | 4   | CACGAGGATGA   | 0.597 |
| + | 25 | 4050  | i.G1202R MADD_u   | NM_003682    | NP_003673    | Q8WXG6 | MADD_HUMAN   |                               | 11  | ATGAGGGACTC   | 0.527 |
| + | 1  | 325   |                   | NM_001004747 | NP_001004747 | Q8NGG3 | OR5T3_HUMAN  | ellular (Potential).          | 0   | CTCACTCCAAA   | 0.368 |
| + | 3  | 719   |                   | NM_178570    | NP_848665    | Q86UN3 | R4RL2_HUMAN  | LRR 8.                        | 0   | CCTGGCCTCGC   | 0.731 |
| + | 2  | 772   |                   | NM_001105565 | NP_001099035 | E9PPJ3 | E9PPJ3_HUMAN |                               | 1   | CGGAGGATGCA   | 0.567 |
| - | 3  | 547   | nsn.2_Missense_A  | NM_021727    | NP_068373    | Q9Y5Q0 | FADS3_HUMAN  | lasmic (Potential).           | 2   | GGTGGGACTGG   | 0.627 |
| - | 5  | 10334 | IAK_uc001ntk.1_Ir | NM_001620    | NP_001611    | Q09666 | AHNK_HUMAN   |                               | 19  | ACTTGCCCTCG   | 0.423 |
| - | 6  | 826   | A2_uc010rix.1_5'L | NM_004739    | NP_004730    | O94776 | MTA2_HUMAN   | ELM2.                         | 2   | ACCAACTCTAAT  | 0.403 |
| + | 4  | 523   |                   | NM_004585    | NP_004576    | Q9UL19 | TIG3_HUMAN   |                               | 1   | GATGCTCTTTG   | 0.517 |
| - | 11 | 1647  |                   | NM_015104    | NP_055919    | Q2TAZ0 | ATG2A_HUMAN  |                               | 2   | TGCTGGTTGTCC  | 0.667 |
| + | 15 | 3115  | _p.S881F SIPA1_u  | NM_006747    | NP_006738    | Q96FS4 | SIPA1_HUMAN  | Potential.                    | 0   | GGAGTCCATGC   | 0.632 |
| - | 7  | 683   | 79_splice BRMS1   | NM_015399    | NP_056214    | Q9HCU9 | BRMS1_HUMAN  |                               | 0   | CCATTCTGCCCC  | 0.602 |
| - | 2  | 1285  | jb.2_Missense_Mi  | NM_031492    | NP_113680    | Q9BQ04 | RBM4B_HUMAN  | ith TNPO3 (By similarity).    | 0   | TTCCCGTAGCC   | 0.512 |
| - | 22 | 4201  | CD3_uc001out.2_F  | NM_015531    | NP_056346    | Q4AC94 | C2CD3_HUMAN  |                               | 7   | TCTTTTGTGGA   | 0.378 |
| - | 23 | 3954  |                   | NM_001098816 | NP_001092286 | Q6N022 | TEN4_HUMAN   | ellular (Potential).          | 4   | ACGCGTCAATT   | 0.453 |
| + | 8  | 3515  | u.1_Missense_Mu   | NM_015885    | NP_056969    | O94913 | PCF11_HUMAN  | Gly-rich.                     | 1   | CATGGTCAGCC   | 0.512 |
| + | 16 | 4837  |                   | NM_015885    | NP_056969    | O94913 | PCF11_HUMAN  |                               | 1   | GACACCAGTT    | 0.373 |
| - | 2  | 526   | i_p.A84T SYTL2_u  | NM_001162951 | NP_001156423 | Q9HCH5 | SYTL2_HUMAN  |                               | 3   | ACCTGCTATCTG  | 0.473 |
| + | 3  | 815   | eq.2_Missense_Mi  | NM_015368    | NP_056183    | Q96RD7 | PANX1_HUMAN  | lasmic (Potential).           | 0   | TCATGGAAGAAC  | 0.502 |
| + | 20 | 2849  | gb.2_Missense_Mi  | NM_014361    | NP_055176    | O94779 | CNTN5_HUMAN  | nectin type-III 2.            | 8   | TTATCGAGATGA  | 0.433 |
| - | 10 | 1420  | uc001phh.1_Intror | NM_002422    | NP_002413    | P08254 | MMP3_HUMAN   | mopexin-like 4.               | 2   | AAGATCCAGTA   | 0.338 |
| + | 89 | 12974 | p.R4284K DYNC2I   | NM_001080463 | NP_001073932 | Q8NCM8 | DYHC2_HUMAN  |                               | 0   | TGAAAGGGATC   | 0.398 |
| + | 2  | 96    | _Start_Site PAFAH | NM_002572    | NP_002563    | P68402 | PA1B2_HUMAN  |                               | 1   | CTCAGGTGTAG   | 0.373 |
| + | 21 | 2055  | e_Mutation_p.L69  | NM_001040455 | NP_001035545 | Q8NBJ9 | SIDT2_HUMAN  | ellular (Potential).          | 0   | ACGTGCTCTAC   | 0.622 |
| - | 9  | 2155  |                   | NM_020693    | NP_065744    | Q8TD84 | DSCL1_HUMAN  | otential), lg-like C2-type 7. | 8   | AGACGCTAGAG   | 0.602 |

|   |    |           |                   |              |              |        |              |                                   |    |              |       |             |
|---|----|-----------|-------------------|--------------|--------------|--------|--------------|-----------------------------------|----|--------------|-------|-------------|
| + | 4  | 498       | aa.1_Missense_Mi  | NM_000073    | NP_000064    | P09693 | CD3G_HUMAN   | lasmic (Potential).               | 0  | AGACAGGATGGA | 0.473 |             |
| + | 35 | 3380      | rn.1_Missense_N   | NM_015313    | NP_056128    | Q9NZN5 | ARHG_C_HUMAN | PH.                               | 7  | GAGCAGGACCTA | 0.383 |             |
| + | 10 | 3406      |                   | NM_005422    | NP_005413    | O75443 | TECTA_HUMAN  | VWFD 3.                           | 10 | AGCTCAGACTCT | 0.567 | rs147890616 |
| + | 9  | 2599      |                   | NM_024806    | NP_079082    | Q6NUN7 | CK063_HUMAN  |                                   | 3  | AACAGGCTGTG  | 0.413 |             |
| + | 10 | 1498      |                   | NM_002014    | NP_002005    | Q02790 | FKBP4_HUMAN  |                                   | 0  | GAGACCATCCC  | 0.532 |             |
| + | 5  | 529       | seg.1_RNA TULP3   | NM_003324    | NP_003315    | O75386 | TULP3_HUMAN  |                                   | 0  | AGTCAGCATGT  | 0.383 |             |
| - | 13 | 1451      |                   | NM_020373    | NP_065106    | Q9NQ90 | ANO2_HUMAN   | lasmic (Potential).               | 7  | CCAGTCGCATC  | 0.418 |             |
| - | 16 | 2510      | 1qpd.1_5'Flank N  | NM_001033714 | NP_001028886 | P46087 | NOP2_HUMAN   |                                   | 2  | GAGGCTGAGGC  | 0.577 |             |
| + | 14 | 1778      | rb.1_Missense_M   | NM_014262    | NP_055077    | Q8IVL6 | P3H3_HUMAN   | OG dioxygenase.                   | 0  | GTCACCCAGTG  | 0.647 |             |
| + | 7  | 970       | il.2_Missense_Mul | NM_201442    | NP_958850    | P09871 | C1S_HUMAN    | CUB 1.                            | 1  | CTGTGGACAGA  | 0.403 |             |
| - | 12 | 3204      | .V1026M CD163_u   | NM_004244    | NP_004235    | Q86VB7 | C163A_HUMAN  | extracellular (Potential).        | 8  | ATTCACTGCAG  | 0.512 |             |
| - | 12 | 3136      | .S1003F CD163_u   | NM_004244    | NP_004235    | Q86VB7 | C163A_HUMAN  | extracellular (Potential).        | 8  | AGGAAGACTCA  | 0.522 |             |
| - | 7  | 1757      | quh.2_Missense_N  | NM_018088    | NP_060558    | Q86YD7 | F90A1_HUMAN  |                                   | 1  | GTTTTCCAGTC  | 0.622 |             |
| + | 27 | 3417      | p.E687K A2ML1_u   | NM_144670    | NP_653271    | A8K2U0 | A2ML1_HUMAN  |                                   | 3  | TGCTGGAGATG  | 0.517 |             |
| + | 10 | 2407      | re.2_Missense_Mu  | NM_004426    | NP_004417    | P78364 | PHC1_HUMAN   |                                   | 2  | CTTTCCCGGTG  | 0.478 |             |
| - | 3  | 266       | u.p.P77S PRB1_u   | NM_005039    | NP_005030    | P04280 | PRP1_HUMAN   | -P-[PAQ]-Q-[GE]-[GD]-[NR          | 0  | TTGTGGCTTTG  | 0.622 |             |
| - | 8  | 1752      | _RP6_uc010shl.1_  | NM_002336    | NP_002327    | O75581 | LRP6_HUMAN   | lar (Potential). LDL-recept       | 12 | GTAATCCAAAT  | 0.403 |             |
| - | 4  | 856       | 1raj.1_Missense_N | NM_018050    | NP_060520    | Q9H8J5 | MANS1_HUMAN  | ellular (Potential).              | 0  | CTTTTTCTTATA | 0.453 |             |
| - | 9  | 1485      |                   | NM_024829    | NP_079105    | Q6P4A8 | PLBL1_HUMAN  |                                   | 0  | TTTCCCTTGGT  | 0.418 |             |
| - | 18 | 2085      |                   | NM_004963    | NP_004954    | P25092 | GUC2C_HUMAN  | Potential). Protein kinase.       | 6  | GCTGCTCTGGAG | 0.483 |             |
| + | 1  | 157       | e_Mutation_p.G24  | NM_019012    | NP_061885    | Q9HAU0 | PKHA5_HUMAN  | VW 1.                             | 3  | GCGCGCCGAC   | 0.637 |             |
| + | 24 | 3309      | lsif.1_Missense_M | NM_019012    | NP_061885    | Q9HAU0 | PKHA5_HUMAN  |                                   | 3  | CAACTCCTGAG  | 0.368 |             |
| - | 7  | 967       | _p.T107I SLCO1A   | NM_021094    | NP_066580    | P46721 | SO1A2_HUMAN  | ellular (Potential).              | 4  | AACGAGTGCTA  | 0.378 |             |
| + | 1  | 198       | u.p.G59E ETNK1_   | NM_018638    | NP_061108    | Q9HBU6 | EK1_HUMAN    |                                   | 0  | CCCCGGGACGC  | 0.532 |             |
| - | 3  | 628       | u.p.W74* BCAT1_u  | NM_005504    | NP_005495    | P54687 | BCAT1_HUMAN  |                                   | 2  | GAGGACCACTC  | 0.453 |             |
| + | 3  | 232       | D21_uc009zjh.1_F  | NM_004264    | NP_004255    | Q13503 | MED21_HUMAN  |                                   | 0  | CAAAAAGACATT | 0.368 |             |
| + | 11 | 1308      | p.A291T PPFBP1    | NM_003622    | NP_003613    | Q86W92 | LIPB1_HUMAN  | Potential.                        | 5  | AAAAAGCTGTG  | 0.348 |             |
| - | 3  | 590       | im.2_Missense_Mi  | NM_198966    | NP_945317    | P12272 | PTHR_HUMAN   |                                   | 1  | CAGACCCAAATC | 0.512 |             |
| - | 8  | 2412      | p.S221N CAPRIN2   | NM_001002259 | NP_001002259 | Q6IMN6 | CAPR2_HUMAN  |                                   | 2  | TTTTGACTCTCA | 0.468 |             |
| + | 24 | 3096      | nn.1_Missense_M   | NM_001843    | NP_001834    | Q12860 | CNTN1_HUMAN  | nectin type-III 4.                | 9  | CAGGTGCACCC  | 0.468 | rs143416044 |
| - | 16 | 2351      | ase_Mutation_p.Gi | NM_001145108 | NP_001138580 | Q99435 | NELL2_HUMAN  | alcium-binding (Potential).       | 4  | GTAGCCATCTCT | 0.433 |             |
| + | 7  | 433       | orf54_uc009zky.1_ | NM_152319    | NP_689532    | Q6X4T0 | CL054_HUMAN  |                                   | 0  | ACCCTGGACCC  | 0.517 |             |
| + | 17 | 2402      | ryo.2_Missense_N  | NM_001039960 | NP_001035049 | Q2Y0W8 | S4A8_HUMAN   | ical; (Potential).                | 5  | CAATGGTGATT  | 0.413 |             |
| + | 11 | 1712_1713 | p.P377F SCN8A_    | NM_014191    | NP_055006    | Q9UQD0 | SCN8A_HUMAN  |                                   | 7  | GAGATCCCAGA  | 0.45  |             |
| + | 5  | 937       | zm.2_Missense_M   | NM_004302    | NP_004293    | P36896 | ACV1B_HUMAN  | ellular; Cytoplasmic (Potential). | 9  | TACACAGTGACA | 0.532 |             |
| - | 9  | 1347      | g_Mutation_p.G45  | NM_182507    | NP_872313    | Q6KB66 | K2C80_HUMAN  | Tail.                             | 0  | GAGGCCTGATC  | 0.547 |             |
| + | 2  | 597       | sdq.2_5'UTR TAR   | NM_134323    | NP_599150    | Q15633 | TRBP2_HUMAN  | action with PRKRA. DRBM           | 1  | TGCAGGAGTATC | 0.592 |             |
| - | 4  | 1031      | pa.2_Missense_Mi  | NM_003708    | NP_003699    | O75452 | RDH16_HUMAN  | lasmic (Potential).               | 0  | GTTGGCATCCC  | 0.572 |             |
| - | 19 | 2290      | p.P521S MYO1A_    | NM_005379    | NP_005370    | Q9UBC5 | MYO1A_HUMAN  |                                   | 7  | GTTGGGGCTTC  | 0.532 |             |
| + | 3  | 737       | rb.2_Missense_Mi  | NM_002332    | NP_002323    | Q07954 | LRP1_HUMAN   | ntial). LDL-receptor class 4      | 22 | CCCGCTCTGC   | 0.592 |             |
| - | 13 | 1820      | ie_Mutation_p.S46 | NM_153377    | NP_700356    | Q6UXM1 | LRIG3_HUMAN  | like C2-type 1.                   | 4  | CACTGCTGCTG  | 0.458 |             |
| + | 20 | 2577      | srv.2_Missense_M  | NM_020762    | NP_065813    | Q726B7 | SRGP1_HUMAN  |                                   | 4  | GTCATCCTGAC  | 0.587 |             |
| - | 12 | 2175      | TPRR_uc009zrs.2_  | NM_002849    | NP_002840    | Q15256 | PTPRR_HUMAN  | iphatase. Cytoplasmic (Pot        | 3  | GCAGTGGACAA  | 0.522 |             |
| + | 13 | 2284      |                   | NM_013381    | NP_037513    | Q9UKU6 | TRHDE_HUMAN  | ellular (Potential).              | 3  | GATTTCTTCTT  | 0.368 |             |
| + | 5  | 882       | zm.1_Missense_M   | NM_024560    | NP_078836    | Q9H6R3 | ACSS3_HUMAN  |                                   | 4  | GTTCTCTTTGG  | 0.398 |             |
| - | 5  | 496       | tan.2_Missense_N  | NM_152589    | NP_689802    | Q8NA57 | CL050_HUMAN  |                                   | 3  | TTTCTCAATTC  | 0.259 |             |
| - | 14 | 2190      | ie_Mutation_p.W5  | NM_016122    | NP_057206    | Q9Y592 | CCD41_HUMAN  | Potential.                        | 0  | CCAACCACGTG  | 0.363 |             |

|   |    |      |                   |              |              |        |             |                             |    |               |       |
|---|----|------|-------------------|--------------|--------------|--------|-------------|-----------------------------|----|---------------|-------|
| - | 10 | 1119 | e_Mutation_p.W6f  | NM_002108    | NP_002099    | P42357 | HUTH_HUMAN  |                             | 3  | :GGAGACCACAT  | 0.522 |
| + | 11 | 3132 | mj.2_Missense_M   | NM_001018072 | NP_001018082 | A6QL63 | BTDB_HUMAN  |                             | 3  | ATGTTTGAGATCC | 0.517 |
| - | 12 | 1619 | lts.2_Missense_I  | NM_001109662 | NP_001103132 |        |             |                             | 2  | CCCTTAGTAACTT | 0.423 |
| - | 3  | 206  |                   | NM_002442    | NP_002433    | O43347 | MS1H_HUMAN  | RRM 1.                      | 3  | ACTCTCCTTCA   | 0.502 |
| - | 19 | 3237 | i.2_Missense_Mut  | NM_032590    | NP_115979    | Q8NHM5 | KDM2B_HUMAN | Pro-rich.                   | 2  | GGGTGGCCGGA   | 0.697 |
| + | 3  | 348  | by.2_Missense_I   | NM_030765    | NP_110392    | Q9C0J1 | B3GN4_HUMAN | type II membrane protein;   | 1  | TGCTCGGCTGC   | 0.682 |
| - | 28 | 3677 | NO1_uc010taq.1    | NM_018183    | NP_060653    | A3KN83 | SBNO1_HUMAN |                             | 9  | TTTTTAGGATTCA | 0.264 |
| + | 8  | 1497 | bm.1_Missense_IV  | NM_198827    | NP_942122    | Q6QNK2 | GP133_HUMAN | cellular (Potential).       | 10 | CCTCTCGGAGC   | 0.453 |
| + | 45 | 8037 | 0_uc001ujm.2_Nc   | NM_015409    | NP_056224    | Q96L91 | EP400_HUMAN | with ZNF42 (By similarity). | 12 | GTGTTTCGAGCG  | 0.667 |
| - | 11 | 1622 |                   | NM_175066    | NP_778236    | Q8N8A6 | DDX51_HUMAN | case C-terminal.            | 2  | CACCCCCAAAA   | 0.627 |
| - | 31 | 4355 |                   | NM_006437    | NP_006428    | Q9UKK3 | PARP4_HUMAN |                             | 4  | TCCAGGATGTT   | 0.532 |
| + | 1  | 980  |                   | NM_001033602 | NP_001028774 | Q5JR59 | MTUS2_HUMAN |                             | 0  | AACTGGAAGCA   | 0.507 |
| - | 11 | 1928 |                   | NM_003045    | NP_003036    | P30825 | CTR1_HUMAN  | cellular (Potential).       | 0  | GACCGGTCACA   | 0.562 |
| + | 41 | 6769 | e_Mutation_p.A84  | NM_015678    | NP_056493    | Q8NFP9 | NBEA_HUMAN  |                             | 11 | TTCTGCCTTCA   | 0.488 |
| - | 19 | 1750 | .2_Missense_Mute  | NM_001014286 | NP_001014308 | Q8NEM7 | FA48A_HUMAN |                             | 0  | TTGATGGCTTAC  | 0.403 |
| - | 19 | 2256 | uyk.2_Missense_I  | NM_015058    | NP_055873    | A3KMH1 | K0564_HUMAN |                             | 6  | GAGTTCAGAT    | 0.413 |
| - | 11 | 1468 | e_Mutation_p.Q3E  | NM_001127615 | NP_001121087 | Q8TC92 | ENOX1_HUMAN |                             | 2  | GAGCTGCTCAC   | 0.458 |
| - | 1  | 1915 | uzo.1_Missense_I  | NM_183422    | NP_904358    | Q15714 | T22D1_HUMAN |                             | 0  | GTGTGCTGACA   | 0.398 |
| + | 7  | 838  | nse_Mutation_p.P; | NM_031431    | NP_113619    | Q96JB2 | COG3_HUMAN  |                             | 2  | ATTATCCCATATA | 0.358 |
| - | 9  | 999  | ron CPB2_uc001v   | NM_001872    | NP_001863    | Q96IY4 | CBPB2_HUMAN |                             | 2  | GAGTATGAATGC  | 0.378 |
| + | 5  | 846  | r_p.T139 CDADC    | NM_030911    | NP_112173    | Q9BWW3 | CDAC1_HUMAN |                             | 1  | GATGACTATAGC  | 0.323 |
| + | 2  | 901  | U2_uc001vdo.1_In  | NM_173605    | NP_775876    | Q8N5I3 | KCNRG_HUMAN |                             | 0  | TAAAGGAAGGC   | 0.383 |
| + | 1  | 319  | f.1_intron DLEU1_ | NR_002183    |              |        |             |                             | 0  | AGAAGGTGTGA   | 0.408 |
| - | 1  | 284  | aed.1_Missense_I  | NM_001042517 | NP_001035982 | Q9NSV4 | DIAP3_HUMAN |                             | 2  | AGGAAGGGTAG   | 0.711 |
| - | 1  | 515  | n_p.T31 DACH1_    | NM_080759    | NP_542937    | Q9UI36 | DACH1_HUMAN |                             | 1  | TGGAGGTGGTG   | 0.667 |
| - | 1  | 518  | _p.W57* TBC1D4_   | NM_014832    | NP_055647    | O60343 | TBCD4_HUMAN | PID 1.                      | 6  | ATGAGCCAGGG   | 0.577 |
| + | 12 | 2879 | p.P606S LMO7_uc   | NM_015842    | NP_056667    | Q8WWI1 | LMO7_HUMAN  |                             | 5  | CATCCCCCTT    | 0.493 |
| - | 46 | 6644 | iev.2_Missense_M  | NM_015057    | NP_055872    | O75592 | MYCB2_HUMAN |                             | 14 | CAAGTGCTTCTA  | 0.373 |
| - | 1  | 446  | fh.2_Missense_Mu  | NM_001922    | NP_001913    | P40126 | TYRP2_HUMAN |                             | 5  | AAACCCACC     | 0.388 |
| + | 1  | 212  | Jafz.1_Missense_I | NM_004800    | NP_004791    | Q99805 | TM9S2_HUMAN |                             | 1  | GGCGGTTCT     | 0.652 |
| + | 4  | 464  | F3A_uc001vur.2_R  | NM_023011    | NP_075387    | Q9H1J1 | REN3A_HUMAN |                             | 1  | GCCTAGAATATC  | 0.388 |
| - | 2  | 270  | Jahw.2_Missense_  | NM_145250    | NP_660293    | Q8TAA1 | RNS11_HUMAN |                             | 3  | TAAATCTTCTT   | 0.403 |
| + | 2  | 454  | vyl.1_Missense_M  | NM_002934    | NP_002925    | P10153 | RNAS2_HUMAN |                             | 1  | GACACCAGCA    | 0.453 |
| - | 7  | 636  | ax.2_Missense_M   | NM_032846    | NP_116235    | Q8WUD1 | RAB2B_HUMAN |                             | 1  | TATTGTGGACAT  | 0.408 |
| - | 2  | 2009 | 439L SALL2_uc0    | NM_005407    | NP_005398    | Q9Y467 | SALL2_HUMAN |                             | 3  | CATAGGGGAAG   | 0.547 |
| + | 7  | 2513 | 10_uc001whe.2_Ir  | NM_014045    | NP_054764    | Q724F1 | LRP10_HUMAN | cytoplasmic (Potential).    | 1  | CTGAGTGGTG    | 0.677 |
| + | 9  | 828  |                   | NM_138360    | NP_612369    | Q8ND23 | LR16B_HUMAN |                             | 5  | CAAGGACTTGC   | 0.592 |
| - | 3  | 980  | 10tob.1_Missense  | NM_006405    | NP_006396    | O15321 | TM9S1_HUMAN |                             | 1  | CTGAAGTCTCA   | 0.542 |
| + | 1  | 1799 | ense_Mutation_p./ | NM_019839    | NP_062813    | Q9NPC1 | LT4R2_HUMAN | Name=1; (Potential).        | 0  | GCTGGCGGCGC   | 0.697 |
| + | 2  | 335  |                   | NM_025081    | NP_079357    | Q9P2P1 | NYNRI_HUMAN |                             | 3  | TGGGGCGGATC   | 0.667 |
| - | 33 | 5469 | LGAPA1_uc010tp    | NM_014990    | NP_055805    | Q6GYQ0 | RGPA1_HUMAN | binds to TCF3/E12 (By sim   | 4  | TATTCAGGACTA  | 0.358 |
| - | 2  | 551  | pz.1_Missense_M   | NM_004496    | NP_004487    | P55317 | FOXA1_HUMAN |                             | 0  | CTGCCCGGGA    | 0.677 |
| - | 16 | 2114 | _p.P517S SEC23A   | NM_006364    | NP_006355    | Q15436 | SC23A_HUMAN |                             | 5  | TGGTGTCCAC    | 0.348 |
| + | 11 | 1253 | te_p.D277_splice  | NM_005930    | NP_005921    | O15320 | CTGE5_HUMAN |                             | 0  | CTGTAGATAATC  | 0.328 |
| + | 7  | 1149 | Missense_Mutatioi | NM_017922    | NP_060392    | Q86UA1 | PRP39_HUMAN |                             | 2  | AGCATGAAGTT   | 0.259 |
| - | 2  | 321  | j.1_intron MGAT2_ | NM_001001    | NP_000992    | Q969Q0 | RL36L_HUMAN |                             | 0  | CAACACATCC    | 0.483 |
| + | 2  | 841  | 5S_uc001wx.1_I    | NM_001003803 | NP_001003803 | Q99766 | ATP5S_HUMAN |                             | 2  | TGTTAATAAGT   | 0.383 |

|   |    |           |                    |              |              |        |              |                             |    |               |       |
|---|----|-----------|--------------------|--------------|--------------|--------|--------------|-----------------------------|----|---------------|-------|
| - | 4  | 802       | h.1_Missense_Mu    | NM_021818    | NP_068590    | Q9H4B6 | SAV1_HUMAN   | WW 1.                       | 1  | TATTTTCTCCCTC | 0.453 |
| - | 7  | 2005      | .1_Missense_Mut    | NM_007361    | NP_031387    | Q14112 | NID2_HUMAN   | en G2 beta-barrel.          | 7  | CCAGCCAAACA   | 0.582 |
| - | 2  | 556       | .1_Missense_Mut    | NM_007361    | NP_031387    | Q14112 | NID2_HUMAN   | NIDO.                       | 7  | AAAAGGGGCGA   | 0.642 |
| + | 7  | 1184      | 1wzt.3_Missense_   | NM_001099652 | NP_001093122 | Q8N3F9 | G137C_HUMAN  | lasmic (Potential).         | 0  | AGTCACTCCCC   | 0.418 |
| + | 16 | 2598      | 336_splice KIAA05  | NM_014749    | NP_055564    | E9PGW8 | E9PGW8_HUMAN |                             | 1  | ATAAAGGTATATT | 0.318 |
| + | 51 | 10500     | .L3424F SYNE2_     | NM_015180    | NP_055995    | Q8WXH0 | SYNE2_HUMAN  | ic (Potential). Potential.  | 14 | CAGATCCTTAGA  | 0.393 |
| + | 69 | 13462     | py.2_Missense_M    | NM_015180    | NP_055995    | Q8WXH0 | SYNE2_HUMAN  | lasmic (Potential).         | 14 | GTGGCCCCAGT   | 0.348 |
| + | 10 | 809       | f50_uc001xhm.1_    | NM_172365    | NP_758953    | Q96LQ0 | CN050_HUMAN  |                             | 1  | TGTAGTCCTTTT  | 0.393 |
| + | 7  | 779       |                    | NM_020715    | NP_065766    | Q9ULM0 | PKHH1_HUMAN  |                             | 0  | TGAAGGCAGCT   | 0.612 |
| - | 38 | 7126      | e ZFYVE26_uc001    | NM_015346    | NP_056161    | Q68DK2 | ZFY26_HUMAN  |                             | 11 | TGTGCCTGTGG   | 0.517 |
| - | 11 | 1957_1958 | nse_Mutation_p.G   | NM_015346    | NP_056161    | Q68DK2 | ZFY26_HUMAN  |                             | 11 | CTTCCCCTCAAT  | 0.525 |
| + | 3  | 208       | .2_5'UTR DNAL1_    | NM_031427    | NP_113615    | Q4LDG9 | DNAL1_HUMAN  |                             | 0  | CATAGGAAGAG   | 0.403 |
| + | 2  | 432       |                    | NM_018228    | NP_060698    | Q9H8Y1 | VRTN_HUMAN   |                             | 0  | GCAAGGGGGAG   | 0.672 |
| - | 3  | 580       | 1_uc001xru.2_Spli  | NM_007176    | NP_009107    | Q9UKR5 | ERG28_HUMAN  |                             | 0  | CATTCAGTGTGT  | 0.498 |
| - | 42 | 5837      | d.2_Missense_Mu    | NM_183387    | NP_899243    | Q05BV3 | EMAL5_HUMAN  |                             | 3  | TCATCTCCTAGA  | 0.418 |
| - | 6  | 1430      | 14orf102_uc001xyj  | NM_017970    | NP_060440    | Q9H7Z3 | CN102_HUMAN  |                             | 3  | GGCCTCTTCCG   | 0.408 |
| - | 11 | 5137      | f.1_Missense_Mu    | NM_004239    | NP_004230    | Q15643 | TRIPB_HUMAN  | Potential.                  | 13 | ATATTCTCTCCT  | 0.338 |
| + | 21 | 2791      | lybs.1_Missense_   | NM_020818    | NP_065869    | Q9P2D8 | UNC79_HUMAN  |                             | 17 | AGTAACCAAAA   | 0.468 |
| - | 18 | 2935      | sense_Mutation_p.  | NM_030621    | NP_085124    | Q9UPY3 | DICER_HUMAN  | PAZ.                        | 5  | AGGGTGTTTCT   | 0.338 |
| + | 3  | 650       | avn.2_Nonsense_M   | NM_000710    | NP_000701    | P46663 | BKRB1_HUMAN  | lasmic (Potential).         | 3  | GGAGGCAGCAG   | 0.642 |
| - | 1  | 458       | R20_uc010txu.1_5   | NM_001017963 | NP_001017963 | P07900 | HS90A_HUMAN  |                             | 7  | TTCCTGGGCGG   | 0.637 |
| - | 10 | 1207      | _uc001yjh.2_Intron | NM_014226    | NP_055041    | Q9UQ07 | MOK_HUMAN    |                             | 4  | TTAGTACCTGCT  | 0.612 |
| + | 2  | 1045      | NF839_uc001yjq.1   | NM_018335    | NP_060805    | A8K0R7 | ZN839_HUMAN  |                             | 2  | GCTGTCTGAGA   | 0.582 |
| + | 9  | 1114      |                    | NM_015156    | NP_055971    | Q9UKL0 | RCOR1_HUMAN  | ction with KDM1A.           | 1  | ATCGACTTCCAC  | 0.308 |
| - | 22 | 3220      | 01ymj.1_Splice_Si  | NM_006035    | NP_006026    | Q9Y5S2 | MRCKB_HUMAN  |                             | 11 | TCTCACCTCCTC  | 0.592 |
| - | 7  | 6868      | px.2_Missense_Mi   | NM_138420    | NP_612429    | Q8IVF2 | AHNK2_HUMAN  |                             | 1  | GAGGTCCACTT   | 0.602 |
| + | 1  | 286       | 727924_uc001yub    | NM_001004719 | NP_001004719 | Q8NGB6 | OR4M2_HUMAN  | ellular (Potential).        | 1  | TTGATGGATGCA  | 0.458 |
| + | 1  | 3712      |                    | NM_018958    | NP_061831    | Q9NZP6 | CO002_HUMAN  |                             | 8  | GTATTTGGATATA | 0.537 |
| + | 36 | 5582      | r.2_Nonsense_Mu    | NM_001036    | NP_001027    | Q15413 | RYR3_HUMAN   | eats. Cytoplasmic (By simil | 10 | AGCTGCAGGCA   | 0.552 |
| + | 7  | 1309      |                    | NM_152594    | NP_689807    | Q7Z699 | SPRE1_HUMAN  |                             | 5  | AAAACGAAGAA   | 0.413 |
| - | 32 | 4077      | 80_uc010ucu.1_F    | NM_017553    | NP_060023    | Q9ULG1 | INO80_HUMAN  | rserved components INO80    | 4  | TCCTCCTGTTG   | 0.473 |
| + | 18 | 2229      | _Mutation_p.G642   | NM_001128608 | NP_001122080 | O60336 | MABP1_HUMAN  | WD 10.                      | 10 | CAGTGAAAGC    | 0.517 |
| - | 13 | 5295      | pv.2_Missense_M    | NM_022473    | NP_071918    | Q9H2Y7 | ZF106_HUMAN  | WD 3.                       | 3  | GCATGGCATT    | 0.463 |
| + | 8  | 1045      | e_Mutation_p.P26   | NM_014444    | NP_055259    | Q9UGJ1 | GCP4_HUMAN   |                             | 3  | ACATTCCAGTGA  | 0.428 |
| - | 2  | 333       | J1zsj.2_Missense_  | NM_172095    | NP_742093    | Q96P56 | CTSR2_HUMAN  | lasmic (Potential).         | 1  | CCGCGGCACAG   | 0.453 |
| - | 25 | 4329      | iei.1_Missense_Mi  | NM_025137    | NP_079413    | Q96J17 | SPTCS_HUMAN  | lasmic (Potential).         | 5  | TCCTCCTTGA    | 0.488 |
| + | 26 | 3750      | ee.1_Missense_M    | NM_017434    | NP_059130    | Q9NRD9 | DUOX1_HUMAN  | TXNDC11 (By similarity). C  | 8  | TGCCTCCACCG   | 0.657 |
| + | 8  | 1700      | .p.E437K SLC27A    | NM_003645    | NP_003636    | O14975 | S27A2_HUMAN  | lasmic (Potential).         | 2  | AAGGGGAAAAT   | 0.453 |
| - | 3  | 644       | ABPB1_uc001zyc     | NM_005254    | NP_005245    | Q06547 | GABP1_HUMAN  | ANK 3.                      | 1  | TAATGGTGTTCG  | 0.453 |
| + | 2  | 536       | .1_Intron GLDN_uc  | NM_181789    | NP_861454    | Q6ZMI3 | GLDN_HUMAN   | ellular (Potential).        | 2  | AGATCCGAGTG   | 0.572 |
| - | 18 | 3035      |                    | NM_173814    | NP_776175    | Q2VWP7 | PRTG_HUMAN   |                             | 3  | AGGAGGCACTG   | 0.418 |
| - | 18 | 2330      | e_Mutation_p.D70   | NM_017661    | NP_060131    | Q6N043 | Z280D_HUMAN  |                             | 3  | TATTATCTAAGCC | 0.308 |
| - | 8  | 867       | se_Mutation_p.S21  | NM_017661    | NP_060131    | Q6N043 | Z280D_HUMAN  |                             | 3  | CCTGGGAAGAA   | 0.328 |
| - | 18 | 2492      | p.G784R SLTM_uc    | NM_024755    | NP_079031    | Q9NWH9 | SLTM_HUMAN   | Arg/Glu-rich.               | 1  | TTTCCCCTCAC   | 0.423 |
| - | 69 | 12992     |                    | NM_003922    | NP_003913    | Q15751 | HERC1_HUMAN  | RCC1 13. p.P4282P(1)        | 19 | TTGCGGTCGAT   | 0.468 |
| - | 38 | 7406      |                    | NM_003922    | NP_003913    | Q15751 | HERC1_HUMAN  |                             | 19 | ATTCATGTCGGT  | 0.483 |
| + | 4  | 935       | ujp.1_Missense_Iv  | NM_002755    | NP_002746    | Q02750 | MP2K1_HUMAN  | rotein kinase.              | 0  | ATCAAGTCTCTG  | 0.353 |

rs142015707

|   |    |         |                                                  |              |              |        |             |                                |     |              |       |
|---|----|---------|--------------------------------------------------|--------------|--------------|--------|-------------|--------------------------------|-----|--------------|-------|
| - | 9  | 1133    | p.G161D LCTL_u                                   | NM_207338    | NP_997221    | Q6UWM7 | LCTL_HUMAN  | cellular (Potential).          | 2   | GATGTGCCTTTA | 0.498 |
| - | 6  | 1070    | v2_uc002atw.1_M                                  | NM_182471    | NP_872271    | P14618 | KPYM_HUMAN  |                                | 1   | CCGAACCCCT   | 0.532 |
| - | 1  | 413     | 1_Missense_Muta                                  | NM_052840    | NP_443072    | Q96J87 | CELF6_HUMAN |                                | 3   | GGGACCGGGG   | 0.721 |
| + | 3  | 716     | D1_uc010uky.1_Mi                                 | NM_002499    | NP_002490    | Q92859 | NEO1_HUMAN  | potential). Ig-like C2-type 2. | 1   | AAACCCCTTCTT | 0.443 |
| - | 10 | 1933    | p.P482L EDC3_uc                                  | NM_001142443 | NP_001135915 | Q96F86 | EDC3_HUMAN  | ef N-terminal.                 | 1   | GCTGGGGAATG  | 0.577 |
| + | 3  | 333     | .2_5'UTR C15orf2                                 | NM_152335    | NP_689548    | Q2M3C6 | CO027_HUMAN |                                | 0   | CCACGGCGGGC  | 0.522 |
| + | 5  | 1075    |                                                  | NM_001101404 | NP_001094874 | A6NKC9 | SH2D7_HUMAN |                                | 0   | AAGGCCTCCTG  | 0.617 |
| - | 10 | 1805    | blm.1_Missense_M                                 | NM_002891    | NP_002882    | Q13972 | RGRF1_HUMAN | PH 2.                          | 6   | GGCGCCCCCTG  | 0.562 |
| + | 21 | 3142    | p.A973V ADAMTS                                   | NM_207517    | NP_997400    | P82987 | ATL3_HUMAN  | like C2-type 1.                | 27  | TCTTGCTGCCCT | 0.552 |
| + | 4  | 2428    | 592_uc010upb.1_                                  | NM_014630    | NP_055445    | Q92610 | ZN592_HUMAN |                                | 6   | CCCTTGCCACTC | 0.592 |
| + | 8  | 4285    | lu.1_Missense_M                                  | NM_007200    | NP_009131    | Q12802 | AKP13_HUMAN |                                | 9   | AGGGAGCATAG  | 0.463 |
| - | 2  | 169     | nk.2_RNA DET1_u                                  | NM_001144074 | NP_001137546 | Q7L5Y6 | DET1_HUMAN  |                                | 2   | ATGGTAGAAACA | 0.403 |
| - | 7  | 1048    | c.1_Missense_Mu                                  | NM_002168    | NP_002159    | P48735 | IDHP_HUMAN  |                                | 711 | CCTGGGCCAGG  | 0.562 |
| + | 24 | 3009    |                                                  | NM_003870    | NP_003861    | P46940 | IQGA1_HUMAN | C1.                            | 8   | AGTTGGAAGCT  | 0.358 |
| - | 19 | 1890    | nse_Mutation_p.C                                 | NM_001287    | NP_001278    | P51798 | CLCN7_HUMAN | al; (By similarity).           | 4   | GTCGCCACGA   | 0.632 |
| + | 16 | 1725    | v.1_Missense_Mu                                  | NM_000548    | NP_000539    | P49815 | TSC2_HUMAN  |                                | 10  | CCTCTCCCCAC  | 0.577 |
| - | 15 | 5859    | t.1_Missense_Mut                                 | NM_001009944 | NP_001009944 | P98161 | PKD1_HUMAN  | xtracellular (Potential).      | 3   | CTCCTCCGCCG  | 0.637 |
| + | 11 | 1628    | rl.1_Missense_Mu                                 | NM_016333    | NP_057417    | Q9UQ35 | SRRM2_HUMAN | rich. Ser-ri p.G360D(1)        | 4   | CACAGGCCCAG  | 0.577 |
| - | 2  | 639     | 2cuk.2_Missense_                                 | NM_003454    | NP_003445    | P98182 | ZN200_HUMAN |                                | 0   | TGCAGCCATCA  | 0.542 |
| - | 10 | 2316    |                                                  | NM_000243    | NP_000234    | O15553 | MEFV_HUMAN  | 330.2/SPRY.                    | 6   | GTGTCCCAGGG  | 0.527 |
| - | 5  | 1068    | _p.R12Q ZNF434_                                  | NM_017810    | NP_060280    | Q9NX65 | ZN434_HUMAN |                                | 2   | GGGTCGCAGAG  | 0.502 |
| + | 4  | 469     | cws.3_Missense_M                                 | NM_001127206 | NP_001120678 | P30519 | HMOX2_HUMAN |                                | 0   | ACTTCCCATGC  | 0.567 |
| + | 14 | 1517    | N1_uc002cxb.2_M                                  | NM_001142290 | NP_001135762 | O60291 | MGRN1_HUMAN |                                | 2   | GCTTCCCCATC  | 0.652 |
| + | 12 | 1776    | v.1_Missense_Mu                                  | NM_018723    | NP_061193    | Q9NWB1 | RFOX1_HUMAN |                                | 0   | CACCGCCCGGG  | 0.592 |
| - | 4  | 256     | _Intron NTAN1_uc                                 | NM_173474    | NP_775745    | Q96AB6 | NTAN1_HUMAN |                                | 0   | CATTACCTGAAG | 0.527 |
| - | 7  | 1087    | _p.P293S ACSM2E                                  | NM_182617    | NP_872423    | Q68CK6 | ACS2B_HUMAN |                                | 5   | CAGTGGGTCAA  | 0.408 |
| + | 15 | 1919    | dme.2_Splice_Site                                | NM_212535    | NP_997700    | P05771 | KPCB_HUMAN  |                                | 9   | AAGGGTAAGT   | 0.299 |
| + | 2  | 184     | lissense_Mutation                                | NM_007074    | NP_009005    | P31146 | COR1A_HUMAN | WD 1.                          | 0   | CAAGGCCGACC  | 0.592 |
| + | 8  | 1228    | za.2_Missense_Mi                                 | NM_024031    | NP_076936    | Q9BWN1 | PRR14_HUMAN | Pro-rich.                      | 0   | TTCTCCCTAAG  | 0.677 |
| + | 2  | 483     | et.2_Missense_Mi                                 | NM_006742    | NP_006733    | P11801 | KPSH1_HUMAN | ilarity). Protein kinase.      | 0   | TAATTGGCCGA  | 0.587 |
| - | 72 | 12372   | DIN_uc010cfy.2_R                                 | NM_032821    | NP_116210    | Q4G0P3 | HYDIN_HUMAN |                                | 2   | GATGAGAGGTT  | 0.483 |
| + | 6  | 639     | 74_uc002fbl.1_Missense_Mutation_p.A106V KIAA0174 |              | NP_053990    | P53990 | IST1_HUMAN  | teraction with CHMP1A an       | 1   | CTGGGCTGCTC  | 0.368 |
| + | 7  | 984_985 | p.S175F CNTNAF                                   | NM_033401    | NP_207837    | Q9C0A0 | CNTP4_HUMAN | cellular (Potential).          | 2   | AAAATCCCTGAG | 0.381 |
| + | 4  | 689     | n_p.V158I BCMO                                   | NM_017429    | NP_059125    | Q9HAY6 | BCDO1_HUMAN |                                | 0   | AAGAAGTATCA  | 0.517 |
| + | 4  | 551     | .1_Missense_Mut                                  | NM_001257    | NP_001248    | P55290 | CAD13_HUMAN | Cadherin 1.                    | 1   | TATCTCCCATTT | 0.358 |
| + | 7  | 1362    | _p.L244F OSGIN1                                  | NM_013370    | NP_037502    | Q9UJX0 | OSG1_HUMAN  |                                | 0   | TGGTCTCGCC   | 0.701 |
| + | 11 | 1286    | cc.2_Missense_Mi                                 | NM_014972    | NP_055787    | Q9BQ70 | TCF25_HUMAN |                                | 0   | TCCGCTCTTCC  | 0.627 |
| - | 5  | 1282    | tn.1_Missense_Mi                                 | NM_052928    | NP_443160    | Q8IYR2 | SMYD4_HUMAN |                                | 5   | GTTATCACAAG  | 0.433 |
| - | 5  | 480     | _p.R110H ATP2A3                                  | NM_174955    | NP_777615    | Q93084 | AT2A3_HUMAN | ame=2; (By similarity).        | 5   | CGTTGCGTTCC  | 0.652 |
| - | 17 | 2399    | p.Q788H ANKFY1                                   | NM_016376    | NP_057460    | Q9P2R3 | ANFY1_HUMAN | ANK 13.                        | 3   | AGACACTGTAC  | 0.562 |
| + | 5  | 573     |                                                  | NM_006612    | NP_006603    | O43896 | KIF1C_HUMAN | inesin-motor.                  | 2   | TGCTGCTCCAC  | 0.552 |
| - | 3  | 1004    | gat.2_Missense_M                                 | NM_014519    | NP_055334    | Q9UNY5 | ZN232_HUMAN | SCAN box.                      | 2   | TTTCTCTGGCC  | 0.592 |
| - | 2  | 93      | onsense_Mutation                                 | NM_207103    | NP_996986    | Q6UWF3 | CQ087_HUMAN | ical; (Potential).             | 1   | ATGATCCAGAA  | 0.473 |
| - | 17 | 4894    | se_Mutation_p.A14                                | NM_033004    | NP_127497    | Q9C000 | NALP1_HUMAN | CARD.                          | 9   | CAGGGCTTGGT  | 0.572 |
| - | 29 | 4544    | _uc002gfy.1_Splic                                | NM_032442    | NP_115818    | Q96JN8 | NEUL4_HUMAN |                                | 2   | ACACACTGGA   | 0.552 |
| + | 7  | 777     | _p.L174F CHRNB                                   | NM_000747    | NP_000738    | P11230 | ACHB_HUMAN  | ical; (Potential).             | 2   | AAGCTCTCTTC  | 0.577 |
| + | 11 | 1674    | r.2_Missense_Mut                                 | NM_001143990 | NP_001137462 | Q9BUR4 | WAP53_HUMAN |                                | 0   | CGGCCACGTC   | 0.642 |

rs149750747



|   |    |      |                                 |              |              |        |              |                            |    |                  |       |
|---|----|------|---------------------------------|--------------|--------------|--------|--------------|----------------------------|----|------------------|-------|
| + | 12 | 2103 | p.P661L ARHGEF                  | NM_173728    | NP_776089    | O94989 | ARHG_F_HUMAN |                            | 3  | GCACCCCTCTTT     | 0.637 |
| - | 24 | 3061 | ve.1_Missense_M                 | NM_003802    | NP_003793    | Q9UKX3 | MYH13_HUMAN  | Potential.                 | 6  | FGTTTTCTTCAAC    | 0.378 |
| + | 35 | 6955 | o.2_Missense_Mt                 | NM_001372    | NP_001363    | Q9NYC9 | DYH9_HUMAN   | 2 (By similarity).         | 20 | GAACCCCTCCAG     | 0.443 |
| - | 8  | 1937 | gov.3_Splice_Site_p.E224_splice |              |              | O95361 | TRI16_HUMAN  |                            | 3  | ACTTACCAGGG      | 0.303 |
| - | 1  | 262  | 116_uc002gor.1_lr               | NM_006382    | NP_006373    | O95170 | CDRT1_HUMAN  |                            | 0  | ATAGAGGGATGG     | 0.463 |
| - | 3  | 460  | COR1_uc010coz.1                 | NM_006311    | NP_006302    | O75376 | NCOR1_HUMAN  | with ZBTB33 and HEXIM1.    | 5  | AAATCTGAAA       | 0.388 |
| - | 1  | 447  |                                 | NM_181716    | NP_859067    | Q7Z7K6 | CENPV_HUMAN  |                            | 0  | GGCGGCACCTT      | 0.617 |
| - | 4  | 422  | rl.2_Splice_Site_f              | NM_148173    | NP_680478    | Q9UBM1 | PEMT_HUMAN   |                            | 0  | CTTTACCTAGG      | 0.672 |
| + | 12 | 1154 | sense_Mutation_p                | NM_018242    | NP_060712    | Q96FL8 | S47A1_HUMAN  | ical; (Potential).         | 0  | TTAAGCTGTAA      | 0.408 |
| - | 26 | 3592 |                                 | NM_000625    | NP_000616    | P35228 | NOS2_HUMAN   |                            | 4  | CTCGACCTGCT      | 0.602 |
| - | 16 | 2814 | sa.1_Missense_IV                | NM_078471    | NP_510880    | Q92614 | MY18A_HUMAN  | rosin head-like.           | 0  | AGCCTCCTCTT      | 0.587 |
| - | 5  | 1122 |                                 | NM_001045    | NP_001036    | P31645 | SC6A4_HUMAN  | cellular (Potential).      | 4  | GCTGGTCCGTG      | 0.527 |
| + | 11 | 1551 | 45B_uc002hjc.2_f                | NM_173167    | NP_775259    | Q8IWX7 | UN45B_HUMAN  |                            | 6  | TCAGGGACTCT      | 0.458 |
| - | 10 | 1999 |                                 | NM_001004334 | NP_001004334 | Q6PRD1 | GP179_HUMAN  | plasmic (Potential).       | 3  | GCCAAAGGTAGG     | 0.622 |
| - | 3  | 265  | T40_uc002hvj.1_F                | NM_182497    | NP_872303    | Q6A162 | K1C40_HUMAN  | Head.                      | 0  | TACCGGGGAGA      | 0.577 |
| - | 1  | 216  |                                 | NM_033188    | NP_149445    | Q9BYR2 | KRA45_HUMAN  | [GRQVCHIEK]-[SPTR]-[V:     | 0  | gagatgcagcagctag | 0.274 |
| + | 12 | 2014 | 458* STAT5A_uc                  | NM_003152    | NP_003143    | P42229 | STA5A_HUMAN  |                            | 1  | TGTTCCAGGTG      | 0.607 |
| + | 14 | 2156 | 474L STAT5A_uc                  | NM_003152    | NP_003143    | P42229 | STA5A_HUMAN  |                            | 1  | TGGGCCGCAGC      | 0.552 |
| + | 6  | 1920 |                                 | NM_000263    | NP_000254    | P54802 | ANAG_HUMAN   |                            | 0  | GAATACCAGCAT     | 0.632 |
| + | 10 | 2015 | ibk.1_Missense_M                | NM_032387    | NP_115763    | Q96J92 | WNK4_HUMAN   |                            | 7  | CCCAGGGAGGA      | 0.552 |
| + | 1  | 294  |                                 | NM_003734    | NP_003725    | Q16853 | AOC3_HUMAN   | cellular (Potential).      | 4  | TGTATCTCCAC      | 0.622 |
| - | 8  | 4535 | .G1413S GPATCH                  | NM_001002909 | NP_001002909 | Q9UKJ3 | GPTC8_HUMAN  |                            | 4  | CTGACCTGAGA      | 0.607 |
| + | 14 | 1748 | 4B_uc010wjc.1_lr                | NM_145663    | NP_663696    | Q8NFT6 | DBF4B_HUMAN  |                            | 0  | TTCGTCCTTTC      | 0.552 |
| - | 17 | 1948 | p.A528T EFTUD2                  | NM_004247    | NP_004238    | Q15029 | U5S1_HUMAN   |                            | 1  | GGTTGCTGTCT      | 0.498 |
| + | 6  | 1749 |                                 | NM_013351    | NP_037483    | Q9UL17 | TBX21_HUMAN  |                            | 0  | CTCCTCCCCTG      | 0.522 |
| + | 2  | 1004 | inb.3_Missense_M                | NM_003204    | NP_003195    | Q14494 | NF2L1_HUMAN  |                            | 1  | TCAGCCCAACT      | 0.607 |
| + | 7  | 2576 | p.S782F AKAP1_u                 | NM_003488    | NP_003479    | Q92667 | AKAP1_HUMAN  | Tudor.                     | 1  | TGCCTCTACG       | 0.607 |
| - | 15 | 2798 | p.P583S BZRAP1                  | NM_004758    | NP_004749    | O95153 | RIMB1_HUMAN  |                            | 3  | AGCTGGGAGCA      | 0.647 |
| + | 25 | 5802 | \NC2_uc002jao.3_                | NM_025185    | NP_079461    | Q9HCD6 | TANC2_HUMAN  |                            | 2  | TGCTGGCTAAC      | 0.527 |
| - | 14 | 1713 | LZ_uc002jfx.3_Mi                | NM_014877    | NP_055692    |        |              |                            | 2  | AGCGACAAAAA      | 0.413 |
| + | 4  | 1914 | .G618V BPTF_uc                  | NM_182641    | NP_872579    | Q12830 | BPTF_HUMAN   | ction with KEAP1.          | 4  | GCAAGGAAAAA      | 0.318 |
| + | 7  | 888  | i6_splice PRKAR1                | NM_212471    | NP_997636    | P10644 | KAP0_HUMAN   |                            | 12 | TCATGGTAAGAC     | 0.368 |
| - | 22 | 3096 | wqq.1_Splice_Site               | NM_007168    | NP_009099    | O94911 | ABCA8_HUMAN  |                            | 3  | CCATTCTGAAA      | 0.353 |
| + | 2  | 131  | g.2_RNA DNAI2_u                 | NM_023036    | NP_075462    | Q9GZS0 | DNAI2_HUMAN  |                            | 3  | GAAGCGCAGCG      | 0.637 |
| + | 9  | 1459 | p.A426V GAA_uc                  | NM_001079803 | NP_001073271 | P10253 | LYAG_HUMAN   |                            | 1  | CCCGCCATGG       | 0.647 |
| + | 10 | 1512 | p.P444S GAA_uc                  | NM_001079803 | NP_001073271 | P10253 | LYAG_HUMAN   |                            | 1  | AGGATCCTGCC      | 0.642 |
| + | 32 | 3015 | _Mutation_p.P287                | NM_005993    | NP_005984    | Q9BTW9 | TBCD_HUMAN   |                            | 0  | TGCACCTTCCC      | 0.657 |
| + | 11 | 969  | o.2_Missense_Mu                 | NM_003826    | NP_003817    | Q99747 | SNAG_HUMAN   |                            | 0  | ACCAAGATCAG      | 0.453 |
| - | 29 | 4390 |                                 | NM_005406    | NP_005397    | Q13464 | ROCK1_HUMAN  | Auto-inhibitory.           | 5  | AACAAAATTTTT     | 0.338 |
| + | 3  | 940  | ABLES1_uc002ku                  | NM_001100619 | NP_001094089 | Q8TDN4 | CABL1_HUMAN  | th CDK3 (By similarity).   | 1  | GTTCACCCAGA      | 0.438 |
| - | 10 | 1847 | n.1_Missense_Mu                 | NM_001792    | NP_001783    | P19022 | CADH2_HUMAN  | r (Potential). Cadherin 3. | 4  | CTGCAGCAACAC     | 0.403 |
| - | 13 | 2190 | m.2_Missense_Mt                 | NM_024421    | NP_077739    | Q08554 | DSC1_HUMAN   | r (Potential). p.S643F(1)  | 4  | GCACAGAATAA      | 0.358 |
| - | 9  | 980  | I8orf34_uc002kxo.               | NM_001105528 | NP_001098998 | Q5BJE1 | CR034_HUMAN  | Potential.                 | 1  | AAGTTCTCTGAT     | 0.323 |
| + | 1  | 177  | rf21_uc002kzd.2_f               | NM_031446    | NP_113634    | Q32NC0 | CR021_HUMAN  |                            | 0  | GCTACCTCTCTG     | 0.637 |
| - | 9  | 1201 | _Mutation_p.D173h               | NM_003199    | NP_003190    | P15884 | ITF2_HUMAN   |                            | 2  | CGAGTCCCTAT      | 0.512 |
| + | 18 | 2699 |                                 | NM_194449    | NP_919431    | O60346 | PHLP1_HUMAN  | PP2C-like.                 | 0  | TGGTGCTCTCGC     | 0.602 |
| + | 6  | 688  | xet.1_Missense_h                | NM_001040147 | NP_001035237 | O75635 | SPB7_HUMAN   |                            | 3  | AATCTCCAAGC      | 0.413 |

|   |    |           |                   |              |              |        |             |    |                |       |             |
|---|----|-----------|-------------------|--------------|--------------|--------|-------------|----|----------------|-------|-------------|
| - | 6  | 941       | 2lf.2_Missense_M  | NM_152676    | NP_689889    | Q8NCQ5 | FBX15_HUMAN | 3  | GATATGGTCAAA   | 0.468 |             |
| + | 4  | 371       | lo.2_Missense_Mt  | NM_018235    | NP_060705    | Q96KP4 | CNDP2_HUMAN | 3  | CGTCCCTGATG    | 0.517 |             |
| - | 2  | 233       | ense_Mutation_p.A | NM_025078    | NP_079354    | Q8N2U9 | PQLC1_HUMAN | 2  | GGCCGCGCCCC    | 0.711 |             |
| + | 21 | 3169      | sb.1_Missense_Mi  | NM_019112    | NP_061985    | Q8IZY2 | ABCA7_HUMAN | 9  | TTTTGGGAGCTG   | 0.408 |             |
| - | 4  | 649       | DAMTSL5_uc010     | NM_213604    | NP_998769    | Q6ZMM2 | ATL5_HUMAN  | 0  | ICGGTTCTTCCC   | 0.677 |             |
| - | 5  | 2446_2447 | O1_uc010xgs.1_5   | NM_020695    | NP_065746    | Q8N1G1 | REXO1_HUMAN | 0  | ATGGTGGTGGT    | 0.644 |             |
| - | 14 | 2147      |                   | NM_015174    | NP_055989    | Q9UPR6 | ZFR2_HUMAN  | 2  | GGTCGGAGGAG    | 0.542 |             |
| - | 5  | 1113      | JS3L_uc010duk.2   | NM_020175    | NP_064560    | Q96G46 | DUS3L_HUMAN | 0  | TGGTCGACACG    | 0.607 |             |
| + | 3  | 1929      |                   | NM_025061    | NP_079337    | Q6NSJ5 | LRC8E_HUMAN | 2  | AGGAACTTGAC    | 0.632 |             |
| - | 3  | 14698     |                   | NM_024690    | NP_078966    | Q8WXI7 | MUC16_HUMAN | 57 | FGGTAACACTG    | 0.453 |             |
| - | 1  | 3155      |                   | NM_024690    | NP_078966    | Q8WXI7 | MUC16_HUMAN | 57 | AAACAGTGGTT    | 0.463 |             |
| - | 1  | 2849      |                   | NM_024690    | NP_078966    | Q8WXI7 | MUC16_HUMAN | 57 | CTCTGAAACA     | 0.483 |             |
| - | 8  | 1222      | ws.2_Missense_M   | NM_024106    | NP_077011    | Q9BUY5 | ZN426_HUMAN | 1  | AGTTGGAATAAT   | 0.433 |             |
| - | 26 | 2815      | inh.2_Missense_M  | NM_001379    | NP_001370    | P26358 | DNMT1_HUMAN | 6  | TGGAGGGGACT    | 0.572 |             |
| - | 25 | 2997      | lq.1_Missense_Mt  | NM_020812    | NP_065863    | Q96HP0 | DOCK6_HUMAN | 3  | CACATCCTGGG    | 0.617 |             |
| + | 3  | 349       |                   | NM_152356    | NP_689569    | Q8N8L2 | ZN491_HUMAN | 2  | AGGTTCCGGAA    | 0.398 |             |
| - | 5  | 1592      |                   | NM_020714    | NP_065765    | Q9ULM2 | ZN490_HUMAN | 0  | TCAGGGAAATTT   | 0.413 |             |
| - | 9  | 3261      | p.E1039K SFRS14   | NM_014884    | NP_055699    | Q8IX01 | SUGP2_HUMAN | 0  | CGGCTCCCTGA    | 0.642 |             |
| + | 3  | 307       |                   | NM_004386    | NP_004377    | O14594 | NCAN_HUMAN  | 4  | GCGCAGCCCGA    | 0.652 | rs2228601   |
| + | 6  | 1204      | 714_uc010ecp.1_f  | NM_182515    | NP_872321    | Q96N38 | ZN714_HUMAN | 0  | TTAAAGAAAAAC   | 0.348 |             |
| + | 2  | 903       | _p.P336L ZNF493   | NM_175910    | NP_787106    | Q6ZR52 | ZN493_HUMAN | 1  | AACCCCTACTA    | 0.348 | rs142651314 |
| - | 3  | 1700      |                   | NM_001001411 | NP_001001411 | Q8N7Q3 | ZN676_HUMAN | 0  | TTGAGGACCAG    | 0.418 |             |
| - | 4  | 1151_1152 | p.P268F ZNF681    | NM_138286    | NP_612143    | Q96N22 | ZN681_HUMAN | 0  | TGTAGGGTTTCT   | 0.401 |             |
| + | 7  | 613       | o10xsh.1_Missen   | NM_002151    | NP_002142    | P05981 | HEPS_HUMAN  | 2  | CGAGGGGAGGC    | 0.692 |             |
| + | 6  | 1388      | o.G389D ZNF567    | NM_152603    | NP_689816    | Q8N184 | ZN567_HUMAN | 0  | TACAGGTGAGA    | 0.438 |             |
| + | 11 | 1035      | oe.2_Missense_M   | NM_138392    | NP_612401    | Q8TBC3 | SHKB1_HUMAN | 2  | CACCAGTTATGA   | 0.647 |             |
| + | 9  | 2266      | V5_uc002orf.2_Sp  | NM_004363    | NP_004354    | P06731 | CEAM5_HUMAN | 2  | AGACTGGTAGGT   | 0.507 |             |
| - | 1  | 1756      |                   | NM_015649    | NP_056464    | Q8IU81 | I2BP1_HUMAN | 0  | CGTTGCGGGCC    | 0.741 |             |
| - | 3  | 2001      |                   | NM_001080457 | NP_001073926 | Q9NT99 | LRC4B_HUMAN | 2  | CTCGTCTCCA     | 0.731 |             |
| - | 5  | 755       | p.C225Y KLK10_L   | NM_145888    | NP_665895    | O43240 | KLK10_HUMAN | 2  | CCTGGCAAGGG    | 0.512 |             |
| + | 5  | 819       | p.V243M TTYH1_U   | NM_020659    | NP_065710    | Q9H313 | TTYH1_HUMAN | 0  | TGGCTGGTGATC   | 0.632 |             |
| - | 19 | 2386_2387 | lSAPS1_uc002qjv   | NM_014931    | NP_055746    | Q9UPN7 | PP6R1_HUMAN | 0  | TCAAAGGTGGC    | 0.668 |             |
| - | 2  | 341       |                   | NM_176820    | NP_789790    | Q7RTR0 | NALP9_HUMAN | 7  | ATGTTTCCTTCA   | 0.348 |             |
| + | 3  | 1839      | lq.2_Missense_M   | NM_176811    | NP_789781    | Q86W28 | NALP8_HUMAN | 13 | CTGAAAGTCATA   | 0.488 |             |
| + | 7  | 2209      | ni.2_Missense_Mt  | NM_153447    | NP_703148    | P59047 | NALP5_HUMAN | 7  | AAAATTCGGGTG   | 0.498 |             |
| + | 7  | 1335      | 446_uc010eur.2_3  | NM_017908    | NP_060378    | Q9NWS9 | ZN446_HUMAN | 1  | AGCTGGAAGTC    | 0.652 |             |
| - | 6  | 2425      | on MZF1_uc002qt   | NM_198055    | NP_932172    | P28698 | MZF1_HUMAN  | 1  | CTTTTCGCCGG    | 0.672 |             |
| + | 2  | 1003      | vm.1_Missense_M   | NM_016030    | NP_057114    | Q8WVT3 | TTC15_HUMAN | 4  | CATGCGAGGGC    | 0.577 |             |
| + | 1  | 482       |                   | NM_080657    | NP_542388    | Q8WXG1 | RSAD2_HUMAN | 0  | AGCTGGTGAGT    | 0.512 |             |
| + | 7  | 971       | 2qyt.2_Missense_f | NM_014746    | NP_055561    | P50876 | R144A_HUMAN | 2  | TGGAAGAAGATC   | 0.567 |             |
| + | 7  | 665       | 2rat.2_Missense_l | NM_001039362 | NP_001034451 | Q8NEY4 | VATC2_HUMAN | 1  | TTCTGGTCATCC   | 0.562 |             |
| - | 31 | 3682      | e_Mutation_p.A29  | NM_015909    | NP_056993    | A2RRP1 | NBAS_HUMAN  | 4  | CAACGGCTTGG    | 0.378 |             |
| - | 15 | 2254      |                   | NM_000384    | NP_000375    | P04114 | APOB_HUMAN  | 27 | AAAAATCCTTGC   | 0.418 |             |
| - | 1  | 420       | km.1_Missense_lv  | NM_004036    | NP_004027    | O60266 | ADCY3_HUMAN | 4  | CGTGGCGCTGC    | 0.597 |             |
| - | 3  | 376       |                   | NM_018263    | NP_060733    | Q76L83 | ASXL2_HUMAN | 1  | CAAGAGGAGAA    | 0.373 |             |
| + | 14 | 1905      |                   | NM_145038    | NP_659475    | Q96MC2 | CC164_HUMAN | 0  | gaagaggaggagAC | 0.358 |             |
| + | 11 | 1661      | v.2_Missense_Mut  | NM_004341    | NP_004332    | P27708 | PYR1_HUMAN  | 10 | GGTCCGGGTCC    | 0.627 |             |

|   |     |       |                    |              |              |        |             |                              |     |                 |       |
|---|-----|-------|--------------------|--------------|--------------|--------|-------------|------------------------------|-----|-----------------|-------|
| + | 6   | 673   | SNX17_uc010ylm.1   | NM_014748    | NP_055563    | Q15036 | SNX17_HUMAN | as-associating.              | 1   | AGCTGGATCTT     | 0.468 |
| + | 37  | 7450  |                    | NM_016252    | NP_057336    | Q9NR09 | BIRC6_HUMAN |                              | 14  | TGTAGGTGCGA     | 0.443 |
| - | 8   | 1473  | nd.1_Missense_I    | NM_015475    | NP_056290    | Q8NCA5 | FA98A_HUMAN | Gly-rich.                    | 1   | gcctccacgaccac  | 0.393 |
| - | 4   | 601   | g.2_Missense_Mu    | NM_005102    | NP_005093    | Q9UHY8 | FEZ2_HUMAN  |                              | 1   | GTGTAGGGGTT     | 0.418 |
| + | 4   | 817   | p.G250E MSH2_t     | NM_000251    | NP_000242    | P43246 | MSH2_HUMAN  |                              | 55  | AAAGGGAGAGC     | 0.318 |
| + | 5   | 3565  | i.1_Missense_Mut   | NM_000179    | NP_000170    | P52701 | MSH6_HUMAN  | TP (Potential).              | 168 | TATGGGGGGCA     | 0.378 |
| - | 9   | 1754  | zd.2_Missense_Mi   | NM_001122964 | NP_001116436 | Q5MIZ7 | P4R3B_HUMAN |                              | 1   | AATTCACITTTTT   | 0.318 |
| + | 18  | 1969  |                    | NM_032208    | NP_115584    | Q9H6X2 | ANTR1_HUMAN | ic (Potential). Pro-rich.    | 4   | cccacctccacctcc | 0.09  |
| - | 8   | 1674  |                    | NM_017880    | NP_060350    | Q9NWW7 | CB042_HUMAN |                              | 0   | TCTGGGGTATCT    | 0.428 |
| + | 10  | 2199  |                    | NM_005791    | NP_005782    | O00566 | MPP10_HUMAN |                              | 3   | FAGCTTCGGAGA    | 0.423 |
| + | 10  | 5698  | g.2_Missense_Mut   | NM_015120    | NP_055935    | Q8TCU4 | ALMS1_HUMAN | approximate tandem repea     | 9   | CTTATGAGCAGC    | 0.453 |
| - | 3   | 909   | p.S130N MOGS_t     | NM_006302    | NP_006293    | Q13724 | MOGS_HUMAN  | lenal (Potential).           | 0   | CTGGACTGGTT     | 0.527 |
| - | 6   | 683   | th.1_Missense_M    | NM_022912    | NP_075063    | Q9H902 | REEP1_HUMAN |                              | 0   | GTTTGCCGCTG     | 0.647 |
| - | 9   | 1852  |                    | NM_004836    | NP_004827    | Q9NZJ5 | E2AK3_HUMAN |                              | 3   | TCTTACCCTGTG    | 0.254 |
| - | 33  | 4699  | NP200_uc010yuj.1   | NM_014014    | NP_054733    | O75643 | U520_HUMAN  | p.R1538C(1)                  | 10  | GCAGGCGGGTT     | 0.557 |
| + | 11  | 1727  | bt.2_Missense_Mu   | NM_003854    | NP_003845    | Q9HB29 | ILRL2_HUMAN | oplasmic (Potential).        | 2   | FAGATACCACAT    | 0.572 |
| - | 6   | 1265  | p.S164F TGFBRA     | NM_004257    | NP_004248    | Q8WUH2 | TGFA1_HUMAN |                              | 2   | AGGAGGAGGTG     | 0.547 |
| - | 7   | 705   | b.2_Missense_Mu    | NM_004336    | NP_004327    | O43683 | BUB1_HUMAN  |                              | 7   | CTGAAGATATC     | 0.323 |
| + | 5   | 1448  | iD4_uc002tje.2_Inl | NM_012455    | NP_036587    | Q8NDX1 | PSD4_HUMAN  |                              | 2   | GGGTGACACC      | 0.642 |
| + | 13  | 3572  | it.3_Missense_Mu   | NM_005270    | NP_005261    | P10070 | GLI2_HUMAN  |                              | 13  | CTTTGGCCAGT     | 0.692 |
| + | 13  | 1673  | POTEE_uc002tsl.    | NM_001083538 | NP_001077007 | Q6S8J3 | POTEE_HUMAN |                              | 0   | TCCAAGAAATG     | 0.373 |
| + | 9   | 783   | iGAP1_uc010fng.2   | NM_012233    | NP_036365    | Q15042 | RB3GP_HUMAN |                              | 2   | FAGATGCCCTTG    | 0.363 |
| + | 19  | 2141  | GAP1_uc010fng.2    | NM_012233    | NP_036365    | Q15042 | RB3GP_HUMAN |                              | 2   | CCCCGGGATTAT    | 0.423 |
| - | 54  | 9568  |                    | NM_018557    | NP_061027    | Q9NZR2 | LRP1B_HUMAN | ntial). LDL-receptor class A | 50  | TCCATCACACT     | 0.403 |
| + | 7   | 1112  | D2_uc002tzd.3_M    | NM_001083112 | NP_001076581 | P43304 | GPDM_HUMAN  |                              | 1   | FAGTGAGCTTGC    | 0.572 |
| - | 3   | 1327  |                    | NM_018086    | NP_060556    | Q5HY92 | FIGN_HUMAN  |                              | 4   | GTTGCCATAG      | 0.448 |
| + | 7   | 1869  | udg.2_Missense_I   | NM_024969    | NP_079245    | Q8WYN3 | CSRN3_HUMAN |                              | 5   | CAACCCCTCTG     | 0.517 |
| - | 8   | 1147  | p.R246* SCN1A_     | NM_006920    | NP_008851    | P35498 | SCN1A_HUMAN | I.                           | 13  | TAGTCGAAACA     | 0.388 |
| + | 3   | 384   | z.2_Missense_Mut   | NM_138995    | NP_620482    | Q8WXR4 | MYO3B_HUMAN | rotein kinase.               | 19  | CCTAATCATCCC    | 0.418 |
| + | 14  | 1488  | Ofqo.2_Missense_   | NM_007023    | NP_008954    | Q8WZA2 | RPGF4_HUMAN | cAMP 2.                      | 6   | AGCTGCCTCTA     | 0.488 |
| - | 1   | 882   |                    | NM_152275    | NP_689488    | Q86WT1 | TT30A_HUMAN | TPR 4.                       | 0   | GTGCTGAGGCA     | 0.552 |
| - | 275 | 71319 | 94G TTN_uc010zl    | NM_133378    | NP_596869    | Q8WZ42 | TITIN_HUMAN |                              | 153 | AAGCTCTTAAA     | 0.378 |
| - | 275 | 62973 | 312T TTN_uc010z    | NM_133378    | NP_596869    | Q8WZ42 | TITIN_HUMAN |                              | 153 | GGTGCTGTGG      | 0.438 |
| - | 253 | 52930 | T11264 TTN_uc0     | NM_133378    | NP_596869    | Q8WZ42 | TITIN_HUMAN |                              | 153 | TTAATGGTAAGT    | 0.438 |
| - | 194 | 37684 | .1_Missense_Mut    | NM_133378    | NP_596869    | Q8WZ42 | TITIN_HUMAN |                              | 153 | GTGTGGAGACT     | 0.398 |
| - | 66  | 16515 | v_uc010zfi.1_Intro | NM_133378    | NP_596869    | Q8WZ42 | TITIN_HUMAN |                              | 153 | GGAGGCTTCTA     | 0.373 |
| - | 46  | 15582 | N_uc010zfi.1_Intr  | NM_133379    | NP_596870    | Q8WZ42 | TITIN_HUMAN |                              | 153 | CAGTAGGAATAG    | 0.478 |
| - | 46  | 13311 | N_uc010zfi.1_Intr  | NM_133379    | NP_596870    | Q8WZ42 | TITIN_HUMAN | p.A4363A(1)                  | 153 | TCTCTTTTCCC     | 0.383 |
| - | 46  | 13143 | N_uc010zfi.1_Intr  | NM_133379    | NP_596870    | Q8WZ42 | TITIN_HUMAN |                              | 153 | AATAGTCCCTTAC   | 0.418 |
| + | 9   | 1301  |                    | NM_018471    | NP_060941    | Q8WU90 | ZC3HF_HUMAN |                              | 1   | CATATACTTCAG    | 0.308 |
| + | 8   | 1455  | i_Mutation_p.E415  | NM_177454    | NP_803237    | Q6P995 | F171B_HUMAN | lasmic (Potential).          | 10  | AACAGAAGAAA     | 0.348 |
| - | 17  | 1791  | jk.1_Missense_ML   | NM_003151    | NP_003142    | Q14765 | STAT4_HUMAN |                              | 9   | TGTATCTGAGT     | 0.453 |
| + | 6   | 1821  | p.T536I SLC39A     | NM_001127257 | NP_001120729 | Q9ULF5 | S39AA_HUMAN |                              | 2   | GAACACAGAAG     | 0.338 |
| - | 46  | 8787  |                    | NM_018897    | NP_061720    | Q8WXX0 | DYH7_HUMAN  |                              | 12  | TAGCTCCAGAG     | 0.488 |
| - | 36  | 5971  |                    | NM_018897    | NP_061720    | Q8WXX0 | DYH7_HUMAN  | 3 (By simila p.R1957*(1)     | 12  | AGTATCGAATT     | 0.378 |
| + | 21  | 2361  | p.E310K AOX1_u     | NM_001159    | NP_001150    | Q06278 | ADO_HUMAN   |                              | 6   | ATATGAAACCC     | 0.433 |
| + | 10  | 1088  |                    | NM_015934    | NP_057018    | Q9Y2X3 | NOP58_HUMAN | Nop.                         | 0   | TGCAGCTTCTA     | 0.393 |

|   |    |      |                   |              |              |        |             |                                |     |                |       |
|---|----|------|-------------------|--------------|--------------|--------|-------------|--------------------------------|-----|----------------|-------|
| + | 10 | 1319 | 10zib.1_Missense_ | NM_001104586 | NP_001098056 | Q8N187 | AL2S8_HUMAN |                                | 2   | ITGGAGCAGGAG   | 0.308 |
| + | 12 | 1679 | ase_Mutation_p.P  | NM_001104586 | NP_001098056 | Q8N187 | AL2S8_HUMAN |                                | 2   | ITTTTTCCAACTC  | 0.328 |
| - | 25 | 3132 | zji.1_Missense_Mu | NM_005235    | NP_005226    | Q15303 | ERBB4_HUMAN | lasmic (Potential).            | 33  | ICAAATCCTCTTC  | 0.433 |
| - | 28 | 4878 | _uc002vfg.2_Splic | NM_212482    | NP_997647    | P02751 | FINC_HUMAN  |                                | 13  | IAGTTACCTGTTG  | 0.438 |
| + | 17 | 3416 | x.2_Missense_Mut  | NM_014640    | NP_055455    | Q14679 | TTL4_HUMAN  |                                | 3   | IAAGATGAGTTTI  | 0.458 |
| + | 22 | 4838 |                   | NM_005876    | NP_005867    | Q15772 | SPEG_HUMAN  | se 1.ATP (By similarity).      | 14  | ITTTCTCCTACTT  | 0.642 |
| - | 4  | 845  | ER_uc010zly.1_5'l | NM_139072    | NP_620711    | Q8NFT8 | DNER_HUMAN  | ellular (Potential).           | 8   | IAGGCAGTGGCA   | 0.453 |
| + | 5  | 887  | p.R152K CAB39_t   | NM_016289    | NP_057373    | Q9Y376 | CAB39_HUMAN |                                | 1   | ICATCAGACATG/  | 0.333 |
| + | 17 | 2219 | mp.1_Missense_N   | NM_001017915 | NP_001017915 | Q92835 | SHIP1_HUMAN |                                | 2   | ITCAGTCTTATGC  | 0.488 |
| - | 8  | 1293 | _p.W348* HJURP_   | NM_018410    | NP_060880    | Q8NCD3 | HJURP_HUMAN |                                | 1   | IATTAACCATTTI  | 0.398 |
| + | 8  | 1413 | vt.2_Missense_Ml  | NM_001037131 | NP_001032208 | Q9UPQ3 | AGAP1_HUMAN | all GTPase-like.               | 3   | IAGGTGGGAGTT   | 0.498 |
| - | 18 | 2548 | CA1_uc002vwa.1_   | NM_024726    | NP_079002    | Q86XH1 | IQCA1_HUMAN |                                | 1   | ITAAAGCTCTCTI  | 0.478 |
| + | 17 | 2272 | DI_uc002waj.1_5'i | NM_001080437 | NP_001073906 | Q8TER0 | SNED1_HUMAN | alcium-binding (Potential).    | 2   | IAGTGCCGGCTCI  | 0.562 |
| + | 8  | 1248 | iDH_uc002wgc.1_   | NM_152783    | NP_689996    | Q8N465 | D2HDH_HUMAN |                                | 0   | ITCCTGGAGCACI  | 0.612 |
| - | 8  | 1368 | PT4_uc010zpn.1_   | NM_015985    | NP_057069    | Q9Y264 | ANGP4_HUMAN | rogen C-terminal.              | 2   | ICCAGGCTGCTC   | 0.617 |
| - | 12 | 1118 | DH3B_uc002wgr.2   | NM_006899    | NP_008830    | O43837 | IDH3B_HUMAN |                                | 0   | IAGTCGGTTGTGI  | 0.562 |
| + | 4  | 1283 | zqz.1_Missense_N  | NM_001819    | NP_001810    | P05060 | SCG1_HUMAN  |                                | 6   | ICAGGGACCACC   | 0.537 |
| - | 8  | 1810 | ERM1_uc002wms     | NM_017671    | NP_060141    | Q9BQL6 | FERM1_HUMAN | FERM.                          | 3   | ITTCATCAACCTC  | 0.413 |
| + | 10 | 1546 | 341_uc010geq.2_   | NM_032819    | NP_116208    | Q9BYN7 | ZN341_HUMAN | C2H2-type 6.                   | 2   | ICTGCGGCAAGG   | 0.587 |
| - | 2  | 960  | _Missense_Mutati  | NM_000557    | NP_000548    | P43026 | GDF5_HUMAN  |                                | 0   | ICGGGACCTCGC   | 0.612 |
| + | 2  | 1432 |                   | NM_080552    | NP_542119    | Q9H598 | VIAAT_HUMAN | ical; (Potential).             | 0   | ICAAAGGCGCTGT  | 0.617 |
| + | 3  | 334  | amu.2_Missense_f  | NM_003404    | NP_003395    | P31946 | 1433B_HUMAN |                                | 4   | IAGCAGGCTGAG   | 0.463 |
| - | 1  | 121  | .W1_uc002xot.2_5  | NM_020398    | NP_065131    | O95925 | EPP1_HUMAN  | WAP.                           | 1   | ITACTGGGAATA   | 0.507 |
| + | 2  | 209  | xpo.2_Splice_Site | NM_007019    | NP_008950    | O00762 | UBE2C_HUMAN |                                | 0   | ITCATGGTGAGT   | 0.498 |
| + | 12 | 2361 | m.2_Missense_Ml   | NM_181659    | NP_858045    | Q9Y6Q9 | NCOA3_HUMAN |                                | 5   | ICGACGGAAATG   | 0.473 |
| - | 2  | 1608 | us.1_Missense_Ml  | NM_004975    | NP_004966    | Q14721 | KCNB1_HUMAN | lasmic (Potential).            | 2   | ICAAAGTGTTATI  | 0.428 |
| - | 6  | 865  | xvc.2_Intron UBEz | NM_199203    | NP_954673    | Q13404 | UB2V1_HUMAN |                                | 0   | ITGCGAGGGACT   | 0.458 |
| + | 12 | 2089 | p.S500N PHACTR    | NM_080672    | NP_542403    | Q96KR7 | PHAR3_HUMAN |                                | 3   | ICAAAAAGTAATG/ | 0.333 |
| - | 23 | 2487 |                   | NM_014258    | NP_055073    | Q9BX26 | SYCP2_HUMAN |                                | 5   | ITTTTCGAATCCC  | 0.328 |
| - | 16 | 1908 |                   | NM_002772    | NP_002763    | P98073 | ENTK_HUMAN  | lar (Potential). CUB 2.        | 8   | ITAAACCTCCTC   | 0.458 |
| + | 21 | 2652 | ITSN1_uc002ysx.   | NM_003024    | NP_003015    | Q15811 | ITSN1_HUMAN | SH3 1.                         | 4   | IAGGGTGGTTCC   | 0.483 |
| - | 4  | 2230 | uk.3_Missense_Ml  | NM_001001890 | NP_001001890 | Q01196 | RUNX1_HUMAN | o/Ser/Thr-rip.H242fs*14(2,     | 387 | ICGTGGGGGCTG   | 0.627 |
| + | 10 | 1269 | ueb.1_Missense_N  | NM_005128    | NP_005119    | Q9Y3R5 | DOP2_HUMAN  |                                | 2   | ICTGCAGAGATG/  | 0.453 |
| - | 11 | 2727 | CAM_uc002yyr.1_f  | NM_001389    | NP_001380    | O60469 | DSCAM_HUMAN | potential). Ig-like C2-type 8. | 11  | ITCTTCTCTCCA   | 0.517 |
| - | 5  | 1302 | CAM_uc002yyr.1_f  | NM_001389    | NP_001380    | O60469 | DSCAM_HUMAN | potential). Ig-like C2-type 3. | 11  | ICGGGCGAATGT   | 0.542 |
| + | 6  | 577  | r_p.P12S RRP1_u   | NM_003683    | NP_003674    | P56182 | RRP1_HUMAN  |                                | 0   | IAGCCCCCAAC    | 0.597 |
| - | 15 | 2311 | l.1_Missense_Mut  | NM_001127491 | NP_001120963 | P05107 | ITB2_HUMAN  | lasmic (Potential).            | 9   | ITGGCGCTCTTG   | 0.557 |
| + | 33 | 7306 | .2_Missense_Mut   | NM_006031    | NP_006022    | O95613 | PCNT_HUMAN  |                                | 8   | IGGTGCGTGACG   | 0.642 |
| - | 2  | 334  | 4R_uc002zru.2_5'  | NM_023004    | NP_075380    | Q9BZR6 | RTN4R_HUMAN | LRRNT.                         | 0   | ICTGCTGGGGGC   | 0.672 |
| - | 10 | 1717 | zsk.1_Missense_M  | NM_153334    | NP_699165    | Q96GP6 | SREC2_HUMAN | lasmic (Potential).            | 1   | ICAGCCTGAGGI   | 0.612 |
| + | 5  | 1859 |                   | NM_152612    | NP_689825    | Q8IYX3 | CC116_HUMAN |                                | 2   | ITAAAGCCGAGA   | 0.438 |
| + | 13 | 3250 | y.1_Missense_Mut  | NM_004327    | NP_004318    | P11274 | BCR_HUMAN   | C2.                            | 12  | ICAACTCGTGTG   | 0.567 |
| + | 5  | 506  | .C2A11_uc011ajc.  | NM_001024938 | NP_001020109 | Q9BYW1 | GTR11_HUMAN | Name=4; (Potential).           | 1   | ITCCAGGTGTGA   | 0.642 |
| + | 4  | 1533 | 309L MYO18B_uc    | NM_032608    | NP_115997    | Q8IUG5 | MY18B_HUMAN |                                | 12  | IGGAGTCGCCAG   | 0.632 |
| + | 15 | 3143 | guz.1_Missense_N  | NM_032608    | NP_115997    | Q8IUG5 | MY18B_HUMAN | rosin head-like.               | 12  | ITGAGGAGCTG    | 0.612 |
| + | 4  | 3000 | uc003afp.2_Silent | NM_021076    | NP_066554    | P12036 | NFH_HUMAN   | Tail.                          | 0   | ICCAAGGAAGAT   | 0.507 |
| + | 7  | 859  | ia.1_Missense_Ml  | NM_014291    | NP_055106    | O75600 | KBL_HUMAN   |                                | 0   | ITGGGCCCTCG    | 0.657 |

|   |    |           |                    |              |              |         |             |    |               |       |             |
|---|----|-----------|--------------------|--------------|--------------|---------|-------------|----|---------------|-------|-------------|
| + | 8  | 1373      |                    | NM_004286    | NP_004277    | O00178  | GTPB1_HUMAN | 1  | TGGCAGGGTGT   | 0.612 |             |
| + | 6  | 1417      | gxz.1_Missense_M   | NM_019008    | NP_061881    | Q9NQG6  | SMC7L_HUMAN | 1  | GACAAACATCTC  | 0.577 |             |
| + | 2  | 730       |                    | NM_001429    | NP_001420    | Q09472  | EP300_HUMAN | 64 | AGAGCAGTCCCTG | 0.512 |             |
| - | 10 | 1279      | p.R381Q NAGA_u     | NM_000262    | NP_000253    | P17050  | NAGAB_HUMAN | 1  | CATCTCGGAGG   | 0.562 | rs144771084 |
| - | 3  | 1225      | zdz.2_Nonsense_M   | NM_017436    | NP_059132    | Q9NPC4  | A4GAT_HUMAN | 2  | FGCCCTGGCTCT  | 0.617 |             |
| - | 5  | 564       | 1_uc003bdj.2_Spli  | NM_012263    | NP_036395    | O95922  | TTL1_HUMAN  | 1  | AAAGTCTGCAA   | 0.552 |             |
| + | 2  | 65        |                    | NM_001197    | NP_001188    | Q13323  | BIK_HUMAN   | 0  | AAATGTCTGAAG  | 0.532 |             |
| + | 12 | 1683      | 2_splice ATXN10_   | NM_013236    | NP_037368    | Q9UBB4  | ATX10_HUMAN | 2  | GCTTTAGTGAATG | 0.343 |             |
| - | 3  | 727       | aa.2_Missense_M    | NM_058238    | NP_478679    | P56706  | WNT7B_HUMAN | 1  | ITGACGGCGTGC  | 0.692 |             |
| - | 9  | 1199      | p.V212M LMF2_u     | NM_033200    | NP_149977    | Q9BU23  | LMF2_HUMAN  | 1  | CCGCACCTGGG   | 0.652 |             |
| + | 15 | 1279      |                    | NM_153635    | NP_705899    | Q8IYJ1  | CPNE9_HUMAN | 2  | AGTTCCCCCTG   | 0.522 |             |
| + | 4  | 2096      | sg.2_Missense_M    | NM_004634    | NP_004625    | P55201  | BRPF1_HUMAN | 3  | GCAATCTCAGAC  | 0.547 |             |
| + | 15 | 1450      | Flank IL17RC_uc    | NM_153483    | NP_705616    | Q8NFR9  | I17RE_HUMAN | 1  | AGCACCTCTTG   | 0.607 |             |
| + | 16 | 1366      | D2_uc003buy.1_M    | NM_033084    | NP_149075    | Q9BXW9  | FACD2_HUMAN | 4  | CTTAAGGATATG  | 0.398 |             |
| - | 22 | 3753      | 1_Mutation_p.P106  | NM_001001331 | NP_001001331 | Q01814  | AT2B2_HUMAN | 6  | CCTCCGGGATC   | 0.637 |             |
| - | 3  | 749       | e_Mutation_p.Q10   | NM_001001331 | NP_001001331 | Q01814  | AT2B2_HUMAN | 6  | GTCCTGCAGCG   | 0.557 |             |
| - | 5  | 530       | _Missense_Mutati   | NM_012260    | NP_036392    | Q9UJ83  | HACL1_HUMAN | 0  | AAACTCCTGGA   | 0.244 |             |
| + | 5  | 1614      | caq.3_Missense_M   | NM_054110    | NP_473451    | Q8N3T1  | GLTL2_HUMAN | 1  | CACTGGAGCGT   | 0.547 |             |
| + | 6  | 1773      | 3caq.3_Missense_M  | NM_054110    | NP_473451    | Q8N3T1  | GLTL2_HUMAN | 1  | GGCCACCCTGA   | 0.552 |             |
| - | 2  | 526       | 85D_uc010hfb.1_    | NM_024697    | NP_078973    | Q9H6B1  | Z385D_HUMAN | 5  | AAGAGGAAAGG   | 0.502 |             |
| + | 2  | 608       |                    | NM_001137674 | NP_001131146 | A6NHJ4  | ZN860_HUMAN | 1  | TCTTCTCAGG    | 0.483 |             |
| + | 11 | 1088      | P21_uc011axy.1_M   | NM_016300    | NP_057384    | Q9UBL0  | ARP21_HUMAN | 3  | AGATGACAGAC   | 0.378 |             |
| + | 2  | 334       | TAC_uc011aya.1_M   | NM_003149    | NP_003140    | Q99469  | STAC_HUMAN  | 4  | CCAGGGCTGGT   | 0.562 |             |
| + | 2  | 337       | AC_uc011aya.1_M    | NM_003149    | NP_003140    | Q99469  | STAC_HUMAN  | 4  | GGGCTGGTCTG   | 0.562 |             |
| - | 12 | 6694      |                    | NM_014831    | NP_055646    | O15050  | TRNK1_HUMAN | 2  | CATGCCCTCCTC  | 0.582 |             |
| + | 14 | 2164      | 1_p.V715M DLEC1    | NM_007335    | NP_031361    | Q9Y238  | DLEC1_HUMAN | 9  | AGATGGTGCTA   | 0.587 |             |
| + | 3  | 430       | 99K MYRIP_uc011    | NM_015460    | NP_056275    | Q8NFW9  | MYRIP_HUMAN | 5  | AGCAGGAAAGG   | 0.557 |             |
| + | 4  | 966_967   | nr.2_Missense_M    | NM_003420    | NP_003411    | P13682  | ZNF35_HUMAN | 0  | AGAAACCCTTTC  | 0.465 |             |
| + | 26 | 3312      | p.D958N KIF15_u    | NM_020242    | NP_064627    | Q9NS87  | KIF15_HUMAN | 1  | CTGAGGACATAC  | 0.383 |             |
| - | 8  | 2362      | al.1_Missense_M    | NM_024513    | NP_078789    | Q9BQS8  | FYCO1_HUMAN | 1  | GCTGGCACTGC   | 0.607 |             |
| - | 3  | 1433_1434 | ro.3_Nonsense_M    | NM_006574    | NP_006565    | O95196  | CSPG5_HUMAN | 2  | CACCTGGAAAGTC | 0.589 |             |
| + | 2  | 2297      | p.G153D TREX1_u    | NM_033629    | NP_338599    | Q9NSU2  | TREX1_HUMAN | 0  | ACTGGGTCTGC   | 0.577 |             |
| - | 1  | 320       | RKAR2A_uc003c      | NM_004157    | NP_004148    | P13861  | KAP2_HUMAN  | 1  | GTCAGGCGGCT   | 0.711 |             |
| - | 5  | 475       | p.L12P QARS_uc     | NM_005051    | NP_005042    | P47897  | SYQ_HUMAN   | 1  | ACTTCAGCACAC  | 0.527 |             |
| + | 3  | 2071      |                    | NM_004393    | NP_004384    | Q14118  | DAG1_HUMAN  | 2  | TCTCTGGGTACA  | 0.567 |             |
| - | 10 | 1240      | c011bcs.1_Silent_M | NM_020998    | NP_066278    | P26927  | HGFL_HUMAN  | 1  | CTGCTCCCCTGC  | 0.706 |             |
| - | 4  | 1078      | p.A156T MON1A_     | NM_032355    | NP_115731    | Q86VX9  | MON1A_HUMAN | 2  | CACCGCCACTA   | 0.612 |             |
| + | 5  | 999       | ddt.1_Splice_Site  | NM_015512    | NP_056327    | Q9P2D7  | DYH1_HUMAN  | 3  | TGAAGGTGAGC   | 0.597 |             |
| + | 4  | 483       | ei.1_Missense_Mu   | NM_015136    | NP_055951    | Q9NY15  | STAB1_HUMAN | 9  | CCTGTGTGTGC   | 0.637 |             |
| + | 7  | 773       | 1_uc003dft.2_5'Fla | NM_002215    | NP_002206    | P19827  | ITIH1_HUMAN | 3  | CTACATCCTTACT | 0.572 |             |
| - | 14 | 1887      | nse_Mutation_p.F   | NM_015541    | NP_056356    | Q96JA1  | LRIG1_HUMAN | 5  | TGGGTGACCTG   | 0.562 |             |
| - | 6  | 776       | .A124V C3orf64_u   | NM_173654    | NP_775925    | Q5NDL2  | AER61_HUMAN | 1  | TCTCTGGCATATC | 0.363 |             |
| - | 2  | 192       |                    | NM_020872    | NP_065923    | Q9P232  | CNTN3_HUMAN | 5  | AACAGGAAAAA   | 0.363 |             |
| + | 5  | 1344      | 1_p.V367I COL8A1   | NM_001850    | NP_001841    | P27658  | CO8A1_HUMAN | 0  | GAGGTGTTCTC   | 0.637 |             |
| + | 5  | 458       | uc003dvc.2_RNA F   | NM_020357    | NP_065090    | Q8VWW12 | PCNP_HUMAN  | 0  | CAAACCTCTTCA  | 0.338 |             |
| + | 11 | 2413      | l.1_Missense_Mul   | NM_024548    | NP_078824    | Q8IW35  | CEP97_HUMAN | 2  | AGACAAGAGAT   | 0.413 |             |
| + | 2  | 1067      | p.D161N PLCX2D     | NM_001134478 | NP_001127950 | Q0VAA5  | PLCX2_HUMAN | 1  | TCCTGGATTCA   | 0.502 |             |



|   |    |           |                     |              |              |        |             |                              |    |               |       |
|---|----|-----------|---------------------|--------------|--------------|--------|-------------|------------------------------|----|---------------|-------|
| + | 7  | 871       | bjd.1_Missense_A    | NM_033364    | NP_203528    | Q7Z4T9 | AAT1_HUMAN  | Potential.                   | 3  | TGAGAAGAGGA   | 0.522 |
| + | 13 | 1277      | bjn.1_Missense_IV   | NM_021082    | NP_066568    | Q16348 | S15A2_HUMAN |                              | 1  | CTTCTCGTAAGT  | 0.378 |
| + | 8  | 947       | ense_Mutation_p.V   | NM_013336    | NP_037468    | P61619 | S61A1_HUMAN | ical; (Potential).           | 1  | ACAGTGGTCATC  | 0.532 |
| - | 19 | 2312      | rc.1_Missense_ML    | NM_005862    | NP_005853    | Q8WVM7 | STAG1_HUMAN |                              | 2  | GTCTTCCACAG   | 0.343 |
| - | 5  | 1019      | ns.1_Missense_M     | NM_015472    | NP_056287    | Q9GZV5 | WWTR1_HUMAN |                              | 4  | GCTCATCCACATT | 0.463 |
| - | 6  | 7096      | p.P393S IGSF10_     | NM_178822    | NP_849144    | Q6WRI0 | IGS10_HUMAN | like C2-type 10.             | 13 | AGGTGGTGGGT   | 0.383 |
| + | 1  | 94        |                     | NM_001101337 | NP_001094807 | P0CE67 | CC079_HUMAN |                              | 0  | GGTCAGGATCC   | 0.443 |
| + | 12 | 1216      | d.1_Missense_Mut    | NM_015938    | NP_057022    | Q96D46 | NMD3_HUMAN  |                              | 1  | ATTGGGGACATC  | 0.373 |
| + | 2  | 152       |                     | NM_130770    | NP_570126    | Q8WXA8 | 5HT3C_HUMAN | cellular (Potential).        | 3  | ATGGGGTTGAC   | 0.527 |
| + | 5  | 852       | b.2_Missense_Mu     | NM_003722    | NP_003713    | Q9H3D4 | P63_HUMAN   |                              | 12 | TCAACGAGGGT   | 0.498 |
| - | 4  | 376_377   | IAP1_uc003fvx.3_RNA |              |              |        |             |                              | 0  | ATTATGGGTCTAT | 0.406 |
| + | 12 | 1590      | p.E513K PDE6B_      | NM_000283    | NP_000274    | P35913 | PDE6B_HUMAN |                              | 0  | GCACCGAACTG   | 0.582 |
| - | 8  | 1299      | 329W MFSD10_uc      | NM_001120    | NP_001111    | Q14728 | MFS10_HUMAN |                              | 0  | GATCCGCCGGG   | 0.662 |
| + | 12 | 1523      | w.2_Missense_Mt     | NM_001528    | NP_001519    | Q04756 | HGFA_HUMAN  | peptidase S1.                | 2  | GAAAGGGGACC   | 0.667 |
| - | 6  | 1711      |                     | NM_177998    | NP_819056    | Q7RTM1 | OTOP1_HUMAN | ical; (Potential).           | 3  | GCGGGGAGGTA   | 0.537 |
| - | 16 | 2461      | e_Mutation_p.E47    | NM_001099433 | NP_001092903 | Q96N16 | JKIP1_HUMAN |                              | 4  | GTTCTTCATTTCT | 0.458 |
| + | 7  | 1093      | s3_splice MAN2B2    | NM_015274    | NP_056089    | Q9Y2E5 | MA2B2_HUMAN |                              | 2  | CACAGGTACAG   | 0.617 |
| - | 25 | 2794      | 003gou.2_Intron P   | NM_006017    | NP_006008    | O43490 | PROM1_HUMAN |                              | 7  | CTTTTACCTTGT  | 0.383 |
| - | 4  | 758       | p.A181V SEPSEC      | NM_153825    | NP_722547    | Q9HD40 | SPCS_HUMAN  |                              | 0  | TACCTGCAGTG   | 0.303 |
| + | 10 | 1081      | _Mutation_p.M309    | NM_025132    | NP_079408    | Q8NEZ3 | WDR19_HUMAN | WD 5.                        | 1  | AGACATGTATGT  | 0.274 |
| - | 21 | 2909_2910 | x.1_Missense_Mut    | NM_002913    | NP_002904    | P35251 | RFC1_HUMAN  |                              | 4  | ACTCCGGATCTG  | 0.495 |
| + | 2  | 754       | n_p.Q87* NSUN7_     | NM_024677    | NP_078953    |        |             |                              | 0  | GCCTTTCAGCGT  | 0.448 |
| + | 8  | 2538      | bzz.1_Missense_IV   | NM_020722    | NP_065773    | Q6ZU35 | K1211_HUMAN |                              | 2  | CAGTCAATGCAA  | 0.577 |
| - | 5  | 1219      | p.V386I UGT2A       | NM_006798    | NP_006789    | Q9Y4X1 | UD2A1_HUMAN | cellular (Potential).        | 1  | AGGGACTCCGT   | 0.458 |
| - | 2  | 156       | Jihv.1_Missense_A   | NM_005420    | NP_005411    | P49888 | ST1E1_HUMAN |                              | 1  | GCCATGGACTT   | 0.343 |
| + | 5  | 1594      | OM3_uc003hkf.1_     | NM_020859    | NP_065910    | Q8TF72 | SHRM3_HUMAN |                              | 3  | GAGCCCTGACC   | 0.547 |
| + | 27 | 3976      | w.2_Missense_ML     | NM_025074    | NP_079350    | Q86XX4 | FRAS1_HUMAN | extracellular (Potential).   | 5  | AGTGCCTTTTG   | 0.478 |
| + | 41 | 6036      | p.L1866F FRAS1      | NM_025074    | NP_079350    | Q86XX4 | FRAS1_HUMAN | extracellular (Potential).   | 5  | ACAACCTCCAG   | 0.428 |
| - | 1  | 314       | R3_uc003hln.2_R     | NM_001040202 | NP_001035292 | Q6TCH7 | PAQR3_HUMAN | lasmic (Potential).          | 0  | ACCCGGGGATC   | 0.632 |
| - | 6  | 352       | 1ccj.1_Missense_J   | NM_001080506 | NP_001073975 | B9EJG8 | T150C_HUMAN |                              | 1  | CTTCGGTTTCA   | 0.418 |
| - | 21 | 2704      | i.2_Missense_Mut    | NM_001077207 | NP_001070675 | O94979 | SC31A_HUMAN | with PDCD6. Pro-rich.        | 8  | ACATTTCCATGC  | 0.473 |
| - | 15 | 1864      | s.G567E SEC31A_     | NM_001077207 | NP_001070675 | O94979 | SC31A_HUMAN |                              | 8  | TACCCCCACTG   | 0.289 |
| - | 33 | 5797      |                     | NM_014991    | NP_055806    | Q8IZQ1 | WDFY3_HUMAN |                              | 3  | GACAGGCACAC   | 0.498 |
| + | 4  | 854       |                     | NM_014208    | NP_055023    | Q9NZW4 | DSPP_HUMAN  |                              | 1  | TGGGAGTCCTAC  | 0.468 |
| - | 3  | 699       | ense_Mutation_p.C   | NM_004827    | NP_004818    | Q9UNQ0 | ABCG2_HUMAN | er. Cytoplasmic (Potential). | 1  | TGATCCCCTGT   | 0.393 |
| - | 5  | 629       | DH1B_uc011ceh.1     | NM_000668    | NP_000659    | P00325 | ADH1B_HUMAN |                              | 2  | CAGACCCATAAC  | 0.483 |
| - | 15 | 1549      | ix.1_Missense_M     | NM_001813    | NP_001804    | Q02224 | CENPE_HUMAN | Potential.                   | 9  | TTGTTGCTGGAT  | 0.289 |
| - | 2  | 235       | 'SS1_uc011cfh.1_I   | NM_005443    | NP_005434    | O43252 | PAPS1_HUMAN | yl-sulfate kinase.           | 1  | ACCACGAAAGC   | 0.463 |
| - | 28 | 2092      | 25A1_uc003hzd.2     | NM_198721    | NP_942014    | Q9BXS0 | COPA1_HUMAN | cellular (Potential).        | 2  | TGGACCCGGCA   | 0.448 |
| + | 9  | 1809      | p.P411S EGF_ucf     | NM_001963    | NP_001954    | P01133 | EGF_HUMAN   | Extracellular (Potential).   | 4  | GCGTTCCTCTT   | 0.423 |
| - | 3  | 1956      | p.L385F ANKRD5      | NM_020337    | NP_065070    | Q9ULJ7 | ANR50_HUMAN | ANK 3.                       | 1  | AGACAAGTAAAT  | 0.398 |
| - | 3  | 3127      | 25_splice PCDH1E    | NM_019035    | NP_061908    | Q9HCL0 | PCD18_HUMAN |                              | 5  | TCTTACCTGCT   | 0.398 |
| + | 7  | 1037      |                     | NM_033393    | NP_203751    | Q9C0D6 | FHDC1_HUMAN | FH2.                         | 2  | GTCTTCTTTGCT  | 0.343 |
| - | 25 | 7555      |                     | NM_017639    | NP_060109    | Q6V1P9 | PCD23_HUMAN | Cadherin 22.                 | 4  | AAAAACAGTGC   | 0.418 |
| + | 18 | 2217      | cjd.1_Missense_M    | NM_021634    | NP_067647    | Q9HBX9 | RXFP1_HUMAN | lasmic (Potential).          | 0  | AGAAAACATATG  | 0.413 |
| + | 10 | 1370      | irc.2_Missense_Ml   | NM_007246    | NP_009177    | O95198 | KLHL2_HUMAN | Kelch 2.                     | 0  | ACTGTAGATTC   | 0.463 |
| + | 21 | 4439      | e.1_Missense_Mu     | NM_001080477 | NP_001073946 | Q9P273 | TEN3_HUMAN  | ilar (Potential). NHL 5.     | 0  | CCAAGGATGCC   | 0.498 |

|   |    |       |                                                    |              |              |        |             |                              |    |               |       |             |
|---|----|-------|----------------------------------------------------|--------------|--------------|--------|-------------|------------------------------|----|---------------|-------|-------------|
| + | 1  | 122   | ssense_Mutation_                                   | NM_004168    | NP_004159    | P31040 | DHSA_HUMAN  |                              | 0  | TGTCGGGGGTC   | 0.637 |             |
| - | 20 | 2782  |                                                    | NM_006598    | NP_006589    | Q9Y666 | S12A7_HUMAN | lasmic (Potential).          | 4  | :CTCGGCGCTGA  | 0.408 |             |
| - | 3  | 408   |                                                    | NM_001044    | NP_001035    | Q01959 | SC6A3_HUMAN |                              | 6  | GGCACCTGTGG   | 0.607 |             |
| + | 13 | 5801  |                                                    | NM_015325    | NP_056140    | Q9Y2F5 | K0947_HUMAN |                              | 2  | AACCAGGGGAG   | 0.507 |             |
| - | 9  | 1548  |                                                    | NM_003966    | NP_003957    | Q13591 | SEM5A_HUMAN | tracellular (Potential).     | 2  | iGACGGGAGCAC  | 0.517 |             |
| - | 47 | 7834  |                                                    | NM_001369    | NP_001360    | Q8TE73 | DYH5_HUMAN  | 3 (By similarity).           | 31 | TTATTACTGTTTT | 0.308 |             |
| - | 11 | 2085  | -110_uc011cnu.1_f                                  | NM_006727    | NP_006718    | Q9Y6N8 | CAD10_HUMAN | Extracellular (Potential).   | 12 | CACTCGAATGG   | 0.512 |             |
| - | 7  | 1574  | G3A1_uc003jjw.1_f                                  | NM_152404    | NP_689617    | Q6NUS8 | UD3A1_HUMAN | ellular (Potential).         | 3  | :ATAGGGCTTGA  | 0.597 |             |
| + | 10 | 1615  | iLAM_uc003jle.1_f                                  | NM_152403    | NP_689616    | Q63HQ2 | EGFLA_HUMAN | minin G-like 1.              | 7  | iAGAACGAACAC  | 0.498 | rs140240157 |
| - | 29 | 2857  | p.E945K RICTOR                                     | NM_152756    | NP_689969    | Q6R327 | RICTR_HUMAN |                              | 10 | TTTCTTCTGTAC  | 0.348 |             |
| - | 13 | 2156  | .1_Missense_Muta                                   | NM_000065    | NP_000056    | P13671 | CO6_HUMAN   | C5b-binding domain.          | 7  | CTGGAGGAACTC  | 0.398 |             |
| - | 8  | 1337  | _p.S58F HMGCS1                                     | NM_001098272 | NP_001091742 | Q01581 | HMCS1_HUMAN |                              | 0  | AACCAGAACCA   | 0.403 |             |
| + | 3  | 714   |                                                    | NM_152687    | NP_689900    | Q8N292 | GAPT_HUMAN  |                              | 0  | AAAAACCGATA   | 0.413 |             |
| + | 6  | 715   | xqu.1_Missense_M                                   | NM_001029875 | NP_001025046 | Q6MZT1 | R7BP_HUMAN  |                              | 0  | :CCTACCCCTGC  | 0.468 |             |
| + | 3  | 399   | i_Mutation_p.S101                                  | NM_015342    | NP_056157    | Q96BP3 | PPWD1_HUMAN | WD 2.                        | 1  | TCGTAGTCACCT  | 0.289 |             |
| + | 28 | 7258  | p.S2325F MAST4                                     | NM_015183    | NP_055998    | O15021 | MAST4_HUMAN |                              | 13 | .GCCATCCCCAG  | 0.597 |             |
| + | 10 | 1302  | _p.E431K RGNEF                                     | NM_001080479 | NP_001073948 | Q8N1W1 | RGNEF_HUMAN |                              | 0  | CTTAGTGAAATC  | 0.507 |             |
| + | 8  | 1041  |                                                    | NM_006633    | NP_006624    | Q13576 | IQGA2_HUMAN |                              | 7  | CTGAAGGTGCTT  | 0.338 |             |
| + | 7  | 1931  | u.2_Missense_Mu                                    | NM_004385    | NP_004376    | P13611 | CSPG2_HUMAN | minoglycan attachment dor    | 16 | AGAATGATCCTC  | 0.398 | rs146518697 |
| - | 10 | 1603  | p.1_Missense_Mu                                    | NM_005711    | NP_005702    | O43854 | EDIL3_HUMAN | 5/8 type C 2.                | 2  | ITAGCTCCTTGT  | 0.388 |             |
| + | 83 | 17932 | .A3652T GPR98_t                                    | NM_032119    | NP_115495    | Q8WXG9 | GPR98_HUMAN | ical; (Potential).           | 16 | ITGATGGCAGCC  | 0.433 |             |
| + | 7  | 1620  | q.2_RNA AQPEP_                                     | NM_173800    | NP_776161    | Q6Q4G3 | AMPQ_HUMAN  | renal (Potential).           | 0  | ATGAAGGTGGAA  | 0.353 |             |
| - | 3  | 883   | 3krx.3_Missense_M                                  | NM_020796    | NP_065847    | Q9H2E6 | SEM6A_HUMAN | tracellular (Potential).     | 2  | :ATCTGGATGTCC | 0.507 |             |
| + | 1  | 213   | 3ksn.2_Missense_                                   | NM_182761    | NP_877438    | A1A519 | F170A_HUMAN |                              | 1  | ATCATGAAACGA  | 0.448 |             |
| + | 2  | 868   | 2_Missense_Muta                                    | NM_004384    | NP_004375    | Q9Y6M4 | KC1G3_HUMAN | ase. ATP (By similarity).    | 0  | AATTGGATGTGC  | 0.348 |             |
| + | 4  | 292   | 218P IRF1_uc003kxb.2_Silent_p.P218P IRF1_uc010jdt. |              |              | Q8N8D9 | CE056_HUMAN |                              | 0  | :GTGGAGGGCAT  | 0.577 |             |
| + | 12 | 1803  |                                                    | NM_002154    | NP_002145    | P34932 | HSP74_HUMAN |                              | 2  | ATGAGGAGCCA   | 0.423 |             |
| + | 3  | 534   | F7_uc003kyx.2_5'l                                  | NM_003202    | NP_003193    | P36402 | TCF7_HUMAN  |                              | 0  | :GTGCACCAGCG  | 0.627 |             |
| + | 6  | 813   | se_Mutation_p.T2E                                  | NM_058244    | NP_490645    | Q9H1J5 | WNT8A_HUMAN |                              | 4  | ATGGCACAGAGC  | 0.572 |             |
| + | 19 | 3072  | yo.1_Missense_M                                    | NM_005733    | NP_005724    | O95235 | KI20A_HUMAN | ular (Potential).            | 0  | :ACCAACCTGCC  | 0.502 |             |
| + | 1  | 3118  | lhk.1_Intron PCDH                                  | NM_031857    | NP_114063    | Q9Y5H5 | PCDA9_HUMAN |                              | 5  | iGGAAGGTGGGT  | 0.418 |             |
| + | 1  | 2329  | :DHA7_uc003lhq.2                                   | NM_018904    | NP_061727    | Q9Y5I0 | PCDAD_HUMAN | XXP 2. 6 X 4 AA repeats c    | 6  | AGCCTTCTCTCT  | 0.552 |             |
| + | 1  | 2800  |                                                    | NM_020957    | NP_066008    | Q9NRJ7 | PCDBG_HUMAN | r (Potential). Cadherin 5.   | 2  | iTGCGCGTGCTG  | 0.711 |             |
| + | 1  | 727   | ljm.1_Intron PCDF                                  | NM_018922    | NP_061745    | Q9Y5G3 | PCDGD_HUMAN | r (Potential). Cadherin 3.   | 0  | :AGGAGGTATACA | 0.562 |             |
| + | 1  | 657   | :DHGB1_uc003ljo.                                   | NM_018918    | NP_061741    | Q9Y5G8 | PCDG5_HUMAN | r (Potential). Cadherin 2.   | 4  | :GGAGACCCGGT  | 0.577 |             |
| + | 1  | 1222  | ju.1_Intron PCDHC                                  | NM_018921    | NP_061744    | Q9Y5G4 | PCDG9_HUMAN | Extracellular (Potential).   | 0  | CGGCCAAATTT   | 0.423 |             |
| + | 1  | 1917  | 1_Intron PCDHGA                                    | NM_002588    | NP_002579    | Q9UN70 | PCDGK_HUMAN | r (Potential). Cadherin 6.   | 2  | ITGACAGGCACA  | 0.597 |             |
| + | 2  | 956   |                                                    | NM_000112    | NP_000103    | P50443 | S26A2_HUMAN | ical; (Potential).           | 0  | ITAGCTGGAGTT  | 0.353 |             |
| - | 3  | 308   | .2_5'UTR CCDC6                                     | NM_015621    | NP_056436    | A6NI79 | CCD69_HUMAN | Potential.                   | 2  | AGAATTCTGGTT  | 0.453 |             |
| + | 2  | 565   | wb.2_Missense_Mi                                   | NM_001128209 | NP_001121681 | Q92629 | SGCD_HUMAN  | lasmic (Potential).          | 0  | CTGGCGGAAAC   | 0.483 |             |
| - | 34 | 4360  | i.2_Missense_Muti                                  | NM_003062    | NP_003053    | O75094 | SLIT3_HUMAN | aminin G-like.               | 4  | iCAGCTCGTTGT  | 0.662 |             |
| - | 19 | 3067  |                                                    | NM_005990    | NP_005981    | O94804 | STK10_HUMAN | Potential.                   | 8  | CAGAGCCTAGG   | 0.587 |             |
| + | 7  | 2101  | rf25_uc003mdr.3_RNA C5orf25_uc003mdv.2_Missense    |              |              | Q8NDZ2 | CE025_HUMAN |                              | 0  | GCCTGGGCGAG   | 0.488 |             |
| - | 3  | 929   | _5'Flank GRM6_ur                                   | NM_000843    | NP_000834    | O15303 | GRM6_HUMAN  | ellular (Potential).         | 8  | GGGAATCTTGAT  | 0.602 |             |
| - | 14 | 1635  | _p.D501N EXOC2                                     | NM_018303    | NP_060773    | Q96KP1 | EXOC2_HUMAN |                              | 7  | TAAAATCATTTTC | 0.318 |             |
| + | 4  | 1560  | w.2_RNA PRPF4E                                     | NM_003913    | NP_003904    | Q13523 | PRP4B_HUMAN | Lys-rich (basic).            | 5  | iCGGTGGTCGTA  | 0.423 |             |
| + | 7  | 1064  | q.1_Missense_Mu                                    | NM_004415    | NP_004406    | P15924 | DESP_HUMAN  | plakophilin 1 and junction p | 9  | AGCGTCTTTGT   | 0.483 |             |

|   |    |       |                   |              |              |        |             |    |               |       |
|---|----|-------|-------------------|--------------|--------------|--------|-------------|----|---------------|-------|
| + | 25 | 2415  | ow.2_Missense_M   | NM_001040274 | NP_001035364 | Q5T4T6 | SYC2L_HUMAN | 2  | ATTCTCCCAACC  | 0.318 |
| + | 6  | 915   | div.1_Splice_Site | NM_004973    | NP_004964    | Q92833 | JARD2_HUMAN | 4  | TTTCTAGTTTTCA | 0.373 |
| + | 1  | 782   |                   | NM_016255    | NP_057339    | Q9UBU6 | FA8A1_HUMAN | 0  | GACGAGGGTAG   | 0.711 |
| - | 18 | 3303  | p.P1066S NUP15    | NM_005124    | NP_005115    | P49790 | NU153_HUMAN | 9  | AGCAGGAGCAG   | 0.453 |
| + | 1  | 653   | z.2_Missense_Mu   | NM_001949    | NP_001940    | O00716 | E2F3_HUMAN  | 1  | CAGCAGAGCCG   | 0.662 |
| + | 11 | 1084  | J4_splice CDKAL1  | NM_017774    | NP_060244    | Q5VV42 | CDKAL_HUMAN | 2  | TTTAAGGAAATG  | 0.393 |
| - | 3  | 847   | _p.A204T KIAA03   | NM_014809    | NP_055624    | Q5VV43 | K0319_HUMAN | 2  | CACCCGAGGAC   | 0.622 |
| - | 1  | 76    | H3C_uc003nfv.2_!  | NM_021062    | NP_066406    | P33778 | H2B1B_HUMAN | 0  | FACCATCCTTCTT | 0.488 |
| + | 1  | 287   |                   | NM_003540    | NP_003531    | P62805 | H4_HUMAN    | 0  | GGGACGCACTC   | 0.552 |
| + | 4  | 1538  | p.V152M ZNF165    | NM_003447    | NP_003438    | P49910 | ZN165_HUMAN | 0  | AAAAAGTGTCA   | 0.428 |
| - | 6  | 1001  | pn.2_Missense_M   | NM_006778    | NP_006769    | Q9UDY6 | TRI10_HUMAN | 0  | ACCTGGCTCAT   | 0.373 |
| - | 10 | 4492  | CC1_uc011dmp.1_   | NM_014641    | NP_055456    | Q14676 | MDC1_HUMAN  | 4  | TCCTAGTGGTCC  | 0.557 |
| + | 6  | 454   | 9E PSORS1C1_uc    | NM_014068    | NP_054787    | Q9UIG5 | PS1C1_HUMAN | 1  | GGGGACCTCCA   | 0.572 |
| + | 6  | 629   | 8S PSORS1C1_u     | NM_014068    | NP_054787    | Q9UIG5 | PS1C1_HUMAN | 1  | CTCCTCCTCCC   | 0.562 |
| + | 6  | 926   | _p.P60L LY6G6D    | NM_001003693 | NP_001003693 | Q5SQ64 | LY66F_HUMAN | 2  | CTCAGCCCCAG   | 0.537 |
| - | 17 | 1807  | J1_uc003nrx.3_5'F | NM_025257    | NP_079533    | Q53GD3 | CTL4_HUMAN  | 4  | CATGAGTAGCAT  | 0.532 |
| - | 17 | 2153  | ssense_Mutation_  | NM_006709    | NP_006700    | Q96KQ7 | EHMT2_HUMAN | 1  | TTTGTCCACTG   | 0.617 |
| + | 2  | 418   | os.1_Missense_Mt  | NM_001710    | NP_001701    | P00751 | CFAB_HUMAN  | 1  | AGCGGCTCCT    | 0.592 |
| + | 18 | 2563  | .1_Missense_Muta  | NM_001710    | NP_001701    | P00751 | CFAB_HUMAN  | 1  | ATTTGGGTTTTC  | 0.517 |
| - | 2  | 404   | AT1_uc003oag.2_   | NM_006411    | NP_006402    | Q99943 | PLCA_HUMAN  | 1  | TGGGGCTGCAG   | 0.468 |
| - | 4  | 629   | fpv.1_RNA NOTCI   | NM_004557    | NP_004548    | Q99466 | NOTC4_HUMAN | 22 | ACATGGGTTGG   | 0.567 |
| - | 4  | 753   | QB1_uc003obv.2_   | NM_002123    | NP_002114    | P01920 | DQB1_HUMAN  | 0  | ATTACAGACTGA  | 0.547 |
| - | 1  | 358   | 9_uc011dqj.1_5'F  | NM_000593    | NP_000584    | Q03518 | TAP1_HUMAN  | 1  | GGGGAGCGGG    | 0.726 |
| - | 18 | 2030  | dn.1_Missense_M   | NM_022553    | NP_072047    | Q8N1B4 | VPS52_HUMAN | 5  | AAGGGGAGAC    | 0.473 |
| + | 4  | 336   | 8_uc003odq.1_Sp   | NM_022551    | NP_072045    | P62269 | RS18_HUMAN  | 0  | GCCAGGTGTGT   | 0.493 |
| - | 3  | 351   | i_uc010juo.1_RNA  | NM_005452    | NP_005443    | O15213 | WDR46_HUMAN | 0  | GACGGGGGCGG   | 0.582 |
| - | 2  | 1419  | dz.2_5'Flank TAPE | NM_005453    | NP_005444    | O15209 | ZBT22_HUMAN | 1  | GTTGCCCTGCA   | 0.622 |
| - | 7  | 2296  | ation_p.L623F DA  | NM_001350    | NP_001341    | Q9UER7 | DAXX_HUMAN  | 23 | GCAGAGGGAGC   | 0.627 |
| + | 27 | 3740  |                   | NM_002224    | NP_002215    | Q14573 | ITPR3_HUMAN | 19 | CAAGGGCGTGA   | 0.647 |
| + | 5  | 546   | se_Mutation_p.T7  | NM_145899    | NP_665906    | P17096 | HMGAI_HUMAN | 0  | GAAAACCACCA   | 0.507 |
| + | 11 | 1679  | dst.1_Missense_M  | NM_015245    | NP_056060    | Q92625 | ANS1A_HUMAN | 4  | AGGTGGGGCAG   | 0.697 |
| + | 2  | 463   | ml.2_Missense_M   | NM_000389    | NP_000380    | P38936 | CDN1A_HUMAN | 2  | ACCTGTCACTGT  | 0.657 |
| + | 25 | 3556  |                   | NM_001371    | NP_001362    |        |             | 21 | AGTTGGTCCTG   | 0.468 |
| + | 57 | 8581  |                   | NM_001371    | NP_001362    |        |             | 21 | ATCTTCGAGAT   | 0.393 |
| + | 79 | 12136 | sense_Mutation_p  | NM_001371    | NP_001362    |        |             | 21 | AGGAGGAAATT   | 0.388 |
| - | 6  | 3041  | 318_uc003ouw.2_   | NM_014345    | NP_055160    | Q5VUA4 | ZN318_HUMAN | 7  | TTCTGGGATTAT  | 0.448 |
| + | 18 | 4123  | p.R1275Q ABCC1    | NM_033450    | NP_258261    | Q5T3U5 | MRP7_HUMAN  | 7  | AGGGCGAGTGC   | 0.642 |
| - | 15 | 2391  | oy.3_Missense_M   | NM_001098518 | NP_001091988 | Q8IZF2 | GP116_HUMAN | 2  | TCGCCCAATG    | 0.537 |
| - | 3  | 1662  | lwn.1_Missense_M  | NM_001013732 | NP_001013754 | Q6ZW05 | CF138_HUMAN | 1  | ATCCACTACAG   | 0.468 |
| - | 2  | 352   | _p.V97A RHAG_ur   | NM_000324    | NP_000315    | Q02094 | RHAG_HUMAN  | 2  | CCCTGTACAATAC | 0.388 |
| - | 1  | 1078  |                   | NM_138733    | NP_620061    | P07205 | PGK2_HUMAN  | 1  | GAGCATGATTC   | 0.483 |
| - | 23 | 2563  | ai.2_Missense_Mt  | NM_138694    | NP_619639    | P08F94 | PKHD1_HUMAN | 44 | AGTGGGCACAG   | 0.542 |
| + | 2  | 649   |                   | NM_133367    | NP_588608    | Q8TEZ7 | MPRB_HUMAN  | 0  | GCAGTGCTTTG   | 0.527 |
| - | 9  | 1242  | _p.P251L ICK_uc0  | NM_016513    | NP_057597    | Q9UPZ9 | ICK_HUMAN   | 5  | CATTGGGAATC   | 0.458 |
| + | 2  | 369   |                   | NM_001010872 | NP_001010872 | Q5T0W9 | FA83B_HUMAN | 6  | TGTGATGATACC  | 0.433 |
| - | 28 | 3867  | oy.3_Missense_Mu  | NM_001144769 | NP_001138241 | Q03001 | DYST_HUMAN  | 14 | ACACACTTTTCA  | 0.383 |
| + | 11 | 4430  | i.2_Missense_Mut  | NM_001624    | NP_001615    | Q9Y4K1 | AIM1_HUMAN  | 9  | CAATAGGATTTTT | 0.313 |

rs149070832

|   |    |       |                   |              |              |        |             |                                |       |                |       |
|---|----|-------|-------------------|--------------|--------------|--------|-------------|--------------------------------|-------|----------------|-------|
| - | 4  | 623   | k.2_Missense_Mu   | NM_002037    | NP_002028    | P06241 | FYN_HUMAN   | SH3.                           | 7     | CCGTGCTTCAT/   | 0.393 |
| + | 3  | 1039  |                   | NM_001013734 | NP_001013756 | Q6ZWI9 | RFPLB_HUMAN | 330.2/SPRY.                    | 0     | TTGTGTCCATTC1  | 0.443 |
| - | 9  | 1024  | D3_uc003qbw.2_f   | NM_001017373 | NP_001017373 | Q8N6K7 | SAMD3_HUMAN |                                | 1     | GTCTTCGAACA'   | 0.343 |
| + | 14 | 2512  | khe.2_Missense_Iv | NM_020455    | NP_065188    | Q86SQ4 | GP126_HUMAN | cellular (Potential).          | 1     | GTCTTCCAAGC.   | 0.348 |
| + | 11 | 2902  | jw.1_Missense_Mi  | NM_032532    | NP_115921    | Q4ZHG4 | FNDC1_HUMAN |                                | 8     | GCAGCCCATCT'   | 0.607 |
| - | 3  | 408   | 44L_uc003qva.2_   | NM_016098    | NP_057182    | Q9Y5U8 | BR44L_HUMAN |                                | 1     | CCGCCCTCCCT'   | 0.433 |
| + | 7  | 801   | c.2_Missense_Mut  | NM_001159767 | NP_001153239 | Q9Y6E2 | BZW2_HUMAN  |                                | 2     | TTTGAGAAAAG'   | 0.418 |
| + | 15 | 2239  | ui.2_Missense_Mt  | NM_058176    | NP_478056    | Q9UKV0 | HDAC9_HUMAN | one deacetylase.               | 5     | TGGTGGACTTG'   | 0.269 |
| + | 8  | 1628  | _p.T211 CCDC12    | NM_194300    | NP_919276    | Q6ZRS4 | CC129_HUMAN |                                | 0     | ATGTGACCAATG'  | 0.473 |
| - | 1  | 808   |                   | NM_003014    | NP_003005    | Q6FHJ7 | SFRP4_HUMAN |                                | 1     | CGATGGCTTCA'   | 0.657 |
| + | 3  | 461   | nc.2_Missense_Mi  | NM_005856    | NP_005847    | O60896 | RAMP3_HUMAN | ical; (Potential).             | 0     | CCATGGCTGGC'   | 0.612 |
| - | 4  | 398   |                   | NM_138295    | NP_612152    | Q8TDX9 | PK1L1_HUMAN |                                | 11    | GCATACCTATC    | 0.388 |
| + | 53 | 14067 | CA13_uc010kyt.1_  | NM_152701    | NP_689914    | Q86UQ4 | ABCAD_HUMAN |                                | 10    | TCTGCGATGGC'   | 0.493 |
| + | 28 | 3605  | o.1_Missense_Mut  | NM_005228    | NP_005219    | P00533 | EGFR_HUMAN  | lasmic (Potential).            | 9571  | GCCCAGCAGAG    | 0.532 |
| + | 4  | 534   |                   | NM_001159279 | NP_001152751 |        |             |                                | 2     | AAGGAGGTTATA   | 0.338 |
| + | 16 | 1318  | r.2_Missense_Mut  | NM_000048    | NP_000039    | P04424 | ARLY_HUMAN  |                                | 2     | AGGGGGTCGCC    | 0.642 |
| - | 5  | 809   |                   | NM_016038    | NP_057122    | Q9Y3A5 | SBDS_HUMAN  |                                | 1     | ACATACCTGAA/   | 0.403 |
| + | 2  | 1197  | _p.R152* AUTS2_   | NM_015570    | NP_056385    | Q8WXX7 | AUTS2_HUMAN |                                | 3     | GCAGATCGAGAA   | 0.512 |
| - | 2  | 185   | ik SBDSP1_uc011   | NM_001145440 | NP_001138912 | Q6NUM6 | TYW1B_HUMAN |                                | 0     | AGAGGTCCCAT    | 0.348 |
| - | 5  | 1149  | gr.1_Missense_Mt  | NM_012301    | NP_036433    | Q86UL8 | MAGI2_HUMAN |                                | 11    | GTCTCTCATTGT'  | 0.488 |
| - | 15 | 1548  | uc003uhs.1_Intron | NM_000722    | NP_000713    | P54289 | CA2D1_HUMAN | cellular (Potential).          | 6     | GTCTTCCCAAA/   | 0.348 |
| + | 4  | 1008  |                   | NM_181646    | NP_857597    | A4D1E1 | Z804B_HUMAN |                                | 11    | ATGGCAGAAAGG   | 0.438 |
| - | 5  | 2658  | ID9L_uc003umk.1_  | NM_152703    | NP_689916    | Q8IVG5 | SAM9L_HUMAN |                                | 4     | TTCTCCACATG'   | 0.413 |
| + | 22 | 1675  | 1A2_uc011kib.1_   | NM_000089    | NP_000080    | P08123 | CO1A2_HUMAN |                                | 9     | GTAGTCCCTGGT   | 0.448 |
| - | 12 | 1982  | 2_splice ASNS_u   | NM_133436    | NP_597680    | P08243 | ASNS_HUMAN  |                                | 1     | ATTATACCTGATC  | 0.338 |
| + | 9  | 1213  | upy.1_Missense_Iv | NM_006409    | NP_006400    | Q92747 | ARC1A_HUMAN | WD 6.                          | 1     | ATTTGGGATTTCT/ | 0.274 |
| + | 2  | 550   | :AN1_uc003usl.1_  | NM_003439    | NP_003430    | P17029 | ZKSC1_HUMAN | SCAN box.                      | 3     | :CCAAGGAGCTC   | 0.517 |
| + | 2  | 233   | 1kf.1_Splice_Site | NM_006833    | NP_006824    | Q7L5N1 | CSN6_HUMAN  |                                | 0     | GCAGGGTGAGT'   | 0.592 |
| + | 14 | 1307  | td.2_Missense_Mt  | NM_004722    | NP_004713    | O00189 | AP4M1_HUMAN | MHD.                           | 0     | :TGCCTCGGGTG   | 0.632 |
| - | 3  | 670   | 68T STAG3_uc01C   | NM_152742    | NP_689955    | Q8N158 | GPC2_HUMAN  |                                | 2     | CTGTGCCCAGA    | 0.592 |
| - | 3  | 505   | 13K STAG3_uc01C   | NM_152742    | NP_689955    | Q8N158 | GPC2_HUMAN  |                                | 2     | CATCTCCAGAA.   | 0.557 |
| - | 1  | 176   | 3V STAG3_uc010    | NM_152742    | NP_689955    | Q8N158 | GPC2_HUMAN  |                                | 2     | :GCAGCGCGGAC   | 0.657 |
| - | 7  | 1896  | i.V469 EPHB4_uc   | NM_004444    | NP_004435    | P54760 | EPHB4_HUMAN | tential), Fibronectin type-III | 15    | ATTTGACCTCGT/  | 0.602 |
| + | 12 | 1815  | _p.G294E SLC12A'  | NM_020246    | NP_064631    | Q9BXP2 | S12A9_HUMAN | cellular (Potential).          | 0     | .GGGGGGGCTGT   | 0.627 |
| + | 14 | 2155  | _p.P670S CDHR3    | NM_152750    | NP_689963    | Q6ZTQ4 | CDHR3_HUMAN | Extracellular (Potential).     | 1     | :CCCACCAACC    | 0.493 |
| + | 3  | 570   |                   | NM_002736    | NP_002727    | P31323 | KAP3_HUMAN  | in and phosphorylation.        | 1     | AGTCCAGGGTAT   | 0.299 |
| + | 6  | 1486  | _p.P265S CBLL1_   | NM_024814    | NP_079090    | Q75N03 | HAKAI_HUMAN | Pro-rich.                      | 5     | TAACCCCTCCCC   | 0.547 |
| + | 3  | 452   | n.2_Missense_Mu   | NM_000230    | NP_000221    | P41159 | LEP_HUMAN   |                                | 0     | :CCTGGGGGGTG   | 0.627 |
| - | 3  | 340   | _p.M153 IMPDH1    | NM_001142573 | NP_001136045 | P20839 | IMDH1_HUMAN |                                | 4     | ATGGCCATGTC/   | 0.607 |
| + | 9  | 1129  | _p.W299* METTL2   | NM_018396    | NP_060866    | Q6P1Q9 | MTL2B_HUMAN |                                | 1     | GTTTGGATTCA'   | 0.517 |
| + | 8  | 1037  | 5_uc003voi.2_Mi   | NM_002200    | NP_002191    | Q13568 | IRF5_HUMAN  |                                | 0     | :GCTTCCCCAGC   | 0.637 |
| + | 16 | 1871  | _p.P503L AHCYL2   | NM_015328    | NP_056143    | Q96HN2 | SAHH3_HUMAN |                                | 2     | TCAAGCCTAATT/  | 0.527 |
| + | 2  | 219   | vow.2_Missense_I  | NM_020704    | NP_065755    | Q9ULQ0 | FA40B_HUMAN |                                | 0     | :AGATGGGCATG'  | 0.507 |
| + | 10 | 1193  | th.2_Missense_Mt  | NM_013255    | NP_037387    | Q9UL63 | MKLN1_HUMAN | Kelch 2.                       | 1     | :GTGAGGATACT'  | 0.403 |
| - | 3  | 445   | 2_5'Flank WDR91_  | NM_014149    | NP_054868    | A4D1P6 | WDR91_HUMAN |                                | 4     | ACAAACCAATCC   | 0.532 |
| - | 13 | 4440  | o.S1414F KIAA154  | NM_020910    | NP_065961    | Q9HCM3 | K1549_HUMAN |                                | 230   | VAGATGGAGGCT'  | 0.572 |
| - | 15 | 1860  |                   | NM_004333    | NP_004324    | P15056 | BRAF_HUMAN  | rotein kinase_R603>I(2) p.T    | 18290 | ATTTCACTGTAC   | 0.368 |

rs138935052

|   |    |           |                                                   |              |              |        |             |                               |    |                |       |            |
|---|----|-----------|---------------------------------------------------|--------------|--------------|--------|-------------|-------------------------------|----|----------------|-------|------------|
| + | 11 | 845_846   | 3K_uc011krg.1_Rf                                  | NM_018238    | NP_060708    | Q53H12 | AGK_HUMAN   |                               | 2  | GTACTGGTATCT   | 0.332 |            |
| - | 4  | 852       |                                                   | NM_005232    | NP_005223    | P21709 | EPHA1_HUMAN | ar (Potential). Cys-rich.     | 5  | ACCAGCCACTC    | 0.657 |            |
| + | 1  | 538       |                                                   | NM_012365    | NP_036497    | Q96R48 | OR2A5_HUMAN | ellular (Potential).          | 3  | TTCTGTGAAATCC  | 0.557 |            |
| + | 1  | 808       |                                                   | NM_001005480 | NP_001005480 | Q6IF42 | OR2A2_HUMAN | ellular (Potential).          | 2  | AGCAGGAGAAA    | 0.517 |            |
| - | 7  | 950       | 3whv.3_Missense_                                  | NM_001101313 | NP_001094783 | Q3YBM2 | T176B_HUMAN |                               | 1  | CTGCTCCCTAG/   | 0.567 |            |
| - | 6  | 818       | 3whv.3_Missense_                                  | NM_001101313 | NP_001094783 | Q3YBM2 | T176B_HUMAN | ical; (Potential).            | 1  | CAATGACCTTCA/  | 0.542 |            |
| - | 14 | 2119      |                                                   | NM_170606    | NP_733751    | Q8NEZ4 | MLL3_HUMAN  |                               | 63 | iCTTCACTTCAGA  | 0.353 |            |
| + | 18 | 3864      | mg.2_Missense_IV                                  | NM_053043    | NP_444271    | Q96EV2 | RBM33_HUMAN | RRM.                          | 1  | ATGTGGCCCTG/   | 0.507 |            |
| - | 63 | 10166     | p.L2588P CSMD1_                                   | NM_033225    | NP_150094    | Q96PZ7 | CSMD1_HUMAN | ar (Potential). Sushi 27.     | 25 | TGGCAAGGCAG/   | 0.438 |            |
| - | 1  | 117       |                                                   | NM_001926    | NP_001917    | Q01524 | DEF6_HUMAN  |                               | 0  | ATCATCCTCAG/   | 0.582 |            |
| - | 1  | 1198      | .1_Intron FAM66D                                  | NM_201402    | NP_958804    | Q6R6M4 | U17L2_HUMAN |                               | 3  | CTGTCTGTGT/    | 0.567 |            |
| - | 6  | 1088      | p.G297D MSR1_L                                    | NM_138715    | NP_619729    | P21757 | MSRE_HUMAN  | . Extracellular (Potential).  | 1  | TTGGACCTGGGA   | 0.398 |            |
| + | 15 | 2030      | 60B2_uc011kyy.1                                   | NM_022749    | NP_073586    | Q86V87 | F16B2_HUMAN |                               | 0  | TATTCTCCGTGT/  | 0.642 |            |
| + | 2  | 653       | rn_p.T61I RHOBTE                                  | NM_015178    | NP_055993    | Q9BYZ6 | RHBT2_HUMAN | Rho-like. p.T39T(1)           | 2  | TGCCACCCTCA/   | 0.582 |            |
| - | 5  | 463       | aj.1_Missense_Mutation_p.A108T STMN4_uc011lak.1_I | NM_031271    | NP_112561    | Q9H169 | STMN4_HUMAN | Potential.                    | 2  | CTCTGCTAGGT/   | 0.493 |            |
| - | 3  | 8018      |                                                   | NM_031271    | NP_112561    | Q9BXT5 | TEX15_HUMAN |                               | 7  | GTAATGGCATTG/  | 0.433 |            |
| + | 7  | 2106      | C1_uc010lwo.1_I                                   | NM_006283    | NP_006274    | O75410 | TACC1_HUMAN |                               | 1  | GGAGTCTCTG/    | 0.532 |            |
| + | 11 | 991       | AM18_uc010lwx.2                                   | NM_014237    | NP_055052    | Q9Y3Q7 | ADA18_HUMAN | B. Extracellular (Potential). | 6  | TATGATGACATC/  | 0.318 |            |
| - | 4  | 751       |                                                   | NM_014420    | NP_055235    | Q9UBT3 | DKK4_HUMAN  | K-type Cys-2.                 | 1  | TAAATCGAGCATC  | 0.398 |            |
| - | 7  | 1605      | xpe.2_Missense_I                                  | NM_006749    | NP_006740    | Q08357 | S20A2_HUMAN | lasmic (Potential).           | 2  | GGCTGCCCGCA    | 0.612 |            |
| - | 14 | 1817_1818 |                                                   | NM_144651    | NP_653252    | A1KZ92 | PXDNL_HUMAN | like C2-type 4.               | 2  | TCAGGGAACCC    | 0.475 |            |
| - | 5  | 1015      | ie_Mutation_p.A19                                 | NM_014682    | NP_055497    | O60284 | ST18_HUMAN  |                               | 5  | TACTGCCAGGC    | 0.532 |            |
| + | 4  | 2174      | 1_uc011ldy.1_Intr                                 | NM_006269    | NP_006260    | P56715 | RP1_HUMAN   |                               | 12 | AAAAATCTCGA/   | 0.328 |            |
| + | 4  | 5817      | 1_uc011ldy.1_Intr                                 | NM_006269    | NP_006260    | P56715 | RP1_HUMAN   |                               | 12 | CCAACCATTGCC   | 0.398 |            |
| - | 2  | 759       | r_p.E41K SDR16C                                   | NM_138969    | NP_620419    | Q8N3Y7 | RDHE2_HUMAN |                               | 3  | CTATTCACCAGC   | 0.448 |            |
| + | 4  | 580       | JC5B_uc003xvt.1                                   | NM_033105    | NP_149096    | Q9UF47 | DNJ5B_HUMAN |                               | 0  | GAGACGAAAAC    | 0.448 |            |
| - | 7  | 2376      | O5A1_uc011lfa.1_                                  | NM_030958    | NP_112220    | Q9H2Y9 | SO5A1_HUMAN | ir (Potential). Kazal-like.   | 4  | AATTAACGTTCG/  | 0.413 |            |
| - | 2  | 1171      | CO5A1_uc003xyk                                    | NM_030958    | NP_112220    | Q9H2Y9 | SO5A1_HUMAN | ellular (Potential).          | 4  | TCAATGGTGGTA   | 0.547 |            |
| + | 3  | 2630      |                                                   | NM_004770    | NP_004761    | Q92953 | KCNB2_HUMAN | lasmic (Potential).           | 7  | TGCCAGTGGCT/   | 0.542 |            |
| + | 10 | 1427      | p.G163D CRISPLI                                   | NM_031461    | NP_113649    | Q9H336 | CRLD1_HUMAN | LCCL 1.                       | 2  | TGGTGGCTGGG    | 0.333 |            |
| + | 3  | 308       | r_p.A13V HNF4G_                                   | NM_004133    | NP_004124    | Q14541 | HNF4G_HUMAN | ceptor. NR C4-type.           | 1  | TGTGTCTATCTC   | 0.448 |            |
| + | 1  | 178       |                                                   | NM_152565    | NP_689778    | Q8N8Y2 | VA0D2_HUMAN |                               | 0  | ACCTGGTCCAGT   | 0.483 |            |
| - | 5  | 689       | Jmaj.2_Splice_Site                                | NM_019098    | NP_061971    | Q9NQW8 | CNGB3_HUMAN |                               | 3  | ATAATACCTGTGT  | 0.378 |            |
| - | 5  | 453       | ygp.2_Missense_I                                  | NM_015496    | NP_056311    | Q69YN4 | VIR_HUMAN   | Pro-rich.                     | 2  | GGGAggtggtggcg | 0.323 |            |
| + | 2  | 366       |                                                   | NM_024613    | NP_078889    | Q9H8W4 | PKHF2_HUMAN | PH.                           | 2  | AGAAGGAGTAT    | 0.363 |            |
| + | 15 | 2582      | p.R795C RIMS2_                                    | NM_014677    | NP_055492    | Q9UQ26 | RIMS2_HUMAN |                               | 15 | GACATCGTGTC    | 0.393 |            |
| + | 1  | 496       |                                                   | NM_003301    | NP_003292    | P34981 | TRFR_HUMAN  | Name=4; (Potential).          | 3  | CTCTGGTTCTTC   | 0.408 |            |
| - | 3  | 599       | hx.1_Missense_Mt                                  | NM_198123    | NP_937756    | Q72407 | CSMD3_HUMAN | lar (Potential). CUB 1.       | 63 | ATTTGGTACTTC   | 0.358 |            |
| + | 9  | 1041      |                                                   | NM_001039112 | NP_001034201 | Q2WJG9 | FR1L6_HUMAN | toplasmic (Potential).        | 11 | TGGTGGATCCC    | 0.507 |            |
| - | 11 | 786       | nse_Mutation_p.V                                  | NM_032026    | NP_114415    | Q6P1N9 | TATD1_HUMAN |                               | 0  | ACTTCCCACTT/   | 0.383 |            |
| - | 23 | 3122      | p.F783L KIAA019f                                  | NM_014846    | NP_055661    | Q12768 | STRUM_HUMAN |                               | 2  | GCGGAAAAATA    | 0.363 |            |
| - | 6  | 2126      | FAT_uc010mei.2_F                                  | NM_020863    | NP_065914    | Q9P243 | ZFAT_HUMAN  |                               | 1  | GCTCTGGGCGC    | 0.587 |            |
| - | 13 | 3364      | M135B_uc003yva                                    | NM_015912    | NP_056996    | Q49AJ0 | F135B_HUMAN | p.P1065P(1)                   | 9  | GATGGAAACA/    | 0.517 | rs35639744 |
| - | 13 | 1727      | M135B_uc003yva                                    | NM_015912    | NP_056996    | Q49AJ0 | F135B_HUMAN |                               | 9  | CAGTCCAACAT    | 0.473 |            |
| - | 11 | 1214      | ie_Mutation_p.S24                                 | NM_015912    | NP_056996    | Q49AJ0 | F135B_HUMAN |                               | 9  | CTCAGAAAAC     | 0.383 |            |
| - | 4  | 1132      |                                                   | NM_152888    | NP_690848    | Q8NFW1 | COMA1_HUMAN |                               | 13 | TCTTCTACACC    | 0.453 |            |
| + | 3  | 792       |                                                   | NM_030895    | NP_112157    | Q9H7X3 | ZN696_HUMAN | C2H2-type 1.                  | 0  | GTGCGGCGCT/    | 0.687 |            |



|   |    |      |                   |              |              |        |             |     |                |       |
|---|----|------|-------------------|--------------|--------------|--------|-------------|-----|----------------|-------|
| + | 1  | 1234 | D_uc011kk.1_5'FI  | NM_032862    | NP_116251    | Q53EQ6 | TIGD5_HUMAN | 0   | 'ACCTGGCTGGC   | 0.687 |
| - | 24 | 3543 |                   | NM_017570    | NP_060040    | O14841 | OPLA_HUMAN  | 0   | 'GCTCACCGGCT   | 0.647 |
| - | 17 | 2381 | zas.1_Missense_M  | NM_017570    | NP_060040    | O14841 | OPLA_HUMAN  | 0   | 'ACGCTCCTTGA'  | 0.647 |
| - | 23 | 2515 |                   | NM_013291    | NP_037423    | Q10570 | CPSF1_HUMAN | 1   | 'CTGCCCCACAG'  | 0.667 |
| - | 5  | 1010 | ic003zco.2_Nonse  | NM_130849    | NP_570901    | Q6P5W5 | S39A4_HUMAN | 0   | 'CAGCTGCTGTT'  | 0.662 |
| - | 17 | 2786 | uc011lh.1_intron  | NM_013432    | NP_038460    | Q96HA7 | TONSL_HUMAN | 0   | 'CCAAGGGCTGG'  | 0.677 |
| + | 20 | 2468 | CK8_uc010mgw.1    | NM_203447    | NP_982272    | Q8NF50 | DOCK8_HUMAN | 6   | 'GCCTGGAGCCG'  | 0.607 |
| + | 33 | 4793 | r_p.P229L SMAR    | NM_003070    | NP_003061    | P51531 | SMCA2_HUMAN | 3   | 'CAAACCTGTAG'  | 0.498 |
| - | 10 | 2442 | IS3_uc010mhf.1_A  | NM_152629    | NP_689842    | Q8NEA6 | GLIS3_HUMAN | 1   | 'TTCAGCCCCGC'  | 0.532 |
| - | 2  | 949  |                   | NM_001017969 | NP_001017969 | Q5HYC2 | K2026_HUMAN | 3   | 'AGATTCAAAAAC  | 0.398 |
| - | 43 | 6233 | s.S1434L PTPRD_   | NM_002839    | NP_002830    | P23468 | PTPRD_HUMAN | 22  | 'GGACTGAAATG'  | 0.403 |
| - | 39 | 5566 | .E1212K PTPRD_    | NM_002839    | NP_002830    | P23468 | PTPRD_HUMAN | 22  | 'CACTTCGGTAT'  | 0.408 |
| + | 18 | 2669 | l3znr.2_Missense_ | NM_017925    | NP_060395    | Q5VZ89 | DEN4C_HUMAN | 2   | 'TATGTCTGAAAC  | 0.453 |
| + | 10 | 1160 |                   | NM_017794    | NP_060264    | Q5VW36 | K1797_HUMAN | 10  | 'GCTTACCCAGAT' | 0.393 |
| + | 10 | 2015 | NFX1_uc003zsp.'   | NM_002504    | NP_002495    | Q12986 | NFX1_HUMAN  | 1   | 'GTGGACCATGC'  | 0.368 |
| + | 2  | 942  | zvv.2_Missense_M  | NM_203299    | NP_976044    | Q5VYM1 | CI131_HUMAN | 0   | 'AGGCACCCACA'  | 0.537 |
| + | 6  | 1295 | lb.2_Missense_ML  | NM_003995    | NP_003986    | P20594 | ANPRB_HUMAN | 3   | 'GGCTCCTCCCT'  | 0.582 |
| - | 2  | 1177 |                   | NM_014872    | NP_055687    | O15062 | ZBTB5_HUMAN | 2   | 'CCACTCTCATG'  | 0.502 |
| - | 2  | 600  |                   | NM_014872    | NP_055687    | O15062 | ZBTB5_HUMAN | 2   | 'CTCCTGAACGC'  | 0.547 |
| - | 3  | 1070 | e_Mutation_p.G35  | NM_012166    | NP_036298    | Q9UK96 | FBX10_HUMAN | 5   | 'ACTACCCACCT'  | 0.607 |
| - | 13 | 2121 | nse_Mutation_p.A  | NM_033655    | NP_387504    | Q9BZ76 | CNTP3_HUMAN | 1   | 'CGCGGCGTCTG'  | 0.637 |
| - | 1  | 589  | np.1_Missense_M   | NM_152573    | NP_689786    | Q8IZ41 | RASEF_HUMAN | 3   | 'CGCGTCTCTCGT  | 0.741 |
| - | 11 | 1057 | ltv.1_Missense_ML | NM_006415    | NP_006406    | O15269 | SPTC1_HUMAN | 2   | 'GTAACGAAGCT'  | 0.428 |
| - | 3  | 430  | tion_p.T122 ECM   | NM_001393    | NP_001384    | O94769 | ECM2_HUMAN  | 2   | 'AGGTAGTGACAG  | 0.483 |
| + | 5  | 595  | tc.2_Missense_ML  | NM_145006    | NP_659443    | Q96L08 | SUSD3_HUMAN | 6   | 'ACAGAGACCAT'  | 0.597 |
| - | 12 | 1055 | p.G280S SLC35D2   | NM_007001    | NP_008932    | Q76EJ3 | S35D2_HUMAN | 0   | 'TTCACCCACAG'  | 0.453 |
| - | 7  | 1410 | r_p.L82F TSTD2_U  | NM_139246    | NP_640339    | Q5T7W7 | TSTD2_HUMAN | 2   | 'AATCAAGAAGGA' | 0.353 |
| - | 6  | 945  | 4_uc004ayg.1_Mi   | NM_033220    | NP_150089    | Q14142 | TR14_HUMAN  | 1   | 'ACTTGCCAGAG'  | 0.746 |
| - | 15 | 2958 | _p.I754V TEX10_U  | NM_017746    | NP_060216    | Q9NXF1 | TEX10_HUMAN | 2   | 'CAGTGATATACAC | 0.438 |
| - | 2  | 1845 | ibq.1_Missense_M  | NM_133445    | NP_597702    | Q8TCU5 | NMD3A_HUMAN | 7   | 'TCGTGCTGGGA'  | 0.478 |
| - | 1  | 1094 | ibq.1_Missense_M  | NM_133445    | NP_597702    | Q8TCU5 | NMD3A_HUMAN | 7   | 'GAAGGGCAAAA'  | 0.597 |
| - | 10 | 2343 | _p.S669N SVEP1_   | NM_153366    | NP_699197    | Q4LDE5 | SVEP1_HUMAN | 7   | 'CCCAGCTTGCG'  | 0.448 |
| - | 4  | 1115 | _p.A378T ZFP37_U  | NM_003408    | NP_003399    | Q9Y6Q3 | ZFP37_HUMAN | 2   | 'TGAGTGATGTT'  | 0.413 |
| - | 1  | 160  |                   | NM_001244    | NP_001235    | P32971 | TNFL8_HUMAN | 6   | 'ATCACACCTTATC | 0.507 |
| - | 3  | 1413 | 1mac.1_intron RAL | NM_012098    | NP_036230    | Q9UKU9 | ANGL2_HUMAN | 0   | 'CCACACCTGCA'  | 0.617 |
| + | 2  | 942  |                   | NM_032728    | NP_116117    | Q8NBV4 | PPAC3_HUMAN | 1   | 'GGTGCCCTGCTGC | 0.677 |
| + | 1  | 323  |                   | NM_000787    | NP_000778    | P09172 | DOPO_HUMAN  | 4   | 'CTGGACCGATG'  | 0.602 |
| + | 3  | 815  |                   | NM_000093    | NP_000084    | P20908 | CO5A1_HUMAN | 11  | 'ACACGGGGAAG'  | 0.627 |
| + | 3  | 248  | fh.1_Missense_ML  | NM_004108    | NP_004099    | Q15485 | FCN2_HUMAN  | 1   | 'GACCTCCTGGG'  | 0.617 |
| - | 4  | 722  | mdx.1_Missense_I  | NM_052813    | NP_434700    | Q9H257 | CARD9_HUMAN | 3   | 'CATGGCCAGGT'  | 0.692 |
| - | 22 | 3566 | cia.1_Missense_M  | NM_017617    | NP_060087    | P46531 | NOTC1_HUMAN | 856 | 'GGTGGGAGAGG'  | 0.692 |
| - | 3  | 296  | . LCN10_uc011me   | NM_198946    | NP_945184    | P62502 | LCN6_HUMAN  | 0   | 'TGACACTCTGG'  | 0.612 |
| - | 16 | 2469 | e_Mutation_p.G70! | NM_001606    | NP_001597    | Q9BZC7 | ABCA2_HUMAN | 0   | 'CTGGCCGTAC'   | 0.602 |
| - | 3  | 238  | eq.1_Missense_M   | NM_013379    | NP_037511    | Q9UHL4 | DPP2_HUMAN  | 0   | 'GATGGCCCTCT'  | 0.527 |
| + | 5  | 1011 | AT1_uc004cob.1_I  | NM_024757    | NP_079033    | Q9H9B1 | EHMT1_HUMAN | 3   | 'TGTGGTTCCA'   | 0.448 |
| - | 5  | 5607 |                   | NM_015419    | NP_056234    | Q9NR99 | MXRA5_HUMAN | 8   | 'TAAAGGAGATAC  | 0.512 |
| - | 5  | 3479 |                   | NM_015419    | NP_056234    | Q9NR99 | MXRA5_HUMAN | 8   | 'AACTGGAGACA'  | 0.502 |

rs1758272

|   |    |           |                    |              |              |        |              |    |               |       |
|---|----|-----------|--------------------|--------------|--------------|--------|--------------|----|---------------|-------|
| + | 1  | 1946      |                    | NM_182699    | NP_874358    | Q86TM3 | DDX53_HUMAN  | 3  | .GAAAACCTGGA( | 0.378 |
| + | 1  | 499       |                    | NM_181532    | NP_853510    | Q7Z444 | RASE_HUMAN   | 5  | (GTTGACCCTGG. | 0.602 |
| - | 1  | 298       |                    | NM_018159    | NP_060629    | Q96G61 | NUD11_HUMAN  | 0  | .ACGATCCAGCG  | 0.692 |
| - | 5  | 1750      | lsc.2_Missense_M   | NM_001111125 | NP_001104595 | Q5JU85 | IQEC2_HUMAN  | 3  | .GAGGGGAAGAT  | 0.632 |
| - | 4  | 533       | ldyp.1_RNA uc004   | NM_013346    | NP_037478    | Q9UMY4 | SNX12_HUMAN  | 0  | TAGTTCCTGTCA  | 0.507 |
| - | 1  | 513       | 1L2_uc011mqj.1_I   | NM_021963    | NP_068798    | Q9ULW6 | NP1L2_HUMAN  | 1  | iCCCAGCGGCAG  | 0.567 |
| - | 3  | 424       | 39B_uc004eli.1_In  | NM_016370    | NP_057454    | Q9NP90 | RAB9B_HUMAN  | 3  | 3ATCTCGATTTAA | 0.498 |
| - | 1  | 652       |                    | NM_003604    | NP_003595    | O14654 | IRS4_HUMAN   | 10 | CGTGCCGCAGC   | 0.657 |
| - | 14 | 1863      | muk.1_Missense_    | NM_003069    | NP_003060    | P28370 | SMCA1_HUMAN  | 4  | CACTTGCCAGGT  | 0.368 |
| + | 18 | 2346      | p.E696K SAGE1_u    | NM_018666    | NP_061136    | Q9NXZ1 | SAGE1_HUMAN  | 3  | 3AGGAGGAGATG  | 0.428 |
| - | 3  | 770       | 1_5'UTR ARHGEF     | NM_004840    | NP_004831    | Q15052 | ARHG6_HUMAN  | 0  | 3CTAAAAGAGTA( | 0.393 |
| - | 9  | 1280      | C RBMX_uc004faf    | NM_002139    | NP_002130    | P38159 | HNRPG_HUMAN  | 1  | 3GAGGGTACCCC  | 0.567 |
| - | 2  | 236       |                    | NM_001009609 | NP_001009609 | Q5MJ09 | SPXN3_HUMAN  | 2  | TTATTGGATATTC | 0.383 |
| - | 1  | 577       | hn.1_Missense_M    | NM_017518    | NP_059988    | Q99871 | HAUS7_HUMAN  | 0  | CGCTCCGAGCC(  | 0.721 |
| - | 7  | 1264      | u.1_Missense_Mu    | NM_001110556 | NP_001104026 | P21333 | FLNA_HUMAN   | 6  | FGCGGTTCTTGT  | 0.622 |
| - | 14 | 3706      |                    | NM_000132    | NP_000123    | P00451 | FA8_HUMAN    | 11 | CTACGTCCTTTG  | 0.338 |
| + | 6  | 960       | 40_splice IL9R_uc  | NM_002186    | NP_002177    | Q01113 | IL9R_HUMAN   | 0  | .CAAGGTGGGCA  | 0.617 |
| - | 6  | 847       | e_Mutation_p.D13   | NM_004653    | NP_004644    | Q9BY66 | KDM5D_HUMAN  | 1  | CCTTATCTTTTAC | 0.408 |
| - | 8  | 1137      | _p.R360* C1orf127  | NM_173507    | NP_775778    | B7ZLG7 | B7ZLG7_HUMAN | 1  | .AGGTGCTTCAG( | 0.622 |
| - | 10 | 1754      |                    | NR_026567    |              |        |              | 0  | .GCAGCGGCTGA  | 0.687 |
| + | 8  | 1145_1146 | _p.P311L SERINC;   | NM_178865    | NP_849196    | Q96SA4 | SERC2_HUMAN  | 0  | AGGCCCGAGG(   | 0.589 |
| + | 11 | 1953      | _p.F583Y ZMYM1     | NM_024772    | NP_079048    | Q5SVZ6 | ZMYM1_HUMAN  | 0  | AAACATTTTCGAC | 0.308 |
| + | 3  | 331       |                    | NM_007102    | NP_009033    | Q16661 | GUC2B_HUMAN  | 0  | 3ACTGTGAGCTG  | 0.627 |
| + | 9  | 1592      | _p.S263L PGM1_u    | NM_002633    | NP_002624    | P36871 | PGM1_HUMAN   | 3  | (GTTCTCAGCAA  | 0.473 |
| + | 2  | 247       | 2_5'UTR CLCA4_u    | NM_012128    | NP_036260    | Q14CN2 | CLCA4_HUMAN  | 2  | CCACAGAAAAAA  | 0.328 |
| - | 11 | 1731      | e COL11A1_uc00'    | NM_001854    | NP_001845    | P12107 | COBA1_HUMAN  | 12 | CACTTACCCTATC | 0.403 |
| + | 4  | 1008      |                    | NM_020440    | NP_065173    | Q9P2B2 | FPRP_HUMAN   | 1  | iTGCTGAAGGA.  | 0.493 |
| + | 9  | 1128      | 'GA10_uc009wiw.z   | NM_003637    | NP_003628    | O75578 | ITA10_HUMAN  | 8  | CACTAGGAGATC( | 0.473 |
| + | 8  | 1567      | .r.1_Missense_Mut  | NM_004326    | NP_004317    | O00512 | BCL9_HUMAN   | 6  | GGACCGGGAGA   | 0.592 |
| + | 2  | 228       | _p.V74A TARS2_L    | NM_025150    | NP_079426    | Q9BW92 | SYTM_HUMAN   | 1  | iTGCTGTGGCATC | 0.502 |
| - | 5  | 767       | eh.1_Missense_A    | NM_207308    | NP_997191    | Q5VU65 | P210L_HUMAN  | 11 | FGAATTCGAACT  | 0.368 |
| - | 2  | 990       | 2_Missense_Muta    | NM_001111    | NP_001102    | P55265 | DSRAD_HUMAN  | 6  | TATGACTGTCTG( | 0.488 |
| - | 8  | 879_880   | iPATCH4_uc001fp    | NM_015590    | NP_056405    | Q5T310 | GPTC4_HUMAN  | 1  | CAATTCGCCAAG  | 0.485 |
| + | 15 | 1826      | rf92_uc001fq1.2_3' | NM_144702    | NP_653303    | Q8N4P6 | LRC71_HUMAN  | 0  | .GGGAGGATGAG  | 0.562 |
| + | 1  | 364       |                    | NM_001004473 | NP_001004473 | Q8NGX5 | O10K1_HUMAN  | 1  | .TATGATCGCTAT | 0.527 |
| - | 6  | 981       | f112_uc001ggj.2_I  | NM_000450    | NP_000441    | P16581 | LYAM2_HUMAN  | 5  | TCAAATCCTTCTT | 0.473 |
| + | 5  | 1010      |                    | NM_031935    | NP_114141    | Q96RW7 | HMCN1_HUMAN  | 23 | 3AAATTCGCAAT( | 0.358 |
| - | 6  | 930       |                    | NM_001994    | NP_001985    | P05160 | F13B_HUMAN   | 3  | CTATTTCTCCATG | 0.368 |
| - | 27 | 3258      | lissense_Mutation  | NM_012414    | NP_036546    | Q9H2M9 | RBGPR_HUMAN  | 1  | AAAAACGTGCTT( | 0.308 |
| + | 3  | 1031      |                    | NM_021205    | NP_067028    | Q7L0Q8 | RHOU_HUMAN   | 0  | :CTTCAGAACG'  | 0.522 |
| + | 5  | 328       | 1hvx.1_Missense_   | NM_145861    | NP_665860    | Q8WWZ3 | EDAD_HUMAN   | 0  | CTCTCCAGGTA(  | 0.294 |
| - | 3  | 499       | icp.2_Missense_M   | NM_032752    | NP_116141    | Q96IT1 | ZN496_HUMAN  | 2  | :CTTCGGAGCCA( | 0.592 |
| + | 1  | 518       |                    | NM_001001915 | NP_001001915 | Q8NGZ5 | OR2G2_HUMAN  | 0  | 'CTGTGGGCATC( | 0.552 |
| - | 2  | 327       | ase_Mutation_p.N'  | NM_002189    | NP_002180    | Q13261 | I15RA_HUMAN  | 0  | 3CGACATTCGTG  | 0.572 |
| - | 22 | 3153      | xjf.1_Missense_M   | NM_018027    | NP_060497    | Q9P2Q2 | FRM4A_HUMAN  | 3  | 3TGGAACGCTGC  | 0.701 |
| - | 23 | 2732      | i.2_RNA NEBL_uc    | NM_006393    | NP_006384    | O76041 | NEBL_HUMAN   | 2  | AAATATGATTTTG | 0.388 |
| - | 9  | 1215      | _p.S67F ANKRD2E    | NM_014915    | NP_055730    | Q9UPS8 | ANR26_HUMAN  | 4  | 'TGTGGGAAGGT  | 0.403 |

rs146743970

rs11260887

|   |    |         |                   |              |              |        |             |                               |    |                |       |
|---|----|---------|-------------------|--------------|--------------|--------|-------------|-------------------------------|----|----------------|-------|
| - | 15 | 1927    | _p.E573Q ANK3_u   | NM_020987    | NP_066267    | Q12955 | ANK3_HUMAN  | ANK 16.                       | 19 | CGACTTCAAGCT   | 0.363 |
| - | 12 | 1606    | 9xpr.2_Missense_  | NM_022079    | NP_071362    | Q5GLZ8 | HERC4_HUMAN |                               | 3  | CAGAGGAAGAA    | 0.244 |
| - | 8  | 861     | _Mutation_p.P220  | NM_022129    | NP_071412    | P30039 | PBLD_HUMAN  |                               | 3  | CCACGGTGCAA    | 0.448 |
| + | 34 | 4767    | CDH23_uc001jsc.   | NM_022124    | NP_071407    | Q9H251 | CAD23_HUMAN | Extracellular (Potential).    | 11 | ACATCGCGGGG    | 0.602 |
| + | 17 | 2544    | g.2_Nonsense_Mi   | NM_020338    | NP_065071    | Q9ULJ6 | ZMIZ1_HUMAN |                               | 4  | TGTGCCAGCCG    | 0.677 |
| + | 3  | 549     | M20_uc001kjh.2_Ir | NM_001134658 | NP_001128130 | Q2M3R5 | TMM20_HUMAN | (Potential). DUF6 1.          | 1  | TTATCACGTTTAC  | 0.438 |
| + | 17 | 4988    | .H1436Y PLCE1_    | NM_016341    | NP_057425    | Q9P212 | PLCE1_HUMAN | 'I-PLC X-box.                 | 3  | ATTTATCATGGAC  | 0.423 |
| - | 4  | 652     | nse_Mutation_p.R  | NM_000770    | NP_000761    | P10632 | CP2C8_HUMAN |                               | 0  | CAAATCGTTTCT   | 0.388 |
| - | 4  | 731     | L2_uc009xvf.1_Int | NM_012465    | NP_036597    | Q9Y6L7 | TLL2_HUMAN  | otease (By similarity).       | 3  | CCCTCCAATGA    | 0.572 |
| - | 1  | 196     |                   | NM_001004758 | NP_001004758 | Q8NGJ8 | O51S1_HUMAN | Name=2; (Potential).          | 4  | CATTGGGCGGT    | 0.567 |
| + | 1  | 493     | _uc001mam.1_Int   | NM_001004750 | NP_001004750 | Q9H340 | O51B6_HUMAN | ellular (Potential).          | 2  | GGTTTCCCTAC    | 0.488 |
| - | 2  | 1185    | S_uc009yiz.2_Int  | NM_001143816 | NP_001137288 | P23560 | BDNF_HUMAN  |                               | 0  | GATTTCCTCCAG   | 0.522 |
| + | 24 | 3427    | d.2_Missense_Mul  | NM_018259    | NP_060729    | Q96AE7 | TTC17_HUMAN |                               | 5  | GGGACGGCGCT    | 0.428 |
| + | 1  | 48      |                   | NM_001001952 | NP_001001952 | Q8NGL1 | OR5D1_HUMAN | ellular (Potential).          | 3  | CTCTTGGGCTT    | 0.433 |
| + | 1  | 285_286 |                   | NM_001005200 | NP_001005200 | Q8N162 | OR8H2_HUMAN | ellular (Potential).          | 2  | TTTACGGGCTGC   | 0.446 |
| + | 7  | 1951    | oc.1_Missense_Mt  | NM_178864    | NP_849195    | Q8IUM7 | NPAS4_HUMAN |                               | 0  | CCTAGCCCAGC    | 0.587 |
| - | 19 | 3080    | oly.2_Missense_N  | NM_004910    | NP_004901    | O00562 | PITM1_HUMAN |                               | 3  | TGCCCGACAGC    | 0.647 |
| + | 24 | 3303    | se_Mutation_p.G1  | NM_000260    | NP_000251    | Q13402 | MYO7A_HUMAN |                               | 4  | TCCAGGGGACA    | 0.602 |
| + | 5  | 776     | os.1_Missense_Mt  | NM_006169    | NP_006160    | P40261 | NNMT_HUMAN  |                               | 1  | CTGCCAGACC     | 0.632 |
| + | 7  | 1375    | 2_Missense_Muta   | NM_015157    | NP_055972    | Q86UU1 | PHLB1_HUMAN |                               | 0  | CTTGGCGGAGG    | 0.657 |
| + | 1  | 722     |                   | NM_001004464 | NP_001004464 | Q8NGN5 | O10G8_HUMAN | Name=6; (Potential).          | 2  | CTGTGCCTCCC    | 0.547 |
| + | 2  | 315     |                   | NM_138342    | NP_612351    | Q8IW92 | GLBL2_HUMAN |                               | 3  | GCCATCGACAG    | 0.622 |
| - | 2  | 768     |                   | NM_004054    | NP_004045    | Q16581 | C3AR_HUMAN  | ellular (Potential).          | 1  | AGTGGGGACTG    | 0.408 |
| - | 1  | 157     | H1_uc001qzc.2_Ir  | NM_176889    | NP_795370    | P59543 | T2R20_HUMAN | Name=2; (Potential).          | 0  | GGAGACTGCCA    | 0.343 |
| + | 15 | 2016    |                   | NM_006446    | NP_006437    | Q9Y6L6 | SO1B1_HUMAN | lame=12; (Potential).         | 8  | CATCACTTgtttat | 0.289 |
| + | 3  | 1295    | p.D356N ALG10B    | NM_001013620 | NP_001013642 | Q517T1 | AG10B_HUMAN | icat; (Potential).            | 3  | ATAGCTGACTCA   | 0.308 |
| - | 3  | 1660    |                   | NM_005164    | NP_005155    | Q9UBJ2 | ABCD2_HUMAN |                               | 6  | GTACCTCTTTGT   | 0.328 |
| + | 4  | 766     | J1rze.2_Nonsense  | NM_001130015 | NP_001123487 | Q7Z3H0 | ANR33_HUMAN |                               | 0  | GGGACCAGCGG    | 0.652 |
| + | 5  | 851     | rf.1_Missense_Mu  | NM_005556    | NP_005547    | P08729 | K2C7_HUMAN  | od. Linker 12.                | 0  | ATCTCCGACACA   | 0.592 |
| - | 6  | 1180    |                   | NM_033045    | NP_149034    | Q9NSB2 | KRT84_HUMAN | Rod. Coil 2.                  | 1  | GTTCGGTATGTT   | 0.552 |
| + | 1  | 244     |                   | NM_001005519 | NP_001005519 | A6NDL8 | O6C68_HUMAN | ellular (Potential).          | 1  | FGTGTCCAAGA    | 0.363 |
| - | 6  | 2024    | p.G607D DNAJC1    | NM_032364    | NP_115740    | Q6Y2X3 | DJC14_HUMAN |                               | 4  | AGATACCTTACA   | 0.468 |
| - | 22 | 2990    | .R684W GRIP1_u    | NM_021150    | NP_066973    | Q9Y3R0 | GRIP1_HUMAN |                               | 2  | GCTCCGAGTTG    | 0.537 |
| - | 3  | 572     | .1_Intron MMD1_u  | NM_017440    | NP_059136    | Q8TC05 | MDM1_HUMAN  |                               | 5  | ATTAACCTGGTG   | 0.408 |
| + | 5  | 437     | se_Mutation_p.D7  | NM_001089704 | NP_001083173 | P61224 | RAP1B_HUMAN |                               | 0  | TTTAACGATTTAC  | 0.328 |
| + | 1  | 198     | i.1_RNA ZDHHC1    | NM_015336    | NP_056151    | Q8IUH5 | ZDH17_HUMAN | lasmic (Potential).           | 0  | GATGGCGGACG    | 0.672 |
| - | 9  | 1343    | do.3_Missense_Mi  | NM_003297    | NP_003288    | P13056 | NR2C1_HUMAN |                               | 1  | CTTTTTCGGTGT   | 0.428 |
| + | 5  | 731     | 5A3_uc001tfr.2_Mi | NM_005888    | NP_005879    | Q00325 | MPCP_HUMAN  | :hondrial matrix (Potential). | 0  | ATGCAGCTCCCA   | 0.373 |
| - | 2  | 1546    |                   | NM_006825    | NP_006816    | Q07065 | CKAP4_HUMAN |                               | 0  | CAGCTCCTCCA    | 0.657 |
| - | 35 | 4513    | .Q1006P CIT_uc0   | NM_007174    | NP_009105    | O14578 | CTRO_HUMAN  | PH.                           | 10 | GCCTCTGTCCA    | 0.313 |
| - | 9  | 1424    | c.3_Missense_Mu   | NM_002019    | NP_002010    | P17948 | VGFR1_HUMAN | 4. Extracellular (Potential). | 24 | GAGCAGATTTCT   | 0.403 |
| - | 2  | 1472    | _p.R168* SLC46A   | NM_181785    | NP_861450    | Q7Z3Q1 | S46A3_HUMAN | lasmic (Potential).           | 2  | CTATTGAATTGT   | 0.373 |
| + | 7  | 1268    | .P287A SLAIN1_u   | NM_144595    | NP_653196    | Q8ND83 | SLAI1_HUMAN |                               | 2  | CAAAGCCTCTG    | 0.393 |
| - | 7  | 1053    | se_Mutation_p.P3  | NM_022118    | NP_071401    | Q5T8P6 | RBM26_HUMAN | Pro-rich.                     | 1  | TGGGGGGAGTC    | 0.552 |
| + | 8  | 1066    | nh.2_Missense_M   | NM_005766    | NP_005757    | Q9Y4F1 | FARP1_HUMAN | FERM.                         | 2  | TGGCCGTTGCC    | 0.537 |
| - | 8  | 845     | OCK9_uc010tis.1   | NM_015296    | NP_056111    | Q9BZ29 | DOCK9_HUMAN | PH.                           | 1  | ACTGTCTGCTG    | 0.398 |
| + | 4  | 669     | RG2_uc010tl.1_In  | NM_173846    | NP_776245    | P59282 | TPPP2_HUMAN |                               | 0  | ACAAGGGTTCT    | 0.542 |

rs143797065

|   |    |           |                   |              |              |        |             |                                |    |               |       |             |
|---|----|-----------|-------------------|--------------|--------------|--------|-------------|--------------------------------|----|---------------|-------|-------------|
| - | 15 | 1612      | PO4_uc001wmy.1_   | NM_024658    | NP_078934    | Q8TEX9 | IPO4_HUMAN  | HEAT 4.                        | 1  | CCCGGGGACTG   | 0.627 |             |
| - | 4  | 406       | xfz.1_Missense_M  | NM_139318    | NP_647479    | Q8NCM2 | KCNH5_HUMAN | toplasmic (Potential).         | 9  | CCTTTTCATGTT  | 0.378 |             |
| + | 64 | 12657     | apy.2_Missense_I  | NM_015180    | NP_055995    | Q8WXH0 | SYNE2_HUMAN | lasmic (Potential).            | 14 | GCTTCACCTTGG  | 0.473 |             |
| - | 15 | 2626      |                   | NM_001080414 | NP_001073883 | Q9P219 | DAPLE_HUMAN | Potential.                     | 3  | CAGCCCGCTTGG  | 0.612 |             |
| - | 12 | 2683      | se_Mutation_p.I6C | NM_032560    | NP_115949    | Q6IN85 | P4R3A_HUMAN |                                | 0  | FTTCAATTACATG | 0.289 |             |
| + | 2  | 149       | _p.G18E PPP2R5    | NM_001161725 | NP_001155197 | Q13362 | 2A5G_HUMAN  |                                | 2  | AGAGTGGAAAAA  | 0.353 |             |
| - | 6  | 710       | ypx.2_Missense_#  | NM_138420    | NP_612429    | Q8IVF2 | AHNK2_HUMAN |                                | 1  | CCTGTGGGGCA   | 0.542 |             |
| + | 6  | 574       | PO_uc010bcd.1_5'F | NM_007236    | NP_009167    | Q99653 | CHP1_HUMAN  | EF-hand 3.                     | 1  | ATGGTCGGAGTA  | 0.473 |             |
| + | 21 | 7610      | Q2268* MGA_uc     | NM_001164273 | NP_001157745 | Q8IWI9 | MGAP_HUMAN  |                                | 12 | CAGATCAGGCA   | 0.363 |             |
| - | 30 | 4203      | 02aca.1_Splice_Si | NM_000259    | NP_000250    | Q9Y4I1 | MYO5A_HUMAN |                                | 4  | AACTTACCTATTT | 0.303 |             |
| - | 2  | 279       | ace.1_Missense_I  | NM_006628    | NP_006619    | P56211 | ARP19_HUMAN |                                | 0  | GCAACCGTTTC   | 0.403 |             |
| + | 2  | 287       | jx.1_Missense_Mt  | NM_016166    | NP_057250    | O75925 | PIAS1_HUMAN | lization signal (Potential).   | 2  | GCGGCGGTTCC   | 0.483 |             |
| + | 14 | 2002      | se_Mutation_p.A6: | NM_024505    | NP_078781    | Q96PH1 | NOX5_HUMAN  | ellular (Potential).           | 2  | CCAGGCCGAGG   | 0.502 |             |
| - | 6  | 937       | OG_uc002boa.2_R   | NM_016321    | NP_057405    | Q9UBD6 | RHCG_HUMAN  | ical; (Potential).             | 1  | GGCACCGTAA    | 0.617 | rs146143065 |
| + | 13 | 1556      | _p.M457I WDR93_   | NM_020212    | NP_064597    | Q6P2C0 | WDR93_HUMAN |                                | 2  | CAAATGAAATGT  | 0.488 |             |
| - | 5  | 932       | pd.2_3'UTR MLST   | NM_182563    | NP_872369    | Q6PL45 | CP079_HUMAN | ical; (Potential).             | 1  | AGACCGACACG   | 0.637 |             |
| - | 5  | 952       |                   | NM_178844    | NP_849172    | Q7RTR2 | NLRC3_HUMAN | NACHT.                         | 6  | GAGATCCCGGA   | 0.672 |             |
| - | 4  | 275       | RL_uc002cvy.3_R#  | NM_001098814 | NP_001092284 | Q86TD4 | SRCA_HUMAN  |                                | 5  | CTCTCCATCTGT  | 0.468 |             |
| - | 11 | 1561      | SM1_uc010bwg.1    | NM_052956    | NP_443188    | Q08AH1 | ACSM1_HUMAN |                                | 2  | CCACGGCTGAC   | 0.607 |             |
| + | 2  | 493       | Missense_Mutati   | NM_007245    | NP_009176    | Q8WWM7 | ATX2L_HUMAN | action with MPL.               | 2  | GACCCCCACAG   | 0.403 |             |
| + | 8  | 800       | p.R240Q PHKG2_    | NM_000294    | NP_000285    | P15735 | PHKG2_HUMAN | rotein kinase.                 | 1  | GCACCGCGGCG   | 0.607 | rs143915773 |
| - | 11 | 2304      | ge.1_Missense_Mt  | NM_182493    | NP_872299    | Q32MK0 | MYLK3_HUMAN | rotein kinase.                 | 7  | AAAATCCCAGC   | 0.468 |             |
| - | 3  | 580       |                   | NM_001796    | NP_001787    | P55286 | CADH8_HUMAN | r (Potential). Cadherin 1.     | 9  | TTATTTGAAATAT | 0.418 |             |
| - | 9  | 1141      | p.R302C SPATA22   | NM_032598    | NP_115987    | Q8NHS9 | SPT22_HUMAN |                                | 0  | GTTCCACGATCCT | 0.348 |             |
| - | 48 | 7743      | F1_uc002fxg.1_5'F | NM_015113    | NP_055928    | O43149 | ZZEF1_HUMAN |                                | 4  | GGTTCGATTCA   | 0.592 |             |
| - | 3  | 878       | 6F ZMYND15_uc0    | NM_022059    | NP_071342    | Q9H2A7 | CXL16_HUMAN | r (Potential). Chemokine.      | 0  | ATCAAGACAGC   | 0.547 |             |
| - | 37 | 5472      | uc002gml.1_Intron | NM_002472    | NP_002463    | P13535 | MYH8_HUMAN  | Potential.                     | 11 | CTTCCACCGTCT  | 0.557 |             |
| - | 19 | 2186      | uc002gml.1_Intron | NM_017533    | NP_060003    | Q9Y623 | MYH4_HUMAN  | rosin head-like.               | 13 | GGACAAGCTCA   | 0.493 |             |
| - | 30 | 4154_4155 | Missense_Mutati   | NM_001100112 | NP_001093582 | Q9UKX2 | MYH2_HUMAN  | Potential.                     | 14 | GTGGCGGGAAG   | 0.52  | rs145911509 |
| + | 3  | 1399      |                   | NM_021012    | NP_066292    | Q14500 | IRK12_HUMAN | smic (By similarity).          | 4  | CGCAGCTCATC   | 0.637 |             |
| + | 15 | 1860      | R1_uc002gzm.2_I   | NM_014238    | NP_055053    | Q8IVT5 | KSR1_HUMAN  |                                | 4  | CATCCCCTTCG   | 0.716 |             |
| + | 3  | 791       | TF_uc002hnj.2_RI  | NM_012138    | NP_036270    | Q9NY61 | AATF_HUMAN  | Glu-rich.                      | 0  | GGCATGGAAGA   | 0.517 |             |
| - | 8  | 768       | z.1_Missense_Mut  | NM_001143780 | NP_001137252 | Q9BZJ4 | S2539_HUMAN | Solcar 2.                      | 1  | CTGCAGTTCGA   | 0.642 |             |
| - | 9  | 1389      | _p.E253* SPOP_u   | NM_003563    | NP_003554    | O43791 | SPOP_HUMAN  | BTB.                           | 6  | TCATTTCTTAAA  | 0.383 |             |
| + | 11 | 854       | sense_Mutation_p. | NM_001099432 | NP_001092902 | Q9H6U6 | BCAS3_HUMAN |                                | 5  | TTGATTCGATGT  | 0.428 |             |
| + | 3  | 459       |                   | NM_000727    | NP_000718    | Q06432 | CCG1_HUMAN  |                                | 0  | CCCTCGGGAAG   | 0.612 | rs142384274 |
| + | 5  | 394       | MID_uc002juz.3_I  | NM_001010982 | NP_001010982 | Q63HM1 | AFMID_HUMAN |                                | 2  | CTTACGGCATCC  | 0.582 |             |
| + | 5  | 1499      |                   | NM_005189    | NP_005180    | Q14781 | CBX2_HUMAN  |                                | 0  | AGTGTCCGTTCC  | 0.627 |             |
| - | 17 | 2758      | fw.1_Missense_Mt  | NM_004104    | NP_004095    | P49327 | FAS_HUMAN   |                                | 1  | ACCGTCGAGGG   | 0.672 |             |
| - | 58 | 8407_8408 | l.2_Missense_Mu   | NM_005559    | NP_005550    | P25391 | LAMA1_HUMAN | minin G-like 4.                | 21 | AGGCGGCCCCC   | 0.574 |             |
| - | 5  | 804       | dD3_uc010xao.1_I  | NM_138340    | NP_612213    | Q8WU67 | ABHD3_HUMAN |                                | 1  | CCCTCCCATTG   | 0.433 |             |
| + | 1  | 124       | lA8_uc002kvp.2_I  | NM_144662    | NP_653263    | Q8TAA3 | PSA7L_HUMAN |                                | 1  | CGTCTCGATAT   | 0.602 |             |
| + | 15 | 2574      | yp.1_Missense_Mu  | NM_001942    | NP_001933    | Q02413 | DSG1_HUMAN  | lasmic (Potential).            | 7  | CTCAGGAAACA   | 0.488 |             |
| - | 11 | 2316      | lbo.1_Missense_I  | NM_020964    | NP_066015    | Q9HCE0 | EPG5_HUMAN  |                                | 0  | AGGAGGAGAGC   | 0.577 |             |
| + | 7  | 1794      | _p.E251K DCC_uc   | NM_005215    | NP_005206    | P43146 | DCC_HUMAN   | potential). Ig-like C2-type 4. | 17 | TGGCTGAAAATC  | 0.438 |             |
| - | 12 | 6497      |                   | NM_052947    | NP_443179    | Q86TB3 | ALPK2_HUMAN | ype protein kinase.            | 14 | CAGCGTTGCTAT  | 0.498 | rs149775332 |
| + | 5  | 1025      | p.D234N CDH7_u    | NM_033646    | NP_387450    | Q9ULB5 | CADH7_HUMAN | r (Potential). Cadherin 2.     | 4  | CAAAGGATATGC  | 0.423 |             |

|   |     |       |                    |              |              |        |             |                                |      |                |       |
|---|-----|-------|--------------------|--------------|--------------|--------|-------------|--------------------------------|------|----------------|-------|
| + | 37  | 5339  | _Mutation_p.M156   | NM_019112    | NP_061985    | Q8IZY2 | ABCA7_HUMAN | ical; (Potential).             | 9    | TGACATGGTGCC   | 0.577 |
| - | 4   | 751   | D2_uc002luo.1_5'   | NM_017797    | NP_060267    | Q9BX70 | BTBD2_HUMAN |                                | 2    | GCGTCTGCAG     | 0.672 |
| + | 2   | 418   | iva.1_Splice_Site  | NM_005428    | NP_005419    | P15498 | VAV_HUMAN   |                                | 16   | GCAAGGTGAGC    | 0.51  |
| - | 3   | 14392 |                    | NM_024690    | NP_078966    | Q8WXI7 | MUC16_HUMAN | xtracellular (Potential).      | 57   | ACAGTCCTTGA    | 0.488 |
| + | 6   | 700   |                    | NM_138353    | NP_612362    | Q66K64 | DCA15_HUMAN |                                | 1    | CCTCCAGCCC     | 0.622 |
| - | 5   | 1866  | 208_uc002nqo.1_I   | NM_007153    | NP_009084    |        |             |                                | 7    | AAAGGCTTTGCC   | 0.383 |
| - | 5   | 920   | p.R206K ZNF565     | NM_152477    | NP_689690    | Q8N9K5 | ZN565_HUMAN | 2H2-type 4.                    | 2    | FGAGTCTTTGAT   | 0.463 |
| - | 1   | 97    |                    | NM_001080468 | NP_001073937 | Q0VAF6 | SYCN_HUMAN  |                                | 0    | CTTGAGGTCCG    | 0.706 |
| + | 18  | 1780  | 2osb.2_Missense    | NM_004706    | NP_004697    | Q92888 | ARHG1_HUMAN | DH.                            | 4    | GACATGATCCC    | 0.667 |
| - | 2   | 340   | ug.1_Intron PSG3   | NM_021016    | NP_066296    | Q16557 | PSG3_HUMAN  | g-like V-type.                 | 2    | TTGCCCTTTGTA   | 0.433 |
| - | 1   | 166   |                    | NM_178449    | NP_848544    | Q96A98 | TIP39_HUMAN |                                | 0    | ACCACcagcagcaç | 0.597 |
| - | 2   | 454   | wk.2_Missense_M    | NM_005601    | NP_005592    | Q16617 | NKG7_HUMAN  | ical; (Potential).             | 1    | GGTGGTTGAGA    | 0.617 |
| - | 2   | 543   | ycd.1_Nonsense_I   | NM_001245    | NP_001236    | O43699 | SIGL6_HUMAN | ellular (Potential).           | 1    | TTTCATCCATTG   | 0.537 |
| + | 4   | 1821  | 313_uc010eqq.1_I   | NM_001004301 | NP_001004301 | Q6ZN06 | ZN813_HUMAN | 2H2-type 13.                   | 1    | AAGCACACCTTC   | 0.368 |
| - | 2   | 664   | gn.1_Missense_M    | NM_001005850 | NP_001005850 |        |             |                                | 4    | CTTGCCCGCAGT   | 0.731 |
| - | 3   | 919   | issense_Mutation   | NM_198458    | NP_940860    | Q6ZNH5 | ZN497_HUMAN |                                | 2    | CGGCCCGCGCG    | 0.697 |
| - | 11  | 2916  |                    | NM_004304    | NP_004295    | Q9UM73 | ALK_HUMAN   | ellular (Potential).           | 1218 | TTGGTGAATTTI   | 0.468 |
| + | 15  | 1657  | p.L445S KLRAQ1     | NM_001135629 | NP_001129101 | Q6ZMI0 | KLRAQ_HUMAN |                                | 1    | ACAATTTGGACT   | 0.343 |
| + | 6   | 579   | _p.V153I ACTG2     | NM_001615    | NP_001606    | P63267 | ACTH_HUMAN  |                                | 0    | GCATCGTCCCTG   | 0.507 |
| + | 10  | 1411  | VYD1_uc002sss.2    | NM_198274    | NP_938015    | Q8NB12 | SMYD1_HUMAN |                                | 4    | CCAGCCCATGC    | 0.602 |
| + | 2   | 381   | RTK_uc002thl.1_In  | NM_006343    | NP_006334    | Q12866 | MERTK_HUMAN | potential). lg-like C2-type 1. | 9    | CTGTGCGAATCA   | 0.483 |
| - | 4   | 554   |                    | NM_032494    | NP_115883    | Q8N5P1 | ZC3H8_HUMAN |                                | 0    | AGGGCCAGGCC    | 0.383 |
| - | 3   | 317   | _Mutation_p.L51F   | NM_003466    | NP_003457    | Q06710 | PAX8_HUMAN  | Paired.                        | 2    | GCGGAGCTGGC    | 0.627 |
| - | 10  | 1205  | z.2_Nonsense_Mu    | NM_002980    | NP_002971    | P47872 | SCTR_HUMAN  | lasmic (Potential).            | 3    | TTCTTGGGTTCT   | 0.328 |
| - | 14  | 2785  | AP5_uc002ttq.2_I   | NM_207363    | NP_997246    | O14513 | NCKP5_HUMAN |                                | 0    | CTGGGAGGTATT   | 0.458 |
| - | 2   | 451   | p.N123S CXCR4      | NM_003467    | NP_003458    | P61073 | CXCR4_HUMAN | ilical; Name=3.                | 3    | TAGAGGTGACT    | 0.542 |
| + | 9   | 3414  | se_Mutation_p.P8   | NM_018328    | NP_060798    | Q9P267 | MBD5_HUMAN  |                                | 5    | TACATCCCAATCC  | 0.453 |
| - | 34  | 3806  |                    | NM_004543    | NP_004534    | P20929 | NEBU_HUMAN  | Nebulin 30.                    | 20   | GGAATCCAGCC    | 0.453 |
| + | 7   | 1246  | is.2_Missense_Mu   | NM_004180    | NP_004171    | Q92844 | TANK_HUMAN  |                                | 1    | AATCCGAGGAC    | 0.413 |
| - | 275 | 70825 | 229K TTN_uc010zi   | NM_133378    | NP_596869    | Q8WZ42 | TITIN_HUMAN |                                | 153  | TCATTTCTTTTAA  | 0.423 |
| - | 259 | 57436 | 66Q TTN_uc010zfi   | NM_133378    | NP_596869    | Q8WZ42 | TITIN_HUMAN |                                | 153  | CAAATCGGTTTI   | 0.468 |
| - | 51  | 12415 | N_uc010zfi.1_Intrc | NM_133378    | NP_596869    | Q8WZ42 | TITIN_HUMAN |                                | 153  | CTTATTCGGTATI  | 0.473 |
| - | 63  | 11862 | iti.3_Missense_Mu  | NM_018897    | NP_061720    | Q8WXX0 | DYH7_HUMAN  |                                | 12   | ACCATCCTCAGC   | 0.413 |
| + | 1   | 799   |                    | NM_152614    | NP_689827    | Q53QW1 | CB057_HUMAN |                                | 1    | GCCCCACGAG     | 0.637 |
| + | 2   | 250   |                    | NM_022134    | NP_071417    | Q9H3Q3 | G3ST2_HUMAN |                                | 0    | ACACCGTAAGT    | 0.632 |
| - | 8   | 724   | 'D1_uc002wmd.3     | NM_019593    | NP_062539    | Q9NPB8 | GPCP1_HUMAN | Poly-Asp.                      | 0    | TATCATCGTCATC  | 0.418 |
| - | 5   | 1501  |                    | NM_152611    | NP_689824    | Q8WUT4 | LRRN4_HUMAN | ellular (Potential).           | 3    | CTCCCGTGCA     | 0.672 |
| - | 2   | 234   | uc002wqu.1_RNA     | NM_001099407 | NP_001092877 | Q9NVP4 | CT012_HUMAN |                                | 1    | CTGAGGGACAC    | 0.328 |
| - | 12  | 6122  | aw.2_Missense_Mi   | NM_014071    | NP_054790    | Q14686 | NCOA6_HUMAN | 11-binding region.             | 7    | AGGGGGTTGCT    | 0.552 |
| - | 4   | 1501  | zpz.1_Missense_I   | NM_153360    | NP_699191    | Q8NCL9 | APCDL_HUMAN |                                | 1    | GGTATCGGGAC    | 0.612 |
| + | 1   | 493   | 3NAS_uc002xzu.3    | NM_080425    | NP_536350    | P63092 | GNAS2_HUMAN |                                | 292  | GTGGACCCCA     | 0.632 |
| + | 3   | 798   | jks.2_Nonsense_I   | NM_003195    | NP_003186    | Q15560 | TCEA2_HUMAN | ilis N-terminal.               | 0    | CCACCCGAGTC    | 0.617 |
| - | 14  | 1163  | æ TPTE_uc002yir.   | NM_199261    | NP_954870    | P56180 | TPTE_HUMAN  |                                | 5    | CTTACCTTGAT    | 0.313 |
| - | 3   | 603   | v.1_Missense_Mut   | NM_198996    | NP_945347    | Q6XZB0 | LIP1_HUMAN  |                                | 2    | TTCTTCCAAGTT   | 0.284 |
| + | 11  | 1984  | 1A_uc002ywl.2_3    | NM_001396    | NP_001387    | Q13627 | DYR1A_HUMAN |                                | 4    | TCCAACGAAT     | 0.408 |
| - | 33  | 6235  | 3AM_uc002yyr.1_f   | NM_001389    | NP_001380    | O60469 | DSCAM_HUMAN | lasmic (Potential).            | 11   | TCCAAGCATGCT   | 0.572 |
| + | 8   | 890   | abj.2_Missense_M   | NM_001039948 | NP_001035037 | Q2NKQ1 | SGSM1_HUMAN |                                | 5    | ACTACGTGGAG    | 0.562 |

rs146847928



|   |    |       |                    |              |              |        |              |                            |    |                |       |             |
|---|----|-------|--------------------|--------------|--------------|--------|--------------|----------------------------|----|----------------|-------|-------------|
| - | 14 | 2808  | sense_Mutation_p   | NM_012143    | NP_036275    | Q9UBB9 | TFP11_HUMAN  |                            | 0  | CCGGTCGATGT    | 0.572 |             |
| + | 12 | 1597  | _p.Q320* SFI1_uc   | NM_001007467 | NP_001007468 | A8K8P3 | SFI1_HUMAN   | HAT 5.                     | 1  | ATCTCCAGCAA    | 0.468 |             |
| + | 18 | 3689  |                    | NM_001429    | NP_001420    | Q09472 | EP300_HUMAN  | Bromo.                     | 64 | CATGGATCTTTC   | 0.393 |             |
| - | 1  | 88    |                    | NM_002676    | NP_002667    | Q92871 | PMM1_HUMAN   |                            | 1  | TCCTGCGGGCT    | 0.672 |             |
| - | 13 | 1690  | _p.G146R TLL12_    | NM_015140    | NP_055955    | Q14166 | TTL12_HUMAN  | TTL.                       | 1  | AGGCCCGGAAC    | 0.667 |             |
| + | 14 | 1872  | blc.2_Missense_M   | NM_014678    | NP_055493    | O75170 | PP6R2_HUMAN  |                            | 0  | GGATCGCCAAC    | 0.667 | rs140951188 |
| + | 5  | 1532  | asw.1_Missense_M   | NM_003670    | NP_003661    | O14503 | BHE40_HUMAN  |                            | 1  | ACTTAGAAACCA   | 0.478 | rs147880359 |
| - | 22 | 2965  | RIP2_uc011avh.1_   | NM_001080423 | NP_001073892 | Q9C0E4 | GRIP2_HUMAN  |                            | 1  | CAGTCCCTCAC    | 0.627 |             |
| - | 22 | 3871  | rev.2_Nonsense_M   | NM_014744    | NP_055559    | Q92609 | TBCD5_HUMAN  |                            | 1  | AGGCTGGGCCT    | 0.587 | rs150988847 |
| + | 5  | 3340  |                    | NM_003458    | NP_003449    | Q9UPA5 | BSN_HUMAN    | Potential.                 | 8  | CCCGCGGGGAC    | 0.657 |             |
| - | 3  | 471   | 717_uc003dpw.3_    | NM_001128223 | NP_001121695 | C9JSV9 | C9JSV9_HUMAN |                            | 0  | CATCACGTCCT    | 0.502 | rs147946451 |
| - | 1  | 469   | '1_uc003dty.3_5'F  | NM_014820    | NP_055635    | O94826 | TOM70_HUMAN  | intermembrane (Potential). | 1  | GGCTGCGACCA    | 0.716 |             |
| + | 10 | 1082  | se_Mutation_p.H1   | NM_017577    | NP_060047    | Q8IYS0 | GRM1C_HUMAN  |                            | 3  | ATTTTTCATATCA  | 0.338 |             |
| + | 16 | 1627  | bjn.1_Missense_M   | NM_021082    | NP_066568    | Q16348 | S15A2_HUMAN  |                            | 1  | TCATTCTGTGAAC  | 0.398 |             |
| - | 14 | 2356  |                    | NM_173543    | NP_775814    | Q8IYY4 | DZ11L_HUMAN  |                            | 2  | GCCCTGGCCAG    | 0.612 |             |
| + | 8  | 761   |                    | NM_001870    | NP_001861    | P15088 | CBPA3_HUMAN  |                            | 2  | AAAAATCGTTCC   | 0.383 |             |
| - | 4  | 1922  | HE_uc003fen.3_R    | NM_000055    | NP_000046    | P06276 | CHLE_HUMAN   |                            | 4  | TAAATTGATTTTT  | 0.333 |             |
| + | 13 | 2826  |                    | NM_004443    | NP_004434    | P54753 | EPHB3_HUMAN  |                            | 11 | CACCAGGGCGG    | 0.662 |             |
| - | 3  | 12753 | l1bth.1_intron MUC | NM_018406    | NP_060876    | Q99102 | MUC4_HUMAN   | Ser-rich.                  | 0  | TGACAGGAAGA    | 0.587 |             |
| - | 8  | 796   | wh.2_Missense_M    | NM_005017    | NP_005008    | P49585 | PCY1A_HUMAN  | alytic (Potential).        | 0  | CAATTCGGGTG    | 0.483 |             |
| - | 5  | 1222  | 53A_uc010ibw.2_3   | NM_001013622 | NP_001013644 | Q6NSI3 | FA53A_HUMAN  |                            | 0  | GAGGCCCTCT     | 0.657 |             |
| + | 67 | 9249  |                    | NM_002111    | NP_002102    | P42858 | HD_HUMAN     |                            | 4  | GGTCCGGGACT    | 0.647 |             |
| - | 1  | 588   |                    | NM_198353    | NP_938167    | Q6ZWB6 | KCTD8_HUMAN  | BTB.                       | 3  | GCCGTCCTCGGT   | 0.567 |             |
| - | 3  | 410   | cw.2_Missense_M    | NM_001010874 | NP_001010874 | Q5HYJ1 | TECRL_HUMAN  |                            | 0  | AGAAGGGTACC    | 0.318 |             |
| + | 3  | 752   |                    | NM_021225    | NP_067048    | Q99935 | PROL1_HUMAN  | Thr-rich.                  | 1  | CATATCAGCAGC   | 0.498 |             |
| - | 9  | 1289  | 2_Missense_Mut     | NM_000583    | NP_000574    | P02774 | VTDB_HUMAN   | Albumin 2.                 | 3  | AGTCTTCAACA    | 0.308 |             |
| + | 6  | 968   |                    | NM_016599    | NP_057683    | Q9NPC6 | MYOZ2_HUMAN  |                            | 0  | CGAACCTACAG    | 0.373 |             |
| + | 83 | 14728 | em.2_Missense_M    | NM_015312    | NP_056127    | Q2LD37 | K1109_HUMAN  |                            | 12 | AAAAGTCCAATT   | 0.338 |             |
| + | 5  | 6625  | p.1_Missense_Mut   | NM_024582    | NP_078858    | Q6V0I7 | FAT4_HUMAN   | Extracellular (Potential). | 18 | TCACAGGTGCC    | 0.463 |             |
| - | 6  | 725   | 3ivv.1_Missense_M  | NM_152682    | NP_689895    | Q6NW29 | RWDD4_HUMAN  |                            | 0  | TCGAGGAAGTT    | 0.284 |             |
| + | 22 | 3214  | jp.1_Missense_Mu   | NM_024867    | NP_079143    | Q9C093 | SPEF2_HUMAN  |                            | 4  | CTAATAGAAAAT   | 0.333 |             |
| - | 34 | 6788  | orf42_uc011coz.1_  | NM_023073    | NP_075561    | E9PH94 | E9PH94_HUMAN |                            | 7  | AAAACGAAGTG    | 0.423 |             |
| + | 28 | 3537  | 3A1_uc003jow.2_M   | NM_181501    | NP_852478    | P56199 | ITA1_HUMAN   | ical; (Potential).         | 3  | TTTAGCACTGTC   | 0.318 |             |
| + | 4  | 765   | zx.2_Missense_M    | NM_001882    | NP_001873    | P24387 | CRHBP_HUMAN  |                            | 0  | CTTCCGAGTCC    | 0.468 | rs139472454 |
| + | 11 | 2210  | 398_uc003kjt.2_5'  | NM_032119    | NP_115495    | Q8WXC9 | GPR98_HUMAN  | ellular (Potential).       | 16 | CCCGGATGATA    | 0.428 |             |
| - | 6  | 786   | ikpw.1_Missense_M  | NM_022140    | NP_071423    | Q9HCS5 | E41LA_HUMAN  | FERM.                      | 1  | AGTTCTTCTTCT   | 0.358 |             |
| + | 1  | 2159  |                    | NM_018935    | NP_061758    | Q9Y5E8 | PCDBF_HUMAN  | lasmic (Potential).        | 5  | GGCGGCTCAG     | 0.652 |             |
| + | 1  | 185   | ljm.1_intron PCDF  | NM_018922    | NP_061745    | Q9Y5G3 | PCDGD_HUMAN  | Extracellular (Potential). | 0  | AACTCGAAAAC    | 0.522 |             |
| + | 11 | 2912  | _p.S918F PPARGC    | NM_133263    | NP_573570    | Q86YN6 | PRGC2_HUMAN  | RRM.                       | 0  | CCCTCTCTTTGA   | 0.612 |             |
| + | 4  | 477   | RS_uc011deo.1_In   | NM_002887    | NP_002878    | P54136 | SYRC_HUMAN   |                            | 3  | ACCTCCAGAC     | 0.328 |             |
| + | 2  | 199   |                    | NM_197975    | NP_932079    | Q6UXE8 | BTNL3_HUMAN  | ellular (Potential).       | 0  | TGACCAGGCA     | 0.552 |             |
| + | 8  | 1099  | rag.1_Missense_M   | NM_030948    | NP_112210    | Q9C0D0 | PHAR1_HUMAN  |                            | 0  | GACCTCTCAC     | 0.607 |             |
| - | 8  | 2712  | ie_Mutation_p.Q5E  | NM_000332    | NP_000323    | P54253 | ATX1_HUMAN   | tion with USP7. RNA-bind   | 4  | CAACTGGATGAT   | 0.572 |             |
| - | 8  | 1631  | 2_Mutation_p.Q22   | NM_000332    | NP_000323    | P54253 | ATX1_HUMAN   | Poly-Gln.                  | 4  | ctgctgtgctgctg | 0.363 |             |
| - | 8  | 1625  | 2_Mutation_p.Q21   | NM_000332    | NP_000323    | P54253 | ATX1_HUMAN   | Poly-Gln.                  | 4  | ctgctgtgctgctg | 0.368 |             |
| + | 6  | 697   | 1.P126S CAP2_uc    | NM_006366    | NP_006357    | P40123 | CAP2_HUMAN   |                            | 1  | CCAAACCTGGT    | 0.413 |             |
| + | 1  | 278   |                    | NM_012367    | NP_036499    | P58173 | OR2B6_HUMAN  | ellular (Potential).       | 1  | TAATCAGTTATCC  | 0.408 |             |

|   |    |           |                                                  |              |              |        |             |                               |       |               |       |             |
|---|----|-----------|--------------------------------------------------|--------------|--------------|--------|-------------|-------------------------------|-------|---------------|-------|-------------|
| - | 7  | 1524      | HX16_uc011dmo.1                                  | NM_003587    | NP_003578    | O60231 | DHX16_HUMAN | ase ATP-binding.              | 4     | CTCCTCAAAGA   | 0.408 |             |
| + | 2  | 226       | n_p.Q5R MICB_uc                                  | NM_005931    | NP_005922    | Q29980 | MICB_HUMAN  | ellular (Potential).          | 0     | GTCCCAGGATG   | 0.522 |             |
| - | 15 | 2667      | oca.2_Missense_I                                 | NM_018833    | NP_061313    | Q03519 | TAP2_HUMAN  |                               | 0     | GATCCCACCAC   | 0.517 |             |
| - | 2  | 461       | dsq.1_Missense_I                                 | NM_012391    | NP_036523    | O95238 | SPDEF_HUMAN |                               | 5     | CAGGAGGTGGC   | 0.677 |             |
| + | 6  | 1294      | _p.V337L PNPLA1                                  | NM_001145717 | NP_001139189 | Q8N8W4 | PLPL1_HUMAN | Pro-rich. p.P432A(1)          | 4     | CAACTGTGGGG   | 0.592 |             |
| - | 4  | 498       |                                                  | NM_006708    | NP_006699    | Q04760 | LGUL_HUMAN  |                               | 1     | ACTTACCGAATC  | 0.338 |             |
| + | 5  | 706       | ML4_uc003oqd.2_                                  | NM_198153    | NP_937796    | Q6UXN2 | TRML4_HUMAN |                               | 1     | GTTGTGAGTCC   | 0.582 |             |
| + | 5  | 1657      |                                                  | NM_001010872 | NP_001010872 | Q5T0W9 | FA83B_HUMAN |                               | 6     | ATGGATCAGCTT  | 0.403 |             |
| - | 4  | 945       | YS_uc003per.1_M                                  | NM_001142800 | NP_001136272 | Q5T1H1 | EYS_HUMAN   |                               | 6     | AAATTAACAGTGT | 0.413 |             |
| + | 18 | 2053      | 0776_uc010kck.2_                                 | NM_015323    | NP_056138    | O94874 | UFL1_HUMAN  |                               | 1     | AACATCGACAA   | 0.378 | rs141416978 |
| - | 5  | 779       | 1_intron ROS1_u                                  | NM_001017408 | NP_001017408 | Q9HD26 | GOPC_HUMAN  |                               | 1     | TTTGCCCTAGGT  | 0.333 |             |
| - | 7  | 2147      |                                                  | NM_015204    | NP_056019    | Q9UPZ6 | THS7A_HUMAN | ellular (Potential).          | 3     | CTTTCGGGCATC  | 0.537 |             |
| - | 9  | 1006      | uc.2_Nonsense_Mutation_p.Q62* SNX13_uc003stx.1_1 |              |              | Q9Y5W8 | SNX13_HUMAN | PXA.                          | 3     | TGAGTTGATTTA  | 0.269 |             |
| + | 3  | 607       | se_Mutation_p.E1                                 | NM_018685    | NP_061155    | Q9NQW6 | ANLN_HUMAN  | tion. Interaction with CD2A1  | 3     | GATTGGAAGCA   | 0.493 |             |
| + | 10 | 1110      | A13_uc010kyr.2_5                                 | NM_152701    | NP_689914    | Q86UQ4 | ABCAD_HUMAN |                               | 10    | ACAGGGTAGCC   | 0.423 |             |
| + | 2  | 574       | Oldj.1_RNA uc003                                 | NM_001540    | NP_001531    | P04792 | HSPB1_HUMAN | h TGFB111 (By similarity).    | 0     | CACCGGAAAT/   | 0.647 |             |
| + | 13 | 1692      | ldp.2_Missense_I                                 | NM_020879    | NP_065930    | Q81YE0 | CC146_HUMAN |                               | 2     | CATTCGAAATG/  | 0.303 |             |
| - | 2  | 643       | ERF_uc011kkm.1                                   | NM_006980    | NP_008911    | Q99551 | MTERF_HUMAN |                               | 0     | GAGGGGCATTG   | 0.403 |             |
| - | 6  | 843       | L13_uc003var.2_F                                 | NM_145032    | NP_659469    | Q8NEE6 | FXL13_HUMAN |                               | 0     | AACTTCGTTCA   | 0.318 |             |
| - | 18 | 2293      | ey.2_Missense_Mt                                 | NM_007356    | NP_031382    | A4D0S4 | LAMB4_HUMAN | inin IV type B.               | 8     | CAATTTCAACAC/ | 0.473 |             |
| + | 15 | 2824_2825 |                                                  | NM_173569    | NP_775840    | Q6ZU65 | UBN2_HUMAN  | Ser-rich.                     | 2     | TGCTCCATTAC/  | 0.465 |             |
| - | 15 | 1860      |                                                  | NM_004333    | NP_004324    | P15056 | BRAF_HUMAN  | rotein kinas_R603>1(2))p.T    | 18290 | ATTTCACTGTAC  | 0.368 |             |
| - | 2  | 1788      | ion_p.G28S FAM1                                  | NM_014690    | NP_055505    | Q86XD5 | F131B_HUMAN |                               | 0     | GATGCCGTCCC/  | 0.577 |             |
| + | 7  | 805       | M2_uc011kwi.1_I                                  | NM_003970    | NP_003961    | P54296 | MYOM2_HUMAN | like C2-type 1.               | 6     | TTGACGACTC    | 0.537 |             |
| + | 15 | 1282      | ITG1_uc010lxz.1_I                                | NM_018967    | NP_061840    | Q9NSN8 | SNTG1_HUMAN | PH.                           | 5     | GTACTCCCCGA   | 0.478 |             |
| - | 9  | 860       | _p.A32T SNX31_u                                  | NM_152628    | NP_689841    | Q8N9S9 | SNX31_HUMAN |                               | 0     | GTTTGCCCATC   | 0.363 |             |
| - | 5  | 1389      | e_Mutation_p.R41:                                | NM_013437    | NP_038465    | Q9Y561 | LRP12_HUMAN | ntial). LDL-receptor class /  | 0     | GCAGCGATCAG/  | 0.413 |             |
| - | 2  | 1304      | cw.2_Missense_M                                  | NM_014379    | NP_055194    | Q6PIU1 | KCNV1_HUMAN | r; Name=Segment S4; (Po       | 2     | GCATGCGCAGAC  | 0.502 |             |
| - | 16 | 1450      | p.C285W ASAP1_                                   | NM_018482    | NP_060952    | Q9ULH1 | ASAP1_HUMAN | -GAP. C4-type.                | 4     | TTCTATACAGGTC | 0.388 |             |
| - | 1  | 1378      |                                                  | NM_015193    | NP_056008    | Q7LC44 | ARC_HUMAN   |                               | 1     | CTGGGTCCGGT   | 0.711 |             |
| - | 5  | 2192      |                                                  | NM_138367    | NP_612376    | Q9BRH9 | ZN251_HUMAN |                               | 0     | CTCTCCAACAC   | 0.403 |             |
| + | 21 | 3000      | v.2_Missense_Mut                                 | NM_004972    | NP_004963    | O60674 | JAK2_HUMAN  | otein kinase 2.               | 28641 | CATAGGGTATGC  | 0.318 |             |
| + | 1  | 257       |                                                  | NM_022160    | NP_071443    | Q5VZB9 | DMRTA_HUMAN |                               | 2     | AGACCGAGGCG   | 0.667 |             |
| + | 3  | 196       | 1P1_uc010mqj.1_                                  | NM_014471    | NP_055286    | O60575 | ISK4_HUMAN  | Kazal-like.                   | 0     | CATATACGAATG/ | 0.557 | rs149166930 |
| + | 7  | 1722      | 1P1_uc011loj.1_Mi                                | NM_016525    | NP_057609    | Q9NZ09 | UBAP1_HUMAN | UBA 2.                        | 0     | CTCATGGCTC    | 0.532 |             |
| + | 1  | 58        | 1b.2_Missense_Mt                                 | NM_003995    | NP_003986    | P20594 | ANPRB_HUMAN |                               | 3     | GTCCTCCCGGG   | 0.677 |             |
| - | 13 | 2140      | nse_Mutation_p.Q                                 | NM_033655    | NP_387504    | Q9BZ76 | CNTP3_HUMAN | ninal. Extracellular (Potenti | 1     | CGTGCTGCACC   | 0.701 | rs1758271   |
| - | 5  | 1086      |                                                  | NM_017561    | NP_060031    | A1L443 | FA22F_HUMAN | Pro-rich.                     | 0     | TGGGCCTTGGT   | 0.706 |             |
| + | 25 | 2784      |                                                  | NM_001855    | NP_001846    | P39059 | COFA1_HUMAN | lical region 4 (COL4).        | 6     | AGGGCGAGAAG   | 0.512 |             |
| + | 1  | 1270      |                                                  | NM_006687    | NP_006678    | Q9Y615 | ACL7A_HUMAN |                               | 0     | ACGAGGAACAC   | 0.587 |             |
| + | 14 | 2342      | ckz.1_Missense_I                                 | NM_007018    | NP_008949    | Q7Z7A1 | CNTRL_HUMAN | Potential.                    | 0     | GTGAGCTCCAT   | 0.418 |             |
| - | 17 | 1470      | .G381R DENND1/                                   | NM_020946    | NP_065997    | Q8TEH3 | DEN1A_HUMAN |                               | 2     | TTGCTCCACTTC  | 0.408 |             |
| + | 1  | 679       |                                                  | NM_032728    | NP_116117    | Q8NBV4 | PPAC3_HUMAN | ical; (Potential).            | 1     | CCCTGGATCGG/  | 0.687 |             |
| + | 26 | 4113      | 53_splice CACNA                                  | NM_000718    | NP_000709    | Q00975 | CAC1B_HUMAN |                               | 6     | TGCAGGTAAC    | 0.542 |             |
| + | 4  | 524       |                                                  | NM_001011719 | NP_001011719 | Q5FYA8 | ARSH_HUMAN  | ical; (Potential).            | 1     | CTTGCCCTGG    | 0.532 |             |
| + | 9  | 1703      | iid.1_Missense_Mt                                | NM_001830    | NP_001821    | P51793 | CLCN4_HUMAN |                               | 5     | CTCGGCCTGTG   | 0.542 |             |
| + | 8  | 781       |                                                  | NM_005089    | NP_005080    | Q15696 | U2AFM_HUMAN | RRM.                          | 3     | TGCCCGAGTTC/  | 0.522 |             |

|   |    |           |                    |              |              |        |              |                           |    |                 |       |             |
|---|----|-----------|--------------------|--------------|--------------|--------|--------------|---------------------------|----|-----------------|-------|-------------|
| + | 5  | 662       | _p.P190L SYAP1_    | NM_032796    | NP_116185    | Q96A49 | SYAP1_HUMAN  | BSD.                      | 1  | TCGTTCCCTAAAC   | 0.488 |             |
| + | 9  | 2561      | se_Mutation_p.S8f  | NM_003410    | NP_003401    | P17010 | ZFX_HUMAN    | :2H2-type 12.             | 2  | TTATTTCCATTCA   | 0.433 |             |
| + | 11 | 1504      |                    | NM_173695    | NP_775966    | Q8N9S7 | CX059_HUMAN  |                           | 1  | gagaaaggaagatac | 0     |             |
| - | 5  | 1254_1255 |                    | NM_176819    | NP_789789    | Q9H7Y0 | CX036_HUMAN  |                           | 1  | TGGGCGGATGC     | 0.569 |             |
| + | 1  | 530       |                    | NM_019886    | NP_063939    | Q9NS84 | CHST7_HUMAN  | lenal (Potential).        | 3  | TGGGCGAACTC     | 0.627 |             |
| + | 4  | 736       | lhh.2_Missense_M   | NM_005676    | NP_005667    | P98175 | RBM10_HUMAN  | Poly-Glu.                 | 5  | aggaggaggatgagg | 0.522 |             |
| + | 6  | 2909      | E871K CCNB3_uc     | NM_033031    | NP_149020    | Q8WWL7 | CCNB3_HUMAN  | p.E871>*(1)               | 9  | AGCAGGAGGCC     | 0.527 |             |
| - | 12 | 2736      | oi.1_Missense_Mu   | NM_004463    | NP_004454    | P98174 | FGD1_HUMAN   | PH 1.                     | 6  | GAGCTCGAGGG     | 0.552 |             |
| + | 5  | 1810      | p.D560N STARD8     | NM_014725    | NP_055540    | Q92502 | STAR8_HUMAN  |                           | 6  | :GGCGGATTC      | 0.607 |             |
| - | 4  | 416       | F5_uc004ejj.1_RN   | NM_032946    | NP_116564    | Q9H1B4 | NXF5_HUMAN   | RRM.                      | 1  | CATAAGGAATCT    | 0.413 |             |
| + | 6  | 1444      | ejh.2_Missense_Iv  | NM_022838    | NP_073749    | Q6P1M9 | ARMX5_HUMAN  |                           | 1  | CTGGCCTGAAG     | 0.458 |             |
| - | 8  | 1613      |                    | NM_005334    | NP_005325    | P51610 | HCFC1_HUMAN  |                           | 2  | CTTTTCTGTGG     | 0.632 |             |
| + | 5  | 648       | i.2_Missense_Mut   | NM_017765    | NP_060235    | Q6ZP29 | PQLC2_HUMAN  | 1. Helical; (Potential).  | 0  | ACAGACCTACAC    | 0.284 |             |
| + | 11 | 1953      | _p.F583Y ZMYM1     | NM_024772    | NP_079048    | Q5SVZ6 | ZMYM1_HUMAN  |                           | 0  | AAACATTTTCGAC   | 0.308 |             |
| - | 12 | 1456      | r.1_Missense_Mul   | NM_021080    | NP_066566    | O75553 | DAB1_HUMAN   |                           | 3  | CGGGGGGAGAC     | 0.363 |             |
| + | 9  | 1592      | _p.S263L PGM1_u    | NM_002633    | NP_002624    | P36871 | PGM1_HUMAN   |                           | 3  | AGTTCTCAGCAA    | 0.473 |             |
| + | 2  | 247       | 2_5'UTR CLCA4_u    | NM_012128    | NP_036260    | Q14CN2 | CLCA4_HUMAN  |                           | 2  | CACAGAAAAAA     | 0.328 |             |
| + | 9  | 1128      | GA10_uc009wiw.2    | NM_003637    | NP_003628    | O75578 | ITA10_HUMAN  | cellular (Potential).     | 8  | ACTAGGAGATC     | 0.473 |             |
| - | 8  | 879_880   | iPATCH4_uc001fp    | NM_015590    | NP_056405    | Q5T3I0 | GPTC4_HUMAN  |                           | 1  | CAATCCCCAAG     | 0.485 |             |
| + | 15 | 1826      | rf92_uc001fqj.2_3' | NM_144702    | NP_653303    | Q8N4P6 | LRC71_HUMAN  |                           | 0  | .GGGAGGATGAG    | 0.562 |             |
| + | 1  | 364       |                    | NM_001004473 | NP_001004473 | Q8NGX5 | O10K1_HUMAN  | lasmic (Potential).       | 1  | TATGATCGCTAT    | 0.527 |             |
| - | 6  | 981       | f112_uc001ggj.2_l  | NM_000450    | NP_000441    | P16581 | LYAM2_HUMAN  | xtracellular (Potential). | 5  | CAAATCCTTCTT    | 0.473 |             |
| + | 5  | 1010      |                    | NM_031935    | NP_114141    | Q96RW7 | HMCN1_HUMAN  |                           | 23 | AAAATTCGCAAT    | 0.358 |             |
| - | 6  | 930       |                    | NM_001994    | NP_001985    | P05160 | F13B_HUMAN   | Sushi 5.                  | 3  | CTATTCTCCATG    | 0.368 |             |
| + | 3  | 1031      |                    | NM_021205    | NP_067028    | Q7L0Q8 | RHOU_HUMAN   |                           | 0  | :CTCCAGAACG     | 0.522 |             |
| + | 5  | 328       | 1hvx.1_Missense_   | NM_145861    | NP_665860    | Q8WWZ3 | EDAD_HUMAN   |                           | 0  | CTCTCCAGGTA     | 0.294 |             |
| - | 2  | 211       | 1ibx.2_Missense_   | NM_020394    | NP_065127    | Q8IW36 | ZN695_HUMAN  | KRAB.                     | 0  | GCTGGGTCCAG     | 0.453 |             |
| - | 3  | 499       | icp.2_Missense_M   | NM_032752    | NP_116141    | Q96IT1 | ZN496_HUMAN  |                           | 2  | :CTTCGGAGCCA    | 0.592 |             |
| - | 2  | 327       | se_Mutation_p.N4   | NM_002189    | NP_002180    | Q13261 | I15RA_HUMAN  | tracellular (Potential).  | 0  | CGACATTCGTG     | 0.572 |             |
| - | 9  | 1215      | _p.S67F ANKRD2f    | NM_014915    | NP_055730    | Q9UPS8 | ANR26_HUMAN  |                           | 4  | TGTGGGAAGGT     | 0.403 |             |
| - | 12 | 1606      | 9xpr.2_Missense_   | NM_022079    | NP_071362    | Q5GLZ8 | HERC4_HUMAN  |                           | 3  | :CAGAGGAAGAA    | 0.244 |             |
| - | 8  | 861       | i_Mutation_p.P220  | NM_022129    | NP_071412    | P30039 | PBLD_HUMAN   |                           | 3  | CCACGGTGCAA     | 0.448 |             |
| + | 17 | 4988      | 1.H1436Y PLCE1_    | NM_016341    | NP_057425    | Q9P212 | PLCE1_HUMAN  | 1-PLC X-box.              | 3  | ATTATCATGGAC    | 0.423 |             |
| - | 4  | 652       | nse_Mutation_p.R   | NM_000770    | NP_000761    | P10632 | CP2C8_HUMAN  |                           | 0  | CAAATCGTTTCT    | 0.388 |             |
| + | 1  | 283       | uc001kwr.2_Intron  | NM_001143909 | NP_001137381 | Q2QD12 | Q2QD12_HUMAN |                           | 0  | CTTCGAAAGC      | 0.498 | rs61746133  |
| + | 31 | 11879     |                    | NM_002457    | NP_002448    | Q02817 | MUC2_HUMAN   |                           | 2  | accaccaccactacg | 0.129 |             |
| - | 1  | 196       |                    | NM_001004758 | NP_001004758 | Q8NGJ8 | O51S1_HUMAN  | Name=2; (Potential).      | 4  | .CATTGGGCGGT    | 0.567 |             |
| + | 1  | 493       | _uc001mam.1_Int    | NM_001004750 | NP_001004750 | Q9H340 | O51B6_HUMAN  | cellular (Potential).     | 2  | GGTTTCCCTACT    | 0.488 |             |
| - | 2  | 1185      | 1S_uc009yiz.2_Intr | NM_001143816 | NP_001137288 | P23560 | BDNF_HUMAN   |                           | 0  | GTATTCTCCAG     | 0.522 |             |
| + | 24 | 3427      | d.2_Missense_Mul   | NM_018259    | NP_060729    | Q96AE7 | TTC17_HUMAN  |                           | 5  | .GGGACGGCGCT    | 0.428 | rs143797065 |
| + | 1  | 285_286   |                    | NM_001005200 | NP_001005200 | Q8N162 | OR8H2_HUMAN  | cellular (Potential).     | 2  | TTTACGGGCTGC    | 0.446 |             |
| + | 7  | 1951      | cc.1_Missense_Mu   | NM_178864    | NP_849195    | Q8IUM7 | NPAS4_HUMAN  |                           | 0  | :CTAGCCCAGC     | 0.587 |             |
| + | 24 | 3303      | se_Mutation_p.G1C  | NM_000260    | NP_000251    | Q13402 | MYO7A_HUMAN  |                           | 4  | TCCAGGGGACA     | 0.602 |             |
| + | 5  | 776       | cs.1_Missense_Mu   | NM_006169    | NP_006160    | P40261 | NNMT_HUMAN   |                           | 1  | :CTGCCAGACC     | 0.632 |             |
| + | 1  | 722       |                    | NM_001004464 | NP_001004464 | Q8NGN5 | O10G8_HUMAN  | Name=6; (Potential).      | 2  | :CTGTGCCTCCC    | 0.547 |             |
| - | 3  | 252       |                    | NM_006248    | NP_006239    |        |              |                           | 0  | AGGAGGTGGGG     | 0.607 |             |
| + | 3  | 1295      | p.D356N ALG10B_    | NM_001013620 | NP_001013642 | Q5I7T1 | AG10B_HUMAN  | ical; (Potential).        | 3  | ATAGCTGACTCA    | 0.308 |             |

|   |    |           |                   |              |              |        |             |                                |    |               |       |             |
|---|----|-----------|-------------------|--------------|--------------|--------|-------------|--------------------------------|----|---------------|-------|-------------|
| - | 3  | 1660      |                   | NM_005164    | NP_005155    | Q9UBJ2 | ABCD2_HUMAN |                                | 6  | GTACCTCTTTGT  | 0.328 |             |
| + | 4  | 766       | 1rze.2_Nonsense   | NM_001130015 | NP_001123487 | Q7Z3H0 | ANR33_HUMAN |                                | 0  | GGGACCAGCGG   | 0.652 |             |
| + | 5  | 851       | 1f.1_Missense_Mu  | NM_005556    | NP_005547    | P08729 | K2C7_HUMAN  | od. Linker 12.                 | 0  | ATCTCCGACACA  | 0.592 |             |
| + | 1  | 244       |                   | NM_001005519 | NP_001005519 | A6NDL8 | O6C68_HUMAN | ellular (Potential).           | 1  | FGTGTTCGAAGA  | 0.363 |             |
| - | 6  | 2024      | p.G607D DNAJC1    | NM_032364    | NP_115740    | Q6Y2X3 | DJC14_HUMAN |                                | 4  | AGATACCTACAC  | 0.468 |             |
| - | 22 | 2990      | 1.R684W GRIP1_u   | NM_021150    | NP_066973    | Q9Y3R0 | GRIP1_HUMAN |                                | 2  | GCTCCGAGTTG   | 0.537 |             |
| - | 3  | 572       | 1.1_intron MMD1_u | NM_017440    | NP_059136    | Q8TC05 | MDM1_HUMAN  |                                | 5  | ATTAACCTGGGT  | 0.408 |             |
| - | 35 | 4513      | 1.Q1006P CIT_uc0  | NM_007174    | NP_009105    | O14578 | CTRO_HUMAN  | PH.                            | 10 | GCCTCTGTCCA   | 0.313 |             |
| + | 11 | 770       | 1e.Mutation_p.S16 | NM_144669    | NP_653270    | Q96MS3 | GL1D1_HUMAN |                                | 0  | ATAGCTCTGTCT  | 0.468 |             |
| - | 9  | 1424      | c.3_Missense_Mu   | NM_002019    | NP_002010    | P17948 | VGFR1_HUMAN | 4. Extracellular (Potential).  | 24 | GAGCAGATTTCT  | 0.403 |             |
| - | 2  | 1472      | p.R168* SLC46A3   | NM_181785    | NP_861450    | Q7Z3Q1 | S46A3_HUMAN | lasmic (Potential).            | 2  | CTATTCGAATTGT | 0.373 |             |
| - | 8  | 845       | 1OCK9_uc010tis.1  | NM_015296    | NP_056111    | Q9BZ29 | DOCK9_HUMAN | PH.                            | 1  | ACTGTCTGCTGT  | 0.398 |             |
| - | 1  | 78        |                   | NM_001004712 | NP_001004712 | Q8NGD5 | OR4KE_HUMAN | Name=1; (Potential).           | 3  | AAGAAAAAATTT  | 0.423 |             |
| + | 14 | 1516      | p.2_Missense_Mu   | NM_022734    | NP_073571    | Q9H7H0 | MET17_HUMAN |                                | 0  | TGTGCTTACTCC  | 0.532 |             |
| + | 4  | 669       | RG2_uc010tll.1_in | NM_173846    | NP_776245    | P59282 | TPPP2_HUMAN |                                | 0  | ACAAGGGTTCTC  | 0.542 |             |
| - | 12 | 2683      | se.Mutation_p.I6C | NM_032560    | NP_115949    | Q6IN85 | P4R3A_HUMAN |                                | 0  | TTCAATTACATG  | 0.289 |             |
| + | 2  | 149       | p.G18E PPP2R5B    | NM_001161725 | NP_001155197 | Q13362 | 2A5G_HUMAN  |                                | 2  | GAGTGAAAAAA   | 0.353 |             |
| + | 21 | 7610      | 1.Q2268* MGA_uc   | NM_001164273 | NP_001157745 | Q8IWI9 | MGAP_HUMAN  |                                | 12 | CAGATCAGGCA   | 0.363 |             |
| - | 2  | 279       | ace.1_Missense_N  | NM_006628    | NP_006619    | P56211 | ARP19_HUMAN |                                | 0  | GCAACCGTTTC   | 0.403 |             |
| + | 14 | 2002      | se.Mutation_p.A6I | NM_024505    | NP_078781    | Q96PH1 | NOX5_HUMAN  | ellular (Potential).           | 2  | CCAGGCCGAGG   | 0.502 |             |
| + | 13 | 1556      | p.M457I WDR93_    | NM_020212    | NP_064597    | Q6P2C0 | WDR93_HUMAN |                                | 2  | CAAATGAAATGT  | 0.488 |             |
| - | 5  | 952       |                   | NM_178844    | NP_849172    | Q7RTR2 | NLRC3_HUMAN | NACHT.                         | 6  | GAGATCCCGGA   | 0.672 |             |
| - | 3  | 439       | p.L104V UMOD_u    | NM_003361    | NP_003352    | P07911 | UROM_HUMAN  | alcium-binding (Potential).    | 2  | GCCGAGACCGG   | 0.627 |             |
| - | 11 | 1561      | 1SM1_uc010bwg.1   | NM_052956    | NP_443188    | Q08AH1 | ACSM1_HUMAN |                                | 2  | CCACGGCTGAC   | 0.607 |             |
| + | 2  | 493       | Missense.Mutati   | NM_007245    | NP_009176    | Q8WWM7 | ATX2L_HUMAN | action with MPL.               | 2  | GACCCCCACAG   | 0.403 |             |
| + | 18 | 2586      |                   | NM_001114    | NP_001105    | P51828 | ADCY7_HUMAN | ical; (Potential).             | 1  | CCAAGGCCTGG   | 0.662 |             |
| - | 3  | 580       |                   | NM_001796    | NP_001787    | P55286 | CADH8_HUMAN | r (Potential). Cadherin 1.     | 9  | TTATTTGAAATAT | 0.418 |             |
| - | 48 | 7743      | F1_uc002fxg.1_5'F | NM_015113    | NP_055928    | O43149 | ZZEF1_HUMAN |                                | 4  | GGTTCGATTCA   | 0.592 |             |
| - | 3  | 878       | 6F ZMYND15_uc0    | NM_022059    | NP_071342    | Q9H2A7 | CXL16_HUMAN | r (Potential). Chemokine.      | 0  | ATCAAGACAGC   | 0.547 |             |
| - | 37 | 5472      | uc002gml.1_intron | NM_002472    | NP_002463    | P13535 | MYH8_HUMAN  | Potential.                     | 11 | CTTCCACCTCT   | 0.557 |             |
| - | 19 | 2186      | uc002gml.1_intron | NM_017533    | NP_060003    | Q9Y623 | MYH4_HUMAN  | rosin head-like.               | 13 | GACAAGCTCA    | 0.493 |             |
| + | 3  | 1399      |                   | NM_021012    | NP_066292    | Q14500 | IRK12_HUMAN | smic (By similarity).          | 4  | CGCAGCTCATC   | 0.637 |             |
| + | 15 | 1860      | R1_uc002gzm.2_h   | NM_014238    | NP_055053    | Q8IVT5 | KSR1_HUMAN  |                                | 4  | CATCCCCTTCG   | 0.716 |             |
| + | 3  | 791       | TF_uc002hnj.2_Rl  | NM_012138    | NP_036270    | Q9NY61 | AATF_HUMAN  | Glu-rich.                      | 0  | GGCATGGAAGA   | 0.517 |             |
| - | 1  | 384       | 115_uc002hxa.2_5  | NM_002275    | NP_002266    | P19012 | K1C15_HUMAN | ily-rich. Head.                | 0  | GACCCTCATGC   | 0.323 |             |
| - | 5  | 1186      | P_uc010wfs.1_int  | NM_000226    | NP_000217    | P35527 | K1C9_HUMAN  | Rod. Coil 2.                   | 3  | GTGCCGAGACT   | 0.547 | rs116216460 |
| - | 9  | 1389      | p.E253* SPOP_u    | NM_003563    | NP_003554    | O43791 | SPOP_HUMAN  | BTB.                           | 6  | TCATTTCCTTAA  | 0.383 |             |
| + | 11 | 854       | sense.Mutation_p. | NM_001099432 | NP_001092902 | Q9H6U6 | BCAS3_HUMAN |                                | 5  | TTGATTCGATGT  | 0.428 |             |
| + | 5  | 1499      |                   | NM_005189    | NP_005180    | Q14781 | CBX2_HUMAN  |                                | 0  | AGTGCCGTTCT   | 0.627 |             |
| - | 58 | 8407_8408 | 1l.2_Missense_Mu  | NM_005559    | NP_005550    | P25391 | LAMA1_HUMAN | minin G-like 4.                | 21 | AGGCGGCCCCC   | 0.574 |             |
| + | 1  | 124       | 1A8_uc002kvp.2_h  | NM_144662    | NP_653263    | Q8TAA3 | PSA7L_HUMAN |                                | 1  | CGTCTCGATAT   | 0.602 |             |
| + | 15 | 2574      | p.1_Missense_Mu   | NM_001942    | NP_001933    | Q02413 | DSG1_HUMAN  | lasmic (Potential).            | 7  | CTCAGGAAACA   | 0.488 |             |
| - | 11 | 2316      | !bo.1_Missense_N  | NM_020964    | NP_066015    | Q9HCE0 | EPG5_HUMAN  |                                | 0  | AGGAGGAGAGC   | 0.577 |             |
| + | 7  | 1794      | p.E251K DCC_uc    | NM_005215    | NP_005206    | P43146 | DCC_HUMAN   | potential). Ig-like C2-type 4. | 17 | TGGCTGAAAATC  | 0.438 |             |
| - | 12 | 6497      |                   | NM_052947    | NP_443179    | Q86TB3 | ALPK2_HUMAN | ype protein kinase.            | 14 | CAGCGTTGCTAT  | 0.498 | rs149775332 |
| + | 5  | 1025      | p.D234N CDH7_u    | NM_033646    | NP_387450    | Q9ULB5 | CADH7_HUMAN | r (Potential). Cadherin 2.     | 4  | CAAAGGATATGC  | 0.423 |             |
| + | 37 | 5339      | _Mutation_p.M156  | NM_019112    | NP_061985    | Q8IZY2 | ABCA7_HUMAN | ical; (Potential).             | 9  | TGACATGGTGCC  | 0.577 |             |

|   |     |       |                    |              |              |        |             |                               |      |               |       |             |
|---|-----|-------|--------------------|--------------|--------------|--------|-------------|-------------------------------|------|---------------|-------|-------------|
| + | 2   | 418   | jva.1_Splice_Site_ | NM_005428    | NP_005419    | P15498 | VAV_HUMAN   |                               | 16   | 3GCAAGGTGAGC  | 0.51  |             |
| - | 3   | 17809 |                    | NM_024690    | NP_078966    | Q8WXI7 | MUC16_HUMAN | xtracellular (Potential).     | 57   | TAGTCCCTATAGC | 0.502 |             |
| - | 5   | 920   | p.R206K ZNF565_    | NM_152477    | NP_689690    | Q8N9K5 | ZN565_HUMAN | 2H2-type 4.                   | 2    | FGAGTTCTTTGAT | 0.463 |             |
| - | 11  | 2916  |                    | NM_004304    | NP_004295    | Q9UM73 | ALK_HUMAN   | ellular (Potential).          | 1218 | CTTGGTGAATTTT | 0.468 |             |
| + | 15  | 1657  | p.L445S KLRAQ1_    | NM_001135629 | NP_001129101 | Q6ZMI0 | KLRAQ_HUMAN |                               | 1    | ACAATTTGGACT/ | 0.343 |             |
| - | 3   | 345   | yqv.1_Missense_Iv  | NM_173535    | NP_775806    | Q8N1N0 | CLC4F_HUMAN | ellular (Potential).          | 5    | ACTCACTGTTGG/ | 0.527 |             |
| + | 10  | 1411  | MYD1_uc002sss.2    | NM_198274    | NP_938015    | Q8NB12 | SMYD1_HUMAN |                               | 4    | CCAGCCCATGC/  | 0.602 |             |
| + | 2   | 381   | RTK_uc0002thl.1_In | NM_006343    | NP_006334    | Q12866 | MERTK_HUMAN | otential).Ilg-like C2-type 1. | 9    | CTGTGCGAATCA/ | 0.483 |             |
| + | 4   | 564   | SH2P_uc002tkd.2_   | NM_182905    | NP_878908    |        |             |                               | 0    | CATCCGCCAAG/  | 0.522 |             |
| - | 10  | 1205  | z.2_Nonsense_Mu    | NM_002980    | NP_002971    | P47872 | SCTR_HUMAN  | lasmic (Potential).           | 3    | FTTCTTGGGTTC  | 0.328 |             |
| - | 14  | 2785  | AP5_uc002ttq.2_Ii  | NM_207363    | NP_997246    | O14513 | NCKP5_HUMAN |                               | 0    | CTGGGAGGTATT  | 0.458 |             |
| + | 9   | 3414  | se_Mutation_p.P8f  | NM_018328    | NP_060798    | Q9P267 | MBD5_HUMAN  |                               | 5    | TACATCCCAATCC | 0.453 |             |
| - | 11  | 1862  | p.G484E SCN1A_     | NM_006920    | NP_008851    | P35498 | SCN1A_HUMAN |                               | 13   | CTCTCTCCGTGT/ | 0.527 |             |
| - | 275 | 70825 | 229K TTN_uc010zi   | NM_133378    | NP_596869    | Q8WZ42 | TITIN_HUMAN |                               | 153  | TCATTTCTTTTAA | 0.423 |             |
| - | 259 | 57436 | 86Q TTN_uc010zfi   | NM_133378    | NP_596869    | Q8WZ42 | TITIN_HUMAN |                               | 153  | CAAATCGGTTTT  | 0.468 |             |
| - | 51  | 12415 | N_uc010zfi.1_Intrc | NM_133378    | NP_596869    | Q8WZ42 | TITIN_HUMAN |                               | 153  | CTTATTCGGTATT | 0.473 | rs146847928 |
| - | 63  | 11862 | iti.3_Missense_Mu  | NM_018897    | NP_061720    | Q8WXX0 | DYH7_HUMAN  |                               | 12   | ACCATCCTCAGC  | 0.413 |             |
| + | 1   | 799   |                    | NM_152614    | NP_689827    | Q53QW1 | CB057_HUMAN |                               | 1    | GCCCCACGAG    | 0.637 |             |
| - | 4   | 1501  | zzp.1_Missense_Ih  | NM_153360    | NP_699191    | Q8NCL9 | APCDL_HUMAN |                               | 1    | GGTATCGGGAC   | 0.612 |             |
| - | 14  | 1163  | se TPTE_uc002yir.  | NM_199261    | NP_954870    | P56180 | TPTE_HUMAN  |                               | 5    | CCCTTACCTTGAT | 0.313 |             |
| - | 3   | 603   | v.1_Missense_Mut   | NM_198996    | NP_945347    | Q6XZB0 | LIP1_HUMAN  |                               | 2    | TTCTTCCAAGTT  | 0.284 |             |
| - | 33  | 6235  | AM_uc002yir.1_f    | NM_001389    | NP_001380    | O60469 | DSCAM_HUMAN | lasmic (Potential).           | 11   | GCAAGCATGCT   | 0.572 |             |
| + | 12  | 1597  | _p.Q320* SFI1_uc   | NM_001007467 | NP_001007468 | A8K8P3 | SFI1_HUMAN  | HAT 5.                        | 1    | ATCTCCAGCAA.  | 0.468 |             |
| - | 22  | 2965  | RP2_uc011avh.1_    | NM_001080423 | NP_001073892 | Q9C0E4 | GRIP2_HUMAN |                               | 1    | CAGTTCCTCAC   | 0.627 |             |
| - | 22  | 3871  | tev.2_Nonsense_Ih  | NM_014744    | NP_055559    | Q92609 | TBCD5_HUMAN |                               | 1    | AGGCTGGGCCT/  | 0.587 | rs150988847 |
| + | 2   | 127   |                    | NM_153215    | NP_694947    | Q8N112 | CC045_HUMAN |                               | 1    | GGGGGCCATTG   | 0.617 |             |
| - | 2   | 7628  | C4_uc003fvp.2_Inl  | NM_018406    | NP_060876    | Q99102 | MUC4_HUMAN  |                               | 0    | GGAAGCGTCGG   | 0.592 |             |
| + | 5   | 1022  | p.R176Q NSUN7_     | NM_024677    | NP_078953    |        |             |                               | 0    | ATGTGCGAATCA/ | 0.378 |             |
| + | 3   | 752   |                    | NM_021225    | NP_067048    | Q99935 | PROL1_HUMAN | Thr-rich.                     | 1    | ATATCAGCAGC/  | 0.498 |             |
| - | 9   | 1289  | e.2_Missense_Mut   | NM_000583    | NP_000574    | P02774 | VTDB_HUMAN  | Albumin 2.                    | 3    | AGTCTTCAACA/  | 0.308 |             |
| + | 83  | 14728 | em.2_Missense_Iv   | NM_015312    | NP_056127    | Q2LD37 | K1109_HUMAN |                               | 12   | AAAAGTCCAATT. | 0.338 |             |
| + | 5   | 6625  | p.1_Missense_Mul   | NM_024582    | NP_078858    | Q6V0I7 | FAT4_HUMAN  | Extracellular (Potential).    | 18   | TCACAGGTGCC.  | 0.463 |             |
| - | 6   | 725   | 3iv.1_Missense_Iv  | NM_152682    | NP_689895    | Q6NW29 | RWDD4_HUMAN |                               | 0    | TCGAGGAAGTT   | 0.284 |             |
| + | 1   | 1318  | I03hf.2_Intron PCI | NM_018907    | NP_061730    | Q9UN74 | PCDA4_HUMAN | Extracellular (Potential).    | 6    | CTACTCGTTGGT  | 0.622 | rs143891810 |
| + | 1   | 2159  |                    | NM_018935    | NP_061758    | Q9Y5E8 | PCDBF_HUMAN | lasmic (Potential).           | 5    | GGCGCCTCAG    | 0.652 |             |
| - | 9   | 6462  | 2A_uc011dcs.1_In   | NM_001447    | NP_001438    | Q9NYQ8 | FAT2_HUMAN  | (Potential). Cadherin 18.     | 6    | ATGGCGTTCCT   | 0.418 | rs147595273 |
| - | 8   | 2712  | se_Mutation_p.Q5E  | NM_000332    | NP_000323    | P54253 | ATX1_HUMAN  | tion with USP7. RNA-bind      | 4    | CAACTGGATGAT  | 0.572 |             |
| + | 6   | 697   | p.P126S CAP2_ucf   | NM_006366    | NP_006357    | P40123 | CAP2_HUMAN  |                               | 1    | CCAAAACCTGGT  | 0.413 |             |
| + | 1   | 278   |                    | NM_012367    | NP_036499    | P58173 | OR2B6_HUMAN | ellular (Potential).          | 1    | TAATCAGTTATCG | 0.408 |             |
| - | 15  | 2667  | oca.2_Missense_Ih  | NM_018833    | NP_061313    | Q03519 | TAP2_HUMAN  |                               | 0    | GATCCCCACCAC  | 0.517 |             |
| - | 2   | 461   | dsq.1_Missense_Ih  | NM_012391    | NP_036523    | Q95238 | SPDEF_HUMAN |                               | 5    | CAGGAGGTGGC   | 0.677 |             |
| + | 6   | 1294  | p.V337L PNPLA1_    | NM_001145717 | NP_001139189 | Q8N8W4 | PLPL1_HUMAN | Pro-rich. p.P432A(1)          | 4    | CAACTGTGGGG/  | 0.592 |             |
| - | 8   | 1165  | p.S288R GTPBP2_    | NM_019096    | NP_061969    | Q9BX10 | GTPB2_HUMAN |                               | 2    | GACACACTGGA   | 0.532 |             |
| + | 5   | 1657  |                    | NM_001010872 | NP_001010872 | Q5T0W9 | FA83B_HUMAN |                               | 6    | TGGATCAGCTT/  | 0.403 |             |
| + | 10  | 889   | _p.V252L C7orf10_  | NM_024728    | NP_079004    | Q9HAC7 | CG010_HUMAN |                               | 2    | TATATTGTAGTTG | 0.333 |             |
| + | 10  | 1110  | A13_uc010kyr.2_5   | NM_152701    | NP_689914    | Q86UQ4 | ABCAD_HUMAN |                               | 10   | CAGGGTAGCC    | 0.423 |             |
| - | 6   | 843   | L13_uc003var.2_F   | NM_145032    | NP_659469    | Q8NEE6 | FXL13_HUMAN |                               | 0    | AACTCGTTCA/   | 0.318 |             |



|   |    |       |                   |              |              |        |              |                               |       |               |       |             |
|---|----|-------|-------------------|--------------|--------------|--------|--------------|-------------------------------|-------|---------------|-------|-------------|
| - | 18 | 2293  | ey.2_Missense_Mt  | NM_007356    | NP_031382    | A4D0S4 | LAMB4_HUMAN  | ninin IV type B.              | 8     | CAATTTCAACAC/ | 0.473 |             |
| + | 4  | 718   | CHRM2_uc003vtm    | NM_001006630 | NP_001006631 | P08172 | ACM2_HUMAN   | ame=1; (By similarity).       | 5     | CTGGATCCCTCA/ | 0.423 |             |
| - | 15 | 1860  |                   | NM_004333    | NP_004324    | P15056 | BRAF_HUMAN   | rotein kinas_R603>I(2))p.T    | 18290 | 3ATTTCACTGTAC | 0.368 |             |
| + | 7  | 805   | M2_uc011kwi.1_li  | NM_003970    | NP_003961    | P54296 | MYOM2_HUMAN  | like C2-type 1.               | 6     | TTGACGACACTC/ | 0.537 |             |
| - | 2  | 212   | wso.3_Missense_   | NM_024607    | NP_078883    | Q86X16 | PPR3B_HUMAN  | p.S16F(1)                     | 2     | GCAAGGAAGGA   | 0.493 | rs142670074 |
| - | 9  | 860   | _p.A32T SNX31_u   | NM_152628    | NP_689841    | Q8N9S9 | SNX31_HUMAN  |                               | 0     | GTTTGGCCCATC  | 0.363 |             |
| - | 5  | 1389  | e_Mutation_p.R41: | NM_013437    | NP_038465    | Q9Y561 | LRP12_HUMAN  | ntial). LDL-receptor class /  | 0     | GCAGCGATCAG/  | 0.413 |             |
| - | 16 | 1450  | p.C285W ASAP1_    | NM_018482    | NP_060952    | Q9ULH1 | ASAP1_HUMAN  | GAP. C4-type.                 | 4     | TTCTATACAGGTC | 0.388 |             |
| - | 1  | 1378  |                   | NM_015193    | NP_056008    | Q7LC44 | ARC_HUMAN    |                               | 1     | CTGGGTCCGGT   | 0.711 |             |
| - | 5  | 2192  |                   | NM_138367    | NP_612376    | Q9BRH9 | ZN251_HUMAN  |                               | 0     | CTCTCCAACAC/  | 0.403 |             |
| + | 7  | 1722  | \P1_uc011loj.1_Mi | NM_016525    | NP_057609    | Q9NZ09 | UBAP1_HUMAN  | UBA 2.                        | 0     | CCTCATGGCTC/  | 0.532 |             |
| - | 16 | 1981  | pc.1_Intron TRPM  | NM_017662    | NP_060132    | Q9BX84 | TRPM6_HUMAN  | lasmic (Potential).           | 8     | AGGACTATAGAC/ | 0.363 |             |
| + | 4  | 892   |                   | NR_026851    |              |        |              |                               | 0     | TATTTCCCAGGC  | 0.483 |             |
| - | 17 | 1470  | .G381R DENND1/    | NM_020946    | NP_065997    | Q8TEH3 | DEN1A_HUMAN  |                               | 2     | TTGCTCCACTTC/ | 0.408 |             |
| + | 9  | 1703  | id.1_Missense_Mt  | NM_001830    | NP_001821    | P51793 | CLCN4_HUMAN  |                               | 5     | CTCGGCTGTG/   | 0.542 |             |
| + | 5  | 662   | _p.P190L SYAP1_   | NM_032796    | NP_116185    | Q96A49 | SYAP1_HUMAN  | BSD.                          | 1     | TCGTTCCATAAC  | 0.488 |             |
| + | 9  | 2561  | se_Mutation_p.S8/ | NM_003410    | NP_003401    | P17010 | ZFX_HUMAN    | 2H2-type 12.                  | 2     | TTATTTCCATTCA | 0.433 |             |
| - | 3  | 366   | ikh.1_Missense_M  | NM_006307    | NP_006298    | P78539 | SRPX_HUMAN   | Sushi 1.                      | 0     | CAGCTCGTAGC/  | 0.542 |             |
| - | 7  | 923   | jit.2_Missense_ML | NM_006962    | NP_008893    | P17025 | ZN182_HUMAN  |                               | 3     | AGTATGGAAGA/  | 0.348 |             |
| + | 6  | 2909  | E871K CCNB3_uc    | NM_033031    | NP_149020    | Q8WWL7 | CCNB3_HUMAN  | p.E871>*(1)                   | 9     | AGCAGGAGGCC   | 0.527 |             |
| + | 5  | 1810  | p.D560N STARD8    | NM_014725    | NP_055540    | Q92502 | STAR8_HUMAN  |                               | 6     | GGCGCATTCAC/  | 0.607 |             |
| + | 8  | 1294  | RN1_uc011mpt.1_   | NM_052957    | NP_443189    | Q96QF7 | ACRC_HUMAN   | Asp/Ser-rich.                 | 3     | AAGCTCCCAGC/  | 0.557 |             |
| + | 28 | 4498  | _Mutation_p.P78C  | NM_014675    | NP_055490    | Q5TZA2 | CROCC_HUMAN  |                               | 5     | CAGCCCCAGC    | 0.627 |             |
| - | 10 | 1254  | xm.1_Missense_N   | NM_052896    | NP_443128    | Q7Z408 | CSMD2_HUMAN  | tracellular (Potential).      | 12    | TCGAAGGTGGC   | 0.537 |             |
| + | 25 | 11625 | a.1_Nonsense_Mt   | NM_033044    | NP_149033    | Q9UPN3 | MACF1_HUMAN  | Spectrin 7.                   | 16    | ATGATCGAAAGC  | 0.428 | rs145098670 |
| - | 8  | 2050  |                   | NM_020883    | NP_065934    | Q9P217 | ZSWM5_HUMAN  |                               | 0     | GATGGGATCCAC  | 0.522 |             |
| - | 3  | 710   |                   | NM_023077    | NP_075565    | Q96BR5 | SELR1_HUMAN  |                               | 0     | GACACCTTCTC/  | 0.527 |             |
| - | 5  | 498   | ont.1_Missense_N  | NM_002370    | NP_002361    | P61326 | MGN_HUMAN    |                               | 0     | ATCCAATAAGAC  | 0.378 |             |
| + | 3  | 709   |                   | NM_057176    | NP_476517    | Q8WZ55 | BSND_HUMAN   | lasmic (Potential).           | 2     | TTCAGGCCTGG   | 0.627 |             |
| - | 2  | 498   | lorf168_uc009vzv. | NM_001004303 | NP_001004303 | Q5VWT5 | CA168_HUMAN  |                               | 5     | CTGCTGGGAAT   | 0.458 |             |
| + | 15 | 2222  | d1_uc001dbq.1_    | NM_020925    | NP_065976    | Q5VU97 | CAHD1_HUMAN  | ellular (Potential).          | 2     | TAGGAGACAAT/  | 0.448 |             |
| + | 6  | 1132  | o.2_Missense_Mut  | NM_174858    | NP_777283    | Q9Y6K8 | KAD5_HUMAN   |                               | 1     | GGAAAAGGGGC   | 0.433 |             |
| + | 12 | 1400  | i_RNA NBPF9_uc/   | NM_001037675 | NP_001037674 | Q3BBV1 | NBPFK_HUMAN  | NBPF 2.                       | 0     | ATGACAATGAA/  | 0.423 |             |
| + | 14 | 1889  | 10_uc010oyi.1_Int | NM_001039703 | NP_001034792 | A6NDV3 | A6NDV3_HUMAN |                               | 0     | TCCACGCTCAC   | 0.453 | rs61816394  |
| - | 3  | 6171  | uc001ezv.2_Intron | NM_001014342 | NP_001014364 | Q5D862 | FILA2_HUMAN  | Filaggrin 9.                  | 17    | CACTGTACTCAC  | 0.537 |             |
| - | 3  | 4318  | uc001ezv.2_Intron | NM_001014342 | NP_001014364 | Q5D862 | FILA2_HUMAN  |                               | 17    | GTTGCTCTGGA/  | 0.527 |             |
| - | 3  | 883   |                   | NM_016190    | NP_057274    | Q9UBG3 | CRNN_HUMAN   | Gln-rich.                     | 3     | CGTGGTCTCA/   | 0.612 | rs3814301   |
| + | 2  | 336   | o_uc001fht.1_RNA  | NM_025058    | NP_079334    | Q7Z4K8 | TRI46_HUMAN  |                               | 3     | CCCCTCCACCC/  | 0.682 |             |
| + | 8  | 1629  | sense_Mutation_p. | NM_025058    | NP_079334    | Q7Z4K8 | TRI46_HUMAN  | onectin type-III.             | 3     | ACGGCGAATAC/  | 0.657 |             |
| - | 6  | 1176  | L2_uc010phz.1_M   | NM_030764    | NP_110391    | Q96LA5 | FCRL2_HUMAN  | 4. Extracellular (Potential). | 2     | CAGGCCGTTGT   | 0.577 | rs149829829 |
| - | 27 | 3994  |                   | NM_003126    | NP_003117    | P02549 | SPTA1_HUMAN  | Spectrin 12.                  | 8     | AGCTCCATTTTC  | 0.552 |             |
| - | 1  | 431   | pmk.1_Splice_Site | NM_000261    | NP_000252    | Q99972 | MYOC_HUMAN   | Potential.                    | 1     | CAACTCTCTGG   | 0.597 |             |
| + | 16 | 5609  | P2A2_uc009www.2_  | NM_020318    | NP_064714    | Q9BXP8 | PAPP2_HUMAN  | Sushi 2.                      | 16    | AGAGGAACCA    | 0.522 |             |
| - | 5  | 1502  | opl.1_Missense_Mi | NM_001031725 | NP_001026895 | Q5T1V6 | DDX59_HUMAN  | case C-terminal.              | 4     | AAAATAATCTGAC | 0.358 |             |
| - | 2  | 251   | se_Mutation_p.R6  | NM_001438    | NP_001429    | P62508 | ERR3_HUMAN   |                               | 2     | GTGTCGATCTT/  | 0.373 |             |
| + | 46 | 12282 | sn.2_Missense_Mt  | NM_001098623 | NP_001092093 | Q5VST9 | OBSCN_HUMAN  | Ig-like 42.                   | 28    | AGCAGGAGACA   | 0.622 |             |
| + | 1  | 99    | L13_uc001ids.2_li | NM_001004686 | NP_001004686 | Q8NH16 | OR2L2_HUMAN  | ellular (Potential).          | 3     | CCCATGAAAAA   | 0.289 |             |

|   |    |       |                      |              |              |        |              |                                |     |               |       |             |
|---|----|-------|----------------------|--------------|--------------|--------|--------------|--------------------------------|-----|---------------|-------|-------------|
| + | 1  | 560   |                      | NR_002141    |              |        |              |                                | 0   | AGCAGGTTTGT   | 0.517 |             |
| - | 4  | 477   | hz.2_Missense_Mi     | NM_024803    | NP_079079    | A6NHL2 | TBAL3_HUMAN  |                                | 1   | AGCTTCGAAAA   | 0.448 |             |
| - | 12 | 1462  | qie.1_Missense_IV    | NM_198215    | NP_937858    | Q8NE31 | FA13C_HUMAN  |                                | 2   | ACAATTGTTGGA/ | 0.378 | rs148740536 |
| + | 46 | 7072  | }_5'Flank CDH23_     | NM_022124    | NP_071407    | Q9H251 | CAD23_HUMAN  | Extracellular (Potential).     | 11  | CCTTTGCTGTGA  | 0.363 |             |
| + | 9  | 1943  | p.R442Q NRG3_u       | NM_001010848 | NP_001010848 | P56975 | NRG3_HUMAN   | lasmic (Potential).            | 6   | AGATCCGAATTC  | 0.483 |             |
| + | 11 | 4067  | p.P1145S PLCE1_      | NM_016341    | NP_057425    | Q9P212 | PLCE1_HUMAN  |                                | 3   | CCCTCCCTTCC/  | 0.532 |             |
| + | 9  | 1722  | 407N CYP2C19_u       | NM_000772    | NP_000763    | P33260 | CP2C1_HUMAN  |                                | 5   | CCAAAGGATATTC | 0.498 |             |
| + | 1  | 845   |                      | NM_001127389 | NP_001120861 | F5GZ66 | F5GZ66_HUMAN |                                | 0   | CACCGGCGCGT   | 0.786 |             |
| - | 13 | 1990  | :DHR5_uc009ycc.:     | NM_021924    | NP_068743    | Q9HBB8 | CDHR5_HUMAN  | lem repeats.  3.  Extracellula | 0   | CCCACCGGGTG   | 0.652 | rs140290184 |
| + | 39 | 13975 |                      | NM_002457    | NP_002448    | Q02817 | MUC2_HUMAN   | VWFD 4.                        | 2   | CTGACCAGTGG   | 0.657 |             |
| - | 1  | 742   |                      | NM_001012708 | NP_001012726 | Q6L8H2 | KRA53_HUMAN  | A repeats of C-C-X-P.          | 2   | AGGAGCAGGGC   | 0.313 |             |
| + | 4  | 660   |                      | NM_024114    | NP_077019    | Q8IWZ4 | TRI48_HUMAN  |                                | 0   | ATATTATACAGGT | 0.338 |             |
| - | 5  | 6119  | IAK_uc001ntk.1_lr    | NM_001620    | NP_001611    | Q09666 | AHNK_HUMAN   |                                | 19  | ACATCCACATCC/ | 0.502 |             |
| - | 4  | 504   |                      | NM_030930    | NP_112192    | Q9H1C4 | UN93B_HUMAN  | ical; (Potential).             | 0   | CACAGCGAGGA   | 0.602 |             |
| - | 31 | 3007  | sn.2_Missense_M      | NM_002599    | NP_002590    | O00408 | PDE2A_HUMAN  |                                | 4   | AGGCACCTCGT   | 0.612 |             |
| + | 24 | 3499  | p.G980R CNTN5_       | NM_014361    | NP_055176    | O94779 | CNTN5_HUMAN  | nectin type-III 4.             | 8   | GAGATGGAACA   | 0.383 |             |
| + | 9  | 1165  | e_Mutation_p.A26     | NM_019894    | NP_063947    | Q9NRS4 | TMPS4_HUMAN  | (Potential).  Peptidase S1.    | 2   | ACATCGCCCTC/  | 0.498 | rs140795322 |
| - | 1  | 43    |                      | NM_001004474 | NP_001004474 | Q8NGN2 | O10S1_HUMAN  | ellular (Potential).           | 2   | GTTCTCCGTTG   | 0.473 |             |
| - | 9  | 2222  | p.L698F CD163_t      | NM_004244    | NP_004235    | Q86VB7 | C163A_HUMAN  | ellular (Potential).           | 8   | GGGCCCAAAGA/  | 0.448 |             |
| - | 3  | 384   | i.1_intron PRB1_u    | NM_005039    | NP_005030    | P04280 | PRP1_HUMAN   | -P-[PAQ]-Q-[GE]-[GD]- [Nk      | 0   | GCTTCTCTGGAC  | 0.612 |             |
| - | 29 | 3654  | p.L1212F ABCC9_      | NM_005691    | NP_005682    | O60706 | ABCC9_HUMAN  | al).  ABC transmembrane ty     | 6   | CTGAGAGAAATA  | 0.438 |             |
| - | 22 | 2749  | p.Q349P IPO8_uc      | NM_006390    | NP_006381    | O15397 | IPO8_HUMAN   |                                | 3   | CAATCTGTCCC/  | 0.438 |             |
| + | 5  | 751   | _Mutation_p.R167     | NM_152438    | NP_689651    | Q96FC9 | DDX11_HUMAN  | Helicase ATP-binding.          | 3   | AGAAAGAGAGA   | 0.612 |             |
| - | 4  | 1551  | TUBA1B_uc001rtl.     | NM_006082    | NP_006073    | P68363 | TBA1B_HUMAN  |                                | 0   | CTCACCCCTCTC/ | 0.483 |             |
| + | 7  | 934   | p.T293S SRGAP1       | NM_020762    | NP_065813    | Q7Z6B7 | SRGP1_HUMAN  |                                | 4   | TGAAACCTCCA/  | 0.423 |             |
| + | 9  | 1063  | rj.2_Missense_Mu     | NM_006654    | NP_006645    | Q8WU20 | FRS2_HUMAN   |                                | 2   | CACATCCTTTGC  | 0.458 |             |
| + | 9  | 2028  | i.S577L ZMYM2_u      | NM_003453    | NP_003444    | Q9UBW7 | ZMYM2_HUMAN  | MYM-type 5.                    | 6   | AAAATCACAAAC  | 0.289 |             |
| - | 2  | 686   |                      | NM_005780    | NP_005771    | Q9Y693 | LHFP_HUMAN   |                                | 4   | CTGCCGACTCT/  | 0.582 |             |
| + | 9  | 2614  | se_Mutation_p.S7     | NM_000123    | NP_000114    | P28715 | ERCC5_HUMAN  |                                | 7   | AAGATTCGCTCC  | 0.488 |             |
| + | 1  | 386   |                      | NM_001004717 | NP_001004717 | Q8NH43 | OR4L1_HUMAN  | lasmic (Potential).            | 5   | TAAACCCCTGC/  | 0.438 |             |
| + | 2  | 218   |                      | NM_002687    | NP_002678    | Q9H307 | PININ_HUMAN  | ternative 5' splicing.  Neces: | 1   | CCATCCAAGCC   | 0.423 |             |
| - | 11 | 2254  | IH5_uc001xfy.2_3'    | NM_139318    | NP_647479    | Q8NCM2 | KCNH5_HUMAN  | lasmic (Potential).            | 9   | TACCTGGAGTT/  | 0.552 |             |
| + | 8  | 956   | vk.1_Missense_Mu     | NM_012111    | NP_036243    | O95433 | AHSA1_HUMAN  |                                | 0   | AGGTCCCTGAG/  | 0.388 |             |
| + | 3  | 526   | RXN3_uc010asv.1_     | NM_004796    | NP_004787    | Q9Y4C0 | NRX3A_HUMAN  | 2.  Extracellular (Potential). | 10  | AGGAGGAAGCC/  | 0.502 |             |
| - | 3  | 918   |                      | NM_206918    | NP_996801    | Q6QHC5 | DEGS2_HUMAN  |                                | 0   | ATCTTCCGCACC  | 0.657 |             |
| + | 2  | 633   | ujp.1_Missense_A     | NM_002755    | NP_002746    | Q02750 | MP2K1_HUMAN  |                                | 0   | GGCCTTTCTTAC  | 0.547 | rs121908594 |
| - | 13 | 3226  | xl.1_Missense_Mu     | NM_001009944 | NP_001009944 | P98161 | PKD1_HUMAN   | lar (Potential).  PKD 4.       | 3   | TCACGGTGACG   | 0.637 |             |
| - | 22 | 3012  | ip.2_Missense_Mu     | NM_033266    | NP_150296    | Q76MJ5 | ERN2_HUMAN   | toplasmic (Potential).         | 6   | AGGCGCAGCTC   | 0.647 |             |
| + | 4  | 2173  |                      | NM_003414    | NP_003405    | Q14586 | ZN267_HUMAN  |                                | 4   | TCATACTGGAG/  | 0.453 |             |
| - | 5  | 440   | iA10P_uc002edi.1_RNA |              |              |        |              |                                | 0   | GTTTTTTGTAC   | 0.512 |             |
| - | 5  | 423   | iA10P_uc002edi.1_RNA |              |              |        |              |                                | 0   | CGCTTGTAGT/   | 0.453 | rs79284655  |
| + | 5  | 794   | H1_uc010cfg.1_M      | NM_004360    | NP_004351    | P12830 | CADH1_HUMAN  | Extracellular (Potential).     | 243 | GAGAACGCATT/  | 0.488 |             |
| - | 5  | 814   | 8B_uc010vmu.1_M      | NM_001011880 | NP_001011880 | Q6UXF7 | CL18B_HUMAN  |                                | 0   | AGAGCGAACAC/  | 0.612 |             |
| + | 10 | 1278  | on_p.G285S SPNE      | NM_182538    | NP_872344    | Q6ZMD2 | SPNS3_HUMAN  | ical; (Potential).             | 1   | CGGTGGCCAC    | 0.652 |             |
| - | 1  | 25    | 1_5'UTR PLSCR3_      | NM_152766    | NP_689979    | Q8N2U0 | CQ061_HUMAN  |                                | 1   | AGCTGGCCCCG   | 0.667 |             |
| + | 3  | 1353  | F11_uc010vtw.1_In    | NM_175734    | NP_783861    | Q0P670 | CQ074_HUMAN  |                                | 0   | TTCCTCCCAGC/  | 0.652 |             |
| - | 30 | 4153  | i.E1384Q MYH10_      | NM_005964    | NP_005955    | P35580 | MYH10_HUMAN  | Potential.                     | 2   | CTCCTCTGCT/   | 0.587 |             |

|   |    |           |                                                               |              |              |        |             |     |                    |       |             |
|---|----|-----------|---------------------------------------------------------------|--------------|--------------|--------|-------------|-----|--------------------|-------|-------------|
| + | 1  | 287       |                                                               | NM_033061    | NP_149050    |        |             | 0   | ctgctgcaagccccagl  | 0.194 |             |
| - | 1  | 363       |                                                               | NM_031960    | NP_114166    | Q9BYQ9 | KRA48_HUMAN | 0   | ttgcagcagctggacac  | 0.179 |             |
| - | 1  | 457       |                                                               | NM_033059    | NP_149048    | Q9BYQ6 | KR411_HUMAN | 0   | ygagatgctgcagctgg  | 0.129 |             |
| - | 1  | 393       |                                                               | NM_033059    | NP_149048    | Q9BYQ6 | KR411_HUMAN | 0   | tgagcagcagctggacac | 0.129 |             |
| - | 6  | 495       | ifz.2_Intron ATP5H                                            | NM_006356    | NP_006347    | O75947 | ATP5H_HUMAN | 0   | TCTAATTTGGTTT      | 0.393 |             |
| - | 10 | 1973      | TEC_uc010xaj.1_F                                              | NM_001137671 | NP_001131143 | B2RU33 | POTEC_HUMAN | 3   | TCATTTTCTTTTC      | 0.284 |             |
| + | 1  | 736       | ES1_uc002kub.2                                                | NM_001100619 | NP_001094089 | Q8TDN4 | CABL1_HUMAN | 1   | CTCAGGGAATC        | 0.672 |             |
| + | 17 | 3190      | p.S696F DCC_uc                                                | NM_005215    | NP_005206    | P43146 | DCC_HUMAN   | 17  | CAACTCTGTCC        | 0.527 |             |
| + | 4  | 1336      | 1a.1_Missense_Mt                                              | NM_173480    | NP_775751    | Q68EA5 | ZNF57_HUMAN | 3   | GAACAATGTGGC       | 0.428 |             |
| + | 4  | 1371      | 1a.1_Missense_Mt                                              | NM_173480    | NP_775751    | Q68EA5 | ZNF57_HUMAN | 3   | ATTCCGAGGTC        | 0.428 | rs149690257 |
| + | 4  | 1386      | 1a.1_Missense_Mt                                              | NM_173480    | NP_775751    | Q68EA5 | ZNF57_HUMAN | 3   | GAGGACGCACA        | 0.438 | rs148390269 |
| - | 4  | 453       | vq.2_Missense_M                                               | NM_021155    | NP_066978    | Q9NNX6 | CD209_HUMAN | 1   | TCAGCCGGGTC        | 0.567 |             |
| - | 3  | 28508     |                                                               | NM_024690    | NP_078966    | Q8WXI7 | MUC16_HUMAN | 57  | CCAGGGAAGATC       | 0.507 |             |
| - | 3  | 20909     |                                                               | NM_024690    | NP_078966    | Q8WXI7 | MUC16_HUMAN | 57  | CAGAGGATTGT        | 0.488 |             |
| + | 4  | 1651      | ym.1_Missense_M                                               | NM_001136501 | NP_001129973 | Q08AG5 | ZN844_HUMAN | 0   | AAACCCATGAT        | 0.413 |             |
| + | 4  | 1710      | ym.1_Missense_M                                               | NM_001136501 | NP_001129973 | Q08AG5 | ZN844_HUMAN | 0   | GCATGAAAGGA        | 0.413 |             |
| - | 4  | 1355      |                                                               | NM_145276    | NP_660319    | Q8TA94 | ZN563_HUMAN | 0   | ATAACGTTTTCCC      | 0.413 |             |
| - | 6  | 3184      | 208_uc002nqo.1_I                                              | NM_007153    | NP_009084    |        |             | 7   | TGTAGGGTTTCT       | 0.368 |             |
| - | 3  | 545       | p.P16S ZNF599_u                                               | NM_001007248 | NP_001007249 | Q96NL3 | ZN599_HUMAN | 2   | TTTGGGAACAG        | 0.458 |             |
| - | 16 | 7944      |                                                               | NM_003890    | NP_003881    | Q9Y6R7 | FCGBP_HUMAN | 9   | CTCCTCGCTGG        | 0.657 |             |
| + | 4  | 799       | P62_uc002pqz.2_I                                              | NM_012068    | NP_036200    | Q9Y2D1 | ATF5_HUMAN  | 2   | TCCTCCCTCTG        | 0.577 |             |
| - | 3  | 2328      | rt.1_Missense_Mt                                              | NM_004977    | NP_004968    | Q14003 | KCNC3_HUMAN | 1   | TGGCTGGGCAG        | 0.642 |             |
| - | 4  | 613       | K8_uc002put.1_Inl                                             | NM_007196    | NP_009127    | O60259 | KLK8_HUMAN  | 1   | TGGTGCAATGA        | 0.592 |             |
| - | 5  | 1439      | k.1_Intron ZNF81E                                             | NM_001031665 | NP_001026835 | Q0VGE8 | ZN816_HUMAN | 0   | TTTCTGACTGA        | 0.398 |             |
| + | 3  | 1399      | NF17_uc002qop.1                                               | NM_006959    | NP_008890    | P17021 | ZNF17_HUMAN | 1   | GCAACGAATGT        | 0.393 |             |
| + | 3  | 1622_1623 | i47_uc002qpm.3_I                                              | NM_001023561 | NP_001018855 | O43361 | ZN749_HUMAN | 0   | CAGCACCAGAAA       | 0.421 |             |
| + | 2  | 321       | i.3_Intron ZNF776_                                            | NM_138347    | NP_612356    | Q7Z340 | ZN551_HUMAN | 1   | TGAGTCTCAGA        | 0.483 |             |
| - | 7  | 2374      | hp.1_Missense_M                                               | NM_025027    | NP_079303    | Q8WXB4 | ZN606_HUMAN | 2   | TCTGATGGGCAA       | 0.423 |             |
| - | 2  | 189       | e_Mutation_p.E29f                                             | NM_001002006 | NP_001002006 | Q96P26 | 5NT1B_HUMAN | 3   | CAGATTCCTTC        | 0.393 |             |
| - | 3  | 867       | kj.2_Missense_Mu                                              | NM_144631    | NP_653232    | Q8N8E2 | ZN513_HUMAN | 1   | ATGCCGCCTCA        | 0.677 |             |
| + | 10 | 1436      | S1_uc010yqh.1_F                                               | NM_002398    | NP_002389    | O00470 | MEIS1_HUMAN | 0   | ATGCCCGGAGA        | 0.448 |             |
| + | 5  | 674       | H2P_uc002tkb.2_                                               | NM_182905    | NP_878908    |        |             | 0   | GTGGGCACTTG        | 0.612 |             |
| + | 13 | 4582      | i.3_Missense_Mut                                              | NM_005270    | NP_005261    | P10070 | GLI2_HUMAN  | 13  | TGGATGATGGC        | 0.627 |             |
| - | 63 | 10974     |                                                               | NM_018557    | NP_061027    | Q9NZR2 | LRP1B_HUMAN | 50  | CATTTCCACCA        | 0.338 |             |
| + | 2  | 392       | on_p.P98S PDK1_                                               | NM_002610    | NP_002601    | Q15118 | PDK1_HUMAN  | 4   | CTCCTCCAGAT        | 0.393 |             |
| - | 40 | 9583      | R3074Q TTN_uc0                                                | NM_133378    | NP_596869    | Q8WZ42 | TITIN_HUMAN | 153 | ACATCCGGGTG        | 0.453 | rs72647894  |
| + | 8  | 1892      | p.H561Y FAM171                                                | NM_177454    | NP_803237    | Q6P995 | F171B_HUMAN | 10  | ATTCTCATGCAC       | 0.478 |             |
| - | 40 | 6558      |                                                               | NM_018897    | NP_061720    | Q8WXX0 | DYH7_HUMAN  | 12  | CATTTACGATTC       | 0.318 |             |
| + | 13 | 1535      |                                                               | NM_015934    | NP_057018    | Q9Y2X3 | NOP58_HUMAN | 0   | AAAAAGCCAAGA       | 0.328 |             |
| - | 17 | 2526      | e_Mutation_p.S45                                              | NM_173076    | NP_775099    | Q86UK0 | ABCAC_HUMAN | 11  | TATTTTGAAGCA       | 0.348 |             |
| + | 17 | 1697      | P140_uc002vqm.2                                               | NM_007237    | NP_009168    | Q13342 | LY10_HUMAN  | 0   | CCGACGGCCAG        | 0.478 |             |
| - | 7  | 1266      | r_p.E63K NGEF_u                                               | NM_019850    | NP_062824    | Q8N5V2 | NGEF_HUMAN  | 7   | CTCCTCCATCC        | 0.587 |             |
| + | 1  | 67        | B_uc010zlj.1_Splice_Site FRG1B_uc010gdr.1_Splice_Site         |              |              |        |             | 0   | CGTTGGTGAGT        | 0.219 | rs137860963 |
| + | 2  | 127       | lj.1_RNA FRG1B_uc010gdr.1_RNA FRG1B_uc010ztk.1_Intron         |              |              |        |             | 0   | ATTCAGATGCAA       | 0.333 |             |
| + | 3  | 264       | RG1B_uc010gdr.1_RNA FRG1B_uc010ztk.1_Nonsense_Mutation_p.E30* |              |              |        |             | 0   | GAAGAAGAAATG       | 0.373 |             |
| - | 4  | 2461      |                                                               | NM_052846    | NP_443078    | Q9NT22 | EMIL3_HUMAN | 1   | CATCCCGGAGG        | 0.652 |             |
| + | 2  | 1229      | e_Mutation_p.R39                                              | NM_003008    | NP_002999    | Q02383 | SEMG2_HUMAN | 1   | AGGTAAGAATTC       | 0.403 |             |

|   |    |           |                   |              |              |        |              |    |                 |       |
|---|----|-----------|-------------------|--------------|--------------|--------|--------------|----|-----------------|-------|
| - | 38 | 4807      | :tv.1_Missense_Mt | NM_020820    | NP_065871    | Q8TCU6 | PREX1_HUMAN  | 6  | CCAGGGACACG     | 0.687 |
| - | 8  | 1214      | yi.1_Missense_Mu  | NM_000961    | NP_000952    | Q16647 | PTGIS_HUMAN  | 3  | GGAAGGGGAAG     | 0.557 |
| + | 2  | 3406      |                   | NM_173485    | NP_775756    | Q9NRE2 | TSH2_HUMAN   | 6  | GGTCCCCCCA      | 0.552 |
| - | 8  | 976       | nse_Mutation_p.L2 | NM_006052    | NP_006043    | O14972 | DSCR3_HUMAN  | 0  | CAGAGAGGCC      | 0.602 |
| + | 2  | 98        | :1_Missense_Mut   | NM_018943    | NP_061816    | Q9NY65 | TBA8_HUMAN   | 0  | TCCACGTGGGC     | 0.572 |
| + | 7  | 1731      | atq.1_Missense_M  | NM_001039141 | NP_001034230 | Q9H2D6 | TARA_HUMAN   | 1  | CAATCCCAGAG     | 0.592 |
| - | 16 | 3082      |                   | NM_006514    | NP_006505    | Q9Y5Y9 | SCNA4_HUMAN  | 10 | CTGTCTTTGGC     | 0.542 |
| + | 3  | 1576      |                   | NM_001123041 | NP_001116513 | P41597 | CCR2_HUMAN   | 2  | AGCCCTGAAG      | 0.488 |
| - | 8  | 1442      | ip.1_Missense_Mu  | NM_001142733 | NP_001136205 | A6NK59 | ASB14_HUMAN  | 0  | AAATCGTCTC      | 0.428 |
| + | 25 | 4525      | if.2_Missense_Mu  | NM_001457    | NP_001448    | O75369 | FLNB_HUMAN   | 19 | TGGTCCGCTG      | 0.657 |
| + | 6  | 1109      | M2_uc010hsl.2_F   | NM_004526    | NP_004517    | P49736 | MCM2_HUMAN   | 4  | AGGCTCCTGC      | 0.582 |
| - | 33 | 5520      | PLXND1_uc011blb.  | NM_015103    | NP_055918    | Q9Y4D7 | PLXD1_HUMAN  | 1  | AGATGGAGCAG     | 0.602 |
| - | 15 | 1760      | p.Q529K CLCN2_u   | NM_004366    | NP_004357    | P51788 | CLCN2_HUMAN  | 0  | ACTCTGGGCGA     | 0.612 |
| + | 3  | 377       | .P74L ZNF595_ucl  | NM_182524    | NP_872330    | Q7Z3I0 | Q7Z3I0_HUMAN | 0  | CAAACCCCCAG     | 0.498 |
| - | 3  | 1553_1554 | 732_uc010ibb.1_l  | NM_001137608 | NP_001131080 | B4DXR9 | ZN732_HUMAN  | 0  | GTATGTGGACC     | 0.386 |
| - | 3  | 1518      | 732_uc010ibb.1_l  | NM_001137608 | NP_001131080 | B4DXR9 | ZN732_HUMAN  | 0  | CATTCGTAAGC     | 0.398 |
| - | 3  | 1350      | 732_uc010ibb.1_l  | NM_001137608 | NP_001131080 | B4DXR9 | ZN732_HUMAN  | 0  | CATTTGTAAGC     | 0.418 |
| - | 4  | 2300      |                   | NM_001024611 | NP_001019782 | Q68CR7 | LRC66_HUMAN  | 3  | CCCTGGAATTG     | 0.478 |
| + | 4  | 860       | / MUC7_uc003hfg.  | NM_001145006 | NP_001138478 | Q8TAX7 | MUC7_HUMAN   | 4  | AGCTGCCCCAC     | 0.587 |
| - | 16 | 2186      | _p.Q320K FAM13A   | NM_014883    | NP_055698    | O94988 | FA13A_HUMAN  | 2  | CCTCTTGCTCA     | 0.522 |
| + | 3  | 5443      | p.1_Missense_Mu   | NM_024582    | NP_078858    | Q6V0I7 | FAT4_HUMAN   | 18 | TAGTTCGTGCT     | 0.468 |
| + | 7  | 940       | ie_Mutation_p.R17 | NM_001040157 | NP_001035247 | Q9C0F1 | CEP44_HUMAN  | 0  | TGATTCGTGCT     | 0.289 |
| + | 20 | 4001      | e.1_Missense_Mu   | NM_001080477 | NP_001073946 | Q9P273 | TEN3_HUMAN   | 0  | TCTAACGATTTG    | 0.393 |
| + | 8  | 1174      | 7R_uc011cop.1_R   | NM_002185    | NP_002176    | P16871 | IL7RA_HUMAN  | 5  | CTTTGGAAGAG     | 0.537 |
| + | 1  | 672       | uc011ctk.1_Intron | NM_032567    | NP_115956    | Q9BXG8 | SPZ1_HUMAN   | 1  | AAACAGGAGATG    | 0.358 |
| + | 8  | 1039      | _p.P70S DCP2_u    | NM_152624    | NP_689837    | Q8IU60 | DCP2_HUMAN   | 0  | TATTTCTGACC     | 0.373 |
| + | 4  | 1033      | uc003nkk.1_Intron | NM_025231    | NP_079507    | Q9H4T2 | ZSC16_HUMAN  | 1  | CATCAGAGAATC    | 0.418 |
| - | 10 | 4459      | IC1_uc011dmp.1_I  | NM_014641    | NP_055456    | Q14676 | MDC1_HUMAN   | 4  | CAGGTTGGTCT     | 0.537 |
| - | 9  | 1487      | se_Mutation_p.D9  | NM_025258    | NP_079534    | Q9Y334 | G7C_HUMAN    | 3  | GGCATCCGTGA     | 0.582 |
| - | 25 | 8843      |                   | NM_019105    | NP_061978    | P22105 | TENX_HUMAN   | 0  | CTGCCATCCC      | 0.627 |
| - | 7  | 1674      | :X6_uc010jya.2_R  | NM_000287    | NP_000278    | Q13608 | PEX6_HUMAN   | 1  | GTGAGCAACAG     | 0.642 |
| - | 11 | 1839      | fwl.1_Missense_M  | NM_153840    | NP_722582    | Q5T601 | GP110_HUMAN  | 3  | GGCAGcctcatcgtt | 0.264 |
| - | 63 | 10098     |                   | NM_014611    | NP_055426    | Q9NU22 | MDN1_HUMAN   | 10 | CTCCTGAACCA     | 0.572 |
| + | 10 | 1582      | qo.3_Missense_M   | NM_021956    | NP_068775    | Q13002 | GRIK2_HUMAN  | 5  | TATGTCTTTTTTA   | 0.343 |
| - | 5  | 2449      |                   | NM_001080450 | NP_001073919 | Q5T5X7 | BEND3_HUMAN  | 3  | CCAGGGAGCCG     | 0.637 |
| + | 6  | 1896      | t.2_Missense_Mut  | NM_001080976 | NP_001074445 | Q9UL01 | DSE_HUMAN    | 1  | CTTCTCCTTGTA    | 0.498 |
| + | 13 | 5311_5312 | P4_uc003qrg.2_Ir  | NM_020245    | NP_064630    | Q9NRJ4 | TULP4_HUMAN  | 1  | GAAGTCCTCTCC    | 0.584 |
| - | 3  | 465       | l1egc.1_Missense  | NM_020133    | NP_064518    | Q9NRZ5 | PLCD_HUMAN   | 0  | GGCGCGGGGT      | 0.527 |
| + | 2  | 976       | md.2_Missense_M   | NM_018641    | NP_061111    | Q9NRB3 | CHSTC_HUMAN  | 1  | CCAACCACACC     | 0.647 |
| - | 2  | 802       |                   | NM_015204    | NP_056019    | Q9UPZ6 | THS7A_HUMAN  | 3  | CTGCTCCAGGA     | 0.537 |
| - | 19 | 2454      | n_p.W647* OSBP1   | NM_015550    | NP_056365    | Q9H4L5 | OSBL3_HUMAN  | 1  | TTTGTCCACTC     | 0.403 |
| - | 11 | 1499      | sense_Mutation_p  | NM_033054    | NP_149043    | B011T2 | MYO1G_HUMAN  | 4  | CAATGGTGGCG     | 0.622 |
| - | 4  | 688       | n_p.H67Y MYO1C    | NM_033054    | NP_149043    | B011T2 | MYO1G_HUMAN  | 4  | GCTGTGGATGT     | 0.602 |
| - | 9  | 1101      | tb.2_Missense_M   | NM_005311    | NP_005302    | Q13322 | GRB10_HUMAN  | 6  | CTGTAGGGGCG     | 0.597 |
| - | 6  | 801       | iph.1_Missense_M  | NM_015395    | NP_056210    | Q7Z6L1 | TCPR1_HUMAN  | 1  | CTCCCAGCCC      | 0.622 |
| - | 3  | 1904      | GAL3ST4_uc003ui   | NM_024637    | NP_078913    | Q96RP7 | G3ST4_HUMAN  | 3  | AGACAGATCC      | 0.532 |
| + | 14 | 2903      | ZAN_uc003uwl.2_F  | NM_003386    | NP_003377    | Q9Y493 | ZAN_HUMAN    | 11 | AAAACCCACCA     | 0.507 |

rs148258730

|   |    |           |                    |              |              |        |             |                               |       |               |       |             |
|---|----|-----------|--------------------|--------------|--------------|--------|-------------|-------------------------------|-------|---------------|-------|-------------|
| - | 5  | 574       | jo.2_Nonsense_M    | NM_006754    | NP_006745    | Q16563 | SYPL1_HUMAN | Helical; (Potential).         | 0     | ACCAACCACAA   | 0.343 |             |
| - | 15 | 1860      |                    | NM_004333    | NP_004324    | P15056 | BRAF_HUMAN  | rotein kinas_R603>I(2)]p.T    | 18290 | 3ATTTCACTGTAC | 0.368 |             |
| - | 5  | 551       |                    | NM_001040135 | NP_001035225 | Q9C0K3 | ARP3C_HUMAN |                               | 0     | CTTCTGGGGAT   | 0.413 |             |
| - | 28 | 3497_3498 | uc003xhi.1_Intron  | NM_015254    | NP_056069    | Q9NQT8 | KI13B_HUMAN |                               | 0     | AGAGGGGACCA   | 0.54  |             |
| - | 16 | 3579      | R1012Q MYST3_u     | NM_001099412 | NP_001092882 | Q92794 | MYST3_HUMAN |                               | 7     | CCTTTTCGTTCA  | 0.498 |             |
| - | 3  | 1130      | p.R252H OPRK1_     | NM_000912    | NP_000903    | P41145 | OPRK_HUMAN  | lasmic (Potential).           | 2     | TGAGACGCAGG   | 0.552 |             |
| + | 7  | 812       | p.D255N C8orf34_   | NM_052958    | NP_443190    | Q49A92 | CH034_HUMAN |                               | 1     | TCTCAAGATTCT  | 0.368 |             |
| - | 2  | 710       | p.R224C JPH1_ur    | NM_020647    | NP_065698    | Q9HDC5 | JPH1_HUMAN  | lasmic (Potential).           | 1     | ACTTGCGAAGTT  | 0.587 |             |
| - | 6  | 575_576   | p.P164S ENPP2_u    | NM_001040092 | NP_001035181 | Q13822 | ENPP2_HUMAN |                               | 7     | GGAGGGCGAAC   | 0.376 |             |
| - | 5  | 1584      |                    | NM_138367    | NP_612376    | Q9BRH9 | ZN251_HUMAN | 2H2-type 9.                   | 0     | TCCGACGAAAG   | 0.493 |             |
| - | 1  | 609       |                    | NM_207305    | NP_997188    | Q12950 | FOXD4_HUMAN | Fork-head.                    | 1     | GGGGCTTTGCC   | 0.677 |             |
| + | 3  | 405       | laza.2_Missense_l  | NM_001855    | NP_001846    | P39059 | COFA1_HUMAN | 3P N-terminal.                | 6     | CGCCTACAGT    | 0.617 |             |
| + | 5  | 906       |                    | NM_001340    | NP_001331    | Q14093 | CYLC2_HUMAN | 4 repeats of K-K-X.           | 1     | CAGTAGTACAG   | 0.254 |             |
| + | 10 | 7190      | isense_Mutation_c  | NM_021224    | NP_067047    | Q96JM2 | ZN462_HUMAN | 2H2-type 25.                  | 5     | TTTTCCGCTGT   | 0.448 |             |
| - | 1  | 1051      |                    | NM_006686    | NP_006677    | Q9Y614 | ACL7B_HUMAN |                               | 1     | AGCCCGTGTC    | 0.667 |             |
| + | 6  | 1179      |                    | NM_000093    | NP_000084    | P20908 | CO5A1_HUMAN | nhelical region.              | 11    | GGAAGGAGACG   | 0.602 |             |
| - | 20 | 3080      | _Mutation_p.G909   | NM_001606    | NP_001597    | Q9BZC7 | ABCA2_HUMAN |                               | 0     | CATGCCACGGG   | 0.637 |             |
| + | 5  | 521       |                    | NM_000377    | NP_000368    | P42768 | WASP_HUMAN  |                               | 1     | CCACAGACAGAC  | 0.572 |             |
| + | 17 | 2020      | iq.2_Missense_M    | NM_144658    | NP_653259    | Q5JSL3 | DOC11_HUMAN | DHR-1.                        | 3     | AATACGATAGCC  | 0.308 |             |
| + | 9  | 1615      |                    | NM_018558    | NP_061028    | Q9UN88 | GBRT_HUMAN  |                               | 3     | AGGCTGGGACC   | 0.527 |             |
| + | 7  | 1141      | hs.1_Missense_Mi   | NM_001001344 | NP_001001344 | Q16720 | AT2B3_HUMAN | lasmic (Potential).           | 1     | CGGAGGGTGGC   | 0.592 |             |
| - | 5  | 582       | _1_uc009vka.2_5f   | NM_004421    | NP_004412    | O14640 | DVL1_HUMAN  |                               | 0     | GGTGGACGCGC   | 0.667 |             |
| + | 10 | 1727      | _p.E273K PLCH2_    | NM_014638    | NP_055453    | O75038 | PLCH2_HUMAN |                               | 5     | AAGGCGAGGTG   | 0.617 |             |
| - | 22 | 3432      | uc001ama.1_RNA     | NM_015557    | NP_056372    | Q8TDI0 | CHD5_HUMAN  | case C-terminal.              | 12    | CCGCCGTGGCC   | 0.632 |             |
| + | 17 | 2267      | p.E686K PIK3CD_    | NM_005026    | NP_005017    | O00329 | PK3CD_HUMAN |                               | 7     | AGGGGAAGCA    | 0.667 |             |
| - | 21 | 5001      |                    | NM_001079843 | NP_001073312 | Q86V15 | CASZ1_HUMAN |                               | 1     | CAGTCGGGCA    | 0.647 |             |
| + | 2  | 233       | ie_Mutation_p.R38  | NM_015291    | NP_056106    | Q9Y2G8 | DJC16_HUMAN | asmic (Potential). J.         | 3     | CAGCCGAACAG   | 0.438 |             |
| - | 26 | 3845      | yz.1_Missense_Mi   | NM_017940    | NP_060410    | Q3BBV0 | NBPF1_HUMAN | NBPF 6.                       | 0     | GTTGAATAACAT  | 0.488 |             |
| + | 28 | 4498      | z_Mutation_p.P78C  | NM_014675    | NP_055490    | Q5TZA2 | CROCC_HUMAN |                               | 5     | CAGCCCCAGC    | 0.627 |             |
| - | 6  | 768       | z_Mutation_p.G20z  | NM_152372    | NP_689585    | Q5VTT5 | MYOM3_HUMAN | like C2-type 1.               | 3     | TATTTCCGGCA   | 0.478 |             |
| + | 13 | 1921      | e_Mutation_p.P53   | NM_005839    | NP_005830    | Q8IYB3 | SRRM1_HUMAN | is and matrix localization. A | 3     | CCCTCCTCCTC   | 0.537 |             |
| + | 13 | 1933      | e_Mutation_p.R54   | NM_005839    | NP_005830    | Q8IYB3 | SRRM1_HUMAN | is and matrix localization. A | 3     | ACGGCGCAGGA   | 0.532 | rs78787676  |
| + | 3  | 346       | uj.2_Missense_Mi   | NM_175852    | NP_787048    | P40222 | TXLNA_HUMAN |                               | 2     | GGGGGCCCCG    | 0.597 |             |
| - | 10 | 1254      | xm.1_Missense_l    | NM_052896    | NP_443128    | Q7Z408 | CSMD2_HUMAN | tracellular (Potential).      | 12    | TGGAAGGTGGG   | 0.537 |             |
| + | 25 | 11625     | a.1_Nonsense_Mi    | NM_033044    | NP_149033    | Q9UPN3 | MACF1_HUMAN | Spectrin 7.                   | 16    | ATGATCGAAAGC  | 0.428 | rs145098670 |
| - | 5  | 768       | T1_uc010ojg.1_M    | NM_000310    | NP_000301    | P50897 | PPT1_HUMAN  |                               | 1     | CATACCGTTCCT  | 0.458 |             |
| - | 8  | 2050      |                    | NM_020883    | NP_065934    | Q9P217 | ZSWM5_HUMAN |                               | 0     | GATGGATCCAC   | 0.522 |             |
| - | 28 | 4547      | ctz.2_Missense_M   | NM_015269    | NP_056084    | Q5TAX3 | TUT4_HUMAN  | r-rich. Pro-rich.             | 3     | ACTGGGAAGAG   | 0.433 |             |
| + | 25 | 3559      | e_Mutation_p.G11   | NM_176877    | NP_795352    | Q8NI35 | INADL_HUMAN | PDZ 6.                        | 4     | ATGCAGGAAAC   | 0.403 |             |
| + | 15 | 2222      | d1_uc001dbq.1_l    | NM_020925    | NP_065976    | Q5VU97 | CAHD1_HUMAN | ellular (Potential).          | 2     | TAGGAGACAAT   | 0.448 |             |
| + | 11 | 1440      | _p.T348M KIAA13    | NM_020775    | NP_065826    | Q6UXG2 | K1324_HUMAN | ellular (Potential).          | 5     | GGAACGACCG    | 0.537 | rs143784237 |
| + | 9  | 994       | uc010oyd.1_Intron  | NM_001037675 | NP_001032764 | Q3BBV1 | NBPFK_HUMAN |                               | 0     | CAGTTCAGAAA   | 0.468 |             |
| - | 1  | 92        | t2BF_uc010pbk.1    | NM_001123375 | NP_001116847 | Q71D13 | H32_HUMAN   |                               | 0     | TGGCCGGCGCC   | 0.692 |             |
| + | 3  | 279       | df.1_Missense_M    | NM_020127    | NP_064512    | Q9NNX1 | TUFT1_HUMAN |                               | 0     | ATGATGGACAT   | 0.483 |             |
| + | 2  | 336       | z_uc001fht.1_RNA   | NM_025058    | NP_079334    | Q7Z4K8 | TRI46_HUMAN |                               | 3     | CCCTTCCACC    | 0.682 |             |
| + | 8  | 1629      | isense_Mutation_p. | NM_025058    | NP_079334    | Q7Z4K8 | TRI46_HUMAN | onectin type-III.             | 3     | ACGGCGAATAC   | 0.657 |             |
| - | 2  | 921       | _5'Flank RUSC1_u   | NM_001039517 | NP_001034606 | Q66K80 | RUAS1_HUMAN |                               | 0     | AGCTACGCCAC   | 0.657 |             |



|   |    |       |                   |              |              |        |             |                               |     |                |       |             |
|---|----|-------|-------------------|--------------|--------------|--------|-------------|-------------------------------|-----|----------------|-------|-------------|
| - | 6  | 1176  | L2_uc010phz.1_M   | NM_030764    | NP_110391    | Q96LA5 | FCRL2_HUMAN | 4. Extracellular (Potential). | 2   | :CAGGCCGTTGT   | 0.577 | rs149829829 |
| - | 27 | 3994  |                   | NM_003126    | NP_003117    | P02549 | SPTA1_HUMAN | Spectrin 12.                  | 8   | :AGCTCCATTTTC  | 0.552 |             |
| - | 7  | 854   | i_p.R194Q CCDC1   | NM_012337    | NP_036469    | Q9UL16 | CCD19_HUMAN | Potential.                    | 1   | 'GCTCCCGCTGC'  | 0.512 |             |
| + | 7  | 1208  | nd.1_Nonsense_M   | NM_001460    | NP_001451    | Q99518 | FMO2_HUMAN  |                               | 1   | 'CAAGTCAACCC'  | 0.433 |             |
| - | 1  | 431   | pmk.1_Splice_Site | NM_000261    | NP_000252    | Q99972 | MYOC_HUMAN  | Potential.                    | 1   | :CAACTCTCTGG'  | 0.597 |             |
| + | 72 | 11228 |                   | NM_031935    | NP_114141    | Q96RW7 | HMCN1_HUMAN | like C2-type 35.              | 23  | \CACCTCGAGTG   | 0.393 |             |
| + | 8  | 1006  |                   | NM_024529    | NP_078805    | Q6P1J9 | CDC73_HUMAN |                               | 49  | :TTCAATCTGTAA  | 0.333 |             |
| + | 3  | 509   | R1_uc001gtm.2_li  | NM_002113    | NP_002104    | Q03591 | FHR1_HUMAN  | Sushi 2.                      | 0   | AGAACGGGGCTI   | 0.393 |             |
| - | 5  | 1502  | opl.1_Missense_Mi | NM_001031725 | NP_001026895 | Q5T1V6 | DDX59_HUMAN | case C-terminal.              | 4   | AAAATAATCTGAC  | 0.358 |             |
| + | 8  | 4114  |                   | NM_032890    | NP_116279    | Q96F81 | DISP1_HUMAN |                               | 0   | :CTGTGCGAGGGC  | 0.562 | rs149927406 |
| + | 9  | 2836  | asn.2_Missense_IV | NM_001098623 | NP_001092093 | Q5VST9 | OBSCN_HUMAN | ly-Ser. Ig-like 9.            | 28  | .GCTGAGCTCCA'  | 0.647 |             |
| + | 46 | 12282 | asn.2_Missense_Mt | NM_001098623 | NP_001092093 | Q5VST9 | OBSCN_HUMAN | Ig-like 42.                   | 28  | 'AGCAGGAGACA   | 0.622 |             |
| + | 5  | 3587  | e.1_Missense_Mu   | NM_020066    | NP_064450    | Q9NZ56 | FMN2_HUMAN  | Pro-rich. FH1.                | 12  | :CCCTCCTCCCC'  | 0.716 |             |
| + | 1  | 99    | L13_uc001ids.2_li | NM_001004686 | NP_001004686 | Q8NH16 | OR2L2_HUMAN | cellular (Potential).         | 3   | :CCCATGGAAAA'  | 0.289 |             |
| + | 1  | 55    |                   | NM_001004696 | NP_001004696 | Q8NH00 | OR2T4_HUMAN | cellular (Potential).         | 1   | \TCCTGATGGGA'  | 0.488 |             |
| + | 15 | 5595  | iik.2_Missense_M  | NM_017782    | NP_060252    | Q5VWN6 | CJ018_HUMAN |                               | 2   | TCCCCACGCTTT   | 0.458 |             |
| + | 4  | 1055  | p.R120H MAP3K8    | NM_005204    | NP_005195    | P41279 | M3K8_HUMAN  |                               | 4   | ATGACGTTACC.   | 0.433 |             |
| + | 7  | 860   |                   | NM_052997    | NP_443723    | Q9BXX3 | AN30A_HUMAN |                               | 9   | :CTTGGTGGAAA'  | 0.502 |             |
| - | 12 | 1462  | qje.1_Missense_IV | NM_198215    | NP_937858    | Q8NE31 | FA13C_HUMAN |                               | 2   | \CAATTGTTGGA/  | 0.378 | rs148740536 |
| - | 12 | 1808  | mw.2_Missense_IV  | NM_001127384 | NP_001120856 | Q9UI47 | CTNA3_HUMAN |                               | 8   | :TGTAAAGCCCTC' | 0.458 |             |
| + | 9  | 1943  | p.R442Q NRG3_u    | NM_001010848 | NP_001010848 | P56975 | NRG3_HUMAN  | lasmic (Potential).           | 6   | 'AGATCCGAATTC' | 0.483 |             |
| + | 9  | 1722  | 407N CYP2C19_u    | NM_000772    | NP_000763    | P33260 | CP2C1_HUMAN |                               | 5   | CCAAAGGATATTC  | 0.498 |             |
| - | 1  | 341   | C2_uc009xxx.2_lr  | NR_026715    |              |        |             |                               | 0   | :GATGCAGTCAA   | 0.592 |             |
| + | 1  | 427   |                   | NM_001001480 | NP_001001480 | Q701N2 | KRA55_HUMAN | repeats of C-C-X-P.           | 1   | :CTGTGGCTCCT'  | 0.692 |             |
| - | 9  | 1140  | _p.D260N OSBPL1   | NM_020896    | NP_065947    | Q9H0X9 | OSBL5_HUMAN |                               | 3   | .CTGGTCGCTGC'  | 0.637 |             |
| + | 1  | 664   |                   | NM_001005172 | NP_001005172 | Q8NGK3 | O52K2_HUMAN | lasmic (Potential).           | 2   | TATATCTTTATTC  | 0.483 |             |
| - | 1  | 167   |                   | NM_001005164 | NP_001005164 | Q8NGJ4 | O52E2_HUMAN | lasmic (Potential).           | 3   | 'GTAGGCTGCTG   | 0.488 |             |
| - | 5  | 538   | mutation_p.R40H f | NM_012402    | NP_036534    | P53365 | ARFP2_HUMAN | AH.                           | 0   | :TCTCACGCAGC.  | 0.567 |             |
| + | 15 | 2449  | yic.2_Missense_M  | NM_004211    | NP_004202    | Q9Y345 | SC6A5_HUMAN | name=12; (Potential).         | 4   | TGTTCCGTCATC'  | 0.478 | rs138848148 |
| - | 15 | 1916  | Y160_uc009ylw.2_l | NM_015231    | NP_056046    | Q12769 | NU160_HUMAN |                               | 7   | 'CAGCCGGAGGC   | 0.383 |             |
| - | 1  | 586   |                   | NM_001005282 | NP_001005282 | Q8NGP6 | OR5M8_HUMAN | Name=5; (Potential).          | 1   | TTGACAACCTCTI  | 0.418 |             |
| + | 14 | 1766  | _p.W571* CCDC8E   | NM_032251    | NP_115627    | A6NC98 | CC88B_HUMAN |                               | 4   | .GACTGGTCCCC'  | 0.642 |             |
| + | 8  | 889   | p.A206V RPS6KA    | NM_003942    | NP_003933    | O75676 | KS6A4_HUMAN | otein kinase 1.               | 5   | :CGTGGCGCAGG   | 0.667 | rs142374327 |
| + | 14 | 1846  | US81_uc001ofx.3   | NM_025128    | NP_079404    | Q96NY9 | MUS81_HUMAN |                               | 0   | :ATACAGCACCC'  | 0.607 |             |
| - | 4  | 1410  | ons.2_Missense_IV | NM_022338    | NP_071733    | Q96F05 | CK024_HUMAN | ar (Potential). Pro-rich.     | 0   | 'GTGTGCTGGGG   | 0.627 | rs138575739 |
| + | 33 | 5319  | ke.1_Missense_M   | NM_000051    | NP_000042    | Q13315 | ATM_HUMAN   |                               | 240 | TTATGGTGAAAC'  | 0.259 |             |
| + | 11 | 915   | Jrzn.1_Missense_I | NM_015313    | NP_056128    | Q9NZN5 | ARHGC_HUMAN |                               | 7   | :GCCCAGTAGTG   | 0.428 |             |
| + | 48 | 6705  | _p.V1055 SORL1    | NM_003105    | NP_003096    | Q92673 | SORL_HUMAN  | lasmic (Potential).           | 15  | :ATGACGTCCCC'  | 0.393 |             |
| - | 10 | 1455  |                   | NM_170601    | NP_733746    | Q9HAT2 | SIAE_HUMAN  |                               | 0   | 'GCATCGATGGT'  | 0.498 |             |
| - | 1  | 101   |                   | NM_020996    | NP_066276    | P10767 | FGF6_HUMAN  |                               | 3   | :GTGCCCTGCAG   | 0.607 |             |
| - | 9  | 2222  | _p.L698F CD163_t  | NM_004244    | NP_004235    | Q86VB7 | C163A_HUMAN | cellular (Potential).         | 8   | GGGCCCAAAGA'   | 0.448 |             |
| - | 3  | 384   | i.1_Intron PRB1_u | NM_005039    | NP_005030    | P04280 | PRP1_HUMAN  | -P-[PAQ]-Q-[GE]-[GD]-[NK      | 0   | GCTTTCCTGGAC   | 0.612 |             |
| - | 29 | 3654  | p.L1212F ABCC9    | NM_005691    | NP_005682    | O60706 | ABCC9_HUMAN | al). ABC transmembrane tyj    | 6   | CTGAGAGAAATA'  | 0.438 |             |
| - | 22 | 2749  | p.Q349P IPO8_uc   | NM_006390    | NP_006381    | O15397 | IPO8_HUMAN  |                               | 3   | \CAATCTGTCCC'  | 0.438 |             |
| - | 1  | 256   |                   | NM_001013699 | NP_001013721 | Q6NXT2 | H3C_HUMAN   |                               | 0   | :GATGAGCAGCT'  | 0.602 |             |
| - | 4  | 1551  | TUBA1B_uc001rtl   | NM_006082    | NP_006073    | P68363 | TBA1B_HUMAN |                               | 0   | :CTACCCTCTC'   | 0.483 |             |
| + | 13 | 2025  | _p.G620R TROAP    | NM_005480    | NP_005471    | Q12815 | TROAP_HUMAN | VA approximate tandem rep     | 1   | :AACCCGGGCCC   | 0.642 |             |

|   |    |      |                   |              |              |        |             |                               |    |                   |       |             |
|---|----|------|-------------------|--------------|--------------|--------|-------------|-------------------------------|----|-------------------|-------|-------------|
| + | 9  | 1552 | A211V TARBP2_u    | NM_134323    | NP_599150    | Q15633 | TRBP2_HUMAN | I. DRBM 3. Sufficient for int | 1  | 3CGTGCCCTGC       | 0.627 |             |
| + | 8  | 1098 | _p.Q348* SRGAP1   | NM_020762    | NP_065813    | Q7Z6B7 | SRGP1_HUMAN |                               | 4  | .GTGCCCAGCAG      | 0.532 |             |
| + | 9  | 1063 | rj.2_Missense_Mu  | NM_006654    | NP_006645    | Q8WU20 | FRS2_HUMAN  |                               | 2  | \CACATCCTTTGC     | 0.458 |             |
| + | 18 | 2666 | se_Mutation_p.S8  | NM_003667    | NP_003658    | O75473 | LGR5_HUMAN  | lasmic (Pote p.S873(1)        | 9  | TACCAGCTCCA       | 0.478 |             |
| + | 1  | 112  | _Mutation_p.A3T L | NM_003299    | NP_003290    | P14625 | ENPL_HUMAN  |                               | 3  | .TGAGGGCCCTG      | 0.682 |             |
| - | 3  | 861  | trmv.2_Missense_n | NM_001142345 | NP_001135817 | Q99788 | CML1_HUMAN  | cellular (Potential).         | 5  | iGAAGCGGGTGA      | 0.582 |             |
| + | 5  | 455  | mh.2_Missense_Mi  | NM_138432    | NP_612441    | Q96GA7 | SDSL_HUMAN  |                               | 0  | CTATGCTGCTAC      | 0.637 |             |
| - | 2  | 686  |                   | NM_005780    | NP_005771    | Q9Y693 | LHFP_HUMAN  |                               | 4  | CTGCCGACTCT       | 0.582 |             |
| + | 14 | 1497 | p.R414H COG6_u    | NM_020751    | NP_065802    | Q9Y2V7 | COG6_HUMAN  |                               | 2  | TGCTCGTCAAG       | 0.363 |             |
| + | 9  | 2614 | se_Mutation_p.S7  | NM_000123    | NP_000114    | P28715 | ERCC5_HUMAN |                               | 7  | AAGATTCGCTCC      | 0.488 |             |
| + | 1  | 386  |                   | NM_001004717 | NP_001004717 | Q8NH43 | OR4L1_HUMAN | lasmic (Potential).           | 5  | TAACCCCTGC        | 0.438 |             |
| - | 23 | 3675 | .R1090H CHD8_L    | NM_020920    | NP_065971    | Q9HCK8 | CHD8_HUMAN  |                               | 10 | TCATACGTCGC       | 0.428 |             |
| + | 2  | 218  |                   | NM_002687    | NP_002678    | Q9H307 | PININ_HUMAN | ternative 5' splicing. Neces: | 1  | CCATCCAAGCC       | 0.423 |             |
| - | 11 | 2254 | IH5_uc001xfy.2_3' | NM_139318    | NP_647479    | Q8NCM2 | KCNH5_HUMAN | lasmic (Potential).           | 9  | TACCTGGAGTT       | 0.552 |             |
| + | 8  | 956  | vk.1_Missense_Mi  | NM_012111    | NP_036243    | O95433 | AHSA1_HUMAN |                               | 0  | AGGTCCCTGAG       | 0.388 |             |
| + | 2  | 242  |                   | NM_207322    | NP_997205    | Q8NCU7 | C2C4A_HUMAN |                               | 0  | CACCACCGCCG       | 0.682 |             |
| + | 2  | 633  | ujp.1_Missense_n  | NM_002755    | NP_002746    | Q02750 | MP2K1_HUMAN |                               | 0  | GGCTTTCTTAC       | 0.547 | rs121908594 |
| + | 2  | 2964 | p.R882W C15orf3   | NM_015492    | NP_056307    | Q6ZRI6 | CO039_HUMAN |                               | 0  | AGGAGCGGGCA       | 0.672 |             |
| + | 9  | 1102 |                   | NM_002569    | NP_002560    | P09958 | FURIN_HUMAN |                               | 7  | GGAACGGGGGC       | 0.627 |             |
| - | 3  | 645  | _p.R16C RGMA_L    | NM_020211    | NP_064596    | Q96B86 | RGMA_HUMAN  |                               | 0  | CAGGCGTGGCT       | 0.662 |             |
| - | 13 | 3226 | xt.1_Missense_Mu  | NM_001009944 | NP_001009944 | P98161 | PKD1_HUMAN  | lar (Potential). PKD 4.       | 3  | TCACGGTGACG       | 0.637 |             |
| - | 8  | 737  | cya.2_Missense_n  | NM_032569    | NP_115958    | Q49A26 | GLYR1_HUMAN |                               | 0  | GATTGCTGGT        | 0.453 |             |
| - | 25 | 4940 | zv.1_Missense_M   | NM_014647    | NP_055462    | Q9Y4F3 | LKAP_HUMAN  |                               | 0  | GCGCTCGCCCT       | 0.547 |             |
| + | 3  | 411  |                   | NM_014669    | NP_055484    | Q8N1F7 | NUP93_HUMAN |                               | 2  | CACTGACATTC       | 0.527 |             |
| - | 3  | 627  | ex.2_Missense_Mi  | NM_022357    | NP_071752    | Q9H4B8 | DPEP3_HUMAN |                               | 3  | GCACGGCAGTC       | 0.607 |             |
| - | 2  | 366  | e_Mutation_p.R41  | NM_001128    | NP_001119    | O43747 | AP1G1_HUMAN |                               | 2  | GGTTCGGGCTG       | 0.463 |             |
| - | 5  | 814  | 8B_uc010vmu.1_n   | NM_001011880 | NP_001011880 | Q6UXF7 | CL18B_HUMAN |                               | 0  | AGAGCGAACAC       | 0.612 |             |
| - | 6  | 787  | n.2_Missense_Mu   | NM_153486    | NP_705690    | Q86WU2 | LDHD_HUMAN  | inding PCMH-type.             | 0  | CGGAGCCCACG       | 0.652 |             |
| + | 3  | 796  | rf97_uc010vpz.1   | NM_001013672 | NP_001013694 | Q6ZQX7 | CQ097_HUMAN | tandem repeat of A-L-K-G-     | 1  | CCCGAGGCTCT       | 0.711 |             |
| - | 5  | 1295 | tn.1_Missense_Mi  | NM_052928    | NP_443160    | Q8IYR2 | SMYD4_HUMAN |                               | 5  | TCCTTGTTACTA      | 0.423 |             |
| - | 14 | 2478 | _Mutation_p.R731' | NM_015229    | NP_056044    | O75153 | K0664_HUMAN |                               | 2  | GCTCCGACAGCA      | 0.711 |             |
| - | 8  | 1019 | _p.R290C ATP2A3   | NM_174955    | NP_777615    | Q93084 | AT2A3_HUMAN | nal (By similarity).          | 5  | GCCACGCAGCC       | 0.672 |             |
| + | 10 | 1278 | on_p.G285S SPNS   | NM_182538    | NP_872344    | Q6ZMD2 | SPNS3_HUMAN | ical; (Potential).            | 1  | .CGGTGGGCCAC      | 0.652 |             |
| - | 6  | 787  | i'Flank RNF167_uc | NM_003562    | NP_003553    | Q02978 | M2OM_HUMAN  | e=5; (Potential). Solcar 3.   | 0  | TGCTGGCACAG       | 0.617 |             |
| - | 7  | 3364 | _p.V937I NLRP1_   | NM_033004    | NP_127497    | Q9C000 | NALP1_HUMAN | LRR 5.                        | 9  | GCCAACGTCAT       | 0.622 |             |
| + | 3  | 1353 | 11_uc010vtw.1_In  | NM_175734    | NP_783861    | Q0P670 | CQ074_HUMAN |                               | 0  | TTCTCCAGCC        | 0.652 |             |
| - | 30 | 4135 |                   | NM_003802    | NP_003793    | Q9UKX3 | MYH13_HUMAN | Potential.                    | 6  | CTGTTCCGCAC       | 0.592 |             |
| - | 9  | 1914 | grr.1_Missense_Mi | NM_004176    | NP_004167    | P36956 | SRBP1_HUMAN | lasmic (Potential).           | 1  | .GTGGGGCCGTG      | 0.667 |             |
| + | 2  | 1028 | p.A304V SLFN5_u   | NM_144975    | NP_659412    | Q08AF3 | SLFN5_HUMAN |                               | 3  | iCTGTGCGGTGT      | 0.493 | rs149363506 |
| + | 2  | 233  | hse.2_Missense_I  | NM_006804    | NP_006795    | Q14849 | STAR3_HUMAN | lasmic (Potential).           | 0  | ACCTCCTCCCG       | 0.642 |             |
| - | 2  | 375  | nse_Mutation_p.R  | NM_001042471 | NP_001035936 | Q8TAX9 | GSDMB_HUMAN |                               | 2  | ATATCCGGTTCT      | 0.488 | rs144892352 |
| - | 1  | 235  | 39_uc010wfm.1_5   | NM_213656    | NP_998821    | Q6A163 | K1C39_HUMAN | Head.                         | 0  | iCTTGCGACAAA      | 0.517 |             |
| - | 1  | 363  |                   | NM_031960    | NP_114166    | Q9BYQ9 | KRA48_HUMAN | [IKRQVHEC]-[SPRT]-[STC        | 0  | ttgagcagctggacac  | 0.179 |             |
| - | 1  | 216  |                   | NM_033188    | NP_149445    | Q9BYR2 | KRA45_HUMAN | [GRQVCHIEK]-[SPTR]-[V:        | 0  | igagatgcagcagctag | 0.274 |             |
| - | 1  | 428  | T17_uc010wft.1_N  | NM_000422    | NP_000413    | Q04695 | K1C17_HUMAN | keratinocyte proliferation a  | 2  | iGGCACGCACCT      | 0.632 |             |
| - | 16 | 2186 |                   | NM_012448    | NP_036580    | P51692 | STA5B_HUMAN | SH2.                          | 6  | TGGCCGATCAG       | 0.428 |             |
| + | 19 | 3427 | JAP1_uc010wgs.1   | NM_003632    | NP_003623    | P78357 | CNTP1_HUMAN | cellular (Potential).         | 8  | iTGCCCGGTTAC      | 0.637 |             |

|   |    |       |                    |              |              |        |             |                                |    |               |       |
|---|----|-------|--------------------|--------------|--------------|--------|-------------|--------------------------------|----|---------------|-------|
| - | 26 | 3467  | i.1_Missense_Mut   | NM_005474    | NP_005465    | Q9UQL6 | HDAC5_HUMAN | ear export signal.             | 1  | :GCTCACAGTCTC | 0.677 |
| + | 3  | 545   |                    | NM_016001    | NP_057085    | Q9Y5J1 | UTP18_HUMAN |                                | 0  | ATGATGAAAAATC | 0.303 |
| - | 6  | 495   | ifz.2_Intron ATP5H | NM_006356    | NP_006347    | O75947 | ATP5H_HUMAN |                                | 0  | TCTAATTTGGTTT | 0.393 |
| + | 3  | 422   |                    | NM_032048    | NP_114437    | Q9BXX0 | EMIL2_HUMAN | EMI.                           | 3  | GTATCGAGTGA   | 0.502 |
| + | 10 | 2513  | p.R750W KIAA080    | NM_015210    | NP_056025    | Q9Y4B5 | CC165_HUMAN |                                | 0  | ACTCCCGGGTG   | 0.672 |
| + | 3  | 886   |                    | NM_153000    | NP_694545    | Q8J025 | APCD1_HUMAN | cellular (Potential).          | 0  | CAGACGGGGGT   | 0.627 |
| - | 40 | 5738  | p.M387T MYO5B      | NM_001080467 | NP_001073936 | Q9ULV0 | MYO5B_HUMAN |                                | 5  | GAAACATGTGC   | 0.423 |
| + | 2  | 254   | /DR7_uc002 gl.1_l  | NM_015285    | NP_056100    | Q9Y4E6 | WDR7_HUMAN  |                                | 3  | GGGGTCGAAAAA  | 0.413 |
| + | 11 | 1647  | Is.2_Missense_Mt   | NM_032649    | NP_116038    | Q96KN2 | CNDP1_HUMAN |                                | 0  | AACATTCGCAGA  | 0.512 |
| + | 1  | 1577  | lqu.1_Missense_IV  | NM_017757    | NP_060227    | Q9C0G0 | ZN407_HUMAN |                                | 2  | TGCCCGTCTCTC  | 0.572 |
| + | 2  | 1555  |                    | NM_005786    | NP_005777    | Q6ZS26 | TSH1_HUMAN  |                                | 0  | GGCCCTGAGTGT  | 0.617 |
| + | 9  | 1072  | p.V245M PNPLA6     | NM_006702    | NP_006693    | Q8IY17 | PLPL6_HUMAN | cytoplasmic (Potential).       | 3  | CCACGGTGCTGT  | 0.687 |
| - | 3  | 28508 |                    | NM_024690    | NP_078966    | Q8WXI7 | MUC16_HUMAN | ch. Extracellular (Potential). | 57 | CCAGGGAAGATC  | 0.507 |
| - | 3  | 20909 |                    | NM_024690    | NP_078966    | Q8WXI7 | MUC16_HUMAN | xtracellular (Potential).      | 57 | CAGAGGATTGTG  | 0.488 |
| + | 8  | 1035  | p.S210N C19orf66   | NM_018381    | NP_060851    | Q9NUL5 | CS066_HUMAN |                                | 0  | CATTAGCAGTGT  | 0.557 |
| - | 13 | 2818  | nqo.3_Missense_A   | NM_015493    | NP_056308    | Q63ZY3 | KANK2_HUMAN | ANK 3.                         | 0  | GACAACGTCCAC  | 0.632 |
| - | 4  | 765   | isi.3_Missense_Mt  | NM_001611    | NP_001602    | P13686 | PPA5_HUMAN  |                                | 1  | CACGGGGTAGT   | 0.667 |
| + | 14 | 1938  | Jzh.2_Missense_IV  | NM_017721    | NP_060191    | Q6P1N0 | C2D1A_HUMAN |                                | 0  | TCACCAAGGTGT  | 0.552 |
| + | 5  | 1455  | tpk.2_Missense_IV  | NM_025189    | NP_079465    | Q9H8G1 | ZN430_HUMAN | C2H2-type 9.                   | 2  | CATAAGATAATTC | 0.378 |
| + | 5  | 1464  | tpk.2_Missense_M   | NM_025189    | NP_079465    | Q9H8G1 | ZN430_HUMAN |                                | 2  | TTCATACTGGAC  | 0.383 |
| - | 3  | 1913  |                    | NM_001001411 | NP_001001411 | Q8N7Q3 | ZN676_HUMAN |                                | 0  | TGTAGGGTTTCT  | 0.418 |
| - | 18 | 1883  |                    | NM_032139    | NP_115515    | Q96NW4 | ANR27_HUMAN | ANK 5.                         | 5  | GGTAGCCCCAG   | 0.532 |
| - | 9  | 1058  | p.A180V RHPN2      | NM_033103    | NP_149094    | Q8IUC4 | RHPN2_HUMAN | BRO1.                          | 6  | CCGGCGCCTGG   | 0.622 |
| - | 3  | 545   | p.P16S ZNF599_u    | NM_001007248 | NP_001007249 | Q96NL3 | ZN599_HUMAN | KRAB.                          | 2  | TTTGGGAACAG   | 0.458 |
| + | 6  | 1891  | p.G557S ZNF567     | NM_152603    | NP_689816    | Q8N184 | ZN567_HUMAN |                                | 0  | ATACCGGCCAG   | 0.418 |
| - | 16 | 7944  |                    | NM_003890    | NP_003881    | Q9Y6R7 | FCGBP_HUMAN | VWFD 6.                        | 9  | CTCTCGCTGG    | 0.657 |
| - | 1  | 1071  | c.2_Missense_Mut   | NM_175875    | NP_787071    | Q8N196 | SIX5_HUMAN  | Homeobox.                      | 1  | CGTGGGGTAGC   | 0.687 |
| + | 11 | 1288  | p.V277I PPP5C      | NM_006247    | NP_006238    | P53041 | PPP5_HUMAN  | Catalytic.                     | 2  | CTGACGTCACC   | 0.612 |
| - | 19 | 2941  | p.D387N PRKD2      | NM_001079881 | NP_001073350 | Q9BZL6 | KPCD2_HUMAN |                                | 7  | CATGTCGTGGT   | 0.652 |
| - | 11 | 1841  | !KD2_uc002pfi.2_f  | NM_001079881 | NP_001073350 | Q9BZL6 | KPCD2_HUMAN | PH.                            | 7  | TCTCCAGCCCA   | 0.692 |
| - | 4  | 472   | pfu.1_Missense_M   | NM_004069    | NP_004060    | P53680 | AP2S1_HUMAN |                                | 0  | CAGACATTGTG   | 0.507 |
| + | 4  | 799   | P62_uc002pqz.2_f   | NM_012068    | NP_036200    | Q9Y2D1 | ATF5_HUMAN  |                                | 2  | TCCTCCCTCTG   | 0.577 |
| + | 4  | 1437  | dn.1_Missense_M    | NM_018260    | NP_060730    | Q9NV72 | ZN701_HUMAN |                                | 0  | AGAAACCTTACA  | 0.348 |
| - | 4  | 403   | p.A75T OSCAR       | NM_206818    | NP_996554    | Q8IYS5 | OSCAR_HUMAN | Ig-like 1.                     | 0  | GGGAGCGATCT   | 0.582 |
| - | 5  | 988   | LIRA3_uc010erk.2   | NM_006865    | NP_006856    | Q8N6C8 | LIRA3_HUMAN | like C2-type 3.                | 1  | GGGCCGACCAC   | 0.677 |
| - | 6  | 1154  | ifi.2_Missense_Mu  | NM_012276    | NP_036408    | P59901 | LIRA4_HUMAN | 4. Extracellular (Potential).  | 2  | TCAGACGCAACC  | 0.587 |
| + | 5  | 495   | g_Mutation_p.T11E  | NM_017852    | NP_060322    | Q9NX02 | NALP2_HUMAN |                                | 2  | CAGAAACGAAAC  | 0.323 |
| + | 2  | 321   | :3_Intron ZNF776   | NM_138347    | NP_612356    | Q7Z340 | ZN551_HUMAN | KRAB.                          | 1  | TGAGTCTCAGAC  | 0.483 |
| - | 7  | 2374  | hp.1_Missense_M    | NM_025027    | NP_079303    | Q8WXB4 | ZN606_HUMAN | C2H2-type 9.                   | 2  | CTGATGGGCAA   | 0.423 |
| + | 3  | 840   | r.2_Missense_Mut   | NM_000221    | NP_000212    | P50053 | KHK_HUMAN   |                                | 0  | TAGCCGACCA    | 0.557 |
| - | 4  | 533   | p.A150V ATL2_ucf   | NM_001135673 | NP_001129145 | Q8NHH9 | ATLA2_HUMAN | Cytoplasmic.                   | 3  | GCACAGCAACC   | 0.363 |
| + | 3  | 682   | 'svy.2_Missense_A  | NM_001008949 | NP_001008949 | Q6GPH6 | IPIL1_HUMAN | ical; (Potent p.G124V(1)       | 3  | ACTGGCCTCT    | 0.572 |
| - | 3  | 336   |                    | NM_016466    | NP_057550    | Q53RE8 | ANR39_HUMAN | ANK 3.                         | 0  | TCGGTGCAGAG   | 0.622 |
| - | 11 | 1379  | xe.2_5'Flank SEM   | NM_017789    | NP_060259    | Q9C0C4 | SEM4C_HUMAN | effect on m p.R407W(1)         | 2  | CCACCGAGGCC   | 0.622 |
| + | 13 | 4582  | :3_Missense_Mut    | NM_005270    | NP_005261    | P10070 | GLI2_HUMAN  |                                | 13 | TGATGATGGCA   | 0.627 |
| + | 1  | 207   | g.1_Intron UGGT1   | NM_020120    | NP_064505    | Q9NYU2 | UGGG1_HUMAN |                                | 1  | CGGTGCGTGTG   | 0.721 |
| - | 63 | 10974 |                    | NM_018557    | NP_061027    | Q9NZR2 | LRP1B_HUMAN | ntial) LDL-receptor class A    | 50 | CATTTCACCA    | 0.338 |

rs144721445

rs142390931

rs139101339

rs138367050

|   |    |           |                    |              |              |        |             |                            |             |               |       |                    |
|---|----|-----------|--------------------|--------------|--------------|--------|-------------|----------------------------|-------------|---------------|-------|--------------------|
| + | 2  | 392       | on_p.P98S PDK1_    | NM_002610    | NP_002601    | Q15118 | PDK1_HUMAN  |                            | 4           | CTCCTTCCAGAT  | 0.393 |                    |
| - | 46 | 15972     | N_uc010zfi.1_intri | NM_133379    | NP_596870    | Q8WZ42 | TITIN_HUMAN |                            | 153         | TCCCCCTTCTC   | 0.403 |                    |
| - | 40 | 9583      | R3074Q TTN_uc0     | NM_133378    | NP_596869    | Q8WZ42 | TITIN_HUMAN |                            | 153         | ACATCCGGGTG   | 0.453 | rs72647894         |
| - | 40 | 6558      |                    | NM_018897    | NP_061720    | Q8WXX0 | DYH7_HUMAN  | 3 (By similarity).         | 12          | CATTTACGATTTG | 0.318 |                    |
| + | 3  | 285       | 10ziu.1_5'Flank E  | NM_001037663 | NP_001032752 | P24534 | EF1B_HUMAN  | ST C-terminal.             | 0           | TGTCCAGCCCA   | 0.468 |                    |
| - | 17 | 2526      | e_Mutation_p.S45   | NM_173076    | NP_775099    | Q86UK0 | ABCAC_HUMAN |                            | 11          | TATTTTGAAGCA  | 0.348 |                    |
| + | 17 | 1697      | P140_uc002vqm.2    | NM_007237    | NP_009168    | Q13342 | LY10_HUMAN  |                            | 0           | CCGACGGCCAG   | 0.478 |                    |
| + | 3  | 247       | uc010fyc.2_Splice  | NM_000751    | NP_000742    | Q07001 | ACHD_HUMAN  |                            | 3           | AGCACGTAAGA   | 0.284 |                    |
| - | 7  | 1266      | r_p.E63K NGEF_u    | NM_019850    | NP_062824    | Q8N5V2 | NGEF_HUMAN  | DH.                        | 7           | CTCCTCCATCCG  | 0.587 |                    |
| + | 2  | 673       |                    | NM_005383    | NP_005374    | Q9Y3R4 | NEUR2_HUMAN |                            | 0           | AAGTCGAGACT   | 0.652 |                    |
| - | 10 | 4652      | p.R1250Q COL6A     | NM_004369    | NP_004360    | P12111 | CO6A3_HUMAN | Nonhelical region.         | 18          | AAATCTCGAATAT | 0.458 |                    |
| - | 9  | 817       | _p.P270S IDH3B_u   | NM_006899    | NP_008830    | O43837 | IDH3B_HUMAN |                            | 0           | ATTGGGCATCAC  | 0.527 |                    |
| + | 2  | 959       | K2_uc002wkd.2_Ir   | NM_153638    | NP_705902    | Q9BZ23 | PANK2_HUMAN |                            | 0           | TGGAGCGTACA   | 0.383 |                    |
| + | 4  | 620       | 0zrc.1_Missense_I  | NM_012261    | NP_036393    | Q9UJQ1 | CT103_HUMAN | cellular (Potential).      | 3           | CCAAGGGACCT   | 0.582 |                    |
| + | 10 | 1488      | jfw.2_Splice_Site_ | NM_002951    | NP_002942    | P04844 | RPN2_HUMAN  |                            | 3           | ACCCGGTAGGT   | 0.517 |                    |
| + | 2  | 349       | l2xix.2_Missense_  | NM_020336    | NP_065069    | Q86X10 | RLGPB_HUMAN |                            | 2           | TGGACGAGAGG   | 0.488 |                    |
| - | 38 | 4807      | rtv.1_Missense_Mu  | NM_020820    | NP_065871    | Q8TCU6 | PREX1_HUMAN |                            | 6           | CCAGGGACACG   | 0.687 |                    |
| - | 8  | 1214      | yi.1_Missense_Mu   | NM_000961    | NP_000952    | Q16647 | PTGIS_HUMAN |                            | 3           | GGAAGGGGAAG   | 0.557 |                    |
| + | 2  | 3406      |                    | NM_173485    | NP_775756    | Q9NRE2 | TSH2_HUMAN  |                            | 6           | GGTCCCCCCA    | 0.552 |                    |
| + | 21 | 2975      | VCRNA00176_uc0     | NM_012469    | NP_036601    | O94906 | PRP6_HUMAN  |                            | 2           | CGCCGCATCA    | 0.617 |                    |
| - | 6  | 2187      |                    | NM_006988    | NP_008919    | Q9UHI8 | ATS1_HUMAN  | SP type-1.                 | 6           | GACTCCTCCACC  | 0.498 |                    |
| - | 11 | 1188_1189 | n_p.K416E CHEK     | NM_007194    | NP_009125    | O96017 | CHK2_HUMAN  | rotein kinase73E(2) p.S372 | 20          | AATCTTGGAGTG  | 0.416 | 470496;rs146546850 |
| - | 16 | 2130      |                    | NM_173050    | NP_766638    | Q8IWI4 | SCUB1_HUMAN |                            | 5           | ATTCCGACACG   | 0.647 |                    |
| - | 13 | 1598      | iqk.1_Missense_M   | NM_138415    | NP_612424    | Q96EK2 | PF21B_HUMAN |                            | 3           | GGCCCGCAGGC   | 0.652 |                    |
| - | 3  | 557       |                    | NM_012401    | NP_036533    | O15031 | PLXB2_HUMAN | ilar (Potential). Sema.    | 6           | GGCCACGCCCT   | 0.637 |                    |
| + | 9  | 885       | aux.1_Missense_I   | NM_024827    | NP_079103    | Q96DB2 | HDA11_HUMAN | one deacetylase.           | 2           | CTGCCCCGACG   | 0.617 |                    |
| + | 8  | 1321      | .C22A13_uc011ay    | NM_004256    | NP_004247    | Q9Y226 | S22AD_HUMAN | cellular (Potential).      | 1           | TGGCTGTGGTG   | 0.612 |                    |
| - | 16 | 3082      |                    | NM_006514    | NP_006505    | Q9Y5Y9 | SCNAA_HUMAN |                            | 10          | CTGTCTTTGGC   | 0.542 |                    |
| + | 10 | 1513      | NB1_uc011azf.1_f   | NM_001904    | NP_001895    | P35222 | CTNB1_HUMAN | ARM 8.                     | 3166        | TCCTTCGGGCT   | 0.502 |                    |
| + | 3  | 1576      |                    | NM_001123041 | NP_001116513 | P41597 | CCR2_HUMAN  | lasmic (Potential).        | 2           | AGCCCCTGAAG   | 0.488 |                    |
| + | 47 | 6293      | e_Mutation_p.P20:  | NM_001128840 | NP_001122312 | Q01668 | CAC1D_HUMAN | lasmic (Potential).        | 11          | CTGTCCCCAGC   | 0.622 |                    |
| - | 8  | 1442      | ip.1_Missense_Mu   | NM_001142733 | NP_001136205 | A6NK59 | ASB14_HUMAN | ANK 11.                    | 0           | AACATCGCTCT   | 0.428 |                    |
| + | 25 | 4525      | if.2_Missense_Mu   | NM_001457    | NP_001448    | O75369 | FLNB_HUMAN  | Interaction with FBLP1.    | 19          | TGGCTCCGCTG   | 0.657 |                    |
| + | 1  | 374       |                    | NM_001005482 | NP_001005482 | Q8NGV7 | OR5H2_HUMAN | lasmic (Potential).        | 3           | TGGCATATGATC  | 0.378 |                    |
| - | 9  | 980       | h.1_Missense_Mu    | NM_007085    | NP_009016    | Q12841 | FSTL1_HUMAN | VWFC.                      | 1           | CTCACCGTCA    | 0.517 |                    |
| + | 6  | 1109      | M2_uc010hsl.2_F    | NM_004526    | NP_004517    | P49736 | MCM2_HUMAN  | type (Potential).          | 4           | AGGCTCCTGTC   | 0.582 |                    |
| + | 1  | 3723      |                    | NM_175918    | NP_787114    | Q8N1N5 | CRPAK_HUMAN | 7                          | CGTGCCGATGT | 0.687         |       |                    |
| - | 4  | 2300      |                    | NM_001024611 | NP_001019782 | Q68CR7 | LRC66_HUMAN |                            | 3           | CCCTGGAATTGT  | 0.478 |                    |
| - | 7  | 695       | 003hdl.3_Intron uc | NM_207407    | NP_997290    | Q6ZWK6 | TM11F_HUMAN | Extracellular (Potential). | 1           | ATCCCCCTTCCA  | 0.522 |                    |
| + | 19 | 3830      | jk.3_Missense_Mu   | NM_005935    | NP_005926    | P51825 | AFF1_HUMAN  |                            | 1           | GAATATGACATC  | 0.537 |                    |
| + | 38 | 5850      | 3_Intron ANK2_uc   | NM_001148    | NP_001139    | Q01484 | ANK2_HUMAN  | ich region. Repeat A.      | 14          | TGTATCGCCCT   | 0.512 |                    |
| + | 3  | 5443      | p.1_Missense_Mu    | NM_024582    | NP_078858    | Q6V017 | FAT4_HUMAN  | Extracellular (Potential). | 18          | TAGTTCGTGCT   | 0.468 |                    |
| + | 13 | 2650      | ciu.1_Missense_N   | NM_001083619 | NP_001077088 | P42262 | GRIA2_HUMAN | cellular (Potential).      | 4           | ATGAACGAGTAC  | 0.507 |                    |
| + | 20 | 4001      | e.1_Missense_Mu    | NM_001080477 | NP_001073946 | Q9P273 | TEN3_HUMAN  | cellular (Potential).      | 0           | TCTAACGATTTG  | 0.393 |                    |
| - | 6  | 1180      | 110_uc011cnu.1_F   | NM_006727    | NP_006718    | Q9Y6N8 | CAD10_HUMAN | Extracellular (Potential). | 12          | CAACTGGGGAG   | 0.313 |                    |
| + | 8  | 1174      | 7R_uc011cop.1_RI   | NM_002185    | NP_002176    | P16871 | IL7RA_HUMAN | lasmic (Potential).        | 5           | CTTTGGAAGAG   | 0.537 |                    |
| - | 4  | 321       | TARD4_uc003kpi.    | NM_139164    | NP_631903    | Q96DR4 | STAR4_HUMAN | START.                     | 1           | CTGTCCCAATC   | 0.398 |                    |

|   |    |                            |                    |              |              |             |             |                              |              |                |       |             |
|---|----|----------------------------|--------------------|--------------|--------------|-------------|-------------|------------------------------|--------------|----------------|-------|-------------|
| + | 8  | 1039                       | i_p.P70S DCP2_ur   | NM_152624    | NP_689837    | Q8IU60      | DCP2_HUMAN  |                              | 0            | TTATTCCTGACC   | 0.373 |             |
| - | 5  | 1421                       | nse_Mutation_p.L   | NM_020389    | NP_065122    | Q9HCX4      | TRPC7_HUMAN | ical; (Potential).           | 0            | AAATCTAGCAGG   | 0.582 |             |
| - | 1  | 463                        | h.1_Missense_Mu    | NM_020389    | NP_065122    | Q9HCX4      | TRPC7_HUMAN | lasmic (Potential).          | 0            | CTCGTCGTAGG    | 0.662 |             |
| + | 3  | 801                        |                    | NM_032289    | NP_115665    | Q9BQI7      | PSD2_HUMAN  |                              | 1            | GTGGGCATTG     | 0.687 |             |
| + | 21 | 2029                       | e_Mutation_p.P66f  | NM_015071    | NP_055886    | Q9UNA1      | RHG26_HUMAN | Ser-rich.                    | 1            | CCCCCGAATC     | 0.587 |             |
| + | 22 | 3698                       | p.A1159V TCOF1_    | NM_001135243 | NP_001128715 | Q13428      | TCOF_HUMAN  |                              | 3            | GGTGGCGCCAT    | 0.632 |             |
| - | 2  | 3165                       |                    | NM_052899    | NP_443131    | Q7Z2K8      | GRIN1_HUMAN | th GNAO1 (By similarity).    | 2            | ACCGCGGCCGG    | 0.672 |             |
| - | 16 | 1807                       | i_p.T558I EXOC2_   | NM_018303    | NP_060773    | Q96KP1      | EXOC2_HUMAN |                              | 7            | CATGAGTAAGTC   | 0.458 |             |
| + | 1  | 109                        |                    | NM_003540    | NP_003531    | P62805      | H4_HUMAN    |                              | 0            | TCGTCGCTTG     | 0.577 |             |
| + | 3  | 612                        | 2A1_uc003nid.1_ε   | NM_007049    | NP_008980    | Q7KYR7      | BT2A1_HUMAN | (Potential). Ig-like V-type. | 2            | GCCTACGATGAG   | 0.532 |             |
| + | 4  | 1033                       | uc003nkk.1_Intror  | NM_025231    | NP_079507    | Q9H4T2      | ZSC16_HUMAN | 2H2-type 3.                  | 1            | CATCAGAGAATC   | 0.418 |             |
| + | 16 | 3979                       | T2_uc003nvc.3_Ni   | NM_080686    | NP_542417    | P48634      | PRC2A_HUMAN | X 57 AA type A repeats.      | 0            | GGAGGCGACAT    | 0.632 |             |
| - | 9  | 1487                       | se_Mutation_p.D9;  | NM_025258    | NP_079534    | Q9Y334      | G7C_HUMAN   |                              | 3            | GGCATCCGTGA    | 0.582 |             |
| - | 25 | 8843                       |                    | NM_019105    | NP_061978    | P22105      | TENX_HUMAN  | nectin type-III 21.          | 0            | CTGCCCATCCC    | 0.627 |             |
| - | 1  | 483                        | aw.2_Missense_Mi   | NM_002586    | NP_002577    | P40425      | PBX2_HUMAN  |                              | 1            | CCTGGGCCTCG    | 0.647 |             |
| + | 10 | 1582                       | qo.3_Missense_Mi   | NM_021956    | NP_068775    | Q13002      | GRIK2_HUMAN | ellular (Potential).         | 5            | TATGTCCTTTTA   | 0.343 |             |
| - | 5  | 2449                       |                    | NM_001080450 | NP_001073919 | Q5T5X7      | BEND3_HUMAN | BEN 3.                       | 3            | CCAGGGAGCCG    | 0.637 |             |
| + | 13 | 5311_5312.P4_uc003qrg.2_Ir | NM_020245          | NP_064630    | Q9NRJ4       | TULP4_HUMAN |             | 1                            | GAAGTCCTCTCC | 0.584          |       |             |
| + | 5  | 775                        | jw.1_Missense_Mi   | NM_032532    | NP_115921    | Q4ZHG4      | FNDC1_HUMAN | nectin type-III 2.           | 8            | ATCACGGGGTT    | 0.542 |             |
| + | 18 | 1637                       | isy.1_Nonsense_N   | NM_173516    | NP_775787    | Q8NA58      | PNDC1_HUMAN | lasmic (Potential).          | 0            | CTACTGGAGGC    | 0.622 |             |
| - | 3  | 465                        | l1egc.1_Missense_  | NM_020133    | NP_064518    | Q9NRZ5      | PLCD_HUMAN  |                              | 0            | GGCGCGGGGT     | 0.527 |             |
| - | 19 | 2454                       | n_p.W647* OSBPl    | NM_015550    | NP_056365    | Q9H4L5      | OSBL3_HUMAN |                              | 1            | TTTGTCCACTC    | 0.403 |             |
| + | 11 | 1814                       |                    | NM_002047    | NP_002038    | P41250      | SYG_HUMAN   |                              | 1            | ACCTCTGAAAG    | 0.433 |             |
| - | 11 | 1499                       | sense_Mutation_p   | NM_033054    | NP_149043    | B01T2       | MYO1G_HUMAN | osin head-like.              | 4            | CAATGGTGGCG    | 0.622 |             |
| + | 4  | 1052                       |                    | NM_001159279 | NP_001152751 |             |             |                              | 2            | CTAACCACAAG    | 0.398 |             |
| - | 20 | 2777                       | ic.1_Missense_Mu   | NM_000927    | NP_000918    | P08183      | MDR1_HUMAN  | smembrane type-1 2.          | 7            | GAGCCGCTTGG    | 0.522 |             |
| + | 8  | 2347                       | p.V689I PPP1R9A    | NM_017650    | NP_060120    | Q9ULJ8      | NEB1_HUMAN  | N38 (By similarity). Potenti | 4            | ATGCAGTTACAC   | 0.318 |             |
| - | 6  | 741                        | r_p.R184* SLC25f   | NM_014251    | NP_055066    | Q9UJS0      | CMC2_HUMAN  | EF-hand 4.                   | 4            | GTCTCGGAAGT    | 0.453 | rs80338716  |
| - | 3  | 1904                       | 3AL3ST4_uc003ui    | NM_024637    | NP_078913    | Q96RP7      | G3ST4_HUMAN | renal (Potential).           | 3            | AGACAGAGTCC    | 0.532 |             |
| + | 4  | 713                        | ntron AGFG2_uc0    | NM_006076    | NP_006067    | O95081      | AGFG2_HUMAN |                              | 1            | CCACCTCGAGC    | 0.552 |             |
| - | 2  | 477                        | iKI_uc003vtu.2_Int | NM_004717    | NP_004708    | O75912      | DGKI_HUMAN  |                              | 3            | TGGCTGGACCA    | 0.478 |             |
| - | 15 | 1860                       |                    | NM_004333    | NP_004324    | P15056      | BRAF_HUMAN  | rotein kinase_R603>I(2) p.T  | 18290        | GATTTCACTGTAC  | 0.368 |             |
| + | 3  | 5767                       | p.R517C ABP1_u     | NM_001091    | NP_001082    | P19801      | ABP1_HUMAN  |                              | 6            | ACTACCGCGTA    | 0.567 |             |
| - | 1  | 871                        | .1_Intron FAM66D   | NM_201402    | NP_958804    | Q6R6M4      | U17L2_HUMAN |                              | 3            | GGCAAGTTTGT    | 0.498 |             |
| - | 28 | 3497_3498                  | uc003xhi.1_Intron  | NM_015254    | NP_056069    | Q9NQ8       | KI13B_HUMAN |                              | 0            | AGAGGGGACCAT   | 0.54  |             |
| + | 2  | 430                        | HD2_uc003xlc.2_N   | NM_015214    | NP_056029    | O94830      | DDHD2_HUMAN |                              | 2            | ATCTCCGTCAAC   | 0.408 | rs143549962 |
| - | 16 | 3579                       | R1012Q MYST3_u     | NM_001099412 | NP_001092882 | Q92794      | MYST3_HUMAN |                              | 7            | CCTTCGCTTCA    | 0.498 |             |
| - | 3  | 1130                       | p.R252H OPRK1_     | NM_000912    | NP_000903    | P41145      | OPRK_HUMAN  | lasmic (Potential).          | 2            | TGAGACGCAGG    | 0.552 |             |
| + | 5  | 1103                       |                    | NM_147189    | NP_671722    | Q8TC76      | F110B_HUMAN |                              | 1            | AGCCCGTGAAG    | 0.677 |             |
| + | 7  | 812                        | p.D255N C8orf34_   | NM_052958    | NP_443190    | Q49A92      | CH034_HUMAN |                              | 1            | TCTCAAGATTCT   | 0.368 |             |
| - | 2  | 80                         | IF2C2_uc010meo.    | NM_012154    | NP_036286    | Q9UKV8      | AGO2_HUMAN  |                              | 0            | CGCGGCGCAC     | 0.582 |             |
| - | 31 | 6907                       | e.1_Missense_Mul   | NM_201380    | NP_958782    | Q15149      | PLEC_HUMAN  | us rod domain. Potential.    | 9            | CCTGCCCGCGG    | 0.761 |             |
| - | 5  | 1584                       |                    | NM_138367    | NP_612376    | Q9BRH9      | ZN251_HUMAN | 2H2-type 9.                  | 0            | TCCGACGAAAG    | 0.493 |             |
| - | 5  | 780                        | _T3_uc011nf.1_Mi   | NM_004529    | NP_004520    | P42568      | AF9_HUMAN   | Poly-Ser.                    | 3            | ctgctgtgctgctg | 0.139 |             |
| - | 7  | 1177                       | p.A288V ELAVL2_    | NM_004432    | NP_004423    | Q12926      | ELAV2_HUMAN | RRM 3.                       | 3            | TGACAGCTCCA    | 0.468 |             |
| - | 3  | 730                        | sense_Mutation_p.  | NM_004323    | NP_004314    | Q99933      | BAG1_HUMAN  | . Interaction with HSPA8.    | 1            | TGACCCGGCAA    | 0.368 |             |
| + | 7  | 1613                       | NFX1_uc003zsp.1    | NM_002504    | NP_002495    | Q12986      | NFX1_HUMAN  | IF-X1-type 2.                | 1            | ATGGGGGTGACG   | 0.493 | rs35268125  |



|   |    |       |                   |              |              |        |             |    |              |       |             |
|---|----|-------|-------------------|--------------|--------------|--------|-------------|----|--------------|-------|-------------|
| - | 16 | 2167  | ssense_Mutation_  | NM_022917    | NP_075068    | Q9H6R4 | NOL6_HUMAN  | 2  | GGTGAGCTCCC  | 0.617 | rs139620819 |
| - | 3  | 797   |                   | NM_017561    | NP_060031    | A1L443 | FA22F_HUMAN | 0  | TGGCCTGCCAC  | 0.617 |             |
| + | 3  | 285   | 4brk.2_Splice_Sit | NM_001032221 | NP_001027392 | P61764 | STXB1_HUMAN | 1  | CTTGCAGGTGC  | 0.517 |             |
| - | 7  | 1089  | idn.1_Missense_M  | NM_001134707 | NP_001128179 | Q9UL12 | SARDH_HUMAN | 0  | GCGGAGGTAGA  | 0.577 |             |
| + | 6  | 1179  |                   | NM_000093    | NP_000084    | P20908 | CO5A1_HUMAN | 11 | GGAAGGAGACG  | 0.602 |             |
| - | 2  | 367   | n_p.C59F[MID1_u   | NM_033290    | NP_150632    | O15344 | TRI18_HUMAN | 3  | GCCGGCAGGTG  | 0.587 |             |
| + | 5  | 521   |                   | NM_000377    | NP_000368    | P42768 | WASP_HUMAN  | 1  | CCACAGACAGAC | 0.572 |             |
| - | 2  | 795   |                   | NM_019003    | NP_061876    | Q99865 | SPI2A_HUMAN | 0  | AGAACCATGCTC | 0.423 |             |
| - | 14 | 1938  | r_p.S612L ABCB7   | NM_004299    | NP_004290    | O75027 | ABCB7_HUMAN | 1  | GCTAACGATGAA | 0.353 |             |
| + | 17 | 2020  | 3qq.2_Missense_M  | NM_144658    | NP_653259    | Q5JSL3 | DOC11_HUMAN | 3  | AATACGATAGCC | 0.308 |             |
| + | 4  | 2019  | EC1_uc010nsl.1_l  | NM_005462    | NP_005453    | O60732 | MAGC1_HUMAN | 4  | CTCCTCACTACT | 0.582 |             |
| + | 8  | 602   | 5_uc011myj.1_Mis  | NM_007150    | NP_009081    | O15231 | ZN185_HUMAN | 3  | GGACAGCTCCC  | 0.488 |             |
| - | 7  | 904   | iku.1_Missense_M  | NM_006730    | NP_006721    | P49184 | DNSL1_HUMAN | 0  | GCAGACTCCGG  | 0.662 |             |
| - | 9  | 875   | se_Mutation_p.E1  | NM_017871    | NP_060341    | Q5TA45 | INT11_HUMAN | 0  | CTTCTCGGTCA  | 0.562 |             |
| - | 4  | 545   | P2_uc001arw.2_3   | NM_006610    | NP_006601    | O00187 | MASP2_HUMAN | 4  | TGTTACGGTGC  | 0.687 |             |
| + | 5  | 857   | ii.2_Missense_Mu  | NM_014874    | NP_055689    | O95140 | MFN2_HUMAN  | 1  | CCTGCGGGTAG  | 0.582 |             |
| - | 13 | 2091  | r_p.Q5* ARHGEF    | NM_153213    | NP_694945    | Q8IW93 | ARHGJ_HUMAN | 3  | CACCTGCAGCT  | 0.657 |             |
| + | 6  | 1125  | jav.1_Missense_M  | NM_032880    | NP_116269    | Q96ID5 | IGS21_HUMAN | 4  | CCTCCCGTGGC  | 0.637 |             |
| - | 94 | 13667 | se_Mutation_p.G2  | NM_020765    | NP_065816    | Q5T4S7 | UBR4_HUMAN  | 25 | TGCACCCCCAC  | 0.537 |             |
| - | 65 | 8547  | id.2_Missense_Mt  | NM_005529    | NP_005520    | P98160 | PGBM_HUMAN  | 9  | CTCGGGAGGAG  | 0.677 |             |
| + | 15 | 2948  | igf.2_Missense_Mt | NM_017449    | NP_059145    | P29323 | EPHB2_HUMAN | 5  | GCTTCGCCAAT  | 0.592 |             |
| + | 8  | 534   | uc001bhs.1_Silent | NM_007260    | NP_009191    | O95372 | LYPA2_HUMAN | 2  | CCACCTCTGG   | 0.682 |             |
| + | 13 | 1933  | e_Mutation_p.R54  | NM_005839    | NP_005830    | Q8IYB3 | SRRM1_HUMAN | 3  | ACGGCGCAGGA  | 0.532 | rs78787676  |
| + | 13 | 1157  | u.R316C RPS6KA    | NM_002953    | NP_002944    | Q15418 | KS6A1_HUMAN | 1  | ACCGTCGTGAG  | 0.597 |             |
| + | 3  | 1442  | p.D371N PIGV_uc   | NM_017837    | NP_060307    | Q9NUD9 | PIGV_HUMAN  | 1  | AGCCCGATCTT  | 0.537 |             |
| + | 4  | 879   | lofh.1_Missense_M | NM_032283    | NP_115659    | Q9NUE0 | ZDH18_HUMAN | 0  | CGTTGCGTGAG  | 0.567 |             |
| + | 11 | 1671  | p.D267Y ADC_uc    | NM_052998    | NP_443724    | Q96A70 | ADC_HUMAN   | 2  | CGGTTGATGGC  | 0.617 |             |
| - | 13 | 2278  | p.D743H PHC2_u    | NM_198040    | NP_932157    | Q8IXK0 | PHC2_HUMAN  | 1  | GTTATCTGAGC  | 0.572 |             |
| - | 14 | 2437  | p.L169F KIAA031   | NM_024874    | NP_079150    | Q8IZA0 | K319L_HUMAN | 2  | CCAGAGGTAGC  | 0.557 |             |
| - | 7  | 1117  | aa.1_Missense_Mt  | NM_000831    | NP_000822    | Q13003 | GRIK3_HUMAN | 7  | GGCGTCGTACA  | 0.652 |             |
| - | 2  | 425   | ba.1_Missense_M   | NM_000831    | NP_000822    | Q13003 | GRIK3_HUMAN | 7  | CACCCTTTTTGC | 0.547 |             |
| + | 34 | 4383  | p.T480M MACF1     | NM_012090    | NP_036222    | Q9UPN3 | MACF1_HUMAN | 16 | CTACACGGCAT  | 0.418 |             |
| - | 9  | 2205  | u.R436H PABPC4    | NM_003819    | NP_003810    | Q13310 | PABP4_HUMAN | 0  | GCCAGCGTGGA  | 0.527 |             |
| - | 4  | 825   | fv.1_Missense_Mu  | NM_014747    | NP_055562    | Q9UJD0 | RIMS3_HUMAN | 0  | ACGTGCCGTCG  | 0.667 |             |
| + | 8  | 1174  |                   |              |              | Q5T011 | SZT2_HUMAN  | 0  | ACTGCGGTGAG  | 0.577 |             |
| + | 7  | 987   | js.2_Missense_Mt  | NM_002840    | NP_002831    | P10586 | PTPRF_HUMAN | 10 | CACACGTTACT  | 0.607 |             |
| + | 4  | 1074  | okl.1_Missense_M  | NM_003780    | NP_003771    | O60909 | B4GT2_HUMAN | 2  | ACCCCGCCACT  | 0.617 | rs145778728 |
| + | 2  | 844   | lw.1_Missense_M   | NM_018150    | NP_060620    | Q5VTB9 | RN220_HUMAN | 2  | GCAAGGAATAT  | 0.517 |             |
| + | 6  | 822   | ie_Mutation_p.R12 | NM_006066    | NP_006057    | P14550 | AK1A1_HUMAN | 0  | TCAGCGGGGGA  | 0.557 |             |
| - | 17 | 3570  | se_Mutation_p.E1  | NM_003035    | NP_003026    | Q15468 | STIL_HUMAN  | 3  | GTTCTCTTCAT  | 0.393 |             |
| - | 9  | 1754  | u.1_RNA C1orf16   | NM_001004303 | NP_001004303 | Q5VWT5 | CA168_HUMAN | 5  | CTCAGGGCAGC  | 0.463 |             |
| + | 19 | 3394  | p.A406T LRRC7     | NM_020794    | NP_065845    | Q96NW7 | LRRC7_HUMAN | 14 | TGAGCGCCACA  | 0.587 | rs144289156 |
| + | 5  | 1043  | NAC5_uc009wbw     | NM_030965    | NP_112227    | Q9BVH7 | SIA7E_HUMAN | 2  | GAGGACGCAAG  | 0.443 |             |
| - | 3  | 415   | dkr.2_Missense_M  | NM_018298    | NP_060768    | Q8TDD5 | MCLN3_HUMAN | 1  | TTCGGTCCATAT | 0.378 |             |
| - | 17 | 2111  | nse_Mutation_p.R: | NM_001017975 | NP_001017975 | A2PYH4 | HFM1_HUMAN  | 0  | TTAATCGAGTCA | 0.373 |             |
| + | 7  | 1416  | dur.2_Missense_M  | NM_020978    | NP_066188    | P19961 | AMY2B_HUMAN | 0  | TGGCCGGGTGA  | 0.378 |             |
| + | 7  | 4649  |                   | NM_001408    | NP_001399    | Q9HCU4 | CELR2_HUMAN | 8  | TGCCTGACCTG  | 0.642 |             |

|   |    |       |                   |              |              |        |              |                                 |    |               |       |             |
|---|----|-------|-------------------|--------------|--------------|--------|--------------|---------------------------------|----|---------------|-------|-------------|
| + | 17 | 3083  | gn.1_Missense_Mi  | NM_014813    | NP_055628    | O94898 | LRIG2_HUMAN  | lasmic (Potential).             | 3  | FGATACCGTCAG  | 0.488 |             |
| - | 1  | 461   | wu.1_Missense_Iv  | NM_001232    | NP_001223    | O14958 | CASQ2_HUMAN  |                                 | 1  | TTTTGCGTGACC  | 0.473 |             |
| - | 5  | 1864  | _p.G387R IGSF3_i  | NM_001007237 | NP_001007238 | O75054 | IGSF3_HUMAN  | cellular (Potential).           | 2  | TTCCCCCGGTCA  | 0.517 |             |
| - | 4  | 532   | _p.A31V REG4_ur   | NM_001159352 | NP_001152824 | Q9BYZ8 | REG4_HUMAN   |                                 | 1  | CAGGAGCACAG   | 0.373 |             |
| + | 32 | 4104  | 10_uc010oyl.1_Int | NM_001039703 | NP_001034792 | A6NDV3 | A6NDV3_HUMAN |                                 | 0  | GTGCTGGATGAG  | 0.478 |             |
| + | 74 | 9249  | .1_Intron NBPF10  | NM_001039703 | NP_001034792 | A6NDV3 | A6NDV3_HUMAN |                                 | 0  | GGCCTAAAGTC   | 0.473 |             |
| + | 4  | 613   | _uc001enz.1_5'Fla | NM_003846    | NP_003837    | O96011 | PX11B_HUMAN  |                                 | 0  | GTGGCTCGAGTC  | 0.582 |             |
| + | 19 | 2327  |                   | NM_173638    | NP_775909    | Q8N660 | NBPF_HUMAN   | NBPF 6.                         | 0  | TTATTTCGACTCC | 0.458 |             |
| - | 2  | 1030  | pcr.1_Missense_Iv | NM_212551    | NP_997716    | Q96S90 | LYSM1_HUMAN  |                                 | 0  | GGCACGTCCTG   | 0.502 |             |
| - | 3  | 11572 |                   | NM_002016    | NP_002007    | P20930 | FILA_HUMAN   | grin 23. Ser-rich.              | 16 | CTGGCCGGACT   | 0.592 | rs143233744 |
| - | 12 | 1520  | 01fde.3_RNA CR1   | NM_181715    | NP_859066    | Q53ET0 | CRTC2_HUMAN  |                                 | 2  | TGGGGGTAACCA  | 0.542 | rs35857186  |
| - | 7  | 2205  | fo.2_Missense_Mt  | NM_002249    | NP_002240    | Q9UGI6 | KCNN3_HUMAN  | i-binding (By similarity).      | 1  | GGAAGGTCCA    | 0.552 |             |
| + | 3  | 757   | _p.R234H ZBTB7B   | NM_015872    | NP_056956    | O15156 | ZBT7B_HUMAN  |                                 | 0  | CCGCCGACGCC   | 0.657 |             |
| + | 20 | 2677  | zk.1_Missense_Mt  | NM_001080471 | NP_001073940 | Q5VY43 | PEAR1_HUMAN  | Pro-rich.                       | 3  | AGGTGGGGCCC   | 0.667 |             |
| - | 21 | 3114  |                   | NM_003126    | NP_003117    | P02549 | SPTA1_HUMAN  |                                 | 8  | CCACTGGTGCA   | 0.507 |             |
| - | 16 | 2415  |                   | NM_003126    | NP_003117    | P02549 | SPTA1_HUMAN  | Spectrin 8.                     | 8  | CCTGACGAGCA   | 0.463 | rs145972324 |
| - | 4  | 415   |                   | NM_017625    | NP_060095    | Q8WWA0 | ITLN1_HUMAN  | rogen C-terminal.               | 7  | TGGACCAGCGA   | 0.627 |             |
| + | 8  | 1334  | _p.V326M UHMK1    | NM_175866    | NP_787062    | Q8TAS1 | UHMK1_HUMAN  | RRM.                            | 0  | TTTGTGTGGCT   | 0.433 |             |
| + | 3  | 478   | cr.1_Nonsense_Mi  | NM_145697    | NP_663735    | Q9BZD4 | NUF2_HUMAN   | the N-terminus of NDC80.        | 4  | GAAATTCGACTGC | 0.348 |             |
| - | 13 | 3971  |                   | NM_000130    | NP_000121    | P12259 | FA5_HUMAN    | ndem repeats of [TNP]-L-S       | 6  | AGAAAGGGGCA   | 0.502 | rs140018525 |
| + | 6  | 643   | _p.C62S FAM163f   | NM_173509    | NP_775780    | Q96GL9 | F163A_HUMAN  |                                 | 1  | CCACCTGCAAT   | 0.667 |             |
| + | 16 | 2338  | qh.2_Missense_Mt  | NM_173156    | NP_775179    | Q92540 | SMG7_HUMAN   | Gln/Pro-rich.                   | 3  | GCCACCTTCCC   | 0.537 |             |
| + | 6  | 999   |                   | NM_030787    | NP_110414    | Q9BXR6 | FHR5_HUMAN   | Sushi 5.                        | 2  | ATGGAGTTTCA   | 0.378 |             |
| - | 2  | 2245  | p.T713M ZNF281_   | NM_012482    | NP_036614    | Q9Y2X9 | ZN281_HUMAN  |                                 | 2  | GAGACGTAGTC   | 0.433 |             |
| - | 2  | 636   | _Mutation_p.L177F | NM_012482    | NP_036614    | Q9Y2X9 | ZN281_HUMAN  |                                 | 2  | ACTGAGGTCCCT  | 0.547 |             |
| - | 8  | 2173  | ypj.1_Missense_Mt | NM_014875    | NP_055690    | Q15058 | KIF14_HUMAN  | inesin-motor.                   | 7  | TGGGTATCACC   | 0.388 | rs144936292 |
| + | 5  | 1011  | _p.S29P RNPEP_    | NM_020216    | NP_064601    | Q9H4A4 | AMPB_HUMAN   |                                 | 1  | AGATCTCCCA    | 0.537 |             |
| - | 8  | 2175  | z.2_Missense_Mu   | NM_002644    | NP_002635    | P01833 | PIGR_HUMAN   | lasmic (Potential).             | 3  | TGTCCGGGCT    | 0.652 |             |
| - | 10 | 2155  | kv.2_Missense_Mi  | NM_206933    | NP_996816    | O75445 | USH2A_HUMAN  | e 2. Extracellular (Potential   | 26 | GTCTACAGAGA   | 0.423 |             |
| + | 1  | 996   |                   | NM_021958    | NP_068777    | Q14774 | HLX_HUMAN    |                                 | 2  | TGACCGCATTT   | 0.597 |             |
| + | 4  | 552   | d.1_Missense_Mu   | NM_014777    | NP_055592    | Q14146 | URB2_HUMAN   |                                 | 3  | CATCTACACGG   | 0.572 |             |
| + | 4  | 2297  | d.1_Missense_Mu   | NM_014777    | NP_055592    | Q14146 | URB2_HUMAN   |                                 | 3  | GACGGCTTCC    | 0.463 |             |
| + | 1  | 55    |                   | NM_001004696 | NP_001004696 | Q8NH00 | OR2T4_HUMAN  | cellular (Potential).           | 1  | TCCTGATGGGA   | 0.488 |             |
| + | 9  | 992   | F18_uc001imq.2_   | NM_003675    | NP_003666    | Q99633 | PRP18_HUMAN  |                                 | 1  | CCATCGGTGTC   | 0.413 |             |
| - | 22 | 3080  |                   | NM_001081    | NP_001072    | O60494 | CUBN_HUMAN   | CUB 5.                          | 19 | TGGCGGGATCG   | 0.393 |             |
| + | 7  | 860   |                   | NM_052997    | NP_443723    | Q9BXX3 | AN30A_HUMAN  |                                 | 9  | CTTGGTGGA     | 0.502 |             |
| - | 6  | 957   | _p.E188* PCDH15   | NM_033056    | NP_149045    | Q96QU1 | PCD15_HUMAN  | r (Potential). Cadherin 2.      | 13 | CATACTCTATCTG | 0.333 |             |
| + | 8  | 994   |                   | NM_001080512 | NP_001073981 | Q9H694 | BICC1_HUMAN  | KH 2.                           | 4  | CTACCGTCTACC  | 0.413 |             |
| + | 15 | 2308  | 50_uc010qjc.1_3'  | NM_024045    | NP_076950    | Q9BQ39 | DDX50_HUMAN  |                                 | 1  | CAAACGGAGTT   | 0.423 |             |
| - | 1  | 812   |                   | NM_001057    | NP_001048    | P21452 | NK2R_HUMAN   | Name=2; (Potential).            | 1  | ATTGACGATGA   | 0.572 |             |
| + | 27 | 2022  | ljqc.1_Missense_I | NM_005203    | NP_005194    | Q5TAT6 | CODA1_HUMAN  | al). Triple-helical region 3 (C | 1  | GACACGATGGG   | 0.502 |             |
| - | 6  | 1327  | cbt.1_Missense_Mi | NM_145869    | NP_665876    | P50995 | ANX11_HUMAN  |                                 | 1  | GCTCGGCACTG   | 0.701 |             |
| + | 3  | 456   | 70_splice PCGF5_  | NM_032373    | NP_115749    | Q86SE9 | PCGF5_HUMAN  |                                 | 1  | TTGAGGTAAGG   | 0.318 |             |
| - | 2  | 562   |                   | NM_005398    | NP_005389    | Q9UQK1 | PPR3C_HUMAN  | ction with EPM2A.               | 1  | GTAATCGTTGA   | 0.428 |             |
| - | 3  | 283   |                   | NM_006993    | NP_008924    | O75607 | NPM3_HUMAN   |                                 | 0  | GGTCCGGGCC    | 0.542 |             |
| - | 6  | 978   | kxy.1_Missense_I  | NM_025145    | NP_079421    | Q8NDM7 | WDR96_HUMAN  | WD 3.                           | 0  | AAGTACAGTAC   | 0.408 |             |
| - | 5  | 2445  |                   | NM_173791    | NP_776152    | Q8NEN9 | PDZD8_HUMAN  |                                 | 0  | TATCCGTGTTTC  | 0.453 |             |

|   |    |       |                   |              |              |        |              |    |                |       |                              |
|---|----|-------|-------------------|--------------|--------------|--------|--------------|----|----------------|-------|------------------------------|
| + | 4  | 3076  | se_Mutation_p.PE  | NM_206862    | NP_996744    | O95359 | TACC2_HUMAN  | 10 | :AGCTCCCCAAA   | 0.493 |                              |
| - | 8  | 1099  | T_uc001hr.2_Mis   | NM_000274    | NP_000265    | P04181 | OAT_HUMAN    | 0  | :CCACTCGGCAG   | 0.488 |                              |
| - | 7  | 1008  | oc.1_Nonsense_M   | NM_173575    | NP_775846    | Q86UX6 | ST32C_HUMAN  | 5  | :TCCTCGCAGCA   | 0.662 |                              |
| + | 6  | 756   | lra.2_Missense_M  | NM_006755    | NP_006746    | P37837 | TALDO_HUMAN  | 0  | :TGGGCGCCTCC   | 0.527 |                              |
| + | 12 | 2169  | sq.2_Missense_Mu  | NM_001003819 | NP_001003819 | B2RNG4 | B2RNG4_HUMAN | 1  | :TGCTGCAAATGT  | 0.428 |                              |
| + | 2  | 508   |                   | NM_173525    | NP_775796    | Q8N5U0 | CK042_HUMAN  | 1  | :GGCTCCGAAGC   | 0.597 |                              |
| - | 7  | 1475  | d.2_Missense_Mu   | NM_006458    | NP_006449    | O75382 | TRIM3_HUMAN  | 5  | :CTGCACGCAGC   | 0.657 | Filamin.                     |
| + | 1  | 117   | akh.2_Missense_M  | NM_018222    | NP_060692    | Q9NVD7 | PARVA_HUMAN  | 3  | :GTCCCCAAGA    | 0.697 | on with ARHGAP31.            |
| - | 9  | 1043  | F22_uc001mpa.2_   | NM_173588    | NP_775859    | Q8N9C0 | IGS22_HUMAN  | 7  | :CACATCGTACTT  | 0.527 | Ig-like 2.                   |
| + | 8  | 1467  | _p.S282L NAV2_u   | NM_145117    | NP_660093    | Q8IVL1 | NAV2_HUMAN   | 6  | :CTCCTCGGCCA   | 0.607 |                              |
| + | 2  | 198   |                   | NM_152316    | NP_689529    | Q8N8R7 | CK046_HUMAN  | 0  | :AGCTTCGTA     | 0.383 |                              |
| + | 2  | 2063  | nun.1_Missense_M  | NM_012194    | NP_036326    | Q6ZVL6 | CK041_HUMAN  | 2  | :CAGCAGCTGCC   | 0.512 |                              |
| - | 40 | 5566  | dj.1_Missense_Mu  | NM_001008938 | NP_001008938 | Q14008 | CKAP5_HUMAN  | 2  | :CTATTTCGAGATC | 0.498 |                              |
| + | 8  | 1342  | z.2_Missense_Mut  | NM_207341    | NP_997224    | P60852 | ZP1_HUMAN    | 0  | :GGTCCGGCTTC   | 0.622 | lular (Potential). ZP.       |
| + | 8  | 1116  | nxd.2_Missense_M  | NM_033101    | NP_149092    | Q96DT0 | LEG12_HUMAN  | 2  | :CCTTCGCAGAC   | 0.572 | Galectin 2.                  |
| + | 1  | 99    | _uc001ocy.1_5'Fla | NM_004927    | NP_004918    | Q13405 | RM49_HUMAN   | 0  | :GGCAGCTACCA   | 0.677 |                              |
| - | 7  | 1584  | o.R439W LTBP3_u   | NM_001130144 | NP_001123616 | Q9NS15 | LTBP3_HUMAN  | 3  | :ACACCGCGCGC   | 0.637 | TB 2.                        |
| + | 5  | 684   | z_Mutation_p.R17i | NM_006388    | NP_006379    | Q92993 | KAT5_HUMAN   | 0  | :CCACCGCTCAA   | 0.592 |                              |
| + | 2  | 256   | _p.R65H DPP3_uc   | NM_005700    | NP_005691    | Q9NY33 | DPP3_HUMAN   | 2  | :CAGCCGCCTCT   | 0.642 |                              |
| + | 3  | 414   |                   | NM_014578    | NP_055393    | O00212 | RHOD_HUMAN   | 0  | :TAACCGGGTAGC  | 0.547 |                              |
| + | 6  | 713   | _p.R155* ANKRD    | NM_207354    | NP_997237    | Q6ZTN6 | AN13D_HUMAN  | 1  | :GCCTGCGAGTA   | 0.607 |                              |
| - | 3  | 713   | _p.A157V LRRC32   | NM_005512    | NP_005503    | Q14392 | LRC32_HUMAN  | 0  | :TCTCCGCCAGT   | 0.642 | ilar (Potential). LRR 5.     |
| + | 18 | 2739  | IL5_uc001pju.2_R  | NM_003478    | NP_003469    | Q93034 | CUL5_HUMAN   | 1  | :TGGACGTTTGC/  | 0.343 |                              |
| + | 6  | 599   | .1_Missense_Mut   | NM_014956    | NP_055771    | Q9UPV0 | CE164_HUMAN  | 2  | :TTTACGAGGTC   | 0.537 | action with ATRIP.           |
| + | 27 | 10365 | .2_Missense_Mut   | NM_005933    | NP_005924    | Q03164 | MLL1_HUMAN   | 25 | :CAGACGAACAC   | 0.537 | rs139366882                  |
| - | 2  | 804   | 22_uc001pwn.3_In  | NM_004205    | NP_004196    | O75604 | UBP2_HUMAN   | 4  | :GCATGGGGCTG   | 0.627 | or interaction with MDM4.    |
| + | 4  | 693   |                   | NM_003105    | NP_003096    | Q92673 | SORL_HUMAN   | 15 | :CATTCGGGCA    | 0.512 | ellular (Potential).         |
| - | 2  | 242   | pat.2_Missense_M  | NM_014312    | NP_055127    | Q96IQ7 | VSIG2_HUMAN  | 4  | :CAGGGCGAAGC   | 0.632 | (Potential). Ig-like V-type. |
| + | 11 | 1314  | bg.1_Missense_M   | NM_152713    | NP_689926    | P46977 | STT3A_HUMAN  | 0  | :CAGCTGTAATGC  | 0.428 | ical; (Potential).           |
| + | 5  | 1227  | ijk.2_Missense_M  | NM_032642    | NP_116031    | Q9H1J7 | WNT5B_HUMAN  | 1  | :AGAGCGTGCAG   | 0.602 |                              |
| - | 43 | 7686  | vF_uc010set.1_Int | NM_000552    | NP_000543    | P04275 | VWF_HUMAN    | 12 | :TCACCGACCGA   | 0.577 | VWFC 2.                      |
| + | 14 | 1851  | _p.G498R PTPN6_   | NM_002831    | NP_002822    | P29350 | PTN6_HUMAN   | 1  | :AGTACGGGAAC   | 0.652 |                              |
| - | 10 | 2433  | sge.1_Missense_M  | NM_174941    | NP_777601    | Q9NR16 | C163B_HUMAN  | 11 | :GCAGGGCATAT   | 0.453 | :extracellular (Potential).  |
| + | 6  | 648   | IM1L_uc010skh.1_  | NM_012062    | NP_036192    | O00429 | DNM1L_HUMAN  | 2  | :GATATTGAGCTT  | 0.388 | GTPase domain.               |
| + | 17 | 2220  | nn.1_Missense_M   | NM_001843    | NP_001834    | Q12860 | CNTN1_HUMAN  | 9  | :CAGACGGTGTCT  | 0.368 |                              |
| - | 11 | 1222  | FRS2IP_uc001roy.  | NM_004719    | NP_004710    | Q99590 | SCAFB_HUMAN  | 0  | :GTTTTTCGTCTT  | 0.428 |                              |
| - | 1  | 367   |                   | NM_001004134 | NP_001004134 | Q8NGE0 | O10AD_HUMAN  | 1  | :ATAACGGTCAT   | 0.488 | lasmic (Potential).          |
| - | 4  | 1485  | TUBA1B_uc001rtl.  | NM_006082    | NP_006073    | P68363 | TBA1B_HUMAN  | 0  | :TTCACGGGCCCT  | 0.512 |                              |
| + | 4  | 1269  | TUBA1C_uc010sm    | NM_032704    | NP_116093    | Q9BQE3 | TBA1C_HUMAN  | 0  | :GGCTCGCCTGG   | 0.592 |                              |
| - | 5  | 1089  |                   | NM_030809    | NP_110436    | Q9H175 | CSRN2_HUMAN  | 0  | :GGACCCGGATT   | 0.592 |                              |
| + | 22 | 5078  | zj.2_Missense_Mu  | NM_012291    | NP_036423    | Q14674 | ESPL1_HUMAN  | 3  | :TTCAGGAGATG   | 0.592 |                              |
| - | 2  | 1134  | _p.R325C SP7_uc   | NM_152860    | NP_690599    | Q8TDD2 | SP7_HUMAN    | 0  | :ATGACGCTCCA   | 0.612 | 2H2-type 2.                  |
| + | 7  | 780   | tation_p.R144W P  | NM_001128911 | NP_001122383 | Q15366 | PCBP2_HUMAN  | 0  | :CTGAGCGGGCC   | 0.473 | KH 2.                        |
| - | 2  | 863   | zob.1_Missense_M  | NM_032364    | NP_115740    | Q6Y2X3 | DJC14_HUMAN  | 4  | :GATGTCGACCA   | 0.597 |                              |
| - | 9  | 988   | se_Mutation_p.D   | NM_145064    | NP_659501    | Q96MF2 | STAC3_HUMAN  | 3  | :CAGATCGTCCT   | 0.567 | SH3 1.                       |
| - | 3  | 357   |                   | NM_018402    | NP_060872    | Q9NPH9 | IL26_HUMAN   | 0  | :CTCCACAAAGC   | 0.388 |                              |
| - | 1  | 661   |                   | NM_201550    | NP_963844    | Q5BKY1 | LRC10_HUMAN  | 0  | :GGGGAGGTGCG   | 0.577 | LRR 3.                       |

|   |    |       |                   |              |              |        |             |                               |     |               |       |             |
|---|----|-------|-------------------|--------------|--------------|--------|-------------|-------------------------------|-----|---------------|-------|-------------|
| + | 3  | 905   |                   | NM_032790    | NP_116179    | Q96D31 | CRCM1_HUMAN | ical; (Potential).            | 0   | CCATCGCCTCG   | 0.642 |             |
| + | 6  | 664   | z_xh.2_Missense_I | NM_001080825 | NP_001074294 | A0PK00 | T120B_HUMAN | ical; (Potential).            | 0   | CCATTCGGGAG   | 0.572 |             |
| - | 3  | 769   | _p.R27H RILPL1_u  | NM_178314    | NP_847884    | Q5EBL4 | RIPL1_HUMAN | Potential.                    | 0   | TGGCGCGGATC   | 0.617 |             |
| - | 12 | 2436  |                   | NM_015347    | NP_056162    | O15034 | RIMB2_HUMAN |                               | 11  | CTCCTCCATGA   | 0.612 |             |
| + | 6  | 719   |                   | NM_003565    | NP_003556    | O75385 | ULK1_HUMAN  | rotein kinase.                | 4   | CCGCCGGCCCG   | 0.473 |             |
| - | 5  | 1441  | _p.D294E GOLGA3   | NM_005895    | NP_005886    | Q08378 | GOGA3_HUMAN |                               | 6   | CGGTCGTGAGT   | 0.597 | rs143511800 |
| - | 14 | 2075  | IR6_uc001uqe.1_I  | NM_004685    | NP_004676    | Q9Y217 | MTMR6_HUMAN |                               | 4   | TGCCCTCTATAG  | 0.423 |             |
| - | 5  | 1531  | se_Mutation_p.R4  | NM_183044    | NP_898865    | Q9Y252 | RNF6_HUMAN  | Arg-rich.                     | 2   | TATCCCGATCTC  | 0.463 |             |
| + | 1  | 2516  |                   | NM_207361    | NP_997244    | Q5SZK8 | FREM2_HUMAN | extracellular (Potential).    | 11  | TGACCGAGAAC   | 0.562 |             |
| + | 7  | 771   | _p.E172G COG6_u   | NM_020751    | NP_065802    | Q9Y2V7 | COG6_HUMAN  |                               | 2   | CTTATGAAAGAC  | 0.264 |             |
| - | 2  | 233   |                   | NM_198849    | NP_942146    | Q8IW03 | SIAH3_HUMAN |                               | 2   | GGCGCGCCGAC   | 0.443 |             |
| - | 13 | 3281  | nse_Mutation_p.S  | NM_015070    | NP_055885    | Q5T200 | ZC3HD_HUMAN |                               | 2   | GGGTACTACCA   | 0.373 |             |
| - | 5  | 650   |                   | NM_002267    | NP_002258    | O00505 | IMA3_HUMAN  |                               | 0   | GCATTCTGCAAT  | 0.328 |             |
| - | 13 | 2665  | oer.2_Missense_   | NM_014832    | NP_055647    | O60343 | TBCD4_HUMAN |                               | 6   | GCTGCCGCCAG   | 0.517 |             |
| - | 3  | 727   |                   | NM_012158    | NP_036290    | Q9UKT7 | FBXL3_HUMAN | LRR 1.                        | 0   | TGCTGCTGTCC   | 0.348 |             |
| - | 13 | 1642  | _p.L475F TUBGCF   | NM_006322    | NP_006313    | Q96CW5 | GCP3_HUMAN  |                               | 1   | CTATCAAAGC    | 0.358 |             |
| - | 9  | 688   | _p.D203N PCID2_   | NM_001127203 | NP_001120675 | Q5JVF3 | PCID2_HUMAN |                               | 0   | TGTAATCGTCTT  | 0.333 |             |
| + | 2  | 470   | vt.3_Missense_M   | NM_017905    | NP_060375    | Q6UWJ1 | TMCO3_HUMAN |                               | 0   | TGCACCGCGGG   | 0.627 |             |
| - | 10 | 1144  | _p.E32K GAS6_u    | NM_000820    | NP_000811    | Q14393 | GAS6_HUMAN  | minin G-like 1.               | 4   | GCCCTCGGGGT   | 0.652 |             |
| - | 9  | 1247  | u.2_Missense_Mu   | NM_138376    | NP_612385    | Q8N0Z6 | TTC5_HUMAN  |                               | 1   | TGTGCTGAATTC  | 0.428 |             |
| + | 2  | 807   | VASE4_uc001vya.   | NM_002937    | NP_002928    | P34096 | RNAS4_HUMAN |                               | 1   | AACATTCGAGT   | 0.463 |             |
| - | 1  | 166   |                   | NM_001005466 | NP_001005466 | Q8NGC3 | O10G2_HUMAN | lasmic (Potential).           | 1   | CGGGTCAGCCC   | 0.527 |             |
| - | 15 | 1958  |                   | NM_002471    | NP_002462    | P13533 | MYH6_HUMAN  | rosin head-like.              | 4   | CTTACCAGTATC  | 0.567 |             |
| - | 1  | 25    |                   | NM_199047    | NP_950248    | Q6SJ96 | TBPL2_HUMAN |                               | 0   | AACCCGCTCCG   | 0.692 |             |
| + | 8  | 2096  | :3_Intron FUT8_uc | NM_178155    | NP_835368    | Q9BYC5 | FUT8_HUMAN  | ntential). Lumenal (Potential | 1   | ATCCCCGCTCCTC | 0.458 |             |
| + | 22 | 3258  | _p.P759S GPHN_u   | NM_001024218 | NP_001019389 | Q9NQX3 | GEPH_HUMAN  | denyltransferase.             | 2   | TGTACTCTCCA   | 0.473 |             |
| + | 6  | 736   | _p.E215K GALNTL   | NM_020692    | NP_065743    | Q8N428 | GLTL1_HUMAN | main A. Lumenal (Potential    | 2   | ACTCGGAAGTG   | 0.627 |             |
| - | 1  | 1111  |                   | NR_003951    |              |        |             |                               | 0   | TATCAACTCCAC  | 0.403 |             |
| + | 8  | 906   | :AF4_uc010tts.1_A | NM_015604    | NP_056419    | Q8WV16 | DCAF4_HUMAN |                               | 3   | TGAATTCGGTGT  | 0.507 |             |
| - | 7  | 830   | _Mutation_p.H67Q  | NM_005050    | NP_005041    | O14678 | ABCD4_HUMAN | nsmembrane type-1.            | 4   | TGCATGTGCTTC  | 0.552 |             |
| + | 13 | 5711  | M1_uc001xqm.1_    | NM_019589    | NP_062535    | P49750 | YLPM1_HUMAN |                               | 3   | TTGGAGGACCTC  | 0.378 |             |
| + | 10 | 1301  |                   | NM_000369    | NP_000360    | P16473 | TSHR_HUMAN  | ellular (Pote p.D382H(1)      | 299 | CTTTTGACAGCC  | 0.458 |             |
| - | 3  | 951   |                   | NM_206918    | NP_996801    | Q6QHC5 | DEGS2_HUMAN |                               | 0   | GCTGCGGCAGG   | 0.637 |             |
| + | 8  | 1852  |                   | NM_001376    | NP_001367    | Q14204 | DYHC1_HUMAN | similarity). Stem (By simila  | 10  | GACCCGGATCA   | 0.532 |             |
| - | 2  | 452   |                   | NM_207379    | NP_997262    | Q6ZVK1 | T179A_HUMAN |                               | 0   | GGGTACGGTGC   | 0.657 |             |
| + | 7  | 1316  | OR4N4_uc010tzv    | NM_001005241 | NP_001005241 | Q8N0Y3 | OR4N4_HUMAN | Name=3; (Potential).          | 5   | GGGAGGGATTAC  | 0.512 |             |
| + | 1  | 95    |                   | NM_001080841 | NP_001074310 |        |             |                               | 0   | GGGAGGGATTAC  | 0.493 |             |
| + | 6  | 561   | _p.V153M CYFIP1_  | NM_014608    | NP_055423    | Q7L576 | CYFP1_HUMAN |                               | 9   | ACTTCGTGTCA   | 0.537 |             |
| - | 5  | 551   | :C2_uc001zbl.1_5' | NM_004667    | NP_004658    | O95714 | HERC2_HUMAN |                               | 13  | TATAGCGCTCCA  | 0.502 |             |
| - | 16 | 2034  | se_Mutation_p.E5' | NM_002420    | NP_002411    | Q7Z4N2 | TRPM1_HUMAN | lasmic (Potential).           | 4   | CTCTCCCTCC    | 0.592 |             |
| + | 4  | 1192  |                   | NM_020857    | NP_065908    | Q9P253 | VPS18_HUMAN |                               | 3   | CCCTTCGCCTGG  | 0.637 |             |
| + | 8  | 1058  | _p.E290G SQRD_L   | NM_021199    | NP_067022    | Q9Y6N5 | SQRD_HUMAN  |                               | 1   | AGTATGAAATGC  | 0.448 |             |
| - | 4  | 663   |                   | NM_000138    | NP_000129    | P35555 | FBN1_HUMAN  | EGF-like 1.                   | 3   | TGGAGCCACAG   | 0.408 |             |
| - | 9  | 4299  | .1_Intron RFX7_uc | NM_022841    | NP_073752    | Q2KHR2 | RFX7_HUMAN  |                               | 0   | TTCACTGCAAAAT | 0.368 |             |
| + | 4  | 801   | se_Mutation_p.R6' | NM_000236    | NP_000227    | P11150 | LIPC_HUMAN  |                               | 1   | CAGATTCGAATC  | 0.488 |             |
| - | 77 | 14256 | C1_uc002amo.2_5   | NM_003922    | NP_003913    | Q15751 | HERC1_HUMAN | HECT.                         | 19  | CTTCTCGGACTC  | 0.597 |             |
| - | 1  | 133   | _PX_uc010bhg.1_I  | NM_006660    | NP_006651    | O76031 | CLPX_HUMAN  |                               | 0   | GGCGAGTGAGG   | 0.706 |             |

|   |    |      |                   |              |              |        |              |                             |    |               |       |             |
|---|----|------|-------------------|--------------|--------------|--------|--------------|-----------------------------|----|---------------|-------|-------------|
| - | 4  | 791  |                   | NM_001102658 | NP_001096128 | P0C5K7 | CT62_HUMAN   |                             | 0  | ACATTCCGCTCG  | 0.493 |             |
| - | 2  | 739  |                   | NM_001039614 | NP_001034703 | Q2T9L4 | CO059_HUMAN  |                             | 1  | GTGCCGAGTCG   | 0.627 | rs138123176 |
| - | 2  | 1379 |                   | NM_032246    | NP_115622    | Q6ZN04 | MEX3B_HUMAN  |                             | 2  | GGCAGCCGTCG   | 0.652 |             |
| - | 18 | 2305 | 678S AP3B2_uc01   | NM_004644    | NP_004635    | Q13367 | AP3B2_HUMAN  | Glu/Ser-rich.               | 5  | AGAGCCGCTCT   | 0.562 |             |
| - | 4  | 1128 | rs.1_Missense_Mu  | NM_001717    | NP_001708    | Q01954 | BNC1_HUMAN   |                             | 3  | CTATTCCTCTCAC | 0.473 |             |
| + | 10 | 1038 |                   | NM_003870    | NP_003861    | P46940 | IQGA1_HUMAN  |                             | 8  | AATATCGACCTCG | 0.473 |             |
| + | 18 | 3513 | ie_Mutation_p.R76 | NM_000057    | NP_000048    | P54132 | BLM_HUMAN    |                             | 6  | TTTACGACACA   | 0.368 |             |
| + | 5  | 1217 | 3A1_uc010boc.1_   | NM_013272    | NP_037404    | Q9UIG8 | SO3A1_HUMAN  | lasmic (Potential).         | 1  | GATCCCGAAGG   | 0.582 |             |
| - | 9  | 1434 | p.E374K PCSK6_    | NM_002570    | NP_002561    | P29122 | PCSK6_HUMAN  | Catalytic.                  | 2  | ATTCTCGGTGG   | 0.567 |             |
| + | 5  | 1855 |                   | NM_005632    | NP_005623    | O75808 | CAN15_HUMAN  | lpain catalyp.E498fs*15(1)  | 2  | GGCCCGAGTCT   | 0.657 |             |
| + | 25 | 3152 | rs.R1005H MAPK8I  | NM_015133    | NP_055948    | Q9UPT6 | JIP3_HUMAN   |                             | 3  | AGGCCGTGTGC   | 0.701 |             |
| - | 10 | 1977 |                   | NM_000243    | NP_000234    | O15553 | MEFV_HUMAN   | 330.2/SPRY.                 | 6  | AACTCGGAGAG   | 0.522 | rs104895107 |
| + | 6  | 1347 | IP2_uc010uyp.1_1  | NM_024997    | NP_079273    | Q5U623 | MCAF2_HUMAN  | Potential.                  | 0  | AAAGACGTATT   | 0.289 |             |
| + | 25 | 3845 | rs.2_Missense_Mut | NM_004996    | NP_004987    | P33527 | MRP1_HUMAN   | ne type-1 2. Helical; Name: | 4  | GGCACAGCCTC   | 0.567 |             |
| + | 12 | 1778 | p.G550R TMC7_uc   | NM_024847    | NP_079123    | Q7Z402 | TMC7_HUMAN   | cellular (Potential).       | 3  | TTTACGGGCAA   | 0.498 |             |
| + | 5  | 936  | ffy.2_Missense_Mi | NM_016524    | NP_057608    | Q9BSW7 | SYT17_HUMAN  | C2 1.                       | 1  | CCTCACCGTGC   | 0.607 |             |
| + | 7  | 1252 | 2K_uc002dkh.2_F   | NM_013302    | NP_037434    | O00418 | EF2K_HUMAN   | ype protein kinase.         | 1  | GCCGCAGGTGA   | 0.607 |             |
| + | 15 | 2162 | Mutation_p.D660N  | NM_173201    | NP_775293    | O14983 | AT2A1_HUMAN  | smic (By similarity).       | 4  | TCGACGACCTG   | 0.632 |             |
| + | 15 | 2183 | Mutation_p.R667W  | NM_173201    | NP_775293    | O14983 | AT2A1_HUMAN  | smic (By similarity).       | 4  | AACAGCGGGAA   | 0.622 |             |
| - | 4  | 571  | _Intron TBX6_uc0  | NM_004608    | NP_004599    | O95947 | TBX6_HUMAN   | T-box.                      | 2  | GACACGGTCAG   | 0.632 |             |
| - | 3  | 945  | 389_uc010bzy.2_5  | NM_138447    | NP_612456    | Q96CS4 | ZN689_HUMAN  | 2H2-type 3.                 | 0  | ACACTGGTCAC   | 0.602 |             |
| + | 18 | 2771 | p.R215Q RNF40_    | NM_014771    | NP_055586    | O75150 | BRE1B_HUMAN  | Potential.                  | 1  | GACTCGGCTGCT  | 0.642 |             |
| - | 2  | 532  | efh.1_Missense_M  | NM_033151    | NP_149163    | Q96J66 | ABCCB_HUMAN  | lasmic (Potential).         | 6  | TCCCCACGGTC   | 0.552 |             |
| + | 3  | 748  | p.R70H MMP2_L     | NM_004530    | NP_004521    | P08253 | MMP2_HUMAN   | lagenase-like 1.            | 11 | TGCTCGTGCCCT  | 0.478 |             |
| - | 5  | 545  |                   | NM_001896    | NP_001887    | P19784 | CSK22_HUMAN  | rotein kinase.              | 1  | AAACCGGATATC  | 0.343 |             |
| - | 18 | 2955 | p.R7H FHOD1_u     | NM_013241    | NP_037373    | Q9Y613 | FHOD1_HUMAN  | FH2.                        | 3  | CACGGCGGTGC   | 0.617 |             |
| - | 3  | 1322 | p.A163T TPPP3_1   | NM_016140    | NP_057224    | Q9BW30 | TPPP3_HUMAN  |                             | 1  | GTAGGCGCTCAC  | 0.627 |             |
| - | 3  | 812  | FOD2_uc002euc.2   | NM_030819    | NP_110446    | Q3B7J2 | GFOD2_HUMAN  |                             | 3  | GCCCCCGCCGC   | 0.612 |             |
| + | 4  | 1029 | AS3_uc002ewl.2_1  | NM_005329    | NP_005320    | O00219 | HAS3_HUMAN   | lasmic (Potential).         | 0  | TCAACGTGGAG   | 0.567 |             |
| - | 3  | 237  | fn.2_Missense_Mi  | NM_153486    | NP_705690    | Q86WU2 | LDHD_HUMAN   | inding PCMH-type.           | 0  | AGGTTTCGCACC  | 0.632 |             |
| + | 4  | 1202 | ng.1_Missense_M   | NM_014940    | NP_055755    | Q7L1V2 | MON1B_HUMAN  |                             | 0  | GGAGCGAAATG   | 0.657 |             |
| + | 23 | 2649 |                   | NM_002661    | NP_002652    | P16885 | PLCG2_HUMAN  |                             | 8  | ACTTCGAGGAG   | 0.512 |             |
| + | 5  | 761  | Jvoj.1_Missense_M | NM_014732    | NP_055547    | O60268 | K0513_HUMAN  |                             | 1  | AGAACCTCATG   | 0.522 |             |
| - | 3  | 268  | V72I MTHFSD_uc    | NM_001159377 | NP_001152849 | Q2M296 | MTHSD_HUMAN  |                             | 0  | CGAACGCCTT    | 0.537 |             |
| - | 12 | 1445 | CHC14_uc002fkb.   | NM_015144    | NP_055959    | Q8WYQ9 | ZCH14_HUMAN  |                             | 2  | GGGCCGTGGGT   | 0.587 |             |
| - | 9  | 1179 | cjf.2_Intron PRDM | NM_001098173 | NP_001091643 | Q9NQW5 | PRDM7_HUMAN  |                             | 1  | CCCCATACCAG   | 0.522 |             |
| - | 8  | 984  | p.V299I SLC43A    | NM_152346    | NP_689559    | Q8N370 | LAT4_HUMAN   |                             | 0  | GTCGACGGTGG   | 0.697 |             |
| - | 5  | 1099 | tn.1_Missense_Mi  | NM_052928    | NP_443160    | Q8IYR2 | SMYD4_HUMAN  | MYND-type.                  | 5  | GCATCCGTCCAC  | 0.542 |             |
| - | 28 | 3250 | 3_Intron GSG2_uc  | NM_002208    | NP_002199    | P38570 | ITAE_HUMAN   | cellular (Potential).       | 4  | CCATTCTTCCAC  | 0.458 |             |
| - | 3  | 657  | rk.1_Missense_Mu  | NM_015113    | NP_055928    | O43149 | ZZEF1_HUMAN  |                             | 4  | TCACCGCGCTG   | 0.512 |             |
| - | 17 | 3016 | l2gag.1_Missense  | NM_015099    | NP_055914    | O94983 | CMTA2_HUMAN  |                             | 1  | CTCCCGCATTG   | 0.612 |             |
| - | 12 | 1834 |                   | NM_001139    | NP_001130    | O75342 | LX12B_HUMAN  | ipoxygenase.                | 0  | GGCTGCGTCAC   | 0.577 |             |
| - | 14 | 1697 | p.L544P MYH10_    | NM_005964    | NP_005955    | P35580 | MYH10_HUMAN  | rosin head-like.            | 2  | CCAAAAGGGCC   | 0.428 |             |
| + | 16 | 2919 | oo.2_Missense_Mi  | NM_001372    | NP_001363    | Q9NYC9 | DYH9_HUMAN   | n (By similarity).          | 20 | TTGAGGGTCTC   | 0.502 |             |
| + | 12 | 1374 | p.D440N MPRIIP_1  | NM_201274    | NP_958431    | Q6WCQ1 | MPRIIP_HUMAN | PH 2.                       | 0  | GTTACGATGTC   | 0.488 | rs144918812 |
| - | 6  | 880  | rn.2_Missense_Mu  | NM_001142610 | NP_001136082 | Q8IY78 | ULK2_HUMAN   | rotein kinase.              | 4  | CTTTGCTGTGCT  | 0.453 |             |
| + | 2  | 342  | 2_5'UTR MAP2K3    | NM_145109    | NP_659731    | P46734 | MP2K3_HUMAN  |                             | 0  | ATCTACGGATATC | 0.557 | rs144032462 |



|   |    |       |                    |              |              |        |              |                              |     |               |       |             |
|---|----|-------|--------------------|--------------|--------------|--------|--------------|------------------------------|-----|---------------|-------|-------------|
| + | 3  | 986   |                    | NM_021012    | NP_066292    | Q14500 | IRK12_HUMAN  | me=M1; (By similarity).      | 4   | TGCCTCCTGGC   | 0.627 |             |
| + | 26 | 3675  | sn.1_Missense_Mu   | NM_001042492 | NP_001035957 | P21359 | NF1_HUMAN    | p.?(2)                       | 330 | CTTTTGAATGAC  | 0.433 |             |
| + | 2  | 675   | ie_Mutation_p.L15  | NM_003885    | NP_003876    | Q15078 | CD5R1_HUMAN  |                              | 1   | AGCTGCTTCGC   | 0.682 |             |
| - | 26 | 3736  | p.R715Q MYO19_1    | NM_001163735 | NP_001157207 | Q96H55 | MYO19_HUMAN  | hondrial targeting.          | 1   | GCCTCGGATG    | 0.567 |             |
| + | 11 | 2057  | ue.2_Missense_M    | NM_007359    | NP_031385    | O15234 | CASC3_HUMAN  | ion in cytoplasmic stress g  | 1   | ATCCCCACCAG/  | 0.498 |             |
| - | 3  | 274   |                    | NM_001838    | NP_001829    | P32248 | CCR7_HUMAN   | Name=1; (Potential).         | 1   | GCCCACGAAAC   | 0.502 |             |
| - | 4  | 864   |                    | NM_181537    | NP_853515    | Q7Z3Y8 | K1C27_HUMAN  | Rod. Coil 2.                 | 0   | CTCCGCGTCCC   | 0.652 |             |
| + | 3  | 310   |                    | NM_030975    | NP_112237    | B5MDD6 | B5MDD6_HUMAN |                              | 0   | CTACCCGACGA/  | 0.637 |             |
| - | 5  | 848   |                    | NM_002279    | NP_002270    | Q14525 | KT33B_HUMAN  | Coil 2. Rod.                 | 0   | CCTGGTAGGAC   | 0.592 |             |
| + | 6  | 688   | p.L154Q MLX_ucf    | NM_170607    | NP_733752    | Q9UH92 | MLX_HUMAN    |                              | 0   | CGCCCTAAAGA   | 0.502 |             |
| - | 3  | 723   | p.R174K MEOX1_     | NM_004527    | NP_004518    | P50221 | MEOX1_HUMAN  |                              | 0   | CTGACCTCCCT   | 0.567 |             |
| - | 6  | 1906  | ie_Mutation_p.S4E  | NM_001145365 | NP_001138837 | Q9Y2D9 | ZN652_HUMAN  | ype 9; degenerate.           | 1   | TGTTCCGAGAAG/ | 0.567 |             |
| + | 5  | 746   | ird.2_Missense_Mi  | NM_022827    | NP_073738    | Q8TB22 | SPT20_HUMAN  |                              | 0   | AATACGAGAAC/  | 0.627 |             |
| + | 1  | 490   |                    | NM_001004707 | NP_001004707 | P58180 | OR4D2_HUMAN  | ellular (Potential).         | 2   | TGATGCTCCCA/  | 0.552 |             |
| - | 2  | 219   | 02jcu.1_Missense   | NM_001317    | NP_001308    | P01243 | CSH_HUMAN    |                              | 1   | AAAAAGCCTGG   | 0.612 |             |
| - | 24 | 4596  |                    | NM_000334    | NP_000325    | P35499 | SCN4A_HUMAN  | s=S5 of repeat IV; (Potentia | 3   | CTTGACGTAGG/  | 0.557 | rs140517911 |
| - | 11 | 2458  | HM1P_uc002jev.3    | NR_024386    |              |        |              |                              | 0   | AGCGGGGGCAG   | 0.637 |             |
| + | 4  | 697   |                    | NM_000727    | NP_000718    | Q06432 | CCG1_HUMAN   |                              | 0   | GCCCCGGAACC   | 0.632 |             |
| - | 35 | 4600  | ez.2_Missense_Mu   | NM_080283    | NP_525022    | Q8IUA7 | ABCA9_HUMAN  | C transporter 2.             | 6   | ACACCGCCTCA/  | 0.572 |             |
| + | 10 | 1267  | k.2_Nonsense_Mu    | NM_153209    | NP_694941    | Q2TAC6 | KIF19_HUMAN  | Potential.                   | 0   | TCCAGCGACTC/  | 0.632 |             |
| - | 10 | 1794  | p.H577Y UBE2O_     | NM_022066    | NP_071349    | Q9C0C9 | UBE2O_HUMAN  |                              | 5   | GTGGTGACAG/   | 0.597 |             |
| - | 4  | 585   |                    | NM_001008528 | NP_001008528 | P84157 | MXRA7_HUMAN  |                              | 0   | CAAAACGTCTCC  | 0.567 |             |
| + | 2  | 703   | p.H178Y FOXK2_     | NM_004514    | NP_004505    | Q01167 | FOXK2_HUMAN  |                              | 0   | AGCCACACATC   | 0.592 |             |
| - | 3  | 2287  | CD_uc002kfy.1_Inl  | NM_024702    | NP_078978    | Q32MQ0 | ZN750_HUMAN  |                              | 1   | GTTCCGGGGCC   | 0.642 |             |
| - | 10 | 894   | ie_Mutation_p.V18: | NM_001009905 | NP_001009905 | Q67FW5 | B3GNL_HUMAN  |                              | 2   | GTCCACGTAC/   | 0.637 |             |
| + | 4  | 1118  |                    | NM_032048    | NP_114437    | Q9BXX0 | EMIL2_HUMAN  | Potential.                   | 3   | GGACAGTAAGAT  | 0.562 |             |
| - | 1  | 438   | N2_uc002klo.2_Inl  | NR_026659    |              |        |              |                              | 0   | TAATTTCAAATTT | 0.338 |             |
| - | 18 | 1766  | i.R536W L3MBTL4    | NM_173464    | NP_775735    | Q8NA19 | LMBL4_HUMAN  |                              | 3   | GGCCCGGATGT/  | 0.632 |             |
| + | 36 | 4728  | jr.2_Missense_Mu   | NM_198129    | NP_937762    | Q16787 | LAMA3_HUMAN  | inin IV type A.              | 11  | CTGGCGACATG   | 0.448 |             |
| - | 6  | 898   | la.1_5'UTR PIAS2   | NM_004671    | NP_004662    | O75928 | PIAS2_HUMAN  | PINIT.                       | 4   | TAGGCGGTGGT/  | 0.398 |             |
| + | 2  | 1024  | HC2_uc002lio.2_f   | NM_017742    | NP_060212    | Q9C0B9 | ZCHC2_HUMAN  |                              | 2   | TTACCGTGGCA   | 0.418 |             |
| - | 2  | 2804  |                    | NM_032160    | NP_115536    | Q8IZU8 | DSEL_HUMAN   |                              | 6   | GTTGACCTTCCC  | 0.493 |             |
| + | 6  | 787   | p.G125S CNDP2_     | NM_018235    | NP_060705    | Q96KP4 | CNDP2_HUMAN  |                              | 3   | CCTACGGCCTC/  | 0.483 |             |
| - | 5  | 685   | p.R217* PPAP2C     | NM_003712    | NP_003703    | O43688 | LPP2_HUMAN   |                              | 1   | GGGTCGCAGCA/  | 0.612 |             |
| + | 4  | 1194  | wn.3_Missense_M    | NM_152791    | NP_690004    | Q8NEP9 | ZN555_HUMAN  | C2H2-type 8.                 | 1   | CTACGAATGC/   | 0.453 |             |
| - | 3  | 250   | r_p.A65T PIP5K1C   | NM_012398    | NP_036530    | O60331 | PI51C_HUMAN  |                              | 4   | GGATGCGTCCA/  | 0.617 |             |
| - | 29 | 38320 | i16_uc010xki.1_5'l | NM_024690    | NP_078966    | Q8WXI7 | MUC16_HUMAN  | tracellular (Potential).     | 57  | GATGGTGAAGT/  | 0.498 |             |
| - | 1  | 136   |                    | NM_001005192 | NP_001005192 | Q8NGA0 | OR7G1_HUMAN  | Name=1; (Potential).         | 2   | CAGGAGAATGA/  | 0.493 |             |
| - | 2  | 339   | 02mog.1_Missens    | NM_007065    | NP_008996    | Q16543 | CDC37_HUMAN  |                              | 0   | GCCCTCGGCCA   | 0.652 |             |
| - | 2  | 595   | nrx.1_Missense_M   | NM_001420    | NP_001411    | Q14576 | ELAV3_HUMAN  | RRM 1.                       | 3   | TGTCCGAACC.   | 0.562 |             |
| - | 5  | 909   | on_p.P259S ECSI    | NM_016581    | NP_057665    | Q9BQ95 | ECSIT_HUMAN  |                              | 1   | GGGGGATCTG    | 0.582 | rs139421495 |
| + | 2  | 253   |                    | NR_027049    |              |        |              |                              | 0   | CCAGACGAGTG   | 0.473 |             |
| + | 19 | 2301  |                    | NM_014975    | NP_055790    | Q9Y2H9 | MAST1_HUMAN  |                              | 7   | AGCACGAGCCC   | 0.657 |             |
| - | 19 | 2717  | IR2_uc002mzr.1_A   | NM_013447    | NP_038475    | Q9UHX3 | EMR2_HUMAN   | Name=6; (Potential).         | 4   | CAGCCGACCC    | 0.572 |             |
| + | 5  | 848   | r_p.R115W YJEFN    | NM_015965    | NP_057049    | Q9P0J0 | NDUAD_HUMAN  |                              | 0   | TCTCCGGAAG/   | 0.517 |             |
| + | 17 | 1903  | A576V DPY19L3_     | NM_207325    | NP_997208    | Q6ZPD9 | D19L3_HUMAN  |                              | 4   | GTTTGCGGGAA   | 0.488 |             |
| + | 5  | 304   | yf.1_Missense_Mu   | NM_022006    | NP_071289    | P58549 | FXYD7_HUMAN  |                              | 0   | CTTACGGTGAG/  | 0.542 |             |

|   |    |       |                   |              |              |        |              |                                |              |              |       |             |
|---|----|-------|-------------------|--------------|--------------|--------|--------------|--------------------------------|--------------|--------------|-------|-------------|
| + | 4  | 456   | e_Mutation_p.G14  | NM_174905    | NP_777565    | Q17RN3 | FA98C_HUMAN  | 1                              | GTGAAGGGGTAG | 0.632        |       |             |
| + | 7  | 615   | _p.A142T SUPT5F   | NM_001111020 | NP_001104490 | O00267 | SPT5H_HUMAN  | 4                              | AAATACGCCAAG | 0.582        |       |             |
| - | 2  | 535   | 0xwd.1_Splice_Sil | NM_001817    | NP_001808    | O75871 | CEAM4_HUMAN  | 0                              | ACTCACGGTGT  | 0.547        |       |             |
| - | 4  | 1182  | d.3_Missense_Mu   | NM_006494    | NP_006485    | P50548 | ERF_HUMAN    | 4                              | CTGGGGCTGGC  | 0.657        |       |             |
| - | 9  | 2880  | uc010eif.1_intron | NM_005357    | NP_005348    | Q05469 | LIPS_HUMAN   | 2                              | AATCCGTGCC   | 0.617        |       |             |
| + | 5  | 1145  | 284_uc010ejd.2_f  | NM_013361    | NP_037493    | Q9UK11 | ZN223_HUMAN  | 2H2-type 5.                    | 1            | CGTTCCGTCTT  | 0.443 |             |
| + | 4  | 1083  | _p.A262T PVR_ucf  | NM_006505    | NP_006496    | P15151 | PVR_HUMAN    | potential). lg-like C2-type 2. | 0            | ATGAGGCCACC  | 0.448 |             |
| - | 17 | 2643  | _p.M287I PRKD2_   | NM_001079881 | NP_001073350 | Q9BZL6 | KPCD2_HUMAN  | rotein kinase.                 | 7            | GGGTACATGAA  | 0.637 |             |
| - | 12 | 2942  |                   | NM_001080434 | NP_001073903 |        |              |                                | 6            | TCTCGGGGGAC  | 0.652 |             |
| - | 7  | 772   | p.V240M IL4I1_ucf | NM_152899    | NP_690863    | Q96RQ9 | OXLA_HUMAN   |                                | 3            | CATCAGCTCTC  | 0.587 |             |
| + | 4  | 331   |                   | NM_033068    | NP_149059    | Q9BZG2 | PPAT_HUMAN   | ellular (Potential).           | 0            | TTGACCGCACG  | 0.682 |             |
| - | 5  | 637   |                   | NM_022046    | NP_071329    | Q9P0G3 | KLK14_HUMAN  | peptidase S1.                  | 1            | CCTCCGATCC   | 0.652 |             |
| + | 4  | 1000  | 218Y SIGLEC7_L    | NM_014385    | NP_055200    | Q9Y286 | SIGL7_HUMAN  | 2. Extracellular (Potential).  | 1            | AAGTGACCTG   | 0.587 |             |
| - | 3  | 590   | EC6_uc010ydc.1_   | NM_001245    | NP_001236    | O43699 | SIGL6_HUMAN  | ellular (Potential).           | 1            | TCAGGGCTGGT  | 0.622 |             |
| + | 2  | 344   |                   | NM_002030    | NP_002021    | P25089 | FPR3_HUMAN   | lasmic (Potential).            | 6            | GATTCCGGATG  | 0.542 |             |
| + | 7  | 1279  | pzi.2_Missense_M  | NM_032423    | NP_115799    | Q3MIS6 | ZN528_HUMAN  | 2H2-type 3.                    | 2            | AGTTGCACAA   | 0.368 |             |
| - | 3  | 663   |                   | NM_198457    | NP_940859    | Q6ZNG1 | ZN600_HUMAN  |                                | 0            | GAAATCTTTGG  | 0.388 |             |
| - | 4  | 1042  | 2qah.2_Missense   | NM_207333    | NP_997216    | A2RRD8 | ZN320_HUMAN  | 2H2-type 5.                    | 0            | AATTCGAGCG   | 0.423 |             |
| - | 4  | 603   | LILRB2_uc002qf    | NM_005874    | NP_005865    | Q8N423 | LIRB2_HUMAN  | potential). lg-like C2-type 2. | 1            | CACGAGGGGGT  | 0.612 |             |
| - | 7  | 1009  | ff.2_Missense_Ml  | NM_021250    | NP_067073    | A6NI73 | LIRA5_HUMAN  | lasmic (Potential).            | 1            | TCCAGCTGCAG  | 0.537 |             |
| + | 4  | 508   | _p.T140I LILRA2_  | NM_001130917 | NP_001124389 | Q8N149 | LIRA2_HUMAN  | potential). lg-like C2-type 2. | 1            | CGTGACCCTCC  | 0.557 |             |
| + | 3  | 142   | 8_uc010yga.1_Mis  | NM_000991    | NP_000982    | P46779 | RL28_HUMAN   |                                | 0            | TGAAGGCCCGC  | 0.597 | rs147614077 |
| - | 2  | 384   | 256_uc010euj.2_I  | NM_005773    | NP_005764    | Q9Y2P7 | ZN256_HUMAN  | KRAB.                          | 2            | AGTTGTAAGT   | 0.522 |             |
| + | 4  | 275   | 135_uc002qrf.2_M  | NM_003436    | NP_003427    | B4DHH9 | B4DHH9_HUMAN |                                | 1            | GAAAGCCGAATG | 0.582 |             |
| + | 3  | 1247  | cw.2_Missense_M   | NM_002252    | NP_002243    | Q9BQ31 | KCNS3_HUMAN  | =Segment S3; (Potential).      | 4            | TTCCCTTCTATG | 0.498 |             |
| + | 12 | 1269  |                   | NM_001080473 | NP_001073942 | A6NFX1 | MFS2B_HUMAN  | ical; (Potential).             | 2            | TCCTACGTCTTC | 0.607 |             |
| - | 12 | 4254  | gt.1_Missense_Ml  | NM_018263    | NP_060733    | Q76L83 | ASXL2_HUMAN  |                                | 1            | TGGTACAGCAG  | 0.498 |             |
| + | 2  | 260   |                   | NM_001105519 | NP_001098989 | A6NJV1 | CB070_HUMAN  |                                | 1            | CGCCAGCACCC  | 0.592 |             |
| + | 5  | 731   | u.2_RNA ABHD1_    | NM_032604    | NP_115993    | Q96SE0 | ABHD1_HUMAN  |                                | 0            | AGCATCGTTATC | 0.522 | rs138157315 |
| + | 1  | 4967  | 1_5'Flank ZNF512  | NM_032266    | NP_115642    | Q68DN1 | CB016_HUMAN  | lem repeat of P-S-E-R-S-H      | 1            | CCATCGCGGTG  | 0.572 |             |
| - | 23 | 3624  | j.3_Nonsense_Mu   | NM_005633    | NP_005624    | Q07889 | SOS1_HUMAN   |                                | 10           | ATATCGTGGTG  | 0.443 |             |
| - | 3  | 441   |                   | NM_017880    | NP_060350    | Q9NWW7 | CB042_HUMAN  |                                | 0            | GTCCCCGGGTT  | 0.488 |             |
| + | 3  | 2628  |                   | NM_001080474 | NP_001073943 | A6NCI8 | CB078_HUMAN  |                                | 2            | TCTCCGGTCAC  | 0.512 |             |
| - | 4  | 1964  | rt.1_Nonsense_M   | NM_006302    | NP_006293    | Q13724 | MOGS_HUMAN   | lenal (Potential).             | 0            | CATCGCAGGT   | 0.632 |             |
| - | 2  | 1478  | DC142_uc002slo    | NM_032779    | NP_116168    | Q17RM4 | CC142_HUMAN  |                                | 1            | TAAGCGACTGA  | 0.537 |             |
| - | 1  | 742   |                   | NM_000682    | NP_000673    | P18089 | ADA2B_HUMAN  | smic (By similarity).          | 3            | GTGTCCGTTGA  | 0.647 |             |
| + | 4  | 566   | se_Mutation_p.T1  | NM_003855    | NP_003846    | Q13478 | IL18R_HUMAN  | 2. Extracellular (Potential).  | 3            | GATAACCTGTG  | 0.279 | rs34216045  |
| + | 15 | 3774  | kp.2_Missense_M   | NM_019014    | NP_061887    | Q9H9Y6 | RPA2_HUMAN   |                                | 1            | TCGGTCGGTAG  | 0.512 |             |
| - | 4  | 516   |                   | NM_001009993 | NP_001009993 | A1KXE4 | F168B_HUMAN  |                                | 0            | CATACGGGCTC  | 0.617 |             |
| + | 4  | 479   | wz.2_RNA LYPD6_   | NM_194317    | NP_919298    | Q86Y78 | LYPD6_HUMAN  | UPAR/Ly6.                      | 0            | CAAACGCTGTG  | 0.478 |             |
| - | 6  | 1674  | cf.1_Missense_Ml  | NM_006186    | NP_006177    | P43354 | NR4A2_HUMAN  | -binding (Potential).          | 3            | GCCCCGATGA   | 0.502 |             |
| - | 3  | 586   |                   | NM_018086    | NP_060556    | Q5HY92 | FIGN_HUMAN   |                                | 4            | TGTCCGAATAG  | 0.463 |             |
| + | 18 | 2264  | c.A598V OSBPL6_   | NM_032523    | NP_115912    | Q9BZF3 | OSBL6_HUMAN  |                                | 1            | CGTTGCCGCAT  | 0.438 |             |
| - | 44 | 10527 | .1_Missense_Mut   | NM_133378    | NP_596869    | Q8WZ42 | TITIN_HUMAN  |                                | 153          | TTTACCTTCCAC | 0.378 |             |
| - | 28 | 6232  | TN_uc010zjf.1_Mi  | NM_133378    | NP_596869    | Q8WZ42 | TITIN_HUMAN  |                                | 153          | TCTGCGCTTG   | 0.443 |             |
| - | 51 | 4155  | frx.2_Missense_Ml | NM_000393    | NP_000384    | P05997 | COSA2_HUMAN  | lar collagen NC1.              | 2            | CGTGCGGCTG   | 0.498 |             |
| - | 25 | 2576  | _p.N647S PGAP1    | NM_024989    | NP_079265    | Q75T13 | PGAP1_HUMAN  | ical; (Potential).             | 4            | GTAAGTTAATCA | 0.353 |             |

|   |    |      |                   |              |              |        |              |      |               |       |             |
|---|----|------|-------------------|--------------|--------------|--------|--------------|------|---------------|-------|-------------|
| + | 2  | 1192 |                   | NM_153689    | NP_710156    | Q8N8R5 | CB069_HUMAN  | 1    | AAAGTACGTGATC | 0.388 |             |
| + | 23 | 3749 | sense_Mutation_p. | NM_152526    | NP_689739    | Q8TEW8 | PAR3L_HUMAN  | 4    | GCCCCGTGGGG   | 0.627 |             |
| - | 6  | 411  | I_uc010fvj.1_Miss | NM_022648    | NP_072174    | Q9HBL0 | TENS1_HUMAN  | 4    | GGTCCGGCTCA   | 0.582 |             |
| + | 17 | 3393 | c.2_Missense_Mut  | NM_014640    | NP_055455    | Q14679 | TTL4_HUMAN   | 3    | ATGTTCCGATTCT | 0.483 |             |
| + | 3  | 233  | p.G53S STK11IP_   | NM_052902    | NP_443134    | Q8N1F8 | S11IP_HUMAN  | 1    | CATGGGGCCCT   | 0.577 |             |
| + | 23 | 2859 | 'F2_uc002vth.3_M  | NM_015575    | NP_056390    | Q6Y7W6 | PERQ2_HUMAN  | 7    | GTTACGCAAAC   | 0.403 |             |
| + | 8  | 842  | s_Mutation_p.S144 | NM_152879    | NP_690618    | Q16760 | DGKD_HUMAN   | 5    | ACACATCGTGTA  | 0.552 |             |
| + | 4  | 1549 | p.E386Q SH3BP4_   | NM_014521    | NP_055336    | Q9P0V3 | SH3B4_HUMAN  | 4    | ACCTGGAGGTG   | 0.537 |             |
| - | 4  | 1702 | bs.2_Missense_M   | NM_015963    | NP_057047    | Q8WY91 | THAP4_HUMAN  | 0    | ACCTTGTGGT    | 0.627 |             |
| + | 4  | 1048 | p.V230M SIRPA_L   | NM_001040022 | NP_001035111 | P78324 | SHPS1_HUMAN  | 1    | GCGAGGTGGCC   | 0.612 |             |
| + | 4  | 1057 | _p.V233I SIRPA_L  | NM_001040022 | NP_001035111 | P78324 | SHPS1_HUMAN  | 1    | CCCACGTCACC   | 0.617 |             |
| + | 9  | 1199 |                   | NM_003245    | NP_003236    | Q08188 | TGM3_HUMAN   | 9    | AGTGC GGCCCC  | 0.592 |             |
| + | 21 | 2081 | S16_uc002whd.2    | NM_022575    | NP_072097    | Q9H269 | VPS16_HUMAN  | 4    | CCTACGGCTGC   | 0.587 |             |
| - | 3  | 3341 | wib.1_Missense_I  | NM_014731    | NP_055546    | O60299 | PRIP1_HUMAN  | 1    | TGGGCGTGCTT   | 0.652 |             |
| - | 2  | 176  |                   | NR_003678    |              |        |              | 0    | GCCTCAAATGC   | 0.373 | rs76611503  |
| - | 20 | 2927 | iL1_uc002xgj.1_Mi | NM_002895    | NP_002886    | P28749 | RBL1_HUMAN   | 10   | CAAGTCGTATT   | 0.323 |             |
| + | 3  | 465  | :38* WISP2_uc002  | NM_003881    | NP_003872    | O76076 | WISP2_HUMAN  | 1    | CTCCCGATGC    | 0.667 |             |
| + | 13 | 1733 | 2xmw.2_Missense   | NM_001124756 | NP_001118228 | Q4VXU2 | PAP1L_HUMAN  | 1    | GAGAGCGTCTC   | 0.572 |             |
| - | 9  | 924  | jp.1_Missense_Mu  | NM_006227    | NP_006218    | P55058 | PLTP_HUMAN   | 1    | CGCCCGAAGT    | 0.602 |             |
| + | 2  | 922  | yfk.2_Missense_M  | NM_024059    | NP_076964    | Q9BVV2 | CT195_HUMAN  | 0    | CAACCGATCCT   | 0.647 |             |
| + | 5  | 1179 | l_Missense_Mutat  | NM_032527    | NP_115916    | Q8N5A5 | ZGPAT_HUMAN  | 0    | CACGCGAGGTA   | 0.602 |             |
| - | 13 | 2171 |                   | NM_020713    | NP_065764    | Q96KM6 | Z512B_HUMAN  | 0    | TGTCAGTCG     | 0.711 |             |
| + | 16 | 2816 | EY2_uc011aeb.1_I  | NM_005128    | NP_005119    | Q9Y3R5 | DOP2_HUMAN   | 2    | TCTGCGAGGAC   | 0.607 |             |
| + | 6  | 973  | ywl.2_Missense_M  | NM_001396    | NP_001387    | Q13627 | DYR1A_HUMAN  | 4    | CCAAACGCAGT   | 0.383 |             |
| - | 8  | 2083 |                   | NM_020639    | NP_065690    | P57078 | RIPK4_HUMAN  | 7    | GTTGCGGGCAG   | 0.687 |             |
| - | 15 | 1669 | w.3_Missense_Mu   | NM_000071    | NP_000062    | P35520 | CBS_HUMAN    | 0    | CTGACGGCTGC   | 0.577 |             |
| + | 9  | 955  | p.D138N RRP1_uc   | NM_003683    | NP_003674    | P56182 | RRP1_HUMAN   | 0    | GTGACGACAGG   | 0.637 |             |
| + | 4  | 1334 | RB1_uc002zgt.2_I  | NM_015833    | NP_056648    | P78563 | RED1_HUMAN   | 1    | CTTGCACTGG    | 0.557 |             |
| + | 38 | 4843 | P2A_uc002zjs.2_I  | NM_015151    | NP_055966    | Q14689 | DIP2A_HUMAN  | 2    | ACCTGCGGGAC   | 0.632 |             |
| + | 7  | 724  | 1_RNA SEPT5_uc    | NM_002688    | NP_002679    | Q99719 | SEPT5_HUMAN  | 1    | GATCCGGAAGC   | 0.602 |             |
| + | 9  | 903  | 1_RNA SEPT5_uc    | NM_002688    | NP_002679    | Q99719 | SEPT5_HUMAN  | 1    | AGCGGTCCGG    | 0.682 |             |
| - | 5  | 763  | p.D110N TOP3B_I   | NM_003935    | NP_003926    | O95985 | TOP3B_HUMAN  | 1    | GTAGTCGCAGC   | 0.597 |             |
| + | 43 | 7532 | D18B_uc011aka.1   | NM_032608    | NP_115997    | Q8IUG5 | MY18B_HUMAN  | 12   | GAAACTCCCA    | 0.567 |             |
| + | 8  | 1130 | se_Mutation_p.R21 | NM_005243    | NP_005234    | Q01844 | EWS_HUMAN    | 3254 | CATCCGACAGC   | 0.517 |             |
| + | 2  | 209  |                   | NM_182527    | NP_872333    | Q86V35 | CABP7_HUMAN  | 0    | TTGACCGTGAC   | 0.597 |             |
| + | 15 | 1205 | EPDC5_uc003alt.2  | NM_014662    | NP_055477    | O75140 | DEPD5_HUMAN  | 8    | CCAAGCAGCGG   | 0.512 |             |
| - | 1  | 355  | EP3_uc011aoy.1_I  | NM_145174    | NP_660157    | Q7Z6W7 | DNJB7_HUMAN  | 1    | CACTCCGTTTA   | 0.363 |             |
| - | 3  | 361  | :22orf9_uc003bfw. | NM_001009880 | NP_001009880 | Q6ICG6 | K0930_HUMAN  | 0    | CCAGTCGATGT   | 0.642 |             |
| + | 3  | 358  | had.2_Missense_I  | NM_015124    | NP_055939    | Q6IC98 | GRAM4_HUMAN  | 1    | CCAACGCGGAG   | 0.652 |             |
| - | 6  | 2663 | p.D775N BRD1_uc   | NM_014577    | NP_055392    | O95696 | BRD1_HUMAN   | 1    | GAGGTCGAGCA   | 0.592 |             |
| + | 2  | 258  | i.3_RNA NCAPH2_   | NM_152299    | NP_689512    | Q6IBW4 | CNDH2_HUMAN  | 2    | TTGACGAAGGC   | 0.537 |             |
| - | 16 | 2194 | se_Mutation_p.L64 | NM_001145137 | NP_001138609 | Q92523 | CPT1B_HUMAN  | 2    | CGAGAGCACCT   | 0.617 |             |
| + | 43 | 6127 | R1_uc011asu.1_I   | NM_001099952 | NP_001093422 | Q14643 | ITPR1_HUMAN  | 21   | TGATGACGCCC   | 0.647 |             |
| + | 7  | 1701 | e_Mutation_p.R47  | NM_000844    | NP_000835    | Q14831 | GRM7_HUMAN   | 7    | TGGGCGTTATG   | 0.463 |             |
| - | 6  | 978  | OL1_uc003cbx.2    | NM_001012410 | NP_001012410 | Q5FBB7 | SGOL1_HUMAN  | 0    | TAAACGTTCTC   | 0.269 | rs148005116 |
| + | 4  | 1550 | en.2_Missense_M   | NM_003242    | NP_003233    | P37173 | TGFR2_HUMAN  | 26   | VGAACGACCTA   | 0.552 |             |
| - | 18 | 2221 | axu.1_Missense_I  | NM_015097    | NP_055912    | B2RTR1 | B2RTR1_HUMAN | 4    | TCGCACAGACT   | 0.522 |             |

|   |    |           |                    |              |              |        |             |                             |     |                   |       |             |
|---|----|-----------|--------------------|--------------|--------------|--------|-------------|-----------------------------|-----|-------------------|-------|-------------|
| - | 12 | 4389      |                    | NM_014831    | NP_055646    | O15050 | TRNK1_HUMAN |                             | 2   | :CCTGTTTCAGCA     | 0.547 |             |
| + | 36 | 5047      | p.Q1679* DLEC1_    | NM_007335    | NP_031361    | Q9Y238 | DLEC1_HUMAN |                             | 9   | GCCAGCAGGAG       | 0.617 |             |
| + | 2  | 185       | u.1_Missense_Mul   | NM_020839    | NP_065890    | Q8TAF3 | WDR48_HUMAN | WD 1.                       | 2   | GGAGTGTCAATC      | 0.413 |             |
| + | 12 | 1220      | NKTR_uc003clq.1_   | NM_005385    | NP_005376    | P30414 | NKTR_HUMAN  |                             | 3   | VTGACAGCAGTG,     | 0.388 |             |
| + | 50 | 7837      | hjn.1_Missense_A   | NM_015175    | NP_055990    | Q6ZNJ1 | NBEL2_HUMAN | WD 4.                       | 1   | GCATGGGGCTG       | 0.587 | rs144664865 |
| - | 1  | 2272      | cuf.1_Missense_M   | NM_001407    | NP_001398    | Q9NYQ7 | CELR3_HUMAN | r (Potential). Cadherin 4.  | 11  | VAGGGAGCATTT      | 0.517 |             |
| + | 5  | 1049      | 5'Flank MIR191_hs  | NM_199069    | NP_951032    | Q9BU61 | NDUF3_HUMAN |                             | 0   | CCCAAGCTGCCTC     | 0.522 |             |
| - | 4  | 1600_1601 | p.Q435P QRICH1     | NM_198880    | NP_942581    | Q2TAL8 | QRIC1_HUMAN | Gln-rich.                   | 1   | tgtcgtcgtgtggtggt | 0.361 |             |
| + | 4  | 528       | yl.2_Missense_ML   | NM_144499    | NP_653082    | P11488 | GNAT1_HUMAN |                             | 3   | TTGAGCGCGCC       | 0.478 |             |
| - | 21 | 2333      | s.G561E ITI4_uc    | NM_002218    | NP_002209    | Q14624 | ITI4_HUMAN  |                             | 3   | CAACCCCTGGG,      | 0.602 |             |
| + | 12 | 2348      | inv.2_Missense_M   | NM_000333    | NP_000324    | O15265 | ATX7_HUMAN  |                             | 0   | CCACCGTCTCT.      | 0.537 |             |
| - | 22 | 3100      |                    | NM_020872    | NP_065923    | Q9P232 | CNTN3_HUMAN |                             | 5   | ACATTCGAGATG      | 0.338 |             |
| - | 2  | 610       | lzg.2_Missense_M   | NM_199512    | NP_955806    | Q76M96 | CCD80_HUMAN |                             | 2   | GGAAACGCAAC       | 0.582 |             |
| + | 9  | 1556      |                    | NM_020754    | NP_065805    | Q2M1Z3 | RHG31_HUMAN |                             | 2   | ACTATCCGACCA      | 0.383 |             |
| + | 12 | 4208      |                    | NM_020754    | NP_065805    | Q2M1Z3 | RHG31_HUMAN |                             | 2   | VATGGGGTTCAG      | 0.587 |             |
| - | 13 | 3686      | .R1153H GOLGB1     | NM_004487    | NP_004478    | Q14789 | GOGB1_HUMAN | ic (Potential). Potential.  | 10  | CCTTCGCGGAG       | 0.413 | rs146898283 |
| - | 14 | 2115      | MA5B_uc003egb.     | NM_001031702 | NP_001026872 | Q9P283 | SEM5B_HUMAN | ellular (Potential).        | 7   | CATTCCGCACCT      | 0.562 |             |
| - | 8  | 1056      | egb.1_Missense_M   | NM_001031702 | NP_001026872 | Q9P283 | SEM5B_HUMAN | ilar (Potential). Sema.     | 7   | VTGACCGTGGCT      | 0.592 |             |
| - | 3  | 1247      | L2_uc003eqh.1_A    | NM_016201    | NP_057285    | Q9Y2J4 | AMOL2_HUMAN | Potential.                  | 1   | TCTCCCTCAGC/      | 0.662 |             |
| + | 14 | 2673      | s.GEF_uc011boi.1_  | NM_015595    | NP_056410    | Q96DR7 | ARHGQ_HUMAN | SH3.                        | 1   | TCAACGTGTCCAC     | 0.527 |             |
| + | 22 | 4135      | sgee.3_RNA WHS     | NM_001042424 | NP_001035889 | O96028 | NSD2_HUMAN  |                             | 9   | CGGGCGGTCCCT      | 0.612 |             |
| + | 2  | 549       | s.E32K GRK4_uc0    | NM_182982    | NP_892027    | P32298 | GRK4_HUMAN  | N-terminal.                 | 1   | GGAAGGAGATA       | 0.403 |             |
| + | 17 | 2688      | 1_RNA CRMP1_u      | NM_153717    | NP_714928    | P57679 | EVC_HUMAN   |                             | 2   | CCCTTCGTCGG       | 0.552 |             |
| - | 14 | 1520      | J7_splice ABLIM2   | NM_001130084 | NP_001123556 | Q6H8Q1 | ABLM2_HUMAN |                             | 3   | GCATTACCTTCC      | 0.493 |             |
| - | 3  | 2171      |                    | NM_053042    | NP_444270    | Q9C0D4 | Z518B_HUMAN |                             | 4   | TTACAGGAATATT     | 0.423 |             |
| - | 12 | 1940      | qn.1_Missense_M    | NM_145290    | NP_660333    | Q8IWK6 | GP125_HUMAN | ellular (Potential).        | 1   | GAACACGGTAC/      | 0.468 |             |
| - | 3  | 703       |                    | NM_001358    | NP_001349    | O43143 | DHX15_HUMAN | ase ATP-binding.            | 1   | ATGATCGCATGT/     | 0.418 |             |
| - | 4  | 1814      | sM47_uc011bys.1    | NM_001098634 | NP_001092104 | A0AV96 | RBM47_HUMAN |                             | 3   | TCCCTGTGGG        | 0.637 |             |
| - | 3  | 714       | s haf.3_Missense_M | NM_001126328 | NP_001119800 | Q8TBB1 | LNX1_HUMAN  |                             | 4   | GGCTCGCACAG       | 0.597 |             |
| + | 13 | 970       |                    | NM_016519    | NP_057603    | Q9NP70 | AMBN_HUMAN  |                             | 4   | CTATGGGCGGT       | 0.592 |             |
| + | 11 | 1366      | s4_uc003hgc.3_Mi   | NM_001098484 | NP_001091954 | Q9Y6R1 | S4A4_HUMAN  | lasmic (Potential).         | 5   | VTGAATGGGGAT/     | 0.443 |             |
| + | 55 | 8445      |                    | NM_025074    | NP_079350    | Q86XX4 | FRAS1_HUMAN | r (Potential). Calx-beta 2. | 5   | TC AACGATACCG     | 0.448 |             |
| + | 7  | 1168      | s5_uc011cdm.1_5'   | NM_016323    | NP_057407    | Q9UII4 | HERC5_HUMAN | RCC1 5.                     | 9   | TGATGCCCGCTT      | 0.398 |             |
| + | 3  | 3267      | sT2_uc010ilp.1_Mi  | NM_001127208 | NP_001120680 | Q6N021 | TET2_HUMAN  | Gln-rich. p.E961*(1)        | 733 | AGCAAGAACAG       | 0.512 |             |
| + | 27 | 3994      | 1109_uc010ins.1_   | NM_015312    | NP_056127    | Q2LD37 | K1109_HUMAN |                             | 12  | CCACCGTCTTC       | 0.463 |             |
| - | 12 | 1600      | se_Mutation_p.S4   | NM_031956    | NP_114162    | Q8NA56 | TTC29_HUMAN |                             | 0   | GTTCCTGAGTTT      | 0.308 |             |
| - | 11 | 1346      |                    | NM_004564    | NP_004555    | O75879 | GATB_HUMAN  |                             | 0   | ITGACAGGACTG      | 0.502 |             |
| - | 13 | 1342      | nz.2_Missense_ML   | NM_002669    | NP_002660    | O43660 | PLRG1_HUMAN | WD 6.                       | 0   | ATACAAGCACTC      | 0.294 |             |
| - | 3  | 572       |                    | NM_144644    | NP_653245    | Q8NEY3 | SPAT4_HUMAN |                             | 0   | ACTCTCGATGTG      | 0.279 | rs144504100 |
| - | 5  | 4020      |                    | NM_005245    | NP_005236    | Q14517 | FAT1_HUMAN  | (Potential). Cadherin 11.   | 12  | CTTGTCGGTGG       | 0.498 |             |
| - | 4  | 628       |                    | NM_024830    | NP_079106    | Q8NF37 | PCAT1_HUMAN | renal (Potential).          | 2   | AGGCCGTATAT/      | 0.577 |             |
| - | 2  | 316       | sS6_uc003jcy.2_5'  | NM_032479    | NP_115868    | Q9P0J6 | RM36_HUMAN  |                             | 0   | ACCCCGCCTCT       | 0.557 |             |
| + | 5  | 744       | p.R173* DNAJC2     | NM_001012339 | NP_001012339 | Q5F1R6 | DJC21_HUMAN |                             | 2   | ATACACGACAGC      | 0.413 | rs150576702 |
| + | 10 | 3303      | p.P935L NIPBL_u    | NM_133433    | NP_597677    | Q6KC79 | NIPBL_HUMAN |                             | 9   | CACCCCTGACA       | 0.373 |             |
| + | 13 | 2009      | sM_uc003jje.1_Spl  | NM_152403    | NP_689616    | Q63HQ2 | EGFLA_HUMAN |                             | 7   | TATTAGGGGA/       | 0.507 |             |
| + | 28 | 3604      | _Mutation_p.R110   | NM_015183    | NP_055998    | O15021 | MAST4_HUMAN |                             | 13  | AAGGGCAAAGT       | 0.692 |             |
| + | 5  | 817       | scy.1_Missense_M   | NM_001080479 | NP_001073948 | Q8N1W1 | RGNEF_HUMAN |                             | 0   | TCTCCGGAAT/       | 0.433 |             |

|   |    |      |                    |              |              |        |             |                              |    |                 |       |             |
|---|----|------|--------------------|--------------|--------------|--------|-------------|------------------------------|----|-----------------|-------|-------------|
| - | 5  | 751  | splice DMGDH_ucf   | NM_013391    | NP_037523    | Q9UI17 | M2GD_HUMAN  |                              | 4  | GCTTACCTGCA     | 0.403 |             |
| + | 2  | 2213 |                    | NM_005654    | NP_005645    | P10589 | COT1_HUMAN  |                              | 3  | CCAACGGGGAC     | 0.607 |             |
| + | 20 | 1576 | Missense_Mutatio   | NM_001042443 | NP_001035908 | P20810 | ICAL_HUMAN  | itory domain 3.              | 5  | TTGGTGAAAAA     | 0.328 |             |
| - | 13 | 2000 |                    | NM_001270    | NP_001261    | O14646 | CHD1_HUMAN  | ase ATP-binding.             | 5  | TAATCGGTGTGC    | 0.338 |             |
| + | 18 | 2558 | oe.2_Missense_Mt   | NM_015216    | NP_056031    | O43314 | VIP2_HUMAN  |                              | 2  | ACATCGAATGG     | 0.284 |             |
| + | 16 | 2068 | R36_uc010jbu.2_F   | NM_139281    | NP_644810    | Q8NI36 | WDR36_HUMAN | WD 8.                        | 2  | GGGACCTTCTT     | 0.313 |             |
| - | 2  | 410  | nse_Mutation_p.N   | NM_001182    | NP_001173    | P49419 | AL7A1_HUMAN |                              | 3  | CGTTGTTAGCA     | 0.313 |             |
| + | 16 | 2554 | nse_Mutation_p.f   | NM_001046    | NP_001037    | P55011 | S12A2_HUMAN | ellular (Potential).         | 3  | AGGTGCTCCAA     | 0.343 |             |
| + | 4  | 1150 | kuz.2_Missense_N   | NM_014031    | NP_054750    | Q9Y2P4 | S27A6_HUMAN |                              | 0  | CTTTTGGTTGT     | 0.418 |             |
| - | 1  | 33   |                    | NM_000879    | NP_000870    | P05113 | IL5_HUMAN   |                              | 0  | GAAACGTTCTG     | 0.438 |             |
| + | 3  | 1278 | y.1_RNA TXNDC1     | NM_024715    | NP_078991    | Q96J42 | TXD15_HUMAN | (Potential).  p.G207S(1)     | 2  | AAACGGTAGTG     | 0.448 |             |
| - | 12 | 1804 | e_Mutation_p.R37:  | NM_017415    | NP_059111    | Q9UH77 | KLHL3_HUMAN | Kelch 4.                     | 0  | CTGGCCGGGAAG    | 0.557 |             |
| + | 12 | 1875 | yo.1_Missense_Mt   | NM_005733    | NP_005724    | O95235 | KI20A_HUMAN | inesin-motor.                | 0  | CTTCCGTGACA     | 0.502 |             |
| - | 2  | 430  | lcs.1_Missense_N   | NM_001790    | NP_001781    | P30307 | MPIP3_HUMAN |                              | 3  | CCAAGAAATTTG    | 0.388 |             |
| + | 6  | 1347 |                    | NM_032289    | NP_115665    | Q9BQI7 | PSD2_HUMAN  | SEC7.                        | 1  | AGAGCGTGAGC     | 0.587 |             |
| + | 8  | 1037 | p.C130Y HARS2_     | NM_012208    | NP_036340    | P49590 | SYHM_HUMAN  |                              | 0  | CCAGTGTCATG     | 0.463 |             |
| + | 1  | 2125 |                    | NM_018935    | NP_061758    | Q9Y5E8 | PCDBF_HUMAN | ical; (Potential).           | 5  | TGTTCTGGGCA     | 0.682 |             |
| - | 3  | 1326 | p.N403K PCDH1_     | NM_002587    | NP_002578    | Q08174 | PCDH1_HUMAN | r (Potential). Cadherin 4.   | 5  | FGAGATGTTAGC    | 0.567 |             |
| - | 18 | 1564 | _p.R471Q ANXA6     | NM_001155    | NP_001146    | P08133 | ANXA6_HUMAN | Annexin 6.                   | 0  | TGGCCCGGATT     | 0.562 |             |
| - | 9  | 1067 | _Silent_p.L39L C5  | NM_032385    | NP_115761    | Q96IV6 | CE004_HUMAN |                              | 1  | TGTACAGTCCCA    | 0.592 |             |
| - | 3  | 625  | jii.2_Missense_Mu  | NM_138379    | NP_612388    | Q96H15 | TIMD4_HUMAN | ar (Potential). Thr-rich.    | 2  | GAAGACGGCAA     | 0.547 |             |
| - | 31 | 3949 | i.2_Nonsense_Mul   | NM_003062    | NP_003053    | O75094 | SLIT3_HUMAN | aminin G-like.               | 4  | GGGTCGGACCT     | 0.607 | rs141058025 |
| + | 2  | 170  | 2A3_uc011dkm.1_RNA |              |              |        |             |                              | 0  | CACTACGTTACC    | 0.547 |             |
| - | 18 | 1568 | p.W480L BAT5_uc    | NM_021160    | NP_066983    | O95870 | ABHGA_HUMAN |                              | 0  | CGTCCAGGGGG     | 0.602 |             |
| + | 9  | 923  | FL8_uc003oac.1_f   | NM_030652    | NP_085155    | Q99944 | EGFL8_HUMAN |                              | 0  | GCCCTCGGCGTC    | 0.552 |             |
| + | 9  | 1033 | se_Mutation_p.C2l  | NM_024165    | NP_077084    | O43189 | PHF1_HUMAN  |                              | 0  | TTTGCTGTAAGA    | 0.468 |             |
| + | 15 | 1898 | p.R630H SCUBE3     | NM_152753    | NP_689966    | Q8IX30 | SCUB3_HUMAN |                              | 1  | GCACCGTGCTG     | 0.632 |             |
| - | 3  | 340  | BP5_uc003oky.2     | NM_001145776 | NP_001139248 | Q13451 | FKBP5_HUMAN | ise FKBP-type 1.             | 1  | TCGGCGTTTCC     | 0.338 |             |
| - | 6  | 906  | REML1_uc011dud.    | NM_178174    | NP_835468    | Q86YW5 | TRML1_HUMAN | lasmic (Potential).          | 1  | CCCTCCCGGGA     | 0.537 |             |
| - | 4  | 1419 | 318_uc003ouw.2_    | NM_014345    | NP_055160    | Q5VUA4 | ZN318_HUMAN |                              | 7  | TTGCCCTGAGG     | 0.483 |             |
| + | 5  | 762  | _p.R171C SLC25f    | NM_004277    | NP_004268    | O95847 | UCP4_HUMAN  | Solcar 2.                    | 0  | GATTCGTGGTC     | 0.388 |             |
| - | 2  | 932  |                    | NM_014452    | NP_055267    | O75509 | TNR21_HUMAN | (Potential). TNFR-Cys 3.     | 0  | ACACCGCACAT     | 0.542 |             |
| + | 3  | 446  |                    | NM_002190    | NP_002181    | Q16552 | IL17_HUMAN  |                              | 0  | CTTCCGGCTGG     | 0.597 | rs147810050 |
| - | 10 | 1593 | u.1_Missense_Mu    | NM_002388    | NP_002379    | P25205 | MCM3_HUMAN  | MCM.                         | 3  | CTCCCATCCTC     | 0.498 | rs148636199 |
| - | 14 | 1173 | ite_p.R196_splice  | NM_020320    | NP_064716    | Q5T160 | SYRM_HUMAN  |                              | 3  | GCACCTAAAAG     | 0.413 |             |
| - | 1  | 1    | ?_uc003qab.1_Spli  | NM_016063    | NP_057147    | Q7Z4H3 | HDCC2_HUMAN |                              | 0  | ccccactccgcttcc | 0     |             |
| - | 4  | 794  | bt.1_Missense_Mt   | NM_001010923 | NP_001010923 | Q8N1K5 | THMS1_HUMAN | CABIT 1.                     | 4  | GAGTTTGATGAT    | 0.388 |             |
| + | 59 | 8503 | nse_Mutation_p.C   | NM_000426    | NP_000417    | P24043 | LAMA2_HUMAN | inin G-like 4.               | 10 | AAATCCGGCTTG    | 0.413 |             |
| + | 8  | 937  | B_uc003qgr.2_Mis   | NM_018945    | NP_061818    | Q9NP56 | PDE7B_HUMAN | ytic (By similarity).        | 1  | CAGCAGCACAC     | 0.478 |             |
| + | 2  | 641  |                    | NM_016217    | NP_057301    | Q9UBI9 | HDC_HUMAN   |                              | 0  | GTGCAACAACG     | 0.612 |             |
| + | 3  | 637  |                    | NM_025218    | NP_079494    | Q9BZM6 | N2DL1_HUMAN | lass I alpha-2 like.         | 1  | ATTTTGTGATGAC   | 0.408 |             |
| + | 18 | 2124 | nse_Mutation_p.T   | NM_015440    | NP_056255    | Q6UB35 | C1TM_HUMAN  | hydrofolate synthetase.      | 4  | CCTGACGGACA     | 0.597 | rs143492706 |
| + | 17 | 2483 |                    | NM_000876    | NP_000867    | P11717 | MPRI_HUMAN  | menal (Potential).           | 3  | AGTACGACCTC     | 0.577 |             |
| + | 10 | 2052 | sjb.2_Missense_N   | NM_017802    | NP_060272    | Q86Y56 | HEAT2_HUMAN |                              | 1  | CTGCCGTGTCC     | 0.692 |             |
| + | 2  | 464  | PR146_uc003sjx.    | NM_138445    | NP_612454    | Q96CH1 | GP146_HUMAN | lasmic (Potential).          | 1  | ACATCGAGCGT     | 0.642 |             |
| + | 2  | 871  | md.2_Missense_N    | NM_018641    | NP_061111    | Q9NRB3 | CHSTC_HUMAN | arity). Luminal (Potential). | 1  | TGCGGACCCCC     | 0.602 |             |
| + | 6  | 937  | ig.2_Missense_Mt   | NM_001040167 | NP_001035257 | Q8NES3 | LFNG_HUMAN  | enal (Potential).            | 0  | CATCCGACGG      | 0.667 |             |



|   |    |       |                     |              |              |        |             |                            |       |                |       |             |
|---|----|-------|---------------------|--------------|--------------|--------|-------------|----------------------------|-------|----------------|-------|-------------|
| - | 10 | 1275  | p.H376Y EIF2AK1     | NM_014413    | NP_055228    | Q9BQI3 | E2AK1_HUMAN | rotein kinase.             | 4     | 'CAGGTGGTACTC  | 0.443 |             |
| - | 2  | 402   | Mutation_p.R86C E   | NM_014413    | NP_055228    | Q9BQI3 | E2AK1_HUMAN |                            | 4     | 'TGAACGAAGTG'  | 0.348 |             |
| - | 9  | 1514  | se_Mutation_p.E2'   | NM_004956    | NP_004947    | P50549 | ETV1_HUMAN  |                            | 35    | 'FGGGTTCCTGTT' | 0.493 |             |
| - | 13 | 1762  | swf.2_Missense_Iv   | NM_006547    | NP_006538    | O00425 | IF2B3_HUMAN | KH 4.                      | 2     | 'TGCCAGCAGCA'  | 0.413 |             |
| + | 11 | 1462  | 'L9_uc010kwj.1_M    | NM_015060    | NP_055875    | Q8NBF6 | AVL9_HUMAN  |                            | 0     | 'TTTTTCGACAAC' | 0.453 | rs145306409 |
| - | 3  | 771   | p.V100M GCK_uc'     | NM_000162    | NP_000153    | P35557 | HXK4_HUMAN  |                            | 4     | 'CTTCACGCTCC'  | 0.627 |             |
| - | 5  | 521   | 'MK2B_uc003tku.2    | NM_001220    | NP_001211    | Q13554 | KCC2B_HUMAN | rotein kinase.             | 2     | 'CTCTCGCCACA'  | 0.542 |             |
| + | 11 | 1791  | 3tvz.2_Missense_I   | NM_022479    | NP_071924    | Q6IS24 | GLTL3_HUMAN | ienal (Potential).         | 7     | 'TCCATCAAGTAC' | 0.652 |             |
| - | 6  | 690   | p.R217Q SEMA3E      | NM_152754    | NP_689967    | O95025 | SEM3D_HUMAN | Sema.                      | 5     | 'GGGATCGAGTG'  | 0.408 |             |
| - | 8  | 939   | 'N2_uc010lfk.2_RI   | NM_000305    | NP_000296    | Q15165 | PON2_HUMAN  |                            | 0     | 'GAAGGATCAATA' | 0.398 |             |
| + | 3  | 476   | 'l3_uc011kip.1_Int  | NM_015379    | NP_056194    | O95415 | BRI3_HUMAN  |                            | 0     | 'GCGACGATGCC'  | 0.512 |             |
| + | 7  | 2081  | 'p.R653* ZKSCAN     | NM_145102    | NP_659570    | Q9Y2L8 | ZKSC5_HUMAN | 2H2-type 8.                | 1     | 'ATCTTCGACTCC' | 0.512 |             |
| - | 2  | 668   | '2_5'Flank C7orf43  | NM_018275    | NP_060745    | Q8WVR3 | CG043_HUMAN |                            | 0     | 'TCCCTGGGGGC'  | 0.527 |             |
| - | 2  | 557   |                     | NM_001004323 | NP_001004323 | Q8IZ16 | CG061_HUMAN |                            | 0     | 'TCTCTGGCAGC'  | 0.632 |             |
| + | 1  | 309   | XO24_uc003uvl.1     | NM_033506    | NP_277041    | O75426 | FBX24_HUMAN |                            | 4     | 'AGGCGGTCCCT'  | 0.582 |             |
| + | 4  | 12489 | C17_uc010lho.1_F    | NM_001040105 | NP_001035194 | Q685J3 | MUC17_HUMAN | ar (Potential). EGF-like.  | 27    | 'CCTCTCGCTGC'  | 0.532 |             |
| - | 8  | 845   |                     | NM_138403    | NP_612412    | Q9BUA6 | MYL10_HUMAN | EF-hand 3.                 | 2     | 'CTCTTACCGTC'  | 0.547 |             |
| + | 9  | 1061  | p.D257N ASB15_L     | NM_080928    | NP_563616    | Q8WXX1 | ASB15_HUMAN | ANK 5.                     | 3     | 'ATCCCAGACTGC' | 0.522 |             |
| - | 9  | 1615  | Olly.1_Missense_Iv  | NM_012470    | NP_036602    | Q9Y5L0 | TNPO3_HUMAN |                            | 5     | 'ACCCTATCAAG'  | 0.413 |             |
| - | 5  | 523   | 'p.R53* ZC3HC1      | NM_016478    | NP_057562    | Q86WB0 | NIPA_HUMAN  |                            | 0     | 'AAATCGGTCTGT' | 0.318 |             |
| - | 15 | 1860  |                     | NM_004333    | NP_004324    | P15056 | BRAF_HUMAN  | rotein kinase_R603>(2) p.T | 18290 | 'ATTTCACTGTAC' | 0.368 |             |
| + | 12 | 1345  | 'N1_uc011ktc.1_In   | NM_000083    | NP_000074    | P35523 | CLCN1_HUMAN |                            | 5     | 'TGATGCCCCCGC' | 0.522 |             |
| + | 3  | 301   | PO_uc010lpl.1_Int   | NM_198455    | NP_940857    | A2VEC9 | SSPO_HUMAN  | EMI.                       | 0     | 'GGGGCGCCAC'   | 0.627 |             |
| + | 22 | 3136  | ly.1_Missense_Mu    | NM_000603    | NP_000594    | P29474 | NOS3_HUMAN  | -binding FR-type.          | 8     | 'ACCCAGCACCC'  | 0.652 |             |
| + | 4  | 648   | 'p.A122V SLC4A2     | NM_003040    | NP_003031    | P04920 | B3A2_HUMAN  | ic (Potential). Pro-rich.  | 0     | 'TGAGGCCAGCG'  | 0.697 |             |
| - | 9  | 1390  | '_p.M423 PTPRN2     | NM_002847    | NP_002838    | Q92932 | PTPR2_HUMAN | ellular (Potential).       | 7     | 'CTCTCCATGTCC' | 0.592 |             |
| - | 4  | 1664  |                     | NM_178857    | NP_849188    | Q8IWN7 | RP1L1_HUMAN |                            | 8     | 'CACCCGTCCTC'  | 0.692 |             |
| - | 4  | 2904  | 'nse_Mutation_p.C   | NM_001002814 | NP_001002814 | Q6WKZ4 | RFIP1_HUMAN |                            | 3     | 'CAGATCGGCCA'  | 0.448 | rs146977784 |
| + | 3  | 947   | 'C1_uc003xmd.1_Ir   | NM_006283    | NP_006274    | O75410 | TACC1_HUMAN | ction with TDRD7.          | 1     | 'CAGACGCCCTC'  | 0.587 |             |
| + | 6  | 577   | 'C1_uc003xnn.2_R    | NM_002164    | NP_002155    | P14902 | I23O1_HUMAN |                            | 2     | 'CATTTCGTGATC' | 0.358 |             |
| - | 9  | 846   | 'p.V179L LYPLA1     | NM_006330    | NP_006321    | O75608 | LYPA1_HUMAN |                            | 1     | 'CCTTGACATCCA' | 0.353 |             |
| + | 3  | 3299  |                     | NM_004770    | NP_004761    | Q92953 | KCNB2_HUMAN | lasmic (Potential).        | 7     | 'TTATTGTCCCA'  | 0.348 |             |
| - | 5  | 491   | 'h.1_Missense_Mu    | NM_000971    | NP_000962    | P18124 | RL7_HUMAN   |                            | 0     | 'ACCACGCTTGT'  | 0.358 |             |
| - | 3  | 1005  | 'ij.1_Missense_Mu   | NM_005655    | NP_005646    | Q13118 | KLF10_HUMAN |                            | 0     | 'CAACAGGGTTG'  | 0.587 |             |
| + | 15 | 2582  | '_p.R795C RIMS2     | NM_014677    | NP_055492    | Q9UQ26 | RIMS2_HUMAN |                            | 15    | 'GACATCGTGTC'  | 0.393 |             |
| - | 2  | 395   | 'v74_uc003ymx.2_    | NM_153015    | NP_694560    | Q96NL1 | TMM74_HUMAN | p.R97W(1)                  | 4     | 'CTTTCGTTCC'   | 0.502 |             |
| + | 3  | 2122  |                     | NM_014943    | NP_055758    | Q9Y6X8 | ZHX2_HUMAN  |                            | 2     | 'GACACGGTCGC'  | 0.522 | rs137944558 |
| - | 1  | 506   |                     | NM_001081675 | NP_001075144 | Q2WVG6 | KLH38_HUMAN | BACK.                      | 0     | 'AGGACGTCAGT'  | 0.582 |             |
| + | 2  | 273   | GPR172A_uc003z      | NM_024531    | NP_078807    | Q9HAB3 | RFT3_HUMAN  |                            | 0     | 'GGTCAAAGAGC'  | 0.647 |             |
| + | 7  | 1364  | 'iK_uc011ino.1_Intr | NM_000459    | NP_000450    | Q02763 | TIE2_HUMAN  | Extracellular (Potential). | 12    | 'TTTACGGGCCA'  | 0.473 |             |
| - | 10 | 1286  | 'U1_uc010mjp.1_Ir   | NM_018225    | NP_060695    | Q2TAY7 | SMU1_HUMAN  | WD 5.                      | 1     | 'CTGCGGTGCTG'  | 0.398 |             |
| + | 8  | 882   | 'T_uc003zvh.2_Mis   | NM_000155    | NP_000146    | P07902 | GALT_HUMAN  |                            | 0     | 'TGAGCGTGATG'  | 0.617 | rs111033831 |
| - | 2  | 709   | 'se_Mutation_p.R5   | NM_013390    | NP_037522    | Q9UHN6 | TMEM2_HUMAN |                            | 2     | 'TGCCCGGTCTT'  | 0.468 |             |
| - | 3  | 575   | 'sp.1_Missense_Mu   | NM_015250    | NP_056065    | Q8TD16 | BICD2_HUMAN | Potential.                 | 1     | 'CTTCCCGGAAT'  | 0.562 |             |
| - | 12 | 1803  | 'lorf5_uc004bdr.3_I | NM_032012    | NP_114401    | Q9H330 | CI005_HUMAN |                            | 1     | 'CTGACGACTGAC' | 0.323 |             |
| + | 15 | 2444  | 'kz.1_Missense_M    | NM_007018    | NP_008949    | Q7Z7A1 | CNTRL_HUMAN |                            | 0     | 'TGTTTCGTCCA'  | 0.413 | rs149200288 |
| + | 9  | 1253  | 'mf.1_Missense_M    | NM_000962    | NP_000953    | P23219 | PGH1_HUMAN  |                            | 2     | 'ATACCGCAACC'  | 0.537 |             |

|   |    |      |                    |              |              |        |             |                                 |     |               |       |             |
|---|----|------|--------------------|--------------|--------------|--------|-------------|---------------------------------|-----|---------------|-------|-------------|
| + | 8  | 864  | vj.2_Missense_Mu   | NM_014397    | NP_055212    | Q9HC98 | NEK6_HUMAN  | rotein kinase.                  | 3   | :TGACGAGGTG,  | 0.587 |             |
| + | 15 | 1668 | _p.R401* GARNL     | NM_032293    | NP_115669    | Q5VVW2 | GARL3_HUMAN |                                 | 3   | AATAGACGATCT  | 0.408 |             |
| + | 7  | 1185 | .2_Intron C9orf117 | NM_001012502 | NP_001012520 | Q5JU67 | CI117_HUMAN |                                 | 0   | GCACCCGGATG,  | 0.592 |             |
| - | 17 | 1362 | 3OLGA2_uc004bu     | NM_004486    | NP_004477    | Q08379 | GOGA2_HUMAN | ential. Poly-Pro.               | 1   | GGGGCGGGGGT   | 0.597 |             |
| - | 5  | 713  | mzn.2_Missense_I   | NM_005312    | NP_005303    | Q13905 | RPGF1_HUMAN |                                 | 7   | :CAGCACAGCCT  | 0.562 |             |
| + | 4  | 464  | :bo.2_Nonsense_I   | NM_207417    | NP_997300    | Q6ZQR2 | CI171_HUMAN |                                 | 5   | :ACGCTGGAACG  | 0.647 |             |
| - | 13 | 3980 | .R1217Q CAMSAF     | NM_015447    | NP_056262    | Q5T5Y3 | CAMP1_HUMAN |                                 | 3   | :GCACCCGGTCT  | 0.657 |             |
| - | 26 | 4647 | cia.1_Nonsense_I   | NM_017617    | NP_060087    | P46531 | NOTC1_HUMAN | ilar (Potential). LNR 3.        | 856 | :CTGTTGCAGCC  | 0.706 |             |
| + | 13 | 2069 | lorf86_uc004cjl.1_ | NM_024718    | NP_078994    | Q3YEC7 | PARF_HUMAN  |                                 | 0   | .CTGACGAGGAT  | 0.647 |             |
| - | 17 | 2202 | mfa.1_Intron PNPI  | NM_152286    | NP_689499    | Q6ZV29 | PLPL7_HUMAN | cNMP 3.                         | 1   | CAGAGCGCAGC   | 0.682 |             |
| + | 7  | 1057 | XD1_uc011mgx.1_    | NM_018390    | NP_060860    | Q9NUJ7 | PLCX1_HUMAN |                                 | 0   | TTGTTCTGGGCC  | 0.612 |             |
| + | 2  | 560  | .P122S SFRS17A     | NM_005088    | NP_005079    | Q02040 | AK17A_HUMAN |                                 | 0   | :ACTTCCCCACC  | 0.647 |             |
| - | 9  | 1412 | p.R334C ARSE_uc    | NM_000047    | NP_000038    | P51690 | ARSE_HUMAN  |                                 | 2   | :CACCGGATCC   | 0.602 |             |
| + | 11 | 1453 | se_Mutation_p.D8   | NM_015691    | NP_056506    | Q9ULE0 | WWC3_HUMAN  | Ser-rich.                       | 4   | :CCTTCGACTCTC | 0.647 |             |
| + | 6  | 847  | p.P194Q HCCS_u     | NM_005333    | NP_005324    | P53701 | CCHL_HUMAN  |                                 | 0   | TTTACCAAGGG   | 0.448 |             |
| - | 8  | 2449 | RHGAP6_uc004cu     | NM_013427    | NP_038286    | O43182 | RHG06_HUMAN | Rho-GAP.                        | 2   | GGAGAGGAACT   | 0.562 |             |
| + | 5  | 725  |                    | NM_000531    | NP_000522    | P00480 | OTC_HUMAN   | rbamoyl phosphate binding       | 2   | :CTATCCAGATCC | 0.393 |             |
| + | 5  | 1492 | iN_uc010nho.1_Mi   | NM_152869    | NP_690608    | Q15493 | RGN_HUMAN   |                                 | 0   | FACTCCGTGGAT  | 0.413 |             |
| + | 4  | 504  | Idmu.2_Missense_   | NM_024859    | NP_079135    | Q9H6Y5 | MAGIX_HUMAN | PDZ.                            | 0   | TGGCCGTGCGC   | 0.632 |             |
| - | 3  | 624  | lyo.2_Missense_M   | NM_032803    | NP_116192    | Q8WY07 | CTR3_HUMAN  | ellular (Potential).            | 2   | GGGCACGTGCA   | 0.552 |             |
| + | 6  | 1696 | zc.2_Missense_Mt   | NM_018977    | NP_061850    | Q9NZ94 | NLGN3_HUMAN | ellular (Potential).            | 1   | CGGCTCGCCTA   | 0.562 |             |
| + | 10 | 1801 | nse_Mutation_p.R   | NM_001145408 | NP_001138880 | Q15233 | NONO_HUMAN  | ntential. DBHS.                 | 4   | GATGCGGCGAC   | 0.517 |             |
| + | 2  | 3355 | lefm.1_Missense_I  | NM_032968    | NP_116750    | Q9BZA7 | PC11X_HUMAN | lasmic (Potential).             | 2   | :ATGTGCCAGG   | 0.433 |             |
| - | 11 | 3180 | as.2_Missense_Mt   | NM_001113490 | NP_001106962 | Q4VCS5 | AMOT_HUMAN  |                                 | 1   | :AGAGTATTGGAC | 0.428 |             |
| - | 1  | 439  |                    | NM_001145718 | NP_001139190 | P0C2W7 | CT47B_HUMAN |                                 | 0   | :CTCCCCGAGGC  | 0.697 |             |
| + | 19 | 1944 |                    | NM_003399    | NP_003390    | O43895 | XPP2_HUMAN  |                                 | 0   | :GATCCGTCTCG  | 0.542 |             |
| - | 22 | 3127 | R1007W L1CAM_L     | NM_000425    | NP_000416    | P32004 | L1CAM_HUMAN | ntential). Fibronectin type-III | 9   | :TTCCCGTACGA  | 0.627 |             |
| - | 13 | 2099 | iu.1_Missense_Mu   | NM_001110556 | NP_001104026 | P21333 | FLNA_HUMAN  | Filamin 4.                      | 6   | :CCTGCGATGGC  | 0.637 |             |
| + | 10 | 919  |                    | NM_004699    | NP_004690    | Q14320 | FA50A_HUMAN |                                 | 1   | :ACGGGGGAAGA  | 0.642 |             |
| + | 28 | 4881 |                    | NM_017514    | NP_059984    | P51805 | PLXA3_HUMAN | lasmic (Potential).             | 3   | :CAGACGGTTCC  | 0.627 |             |
| - | 3  | 189  | 001aeh.1_Intron C  | NM_017871    | NP_060341    | Q5TA45 | INT11_HUMAN |                                 | 0   | :GGAAGCGTCGC  | 0.617 |             |
| + | 22 | 3926 | .CH2_uc001ajj.1_3  | NM_014638    | NP_055453    | O75038 | PLCH2_HUMAN |                                 | 5   | CTGACGAAGTGC  | 0.687 |             |
| + | 7  | 733  | k.1_Missense_Mu    | NM_002631    | NP_002622    | P52209 | 6PGD_HUMAN  |                                 | 1   | :AGGACGAGATG  | 0.562 |             |
| - | 21 | 2602 | alice_Site_p.K799_ | NM_022089    | NP_071372    | Q9NQ11 | AT132_HUMAN |                                 | 4   | :CCTCACCTTAAC | 0.632 |             |
| + | 6  | 1125 | av.1_Missense_M    | NM_032880    | NP_116269    | Q96ID5 | IGS21_HUMAN |                                 | 4   | :CCTCCGTGGC   | 0.637 |             |
| - | 37 | 4307 | .R275C MYOM3_u     | NM_152372    | NP_689585    | Q5VTT5 | MYOM3_HUMAN | like C2-type 4.                 | 3   | :CATGCGGTATCC | 0.542 |             |
| + | 11 | 1428 | AL3_uc009vrc.2_S   | NM_020448    | NP_065181    | Q6P499 | NPAL3_HUMAN |                                 | 0   | GCAGGTAAGG    | 0.473 |             |
| + | 11 | 1671 | p.D267Y ADC_uc     | NM_052998    | NP_443724    | Q96A70 | ADC_HUMAN   |                                 | 2   | :CGGTTGATGGC  | 0.617 |             |
| - | 31 | 4891 | p.G1661E CSMD2     | NM_052896    | NP_443128    | Q72408 | CSMD2_HUMAN | ar (Potential). CUB 10.         | 12  | ACTGTCCCCCAC  | 0.547 |             |
| + | 16 | 2758 | yu.2_Missense_M    | NM_005095    | NP_005086    | Q5VZL5 | ZMYM4_HUMAN |                                 | 5   | :ATTGGCAAGTG  | 0.423 |             |
| + | 3  | 278  |                    | NM_024097    | NP_077002    | Q9BV19 | CA050_HUMAN | Potential.                      | 1   | TCATCCGAGCA   | 0.358 | rs150987262 |
| - | 3  | 676  |                    | NM_006516    | NP_006507    | P11166 | GTR1_HUMAN  | ellular (Potential).            | 5   | :ATAGCGGTGGA  | 0.597 |             |
| + | 19 | 3119 | q.2_Missense_Mu    | NM_005424    | NP_005415    | P35590 | TIE1_HUMAN  | Potential). Protein kinase.     | 7   | AGGGGCGTCTC   | 0.582 | rs144134618 |
| + | 2  | 844  | lw.1_Missense_M    | NM_018150    | NP_060620    | Q5VTB9 | RN220_HUMAN |                                 | 2   | :GCAAGGAATAT  | 0.517 |             |
| - | 17 | 3570 | se_Mutation_p.E1'  | NM_003035    | NP_003026    | Q15468 | STIL_HUMAN  |                                 | 3   | GTTCTCTCAT    | 0.393 |             |
| - | 9  | 1754 | u.1_RNA C1orf16i   | NM_001004303 | NP_001004303 | Q5VWT5 | CA168_HUMAN |                                 | 5   | :CTCAGGGCAGC  | 0.463 |             |
| + | 6  | 1087 | 5_splice PGM1_uc   | NM_002633    | NP_002624    | P36871 | PGM1_HUMAN  |                                 | 3   | :CCAAGGATCG,  | 0.383 |             |

|   |    |      |                   |              |              |        |              |                             |    |                 |       |             |
|---|----|------|-------------------|--------------|--------------|--------|--------------|-----------------------------|----|-----------------|-------|-------------|
| - | 8  | 1360 | m.1_Nonsense_M    | NM_002227    | NP_002218    | P23458 | JAK1_HUMAN   | FERM.                       | 61 | FGATTTTCAGGGA   | 0.373 |             |
| + | 12 | 1301 | _p.R400* SFRS11_  | NM_004768    | NP_004759    | Q05519 | SRS11_HUMAN  |                             | 0  | aagagaacgatcaac | 0.159 |             |
| + | 12 | 1365 | 73A_uc010ori.1_M  | NM_198549    | NP_940951    | Q8NAN2 | FA73A_HUMAN  |                             | 1  | AGACCCGATCAC    | 0.294 | rs146380219 |
| - | 9  | 1183 | leal.1_Missense_f | NM_024901    | NP_079177    | Q9H6A0 | DEN2D_HUMAN  | DENN.                       | 1  | GATTGACCAGC/    | 0.458 |             |
| + | 3  | 332  | nse_Mutation_p.C  | NM_003176    | NP_003167    | Q15431 | SYCP1_HUMAN  | Glu-rich (acidic).          | 1  | AAATGTACTGA/    | 0.318 |             |
| - | 4  | 574  |                   | NM_052891    | NP_443123    | Q96LB9 | PGRP3_HUMAN  |                             | 4  | TCCTGGGCATC/    | 0.532 |             |
| + | 20 | 2677 | rk.1_Missense_Ml  | NM_001080471 | NP_001073940 | Q5VY43 | PEAR1_HUMAN  | Pro-rich.                   | 3  | AGGTGGGGCCCC    | 0.667 |             |
| - | 16 | 2415 |                   | NM_003126    | NP_003117    | P02549 | SPTA1_HUMAN  | Spectrin 8.                 | 8  | CCTGACGAGCA/    | 0.463 | rs145972324 |
| + | 10 | 1469 | g.2_Missense_Mu   | NM_001014796 | NP_001014796 | Q16832 | DDR2_HUMAN   | cellular (Potential).       | 6  | TGTCCACGGTGC    | 0.522 | rs147483979 |
| - | 7  | 1074 | gcw.1_Missense_l  | NM_177398    | NP_796372    | Q8TE12 | LMX1A_HUMAN  |                             | 5  | FGATTCCTTCCAT   | 0.577 |             |
| + | 2  | 725  | 0794_uc001gdd.2   | NM_001005214 | NP_001005214 | Q8N7C0 | LRC52_HUMAN  | lar (Potential), LRRCT.     | 1  | GGGTGGCCCAT/    | 0.552 |             |
| - | 13 | 3971 |                   | NM_000130    | NP_000121    | P12259 | FA5_HUMAN    | ndem repeats of [TNP]-L-S   | 6  | AGAAAGGGGCA     | 0.502 | rs140018525 |
| + | 7  | 654  | G4A_uc010pos.1_   | NM_024420    | NP_077734    | P47712 | PA24A_HUMAN  | inding (Probable), PLA2c.   | 3  | GGCTCTGTGTG/    | 0.443 |             |
| + | 2  | 499  | ix.2_Missense_Mu  | NM_001136475 | NP_001129947 | Q86V25 | VASH2_HUMAN  |                             | 0  | AGGTCCCAAAC     | 0.542 |             |
| + | 4  | 552  | d.1_Missense_Mu   | NM_014777    | NP_055592    | Q14146 | URB2_HUMAN   |                             | 3  | GCATCTACACGG/   | 0.572 |             |
| + | 8  | 2129 |                   | NM_001004342 | NP_001004342 | Q6ZTA4 | TRI67_HUMAN  | B30.2/SPRY.                 | 4  | CAACCCGACGT/    | 0.607 |             |
| + | 1  | 55   |                   | NM_001004696 | NP_001004696 | Q8NH00 | OR2T4_HUMAN  | cellular (Potential).       | 1  | TCCTGATGGGA/    | 0.488 |             |
| + | 9  | 992  | F18_uc001imq.2_   | NM_003675    | NP_003666    | Q99633 | PRP18_HUMAN  |                             | 1  | CCCATCGGTGTC    | 0.413 |             |
| + | 4  | 856  | ii.1_Missense_Mut | NM_030664    | NP_109589    | Q96BW5 | PTER_HUMAN   |                             | 2  | TATTGCAAGAAC    | 0.473 |             |
| - | 32 | 6413 | 010qdw.1_Missen   | NM_021738    | NP_068506    | Q95425 | SVIL_HUMAN   | ielolin-like 4.             | 6  | CTCCACGCACG     | 0.627 |             |
| + | 7  | 794  |                   | NM_052997    | NP_443723    | Q9BXX3 | AN30A_HUMAN  |                             | 9  | CTTGGCGGAAA     | 0.423 |             |
| + | 7  | 860  |                   | NM_052997    | NP_443723    | Q9BXX3 | AN30A_HUMAN  |                             | 9  | CTTGGTGGAAA/    | 0.502 |             |
| + | 7  | 1120 |                   | NM_052997    | NP_443723    | Q9BXX3 | AN30A_HUMAN  |                             | 9  | ATTATGAGTCCCC   | 0.428 |             |
| - | 6  | 957  | _p.E188* PCDH15   | NM_033056    | NP_149045    | Q96QU1 | PCD15_HUMAN  | r (Potential), Cadherin 2.  | 13 | CATACTCTATCTG   | 0.333 |             |
| + | 3  | 413  | D1_uc001jkd.3_R   | NM_018464    | NP_060934    | Q9NZ45 | CISD1_HUMAN  | lasmic (Potential).         | 0  | ATAACGAAGAG/    | 0.403 |             |
| - | 19 | 3921 | _Mutation_p.R69E  | NM_004747    | NP_004738    | Q8TDM6 | DLG5_HUMAN   |                             | 8  | CACTCCGCGGA     | 0.502 |             |
| + | 9  | 2379 | ug.1_Missense_M   | NM_017580    | NP_060050    | Q9UGI0 | ZRAN1_HUMAN  |                             | 2  | CTCGGCGGCGA     | 0.547 |             |
| - | 13 | 7474 | l.1_Missense_Mut  | NM_002417    | NP_002408    | P46013 | KI67_HUMAN   | approximate repeats, 12.    | 7  | CTTAGGAGTCTC    | 0.453 |             |
| + | 12 | 2169 | iq.2_Missense_Ml  | NM_001003819 | NP_001003819 | B2RNG4 | B2RNG4_HUMAN |                             | 1  | FGCTGCAAATGT    | 0.428 |             |
| - | 5  | 917  | cy.1_Missense_Ml  | NM_000352    | NP_000343    | Q09428 | ABCC8_HUMAN  | smic (By similarity).       | 1  | GCCGTTGGTAG     | 0.547 |             |
| - | 5  | 501  | se_Mutation_p.G1K | NM_005709    | NP_005700    | Q9Y6N9 | USH1C_HUMAN  | PDZ 1.                      | 1  | CGTCCCTACC      | 0.552 |             |
| + | 1  | 317  | C86_uc001nqb.2_f  | NM_024098    | NP_077003    | Q9H6F5 | CCD86_HUMAN  | Pro-rich.                   | 0  | CTCCGAGTGTG/    | 0.662 |             |
| + | 25 | 2969 | ph.1_Missense_M   | NM_000932    | NP_000923    | Q01970 | PLCB3_HUMAN  |                             | 2  | CACCCGCCGCC     | 0.677 |             |
| - | 2  | 1150 | vv.2_Missense_Ml  | NM_033063    | NP_149052    | Q96JE9 | MAP6_HUMAN   | i-binding (By similarity).  | 0  | FAGAGGTGCGT     | 0.512 |             |
| - | 11 | 1351 | p.R388W MRE11A    | NM_005591    | NP_005582    | P49959 | MRE11_HUMAN  |                             | 5  | TACCCGATCCA/    | 0.353 |             |
| - | 5  | 667  | A154G CASP5_uc    | NM_004347    | NP_004338    | P51878 | CASP5_HUMAN  |                             | 3  | AGTGAGCCCCA     | 0.498 |             |
| + | 6  | 850  | 3A_uc009yxx.2_l   | NM_213621    | NP_998786    | P46098 | 5HT3A_HUMAN  | cellular (Potential).       | 0  | CGACAGGAGTG     | 0.493 |             |
| - | 22 | 4741 | nse_Mutation_p.F  | NM_001142685 | NP_001136157 | A7KAX9 | RHG32_HUMAN  | action with GAB2.           | 5  | TCTCCGGATGG     | 0.557 |             |
| + | 13 | 1608 | _p.G332E LEPREL   | NM_014262    | NP_055077    | Q8IVL6 | P3H3_HUMAN   |                             | 0  | GGCTGGGACAG     | 0.662 |             |
| + | 13 | 1779 | _p.A474T PTPN6_   | NM_002831    | NP_002822    | P29350 | PTN6_HUMAN   | protein phosphatase.        | 1  | CCATCGCCCAG     | 0.617 |             |
| - | 5  | 504  | r_p.R96C KLRC1_   | NM_002259    | NP_002250    | P26715 | NGG2A_HUMAN  | cellular (Potential).       | 0  | AATGACGTGCTA    | 0.338 |             |
| - | 20 | 2511 | osit.1_Missense_N | NM_014802    | NP_055617    | Q86YS7 | K0528_HUMAN  |                             | 4  | TCGTAGTTTAAAC   | 0.274 |             |
| - | 3  | 971  |                   | NM_021044    | NP_066382    | O43323 | DHH_HUMAN    |                             | 2  | GTCTCCGCGGT/    | 0.677 |             |
| - | 2  | 573  |                   | NM_175068    | NP_778238    | Q86Y46 | K2C73_HUMAN  | rod, Linker 1.              | 6  | GGGCTCCAGGT     | 0.607 |             |
| + | 19 | 2385 | rr.1_Missense_Mut | NM_004984    | NP_004975    | Q12840 | KIF5A_HUMAN  |                             | 3  | GCAGAAGACCA     | 0.597 |             |
| + | 17 | 2202 |                   | NM_007235    | NP_009166    | O43592 | XPOT_HUMAN   | ytoplasmic localization and | 2  | TGATCAACTTTT    | 0.373 |             |
| + | 15 | 3579 | ub.1_Missense_Ml  | NM_014903    | NP_055718    | Q8IVL0 | NAV3_HUMAN   | Ser-rich.                   | 17 | AAATATCGCAGC1   | 0.512 |             |

|   |    |      |                   |              |              |        |             |                                 |    |                |       |             |
|---|----|------|-------------------|--------------|--------------|--------|-------------|---------------------------------|----|----------------|-------|-------------|
| + | 3  | 1201 |                   | NM_007076    | NP_009007    | Q9BVA6 | FICD_HUMAN  | Fido.                           | 0  | AGTTTGCAGCCT   | 0.542 |             |
| - | 1  | 191  | utation_p.V40M M  | NM_052845    | NP_443077    | Q96EY8 | MMAB_HUMAN  |                                 | 0  | :TCCACGCCCTC   | 0.692 |             |
| - | 2  | 284  | uq.3_Missense_M   | NM_024072    | NP_076977    | Q8TDD1 | DDX54_HUMAN |                                 | 3  | :GGCACGCACCA   | 0.617 |             |
| - | 3  | 418  | iNO1_uc001ueu.2   | NM_018183    | NP_060653    | A3KN83 | SBNO1_HUMAN |                                 | 9  | CATTTCTGACTGT  | 0.418 |             |
| - | 12 | 2436 |                   | NM_015347    | NP_056162    | O15034 | RIMB2_HUMAN |                                 | 11 | CCTCCTCCATGA   | 0.612 |             |
| + | 21 | 2472 | 5B_uc010abg.2_f   | NM_015032    | NP_055847    | Q9NTI5 | PDS5B_HUMAN |                                 | 4  | ATTGGTCATATTG  | 0.393 |             |
| - | 11 | 3433 | mwz.2_Missense_N  | NM_025138    | NP_079414    | Q86XN7 | CM023_HUMAN |                                 | 5  | :ATACCCGGCTTC  | 0.433 |             |
| + | 7  | 771  | p.E172G COG6_u    | NM_020751    | NP_065802    | Q9Y2V7 | COG6_HUMAN  |                                 | 2  | CTTATGAAAGAC   | 0.264 |             |
| + | 1  | 447  |                   | NM_001004724 | NP_001004724 | Q8IXE1 | OR4N5_HUMAN | Name=4; (Potential).            | 1  | CTGTGGCTTGGC   | 0.488 |             |
| + | 21 | 4348 | j.2_RNA FLJ1035i  | NM_018071    | NP_060541    | Q8TER5 | ARH40_HUMAN |                                 | 0  | GCCGGGAGCCT    | 0.687 |             |
| + | 12 | 1166 | E6_uc001wlm.2_M   | NM_006032    | NP_006023    | O95741 | CPNE6_HUMAN | VWFA.                           | 3  | :TAAGCGGTTCC   | 0.582 | rs146313186 |
| + | 7  | 870  | mp.2_RNA IRF9_t   | NM_006084    | NP_006075    | Q00978 | IRF9_HUMAN  |                                 | 1  | :GCCCTCAGGCT   | 0.642 |             |
| + | 8  | 2096 | .3_Intron FUT8_uc | NM_178155    | NP_835368    | Q9BYC5 | FUT8_HUMAN  | (Potential). Luminal (Potential | 1  | :ATCCCCGTCCTC  | 0.458 |             |
| - | 2  | 445  | xkr.3_Missense_M  | NM_003861    | NP_003852    | Q96JK2 | DCAF5_HUMAN | WD 1.                           | 2  | :CCGGCGGTCAT   | 0.488 |             |
| + | 3  | 527  | Jaqz.2_Missense_  | NM_014734    | NP_055549    | Q92537 | K0247_HUMAN | tracellular (Potential).        | 3  | :TCATCGAATAC   | 0.557 |             |
| - | 7  | 830  | _Mutation_p.H67Q  | NM_005050    | NP_005041    | O14678 | ABCD4_HUMAN | nsmembrane type-1.              | 4  | :TGCATGTGCTTC  | 0.552 |             |
| - | 4  | 2590 | _p.R797* STON2_   | NM_033104    | NP_149095    | Q8WXE9 | STON2_HUMAN | MHD.                            | 5  | :CAGTCGGTTTA   | 0.473 |             |
| - | 21 | 3415 | _p.A1068V DICEI   | NM_030621    | NP_085124    | Q9UPY3 | DICER_HUMAN |                                 | 5  | :CGCCAGCATCG   | 0.498 |             |
| + | 3  | 1209 | nsse_Mutation_p.R | NM_000623    | NP_000614    | P30411 | BKRB2_HUMAN | lasmic (Potential).             | 5  | :CAAGCGCTTCC   | 0.567 | rs148172749 |
| + | 7  | 1316 | OR4N4_uc010tzv    | NM_001005241 | NP_001005241 | Q8N0Y3 | OR4N4_HUMAN | Name=3; (Potential).            | 5  | :GGAGGATTAC    | 0.512 |             |
| - | 17 | 2760 | _2_Missense_Mut   | NM_003257    | NP_003248    | Q07157 | ZO1_HUMAN   | ylate kinase-like.              | 6  | :TTTTACGAAGTT  | 0.373 |             |
| - | 3  | 253  | _p.A48V ATPBD4    | NM_080650    | NP_542381    | Q7L8W6 | ATBD4_HUMAN |                                 | 0  | :GCCATTGCTTCT  | 0.438 |             |
| + | 6  | 810  | _p.K207N SQRD_L   | NM_021199    | NP_067022    | Q9Y6N5 | SQRD_HUMAN  |                                 | 1  | :CAGAAGATCAT   | 0.478 |             |
| - | 11 | 1359 | _p.S442L CEP152   | NM_014985    | NP_055800    | O94986 | CE152_HUMAN | Potential.                      | 2  | :GTACTGACCCCT  | 0.453 |             |
| - | 16 | 1722 | .V400D ATP8B4_u   | NM_024837    | NP_079113    | Q8TF62 | AT8B4_HUMAN | lasmic (Potential).             | 8  | :AAGTAACTAGTC  | 0.388 |             |
| - | 15 | 1738 |                   | NM_032802    | NP_116191    | Q8TCT8 | PSL2_HUMAN  |                                 | 0  | :TTATTGCTGGAC  | 0.333 |             |
| - | 40 | 5648 | _R1775C MYO5A     | NM_000259    | NP_000250    | Q9Y411 | MYO5A_HUMAN | Dilute.                         | 4  | :AGTACGAATGAA  | 0.333 |             |
| + | 10 | 1927 | _p.S440N LIPC_uc  | NM_000236    | NP_000227    | P11150 | LIPC_HUMAN  | PLAT.                           | 1  | :ATGGAGCACAGC  | 0.512 | rs6079      |
| + | 3  | 858  | _jp.1_Missense_M  | NM_002755    | NP_002746    | Q02750 | MP2K1_HUMAN | rotein kinase.                  | 0  | :CGTGGCTTCT/   | 0.507 | rs121908596 |
| + | 13 | 2163 | _p.R674Q NEO1_u   | NM_002499    | NP_002490    | Q92859 | NEO1_HUMAN  | tential). Fibronectin type-III  | 1  | :CTACCGAAAGG   | 0.483 |             |
| - | 6  | 687  | aq.2_Missense_M   | NM_005701    | NP_005692    | O95149 | SPN1_HUMAN  |                                 | 1  | :TACCTGGCAATC  | 0.502 |             |
| + | 20 | 4889 | rf42_uc010upv.1_  | NM_152259    | NP_689472    | Q7Z2Z1 | TICRR_HUMAN |                                 | 7  | :CCTCTCCACAC   | 0.607 |             |
| + | 9  | 1943 | _p.2_Missense_Mu  | NR_003659    |              |        |             |                                 | 0  | :GCATCGGCAAG   | 0.652 |             |
| + | 6  | 1347 | IP2_uc010uyp.1_l  | NM_024997    | NP_079273    | Q5U623 | MCAF2_HUMAN | Potential.                      | 0  | :AAAGACGTATT/  | 0.289 |             |
| + | 6  | 872  | _p.2_Missense_Mu  | NM_024847    | NP_079123    | Q7Z402 | TMC7_HUMAN  | ellular (Potential).            | 3  | :TTTTACGGACAT  | 0.498 |             |
| + | 8  | 1136 | se_Mutation_p.A3  | NM_024847    | NP_079123    | Q7Z402 | TMC7_HUMAN  | lasmic (Potential).             | 3  | :TTCAGGCAGATC  | 0.393 |             |
| + | 3  | 546  | sense_Mutation_p. | NM_020422    | NP_065155    | Q96B96 | TM159_HUMAN | ical; (Potential).              | 1  | :CATGTCGGCCG   | 0.527 | rs145147020 |
| - | 5  | 2714 |                   | NM_024675    | NP_078951    | Q86YC2 | PALB2_HUMAN |                                 | 11 | :ATTGTACCTGTTC | 0.438 |             |
| + | 15 | 1869 | me.2_Missense_N   | NM_212535    | NP_997700    | P05771 | KPCB_HUMAN  | rotein kinase.                  | 9  | :ACAACGTAGCC   | 0.443 |             |
| + | 4  | 1020 | ae.1_Missense_N   | NM_014712    | NP_055527    | O15047 | SET1A_HUMAN | RRM.                            | 3  | :TGAAGGATATGT  | 0.547 |             |
| + | 24 | 5152 | _p.P1663L CHD9_   | NM_025134    | NP_079410    | Q3L8U1 | CHD9_HUMAN  |                                 | 7  | :GGTACCAGAAC   | 0.338 |             |
| + | 2  | 470  | VS3_uc002enj.3_lr | NM_022770    | NP_073607    | Q9BRX5 | PSF3_HUMAN  |                                 | 0  | :TGGAACTCCCC.  | 0.502 |             |
| + | 2  | 1005 | ao.2_Missense_Mi  | NM_005769    | NP_005760    | Q8NCG5 | CHST4_HUMAN | ienal (Potential).              | 0  | :TGTGGCTATG/   | 0.552 |             |
| - | 9  | 1179 | cfj.2_Intron PRDM | NM_001098173 | NP_001091643 | Q9NQW5 | PRDM7_HUMAN |                                 | 1  | :CCCCATACCAG/  | 0.522 |             |
| + | 3  | 996  | rf97_uc010vpz.1_  | NM_001013672 | NP_001013694 | Q6ZQX7 | CQ097_HUMAN | tandem repeat of A-L-K-G        | 1  | :CCACTGACCC    | 0.687 |             |
| + | 22 | 3359 | USP6_uc010ckz.1   | NM_004505    | NP_004496    | P35125 | UBP6_HUMAN  |                                 | 5  | :CACGTGGTGGG   | 0.637 |             |
| - | 7  | 1644 | _Mutation_p.A10i  | NM_001365    | NP_001356    | P78352 | DLG4_HUMAN  | PDZ 1.                          | 2  | :GGCCGCAGCC    | 0.612 |             |

|   |    |      |             |             |            |             |             |            |
|---|----|------|-------------|-------------|------------|-------------|-------------|------------|
| - | 6  | 858  | rs138801573 | rs146815063 | rs34778227 | rs138801573 | rs146815063 | rs34778227 |
| - | 11 | 2310 | rs138801573 | rs146815063 | rs34778227 | rs138801573 | rs146815063 | rs34778227 |
| - | 1  | 112  | rs138801573 | rs146815063 | rs34778227 | rs138801573 | rs146815063 | rs34778227 |
| + | 4  | 598  | rs138801573 | rs146815063 | rs34778227 | rs138801573 | rs146815063 | rs34778227 |
| - | 18 | 2284 | rs138801573 | rs146815063 | rs34778227 | rs138801573 | rs146815063 | rs34778227 |
| + | 1  | 904  | rs138801573 | rs146815063 | rs34778227 | rs138801573 | rs146815063 | rs34778227 |
| - | 4  | 369  | rs138801573 | rs146815063 | rs34778227 | rs138801573 | rs146815063 | rs34778227 |
| - | 25 | 3508 | rs138801573 | rs146815063 | rs34778227 | rs138801573 | rs146815063 | rs34778227 |
| - | 4  | 1648 | rs138801573 | rs146815063 | rs34778227 | rs138801573 | rs146815063 | rs34778227 |
| - | 10 | 1794 | rs138801573 | rs146815063 | rs34778227 | rs138801573 | rs146815063 | rs34778227 |
| + | 5  | 4530 | rs138801573 | rs146815063 | rs34778227 | rs138801573 | rs146815063 | rs34778227 |
| + | 6  | 1764 | rs138801573 | rs146815063 | rs34778227 | rs138801573 | rs146815063 | rs34778227 |
| + | 19 | 2378 | rs138801573 | rs146815063 | rs34778227 | rs138801573 | rs146815063 | rs34778227 |
| - | 11 | 1300 | rs138801573 | rs146815063 | rs34778227 | rs138801573 | rs146815063 | rs34778227 |
| + | 1  | 288  | rs138801573 | rs146815063 | rs34778227 | rs138801573 | rs146815063 | rs34778227 |
| - | 5  | 701  | rs138801573 | rs146815063 | rs34778227 | rs138801573 | rs146815063 | rs34778227 |
| - | 15 | 2525 | rs138801573 | rs146815063 | rs34778227 | rs138801573 | rs146815063 | rs34778227 |
| - | 4  | 1447 | rs138801573 | rs146815063 | rs34778227 | rs138801573 | rs146815063 | rs34778227 |
| - | 4  | 1419 | rs138801573 | rs146815063 | rs34778227 | rs138801573 | rs146815063 | rs34778227 |
| - | 5  | 1782 | rs138801573 | rs146815063 | rs34778227 | rs138801573 | rs146815063 | rs34778227 |
| + | 4  | 342  | rs138801573 | rs146815063 | rs34778227 | rs138801573 | rs146815063 | rs34778227 |
| - | 5  | 608  | rs138801573 | rs146815063 | rs34778227 | rs138801573 | rs146815063 | rs34778227 |
| - | 7  | 2439 | rs138801573 | rs146815063 | rs34778227 | rs138801573 | rs146815063 | rs34778227 |
| + | 7  | 726  | rs138801573 | rs146815063 | rs34778227 | rs138801573 | rs146815063 | rs34778227 |
| + | 2  | 669  | rs138801573 | rs146815063 | rs34778227 | rs138801573 | rs146815063 | rs34778227 |
| - | 12 | 2942 | rs138801573 | rs146815063 | rs34778227 | rs138801573 | rs146815063 | rs34778227 |
| + | 1  | 282  | rs138801573 | rs146815063 | rs34778227 | rs138801573 | rs146815063 | rs34778227 |
| - | 4  | 603  | rs138801573 | rs146815063 | rs34778227 | rs138801573 | rs146815063 | rs34778227 |
| - | 7  | 1009 | rs138801573 | rs146815063 | rs34778227 | rs138801573 | rs146815063 | rs34778227 |
| + | 6  | 1683 | rs138801573 | rs146815063 | rs34778227 | rs138801573 | rs146815063 | rs34778227 |
| + | 3  | 1256 | rs138801573 | rs146815063 | rs34778227 | rs138801573 | rs146815063 | rs34778227 |
| - | 16 | 3293 | rs138801573 | rs146815063 | rs34778227 | rs138801573 | rs146815063 | rs34778227 |
| - | 30 | 5059 | rs138801573 | rs146815063 | rs34778227 | rs138801573 | rs146815063 | rs34778227 |
| + | 3  | 1247 | rs138801573 | rs146815063 | rs34778227 | rs138801573 | rs146815063 | rs34778227 |
| - | 12 | 4254 | rs138801573 | rs146815063 | rs34778227 | rs138801573 | rs146815063 | rs34778227 |
| + | 1  | 4409 | rs138801573 | rs146815063 | rs34778227 | rs138801573 | rs146815063 | rs34778227 |
| - | 20 | 1541 | rs138801573 | rs146815063 | rs34778227 | rs138801573 | rs146815063 | rs34778227 |
| + | 14 | 1845 | rs138801573 | rs146815063 | rs34778227 | rs138801573 | rs146815063 | rs34778227 |
| + | 52 | 6168 | rs138801573 | rs146815063 | rs34778227 | rs138801573 | rs146815063 | rs34778227 |
| - | 7  | 867  | rs138801573 | rs146815063 | rs34778227 | rs138801573 | rs146815063 | rs34778227 |
| + | 5  | 674  | rs138801573 | rs146815063 | rs34778227 | rs138801573 | rs146815063 | rs34778227 |
| + | 16 | 1433 | rs138801573 | rs146815063 | rs34778227 | rs138801573 | rs146815063 | rs34778227 |
| + | 17 | 2361 | rs138801573 | rs146815063 | rs34778227 | rs138801573 | rs146815063 | rs34778227 |
| - | 34 | 4103 | rs138801573 | rs146815063 | rs34778227 | rs138801573 | rs146815063 | rs34778227 |
| + | 6  | 590  | rs138801573 | rs146815063 | rs34778227 | rs138801573 | rs146815063 | rs34778227 |
| - | 7  | 914  | rs138801573 | rs146815063 | rs34778227 | rs138801573 | rs146815063 | rs34778227 |
| - | 45 | 5689 | rs138801573 | rs146815063 | rs34778227 | rs138801573 | rs146815063 | rs34778227 |



|   |    |      |                                                       |              |              |        |              |                               |    |               |       |             |
|---|----|------|-------------------------------------------------------|--------------|--------------|--------|--------------|-------------------------------|----|---------------|-------|-------------|
| + | 6  | 1987 | p.N221K DHRS9_                                        | NM_005771    | NP_005762    | Q9BPW9 | DHRS9_HUMAN  |                               | 0  | TATTAATGTCTCC | 0.428 |             |
| - | 25 | 2576 | _p.N647S PGAP1                                        | NM_024989    | NP_079265    | Q75T13 | PGAP1_HUMAN  | ical; (Potential).            | 4  | AGTAAGTTAATCA | 0.353 |             |
| - | 3  | 2599 |                                                       | NM_020814    | NP_065865    | Q9P2E8 | MARH4_HUMAN  | ical; (Potential).            | 1  | ACATCCCGTAGC/ | 0.557 |             |
| + | 9  | 1816 | _Splice_Site_p.A4                                     | NM_014140    | NP_054859    | Q9NZC9 | SMAL1_HUMAN  |                               | 7  | CCACAGGCCTT/  | 0.557 |             |
| - | 1  | 3044 |                                                       | NM_005544    | NP_005535    | P35568 | IRS1_HUMAN   |                               | 12 | CTGACGGGGAC   | 0.632 |             |
| + | 10 | 1224 | yc.2_Missense_Mt                                      | NM_000751    | NP_000742    | Q07001 | ACHD_HUMAN   | lasmic (Potential).           | 3  | AGAGCGGCATG/  | 0.632 |             |
| + | 8  | 842  | ε_Mutation_p.S144                                     | NM_152879    | NP_690618    | Q16760 | DGKD_HUMAN   | l-ester/DAG-type 2.           | 5  | ACACATCGTGTA/ | 0.552 |             |
| + | 4  | 1549 | p.E386Q SH3BP4                                        | NM_014521    | NP_055336    | Q9P0V3 | SH3B4_HUMAN  |                               | 4  | ACCTGGAGGTG   | 0.537 |             |
| + | 4  | 1048 | p.V230M SIRPA_1                                       | NM_001040022 | NP_001035111 | P78324 | SHPS1_HUMAN  | 1. Extracellular (Potential). | 1  | GCGAGGTGGCC   | 0.612 |             |
| - | 36 | 3425 | p.G864V C20orf19                                      | NM_001009984 | NP_001009984 | Q5TEA3 | CT194_HUMAN  |                               | 0  | FGGGTGCCATTA/ | 0.453 |             |
| - | 3  | 495  | zrn.1_Missense_Iv                                     | NM_001195    | NP_001186    | Q12934 | BFSP1_HUMAN  | Rod. Coil 1B.                 | 1  | TGCAGCAAGGC   | 0.488 |             |
| + | 2  | 133  | tj.1_RNA FRG1B_uc010gdr.1_RNA FRG1B_uc010ztk.1_Intron |              |              |        |              |                               | 0  | TGCAATTGGAC/  | 0.343 |             |
| + | 7  | 1117 | VT3B_uc010gef.2                                       | NM_006892    | NP_008823    | Q9UBC3 | DNM3B_HUMAN  | n with DNMT1 and DNMT3        | 5  | TTGGCGATGGC   | 0.617 |             |
| + | 3  | 223  | ud.1_Missense_Mt                                      | NM_174897    | NP_777557    | Q8NFK5 | BPIL3_HUMAN  |                               | 2  | AGCTGCCCGTC   | 0.562 |             |
| - | 2  | 303  | I0gel.2_Intron CD1                                    | NM_016408    | NP_057492    | Q96S26 | CK5P1_HUMAN  | activation inhibition.        | 5  | CAGCAGCCAGC   | 0.522 |             |
| - | 4  | 999  | uf.1_Missense_Mu                                      | NM_003098    | NP_003089    | Q13424 | SNTA1_HUMAN  | PH 1.                         | 1  | TTGACCATCTGC  | 0.597 |             |
| + | 30 | 3958 |                                                       | NM_020884    | NP_065935    | A7E2Y1 | MYH7B_HUMAN  | Potential.                    | 2  | GACCCGCGCCA   | 0.617 |             |
| - | 12 | 2869 |                                                       | NM_003185    | NP_003176    | O00268 | TAF4_HUMAN   |                               | 3  | CTTCTCTGCTT   | 0.527 |             |
| + | 5  | 1468 | p.V356M OPRL1_                                        | NM_182647    | NP_872588    | P41146 | OPRX_HUMAN   | lasmic (Potential).           | 2  | AGGACGTGGCC   | 0.652 |             |
| + | 7  | 1487 |                                                       | NM_014586    | NP_055401    | P57058 | HUNK_HUMAN   |                               | 2  | CTCTGGCCATCT/ | 0.547 |             |
| + | 19 | 3348 | DL1_uc002zag.1                                        | NM_001004416 | NP_001004416 | Q5DID0 | UROL1_HUMAN  | llular (Potential). ZP.       | 3  | GAAATGCAGTT/  | 0.517 |             |
| - | 1  | 881  | .1_Intron C21orf29                                    | NM_198691    | NP_941964    | P60331 | KR101_HUMAN  |                               | 1  | CCGGCGGGGAC   | 0.716 |             |
| + | 15 | 2865 | jj.2_Missense_Mut                                     | NM_006031    | NP_006022    | O95613 | PCNT_HUMAN   |                               | 8  | AGCTCGAGGCC   | 0.642 |             |
| - | 4  | 424  | .2_5'UTR BPIL2_u                                      | NM_174932    | NP_777592    | Q8NFK6 | BPIL2_HUMAN  |                               | 2  | GATACCGGTAAP  | 0.498 |             |
| + | 4  | 1154 |                                                       | NM_030642    | NP_085145    | Q9BWW9 | APOL5_HUMAN  |                               | 0  | GCCTGTTGTGG   | 0.592 |             |
| + | 10 | 3566 | lyn.3_Missense_M                                      | NM_001162501 | NP_001155973 | Q9UPQ9 | TNR6B_HUMAN  |                               | 0  | GGTCCGTCCA/   | 0.408 |             |
| - | 12 | 3585 | R1082Q BRD1_uc                                        | NM_014577    | NP_055392    | O95696 | BRD1_HUMAN   |                               | 1  | CGATCCGCACG/  | 0.582 |             |
| + | 2  | 552  | R1D2_uc011awk.1                                       | NM_005126    | NP_005117    | Q14995 | NR1D2_HUMAN  |                               | 3  | GAAAACAAGCA/  | 0.378 |             |
| - | 18 | 2221 | axu.1_Missense_I                                      | NM_015097    | NP_055912    | B2RTR1 | B2RTR1_HUMAN |                               | 4  | TCGCACAGACT/  | 0.522 |             |
| - | 12 | 4389 |                                                       | NM_014831    | NP_055646    | O15050 | TRNK1_HUMAN  |                               | 2  | CCTGTTCAGCA/  | 0.547 |             |
| + | 10 | 985  |                                                       | NM_018725    | NP_061195    | Q9NRM6 | I17RB_HUMAN  | lasmic (Potential).           | 3  | GGCACGGTAAG   | 0.458 | rs61751221  |
| + | 7  | 1211 | u.2_Nonsense_Mt                                       | NM_007072    | NP_009003    | Q9UM44 | HHLA2_HUMAN  | ical; (Potential).            | 1  | CTTATGGATTTTC | 0.413 |             |
| + | 3  | 1386 |                                                       | NM_032242    | NP_115618    | Q9UIW2 | PLXA1_HUMAN  | tracellular (Potential).      | 3  | GGGCAGCCCCA   | 0.662 |             |
| - | 6  | 855  | Y171C THPO_uc                                         | NM_000460    | NP_000451    | P40225 | TPO_HUMAN    |                               | 1  | GCCAGTAGTTC   | 0.542 |             |
| + | 16 | 2033 | buy.1_Missense_Iv                                     | NM_000283    | NP_000274    | P35913 | PDE6B_HUMAN  |                               | 0  | CTGATGGACAT/  | 0.692 |             |
| + | 2  | 549  | E32K GRK4_uc0                                         | NM_182982    | NP_892027    | P32298 | GRK4_HUMAN   | N-terminal.                   | 1  | GGAAGGAGATA/  | 0.403 |             |
| + | 7  | 920  | oi.2_Missense_Mu                                      | NM_004334    | NP_004325    | Q10588 | BST1_HUMAN   |                               | 1  | AGGCAGCATGA   | 0.393 |             |
| + | 1  | 230  |                                                       | NM_001079827 | NP_001073296 | A0PK11 | CLRN2_HUMAN  |                               | 0  | GACTGGAGTGG   | 0.537 |             |
| - | 2  | 477  | IGDH_uc003gul.1                                       | NM_003359    | NP_003350    | O60701 | UGDH_HUMAN   |                               | 4  | TTTACCTCATAAA | 0.303 |             |
| - | 7  | 1026 | zr.1_Missense_Mt                                      | NM_022832    | NP_073743    | P62068 | UBP46_HUMAN  |                               | 1  | GAGCCGGAGTT/  | 0.547 |             |
| - | 8  | 1169 | can.1_Missense_Mutation_p.T261A                       |              |              | P36537 | UDB10_HUMAN  |                               | 5  | GATTGTCTCGT/  | 0.403 | rs13118402  |
| + | 11 | 1366 | 4_uc003hgc.3_Mi                                       | NM_001098484 | NP_001091954 | Q9Y6R1 | S4A4_HUMAN   | lasmic (Potential).           | 5  | TGAATGGGGAT/  | 0.443 |             |
| + | 21 | 2914 | kw.2_Missense_Mt                                      | NM_025074    | NP_079350    | Q86XX4 | FRAS1_HUMAN  | tracellular (Potential).      | 5  | TGGGAGCATCT/  | 0.577 |             |
| + | 5  | 942  | p.C157R NUDT9                                         | NM_024047    | NP_076952    | Q9BW91 | NUDT9_HUMAN  | idix hydrolase.               | 0  | AAGACTGTGGA   | 0.348 |             |
| - | 4  | 1250 | K2_uc003hyj.1_3'L                                     | NM_014421    | NP_055236    | Q9UBU2 | DKK2_HUMAN   |                               | 5  | GCAGGGGTCT    | 0.433 |             |
| + | 6  | 822  | R169Q PHF17_ur                                        | NM_199320    | NP_955352    | Q6IE81 | JADE1_HUMAN  |                               | 0  | GCAGCGATGCT/  | 0.428 |             |
| - | 3  | 540  | hx.2_Missense_M                                       | NM_030648    | NP_085151    | Q8WTS6 | SETD7_HUMAN  |                               | 2  | CATACGTGCCCT  | 0.507 | rs139666025 |

|   |    |         |                   |              |              |        |             |                             |       |              |       |             |
|---|----|---------|-------------------|--------------|--------------|--------|-------------|-----------------------------|-------|--------------|-------|-------------|
| - | 12 | 1600    | se_Mutation_p.S4  | NM_031956    | NP_114162    | Q8NA56 | TTC29_HUMAN |                             | 0     | CGTTCTGAGTTT | 0.308 |             |
| + | 10 | 1491    | irc.2_Missense_M  | NM_007246    | NP_009177    | O95198 | KLHL2_HUMAN | Kelch 3.                    | 0     | ATGGGAGTACAG | 0.418 |             |
| - | 3  | 732     | ix.1_Missense_Mt  | NM_004174    | NP_004165    | P48764 | SL9A3_HUMAN | lasmic (Potential).         | 0     | AGACCTCGTTG  | 0.642 |             |
| + | 11 | 2236    |                   | NM_020227    | NP_064612    | Q9NQV7 | PRDM9_HUMAN | 2H2-type 7.                 | 6     | GAGGACACACA  | 0.602 | rs111488757 |
| - | 7  | 1588    | uc011cnu.1_Spli   | NM_006727    | NP_006718    | Q9Y6N8 | CAD10_HUMAN |                             | 12    | ACTTACCTAATC | 0.259 |             |
| + | 5  | 744     | _p.R173* DNAJC2   | NM_001012339 | NP_001012339 | Q5F1R6 | DJC21_HUMAN |                             | 2     | ATACACGACAGC | 0.413 | rs150576702 |
| + | 10 | 3303    | _p.P935L NIPBL_u  | NM_133433    | NP_597677    | Q6KC79 | NIPBL_HUMAN |                             | 9     | CACCCTGACA   | 0.373 |             |
| + | 2  | 762     | 'ELD2_uc003jwr.1  | NM_001038603 | NP_001033692 | Q8N4S9 | MALD2_HUMAN | Helical; (Potential).       | 0     | TGGGAGGCGTT  | 0.498 |             |
| + | 16 | 4383    | _p.R1361* ZFYVE   | NM_001105251 | NP_001098721 | Q7Z3T8 | ZFY16_HUMAN |                             | 0     | CTTTACGAGAA  | 0.388 |             |
| + | 77 | 16610   | .R3211Q GPR98_u   | NM_032119    | NP_115495    | Q8WXG9 | GPR98_HUMAN | ellular (Potential).        | 16    | TTCTCGGCTGG  | 0.448 |             |
| + | 21 | 2812    | kks.2_Missense_M  | NM_032290    | NP_115666    | Q9BQI6 | ANR32_HUMAN |                             | 2     | GAGGAAATTCG  | 0.378 |             |
| + | 23 | 5344    | .R1371H KDM3B     | NM_016604    | NP_057688    | Q7LBC6 | KDM3B_HUMAN | JmjC.                       | 11    | TTCCGCCTGA   | 0.428 |             |
| - | 9  | 1654    | loh.3_Missense_M  | NM_004576    | NP_004567    | Q00005 | 2ABB_HUMAN  |                             | 2     | CGAAGCCTCAA  | 0.527 |             |
| - | 2  | 1340    |                   | NM_001012301 | NP_001012301 | Q5FYB1 | ARSL_HUMAN  |                             | 2     | GTAGCGGTACA  | 0.627 |             |
| - | 13 | 1991    | gx.2_Missense_M   | NM_004395    | NP_004386    | Q16643 | DREB_HUMAN  |                             | 6     | TTGGGCAAAC   | 0.582 |             |
| - | 7  | 1429    | lm.1_Nonsense_M   | NM_018434    | NP_060904    | Q86XS8 | GOLI_HUMAN  | lasmic (Potential).         | 3     | GGGCTGATCTT  | 0.522 |             |
| + | 2  | 924     |                   | NM_001718    | NP_001709    | P22004 | BMP6_HUMAN  |                             | 3     | GGGTGAGGTGG  | 0.438 |             |
| - | 5  | 917     | on.2_Missense_M   | NM_006778    | NP_006769    | Q9UDY6 | TRI10_HUMAN |                             | 0     | GTCCCGAATCC  | 0.512 |             |
| + | 9  | 1411    | p.R337W TRIM39    | NM_021253    | NP_067076    | Q9HCM9 | TRI39_HUMAN | 330.2/SPRY.                 | 3     | GACTCCGGGAT  | 0.577 |             |
| - | 2  | 188     | in_p.F8L HLA-DO   | NM_002119    | NP_002110    | P06340 | DOA_HUMAN   | ar (Potential). Alpha-1.    | 0     | GTAAGGCGCG   | 0.522 |             |
| - | 4  | 779     | _p.T9M CCND3_u    | NM_001760    | NP_001751    | P30281 | CCND3_HUMAN |                             | 0     | TGCCCGTGGCG  | 0.577 |             |
| + | 3  | 717     |                   | NM_003221    | NP_003212    | Q92481 | AP2B_HUMAN  |                             | 0     | TTAAGATGCCA  | 0.343 |             |
| - | 2  | 217_218 | jzr.2_Missense_M  | NM_003643    | NP_003634    | Q9NP62 | GCM1_HUMAN  |                             | 1     | TCGTCAGGTTCC | 0.396 |             |
| + | 18 | 3042    | 2_Missense_Mutat  | NM_014989    | NP_055804    | Q86UR5 | RIMS1_HUMAN | p.S989S(1)                  | 10    | CACGTTCTCCA  | 0.383 |             |
| + | 10 | 1550    |                   | NM_003080    | NP_003071    | O60906 | NSMA_HUMAN  |                             | 0     | GGCCAGGCTC   | 0.622 |             |
| - | 4  | 888     | bt.1_Missense_M   | NM_001010923 | NP_001010923 | Q8N1K5 | THMS1_HUMAN | CABIT 1.                    | 4     | ATCTCCATTCA  | 0.353 |             |
| + | 7  | 1368    | Okhi.2_Missense_I | NM_014721    | NP_055536    | O75167 | PHAR2_HUMAN |                             | 2     | GCCTCAGCTAC  | 0.517 |             |
| + | 13 | 1822    | szk.2_Missense_M  | NM_006024    | NP_006015    | Q86VP1 | TAXB1_HUMAN | Potential.                  | 1     | ATAAATATGCTG | 0.279 |             |
| + | 3  | 660     | lkwc.1_RNA INMT   | NM_006774    | NP_006765    | O95050 | INMT_HUMAN  |                             | 0     | CGTGGCCCTGG  | 0.587 |             |
| + | 11 | 1791    | 3tvz.2_Missense_I | NM_022479    | NP_071924    | Q6IS24 | GLTL3_HUMAN | renal (Potential).          | 7     | TCCATCAAGTAC | 0.652 |             |
| + | 4  | 1042    | in.2_Missense_Mu  | NM_003388    | NP_003379    | Q9UDT6 | CLIP2_HUMAN | CAP-Gly 2.                  | 3     | ACGTGGGGGAG  | 0.647 |             |
| - | 6  | 690     | p.R217Q SEMA3C    | NM_152754    | NP_689967    | O95025 | SEM3D_HUMAN | Sema.                       | 5     | GGGATCGAGTG  | 0.408 |             |
| - | 23 | 3801    | y.2_Missense_Mu   | NM_000466    | NP_000457    | O43933 | PEX1_HUMAN  |                             | 2     | TGCAGTCATTA  | 0.388 |             |
| - | 8  | 939     | YN2_uc010lfk.2_RI | NM_000305    | NP_000296    | Q15165 | PON2_HUMAN  |                             | 0     | GAAGGATCAATA | 0.398 |             |
| + | 6  | 634     | is.1_Missense_M   | NM_003496    | NP_003487    | Q9Y4A5 | TRRAP_HUMAN |                             | 37    | CAAACAGTTCAC | 0.313 |             |
| + | 8  | 1352    | 498_uc003urm.2_I  | NM_145115    | NP_660090    | Q6NSZ9 | ZN498_HUMAN |                             | 2     | CCACAGCTCCT  | 0.602 |             |
| - | 3  | 809     |                   | NM_001004323 | NP_001004323 | Q8IZ16 | CG061_HUMAN |                             | 0     | GGGCAGCATGG  | 0.637 |             |
| + | 14 | 2911    | ZAN_uc003uwl.2_F  | NM_003386    | NP_003377    | Q9Y493 | ZAN_HUMAN   | ate) (mucin-like domain). E | 11    | CCATCTCCACG  | 0.502 |             |
| + | 23 | 4529    | ZAN_uc010lhh.2_   | NM_003386    | NP_003377    | Q9Y493 | ZAN_HUMAN   | tracellular (Potential).    | 11    | AGACCGGTGCG  | 0.622 |             |
| + | 3  | 6234    | C17_uc010lho.1_F  | NM_001040105 | NP_001035194 | Q685J3 | MUC17_HUMAN | 3 X approximate tandem re   | 27    | CTGAGGGTAAAC | 0.488 |             |
| + | 10 | 1156    | mh.1_Splice_Site_ | NM_000108    | NP_000099    | P09622 | DLDH_HUMAN  |                             | 1     | CCAAAGTAAGTI | 0.308 |             |
| - | 2  | 172     |                   | NM_001024607 | NP_001019778 | A4D0T2 | CG066_HUMAN | ical; (Potential).          | 2     | TGGTGCAGAAA  | 0.463 |             |
| + | 1  | 263     | /1_uc003vig.1_RN  | NM_001753    | NP_001744    | Q03135 | CAV1_HUMAN  |                             | 0     | TCATCCAGCC   | 0.607 |             |
| - | 9  | 1615    | Oily.1_Missense_M | NM_012470    | NP_036602    | Q9Y5L0 | TNPO3_HUMAN |                             | 5     | ACCCTATCAAG  | 0.413 |             |
| + | 7  | 835     | _p.D129G TBXAS1   | NM_001130966 | NP_001124438 | P24557 | THAS_HUMAN  | lasmic (Potential).         | 3     | ATTTGACATCC  | 0.443 |             |
| - | 15 | 1860    |                   | NM_004333    | NP_004324    | P15056 | BRAF_HUMAN  | rotein kinase_R603>I(2))p.T | 18290 | ATTTCACTGTAC | 0.368 |             |
| - | 9  | 1390    | _p.M423I PTPRN    | NM_002847    | NP_002838    | Q92932 | PTPR2_HUMAN | ellular (Potential).        | 7     | CTCTCATGTCC  | 0.592 |             |

|   |    |           |                                                |              |              |             |              |                           |            |                  |       |             |
|---|----|-----------|------------------------------------------------|--------------|--------------|-------------|--------------|---------------------------|------------|------------------|-------|-------------|
| + | 6  | 577       | D1_uc003xnn.2_R                                | NM_002164    | NP_002155    | P14902      | I23O1_HUMAN  |                           | 2          | TCATTCGTGATG     | 0.358 |             |
| + | 5  | 508       | rf45_uc011lew.1_I                              | NM_173518    | NP_775789    | Q4G0Z9      | CH045_HUMAN  |                           | 1          | TATGGCTTTGATC    | 0.313 |             |
| - | 3  | 1005      | ij.1_Missense_Mu                               | NM_005655    | NP_005646    | Q13118      | KLF10_HUMAN  |                           | 0          | CAACAGGGTTG      | 0.587 |             |
| + | 2  | 398       | _uc003ylg.2_Miss                               | NM_024812    | NP_079088    | Q8WXS3      | BAALC_HUMAN  |                           | 0          | ATGGTGTGCCCA     | 0.557 |             |
| - | 7  | 1618      | no.2_Nonsense_IV                               | NM_001146    | NP_001137    | Q15389      | ANGP1_HUMAN  | rogen C-terminal.         | 7          | GGCTCGGTCCCA     | 0.428 |             |
| + | 5  | 478       | i.2_RNA ADCK5_L                                | NM_174922    | NP_777582    | Q3MIX3      | ADCK5_HUMAN  |                           | 1          | GCAACGGGGGC      | 0.657 |             |
| + | 1  | 1137      |                                                | NM_006570    | NP_006561    | Q7L523      | RRAGA_HUMAN  |                           | 0          | TTCTGCGGCCCA     | 0.493 |             |
| + | 2  | 211       | _p.R59W DNAJB5                                 | NM_012266    | NP_036398    | O75953      | DNJB5_HUMAN  | J.                        | 0          | CCTACCGGAAG      | 0.498 |             |
| + | 1  | 490       | 42421_uc004aed.1_RNA                           |              |              |             |              |                           | 0          | TTAACCCCTTCC     | 0.582 |             |
| + | 4  | 637       |                                                | NM_001001670 | NP_001001670 | Q6ZQQ2      | F75D1_HUMAN  | Pro-rich.                 | 0          | ACCCCCCTTAA      | 0.557 |             |
| - | 27 | 4202      |                                                | NM_005502    | NP_005493    | O95477      | ABCA1_HUMAN  |                           | 17         | CTATGTCAGAAT     | 0.488 |             |
| + | 17 | 4640      | iq.1_Missense_Mu                               | NM_002581    | NP_002572    | Q13219      | PAPP1_HUMAN  | Sushi 4.                  | 9          | CTCCACCAAAAT     | 0.527 |             |
| + | 4  | 1036      | HD1_uc004bwm.2                                 | NM_001100876 | NP_001094346 | Q5SRE7      | PHYD1_HUMAN  |                           | 0          | AACAAAGGATTC     | 0.552 | rs149087529 |
| + | 4  | 853       |                                                | NM_014811    | NP_055626    | Q5T8A7      | K0649_HUMAN  |                           | 3          | GTCTCGTTGCT      | 0.612 |             |
| + | 5  | 725       |                                                | NM_000531    | NP_000522    | P00480      | OTC_HUMAN    | rbamoyl phosphate binding | 2          | CTATCCAGATCC     | 0.393 |             |
| + | 6  | 1596      | _p.I557V IMAGED                                | NM_001005332 | NP_001005332 | Q9Y5V3      | MAGD1_HUMAN  | MAGE.                     | 3          | AGAGATATCATCC    | 0.537 |             |
| - | 19 | 2948      | oe.1_Missense_M                                | NM_006306    | NP_006297    | Q14683      | SMC1A_HUMAN  |                           | 6          | AGTCCCTCCCC      | 0.527 |             |
| - | 3  | 624       | lyo.2_Missense_M                               | NM_032803    | NP_116192    | Q8WY07      | CTR3_HUMAN   | ellular (Potential).      | 2          | GGGCACGTGCA      | 0.552 |             |
| + | 8  | 1304_1305 | RN1_uc011mpt.1_I                               | NM_052957    | NP_443189    | Q96QF7      | ACRC_HUMAN   | Asp/Ser-rich.             | 3          | CGACAGCAGTG      | 0.554 |             |
| - | 11 | 3180      | rs.2_Missense_Mt                               | NM_001113490 | NP_001106962 | Q4VCS5      | AMOT_HUMAN   |                           | 1          | AGAGTATTGGAC     | 0.428 |             |
| + | 11 | 1631      | zm.1_Missense_M                                | NM_012253    | NP_036385    | P51854      | TKTL1_HUMAN  |                           | 4          | TGGAGCTGGAA      | 0.468 |             |
| - | 9  | 972       | cy.2_Nonsense_Mt                               | NM_002074    | NP_002065    | P62873      | GBB1_HUMAN   |                           | 0          | TTCTCGCACATC     | 0.567 |             |
| - | 16 | 3113      | oag.1_Missense_M                               | NM_001009566 | NP_001009566 | O94985      | CSTN1_HUMAN  | ellular (Potential).      | 1          | CAAGCAAGGAC      | 0.557 |             |
| - | 17 | 2499      | xm.1_Missense_M                                | NM_052896    | NP_443128    | Q7Z408      | CSMD2_HUMAN  | tracellular (Potential).  | 12         | GGTCCCGTGGT      | 0.542 |             |
| + | 5  | 538       | Nonsense_Mutatic                               | NM_000374    | NP_000365    | P06132      | DCUP_HUMAN   |                           | 0          | GACAACGACTG      | 0.587 |             |
| + | 5  | 953       | i.1_RNA PCSK9_L                                | NM_174936    | NP_777596    | Q8NBP7      | PCSK9_HUMAN  | eptidase S8.              | 4          | GGCCAGCAAGT      | 0.627 |             |
| - | 10 | 2107      | tation_p.D655G Al                              | NM_006594    | NP_006585    | Q9Y6B7      | AP4B1_HUMAN  |                           | 4          | GGGTGTCAGGA      | 0.498 |             |
| - | 4  | 529       | _p.C30S REG4_ur                                | NM_001159352 | NP_001152824 | Q9BYZ8      | REG4_HUMAN   |                           | 1          | GAGCACAGCTG      | 0.363 |             |
| + | 8  | 1168      | .1_Intron NBPF10                               | NM_001039703 | NP_001034792 | A6NDV3      | A6NDV3_HUMAN |                           | 0          | GCTGACCCAGT      | 0.507 |             |
| + | 74 | 9249      | .1_Intron NBPF10                               | NM_001039703 | NP_001034792 | A6NDV3      | A6NDV3_HUMAN |                           | 0          | GGCCTAAAGTC      | 0.473 |             |
| + | 78 | 9695      | 3PF10_uc010oyl.1                               | NM_001039703 | NP_001034792 | A6NDV3      | A6NDV3_HUMAN |                           | 0          | AAAGAGCCTGA      | 0.473 |             |
| + | 10 | 1949      | IKRD35_uc010oyx                                | NM_144698    | NP_653299    | Q8N283      | ANR35_HUMAN  | Potential.                | 5          | GCTGGAGAAAGG     | 0.587 |             |
| - | 2  | 1066      | ae.1_Missense_Mt                               | NM_007113    | NP_009044    | Q07283      | TRHY_HUMAN   | eats of R-R-E-Q-E-E- E-R- | 5          | tctctctctgctcgcg | 0     |             |
| - | 2  | 624       | si.1_Intron INSRR                              | NM_014215    | NP_055030    | P14616      | INSRR_HUMAN  |                           | 20         | GTCACGCAGAT      | 0.622 |             |
| - | 13 | 3971      |                                                | NM_000130    | NP_000121    | P12259      | FA5_HUMAN    | ndem repeats of [TNP]-L-S | 6          | AGAAAGGGGCA      | 0.502 | rs140018525 |
| - | 20 | 2807      | e_Mutation_p.G3E                               | NM_178527    | NP_848622    | Q5TAH2      | S9A11_HUMAN  |                           | 2          | CACGACCCTCA      | 0.308 |             |
| + | 8  | 2597      | ilg.2_Missense_Mt                              | NM_021165    | NP_066988    | Q9C0B6      | FAM5B_HUMAN  |                           | 6          | GTCCCTCCCTGAC    | 0.557 |             |
| + | 18 | 3028      |                                                | NM_000186    | NP_000177    | P08603      | CFAH_HUMAN   | Sushi 16.                 | 6          | GCCTTCTTGT       | 0.299 |             |
| + | 1  | 520       |                                                | NM_001105517 | NP_001098987 | P0C7Q3      | FA58B_HUMAN  |                           | 0          | TGAACTGCCAC      | 0.617 |             |
| - | 4  | 1167      | w.1_Missense_Mu                                | NM_003268    | NP_003259    | O60602      | TLR5_HUMAN   | ellular (Potential).      | 4          | GATGTCCACTG      | 0.468 |             |
| + | 10 | 1796      |                                                | NM_014753    | NP_055568    | Q14692      | BMS1_HUMAN   |                           | 3          | TGGCTGTTAAGC     | 0.458 |             |
| + | 4  | 802       | ry.1_Missense_Mu                               | NM_020549    | NP_065574    | P28329      | CLAT_HUMAN   |                           | 3          | GCCCTGCCGTG      | 0.612 |             |
| + | 2  | 1161      | JT11_uc001juz.1_I                              | NM_173540    | NP_775811    | Q495W5      | FUT11_HUMAN  | renal (Potential).        | 0          | GGAGTGGGGAC      | 0.512 |             |
| + | 4  | 496       | _p.P31S CYP2C1E                                | NM_000769    | NP_000760    | P33261      | CP2CJ_HUMAN  |                           | 6          | TGTGATCCCACT     | 0.328 |             |
| + | 4  | 347       | ilgg.1_Missense_M                              | NM_001001974 | NP_001001974 | Q9HB21      | PKHA1_HUMAN  | PH 1.                     | 1          | AAGGCCAAAGG      | 0.328 |             |
| + | 2  | 793       |                                                | NM_001105574 | NP_001099044 | A6NHT5      | HMX3_HUMAN   | Homeobox.                 | 0          | CCCTGCACCTC      | 0.652 |             |
| - | 8  | 769       | e_Mutation_p.R279W ADAM8_uc010qvb.1_Missense_I |              | P78325       | ADAM8_HUMAN |              | 3                         | GTCCGTTGCC | 0.522            |       |             |

|   |    |       |                    |              |              |        |             |                                 |     |               |       |             |
|---|----|-------|--------------------|--------------|--------------|--------|-------------|---------------------------------|-----|---------------|-------|-------------|
| + | 1  | 556   |                    | NM_001004702 | NP_001004702 | Q8NH37 | OR4C3_HUMAN | cellular (Potential).           | 1   | AGCTCCTCCTG   | 0.522 |             |
| - | 1  | 554   |                    | NM_006637    | NP_006628    | Q13606 | OR5I1_HUMAN | cellular (Potential).           | 1   | CCAGGGGAGGG   | 0.403 |             |
| + | 11 | 2328  | on_p.G713D TMEH    | NM_178031    | NP_821174    | Q24JP5 | T132A_HUMAN | lization similar to full-length | 1   | AGCCTGGTGCCA  | 0.687 |             |
| + | 6  | 467   | iFB_uc001nyx.2_lr  | NM_003377    | NP_003368    | P49765 | VEGFB_HUMAN |                                 | 0   | CCCACCACCGT   | 0.672 |             |
| + | 6  | 554   | nyx.2_Missense_M   | NM_003377    | NP_003368    | P49765 | VEGFB_HUMAN |                                 | 0   | CAGCCCCAGGC   | 0.726 |             |
| + | 14 | 1737  |                    | NM_006842    | NP_006833    | Q13435 | SF3B2_HUMAN |                                 | 3   | TGACATCGACTA  | 0.493 |             |
| - | 3  | 259   | 5332_uc001omu.3    | NR_024249    |              |        |             |                                 | 0   | GCCCCGTGGTG   | 0.627 |             |
| + | 5  | 617   | ofz.2_Missense_M   | NM_014361    | NP_055176    | O94779 | CNTN5_HUMAN |                                 | 8   | TACAGAAAGTG   | 0.313 |             |
| - | 2  | 203   | 1prt.1_5'UTR TMF   | NM_001077263 | NP_001070731 | Q9BYE2 | TMPSD_HUMAN | peats of A-S-P-A-[GLQR].        | 1   | CCTGGGCTGGA   | 0.632 |             |
| + | 9  | 1567  |                    | NM_005188    | NP_005179    | P22681 | CBL_HUMAN   | Pro-rich. E366_K477del          | 149 | GTGCCAAGGTA   | 0.433 |             |
| + | 8  | 1632  |                    | NM_025004    | NP_079280    | Q0P6D6 | CCD15_HUMAN |                                 | 2   | TCTCCACAAAG   | 0.418 | rs113451248 |
| - | 12 | 2974  | p.S949F CD163_t    | NM_004244    | NP_004235    | Q86VB7 | C163A_HUMAN | extracellular (Potential).      | 8   | CCCAGGAACCT   | 0.483 |             |
| - | 11 | 1138  | l.2_Missense_Mut   | NM_002864    | NP_002855    |        |             |                                 | 5   | CTTTTCCATCC   | 0.428 |             |
| - | 3  | 198   | zt.2_Missense_ML   | NM_002723    | NP_002714    | P10163 | PRB4_HUMAN  | 'R]-[PR]-P-Q-G-G-N-Q-[PS        | 1   | GCTTTCCTGGAC  | 0.607 |             |
| + | 66 | 10859 |                    | NM_002332    | NP_002323    | Q07954 | LRP1_HUMAN  | ntial). LDL-receptor class A    | 22  | CCAAACGGTGC   | 0.627 |             |
| - | 3  | 741   | bg.2_Missense_Mi   | NM_001682    | NP_001673    | P20020 | AT2B1_HUMAN | lasmic (Potential).             | 3   | CAATTCGGCTC   | 0.418 |             |
| - | 4  | 1007  | NKS1B_uc009ztt.1   | NM_152788    | NP_690001    | Q7Z6G8 | ANS1B_HUMAN | ANK 6.                          | 0   | GAAAGTGGCGTG  | 0.522 |             |
| + | 1  | 2071  |                    | NR_003268    |              |        |             |                                 | 0   | TAATTGTGCTAG  | 0.433 | rs150112365 |
| - | 1  | 1408  |                    | NM_175060    | NP_778230    | Q86T13 | CLC14_HUMAN | cellular (Potential).           | 4   | ACATCGTGCTC   | 0.493 |             |
| + | 4  | 2672  | N5_uc010ana.2_lr   | NM_152447    | NP_689660    | Q96NI6 | LRFN5_HUMAN | ntential). Fibronectin type-II  | 8   | ATGATGATGGCA  | 0.443 |             |
| + | 1  | 411   |                    | NM_000956    | NP_000947    | P43116 | PE2R2_HUMAN | lasmic (Potential).             | 2   | GGGACGTGGGC   | 0.697 |             |
| + | 2  | 1635  | XO34_uc010aoo.2    | NM_017943    | NP_060413    | Q9NWN3 | FBX34_HUMAN |                                 | 5   | AGGTAGACAAA   | 0.433 |             |
| - | 14 | 1393  | 'ERB_uc010aub.1    | NM_024764    | NP_079040    | Q9H7T0 | CTSRB_HUMAN |                                 | 5   | CTTCGGGGATGA  | 0.413 |             |
| + | 8  | 2491  | 01yir.2_Nonsense_  | NM_018335    | NP_060805    | A8K0R7 | ZN839_HUMAN |                                 | 2   | ATGGATCACTAT  | 0.582 |             |
| - | 26 | 3808  | e_Mutation_p.R53   | NM_002226    | NP_002217    | Q9Y219 | JAG2_HUMAN  | lasmic (Potential).             | 5   | GTTGCGGATG    | 0.527 |             |
| - | 1  | 545   |                    | NR_024387    |              |        |             |                                 | 0   | TCACTTCCAATT  | 0.393 |             |
| + | 7  | 1124  | \ OR4N4_uc010tz    | NM_001005241 | NP_001005241 | Q8N0Y3 | OR4N4_HUMAN | Name=1; (Potential).            | 5   | TTTCACCATAAG  | 0.458 |             |
| - | 7  | 927   | GM5_uc001zre.1_    | NM_201631    | NP_963925    | O43548 | TGM5_HUMAN  |                                 | 1   | TGATCGTGGCC   | 0.453 |             |
| - | 11 | 1729  | lzza.3_Missense_I  | NM_031226    | NP_112503    | P11511 | CP19A_HUMAN |                                 | 3   | TTGGGGTAAAG   | 0.448 |             |
| - | 17 | 3061  | e_Mutation_p.P94f  | NM_015263    | NP_056078    | Q8TDJ6 | DMXL2_HUMAN |                                 | 9   | TTTCTGGAGAAG  | 0.393 |             |
| - | 34 | 3642  | shb.1_Missense_IV  | NM_020821    | NP_065872    | Q709C8 | VP13C_HUMAN |                                 | 2   | AGACAATCTGAAT | 0.308 |             |
| + | 7  | 1178  | uj.1_Missense_M    | NM_005902    | NP_005893    | P84022 | SMAD3_HUMAN | teraction with XPO4. MH2.       | 5   | GAGGCGTGCGG   | 0.572 |             |
| + | 4  | 319   | se_Mutation_p.V5c  | NM_138967    | NP_620417    | Q8TAC9 | SCAM5_HUMAN | ical; (Potential).              | 1   | TGGCCGTGAAC   | 0.617 |             |
| + | 8  | 842   | 'IP_uc002dcx.3_R   | NM_006985    | NP_008916    | Q9UND3 | NPIP_HUMAN  | Pro-rich.                       | 0   | TACCCTCAGCGG  | 0.522 |             |
| + | 2  | 1064  |                    | NM_001451    | NP_001442    | Q12946 | FOXF1_HUMAN |                                 | 0   | GTGACCGAAAG   | 0.607 |             |
| - | 13 | 4201  | cj.2_Missense_Mu   | NM_033004    | NP_127497    | Q9C000 | NALP1_HUMAN |                                 | 9   | GACTCCCAAGG   | 0.547 |             |
| + | 4  | 978   | J1_uc002gja.2_5'F  | NM_144607    | NP_653208    | Q6P9G0 | CB5D1_HUMAN |                                 | 1   | GATCCGGGATG   | 0.463 | rs62059715  |
| + | 8  | 1322  | va.1_Missense_Mi   | NM_153210    | NP_694942    | Q70EL4 | UBP43_HUMAN |                                 | 5   | AGGTCCGCCATC  | 0.373 |             |
| - | 20 | 2432  | .3_Splice_Site_p.f | NM_001100112 | NP_001093582 | Q9UKX2 | MYH2_HUMAN  |                                 | 14  | AAAATTACCTTGC | 0.413 |             |
| - | 19 | 2707  |                    | NM_000342    | NP_000333    | P02730 | B3AT_HUMAN  | . Membrane (anion exchan        | 3   | CCGGCGTGGAC   | 0.637 |             |
| + | 4  | 1207  | .2_Missense_Mut    | NM_003110    | NP_003101    | Q02086 | SP2_HUMAN   |                                 | 0   | CATCCGCACGC   | 0.592 |             |
| + | 9  | 1177  | _RNA HLS1_uc0'     | NM_000023    | NP_000014    | Q16586 | SGCA_HUMAN  | lasmic (Potential).             | 2   | AGGTGCCCTC    | 0.637 |             |
| + | 12 | 1456  |                    | NM_153228    | NP_694960    | Q8N957 | ANKF1_HUMAN |                                 | 2   | GTTCTATTACAC  | 0.328 |             |
| - | 12 | 3477  | p.l1109L TEX2_uc   | NM_018469    | NP_060939    | Q8IWB9 | TEX2_HUMAN  |                                 | 1   | GCATTATAGTA   | 0.473 |             |
| - | 2  | 382   |                    | NM_181449    | NP_852114    | Q496F6 | CLM2_HUMAN  | . Extracellular (Potential).    | 4   | ACCATGAATCC   | 0.552 |             |
| - | 2  | 576   | lxx.2_Missense_M   | NM_174983    | NP_778148    | Q6NUT3 | CS028_HUMAN | ical; (Potential).              | 2   | GATCACGATGA   | 0.637 |             |
| - | 4  | 453   | vq.2_Missense_M    | NM_021155    | NP_066978    | Q9NNX6 | CD209_HUMAN | 2. 7 X approximate tanden       | 1   | TCAGCCGGGTC   | 0.567 |             |

|   |    |           |                    |              |              |        |              |                               |     |                    |       |             |
|---|----|-----------|--------------------|--------------|--------------|--------|--------------|-------------------------------|-----|--------------------|-------|-------------|
| - | 10 | 1810      | lwr.1_Missense_M   | NM_152476    | NP_689689    | Q96MR9 | ZN560_HUMAN  | 2H2-type 7.                   | 6   | 3CATGTGAATACC      | 0.403 |             |
| - | 4  | 1916      | 799_uc002mts.3_I   | NM_001080821 | NP_001074290 | Q96GE5 | ZN799_HUMAN  | 2H2-type 17.                  | 6   | TTACATTCATACG      | 0.413 |             |
| - | 14 | 2453      | O8_uc010eap.2_F    | NM_020959    | NP_066010    | Q9HCE9 | ANO8_HUMAN   | ical; (Potential).            | 3   | GGGGGAAGGCG        | 0.652 |             |
| + | 4  | 1594      |                    | NM_031218    | NP_112495    | P35789 | ZNF93_HUMAN  | 2H2-type 13.                  | 1   | TCCTCTTCCCTT/      | 0.358 |             |
| - | 4  | 935       |                    | NM_001159293 | NP_001152765 | C9JHM3 | C9JHM3_HUMAN |                               | 1   | TCTCCACTATGA/      | 0.403 |             |
| - | 5  | 1789      | 208_uc002nqo.1_I   | NM_007153    | NP_009084    |        |              |                               | 7   | ACCTTAATAAAGC      | 0.398 |             |
| + | 4  | 1004      | cy.2_Missense_M    | NM_033468    | NP_258429    | Q9Y2Q1 | ZN257_HUMAN  | 2H2-type 4.                   | 0   | AGAATTCATAATA      | 0.378 |             |
| - | 3  | 1798      |                    | NM_001001411 | NP_001001411 | Q8N7Q3 | ZN676_HUMAN  | 2H2-type 12.                  | 0   | TATGTTTAGTAAG      | 0.383 |             |
| + | 4  | 1398      |                    | NM_020855    | NP_065906    | Q9P255 | ZN492_HUMAN  | 2H2-type 9.                   | 0   | ATAAGAGAATTC/      | 0.378 |             |
| - | 5  | 1402      |                    | NM_001080409 | NP_001073878 |        |              |                               | 2   | CAGTATGAATTAT      | 0.338 |             |
| - | 4  | 1086      | rj.1_Missense_Mu   | NM_003430    | NP_003421    | Q05481 | ZNF91_HUMAN  | 2H2-type 7.                   | 0   | ATTCTTCACATTI      | 0.388 |             |
| - | 6  | 2022      | ense_Mutation_p.C  | NM_001010880 | NP_001010880 | O75290 | Z780A_HUMAN  | 2H2-type 16.                  | 0   | AATAAGTTGCAT/      | 0.403 |             |
| + | 3  | 527       |                    | NM_005178    | NP_005169    | P20749 | BCL3_HUMAN   | ANK 1. p.R145W(1)             | 2   | GTGACCCGGCTG       | 0.507 |             |
| - | 7  | 1641      | p.R409C ZNF160     | NM_001102603 | NP_001096073 | Q9HCG1 | ZN160_HUMAN  | 2H2-type 6.                   | 1   | TTGAACGAACAC       | 0.408 |             |
| + | 4  | 2891      | dw.1_Missense_M    | NM_138374    | NP_612383    | Q96IR2 | ZN845_HUMAN  | 2H2-type 26.                  | 0   | CTTCCGTCACA        | 0.363 | rs150688663 |
| + | 4  | 2950      | dw.1_Missense_M    | NM_138374    | NP_612383    | Q96IR2 | ZN845_HUMAN  | 2H2-type 27.                  | 0   | TACAAGTGTAATC      | 0.348 |             |
| + | 4  | 1772      | 313_uc010eqq.1_I   | NM_001004301 | NP_001004301 | Q6ZN06 | ZN813_HUMAN  |                               | 1   | GGAGATAAACC        | 0.378 |             |
| + | 5  | 657       | LRA1_uc010yfh.1_   | NM_006863    | NP_006854    | O75019 | LIRA1_HUMAN  | 2. Extracellular (Potential). | 3   | GTAAGGAAGGA        | 0.592 |             |
| + | 7  | 1096_1097 | pod.2_Missense_M   | NM_001015878 | NP_001015878 | Q9UQB9 | AURKC_HUMAN  |                               | 6   | TGCCCTCCCTGTG      | 0.569 |             |
| - | 3  | 2715      | c.2_intron ZNF814  | NM_001144989 | NP_001138461 | B7Z6K7 | ZN814_HUMAN  | 2H2-type 22.                  | 0   | AGTGAGACTGG/       | 0.403 |             |
| + | 65 | 13161     |                    | NM_016252    | NP_057336    | Q9NR09 | BIRC6_HUMAN  |                               | 14  | 3AAGCTCAGTCA       | 0.418 |             |
| + | 5  | 1019      | .2_Missense_Mut    | NM_001007231 | NP_001007232 | P42331 | RHG25_HUMAN  | Rho-GAP. p.A210fs*4(1)        | 4   | GGGAGCGGCC         | 0.607 |             |
| + | 8  | 7097      | se_Mutation_p.S2   | NM_152381    | NP_689594    | A4UGR9 | XIRP2_HUMAN  | Pro-rich.                     | 14  | AAAGTTCATCGA       | 0.493 |             |
| - | 2  | 122       | se_Mutation_p.L2   | NM_012433    | NP_036565    | O75533 | SF3B1_HUMAN  |                               | 6   | TCATCAAGAGCT       | 0.393 |             |
| + | 13 | 1554      | ver.2_Missense_M   | NM_024532    | NP_078808    | Q8N0X2 | SPG16_HUMAN  | WD 4.                         | 2   | TTTTTCTCTTCT       | 0.363 |             |
| + | 12 | 1533      | p.A468T PSMD1_     | NM_002807    | NP_002798    | Q99460 | PSMD1_HUMAN  | PC 2.                         | 2   | AGAACGCCAGC        | 0.363 |             |
| + | 10 | 1177      | ie_Mutation_p.E25  | NM_152879    | NP_690618    | Q16760 | DGKD_HUMAN   | DAGKc.                        | 5   | CTCCGAAATCC        | 0.532 |             |
| - | 6  | 454       |                    | NM_080675    | NP_542406    | Q8TC36 | SUN5_HUMAN   |                               | 1   | 3TAAGTGAATAG/      | 0.383 |             |
| + | 7  | 788       |                    | NM_017895    | NP_060365    | Q96GQ7 | DDX27_HUMAN  | Q motif.                      | 2   | CCACCCCGATC        | 0.577 |             |
| - | 2  | 640       | ixys.2_Missense_M  | NM_020182    | NP_064567    | Q969W9 | PMEPA_HUMAN  | lasmic (Potential).           | 1   | CATCTTCTCTCC       | 0.537 |             |
| + | 1  | 2068      | .3_intron GNAS_1   | NM_080425    | NP_536350    | P63092 | GNAS2_HUMAN  |                               | 292 | AGCATCGGCGA        | 0.637 |             |
| - | 3  | 332       | GE_uc002yiw.1_R    | NM_182482    | NP_872288    |        |              |                               | 0   | AAAATGCACATC       | 0.388 |             |
| - | 3  | 326       | GE_uc002yiw.1_R    | NM_182482    | NP_872288    |        |              |                               | 0   | CACATCGCTGA/       | 0.383 |             |
| + | 1  | 756       | .1_intron C21orf29 | NM_198695    | NP_941968    | P60410 | KR108_HUMAN  |                               | 2   | cggcctcctgcctgtcct | 0.199 |             |
| - | 20 | 1965      | 2_Nonsense_Mut     | NM_001001438 | NP_001001438 | P48449 | ERG7_HUMAN   | PFTB 4.                       | 0   | CCCCCAGCCTI        | 0.607 |             |
| + | 3  | 765       |                    | NM_138435    | NP_612444    | Q8NEG4 | FA83F_HUMAN  |                               | 1   | GTCCGCTCTG         | 0.602 |             |
| + | 4  | 840       | .1_Missense_Mut    | NM_178329    | NP_847899    | P51677 | CCR3_HUMAN   | ellular (Potential).          | 8   | AACTGGGTTTTI       | 0.488 |             |
| - | 2  | 2235      | b.2_Missense_Mu    | NM_017442    | NP_059138    | Q9NR96 | TLR9_HUMAN   | xtracellular (Potential).     | 4   | TAGAGGTCCAGC       | 0.617 |             |
| - | 8  | 869       | .G244R GLT8D1_I    | NM_152932    | NP_690909    | Q68CQ7 | GL8D1_HUMAN  | renal (Potential).            | 0   | AAACTCCAGGAT       | 0.358 |             |
| - | 4  | 4145      |                    | NM_178822    | NP_849144    | Q6WRI0 | IGS10_HUMAN  |                               | 13  | TTTCGGCTGTG/       | 0.468 |             |
| - | 2  | 1388      | fek.2_Missense_M   | NM_014926    | NP_055741    | Q94933 | SLIK3_HUMAN  | ellular (Potential).          | 10  | CAGAGGATAGC        | 0.478 |             |
| - | 5  | 609       | 3F10_uc003fie.2_3  | NM_003810    | NP_003801    | P50591 | TNF10_HUMAN  | ellular (Potential).          | 5   | TTTACCATTCC        | 0.408 |             |
| - | 7  | 1350      |                    | NM_031955    | NP_114161    | Q9BXB7 | SPT16_HUMAN  |                               | 3   | TTTTTCCAAAA/       | 0.408 |             |
| + | 24 | 3643      | _Mutation_p.E115E  | NM_198241    | NP_937884    | Q04637 | IF4G1_HUMAN  |                               | 7   | GCCGAGAACGA/       | 0.572 |             |
| - | 31 | 4108      | p.N1168S FRYL_I    | NM_015030    | NP_055845    | Q94915 | FRYL_HUMAN   |                               | 1   | TCAGGTGTGCT        | 0.527 |             |
| - | 5  | 628       | cw.2_Missense_M    | NM_001010874 | NP_001010874 | Q5HYJ1 | TECRL_HUMAN  |                               | 0   | GCACTCTCTTTI       | 0.279 |             |
| - | 6  | 1083      | p.G197E ABCG2      | NM_004827    | NP_004818    | Q9UNQ0 | ABCG2_HUMAN  | er. Cytoplasmic (Potential).  | 1   | TCCATTCTATAC       | 0.408 |             |



|   |    |           |                    |              |              |        |             |                           |       |               |       |             |
|---|----|-----------|--------------------|--------------|--------------|--------|-------------|---------------------------|-------|---------------|-------|-------------|
| - | 3  | 1116      | ef.2_Missense_Mu   | NM_001130698 | NP_001124170 | Q13507 | TRPC3_HUMAN | lasmic (Potential).       | 2     | AGAGATCCAGCA  | 0.433 |             |
| + | 3  | 988       | ε_Mutation_p.R114  | NM_012464    | NP_036596    | O43897 | TLL1_HUMAN  |                           | 7     | AGACAGGATAAC  | 0.348 |             |
| - | 17 | 3140      | ND2_uc011cmz.1     | NM_001332    | NP_001323    | Q9UQB3 | CTND2_HUMAN | ARM 9.                    | 8     | ACTTATCTCCTTT | 0.483 |             |
| + | 4  | 655       | ijlb.1_Missense_M  | NM_152403    | NP_689616    | Q63HQ2 | EGFLA_HUMAN | nectin type-III 1.        | 7     | AAATATCGTGTG/ | 0.458 |             |
| + | 12 | 1981      | iLAM_uc003jle.1_I  | NM_152403    | NP_689616    | Q63HQ2 | EGFLA_HUMAN | minin G-like 1.           | 7     | CCCTGGGAAAA   | 0.557 |             |
| - | 19 | 2398      | g.2_Missense_Mu    | NM_003062    | NP_003053    | O75094 | SLIT3_HUMAN |                           | 4     | CAGGAGGTTTC   | 0.602 |             |
| + | 3  | 421       | p.P38S PPARD_u     | NM_006238    | NP_006229    | Q03181 | PPARD_HUMAN |                           | 1     | CACCTTCTCC/   | 0.627 | rs147861745 |
| + | 10 | 1134      |                    | NM_016224    | NP_057308    | Q9Y5X1 | SNX9_HUMAN  | PX.                       | 0     | TTTGAAGAGGAA  | 0.423 |             |
| - | 1  | 315       |                    | NM_006735    | NP_006726    | O43364 | HXA2_HUMAN  |                           | 2     | GCTGGCTATTGA  | 0.498 |             |
| - | 12 | 1455      | nse_Mutation_p.S   | NM_001883    | NP_001874    | Q13324 | CRFR2_HUMAN | lasmic (Potential).       | 4     | TTGATGCTGTGG/ | 0.637 |             |
| + | 7  | 1486      | p.P164S CCDC12     | NM_194300    | NP_919276    | Q6ZRS4 | CC129_HUMAN |                           | 0     | AAATCCCAGCC   | 0.483 |             |
| + | 4  | 955       | zu.2_Missense_Mt   | NM_152626    | NP_689839    | Q03936 | ZNF92_HUMAN | 2H2-type 5.               | 0     | CCTCAACCCTTA/ | 0.353 |             |
| + | 12 | 2644      | JTS2_uc011keg.1    | NM_015570    | NP_056385    | Q8WXX7 | AUTS2_HUMAN |                           | 3     | CCCGAGGGTAC   | 0.527 |             |
| - | 7  | 984       | rex.2_Missense_M   | NM_002291    | NP_002282    | P07942 | LAMB1_HUMAN | inin N-terminal.          | 8     | GATCTTCTATTTT | 0.259 |             |
| + | 37 | 5231      | '205_uc003vxs.2_   | NM_015135    | NP_055950    | Q92621 | NU205_HUMAN |                           | 6     | AAATTTCAAGACC | 0.383 |             |
| - | 16 | 3008      | nse_Mutation_p.F   | NM_015689    | NP_056504    | Q9ULE3 | DEN2A_HUMAN | dDENN.                    | 4     | CCGAAACATCT/  | 0.607 |             |
| - | 15 | 1859_1860 |                    | NM_004333    | NP_004324    | P15056 | BRAF_HUMAN  | rotein kinas_R603>(2) p.T | 18290 | ATTTCACTGTAG  | 0.366 | rs121913378 |
| + | 4  | 567       | 1_Intron uc010loj. | NR_001296    |              |        |             |                           | 0     | GCCTGGACGCT   | 0.502 |             |
| + | 1  | 352_353   |                    | NM_054028    | NP_473369    | Q96KT7 | AMCL2_HUMAN | . Helical; (Potential).   | 0     | CGATGCCTCTTC  | 0.624 | rs148317481 |
| - | 2  | 659       | r_p.N95S OPRK1_    | NM_000912    | NP_000903    | P41145 | OPRK_HUMAN  | lasmic (Potential).       | 2     | AAATGTTGGTTC  | 0.388 |             |
| - | 1  | 444       |                    | NM_152418    | NP_689631    | Q8NA75 | DC4L2_HUMAN |                           | 1     | TGTGCGGGTAT/  | 0.547 |             |
| - | 14 | 1957      |                    | NM_003184    | NP_003175    | Q6P1X5 | TAF2_HUMAN  |                           | 6     | AAAGTGGTCCCT  | 0.318 |             |
| - | 31 | 6339      | ε.1_Missense_Mut   | NM_201380    | NP_958782    | Q15149 | PLEC_HUMAN  | us rod domain. Potential. | 9     | CCGCCGCTGCC   | 0.687 |             |
| + | 6  | 880       | 0mn.2_Missense     | NM_001012419 | NP_001012419 | Q5VUR7 | A20A3_HUMAN |                           | 0     | TAAAAAGAAGAT/ | 0.234 |             |
| + | 16 | 2435      | p.T141M TLE4_uc    | NM_007005    | NP_008936    | O60756 | BCE1_HUMAN  |                           | 5     | GTACACGGGTG/  | 0.602 |             |
| + | 4  | 2303      | lwx.1_Missense_M   | NM_133465    | NP_597722    | Q8N8K9 | K1958_HUMAN |                           | 1     | GGCTTGGCTCC   | 0.607 |             |
| - | 18 | 1981      | 3A1_uc010mws.2_    | NM_002077    | NP_002068    | Q92805 | GOGA1_HUMAN | Potential.                | 1     | CTCGGCCTGCA/  | 0.672 |             |
| + | 3  | 635       |                    | NM_014506    | NP_055321    | O14657 | TOR1B_HUMAN |                           | 0     | CAAGCCGTTTC   | 0.498 |             |
| + | 30 | 2906      |                    | NM_000093    | NP_000084    | P20908 | CO5A1_HUMAN | le-helical region.        | 11    | ATGGCCCTGAA/  | 0.617 |             |
| + | 27 | 3460      | mej.1_Missense_M   | NM_206920    | NP_996803    | Q6UXC1 | AEGP_HUMAN  | lasmic (Potential).       | 7     | TGATCCGTAGA/  | 0.502 |             |
| + | 1  | 721       |                    | NM_001013736 | NP_001013758 | Q5HY64 | FA47C_HUMAN |                           | 3     | CCACCTGGAGC   | 0.637 |             |
| + | 1  | 2230      |                    | NM_001013736 | NP_001013758 | Q5HY64 | FA47C_HUMAN |                           | 3     | TCTCCGCCAG/   | 0.637 |             |
| - | 5  | 705       | kh.1_Missense_Mt   | NM_006307    | NP_006298    | P78539 | SRPX_HUMAN  | HYR.                      | 0     | TCCTTCGGGTG   | 0.443 |             |
| + | 8  | 1294      | RN1_uc011mpt.1_I   | NM_052957    | NP_443189    | Q96QF7 | ACRC_HUMAN  | Asp/Ser-rich.             | 3     | AAGCTCCCAGC/  | 0.557 |             |
| - | 3  | 567       | εas.2_Missense_M   | NM_001144887 | NP_001138359 | Q99966 | CITE1_HUMAN |                           | 0     | AGAAGGAGAGA   | 0.627 |             |
| - | 13 | 1625      | 42_splice PHKA1_   | NM_002637    | NP_002628    | P46020 | KPB1_HUMAN  |                           | 4     | TACATACCTTGA/ | 0.378 |             |
| - | 2  | 323       | 1_uc004evh.2_Intr  | NM_004208    | NP_004199    | O95831 | AIFM1_HUMAN |                           | 5     | TCATCTGGAGTT/ | 0.383 |             |
| + | 4  | 2019      | EC1_uc010nsl.1_I   | NM_005462    | NP_005453    | O60732 | MAGC1_HUMAN |                           | 4     | CTCCTCACTACT  | 0.582 |             |
| - | 3  | 503       |                    | NM_021049    | NP_066387    | P43359 | MAGA5_HUMAN | MAGE.                     | 0     | TGGGTGAGGGG   | 0.542 |             |
| + | 5  | 820       |                    | NM_152492    | NP_689705    | Q2M243 | CCD27_HUMAN | Potential.                | 1     | AGATACAGGTT/  | 0.587 |             |
| - | 6  | 961_962   | rnx.2_Missense_M   | NM_001079843 | NP_001073312 | Q86V15 | CASZ1_HUMAN |                           | 1     | CCGGGTGGGAC   | 0.604 |             |
| + | 19 | 3059      | p.R973Q VPS13D     | NM_015378    | NP_056193    | Q5THJ4 | VP13D_HUMAN |                           | 5     | ATGGCCGTACA   | 0.502 |             |
| - | 9  | 1112      | 1_Intron MST1P9_   | NR_002729    |              |        |             |                           | 0     | CACCCTTGCGG   | 0.731 |             |
| + | 9  | 1023_1024 |                    | NM_016233    | NP_057317    | Q9ULW8 | PADI3_HUMAN |                           | 2     | GCCAGGAAGG/   | 0.653 |             |
| - | 3  | 578       | fs.3_Missense_Mu   | NM_020816    | NP_065867    | Q9P2E2 | KIF17_HUMAN | inesin-motor.             | 4     | GGTGTGAGCC/   | 0.577 |             |
| - | 8  | 1355      | e_Mutation_p.G32   | NM_001103160 | NP_001096630 | Q6ZV89 | SH2D5_HUMAN | SH2.                      | 0     | CTGGCCGCTAG   | 0.662 | rs74703877  |
| - | 8  | 924       | IRNP40_uc010oge    | NM_004814    | NP_004805    | Q96D17 | SNR40_HUMAN | WD 6.                     | 0     | GTGACCAAGAA   | 0.373 |             |

|   |    |       |                   |              |              |        |              |                             |      |                |       |             |
|---|----|-------|-------------------|--------------|--------------|--------|--------------|-----------------------------|------|----------------|-------|-------------|
| - | 4  | 2501  | ae_Mutation_p.A43 | NM_024503    | NP_078779    | Q5T1R4 | ZEP3_HUMAN   | TRAF-dependent NF-Kapp      | 6    | iCATGGCGGTCC   | 0.622 |             |
| + | 11 | 1718  | A4A_uc010oki.1_lr | NM_014663    | NP_055478    | O75164 | KDM4A_HUMAN  |                             | 1    | TCTTCACGGGAT   | 0.517 |             |
| + | 5  | 731   | K3_uc001cmo.2_R   | NM_004073    | NP_004064    | Q9H4B4 | PLK3_HUMAN   | rotein kinase.              | 0    | iGGTTGGAGCCT   | 0.498 |             |
| - | 8  | 989   | nv.1_Missense_Mi  | NM_020365    | NP_065098    | Q9NR50 | EI2BG_HUMAN  |                             | 1    | iCCTGTCTCCTC   | 0.493 |             |
| - | 42 | 5991  | lqi.1_Missense_M  | NM_000350    | NP_000341    | P78363 | ABCA4_HUMAN  | porter 2. Cytoplasmic.      | 12   | AGGGCGAACTC    | 0.522 |             |
| - | 6  | 913   |                   | NM_152380    | NP_689593    | Q96SF7 | TBX15_HUMAN  |                             | 2    | iTCTCCCAGAAT   | 0.378 |             |
| - | 5  | 724   |                   | NM_152380    | NP_689593    | Q96SF7 | TBX15_HUMAN  | T-box.                      | 2    | iAACTCGAGGCT   | 0.438 |             |
| + | 3  | 201   | nu.1_Missense_N   | NM_005105    | NP_005096    | Q9Y5S9 | RBM8A_HUMAN  |                             | 0    | GCGTGGAGCAG    | 0.488 |             |
| + | 14 | 1711  | vkt.1_Missense_M  | NM_001102663 | NP_001096133 |        |              |                             | 0    | iAGTAGAGCCTG   | 0.473 |             |
| - | 44 | 6536  |                   | NM_003126    | NP_003117    | P02549 | SPTA1_HUMAN  | Spectrin 20.                | 8    | iCACACCTAAGG   | 0.517 |             |
| - | 43 | 6158  |                   | NM_003126    | NP_003117    | P02549 | SPTA1_HUMAN  | Spectrin 19.                | 8    | iGATCTCGGGAA   | 0.498 |             |
| + | 13 | 1668  | p.P377L NCSTN_    | NM_015331    | NP_056146    | Q92542 | NICA_HUMAN   | ellular (Potential).        | 2    | iTGATCCCCAAA   | 0.552 |             |
| - | 18 | 2573  | plj.1_Missense_M  | NM_018417    | NP_060887    | Q96PN6 | ADCYA_HUMAN  |                             | 3    | iCTTTTCTCTCAG  | 0.438 |             |
| - | 3  | 512   | f112_uc001ggj.2_J | NM_000450    | NP_000441    | P16581 | LYAM2_HUMAN  | (Potential). C-type lectin. | 5    | iTTTTTCTCTCTT  | 0.493 | rs142216825 |
| + | 6  | 958   | wb.2_Missense_M   | NM_015569    | NP_056384    | Q9UQ16 | DYN3_HUMAN   |                             | 1    | CCTTTCCACCC    | 0.473 |             |
| - | 2  | 421   | PIGC_uc001gin.2   | NM_153747    | NP_714969    | Q92535 | PIGC_HUMAN   |                             | 1    | CAATATTGGTATT  | 0.483 |             |
| + | 22 | 3568  | l1gox.1_Missense_ | NM_000721    | NP_000712    | Q15878 | CAC1E_HUMAN  | lasmic (Potential).         | 6    | iTGTTTCATCTTCA | 0.458 |             |
| + | 1  | 143   |                   | NM_005298    | NP_005289    | O00155 | GPR25_HUMAN  | Name=1; (Potential).        | 1    | CCTGGCGGCCT    | 0.587 |             |
| + | 6  | 787   | ion_p.T116M DTL_  | NM_016448    | NP_057532    | Q9NZJ0 | DTL_HUMAN    | WD 3.                       | 0    | CTGTACGGGTG    | 0.328 |             |
| - | 2  | 410   |                   | NM_024746    | NP_079022    | Q6UWX4 | HIPL2_HUMAN  |                             | 1    | GGCGTCGTAGAC   | 0.567 |             |
| - | 7  | 2012  | p.P460S SUSD4_    | NM_017982    | NP_060452    | Q5VX71 | SUSD4_HUMAN  | lasmic (Potential).         | 0    | GTCAGGGTTGT    | 0.582 |             |
| + | 65 | 16687 | p.S5548L OBSCN    | NM_001098623 | NP_001092093 | Q5VST9 | OBSCN_HUMAN  |                             | 28   | iGGTATCGGCCA   | 0.642 |             |
| - | 3  | 392   | tr.2_Nonsense_M   | NM_014409    | NP_055224    | O75529 | TAF5L_HUMAN  |                             | 1    | iCAGTCGTCCAA   | 0.373 |             |
| - | 5  | 723   | .1_Missense_Mut   | NM_030569    | NP_085046    | Q86UX2 | ITI5_HUMAN   |                             | 4    | CCCCGCGCCCA    | 0.617 |             |
| + | 7  | 1473  | e_Mutation_p.G23  | NM_032812    | NP_116201    | Q6UX71 | PXDC2_HUMAN  | ellular (Potential).        | 4    | iAGTCGGACTGT   | 0.423 |             |
| + | 7  | 926   | YO3A_uc009xkq.1   | NM_017433    | NP_059129    | Q8NEV4 | MYO3A_HUMAN  | rotein kinase.              | 18   | iAACACCGTTTT   | 0.443 |             |
| + | 8  | 2452  | TL_uc009xkw.1_N   | NM_032844    | NP_116233    | Q96GX5 | GWL_HUMAN    | rotein kinase.              | 3    | iATATTGAAGATC  | 0.373 |             |
| - | 6  | 624   | _p.A74T MPPT7_u   | NM_173496    | NP_775767    | Q5T2T1 | MPP7_HUMAN   | L27 2.                      | 1    | iCAAGCCGCGCG   | 0.512 |             |
| - | 5  | 556   | ZNF33B_uc001jag   | NM_006955    | NP_008886    | Q06732 | ZN33B_HUMAN  |                             | 0    | iAAACTCATTCC   | 0.328 |             |
| + | 7  | 1642  |                   | NM_000314    | NP_000305    | P60484 | PTEN_HUMAN   | 2 tensin-tyr'_N212>Y(2) p.  | 2334 | CTATTCCAATGTI  | 0.358 |             |
| - | 3  | 643   | ie_Mutation_p.A85 | NM_018058    | NP_060528    | Q9NQ79 | CRAC1_HUMAN  |                             | 5    | iGACCCGCGATG   | 0.662 |             |
| + | 10 | 1517  | p.E237K C10orf81  | NM_024889    | NP_079165    | Q5SXH7 | CJ081_HUMAN  |                             | 1    | iAAGTGGAGAAA   | 0.428 |             |
| + | 2  | 1391  | g.2_5'Flank EMX2  | NM_004098    | NP_004089    | Q04743 | EMX2_HUMAN   | Homeobox.                   | 0    | iCACACAGCCTC   | 0.632 |             |
| + | 1  | 731   |                   | NM_001127389 | NP_001120861 | F5GZ66 | F5GZ66_HUMAN |                             | 0    | iTCAAGGGGCCA   | 0.701 |             |
| + | 9  | 1051  | _p.S306F PHRF1_   | NM_020901    | NP_065952    | Q9P1Y6 | PHRF1_HUMAN  | Arg-rich.                   | 0    | iGTCTTCCCTGC   | 0.672 |             |
| + | 8  | 1197  | nt_p.H143H EFC    | NM_020376    | NP_065109    | Q96AD5 | PLPL2_HUMAN  | renal (Potential).          | 0    | iGGCCACGGCCA   | 0.711 |             |
| - | 13 | 1921  | o.W638G TRPM5_    | NM_014555    | NP_055370    | Q9NZQ8 | TRPM5_HUMAN  | lasmic (Pote p.W638*(1)     | 4    | iCCCCACCAGA    | 0.642 |             |
| - | 1  | 14    |                   | NM_001005238 | NP_001005238 | Q8NGK0 | O51G2_HUMAN  | ellular (Potential).        | 2    | CCAGGGATCCC    | 0.552 | rs150566249 |
| + | 10 | 1335  | p.H402Y TUB_uc    | NM_177972    | NP_813977    | P50607 | TUB_HUMAN    |                             | 1    | iTGTTTCATGAG   | 0.547 |             |
| + | 1  | 140   |                   | NM_001005205 | NP_001005205 | Q8NGP2 | OR8J1_HUMAN  | lasmic (Potential).         | 2    | iCATCACCCCTCA  | 0.502 |             |
| + | 6  | 1047  | e.2_Nonsense_M    | NM_207341    | NP_997224    | P60852 | ZP1_HUMAN    | llular (Potential). ZP.     | 0    | iGCGACCAGCTC   | 0.612 |             |
| - | 3  | 495   | ZAT3_uc001ntx.2_  | NM_012200    | NP_036332    | O94766 | B3GA3_HUMAN  | renal (Potential).          | 0    | iACCACGGGGAT   | 0.682 |             |
| + | 28 | 4579  | ez.2_Missense_M   | NM_032223    | NP_115599    | Q9H6A9 | PCX3_HUMAN   |                             | 0    | iACTCGGATCCC   | 0.622 |             |
| + | 21 | 2507  | nu.2_Missense_N   | NM_001164161 | NP_001157633 | Q5H9R7 | PP6R3_HUMAN  |                             | 0    | iAACCAGCACTG   | 0.512 |             |
| - | 22 | 5119  | ssense_Mutation_r | NM_012309    | NP_036441    | Q9UPX8 | SHAN2_HUMAN  |                             | 5    | iGGGGCGAACAG   | 0.602 |             |
| - | 5  | 778   | rtj.1_Missense_Mu | NM_001162951 | NP_001156423 | Q9HCH5 | SYTL2_HUMAN  |                             | 3    | iTTCTGGCAACT   | 0.333 |             |
| + | 23 | 3601  | _Mutation_p.R115  | NM_001080463 | NP_001073932 | Q8NCM8 | DYHC2_HUMAN  | n (By similarity).          | 0    | ACTTTTCGGTTTC  | 0.323 |             |

|   |    |           |                        |              |              |        |              |                                |    |               |       |             |
|---|----|-----------|------------------------|--------------|--------------|--------|--------------|--------------------------------|----|---------------|-------|-------------|
| - | 5  | 243       | FXYD2_uc001prk.        | NM_001680    | NP_001671    | P54710 | ATNG_HUMAN   |                                | 0  | ATTTGCCTGGTG  | 0.584 |             |
| + | 46 | 6278      | p.S912R SORL1_         | NM_003105    | NP_003096    | Q92673 | SORL_HUMAN   | tential). Fibronectin type-III | 15 | FGATAGTGCCATC | 0.393 |             |
| - | 16 | 2931      | p.P312S CDON_u         | NM_016952    | NP_058648    | Q4KMG0 | CDON_HUMAN   | ellular (Potential).           | 6  | TGACAGGATATTC | 0.428 |             |
| - | 17 | 2793      | p.R870W CHD4_u         | NM_001273    | NP_001264    | Q14839 | CHD4_HUMAN   | ase ATP-binding.               | 2  | CAGCCGATGGG   | 0.468 |             |
| - | 8  | 469       | p.D76N MFAP5_          | NM_003480    | NP_003471    | Q13361 | MFAP5_HUMAN  |                                | 1  | CTCATCCCAGCA  | 0.443 |             |
| - | 6  | 604       | p.L2_Missense_Mu       | NM_002864    | NP_002855    |        |              |                                | 5  | AGAGGGGAAAAG  | 0.502 |             |
| - | 5  | 740       | i.2_intron CLEC7A      | NM_197947    | NP_922938    | Q9BXN2 | CLC7A_HUMAN  | . Extracellular (Potential).   | 1  | GGGCCGAGAAA   | 0.368 |             |
| - | 1  | 645       | B4_uc001qzf.1_inl      | NM_181429    | NP_852094    | Q7RTR8 | T2R42_HUMAN  | lasmic (Potential).            | 1  | ACTGAGCTTCAA  | 0.413 |             |
| - | 13 | 3180      |                        | NM_000834    | NP_000825    | Q13224 | NMDE2_HUMAN  | lasmic (Potential).            | 12 | CCCATCGATGG   | 0.587 |             |
| - | 8  | 992       | p.E264K CASC1_         | NM_001082973 | NP_001076442 | Q6TDU7 | CASC1_HUMAN  |                                | 2  | CTCTTTCTTGTT  | 0.358 |             |
| - | 34 | 9446      |                        | NM_003482    | NP_003473    | O14686 | MLL2_HUMAN   |                                | 41 | CAAGGGGAATTG  | 0.607 |             |
| + | 8  | 1341      | p.L2_Missense_Mu       | NM_001095    | NP_001086    | P78348 | ACCN2_HUMAN  | llular (By similarity).        | 1  | GACCCGCTATG   | 0.532 |             |
| + | 2  | 586       | p.H1_Missense_Mu       | NM_032889    | NP_116278    | Q6N075 | MFSD5_HUMAN  | ical; (Potential).             | 3  | GCTAGTGGGGC   | 0.537 |             |
| - | 1  | 151       |                        | NM_001005493 | NP_001005493 | A6NF89 | OR6C6_HUMAN  | lasmic (Potential).            | 2  | CCGGGGATCCA   | 0.408 | rs138420259 |
| + | 1  | 209       |                        | NM_001005182 | NP_001005182 | Q96RD1 | OR6C1_HUMAN  | Name=2; (Potential).           | 2  | AATTCGTTTCA   | 0.378 |             |
| + | 1  | 116       |                        | NM_001005494 | NP_001005494 | Q8NGE1 | OR6C4_HUMAN  | Name=1; (Potential).           | 0  | CCTAGGAAATCT  | 0.418 |             |
| + | 4  | 512       | p.S5A_uc010srr.1_inl   | NM_004984    | NP_004975    | Q12840 | KIF5A_HUMAN  | inesin-motor.                  | 3  | TGCACGACCTT   | 0.507 |             |
| + | 9  | 1894      |                        | NM_013381    | NP_037513    | Q9UKU6 | TRHDE_HUMAN  | ellular (Potential).           | 3  | ATCATGATATCA  | 0.323 |             |
| - | 18 | 2308      | p.L1_RNA PPFIA2        | NM_003625    | NP_003616    | B7Z663 | B7Z663_HUMAN |                                | 6  | GAGATGAACTG   | 0.547 |             |
| - | 1  | 715       |                        | NM_152638    | NP_689851    | Q8TC90 | CL012_HUMAN  |                                | 2  | GGGGTGGGCGC   | 0.652 |             |
| + | 4  | 762       | p.L1_Mutation_p.E2     | NM_178826    | NP_849148    | Q32M45 | ANO4_HUMAN   | ellular (Potential).           | 6  | TTGATGAATTAG  | 0.403 |             |
| + | 5  | 669       | p.L1_Nonsense_Mu       | NM_014503    | NP_055318    | O75691 | UTP20_HUMAN  | HEAT 1.                        | 4  | TATATACAGGTAA | 0.418 |             |
| + | 39 | 4454      |                        | NM_017564    | NP_060034    | Q8WWQ8 | STAB2_HUMAN  | ellular (Potential).           | 14 | CTGGCGAGGAG   | 0.443 |             |
| + | 4  | 654       | p.L1_V94I C12orf23     | NM_152261    | NP_689474    | Q8WUH6 | CL023_HUMAN  | ical; (Potential).             | 0  | GAGGTGTTACA   | 0.478 |             |
| + | 3  | 993_994   |                        | NM_007076    | NP_009007    | Q9BVA6 | FICD_HUMAN   |                                | 0  | GCATCGGCTCCC  | 0.624 |             |
| + | 10 | 1163_1164 | p.S361F TPCN1_         | NM_017901    | NP_060371    | Q9ULQ1 | TPC1_HUMAN   | ellular (Potential).           | 3  | CCCTCCTACTC   | 0.545 |             |
| + | 2  | 420       | p.L1_Mutation_p.P47    | NM_153348    | NP_699179    | Q8N3Y1 | FBXW8_HUMAN  | F-box.                         | 3  | ATGTGCCTTTCT  | 0.338 |             |
| - | 3  | 948       | p.L1 ABLO_uc010tad.    | NM_019887    | NP_063940    | Q9NR28 | DBLOH_HUMAN  |                                | 0  | AGCCAATCGTC   | 0.458 |             |
| + | 3  | 339       | p.L1_Missense_Mu       | NM_003959    | NP_003950    | O75146 | HIP1R_HUMAN  | ENTH.                          | 1  | AGGTCTTCGAC   | 0.642 |             |
| + | 1  | 912       |                        | NM_001033602 | NP_001028774 | Q5JR59 | MTUS2_HUMAN  |                                | 0  | ACACATCACATT  | 0.517 |             |
| + | 34 | 5904      | p.L1_Missense_Mu       | NM_015678    | NP_056493    | Q8NFP9 | NBEA_HUMAN   |                                | 11 | CTTCTTCGTGAA  | 0.303 |             |
| + | 1  | 5230      |                        | NM_207361    | NP_997244    | Q5SZK8 | FREM2_HUMAN  | ir (Potential). CSPG 12.       | 11 | GGAGACCCCAA   | 0.493 |             |
| + | 7  | 1864      |                        | NM_004466    | NP_004457    | P78333 | GPC5_HUMAN   |                                | 5  | GTGATGATGAA   | 0.458 |             |
| - | 11 | 1427      | p.L1_Missense_Mu       | NM_052867    | NP_443099    | Q8IZF0 | NALCN_HUMAN  | ellular (Potential).           | 16 | ACTGCCTCCTG   | 0.552 |             |
| + | 1  | 157       |                        | NM_001004723 | NP_001004723 | Q8NGD1 | OR4N2_HUMAN  | lasmic (Potential).            | 4  | CAGACCCTGGG   | 0.463 |             |
| + | 1  | 447       |                        | NM_001004717 | NP_001004717 | Q8NH43 | OR4L1_HUMAN  | Name=4; (Potential).           | 5  | TCATGGATAATT  | 0.398 |             |
| - | 33 | 5636      | p.L1_Mutation_p.Q1744I | NM_020920    | NP_065971    | Q9HCK8 | CHD8_HUMAN   |                                | 10 | ATCTTGGGACAT  | 0.483 |             |
| - | 35 | 5330      |                        | NM_002471    | NP_002462    | P13533 | MYH6_HUMAN   | Potential.                     | 4  | CTTCTCCTCGG   | 0.582 |             |
| + | 33 | 3294      | p.L1_Missense_Mu       | NM_138360    | NP_612369    | Q8ND23 | LR16B_HUMAN  |                                | 5  | GCCTCCACTCC   | 0.652 |             |
| + | 33 | 3312      | p.L1_Missense_Mu       | NM_138360    | NP_612369    | Q8ND23 | LR16B_HUMAN  |                                | 5  | GAGGCGCCGGG   | 0.682 |             |
| + | 2  | 3216      | p.L1_Missense_Mut      | NM_001173    | NP_001025226 | Q13017 | RHG05_HUMAN  |                                | 5  | TATAGTCCAATTG | 0.403 |             |
| + | 14 | 1943      | p.L1_Missense_Mu       | NM_152330    | NP_689543    | Q96NE9 | FRMD6_HUMAN  |                                | 3  | CCAGAAAGACT   | 0.478 |             |
| + | 3  | 453       |                        | NM_144578    | NP_653179    | Q8NDC0 | MISSL_HUMAN  | Pro-rich.                      | 0  | GTCCCCACCTC   | 0.602 |             |
| - | 3  | 498       | p.L1_Missense_Mu       | NM_014750    | NP_055565    | Q15398 | DLGP5_HUMAN  | Potential.                     | 2  | TTTGGAGCATC   | 0.338 |             |
| + | 10 | 1056      | p.L1_Missense_Mu       | NM_133509    | NP_598193    | O15315 | RA51B_HUMAN  |                                | 0  | CCTCACCTCAT   | 0.468 |             |
| - | 2  | 436       |                        | NM_001080451 | NP_001073920 | Q86U17 | SPA11_HUMAN  |                                | 1  | GGCAAGGGTGT   | 0.557 |             |
| + | 2  | 1050      | p.L1 uc001ykg.2_5'Fl   | NM_001362    | NP_001353    | P55073 | IOD3_HUMAN   | ellular (Potential).           | 3  | GGCCCGGAGG    | 0.597 |             |

|   |      |           |                                                  |              |              |        |              |                                |     |                |       |             |
|---|------|-----------|--------------------------------------------------|--------------|--------------|--------|--------------|--------------------------------|-----|----------------|-------|-------------|
| + | 4    | 607       | PR2_uc010awl.2_                                  | NM_014844    | NP_055659    | O15040 | TCPR2_HUMAN  | WD 2.                          | 3   | TGTTTATTCTTCT  | 0.338 |             |
| - | 3089 |           | i_uc001ysq.2_5'Flank KIAA0125_uc001ysr.2_5'Flank |              |              |        |              |                                | 0   | :ACAGTGACACG,  | 0.567 |             |
| - | 3    | 185       | tas.2_Missense_M                                 | NM_000462    | NP_000453    | Q05086 | UBE3A_HUMAN  |                                | 3   | :CCATACGAAGAA  | 0.433 |             |
| - | 9    | 1368      | zba.2_Missense_IV                                | NM_000814    | NP_000805    | P28472 | GBRB3_HUMAN  | lasmic (Probable).             | 5   | :CTTCTCGAGGC,  | 0.488 |             |
| + | 7    | 3208_3209 | S1046F C15orf5                                   | NM_175741    | NP_786883    | Q86Y26 | NUT_HUMAN    |                                | 30  | :ACTCTCCAAC TT | 0.505 |             |
| + | 15   | 2538      | bbj.1_Nonsense_IV                                | NM_001013703 | NP_001013725 | Q9P2K8 | E2AK4_HUMAN  | otein kinase 2.                | 4   | :CTTTTTCGAGAG  | 0.378 |             |
| - | 3    | 395       | tutation_p.R111Q                                 | NM_001080792 | NP_001074261 | Q9BV29 | CO057_HUMAN  |                                | 1   | :AGAGTTCTGAAGC | 0.438 | rs139886034 |
| - | 5    | 1159      | d.2_Missense_Mu                                  | NM_138792    | NP_620147    | Q8WVC0 | LEO1_HUMAN   |                                | 0   | :CTGAGAAAGTTCT | 0.338 |             |
| + | 1    | 730       |                                                  | NM_001080534 | NP_001074003 | Q8NB66 | UN13C_HUMAN  |                                | 7   | :TCATGGAAATG,  | 0.448 |             |
| - | 2    | 175       | 1_uc010bkk.2_Mis                                 | NM_006715    | NP_006706    | Q9NTJ4 | MA2C1_HUMAN  |                                | 0   | :GAAGTCTCTCC   | 0.706 |             |
| + | 16   | 7690      | e_Mutation_p.T24                                 | NM_013227    | NP_037359    | E7EX88 | E7EX88_HUMAN |                                | 3   | :CTTCACGTGTA/  | 0.507 |             |
| + | 8    | 1236      | i_p.R374P MAN2A                                  | NM_006122    | NP_006113    | P49641 | MA2A2_HUMAN  | lenal (Potential).             | 3   | :CAAACGCCTGCC  | 0.557 |             |
| + | 8    | 908       | e_Mutation_p.D18                                 | NM_020664    | NP_065715    | Q9NUI1 | DECR2_HUMAN  |                                | 0   | :TGGCCGATGGC   | 0.627 |             |
| + | 9    | 2642      | .H_uc002chj.2_5'F                                | NM_005632    | NP_005623    | O75808 | CAN15_HUMAN  | lpain catalytic.               | 2   | :CCTGCGTGGCG   | 0.677 | rs139791573 |
| + | 4    | 727       | CH1_uc002csc.2_                                  | NM_032296    | NP_115672    | Q4VC44 | FWCH1_HUMAN  | YWCH-type 1.                   | 0   | :CATTCCGGGGGC  | 0.612 |             |
| + | 4    | 730       | VEN2_uc010bsx.2                                  | NM_172229    | NP_757384    | Q8NCW0 | KREM2_HUMAN  | ilar (Potential), WSC.         | 2   | :CAGCGGCACCT   | 0.647 |             |
| + | 4    | 2388      |                                                  | NM_005223    | NP_005214    | P24855 | DNAS1_HUMAN  |                                | 0   | :ACTGGGACGGA   | 0.597 |             |
| + | 17   | 2070      | CB_uc002dme.2_3                                  | NM_212535    | NP_997700    | P05771 | KPCB_HUMAN   | kinase C-terminal.             | 9   | :ACAAGAGAGAC   | 0.453 |             |
| - | 17   | 2779      | FHOD1_uc010ced                                   | NM_013241    | NP_037373    | Q9Y613 | FHOD1_HUMAN  |                                | 3   | :TGCTAACCTTGG  | 0.587 |             |
| - | 6    | 836       | o.R287W ATP6V0I                                  | NM_004691    | NP_004682    | P61421 | VA0D1_HUMAN  |                                | 0   | :GAGCCGCCAC    | 0.597 |             |
| + | 13   | 1790      | c.1_RNA SPG7_uc                                  | NM_003119    | NP_003110    | Q9UQ90 | SPG7_HUMAN   | trial matrix (Potential).      | 0   | :GGAGGCCGTGA   | 0.617 |             |
| - | 4    | 685       | S156F YWHAE_u                                    | NM_006761    | NP_006752    | P62258 | 1433E_HUMAN  |                                | 3   | :ATACGGAAAAAT  | 0.483 |             |
| - | 4    | 474       | NA_uc010cju.2_5                                  | NM_006224    | NP_006215    | Q00169 | PIPNA_HUMAN  |                                | 1   | :AGCATTCGAACA, | 0.522 |             |
| + | 8    | 1415      | sense_Mutation_p                                 | NM_001114974 | NP_001108446 | Q2TAL5 | SMTL2_HUMAN  | CH.                            | 0   | :CCTACGTCCAG   | 0.592 | rs144468111 |
| + | 22   | 2866      | vsn.1_Splice_Site                                | NM_153827    | NP_722549    | Q8N4C8 | MINK1_HUMAN  |                                | 6   | :AGCGCGTGAGT   | 0.657 | rs112125089 |
| - | 11   | 1923_1924 | p.L605F CAMTA                                    | NM_015099    | NP_055914    | O94983 | CMTA2_HUMAN  | IPT/TIG.                       | 1   | :AGAAAGGGGCC   | 0.594 |             |
| + | 11   | 1793      | i.S540G TNK1_uc                                  | NM_003985    | NP_003976    | Q13470 | TNK1_HUMAN   | Pro-rich.                      | 3   | :CCTCTAGCTCTC  | 0.617 |             |
| + | 76   | 11805     | am.1_Missense_M                                  | NM_020877    | NP_065928    | Q9P225 | DYH2_HUMAN   | 6 (By similarity).             | 13  | :TCCCCCACCCA   | 0.552 |             |
| - | 5    | 829       |                                                  | NM_001128076 | NP_001121548 | A6NLX3 | SPDE4_HUMAN  |                                | 0   | :TACCTCCTCCA   | 0.622 |             |
| - | 6    | 735       | e_Mutation_p.S14E                                | NM_001082968 | NP_001076437 | Q6ZVM7 | TM1L2_HUMAN  |                                | 0   | :GCGAGGAATAG   | 0.582 |             |
| + | 2    | 153       | S9C_uc010vyb.1                                   | NM_001040078 | NP_001035167 | Q6DKI2 | LEG9C_HUMAN  | Galectin 1.                    | 1   | :GGACGGATTTC,  | 0.567 |             |
| + | 4    | 999       | n_p.R66C MAPK7                                   | NM_139033    | NP_620602    | Q13164 | MK07_HUMAN   | zation (By similarity), Protei | 9   | :TGGCTCGTGGC   | 0.552 |             |
| + | 5    | 679       | F4_uc002hcq.1_lr                                 | NM_004295    | NP_004286    | Q9BUZ4 | TRAF4_HUMAN  | TRAF-type 2.                   | 2   | :CCAAGCGCACT   | 0.592 |             |
| + | 18   | 3134      | JAP1_uc010wgs.1                                  | NM_003632    | NP_003623    | P78357 | CNTP1_HUMAN  | Extracellular (Potential).     | 8   | :AGGCCGCTGCG   | 0.597 |             |
| - | 3    | 549       | p.E150K KIF18B_u                                 | NM_001080443 | NP_001073912 |        |              |                                | 2   | :CACCTCGAAGT   | 0.647 |             |
| + | 6    | 842       | BP1_uc010dbj.2_l                                 | NM_006546    | NP_006537    | Q9NZI8 | IF2B1_HUMAN  |                                | 1   | :GAGGGGGCTTT   | 0.647 |             |
| - | 25   | 1820_1821 |                                                  | NM_000088    | NP_000079    | P02452 | CO1A1_HUMAN  | le-helical region.             | 382 | :GTCCGGGGCG,   | 0.614 |             |
| + | 5    | 2288      | AP1_uc002iuy.2_R                                 | NM_003488    | NP_003479    | Q92667 | AKAP1_HUMAN  |                                | 1   | :CGCTCCCCCATI  | 0.527 |             |
| - | 17   | 2654      | r_p.P806L RECQL                                  | NM_004259    | NP_004250    | O94762 | RECQ5_HUMAN  |                                | 3   | :TGGGCGGGCAG   | 0.652 |             |
| + | 8    | 1830      | sense_Mutation_p.                                | NM_001142602 | NP_001136074 | Q9NYA1 | SPHK1_HUMAN  |                                | 1   | :CAGTGGATGGG   | 0.592 |             |
| - | 18   | 3474      | rl.3_Missense_Mu                                 | NM_022066    | NP_071349    | Q9C0C9 | UBE2O_HUMAN  |                                | 5   | :CAGCCGCCAGC   | 0.657 |             |
| - | 7    | 738_739   | i_p.H255Y PCYT2                                  | NM_002861    | NP_002852    | Q99447 | PCY2_HUMAN   | lytic 2 (Potential).           | 0   | :GATACGGAACAC  | 0.609 |             |
| + | 66   | 8737      | as.3_Missense_Mu                                 | NM_198129    | NP_937762    | Q16787 | LAMA3_HUMAN  | minin G-like 3.                | 11  | :GCAGTCTCTGC   | 0.463 |             |
| - | 2    | 1156      | n.1_Missense_Mu                                  | NM_020783    | NP_065834    | Q9H2B2 | SYT4_HUMAN   | Probable), Cytoplasmic (Pc     | 5   | :AATCCCAGAGAC  | 0.328 |             |
| + | 17   | 3094      | :1_Intron DCC_uc                                 | NM_005215    | NP_005206    | P43146 | DCC_HUMAN    | ellular (Potential).           | 17  | :CACCTCGGTCC   | 0.453 |             |
| + | 25   | 4248      | fi.1_Missense_Mut                                | NM_005215    | NP_005206    | P43146 | DCC_HUMAN    | lasmic (Potential).            | 17  | :CTCTGGAGAGG   | 0.522 |             |
| + | 2    | 465       | :LN_uc002lxh.1_R                                 | NM_020170    | NP_064555    | Q969V3 | NCLN_HUMAN   | lenal (Potential).             | 0   | :GCAGTCGGCGG   | 0.721 |             |

|   |     |                          |              |              |        |                                            |     |               |       |             |
|---|-----|--------------------------|--------------|--------------|--------|--------------------------------------------|-----|---------------|-------|-------------|
| + | 15  | 2351_2352 p.G743K KDM4B_ | NM_015015    | NP_055830    | O94953 | KDM4B_HUMAN                                | 1   | CCCTCGGAAAGC  | 0.649 |             |
| + | 5   | 454 ise_Mutation_p.Sf    | NM_001974    | NP_001965    | Q14246 | EMR1_HUMAN :GF-like 3; calcium-binding     | 5   | CACCAGCAGCG   | 0.483 |             |
| + | 3   | 624 mgu.3_Missense_l     | NM_020902    | NP_065953    | Q9P1Y5 | CAMP3_HUMAN CH.                            | 1   | TGGACACGGTA   | 0.652 |             |
| - | 4   | 659 q.2_Missense_Mu      | NM_021155    | NP_066978    | Q9NNX6 | CD209_HUMAN  5, 7 X approximate tandem     | 1   | CAGCCGGGTCA   | 0.562 | rs141131967 |
| + | 4   | 424 site_p.A115_splice   | NM_005968    | NP_005959    | P52272 | HNRPM_HUMAN                                | 0   | ATGTGCGTAAGT  | 0.378 |             |
| - | 26  | 3527 2mki.1_Nonsense_    | NM_030957    | NP_112219    | Q9H324 | ATS10_HUMAN PLAC.                          | 4   | AGAACTGAAATT  | 0.627 |             |
| - | 3   | 24249                    | NM_024690    | NP_078966    | Q8WXI7 | MUC16_HUMAN ch. Extracellular (Potential). | 57  | TGCAACATATCT  | 0.473 |             |
| - | 67  | 5182                     | NM_015719    | NP_056534    | P25940 | CO5A3_HUMAN lar collagen NC1.              | 10  | CTTCCGGAGC    | 0.592 |             |
| + | 9   | 824 xoj.1_Missense_M     | NM_007253    | NP_009184    | P98187 | CP4F8_HUMAN                                | 1   | GTGGACGGCGC   | 0.552 |             |
| + | 2   | 682 p.T177M MYO9B_       | NM_004145    | NP_004136    | Q13459 | MYO9B_HUMAN osin head-like.                | 1   | CTACACGTACGC  | 0.547 |             |
| - | 4   | 305 r.p.V92E TMEM1f      | NM_017814    | NP_060284    | Q9NX61 | T161A_HUMAN ellular (Potential).           | 2   | CATCCACGGTC   | 0.607 |             |
| + | 4   | 1536 i.1_intron ZNF90_u  | NM_007138    | NP_009069    | Q03938 | ZNF90_HUMAN :2H2-type 11.                  | 2   | CTCTCAAACC    | 0.418 |             |
| - | 4   | 800 o.N218H ZNF43_u      | NM_003423    | NP_003414    | P17038 | ZNF43_HUMAN ype 2; degenerate.             | 2   | CAGTATTAATTCT | 0.323 |             |
| - | 1   | 1166                     | NM_002152    | NP_002143    | P23327 | SRCH_HUMAN . 2-6, 6 X approximate tand     | 1   | CTCTCTCTTCT   | 0.532 |             |
| - | 4   | 349 C7_uc010yco.1_5'l    | NM_139277    | NP_644806    | P49862 | KLK7_HUMAN peptidase S1.                   | 0   | CGTATCACTGC   | 0.572 |             |
| - | 5   | 563                      | NM_022046    | NP_071329    | Q9P0G3 | KLK14_HUMAN peptidase S1.                  | 1   | GGTGCCTCACC   | 0.647 |             |
| + | 2   | 187                      | NM_002030    | NP_002021    | P25089 | FPR3_HUMAN ellular (Potential).            | 6   | AAGATGGAAAC   | 0.483 |             |
| - | 4   | 576                      | NM_052882    | NP_443114    | Q96PE6 | ZIM3_HUMAN KRAB.                           | 2   | CTTCTCTTGTTC  | 0.468 |             |
| + | 4   | 747                      | NM_182626    | NP_872432    | Q96LS8 | CB048_HUMAN                                | 0   | CATTCTCAGACC  | 0.587 |             |
| + | 13  | 1029 e_Mutation_p.L22i   | NM_007266    | NP_009197    | Q9HCN4 | GPN1_HUMAN                                 | 0   | GATTTGATCCTC  | 0.483 |             |
| - | 7   | 1056                     | NM_018079    | NP_060549    | Q8N5C6 | SRBD1_HUMAN                                | 1   | GTCTTGCTCTCT  | 0.423 |             |
| + | 21  | 2412 M2_uc002suk.2_n     | NM_144707    | NP_653308    | Q8N271 | PROM2_HUMAN ellular (Potential).           | 1   | CCTCTCCGGAG   | 0.622 |             |
| - | 1   | 137                      | NM_000682    | NP_000673    | P18089 | ADA2B_HUMAN smic (By similarity).          | 3   | TCTGAGGGGCG   | 0.632 |             |
| - | 3   | 1144 ic002too.1_5'Flank  | NM_017969    | NP_060439    | Q96ST2 | IWS1_HUMAN pproximate tandem repeat        | 1   | TGGGGGATCTT   | 0.557 |             |
| - | 4   | 1062 uci.2_Missense_M    | NM_033272    | NP_150375    | Q9NS40 | KCNH7_HUMAN lasmic (Potential).            | 5   | GTGGACGCCGA   | 0.398 |             |
| - | 240 | 49420 094S TTN_uc010z    | NM_133378    | NP_596869    | Q8WZ42 | TITIN_HUMAN                                | 153 | GCAGCATTGATT  | 0.433 |             |
| - | 230 | 46866 243K TTN_uc010z    | NM_133378    | NP_596869    | Q8WZ42 | TITIN_HUMAN                                | 153 | GACTTCTCTCC   | 0.393 |             |
| + | 19  | 2857 rap.1_Missense_M    | NM_152526    | NP_689739    | Q8TEW8 | PAR3L_HUMAN Lys-rich.                      | 4   | AAGAGGATAAGC  | 0.423 |             |
| - | 14  | 2220 ve.1_Missense_Mi    | NM_005689    | NP_005680    | Q9NP58 | ABCB6_HUMAN 3C transporter.                | 2   | CTATTCGGATGC  | 0.537 | rs13402964  |
| - | 14  | 1474 md.3_Missense_N     | NM_019593    | NP_062539    | Q9NPB8 | GPCP1_HUMAN GDPD.                          | 0   | CTTCCGATCCTT  | 0.348 |             |
| + | 4   | 591 o.R26Q TM9SF4_u      | NM_014742    | NP_055557    | Q92544 | TM9S4_HUMAN                                | 2   | GAGCCGACTCG   | 0.577 | rs139891092 |
| + | 2   | 296 i_p.R80Q SEMG2_      | NM_003008    | NP_002999    | Q02383 | SEMG2_HUMAN at-rich region. 3-1.           | 1   | GACCCGAAAAA   | 0.368 |             |
| - | 1   | 364                      | NM_181621    | NP_853652    | Q52LG2 | KR132_HUMAN                                | 0   | TCGATCCATAGC  | 0.582 |             |
| - | 1   | 208                      | NM_181611    | NP_853642    | Q3LI72 | KR195_HUMAN                                | 0   | AAATCCAGAGA   | 0.502 | rs73186218  |
| + | 2   | 316 rR1_uc011adv.1_5     | NM_000629    | NP_000620    | P17181 | INAR1_HUMAN ellular (Potential).           | 2   | CTGTGCGGAATC  | 0.348 |             |
| + | 12  | 1334 zbj.2_Missense_N    | NM_018964    | NP_061837    | P57057 | GLPT_HUMAN ical; (Potential).              | 0   | TTCTCCCAGGGC  | 0.572 |             |
| + | 17  | 2399 p.E708K CABIN1_     | NM_012295    | NP_036427    | Q9Y6J0 | CABIN_HUMAN                                | 5   | GTTTTGAGTGT   | 0.587 |             |
| + | 4   | 1238 d.1_Missense_Mi     | NM_021115    | NP_066938    | Q9BYH1 | SE6L1_HUMAN xtracellular (Potential).      | 6   | AATCCGAAGCC   | 0.632 |             |
| - | 5   | 1753 mf.3_Missense_Mi    | NM_001098527 | NP_001091997 | O75678 | RFPL2_HUMAN 330.2 SPRY.                    | 1   | AAGCTCTGTGG   | 0.582 |             |
| - | 3   | 314                      | NM_002872    | NP_002863    | P15153 | RAC2_HUMAN                                 | 4   | GGAGACGGTCC   | 0.403 |             |
| - | 7   | 1507                     | NM_152512    | NP_689725    | Q8IYW4 | ENTD1_HUMAN                                | 3   | ATAAAGGAGAA   | 0.398 |             |
| - | 1   | 1839                     | NM_006071    | NP_006062    | Q9NTG1 | PKDRE_HUMAN ular (Potential). REJ.         | 5   | GTTCTCTTTTACT | 0.433 |             |
| - | 33  | 5283 p.T518M PLXNB2_     | NM_012401    | NP_036533    | O15031 | PLXB2_HUMAN lasmic (Potential).            | 6   | GCTCCGTGCGC   | 0.622 |             |
| + | 31  | 4087 rR1_uc011asu.1_l    | NM_001099952 | NP_001093422 | Q14643 | ITPR1_HUMAN lasmic (Potential).            | 21  | TCTGCGCAGGC   | 0.453 |             |
| - | 1   | 97 l_5'Flank GRIP2_u     | NM_001080423 | NP_001073892 | Q9C0E4 | GRIP2_HUMAN                                | 1   | CACGCGGAAG    | 0.597 |             |
| - | 21  | 2637 odj.2_Missense_M    | NM_001068    | NP_001059    | Q02880 | TOP2B_HUMAN                                | 5   | GGAATTATAGGA  | 0.408 |             |
| + | 2   | 1352                     | NM_152393    | NP_689606    | Q2TBA0 | KBTB5_HUMAN Kelch 2.                       | 1   | TGGTCGGTGCC   | 0.642 |             |



|   |    |           |                    |              |              |        |             |                                |    |               |       |             |
|---|----|-----------|--------------------|--------------|--------------|--------|-------------|--------------------------------|----|---------------|-------|-------------|
| + | 5  | 481       | CC36_uc011bck.1_   | NM_178173    | NP_835467    | Q8IYA8 | CCD36_HUMAN |                                | 2  | CAAAATGATTATT | 0.363 |             |
| - | 12 | 1522      | _p.P342S PCBP4_    | NM_033010    | NP_127503    | P57723 | PCBP4_HUMAN |                                | 0  | CGGCGGCGGCC   | 0.622 |             |
| - | 2  | 1584      | b.2_Missense_Mu    | NM_017442    | NP_059138    | Q9NR96 | TLR9_HUMAN  | xtracellular (Potential).      | 4  | AAGTTCTCACTC  | 0.527 |             |
| + | 6  | 664       | k.1_Missense_Mu    | NM_002217    | NP_002208    | Q06033 | ITIH3_HUMAN |                                | 3  | TCCTGGGAAGC   | 0.532 |             |
| + | 2  | 464       | _p.R101* CACNA1    | NM_001128840 | NP_001122312 | Q01668 | CAC1D_HUMAN | lasmic (Potential).            | 11 | ACAGCCGACCT   | 0.488 |             |
| + | 19 | 3095      | .1_3'UTR MINA_u    | NM_153605    | NP_705833    |        |             |                                | 0  | TGGAGGGAGAA   | 0.318 |             |
| + | 6  | 739       |                    | NM_017945    | NP_060415    | Q9BS91 | S35A5_HUMAN | ical; (Potential).             | 1  | CTTGACTGCCG   | 0.438 |             |
| + | 16 | 3165      |                    | NM_032242    | NP_115618    | Q9UIW2 | PLXA1_HUMAN | ir (Potential). IPT/TIG 3.     | 3  | TGTCCGTGAAC   | 0.647 |             |
| + | 28 | 5144      | 6A6_uc003eni.3_5   | NM_001102608 | NP_001096078 | A6NMZ7 | CO6A6_HUMAN | le-helical region.             | 8  | CAGGAGAGATG   | 0.343 |             |
| + | 2  | 382       | TP1B3_uc003euh.    | NM_001679    | NP_001670    | P54709 | AT1B3_HUMAN | ellular (Potential).           | 0  | AGGTTCCAAAA   | 0.333 | rs41265475  |
| - | 1  | 137       |                    | NM_178822    | NP_849144    | Q6WRI0 | IGS10_HUMAN | LRRNT.                         | 13 | GGTACCGAAAT   | 0.552 | rs148699040 |
| - | 26 | 2991      |                    | NM_001041    | NP_001032    | P14410 | SUIS_HUMAN  | IP-type 2.  Isomaltase.        | 14 | TCTGGGAAAGT   | 0.363 |             |
| + | 21 | 2843      | oy.2_Missense_ML   | NM_003741    | NP_003732    | Q9H2X0 | CHRD_HUMAN  |                                | 3  | GCAGGCTGATG   | 0.612 |             |
| + | 7  | 1364      | frw.1_Missense_M   | NM_198485    | NP_940887    | Q6ZUI0 | TPRG1_HUMAN |                                | 0  | GTCAAGTGTGA   | 0.453 |             |
| + | 20 | 2198      | rs.1_Missense_ML   | NM_004787    | NP_004778    | O94813 | SLIT2_HUMAN | LRRCT 3.                       | 11 | CCAATCCTTTTA  | 0.463 |             |
| + | 21 | 2683      | _p.Q717* LIMCH1_   | NM_014988    | NP_055803    | Q9UPQ0 | LIMC1_HUMAN |                                | 4  | CATTCCAGGGA   | 0.398 |             |
| + | 9  | 825       | v1D4_uc003gzg.2_   | NM_001040402 | NP_001035492 | Q92564 | DCNL4_HUMAN | DCUN1.                         | 2  | GCCCCTTTTTC   | 0.383 |             |
| + | 4  | 471       |                    | NM_001432    | NP_001423    | O14944 | EREG_HUMAN  | ar (Potential). EGF-like.      | 2  | TGTCCGATGTG   | 0.358 |             |
| + | 2  | 765       | bv.1_3'UTR STBD    | NM_003943    | NP_003934    | O95210 | STBD1_HUMAN | lasmic (Potential).            | 1  | AAGTTGCCTTC   | 0.448 |             |
| - | 2  | 200       | o.E36K ADH6_uc0    | NM_000672    | NP_000663    | P28332 | ADH6_HUMAN  |                                | 3  | AACTTCCTTTG   | 0.388 |             |
| - | 5  | 1437      | sw.1_Missense_M    | NM_178833    | NP_849155    | Q86UD5 | NHDC2_HUMAN |                                | 0  | AAGCCAGCAC    | 0.388 |             |
| - | 4  | 1784      | 3T4_uc010imw.2_f   | NM_022569    | NP_072091    | Q9H3R1 | NDST4_HUMAN | Heparan sulfate N-deacetyl     | 4  | AGACCGAAGTA   | 0.388 |             |
| - | 5  | 1098      |                    | NM_003619    | NP_003610    | P56730 | NETR_HUMAN  | SRCR 2.                        | 1  | ATCCAGTGC     | 0.478 |             |
| + | 3  | 5551      | p.1_Missense_Mu    | NM_024582    | NP_078858    | Q6V0I7 | FAT4_HUMAN  | Extracellular (Potential).     | 18 | ACATTCCTGAGC  | 0.403 |             |
| + | 2  | 152       | XFP1_uc011cjd.1    | NM_021634    | NP_067647    | Q9HBX9 | RXFP1_HUMAN | ellular (Potential).           | 0  | GACAGGATGTC   | 0.507 |             |
| + | 2  | 179       | XFP1_uc011cjd.1    | NM_021634    | NP_067647    | Q9HBX9 | RXFP1_HUMAN | ential). LDL-receptor class    | 0  | TATTTCCCTGTC  | 0.517 |             |
| - | 14 | 9951      |                    | NM_005245    | NP_005236    | Q14517 | FAT1_HUMAN  | (Potential). Cadherin 30.      | 12 | ACTTGCTGCAT   | 0.413 |             |
| - | 63 | 10660     | vH5_uc003jfc.2_5'  | NM_001369    | NP_001360    | Q8TE73 | DYH5_HUMAN  |                                | 31 | AAGATCACGAA   | 0.373 |             |
| - | 2  | 822       | uc003jfp.2_5'Flank | NM_001102562 | NP_001096032 | A6NNE9 | MARHB_HUMAN | ING-CH-type.                   | 0  | ACTGATCCATTT  | 0.428 |             |
| + | 3  | 539       | lm.1_Missense_M    | NM_003999    | NP_003990    | Q99650 | OSMR_HUMAN  | ellular (Potential).           | 5  | AACCTTCCTATC  | 0.388 |             |
| - | 8  | 1293      |                    | NM_001737    | NP_001728    | P02748 | CO9_HUMAN   | MACPF.                         | 0  | CATCTTTATAAA  | 0.413 |             |
| + | 7  | 747       | iq.1_Missense_Mu   | NM_000163    | NP_000154    | P10912 | GHR_HUMAN   | otential). Fibronectin type-II | 6  | ACAACGAAACT   | 0.373 |             |
| + | 8  | 1105      | OLK_uc010izr.2_F   | NM_016218    | NP_057302    | Q9UBT6 | POLK_HUMAN  | UmuC.                          | 4  | ATCTTCCCAATA  | 0.323 |             |
| - | 3  | 908       | _p.R79W MEF2C_1    | NM_002397    | NP_002388    | Q06413 | MEF2C_HUMAN | l-type (Potential).            | 7  | TGTCCGGCTCT   | 0.557 |             |
| - | 3  | 906       | _p.S78T MEF2C_1    | NM_002397    | NP_002388    | Q06413 | MEF2C_HUMAN | l-type (Potential).            | 7  | TCCGGCTCTCAT  | 0.557 |             |
| + | 29 | 6413      | R98_uc003kjt.2_5'  | NM_032119    | NP_115495    | Q8WXG9 | GPR98_HUMAN | ellular (Poten p.A2106V(1)     | 16 | CTATTGCGCAAC  | 0.413 |             |
| + | 1  | 2356      | vA6_uc003lhn.2_Ir  | NM_018902    | NP_061725    | Q9Y511 | PCDAB_HUMAN | r (Potential). Cadherin 5.     | 1  | TGGGCGACCGC   | 0.677 |             |
| - | 20 | 2950      | oe.1_Missense_M    | NM_022481    | NP_071926    | Q8WWW8 | ARAP3_HUMAN | Rho-GAP.                       | 7  | CCGACGGAAC    | 0.622 |             |
| + | 2  | 198       |                    | NM_197975    | NP_932079    | Q6UXE8 | BTNL3_HUMAN | ellular (Potential).           | 0  | CTGGACCGGGC   | 0.552 |             |
| + | 1  | 1530      | CC5_uc003mxw.2_    | NR_027712    |              |        |             |                                | 0  | ACCATGGAGGC   | 0.498 |             |
| - | 21 | 4476      | o.A1457T NUP153    | NM_005124    | NP_005115    | P49790 | NU153_HUMAN |                                | 9  | TGAGGCTGCAG   | 0.458 |             |
| - | 3  | 1934_1935 |                    | NM_052923    | NP_443155    | Q6R2W3 | SCND3_HUMAN | rgrase catalytic.              | 1  | TCCCTCCATTG   | 0.421 |             |
| - | 31 | 10704     | 1_5'Flank TNXB_u   | NM_019105    | NP_061978    | P22105 | TENX_HUMAN  | nectin type-III 27.            | 0  | TACGGTGACT    | 0.637 |             |
| - | 2  | 456       | qg.1_Missense_M    | NM_018643    | NP_061113    | Q9NP99 | TREM1_HUMAN | (Potential). Ilg-like V-type.  | 1  | CCACCAAGCGG   | 0.567 |             |
| + | 4  | 463       | r_p.A45V MDF1_u    | NM_005586    | NP_005577    | Q99750 | MDF1_HUMAN  |                                | 0  | CCCTGCGGAGG   | 0.627 | rs144261097 |
| + | 4  | 662       | p.G151E RUNX2_     | NM_001024630 | NP_001019801 | Q13950 | RUNX2_HUMAN | Runt.                          | 3  | AGATGGGACTG   | 0.438 |             |
| - | 2  | 834       | fvz.1_Missense_M   | NM_021572    | NP_067547    | Q9UJA9 | ENPP5_HUMAN |                                | 0  | ATATCTGAAATGA | 0.438 |             |

|   |    |           |                    |              |              |        |             |                                |       |                 |       |
|---|----|-----------|--------------------|--------------|--------------|--------|-------------|--------------------------------|-------|-----------------|-------|
| - | 30 | 3800      | ai.2_Missense_Mu   | NM_138694    | NP_619639    | P08F94 | PKHD1_HUMAN | potential). IPT/TIG 6; atypica | 44    | AGACGGAAATT     | 0.527 |
| - | 21 | 1651      | _p.P71S COL9A1_    | NM_001851    | NP_001842    | P20849 | CO9A1_HUMAN | alical region (COL2).          | 4     | ACCAGGAAGAC     | 0.403 |
| - | 5  | 698       | _p.E123K ME1_uc    | NM_002395    | NP_002386    | P48163 | MAOX_HUMAN  |                                | 2     | ATTTTCGGTTCC    | 0.393 |
| - | 58 | 9007      |                    | NM_014611    | NP_055426    | Q9NU22 | MDN1_HUMAN  |                                | 10    | CTGGGGTTGT      | 0.433 |
| + | 4  | 466       | SP3_uc003pvo.2_    | NM_003880    | NP_003871    | O95389 | WISP3_HUMAN |                                | 0     | TGTAGCTGTTG     | 0.453 |
| + | 13 | 1423      | PP3_uc010kfq.2_l   | NM_005021    | NP_005012    | O14638 | ENPP3_HUMAN | potential). Phosphodiesterase  | 4     | GCAGCGGAATT     | 0.348 |
| - | 3  | 587_588   |                    | NM_001901    | NP_001892    | P29279 | CTGF_HUMAN  | VWFC.                          | 0     | CCCGTCCAGGC     | 0.639 |
| + | 4  | 625       | ense_Mutation_p.:  | NM_004100    | NP_004091    | O95677 | EYA4_HUMAN  |                                | 2     | AAAAATCTAATCT   | 0.423 |
| - | 3  | 884       |                    | NM_001143676 | NP_001137148 | O00141 | SGK1_HUMAN  |                                | 6     | CTCACCTTTAAA    | 0.373 |
| + | 11 | 1075      | se_Mutation_p.L34  | NM_018341    | NP_060811    | Q5T6L9 | CF070_HUMAN |                                | 1     | TTTTCCTTGGAC    | 0.328 |
| + | 4  | 408_409   | n_p.T59 IQCE_uc    | NM_152558    | NP_689771    | Q6IPM2 | IQCE_HUMAN  |                                | 0     | CCTGACCCCGC     | 0.584 |
| - | 20 | 3056_3057 |                    | NM_032415    | NP_115791    | Q9BXL7 | CAR11_HUMAN |                                | 50    | CCTGACCCGGG     | 0.55  |
| + | 4  | 852       | 2_3'UTR EIF2AK1    | NM_006303    | NP_006294    | Q13155 | AIMP2_HUMAN | ST C-terminal.                 | 1     | AAGAGGGAAGC     | 0.473 |
| - | 4  | 773       | y.2_Missense_Mut   | NM_001101426 | NP_001094896 | A4D126 | ISPD_HUMAN  |                                | 1     | TCAGGTGATCCT    | 0.418 |
| + | 24 | 3183      | uj.2_Missense_Mi   | NM_178425    | NP_848512    | Q9UKV0 | HDAC9_HUMAN |                                | 5     | ATGTGGAAACAG    | 0.532 |
| + | 3  | 651       | kwc.1_RNA INMT     | NM_006774    | NP_006765    | O95050 | INMT_HUMAN  |                                | 0     | ATTTTCCTGCGT    | 0.597 |
| + | 7  | 1565      | p.M190K CCDC12     | NM_194300    | NP_919276    | Q6ZRS4 | CC129_HUMAN |                                | 0     | CGGAATGGACA     | 0.488 |
| + | 4  | 445       | kaf.1_Missense_M   | NM_006658    | NP_006649    | O96001 | GSUB_HUMAN  |                                | 3     | ACATCCAAAGG     | 0.423 |
| - | 1  | 229       |                    | NM_000290    | NP_000281    | P15259 | PGAM2_HUMAN |                                | 0     | GGGTGCGGATG     | 0.632 |
| - | 14 | 3137      | 1kbw.1_Splice_Sit  | NM_013389    | NP_037521    | Q9UHC9 | NPCL1_HUMAN |                                | 5     | GGCCGCTGCAA     | 0.577 |
| + | 1  | 429       |                    | NM_182595    | NP_872401    | Q8N7R1 | P1L12_HUMAN |                                | 0     | GGTGACCATCG     | 0.577 |
| + | 11 | 998       | _splice LAT2_uc0   | NM_032464    | NP_115853    | Q9GZY6 | NTAL_HUMAN  |                                | 0     | ACAGGTGAGGC     | 0.617 |
| - | 11 | 1548      | n.2_Nonsense_Mu    | NM_000601    | NP_000592    | P14210 | HGF_HUMAN   | Kringle 4.                     | 4     | ATAATCCCAAGG    | 0.383 |
| + | 17 | 2162      | _p.R592C DYNC1     | NM_004411    | NP_004402    | O14576 | DC111_HUMAN |                                | 4     | AAAATTCGTGCT    | 0.488 |
| + | 1  | 95        | X6AS_uc003uol.2_   | NM_005222    | NP_005213    | P56179 | DLX6_HUMAN  |                                | 2     | agcagcagcaacagc | 0.313 |
| + | 6  | 1028      | jt.2_Intron GATS_u | NM_024070    | NP_076975    | Q6DKI7 | PVRIG_HUMAN |                                | 2     | AGCATGGGTGA     | 0.677 |
| + | 3  | 443       | _Intron SLC12A9_   | NM_020246    | NP_064631    | Q9BXP2 | S12A9_HUMAN | lasmic (Potential).            | 0     | TGCAGGGGGGC     | 0.612 |
| - | 2  | 904       | e_Mutation_p.T17   | NM_022484    | NP_071929    | Q9H0V1 | TM168_HUMAN |                                | 2     | ACATAGTTGTGC    | 0.423 |
| - | 15 | 1860      |                    | NM_004333    | NP_004324    | P15056 | BRAF_HUMAN  | rotein kinase_R603>(2) p.T     | 18290 | ATTTCACTGTAC    | 0.368 |
| + | 19 | 2368      |                    | NM_004668    | NP_004659    | O43451 | MGA_HUMAN   | (Potential). Maltase.          | 2     | TGGATGAAGTA     | 0.488 |
| + | 7  | 760       |                    | NM_018487    | NP_060957    | Q96HP8 | T176A_HUMAN |                                | 2     | AGAAGGAAATG     | 0.522 |
| + | 3  | 4885      | _p.H223Y ABP1_u    | NM_001091    | NP_001082    | P19801 | ABP1_HUMAN  |                                | 6     | TGGATCATGGG     | 0.597 |
| - | 1  | 486_487   | e_Mutation_p.D12   | NM_001142459 | NP_001135931 | Q8WXI3 | ASB10_HUMAN |                                | 0     | GAGTCCGCGAC     | 0.644 |
| - | 4  | 1180      | _Mutation_p.R146   | NM_016203    | NP_057287    | Q9UGJ0 | AAKG2_HUMAN |                                | 2     | TAGATCGGATTC    | 0.592 |
| - | 27 | 4666      | o.G818R CSMD1_     | NM_033225    | NP_150094    | Q96PZ7 | CSMD1_HUMAN | ar (Potential). Sushi 8.       | 25    | TGTCTTGGAC      | 0.493 |
| - | 3  | 1205      |                    | NM_015310    | NP_056125    | Q9NYI0 | PSD3_HUMAN  |                                | 3     | TGAAGGAGCTT     | 0.468 |
| + | 4  | 3519      | o1_uc011ldy.1_Intr | NM_006269    | NP_006260    | P56715 | RP1_HUMAN   |                                | 12    | TAATTCATCCAC    | 0.418 |
| + | 12 | 1609_1610 | i.3_Missense_Mut   | NM_002350    | NP_002341    | P07948 | LYN_HUMAN   | rotein kinase.                 | 3     | AAATTCCTACC     | 0.371 |
| + | 4  | 488       | p.2_RNA STMN2_     | NM_007029    | NP_008960    | Q93045 | STMN2_HUMAN | Potential.                     | 2     | AAACCGTGAGG     | 0.453 |
| - | 1  | 293       |                    | NM_152418    | NP_689631    | Q8NA75 | DC4L2_HUMAN |                                | 1     | GGAGGGATCCC     | 0.517 |
| + | 18 | 1995      |                    | NM_181787    | NP_861452    | Q72388 | D19L4_HUMAN |                                | 2     | AAAGCGATCTGC    | 0.279 |
| - | 33 | 4313_4314 | s.1_Missense_Mut   | NM_015902    | NP_056986    | O95071 | UBR5_HUMAN  |                                | 28    | AGAAACCTCATT    | 0.351 |
| - | 2  | 914       | rcw.2_Missense_M   | NM_014379    | NP_055194    | Q6PIU1 | KCNV1_HUMAN | lasmic (Potential).            | 2     | GAACAGTGGGA     | 0.488 |
| - | 12 | 1891      | tdt.2_Missense_M   | NM_004519    | NP_004510    | O43525 | KCNQ3_HUMAN |                                | 5     | CATGTCGAGATC    | 0.453 |
| - | 10 | 1312      | 1_5'Flank OPLAH    | NM_017570    | NP_060040    | O14841 | OPLA_HUMAN  |                                | 0     | GGCCAAAAATC     | 0.642 |
| - | 6  | 378       | p.R109W VPS28_u    | NM_016208    | NP_057292    | Q9UK41 | VPS28_HUMAN | S28 N-terminal.                | 0     | GATCCGCTCCAT    | 0.667 |
| - | 5  | 1132      | 1_5'Flank LRRC14   | NM_004260    | NP_004251    | O94761 | RECQ4_HUMAN |                                | 4     | GTCCCGGCC       | 0.642 |

|   |    |       |                    |              |              |        |             |                               |    |                |       |             |
|---|----|-------|--------------------|--------------|--------------|--------|-------------|-------------------------------|----|----------------|-------|-------------|
| - | 3  | 588   | izif.1_Missense_M  | NM_152629    | NP_689842    | Q8NEA6 | GLIS3_HUMAN | Ser-rich.                     | 1  | GTGCCGAGGAC    | 0.542 |             |
| + | 8  | 1312  | _p.S429L CNTLN_    | NM_017738    | NP_060208    | Q9NXG0 | CNTLN_HUMAN |                               | 1  | .GGAATCACAGG   | 0.368 |             |
| - | 1  | 3217  | uc003zrh.1_5'Flanl | NM_153809    | NP_722516    | Q8IZX4 | TAF1L_HUMAN |                               | 26 | CACTTCCCAGCC   | 0.478 |             |
| - | 24 | 2805  | of.1_Missense_Mu   | NM_018449    | NP_060919    | Q5T6F2 | UBAP2_HUMAN |                               | 3  | CTGCTGGGCTG    | 0.587 |             |
| + | 16 | 2348  | _p.P112L TLE4_uc   | NM_007005    | NP_008936    | O60756 | BCE1_HUMAN  |                               | 5  | AAATCCCCCGGC   | 0.607 |             |
| + | 4  | 4092  |                    | NM_178828    | NP_849150    | Q6ZUB1 | CI079_HUMAN |                               | 3  | CCCAGGAGAAT    | 0.597 |             |
| - | 8  | 1693  | 31_splice ASTN2_   | NM_198187    | NP_937830    | O75129 | ASTN2_HUMAN |                               | 9  | ACTCTCCTGTAAC  | 0.468 |             |
| + | 5  | 1886  | qb.2_RNA ASMT_     | NM_005088    | NP_005079    | Q02040 | AK17A_HUMAN |                               | 0  | CCTGCGAGCAG    | 0.647 |             |
| + | 2  | 394   |                    | NM_001099921 | NP_001093391 | A2A368 | MAGBG_HUMAN |                               | 7  | ACCTCCTCTCC    | 0.557 |             |
| - | 4  | 424   | _p.P86S RPGR_uc    | NM_001034853 | NP_001030025 | Q92834 | RPGR_HUMAN  | RCC1 1.                       | 1  | TTTCAGGTTTTAG  | 0.299 |             |
| + | 1  | 38    |                    | NM_207320    | NP_997203    | Q7L8S5 | OTU6A_HUMAN |                               | 2  | ATCATGGATGATC  | 0.547 |             |
| - | 13 | 1548  | _p.G416E PHKA1_    | NM_002637    | NP_002628    | P46020 | KPB1_HUMAN  |                               | 4  | AAAAATCCCTAA   | 0.398 |             |
| + | 13 | 2135  | c.1_Missense_Mu    | NM_198465    | NP_940867    | Q7Z2Y5 | NRK_HUMAN   |                               | 14 | CATTCAGTAGA    | 0.498 |             |
| + | 33 | 3102  | _p.G967E COL4A5    | NM_033380    | NP_203699    | P29400 | CO4A5_HUMAN | le-helical region.            | 4  | .GAAGGGGGAAC   | 0.413 |             |
| - | 6  | 699   | zh.1_Missense_Mi   | NM_002910    | NP_002901    | P51606 | RENBP_HUMAN |                               | 2  | GGGCCGGCCCA    | 0.692 |             |
| - | 15 | 1833  | _1_uc009vka.2_Mi   | NM_004421    | NP_004412    | O14640 | DVL1_HUMAN  |                               | 0  | GCCGGCCGGAC    | 0.726 |             |
| - | 4  | 1279  | pa.1_Missense_M    | NM_018948    | NP_061821    | Q9UJM3 | ERRFI_HUMAN | RBB2 and regulation of EG     | 1  | FGACCCCATTTGA  | 0.537 |             |
| - | 1  | 138   | PEX14_uc010oar     | NM_004401    | NP_004392    | O00273 | DFFA_HUMAN  |                               | 0  | AGATCTCGCCAG   | 0.667 |             |
| - | 28 | 3638  | d.2_Missense_Mu    | NM_005529    | NP_005520    | P98160 | PGBM_HUMAN  | inin EGF-like 6.              | 9  | CCCCCGCTGGG    | 0.667 |             |
| - | 5  | 707   | vr.1_Missense_M    | NM_021258    | NP_067081    | Q8N6P7 | I2R1_HUMAN  | ellular (Potential).          | 1  | TCACCTGGCAGT   | 0.562 |             |
| + | 4  | 253   |                    | NM_001010980 | NP_001010980 | Q5T1S8 | CA130_HUMAN |                               | 0  | .GGCGGGAAC     | 0.587 |             |
| - | 6  | 3478  | sz.1_Missense_Mi   | NM_001029882 | NP_001025053 | Q5TGY3 | AHDC1_HUMAN |                               | 1  | .GCCGGTGAAGA   | 0.632 |             |
| - | 2  | 433   |                    | NM_032881    | NP_116270    | Q969L4 | LSM10_HUMAN |                               | 0  | CTGCTCAATGG    | 0.557 |             |
| + | 47 | 15372 | s.1_Nonsense_Mi    | NM_033044    | NP_149033    | Q9UPN3 | MACF1_HUMAN |                               | 16 | TTGTCCAGCGA    | 0.443 |             |
| + | 11 | 1528  |                    | NM_015284    | NP_056099    | Q5T011 | SZT2_HUMAN  |                               | 0  | VTGGTTGGCATG   | 0.607 |             |
| + | 16 | 3030  | ise_Mutation_p.R4  | NM_002840    | NP_002831    | P10586 | PTPRF_HUMAN | ential), Fibronectin type-III | 10 | .GAACCGGGCTG   | 0.602 | rs149018733 |
| + | 1  | 278   | 3_uc001cmo.2_5'F   | NM_004073    | NP_004064    | Q9H4B4 | PLK3_HUMAN  |                               | 0  | .GCGGCCGCACC   | 0.677 |             |
| + | 21 | 2729  | ie_Mutation_p.R49  | NM_015112    | NP_055927    | Q6P0Q8 | MAST2_HUMAN | kinase C-terminal.            | 11 | .CAGCCCGCTCA   | 0.552 |             |
| - | 3  | 556   |                    | NM_032027    | NP_114416    | Q9BX74 | TM2D1_HUMAN |                               | 1  | GGGTGCTGGAA    | 0.353 |             |
| + | 3  | 401   | e_Mutation_p.P63   | NM_144701    | NP_653302    | Q5VWK5 | IL23R_HUMAN | ellular (Potential).          | 0  | AAATGTCCCAA    | 0.358 |             |
| - | 6  | 1066  | lQ3_uc001dfz.3_f   | NM_001105659 | NP_001099129 | A6PVS8 | LRIQ3_HUMAN |                               | 2  | .GATAATATATATT | 0.169 |             |
| + | 10 | 1685  | q.2_Nonsense_Mi    | NM_001001933 | NP_001001933 | Q68G74 | LHX8_HUMAN  |                               | 3  | .GACTCCAGCCC   | 0.328 |             |
| + | 16 | 2229  |                    | NM_002440    | NP_002431    | O15457 | MSH4_HUMAN  |                               | 5  | .GATATCGAAACA  | 0.289 |             |
| + | 6  | 716   | HN2_uc001div.2_f   | NM_012302    | NP_036434    | O95490 | LPHN2_HUMAN | otential), Olfactomedin-like  | 9  | CCCTATCGTACC   | 0.398 |             |
| + | 7  | 1321  | ue.1_Missense_M    | NM_014839    | NP_055654    | Q7Z2D5 | LPPR4_HUMAN |                               | 3  | .CCCATGGGGAA   | 0.488 |             |
| + | 7  | 776   |                    | NM_033055    | NP_149044    | Q96MC6 | HIAT1_HUMAN | Name=7; (Potential).          | 0  | CCTACCGGAGG    | 0.383 |             |
| - | 7  | 703   | tu.2_RNA DPH5_u    | NM_015958    | NP_057042    | Q9H2P9 | DPH5_HUMAN  |                               | 0  | .ATACCGTGGAG   | 0.418 | rs116634893 |
| - | 8  | 1480  | _p.E400K COL11A    | NM_001854    | NP_001845    | P12107 | COBA1_HUMAN | helical region.               | 12 | .CATATTCTTTATA | 0.363 |             |
| + | 3  | 216   | M5_uc010ovu.1_5    | NM_000851    | NP_000842    | P46439 | GSTM5_HUMAN | (By similarity), GST N-term   | 6  | CTGAATGAAAAA   | 0.572 |             |
| - | 4  | 430   | ff.1_Nonsense_M    | NM_000036    | NP_000027    | P23109 | AMPD1_HUMAN |                               | 4  | .CTCTGAAAATC   | 0.463 |             |
| + | 4  | 488   | hr.1_Missense_Mi   | NM_001005783 | NP_001005783 | Q9NYQ3 | HAOX2_HUMAN | xy acid dehydrogenase.        | 4  | .GAATTCGCCTC   | 0.552 |             |
| + | 17 | 1995  | r441S NBPFF9_uc    | NM_001037675 | NP_001032764 | Q3BBV1 | NBPFF_HUMAN | NBPF 4.                       | 0  | .ATGTTATTCAAC  | 0.483 |             |
| + | 4  | 2006  | r10_uc001emp.3     | NM_001039888 | NP_001034977 | Q69YU3 | AN34A_HUMAN | Pro-rich.                     | 0  | .CCATCCCCCAA   | 0.612 |             |
| + | 12 | 1521  | vkt.1_Missense_M   | NM_001102663 | NP_001096133 |        |             |                               | 0  | .AGATGTTATTG   | 0.478 |             |
| - | 1  | 381   | lCL1_uc001eva.2    | NM_021960    | NP_068779    | Q07820 | MCL1_HUMAN  |                               | 0  | .CTCGGCGCCA    | 0.771 |             |
| - | 2  | 991   | ie.1_Missense_Mi   | NM_007113    | NP_009044    | Q07283 | TRHY_HUMAN  | !-E-Q-E-E- E-R-R-E-Q-Q-L      | 5  | lctctctgctgctg | 0     |             |
| - | 3  | 1734  |                    | NM_001009931 | NP_001009931 | Q86YZ3 | HORN_HUMAN  | 5                             | 3  | .ACTGCCTGGAA   | 0.592 |             |

|   |    |           |                    |              |              |         |              |                             |    |               |       |             |
|---|----|-----------|--------------------|--------------|--------------|---------|--------------|-----------------------------|----|---------------|-------|-------------|
| - | 2  | 65        |                    | NM_002964    | NP_002955    | P05109  | S10A8_HUMAN  |                             | 0  | :CAGCTCGGTCA  | 0.512 |             |
| + | 7  | 1821      | Site_p.D213_splice | NM_000906    | NP_000897    | P16066  | ANPRA_HUMAN  |                             | 7  | cGCAGATCACCT  | 0.348 |             |
| + | 7  | 1183      | ib.1_Missense_Mu   | NM_001002294 | NP_001002294 | P31513  | FMO3_HUMAN   |                             | 1  | GTATTTCTCTCT  | 0.453 |             |
| - | 4  | 1339_1340 | 3_Mutation_p.G42I  | NM_003285    | NP_003276    | Q92752  | TENR_HUMAN   | nectin type-III 2.          | 11 | 3TAGCCCTTGAG  | 0.495 |             |
| + | 31 | 6580      | 350_uc001gnv.2_iv  | NM_014810    | NP_055625    | Q5VT06  | CE350_HUMAN  | Potential.                  | 4  | 3AAAATCAGTTG  | 0.393 |             |
| + | 12 | 1783      | _Mutation_p.E570   | NM_002826    | NP_002817    | O00391  | QSOX1_HUMAN  |                             | 2  | 3CCCTGGAGCTG  | 0.622 |             |
| + | 38 | 5392      | 1gox.1_Missense_Mu | NM_000721    | NP_000712    | Q15878  | CAC1E_HUMAN  | Cytoplasmic (Potential).    | 6  | TGGACGAGTTT   | 0.607 |             |
| + | 6  | 1103      | tm.2_Missense_Mu   | NM_002113    | NP_002104    | Q03591  | FHR1_HUMAN   |                             | 0  | 3AAAAAGATAGA  | 0.323 |             |
| + | 5  | 748       |                    | NM_030787    | NP_110414    | Q9BXR6  | FHR5_HUMAN   | Sushi 4.                    | 2  | TACGATCATGTG  | 0.318 |             |
| + | 12 | 2092      | p.G597S CAMSAF     | NM_203459    | NP_982284    | Q08AD1  | CAMP2_HUMAN  |                             | 4  | CGAAAGGTGCC   | 0.353 |             |
| + | 5  | 425       |                    | NM_006335    | NP_006326    | Q99595  | TI17A_HUMAN  | ical; (Potential).          | 0  | 3AGCTGGTATCT  | 0.398 |             |
| + | 20 | 2717      | 1gyb.1_Missense_Mu | NM_002481    | NP_002472    | O60237  | MYPT2_HUMAN  |                             | 3  | AAGAGCCCCTC   | 0.473 |             |
| - | 8  | 1369      | gyr.3_Missense_iv  | NM_015999    | NP_057083    | Q96A54  | ADR1_HUMAN   | ellular (Potential).        | 0  | ACAGCCGCTT    | 0.512 |             |
| - | 7  | 1162      | se_Mutation_p.R2E  | NM_001017402 | NP_001017402 | Q13751  | LAMB3_HUMAN  | inin EGF-like 1.            | 6  | 3GCAGCGATCAG  | 0.677 | rs145575474 |
| + | 3  | 1409      |                    | NM_021958    | NP_068777    | Q14774  | HLX_HUMAN    | Homeobox.                   | 2  | .CGGACGCACAG  | 0.642 |             |
| + | 20 | 2278      | p.G607E CAPN2_     | NM_001748    | NP_001739    | P17655  | CAN2_HUMAN   | ain IV. EF-hand 3.          | 5  | ATACTGGAACAA  | 0.502 |             |
| - | 4  | 1014      | 3_Mutation_p.G27E  | NM_003240    | NP_003231    | O00292  | LFTY2_HUMAN  |                             | 0  | :CGGCCCCAGAA  | 0.657 |             |
| - | 7  | 1796      | 9xes.2_Missense_Mu | NM_003607    | NP_003598    | Q5VT25  | MRCKA_HUMAN  | rotein kinase.              | 11 | GCGATTCTGCAT  | 0.368 |             |
| + | 4  | 821       | .1_Intron ZNF678_  | NM_178549    | NP_848644    | F5GXA7  | F5GXA7_HUMAN |                             | 1  | AATGTGGCAAAG  | 0.333 | rs145397350 |
| + | 4  | 854       | .1_Intron ZNF678_  | NM_178549    | NP_848644    | F5GXA7  | F5GXA7_HUMAN |                             | 1  | TAACTAACCATAA | 0.333 |             |
| + | 10 | 1335      | 0pyl.1_Missense_I  | NM_006642    | NP_006633    | Q86SQ7  | SDCG8_HUMAN  | r homodimerization (By sirr | 0  | 3ATGATGAAAAAC | 0.433 |             |
| - | 8  | 858_859   | z.1_Missense_Mu    | NM_005465    | NP_005456    | Q9Y243  | AKT3_HUMAN   | rotein kinase.              | 4  | ATAGTCCAAGGC  | 0.416 |             |
| + | 1  | 548       |                    | NM_001004690 | NP_001004690 | A3KFT3  | OR2M5_HUMAN  | ellular (Potential).        | 3  | TCCCTTCCCTAC  | 0.418 |             |
| - | 1  | 548       |                    | NM_001004691 | NP_001004691 | Q8NG81  | OR2M7_HUMAN  | ellular (Potential).        | 2  | GTAGGGAAGGG   | 0.428 |             |
| + | 1  | 74        |                    | NM_001004697 | NP_001004697 | Q6IEZ7  | OR2T5_HUMAN  | ellular (Potential).        | 0  | 3ACGATCCAAAC  | 0.498 |             |
| + | 4  | 773       |                    | NM_002438    | NP_002429    | P22897  | MRC1_HUMAN   | ellular (Potential).        | 0  | AAGACCCGCTG   | 0.433 |             |
| + | 10 | 1321      | g.2_Nonsense_Mu    | NM_005180    | NP_005171    | P35226  | BMI1_HUMAN   | action with E4F1.           | 2  | .GAGTTCGACCT  | 0.373 |             |
| - | 12 | 1635      | p.R458* ABI1_uc0   | NM_005470    | NP_005461    | Q8IZP0  | ABI1_HUMAN   | SH3.                        | 1  | TCACTCGATTGC  | 0.348 |             |
| - | 7  | 1310      | t.2_Missense_Mut   | NM_025209    | NP_079485    | Q9H2F5  | EPC1_HUMAN   |                             | 4  | 3CAGACGATGGT  | 0.443 |             |
| - | 1  | 634       |                    | NM_002900    | NP_002891    | P10745  | RET3_HUMAN   | nate tandem repeats. 1.     | 2  | :GCCTCCTGTGC  | 0.607 |             |
| - | 10 | 1432      | .2_Missense_Muta   | NM_138932    | NP_620310    | Q9NQ94  | A1CF_HUMAN   |                             | 1  | TGTCTCCTTTGA  | 0.498 |             |
| - | 33 | 6235      | sense_Mutation_p   | NM_033056    | NP_149045    | Q96QU1  | PCD15_HUMAN  | lasmic (Potential).         | 13 | TGAGATTGTTTTI | 0.353 |             |
| - | 37 | 6532      | K3_uc010qih.1_In   | NM_020987    | NP_066267    | Q12955  | ANK3_HUMAN   |                             | 19 | 3AAAGTCATCAG  | 0.433 |             |
| + | 39 | 5614      |                    | NM_022124    | NP_071407    | Q9H251  | CAD23_HUMAN  | Extracellular (Potential).  | 11 | CCCCCGGGACT   | 0.577 | rs111033270 |
| + | 24 | 3627      | e_Mutation_p.G89   | NM_020338    | NP_065071    | Q9ULJ6  | ZMIZ1_HUMAN  |                             | 4  | AGGCCGGAGCG   | 0.692 |             |
| - | 4  | 311       | can.3_Missense_iv  | NM_006926    | NP_008857    | Q8IWL1  | SFPA2_HUMAN  | Collagen-like.              | 0  | 3ATTATCCGAGC  | 0.622 |             |
| + | 3  | 582       | l4_uc010qmk.1_M    | NM_033282    | NP_150598    | Q9UHM6  | OPN4_HUMAN   | Name=2; (Potential).        | 1  | TTCTCATGTCC   | 0.567 |             |
| - | 2  | 567       | t_Site GLUD1_uc0   | NM_005271    | NP_005262    | P00367  | DHE3_HUMAN   |                             | 0  | TCACACTCACAT  | 0.418 |             |
| - | 7  | 738       | utation_p.R163C /  | NM_001613    | NP_001604    | P62736  | ACTA_HUMAN   |                             | 0  | CTCAGCTCAGC   | 0.493 |             |
| - | 13 | 1324      | ip.3_Missense_Mu   | NM_013451    | NP_038479    | Q9NZM1  | MYOF_HUMAN   | mic (Potential). C2 3.      | 4  | AGGAAACTTCTA  | 0.373 |             |
| + | 4  | 562       | p.D53N CYP2C1E     | NM_000769    | NP_000760    | P33261  | CP2CJ_HUMAN  |                             | 6  | CGTTTCGATTATA | 0.403 |             |
| - | 10 | 1501      | po.1_Missense_Mu   | NM_021828    | NP_068600    | Q8VWWQ2 | HPSE2_HUMAN  |                             | 1  | 3AGCATAAAATCC | 0.572 |             |
| + | 12 | 1186      | p.P405S ACSL5_     | NM_203379    | NP_976313    | Q9ULC5  | ACSL5_HUMAN  | lasmic (Potential).         | 3  | TGTTTCCCGCGC  | 0.507 |             |
| - | 17 | 2730      | 3_Mutation_p.E57E  | NM_000141    | NP_000132    | P21802  | FGFR2_HUMAN  | Potential). Protein kinase. | 96 | AGATCTCCACA   | 0.517 |             |
| + | 49 | 6119      | 34_splice DMBT1_   | NM_007329    | NP_015568    | Q9UGM3  | DMBT1_HUMAN  |                             | 7  | ACAGCAGATTAT  | 0.448 |             |
| + | 35 | 3521      | p.L1174F DOCK1_    | NM_001380    | NP_001371    | Q14185  | DOCK1_HUMAN  | DHR-2.                      | 9  | TCAGCCTTCTGC  | 0.343 |             |
| + | 8  | 1288      | p.G220R CYP2E1     | NM_000773    | NP_000764    | P05181  | CP2E1_HUMAN  |                             | 3  | 3AAAATGGAAAG  | 0.448 |             |

|   |    |           |                   |              |              |        |             |                               |    |               |       |             |
|---|----|-----------|-------------------|--------------|--------------|--------|-------------|-------------------------------|----|---------------|-------|-------------|
| - | 1  | 505       |                   | NM_001005237 | NP_001005237 | Q8NGK1 | O51G1_HUMAN | cellular (Potential).         | 2  | AGTATTGGAAGC  | 0.512 |             |
| - | 1  | 482       |                   | NM_001005160 | NP_001005160 | Q9H2C5 | O52A5_HUMAN | Name=4; (Potential).          | 4  | CCTAAGGAAGGT  | 0.458 |             |
| - | 1  | 641       | .1_Intron HBE1_uc | NM_033179    | NP_149419    | Q9Y5P0 | O51B4_HUMAN | Name=5; (Potential).          | 2  | ATATAAGAAAAG  | 0.378 |             |
| - | 1  | 78        | .1_Intron HBE1_uc | NM_033180    | NP_149420    | Q9Y5P1 | O51B2_HUMAN | cellular (Potential).         | 3  | AAGGGGCTGCA   | 0.488 |             |
| - | 2  | 373       | 32_uc001mak.1_lr  | NM_017481    | NP_059509    | Q9H347 | UBQL3_HUMAN | Jbiquitin-like.               | 3  | TGGCACGGTGC   | 0.582 |             |
| + | 1  | 842       | .1_Intron TRIM22  | NM_001005180 | NP_001005180 | Q8NGI3 | O56B1_HUMAN | cellular (Potential).         | 2  | FGATTCCAGTTC  | 0.428 |             |
| + | 22 | 2607      | PFIBP2_uc010rbe   | NM_003621    | NP_003612    | Q8ND30 | LIPB2_HUMAN | SAM 3.                        | 4  | TCTTCGAGGGA   | 0.502 |             |
| + | 5  | 750       | _p.M217 ISWAP70   | NM_015055    | NP_055870    | Q9UH65 | SWP70_HUMAN | PH.                           | 3  | TTACATGATGAA  | 0.343 |             |
| - | 11 | 1461_1462 | rcv.1_Missense_M  | NM_175058    | NP_778228    | Q6IQ23 | PKHA7_HUMAN |                               | 3  | 3GAGCCCCCCC   | 0.629 |             |
| - | 30 | 3781      |                   | NM_000352    | NP_000343    | Q09428 | ABCC8_HUMAN | pe-1 2. Cytoplasmic (By si    | 1  | 3GGCCTCATACC  | 0.567 |             |
| + | 5  | 1074      | p.R219C RCN1_u    | NM_002901    | NP_002892    | Q15293 | RCN1_HUMAN  | EF-hand 5.                    | 1  | 3AGATTCGCCAC  | 0.473 |             |
| - | 15 | 2146      | /kx.2_Missense_M  | NM_001101802 | NP_001095272 | Q96BD5 | PF21A_HUMAN | riptional repression. PHD-t   | 2  | TACACGGGAAC   | 0.468 |             |
| - | 2  | 554       |                   | NM_031909    | NP_114115    | Q9BXJ3 | C1QT4_HUMAN | C1q 1.                        | 0  | 3GGTTTCGCACC  | 0.711 |             |
| + | 3  | 486       | igo.3_Missense_IV | NM_002843    | NP_002834    | Q12913 | PTPRJ_HUMAN | cellular (Potential).         | 8  | 3AATTCCTGACC  | 0.418 |             |
| + | 4  | 660       |                   | NM_024114    | NP_077019    | Q8IWZ4 | TRI48_HUMAN |                               | 0  | ATATTATACAGGT | 0.338 |             |
| - | 1  | 782       |                   | NM_001004700 | NP_001004700 | Q6IEV9 | OR4CB_HUMAN | cellular (Potential).         | 1  | AAGTGGTCGGG   | 0.433 |             |
| + | 3  | 712_713   | ik.1_Missense_Mu  | NM_001004704 | NP_001004704 | Q8NH72 | OR4C6_HUMAN | Name=4; (Potential).          | 2  | GTGGGGGGATT   | 0.465 |             |
| + | 1  | 449       |                   | NM_001001967 | NP_001001967 | Q8NGL4 | OR5DD_HUMAN | Name=4; (Potential).          | 3  | CTGGGTCTATA   | 0.418 |             |
| - | 1  | 865       |                   | NM_006637    | NP_006628    | Q13606 | OR5I1_HUMAN | Name=7; (Potential).          | 1  | CAACGGATTAC   | 0.368 |             |
| - | 1  | 241       |                   | NM_001004742 | NP_001004742 | Q8NGP4 | OR5M3_HUMAN | cellular (Potential).         | 2  | GGTTTTCCAACA  | 0.368 |             |
| + | 4  | 1670      | r_p.T446 FAM111   | NM_198947    | NP_945185    | Q6SJ93 | F111B_HUMAN |                               | 2  | ATGCTACTTGCT  | 0.388 |             |
| - | 12 | 1466      | p.R381Q GANAB_    | NM_198334    | NP_938148    | Q14697 | GANAB_HUMAN |                               | 5  | GAACTCGGTAG   | 0.562 |             |
| + | 3  | 982       | N3_uc001npx.2_lr  | NM_201428    | NP_958831    | O95197 | RTN3_HUMAN  |                               | 1  | CTCATATAAGGAC | 0.363 |             |
| + | 18 | 3039      | 2_Missense_Mutat  | NM_032251    | NP_115627    | A6NC98 | CC88B_HUMAN | Potential.                    | 4  | TGCAGGGGCAG   | 0.682 |             |
| - | 16 | 1921      |                   | NM_017525    | NP_059995    | Q6DT37 | MRCKG_HUMAN | Potential.                    | 4  | 3GTTTTCTCCTC  | 0.667 |             |
| + | 8  | 1711      | 5_uc009ysg.2_5'l  | NM_002335    | NP_002326    | O75197 | LRP5_HUMAN  | ta-propeller 2. Extracellular | 7  | AAGCTCCCGCAC  | 0.602 |             |
| - | 2  | 413       |                   | NM_005169    | NP_005160    | O14813 | PHX2A_HUMAN |                               | 0  | 3GGATGGCTCTG  | 0.637 |             |
| + | 10 | 2873      | sp.1_Missense_Mi  | NM_020798    | NP_065849    | Q9P2H5 | UBP35_HUMAN |                               | 3  | 3TGCCGCTTCTC  | 0.587 |             |
| + | 6  | 2321      | su.1_Missense_Mi  | NM_015885    | NP_056969    | O94913 | PCF11_HUMAN |                               | 1  | TCTTGCAAGCA   | 0.328 |             |
| + | 2  | 986       |                   | NM_000372    | NP_000363    | P14679 | TYRO_HUMAN  | relanosome (Potential).       | 3  | ATCCTGGAAC    | 0.473 |             |
| + | 85 | 12584     | p.R4154H DYNC2I   | NM_001080463 | NP_001073932 | Q8NCM8 | DYHC2_HUMAN |                               | 0  | TGCCCGTGCCC   | 0.423 |             |
| - | 7  | 784       | SP28_uc001poj.3_  | NM_020886    | NP_065937    | Q96RU2 | UBP28_HUMAN |                               | 7  | 3CTGTTCTCAG   | 0.423 |             |
| + | 6  | 629       | 09yzm.2_Intron P  | NM_002572    | NP_002563    | P68402 | PA1B2_HUMAN |                               | 1  | TACCGACGGGG   | 0.542 |             |
| + | 14 | 1321      | 3_Mutation_p.E344 | NM_173593    | NP_775864    | Q6L9W6 | B4GN3_HUMAN | renal (Potential).            | 2  | 3CAGAGGAGACC  | 0.517 |             |
| + | 49 | 6572      | 3 CACNA1C_uc00    | NM_199460    | NP_955630    | Q13936 | CAC1C_HUMAN | cytoplasmic (Potential).      | 11 | GCGGGGGCAGC   | 0.701 |             |
| + | 6  | 857       | _p.P138L CD9_uc   | NM_001769    | NP_001760    | P21926 | CD9_HUMAN   | cellular (Potential).         | 1  | TGAGCCCCAGC   | 0.542 |             |
| + | 2  | 272_273   | IG6_uc010sew.1_   | NM_018173    | NP_060643    | Q3KR16 | PKHG6_HUMAN |                               | 2  | 3CCGAGGATACC  | 0.619 |             |
| - | 5  | 813       | sense_Mutation_p. | NM_001065    | NP_001056    | P19438 | TNR1A_HUMAN | . Extracellular (Potential).  | 3  | CACACTCGTTTT  | 0.547 |             |
| - | 2  | 178       | nse_Mutation_p.G  | NM_014231    | NP_055046    | P23763 | VAMP1_HUMAN | lasmic (Potential).           | 0  | CTGTCCCTTAC   | 0.502 |             |
| - | 3  | 673       | B4_uc001qzf.1_Inl | NM_006249    | NP_006240    | Q04118 | PRB3_HUMAN  | [PQS]-P-[PS]-Q-[GE]-G-N-      | 1  | FGTTTCTCCTC   | 0.622 |             |
| + | 6  | 769       | 1C1_uc009zip.2_   | NM_017435    | NP_059131    | Q9NYB5 | SO1C1_HUMAN | cellular (Potential).         | 7  | CAAATATGAGAG  | 0.373 | rs145524055 |
| - | 18 | 2332      | r_p.T771 ABCC9_   | NM_005691    | NP_005682    | O60706 | ABCC9_HUMAN | potential). ABC transporter 1 | 6  | CCAAAAGTAATA  | 0.328 |             |
| - | 14 | 1985      |                   | NM_025003    | NP_079279    | P59510 | ATS20_HUMAN | Cys-rich.                     | 19 | TGGTTCAGCAA   | 0.348 |             |
| + | 15 | 4175      | p.P848L ARID2_u   | NM_152641    | NP_689854    | Q68CP9 | ARID2_HUMAN |                               | 10 | TATCTCCAATGG  | 0.358 |             |
| + | 13 | 1852      | _p.S562 TROAP_    | NM_005480    | NP_005471    | Q12815 | TROAP_HUMAN | ate tandem repeats. Cys-rii   | 1  | TAGGAGTGAGC   | 0.592 |             |
| + | 13 | 1942      | e_Mutation_p.Y59  | NM_005480    | NP_005471    | Q12815 | TROAP_HUMAN | approximate tandem repea      | 1  | AGTCCTACTGT   | 0.617 |             |
| + | 5  | 1047      | imj.1_Missense_M  | NM_012284    | NP_036416    | Q9ULD8 | KCNH3_HUMAN | =Segment S2; (Potential).     | 0  | 3CAGCGTCTGT   | 0.662 |             |



|   |    |           |                    |              |              |        |             |                             |    |               |       |
|---|----|-----------|--------------------|--------------|--------------|--------|-------------|-----------------------------|----|---------------|-------|
| - | 2  | 532       |                    | NM_004693    | NP_004684    | O95678 | K2C75_HUMAN | Coil 1A. Rod.               | 0  | GTGCTCCAAGAA  | 0.498 |
| - | 7  | 1472      |                    | NM_173086    | NP_775109    | P48668 | K2C6C_HUMAN |                             | 2  | TTACCTACCTGCA | 0.567 |
| - | 7  | 617       | AD_uc001sbz.2_M    | NM_015989    | NP_057073    | Q9Y600 | CSAD_HUMAN  |                             | 1  | FGATAGCGGGCC  | 0.617 |
| - | 9  | 1291      | se_Mutation_p.S40  | NM_000889    | NP_000880    | P26010 | ITB7_HUMAN  | cellular (Potential).       | 8  | TCGTAAGAAATG  | 0.552 |
| + | 1  | 341       |                    | NM_017409    | NP_059105    | Q9NYD6 | HXC10_HUMAN |                             | 1  | GGCGACCCCAA   | 0.637 |
| - | 5  | 709       | w.1_RNA ITGA5_L    | NM_002205    | NP_002196    | P08648 | ITA5_HUMAN  | r (Potential). FG-GAP 3.    | 2  | .CCTTGGTGAAC  | 0.582 |
| + | 1  | 460       |                    | NM_001005280 | NP_001005280 | Q8NGE5 | O10A7_HUMAN | Name=4; (Potential).        | 4  | GTGTTCCTGTG   | 0.488 |
| + | 1  | 812       |                    | NM_054105    | NP_473446    | Q9NZP2 | OR6C2_HUMAN | Name=7; (Potential).        | 2  | ATAAAGGAGTTTC | 0.423 |
| - | 10 | 2149      | o.R650Q BAZ2A_L    | NM_013449    | NP_038477    | Q9UIF9 | BAZ2A_HUMAN | A.T hook 1.                 | 0  | GACCCCGTTTG   | 0.527 |
| - | 5  | 743       |                    | NM_001686    | NP_001677    | P06576 | ATPB_HUMAN  | (By similarity).            | 1  | GTACAGTCTTG   | 0.408 |
| + | 8  | 1450      |                    | NM_032230    | NP_115606    | Q8N6Q8 | CL026_HUMAN |                             | 0  | TTCTATCGTGCT  | 0.284 |
| - | 1  | 1178_1179 | sun.1_Intron GALI  | NM_003774    | NP_003765    | Q8N4A0 | GALT4_HUMAN | main B. Lumenal (Potential  | 0  | TCCAAGGTACTG  | 0.49  |
| + | 32 | 3649      |                    | NM_017564    | NP_060034    | Q8WWQ8 | STAB2_HUMAN | lar (Potential). FAS1 4.    | 14 | TCCGGGGCTAC   | 0.507 |
| - | 4  | 487       | PL2_uc010swu.1     | NM_018171    | NP_060641    | Q8NEU8 | DP13B_HUMAN | B5A binding (By similarity) | 1  | ACTTTGGAAAA   | 0.343 |
| - | 3  | 705       | 1_Missense_Muta    | NM_001145374 | NP_001138846 | Q6NS38 | ALKB2_HUMAN | strate binding.             | 0  | TGCCACTTCCC   | 0.572 |
| + | 2  | 378       | oc.2_Missense_Mi   | NM_001093    | NP_001084    | O00763 | ACACB_HUMAN |                             | 8  | CCGGTCGGCGG   | 0.637 |
| + | 17 | 2567      |                    | NM_015267    | NP_056082    | O14529 | CUX2_HUMAN  | Poly-Ser.                   | 6  | GTCGCCCTCGC   | 0.731 |
| - | 38 | 5776      | litr.1_Missense_M  | NM_001109662 | NP_001103132 |        |             |                             | 2  | GTCCCGGTAGA   | 0.592 |
| + | 10 | 1147      | ie.1_Missense_Mu   | NM_001143854 | NP_001137326 | Q9Y2J0 | RP3A_HUMAN  | Pro-rich.                   | 7  | CAGCCGGAGCC   | 0.532 |
| - | 15 | 2643      |                    | NM_015335    | NP_056150    | Q71F56 | MD13L_HUMAN |                             | 8  | AACATCCTTTGC  | 0.403 |
| - | 7  | 1227      |                    | NM_173598    | NP_775869    | Q6VAB6 | KSR2_HUMAN  | ol-ester/DAG-type.          | 15 | ACATCCAGTAC   | 0.458 |
| - | 4  | 526       | SRC2_uc001ucs.2    | NM_023012    | NP_075388    | Q7L4I2 | RSRC2_HUMAN | Ser-rich.                   | 1  | TAGATCTTGAG   | 0.378 |
| + | 16 | 2447      | p.P350S IDNAH10    | NM_207437    | NP_997320    | Q8IVF4 | DYH10_HUMAN | n (By similarity).          | 6  | AACTCCCAGGT   | 0.299 |
| + | 1  | 1954      | l_5'Flank uc001uit | NM_007197    | NP_009128    | Q9ULW2 | FZD10_HUMAN | cellular (Potential).       | 5  | TCCCCGCCGTG   | 0.552 |
| - | 11 | 2244      | p.E602K RIMBP2     | NM_015347    | NP_056162    | O15034 | RIMB2_HUMAN |                             | 11 | TCTCTCTAGGA   | 0.587 |
| + | 19 | 1904      |                    | NM_003565    | NP_003556    | O75385 | ULK1_HUMAN  |                             | 4  | TCCCCGCACT    | 0.701 |
| - | 10 | 14105     | A4359T SACS_uc     | NM_014363    | NP_055178    | Q9NZJ4 | SACS_HUMAN  | HEPN.                       | 12 | CTGAGCAAGTG   | 0.388 |
| + | 7  | 6406      | ww.2_Missense_M    | NM_207361    | NP_997244    | Q5SZK8 | FREM2_HUMAN | (Potential). Calx-beta 3.   | 11 | GGAGAACGGGC   | 0.493 |
| - | 8  | 1597      | p.D384E ELF1_ucl   | NM_172373    | NP_758961    | P32519 | ELF1_HUMAN  |                             | 1  | GTTTCATCCTGC  | 0.428 |
| + | 1  | 1542      |                    | NR_003268    |              |        |             |                             | 0  | ATTATATACCATG | 0.383 |
| + | 1  | 61        | rhk.1_Missense_M   | NM_006418    | NP_006409    | Q6UX06 | OLFM4_HUMAN |                             | 1  | CAGGGGATTTG   | 0.478 |
| - | 1  | 632       | h.2_Missense_Mu    | NM_001922    | NP_001913    | P40126 | TYRP2_HUMAN | melanosome (Potential).     | 5  | .GGCCTTGTTG   | 0.607 |
| - | 19 | 2858      | nse_Mutation_p.P   | NM_198968    | NP_945319    | Q86YF9 | DZIP1_HUMAN |                             | 2  | TTCTGGGAAAA   | 0.279 |
| - | 3  | 1121      |                    | NM_000452    | NP_000443    | Q12908 | NTCP2_HUMAN | ical; (Potential).          | 4  | AAACAGGAACA   | 0.393 |
| - | 5  | 707       |                    | NM_004093    | NP_004084    | P52799 | EFNB2_HUMAN | cellular (Potential).       | 1  | TGCAAATAAGGC  | 0.493 |
| + | 1  | 167       | a.1_RNA POTEG      | NM_001005356 | NP_001005356 | Q6S5H5 | POTEG_HUMAN |                             | 1  | GGAGCGGCAAC   | 0.592 |
| + | 1  | 686       |                    | NM_001004717 | NP_001004717 | Q8NH43 | OR4L1_HUMAN | lasmic (Potential).         | 5  | AAAAATCATCAC  | 0.438 |
| - | 16 | 2380      | EP1_uc010tif.1_R   | NM_007110    | NP_009041    | Q99973 | TEP1_HUMAN  |                             | 5  | ACCCTGTCCAC   | 0.468 |
| - | 5  | 1021      | se_Mutation_p.S1:  | NM_019852    | NP_062826    | Q86U44 | MTA70_HUMAN |                             | 2  | CTAAAGACTCA   | 0.398 |
| - | 34 | 5039      |                    | NM_002471    | NP_002462    | P13533 | MYH6_HUMAN  | Potential.                  | 4  | CAGCTGGATCT   | 0.627 |
| - | 22 | 2813      |                    | NM_002471    | NP_002462    | P13533 | MYH6_HUMAN  | Potential.                  | 4  | CCAGCTGAATCT  | 0.517 |
| - | 28 | 3888      | ia-mir-208b MI000! | NM_000257    | NP_000248    | P12883 | MYH7_HUMAN  | Potential.                  | 4  | CCTTGCTCCGG   | 0.582 |
| + | 1  | 144       |                    | NM_203402    | NP_981947    | A5D6W6 | FITM1_HUMAN | lasmic (Potential).         | 0  | gggcCGAATCC   | 0.443 |
| - | 12 | 1878      | p.S496F RALGAP,    | NM_014990    | NP_055805    | Q6GYQ0 | RGPA1_HUMAN |                             | 4  | AACTGGAATTT   | 0.413 |
| - | 10 | 1287      | yv.2_Missense_Mi   | NM_002863    | NP_002854    | P06737 | PYGL_HUMAN  |                             | 1  | GCCAGCGCTCC   | 0.522 |
| - | 1  | 238       | l_p.D23N OTX2_u    | NM_172337    | NP_758840    | P32243 | OTX2_HUMAN  |                             | 1  | CAAGTCCATAC   | 0.587 |
| - | 20 | 4430      | o.R1459Q SPTB_u    | NM_000347    | NP_000338    | P11277 | SPTB1_HUMAN | Spectrin 12.                | 11 | GGAACCGCTTC   | 0.567 |

rs148127231

|   |    |           |                   |              |              |        |             |                               |    |                |       |             |
|---|----|-----------|-------------------|--------------|--------------|--------|-------------|-------------------------------|----|----------------|-------|-------------|
| + | 7  | 2579      | _p.P744L SIPA1L1  | NM_015556    | NP_056371    | O43166 | SI1L1_HUMAN | Rap-GAP.                      | 4  | ACAATCCGTGCT   | 0.512 |             |
| + | 10 | 3566      | p.S1073N SIPA1L   | NM_015556    | NP_056371    | O43166 | SI1L1_HUMAN |                               | 4  | .CGCCAGCAAGG   | 0.507 |             |
| + | 10 | 1314      | o.R369Q RBM25_u   | NM_021239    | NP_067062    | P49756 | RBM25_HUMAN | heckle localization. Glu-rich | 4  | .TGACCCGGGATAC | 0.234 |             |
| + | 2  | 1779      |                   | NM_018228    | NP_060698    | Q9H8Y1 | VRTN_HUMAN  |                               | 0  | .GCTTCCGCCTC   | 0.652 |             |
| + | 2  | 1509      |                   | NM_022054    | NP_071337    | Q9HB14 | KCNKD_HUMAN | lasmic (Potential).           | 1  | .AGCCAACAAGG   | 0.602 |             |
| - | 15 | 1978_1979 |                   | NM_001080414 | NP_001073883 | Q9P219 | DAPLE_HUMAN | Potential.                    | 3  | GCTCCCCCTTCT   | 0.629 |             |
| + | 9  | 1338      | _p.Q292* UBR7_u   | NM_175748    | NP_786924    | Q8N806 | UBR7_HUMAN  |                               | 0  | GAGTCCAGCAA    | 0.413 |             |
| + | 2  | 334       | _p.W55* PPP2R5i   | NM_002719    | NP_002710    | Q13362 | 2A5G_HUMAN  |                               | 2  | FAAAGTGGAAAGG  | 0.408 |             |
| + | 1  | 122       | :727924_uc001yut  | NM_001004719 | NP_001004719 | Q8NGB6 | OR4M2_HUMAN | Name=1; (Potential).          | 1  | TACCAGGAAATAI  | 0.413 |             |
| - | 23 | 4569      | i_2_Missense_Mut  | NM_003257    | NP_003248    | Q07157 | ZO1_HUMAN   |                               | 6  | .AAACTTCTTCGG  | 0.428 |             |
| + | 20 | 3510      | bi_2_Missense_ML  | NM_003246    | NP_003237    | P07996 | TSP1_HUMAN  | 3P C-terminal.                | 6  | .GATGGCGTCTC/  | 0.463 |             |
| - | 3  | 1115      | FAF1_uc010bcf.2_  | NM_016013    | NP_057097    | Q9Y375 | CIA30_HUMAN |                               | 1  | .TCCCCCGCGGG   | 0.383 |             |
| + | 15 | 5207      | GA_uc010uda.1_M   | NM_001164273 | NP_001157745 | Q8IWI9 | MGAP_HUMAN  | Thr-rich.                     | 12 | .GCTTTTCTAAG   | 0.478 |             |
| - | 4  | 558       |                   | NM_052955    | NP_443187    | Q96PF1 | TGM7_HUMAN  |                               | 2  | .CTGCCCGTAGT   | 0.493 |             |
| - | 12 | 2495      | _p.D788N TP53BP   | NM_005657    | NP_005648    | Q12888 | TP53B_HUMAN |                               | 7  | .GGGAATCTGAGC  | 0.433 |             |
| + | 4  | 243       |                   | NM_004212    | NP_004203    | O43868 | S28A2_HUMAN |                               | 4  | .GGAGTCGGTGG   | 0.408 | rs144302819 |
| + | 4  | 541       | r_2_RNA PLDN_uc   | NM_012388    | NP_036520    | Q9UL45 | PLDN_HUMAN  | Potential.                    | 1  | .AGTTTGCTGAG   | 0.279 |             |
| - | 5  | 2140      | lD4_uc010ugj.1_M  | NM_198400    | NP_006145    | P46934 | NEDD4_HUMAN | raction with TNIK (By simil   | 4  | .CCCTGGAGGTA   | 0.473 |             |
| - | 7  | 780       | DH1A2_uc010ugw    | NM_003888    | NP_003879    | O94788 | AL1A2_HUMAN |                               | 1  | .CCATATCCTGGC  | 0.473 |             |
| + | 11 | 1526      | exp.2_Missense_M  | NM_025055    | NP_079331    | Q8N5R6 | CCD33_HUMAN |                               | 5  | .GCAAGGCTCTT   | 0.398 |             |
| - | 1  | 1396      |                   | NM_017793    | NP_060263    | Q9BUL9 | RPP25_HUMAN |                               | 0  | .TCGCGGAGCCT   | 0.687 |             |
| - | 4  | 3938      |                   | NM_001897    | NP_001888    | Q6UVK1 | CSPG4_HUMAN | noglycan attachment doma      | 3  | .CACTCGGTGGC   | 0.627 |             |
| + | 9  | 1047      | _p.Q275* ADAMTS   | NM_207517    | NP_997400    | P82987 | ATL3_HUMAN  |                               | 27 | .CACTTCAAGGA/  | 0.333 |             |
| + | 4  | 1541      | 592_uc010upb.1_   | NM_014630    | NP_055445    | Q92610 | ZN592_HUMAN |                               | 6  | .TCCAAGTAAGTC  | 0.532 |             |
| + | 2  | 202       |                   | NM_152336    | NP_689549    | Q96MI9 | CBPC4_HUMAN |                               | 0  | .CCTAAGAGGTA   | 0.522 |             |
| + | 2  | 256       | _p.S52F WDR93_    | NM_020212    | NP_064597    | Q6P2C0 | WDR93_HUMAN |                               | 2  | .GGATTCTTGGC   | 0.502 |             |
| + | 29 | 3682      |                   | NM_003870    | NP_003861    | P46940 | IQGA1_HUMAN | ras-GAP. C1.                  | 8  | .ATTATCGATACAT | 0.438 |             |
| + | 5  | 694       |                   | NM_023933    | NP_076422    | Q9BQD7 | F173A_HUMAN |                               | 1  | .TGGACCGAGTA   | 0.687 |             |
| - | 3  | 495       | TG_uc002clm.2_5'  | NM_001001410 | NP_001001410 | Q9UJK0 | TSR3_HUMAN  |                               | 0  | .CAGGCGCAAGT   | 0.637 |             |
| + | 6  | 1220      | vg.1_Missense_Mi  | NM_016111    | NP_057195    | Q9Y4R8 | TELO2_HUMAN |                               | 0  | .CCGGCTCACGG   | 0.597 |             |
| + | 2  | 630       |                   | NM_014117    | NP_054836    | Q14CZ0 | CP072_HUMAN |                               | 1  | .GGGTCCCCTTC   | 0.458 |             |
| - | 20 | 2752      | iH7A_uc002dbl.2_  | NM_014153    | NP_054872    | Q8IWR0 | Z3H7A_HUMAN | p.E852Q(1)                    | 4  | .TAACTTCAGCAT/ | 0.328 | rs150604583 |
| - | 2  | 862       | _5'Flank IQCK_uc  | NM_001012991 | NP_001013009 | Q1ED39 | CP088_HUMAN | Lys-rich.                     | 0  | .TGGCTCCTCGA   | 0.473 |             |
| + | 4  | 629       | hd.1_Missense_M   | NM_017888    | NP_060358    | Q6NUN0 | ACSM5_HUMAN |                               | 2  | .GGCGTCCAGGG   | 0.562 |             |
| - | 49 | 7777      | /bd.1_Nonsense_A  | NM_017539    | NP_060009    | Q8TD57 | DYH3_HUMAN  | 4 (By similarity).            | 18 | .GGACTGGAACC   | 0.473 |             |
| + | 2  | 1746      |                   | NM_006040    | NP_006031    | Q9Y661 | HS3S4_HUMAN | renal (Potential).            | 2  | .AACAGGAAGAG   | 0.463 |             |
| - | 2  | 153       | uc010vct.1_Intron | NM_145659    | NP_663634    | Q8NEV9 | IL27A_HUMAN |                               | 0  | .CCTCCGCACTC   | 0.647 |             |
| + | 7  | 782       | _uc010vdz.1_RN    | NM_005115    | NP_005106    | Q14764 | MVP_HUMAN   | MVP 5.                        | 4  | .TCGGCGGAACT   | 0.627 |             |
| - | 7  | 2097      | lank INO80E_uc0C  | NM_003609    | NP_003600    | Q9BW71 | HIRP3_HUMAN |                               | 1  | .GCCACGCATATC  | 0.597 | rs139557944 |
| + | 10 | 1021      | _p.P315L TGFB111  | NM_001042454 | NP_001035919 | Q43294 | TGFI1_HUMAN | I zinc-binding 2.             | 0  | .CCGCCCTACTC   | 0.682 |             |
| + | 4  | 2245      |                   | NM_003414    | NP_003405    | Q14586 | ZN267_HUMAN | :2H2-type 13.                 | 4  | .ACATCGGAGAA   | 0.443 |             |
| - | 2  | 3356      | _Mutation_p.P101  | NM_002968    | NP_002959    | Q9NSC2 | SALL1_HUMAN |                               | 8  | .AGACGGGACGT   | 0.562 |             |
| + | 5  | 536       |                   | NM_001950    | NP_001941    | Q16254 | E2F4_HUMAN  | ization (Potential).          | 1  | .CATCCGGGCC    | 0.627 |             |
| - | 11 | 1504      | _p.P437L RANBP    | NM_020850    | NP_065901    | Q6VN20 | RBP10_HUMAN |                               | 1  | .CGTTGGGGTAG   | 0.602 |             |
| + | 10 | 3361      | in_p.Q572* NFATC  | NM_173165    | NP_775188    | Q12968 | NFAC3_HUMAN |                               | 3  | .TTTCCCAAGGAC  | 0.493 |             |
| + | 10 | 716       | ALB2_uc002fac.3_  | NM_001740    | NP_001731    | P22676 | CALB2_HUMAN | nable). EF-hand 5.            | 0  | .TACATTGACGAG  | 0.567 |             |
| - | 2  | 2477      | lX3_uc002fcl.2_In | NM_006885    | NP_008816    | Q15911 | ZFH3_HUMAN  |                               | 4  | .TGGTGTGTGG    | 0.582 |             |

|   |    |           |                   |              |              |        |             |                               |     |                |       |             |
|---|----|-----------|-------------------|--------------|--------------|--------|-------------|-------------------------------|-----|----------------|-------|-------------|
| - | 3  | 2426      | ej.1_Missense_Mt  | NM_024533    | NP_078809    | Q9GZS9 | CHST5_HUMAN | lenal (Potential).            | 0   | GTAGACGAAGTAT  | 0.657 |             |
| + | 5  | 1095      |                   | NM_012213    | NP_036345    | O95822 | DCMC_HUMAN  |                               | 0   | ATTTCGGAATGT   | 0.522 |             |
| + | 3  | 689       | orf97_uc010vpz.1  | NM_001013672 | NP_001013694 | Q6ZQX7 | CQ097_HUMAN | tandem repeat of A-L-K-G-     | 1   | AGGGCTTCCAC    | 0.647 |             |
| - | 2  | 397       |                   | NM_001212    | NP_001203    | Q07021 | C1QBP_HUMAN |                               | 1   | ACCTCCAGACA    | 0.448 |             |
| - | 9  | 1191      | e_Mutation_p.T311 | NM_031220    | NP_112497    | Q9BZ71 | PITM3_HUMAN |                               | 4   | CATAGGTGGAG    | 0.582 |             |
| - | 7  | 848       | e_Mutation_p.V19  | NM_031220    | NP_112497    | Q9BZ71 | PITM3_HUMAN |                               | 4   | GGCGACAGCAT    | 0.627 |             |
| - | 5  | 616       | ggo.1_Missense_M  | NM_020360    | NP_065093    | Q9NRY6 | PLS3_HUMAN  | smic (By similarity).         | 0   | GCAGCGGCCGG    | 0.721 |             |
| + | 6  | 1542      |                   | NM_000180    | NP_000171    | Q02846 | GUC2D_HUMAN | lasmic (Potential).           | 1   | GGCACCGGCTA    | 0.587 |             |
| + | 14 | 2331      | p.G737E ARHGFE    | NM_173728    | NP_776089    | O94989 | ARHGF_HUMAN |                               | 3   | GCTGGGAGCCT    | 0.582 |             |
| + | 5  | 701       | _p.K134N MYOCD    | NM_153604    | NP_705832    | Q8IZQ8 | MYCD_HUMAN  |                               | 5   | GTGAAAGAGGC    | 0.488 |             |
| + | 11 | 1086      | _p.G234D LGALS5   | NM_009587    | NP_033665    | O00182 | LEG9_HUMAN  | Galectin 2.                   | 0   | GGATGGTCAGC    | 0.552 | rs145626584 |
| + | 3  | 365       | ag.1_5'Flank TME  | NM_152464    | NP_689677    | Q6SZW1 | SARM1_HUMAN |                               | 0   | TCACCCGCAAC    | 0.468 |             |
| - | 5  | 1562      | _p.G374R SLFN11   | NM_001104588 | NP_001098058 | Q7Z7L1 | SLN11_HUMAN |                               | 3   | AGGCCCACTAG    | 0.383 |             |
| - | 1  | 403       |                   | NM_139285    | NP_644814    | Q8NHY3 | GA2L2_HUMAN | CH.                           | 2   | ATGCCCATCTC    | 0.592 |             |
| + | 5  | 792       | _p.G76R PPP1R1    | NM_032192    | NP_115568    | Q9UD71 | PPR1B_HUMAN |                               | 0   | AGCTGGGGGAG    | 0.418 |             |
| + | 2  | 421       | _1_intron DHX40   | NM_024612    | NP_078888    | Q8IX18 | DHX40_HUMAN | ase ATP-binding.              | 0   | TATATGAAGCAG   | 0.323 |             |
| - | 4  | 865       | cyb561_uc010d     | NM_001915    | NP_001906    | P49447 | CY561_HUMAN | ochrome b561.                 | 1   | GTAGCGGCTCC    | 0.617 |             |
| - | 8  | 973       | ifz.2_Missense_M  | NM_002816    | NP_002807    | O00232 | PSD12_HUMAN | PCI.                          | 0   | GTTCTAACTTCT   | 0.353 |             |
| - | 5  | 444       | _p.T110M SLC39A   | NM_001159770 | NP_001153242 | Q8N1S5 | S39AB_HUMAN |                               | 1   | GGTCTGTCTGG    | 0.542 |             |
| - | 4  | 1486      | e_Mutation_p.R36  | NM_032134    | NP_115510    | Q9H0J4 | QRIC2_HUMAN | Gln-rich.                     | 5   | ccagggcggaacaa | 0.139 | rs143499534 |
| + | 14 | 4319      | uf.2_Missense_Mt  | NM_018996    | NP_061869    | Q9HCJ0 | TNR6C_HUMAN | Pro-rich.                     | 2   | CCCCTCGCAC     | 0.647 |             |
| - | 10 | 1342      | Zl1_uc002jzo.1_Mi | NM_014984    | NP_055799    | Q9UPN4 | AZI1_HUMAN  |                               | 4   | TGGGGGACAGC    | 0.677 |             |
| - | 3  | 795       |                   | NM_178520    | NP_848615    | Q8N8V8 | TM105_HUMAN |                               | 1   | GTCTTCGCCCTT   | 0.662 | rs75774881  |
| - | 5  | 1788      | orf70_uc010wuq.1  | NM_001109760 | NP_001103230 | Q0VG06 | FP100_HUMAN |                               | 2   | CCTCCGCCGA     | 0.682 |             |
| - | 12 | 1672      | ssense_Mutation_j | NM_022156    | NP_071439    | Q6P1R4 | DUS1L_HUMAN |                               | 1   | AGGCTCGCTTC    | 0.672 |             |
| - | 16 | 2368      | tion_p.T33 EPB41  | NM_012307    | NP_036439    | Q9Y2J2 | E41L3_HUMAN | ctin-binding (Potential).     | 5   | GGGAGGTGGAA    | 0.512 |             |
| - | 6  | 392       | dk.2_Missense_M   | NM_173464    | NP_775735    | Q8NA19 | LMBL4_HUMAN | MBT 1.                        | 3   | CTCTGGAAGG     | 0.343 |             |
| - | 23 | 3438      | vz.1_Missense_M   | NM_005559    | NP_005550    | P25391 | LAMA1_HUMAN | inin EGF-like 13.             | 21  | CCCCGGTTTCC    | 0.572 |             |
| + | 17 | 2503      | o.2_Missense_Mut  | NM_020774    | NP_065825    | Q86YT6 | MIB1_HUMAN  | RING-type 1.                  | 4   | CATGTGGACAT    | 0.383 |             |
| + | 5  | 589       | vr.2_Missense_Mu  | NM_177986    | NP_817123    | Q86SJ6 | DSG4_HUMAN  | Extracellular (Potential).    | 8   | ATAAATGATAACC  | 0.408 |             |
| - | 4  | 1513      | o.R221H SMAD7_i   | NM_005904    | NP_005895    | O15105 | SMAD7_HUMAN | MH2.                          | 0   | ACTGGCGGGTG    | 0.622 |             |
| + | 7  | 1422      | fb.3_Missense_Mt  | NM_005359    | NP_005350    | Q13485 | SMAD4_HUMAN | SAD. p.0?(35)p.?(2)           | 369 | TATGCCGCCCC    | 0.433 |             |
| + | 3  | 557       | lfp.1_Missense_M  | NM_173629    | NP_775900    | Q8N1N2 | CR026_HUMAN |                               | 0   | GTCCACCTACA    | 0.468 |             |
| + | 5  | 959       | if.2_Missense_Mu  | NM_031891    | NP_114097    | Q9HBT6 | CAD20_HUMAN | r (Potential). Cadherin 3.    | 5   | GGATGGAGATG    | 0.423 |             |
| - | 2  | 641       | km.3_Missense_M   | NM_006566    | NP_006557    | Q15762 | CD226_HUMAN | 1. Extracellular (Potential). | 0   | GAGTAGGGCTG    | 0.448 |             |
| - | 8  | 1251      | _p.E322K NETO1_   | NM_138966    | NP_620416    | Q8TDF5 | NETO1_HUMAN | ss A. Extracellular (Potentic | 4   | ATTTTCATCCC    | 0.378 |             |
| - | 5  | 770       | fs.1_Missense_M   | NM_214710    | NP_999875    | Q6UWY2 | PRS57_HUMAN | eptidase S1.                  | 0   | GTACACGTCGG    | 0.711 |             |
| + | 41 | 5794      | e_Mutation_p.G30  | NM_019112    | NP_061985    | Q8IZY2 | ABCA7_HUMAN | C transporter 2.              | 9   | TGGCAGGCCAC    | 0.647 |             |
| + | 1  | 780       |                   | NM_003775    | NP_003766    | O95977 | S1PR4_HUMAN | smic (By similarity).         | 2   | GAAGACGGTGC    | 0.687 |             |
| + | 7  | 737       | p.V235M FZR1_uc   | NM_001136198 | NP_001129670 | Q9UM11 | FZR_HUMAN   | WD 2.                         | 2   | CCTCCGTGGGC    | 0.632 |             |
| + | 8  | 1561_1562 |                   | NM_005483    | NP_005474    | Q13111 | CAF1A_HUMAN |                               | 2   | GCTTTCATCCA    | 0.594 |             |
| - | 2  | 792       | idj.2_Missense_Mt | NM_001097641 | NP_001091110 | P21217 | FUT3_HUMAN  | lenal (Potential).            | 0   | TGGTCCCCTTGC   | 0.607 |             |
| - | 3  | 448       | f.1_Missense_Mut  | NM_001252    | NP_001243    | P32970 | CD70_HUMAN  | ellular (Potential).          | 0   | ATCACGATGGA    | 0.637 |             |
| - | 4  | 521       | q.2_Missense_Mu   | NM_021155    | NP_066978    | Q9NNX6 | CD209_HUMAN | 7 X approximate tandem r      | 1   | CAGCCAGGTCA    | 0.557 |             |
| - | 11 | 1068      | o.Q96* TIMM44_uc  | NM_006351    | NP_006342    | O43615 | TIM44_HUMAN |                               | 1   | CTGCTGGATGG    | 0.642 |             |
| + | 2  | 182       | xkd.1_Missense_M  | NM_004218    | NP_004209    | Q15907 | RB11B_HUMAN |                               | 0   | GCTGTCGCGCT    | 0.642 |             |
| - | 5  | 35792     |                   | NM_024690    | NP_078966    | Q8WXI7 | MUC16_HUMAN | xtracellular (Potential).     | 57  | AAGTTGGAATC    | 0.488 |             |

|   |    |       |                   |              |              |        |              |                                |    |               |       |             |
|---|----|-------|-------------------|--------------|--------------|--------|--------------|--------------------------------|----|---------------|-------|-------------|
| - | 5  | 32182 |                   | NM_024690    | NP_078966    | Q8WXI7 | MUC16_HUMAN  | xtracellular (Potential).      | 57 | :TGTCCCCGAAA  | 0.498 |             |
| - | 3  | 30874 |                   | NM_024690    | NP_078966    | Q8WXI7 | MUC16_HUMAN  | ch. Extracellular (Potential). | 57 | :CACTGGAATTT  | 0.458 |             |
| - | 3  | 26695 |                   | NM_024690    | NP_078966    | Q8WXI7 | MUC16_HUMAN  | ch. Extracellular (Potential). | 57 | FCATAGGAGTGG  | 0.527 |             |
| - | 1  | 9503  |                   | NM_024690    | NP_078966    | Q8WXI7 | MUC16_HUMAN  | xtracellular (Potential).      | 57 | :CTGCAATGGTC  | 0.478 |             |
| - | 1  | 4672  |                   | NM_024690    | NP_078966    | Q8WXI7 | MUC16_HUMAN  | xtracellular (Potential).      | 57 | TAGGTGGAAAA   | 0.423 |             |
| + | 4  | 1932  | e_Mutation_p.S62  | NM_144566    | NP_653167    | Q9H0M5 | ZN700_HUMAN  | :2H2-type 14.                  | 0  | :TTCAGTTGTGC  | 0.483 |             |
| + | 4  | 1934  | e_Mutation_p.C62  | NM_144566    | NP_653167    | Q9H0M5 | ZN700_HUMAN  | :2H2-type 14.                  | 0  | FCAGTTGTGCCT  | 0.483 |             |
| - | 4  | 901   |                   | NM_005815    | NP_005806    | Q9Y2A4 | ZN443_HUMAN  | :2H2-type 4.                   | 1  | :AAAAGAAAAGG  | 0.378 |             |
| + | 1  | 905   |                   | NM_012377    | NP_036509    | O60412 | OR7C2_HUMAN  | lasmic (Potential).            | 3  | GGGGAGACTCC   | 0.542 |             |
| - | 1  | 501   |                   | NM_013940    | NP_039228    | Q9Y4A9 | O10H1_HUMAN  | lasmic (Potential).            | 0  | :CCGCGGGCTCA  | 0.647 |             |
| - | 23 | 2976  |                   | NM_015692    | NP_056507    | Q8IZJ3 | CPMD8_HUMAN  |                                | 13 | :GGGGACTCCTT  | 0.602 |             |
| + | 10 | 1530  |                   | NM_000453    | NP_000444    | Q92911 | SC5A5_HUMAN  | ical; (Potential).             | 4  | :TCTACGGATCG  | 0.607 | rs121909180 |
| - | 4  | 1316  |                   | NM_021030    | NP_066358    | P17017 | ZNF14_HUMAN  |                                | 3  | :TTTCTCTCCAG  | 0.378 |             |
| + | 4  | 1280  |                   | NM_031218    | NP_112495    | P35789 | ZNF93_HUMAN  | :2H2-type 9.                   | 1  | :GAGAGTTCATAC | 0.393 |             |
| - | 4  | 1019  |                   | NM_001159293 | NP_001152765 | C9JHM3 | C9JHM3_HUMAN |                                | 1  | TCTCCAGTATGA  | 0.413 |             |
| - | 4  | 1000  |                   | NM_001159293 | NP_001152765 | C9JHM3 | C9JHM3_HUMAN |                                | 1  | TATGTGTAGTAAC | 0.398 | rs57947174  |
| + | 4  | 1244  | co.2_Missense_M   | NM_003429    | NP_003420    | Q03923 | ZNF85_HUMAN  | :2H2-type 9.                   | 1  | :AATGTGAAAAAT | 0.358 |             |
| + | 6  | 1631  | 714_uc010ecp.1_f  | NM_182515    | NP_872321    | Q96N38 | ZN714_HUMAN  |                                | 0  | AGAAACTCTACA  | 0.368 |             |
| - | 5  | 1663  | qh.2_Missense_M   | NM_173531    | NP_775802    | Q8IYN0 | ZN100_HUMAN  | :2H2-type 12.                  | 0  | ACATTCCTCACA  | 0.398 |             |
| - | 6  | 2775  | 208_uc002nqo.1_l  | NM_007153    | NP_009084    |        |              |                                | 7  | ATTCTTCACATT  | 0.368 |             |
| - | 4  | 822   | 1_Intron ZNF208_  | NM_007153    | NP_009084    |        |              |                                | 7  | CTCTCCAGTATC  | 0.353 |             |
| - | 5  | 1066  |                   | NM_001080409 | NP_001073878 |        |              |                                | 2  | CAGTATGAATTAT | 0.368 | rs34442493  |
| - | 4  | 1111  | rj.1_Missense_Mu  | NM_003430    | NP_003421    | Q05481 | ZNF91_HUMAN  | :2H2-type 7.                   | 0  | :AAGAACGGCTA  | 0.393 | rs410211    |
| - | 4  | 1486  |                   | NM_138330    | NP_612203    | Q8TD23 | ZN675_HUMAN  | :2H2-type 11.                  | 2  | :AGGATCGGTTA  | 0.378 |             |
| - | 4  | 1655  | p.S436P ZNF681_   | NM_138286    | NP_612143    | Q96N22 | ZN681_HUMAN  |                                | 0  | GTAGGATTTCTC  | 0.373 |             |
| + | 4  | 2677  | dd.1_Missense_M   | NM_014717    | NP_055532    | O15090 | ZN536_HUMAN  |                                | 11 | :TCCCTGGAATC  | 0.572 |             |
| - | 15 | 2117  | p.S533F RHPN2_    | NM_033103    | NP_149094    | Q8IUC4 | RHPN2_HUMAN  |                                | 6  | :ACCAAGAAGCTG | 0.502 |             |
| - | 7  | 1102  | 2nul.2_Missense_f | NM_019849    | NP_062823    | Q9NS82 | AAA1_HUMAN   | ical; (Potential).             | 2  | :GACAGGCATGA  | 0.612 |             |
| - | 2  | 251   | _p.A39V PEPD_ur   | NM_000285    | NP_000276    | P12955 | PEPD_HUMAN   |                                | 2  | GCACAGCAGGG   | 0.662 |             |
| + | 2  | 243   | ea.2_Missense_M   | NM_005306    | NP_005297    | O15552 | FFAR2_HUMAN  | Name=2; (Potential).           | 1  | :TGGCCGACCTC  | 0.662 |             |
| + | 5  | 1902  |                   | NM_144689    | NP_653290    | Q8TAQ5 | ZN420_HUMAN  | :2H2-type 16.                  | 0  | :GTAAGGAATGTC | 0.428 |             |
| + | 4  | 284   | ixtq.1_RNA ZNF52  | NM_032453    | NP_115829    | Q8NB42 | ZN527_HUMAN  | KRAB.                          | 2  | :CATTCTAAGCC  | 0.483 |             |
| - | 14 | 1703  | p.E419K AKT2_ur   | NM_001626    | NP_001617    | P31751 | AKT2_HUMAN   | kinase C-terminal.             | 2  | :TCACTCGCGGA  | 0.597 |             |
| - | 7  | 4471  | i_Mutation_p.S126 | NM_181882    | NP_870998    | Q9BXM0 | PRAX_HUMAN   |                                | 2  | CGGGGGACTTG   | 0.692 |             |
| + | 2  | 894   | sk.3_Missense_M   | NM_022752    | NP_073589    | Q6ZN55 | ZN574_HUMAN  |                                | 0  | :TGTACCCGAGT  | 0.617 |             |
| - | 5  | 858   | p.D175N PAFAH1l   | NM_002573    | NP_002564    | Q15102 | PA1B3_HUMAN  |                                | 0  | :AGGGTCGGCAT  | 0.597 |             |
| + | 3  | 1277  | .2_Missense_Mut   | NM_199285    | NP_954979    | A6NJB7 | PRR19_HUMAN  | Pro-rich.                      | 0  | TCGGCCCTGGG   | 0.647 |             |
| + | 4  | 716   |                   | NM_005178    | NP_005169    | P20749 | BCL3_HUMAN   | ANK 3.                         | 2  | :AGCACCGCAGC  | 0.682 |             |
| - | 1  | 707   | g.1_Intron DMPK_  | NM_001081563 | NP_001075032 | Q09013 | DMPK_HUMAN   |                                | 3  | :GAACCGAGGGT  | 0.602 |             |
| - | 1  | 1352  | uc002peu.1_5'UTF  | NM_020709    | NP_065760    | Q9ULN7 | PNML2_HUMAN  |                                | 1  | :CGTCCGGGGTG  | 0.572 |             |
| - | 6  | 705   | ct.2_Missense_Mu  | NM_001190    | NP_001181    | O15382 | BCAT2_HUMAN  |                                | 1  | :CCCCGCCACC   | 0.647 |             |
| - | 1  | 77    | K1_uc010ycg.1_R   | NM_002257    | NP_002248    | P06870 | KLK1_HUMAN   |                                | 0  | :TCCCCCCAGG   | 0.642 |             |
| + | 3  | 642   | C33_uc010eot.1_l  | NM_001772    | NP_001763    | P20138 | CD33_HUMAN   | Potential). lg-like C2-type.   | 0  | :ACCCCACGGCC  | 0.612 |             |
| - | 2  | 1102  |                   | NM_002029    | NP_002020    | P21462 | FPR1_HUMAN   | lasmic (Potential).            | 3  | :AATTGGTAGCT  | 0.582 |             |
| - | 5  | 1531  | .2_Intron uc002py | NM_021632    | NP_067645    | Q9GZX5 | ZN350_HUMAN  |                                | 1  | GATTTTCCACTT  | 0.493 |             |
| + | 5  | 649   | sense_Mutation_p  | NM_144684    | NP_653285    | Q8WV37 | ZN480_HUMAN  |                                | 1  | :CAAGAACAGAA  | 0.358 |             |
| + | 4  | 1437  | dn.1_Missense_M   | NM_018260    | NP_060730    | Q9NV72 | ZN701_HUMAN  |                                | 0  | AGAAACCTTACA  | 0.348 | rs142390931 |

|   |    |       |                    |              |              |        |             |                              |    |               |       |             |
|---|----|-------|--------------------|--------------|--------------|--------|-------------|------------------------------|----|---------------|-------|-------------|
| - | 7  | 2131  | p.R536H ZNF611_    | NM_030972    | NP_112234    | Q8N823 | ZN611_HUMAN | :2H2-type 14.                | 1  | ACCTGCGACTG   | 0.448 | rs145568781 |
| - | 4  | 2277  | _p.*666C ZNF28_    | NM_006969    | NP_008900    | P17035 | ZNF28_HUMAN |                              | 1  | CACTTTCAAGG   | 0.403 |             |
| + | 8  | 2341  | p.R728Q NLRP2_     | NM_017852    | NP_060322    | Q9NX02 | NALP2_HUMAN |                              | 2  | TCTTCGAGGTC   | 0.453 |             |
| + | 10 | 2787  | p.T877P NLRP2_     | NM_017852    | NP_060322    | Q9NX02 | NALP2_HUMAN | LRR 4.                       | 2  | TGCAGACCTTG   | 0.552 |             |
| + | 3  | 214   | 5D_uc002qlg.3_5'   | NM_020378    | NP_065111    | Q8WUY8 | NAT14_HUMAN | setyltransferase.            | 2  | GGCCCTGCTCC   | 0.701 |             |
| - | 5  | 1369  | b.2_Missense_Mu    | NM_145007    | NP_659444    | P59045 | NAL11_HUMAN | NACHT.                       | 6  | GGGATCAGACA   | 0.478 |             |
| + | 7  | 1604  | mi.2_Missense_Mi   | NM_153447    | NP_703148    | P59047 | NALP5_HUMAN | NACHT.                       | 7  | TATGGCTGTGG   | 0.557 |             |
| + | 6  | 397   | LP_uc010eti.2_3'   | NM_033106    | NP_149097    | Q9UBC7 | GALP_HUMAN  |                              | 0  | AGCATGAAAAAT  | 0.368 |             |
| - | 2  | 865   | gn.1_Missense_M    | NM_001005850 | NP_001005850 |        |             |                              | 4  | GTGGCGGATGA   | 0.682 |             |
| - | 5  | 1758  |                    | NM_052882    | NP_443114    | Q96PE6 | ZIM3_HUMAN  | :2H2-type 11.                | 2  | CCTGTCAGCGA   | 0.408 |             |
| - | 5  | 499   |                    | NM_001012729 | NP_001012747 | A6NLW8 | DUXA_HUMAN  | homeobox 2.                  | 1  | ATCTTCGATTTT  | 0.383 |             |
| + | 3  | 1610  | JF776_uc002qqa.2   | NM_173632    | NP_775903    | Q68D11 | ZN776_HUMAN | ype 10; degenerate.          | 1  | AGTGTGGAGAA   | 0.448 |             |
| + | 10 | 1622  | _p.V363M TRIM28    | NM_005762    | NP_005753    | Q13263 | TIF1B_HUMAN |                              | 3  | TGGAGGTGCGAG  | 0.607 |             |
| - | 10 | 1533  | ie_Mutation_p.D23  | NM_015025    | NP_055840    | Q9UL68 | MYT1L_HUMAN |                              | 6  | ACTATCGTCTTC  | 0.443 |             |
| + | 1  | 1302  |                    | NM_002236    | NP_002227    | Q9H3M0 | KCNF1_HUMAN |                              | 1  | CTCACGCTCA    | 0.627 |             |
| - | 8  | 1338  | da.2_Missense_Mi   | NM_001002006 | NP_001002006 | Q96P26 | 5NT1B_HUMAN |                              | 3  | TTTTCCCCCGG   | 0.393 |             |
| - | 26 | 10625 |                    | NM_000384    | NP_000375    | P04114 | APOB_HUMAN  | parin-binding.               | 27 | TTGACATCTCC   | 0.458 |             |
| - | 26 | 8053  |                    | NM_000384    | NP_000375    | P04114 | APOB_HUMAN  |                              | 27 | CTGGATGGGATT  | 0.358 |             |
| + | 4  | 2634  | Flank KHK_uc002r   | NM_007046    | NP_008977    | Q9Y6C2 | EMIL1_HUMAN | Potential.                   | 1  | GTGAACGGTTG   | 0.657 | rs139887250 |
| + | 4  | 1510  | mi.1_Missense_Mi   | NM_005253    | NP_005244    | P15408 | FOSL2_HUMAN |                              | 3  | GTCCTCGTCGG   | 0.682 |             |
| + | 8  | 932   | nk.1_Missense_M    | NM_144736    | NP_653337    | Q7L592 | MIDA_HUMAN  |                              | 1  | AACTTCTCAAC   | 0.413 |             |
| + | 8  | 934   | nk.1_Nonsense_IV   | NM_144736    | NP_653337    | Q7L592 | MIDA_HUMAN  |                              | 1  | TTTCTCAACGC   | 0.413 |             |
| + | 25 | 5363  | xx.2_Missense_Mi   | NM_003128    | NP_003119    | Q01082 | SPTB2_HUMAN | with ANK2. Spectrin 14.      | 8  | CAACCGGGAGG   | 0.547 |             |
| + | 8  | 955   | sf.2_Missense_M    | NM_032208    | NP_115584    | Q9H6X2 | ANTR1_HUMAN | ilar (Potential). VWFA.      | 4  | TTTTCCCCTGA   | 0.488 |             |
| + | 2  | 1034  | 10feb.1_Missense_  | NM_005791    | NP_005782    | O00566 | MPP10_HUMAN | Potential.                   | 3  | ATAATGATGAGC  | 0.323 |             |
| + | 51 | 6134  | YSF_uc010fej.2_M   | NM_003494    | NP_003485    | O75923 | DYSF_HUMAN  | lasmic (Potential).          | 7  | TTTGATGATTTTC | 0.522 |             |
| + | 8  | 739   |                    | NM_032118    | NP_115494    | Q9H977 | WDR54_HUMAN | WD 3.                        | 0  | TAGCAGCAGGC   | 0.557 |             |
| - | 1  | 124   | 3P39_uc010ysv.1_   | NM_001013649 | NP_001013671 | Q2NKX9 | CB068_HUMAN |                              | 1  | CAGCCGCCCC    | 0.731 |             |
| - | 4  | 909   | svr.2_Missense_I   | NM_017849    | NP_060319    | O75204 | TM127_HUMAN |                              | 0  | GGGCTCGTTCT   | 0.622 |             |
| + | 7  | 1083  |                    | NM_004804    | NP_004795    | O76071 | CIAO1_HUMAN |                              | 0  | CTTCTCCCTGA   | 0.612 |             |
| - | 22 | 2922  |                    | NM_022662    | NP_073153    | Q9H1A4 | APC1_HUMAN  |                              | 2  | GTGAGGATTCAT  | 0.289 |             |
| - | 6  | 797   | 2orf76_uc002tit.2_ | NM_001017927 | NP_001017927 | Q3KRA6 | CB076_HUMAN |                              | 0  | GTCTTTCGTCAT  | 0.448 |             |
| + | 3  | 408   | 3LI2_uc002tmu.3_   | NM_005270    | NP_005261    | P10070 | GLI2_HUMAN  |                              | 13 | CACATGGAGCA   | 0.647 |             |
| - | 3  | 387   | IMS2_uc010yzm.1    | NM_001161403 | NP_001154875 | Q7Z417 | LIMS2_HUMAN | I zinc-binding 1.            | 0  | AGCACGGAGCA   | 0.602 |             |
| - | 14 | 2946  | AP5_uc002ttq.2_I   | NM_207363    | NP_997246    | O14513 | NCKP5_HUMAN |                              | 0  | TAAATCAAAGAC  | 0.532 |             |
| - | 6  | 1158  |                    | NM_002299    | NP_002290    | P09848 | LPH_HUMAN   | ial). 4 X approximate repez  | 13 | TTCAGGAAAG    | 0.602 |             |
| + | 27 | 4684  |                    | NM_001080427 | NP_001073896 |        |             |                              | 7  | CACCTCCCAA    | 0.418 |             |
| - | 89 | 14518 |                    | NM_018557    | NP_061027    | Q9NZR2 | LRP1B_HUMAN | lasmic (Potential).          | 50 | GTCTATCATAAA  | 0.373 |             |
| + | 1  | 1118  |                    | NR_026904    |              |        |             |                              | 0  | AGACAGCTATG   | 0.388 |             |
| + | 9  | 1616  | foc.1_Missense_IV  | NM_052917    | NP_443149    | Q8IUC8 | GLT13_HUMAN | renal (Potential).           | 6  | CAACTCCATACA  | 0.413 |             |
| + | 3  | 1630  | IJ3_uc010zce.1_3'  | NM_002239    | NP_002230    | P48549 | IRK3_HUMAN  | smic (By similarity).        | 2  | TGGCTGGAGGA   | 0.428 |             |
| + | 6  | 1000  | zd.3_Missense_Mi   | NM_001083112 | NP_001076581 | P43304 | GPDM_HUMAN  |                              | 1  | TGGTAGGAGCA   | 0.393 |             |
| - | 12 | 2539  |                    | NM_022168    | NP_071451    | Q9BYX4 | IFIH1_HUMAN | case C-terminal.             | 1  | FACTTCTTTTT   | 0.294 |             |
| - | 16 | 3400  | p.E1008K SCN1A     | NM_006920    | NP_008851    | P35498 | SCN1A_HUMAN |                              | 13 | TTTCTCCAGATC  | 0.284 |             |
| + | 8  | 2470  | udy.2_Missense_I   | NM_152381    | NP_689594    | A4UGR9 | XIRP2_HUMAN | Xin 8.                       | 14 | CTTTGGAGAAA   | 0.378 |             |
| + | 2  | 910   |                    | NM_020981    | NP_066191    | Q9Y5Z6 | B3GT1_HUMAN | renal (Potential).           | 4  | GACAATCTATT   | 0.408 |             |
| - | 2  | 229   |                    | NM_020675    | NP_065726    | Q9HBM1 | SPC25_HUMAN | omplex. Interaction with the | 1  | TATCTTAGTC    | 0.373 |             |



|   |     |         |                     |              |              |        |             |                                |     |                 |       |             |
|---|-----|---------|---------------------|--------------|--------------|--------|-------------|--------------------------------|-----|-----------------|-------|-------------|
| - | 36  | 6052    |                     | NM_004525    | NP_004516    | P98164 | LRP2_HUMAN  | ; B 18.]Extracellular (Poten   | 29  | CCACGTTTCCTC'   | 0.343 |             |
| - | 4   | 405     | i_2_intron SLC25A   | NM_003705    | NP_003696    | O75746 | CMC1_HUMAN  | ]. EF-hand 2.                  | 0   | ATGTCACCTCTC'   | 0.363 |             |
| - | 254 | 55829   | 2230 TTN_uc010z     | NM_133378    | NP_596869    | Q8WZ42 | TITIN_HUMAN |                                | 153 | GGTCTCATTTCC    | 0.453 |             |
| - | 253 | 54483   | 782K TTN_uc010z     | NM_133378    | NP_596869    | Q8WZ42 | TITIN_HUMAN |                                | 153 | TGTTTTCGATGGT   | 0.393 |             |
| - | 250 | 52053   | 172C TTN_uc010z     | NM_133378    | NP_596869    | Q8WZ42 | TITIN_HUMAN |                                | 153 | CATTACGAATTTTC  | 0.388 |             |
| - | 238 | 48717   | 860F TTN_uc010z     | NM_133378    | NP_596869    | Q8WZ42 | TITIN_HUMAN |                                | 153 | ATAGAGAACAG'    | 0.433 |             |
| - | 65  | 16329   | v_uc010z fj_1_Intro | NM_133378    | NP_596869    | Q8WZ42 | TITIN_HUMAN |                                | 153 | CAAGTTCACAT'    | 0.408 |             |
| - | 65  | 16228   | v_uc010z fj_1_Intro | NM_133378    | NP_596869    | Q8WZ42 | TITIN_HUMAN |                                | 153 | CCAGGTTTCACT'   | 0.338 |             |
| + | 3   | 884     |                     | NM_194250    | NP_919226    | Q7Z570 | Z804A_HUMAN | p.R97Q(1)                      | 11  | TTGCTCGAAATG'   | 0.368 | rs145158210 |
| - | 7   | 911     | frt.2_Nonsense_M    | NM_005795    | NP_005786    | Q16602 | CALRL_HUMAN | ellular (Potential).           | 4   | TTTTGTCCATGTT   | 0.333 |             |
| - | 44  | 8356    |                     | NM_018897    | NP_061720    | Q8WXX0 | DYH7_HUMAN  | k (By similarity).             | 12  | CATGAAGTGACTION | 0.373 |             |
| - | 41  | 7050    |                     | NM_018897    | NP_061720    | Q8WXX0 | DYH7_HUMAN  | 4 (By similarity).             | 12  | AAATCGAAACA'    | 0.443 | rs115474479 |
| - | 36  | 6037    |                     | NM_018897    | NP_061720    | Q8WXX0 | DYH7_HUMAN  | milarity). ATP (Potential).    | 12  | CAGTTCCTGTTC    | 0.368 |             |
| - | 8   | 1165    | W2_uc002utl.1_Ir    | NM_020760    | NP_065811    | Q9P2P5 | HECW2_HUMAN |                                | 18  | ACCTTCATGAAC    | 0.403 |             |
| + | 11  | 2709    | tr.2_Missense_Mu    | NM_001204    | NP_001195    | Q13873 | BMPR2_HUMAN | lasmic (Potential).            | 9   | AATCCAATGTCTA'  | 0.423 |             |
| + | 11  | 1748    | _p.V393 ABI2_uc     | NM_005759    | NP_005750    | Q9NYB9 | ABI2_HUMAN  | SH3.                           | 0   | AATTACGTTGAG    | 0.453 |             |
| + | 3   | 285     | 10z u.1_5'Flank E   | NM_001037663 | NP_001032752 | P24534 | EF1B_HUMAN  | ST C-terminal.                 | 0   | GTCCAGCCCA'     | 0.468 |             |
| - | 7   | 979     | _p.P294L ERBB4_     | NM_005235    | NP_005226    | Q15303 | ERBB4_HUMAN | :extracellular (Potential).    | 33  | TCAGTGGACAT'    | 0.318 |             |
| + | 4   | 392     | _p.P131L RQCD1_     | NM_005444    | NP_005435    | Q92600 | RCD1_HUMAN  |                                | 2   | ACGTCCTTTTG.    | 0.423 |             |
| - | 4   | 575     | 2_5'UTR ZNF142_     | NM_001105537 | NP_001099007 | P52746 | ZN142_HUMAN |                                | 4   | GTCCCGGAAG      | 0.602 |             |
| - | 10  | 1868    | o.R555W ECEL1_u     | NM_004826    | NP_004817    | O95672 | ECEL1_HUMAN | lenal (Potential).             | 2   | CTGCCGAATCT     | 0.567 |             |
| + | 12  | 1227    | rF2_uc002v tk.3_M   | NM_015575    | NP_056390    | Q6Y7W6 | PERQ2_HUMAN |                                | 7   | AAGAAATGGGTA    | 0.448 |             |
| + | 1   | 900     | _p.A140T GPR35_     | NM_005301    | NP_005292    | Q9HC97 | GPR35_HUMAN | Name=3; (Potential).           | 3   | TCACGGCCATC'    | 0.697 |             |
| + | 3   | 469     |                     | NM_032515    | NP_115904    | Q9UMX3 | BOK_HUMAN   | BH3.                           | 1   | CAGGCGATGAG     | 0.647 |             |
| - | 2   | 471     |                     | NM_015963    | NP_057047    | Q8WY91 | THAP4_HUMAN | THAP-type.                     | 0   | AGATGGATGGC'    | 0.582 |             |
| + | 4   | 582     | al.1_Missense_Mu    | NM_198994    | NP_945345    | O95932 | TGM3L_HUMAN |                                | 4   | ACGAGCCCAGG'    | 0.622 |             |
| - | 5   | 1408    | nj.2_Missense_Mu    | NM_020341    | NP_065074    | Q9P286 | PAK7_HUMAN  | Linker.                        | 23  | AGCCTGACCTG'    | 0.552 |             |
| - | 5   | 1064    | nj.2_Missense_Mu    | NM_020341    | NP_065074    | Q9P286 | PAK7_HUMAN  | Linker.                        | 23  | CATTTTCATTACG   | 0.463 |             |
| - | 3   | 679     |                     | NM_021220    | NP_067043    | Q9BRP0 | OVOL2_HUMAN |                                | 1   | GTGTCTTTTCA'    | 0.592 |             |
| + | 3   | 302     | CLR3F_uc002w qx     | NM_006466    | NP_006457    | Q9H1D9 | RPC6_HUMAN  |                                | 0   | AGGGTCAGTTG'    | 0.303 |             |
| - | 1   | 1496    | HBD_uc002wsu.1_     | NM_000361    | NP_000352    | P07204 | TRBM_HUMAN  | ig (Potential). Extracellular  | 0   | GTTTTCGCACT'    | 0.642 |             |
| - | 17  | 3072    | IL_uc010gdn.1_Inl   | NM_025176    | NP_079452    | Q9Y2I6 | NINL_HUMAN  |                                | 5   | GGCCCGGGCCT     | 0.677 |             |
| + | 15  | 2497    | lv.1_Missense_Mu    | NM_012112    | NP_036244    | Q9ULW0 | TPX2_HUMAN  |                                | 2   | CAGAGAGGTG      | 0.488 |             |
| + | 6   | 991     | eb.2_Missense_Mu    | NM_015338    | NP_056153    | Q8IXJ9 | ASXL1_HUMAN |                                | 248 | CCATCAGGTATG'   | 0.507 |             |
| + | 3   | 228_229 |                     | NM_182519    | NP_872325    | P59827 | LPLC4_HUMAN |                                | 0   | GGACCCCCCCC.    | 0.485 | rs145261889 |
| - | 3   | 594     |                     | NM_005225    | NP_005216    | Q01094 | E2F1_HUMAN  | Potential.                     | 0   | CAGGTCGACGA'    | 0.577 |             |
| + | 15  | 2212    | v.2_Nonsense_Mu     | NM_012156    | NP_036288    | Q9H4G0 | E41L1_HUMAN |                                | 3   | CGGATCGAGGG     | 0.652 |             |
| - | 6   | 680     | gu.2_Missense_M     | NM_182970    | NP_892015    | Q9H426 | RIMS4_HUMAN |                                | 5   | CCAGGTTGGTC     | 0.657 |             |
| + | 1   | 100     |                     | NM_002638    | NP_002629    | P19957 | ELAF_HUMAN  |                                | 0   | TCACGGGAGGT'    | 0.597 |             |
| - | 5   | 922     | _p.P274L EEF1A2_    | NM_001958    | NP_001949    | Q05639 | EF1A2_HUMAN |                                | 0   | TGCCCGCCGCG     | 0.672 |             |
| + | 2   | 545     | nk ARFRP1_uc011     | NM_032527    | NP_115916    | Q8N5A5 | ZGPAT_HUMAN | Poly-Glu.                      | 0   | ggaagaggagagagg | 0.542 |             |
| + | 18  | 2522    | P25_uc002y jz.1_M   | NM_013396    | NP_037528    | Q9UHP3 | UBP25_HUMAN |                                | 5   | AGCATGAAGAT'    | 0.378 |             |
| - | 2   | 276     | orf59_uc010g lx.2_  | NM_021254    | NP_067077    | P57076 | CU059_HUMAN |                                | 0   | ATATGCCATGTTTC  | 0.328 |             |
| + | 4   | 476     | lyri.1_Missense_M   | NM_000628    | NP_000619    | Q08334 | I10R2_HUMAN | -III.]Extracellular (Potential | 0   | CTGATTCITTACA'  | 0.348 |             |
| + | 4   | 1278    | _p.D326N KCNJ15_    | NM_002243    | NP_002234    | Q99712 | IRK15_HUMAN | smic (By similarity).          | 6   | TGGCTGATTTCA'   | 0.443 |             |
| - | 6   | 1522    | AM_uc002y yr.1_f    | NM_001389    | NP_001380    | O60469 | DSCAM_HUMAN | otential). Ig-like C2-type 4.  | 11  | TTTTTCCAGGG'    | 0.507 |             |
| - | 5   | 857     |                     | NM_020639    | NP_065690    | P57078 | RIPK4_HUMAN |                                | 7   | CTCGCGGATCC'    | 0.687 |             |

|   |    |           |                    |              |              |        |             |                               |      |               |       |             |
|---|----|-----------|--------------------|--------------|--------------|--------|-------------|-------------------------------|------|---------------|-------|-------------|
| - | 5  | 706       | _Splice_Site PTTG  | NM_004339    | NP_004330    | P53801 | PTTG_HUMAN  |                               | 1    | TCCTTACCATAT  | 0.502 |             |
| - | 14 | 2352      | nk.1_Missense_M    | NM_015241    | NP_056056    | Q7RTP6 | MICA3_HUMAN |                               | 0    | CTTGGGAGAAC   | 0.502 |             |
| - | 4  | 672       | :ol.3_Missense_Mt  | NM_016335    | NP_057419    | O43272 | PROD_HUMAN  |                               | 1    | GGCTTCGATGC   | 0.612 |             |
| - | 31 | 4855      | _p.L1573M CLTCL    | NM_007098    | NP_009029    | P53675 | CLH2_HUMAN  | zation (By similarity). Heav  | 5    | GGCCAAGTCCA   | 0.617 |             |
| + | 2  | 329       | e_Mutation_p.R75   | NM_013373    | NP_037505    | Q9ULC8 | ZDHC8_HUMAN | lasmic (Potential).           | 2    | TCCCCGAGGT    | 0.562 |             |
| + | 5  | 2391      | CR_uc011aiy.1_Mi   | NM_004327    | NP_004318    | P11274 | BCR_HUMAN   | DH.                           | 12   | ACTACGGAGTT   | 0.577 |             |
| + | 4  | 2128      | FH_uc003afp.2_5'l  | NM_021076    | NP_066554    | P12036 | NFH_HUMAN   | ats of K-S-P-[AEPV]-[EAK]     | 0    | GAAGGCAGAAG   | 0.562 |             |
| - | 1  | 729       | ense_Mutation_p.:  | NM_014323    | NP_055138    | Q9HBE1 | PATZ1_HUMAN |                               | 2    | CCGTGCTGTGT   | 0.672 |             |
| + | 4  | 539       | aqc.3_Missense_M   | NM_000395    | NP_000386    | P32927 | IL3RB_HUMAN | ellular (Potential).          | 3    | CTGACGTTGAC   | 0.627 |             |
| - | 2  | 388       | rb.2_Nonsense_Mi   | NM_001051    | NP_001042    | P32745 | SSR3_HUMAN  | ellular (Potential).          | 1    | AGGGCCAGTAG   | 0.617 |             |
| + | 7  | 2067      | atq.1_Missense_M   | NM_001039141 | NP_001034230 | Q9H2D6 | TARA_HUMAN  |                               | 1    | CCCCACAACAT   | 0.582 |             |
| + | 1  | 783_784   | '_5'Flank GCAT_uc  | NM_005318    | NP_005309    | P07305 | H10_HUMAN   |                               | 0    | ATCAAGAAGGTA  | 0.564 |             |
| - | 6  | 523       |                    | NM_025045    | NP_079321    | Q6UXY1 | BI2L2_HUMAN | IMD.                          | 1    | GTGGCGGTACT   | 0.632 |             |
| + | 3  | 291       | lgzn.2_Missense_M  | NM_013327    | NP_037459    | Q9HBI1 | PARVB_HUMAN |                               | 0    | CACCTTCCAAGG  | 0.572 |             |
| - | 2  | 564       | aa.2_Missense_M    | NM_058238    | NP_478679    | P56706 | WNT7B_HUMAN |                               | 1    | CCCCCTCCCCAA  | 0.627 |             |
| - | 13 | 5828      | arc.1_Missense_M   | NM_014246    | NP_055061    | Q9NYQ6 | CELR1_HUMAN | ial). EGF-like 6; calcium-bir | 11   | AGTACGGCCCG   | 0.612 |             |
| - | 35 | 5441      | _.R571W PLXNB2_    | NM_012401    | NP_036533    | O15031 | PLXB2_HUMAN | lasmic (Potential).           | 6    | TACCCGGGAAA   | 0.617 |             |
| - | 19 | 2389      | _p.R396C SBF1_u    | NM_002972    | NP_002963    | O95248 | MTMR5_HUMAN |                               | 0    | CAAGCGCCGCT   | 0.642 |             |
| + | 2  | 200       | _p.R29Q MIOX_u     | NM_017584    | NP_060054    | Q9UGB7 | MIOX_HUMAN  |                               | 0    | CTTCCGGAACT   | 0.612 | rs151151350 |
| + | 9  | 1294      | _.G271R CNTN6_t    | NM_014461    | NP_055276    | Q9UQ52 | CNTN6_HUMAN | like C2-type 4.               | 8    | CTAGTGGAAGG   | 0.398 |             |
| - | 2  | 143       | lauj.1_Intron GHR1 | NM_016362    | NP_057446    | Q9UBU3 | GHRL_HUMAN  |                               | 1    | CTGGGGAGGGC   | 0.652 |             |
| + | 2  | 1079      | ft.2_Missense_Mu   | NM_001098213 | NP_001091683 | P35367 | HRH1_HUMAN  | lasmic (Potential).           | 2    | CAAGGGGGATG   | 0.532 |             |
| + | 10 | 1809      | xxj.2_Missense_Mt  | NM_001162499 | NP_001155971 | O75155 | CAND2_HUMAN | HEAT 12.                      | 4    | GGAGGTGAAGG   | 0.632 |             |
| + | 5  | 2377      | wd.1_Missense_M    | NM_001144382 | NP_001137854 | Q9UPR0 | PLCL2_HUMAN | C2.                           | 4    | CAGAACTTCCC   | 0.473 | rs138785787 |
| + | 2  | 674       | cdq.2_Missense_M   | NM_052953    | NP_443185    | Q96PB8 | LRC3B_HUMAN |                               | 4    | GTCTTTCATTCTC | 0.443 |             |
| - | 9  | 1329      | _Mutation_p.Q379   | NM_198056    | NP_932173    | Q14524 | SCN5A_HUMAN |                               | 9    | CTGCTGATAGAC  | 0.612 |             |
| - | 11 | 1645      |                    | NM_006514    | NP_006505    | Q9Y5Y9 | SCNAA_HUMAN |                               | 10   | AGGGAGGGGGC   | 0.612 |             |
| + | 4  | 290       | J03ckr.2_Missense  | NM_001904    | NP_001895    | P35222 | CTNB1_HUMAN | 50del(1) p.M1_A87del(1) p.    | 3166 | CTCCTTCTCTGAC | 0.498 | rs121913409 |
| + | 2  | 968       | al.1_Intron CXCR1  | NM_006564    | NP_006555    | O00574 | CXCR6_HUMAN | lasmic (Potential).           | 1    | GTTCGAAAAGA   | 0.473 | rs141955108 |
| + | 4  | 1373      | ik.1_Missense_Mu   | NM_178329    | NP_847899    | P51677 | CCR3_HUMAN  | ellular (Potential).          | 8    | GAGCAAGCATC   | 0.498 |             |
| - | 3  | 419       | .1_5'UTR SCAP_u    | NM_012235    | NP_036367    | Q12770 | SCAP_HUMAN  | nal (By similarity).          | 1    | ATTCCACAGGT   | 0.537 |             |
| - | 14 | 3272      | .2_Missense_Muta   | NM_002673    | NP_002664    | O43157 | PLXB1_HUMAN | ellular (Potential).          | 5    | GACGCAGAAAC   | 0.662 |             |
| - | 11 | 2819      | csx.2_Missense_M   | NM_002673    | NP_002664    | O43157 | PLXB1_HUMAN | ellular (Potential).          | 5    | CCTCGGGCAGC   | 0.687 |             |
| - | 1  | 1957      | zuf.1_Missense_M   | NM_001407    | NP_001398    | Q9NYQ7 | CELR3_HUMAN | r (Potential). Cadherin 3.    | 11   | GGGGCGCACA    | 0.602 | rs140226738 |
| - | 16 | 2332      | wf.1_Missense_Mi   | NM_002292    | NP_002283    | P55268 | LAMB2_HUMAN | inin IV type B.               | 3    | GGATTAGGAAAT  | 0.572 |             |
| + | 1  | 166       | cyl.2_Missense_M   | NM_144499    | NP_653082    | P11488 | GNAT1_HUMAN |                               | 3    | GAAAAGAAAGC   | 0.612 |             |
| + | 46 | 4804      |                    | NM_004947    | NP_004938    | Q8IZD9 | DOCK3_HUMAN | DHR-2.                        | 0    | CCTTGGAGTTG   | 0.488 |             |
| + | 53 | 5707_5708 |                    | NM_004947    | NP_004938    | Q8IZD9 | DOCK3_HUMAN |                               | 0    | GTCCTCCTTGAC  | 0.614 |             |
| + | 26 | 3380      | p.R1073C CACNA     | NM_001128840 | NP_001122312 | Q01668 | CAC1D_HUMAN | ellular (Potential). III.     | 11   | TGGTCCGTGAA   | 0.527 |             |
| + | 9  | 977       | _p.G216E CACNA     | NM_018398    | NP_060868    | Q8IZS8 | CA2D3_HUMAN | ilar (Potential). VWFA.       | 7    | GAAATGGAAC TT | 0.453 |             |
| + | 18 | 1655      | JTR PXX_uc010hn    | NM_017771    | NP_060241    | Q7Z7A4 | PXX_HUMAN   |                               | 1    | CTCTCCACCTC   | 0.612 |             |
| - | 21 | 2985      |                    | NM_020872    | NP_065923    | Q9P232 | CNTN3_HUMAN | nectin type-III 4.            | 5    | GTAGTCCTCTT   | 0.408 |             |
| - | 6  | 822       | _p.C30G PROS1_     | NM_000313    | NP_000304    | P07225 | PROS_HUMAN  | alcium-binding (Potential).   | 1    | CTTTGCATT CAT | 0.348 |             |
| + | 9  | 1318      | cx.2_Missense_Mu   | NM_198196    | NP_937839    | P40200 | TACT_HUMAN  | potential). Pro/Ser/Thr-rich. | 3    | AAATTCCTCAAC  | 0.358 |             |
| + | 16 | 3180      |                    | NM_032242    | NP_115618    | Q9UIW2 | PLXA1_HUMAN | ir (Potential). IPT/TIG 3.    | 3    | AATCCGGGCCA   | 0.632 |             |
| - | 3  | 921       | _Mutation_p.G24    | NM_003925    | NP_003916    | O95243 | MBD4_HUMAN  |                               | 2    | TACATCCTTTTT  | 0.363 |             |
| - | 4  | 1790      |                    | NM_015103    | NP_055918    | Q9Y4D7 | PLXD1_HUMAN | ellular (Potential).          | 1    | GTAGGCGTCCG   | 0.692 |             |

|   |    |           |                   |              |              |        |              |    |               |       |                            |
|---|----|-----------|-------------------|--------------|--------------|--------|--------------|----|---------------|-------|----------------------------|
| - | 2  | 230       | i.R27G NMNAT3_t   | NM_178177    | NP_835471    | Q96T66 | NMNA3_HUMAN  | 0  | CACTCGGTGAT   | 0.572 |                            |
| + | 5  | 1184      | hvn.2_Missense_f  | NM_207365    | NP_997248    | Q6P093 | ADCL2_HUMAN  | 0  | ACTTCGAAATG   | 0.358 |                            |
| + | 5  | 545_546   | i.p.P125F FNDC3l  | NM_022763    | NP_073600    | Q53EP0 | FND3B_HUMAN  | 3  | TCCCTCCCTATC  | 0.535 |                            |
| + | 26 | 3581      | hz.3_Missense_Mi  | NM_022763    | NP_073600    | Q53EP0 | FND3B_HUMAN  | 3  | CTCAGGAGCTA   | 0.517 | nectin type-III 9.         |
| + | 9  | 1118      | my.2_Missense_M   | NM_004068    | NP_004059    | Q96CW1 | AP2M1_HUMAN  | 0  | AGATCGAGGTG   | 0.542 | MHD.                       |
| + | 17 | 1770      | p.R540Q ABCF3_u   | NM_018358    | NP_060828    | Q9NUQ8 | ABCF3_HUMAN  | 4  | TGTTCGGGGCA   | 0.577 | C transporter 2.           |
| + | 10 | 2109      | G1_uc003fqr.2_Int | NM_001102416 | NP_001095886 | P01042 | KNG1_HUMAN   | 1  | ATGAAAGAATCT  | 0.368 |                            |
| - | 2  | 1351      |                   | NM_178496    | NP_848591    | Q81YB1 | M21D2_HUMAN  | 0  | GGCAGGAAGTC   | 0.532 |                            |
| - | 3  | 3308      | tron ABCA11P_uc   | NM_133474    | NP_597731    | D9N162 | D9N162_HUMAN | 1  | FAAAGGTTTGGC  | 0.418 |                            |
| - | 3  | 2433      | ron ABCA11P_uc0   | NM_133474    | NP_597731    | D9N162 | D9N162_HUMAN | 1  | TTCTCTCCAGTA  | 0.398 |                            |
| - | 3  | 1628      | tron ABCA11P_uc   | NM_133474    | NP_597731    | D9N162 | D9N162_HUMAN | 1  | FAAAGGCTTGGC  | 0.403 |                            |
| - | 27 | 3894      | iAK_uc010ibi.2_Mi | NM_005255    | NP_005246    | O14976 | GAK_HUMAN    | 4  | GGGCCCGGATG   | 0.687 |                            |
| - | 9  | 816       | _p.A239T CRMP1_   | NM_001313    | NP_001304    | Q14194 | DPYL1_HUMAN  | 2  | GATGGCCCGGA   | 0.557 |                            |
| - | 9  | 1669      | p.D465N JAKMIP1   | NM_144720    | NP_653321    | Q96N16 | JKIP1_HUMAN  | 4  | TCCTGTCTGTCC  | 0.537 | tion with TYK2 and GABBR   |
| - | 16 | 2384      | _Mutation_p.S788R | NM_198595    | NP_940997    | Q8N556 | AFAP1_HUMAN  | 0  | CCCTGGCTCTTC  | 0.677 |                            |
| - | 10 | 6442      | r.1_Missense_Mut  | NM_148894    | NP_683692    | Q8NFC6 | BOD1L_HUMAN  | 6  | TTACTCTGGTAC  | 0.483 |                            |
| + | 10 | 1556      | l.1_Missense_Mu   | NM_182485    | NP_872291    | Q7Z5Q1 | CPEB2_HUMAN  | 1  | CTTCTCCAATCA  | 0.433 | RRM 2.                     |
| + | 10 | 1170      | o.P312S RBPJ_uc   | NM_005349    | NP_005340    | Q06330 | SUH_HUMAN    | 3  | CCACTCCATGTC  | 0.338 |                            |
| + | 11 | 1414      |                   | NM_021927    | NP_068746    | Q8N442 | GUF1_HUMAN   | 1  | AGGCTAGGATTT  | 0.373 |                            |
| + | 4  | 3067      | _p.P907L REST_u   | NM_005612    | NP_005603    | Q13127 | REST_HUMAN   | 9  | CCCTACCTGGTC  | 0.428 |                            |
| + | 1  | 135       | 0ihr.2_Missense_f | NM_053039    | NP_444267    | Q9BY64 | UDB28_HUMAN  | 1  | TGAAAGAGCTT   | 0.443 |                            |
| + | 1  | 331       | 0ihr.2_Missense_f | NM_053039    | NP_444267    | Q9BY64 | UDB28_HUMAN  | 1  | TTTTTCCACAAGA | 0.294 |                            |
| + | 13 | 1793      | _B_uc003hgu.3_M   | NM_000477    | NP_000468    | P02768 | ALBU_HUMAN   | 6  | TGGATGATTTCC  | 0.413 | Albumin 3.                 |
| - | 9  | 1237      |                   | NM_001042784 | NP_001036249 | Q5M9N0 | CD158_HUMAN  | 6  | TGTCCGGGCTT   | 0.388 | Potential.                 |
| + | 27 | 3909      | w.2_Missense_Mu   | NM_025074    | NP_079350    | Q86XX4 | FRAS1_HUMAN  | 5  | GAAATGGAAAAA  | 0.478 | extracellular (Potential). |
| + | 2  | 993       |                   | NM_001201    | NP_001192    | P12645 | BMP3_HUMAN   | 5  | CCAAGGGACGC   | 0.438 |                            |
| - | 8  | 1087      | 0H1B_uc011ceh.1   | NM_000668    | NP_000659    | P00325 | ADH1B_HUMAN  | 2  | FAAAATCAGCCAC | 0.368 |                            |
| - | 3  | 269       |                   | NM_000673    | NP_000664    | P40394 | ADH7_HUMAN   | 3  | CAGATTCCTGTG  | 0.393 |                            |
| + | 8  | 1722      | _p.P382S EGF_uc   | NM_001963    | NP_001954    | P01133 | EGF_HUMAN    | 4  | TCTGTCTCTGAAC | 0.398 | Extracellular (Potential). |
| + | 9  | 1865_1866 | p.D430N EGF_uc    | NM_001963    | NP_001954    | P01133 | EGF_HUMAN    | 4  | CAACTGGATGAA  | 0.441 | Extracellular (Potential). |
| + | 6  | 879       | a.2_Missense_Mi   | NM_016648    | NP_057732    | Q4G0J3 | LARP7_HUMAN  | 3  | ATATTTCTAAAA  | 0.279 | RRM.                       |
| - | 8  | 1705      |                   | NM_015130    | NP_055945    | Q6ZT07 | TBCD9_HUMAN  | 1  | CCAATTCGGG    | 0.463 |                            |
| + | 1  | 1787      | t.3_Intron LRBA_u | NM_006439    | NP_006430    | Q9Y586 | MB212_HUMAN  | 1  | AGAGCGACGCC   | 0.652 |                            |
| + | 3  | 1301      | _p.S361L TLR2_uc  | NM_003264    | NP_003255    | O60603 | TLR2_HUMAN   | 3  | TAAATCATTAGA  | 0.323 | tracellular (Potential).   |
| + | 3  | 696       | _p.P175S RBM46_   | NM_144979    | NP_659416    | Q8TBY0 | RBM46_HUMAN  | 2  | TTTATCCAAGTC  | 0.353 | RRM 2.                     |
| + | 4  | 636       | 3_uc003iox.2_Mis  | NM_000856    | NP_000847    | Q02108 | GCYA3_HUMAN  | 4  | AGGCAGCAGGA   | 0.488 |                            |
| + | 15 | 2993      | _Mutation_p.R798K | NM_001083619 | NP_001077088 | P42262 | GRIA2_HUMAN  | 4  | GAAACGAATGA   | 0.448 | lasmic (Potential).        |
| + | 11 | 1977      | p.R444C TLL1_uc   | NM_012464    | NP_036596    | O43897 | TLL1_HUMAN   | 7  | AGTTTCGTAGCA  | 0.368 | CUB 1.                     |
| - | 9  | 1223      | e.1_Missense_Mu   | NM_012224    | NP_036356    | Q96PY6 | NEK1_HUMAN   | 6  | CTATCCCTAGGA  | 0.368 | rotein kinase.             |
| + | 8  | 949       | e_Mutation_p.R25  | NM_021942    | NP_068761    | Q7Z392 | CD041_HUMAN  | 0  | ATTGAGAGCCC   | 0.318 |                            |
| - | 10 | 6595      |                   | NM_005245    | NP_005236    | Q14517 | FAT1_HUMAN   | 12 | TCAGTGAAATTT  | 0.428 | (Potential). Cadherin 19.  |
| + | 18 | 2891      | 3jdk.1_Missense_I | NM_139056    | NP_620687    | Q8TE57 | ATS16_HUMAN  | 8  | CACGGGGCTGG   | 0.527 | SP type-1 2.               |
| - | 7  | 2121      | se_Mutation_p.E3f | NM_024091    | NP_076996    | Q14CZ7 | FAKD3_HUMAN  | 4  | TCATTCCTTGCA  | 0.333 |                            |
| + | 11 | 1523      | RR_uc003jef.3_R   | NM_024010    | NP_076915    | Q9UBK8 | MTRR_HUMAN   | 1  | CTTCAACATTGT  | 0.443 | -binding FR-type.          |
| - | 78 | 13601     | ic.2_Nonsense_Mi  | NM_001369    | NP_001360    | Q8TE73 | DYH5_HUMAN   | 31 | TCATCCATTTGC  | 0.478 |                            |
| + | 11 | 1984      |                   | NM_020227    | NP_064612    | Q9NQV7 | PRDM9_HUMAN  | 6  | GAGGACACACA   | 0.597 | 2H2-type 4.                |
| + | 11 | 2068      |                   | NM_020227    | NP_064612    | Q9NQV7 | PRDM9_HUMAN  | 6  | GAGGACACACA   | 0.612 | 2H2-type 5.                |

rs146224376

rs112192848

|   |    |           |                    |              |              |        |              |                               |    |              |       |
|---|----|-----------|--------------------|--------------|--------------|--------|--------------|-------------------------------|----|--------------|-------|
| - | 4  | 959       |                    | NM_022130    | NP_071413    | Q9H4A6 | GOLP3_HUMAN  |                               | 1  | TCACCCATTTGT | 0.502 |
| - | 12 | 1928      | 0iuq.1_Missense_I  | NM_030955    | NP_112217    | P58397 | ATS12_HUMAN  | SP type-1 1.                  | 9  | CAAGCGATAGC  | 0.458 |
| - | 7  | 960       |                    | NM_001737    | NP_001728    | P02748 | CO9_HUMAN    | MACPF.                        | 0  | TTTTTCTCTGTG | 0.328 |
| + | 19 | 2486      | 3A1_uc003jow.2_h   | NM_181501    | NP_852478    | P56199 | ITA1_HUMAN   | cellular (Potential).         | 3  | AATAAGGAAAA  | 0.398 |
| + | 20 | 1971      | h.3_Missense_Mu    | NM_001136034 | NP_001129506 | Q9NQI0 | DDX4_HUMAN   | case C-terminal.              | 2  | CTGGTCGTTGT  | 0.388 |
| + | 2  | 330       |                    | NM_005242    | NP_005233    | P55085 | PAR2_HUMAN   | cellular (Potential).         | 1  | 3AAAAGGAGTTA | 0.433 |
| + | 33 | 8017      | p.G347R GPR98_I    | NM_032119    | NP_115495    | Q8WXG9 | GPR98_HUMAN  | Extracellular (Potential).    | 16 | GTGCTGGAGAG  | 0.423 |
| - | 17 | 2333      | p.F511C MCTP1_I    | NM_024717    | NP_078993    | Q6DN14 | MCTP1_HUMAN  |                               | 2  | CTGATAAAGTTT | 0.353 |
| + | 8  | 1045      | R36_uc010jbu.2_f   | NM_139281    | NP_644810    | Q8NI36 | WDR36_HUMAN  | WD 3.                         | 2  | GAAGCCCATGT  | 0.373 |
| - | 13 | 1452      | 03kpp.1_Splice_Si  | NM_022140    | NP_071423    | Q9HCS5 | E41LA_HUMAN  |                               | 1  | ACTGACCTTTT  | 0.313 |
| + | 3  | 513       | ksn.2_Missense_I   | NM_182761    | NP_877438    | A1A519 | F170A_HUMAN  |                               | 1  | CAACATGTCTC  | 0.493 |
| + | 1  | 580       |                    | NM_177478    | NP_803431    | Q8N4E7 | FTMT_HUMAN   | ritin-like diiron.            | 1  | TGTGCGATTTCC | 0.507 |
| - | 7  | 1289      | wk.2_Missense_M    | NM_004199    | NP_004190    | O15460 | P4HA2_HUMAN  |                               | 0  | CAGCTCGTTCCG | 0.433 |
| - | 13 | 1850      | p.E551K KIF3A_I    | NM_007054    | NP_008985    | Q9Y496 | KIF3A_HUMAN  | Potential.                    | 1  | ATGTTCTTGTTC | 0.398 |
| - | 2  | 445       | f20_uc003lav.2_5'I | NM_001099221 | NP_001092691 | Q6ZNK6 | TIFAB_HUMAN  | FHA.                          | 0  | ACAGCCCTTGC  | 0.647 |
| - | 10 | 1614_1615 | IL3_uc011cyd.1_In  | NM_017415    | NP_059111    | Q9UH77 | KLHL3_HUMAN  | Kelch 2.                      | 0  | AGCACCGCTGC  | 0.599 |
| + | 26 | 5064      | p.R386Q ANKHC      | NM_020690    | NP_065741    | Q8IWZ2 | Q8IWZ2_HUMAN |                               | 6  | AGCACGGTAAA  | 0.363 |
| + | 1  | 563       | 03lhc.1_Missense_I | NM_018905    | NP_061728    | Q9Y5H9 | PCDA2_HUMAN  | cellular (Potential).         | 4  | GGTTTCTCTAC  | 0.448 |
| + | 1  | 1966      | lhd.2_Intron PCDH  | NM_018906    | NP_061729    | Q9Y5H8 | PCDA3_HUMAN  | Extracellular (Potential).    | 8  | CACGGTGAACCC | 0.697 |
| + | 1  | 1050      | 03lhf.2_Intron PCI | NM_018907    | NP_061730    | Q9UN74 | PCDA4_HUMAN  | Extracellular (Potential).    | 6  | TCCTATGAAATT | 0.358 |
| + | 1  | 1475      | 003lhi.2_Intron PC | NM_018908    | NP_061731    | Q9Y5H7 | PCDA5_HUMAN  | r (Potential). Cadherin 5.    | 3  | CTACTCGCTGG  | 0.662 |
| + | 1  | 1922      | l.2_Intron PCDHAf  | NM_018901    | NP_061724    | Q9Y5I2 | PCDAA_HUMAN  | r (Potential). Cadherin 6.    | 5  | TGACTCGCCAC  | 0.647 |
| + | 1  | 871       | lah.1_Missense_IV  | NM_018939    | NP_061762    | Q9Y5E3 | PCDB6_HUMAN  | Extracellular (Potential).    | 1  | CCCTCGAAATA  | 0.458 |
| + | 1  | 1948      | lah.1_Missense_IV  | NM_018939    | NP_061762    | Q9Y5E3 | PCDB6_HUMAN  | Extracellular (Potential).    | 1  | CTCCGCGCTCG  | 0.706 |
| + | 1  | 1463      | o.1_Intron PCDHG   | NM_018923    | NP_061746    | Q9Y5G2 | PCDGE_HUMAN  | r (Potential). Cadherin 5.    | 0  | AAGTTTCTACT  | 0.592 |
| + | 1  | 610       | 3ljo.1_Intron PCDF | NM_018924    | NP_061747    | Q9Y5G1 | PCDGF_HUMAN  | r (Potential). Cadherin 2.    | 0  | GGGAAGAGCAG  | 0.552 |
| + | 11 | 1093      | p.S353L ARHGAF     | NM_015071    | NP_055886    | Q9UNA1 | RHG26_HUMAN  | PH.                           | 1  | TTTGTCCGGAAG | 0.498 |
| + | 3  | 326       | p.R69Q FBXO38      | NM_205836    | NP_995308    | Q6PIJ6 | FBX38_HUMAN  | KLF7 (By similarity). F-box   | 6  | CTGCGAGTTGT  | 0.468 |
| - | 8  | 1034      | lua.2_Missense_I   | NM_181776    | NP_861441    | Q495M3 | S36A2_HUMAN  | ical; (Potential p.G302V(1))  | 2  | CATCCCCAAAG  | 0.453 |
| - | 2  | 1445      | o.Q463R PWWP2I     | NM_001130864 | NP_001124336 | Q96N64 | PWP2A_HUMAN  |                               | 0  | GATTCTGATATC | 0.403 |
| + | 2  | 397       | 99_uc011deq.1_5    | NM_017785    | NP_060255    | Q96EA4 | SPDLY_HUMAN  | Potential.                    | 2  | GAAATCAATTGC | 0.413 |
| + | 4  | 389       | ndf.1_Missense_M   | NM_006650    | NP_006641    | Q6PUV4 | CPLX2_HUMAN  |                               | 1  | CAAAGGACATG  | 0.413 |
| + | 4  | 1334      | SD1_uc011dfx.1_I   | NM_022455    | NP_071900    | Q96L73 | NSD1_HUMAN   |                               | 3  | CCTTAGGAGAAC | 0.418 |
| - | 5  | 760       | p.G196D DOK3_u     | NM_024872    | NP_079148    | Q7L591 | DOK3_HUMAN   | RS-type PTB.                  | 0  | GGGTGCCCTTG  | 0.687 |
| + | 3  | 648       |                    | NM_197975    | NP_932079    | Q6UXE8 | BTNL3_HUMAN  | Extracellular (Potential).    | 0  | GACAGGATTTG  | 0.502 |
| + | 8  | 1245      | p.2_Missense_Mu    | NM_197975    | NP_932079    | Q6UXE8 | BTNL3_HUMAN  | Cytoplasmic (Potential).      | 0  | TGTCTCCCAAC  | 0.498 |
| - | 5  | 734       | ij.1_Missense_Mu   | NM_006098    | NP_006089    | P63244 | GBLP_HUMAN   | WD 5.                         | 0  | GCCTCCAGAAG  | 0.512 |
| - | 13 | 1483      | p.A450V EXOC2      | NM_018303    | NP_060773    | Q96KP1 | EXOC2_HUMAN  |                               | 7  | CAAAGCCACCA  | 0.428 |
| - | 11 | 1776_1777 | iba.2_Missense_IV  | NM_005493    | NP_005484    | Q96S59 | RANB9_HUMAN  |                               | 2  | TTTCTCCAACTC | 0.356 |
| - | 3  | 711       | p.D171N NUP153     | NM_005124    | NP_005115    | P49790 | NU153_HUMAN  |                               | 9  | TAGAACTTTAA  | 0.398 |
| - | 20 | 2045      |                    | NM_001503    | NP_001494    | P80108 | PHLD_HUMAN   | FG-GAP 5.                     | 3  | GTTTCCCATT   | 0.493 |
| - | 1  | 236       | nk HIST1H2AC_uc    | NM_003526    | NP_003517    | P62807 | H2B1C_HUMAN  |                               | 1  | GCGCTCAAATA  | 0.577 |
| + | 5  | 658       | p.G118R BTN3A3     | NM_006994    | NP_008925    | O00478 | BT3A3_HUMAN  | Potential). Ig-like V-type 2. | 0  | AGGATGGAGGG  | 0.468 |
| + | 1  | 699       | 2_5'Flank TRIM10   | NM_033229    | NP_150232    | Q9C019 | TRI15_HUMAN  |                               | 0  | CTGTGCCCTGT  | 0.632 |
| - | 5  | 1046      | dnk.1_RNA HLA-E    | NM_005514    | NP_005505    | P01889 | 1B07_HUMAN   | ical; (Potential).            | 0  | TACACATCACAC | 0.597 |
| + | 18 | 1739      | 3H5_uc003nwx.1_I   | NM_172166    | NP_751898    | O43196 | MSH5_HUMAN   |                               | 3  | AAGCTCTGGG   | 0.572 |
| - | 12 | 1907_1908 | ixd.2_Missense_M   | NM_025258    | NP_079534    | Q9Y334 | G7C_HUMAN    |                               | 3  | CTAGAGGACCCC | 0.584 |

|   |    |       |                   |              |              |        |             |                                |    |              |       |             |
|---|----|-------|-------------------|--------------|--------------|--------|-------------|--------------------------------|----|--------------|-------|-------------|
| + | 11 | 3661  | cp.3_Missense_M   | NM_005104    | NP_005095    | P25440 | BRD2_HUMAN  | ET.                            | 5  | CTGGACATCAAC | 0.517 |             |
| - | 4  | 1457  | 318_uc003ouw.2_   | NM_014345    | NP_055160    | Q5VUA4 | ZN318_HUMAN |                                | 7  | CTTTGGGAATCC | 0.478 |             |
| + | 9  | 999   | J11_uc011dvn.1_5  | NM_007058    | NP_008989    | Q9UMQ6 | CAN11_HUMAN | lpain catalytic.               | 2  | GGAATCCCTGGG | 0.597 |             |
| - | 3  | 650   | p.S158L RCAN2_    | NM_005822    | NP_005813    | Q14206 | RCAN2_HUMAN |                                | 0  | GGGGCAGATG   | 0.532 |             |
| + | 1  | 501   | se_Mutation_p.G11 | NM_014464    | NP_055279    | Q9UJW2 | TINAG_HUMAN |                                | 4  | CAGAAGGTAGG  | 0.353 |             |
| - | 83 | 14940 | .R4822Q DST_uc    | NM_001144769 | NP_001138241 | Q03001 | DYST_HUMAN  | Spectrin 19.                   | 14 | GTTCTCGGGCTC | 0.478 |             |
| + | 7  | 1671  | k.2_Missense_Mu   | NM_001704    | NP_001695    | O60242 | BAI3_HUMAN  | . Extracellular (Potential).   | 50 | GAGTTCGTGGA  | 0.527 |             |
| + | 14 | 3788  | e_Mutation_p.P88  | NM_001162529 | NP_001156001 | Q9P2D6 | F135A_HUMAN |                                | 1  | AACTTCCTGGG  | 0.393 |             |
| + | 19 | 4409  | 135A_uc003pfn.2_  | NM_001162529 | NP_001156001 | Q9P2D6 | F135A_HUMAN |                                | 1  | AGGATCGCTAT  | 0.328 |             |
| - | 5  | 3300  | p.R877Q FILIP1_   | NM_015687    | NP_056502    | Q7Z7B0 | FLIP1_HUMAN |                                | 4  | TGGCTCGTTCT  | 0.443 |             |
| + | 2  | 1331  | bm.2_Missense_Iv  | NM_153362    | NP_699193    | Q8N3Z0 | PRS35_HUMAN | eptidase S1.                   | 1  | CTGTTCCGATC  | 0.507 |             |
| - | 15 | 2148  | p.M606I LAMA4_    | NM_001105206 | NP_001098676 | Q16363 | LAMA4_HUMAN | al. Domain II and I.           | 9  | CCCGTTCATATC | 0.358 |             |
| - | 30 | 5123  | 1_Intron GOPC_u   | NM_002944    | NP_002935    | P08922 | ROS_HUMAN   | III 7. Extracellular (Potentia | 25 | CATTTCTCAG   | 0.398 |             |
| - | 14 | 3238  | l184A_uc003pyl.3_ | NM_024581    | NP_078857    | Q8NB25 | F184A_HUMAN |                                | 7  | TATTTCTTGAC  | 0.358 |             |
| - | 2  | 232   | nse_Mutation_p.R  | NM_004665    | NP_004656    | O95498 | VNN2_HUMAN  | N hydrolase.                   | 0  | TGATTCGAGCAC | 0.448 |             |
| - | 4  | 1101  | .R281Q BCLAF1_    | NM_014739    | NP_055554    | Q9NYF8 | BCLF1_HUMAN |                                | 1  | CTGTATCGACTA | 0.443 | rs145724464 |
| - | 2  | 598   | i.H67Y SHPRH_uc   | NM_001042683 | NP_001036148 | Q149N8 | SHPRH_HUMAN |                                | 3  | TCTGTGAGCCAC | 0.388 |             |
| - | 3  | 652   |                   | NM_020861    | NP_065912    | Q8N680 | ZBTB2_HUMAN |                                | 1  | GGCCTCAGGGA  | 0.557 |             |
| + | 13 | 4101  | .P4_uc003qrg.2_Ir | NM_020245    | NP_064630    | Q9NRJ4 | TULP4_HUMAN |                                | 1  | GTACACCCCTCC | 0.662 |             |
| - | 30 | 4833  |                   | NM_005577    | NP_005568    | P08519 | APOA_HUMAN  | Kringle 36.                    | 6  | TACTCCCACCT  | 0.493 |             |
| - | 21 | 3334  |                   | NM_005577    | NP_005568    | P08519 | APOA_HUMAN  | Kringle 32.                    | 6  | TCTTCTGTGAC  | 0.483 |             |
| + | 10 | 1246  |                   | NM_000301    | NP_000292    | P00747 | PLMN_HUMAN  | Kringle 4.                     | 4  | CCACAGGAAAG  | 0.488 |             |
| - | 11 | 1339  | sh.1_Missense_M   | NM_001013836 | NP_001013858 | Q9Y6D9 | MD1L1_HUMAN | Potential.                     | 2  | TCTACCTGCTG  | 0.582 |             |
| + | 2  | 659   | e_Mutation_p.P10  | NM_133463    | NP_597720    | Q400G9 | AMZ1_HUMAN  |                                | 0  | TACAGCCGATAC | 0.642 |             |
| + | 8  | 1050  | p.P297S SLC29A    | NM_153247    | NP_694979    | Q7RTT9 | S29A4_HUMAN | lasmic (Potential).            | 1  | AGCACCCAGCC  | 0.682 |             |
| + | 2  | 270   | yb.1_Missense_M   | NM_058176    | NP_478056    | Q9UKV0 | HDAC9_HUMAN |                                | 5  | TGACACGGCAG  | 0.483 |             |
| - | 5  | 698   | ug.2_Missense_M   | NM_182762    | NP_877439    | Q6ZN28 | MACC1_HUMAN |                                | 3  | TTGAGGAAGTC  | 0.383 |             |
| + | 41 | 6681  |                   | NM_003777    | NP_003768    | Q96DT5 | DYH11_HUMAN | 2 (By similarity).             | 15 | GACAACAGATG  | 0.393 |             |
| + | 5  | 1138  | kwe.2_Missense_I  | NM_032222    | NP_115598    | Q4G0A6 | F188B_HUMAN |                                | 0  | CCAGCCCGCAC  | 0.547 |             |
| + | 11 | 2499  | p.M353I CCDC12    | NM_194300    | NP_919276    | Q6ZRS4 | CC129_HUMAN |                                | 0  | GTGATGGAGGA  | 0.537 |             |
| - | 10 | 1458  | p.R390Q PDE1C_    | NM_005020    | NP_005011    | Q14123 | PDE1C_HUMAN | ytic (By similarity).          | 4  | AGGTTCCGAAAC | 0.388 |             |
| + | 10 | 1133  |                   | NM_133468    | NP_597725    | Q8N8U9 | BMPER_HUMAN | VWFC 5.                        | 3  | CATCAGTAGCTC | 0.483 |             |
| + | 4  | 2353  | p.K691* CDK13_    | NM_003718    | NP_003709    | Q14004 | CDK13_HUMAN |                                | 5  | AAACCAAAGAA  | 0.343 |             |
| + | 2  | 91    | p.S31L MRPS17_    | NM_182633    | NP_872439    | Q8N859 | ZN713_HUMAN |                                | 2  | GGAATCACTGA  | 0.517 |             |
| + | 7  | 2086  | te.2_Missense_M   | NM_016220    | NP_057304    | Q9UII5 | ZN107_HUMAN | :2H2-type 13.                  | 1  | AAATTCATACTG | 0.353 |             |
| + | 6  | 906   |                   | NM_001099435 | NP_001092905 | A6NIY4 | SPDE5_HUMAN | Arg-rich.                      | 0  | GAACCCGAGGG  | 0.592 |             |
| + | 6  | 981   |                   | NM_001099435 | NP_001092905 | A6NIY4 | SPDE5_HUMAN | Arg-rich.                      | 0  | GAACCTGAGGG  | 0.577 |             |
| - | 19 | 1899  | z.1_Nonsense_Mu   | NM_005338    | NP_005329    | O00291 | HIP1_HUMAN  | Potential. p.D620G(1)          | 8  | TTTTTCGTTGGT | 0.537 |             |
| - | 2  | 1134  | .1_Intron CCDC14  | NM_006682    | NP_006673    | Q14314 | FGL2_HUMAN  | rogen C-terminal.              | 2  | GGATATCGATCA | 0.398 |             |
| - | 5  | 7208  | _Mutation_p.E230  | NM_033026    | NP_149015    | Q9Y6V0 | PCLO_HUMAN  |                                | 7  | AGTTTCTTCTT  | 0.418 |             |
| - | 5  | 4875  | v.2_Missense_Mut  | NM_033026    | NP_149015    | Q9Y6V0 | PCLO_HUMAN  |                                | 7  | TCTTTCGTTTTC | 0.398 |             |
| - | 16 | 2195  | hc.1_Missense_M   | NM_000927    | NP_000918    | P08183 | MDR1_HUMAN  | r 1. Cytoplasmic (Potential)   | 7  | ATTACGAAGTCT | 0.393 | rs28381914  |
| + | 8  | 881   | R260S CYP3A43_    | NM_057095    | NP_476436    | Q9HB55 | CP343_HUMAN |                                | 2  | AAAGTCGCCTC  | 0.204 |             |
| + | 14 | 2378  | ZAN_uc003uwl.2_F  | NM_003386    | NP_003377    | Q9Y493 | ZAN_HUMAN   | ate) (mucin-like domain)- E    | 11 | AAAACCCACCA  | 0.522 |             |
| - | 33 | 4973  | .2_Missense_Mut   | NM_005045    | NP_005036    | P78509 | RELN_HUMAN  |                                | 19 | AAATCCAGTTTC | 0.413 |             |
| - | 4  | 1349  |                   | NM_002711    | NP_002702    | Q16821 | PPR3A_HUMAN | p.D440N(1)                     | 34 | ATTATCATCCAG | 0.418 | rs145814266 |
| + | 9  | 1536  | XP2_uc011kmv.1    | NM_014491    | NP_055306    | O15409 | FOXP2_HUMAN | ucine-zipper.                  | 8  | AGGTGGTGCAA  | 0.408 |             |



|   |    |           |                      |              |              |        |              |                               |       |               |       |             |
|---|----|-----------|----------------------|--------------|--------------|--------|--------------|-------------------------------|-------|---------------|-------|-------------|
| + | 14 | 2219      | ιq.1_Missense_Mt     | NM_000492    | NP_000483    | P13569 | CFTR_HUMAN   | lasmic (Potential).           | 5     | ιGGAAAAAGGA   | 0.378 |             |
| - | 13 | 1461      | lks.2_Missense_M     | NM_022444    | NP_071889    | Q9BZW2 | S13A1_HUMAN  | ical; (Potential).            | 2     | ACCATCAAAGAA  | 0.363 |             |
| - | 5  | 1827      | vly.1_Missense_M     | NM_176814    | NP_789784    | Q2TB10 | ZN800_HUMAN  | 2H2-type 6.                   | 1     | AAAGAGGACACT  | 0.358 |             |
| + | 6  | 705       | N33_uc003voq.1_      | NM_178562    | NP_848657    | Q86UF1 | TSN33_HUMAN  | ellular (Potential).          | 1     | ιTGGAGGGATTT  | 0.512 |             |
| - | 15 | 1860      |                      | NM_004333    | NP_004324    | P15056 | BRAF_HUMAN   | rotein kinas_R603>I(2)]p.T    | 18290 | 3ATTTCACTGTAC | 0.368 |             |
| - | 14 | 1711_1712 |                      | NM_000420    | NP_000411    | P23276 | KELL_HUMAN   | ellular (Potential).          | 4     | ιTCGATCCAAGC1 | 0.545 |             |
| + | 1  | 757       | uc003wda.2_Intror    | NM_176883    | NP_795364    | P59536 | T2R41_HUMAN  | Name=6; (Potential).          | 2     | ATCATTGATGCC  | 0.498 |             |
| + | 1  | 1267      |                      | NM_001008747 | NP_001008747 | A4D2H0 | A4D2H0_HUMAN |                               | 0     | ιAGAAGCTTCTC/ | 0.378 |             |
| - | 6  | 2513      |                      | NM_015694    | NP_056509    | Q9ULD5 | ZN777_HUMAN  |                               | 1     | ιCTTGCCGCACT  | 0.687 |             |
| + | 4  | 656       | p.A113V REPIN1_      | NM_013400    | NP_037532    | Q9BWE0 | REPI1_HUMAN  |                               | 1     | ιCAGGGCCCATC  | 0.701 |             |
| - | 36 | 5881      | ιz.2_Missense_Mu     | NM_170606    | NP_733751    | Q8NEZ4 | MLL3_HUMAN   | Pro-rich.                     | 63    | ιTGAGTTAGAGG  | 0.527 |             |
| - | 22 | 3673      | ιz.2_Missense_Mu     | NM_170606    | NP_733751    | Q8NEZ4 | MLL3_HUMAN   |                               | 63    | ιAGATTCACAGC/ | 0.269 |             |
| - | 58 | 9334      | ε_Mutation_p.P23     | NM_033225    | NP_150094    | Q96PZ7 | CSMD1_HUMAN  | ar (Potential). Sushi 23.     | 25    | ιGCCAGGGTTGC  | 0.522 |             |
| - | 28 | 4819      | p.E869K CSMD1_       | NM_033225    | NP_150094    | Q96PZ7 | CSMD1_HUMAN  | lar (Potential). CUB 9.       | 25    | ιACATTCCTTCCC | 0.458 |             |
| + | 24 | 2749      | p.Y892D XPO7_uc      | NM_015024    | NP_055839    | Q9UIA9 | XPO7_HUMAN   |                               | 5     | ιAGGATTACCCC/ | 0.458 |             |
| - | 1  | 408       | κ LGI3_uc010ltu.2    | NM_139278    | NP_644807    | Q8N145 | LGI3_HUMAN   | LRRNT.                        | 1     | TGGGCGGGCAG   | 0.597 |             |
| - | 10 | 1281      |                      | NM_003844    | NP_003835    | O00220 | TR10A_HUMAN  | nic (Potential). Death.       | 6     | GGCATCCCCTGC  | 0.537 |             |
| + | 6  | 619       | ea.1_Missense_M      | NM_003817    | NP_003808    | Q9H2U9 | ADAM7_HUMAN  | ellular (Potential).          | 5     | ATTATTCTGTAC  | 0.373 |             |
| + | 3  | 756       | ιD2_uc003xlc.2_M     | NM_015214    | NP_056029    | O94830 | DDHD2_HUMAN  |                               | 2     | ιATGTTCCCTACT | 0.398 |             |
| + | 13 | 903       | _p.Q235* POLB_L      | NM_002690    | NP_002681    | P06746 | DPOLB_HUMAN  |                               | 2     | AAAGATCAGTAT  | 0.343 |             |
| - | 2  | 461       |                      | NM_003068    | NP_003059    | O43623 | SNAI2_HUMAN  |                               | 2     | ιCCACTGTGGTC  | 0.517 |             |
| - | 17 | 3318      | ιNL_uc003xqt.3_F     | NM_144651    | NP_653252    | A1KZ92 | PXDNL_HUMAN  |                               | 2     | AAATTTACCTAA  | 0.473 |             |
| + | 4  | 1262_1263 | ρ1_uc011ldy.1_Intr   | NM_006269    | NP_006260    | P56715 | RP1_HUMAN    |                               | 12    | ιAGGAAGAACAG  | 0.396 |             |
| + | 4  | 3056      | ρ1_uc011ldy.1_Intr   | NM_006269    | NP_006260    | P56715 | RP1_HUMAN    |                               | 12    | ιTTATGGAAAGT/ | 0.328 |             |
| - | 4  | 1216      |                      | NM_004820    | NP_004811    | O75881 | CP7B1_HUMAN  |                               | 3     | ιGATGGGAAATC/ | 0.443 |             |
| - | 9  | 1280      | A6_uc003xxr.3_Int    | NM_020361    | NP_065094    | Q8N4T0 | CBPA6_HUMAN  |                               | 2     | ιATTGGGAATTG1 | 0.378 | rs140734555 |
| + | 26 | 3317      |                      | NM_024870    | NP_079146    | Q70Z35 | PREX2_HUMAN  |                               | 17    | ιAGATTCTGGTC. | 0.393 |             |
| + | 8  | 1009      | ar.2_Missense_Mt     | NM_004133    | NP_004124    | Q14541 | HNF4G_HUMAN  |                               | 1     | ιTTTTTGATCCAG | 0.318 |             |
| + | 2  | 927       |                      | NM_173549    | NP_775820    | Q6P6B1 | CH047_HUMAN  | Glu-rich.                     | 0     | ιAGAAAGAATTCC | 0.433 |             |
| - | 6  | 817       | _Mutation_p.P254     | NM_006281    | NP_006272    | Q13188 | STK3_HUMAN   | rotein kinase.                | 4     | TCATTGGATGTA  | 0.348 |             |
| + | 14 | 2460      | /ιq.2_Missense_Mt    | NM_014677    | NP_055492    | Q9UQ26 | RIMS2_HUMAN  |                               | 15    | ιTATAGGAAGGA  | 0.388 |             |
| + | 28 | 4156      | ιq.2_Missense_Mt     | NM_014677    | NP_055492    | Q9UQ26 | RIMS2_HUMAN  | C2 2.                         | 15    | ιCGCATGGATCA  | 0.393 |             |
| - | 5  | 2822      | 83H_uc010mfk.1_      | NM_198488    | NP_940890    | Q6ZRV2 | FA83H_HUMAN  |                               | 3     | GCACGGGGGGC   | 0.692 |             |
| - | 6  | 716       | AH_uc003zat.1_5'     | NM_017570    | NP_060040    | O14841 | OPLA_HUMAN   |                               | 0     | GAAGCCCAGCT/  | 0.682 |             |
| + | 6  | 675       | ι.A173V GPT_uc0l     | NM_005309    | NP_005300    | P24298 | ALAT1_HUMAN  |                               | 2     | GGTGGCCGCG    | 0.692 |             |
| - | 12 | 835       | zkl.2_Missense_Mt    | NM_002839    | NP_002830    | P23468 | PTPRD_HUMAN  | 1. Extracellular (Potential). | 22    | GAAGAGGGCAA   | 0.418 |             |
| - | 8  | 1257      | ι_p.L400F MPDZ_      | NM_003829    | NP_003820    | O75970 | MPDZ_HUMAN   | PDZ 3.                        | 6     | ATTACCCAATTTI | 0.303 |             |
| - | 2  | 417       | ιuv.2_Missense_M     | NM_148179    | NP_680545    | Q8N5L8 | CI023_HUMAN  |                               | 0     | ιCAACCGACCCA  | 0.622 |             |
| - | 2  | 1376      |                      | NM_003028    | NP_003019    | Q15464 | SHB_HUMAN    | with LAT, FAK1, JAK1 and      | 3     | ιGGGCTCCATGT/ | 0.557 |             |
| + | 1  | 526       | ι2421_uc004aed.1_RNA |              |              |        |              |                               | 0     | ιAGCCCAATCTG/ | 0.607 | rs141617852 |
| - | 17 | 2002      | ε_Mutation_p.P58ζ    | NM_013417    | NP_038203    | P41252 | SYIC_HUMAN   |                               | 2     | ιAGGGCGTTGT/  | 0.438 | rs45474891  |
| + | 23 | 5299      | .R1730W WNK2_ι       | NM_006648    | NP_006639    | Q9Y3S1 | WNK2_HUMAN   |                               | 12    | ιCCCCTCGGAAA  | 0.662 |             |
| - | 4  | 679       | axx.1_Missense_ι     | NM_016481    | NP_057565    | Q9BU70 | NAP1_HUMAN   |                               | 0     | ιGCTGTCGCTGG  | 0.458 |             |
| + | 8  | 849       | ιx.2_RNA STX17_      | NM_017919    | NP_060389    | P56962 | STX17_HUMAN  | ε IV membrane protein; (Pc    | 1     | ιTGCACTCATCG/ | 0.493 |             |
| - | 1  | 779       |                      | NM_012363    | NP_036495    | Q8NGS0 | OR1N1_HUMAN  | ellular (Potential).          | 3     | ιAGGGAGGACAC  | 0.527 |             |
| + | 8  | 1166      | _p.A374V SLC2A8      | NM_014580    | NP_055395    | Q9NY64 | GTR8_HUMAN   | ιame=10; (Potential).         | 2     | GCTGGCCGTGG   | 0.701 |             |
| - | 5  | 374       | ι_p.S26L C9orf78_    | NM_016520    | NP_057604    | Q9NZ63 | CI078_HUMAN  |                               | 0     | ιAAAACGATGTC/ | 0.507 |             |

|   |    |           |                   |              |              |        |             |                                |    |                 |       |             |
|---|----|-----------|-------------------|--------------|--------------|--------|-------------|--------------------------------|----|-----------------|-------|-------------|
| - | 6  | 1233      | icc.1_Missense_M  | NM_032843    | NP_116232    | Q8N539 | FBCD1_HUMAN | ininal. Extracellular (Potenti | 0  | icAGCTCGTAGG    | 0.627 |             |
| - | 5  | 668       | mzn.2_Missense_   | NM_005312    | NP_005303    | Q13905 | RPGF1_HUMAN |                                | 7  | GTCTTCTGAGT     | 0.557 |             |
| + | 2  | 593       |                   | NM_000093    | NP_000084    | P20908 | CO5A1_HUMAN | SP N-terminal.                 | 11 | AAGGCCCGGAT     | 0.557 |             |
| - | 3  | 2147      | p.P613L SEC16A    | NM_014866    | NP_055681    | O15027 | SC16A_HUMAN |                                | 0  | TTACCGGTTCCG    | 0.522 |             |
| + | 1  | 1328      | T1_uc004cjp.2_5f  | NM_001080482 | NP_001073951 | C9J069 | CI172_HUMAN |                                | 0  | icAGCCGCCACT    | 0.741 |             |
| - | 6  | 983       | i_p.R26C FBXW5    | NM_018998    | NP_061871    | Q969U6 | FBXW5_HUMAN |                                | 0  | GATGCGGCAGG     | 0.697 |             |
| - | 2  | 1609      | u.2_Missense_Mu   | NM_173691    | NP_775962    | Q4KMQ1 | TPRN_HUMAN  | Glu-rich.                      | 0  | ctgtctTAGGGAG   | 0.348 |             |
| + | 4  | 1016_1017 | mg.1_Missense_h   | NM_006088    | NP_006079    | P68371 | TBB2C_HUMAN |                                | 1  | CGACCCCGGCC     | 0.604 |             |
| - | 6  | 2812      | Jndi.2_Missense_f | NM_181332    | NP_851849    | Q8N0W4 | NLGNX_HUMAN | lasmic (Potential).            | 4  | itGGGATGTCATC   | 0.557 |             |
| - | 6  | 934       |                   | NM_000216    | NP_000207    | P23352 | KALM_HUMAN  | onnectin type-III 1.           | 4  | CGACTCGAAACT    | 0.512 | rs137852516 |
| + | 3  | 317       |                   | NM_016562    | NP_057646    | Q9NYK1 | TLR7_HUMAN  | ilar (Potential). LRR 1.       | 5  | CGAAATTCCTGGA   | 0.493 |             |
| + | 2  | 769       | se_Mutation_p.L18 | NM_152634    | NP_689847    | Q8N8B7 | TEANC_HUMAN | FIIS central.                  | 1  | TAGAGCTTCTTTA   | 0.428 |             |
| - | 3  | 569       |                   | NM_030624    | NP_085127    | Q96M94 | KLH15_HUMAN |                                | 2  | CCTGAAGAATCT    | 0.388 |             |
| + | 1  | 1487      |                   | NM_001136533 | NP_001130005 |        |             |                                | 2  | GACACAGAAATA    | 0.448 |             |
| + | 4  | 1179      | p.E287K IMAGEB    | NM_002363    | NP_002354    | P43366 | MAGB1_HUMAN | MAGE.                          | 0  | CTCCTCGAGTTT    | 0.512 |             |
| - | 40 | 5918      | Mutation_p.C176E  | NM_004006    | NP_003997    | P11532 | DMD_HUMAN   | ction with SYN (By simila      | 6  | CGAAGCATTTTAC   | 0.383 |             |
| + | 8  | 1437      | rf22_uc010ngv.2_l | NM_152632    | NP_689845    | Q6ZTR5 | CX022_HUMAN |                                | 3  | ATCCTGAAAAGC    | 0.373 |             |
| + | 1  | 687       |                   | NM_001013736 | NP_001013758 | Q5HY64 | FA47C_HUMAN |                                | 3  | GCCACAGCCT      | 0.647 |             |
| + | 1  | 281       |                   | NM_000531    | NP_000522    | P00480 | OTC_HUMAN   |                                | 2  | ATGGTTCGAAAT    | 0.378 | rs72552300  |
| - | 27 | 4003      | ey.1_Missense_Mi  | NM_004229    | NP_004220    | O60244 | MED14_HUMAN |                                | 4  | CATACTTTGTTT    | 0.343 |             |
| + | 22 | 2876      | p.P832A RBM10     | NM_005676    | NP_005667    | P98175 | RBM10_HUMAN |                                | 5  | CGAGGCCCAAG     | 0.612 |             |
| - | 33 | 4204      | Jsn.2_Nonsense_f  | NM_031407    | NP_113584    | Q7Z6Z7 | HUWE1_HUMAN |                                | 17 | CCATTCGTCCAC    | 0.458 |             |
| - | 2  | 164       |                   | NM_198510    | NP_940912    | Q6UXX5 | ITH5L_HUMAN | VIT.                           | 6  | CCACCGTGGAG     | 0.493 |             |
| + | 3  | 582       | H159Y TRO_uc00    | NM_001039705 | NP_001034794 | Q12816 | TROP_HUMAN  |                                | 1  | CTGGCCATGAG     | 0.507 |             |
| - | 1  | 999       |                   | NM_001012968 | NP_001012986 | Q56A73 | SPIN4_HUMAN |                                | 2  | GAAACAGGATCT    | 0.448 |             |
| - | 2  | 1620      | g.2_Missense_Mu   | NM_145119    | NP_660095    | Q8NG27 | PJA1_HUMAN  |                                | 0  | GTCTCTCGAACT    | 0.572 |             |
| + | 2  | 1512      | OXO4_uc004dyt.1   | NM_005938    | NP_005929    | P98177 | FOXO4_HUMAN |                                | 3  | CAGGTAGATCCC    | 0.632 |             |
| + | 8  | 1294      | RN1_uc011mpt.1_l  | NM_052957    | NP_443189    | Q96QF7 | ACRC_HUMAN  | Asp/Ser-rich.                  | 3  | AAGCTCCCAGC     | 0.557 |             |
| + | 8  | 1324      | RN1_uc011mpt.1_l  | NM_052957    | NP_443189    | Q96QF7 | ACRC_HUMAN  | Asp/Ser-rich.                  | 3  | AAGCTCCCAGC     | 0.557 |             |
| + | 8  | 1334_1335 | RN1_uc011mpt.1_l  | NM_052957    | NP_443189    | Q96QF7 | ACRC_HUMAN  | Asp/Ser-rich.                  | 3  | CGACAGCAGTG     | 0.55  |             |
| - | 16 | 2144      | i_p.T681A ABCB7   | NM_004299    | NP_004290    | O75027 | ABCB7_HUMAN |                                | 1  | TCTGTGTATGCC    | 0.408 |             |
| + | 1  | 712       |                   | NM_020932    | NP_065983    | Q9HCI5 | MAGE1_HUMAN | Pro-rich.                      | 6  | CCCCTGGTGAG     | 0.687 |             |
| - | 15 | 4565      | i.E1407K ATRX_uc  | NM_000489    | NP_000480    | P46100 | ATRX_HUMAN  | Poly-Glu.                      | 30 | ctcctctctctcAGA | 0.199 |             |
| + | 1  | 392       | se_Mutation_p.H74 | NM_053281    | NP_444511    | Q96NX9 | DACH2_HUMAN | DACHbox-N.                     | 5  | ATGCACGGGAT     | 0.547 |             |
| - | 3  | 1172      |                   | NM_080879    | NP_543155    | Q8WXH6 | RB40A_HUMAN |                                | 0  | CCTAAGAAATTT    | 0.483 |             |
| + | 13 | 1481      | icc.1_Missense_Mu | NM_198465    | NP_940867    | Q7Z2Y5 | NRK_HUMAN   |                                | 14 | GCCAAAGGTGGC    | 0.557 |             |
| + | 32 | 2967      | p.K922I COL4A5    | NM_033380    | NP_203699    | P29400 | CO4A5_HUMAN | le-helical region.             | 4  | GTCTTAAGGTA     | 0.408 |             |
| + | 13 | 1753      |                   | NM_007231    | NP_009162    | Q9UN76 | S6A14_HUMAN |                                | 3  | TTCATAGACCTA    | 0.358 |             |
| - | 11 | 1931      |                   | NM_020721    | NP_065772    | Q9ULL0 | K1210_HUMAN |                                | 5  | CCATGGAATTGT    | 0.458 |             |
| - | 10 | 1456      |                   | NM_020721    | NP_065772    | Q9ULL0 | K1210_HUMAN |                                | 5  | TCTTTTCGTTGA    | 0.433 |             |
| - | 16 | 1707      | uh.1_Missense_M   | NM_001081550 | NP_001075019 | Q8NI27 | THOC2_HUMAN |                                | 3  | CATTTTCCTTGGT   | 0.388 |             |
| - | 31 | 8096      | i.E2684K ODZ1_u   | NM_014253    | NP_055068    | Q9UKZ4 | TEN1_HUMAN  | ellular (Potential).           | 23 | CCCTTCTGTCC     | 0.517 |             |
| - | 6  | 2931      | vf.1_Missense_Mi  | NM_031907    | NP_114113    | Q9BXU7 | UBP26_HUMAN |                                | 8  | TATGATCTCCCT    | 0.383 |             |
| - | 6  | 2929      | vf.1_Missense_Mi  | NM_031907    | NP_114113    | Q9BXU7 | UBP26_HUMAN |                                | 8  | TGATCTCCCTTA    | 0.383 |             |
| + | 6  | 5036      | i.S1377F GPR112   | NM_153834    | NP_722576    | Q8IZF6 | GP112_HUMAN | ellular (Potential).           | 12 | CACTCCACAA      | 0.428 |             |
| - | 14 | 1540      | P11C_uc004fba.2   | NM_173694    | NP_775965    | Q8NB49 | AT11C_HUMAN | lasmic (Potential).            | 8  | CAGCATCGTTTG    | 0.353 |             |
| - | 2  | 1145      |                   | NM_001009615 | NP_001009615 | Q5MJ10 | SPXN2_HUMAN |                                | 1  | TTCAGATGAGTC    | 0.527 |             |

|   |    |           |                    |              |              |        |             |      |                    |       |             |
|---|----|-----------|--------------------|--------------|--------------|--------|-------------|------|--------------------|-------|-------------|
| - | 2  | 1106      |                    | NM_001009615 | NP_001009615 | Q5MJ10 | SPXN2_HUMAN | 1    | TTTCAGATGAGTC      | 0.522 |             |
| + | 2  | 124       |                    | NM_001009614 | NP_001009614 | Q5VSR9 | SPXN1_HUMAN | 0    | TTGAAAAAGATG/      | 0.408 |             |
| - | 3  | 913       | o.D187N CSAG1_u    | NM_005367    | NP_005358    | P43365 | MAGAC_HUMAN | 1    | GGCCATCGTAGG/      | 0.582 |             |
| - | 9  | 998       | p.R265C MPP1_ur    | NM_002436    | NP_002427    | Q00013 | EM55_HUMAN  | 3    | GCTGCGACCCCA       | 0.527 |             |
| - | 2  | 680       |                    | NM_171998    | NP_741995    | Q96DA2 | RB39B_HUMAN | 0    | GGCGAGTCACT        | 0.498 |             |
| + | 11 | 1728      | 1akj.2_Missense_f  | NM_014448    | NP_055263    | Q5VV41 | ARHGG_HUMAN | 1    | GCCTCCCACTG        | 0.627 |             |
| + | 8  | 937       |                    | NM_015215    | NP_056030    | Q9Y6Y1 | CMTA1_HUMAN | 9    | AGCTGGTGCCAG       | 0.662 |             |
| - | 4  | 1279      | pa.1_Missense_M    | NM_018948    | NP_061821    | Q9UJM3 | ERRFI_HUMAN | 1    | FGACCCCATTTGA      | 0.537 |             |
| - | 1  | 138       | PEX14_uc010oar     | NM_004401    | NP_004392    | O00273 | DDFA_HUMAN  | 0    | GGATCTCGCCAG       | 0.667 |             |
| + | 4  | 253       |                    | NM_001010980 | NP_001010980 | Q5T1S8 | CA130_HUMAN | 0    | GGCGGGAACATA       | 0.587 |             |
| + | 1  | 131       | y.1_5'UTR CATSPI   | NM_198137    | NP_937770    | Q7RTX7 | CTSR4_HUMAN | 1    | CTCTCCCCTGTC       | 0.617 |             |
| - | 6  | 3478      | sz.1_Missense_Mi   | NM_001029882 | NP_001025053 | Q5TGY3 | AHDC1_HUMAN | 1    | GCCGGTGAAGA        | 0.632 |             |
| - | 7  | 1372      | p.V411M PHC2_u     | NM_198040    | NP_932157    | Q8IXK0 | PHC2_HUMAN  | 1    | GGGCACGCCCT        | 0.602 | rs146737581 |
| - | 2  | 1646      | zw.1_Missense_IV   | NM_005202    | NP_005193    | P25067 | CO8A2_HUMAN | 1    | GTTGGGCAGGT        | 0.716 |             |
| - | 1  | 1058      |                    | NM_002699    | NP_002690    | Q03052 | PO3F1_HUMAN | 0    | CGCTTCTTGCG        | 0.652 |             |
| + | 47 | 15372     | s.1_Nonsense_Mt    | NM_033044    | NP_149033    | Q9UPN3 | MACF1_HUMAN | 16   | TTGTCCAGCGGA       | 0.443 |             |
| + | 6  | 867       | .2_Missense_Mut    | NM_005424    | NP_005415    | P35590 | TIE1_HUMAN  | 7    | GGGCCGTTTTGT       | 0.642 |             |
| - | 3  | 556       |                    | NM_032027    | NP_114416    | Q9BX74 | TM2D1_HUMAN | 1    | GGGTGCTGGAA        | 0.353 |             |
| + | 3  | 401       | e_Mutation_p.P63   | NM_144701    | NP_653302    | Q5VVK5 | IL23R_HUMAN | 0    | GAATGCCCAAA        | 0.358 |             |
| - | 6  | 1066      | lIQ3_uc001dfz.3_f  | NM_001105659 | NP_001099129 | A6PVS8 | LRIQ3_HUMAN | 2    | GATAATATATATT      | 0.169 |             |
| + | 10 | 1685      | q.2_Nonsense_Mt    | NM_001001933 | NP_001001933 | Q68G74 | LHX8_HUMAN  | 3    | GACTCCAGCCC        | 0.328 |             |
| + | 16 | 2229      |                    | NM_002440    | NP_002431    | O15457 | MSH4_HUMAN  | 5    | GATATCGAAACA       | 0.289 |             |
| + | 6  | 716       | HN2_uc001div.2_f   | NM_012302    | NP_036434    | O95490 | LPHN2_HUMAN | 9    | CCCTATCGTACC       | 0.398 |             |
| + | 7  | 776       |                    | NM_033055    | NP_149044    | Q96MC6 | HIAT1_HUMAN | 0    | CCTACCGGAGG        | 0.383 |             |
| - | 8  | 1480      | p.E400K COL11A     | NM_001854    | NP_001845    | P12107 | COBA1_HUMAN | 12   | CATATTCTTTATA      | 0.363 |             |
| + | 3  | 216       | M5_uc010ovu.1_5    | NM_000851    | NP_000842    | P46439 | GSTM5_HUMAN | 6    | CTGAATGAAAAA       | 0.572 |             |
| - | 4  | 430       | ff.1_Nonsense_M    | NM_000036    | NP_000027    | P23109 | AMPD1_HUMAN | 4    | CTCTCTGAAAATC      | 0.463 |             |
| - | 3  | 435       |                    | NM_002524    | NP_002515    | P01111 | RASN_HUMAN  | 2607 | TTCTTGTCAGC        | 0.458 | rs121913254 |
| + | 4  | 488       | hr.1_Missense_Mt   | NM_001005783 | NP_001005783 | Q9NYQ3 | HAOX2_HUMAN | 4    | GAAATTCGCCCTC      | 0.552 |             |
| + | 19 | 2193      | ition_p.E30G NBP   | NM_001037675 | NP_001032764 | Q3BBV1 | NBPFK_HUMAN | 0    | GAAAGAGCCTG        | 0.483 |             |
| + | 4  | 2006      | 10_uc001emp.3      | NM_001039888 | NP_001034977 | Q69YU3 | AN34A_HUMAN | 0    | CCATCCCCCAA        | 0.612 |             |
| + | 12 | 1506      | wkt.1_Missense_M   | NM_001102663 | NP_001096133 |        |             | 0    | AGGACTCACTG        | 0.468 |             |
| + | 12 | 1525      | wkt.1_Missense_M   | NM_001102663 | NP_001096133 |        |             | 0    | TTATTGACTCC        | 0.478 |             |
| - | 2  | 991       | ae.1_Missense_Mt   | NM_007113    | NP_009044    | Q07283 | TRHY_HUMAN  | 5    | tcctctctgctgctcgcg | 0     |             |
| - | 3  | 1734      |                    | NM_001009931 | NP_001009931 | Q86YZ3 | HORN_HUMAN  | 3    | ACTGCCTGGAA        | 0.592 |             |
| - | 3  | 2699      | uc001ezv.2_5'Flanl | NM_002016    | NP_002007    | P20930 | FILA_HUMAN  | 16   | TGGATCCTGACT       | 0.562 |             |
| - | 2  | 65        |                    | NM_002964    | NP_002955    | P05109 | S10A8_HUMAN | 0    | CAGCTCGGTCA        | 0.512 |             |
| - | 3  | 317       | 1fcd.1_Missense_f  | NM_080388    | NP_525127    | Q96FQ6 | S10AG_HUMAN | 0    | GATGAGCTTATC       | 0.587 |             |
| + | 7  | 1821      | Site_p.D213_splice | NM_000906    | NP_000897    | P16066 | ANPRA_HUMAN | 7    | ctGCAGATCACCT      | 0.348 |             |
| - | 13 | 4253      |                    | NM_000130    | NP_000121    | P12259 | FA5_HUMAN   | 6    | GCTGAGGTCTA        | 0.517 |             |
| - | 13 | 4214      |                    | NM_000130    | NP_000121    | P12259 | FA5_HUMAN   | 6    | AGAAAGGGGCA        | 0.517 |             |
| + | 1  | 97        | jhe.2_Missense_M   | NM_022716    | NP_073207    | P54821 | PRRX1_HUMAN | 1    | GGCGGCCGCT         | 0.657 |             |
| + | 7  | 1183      | rb.1_Missense_Mt   | NM_001002294 | NP_001002294 | P31513 | FMO3_HUMAN  | 1    | GTATTTCTCCTC       | 0.453 |             |
| - | 4  | 1339_1340 | g_Mutation_p.G42l  | NM_003285    | NP_003276    | Q92752 | TENR_HUMAN  | 11   | TAGCCCTTGAG        | 0.495 |             |
| + | 8  | 1485      |                    | NM_014864    | NP_055679    | O75063 | XYLK_HUMAN  | 3    | ACACAGTACTG        | 0.498 |             |
| + | 31 | 6580      | 350_uc001gnv.2_l   | NM_014810    | NP_055625    | Q5VT06 | CE350_HUMAN | 4    | AAAATCAGTTG1       | 0.393 |             |
| + | 12 | 1783      | _Mutation_p.E570   | NM_002826    | NP_002817    | O00391 | QSOX1_HUMAN | 2    | CCCTGGAGCTG        | 0.622 |             |

|   |    |         |                   |              |              |        |             |                               |    |               |       |             |
|---|----|---------|-------------------|--------------|--------------|--------|-------------|-------------------------------|----|---------------|-------|-------------|
| + | 38 | 5392    | 1gox.1_Missense_  | NM_000721    | NP_000712    | Q15878 | CAC1E_HUMAN | Cytoplasmic (Potential).      | 6  | TGGACGAGTTT   | 0.607 |             |
| + | 6  | 1103    | tm.2_Missense_Mi  | NM_002113    | NP_002104    | Q03591 | FHR1_HUMAN  |                               | 0  | CAAAAAGATAGA  | 0.323 |             |
| + | 5  | 748     |                   | NM_030787    | NP_110414    | Q9BXR6 | FHR5_HUMAN  | Sushi 4.                      | 2  | TACGATCATGTG  | 0.318 |             |
| + | 12 | 2092    | p.G597S CAMSAF    | NM_203459    | NP_982284    | Q08AD1 | CAMP2_HUMAN |                               | 4  | CGAAAGGTGCC   | 0.353 |             |
| + | 20 | 2717    | l1gyb.1_Missense_ | NM_002481    | NP_002472    | O60237 | MYPT2_HUMAN |                               | 3  | AAGAGCCCGTC   | 0.473 |             |
| - | 8  | 1369    | gyr.3_Missense_Iv | NM_015999    | NP_057083    | Q96A54 | ADR1_HUMAN  | cellular (Potential).         | 0  | ACAGCCCGCTT   | 0.512 |             |
| - | 12 | 3208    |                   | NM_025179    | NP_079455    | O75051 | PLXA2_HUMAN | cellular (Potential).         | 3  | GGTCGGCCTTG   | 0.627 |             |
| - | 7  | 1162    | se_Mutation_p.R2f | NM_001017402 | NP_001017402 | Q13751 | LAMB3_HUMAN | inin EGF-like 1.              | 6  | GCAGCGATCAG   | 0.677 | rs145575474 |
| + | 20 | 2278    | p.G607E CAPN2_    | NM_001748    | NP_001739    | P17655 | CAN2_HUMAN  | ain IV. EF-hand 3.            | 5  | ATACTGGAACAA  | 0.502 |             |
| - | 4  | 1014    | 3_Mutation_p.G27f | NM_003240    | NP_003231    | O00292 | LFTY2_HUMAN |                               | 0  | ICGGCCCCAGAA  | 0.657 |             |
| - | 7  | 1796    | 9xes.2_Missense_  | NM_003607    | NP_003598    | Q5VT25 | MRCKA_HUMAN | rotein kinase.                | 11 | GCGATTCTGCAT  | 0.368 |             |
| + | 1  | 200     |                   | NM_003272    | NP_003263    | O60478 | G137B_HUMAN | cellular (Potential).         | 0  | ICGGCCGTGCC   | 0.562 |             |
| + | 10 | 1335    | 0pyl.1_Missense_I | NM_006642    | NP_006633    | Q86SQ7 | SDCG8_HUMAN | r homodimerization (By sirr   | 0  | ATGATGAAAAAC  | 0.433 |             |
| + | 17 | 2212    | nse_Mutation_p.Q  | NM_006642    | NP_006633    | Q86SQ7 | SDCG8_HUMAN | potential. Sufficient for hom | 0  | AGAACCAGCTT   | 0.617 |             |
| - | 8  | 858_859 | z.1_Missense_Mu   | NM_005465    | NP_005456    | Q9Y243 | AKT3_HUMAN  | rotein kinase.                | 4  | ATAGTCCAAGGC  | 0.416 |             |
| + | 1  | 548     |                   | NM_001004690 | NP_001004690 | A3KFT3 | OR2M5_HUMAN | cellular (Potential).         | 3  | TCCCTTCCCTAC  | 0.418 |             |
| - | 1  | 548     |                   | NM_001004691 | NP_001004691 | Q8NG81 | OR2M7_HUMAN | cellular (Potential).         | 2  | GTAGGGAAGGG   | 0.428 |             |
| - | 8  | 959     | 2C_uc009xhj.1_5'l | NM_014974    | NP_055789    | Q9Y2E4 | DIP2C_HUMAN |                               | 7  | 3GATCCGGTTGT  | 0.512 |             |
| + | 10 | 1321    | g.2_Nonsense_Mu   | NM_005180    | NP_005171    | P35226 | BMI1_HUMAN  | action with E4F1.             | 2  | GAGTTCGACCT   | 0.373 |             |
| + | 6  | 1742    | ie_Mutation_p.E29 | NM_019590    | NP_062536    | Q5T5P2 | SKT_HUMAN   |                               | 7  | ATATGGAACAAT  | 0.512 |             |
| - | 7  | 1310    | t.2_Missense_Mut  | NM_025209    | NP_079485    | Q9H2F5 | EPC1_HUMAN  |                               | 4  | 3CAGACGATGGT  | 0.443 |             |
| + | 7  | 1016    |                   | NM_052997    | NP_443723    | Q9BXX3 | AN30A_HUMAN |                               | 9  | AAATTACGAGTC  | 0.433 |             |
| + | 7  | 1156    |                   | NM_052997    | NP_443723    | Q9BXX3 | AN30A_HUMAN |                               | 9  | CGTGGGCAGCA   | 0.408 |             |
| - | 1  | 634     |                   | NM_002900    | NP_002891    | P10745 | RET3_HUMAN  | nate tandem repeats. 1.       | 2  | GCCTCCTGTGC   | 0.607 |             |
| - | 10 | 1432    | .2_Missense_Mute  | NM_138932    | NP_620310    | Q9NQ94 | A1CF_HUMAN  |                               | 1  | TGTCTCCTTTGA  | 0.498 |             |
| - | 33 | 6235    | sense_Mutation_p  | NM_033056    | NP_149045    | Q96QU1 | PCD15_HUMAN | lasmic (Potential).           | 13 | TGAGATTGTTTTI | 0.353 |             |
| - | 37 | 6532    | K3_uc010qih.1_In  | NM_020987    | NP_066267    | Q12955 | ANK3_HUMAN  |                               | 19 | AAAGTCATCAGC  | 0.433 |             |
| - | 4  | 311     | can.3_Missense_Iv | NM_006926    | NP_008857    | Q8IWL1 | SFPA2_HUMAN | ollagen-like.                 | 0  | CATTATCCAGC   | 0.622 |             |
| + | 3  | 582     | l4_uc010qmk.1_M   | NM_033282    | NP_150598    | Q9UHM6 | OPN4_HUMAN  | Name=2; (Potential).          | 1  | TTCTCATGTCC   | 0.567 |             |
| + | 29 | 4997    | 20B_uc001kgt.1_I  | NM_016195    | NP_057279    | Q96Q89 | KI20B_HUMAN | action with PIN1.             | 3  | TTGGTTGTACCA  | 0.383 |             |
| - | 13 | 1324    | ip.3_Missense_Mu  | NM_013451    | NP_038479    | Q9NZM1 | MYOF_HUMAN  | mic (Potential). C2 3.        | 4  | AGGAAACTTCTA  | 0.373 |             |
| + | 4  | 562     | p.D53N CYP2C1f    | NM_000769    | NP_000760    | P33261 | CP2CJ_HUMAN |                               | 6  | CGTTTCGATTATA | 0.403 |             |
| - | 10 | 1501    | po.1_Missense_Mi  | NM_021828    | NP_068600    | Q8VWQ2 | HPSE2_HUMAN |                               | 1  | GAGCATAAATCC  | 0.572 |             |
| - | 2  | 835     | p.S150* CALHM2    | NM_015916    | NP_057000    | Q9HA72 | CAHM2_HUMAN |                               | 1  | GGGCTGATGGG   | 0.592 |             |
| + | 12 | 1186    | p.P405S ACSL5_    | NM_203379    | NP_976313    | Q9ULC5 | ACSL5_HUMAN | lasmic (Potential).           | 3  | TGTTTCCCGCG   | 0.507 |             |
| + | 16 | 2264    | R11_uc001lfd.1_M  | NM_018117    | NP_060587    | Q9BZH6 | WDR11_HUMAN |                               | 0  | CTGCCCGGGAA   | 0.408 |             |
| - | 17 | 2730    | 3_Mutation_p.E57f | NM_000141    | NP_000132    | P21802 | FGFR2_HUMAN | Potential). Protein kinase.   | 96 | AGATCTCCACA   | 0.517 |             |
| + | 49 | 6119    | 34_splice DMBT1_  | NM_007329    | NP_015568    | Q9UGM3 | DMBT1_HUMAN |                               | 7  | ACAGCAGATTATI | 0.448 |             |
| + | 35 | 3521    | p.L1174F DOCK1_   | NM_001380    | NP_001371    | Q14185 | DOCK1_HUMAN | DHR-2.                        | 9  | TCAGCCTTCTGC  | 0.343 |             |
| + | 11 | 1799    | p.A535T KNDC1_    | NM_152643    | NP_689856    | Q76N11 | VKIND_HUMAN | KIND 2.                       | 2  | TCAGAGCTTCC   | 0.662 |             |
| + | 8  | 1288    | p.G220R CYP2E1    | NM_000773    | NP_000764    | P05181 | CP2E1_HUMAN |                               | 3  | 3AAAATGGAAAG  | 0.448 |             |
| - | 13 | 1831    | 9ycc.2_Missense_  | NM_021924    | NP_068743    | Q9HBB8 | CDHR5_HUMAN | tem repeats. 2. Extracellule  | 0  | TCCTGGCTCTG   | 0.667 | rs139058512 |
| + | 35 | 13223   |                   | NM_002457    | NP_002448    | Q02817 | MUC2_HUMAN  |                               | 2  | GTCCACGCCCT   | 0.647 |             |
| - | 1  | 505     |                   | NM_001005237 | NP_001005237 | Q8NGK1 | O51G1_HUMAN | cellular (Potential).         | 2  | GTATTGGAAGC   | 0.512 |             |
| - | 1  | 482     |                   | NM_001005160 | NP_001005160 | Q9H2C5 | O52A5_HUMAN | Name=4; (Potential).          | 4  | CCTAAGGAAGGT  | 0.458 |             |
| - | 1  | 641     | .1_Intron HBE1_uc | NM_033179    | NP_149419    | Q9Y5P0 | O51B4_HUMAN | Name=5; (Potential).          | 2  | ATATAAGAAAAG  | 0.378 |             |
| - | 1  | 78      | .1_Intron HBE1_uc | NM_033180    | NP_149420    | Q9Y5P1 | O51B2_HUMAN | cellular (Potential).         | 3  | AAGGGGCTGCA   | 0.488 |             |

|   |    |           |                    |              |              |        |             |                               |    |              |       |             |
|---|----|-----------|--------------------|--------------|--------------|--------|-------------|-------------------------------|----|--------------|-------|-------------|
| + | 1  | 418       | lms.1_Missense_    | NM_001005180 | NP_001005180 | Q8NGI3 | O56B1_HUMAN | lasmic (Potential).           | 2  | CTCTTCGCTATC | 0.443 | rs150132590 |
| + | 1  | 842       | .1_Intron TRIM22_  | NM_001005180 | NP_001005180 | Q8NGI3 | O56B1_HUMAN | ellular (Potential).          | 2  | FGATTCCAGTTC | 0.428 |             |
| + | 5  | 750       | _p.M217 ISWAP70    | NM_015055    | NP_055870    | Q9UH65 | SWP70_HUMAN | PH.                           | 3  | TTACATGATGAA | 0.343 |             |
| - | 11 | 1461_1462 | rcv.1_Missense_M   | NM_175058    | NP_778228    | Q6IQ23 | PKHA7_HUMAN |                               | 3  | AGAGCCCCCGA  | 0.629 |             |
| - | 30 | 3781      |                    | NM_000352    | NP_000343    | Q09428 | ABCC8_HUMAN | pe-1 2. Cytoplasmic (By si    | 1  | GGCCTCATACC  | 0.567 |             |
| - | 2  | 816       |                    | NM_054030    | NP_473371    | Q96LB1 | MRGX2_HUMAN | Name=6; (Potential).          | 1  | GGAACCACTGA  | 0.507 |             |
| + | 5  | 1074      | p.R219C RCN1_u     | NM_002901    | NP_002892    | Q15293 | RCN1_HUMAN  | EF-hand 5.                    | 1  | AGATTCGCCAC  | 0.473 |             |
| + | 3  | 486       | go.3_Missense_IV   | NM_002843    | NP_002834    | Q12913 | PTPRJ_HUMAN | ellular (Potential).          | 8  | CAATTCCTGACC | 0.418 |             |
| - | 1  | 782       |                    | NM_001004700 | NP_001004700 | Q6IEV9 | OR4CB_HUMAN | ellular (Potential).          | 1  | AAGTGGTCGGG  | 0.433 |             |
| + | 3  | 712_713   | ik.1_Missense_Mu   | NM_001004704 | NP_001004704 | Q8NH72 | OR4C6_HUMAN | Name=4; (Potential).          | 2  | GTGGGGGGATT  | 0.465 |             |
| + | 1  | 449       |                    | NM_001001967 | NP_001001967 | Q8NGL4 | OR5DD_HUMAN | Name=4; (Potential).          | 3  | CTGGGTCTATA  | 0.418 |             |
| - | 1  | 865       |                    | NM_006637    | NP_006628    | Q13606 | OR5I1_HUMAN | Name=7; (Potential).          | 1  | CAACGGATTAC  | 0.368 |             |
| - | 1  | 241       |                    | NM_001004742 | NP_001004742 | Q8NGP4 | OR5M3_HUMAN | ellular (Potential).          | 2  | GGTTTTCCAACA | 0.368 |             |
| + | 4  | 1670      | r_p.T446 FAM111    | NM_198947    | NP_945185    | Q6SJ93 | F111B_HUMAN |                               | 2  | ATGCTACTTGCT | 0.388 |             |
| - | 2  | 620       |                    | NM_004778    | NP_004769    | Q9Y5Y4 | GPR44_HUMAN | ellular (Potential).          | 1  | GTCCCGGAACA  | 0.642 |             |
| + | 3  | 982       | N3_uc001npx.2_Ir   | NM_201428    | NP_958831    | O95197 | RTN3_HUMAN  |                               | 1  | TCATATAAGGAC | 0.363 |             |
| + | 3  | 406       | _5'Flank ESRRA_1   | NM_001039496 | NP_001034585 | Q9NTU4 | CK020_HUMAN |                               | 0  | ATTATTCGAAGC | 0.552 |             |
| + | 18 | 3039      | _2_Missense_Mutat  | NM_032251    | NP_115627    | A6NC98 | CC88B_HUMAN | Potential.                    | 4  | TGCAGGGGCAG  | 0.682 |             |
| - | 16 | 1921      |                    | NM_017525    | NP_059995    | Q6DT37 | MRCKG_HUMAN | Potential.                    | 4  | GTTCCTCTCTC  | 0.667 |             |
| + | 8  | 1711      | _5_uc009ysg.2_5'   | NM_002335    | NP_002326    | O75197 | LRP5_HUMAN  | ta-propeller 2. Extracellular | 7  | AGCTCCCGCAC  | 0.602 |             |
| + | 10 | 2873      | sp.1_Missense_Mi   | NM_020798    | NP_065849    | Q9P2H5 | UBP35_HUMAN |                               | 3  | TGCCCGTTCTC  | 0.587 |             |
| + | 5  | 1393      | su.1_Missense_ML   | NM_015885    | NP_056969    | O94913 | PCF11_HUMAN | Lys-rich.                     | 1  | CAGGTGAAAAA  | 0.303 |             |
| + | 2  | 986       |                    | NM_000372    | NP_000363    | P14679 | TYRO_HUMAN  | elanosome (Potential).        | 3  | ATCCTGGAAAC  | 0.473 |             |
| - | 4  | 959       | p.R190Q GUCY1A     | NM_000855    | NP_000846    | P33402 | GCYA2_HUMAN |                               | 8  | CAGCTCGAAGG  | 0.398 |             |
| - | 2  | 2609      | .2_RNA C11orf93_   | NM_207429    | NP_997312    |        |             |                               | 1  | AGATCCTTGCTG | 0.547 |             |
| - | 7  | 784       | SP28_uc001poj.3_   | NM_020886    | NP_065937    | Q96RU2 | UBP28_HUMAN |                               | 7  | CTGTTCCTCAG  | 0.423 |             |
| + | 6  | 629       | 09yzm.2_Intron P   | NM_002572    | NP_002563    | P68402 | PA1B2_HUMAN |                               | 1  | TACCGACGGGG  | 0.542 |             |
| + | 6  | 670       | 09yzm.2_Intron P   | NM_002572    | NP_002563    | P68402 | PA1B2_HUMAN |                               | 1  | TGCCACGACATG | 0.537 |             |
| + | 6  | 1123      |                    | NM_005422    | NP_005413    | O75443 | TECTA_HUMAN | VWFD 1.                       | 10 | CAGCCGTCTCC  | 0.537 |             |
| - | 5  | 472       | 9zqc.1_Missense_   | NM_001142685 | NP_001136157 | A7KAX9 | RHG32_HUMAN | PX; atypical.                 | 5  | CTGCACGAGGT  | 0.343 |             |
| - | 15 | 2383      | ln.1_Missense_ML   | NM_001042603 | NP_001036068 | P29375 | KDM5A_HUMAN |                               | 3  | CTGCCGCTCAT  | 0.418 |             |
| + | 14 | 1321      | _2_Mutation_p.E344 | NM_173593    | NP_775864    | Q6L9W6 | B4GN3_HUMAN | renal (Potential).            | 2  | CAGAGGAGACC  | 0.517 |             |
| + | 49 | 6572      | 3 CACNA1C_uc00     | NM_199460    | NP_955630    | Q13936 | CAC1C_HUMAN | ytoplasmic (Potential).       | 11 | GCGGGGGCAGC  | 0.701 |             |
| + | 6  | 857       | _p.P138L CD9_uc    | NM_001769    | NP_001760    | P21926 | CD9_HUMAN   | ellular (Potential).          | 1  | TGAGCCCCAGC  | 0.542 |             |
| + | 2  | 272_273   | IG6_uc010sew.1_    | NM_018173    | NP_060643    | Q3KR16 | PKHG6_HUMAN |                               | 2  | CCGAGGATACC  | 0.619 |             |
| - | 3  | 792       | sense_Mutation_p   | NM_001038    | NP_001029    | P37088 | SCNNA_HUMAN | llular (By similarity).       | 0  | GAGTGGTGAAG  | 0.662 |             |
| - | 2  | 178       | ense_Mutation_p.C  | NM_014231    | NP_055046    | P23763 | VAMP1_HUMAN | lasmic (Potential).           | 0  | CTGTCCCTTCAC | 0.502 |             |
| - | 3  | 673       | B4_uc001qzf.1_Inl  | NM_006249    | NP_006240    | Q04118 | PRB3_HUMAN  | [PQS]-P-[PS]-Q-[GE]-G-N-      | 1  | GGTTTTCTCTC  | 0.622 |             |
| - | 3  | 239       | r_p.P68S PRB1_u    | NM_005039    | NP_005030    | P04280 | PRP1_HUMAN  | -[PAQ]-Q-[GE]-[GD]- [NKS]     | 0  | CTTGAGGTTTGT | 0.607 |             |
| + | 6  | 769       | 1C1_uc009zip.2_    | NM_017435    | NP_059131    | Q9NYB5 | SO1C1_HUMAN | ellular (Potential).          | 7  | CAAATATGAGAG | 0.373 | rs145524055 |
| - | 18 | 2332      | r_p.T771 ABCC9_    | NM_005691    | NP_005682    | O60706 | ABCC9_HUMAN | otential). ABC transporter 1  | 6  | CCAAAAGTAATA | 0.328 |             |
| - | 14 | 1985      |                    | NM_025003    | NP_079279    | P59510 | ATS20_HUMAN | Cys-rich.                     | 19 | TGGTCCAGCAA  | 0.348 |             |
| + | 15 | 4175      | p.P848L ARID2_u    | NM_152641    | NP_689854    | Q68CP9 | ARID2_HUMAN |                               | 10 | TATCTCCAATGG | 0.358 |             |
| - | 34 | 9272      |                    | NM_003482    | NP_003473    | O14686 | MLL2_HUMAN  |                               | 41 | GTCTCTGGCTCC | 0.627 |             |
| + | 6  | 1219      |                    | NM_006262    | NP_006253    | P41219 | PERI_HUMAN  | Coil 2. Rod.                  | 0  | AGGAGCTCCTC  | 0.637 |             |
| + | 15 | 2967      | mj.1_Missense_ML   | NM_012284    | NP_036416    | Q9ULD8 | KCNH3_HUMAN | lasmic (Potential).           | 0  | CACTTCGCCAG  | 0.662 | rs148404630 |
| - | 7  | 1472      |                    | NM_005555    | NP_005546    | P04259 | K2C6B_HUMAN |                               | 2  | TACCCACCTGC  | 0.567 |             |



|   |    |           |                   |              |              |        |             |                               |      |               |       |
|---|----|-----------|-------------------|--------------|--------------|--------|-------------|-------------------------------|------|---------------|-------|
| - | 7  | 1472      |                   | NM_173086    | NP_775109    | P48668 | K2C6C_HUMAN |                               | 2    | TTACCTACCTGC/ | 0.567 |
| - | 9  | 1291      | ie_Mutation_p.S40 | NM_000889    | NP_000880    | P26010 | ITB7_HUMAN  | ellular (Potential).          | 8    | TCGTAAGAAATG1 | 0.552 |
| + | 1  | 341       |                   | NM_017409    | NP_059105    | Q9NYD6 | HXC10_HUMAN |                               | 1    | GGCGACCCCAA   | 0.637 |
| - | 5  | 709       | w.1_RNA ITGA5_L   | NM_002205    | NP_002196    | P08648 | ITA5_HUMAN  | r (Potential). FG-GAP 3.      | 2    | .CCTTGGTGAAC1 | 0.582 |
| + | 1  | 460       |                   | NM_001005280 | NP_001005280 | Q8NGE5 | O10A7_HUMAN | Name=4; (Potential).          | 4    | 3GTGTTCTGTG   | 0.488 |
| + | 1  | 812       |                   | NM_054105    | NP_473446    | Q9NZP2 | OR6C2_HUMAN | Name=7; (Potential).          | 2    | ATAAAGGAGTTTC | 0.423 |
| - | 5  | 743       |                   | NM_001686    | NP_001677    | P06576 | ATPB_HUMAN  | (By similarity).              | 1    | GTACAGTCTTG(  | 0.408 |
| + | 8  | 1450      |                   | NM_032230    | NP_115606    | Q8N6Q8 | CL026_HUMAN |                               | 0    | TTCTATCGTGCT( | 0.284 |
| - | 1  | 1178_1179 | sun.1_Intron GALI | NM_003774    | NP_003765    | Q8N4A0 | GALT4_HUMAN | main B.  Lumenal (Potential   | 0    | TCCAAGGTACTG  | 0.49  |
| + | 32 | 3649      |                   | NM_017564    | NP_060034    | Q8WWW8 | STAB2_HUMAN | iar (Potential). FAS1 4.      | 14   | TCCGGGGCTAC.  | 0.507 |
| + | 2  | 122       | tkm.1_Missense_M  | NM_001093771 | NP_001087240 | Q16881 | TRXR1_HUMAN |                               | 0    | AAGATCATCACC  | 0.428 |
| - | 4  | 487       | PL2_uc010swu.1    | NM_018171    | NP_060641    | Q8NEU8 | DP13B_HUMAN | B5A binding (By similarity)   | 1    | ACTTTGGAAAAA  | 0.343 |
| - | 3  | 705       | 1_Missense_Muta   | NM_001145374 | NP_001138846 | Q6NS38 | ALKB2_HUMAN | bstrate binding.              | 0    | GTGCCACTTCCC  | 0.572 |
| + | 10 | 1147      | ie.1_Missense_Mu  | NM_001143854 | NP_001137326 | Q9Y2J0 | RP3A_HUMAN  | Pro-rich.                     | 7    | CAGCCGGAGCC   | 0.532 |
| - | 15 | 2643      |                   | NM_015335    | NP_056150    | Q71F56 | MD13L_HUMAN |                               | 8    | AACATCCTTTGC/ | 0.403 |
| - | 7  | 1227      |                   | NM_173598    | NP_775869    | Q6VAB6 | KSR2_HUMAN  | ol-ester/DAG-type.            | 15   | ACATCCAGTAC   | 0.458 |
| - | 11 | 1476      | .G427R KDM2B_L    | NM_032590    | NP_115979    | Q8NHM5 | KDM2B_HUMAN |                               | 2    | CTTCCCGAGGG   | 0.562 |
| - | 4  | 526       | SRC2_uc001ucs.2   | NM_023012    | NP_075388    | Q7L4I2 | RSRC2_HUMAN | Ser-rich.                     | 1    | CTAGATCTTGAG  | 0.378 |
| + | 16 | 2447      | p.P350S DNAH10    | NM_207437    | NP_997320    | Q8IVF4 | DYH10_HUMAN | n (By similarity).            | 6    | AACTCCCAGGT   | 0.299 |
| + | 6  | 2218      | _p.L130I ZNF664_  | NM_152437    | NP_689650    | Q8N3J9 | ZN664_HUMAN | C2H2-type 5.                  | 0    | CAAACCTTTGC/  | 0.468 |
| + | 1  | 1954      | _5'Flank uc001uif | NM_007197    | NP_009128    | Q9ULW2 | FZD10_HUMAN | ellular (Potential).          | 5    | TCCCCGCCGTG   | 0.552 |
| - | 11 | 2244      | _p.E602K RIMBP2   | NM_015347    | NP_056162    | O15034 | RIMB2_HUMAN |                               | 11   | TCTCTCTAGGA/  | 0.587 |
| + | 6  | 720       |                   | NM_003565    | NP_003556    | O75385 | ULK1_HUMAN  | rotein kinase.                | 4    | CGCCGGCCGCC   | 0.468 |
| - | 10 | 14105     | A4359T SACS_uc    | NM_014363    | NP_055178    | Q9NZJ4 | SACS_HUMAN  | HEPN.                         | 12   | CTGAGCAAGTG(  | 0.388 |
| - | 13 | 1683      | .T3_uc010tdn.1_M  | NM_004119    | NP_004110    | P36888 | FLT3_HUMAN  | ellular (Potential).          | 8549 | GGAAGGGGCCT   | 0.393 |
| + | 1  | 132       | 0tdr.1_Missense_M | NM_001629    | NP_001620    | P20292 | AL5AP_HUMAN | I.  Inhibitor binding.        | 0    | TCAGCGTGGTC(  | 0.493 |
| - | 8  | 2140      | ie_Mutation_p.W63 | NM_016179    | NP_057263    | Q9UBN4 | TRPC4_HUMAN | and ITPR3.  Cytoplasmic (P    | 6    | AAATTTCCATT(  | 0.428 |
| + | 7  | 6406      | ww.2_Missense_M   | NM_207361    | NP_997244    | Q5SZK8 | FREM2_HUMAN | (Potential).  Calx-beta 3.    | 11   | GGAGAACGGGC   | 0.493 |
| - | 8  | 1597      | p.D384E ELF1_ucf  | NM_172373    | NP_758961    | P32519 | ELF1_HUMAN  |                               | 1    | GTTTCATCCTGC  | 0.428 |
| + | 1  | 1542      |                   | NR_003268    |              |        |             |                               | 0    | ATTATATACCATG | 0.383 |
| + | 1  | 61        | rhk.1_Missense_M  | NM_006418    | NP_006409    | Q6UX06 | OLFM4_HUMAN |                               | 1    | CAGGGGATTTG(  | 0.478 |
| - | 1  | 632       | h.2_Missense_Mu   | NM_001922    | NP_001913    | P40126 | TYRP2_HUMAN | elanosome (Potential).        | 5    | .GGCCTTGTGT(  | 0.607 |
| - | 19 | 2858      | nse_Mutation_p.P  | NM_198968    | NP_945319    | Q86YF9 | DZIP1_HUMAN |                               | 2    | TTCTGGGAAAA(  | 0.279 |
| - | 3  | 1121      |                   | NM_000452    | NP_000443    | Q12908 | NTCP2_HUMAN | ical; (Potential).            | 4    | AAACAGGAACA/  | 0.393 |
| - | 5  | 707       |                   | NM_004093    | NP_004084    | P52799 | EFNB2_HUMAN | ellular (Potential).          | 1    | TGCAAATAAGGC( | 0.493 |
| + | 2  | 670       | 0agj.2_Missense_  | NM_006573    | NP_006564    | Q9Y275 | TN13B_HUMAN | ellular (Potential).          | 0    | .GTGCCGTTCAG( | 0.453 |
| + | 1  | 686       |                   | NM_001004717 | NP_001004717 | Q8NH43 | OR4L1_HUMAN | lasmic (Potential).           | 5    | AAAAATCATCAC/ | 0.438 |
| - | 5  | 1021      | se_Mutation_p.S1: | NM_019852    | NP_062826    | Q86U44 | MTA70_HUMAN |                               | 2    | CTAAAGACTCA(  | 0.398 |
| - | 22 | 2813      |                   | NM_002471    | NP_002462    | P13533 | MYH6_HUMAN  | Potential.                    | 4    | CCAGCTGAATCT  | 0.517 |
| - | 12 | 1878      | p.S496F RALGAP,   | NM_014990    | NP_055805    | Q6GYQ0 | RGPA1_HUMAN |                               | 4    | AACTGGAATTT(  | 0.413 |
| - | 4  | 1179      | t.1_Missense_Mut: | NM_007361    | NP_031387    | Q14112 | NID2_HUMAN  |                               | 7    | TAATCCAAATTG  | 0.498 |
| - | 1  | 238       | _p.D23N OTX2_u    | NM_172337    | NP_758840    | P32243 | OTX2_HUMAN  |                               | 1    | CAAGTCCATAC(  | 0.587 |
| - | 1  | 1133      | t135_uc001xed.2_  | NM_022571    | NP_072093    | Q8IZ08 | GP135_HUMAN | lasmic (Potential).           | 0    | AGATGACGAAGA  | 0.697 |
| + | 7  | 2579      | _p.P744L SIPA1L1  | NM_015556    | NP_056371    | O43166 | S1L1_HUMAN  | Rap-GAP.                      | 4    | CAATCCGTGCT(  | 0.512 |
| + | 10 | 1314      | .R369Q RBM25_L    | NM_021239    | NP_067062    | P49756 | RBM25_HUMAN | eckle localization.  Glu-rich | 4    | TGACCGGGATA(  | 0.234 |
| + | 2  | 1779      |                   | NM_018228    | NP_060698    | Q9H8Y1 | VRTN_HUMAN  |                               | 0    | GCTTCGCCTC    | 0.652 |
| + | 2  | 1509      |                   | NM_022054    | NP_071337    | Q9HB14 | KCNKD_HUMAN | lasmic (Potential).           | 1    | AGCCAAACAAGG  | 0.602 |

|   |    |           |                    |              |              |        |             |                             |    |               |       |             |
|---|----|-----------|--------------------|--------------|--------------|--------|-------------|-----------------------------|----|---------------|-------|-------------|
| - | 5  | 831       | 6KA5_uc001xyt.2    | NM_004755    | NP_004746    | O75582 | KS6A5_HUMAN | otein kinase 1.             | 1  | CACTTCATCAGC  | 0.343 |             |
| - | 15 | 1978_1979 |                    | NM_001080414 | NP_001073883 | Q9P219 | DAPLE_HUMAN | Potential.                  | 3  | GCTCCCCCTTCT  | 0.629 |             |
| - | 10 | 2698      | vo.1_Missense_Mu   | NM_001002860 | NP_001002860 | Q9P203 | BTBD7_HUMAN | Pro-rich.                   | 1  | ATGAACGTGAAC  | 0.552 |             |
| + | 2  | 334       | _p.W55* PPP2R5I    | NM_002719    | NP_002710    | Q13362 | 2A5G_HUMAN  |                             | 2  | FAAAGTGGAAAG  | 0.408 |             |
| + | 1  | 122       | :727924_uc001yut   | NM_001004719 | NP_001004719 | Q8NGB6 | OR4M2_HUMAN | Name=1; (Potential).        | 1  | TACCAGGAAATAI | 0.413 |             |
| - | 23 | 4569      | i.2_Missense_Mut   | NM_003257    | NP_003248    | Q07157 | ZO1_HUMAN   |                             | 6  | AAACTTCTTCGG  | 0.428 |             |
| + | 3  | 1328      |                    | NM_152260    | NP_689473    | Q8IZ73 | RUSD2_HUMAN |                             | 1  | CTCTACGGCCC   | 0.597 | rs148617479 |
| - | 3  | 1115      | FAF1_uc010bcf.2    | NM_016013    | NP_057097    | Q9Y375 | CIA30_HUMAN |                             | 1  | TCCCCCGCGGG   | 0.383 |             |
| + | 15 | 5207      | GA_uc010uda.1_i    | NM_001164273 | NP_001157745 | Q8IWI9 | MGAP_HUMAN  | Thr-rich.                   | 12 | CTTTTCTAAG    | 0.478 |             |
| - | 4  | 558       |                    | NM_052955    | NP_443187    | Q96PF1 | TGM7_HUMAN  |                             | 2  | CTGCCCGTAGT   | 0.493 |             |
| - | 12 | 2495      | _p.D788N TP53BP    | NM_005657    | NP_005648    | Q12888 | TP53B_HUMAN |                             | 7  | GGAATCTGAGC   | 0.433 |             |
| + | 4  | 243       |                    | NM_004212    | NP_004203    | O43868 | S28A2_HUMAN |                             | 4  | GGAGTCGGTGG   | 0.408 | rs144302819 |
| - | 5  | 2140      | D4_uc010ugj.1_M    | NM_198400    | NP_006145    | P46934 | NEDD4_HUMAN | raction with TNIK (By simil | 4  | CCCTGGAGGTA   | 0.473 |             |
| - | 5  | 487       | _l_5'Flank RFX7_uc | NM_022841    | NP_073752    | Q2KHR2 | RFX7_HUMAN  | ype winged-helix.           | 0  | ACGTGCCTTCA   | 0.378 |             |
| - | 7  | 780       | DH1A2_uc010ugw     | NM_003888    | NP_003879    | O94788 | AL1A2_HUMAN |                             | 1  | CCATATCCTGGC  | 0.473 |             |
| + | 48 | 6604      | c.3_Missense_Mut   | NM_015059    | NP_055874    | Q9Y4G6 | TLN2_HUMAN  |                             | 11 | GAGACGTGATT   | 0.498 |             |
| + | 11 | 1526      | exp.2_Missense_M   | NM_025055    | NP_079331    | Q8N5R6 | CCD33_HUMAN |                             | 5  | GCAAGGCTCTT   | 0.398 |             |
| + | 4  | 895       | i.3_RNA IL16_uc0   | NM_172217    | NP_757366    | Q14005 | IL16_HUMAN  |                             | 4  | TAACAGGAAGTC  | 0.498 |             |
| + | 3  | 1422      |                    | NM_001080435 | NP_001073904 | Q8TF30 | WHAMM_HUMAN |                             | 0  | AGGAGACAGTA   | 0.308 |             |
| + | 9  | 1047      | _p.Q275* ADAMTS    | NM_207517    | NP_997400    | P82987 | ATL3_HUMAN  |                             | 27 | CACTTCAAGGA   | 0.333 |             |
| + | 2  | 202       |                    | NM_152336    | NP_689549    | Q96MI9 | CBPC4_HUMAN |                             | 0  | CCTAAGAGGTA   | 0.522 |             |
| + | 2  | 256       | _p.S52F WDR93      | NM_020212    | NP_064597    | Q6P2C0 | WDR93_HUMAN |                             | 2  | GGATTCTTTGC   | 0.502 |             |
| + | 6  | 1220      | vg.1_Missense_Mu   | NM_016111    | NP_057195    | Q9Y4R8 | TELO2_HUMAN |                             | 0  | CCGGCTCACGG   | 0.597 |             |
| - | 9  | 1305      | dbg.1_Missense_M   | NM_015914    | NP_056998    | Q6PKC3 | TXD11_HUMAN |                             | 0  | GAGACGCTCCA   | 0.612 |             |
| - | 20 | 2752      | iH7A_uc002dbl.2    | NM_014153    | NP_054872    | Q8IWR0 | Z3H7A_HUMAN | p.E852Q(1)                  | 4  | TAACTTCAGCAT  | 0.328 | rs150604583 |
| - | 4  | 1033      |                    | NM_001012991 | NP_001013009 | Q1ED39 | CP088_HUMAN | th ZFP106 (By similarity).  | 0  | CGGATCGATCT   | 0.557 |             |
| - | 2  | 862       | _l_5'Flank IQCK_uc | NM_001012991 | NP_001013009 | Q1ED39 | CP088_HUMAN | Lys-rich.                   | 0  | TGGCTCCTCGA   | 0.473 |             |
| + | 4  | 629       | hd.1_Missense_M    | NM_017888    | NP_060358    | Q6NUN0 | ACSM5_HUMAN |                             | 2  | GGCGTCCAGGG   | 0.562 |             |
| - | 49 | 7777      | /bd.1_Nonsense_M   | NM_017539    | NP_060009    | Q8TD57 | DYH3_HUMAN  | 4 (By similarity).          | 18 | GACTGGAACC    | 0.473 |             |
| + | 2  | 1746      |                    | NM_006040    | NP_006031    | Q9Y661 | HS3S4_HUMAN | lenal (Potential).          | 2  | AACAGGAAGAG   | 0.463 |             |
| - | 2  | 153       | uc010vct.1_Intron  | NM_145659    | NP_663634    | Q8NEV9 | IL27A_HUMAN |                             | 0  | CCTCCGACGCT   | 0.647 |             |
| + | 9  | 1235      | 51N ATP2A1_uc0     | NM_173201    | NP_775293    | O14983 | AT2A1_HUMAN | smic (By similarity).       | 4  | GTTCCGACAAG   | 0.582 |             |
| + | 9  | 1480      | 'P_uc002duj.2_Mis  | NM_005115    | NP_005106    | Q14764 | MVP_HUMAN   | MVP 9.                      | 4  | ACAACGCTGCG   | 0.657 |             |
| + | 2  | 1179      | tron ASPHD1_uc0    | NM_181718    | NP_859069    | Q5U4P2 | ASPH1_HUMAN | lenal (Potential).          | 0  | TGGACGACTCT   | 0.512 |             |
| + | 10 | 1021      | _p.P315L TGFB11    | NM_001042454 | NP_001035919 | O43294 | TGF11_HUMAN | I zinc-binding 2.           | 0  | CGGCCCTACT    | 0.682 |             |
| + | 4  | 2252      |                    | NM_003414    | NP_003405    | Q14586 | ZN267_HUMAN | :2H2-type 13.               | 4  | AGAAGACATACT  | 0.448 |             |
| - | 2  | 3356      | _l_Mutation_p.P101 | NM_002968    | NP_002959    | Q9NSC2 | SALL1_HUMAN |                             | 8  | AGACGGGACGT   | 0.562 |             |
| + | 8  | 772       | kj.2_Missense_Mu   | NM_000078    | NP_000069    | P11597 | CETP_HUMAN  |                             | 2  | ATCCCCTCATC   | 0.572 |             |
| + | 6  | 596       | C29_uc002esg.2_!   | NM_014187    | NP_054906    | Q9BTX3 | TM208_HUMAN |                             | 0  | AGCGCCGACAG   | 0.632 |             |
| - | 14 | 2228      | HOD1_uc010ced.2    | NM_013241    | NP_037373    | Q9Y613 | FHOD1_HUMAN | on with ROCK1. FH2.         | 3  | TAGGCCGATGT   | 0.562 |             |
| + | 13 | 2519      | 'eti.1_Missense_M  | NM_024519    | NP_078795    | Q6ZS17 | FA65A_HUMAN |                             | 3  | GGACAGGAGCC   | 0.662 |             |
| - | 11 | 1504      | _p.P437L RANBP     | NM_020850    | NP_065901    | Q6VN20 | RBP10_HUMAN |                             | 1  | CGTTGGGGTAG   | 0.602 |             |
| + | 10 | 3360_3361 | n_p.Q572* NFATC    | NM_173165    | NP_775188    | Q12968 | NFAC3_HUMAN |                             | 3  | TTTCCCAAGGA   | 0.49  |             |
| - | 3  | 2426      | 'ej.1_Missense_Mu  | NM_024533    | NP_078809    | Q9GZS9 | CHST5_HUMAN | lenal (Potential).          | 0  | TAGACGAAGTAT  | 0.657 |             |
| + | 5  | 1095      |                    | NM_012213    | NP_036345    | O95822 | DCMC_HUMAN  |                             | 0  | ATTCCGAATGTA  | 0.522 |             |
| + | 3  | 898       | :hl.2_Missense_Mu  | NM_024731    | NP_079007    | Q8N4N3 | KLH36_HUMAN |                             | 2  | CGCCGTGTGC    | 0.677 |             |
| - | 15 | 2189      | .1_RNA TRPV3_u     | NM_145068    | NP_659505    | Q8NET8 | TRPV3_HUMAN |                             | 4  | GCTGCCGTAGG   | 0.537 |             |

|   |    |           |                   |              |              |        |              |                                |    |                 |       |             |
|---|----|-----------|-------------------|--------------|--------------|--------|--------------|--------------------------------|----|-----------------|-------|-------------|
| - | 10 | 1448      |                   | NM_002558    | NP_002549    | P51575 | P2RX1_HUMAN  | al). Pore-forming motif (Pot   | 2  | CAGAGCCGATG     | 0.587 |             |
| + | 21 | 2702      | sn.1_Missense_Mu  | NM_153827    | NP_722549    | Q8N4C8 | MINK1_HUMAN  |                                | 6  | AGGACGACGAG     | 0.657 |             |
| - | 2  | 397       |                   | NM_001212    | NP_001203    | Q07021 | C1QBP_HUMAN  |                                | 1  | AACCTCCAGACA    | 0.448 |             |
| - | 9  | 1191      | e_Mutation_p.T311 | NM_031220    | NP_112497    | Q9BZ71 | PITM3_HUMAN  |                                | 4  | CATAGGTGGAG     | 0.582 |             |
| + | 71 | 10969     | am.1_Missense_M   | NM_020877    | NP_065928    | Q9P225 | DYH2_HUMAN   |                                | 13 | CCGCAGCAATA     | 0.542 |             |
| + | 14 | 2331      | p.G737E ARHGFEF   | NM_173728    | NP_776089    | O94989 | ARHG_F_HUMAN |                                | 3  | GCTGGGAGCCT     | 0.582 |             |
| + | 5  | 701       | _p.K134N MYOCD    | NM_153604    | NP_705832    | Q8IZQ8 | MYCD_HUMAN   |                                | 5  | GTGAAAGAGGC     | 0.488 |             |
| + | 3  | 5781      | r.1_Missense_Mut  | NM_030665    | NP_109590    | Q7Z5J4 | RAI1_HUMAN   |                                | 2  | GCGCACCACTG     | 0.701 |             |
| + | 11 | 1086      | _p.G234D LGALS5   | NM_009587    | NP_033665    | O00182 | LEG9_HUMAN   | Galectin 2.                    | 0  | GGATGGTCAGC     | 0.552 | rs145626584 |
| + | 3  | 365       | rag.1_5'Flank TME | NM_152464    | NP_689677    | Q6SZW1 | SARM1_HUMAN  |                                | 0  | TCACCCGCAAC     | 0.468 |             |
| - | 5  | 1562      | _p.G374R SLFN11   | NM_001104588 | NP_001098058 | Q7Z7L1 | SLN11_HUMAN  |                                | 3  | AGGCCCACTAG     | 0.383 |             |
| + | 2  | 383       |                   | NM_033315    | NP_201572    | Q96S79 | RSLAB_HUMAN  | all GTPase-like.               | 4  | CTACCGGGTGG     | 0.697 |             |
| - | 1  | 403       |                   | NM_139285    | NP_644814    | Q8NHY3 | GA2L2_HUMAN  | CH.                            | 2  | ATGCCCATCTC     | 0.592 |             |
| - | 4  | 1144      |                   | NM_001004334 | NP_001004334 | Q6PRD1 | GP179_HUMAN  | cellular (Potential).          | 3  | CTCTTCCACCA     | 0.652 |             |
| + | 5  | 792       | _p.G76R PPP1R1    | NM_032192    | NP_115568    | Q9UD71 | PPR1B_HUMAN  |                                | 0  | AGCTGGGGGAG     | 0.418 |             |
| - | 14 | 2203      |                   | NM_133373    | NP_588614    | Q8N3E9 | PLCD3_HUMAN  | C2.                            | 3  | GTCTGCGGGCA     | 0.627 |             |
| + | 4  | 1438      |                   | NM_014726    | NP_055541    | A7MCY6 | TBKB1_HUMAN  |                                | 0  | ATTTAGACCTG     | 0.597 |             |
| + | 2  | 421       | s.1_Intron DHX40_ | NM_024612    | NP_078888    | Q8IX18 | DHX40_HUMAN  | ase ATP-binding.               | 0  | TATATGAAGCAG    | 0.323 |             |
| - | 2  | 643       | ddt.2_Missense_M  | NM_001915    | NP_001906    | P49447 | CY561_HUMAN  | ochrome b561.                  | 1  | GGTGCGTTTAG     | 0.647 |             |
| - | 16 | 2065      | n.2_Missense_Mu   | NM_001144952 | NP_001138424 | Q58EX2 | SDK2_HUMAN   | cellular (Potential).          | 2  | GGGGGGCTCCT     | 0.577 |             |
| + | 9  | 1346      | 1_5'Flank LLGL2_  | NM_207346    | NP_997229    | Q7Z6J9 | SEN54_HUMAN  |                                | 1  | TGCCCGTAAG      | 0.537 |             |
| + | 14 | 4319      | uf.2_Missense_Mu  | NM_018996    | NP_061869    | Q9HCJ0 | TNR6C_HUMAN  | Pro-rich.                      | 2  | CCCCTCGCAC      | 0.647 |             |
| - | 3  | 795       |                   | NM_178520    | NP_848615    | Q8N8V8 | TM105_HUMAN  |                                | 1  | GTCTTCGCCCT     | 0.662 | rs75774881  |
| + | 2  | 246_247   | 1WG>*R USP14_     | NM_005151    | NP_005142    | P54578 | UBP14_HUMAN  | Ubiquitin-like.                | 2  | AATGGGAAAG      | 0.371 |             |
| - | 6  | 392       | jdk.2_Missense_M  | NM_173464    | NP_775735    | Q8NA19 | LMBL4_HUMAN  | MBT 1.                         | 3  | CTCTGAAAGG      | 0.343 |             |
| - | 23 | 3438      | vzj.1_Missense_M  | NM_005559    | NP_005550    | P25391 | LAMA1_HUMAN  | inin EGF-like 13.              | 21 | CCCCGGTTTCC     | 0.572 |             |
| + | 17 | 2503      | o.2_Missense_Mut  | NM_020774    | NP_065825    | Q86YT6 | MIB1_HUMAN   | RING-type 1.                   | 4  | CATGTGGACAT     | 0.383 |             |
| + | 7  | 1446      | kub.2_Intron CABL | NM_001100619 | NP_001094089 | Q8TDN4 | CABL1_HUMAN  | th CDK3 (By similarity).       | 1  | TACATGGTGAG     | 0.567 |             |
| + | 5  | 589       | vr.2_Missense_Mu  | NM_177986    | NP_817123    | Q86SJ6 | DSG4_HUMAN   | Extracellular (Potential).     | 8  | ATAAATGATAACC   | 0.408 |             |
| + | 3  | 557       | !fp.1_Missense_M  | NM_173629    | NP_775900    | Q8N1N2 | CR026_HUMAN  |                                | 0  | GTCCACCTACA     | 0.468 |             |
| + | 5  | 959       | if.2_Missense_Mu  | NM_031891    | NP_114097    | Q9HBT6 | CAD20_HUMAN  | r (Potential). Cadherin 3.     | 5  | GGATGGAGATG     | 0.423 |             |
| - | 2  | 641       | km.3_Missense_M   | NM_006566    | NP_006557    | Q15762 | CD226_HUMAN  | 1. Extracellular (Potential).  | 0  | GAGTAGGGCTG     | 0.448 |             |
| - | 8  | 1251      | _p.E322K NETO1_   | NM_138966    | NP_620416    | Q8TDF5 | NETO1_HUMAN  | ss A. Extracellular (Potentie  | 4  | ATTTTCATCCC     | 0.378 |             |
| - | 9  | 1486      |                   | NM_152769    | NP_689982    | Q8N350 | DOS_HUMAN    |                                | 0  | CCCTGGGCCGC     | 0.711 |             |
| - | 2  | 333       | _p.V27M SLC39A1   | NM_144564    | NP_653165    | Q9BRY0 | S39A3_HUMAN  | lasmic (Potential).            | 0  | CTTACGGGGAC     | 0.547 |             |
| + | 3  | 654       |                   | NM_002067    | NP_002058    | P29992 | GNA11_HUMAN  |                                | 86 | GGGAGGACCCG     | 0.652 |             |
| + | 8  | 1561_1562 |                   | NM_005483    | NP_005474    | Q13111 | CAF1A_HUMAN  |                                | 2  | GCTTCCATCCA     | 0.594 |             |
| - | 2  | 234       | N5_uc002mat.1_In  | NM_052972    | NP_443204    | P02750 | A2GL_HUMAN   |                                | 1  | TTCCACGGCCA     | 0.607 |             |
| - | 22 | 3935      | w.2_Missense_Mu   | NM_002850    | NP_002841    | Q13332 | PTPRS_HUMAN  | cellular (Potential).          | 4  | GCCCCGGTTA      | 0.622 |             |
| - | 2  | 792       | idj.2_Missense_Mu | NM_001097641 | NP_001091110 | P21217 | FUT3_HUMAN   | renal (Potential).             | 0  | TGGTCCCCTTG     | 0.607 |             |
| - | 1  | 181       | 5A41_uc010dut.2_  | NM_173637    | NP_775908    | Q8N5S1 | S2541_HUMAN  | Pro-rich.                      | 0  | ttggggggaggcggg | 0.423 | rs113229271 |
| - | 26 | 3094      |                   | NM_012335    | NP_036467    | O00160 | MYO1F_HUMAN  |                                | 3  | GGGTCTGTCTG     | 0.697 |             |
| - | 5  | 36158     |                   | NM_024690    | NP_078966    | Q8WXI7 | MUC16_HUMAN  | xtracellular (Potential).      | 57 | CAGTGGGACTG     | 0.498 |             |
| - | 5  | 35792     |                   | NM_024690    | NP_078966    | Q8WXI7 | MUC16_HUMAN  | xtracellular (Potential).      | 57 | AAGTTGGAATC     | 0.488 |             |
| - | 5  | 32182     |                   | NM_024690    | NP_078966    | Q8WXI7 | MUC16_HUMAN  | xtracellular (Potential).      | 57 | TGCCCCGAAA      | 0.498 |             |
| - | 3  | 30874     |                   | NM_024690    | NP_078966    | Q8WXI7 | MUC16_HUMAN  | ch. Extracellular (Potential). | 57 | CACTGGAATTC     | 0.458 |             |
| - | 3  | 26695     |                   | NM_024690    | NP_078966    | Q8WXI7 | MUC16_HUMAN  | ch. Extracellular (Potential). | 57 | CATAGGAGTGG     | 0.527 |             |

|   |    |       |                   |              |              |        |             |                                |    |               |       |             |
|---|----|-------|-------------------|--------------|--------------|--------|-------------|--------------------------------|----|---------------|-------|-------------|
| - | 3  | 24100 |                   | NM_024690    | NP_078966    | Q8WXI7 | MUC16_HUMAN | ch. Extracellular (Potential). | 57 | TTTTTCCAGAAG  | 0.468 |             |
| - | 1  | 9503  |                   | NM_024690    | NP_078966    | Q8WXI7 | MUC16_HUMAN | xtracellular (Potential).      | 57 | CTGCAATGGTCT  | 0.478 |             |
| - | 1  | 4672  |                   | NM_024690    | NP_078966    | Q8WXI7 | MUC16_HUMAN | xtracellular (Potential).      | 57 | FAGGTGGAAAAA  | 0.423 |             |
| + | 1  | 946   |                   | NM_175883    | NP_787079    | Q96RA2 | OR7D2_HUMAN | Name=6; (Potential).           | 3  | TTATGGGACAGC  | 0.498 |             |
| + | 4  | 1932  | e_Mutation_p.S62  | NM_144566    | NP_653167    | Q9H0M5 | ZN700_HUMAN | :2H2-type 14.                  | 0  | CTTCAGTTGTGC  | 0.483 |             |
| + | 4  | 1934  | e_Mutation_p.C62  | NM_144566    | NP_653167    | Q9H0M5 | ZN700_HUMAN | :2H2-type 14.                  | 0  | FCAGTTGTGCCT  | 0.483 |             |
| - | 5  | 1075  |                   | NM_001080404 | NP_001073873 | C9JN71 | ZN878_HUMAN | :2H2-type 8.                   | 0  | TACACTCATAGG  | 0.398 |             |
| - | 4  | 1042  |                   | NM_005815    | NP_005806    | Q9Y2A4 | ZN443_HUMAN | :2H2-type 6.                   | 1  | TACATTTATATG  | 0.383 |             |
| + | 1  | 905   |                   | NM_012377    | NP_036509    | O60412 | OR7C2_HUMAN | lasmic (Potential).            | 3  | GGGGAGACTCC   | 0.542 |             |
| - | 9  | 1546  | _p.S435L SLC1A6   | NM_005071    | NP_005062    | P48664 | EAA4_HUMAN  |                                | 6  | CAATTGAGTCC   | 0.567 |             |
| - | 4  | 558   |                   | NM_022904    | NP_075055    | Q86YV0 | RASL3_HUMAN |                                | 0  | CCCTTCGAGGAC  | 0.537 |             |
| - | 1  | 501   |                   | NM_013940    | NP_039228    | Q9Y4A9 | O10H1_HUMAN | lasmic (Potential).            | 0  | CCGCGGGCTCA   | 0.647 |             |
| - | 23 | 2976  |                   | NM_015692    | NP_056507    | Q8IZJ3 | CPMD8_HUMAN |                                | 13 | GGGGACTCCTT   | 0.602 |             |
| - | 4  | 1316  |                   | NM_021030    | NP_066358    | P17017 | ZNF14_HUMAN |                                | 3  | TTTCTCTCCAG   | 0.378 |             |
| + | 4  | 1601  |                   | NM_031218    | NP_112495    | P35789 | ZNF93_HUMAN | :2H2-type 13.                  | 1  | CCCTTACTAAAC  | 0.358 |             |
| + | 4  | 1624  |                   | NM_031218    | NP_112495    | P35789 | ZNF93_HUMAN |                                | 1  | ATACTGGAGAG   | 0.353 |             |
| + | 4  | 1693  | 429_uc010ecu.1_J  | NM_001001415 | NP_001001415 | Q86V71 | ZN429_HUMAN | :2H2-type 14.                  | 2  | CTTTTATCCTGT  | 0.378 |             |
| + | 4  | 1696  | 429_uc010ecu.1_J  | NM_001001415 | NP_001001415 | Q86V71 | ZN429_HUMAN | :2H2-type 14.                  | 2  | TTATCCTGTCTC  | 0.378 |             |
| - | 6  | 2775  | 208_uc002nqo.1_J  | NM_007153    | NP_009084    |        |             |                                | 7  | ATTCTTCACATT  | 0.368 |             |
| - | 5  | 1789  | 208_uc002nqo.1_J  | NM_007153    | NP_009084    |        |             |                                | 7  | ACCTTAATAAAG  | 0.398 |             |
| - | 4  | 822   | 1_Intron ZNF208_  | NM_007153    | NP_009084    |        |             |                                | 7  | CTCTCCAGTATC  | 0.353 |             |
| - | 5  | 1066  |                   | NM_001080409 | NP_001073878 |        |             |                                | 2  | CAGTATGAATTAT | 0.368 | rs34442493  |
| - | 4  | 1170  | rj.1_Missense_Mu  | NM_003430    | NP_003421    | Q05481 | ZNF91_HUMAN | :2H2-type 8.                   | 0  | ATTCTTTACATT  | 0.373 |             |
| - | 4  | 1111  | rj.1_Missense_Mu  | NM_003430    | NP_003421    | Q05481 | ZNF91_HUMAN | :2H2-type 7.                   | 0  | AAGAACGGCTA   | 0.393 | rs410211    |
| + | 4  | 2677  | dd.1_Missense_M   | NM_014717    | NP_055532    | O15090 | ZN536_HUMAN |                                | 11 | CTCCCTGGAATC  | 0.572 |             |
| - | 15 | 2117  | p.S533F RHPN2_    | NM_033103    | NP_149094    | Q8IUC4 | RHPN2_HUMAN |                                | 6  | ACCAAGAAGTGT  | 0.502 |             |
| - | 7  | 1102  | 2nul.2_Missense_f | NM_019849    | NP_062823    | Q9NS82 | AAA1_HUMAN  | ical; (Potential).             | 2  | GACAGGCATGA   | 0.612 |             |
| + | 5  | 754   | i_p.T131I KIRREL  | NM_199180    | NP_954649    | Q6UWL6 | KIRR2_HUMAN | 2. Extracellular (Potential).  | 3  | AGGGACCCCTG   | 0.458 |             |
| + | 5  | 1902  |                   | NM_144689    | NP_653290    | Q8TAQ5 | ZN420_HUMAN | :2H2-type 16.                  | 0  | GTAAGGAATGTC  | 0.428 |             |
| + | 7  | 775   | NF383_uc002ofu.1  | NM_152604    | NP_689817    | Q8NA42 | ZN383_HUMAN | KRAB.                          | 2  | CCCTGGATGGT   | 0.493 |             |
| + | 4  | 284   | ixtq.1_RNA ZNF52  | NM_032453    | NP_115829    | Q8NB42 | ZN527_HUMAN | KRAB.                          | 2  | CATTTCTAAGCC  | 0.483 |             |
| + | 14 | 4222  |                   | NM_015073    | NP_055888    | O60292 | SI1L3_HUMAN |                                | 2  | CGGAAGCAGCG   | 0.612 |             |
| + | 1  | 851   |                   | NM_002446    | NP_002437    | Q02779 | M3K10_HUMAN | rotein kinase.                 | 6  | GGCAGGTCGCC   | 0.637 |             |
| - | 7  | 4471  | i_Mutation_p.S126 | NM_181882    | NP_870998    | Q9BXM0 | PRAX_HUMAN  |                                | 2  | CGGGGGACTTGT  | 0.692 |             |
| + | 27 | 3449  | ise_Mutation_p.P2 | NM_001042544 | NP_001036009 | Q8N2S1 | LTBP4_HUMAN | Pro-rich.                      | 1  | GGCACCTGCTA   | 0.697 |             |
| + | 2  | 894   | sk.3_Missense_M   | NM_022752    | NP_073589    | Q6ZN55 | ZN574_HUMAN |                                | 0  | TGTACCCGAGT   | 0.617 |             |
| + | 3  | 1277  | .2_Missense_Mut   | NM_199285    | NP_954979    | A6NJB7 | PRR19_HUMAN | Pro-rich.                      | 0  | TCGGCCCTGGG   | 0.647 |             |
| - | 1  | 707   | g.1_Intron DMPK_  | NM_001081563 | NP_001075032 | Q09013 | DMPK_HUMAN  |                                | 3  | GAACCGAGGGT   | 0.602 |             |
| - | 16 | 2371  | p.R709H SYMPK_    | NM_004819    | NP_004810    | Q92797 | SYMPK_HUMAN |                                | 1  | ACTGGCGGGAC   | 0.597 | rs145063068 |
| - | 1  | 1352  | uc002peu.1_5'UTF  | NM_020709    | NP_065760    | Q9ULN7 | PNML2_HUMAN |                                | 1  | CGTCCGGGGTG   | 0.572 |             |
| - | 6  | 705   | ct.2_Missense_Mu  | NM_001190    | NP_001181    | O15382 | BCAT2_HUMAN |                                | 1  | CCCCGCCACC    | 0.647 |             |
| + | 22 | 3108  | o.E794K PPFIA3_L  | NM_003660    | NP_003651    | O75145 | LIPA3_HUMAN |                                | 1  | ACGAGGAGATG   | 0.647 |             |
| - | 1  | 77    | K1_uc010ycg.1_R   | NM_002257    | NP_002248    | P06870 | KLK1_HUMAN  |                                | 0  | TCCCCCCAGG    | 0.642 |             |
| + | 2  | 219   | ise_Mutation_p.V6 | NM_001030047 | NP_001025218 | P07288 | KLK3_HUMAN  | eptidase S1.                   | 3  | AGTGGTCTCTC   | 0.632 |             |
| + | 3  | 642   | D33_uc010eot.1_N  | NM_001772    | NP_001763    | P20138 | CD33_HUMAN  | Potential). lg-like C2-type.   | 0  | CACCCACGGCC   | 0.612 |             |
| - | 2  | 1102  |                   | NM_002029    | NP_002020    | P21462 | FPR1_HUMAN  | lasmic (Potential).            | 3  | AATTGGTAGCT   | 0.582 |             |
| - | 5  | 1038  | i77_uc010ydf.1_5' | NM_023074    | NP_075562    | Q9BS31 | ZN649_HUMAN |                                | 3  | CTCCTTTGTGAC  | 0.507 |             |

|   |    |       |                                |              |              |        |             |                             |    |                |       |
|---|----|-------|--------------------------------|--------------|--------------|--------|-------------|-----------------------------|----|----------------|-------|
| - | 5  | 1531  | i.2_Intron uc002py             | NM_021632    | NP_067645    | Q9GZX5 | ZN350_HUMAN |                             | 1  | GATTTTCCACCT   | 0.493 |
| + | 5  | 649   | .sense_Mutation_p              | NM_144684    | NP_653285    | Q8WV37 | ZN480_HUMAN |                             | 1  | CAAGAACAGAA    | 0.358 |
| - | 6  | 848   | n.1_Missense_Mu                | NM_002287    | NP_002278    | Q6GTX8 | LAIR1_HUMAN | ical; (Potential).          | 4  | CAGGAGGAGGA    | 0.542 |
| + | 10 | 1540  | fw.2_Missense_Mutation_p.P503S |              |              | Q96PV6 | LENG8_HUMAN |                             | 2  | AGGACCCGGAG    | 0.667 |
| + | 8  | 2341  | p.R728Q NLRP2_u                | NM_017852    | NP_060322    | Q9NX02 | NALP2_HUMAN |                             | 2  | TCTTCGAGGTC    | 0.453 |
| + | 10 | 2787  | p.T877P NLRP2_u                | NM_017852    | NP_060322    | Q9NX02 | NALP2_HUMAN | LRR 4.                      | 2  | TGCAGACCTTG    | 0.552 |
| - | 5  | 1369  | b.2_Missense_Mu                | NM_145007    | NP_659444    | P59045 | NAL11_HUMAN | NACHT.                      | 6  | GGGATCAGACA    | 0.478 |
| + | 7  | 1604  | mi.2_Missense_Mi               | NM_153447    | NP_703148    | P59047 | NALP5_HUMAN | NACHT.                      | 7  | TATGGCTGTGG    | 0.557 |
| + | 6  | 397   | LP_uc010eti.2_3'L              | NM_033106    | NP_149097    | Q9UBC7 | GALP_HUMAN  |                             | 0  | AGCATGAAAAT    | 0.368 |
| - | 5  | 1758  |                                | NM_052882    | NP_443114    | Q96PE6 | ZIM3_HUMAN  | 2H2-type 11.                | 2  | CCTGTCAGCGA    | 0.408 |
| - | 5  | 499   |                                | NM_001012729 | NP_001012747 | A6NLW8 | DUXA_HUMAN  | homeobox 2.                 | 1  | ATCTTCGATTTT   | 0.383 |
| - | 19 | 3912  |                                | NM_012293    | NP_036425    | Q92626 | PXDN_HUMAN  |                             | 8  | GCACCCGGGTG    | 0.627 |
| - | 10 | 1533  | ie_Mutation_p.D23              | NM_015025    | NP_055840    | Q9UL68 | MYT1L_HUMAN |                             | 6  | ACTATCGTCTTC   | 0.443 |
| + | 7  | 671   | p.G127S COLEC1                 | NM_024027    | NP_076932    | Q9BWP8 | COL11_HUMAN | C-type lectin.              | 0  | GCGGGGGCACC    | 0.667 |
| - | 2  | 229   | BP1_uc002qzm.2                 | NM_004763    | NP_004754    | O14713 | ITBP1_HUMAN | Ser/Thr-rich.               | 0  | FGATTTTCGCTACT | 0.398 |
| - | 8  | 1338  | da.2_Missense_Mi               | NM_001002006 | NP_001002006 | Q96P26 | 5NT1B_HUMAN |                             | 3  | TTTTCCCCCGG    | 0.393 |
| - | 26 | 10625 |                                | NM_000384    | NP_000375    | P04114 | APOB_HUMAN  | parin-binding.              | 27 | TTGACATCTCC    | 0.458 |
| - | 26 | 8053  |                                | NM_000384    | NP_000375    | P04114 | APOB_HUMAN  |                             | 27 | CTGGATGGGATT   | 0.358 |
| + | 4  | 454   | p.G146E KRTCAP                 | NM_173853    | NP_776252    | Q53RY4 | KCP3_HUMAN  |                             | 0  | TGAGGGGCCCG    | 0.547 |
| - | 18 | 2644  |                                | NM_019024    | NP_061897    | Q9P2D3 | HTR5B_HUMAN | HEAT 1.                     | 8  | ATTTACGAACCT   | 0.398 |
| + | 8  | 932   | nk.1_Missense_M                | NM_144736    | NP_653337    | Q7L592 | MIDA_HUMAN  |                             | 1  | AACTTCTCAAC    | 0.413 |
| + | 8  | 934   | nk.1_Nonsense_IV               | NM_144736    | NP_653337    | Q7L592 | MIDA_HUMAN  |                             | 1  | TCTTCTCAACGC   | 0.413 |
| + | 8  | 955   | sff.2_Missense_M               | NM_032208    | NP_115584    | Q9H6X2 | ANTR1_HUMAN | ilar (Potential). VWFA.     | 4  | TGTTTCCCCTGA   | 0.488 |
| + | 11 | 1204  | V1B1_uc010fdw.2                | NM_001692    | NP_001683    | P15313 | VATB1_HUMAN |                             | 1  | TCTACGTGGAC    | 0.552 |
| + | 2  | 1034  | 10feb.1_Missense_              | NM_005791    | NP_005782    | O00566 | MPP10_HUMAN | Potential.                  | 3  | TATAATGATGAG   | 0.323 |
| + | 51 | 6134  | YSF_uc010fej.2_M               | NM_003494    | NP_003485    | O75923 | DYSF_HUMAN  | lasmic (Potential).         | 7  | TTTGATGATTTTC  | 0.522 |
| + | 7  | 706   | suq.2_Missense_M               | NM_013434    | NP_038462    | Q9Y2W7 | CSEN_HUMAN  | EF-hand 3.                  | 3  | GACATGATGGGC   | 0.667 |
| + | 7  | 1083  |                                | NM_004804    | NP_004795    | O76071 | CIAO1_HUMAN |                             | 0  | TCTTCTCCCTGA   | 0.612 |
| - | 29 | 3934  | NRNP200_uc002s                 | NM_014014    | NP_054733    | O75643 | U520_HUMAN  | SEC63 1.                    | 10 | AGACAGGCAGC    | 0.552 |
| + | 7  | 794   | e_Mutation_p.G13               | NM_001134224 | NP_001127696 | Q96PE3 | INP4A_HUMAN | C2.                         | 1  | ACTGGGCTCTGC   | 0.458 |
| - | 1  | 791   | ALL_uc010fju.2_RI              | NM_005434    | NP_005425    | Q13021 | MALL_HUMAN  |                             | 2  | CGGGCGGGTCG    | 0.706 |
| - | 22 | 2922  |                                | NM_022662    | NP_073153    | Q9H1A4 | APC1_HUMAN  |                             | 2  | TGTGAGGATTCAT  | 0.289 |
| + | 3  | 408   | 3LI2_uc002tmu.3_               | NM_005270    | NP_005261    | P10070 | GLI2_HUMAN  |                             | 13 | CACATGGAGCA    | 0.647 |
| + | 2  | 468   | Ofiu.2_Missense_f              | NM_130773    | NP_570129    | Q8WYK1 | CNTP5_HUMAN | Extracellular (Potential).  | 10 | ACTAGCATCCC    | 0.458 |
| - | 3  | 387   | IMS2_uc010yzm.1                | NM_001161403 | NP_001154875 | Q7Z4I7 | LIMS2_HUMAN | zinc-binding 1.             | 0  | AGCACGGAGCA    | 0.602 |
| - | 14 | 3243  | AP5_uc002ttq.2_li              | NM_207363    | NP_997246    | O14513 | NCKP5_HUMAN |                             | 0  | TGGTTTCGGACT   | 0.567 |
| - | 14 | 2946  | AP5_uc002ttq.2_li              | NM_207363    | NP_997246    | O14513 | NCKP5_HUMAN |                             | 0  | TAAATCAAGAG    | 0.532 |
| - | 6  | 1158  |                                | NM_002299    | NP_002290    | P09848 | LPH_HUMAN   | ial). 4 X approximate repez | 13 | TTCAGGAAAG     | 0.602 |
| + | 27 | 4684  |                                | NM_001080427 | NP_001073896 |        |             |                             | 7  | CACCTCCCAA     | 0.418 |
| - | 89 | 14518 |                                | NM_018557    | NP_061027    | Q9NZR2 | LRP1B_HUMAN | lasmic (Potential).         | 50 | TGTCTATCATAA   | 0.373 |
| + | 1  | 1118  |                                | NR_026904    |              |        |             |                             | 0  | TAGACAGCTATG   | 0.388 |
| + | 9  | 1616  | foc.1_Missense_IV              | NM_052917    | NP_443149    | Q8IUC8 | GLT13_HUMAN | renal (Potential).          | 6  | CAACTCCATACA   | 0.413 |
| + | 3  | 387   | o.2_Missense_Mu                | NM_173355    | NP_775491    | O95045 | UPP2_HUMAN  |                             | 0  | GTGTGGTGGG     | 0.418 |
| - | 12 | 2539  |                                | NM_022168    | NP_071451    | Q9BYX4 | IFIH1_HUMAN | case C-terminal.            | 1  | FGACTTCTTTTT   | 0.294 |
| - | 16 | 3400  | p.E1008K SCN1A                 | NM_006920    | NP_008851    | P35498 | SCN1A_HUMAN |                             | 13 | TTTCTTCCAGAT   | 0.284 |
| + | 8  | 2470  | udy.2_Missense_h               | NM_152381    | NP_689594    | A4UGR9 | XIRP2_HUMAN | Xin 8.                      | 14 | TCTTTGGAGAAA   | 0.378 |
| + | 2  | 910   |                                | NM_020981    | NP_066191    | Q9Y5Z6 | B3GT1_HUMAN | renal (Potential).          | 4  | GACAACTTATT    | 0.408 |



|   |     |           |                    |              |              |        |             |                                |     |                |       |             |
|---|-----|-----------|--------------------|--------------|--------------|--------|-------------|--------------------------------|-----|----------------|-------|-------------|
| - | 2   | 229       |                    | NM_020675    | NP_065726    | Q9HBM1 | SPC25_HUMAN | omplex. Interaction with the   | 1   | 3TATCTCTTAGTC  | 0.373 |             |
| - | 36  | 6052      |                    | NM_004525    | NP_004516    | P98164 | LRP2_HUMAN  | ; B 18. Extracellular (Potenti | 29  | CCACGTTTCCTC   | 0.343 |             |
| - | 4   | 405       | 1.2_intron SLC25A  | NM_003705    | NP_003696    | O75746 | CMC1_HUMAN  | 2. JEF-hand 2.                 | 0   | ATGTCACCTCTC   | 0.363 |             |
| - | 254 | 55829     | 220 TTN_uc010z     | NM_133378    | NP_596869    | Q8WZ42 | TITIN_HUMAN |                                | 153 | GGTCTCATTTC    | 0.453 |             |
| - | 253 | 54483     | 782K TTN_uc010z    | NM_133378    | NP_596869    | Q8WZ42 | TITIN_HUMAN |                                | 153 | TGTTTTCGATGGT  | 0.393 |             |
| - | 250 | 52053     | 172C TTN_uc010z    | NM_133378    | NP_596869    | Q8WZ42 | TITIN_HUMAN |                                | 153 | CATTACGAATTTTC | 0.388 |             |
| - | 238 | 48717     | 860F TTN_uc010z    | NM_133378    | NP_596869    | Q8WZ42 | TITIN_HUMAN |                                | 153 | ATAGAGAACAG    | 0.433 |             |
| - | 65  | 16329     | uc010zfj.1_Intro   | NM_133378    | NP_596869    | Q8WZ42 | TITIN_HUMAN |                                | 153 | CAAGTCCACAT    | 0.408 |             |
| - | 65  | 16228     | uc010zfj.1_Intro   | NM_133378    | NP_596869    | Q8WZ42 | TITIN_HUMAN |                                | 153 | CAGGTTTCACT    | 0.338 |             |
| - | 47  | 11075     | N_uc010zfj.1_Intrc | NM_133378    | NP_596869    | Q8WZ42 | TITIN_HUMAN |                                | 153 | TCCTCTATCTTGA  | 0.408 |             |
| + | 3   | 884       |                    | NM_194250    | NP_919226    | Q7Z570 | Z804A_HUMAN | p.R97Q(1)                      | 11  | TGCTCGAAATG    | 0.368 | rs145158210 |
| - | 7   | 911       | frt.2_Nonsense_M   | NM_005795    | NP_005786    | Q16602 | CALRL_HUMAN | ellular (Potential).           | 4   | TTTGTCCATGTT   | 0.333 |             |
| + | 22  | 1721      |                    | NM_000090    | NP_000081    | P02461 | CO3A1_HUMAN | le-helical region.             | 13  | AGGAATGAGGG    | 0.488 |             |
| - | 44  | 8356      |                    | NM_018897    | NP_061720    | Q8WXX0 | DYH7_HUMAN  | k (By similarity).             | 12  | CATGAAGTGA     | 0.373 |             |
| - | 41  | 7050      |                    | NM_018897    | NP_061720    | Q8WXX0 | DYH7_HUMAN  | 4 (By similarity).             | 12  | AAATCGAAACA    | 0.443 | rs115474479 |
| - | 36  | 6037      |                    | NM_018897    | NP_061720    | Q8WXX0 | DYH7_HUMAN  | milarity). ATP (Potential).    | 12  | CAGTTCCTGTT    | 0.368 |             |
| + | 11  | 2709      | tr.2_Missense_Mu   | NM_001204    | NP_001195    | Q13873 | BMPR2_HUMAN | lasmic (Potential).            | 9   | AATCCAATGTCTA  | 0.423 |             |
| + | 3   | 285       | 10zIU.1_5'Flank E  | NM_001037663 | NP_001032752 | P24534 | EF1B_HUMAN  | ST C-terminal.                 | 0   | TGTCCAGCCCA    | 0.468 |             |
| + | 5   | 4256      |                    | NM_020923    | NP_065974    | Q9HCK1 | ZDBF2_HUMAN |                                | 3   | AATATCCCTCTTC  | 0.378 |             |
| - | 2   | 323       | zjg.1_Missense_M   | NM_001608    | NP_001599    | P28330 | ACADL_HUMAN |                                | 0   | CTTCCCTCCCG    | 0.348 |             |
| - | 7   | 979       | _p.P294L ERBB4_    | NM_005235    | NP_005226    | Q15303 | ERBB4_HUMAN | :extracellular (Potential).    | 33  | TACGTGGACAT    | 0.318 |             |
| - | 13  | 1071      | S1_uc010fvj.1_Mi:  | NM_022648    | NP_072174    | Q9HBL0 | TENS1_HUMAN | 2 tensin-type.                 | 4   | TCCTGGGATGT    | 0.582 |             |
| + | 4   | 392       | _p.P131L RQCD1_    | NM_005444    | NP_005435    | Q92600 | RCD1_HUMAN  |                                | 2   | CAGTCCCTTTG    | 0.423 |             |
| - | 1   | 1032_1033 | e_Mutation_p.G32   | NM_015311    | NP_056126    | O75147 | OBSL1_HUMAN | Ig-like 3.                     | 0   | TGGCCCCCGCG    | 0.683 |             |
| + | 28  | 2285      | utation_p.K708R C  | NM_000091    | NP_000082    | Q01955 | CO4A3_HUMAN | le-helical region.             | 3   | ACCTAAGGGTA    | 0.373 |             |
| - | 10  | 1868      | o.R555W ECEL1_u    | NM_004826    | NP_004817    | O95672 | ECEL1_HUMAN | renal (Potential).             | 2   | CCTGCCGAATCT   | 0.567 |             |
| + | 12  | 1227      | rF2_uc002vtk.3_M   | NM_015575    | NP_056390    | Q6Y7W6 | PERQ2_HUMAN |                                | 7   | AAGAAATGGGTA   | 0.448 |             |
| + | 4   | 671       |                    | NM_001080437 | NP_001073906 | Q8TER0 | SNED1_HUMAN | NIDO.                          | 2   | GCAGCGTTACT    | 0.657 |             |
| + | 3   | 469       |                    | NM_032515    | NP_115904    | Q9UMX3 | BOK_HUMAN   | BH3.                           | 1   | CAGGCGATGAG    | 0.647 |             |
| - | 2   | 471       |                    | NM_015963    | NP_057047    | Q8WY91 | THAP4_HUMAN | THAP-type.                     | 0   | AGATGGATGGC    | 0.582 |             |
| + | 4   | 582       | al.1_Missense_Mu   | NM_198994    | NP_945345    | O95932 | TGM3L_HUMAN |                                | 4   | ACGAGCCCAGG    | 0.622 |             |
| + | 11  | 1051      | f.2_intron VPS16_  | NM_022575    | NP_072097    | Q9H269 | VPS16_HUMAN |                                | 4   | CCAGCGAGGA     | 0.602 |             |
| - | 3   | 921       | mp.2_Missense_M    | NM_152611    | NP_689824    | Q8WUT4 | LRRN4_HUMAN | ilar (Potential). LRR 8.       | 3   | GTAGAGGGATG    | 0.572 |             |
| - | 5   | 1408      | nj.2_Missense_Ml   | NM_020341    | NP_065074    | Q9P286 | PAK7_HUMAN  | Linker.                        | 23  | AGCCTGACCTG    | 0.552 |             |
| - | 5   | 1064      | nj.2_Missense_Ml   | NM_020341    | NP_065074    | Q9P286 | PAK7_HUMAN  | Linker.                        | 23  | CATTTTCATTACG  | 0.463 |             |
| + | 3   | 302       | CLR3F_uc002wqx     | NM_006466    | NP_006457    | Q9H1D9 | RPC6_HUMAN  |                                | 0   | AGGGTCAGTTG    | 0.303 |             |
| + | 15  | 2497      | lv.1_Missense_Mu   | NM_012112    | NP_036244    | Q9ULW0 | TPX2_HUMAN  |                                | 2   | CAGAAGAGGTG    | 0.488 |             |
| + | 6   | 991       | ab.2_Missense_Ml   | NM_015338    | NP_056153    | Q8IXJ9 | ASXL1_HUMAN |                                | 248 | CATCAGGTATG    | 0.507 |             |
| + | 3   | 228_229   |                    | NM_182519    | NP_872325    | P59827 | LPLC4_HUMAN |                                | 0   | GGACCCCCCCC    | 0.485 | rs145261889 |
| + | 15  | 2212      | v.2_Nonsense_Mu    | NM_012156    | NP_036288    | Q9H4G0 | E41L1_HUMAN |                                | 3   | CGGATCGAGGG    | 0.652 |             |
| + | 5   | 501       | r_p.E72K MYBL2_    | NM_002466    | NP_002457    | P10244 | MYBB_HUMAN  | T_H myb-type 2.                | 5   | TTCATCGAGCTG   | 0.587 |             |
| + | 8   | 1203      | p.E350K HNF4A_u    | NM_000457    | NP_000448    | P41235 | HNF4A_HUMAN |                                | 3   | TGCAGGAGATG    | 0.383 |             |
| - | 6   | 680       | gu.2_Missense_M    | NM_182970    | NP_892015    | Q9H426 | RIMS4_HUMAN |                                | 5   | CCAGGTTGGTC    | 0.657 |             |
| + | 6   | 869       | a_Mutation_p.G21:  | NM_001164116 | NP_001157588 | Q9NQ75 | CASS4_HUMAN |                                | 3   | ACAGGGGCAGG    | 0.502 |             |
| + | 18  | 2599      | np.2_Missense_Ml   | NM_012469    | NP_036601    | O94906 | PRP6_HUMAN  |                                | 2   | ACTCCGGTAAG    | 0.642 |             |
| + | 18  | 2522      | P25_uc002yvjz.1_M  | NM_013396    | NP_037528    | Q9UHP3 | UBP25_HUMAN |                                | 5   | AGCATGAAGAT    | 0.378 |             |
| - | 2   | 276       | orf59_uc010gix.2_  | NM_021254    | NP_067077    | P57076 | CU059_HUMAN |                                | 0   | ATATGCCATGTT   | 0.328 |             |

|   |    |           |                    |              |              |        |             |                                 |      |               |       |                    |
|---|----|-----------|--------------------|--------------|--------------|--------|-------------|---------------------------------|------|---------------|-------|--------------------|
| - | 29 | 3637      | J2yqg.2_Missense   | NM_003895    | NP_003886    | O43426 | SYNJ1_HUMAN | Pro-rich.                       | 5    | ACTGCGTCTCTG  | 0.299 |                    |
| + | 4  | 476       | yri.1_Missense_M   | NM_000628    | NP_000619    | Q08334 | I10R2_HUMAN | -III.} Extracellular (Potential | 0    | CTGATTCTTTAC/ | 0.348 |                    |
| + | 4  | 1278      | p.D326N KCNJ15     | NM_002243    | NP_002234    | Q99712 | IRK15_HUMAN | smic (By similarity).           | 6    | TGGCTGATTTCA/ | 0.443 |                    |
| - | 6  | 1522      | CAM_uc002yvr.1_f   | NM_001389    | NP_001380    | O60469 | DSCAM_HUMAN | potential).} lg-like C2-type 4. | 11   | TTTTTCCAGGGG  | 0.507 |                    |
| + | 21 | 3495      | 1afa.1_Missense_   | NM_003274    | NP_003265    | P48553 | TPC10_HUMAN |                                 | 2    | ATTTTTCGACAA/ | 0.299 |                    |
| - | 5  | 706       | Splice_Site PTTG   | NM_004339    | NP_004330    | P53801 | PTTG_HUMAN  |                                 | 1    | TCCTTACCATAT  | 0.502 |                    |
| - | 7  | 939       | i.R299W FTCD_uc    | NM_006657    | NP_006648    | O95954 | FTCD_HUMAN  | ise C-subdomain (By simila      | 2    | GATCCGCTGCT/  | 0.697 |                    |
| - | 14 | 2352      | nk.1_Missense_M    | NM_015241    | NP_056056    | Q7RTP6 | MICA3_HUMAN |                                 | 0    | CTTGGGAGAAC/  | 0.502 |                    |
| - | 5  | 831       | 3CR2_uc011agr.1    | NM_005137    | NP_005128    | P98153 | IDD_HUMAN   | (Potential).} C-type lectin.    | 1    | 3GTTCCGGCCAG  | 0.562 |                    |
| - | 3  | 556       | IGCR2_uc011agr.1   | NM_005137    | NP_005128    | P98153 | IDD_HUMAN   | ellular (Potential).            | 1    | GCTGCGCCACG   | 0.647 |                    |
| - | 31 | 4855      | p.L1573M CLTCL     | NM_007098    | NP_009029    | P53675 | CLH2_HUMAN  | zation (By similarity).} Heavy  | 5    | GGCCAAGTCCAA/ | 0.617 |                    |
| + | 5  | 2391      | CR_uc011aiy.1_Mi   | NM_004327    | NP_004318    | P11274 | BCR_HUMAN   | DH.                             | 12   | ACTACGGAGTT/  | 0.577 |                    |
| - | 2  | 276       | 70_uc002zxs.2_5'   | NM_013378    | NP_037510    | Q9UKI3 | VPRE3_HUMAN | lg-like.                        | 0    | ATATCGAGGGGG  | 0.622 |                    |
| - | 11 | 1188_1189 | n_p.K416E CHEK1    | NM_007194    | NP_009125    | O96017 | CHK2_HUMAN  | rotein kinase 73E(2) p.S372     | 20   | AATCTTGGAGTG  | 0.416 | 470496;rs146546850 |
| + | 12 | 2752      | sense_Mutation_p   | NM_001017437 | NP_001017437 | Q569K6 | CC157_HUMAN |                                 | 1    | CCCCATCTCGG/  | 0.667 |                    |
| - | 6  | 907       | p.G250R SYN3_uc    | NM_003490    | NP_003481    | O14994 | SYN3_HUMAN  | and synaptic-vesicle bindin     | 1    | ATGTCCCAGCT   | 0.542 |                    |
| - | 6  | 727       | e_Mutation_p.G121  | NM_006860    | NP_006851    | Q9BW83 | IFT27_HUMAN |                                 | 0    | GTTCCCAACTA/  | 0.542 |                    |
| - | 2  | 388_389   | rb.2_Nonsense_Mi   | NM_001051    | NP_001042    | P32745 | SSR3_HUMAN  | ellular (Potential).            | 1    | AAGGGCCAGTAC  | 0.619 |                    |
| + | 7  | 1998      | atq.1_Missense_M   | NM_001039141 | NP_001034230 | Q9H2D6 | TARA_HUMAN  |                                 | 1    | CCCCAGAACAT/  | 0.587 |                    |
| + | 1  | 783_784   | '_5'Flank GCAT_uc  | NM_005318    | NP_005309    | P07305 | H10_HUMAN   |                                 | 0    | ATCAAGAAGGTA  | 0.564 |                    |
| + | 31 | 6228      |                    | NM_001429    | NP_001420    | Q09472 | EP300_HUMAN |                                 | 64   | 3CCCACGTGCAA  | 0.597 |                    |
| + | 4  | 358       | ie_Mutation_p.R4E  | NM_017590    | NP_060060    | Q9UGR2 | Z3H7B_HUMAN | TPR 1.                          | 1    | TGTTCCGGGAG/  | 0.602 | rs139726421        |
| + | 3  | 291       | lgzn.2_Missense_I  | NM_013327    | NP_037459    | Q9HB11 | PARVB_HUMAN |                                 | 0    | CACCTTCCAAGG  | 0.572 |                    |
| - | 2  | 564       | 1aa.2_Missense_M   | NM_058238    | NP_478679    | P56706 | WNT7B_HUMAN |                                 | 1    | 3CCCTCCCCAA   | 0.627 |                    |
| - | 13 | 5828      | arc.1_Missense_M   | NM_014246    | NP_055061    | Q9NYQ6 | CELR1_HUMAN | ial).} EGF-like 6; calcium-bir  | 11   | AGTACGGCCCG   | 0.612 |                    |
| - | 35 | 5441      | i.R571W PLXNB2     | NM_012401    | NP_036533    | O15031 | PLXB2_HUMAN | lasmic (Potential).             | 6    | TACCCGGGAAA   | 0.617 |                    |
| + | 9  | 1294      | o.G271R CNTN6_u    | NM_014461    | NP_055276    | Q9UQ52 | CNTN6_HUMAN | like C2-type 4.                 | 8    | CTAGTGGAAGG/  | 0.398 |                    |
| + | 2  | 1079      | lt.2_Missense_Mu   | NM_001098213 | NP_001091683 | P35367 | HRH1_HUMAN  | lasmic (Potential).             | 2    | CAAGGGGGATG   | 0.532 |                    |
| + | 10 | 1809      | xxj.2_Missense_Mi  | NM_001162499 | NP_001155971 | O75155 | CAND2_HUMAN | HEAT 12.                        | 4    | GGAGGTGAAGG   | 0.632 |                    |
| - | 1  | 241       |                    | NM_024923    | NP_079199    | Q8TEM1 | PO210_HUMAN | lenal (Probable).               | 11   | GGTAGCAGCCC   | 0.582 |                    |
| + | 5  | 2377      | wd.1_Missense_M    | NM_001144382 | NP_001137854 | Q9UPR0 | PLCL2_HUMAN | C2.                             | 4    | AGAACITTTCCC/ | 0.473 | rs138785787        |
| + | 2  | 674       | cdq.2_Missense_M   | NM_052953    | NP_443185    | Q96PB8 | LRC3B_HUMAN |                                 | 4    | GTCTTCATTCTC  | 0.443 |                    |
| - | 11 | 1307      | axh.1_Nonsense_    | NM_016141    | NP_057225    | Q9Y6G9 | DC1L1_HUMAN |                                 | 1    | TGTTCTGGGGG   | 0.378 |                    |
| - | 10 | 1084      | j.1_Missense_Mut   | NM_000404    | NP_000395    | P16278 | BGAL_HUMAN  |                                 | 1    | ATAGGGTGAGT   | 0.502 |                    |
| - | 9  | 1329      | _Mutation_p.Q37E   | NM_198056    | NP_932173    | Q14524 | SCN5A_HUMAN |                                 | 9    | CTGCTGATAGAC  | 0.612 |                    |
| - | 11 | 1645      |                    | NM_006514    | NP_006505    | Q9Y5Y9 | SCNAA_HUMAN |                                 | 10   | AGGGAGGGGGC   | 0.612 |                    |
| + | 4  | 290       | 03ckr.2_Missense   | NM_001904    | NP_001895    | P35222 | CTNB1_HUMAN | 50del(1) p.M1_A87del(1) p.      | 3166 | TCTTCTCTGAC   | 0.498 | rs121913409        |
| + | 2  | 968       | 1al.1_Intron CXCR6 | NM_006564    | NP_006555    | O00574 | CXCR6_HUMAN | lasmic (Potential).             | 1    | AGTTTCGAAAGA  | 0.473 | rs141955108        |
| + | 4  | 1373      | ik.1_Missense_Mu   | NM_178329    | NP_847899    | P51677 | CCR3_HUMAN  | ellular (Potential).            | 8    | GAGCAAGCATC   | 0.498 |                    |
| + | 7  | 639       | qn.2_Nonsense_M    | NM_000316    | NP_000307    | Q03431 | PTH1R_HUMAN | ellular (Potential).            | 1    | CCTACCGACGC   | 0.607 | rs143863124        |
| - | 3  | 419       | .1_5'UTR SCAP_u    | NM_012235    | NP_036367    | Q12770 | SCAP_HUMAN  | nal (By similarity).            | 1    | ATTCCACAGGT/  | 0.537 |                    |
| - | 14 | 3272      | .2_Missense_Muta   | NM_002673    | NP_002664    | O43157 | PLXB1_HUMAN | ellular (Potential).            | 5    | GACGCAGAAAC   | 0.662 |                    |
| - | 3  | 368       | NB1_uc003csx.2     | NM_002673    | NP_002664    | O43157 | PLXB1_HUMAN | ilar (Potential).} Sema.        | 5    | GATACGTGCCA/  | 0.647 |                    |
| - | 16 | 2332      | wf.1_Missense_Mi   | NM_002292    | NP_002283    | P55268 | LAMB2_HUMAN | ninin IV type B.                | 3    | GGATTAGGAAAT/ | 0.572 |                    |
| + | 46 | 4804      |                    | NM_004947    | NP_004938    | Q8IZD9 | DOCK3_HUMAN | DHR-2.                          | 0    | CTTGAGTTG/    | 0.488 |                    |
| + | 53 | 5707_5708 |                    | NM_004947    | NP_004938    | Q8IZD9 | DOCK3_HUMAN |                                 | 0    | GTCTCTCTTGAC  | 0.614 |                    |
| - | 21 | 2413      | .W588R ITIH4_uc    | NM_002218    | NP_002209    | Q14624 | ITIH4_HUMAN |                                 | 3    | AACCCATACCAC  | 0.567 |                    |

|   |    |           |                   |              |              |        |              |                               |    |               |       |
|---|----|-----------|-------------------|--------------|--------------|--------|--------------|-------------------------------|----|---------------|-------|
| - | 9  | 1261      | p.P384L TKT_uc0   | NM_001135055 | NP_001128527 | P29401 | TKT_HUMAN    |                               | 2  | :AGAAGGGCACC  | 0.652 |
| + | 26 | 3380      | p.R1073C CACNA    | NM_001128840 | NP_001122312 | Q01668 | CAC1D_HUMAN  | ellular (Potential), III.     | 11 | :TGGTCCGTGAA  | 0.527 |
| + | 9  | 977       | p.G216E CACNA     | NM_018398    | NP_060868    | Q8IZS8 | CA2D3_HUMAN  | ilar (Potential), VWFA.       | 7  | :GAATGGAACCTT | 0.453 |
| - | 14 | 2161      | p.L291S C3orf63   | NM_015224    | NP_056039    | Q9UK61 | CC063_HUMAN  |                               | 5  | :TGAATTAATAA  | 0.363 |
| + | 18 | 1655      | JTR PXX_uc010hn   | NM_017771    | NP_060241    | Q7Z7A4 | PXX_HUMAN    |                               | 1  | :TCCTCCACCTC  | 0.612 |
| - | 21 | 2985      |                   | NM_020872    | NP_065923    | Q9P232 | CNTN3_HUMAN  | nectin type-III 4.            | 5  | :GTAGTCTCTTT  | 0.408 |
| - | 6  | 822       | p.C30G PROS1      | NM_000313    | NP_000304    | P07225 | PROS_HUMAN   | alcium-binding (Potential).   | 1  | :CTTTGCATTCAT | 0.348 |
| - | 13 | 2919      | ae.1_Nonsense_M   | NM_016247    | NP_057331    | Q9BZV3 | IMPG2_HUMAN  | ilar (Potential), SEA 2.      | 3  | :CACTCGGAGGC  | 0.423 |
| + | 9  | 1318      | ix.2_Missense_Mu  | NM_198196    | NP_937839    | P40200 | TACT_HUMAN   | potential), Pro/Ser/Thr-rich. | 3  | :AAATTCCTCAAC | 0.358 |
| - | 3  | 921       | y_Mutation_p.G24  | NM_003925    | NP_003916    | O95243 | MBD4_HUMAN   |                               | 2  | :TACATCCTTTTT | 0.363 |
| - | 2  | 230       | u.R27G NMNAT3     | NM_178177    | NP_835471    | Q96T66 | NMNA3_HUMAN  |                               | 0  | :CACTCGGTGAT  | 0.572 |
| + | 5  | 1184      | hvn.2_Missense_M  | NM_207365    | NP_997248    | Q6P093 | ADCL2_HUMAN  |                               | 0  | :ACTTCGAAATG  | 0.358 |
| - | 2  | 3118      | fek.2_Missense_M  | NM_014926    | NP_055741    | O94933 | SLIK3_HUMAN  | lasmic (Potential).           | 10 | :GGCAGGCTGTG  | 0.552 |
| + | 5  | 545_546   | u_p.P125F FNDC3   | NM_022763    | NP_073600    | Q53EP0 | FND3B_HUMAN  |                               | 3  | :TCCCTCCCTATC | 0.535 |
| + | 26 | 3581      | hz.3_Missense_Mi  | NM_022763    | NP_073600    | Q53EP0 | FND3B_HUMAN  | nectin type-III 9.            | 3  | :CTCAGGAGCTA  | 0.517 |
| - | 1  | 320       | _HL6_uc003fft.1_N | NM_130446    | NP_569713    | Q8WZ60 | KLHL6_HUMAN  | BTB.                          | 3  | :CACCACGCGGT  | 0.507 |
| + | 17 | 1770      | p.R540Q ABCF3     | NM_018358    | NP_060828    | Q9NUQ8 | ABCF3_HUMAN  | C transporter 2.              | 4  | :TGTTCCGGGGCA | 0.577 |
| - | 2  | 1351      |                   | NM_178496    | NP_848591    | Q8IYB1 | M21D2_HUMAN  |                               | 0  | :GGCAGGAAGTC  | 0.532 |
| - | 2  | 610       |                   | NM_178496    | NP_848591    | Q8IYB1 | M21D2_HUMAN  |                               | 0  | :CACCACGCCCTT | 0.493 |
| - | 3  | 2433      | ron ABCA11P_uc0   | NM_133474    | NP_597731    | D9N162 | D9N162_HUMAN |                               | 1  | :TTCTCTCCAGTA | 0.398 |
| - | 3  | 2289      | ron ABCA11P_uc    | NM_133474    | NP_597731    | D9N162 | D9N162_HUMAN |                               | 1  | :CACATACTTCAC | 0.398 |
| + | 5  | 1035      | y.P211L PIGG_ucC  | NM_001127178 | NP_001120650 | Q5H8A4 | PIGG_HUMAN   | renal (Potential).            | 4  | :GAAACCCCGGTG | 0.393 |
| + | 15 | 2719      | J812N FAM193A     | NM_003704    | NP_003695    | P78312 | F193A_HUMAN  |                               | 3  | :FACTGCGACTGC | 0.577 |
| + | 10 | 1351      | DD1_uc003gfg.2_I  | NM_001119    | NP_001110    | P35611 | ADDA_HUMAN   |                               | 1  | :CTAGGGCTACA  | 0.358 |
| + | 45 | 6167      |                   | NM_002111    | NP_002102    | P42858 | HD_HUMAN     |                               | 4  | :TGGCTCGCATG  | 0.502 |
| - | 14 | 2350      | p.R206S EVC2_u    | NM_147127    | NP_667338    | Q86UK5 | LBN_HUMAN    | Potential.                    | 5  | :CCCACGCTTGA  | 0.647 |
| - | 9  | 816       | p.A239T CRMP1     | NM_001313    | NP_001304    | Q14194 | DPYL1_HUMAN  |                               | 2  | :GATGGCCCGGA  | 0.557 |
| - | 9  | 1669      | p.D465N JAKMIP1   | NM_144720    | NP_653321    | Q96N16 | JKIP1_HUMAN  | tion with TYK2 and GABBR      | 4  | :TCCTGTCTGTCC | 0.537 |
| + | 8  | 2122      | p.Y652* WFS1_u    | NM_001145853 | NP_001139325 | O76024 | WFS1_HUMAN   | ical; (Potential).            | 2  | :GTGTACCCTCA  | 0.607 |
| - | 16 | 2384      | _Mutation_p.S788  | NM_198595    | NP_940997    | Q8N556 | AFAP1_HUMAN  |                               | 0  | :CCCTGGCTCTTC | 0.677 |
| + | 10 | 1556      | u.1_Missense_Mu   | NM_182485    | NP_872291    | Q7Z5Q1 | CPEB2_HUMAN  | RRM 2.                        | 1  | :TTTCTCCAATCA | 0.433 |
| + | 10 | 1170      | y.P312S RBPJ_uc   | NM_005349    | NP_005340    | Q06330 | SUH_HUMAN    |                               | 3  | :CCACTCCATGT  | 0.338 |
| + | 11 | 1414      |                   | NM_021927    | NP_068746    | Q8N442 | GUF1_HUMAN   |                               | 1  | :AGGCTAGGATTT | 0.373 |
| + | 1  | 135       | 0ihr.2_Missense_M | NM_053039    | NP_444267    | Q9BY64 | UDB28_HUMAN  |                               | 1  | :TGAAAGAGCTT  | 0.443 |
| + | 1  | 331       | Jihr.2_Missense_M | NM_053039    | NP_444267    | Q9BY64 | UDB28_HUMAN  |                               | 1  | :TTTTTACAAGA  | 0.294 |
| + | 13 | 1793      | _B_uc003hgu.3_M   | NM_000477    | NP_000468    | P02768 | ALBU_HUMAN   | Albumin 3.                    | 6  | :TGGATGATTTCC | 0.413 |
| + | 27 | 3909      | w.2_Missense_Mu   | NM_025074    | NP_079350    | Q86XX4 | FRAS1_HUMAN  | extracellular (Potential).    | 5  | :GAAATGGAAAA  | 0.478 |
| + | 16 | 3326      | PAQR3_uc003hln.   | NM_198892    | NP_942595    | Q9NSY1 | BMP2K_HUMAN  |                               | 1  | :GGAAAGATAGG  | 0.507 |
| + | 2  | 993       |                   | NM_001201    | NP_001192    | P12645 | BMP3_HUMAN   |                               | 5  | :CCAAGGGACGC  | 0.438 |
| - | 3  | 349       | EF1B_uc010ijq.1   | NM_152545    | NP_689758    | Q0VAM2 | RGF1B_HUMAN  | rminal Ras-GEF.               | 0  | :AGAACTGAGTA  | 0.368 |
| - | 7  | 1006      | is.1_Missense_Mu  | NM_001098540 | NP_001092010 | Q9Y251 | HPSE_HUMAN   |                               | 1  | :AGTCCGTCCAT  | 0.299 |
| - | 8  | 1087      | JH1B_uc011ceh.1   | NM_000668    | NP_000659    | P00325 | ADH1B_HUMAN  |                               | 2  | :AAAATCAGCCA  | 0.368 |
| - | 3  | 269       |                   | NM_000673    | NP_000664    | P40394 | ADH7_HUMAN   |                               | 3  | :AGATTCCTGTG  | 0.393 |
| - | 26 | 3328      | hxc.1_Splice_Site | NM_001813    | NP_001804    | Q02224 | CENPE_HUMAN  |                               | 9  | :ATGGTCTAGAA  | 0.318 |
| + | 8  | 1722      | p.P382S EGF_ucl   | NM_001963    | NP_001954    | P01133 | EGF_HUMAN    | Extracellular (Potential).    | 4  | :TCTGTCCCTGAA | 0.398 |
| + | 9  | 1865_1866 | p.D430N EGF_ucl   | NM_001963    | NP_001954    | P01133 | EGF_HUMAN    | Extracellular (Potential).    | 4  | :CAACTGGATGAA | 0.441 |
| + | 6  | 879       | sa.2_Missense_Ml  | NM_016648    | NP_057732    | Q4G0J3 | LARP7_HUMAN  | RRM.                          | 3  | :ATATTCCTAAAA | 0.279 |

rs146224376

|   |    |           |                    |              |              |        |             |                                           |    |               |       |
|---|----|-----------|--------------------|--------------|--------------|--------|-------------|-------------------------------------------|----|---------------|-------|
| + | 6  | 951       | .D212G PHF17_ur    | NM_199320    | NP_955352    | Q6IE81 | JADE1_HUMAN | PHD-type 1.                               | 0  | CTGTGACAAATC  | 0.532 |
| - | 8  | 1705      |                    | NM_015130    | NP_055945    | Q6ZT07 | TBCD9_HUMAN |                                           | 1  | ACCAATTTTCGGG | 0.463 |
| + | 1  | 1787      | t_3_intron LRBA_u  | NM_006439    | NP_006430    | Q9Y586 | MB212_HUMAN |                                           | 1  | AGAGCGACGCC   | 0.652 |
| + | 3  | 1301      | .p.S361L TLR2_uc   | NM_003264    | NP_003255    | O60603 | TLR2_HUMAN  | intracellular (Potential).                | 3  | TAAATCATTAGA  | 0.323 |
| + | 3  | 696       | .p.P175S RBM46_    | NM_144979    | NP_659416    | Q8TBY0 | RBM46_HUMAN | RRM 2.                                    | 2  | TTTATCCAAGTC  | 0.353 |
| + | 4  | 636       | 3_uc003iox.2_Mis:  | NM_000856    | NP_000847    | Q02108 | GCYA3_HUMAN |                                           | 4  | AGGCAGCAGGA   | 0.488 |
| + | 15 | 2993      | .Mutation_p.R798C  | NM_001083619 | NP_001077088 | P42262 | GRIA2_HUMAN | transmembrane (Potential).                | 4  | AGAAACGAATGA  | 0.448 |
| + | 11 | 1977      | .p.R444C TLL1_uc   | NM_012464    | NP_036596    | O43897 | TLL1_HUMAN  | CUB 1.                                    | 7  | AGTTTCGTAGCA  | 0.368 |
| - | 5  | 685       |                    | NM_017631    | NP_060101    | Q8IY21 | DDX60_HUMAN |                                           | 3  | ACTTCCCCTACTC | 0.368 |
| + | 9  | 1725      | .p.T505N PALLD_u   | NM_016081    | NP_057165    | Q8WX93 | PALLD_HUMAN | like C2-type 2.                           | 1  | TTTGCACCCCTAG | 0.443 |
| - | 9  | 1223      | e_1_Missense_Mu    | NM_012224    | NP_036356    | Q96PY6 | NEK1_HUMAN  | serine/threonine kinase.                  | 6  | CTATCCCTAGGA  | 0.368 |
| + | 8  | 949       | e_Mutation_p.R25   | NM_021942    | NP_068761    | Q7Z392 | CD041_HUMAN |                                           | 0  | AATTGAGAGCCC  | 0.318 |
| - | 10 | 6595      |                    | NM_005245    | NP_005236    | Q14517 | FAT1_HUMAN  | (Potential). Cadherin 19.                 | 12 | TCAGTGAAATTT  | 0.428 |
| + | 11 | 1176      | .e_Mutation_p.L35  | NM_020731    | NP_065782    | A9YTQ3 | AHRR_HUMAN  |                                           | 2  | TGTGCCTCCGGC  | 0.662 |
| + | 18 | 2891      | 3jdk.1_Missense_I  | NM_139056    | NP_620687    | Q8TE57 | ATS16_HUMAN | type-1 2.                                 | 8  | CACGGGGCTGG   | 0.527 |
| - | 7  | 2121      | .se_Mutation_p.E3f | NM_024091    | NP_076996    | Q14CZ7 | FAKD3_HUMAN |                                           | 4  | TCATTCTTGCAA  | 0.333 |
| + | 11 | 1523      | .RR_uc003jef.3_R   | NM_024010    | NP_076915    | Q9UBK8 | MTRR_HUMAN  | RNA-binding FR-type.                      | 1  | CTTCAACATTGT  | 0.443 |
| - | 78 | 13601     | .ic.2_Nonsense_Mt  | NM_001369    | NP_001360    | Q8TE73 | DYH5_HUMAN  |                                           | 31 | TCATCCATTTGC  | 0.478 |
| - | 40 | 6628      |                    | NM_001369    | NP_001360    | Q8TE73 | DYH5_HUMAN  |                                           | 31 | CATCCTCATCAA  | 0.368 |
| - | 4  | 959       |                    | NM_022130    | NP_071413    | Q9H4A6 | GOLP3_HUMAN |                                           | 1  | TCACCCATTTGT  | 0.502 |
| - | 7  | 960       |                    | NM_001737    | NP_001728    | P02748 | CO9_HUMAN   | MACPF.                                    | 0  | TTTTTCTCTGTG  | 0.328 |
| + | 19 | 2486      | .3A1_uc003jow.2_N  | NM_181501    | NP_852478    | P56199 | ITA1_HUMAN  | cytoskeletal (Potential).                 | 3  | AATAAGGAAAAA  | 0.398 |
| + | 20 | 1971      | .h.3_Missense_Mu   | NM_001136034 | NP_001129506 | Q9NQI0 | DDX4_HUMAN  | case C-terminal.                          | 2  | CTGGTCGTTGT   | 0.388 |
| + | 2  | 330       |                    | NM_005242    | NP_005233    | P55085 | PAR2_HUMAN  | cytoskeletal (Potential).                 | 1  | 3AAAAGGAGTTA  | 0.433 |
| + | 33 | 8017      | .p.G347R GPR98_u   | NM_032119    | NP_115495    | Q8WXG9 | GPR98_HUMAN | transmembrane  Extracellular (Potential). | 16 | GTGCTGGAGAG   | 0.423 |
| - | 17 | 2333      | .p.F511C MCTP1_    | NM_024717    | NP_078993    | Q6DN14 | MCTP1_HUMAN |                                           | 2  | CTGATAAAGTTTC | 0.353 |
| - | 13 | 1452      | 03kpp.1_Splice_Si  | NM_022140    | NP_071423    | Q9HCS5 | E41LA_HUMAN |                                           | 1  | ACTGACCTTTT   | 0.313 |
| - | 1  | 514       |                    | NM_001085377 | NP_001078846 | P23508 | CRCM_HUMAN  |                                           | 1  | CGGTGCTGGAC   | 0.383 |
| + | 3  | 513       | .ksn.2_Missense_N  | NM_182761    | NP_877438    | A1A519 | F170A_HUMAN |                                           | 1  | ACAACATGTCTC  | 0.493 |
| + | 1  | 580       |                    | NM_177478    | NP_803431    | Q8N4E7 | FTMT_HUMAN  | protein-tyrosine phosphatase-like diiron. | 1  | TGTGCGATTTCC  | 0.507 |
| - | 7  | 1289      | .wk.2_Missense_M   | NM_004199    | NP_004190    | O15460 | P4HA2_HUMAN |                                           | 0  | CAGCTCGTTCC   | 0.433 |
| - | 13 | 1850      | .p.E551K KIF3A_u   | NM_007054    | NP_008985    | Q9Y496 | KIF3A_HUMAN | (Potential).                              | 1  | 3ATGTTCTTGTTG | 0.398 |
| - | 2  | 445       | .f20_uc003lav.2_5' | NM_001099221 | NP_001092691 | Q6ZNK6 | TIFAB_HUMAN | FHA.                                      | 0  | ACAGCCCTTGC   | 0.647 |
| - | 10 | 1614_1615 | IL3_uc011cyd.1_In  | NM_017415    | NP_059111    | Q9UH77 | KLHL3_HUMAN | Kelch 2.                                  | 0  | AGCACCGCTGC   | 0.599 |
| + | 1  | 563       | 03lhc.1_Missense   | NM_018905    | NP_061728    | Q9Y5H9 | PCDA2_HUMAN | cytoskeletal (Potential).                 | 4  | GGTTTCTCTAG   | 0.448 |
| + | 1  | 1966      | .lhd.2_intron PCDH | NM_018906    | NP_061729    | Q9Y5H8 | PCDA3_HUMAN | transmembrane  Extracellular (Potential). | 8  | CACGGTGAACCC  | 0.697 |
| + | 1  | 1050      | 03lhf.2_intron PCD | NM_018907    | NP_061730    | Q9UN74 | PCDA4_HUMAN | transmembrane  Extracellular (Potential). | 6  | TCCTATGAAATTA | 0.358 |
| + | 1  | 1475      | 003lhi.2_intron PC | NM_018908    | NP_061731    | Q9Y5H7 | PCDA5_HUMAN | transmembrane (Potential). Cadherin 5.    | 3  | CTACTCGTGG    | 0.662 |
| + | 1  | 1922      | .l.2_intron PCDHA  | NM_018901    | NP_061724    | Q9Y5I2 | PCDAA_HUMAN | transmembrane (Potential). Cadherin 6.    | 5  | TGACTCGCCAC   | 0.647 |
| + | 1  | 871       | .lah.1_Missense_N  | NM_018939    | NP_061762    | Q9Y5E3 | PCDB6_HUMAN | transmembrane  Extracellular (Potential). | 1  | CCCTCGAAATA   | 0.458 |
| + | 1  | 1948      | .lah.1_Missense_N  | NM_018939    | NP_061762    | Q9Y5E3 | PCDB6_HUMAN | transmembrane  Extracellular (Potential). | 1  | CTCCGCGCTCG   | 0.706 |
| + | 1  | 1463      | .o.1_intron PCDHG  | NM_018923    | NP_061746    | Q9Y5G2 | PCDGE_HUMAN | transmembrane (Potential). Cadherin 5.    | 0  | AAGTTTCTACT   | 0.592 |
| + | 1  | 610       | 3ljo.1_intron PCDF | NM_018924    | NP_061747    | Q9Y5G1 | PCDGF_HUMAN | transmembrane (Potential). Cadherin 2.    | 0  | GGGAAGAGCAG   | 0.552 |
| + | 1  | 2213      | .ljs.1_intron PCDH | NM_032088    | NP_114477    | Q9Y5G5 | PCDG8_HUMAN | transmembrane  Extracellular (Potential). | 0  | AAATCGCTCTG   | 0.468 |
| + | 1  | 967       | .l_intron PCDHGB   | NM_018929    | NP_061752    | Q9Y5F6 | PCDGM_HUMAN | transmembrane (Potential). Cadherin 3.    | 3  | GAGCCGTGAC    | 0.542 |
| + | 11 | 1093      | .p.S353L ARHGAF    | NM_015071    | NP_055886    | Q9UNA1 | RHG26_HUMAN | PH.                                       | 1  | TTTGTGCGAAG   | 0.498 |
| + | 3  | 326       | .p.R69Q FBXO38     | NM_205836    | NP_995308    | Q6PIJ6 | FBX38_HUMAN | KLF7 (By similarity). F-box               | 6  | CTGCGAGTTGT   | 0.468 |

rs142098675

|   |    |           |                   |              |              |        |             |                                |    |                  |       |             |
|---|----|-----------|-------------------|--------------|--------------|--------|-------------|--------------------------------|----|------------------|-------|-------------|
| - | 2  | 433       | on_p.G80R CSF1F   | NM_005211    | NP_005202    | P07333 | CSF1R_HUMAN | 1. Extracellular (Potential).  | 54 | .GGTCCCCGTGT     | 0.612 |             |
| - | 8  | 1034      | lua.2_Missense_I  | NM_181776    | NP_861441    | Q495M3 | S36A2_HUMAN | ical; (Potent p.G302V(1)       | 2  | .CATTCCCAAAG/    | 0.453 |             |
| - | 26 | 3239      | j.2_Missense_Mut  | NM_003062    | NP_003053    | O75094 | SLIT3_HUMAN | EGF-like 1.                    | 4  | .CACAGCGGTAC     | 0.622 |             |
| + | 2  | 397       | :99_uc011deq.1_5  | NM_017785    | NP_060255    | Q96EA4 | SPDLY_HUMAN | Potential.                     | 2  | .AGAATCAATTGC    | 0.413 |             |
| + | 35 | 3589      | OCK2_uc010jim.2_  | NM_004946    | NP_004937    | Q92608 | DOCK2_HUMAN | nteraction with CRKL.          | 7  | .CAAGTCGGTGG,    | 0.577 | rs137955744 |
| + | 4  | 389       | ndf.1_Missense_M  | NM_006650    | NP_006641    | Q6PUV4 | CPLX2_HUMAN |                                | 1  | .CAAAGGACATG/    | 0.413 |             |
| + | 4  | 1334      | SD1_uc011dfx.1_I  | NM_022455    | NP_071900    | Q96L73 | NSD1_HUMAN  |                                | 3  | .CCTTAGGAGAA/    | 0.418 |             |
| - | 5  | 760       | p.G196D DOK3_u    | NM_024872    | NP_079148    | Q7L591 | DOK3_HUMAN  | RS-type PTB.                   | 0  | .GGGTGCCCTTG     | 0.687 |             |
| + | 8  | 1246      | jil.2_3'UTR BTNL1 | NM_001040462 | NP_001035552 | Q6UX41 | BTNL8_HUMAN | . Cytoplasmic (Potential).     | 2  | .TCCAAGCAGGG     | 0.507 |             |
| + | 3  | 648       |                   | NM_197975    | NP_932079    | Q6UXE8 | BTNL3_HUMAN | . Extracellular (Potential).   | 0  | .GACAGGATTTG     | 0.502 |             |
| + | 8  | 1245      | p.2_Missense_Mu   | NM_197975    | NP_932079    | Q6UXE8 | BTNL3_HUMAN | . Cytoplasmic (Potential).     | 0  | .TGTCTCCCAAC/    | 0.498 |             |
| - | 5  | 734       | ij.1_Missense_Mu  | NM_006098    | NP_006089    | P63244 | GBLP_HUMAN  | WD 5.                          | 0  | .GCCTCCAGAAG/    | 0.512 |             |
| - | 13 | 1483      | _p.A450V EXOC2_   | NM_018303    | NP_060773    | Q96KP1 | EXOC2_HUMAN |                                | 7  | .CAAAGGCCACC/    | 0.428 |             |
| + | 1  | 885       | lua.2_Missense_Iv | NM_020135    | NP_064520    | Q96S55 | WRIP1_HUMAN |                                | 2  | .CGATGCGTCTC/    | 0.547 |             |
| - | 11 | 1776_1777 | iba.2_Missense_Iv | NM_005493    | NP_005484    | Q96S59 | RANB9_HUMAN |                                | 2  | .TTTCTCCAACTC    | 0.356 |             |
| - | 3  | 711       | p.D171N NUP153    | NM_005124    | NP_005115    | P49790 | NU153_HUMAN |                                | 9  | .TAGAATCTTTAAT   | 0.398 |             |
| + | 15 | 1712      | e.1_Missense_Mul  | NM_017774    | NP_060244    | Q5VV42 | CDKAL_HUMAN |                                | 2  | .CTCGGGTTTGA/    | 0.453 |             |
| - | 20 | 2045      |                   | NM_001503    | NP_001494    | P80108 | PHLD_HUMAN  | FG-GAP 5.                      | 3  | .GTTTCCCATT/     | 0.493 |             |
| - | 1  | 236       | nk HIST1H2AC_uc   | NM_003526    | NP_003517    | P62807 | H2B1C_HUMAN |                                | 1  | .GCGCTCAAATA/    | 0.577 |             |
| - | 1  | 233       |                   | NM_030876    | NP_110503    | Q9UGF6 | OR5V1_HUMAN | lasmic (Potential).            | 4  | .ATCAGTCACAG/    | 0.393 |             |
| - | 3  | 199       | ise_Mutation_p.R1 | NM_019052    | NP_061925    | Q8TD31 | CCHCR_HUMAN |                                | 1  | .CATTCTTGGA/     | 0.547 |             |
| - | 5  | 1046      | dnk.1_RNA HLA-E   | NM_005514    | NP_005505    | P01889 | 1B07_HUMAN  | ical; (Potential).             | 0  | .TACACATCACAC    | 0.597 |             |
| + | 18 | 1739      | H5_uc003nwx.1_I   | NM_172166    | NP_751898    | O43196 | MSH5_HUMAN  |                                | 3  | .AAGTCTTTGGG     | 0.572 |             |
| - | 12 | 1907_1908 | ixd.2_Missense_M  | NM_025258    | NP_079534    | Q9Y334 | G7C_HUMAN   |                                | 3  | .TAGAGGACCCC     | 0.584 |             |
| - | 1  | 341       | aw.2_Missense_Mi  | NM_002586    | NP_002577    | P40425 | PBX2_HUMAN  |                                | 1  | .AGGCTCCCCAC     | 0.592 |             |
| - | 4  | 1457      | 318_uc003ouw.2_   | NM_014345    | NP_055160    | Q5VUA4 | ZN318_HUMAN |                                | 7  | .CTTTGGGAATCC    | 0.478 |             |
| + | 9  | 999       | J11_uc011dvn.1_5  | NM_007058    | NP_008989    | Q9UMQ6 | CAN11_HUMAN | lpain catalytic.               | 2  | .GGAATCCCTGG/    | 0.597 |             |
| - | 3  | 650       | _p.S158L RCAN2_   | NM_005822    | NP_005813    | Q14206 | RCAN2_HUMAN |                                | 0  | .GGGGCGAGATG     | 0.532 |             |
| - | 17 | 2787      | oyp.3_Missense_I  | NM_001098518 | NP_001091988 | Q8IZF2 | GP116_HUMAN | ellular (Potential).           | 2  | .CTTGGGAAAAT/    | 0.463 |             |
| - | 5  | 484       |                   | NM_145740    | NP_665683    | P08263 | GSTA1_HUMAN | ST C-terminal.                 | 1  | .TCTTTGATCAAG    | 0.398 |             |
| + | 1  | 501       | se_Mutation_p.G11 | NM_014464    | NP_055279    | Q9UJW2 | TINAG_HUMAN |                                | 4  | .CAGAAGGTAGG/    | 0.353 |             |
| + | 7  | 1671      | k.2_Missense_Mu   | NM_001704    | NP_001695    | O60242 | BAI3_HUMAN  | . Extracellular (Potential).   | 50 | .GAGTTCGTGGA/    | 0.527 |             |
| + | 14 | 3788      | e_Mutation_p.P88  | NM_001162529 | NP_001156001 | Q9P2D6 | F135A_HUMAN |                                | 1  | .AACTTCCTGGG/    | 0.393 |             |
| + | 19 | 4409      | 135A_uc003pfn.2_  | NM_001162529 | NP_001156001 | Q9P2D6 | F135A_HUMAN |                                | 1  | .AGGATCGCTAT/    | 0.328 |             |
| - | 51 | 8038      | ht.2_Missense_M   | NM_004370    | NP_004361    | Q99715 | COCA1_HUMAN | il. Nonhelical region (NC3).   | 9  | .GTATCCTTGTTA    | 0.279 |             |
| - | 5  | 3300      | p.R877Q FILIP1_u  | NM_015687    | NP_056502    | Q727B0 | FLIP1_HUMAN |                                | 4  | .TGGCTCGTTCT/    | 0.443 |             |
| + | 2  | 1331      | bm.2_Missense_Iv  | NM_153362    | NP_699193    | Q8N3Z0 | PRS35_HUMAN | eptidase S1.                   | 1  | .CTGTTTCGCAT/    | 0.507 |             |
| + | 15 | 2676      | p.S809R GRIK2_u   | NM_021956    | NP_068775    | Q13002 | GRIK2_HUMAN | ellular (Potential).           | 5  | .GAGAGCAAAGA/    | 0.483 |             |
| - | 15 | 2148      | _p.M606I LAMA4_   | NM_001105206 | NP_001098676 | Q16363 | LAMA4_HUMAN | al. Domain II and I.           | 9  | .CCCGTTCATATC/   | 0.358 |             |
| - | 30 | 5123      | 1_Intron GOPC_u   | NM_002944    | NP_002935    | P08922 | ROS_HUMAN   | III 7. Extracellular (Potentia | 25 | .CATTTCCTCAG/    | 0.398 |             |
| - | 14 | 3238      | l184A_uc003pyl.3_ | NM_024581    | NP_078857    | Q8NB25 | F184A_HUMAN |                                | 7  | .TATTTCTTGAG     | 0.358 |             |
| - | 2  | 232       | nse_Mutation_p.R  | NM_004665    | NP_004656    | O95498 | VNN2_HUMAN  | :N hydrolase.                  | 0  | .TGATTCGAGCA/    | 0.448 |             |
| - | 4  | 1101      | .R281Q BCLAF1_u   | NM_014739    | NP_055554    | Q9NYF8 | BCLF1_HUMAN |                                | 1  | .CTGTATCGACTA/   | 0.443 | rs145724464 |
| - | 11 | 1526      | iy.2_Missense_Mu  | NM_003980    | NP_003971    | Q14244 | MAP7_HUMAN  | Pro-rich.                      | 0  | .atggctggagcAGC/ | 0.214 |             |
| - | 2  | 598       | .H67Y SHPRH_uc    | NM_001042683 | NP_001036148 | Q149N8 | SHPRH_HUMAN |                                | 3  | .TCTGTGAGCCA/    | 0.388 |             |
| - | 3  | 652       |                   | NM_020861    | NP_065912    | Q8N680 | ZBTB2_HUMAN |                                | 1  | .GGCCTCAGGGA     | 0.557 |             |
| + | 13 | 4101      | .P4_uc003qrg.2_Ir | NM_020245    | NP_064630    | Q9NRJ4 | TULP4_HUMAN |                                | 1  | .GTACACCCTCCC    | 0.662 |             |



|   |    |           |                   |              |              |        |              |                              |       |                |       |
|---|----|-----------|-------------------|--------------|--------------|--------|--------------|------------------------------|-------|----------------|-------|
| + | 10 | 1394      |                   | NM_000876    | NP_000867    | P11717 | MPRI_HUMAN   | inal (Potential). 3.         | 3     | ATTTTGGAGGTC   | 0.423 |
| + | 44 | 6746      |                   | NM_000876    | NP_000867    | P11717 | MPRI_HUMAN   | iminal (Potential).          | 3     | CCAACGATCAG    | 0.498 |
| - | 30 | 4833      |                   | NM_005577    | NP_005568    | P08519 | APOA_HUMAN   | Kringle 36.                  | 6     | TACTCCCACCT    | 0.493 |
| - | 21 | 3334      |                   | NM_005577    | NP_005568    | P08519 | APOA_HUMAN   | Kringle 32.                  | 6     | TCTTCCTGTGA    | 0.483 |
| + | 10 | 1246      |                   | NM_000301    | NP_000292    | P00747 | PLMN_HUMAN   | Kringle 4.                   | 4     | CCACAGGAAAG    | 0.488 |
| - | 15 | 2490      |                   | NM_003247    | NP_003238    | P35442 | TSP2_HUMAN   | TSP type-3 2.                | 5     | GCACCCGTCAT    | 0.562 |
| + | 2  | 659       | ε_Mutation_p.P10  | NM_133463    | NP_597720    | Q400G9 | AMZ1_HUMAN   |                              | 0     | TACAGCCGATA    | 0.642 |
| + | 18 | 3226      | ε_Mutation_p.E64  | NM_001007157 | NP_001007158 | O94880 | PHF14_HUMAN  |                              | 3     | AAGCTGAAAGA    | 0.274 |
| + | 4  | 681       | Δssh.2_Missense   | NM_018374    | NP_060844    | Q9NUM4 | T106B_HUMAN  |                              | 0     | AAGAACGTAAG    | 0.279 |
| - | 5  | 698       | ug.2_Missense_M   | NM_182762    | NP_877439    | Q6ZN28 | MACC1_HUMAN  |                              | 3     | TTGAGGAAGTC    | 0.383 |
| + | 41 | 6681      |                   | NM_003777    | NP_003768    | Q96DT5 | DYH11_HUMAN  | 2 (By similarity).           | 15    | GCACAACAGATG   | 0.393 |
| + | 5  | 1138      | kwe.2_Missense_I  | NM_032222    | NP_115598    | Q4G0A6 | F188B_HUMAN  |                              | 0     | CCAGCCCGCAC    | 0.547 |
| + | 11 | 2499      | _p.M353 CCDC12    | NM_194300    | NP_919276    | Q6ZRS4 | CC129_HUMAN  |                              | 0     | GTGATGGAGGA    | 0.537 |
| - | 10 | 1458      | _p.R390Q PDE1C_   | NM_005020    | NP_005011    | Q14123 | PDE1C_HUMAN  | ytic (By similarity).        | 4     | AGTTTCGAAAC    | 0.388 |
| + | 10 | 1133      |                   | NM_133468    | NP_597725    | Q8N8U9 | BMPER_HUMAN  | VWFC 5.                      | 3     | CATCAGTAGCTC   | 0.483 |
| + | 4  | 2353      | _p.K691* CDK13_   | NM_003718    | NP_003709    | Q14004 | CDK13_HUMAN  |                              | 5     | AAACCAAAGAA    | 0.343 |
| + | 2  | 91        | _p.S31L MRPS17_   | NM_182633    | NP_872439    | Q8N859 | ZN713_HUMAN  |                              | 2     | GGAATCACTGA    | 0.517 |
| - | 5  | 1605      |                   | NM_033273    | NP_150376    | Q96JC4 | ZN479_HUMAN  | 2H2-type 10.                 | 4     | TAAAGGCTTTG    | 0.443 |
| + | 7  | 2086      | te.2_Missense_Mt  | NM_016220    | NP_057304    | Q9UII5 | ZN107_HUMAN  | 2H2-type 13.                 | 1     | AAATTCATACTG   | 0.353 |
| - | 14 | 1282      | z.1_Missense_Mut  | NM_005338    | NP_005329    | O00291 | HIP1_HUMAN   | ntential. pDED.              | 8     | GATCTGCTTCC    | 0.677 |
| - | 2  | 1134      | .1_Intron CCDC14  | NM_006682    | NP_006673    | Q14314 | FGL2_HUMAN   | rogen C-terminal.            | 2     | GGATATCGATCA   | 0.398 |
| - | 5  | 7208      | _Mutation_p.E230  | NM_033026    | NP_149015    | Q9Y6V0 | PCLO_HUMAN   |                              | 7     | AGTTTCCTTCT    | 0.418 |
| - | 5  | 4875      | v.2_Missense_Mut  | NM_033026    | NP_149015    | Q9Y6V0 | PCLO_HUMAN   |                              | 7     | TCTTCGTTTTTC   | 0.398 |
| - | 22 | 3032      | rc.1_Missense_Mt  | NM_000927    | NP_000918    | P08183 | MDR1_HUMAN   | ne type-1 2. Helical; (Poten | 7     | AACTCCTGCTAT   | 0.353 |
| - | 16 | 2195      | hc.1_Missense_Mt  | NM_000927    | NP_000918    | P08183 | MDR1_HUMAN   | r 1. Cytoplasmic (Potential) | 7     | TATTACGAACTG   | 0.393 |
| + | 14 | 2378      | ZAN_uc003uwl.2_F  | NM_003386    | NP_003377    | Q9Y493 | ZAN_HUMAN    | ate) (mucin-like domain). E  | 11    | AAAACCCACCA    | 0.522 |
| - | 33 | 4973_4974 | .2_Missense_Mutε  | NM_005045    | NP_005036    | P78509 | RELN_HUMAN   |                              | 19    | GAAATCCAGTTT   | 0.411 |
| - | 4  | 1349      |                   | NM_002711    | NP_002702    | Q16821 | PPR3A_HUMAN  | p.D440N(1)                   | 34    | TATTATCATCCAG  | 0.418 |
| + | 9  | 1536      | ΔXP2_uc011kmv.1   | NM_014491    | NP_055306    | O15409 | FOXP2_HUMAN  | ucine-zipper.                | 8     | AGGTGGTGCAA    | 0.408 |
| + | 14 | 2219      | rq.1_Missense_Mt  | NM_000492    | NP_000483    | P13569 | CFTR_HUMAN   | lasmic (Potential).          | 5     | GGAAAAAAGGA    | 0.378 |
| - | 13 | 1461      | lks.2_Missense_M  | NM_022444    | NP_071889    | Q9BZW2 | S13A1_HUMAN  | ical; (Potential).           | 2     | ACCATCAAAGAA   | 0.363 |
| - | 5  | 1827      | vly.1_Missense_M  | NM_176814    | NP_789784    | Q2TB10 | ZN800_HUMAN  | 2H2-type 6.                  | 1     | AAGAGGACACT    | 0.358 |
| + | 6  | 705       | N33_uc003voq.1_   | NM_178562    | NP_848657    | Q86UF1 | TSN33_HUMAN  | ellular (Potential).         | 1     | TGGAGGGATTT    | 0.512 |
| - | 33 | 2983      | tu.2_Splice_Site_ | NM_004717    | NP_004708    | O75912 | DGKI_HUMAN   |                              | 3     | ACCCCTAAATC    | 0.572 |
| - | 15 | 1860      |                   | NM_004333    | NP_004324    | P15056 | BRAF_HUMAN   | rotein kinase_R603>I(2) p.T  | 18290 | TATTCCTACTGTAC | 0.368 |
| - | 14 | 1711_1712 |                   | NM_000420    | NP_000411    | P23276 | KELL_HUMAN   | ellular (Potential).         | 4     | TCGATCCAAGC    | 0.545 |
| + | 1  | 757       | uc003wda.2_Intror | NM_176883    | NP_795364    | P59536 | T2R41_HUMAN  | Name=6; (Potential).         | 2     | ATCATTGATGCC   | 0.498 |
| + | 1  | 1267      |                   | NM_001008747 | NP_001008747 | A4D2H0 | A4D2H0_HUMAN |                              | 0     | AAGAAGCTTCT    | 0.378 |
| + | 2  | 493       | hwfn.2_Missense_I | NM_003575    | NP_003566    | Q9UDV7 | ZN282_HUMAN  |                              | 0     | CAGCCGAGAAG    | 0.632 |
| - | 2  | 965       |                   | NM_015694    | NP_056509    | Q9ULD5 | ZN777_HUMAN  |                              | 1     | GATCCAGAAAT    | 0.562 |
| + | 1  | 566       | Δ61_uc003wgx.2_I  | NM_138434    | NP_612443    | Q96FA7 | CG029_HUMAN  |                              | 1     | TGGTCCGCGAG    | 0.632 |
| - | 36 | 5881      | z.2_Missense_Mu   | NM_170606    | NP_733751    | Q8NEZ4 | MLL3_HUMAN   | Pro-rich.                    | 63    | TGAGTTAGAGG    | 0.527 |
| - | 22 | 3673      | z.2_Missense_Mu   | NM_170606    | NP_733751    | Q8NEZ4 | MLL3_HUMAN   |                              | 63    | AGATTCACAGC    | 0.269 |
| - | 58 | 9334      | ε_Mutation_p.P23  | NM_033225    | NP_150094    | Q96PZ7 | CSMD1_HUMAN  | ar (Potential). Sushi 23.    | 25    | GCCAGGGTTGC    | 0.522 |
| - | 28 | 4819      | p.E869K CSMD1_    | NM_033225    | NP_150094    | Q96PZ7 | CSMD1_HUMAN  | lar (Potential). CUB 9.      | 25    | CATTCTTCCC     | 0.458 |
| - | 20 | 3332      | p.S373F CSMD1_    | NM_033225    | NP_150094    | Q96PZ7 | CSMD1_HUMAN  | lar (Potential). CUB 6.      | 25    | CGTGGAAACTC    | 0.478 |
| + | 24 | 2749      | p.Y892D XPO7_uc   | NM_015024    | NP_055839    | Q9UIA9 | XPO7_HUMAN   |                              | 5     | AGGATTACCC     | 0.458 |

rs28381914

rs145814266

|   |    |           |                      |              |              |        |             |                               |     |                |       |             |
|---|----|-----------|----------------------|--------------|--------------|--------|-------------|-------------------------------|-----|----------------|-------|-------------|
| - | 10 | 1281      |                      | NM_003844    | NP_003835    | O00220 | TR10A_HUMAN | nic (Potential). Death.       | 6   | GGCATCCCCTGC   | 0.537 |             |
| + | 6  | 619       | ea.1_Missense_M      | NM_003817    | NP_003808    | Q9H2U9 | ADAM7_HUMAN | cellular (Potential).         | 5   | ATTATTCCTGTAC  | 0.373 |             |
| + | 3  | 2501      | p.R605K NEFM_u       | NM_005382    | NP_005373    | P07197 | NFM_HUMAN   | Tail.                         | 1   | agtgggaggaagag | 0.214 |             |
| + | 3  | 756       | 1D2_uc003xlc.2_l     | NM_015214    | NP_056029    | O94830 | DDHD2_HUMAN |                               | 2   | GATGTTCCCTACT  | 0.398 |             |
| - | 2  | 461       |                      | NM_003068    | NP_003059    | O43623 | SNAI2_HUMAN |                               | 2   | CCACTGTGGTC    | 0.517 |             |
| - | 17 | 3318      | 1JNL_uc003xqt.3_F    | NM_144651    | NP_653252    | A1KZ92 | PXDNL_HUMAN |                               | 2   | AAATTTACCTAA   | 0.473 |             |
| + | 4  | 1262_1263 | 1uc011ldy.1_Intr     | NM_006269    | NP_006260    | P56715 | RP1_HUMAN   |                               | 12  | AGGAAGAACAG    | 0.396 |             |
| + | 4  | 3056      | 1uc011ldy.1_Intr     | NM_006269    | NP_006260    | P56715 | RP1_HUMAN   |                               | 12  | TTATGGAAAGT    | 0.328 |             |
| + | 4  | 6432      | 1uc011ldy.1_Intr     | NM_006269    | NP_006260    | P56715 | RP1_HUMAN   |                               | 12  | GTCATTACTTCTT  | 0.323 |             |
| - | 4  | 1216      |                      | NM_004820    | NP_004811    | O75881 | CP7B1_HUMAN |                               | 3   | GATGGGAAATC    | 0.443 |             |
| - | 1  | 292       | 5'Flank C8orf44_t    | NM_025054    | NP_079330    | Q96JH7 | VCIP1_HUMAN | Pro-rich.                     | 8   | gcggcggaacggag | 0.527 |             |
| - | 9  | 1280      | A6_uc003xxr.3_Int    | NM_020361    | NP_065094    | Q8N4T0 | CBPA6_HUMAN |                               | 2   | ATTGGGAATTGT   | 0.378 | rs140734555 |
| + | 26 | 3317      |                      | NM_024870    | NP_079146    | Q70Z35 | PREX2_HUMAN |                               | 17  | AAGATTCTGGTC   | 0.393 |             |
| - | 6  | 732       | h.1_Missense_Mu      | NM_000971    | NP_000962    | P18124 | RL7_HUMAN   |                               | 0   | GGTCCTCCCTG    | 0.433 |             |
| + | 8  | 1009      | ar.2_Missense_Mt     | NM_004133    | NP_004124    | Q14541 | HNF4G_HUMAN |                               | 1   | TTTTTGTATCCAG  | 0.318 |             |
| - | 5  | 833_834   | p.E93K HEY1_uc       | NM_012258    | NP_036390    | Q9Y5J3 | HEY1_HUMAN  |                               | 3   | CGTTCCTGGGC    | 0.713 |             |
| + | 2  | 927       |                      | NM_173549    | NP_775820    | Q6P6B1 | CH047_HUMAN | Glu-rich.                     | 0   | GAGAAAGAATTCC  | 0.433 |             |
| - | 6  | 817       | Mutation_p.P254      | NM_006281    | NP_006272    | Q13188 | STK3_HUMAN  | rotein kinase.                | 4   | TCATTGGATGTA   | 0.348 |             |
| + | 14 | 2460      | lq.2_Missense_Mt     | NM_014677    | NP_055492    | Q9UQ26 | RIMS2_HUMAN |                               | 15  | GTATAGGAAGCA   | 0.388 |             |
| + | 28 | 4156      | lq.2_Missense_Mt     | NM_014677    | NP_055492    | Q9UQ26 | RIMS2_HUMAN | C2 2.                         | 15  | CGCATGGATCA    | 0.393 |             |
| - | 10 | 924       | ank NRBP2_uc010      | NM_178564    | NP_848659    | Q9NSY0 | NRBP2_HUMAN | rotein kinase.                | 2   | TGTGACCCGGG    | 0.647 |             |
| - | 12 | 835       | zkl.2_Missense_Mt    | NM_002839    | NP_002830    | P23468 | PTPRD_HUMAN | 1. Extracellular (Potential). | 22  | GAAAGAGGCAA    | 0.418 |             |
| - | 8  | 1257      | p.L400F MPDZ_        | NM_003829    | NP_003820    | O75970 | MPDZ_HUMAN  | PDZ 3.                        | 6   | ATTACCAATTTT   | 0.303 |             |
| + | 10 | 1439      | p.V383F UNC13B       | NM_006377    | NP_006368    | O14795 | UN13B_HUMAN |                               | 5   | CCAAGGTTCCGA   | 0.433 |             |
| - | 2  | 1376      |                      | NM_003028    | NP_003019    | Q15464 | SHB_HUMAN   | with LAT, FAK1, JAK1 and      | 3   | GGGCTCCATGT    | 0.557 |             |
| + | 1  | 526       | 42421_uc004aed.1_RNA |              |              |        |             |                               | 0   | AGCCCAATCTG    | 0.607 | rs141617852 |
| + | 6  | 1181      | p.P102L CENPF        | NM_001012267 | NP_001012267 | Q6IPU0 | CENPP_HUMAN |                               | 2   | CCGGCCAGGGT    | 0.567 |             |
| + | 2  | 371       |                      | NM_001012994 | NP_001013012 | Q5VWJ9 | SNX30_HUMAN |                               | 0   | CCCTTCTCAAC    | 0.403 |             |
| - | 1  | 779       |                      | NM_012363    | NP_036495    | Q8NGS0 | OR1N1_HUMAN | cellular (Potential).         | 3   | AGGGAGGACAC    | 0.527 |             |
| - | 2  | 494       |                      | NM_005347    | NP_005338    | P11021 | GRP78_HUMAN |                               | 4   | CTTGGCGGCAT    | 0.607 |             |
| - | 3  | 1359      | PS1_uc011mac.1_      | NM_012098    | NP_036230    | Q9UKU9 | ANGL2_HUMAN | rogen C-terminal.             | 0   | TGGTGTCTGGC    | 0.632 |             |
| + | 8  | 1166      | p.A374V SLC2A8       | NM_014580    | NP_055395    | Q9NY64 | GTR8_HUMAN  | lame=10; (Potential).         | 2   | GCTGGCCGTGG    | 0.701 |             |
| + | 13 | 1160      | Mutation_p.R27:      | NM_001005373 | NP_001005373 | Q6UWE0 | LRSM1_HUMAN | Potential.                    | 0   | TGAACGGCGCC    | 0.582 |             |
| - | 5  | 374       | p.S26L C9orf78_      | NM_016520    | NP_057604    | Q9NZ63 | CI078_HUMAN |                               | 0   | AAAACGATGTC    | 0.507 |             |
| - | 5  | 668       | mzn.2_Missense_      | NM_005312    | NP_005303    | Q13905 | RPGF1_HUMAN |                               | 7   | TCTTCTGAGT     | 0.557 |             |
| + | 6  | 598       | az.2_Missense_Mt     | NM_017588    | NP_060058    | P61964 | WDR5_HUMAN  | WD 3.                         | 0   | TCCAACCTTATC   | 0.473 |             |
| + | 2  | 593       |                      | NM_000093    | NP_000084    | P20908 | CO5A1_HUMAN | 3P N-terminal.                | 11  | AAGGCCCGGAT    | 0.557 |             |
| - | 6  | 929       |                      | NM_017617    | NP_060087    | P46531 | NOTC1_HUMAN | :GF-like 8; c p.G310R(1)      | 856 | AGGTCCCGCCG    | 0.627 |             |
| - | 2  | 1609      | u.2_Missense_Mu      | NM_173691    | NP_775962    | Q4KMQ1 | TPRN_HUMAN  | Glu-rich.                     | 0   | ctgctcTAGGGAG  | 0.348 |             |
| + | 4  | 1016_1017 | mg.1_Missense_A      | NM_006088    | NP_006079    | P68371 | TBB2C_HUMAN |                               | 1   | CGACCCCGCC     | 0.604 |             |
| - | 6  | 2812      | ndi.2_Missense_M     | NM_181332    | NP_851849    | Q8N0W4 | NLGNX_HUMAN | lasmic (Potential).           | 4   | TGGGATGTCATC   | 0.557 |             |
| + | 3  | 317       |                      | NM_016562    | NP_057646    | Q9NYK1 | TLR7_HUMAN  | ilar (Potential). LRR 1.      | 5   | AAATTCCTGGA    | 0.493 |             |
| + | 2  | 769       | se_Mutation_p.L18    | NM_152634    | NP_689847    | Q8N8B7 | TEANC_HUMAN | FIIS central.                 | 1   | GAGAGCTTCTTTA  | 0.428 |             |
| - | 3  | 569       |                      | NM_030624    | NP_085127    | Q96M94 | KLH15_HUMAN |                               | 2   | CCTGAAGAATCT   | 0.388 |             |
| + | 1  | 1487      |                      | NM_001136533 | NP_001130005 |        |             |                               | 2   | GACACAGAAATA   | 0.448 |             |
| + | 4  | 1179      | p.E287K IMAGEB       | NM_002363    | NP_002354    | P43366 | MAGB1_HUMAN | MAGE.                         | 0   | TCTCTCGATTT    | 0.512 |             |
| - | 40 | 5918      | Mutation_p.C176E     | NM_004006    | NP_003997    | P11532 | DMD_HUMAN   | ction with SYNM (By simila    | 6   | CAAGCATTTAC    | 0.383 |             |

|   |    |         |                   |              |              |        |             |    |                |       |             |
|---|----|---------|-------------------|--------------|--------------|--------|-------------|----|----------------|-------|-------------|
| + | 8  | 1437    | rf22_uc010ngv.2_l | NM_152632    | NP_689845    | Q6ZTR5 | CX022_HUMAN | 3  | AATCCTGAAAAGC  | 0.373 |             |
| + | 1  | 281     |                   | NM_000531    | NP_000522    | P00480 | OTC_HUMAN   | 2  | ATGGTTCGAAAT   | 0.378 | rs72552300  |
| - | 27 | 4003    | ey.1_Missense_Mi  | NM_004229    | NP_004220    | O60244 | MED14_HUMAN | 4  | CATACTTTGTTT   | 0.343 |             |
| + | 22 | 2876    | _p.P832A RBM10_   | NM_005676    | NP_005667    | P98175 | RBM10_HUMAN | 5  | CAGAGCCCAAG    | 0.612 |             |
| + | 1  | 132_133 | tron LOC100133E   | NR_027444    |              |        |             | 0  | TTGGCCTCACAC   | 0.653 |             |
| + | 6  | 822     |                   | NM_007137    | NP_009068    | P51508 | ZNF81_HUMAN | 0  | TGAGTCGCACT    | 0.333 |             |
| - | 41 | 4908    | nip.2_Missense_M  | NM_005183    | NP_005174    | O60840 | CAC1F_HUMAN | 6  | AAGGGCGGAAG    | 0.512 |             |
| - | 2  | 164     |                   | NM_198510    | NP_940912    | Q6UXX5 | ITH5L_HUMAN | 6  | CCACCGTGGAG    | 0.493 |             |
| + | 3  | 582     | H159Y TRO_uc00    | NM_001039705 | NP_001034794 | Q12816 | TROP_HUMAN  | 1  | CTGGCCATGAG    | 0.507 |             |
| - | 1  | 999     |                   | NM_001012968 | NP_001012986 | Q56A73 | SPIN4_HUMAN | 2  | GAACAGGATCT    | 0.448 |             |
| - | 2  | 1620    | g.2_Missense_Mu   | NM_145119    | NP_660095    | Q8NG27 | PJA1_HUMAN  | 0  | GTTCCTCGAACT   | 0.572 |             |
| + | 8  | 1294    | RN1_uc011mpt.1_l  | NM_052957    | NP_443189    | Q96QF7 | ACRC_HUMAN  | 3  | AAGCTCCCAGC    | 0.557 |             |
| - | 3  | 1196    |                   | NM_001008537 | NP_001008537 | Q5QGS0 | K2022_HUMAN | 15 | ATATTTTCATATTT | 0.453 |             |
| - | 16 | 2144    | p.T681A ABCB7     | NM_004299    | NP_004290    | O75027 | ABCB7_HUMAN | 1  | TCTGTGTATGCC   | 0.408 |             |
| + | 1  | 392     | g_Mutation_p.H74  | NM_053281    | NP_444511    | Q96NX9 | DACH2_HUMAN | 5  | ATGCACGGGAT    | 0.547 |             |
| - | 3  | 1172    |                   | NM_080879    | NP_543155    | Q8WXH6 | RB40A_HUMAN | 0  | CCTTAAGAAATTT  | 0.483 |             |
| + | 13 | 1481    | ic.1_Missense_Mu  | NM_198465    | NP_940867    | Q7Z2Y5 | NRK_HUMAN   | 14 | GCCAAGGTGGC    | 0.557 |             |
| + | 32 | 2967    | _p.K922I COL4A5   | NM_033380    | NP_203699    | P29400 | CO4A5_HUMAN | 4  | GTCTTAAAGGTA   | 0.408 |             |
| + | 13 | 1753    |                   | NM_007231    | NP_009162    | Q9UN76 | S6A14_HUMAN | 3  | TTCATAGACCTA   | 0.358 |             |
| - | 11 | 1931    |                   | NM_020721    | NP_065772    | Q9ULL0 | K1210_HUMAN | 5  | CCATGGAATTGT   | 0.458 |             |
| - | 10 | 1456    |                   | NM_020721    | NP_065772    | Q9ULL0 | K1210_HUMAN | 5  | TCTTTTCGTTGAT  | 0.433 |             |
| - | 16 | 1707    | uh.1_Missense_M   | NM_001081550 | NP_001075019 | Q8NI27 | THOC2_HUMAN | 3  | ATTTTCTCTGGT   | 0.388 |             |
| - | 31 | 8096    | E2684K ODZ1_u     | NM_014253    | NP_055068    | Q9UKZ4 | TEN1_HUMAN  | 23 | CCCTTCTGTCC    | 0.517 |             |
| - | 6  | 2931    | vf.1_Missense_Mi  | NM_031907    | NP_114113    | Q9BXU7 | UBP26_HUMAN | 8  | TATGATCTCCCT   | 0.383 |             |
| - | 6  | 2929    | vf.1_Missense_Mi  | NM_031907    | NP_114113    | Q9BXU7 | UBP26_HUMAN | 8  | TGATCTCCCTTA   | 0.383 |             |
| + | 6  | 5036    | S1377F GPR112     | NM_153834    | NP_722576    | Q8IZF6 | GP112_HUMAN | 12 | CACCTCCACAA    | 0.428 |             |
| - | 14 | 1540    | P11C_uc004fba.2   | NM_173694    | NP_775965    | Q8NB49 | AT11C_HUMAN | 8  | CAGCATCGTTTG   | 0.353 |             |
| + | 4  | 1679    | EC1_uc010nsl.1_l  | NM_005462    | NP_005453    | O60732 | MAGC1_HUMAN | 4  | CTGAGAGAACT    | 0.478 |             |
| + | 4  | 1681    | EC1_uc010nsl.1_l  | NM_005462    | NP_005453    | O60732 | MAGC1_HUMAN | 4  | TGAGAGAACTCA   | 0.483 |             |
| + | 2  | 124     |                   | NM_001009614 | NP_001009614 | Q5VSR9 | SPXN1_HUMAN | 0  | TGAAAAGATG     | 0.408 |             |
| - | 3  | 913     | D187N CSAG1_u     | NM_005367    | NP_005358    | P43365 | MAGAC_HUMAN | 1  | GCCATCGTAGG    | 0.582 |             |
| + | 9  | 813     | p.G218S SRPK3_    | NM_014370    | NP_055185    | Q9UPE1 | SRPK3_HUMAN | 3  | AGACCGGTAAG    | 0.627 |             |
| - | 9  | 998     | p.R265C MPP1_uc   | NM_002436    | NP_002427    | Q00013 | EM55_HUMAN  | 3  | GCTGCGACCCA    | 0.527 |             |
| - | 2  | 680     |                   | NM_171998    | NP_741995    | Q96DA2 | RB39B_HUMAN | 0  | GGCGAGTCACT    | 0.498 |             |
| - | 39 | 5751    | g_Mutation_p.R74  | NM_015557    | NP_056372    | Q8TDI0 | CHD5_HUMAN  | 12 | GGATGCGGGAC    | 0.647 |             |
| + | 3  | 509     | nv.2_Intron TAS1F | NM_138697    | NP_619642    | Q7RTX1 | TS1R1_HUMAN | 3  | CTATGCGGCCAC   | 0.378 |             |
| - | 9  | 1151    | ii.1_Missense_Mu  | NM_001428    | NP_001419    | P06733 | ENOA_HUMAN  | 4  | CTTCTCGTTTCA   | 0.572 |             |
| + | 27 | 6673    | I3D_uc001atx.2_M  | NM_015378    | NP_056193    | Q5THJ4 | VP13D_HUMAN | 5  | CGAAGGCACCA    | 0.502 |             |
| - | 3  | 415     | ca.1_Missense_M   | NM_004431    | NP_004422    | P29317 | EPHA2_HUMAN | 10 | AGATACGCTCAC   | 0.542 |             |
| - | 8  | 956     | 1_Intron MST1P9_  | NR_002729    |              |        |             | 0  | CGTCGAGGTTTC   | 0.667 | rs1057378   |
| - | 14 | 1741    | _p.V429I ALDH4A   | NM_170726    | NP_733844    | P30038 | AL4A1_HUMAN | 0  | CACGAGTCCC     | 0.458 | rs150916561 |
| - | 39 | 4949    | id.2_Missense_Mu  | NM_005529    | NP_005520    | P98160 | PGBM_HUMAN  | 9  | GCAGCGGTACC    | 0.597 | rs142149919 |
| - | 2  | 1042    |                   | NM_152365    | NP_689578    | Q8NAX2 | CA172_HUMAN | 2  | AACGACCCTCC    | 0.642 |             |
| + | 4  | 945     | IB2_uc001bzd.1_l  | NM_178548    | NP_848643    | Q6VUC0 | AP2E_HUMAN  | 0  | ACTCTCGCCTC    | 0.642 |             |
| + | 1  | 4631    | i.1_Intron MACF1_ | NM_015038    | NP_055853    | O94854 | K0754_HUMAN | 0  | CAACCTAGAGG    | 0.667 |             |
| + | 1  | 4642    | i.1_Intron MACF1_ | NM_015038    | NP_055853    | O94854 | K0754_HUMAN | 0  | AGCCCGCCTCC    | 0.672 |             |
| + | 9  | 1238    | ym.2_Missense_M   | NM_000779    | NP_000770    | P13584 | CP4B1_HUMAN | 2  | GTACCGCCAGC    | 0.572 |             |

|   |    |         |                                               |              |              |        |             |                                |    |               |       |             |
|---|----|---------|-----------------------------------------------|--------------|--------------|--------|-------------|--------------------------------|----|---------------|-------|-------------|
| + | 2  | 416     | 1_p.V67 ELAVL4_u                              | NM_021952    | NP_068771    | P26378 | ELAV4_HUMAN | RRM 1.                         | 2  | CTCATCGTCAAC  | 0.448 | rs116391279 |
| - | 2  | 548     | 105L ZCCHC11_u                                | NM_015269    | NP_056084    | Q5TAX3 | TUT4_HUMAN  |                                | 3  | TCACCGGTGAA   | 0.403 |             |
| - | 4  | 2334    | 1_p.R25C KANK4_u                              | NM_181712    | NP_859063    | Q577N3 | KANK4_HUMAN |                                | 6  | TGCACGGAAGC   | 0.468 | rs139344628 |
| - | 14 | 2230    | 3_Mutation_p.V64                              | NM_002227    | NP_002218    | P23458 | JAK1_HUMAN  | otin kinase 1.                 | 61 | CTCCACGTCGC   | 0.592 |             |
| + | 2  | 344     | 3e_Mutation_p.H6                              | NM_152996    | NP_694541    | Q8NDV1 | SIA7C_HUMAN | enol (Potential).              | 5  | TGAACTCACTAT  | 0.438 |             |
| + | 22 | 7065    |                                               | NM_001408    | NP_001399    | Q9HCU4 | CELR2_HUMAN | ular (Potential). GPS.         | 8  | CTGGTCGGCCA   | 0.617 |             |
| - | 3  | 192     | IA5_uc010ovj.1_5'                             | NM_002790    | NP_002781    | P28066 | PSA5_HUMAN  |                                | 0  | TGGCTGTAGAA   | 0.418 |             |
| + | 7  | 990     | ense_Mutation_p.f                             | NM_004425    | NP_004416    | Q16610 | ECM1_HUMAN  | roximate repeats. 1.           | 3  | .GGGGGAGGCTC  | 0.632 |             |
| - | 3  | 5928    | uc001ezv.2_Intron                             | NM_001014342 | NP_001014364 | Q5D862 | FILA2_HUMAN | Filaggrin 8.                   | 17 | TAGATCCCCCTT  | 0.527 |             |
| + | 8  | 947_948 | _Missense_Mutatio                             | NM_023015    | NP_075391    | Q68E01 | INT3_HUMAN  |                                | 3  | TGGGAACGGGTG  | 0.515 |             |
| - | 6  | 1289    | MUC1_uc001fin.2_Missense_Mutation_p.R104W MUC |              |              | P15941 | MUC1_HUMAN  | tential). Interaction with P5  | 4  | ATCCCGGGCTG   | 0.587 |             |
| - | 1  | 437     | S59L C1orf66_uc0                              | NM_030980    | NP_112242    | Q9H9L3 | I20L2_HUMAN |                                | 2  | TTCTTTGAAGGT  | 0.507 |             |
| + | 1  | 68      |                                               | NM_001004473 | NP_001004473 | Q8NGX5 | O10K1_HUMAN | ellular (Potential).           | 1  | TAGGCTGCAGC   | 0.512 |             |
| - | 24 | 3672    |                                               | NM_003126    | NP_003117    | P02549 | SPTA1_HUMAN | Spectrin 11.                   | 8  | .CTGCCGGATT   | 0.463 |             |
| + | 2  | 506     | tp.3_Missense_ML                              | NM_002036    | NP_002027    | Q16570 | DUFFY_HUMAN | lasmic (Potential).            | 2  | CTTCCGCTGGC   | 0.602 |             |
| - | 2  | 301_302 | Site_p.G66_splice                             | NM_000567    | NP_000558    | P02741 | CRP_HUMAN   | Pentaxin.                      | 1  | TGTACCCACGG   | 0.455 |             |
| + | 12 | 1792    | uc001fym.2_5'Flan                             | NM_001014443 | NP_001014443 | Q9UK80 | UBP21_HUMAN |                                | 5  | TAGGCTCCATCA  | 0.517 |             |
| + | 6  | 650     | 10ppg.1_Missense                              | NM_002838    | NP_002829    | P08575 | PTPRC_HUMAN | ellular (Potential).           | 12 | TCTTCTCCTACAG | 0.552 |             |
| + | 15 | 2234    | 97L PPP1R12B_u                                | NM_002481    | NP_002472    | O60237 | MYPT2_HUMAN |                                | 3  | TAGTCCAGCAA   | 0.582 |             |
| + | 20 | 3030    | _p.S805* ZC3H11/                              | NM_014827    | NP_055642    | O75152 | ZC11A_HUMAN |                                | 2  | TAGCTATCAGAAA | 0.378 |             |
| + | 16 | 2119    | 0pyl.1_Missense_l                             | NM_006642    | NP_006633    | Q86SQ7 | SDCG8_HUMAN | potential). Sufficient for hom | 0  | TGGAGAGTACAT  | 0.408 |             |
| - | 2  | 245     | C_uc009xhk.1_5'                               | NM_014974    | NP_055789    | Q9Y2E4 | DIP2C_HUMAN |                                | 7  | TACTCGGAGGCT  | 0.478 |             |
| - | 4  | 288     | _p.E42K A1CF_uc                               | NM_138932    | NP_620310    | Q9NQ94 | A1CF_HUMAN  |                                | 1  | TATTTCTCTGCA  | 0.413 |             |
| - | 7  | 1082    | _p.T320M CTNNA3                               | NM_001127384 | NP_001120856 | Q9UI47 | CTNA3_HUMAN |                                | 8  | TCCCTCGTACATC | 0.502 | rs139460414 |
| + | 3  | 456     |                                               | NM_012339    | NP_036471    | O95858 | TSN15_HUMAN | ical; (Potential).             | 0  | TGGCGTGGTG    | 0.388 | rs150067289 |
| - | 16 | 3510    | _p.P562L DLG5_u                               | NM_004747    | NP_004738    | Q8TDM6 | DLG5_HUMAN  |                                | 8  | .GCTCCGGGGAG  | 0.557 |             |
| - | 42 | 4760    | 3_Mutation_p.P153                             | NM_013451    | NP_038479    | Q9NZM1 | MYOF_HUMAN  | mic (Potential). C2 5.         | 4  | TGTACGGTAAT   | 0.552 |             |
| - | 1  | 2175    |                                               | NR_002319    |              |        |             |                                | 0  | TCCAGTGTCTGG  | 0.537 |             |
| - | 4  | 517     | 3e_Mutation_p.R1                              | NM_022362    | NP_071757    | Q96T76 | MMS19_HUMAN |                                | 0  | TAGCCGGTCTCT  | 0.463 | rs29001280  |
| - | 9  | 2959    | 3e_Mutation_p.A1                              | NM_015221    | NP_056036    | Q6XZF7 | DNMBP_HUMAN | DH.                            | 6  | TGACCGCAAGG   | 0.443 |             |
| - | 8  | 2130    | 2_Missense_Mut                                | NM_013274    | NP_037406    | Q9UGP5 | DPOLL_HUMAN |                                | 0  | .GGAACCTGGC   | 0.607 |             |
| - | 2  | 210     | C2_uc001kvm.2_5'                              | NM_024040    | NP_076945    | Q9H467 | CUED2_HUMAN |                                | 0  | TCTCCGGGAGG   | 0.602 |             |
| - | 1  | 441     | C2_uc009xxx.2_l                               | NR_026715    |              |        |             |                                | 0  | TCCAGGTGCCCC  | 0.537 |             |
| + | 4  | 1204    | 3e_Mutation_p.A2                              | NM_206862    | NP_996744    | O95359 | TACC2_HUMAN |                                | 10 | TATCCAGCCCCA  | 0.602 |             |
| - | 5  | 1030    | 10qy.1_Intron CU                              | NM_022034    | NP_071317    | Q86UP6 | CUZD1_HUMAN | lar (Potential). CUB 2.        | 2  | TGGGAGTCACA   | 0.453 |             |
| + | 18 | 2788    |                                               | NM_178537    | NP_848632    | Q76KP1 | B4GN4_HUMAN | enol (Potential).              | 1  | TGGACGGCATC   | 0.711 |             |
| - | 2  | 1538    | 3sense_Mutation_p                             | NM_203389    | NP_976323    | P13489 | RINI_HUMAN  | LRR 1.                         | 0  | TGACCGTGCTT   | 0.632 | rs149360262 |
| - | 30 | 4076    |                                               | NM_005961    | NP_005952    | Q6W4X9 | MUC6_HUMAN  | rich.} Thr-rich.               | 1  | TGACCGTGGGG   | 0.612 |             |
| - | 29 | 3697    |                                               | NM_005961    | NP_005952    | Q6W4X9 | MUC6_HUMAN  |                                | 1  | GGCCGTGAGC    | 0.672 |             |
| + | 51 | 14903   | b.2_Missense_Mu                               | NM_017511    | NP_059981    | Q9HC84 | MUC5B_HUMAN | em repeats, Ser/Thr- rich.}    | 0  | TAGACCGAGCA   | 0.662 |             |
| + | 51 | 14906   | b.2_Missense_Mu                               | NM_017511    | NP_059981    | Q9HC84 | MUC5B_HUMAN | em repeats, Ser/Thr- rich.}    | 0  | .GCCGAGCACTA  | 0.662 |             |
| + | 52 | 15536   | b.2_Missense_Mu                               | NM_017511    | NP_059981    | Q9HC84 | MUC5B_HUMAN | em repeats, Ser/Thr- rich.}    | 0  | GGGGACGACCC   | 0.622 |             |
| - | 1  | 626     | 32_uc001mak.1_l                               | NM_145053    | NP_659490    | Q8IYU4 | UBQLN_HUMAN |                                | 3  | .GGTCCGGGAAG  | 0.542 |             |
| + | 1  | 277     | 45_uc001mbq.1_l                               | NM_001005165 | NP_001005165 | Q8NGH9 | O52E4_HUMAN | ellular (Potential).           | 2  | TCCAAGAGATC   | 0.463 |             |
| - | 6  | 932     | MPPED2_uc009yji                               | NM_001584    | NP_001575    | Q15777 | MPPD2_HUMAN |                                | 1  | TAGTCGAGGCA   | 0.448 |             |
| + | 7  | 1533    | go.3_Missense_M                               | NM_002843    | NP_002834    | Q12913 | PTPRJ_HUMAN | tential). Fibronectin type-III | 8  | TGAGTCGTATC   | 0.512 |             |
| - | 14 | 1144    | obi.2_Missense_M                              | NM_004579    | NP_004570    | Q12851 | M4K2_HUMAN  |                                | 2  | TACCGGCTCA    | 0.602 |             |

|   |      |      |                    |              |              |        |             |                                |     |               |       |             |
|---|------|------|--------------------|--------------|--------------|--------|-------------|--------------------------------|-----|---------------|-------|-------------|
| - | 4    | 758  | nk.2_Missense_Mi   | NM_001277    | NP_001268    | P35790 | CHKA_HUMAN  |                                | 2   | ACATAACGCTCTC | 0.393 | rs143460799 |
| + | 62   | 9311 | 1_Intron C11orf65  | NM_000051    | NP_000042    | Q13315 | ATM_HUMAN   |                                | 240 | CCGGAAGATGAA  | 0.403 |             |
| - | 6    | 3093 | al.2_Missense_Mu   | NM_182557    | NP_872363    | Q86UU0 | BCL9L_HUMAN | Met-rich.                      | 2   | GCATCCGCTCCA  | 0.657 |             |
| - | 10   | 1571 | p.R404C KIRREL     | NM_032531    | NP_115920    | Q8IZU9 | KIRR3_HUMAN | potential). Ig-like C2-type 4. | 3   | CACACGGGGCA   | 0.632 |             |
| + | 24   | 6250 | p.P1667S WNK1_u    | NM_018979    | NP_061852    | Q9H4A3 | WNK1_HUMAN  |                                | 23  | CCATCCCTGGT   | 0.498 |             |
| - | 3    | 552  | _5'Flank NCAPD2    | NM_016497    | NP_057581    | Q4U2R6 | RM51_HUMAN  |                                | 0   | TTCTATCGAAACT | 0.433 |             |
| + | 7    | 1347 | !3_uc001qrs.2_intr | NM_001135217 | NP_001128689 | Q53EV4 | LRC23_HUMAN | Potential.                     | 1   | TGATTTCGACAG  | 0.547 |             |
| + | 12   | 1635 |                    | NM_006446    | NP_006437    | Q9Y6L6 | SO1B1_HUMAN | cellular (Potential).          | 8   | TAACTGGTCTC   | 0.363 |             |
| - | 53   | 7882 | g.1_Missense_Mu    | NM_002223    | NP_002214    | Q14571 | ITPR2_HUMAN | cellular (Pote p.V2489G(1)     | 14  | CAGCACGGTGA   | 0.413 |             |
| + | 5    | 751  | _Mutation_p.R167   | NM_152438    | NP_689651    | Q96FC9 | DDX11_HUMAN | Helicase ATP-binding.          | 3   | AGAAAGAGAGA   | 0.612 |             |
| + | 26   | 2889 | .1_Missense_Mute   | NM_152438    | NP_689651    | Q96FC9 | DDX11_HUMAN |                                | 3   | GCCCGTGTGGA   | 0.597 |             |
| - | 4    | 583  | ie_Mutation_p.K17  | NM_004719    | NP_004710    | Q99590 | SCAFB_HUMAN |                                | 0   | CTTACCTTAACAT | 0.299 |             |
| + | 11   | 2257 | mj.1_Missense_Mi   | NM_012284    | NP_036416    | Q9ULD8 | KCNH3_HUMAN | cytoplasmic (Potential).       | 0   | CGCTGACGTACT  | 0.662 |             |
| + | 34   | 4204 | lt.2_Missense_Mul  | NM_173602    | NP_775873    | Q9P265 | DIP2B_HUMAN |                                | 6   | GGTTTCGTCTC   | 0.502 |             |
| + | 3    | 997  | v1_uc009zmb.1_M    | NM_002135    | NP_002126    | P22736 | NR4A1_HUMAN |                                | 0   | GCCTACGGCCT   | 0.667 | rs150018506 |
| - | 8    | 1392 |                    | NM_175068    | NP_778238    | Q86Y46 | K2C73_HUMAN | Tail.                          | 6   | GCTCACGGAGT   | 0.507 | rs145362309 |
| + | 3    | 314  | ICKAP1L_uc010sc    | NM_005337    | NP_005328    | P55160 | NCKPL_HUMAN |                                | 4   | TACATCGTGAA   | 0.378 |             |
| + | 20   | 2171 | p.V240M NCKAP1     | NM_005337    | NP_005328    | P55160 | NCKPL_HUMAN |                                | 4   | TTCCCGTGTTC   | 0.453 |             |
| + | 1    | 209  |                    | NM_001005182 | NP_001005182 | Q96RD1 | OR6C1_HUMAN | Name=2; (Potential).           | 2   | AATTCGTTCCAC  | 0.378 |             |
| - | 24   | 5077 | .G434D BAZ2A_u     | NM_013449    | NP_038477    | Q9UIF9 | BAZ2A_HUMAN |                                | 0   | TGGTGCCCTCAC  | 0.547 |             |
| + | 11   | 1293 | 1snj.1_Missense_I  | NM_005412    | NP_005403    | P34897 | GLYM_HUMAN  |                                | 2   | AGGGGCCCCAG   | 0.557 |             |
| - | 10   | 1670 |                    | NM_020700    | NP_065751    | Q9ULR3 | PPM1H_HUMAN | PP2C-like.                     | 4   | ATGATTAAGG    | 0.527 |             |
| + | 2    | 397  |                    | NM_032230    | NP_115606    | Q8N6Q8 | CL026_HUMAN |                                | 0   | CTCCTTTGAAC   | 0.378 |             |
| - | 16   | 1991 | p.P501L CDK17_u    | NM_002595    | NP_002586    | Q00537 | CDK17_HUMAN |                                | 7   | AACCCGGGTCC   | 0.353 |             |
| - | 26   | 3086 |                    | NM_006836    | NP_006827    | Q92616 | GCN1L_HUMAN |                                | 4   | CCGCCCGGGTG   | 0.602 |             |
| - | 2    | 304  | 2B_uc001uau.2_5    | NM_032590    | NP_115979    | Q8NHM5 | KDM2B_HUMAN |                                | 2   | TGAAGCCGCGG   | 0.672 |             |
| - | 4    | 578  | p.P154L NCOR2      | NM_001077261 | NP_001070729 | Q9Y618 | NCOR2_HUMAN |                                | 4   | TGTGCGGGGGG   | 0.642 |             |
| + | 1    | 132  | u_p.N33H EP400_u   | NM_015409    | NP_056224    | Q96L91 | EP400_HUMAN |                                | 12  | ACCCCAACCCA   | 0.657 |             |
| - | 14   | 1970 |                    | NM_175066    | NP_778236    | Q8N8A6 | DDX51_HUMAN |                                | 2   | ACCAGGAACC    | 0.617 |             |
| + | 3    | 862  | 3PH8_uc001umg.z    | NM_017520    | NP_059990    | Q99549 | MPP8_HUMAN  |                                | 0   | ATCCGACAGC    | 0.443 |             |
| + | 4    | 925  |                    | NM_206827    | NP_996563    | Q6T310 | RSLBA_HUMAN | all GTPase-like.               | 1   | AATGCGTGCAG   | 0.517 |             |
| - | 4    | 365  | se_Mutation_p.M1l  | NM_001010875 | NP_001010875 | Q5SVS4 | KMCP1_HUMAN | e=2; (Potential). Solcar 1.    | 1   | CGTAACATCGCC  | 0.478 |             |
| + | 19   | 2171 | l1A_uc001vsm.1_I   | NM_015205    | NP_056020    | P98196 | AT11A_HUMAN | cytoplasmic (Potential).       | 4   | CGGCCGCGGCC   | 0.622 | rs146012121 |
| + | 12   | 1625 | p.E482Q MCF2L_u    | NM_001112732 | NP_001106203 | O15068 | MCF2L_HUMAN | Potential.                     | 2   | GTGCGGAAAAT   | 0.532 |             |
| - | 1    | 265  | i4P_uc001vwb.3_F   | NM_001145442 | NP_001138914 | A6NI47 | POTEM_HUMAN |                                | 0   | CTGCACCAGGG   | 0.587 |             |
| - | 1    | 260  | i4P_uc001vwb.3_F   | NM_001145442 | NP_001138914 | A6NI47 | POTEM_HUMAN |                                | 0   | CCAGGGGAAGC   | 0.592 |             |
| - | 33   | 4896 |                    | NM_002471    | NP_002462    | P13533 | MYH6_HUMAN  | Potential.                     | 4   | CGTTGCGGCTG   | 0.607 |             |
| + | 11   | 1107 | isense_Mutation_p  | NM_004086    | NP_004077    | O43405 | COCH_HUMAN  | VWFA 1.                        | 3   | AAATACGTAAGC  | 0.438 |             |
| - | 13   | 1904 | se_Mutation_p.P4   | NM_001083893 | NP_001077362 | Q13033 | STRN3_HUMAN | WD 2.                          | 0   | GGACTCGGCATA  | 0.368 |             |
| - | 6    | 1492 |                    | NM_015382    | NP_056197    | Q9ULT8 | HECD1_HUMAN |                                | 5   | CTTTTCGTCTTC  | 0.458 |             |
| + | 2    | 134  | lxsg.2_Missense_I  | NM_001102564 | NP_001096034 | Q96FT9 | IFT43_HUMAN |                                | 0   | AGGCCGAGAAT   | 0.473 | rs140366557 |
| + | 9    | 1738 | ie_Mutation_p.F53  | NM_014844    | NP_055659    | O15040 | TCPR2_HUMAN |                                | 3   | AGCTTCAATGG   | 0.512 |             |
| - | 8    | 1296 |                    | NM_006035    | NP_006026    | Q9Y5S2 | MRCKB_HUMAN | kinase C-terminal.             | 11  | AAGGTGCTTCTA  | 0.463 |             |
| - | 4    | 807  | .T1_uc001ypm.2_h   | NM_005163    | NP_005154    | P31749 | AKT1_HUMAN  | PH.                            | 134 | GCGTTCGATGA   | 0.657 |             |
| - | 7    | 1676 | ypx.2_Missense_IV  | NM_138420    | NP_612429    | Q8IVF2 | AHNK2_HUMAN |                                | 1   | AGGACGCATCC   | 0.537 |             |
| + | 8    | 945  | qv.2_Missense_Mi   | NM_015197    | NP_056012    | Q86VP3 | PACS2_HUMAN |                                | 1   | GGTAGCGTGC    | 0.657 |             |
| - | 1363 |      |                    |              |              |        |             |                                | 0   | CGTGCTCAGTG   | 0.647 | rs76812739  |



|   |    |         |                      |              |              |        |             |                             |       |              |       |                 |
|---|----|---------|----------------------|--------------|--------------|--------|-------------|-----------------------------|-------|--------------|-------|-----------------|
| - | 80 | 12471   |                      | NM_004667    | NP_004658    | O95714 | HERC2_HUMAN | RCC1 16.                    | 13    | CCAGCCGGCCG  | 0.647 |                 |
| + | 3  | 915     | p.T282A C15orf5      | NM_175741    | NP_786883    | Q86Y26 | NUT_HUMAN   |                             | 30    | AGCCCACTATG  | 0.547 |                 |
| - | 17 | 1707    |                      | NM_014691    | NP_055506    | O60306 | AQR_HUMAN   |                             | 1     | CCATTCGCGCC  | 0.443 |                 |
| + | 8  | 1207    | icl.1_Missense_Mt    | NM_001211    | NP_001202    | O60566 | BUB1B_HUMAN |                             | 4     | GATAGCTGTACC | 0.418 |                 |
| - | 2  | 330     | <3_uc002ayv.2_Mi     | NM_001099436 | NP_001092906 | Q6PHR2 | ULK3_HUMAN  | rotein kinase.              | 2     | GCTGCACAATGT | 0.552 |                 |
| + | 4  | 496     | jbmt.1_Missense_     | NM_207517    | NP_997400    | P82987 | ATL3_HUMAN  | SP type-1 1.                | 27    | GACCTGTGGGG  | 0.512 |                 |
| - | 21 | 3725    | r.3_Missense_Mut     | NM_002693    | NP_002684    | P54098 | DPOG1_HUMAN |                             | 2     | CAGCGGGTAG   | 0.602 | rs145004638     |
| - | 18 | 3110    | r.3_Missense_Mu      | NM_002693    | NP_002684    | P54098 | DPOG1_HUMAN |                             | 2     | GCTCACGGCTG  | 0.557 |                 |
| - | 6  | 538     | ense_Mutation_p.f    | NM_001077350 | NP_001070818 | Q12980 | NPRL3_HUMAN |                             | 1     | ACGACGGGACA  | 0.607 |                 |
| - | 3  | 202     |                      | NM_001025190 | NP_001020361 | Q96KJ4 | MSLNL_HUMAN |                             | 4     | ACGGGTAGGTG  | 0.592 |                 |
| - | 5  | 985     | 010uus.1_5'Flank     | NM_058192    | NP_478072    | Q9UJJ7 | RUSD1_HUMAN |                             | 0     | CTGCACGAGCT  | 0.721 |                 |
| - | 2  | 451     |                      | NM_001013658 | NP_001013680 | Q96A99 | PTX4_HUMAN  |                             | 0     | CAGGCGTGCCA  | 0.741 |                 |
| - | 8  | 1458    | _p.P249L ABCA3_      | NM_001089    | NP_001080    | Q99758 | ABCA3_HUMAN |                             | 16    | TGAACGGCGGG  | 0.627 |                 |
| + | 1  | 990     | 2_5'Flank TBC1D2     | NM_006181    | NP_006172    | O00634 | NET3_HUMAN  | inin EGF-like 1.            | 1     | CCTCACGGTGC  | 0.672 |                 |
| - | 14 | 1395    | 407_splice CORO      | NM_024535    | NP_078811    | P57737 | CORO7_HUMAN |                             | 0     | TACTTACGCTTG | 0.587 |                 |
| + | 12 | 1094    | h.2_Missense_Mu      | NM_020686    | NP_065737    | P80404 | GABT_HUMAN  |                             | 1     | TCTTTCGGAAG  | 0.557 |                 |
| - | 5  | 1157    | _p.S343L UMOD_t      | NM_003361    | NP_003352    | P07911 | UROM_HUMAN  | ZP.                         | 2     | CCAGCGACACC  | 0.552 |                 |
| + | 17 | 3613    | e_Mutation_p.E82     | NM_006910    | NP_008841    | Q7Z6E9 | RBBP6_HUMAN |                             | 4     | ATAGAGAGAACT | 0.428 |                 |
| + | 11 | 2500    | y.2_Missense_Mu      | NM_000418    | NP_000409    | P24394 | IL4RA_HUMAN | lasmic (Potential).         | 2     | GTCCCTCGCCCC | 0.662 |                 |
| + | 4  | 2329    |                      | NM_003414    | NP_003405    | Q14586 | ZN267_HUMAN | 2H2-type 14.                | 4     | ACATCGGAGAA  | 0.433 | rs146914846     |
| + | 4  | 2341    |                      | NM_003414    | NP_003405    | Q14586 | ZN267_HUMAN |                             | 4     | TCATAGTGGAG  | 0.418 |                 |
| - | 5  | 440     | iA10P_uc002edi.1_RNA |              |              |        |             |                             | 0     | GTGTTTTTGTAC | 0.512 |                 |
| - | 6  | 3854    | gn.1_Missense_Mt     | NM_015069    | NP_055884    | Q2M1K9 | ZN423_HUMAN | 2H2-type 27.                | 4     | AACGTGGATTT  | 0.423 |                 |
| + | 4  | 1271    | c010cbm.1_Misse      | NM_022162    | NP_071445    | Q9HC29 | NOD2_HUMAN  | NACHT.                      | 4     | GTTCACGGATC  | 0.547 |                 |
| + | 4  | 473     | .2_5'UTR NUP93_      | NM_014669    | NP_055484    | Q8N1F7 | NUP93_HUMAN |                             | 2     | AGTCCCGGAAG  | 0.308 |                 |
| - | 5  | 678     | q.2_Intron NQO1_     | NM_000903    | NP_000894    | P15559 | NQO1_HUMAN  |                             | 0     | GTCCCCGTGGA  | 0.333 |                 |
| + | 8  | 1179    | i.M239V WVVOX_u      | NM_016373    | NP_057457    | Q9NZC7 | WVVOX_HUMAN | with MAPT (By similarity).  | 0     | AGTCCATGGTA  | 0.517 |                 |
| - | 29 | 4861    | l1L2_uc002fgg.1_I    | NM_052892    | NP_443124    | Q7Z442 | PK1L2_HUMAN | lasmic (Potential).         | 3     | GACCCGGGGAC  | 0.587 |                 |
| + | 9  | 1583    |                      | NM_022041    | NP_071324    | Q9H2C0 | GAN_HUMAN   | Kelch 5.                    | 2     | GAAGTCGTGAG  | 0.498 |                 |
| + | 3  | 393     | chl.2_Missense_M     | NM_024731    | NP_079007    | Q8N4N3 | KLH36_HUMAN | BTB.                        | 2     | TTCCAGAAGGA  | 0.612 |                 |
| - | 9  | 1179    | cfj.2_Intron PRDM    | NM_001098173 | NP_001091643 | Q9NQW5 | PRDM7_HUMAN |                             | 1     | CCCCATACCAG  | 0.522 |                 |
| - | 2  | 765     | d.1_Missense_Mu      | NM_017575    | NP_060045    | Q86US8 | EST1A_HUMAN | n with telomeric DNA.       | 4     | CCGGCTCCCG   | 0.627 |                 |
| - | 23 | 3316    | .R1094Q ANKFY1       | NM_016376    | NP_057460    | Q9P2R3 | ANFY1_HUMAN |                             | 3     | GCAGTCGGAAC  | 0.562 |                 |
| + | 8  | 1523    | jhe.2_Missense_M     | NM_000937    | NP_000928    | P24928 | RPB1_HUMAN  |                             | 1     | CTTGCGTTTCC  | 0.552 |                 |
| - | 8  | 993     | n_p.R135G TP53_      | NM_001126112 | NP_001119584 | P04637 | P53_HUMAN   | K1 (By simil.GRNS(2))p.G;   | 22245 | GTTCCTGCCCA  | 0.522 | rs55832599      |
| + | 6  | 1222    | LK_uc010cri.1_RN     | NM_016231    | NP_057315    | Q9UBE8 | NLK_HUMAN   | rotein kinase.              | 3     | AGGACGAAGAA  | 0.413 |                 |
| - | 7  | 877     | i_p.R58Q CORO6_      | NM_032854    | NP_116243    | Q6QEF8 | CORO6_HUMAN | WD 5.                       | 0     | AGTACCGAATG  | 0.607 |                 |
| + | 3  | 230     | _p.G73R MLLT6_u      | NM_005937    | NP_005928    | P55198 | AF17_HUMAN  |                             | 6     | AAGACGGGGCA  | 0.597 |                 |
| - | 5  | 926     |                      | NM_181535    | NP_853513    | Q7Z3Y7 | K1C28_HUMAN | Rod. Coil 2.                | 1     | GCAGCGAGGCG  | 0.652 |                 |
| - | 1  | 296_297 |                      | NM_033059    | NP_149048    | Q9BYQ6 | KR411_HUMAN | C-[GIKRQVHEL]- [SPTR]-[     | 0     | TGGGGCTTGAC  | 0.446 | 375721;rs425755 |
| - | 2  | 1043    | _p.R215W HOXB        | NM_002146    | NP_002137    | P14651 | HXB3_HUMAN  | Homeobox.                   | 0     | AGCCCGGCACA  | 0.632 |                 |
| - | 5  | 639     |                      | NM_018509    | NP_060979    | Q96AG4 | LR59_HUMAN  | ytoplasmic (Potential).     | 1     | CCAGCCGCCGC  | 0.532 |                 |
| - | 8  | 3841    | _p.A629T RNF43_      | NM_017763    | NP_060233    | Q68DV7 | RNF43_HUMAN | ytoplasmic (Potential).     | 1     | GGAGCGGTCAA  | 0.632 |                 |
| + | 4  | 2468    | p.S623N TNRC6C       | NM_018996    | NP_061869    | Q9HCJ0 | TNR6C_HUMAN | on with argonaute family pr | 2     | TGACAGTAATAC | 0.532 |                 |
| + | 30 | 4379    | i_p.V1034I RPTOf     | NM_020761    | NP_065812    | Q8N122 | RPTOR_HUMAN | WD 4.                       | 6     | TCCGGCTCTACC | 0.617 |                 |
| + | 3  | 569     |                      | NM_032048    | NP_114437    | Q9BXX0 | EMIL2_HUMAN |                             | 3     | GCCTCGAAACA  | 0.512 | rs147386217     |
| - | 1  | 458     | DLGAP1_uc002kn       | NM_004746    | NP_004737    | O14490 | DLGP1_HUMAN |                             | 4     | GCTGCGGTGCT  | 0.677 |                 |

|   |    |       |                    |              |              |        |              |                                |    |               |       |             |
|---|----|-------|--------------------|--------------|--------------|--------|--------------|--------------------------------|----|---------------|-------|-------------|
| + | 19 | 3394  | 192_uc002kru.2_F   | NM_032142    | NP_115518    | E9PF99 | E9PF99_HUMAN |                                | 5  | ACATTATCATCTA | 0.373 |             |
| + | 7  | 716   | L3_uc002kxq.2_5'   | NM_030632    | NP_085135    | Q9C0F0 | ASXL3_HUMAN  |                                | 3  | AAATCTCCCACTC | 0.318 |             |
| - | 2  | 1410  | p.R474H ZBTB7C     | NM_001039360 | NP_001034449 | A1YPR0 | ZBT7C_HUMAN  | type 4; degenerate.            | 1  | TGTGGCGGTGC   | 0.607 | rs141739519 |
| - | 10 | 1423  | ec.1_Missense_Mu   | NM_001080467 | NP_001073936 | Q9ULV0 | MYO5B_HUMAN  | rosin head-like.               | 5  | CTTGCGATGAC   | 0.577 |             |
| + | 13 | 2986  | 1_3'UTR CTDP1_u    | NM_004715    | NP_004706    | Q9Y5B0 | CTDP1_HUMAN  |                                | 0  | AGGCCGACGAG   | 0.652 |             |
| + | 4  | 452   | wq.2_Missense_M    | NM_024967    | NP_079243    | Q9HAH1 | ZN556_HUMAN  |                                | 3  | TAAACGTGGAA   | 0.373 |             |
| + | 14 | 1775  | ij.1_RNA NCLN_uc   | NM_020170    | NP_064555    | Q969V3 | NCLN_HUMAN   | ical; (Potential).             | 0  | CCTACGTGGCT   | 0.672 |             |
| - | 10 | 998   | p.P301S STAP2_u    | NM_001013841 | NP_001013863 | Q9UGK3 | STAP2_HUMAN  | Pro-rich.                      | 1  | TGGGGGCAGTG   | 0.597 | rs139216713 |
| - | 3  | 2836  | v4_uc010dub.1_5'   | NM_001080400 | NP_001073869 | Q96Q06 | PLIN4_HUMAN  | roximate tandem repeat. 2f     | 0  | CTTAGCGCCAC   | 0.592 |             |
| + | 7  | 1026  | mgv.3_Missense_I   | NM_020902    | NP_065953    | Q9P1Y5 | CAMP3_HUMAN  | CH.                            | 1  | TGGCCGAGTTG   | 0.662 |             |
| - | 5  | 36092 |                    | NM_024690    | NP_078966    | Q8WXI7 | MUC16_HUMAN  | xtracellular (Potential).      | 57 | TTGGACTCACT   | 0.478 |             |
| - | 1  | 7184  |                    | NM_024690    | NP_078966    | Q8WXI7 | MUC16_HUMAN  | ch. Extracellular (Potential). | 57 | TGGGGGAAGTG   | 0.473 |             |
| - | 4  | 725   | 709_uc002mtx.3_I   | NM_144976    | NP_659413    | Q8TBZ8 | ZN564_HUMAN  | C2H2-type 3.                   | 1  | CATTCCGGACAT  | 0.433 |             |
| - | 3  | 590   | nse_Mutation_p.T   | NM_032301    | NP_115677    | Q5XUX1 | FBXW9_HUMAN  | WD 1.                          | 1  | ACTCCGTCGCC   | 0.557 |             |
| + | 8  | 2081  | p.E617K SYDE1_u    | NM_033025    | NP_149014    | Q6ZW31 | SYDE1_HUMAN  |                                | 2  | ACAGCGAGGAC   | 0.642 |             |
| - | 10 | 1285  | p.G29E ILVBL_uc    | NM_006844    | NP_006835    | A1L0T0 | ILVBL_HUMAN  |                                | 2  | GGCTTCCAGAA   | 0.557 |             |
| + | 3  | 468   |                    | NM_024074    | NP_076979    | Q9H6F2 | TM38A_HUMAN  | lasmic (Potential).            | 3  | GGTCCGAGTCC   | 0.527 |             |
| + | 12 | 1636  | se_Mutation_p.A2z  | NM_173544    | NP_775815    | Q86XR2 | NIBL2_HUMAN  |                                | 0  | ACCAGGCTGCC   | 0.637 |             |
| - | 4  | 827   | pc.1_Missense_M    | NM_001076675 | NP_001070143 | Q68DY1 | ZN626_HUMAN  |                                | 1  | GTTTCTCTCCA   | 0.393 |             |
| + | 2  | 903   | p.P336L ZNF493     | NM_175910    | NP_787106    | Q6ZR52 | ZN493_HUMAN  | ype 7; degenerate.             | 1  | AACCCCTACTA   | 0.348 | rs142651314 |
| - | 4  | 1111  | rj.1_Missense_Mu   | NM_003430    | NP_003421    | Q05481 | ZNF91_HUMAN  | C2H2-type 7.                   | 0  | AAGAACGGCTA   | 0.393 | rs410211    |
| + | 14 | 1298  |                    | NM_015302    | NP_056117    | O94927 | HAUS5_HUMAN  |                                | 0  | GTGCCGAGGCC   | 0.632 |             |
| - | 2  | 233   | uu.1_Missense_Mu   | NM_172139    | NP_742151    | Q8IZI9 | IL28B_HUMAN  |                                | 0  | CCTGGGAAGA    | 0.637 |             |
| - | 5  | 1534  | mv.2_Missense_N    | NM_001005851 | NP_001005851 | Q9Y6R6 | Z780B_HUMAN  | C2H2-type 12.                  | 2  | TATGTCGAGCA   | 0.408 |             |
| + | 5  | 1053  | 2F1_uc010xvw.1_I   | NM_052848    | NP_443080    | Q96F63 | CCD97_HUMAN  |                                | 0  | ACCCCGACTTC   | 0.612 |             |
| - | 4  | 842   | ig.1_Intron PSG3   | NM_021016    | NP_066296    | Q16557 | PSG3_HUMAN   |                                | 2  | GCTTCGCTGTG   | 0.502 |             |
| - | 2  | 472   | se_Mutation_p.R11  | NM_002781    | NP_002772    | Q15238 | PSG5_HUMAN   | g-like V-type.                 | 3  | CTTCCCGGGTG   | 0.433 |             |
| - | 11 | 1552  | idp.1_Missense_M   | NM_004819    | NP_004810    | Q92797 | SYMPK_HUMAN  |                                | 1  | CCACGGGGGTG   | 0.607 |             |
| + | 3  | 410   | X_uc010elm.1_RI    | NM_000554    | NP_000545    | O43186 | CRX_HUMAN    | Homeobox.                      | 2  | TGCCCGTGAAG   | 0.632 |             |
| + | 11 | 1602  | p.D348N PPPIA3     | NM_003660    | NP_003651    | O75145 | LIPA3_HUMAN  | Potential.                     | 1  | TGAACGATGAC   | 0.642 |             |
| + | 1  | 248   | P2A1_uc002ppo.2    | NM_014203    | NP_055018    | O95782 | AP2A1_HUMAN  |                                | 2  | GGGGGCTCGCG   | 0.697 |             |
| - | 5  | 921   | ij77_uc010ydf.1_5' | NM_023074    | NP_075562    | Q9BS31 | ZN649_HUMAN  | C2H2-type 2.                   | 3  | CTGTACTTCTTG  | 0.483 |             |
| + | 6  | 1161  |                    | NM_001099694 | NP_001093164 | Q96N58 | ZN578_HUMAN  | C2H2-type 3.                   | 0  | CCATCGTAGATC  | 0.433 |             |
| + | 4  | 2891  | dw.1_Missense_M    | NM_138374    | NP_612383    | Q96IR2 | ZN845_HUMAN  | C2H2-type 26.                  | 0  | CTTCCGTCACA   | 0.363 | rs150688663 |
| + | 4  | 2950  | dw.1_Missense_M    | NM_138374    | NP_612383    | Q96IR2 | ZN845_HUMAN  | C2H2-type 27.                  | 0  | TACAAGTGTAATC | 0.348 |             |
| - | 6  | 1060  | ILRA3_uc010erk.2   | NM_006865    | NP_006856    | Q8N6C8 | LIRA3_HUMAN  | like C2-type 4.                | 1  | GGCCCGCCCGC   | 0.627 |             |
| - | 2  | 908   | p.R206* ZBTB45     | NM_032792    | NP_116181    | Q96K62 | ZBT45_HUMAN  |                                | 0  | ACCTCGGTCACTC | 0.677 |             |
| - | 2  | 194   | p.G71V PDIA6_u     | NM_005742    | NP_005733    | Q15084 | PDIA6_HUMAN  |                                | 0  | TACAGACCATTCA | 0.413 |             |
| - | 1  | 1274  | F3C_uc010ykr.1_N   | NM_002254    | NP_002245    | O14782 | KIF3C_HUMAN  | inesin-motor.                  | 4  | GGGTGCTGCC    | 0.567 |             |
| - | 7  | 1105  | R113_uc010eyk.1    | NM_001145168 | NP_001138640 | Q8IZF5 | GP113_HUMAN  | ellular (Potential).           | 4  | CCAGGCCCGCG   | 0.632 |             |
| + | 5  | 641   | R144Q SEMA4F_u     | NM_004263    | NP_004254    | O95754 | SEM4F_HUMAN  | tracellular (Potential).       | 4  | TGAGCGGTGAG   | 0.512 |             |
| + | 20 | 2975  | nse_Mutation_p.K2  | NM_144992    | NP_659429    | Q502W6 | VVA3B_HUMAN  |                                | 6  | CAAATAAGATGA  | 0.418 |             |
| + | 21 | 2481  | ion_p.T805M MAP    | NM_145687    | NP_663720    | O95819 | M4K4_HUMAN   |                                | 4  | TGAAACGGAATC  | 0.478 |             |
| + | 12 | 3257  |                    | NM_198581    | NP_940983    | P61129 | ZC3H6_HUMAN  |                                | 4  | CACACGGTTCA   | 0.393 |             |
| + | 15 | 3701  | cp.2_Missense_Mu   | NM_019014    | NP_061887    | Q9H9Y6 | RPA2_HUMAN   |                                | 1  | AGATGGAACGG   | 0.507 |             |
| + | 2  | 1254  | p.R261C TMEM1      | NM_001105198 | NP_001098668 | Q53S58 | TM177_HUMAN  |                                | 1  | CCCTGCGCAGT   | 0.592 | rs114786834 |
| - | 3  | 687   |                    | NM_001099771 | NP_001093241 | A5A3E0 | POTEF_HUMAN  |                                | 5  | ATCTTGTTCTCTG | 0.607 |             |

|   |    |         |                    |              |              |        |             |                                |    |               |       |
|---|----|---------|--------------------|--------------|--------------|--------|-------------|--------------------------------|----|---------------|-------|
| - | 81 | 12516   | :2_Missense_Mut    | NM_004543    | NP_004534    | P20929 | NEBU_HUMAN  | Nebulin 112.                   | 20 | GCACATCGCTCTC | 0.493 |
| - | 27 | 3766    | o.P1233S LY75_uc   | NM_002349    | NP_002340    | O60449 | LY75_HUMAN  | cellular (Potential).          | 0  | AACTGGTTTGA   | 0.328 |
| + | 48 | 3770    |                    | NM_000090    | NP_000081    | P02461 | CO3A1_HUMAN |                                | 13 | TTGCCCCGATT   | 0.498 |
| - | 20 | 3226    |                    | NM_018897    | NP_061720    | Q8WXX0 | DYH7_HUMAN  | n (By similarity).             | 12 | TCAGCCTTTCC   | 0.299 |
| - | 40 | 6658    | vfh.2_Intron FN1_u | NM_212482    | NP_997647    | P02751 | FINC_HUMAN  | trand 3 (CS-3) (V region).     | 13 | GACCAGAAAGTG  | 0.527 |
| - | 14 | 2212    |                    | NM_005381    | NP_005372    | P19338 | NUCL_HUMAN  | g/Gly/Phe-rich.                | 3  | TCCTCGGAAGC   | 0.517 |
| + | 5  | 755     | 'P_uc002vsr.2_5'F  | NM_001632    | NP_001623    | P05187 | PPB1_HUMAN  |                                | 1  | CGTGCCTGCCT   | 0.672 |
| - | 41 | 9262    | zrj.1_Missense_M   | NM_004369    | NP_004360    | P12111 | CO6A3_HUMAN | ype-III. Nonhelical region.    | 18 | CTTACCGGACA   | 0.473 |
| - | 2  | 762_763 | oc.1_Missense_Mi   | NM_001005853 | NP_001005853 | Q61FH4 | OR6B2_HUMAN | Name=6; (Potential).           | 0  | CAGGTAGAGAAC  | 0.579 |
| + | 7  | 637     | gca.1_Missense_A   | NM_130811    | NP_570824    | P60880 | SNP25_HUMAN | coiled-coil homology 2.        | 2  | VTGCCCGAGAAA  | 0.458 |
| - | 5  | 635     | wtu.2_Missense_A   | NM_178312    | NP_842564    | Q9BX51 | GGTL1_HUMAN |                                | 1  | CGTGACGTTGG   | 0.622 |
| - | 17 | 2820    | _p.T898M PTPRT_    | NM_007050    | NP_008981    | O14522 | PTPRT_HUMAN | lasmic (Potential).            | 20 | VTCTGCGTGATG  | 0.572 |
| - | 5  | 776     |                    | NM_005560    | NP_005551    | O15230 | LAMA5_HUMAN | inin N-terminal.               | 3  | ACGTCCGTTCA   | 0.498 |
| - | 3  | 721     | lv.1_Missense_Mu   | NM_033081    | NP_149072    | Q9BTC0 | DIDO1_HUMAN |                                | 6  | ACTATCGGAGG   | 0.572 |
| + | 2  | 734     | .1_Intron C21orf29 | NM_198689    | NP_941962    | P60409 | KR107_HUMAN | peats of C-C-X(3). 18.         | 0  | AGCCCGTCTGC   | 0.662 |
| - | 2  | 1274    | f57_uc002ziw.2_5'  | NM_003906    | NP_003897    | O60318 | MCM3A_HUMAN |                                | 5  | GCGCCGGAGTT   | 0.507 |
| - | 36 | 4259    | sy.3_Missense_Mu   | NM_058004    | NP_477352    | P42356 | PI4KA_HUMAN |                                | 4  | CTTACGCAGCC   | 0.512 |
| - | 2  | 1458    | 70_uc002zxr.1_5'F  | NM_021916    | NP_068735    | Q9UC06 | ZNF70_HUMAN |                                | 2  | CTTCTCGCCAG   | 0.572 |
| + | 11 | 1367    | _C2A11_uc011ajc.   | NM_001024938 | NP_001020109 | Q9BYW1 | GTR11_HUMAN | lame=11; (Potential).          | 1  | GGTCGGCCTGG   | 0.642 |
| - | 2  | 1018    | rb.2_Missense_Mt   | NM_001051    | NP_001042    | P32745 | SSR3_HUMAN  | lasmic (Potential).            | 1  | TGAAGCGGTAG   | 0.617 |
| + | 2  | 1222    | xy.2_Missense_Mi   | NM_002409    | NP_002400    | Q09327 | MGAT3_HUMAN | lenal (Potential).             | 0  | CGTCCTTTTCC   | 0.642 |
| + | 21 | 2663    | issense_Mutation_  | NM_152513    | NP_689726    | Q5TIA1 | MEI1_HUMAN  |                                | 2  | TGGGCGGTCTT   | 0.567 |
| + | 2  | 1940    |                    | NM_001137674 | NP_001131146 | A6NHJ4 | ZN860_HUMAN | 2H2-type 9.                    | 1  | CCTTCCATCACA  | 0.418 |
| - | 13 | 7315    |                    | NM_014831    | NP_055646    | O15050 | TRNK1_HUMAN |                                | 2  | TTAAGCGGGTC   | 0.512 |
| - | 1  | 643     | _p.P127S MST1R_    | NM_002447    | NP_002438    | Q04912 | RON_HUMAN   | ilar (Potential). Sema.        | 6  | CGCGGGATCCA   | 0.687 |
| + | 5  | 669     | lg.1_Missense_Mt   | NM_002070    | NP_002061    | P04899 | GNAI2_HUMAN |                                | 3  | GACCACGGGGA   | 0.592 |
| + | 4  | 1536    | o.3_5'UTR GRM2_    | NM_000839    | NP_000830    | Q14416 | GRM2_HUMAN  | cellular (Potential).          | 1  | CCTTTCGCCCA   | 0.542 |
| - | 4  | 428     | d.2_Missense_Mu    | NM_017442    | NP_059138    | Q9NR96 | TLR9_HUMAN  |                                | 4  | GCATTCGCTCC   | 0.607 |
| - | 1  | 774     | _p.R83H MAGI1_     | NM_001033057 | NP_001028229 | Q96QZ7 | MAGI1_HUMAN | PDZ 1.                         | 6  | CATAGCGGGGC   | 0.716 |
| - | 9  | 609     | bfy.1_Missense_M   | NM_003968    | NP_003959    | Q8TBC4 | UBA3_HUMAN  | with UBE2M N-terminus.         | 1  | CAAAGGGACAAT  | 0.423 |
| - | 6  | 843     | AM86D_uc003dpc     | NR_024241    |              |        |             |                                | 0  | ACCTGCTGCAAT  | 0.597 |
| - | 29 | 2496    | ul.2_Missense_Mu   | NM_015429    | NP_056244    | Q7Z7G0 | TARSH_HUMAN | p.R805Q(1)                     | 4  | VTGATCGCACAT  | 0.458 |
| - | 16 | 3329    |                    | NM_015103    | NP_055918    | Q9Y4D7 | PLXD1_HUMAN | ir (Potential). IPT/TIG 3.     | 1  | GCGGGGGGAC    | 0.667 |
| - | 7  | 2195    | olc.1_Missense_M   | NM_001017395 | NP_001017395 | Q94876 | TMCC1_HUMAN | Potential.                     | 1  | GCTGTGCAGC    | 0.572 |
| - | 3  | 866     |                    | NM_001040100 | NP_001035189 | Q8NFR3 | SSPTB_HUMAN | lenal (Potential).             | 0  | TAGATCGTCCC   | 0.428 |
| + | 4  | 546     | _p.A83T ACTL6A_    | NM_004301    | NP_004292    | Q96019 | ACL6A_HUMAN |                                | 1  | CAGAGGCACCG   | 0.323 |
| - | 6  | 866     | _p.L223F ALG3_u    | NM_005787    | NP_005778    | Q92685 | ALG3_HUMAN  |                                | 0  | TGGGAGGAAGC   | 0.637 |
| + | 18 | 2833    | Mutation_p.R839C   | NM_198241    | NP_937884    | Q04637 | IF4G1_HUMAN | 3/EIF4A-binding.               | 7  | GAGGACGCCTG   | 0.488 |
| + | 13 | 2946    |                    | NM_004443    | NP_004434    | P54753 | EPHB3_HUMAN | Potential). Protein kinase.    | 11 | GAGAGCGACCC   | 0.567 |
| + | 13 | 2058    | o.T380M TBC1D14    | NM_001113361 | NP_001106832 | Q9P2M4 | TBC14_HUMAN |                                | 2  | GCCACGATCC    | 0.607 |
| + | 19 | 2545    | owi.1_Missense_M   | NM_020777    | NP_065828    | Q96PQ0 | SORC2_HUMAN | umenal (Potential).            | 2  | VTCTACCGCTG   | 0.522 |
| + | 1  | 4105    | p.A986T PCDH7_u    | NM_002589    | NP_002580    | O60245 | PCDH7_HUMAN | lasmic (Potential).            | 4  | TGGGAGCAGGA   | 0.443 |
| + | 21 | 2686    | p.G718R LIMCH1_    | NM_014988    | NP_055803    | Q9UPQ0 | LIMC1_HUMAN |                                | 4  | TCCAGGGAGATC  | 0.403 |
| + | 4  | 805     | Y MUC7_uc003hfj.:  | NM_001145006 | NP_001138478 | Q8TAX7 | MUC7_HUMAN  | 1. Thr-rich.                   | 4  | ACACCTTCTGCA  | 0.522 |
| + | 32 | 5357    | iek.2_Missense_M   | NM_015312    | NP_056127    | Q2LD37 | K1109_HUMAN |                                | 12 | GAACAGGTAAG   | 0.373 |
| + | 9  | 2193    | o.G642R GAB1_uc    | NM_002039    | NP_002030    | Q13480 | GAB1_HUMAN  |                                | 4  | ATGGAGGAAGC   | 0.438 |
| - | 2  | 1113    |                    | NM_145720    | NP_663772    | Q8IY51 | TIGD4_HUMAN | e. H-T-H motif (By similarity) | 1  | GTAGACGTAACAT | 0.383 |

rs148318789

rs17182566

rs1808125

|   |    |         |                   |              |              |        |                         |                            |    |               |       |             |
|---|----|---------|-------------------|--------------|--------------|--------|-------------------------|----------------------------|----|---------------|-------|-------------|
| + | 12 | 2001    | p.E154K ETFDH_    | NM_004453    | NP_004444    | Q16134 | ETFD_HUMAN              |                            | 3  | GGCCCGAGCAG   | 0.363 |             |
| - | 10 | 5068    |                   | NM_005245    | NP_005236    | Q14517 | FAT1_HUMAN (Potential). | Cadherin 14.               | 12 | TTACTTCGATCT/ | 0.368 |             |
| + | 17 | 2767    | 3jdk.1_Missense_I | NM_139056    | NP_620687    | Q8TE57 | ATS16_HUMAN             | SP type-1 2.               | 8  | CCATCGTGCGC   | 0.627 |             |
| - | 4  | 441     |                   | NM_032286    | NP_115662    | Q9BTT4 | MED10_HUMAN             |                            | 1  | AAGGCGGGTGA   | 0.517 |             |
| + | 11 | 2068    |                   | NM_020227    | NP_064612    | Q9NQV7 | PRDM9_HUMAN             | 2H2-type 5.                | 6  | GAGGAGACACA   | 0.612 | rs112192848 |
| + | 4  | 923     |                   | NM_002439    | NP_002430    | P20585 | MSH3_HUMAN              | action with EXO1.          | 4  | ACAAACGGTCC/  | 0.378 |             |
| - | 2  | 1288    |                   | NM_203406    | NP_981951    | Q68D91 | MBLC2_HUMAN             |                            | 0  | TTACACGTAGAC  | 0.323 | rs138820203 |
| + | 64 | 12971   | _Mutation_p.S199E | NM_032119    | NP_115495    | Q8WXG9 | GPR98_HUMAN             | cellular (Potential).      | 16 | TTCCAGTGGAG   | 0.438 |             |
| + | 74 | 15724   | p.V2916I GPR98_   | NM_032119    | NP_115495    | Q8WXG9 | GPR98_HUMAN             | cellular (Potential).      | 16 | CCACTGTAACT/  | 0.463 |             |
| - | 2  | 550     | cx1.1_Missense_I  | NM_178450    | NP_848545    | Q86UD3 | MARH3_HUMAN             |                            | 1  | CTAGGCTGCCA/  | 0.587 |             |
| - | 15 | 2417    | iv.2_Missense_Mu  | NM_001999    | NP_001990    | P35556 | FBN2_HUMAN              | 10; calcium-binding.       | 15 | ATTCATCAACATC | 0.502 |             |
| - | 8  | 1479    | iv.2_Missense_Mu  | NM_001999    | NP_001990    | P35556 | FBN2_HUMAN              | 5; calcium-binding.        | 15 | ATCCACGTGGAC  | 0.438 | rs112428886 |
| - | 5  | 766     |                   | NM_015082    | NP_055897    | Q6MZW2 | FSTL4_HUMAN             | EF-hand.                   | 2  | CCCTGAACAGA/  | 0.557 |             |
| - | 4  | 624     | lbp.2_Missense_M  | NM_004598    | NP_004589    | Q08629 | TICN1_HUMAN             | Kazal-like.                | 1  | CATGGCTGACT/  | 0.473 |             |
| + | 3  | 2887    | i826R PCDHA7_uc   | NM_018899    | NP_061722    | Q9Y5I4 | PCDC2_HUMAN             | X-X-X-P. Cytoplasmic (Pote | 4  | AGGCTGGCATT   | 0.498 |             |
| + | 1  | 1103    | DHGA4_uc003ljq.   | NM_018919    | NP_061742    | Q9Y5G7 | PCDG6_HUMAN             | Extracellular (Potential). | 1  | CGCCCTTTTTC/  | 0.428 |             |
| - | 3  | 349     | 3mbs.1_Missense_  | NM_001017995 | NP_001017995 | A1X283 | SPD2B_HUMAN             | PX.                        | 4  | CATGGGAAATTI  | 0.463 |             |
| - | 11 | 1546    | p.R528W CCHCR     | NM_019052    | NP_061925    | Q8TD31 | CCHCR_HUMAN             |                            | 1  | ACCCCGAATGG   | 0.612 |             |
| + | 4  | 835     | p.R208H MICB_u    | NM_005931    | NP_005922    | Q29980 | MICB_HUMAN              | Extracellular (Potential). | 0  | CTGGCGTCAGG   | 0.582 |             |
| - | 9  | 3776    |                   | NM_019105    | NP_061978    | P22105 | TENX_HUMAN              | nectin type-III 5.         | 0  | GTACTGGACCA/  | 0.582 |             |
| + | 7  | 1403    | rf.1_Missense_Mu  | NM_002263    | NP_002254    | Q9BW19 | KIFC1_HUMAN             | inesin-motor.              | 0  | GGTCCGCCCTG   | 0.647 |             |
| - | 3  | 554     | l_Intron TMEM151  | NM_182539    | NP_872345    | Q5JU00 | TCTE1_HUMAN             |                            | 4  | AGCAGCGGAGC   | 0.607 | rs151164597 |
| + | 16 | 2846    | k.2_Missense_Mut  | NM_001704    | NP_001695    | O60242 | BAI3_HUMAN              | cellular (Potential).      | 50 | CAACCGATTCCG  | 0.363 |             |
| + | 7  | 793     | f165_uc010kbv.1_I | NM_001031743 | NP_001026913 | Q8IYR0 | CF165_HUMAN             |                            | 1  | TGCCCCGAGCC   | 0.488 | rs142943998 |
| + | 2  | 327     | p.M45V DSE_uc     | NM_001080976 | NP_001074445 | Q9UL01 | DSE_HUMAN               |                            | 1  | CATCCCATGCTG  | 0.542 |             |
| - | 12 | 1705    | .1_Missense_Mute  | NM_003379    | NP_003370    | P15311 | EZRI_HUMAN              | ction with SCYL3.          | 1  | AGCCCGTGGGC   | 0.647 |             |
| + | 5  | 457     | se_Mutation_p.R7E | NM_004906    | NP_004897    | Q15007 | FL2D_HUMAN              |                            | 0  | TAATGCGACTAC  | 0.378 |             |
| + | 2  | 427     | e_Mutation_p.K10  | NM_032448    | NP_115824    | Q96EK7 | F120B_HUMAN             |                            | 1  | GCTCAAGAAC.   | 0.433 |             |
| - | 3  | 270     | kq.2_Missense_Mi  | NM_001080453 | NP_001073922 | Q8N201 | INT1_HUMAN              |                            | 0  | CTTGCGCTCAG.  | 0.647 |             |
| + | 11 | 1382    | p.A119T TTYH3_L   | NM_025250    | NP_079526    | Q9C0H2 | TTYH3_HUMAN             | Name=5; (Potential).       | 0  | TCACAGCCCTC.  | 0.637 |             |
| + | 15 | 2606    | wq.1_Missense_Mi  | NM_032172    | NP_115548    | Q9H9J4 | UBP42_HUMAN             | Pro-rich.                  | 5  | CGATGCGAGCC   | 0.716 |             |
| + | 9  | 1215    | i.2_Missense_Mut  | NM_001134388 | NP_001127860 | Q9NPG8 | ZDHC4_HUMAN             |                            | 2  | CCAGACTACTA/  | 0.577 |             |
| - | 6  | 791_792 |                   | NM_001004320 | NP_001004320 | Q6ZNB7 | ALKMO_HUMAN             |                            | 0  | ACCAAGTTATT   | 0.307 |             |
| + | 18 | 2722    | _Mutation_p.V490A | NM_031449    | NP_113637    | Q8NF64 | ZMIZ2_HUMAN             | Pro-rich.                  | 5  | CAGGCGTGATG/  | 0.677 |             |
| + | 4  | 1558    |                   | NM_001159522 | NP_001152994 | A8MUV8 | ZN727_HUMAN             | 2H2-type 11.               | 0  | CAAAACCTTTAC  | 0.428 |             |
| + | 9  | 1211    | ldp.2_Nonsense_I  | NM_020879    | NP_065930    | Q8IYE0 | CC146_HUMAN             |                            | 2  | GATTTTCGAAAT  | 0.423 |             |
| - | 19 | 2402    | ll.2_RNA POT1_uc  | NM_015450    | NP_056265    | Q9NUX5 | POTE1_HUMAN             |                            | 1  | CCACGGATATG/  | 0.323 |             |
| + | 4  | 535     | p.R32C UBE3C_I    | NM_014671    | NP_055486    | Q15386 | UBE3C_HUMAN             |                            | 5  | TTGATCGCTGT/  | 0.388 |             |
| + | 9  | 1227    | oz.2_Missense_M   | NM_183421    | NP_904357    | Q8TCJ0 | FBX25_HUMAN             |                            | 1  | TCTGTCGGCAC/  | 0.383 |             |
| + | 7  | 1422    | p.Q235* MTMR9_    | NM_015458    | NP_056273    | Q96QG7 | MTMR9_HUMAN             | ularin phosphatase.        | 0  | CACTCCAGGTG.  | 0.483 |             |
| + | 11 | 1292    | p.L279F ADAMDI    | NM_014479    | NP_055294    | O15204 | ADEC1_HUMAN             | ptidase M12B.              | 2  | CATGTCCTTGGT. | 0.388 |             |
| - | 1  | 806     | JRG_uc003xim.1_   | NM_013357    | NP_037489    | Q9UJV8 | PURG_HUMAN              | By similarity.             | 0  | CCCTCTGGGA    | 0.448 |             |
| + | 29 | 6304    |                   | NM_017780    | NP_060250    | Q9P2D1 | CHD7_HUMAN              | Poly-Arg.                  | 9  | GACGGCGGCCT   | 0.537 |             |
| - | 1  | 52      |                   | NM_001010893 | NP_001010893 | Q5PT55 | NTCP5_HUMAN             |                            | 0  | TTGCTTCTTCTAT | 0.299 |             |
| - | 2  | 742_743 |                   | NM_005328    | NP_005319    | Q92819 | HAS2_HUMAN              | lasmic (Potential).        | 15 | TTTTCGGTGCTC  | 0.401 |             |
| - | 5  | 829     | p.A99T MTSS1_     | NM_014751    | NP_055566    | O43312 | MTSS1_HUMAN             | IMD.                       | 1  | PTAAAGCGCTTTI | 0.403 |             |
| - | 14 | 3611    | m135B_uc003yva    | NM_015912    | NP_056996    | Q49AJ0 | F135B_HUMAN             |                            | 9  | CCAGGCCATGG.  | 0.348 |             |

|   |    |      |                    |              |              |        |                                          |    |                 |       |             |
|---|----|------|--------------------|--------------|--------------|--------|------------------------------------------|----|-----------------|-------|-------------|
| - | 5  | 623  | 104N TOP1MT_uc     | NM_052963    | NP_443195    | Q969P6 | TOP1M_HUMAN                              | 1  | ATGGTCGCCAC     | 0.547 |             |
| - | 9  | 805  | zb.2_Missense_Mt   | NM_003313    | NP_003304    | Q13630 | FCL_HUMAN                                | 1  | CGCCTCGGCTG     | 0.667 |             |
| - | 3  | 280  |                    | NM_006664    | NP_006655    | Q9Y4X3 | CCL27_HUMAN                              | 0  | TGCTGCGTTGA     | 0.527 |             |
| - | 18 | 3692 | v2_uc010mos.2_h    | NM_013390    | NP_037522    | Q9UHN6 | TMEM2_HUMAN                              | 2  | GTGCCGGCCCA     | 0.443 |             |
| + | 4  | 1872 | lapq.3_Missense_l  | NM_001145124 | NP_001138596 |        |                                          | 0  | TTTCCCGTATCCA   | 0.547 |             |
| - | 5  | 1173 | p.M306 LPAR1_u     | NM_057159    | NP_476500    | Q92633 | LPAR1_HUMAN Name=7; (Potential).         | 2  | GGGTTTCATGGC    | 0.522 |             |
| + | 3  | 2650 | p.R747C TLR4_uc    | NM_138554    | NP_612564    | O00206 | TLR4_HUMAN mic (Potential). TIR.         | 16 | TGTACCGCCTT     | 0.557 |             |
| - | 1  | 722  |                    | NM_012363    | NP_036495    | Q8NGS0 | OR1N1_HUMAN Name=6; (Potential).         | 3  | GGTGGGAACTG     | 0.547 |             |
| + | 6  | 861  | nse_Mutation_p.E   | NM_002540    | NP_002531    | Q5BJF6 | ODFP2_HUMAN Potential.                   | 1  | ACATCGAGCGC     | 0.582 |             |
| - | 7  | 694  | 50A GBGT1_uc011    | NM_021996    | NP_068836    | Q8N5D6 | GBGT1_HUMAN enal (Potential).            | 0  | ACCCACGCATG     | 0.597 |             |
| + | 3  | 791  |                    | NM_000093    | NP_000084    | P20908 | CO5A1_HUMAN minimal. Laminin G-like.     | 11 | TCTCCCGTCTTC    | 0.592 | rs145757313 |
| - | 9  | 1190 | mez.1_Missense_f   | NM_001130969 | NP_001124441 | Q6X4W1 | NELF_HUMAN                               | 0  | GGCCTCGTCCA     | 0.657 |             |
| - | 7  | 898  | B11_uc010nes.1_l   | NM_080873    | NP_543149    | Q8WXH4 | ASB11_HUMAN SOCS box.                    | 3  | TCGACCGAGAC     | 0.512 |             |
| + | 8  | 5209 | .R1468H NHS_uc     | NM_198270    | NP_938011    | Q6T4R5 | NHS_HUMAN                                | 7  | CGACCGTTCTC     | 0.562 |             |
| - | 11 | 1592 | p.E473K MAP7D2     | NM_152780    | NP_689993    | Q96T17 | MA7D2_HUMAN                              | 3  | TCTCTCGAGAC     | 0.458 |             |
| - | 5  | 482  | KA6_uc011mq.1      | NM_014496    | NP_055311    | Q9UK32 | KS6A6_HUMAN otein kinase 1.              | 8  | TTTGACAATAAAT   | 0.269 |             |
| - | 2  | 212  |                    | NM_001012755 | NP_001012773 | Q5H9E4 | MCAR6_HUMAN                              | 0  | AAGCTCCTTCC     | 0.517 |             |
| + | 2  | 510  |                    | NM_198576    | NP_940978    | O00468 | AGRIN_HUMAN NtA.                         | 3  | GTGTGGAAGGT     | 0.652 |             |
| - | 5  | 1021 | p.R231Q SDF4_u     | NM_016176    | NP_057260    | Q9BRK5 | CAB45_HUMAN EF-hand 3.                   | 2  | TTCCCGGCTG      | 0.672 |             |
| + | 4  | 1348 |                    | NM_152228    | NP_689414    | Q7RTX0 | TS1R3_HUMAN ellular (Potential).         | 0  | GAAACGTGGAC     | 0.667 |             |
| + | 6  | 2033 |                    | NM_152228    | NP_689414    | Q7RTX0 | TS1R3_HUMAN lasmic (Potential).          | 0  | CGGGGGCCCT      | 0.682 |             |
| - | 11 | 1383 | 1_Missense_Muta    | NM_030937    | NP_112199    | Q96S94 | CCNL2_HUMAN                              | 3  | GCAGTCTTGG      | 0.627 |             |
| + | 4  | 719  | 2_uc001agl.1_Miss  | NM_080875    | NP_543151    | Q96AX9 | MIB2_HUMAN                               | 0  | CGCGCCCGTGA     | 0.687 |             |
| + | 12 | 1727 | Mutation_p.G490E   | NM_080875    | NP_543151    | Q96AX9 | MIB2_HUMAN ANK 1.                        | 0  | ACCTGGGCCAG     | 0.662 |             |
| - | 5  | 251  | .S47F CDK11A_uc    | NM_033486    | NP_277021    | P21127 | CD11B_HUMAN                              | 1  | cctcaagggaatccg | 0.179 |             |
| + | 5  | 778  | 1ajt.1_Missense_h  | NM_003820    | NP_003811    | Q92956 | TNR14_HUMAN . Extracellular (Potential). | 1  | GGACACCCTGT     | 0.647 |             |
| + | 4  | 433  | vk.1_Missense_M    | NM_005427    | NP_005418    | O15350 | P73_HUMAN                                | 2  | CGACACCATGTC    | 0.677 |             |
| - | 2  | 1041 |                    | NM_020710    | NP_065761    | Q8N1G4 | LR47_HUMAN                               | 2  | CGCCCCCACA      | 0.652 |             |
| - | 8  | 1170 | AA0562_uc001akz    | NM_014704    | NP_055519    | O60308 | CE104_HUMAN Potential.                   | 0  | CTTCTCCTTGGC    | 0.552 |             |
| - | 3  | 543  | IAA0562_uc001ak    | NM_014704    | NP_055519    | O60308 | CE104_HUMAN                              | 0  | AGCAAAGTAACT    | 0.368 |             |
| + | 2  | 496  | aln.2_Missense_Mi  | NM_001042478 | NP_001035943 | Q9UKB5 | AJAP1_HUMAN ellular (Potential).         | 1  | ACCTGCCCGCC     | 0.572 |             |
| + | 2  | 523  | aln.2_Missense_Mi  | NM_001042478 | NP_001035943 | Q9UKB5 | AJAP1_HUMAN ellular (Potential).         | 1  | CGGGGCCGGAC     | 0.602 |             |
| - | 3  | 167  | me.2_Nonsense_h    | NM_000983    | NP_000974    | P35268 | RL22_HUMAN                               | 0  | AAACTGCTCTC     | 0.408 |             |
| + | 6  | 1301 |                    | NM_031475    | NP_113663    | B1AK53 | ESPN_HUMAN                               | 0  | CTCTCCAACAT     | 0.612 |             |
| + | 3  | 1186 | inv.2_Intron TAS1F | NM_138697    | NP_619642    | Q7RTX1 | TS1R1_HUMAN ellular (Potential).         | 3  | ATGCGGTGGCC     | 0.607 |             |
| + | 2  | 131  | n_p.G3D ZBTB48_    | NM_005341    | NP_005332    | P10074 | ZBT48_HUMAN                              | 0  | GGACGGCTCCT     | 0.622 |             |
| + | 3  | 898  |                    | NM_153812    | NP_722519    | Q86Y18 | PHF13_HUMAN                              | 0  | TACTCCCTCGAC    | 0.587 |             |
| + | 17 | 2442 | p.G757D PER3_u     | NM_016831    | NP_058515    | P56645 | PER3_HUMAN                               | 3  | CACCGGCTCTG     | 0.682 |             |
| + | 17 | 2459 | p.G763R PER3_u     | NM_016831    | NP_058515    | P56645 | PER3_HUMAN                               | 3  | GCAGGGGAGCC     | 0.706 |             |
| + | 17 | 2858 | p.P896S PER3_u     | NM_016831    | NP_058515    | P56645 | PER3_HUMAN Pro-rich.                     | 3  | CACCCCTTCA      | 0.547 |             |
| - | 2  | 351  | F11_uc001apa.1_5   | NM_018948    | NP_061821    | Q9UJM3 | ERRFI_HUMAN                              | 1  | CTGCTCCAGTA     | 0.433 |             |
| - | 20 | 4250 | p.T1147I RERE_u    | NM_012102    | NP_036234    | Q9P2R6 | RERE_HUMAN                               | 2  | GGTCTGTCCGG     | 0.617 |             |
| - | 14 | 2209 | RE_uc010nzx.1_Mi   | NM_012102    | NP_036234    | Q9P2R6 | RERE_HUMAN                               | 2  | GGACGGGTGC      | 0.602 | rs140945349 |
| - | 7  | 1483 | p.R225* RERE_u     | NM_012102    | NP_036234    | Q9P2R6 | RERE_HUMAN BAH.                          | 2  | CTCTCGTTCT      | 0.408 |             |
| - | 5  | 1223 | p.A138V RERE_u     | NM_012102    | NP_036234    | Q9P2R6 | RERE_HUMAN BAH.                          | 2  | AACAGGCCTGG     | 0.547 |             |
| - | 7  | 705  | ii.1_Missense_Mut  | NM_001428    | NP_001419    | P06733 | ENOA_HUMAN sion of c-myc promoter act    | 4  | CTGCTCCAATG     | 0.522 |             |
| + | 17 | 2952 | BE4B_uc010oaj.1_   | NM_001105562 | NP_001099032 | O95155 | UBE4B_HUMAN                              | 4  | AGCCTCCATTT     | 0.418 |             |



|   |    |           |                   |              |              |        |              |                             |     |               |       |
|---|----|-----------|-------------------|--------------|--------------|--------|--------------|-----------------------------|-----|---------------|-------|
| + | 21 | 2181      | 1_p.T634 KIF1B_l  | NM_015074    | NP_055889    | O60333 | KIF1B_HUMAN  |                             | 3   | ACTGGACATTTG  | 0.478 |
| + | 25 | 2601      | qz.2_Missense_Mi  | NM_015074    | NP_055889    | O60333 | KIF1B_HUMAN  |                             | 3   | FGTACTCCCCTT  | 0.448 |
| + | 1  | 98        | _Splice_Site_p.Q  | NM_002631    | NP_002622    | P52209 | 6PGD_HUMAN   |                             | 1   | IGCCCACTGAGT  | 0.701 |
| + | 3  | 247       | _Missense_Mutati  | NM_002631    | NP_002622    | P52209 | 6PGD_HUMAN   |                             | 1   | AAGTGGTGGGT   | 0.507 |
| + | 1  | 192       | .2_Intron APITD1_ | NM_001302    | NP_001293    | O00230 | CORT_HUMAN   |                             | 0   | GATTGGGCTTAA  | 0.522 |
| - | 8  | 1043      | p.W328* C1orf127  | NM_173507    | NP_775778    | B7ZLG7 | B7ZLG7_HUMAN |                             | 1   | GGCCGCCAGGC   | 0.687 |
| - | 9  | 1027      | _p.T326 EXOSC1    | NM_001001998 | NP_001001998 | Q01780 | EXOSX_HUMAN  |                             | 1   | GGCAGGTCAGT   | 0.453 |
| - | 1  | 103       | 1_p.T18N EXOSC1   | NM_001001998 | NP_001001998 | Q01780 | EXOSX_HUMAN  |                             | 1   | ATTTGGTTGCG   | 0.672 |
| - | 55 | 7536      | sc.2_Missense_ML  | NM_004958    | NP_004949    | P42345 | MTOR_HUMAN   | PI3K/PI4K.                  | 29  | ITGGTCCCCGTT  | 0.423 |
| + | 4  | 946       | DR_uc001asd.2_In  | NM_021146    | NP_066969    | O43827 | ANGL7_HUMAN  | rogen C-terminal.           | 0   | AGTATAGCCACT  | 0.522 |
| - | 26 | 4061      |                   | NM_004958    | NP_004949    | P42345 | MTOR_HUMAN   |                             | 29  | CCTGGCCATCG   | 0.517 |
| + | 13 | 2795      | asi.1_Missense_M  | NM_020780    | NP_065831    | Q9P2K9 | PTHD2_HUMAN  | ellular (Potential).        | 7   | FGACCGCTTGTA  | 0.587 |
| + | 17 | 3460      |                   | NM_020780    | NP_065831    | Q9P2K9 | PTHD2_HUMAN  | ellular (Potential).        | 7   | ACGGGGCAGTG   | 0.672 |
| + | 20 | 3940      |                   | NM_020780    | NP_065831    | Q9P2K9 | PTHD2_HUMAN  | ellular (Potential).        | 7   | ITGCCCCCCAC   | 0.652 |
| + | 17 | 1864      | p.G300D CLCN6_l   | NM_001286    | NP_001277    | P51797 | CLCN6_HUMAN  | smic (By similarity).       | 0   | GCGAGGCGTGC   | 0.468 |
| - | 2  | 1474      | 1atl.1_Missense_M | NM_138346    | NP_612355    | Q8IYS2 | K2013_HUMAN  | ellular (Potential).        | 1   | .GGTCAGAGAGC  | 0.647 |
| + | 17 | 1943      | bb.1_Missense_Mi  | NM_000302    | NP_000293    | Q02809 | PLOD1_HUMAN  |                             | 3   | ITGCTGGAGTAC  | 0.597 |
| + | 9  | 1388      | ri.2_Missense_Mu  | NM_014874    | NP_055689    | O95140 | MFN2_HUMAN   | lasmic (Potential).         | 1   | CAACGCCAGGA   | 0.537 |
| + | 13 | 1756      | ri.2_Missense_Mu  | NM_014874    | NP_055689    | O95140 | MFN2_HUMAN   | lasmic (Potential).         | 1   | CAATGGCCGAG   | 0.502 |
| + | 15 | 1807_1808 | 01atr.2_Missense_ | NM_001243    | NP_001234    | P28908 | TNR8_HUMAN   | lasmic (Potential).         | 5   | FGGGGACCGTG   | 0.649 |
| + | 19 | 3527      | p.S1129F VPS13C   | NM_015378    | NP_056193    | Q5THJ4 | VP13D_HUMAN  |                             | 5   | AAAAATCCTTTC  | 0.353 |
| + | 19 | 4379      | p.G1413E VPS13C   | NM_015378    | NP_056193    | Q5THJ4 | VP13D_HUMAN  |                             | 5   | GGCGGGAGATG   | 0.473 |
| + | 57 | 11282     | 313D_uc001atx.2_  | NM_015378    | NP_056193    | Q5THJ4 | VP13D_HUMAN  |                             | 5   | ITGGGATTTCC   | 0.502 |
| - | 2  | 110       |                   | NM_001009611 | NP_001009611 | O60810 | PRAM4_HUMAN  |                             | 1   | GCAAGCTCCAG   | 0.562 |
| - | 4  | 1241      |                   | NM_001099854 | NP_001093324 | Q5SWL7 | PRA14_HUMAN  |                             | 0   | ICTAGGTGTGG   | 0.552 |
| + | 8  | 2100      | od.1_Missense_M   | NM_012231    | NP_036363    | Q13029 | PRDM2_HUMAN  |                             | 1   | AGCAGGGTTAA   | 0.498 |
| + | 7  | 681       |                   | NM_033440    | NP_254275    | P08217 | CEL2A_HUMAN  | eptidase S1.                | 2   | GCGGGCCACTG   | 0.577 |
| + | 3  | 161       |                   | NM_015849    | NP_056933    | P08218 | CEL2B_HUMAN  | eptidase S1.                | 1   | ITCTCCCTGCAG  | 0.527 |
| + | 4  | 662       | e_Mutation_p.W1E  | NM_015291    | NP_056106    | Q9Y2G8 | DJC16_HUMAN  | (Potential), Thioredoxin.   | 3   | ITGTGTGGAAG   | 0.328 |
| + | 6  | 914       | e_Mutation_p.G26I | NM_015291    | NP_056106    | Q9Y2G8 | DJC16_HUMAN  | lasmic (Potential).         | 3   | CTCTGGCTGGC   | 0.343 |
| + | 15 | 2164      | e_Mutation_p.P37  | NM_015291    | NP_056106    | Q9Y2G8 | DJC16_HUMAN  | ellular (Potential).        | 3   | CCAATCCCAAC   | 0.438 |
| + | 4  | 616       | ense_Mutation_p.C | NM_017556    | NP_060026    | Q8WUP2 | FBL1_HUMAN   | 1-binding, Pro-rich.        | 1   | GGCGGGGAGGC   | 0.677 |
| + | 10 | 1491      | LIM1_uc001axh.1   | NM_017556    | NP_060026    | Q8WUP2 | FBL1_HUMAN   | inding, LIM zinc-binding 3. | 1   | ACCAAGGCTGC   | 0.637 |
| + | 2  | 533       | N_uc010obp.1_5F   | NM_015001    | NP_055816    | Q96T58 | MINT_HUMAN   | By similarity.              | 15  | AGGAGGTGGTG   | 0.517 |
| - | 1  | 865       | R101K HSPB7_ucC   | NM_014424    | NP_055239    | Q9UBY9 | HSPB7_HUMAN  | ation to SC35 splicing spec | 0   | AACTTCTCTCC   | 0.567 |
| + | 19 | 2052      | .V657M CLCNKA_    | NM_004070    | NP_004061    | P51800 | CLCKA_HUMAN  | CBS 2.                      | 1   | ITCTTCGTGACAT | 0.612 |
| + | 7  | 821       | cd.1_Missense_M   | NM_018090    | NP_060560    | Q9NVZ3 | NECP2_HUMAN  |                             | 0   | ACTTTACCAAT   | 0.572 |
| + | 22 | 3365      | p.A698V CROCC_    | NM_014675    | NP_055490    | Q5TZA2 | CROCC_HUMAN  | Potential.                  | 5   | AGATGCCCAGAC  | 0.642 |
| - | 7  | 459       | zy.2_Missense_M   | NM_002403    | NP_002394    | P55001 | MFAP2_HUMAN  |                             | 0   | GTATGGAGTAG   | 0.622 |
| - | 20 | 2403      | ense_Mutation_p., | NM_022089    | NP_071372    | Q9NQ11 | AT132_HUMAN  | lasmic (Potential).         | 4   | GCAGAGCCTGG   | 0.627 |
| - | 3  | 315       | _p.G42D ATP13A    | NM_022089    | NP_071372    | Q9NQ11 | AT132_HUMAN  | ellular (Potential).        | 4   | IGACTGCCACAG  | 0.652 |
| - | 2  | 222       | 1_p.S11N ATP13A   | NM_022089    | NP_071372    | Q9NQ11 | AT132_HUMAN  | lasmic (Potential).         | 4   | IGCGTGCTGCC   | 0.522 |
| - | 15 | 1811      | m.1_Missense_Mi   | NM_007365    | NP_031391    | Q9Y2J8 | PADI2_HUMAN  |                             | 6   | ITCCTCGTCCA   | 0.597 |
| - | 12 | 1491      | m.1_Missense_Mi   | NM_007365    | NP_031391    | Q9Y2J8 | PADI2_HUMAN  |                             | 6   | CGTGGCCACA    | 0.582 |
| + | 12 | 1478      |                   | NM_016233    | NP_057317    | Q9ULW8 | PADI3_HUMAN  |                             | 2   | ITCCCTGCCCC   | 0.607 |
| + | 6  | 1416      | _p.R271H PAX7_u   | NM_002584    | NP_002575    | P23759 | PAX7_HUMAN   | Homeobox.                   | 203 | ITGGCGTAAGC   | 0.652 |
| - | 3  | 313       | 0090_uc001bbq.2_  | NM_015047    | NP_055862    | Q8N766 | K0090_HUMAN  | ellular (Potential).        | 1   | AGCAGCATGGC   | 0.552 |

|   |    |           |                    |              |              |        |                                           |   |               |       |
|---|----|-----------|--------------------|--------------|--------------|--------|-------------------------------------------|---|---------------|-------|
| - | 8  | 847       | cy.1_Missense_Mt   | NM_201252    | NP_957704    |        |                                           | 0 | CGCGTCCCCGTG  | 0.637 |
| - | 4  | 735       | pk.2_Missense_Mi   | NM_004930    | NP_004921    | P47756 | CAPZB_HUMAN                               | 0 | CCATGGTGACCT  | 0.542 |
| + | 3  | 1455      |                    | NM_000871    | NP_000862    | P50406 | 5HT6R_HUMAN smic (By similarity).         | 1 | AGCGGGCGCTG   | 0.652 |
| + | 2  | 444       |                    | NM_015207    | NP_056022    | Q572D3 | OTUD3_HUMAN OTU.                          | 0 | CGGGAAGATTTT  | 0.438 |
| + | 3  | 523       |                    | NM_015207    | NP_056022    | Q572D3 | OTUD3_HUMAN OTU.                          | 0 | TGCTGGCAATG   | 0.388 |
| + | 2  | 680       |                    | NM_032409    | NP_115785    | Q9BXM7 | PINK1_HUMAN Cytoplasmic (Potential).      | 3 | GAGGCCCAGGT   | 0.602 |
| + | 7  | 1458      | fn.2_Missense_Mt   | NM_032409    | NP_115785    | Q9BXM7 | PINK1_HUMAN Cytoplasmic (Potential).      | 3 | CTACGGCCAGG   | 0.602 |
| - | 8  | 1662      | KIF17_uc009vpx.2   | NM_020816    | NP_065867    | Q9P2E2 | KIF17_HUMAN                               | 4 | CCTGAGTCTTG   | 0.542 |
| - | 15 | 2592      | G499E EIF4G3_1     | NM_003760    | NP_003751    | O43432 | IF4G3_HUMAN (By similarity) MIF4G HE.     | 1 | TAAGTCTGAC    | 0.413 |
| - | 11 | 1841      | p.L249F EIF4G3_1   | NM_003760    | NP_003751    | O43432 | IF4G3_HUMAN                               | 1 | CTTTAAGCTAAA  | 0.358 |
| + | 5  | 868       | jb.2_Missense_Mt   | NM_032264    | NP_115640    | Q9H094 | NBPF3_HUMAN Potential.                    | 2 | AGGGAGAGATG   | 0.527 |
| + | 1  | 240       |                    | NM_001013693 | NP_001013715 | Q5SZ11 | LRAD2_HUMAN                               | 0 | GGGGGCGAGCCG  | 0.577 |
| - | 26 | 3394_3395 | id.2_Missense_Mt   | NM_005529    | NP_005520    | P98160 | PGBM_HUMAN iinin IV type A 2.             | 9 | GCGGGGTCTCTC  | 0.569 |
| - | 7  | 662       | itation_p.S208G H  | NM_005529    | NP_005520    | P98160 | PGBM_HUMAN eceptor class A 1.             | 9 | GTAGCTGTGGC   | 0.627 |
| + | 6  | 602       | p.H104Y CDC42_     | NM_001039802 | NP_001034891 | P60953 | CDC42_HUMAN                               | 1 | CTCACCACCTGT  | 0.378 |
| + | 4  | 1340      | p.E277K ZBTB40_    | NM_001083621 | NP_001077090 | Q9NUA8 | ZBT40_HUMAN                               | 1 | AGAAGGAGGTA   | 0.383 |
| + | 8  | 1997      | iqi.1_Missense_Mi  | NM_001083621 | NP_001077090 | Q9NUA8 | ZBT40_HUMAN                               | 1 | GCCCCTGgagaaa | 0.239 |
| + | 11 | 2036      | igf.2_Missense_Mt  | NM_017449    | NP_059145    | P29323 | EPHB2_HUMAN . ATP (By similarity) Proteii | 5 | CAGGGGAGTTTC  | 0.582 |
| - | 3  | 1658      | gu.2_Missense_M    | NM_030634    | NP_085137    | Q9C0F3 | ZN436_HUMAN :2H2-type 11.                 | 1 | TGAAACCTTTTC  | 0.473 |
| - | 3  | 896       | gu.2_Missense_M    | NM_030634    | NP_085137    | Q9C0F3 | ZN436_HUMAN :2H2-type 2.                  | 1 | CCTTTTCCACAT  | 0.438 |
| - | 3  | 832       |                    | NM_004091    | NP_004082    | Q14209 | E2F2_HUMAN Potential.                     | 4 | GCAGCCCCAGC   | 0.627 |
| + | 9  | 660       | A2_uc001bhs.1_3    | NM_007260    | NP_009191    | O95372 | LYPA2_HUMAN                               | 2 | GGTGCCCGTAC   | 0.617 |
| + | 2  | 127       |                    | NM_001010980 | NP_001010980 | Q5T1S8 | CA130_HUMAN                               | 0 | CCAGGGGAGAA   | 0.428 |
| + | 10 | 1943      | p.D354N TMEM57     | NM_018202    | NP_060672    | Q8N5G2 | MACOI_HUMAN                               | 0 | AGCTGGACCTG   | 0.542 |
| + | 5  | 1210      | vry.1_Missense_M   | NM_020379    | NP_065112    | Q9NR34 | MA1C1_HUMAN ienal (Potential).            | 1 | TGCCGGCGTTTC  | 0.592 |
| + | 9  | 1727      | _Mutation_p.A286   | NM_020379    | NP_065112    | Q9NR34 | MA1C1_HUMAN ienal (Potential).            | 1 | GGATGCCAAGG   | 0.617 |
| - | 3  | 905       |                    | NM_024037    | NP_076942    | Q9H7T9 | CA135_HUMAN                               | 0 | TCTTAGTGTGT   | 0.478 |
| + | 3  | 466       |                    | NM_015871    | NP_056955    | O00488 | ZN593_HUMAN                               | 0 | CTGAGGTCCCT   | 0.622 |
| + | 21 | 2121      | on_p.S423F CNKc    | NM_006314    | NP_006305    | Q969H4 | CNKR1_HUMAN                               | 2 | TGACTCCACAG   | 0.637 |
| - | 4  | 368       | _5'UTR UBXN11_1    | NM_183008    | NP_892120    | Q5T124 | UBX11_HUMAN                               | 1 | CATCTCCATAGA  | 0.552 |
| - | 2  | 851       |                    | NM_021969    | NP_068804    | Q15466 | NR0B2_HUMAN                               | 0 | GATAGGGCGAA   | 0.612 |
| - | 2  | 1042      |                    | NM_152365    | NP_689578    | Q8NAX2 | CA172_HUMAN                               | 2 | AACGACCCTCC   | 0.642 |
| - | 3  | 546       | l.2_Missense_Mut   | NM_005248    | NP_005239    | P09769 | FGR_HUMAN SH3.                            | 2 | AGGGGCCACGT   | 0.557 |
| + | 9  | 949       |                    | NM_177424    | NP_803173    | Q86Y82 | STX12_HUMAN cular (Potential).            | 2 | TAAAACGAAGTC  | 0.418 |
| + | 4  | 370       | ox.1_Intron PPP1R  | NM_014110    | NP_054829    | Q12972 | PP1R8_HUMAN CDC5L, SF3B1 and MELK         | 0 | ACAAGCCTCAG   | 0.493 |
| + | 6  | 1934      | l10ofn.1_Missense  | NM_001105556 | NP_001099026 | Q5TEJ8 | THMS2_HUMAN Asp/Glu-rich.                 | 1 | GAAATACTTGAG  | 0.358 |
| + | 7  | 1063      | l10ofq.1_Splice_Si | NM_014474    | NP_055289    | Q92485 | ASM3B_HUMAN                               | 3 | TGACAGGTGTC   | 0.567 |
| + | 3  | 594       |                    | NM_018053    | NP_060523    | Q9H6D3 | XKR8_HUMAN ical; (Potential).             | 0 | TCCTGGGCATC1  | 0.642 |
| + | 3  | 812       |                    | NM_018053    | NP_060523    | Q9H6D3 | XKR8_HUMAN                                | 0 | GTCTGGCTTCA   | 0.637 |
| - | 6  | 520       | p.P119S EYA3_ucC   | NM_001990    | NP_001981    | Q99504 | EYA3_HUMAN                                | 3 | AAAAGGAGGTA   | 0.423 |
| + | 9  | 1035      | C1_uc001bqc.1_I    | NM_001269    | NP_001260    | P18754 | RCC1_HUMAN RCC1 6.                        | 1 | ATACAGCCTGGC  | 0.602 |
| + | 11 | 1775      | tk.1_Missense_Mt   | NM_203342    | NP_976217    | P11171 | 41_HUMAN Hydrophilic.                     | 1 | AGAAGGAAACA   | 0.512 |
| - | 6  | 757       | :CR_uc001brs.1_F   | NM_016011    | NP_057095    | Q9BV79 | MECR_HUMAN                                | 1 | TAGCTCCTCTTC  | 0.493 |
| + | 27 | 3859      | PRU_uc009vtq.2_N   | NM_005704    | NP_005695    | Q92729 | PTPRU_HUMAN hatase 2. Cytoplasmic (Po     | 7 | CGTGACCCTGCA  | 0.647 |
| - | 8  | 791       |                    | NM_006762    | NP_006753    | Q13571 | LAPM5_HUMAN                               | 0 | GACCACCTGGG   | 0.592 |
| - | 12 | 1777      | v1_uc001bsj.1_Mi   | NM_014676    | NP_055491    | Q14671 | PUM1_HUMAN Ala-rich.                      | 3 | CAGCAGGAGCC   | 0.458 |
| - | 11 | 1754      | lutation_p.M548 I  | NM_014676    | NP_055491    | Q14671 | PUM1_HUMAN Ala-rich.                      | 3 | CCTGGCATGCC   | 0.532 |

rs35802484

|   |    |       |                   |              |              |        |             |                           |    |                |       |
|---|----|-------|-------------------|--------------|--------------|--------|-------------|---------------------------|----|----------------|-------|
| - | 8  | 1356  | i.1_Missense_Mut  | NM_014676    | NP_055491    | Q14671 | PUM1_HUMAN  | Ala-rich.                 | 3  | 'GTGCGGCTGAT'  | 0.493 |
| - | 2  | 282   | Joge.1_Missense_  | NM_004814    | NP_004805    | Q96DI7 | SNR40_HUMAN | WD 1.                     | 0  | AGGTGGATCCG'   | 0.443 |
| - | 37 | 2847  | p.V657M COL16A    | NM_001856    | NP_001847    | Q07092 | COGA1_HUMAN | 5 (COL5) with 3 imperfect | 8  | 'TTTCACCCCTG'  | 0.557 |
| - | 23 | 1950  | p.P358S COL16A    | NM_001856    | NP_001847    | Q07092 | COGA1_HUMAN | 8 (COL8) with 1 imperfec  | 8  | 'TTTGGGCCCTG'  | 0.572 |
| - | 17 | 1570  | p.G231D COL16A    | NM_001856    | NP_001847    | Q07092 | COGA1_HUMAN | 9 (COL9) with 3 imperfect | 8  | 'TCTCGCCTTTCT' | 0.647 |
| - | 29 | 4690  | l_Missense_Mutat  | NM_001703    | NP_001694    | O60241 | BAI2_HUMAN  | lasmic (Potential).       | 13 | 'GCGAGGCATGG'  | 0.637 |
| + | 4  | 469   | uc001bum.2_5'F    | NM_024296    | NP_077272    | Q9BUN5 | CC28B_HUMAN |                           | 0  | 'GGGAAGGAATGC' | 0.527 |
| + | 8  | 886   | Mutation_p.R25(   | NM_005356    | NP_005347    | P06239 | LCK_HUMAN   | rotein kinase.            | 6  | 'TGGAGCGGCTG'  | 0.672 |
| + | 4  | 395   | he.1_Missense_#   | NM_004964    | NP_004955    | Q13547 | HDAC1_HUMAN | one deacetylase.          | 3  | 'CTGTTCAGTTGT' | 0.438 |
| + | 6  | 2067  | 522_uc010ohm.1_   | NM_020888    | NP_065939    | Q9P206 | K1522_HUMAN | Pro-rich.                 | 0  | 'CGCCAGTCCCTC' | 0.627 |
| + | 6  | 2474  | 522_uc010ohm.1_   | NM_020888    | NP_065939    | Q9P206 | K1522_HUMAN | Pro-rich.                 | 0  | 'CAGCTCCGCCCA' | 0.657 |
| - | 9  | 1755  | 1_5'Flank YARS_u  | NM_003680    | NP_003671    | P54577 | SYYC_HUMAN  |                           | 2  | 'GATTGGATCCCA' | 0.498 |
| + | 5  | 580   |                   | NM_152493    | NP_689706    | Q5T0B9 | ZN362_HUMAN |                           | 0  | 'CGCGGGCACCG'  | 0.701 |
| + | 5  | 682   |                   | NM_152493    | NP_689706    | Q5T0B9 | ZN362_HUMAN |                           | 0  | 'CCCCCTCTCT'   | 0.672 |
| - | 6  | 718   | uh.1_Missense_M   | NM_198040    | NP_932157    | Q8IXK0 | PHC2_HUMAN  |                           | 1  | 'CTGTACCTGGA'  | 0.582 |
| - | 15 | 2252  | m.1_Nonsense_N    | NM_052896    | NP_443128    | Q7Z408 | CSMD2_HUMAN | xtracellular (Potential). | 12 | 'CTGTTCCAGAC'  | 0.632 |
| - | 4  | 520   | xm.1_Missense_M   | NM_052896    | NP_443128    | Q7Z408 | CSMD2_HUMAN | xtracellular (Potential). | 12 | 'TGCAGCTGTAG'  | 0.622 |
| - | 3  | 1376  |                   | NM_001080418 | NP_001073887 | O95886 | DLGP3_HUMAN |                           | 3  | 'CAGTGGTGAGG'  | 0.567 |
| + | 10 | 1286  | n_p.I361V ZMYM1   | NM_024772    | NP_079048    | Q5SVZ6 | ZMYM1_HUMAN |                           | 0  | 'ATGTTCATTGTG' | 0.214 |
| + | 11 | 1347  | _p.T381M ZMYM1    | NM_024772    | NP_079048    | Q5SVZ6 | ZMYM1_HUMAN | Ser-rich.                 | 0  | 'TAGTACGGAAC'  | 0.353 |
| + | 9  | 1480  | yu.2_Missense_M   | NM_005095    | NP_005086    | Q5VZL5 | ZMYM4_HUMAN | MYM-type 3.               | 5  | 'ACTTTGCAGTG'  | 0.418 |
| + | 8  | 2018  | p.A631T NCDN_u    | NM_001014839 | NP_001014839 | Q9UBB6 | NCDN_HUMAN  |                           | 3  | 'TCTGGGCCGAC'  | 0.692 |
| - | 11 | 2115  | ux.2_Missense_M   | NM_022111    | NP_071394    | Q9HAW4 | CLSPN_HUMAN | Potential.                | 8  | 'GGAATTCTGCAG' | 0.343 |
| - | 8  | 1659  | vux.2_Splice_Site | NM_022111    | NP_071394    | Q9HAW4 | CLSPN_HUMAN |                           | 8  | 'GATTACCTCTGT' | 0.438 |
| + | 15 | 2104  | se_Mutation_p.R5! | NM_012199    | NP_036331    | Q9UL18 | AGO1_HUMAN  | Piwi.                     | 3  | 'TACAGCGACCA'  | 0.522 |
| + | 3  | 456   | HL2_uc001bzu.2_   | NM_017825    | NP_060295    | Q9NX46 | ARHL2_HUMAN |                           | 1  | 'GCGATGTCTTTC' | 0.557 |
| + | 2  | 308   | 'D1_uc001cab.2_#  | NM_018067    | NP_060537    | Q3KQU3 | MA7D1_HUMAN | Pro-rich.                 | 5  | 'AGAAGGTGACC'  | 0.597 |
| + | 2  | 90    | _p.R76W MACF1_    | NM_012090    | NP_036222    | Q9UPN3 | MACF1_HUMAN |                           | 16 | 'ATGAACGGGAC'  | 0.507 |
| + | 16 | 1754  | ada.1_Missense_M  | NM_012090    | NP_036222    | Q9UPN3 | MACF1_HUMAN |                           | 16 | 'AGCTGGTCACC'  | 0.393 |
| + | 27 | 3474  | p.R177K MACF1_    | NM_012090    | NP_036222    | Q9UPN3 | MACF1_HUMAN |                           | 16 | 'ATTAAGGATTGC' | 0.502 |
| + | 4  | 6004  | .1_Intron MACF1_  | NM_033044    | NP_149033    | Q9UPN3 | MACF1_HUMAN |                           | 16 | 'TGACAGCCTGA'  | 0.413 |
| + | 13 | 8013  | .G2034S MACF1_    | NM_033044    | NP_149033    | Q9UPN3 | MACF1_HUMAN |                           | 16 | 'TGCAGGGCAA'   | 0.552 |
| + | 1  | 3841  | i.1_Intron MACF1_ | NM_015038    | NP_055853    | O94854 | K0754_HUMAN | Ala-rich. 2.              | 0  | 'AGCCACCTCC'   | 0.721 |
| + | 1  | 4075  | i.1_Intron MACF1_ | NM_015038    | NP_055853    | O94854 | K0754_HUMAN | Ala-rich. 8.              | 0  | 'AGCCACCTCC'   | 0.726 |
| + | 31 | 12879 | a.1_Nonsense_M    | NM_033044    | NP_149033    | Q9UPN3 | MACF1_HUMAN | 23. Spectrin 9.           | 16 | 'AGGACCAGACC'  | 0.478 |
| + | 38 | 14020 | s.1_Missense_Mu   | NM_033044    | NP_149033    | Q9UPN3 | MACF1_HUMAN |                           | 16 | 'GAGAGCATTG'   | 0.438 |
| - | 4  | 1440  | 4_uc001cdm.2_Mi   | NM_003819    | NP_003810    | Q13310 | PABP4_HUMAN |                           | 0  | 'GCTCAGCTTCC'  | 0.423 |
| - | 1  | 881   | tart_Site PABPC4_ | NM_003819    | NP_003810    | Q13310 | PABP4_HUMAN |                           | 0  | 'CACCACCCCGA'  | 0.721 |
| + | 3  | 186   | lv.2_Missense_Mu  | NM_006112    | NP_006103    | Q9UNP9 | PPIE_HUMAN  | RRM.                      | 0  | 'ACCGAGGATTTG' | 0.383 |
| - | 2  | 519   | _p.A101V MYCL1_   | NM_001033082 | NP_001028254 | P12524 | MYCL1_HUMAN |                           | 2  | 'CCCGGGCCGAG'  | 0.706 |
| + | 6  | 905   | T229A MFS2A_u     | NM_001136493 | NP_001129965 | Q8NA29 | MFS2A_HUMAN |                           | 2  | 'ACCATACACATC' | 0.547 |
| - | 8  | 1030  | 1_Splice_Site_p.Q | NM_000310    | NP_000301    | P50897 | PPT1_HUMAN  |                           | 1  | 'AGTTACCTGTG'  | 0.488 |
| + | 8  | 2423  | l.3_Missense_Mutr | NM_012421    | NP_036553    | Q13129 | RLF_HUMAN   |                           | 3  | 'TTTAGGATGCA'  | 0.363 |
| + | 5  | 1120  |                   | NM_152373    | NP_689586    | Q5T5D7 | ZN684_HUMAN | 2H2-type 5.               | 0  | 'ACATTCCAGATT' | 0.378 |
| - | 8  | 6887  | e_Mutation_p.A18' | NM_024503    | NP_078779    | Q5T1R4 | ZEP3_HUMAN  |                           | 6  | 'GTCTGCCCGCA'  | 0.672 |
| - | 8  | 883   | J3_uc001chg.2_M   | NM_014947    | NP_055762    | Q9UPW0 | FOXJ3_HUMAN |                           | 2  | 'ACTCCATTCC'   | 0.323 |
| + | 3  | 887   | ik.2_Missense_Mu  | NM_024664    | NP_078940    | Q9HAB8 | PPCS_HUMAN  |                           | 0  | 'ACTCGGAAACC'  | 0.408 |

rs783822

|   |    |      |                   |              |              |        |                          |                                |     |               |       |
|---|----|------|-------------------|--------------|--------------|--------|--------------------------|--------------------------------|-----|---------------|-------|
| - | 1  | 165  | RE1_uc001chy.3_I  | NM_022356    | NP_071751    | Q32P28 | P3H1_HUMAN               |                                | 4   | .GGCAGCGCCA   | 0.692 |
| + | 12 | 1301 | se_Mutation_p.S   | NM_001017922 | NP_001017922 | Q96PL5 | ERMAP_HUMAN (Potential). | B30.2/SPRY.                    | 1   | .CACATCCCCG   | 0.527 |
| - | 9  | 1732 |                   | NM_006516    | NP_006507    | P11166 | GTR1_HUMAN               | name=11; (Potential).          | 5   | .AATGGCAGCTG  | 0.547 |
| - | 8  | 1036 | icim.2_Missense_I | NM_006824    | NP_006815    | Q99848 | EBP2_HUMAN               |                                | 0   | .TGAGGCCCTCTG | 0.557 |
| + | 10 | 1738 | ense_Mutation_p.l | NM_152498    | NP_689711    | Q96MR6 | WDR65_HUMAN              | WD 8.                          | 1   | .GAATGGAATCTC | 0.458 |
| + | 11 | 2147 | ojoz.1_Intron WDF | NM_152498    | NP_689711    | Q96MR6 | WDR65_HUMAN              |                                | 1   | .CTCCTTCTTCTC | 0.363 |
| + | 4  | 1033 | MEM125_uc001c     | NM_144626    | NP_653227    | Q96AQ2 | TM125_HUMAN              | ical; (Potential).             | 1   | .CTCTGGCTGCC  | 0.687 |
| + | 4  | 542  | p.R166K MPL_uc    | NM_005373    | NP_005364    | P40238 | TPOR_HUMAN               | tential). Fibronectin type-III | 363 | .CCTGAGGTACG  | 0.587 |
| + | 44 | 5947 |                   | NM_015284    | NP_056099    | Q5T011 | SZT2_HUMAN               |                                | 0   | .CCATGGAAGTG  | 0.617 |
| + | 44 | 6026 |                   | NM_015284    | NP_056099    | Q5T011 | SZT2_HUMAN               |                                | 0   | .TGGTGGGGGTC  | 0.642 |
| + | 9  | 1830 | l_p.G68D PTPRF_   | NM_002840    | NP_002831    | P10586 | PTPRF_HUMAN              | tential). Fibronectin type-III | 10  | .CGATGGCCCTC  | 0.677 |
| + | 16 | 3200 | se_Mutation_p.V5  | NM_002840    | NP_002831    | P10586 | PTPRF_HUMAN              | III 7. Extracellular (Potentia | 10  | .CCGTGGTGTTCC | 0.567 |
| + | 27 | 4839 | wt.2_Missense_Mi  | NM_002840    | NP_002831    | P10586 | PTPRF_HUMAN              | phatase 1. Cytoplasmic (Po     | 10  | .TGGCTCCAGTG  | 0.587 |
| - | 5  | 892  | d.2_RNA SLC6A9    | NM_201649    | NP_964012    | P48067 | SC6A9_HUMAN              | ellular (Potential).           | 0   | .GGCGTCCAGTA  | 0.622 |
| - | 1  | 218  | d.2_RNA SLC6A9    | NM_201649    | NP_964012    | P48067 | SC6A9_HUMAN              | lasmic (Potential).            | 0   | .CGATCGCAGCC  | 0.667 |
| + | 3  | 1172 |                   | NM_173484    | NP_775755    | Q5JT82 | KLF17_HUMAN              |                                | 2   | .CAGACCCACAG  | 0.493 |
| + | 5  | 558  | IF DMAP1_uc001c   | NM_001034024 | NP_001029196 | Q9NPF5 | DMAP1_HUMAN              | SANT.                          | 0   | .ACCACCTCTTT  | 0.517 |
| + | 2  | 258  | lb.1_Missense_Mi  | NM_006845    | NP_006836    | Q99661 | KIF2C_HUMAN              | ular (Potential).              | 1   | .AGAAGGAGGTG  | 0.413 |
| + | 7  | 945  | K3_uc001cmo.2_R   | NM_004073    | NP_004064    | Q9H4B4 | PLK3_HUMAN               | rotein kinase.                 | 0   | .TGCCAGCCTCT  | 0.622 |
| + | 13 | 1664 | K3_uc001cmo.2_In  | NM_004073    | NP_004064    | Q9H4B4 | PLK3_HUMAN               | POLO box 1.                    | 0   | .CTGTGCCCCGG  | 0.597 |
| - | 18 | 2843 | lg.1_Missense_Mi  | NM_003738    | NP_003729    | Q9Y6C5 | PTC2_HUMAN               | ellular (Potential).           | 18  | .GGTAGGCGTGC  | 0.672 |
| - | 9  | 2300 |                   | NM_020883    | NP_065934    | Q9P217 | ZSWM5_HUMAN              |                                | 0   | .GGAGCTGCTCC  | 0.512 |
| + | 1  | 791  |                   | NM_032756    | NP_116145    | Q96IR7 | HPDL_HUMAN               |                                | 0   | .CGGCAGCTCCC  | 0.682 |
| + | 29 | 5651 | se_Mutation_p.V17 | NM_015112    | NP_055927    | Q6P0Q8 | MAST2_HUMAN              |                                | 11  | .CATTGGTTCCA  | 0.502 |
| - | 10 | 2117 | pc.3_Missense_M   | NM_003629    | NP_003620    | Q92569 | P55G_HUMAN               |                                | 0   | .TCTGTGCATGA  | 0.483 |
| + | 3  | 541  | pw.2_Missense_M   | NM_147192    | NP_671725    | Q8NFW5 | DMBX1_HUMAN              |                                | 1   | .ACCCCTCTGCT  | 0.677 |
| - | 3  | 719  | BKL2C_uc001cqe    | NM_201403    | NP_958805    | Q70IA8 | MOL2C_HUMAN              |                                | 1   | .CATGGACAAG   | 0.557 |
| + | 9  | 1187 |                   | NM_178134    | NP_835235    | Q86W10 | CP4Z1_HUMAN              | renal (Potential).             | 1   | .AGATGGACGCT  | 0.423 |
| + | 1  | 638  |                   | NM_012186    | NP_036318    | Q13461 | FOXE3_HUMAN              | Fork-head.                     | 0   | .TCAAGGTGCC   | 0.652 |
| + | 9  | 1122 | ense_Mutation_p.F | NM_001011547 | NP_001011547 | Q2M3M2 | SC5A9_HUMAN              | ellular (Potential).           | 3   | .CCAAAGAATCT  | 0.557 |
| + | 10 | 1325 | ense_Mutation_p.E | NM_001011547 | NP_001011547 | Q2M3M2 | SC5A9_HUMAN              | lasmic (Potential).            | 3   | .AGCAGGAGCTG  | 0.587 |
| - | 13 | 1595 | p.A461V SPATA6_   | NM_019073    | NP_061946    | Q9NWH7 | SPAT6_HUMAN              |                                | 1   | .CTACAGCCTTT  | 0.423 |
| - | 7  | 602  | F1_uc001cse.1_M   | NM_007051    | NP_008982    | Q9UNN5 | FAF1_HUMAN               | p.0?(1)                        | 2   | .GACTAGATGATC | 0.338 |
| + | 2  | 1232 | 1csg.2_Missense_  | NM_001262    | NP_001253    | P42773 | CDN2C_HUMAN              | ANK 1. p.0?(4)                 | 17  | .CTTGGGGGAAC  | 0.468 |
| + | 12 | 912  | SBPL9_uc001csw    | NM_024586    | NP_078862    | Q96SU4 | OSBL9_HUMAN              |                                | 1   | .TGATGCTGATG  | 0.398 |
| - | 4  | 490  |                   | NM_002867    | NP_002858    | P20337 | RAB3B_HUMAN              |                                | 1   | .AGTAGGTCTTG  | 0.353 |
| - | 1  | 736  | JC12_uc001cti.2_I | NM_138417    | NP_612426    | Q96EK9 | KTI12_HUMAN              |                                | 2   | .GCCACCAAAG   | 0.637 |
| - | 1  | 575  | JC12_uc001cti.2_I | NM_138417    | NP_612426    | Q96EK9 | KTI12_HUMAN              |                                | 2   | .CCCCGGATTCT  | 0.587 |
| + | 4  | 935  | p.D255N ZFYVE9    | NM_004799    | NP_004790    | Q95405 | ZFYV9_HUMAN              |                                | 8   | .GTAGAGACCCC  | 0.433 |
| + | 3  | 482  | .1_Intron FAM159  | NM_001042693 | NP_001036158 | Q6UWV7 | F159A_HUMAN              |                                | 0   | .AAGTGCCAAA   | 0.562 |
| + | 3  | 1073 | G11B_uc010onj.1   | NM_024646    | NP_078922    | Q9C0D3 | ZY11B_HUMAN              |                                | 4   | .TCCAAGCATGC  | 0.403 |
| + | 7  | 914  | nr.1_Missense_Mi  | NM_153703    | NP_714914    | Q7Z5L7 | PODN_HUMAN               | LRR 7.                         | 2   | .TCCCCCGGGG   | 0.617 |
| - | 4  | 271  | C1orf123_uc001cv  | NM_017887    | NP_060357    | Q9NWW4 | CA123_HUMAN              |                                | 2   | .ACCTACCGATG  | 0.562 |
| - | 13 | 2107 | ij.1_Missense_Mul | NM_004631    | NP_004622    | Q14114 | LRP8_HUMAN               | s B 5. Extracellular (Potenti  | 0   | .AGCCGATTTCG  | 0.512 |
| - | 4  | 2131 |                   | NM_201546    | NP_963840    | Q5VXM1 | CDCP2_HUMAN              |                                | 1   | .TTAGGGGTCCC  | 0.582 |
| + | 3  | 496  | orf175_uc010oof.1 | NM_001039464 | NP_001034553 | Q68CQ1 | HEAT8_HUMAN              |                                | 0   | .CTCTGTTCCA   | 0.572 |
| - | 48 | 5585 |                   | NM_015306    | NP_056121    | Q9UPU5 | UBP24_HUMAN              |                                | 13  | .TATGGGTTTGCT | 0.373 |

rs112803850

|   |    |      |                    |              |              |        |             |                              |    |                 |       |
|---|----|------|--------------------|--------------|--------------|--------|-------------|------------------------------|----|-----------------|-------|
| + | 1  | 145  |                    | NM_006252    | NP_006243    | P54646 | AAPK2_HUMAN | ase. ATP (By similarity).    | 6  | icGTCCGGCACCT   | 0.647 |
| - | 18 | 2472 | rf168_uc001cyl.2_  | NM_001004303 | NP_001004303 | Q5VWT5 | CA168_HUMAN |                              | 5  | ATTCTTCTCCAC    | 0.323 |
| + | 8  | 1307 |                    | NM_000562    | NP_000553    | P07357 | CO8A_HUMAN  | MACPF.                       | 3  | TTGGTGGAGGTT    | 0.413 |
| - | 14 | 1849 | r.1_Missense_Mut   | NM_021080    | NP_066566    | O75553 | DAB1_HUMAN  |                              | 3  | TCGTGCCTGGG.    | 0.592 |
| - | 12 | 1432 | r.1_Missense_Mut   | NM_021080    | NP_066566    | O75553 | DAB1_HUMAN  |                              | 3  | GTGTGGACATG     | 0.438 |
| - | 9  | 1363 | SM1_uc001czc.2_1   | NM_001085487 | NP_001078956 | Q5VVJ2 | MYSM1_HUMAN | SWIRM.                       | 1  | ATCCGTCCAATAA   | 0.348 |
| + | 16 | 1591 | OK1_uc001czp.2_1   | NM_015888    | NP_056972    | Q9UJC3 | HOOK1_HUMAN | tion with microtubules. Pote | 2  | AGCTAGAACAG     | 0.403 |
| + | 19 | 1846 | OK1_uc001czp.2_1   | NM_015888    | NP_056972    | Q9UJC3 | HOOK1_HUMAN |                              | 2  | AAATGGTAGGT/    | 0.353 |
| - | 5  | 739  |                    | NM_152377    | NP_689590    | Q8N0U7 | CA087_HUMAN |                              | 2  | GCTGAGATTGG/    | 0.423 |
| + | 8  | 1007 | DL_uc001daa.2_M    | NM_176877    | NP_795352    | Q8NI35 | INADL_HUMAN | PDZ 2.                       | 4  | TGGTGGCACAA/    | 0.438 |
| + | 27 | 3743 | fbq.1_Missense_M   | NM_020925    | NP_065976    | Q5VU97 | CAHD1_HUMAN | lasmic (Potential).          | 2  | GGCGGCCGTC/     | 0.517 |
| + | 13 | 1923 | _p.P574S DNAJC6    | NM_014787    | NP_055602    | O75061 | AUX1_HUMAN  | Pro-rich.                    | 3  | GAGCACCTTCT/    | 0.443 |
| + | 16 | 2387 | _p.M728I DNAJC6    | NM_014787    | NP_055602    | O75061 | AUX1_HUMAN  | Pro-rich.                    | 3  | AGCATGCCCCA     | 0.612 |
| + | 3  | 333  | DE4B_uc001dco.2    | NM_001037341 | NP_001032418 | Q07343 | PDE4B_HUMAN |                              | 3  | GCTCAGGAAAC     | 0.458 |
| + | 3  | 253  | u.2_RNA TCTEX1     | NM_152665    | NP_689878    | Q8N7M0 | TC1D1_HUMAN |                              | 0  | TTAGTTCTATGAC   | 0.318 |
| - | 12 | 1861 | ie_Mutation_p.G34  | NM_024763    | NP_079039    | Q5VTH9 | WDR78_HUMAN | WD 2.                        | 2  | CATCTCCTGTT     | 0.348 |
| - | 12 | 1816 | se_Mutation_p.P35  | NM_024763    | NP_079039    | Q5VTH9 | WDR78_HUMAN | WD 2.                        | 2  | ATACAGGTCCC/    | 0.328 |
| + | 7  | 813  | df.2_Missense_Mi   | NM_001077700 | NP_001071168 | Q8N108 | MIER1_HUMAN | Glu-rich.                    | 1  | TATATCCATCAG    | 0.249 |
| - | 12 | 1435 |                    | NM_015139    | NP_055954    | Q9NTN3 | S35D1_HUMAN |                              | 0  | CTTCCCTTAAT     | 0.453 |
| - | 1  | 499  | SD1_uc010oph.1_1   | NM_015139    | NP_055954    | Q9NTN3 | S35D1_HUMAN | ical; (Potential).           | 0  | AAACACGGTCA/    | 0.557 |
| + | 11 | 1325 | 0opt.1_Splice_Site | NM_144701    | NP_653302    | Q5VWK5 | IL23R_HUMAN |                              | 0  | TCCTAGGAAAAT    | 0.318 |
| - | 7  | 1246 | ldy.2_Missense_M   | NM_001018067 | NP_001018077 | Q8NC51 | PAIRB_HUMAN |                              | 1  | CCCTGCCGCCA/    | 0.517 |
| - | 8  | 1820 | DC1_uc001dek.3_1   | NM_001114120 | NP_001107592 | Q5TB30 | DEP1A_HUMAN |                              | 0  | TCTATTGTACTTT   | 0.388 |
| + | 4  | 737  | dge.1_Intron FPG1  | NM_003838    | NP_003829    | O14772 | FPGT_HUMAN  |                              | 1  | AGCATAGAAAAG    | 0.388 |
| + | 2  | 109  | fgd.2_Missense_M   | NM_015978    | NP_057062    | Q59H18 | TNI3K_HUMAN |                              | 10 | AAAAAAGTCAGT/   | 0.308 |
| - | 14 | 4553 |                    | NM_001002912 | NP_001002912 | Q5RHP9 | CA173_HUMAN | Glu-rich.                    | 5  | CCTGTCTAGCC/    | 0.592 |
| - | 14 | 3809 |                    | NM_001002912 | NP_001002912 | Q5RHP9 | CA173_HUMAN | Glu-rich.                    | 5  | TGCTGGACAGC     | 0.557 |
| - | 14 | 3013 |                    | NM_001002912 | NP_001002912 | Q5RHP9 | CA173_HUMAN | Glu-rich.                    | 5  | AGCCTCTCCCT/    | 0.537 |
| - | 24 | 2207 | l10oqz.1_Intron SL | NM_152697    | NP_689910    | Q8NCS7 | CTL5_HUMAN  | lasmic (Potential).          | 4  | TCATTTCTTTCCA   | 0.418 |
| + | 14 | 1828 |                    | NM_002440    | NP_002431    | O15457 | MSH4_HUMAN  |                              | 5  | GATAGTGTGCA/    | 0.323 |
| + | 2  | 344  | se_Mutation_p.H67  | NM_152996    | NP_694541    | Q8NDV1 | SIA7C_HUMAN | renal (Potential).           | 5  | GAACTCACTAT/    | 0.438 |
| - | 8  | 754  | x.2_Missense_Mu    | NM_005482    | NP_005473    | Q92643 | GPI8_HUMAN  | renal (Potential).           | 3  | GATCAGGTTGAT    | 0.308 |
| - | 1  | 141  | n.1_Missense_Mut   | NM_003902    | NP_003893    | Q96AE4 | FUBP1_HUMAN | Gly-rich.                    | 3  | ccaccaccgccacca | 0.488 |
| + | 6  | 1104 |                    | NM_017655    | NP_060125    | Q8TF65 | GIPC2_HUMAN |                              | 1  | TTGGGGAGTCA/    | 0.403 |
| + | 5  | 928  | 1_5'UTR IFI44L_u   | NM_006820    | NP_006811    | Q53G44 | IF44L_HUMAN |                              | 0  | AGATGGAAAAA/    | 0.373 |
| - | 9  | 1285 |                    | NM_022159    | NP_071442    | Q9HBW9 | ELTD1_HUMAN | tracellular (Potential).     | 2  | TATCAGGTGAGT/   | 0.403 |
| + | 11 | 2268 | se_Mutation_p.R65  | NM_012302    | NP_036434    | O95490 | LPHN2_HUMAN | cellular (Potential).        | 9  | CAGCAGGAATG     | 0.358 |
| - | 1  | 216  | SD_uc001dkd.2_5'1  | NM_004388    | NP_004379    | Q01459 | DIAC_HUMAN  |                              | 0  | AATCGGGCGGC     | 0.542 |
| - | 7  | 948  | SD225_splice SSX2I | NM_014021    | NP_054740    | Q9Y2D8 | ADIP_HUMAN  |                              | 2  | TGTTTACTATTI    | 0.303 |
| - | 2  | 256  | LN3_uc001dkr.2_1   | NM_018298    | NP_060768    | Q8TDD5 | MCLN3_HUMAN |                              | 1  | TCGAGCCCAGA     | 0.398 |
| - | 6  | 949  | _uc010osb.1_Miss   | NM_012137    | NP_036269    | O94760 | DDAH1_HUMAN |                              | 0  | GTTCAGACATG/    | 0.473 |
| - | 39 | 3406 | _Mutation_p.G422F  | NM_152890    | NP_690850    | Q17RW2 | COOA1_HUMAN | ollagen-like 11.             | 5  | TTTGTCTTTTATC   | 0.403 |
| + | 14 | 2764 |                    | NM_001285    | NP_001276    | A8K714 | CLCA1_HUMAN |                              | 1  | CTGATGAAACG/    | 0.423 |
| + | 14 | 2771 |                    | NM_001285    | NP_001276    | A8K714 | CLCA1_HUMAN |                              | 1  | AACGTCTGCTC/    | 0.418 |
| - | 7  | 1109 |                    | NM_002053    | NP_002044    | P32455 | GBP1_HUMAN  |                              | 2  | CAGCACCAGGC     | 0.473 |
| - | 7  | 1340 | P2_uc001dmy.1_F    | NM_004120    | NP_004111    | P32456 | GBP2_HUMAN  |                              | 1  | ACTGTCCCTGT/    | 0.512 |
| - | 8  | 1413 | P2_uc001dmy.1_F    | NM_207398    | NP_997281    | Q8N8V2 | GBP7_HUMAN  |                              | 2  | AGAAAAGTTCT/    | 0.428 |



|   |    |      |                   |              |              |        |             |                               |    |               |       |             |
|---|----|------|-------------------|--------------|--------------|--------|-------------|-------------------------------|----|---------------|-------|-------------|
| + | 5  | 713  | st.1_Missense_Mt  | NM_198460    | NP_940862    | Q6ZN66 | GBP6_HUMAN  |                               | 2  | TGACGGAGCTC/  | 0.403 |             |
| + | 7  | 1487 | p.G327D LRRC8E    | NM_001134476 | NP_001127948 | Q6P9F7 | LRC8B_HUMAN | ical; (Potential).            | 2  | TTATGGTCTGAC  | 0.428 |             |
| - | 4  | 3614 | :2_Intron ZNF644_ | NM_201269    | NP_958357    | Q9H582 | ZN644_HUMAN |                               | 3  | GTTCTGGTTTTG  | 0.383 |             |
| + | 6  | 1051 | 3D8_uc010otc.1_F  | NM_183242    | NP_899065    | Q5XKL5 | BTBD8_HUMAN | BTB 2.                        | 1  | ATGATGCATTTT/ | 0.279 |             |
| + | 6  | 1067 | 3D8_uc010otc.1_F  | NM_183242    | NP_899065    | Q5XKL5 | BTBD8_HUMAN | BTB 2.                        | 1  | TGGAGGAACCTCT | 0.299 |             |
| + | 11 | 1392 | se_Mutation_p.G2f | NM_007358    | NP_031384    | Q9Y483 | MTF2_HUMAN  |                               | 2  | CTGAAGGAACAT  | 0.378 |             |
| + | 11 | 1419 | se_Mutation_p.G2f | NM_007358    | NP_031384    | Q9Y483 | MTF2_HUMAN  |                               | 2  | TAAAGGCAGAA/  | 0.353 |             |
| + | 1  | 229  | ED5_uc001dpo.2_!  | NM_206886    | NP_996769    | Q5T9S5 | CCD18_HUMAN |                               | 5  | GGCGGGCTCCG   | 0.726 |             |
| + | 4  | 281  | dvp.2_Missense_h  | NM_001024948 | NP_001020119 | Q5T0N5 | FBP1L_HUMAN | brane tubulation (By similari | 0  | AATGGCGCACAI  | 0.348 |             |
| - | 25 | 3804 |                   | NM_000350    | NP_000341    | P78363 | ABCA4_HUMAN | Cytoplasmic.                  | 12 | ATTTGGAAGAAG  | 0.473 |             |
| - | 23 | 3431 | AP29_uc009wdq.1   | NM_004815    | NP_004806    | Q52LW3 | RHG29_HUMAN |                               | 11 | CTACAGGCAAAI  | 0.398 |             |
| + | 2  | 438  | e_Mutation_p.G12  | NM_015485    | NP_056300    | Q9Y3V2 | RWDD3_HUMAN |                               | 1  | AACCTGGCAGTG  | 0.448 |             |
| - | 20 | 2759 |                   | NM_000110    | NP_000101    | Q12882 | DPYD_HUMAN  |                               | 8  | CACATACCTTGT  | 0.413 |             |
| - | 5  | 1135 | sc.2_Missense_Mt  | NM_001037317 | NP_001032394 | Q32ZL2 | LPPR5_HUMAN |                               | 0  | CTTTTCCAAAGC  | 0.353 |             |
| + | 4  | 708  | je.1_Missense_Mt  | NM_014839    | NP_055654    | Q7Z2D5 | LPPR4_HUMAN |                               | 3  | CACAGGATATC/  | 0.368 |             |
| - | 7  | 1324 |                   | NM_001013660 | NP_001013682 | Q6ZNA5 | FRRS1_HUMAN | DOMON.                        | 1  | AATAGCCTTTAC  | 0.413 |             |
| + | 3  | 472  | _p.G92E SLC35A:   | NM_012243    | NP_036375    | Q9Y2D2 | S35A3_HUMAN |                               | 0  | CATCAGGGATCT/ | 0.299 |             |
| + | 8  | 1149 | LC35A3_uc001dsi   | NM_012243    | NP_036375    | Q9Y2D2 | S35A3_HUMAN |                               | 0  | CCAAACCTGCAC  | 0.363 |             |
| - | 7  | 740  | vdz.2_Missense_h  | NM_194292    | NP_919268    | Q6UVJ0 | SAS6_HUMAN  | Potential.                    | 2  | GTGACGCCCAT   | 0.328 |             |
| - | 9  | 1090 | j.1_Missense_Mut  | NM_001918    | NP_001909    | P11182 | ODB2_HUMAN  |                               | 1  | CAAACCTGCTI   | 0.393 |             |
| - | 17 | 1747 | vl.1_Missense_Mu  | NM_006113    | NP_006104    | Q9UKW4 | VAV3_HUMAN  |                               | 9  | AATTAACCTGCT  | 0.343 |             |
| - | 7  | 992  | _p.A252T C1orf59  | NM_001102592 | NP_001096062 | Q5T8I9 | HENMT_HUMAN |                               | 0  | GCACAGCTTATA  | 0.403 |             |
| - | 13 | 2720 | lwi.2_Missense_M  | NM_001142551 | NP_001136023 | O94967 | WDR47_HUMAN | WD 4.                         | 1  | AAAGATCCCAA   | 0.353 |             |
| + | 3  | 399  | 1324_uc009wey.2   | NM_020775    | NP_065826    | Q6UXG2 | K1324_HUMAN | ellular (Potential).          | 5  | CAAGGGCACCG   | 0.632 |             |
| + | 1  | 1247 |                   | NM_001408    | NP_001399    | Q9HCU4 | CELR2_HUMAN | Extracellular (Potential).    | 8  | ATAATGCCCCCC  | 0.587 |             |
| + | 3  | 4107 |                   | NM_001408    | NP_001399    | Q9HCU4 | CELR2_HUMAN | ial). EGF-like 3; calcium-bir | 8  | GGTGGCGGTT    | 0.617 |             |
| + | 4  | 4284 |                   | NM_001408    | NP_001399    | Q9HCU4 | CELR2_HUMAN | otential). Laminin G-like 1.  | 8  | CAATGGGCGTT   | 0.582 |             |
| + | 21 | 6920 |                   | NM_001408    | NP_001399    | Q9HCU4 | CELR2_HUMAN | ellular (Potential).          | 8  | ATCAGCGTCCAT  | 0.612 | rs141489111 |
| + | 27 | 7857 |                   | NM_001408    | NP_001399    | Q9HCU4 | CELR2_HUMAN | Name=7; (Potential).          | 8  | CAATTCATCC/   | 0.617 |             |
| - | 2  | 819  |                   | NM_020703    | NP_065754    | Q86WK6 | AMGO1_HUMAN | tracellular (Potential).      | 2  | GCCATGATGTGG  | 0.557 |             |
| + | 8  | 666  | TM2_uc009wfk.2_f  | NM_001142368 | NP_001135840 | P28161 | GSTM2_HUMAN |                               | 0  | GCATTCCTGAT   | 0.443 |             |
| - | 5  | 509  | Wfm.1_Missense_   | NM_133181    | NP_573444    | Q8TE67 | ES8L3_HUMAN |                               | 3  | GCCTGGCAGGC   | 0.587 |             |
| + | 7  | 734  | _p.A144T FAM40A   | NM_033088    | NP_149079    | Q5VSL9 | FA40A_HUMAN |                               | 4  | ACAAGGCTGAG   | 0.582 |             |
| + | 10 | 2005 |                   | NM_001010898 | NP_001010898 | Q9H1V8 | S6A17_HUMAN | ellular (Potential).          | 2  | GCGCTCCGGAA   | 0.572 |             |
| + | 1  | 2211 | sense_Mutation_p. | NM_022768    | NP_073605    | Q96T37 | RBM15_HUMAN | Arg-rich.                     | 3  | GTTTGAGGAA/   | 0.517 |             |
| - | 7  | 1419 | ovy.1_Missense_h  | NM_004696    | NP_004687    | O15374 | MOT5_HUMAN  | ical; (Potential).            | 3  | CAGTACAGGCA   | 0.388 | rs140070822 |
| - | 6  | 928  | ovy.1_Missense_h  | NM_004696    | NP_004687    | O15374 | MOT5_HUMAN  | lasmic (Potential).           | 3  | TTTTGCTAGGTA  | 0.423 |             |
| - | 1  | 1682 |                   | NM_005549    | NP_005540    | Q16322 | KCA10_HUMAN |                               | 4  | CCCTGGGGTGG   | 0.552 |             |
| - | 1  | 1494 |                   | NM_002232    | NP_002223    | P22001 | KCNA3_HUMAN |                               | 5  | AGTGGGGTCGT   | 0.567 |             |
| - | 3  | 1959 | eab.2_Missense_f  | NM_018372    | NP_060842    | Q5T3J3 | LRIF1_HUMAN |                               | 0  | ATTTCAGCATCAC | 0.388 |             |
| - | 2  | 456  | f103_uc001eab.2   | NM_018372    | NP_060842    | Q5T3J3 | LRIF1_HUMAN |                               | 0  | TTCAAAGCATCAI | 0.393 |             |
| + | 3  | 626  | ai.1_Missense_Mi  | NM_001007794 | NP_001007795 | Q9Y6K0 | CEPT1_HUMAN |                               | 0  | AACAGCAAGA    | 0.378 |             |
| + | 7  | 696  | ao.2_Missense_M   | NM_004000    | NP_003991    | Q15782 | CH3L2_HUMAN |                               | 1  | TCAACCTCCTG1  | 0.473 |             |
| + | 8  | 753  | eat.2_Missense_h  | NM_201653    | NP_970615    | Q9BZP6 | CHIA_HUMAN  |                               | 1  | TGGCTCCTGGG/  | 0.532 |             |
| - | 11 | 1233 | _p.P355S OVGP1    | NM_002557    | NP_002548    | Q12889 | OVGP1_HUMAN |                               | 5  | TTGTGGTAAAG/  | 0.423 |             |
| - | 5  | 412  | 1_uc010owb.1_5'   | NM_002557    | NP_002548    | Q12889 | OVGP1_HUMAN |                               | 5  | ATAAACTTTTAC  | 0.448 |             |
| + | 6  | 951  | e_Mutation_p.A32  | NM_001688    | NP_001679    | P24539 | AT5F1_HUMAN |                               | 0  | TATGGCTTTGG/  | 0.373 |             |

|   |    |      |                    |              |              |        |             |                               |      |               |       |             |
|---|----|------|--------------------|--------------|--------------|--------|-------------|-------------------------------|------|---------------|-------|-------------|
| + | 11 | 2171 | p.G367E DDX20_     | NM_007204    | NP_009135    | Q9UHI6 | DDX20_HUMAN |                               | 2    | AGAGGGGTTAG/  | 0.408 |             |
| + | 3  | 428  | 2_Missense_Mutat   | NM_001130079 | NP_001123551 | Q9HCE1 | MOV10_HUMAN |                               | 5    | CCCTGGCTTCT/  | 0.627 |             |
| + | 4  | 793  | p.P175S MOV10_1    | NM_001130079 | NP_001123551 | Q9HCE1 | MOV10_HUMAN |                               | 5    | GGACACCCAG    | 0.577 | rs146126921 |
| + | 4  | 841  | c.G191S MOV10_1    | NM_001130079 | NP_001123551 | Q9HCE1 | MOV10_HUMAN |                               | 5    | CACTGGGCCCC/  | 0.562 |             |
| - | 9  | 1349 | M1J_uc001ecs.1_    | NM_005167    | NP_005158    | Q5JR12 | PPM1J_HUMAN | PP2C-like.                    | 3    | CAGTGGCAGCT/  | 0.547 |             |
| + | 4  | 386  | G129R FAM19A3_     | NM_182759    | NP_877436    | Q7Z5A8 | F19A3_HUMAN |                               | 0    | GCCGGGGGAGC   | 0.622 |             |
| + | 7  | 1800 | p.H547Y HIPK1_u    | NM_198268    | NP_938009    | Q86Z02 | HIPK1_HUMAN |                               | 4    | AGGGTTCACATG  | 0.398 |             |
| + | 9  | 2232 | 1_uc001eoo.2_Mi    | NM_198268    | NP_938009    | Q86Z02 | HIPK1_HUMAN |                               | 4    | CTCAGCCACTA/  | 0.438 |             |
| + | 11 | 2508 | eo.2_Missense_Mi   | NM_198268    | NP_938009    | Q86Z02 | HIPK1_HUMAN |                               | 4    | CAGAGGCCATG/  | 0.552 |             |
| - | 15 | 2774 | _p.G529E TRIM33    | NM_015906    | NP_056990    | Q9UPN9 | TRI33_HUMAN | PHD-type.                     | 11   | AGATCTCCTCCG  | 0.433 |             |
| - | 16 | 2210 | AMPD1_uc001eff     | NM_000036    | NP_000027    | P23109 | AMPD1_HUMAN |                               | 4    | CAGGGCCTTCC   | 0.428 |             |
| - | 14 | 2058 | 1eff.1_Splice_Site | NM_000036    | NP_000027    | P23109 | AMPD1_HUMAN |                               | 4    | ACTATACCTTGGT | 0.368 | rs145328844 |
| - | 3  | 436  |                    | NM_002524    | NP_002515    | P01111 | RASN_HUMAN  | GTP. i) p.Q61P(21) f          | 2607 | CTTCTTGTCAC   | 0.458 | rs11554290  |
| - | 3  | 427  |                    | NM_002524    | NP_002515    | P01111 | RASN_HUMAN  | GTP. p.T58I(2)                | 2607 | CAGCTGTATCC/  | 0.478 |             |
| - | 19 | 2799 | _p.G747E CSDE1_    | NM_001007553 | NP_001007554 | O75534 | CSDE1_HUMAN |                               | 1    | CTGGTCCCCTTC  | 0.478 |             |
| - | 17 | 2393 | E1_uc001efm.2_n    | NM_001007553 | NP_001007554 | O75534 | CSDE1_HUMAN | CSD 8.                        | 1    | ATCCCCTTTGTI  | 0.483 |             |
| + | 4  | 503  | _p.A76T VANGL1     | NM_138959    | NP_620409    | Q8TAA9 | VANG1_HUMAN | lasmic (Potential).           | 1    | CCACGGCCATC/  | 0.542 |             |
| + | 4  | 665  | _p.L130F VANGL1    | NM_138959    | NP_620409    | Q8TAA9 | VANG1_HUMAN | Name=1; (Potential).          | 1    | TCATCCTTTTAC  | 0.522 |             |
| + | 6  | 1236 | wgy.1_Missense_M   | NM_138959    | NP_620409    | Q8TAA9 | VANG1_HUMAN | lasmic (Potential).           | 1    | TGCCACTGGCC/  | 0.517 |             |
| - | 6  | 2254 | p.V537M IGSF3_u    | NM_001007237 | NP_001007238 | O75054 | IGSF3_HUMAN | 4. Extracellular (Potential). | 2    | CCGCACCCATT/  | 0.607 |             |
| - | 3  | 842  | gq.1_Missense_Mi   | NM_001007237 | NP_001007238 | O75054 | IGSF3_HUMAN | 1. Extracellular (Potential). | 2    | GGTAGCCACTC/  | 0.572 |             |
| + | 4  | 1091 | xc.1_Missense_Mi   | NM_004258    | NP_004249    | Q93033 | IGSF2_HUMAN | 3. Extracellular (Potential). | 4    | AGAGAGCAAGT/  | 0.498 |             |
| + | 5  | 413  | x.1_Missense_Mu    | NM_003594    | NP_003585    | Q9UNY4 | TTF2_HUMAN  |                               | 1    | GACAAGAATCA/  | 0.408 |             |
| + | 15 | 2563 |                    | NM_003594    | NP_003585    | Q9UNY4 | TTF2_HUMAN  |                               | 1    | GCTTTCTGAAG/  | 0.358 |             |
| - | 6  | 2285 | p.G548D TRIM45_    | NM_025188    | NP_079464    | Q9H8W5 | TRI45_HUMAN |                               | 1    | GCCCACCTGTG   | 0.527 |             |
| - | 2  | 1787 | IM45_uc001eha.2    | NM_025188    | NP_079464    | Q9H8W5 | TRI45_HUMAN | Filamin.                      | 1    | ATTGGCTGGA/   | 0.473 |             |
| - | 1  | 662  | ie_Mutation_p.G2f  | NM_025188    | NP_079464    | Q9H8W5 | TRI45_HUMAN |                               | 1    | CTTGCCTGAG    | 0.522 |             |
| - | 36 | 5422 |                    | NM_206996    | NP_996879    | Q6Q759 | SPG17_HUMAN | p.S1785S(1)                   | 6    | TAAGGGAAACCT  | 0.443 |             |
| - | 5  | 702  |                    | NM_206996    | NP_996879    | Q6Q759 | SPG17_HUMAN |                               | 6    | ACTGACCAATG/  | 0.478 |             |
| - | 8  | 1684 | hj.1_Missense_Mi   | NM_152380    | NP_689593    | Q96SF7 | TBX15_HUMAN |                               | 2    | GTGCTCCATCC/  | 0.552 |             |
| - | 8  | 1223 | hj.1_Missense_Mi   | NM_152380    | NP_689593    | Q96SF7 | TBX15_HUMAN |                               | 2    | GCAAGGCAGCC   | 0.547 |             |
| - | 2  | 272  | S2_uc010oxg.1_I    | NM_015836    | NP_056651    | Q9UGM6 | SYWM_HUMAN  |                               | 0    | TTGGGGGACAG   | 0.493 | rs142739265 |
| - | 5  | 917  | _p.P247L HMGCS:    | NM_005518    | NP_005509    | P54868 | HMCS2_HUMAN |                               | 2    | TGAAGGGTGCA   | 0.502 | rs146296049 |
| - | 34 | 6636 |                    | NM_024408    | NP_077719    | Q04721 | NOTC2_HUMAN | lasmic (Potential).           | 27   | TACCCTTGGA/   | 0.507 |             |
| - | 27 | 4180 | :4DIP_uc001elm.3   | NM_014644    | NP_055459    | Q5VU43 | MYOME_HUMAN |                               | 5    | CTCACACTCTG/  | 0.502 |             |
| - | 23 | 3397 | E4DIP_uc001elm.:   | NM_014644    | NP_055459    | Q5VU43 | MYOME_HUMAN | Potential.                    | 5    | CTGCTTCTCAAT  | 0.532 |             |
| - | 22 | 3121 | 1elo.2_Intron PDE  | NM_014644    | NP_055459    | Q5VU43 | MYOME_HUMAN |                               | 5    | GTATCCCCCTG/  | 0.488 |             |
| - | 19 | 2833 | :001elx.3_Missens  | NM_014644    | NP_055459    | Q5VU43 | MYOME_HUMAN | Potential.                    | 5    | TTGACCCTGGG/  | 0.353 |             |
| - | 12 | 1896 | 1elx.3_Splice_Site | NM_014644    | NP_055459    | Q5VU43 | MYOME_HUMAN |                               | 5    | CTCTTACTTGCAI | 0.473 |             |
| + | 3  | 565  | 10_uc001emp.3_     | NM_153713    | NP_714924    | Q8IVB5 | LIX1L_HUMAN |                               | 1    | GAGTGCTGCAA   | 0.473 |             |
| + | 5  | 409  | nu.1_Missense_M    | NM_005105    | NP_005096    | Q9Y5S9 | RBM8A_HUMAN | RRM.                          | 0    | GGAAGCCCAGG   | 0.478 |             |
| - | 5  | 772  | _p.S217L POLR3     | NM_006468    | NP_006459    | Q9BUI4 | RPC3_HUMAN  |                               | 1    | CAGATGATCTCC  | 0.428 |             |
| - | 4  | 681  | ik POLR3C_uc001    | NM_006468    | NP_006459    | Q9BUI4 | RPC3_HUMAN  |                               | 1    | TGGTGGTGGCC   | 0.478 |             |
| - | 2  | 91   |                    | NR_024442    |              |        |             |                               | 0    | GAAATCTAGGG/  | 0.532 |             |
| + | 1  | 498  |                    | NR_002305    |              |        |             |                               | 0    | ATAGTCCCATTAC | 0.473 |             |
| + | 9  | 3760 | rr.1_Missense_Mu   | NM_004326    | NP_004317    | O00512 | BCL9_HUMAN  | Pro-rich.                     | 6    | CACTCTCTATTAT | 0.512 |             |
| - | 2  | 964  | xt.1_Missense_Mu   | NM_181703    | NP_859054    | P36382 | CXA5_HUMAN  | lasmic (Potential).           | 1    | CCAGGGCCAT/   | 0.552 |             |

|   |    |       |                    |              |              |        |             |                              |    |              |       |             |
|---|----|-------|--------------------|--------------|--------------|--------|-------------|------------------------------|----|--------------|-------|-------------|
| - | 8  | 882   | tron NBPF14_uc01   | NM_015383    | NP_056198    | Q5TI25 | NBPFE_HUMAN | NBPF 3.                      | 1  | CTTCAGGCCCTT | 0.478 |             |
| - | 4  | 598   | P188L uc001erc.3_  | NM_017940    | NP_060410    | Q86T75 | NBPFB_HUMAN | NBPF 1.                      | 0  | ACCTGGGGGCA  | 0.428 |             |
| - | 1  | 244   | _p.S65F HIST2H2    | NM_001024599 | NP_001019770 | Q5QNW6 | H2B2F_HUMAN |                              | 0  | ACGAAGGAGTTC | 0.617 |             |
| - | 2  | 519   | th.2_Missense_Mt   | NM_014849    | NP_055664    | Q7L0J3 | SV2A_HUMAN  | Interaction with SYT1 (By s  | 7  | GAAAGCTGCCC  | 0.542 |             |
| - | 12 | 2329  |                    | NM_020205    | NP_064590    | Q6GQQ9 | OTU7B_HUMAN |                              | 3  | CCACCCCTATT  | 0.562 |             |
| - | 12 | 1716  |                    | NM_020205    | NP_064590    | Q6GQQ9 | OTU7B_HUMAN |                              | 3  | TCCAGCTGAGG  | 0.627 |             |
| + | 14 | 2096  | S45_uc010pbs.1_    | NM_007259    | NP_009190    | Q9NRW7 | VPS45_HUMAN |                              | 2  | AATTGGAGGAG  | 0.428 |             |
| + | 6  | 984   | _p.P195L C1orf51_  | NM_144697    | NP_653298    | Q8N365 | CA051_HUMAN |                              | 0  | ATGGTCCTTTAG | 0.552 |             |
| + | 11 | 2953  | _p.V892I RP RD2_   | NM_015203    | NP_056018    | Q5VT52 | RPRD2_HUMAN | Ser-rich.                    | 1  | TCAGCGTAAGAC | 0.507 |             |
| + | 11 | 3664  | RD2_uc001eup.3_    | NM_015203    | NP_056018    | Q5VT52 | RPRD2_HUMAN | Poly-Gly.                    | 1  | GTGGGGGCAGC  | 0.532 |             |
| + | 9  | 998   | :2_Intron TARS2_u  | NM_025150    | NP_079426    | Q9BW92 | SYTM_HUMAN  |                              | 1  | ACAAGGGTGTAT | 0.527 |             |
| + | 3  | 365   | CM1_uc001euu.2_    | NM_004425    | NP_004416    | Q16610 | ECM1_HUMAN  |                              | 3  | AGCCTCCCCATG | 0.607 |             |
| - | 3  | 1145  | _p.A229T MCL1_u    | NM_021960    | NP_068779    | Q07820 | MCL1_HUMAN  | ical; (Potential).           | 0  | TCCAGCAACAC  | 0.433 |             |
| + | 13 | 1382  |                    | NM_003568    | NP_003559    | O76027 | ANXA9_HUMAN | Annexin 4.                   | 0  | ACTGACCTCTC  | 0.483 |             |
| + | 2  | 1136  |                    | NM_006818    | NP_006809    | Q13015 | AF1Q_HUMAN  |                              | 0  | CCACTCCTTCG  | 0.527 |             |
| - | 15 | 1846  | www.2_Missense_I   | NM_030913    | NP_112175    | Q9H3T2 | SEM6C_HUMAN | ilar (Potential); Sema.      | 2  | GCTGAGAGGGA  | 0.617 |             |
| - | 3  | 1297  | pcr.1_Missense_M   | NM_212551    | NP_997716    | Q96S90 | LYSM1_HUMAN |                              | 0  | ATCCTCCTGGTC | 0.562 |             |
| + | 10 | 1662  | P5K1A_uc001exk.    | NM_001135638 | NP_001129110 | Q99755 | PI51A_HUMAN | PIPK.                        | 3  | ATCATTGACATT | 0.428 |             |
| - | 6  | 663   | _Mutation_p.A1441  | NM_003944    | NP_003935    | Q13228 | SBP1_HUMAN  |                              | 0  | GGGAGCTGCCC  | 0.587 |             |
| - | 4  | 337   | _Intron SELENBP    | NM_003944    | NP_003935    | Q13228 | SBP1_HUMAN  |                              | 0  | GACTGGGCAGC  | 0.607 |             |
| - | 6  | 1081  | iZ_uc010pdc.1_Mi   | NM_015100    | NP_055915    | Q7Z3K3 | POGZ_HUMAN  |                              | 3  | AGTGGGAGTGG  | 0.577 |             |
| + | 19 | 3394  | Je.1_Missense_Mt   | NM_020770    | NP_065821    | Q9P2M7 | CING_HUMAN  | Potential.                   | 3  | GTTAAAGAACTA | 0.493 |             |
| + | 20 | 3469  | e.1_Missense_Mu    | NM_020770    | NP_065821    | Q9P2M7 | CING_HUMAN  | Potential.                   | 3  | TGAAGGCTTTG  | 0.542 |             |
| + | 2  | 348   | e_Mutation_p.G18   | NM_030918    | NP_112180    | Q96L92 | SNX27_HUMAN | PDZ.                         | 3  | TGAGGGGGCGA  | 0.493 |             |
| + | 3  | 729   | _p.G145E SNX27_    | NM_030918    | NP_112180    | Q96L92 | SNX27_HUMAN | PX.                          | 3  | TCGGGGATTGG  | 0.408 |             |
| - | 4  | 567   | JKH_uc001eza.3     | NM_006862    | NP_006853    | Q9Y2W6 | TDRKH_HUMAN | KH 2.                        | 2  | TGAAAGCTGCT  | 0.483 |             |
| - | 2  | 1958  |                    | NM_001004432 | NP_001004432 | Q6UY18 | LIGO4_HUMAN | lasmic (Potential).          | 1  | CTTGGCAGTGA  | 0.542 |             |
| - | 2  | 1436  |                    | NM_001004432 | NP_001004432 | Q6UY18 | LIGO4_HUMAN | Potential); Ig-like C2-type. | 1  | CTTTCGGATCA  | 0.612 | rs140280186 |
| - | 2  | 1313  |                    | NM_001004432 | NP_001004432 | Q6UY18 | LIGO4_HUMAN | ilar (Potential); LRRCT.     | 1  | CAGGTGGCGGC  | 0.612 |             |
| - | 2  | 452   |                    | NM_001004432 | NP_001004432 | Q6UY18 | LIGO4_HUMAN | ilar (Potential); LRR 2.     | 1  | CAATTCCTGGA  | 0.622 |             |
| - | 3  | 412   | uc001ezm.1_Intror  | NM_005620    | NP_005611    | P31949 | S10AB_HUMAN |                              | 0  | GACAGCCTTGA  | 0.532 |             |
| - | 2  | 4600  | ie.1_Missense_Mu   | NM_007113    | NP_009044    | Q07283 | TRHY_HUMAN  | proximate tandem repeats.    | 5  | CTGGAGGAATT  | 0.597 |             |
| - | 2  | 1528  | ie.1_Missense_Mt   | NM_007113    | NP_009044    | Q07283 | TRHY_HUMAN  | roximate tandem repeats.     | 5  | TTGCTCCCGCC  | 0.577 |             |
| - | 3  | 2184  |                    | NM_001122965 | NP_001116437 | Q6XPR3 | RPTN_HUMAN  | Gln-rich.                    | 0  | CTCTCCTCTGC  | 0.562 |             |
| - | 3  | 6564  |                    | NM_001009931 | NP_001009931 | Q86YZ3 | HORN_HUMAN  | 24                           | 3  | CAGACCCATGC  | 0.622 |             |
| - | 3  | 10606 |                    | NM_002016    | NP_002007    | P20930 | FILA_HUMAN  | ich); Filaggrin 21.          | 16 | TTGTCCTGGCC  | 0.567 |             |
| - | 3  | 10301 |                    | NM_002016    | NP_002007    | P20930 | FILA_HUMAN  | Ser-rich.                    | 16 | GCCTGGAGCTG  | 0.597 |             |
| - | 3  | 3494  | uc001ezv.2_5'Flanl | NM_002016    | NP_002007    | P20930 | FILA_HUMAN  | Ser-rich.                    | 16 | GCCTGGAGCTG  | 0.602 |             |
| - | 3  | 2450  | uc001ezv.2_5'Flanl | NM_002016    | NP_002007    | P20930 | FILA_HUMAN  | Ser-rich.                    | 16 | GGGAGGACTCA  | 0.572 | rs72698904  |
| - | 3  | 1807  | uc001ezv.2_5'Flanl | NM_002016    | NP_002007    | P20930 | FILA_HUMAN  | ggrin 3); Ser-rich.          | 16 | AGGAAGCTTCAT | 0.557 |             |
| - | 3  | 4899  | uc001ezv.2_Intron  | NM_001014342 | NP_001014364 | Q5D862 | FILA2_HUMAN | Filaggrin 6.                 | 17 | AATTCTGGCTCT | 0.522 |             |
| - | 3  | 4470  | uc001ezv.2_Intron  | NM_001014342 | NP_001014364 | Q5D862 | FILA2_HUMAN | Filaggrin 5.                 | 17 | TAGTTCGGTGT  | 0.502 |             |
| - | 3  | 2586  | uc001ezv.2_Intron  | NM_001014342 | NP_001014364 | Q5D862 | FILA2_HUMAN | Ser-rich.                    | 17 | ATCTAGACTCAT | 0.512 |             |
| - | 3  | 1140  | uc001ezv.2_Intron  | NM_001014342 | NP_001014364 | Q5D862 | FILA2_HUMAN | Ser-rich.                    | 17 | TAGCTCCATATC | 0.522 |             |
| - | 2  | 129   |                    | NM_016190    | NP_057274    | Q9UBG3 | CRNN_HUMAN  |                              | 3  | CTTGCCATAGCC | 0.522 |             |
| + | 2  | 119   |                    | NM_001025231 | NP_001020402 | Q5T749 | KPRP_HUMAN  | Gln-rich.                    | 5  | AGGGTCCCTCC  | 0.582 |             |
| + | 2  | 299   | R1B_uc009wnx.1_    | NM_003125    | NP_003116    | P22528 | SPR1B_HUMAN |                              | 1  | TCACTCCAGCAC | 0.617 |             |

|   |    |         |                       |              |              |        |             |                                |    |                 |       |             |
|---|----|---------|-----------------------|--------------|--------------|--------|-------------|--------------------------------|----|-----------------|-------|-------------|
| - | 2  | 251     |                       | NM_001014291 | NP_001014313 | Q9BYE4 | SPR2G_HUMAN | proximate tandem repeats.      | 0  | AATGCTCAGGTG    | 0.597 |             |
| + | 3  | 356     |                       | NM_176823    | NP_789793    | Q86SG5 | S1A7A_HUMAN |                                | 1  | GGGAAGCCAGT     | 0.532 |             |
| + | 2  | 307     | .G29E INTS3_uc0       | NM_023015    | NP_075391    | Q68E01 | INT3_HUMAN  | Ala/Gly-rich.                  | 3  | ggagcaggagcccca | 0.413 | rs140871791 |
| + | 8  | 947_948 | _Missense_Mutatir     | NM_023015    | NP_075391    | Q68E01 | INT3_HUMAN  |                                | 3  | GGGAACGGGTG     | 0.515 |             |
| + | 16 | 1841    | .p.E334D INTS3_u      | NM_023015    | NP_075391    | Q68E01 | INT3_HUMAN  |                                | 3  | GAAAGAGGATCT    | 0.512 |             |
| - | 7  | 1389    |                       | NM_020699    | NP_065750    | Q8WXI9 | P66B_HUMAN  | CR2.                           | 0  | CTGCACTAGGC     | 0.478 |             |
| - | 32 | 4510    | p.H389Y NUP210L       | NM_207308    | NP_997191    | Q5VU65 | P210L_HUMAN |                                | 11 | GGCATGCTCTAC    | 0.493 |             |
| - | 10 | 1355    | _Site NUP210L_u       | NM_207308    | NP_997191    | Q5VU65 | P210L_HUMAN |                                | 11 | CAACACCATCT     | 0.403 |             |
| - | 4  | 638     | 0peh.1_Splice_Site    | NM_207308    | NP_997191    | Q5VU65 | P210L_HUMAN |                                | 11 | AGTTTACCTAATT   | 0.418 |             |
| + | 6  | 646     | 0pel.1_Missense_I     | NM_014847    | NP_055662    | Q14157 | UBP2L_HUMAN |                                | 2  | TGGCACCAGA      | 0.448 |             |
| + | 5  | 816     | .p.P227S HAX1_uc      | NM_006118    | NP_006109    | O00165 | HAX1_HUMAN  | calization in sarcoplasmic r   | 0  | CTAAACCAGATC    | 0.483 |             |
| - | 3  | 1012    | HE_uc001ffc.2_RN      | NM_001010846 | NP_001010846 | Q5VZ18 | SHE_HUMAN   |                                | 6  | TGGGGGCCGCG     | 0.667 |             |
| - | 1  | 629     | _uc001ffd.2_5'Flan    | NM_001010846 | NP_001010846 | Q5VZ18 | SHE_HUMAN   | Ser-rich.                      | 6  | CCCAGggaggaa    | 0.433 | rs138829106 |
| - | 9  | 1068    |                       | NM_017582    | NP_060052    | Q7Z7E8 | UB2Q1_HUMAN |                                | 0  | TCAAAGGGAAAG    | 0.597 |             |
| - | 2  | 544     | .p.T115D ADAR_uc0     | NM_001111    | NP_001102    | P55265 | DSRAD_HUMAN |                                | 6  | TCTCTGCCACGT    | 0.532 |             |
| - | 2  | 1278    | .p.L17F KCNN3_u       | NM_002249    | NP_002240    | Q9UGI6 | KCNN3_HUMAN | =Segment S2; (Potential).      | 1  | TGATAAGGCATT    | 0.542 |             |
| - | 10 | 1944    | p.A600T PBXIP1_u      | NM_020524    | NP_065385    | Q96AQ6 | PBIP1_HUMAN |                                | 1  | CCCAGCCCAGG     | 0.602 |             |
| - | 10 | 972     | .p.G276R PBXIP1_u     | NM_020524    | NP_065385    | Q96AQ6 | PBIP1_HUMAN | Potential.                     | 1  | TAGCCCTTTGGC    | 0.592 |             |
| - | 9  | 1431    | ise_Mutation_p.P4     | NM_183001    | NP_892113    | P29353 | SHC1_HUMAN  | CH1.                           | 2  | TCTCTGGATCTC    | 0.592 |             |
| + | 3  | 1511    | ie_Mutation_p.T28     | NM_025207    | NP_079483    | Q8NFF5 | FAD1_HUMAN  |                                | 3  | TACAGACCATTG    | 0.562 |             |
| + | 11 | 1216    | .p.T72L ADAM15_uc0    | NM_207197    | NP_997080    | Q13444 | ADA15_HUMAN | 'B. Extracellular (Potential). | 6  | AGCCCCAGCCA     | 0.637 |             |
| + | 2  | 229     | .p.G6_uuc001fft.1_RN  | NM_025058    | NP_079334    | Q7Z4K8 | TRI46_HUMAN | ype 1; degenerate.             | 3  | CTGTATCCACAA    | 0.612 |             |
| - | 22 | 2727    | ense_Mutation_p.v     | NM_007112    | NP_009043    | P49746 | TSP3_HUMAN  | SP C-terminal.                 | 5  | ATCCGCCACAA     | 0.537 |             |
| - | 13 | 1695    | .p.MP3_uc001fft.2_E   | NM_003993    | NP_003984    | P49760 | CLK2_HUMAN  | rotein kinase.                 | 0  | CAAGGTCAGCC     | 0.567 |             |
| - | 5  | 586     | .p.PKLR_uc001fka.3    | NM_000298    | NP_000289    | P30613 | KPYR_HUMAN  |                                | 5  | CAGCACCTGGG     | 0.677 |             |
| - | 25 | 8872    | .p.ASH1L_uc001fkt.2   | NM_018489    | NP_060959    | Q9NR48 | ASH1L_HUMAN | BAH.                           | 11 | TCCGGTGGATCT    | 0.473 |             |
| - | 3  | 5000    | .p.S1507F ASH1L_u     | NM_018489    | NP_060959    | Q9NR48 | ASH1L_HUMAN |                                | 11 | ATCGGGAAGAG     | 0.483 |             |
| - | 3  | 4157    | .p.S1226F ASH1L_u     | NM_018489    | NP_060959    | Q9NR48 | ASH1L_HUMAN |                                | 11 | TCAAAAGAATGC    | 0.403 |             |
| - | 3  | 2998    | p.E840K ASH1L_u       | NM_018489    | NP_060959    | Q9NR48 | ASH1L_HUMAN |                                | 11 | CCCTTCCAGTT     | 0.398 |             |
| - | 2  | 539     | .p.R20K ASH1L_u       | NM_018489    | NP_060959    | Q9NR48 | ASH1L_HUMAN |                                | 11 | CTCTTTCTTGAA    | 0.403 |             |
| + | 9  | 914     | .p.Ld.3_Missense_ML   | NM_018116    | NP_060586    | Q9BUK6 | MSTO1_HUMAN |                                | 0  | TACACAGCTCTC    | 0.522 |             |
| - | 21 | 3836    | .p.ON4L_uc001fmb.3    | NM_001037533 | NP_001032622 | Q3T8J9 | GON4L_HUMAN |                                | 3  | TTTGGGTCTAG     | 0.512 |             |
| - | 21 | 2868    | .p.p.S889F ARHG2F     | NM_001162383 | NP_001155855 | Q92974 | ARHG2_HUMAN |                                | 1  | GGACAGAGCGA     | 0.592 |             |
| - | 4  | 408     | .p.mu.2_Missense_M    | NM_001162383 | NP_001155855 | Q92974 | ARHG2_HUMAN |                                | 1  | GCAGGGCCGCT     | 0.572 |             |
| - | 7  | 1235    | .p.ogx.1_Missense_M   | NM_020131    | NP_064516    | Q9NRR5 | UBQL4_HUMAN |                                | 2  | ATGTAGGGTGTCT   | 0.532 |             |
| + | 6  | 1406    | .p.pg2.1_Splice_Site  | NM_170707    | NP_733821    | P02545 | LMNA_HUMAN  |                                | 2  | GAGAGGTGGGC     | 0.642 |             |
| - | 3  | 173     | .p.i_uc001fnx.1_5'UT  | NM_198406    | NP_940798    | Q6TCH4 | PAQR6_HUMAN | lasmic (Potential).            | 0  | CAAAGCCGAGC     | 0.622 |             |
| + | 6  | 875     | .p.tutation_p.P196L f | NM_144772    | NP_658985    | Q8NCW5 | AIBP_HUMAN  |                                | 1  | CTACCCTGACA     | 0.532 |             |
| - | 8  | 839     | .p.iPATCH4_uc001fpl   | NM_015590    | NP_056405    | Q5T310 | GPCT4_HUMAN |                                | 1  | TCATTCCTTTAG    | 0.463 |             |
| - | 1  | 437     | .p.S59L C1orf66_uc0   | NM_030980    | NP_112242    | Q9H9L3 | I20L2_HUMAN |                                | 2  | TTCTTTGAAGGT    | 0.507 |             |
| - | 4  | 467     | .p.fpx.1_Missense_M   | NM_024540    | NP_078816    | Q96A35 | RM24_HUMAN  |                                | 0  | ACTAGGGATCA     | 0.572 |             |
| - | 2  | 293     | .p.fpx.1_Missense_M   | NM_024540    | NP_078816    | Q96A35 | RM24_HUMAN  |                                | 0  | GTCTTCATCAG     | 0.582 |             |
| - | 2  | 817     | .p.si.1_Intron INSRR  | NM_014215    | NP_055030    | P14616 | INSRR_HUMAN |                                | 20 | GTCCACCAGCA     | 0.627 |             |
| + | 12 | 1443    | .p.p.A162T NTRK1_u    | NM_002529    | NP_002520    | P04629 | NTRK1_HUMAN | lasmic (Potential).            | 17 | GGCTGGCCATG     | 0.627 |             |
| + | 8  | 1014    | .p.fql.2_Missense_M   | NM_144702    | NP_653303    | Q8N4P6 | LRC71_HUMAN | LRR 5.                         | 0  | CGTTCCCTGC      | 0.716 |             |
| - | 4  | 656     | .p.t.2_Missense_Mut   | NM_001145312 | NP_001138784 | P41162 | ETV3_HUMAN  |                                | 0  | GTTGGGCATCA     | 0.313 |             |
| - | 6  | 1014    | .p.RL4_uc010phy.1_F   | NM_031282    | NP_112572    | Q96PJ5 | FCRL4_HUMAN | 4. Extracellular (Potential).  | 4  | GCTGGGTCTCC     | 0.617 |             |

|   |    |         |                   |              |              |        |                                           |   |               |       |
|---|----|---------|-------------------|--------------|--------------|--------|-------------------------------------------|---|---------------|-------|
| - | 9  | 1399    | L2_uc010phz.1_In  | NM_030764    | NP_110391    | Q96LA5 | FCRL2_HUMAN (Potential), ITIM motif 1.    | 2 | 3AATAGGTGAAC  | 0.512 |
| - | 6  | 1002    | ie_Mutation_p.P29 | NM_052938    | NP_443170    | Q96LA6 | FCRL1_HUMAN xellular (Potential).         | 7 | AGTAGGCACTAC  | 0.557 |
| + | 9  | 1449    | vsq.2_Missense_I  | NM_018240    | NP_060710    | Q96J84 | KIRR1_HUMAN otential), Ig-like C2-type 4. | 1 | CCCAGGTCCTG   | 0.642 |
| + | 11 | 1714    | vsq.2_Missense_I  | NM_018240    | NP_060710    | Q96J84 | KIRR1_HUMAN 5. Extracellular (Potential). | 1 | GGGGACCCTGG   | 0.572 |
| + | 1  | 68      |                   | NM_001004473 | NP_001004473 | Q8NGX5 | O10K1_HUMAN xellular (Potential).         | 1 | CAGGCTGCAGC   | 0.512 |
| + | 1  | 169     | uc001fso.1_RNA    | NM_001004472 | NP_001004472 | Q8NGX6 | O10R2_HUMAN Name=1; (Potential).          | 3 | TATCTAGTCATTC | 0.433 |
| - | 51 | 7196    |                   | NM_003126    | NP_003117    | P02549 | SPTA1_HUMAN nd 2. 2 (Potential).          | 8 | AGCATAGCCCT   | 0.468 |
| - | 4  | 669     |                   | NM_003126    | NP_003117    | P02549 | SPTA1_HUMAN                               | 8 | TCAGGGCCCCGC  | 0.527 |
| - | 2  | 387     |                   | NM_004833    | NP_004824    | O14862 | AIM2_HUMAN DAPIN.                         | 3 | TAGCTACTTGTAT | 0.388 |
| + | 2  | 1027    | p.3_Missense_Mu   | NM_002036    | NP_002027    | Q16570 | DUFFY_HUMAN Name=6; (Potential).          | 2 | GACTGGATTTCC  | 0.562 |
| - | 2  | 301_302 | Site_p.G66_splice | NM_000567    | NP_000558    | P02741 | CRP_HUMAN Pentaxin.                       | 1 | TGTACCCACGG   | 0.455 |
| - | 4  | 615     | _5'Flank C1orf204 | NM_001013661 | NP_001013683 | Q5VU13 | VSIG8_HUMAN Potential), Ig-like V-type 2. | 1 | TCGTTGCCATATC | 0.592 |
| - | 2  | 137     | jk.2_5'UTR CCDC   | NM_012337    | NP_036469    | Q9UL16 | CCD19_HUMAN                               | 1 | TATCTCCAAGA   | 0.517 |
| - | 30 | 3620    | v.3_Missense_Mut  | NM_004371    | NP_004362    | P53621 | COPA_HUMAN                                | 2 | AGTCTCTTTGGC  | 0.512 |
| + | 17 | 2235    | p.P566L NCSTN_    | NM_015331    | NP_056146    | Q92542 | NICA_HUMAN lasmic (Potential).            | 2 | GGAGCCAGGAG   | 0.527 |
| + | 5  | 1242    | Y9_uc001fwx.2_Inl | NM_002348    | NP_002339    | Q9HGB7 | LY9_HUMAN otential), Ig-like C2-type 2.   | 1 | GGACCCCGCTG   | 0.552 |
| - | 9  | 815     | STD1_uc009wtw.2   | NM_007122    | NP_009053    | P22415 | USF1_HUMAN                                | 3 | CTCCACTGTGG   | 0.537 |
| - | 3  | 226     | F1_uc001fxj.2_5'U | NM_007122    | NP_009053    | P22415 | USF1_HUMAN                                | 3 | CTCTTCCGTTTC  | 0.488 |
| - | 10 | 1445    | _p.A213T ARHGA    | NM_001025598 | NP_001020769 | Q7Z616 | RHG30_HUMAN                               | 3 | TGCTGCCTCTA   | 0.637 |
| + | 2  | 780     | _HDC9_uc001fxs.2  | NM_152366    | NP_689579    | Q8NEP7 | KLDC9_HUMAN                               | 0 | ATCCAGGTCATC  | 0.512 |
| + | 13 | 1681    | _Mutation_p.R302I | NM_001122764 | NP_001116236 | P50336 | PPOX_HUMAN                                | 1 | TGGGCGCCAGG   | 0.522 |
| - | 3  | 413     | uc001fyr.1_Missen | NM_003779    | NP_003770    | O60512 | B4GT3_HUMAN enal (Potential).             | 0 | ACGAGGGTGAG   | 0.572 |
| - | 3  | 315     | uc001fyr.1_Missen | NM_003779    | NP_003770    | O60512 | B4GT3_HUMAN type II membrane protein;     | 0 | GCTGGGAGCCC   | 0.602 |
| + | 13 | 1727    | 376S NDUFS2_uc    | NM_004550    | NP_004541    | O75306 | NDUS2_HUMAN                               | 1 | AGGCTCCTGGT   | 0.453 |
| + | 3  | 408     |                   | NM_001102566 | NP_001096036 | A6NKN8 | PC4L1_HUMAN IQ.                           | 0 | TTCAGGGCAAG   | 0.527 |
| - | 1  | 11      |                   | NM_001013625 | NP_001013647 | Q5VTH2 | CA192_HUMAN                               | 0 | TAGTGGCCATG   | 0.458 |
| + | 3  | 174     | se_Mutation_p.A4  | NM_001136219 | NP_001129691 | P12318 | FCG2A_HUMAN otential), Ig-like C2-type 1. | 1 | CAAAGGCTGTG   | 0.587 |
| + | 5  | 763     | se_Mutation_p.A2C | NM_001136219 | NP_001129691 | P12318 | FCG2A_HUMAN ical; (Potential).            | 1 | TAGTGGCCTTGA  | 0.517 |
| + | 8  | 967     |                   | NM_201563    | NP_963857    |        |                                           | 0 | AACAGCTGACG   | 0.254 |
| + | 3  | 319     | gba.1_Missense_I  | NM_004001    | NP_003992    | P31994 | FCG2B_HUMAN 1. Extracellular (Potential). | 0 | TACACGCCCTG   | 0.587 |
| + | 5  | 988     | p.A161T PBX1_uc   | NM_002585    | NP_002576    | P40424 | PBX1_HUMAN xobox; TALE-type.              | 5 | AGCAAGCGACA   | 0.398 |
| - | 6  | 858     |                   | NM_199351    | NP_955383    | Q71H61 | ILDR2_HUMAN lasmic (Potential).           | 1 | TGAGGGGGCTC   | 0.592 |
| + | 6  | 637     | ie_Mutation_p.G1E | NM_032858    | NP_116247    | Q96JY0 | MAEL_HUMAN                                | 1 | ACGTGGGCATA   | 0.373 |
| + | 6  | 448     | p.A96T POU2F1_    | NM_002697    | NP_002688    | P14859 | PO2F1_HUMAN                               | 5 | AGGCAGCCATT   | 0.493 |
| - | 23 | 3438    | sense_Mutation_p  | NM_018417    | NP_060887    | Q96PN6 | ADCYA_HUMAN                               | 3 | TCAGATGTCTTC  | 0.373 |
| - | 3  | 1076    | lqgf.3_Missense_I | NM_006996    | NP_008927    | O60779 | S19A2_HUMAN ical; (Potential).            | 0 | GAGAGGAGTAG   | 0.483 |
| - | 20 | 6009    |                   | NM_000130    | NP_000121    | P12259 | FA5_HUMAN :5/8 type C 1.                  | 6 | AATTCTGCTGCA  | 0.338 |
| - | 13 | 3576    |                   | NM_000130    | NP_000121    | P12259 | FA5_HUMAN B.                              | 6 | GACTGGGGTCT   | 0.483 |
| - | 13 | 2709    |                   | NM_000130    | NP_000121    | P12259 | FA5_HUMAN B.                              | 6 | ATTCTCCAGCAC  | 0.453 |
| - | 10 | 1718    | f112_uc001ggj.2_I | NM_000450    | NP_000441    | P16581 | LYAM2_HUMAN ar (Potential), Sushi 6.      | 5 | TTCAGGACAGG   | 0.537 |
| + | 17 | 1849    | ae C1orf112_uc009 | NM_018186    | NP_060656    | Q9NSG2 | CA112_HUMAN                               | 0 | ATCAGGCAAGG   | 0.388 |
| - | 14 | 2384    | YL3_uc001ggt.2_N  | NM_181093    | NP_851607    | Q8IZE3 | PAGE1_HUMAN action with EZR.              | 2 | CTTCCAGCCTI   | 0.363 |
| + | 16 | 3790    | mh.1_Missense_M   | NM_015172    | NP_055987    | Q9Y520 | PRC2C_HUMAN                               | 0 | AGCTAGAGAGA   | 0.468 |
| + | 16 | 4767    | mh.1_Missense_M   | NM_015172    | NP_055987    | Q9Y520 | PRC2C_HUMAN                               | 0 | CTTCTGAAAGC   | 0.398 |
| + | 19 | 6207    | e_Mutation_p.P95  | NM_015172    | NP_055987    | Q9Y520 | PRC2C_HUMAN                               | 0 | AGACCCACAG    | 0.453 |
| - | 5  | 1230    | gjj.3_Missense_Iv | NM_033319    | NP_201576    | Q8N0S6 | CENPL_HUMAN                               | 0 | AAATTGCCAGT   | 0.308 |
| + | 15 | 1977    |                   | NM_018122    | NP_060592    | Q6PI48 | SYDM_HUMAN                                | 2 | AGGCCGTAGC    | 0.388 |

rs145559645



|   |     |       |                   |              |              |        |             |                            |    |                 |       |
|---|-----|-------|-------------------|--------------|--------------|--------|-------------|----------------------------|----|-----------------|-------|
| - | 6   | 1296  |                   | NM_000488    | NP_000479    | P01008 | ANT3_HUMAN  |                            | 1  | .GAGGTCATCTCC   | 0.473 |
| - | 5   | 981   |                   | NM_000488    | NP_000479    | P01008 | ANT3_HUMAN  |                            | 1  | .ACTTGCCTTCCTC  | 0.527 |
| - | 10  | 1825  | jjv.2_Missense_Mt | NM_172071    | NP_742068    | Q5TC82 | RC3H1_HUMAN | Pro-rich.                  | 2  | .AGAACCTCGAG    | 0.488 |
| + | 7   | 1165  | AP1L_uc001gju.2   | NM_014857    | NP_055672    | Q5R372 | RBG1L_HUMAN |                            | 4  | .ACAAAGAATTAC   | 0.363 |
| + | 4   | 840   | lgi.1_Missense_M  | NM_014412    | NP_055227    | Q9HB71 | CYBP_HUMAN  | tion with SKP1. CS.        | 0  | .CTGTGGAAGGC    | 0.363 |
| - | 18  | 3664  | .1_Missense_Mut   | NM_003285    | NP_003276    | Q92752 | TENR_HUMAN  | rogen C-terminal.          | 11 | .ATCAGCCCATTI   | 0.398 |
| - | 16  | 3370  | .1_Missense_Mut   | NM_003285    | NP_003276    | Q92752 | TENR_HUMAN  | onnectin type-III 9.       | 11 | .GCCCTCCAGTC    | 0.557 |
| + | 2   | 1673  | e_Mutation_p.A17C | NM_020318    | NP_064714    | Q9BXP8 | PAPP2_HUMAN |                            | 16 | .GGCTGCCACTA    | 0.557 |
| + | 3   | 2357  | e_Mutation_p.P39I | NM_020318    | NP_064714    | Q9BXP8 | PAPP2_HUMAN |                            | 16 | .CAGCCCCTTCA    | 0.587 |
| + | 8   | 4283  | A2_uc009www.2_    | NM_020318    | NP_064714    | Q9BXP8 | PAPP2_HUMAN |                            | 16 | .TCAGCCCCACA    | 0.557 |
| - | 12  | 2236  | d.1_Missense_Mu   | NM_004319    | NP_004310    | O14525 | ASTN1_HUMAN | EGF-like 3.                | 15 | .AGGTGGGGTCCG   | 0.532 |
| + | 16  | 3538  | _Mutation_p.S127I | NM_004841    | NP_004832    | Q9UJF2 | NGAP_HUMAN  |                            | 5  | .CAGCAGCTGCTC   | 0.522 |
| - | 6   | 1838  | _GPS2_uc010pnb.   | NM_004673    | NP_004664    | O95841 | ANGL1_HUMAN | rogen C-terminal.          | 0  | .TCTGTACCATACT  | 0.438 |
| + | 5   | 557   | :1orf125_uc010pnl | NM_144696    | NP_653297    | Q5T1B0 | AXDN1_HUMAN |                            | 0  | .AGAAGGCAGTT    | 0.363 |
| + | 10  | 1026  | _p.R88Q C1orf12E  | NM_144696    | NP_653297    | Q5T1B0 | AXDN1_HUMAN |                            | 0  | .TGCTCGGCAGA    | 0.299 |
| + | 9   | 1745  | _p.L499F TDRD5_   | NM_173533    | NP_775804    | Q8NAT2 | TDRD5_HUMAN |                            | 5  | .AGTTACTCGAA    | 0.348 |
| + | 5   | 2452  | e_Mutation_p.W41  | NM_020950    | NP_066001    | Q5VZ46 | K1614_HUMAN |                            | 4  | .GCCTGGCAGCC    | 0.612 |
| - | 2   | 1674  | SEL_uc001gpk.2_   | NM_021133    | NP_066956    | Q05823 | RN5A_HUMAN  | rotein kinase.             | 5  | .AAAATCTGCCAC   | 0.378 |
| - | 5   | 719   |                   | NM_002928    | NP_002919    | O15492 | RGS16_HUMAN |                            | 1  | .AGTGGCAGAGG    | 0.632 |
| - | 5   | 400   | _p.E48K RGS8_uc   | NM_001102450 | NP_001095920 | P57771 | RGS8_HUMAN  |                            | 1  | .CTTCTCTGTTCG   | 0.383 |
| + | 11  | 865   | L_uc009wyc.2_In   | NM_030769    | NP_110396    | Q9BXD5 | NPL_HUMAN   |                            | 3  | .TTTAGCCCTGA    | 0.413 |
| + | 4   | 416   | _uc001gps.2_Splic | NM_001357    | NP_001348    | Q08211 | DHX9_HUMAN  |                            | 2  | .TTGCAGGTAGC    | 0.458 |
| + | 17  | 2581  | h.2_Missense_Mt   | NM_173156    | NP_775179    | Q92540 | SMG7_HUMAN  | Gln/Pro-rich.              | 3  | .GCCCTACTACC    | 0.463 |
| + | 22  | 3508  | IG7_uc001gqi.2_N  | NM_173156    | NP_775179    | Q92540 | SMG7_HUMAN  |                            | 3  | .ACGGGGACAAG    | 0.527 |
| + | 3   | 429   | sense_Mutation_p  | NM_015149    | NP_055964    | Q9NZL6 | RGL1_HUMAN  | rminal Ras-GEF.            | 11 | .ACTTTACCTATAT  | 0.443 |
| - | 5   | 966   | 1ABP_uc009wyj.2_  | NM_006469    | NP_006460    | Q9Y6Y0 | NS1BP_HUMAN |                            | 5  | .TCGATCCATCTT   | 0.303 |
| + | 15  | 2510  | jrr.1_Missense_Mt | NM_031935    | NP_114141    | Q96RW7 | HMCN1_HUMAN | like C2-type 4.            | 23 | .ATTCAGAAACA    | 0.443 |
| + | 18  | 2939  | jrr.1_Missense_Mt | NM_031935    | NP_114141    | Q96RW7 | HMCN1_HUMAN | like C2-type 6.            | 23 | .TTGAAGGACAGC   | 0.418 |
| + | 30  | 4718  |                   | NM_031935    | NP_114141    | Q96RW7 | HMCN1_HUMAN | ike C2-type 12.            | 23 | .TTTTGGCGGATC   | 0.353 |
| + | 58  | 9195  |                   | NM_031935    | NP_114141    | Q96RW7 | HMCN1_HUMAN | ike C2-type 28.            | 23 | .AGGTCTCTGGTT   | 0.398 |
| + | 64  | 10028 |                   | NM_031935    | NP_114141    | Q96RW7 | HMCN1_HUMAN | ike C2-type 31.            | 23 | .AGCTGGTCTGC    | 0.393 |
| + | 107 | 16820 | jrs.1_Missense_Mt | NM_031935    | NP_114141    | Q96RW7 | HMCN1_HUMAN |                            | 23 | .TGAGCCCATATC   | 0.443 |
| + | 3   | 128   | Site_p.D26_splice | NM_005807    | NP_005798    | Q92954 | PRG4_HUMAN  |                            | 1  | .ATTTTAGATTTATC | 0.428 |
| + | 7   | 2279  | _Mutation_p.S650  | NM_005807    | NP_005798    | Q92954 | PRG4_HUMAN  | C-X-P-X-P-T-T-X. 46; appro | 1  | .CCATCCACCA     | 0.592 |
| + | 7   | 3160  | e_Mutation_p.P944 | NM_005807    | NP_005798    | Q92954 | PRG4_HUMAN  |                            | 1  | .AAAAGCCAAAA    | 0.423 |
| + | 2   | 256   | oy.1_Missense_M   | NM_021023    | NP_066303    | Q02985 | FHR3_HUMAN  | Sushi 1.                   | 0  | .GTGATGAACATT   | 0.388 |
| + | 2   | 136   | HR2_uc001gtr.1_In | NM_005666    | NP_005657    | P36980 | FHR2_HUMAN  |                            | 3  | .TCCCAGCAATGT   | 0.269 |
| - | 21  | 9382  | .G1457E ASPM_L    | NM_018136    | NP_060606    | Q8IZT6 | ASPM_HUMAN  | IQ 36.                     | 6  | .TTATATCCTCTAT  | 0.378 |
| + | 4   | 304   | .1_Intron PTPRC_  | NM_002838    | NP_002829    | P08575 | PTPRC_HUMAN | ellular (Potential).       | 12 | .AGTGTCCACTT    | 0.418 |
| + | 6   | 650   | 10ppg.1_Missense  | NM_002838    | NP_002829    | P08575 | PTPRC_HUMAN | ellular (Potential).       | 12 | .CTTCTCTACAG    | 0.552 |
| + | 29  | 3295  | _p.E991K PTPRC_   | NM_002838    | NP_002829    | P08575 | PTPRC_HUMAN | hatase 2. Cytoplasmic (Po  | 12 | .TGAAGGAGACC    | 0.418 |
| + | 1   | 173   |                   | NM_001105517 | NP_001098987 | P0C7Q3 | FA58B_HUMAN |                            | 0  | .GCTAGGGATGC    | 0.498 |
| - | 2   | 849   | Mutation_p.D248N  | NM_012482    | NP_036614    | Q9Y2X9 | ZN281_HUMAN |                            | 2  | .TCCATCTCCAAC   | 0.483 |
| - | 16  | 3237  | oj.1_Missense_Mu  | NM_014875    | NP_055690    | Q15058 | KIF14_HUMAN | quired for CIT-binding.    | 7  | .GTGCCATGAGC    | 0.383 |
| - | 6   | 2012  | ipj.1_Missense_Mt | NM_014875    | NP_055690    | Q15058 | KIF14_HUMAN | inesin-motor.              | 7  | .AACAGGATGTTC   | 0.368 |
| + | 1   | 101   |                   | NM_018265    | NP_060735    | Q3KP66 | CA106_HUMAN |                            | 3  | .GGAGGAAGAT     | 0.612 |
| - | 30  | 4359  | zl.1_Missense_Mu  | NM_017596    | NP_060066    | O75037 | KI21B_HUMAN | WD 2.                      | 6  | .GTTGGGGTGGC    | 0.577 |

|   |    |      |                   |              |              |        |             |                                |    |              |       |             |
|---|----|------|-------------------|--------------|--------------|--------|-------------|--------------------------------|----|--------------|-------|-------------|
| - | 7  | 1272 | p.H319Y KIF21B_u  | NM_017596    | NP_060066    | O75037 | KI21B_HUMAN |                                | 6  | AAACGTGCACCA | 0.612 |             |
| + | 20 | 4611 | x.2_Missense_Mut  | NM_020443    | NP_065176    | Q8NEY1 | NAV1_HUMAN  |                                | 4  | TGGTGGTGAGG  | 0.493 |             |
| + | 26 | 5521 | rx.2_Missense_Mu  | NM_020443    | NP_065176    | Q8NEY1 | NAV1_HUMAN  |                                | 4  | CCACACCTTCC  | 0.567 |             |
| + | 2  | 582  | NPPEP_uc001gxf.   | NM_020216    | NP_064601    | Q9H4A4 | AMPB_HUMAN  |                                | 1  | ACACGCCTGCT  | 0.502 |             |
| + | 2  | 3488 | _p.G99D ELF3_uc   | NM_004433    | NP_004424    | P78545 | ELF3_HUMAN  | PNT.                           | 0  | GGATGGCGCCA  | 0.572 |             |
| + | 18 | 1817 | R6_uc009xab.2_R   | NM_001017403 | NP_001017403 | Q9HBX8 | LGR6_HUMAN  | Name=2; (Potential).           | 10 | TGCAGCGCCA   | 0.617 |             |
| + | 15 | 2234 | 97L PPP1R12B_u    | NM_002481    | NP_002472    | O60237 | MYPT2_HUMAN |                                | 3  | AGTTCCAGCAA  | 0.582 |             |
| - | 7  | 1110 | _p.S306L SYT2_u   | NM_001136504 | NP_001129976 | Q8N9I0 | SYT2_HUMAN  | ilarity). C2 2. Cytoplasmic    | 3  | TACCTGAAAGG  | 0.587 |             |
| - | 3  | 253  | 5R1_uc010pqa.1_   | NM_016243    | NP_057327    | Q9UHQ9 | NB5R1_HUMAN | -binding FR-type.              | 1  | TCTTGGTGTG   | 0.612 |             |
| - | 9  | 1135 | p.G58S CHI3L1_u   | NM_001276    | NP_001267    | P36222 | CH3L1_HUMAN |                                | 1  | GTTGCCCTTGG  | 0.567 |             |
| - | 2  | 956  | OD_uc010pqi.1_R   | NM_002023    | NP_002014    | Q06828 | FMOD_HUMAN  | LRR 8.                         | 3  | CAGCCGCACAT  | 0.567 |             |
| - | 2  | 263  | OD_uc010pqi.1_R   | NM_002023    | NP_002014    | Q06828 | FMOD_HUMAN  |                                | 3  | AGGGTCATAGG  | 0.597 |             |
| + | 8  | 1890 | _p.E336K ATP2B4_  | NM_001684    | NP_001675    | P23634 | AT2B4_HUMAN | lasmic (Potential).            | 3  | ATGAGGAAAAA  | 0.532 |             |
| + | 14 | 3126 | _p.P748S ATP2B4_  | NM_001684    | NP_001675    | P23634 | AT2B4_HUMAN | lasmic (Potential).            | 3  | TCTGGCCTAAG  | 0.512 |             |
| + | 15 | 3226 | _p.A781V ATP2B4_  | NM_001684    | NP_001675    | P23634 | AT2B4_HUMAN | lasmic (Potential).            | 3  | CGTGGCTGTCA  | 0.537 |             |
| + | 17 | 3588 | 2_Missense_Mutat  | NM_001684    | NP_001675    | P23634 | AT2B4_HUMAN | lasmic (Potential).            | 3  | TGAAGCGGCGC  | 0.488 |             |
| + | 4  | 964  | I3_uc010pqp.1_Nc  | NM_005686    | NP_005677    | Q9UN79 | SOX13_HUMAN |                                | 2  | GACTGGAAGGA  | 0.527 |             |
| - | 15 | 2790 | oqv.1_Missense_M  | NM_002646    | NP_002637    | O00750 | P3C2B_HUMAN |                                | 7  | ATTAGGTGCAC  | 0.547 |             |
| + | 2  | 272  | p.P18L CDK18_uc   | NM_212503    | NP_997668    | Q07002 | CDK18_HUMAN |                                | 2  | AGTGCCCGCA   | 0.552 |             |
| + | 10 | 1587 | .1_RNA MFSD4_L    | NM_181644    | NP_857595    | Q8N468 | MFSD4_HUMAN |                                | 3  | CCCAAGACAGA  | 0.443 |             |
| - | 5  | 1919 | ro.1_Intron SLC45 | NM_033102    | NP_149093    | Q96JT2 | S45A3_HUMAN | Name=11; (Potential).          | 4  | CTGCGGCAGAC  | 0.527 |             |
| - | 7  | 1804 | hdg.1_5'Flank uc  | NM_173854    | NP_776253    | Q8IVJ1 | S41A1_HUMAN |                                | 2  | TTGTGGCTGGA  | 0.592 |             |
| - | 4  | 1269 | ixcb.1_Missense_M | NM_023938    | NP_076427    | Q9BW04 | SARG_HUMAN  |                                | 4  | AACAGGAGATC  | 0.542 |             |
| + | 2  | 544  | 55_uc010psf.1_R   | NM_000574    | NP_000565    | P08174 | DAF_HUMAN   | Sushi 1.                       | 1  | TTAAGGGCAGT  | 0.368 |             |
| + | 5  | 848  | 2_uc009xch.2_Mis  | NM_001877    | NP_001868    | P20023 | CR2_HUMAN   | xtracellular (Potential).      | 8  | GCCCACCTTCT  | 0.473 |             |
| - | 20 | 4492 |                   | NM_025179    | NP_079455    | O75051 | PLXA2_HUMAN | icat; (Potential).             | 3  | TGCCCGCGGCC  | 0.587 |             |
| - | 2  | 1344 | ha.3_Missense_M   | NM_025179    | NP_079455    | O75051 | PLXA2_HUMAN | ilar (Potential). Sema.        | 3  | GGTCGGGAAGT  | 0.577 |             |
| - | 14 | 2461 | _Missense_Mutat   | NM_001017402 | NP_001017402 | Q13751 | LAMB3_HUMAN | Domain II.                     | 6  | GAGACCATTGA  | 0.547 | rs144538210 |
| - | 8  | 1796 | iv.2_Missense_Mi  | NM_014873    | NP_055688    | Q92604 | LGAT1_HUMAN |                                | 2  | TATGGCCCTTGC | 0.378 |             |
| - | 8  | 1063 | Opte.1_Missense_I | NM_018252    | NP_060722    | Q9H813 | TM206_HUMAN | ellular (Potential).           | 1  | AGTGACTATCTC | 0.313 |             |
| - | 8  | 1534 | ie_Mutation_p.P33 | NM_144567    | NP_653168    | Q5VTE6 | ANGE2_HUMAN |                                | 0  | TGTACAGAAAG  | 0.378 |             |
| - | 1  | 183  | EL2_uc001hka.2_   | NM_144567    | NP_653168    | Q5VTE6 | ANGE2_HUMAN |                                | 0  | GTAGCCCTTCC  | 0.667 |             |
| + | 11 | 2915 | p.A707V RPS6KC    | NM_012424    | NP_036556    | Q96S38 | KS6C1_HUMAN | otein kinase 2.                | 8  | TTGATGCTTAC  | 0.413 |             |
| + | 2  | 179  |                   | NM_016343    | NP_057427    | P49454 | CENPF_HUMAN | d for localization to the cyto | 13 | AATGAGCTGGG  | 0.393 |             |
| + | 6  | 869  |                   | NM_016343    | NP_057427    | P49454 | CENPF_HUMAN | d for localization to the cyto | 13 | TAATTCTCAAAG | 0.448 |             |
| + | 13 | 5314 |                   | NM_016343    | NP_057427    | P49454 | CENPF_HUMAN |                                | 13 | CTGGTGCAGTG  | 0.448 |             |
| + | 20 | 9337 |                   | NM_016343    | NP_057427    | P49454 | CENPF_HUMAN |                                | 13 | GGAGCCAGTA   | 0.478 |             |
| - | 47 | 9746 |                   | NM_206933    | NP_996816    | O75445 | USH2A_HUMAN | ential). Fibronectin type-III  | 26 | TGATGCCACGA  | 0.388 |             |
| - | 39 | 7759 |                   | NM_206933    | NP_996816    | O75445 | USH2A_HUMAN | ential). Fibronectin type-III  | 26 | AGCTGGTGTAG  | 0.512 |             |
| - | 29 | 6239 |                   | NM_206933    | NP_996816    | O75445 | USH2A_HUMAN | ellular (Potential).           | 26 | CTGCTCCTGTT  | 0.388 | rs111598839 |
| - | 24 | 5341 |                   | NM_206933    | NP_996816    | O75445 | USH2A_HUMAN | 1. Extracellular (Potential).  | 26 | TCGCGGGAGCC  | 0.408 |             |
| - | 23 | 5201 |                   | NM_206933    | NP_996816    | O75445 | USH2A_HUMAN | 1. Extracellular (Potential).  | 26 | CATTTTCCATCA | 0.338 |             |
| - | 19 | 4532 | iv.2_Nonsense_Mu  | NM_206933    | NP_996816    | O75445 | USH2A_HUMAN | tential). Fibronectin type-III | 26 | TTCTCCAGGAG  | 0.403 |             |
| - | 16 | 3616 | iv.2_Missense_Mu  | NM_206933    | NP_996816    | O75445 | USH2A_HUMAN | tential). Fibronectin type-III | 26 | ATCAGGTGGAC  | 0.428 |             |
| - | 6  | 1348 | kv.2_Missense_Mi  | NM_206933    | NP_996816    | O75445 | USH2A_HUMAN | nal. Extracellular (Potential  | 26 | ATTAGGAATGC  | 0.498 |             |
| - | 2  | 796  | hlg.3_Missense_M  | NM_018040    | NP_060510    | Q9NW75 | GPTC2_HUMAN |                                | 1  | CGTTTCTCAC   | 0.328 |             |
| - | 2  | 153  | 1hlg.3_Nonsense_M | NM_018040    | NP_060510    | Q9NW75 | GPTC2_HUMAN |                                | 1  | AAATGCCTCA   | 0.383 |             |

|   |    |       |                                                  |              |              |        |             |                      |    |               |       |             |
|---|----|-------|--------------------------------------------------|--------------|--------------|--------|-------------|----------------------|----|---------------|-------|-------------|
| - | 29 | 4354  |                                                  | NM_004446    | NP_004437    | P07814 | SYEP_HUMAN  | -tRNA synthetase.    | 2  | GAACTCCCTATA/ | 0.358 |             |
| - | 11 | 1700  | lz.1_Missense_Mu                                 | NM_004446    | NP_004437    | P07814 | SYEP_HUMAN  | yl-tRNA synthetase.  | 2  | ACCTGAGCAGCA  | 0.383 |             |
| + | 9  | 1399  | rn.1_Nonsense_M                                  | NM_018650    | NP_061120    | Q9P0L2 | MARK1_HUMAN | rotein kinase.       | 10 | AGAGAGCGAGTT  | 0.348 |             |
| + | 16 | 2512  | rn.1_Missense_Mt                                 | NM_018650    | NP_061120    | Q9P0L2 | MARK1_HUMAN |                      | 10 | AACGGGTGCA    | 0.502 |             |
| - | 5  | 1635  |                                                  | NM_024746    | NP_079022    | Q6UWX4 | HIPL2_HUMAN |                      | 1  | CTTACCCACTC/  | 0.323 |             |
| + | 5  | 3257  | sa.1_Missense_Mt                                 | NM_198551    | NP_940953    | Q5JRA6 | MIA3_HUMAN  | ellular (Potential). | 5  | ACCCACCCACT   | 0.468 |             |
| + | 17 | 4411  | o.E1245K MIA3_uc                                 | NM_198551    | NP_940953    | Q5JRA6 | MIA3_HUMAN  | lasmic (Potential).  | 5  | TAGTTGAAGAG/  | 0.378 |             |
| + | 5  | 792   | uu.1_Missense_M                                  | NM_144695    | NP_653296    | Q5VW32 | BROX_HUMAN  | BRO1.                | 0  | GAAAAGAAAAG   | 0.328 |             |
| + | 2  | 181   |                                                  | NM_032890    | NP_116279    | Q96F81 | DISP1_HUMAN |                      | 0  | TTGTGGTTCTG/  | 0.488 |             |
| + | 6  | 999   |                                                  | NM_032890    | NP_116279    | Q96F81 | DISP1_HUMAN |                      | 0  | GACTGGAACCTT/ | 0.398 | rs79910153  |
| + | 8  | 4522  |                                                  | NM_032890    | NP_116279    | Q96F81 | DISP1_HUMAN |                      | 0  | AGAATGAACCA/  | 0.448 |             |
| + | 1  | 780   |                                                  | NM_152610    | NP_689823    | Q8N715 | CA065_HUMAN |                      | 2  | GGACTCCCAGC   | 0.602 |             |
| + | 3  | 568   | puy.1_Missense_M                                 | NM_001748    | NP_001739    | P17655 | CAN2_HUMAN  | lpain catalytic.     | 5  | CTCACCTTGA    | 0.493 |             |
| - | 9  | 1331  | g6_splice LBR_uc                                 | NM_002296    | NP_002287    | Q14739 | LBR_HUMAN   |                      | 2  | GACATACCCATC/ | 0.353 |             |
| - | 7  | 1379  | g_Mutation_p.G30                                 | NM_001008493 | NP_001008493 | Q8N8S7 | ENAH_HUMAN  |                      | 2  | GTGGTCCCAAG/  | 0.224 |             |
| - | 2  | 598   | pd.1_Missense_Mi                                 | NM_001008493 | NP_001008493 | Q8N8S7 | ENAH_HUMAN  | WH1.                 | 2  | GCCCACCACTC   | 0.398 |             |
| - | 2  | 288   | 2_Missense_Mutation_p.L45F PYCR2_uc001hpr.2_Intr |              |              | O75610 | LFTY1_HUMAN |                      | 0  | CCTGAGCGCGG   | 0.617 |             |
| - | 6  | 1126  | ipv.2_Missense_M                                 | NM_152608    | NP_689821    | Q6IQ49 | CA055_HUMAN |                      | 1  | CAGGTGCTACCT  | 0.483 |             |
| - | 2  | 423   |                                                  | NM_022735    | NP_073572    | Q9H3P7 | GCP60_HUMAN | ACB.                 | 0  | TGCTGGATTAT/  | 0.373 |             |
| - | 3  | 2363  |                                                  | NM_002221    | NP_002212    | P27987 | IP3KB_HUMAN |                      | 5  | GTGTCTGCCA/   | 0.537 |             |
| - | 26 | 4381  | 10pvs.1_Missense                                 | NM_003607    | NP_003598    | Q5VT25 | MRCKA_HUMAN | PH.                  | 11 | CAGGGTATATCT  | 0.328 |             |
| + | 3  | 1213  | hrd.2_Missense_M                                 | NM_053052    | NP_444280    | Q5SQN1 | SNP47_HUMAN |                      | 1  | GAACAGAGTCT/  | 0.463 |             |
| + | 14 | 4089  | sn.2_Missense_Mt                                 | NM_001098623 | NP_001092093 | Q5VST9 | OBSCN_HUMAN | Ig-like 14.          | 28 | AGCGGTGTTT    | 0.647 |             |
| + | 64 | 16536 | p.G5498R OBSCN                                   | NM_001098623 | NP_001092093 | Q5VST9 | OBSCN_HUMAN |                      | 28 | CACAGGGGTG    | 0.587 |             |
| - | 1  | 394   |                                                  | NM_003493    | NP_003484    | Q16695 | H31T_HUMAN  |                      | 0  | CCCGGGATAC/   | 0.587 |             |
| - | 4  | 757   | rf96_uc009xfc.2_f                                | NM_145257    | NP_660300    | Q6IQ19 | CA096_HUMAN |                      | 0  | TTTTTCCACCTC  | 0.423 |             |
| - | 2  | 199   | rf96_uc009xfc.2_f                                | NM_145257    | NP_660300    | Q6IQ19 | CA096_HUMAN |                      | 0  | CTGCTCCAGCA/  | 0.632 |             |
| - | 6  | 985   |                                                  | NM_001100    | NP_001091    | P68133 | ACTS_HUMAN  |                      | 0  | CAGGTCTTCC    | 0.602 |             |
| - | 5  | 621   |                                                  | NM_018230    | NP_060700    | Q8WUM0 | NU133_HUMAN |                      | 7  | GCAACCATGA/   | 0.443 |             |
| + | 4  | 3110  | d.1_Missense_Mu                                  | NM_014777    | NP_055592    | Q14146 | URB2_HUMAN  |                      | 3  | ATGATCCCCT    | 0.428 |             |
| - | 3  | 674   | tv.2_Missense_Mt                                 | NM_024554    | NP_078830    | Q8N414 | PGBD5_HUMAN |                      | 4  | TGAAGCCAGTG/  | 0.562 |             |
| + | 18 | 2079  | p.V593I CAPN9_i                                  | NM_006615    | NP_006606    | O14815 | CAN9_HUMAN  | Domain IV.           | 1  | GCCTGGTCCGG   | 0.592 | rs150802007 |
| - | 3  | 454   | l98_uc001huc.1_lr                                | NM_032800    | NP_116189    | Q9H425 | CA198_HUMAN |                      | 0  | ATAGGGCGGAG   | 0.577 |             |
| + | 4  | 1402  |                                                  | NM_001004342 | NP_001004342 | Q6ZTA4 | TRI67_HUMAN | COS.                 | 4  | ACCCCTCCGGG   | 0.547 |             |
| + | 2  | 408   | .1_5'UTR GNPAT_                                  | NM_014236    | NP_055051    | O15228 | GNPAT_HUMAN |                      | 4  | TGTAAACCAATT/ | 0.353 |             |
| - | 19 | 4999  | hvf.2_Missense_M                                 | NM_020808    | NP_065859    | Q9P2F8 | SI1L2_HUMAN |                      | 6  | TCAGGGTGAG/   | 0.517 |             |
| - | 15 | 4450  | hvf.2_Missense_M                                 | NM_020808    | NP_065859    | Q9P2F8 | SI1L2_HUMAN |                      | 6  | GCTGAGTTGCT/  | 0.408 |             |
| - | 14 | 4236  | rvf.2_Missense_M                                 | NM_020808    | NP_065859    | Q9P2F8 | SI1L2_HUMAN | Ser-rich.            | 6  | ACCCACTACTTT  | 0.498 |             |
| + | 1  | 1531  |                                                  | NM_019090    | NP_061963    | Q9P2G4 | K1383_HUMAN |                      | 1  | ATTGAGCCTCAA/ | 0.448 |             |
| + | 1  | 1621  |                                                  | NM_019090    | NP_061963    | Q9P2G4 | K1383_HUMAN |                      | 1  | AGCATCCAAGT/  | 0.423 |             |
| - | 33 | 6068  | e_Mutation_p.A59                                 | NM_014801    | NP_055616    | A6NKB5 | PCX2_HUMAN  | Ser-rich.            | 2  | TAGCGCTGAGT/  | 0.567 |             |
| - | 30 | 5495  | e_Mutation_p.D40                                 | NM_014801    | NP_055616    | A6NKB5 | PCX2_HUMAN  |                      | 2  | CTCGTCCACCA/  | 0.607 |             |
| + | 6  | 1892  | hvs.1_Missense_M                                 | NM_032435    | NP_115811    | Q5TCX8 | M3KL4_HUMAN |                      | 8  | CAGTCCCCGGA/  | 0.567 |             |
| + | 1  | 511   |                                                  | NM_002245    | NP_002236    | O00180 | KCNK1_HUMAN |                      | 1  | CGGTGCTCTCC/  | 0.582 |             |
| - | 2  | 1403  | p.P68S IRF2BP2                                   | NM_182972    | NP_892017    | Q7Z5L9 | I2BP2_HUMAN |                      | 0  | GGCGGACTGT/   | 0.592 |             |
| - | 20 | 3113  | e_Mutation_p.K78                                 | NM_016374    | NP_057458    | Q4LE39 | ARI4B_HUMAN |                      | 3  | GTCATCTTGCT   | 0.383 |             |
| - | 13 | 1495  | hws.3_Missense_M                                 | NM_016374    | NP_057458    | Q4LE39 | ARI4B_HUMAN | RID. Glu-rich.       | 3  | TCCAAGTACAGC  | 0.289 |             |

|   |    |       |                    |              |              |        |             |                               |    |               |       |             |
|---|----|-------|--------------------|--------------|--------------|--------|-------------|-------------------------------|----|---------------|-------|-------------|
| - | 45 | 10443 | i.2_Missense_Mu    | NM_000081    | NP_000072    | Q99698 | LYST_HUMAN  |                               | 12 | CTCCAGGTCTG   | 0.522 |             |
| - | 44 | 10199 | i.2_Missense_Mut   | NM_000081    | NP_000072    | Q99698 | LYST_HUMAN  | BEACH.                        | 12 | CTGCCGATGGA   | 0.483 |             |
| - | 31 | 8405  | ja.1_Missense_Mu   | NM_000081    | NP_000072    | Q99698 | LYST_HUMAN  |                               | 12 | CCCAAGCTGCA   | 0.413 |             |
| - | 23 | 6854  | b.1_RNA LYST_uc    | NM_000081    | NP_000072    | Q99698 | LYST_HUMAN  |                               | 12 | ATCAGGTCGGC   | 0.532 |             |
| - | 21 | 6296  | _Intron LYST_uc01  | NM_000081    | NP_000072    | Q99698 | LYST_HUMAN  |                               | 12 | ACCTACCTATGT  | 0.348 |             |
| - | 6  | 2681  | xs.1_RNA LYST_u    | NM_000081    | NP_000072    | Q99698 | LYST_HUMAN  |                               | 12 | TGGAAGTGGAG   | 0.378 |             |
| + | 6  | 484   | lhv.1_Missense_I   | NM_145861    | NP_665860    | Q8WWZ3 | EDAD_HUMAN  | Death.                        | 0  | CTGGAGGAATT   | 0.522 |             |
| + | 37 | 5161  |                    | NM_001035    | NP_001026    | Q92736 | RYR2_HUMAN  | ilarity). 4 X approximate rej | 33 | ATGTGGATGAA   | 0.537 |             |
| + | 38 | 5996  |                    | NM_001035    | NP_001026    | Q92736 | RYR2_HUMAN  | ilarity). 4 X approximate rej | 33 | CACAGCCAGGA   | 0.403 |             |
| - | 10 | 1334  | 130331_uc010pyc    | NM_021186    | NP_067009    | Q12836 | ZP4_HUMAN   | acellular (Potential).        | 3  | AGACTGACACG   | 0.498 |             |
| + | 5  | 3203  | re.1_Missense_ML   | NM_020066    | NP_064450    | Q9NZ56 | FMN2_HUMAN  | pro-rich. FH1.                | 12 | ACTTCCCGGAG   | 0.711 |             |
| + | 7  | 4378  | AN2_uc010pyf.1_ξ   | NM_020066    | NP_064450    | Q9NZ56 | FMN2_HUMAN  |                               | 12 | ACATGGTAAGTC  | 0.323 |             |
| - | 2  | 277   |                    | NM_000143    | NP_000134    | P07954 | FUMH_HUMAN  |                               | 5  | ACACCTCCAATC  | 0.398 |             |
| - | 3  | 235   |                    | NM_001004343 | NP_001004343 | Q9BXW4 | MLP3C_HUMAN |                               | 1  | TTTGTCCAGCGC  | 0.592 |             |
| - | 13 | 3718  | zu.2_Missense_M    | NM_014812    | NP_055627    | Q5SW79 | CE170_HUMAN | ng to microtubules.           | 2  | TCTGCGCAAGA   | 0.458 |             |
| + | 3  | 222   | p.E55K C1orf101_   | NM_001130957 | NP_001124429 | Q5SY80 | CA101_HUMAN | ellular (Potential).          | 2  | TGCCAGAAACT   | 0.279 |             |
| + | 16 | 2249  | l_splice C1orf101_ | NM_001130957 | NP_001124429 | Q5SY80 | CA101_HUMAN |                               | 2  | TCACAGGTCAT   | 0.323 |             |
| - | 4  | 1158  | ation_p.E38K HNR   | NM_031844    | NP_114032    | Q00839 | HNRPU_HUMAN | 330.2/SPRY.                   | 0  | ACTCTCCATTGT  | 0.343 |             |
| + | 6  | 1963  | p.A508V KIF26B_    | NM_018012    | NP_060482    | Q2KJY2 | KI26B_HUMAN | inesin-motor.                 | 3  | GTTTGCCTTCG   | 0.502 |             |
| + | 14 | 6472  |                    | NM_018012    | NP_060482    | Q2KJY2 | KI26B_HUMAN |                               | 3  | GGAGGCCATGT   | 0.577 |             |
| - | 10 | 1057  | ibi.2_Missense_Mi  | NM_022743    | NP_073580    | Q9H7B4 | SMYD3_HUMAN |                               | 0  | TATCGGGAAGC   | 0.498 |             |
| - | 1  | 393   | ST_uc001ibp.2_5f   | NM_022366    | NP_071761    | Q9H5Q4 | TFB2M_HUMAN |                               | 1  | GTTTTCCCAAT   | 0.463 | rs150011053 |
| - | 32 | 5966  | CTF1_uc009xgs.1_   | NM_015446    | NP_056261    | Q8WYP5 | ELYS_HUMAN  | lear localization (By similar | 7  | TAGATCCTACATC | 0.408 |             |
| - | 1  | 605   |                    | NM_001005487 | NP_001005487 | Q8NGZ3 | O13G1_HUMAN | Name=5; (Potential).          | 1  | CCAGGGTAATAT  | 0.458 |             |
| - | 1  | 874   |                    | NM_001005286 | NP_001005286 | Q8NGZ6 | OR6F1_HUMAN | Name=7; (Potential).          | 0  | ACGAAGCGTATA  | 0.438 |             |
| + | 1  | 47    |                    | NM_001004690 | NP_001004690 | A3KFT3 | OR2M5_HUMAN | ellular (Potential).          | 3  | TCCTGGGAATCT  | 0.443 |             |
| + | 1  | 538   |                    | NM_017504    | NP_059974    | Q96R27 | OR2M4_HUMAN | ellular (Potential).          | 2  | TCTGTGATGTTG  | 0.428 |             |
| + | 1  | 556   |                    | NM_017504    | NP_059974    | Q96R27 | OR2M4_HUMAN | ellular (Potential).          | 2  | CTTTTACCTCTAT | 0.398 |             |
| + | 1  | 26    |                    | NM_001004696 | NP_001004696 | Q8NH00 | OR2T4_HUMAN | ellular (Potential).          | 1  | GGCCAGCCACA   | 0.483 | rs140989725 |
| + | 1  | 343   |                    | NM_001005495 | NP_001005495 | Q8NH03 | OR2T3_HUMAN | Name=3; (Potential).          | 1  | CTGGAGCTGAG   | 0.557 |             |
| + | 1  | 515   |                    | NM_001013355 | NP_001013373 | Q5TZ20 | OR2G6_HUMAN | ellular (Potential).          | 3  | TTCATCGCACAC  | 0.552 |             |
| - | 20 | 2481  | p.M183I DIP2C_u    | NM_014974    | NP_055789    | Q9Y2E4 | DIP2C_HUMAN |                               | 7  | ACCACCATGAG   | 0.612 |             |
| - | 1  | 352   | LF6_uc010qal.1_N   | NM_001300    | NP_001291    | Q99612 | KLF6_HUMAN  |                               | 4  | CTCCTCCAGAG   | 0.557 |             |
| + | 2  | 274   |                    | NM_053049    | NP_444277    | Q969E3 | UCN3_HUMAN  |                               | 0  | GGGGGGCCCCA   | 0.632 |             |
| + | 8  | 862   | o.2_Missense_Mut   | NM_001047160 | NP_001040625 | Q7Z628 | ARHG8_HUMAN | DH.                           | 1  | CCAAGCCTGAT   | 0.398 |             |
| + | 19 | 7632  | iik.2_Missense_Mi  | NM_017782    | NP_060252    | Q5VWN6 | CJ018_HUMAN |                               | 2  | AACTGCACATA   | 0.328 |             |
| - | 15 | 1852  | iks.1_Missense_M   | NM_014688    | NP_055503    | Q92738 | US6NL_HUMAN |                               | 0  | GTGCGCTGCTC   | 0.567 |             |
| - | 15 | 1573  | iks.1_Missense_M   | NM_014688    | NP_055503    | Q92738 | US6NL_HUMAN |                               | 0  | CTGGGGGTGCG   | 0.657 |             |
| - | 2  | 1201  | c.2_Missense_Mu    | NM_080599    | NP_542166    | Q9HAU5 | RENT2_HUMAN | MIF4G 1.                      | 3  | CCAGACCTGAAC  | 0.413 |             |
| + | 13 | 1269  | ilm.2_Splice_Site  | NM_006023    | NP_006014    | O75794 | CD123_HUMAN |                               | 1  | TGACAGAAGAG   | 0.507 |             |
| - | 4  | 555   | nse_Mutation_p.E   | NM_031453    | NP_113641    | Q9H098 | F107B_HUMAN | Potential.                    | 4  | TTGCTCTTCTTC  | 0.443 |             |
| + | 5  | 1095  | l_Mutation_p.G347  | NM_024670    | NP_078946    | Q9H511 | SUV92_HUMAN | Post-SET.                     | 3  | GCAGAGGTTAC   | 0.348 |             |
| - | 8  | 717   | no.2_Missense_Mi   | NM_001033855 | NP_001029027 | Q96SD1 | DCR1C_HUMAN |                               | 1  | CATAGCCATAAG  | 0.398 |             |
| - | 7  | 988   | o.G229V RSU1_uc    | NM_152724    | NP_689937    | Q15404 | RSU1_HUMAN  |                               | 1  | ACACGCCAAGC   | 0.428 |             |
| - | 40 | 6014  |                    | NM_001081    | NP_001072    | O60494 | CUBN_HUMAN  | CUB 14.                       | 19 | CACGGGTGCAT   | 0.512 | rs142570571 |
| - | 12 | 1371  |                    | NM_001081    | NP_001072    | O60494 | CUBN_HUMAN  | alcium-binding (Potential).   | 19 | AACAGGGTTGT   | 0.453 |             |
| - | 3  | 281   | 'L TRDMT1_uc00ξ    | NM_004412    | NP_004403    | O14717 | TRDMT_HUMAN |                               | 1  | GGCAGGGAGGC   | 0.264 |             |

|   |    |      |                   |              |              |        |             |                            |    |                |       |
|---|----|------|-------------------|--------------|--------------|--------|-------------|----------------------------|----|----------------|-------|
| + | 2  | 894  | _Missense_Mutatio | NM_003380    | NP_003371    | P08670 | VIME_HUMAN  | Rod. Coil 1B.              | 4  | :GGCAGGTGGAC   | 0.652 |
| + | 8  | 1570 | lipp.2_Missense_M | NM_001145195 | NP_001138667 | Q504Y0 | S39AC_HUMAN | lasmic (Potential).        | 2  | :AAGCCCCAGAA   | 0.343 |
| + | 3  | 311  | CNB2_uc001ipx.2_  | NM_201596    | NP_963890    | Q08289 | CACB2_HUMAN |                            | 3  | :CGATTCCGATG   | 0.502 |
| - | 17 | 2129 | BL_uc001iqk.2_Inl | NM_006393    | NP_006384    | O76041 | NEBL_HUMAN  | Nebulin 16.                | 2  | :TTTCAGGAGTATC | 0.313 |
| + | 18 | 2330 | t2splice ARMC3_   | NM_173081    | NP_775104    | Q5W041 | ARMC3_HUMAN |                            | 0  | :ACACAGGTATG   | 0.328 |
| + | 6  | 1478 | nse_Mutation_p.P  | NM_019590    | NP_062536    | Q5T5P2 | SKT_HUMAN   | Pro-rich.                  | 7  | :CCAGACCCATC   | 0.517 |
| + | 1  | 580  | D10qde.1_Missens  | NM_020752    | NP_065803    | Q5T848 | GP158_HUMAN | cellular (Potential).      | 8  | :CCCGGGCGGCC   | 0.652 |
| + | 26 | 3236 | Q959R MYO3A_u     | NM_017433    | NP_059129    | Q8NEV4 | MYO3A_HUMAN | rosin head-like.           | 18 | :GCGTCAGGCCA   | 0.408 |
| - | 32 | 4950 | .S1280N ANKRD2    | NM_014915    | NP_055730    | Q9UPS8 | ANR26_HUMAN |                            | 4  | :ATCTGCTCTGC   | 0.408 |
| - | 1  | 198  | 9xku.1_Missense_  | NM_014915    | NP_055730    | Q9UPS8 | ANR26_HUMAN |                            | 4  | :GACTCGCCCTTC  | 0.657 |
| - | 20 | 2472 | 1L1_uc010qdl.1_M  | NM_139312    | NP_647473    | Q96TA2 | YMEL1_HUMAN |                            | 1  | :AAGAACAATTT   | 0.378 |
| - | 1  | 2190 |                   | NR_003525    |              |        |             |                            | 0  | :TGGGAGGTTCT   | 0.542 |
| - | 1  | 192  |                   | NM_001034842 | NP_001030014 | Q3KNS1 | PTHD3_HUMAN |                            | 4  | :GCCCCGTGGCA   | 0.652 |
| + | 5  | 599  |                   | NM_032517    | NP_115906    | Q6UWQ5 | LYZL1_HUMAN |                            | 0  | :TGAGGGCAGAG   | 0.502 |
| - | 6  | 1243 | vb.3_Missense_Mt  | NM_018109    | NP_060579    | Q9NVV4 | PAPD1_HUMAN |                            | 1  | :AATAGGGGGTG   | 0.368 |
| - | 3  | 354  |                   | NM_183058    | NP_898881    | Q7Z4W2 | LYZL2_HUMAN |                            | 0  | :TGTCTGCCGTA   | 0.587 |
| - | 7  | 1530 | 1iwc.1_Nonsense_  | NM_018287    | NP_060757    | Q8IWW6 | RHG12_HUMAN |                            | 0  | :ATGTCTCCACTT  | 0.363 |
| - | 18 | 2520 |                   | NM_004521    | NP_004512    | P33176 | KINH_HUMAN  |                            | 5  | :CCTTTTCCATTT  | 0.313 |
| - | 14 | 2356 | p.G623S EPC1_uc   | NM_025209    | NP_079485    | Q9H2F5 | EPC1_HUMAN  |                            | 4  | :GTAAGCCCTTGT  | 0.343 |
| - | 25 | 4058 | nse_Mutation_p.F  | NM_019619    | NP_062565    | Q8TEW0 | PARD3_HUMAN |                            | 1  | :AGAAGGGCCTC   | 0.502 |
| + | 7  | 1054 |                   | NM_052997    | NP_443723    | Q9BXX3 | AN30A_HUMAN |                            | 9  | :CGTGGCCAGCA   | 0.423 |
| + | 34 | 3425 |                   | NM_052997    | NP_443723    | Q9BXX3 | AN30A_HUMAN | Potential.                 | 9  | :ATATAGTGGGC   | 0.343 |
| + | 5  | 1289 | 33A_uc010qev.1_I  | NM_006974    | NP_008905    | Q06730 | ZN33A_HUMAN | 2H2-type 2.                | 3  | :CAAACCTCACT   | 0.438 |
| - | 5  | 791  | NF33B_uc001jag.   | NM_006955    | NP_008886    | Q06732 | ZN33B_HUMAN |                            | 0  | :GGGTTTCTGAC   | 0.368 |
| - | 9  | 1093 | 1jao.1_Missense_  | NM_145313    | NP_660356    | Q8N9B8 | RGF1A_HUMAN | Ras-GEF.                   | 0  | :CTTGCTGTCTT   | 0.617 |
| - | 2  | 1303 | 1j.2_Missense_Mt  | NM_005674    | NP_005665    | Q16600 | ZN239_HUMAN | 2H2-type 1.                | 0  | :CTTGACTGAAG   | 0.443 |
| - | 2  | 1206 |                   | NM_016204    | NP_057288    | Q9UK05 | GDF2_HUMAN  |                            | 3  | :CCTGGGTGCA    | 0.597 |
| - | 5  | 847  | P22_uc010qgl.1_I  | NM_021226    | NP_067049    | Q7Z5H3 | RHG22_HUMAN | Rho-GAP.                   | 1  | :CTCCCGGATGA   | 0.647 |
| + | 3  | 838  |                   | NM_199459    | NP_955629    | Q711Q0 | CJ071_HUMAN |                            | 0  | :GCAAGCCTCCG   | 0.507 |
| - | 4  | 288  | p.E42K A1CF_uc    | NM_138932    | NP_620310    | Q9NQ94 | A1CF_HUMAN  |                            | 1  | :CATTTTCTGCA   | 0.413 |
| + | 1  | 162  | _5'Flank uc009xox | NM_012242    | NP_036374    | O94907 | DKK1_HUMAN  |                            | 3  | :GATGGCTCTGG   | 0.612 |
| - | 27 | 3954 | se_Mutation_p.P1  | NM_033056    | NP_149045    | Q96QU1 | PCD15_HUMAN | Extracellular (Potential). | 13 | :AATTGGTGGTAT  | 0.368 |
| - | 6  | 599  | a.1_Missense_Mu   | NM_007057    | NP_008988    | O95229 | ZWINT_HUMAN | Potential.                 | 0  | :AAACACCCGTG   | 0.557 |
| + | 10 | 1361 | kj.1_Missense_Mt  | NM_001080512 | NP_001073981 | Q9H694 | BICC1_HUMAN |                            | 4  | :TCACTGGACTAG  | 0.507 |
| - | 37 | 4640 | 1.1_Intron ANK3_u | NM_020987    | NP_066267    | Q12955 | ANK3_HUMAN  |                            | 19 | :TTGCTCCTGTAC  | 0.403 |
| - | 11 | 1441 | se_Mutation_p.E4  | NM_020987    | NP_066267    | Q12955 | ANK3_HUMAN  | ANK 11.                    | 19 | :GGAGTTCATTAT  | 0.423 |
| + | 5  | 795  | p.P257S ARID5B    | NM_032199    | NP_115575    | Q14865 | ARI5B_HUMAN |                            | 4  | :AGAAACCATGCC  | 0.413 |
| + | 1  | 944  |                   | NM_032804    | NP_116193    | Q96SZ5 | AEDO_HUMAN  |                            | 0  | :ACGACCCGGAC   | 0.692 |
| - | 2  | 312  | p.G53E EGR2_uc    | NM_001136177 | NP_001129649 | P11161 | EGR2_HUMAN  |                            | 2  | :CCACTCCGTTT   | 0.652 |
| - | 4  | 511  | e_Mutation_p.A13  | NM_001127384 | NP_001120856 | Q9UI47 | CTNA3_HUMAN |                            | 8  | :CGCAGCCAGCA   | 0.483 |
| - | 2  | 316  | 1jnc.2_Missense_I | NM_021800    | NP_068572    | Q9UKB3 | DJC12_HUMAN | J.                         | 1  | :TTTGGGGTTTT   | 0.343 |
| + | 12 | 2568 | 'PN_uc009xpt.2_M  | NM_032578    | NP_115967    | Q86TC9 | MYPN_HUMAN  | Pro-rich.                  | 5  | :ACCACCACCA    | 0.547 |
| - | 19 | 3119 | se_Mutation_p.L71 | NM_001080449 | NP_001073918 | P51530 | DNA2L_HUMAN |                            | 0  | :CGTGCCAATAAA  | 0.353 |
| + | 15 | 2091 | <50_uc010qjc.1_In | NM_024045    | NP_076950    | Q9BQ39 | DDX50_HUMAN |                            | 1  | :AAATTACCTGAA  | 0.448 |
| + | 4  | 536  | IC1_uc010qje.1_5' | NM_025130    | NP_079406    | Q2TB90 | HKDC1_HUMAN |                            | 5  | :GTCTGGCAGAT   | 0.468 |
| + | 10 | 1508 | je.1_Missense_Mt  | NM_025130    | NP_079406    | Q2TB90 | HKDC1_HUMAN |                            | 5  | :CCGGGTGGCC    | 0.647 |
| + | 9  | 1183 | p.V365A HK1_ucC   | NM_000188    | NP_000179    | P19367 | HXK1_HUMAN  | Regulatory.                | 1  | :GGGAGTGGAGC   | 0.537 |



|   |    |      |                   |              |              |        |             |                                 |    |               |       |             |
|---|----|------|-------------------|--------------|--------------|--------|-------------|---------------------------------|----|---------------|-------|-------------|
| + | 15 | 2203 | i.3_Missense_Mut  | NM_000188    | NP_000179    | P19367 | HXK1_HUMAN  | Catalytic.                      | 1  | CCAGGGGCAGA   | 0.577 |             |
| + | 17 | 1507 | ljqc.1_Missense_M | NM_005203    | NP_005194    | Q5TAT6 | CODA1_HUMAN | al.],Triple-helical region 2 (( | 1  | GCCAGGGATGC   | 0.617 |             |
| - | 3  | 956  |                   | NM_018055    | NP_060525    | Q96S42 | NODAL_HUMAN |                                 | 2  | GGTGGGGCTGC   | 0.473 |             |
| - | 2  | 503  | p.G118D DNAJB1    | NM_017626    | NP_060096    | Q9NXW2 | DJB12_HUMAN |                                 | 0  | CTTCACCGTTGC  | 0.612 |             |
| + | 6  | 603  | uc001jtk.2_Missen | NM_015901    | NP_056985    | Q86X67 | NUD13_HUMAN |                                 | 0  | CTCTTCTCCGC   | 0.522 |             |
| - | 18 | 3913 | p.R387K USP54_u   | NM_152586    | NP_689799    | Q70EL1 | UBP54_HUMAN |                                 | 6  | TGATTTCTCTCTC | 0.483 | rs150112870 |
| - | 5  | 966  |                   | NM_021245    | NP_067068    | Q9NP98 | MYOZ1_HUMAN |                                 | 2  | CAAGTTCCATTTI | 0.512 |             |
| - | 4  | 835  |                   | NM_021245    | NP_067068    | Q9NP98 | MYOZ1_HUMAN | Gly-rich.                       | 2  | TGCCAGCAGCTI  | 0.592 |             |
| + | 9  | 1017 | n_p.P205S PLAU    | NM_002658    | NP_002649    | P00749 | UROK_HUMAN  | peptidase S1.                   | 3  | CGCAGCCATCC   | 0.542 |             |
| - | 5  | 1053 | wh.2_Missense_Mi  | NM_207012    | NP_996895    | Q9Y2T2 | AP3M1_HUMAN | MHD.                            | 0  | TGCAAGCATCA   | 0.368 |             |
| + | 3  | 1056 | wo.1_Missense_M   | NM_012330    | NP_036462    | Q8WYB5 | MYST4_HUMAN |                                 | 16 | ATATCCCAGTG   | 0.527 |             |
| - | 1  | 156  | 5'UTR DUSP13_uc   | NM_001007271 | NP_001007272 | Q6B8I1 | MDSP_HUMAN  |                                 | 0  | TGCAAGAAGAC   | 0.617 |             |
| + | 5  | 417  | ta.2_Nonsense_Mi  | NM_003375    | NP_003366    | P45880 | VDAC2_HUMAN | inded; (By similarity).         | 3  | AAGTGAACAC    | 0.343 |             |
| - | 20 | 2778 |                   | NM_007055    | NP_008986    | O14802 | RPC1_HUMAN  |                                 | 0  | TATCGCCAGTAC  | 0.438 |             |
| + | 7  | 1334 | r_p.P215L NRG3_   | NM_001010848 | NP_001010848 | P56975 | NRG3_HUMAN  | lasmic (Potential).             | 6  | GCATCCTGTGA   | 0.483 |             |
| + | 2  | 399  | n_p.V58I OPN4_uc  | NM_033282    | NP_150598    | Q9UHM6 | OPN4_HUMAN  | ellular (Potential).            | 1  | CCTGGTCCCC    | 0.478 |             |
| + | 5  | 690  | it.1_Missense_Mut | NM_004190    | NP_004181    | P07098 | LIPG_HUMAN  |                                 | 0  | GGGCACCACCA   | 0.378 |             |
| + | 7  | 1326 | ite STAMBPL1_uc   | NM_020799    | NP_065850    | Q96FJ0 | STALP_HUMAN |                                 | 1  | AAACTGGTATGA  | 0.318 |             |
| - | 9  | 1162 |                   | NM_014391    | NP_055206    | Q15327 | ANKR1_HUMAN | ANK 5.                          | 0  | TGAGGCTGTCTG  | 0.453 |             |
| + | 6  | 675  | .1_RNA BTAF1_uc   | NM_003972    | NP_003963    | O14981 | BTAF1_HUMAN | lization signal (Potential).    | 3  | AGGCAGCTGAA   | 0.368 |             |
| + | 32 | 4614 |                   | NM_003972    | NP_003963    | O14981 | BTAF1_HUMAN |                                 | 3  | ATGAAAGAAGAT  | 0.373 |             |
| - | 1  | 2320 |                   | NR_002319    |              |        |             |                                 | 0  | CACCGGGTTTC   | 0.478 |             |
| - | 10 | 1104 | 1_uc001kks.2_Mis  | NM_001034954 | NP_001030126 | Q9BX66 | SRBS1_HUMAN |                                 | 1  | ATAGCCTTGCCA  | 0.502 |             |
| - | 4  | 767  | qot.1_Missense_M  | NM_020123    | NP_064508    | Q9HD45 | TM9S3_HUMAN |                                 | 0  | TGGAACCAGTTI  | 0.318 |             |
| - | 20 | 2317 | h.1_Missense_Mu   | NM_003061    | NP_003052    | O75093 | SLIT1_HUMAN | LRRCT 3.                        | 4  | CTTGCGCTTCC   | 0.612 |             |
| - | 16 | 1856 | h.1_Missense_Mu   | NM_003061    | NP_003052    | O75093 | SLIT1_HUMAN | LRRNT 3.                        | 4  | GCTCAGGGATC   | 0.637 |             |
| + | 12 | 1439 | -C16_uc001kkn.2   | NM_198046    | NP_932163    | Q969W1 | ZDH16_HUMAN | lasmic (Potential).             | 1  | AGCCCCCTCCC   | 0.532 | rs12259677  |
| - | 10 | 1599 | p.D404N CRTAC1    | NM_018058    | NP_060528    | Q9NQ79 | CRAC1_HUMAN | GAP 4; atypical.                | 5  | CCCGTCTCCGT   | 0.582 |             |
| - | 8  | 914  | _Mutation_p.G276  | NM_018294    | NP_060764    | Q69YN2 | C19L1_HUMAN |                                 | 0  | GCTTCTCTATGG  | 0.398 |             |
| - | 2  | 93   | :1S2_uc001kqv.1_  | NM_173809    | NP_776170    | Q6QNY1 | BL1S2_HUMAN |                                 | 1  | TGTCTCCACGG   | 0.572 |             |
| + | 2  | 659  |                   | NM_005063    | NP_005054    | O00767 | ACOD_HUMAN  | lasmic (Potential).             | 0  | ATGACCCACCT   | 0.483 |             |
| + | 5  | 503  |                   | NM_003393    | NP_003384    | Q93098 | WNT8B_HUMAN |                                 | 4  | GTGGGGAGGCT   | 0.587 |             |
| - | 1  | 77   | :31B_uc010qpq.1_  | NM_005004    | NP_004995    | O95169 | NDUB8_HUMAN |                                 | 0  | GGATGCCCTTTC  | 0.627 |             |
| + | 3  | 582  |                   | NM_017902    | NP_060372    | Q9NWT6 | HIF1N_HUMAN | ith HIF1A.],Interaction with    | 0  | GAACTGGATTAAT | 0.418 |             |
| - | 9  | 1590 | sn.2_Missense_Mi  | NM_024895    | NP_079171    | Q9H5P4 | PDZD7_HUMAN |                                 | 3  | GGCACCTTCTI   | 0.557 |             |
| - | 8  | 2130 | i.2_Missense_Mut  | NM_013274    | NP_037406    | Q9UGP5 | DPOLL_HUMAN |                                 | 0  | GGAACCTGGC    | 0.607 |             |
| - | 16 | 3159 | se_Mutation_p.P8  | NM_012215    | NP_036347    | O60502 | NCOAT_HUMAN | iferase activity (By similari   | 3  | CTTTGGAAATCC  | 0.413 |             |
| - | 9  | 1761 | se_Mutation_p.Q   | NM_012215    | NP_036347    | O60502 | NCOAT_HUMAN |                                 | 3  | TCCCTGGCTCA   | 0.463 |             |
| - | 4  | 621  | <CNIP2_uc001kue   | NM_173191    | NP_775283    | Q9NS61 | KCIP2_HUMAN | ind 1; degenerate.              | 0  | CCTCAGGCCGG   | 0.617 |             |
| + | 1  | 1425 |                   | NM_024747    | NP_079023    | Q86YV9 | HPS6_HUMAN  |                                 | 0  | ACTGCCCCCAT   | 0.627 |             |
| + | 9  | 4382 | S1328F PPRC1_u    | NM_015062    | NP_055877    | Q5VV67 | PPRC1_HUMAN | raction with CREB1 and NF       | 3  | ATCGTCTTCTC   | 0.597 |             |
| + | 1  | 191  |                   | NM_152310    | NP_689523    | Q9HB03 | ELOV3_HUMAN |                                 | 2  | TCACATGAAGTA  | 0.517 |             |
| + | 6  | 655  | uy.1_Missense_Mi  | NM_004193    | NP_004184    | Q92538 | GBF1_HUMAN  |                                 | 2  | GATAGTTCTAC   | 0.468 |             |
| + | 40 | 5630 | .P1793L GBF1_uc   | NM_004193    | NP_004184    | Q92538 | GBF1_HUMAN  | Pro-rich.                       | 2  | CACCCCGACG    | 0.672 |             |
| + | 5  | 465  | _p.G67D NFKB2_    | NM_001077494 | NP_001070962 | Q00653 | NFKB2_HUMAN | RHD.                            | 3  | GCCCGTGCCT    | 0.582 |             |
| + | 12 | 1356 | _p.A364V NFKB2_   | NM_001077494 | NP_001070962 | Q00653 | NFKB2_HUMAN | RR.],Gly-rich.                  | 3  | TGCAGCCGGG    | 0.607 |             |
| - | 2  | 1056 | .P177S PSD_uc0    | NM_002779    | NP_002770    | A5PKW4 | PSD1_HUMAN  | Pro-rich.                       | 3  | TGGCGGCCCAT   | 0.662 |             |

|   |    |       |                                                    |              |              |        |             |    |               |       |             |
|---|----|-------|----------------------------------------------------|--------------|--------------|--------|-------------|----|---------------|-------|-------------|
| - | 15 | 1280  | vq.2_Missense_Mi                                   | NM_012229    | NP_036361    | P49902 | 5NTC_HUMAN  | 0  | :GCCACCCTTGC  | 0.398 |             |
| + | 19 | 2905  | CS3_uc010qqz.1_                                    | NM_014978    | NP_055793    | Q9UPU3 | SORC3_HUMAN | 10 | FGACAGCCTATG  | 0.532 |             |
| - | 1  | 343   | p.G112E SORCS1                                     | NM_052918    | NP_443150    | Q8WY21 | SORC1_HUMAN | 2  | CCGCTCCGCTC   | 0.716 |             |
| + | 5  | 649   | p.S112N ADD3_u                                     | NM_016824    | NP_058432    | Q9UEY8 | ADDG_HUMAN  | 5  | TTTTAGGTCTTGC | 0.468 |             |
| + | 17 | 1870  |                                                    | NM_005445    | NP_005436    | Q9UQE7 | SMC3_HUMAN  | 3  | ATCTTCCTGGAC  | 0.343 |             |
| + | 3  | 485   | i_p.G70E PDCD4_                                    | NM_014456    | NP_055271    | Q53EL6 | PDCD4_HUMAN | 3  | .CAGTGGGAGTG  | 0.512 |             |
| + | 6  | 576   | e_Mutation_p.W20                                   | NM_203379    | NP_976313    | Q9ULC5 | ACSL5_HUMAN | 3  | ACAGTGGATCATC | 0.448 | rs151027490 |
| - | 22 | 2336  | qsi.1_Missense_M                                   | NM_002313    | NP_002304    | O14639 | ABLM1_HUMAN | 1  | .CTTCAGGGGCT  | 0.433 |             |
| - | 4  | 589   | Qqss.1_Splice_Site                                 | NM_022063    | NP_071346    | Q9H8W3 | F204A_HUMAN | 0  | AAACACCTTTTC  | 0.323 |             |
| + | 2  | 117   | i_uc010qsw.1_5'U                                   | NM_207009    | NP_996892    | Q8TCE6 | FA45A_HUMAN | 1  | ATGGAGAAGTT   | 0.443 |             |
| - | 7  | 424   | KN4_uc001ldz.2_N                                   | NM_213649    | NP_998814    | Q6P4A7 | SFXN4_HUMAN | 1  | CAGTGGCGTCA   | 0.413 |             |
| + | 13 | 1623  | h.2_Missense_Mu                                    | NM_005308    | NP_005299    | P34947 | GRK5_HUMAN  | 3  | ACCCTCCCTTC   | 0.632 |             |
| + | 20 | 2478  | ep.2_Missense_Mi                                   | NM_014937    | NP_055752    | Q9Y2H2 | SAC2_HUMAN  | 2  | .TTTGGCCCAGG  | 0.373 |             |
| + | 20 | 2397  | zz.1_Missense_M                                    | NM_007329    | NP_015568    | Q9UGM3 | DMBT1_HUMAN | 7  | GGATACCAATG   | 0.607 |             |
| + | 20 | 2463  | zz.1_Missense_Mi                                   | NM_007329    | NP_015568    | Q9UGM3 | DMBT1_HUMAN | 7  | AAATGCCCGGT   | 0.622 |             |
| - | 5  | 1030  | 10qy.1_Intron CU                                   | NM_022034    | NP_071317    | Q86UP6 | CUZD1_HUMAN | 2  | ITGGGAGTCACA  | 0.453 |             |
| + | 2  | 289   | n_p.190T LHPP_uc                                   | NM_022126    | NP_071409    | Q9H008 | LHPP_HUMAN  | 0  | CCAGATCCTGA   | 0.632 |             |
| - | 11 | 2587  | .1_Missense_Mut                                    | NM_018180    | NP_060650    | Q7L7V1 | DHX32_HUMAN | 4  | AGATTACTGAAA  | 0.398 |             |
| - | 8  | 2035  | .1_Splice_Site_p.A                                 | NM_018180    | NP_060650    | Q7L7V1 | DHX32_HUMAN | 4  | TGGAGCTTCAA   | 0.443 |             |
| - | 4  | 739   | _p.A109V ADAM1                                     | NM_003474    | NP_003465    | O43184 | ADA12_HUMAN | 9  | TTCGAGCGAGG   | 0.438 |             |
| + | 35 | 3599  | p.E1200K DOCK1                                     | NM_001380    | NP_001371    | Q14185 | DOCK1_HUMAN | 9  | TTAATGGAAAGG  | 0.423 |             |
| + | 47 | 4901  | o.G1634S DOCK1                                     | NM_001380    | NP_001371    | Q14185 | DOCK1_HUMAN | 9  | AGTACGGCGTC   | 0.532 |             |
| - | 7  | 1040  | 37_uc009yav.1_Int                                  | NM_002417    | NP_002408    | P46013 | KI67_HUMAN  | 7  | 3TCTCCCCCTGT  | 0.458 |             |
| - | 1  | 156   | 27_uc010quv.1_5'                                   | NM_173575    | NP_775846    | Q86UX6 | ST32C_HUMAN | 5  | CCCGCCCGCCC   | 0.587 |             |
| - | 1  | 91    |                                                    | NM_001080998 | NP_001074467 | Q96QU4 | FRG2B_HUMAN | 0  | .TGGAGGAGCAG  | 0.502 |             |
| + | 2  | 162   | 3_uc010qvk.1_5'F                                   | NM_145651    | NP_663626    | Q8TD33 | SG1C1_HUMAN | 1  | ATGAGGGGACC   | 0.542 |             |
| + | 9  | 809   |                                                    | NM_178537    | NP_848632    | Q76KP1 | B4GN4_HUMAN | 1  | CCTGCCCGGCC   | 0.672 |             |
| - | 3  | 1823  | w.1_RNA RNH1_u                                     | NM_203389    | NP_976323    | P13489 | RINI_HUMAN  | 0  | GGGGTCCAGGA   | 0.657 |             |
| - | 2  | 1538  | sense_Mutation_p                                   | NM_203389    | NP_976323    | P13489 | RINI_HUMAN  | 0  | GCACCGTGCTT   | 0.632 | rs149360262 |
| + | 8  | 979   | _p.R282K PHRF1                                     | NM_020901    | NP_065952    | Q9P1Y6 | PHRF1_HUMAN | 0  | AGTGAGAGCAA   | 0.652 |             |
| + | 14 | 2380  | RF1_uc010qwe.1_                                    | NM_020901    | NP_065952    | Q9P1Y6 | PHRF1_HUMAN | 0  | CCGGCCCCCAG   | 0.692 |             |
| - | 13 | 1897  | 3ycc.2_Missense_I                                  | NM_021924    | NP_068743    | Q9HBB8 | CDHR5_HUMAN | 0  | :CCCACCGGGTG  | 0.672 | rs139590704 |
| + | 4  | 1138  |                                                    | NM_000797    | NP_000788    | P21917 | DRD4_HUMAN  | 0  | .CCCCGCGGCTG  | 0.672 |             |
| + | 5  | 673   | lra.2_Missense_Mi                                  | NM_006755    | NP_006746    | P37837 | TALDO_HUMAN | 0  | TGAGCCCCCTGG  | 0.607 |             |
| + | 8  | 1403  | uc001lrx.2_5'Flank CD151_uc001lry.2_5'Flank CD151_ | NM_003271    | NP_003262    | Q8N4Y2 | EFC4A_HUMAN | 0  | :CTCAGGTACGG  | 0.592 |             |
| + | 4  | 421   | _p.G71D TSPAN4                                     | NM_003271    | NP_003262    | O14817 | TSN4_HUMAN  | 1  | CGTGGGTGCC    | 0.657 |             |
| - | 31 | 4942  |                                                    | NM_005961    | NP_005952    | Q6W4X9 | MUC6_HUMAN  | 1  | TGATGACTGTGT  | 0.557 |             |
| - | 30 | 3947  |                                                    | NM_005961    | NP_005952    | Q6W4X9 | MUC6_HUMAN  | 1  | CTGTGGGTTTT   | 0.622 |             |
| + | 20 | 2380  | 5B_uc001ltb.2_M                                    | NM_017511    | NP_059981    | Q9HC84 | MUC5B_HUMAN | 0  | :GCTTCCCTGGC  | 0.647 |             |
| + | 51 | 14903 | b.2_Missense_Mu                                    | NM_017511    | NP_059981    | Q9HC84 | MUC5B_HUMAN | 0  | :AGAGCCGAGCA  | 0.662 |             |
| + | 6  | 754   | .Missense_Mutatio                                  | NM_138567    | NP_612634    | Q8NBV8 | SYT8_HUMAN  | 1  | CTCGGGGCATG   | 0.672 |             |
| + | 8  | 1016  | p.P219S LSP1_uc                                    | NM_002339    | NP_002330    | P33241 | LSP1_HUMAN  | 1  | AGACTCCGTCC   | 0.622 |             |
| - | 6  | 1861  | 5_uc010qxr.1_Non                                   | NM_001130520 | NP_001123992 | O14628 | ZN195_HUMAN | 0  | GAGAACCACAT   | 0.393 |             |
| - | 4  | 782   | _p.A31V CHRNA1                                     | NM_020402    | NP_065135    | Q9GZZ6 | ACH10_HUMAN | 1  | AGGCGGCGGCG   | 0.716 |             |
| - | 27 | 4571  | o.R1427K NUP98_                                    | NM_016320    | NP_057404    | P52948 | NUP98_HUMAN | 12 | AGGCCCTAGAA   | 0.443 |             |
| - | 5  | 698   | _p.T136I NUP98_i                                   | NM_016320    | NP_057404    | P52948 | NUP98_HUMAN | 12 | TTAGAGGTGGTA  | 0.378 |             |
| + | 9  | 1706  | p.A380T STIM1_u                                    | NM_003156    | NP_003147    | Q13586 | STIM1_HUMAN | 1  | TGCAGGCTGAG   | 0.483 |             |

|   |    |       |                     |              |              |        |             |                             |    |               |       |             |
|---|----|-------|---------------------|--------------|--------------|--------|-------------|-----------------------------|----|---------------|-------|-------------|
| + | 1  | 881   |                     | NM_001005169 | NP_001005169 | Q8NGK6 | O5211_HUMAN | Name=7; (Potential).        | 2  | TAAATCCCATCAT | 0.498 | rs150466381 |
| + | 1  | 940   |                     | NM_001005169 | NP_001005169 | Q8NGK6 | O5211_HUMAN | lasmic (Potential).         | 2  | GTGATGCACTTCC | 0.458 |             |
| + | 2  | 241   |                     | NM_021801    | NP_068573    | Q9NRE1 | MMP26_HUMAN |                             | 0  | ATGCATGCTCTG  | 0.537 |             |
| - | 1  | 149   |                     | NM_001004760 | NP_001004760 | Q9H2C8 | O51V1_HUMAN | Name=1; (Potential).        | 1  | AATTGCCCAAA   | 0.507 |             |
| + | 1  | 559   | _uc001mam.1_Int     | NM_001004757 | NP_001004757 | Q8NH59 | O51Q1_HUMAN | ellular (Potential).        | 1  | ATATGATCCCGC  | 0.512 |             |
| - | 2  | 1482  | _uc001mam.1_5'Fl    | NM_017481    | NP_059509    | Q9H347 | UBQL3_HUMAN |                             | 3  | GGCTGCCGTGG   | 0.542 |             |
| + | 1  | 277   | _uc001mbq.1_In      | NM_001005165 | NP_001005165 | Q8NGH9 | O52E4_HUMAN | ellular (Potential).        | 2  | TCCAAGAGATC   | 0.463 |             |
| - | 1  | 970   |                     | NM_001005179 | NP_001005179 | Q8NGH8 | O56A4_HUMAN | ellular (Potential).        | 2  | TGAGGGAATTC   | 0.532 |             |
| + | 42 | 13927 | sense_Mutation_p.   | NM_144666    | NP_653267    | Q96M86 | DNHD1_HUMAN | Potential.                  | 2  | TGCAGGATCTG   | 0.637 |             |
| + | 3  | 341   | _Mutation_p.T69I    | NM_001014794 | NP_001014794 | Q13418 | ILK_HUMAN   | n with LIMS1.JANK 3.        | 1  | ATGACACCCCCC  | 0.557 |             |
| - | 21 | 10186 | _uc001mel.1_5'      | NM_003737    | NP_003728    | Q96JQ0 | PCD16_HUMAN | lasmic (Potential).         | 5  | GAGGAGACAGA   | 0.642 |             |
| - | 21 | 9978  | _uc001mel.1_5'      | NM_003737    | NP_003728    | Q96JQ0 | PCD16_HUMAN | lasmic (Potential).         | 5  | CCGAGCTTCAT   | 0.622 |             |
| + | 1  | 290   |                     | NM_178168    | NP_835462    | Q9H207 | O10A5_HUMAN | ellular (Potential).        | 3  | CCTTGGCTGTG   | 0.507 |             |
| + | 1  | 889   |                     | NM_001004684 | NP_001004684 | Q8NGH3 | OR2D3_HUMAN | Name=7; (Potential).        | 0  | CAGCGGTGACT   | 0.418 |             |
| + | 4  | 2230  |                     | NM_176822    | NP_789792    | Q86W24 | NAL14_HUMAN |                             | 8  | CTGTAAGTGTGG  | 0.438 |             |
| + | 11 | 1355  | _rbd.1_Missense_M   | NM_003621    | NP_003612    | Q8ND30 | LIPB2_HUMAN |                             | 4  | CAGGGCCTTCG   | 0.383 |             |
| - | 1  | 761   |                     | NM_153445    | NP_703146    | Q8WZ94 | OR5P3_HUMAN | Name=6; (Potential).        | 1  | GTAATGGTCCCA  | 0.527 |             |
| - | 22 | 3000  | _p.E946K SCUBE2     | NM_020974    | NP_066025    | Q9NQ36 | SCUB2_HUMAN |                             | 2  | GGACTCCTGGG   | 0.448 |             |
| - | 16 | 2034  | _UBE2_uc001mhj.     | NM_020974    | NP_066025    | Q9NQ36 | SCUB2_HUMAN |                             | 2  | CGCTTCTCGTG   | 0.488 |             |
| + | 10 | 1519  | _nhx.2_Missense_M   | NM_015055    | NP_055870    | Q9UH65 | SWP70_HUMAN | Potential.                  | 3  | AGCAGGCCATT   | 0.547 |             |
| - | 3  | 383   | _f.3_5'UTR SBF2_u   | NM_030962    | NP_112224    | Q86WG5 | MTMRD_HUMAN | UDENN.                      | 3  | TTAGGCATGAG   | 0.448 |             |
| + | 4  | 831   | _x.1_Missense_Mu    | NM_001025389 | NP_001020560 | Q01432 | AMPD3_HUMAN |                             | 2  | AGTATCGCGCG   | 0.567 |             |
| + | 21 | 3175  | _njs.2_Missense_M   | NM_017944    | NP_060414    | Q96K76 | UBP47_HUMAN |                             | 2  | CAGATGGCCTTI  | 0.363 |             |
| - | 4  | 585   | _6_splice DKK3_uc   | NM_001018057 | NP_001018067 | Q9UBP4 | DKK3_HUMAN  |                             | 1  | TACTCACCATCC  | 0.642 |             |
| + | 4  | 679   | _p.P131S MICAL2_    | NM_014632    | NP_055447    | O94851 | MICA2_HUMAN |                             | 2  | TCTGGCCTTTC   | 0.552 |             |
| + | 11 | 1702  | _L2_uc001mkb.2_M    | NM_014632    | NP_055447    | O94851 | MICA2_HUMAN |                             | 2  | GGTACCCAAAC   | 0.552 |             |
| + | 23 | 3173  | _41V MICAL2_uc00    | NM_014632    | NP_055447    | O94851 | MICA2_HUMAN |                             | 2  | GGCTCGACGTG   | 0.562 |             |
| + | 14 | 1492  | _uc001mkt.2_Mis     | NM_001178    | NP_001169    | O00327 | BMAL1_HUMAN | PAS 2.                      | 0  | ATTTTGGCATATT | 0.368 |             |
| - | 9  | 1384  | _e_Mutation_p.T36   | NM_032320    | NP_115696    | Q9BSF8 | BTBDA_HUMAN |                             | 0  | TGTAGGTAGGAT  | 0.413 |             |
| + | 5  | 1769  | _rcr.1_Splice_Site  | NM_000922    | NP_000913    | Q13370 | PDE3B_HUMAN |                             | 0  | TTTTAGTCAAGC  | 0.333 |             |
| - | 4  | 1462  | _nmr.3_RNA PIK3C    | NM_002645    | NP_002636    | O00443 | P3C2A_HUMAN |                             | 10 | CAACATCTACTC  | 0.348 |             |
| - | 24 | 2993  |                     | NM_000352    | NP_000343    | Q09428 | ABCC8_HUMAN | smic (By similarity).       | 1  | CACGAGATAGG   | 0.542 | rs72559721  |
| - | 12 | 1841  | _cy.1_Missense_Mt   | NM_000352    | NP_000343    | Q09428 | ABCC8_HUMAN | ity). ABC transmembrane 1   | 1  | AGGGCGAGAAG   | 0.597 |             |
| - | 3  | 266   | _se_Mutation_p.P5E  | NM_005709    | NP_005700    | Q9Y6N9 | USH1C_HUMAN |                             | 1  | GGCTGGGTTCAT  | 0.617 |             |
| - | 18 | 2892  | _p.P758S HPS5_u     | NM_181507    | NP_852608    | Q9UPZ3 | HPS5_HUMAN  |                             | 3  | GGATGGAAAGA   | 0.368 |             |
| - | 9  | 1140  | _Jrdf.1_Splice_Site | NM_001040697 | NP_001035787 | Q8IX04 | UEVLD_HUMAN |                             | 0  | TTCTTACCTTTG  | 0.219 |             |
| + | 3  | 574   |                     | NM_153347    | NP_699178    | Q8N2M4 | TM86A_HUMAN |                             | 1  | GGCAGGGCTGC   | 0.607 |             |
| + | 17 | 1964  | _mpj.2_Missense_M   | NM_019028    | NP_061901    | Q8IUH4 | ZDH13_HUMAN |                             | 0  | TTCTTCGCTCAG  | 0.428 |             |
| + | 8  | 1443  | _i_p.T274I NAV2_u   | NM_145117    | NP_660093    | Q8IVL1 | NAV2_HUMAN  |                             | 6  | CTCCACCCCTA   | 0.602 |             |
| + | 36 | 7212  | _rhz.2_Missense_M   | NM_182964    | NP_892009    | Q8IVL1 | NAV2_HUMAN  |                             | 6  | TCCAGGCCCCC   | 0.557 |             |
| + | 8  | 1609  | _yic.2_Missense_M   | NM_004211    | NP_004202    | Q9Y345 | SC6A5_HUMAN |                             | 4  | CTGGAGCTGGA   | 0.562 |             |
| + | 13 | 1547  | _p.G493E NELL1_u    | NM_006157    | NP_006148    | Q92832 | NELL1_HUMAN | alcium-binding (Potential). | 3  | TCCAGGATACA   | 0.418 |             |
| + | 7  | 862   | _qj.2_Missense_Mt   | NM_213599    | NP_998764    | Q75V66 | ANO5_HUMAN  | lasmic (Potential).         | 4  | AGTATCCCCATC  | 0.453 |             |
| + | 1  | 447   |                     | NM_020346    | NP_065079    | Q9P2U8 | VGLU2_HUMAN | lasmic (Potential).         | 4  | CCCCAGGAAAA   | 0.433 |             |
| - | 1  | 794   |                     | NM_022725    | NP_073562    | Q9NPI8 | FANCF_HUMAN |                             | 1  | TGGGAGGGCGC   | 0.562 |             |
| + | 4  | 508   | _i_p.E6K LUZP2_u    | NM_001009909 | NP_001009909 | Q86TE4 | LUZP2_HUMAN | Potential.                  | 2  | TTCAGGAGGCC   | 0.368 |             |
| - | 18 | 2770  | _rk.3_Missense_Mt   | NM_018490    | NP_060960    | Q9BXB1 | LGR4_HUMAN  | Name=6; (Potential).        | 1  | CCACAGGGCAG   | 0.408 |             |

|   |    |      |                   |              |              |        |             |    |               |       |
|---|----|------|-------------------|--------------|--------------|--------|-------------|----|---------------|-------|
| - | 13 | 2080 |                   | NM_031217    | NP_112494    | Q8NI77 | K118A_HUMAN | 2  | .GAACAGAAATCC | 0.378 |
| - | 3  | 556  |                   | NM_031217    | NP_112494    | Q8NI77 | K118A_HUMAN | 2  | 3CTGATCCTAGC  | 0.378 |
| - | 3  | 541  | v.p.V141M MPPEI   | NM_001584    | NP_001575    | Q15777 | MPPD2_HUMAN | 1  | GGACACAGAGG   | 0.393 |
| - | 3  | 243  | fP1L_uc009yjo.2_l | NM_144981    | NP_659418    | Q96LU5 | IMP1L_HUMAN | 0  | TGAATAGTATAGC | 0.363 |
| + | 4  | 2024 | _p.S347F QSER1    | NM_001076786 | NP_001070254 | Q2KHR3 | QSER1_HUMAN | 6  | 3GCTATCTGATG  | 0.398 |
| + | 2  | 186  | reh.1_Missense_N  | NM_001077242 | NP_001070710 | Q96QD5 | DEPD7_HUMAN | 2  | AGAAGCCATTT   | 0.393 |
| + | 2  | 488  | ense_Mutation_p.E | NM_018393    | NP_060863    | Q9NUJ3 | T11L1_HUMAN | 0  | iCTGTGGAAGGT  | 0.413 |
| - | 21 | 2118 | 1L1_uc001muf.1_   | NM_001326    | NP_001317    | Q12996 | CSTF3_HUMAN | 0  | TCAACAGCTATT  | 0.428 |
| - | 14 | 1347 | 1L1_uc001muf.1_   | NM_001326    | NP_001317    | Q12996 | CSTF3_HUMAN | 0  | ATTCTTCCAGATT | 0.343 |
| + | 12 | 2603 | n.1_Intron HIPK3  | NM_005734    | NP_005725    | Q9H422 | HIPK3_HUMAN | 5  | GGAATGGGAGC   | 0.353 |
| + | 1  | 302  | mun.1_Missense_I  | NM_012194    | NP_036326    | Q6ZVL6 | CK041_HUMAN | 2  | CTCCCCCTCCC   | 0.562 |
| - | 1  | 294  |                   | NM_145804    | NP_665803    | Q8N961 | ABTB2_HUMAN | 2  | GCGACCCACTG   | 0.672 |
| - | 11 | 2256 | we.2_Missense_N   | NM_004171    | NP_004162    | P43004 | EAA2_HUMAN  | 3  | TGGCTGCCAGA   | 0.433 |
| - | 9  | 1929 | _p.G437E SLC1A2   | NM_004171    | NP_004162    | P43004 | EAA2_HUMAN  | 3  | CCAGCCCGGCA   | 0.572 |
| - | 11 | 1946 | ew.1_Nonsense_N   | NM_001001991 | NP_001001991 | Q6UXH9 | PAMR1_HUMAN | 2  | 3GTCCTCATGCT  | 0.572 |
| - | 2  | 180  | OMMD9_uc010rfb    | NM_014186    | NP_054905    | Q9P000 | COMD9_HUMAN | 1  | AGCTGGAACAT   | 0.463 |
| + | 2  | 542  | G1_uc001mwt.2_F   | NM_000448    | NP_000439    | P15918 | RAG1_HUMAN  | 5  | CTAGGCCTTTAC  | 0.502 |
| + | 2  | 2834 | G1_uc001mwt.2_F   | NM_000448    | NP_000439    | P15918 | RAG1_HUMAN  | 5  | 3CTAAAGAGTGC  | 0.468 |
| - | 2  | 1735 | t_uc001mw.1_5'F   | NM_000536    | NP_000527    | P55895 | RAG2_HUMAN  | 5  | TGGCAGGAGTC   | 0.368 |
| - | 2  | 3681 | nd.1_Missense_N   | NM_020929    | NP_065980    | Q9HCJ2 | LRC4C_HUMAN | 8  | TCTCATCATCCA  | 0.468 |
| + | 23 | 3243 | xl.2_Missense_ML  | NM_018259    | NP_060729    | Q96AE7 | TTC17_HUMAN | 5  | ACCATGGCAGTA  | 0.522 |
| + | 1  | 1247 | 36_splice SLC35C  | NM_018389    | NP_060859    | Q96A29 | FUCT1_HUMAN | 0  | CATCGGTGAGTC  | 0.493 |
| + | 10 | 1634 | ncg.2_Missense_I  | NM_052854    | NP_443086    | Q96BA8 | CR3L1_HUMAN | 8  | CTCCGGCTCCC   | 0.637 |
| - | 7  | 2425 | p.L599F AMBRA1    | NM_017749    | NP_060219    | Q9C0C7 | AMRA1_HUMAN | 3  | CCTGAGTGAATC  | 0.483 |
| - | 7  | 1448 | lBRA1_uc001ncv.2  | NM_017749    | NP_060219    | Q9C0C7 | AMRA1_HUMAN | 3  | GGAGGCCCTGG   | 0.627 |
| - | 7  | 1039 | lBRA1_uc001ncv.   | NM_017749    | NP_060219    | Q9C0C7 | AMRA1_HUMAN | 3  | GAGGGCACGCT   | 0.582 |
| - | 8  | 1006 | _p.A185V CKAP5    | NM_001008938 | NP_001008938 | Q14008 | CKAP5_HUMAN | 2  | CCAGGGCCTCT   | 0.373 |
| + | 8  | 1627 | n.1_Missense_Mut  | NM_003682    | NP_003673    | Q8WXG6 | MADD_HUMAN  | 11 | CTATGGCAATG   | 0.458 |
| - | 32 | 3783 |                   | NM_000256    | NP_000247    | Q14896 | MYPC3_HUMAN | 3  | 3GGCAGGGCTTT  | 0.602 |
| - | 32 | 3683 |                   | NM_000256    | NP_000247    | Q14896 | MYPC3_HUMAN | 3  | TCTTGGGTATA   | 0.557 |
| + | 6  | 824  | .C39A13_uc001nff  | NM_001128225 | NP_001121697 | Q96H72 | S39AD_HUMAN | 0  | CCAGCGCTACC   | 0.642 |
| - | 12 | 1434 | /lr.1_Missense_ML | NM_002804    | NP_002795    | P17980 | PRS6A_HUMAN | 4  | GAGCTCCGTGG   | 0.607 |
| - | 6  | 687  | /lr.1_Missense_ML | NM_002804    | NP_002795    | P17980 | PRS6A_HUMAN | 4  | TGTGGGCAGCG   | 0.562 |
| - | 9  | 1487 | se_Mutation_p.P4  | NM_024783    | NP_079059    | Q5U5Z8 | CBPC2_HUMAN | 2  | TCCAGGGTGAA   | 0.488 |
| - | 2  | 382  | j.2_5'UTR FNBP4   | NM_015308    | NP_056123    | Q8N3X1 | FNBP4_HUMAN | 1  | CCGCTTCTGTT   | 0.348 |
| - | 1  | 224  | JP160_uc001ngn.   | NM_015231    | NP_056046    | Q12769 | NU160_HUMAN | 7  | TAGCTCCACGA   | 0.657 |
| - | 7  | 1118 | s_Mutation_p.A271 | NM_004476    | NP_004467    | Q04609 | FOLH1_HUMAN | 3  | CAACAGCCTCT   | 0.368 |
| + | 1  | 406  |                   | NM_001001955 | NP_001001955 | Q8NGP0 | OR4CD_HUMAN | 4  | TGAAGCAGCAT   | 0.468 |
| - | 1  | 355  |                   | NM_001004700 | NP_001004700 | Q6IEV9 | OR4CB_HUMAN | 1  | .GCGATCAACAG  | 0.433 |
| + | 1  | 356  |                   | NM_001005200 | NP_001005200 | Q8N162 | OR8H2_HUMAN | 2  | AATGGCCCATG   | 0.468 |
| + | 1  | 400  |                   | NM_001005202 | NP_001005202 | Q8NH51 | OR8K3_HUMAN | 4  | TACACAGTAATC  | 0.408 |
| - | 1  | 653  |                   | NM_001005245 | NP_001005245 | Q96RB7 | OR5MB_HUMAN | 0  | TGAAGGCATAG   | 0.483 |
| - | 5  | 3626 | .G1105E TNKS1B    | NM_033396    | NP_203754    | Q9C0C2 | TB182_HUMAN | 1  | GCTGCCCTGGG   | 0.592 |
| - | 2  | 548  | s_Mutation_p.R79I | NM_033396    | NP_203754    | Q9C0C2 | TB182_HUMAN | 1  | TCTTCTGGCAC   | 0.667 |
| - | 9  | 1020 | nkl.2_Missense_N  | NM_003627    | NP_003618    | O75387 | LAT3_HUMAN  | 0  | TGGGGGAGCAG   | 0.602 |
| - | 3  | 296  | nko.1_Missense_I  | NM_004223    | NP_004214    | O14933 | UB2L6_HUMAN | 1  | TGATCATGGGAC  | 0.537 |
| + | 3  | 1157 | p.P276S CLP1_uc   | NM_006831    | NP_006822    | Q92989 | CLP1_HUMAN  | 1  | TGTTTACCTTTC  | 0.493 |

|   |    |       |                    |              |              |        |                                       |    |              |       |             |
|---|----|-------|--------------------|--------------|--------------|--------|---------------------------------------|----|--------------|-------|-------------|
| + | 9  | 2211  | p.D266N ZDHHC5     | NM_015457    | NP_056272    | Q9C0B5 | ZDHC5_HUMAN                           | 1  | AGCCAGACCTG/ | 0.512 |             |
| + | 8  | 2096  | sense_Mutation_p.  | NM_001085458 | NP_001078927 | O60716 | CTND1_HUMAN ARM 4.                    | 6  | GTTGGGAGCGG  | 0.488 |             |
| + | 1  | 607   | Q1_uc001nmj.2_li   | NM_001005186 | NP_001005186 | Q8NGQ2 | OR6Q1_HUMAN Name=5; (Potential).      | 1  | ACTGTGGATTTC | 0.517 |             |
| - | 1  | 544   |                    | NM_001005566 | NP_001005566 | Q96R09 | OR5B2_HUMAN xellular (Potential).     | 3  | CCATGACTGCTG | 0.388 |             |
| + | 5  | 1372  | no.2_Missense_IV   | NM_001142521 | NP_001135993 | Q96PZ2 | F111A_HUMAN                           | 3  | TTTTAACTTGTC | 0.423 |             |
| - | 1  | 874   |                    | NM_001039396 | NP_001034485 | Q2M385 | MPEG1_HUMAN xtracellular (Potential). | 2  | TCCAGCAGAGG  | 0.537 |             |
| - | 1  | 458   |                    | NM_001001954 | NP_001001954 | Q8NGI9 | OR5A2_HUMAN Name=4; (Potential).      | 0  | GGAATCCACCC  | 0.458 |             |
| + | 3  | 465   | I_uc001nqe.2_5'Fl  | NM_207341    | NP_997224    | P60852 | ZP1_HUMAN xellular (Potential).       | 0  | AGCTGGCACCA  | 0.607 |             |
| + | 9  | 1480  | e.2_Missense_Mu    | NM_207341    | NP_997224    | P60852 | ZP1_HUMAN llular (Potential). ZP.     | 0  | CAGAACCCAAA  | 0.592 |             |
| + | 4  | 737   | OD TMEM132A_u      | NM_024092    | NP_076997    | Q9BVC6 | TM109_HUMAN                           | 0  | CCAGGGCCTGA  | 0.622 |             |
| + | 6  | 1170  |                    | NM_014207    | NP_055022    | P06127 | CD5_HUMAN ar (Potential). SRCR 3.     | 1  | GAGAGAAATT   | 0.552 |             |
| + | 4  | 524   | se.1_Missense_Mi   | NM_001127392 | NP_001120864 | Q9Y2G1 | MRF_HUMAN Pro-rich.                   | 1  | CTCGGGCTCCG  | 0.672 |             |
| + | 27 | 3538  | p.R1108C C11orf    | NM_001127392 | NP_001120864 | Q9Y2G1 | MRF_HUMAN                             | 1  | TCTACCGCCTG  | 0.627 |             |
| - | 5  | 15023 | IAK_uc001ntk.1_lr  | NM_001620    | NP_001611    | Q09666 | AHNK_HUMAN                            | 19 | CCAGCGATGGC  | 0.463 | rs146517943 |
| - | 5  | 14611 | IAK_uc001ntk.1_lr  | NM_001620    | NP_001611    | Q09666 | AHNK_HUMAN                            | 19 | CATGAACATCCA | 0.522 | rs143263481 |
| - | 5  | 8109  | IAK_uc001ntk.1_lr  | NM_001620    | NP_001611    | Q09666 | AHNK_HUMAN                            | 19 | TCCACTTTGGG  | 0.522 |             |
| - | 5  | 7862  | IAK_uc001ntk.1_lr  | NM_001620    | NP_001611    | Q09666 | AHNK_HUMAN                            | 19 | AGCCAGGCATG  | 0.517 | rs143391519 |
| - | 5  | 7514  | IAK_uc001ntk.1_lr  | NM_001620    | NP_001611    | Q09666 | AHNK_HUMAN                            | 19 | CTACATCCACCT | 0.483 |             |
| - | 5  | 6706  | IAK_uc001ntk.1_lr  | NM_001620    | NP_001611    | Q09666 | AHNK_HUMAN                            | 19 | CACATCCACAT  | 0.507 |             |
| - | 5  | 1325  | IAK_uc001ntk.1_lr  | NM_001620    | NP_001611    | Q09666 | AHNK_HUMAN                            | 19 | TGCCGCCCTTG  | 0.577 |             |
| - | 5  | 1219  | IAK_uc001ntk.1_lr  | NM_001620    | NP_001611    | Q09666 | AHNK_HUMAN                            | 19 | GGTGGGAAATT  | 0.527 |             |
| + | 1  | 607   | _5'Flank EML3_uc   | NM_000327    | NP_000318    | Q03395 | ROM1_HUMAN ical; (Potential).         | 3  | CTCTGGCTCCT  | 0.662 |             |
| - | 9  | 931   | p.P203S GANAB_     | NM_198334    | NP_938148    | Q14697 | GANAB_HUMAN                           | 5  | CACAGGCACAG  | 0.537 |             |
| - | 5  | 503   | p.R60H GANAB_      | NM_198334    | NP_938148    | Q14697 | GANAB_HUMAN                           | 5  | CAAGCGGGAAT  | 0.522 |             |
| - | 2  | 2766  | AB_uc001nuc.2_5'   | NM_030628    | NP_085131    | Q6P9B9 | INT5_HUMAN                            | 2  | TGCCTCCAGGT  | 0.617 |             |
| + | 4  | 397   | R2G_uc001nvb.2_    | NM_002696    | NP_002687    | P62487 | RPB7_HUMAN                            | 0  | GGTTGGACTCT  | 0.299 |             |
| + | 4  | 463   | p.G121D TAF6L_u    | NM_006473    | NP_006464    | Q9Y6J9 | TAF6L_HUMAN                           | 3  | CAAAGGCTGTG  | 0.627 |             |
| + | 12 | 1899  | we.2_Nonsense_f    | NM_002394    | NP_002385    | P08195 | 4F2_HUMAN xellular (Potential).       | 0  | GGGACCAGAA   | 0.617 |             |
| - | 8  | 1149  | ense_Mutation_p.C  | NM_004254    | NP_004245    | Q8TCC7 | S22A8_HUMAN ical; (Potential).        | 3  | CAAAACCCGTA  | 0.493 |             |
| - | 3  | 580   | C22A25_uc001nw     | NM_199352    | NP_955384    | Q6T423 | S22AP_HUMAN Name=3; (Potential).      | 4  | GGTGGGAGCAA  | 0.468 |             |
| + | 3  | 436   |                    | NM_004585    | NP_004576    | Q9UL19 | TIG3_HUMAN                            | 1  | TATATGGCAAGT | 0.522 |             |
| - | 13 | 1823  | uc001nxj.1_5'Flanl | NM_015459    | NP_056274    | Q6DD88 | ATLA3_HUMAN Cytoplasmic.              | 1  | TATGAGAAGAA  | 0.368 |             |
| - | 11 | 1345  | p.A339T ATL3_u     | NM_015459    | NP_056274    | Q6DD88 | ATLA3_HUMAN Cytoplasmic.              | 1  | AGAGGCTGCAG  | 0.403 |             |
| + | 4  | 2817  | TN3_uc001nxp.2_    | NM_201428    | NP_958831    | O95197 | RTN3_HUMAN Potential). Reticulon.     | 1  | TCATCAGTGTGG | 0.488 |             |
| + | 5  | 1150  |                    | NM_138471    | NP_612480    | Q9BUA3 | CK084_HUMAN                           | 0  | TCCCCGGGCGG  | 0.652 |             |
| + | 16 | 2513  | nxv.3_Splice_Site  | NM_001039469 | NP_001034558 | Q7KZ17 | MARK2_HUMAN                           | 3  | CGCAGGTAAGC  | 0.627 |             |
| - | 8  | 1115  |                    | NM_173587    | NP_775858    | Q8IZ40 | RCOR2_HUMAN                           | 2  | CTGGACCTCCT  | 0.637 |             |
| + | 11 | 1016  | ph.1_Missense_M    | NM_000932    | NP_000923    | Q01970 | PLCB3_HUMAN 'I-PLC X-box.             | 2  | AGCGGGGCAGC  | 0.697 |             |
| + | 17 | 1914  | lyph.1_Splice_Site | NM_000932    | NP_000923    | Q01970 | PLCB3_HUMAN                           | 2  | ATCTCAGATACA | 0.642 |             |
| + | 2  | 328   | nse_Mutation_p.G   | NM_012094    | NP_036226    | P30044 | PRDX5_HUMAN Thioredoxin.              | 1  | TGAAGGGGAGC  | 0.597 |             |
| - | 7  | 1458  | p.S316F NRXN2_     | NM_015080    | NP_055895    | P58401 | NRX2B_HUMAN                           | 10 | TGAGGGACAGG  | 0.587 |             |
| - | 2  | 519   | .1_Nonsense_Mut    | NM_004630    | NP_004621    | Q15637 | SF01_HUMAN                            | 3  | TTTCTTGTTCTC | 0.408 |             |
| - | 2  | 501   | .1_Missense_Muti   | NM_004630    | NP_004621    | Q15637 | SF01_HUMAN                            | 3  | TCCAGGGGGAA  | 0.423 |             |
| - | 26 | 2977  |                    | NM_017525    | NP_059995    | Q6DT37 | MRCKG_HUMAN PH.                       | 4  | GGCCCCACTGG  | 0.657 |             |
| - | 2  | 238   |                    | NM_017525    | NP_059995    | Q6DT37 | MRCKG_HUMAN ilarity). Protein kinase. | 4  | GGCTCCTCGGC  | 0.493 |             |
| - | 1  | 587   | p.G111D EHD1_u     | NM_006795    | NP_006786    | Q9H4M9 | EHD1_HUMAN                            | 0  | CGTTGCCCGGC  | 0.687 |             |
| - | 30 | 4272  | bw.2_Missense_M    | NM_015104    | NP_055919    | Q2TAZ0 | ATG2A_HUMAN                           | 2  | GGCCGGGATGC  | 0.657 |             |



|   |    |      |                    |              |              |        |             |                               |              |               |       |             |
|---|----|------|--------------------|--------------|--------------|--------|-------------|-------------------------------|--------------|---------------|-------|-------------|
| + | 2  | 1015 | mv.1_Missense_M    | NM_013299    | NP_037431    |        |             | 0                             | GCGCGCCTGCC  | 0.652         |       |             |
| - | 5  | 638  |                    | NM_080668    | NP_542399    | Q96FF9 | CDCA5_HUMAN | 0                             | GGGTGGAGGTA  | 0.617         |       |             |
| + | 5  | 1038 | cs.1_Missense_Mi   | NM_013265    | NP_037397    | Q9UID3 | FFR_HUMAN   | 0                             | :AGCAGGTGCCG | 0.687         |       |             |
| - | 6  | 1161 | lodr.1_Missense_l  | NM_001077241 | NP_001070709 | Q8N413 | S2545_HUMAN | Solcar 3.                     | 0            | :GCTCACCATGC/ | 0.592 |             |
| - | 5  | 1017 | lodr.1_Missense_l  | NM_001077241 | NP_001070709 | Q8N413 | S2545_HUMAN | Solcar 3.                     | 0            | :ACTGGGATTCTC | 0.607 |             |
| + | 14 | 3021 | _p.P850S SIPA1_L   | NM_006747    | NP_006738    | Q96FS4 | SIPA1_HUMAN |                               | 0            | :GACAGCCCATC/ | 0.617 |             |
| + | 15 | 3138 | _p.D889N SIPA1_L   | NM_006747    | NP_006738    | Q96FS4 | SIPA1_HUMAN | Potential.                    | 0            | :AGGAGGACCTG  | 0.637 |             |
| - | 10 | 1116 | se_Mutation_p.P27  | NM_021975    | NP_068810    | Q04206 | TF65_HUMAN  |                               | 4            | TGGAGGCCGGG   | 0.627 |             |
| + | 9  | 1149 | _p.S333F KAT5_u    | NM_006388    | NP_006379    | Q92993 | KAT5_HUMAN  |                               | 0            | CCATCTCCTCT   | 0.507 |             |
| - | 1  | 2014 |                    | NM_138368    | NP_612377    | Q2VPB7 | YK046_HUMAN |                               | 0            | :AGGGCGGCCAG  | 0.667 |             |
| + | 10 | 1061 |                    | NM_006842    | NP_006833    | Q13435 | SF3B2_HUMAN |                               | 3            | :TGCGAGGGGTC  | 0.552 |             |
| + | 10 | 1374 |                    | NM_018026    | NP_060496    | Q6VY07 | PACS1_HUMAN |                               | 6            | :AGACGGAGATT  | 0.627 |             |
| + | 2  | 282  |                    | NM_153266    | NP_694998    | Q8N4L1 | T151A_HUMAN | ical; (Potential).            | 1            | CGGGGCCGTGG   | 0.741 |             |
| - | 1  | 798  |                    | NM_020404    | NP_065137    | Q9HCU0 | CD248_HUMAN | ellular (Potential).          | 3            | :GAAGCCCTCAG  | 0.682 |             |
| - | 1  | 878  | _l_5'Flank BRMS1_  | NM_006876    | NP_006867    | O43505 | B3GN1_HUMAN | lenal (Potential).            | 0            | :CTGATCCAGCA  | 0.622 |             |
| + | 2  | 277  | _l3_uc001oid.3_Mi  | NM_145065    | NP_659502    | Q8N2H9 | PELI3_HUMAN |                               | 1            | GCCAGGCGAGG   | 0.617 |             |
| + | 17 | 1978 | pe.1_Missense_Mi   | NM_005700    | NP_005691    | Q9NY33 | DPP3_HUMAN  |                               | 2            | :GCGGGCCCTGT  | 0.602 |             |
| - | 1  | 195  | S_uc001oir.2_5'Fl  | NM_018219    | NP_060689    | Q9NVE4 | CCD87_HUMAN |                               | 2            | :AATCCGGCCCT  | 0.682 |             |
| + | 3  | 1192 | c.1_Intron RBM4_L  | NM_002896    | NP_002887    | Q9BWF3 | RBM4_HUMAN  | with TNPO3. Poly-Ala.         | 1            | :AGTGGCAGCTG  | 0.567 |             |
| - | 35 | 6940 | _uc001ojc.1_Silent | NM_006946    | NP_008877    | O15020 | SPTN2_HUMAN | PH.                           | 4            | :CTTTTCGGTAAT | 0.587 |             |
| + | 5  | 558  | :11orf80_uc001oji. | NM_024650    | NP_078926    | Q8N6T0 | CK080_HUMAN |                               | 0            | :AATCTCTGCAA/ | 0.433 |             |
| + | 9  | 945  | _p.G80D C11orf80   | NM_024650    | NP_078926    | Q8N6T0 | CK080_HUMAN |                               | 0            | :GGCTGGCATGG  | 0.478 |             |
| + | 8  | 868  | jl.1_Missense_Mul  | NM_005133    | NP_005124    | Q9Y256 | FACE2_HUMAN |                               | 2            | CGCGCCCTTGG   | 0.612 |             |
| - | 19 | 3053 | ojp.1_Missense_M   | NM_022172    | NP_071504    | P11498 | PYC_HUMAN   |                               | 4            | :CGTCACCTCT   | 0.617 |             |
| + | 4  | 574  | /rm.1_Missense_M   | NM_001619    | NP_001610    | P25098 | ARBK1_HUMAN | 3S. N-terminal.               | 1            | :TGTGGCCCGCA  | 0.597 | rs67452775  |
| + | 3  | 239  | 9A_uc001oks.2_5'   | NM_004584    | NP_004575    | Q99638 | RAD9A_HUMAN |                               | 0            | :CTATGCCTGCT  | 0.632 |             |
| - | 5  | 935  | ense_Mutation_p./  | NM_004910    | NP_004901    | O00562 | PITM1_HUMAN |                               | 3            | :TGCGAGCAGTC  | 0.692 |             |
| - | 4  | 1074 | ons.2_Missense_M   | NM_022338    | NP_071733    | Q96F05 | CK024_HUMAN | ellular (Potential).          | 0            | :GTGTGGCCAA   | 0.602 |             |
| + | 9  | 2092 | sg.2_Missense_Ml   | NM_002335    | NP_002326    | O75197 | LRP5_HUMAN  | 3. Extracellular (Potential). | 7            | :TCACGGGCGTC  | 0.587 |             |
| + | 20 | 2309 | onu.2_Missense_l   | NM_001164161 | NP_001157633 | Q5H9R7 | PP6R3_HUMAN |                               | 0            | AGCACCCAACCT  | 0.448 |             |
| + | 3  | 466  | MBP2_uc001ooj.1_   | NM_002180    | NP_002171    | P38935 | SMBP2_HUMAN |                               | 0            | :AGTCCCACGAT  | 0.527 |             |
| + | 5  | 648  | nse_Mutation_p.Lf  | NM_139075    | NP_620714    | Q8NHX9 | TPC2_HUMAN  | ellular (Potential).          | 0            | :TGAGTCTCGTG  | 0.612 |             |
| + | 24 | 2805 | nse_Mutation_p.Tf  | NM_018043    | NP_060513    | Q5XXA6 | ANO1_HUMAN  | ellular (Potential).          | 2            | :ACCACACCCTC  | 0.577 |             |
| + | 16 | 2252 | l.P685L PPF1A1_u   | NM_003626    | NP_003617    | Q13136 | LIPA1_HUMAN |                               | 3            | :CTACCTGCTT   | 0.582 |             |
| - | 21 | 4939 | l1opz.2_Missense_  | NM_012309    | NP_036441    | Q9UPX8 | SHAN2_HUMAN |                               | 5            | :GTTTGCCTTTGC | 0.522 |             |
| - | 21 | 4312 | l1opz.2_Missense_  | NM_012309    | NP_036441    | Q9UPX8 | SHAN2_HUMAN |                               | 5            | :AGGAGGCAATG  | 0.522 |             |
| - | 14 | 2090 | ssense_Mutation_l  | NM_012309    | NP_036441    | Q9UPX8 | SHAN2_HUMAN | PDZ.                          | 5            | :ACCCACCTTCA  | 0.567 |             |
| + | 3  | 337  | l.2_RNA NADSYN     | NM_018161    | NP_060631    | Q6IA69 | NADE_HUMAN  | :N hydrolase.                 | 2            | :TCCTAGCGGCC  | 0.542 |             |
| - | 25 | 6216 | se_Mutation_p.T1:  | NM_006185    | NP_006176    | Q14980 | NUMA1_HUMAN |                               | 8            | GGGGAGTCATG   | 0.557 |             |
| - | 24 | 6006 | se_Mutation_p.S1f  | NM_006185    | NP_006176    | Q14980 | NUMA1_HUMAN |                               | 8            | :TCAGGAAGGC   | 0.592 |             |
| + | 26 | 3274 | sg.2_Missense_M    | NM_001567    | NP_001558    | O15357 | SHIP2_HUMAN | Pro-rich.                     | 4            | :ATGAGGAGTCT  | 0.612 |             |
| - | 5  | 739  | 1_Intron CLPB_ucf  | NM_030813    | NP_110440    | Q9H078 | CLPB_HUMAN  |                               | 1            | :TTGTCCACTGG  | 0.592 |             |
| - | 23 | 3373 | oss.2_Missense_M   | NM_001040118 | NP_001035207 | Q96P48 | ARAP1_HUMAN | Rho-GAP.                      | 1            | :CTTCTCCTCT   | 0.592 |             |
| + | 1  | 2959 |                    | NM_014786    | NP_055601    | Q96PE2 | ARHG_HUMAN  | Pro-rich.                     | 0            | :TTGGTCCCCT   | 0.612 |             |
| - | 15 | 2865 |                    | NM_015531    | NP_056346    | Q4AC94 | C2CD3_HUMAN |                               | 7            | :AATTACCATCAC | 0.433 | rs146497546 |
| - | 11 | 1665 |                    | NM_173582    | NP_775853    | Q6PCE3 | PGM2L_HUMAN |                               | 1            | :AGCAACCACAA  | 0.378 |             |
| - | 9  | 1046 | sense_Mutation_p   | NM_030792    | NP_110419    | Q8WTR4 | GDPD5_HUMAN | ical; (Potential).            | 1            | :CTGCTGCCACA  | 0.632 |             |

|   |    |       |                   |              |              |        |             |                               |   |                |       |
|---|----|-------|-------------------|--------------|--------------|--------|-------------|-------------------------------|---|----------------|-------|
| - | 4  | 2200  |                   | NM_033063    | NP_149052    | Q96JE9 | MAP6_HUMAN  | Pro-rich.                     | 0 | TCACGGACTCGC   | 0.498 |
| + | 14 | 1590  | nse_Mutation_p.T7 | NM_003369    | NP_003360    | Q9P2Y5 | UVRAG_HUMAN |                               | 6 | AGCAAACCCTTC   | 0.408 |
| - | 5  | 1061  | rrz.1_Missense_Mi | NM_004705    | NP_004696    | O43422 | P52K_HUMAN  |                               | 3 | TAGATAGCTTGG   | 0.393 |
| + | 8  | 1213  | rsb.1_Missense_Iv | NM_020193    | NP_064578    | Q7Z589 | EMSY_HUMAN  | Interaction with BRCA2.       | 6 | GGGTGTCCTCTA   | 0.433 |
| - | 3  | 1925  | i_p.T561I LRRC32  | NM_005512    | NP_005503    | Q14392 | LRC32_HUMAN | cellular (Potential).         | 0 | GGCTGGTCTCC    | 0.667 |
| + | 1  | 576   | Y11_uc009yuu.2_Ir | NM_173039    | NP_766627    | Q8NBQ7 | AQP11_HUMAN |                               | 0 | .CCCCGCGCACC   | 0.642 |
| - | 6  | 1048  | r/m.2_Missense_M  | NM_016578    | NP_057662    | Q96T23 | RSF1_HUMAN  | Glu-rich.                     | 4 | TTTCTTCTTTGAT  | 0.353 |
| + | 6  | 1366  | Y35_uc010rsp.1_Ir | NM_020798    | NP_065849    | Q9P2H5 | UBP35_HUMAN |                               | 3 | AGCTGGCGGAG    | 0.637 |
| - | 4  | 952   | g.2_Missense_Mu   | NM_080491    | NP_536739    | Q9UQC2 | GAB2_HUMAN  |                               | 6 | GGTGGCCGGAA    | 0.552 |
| + | 6  | 2415  | rf82_uc010rss.1_A | NM_145018    | NP_659455    | Q8IXT1 | NOXIN_HUMAN |                               | 2 | ACTTTCTGAAG    | 0.383 |
| + | 9  | 4034  |                   | NM_015885    | NP_056969    | O94913 | PCF11_HUMAN |                               | 1 | AGTAGCTTTTGT   | 0.333 |
| - | 15 | 2051  | _p.R583K DLG2_L   | NM_001364    | NP_001355    | Q15700 | DLG2_HUMAN  | SH3.                          | 6 | TGACTCTCCTGT   | 0.473 |
| - | 1  | 1054  | c.1_RNA CREBZF    | NM_001039618 | NP_001034707 | Q9NS37 | ZHANG_HUMAN | zucine-zipper.                | 1 | AGCGACTCTCTC   | 0.657 |
| + | 7  | 1172  | CC83_uc001pbi.1_  | NM_173556    | NP_775827    | Q8IWF9 | CCD83_HUMAN | Potential.                    | 1 | GACTGGCTCAA    | 0.353 |
| - | 10 | 1180  | 3 PICALM_uc010rt  | NM_007166    | NP_009097    | Q13492 | PICAL_HUMAN |                               | 2 | TTTGCCCTAGGA   | 0.443 |
| + | 2  | 698   | RSS23_uc010rts.   | NM_007173    | NP_009104    | O95084 | PRS23_HUMAN |                               | 2 | CTGCACCCGGCA   | 0.517 |
| - | 2  | 1078  | S23_uc001pcc.1_   | NM_012193    | NP_036325    | Q9ULV1 | FZD4_HUMAN  | Name=2; (Potential).          | 1 | TACTGAGAAATAT  | 0.458 |
| + | 5  | 1541  |                   | NM_000372    | NP_000363    | P14679 | TYRO_HUMAN  | ical; (Potential).            | 3 | GGGCCGTCCTC    | 0.527 |
| - | 14 | 1480  | X4_uc001pcv.2_In  | NM_016931    | NP_058627    | Q9NPH5 | NOX4_HUMAN  | ar (Potential). Mediates inte | 2 | GACTTCCAAAAC   | 0.398 |
| + | 1  | 2697  |                   | NM_001008781 | NP_001008781 | Q8TDW7 | FAT3_HUMAN  | Extracellular (Potential).    | 5 | TGGACCCGGGAA   | 0.423 |
| + | 1  | 3264  |                   | NM_001008781 | NP_001008781 | Q8TDW7 | FAT3_HUMAN  | Extracellular (Potential).    | 5 | CCATCAGGGATC   | 0.468 |
| + | 9  | 5290  |                   | NM_001008781 | NP_001008781 | Q8TDW7 | FAT3_HUMAN  | Extracellular (Potential).    | 5 | ATATTCAGATTGT  | 0.438 |
| + | 23 | 12829 | li.3_Missense_Mu  | NM_001008781 | NP_001008781 | Q8TDW7 | FAT3_HUMAN  | lasmic (Potential).           | 5 | GTCGCCCCGCA    | 0.657 |
| + | 25 | 13665 | i.3_Nonsense_Mut  | NM_001008781 | NP_001008781 | Q8TDW7 | FAT3_HUMAN  | lasmic (Potential).           | 5 | TTGTGGAGACT    | 0.517 |
| - | 7  | 734   | 82_splice MRE11A  | NM_005591    | NP_005582    | P49959 | MRE11_HUMAN |                               | 5 | TGGATCCTGAAAT  | 0.299 |
| + | 3  | 1795  |                   | NM_018039    | NP_060509    | Q6B0I6 | KDM4D_HUMAN |                               | 0 | TCCATGGATGCC   | 0.567 |
| + | 1  | 748   | 2B_uc001pfg.1_5   | NM_032102    | NP_115285    | Q9BRL6 | SRSF8_HUMAN | Arg-rich.                     | 0 | CCGGGGTCCCA    | 0.716 |
| - | 4  | 668   | ESN3_uc001pfl.2_  | NM_144665    | NP_653266    | P58005 | SESN3_HUMAN |                               | 0 | CTTTGTGGCACA   | 0.368 |
| - | 9  | 1225  | 76B_uc001pfm.2_   | NM_144664    | NP_653265    | Q5HYJ3 | FA76B_HUMAN | Potential.                    | 0 | CACAGTTTCTTT   | 0.348 |
| - | 7  | 969   | 76B_uc001pfm.2_   | NM_144664    | NP_653265    | Q5HYJ3 | FA76B_HUMAN |                               | 0 | TTTGGGCTTTTTC  | 0.313 |
| + | 2  | 1765  | CCDC82_uc009y     | NM_003772    | NP_003763    | Q9Y4A0 | JERKL_HUMAN |                               | 0 | GACTGGTAATAC   | 0.353 |
| + | 17 | 2347  | N5_uc001pgb.2_Iv  | NM_014361    | NP_055176    | O94779 | CNTN5_HUMAN | nectin type-III 1.            | 8 | TAGACCCCCAC    | 0.448 |
| + | 21 | 3062  | gb.2_Missense_Mi  | NM_014361    | NP_055176    | O94779 | CNTN5_HUMAN | nectin type-III 3.            | 8 | CACAGGGATTGT   | 0.423 |
| - | 5  | 3034  | e_Mutation_p.G66  | NM_000926    | NP_000917    | P06401 | PRGR_HUMAN  | teroid-binding.               | 4 | CTCCATCCTAGAC  | 0.328 |
| + | 5  | 1221  | _p.P246L YAP1_u   | NM_001130145 | NP_001123617 | P46937 | YAP1_HUMAN  |                               | 3 | ACCACCCCTGG    | 0.507 |
| + | 3  | 442   |                   | NM_182962    | NP_892007    | Q13489 | BIRC3_HUMAN | BIR 1.                        | 4 | TGCTGGATAACT   | 0.443 |
| - | 2  | 292   | IMP8_uc010ruu.1_  | NM_002424    | NP_002415    | P22894 | MMP8_HUMAN  |                               | 4 | GCATTTCTTTAAC  | 0.448 |
| - | 6  | 842   |                   | NM_002427    | NP_002418    | P45452 | MMP13_HUMAN |                               | 3 | GGGGTCTTCAT    | 0.448 |
| + | 17 | 2699  | e_Mutation_p.A85. | NM_001080463 | NP_001073932 | Q8NCM8 | DYHC2_HUMAN | n (By similarity).            | 0 | GTGAGCTGTTT    | 0.294 |
| + | 49 | 8104  | 3_Mutation_p.A265 | NM_001080463 | NP_001073932 | Q8NCM8 | DYHC2_HUMAN | 4 (By similarity).            | 0 | TATTAGCAGGAC   | 0.433 |
| - | 6  | 1283  | hp.2_Missense_M   | NM_025208    | NP_079484    | Q9GZP0 | PDGFD_HUMAN |                               | 2 | CAATTTCTCCAC   | 0.463 |
| - | 3  | 249   | Mutation_p.E15K   | NM_004347    | NP_004338    | P51878 | CASP5_HUMAN | CARD.                         | 3 | GGTATTCCAACA   | 0.348 |
| - | 8  | 1069  | SP1_uc010rvi.1_Iv | NM_033292    | NP_150634    | P29466 | CASP1_HUMAN |                               | 2 | AGTCTTCCAATA   | 0.398 |
| - | 2  | 74    | ASP1_uc010rvh.1_  | NM_001017534 | NP_001017534 | Q5EG05 | CAR16_HUMAN | CARD.                         | 1 | CCATGGAATGG    | 0.413 |
| + | 13 | 2374  | iw.2_Missense_Mi  | NM_000829    | NP_000820    | P48058 | GRIA4_HUMAN | ical; (Potential).            | 8 | CTCGCTGCTT     | 0.403 |
| + | 3  | 582   | .1_Intron AASDHP  | NM_015423    | NP_056238    | Q9NRN7 | ADPPT_HUMAN |                               | 0 | TTCTTTTCATATTA | 0.299 |
| - | 6  | 2181  | _p.M618I GUCY1A   | NM_000855    | NP_000846    | P33402 | GCYA2_HUMAN | anylate cyclase.              | 8 | AAGTTCATCATC   | 0.483 |

|   |    |      |                   |              |              |        |             |                               |     |               |       |
|---|----|------|-------------------|--------------|--------------|--------|-------------|-------------------------------|-----|---------------|-------|
| - | 16 | 2440 | 3_RNA CWF19L      | NM_152434    | NP_689647    | Q2TBE0 | C19L2_HUMAN |                               | 0   | AGAGATCTATCA  | 0.313 |
| - | 2  | 558  | LC35F2_uc001pjs   | NM_017515    | NP_059985    | Q8IXU6 | S35F2_HUMAN | ical; (Potential).            | 1   | CTGTGACCCAGG  | 0.348 |
| - | 17 | 3404 | v.1_Missense_Mur  | NM_002519    | NP_002510    | Q14207 | NPAT_HUMAN  |                               | 2   | ACATTGGGTGAG  | 0.438 |
| + | 62 | 9311 | 1_Intron C11orf65 | NM_000051    | NP_000042    | Q13315 | ATM_HUMAN   |                               | 240 | CGGAAGATGAA   | 0.403 |
| - | 6  | 3299 | z.1_Missense_Mur  | NM_015065    | NP_055880    | Q8NEV8 | EXPH5_HUMAN |                               | 5   | AGTTCGCCATTG  | 0.443 |
| - | 4  | 407  | v.V33M RDX_uc00   | NM_002906    | NP_002897    | P35241 | RADI_HUMAN  | FERM.                         | 0   | CACCACCTAAA   | 0.348 |
| - | 5  | 738  |                   | NM_017589    | NP_060059    | Q9NY30 | BTG4_HUMAN  |                               | 0   | GCGGGGGATTT   | 0.443 |
| + | 6  | 505  | e_Mutation_p.D19  | NM_001100388 | NP_001093858 | Q6PI97 | CK088_HUMAN |                               | 0   | ACTTTGGACTAA  | 0.408 |
| - | 5  | 2158 | ACB1_uc009yyi.2   | NM_138378    | NP_612387    | Q9BRP7 | FDXA1_HUMAN | FDX-ACB.                      | 0   | GTATAACATATAG | 0.458 |
| + | 8  | 1789 | p.G272E DLAT_uc   | NM_001931    | NP_001922    | P10515 | ODP2_HUMAN  | ig site (By similarity).      | 0   | TACAGGGACAG   | 0.418 |
| + | 12 | 2229 | p.P419S DLAT_uc   | NM_001931    | NP_001922    | P10515 | ODP2_HUMAN  | ytic (By similarity).         | 0   | ATCACACCTATT  | 0.338 |
| - | 4  | 475  | mp.3_Missense_M   | NM_138789    | NP_620144    | Q8WWB5 | PIHD2_HUMAN |                               | 1   | ATGGCCATCTG   | 0.368 |
| - | 4  | 364  | 3_5'UTR TMPRSS    | NM_030770    | NP_110397    | Q9H3S3 | TMPS5_HUMAN | ellular (Potential).          | 1   | TCCCGGAAATG   | 0.542 |
| - | 10 | 1060 | e_Mutation_p.P21  | NM_020886    | NP_065937    | Q96RU2 | UBP28_HUMAN |                               | 7   | GGAGGGAAGAA   | 0.493 |
| + | 2  | 206  | oq.2_Missense_M   | NM_006028    | NP_006019    | O95264 | 5HT3B_HUMAN | ellular (Potential).          | 0   | AAGAAGTGAGAC  | 0.443 |
| + | 7  | 2096 | oq.2_Missense_M   | NM_006006    | NP_005997    | Q05516 | ZBT16_HUMAN | 2H2-type 8.                   | 2   | GCGCTCCCGGG   | 0.622 |
| - | 3  | 508  | M55A_uc001ppb.    | NM_152315    | NP_689528    | Q8N323 | FA55A_HUMAN |                               | 0   | GCCCTCCCGAG   | 0.557 |
| - | 5  | 716  | p.S196L CADM1     | NM_014333    | NP_055148    | Q9BY67 | CADM1_HUMAN | 1. Extracellular (Potential). | 2   | TGTCTGACCAC   | 0.527 |
| - | 8  | 1568 | po.2_Missense_M   | NM_032725    | NP_116114    | Q9BRD0 | BUD13_HUMAN | Potential.                    | 2   | ATCCTCCACAT   | 0.478 |
| - | 2  | 213  | p.A60V BUD13      | NM_032725    | NP_116114    | Q9BRD0 | BUD13_HUMAN |                               | 2   | AGATAGCTGTCT  | 0.388 |
| - | 22 | 3590 | p.S1125N SIK3_u   | NM_025164    | NP_079440    | Q9Y2K2 | SIK3_HUMAN  |                               | 12  | CAGAGCTAAGT   | 0.507 |
| - | 20 | 3311 | w.2_Missense_M    | NM_025164    | NP_079440    | Q9Y2K2 | SIK3_HUMAN  |                               | 12  | TGTATCCCCAAT  | 0.517 |
| - | 19 | 2155 | w.2_Missense_M    | NM_025164    | NP_079440    | Q9Y2K2 | SIK3_HUMAN  | Gln-rich.                     | 12  | GGAAGAAGATG   | 0.522 |
| - | 13 | 1498 | p.L387F SIK3_uc   | NM_025164    | NP_079440    | Q9Y2K2 | SIK3_HUMAN  |                               | 12  | GCCAAGGGGGC   | 0.622 |
| + | 19 | 1881 | e_Mutation_p.A63  | NM_001040455 | NP_001035545 | Q8NBJ9 | SIDT2_HUMAN | ical; (Potential).            | 0   | GCCTGGCCATT   | 0.572 |
| - | 11 | 1548 |                   | NM_004716    | NP_004707    | Q16549 | PCSK7_HUMAN | Extracellular (Potential).    | 0   | GTGACCCACTC   | 0.557 |
| - | 3  | 503  |                   | NM_004716    | NP_004707    | Q16549 | PCSK7_HUMAN |                               | 0   | CAGCAGGCTGG   | 0.657 |
| + | 3  | 421  | e_Mutation_p.E12  | NM_207343    | NP_997226    | Q8ND24 | RN214_HUMAN |                               | 0   | TTCGGGAGAGC   | 0.542 |
| - | 6  | 1333 | 7D BACE1_uc010    | NM_012104    | NP_036236    | P56817 | BACE1_HUMAN | ellular (Potential).          | 1   | TGGTGCCACTG   | 0.483 |
| + | 19 | 2512 | v.V763I CEP164_u  | NM_014956    | NP_055771    | Q9UPV0 | CE164_HUMAN | Glu-rich.                     | 2   | AGGTGGTCTCC   | 0.582 |
| + | 30 | 4136 | rf.2_RNA CEP164   | NM_014956    | NP_055771    | Q9UPV0 | CE164_HUMAN |                               | 2   | ACCCACGTCCA   | 0.627 |
| + | 32 | 4426 | P1422S CEP164     | NM_014956    | NP_055771    | Q9UPV0 | CE164_HUMAN |                               | 2   | ATGACCCAGG    | 0.582 |
| - | 27 | 4933 |                   | NM_020693    | NP_065744    | Q8TD84 | DSCL1_HUMAN | ellular (Potential).          | 8   | CTTACCTTGAC   | 0.522 |
| - | 2  | 526  | 1prt.1_5'UTR TMF  | NM_001077263 | NP_001070731 | Q9BYE2 | TMPSD_HUMAN | lasmic (Potential).           | 1   | GGTGGCCCTGG   | 0.597 |
| - | 4  | 407  | ense_Mutation_p.S | NM_001098526 | NP_001091996 | Q86YT9 | JAML1_HUMAN | 1. Extracellular (Potential). | 1   | GCACACTGAGA   | 0.502 |
| - | 2  | 337  | st.1_Missense_M   | NM_000732    | NP_000723    | P04234 | CD3D_HUMAN  | ellular (Potential).          | 1   | CTCGTGGGTCC   | 0.458 |
| + | 19 | 3112 | sv.2_Missense_Mu  | NM_004788    | NP_004779    | Q14139 | UBE4A_HUMAN | U-box.                        | 5   | TGGATCCCATT   | 0.473 |
| + | 3  | 2955 | L_uc001psz.1_Mis  | NM_005933    | NP_005924    | Q03164 | MLL1_HUMAN  |                               | 25  | TCGGCCCAACT   | 0.458 |
| + | 5  | 3373 | .2_Missense_Mut   | NM_005933    | NP_005924    | Q03164 | MLL1_HUMAN  |                               | 25  | AATTGCTGGCT   | 0.408 |
| + | 27 | 6979 | .2_Missense_Mut   | NM_005933    | NP_005924    | Q03164 | MLL1_HUMAN  |                               | 25  | AGGATCTGCAC   | 0.458 |
| - | 7  | 733  | p.V170I IFT46_u   | NM_020153    | NP_064538    | Q9NQC8 | IFT46_HUMAN |                               | 0   | TGGGACCTGGT   | 0.408 |
| + | 1  | 122  | 11_uc010ryy.1_5'  | NM_021729    | NP_068375    | Q9H270 | VPS11_HUMAN |                               | 3   | TGGGGCCGCTC   | 0.637 |
| + | 4  | 394  | LRX1_uc001pww.2   | NM_024618    | NP_078894    | Q86UT6 | NLRX1_HUMAN |                               | 2   | TAGGCTCCCC    | 0.632 |
| + | 6  | 1495 | v.R427Q NLRX1_L   | NM_024618    | NP_078894    | Q86UT6 | NLRX1_HUMAN | raction with MAVS. NACH       | 2   | AGCCCGAACCA   | 0.577 |
| - | 9  | 1129 | M_uc001pww.1_5'   | NM_006500    | NP_006491    | P43121 | MUC18_HUMAN | 2. Extracellular (Potential). | 4   | TCTCTGCCTCA   | 0.632 |
| + | 1  | 1080 |                   | NM_032015    | NP_114404    | Q9BY78 | RNF26_HUMAN | Leu-rich.                     | 1   | GGAACCTCTTT   | 0.582 |
| - | 4  | 1304 | p.P133S TRIM2     | NM_012101    | NP_036233    | Q14134 | TRI29_HUMAN |                               | 4   | TGGGACAGGG    | 0.522 |

|   |    |      |                   |              |              |        |             |                             |      |               |       |
|---|----|------|-------------------|--------------|--------------|--------|-------------|-----------------------------|------|---------------|-------|
| + | 10 | 3095 |                   | NM_005422    | NP_005413    | O75443 | TECTA_HUMAN | TIL 2.                      | 10   | GTGCACGCGGA   | 0.577 |
| + | 11 | 3559 |                   | NM_005422    | NP_005413    | O75443 | TECTA_HUMAN | VWFD 3.                     | 10   | AACGGCTCTAT   | 0.478 |
| + | 3  | 479  | nse_Mutation_p.E  | NM_006918    | NP_008849    | O75845 | SC5D_HUMAN  |                             | 1    | TAGGAGAGTTT   | 0.378 |
| - | 1  | 607  | 9959_uc009zba.2   | NM_001001786 | NP_001001786 | Q8IZY5 | BLID_HUMAN  |                             | 0    | CCTCAGCAGAG   | 0.448 |
| + | 11 | 1875 |                   | NM_032873    | NP_116262    | Q8TF42 | UBS3B_HUMAN | phosphatase (By similarity) | 1    | AAATGGGTTGC   | 0.458 |
| + | 12 | 1990 |                   | NM_032873    | NP_116262    | Q8TF42 | UBS3B_HUMAN | phosphatase (By similarity) | 1    | TTTCAGAATCC   | 0.299 |
| - | 2  | 269  | sense_Mutation_p  | NM_006597    | NP_006588    | P11142 | HSP7C_HUMAN |                             | 8    | TGTTGGTGGGG   | 0.428 |
| + | 5  | 765  | _p.E106K GRAMD    | NM_020716    | NP_065767    | Q3KR37 | GRM1B_HUMAN | GRAM.                       | 1    | GCTGGGAAACT   | 0.507 |
| - | 1  | 554  |                   | NM_001005325 | NP_001005325 | Q8NGM8 | OR6M1_HUMAN | ellular (Potential).        | 2    | TACAGGCCACCT  | 0.438 |
| + | 1  | 419  |                   | NM_001004462 | NP_001004462 | Q8NGN3 | O10G4_HUMAN | Name=4; (Potential).        | 4    | CAGGTGTGCC    | 0.557 |
| - | 1  | 47   |                   | NM_001002918 | NP_001002918 | Q9GZM6 | OR8D2_HUMAN | ellular (Potential).        | 3    | TCAAGCCTGCC   | 0.423 |
| - | 12 | 1848 | _p.P460S ROBO4    | NM_019055    | NP_061928    | Q8WZ75 | ROBO4_HUMAN |                             | 2    | GCCGGGGCTTC   | 0.597 |
| + | 8  | 952  | _Mutation_p.P184  | NM_022062    | NP_071345    | Q96KN3 | PKNX2_HUMAN |                             | 3    | TAAACCCAGG    | 0.562 |
| + | 4  | 916  |                   | NM_014026    | NP_054745    | Q96C86 | DCPS_HUMAN  |                             | 0    | AGATCCCTCTG   | 0.502 |
| - | 15 | 2067 | _Mutation_p.G55   | NM_032531    | NP_115920    | Q8IZU9 | KIRR3_HUMAN | lasmic (Potential).         | 3    | CAACACCTTTG   | 0.488 |
| + | 9  | 1248 | v.1_Missense_Mut  | NM_002017    | NP_002008    | Q01543 | FLI1_HUMAN  | ETS.                        | 2273 | CCTGGGAGGGG   | 0.617 |
| + | 9  | 1305 | v.1_Missense_Mut  | NM_002017    | NP_002008    | Q01543 | FLI1_HUMAN  | ETS.                        | 2273 | GCTGGGGCGAG   | 0.562 |
| + | 2  | 1003 | p.V230G KCNJ5_u   | NM_000890    | NP_000881    | P48544 | IRK5_HUMAN  | smic (By similarity).       | 1    | CATCGTGGAGG   | 0.597 |
| - | 20 | 2516 | AP32_uc009zco.2   | NM_001142685 | NP_001136157 | A7KAX9 | RHG32_HUMAN |                             | 5    | TACTACTCTGTT  | 0.468 |
| + | 5  | 654  | 1qff.1_Missense_A | NM_138788    | NP_620143    | Q96B21 | TM45B_HUMAN | ical; (Potential).          | 0    | CCCACCTTTTG   | 0.537 |
| - | 19 | 2104 | _Mutation_p.D65E  | NM_001143835 | NP_001137307 | Q6P4R8 | NFRKB_HUMAN |                             | 3    | AGGATCTTTTT   | 0.448 |
| - | 7  | 904  | fh.2_Missense_Mu  | NM_001143835 | NP_001137307 | Q6P4R8 | NFRKB_HUMAN |                             | 3    | CACACCCGCA    | 0.527 |
| + | 4  | 564  | 0sbz.1_Translatio | NM_001642    | NP_001633    | Q06481 | APLP2_HUMAN | ellular (Potential).        | 3    | AGTGGGTGAAT   | 0.458 |
| - | 7  | 2895 | se_Mutation_p.P22 | NM_014758    | NP_055573    | Q92543 | SNX19_HUMAN |                             | 4    | TTCTGGGGCTT   | 0.478 |
| + | 9  | 1057 | z.1_Missense_Mu   | NM_032801    | NP_116190    | Q9BX67 | JAM3_HUMAN  | lasmic (Potential).         | 1    | TGCAGGGCGAC   | 0.517 |
| - | 2  | 145  | YN1_uc009zdb.2    | NM_001037305 | NP_001032382 | Q9P016 | THYN1_HUMAN |                             | 0    | CCTCACCTGAAC  | 0.512 |
| + | 11 | 1254 | iL2_uc009zdg.1_u  | NM_138342    | NP_612351    | Q8IW92 | GLBL2_HUMAN |                             | 3    | TACACGGCCAAG  | 0.552 |
| + | 13 | 1453 | iL2_uc009zdg.1_u  | NM_138342    | NP_612351    | Q8IW92 | GLBL2_HUMAN |                             | 3    | CAATGGGGGAA   | 0.562 |
| + | 4  | 1399 | ihu.1_Missense_M  | NM_015232    | NP_056047    | Q9UPP2 | IQEC3_HUMAN | SEC7.                       | 4    | ACCCGAAGTG    | 0.622 |
| - | 4  | 723  | se_Mutation_p.W6  | NM_003044    | NP_003035    | P48065 | S6A12_HUMAN | Name=1; (Potential).        | 1    | AACCTCCAGAC   | 0.562 |
| - | 8  | 1363 | 5A_uc010sdn.1_M   | NM_001042603 | NP_001036068 | P29375 | KDM5A_HUMAN | PHD-type 1.                 | 3    | CCAGTCTCCTT   | 0.383 |
| + | 15 | 2335 | 1qik.1_Missense_I | NM_173593    | NP_775864    | Q6L9W6 | B4GN3_HUMAN | renal (Potential).          | 2    | CCTCAGGGTTTC  | 0.642 |
| + | 11 | 3109 | .3_Intron WNK1_u  | NM_018979    | NP_061852    | Q9H4A3 | WNK1_HUMAN  |                             | 23   | CAGCTGGCATT   | 0.527 |
| + | 17 | 4183 | _p.E979K WNK1_u   | NM_018979    | NP_061852    | Q9H4A3 | WNK1_HUMAN  |                             | 23   | AAGGAGAGTTC   | 0.343 |
| + | 18 | 4307 | p.R1020Q WNK1_u   | NM_018979    | NP_061852    | Q9H4A3 | WNK1_HUMAN  |                             | 23   | AAGCCGATTAC   | 0.408 |
| + | 24 | 6250 | o.P1667S WNK1_u   | NM_018979    | NP_061852    | Q9H4A3 | WNK1_HUMAN  |                             | 23   | CCATCCCTGGT   | 0.498 |
| + | 5  | 744  | 1qjn.2_Missense_I | NM_024551    | NP_078827    | Q86V24 | ADR2_HUMAN  | Name=2; (Potential).        | 0    | AGGTGTCTTTT   | 0.468 |
| + | 4  | 1005 | lr.1_Intron LRTM2 | NM_001039029 | NP_001034118 | Q8N967 | LRTM2_HUMAN | xtracellular (Potential).   | 1    | ACGTGCCCGCA   | 0.647 |
| - | 2  | 356  | Missense_Mutation | NM_021953    | NP_068772    | Q08050 | FOXM1_HUMAN |                             | 2    | TAGTTCTCCTC   | 0.507 |
| + | 11 | 1309 | ULP3_uc001qjl.2   | NM_003324    | NP_003315    | O75386 | TULP3_HUMAN |                             | 0    | TGTGTGGCAGAT  | 0.408 |
| - | 5  | 650  | mt.2_Nonsense_M   | NM_020374    | NP_065107    | Q9NQ89 | CL004_HUMAN |                             | 0    | TATCTTGATCTGT | 0.338 |
| + | 1  | 1755 |                   | NM_002234    | NP_002225    | P22460 | KCNA5_HUMAN | =Segment S6; (Potential).   | 4    | CATTGCCCTGCA  | 0.607 |
| - | 13 | 1450 |                   | NM_020373    | NP_065106    | Q9NQ90 | ANO2_HUMAN  | lasmic (Potential).         | 7    | CAGTCGCATCT   | 0.413 |
| - | 6  | 792  | _p.T181I VWF_uc   | NM_000552    | NP_000543    | P04275 | VWF_HUMAN   | VWFD 1.                     | 12   | CCGAGGTCAAG   | 0.507 |
| + | 2  | 449  | ev.1_Missense_Mt  | NM_001769    | NP_001760    | P21926 | CD9_HUMAN   | lasmic (Potential).         | 1    | CATGCCGGTCA   | 0.637 |
| - | 3  | 933  | ense_Mutation_p.l | NM_001038    | NP_001029    | P37088 | SCNNA_HUMAN | llular (By similarity).     | 0    | CCTGGGGGTTG   | 0.507 |
| + | 7  | 893  | _p.T223I LTBR_uc  | NM_002342    | NP_002333    | P36941 | TNR3_HUMAN  | ical; (Potential).          | 2    | TGCCACCGTCT   | 0.582 |

|   |    |      |                    |              |              |        |             |                                |    |               |       |             |
|---|----|------|--------------------|--------------|--------------|--------|-------------|--------------------------------|----|---------------|-------|-------------|
| + | 30 | 4005 | ifd.1_Missense_Mi  | NM_014865    | NP_055680    | Q15021 | CND1_HUMAN  |                                | 5  | ACCATCCACTG   | 0.532 |             |
| - | 10 | 1605 | p.P474S CHD4_u     | NM_001273    | NP_001264    | Q14839 | CHD4_HUMAN  | PHD-type 2.                    | 2  | CTCTGGAAGTG   | 0.522 |             |
| - | 6  | 744  | p.P187S CHD4_u     | NM_001273    | NP_001264    | Q14839 | CHD4_HUMAN  |                                | 2  | FCTTGGGATTTTT | 0.448 |             |
| - | 5  | 603  | p.E140K CHD4_u     | NM_001273    | NP_001264    | Q14839 | CHD4_HUMAN  |                                | 2  | AGGCTCCTGCA   | 0.468 |             |
| - | 2  | 1314 | p.D345N LPAR5_     | NM_001142961 | NP_001136433 | Q9H1C0 | LPAR5_HUMAN | lasmic (Potential).            | 2  | GGCATCCGGCC   | 0.682 |             |
| - | 2  | 1107 | p.R276C LPAR5_     | NM_001142961 | NP_001136433 | Q9H1C0 | LPAR5_HUMAN | ellular (Potential).           | 2  | CCCGCGCACGC   | 0.682 |             |
| - | 3  | 488  | qqg.1_Missense_I   | NM_153685    | NP_710152    | Q8IYJ0 | CL053_HUMAN | ellular (Potential).           | 0  | TGCGAGCCCAT   | 0.612 |             |
| + | 6  | 820  | PS7A_uc001qqi.2    | NM_001164094 | NP_001157566 | Q9UBW8 | CSN7A_HUMAN | Potential.                     | 1  | GAGCCGTGCCA   | 0.602 | rs146030026 |
| + | 2  | 524  | e.Mutation_p.A59   | NM_002286    | NP_002277    | P18627 | LAG3_HUMAN  | . Extracellular (Potential).   | 0  | GAAGAGCAGGG   | 0.652 |             |
| + | 8  | 892  | p.D119N GNB3_u     | NM_002075    | NP_002066    | P16520 | GBB3_HUMAN  | WD 3.                          | 0  | CGGGGACACC    | 0.587 |             |
| + | 1  | 132  | 1qrg.2_5'Flank US  | NM_001098536 | NP_001092006 | P45974 | UBP5_HUMAN  |                                | 4  | ACCGGTCCAC    | 0.627 |             |
| + | 9  | 1183 | rh.3_Missense_Mi   | NM_001098536 | NP_001092006 | P45974 | UBP5_HUMAN  |                                | 4  | CAGCACCCAGG   | 0.537 |             |
| + | 14 | 1805 | h.3_Nonsense_Mu    | NM_001098536 | NP_001092006 | P45974 | UBP5_HUMAN  |                                | 4  | GACTGGGTGCC   | 0.473 |             |
| + | 7  | 994  | p.L212S PTPN6_     | NM_002831    | NP_002822    | P29350 | PTN6_HUMAN  | protein phosphatase.           | 1  | GAGTTTGCA     | 0.582 |             |
| - | 6  | 838  | lank PHB2_uc001    | NM_001144831 | NP_001138303 | Q99623 | PHB2_HUMAN  | Potential.                     | 3  | TTGGGCCCGCT   | 0.592 |             |
| - | 2  | 290  | l1splice C1R_uc0   | NM_001733    | NP_001724    | P00736 | C1R_HUMAN   |                                | 0  | CCCCTACCTTGA  | 0.572 |             |
| - | 13 | 3235 | ge.1_Missense_M    | NM_174941    | NP_777601    | Q9NR16 | C163B_HUMAN | Extracellular (Potential).     | 11 | CGTGGGCATCG   | 0.617 |             |
| - | 2  | 447  |                    | NM_004054    | NP_004045    | Q16581 | C3AR_HUMAN  | lasmic (Potential).            | 1  | GCGATCCAGGC   | 0.512 |             |
| + | 24 | 3037 | p.P560L A2ML1_u    | NM_144670    | NP_653271    | A8K2U0 | A2ML1_HUMAN |                                | 3  | TTGCTCCCATCA  | 0.552 |             |
| + | 29 | 3745 | p.A796V A2ML1_u    | NM_144670    | NP_653271    | A8K2U0 | A2ML1_HUMAN |                                | 3  | GATAGCGAAGG   | 0.532 |             |
| - | 23 | 2564 | p.G12D DDX12_      | NM_004400    | NP_004391    |        |             |                                | 0  | ACCGCCTAGG    | 0.602 |             |
| - | 23 | 2500 | 3_5'UTR DDX12_     | NM_004400    | NP_004391    |        |             |                                | 0  | CAGGGCCCTG    | 0.567 |             |
| + | 1  | 33   | D_uc009zgs.1_RN    | NM_013269    | NP_037401    | Q9UHP7 | CLC2D_HUMAN | lasmic (Potential).            | 0  | TGACAGTAACA   | 0.418 |             |
| - | 1  | 27   | ion_p.T7I KLRC2_   | NM_002261    | NP_002252    | Q07444 | NKG2E_HUMAN | lasmic (Potential).            | 3  | AGAAGTTCTCT   | 0.433 | rs149277235 |
| - | 3  | 530  |                    | NM_018423    | NP_060893    | Q6J9G0 | STYK1_HUMAN |                                | 8  | CGTGTTCATGCC  | 0.478 |             |
| - | 9  | 1327 | u.2_Missense_Mi    | NM_003651    | NP_003642    | P16989 | DBPA_HUMAN  |                                | 4  | AGCAGGGTTCT   | 0.512 |             |
| - | 5  | 652  | H1_uc001qzb.3_F    | NM_006250    | NP_006241    | P02810 | PRPC_HUMAN  | tion, binds to hydroxyapatit   | 0  | TCTTACCTTCAT  | 0.483 |             |
| - | 1  | 521  | H1_uc001qzc.2_Ir   | NM_176890    | NP_795371    | P59544 | T2R50_HUMAN | ellular (Potential).           | 2  | CATATTCTTCTGC | 0.393 |             |
| - | 3  | 375  | B4_uc001qzf.1_Inl  | NM_006249    | NP_006240    | Q04118 | PRB3_HUMAN  | [PQS]-P-[PS]-Q-[GE]-G-N-       | 1  | TGGGGACCTT    | 0.642 |             |
| - | 3  | 456  | i.1_intron PRB1_u  | NM_005039    | NP_005030    | P04280 | PRP1_HUMAN  | -[PAQ]-Q-[GE]-[GD]-[NKS]       | 0  | GTGGTCTTGT    | 0.617 |             |
| + | 3  | 697  | rad.2_Missense_I   | NM_138723    | NP_620049    | Q9BZR8 | B2L14_HUMAN |                                | 1  | GGCCACCACCA   | 0.517 |             |
| - | 13 | 3085 | LRP6_uc010shl.1_   | NM_002336    | NP_002327    | O75581 | LRP6_HUMAN  | xtracellular (Potential). Betz | 12 | GTCATCCAATA   | 0.463 |             |
| - | 12 | 2694 | LRP6_uc010shl.1_   | NM_002336    | NP_002327    | O75581 | LRP6_HUMAN  | ta-propeller 3. LDL-recepto    | 12 | GTCGGCTCCAG   | 0.468 |             |
| - | 11 | 2544 | LRP6_uc010shl.1_   | NM_002336    | NP_002327    | O75581 | LRP6_HUMAN  | L-receptor class B 13. Betz    | 12 | CTTTTAGCATAAT | 0.398 |             |
| - | 3  | 568  | l1raj.1_Missense_I | NM_018050    | NP_060520    | Q9H8J5 | MANS1_HUMAN | xtracellular (Potential).      | 0  | GGCTTCTCTCGT  | 0.378 |             |
| - | 2  | 243  | aq.2_Missense_M    | NM_006143    | NP_006134    | Q15760 | GPR19_HUMAN | ellular (Potential).           | 1  | AGTGTAGGAATA  | 0.448 |             |
| - | 3  | 709  |                    | NM_000834    | NP_000825    | Q13224 | NMDE2_HUMAN | ellular (Potential).           | 12 | GAGCCAGGAAA   | 0.478 |             |
| + | 2  | 733  | 7IP_uc010sht.1_M   | NM_018179    | NP_060649    | Q6VMQ6 | MCAF1_HUMAN |                                | 5  | CTCTGGTGATG   | 0.572 |             |
| - | 10 | 1566 |                    | NM_024829    | NP_079105    | Q6P4A8 | PLBL1_HUMAN |                                | 0  | ACAGGGGTCA    | 0.433 |             |
| + | 4  | 1036 | p.A337V AEBP2_     | NM_001114176 | NP_001107648 | Q6ZN18 | AEBP2_HUMAN | 2H2-type 3.                    | 1  | CAATGCCAGCT   | 0.448 |             |
| + | 9  | 1325 | zip.2_Missense_M   | NM_017435    | NP_059131    | Q9NYB5 | SO1C1_HUMAN | lasmic (Potential).            | 7  | ACACAGACTAC   | 0.333 |             |
| - | 14 | 2053 | p.Y469C SLCO1A     | NM_021094    | NP_066580    | P46721 | SO1A2_HUMAN | ellular (Potential).           | 4  | CGAGGTAGATG   | 0.318 |             |
| - | 34 | 4129 | p.I1370N ABCC9_    | NM_005691    | NP_005682    | O60706 | ABCC9_HUMAN | otential). ABC transporter 2   | 6  | ATGACAATTTTT  | 0.328 |             |
| + | 8  | 1308 | IAS_uc001rfrn.2_R  | NM_018686    | NP_061156    | Q8NFW8 | NEUA_HUMAN  |                                | 3  | TGGTGCCGTG    | 0.433 |             |
| - | 5  | 1143 | zix.2_Missense_I   | NM_003034    | NP_003025    | Q92185 | SIAB8_HUMAN | renal (Potential).             | 3  | GCGAGGCATGT   | 0.388 |             |
| - | 22 | 2761 | osit.1_Missense_N  | NM_014802    | NP_055617    | Q86YS7 | K0528_HUMAN |                                | 4  | CCAACCTTTAGC  | 0.378 |             |
| - | 3  | 381  | IAA0528_uc010sil   | NM_014802    | NP_055617    | Q86YS7 | K0528_HUMAN | C2.                            | 4  | GAGTCCACTG    | 0.323 |             |



|   |    |       |                   |              |              |        |             |                                |    |                 |       |
|---|----|-------|-------------------|--------------|--------------|--------|-------------|--------------------------------|----|-----------------|-------|
| + | 19 | 2166  | MP_uc001rgi.2_Inl | NM_006152    | NP_006143    | Q12912 | LRMP_HUMAN  | lasmic (Potential).            | 2  | 3AAGAAGAAAAA    | 0.398 |
| - | 7  | 668   | i_p.D156N CASC1   | NM_001082973 | NP_001076442 | Q6TDU7 | CASC1_HUMAN |                                | 2  | 3CAGATCTGCCA    | 0.363 |
| + | 3  | 686   | _p.L93F SSPN_uc   | NM_005086    | NP_005077    | Q14714 | SSPN_HUMAN  | ical; (Potential).             | 0  | TTCTTACTCATCC   | 0.512 |
| + | 3  | 779   | p.G124S SSPN_uc   | NM_005086    | NP_005077    | Q14714 | SSPN_HUMAN  | lasmic (Potential).            | 0  | ATGTGGGTGTCA    | 0.478 |
| - | 57 | 8515  |                   | NM_002223    | NP_002214    | Q14571 | ITPR2_HUMAN | lasmic (Potential).            | 14 | GTGTGGTGGCA     | 0.498 |
| + | 6  | 876   | FAR2_uc009zjm.2   | NM_018099    | NP_060569    | Q96K12 | FACR2_HUMAN |                                | 0  | 3GGTTGGGTTGA    | 0.289 |
| - | 5  | 416   | 3IC2_uc001riw.2_f | NM_016570    | NP_057654    | Q96RQ1 | ERGI2_HUMAN | ional (Potential).             | 1  | CTAAATCCAATAC   | 0.363 |
| - | 15 | 2342  | rja.2_Missense_Mi | NM_175861    | NP_787057    | Q8IUR5 | TMTC1_HUMAN |                                | 0  | iTCTGACCCATCA   | 0.453 |
| - | 17 | 3377  | 3_Mutation_p.P10  | NM_144973    | NP_659410    | Q6ZUT9 | DEN5B_HUMAN |                                | 2  | GCTGGGGTGGAA    | 0.428 |
| - | 3  | 631   | r_p.A68T DENND1   | NM_144973    | NP_659410    | Q6ZUT9 | DEN5B_HUMAN |                                | 2  | ATGAAGCATACA    | 0.408 |
| - | 20 | 1694  | rfr.1_Missense_Mu | NM_153634    | NP_705898    | Q86YQ8 | CPNE8_HUMAN |                                | 1  | ATATAGGAGAGAA   | 0.478 |
| - | 5  | 389   |                   | NM_153634    | NP_705898    | Q86YQ8 | CPNE8_HUMAN | C2 1.                          | 1  | CTCTTTGAATCA    | 0.234 |
| - | 27 | 3670  | c.2_Missense_Mut  | NM_017641    | NP_060111    | Q7Z4S6 | KI21A_HUMAN |                                | 7  | 3TACTAGTGTCTC   | 0.483 |
| - | 1  | 1042  |                   | NM_005164    | NP_005155    | Q9UBJ2 | ABCD2_HUMAN | 3 type-1.  Interaction with Pt | 6  | iGTCAGGGTTTG    | 0.413 |
| + | 10 | 1861  | 3zjz.2_Missense_A | NM_013377    | NP_037509    | Q6ZMN7 | PZRN4_HUMAN |                                | 11 | 3CAAAACCACTG    | 0.498 |
| + | 6  | 631   | 6S PPHLN1_uc00    | NM_016488    | NP_057572    | Q8NEY8 | PPHLN_HUMAN | Ser-rich.                      | 2  | 3GTCCTGGTGCC    | 0.498 |
| + | 11 | 1163  | t.1_Missense_Mut  | NM_016488    | NP_057572    | Q8NEY8 | PPHLN_HUMAN |                                | 2  | ggtagccctgtgagg | 0.01  |
| - | 23 | 3269  | _p.T244I ADAMTS   | NM_025003    | NP_079279    | P59510 | ATS20_HUMAN | SP type-1 6.                   | 19 | 3ATGTGGTTGTG    | 0.368 |
| - | 2  | 751   | i7L_uc001rns.3_M  | NM_001098615 | NP_001092085 | Q9H0K6 | PUS7L_HUMAN |                                | 1  | TATGAACCTCTTC   | 0.333 |
| - | 11 | 2585  | _p.K451N SFRS2lf  | NM_004719    | NP_004710    | Q99590 | SCAFB_HUMAN |                                | 0  | TTCAACCTTTTC    | 0.358 |
| - | 4  | 583   | ie_Mutation_p.K17 | NM_004719    | NP_004710    | Q99590 | SCAFB_HUMAN |                                | 0  | CTTACCTTAACAT   | 0.299 |
| - | 6  | 921   | SLC38A2_uc001rf   | NM_018976    | NP_061849    | Q96QD8 | S38A2_HUMAN |                                | 2  | TTCTTACCTCCA    | 0.383 |
| - | 3  | 612   | 8A2_uc001rph.2_f  | NM_018976    | NP_061849    | Q96QD8 | S38A2_HUMAN | turnover upon amino acid       | 2  | CTTCCCCAAAT     | 0.284 |
| - | 3  | 765   | 3sense_Mutation_f | NM_001143668 | NP_001137140 | Q86SJ2 | AMGO2_HUMAN |                                | 2  | CAGAGGCACCA     | 0.587 |
| - | 13 | 1642  | 50_splice RPAP3_u | NM_024604    | NP_078880    | Q9H6T3 | RPAP3_HUMAN |                                | 1  | ACTCACTGCAGC    | 0.358 |
| - | 11 | 900   | qv.2_Missense_M   | NM_001844    | NP_001835    | P02458 | CO2A1_HUMAN | le-helical region.             | 2  | GGGGACCCATG     | 0.483 |
| - | 9  | 794   | rv.2_Missense_M   | NM_001844    | NP_001835    | P02458 | CO2A1_HUMAN | le-helical region.             | 2  | 3CATGGGGCCCT    | 0.552 |
| - | 2  | 360   | 2A1_uc001rv.2_li  | NM_001844    | NP_001835    | P02458 | CO2A1_HUMAN | VWFC.                          | 2  | 3CAGTCCCAGTG    | 0.577 |
| + | 10 | 1017  | 4M_uc001rrd.2_Tr  | NM_000289    | NP_000280    | P08237 | K6PF_HUMAN  |                                | 4  | 3AGCTGGTGGTT    | 0.527 |
| - | 6  | 1361  | _p.P385L ZNF641   | NM_152320    | NP_689533    | Q96N77 | ZN641_HUMAN |                                | 2  | 3GGAAGGGCTTC    | 0.592 |
| - | 6  | 844   | _p.D213N ZNF641   | NM_152320    | NP_689533    | Q96N77 | ZN641_HUMAN | ansactivation.                 | 2  | 3GGAATCCCAGC    | 0.522 |
| - | 1  | 109   |                   | NM_002289    | NP_002280    | P00709 | LALBA_HUMAN |                                | 0  | 3GCTGGGACAGC    | 0.502 |
| - | 3  | 609   | IT1_uc009zgz.1_5' | NM_001240    | NP_001231    | O60563 | CCNT1_HUMAN |                                | 6  | 3CTGCTCCTCCA    | 0.393 |
| - | 6  | 2104  | Y6_uc001rsi.3_Mi  | NM_015270    | NP_056085    | O43306 | ADCY6_HUMAN | lasmic (Potential).            | 0  | GCCGCAGTGCA     | 0.627 |
| + | 6  | 1219  |                   | NM_033124    | NP_149115    | Q8IXS2 | CCD65_HUMAN |                                | 2  | 3TAATGCCACCC    | 0.488 |
| - | 4  | 319   | AG1_uc001rsz.2_3  | NM_002733    | NP_002724    | P54619 | AAKG1_HUMAN |                                | 1  | 3GCTTACCACAA    | 0.458 |
| - | 34 | 10052 |                   | NM_003482    | NP_003473    | O14686 | MLL2_HUMAN  | Gln-rich.                      | 41 | 3GATTGGACACC    | 0.622 |
| - | 2  | 322   | 3e_Mutation_p.V3  | NM_144593    | NP_653194    | Q8TAI7 | REBL1_HUMAN | region (By similarity).        | 2  | 3TCCACTGTAGC    | 0.507 |
| - | 9  | 1076  | 3R1L_uc001rtj.1_M | NM_018113    | NP_060583    | Q6UX01 | LMBRL_HUMAN | lasmic (Potential).            | 1  | 3CAAAGGCTGAG    | 0.592 |
| + | 2  | 228   | _p.G8E TUBA1C_u   | NM_032704    | NP_116093    | Q9BQE3 | TBA1C_HUMAN |                                | 0  | 3CATTGGGGGAG    | 0.567 |
| + | 4  | 796   |                   | NM_006262    | NP_006253    | P41219 | PERI_HUMAN  | inker 2.  Rod.                 | 0  | 3TGCAGGTGAGT    | 0.642 |
| + | 4  | 631   | 3_Mutation_p.G15  | NM_005480    | NP_005471    | Q12815 | TROAP_HUMAN |                                | 1  | 3TCGAGGAAGTC    | 0.607 |
| + | 13 | 2223  | 3ATS2_uc001ruf.2  | NM_023071    | NP_075559    | Q86XZ4 | SPAS2_HUMAN | Ser-rich.                      | 1  | 3CCAGCCTTACA    | 0.537 |
| - | 4  | 1210  | smk.1_Missense_   | NM_032130    | NP_115506    | Q8IYM0 | F186B_HUMAN |                                | 1  | iGGAGGCTCTCT    | 0.542 |
| - | 8  | 2678  | _p.V30M NCKAP5l   | NM_001037806 | NP_001032895 | Q9HCH0 | NCK5L_HUMAN | Pro-rich.                      | 1  | 3CACCACCTTGG    | 0.627 |
| + | 1  | 746   |                   | NM_001651    | NP_001642    | P55064 | AQP5_HUMAN  | lasmic (Potential).            | 0  | 3CCTGGCCCTCT    | 0.682 |
| + | 2  | 1037  |                   | NM_001651    | NP_001642    | P55064 | AQP5_HUMAN  | ical; (Potential).             | 0  | 3CCTGGGCCACC    | 0.637 |

rs139215369

|   |    |      |                    |              |              |        |             |                               |     |               |       |
|---|----|------|--------------------|--------------|--------------|--------|-------------|-------------------------------|-----|---------------|-------|
| - | 17 | 2003 | 1rvs.2_Missense_I  | NM_013277    | NP_037409    | Q9H0H5 | RGAP1_HUMAN |                               | 1   | CTGTGGTGTG    | 0.438 |
| + | 7  | 1275 | ln.2_Missense_Mt   | NM_001095    | NP_001086    | P78348 | ACCN2_HUMAN | llular (By similarity).       | 1   | TCCTGCTCTGG   | 0.587 |
| - | 11 | 1523 | i.3_Missense_Mut   | NM_016357    | NP_057441    | Q9UHB6 | LIMA1_HUMAN |                               | 1   | FAGTTGCCCTTAC | 0.383 |
| - | 3  | 304  | p.A44T LIMA1_ucl   | NM_016357    | NP_057441    | Q9UHB6 | LIMA1_HUMAN |                               | 1   | AGCTGCTTTCTC  | 0.333 |
| + | 21 | 2608 | tit.2_Missense_Mu  | NM_173602    | NP_775873    | Q9P265 | DIP2B_HUMAN |                               | 6   | TGATGGTTAGTC  | 0.373 |
| + | 3  | 372  | i1_uc010smu.1_in   | NM_005171    | NP_005162    | P18846 | ATF1_HUMAN  | KID.                          | 329 | TTTTAGGTATCAT | 0.443 |
| - | 7  | 695  | ase_Mutation_p.D   | NM_000617    | NP_000608    | P49281 | NRAM2_HUMAN | ical; (Potential).            | 1   | TTTGTCCAAGAA  | 0.488 |
| + | 1  | 177  | i.2_Missense_Mut   | NM_015416    | NP_056231    | Q6P1Q0 | LTMD1_HUMAN | ired and sufficient for mitoc | 2   | CCCCCTCGGTGA  | 0.582 |
| - | 4  | 902  | _p.R148K TFCP2_    | NM_005653    | NP_005644    | Q12800 | TFCP2_HUMAN | ONA-binding.                  | 1   | AGAATTCTGTCTC | 0.438 |
| - | 4  | 885  | _p.W142* TFCP2_    | NM_005653    | NP_005644    | Q12800 | TFCP2_HUMAN | ONA-binding.                  | 1   | CGGTTCCACCTC  | 0.433 |
| - | 3  | 457  | _p.P89S POU6F1     | NM_002702    | NP_002693    | Q14863 | PO6F1_HUMAN | Gln/Pro-rich.                 | 1   | TGTGGGCTGGA   | 0.602 |
| + | 2  | 380  |                    | NM_014191    | NP_055006    | Q9UQD0 | SCN8A_HUMAN |                               | 7   | CTTTCATCTACG  | 0.557 |
| + | 7  | 1030 | _p.W149* SCN8A_    | NM_014191    | NP_055006    | Q9UQD0 | SCN8A_HUMAN | I.                            | 7   | GTGTGGCCCAT   | 0.448 |
| + | 2  | 207  | A1_uc001rzt.2_5F   | NM_173157    | NP_775180    | P22736 | NR4A1_HUMAN |                               | 0   | CCAAGGCCTGT   | 0.637 |
| + | 3  | 913  | v1_uc009zmb.1_M    | NM_002135    | NP_002126    | P22736 | NR4A1_HUMAN |                               | 0   | CAGCCCCAGCC   | 0.652 |
| + | 6  | 1638 | _uc001rzt.2_Misser | NM_002135    | NP_002126    | P22736 | NR4A1_HUMAN | -binding (Potential).         | 0   | AGTCGGCCTTC   | 0.617 |
| - | 7  | 1158 | _p.Q389* KRT80_    | NM_182507    | NP_872313    | Q6KB66 | K2C80_HUMAN | Rod. Coil 2.                  | 0   | GGCCTGCTGCA   | 0.617 |
| - | 6  | 985  | 86_uc009zmg.2_l    | NM_002281    | NP_002272    | Q14533 | KRT81_HUMAN | Rod. Coil 2.                  | 0   | TCTCCCCGTGC   | 0.592 |
| + | 2  | 198  | G81_uc001sac.2_l   | NM_002284    | NP_002275    | O43790 | KRT86_HUMAN | Head.                         | 1   | CCGGCCCCGGCC  | 0.672 |
| - | 2  | 607  |                    | NM_002282    | NP_002273    | P78385 | KRT83_HUMAN | Rod. Coil 1B.                 | 1   | TGAGGCCAGCC   | 0.627 |
| - | 1  | 347  |                    | NM_002282    | NP_002273    | P78385 | KRT83_HUMAN | Head.                         | 1   | TGAGGGGCGTG   | 0.642 |
| - | 3  | 829  |                    | NM_033045    | NP_149034    | Q9NSB2 | KRT84_HUMAN | Rod. Coil 1B.                 | 1   | ATTGGCCCGAC   | 0.507 |
| - | 9  | 1515 |                    | NM_004693    | NP_004684    | O95678 | K2C75_HUMAN | Tail.                         | 0   | TGCCCCACCG    | 0.632 |
| - | 1  | 617  | ih.2_Missense_Mt   | NM_000424    | NP_000415    | P13647 | K2C5_HUMAN  | Head.                         | 0   | GAGGGGAGTCA   | 0.498 |
| - | 4  | 884  | nsns.1_Splice_Site | NM_001146225 | NP_001139697 | Q14CN4 | K2C72_HUMAN |                               | 6   | TCCTTACCCTTC  | 0.498 |
| - | 7  | 1185 |                    | NM_175068    | NP_778238    | Q86Y46 | K2C73_HUMAN | Rod. Coil 2.                  | 6   | CCCCCGCTGCTC  | 0.662 |
| + | 12 | 989  | _uc001sbo.1_Misse  | NM_170754    | NP_736610    | Q63HR2 | TENC1_HUMAN | hatase tensin-type.           | 2   | ATATCAGCTACTT | 0.517 |
| + | 20 | 3404 | i.2_Missense_Mut   | NM_170754    | NP_736610    | Q63HR2 | TENC1_HUMAN | Pro-rich.                     | 2   | CTGGGGCCAG    | 0.622 |
| + | 6  | 1538 | icj.2_Missense_Mt  | NM_012291    | NP_036423    | Q14674 | ESPL1_HUMAN |                               | 3   | AGCCGCTCTGT   | 0.522 |
| + | 18 | 4068 | _Mutation_p.A100   | NM_012291    | NP_036423    | Q14674 | ESPL1_HUMAN |                               | 3   | CTCTGCTCCCC1  | 0.557 |
| + | 3  | 806  | g.1_Missense_Mut   | NM_138473    | NP_612482    | P08047 | SP1_HUMAN   | tion domain A (Gln-rich).     | 3   | TGTCCCCCTC    | 0.483 |
| - | 12 | 1641 | sdn.1_Missense_I   | NM_006301    | NP_006292    | Q12852 | M3K12_HUMAN |                               | 5   | AGGGAGCAAG    | 0.552 |
| - | 11 | 1324 | ion_p.P424S ATF7   | NM_001130059 | NP_001123531 | P17544 | ATF7_HUMAN  | inding adenovirus 2 E1A.      | 2   | GGCTGGAGAAC   | 0.557 |
| - | 6  | 714  | splice_Site_p.S220 | NM_001130059 | NP_001123531 | P17544 | ATF7_HUMAN  |                               | 2   | AGCTCACCGATA  | 0.532 |
| + | 9  | 1093 | RNPA1_uc009zni.2   | NM_031157    | NP_112420    | P09651 | ROA1_HUMAN  | ar targeting sequence (M9)    | 3   | GAAGGAGGAGAA  | 0.433 |
| - | 3  | 455  | IF385A_uc001sfx.   | NM_015481    | NP_056296    | Q96PM9 | Z385A_HUMAN |                               | 1   | TGCCCTCTGTCT  | 0.592 |
| - | 26 | 2748 |                    | NM_002205    | NP_002196    | P08648 | ITA5_HUMAN  | ellular (Potential).          | 2   | CTTCCCGTTTTTC | 0.532 |
| - | 17 | 1732 |                    | NM_002205    | NP_002196    | P08648 | ITA5_HUMAN  | ellular (Potential).          | 2   | ACCCTCCCTTC   | 0.552 |
| + | 1  | 209  |                    | NM_001005182 | NP_001005182 | Q96RD1 | OR6C1_HUMAN | Name=2; (Potential).          | 2   | AATTTTCGTTTAC | 0.378 |
| + | 1  | 469  |                    | NM_054104    | NP_473445    | Q9NZP0 | OR6C3_HUMAN | Name=4; (Potential).          | 1   | CACCCCTTATGC  | 0.458 |
| + | 1  | 782  |                    | NM_054104    | NP_473445    | Q9NZP0 | OR6C3_HUMAN | ellular (Potential).          | 1   | ATCTGCAAAAG   | 0.388 |
| + | 1  | 506  |                    | NM_001005518 | NP_001005518 | A6NJZ3 | O6C65_HUMAN | ellular (Potential).          | 0   | TGACTCCAGCA   | 0.438 |
| + | 1  | 235  |                    | NM_206899    | NP_996782    | Q8NGE3 | O10P1_HUMAN | ellular (Potential).          | 2   | TCGTGCCCAGG   | 0.602 |
| - | 5  | 1945 | p.G581S DNAJC1     | NM_032364    | NP_115740    | Q6Y2X3 | DJC14_HUMAN |                               | 4   | GAGGCCCAACA   | 0.473 |
| + | 6  | 1960 | iz.2_Missense_Mu   | NM_000456    | NP_000447    | P51687 | SUOX_HUMAN  | terin domain (By similarity). | 0   | CTCCCATGAGC   | 0.522 |
| + | 1  | 360  | sjr.2_Missense_Mu  | NM_015292    | NP_056107    | Q9BSJ8 | ESYT1_HUMAN | Potential.                    | 5   | TTCGAGCAGCG   | 0.642 |
| + | 8  | 940  | sjr.2_Missense_Mu  | NM_015292    | NP_056107    | Q9BSJ8 | ESYT1_HUMAN |                               | 5   | GGACTCCATTGC  | 0.527 |

|   |    |       |                   |              |              |        |             |                                |    |               |       |             |
|---|----|-------|-------------------|--------------|--------------|--------|-------------|--------------------------------|----|---------------|-------|-------------|
| - | 12 | 1247  | 81_splice SMARCA1 | NM_003075    | NP_003066    | Q8TAQ2 | SMRC2_HUMAN |                                | 6  | TCCTTACCCAGG  | 0.552 |             |
| + | 7  | 1009  | p.A142V SLC39A8   | NM_173596    | NP_775867    | Q6ZMH5 | S39A5_HUMAN | ical; (Potential).             | 2  | GGGGCCCTGG    | 0.617 | rs144269176 |
| - | 6  | 598   | RD52_uc001skn.1   | NM_173595    | NP_775866    | Q8NB46 | ANR52_HUMAN |                                | 2  | TTTTGTACAGAC  | 0.493 |             |
| - | 6  | 1083  | p.G237E PAN2_ur   | NM_001127460 | NP_001120932 | Q504Q3 | PAN2_HUMAN  |                                | 6  | GACTTCCTGAG   | 0.478 |             |
| - | 4  | 725   | S2_uc001slk.2_Int | NM_013267    | NP_037399    | Q9UI32 | GLSL_HUMAN  |                                | 2  | TCTTTTCGGAATC | 0.512 | rs148320432 |
| - | 19 | 3544  | AZ2A_uc009zov.1   | NM_013449    | NP_038477    | Q9UIF9 | BAZ2A_HUMAN |                                | 0  | CCTGACCCAGG   | 0.498 |             |
| - | 7  | 1127  |                   | NM_001686    | NP_001677    | P06576 | ATPB_HUMAN  |                                | 1  | GCATAGTACCC   | 0.403 |             |
| - | 12 | 1482  | p.V301M STAT6_u   | NM_003153    | NP_003144    | P42226 | STAT6_HUMAN |                                | 4  | GACCACCAGGG   | 0.398 |             |
| + | 32 | 5812  |                   | NM_002332    | NP_002323    | Q07954 | LRP1_HUMAN  | ntial). LDL-receptor class B   | 22 | GCCATGCGGAG   | 0.612 |             |
| + | 61 | 10224 |                   | NM_002332    | NP_002323    | Q07954 | LRP1_HUMAN  | ; B 30. Extracellular (Potenti | 22 | AAAGTCCATTAA  | 0.592 |             |
| + | 64 | 10682 |                   | NM_002332    | NP_002323    | Q07954 | LRP1_HUMAN  | ntial). LDL-receptor class A   | 22 | ACGAGGCCAAC   | 0.607 |             |
| + | 8  | 896   | :001snj.1_Missens | NM_005412    | NP_005403    | P34897 | GLYM_HUMAN  |                                | 2  | AAGGGGTGAAG   | 0.562 |             |
| + | 10 | 1159  | q.2_Missense_Mul  | NM_005269    | NP_005260    | P08151 | GLI1_HUMAN  |                                | 15 | AGAAGCCGTAT   | 0.517 |             |
| + | 1  | 288   | irr.1_Missense_Mu | NM_004984    | NP_004975    | Q12840 | KIF5A_HUMAN | inesin-motor.                  | 3  | GCGGGGAGACA   | 0.602 |             |
| + | 6  | 1295  | I3R GEFT_uc009z   | NM_178502    | NP_848597    | Q8N9I9 | DTX3_HUMAN  |                                | 2  | CAGGGGACCC    | 0.587 |             |
| - | 2  | 1194  | _p.W398* AGAP2    | NM_001122772 | NP_001116244 | Q99490 | AGAP2_HUMAN |                                | 5  | AAAGTCCATTCC  | 0.572 |             |
| + | 2  | 305   | ie_Mutation_p.A51 | NM_005981    | NP_005972    | Q12999 | TSN31_HUMAN | ical; (Potential).             | 0  | TCATTGCTGTG   | 0.542 |             |
| - | 5  | 793   | n_p.S69F CDK4_L   | NM_000075    | NP_000066    | P11802 | CDK4_HUMAN  | rotein kinase.                 | 3  | ATGTGGACTGC   | 0.478 |             |
| + | 3  | 947   | 1spy.2_Missense_M | NM_138396    | NP_612405    | Q86YJ5 | MARH9_HUMAN |                                | 0  | TGACGGTCATC   | 0.592 |             |
| + | 6  | 597   |                   | NM_033276    | NP_150592    | Q9Y6H3 | ATP23_HUMAN |                                | 1  | ACAGAGCCACTC  | 0.328 |             |
| - | 13 | 1966  | ie_Mutation_p.A51 | NM_153377    | NP_700356    | Q6UXM1 | LRIG3_HUMAN | like C2-type 1.                | 4  | ACTGGCAAATTC  | 0.473 |             |
| + | 3  | 312   | .2_Missense_Mut   | NM_004731    | NP_004722    | O60669 | MOT2_HUMAN  | lasmic (Potential).            | 1  | CAATGCCAAGTC  | 0.413 |             |
| + | 11 | 1261  | irb.1_Missense_M  | NM_006313    | NP_006304    | Q9Y4E8 | UBP15_HUMAN |                                | 3  | AGGTGGTTGCC   | 0.348 |             |
| + | 13 | 1642  | rb.1_Missense_M   | NM_006313    | NP_006304    | Q9Y4E8 | UBP15_HUMAN |                                | 3  | TATGGAACGGC   | 0.259 |             |
| + | 24 | 3498  | n.1_Missense_Mu   | NM_015026    | NP_055841    | Q7Z3U7 | MON2_HUMAN  |                                | 2  | GGATCCCCGTC   | 0.458 |             |
| - | 6  | 1128  |                   | NM_020700    | NP_065751    | Q9ULR3 | PPM1H_HUMAN | PP2C-like.                     | 4  | ATTTCCCAGCA   | 0.378 |             |
| - | 3  | 798   |                   | NM_020700    | NP_065751    | Q9ULR3 | PPM1H_HUMAN | PP2C-like.                     | 4  | GGCCCCCACC    | 0.677 |             |
| + | 9  | 1323  | p.P423S SRGAP1    | NM_020762    | NP_065813    | Q7Z6B7 | SRGP1_HUMAN |                                | 4  | GTAACCCAGC    | 0.493 |             |
| + | 4  | 309   |                   | NM_013254    | NP_037386    | Q9UHD2 | TBK1_HUMAN  | rotein kinase.                 | 5  | CATAAAGTACTT  | 0.279 |             |
| + | 8  | 924   |                   | NM_013254    | NP_037386    | Q9UHD2 | TBK1_HUMAN  | rotein kinase.                 | 5  | AAGCAGATCAG   | 0.368 |             |
| + | 3  | 1633  | zqo.1_Splice_Site | NM_014319    | NP_055134    | Q9Y2U8 | MAN1_HUMAN  |                                | 4  | TGCAGGTAATT   | 0.279 |             |
| + | 12 | 2530  | qo.1_Missense_M   | NM_014319    | NP_055134    | Q9Y2U8 | MAN1_HUMAN  | 1, SMAD2, SMAD3 and S          | 4  | TCCAGAATATC   | 0.289 |             |
| + | 6  | 569   | p.D163N MSRB3     | NM_198080    | NP_932346    | Q8IXL7 | MSRB3_HUMAN |                                | 2  | CTGCCGATAGC   | 0.547 |             |
| - | 3  | 332   | p.A133T TMBIM4    | NM_016056    | NP_057140    | Q9HC24 | TMBI4_HUMAN | ical; (Potential).             | 2  | CAACGCCAAAA   | 0.353 |             |
| - | 19 | 2673  | p.S593N GRIP1_u   | NM_021150    | NP_066973    | Q9Y3R0 | GRIP1_HUMAN |                                | 2  | CATAACTCAGCC  | 0.502 |             |
| + | 9  | 1815  | JD1_uc001sto.2_Ir | NM_018448    | NP_060918    | Q86VP6 | CAND1_HUMAN | HEAT 10.                       | 2  | TAACTGAGCTG   | 0.373 |             |
| + | 14 | 3880  | sto.2_Missense_M  | NM_018448    | NP_060918    | Q86VP6 | CAND1_HUMAN | HEAT 27.                       | 2  | TGAGCCATTACC  | 0.403 |             |
| + | 3  | 712   | sts.3_Missense_M  | NM_006482    | NP_006473    | Q92630 | DYRK2_HUMAN |                                | 4  | ACAGTCTCAGC   | 0.537 |             |
| + | 25 | 2416  | i_p.M526I NUP107  | NM_020401    | NP_065134    | P57740 | NU107_HUMAN |                                | 1  | CATATGAATTCA  | 0.294 |             |
| + | 3  | 423   |                   | NM_000239    | NP_000230    | P61626 | LYSC_HUMAN  |                                | 0  | ACAAGGCATTAC  | 0.373 |             |
| + | 6  | 1331  | 33IP_uc001svo.2_I | NM_175623    | NP_783322    | Q96QF0 | RAB3I_HUMAN |                                | 1  | GAGTGGCAGTC   | 0.448 | rs61758771  |
| + | 6  | 1064  | rp.2_Missense_M   | NM_014515    | NP_055330    | Q9NZN8 | CNOT2_HUMAN |                                | 0  | ITCAGGGTTAG   | 0.458 |             |
| - | 6  | 1324  | p.V152A PTPRR     | NM_002849    | NP_002840    | Q15256 | PTPRR_HUMAN | lasmic (Potential).            | 3  | GGTCCACGACA   | 0.537 |             |
| + | 7  | 1010  | ry.2_Missense_Mu  | NM_173353    | NP_775489    | Q8IWU9 | TPH2_HUMAN  |                                | 4  | GCGAGACTGG    | 0.522 |             |
| + | 3  | 1189  |                   | NM_013381    | NP_037513    | Q9UKU6 | TRHDE_HUMAN | ellular (Potential).           | 3  | AAGTGCCCTAT   | 0.358 |             |
| - | 1  | 769   |                   | NM_007350    | NP_031376    | Q8WV24 | PHLA1_HUMAN | PH.                            | 0  | CCTTGGCTCC    | 0.612 |             |
| - | 2  | 1589  |                   | NM_024685    | NP_078961    | Q8TAM1 | BBS10_HUMAN |                                | 2  | TATATGTTTCTA  | 0.353 |             |

|   |    |      |                    |              |              |        |              |                               |    |               |       |             |
|---|----|------|--------------------|--------------|--------------|--------|--------------|-------------------------------|----|---------------|-------|-------------|
| + | 9  | 1091 | HC17_uc001syj.2    | NM_015336    | NP_056151    | Q8IUH5 | ZDH17_HUMAN  | ical; (Potential).            | 0  | 3GAACTCCTTTC  | 0.353 |             |
| + | 28 | 5535 | V3_uc010sub.1_in   | NM_014903    | NP_055718    | Q8IVL0 | NAV3_HUMAN   |                               | 17 | AGATCTCGGTAA  | 0.413 |             |
| - | 14 | 2111 | R12A_uc010sud.1    | NM_002480    | NP_002471    | O14974 | MYPT1_HUMAN  | Ser/Thr-rich.                 | 7  | CCTCAGCCCA    | 0.423 |             |
| - | 24 | 2886 | ce_Site PPFIA2_uc  | NM_003625    | NP_003616    | B7Z663 | B7Z663_HUMAN |                               | 6  | CAAAAGCTGTTA  | 0.313 |             |
| + | 2  | 397  |                    | NM_032230    | NP_115606    | Q8N6Q8 | CL026_HUMAN  |                               | 0  | ACTCCTTTTGAAC | 0.378 |             |
| - | 2  | 503  |                    | NM_005447    | NP_005438    | O75901 | RASF9_HUMAN  | as-associating.               | 1  | GCAAAGCCTGG   | 0.483 |             |
| - | 1  | 837  | C1B_uc010sun.1_l   | NM_003774    | NP_003765    | Q8N4A0 | GALT4_HUMAN  | tial);Catalytic subdomain A   | 0  | ACGGGCCCTAA   | 0.488 |             |
| - | 18 | 3345 | 31055D ATP2B1_u    | NM_001682    | NP_001673    | P20020 | AT2B1_HUMAN  | ical; (Potential).            | 3  | CCTGGCCCCAG   | 0.313 |             |
| - | 11 | 2042 | _p.A621T ATP2B1    | NM_001682    | NP_001673    | P20020 | AT2B1_HUMAN  | lasmic (Potential).           | 3  | TTTTTGCTCAC   | 0.353 |             |
| - | 5  | 1011 | bg.2_Missense_M    | NM_001682    | NP_001673    | P20020 | AT2B1_HUMAN  | lasmic (Potential).           | 3  | CTACAGCTGTA   | 0.289 |             |
| - | 3  | 680  | bg.2_Missense_Mi   | NM_001682    | NP_001673    | P20020 | AT2B1_HUMAN  | ical; (Potential).            | 3  | TAACACCACAC   | 0.443 |             |
| - | 2  | 1280 |                    | NM_007035    | NP_008966    | O60938 | KERA_HUMAN   | LRR 7.                        | 1  | FGTTGTCTAAAA  | 0.373 |             |
| - | 5  | 798  | .2_Intron DCN_uc   | NM_133503    | NP_598010    | P07585 | PGS2_HUMAN   | LRR 8.                        | 4  | TCAACTCTGCTG  | 0.348 |             |
| - | 26 | 4016 |                    | NM_003566    | NP_003557    | Q15075 | EEA1_HUMAN   | Potential.                    | 3  | AGTGCCTAAGT   | 0.393 |             |
| + | 3  | 615  | n_p.V21I NUDT4_    | NM_019094    | NP_061967    | Q9NZJ9 | NUDT4_HUMAN  | rdix hydrolase.               | 0  | CTGGAGTCAAA   | 0.284 |             |
| + | 1  | 1228 |                    | NM_005761    | NP_005752    | O60486 | PLXC1_HUMAN  | ilar (Potential); Sema.       | 3  | CCACGGCGCTC   | 0.687 |             |
| + | 5  | 1689 |                    | NM_005761    | NP_005752    | O60486 | PLXC1_HUMAN  |                               | 3  | TTTTTAGGTGCA  | 0.393 |             |
| - | 17 | 1605 | 3.L475F LTA4H_uc   | NM_000895    | NP_000886    | P09960 | LKHA4_HUMAN  |                               | 1  | TGGAAGAGGTG   | 0.388 |             |
| + | 2  | 289  |                    | NM_005230    | NP_005221    | P41970 | ELK3_HUMAN   |                               | 1  | AGAGTGCAATC   | 0.547 |             |
| + | 2  | 628  | ie_Mutation_p.P13  | NM_001032283 | NP_001027454 | P42167 | LAP2B_HUMAN  | smic (Potential); LEM.        | 2  | GTGAATCCTGGT  | 0.353 |             |
| + | 13 | 2469 | AF1_uc001tgb.2_iv  | NM_181861    | NP_863651    | O14727 | APAF_HUMAN   | WD 1.                         | 3  | 3AATAGCTTCTTC | 0.403 |             |
| - | 1  | 527  | AKS1B_uc009ztt.    | NM_152788    | NP_690001    | Q7Z6G8 | ANS1B_HUMAN  |                               | 0  | GCAGGGGTCCG   | 0.587 |             |
| - | 6  | 898  | J01tgr.2_Splice_Si | NM_015054    | NP_055869    | A0JNW5 | UH1BL_HUMAN  |                               | 2  | 3ACTCACCTTC   | 0.328 |             |
| + | 50 | 6724 |                    | NM_014503    | NP_055318    | O75691 | UTP20_HUMAN  |                               | 4  | ACCATACTTGTC  | 0.423 |             |
| + | 18 | 1990 | vr.1_Missense_Mi   | NM_206820    | NP_996556    | Q00872 | MYPC1_HUMAN  | onnectin type-III 1.          | 4  | TGACAGAGGTG   | 0.458 |             |
| - | 13 | 2341 |                    | NM_024312    | NP_077288    | Q3T906 | GNPTA_HUMAN  |                               | 2  | TGTCTCCATGT   | 0.398 |             |
| - | 13 | 2236 |                    | NM_024312    | NP_077288    | Q3T906 | GNPTA_HUMAN  |                               | 2  | CTCCTTGTTGAG  | 0.428 |             |
| - | 5  | 563  | svy.1_RNA CCDC!    | NM_016053    | NP_057137    | Q9Y3C0 | CCD53_HUMAN  |                               | 0  | GCATATCTTGGA  | 0.403 |             |
| + | 8  | 1218 | 88 C12orf48_uc01   | NM_017915    | NP_060385    | Q9NWS1 | PR1BP_HUMAN  |                               | 0  | CTCCTACCAAAA  | 0.373 |             |
| - | 3  | 578  | n.2_Missense_Mut   | NM_001111285 | NP_001104755 | P05019 | IGF1_HUMAN   |                               | 2  | GGACAGAGCGA   | 0.592 |             |
| + | 57 | 6218 | AB2_uc009zug.2_F   | NM_017564    | NP_060034    | Q8WWQ8 | STAB2_HUMAN  | ntential); Laminin EGF-like ; | 14 | TACAGCCTGTGC  | 0.557 |             |
| + | 13 | 1859 | ie_Mutation_p.G2E  | NM_003299    | NP_003290    | P14625 | ENPL_HUMAN   |                               | 3  | TGATGGGAAGA   | 0.433 |             |
| + | 3  | 597  | .2_Missense_Mut    | NM_003211    | NP_003202    | Q13569 | TDG_HUMAN    |                               | 6  | CTCTCCCCGATA  | 0.343 |             |
| + | 7  | 545  | 3_Mutation_p.R153  | NM_015275    | NP_056090    | Q2M389 | WAHS7_HUMAN  |                               | 2  | TACGAGGTGCT   | 0.338 |             |
| - | 1  | 1466 |                    | NM_014840    | NP_055655    | O60285 | NUAK1_HUMAN  |                               | 2  | TCGCCCCCGCC   | 0.736 |             |
| - | 2  | 926  |                    | NM_006825    | NP_006816    | Q07065 | CKAP4_HUMAN  | Potential.                    | 0  | TTGTTCCCCTCA  | 0.498 |             |
| + | 10 | 1537 |                    | NM_152772    | NP_689985    | Q8N4U5 | T11L2_HUMAN  |                               | 3  | CAAGCCCTCAA   | 0.393 | rs150377812 |
| + | 24 | 2936 | tlq.2_Missense_Mi  | NM_018082    | NP_060552    | Q9NW08 | RPC2_HUMAN   |                               | 2  | CCCAGGTGTTTC  | 0.483 |             |
| + | 14 | 1522 | t.2_Missense_Mut   | NM_213594    | NP_998759    | Q33E94 | RFX4_HUMAN   | ary for dimerization.         | 1  | TGAAGGGAGAA   | 0.433 |             |
| + | 16 | 1834 | p.P599S RFX4_uc    | NM_213594    | NP_998759    | Q33E94 | RFX4_HUMAN   |                               | 1  | AGGATACCAGTT  | 0.453 |             |
| - | 7  | 1218 | iART3_uc010swy.'   | NM_014706    | NP_055521    | Q15020 | SART3_HUMAN  | HAT 5.                        | 1  | GAATGCGAGCA   | 0.453 |             |
| + | 3  | 419  | nc.3_Missense_Mi   | NM_213595    | NP_998760    | Q9H1K1 | ISCU_HUMAN   |                               | 0  | TATTAGCCACTG  | 0.368 | rs145206633 |
| + | 13 | 1638 | p.E481K USP30_u    | NM_032663    | NP_116052    | Q70CQ3 | UBP30_HUMAN  | lasmic (Potential).           | 1  | GCCAGGAGTGC   | 0.562 |             |
| + | 35 | 4867 | dl.1_RNA ACACB_    | NM_001093    | NP_001084    | O00763 | ACACB_HUMAN  |                               | 8  | TAACACCAGCGT  | 0.602 |             |
| + | 11 | 1396 | HP_uc001tpp.2_N    | NM_001143852 | NP_001137324 | Q9BT92 | TCHP_HUMAN   | Glu-rich; Potential; Interact | 1  | AGGAGGTGAGA   | 0.537 |             |
| - | 4  | 549  | qp.3_Missense_M    | NM_016238    | NP_057322    | Q9UJX3 | APC7_HUMAN   | TPR 2.                        | 0  | TCCTGACCAGCC  | 0.438 |             |
| + | 9  | 952  | i_p.I203V RAD9B_   | NM_152442    | NP_689655    | Q6WBX8 | RAD9B_HUMAN  |                               | 2  | AACTTTATTTTGG | 0.378 |             |

|   |    |      |                     |              |              |        |             |    |               |       |                                 |
|---|----|------|---------------------|--------------|--------------|--------|-------------|----|---------------|-------|---------------------------------|
| + | 18 | 2928 | e_Mutation_p.A94    | NM_025247    | NP_079523    | Q6JQN1 | ACD10_HUMAN | 2  | AGATCGCCAGC   | 0.607 |                                 |
| + | 10 | 1643 | _p.T354I ALDH2_u    | NM_000690    | NP_000681    | P05091 | ALDH2_HUMAN | 4  | GCCTACTGTGT   | 0.567 |                                 |
| + | 10 | 1632 | tto.2_Missense_M    | NM_006700    | NP_006691    | O14545 | TRAD1_HUMAN | 0  | ATTCGCCCTCTC  | 0.562 |                                 |
| + | 19 | 1858 | p.G593R TPCN1_u     | NM_017901    | NP_060371    | Q9ULQ1 | TPC1_HUMAN  | 3  | TCCTGGGACTG   | 0.642 | ;-S3 of repeat II; (Potential). |
| + | 28 | 2656 | e_Mutation_p.E85    | NM_017901    | NP_060371    | Q9ULQ1 | TPC1_HUMAN  | 3  | CCAGGGAGCAA   | 0.687 | ic (Potential). Potential.      |
| - | 12 | 1402 | 24A6_uc001tva.2_u   | NM_024959    | NP_079235    | Q6J4K2 | NCKX6_HUMAN | 1  | GTGTGCCTGCGA  | 0.592 | Name=8; (Potential).            |
| - | 8  | 1121 | p.R326K RBM19_u     | NM_001146699 | NP_001140171 | Q9Y4C8 | RBM19_HUMAN | 6  | TCGTTTCTCACA  | 0.433 | RRM 2.                          |
| - | 19 | 4268 |                     | NM_015335    | NP_056150    | Q71F56 | MD13L_HUMAN | 8  | TCCTCTCCCAAA  | 0.522 |                                 |
| + | 7  | 1209 | e_Mutation_p.S31I   | NM_153348    | NP_699179    | Q8N3Y1 | FBXW8_HUMAN | 3  | TAGACTCCGCCA  | 0.542 |                                 |
| - | 3  | 327  | SC_uc001twi.2_R     | NM_017899    | NP_060369    | Q96BS2 | TESC_HUMAN  | 0  | GTGTGAGCTCCA  | 0.517 |                                 |
| - | 8  | 1232 | plice FBXO21_uc     | NM_033624    | NP_296373    | O94952 | FBX21_HUMAN | 1  | TCCTTACCGCTT  | 0.463 |                                 |
| - | 21 | 3792 |                     | NM_000620    | NP_000611    | P29475 | NOS1_HUMAN  | 7  | GTGGTCCCCAG   | 0.597 | R-type. FAD (By similarity).    |
| - | 6  | 867  | tb.1_Missense_Mu    | NM_018639    | NP_061109    | Q9NYS7 | WSB2_HUMAN  | 1  | AGAAGCCGTGA   | 0.512 | WD 4.                           |
| + | 3  | 668  | uc001txf.2_intron   | NM_178499    | NP_848594    | Q8IWA6 | CCD60_HUMAN | 3  | TCGTTGGATATT  | 0.428 |                                 |
| + | 3  | 770  | 249K CCDC64_uc      | NM_207311    | NP_997194    | Q6ZP65 | BICR1_HUMAN | 2  | GGCTGGAGAGC   | 0.527 | Potential.                      |
| - | 44 | 5711 |                     | NM_006836    | NP_006827    | Q92616 | GCN1L_HUMAN | 4  | CCGACCACCA    | 0.617 |                                 |
| - | 43 | 5619 |                     | NM_006836    | NP_006827    | Q92616 | GCN1L_HUMAN | 4  | TGTTGGACTGG   | 0.537 |                                 |
| - | 42 | 5481 |                     | NM_006836    | NP_006827    | Q92616 | GCN1L_HUMAN | 4  | TAGAGCCTTGC   | 0.473 | HEAT 14.                        |
| - | 24 | 2634 |                     | NM_006836    | NP_006827    | Q92616 | GCN1L_HUMAN | 4  | ACTGGGTCAGG   | 0.592 |                                 |
| - | 21 | 2294 |                     | NM_006836    | NP_006827    | Q92616 | GCN1L_HUMAN | 4  | CTCCTCCCGCG   | 0.597 |                                 |
| + | 5  | 1303 | JF10_uc001tyq.3_u   | NM_014868    | NP_055683    | Q8N5U6 | RNF10_HUMAN | 2  | TAGAAGGATCTC  | 0.448 |                                 |
| - | 3  | 217  | P5_uc001tyt.2_Int   | NM_015918    | NP_057002    | Q969H6 | POP5_HUMAN  | 0  | ATTCAGTATAGC  | 0.323 |                                 |
| + | 10 | 1329 | zb.3_Missense_Mt    | NM_000017    | NP_000008    | P16219 | ACADS_HUMAN | 2  | TGCCGGGCATC   | 0.697 |                                 |
| - | 6  | 1303 | SL_uc001tzk.1_3'l   | NM_003733    | NP_003724    | Q15646 | OASL_HUMAN  | 1  | TGATCTCGGAGG  | 0.537 | biquitin-like 1.                |
| + | 7  | 766  | o.2_RNA P2RX7_u     | NM_002562    | NP_002553    | Q99572 | P2RX7_HUMAN | 5  | TAGAATCCACAG  | 0.418 | rs146402035                     |
| - | 10 | 1154 | zy.2_Missense_Mu    | NM_006549    | NP_006540    | Q96RR4 | KKCC2_HUMAN | 3  | GGAGAGGAGCG   | 0.582 | rotein kinase.                  |
| - | 2  | 306  | zy.2_Missense_Mu    | NM_006549    | NP_006540    | Q96RR4 | KKCC2_HUMAN | 3  | TACAGCCCGGC   | 0.682 |                                 |
| - | 4  | 546  | uah.2_Missense_I    | NM_016237    | NP_057321    | Q9UJX4 | APC5_HUMAN  | 6  | TGAGGCCAAGA   | 0.443 |                                 |
| - | 16 | 2457 | is.2_Missense_Mu    | NM_032590    | NP_115979    | Q8NHM5 | KDM2B_HUMAN | 2  | TGGCACCTTCT   | 0.622 |                                 |
| - | 8  | 455  | bk.2_Splice_Site_u  | NM_002150    | NP_002141    | P32754 | HPPD_HUMAN  | 0  | TCCATACTACGG  | 0.448 |                                 |
| - | 6  | 364  | ibk.2_Splice_Site_u | NM_002150    | NP_002141    | P32754 | HPPD_HUMAN  | 0  | TCTTACTCTGCAC | 0.577 |                                 |
| + | 1  | 127  | zxi.2_RNA PSMD9     | NM_002813    | NP_002804    | O00233 | PSMD9_HUMAN | 0  | CCGACGAGGAA   | 0.682 |                                 |
| - | 8  | 1107 | 33A_uc001ucc.2_u    | NM_022916    | NP_075067    | Q96AX1 | VP33A_HUMAN | 1  | TCCCCCACGG    | 0.403 |                                 |
| - | 14 | 1662 | p.D273N ZCHC8       | NM_017612    | NP_060082    | Q6NZY4 | ZCHC8_HUMAN | 0  | TCTCATCCACAG  | 0.602 |                                 |
| - | 2  | 498  | e_Mutation_p.G63E   | NM_019625    | NP_062571    | Q9NP78 | ABCB9_HUMAN | 0  | TGGTCTCCAGC   | 0.647 | ical; (Potential).              |
| - | 13 | 1695 | NO1_uc001ueu.2_u    | NM_018183    | NP_060653    | A3KN83 | SBNO1_HUMAN | 9  | TATGACCCACTG  | 0.403 |                                 |
| - | 5  | 573  | _p.A144T EIF2B1_u   | NM_001414    | NP_001405    | Q14232 | EI2BA_HUMAN | 0  | CTTGGCCGCCA   | 0.502 |                                 |
| + | 17 | 2588 | p.P397S DNAH10      | NM_207437    | NP_997320    | Q8IVF4 | DYH10_HUMAN | 6  | TAGCCCCAAG    | 0.502 | n (By similarity).              |
| + | 41 | 6905 |                     | NM_207437    | NP_997320    | Q8IVF4 | DYH10_HUMAN | 6  | TAGTGAAGGA    | 0.388 | 2 (By similarity).              |
| - | 3  | 235  | ufx.1_Missense_A    | NM_025140    | NP_079416    | Q53HC0 | CCD92_HUMAN | 0  | CTGTGCGCTGT   | 0.612 | Potential.                      |
| - | 6  | 863  | p.G249E NCOR2_u     | NM_001077261 | NP_001070729 | Q9Y618 | NCOR2_HUMAN | 4  | GGGGCCCCAGG   | 0.587 |                                 |
| - | 5  | 728  | p.A204V NCOR2_u     | NM_001077261 | NP_001070729 | Q9Y618 | NCOR2_HUMAN | 4  | TGGCAGCCTCC   | 0.682 | Potential.                      |
| - | 2  | 350  | NCOR2_uc010tbc      | NM_001077261 | NP_001070729 | Q9Y618 | NCOR2_HUMAN | 4  | TCTCACCGTTC   | 0.652 |                                 |
| - | 7  | 1176 |                     | NM_032656    | NP_116045    | Q8IY37 | DHX37_HUMAN | 1  | TACCAACCTTCT  | 0.547 |                                 |
| + | 2  | 864  |                     | NM_052907    | NP_443139    | Q14DG7 | T132B_HUMAN | 19 | TCTCGGTACTCT  | 0.537 | cellular (Potential).           |
| + | 8  | 1375 | ijb.1_Missense_Mt   | NM_004592    | NP_004583    | Q12872 | SFSWA_HUMAN | 0  | TACCCGCCAC    | 0.647 |                                 |
| + | 8  | 1384 | ijb.1_Missense_Mt   | NM_004592    | NP_004583    | Q12872 | SFSWA_HUMAN | 0  | TACCACCTCTGT  | 0.647 | Poly-Pro.                       |



|   |    |           |                    |              |              |        |             |                             |      |               |       |
|---|----|-----------|--------------------|--------------|--------------|--------|-------------|-----------------------------|------|---------------|-------|
| - | 14 | 1970      |                    | NM_175066    | NP_778236    | Q8N8A6 | DDX51_HUMAN |                             | 2    | ACCGAGGAACC/  | 0.617 |
| - | 35 | 4492      | _p.S287N POLE_u    | NM_006231    | NP_006222    | Q07864 | DPOE1_HUMAN |                             | 8    | GGATACTCCCTC  | 0.587 |
| - | 30 | 3757      | .E_uc010tbq.1_RN   | NM_006231    | NP_006222    | Q07864 | DPOE1_HUMAN |                             | 8    | CCTGGCTCTCC   | 0.627 |
| - | 26 | 3213      | q.1_RNA POLE_u     | NM_006231    | NP_006222    | Q07864 | DPOE1_HUMAN |                             | 8    | CTTTGCTGTGC   | 0.577 |
| - | 24 | 2751      | i.1_Splice_Site PC | NM_006231    | NP_006222    | Q07864 | DPOE1_HUMAN |                             | 8    | CCCTTCCTGAGA  | 0.333 |
| + | 3  | 403       | AM5_uc001uku.2_    | NM_138575    | NP_612642    | Q96HS1 | PGAM5_HUMAN |                             | 0    | GTCGGGAGCAG   | 0.353 |
| - | 4  | 1014      | ky.3_Missense_M    | NM_015114    | NP_055929    | Q86XL3 | ANKL2_HUMAN |                             | 0    | CCACAGCTTTC   | 0.527 |
| - | 17 | 3843      | ila.1_Missense_Mt  | NM_005895    | NP_005886    | Q08378 | GOGA3_HUMAN | Potential.                  | 6    | TAAAGCCTCTG   | 0.448 |
| - | 4  | 668       |                    | NM_006001    | NP_005992    | Q13748 | TBA3C_HUMAN |                             | 5    | GGCTTCATTGTC  | 0.582 |
| - | 1  | 236       | ij.1_RNA PSPC1_u   | NM_001042414 | NP_001035879 | Q8WXF1 | PSPC1_HUMAN |                             | 1    | GGCGGGCCGGC   | 0.647 |
| - | 6  | 1191      | M5_uc001umr.2_I    | NM_001142684 | NP_001136156 | Q9UJ78 | ZMYM5_HUMAN |                             | 0    | GGAAGGATTTG   | 0.318 |
| - | 3  | 311       | sense_Mutation_p   | NM_001142684 | NP_001136156 | Q9UJ78 | ZMYM5_HUMAN |                             | 0    | AGCAGGAGTCT   | 0.403 |
| + | 5  | 1230      | i_p.P311L ZMYM2    | NM_003453    | NP_003444    | Q9UBW7 | ZMYM2_HUMAN |                             | 6    | CACTTCCTAAAC  | 0.448 |
| - | 1  | 56        | O4_uc010tcr.1_5'L  | NM_022459    | NP_071904    | Q9C0E2 | XPO4_HUMAN  |                             | 3    | GGGGCCCCAGC   | 0.711 |
| + | 7  | 834       | p.L227F SGCG_u     | NM_000231    | NP_000222    | Q13326 | SGCG_HUMAN  | cellular (Potential).       | 0    | GATATTCTTTTT  | 0.443 |
| - | 10 | 13514     | E4162K SACS_uc     | NM_014363    | NP_055178    | Q9NZJ4 | SACS_HUMAN  | J.                          | 12   | TCACTTCTTTTA  | 0.408 |
| - | 10 | 12953     | A3975T SACS_uc     | NM_014363    | NP_055178    | Q9NZJ4 | SACS_HUMAN  |                             | 12   | GCATAGCAATTA  | 0.353 |
| - | 10 | 9521      | V2831M SACS_uc     | NM_014363    | NP_055178    | Q9NZJ4 | SACS_HUMAN  |                             | 12   | CTTTCCTACTAG  | 0.388 |
| - | 10 | 8178      | S2383N SACS_uc     | NM_014363    | NP_055178    | Q9NZJ4 | SACS_HUMAN  |                             | 12   | ATTCTGCTGGTC  | 0.393 |
| - | 10 | 7536      | .T2169 SACS_uc     | NM_014363    | NP_055178    | Q9NZJ4 | SACS_HUMAN  |                             | 12   | GCATTGGTGATA  | 0.343 |
| - | 13 | 1524      |                    | NM_005932    | NP_005923    | Q99797 | MIPEP_HUMAN |                             | 1    | AACGGGGAAGA   | 0.428 |
| - | 25 | 3220      |                    | NM_006437    | NP_006428    | Q9UKK3 | PARP4_HUMAN |                             | 4    | AACATACCTGTT  | 0.353 |
| + | 8  | 1086      | iaa.2_Missense_M   | NM_001676    | NP_001667    | P54707 | AT12A_HUMAN | lasmic (Potential).         | 6    | CCATTGCCATTG  | 0.517 |
| - | 7  | 2471      | 2_RNA CENPJ_u      | NM_018451    | NP_060921    | Q9HC77 | CENPJ_HUMAN |                             | 2    | AAAAGGCCCCCT  | 0.443 |
| + | 1  | 194       |                    | NM_030979    | NP_112241    | Q9H361 | PABP3_HUMAN | RRM 1.                      | 4    | GCAGGGACTTG   | 0.567 |
| - | 1  | 1731      | p.G425D FAM123,    | NM_152704    | NP_689917    | Q8N7J2 | F123A_HUMAN |                             | 4    | GGATGCCCGCC   | 0.637 |
| - | 1  | 1667_1668 | p.G404N FAM123,    | NM_152704    | NP_689917    | Q8N7J2 | F123A_HUMAN |                             | 4    | AGTAGCCCTCGT  | 0.658 |
| + | 9  | 866       | '8A2_uc010tdj.1_F  | NM_016529    | NP_057613    | Q9NTI2 | AT8A2_HUMAN | lasmic (Potential).         | 4    | GTGAAGGGCCC   | 0.393 |
| - | 5  | 1307      | rp.2_Missense_Mt   | NM_183044    | NP_898865    | Q9Y252 | RNF6_HUMAN  | Arg-rich.                   | 2    | CAGATCTTCTAC  | 0.433 |
| + | 10 | 981       | p.D319N CDK8_u     | NM_001260    | NP_001251    | P49336 | CDK8_HUMAN  | rotein kinase.              | 5    | CCATGGACCCA   | 0.413 |
| - | 8  | 1957      | m.1_Missense_Mt    | NM_153371    | NP_699202    | Q8N448 | LNX2_HUMAN  | PDZ 3.                      | 6    | TTTAAGGGCAAC  | 0.502 |
| + | 2  | 216       | ase_Mutation_p.G   | NM_152705    | NP_689918    | Q9Y2S0 | RPAC2_HUMAN |                             | 0    | CCATGGTTGGT   | 0.254 |
| - | 3  | 1001      |                    | NM_001265    | NP_001256    | Q99626 | CDX2_HUMAN  |                             | 1    | CACTTCTCAGAC  | 0.552 |
| - | 20 | 2520      | o.2_RNA FLT3_uc    | NM_004119    | NP_004110    | P36888 | FLT3_HUMAN  | cytoplasmic (Potential).    | 8549 | TGGCGGCCAGG   | 0.458 |
| - | 7  | 933       | .T3_uc010tdn.1_M   | NM_004119    | NP_004110    | P36888 | FLT3_HUMAN  | Potential).Ig-like C2-type. | 8549 | CCCAGGTGAGCC  | 0.393 |
| - | 30 | 4210      | q.2_Missense_Mu    | NM_002019    | NP_002010    | P17948 | VGFR1_HUMAN | lasmic (Potential).         | 24   | GTCGTAGGTGA   | 0.577 |
| + | 1  | 1538      |                    | NM_001033602 | NP_001028774 | Q5JR59 | MTUS2_HUMAN |                             | 0    | AGGTGCTGAG    | 0.512 |
| + | 1  | 1886      |                    | NM_001033602 | NP_001028774 | Q5JR59 | MTUS2_HUMAN |                             | 0    | CCAAGCCTGTC   | 0.522 |
| + | 4  | 718       | .2_5'UTR USPL1_    | NM_005800    | NP_005791    | Q5W0Q7 | USPL1_HUMAN |                             | 3    | TGGAAGAATGTC  | 0.318 |
| + | 4  | 1143      | .W56* USPL1_uc     | NM_005800    | NP_005791    | Q5W0Q7 | USPL1_HUMAN |                             | 3    | TGTTGGTTAGAC  | 0.448 |
| + | 9  | 1972      | p.L185F USPL1_u    | NM_005800    | NP_005791    | Q5W0Q7 | USPL1_HUMAN |                             | 3    | TCCACTTAAAC   | 0.408 |
| - | 11 | 1941      | p.E474K HSPH1_     | NM_006644    | NP_006635    | Q92598 | HS105_HUMAN |                             | 0    | CACTCCATGTC   | 0.433 |
| - | 9  | 1567      | p.R349K HSPH1_     | NM_006644    | NP_006635    | Q92598 | HS105_HUMAN |                             | 0    | AATTCTCTAACT  | 0.338 |
| + | 9  | 874       | ALT1_uc001utn.3_   | NM_194318    | NP_919299    | Q6Y288 | B3GLT_HUMAN | renal (Potential).          | 2    | TCCATTCTTTTCT | 0.438 |
| + | 29 | 4188      | RY_uc010tdw.1_Rf   | NM_023037    | NP_075463    | Q5TBA9 | FRY_HUMAN   |                             | 7    | AGTTCTCTACC   | 0.428 |
| + | 42 | 6024      | uc010tdw.1_Splic   | NM_023037    | NP_075463    | Q5TBA9 | FRY_HUMAN   |                             | 7    | CCCTAGGCTTCT  | 0.507 |
| + | 19 | 8649      |                    | NM_000059    | NP_000050    | P51587 | BRCA2_HUMAN |                             | 64   | CATCGCTTTTCA  | 0.398 |

|   |    |      |                     |              |              |        |             |                               |    |                |       |
|---|----|------|---------------------|--------------|--------------|--------|-------------|-------------------------------|----|----------------|-------|
| + | 21 | 8925 |                     | NM_000059    | NP_000050    | P51587 | BRCA2_HUMAN |                               | 64 | TGCAAGATGGT    | 0.383 |
| + | 3  | 267  | i_uc001uuo.2_Spli   | NM_015032    | NP_055847    | Q9NTI5 | PDS5B_HUMAN |                               | 4  | GTATAGATGGTT   | 0.299 |
| + | 3  | 1407 | .1_Missense_Muta    | NM_004795    | NP_004786    | Q9UEF7 | KLOT_HUMAN  | e-1 1. Extracellular (Potenti | 3  | AGTGGCACAGA    | 0.502 |
| - | 10 | 2650 | se_Mutation_p.P7z   | NM_178006    | NP_821074    | Q9Y3M8 | STA13_HUMAN | Rho-GAP.                      | 4  | ATCTGGCTTCCC   | 0.483 |
| + | 5  | 630  | _p.P174S RFC3_u     | NM_002915    | NP_002906    | P40938 | RFC3_HUMAN  |                               | 0  | ATCCCACCTATTC  | 0.428 |
| - | 1  | 1146 | A_uc010tee.1_Inti   | NM_005584    | NP_005575    | Q13394 | MB211_HUMAN |                               | 2  | GTTGGGTCCCG    | 0.637 |
| + | 45 | 7180 | _p.T118I NBEA_u     | NM_015678    | NP_056493    | Q8NFP9 | NBEA_HUMAN  | BEACH.                        | 11 | TGTTAACCAACT/  | 0.348 |
| - | 5  | 1120 | uc001uvi.1_Intron   | NM_004734    | NP_004725    | O15075 | DCLK1_HUMAN | Pro/Ser-rich.                 | 9  | CTTTGGTGGTG    | 0.507 |
| - | 3  | 919  |                     | NM_004734    | NP_004725    | O15075 | DCLK1_HUMAN | oublecortin 2.                | 9  | CCACTCCCAGG    | 0.498 |
| + | 3  | 742  | IA1_uc010abp.2_     | NM_003914    | NP_003905    | P78396 | CCNA1_HUMAN |                               | 5  | GCCCCCAAGC.    | 0.502 |
| + | 8  | 1650 | VA1_uc010abp.2_     | NM_003914    | NP_003905    | P78396 | CCNA1_HUMAN |                               | 5  | ATATACCCCATC   | 0.398 |
| - | 2  | 495  | se_Mutation_p.A51   | NM_001127217 | NP_001120689 | O15198 | SMAD9_HUMAN | MH1.                          | 0  | GCATGGCTCCC    | 0.592 |
| - | 11 | 3138 | _p.T827I TRPC4_u    | NM_016179    | NP_057263    | Q9UBN4 | TRPC4_HUMAN | and ITPR3. Cytoplasmic (F     | 6  | CGTGGGTGACT    | 0.448 |
| + | 1  | 4609 |                     | NM_207361    | NP_997244    | Q5SZK8 | FREM2_HUMAN | ir (Potential). CSPG 10.      | 11 | AAGAAGGTGGC.   | 0.443 |
| + | 10 | 6986 | ww.2_Missense_M     | NM_207361    | NP_997244    | Q5SZK8 | FREM2_HUMAN | ellular (Potential).          | 11 | CAACTCTCCCT    | 0.458 |
| + | 13 | 1269 | p.G338D COG6_u      | NM_020751    | NP_065802    | Q9Y2V7 | COG6_HUMAN  |                               | 2  | TAGTGGTATTGT   | 0.308 |
| + | 3  | 636  | Y10ffb.1_Splice_Sil | NM_014252    | NP_055067    | Q9Y619 | ORNT1_HUMAN |                               | 0  | CTGAGGTGAGT    | 0.363 |
| - | 1  | 2221 | :010tfe.1_Nonsens   | NM_152903    | NP_690867    | Q86V97 | KBTB6_HUMAN | Kelch 6.                      | 2  | GAAGTCCCATT/   | 0.458 |
| - | 44 | 5664 |                     | NM_015058    | NP_055873    | A3KMH1 | K0564_HUMAN | VWFA.                         | 6  | GATCACCTAAAC   | 0.413 |
| - | 19 | 2327 | uyk.2_Missense_     | NM_015058    | NP_055873    | A3KMH1 | K0564_HUMAN |                               | 6  | GAAAAGAACATC   | 0.363 |
| - | 18 | 2178 | uyk.2_Missense_     | NM_015058    | NP_055873    | A3KMH1 | K0564_HUMAN |                               | 6  | ACTCTGCCAGA    | 0.373 |
| - | 8  | 960  | uyk.2_Missense_     | NM_015058    | NP_055873    | A3KMH1 | K0564_HUMAN |                               | 6  | TTGTGGCAAAG    | 0.313 |
| + | 9  | 1073 | .R106H DGKH_uc      | NM_178009    | NP_821077    | Q86XP1 | DGKH_HUMAN  | DAGKc.                        | 2  | CTCCGTCGCT     | 0.368 |
| + | 22 | 2692 | .A646T DGKH_uc      | NM_178009    | NP_821077    | Q86XP1 | DGKH_HUMAN  |                               | 2  | AAATGGCAGTT    | 0.423 |
| + | 2  | 462  | luyt.2_Missense_    | NM_003701    | NP_003692    | O14788 | TNF11_HUMAN | ellular (Potential).          | 0  | CTCTGGAGAGT    | 0.383 |
| + | 2  | 311  | RP2_uc001uzk.2_f    | NM_001010897 | NP_001010897 | Q8N6R1 | SERP2_HUMAN | IV membrane protein; (Pc      | 0  | TTTGGCACTG     | 0.383 |
| - | 1  | 80   | ?_5'Flank KIAA170   | NM_012345    | NP_036477    | Q9UHK0 | NUFP1_HUMAN |                               | 0  | GCCACCCGATA    | 0.627 |
| - | 2  | 195  | _p.V35M LOC100      | NM_003295    | NP_003286    | P13693 | TCTP_HUMAN  |                               | 0  | ACTCACCTTCC    | 0.672 |
| - | 2  | 191  | _p.G33E LOC100      | NM_003295    | NP_003286    | P13693 | TCTP_HUMAN  |                               | 0  | CTTCCCCTCC     | 0.672 |
| - | 2  | 181  | _p.E30K LOC100      | NM_003295    | NP_003286    | P13693 | TCTP_HUMAN  |                               | 0  | CACCTCCAGGC.   | 0.672 |
| + | 1  | 267  | _p.P56S COG3_uc     | NM_031431    | NP_113619    | Q96JB2 | COG3_HUMAN  |                               | 2  | CGGTGCCAGCT    | 0.701 |
| - | 14 | 3842 | 3H13_uc001vas.1     | NM_015070    | NP_055885    | Q5T200 | ZC3HD_HUMAN | Ser-rich.                     | 2  | CTGGGAAACTT    | 0.343 |
| - | 13 | 3310 | nse_Mutation_p.P    | NM_015070    | NP_055885    | Q5T200 | ZC3HD_HUMAN |                               | 2  | AGGAGGAAGAA    | 0.313 |
| - | 15 | 1811 | y.3_Missense_Mul    | NM_002298    | NP_002289    | P13796 | PLSL_HUMAN  | -binding 2. CH 4.             | 7  | TGGAACCTGGT    | 0.428 |
| - | 3  | 982  | issense_Mutation_   | NM_025113    | NP_079389    | Q9H714 | CMO18_HUMAN | Ser-rich.                     | 0  | AGAAGCTGCTA    | 0.572 |
| + | 2  | 402  |                     | NM_021999    | NP_068839    | Q9Y287 | ITM2B_HUMAN | type II membrane protein;     | 0  | CTTTGGACTAG    | 0.378 |
| - | 1  | 1618 | /ce.2_Missense_M    | NM_001162498 | NP_001155970 | P43657 | LPAR6_HUMAN | ellular (Pote p.?(4)          | 4  | GCATGtggtcttgg | 0.333 |
| - | 10 | 1269 | ?76S RCBTB2_uc      | NM_001268    | NP_001259    | O95199 | RCBT2_HUMAN | RCC1 5.                       | 5  | AGTAGGATAGG    | 0.458 |
| + | 5  | 633  | OC3A_uc001vco.2     | NM_001079673 | NP_001073141 | Q9Y2H6 | FND3A_HUMAN | Pro-rich.                     | 2  | ACACAGTTCTCC   | 0.488 |
| + | 21 | 2661 | C3A_uc001vco.2      | NM_001079673 | NP_001073141 | Q9Y2H6 | FND3A_HUMAN | nectin type-III 6.            | 2  | GTAATGGAACAC   | 0.383 |
| - | 9  | 1342 | _p.A282T CAB39L     | NM_030925    | NP_112187    | Q9H9S4 | CB39L_HUMAN |                               | 0  | ACTGGCCACAA    | 0.478 |
| + | 10 | 1287 | e_Mutation_p.R27    | NM_001040443 | NP_001035533 | Q9UIL8 | PHF11_HUMAN |                               | 0  | AAAATAGAGATC   | 0.373 |
| - | 17 | 3800 | p.D1150N ATP7B_     | NM_000053    | NP_000044    | P35670 | ATP7B_HUMAN | lasmic (Potential).           | 3  | CACGTCCACAC    | 0.562 |
| + | 2  | 590  | i.2_3'UTR UTP14C    | NM_021645    | NP_067677    | Q5TAP6 | UT14C_HUMAN |                               | 5  | AACTAGTGGAT    | 0.463 |
| + | 2  | 1815 | 14C_uc001vgc.2_     | NM_021645    | NP_067677    | Q5TAP6 | UT14C_HUMAN |                               | 5  | GCAATCCCTTA    | 0.478 |
| - | 21 | 1978 |                     | NM_199289    | NP_954983    | Q6P3R8 | NEK5_HUMAN  |                               | 1  | TCATGCCATCC    | 0.348 |
| - | 6  | 875  | _p.A255V LECT1_u    | NM_007015    | NP_008946    | O75829 | LECT1_HUMAN |                               | 2  | TGAAGCTTGT     | 0.408 |

|   |    |       |                    |              |              |        |                                          |    |                |       |            |
|---|----|-------|--------------------|--------------|--------------|--------|------------------------------------------|----|----------------|-------|------------|
| - | 1  | 325   | vhj_2_Missense_M   | NM_002590    | NP_002581    | O95206 | PCDH8_HUMAN r (Potential).               | 1  | :CGGGGGCATCC   | 0.592 |            |
| - | 2  | 812   | thj_1_Missense_M   | NM_022843    | NP_073754    | Q8N6Y1 | PCD20_HUMAN  Extracellular (Potential).  | 6  | :GGCCTCCCTGT   | 0.602 |            |
| - | 10 | 2428  | _p.V521I DACH1_    | NM_080759    | NP_542937    | Q9UI36 | DACH1_HUMAN                              | 1  | :TAAGACCCCTGA  | 0.388 |            |
| + | 2  | 1214  | d_2_Missense_Mul   | NM_001730    | NP_001721    | Q13887 | KLF5_HUMAN                               | 3  | :ACAGGCCACTT   | 0.517 |            |
| - | 21 | 4101  | .E409K TBC1D4_u    | NM_014832    | NP_055647    | O60343 | TBCD4_HUMAN                              | 6  | :TTGTTCCAGGGT  | 0.458 |            |
| - | 6  | 1840  | p.R498K TBC1D4_    | NM_014832    | NP_055647    | O60343 | TBCD4_HUMAN                              | 6  | :GAAACTCTTTCA  | 0.403 |            |
| + | 6  | 1142  | 1_Intron LMO7_uc   | NM_015842    | NP_056667    | Q8WW11 | LMO7_HUMAN                               | 5  | :CAAACCCAGGG   | 0.398 |            |
| + | 11 | 2606  | .R515W LMO7_uc     | NM_015842    | NP_056667    | Q8WW11 | LMO7_HUMAN                               | 5  | :GTTACCGGAAA   | 0.483 |            |
| + | 26 | 4763  | :7_uc010thw.1_Mi   | NM_015842    | NP_056667    | Q8WW11 | LMO7_HUMAN                               | 5  | :CTCAGGAGCTG   | 0.443 |            |
| - | 65 | 11105 | :D3076N MYCBP      | NM_015057    | NP_055872    | O75592 | MYCB2_HUMAN                              | 14 | :CATCATCTGACT  | 0.398 |            |
| - | 57 | 9158  | vkq.1_Missense_M   | NM_015057    | NP_055872    | O75592 | MYCB2_HUMAN                              | 14 | :GGAAGTTTCAG   | 0.388 |            |
| - | 43 | 6408  | ev_2_Missense_M    | NM_015057    | NP_055872    | O75592 | MYCB2_HUMAN                              | 14 | :TCATATCCAATTG | 0.343 |            |
| - | 16 | 2358  | æv_2_Missense_IV   | NM_015057    | NP_055872    | O75592 | MYCB2_HUMAN Cys-rich.                    | 14 | :CTTACCCCTCCGC | 0.438 |            |
| + | 10 | 771   | _p.P201S SCEL_uc   | NM_144777    | NP_659001    | O95171 | SCEL_HUMAN                               | 5  | :CTTCTCCTAACC  | 0.428 | rs17854490 |
| - | 2  | 2830  | afe.1_Missense_IV  | NM_032229    | NP_115605    | Q9H5Y7 | SLIK6_HUMAN  asmic (Potential).          | 3  | :CTCAGGATAAT   | 0.388 |            |
| + | 2  | 961   | :RK5_uc010tic.1_I  | NM_015567    | NP_056382    | O94991 | SLIK5_HUMAN  Extracellular (Potential).  | 5  | :TAAAGGATTGGT  | 0.517 |            |
| + | 2  | 1343  | tic.1_Missense_M   | NM_015567    | NP_056382    | O94991 | SLIK5_HUMAN  lar (Potential); LRRNT.     | 5  | :GTGTCCCACCG   | 0.597 |            |
| - | 31 | 4069  | _p.T108I ABCC4_u   | NM_005845    | NP_005836    | O15439 | MRP4_HUMAN                               | 4  | :TTAAGGTGCGAG  | 0.388 |            |
| - | 24 | 3058  | fk_2_Missense_M    | NM_005845    | NP_005836    | O15439 | MRP4_HUMAN  ABC transmembrane type       | 4  | :CCAAACCAACC   | 0.473 |            |
| - | 27 | 3297  | mu.1_Missense_M    | NM_020121    | NP_064506    | Q9NYU1 | UGGG2_HUMAN                              | 3  | :ATTCAGGAATAT  | 0.408 |            |
| - | 9  | 1170  | ise_Mutation_p.D   | NM_020121    | NP_064506    | Q9NYU1 | UGGG2_HUMAN                              | 3  | :AAATGTCTTTCA  | 0.313 |            |
| - | 4  | 1128  | afr.1_Missense_M   | NM_080818    | NP_543008    | Q96P68 | OXGR1_HUMAN Name=7; (Potential).         | 2  | :CAAAGGTGTTC   | 0.458 |            |
| - | 4  | 1028  | afr.1_Missense_M   | NM_080818    | NP_543008    | Q96P68 | OXGR1_HUMAN Name=6; (Potential).         | 2  | :AATGACCCTCA   | 0.433 |            |
| + | 22 | 2801  | nh_2_Missense_M    | NM_005766    | NP_005757    | Q9Y4F1 | FARP1_HUMAN PH 1.                        | 2  | :GGTGCCCCACT   | 0.617 |            |
| - | 23 | 2528  | ce DOCK9_uc010I    | NM_015296    | NP_056111    | Q9BZ29 | DOCK9_HUMAN                              | 1  | :TGATCCTGAGG   | 0.358 |            |
| - | 21 | 2328  | OCK9_uc010tis.1_   | NM_015296    | NP_056111    | Q9BZ29 | DOCK9_HUMAN DHR-1.                       | 1  | :GCCAGGAGTAG   | 0.478 |            |
| - | 13 | 1502  | OCK9_uc010tis.1_   | NM_015296    | NP_056111    | Q9BZ29 | DOCK9_HUMAN                              | 1  | :CTGAAGGACTT   | 0.403 |            |
| - | 8  | 842   | :OCK9_uc010tis.1_  | NM_015296    | NP_056111    | Q9BZ29 | DOCK9_HUMAN PH.                          | 1  | :GTCTGCTGCCA   | 0.393 |            |
| + | 1  | 644   |                    | NM_007129    | NP_009060    | O95409 | ZIC2_HUMAN  transcriptional activation o | 0  | :GTACGGCCCCA   | 0.562 |            |
| - | 14 | 1865  | :A458T TMTC4_u     | NM_001079669 | NP_001073137 | Q5T4D3 | TMTC4_HUMAN TPR 4.                       | 3  | :CTCTGCTGCTT   | 0.493 |            |
| - | 11 | 1502  | :G337R TMTC4_u     | NM_001079669 | NP_001073137 | Q5T4D3 | TMTC4_HUMAN  Helical; (Potential).       | 3  | :GATTTCCAGCAC  | 0.507 |            |
| - | 8  | 1038  | _p.T182M TMTC4_    | NM_001079669 | NP_001073137 | Q5T4D3 | TMTC4_HUMAN                              | 3  | :GGCCCGTGCCC   | 0.637 |            |
| + | 24 | 3089  |                    | NM_003291    | NP_003282    | P29144 | TPP2_HUMAN                               | 2  | :TACCTCCACCA   | 0.313 |            |
| - | 3  | 313   | vpk.2_Missense_IV  | NM_001010977 | NP_001010977 | Q5VZV1 | MT21C_HUMAN                              | 0  | :TTCCTCCAAGT   | 0.403 |            |
| - | 1  | 795   |                    | NM_000452    | NP_000443    | Q12908 | NTCP2_HUMAN  asmic (Potential).          | 4  | :ATGCCCCACGG   | 0.532 |            |
| - | 1  | 619   |                    | NM_001080396 | NP_001073865 | B1AL88 | F155A_HUMAN                              | 1  | :CTGAGCCCTCT   | 0.562 |            |
| - | 29 | 2227  | 4A1_uc010agl.2_I   | NM_001845    | NP_001836    | P02462 | CO4A1_HUMAN  le-helical region.          | 6  | :GTAAGCCGTCA   | 0.498 |            |
| - | 22 | 1419  | 4A1_uc010agl.2_I   | NM_001845    | NP_001836    | P02462 | CO4A1_HUMAN  le-helical region.          | 6  | :GACATTCACAA   | 0.413 |            |
| - | 8  | 590   | :agl.2_Splice_Site | NM_001845    | NP_001836    | P02462 | CO4A1_HUMAN                              | 6  | :ATGTACCTTCAT  | 0.328 |            |
| + | 1  | 824   | :1_uc001vrf.2_Intr | NM_005537    | NP_005528    | Q9UK53 | ING1_HUMAN                               | 1  | :GCTCAGCCCGG   | 0.736 |            |
| + | 12 | 1625  | p.E482Q MCF2L_u    | NM_001112732 | NP_001106203 | O15068 | MCF2L_HUMAN Potential.                   | 2  | :GTGCGGAAAAT   | 0.532 |            |
| + | 17 | 1763  | agu.2_Splice_Site  | NM_001008895 | NP_001008895 | Q13619 | CUL4A_HUMAN                              | 3  | :AAGAAGTAAGT   | 0.289 |            |
| + | 8  | 788   |                    | NM_182614    | NP_872420    | Q8WV15 | FA70B_HUMAN                              | 0  | :CTTCGCTGCA    | 0.677 |            |
| - | 11 | 1460  | _p.P137L GAS6_u    | NM_000820    | NP_000811    | Q14393 | GAS6_HUMAN  minin G-like 1.              | 4  | :TCACAGGCTGC   | 0.587 |            |
| + | 1  | 167   | a.1_RNA POTEG_     | NM_001005356 | NP_001005356 | Q6S5H5 | POTEG_HUMAN                              | 1  | :GGAGCGGCAAC   | 0.592 |            |
| - | 1  | 265   | l4P_uc001vwb.3_F   | NM_001145442 | NP_001138914 | A6NI47 | POTEM_HUMAN                              | 0  | :CTGCACCAGGG   | 0.587 |            |
| - | 1  | 689   |                    | NM_001004714 | NP_001004714 | Q8NH42 | OR4KD_HUMAN  asmic (Potential).          | 2  | :GACTAGCAGCA   | 0.502 |            |

|   |    |      |                    |              |              |        |             |                        |    |                |       |
|---|----|------|--------------------|--------------|--------------|--------|-------------|------------------------|----|----------------|-------|
| - | 1  | 170  |                    | NM_001004714 | NP_001004714 | Q8NH42 | OR4KD_HUMAN | lasmic (Potential).    | 2  | .TTGGTGTGTGAA  | 0.438 |
| - | 50 | 7251 | EP1_uc010tif.1_Rf  | NM_007110    | NP_009041    | Q99973 | TEP1_HUMAN  | WD 18.                 | 5  | ATTTCCAGATGGA  | 0.458 |
| - | 14 | 2255 | EP1_uc010tif.1_Rf  | NM_007110    | NP_009041    | Q99973 | TEP1_HUMAN  |                        | 5  | AGATGCCTTCTT   | 0.532 |
| - | 14 | 2198 | EP1_uc010tif.1_Rf  | NM_007110    | NP_009041    | Q99973 | TEP1_HUMAN  |                        | 5  | AGACGTCCACCT   | 0.547 |
| - | 2  | 279  | IP1_uc010tlg.1_Mi  | NM_007110    | NP_009041    | Q99973 | TEP1_HUMAN  | >1 N-terminal 3.       | 5  | AGGCACTGGTTC   | 0.542 |
| - | 2  | 223  | EP1_uc010tlg.1_M   | NM_007110    | NP_009041    | Q99973 | TEP1_HUMAN  | >1 N-terminal 3.       | 5  | TTTTTCCATGGT   | 0.507 |
| + | 4  | 654  | APEX1_uc001vxi.2   | NM_001641    | NP_001632    | P27695 | APEX1_HUMAN |                        | 4  | AGCTGAACCTCAG  | 0.502 |
| + | 4  | 455  | .2_3'UTR PNP_ucl   | NM_000270    | NP_000261    | P00491 | PNPH_HUMAN  |                        | 2  | ATCCACCTTCTG   | 0.443 |
| - | 4  | 721  | ahr.2_Missense_Iv  | NM_001110357 | NP_001103827 | P60153 | RNAS9_HUMAN |                        | 2  | AGGTGGCTCCAA   | 0.433 |
| + | 2  | 973  | IASE4_uc001vya.2   | NM_002937    | NP_002928    | P34096 | RNAS4_HUMAN |                        | 1  | ATGAGGGTAACC   | 0.512 |
| + | 3  | 484  | h6N METT11D1_uc    | NM_022734    | NP_073571    | Q9H7H0 | MET17_HUMAN |                        | 0  | CTGGAGCAGAC    | 0.473 |
| + | 14 | 1510 | p.2_Missense_Mur   | NM_022734    | NP_073571    | Q9H7H0 | MET17_HUMAN |                        | 0  | TTTTACCTGTGC   | 0.522 |
| + | 4  | 582  | RG2_uc010tlf.1_In  | NM_173846    | NP_776245    | P59282 | TPPP2_HUMAN |                        | 0  | ACAAGGAGCGC    | 0.542 |
| + | 12 | 2512 | 10ajj.2_RNA FLJ1   | NM_018071    | NP_060541    | Q8TER5 | ARH40_HUMAN | Potential.             | 0  | ATTTCCAGCGCTG  | 0.637 |
| + | 7  | 1325 | OX4_uc010tlu.1_I   | NM_014828    | NP_055643    | O94842 | TOX4_HUMAN  | Gln/Pro-rich.          | 1  | AGTACAGCTACT   | 0.552 |
| + | 1  | 620  |                    | NM_001001912 | NP_001001912 | Q8NGC2 | OR4E2_HUMAN | Name=5; (Potential).   | 4  | CCATCTCCCTCT   | 0.493 |
| - | 8  | 1361 | p.P408L SLC7A7_    | NM_003982    | NP_003973    | Q9UM01 | YLAT1_HUMAN |                        | 2  | AGATCAGGCTCC   | 0.498 |
| + | 1  | 405  |                    | NM_001099780 | NP_001093250 | A5LHX3 | PSB11_HUMAN |                        | 0  | ATTCGGGAACCTG  | 0.612 |
| - | 17 | 3675 | IN1_uc001wir.3_M   | NM_014977    | NP_055792    | Q9UKV3 | ACINU_HUMAN | Pro-rich.              | 4  | GCAGGGGCCCG1   | 0.662 |
| - | 8  | 2586 | p.T435I ACIN1_u    | NM_014977    | NP_055792    | Q9UKV3 | ACINU_HUMAN |                        | 4  | GAGAGGTCTGA    | 0.493 |
| - | 6  | 1253 | nse_Mutation_p.E   | NM_014977    | NP_055792    | Q9UKV3 | ACINU_HUMAN | Glu-rich.              | 4  | GTCTTCCCCCTT   | 0.373 |
| - | 4  | 1261 | e_Mutation_p.A12   | NM_005864    | NP_005855    | O43281 | EFS_HUMAN   | Pro-rich.              | 1  | AGGGCAGCATAG   | 0.622 |
| - | 28 | 3936 | R208A_hsa-mir-2C   | NM_002471    | NP_002462    | P13533 | MYH6_HUMAN  | Potential.             | 4  | GCCGGGCCAAC    | 0.582 |
| + | 2  | 669  | se_Mutation_p.G1   | NM_001126339 | NP_001119811 | Q9BU02 | THTPA_HUMAN |                        | 0  | ATGACGGCCTGG   | 0.592 |
| + | 2  | 263  | S4L1_uc010tnu.1    | NM_001082488 | NP_001075957 | P0CG22 | DR4L1_HUMAN |                        | 0  | ATGTGTGCCATG   | 0.652 |
| + | 34 | 3671 | Y16B_uc001wk.2_    | NM_138360    | NP_612369    | Q8ND23 | LR16B_HUMAN |                        | 5  | ATCGATGGGAAA   | 0.602 |
| + | 4  | 617  | _uc010tny.1_Trans  | NM_001163484 | NP_001156956 | Q8TEB1 | DCA11_HUMAN |                        | 0  | ACACAAGTGGAA   | 0.582 |
| + | 14 | 1752 | r.1_Nonsense_Mut   | NM_001163484 | NP_001156956 | Q8TEB1 | DCA11_HUMAN | WD 7.                  | 0  | ATCAGTTGGCACC  | 0.562 |
| - | 2  | 216  |                    | NM_016049    | NP_057133    | Q9Y3B6 | F158A_HUMAN |                        | 0  | GGGCAGCATGC    | 0.647 |
| + | 7  | 1271 | Y1_uc010alg.1_Mi   | NM_017999    | NP_060469    | Q96EP0 | RNF31_HUMAN | ubiquitin-binding.     | 2  | ATCCAAGGAACCTG | 0.587 |
| + | 16 | 1595 | ns.2_Missense_Mi   | NM_005132    | NP_005123    | O95072 | REC8_HUMAN  | Glu-rich.              | 0  | ATAGGAGAAAGG   | 0.597 |
| - | 26 | 2869 | p.P777L IPO4_uc    | NM_024658    | NP_078934    | Q8TEX9 | IPO4_HUMAN  | HEAT 5.                | 1  | ATCCTCGGGTCT   | 0.647 |
| - | 21 | 2232 | p.E565K IPO4_uc    | NM_024658    | NP_078934    | Q8TEX9 | IPO4_HUMAN  |                        | 1  | ATACTTCTTCAAA  | 0.577 |
| - | 11 | 1137 | wmy.1_Missense_    | NM_024658    | NP_078934    | Q8TEX9 | IPO4_HUMAN  |                        | 1  | ATCACACCTGAG   | 0.587 |
| - | 2  | 209  | Y1_uc010tog.1_5'l  | NM_000359    | NP_000350    | P22735 | TGM1_HUMAN  | near anchorage region. | 3  | ATCTCTGGCTCTG  | 0.637 |
| - | 15 | 1944 | se_Mutation_p.P5   | NM_004581    | NP_004572    | Q92696 | PGTA_HUMAN  | LRR 3.                 | 0  | ATCCGGGGTAGGT  | 0.617 |
| - | 2  | 296  | tation_p.E58K LTE  | NM_014430    | NP_055245    | Q9UHD4 | CIDEB_HUMAN | CIDE-N.                | 0  | ATCAGCTCCTGGC  | 0.592 |
| + | 1  | 2660 | p.G317D LTB4R2     | NM_019839    | NP_062813    | Q9NPC1 | LT4R2_HUMAN | lasmic (Potential).    | 0  | ATGGGGGCGGCC   | 0.682 |
| + | 9  | 3932 |                    | NM_025081    | NP_079357    | Q9P2P1 | NYNRI_HUMAN |                        | 3  | ATGTCAGGGGGTG  | 0.622 |
| - | 4  | 526  | e_Mutation_p.G14   | NM_004131    | NP_004122    | P10144 | GRAB_HUMAN  | peptidase S1.          | 0  | ATTTTTCCCAGGG  | 0.557 |
| - | 5  | 896  | r.p.T169I NOVA1_   | NM_002515    | NP_002506    | P51513 | NOVA1_HUMAN | KH 2.                  | 5  | ATCACAGTAGCA   | 0.433 |
| + | 9  | 779  | lamf.1_Splice_Site | NM_016106    | NP_057190    | Q8WVM8 | SCFD1_HUMAN |                        | 0  | ATTCAGGTATTAC  | 0.294 |
| + | 16 | 1423 | nf.1_Missense_Mi   | NM_016106    | NP_057190    | Q8WVM8 | SCFD1_HUMAN |                        | 0  | ATAGCAAGCACCT  | 0.343 |
| - | 20 | 3174 | ami.2_Missense_I   | NM_015473    | NP_056288    | Q86XA9 | HTR5A_HUMAN |                        | 1  | ATCGCTGTCTCTA  | 0.358 |
| + | 3  | 673  | ml.2_Missense_Mi   | NM_004274    | NP_004265    | Q13023 | AKAP6_HUMAN |                        | 21 | ATGCAAGGTCTGC  | 0.512 |
| + | 11 | 3342 |                    | NM_004274    | NP_004265    | Q13023 | AKAP6_HUMAN | Spectrin 2.            | 21 | ATCCAGGACACA   | 0.358 |
| + | 13 | 6720 |                    | NM_004274    | NP_004265    | Q13023 | AKAP6_HUMAN |                        | 21 | ATCCAGGGAAGCT  | 0.458 |

rs138292688

|   |     |       |                   |              |              |        |              |                          |    |               |       |
|---|-----|-------|-------------------|--------------|--------------|--------|--------------|--------------------------|----|---------------|-------|
| + | 3   | 299   | e_Mutation_p.P49: | NM_173159    | NP_071406    | Q8IXF0 | NPAS3_HUMAN  | -loop-helix motif.       | 2  | TTGTTGCCTCTT  | 0.478 |
| - | 1   | 444   | nse_Mutation_p.G  | NM_022073    | NP_071356    | Q9H6Z9 | EGLN3_HUMAN  |                          | 0  | GTCCGCCACCA   | 0.677 |
| - | 3   | 746   | _p.P60S BAZ1A_u   | NM_013448    | NP_038476    | Q9NRL2 | BAZ1A_HUMAN  | C1/POLE3 complex. Requi  | 7  | TCCAGGTCTACT  | 0.373 |
| + | 4   | 697   | wsq_2_Missense_   | NM_001079519 | NP_001072987 | Q8N128 | F177A_HUMAN  |                          | 0  | GCCTGGAGAAG   | 0.378 |
| - | 6   | 773   | _Mutation_p.G128  | NM_014990    | NP_055805    | Q6GYQ0 | RGPA1_HUMAN  |                          | 4  | AAACACCTTCCC  | 0.333 |
| - | 2   | 792   | on_p.K181E NKX2   | NM_003317    | NP_003308    | P43699 | NKX21_HUMAN  |                          | 1  | GTTCTTGCTCAC  | 0.667 |
| + | 3   | 1229  | 9_uc010amq.2_5f   | NM_006194    | NP_006185    | P55771 | PAX9_HUMAN   | ction with KDM5B.        | 3  | GGCCGCCAAGG   | 0.682 |
| - | 7   | 798   |                   | NM_030631    | NP_085134    | Q9BQT8 | ODC_HUMAN    | Solcar 2.                | 1  | GTCCCCAGCCT   | 0.438 |
| + | 24  | 2653  | _p.P744S CTAGE!   | NM_005930    | NP_005921    | O15320 | CTGE5_HUMAN  | Pro-rich.                | 0  | CCCCACCCCCA   | 0.463 |
| + | 9   | 3546  | e_Mutation_p.G11  | NM_015091    | NP_055906    | Q9Y4F4 | F179B_HUMAN  | Ser-rich.                | 3  | GTATTTGGAAGT  | 0.224 |
| + | 11  | 2029  | inf.2_Missense_Mi | NM_020937    | NP_065988    | Q8IYD8 | FANCM_HUMAN  |                          | 7  | TCACACATGGT   | 0.393 |
| - | 14  | 3602  |                   | NM_018353    | NP_060823    | Q6P0N0 | M18BP_HUMAN  |                          | 0  | TTTATAGAACCTA | 0.363 |
| - | 14  | 2613  | wi.3_Missense_Mi  | NM_001113498 | NP_001106970 | Q7Z553 | MDGA2_HUMAN  | MAM.                     | 6  | ATCTGGGTCTGT  | 0.378 |
| - | 2   | 389   | j.1_Intron MGAT2  | NM_001001    | NP_000992    | Q969Q0 | RL36L_HUMAN  |                          | 0  | TATCTCTCCAC   | 0.418 |
| - | 2   | 307   | 1wxp.1_Missense_  | NM_024558    | NP_078834    | Q9H867 | MT21D_HUMAN  |                          | 0  | GGTGACTACAA   | 0.468 |
| - | 23  | 4087  | 138_uc001wxn.1_!  | NM_006939    | NP_008870    | Q07890 | SOS2_HUMAN   |                          | 2  | GGGGAGTTTCT   | 0.378 |
| - | 18  | 3552  | .2_Intron NIN_uc0 | NM_182946    | NP_891991    | Q8N4C6 | NIN_HUMAN    |                          | 6  | TTTGTTCGCGAG  | 0.448 |
| - | 16  | 2019  | ie_Mutation_p.V61 | NM_182946    | NP_891991    | Q8N4C6 | NIN_HUMAN    |                          | 6  | AATGACCAGCT   | 0.438 |
| - | 2   | 1660  | p.R299C TRIM9_L   | NM_015163    | NP_055978    | Q9C026 | TRIM9_HUMAN  | Potential.               | 3  | GTTGCGCAGCT   | 0.552 |
| + | 7   | 989   | zcc.2_Missense_M  | NM_152330    | NP_689543    | Q96NE9 | FRMD6_HUMAN  | FERM.                    | 3  | CTACAGATTGTA  | 0.388 |
| + | 1   | 493   |                   | NM_000956    | NP_000947    | P43116 | PE2R2_HUMAN  | Name=2; (Potential).     | 2  | GCTCGGGACCT   | 0.692 |
| - | 3   | 410   |                   | NM_198066    | NP_932332    | Q96EK6 | GNA1_HUMAN   | acetyltransferase.       | 0  | AAAAACCTAGT   | 0.338 |
| - | 7   | 1929  | _Mutation_p.P567  | NM_001160148 | NP_001153620 | Q8NEL9 | DDHD1_HUMAN  |                          | 2  | ATCAGGCAACT   | 0.368 |
| - | 3   | 665   | ao.3_Missense_Mi  | NM_130851    | NP_570912    | P12644 | BMP4_HUMAN   |                          | 0  | GAAAGAGCCGAA  | 0.542 |
| + | 12  | 2145  | _p.S627F SAMD4A   | NM_015589    | NP_056404    | Q9UPU9 | SMAG1_HUMAN  |                          | 0  | GACCTCCACCA   | 0.582 |
| - | 4   | 419   | 1_uc001xbn.1_Spl  | NM_007086    | NP_009017    | O75717 | WDHD1_HUMAN  |                          | 1  | CCCTTACCTAGAT | 0.383 |
| - | 3   | 181   | ID1_uc001xbn.1_5  | NM_007086    | NP_009017    | O75717 | WDHD1_HUMAN  | WD 1.                    | 1  | ATCACCATCAC   | 0.274 |
| - | 7   | 1031  | AA0831_uc001xb    | NM_014924    | NP_055739    | Q6ZNE5 | BAKOR_HUMAN  |                          | 0  | ACTTGCTGTTC   | 0.368 |
| + | 2   | 236   | 1_Intron NAA30_u  | NM_001011713 | NP_001011713 | Q147X3 | NAA30_HUMAN  | Pro-rich.                | 1  | GCTGTCCCTTC   | 0.741 |
| - | 4   | 606   | e_Mutation_p.Q66  | NM_018168    | NP_060638    | Q9NVL8 | CN105_HUMAN  |                          | 0  | CACTTGCACTT   | 0.363 |
| - | 1   | 330   | 1_5'UTR C14orf10  | NM_018168    | NP_060638    | Q9NVL8 | CN105_HUMAN  |                          | 0  | TAAAGGTGGCAC  | 0.408 |
| + | 15  | 1593  | .dq.2_Missense_M  | NM_002892    | NP_002883    | P29374 | ARI4A_HUMAN  |                          | 6  | GTGAACCTGAG   | 0.333 |
| + | 3   | 745   | 1xeq.2_Missense_  | NM_022495    | NP_071940    | Q63HM2 | CN135_HUMAN  | ical; (Potential).       | 2  | TCATTCCAAGCA  | 0.333 |
| - | 8   | 706   | rf39_uc010apo.2_  | NM_174978    | NP_777638    | Q08AQ4 | Q08AQ4_HUMAN |                          | 4  | TGCTGGCATGT   | 0.244 |
| - | 2   | 963   |                   | NM_005982    | NP_005973    | Q15475 | SIX1_HUMAN   |                          | 0  | GTGGCCCATAT   | 0.587 |
| + | 6   | 725   | AT1_uc001xfe.2_Ir | NM_002431    | NP_002422    | P51948 | MAT1_HUMAN   |                          | 2  | ATAGATCTACCC  | 0.368 |
| - | 4   | 1497  |                   | NM_020810    | NP_065861    | Q32P41 | TRMT5_HUMAN  |                          | 3  | AGGCAGGAATC   | 0.453 |
| - | 2   | 317   | 2_5'Flank SLC38A  | NM_020810    | NP_065861    | Q32P41 | TRMT5_HUMAN  |                          | 3  | AGAAGGTGGTG   | 0.373 |
| + | 13  | 1120  | 38A6_uc001xfj.1_  | NM_153811    | NP_722518    | Q8IZM9 | S38A6_HUMAN  | ical; (Potential).       | 3  | AGTTATGCATAC  | 0.348 |
| + | 7   | 1194  | isa.1_Missense_M  | NM_006255    | NP_006246    | P24723 | KPCL_HUMAN   |                          | 6  | GTGGGTAATAC   | 0.468 |
| - | 1   | 10    | B5_uc001xgc.2_5   | NM_145171    | NP_660154    | Q86YW7 | GPHB5_HUMAN  |                          | 1  | GATGCCAGCT    | 0.567 |
| + | 48  | 8269  | jl.2_Missense_Mu  | NM_015180    | NP_055995    | Q8WXH0 | SYNE2_HUMAN  | lasmic (Potential).      | 14 | GATTTTCTGTTT  | 0.428 |
| + | 61  | 12306 | ipy.2_Missense_M  | NM_015180    | NP_055995    | Q8WXH0 | SYNE2_HUMAN  | Cytoplasmic (Potential). | 14 | TGTACCAGACC   | 0.338 |
| + | 102 | 18637 | .R1098H SYNE2_!   | NM_015180    | NP_055995    | Q8WXH0 | SYNE2_HUMAN  | Cytoplasmic (Potential). | 14 | GTTGGCCTGT    | 0.527 |
| + | 12  | 1567  | _p.V430M MTHFD    | NM_005956    | NP_005947    | P11586 | C1TC_HUMAN   | hydrofolate synthetase.  | 2  | GGCTAGTGCAAC  | 0.463 |
| + | 2   | 1529  | hk.3_Missense_Mi  | NM_021979    | NP_068814    | P54652 | HSP72_HUMAN  |                          | 1  | TTGACCCAATC   | 0.547 |
| + | 3   | 231   |                   | NM_172365    | NP_758953    | Q96LQ0 | CN050_HUMAN  |                          | 1  | TCTCAGGTTTGC  | 0.383 |



|   |    |      |                   |              |              |        |             |                               |    |              |       |
|---|----|------|-------------------|--------------|--------------|--------|-------------|-------------------------------|----|--------------|-------|
| + | 11 | 997  | xhm.1_Missense_I  | NM_172365    | NP_758953    | Q96LQ0 | CN050_HUMAN |                               | 1  | ATGATGGCAAAA | 0.363 |
| + | 16 | 2308 | p.S801N PLEKHC    | NM_015549    | NP_056364    | A1L390 | PKHG3_HUMAN |                               | 1  | GGACAGCCCTT  | 0.627 |
| - | 29 | 6265 | p.P2071S SPTB_u   | NM_000347    | NP_000338    | P11277 | SPTB1_HUMAN | Spectrin 17.                  | 11 | GGTGGGCTTCT  | 0.592 |
| - | 10 | 1259 | s.2_Missense_Mu   | NM_000347    | NP_000338    | P11277 | SPTB1_HUMAN | Spectrin 2.                   | 11 | FACTCAGCTTCC | 0.577 |
| + | 18 | 2928 | p.P649S GPHN_L    | NM_001024218 | NP_001019389 | Q9NQX3 | GEPH_HUMAN  | denityltransferase.           | 2  | TGAAACCAGGG  | 0.338 |
| + | 22 | 3315 | p.V778I GPHN_L    | NM_001024218 | NP_001019389 | Q9NQX3 | GEPH_HUMAN  | denityltransferase.           | 2  | TCATGGTCATT  | 0.488 |
| + | 8  | 1016 |                   | NM_152443    | NP_689656    | Q96NR8 | RDH12_HUMAN |                               | 1  | CCCAGGCGTCG  | 0.632 |
| - | 32 | 5970 | VE26_uc001xkc.3   | NM_015346    | NP_056161    | Q68DK2 | ZFY26_HUMAN |                               | 11 | CCCGGTGCAGA  | 0.627 |
| - | 16 | 2943 | VE26_uc001xkc     | NM_015346    | NP_056161    | Q68DK2 | ZFY26_HUMAN |                               | 11 | CAGAGGTGTTG  | 0.512 |
| - | 6  | 1094 | nse_Mutation_p.A  | NM_015346    | NP_056161    | Q68DK2 | ZFY26_HUMAN |                               | 11 | CCAAGCCTCGG  | 0.488 |
| + | 5  | 479  | p.V20M RAD51L1    | NM_133509    | NP_598193    | O15315 | RA51B_HUMAN |                               | 0  | CTGTGGTGTAC  | 0.358 |
| - | 2  | 954  | lxi.1_Missense_N  | NM_004926    | NP_004917    | Q07352 | TISB_HUMAN  |                               | 1  | AGGTGGTCGGG  | 0.637 |
| + | 2  | 410  | p.R106Q GALNTL    | NM_020692    | NP_065743    | Q8N428 | GLTL1_HUMAN | lenal (Potential).            | 2  | CATCCGGGACA  | 0.547 |
| + | 1  | 497  |                   | NM_003813    | NP_003804    | Q9UKJ8 | ADA21_HUMAN |                               | 2  | TGAGACACAATT | 0.418 |
| - | 3  | 968  | mk.2_Missense_M   | NM_033141    | NP_149132    | P80192 | M3K9_HUMAN  | rotein kinase.                | 5  | TGAGGCCCGG   | 0.552 |
| + | 6  | 1320 | p.A292T PCNX_L    | NM_014982    | NP_055797    | Q96RV3 | PCX1_HUMAN  |                               | 1  | CTGTGGCTTTT  | 0.458 |
| + | 14 | 3730 | ie_Mutation_p.T98 | NM_014982    | NP_055797    | Q96RV3 | PCX1_HUMAN  |                               | 1  | TGCAACCAAGT  | 0.373 |
| + | 34 | 6748 | rf.1_Missense_Mu  | NM_014982    | NP_055797    | Q96RV3 | PCX1_HUMAN  |                               | 1  | CCTAGGCACTAC | 0.507 |
| + | 14 | 4121 | xmv.2_Missense_   | NM_015556    | NP_056371    | O43166 | SI1L1_HUMAN |                               | 4  | CAGTGGGAGAT  | 0.453 |
| + | 15 | 4355 | xmv.2_Missense_I  | NM_015556    | NP_056371    | O43166 | SI1L1_HUMAN | Ser-rich.                     | 4  | CCCCAGCCACG  | 0.587 |
| + | 15 | 4378 | xmv.2_Missense_I  | NM_015556    | NP_056371    | O43166 | SI1L1_HUMAN | Ser-rich.                     | 4  | CGCTGGGGGCT  | 0.572 |
| + | 8  | 1024 | ny.3_Nonsense_N   | NM_004296    | NP_004287    | P49758 | RGS6_HUMAN  |                               | 3  | AAAGTGGGAATT | 0.403 |
| - | 12 | 2960 | p.P359S ZFYVE1    | NM_021260    | NP_067083    | Q9HBF4 | ZFYV1_HUMAN | VE-type 2.                    | 1  | ACCGGGCTTTT  | 0.572 |
| - | 11 | 2735 | p.P284S ZFYVE1    | NM_021260    | NP_067083    | Q9HBF4 | ZFYV1_HUMAN |                               | 1  | CTAGTGGTATGT | 0.587 |
| + | 14 | 1752 | o.G515E RBM25_L   | NM_021239    | NP_067062    | P49756 | RBM25_HUMAN | eckle localization. Glu-rich  | 4  | CAGAGGAAGTG  | 0.408 |
| + | 2  | 794  | oCOT1_uc010tuc.1  | NM_001037161 | NP_001032238 | Q86TX2 | ACOT1_HUMAN |                               | 0  | CAAGACCATGG  | 0.498 |
| - | 4  | 2621 | n_p.T613I C14orf  | NM_194278    | NP_919254    | Q6PJG2 | CN043_HUMAN |                               | 5  | CCCTTGGTGGGG | 0.627 |
| - | 7  | 1715 |                   | NM_152445    | NP_689658    |        |             |                               | 1  | TTCCCTCCAGTT | 0.348 |
| + | 4  | 761  |                   | NM_182894    | NP_878314    | P58304 | VSX2_HUMAN  | CVC.                          | 1  | CGGGGCCATGG  | 0.637 |
| + | 1  | 424  |                   | NM_019589    | NP_062535    | P49750 | YLPM1_HUMAN | Pro-rich.                     | 3  | GACTGGCAGCC  | 0.682 |
| + | 14 | 5936 | PM1_uc001xqm.1    | NM_019589    | NP_062535    | P49750 | YLPM1_HUMAN |                               | 3  | ACAGATTAGG   | 0.398 |
| - | 1  | 971  | X2_uc001xqq.1_I   | NM_001080408 | NP_001073877 | Q3B8N5 | PROX2_HUMAN |                               | 0  | GACAGGGTTTG  | 0.507 |
| + | 9  | 735  | _uc010tuw.1_Splic | NM_001933    | NP_001924    | P36957 | ODO2_HUMAN  |                               | 1  | ATCGGTAAGC   | 0.517 |
| + | 3  | 426  |                   | NM_014239    | NP_055054    | P49770 | EI2BB_HUMAN |                               | 1  | GACATCCGGAG  | 0.527 |
| - | 19 | 2514 | p.G6E NEK9_ucC    | NM_033116    | NP_149107    | Q8TD19 | NEK9_HUMAN  | ch. Interaction with NEK6.    | 5  | CCATTCTCCGG  | 0.562 |
| + | 3  | 615  |                   | NM_006399    | NP_006390    | Q16520 | BATF_HUMAN  |                               | 1  | TTCCAGCCCTGA | 0.697 |
| + | 10 | 1935 | vd.1_Missense_M   | NM_017791    | NP_060261    | Q9UPI3 | FLVC2_HUMAN |                               | 0  | CACTGCTGTGT  | 0.527 |
| + | 6  | 1075 | 3_uc001xsj.1_3'UT | NM_017926    | NP_060396    | Q9NWX4 | CN118_HUMAN |                               | 3  | GGAGACCAGCA  | 0.413 |
| + | 4  | 892  | xtc.1_Missense_N  | NM_033426    | NP_219494    | Q9C0C6 | K1737_HUMAN |                               | 0  | AGGTGGAAGTC  | 0.627 |
| - | 8  | 1336 |                   | NM_004863    | NP_004854    | O15270 | SPTC2_HUMAN |                               | 2  | CAGAAGCACCA  | 0.517 |
| + | 2  | 181  | I_5'Flank ALKBH1  | NM_031210    | NP_112487    | Q9GZT3 | SLIRP_HUMAN | RRM.                          | 0  | ATTTTACCTTTT | 0.224 |
| - | 11 | 1072 | su.2_Missense_Mi  | NM_012245    | NP_036377    | Q13573 | SNW1_HUMAN  |                               | 1  | ACGTGCCTCCC  | 0.408 |
| + | 9  | 2116 | RXN3_uc010asv.1   | NM_004796    | NP_004787    | Q9Y4C0 | NRX3A_HUMAN | potential). Laminin G-like 5. | 10 | TGATGGCAATG  | 0.463 |
| - | 3  | 600  | vk.1_Nonsense_M   | NM_033104    | NP_149095    | Q8WXE9 | STON2_HUMAN |                               | 5  | CATGTCCAGCA  | 0.468 |
| - | 15 | 2119 | oLC_uc010tvj.1_M  | NM_000153    | NP_000144    | P54803 | GALC_HUMAN  |                               | 0  | ACCTCCTGTGT  | 0.373 |
| - | 3  | 727  | 7_splice GALC_uc  | NM_000153    | NP_000144    | P54803 | GALC_HUMAN  |                               | 0  | TCTACCTGTT   | 0.368 |
| - | 13 | 1521 | wc.1_Missense_M   | NM_007039    | NP_008970    | Q16825 | PTN21_HUMAN |                               | 4  | TGTGTGCACTG  | 0.542 |

|   |    |       |                   |              |              |        |              |                             |    |                |       |
|---|----|-------|-------------------|--------------|--------------|--------|--------------|-----------------------------|----|----------------|-------|
| + | 9  | 1313  | p1_uc001xya.2_Nr  | NM_018319    | NP_060789    | Q9NUW8 | TYDP1_HUMAN  |                             | 2  | 3GAGTGGATAGA'  | 0.428 |
| - | 4  | 512   | .1_5'UTR C14orf10 | NM_017970    | NP_060440    | Q9H7Z3 | CN102_HUMAN  | Potential.                  | 3  | AGGTTTCTCCCG'  | 0.478 |
| - | 4  | 509   | .1_5'UTR C14orf10 | NM_017970    | NP_060440    | Q9H7Z3 | CN102_HUMAN  | Potential.                  | 3  | TTTCTCCCGTCA'  | 0.483 |
| - | 15 | 1479  | PERB_uc010aub.1   | NM_024764    | NP_079040    | Q9H7T0 | CTSRB_HUMAN  |                             | 5  | ATCATGAAAGTT   | 0.353 |
| - | 9  | 1225  | 2N_uc010auc.2_in  | NM_001128595 | NP_001122067 | Q8N9U0 | TAC2N_HUMAN  |                             | 1  | TTGAAGGTGGT'   | 0.373 |
| - | 9  | 1357  | p.R300K FBLN5_u   | NM_006329    | NP_006320    | Q9UBX5 | FBLN5_HUMAN  | alcium-binding (Potential). | 6  | GGTTCCTGTGC'   | 0.552 |
| - | 7  | 1812  | uf.1_Missense_Mt  | NM_004239    | NP_004230    | Q15643 | TRIPB_HUMAN  | Potential.                  | 13 | TCTTTTCCACAT'  | 0.313 |
| - | 11 | 1063  | p.D277N ATXN3_u   | NM_004993    | NP_004984    | P54252 | ATX3_HUMAN   | UIM 3.                      | 0  | AGCATCACCTGT'  | 0.343 |
| + | 14 | 1421  | p.G447E SLC24A4   | NM_153646    | NP_705932    | Q8NFF2 | NCKX4_HUMAN  | ical; (Potential).          | 3  | ACTTGGGATCC'   | 0.468 |
| + | 8  | 2619  | q.2_Missense_Mur  | NM_024832    | NP_079108    | Q8TB24 | RIN3_HUMAN   | VPS9.                       | 3  | GGGAGGGTGAG    | 0.547 |
| + | 9  | 1347  | p.E295K UBR7_u    | NM_175748    | NP_786924    | Q8N806 | UBR7_HUMAN   |                             | 0  | AAGTGGAACTC    | 0.393 |
| + | 23 | 3196  | bs.1_Missense_M   | NM_020818    | NP_065869    | Q9P2D8 | UNC79_HUMAN  |                             | 17 | AGCTCGCTTTG'   | 0.522 |
| + | 36 | 5935  | bs.1_Missense_M   | NM_020818    | NP_065869    | Q9P2D8 | UNC79_HUMAN  |                             | 17 | AGATGGGACTT'   | 0.483 |
| - | 2  | 668   | p.P108L ASB2_u    | NM_016150    | NP_057234    | Q96Q27 | ASB2_HUMAN   | ANK 1.                      | 2  | TCAAGGGGTCCC   | 0.597 |
| - | 3  | 1199  | p.G324E DDX24_u   | NM_020414    | NP_065147    | Q9GZR7 | DDX24_HUMAN  | ase ATP-binding.            | 4  | GATTTCCAGTCT   | 0.493 |
| + | 23 | 2571  |                   | NM_058237    | NP_478144    | Q6NUP7 | PP4R4_HUMAN  |                             | 4  | CTCAGGGTTAG'   | 0.308 |
| - | 5  | 1185  | INA6_uc010auv.2   | NM_001756    | NP_001747    | P08185 | CBG_HUMAN    |                             | 5  | GCCAGCTGTGT'   | 0.522 |
| - | 2  | 270   | INA6_uc010auv.2   | NM_001756    | NP_001747    | P08185 | CBG_HUMAN    |                             | 5  | CAAGGCCACTA'   | 0.537 |
| - | 2  | 94    |                   | NM_001080451 | NP_001073920 | Q86U17 | SPA11_HUMAN  |                             | 1  | GATCCCTGTTC'   | 0.522 |
| - | 22 | 3868  | p.P1219L DICER1   | NM_030621    | NP_085124    | Q9UPY3 | DICER_HUMAN  |                             | 5  | GCTGGGGCTGC'   | 0.423 |
| - | 22 | 3523  | s.S1104F DICER1_u | NM_030621    | NP_085124    | Q9UPY3 | DICER_HUMAN  |                             | 5  | CTGAAGAGGAG    | 0.363 |
| - | 2  | 348   | fb.3_Missense_M   | NM_001098725 | NP_001092195 | P56279 | TCL1A_HUMAN  |                             | 1  | TGATAGGCAGC'   | 0.552 |
| - | 23 | 4007  |                   | NM_018036    | NP_060506    | Q96BY7 | ATG2B_HUMAN  |                             | 3  | TCTTACCTGCT'   | 0.274 |
| + | 3  | 225   | 1yfl.2_Missense_M | NM_016472    | NP_057556    | Q9P0R6 | GSKIP_HUMAN  |                             | 0  | TGAAGGAACTG,   | 0.413 |
| + | 12 | 1326  |                   | NM_152327    | NP_689540    | Q96M32 | KAD7_HUMAN   | ase. Potential. Poly-Glu.   | 1  | gaagaggaagagga | 0.403 |
| + | 6  | 677   | OLA_uc001yfr.2_M  | NM_032632    | NP_116021    | P51003 | PAPOA_HUMAN  |                             | 0  | TACCAGTTATTAA  | 0.343 |
| - | 7  | 847   | p.T226I SETD3_u   | NM_032233    | NP_115609    | Q86TU7 | SETD3_HUMAN  | SET.                        | 0  | GATGGGTCTGG    | 0.423 |
| + | 6  | 768   | yhd.2_Nonsense_I  | NM_207117    | NP_997000    | Q6Q0C1 | S2547_HUMAN  | e=5; (Potential). Solcar 3. | 0  | GGCCTGGGCTG    | 0.682 |
| + | 23 | 5013  |                   | NM_001376    | NP_001367    | Q14204 | DYHC1_HUMAN  | n (By similarity).          | 10 | TGGGAGAATATC   | 0.458 |
| + | 35 | 7344  | 1H1_uc001ykt.1_u  | NM_001376    | NP_001367    | Q14204 | DYHC1_HUMAN  | 2 (By similarity).          | 10 | ATGAGGCACAG'   | 0.612 |
| - | 11 | 2375  | 1ykv.3_Missense_I | NM_005348    | NP_005339    | P07900 | HS90A_HUMAN  | Required for homodimeriz    | 7  | TCTTCCATGCC'   | 0.403 |
| + | 9  | 2268  | e_Mutation_p.G70  | NM_014844    | NP_055659    | O15040 | TCPR2_HUMAN  |                             | 3  | CACAGTTCAGA,   | 0.567 |
| + | 12 | 1794  | md.1_Missense_M   | NM_145725    | NP_663777    | Q13114 | TRAF3_HUMAN  | MATH.                       | 3  | GTGGAGAATATC   | 0.517 |
| - | 36 | 5213  |                   | NM_006035    | NP_006026    | Q9Y5S2 | MRCCKB_HUMAN |                             | 11 | GTCTGGATCAG    | 0.532 |
| - | 2  | 505   | uc001ynj.1_Misser | NM_004873    | NP_004864    | Q9UL15 | BAG5_HUMAN   |                             | 2  | AATCCGGTGTGC   | 0.453 |
| + | 2  | 240   | 14orf153_uc010tyc | NM_005552    | NP_005543    | Q07866 | KLC1_HUMAN   |                             | 0  | TTCGACCTGTT,   | 0.368 |
| + | 5  | 558   | i_Mutation_p.G17E | NM_024071    | NP_076976    | Q9BQ24 | ZFY21_HUMAN  |                             | 0  | TCTCGGAGGTA,   | 0.502 |
| - | 7  | 16304 | px.2_Missense_M   | NM_138420    | NP_612429    | Q8IVF2 | AHNK2_HUMAN  |                             | 1  | GGAAGGAGAAC    | 0.468 |
| - | 7  | 10274 | px.2_Missense_M   | NM_138420    | NP_612429    | Q8IVF2 | AHNK2_HUMAN  |                             | 1  | GGCCAGCTCCC'   | 0.627 |
| - | 7  | 7434  | px.2_Missense_M   | NM_138420    | NP_612429    | Q8IVF2 | AHNK2_HUMAN  |                             | 1  | GGGGCCATCAC    | 0.627 |
| - | 7  | 7372  | px.2_Missense_Mi  | NM_138420    | NP_612429    | Q8IVF2 | AHNK2_HUMAN  |                             | 1  | GGGGCCCTTGA    | 0.632 |
| - | 7  | 7144  | px.2_Missense_Mi  | NM_138420    | NP_612429    | Q8IVF2 | AHNK2_HUMAN  |                             | 1  | CACATCCGCTG'   | 0.587 |
| - | 7  | 4588  | px.2_Missense_Mi  | NM_138420    | NP_612429    | Q8IVF2 | AHNK2_HUMAN  |                             | 1  | GCTGTCTTTGG'   | 0.602 |
| - | 2  | 179   | q.2_Missense_M    | NM_145701    | NP_663747    | Q9BXL8 | CDCA4_HUMAN  |                             | 1  | TATGAGGACTT'   | 0.572 |
| - | 4  | 340   | T14_uc001yqi.2_I  | NM_177533    | NP_803877    | Q95848 | NUD14_HUMAN  | idix hydrolase.             | 1  | GGACCCTGGGA,   | 0.667 |
| + | 10 | 1190  | qv.2_Missense_Mi  | NM_015197    | NP_056012    | Q86VP3 | PACS2_HUMAN  |                             | 1  | GCATCCACAGC'   | 0.632 |
| + | 1  | 40    | 727924_uc001yut   | NM_001004719 | NP_001004719 | Q8NGB6 | OR4M2_HUMAN  | ellular (Potential).        | 1  | TTGTCTCACTC    | 0.333 |

|   |    |       |                   |              |              |        |             |                                |    |                |       |
|---|----|-------|-------------------|--------------|--------------|--------|-------------|--------------------------------|----|----------------|-------|
| + | 9  | 962   | Δ_Mutation_p.L278 | NM_052903    | NP_443135    | Q96RT8 | GCP5_HUMAN  |                                | 1  | (GGTTACTTTTCAC | 0.274 |
| + | 9  | 1108  | _uc001yvv.1_Miss  | NM_022807    | NP_073718    | P63162 | RSMN_HUMAN  |                                | 1  | GCTGCGTGGGG    | 0.448 |
| + | 11 | 1320  | _uc001yvv.1_Mis   | NM_022807    | NP_073718    | P63162 | RSMN_HUMAN  |                                | 1  | (TGACTCCACAG(  | 0.512 |
| - | 3  | 804   |                   | NM_024490    | NP_077816    | O60312 | AT10A_HUMAN | lasmic (Potential).            | 5  | TTCTCGCATTCC(  | 0.498 |
| - | 16 | 1772  | v.2_Nonsense_Mt   | NM_000275    | NP_000266    | Q04671 | P_HUMAN     | lasmic (Potential).            | 5  | (AGGCGCCAGAC   | 0.627 |
| - | 61 | 9444  |                   | NM_004667    | NP_004658    | O95714 | HERC2_HUMAN | RCC1 8.                        | 13 | (TGAGGGCTGCG   | 0.552 |
| - | 32 | 5054  |                   | NM_004667    | NP_004658    | O95714 | HERC2_HUMAN |                                | 13 | (CACATCCACTGC  | 0.393 |
| + | 3  | 478   | _p.P91S APBA2_1   | NM_005503    | NP_005494    | Q99767 | APBA2_HUMAN |                                | 0  | (GCCTCCCTGAG   | 0.607 |
| + | 3  | 682   | p.D159N APBA2_1   | NM_005503    | NP_005494    | Q99767 | APBA2_HUMAN |                                | 0  | (GCCAGGACTAC   | 0.647 |
| - | 19 | 2897  | q.2_Missense_Mul  | NM_003257    | NP_003248    | Q07157 | ZO1_HUMAN   |                                | 6  | (TGTAGCACCATC  | 0.398 |
| - | 16 | 1867  | MR10_uc001zfg.1   | NM_017762    | NP_060232    | Q9NXD2 | MTMRA_HUMAN | ularin phosphatase.            | 1  | TTAAGGCAGACC   | 0.403 |
| + | 1  | 805   | _p.G28E ARHGAL    | NM_014783    | NP_055598    | Q6P4F7 | RHGBA_HUMAN |                                | 6  | (CCGTGGGCAGT   | 0.507 |
| + | 10 | 957   | ar.2_Missense_Mu  | NM_001036    | NP_001027    | Q15413 | RYR3_HUMAN  | c (By similarity) MIR 4.       | 10 | (CCTGGCCTTGA(  | 0.522 |
| + | 11 | 1100  | ar.2_Missense_Mu  | NM_001036    | NP_001027    | Q15413 | RYR3_HUMAN  | c (By similarity) MIR 5.       | 10 | (GAGTTCCAGAA   | 0.448 |
| + | 20 | 2589  | ar.2_Missense_Mt  | NM_001036    | NP_001027    | Q15413 | RYR3_HUMAN  | ats. 1. Cytoplasmic (By sim    | 10 | (GGGTACCACCC   | 0.478 |
| + | 20 | 2600  | ar.2_Missense_Mu  | NM_001036    | NP_001027    | Q15413 | RYR3_HUMAN  | ats. 1. Cytoplasmic (By sim    | 10 | (AGTTCTCTCTCC  | 0.453 |
| + | 90 | 13049 | r.2_Missense_Mut  | NM_001036    | NP_001027    | Q15413 | RYR3_HUMAN  |                                | 10 | (TCTAGGCAGCA(  | 0.393 |
| + | 3  | 388   | hs.2_Missense_M   | NM_016454    | NP_057538    | Q5J8M3 | TMM85_HUMAN |                                | 0  | GATGGCCTGGCC   | 0.418 |
| - | 17 | 2355  | nse_Mutation_p.R  | NM_133647    | NP_598408    | Q9UHW9 | S12A6_HUMAN |                                | 7  | (CCCACGGATAC   | 0.393 |
| + | 3  | 891   | p.R274C C15orf5E  | NM_175741    | NP_786883    | Q86Y26 | NUT_HUMAN   |                                | 30 | (TGCTTCGTTCC(  | 0.557 |
| + | 3  | 915   | p.T282A C15orf5E  | NM_175741    | NP_786883    | Q86Y26 | NUT_HUMAN   |                                | 30 | (AGCCCACTATG(  | 0.547 |
| + | 7  | 1689  | p.P540S C15orf5E  | NM_175741    | NP_786883    | Q86Y26 | NUT_HUMAN   |                                | 30 | (CCTCACCTGGG   | 0.587 |
| + | 7  | 2782  | p.S904F C15orf5E  | NM_175741    | NP_786883    | Q86Y26 | NUT_HUMAN   |                                | 30 | (CTCCTCTTGC(   | 0.488 |
| + | 3  | 339   | kc.2_Missense_M   | NM_001042429 | NP_001035894 | Q52LJ0 | FA98B_HUMAN |                                | 1  | (CAGGAGATATTA  | 0.308 |
| + | 11 | 1767  | p.A573T EIF2AK4   | NM_001013703 | NP_001013725 | Q9P2K8 | E2AK4_HUMAN |                                | 4  | (CCAGTGCTGCC   | 0.418 |
| + | 14 | 1846  | icl.1_Missense_Mt | NM_001211    | NP_001202    | O60566 | BUB1B_HUMAN |                                | 4  | (TCCTCTGCAG.   | 0.378 |
| + | 15 | 2073  | icl.1_Missense_Mt | NM_001211    | NP_001202    | O60566 | BUB1B_HUMAN |                                | 4  | (CCTCCTTTTTC   | 0.453 |
| + | 20 | 2776  |                   | NM_001211    | NP_001202    | O60566 | BUB1B_HUMAN | rotein kinase.                 | 4  | ATATTACCCATGA  | 0.368 |
| + | 5  | 940   | p.R167Q PAK6_u    | NM_001128628 | NP_001122100 | Q9NQU5 | PAK6_HUMAN  | Linker.                        | 8  | (CCCACGGGTCC   | 0.687 |
| + | 8  | 1377  |                   | NM_033510    | NP_277045    | A7MBM2 | DISP2_HUMAN |                                | 2  | (ACCAGGTGCCT   | 0.597 |
| + | 8  | 4282  |                   | NM_033510    | NP_277045    | A7MBM2 | DISP2_HUMAN |                                | 2  | (GTCAGGCTATAC  | 0.652 |
| + | 1  | 1089  |                   | NM_130468    | NP_569735    | Q8NCH0 | CHSTE_HUMAN | renal (Potential).             | 0  | (TTGTGGGCTCC   | 0.597 |
| + | 11 | 4587  | ne.2_Missense_Mt  | NM_170589    | NP_733468    | Q8NG31 | CASC5_HUMAN |                                | 5  | (ACCAACCTCCA   | 0.328 |
| - | 10 | 1551  | p.E252K EXD1_uc   | NM_152596    | NP_689809    | Q8NHP7 | EXD1_HUMAN  |                                | 1  | (GTTTTCCACCA(  | 0.388 |
| - | 7  | 733   | cv.1_Missense_Mt  | NM_152596    | NP_689809    | Q8NHP7 | EXD1_HUMAN  |                                | 1  | (CCTGTGTGTCA(  | 0.398 |
| + | 8  | 1199  |                   | NM_015138    | NP_055953    | Q92541 | RTF1_HUMAN  | Plus3.                         | 2  | (CAACAGCAAAC(  | 0.448 |
| - | 20 | 2942  | P1_uc001zoc.2_5'  | NM_015540    | NP_056355    | Q9BWH6 | RPAP1_HUMAN | Leu-rich.                      | 1  | (GTGAGGTGTG(   | 0.587 |
| - | 8  | 1068  |                   | NM_015540    | NP_056355    | Q9BWH6 | RPAP1_HUMAN |                                | 1  | CAGAGCTGGGG    | 0.582 |
| + | 9  | 1446  |                   | NM_006293    | NP_006284    | Q06418 | TYRO3_HUMAN | III 2. Extracellular (Potentia | 6  | (GTCAGCCACTG(  | 0.577 |
| + | 8  | 2783  | p.A898T MGAP_uc   | NM_001080541 | NP_001074010 | Q8IWI9 | MGAP_HUMAN  |                                | 12 | (GAAAGGCAAAG   | 0.393 |
| + | 8  | 990   | Δ_Mutation_p.T23E | NM_001128608 | NP_001122080 | O60336 | MABP1_HUMAN |                                | 10 | (ATTCACTGATGT  | 0.572 |
| + | 12 | 1003  | on_p.A532V JMJD   | NM_001114633 | NP_001108105 | P0C869 | PA24B_HUMAN | PLA2c.                         | 1  | TATGGCCACTGC   | 0.587 |
| - | 25 | 5030  |                   | NM_016642    | NP_057726    | Q9NRC6 | SPTN5_HUMAN | Spectrin 12.                   | 2  | (CTGGCACTGC    | 0.637 |
| - | 17 | 2069  | p.A162V PLA2G4    | NM_001080490 | NP_001073959 | Q3MJ16 | PA24E_HUMAN | PLA2c.                         | 0  | (GGTCGGCTTTT(  | 0.607 |
| - | 12 | 1223  | lzf.3_Missense_M  | NM_015497    | NP_056312    | Q8NBN3 | TM87A_HUMAN |                                | 1  | (TCTGGCCTGTC   | 0.448 |
| - | 4  | 451   | bcu.1_Missense_M  | NM_015497    | NP_056312    | Q8NBN3 | TM87A_HUMAN |                                | 1  | (TTCTGCCTGGA(  | 0.358 |
| - | 9  | 4861  | pv.2_Missense_M   | NM_022473    | NP_071918    | Q9H2Y7 | ZF106_HUMAN |                                | 3  | (CTGAAGAATTC1  | 0.338 |

|   |    |       |                   |              |              |        |             |                              |    |                |       |             |
|---|----|-------|-------------------|--------------|--------------|--------|-------------|------------------------------|----|----------------|-------|-------------|
| - | 2  | 2526  | ZFP106_uc010ud    | NM_022473    | NP_071918    | Q9H2Y7 | ZF106_HUMAN |                              | 3  | TTAGATCCCTCTC  | 0.512 |             |
| - | 2  | 671   | :DAN1_uc010bcx.   | NM_138477    | NP_612486    | Q8IWY9 | CDAN1_HUMAN |                              | 2  | CGGGGGGAACC    | 0.652 |             |
| - | 12 | 1384  | dk.1_Missense_Mt  | NM_174916    | NP_777576    | Q8IWW7 | UBR1_HUMAN  |                              | 1  | TAATGACAGAGA   | 0.353 |             |
| - | 8  | 955   | lk.1_Missense_Mu  | NM_174916    | NP_777576    | Q8IWW7 | UBR1_HUMAN  |                              | 1  | :AAGTGGATGTT   | 0.328 |             |
| - | 4  | 529   | lk.1_Missense_Mu  | NM_174916    | NP_777576    | Q8IWW7 | UBR1_HUMAN  | UBR-type.                    | 1  | :TGCCCTCTGTGT  | 0.363 |             |
| - | 13 | 2874  | _p.P914L TP53BP   | NM_005657    | NP_005648    | Q12888 | TP53B_HUMAN |                              | 7  | :CTTTAGGCCAAAC | 0.323 | rs2256238   |
| - | 28 | 5204  | _p.T936I STRC_uc  | NM_153700    | NP_714544    | Q7RTU9 | STRC_HUMAN  |                              | 0  | :CACTGGTGAGA   | 0.567 |             |
| + | 1  | 212   | rn CATSPER2P1_u   | NM_005313    | NP_005304    | P30101 | PDIA3_HUMAN |                              | 2  | :GCCTCGCCGCT   | 0.706 |             |
| + | 7  | 918   | _p.G237D PDIA3_u  | NM_005313    | NP_005304    | P30101 | PDIA3_HUMAN |                              | 2  | :ACAGGGCAAGG   | 0.358 |             |
| - | 4  | 607   | tic.1_RNA SERINC  | NM_001033517 | NP_001028689 | A6NH21 | SERC4_HUMAN | ical; (Potential).           | 0  | :AGAAGCTTGATC  | 0.493 |             |
| + | 1  | 349   | :4_uc001ztd.1_5'F | NM_016400    | NP_057484    | Q9NX55 | HYPK_HUMAN  |                              | 0  | :GAGTTCCAATCT  | 0.632 |             |
| - | 9  | 1364  |                   | NM_005926    | NP_005917    | P55081 | MFAP1_HUMAN |                              | 1  | :CACAAAGGTGAG  | 0.408 |             |
| - | 32 | 6122  | Uei.1_Nonsense_u  | NM_025137    | NP_079413    | Q96J17 | SPTCS_HUMAN | ellular (Potential).         | 5  | :GCATCGGTCAG   | 0.547 | rs147713329 |
| - | 3  | 629   | ei.1_Missense_ML  | NM_025137    | NP_079413    | Q96J17 | SPTCS_HUMAN | ellular (Potential).         | 5  | GTCCACTGCCTC   | 0.403 |             |
| - | 5  | 580   | 26V DUOX2_uc0     | NM_014080    | NP_054799    | Q9NRD8 | DUOX2_HUMAN | -like; mediates peroxidase . | 5  | :ACTCGGCGGGG   | 0.662 |             |
| + | 29 | 3953  | :A1203T DUOX1_u   | NM_017434    | NP_059130    | Q9NRD9 | DUOX1_HUMAN | TXNDC11 (By similarity). F   | 8  | :ATCCTGGCCATC  | 0.562 |             |
| - | 8  | 1029  | _p.P302L MYEF2_u  | NM_016132    | NP_057216    | Q9P2K5 | MYEF2_HUMAN | RRM 2.                       | 3  | TGCATAGGTCTAT  | 0.338 |             |
| + | 12 | 1750  | _p.L512F SLC12A   | NM_000338    | NP_000329    | Q13621 | S12A1_HUMAN | lasmic (Potential).          | 2  | :CCTCCCTTGTC   | 0.498 |             |
| - | 61 | 7869  | N1_uc010beo.1_R   | NM_000138    | NP_000129    | P35555 | FBN1_HUMAN  | 43; calcium-binding.         | 3  | :TAAATCCGGGA   | 0.423 |             |
| - | 11 | 1536  |                   | NM_000138    | NP_000129    | P35555 | FBN1_HUMAN  | Pro-rich.                    | 3  | :GTGGGGGAGG    | 0.498 |             |
| - | 26 | 4856  | wz.2_Missense_Ml  | NM_014985    | NP_055800    | O94986 | CE152_HUMAN |                              | 2  | :ATCAGCCTTATG  | 0.408 |             |
| - | 18 | 2321  | _p.E763K CEP152   | NM_014985    | NP_055800    | O94986 | CE152_HUMAN | Potential.                   | 2  | GTTTTTCTTTGAT  | 0.353 |             |
| - | 11 | 1972  | _p.P272S SHC4_uc  | NM_203349    | NP_976224    | Q6S5L8 | SHC4_HUMAN  | CH1.                         | 5  | GTGTGGCAAAG    | 0.527 |             |
| - | 14 | 2070  | _p.P601S SECSIBf  | NM_014701    | NP_055516    | Q93073 | SBP2L_HUMAN |                              | 2  | :ACAGGTGTCA    | 0.433 |             |
| - | 5  | 640   |                   | NM_032802    | NP_116191    | Q8TCT8 | PSL2_HUMAN  | lasmic (Potential).          | 0  | :GTTATCTCCTAG  | 0.363 |             |
| + | 7  | 808   | _p.P260S AP4E1_u  | NM_007347    | NP_031373    | Q9UPM8 | AP4E1_HUMAN |                              | 0  | :AGCTCCCAGTA   | 0.398 |             |
| + | 14 | 1735  |                   | NM_007347    | NP_031373    | Q9UPM8 | AP4E1_HUMAN |                              | 0  | TCTTCTAATACAC  | 0.358 |             |
| - | 11 | 1645  | zza.3_Missense_h  | NM_031226    | NP_112503    | P11511 | CP19A_HUMAN |                              | 3  | :ACTGTCCCTTGC  | 0.473 |             |
| - | 10 | 1362  | _p.D371N CYP19A   | NM_031226    | NP_112503    | P11511 | CP19A_HUMAN |                              | 3  | :CAAGTCCACGA   | 0.408 |             |
| + | 9  | 1295  | bb.2_Missense_Ml  | NM_181789    | NP_861454    | Q6ZMI3 | GLDN_HUMAN  | otential). Olfactomedin-like | 2  | CACGTTGTTTAC   | 0.493 |             |
| + | 8  | 955   | _p.A209V TMOD2_u  | NM_014548    | NP_055363    | Q9NZR1 | TMOD2_HUMAN |                              | 2  | :TAAGGCTTTTGC  | 0.348 |             |
| + | 10 | 1255  | _p.R309K TMOD2_u  | NM_014548    | NP_055363    | Q9NZR1 | TMOD2_HUMAN |                              | 2  | :GAAGAGAGTTG   | 0.368 |             |
| - | 33 | 4179  | :5C_uc010uga.1_u  | NM_018728    | NP_061198    | Q9NQX4 | MYO5C_HUMAN | Potential.                   | 14 | TCTTACCTTTTCC  | 0.343 |             |
| - | 25 | 3283  | a.1_RNA MYO5C_u   | NM_018728    | NP_061198    | Q9NQX4 | MYO5C_HUMAN | Potential.                   | 14 | :GCTCCCCCTCC   | 0.517 |             |
| - | 1  | 1033  |                   | NM_004498    | NP_004489    | Q9UBC0 | HNF6_HUMAN  | CUT.                         | 0  | :CGGTGGTGATA   | 0.617 |             |
| + | 6  | 3397  |                   | NM_001080534 | NP_001074003 | Q8NB66 | UN13C_HUMAN | ol-ester/DAG-type.           | 7  | :GTGGAGTGAAA   | 0.507 |             |
| - | 3  | 1063  | idf.1_Missense_Ml | NM_015617    | NP_056432    | Q9Y3Y4 | PYGO1_HUMAN |                              | 2  | :CAGAAGACGAA   | 0.473 |             |
| - | 14 | 1659  | R481K ZNF280D_u   | NM_017661    | NP_060131    | Q6N043 | Z280D_HUMAN |                              | 3  | :GCAGCCTGCAT   | 0.348 |             |
| - | 4  | 540   | _p.T140I ALDH1A   | NM_003888    | NP_003879    | O94788 | AL1A2_HUMAN |                              | 1  | :GAATGGTCATCC  | 0.448 |             |
| + | 4  | 417   | bge.2_Missense_h  | NM_004701    | NP_004692    | O95067 | CCNB2_HUMAN |                              | 0  | :GTAGGTCCTTC   | 0.428 |             |
| - | 2  | 215   | ARG2_uc010bgk.2   | NM_024611    | NP_078887    | Q659A1 | NARG2_HUMAN |                              | 2  | :CTTCACTCTAGC  | 0.473 |             |
| - | 41 | 4611  | ahb.1_Splice_Site | NM_020821    | NP_065872    | Q709C8 | VP13C_HUMAN |                              | 2  | :TCTGCCTACAA   | 0.313 |             |
| - | 35 | 3975  | hb.1_Missense_M   | NM_020821    | NP_065872    | Q709C8 | VP13C_HUMAN |                              | 2  | TATAAAGTGTAAC  | 0.313 |             |
| - | 29 | 3054  | ahb.1_Missense_h  | NM_020821    | NP_065872    | Q709C8 | VP13C_HUMAN |                              | 2  | :TACTCCACTTT   | 0.328 |             |
| + | 8  | 910   |                   | NM_015059    | NP_055874    | Q9Y4G6 | TLN2_HUMAN  | FERM.                        | 11 | :TCAAACCTCGCA  | 0.512 |             |
| + | 55 | 7500  | 93_splice TLN2_uc | NM_015059    | NP_055874    | Q9Y4G6 | TLN2_HUMAN  |                              | 11 | :CTCAGGTTTGT   | 0.343 |             |
| - | 77 | 14505 | :1_uc002amo.2_5   | NM_003922    | NP_003913    | Q15751 | HERC1_HUMAN | HECT.                        | 19 | CAGCAGTGTTC    | 0.438 |             |

|   |    |      |                    |              |              |        |             |                                |    |               |       |
|---|----|------|--------------------|--------------|--------------|--------|-------------|--------------------------------|----|---------------|-------|
| - | 29 | 5628 |                    | NM_003922    | NP_003913    | Q15751 | HERC1_HUMAN |                                | 19 | ACTTACCCAGTAC | 0.453 |
| - | 10 | 2321 | RC1_uc010uul.1_In  | NM_003922    | NP_003913    | Q15751 | HERC1_HUMAN | RCC1 7.                        | 19 | TCCAGCCGAAA   | 0.413 |
| - | 10 | 890  | uc010uim.1_Spli    | NM_014326    | NP_055141    | Q9UIK4 | DAPK2_HUMAN |                                | 2  | ACCGGCTGAGA   | 0.617 |
| - | 8  | 728  | K2_uc010uim.1_f    | NM_014326    | NP_055141    | Q9UIK4 | DAPK2_HUMAN | rotein kinase.                 | 2  | FTTCTGCTTCG   | 0.478 |
| + | 2  | 883  |                    | NM_015042    | NP_055857    | O15014 | ZN609_HUMAN |                                | 3  | ATGTGGCTCTGC  | 0.517 |
| + | 8  | 4169 |                    | NM_015042    | NP_055857    | O15014 | ZN609_HUMAN |                                | 3  | GCTTTTCTTCTAC | 0.403 |
| - | 8  | 1399 | lice_Site_p.G136_  | NM_025049    | NP_079325    | Q9H611 | PIF1_HUMAN  |                                | 0  | GCTCACCTGGC   | 0.637 |
| - | 6  | 558  | bhb.2_Missense_f   | NM_001127889 | NP_001121361 | Q9NZD8 | SPG21_HUMAN |                                | 0  | GCAGGCATCAG   | 0.318 |
| + | 4  | 465  | hah.2_Missense_    | NM_178859    | NP_849190    | Q86UW2 | OSTB_HUMAN  | lasmic (Potential).            | 0  | ATTTGATGAG    | 0.478 |
| - | 11 | 1465 | PX_uc010uiu.1_R    | NM_006660    | NP_006651    | O76031 | CLPX_HUMAN  |                                | 0  | CGATTCGCCACT  | 0.453 |
| - | 9  | 1822 | oat.1_Missense_M   | NM_020962    | NP_066013    | Q8TDY8 | IGDC4_HUMAN | III 2. Extracellular (Potentia | 3  | GTTGGGGCTGG   | 0.468 |
| - | 2  | 433  |                    | NM_020962    | NP_066013    | Q8TDY8 | IGDC4_HUMAN | 1. Extracellular (Potential).  | 3  | CCCATCCTTGC   | 0.632 |
| - | 2  | 352  | u.V6I C15orf44_uc  | NM_030800    | NP_110427    | Q96SY0 | CO044_HUMAN | VWFA.                          | 1  | CATTACCACCAC  | 0.453 |
| - | 20 | 3157 | _p.Q970* DENND2    | NM_005848    | NP_005839    | Q7Z401 | MYCYP_HUMAN | localization signal (Potentia  | 4  | TTCTTGAATGTC  | 0.303 |
| - | 16 | 2132 | p.A589V MEGF11     | NM_032445    | NP_115821    | A6BM72 | MEG11_HUMAN | EGF-like 11.                   | 1  | GCTGGGCACAG   | 0.607 |
| + | 2  | 654  | ujp.1_Missense_n   | NM_002755    | NP_002746    | Q02750 | MP2K1_HUMAN |                                | 0  | GAAGGTGGGAG   | 0.557 |
| + | 1  | 401  |                    | NM_005902    | NP_005893    | P84022 | SMAD3_HUMAN | MH1.                           | 5  | AGGCGTCAAG    | 0.597 |
| + | 7  | 685  | lice_Site_p.A40_sl | NM_001031715 | NP_001026885 | Q86VS3 | IQCH_HUMAN  |                                | 4  | CCACAGCCACT   | 0.428 |
| + | 9  | 1168 | 31_uc002ara.2_5'F  | NM_016166    | NP_057250    | O75925 | PIAS1_HUMAN | P-RING-type.                   | 2  | GTTTTGACGCA   | 0.378 |
| + | 2  | 2152 | rh.2_Missense_M    | NM_015322    | NP_056137    | Q9UK73 | FEM1B_HUMAN | ANK 7.                         | 0  | ATGCACCTTGCA  | 0.483 |
| + | 7  | 805  | _p.S254F CORO2     | NM_006091    | NP_006082    | Q9UQ03 | COR2B_HUMAN | WD 4.                          | 6  | ACTCTCCATGCA  | 0.557 |
| + | 7  | 822  | _p.E260K CORO2     | NM_006091    | NP_006082    | Q9UQ03 | COR2B_HUMAN | WD 5.                          | 6  | TCGAAGAGGAA   | 0.592 |
| - | 10 | 1877 | .E3_uc010bil.1_Mi  | NM_005078    | NP_005069    | Q04726 | TLE3_HUMAN  | CN domain.                     | 2  | CATTGGAACAAT  | 0.527 |
| + | 4  | 644  | D4_uc002atd.1_5'   | NM_024817    | NP_079093    | Q6ZMP0 | THSD4_HUMAN | SP type-1 1.                   | 2  | AGAGGCTCCGG   | 0.582 |
| + | 11 | 2046 | te.2_Missense_Mt   | NM_024817    | NP_079093    | Q6ZMP0 | THSD4_HUMAN |                                | 2  | TGAGAGTTACT   | 0.542 |
| + | 14 | 2577 | _p.G473D THSD4_    | NM_024817    | NP_079093    | Q6ZMP0 | THSD4_HUMAN | SP type-1 4.                   | 2  | GGAGGGCTGTG   | 0.662 |
| - | 33 | 6483 | tk.2_Missense_Mt   | NM_006901    | NP_008832    | B2RTY4 | MYO9A_HUMAN | bol-ester/DAG-type 1.          | 3  | GGTGGCTTTAA   | 0.378 |
| - | 25 | 4882 | p.G1451E MYO9A     | NM_006901    | NP_008832    | B2RTY4 | MYO9A_HUMAN | Tail.                          | 3  | CTTTCTCTGAGC  | 0.383 |
| - | 23 | 3559 | _Nonsense_Mutati   | NM_006901    | NP_008832    | B2RTY4 | MYO9A_HUMAN | or regulatory domain.          | 3  | TGAACCATCGC   | 0.453 |
| - | 17 | 2902 | _p.R430K MYO9A_    | NM_006901    | NP_008832    | B2RTY4 | MYO9A_HUMAN |                                | 3  | ATAGTCTGCTCT  | 0.398 |
| - | 2  | 1293 | se_Mutation_p.Gz   | NM_006901    | NP_008832    | B2RTY4 | MYO9A_HUMAN | sin head-like 1.               | 3  | CAGCTCCAAGAA  | 0.343 |
| - | 2  | 273  | M2_uc002aty.1_M    | NM_182471    | NP_872271    | P14618 | KPYM_HUMAN  |                                | 1  | TGAAGGCAGTC   | 0.542 |
| - | 9  | 1172 | ARP6_uc002aud.3    | NM_020214    | NP_064599    | Q2NL67 | PARP6_HUMAN |                                | 0  | GCTGAGGGCAC   | 0.607 |
| - | 3  | 567  | se_Mutation_p.G1f  | NM_031284    | NP_112574    | Q9BRR6 | ADPGK_HUMAN | ADPK.                          | 0  | GCATTTCTCTCT  | 0.303 |
| + | 27 | 4214 | _p.P1305S NEO1_    | NM_002499    | NP_002490    | Q92859 | NEO1_HUMAN  | lasmic (Potential).            | 1  | CCCACCCATTGA  | 0.582 |
| + | 8  | 1747 | 276_uc002avv.1_f   | NM_001024736 | NP_001019907 | Q5ZPR3 | CD276_HUMAN | lasmic (Potential).            | 1  | CTGAGGACCAG   | 0.527 |
| + | 9  | 2154 | _p.P624S PML_uc    | NM_033238    | NP_150241    | P29590 | PML_HUMAN   |                                | 5  | GCCGCCCTATC   | 0.602 |
| - | 11 | 1071 | A6_uc002axl.2_M    | NM_022369    | NP_071764    | Q9BX79 | STRA6_HUMAN | lasmic (Potential).            | 1  | AAGCACCAGCT   | 0.602 |
| - | 14 | 1921 | _p.W462* SEMA7A    | NM_003612    | NP_003603    | O75326 | SEM7A_HUMAN | mu-like C2-type.               | 2  | AGCTGCCAGTG   | 0.662 |
| + | 2  | 404  | _p.P68L ARID3B_    | NM_006465    | NP_006456    | Q8IVW6 | ARI3B_HUMAN |                                | 0  | AGGTCCTTAGC   | 0.562 |
| - | 2  | 330  | C3_uc002ayv.2_Mi   | NM_001099436 | NP_001092906 | Q6PHR2 | ULK3_HUMAN  | rotein kinase.                 | 2  | GCTGCACATGT   | 0.552 |
| + | 2  | 828  | ae.2_Missense_Mt   | NM_024608    | NP_078884    | Q96FI4 | NEIL1_HUMAN |                                | 1  | CTGGCCCCCGG   | 0.687 |
| - | 22 | 2586 | ah.2_Missense_n    | NM_006715    | NP_006706    | Q9NTJ4 | MA2C1_HUMAN |                                | 0  | CAGATCCATCCA  | 0.607 |
| - | 10 | 6202 |                    | NM_001897    | NP_001888    | Q6UVK1 | CSPG4_HUMAN | ntaining. Neurite growth inl   | 3  | TACGGCTGATG   | 0.612 |
| - | 9  | 5217 |                    | NM_001897    | NP_001888    | Q6UVK1 | CSPG4_HUMAN | ing. CSPG 12. Neurite grov     | 3  | TTCTTCCAGAGC  | 0.642 |
| + | 8  | 808  | 34_splice C15orf2  | NM_152335    | NP_689548    | Q2M3C6 | CO027_HUMAN |                                | 0  | TCCAGCCTAC    | 0.582 |
| - | 8  | 764  | p.G179E ETFA_uc    | NM_000126    | NP_000117    | P13804 | ETFA_HUMAN  |                                | 0  | TTCTCTCCACTC  | 0.313 |

rs112823141

rs139778598



|   |    |      |                    |              |              |        |             |                              |     |               |       |
|---|----|------|--------------------|--------------|--------------|--------|-------------|------------------------------|-----|---------------|-------|
| + | 5  | 826  | p.G274D RCN2_u     | NM_002902    | NP_002893    | Q14257 | RCN2_HUMAN  | ential). EF-hand 4.          | 0   | AAAATGGTGATG  | 0.343 |
| + | 3  | 224  | on_p.S8F HMG20f    | NM_018200    | NP_060670    | Q9NP66 | HM20A_HUMAN |                              | 3   | TAGCTCCACCC   | 0.418 |
| - | 2  | 1007 | icu.1_Missense_M   | NM_032808    | NP_116197    | Q96FE5 | LIGO1_HUMAN | ar (Potential). LRR 10.      | 2   | GCCCACCAGCT   | 0.612 |
| - | 9  | 2183 | _p.T728 TBC1D2l    | NM_144572    | NP_653173    | Q9UPU7 | TBD2B_HUMAN | ab-GAP TBC.                  | 3   | CTGAGGTGGGG   | 0.542 |
| - | 4  | 526  | BG1_uc010umx.1     | NM_015162    | NP_055977    | Q96GR2 | ACBG1_HUMAN |                              | 1   | TGTGGGCCTGC   | 0.662 |
| + | 4  | 424  | _Intron MORF4L1    | NM_206839    | NP_996670    | Q9UBU8 | MO4L1_HUMAN |                              | 0   | TGAAGGAGCTC   | 0.428 |
| + | 5  | 434  | fn.1_Missense_Mt   | NM_000137    | NP_000128    | P16930 | FAAA_HUMAN  |                              | 0   | ACCTTCCAGCC   | 0.567 |
| + | 25 | 3732 | inn.1_Missense_IV  | NM_018689    | NP_061159    | Q8WUJ3 | K1199_HUMAN |                              | 3   | TGAAAGGCTGTG  | 0.502 |
| + | 7  | 754  |                    | NM_173528    | NP_775799    | Q6P656 | CO026_HUMAN |                              | 0   | GAAAGGAGGCTG  | 0.418 |
| + | 11 | 1767 | 1_Missense_Mutal   | NM_172217    | NP_757366    | Q14005 | IL16_HUMAN  |                              | 4   | GTTTGGAAAGGA  | 0.408 |
| + | 14 | 2792 | e_Mutation_p.P19   | NM_172217    | NP_757366    | Q14005 | IL16_HUMAN  |                              | 4   | CAGACCCAAGAC  | 0.517 |
| + | 15 | 3615 | ase_Mutation_p.Sz  | NM_172217    | NP_757366    | Q14005 | IL16_HUMAN  | ion with HTLV-1 tax.         | 4   | TCAGTCCGTTA   | 0.458 |
| + | 19 | 4259 | se_Mutation_p.L1z  | NM_172217    | NP_757366    | Q14005 | IL16_HUMAN  | PDZ 4.                       | 4   | AGGGCCTCACA   | 0.522 |
| - | 3  | 362  | D5_uc002bgn.2_f    | NM_181900    | NP_871629    | Q9NSY2 | STAR5_HUMAN | START.                       | 1   | CGTCAGTGATG   | 0.483 |
| + | 1  | 73   | 1_5'Flank FAM154   | NM_001008226 | NP_001008227 | Q658L1 | F154B_HUMAN |                              | 2   | GCATGGGAGCC   | 0.627 |
| + | 3  | 335  | se_Mutation_p.A7z  | NM_001008226 | NP_001008227 | Q658L1 | F154B_HUMAN |                              | 2   | TAGAGCTTGGG   | 0.328 |
| - | 3  | 831  | jo.2_Missense_Mt   | NM_025238    | NP_079514    | Q9H0C5 | BTBD1_HUMAN |                              | 2   | TTATTGCATCCAT | 0.328 |
| + | 4  | 974  | 592_uc010upb.1_    | NM_014630    | NP_055445    | Q92610 | ZN592_HUMAN |                              | 6   | CTTGGGGAGCC   | 0.537 |
| + | 12 | 5395 | pc.1_Missense_M    | NM_020778    | NP_065829    | Q96L96 | ALPK3_HUMAN | ype protein kinase.          | 12  | GGCTCCGACAG   | 0.552 |
| + | 19 | 2182 | on_p.V418 PDE8A    | NM_002605    | NP_002596    | O60658 | PDE8A_HUMAN | ytic (By similarity).        | 4   | ACATGGTCTTAC  | 0.433 |
| + | 7  | 2253 | 13_uc002blu.1_Mi   | NM_007200    | NP_009131    | Q12802 | AKP13_HUMAN |                              | 9   | CCACAGCAAGG   | 0.512 |
| + | 7  | 4123 | 13_uc002blu.1_Mi   | NM_007200    | NP_009131    | Q12802 | AKP13_HUMAN |                              | 9   | GGAAGCCACGG   | 0.517 |
| + | 11 | 4818 | Obnf.1_Missense_I  | NM_007200    | NP_009131    | Q12802 | AKP13_HUMAN |                              | 9   | GCTCTGTCTTA   | 0.587 |
| - | 2  | 672  |                    | NM_022480    | NP_071925    | Q9H0H3 | ENC2_HUMAN  |                              | 2   | GGCGTCCGAGA   | 0.607 |
| - | 16 | 2249 | _p.G696E NTRK3     | NM_001012338 | NP_001012338 | Q16288 | NTRK3_HUMAN | Potential). Protein kinase.  | 281 | AAGTCCCCAATC  | 0.552 |
| - | 5  | 1659 | ik.2_RNA DET1_u    | NM_001144074 | NP_001137546 | Q7L5Y6 | DET1_HUMAN  |                              | 2   | CCCCGCCTGGA   | 0.517 |
| + | 2  | 549  | p.S133F AEN_uc0    | NM_022767    | NP_073604    | Q8WTP8 | AEN_HUMAN   | Exonuclease.                 | 0   | CTGTTCATTG    | 0.607 |
| + | 5  | 379  | Splice_Site FANCI  | NM_001113378 | NP_001106849 | Q9NV11 | FANCI_HUMAN |                              | 2   | CTTTTAGGCTCA  | 0.353 |
| + | 13 | 1282 | i.1_RNA FANCI_uc   | NM_001113378 | NP_001106849 | Q9NV11 | FANCI_HUMAN |                              | 2   | AGAAGTTCTTC   | 0.418 |
| + | 17 | 2998 |                    | NM_152259    | NP_689472    | Q7Z2Z1 | TICRR_HUMAN |                              | 7   | TGAAGAGTCC    | 0.398 |
| + | 20 | 3614 | orf42_uc010upv.1_  | NM_152259    | NP_689472    | Q7Z2Z1 | TICRR_HUMAN | Pro-rich.                    | 7   | GCCTGGGTTTT   | 0.517 |
| + | 20 | 4889 | orf42_uc010upv.1_  | NM_152259    | NP_689472    | Q7Z2Z1 | TICRR_HUMAN |                              | 7   | CCTCTCCACAC   | 0.607 |
| - | 3  | 911  |                    | NM_001150    | NP_001141    | P15144 | AMPN_HUMAN  | ular). Metalloprotease.      | 4   | GGCCACCACCC   | 0.602 |
| - | 5  | 749  | qc.1_Missense_Mt   | NM_002168    | NP_002159    | P48735 | IDHP_HUMAN  |                              | 711 | TTGTACATGCC   | 0.478 |
| + | 8  | 929  |                    | NM_003870    | NP_003861    | P46940 | IQGA1_HUMAN |                              | 8   | ACAGGGTAAAA   | 0.299 |
| + | 12 | 1285 |                    | NM_003870    | NP_003861    | P46940 | IQGA1_HUMAN |                              | 8   | ACTGATTAATGC  | 0.507 |
| + | 13 | 2105 | NC45A_uc010uqr.    | NM_018671    | NP_061141    | Q9H3U1 | UN45A_HUMAN |                              | 2   | TTGCGGTGGCC   | 0.592 |
| + | 5  | 1385 | 2B_uc010uqv.1_M    | NM_014848    | NP_055663    | Q7L1I2 | SV2B_HUMAN  | lasmic (Potential).          | 8   | ACCCAGAGAAA   | 0.458 |
| + | 26 | 3877 | o.1_Missense_Mu    | NM_001271    | NP_001262    | O14647 | CHD2_HUMAN  |                              | 2   | TGCTTCTGAGA   | 0.517 |
| + | 37 | 5481 | o.1_Missense_Mul   | NM_001271    | NP_001262    | O14647 | CHD2_HUMAN  |                              | 2   | ATGCAGGTAGG   | 0.443 |
| + | 10 | 2077 | on.2_Missense_Mt   | NM_000875    | NP_000866    | P08069 | IGF1R_HUMAN | onectin type-III 2.          | 8   | CGACGGCACCA   | 0.498 |
| + | 16 | 3086 | e_Mutation_p.M10   | NM_000875    | NP_000866    | P08069 | IGF1R_HUMAN | tein kinase.  Cytoplasmic (P | 8   | GGGATGGTCTA   | 0.522 |
| + | 6  | 1976 | e_Mutation_p.R61   | NM_145728    | NP_663780    | O15061 | SYNEM_HUMAN | Tail.                        | 4   | GTTCAGGTTGG   | 0.537 |
| + | 6  | 4093 | .2_Intron SYNM_u   | NM_145728    | NP_663780    | O15061 | SYNEM_HUMAN | d UTRN.  Interaction with TI | 4   | CAGATAGTTTACC | 0.562 |
| - | 15 | 2111 | 2bvx.1_Missense_   | NM_139057    | NP_620688    | Q8TE56 | ATS17_HUMAN | Cys-rich.                    | 3   | GATGCCGTAC    | 0.557 |
| + | 6  | 671  | 10bpb.2_Intron ucf | NM_000693    | NP_000684    | P47895 | AL1A3_HUMAN |                              | 4   | GTGTGGAAGCT   | 0.602 |
| + | 10 | 1715 | b.1_RNA LRRK1_u    | NM_024652    | NP_078928    | Q38SD2 | LRRK1_HUMAN | LRR 8.                       | 12  | AAGTCCCCTGC   | 0.428 |

|   |    |      |                    |              |              |        |             |                              |     |              |       |
|---|----|------|--------------------|--------------|--------------|--------|-------------|------------------------------|-----|--------------|-------|
| + | 17 | 2561 | b.1_RNA LRRK1_     | NM_024652    | NP_078928    | Q38SD2 | LRRK1_HUMAN | Roc.                         | 12  | AGGCCCAAAC   | 0.582 |
| + | 32 | 5732 | RK1_uc010usc.1_F   | NM_024652    | NP_078928    | Q38SD2 | LRRK1_HUMAN |                              | 12  | CCAACCCAAAG  | 0.637 |
| - | 11 | 1131 | .3_uc010uub.1_Sp   | NM_001077350 | NP_001070818 | Q12980 | NPRL3_HUMAN |                              | 1   | AGTACCTGCAG  | 0.597 |
| - | 3  | 592  | 002cgv.3_Translati | NM_021259    | NP_067082    | Q9HCN3 | TMM8A_HUMAN | ellular (Potential).         | 3   | GGCCACGAACC  | 0.677 |
| + | 10 | 1846 | 10uu.1_3'UTR PIC   | NM_148920    | NP_683721    | Q9BRB3 | PIGQ_HUMAN  |                              | 1   | TGCCAGGGTGG  | 0.632 |
| + | 3  | 236  | R90_uc002cih.1_I   | NM_145294    | NP_660337    | Q96KV7 | WDR90_HUMAN |                              | 1   | GAGCAGCACCC  | 0.607 |
| + | 24 | 2960 | R90_uc002cil.1_RR  | NM_145294    | NP_660337    | Q96KV7 | WDR90_HUMAN | WD 11.                       | 1   | CATCGGCCACT  | 0.672 |
| + | 36 | 4598 | _uc002cio.1_Miss   | NM_145294    | NP_660337    | Q96KV7 | WDR90_HUMAN | WD 18.                       | 1   | CCGCACGGCCA  | 0.677 |
| - | 11 | 1220 | 3_3'UTR CCDC78     | NM_001031737 | NP_001026907 | A2IDD5 | CCD78_HUMAN |                              | 1   | TCCCCCTGGG   | 0.637 |
| + | 14 | 1544 | _p.S489F MSLN_u    | NM_013404    | NP_037536    | Q13421 | MSLN_HUMAN  |                              | 1   | CGGGTCCGAAT  | 0.632 |
| + | 1  | 182  |                    | NM_001013638 | NP_001013660 | Q96S07 | PRR25_HUMAN |                              | 1   | AATAAGCCTGG  | 0.627 |
| - | 3  | 476  |                    | NM_207419    | NP_997302    | P60827 | C1QT8_HUMAN |                              | 1   | TTTGAGGATTT  | 0.677 |
| + | 32 | 3200 | .R1032K BAIAP3_    | NM_003933    | NP_003924    | O94812 | BAIP3_HUMAN | C2 2.                        | 1   | CCAGAGGACCC  | 0.552 |
| + | 6  | 1090 | ense_Mutation_p.f  | NM_015133    | NP_055948    | Q9UPT6 | JIP3_HUMAN  |                              | 3   | CCCAGGAGATG  | 0.622 |
| + | 6  | 869  | MRPS34_uc002ci     | NM_001010865 | NP_001010865 | A4GXA9 | EME2_HUMAN  |                              | 3   | GGCCTCTTGGC  | 0.642 |
| + | 8  | 1300 | w.1_Missense_Mu    | NM_001010865 | NP_001010865 | A4GXA9 | EME2_HUMAN  |                              | 3   | CCACAGCCAA   | 0.692 |
| + | 4  | 492  | UBP2_uc010brx.:    | NM_012225    | NP_036357    | Q9Y5Y2 | NUBP2_HUMAN |                              | 0   | CGCCCCGGGG   | 0.682 |
| - | 3  | 684  | _p.V93M HAGH_u     | NM_005326    | NP_005317    | Q16775 | GLO2_HUMAN  |                              | 1   | TTTCCACCCGT  | 0.632 |
| - | 11 | 1139 | _p.V341I C16orf7:  | NM_152764    | NP_689977    | Q8N635 | CP073_HUMAN |                              | 0   | TCGAACTACTT  | 0.323 |
| - | 9  | 1096 | X1_uc010uvs.1_5'   | NM_005061    | NP_005052    | Q92901 | RL3L_HUMAN  |                              | 0   | GGAGGGACTGG  | 0.552 |
| + | 6  | 937  | _p.S273F SLC9A3F   | NM_001130012 | NP_001123484 | Q15599 | NHRF2_HUMAN |                              | 1   | CTCGTCCCGAA  | 0.572 |
| + | 7  | 1100 | _p.W316* SLC9A3F   | NM_001130012 | NP_001123484 | Q15599 | NHRF2_HUMAN |                              | 1   | GACTGGAACAG  | 0.662 |
| + | 7  | 771  | _ Mutation_p.A21E  | NM_022372    | NP_071767    | Q9BVC4 | LST8_HUMAN  | WD 6.                        | 0   | TCCCTGCCCA   | 0.652 |
| - | 7  | 1346 | S1_uc002cpw.2_M    | NM_080594    | NP_542161    | Q15287 | RNPS1_HUMAN | nuclear localization and exc | 1   | GTGGGGGAGAC  | 0.582 |
| + | 4  | 1194 | 346N TBC1D24_u     | NM_020705    | NP_065756    | Q9ULP9 | TBC24_HUMAN |                              | 0   | TGAGAGACATC  | 0.627 |
| + | 11 | 6034 | 1.1_Missense_Mut   | NM_016333    | NP_057417    | Q9UQ35 | SRRM2_HUMAN | g-rich. Ser-rich.            | 4   | GGCAGGAAAGT  | 0.652 |
| + | 12 | 8518 |                    | NM_016333    | NP_057417    | Q9UQ35 | SRRM2_HUMAN | Ser-rich.                    | 4   | GCCCTCAGGCC  | 0.373 |
| - | 4  | 389  | rm.2_Missense_M    | NM_007108    | NP_009039    | Q15370 | ELOB_HUMAN  |                              | 0   | TGGCACTGCTT  | 0.582 |
| - | 3  | 296  | lcrz.1_Splice_Site | NM_022119    | NP_071402    | Q9GZN4 | BSSP4_HUMAN | eptidase S1.                 | 1   | GAGAACTGCG   | 0.612 |
| + | 5  | 1567 | 2csc.2_Nonsense_   | NM_032296    | NP_115672    | Q4VC44 | FWCH1_HUMAN |                              | 0   | CAACCCAGCCC  | 0.652 |
| + | 3  | 725  | sl.3_Missense_M    | NM_152341    | NP_689554    | Q8N4S7 | PAQR4_HUMAN | ical; (Potential).           | 0   | CAGGGGCCCTG  | 0.672 |
| - | 5  | 811  | 2cte.3_Missense_   | NM_001103175 | NP_001096645 | A1A5D9 | BICR2_HUMAN | Potential.                   | 0   | GCGTTCAGCT   | 0.736 |
| + | 3  | 263  | MGC3771_uc002      | NM_001042428 | NP_001035893 | O95201 | ZN205_HUMAN |                              | 0   | GGACACTCAGG  | 0.597 |
| + | 1  | 191  |                    | NM_012360    | NP_036492    | O43749 | OR1F1_HUMAN | Name=2; (Potential).         | 0   | CCTCAGCAACC  | 0.537 |
| - | 2  | 654  | 2cuk.2_Missense_   | NM_003454    | NP_003445    | P98182 | ZN200_HUMAN |                              | 0   | GCATAGGAACCA | 0.552 |
| - | 1  | 1006 | rr.2_3'UTR TIGD7   | NM_033208    | NP_149985    | Q6NT04 | TIGD7_HUMAN | H CENPB-type.                | 0   | GGTCCCCGTG   | 0.453 |
| + | 2  | 1218 | 35_splice ZNF174_  | NM_003450    | NP_003441    | Q15697 | ZN174_HUMAN |                              | 0   | TCCTAGGTGGC  | 0.483 |
| + | 6  | 806  | _ Mutation_p.P187  | NM_001083601 | NP_001077070 | Q9H7X0 | NAT15_HUMAN |                              | 0   | CCCTCCCTGGA  | 0.537 |
| - | 5  | 763  |                    | NM_178844    | NP_849172    | Q7RTR2 | NLRC3_HUMAN |                              | 6   | GGCGGGTGCC   | 0.706 |
| - | 30 | 5161 | vw.2_Missense_M    | NM_004380    | NP_004371    | Q92793 | CBP_HUMAN   | tion with TRERF1.            | 127 | GGGGTCGGGGT  | 0.632 |
| - | 14 | 2858 | vw.2_Missense_M    | NM_004380    | NP_004371    | Q92793 | CBP_HUMAN   |                              | 127 | GAGTGGGAGCT  | 0.637 |
| - | 4  | 1226 | vw.2_Missense_M    | NM_004380    | NP_004371    | Q92793 | CBP_HUMAN   | ction with SRCAP.            | 127 | CCTGTTGCAATT | 0.418 |
| - | 11 | 4161 |                    | NM_001116    | NP_001107    | O60503 | ADCY9_HUMAN | lasmic (Potential).          | 6   | GCTCACCTGGA  | 0.587 |
| + | 1  | 112  |                    | NM_032575    | NP_115964    | Q9BZE0 | GLIS2_HUMAN |                              | 0   | TCCGGCGGCA   | 0.677 |
| - | 6  | 986  | wo.2_Missense_M    | NM_020677    | NP_065728    | Q9HBL8 | NMRL1_HUMAN |                              | 1   | TGAGTCTCAGG  | 0.617 |
| + | 4  | 544  | ws.3_Missense_M    | NM_001127206 | NP_001120678 | P30519 | HMOX2_HUMAN |                              | 0   | AGCAGGTGCAG  | 0.577 |
| + | 13 | 1430 | IN1_uc002cxb.2_M   | NM_001142290 | NP_001135762 | O60291 | MGRN1_HUMAN |                              | 2   | TGCGGCTATC   | 0.662 |

|   |    |       |                    |              |              |        |             |                              |    |                |       |
|---|----|-------|--------------------|--------------|--------------|--------|-------------|------------------------------|----|----------------|-------|
| + | 16 | 1704  | RN1_uc002cxb.2_in  | NM_001142290 | NP_001135762 | O60291 | MGRN1_HUMAN |                              | 2  | GGACAGCAGCC    | 0.662 |
| - | 8  | 1146  | xl.2_Missense_Mt   | NM_133450    | NP_597707    | Q6ZW76 | ANKS3_HUMAN |                              | 0  | :GTGGGGCTCTG   | 0.602 |
| - | 5  | 786   | plice ANKS3_uc00   | NM_133450    | NP_597707    | Q6ZW76 | ANKS3_HUMAN |                              | 0  | :AATCACCTCAC   | 0.577 |
| - | 5  | 680   | :S3_uc002cxl.2_in  | NM_133450    | NP_597707    | Q6ZW76 | ANKS3_HUMAN | ANK 3.                       | 0  | :GCATTTCTAGCTC | 0.592 |
| - | 14 | 1484  | YR1_uc002cya.2_    | NM_032569    | NP_115958    | Q49A26 | GLYR1_HUMAN |                              | 0  | :CTGGTCCAGGA   | 0.527 |
| + | 15 | 3269  | _p.S977F UBN1_u    | NM_001079514 | NP_001072982 | Q9NPG3 | UBN1_HUMAN  | Ser-rich.                    | 2  | :AGATTCCAGTG   | 0.567 |
| - | 22 | 3766  |                    | NM_002705    | NP_002696    | O60437 | PEPL_HUMAN  | Potential.                   | 6  | :TTCCACCTGGG   | 0.592 |
| - | 21 | 2608  |                    | NM_002705    | NP_002696    | O60437 | PEPL_HUMAN  | Spectrin 4.                  | 6  | :TGCTGCTTCCT   | 0.493 |
| + | 5  | 1223  | cyv.1_Missense_M   | NM_018723    | NP_061193    | Q9NWB1 | RFOX1_HUMAN |                              | 0  | CGGCGGACACG    | 0.652 |
| + | 12 | 1094  | h.2_Missense_Mu    | NM_020686    | NP_065737    | P80404 | GABT_HUMAN  |                              | 1  | :TCTTTCGGAAG   | 0.557 |
| - | 15 | 1881  | yj.1_Missense_Mu   | NM_003470    | NP_003461    | Q93009 | UBP7_HUMAN  |                              | 3  | :GATGGGCTTCC   | 0.572 |
| - | 3  | 1012  | N2A_uc010uyn.1_    | NM_001134407 | NP_001127879 | Q12879 | NMDE1_HUMAN | cellular (Potential).        | 45 | :CCGTGGCTTGC   | 0.498 |
| + | 3  | 463   | IP2_uc010uyp.1_    | NM_024997    | NP_079273    | Q5U623 | MCAF2_HUMAN |                              | 0  | TGGACTCTAATA   | 0.348 |
| + | 7  | 478   | _p.M17T NUBP1_     | NM_002484    | NP_002475    | P53384 | NUBP1_HUMAN |                              | 2  | :AGGCATGATCAA  | 0.438 |
| + | 3  | 344   | ig.2_Missense_Mu   | NM_000246    | NP_000237    | P33076 | C2TA_HUMAN  | Glu-rich (acidic).           | 1  | :ACACAGACACC   | 0.552 |
| + | 9  | 975   | g.2_Missense_Mu    | NM_000246    | NP_000237    | P33076 | C2TA_HUMAN  |                              | 1  | :ATCTCCAGACC   | 0.617 |
| + | 11 | 1812  | g.2_Missense_Mu    | NM_000246    | NP_000237    | P33076 | C2TA_HUMAN  | NACHT.                       | 1  | :CAAGGCCGACG   | 0.637 |
| + | 11 | 1309  | dan.3_Missense_M   | NM_015226    | NP_056041    | Q2KHT3 | CL16A_HUMAN |                              | 2  | :CAAGCCCAGCA   | 0.448 |
| + | 23 | 2884  | 16A_uc002dap.2_    | NM_015226    | NP_056041    | Q2KHT3 | CL16A_HUMAN |                              | 2  | :CGTGGCCAGT    | 0.622 |
| - | 5  | 461   | lbt.2_Missense_Mt  | NM_001130007 | NP_001123479 | P15170 | ERF3A_HUMAN |                              | 3  | :AATAGGCACGAC  | 0.398 |
| + | 8  | 1511  | yz.1_Missense_M    | NM_005236    | NP_005227    | Q92889 | XPF_HUMAN   |                              | 10 | :AAAACCTGAAG   | 0.423 |
| + | 9  | 1894  | yz.1_Missense_M    | NM_005236    | NP_005227    | Q92889 | XPF_HUMAN   | with EME1 and ERCC1.         | 10 | :AGGAAGCTTTT   | 0.398 |
| + | 17 | 3028  | _p.P908L MKL2_u    | NM_014048    | NP_054767    | Q9ULH7 | MKL2_HUMAN  |                              | 5  | :ACCACCCCAAG   | 0.478 |
| - | 14 | 3009  | luzv.1_Missense_M  | NM_014647    | NP_055462    | Q9Y4F3 | LKAP_HUMAN  |                              | 0  | :TGCTGGGTAGG   | 0.493 |
| + | 3  | 429   | p.R129H NDE1_uc    | NM_017668    | NP_060138    | Q9NXR1 | NDE1_HUMAN  | AH1B1 (By similarity). Pote  | 1  | :CAAGCGGTATG   | 0.418 |
| + | 7  | 951   | p.R303K NDE1_uc    | NM_017668    | NP_060138    | Q9NXR1 | NDE1_HUMAN  |                              | 1  | :GGAGAGACGGC   | 0.607 |
| + | 5  | 686   | _p.R171C ABCC1_    | NM_004996    | NP_004987    | P33527 | MRP1_HUMAN  | Extracellular.               | 4  | :CTGTTTCGTGAC  | 0.398 |
| + | 23 | 3255  | l.2_Missense_Mut   | NM_004996    | NP_004987    | P33527 | MRP1_HUMAN  | ne type-1 2.  Helical; Name: | 4  | :TGCAGGGATCG   | 0.622 |
| - | 3  | 750   |                    | NM_022166    | NP_071449    | Q86Y38 | XYLT1_HUMAN | renal (Potential).           | 4  | :CGGCTCTGTCC   | 0.597 |
| + | 7  | 1065  | p.2_Missense_Mu    | NM_024847    | NP_079123    | Q7Z402 | TMC7_HUMAN  | lasmic (Potential).          | 3  | TGCCGGCTGGG    | 0.527 |
| + | 4  | 603   | ffy.2_Missense_M   | NM_016524    | NP_057608    | Q9BSW7 | SYT17_HUMAN |                              | 1  | :GGATGGAAGAC   | 0.582 |
| + | 11 | 2656  | se_Mutation_p.A3   | NM_001105248 | NP_001098718 | Q6UXY8 | TMC5_HUMAN  | ical; (Potential).           | 1  | :TGCAGCCGTTT   | 0.542 |
| + | 12 | 986   | _p.G74E C16orf62   | NM_020314    | NP_064710    | Q7Z3J2 | CP062_HUMAN |                              | 1  | CAGAGGGATCG    | 0.572 |
| + | 6  | 1211  | _p.T171I IQCK_u    | NM_153208    | NP_694940    | Q8N0W5 | IQCK_HUMAN  |                              | 1  | :TCTGACTGAGT   | 0.289 |
| - | 5  | 1261  | p.V378M UMOD_t     | NM_003361    | NP_003352    | P07911 | UROM_HUMAN  | ZP.                          | 2  | AGACACCCAGT    | 0.532 |
| - | 2  | 132   | rl2_uc002dhs.2_N   | NM_001142725 | NP_001136197 | A8K979 | ERL2_HUMAN  |                              | 1  | :CACTGGATTTG   | 0.378 |
| - | 2  | 359   | :l2_uc002dht.3_Int | NM_173475    | NP_775746    | Q8IWE4 | DCNL3_HUMAN |                              | 2  | :CATCTCCCAGG   | 0.577 |
| - | 62 | 12071 | rd.1_Missense_Mu   | NM_017539    | NP_060009    | Q8TD57 | DYH3_HUMAN  |                              | 18 | :GGGCACCTTCT   | 0.502 |
| - | 38 | 5504  |                    | NM_017539    | NP_060009    | Q8TD57 | DYH3_HUMAN  | 2 (By similarity).           | 18 | GGTCGGCGGGC    | 0.567 |
| - | 4  | 245   | p.G121D ZP2_uc0    | NM_003460    | NP_003451    | Q05996 | ZP2_HUMAN   | cellular (Potential).        | 3  | :CGAGACCAAGA   | 0.488 |
| + | 2  | 296   | M_uc010bwq.1_lr    | NM_145865    | NP_665872    | Q8N8V4 | ANS4B_HUMAN | ANK 2.                       | 2  | :TCCTGGTCAAC   | 0.517 |
| + | 28 | 3377  | A_uc002dji.2_Miss  | NM_144672    | NP_653273    | Q7RTW8 | OTOAN_HUMAN |                              | 3  | :TTTGGCTTGGT   | 0.517 |
| - | 5  | 894   |                    | NM_173806    | NP_776167    | Q8IXQ8 | PDZD9_HUMAN |                              | 1  | CTTTACCCTCTT   | 0.448 |
| + | 2  | 408   |                    | NM_000336    | NP_000327    | P51168 | SCNNB_HUMAN | lular (By similarity).       | 7  | GCTGGGAGGTC    | 0.607 |
| + | 9  | 1486  |                    | NM_000336    | NP_000327    | P51168 | SCNNB_HUMAN | lular (By similarity).       | 7  | :GCAGAGAGAGA   | 0.607 |
| - | 1  | 135   | lu.2_Missense_Mt   | NM_001083614 | NP_001077083 | Q5JPH6 | SYEM_HUMAN  |                              | 0  | :CGCAACCCCGG   | 0.721 |
| + | 3  | 654   |                    | NM_005030    | NP_005021    | P53350 | PLK1_HUMAN  | 1 loop.  Protein kinase.     | 2  | ACCAAAGTCGAA   | 0.507 |

rs138304472

|   |    |      |                      |              |              |        |             |                            |    |              |       |
|---|----|------|----------------------|--------------|--------------|--------|-------------|----------------------------|----|--------------|-------|
| + | 12 | 2505 | Site_p.G489_splic    | NM_006910    | NP_008841    | Q7Z6E9 | RBBP6_HUMAN |                            | 4  | AACTGGTGAGT  | 0.358 |
| + | 15 | 2955 | e_Mutation_p.E63!    | NM_006910    | NP_008841    | Q7Z6E9 | RBBP6_HUMAN |                            | 4  | CCAGGGAAGAA  | 0.368 |
| + | 17 | 3613 | e_Mutation_p.E82!    | NM_006910    | NP_008841    | Q7Z6E9 | RBBP6_HUMAN |                            | 4  | ATAGAGAGAACT | 0.428 |
| + | 17 | 4746 | !_Mutation_p.E120    | NM_006910    | NP_008841    | Q7Z6E9 | RBBP6_HUMAN |                            | 4  | AAATTGGAGTCA | 0.383 |
| + | 6  | 1607 | !_G245D TNRC6A_      | NM_014494    | NP_055309    | Q8NDV7 | TNR6A_HUMAN | with EIF2C1, EIF2C3 and    | 2  | ATCAGGTATGA  | 0.483 |
| + | 6  | 2686 | !_G605R TNRC6A_      | NM_014494    | NP_055309    | Q8NDV7 | TNR6A_HUMAN | ction with EIF2C1 and EIF2 | 2  | ACTGGGGAGAA  | 0.488 |
| + | 11 | 3766 | mn.2_Missense_IV     | NM_014494    | NP_055309    | Q8NDV7 | TNR6A_HUMAN | ction with EIF2C1 and EIF2 | 2  | ACTCACCAGAG  | 0.338 |
| + | 20 | 4958 | nn.2_Missense_Mi     | NM_014494    | NP_055309    | Q8NDV7 | TNR6A_HUMAN |                            | 2  | TCCTGGTGAGC  | 0.358 |
| + | 25 | 5789 | p.S1590F TNRC6       | NM_014494    | NP_055309    | Q8NDV7 | TNR6A_HUMAN | interaction with EIF2C2.   | 2  | ATTCTCCAGCC  | 0.597 |
| + | 2  | 98   |                      | NM_001169    | NP_001160    | O94778 | AQP8_HUMAN  | lasmic (Potential).        | 3  | CAGATAGCCATG | 0.572 |
| + | 5  | 740  |                      | NM_001169    | NP_001160    | O94778 | AQP8_HUMAN  | xellular (Potential).      | 3  | CGGTGGTGGCC  | 0.607 |
| - | 5  | 1251 | p.E78K ZKSCAN2       | NM_001012981 | NP_001012999 | Q63HK3 | ZKSC2_HUMAN | KRAB.                      | 4  | CTGTTCCAACCC | 0.403 |
| + | 1  | 366  |                      | NM_001145545 | NP_001139017 | Q7Z2V1 | TNT_HUMAN   |                            | 0  | GCAGCGGGTAC  | 0.642 |
| + | 6  | 1044 | .D326N JMJD5_uc      | NM_024773    | NP_079049    | Q8N371 | KDM8_HUMAN  | JmjC.                      | 3  | AGCAGGACATC  | 0.602 |
| + | 9  | 1324 | IL21R_uc002dos.      | NM_181078    | NP_851564    | Q9HBE5 | IL21R_HUMAN | lasmic (Potential).        | 4  | TTACAGTGAGG  | 0.612 |
| - | 16 | 2747 | lou.2_Missense_IV    | NM_001520    | NP_001511    | Q12789 | TF3C1_HUMAN |                            | 5  | GAGAGCCCAGC  | 0.547 |
| + | 19 | 3736 |                      | NM_015202    | NP_056017    | O60303 | K0556_HUMAN |                            | 8  | AGGAGGGCCAG  | 0.597 |
| + | 3  | 533  | Missense_Mutati      | NM_007245    | NP_009176    | Q8WWM7 | ATX2L_HUMAN |                            | 2  | ATTCCAGAATGC | 0.408 |
| + | 11 | 1529 | ation_p.A454V AT     | NM_007245    | NP_009176    | Q8WWM7 | ATX2L_HUMAN |                            | 2  | TGCTGCCCCCTG | 0.587 |
| + | 15 | 2173 | _Missense_Mutati     | NM_007245    | NP_009176    | Q8WWM7 | ATX2L_HUMAN |                            | 2  | ATCCTACAAAGC | 0.473 |
| - | 4  | 575  | tron SH2B1_uc00      | NM_003321    | NP_003312    | P49411 | EFTU_HUMAN  |                            | 1  | GAGGGGTGCAG  | 0.537 |
| + | 11 | 2361 | _uc002drl.2_Miss     | NM_001145795 | NP_001139267 | Q9NRF2 | SH2B1_HUMAN |                            | 2  | CCCACCCAGC   | 0.637 |
| - | 5  | 593  | 2_uc010byn.2_Mi      | NM_024816    | NP_079092    | Q9H5N1 | RABE2_HUMAN | Potential.                 | 3  | GACGTCTCTAG  | 0.706 |
| + | 11 | 1468 | _uc010byo.1_Mis      | NM_001770    | NP_001761    | P15391 | CD19_HUMAN  | lasmic (Potential).        | 3  | GCTGACCCAGC  | 0.572 |
| + | 3  | 885  | 0bzh.1_5'Flank MA    | NM_024516    | NP_078792    | Q9BTK6 | PA1_HUMAN   |                            | 0  | CTCCAGGAAGC  | 0.493 |
| + | 7  | 758  | _uc010vdz.1_RN       | NM_005115    | NP_005106    | Q14764 | MVP_HUMAN   | MVP 5.                     | 4  | GCAGACAGCCC  | 0.612 |
| - | 13 | 2491 | !681N SEZ6L2_uc      | NM_201575    | NP_963869    | Q6UXD5 | SE6L2_HUMAN | xtracellular (Potential).  | 2  | TGTGTCCCGGC  | 0.687 |
| + | 13 | 2107 | 1_Missense_Mutal     | NM_016151    | NP_057235    | Q9UL54 | TAOK2_HUMAN |                            | 1  | AGCCGCTGCA   | 0.627 |
| + | 10 | 1248 | e_Mutation_p.L27     | NM_002209    | NP_002200    | P20701 | ITAL_HUMAN  | Extracellular (Potential). | 10 | CTGACCTCAGC  | 0.607 |
| - | 2  | 742  | ation_p.T182I ZNF    | NM_023931    | NP_076420    | Q9BV97 | ZN747_HUMAN |                            | 0  | ACAGGGTCGGC  | 0.632 |
| - | 3  | 1214 | Mutation_p.S364L     | NM_152458    | NP_689671    | A8K8V0 | ZN785_HUMAN |                            | 1  | GCTCTGAACGC  | 0.602 |
| + | 34 | 8778 | CAP_uc002dztg.1_     | NM_006662    | NP_006653    | Q6ZRS2 | SRCAP_HUMAN | Pro-rich.                  | 4  | GTCAGGGCCAG  | 0.662 |
| + | 2  | 525  |                      | NM_152288    | NP_689501    | Q9BRQ5 | ORAI3_HUMAN | ical; (Potential).         | 0  | TGGTGGCTGTG  | 0.607 |
| + | 6  | 1389 | ae.1_Missense_M      | NM_014712    | NP_055527    | O15047 | SET1A_HUMAN |                            | 3  | CGGTGGGCACT  | 0.627 |
| + | 2  | 5481 |                      | NM_014699    | NP_055514    | O15015 | ZN646_HUMAN |                            | 2  | CAAGCGCCACT  | 0.652 |
| + | 2  | 503  | <DK_uc010cah.2_      | NM_005881    | NP_005872    | O14874 | BCKD_HUMAN  |                            | 2  | CGGCAGCGGAG  | 0.657 |
| - | 13 | 1969 | /fg.1_Missense_M     | NM_173502    | NP_775773    | Q5K4E3 | POLS2_HUMAN | aptidase S1 3.             | 1  | TTGTAGAGCCTC | 0.592 |
| + | 13 | 1527 | _p.T487I TGAX_u      | NM_000887    | NP_000878    | P20702 | ITAX_HUMAN  | Extracellular (Potential). | 4  | GCAGACCCGAG  | 0.687 |
| + | 18 | 2343 | bt.2_Missense_Mu     | NM_000887    | NP_000878    | P20702 | ITAX_HUMAN  | xellular (Potential).      | 4  | TCAGAGATACT  | 0.627 |
| - | 3  | 246  | !A10P_uc002edi.1_RNA |              |              |        |             |                            | 0  | CCAGAGCAGGG  | 0.632 |
| - | 2  | 227  |                      | NM_024745    | NP_079021    | Q8NEM2 | SHCBP_HUMAN |                            | 2  | TTTTTCCTTCTG | 0.333 |
| - | 6  | 805  | _p.E57K VPS35_u      | NM_018206    | NP_060676    | Q96QK1 | VPS35_HUMAN |                            | 0  | ACGTTCCACAT  | 0.323 |
| + | 2  | 217  | 002eeg.1_Missens     | NM_014321    | NP_055136    | Q9Y5N6 | ORC6_HUMAN  |                            | 0  | GCCTGGACCTTC | 0.532 |
| - | 6  | 717  | /gh.1_Splice_Site    | NM_030790    | NP_110417    | Q8TB96 | TIP_HUMAN   |                            | 2  | ACTCACCTGCT  | 0.328 |
| + | 7  | 744  | p.S224N PHKB_uc      | NM_000293    | NP_000284    | Q93100 | KPBB_HUMAN  |                            | 3  | TGGCAGCACAG  | 0.338 |
| - | 25 | 3837 | C12_uc002efa.1_      | NM_033226    | NP_150229    | Q96J65 | MRP9_HUMAN  | C transporter 2.           | 3  | CCATTCTAAC   | 0.418 |
| - | 6  | 3854 | gn.1_Missense_Mi     | NM_015069    | NP_055884    | Q2M1K9 | ZN423_HUMAN | :2H2-type 27.              | 4  | AACTGGGATTT  | 0.423 |

|   |    |         |                    |              |              |        |             |                            |    |              |       |
|---|----|---------|--------------------|--------------|--------------|--------|-------------|----------------------------|----|--------------|-------|
| - | 5  | 896     | vgn.1_Missense_I   | NM_015069    | NP_055884    | Q2M1K9 | ZN423_HUMAN | C2H2-type 4.               | 4  | TGCCTCGCACT  | 0.597 |
| - | 2  | 314     |                    | NM_015069    | NP_055884    | Q2M1K9 | ZN423_HUMAN |                            | 4  | FGCTCACCCCTC | 0.478 |
| + | 4  | 631     | efx.2_Missense_I   | NM_182922    | NP_891552    | Q7Z4Q2 | HEAT3_HUMAN |                            | 2  | GTATTGAGAAC  | 0.428 |
| - | 9  | 1056    | ge.1_Missense_Mt   | NM_013263    | NP_037395    | Q9NP11 | BRD7_HUMAN  |                            | 0  | GCCTGGTCAGC  | 0.413 |
| + | 3  | 301     |                    | NM_033119    | NP_149110    | Q969G9 | NKD1_HUMAN  |                            | 0  | CGTGAGCGCTG  | 0.682 |
| + | 9  | 1787    | jq.1_Missense_Mt   | NM_015247    | NP_056062    | Q9NQC7 | CYLD_HUMAN  | RAF2. Interaction with TRI | 28 | AGAGTCCACCC  | 0.507 |
| + | 12 | 2354    | jq.1_Missense_Mt   | NM_015247    | NP_056062    | Q9NQC7 | CYLD_HUMAN  |                            | 28 | TTAATCCTCTGA | 0.333 |
| - | 4  | 793     | p.A203T TOX3_uc    | NM_001080430 | NP_001073899 | O15405 | TOX3_HUMAN  |                            | 0  | AGTGGCTGATT  | 0.517 |
| + | 38 | 8358    | p.T2717A CHD9_t    | NM_025134    | NP_079410    | Q3L8U1 | CHD9_HUMAN  |                            | 7  | TCCTGACAAAG  | 0.478 |
| + | 2  | 250     | p.G136_splice IR   | NM_005853    | NP_005844    | P78411 | IRX5_HUMAN  |                            | 0  | CCGCAGGGCTC  | 0.667 |
| + | 43 | 5249    | LRC5_uc002ekq.1    | NM_032206    | NP_115582    | Q86WI3 | NLRC5_HUMAN | LRR 22.                    | 7  | CTGGGGGATC   | 0.677 |
| + | 2  | 400     | eld.2_Missense_I   | NM_133368    | NP_588609    | Q96DX4 | RSPRY_HUMAN |                            | 1  | CATGGGTAATC  | 0.537 |
| + | 5  | 536     | 0vhl.1_Splice_Site | NM_012106    | NP_036238    | Q9Y2Y0 | AR2BP_HUMAN |                            | 0  | TTGCAGGCACC  | 0.463 |
| - | 9  | 1745    |                    | NM_033212    | NP_149989    | Q96A19 | C102A_HUMAN | Potential.                 | 1  | GCTGCCTGCGG  | 0.637 |
| + | 3  | 360     | _p.E91K CCDC13     | NM_032269    | NP_115645    | Q8IY82 | CC135_HUMAN |                            | 1  | CCAAGGAGGAA  | 0.572 |
| + | 6  | 810     | p.V241M CCDC13     | NM_032269    | NP_115645    | Q8IY82 | CC135_HUMAN |                            | 1  | AAAAGGTGCTG  | 0.547 |
| - | 17 | 2536    | se_Mutation_p.G6   | NM_005550    | NP_005541    | Q9BVG8 | KIFC3_HUMAN |                            | 3  | AGGACCCAAGC  | 0.617 |
| - | 13 | 1945    | FC3_uc002emo.3_    | NM_005550    | NP_005541    | Q9BVG8 | KIFC3_HUMAN | inesin-motor.              | 3  | CCCACCTGAGG  | 0.652 |
| - | 8  | 583     | p.P173L CNGB1_     | NM_001297    | NP_001288    | Q14028 | CNGB1_HUMAN | Pro-rich.                  | 4  | TGGGGGGCTGA  | 0.632 |
| - | 5  | 435_436 | p.D124S CNGB1_     | NM_001297    | NP_001288    | Q14028 | CNGB1_HUMAN |                            | 4  | CCGGTCTCTCC  | 0.644 |
| - | 32 | 4764    | se_Mutation_p.A1   | NM_016284    | NP_057368    | A5YKK6 | CNOT1_HUMAN |                            | 6  | AGCTGCCTGAT  | 0.463 |
| - | 32 | 4737    | se_Mutation_p.P1   | NM_016284    | NP_057368    | A5YKK6 | CNOT1_HUMAN |                            | 6  | TTGTGGGGGAG  | 0.423 |
| - | 8  | 1181    | LC38A7_uc010vil.   | NM_018231    | NP_060701    | Q9NVC3 | S38A7_HUMAN |                            | 1  | AGACGGGCACA  | 0.572 |
| - | 2  | 251     | m.1_Missense_Mt    | NM_002080    | NP_002071    | P00505 | AATM_HUMAN  |                            | 2  | TGACTCCCAGA  | 0.473 |
| - | 12 | 2518    |                    | NM_001796    | NP_001787    | P55286 | CADH8_HUMAN | lasmic (Potential).        | 9  | GCCAGCCACTG  | 0.512 |
| - | 13 | 2715    | oj.2_3'UTR CDH11   | NM_001797    | NP_001788    | P55287 | CAD11_HUMAN | lasmic (Potential).        | 14 | GGTGGCCGACT  | 0.493 |
| - | 6  | 1078    | Splice_Site_p.G21  | NM_001797    | NP_001788    | P55287 | CAD11_HUMAN |                            | 14 | GATACCTGGAC  | 0.478 |
| + | 12 | 2381    |                    | NM_001795    | NP_001786    | P33151 | CADH5_HUMAN | ic (Potential). Ser-rich.  | 6  | CGAGTCCCTCA  | 0.617 |
| + | 4  | 626     | l15L CMTM1_uc0     | NM_181269    | NP_851786    | Q8IZ96 | CKLF1_HUMAN |                            | 0  | GAGGCCCGCCT  | 0.642 |
| - | 3  | 562     | qa.2_Missense_M    | NM_178818    | NP_848933    | Q8IZR5 | CKLF4_HUMAN | .. Helical; (Potential).   | 1  | TGAGTCCAGTG  | 0.408 |
| - | 4  | 402     | ense_Mutation_p.!  | NM_006141    | NP_006132    | O43237 | DC1L2_HUMAN |                            | 4  | CAGCAGAAACT  | 0.458 |
| + | 11 | 913     | erd.2_Missense_I   | NM_025187    | NP_079463    | Q9BSU1 | CP070_HUMAN |                            | 2  | AACAAGTTCCAT | 0.368 |
| - | 13 | 2393    | _p.S553N KCTD19    | NM_001100915 | NP_001094385 | Q17RG1 | KCD19_HUMAN |                            | 1  | TGATGCTGTCC  | 0.617 |
| - | 3  | 1323    | p.A163V TPPP3_     | NM_016140    | NP_057224    | Q9BW30 | TPPP3_HUMAN |                            | 1  | TGTAGCGCGCT  | 0.627 |
| + | 13 | 1786    | eti.1_Missense_M   | NM_024519    | NP_078795    | Q6ZS17 | FA65A_HUMAN | Pro-rich.                  | 3  | CAGGCCCACT   | 0.557 |
| + | 13 | 1916    | eti.1_Missense_M   | NM_024519    | NP_078795    | Q6ZS17 | FA65A_HUMAN | Pro-rich.                  | 3  | AGGCCATACC   | 0.542 |
| + | 19 | 3543    | 32_splice FAM65A   | NM_024519    | NP_078795    | Q6ZS17 | FA65A_HUMAN |                            | 3  | AGAGGGTGAGT  | 0.647 |
| + | 26 | 2732    | PR_uc010vjr.1_Mi   | NM_001013838 | NP_001013860 | Q6F5E8 | LR16C_HUMAN |                            | 1  | CACGGGGACCT  | 0.473 |
| - | 4  | 673     | tion_p.G69D IRAN   | NM_020850    | NP_065901    | Q6VN20 | RBP10_HUMAN | 330.2/SPRY.                | 1  | TGTGGCCATTC  | 0.577 |
| + | 1  | 70      | C4_uc002eut.1_3'   | NM_198443    | NP_940845    | Q496H8 | NRN1L_HUMAN |                            | 1  | ACCACCCCATG  | 0.706 |
| - | 4  | 438     |                    | NM_002801    | NP_002792    | P40306 | PSB10_HUMAN |                            | 0  | GCGGGGCTCGC  | 0.682 |
| - | 2  | 171     |                    | NM_002801    | NP_002792    | P40306 | PSB10_HUMAN |                            | 0  | CGGTTCCAATG  | 0.632 |
| - | 17 | 2315    | e_Mutation_p.T72   | NM_005072    | NP_005063    | Q9UP95 | S12A4_HUMAN |                            | 1  | CAATGGTCAGG  | 0.627 |
| - | 1  | 2238    | 2L_uc002evj.2_5'   | NM_018380    | NP_060850    | Q9NUL7 | DDX28_HUMAN | case C-terminal.           | 1  | GCTGTCCAGGC  | 0.562 |
| + | 5  | 1964    | _p.A106V NFATC     | NM_173165    | NP_775188    | Q12968 | NFAC3_HUMAN | RHD.                       | 3  | AGATAGCCTCTA | 0.383 |
| - | 3  | 562     | SRP2_uc002evq.1    | NM_024939    | NP_079215    | Q9H6T0 | ESRP2_HUMAN |                            | 1  | TGTAGGGGCC   | 0.607 |
| - | 3  | 528     | SRP2_uc002evq.1    | NM_024939    | NP_079215    | Q9H6T0 | ESRP2_HUMAN |                            | 1  | GTTCACCAGCT  | 0.607 |

rs144863089



|   |    |       |                                                  |              |              |            |                      |                               |    |                 |       |             |
|---|----|-------|--------------------------------------------------|--------------|--------------|------------|----------------------|-------------------------------|----|-----------------|-------|-------------|
| + | 12 | 1850  | p.T514I SLC7A6_u                                 | NM_001076785 | NP_001070253 | Q92536     | YLAT2_HUMAN          | lasmic (Potential).           | 1  | 3GAAAAGTACTGACT | 0.473 |             |
| - | 1  | 162   | IT7_uc002evy.1_5'                                | NM_032178    | NP_115554    | Q96CW6     | S7A6O_HUMAN          |                               | 1  | 3CCGCTCTCTCC    | 0.637 |             |
| + | 9  | 1067  | 4g.1_Missense_Mt                                 | NM_019023    | NP_061896    | Q9NVM4     | ANM7_HUMAN           |                               | 0  | 3CCATAGCAGGC    | 0.493 |             |
| + | 8  | 1079  | _p.R245Q CIRH1/                                  | NM_032830    | NP_116219    | Q969X6     | CIR1A_HUMAN          | WD 8.                         | 0  | CTCTCCGAAAAA    | 0.537 |             |
| - | 3  | 409   |                                                  | NM_144676    | NP_653277    | Q8WWW62    | TMED6_HUMAN          | il (Potential). GOLD.         | 1  | CGAAGTGATTATC   | 0.413 |             |
| + | 3  | 405   | e_Mutation_p.P10                                 | NM_030579    | NP_085056    | O43169     | CYB5B_HUMAN          |                               | 0  | CTTAAACCTGAA    | 0.323 |             |
| + | 12 | 4254  | _Mutation_p.D940                                 | NM_006599    | NP_006590    | O94916     | NFAT5_HUMAN          |                               | 0  | GTGGGGACAAT     | 0.403 |             |
| + | 4  | 237   | _p.P50S WWP2_u                                   | NM_007014    | NP_008945    | O00308     | WWP2_HUMAN           | C2.                           | 6  | GACTCCCCAGT     | 0.493 | rs150059700 |
| + | 4  | 428   | _p.T103I CLEC18                                  | NM_001136214 | NP_001129686 | A5D8T8     | CL18A_HUMAN          | SCP.                          | 0  | GCGCACCCCTGC    | 0.662 |             |
| + | 14 | 2564  | PR_uc002eyg.1_M                                  | NM_017990    | NP_060460    | Q8NCN5     | PDPR_HUMAN           |                               | 1  | GCAGTCCACTG     | 0.522 |             |
| + | 9  | 871   | se_Mutation_p.C1                                 | NM_018332    | NP_060802    | Q9NUU7     | DD19A_HUMAN          | ase ATP-binding.              | 0  | 3GAACTGCCAGA    | 0.577 |             |
| - | 3  | 2719  | eyx.2_Missense_N                                 | NM_006927    | NP_008858    | Q16842     | SIA4B_HUMAN          | ienal (Potential).            | 1  | TGGCACTCTCA     | 0.597 |             |
| + | 5  | 347   | JK_uc010cft.2_Nor                                | NM_145059    | NP_659496    | Q8N0W3     | FUK_HUMAN            |                               | 1  | AGGGTCGAGAC     | 0.622 |             |
| + | 8  | 677   | _Mutation_p.A23E                                 | NM_145059    | NP_659496    | Q8N0W3     | FUK_HUMAN            |                               | 1  | ACTGAGGCAGAC    | 0.602 |             |
| + | 3  | 341   | Y111B_uc010cfv.1                                 | NM_012426    | NP_036558    | Q15393     | SF3B3_HUMAN          |                               | 1  | GCCCAGACCCC     | 0.453 |             |
| - | 13 | 1750  | Y14_uc002ezn.2_N                                 | NM_018052    | NP_060522    | Q08AM6     | VAC14_HUMAN          |                               | 2  | GGTGGGCACCT     | 0.647 |             |
| - | 86 | 15115 | DIN_uc010cfy.2_R                                 | NM_032821    | NP_116210    | Q4G0P3     | HYDIN_HUMAN          |                               | 2  | CTCACCCAGG      | 0.557 |             |
| - | 64 | 11070 |                                                  | NM_032821    | NP_116210    | Q4G0P3     | HYDIN_HUMAN          |                               | 2  | ACCTGCCACCA     | 0.463 |             |
| + | 2  | 234   | ALB2_uc002fac.3                                  | NM_001740    | NP_001731    | P22676     | CALB2_HUMAN          |                               | 0  | AGGCTCTGGCA     | 0.448 |             |
| - | 5  | 725   | VF19_uc002fal.1_I                                | NM_006961    | NP_008892    | P17023     | ZNF19_HUMAN          | KRAB.                         | 0  | AGGCCCAAGC      | 0.483 |             |
| - | 19 | 2215  | bb.2_Missense_M                                  | NM_001128    | NP_001119    | O43747     | AP1G1_HUMAN          |                               | 2  | CATTTCTCCCA     | 0.383 |             |
| - | 15 | 1783  | G1_uc002fbb.2_Mi                                 | NM_001128    | NP_001119    | O43747     | AP1G1_HUMAN          |                               | 2  | ACTGGCCAGAT     | 0.418 |             |
| - | 4  | 554   | _p.G18S ZNF821                                   | NM_017530    | NP_060000    | O75541     | ZN821_HUMAN          |                               | 1  | ATCACCTCAC      | 0.453 |             |
| + | 5  | 420   | V KIAA0174_uc002fbl.1_Missense_Mutation_p.A33V K |              | P53990       | IST1_HUMAN | h CHMP1A and CHMP1B. |                               | 1  | ACTGGCCCAGA     | 0.542 |             |
| - | 9  | 10040 | l.2_Missense_Mut                                 | NM_006885    | NP_008816    | Q15911     | ZFH3_HUMAN           |                               | 4  | CACAGGAGGAA     | 0.562 |             |
| - | 9  | 9585  | l.2_Missense_Mut                                 | NM_006885    | NP_008816    | Q15911     | ZFH3_HUMAN           | lomeobox 4.                   | 4  | TAGTGGGTGTC     | 0.507 |             |
| - | 7  | 4505  | cl.2_Missense_Mu                                 | NM_006885    | NP_008816    | Q15911     | ZFH3_HUMAN           |                               | 4  | AGGTGCCACGC     | 0.587 |             |
| - | 11 | 1438  | Y18B_uc002fcu.2                                  | NM_001011880 | NP_001011880 | Q6UXF7     | CL18B_HUMAN          | C-type lectin.                | 0  | CCTACCCATGC     | 0.637 | rs149961754 |
| - | 6  | 1044  | G1_uc002fcw.3_M                                  | NM_001145667 | NP_001139139 | Q92896     | GSLG1_HUMAN          | 4. Extracellular (Potential). | 2  | TCTGCCCTCAC     | 0.299 |             |
| - | 4  | 439   | ln.2_Missense_Mu                                 | NM_153486    | NP_705690    | Q86WU2     | LDHD_HUMAN           | inding PCMH-type.             | 0  | CCACAGAGAAG     | 0.622 |             |
| - | 5  | 1861  | b.1_Missense_Mu                                  | NM_014567    | NP_055382    | P56945     | BCAR1_HUMAN          | Ser-rich.                     | 8  | GGCCACCAGCC     | 0.682 |             |
| - | 7  | 553   | fep.1_Missense_N                                 | NM_012091    | NP_036223    | Q9BUB4     | ADAT1_HUMAN          | l to I editase.               | 2  | CTCAAGCATCG     | 0.363 |             |
| - | 8  | 1701  | ATS18_uc002ffe.1                                 | NM_199355    | NP_955387    | Q8TE60     | ATS18_HUMAN          | ptidase M12B.                 | 18 | GCCAAGTCCTG     | 0.448 |             |
| + | 8  | 1179  | l.M239V WVVOX_u                                  | NM_016373    | NP_057457    | Q9NZC7     | WVVOX_HUMAN          | with MAPT (By similarity).    | 0  | AGTCCATGGTA     | 0.517 |             |
| - | 2  | 181   |                                                  | NM_152342    | NP_689555    | Q8N8U2     | CDYL2_HUMAN          | Chromo.                       | 1  | 3GATAAGATACT    | 0.478 |             |
| - | 4  | 1149  | _p.R297H C16orf4f                                | NM_152337    | NP_689550    | Q6P387     | CP046_HUMAN          |                               | 0  | GGCAGCGCTGC     | 0.602 |             |
| - | 45 | 7310  | e_Mutation_p.S23                                 | NM_052892    | NP_443124    | Q72442     | PK1L2_HUMAN          | . Interaction with GNAS ant   | 3  | CCCTGCTGCTT     | 0.547 |             |
| - | 15 | 2459  | fj.2_Missense_Mi                                 | NM_052892    | NP_443124    | Q72442     | PK1L2_HUMAN          | racellular (Potential).       | 3  | GTTCAGGGCCA     | 0.547 |             |
| + | 1  | 262   | ie_Mutation_p.P15                                | NM_017429    | NP_059125    | Q9HAY6     | BCDO1_HUMAN          |                               | 0  | GGAGCTGTGA      | 0.368 |             |
| + | 9  | 1530  |                                                  | NM_022041    | NP_071324    | Q9H2C0     | GAN_HUMAN            | Kelch 4.                      | 2  | TGGAGCGGTGG     | 0.542 |             |
| + | 31 | 3710  |                                                  | NM_002661    | NP_002652    | P16885     | PLCG2_HUMAN          |                               | 8  | GAGATGCGGCC     | 0.522 |             |
| - | 3  | 876   |                                                  | NM_145168    | NP_660151    | Q8WUS8     | D42E1_HUMAN          |                               | 0  | GGGCTGCCAG      | 0.572 |             |
| + | 2  | 259   | ie_Mutation_p.D94                                | NM_001257    | NP_001248    | P55290     | CAD13_HUMAN          |                               | 1  | TTGAGGACCAG     | 0.398 |             |
| - | 4  | 807   | nv.1_Missense_Mi                                 | NM_031463    | NP_113651    | Q3SXM5     | HSDL1_HUMAN          |                               | 0  | TGCAGCAGGAG     | 0.463 |             |
| + | 8  | 1251  | rw.1_Missense_N                                  | NM_178452    | NP_848547    | Q8NEP3     | DAAF1_HUMAN          |                               | 0  | GCCCGCCAGTG     | 0.527 |             |
| + | 9  | 1725  | rw.1_Missense_N                                  | NM_178452    | NP_848547    | Q8NEP3     | DAAF1_HUMAN          |                               | 0  | CCAGGCTGTGG     | 0.478 |             |
| + | 3  | 506   | sense_Mutation_p.                                | NM_031476    | NP_113664    | Q9H0B8     | CRLD2_HUMAN          |                               | 0  | GCGTGGGCCAG     | 0.612 |             |

|   |    |      |                                                |              |              |        |             |       |              |       |                            |
|---|----|------|------------------------------------------------|--------------|--------------|--------|-------------|-------|--------------|-------|----------------------------|
| - | 8  | 1209 | se_Mutation_p.P3                               | NM_017740    | NP_060210    | Q9NXF8 | ZDHC7_HUMAN | 1     | AAAGGGATTCA  | 0.582 |                            |
| + | 7  | 821  | 8_uc010chp.2_Int                               | NM_002163    | NP_002154    | Q02556 | IRF8_HUMAN  | 3     | GCCGGCCGACG  | 0.731 |                            |
| - | 7  | 643  | rop.1_Missense_Iv                              | NM_001159377 | NP_001152849 | Q2M296 | MTHSD_HUMAN | 0     | FGATGTCGTGCT | 0.582 |                            |
| - | 3  | 528  | rt_Site FBXO31_u                               | NM_024735    | NP_079011    | Q5XUX0 | FBX31_HUMAN | 1     | CACCACGTTCA  | 0.552 |                            |
| - | 10 | 1184 | CHC14_uc002fkb.                                | NM_015144    | NP_055959    | Q8WYQ9 | ZCH14_HUMAN | 2     | CGGGCCCCGACG | 0.662 |                            |
| - | 7  | 723  | e_Mutation_p.E21                               | NM_000512    | NP_000503    | P34059 | GALNS_HUMAN | 2     | GGCTTCTATG   | 0.637 |                            |
| - | 9  | 1249 | cjf.2_Intron PRDM                              | NM_001098173 | NP_001091643 | Q9NQW5 | PRDM7_HUMAN | 1     | CCCTCTCCCTGC | 0.458 |                            |
| - | 9  | 1179 | cjf.2_Intron PRDM                              | NM_001098173 | NP_001091643 | Q9NQW5 | PRDM7_HUMAN | 1     | CCCCATACCAG  | 0.522 |                            |
| + | 4  | 956  |                                                | NM_018146    | NP_060616    | Q9HC36 | RMTL1_HUMAN | 1     | CTCGGGTCTAT  | 0.517 |                            |
| + | 4  | 965  |                                                | NM_018146    | NP_060616    | Q9HC36 | RMTL1_HUMAN | 1     | FATGTGGCTGAC | 0.512 | rs139632363                |
| - | 11 | 1642 | jr.2_Missense_Mu                               | NM_016532    | NP_057616    | Q9BT40 | INP5K_HUMAN | 0     | GCAGACTGTTG  | 0.383 | for ruffle localization.   |
| - | 6  | 1008 | 5K_uc010cjr.2_M                                | NM_016532    | NP_057616    | Q9BT40 | INP5K_HUMAN | 0     | GGATTCCCGAAC | 0.542 | lytic (Potential).         |
| - | 6  | 689  | _p.D29N PITPNA                                 | NM_006224    | NP_006215    | Q00169 | PIPNA_HUMAN | 1     | TTCGATCTGCAA | 0.488 |                            |
| - | 38 | 6265 |                                                | NM_006445    | NP_006436    | Q6P2Q9 | PRP8_HUMAN  | 6     | ATCGCCATGCTT | 0.567 |                            |
| + | 1  | 443  |                                                | NM_012352    | NP_036484    | Q9Y585 | OR1A2_HUMAN | 2     | TGGGTCTTGGG  | 0.493 | Name=4; (Potential).       |
| - | 1  | 958  |                                                | NM_003554    | NP_003545    | P47887 | OR1E2_HUMAN | 1     | GAAGGGATTTT  | 0.378 | lasmic (Potential).        |
| - | 9  | 2041 | _p.T503 TRPV1                                  | NM_080706    | NP_542437    | Q8NER1 | TRPV1_HUMAN | 1     | ACAGGGTCTTC  | 0.498 | lasmic (Potential).        |
| - | 20 | 2567 |                                                | NM_002208    | NP_002199    | P38570 | ITAE_HUMAN  | 4     | TCTTGACAGGCC | 0.547 | ellular (Potential).       |
| - | 18 | 2885 | ck.1_Missense_ML                               | NM_015113    | NP_055928    | O43149 | ZZEF1_HUMAN | 4     | TCGAGCAGCAA  | 0.547 |                            |
| - | 20 | 2954 | 3P1A_uc002fya.3                                | NM_014520    | NP_055335    | Q9BQG0 | MBB1A_HUMAN | 2     | GCTCACCTGCG  | 0.652 |                            |
| - | 15 | 2035 | _Mutation_p.L658                               | NM_014520    | NP_055335    | Q9BQG0 | MBB1A_HUMAN | 2     | CCAACAGGGCC  | 0.672 |                            |
| + | 2  | 497  | NL2_uc002fye.2_5                               | NM_001114974 | NP_001108446 | Q2TAL5 | SMTL2_HUMAN | 0     | AGTCGGAGATG  | 0.592 |                            |
| - | 3  | 528  | O1_uc010vsi.1_3                                | NM_182566    | NP_872372    | Q7Z5L0 | VMO1_HUMAN  | 1     | CCTCGCCGCTT  | 0.647 |                            |
| - | 2  | 124  | rf107_uc002fzl.3_                              | NM_000080    | NP_000071    | Q04844 | ACHE_HUMAN  | 0     | GGCTTCTCTGG  | 0.552 | ellular (Potential).       |
| - | 2  | 347  | Flank RNF167_uc                                | NM_003562    | NP_003553    | Q02978 | M2OM_HUMAN  | 0     | ATGCCCTCAG   | 0.572 | Solcar 1.                  |
| + | 11 | 1230 |                                                | NM_006612    | NP_006603    | O43896 | KIF1C_HUMAN | 2     | ACAGGACTCTT  | 0.512 |                            |
| + | 20 | 2190 |                                                | NM_006612    | NP_006603    | O43896 | KIF1C_HUMAN | 2     | AGCCAGTCGAC  | 0.612 |                            |
| - | 5  | 1661 | _p.P321S ZNF232                                | NM_014519    | NP_055334    | Q9UNY5 | ZN232_HUMAN | 2     | TATAGGGTTTCT | 0.413 |                            |
| - | 2  | 423  | le.1_Missense_M                                | NM_002532    | NP_002523    | Q99567 | NUP88_HUMAN | 1     | TAATACCATAAG | 0.333 |                            |
| - | 15 | 2709 | clo.2_Missense_Iv                              | NM_014804    | NP_055619    | Q2KHM9 | K0753_HUMAN | 0     | CATCTCTCCAT  | 0.552 |                            |
| - | 3  | 1032 | 2_5'UTR KIAA075                                | NM_014804    | NP_055619    | Q2KHM9 | K0753_HUMAN | 0     | FCAGTTCTTTCT | 0.428 |                            |
| + | 9  | 1255 | uc002gdy.1_Intron                              | NM_000697    | NP_000688    | P18054 | LOX12_HUMAN | 1     | CAACACCCGGG  | 0.562 | ipoxygenase.               |
| + | 1  | 382  |                                                | NM_201566    | NP_963860    | Q7RTY0 | MOT13_HUMAN | 2     | GTCGGCGCTTG  | 0.647 | ical; (Potential).         |
| - | 4  | 1365 | o.1_Missense_Mu                                | NM_001365    | NP_001356    | P78352 | DLG4_HUMAN  | 2     | AGCGGTATTTCT | 0.692 |                            |
| - | 5  | 673  |                                                | NM_015982    | NP_057066    | Q9Y2T7 | YBOX2_HUMAN | 0     | GCCAGGTCCTG  | 0.672 | Pro-rich.                  |
| - | 7  | 1373 | Mutation_p.G45                                 | NM_032442    | NP_115818    | Q96JN8 | NEUL4_HUMAN | 2     | CCTTACCCTGAT | 0.552 | NHR 2.                     |
| + | 3  | 316  | _p.P97S TMEM95                                 | NM_198154    | NP_937797    | Q3KNT9 | TMM95_HUMAN | 0     | AGCTCCCTGAG  | 0.557 | ellular (Potential).       |
| + | 2  | 548  |                                                | NM_020795    | NP_065846    | Q8NFZ4 | NLGN2_HUMAN | 1     | AAAAACGTGACC | 0.383 | ellular (Potential).       |
| + | 3  | 503  | 11_uc010vtw.1_In                               | NM_175734    | NP_783861    | Q0P670 | CQ074_HUMAN | 0     | AGCAGCGGCCG  | 0.393 |                            |
| + | 3  | 1258 | 11_uc010vtw.1_In                               | NM_175734    | NP_783861    | Q0P670 | CQ074_HUMAN | 0     | GCCTGGCGTCC  | 0.677 |                            |
| + | 4  | 321  | e_Mutation_p.E22                               | NM_000747    | NP_000738    | P11230 | ACHB_HUMAN  | 2     | CTGCGGAGCAC  | 0.622 | ellular (Potential).       |
| - | 3  | 948  | hd.3_Missense_Mi                               | NM_001128833 | NP_001122305 | Q9P1Z0 | ZBTB4_HUMAN | 4     | GGAGGGGCCGC  | 0.697 |                            |
| - | 8  | 993  | n_p.R135G TP53                                 | NM_001126112 | NP_001119584 | P04637 | P53_HUMAN   | 22245 | GTTCCGTCCCA  | 0.522 | K1 (By simil..GRNS(2))p.G; |
| + | 2  | 647  |                                                | NM_001406    | NP_001397    | Q15768 | EFNB3_HUMAN | 1     | ACCTGGTAGGG  | 0.622 | ellular (Potential).       |
| - | 3  | 439  | 62M CYB5D1_uc010cnn.1_5'Flank CYB5D1_uc002gjb. |              |              | Q9BRA0 | LSMD1_HUMAN | 1     | CTGCACCTCAA  | 0.562 |                            |
| + | 9  | 1994 |                                                | NM_000180    | NP_000171    | Q02846 | GUC2D_HUMAN | 1     | GGACTGGATGTT | 0.617 | ellular (Potential).       |
| + | 9  | 1138 | S_uc010vuv.1_5'                                | NM_012393    | NP_036525    | O15067 | PUR4_HUMAN  | 5     | ATTCGAGATGTC | 0.587 | TP (Potential).            |

|   |    |       |                   |               |              |              |        |             |                              |    |               |       |
|---|----|-------|-------------------|---------------|--------------|--------------|--------|-------------|------------------------------|----|---------------|-------|
| - | 31 | 4300  | rs148878294       | E1433K MYH10_ | NM_005964    | NP_005955    | P35580 | MYH10_HUMAN | Potential.                   | 2  | GGCCTCCGCGT   | 0.537 |
| - | 1  | 489   |                   |               | NM_152599    | NP_689812    | Q8IWD5 | MFS6L_HUMAN |                              | 1  | TCAGGCCCGCTG  | 0.632 |
| + | 5  | 607   |                   |               | NM_004246    | NP_004237    | O95838 | GLP2R_HUMAN | lasmic (Potential).          | 3  | TTGTTTCTTCGGT | 0.368 |
| - | 30 | 4091  |                   |               | NM_003802    | NP_003793    | Q9UKX3 | MYH13_HUMAN | Potential.                   | 6  | CGTGCGCCATG   | 0.527 |
| - | 8  | 786   | uc002gml.1_intron |               | NM_002472    | NP_002463    | P13535 | MYH8_HUMAN  | rosin head-like.             | 11 | GGCCTCCAGTAC  | 0.507 |
| - | 22 | 2703  | uc002gml.1_intron |               | NM_005963    | NP_005954    | P12882 | MYH1_HUMAN  | Potential.                   | 21 | CCTCGGTCTTAC  | 0.423 |
| - | 20 | 2346  | uc002gml.1_intron |               | NM_005963    | NP_005954    | P12882 | MYH1_HUMAN  | rosin head-like.             | 21 | TGGACCCCAGG   | 0.403 |
| - | 34 | 5202  |                   |               | NM_002470    | NP_002461    | P11055 | MYH3_HUMAN  | Potential.                   | 7  | GGAGTCCAGGA   | 0.647 |
| + | 36 | 7152  | rs148878294       | rs148878294   | NM_001372    | NP_001363    | Q9NYC9 | DYH9_HUMAN  |                              | 20 | ACATCCCTGCA   | 0.483 |
| + | 52 | 10129 | rs148878294       | rs148878294   | NM_001372    | NP_001363    | Q9NYC9 | DYH9_HUMAN  |                              | 20 | TGGAGGACTCG   | 0.498 |
| - | 4  | 969   |                   |               | NM_144680    | NP_653281    | P17022 | ZNF18_HUMAN | SCAN box.                    | 1  | GGGGTCCCCCT   | 0.522 |
| + | 4  | 755   |                   |               | NM_016113    | NP_057197    | Q9Y5S1 | TRPV2_HUMAN | interaction with SLC50A1     | 1  | AGGACGGAGTC   | 0.572 |
| - | 6  | 1012  |                   |               | NM_020787    | NP_065838    | Q9P2J8 | ZN624_HUMAN | 2H2-type 2.                  | 2  | GTTTTCCACAT   | 0.353 |
| - | 14 | 2207  |                   |               | NM_144997    | NP_659434    | Q8NFG4 | FLCN_HUMAN  |                              | 3  | GGACCGTGGAC   | 0.597 |
| - | 1  | 376   |                   |               | NM_016084    | NP_057168    | Q9Y272 | RASD1_HUMAN | region (By similarity).      | 0  | TGGTAGGCGTG   | 0.627 |
| - | 5  | 1054  |                   |               | NM_004176    | NP_004167    | P36956 | SRBP1_HUMAN | Interaction with LMNA (By    | 1  | TTCCGCCACTC   | 0.632 |
| - | 6  | 693   |                   |               | NM_001082968 | NP_001076437 | Q6ZVM7 | TM1L2_HUMAN |                              | 0  | ACCTGGGCATG   | 0.597 |
| - | 7  | 634   |                   |               | NM_002018    | NP_002009    | Q13045 | FLII_HUMAN  | RRFIP1 and LRRFIP2,ILRF      | 2  | CGCTGGGAGCT   | 0.672 |
| + | 2  | 288   |                   |               | NM_139162    | NP_631901    | Q96C03 | SMCR7_HUMAN | ical; (Potential).           | 0  | CCTGGCCAATG   | 0.662 |
| + | 3  | 1226  |                   |               | NM_021012    | NP_066292    | Q14500 | IRK12_HUMAN | me=M2; (By similarity).      | 4  | GACTCCTTCA    | 0.637 |
| + | 6  | 1156  |                   |               | NM_016231    | NP_057315    | Q9UBE8 | NLK_HUMAN   | rotein kinase.               | 3  | GGCAGCCGTC    | 0.443 |
| - | 2  | 208   |                   |               | NM_001082968 | NP_001076437 | Q8IY31 | IFT20_HUMAN |                              | 0  | GGTAACCTCTG   | 0.502 |
| - | 2  | 429   |                   |               | NM_033198    | NP_149975    | Q96S52 | PIGS_HUMAN  | ical; (Potential).           | 4  | GGCGGCGCGC    | 0.677 |
| - | 24 | 3670  |                   |               | NM_006461    | NP_006452    | Q96R06 | SPAG5_HUMAN |                              | 1  | TCTTAGCTCAGA  | 0.483 |
| - | 16 | 3038  |                   |               | NM_014680    | NP_055495    | Q14667 | K0100_HUMAN |                              | 4  | GGAAGGAGGCA   | 0.547 |
| + | 7  | 1405  |                   |               | NM_004295    | NP_004286    | Q9BUZ4 | TRAF4_HUMAN | MATH.                        | 2  | TCTCTGGGCTTT  | 0.547 |
| - | 8  | 1870  |                   |               | NM_178860    | NP_849191    | Q53EL9 | SEZ6_HUMAN  | ar (Potential), Sushi 2.     | 2  | GGTCGCAGCTG   | 0.592 |
| - | 2  | 2048  |                   |               | NM_020772    | NP_065823    | Q7Z417 | NUFP2_HUMAN |                              | 4  | GAACCCAGCT    | 0.388 |
| - | 19 | 2270  |                   |               | NM_014030    | NP_054749    | Q9Y2X7 | GIT1_HUMAN  | N and TGFB111 (By similar    | 0  | GGAGGCCATCT   | 0.612 |
| - | 9  | 1046  |                   |               | NM_014030    | NP_054749    | Q9Y2X7 | GIT1_HUMAN  | milarity), PTK2-binding (By  | 0  | GAGTTCTCAA    | 0.592 |
| + | 19 | 3656  |                   |               | NM_001304    | NP_001295    | O75976 | CBPD_HUMAN  | ntial), Carboxypeptidase-lik | 2  | CAAGGGAGTTC   | 0.353 |
| - | 2  | 259   |                   |               | NM_018405    | NP_060875    | Q9NQ92 | COPR5_HUMAN |                              | 0  | CATAGCCTTCT   | 0.488 |
| - | 1  | 140   |                   |               | NM_002981    | NP_002972    | P22362 | CCL1_HUMAN  |                              | 0  | TCTTGCTGTCC   | 0.572 |
| + | 3  | 773   |                   |               | NM_017559    | NP_060029    | Q8TC99 | FNDC8_HUMAN | onectin type-III.            | 2  | AAGAATCGTCCA  | 0.532 |
| - | 5  | 516   |                   |               | NM_018096    | NP_060566    | Q9NVX2 | NLE1_HUMAN  | WD 2.                        | 4  | ACCAGGATATA   | 0.408 |
| + | 20 | 2774  |                   |               | NM_173167    | NP_775259    | Q8IWX7 | UN45B_HUMAN |                              | 6  | TGCTGGAGATC   | 0.552 |
| - | 2  | 1290  |                   |               | NM_000286    | NP_000277    | O00623 | PEX12_HUMAN | nal matrix (Potential).      | 0  | TCCTGGCTGGT   | 0.458 |
| - | 2  | 1241  |                   |               | NM_000286    | NP_000277    | O00623 | PEX12_HUMAN | nal matrix (Potential).      | 0  | GAGCTTGATATC  | 0.468 |
| + | 3  | 588   |                   |               | NM_033315    | NP_201572    | Q96S79 | RSLAB_HUMAN | all GTPase-like.             | 4  | GAGTGGGCAGA   | 0.602 |
| - | 42 | 5376  |                   |               | NM_198836    | NP_942133    | Q13085 | ACACA_HUMAN | oxyltransferase.             | 2  | GAATTTCTTCTG  | 0.448 |
| + | 3  | 354   |                   |               | NM_173625    | NP_775896    | Q8N4C9 | CQ078_HUMAN |                              | 0  | TTGCTGCTCCCC  | 0.458 |
| - | 5  | 1279  |                   |               | NM_001004334 | NP_001004334 | Q6PRD1 | GP179_HUMAN | Name=2; (Potential).         | 3  | AGTTTCCAGCA   | 0.552 |
| - | 3  | 495   |                   |               | NM_001008777 | NP_001008777 | Q5MNV8 | FBX47_HUMAN |                              | 0  | CTCAAGGTTAT   | 0.398 |
| + | 1  | 93    |                   |               | NM_003673    | NP_003664    | O15273 | TELT_HUMAN  |                              | 0  | GGAAGGATCTG   | 0.617 |
| - | 6  | 663   |                   |               | NM_012481    | NP_036613    | Q9UKT9 | IKZF3_HUMAN |                              | 6  | TAGGTTTCTC    | 0.502 |
| - | 2  | 150   |                   |               | NM_139280    | NP_644809    | Q8N138 | ORML3_HUMAN | lasmic (Potential).          | 0  | TGTGCCACAT    | 0.612 |
| - | 16 | 1824  |                   |               | NM_014815    | NP_055630    | O75448 | MED24_HUMAN |                              | 1  | TCTGGGCCACA   | 0.647 |

rs148878294

rs61752106

|   |    |      |                    |              |              |        |             |                               |     |                  |       |
|---|----|------|--------------------|--------------|--------------|--------|-------------|-------------------------------|-----|------------------|-------|
| - | 1  | 169  | 39_uc010wfm.1_5    | NM_213656    | NP_998821    | Q6A163 | K1C39_HUMAN | Head.                         | 0   | CTGGTTGACAGT     | 0.498 |
| - | 1  | 208  |                    | NM_031957    | NP_114163    | Q9BYS1 | KRA15_HUMAN | -C-[QEPEVRC]-[TPIVLE]-[E      | 0   | AGGTCCCCTG       | 0.632 |
| + | 1  | 409  |                    | NM_001146041 | NP_001139513 | Q9BYQ8 | KRA49_HUMAN | [RQVHIEK]-[SPTR]-[VSTC        | 0   | gctgcaagccccagtc | 0.149 |
| - | 1  | 163  |                    | NM_033188    | NP_149445    | Q9BYR2 | KRA45_HUMAN | [GRQVCHIEK]-[SPTR]-[V         | 0   | ACTGGGGCTTG      | 0.448 |
| - | 1  | 491  |                    | NM_033187    | NP_149443    | Q9BYR4 | KRA43_HUMAN | C-C-[GIKRVH]-[SPT]-[S         | 0   | CACAGCAGCTG      | 0.627 |
| - | 7  | 1186 | 31_uc010cxn.2_3'   | NM_002277    | NP_002268    | Q15323 | K1H1_HUMAN  | Tail.                         | 0   | TTGCTGCACGCG     | 0.567 |
| - | 1  | 159  | uc002hwo.1_RNA     | NM_003770    | NP_003761    | O76014 | KRT37_HUMAN | Head.                         | 1   | ATTGGCCTCTG      | 0.622 |
| - | 7  | 1362 |                    | NM_002278    | NP_002269    | Q14532 | K1H2_HUMAN  | Tail.                         | 0   | CAGTGCCTGGC      | 0.637 |
| - | 6  | 1148 |                    | NM_002278    | NP_002269    | Q14532 | K1H2_HUMAN  | Coil 2. Rod.                  | 0   | CTGGGCTCAA       | 0.627 |
| - | 6  | 1430 | ixu.2_Splice_Site_ | NM_006455    | NP_006446    | Q92791 | SC65_HUMAN  |                               | 0   | CACTCACCTCAT     | 0.607 |
| - | 5  | 663  | IX58_uc010wgf.1_   | NM_024119    | NP_077024    | Q96C10 | DHX58_HUMAN | ase ATP-binding.              | 0   | FACTGGCTCATG     | 0.602 |
| - | 1  | 329  | B9_uc002hyy.2_5'   | NM_021078    | NP_066564    | Q92830 | KAT2A_HUMAN |                               | 2   | CTTCTCTGAC       | 0.726 |
| - | 6  | 801  | cx2.2_Missense_IV  | NM_201434    | NP_958842    | P51148 | RAB5C_HUMAN |                               | 2   | ATGTCTCCATGA     | 0.527 |
| - | 10 | 1954 |                    | NM_012285    | NP_036417    | Q9UQ05 | KCNH4_HUMAN | asmic (Potential).            | 1   | GTCAGCTCTCA      | 0.572 |
| - | 1  | 150  | 1_5'UTR FAM134C    | NM_178126    | NP_835227    | Q86VR2 | F134C_HUMAN |                               | 2   | TCGACCCCGAA      | 0.692 |
| + | 10 | 1373 | _p.V220I TUBG2_    | NM_016437    | NP_057521    | Q9NRH3 | TBG2_HUMAN  |                               | 1   | ACCGGCTCAGC      | 0.597 |
| + | 18 | 2992 | JAP1_uc010wgs.1    | NM_003632    | NP_003623    | P78357 | CNTP1_HUMAN | 3. Extracellular (Potential). | 8   | GACGCCCTTTT      | 0.468 |
| + | 15 | 2300 | p.P652S DHX8_uc    | NM_004941    | NP_004932    | Q14562 | DHX8_HUMAN  |                               | 4   | ACATATCCAGTG     | 0.443 |
| - | 13 | 1724 | o.1_Missense_Mu    | NM_005374    | NP_005365    | Q14168 | MPP2_HUMAN  | ylate kinase-like.            | 0   | CGTAGCCCCGC      | 0.632 |
| + | 1  | 862  |                    | NM_001466    | NP_001457    | Q14332 | FZD2_HUMAN  | ellular (Potential).          | 3   | GTTTCGCGCGC      | 0.597 |
| - | 1  | 271  | se_Mutation_p.A71  | NM_002055    | NP_002046    | P14136 | GFAP_HUMAN  | Head.                         | 2   | CTCTGCCCGCT      | 0.607 |
| + | 6  | 1381 | PT_uc002ijx.3_Int  | NM_016835    | NP_058519    | P10636 | TAU_HUMAN   |                               | 1   | AGAGCCCTCTG      | 0.632 |
| + | 10 | 1968 | IAPT_uc002ijt.3_M  | NM_016835    | NP_058519    | P10636 | TAU_HUMAN   |                               | 1   | CTCCACCCAAG      | 0.672 |
| + | 16 | 1932 | kf.1_Splice_Site_f | NM_006178    | NP_006169    | P46459 | NSF_HUMAN   |                               | 1   | GCTTGGTGAGT      | 0.343 |
| + | 12 | 1711 | ill.1_Missense_Mt  | NM_152347    | NP_689560    | Q8IY85 | CQ057_HUMAN |                               | 3   | AGAAGCCAGCT      | 0.383 |
| + | 5  | 875  | p.G35E KPNB1_      | NM_002265    | NP_002256    | Q14974 | IMB1_HUMAN  | HEAT 2.                       | 3   | CCAGGGGATGAC     | 0.388 |
| + | 21 | 2818 | p.A683T KPNB1_     | NM_002265    | NP_002256    | Q14974 | IMB1_HUMAN  |                               | 3   | GTACAGCATTTG     | 0.428 |
| + | 3  | 975  |                    | NM_013351    | NP_037483    | Q9UL17 | TBX21_HUMAN | T-box.                        | 0   | TGTGACCCAGG      | 0.587 |
| - | 12 | 560  |                    | NM_016429    | NP_057513    | Q9P299 | COPZ2_HUMAN |                               | 0   | ATCTGCCTGTA      | 0.597 |
| - | 2  | 1081 |                    | NM_002145    | NP_002136    | P14652 | HXB2_HUMAN  |                               | 0   | AGAGGCCTCCGC     | 0.592 |
| - | 2  | 1506 | p.S369F HOXB3      | NM_002146    | NP_002137    | P14651 | HXB3_HUMAN  |                               | 0   | AGAGGGAGGGG      | 0.716 |
| + | 10 | 1047 | p.A251V CALCO      | NM_005831    | NP_005822    | Q13137 | CACO2_HUMAN | Potential.                    | 1   | TAATGCTCTGCA     | 0.383 |
| + | 8  | 1167 | dbj.2_Missense_IV  | NM_006546    | NP_006537    | Q9NZI8 | IF2B1_HUMAN | 4 and binding to TAU mRN      | 1   | AGGTTCCCTGA      | 0.493 |
| - | 2  | 871  | se_Mutation_p.G13  | NM_001145365 | NP_001138837 | Q9Y2D9 | ZN652_HUMAN | Glu-rich.                     | 1   | AGACACCCCTT      | 0.428 |
| - | 4  | 482  |                    | NM_000088    | NP_000079    | P02452 | CO1A1_HUMAN |                               | 382 | CTCGGGGGCCA      | 0.687 |
| + | 2  | 243  | se_Mutation_p.P63  | NM_018346    | NP_060816    | Q9HA92 | RSAD1_HUMAN |                               | 0   | ACATCCCTCGCC     | 0.632 |
| + | 18 | 2852 | BPAP_uc002iqz.2    | NM_032133    | NP_115509    | Q8TBZ2 | MYBPP_HUMAN |                               | 6   | CCGTCCCAACA      | 0.532 |
| + | 9  | 1904 | n_p.A518V EPN3     | NM_017957    | NP_060427    | Q9H201 | EPN3_HUMAN  |                               | 1   | AGAGGCCCGAG      | 0.607 |
| + | 20 | 2775 |                    | NM_003786    | NP_003777    | O15438 | MRP3_HUMAN  | smic (By similarity).         | 4   | TATGTGGTCCAG     | 0.562 |
| - | 3  | 676  |                    | NM_052855    | NP_443087    | Q6AI12 | ANR40_HUMAN |                               | 0   | CTGGGCTGAAT      | 0.582 |
| + | 2  | 2076 | dbu.2_Missense_I   | NM_175575    | NP_783165    | Q8TEU8 | WFKN2_HUMAN | NTR.                          | 3   | TCGCAGCGACT      | 0.627 |
| - | 5  | 817  | in_p.S38L SPAG9    | NM_001130528 | NP_001124000 | O60271 | JIP4_HUMAN  |                               | 5   | CTAATGATATAG     | 0.393 |
| + | 2  | 255  | _Missense_Mutati   | NM_002512    | NP_002503    | P22392 | NDKB_HUMAN  |                               | 0   | AGAGATGGTG       | 0.308 |
| + | 13 | 1306 | lcd.1_Missense_IV  | NM_178509    | NP_848604    | Q6ZJW1 | STXB4_HUMAN | Potential.                    | 1   | GAAATGAAATG      | 0.433 |
| + | 5  | 603  | R11_uc002ixg.1_F   | NM_018304    | NP_060774    | Q96HE9 | PRR11_HUMAN | Pro-rich.                     | 2   | TCCTCCACAC       | 0.423 |
| - | 2  | 586  | RH2_uc002ixs.2_F   | NM_016077    | NP_057161    | Q9Y3E5 | PTH2_HUMAN  |                               | 0   | GAGAGCTGGT       | 0.448 |
| + | 3  | 383  | p.L41F RPS6KB      | NM_003161    | NP_003152    | P23443 | KS6B1_HUMAN | rotein kinase.                | 1   | AGCTACTCGG       | 0.403 |

rs139528234

|   |    |      |                   |              |              |        |             |                           |    |              |       |
|---|----|------|-------------------|--------------|--------------|--------|-------------|---------------------------|----|--------------|-------|
| + | 11 | 1119 | p.G286D RPS6KB    | NM_003161    | NP_003152    | P23443 | KS6B1_HUMAN | rotein kinase.            | 1  | AGCTGGTCTGTG | 0.393 |
| + | 13 | 1305 | p.S348N RPS6KB    | NM_003161    | NP_003152    | P23443 | KS6B1_HUMAN | kinase C-terminal.        | 1  | TCTCAGTGAAAC | 0.393 |
| - | 2  | 578  | T1_uc010wop.1_N   | NM_016125    | NP_057209    | Q5M7Z0 | RNFT1_HUMAN | ical; (Potential).        | 0  | TTGACGCTCAGA | 0.358 |
| + | 6  | 1774 | I1D_uc010ddm.1_   | NM_003620    | NP_003611    | O15297 | PPM1D_HUMAN |                           | 1  | CAACTCCTGGC  | 0.393 |
| + | 24 | 2601 | s3_uc002iyz.3_Mis | NM_001099432 | NP_001092902 | Q9H6U6 | BCAS3_HUMAN |                           | 5  | CGTGACCCTGC  | 0.642 |
| + | 1  | 407  |                   | NM_203425    | NP_982249    | Q86X59 | CQ082_HUMAN |                           | 0  | CGCTCCCTGCT  | 0.736 |
| - | 6  | 849  | m.2_Missense_Mu   | NM_020748    | NP_065799    | Q9H0H0 | INT2_HUMAN  |                           | 3  | TGAGAAGGATTC | 0.443 |
| + | 9  | 1082 | izw.2_Missense_N  | NM_181725    | NP_859076    | Q96IZ6 | MTL2A_HUMAN |                           | 0  | CCGAGGAAAGC  | 0.512 |
| + | 7  | 996  | AF7_uc010wop.1_   | NM_005828    | NP_005819    | P61962 | DCAF7_HUMAN |                           | 1  | TGTCGCCAGGT  | 0.473 |
| - | 9  | 1034 |                   | NM_001433    | NP_001424    | O75460 | ERN1_HUMAN  |                           | 9  | ACTTACCACGA  | 0.483 |
| - | 4  | 720  | .1_5'UTR SMURF;   | NM_022739    | NP_073576    | Q9HAU4 | SMUF2_HUMAN |                           | 4  | CACAACCAGTG  | 0.284 |
| - | 7  | 1979 | I1P_uc002jev.3_St | NR_024386    |              |        |             |                           | 0  | ACTTACCGGGC  | 0.557 |
| - | 11 | 5113 | _p.L505F LRRC37.  | NM_199340    | NP_955372    | O60309 | L37A3_HUMAN | ellular (Potential).      | 0  | ACTGAGAAGCT  | 0.517 |
| - | 2  | 494  | zjfh.2_Missense_N | NM_004655    | NP_004646    | Q9Y2T1 | AXIN2_HUMAN |                           | 2  | AGATGCCCGCC  | 0.607 |
| + | 4  | 991  |                   | NM_014405    | NP_055220    | Q9UBN1 | CCG4_HUMAN  | lasmic (Potential).       | 1  | CGACCCCTGTG  | 0.582 |
| + | 1  | 147  |                   | NM_000727    | NP_000718    | Q06432 | CCG1_HUMAN  | ical; (Potential).        | 0  | TGACAGCCGTG  | 0.632 |
| + | 9  | 1131 | NC1_uc002jgb.2_5  | NM_012417    | NP_036549    | Q9UKF7 | PITC1_HUMAN |                           | 1  | GCATCCCCCTG  | 0.537 |
| + | 12 | 1295 | _p.T249I NOL11_   | NM_015462    | NP_056277    | Q9H8H0 | NOL11_HUMAN |                           | 0  | TCATACTGTCAT | 0.413 |
| + | 11 | 5145 | s.2_Missense_Mut  | NM_182641    | NP_872579    | Q12830 | BPTF_HUMAN  |                           | 4  | TTCAAGACCAA  | 0.423 |
| + | 9  | 1787 | ib.1_Missense_Mu  | NM_014960    | NP_055775    | Q96EG1 | ARSG_HUMAN  |                           | 1  | GAAAGTCCAGCC | 0.562 |
| - | 7  | 747  | io.1_Missense_Mu  | NM_017983    | NP_060453    | Q5MNZ9 | WIPI1_HUMAN | WD 1.                     | 0  | TTTGCCCATCAC | 0.498 |
| + | 9  | 1037 | o.G286E PRKAR1,   | NM_212471    | NP_997636    | P10644 | KAP0_HUMAN  | cAMP 2.                   | 12 | GCAGGGAGAAC  | 0.388 |
| - | 22 | 3067 | ez.2_Missense_Mu  | NM_080283    | NP_525022    | Q8IUA7 | ABCA9_HUMAN |                           | 6  | TATTACATGCTA | 0.348 |
| - | 39 | 5393 | rqs.1_Missense_M  | NM_080282    | NP_525021    | Q8WWZ4 | ABCAA_HUMAN |                           | 4  | CCTGAGAGAGG  | 0.433 |
| + | 5  | 535  | p.R83W MAP2K6_    | NM_002758    | NP_002749    | P52564 | MP2K6_HUMAN | rotein kinase.            | 5  | TTTAGCGGATCC | 0.458 |
| + | 11 | 1546 | 0dfp.2_RNA uc002  | NM_023036    | NP_075462    | Q9GZS0 | DNAI2_HUMAN |                           | 3  | TCTCGCCTGGG  | 0.642 |
| + | 3  | 1243 | nse_Mutation_p.G  | NM_018653    | NP_061123    | Q9NQ84 | GPC5C_HUMAN | lasmic (Potential).       | 5  | TGATGGGCAGT  | 0.617 |
| + | 1  | 511  | _p.G14D RAB37_1   | NM_175738    | NP_783865    | Q96AX2 | RAB37_HUMAN |                           | 1  | AGCTGGCCCTC  | 0.597 |
| + | 10 | 1439 | wrg.1_Intron TMEI | NM_017728    | NP_060198    | Q8NE00 | TM104_HUMAN | ical; (Potential).        | 0  | CACAGGGGCTC  | 0.667 |
| - | 12 | 2636 | RIN2C_uc002jiu.1_ | NM_000835    | NP_000826    | Q14957 | NMDE3_HUMAN | ical; (Potential).        | 4  | CCAGCCCCATG  | 0.597 |
| - | 6  | 616  | k.1_Missense_Mut  | NM_024417    | NP_077728    | P22570 | ADRO_HUMAN  |                           | 0  | TGTGTACACAGC | 0.632 |
| + | 7  | 1177 |                   | NM_178160    | NP_835454    | Q7RTS6 | OTOP2_HUMAN |                           | 4  | GAACCCACCGC  | 0.612 |
| + | 3  | 553  | _p.A61T SLC16A5   | NM_004695    | NP_004686    | O15375 | MOT6_HUMAN  | ical; (Potential).        | 1  | TCAGGCTGTG   | 0.602 |
| + | 4  | 572  | _p.G67E SLC16A5   | NM_004695    | NP_004686    | O15375 | MOT6_HUMAN  | ical; (Potential).        | 1  | CACAGGGCCCC  | 0.627 |
| - | 2  | 130  | 1_5'UTR GGA3_uc   | NM_138619    | NP_619525    | Q9NZ52 | GGA3_HUMAN  | o ARF1 (in long isoform). | 2  | CCCTTCCAGCT  | 0.552 |
| + | 15 | 1938 | p.A595V LLGL2_L   | NM_001031803 | NP_001026973 | Q6P1M3 | L2GL2_HUMAN | WD 10.                    | 2  | CTTGCCCTGTC  | 0.657 |
| - | 16 | 2543 | e_Mutation_p.G76  | NM_004259    | NP_004250    | O94762 | RECQ5_HUMAN |                           | 3  | GGGGTCCCTGA  | 0.657 |
| + | 2  | 79   | n.2_RNA JUNK_uc   | NM_001080419 | NP_001073888 | Q9C0B0 | UNK_HUMAN   |                           | 0  | AGCCGGACATA  | 0.647 |
| - | 26 | 2893 | vsk.1_Missense_N  | NM_199242    | NP_954712    | Q70J99 | UN13D_HUMAN | MHD2.                     | 2  | ATGAGCTGCGC  | 0.652 |
| - | 6  | 1381 | pv.2_Missense_Mu  | NM_033452    | NP_258411    | Q96LD4 | TRI47_HUMAN | 330.2/SPRY.               | 5  | CAGACCCTCT   | 0.562 |
| - | 26 | 3237 | _p.Y979C FBF1_uc  | NM_001080542 | NP_001074011 | Q8TES7 | FBF1_HUMAN  |                           | 0  | CTCTGTACTTCT | 0.463 |
| - | 6  | 479  | nse_Mutation_p.A  | NM_001080542 | NP_001074011 | Q8TES7 | FBF1_HUMAN  |                           | 0  | GTCTGCCTCTG  | 0.527 |
| - | 19 | 2664 | p.Q834H EVPL_uc   | NM_001988    | NP_001979    | Q92817 | EVPL_HUMAN  | Globular 1.               | 4  | AGGGCTGGGA   | 0.637 |
| - | 17 | 2016 | aw.1_Missense_Mu  | NM_001145297 | NP_001138769 | Q9UPT5 | EXOC7_HUMAN |                           | 0  | GACTCCCGCTC  | 0.547 |
| - | 3  | 379  | in_p.S95N EXOC7   | NM_001145297 | NP_001138769 | Q9UPT5 | EXOC7_HUMAN |                           | 0  | TGTACTGGCC   | 0.522 |
| - | 2  | 637  | nse_Mutation_p.F  | NM_001454    | NP_001445    | Q92949 | FOXJ1_HUMAN | Fork-head.                | 1  | CCGAGGCACTT  | 0.597 |
| - | 17 | 1867 | nse_Mutation_p.   | NM_052916    | NP_443148    | Q96PX1 | RN157_HUMAN |                           | 1  | CGTGGGTGATC  | 0.438 |



|   |    |           |                                               |              |              |        |              |    |              |       |                              |
|---|----|-----------|-----------------------------------------------|--------------|--------------|--------|--------------|----|--------------|-------|------------------------------|
| + | 3  | 519       |                                               | NM_182565    | NP_872371    | Q81YN6 | F100B_HUMAN  | 1  | :GCCGCCCAACT | 0.682 |                              |
| - | 18 | 5087      | 8Q QRICH2_uc01                                | NM_032134    | NP_115510    | Q9H0J4 | QRIC2_HUMAN  | 5  | GCGGCCTGTGC  | 0.667 |                              |
| - | 4  | 2786      | ε_Mutation_p.G79                              | NM_032134    | NP_115510    | Q9H0J4 | QRIC2_HUMAN  | 5  | CTATACCAGGTC | 0.488 |                              |
| - | 13 | 2121      | ι_p.V686 UBE2O_                               | NM_022066    | NP_071349    | Q9C0C9 | UBE2O_HUMAN  | 5  | GCTGACGTCCA  | 0.632 |                              |
| - | 19 | 2680      | e_Mutation_p.S76                              | NM_024599    | NP_078875    | Q6PJF5 | RHDF2_HUMAN  | 0  | TGTCGCTGGTG  | 0.622 | lasmic (Potential).          |
| + | 4  | 1242      | _p.M214 TNRC6C                                | NM_018996    | NP_061869    | Q9HCJ0 | TNR6C_HUMAN  | 2  | GGTATGGGGGC  | 0.512 | ith argonaute family proteir |
| + | 12 | 1764      | :38* TMC8_uc010v                              | NM_152468    | NP_689681    | Q8IU68 | TMC8_HUMAN   | 0  | GTCTGGGGCT   | 0.637 | ional (Potential).           |
| - | 2  | 964       |                                               | NM_003955    | NP_003946    | O14543 | SOCS3_HUMAN  | 1  | TGGAGGAGAGG  | 0.632 | SOCS box.                    |
| - | 11 | 1840      | .2_5'Flank DNAH17_uc002jvs.2_RNA              |              |              |        |              | 9  | CTCTGGCTTGT  | 0.562 |                              |
| - | 2  | 286       | ΔH17_uc002jvs.2_RNA                           |              |              |        |              | 9  | CTGCTCCAGAA  | 0.522 |                              |
| - | 16 | 2813      | ε_Mutation_p.P44                              | NM_025090    | NP_079366    | Q9P275 | UBP36_HUMAN  | 5  | CTGTGGGAGGC  | 0.597 |                              |
| - | 12 | 1507      | wb.1_Nonsense_Δ                               | NM_025090    | NP_079366    | Q9P275 | UBP36_HUMAN  | 5  | TGGTACCACTG  | 0.443 |                              |
| - | 4  | 785       | 2_Missense_Muta                               | NM_001159772 | NP_001153244 | Q8WVQ1 | CANT1_HUMAN  | 0  | TGACTCTGTGT  | 0.562 | ional (Potential).           |
| + | 3  | 591       |                                               | NM_178543    | NP_848638    | Q6UWV6 | ENPP7_HUMAN  | 3  | ATCTGGTCACA  | 0.617 |                              |
| - | 5  | 1619      |                                               | NM_003655    | NP_003646    | O00257 | CBX4_HUMAN   | 2  | CGGCTCCCCGG  | 0.557 | action with BMI1.            |
| + | 6  | 891       | ι_p.M288 CCDC4                                | NM_017950    | NP_060420    | Q4G0X9 | CCD40_HUMAN  | 3  | CTGATGGTAAG  | 0.567 |                              |
| + | 6  | 896       | _p.R290K CCDC4                                | NM_017950    | NP_060420    | Q4G0X9 | CCD40_HUMAN  | 3  | TGGTAAGATTCC | 0.562 |                              |
| + | 18 | 2789      | μg.1_Missense_M                               | NM_020761    | NP_065812    | Q8N122 | RPTOR_HUMAN  | 6  | GGCAGGAGCTG  | 0.488 |                              |
| + | 23 | 3537      | μg.1_Missense_M                               | NM_020761    | NP_065812    | Q8N122 | RPTOR_HUMAN  | 6  | AGGCCCCGCTG  | 0.692 |                              |
| + | 13 | 1643      | ο.S512N BAIAP2_ι                              | NM_017451    | NP_059345    | Q9UQB8 | BAIP2_HUMAN  | 0  | GAGCAGGTAAG  | 0.652 |                              |
| - | 7  | 931       | ι.1_Missense_Mut                              | NM_014984    | NP_055799    | Q9UPN4 | AZI1_HUMAN   | 4  | CCCCAGTATTG  | 0.637 |                              |
| - | 3  | 890       |                                               | NM_178520    | NP_848615    | Q8N8V8 | TM105_HUMAN  | 1  | CCTCACCACCC  | 0.602 | ical; (Potential).           |
| - | 3  | 636       | ε_Mutation_p.A20                              | NM_001614    | NP_001605    | P63261 | ACTG_HUMAN   | 2  | GCTCGGCCGTG  | 0.632 | rs11549225                   |
| + | 11 | 994       |                                               | NM_004712    | NP_004703    | O14964 | HGS_HUMAN    | 1  | CAGCAGCCTGT  | 0.637 | with SNX1 (By similarity).   |
| + | 13 | 1060_1061 |                                               | NM_004712    | NP_004703    | O14964 | HGS_HUMAN    | 1  | CGCACGGTATCT | 0.639 | with SNX1 (By similarity).   |
| - | 7  | 1161      | 1_5'UTR P4HB_uc                               | NM_000918    | NP_000909    | P07237 | PDIA1_HUMAN  | 0  | CTCCTCCTCCAC | 0.587 |                              |
| - | 5  | 656       |                                               | NM_005782    | NP_005773    | Q86V81 | THOC4_HUMAN  | 0  | CACCACCAAAA  | 0.612 | al/Arg/Gly-rich.             |
| + | 3  | 249       | sense_Mutation_p                              | NM_016476    | NP_057560    | Q9NYG5 | APC11_HUMAN  | 0  | GCGTGGCCACT  | 0.562 |                              |
| - | 4  | 627       | μvd.1_Missense_Δ                              | NM_006907    | NP_008838    | P32322 | P5CR1_HUMAN  | 0  | GATGACCCTGG  | 0.642 |                              |
| + | 4  | 608       | se_Mutation_p.A1                              | NM_004127    | NP_004118    | Q13098 | CSN1_HUMAN   | 1  | CCGGGCCCGGG  | 0.642 |                              |
| - | 3  | 723       | ρ.D109N SECTM1                                | NM_003004    | NP_002995    | Q8WVN6 | SCTM1_HUMAN  | 0  | GGAGTCCCGGG  | 0.532 | cellular (Potential).        |
| + | 7  | 791       | e_Mutation_p.P247L HEXDC_uc010wvm.1_RNA HEXC  |              |              | Q8WVB3 | HEXDC_HUMAN  | 2  | CTTTCGCAGC   | 0.667 |                              |
| + | 8  | 967       | ε_Mutation_p.V306M HEXDC_uc010wvm.1_RNA HEXC  |              |              | Q8WVB3 | HEXDC_HUMAN  | 2  | ACTCTGTGCTG  | 0.687 |                              |
| + | 8  | 930       | _p.E310K NARF_υ                               | NM_012336    | NP_036468    | Q9UHQ1 | NARF_HUMAN   | 1  | TAATGGAGCAAC | 0.522 |                              |
| + | 1  | 157       | RP_uc010wvr.1_ε                               | NM_024619    | NP_078895    | Q9HA64 | KT3K_HUMAN   | 0  | TCAAGGACGAG  | 0.706 |                              |
| + | 2  | 679       | kgi.2_Missense_M                              | NM_001004431 | NP_001004431 | Q641Q3 | METRL_HUMAN  | 0  | GCTGTCTGGTG  | 0.657 |                              |
| + | 4  | 796       | kgi.2_Missense_M                              | NM_001004431 | NP_001004431 | Q641Q3 | METRL_HUMAN  | 0  | CTCAGCCATCC  | 0.647 |                              |
| + | 5  | 689       | _p.D234N CLUL1_ι                              | NM_014410    | NP_055225    | Q15846 | CLUL1_HUMAN  | 2  | TGGAGGATGTG  | 0.388 |                              |
| - | 4  | 1535      | dkj.2_Missense_M                              | NM_022840    | NP_073751    | Q8N3J2 | METL4_HUMAN  | 2  | TCTGTCCCATT  | 0.328 |                              |
| + | 4  | 450       |                                               | NM_006101    | NP_006092    | O14777 | NDC80_HUMAN  | 1  | ACAAAAGCATT  | 0.358 | minus of CDCA1. Nuclear l    |
| + | 3  | 569       |                                               | NM_032048    | NP_114437    | Q9BXX0 | EMIL2_HUMAN  | 3  | GCTCGAAACA   | 0.512 | rs147386217                  |
| + | 4  | 1709      |                                               | NM_032048    | NP_114437    | Q9BXX0 | EMIL2_HUMAN  | 3  | GCTCAGTCCCC  | 0.512 |                              |
| - | 9  | 1512      | ilq.2_Missense_M                              | NM_003803    | NP_003794    | P52179 | MYOM1_HUMAN  | 5  | TACACCAACT   | 0.388 |                              |
| - | 1  | 458       | DLGAP1_uc002kn                                | NM_004746    | NP_004737    | O14490 | DLGP1_HUMAN  | 4  | GCTGGGTGTG   | 0.677 |                              |
| - | 7  | 826       | dkq.1_Missense_Δ                              | NM_012307    | NP_036439    | Q9Y2J2 | E41L3_HUMAN  | 5  | ATCGCTCCCA   | 0.527 | FERM.                        |
| + | 5  | 482       | _p.P100S ARHGAP28_uc002kne.2_Missense_Mutator |              |              | B4DXL2 | B4DXL2_HUMAN | 1  | GATCACCGGAG  | 0.458 |                              |
| - | 62 | 8939      | knl.2_Spice_Site_                             | NM_005559    | NP_005550    | P25391 | LAMA1_HUMAN  | 21 | AAGACCTAAAA  | 0.403 |                              |

|   |    |      |                    |              |              |        |              |    |               |       |                            |
|---|----|------|--------------------|--------------|--------------|--------|--------------|----|---------------|-------|----------------------------|
| - | 58 | 8491 | kn1.2_Splice_Site_ | NM_005559    | NP_005550    | P25391 | LAMA1_HUMAN  | 21 | ATCGTACCGTGT  | 0.532 |                            |
| + | 13 | 3066 | e_Mutation_p.V93   | NM_015210    | NP_056025    | Q9Y4B5 | CC165_HUMAN  | 0  | CAACGTTCCGCC  | 0.532 |                            |
| + | 9  | 3985 | ?knx.2_Missense_I  | NM_015208    | NP_056023    | Q6UB98 | ANR12_HUMAN  | 3  | AAATGTCCTTTTC | 0.463 |                            |
| + | 5  | 771  | ij.2_Missense_Mu   | NM_194434    | NP_919415    | Q9P0L0 | VAPA_HUMAN   | 0  | ATGGACCTATG   | 0.373 |                            |
| + | 16 | 2503 | _p.T333I CEP192    | NM_032142    | NP_115518    | E9PF99 | E9PF99_HUMAN | 5  | CTGATACTTGGG  | 0.383 | rs146445120                |
| + | 18 | 3112 | 192_uc002kru.2_R   | NM_032142    | NP_115518    | E9PF99 | E9PF99_HUMAN | 5  | TAGAGTCCTTTG  | 0.522 |                            |
| + | 19 | 3394 | 192_uc002kru.2_F   | NM_032142    | NP_115518    | E9PF99 | E9PF99_HUMAN | 5  | ACATTATCATCTA | 0.373 |                            |
| - | 3  | 824  | e_Mutation_p.R13   | NM_001098801 | NP_001092271 | Q96ND0 | CR019_HUMAN  | 2  | TACTGTCTAAATC | 0.383 | DUF1279.                   |
| + | 6  | 860  | se_Mutation_p.E2E  | NM_003799    | NP_003790    | O43148 | MCES_HUMAN   | 0  | TTTCAGGAACCTT | 0.333 |                            |
| - | 1  | 810  | TEC_uc010xaj.1_F   | NM_001137671 | NP_001131143 | B2RU33 | POTEC_HUMAN  | 3  | CCCAAGCGCCC   | 0.597 |                            |
| + | 2  | 491  | :D30B_uc010xak.1   | NM_001145029 | NP_001138501 | Q9BXX2 | AN30B_HUMAN  | 2  | TGATGGCGAAG   | 0.423 |                            |
| - | 7  | 1755 |                    | NM_005406    | NP_005397    | Q13464 | ROCK1_HUMAN  | 5  | CTACAAGCATTTT | 0.343 | rotein kinase.             |
| - | 1  | 1570 |                    | NM_172241    | NP_758441    | Q96RT6 | CTGE2_HUMAN  | 1  | AGGGACCATATC  | 0.413 |                            |
| - | 1  | 1533 |                    | NM_172241    | NP_758441    | Q96RT6 | CTGE2_HUMAN  | 1  | TATTTGGAACATC | 0.368 |                            |
| + | 3  | 1007 | :ABLES1_uc002ku    | NM_001100619 | NP_001094089 | Q8TDN4 | CABL1_HUMAN  | 1  | GAATGGCAGGT   | 0.468 | th CDK3 (By similarity).   |
| + | 10 | 1791 | xas.1_Splice_Site_ | NM_003831    | NP_003822    | O14730 | RIOK3_HUMAN  | 3  | TCACAGTTGATC  | 0.363 |                            |
| - | 20 | 3272 | iz.1_Missense_Mu   | NM_000271    | NP_000262    | O15118 | NPC1_HUMAN   | 2  | ACATGGGCAGGA  | 0.537 |                            |
| - | 8  | 1475 | _p.P202S NPC1_u    | NM_000271    | NP_000262    | O15118 | NPC1_HUMAN   | 2  | GAAAGGCCCAA   | 0.567 |                            |
| - | 2  | 390  | C1_uc010xba.1_In   | NM_000271    | NP_000262    | O15118 | NPC1_HUMAN   | 2  | TTGTACCTCTTGT | 0.428 |                            |
| + | 4  | 820  | kuu.2_Missense_M   | NM_001135993 | NP_001129465 | Q8N584 | TT39C_HUMAN  | 1  | CGCCCCCTCTA   | 0.443 |                            |
| - | 4  | 3069 | ase_Mutation_p.S   | NM_015461    | NP_056276    | Q96K83 | ZN521_HUMAN  | 7  | TTTCGGAGAAG   | 0.488 | :2H2-type 22.              |
| - | 4  | 1766 | ase_Mutation_p.A   | NM_015461    | NP_056276    | Q96K83 | ZN521_HUMAN  | 7  | TTTAGCTGCAGC  | 0.443 |                            |
| - | 2  | 670  | _p.G645D KCTD1_    | NM_001136205 | NP_001129677 | Q719H9 | KCTD1_HUMAN  | 1  | GCCCGCCACA    | 0.502 | BTB.                       |
| - | 5  | 1052 | on.1_Missense_M    | NM_001792    | NP_001783    | P19022 | CADH2_HUMAN  | 4  | GCCCAGTTACA   | 0.478 | Extracellular (Potential). |
| - | 11 | 2097 | mk.3_Missense_M    | NM_024422    | NP_077740    | Q02487 | DSC2_HUMAN   | 3  | AGGACTGTAATA  | 0.383 | r (Potential). Cadherin 4. |
| - | 5  | 998  | vk.3_Missense_M    | NM_024422    | NP_077740    | Q02487 | DSC2_HUMAN   | 3  | CCGAGTTCTTC   | 0.373 | Extracellular (Potential). |
| + | 5  | 729  |                    | NM_001942    | NP_001933    | Q02413 | DSG1_HUMAN   | 7  | TGCAAGTAAGT   | 0.388 |                            |
| + | 1  | 119  |                    | NM_001944    | NP_001935    | P32926 | DSG3_HUMAN   | 9  | TGGGCTCTTTC   | 0.483 |                            |
| + | 4  | 509  |                    | NM_000371    | NP_000362    | P02766 | TTHY_HUMAN   | 1  | GCCGCTACACC   | 0.562 |                            |
| + | 7  | 1080 | xh.2_Missense_M    | NM_016271    | NP_057355    | Q8WVD3 | RN138_HUMAN  | 0  | TCAGAGACATC   | 0.308 |                            |
| + | 7  | 716  | L3_uc002kxq.2_5'   | NM_030632    | NP_085135    | Q9C0F0 | ASXL3_HUMAN  | 3  | AATCTCCCACT   | 0.318 |                            |
| + | 12 | 5868 | q.2_Missense_Mu    | NM_030632    | NP_085135    | Q9C0F0 | ASXL3_HUMAN  | 3  | GGCTGCCAGGG   | 0.522 |                            |
| + | 2  | 95   | e_Mutation_p.L32   | NM_001390    | NP_001381    | Q9Y4J8 | DTNA_HUMAN   | 0  | TCCGACTCTCC   | 0.403 | h MAGEE1 (By similarity).  |
| - | 4  | 983  | ys.2_Missense_M    | NM_006965    | NP_008896    | P17028 | ZNF24_HUMAN  | 0  | TTTCTCCCACT   | 0.428 |                            |
| + | 8  | 1164 | _p.E311K GALNT1    | NM_020474    | NP_065207    | Q10472 | GALT1_HUMAN  | 2  | TGCAAGAGTG    | 0.398 | renal (Potential).         |
| + | 4  | 711  |                    | NM_017947    | NP_060417    | Q96EN8 | MOCOS_HUMAN  | 1  | GCACGCCTGGG   | 0.562 |                            |
| + | 10 | 1287 | LC14A1_uc002lbh    | NM_001146036 | NP_001139508 | Q13336 | UT1_HUMAN    | 2  | TCTTGAGTCTG   | 0.423 | ical; (Potential).         |
| - | 2  | 1053 | !bo.1_Missense_M   | NM_020964    | NP_066015    | Q9HCE0 | EPG5_HUMAN   | 0  | TTTTGGCAATCAC | 0.448 |                            |
| - | 4  | 444  | lct.2_Missense_M   | NM_032124    | NP_115500    | Q9H0R4 | HDHD2_HUMAN  | 0  | GTATTCTGGGA   | 0.343 |                            |
| - | 31 | 4387 | ea.2_Missense_M    | NM_001080467 | NP_001073936 | Q9ULV0 | MYO5B_HUMAN  | 5  | CAGGGCCTCGA   | 0.607 | Potential.                 |
| - | 6  | 1187 |                    | NM_145020    | NP_659457    | Q96M91 | CCD11_HUMAN  | 3  | TGTCTTCTCTA   | 0.408 | Potential.                 |
| - | 15 | 2199 | e_Mutation_p.A48   | NM_015846    | NP_056671    | Q9UIS9 | MBD1_HUMAN   | 2  | GACTGCTGTATC  | 0.542 | TRD.                       |
| - | 10 | 2055 | ink MBD1_uc010x    | NM_014593    | NP_055408    | Q9P0U4 | CXXC1_HUMAN  | 2  | GAGTGGGGCA    | 0.602 | Potential.                 |
| - | 8  | 1671 | _p.S313F CXXC1_u   | NM_014593    | NP_055408    | Q9P0U4 | CXXC1_HUMAN  | 2  | ATGGGACTCT    | 0.483 | Glu-rich (acidic).         |
| + | 2  | 1095 | IAPK4_uc010doz.1   | NM_002747    | NP_002738    | P31152 | MK04_HUMAN   | 6  | CAATGGTTTGG   | 0.612 | ase. ATP (By similarity).  |
| + | 4  | 1781 | se_Mutation_p.P5   | NM_002747    | NP_002738    | P31152 | MK04_HUMAN   | 6  | TGATGCCTTCC   | 0.597 | rotein kinase.             |
| - | 6  | 836  | RO_uc010dpg.2_In   | NM_031939    | NP_114145    | Q9BYG7 | MSTRO_HUMAN  | 0  | GGAGGAATCT    | 0.463 |                            |

|   |    |      |                   |              |              |        |             |                                |    |              |       |
|---|----|------|-------------------|--------------|--------------|--------|-------------|--------------------------------|----|--------------|-------|
| + | 7  | 1755 | _p.V238M DCC_uc   | NM_005215    | NP_005206    | P43146 | DCC_HUMAN   | potential). Ig-like C2-type 4. | 17 | TTGGGGTGGTG  | 0.428 |
| + | 27 | 4576 | f.1_Missense_Mu   | NM_005215    | NP_005206    | P43146 | DCC_HUMAN   | lasmic (Potential).            | 17 | CCAGAACCATCC | 0.537 |
| + | 3  | 451  | lfo.3_Missense_M  | NM_173529    | NP_775800    | Q81YD9 | CR054_HUMAN |                                | 2  | CTAGAAGACACA | 0.338 |
| - | 4  | 815  | 4_uc010xdy.1_Mi   | NM_003199    | NP_003190    | P15884 | ITF2_HUMAN  | OD1 inhibition (By similarity  | 2  | CCCTGGACGGG  | 0.383 |
| - | 6  | 979  | 2lgi.2_Missense_l | NM_004786    | NP_004777    | O43396 | TXNL1_HUMAN | PITH.                          | 0  | AGTTACACTGT  | 0.333 |
| + | 12 | 1718 | /DR7_uc002lgl.1_l | NM_015285    | NP_056100    | Q9Y4E6 | WDR7_HUMAN  | WD 6.                          | 3  | CTGGAGAAATG  | 0.353 |
| + | 14 | 2200 | te WDR7_uc002lg   | NM_015285    | NP_056100    | Q9Y4E6 | WDR7_HUMAN  |                                | 3  | ACAAGGTAAGT  | 0.393 |
| + | 19 | 3318 | DR7_uc002lgl.1_M  | NM_015285    | NP_056100    | Q9Y4E6 | WDR7_HUMAN  |                                | 3  | ACTGAGAAGAA  | 0.493 |
| - | 2  | 275  | RS_uc010xeb.1_R   | NM_004539    | NP_004530    | O43776 | SYNC_HUMAN  |                                | 0  | CCGTGGCATCG  | 0.413 |
| - | 5  | 3507 | rk.1_Missense_Mu  | NM_052947    | NP_443179    | Q86TB3 | ALPK2_HUMAN |                                | 14 | GGGAATTACTG  | 0.493 |
| - | 5  | 2555 | rk.1_Missense_Ml  | NM_052947    | NP_443179    | Q86TB3 | ALPK2_HUMAN |                                | 14 | TGTGGTTCAGC  | 0.537 |
| - | 4  | 1139 |                   | NM_052947    | NP_443179    | Q86TB3 | ALPK2_HUMAN |                                | 14 | AAAGTTCATAGT | 0.478 |
| + | 4  | 674  | rn_p.Q41* ZNF532  | NM_018181    | NP_060651    | Q9HCE3 | ZN532_HUMAN |                                | 2  | ATGAAGCAGAA  | 0.493 |
| + | 4  | 2019 | _p.S489N ZNF532   | NM_018181    | NP_060651    | Q9HCE3 | ZN532_HUMAN |                                | 2  | CAGCAGCGCCA  | 0.547 |
| + | 6  | 3149 | r_p.V866I ZNF532  | NM_018181    | NP_060651    | Q9HCE3 | ZN532_HUMAN |                                | 2  | FGTGAAGTCTTC | 0.453 |
| - | 1  | 217  | tek.1_Missense_M  | NM_005570    | NP_005561    | P49257 | LMAN1_HUMAN | tential). L-type lectin-like.  | 1  | CGGTCCCCTCG  | 0.687 |
| - | 5  | 582  |                   | NM_133459    | NP_597716    | Q6UXH8 | CCBE1_HUMAN | cium-binding (Potential).      | 3  | CTTCCCCTCAT  | 0.453 |
| - | 1  | 1281 |                   | NM_005912    | NP_005903    | P32245 | MC4R_HUMAN  | Name=7; (Potential).           | 1  | TATGAGATACA  | 0.408 |
| + | 3  | 560  | lif.2_Missense_Mu | NM_031891    | NP_114097    | Q9HBT6 | CAD20_HUMAN | r (Potential). Cadherin 2.     | 5  | TACCTCCGTCA  | 0.498 |
| + | 8  | 1508 | o.2_RNA ZCHC2     | NM_017742    | NP_060212    | Q9C0B9 | ZCHC2_HUMAN |                                | 2  | GCATGCCATAA  | 0.318 |
| + | 3  | 376  | e_Mutation_p.A70  | NM_012397    | NP_036529    | Q9UIV8 | SPB13_HUMAN |                                | 1  | ATAAGGCTGAA  | 0.408 |
| + | 7  | 929  | _p.G263D SERPIN   | NM_012397    | NP_036529    | Q9UIV8 | SPB13_HUMAN |                                | 1  | CGATGGCCTGG  | 0.468 |
| + | 9  | 1716 | p.G464E CDH7_u    | NM_033646    | NP_387450    | Q9ULB5 | CADH7_HUMAN | r (Potential). Cadherin 4.     | 4  | AGTAGGAAGAG  | 0.413 |
| - | 12 | 2120 | .1_RNA CDH19_u    | NM_021153    | NP_066976    | Q9H159 | CAD19_HUMAN | lasmic (Potential).            | 2  | TACTACTCCTCA | 0.468 |
| - | 2  | 1766 |                   | NM_032160    | NP_115536    | Q8IZU8 | DSEL_HUMAN  |                                | 6  | AATGGCCAATTC | 0.373 |
| - | 12 | 952  | ez.1_Missense_Ml  | NM_019022    | NP_061895    | Q96JJ7 | TMX3_HUMAN  | renal (Potential).             | 1  | TGCAACTTCTCT | 0.308 |
| - | 2  | 349  | lky.1_Missense_M  | NM_138966    | NP_620416    | Q8TDF5 | NETO1_HUMAN |                                | 4  | TGTTGCCCCCA  | 0.328 |
| + | 1  | 314  | dqu.1_Missense_l  | NM_017757    | NP_060227    | Q9C0G0 | ZN407_HUMAN |                                | 2  | TAAATCTGGAA  | 0.408 |
| + | 4  | 4980 | qu.1_Nonsense_M   | NM_017757    | NP_060227    | Q9C0G0 | ZN407_HUMAN | :2H2-type 17.                  | 2  | AAGTGGGCCCT  | 0.468 |
| + | 18 | 3206 | 236_uc002lmj.2_f  | NM_007345    | NP_031371    | Q9UL36 | ZN236_HUMAN | :2H2-type 19.                  | 4  | ACGCGCTTTG   | 0.478 |
| + | 2  | 1544 | ra.2_Missense_Ml  | NM_171999    | NP_741996    | Q9BXA9 | SALL3_HUMAN |                                | 4  | GGACAGCAAGC  | 0.711 |
| + | 3  | 586  |                   | NM_014913    | NP_055728    | Q6IQ32 | ADNP2_HUMAN |                                | 8  | TCCAGGAGAGA  | 0.318 |
| - | 5  | 712  | _p.A226T PPAP2C   | NM_003712    | NP_003703    | O43688 | LPP2_HUMAN  | ical; (Potential).             | 1  | AAAGCCACCA   | 0.607 |
| + | 9  | 1060 | p.G245E PALM_u    | NM_002579    | NP_002570    | O75781 | PALM_HUMAN  |                                | 0  | GCCGGGGATCC  | 0.692 |
| - | 5  | 663  | 3_uc002lpw.1_Spli | NM_024888    | NP_079164    | Q6T4P5 | LPPR3_HUMAN |                                | 0  | GCTCACCGTGC  | 0.642 |
| - | 2  | 79   |                   | NM_006830    | NP_006821    | O14957 | QCR10_HUMAN | ical; (Potential).             | 2  | CGTCGGGACC   | 0.662 |
| - | 18 | 2201 | e_Mutation_p.C60  | NM_138813    | NP_620168    | O60423 | AT8B3_HUMAN | lasmic (Potential).            | 0  | ACAGGCAGATG  | 0.657 |
| - | 14 | 1503 | NK2_uc010xgv.1_l  | NM_199054    | NP_951009    | Q9HBH9 | MKNK2_HUMAN |                                | 2  | CTGCCCGCGG   | 0.687 |
| + | 5  | 1561 | wl.2_Missense_Ml  | NM_001102651 | NP_001096121 | Q86TJ5 | ZN554_HUMAN | :2H2-type 6.                   | 1  | AGCAGAGCGGA  | 0.542 |
| - | 12 | 1567 | 04_splice PIP5K1C | NM_012398    | NP_036530    | O60331 | PI51C_HUMAN |                                | 4  | CCTCACCTTCG  | 0.711 |
| + | 13 | 2499 |                   | NM_005483    | NP_005474    | Q13111 | CAF1A_HUMAN | 3inds to p60.                  | 2  | CAAGCGGCTCA  | 0.637 |
| - | 8  | 1305 |                   | NM_001013706 | NP_001013728 | Q00G26 | PLIN5_HUMAN |                                | 0  | CCAGGCTCTCT  | 0.716 |
| - | 5  | 449  |                   | NM_019107    | NP_061980    | Q969H8 | CS010_HUMAN |                                | 0  | CAAATGCGGCT  | 0.453 |
| + | 1  | 854  | uc002mbg.1_RNA    | NM_018708    | NP_061178    | Q9BSK4 | FEM1A_HUMAN | ANK 7.                         | 0  | AGCAGCCCGGC  | 0.697 |
| - | 14 | 2258 | bw.2_Missense_M   | NM_002850    | NP_002841    | Q13332 | PTPRS_HUMAN | tential). Fibronectin type-III | 4  | TCGGGGGGATG  | 0.672 |
| - | 21 | 2989 |                   | NM_014649    | NP_055464    | Q14151 | SAFB2_HUMAN | with SAFB1. Gly-rich.          | 0  | CCACTCCGCCA  | 0.502 |
| - | 4  | 467  |                   | NM_133492    | NP_597999    | Q8TDN7 | ACER1_HUMAN | ical; (Potential).             | 0  | TGCTGACCACA  | 0.597 |

|   |    |       |                   |              |              |        |             |                                |    |              |       |
|---|----|-------|-------------------|--------------|--------------|--------|-------------|--------------------------------|----|--------------|-------|
| + | 3  | 430   |                   | NM_006012    | NP_006003    | Q16740 | CLPP_HUMAN  |                                | 1  | CCACAGCTCCTC | 0.582 |
| - | 2  | 313   |                   | NM_000064    | NP_000055    | P01024 | CO3_HUMAN   |                                | 5  | ACGTTGCCCATG | 0.488 |
| + | 11 | 1271  | e_Mutation_p.R34  | NM_004240    | NP_004231    | Q15642 | CIP4_HUMAN  | nteraction with PDE6G (By      | 1  | AAAACGGCTTC  | 0.532 |
| - | 3  | 765   | _p.C219Y INSR_uc  | NM_000208    | NP_000199    | P06213 | INSR_HUMAN  | Cys-rich.                      | 12 | TCGGGCAAACT  | 0.393 |
| + | 3  | 386   | _p.G16E PNPLA6    | NM_006702    | NP_006693    | Q81Y17 | PLPL6_HUMAN | ical; (Potential).             | 3  | GATCGGGGCCG  | 0.701 |
| - | 4  | 384   | q.2_Missense_Mu   | NM_021155    | NP_066978    | Q9NNX6 | CD209_HUMAN | e), 7 X approximate tanden     | 1  | TCAGCTGGGTC  | 0.562 |
| - | 46 | 5926  |                   | NM_032447    | NP_115823    | Q75N90 | FBN3_HUMAN  |                                | 11 | ACTCACCAATG  | 0.438 |
| - | 8  | 997   |                   | NM_032447    | NP_115823    | Q75N90 | FBN3_HUMAN  | TB 2.                          | 11 | AGCTGCCCAGC  | 0.682 |
| + | 4  | 704   | _p.A88V MARCKS    | NM_016496    | NP_057580    | Q9P0N8 | MARH2_HUMAN | ING-CH-type.                   | 2  | GGGTGCCGTGC  | 0.597 |
| + | 12 | 1200  | dwd.2_Splice_Site | NM_005968    | NP_005959    | P52272 | HNRPM_HUMAN |                                | 0  | TAAATGGTAAGC | 0.493 |
| + | 1  | 136   |                   | NM_001004699 | NP_001004699 | Q8NG97 | OR2Z1_HUMAN | Name=1; (Potential).           | 2  | GTTCTTCTCTTC | 0.557 |
| + | 1  | 802   |                   | NM_001004699 | NP_001004699 | Q8NG97 | OR2Z1_HUMAN | ellular (Potential).           | 2  | ACAGTCCACAG  | 0.542 |
| - | 39 | 39220 | C16_uc010dwj.2_ε  | NM_024690    | NP_078966    | Q8WXI7 | MUC16_HUMAN | ellular (Potential).           | 57 | AAACAGCTGCTG | 0.448 |
| - | 3  | 26086 |                   | NM_024690    | NP_078966    | Q8WXI7 | MUC16_HUMAN | ch. Extracellular (Potential). | 57 | ACGTGGCTAATA | 0.458 |
| - | 3  | 21859 |                   | NM_024690    | NP_078966    | Q8WXI7 | MUC16_HUMAN | ch. Extracellular (Potential). | 57 | ATCCTCCTGGG  | 0.483 |
| - | 3  | 18095 |                   | NM_024690    | NP_078966    | Q8WXI7 | MUC16_HUMAN | xtracellular (Potential).      | 57 | TCCTGCCAGAG  | 0.483 |
| - | 1  | 9388  |                   | NM_024690    | NP_078966    | Q8WXI7 | MUC16_HUMAN | xtracellular (Potential).      | 57 | CCTTGCCATGG  | 0.483 |
| - | 1  | 8536  |                   | NM_024690    | NP_078966    | Q8WXI7 | MUC16_HUMAN | ch. Extracellular (Potential). | 57 | CCCAGCTGATG  | 0.512 |
| - | 1  | 7184  |                   | NM_024690    | NP_078966    | Q8WXI7 | MUC16_HUMAN | ch. Extracellular (Potential). | 57 | TGGGGGAAGTG  | 0.473 |
| - | 1  | 7145  |                   | NM_024690    | NP_078966    | Q8WXI7 | MUC16_HUMAN | ch. Extracellular (Potential). | 57 | CTCTCTCCAGT  | 0.483 |
| - | 1  | 541   |                   | NM_024690    | NP_078966    | Q8WXI7 | MUC16_HUMAN | xtracellular (Potential).      | 57 | AGAGGGAGTTC  | 0.517 |
| + | 7  | 1740  | p.R457W ZNF317    | NM_020933    | NP_065984    | Q96PQ6 | ZN317_HUMAN | :2H2-type 10.                  | 0  | TATCCCGCGG   | 0.552 |
| + | 7  | 2155  | _uc002mle.3_Mis   | NM_032497    | NP_115886    | Q9BR84 | ZN559_HUMAN | :2H2-type 13.                  | 1  | CTTTACTCGGT  | 0.438 |
| - | 10 | 1793  | lwr.1_Missense_M  | NM_152476    | NP_689689    | Q96MR9 | ZN560_HUMAN | :2H2-type 7.                   | 6  | AGGCAGAAGAG  | 0.383 |
| - | 10 | 1135  | lwr.1_Missense_M  | NM_152476    | NP_689689    | Q96MR9 | ZN560_HUMAN | ype 1; degenerate.             | 6  | GTGTGCTTCAA  | 0.403 |
| - | 3  | 571   | _RNA ZNF846_uc    | NM_001077624 | NP_001071092 | Q147U1 | ZN846_HUMAN | KRAB.                          | 1  | CCAGCCACAT   | 0.423 |
| - | 26 | 2143  |                   | NM_015719    | NP_056534    | P25940 | CO5A3_HUMAN | le-helical region.             | 10 | CATGTCTGGG   | 0.592 |
| - | 5  | 788   | YK2_uc002mod.2_   | NM_003331    | NP_003322    | P29597 | TYK2_HUMAN  | FERM.                          | 9  | GTGTGTCTCTGA | 0.557 |
| - | 6  | 936   | _Mutation_p.A111  | NM_007065    | NP_008996    | Q16543 | CDC37_HUMAN |                                | 0  | CATGGCCTTCTC | 0.662 |
| + | 14 | 1892  | om.2_Missense_M   | NM_001111307 | NP_001104777 | P27815 | PDE4A_HUMAN | Catalytic.                     | 3  | CAACCCACCA   | 0.617 |
| + | 4  | 589   | F3_uc002mpk.2_M   | NM_012218    | NP_036350    | Q12906 | ILF3_HUMAN  |                                | 3  | GCGGGGAGTGA  | 0.602 |
| - | 3  | 570   |                   | NM_006858    | NP_006849    | Q13445 | TMED1_HUMAN | ellular (Potential).           | 4  | GTCTCTCCATTT | 0.592 |
| + | 25 | 3670  | _p.T1129I SMARCA4 | NM_003072    | NP_003063    | P51532 | SMCA4_HUMAN | case C-terminal.               | 67 | AGGAACCACGA  | 0.627 |
| + | 6  | 754   | l2mq.1_RNA uc001  | NM_012466    | NP_036598    | Q9UKR8 | TSN16_HUMAN | lasmic (Potential).            | 1  | CTCAGGGCTGT  | 0.507 |
| - | 3  | 435   | RGL3_uc002mro.2   | NM_001035223 | NP_001030300 | Q3MIN7 | RGL3_HUMAN  |                                | 1  | ACTGACCCGGG  | 0.627 |
| + | 4  | 1932  | e_Mutation_p.S62  | NM_144566    | NP_653167    | Q9H0M5 | ZN700_HUMAN | :2H2-type 14.                  | 0  | CTCAGTTGTGC  | 0.483 |
| + | 2  | 204   | '63_uc002msv.2_M  | NM_001012753 | NP_001012771 | Q0D2J5 | ZN763_HUMAN | KRAB.                          | 1  | AGGAGGAGTGG  | 0.512 |
| - | 4  | 1619  |                   | NM_145276    | NP_660319    | Q8TA94 | ZN563_HUMAN | :2H2-type 12.                  | 0  | ACTGGGATAAAC | 0.378 |
| + | 4  | 1477  | yu.1_Missense_M   | NM_153358    | NP_699189    | Q3KP31 | ZN791_HUMAN |                                | 2  | ACGGACCTTAT  | 0.418 |
| + | 9  | 1041  | lwk.2_Missense_M  | NM_014975    | NP_055790    | Q9Y2H9 | MAST1_HUMAN |                                | 7  | TGGAGCGGCC   | 0.642 |
| + | 1  | 171   |                   | NM_004343    | NP_004334    | P27797 | CALR_HUMAN  | N-domain.                      | 1  | ACGGAGGTAAC  | 0.677 |
| + | 6  | 1603  |                   | NM_052876    | NP_443108    | Q96RE7 | NACC1_HUMAN |                                | 0  | CCAAGTCAAG   | 0.597 |
| - | 22 | 4021  | nwy.3_Missense_M  | NM_001127221 | NP_001120693 | O00555 | CAC1A_HUMAN | ellular (Potential). III.      | 2  | CGCGGCCAGG   | 0.602 |
| + | 7  | 1385  | ng.1_Missense_M   | NM_023072    | NP_075560    | Q9H7M6 | ZSWM4_HUMAN |                                | 2  | GAAGGCTCCA   | 0.627 |
| + | 11 | 2087  | ng.1_Missense_M   | NM_023072    | NP_075560    | Q9H7M6 | ZSWM4_HUMAN |                                | 2  | GGCTCCATCC   | 0.647 |
| + | 1  | 288   |                   | NM_001098622 | NP_001092092 | P60323 | NANO3_HUMAN |                                | 1  | TGCCGGGACCC  | 0.657 |
| - | 6  | 1047  | _Mutation_p.G214  | NM_024323    | NP_077299    | Q0VDD7 | CS057_HUMAN |                                | 3  | GCATCCAGGC   | 0.662 |

rs149044054

|   |    |      |                   |              |              |         |             |                                           |     |              |       |
|---|----|------|-------------------|--------------|--------------|---------|-------------|-------------------------------------------|-----|--------------|-------|
| + | 8  | 1213 | .2_Missense_Mut   | NM_017721    | NP_060191    | Q6P1N0  | C2D1A_HUMAN | Pro-rich.                                 | 0   | GTGAGCCCGTGC | 0.597 |
| + | 14 | 1893 | zh.2_Missense_N   | NM_017721    | NP_060191    | Q6P1N0  | C2D1A_HUMAN |                                           | 0   | TGGAGCCTATG  | 0.627 |
| + | 25 | 2882 | 60_splice CC2D1A  | NM_017721    | NP_060191    | Q6P1N0  | C2D1A_HUMAN |                                           | 0   | GGAAGGTGGG   | 0.612 |
| - | 3  | 672  | i.2_Missense_Mul  | NM_002918    | NP_002909    | P22670  | RFX1_HUMAN  |                                           | 2   | AACCACCTGAG  | 0.726 |
| + | 3  | 647  |                   | NM_004843    | NP_004834    | Q6UWB1  | I27RA_HUMAN | ellular (Potential).                      | 0   | CCGTTCCAACA  | 0.557 |
| + | 3  | 676  |                   | NM_004843    | NP_004834    | Q6UWB1  | I27RA_HUMAN | ellular (Potential).                      | 0   | TGGCAGCCGGA  | 0.617 |
| + | 7  | 1366 |                   | NM_004843    | NP_004834    | Q6UWB1  | I27RA_HUMAN | ellular (Potential).                      | 0   | CTTTGGTCTGCT | 0.597 |
| + | 8  | 1391 |                   | NM_004843    | NP_004834    | Q6UWB1  | I27RA_HUMAN | ellular (Potential), Fibronectin type-III | 0   | TGCCCCCGTA   | 0.632 |
| - | 2  | 360  | xnr.1_Missense_I  | NM_006145    | NP_006136    | P25685  | DNJB1_HUMAN |                                           | 0   | TGCCACCGAAG  | 0.567 |
| - | 20 | 2891 | p.A752V EMR2_u    | NM_013447    | NP_038475    | Q9UHX3  | EMR2_HUMAN  | lasmic (Potential).                       | 4   | CCTTAGCACTG  | 0.522 |
| - | 1  | 920  |                   | NM_198944    | NP_945182    | O76099  | OR7C1_HUMAN | lasmic (Potential).                       | 2   | TTGCCCTACTGA | 0.502 |
| + | 8  | 2007 | p.G592E SYDE1_    | NM_033025    | NP_149014    | Q6ZW31  | SYDE1_HUMAN |                                           | 2   | TTGCGGGCGGG  | 0.706 |
| - | 10 | 1285 | p.G29E ILVBL_ucl  | NM_006844    | NP_006835    | A1L0T0  | ILVBL_HUMAN |                                           | 2   | GGCTCCAGAA   | 0.557 |
| - | 11 | 1857 | ao.1_Missense_N   | NM_000435    | NP_000426    | Q9UM47  | NOTC3_HUMAN | GF-like 15; calcium-binding               | 21  | TGCCCCATGG   | 0.657 |
| - | 5  | 565  | KAP8L_uc002nay.   | NM_014371    | NP_055186    | Q9ULX6  | AKP8L_HUMAN |                                           | 1   | CATAGGCCATTT | 0.622 |
| - | 7  | 808  | L3_uc010eaa.1_5   | NM_022904    | NP_075055    | Q86YV0  | RASL3_HUMAN | PH.                                       | 0   | CGCACCCAGG   | 0.637 |
| + | 12 | 1419 |                   | NM_023944    | NP_076433    |         |             |                                           | 7   | GGGGAGGTCAC  | 0.557 |
| + | 1  | 520  |                   | NM_013939    | NP_039227    | O60403  | O10H2_HUMAN | ellular (Potential).                      | 3   | ACTGACTTTCTC | 0.577 |
| + | 1  | 841  |                   | NM_001004466 | NP_001004466 | Q8NGA6  | O10H5_HUMAN | Name=7; (Potential).                      | 1   | ACACGGTCCTC  | 0.537 |
| - | 7  | 762  | _p.E89K CYP4F2_   | NM_001082    | NP_001073    | P78329  | CP4F2_HUMAN |                                           | 2   | GATCTCATGGT  | 0.512 |
| + | 6  | 785  | _p.E218K TPM4_u   | NM_003290    | NP_003281    | P67936  | TPM4_HUMAN  | By similarity.                            | 13  | AAAAGGAGGAC  | 0.353 |
| - | 3  | 121  | B3_uc010eaf.2_Int | NM_054113    | NP_473454    | Q96Q77  | CIB3_HUMAN  |                                           | 1   | CACGAGCTGTG  | 0.592 |
| + | 5  | 646  | _p.S158F AP1M1_   | NM_032493    | NP_115882    | Q9BXS5  | AP1M1_HUMAN |                                           | 4   | GGTGCTCTGGC  | 0.572 |
| - | 20 | 2156 | S15L1_uc010xpf.   | NM_021235    | NP_067058    | Q9UBC2  | EP15R_HUMAN | \A repeats of D-P-F.                      | 5   | TTGAGGAGACA  | 0.473 |
| - | 12 | 2122 | HERP_uc010xpg.1   | NM_006387    | NP_006378    | Q8IWX8  | CHERP_HUMAN |                                           | 2   | TCTCGCTGGGC  | 0.652 |
| - | 9  | 1317 | 2_Intron CHERP_u  | NM_006387    | NP_006378    | Q8IWX8  | CHERP_HUMAN | Pro-rich.                                 | 2   | TGGTGGGATCTC | 0.537 |
| - | 9  | 1216 | 2_Intron CHERP_u  | NM_006387    | NP_006378    | Q8IWX8  | CHERP_HUMAN | Pro-rich.                                 | 2   | TGGGAGGCTTG  | 0.512 |
| - | 6  | 1166 | X26_uc002nee.2_I  | NM_024881    | NP_079157    | Q96K37  | S35E1_HUMAN |                                           | 2   | TGCGGCCGTAC  | 0.567 |
| - | 31 | 4242 | D8_uc002nfd.1_5   | NM_015692    | NP_056507    | Q8IZJ3  | CPMD8_HUMAN |                                           | 13  | CTTGCCACGT   | 0.582 |
| - | 8  | 785  |                   | NM_015692    | NP_056507    | Q8IZJ3  | CPMD8_HUMAN |                                           | 13  | ATGAACCATTC  | 0.413 |
| - | 9  | 1545 | BP1_uc002nft.1_F  | NM_031941    | NP_114147    | Q8N6Y0  | USBP1_HUMAN | Potential.                                | 1   | CTTCTCCAGTCC | 0.602 |
| + | 2  | 612  | 1_Intron SLC27A1  | NM_198580    | NP_940982    | Q6PCB7  | S27A1_HUMAN | lasmic (Potential).                       | 0   | TGGCGGGTGAG  | 0.731 |
| + | 7  | 1065 | 'A1_uc010xpp.1_I  | NM_198580    | NP_940982    | Q6PCB7  | S27A1_HUMAN | 1 (By similarity), Cytoplasm              | 0   | TCGGGGAGATC  | 0.701 |
| - | 11 | 1613 | .2_Nonsense_Mu    | NM_000215    | NP_000206    | P52333  | JAK3_HUMAN  |                                           | 56  | GTATTGGGATTG | 0.542 |
| + | 5  | 1002 |                   | NM_000453    | NP_000444    | Q92911  | SC5A5_HUMAN | ellular (Potential).                      | 4   | GCCAGGTGCTC  | 0.577 |
| + | 6  | 1159 |                   | NM_000453    | NP_000444    | Q92911  | SC5A5_HUMAN | lasmic (Potential).                       | 4   | CGTGCTTGCC   | 0.617 |
| + | 5  | 855  | hu.2_Missense_I   | NM_015683    | NP_056498    | Q8TBH0  | ARRD2_HUMAN |                                           | 1   | AACGGCAGTG   | 0.711 |
| + | 5  | 885  | hu.2_Missense_N   | NM_015683    | NP_056498    | Q8TBH0  | ARRD2_HUMAN |                                           | 1   | AGCCGGTGGGC  | 0.711 |
| + | 6  | 1012 | hu.2_Missense_N   | NM_015683    | NP_056498    | Q8TBH0  | ARRD2_HUMAN |                                           | 1   | CCCAGAACGT   | 0.632 |
| + | 17 | 1829 |                   | NM_015016    | NP_055831    | O60307  | MAST3_HUMAN | rotein kinase.                            | 5   | AGACGCCAGG   | 0.602 |
| + | 27 | 3877 |                   | NM_015016    | NP_055831    | O60307  | MAST3_HUMAN |                                           | 5   | TCGCCGTGGAG  | 0.622 |
| + | 2  | 272  | ebj.2_Missense_I  | NM_032683    | NP_116072    | Q567V2  | M17L2_HUMAN | ical; (Potential).                        | 0   | TGGGTCCCTTC  | 0.592 |
| - | 1  | 1397 | nix.2_Missense_M  | NM_145256    | NP_660299    | Q8N386  | LR25_HUMAN  | lasmic (Potential).                       | 0   | GCTCGGCTGCT  | 0.473 |
| - | 6  | 906  | P8_uc002njil.1_Mi | NM_012181    | NP_036313    | Q14318  | FKBP8_HUMAN |                                           | 1   | CTGTGCTCTCT  | 0.647 |
| + | 14 | 1886 | bw.2_Missense_M   | NM_015321    | NP_056136    | Q6UUUV9 | CRTC1_HUMAN |                                           | 519 | ACGAACTCAAG  | 0.637 |
| - | 7  | 2597 | _p.W817* SFRS14.  | NM_014884    | NP_055699    | Q8IX01  | SUGP2_HUMAN | URP motif 2.                              | 0   | AGAAACCTGGG  | 0.413 |
| - | 3  | 1644 | _p.E500K SFRS14.  | NM_014884    | NP_055699    | Q8IX01  | SUGP2_HUMAN |                                           | 0   | CAGCTTCTAAGA | 0.507 |



|   |    |      |                    |              |              |        |              |                                 |    |                  |       |            |
|---|----|------|--------------------|--------------|--------------|--------|--------------|---------------------------------|----|------------------|-------|------------|
| + | 2  | 515  | Jxqv.1_Missense_I  | NM_017660    | NP_060130    | Q86YP4 | P66A_HUMAN   |                                 | 0  | :CACGGCCATGG     | 0.627 |            |
| + | 4  | 790  | ense_Mutation_p.\  | NM_017660    | NP_060130    | Q86YP4 | P66A_HUMAN   | Potential.                      | 0  | :AAACTCGTGTGG    | 0.522 |            |
| - | 6  | 500  | p.S128N GMIP_ur    | NM_016573    | NP_057657    | Q9P107 | GMIP_HUMAN   |                                 | 1  | :TGGTGCTCTTAC    | 0.607 |            |
| + | 2  | 213  | c.2_intron ZNF253  | NM_021047    | NP_066385    | O75346 | ZN253_HUMAN  | KRAB.                           | 0  | :AAGCTTGGTCTTCTC | 0.358 |            |
| + | 4  | 955  |                    | NM_031218    | NP_112495    | P35789 | ZNF93_HUMAN  |                                 | 1  | :CTGGAGAGAGAAA   | 0.368 |            |
| + | 4  | 1624 |                    | NM_031218    | NP_112495    | P35789 | ZNF93_HUMAN  |                                 | 1  | :ATACTGGAGAGAG   | 0.353 |            |
| + | 4  | 1801 |                    | NM_031218    | NP_112495    | P35789 | ZNF93_HUMAN  |                                 | 1  | :GAGAAACCTTAT    | 0.378 |            |
| + | 4  | 1740 | i.1_intron ZNF90_u | NM_007138    | NP_009069    | Q03938 | ZNF90_HUMAN  |                                 | 2  | :TGGAGCGAAAAC    | 0.408 |            |
| - | 4  | 1010 |                    | NM_001159293 | NP_001152765 | C9JHM3 | C9JHM3_HUMAN |                                 | 1  | TGAATTATCTTAT    | 0.413 |            |
| - | 4  | 1127 | ipc.1_Missense_M   | NM_001076675 | NP_001070143 | Q68DY1 | ZN626_HUMAN  | :2H2-type 6.                    | 1  | :AGGGTATAGGAG    | 0.383 |            |
| + | 6  | 1631 | 714_uc010ecp.1_f   | NM_182515    | NP_872321    | Q96N38 | ZN714_HUMAN  |                                 | 0  | AGAAACTCTACA     | 0.368 |            |
| + | 2  | 291  | 1_p.C132Y ZNF49:   | NM_175910    | NP_787106    | Q6ZR52 | ZN493_HUMAN  |                                 | 1  | :TGAGTGTAATGT    | 0.294 |            |
| + | 2  | 1311 | p.R472Q ZNF493     | NM_175910    | NP_787106    | Q6ZR52 | ZN493_HUMAN  | :2H2-type 12.                   | 1  | TTAAACGATCTTC    | 0.333 |            |
| + | 2  | 1423 | p.I509M ZNF493     | NM_175910    | NP_787106    | Q6ZR52 | ZN493_HUMAN  | :2H2-type 13.                   | 1  | :TAAATAAATTCAT   | 0.323 |            |
| - | 4  | 1778 | p.F544I ZNF43_u    | NM_003423    | NP_003414    | P17038 | ZNF43_HUMAN  | :2H2-type 14.                   | 2  | TTGAGAAATGGT     | 0.383 |            |
| - | 5  | 2059 | 208_uc002nqo.1_j   | NM_007153    | NP_009084    |        |              |                                 | 7  | :GTTTAGTAAGGA    | 0.368 |            |
| - | 5  | 1794 | 208_uc002nqo.1_j   | NM_007153    | NP_009084    |        |              |                                 | 7  | TTGAGACCTTAA     | 0.388 |            |
| - | 5  | 1710 | 208_uc002nqo.1_j   | NM_007153    | NP_009084    |        |              |                                 | 7  | TTGAGACCTTAC     | 0.368 |            |
| - | 5  | 1651 | 208_uc002nqo.1_j   | NM_007153    | NP_009084    |        |              |                                 | 7  | TGAATTCTCTTAT    | 0.353 |            |
| - | 3  | 325  | se_Mutation_p.G5!  | NM_007153    | NP_009084    |        |              |                                 | 7  | TCTTTTCTTCCCT    | 0.413 |            |
| - | 4  | 1483 |                    | NM_001098626 | NP_001092096 | A6NK75 | ZNF98_HUMAN  | :2H2-type 10.                   | 2  | TGAATTATCTTAT    | 0.363 |            |
| - | 7  | 2699 |                    | NM_001080409 | NP_001073878 |        |              |                                 | 2  | GTCGAGAAATTG     | 0.353 | rs55891931 |
| - | 4  | 1821 | :NF91_uc010xrxj.1_ | NM_003430    | NP_003421    | Q05481 | ZNF91_HUMAN  |                                 | 0  | TCTTTCCAGCATC    | 0.323 |            |
| - | 4  | 1567 |                    | NM_138330    | NP_612203    | Q8TD23 | ZN675_HUMAN  | :2H2-type 12.                   | 2  | GATTGGATAAAA     | 0.368 |            |
| - | 4  | 1655 | p.S436P ZNF681_    | NM_138286    | NP_612143    | Q96N22 | ZN681_HUMAN  |                                 | 0  | :GTAGGATTTCTC    | 0.373 |            |
| - | 4  | 1313 | p.E322K ZNF681_    | NM_138286    | NP_612143    | Q96N22 | ZN681_HUMAN  |                                 | 0  | :TCTTCTCTCCAG    | 0.408 |            |
| + | 3  | 2333 | :dd.1_Missense_M   | NM_014717    | NP_055532    | O15090 | ZN536_HUMAN  |                                 | 11 | :GAGATCTGCCG     | 0.567 |            |
| + | 3  | 1207 | :rn.1_Missense_M   | NM_001136156 | NP_001129628 | Q8TCN5 | ZN507_HUMAN  |                                 | 5  | :AGAGAGTGAAC     | 0.478 |            |
| + | 4  | 417  | :nth.1_Missense_M  | NM_207325    | NP_997208    | Q6ZPD9 | D19L3_HUMAN  |                                 | 4  | AGGAAGTGGAG      | 0.403 |            |
| - | 6  | 607  | se_Mutation_p.V3C  | NM_033103    | NP_149094    | Q8IUC4 | RHPN2_HUMAN  | BRO1.                           | 6  | :CTCGACAAAGC     | 0.587 |            |
| + | 5  | 740  |                    | NM_173479    | NP_775750    | Q6ZMY6 | WDR88_HUMAN  | WD 3.                           | 3  | :CACCACCGTTTC    | 0.502 |            |
| + | 3  | 605  | p.P34S CHST8_u     | NM_001127895 | NP_001121367 | Q9H2A9 | CHST8_HUMAN  | lenal (Potential).              | 4  | :AGGACCTTACG     | 0.632 |            |
| + | 5  | 563  | in_p.Q99* KCTD15   | NM_001129994 | NP_001123466 | Q96S11 | KCD15_HUMAN  | BTB.                            | 1  | TTGAAGCAACAT     | 0.537 |            |
| + | 5  | 648  | p.D127V KCTD15     | NM_001129994 | NP_001123466 | Q96S11 | KCD15_HUMAN  |                                 | 1  | :GGATGACTTTAA    | 0.532 |            |
| + | 10 | 2883 |                    | NM_014686    | NP_055501    | O15063 | K0355_HUMAN  |                                 | 1  | :TGCTGCCACAG     | 0.577 |            |
| + | 10 | 2997 |                    | NM_014686    | NP_055501    | O15063 | K0355_HUMAN  |                                 | 1  | GACACCCACAG      | 0.632 |            |
| + | 10 | 3293 |                    | NM_014686    | NP_055501    | O15063 | K0355_HUMAN  |                                 | 1  | :CGCAGGGACCT     | 0.502 |            |
| + | 4  | 689  |                    | NM_032346    | NP_115722    | Q9BRP1 | PDD2L_HUMAN  |                                 | 1  | :AGAAGGCATTG     | 0.507 |            |
| + | 10 | 977  | p.P176S UBA2_u     | NM_005499    | NP_005490    | Q9UBT2 | SAE2_HUMAN   |                                 | 1  | :ATGAACCCAG      | 0.358 |            |
| - | 4  | 1872 | :dm.1_Missense_M   | NM_001007248 | NP_001007249 | Q96NL3 | ZN599_HUMAN  | :2H2-type 11.                   | 2  | :GTCGAGTGAAG     | 0.423 |            |
| + | 5  | 1741 | Jq.1_Missense_M    | NM_194325    | NP_919306    | P17039 | ZNF30_HUMAN  |                                 | 2  | :AGAAAACCTTAT    | 0.443 |            |
| + | 10 | 1198 | 2_Missense_Muta    | NM_020895    | NP_065946    | Q96CP6 | GRM1A_HUMAN  |                                 | 0  | CACTGGGGAGG      | 0.607 |            |
| + | 3  | 242  | _uc002nys.1_5'UT   | NM_003367    | NP_003358    | Q15853 | USF2_HUMAN   |                                 | 0  | :CGGAGGAGCAG     | 0.517 |            |
| + | 5  | 991  | :G305E CD22_uc     | NM_001771    | NP_001762    | P20273 | CD22_HUMAN   | :potential).Ilg-like C2-type 2. | 9  | :GAGTGGGAAGT     | 0.582 |            |
| - | 3  | 714  | id.1_Missense_Mu   | NM_198538    | NP_940940    | Q6UWP8 | SBSN_HUMAN   | a/Gly/His-rich.                 | 1  | :CCCCTCTTGA      | 0.602 |            |
| + | 2  | 464  | /2_uc002oat.2_Int  | NM_014209    | NP_055024    | O00321 | ETV2_HUMAN   |                                 | 0  | :ATGAGGCATCC     | 0.602 |            |
| + | 18 | 1854 | p.S454N ARHGAF     | NM_052948    | NP_443180    | O14559 | RHG33_HUMAN  |                                 | 4  | :CAGCAGCTGGA     | 0.672 |            |

|   |    |       |                   |              |              |        |             |                               |    |               |       |
|---|----|-------|-------------------|--------------|--------------|--------|-------------|-------------------------------|----|---------------|-------|
| + | 21 | 2900  | AP33_uc010eel.2_  | NM_052948    | NP_443180    | O14559 | RHG33_HUMAN |                               | 4  | CTGGCCCCACCC  | 0.647 |
| - | 29 | 3615  |                   | NM_004646    | NP_004637    | O60500 | NPHN_HUMAN  | 2. Cytoplasmic (Potential).   | 5  | TCAGGCCAGTGC  | 0.547 |
| - | 18 | 2425  |                   | NM_004646    | NP_004637    | O60500 | NPHN_HUMAN  | 7. Extracellular (Potential). | 5  | CTGGGCCAGTT   | 0.597 |
| - | 5  | 621   |                   | NM_133466    | NP_597723    | Q8N141 | ZFP82_HUMAN |                               | 2  | TCCTGTCTTCA   | 0.388 |
| - | 4  | 1442  | ey.1_Missense_IV  | NM_001012756 | NP_001012774 | Q3ZCT1 | ZN260_HUMAN | 2H2-type 6.                   | 0  | TAAAAGCTTTTCC | 0.398 |
| - | 6  | 1714  | _p.P465S ZNF461   | NM_153257    | NP_694989    | Q8TAF7 | ZN461_HUMAN |                               | 0  | ATAGGGTTTCTC  | 0.393 |
| - | 5  | 1324  | uc002oev.1_Intron | NM_206894    | NP_996777    | Q6PG37 | ZN790_HUMAN | 2H2-type 8.                   | 2  | ATATAGGCTTTCC | 0.413 |
| + | 3  | 1330  | _Mutation_p.E31f  | NM_003419    | NP_003410    | Q14585 | ZN345_HUMAN | 2H2-type 10.                  | 1  | GTAAGGAGTGT   | 0.403 |
| - | 3  | 129   | 0_uc002ogq.2_Intr | NM_016536    | NP_057620    | Q7Z3V5 | ZN571_HUMAN | KRAB.                         | 0  | CACATCCCTGA   | 0.443 |
| - | 5  | 1396  | hb.1_Missense_M   | NM_032689    | NP_116078    | Q96SK3 | ZN607_HUMAN | 2H2-type 6.                   | 0  | TAAGGCCTGCT   | 0.428 |
| - | 2  | 158   | e_Mutation_p.D44  | NM_152360    | NP_689573    | Q86YE8 | ZN573_HUMAN | KRAB.                         | 1  | AGGGTCCAGGT   | 0.403 |
| - | 6  | 705   | ty.1_Missense_Mi  | NM_001039672 | NP_001034761 | Q5BJH7 | YIF1B_HUMAN | asmic (Potential).            | 0  | CGATGGTGGTG   | 0.637 |
| + | 8  | 941   | _p.L226F FAM98C   | NM_174905    | NP_777565    | Q17RN3 | FA98C_HUMAN |                               | 1  | AGGTGCTTATGC  | 0.557 |
| + | 5  | 542   | u.2_Missense_Mu   | NM_000540    | NP_000531    | P21817 | RYR1_HUMAN  | oplasmic. MIR 1.              | 12 | TGCAGGAGGAC   | 0.612 |
| + | 25 | 3408  | .2_Missense_Mut   | NM_000540    | NP_000531    | P21817 | RYR1_HUMAN  | ats. Cytoplasmic. B30.2/Sf    | 12 | TGAAGCAGTCA   | 0.607 |
| + | 39 | 6446  | _Mutation_p.A210  | NM_000540    | NP_000531    | P21817 | RYR1_HUMAN  | 6 X approximate repeats.      | 12 | GCTGGGCCCAA   | 0.672 |
| + | 57 | 8849  | _Mutation_p.P290  | NM_000540    | NP_000531    | P21817 | RYR1_HUMAN  | te repeats. Cytoplasmic. 6.   | 12 | TGGTCCCCTAC   | 0.602 |
| + | 6  | 655   | _p.W156* EIF3K_   | NM_013234    | NP_037366    | Q9UBQ5 | EIF3K_HUMAN |                               | 2  | CGCTGGCTGCT   | 0.612 |
| + | 20 | 2571  | jb.1_Missense_Mt  | NM_004924    | NP_004915    | O43707 | ACTN4_HUMAN | EF-hand 2.                    | 0  | CGCGGGAGACC   | 0.607 |
| - | 8  | 785   | h.2_Missense_Mu   | NM_001398    | NP_001389    | Q13011 | ECH1_HUMAN  |                               | 1  | CTCAGCCATCA   | 0.687 |
| - | 6  | 485   | NL_uc010xuo.1_IV  | NM_198445    | NP_940847    | Q6ZS11 | RINL_HUMAN  |                               | 1  | TTTCATCTCTGGC | 0.567 |
| - | 4  | 397   | _p.G46E SIRT2_1   | NM_012237    | NP_036369    | Q8IXJ6 | SIRT2_HUMAN | tylase sirtuin-type.          | 0  | CCACCCCTTCC   | 0.617 |
| + | 2  | 343   | 33_splice NFKBIB  | NM_002503    | NP_002494    | Q15653 | IKBB_HUMAN  |                               | 2  | GCCAGGTGAGC   | 0.587 |
| + | 5  | 824   | PL_uc010egl.2_Int | NM_001004318 | NP_001004318 | Q6ZNF0 | PAPL_HUMAN  |                               | 0  | TTGGGGATAGG   | 0.607 |
| - | 2  | 233   | uu.1_Missense_Mt  | NM_172139    | NP_742151    | Q8IZI9 | IL28B_HUMAN |                               | 0  | CCTGGGGAAGA   | 0.637 |
| + | 1  | 102   |                   | NM_172140    | NP_742152    | Q8IU54 | IL29_HUMAN  |                               | 0  | CATGGCTGCAG   | 0.557 |
| + | 8  | 1178  | 2olj.2_Missense_M | NM_022835    | NP_073746    | Q9H7P9 | PKHG2_HUMAN |                               | 4  | TGAAGCGCAAG   | 0.667 |
| + | 19 | 3006  | HG2_uc002olj.2_I  | NM_022835    | NP_073746    | Q9H7P9 | PKHG2_HUMAN |                               | 4  | CCTGGGTCCTG   | 0.562 |
| + | 9  | 1160  | MM50_uc002olv.1_  | NM_001001563 | NP_001001563 | Q3ZCQ8 | TIM50_HUMAN | brane (Potential). FCP1 hc    | 1  | ATCGGGACCCA   | 0.532 |
| - | 34 | 15561 |                   | NM_003890    | NP_003881    | Q9Y6R7 | FCGBP_HUMAN | Cys-rich.                     | 9  | AGTTTACCTGTG  | 0.388 |
| - | 21 | 9553  |                   | NM_003890    | NP_003881    | Q9Y6R7 | FCGBP_HUMAN | TIL 7.                        | 9  | AGGGGCCCTCA   | 0.647 |
| - | 4  | 2223  |                   | NM_003890    | NP_003881    | Q9Y6R7 | FCGBP_HUMAN |                               | 9  | AGTTGGCTGGTG  | 0.567 |
| + | 7  | 1274  | mt.2_Missense_M   | NM_178544    | NP_848639    | Q86UE3 | ZN546_HUMAN | 2H2-type 5.                   | 3  | TTTAGACTTCA   | 0.398 |
| - | 6  | 800   | sense_Mutation_p. | NM_001010880 | NP_001010880 | O75290 | Z780A_HUMAN |                               | 0  | CAAAGGGTTTC   | 0.368 |
| - | 7  | 623   | _p.E67K C19orf47  | NM_178830    | NP_849152    | Q8N9M1 | CS047_HUMAN |                               | 2  | CCCCTCCATCT   | 0.647 |
| + | 11 | 1453  | _p.A352V PLD3_uc  | NM_001031696 | NP_001026866 | Q8IV08 | PLD3_HUMAN  | renal (Potential).            | 3  | GCGGGCCACCT   | 0.662 |
| - | 3  | 1519  |                   | NM_144685    | NP_653286    | Q8NE63 | HIPK4_HUMAN |                               | 2  | GAAGGGGCTGC   | 0.647 |
| - | 3  | 1394  |                   | NM_144685    | NP_653286    | Q8NE63 | HIPK4_HUMAN |                               | 2  | AGAGGCGGTAG   | 0.672 |
| - | 2  | 836   |                   | NM_144685    | NP_653286    | Q8NE63 | HIPK4_HUMAN | rotein kinase.                | 2  | TCTCAGGGGCC   | 0.647 |
| + | 33 | 7158  | .N2358D SPTBN4    | NM_020971    | NP_066022    | Q9H254 | SPTN4_HUMAN |                               | 5  | TGCCCAACGGG   | 0.483 |
| + | 6  | 1831  |                   | NM_025194    | NP_079470    | Q96DU7 | IP3KC_HUMAN |                               | 0  | GCCTAGAAGAA   | 0.572 |
| - | 8  | 1207  |                   | NM_000762    | NP_000753    | P11509 | CP2A6_HUMAN |                               | 2  | AGAGCCAGCA    | 0.552 |
| - | 6  | 1395  | _p.E285K CYP2A7   | NM_000764    | NP_000755    | P20853 | CP2A7_HUMAN |                               | 3  | GAACTCCGTGT   | 0.552 |
| - | 4  | 1093  | _p.S184F CYP2A7   | NM_000764    | NP_000755    | P20853 | CP2A7_HUMAN |                               | 3  | CAATGGAGCTG   | 0.547 |
| + | 3  | 431   | Y2B6_uc010xvu.    | NM_000767    | NP_000758    | P20813 | CP2B6_HUMAN |                               | 2  | GGAGTGTGGAG   | 0.532 |
| + | 3  | 353   |                   | NM_000766    | NP_000757    | Q16696 | CP2AD_HUMAN |                               | 3  | CCCCAGGCGTG   | 0.697 |
| + | 3  | 477   | .1_Intron CYP2S1  | NM_030622    | NP_085125    | Q96SQ9 | CP2S1_HUMAN |                               | 1  | CATGGGGAAGC   | 0.622 |

|   |    |      |                    |              |              |        |             |                               |    |              |       |
|---|----|------|--------------------|--------------|--------------|--------|-------------|-------------------------------|----|--------------|-------|
| + | 6  | 970  | YP2S1_uc010xvx     | NM_030622    | NP_085125    | Q96SQ9 | CP2S1_HUMAN |                               | 1  | ACGATGACGGT  | 0.493 |
| + | 20 | 2753 | O2oqa.3_5'Flank    | NM_021913    | NP_068713    | P30530 | UFO_HUMAN   | lasmic (Potential).           | 13 | GCTGCCTCACT  | 0.627 |
| - | 2  | 230  | 491_uc002oqi.2_In  | NM_030578    | NP_085055    | Q9BPU9 | B9D2_HUMAN  | B9.                           | 1  | GTGCACCTCAG  | 0.373 |
| + | 2  | 409  | ense_Mutation_p.E  | NM_000709    | NP_000700    | P12694 | ODBA_HUMAN  |                               | 0  | AATGTGAGACCA | 0.602 |
| + | 7  | 1824 | p.A567V CEACAM     | NM_004363    | NP_004354    | P06731 | CEAM5_HUMAN | Ig-like 6.                    | 2  | CAAGAGCCTATG | 0.522 |
| - | 17 | 2562 | p.G773D ATP1A3_    | NM_152296    | NP_689509    | P13637 | AT1A3_HUMAN | ical; (Potential).            | 2  | CAGTGCCCAAG  | 0.647 |
| - | 16 | 2158 | si.1_Missense_Mu   | NM_002088    | NP_002079    | Q16478 | GRIK5_HUMAN | ellular (Potential).          | 0  | CAATGCCCTCT  | 0.587 |
| - | 15 | 2046 | si.1_Missense_Mu   | NM_002088    | NP_002079    | Q16478 | GRIK5_HUMAN | ellular (Potential).          | 0  | GCCGGCGTGGA  | 0.627 |
| + | 2  | 1310 | sk.3_Missense_M    | NM_022752    | NP_073589    | Q6ZN55 | ZN574_HUMAN | 2H2-type 7.                   | 0  | TCCTGGCCCACT | 0.582 |
| - | 12 | 1221 | p.G158E POU2F2     | NM_002698    | NP_002689    | P09086 | PO2F2_HUMAN |                               | 2  | AGGTCCCCGCG  | 0.617 |
| - | 8  | 632  | OU2F2_uc002osq     | NM_002698    | NP_002689    | P09086 | PO2F2_HUMAN |                               | 2  | TGGCTCCAAGC  | 0.682 |
| + | 3  | 508  |                    | NM_133444    | NP_597701    | Q8TF50 | ZN526_HUMAN | 2H2-type 2.                   | 0  | TATCCTCTCTCC | 0.632 |
| - | 2  | 226  | F_uc002otd.3_5'U   | NM_006494    | NP_006485    | P50548 | ERF_HUMAN   |                               | 4  | TTGAGCCAGGG  | 0.637 |
| + | 10 | 2639 |                    | NM_015125    | NP_055940    | Q96RK0 | CIC_HUMAN   | Pro-rich.                     | 11 | CCCTCCCACCG  | 0.682 |
| + | 12 | 1014 |                    | NM_173633    | NP_775904    | Q8NBT3 | TM145_HUMAN | ical; (Potential).            | 0  | GATTGGACTGC  | 0.582 |
| + | 13 | 1230 |                    | NM_173633    | NP_775904    | Q8NBT3 | TM145_HUMAN | ical; (Potential).            | 0  | GTACGCCCATG  | 0.592 |
| - | 5  | 1124 | uc010eig.1_Intron  | NM_001816    | NP_001807    | P31997 | CEAM8_HUMAN |                               | 1  | AGTACTCCAATC | 0.463 |
| - | 4  | 1066 | x.2_Missense_Mu    | NM_002781    | NP_002772    | Q15238 | PSG5_HUMAN  | like C2-type 2.               | 3  | TGGAGCTTTCC  | 0.458 |
| - | 2  | 472  | se_Mutation_p.R11  | NM_002781    | NP_002772    | Q15238 | PSG5_HUMAN  | g-like V-type.                | 3  | GTTCCCGGGTG  | 0.433 |
| - | 12 | 1510 | wp.1_Missense_M    | NM_006297    | NP_006288    | P18887 | XRCC1_HUMAN |                               | 7  | CTGGAGCACTG  | 0.408 |
| - | 5  | 1306 | iz.2_Missense_Mt   | NM_002250    | NP_002241    | O15554 | KCNN4_HUMAN | nodulin-binding.              | 2  | GATATCCATCAT | 0.552 |
| - | 3  | 364  | xn.3_Missense_M    | NM_001031749 | NP_001026919 | Q6UWN5 | LYPD5_HUMAN |                               | 0  | GTCTGGCGGCA  | 0.692 |
| + | 7  | 1091 | xp.3_Missense_M    | NM_181845    | NP_862828    | Q8N7M2 | ZN283_HUMAN | 2H2-type 3.                   | 0  | GCTGGGGATCA  | 0.418 |
| - | 2  | 1442 |                    | NM_001033719 | NP_001028891 | Q494X3 | ZN404_HUMAN | 2H2-type 13.                  | 0  | AAAGACCTGAG  | 0.343 |
| - | 4  | 698  | p.A200V ZNF45_1    | NM_003425    | NP_003416    | Q02386 | ZNF45_HUMAN | 2H2-type 2.                   | 1  | GGAAGGCATTA  | 0.418 |
| + | 4  | 658  | nse_Mutation_p.A'  | NM_013360    | NP_037492    | Q9UK12 | ZN222_HUMAN | 2H2-type 1.                   | 3  | ATCTCAGCCCTT | 0.423 |
| + | 4  | 1447 | nse_Mutation_p.E'  | NM_013360    | NP_037492    | Q9UK12 | ZN222_HUMAN |                               | 3  | GTTGGAGAAAAC | 0.378 |
| + | 5  | 1976 | p.S495N ZNF225_    | NM_013362    | NP_037494    | Q9UK10 | ZN225_HUMAN | 2H2-type 15.                  | 0  | CTTTAGCCGGG  | 0.428 |
| + | 6  | 2190 | 226_uc010ejg.2_3   | NM_001032373 | NP_001027545 | Q9NYT6 | ZN226_HUMAN | 2H2-type 16.                  | 0  | AAGTGGAGCTT  | 0.473 |
| - | 7  | 1385 | 0ejp.1_Missense_   | NM_001102597 | NP_001096067 | Q6UY09 | CEA20_HUMAN | ical; (Potential).            | 2  | GACAGCCAGGA  | 0.567 |
| - | 6  | 1076 | 354K CEACAM20_     | NM_001102597 | NP_001096067 | Q6UY09 | CEA20_HUMAN | 4. Extracellular (Potential). | 2  | GACTCCCTGG   | 0.567 |
| + | 3  | 668  | jt.2_Missense_Mu   | NM_012116    | NP_036248    | Q9ULV8 | CBLC_HUMAN  | EF-hand-like. Cbl-PTB.        | 6  | CACCTGCAGCG  | 0.522 |
| + | 7  | 1156 | jt.2_Missense_Mu   | NM_012116    | NP_036248    | Q9ULV8 | CBLC_HUMAN  | RING-type.                    | 6  | TGAGCCGTGCG  | 0.607 |
| + | 12 | 1662 | ozt.1_Splice_Site_ | NM_005581    | NP_005572    | P50895 | BCAM_HUMAN  |                               | 1  | CACCGGTGAGT  | 0.647 |
| - | 5  | 556  |                    | NM_001824    | NP_001815    | P06732 | KCRM_HUMAN  | jen kinase C-terminal.        | 1  | TGAGAGCTATG  | 0.602 |
| - | 4  | 424  |                    | NM_001824    | NP_001815    | P06732 | KCRM_HUMAN  |                               | 1  | TCCACCCTGG   | 0.657 |
| + | 4  | 674  | p.G186S KLC3_uc    | NM_177417    | NP_803136    | Q6P597 | KLC3_HUMAN  |                               | 1  | GAAAGGTGGG   | 0.657 |
| + | 8  | 1238 | p.A374T KLC3_uc    | NM_177417    | NP_803136    | Q6P597 | KLC3_HUMAN  | TPR 5.                        | 1  | ACGTGGCCAAG  | 0.642 |
| - | 9  | 1926 | p.P196S PPP1R1     | NM_006663    | NP_006654    | Q8WUF5 | IASPP_HUMAN |                               | 1  | CGCGGGGAGC   | 0.602 |
| + | 3  | 1464 | J2bbp.2_5'Flank C  | NM_012099    | NP_036231    | O15446 | RPA34_HUMAN |                               | 4  | TGCCCTACG    | 0.587 |
| - | 2  | 1964 | A3_uc010xxk.1_In   | NM_005282    | NP_005273    | P46093 | GPR4_HUMAN  | lasmic (Potential).           | 2  | AGCTGCCAGTC  | 0.627 |
| - | 15 | 1459 | xl.1_Missense_Mu   | NM_012155    | NP_036287    | O95834 | EMAL2_HUMAN | WD 8.                         | 2  | GGCCAGGTAC   | 0.692 |
| - | 22 | 3127 | p.S961F SYMPK_     | NM_004819    | NP_004810    | Q92797 | SYMPK_HUMAN |                               | 1  | TGATGATTTC   | 0.602 |
| - | 14 | 2155 | p.G637D SYMPK_     | NM_004819    | NP_004810    | Q92797 | SYMPK_HUMAN |                               | 1  | GGGAGCCCGAG  | 0.642 |
| - | 11 | 1513 | dp.1_Missense_M    | NM_004819    | NP_004810    | Q92797 | SYMPK_HUMAN |                               | 1  | CCTCGGTAGG   | 0.488 |
| - | 8  | 975  | dp.1_Missense_M    | NM_004819    | NP_004810    | Q92797 | SYMPK_HUMAN |                               | 1  | GTGCCACATGA  | 0.572 |
| + | 2  | 583  |                    | NM_004497    | NP_004488    | P55318 | FOXA3_HUMAN | Fork-head.                    | 1  | CATGGCCATCC  | 0.597 |

rs139230139

rs113739218

|   |    |           |                    |              |              |        |             |                             |   |               |       |           |
|---|----|-----------|--------------------|--------------|--------------|--------|-------------|-----------------------------|---|---------------|-------|-----------|
| - | 4  | 1417      |                    | NM_002516    | NP_002507    | Q9UNW9 | NOVA2_HUMAN | KH 3.                       | 0 | GGTGACCCGCC   | 0.652 |           |
| + | 1  | 164       | PP5C_uc002pen.2    | NM_006247    | NP_006238    | P53041 | PPP5_HUMAN  | TPR 1.                      | 2 | TCAGGCCAATG   | 0.682 |           |
| - | 1  | 1902_1903 |                    | NM_032040    | NP_114429    | Q9H0W5 | CCDC8_HUMAN | Potential.                  | 3 | CCCTCCTCAGC   | 0.609 |           |
| - | 5  | 718       | p.L229F STRN4_u    | NM_013403    | NP_037535    | Q9NRL3 | STRN4_HUMAN |                             | 0 | ACTGAGCCCTG   | 0.652 |           |
| + | 1  | 650       |                    | NM_004491    | NP_004482    | Q9NRY4 | RHG35_HUMAN |                             | 1 | TTTTGCCTTAAC  | 0.438 |           |
| - | 4  | 775       | ky.2_Missense_Mt   | NM_014417    | NP_055232    | Q9BXH1 | BBC3_HUMAN  |                             | 0 | GTGAGGGGCGG   | 0.612 |           |
| + | 2  | 596       |                    | NM_001736    | NP_001727    | P21730 | C5AR_HUMAN  | cellular (Potential).       | 4 | TACTTCCACCA   | 0.637 |           |
| + | 11 | 2785      | 34_uc010xyo.1_5'   | NM_014681    | NP_055496    | Q14147 | DHX34_HUMAN |                             | 5 | CGTCCCCGACG   | 0.562 |           |
| - | 7  | 2241      | xyr.1_Missense_M   | NM_015063    | NP_055878    | Q9UPR5 | NAC2_HUMAN  | lasmic (Potential).         | 4 | AGTTCTCCCCAA  | 0.572 |           |
| + | 3  | 726       | yu.1_Missense_Mi   | NM_014601    | NP_055416    | Q9NZN4 | EHD2_HUMAN  |                             | 2 | CCTGTCGGGTG   | 0.408 |           |
| + | 4  | 1097      | e_Mutation_p.Q14   | NM_014601    | NP_055416    | Q9NZN4 | EHD2_HUMAN  |                             | 2 | ACATCCAGGGC   | 0.677 |           |
| + | 3  | 409       | e_Mutation_p.P12   | NM_015710    | NP_056525    | Q9NZM5 | GSCR2_HUMAN |                             | 1 | AAGTCCCTGCC   | 0.557 |           |
| - | 16 | 1978      | splice PLA2G4C     | NM_003706    | NP_003697    | Q9UP65 | PA24C_HUMAN |                             | 2 | ACCTACCCGGC   | 0.333 |           |
| - | 7  | 1131      | n_p.S298F CARD     | NM_014959    | NP_055774    | Q9Y2G2 | CARD8_HUMAN |                             | 0 | TTAGCAGAATTAC | 0.433 |           |
| - | 3  | 490       | 2pja.1_Missense_M  | NM_006801    | NP_006792    | P24390 | ERD21_HUMAN | ical; (Potential).          | 0 | AACGACCAGGA   | 0.522 |           |
| + | 7  | 1301      | 3_Mutation_p.G10   | NM_020126    | NP_064511    | Q9NRA0 | SPHK2_HUMAN | DAGKc.                      | 1 | GGGTGGTGGCC   | 0.617 |           |
| - | 5  | 1088      | C1_uc010ema.2_I    | NM_001217    | NP_001208    | O75493 | CAH11_HUMAN |                             | 0 | GCCGCGGGAGG   | 0.483 |           |
| - | 4  | 1163      |                    | NM_000148    | NP_000139    | P19526 | FUT1_HUMAN  | renal (Potential).          | 1 | TGGGGCCCATC   | 0.622 |           |
| - | 1  | 738       |                    | NM_002152    | NP_002143    | P23327 | SRCH_HUMAN  | . 1-1.16 X approximate tand | 1 | CATGGCCTCGG   | 0.463 |           |
| + | 4  | 395       | _Intron TRPM4_uc   | NM_017636    | NP_060106    | Q8TD43 | TRPM4_HUMAN | lasmic (Potential).         | 2 | CACACGCACAT   | 0.657 |           |
| + | 4  | 404       | _Intron TRPM4_uc   | NM_017636    | NP_060106    | Q8TD43 | TRPM4_HUMAN | lasmic (Potential).         | 2 | ATGGGGCTTCC   | 0.667 |           |
| + | 10 | 1318      | e_Mutation_p.G24   | NM_017636    | NP_060106    | Q8TD43 | TRPM4_HUMAN | lasmic (Potential).         | 2 | TTCGGGGGGAC   | 0.572 |           |
| + | 13 | 1820      | 3_Mutation_p.S40   | NM_017636    | NP_060106    | Q8TD43 | TRPM4_HUMAN | lasmic (Potential).         | 2 | AGGGTTCCAATG  | 0.582 |           |
| - | 3  | 597       | p.R135K PIH1D1_    | NM_017916    | NP_060386    | Q9NWS0 | PIHD1_HUMAN |                             | 0 | AGGCTCTCCCA   | 0.393 |           |
| + | 4  | 213       | n_p.T54I SNORD3    | NM_012423    | NP_036555    | P40429 | RL13A_HUMAN |                             | 0 | GAAACCAACC    | 0.642 |           |
| + | 4  | 449       |                    | NM_020719    | NP_065770    | Q9ULL5 | PRR12_HUMAN |                             | 2 | GTCGGCTTACC   | 0.662 |           |
| + | 3  | 308       | ense_Mutation_p.1  | NM_007121    | NP_009052    | P55055 | NR1H2_HUMAN |                             | 0 | GGATACCCCC    | 0.567 |           |
| + | 8  | 1145      | rz.3_Intron NR1H2  | NM_007121    | NP_009052    | P55055 | NR1H2_HUMAN | -binding (Potential).       | 0 | AGTGCTGGTT    | 0.602 |           |
| + | 1  | 331       |                    | NM_001506    | NP_001497    | O75388 | GPR32_HUMAN | cellular (Potential).       | 1 | TCGGAGAGTGG   | 0.527 |           |
| - | 4  | 352       | 1_p.P91S KLK10_u   | NM_145888    | NP_665895    | O43240 | KLK10_HUMAN | peptidase S1.               | 2 | CAGTGGCCTGG   | 0.607 |           |
| + | 7  | 1382      | A345V SIGLEC7_u    | NM_014385    | NP_055200    | Q9Y286 | SIGL7_HUMAN | c (Potential). ITIM motif.  | 1 | GTATGCACCCC   | 0.527 |           |
| + | 5  | 923       | l9orf75_uc010ycw   | NM_173635    | NP_775906    | Q8N7X8 | CS075_HUMAN |                             | 2 | TAGTCGCCACAT  | 0.458 |           |
| - | 5  | 1155      | EC8_uc002pww.2     | NM_014442    | NP_055257    | Q9NYZ4 | SIGL8_HUMAN | cellular (Potential).       | 5 | CGACTGCTGCC   | 0.567 |           |
| + | 5  | 1045      |                    | NM_007147    | NP_009078    | Q9Y473 | ZN175_HUMAN |                             | 0 | AACAGCTTGAT   | 0.413 |           |
| - | 5  | 1580      | 2_5'Flank ZNF577   | NM_023074    | NP_075562    | Q9BS31 | ZN649_HUMAN | :2H2-type 10.               | 3 | GTAAGCTTTCTC  | 0.448 |           |
| - | 5  | 1244      | 577_uc010ydf.1_5'  | NM_023074    | NP_075562    | Q9BS31 | ZN649_HUMAN | :2H2-type 6.                | 3 | GGAAGCTTTTTC  | 0.463 |           |
| - | 5  | 954       | 577_uc010ydf.1_5'  | NM_023074    | NP_075562    | Q9BS31 | ZN649_HUMAN |                             | 3 | CTCCTCTGTGAC  | 0.488 |           |
| - | 4  | 423       |                    | NM_023074    | NP_075562    | Q9BS31 | ZN649_HUMAN | KRAB.                       | 3 | GTTTGCCGGCT   | 0.498 |           |
| - | 5  | 1115      | 1_2_Intron uc002py | NM_021632    | NP_067645    | Q9GZX5 | ZN350_HUMAN | :2H2-type 4.                | 1 | CCTTTTCCACAT  | 0.408 |           |
| - | 6  | 1047      | yh.1_Missense_M    | NM_198480    | NP_940882    | Q8N8J6 | ZN615_HUMAN | :2H2-type 2.                | 5 | GAGTTCTCTGAT  | 0.388 |           |
| + | 2  | 131       | 880_uc002pzb.3_I   | NM_001145434 | NP_001138906 | Q6PDB4 | ZN880_HUMAN | KRAB.                       | 0 | CTGCTCAGAGG   | 0.483 |           |
| + | 4  | 643       |                    | NM_001145434 | NP_001138906 | Q6PDB4 | ZN880_HUMAN | ype 1; degenerate.          | 0 | GCAAGACTTGC   | 0.373 | rs8104808 |
| + | 7  | 1816      | zi.2_Missense_Mi   | NM_032423    | NP_115799    | Q3MIS6 | ZN528_HUMAN |                             | 2 | GAGAAACCTTAT  | 0.378 |           |
| + | 4  | 1778      | po.1_Intron ZNF5   | NM_001143939 | NP_001137411 | Q76KX8 | ZN534_HUMAN | :2H2-type 14.               | 0 | CTTTCAGTCGG   | 0.453 |           |
| + | 5  | 1117      | .2_RNA ZNF808_u    | NM_001039886 | NP_001034975 | Q8N4W9 | ZN808_HUMAN |                             | 0 | GAAAACCTTACA  | 0.393 |           |
| + | 5  | 2522      | .2_RNA ZNF808_u    | NM_001039886 | NP_001034975 | Q8N4W9 | ZN808_HUMAN | :2H2-type 20.               | 0 | CCATCGTAGAC   | 0.428 |           |
| + | 4  | 1353      | dn.1_Missense_M    | NM_018260    | NP_060730    | Q9NV72 | ZN701_HUMAN |                             | 0 | GAAACGTTACA   | 0.373 |           |

|   |    |           |                               |              |              |        |             |                      |    |                |       |             |
|---|----|-----------|-------------------------------|--------------|--------------|--------|-------------|----------------------|----|----------------|-------|-------------|
| - | 2  | 2553      | pv.2_Missense_Mt              | NM_018300    | NP_060770    | P51522 | ZNF83_HUMAN | :2H2-type 13.        | 1  | CGAAGACCTTCC   | 0.373 |             |
| - | 5  | 1219      | p.A385T ZNF347_               | NM_032584    | NP_115973    | Q96SE7 | ZN347_HUMAN | :2H2-type 5.         | 0  | ACGAGCTCTAA    | 0.423 |             |
| - | 5  | 994       | p.V310M ZNF347_               | NM_032584    | NP_115973    | Q96SE7 | ZN347_HUMAN | :2H2-type 2.         | 0  | GATCACCTGATC   | 0.393 |             |
| - | 5  | 592       | p.A176T ZNF347_               | NM_032584    | NP_115973    | Q96SE7 | ZN347_HUMAN |                      | 0  | TTCTTGCATCTC   | 0.368 |             |
| - | 4  | 1748      |                               | NM_024733    | NP_079009    | Q9H7R5 | ZN665_HUMAN | :2H2-type 14.        | 2  | GAAGACCTTGCA   | 0.383 |             |
| - | 4  | 651       |                               | NM_024733    | NP_079009    | Q9H7R5 | ZN665_HUMAN | :2H2-type 1.         | 2  | ACCTTGCCACAT   | 0.368 |             |
| - | 1  | 1399      |                               | NM_033341    | NP_203127    | Q96P09 | BIRC8_HUMAN | BIR.                 | 1  | CTTGGGCTTCC    | 0.423 |             |
| + | 4  | 2858      | dw.1_Missense_M               | NM_138374    | NP_612383    | Q96IR2 | ZN845_HUMAN |                      | 0  | AGAAACCTTACA   | 0.363 |             |
| + | 4  | 2891      | dw.1_Missense_M               | NM_138374    | NP_612383    | Q96IR2 | ZN845_HUMAN | :2H2-type 26.        | 0  | CTTCCGTCACA    | 0.363 | rs150688663 |
| + | 4  | 2950      | dw.1_Missense_M               | NM_138374    | NP_612383    | Q96IR2 | ZN845_HUMAN | :2H2-type 27.        | 0  | TACAAGTGAATC   | 0.348 |             |
| + | 7  | 1062      | p.L148F ZNF761_               | NM_001008401 | NP_001008401 | Q86XN6 | ZN761_HUMAN |                      | 1  | GCATTACTCACAC  | 0.373 |             |
| + | 7  | 2551      | p.N644T ZNF761_               | NM_001008401 | NP_001008401 | Q86XN6 | ZN761_HUMAN | :2H2-type 18.        | 1  | CAAGAACTTTAC   | 0.393 |             |
| + | 4  | 679       | 313_uc010eqq.1_               | NM_001004301 | NP_001004301 | Q6ZN06 | ZN813_HUMAN |                      | 1  | TAGGCCCAAAA    | 0.383 |             |
| + | 4  | 1746_1747 | 313_uc010eqq.1_               | NM_001004301 | NP_001004301 | Q6ZN06 | ZN813_HUMAN | :2H2-type 12.        | 1  | TTGCACATCATC   | 0.376 |             |
| - | 3  | 1940      | 2qj.3_Missense_M              | NM_144687    | NP_653288    | P59046 | NAL12_HUMAN |                      | 7  | CAGGTGGCTCC    | 0.577 | rs149697517 |
| + | 3  | 630       | p.R161Q MYADM                 | NM_001020820 | NP_001018656 | Q96S97 | MYADM_HUMAN | MARVEL 1.            | 1  | GGCCCGGCCCG    | 0.662 |             |
| + | 14 | 1857      | 25_splice PRKCG               | NM_002739    | NP_002730    | P05129 | KPCG_HUMAN  |                      | 9  | CGGAGGTAACC    | 0.572 |             |
| + | 16 | 2292      | OT3_uc002qdk.1_               | NM_014516    | NP_055331    | O75175 | CNOT3_HUMAN |                      | 3  | ACTGTGGAATTC   | 0.642 |             |
| - | 4  | 467       | uc002qel.1_Intron             | NM_006864    | NP_006855    | O75022 | LIRB3_HUMAN |                      | 3  | GGCTCCTAGGA    | 0.622 |             |
| - | 4  | 603       | v.1_Intron LILRA3             | NM_006865    | NP_006856    | Q8N6C8 | LIRA3_HUMAN | like C2-type 2.      | 1  | GATGGCCCGGG    | 0.567 |             |
| + | 4  | 409       | fw.2_Missense_Mutation_p.W89R |              |              | Q96PV6 | LENG8_HUMAN | Tyr-rich.            | 2  | ACCAGTGGTACC   | 0.463 |             |
| + | 7  | 1200      | p.L321F LILRB4                | NM_006847    | NP_006838    | Q8NHJ6 | LIRB4_HUMAN | ical; (Potential).   | 3  | ctcctctccAACAC | 0.478 |             |
| + | 3  | 161       | _Mutation_p.V41M              | NM_002255    | NP_002246    | Q99706 | KI2L4_HUMAN | ellular (Potential). | 1  | CTGTGGTGCCT    | 0.577 |             |
| - | 6  | 874       | se_Mutation_p.P15             | NM_001145971 | NP_001139443 | Q8NBN7 | RDH13_HUMAN |                      | 3  | CGCCGGGGTGC    | 0.647 |             |
| + | 5  | 764       | kf.2_Missense_Mt              | NM_032430    | NP_115806    | Q8TDC3 | BRSK1_HUMAN | rotein kinase.       | 6  | ACCTGCTTTTG    | 0.612 |             |
| - | 3  | 1009      |                               | NM_001101401 | NP_001094871 | P0C263 | SBK2_HUMAN  |                      | 0  | TGCCTCCGCC     | 0.726 |             |
| + | 2  | 277       | 3_5'Flank FIZ1_uc             | NM_153219    | NP_694951    | Q96C55 | ZN524_HUMAN |                      | 0  | GCCCCACTGG     | 0.672 |             |
| - | 5  | 1855      | b.2_Missense_Mu               | NM_145007    | NP_659444    | P59045 | NAL11_HUMAN | NACHT.               | 6  | TCCAGCCTCTG    | 0.522 |             |
| - | 5  | 525       | my.2_Nonsense_M               | NM_144690    | NP_653291    | Q96NG8 | ZN582_HUMAN |                      | 4  | CAATCCCAATC    | 0.418 |             |
| + | 5  | 622       | p.V153I ZNF583                | NM_001159860 | NP_001153332 | Q96ND8 | ZN583_HUMAN |                      | 1  | CAGAAGTTCAA    | 0.358 |             |
| + | 5  | 1875      |                               | NM_020813    | NP_065864    | Q9BX82 | ZN471_HUMAN | :2H2-type 14.        | 2  | CTTTTAGTGATAC  | 0.428 |             |
| + | 3  | 1011      |                               | NM_021216    | NP_067039    | Q9NQZ8 | ZN776_HUMAN | :2H2-type 5.         | 1  | CCTCATCGTGC    | 0.657 |             |
| + | 3  | 1014      |                               | NM_021216    | NP_067039    | Q9NQZ8 | ZN776_HUMAN | :2H2-type 5.         | 1  | CATCGTGACC     | 0.662 |             |
| - | 7  | 1975      | i_p.E513K PEG3                | NM_001146186 | NP_001139658 | Q9GZU2 | PEG3_HUMAN  |                      | 12 | GGCTTCTCAC     | 0.453 |             |
| + | 3  | 328       | qod.2_Missense_M              | NM_001015878 | NP_001015878 | Q9UQB9 | AURKC_HUMAN | rotein kinase.       | 6  | TCGGCGTCC      | 0.542 |             |
| + | 3  | 1718      | p.A491T ZNF304                | NM_020657    | NP_065708    | Q9HCX3 | ZN304_HUMAN |                      | 1  | CAGGAGCAAGA    | 0.468 |             |
| + | 3  | 389       | ZNF17_uc002qop.               | NM_006959    | NP_008890    | P17021 | ZNF17_HUMAN | KRAB.                | 1  | TGAGGCAAGG     | 0.493 |             |
| + | 5  | 647       | ense_Mutation_p.F             | NM_024691    | NP_078967    | Q96HQ0 | ZN419_HUMAN |                      | 0  | AGAAACCTTAA    | 0.522 |             |
| - | 4  | 1073      | 47_uc002qpm.3_I               | NM_017879    | NP_060349    | Q9BWM5 | ZN416_HUMAN | :2H2-type 3.         | 0  | ACTGACCACAC    | 0.453 |             |
| + | 3  | 1351      | e_Mutation_p.H24              | NM_003435    | NP_003426    | P52741 | ZN134_HUMAN | :2H2-type 11.        | 0  | ATCGGCACCAG    | 0.463 |             |
| + | 3  | 1043      |                               | NM_152677    | NP_689890    | Q8NAM6 | ZSCA4_HUMAN | SCAN box.            | 1  | ACTTGAGAGAG    | 0.413 |             |
| + | 2  | 264       | :3_Intron ZNF776              | NM_138347    | NP_612356    | Q7Z340 | ZN551_HUMAN | KRAB.                | 1  | TATGACCTTTG    | 0.502 |             |
| - | 2  | 313       | 671_uc010eug.2_               | NM_024833    | NP_079109    | Q8TAW3 | ZN671_HUMAN | KRAB.                | 1  | CAAAAGTCTCT    | 0.463 |             |
| + | 3  | 1094      | VF776_uc002qqa.2              | NM_173632    | NP_775903    | Q68D11 | ZN776_HUMAN |                      | 1  | AAAGACCTTAT    | 0.423 |             |
| + | 3  | 1610      | VF776_uc002qqa.2              | NM_173632    | NP_775903    | Q68D11 | ZN776_HUMAN | ype 10; degenerate.  | 1  | AGTGTGGAGAA    | 0.448 |             |
| + | 3  | 833       | p.L174F ZNF586                | NM_017652    | NP_060122    | Q9NXT0 | ZN586_HUMAN | :2H2-type 5.         | 2  | CCTTTGCTTATAC  | 0.438 |             |
| - | 4  | 2157      | IF418_uc010yho.1              | NM_133460    | NP_597717    | Q8TF45 | ZN418_HUMAN | :2H2-type 15.        | 0  | ATTCGCTGCAC    | 0.438 |             |



|   |    |       |                     |              |              |        |             |                             |     |               |       |
|---|----|-------|---------------------|--------------|--------------|--------|-------------|-----------------------------|-----|---------------|-------|
| - | 4  | 1830  | IF418_uc010yho.1    | NM_133460    | NP_597717    | Q8TF45 | ZN418_HUMAN | :2H2-type 12.               | 0   | CATTCACTACAC  | 0.433 |
| + | 7  | 1493  | ation_p.S312F ZNF   | NM_014480    | NP_055295    | Q6NX49 | ZN544_HUMAN |                             | 1   | CCTCATCTTTTTC | 0.468 |
| + | 3  | 1235  | N22_uc010yhz.1_     | NM_181846    | NP_862829    | P10073 | ZSC22_HUMAN | :2H2-type 4.                | 1   | CAGCCGCAGCA   | 0.592 |
| - | 2  | 1032  | _p.A247V ZBTB45     | NM_032792    | NP_116181    | Q96K62 | ZBT45_HUMAN |                             | 0   | iCAGCAGCAGTG  | 0.652 |
| + | 8  | 1479  | _p.A315V TRIM28     | NM_005762    | NP_005753    | Q13263 | TIF1B_HUMAN |                             | 3   | CAATGCCTGGA   | 0.537 |
| - | 5  | 1006  | Flank CHMP2A_uc     | NM_003969    | NP_003960    | P61081 | UBC12_HUMAN |                             | 2   | ACTACCAAGA    | 0.552 |
| - | 7  | 640   | lewe.2_Missense_    | NM_015677    | NP_056492    | Q96HL8 | SH3Y1_HUMAN |                             | 1   | CATAAGCTCGGA  | 0.318 |
| + | 14 | 2508  | t.2_Missense_Mut    | NM_000547    | NP_000538    | P07202 | PERT_HUMAN  | EGF-like; calcium-binding ( | 20  | CCACCCCCCT    | 0.642 |
| - | 10 | 1305  | _p.A414V PXDN_u     | NM_012293    | NP_036425    | Q92626 | PXDN_HUMAN  | like C2-type 2.             | 8   | TGGTCGCAGAG   | 0.592 |
| - | 3  | 1058  | _p.E317* CMPK2_     | NM_207315    | NP_997198    | Q5EBM0 | CMPK2_HUMAN |                             | 0   | TATTTTCGGAGG  | 0.373 |
| - | 25 | 3667  | Jyiw.1_Intron KID1  | NM_020738    | NP_065789    | Q9ULH0 | KDIS_HUMAN  | lasmic (Potential).         | 4   | CTGATGGACGTC  | 0.388 |
| - | 16 | 2002  | 'qzd.2_Missense_'   | NM_020738    | NP_065789    | Q9ULH0 | KDIS_HUMAN  | (Potential). KAP NTPase.    | 4   | CTACACTGGAC   | 0.358 |
| + | 10 | 1274  | 'zi.2_Missense_Mt   | NM_003887    | NP_003878    | O43150 | ASAP2_HUMAN | PH.                         | 0   | GCAGCCCTCTAC  | 0.463 |
| + | 4  | 405   | .H1_uc002qzt.2_N    | NM_001039613 | NP_001034702 | Q2TAA2 | IAH1_HUMAN  |                             | 0   | AGAATCGAGTC   | 0.512 |
| + | 6  | 555   | utation_p.S152N T   | NM_005680    | NP_005671    | Q53T94 | TAF1B_HUMAN |                             | 3   | FGCTAAGTGATG  | 0.408 |
| - | 2  | 194   | _p.G71V PDIA6_u     | NM_005742    | NP_005733    | Q15084 | PDIA6_HUMAN |                             | 0   | FACAGACCATTG  | 0.413 |
| - | 6  | 1091  | 'i_uc002rbg.2_Splic | NM_198256    | NP_937987    | O75461 | E2F6_HUMAN  |                             | 1   | TATTTACCTTCCT | 0.393 |
| + | 3  | 547   | B1_uc002rbm.2_5'    | NM_014668    | NP_055483    | Q4ZG55 | GREB1_HUMAN |                             | 1   | TGCACCCTCTG   | 0.622 |
| + | 7  | 1075  | im.2_Missense_Mt    | NM_014668    | NP_055483    | Q4ZG55 | GREB1_HUMAN |                             | 1   | CAGGACCAGCT   | 0.483 |
| + | 10 | 1549  | 'p.V417 GREB1_      | NM_014668    | NP_055483    | Q4ZG55 | GREB1_HUMAN |                             | 1   | AGTCTGTCTCAC  | 0.582 |
| + | 12 | 2081  | oo.1_Missense_Mt    | NM_014668    | NP_055483    | Q4ZG55 | GREB1_HUMAN |                             | 1   | TACGGGGAAGG   | 0.418 |
| + | 21 | 3692  | bp.1_Missense_Mt    | NM_014668    | NP_055483    | Q4ZG55 | GREB1_HUMAN | Ser-rich.                   | 1   | CTCATCCCTCTC  | 0.527 |
| + | 2  | 429   | 34A_uc002rca.1_5'   | NM_145175    | NP_660158    | Q96KN4 | FA84A_HUMAN |                             | 1   | GCACCCCTGC    | 0.647 |
| - | 45 | 5875  | xl.1_Missense_Mt    | NM_015909    | NP_056993    | A2RRP1 | NBAS_HUMAN  |                             | 4   | CCATAGGTAACT  | 0.403 |
| - | 36 | 4317  | e_Mutation_p.A50    | NM_015909    | NP_056993    | A2RRP1 | NBAS_HUMAN  |                             | 4   | GACGGCCTGCA   | 0.483 |
| + | 3  | 1550  | jr.1_Missense_Mu    | NM_005378    | NP_005369    | P04198 | MYCN_HUMAN  | -loop-helix motif.          | 5   | GAAGGCCGCCA   | 0.547 |
| - | 1  | 389   | Jexn.1_Missense_    | NM_001099218 | NP_001092688 | Q09MP3 | R51A2_HUMAN |                             | 1   | CAGGACTTTGTC  | 0.478 |
| - | 27 | 3444  | o.P1050S SMC6_u     | NM_001142286 | NP_001135758 | Q96SB8 | SMC6_HUMAN  |                             | 6   | TTGAGGTGTGAC  | 0.318 |
| - | 3  | 1088  |                     | NM_145260    | NP_660303    | Q8TAX0 | OSR1_HUMAN  |                             | 1   | TCTTGGAGGTTT  | 0.557 |
| - | 14 | 2249  | D2_splice PUM2_u    | NM_015317    | NP_056132    | Q8TB72 | PUM2_HUMAN  |                             | 1   | ATGAATCTACATA | 0.338 |
| - | 3  | 196   | jj.1_Missense_Mu    | NM_015317    | NP_056132    | Q8TB72 | PUM2_HUMAN  | tion with SNAPIN.           | 1   | iGCTGGGACATT  | 0.343 |
| - | 29 | 13392 |                     | NM_000384    | NP_000375    | P04114 | APOB_HUMAN  |                             | 27  | AGAATGGAAGT   | 0.363 |
| - | 25 | 4261  |                     | NM_000384    | NP_000375    | P04114 | APOB_HUMAN  |                             | 27  | iTGCTGGTGTG   | 0.517 |
| - | 24 | 3891  |                     | NM_000384    | NP_000375    | P04114 | APOB_HUMAN  |                             | 27  | TATTGAGGTGGT  | 0.443 |
| - | 11 | 1582  |                     | NM_000384    | NP_000375    | P04114 | APOB_HUMAN  | Vitellogenin.               | 27  | AAATAGGTGTAAT | 0.433 |
| - | 24 | 3581  | ase_Mutation_p.P    | NM_017552    | NP_060022    | Q9ULI0 | ATD2B_HUMAN |                             | 1   | CTATGAGGATTT  | 0.373 |
| - | 19 | 2926  | nse_Mutation_p.P    | NM_017552    | NP_060022    | Q9ULI0 | ATD2B_HUMAN |                             | 1   | TTCAGGCAGTT   | 0.294 |
| - | 15 | 2023  | i.1_RNA ATAD2B_     | NM_017552    | NP_060022    | Q9ULI0 | ATD2B_HUMAN |                             | 1   | TTCTTGCCTAAG  | 0.348 |
| - | 35 | 4538  | ff.2_Missense_Mut   | NM_006277    | NP_006268    | Q9NZM3 | ITSN2_HUMAN |                             | 4   | AGTTGGTGAGA   | 0.478 |
| + | 3  | 260   | NCOA1_uc002rfj.2    | NM_003743    | NP_003734    | Q15788 | NCOA1_HUMAN |                             | 11  | CAACATGAGTGC  | 0.478 |
| + | 14 | 3035  | _p.R775K NCOA1      | NM_003743    | NP_003734    | Q15788 | NCOA1_HUMAN | tion with CREBBP.           | 11  | AGGGAGAAATG   | 0.428 |
| + | 18 | 3974  | 'rfj.2_Missense_Mt  | NM_003743    | NP_003734    | Q15788 | NCOA1_HUMAN |                             | 11  | GGTCCCCAAG    | 0.418 |
| - | 4  | 1265  | iCY3_uc010ykm.1     | NM_004036    | NP_004027    | O60266 | ADCY3_HUMAN |                             | 4   | FTACAGCTGCCA  | 0.632 |
| - | 7  | 809   | 3182D DNAJC27_      | NM_016544    | NP_057628    | Q9NZQ0 | DJC27_HUMAN | J.                          | 1   | CACTGCCAGGT   | 0.438 |
| - | 19 | 2542  | 4T3A_uc010eyi.2_    | NM_022552    | NP_072046    | Q9Y6K1 | DNM3A_HUMAN |                             | 140 | TAAAGCCCATG   | 0.547 |
| - | 12 | 4451  | gt.1_Nonsense_Mt    | NM_018263    | NP_060733    | Q76L83 | ASXL2_HUMAN | :2-type; atypical.          | 1   | CCCTTTGCACAT  | 0.522 |
| - | 8  | 1146  | 'gt.1_Missense_Mt   | NM_018263    | NP_060733    | Q76L83 | ASXL2_HUMAN |                             | 1   | TACCTCTGGGA   | 0.393 |

|   |    |      |                     |              |              |        |             |                               |      |               |       |
|---|----|------|---------------------|--------------|--------------|--------|-------------|-------------------------------|------|---------------|-------|
| - | 7  | 943  | κL2_uc002rgt.1_5'   | NM_018263    | NP_060733    | Q76L83 | ASXL2_HUMAN |                               | 1    | AGTAAAGTATTTT | 0.413 |
| - | 5  | 688  | κL2_uc002rgt.1_5'   | NM_018263    | NP_060733    | Q76L83 | ASXL2_HUMAN | Ser-rich.                     | 1    | 3ATGGAGAAATG  | 0.428 |
| - | 1  | 1012 | F3C_uc010ykr.1_1'   | NM_002254    | NP_002245    | O14782 | KIF3C_HUMAN | kinesin-motor.                | 4    | AGATGCCCCCGC  | 0.592 |
| + | 13 | 1393 | p.A366V HADHB       | NM_000183    | NP_000174    | P55084 | ECHB_HUMAN  |                               | 2    | ATGAAGCTTTCTC | 0.348 |
| - | 11 | 1745 | κ113_uc010eyk.1_1'  | NM_001145168 | NP_001138640 | Q8IZF5 | GP113_HUMAN | cellular (Potential).         | 4    | GGAGAGTCGAG   | 0.607 |
| - | 7  | 740  | κOF_uc010yib.1_R    | NM_194248    | NP_919224    | Q9HC10 | OTOF_HUMAN  | lasmic (Potential).           | 7    | 3GTCAAGGTCTT  | 0.502 |
| + | 8  | 1014 | κhv.3_Nonsense_IV   | NM_020134    | NP_064519    | Q9BPU6 | DPYL5_HUMAN |                               | 2    | ACCACCAGGAC   | 0.577 |
| + | 6  | 907  | κEM214_uc002rib     | NM_017727    | NP_060197    | Q6NUQ4 | TM214_HUMAN |                               | 0    | VAGCAGTTTTTG  | 0.567 |
| - | 8  | 1344 | κEB_uc002riz.1_RI   | NM_013388    | NP_037520    | Q9HCU5 | PREB_HUMAN  | lasmic (Potential).           | 1    | CATGGGACCCAA  | 0.602 |
| + | 3  | 464  | κw.2_Missense_Mu    | NM_004341    | NP_004332    | P27708 | PYR1_HUMAN  | amine amidotransferase).      | 10   | GTGCCACCCGCA  | 0.572 |
| + | 9  | 1387 | κw.2_Missense_Mu    | NM_004341    | NP_004332    | P27708 | PYR1_HUMAN  | phosphate synthase). CPS      | 10   | GCCAAGCTGGA   | 0.592 |
| + | 41 | 6496 | κv.2_Missense_Mut   | NM_004341    | NP_004332    | P27708 | PYR1_HUMAN  | artate transcarbamylase).     | 10   | GCATGCCACCC   | 0.652 |
| + | 10 | 1172 | κe_Mutation_p.R10   | NM_014748    | NP_055563    | Q15036 | SNX17_HUMAN |                               | 1    | GCACCCGCATGC  | 0.657 |
| + | 19 | 2417 | κ002rkr.2_Missense  | NM_013392    | NP_037524    | Q9UHY1 | NRBP_HUMAN  |                               | 3    | VACTCAGCCGCT  | 0.592 |
| - | 32 | 3533 | κ72_uc010ezb.2_5'   | NM_015662    | NP_056477    | Q9UG01 | IF172_HUMAN | TPR 9.                        | 2    | 3CTTCAGCCTCT  | 0.527 |
| - | 4  | 855  | κIR_uc010ezd.2_5'   | NM_022823    | NP_073734    | Q9H6D8 | FNDC4_HUMAN | cellular (Potential).         | 0    | CTGGGCTTGAA   | 0.557 |
| + | 19 | 1844 | κp.A591V GCKR_1     | NM_001486    | NP_001477    | Q14397 | GCKR_HUMAN  |                               | 2    | GGCTGCAGCTC   | 0.607 |
| + | 1  | 4679 | κ1_5'Flank ZNF512   | NM_032266    | NP_115642    | Q68DN1 | CB016_HUMAN |                               | 1    | VCCCCAGCTTCT  | 0.537 |
| + | 1  | 5482 | κ1_5'Flank ZNF512   | NM_032266    | NP_115642    | Q68DN1 | CB016_HUMAN | lem repeat of P-S-E-R-S-H     | 1    | CCTTGAGAGAG   | 0.537 |
| + | 4  | 436  | κF512_uc010yix.1_1' | NM_032434    | NP_115810    | Q96ME7 | ZN512_HUMAN |                               | 1    | 3AATTTCTCAG   | 0.413 |
| - | 5  | 1175 | κp.E143K SUPT7L     | NM_014860    | NP_055675    | O94864 | ST65G_HUMAN |                               | 2    | VAGTTCTCTCT   | 0.502 |
| + | 22 | 1478 | κnc.2_Missense_Mu   | NM_153021    | NP_694566    | Q6P1J6 | PLB1_HUMAN  | ate repeats. 2. Extracellular | 9    | GAAGAATGACAC  | 0.582 |
| + | 39 | 2674 | κLB1_uc002rme.1_1'  | NM_153021    | NP_694566    | Q6P1J6 | PLB1_HUMAN  | ate repeats. Extracellular (F | 9    | CTTAGGTGCCCA  | 0.587 |
| + | 46 | 3265 | κLB1_uc002rme.1_1'  | NM_153021    | NP_694566    | Q6P1J6 | PLB1_HUMAN  | ate repeats. Extracellular (F | 9    | VACCAGCTCCGA  | 0.552 |
| + | 2  | 282  | κP4_uc010ezm.1_1'   | NM_024692    | NP_078968    | Q8N3C7 | CLIP4_HUMAN |                               | 1    | 3GAAATCCTTTG  | 0.358 |
| + | 3  | 433  | κse_Mutation_p.T6   | NM_024692    | NP_078968    | Q8N3C7 | CLIP4_HUMAN | ANK 1.                        | 1    | VCAAAACTTCAG  | 0.294 |
| - | 29 | 5261 | κo.1_Missense_Mu    | NM_004304    | NP_004295    | Q9UM73 | ALK_HUMAN   | lasmic (Potential).           | 1218 | TGCAGCCTTGCC  | 0.607 |
| - | 20 | 4094 | κuc010ymo.1_5'L     | NM_004304    | NP_004295    | Q9UM73 | ALK_HUMAN   | lasmic (Potential).           | 1218 | CTGGTGCTTCCC  | 0.597 |
| - | 3  | 1707 |                     | NM_004304    | NP_004295    | Q9UM73 | ALK_HUMAN   | xtracellular (Potential).     | 1218 | VCAAAGCTGCAC  | 0.567 |
| - | 7  | 963  | κq.2_Missense_Mu    | NM_015955    | NP_057039    | Q9Y316 | MEMO1_HUMAN |                               | 2    | CTTTGACCTTGA  | 0.338 |
| - | 4  | 2306 | κε_Mutation_p.A68   | NM_021209    | NP_067032    | Q9NPP4 | NLRC4_HUMAN |                               | 6    | CTTGTGGCAGAG  | 0.463 |
| - | 4  | 1642 | κε_Mutation_p.E46   | NM_021209    | NP_067032    | Q9NPP4 | NLRC4_HUMAN | NACHT.                        | 6    | VACCTCCTCTG   | 0.458 |
| + | 10 | 2905 |                     | NM_016252    | NP_057336    | Q9NR09 | BIRC6_HUMAN |                               | 14   | TTTGGCCAAAGT  | 0.423 |
| + | 43 | 8275 |                     | NM_016252    | NP_057336    | Q9NR09 | BIRC6_HUMAN |                               | 14   | VCAATACTTTGCT | 0.348 |
| + | 3  | 613  |                     | NM_206943    | NP_996826    | Q14766 | LTBP1_HUMAN | EGF-like 1.                   | 8    | VGCCACAACCTC  | 0.527 |
| + | 4  | 991  |                     | NM_206943    | NP_996826    | Q14766 | LTBP1_HUMAN |                               | 8    | TCTTTCCCTTTA  | 0.468 |
| + | 5  | 1091 | κov.2_Missense_Mu   | NM_206943    | NP_996826    | Q14766 | LTBP1_HUMAN |                               | 8    | AGTGACCTGCA   | 0.532 |
| - | 8  | 1297 | κnd.1_Missense_IV   | NM_015475    | NP_056290    | Q8NCA5 | FA98A_HUMAN | Gly-rich.                     | 1    | VGATAGCCACCTC | 0.527 |
| - | 3  | 282  | κBA_uc010yne.1_1'   | NM_015475    | NP_056290    | Q8NCA5 | FA98A_HUMAN |                               | 1    | CTTCACTCGGAC  | 0.353 |
| + | 5  | 540  | κi.2_Missense_Mut   | NM_053276    | NP_444506    | Q6UXI7 | VITRN_HUMAN | LCCL.                         | 2    | GGAAGGTTGCT   | 0.398 |
| - | 7  | 2341 |                     | NM_005760    | NP_005751    | Q03701 | CEBPZ_HUMAN |                               | 1    | VGCATACCTTTG  | 0.318 |
| - | 2  | 1717 |                     | NM_006449    | NP_006440    | Q9UKI2 | BORG2_HUMAN |                               | 0    | CAAAAGTGAGG   | 0.453 |
| - | 2  | 1354 |                     | NM_006449    | NP_006440    | Q9UKI2 | BORG2_HUMAN |                               | 0    | VTAAGGGCAACA  | 0.542 |
| - | 23 | 3729 | κj.3_Missense_Mut   | NM_005633    | NP_005624    | Q07889 | SOS1_HUMAN  |                               | 10   | VTAGTGGTGAGC  | 0.507 |
| - | 19 | 3102 | κj.3_Missense_Mut   | NM_005633    | NP_005624    | Q07889 | SOS1_HUMAN  |                               | 10   | 3CTTAGGGTTTC  | 0.353 |
| - | 9  | 659  | κ_Mutation_p.G190   | NM_003618    | NP_003609    | Q8IVH8 | M4K3_HUMAN  | rotein kinase.                | 8    | VTAACCCCTCT   | 0.433 |
| - | 7  | 2104 | κMutation_p.E681K   | NM_021097    | NP_066920    | P32418 | NAC1_HUMAN  | ytoplasmic (Potential).       | 4    | TCTCCTCTCTCT  | 0.478 |

|   |    |      |                     |              |              |        |              |                          |     |                |       |             |
|---|----|------|---------------------|--------------|--------------|--------|--------------|--------------------------|-----|----------------|-------|-------------|
| - | 1  | 1373 | 'sd.3_Missense_M    | NM_021097    | NP_066920    | P32418 | NAC1_HUMAN   | Cytoplasmic (Potential). | 4   | 'TTTGCTGTGCCA' | 0.448 |             |
| + | 7  | 957  | p.2_Missense_Mu     | NM_019063    | NP_061936    | Q9HC35 | EMAL4_HUMAN  |                          | 250 | TATGCCGCGTCC   | 0.388 | rs149615272 |
| - | 1  | 523  | 'HH2_uc002rtf.3_I   | NM_001101330 | NP_001094800 |        |              |                          | 0   | 'GAGGTCTCCAA   | 0.428 |             |
| + | 15 | 2535 | LEKHH2_uc002rtf     | NM_172069    | NP_742066    | Q8IVE3 | PKHH2_HUMAN  | PH 2.                    | 3   | 'GATTGCTCACT/  | 0.478 |             |
| - | 16 | 1785 | /ob.1_Missense_Iv   | NM_133259    | NP_573566    | P42704 | LPPRC_HUMAN  |                          | 3   | 'TCGGTCTCGA/   | 0.403 |             |
| + | 2  | 925  | A1B_uc002rtv.2_In   | NM_002706    | NP_002697    | O75688 | PPM1B_HUMAN  |                          | 2   | 'TTCTACCCAGG/  | 0.428 |             |
| + | 9  | 1612 | p.D512N SLC3A1      | NM_000341    | NP_000332    | Q07837 | SLC31_HUMAN  | ellular (Potential).     | 0   | 'AGTGGGACAA/   | 0.393 |             |
| - | 10 | 1684 | _p.P550L PREPL_     | NM_006036    | NP_006027    | Q4J6C6 | PPCEL_HUMAN  |                          | 1   | 'GACTTGGCTGA/  | 0.507 |             |
| + | 13 | 1938 |                     | NM_005400    | NP_005391    | Q02156 | KPCE_HUMAN   | rotein kinase.           | 10  | 'TGCAGGAGTTG/  | 0.582 |             |
| + | 1  | 395  | 'I'E2_uc002ruz.2_!  | NM_012249    | NP_036381    | P17081 | RHOQ_HUMAN   |                          | 2   | 'TGCTACTCATG/  | 0.677 |             |
| + | 6  | 1081 | /z.2_Missense_Mu    | NM_000251    | NP_000242    | P43246 | MSH2_HUMAN   |                          | 55  | 'TCAAGGACAAA'  | 0.368 |             |
| - | 2  | 880  | H2_uc002rvz.2_In'   | NM_022055    | NP_071338    | Q9HB15 | KCNKC_HUMAN  | ical; (Potential).       | 1   | 'GAAGAGCGAGT   | 0.642 |             |
| + | 2  | 413  | 10fbj.2_Splice_Site | NM_000179    | NP_000170    | P52701 | MSH6_HUMAN   |                          | 168 | 'CAACAGTTGTG/  | 0.408 |             |
| + | 6  | 1084 |                     | NM_002158    | NP_002149    | P32314 | FOXN2_HUMAN  |                          | 0   | 'ATTTTAGAATGT/ | 0.254 |             |
| + | 7  | 804  | wl.2_Missense_Mi    | NM_001135629 | NP_001129101 | Q6ZM10 | KLRAQ_HUMAN  | Potential.               | 1   | 'GACTCTTCATC   | 0.308 |             |
| + | 1  | 930  | 3TF2A1L_uc002rv     | NM_006873    | NP_006864    | B7ZL16 | B7ZL16_HUMAN |                          | 5   | 'CAATGGGGACCA' | 0.413 |             |
| - | 11 | 1133 | 2A1L_uc002rwt.2_    | NM_000233    | NP_000224    | P22888 | LSHR_HUMAN   | ellular (Potential).     | 8   | 'AATATCTTCACA  | 0.443 |             |
| - | 10 | 1017 | _p.A253T FSHR_u     | NM_000145    | NP_000136    | P23945 | FSHR_HUMAN   | ellular (Potential).     | 8   | 'TTCTGCCAGAG/  | 0.433 |             |
| + | 1  | 216  | i.1_Intron ASB3_u   | NM_001008708 | NP_001008708 | Q8WUX2 | CHAC2_HUMAN  |                          | 0   | 'ACCGCGGGGTC   | 0.632 |             |
| + | 11 | 1392 | se_Mutation_p.S37   | NM_015701    | NP_056516    | Q96DZ1 | ERLEC_HUMAN  | PRKCSH 2.                | 2   | 'GGATAGTGGGA   | 0.398 |             |
| + | 16 | 3245 | rx.2_Missense_Iv    | NM_003128    | NP_003119    | Q01082 | SPTB2_HUMAN  | Spectrin 7.              | 8   | 'GCTGACCGGCA'  | 0.622 |             |
| + | 27 | 6058 | _p.Q1924* SPTBN     | NM_003128    | NP_003119    | Q01082 | SPTB2_HUMAN  | . Interaction with ANK2. | 8   | 'AGGCCCAGGAG   | 0.547 |             |
| - | 32 | 6436 | _p.R156K CCDC8      | NM_001135597 | NP_001129069 | Q3V6T2 | GRDN_HUMAN   |                          | 4   | 'GCTCCCTAGAC/  | 0.358 |             |
| - | 31 | 6358 | _p.A341V CCDC8      | NM_001135597 | NP_001129069 | Q3V6T2 | GRDN_HUMAN   |                          | 4   | 'CAGCAGCTGGT/  | 0.458 |             |
| - | 31 | 6321 | _p.D329N CCDC8      | NM_001135597 | NP_001129069 | Q3V6T2 | GRDN_HUMAN   |                          | 4   | 'ACTGTCTCTGG'  | 0.473 |             |
| + | 15 | 1538 | 2LG_uc002sak.2_I    | NM_022894    | NP_075045    | Q9BWT3 | PAPOG_HUMAN  |                          | 2   | 'AATGTGGTTCC/  | 0.279 |             |
| + | 21 | 2299 | sak.2_Missense_M    | NM_022894    | NP_075045    | Q9BWT3 | PAPOG_HUMAN  |                          | 2   | 'ATTGGAGGAGAA  | 0.328 |             |
| + | 11 | 1771 | 1.1_Missense_Mut    | NM_002908    | NP_002899    | Q04864 | REL_HUMAN    |                          | 3   | 'TCTGAGCATGA   | 0.438 |             |
| - | 16 | 1453 | _p.E465K PUS10_I    | NM_144709    | NP_653310    | Q3MIT2 | PUS10_HUMAN  |                          | 4   | 'TGTCTCCATGA/  | 0.542 |             |
| - | 30 | 4207 |                     | NM_014709    | NP_055524    | Q70CQ2 | UBP34_HUMAN  |                          | 19  | 'AGCTCCCAGAC/  | 0.368 |             |
| + | 2  | 480  |                     | NM_006577    | NP_006568    | Q9NY97 | B3GN2_HUMAN  | renal (Potential).       | 1   | 'CCAGACGGGGG   | 0.557 |             |
| + | 2  | 611  |                     | NM_006577    | NP_006568    | Q9NY97 | B3GN2_HUMAN  | renal (Potential).       | 1   | 'TGAGATGCCGC.  | 0.458 |             |
| + | 14 | 2842 | bz.2_Missense_Mt    | NM_015252    | NP_056067    | Q8NDI1 | EHBP1_HUMAN  |                          | 2   | 'GGAGTCTGATC/  | 0.348 |             |
| - | 9  | 1197 | 2scg.2_Missense_    | NM_015910    | NP_056994    | O95876 | FRITZ_HUMAN  |                          | 0   | 'CCAAGGCCAAG   | 0.458 |             |
| + | 8  | 1579 | p.P414S UGP2_uc     | NM_006759    | NP_006750    | Q16851 | UGPA_HUMAN   |                          | 0   | 'GAATTTCTTACA/ | 0.358 |             |
| + | 5  | 2426 | sda.2_Splice_Site   | NM_203437    | NP_982261    | Q6ULP2 | AFTIN_HUMAN  |                          | 2   | 'TTCAGGTAAA/   | 0.279 |             |
| - | 1  | 199  | se_Mutation_p.A40   | NM_138458    | NP_612467    | Q96MX6 | WDR92_HUMAN  |                          | 0   | 'CCGTGCGAAGT   | 0.602 |             |
| + | 2  | 414  | 1_5'Flank WDR92     | NM_020143    | NP_064528    | Q9NRX1 | PNO1_HUMAN   |                          | 0   | 'TAGAAATCAGG/  | 0.368 |             |
| + | 5  | 640  |                     | NM_020143    | NP_064528    | Q9NRX1 | PNO1_HUMAN   | KH.                      | 0   | 'AATTCACCATAG/ | 0.363 |             |
| + | 10 | 1791 | 2sew.2_Missense_    | NM_001007231 | NP_001007232 | P42331 | RHG25_HUMAN  |                          | 4   | 'AGAGGCTAAGG/  | 0.502 |             |
| + | 1  | 814  | sgb.1_5'Flank uc0   | NM_006196    | NP_006187    | Q15365 | PCBP1_HUMAN  |                          | 0   | 'CTCCGCAAGGG   | 0.652 |             |
| - | 11 | 1044 | se_Mutation_p.G2    | NM_022173    | NP_071505    | P31483 | TIA1_HUMAN   | RRM 3.                   | 0   | 'CATGACCTTCA/  | 0.368 |             |
| - | 4  | 477  | /qv.1_Nonsense_Iv   | NM_173535    | NP_775806    | Q8N1N0 | CLC4F_HUMAN  | ellular (Potential).     | 5   | 'GAGCTCGGAAT   | 0.468 |             |
| - | 1  | 163  | 261_uc010fdy.2_5'   | NM_144582    | NP_653183    | Q6UWH6 | TX261_HUMAN  | ical; (Potential).       | 0   | 'GAAGGCCACCT/  | 0.582 |             |
| + | 2  | 692  | OSPH10_uc010fe      | NM_005791    | NP_005782    | O00566 | MPP10_HUMAN  | Potential.               | 3   | 'AACAGGAACGT/  | 0.408 |             |
| + | 7  | 1679 |                     | NM_005791    | NP_005782    | O00566 | MPP10_HUMAN  |                          | 3   | 'TAGTACGTAAC   | 0.338 |             |
| + | 2  | 401  | sense_Mutation_p    | NM_014497    | NP_055312    | Q14966 | ZN638_HUMAN  |                          | 4   | 'GGCTCCAGGA    | 0.502 |             |

|   |    |       |                     |              |              |        |             |   |               |       |
|---|----|-------|---------------------|--------------|--------------|--------|-------------|---|---------------|-------|
| + | 11 | 2706  | o.G796E ZNF638_     | NM_014497    | NP_055312    | Q14966 | ZN638_HUMAN | 4 | AACTGGACAAG   | 0.274 |
| + | 14 | 2925  | p.T869I ZNF638_u    | NM_014497    | NP_055312    | Q14966 | ZN638_HUMAN | 4 | TAAAGACCAGTA  | 0.284 |
| - | 3  | 1349  | I2sit.3_Missense_I  | NM_015470    | NP_056285    | Q9BXF6 | RFIP5_HUMAN | 0 | GACAGCTTGCA   | 0.612 |
| + | 3  | 322   | .2_Missense_Mut     | NM_006429    | NP_006420    | Q99832 | TCPH_HUMAN  | 0 | TCCATCCTGCA   | 0.383 |
| - | 8  | 2107  |                     | NM_001080410 | NP_001073879 | Q8TF61 | FBX41_HUMAN | 3 | GCAGCCCCTGG   | 0.617 |
| + | 14 | 10021 | 90_splice ALMS1_    | NM_015120    | NP_055935    | Q8TCU4 | ALMS1_HUMAN | 9 | ATTCAGGTATTAT | 0.353 |
| + | 18 | 11291 | g.2_Missense_Mul    | NM_015120    | NP_055935    | Q8TCU4 | ALMS1_HUMAN | 9 | AGCCAGGTTTTTA | 0.393 |
| - | 9  | 1088  |                     | NM_003584    | NP_003575    | O75319 | DUS11_HUMAN | 1 | GACTGGCATTG   | 0.507 |
| + | 5  | 571   | _p.T150I ACTG2_     | NM_001615    | NP_001606    | P63267 | ACTH_HUMAN  | 0 | CACGACAGGTC   | 0.493 |
| + | 1  | 1576  | z.1_Missense_Mul    | NM_144993    | NP_659430    | O43151 | TET3_HUMAN  | 0 | CCCCAGAACCT   | 0.642 |
| - | 1  | 28    | ense_Mutation_p.C   | NM_021196    | NP_067019    | Q9BY07 | S4A5_HUMAN  | 9 | CTACCCAGCC    | 0.343 |
| - | 28 | 3625  | Mutation_p.S96E     | NM_004082    | NP_004073    | Q14203 | DCTN1_HUMAN | 5 | GCTGGGAGATG   | 0.592 |
| - | 12 | 1593  | kw.1_Missense_IV    | NM_004082    | NP_004073    | Q14203 | DCTN1_HUMAN | 5 | CTGCTCCTTGA   | 0.567 |
| - | 7  | 896   | _p.A247V RTKN_u     | NM_001015055 | NP_001015055 | Q9BST9 | RTKN_HUMAN  | 1 | TGTGAGCCAAG   | 0.557 |
| + | 4  | 442   | 1_RNA INO80B_u      | NM_031288    | NP_112578    | Q9C086 | INO80_HUMAN | 1 | CCTCTCCACTTC  | 0.512 |
| - | 12 | 2122  | _p.V628M LOXL3_     | NM_032603    | NP_115992    | P58215 | LOXL3_HUMAN | 0 | CTTCACATCCG   | 0.522 |
| - | 8  | 1382  | XL3_uc002smq.1      | NM_032603    | NP_115992    | P58215 | LOXL3_HUMAN | 0 | GCCCAGGTCCC   | 0.632 |
| + | 5  | 1260  | ssense_Mutation_I   | NM_001381    | NP_001372    | Q99704 | DOK1_HUMAN  | 0 | GCCACCCCTC    | 0.617 |
| + | 3  | 2189  |                     | NM_000189    | NP_000180    | P52789 | HXK2_HUMAN  | 2 | AGGGACCAACT   | 0.507 |
| - | 2  | 1479  | OLN2_uc002spb.:     | NM_006464    | NP_006455    | O43493 | TGON2_HUMAN | 0 | GGACGCCACA    | 0.557 |
| - | 4  | 904   | sm.1_Missense_IV    | NM_017750    | NP_060220    | Q6NUM9 | RETST_HUMAN | 2 | GGGTGGATGCT   | 0.597 |
| + | 4  | 476   | se_Mutation_p.G14   | NM_006590    | NP_006581    | Q53GS9 | SNUT2_HUMAN | 1 | CCGGGGTTTGA   | 0.453 |
| - | 13 | 2058  |                     | NM_015425    | NP_056240    | O95602 | RPA1_HUMAN  | 3 | GGATGGAGGGT   | 0.577 |
| + | 12 | 2129  | p.G601D KDM3A_      | NM_018433    | NP_060903    | Q9Y4C1 | KDM3A_HUMAN | 5 | CAATTGGCTTGT  | 0.418 |
| + | 16 | 2723  | p.G799D KDM3A_      | NM_018433    | NP_060903    | Q9Y4C1 | KDM3A_HUMAN | 5 | TGTGGGTGGGG   | 0.562 |
| - | 3  | 292   | ense_Mutation_p.C   | NM_016079    | NP_057163    | Q9Y3E7 | CHMP3_HUMAN | 1 | CTGGCCCTTCT   | 0.433 |
| - | 1  | 169   | l.2_Missense_M      | NM_016079    | NP_057163    | Q9Y3E7 | CHMP3_HUMAN | 1 | CAGTCTTTGGG   | 0.607 |
| - | 4  | 2176  | 02srm.2_Missens     | NM_005667    | NP_005658    | O00237 | RN103_HUMAN | 1 | TGAAGCCAGTG   | 0.393 |
| + | 4  | 931   | Intron TEKT4_uc0    | NM_144705    | NP_653306    | Q8WW24 | TEKT4_HUMAN | 3 | CCGAGGACCTG   | 0.672 |
| - | 3  | 454   | ud.1_Missense_M     | NM_032788    | NP_116177    | Q96K75 | ZN514_HUMAN | 0 | CCTCCCTGTAG   | 0.517 |
| + | 2  | 186   | l.2_Missense_I      | NM_016044    | NP_057128    | Q96GK7 | FAH2A_HUMAN | 1 | TGCTGGTGTCT   | 0.542 |
| + | 52 | 6106  | wt.3_Missense_M     | NM_001113382 | NP_001106853 | A0AVI2 | FR1L5_HUMAN | 1 | TATCCTCCCATT  | 0.463 |
| - | 13 | 1703  | xe.2_Missense_M     | NM_017789    | NP_060259    | Q9C0C4 | SEM4C_HUMAN | 2 | ATAGGGGTCCC   | 0.647 |
| + | 20 | 2975  | se_Mutation_p.K2    | NM_144992    | NP_659429    | Q502W6 | VWA3B_HUMAN | 6 | CAAATAAGATGA  | 0.418 |
| + | 4  | 648   | nse_Mutation_p.P    | NM_014044    | NP_054763    | Q53HI1 | UNC50_HUMAN | 0 | TTTTATCCACTCC | 0.368 |
| - | 4  | 651   | T4A_uc010fil.2_5'   | NM_012214    | NP_036346    | Q9UM21 | MGT4A_HUMAN | 1 | ATGAGGCAAATC  | 0.328 |
| - | 15 | 2163  | 'szi.3_Missense_IV  | NM_182911    | NP_878915    | Q9BZW7 | TSG10_HUMAN | 2 | AGTTCCCTAGTA  | 0.338 |
| + | 6  | 1466  |                     | NM_015904    | NP_056988    | O60841 | IF2P_HUMAN  | 3 | TACAAGCTCAG   | 0.398 |
| + | 12 | 2214  |                     | NM_015904    | NP_056988    | O60841 | IF2P_HUMAN  | 3 | TTGAAGCTATTAT | 0.343 |
| - | 4  | 394   | 31_splice REV1_u    | NM_016316    | NP_057400    | Q9UBZ9 | REV1_HUMAN  | 2 | GAAGGATCTGCa  | 0.308 |
| - | 2  | 558   |                     | NM_153836    | NP_722578    | Q8IUH2 | CREG2_HUMAN | 1 | AGAAAAGGAATC  | 0.517 |
| + | 11 | 1463  | bt.2_Missense_Mu    | NM_003854    | NP_003845    | Q9HB29 | ILRL2_HUMAN | 2 | GTGCAGGAGGC   | 0.493 |
| + | 10 | 1674  | fiz.2_Missense_M    | NM_003853    | NP_003844    | O95256 | I18RA_HUMAN | 5 | CCAGACCAAGG   | 0.557 |
| + | 2  | 690   |                     | NM_003048    | NP_003039    | Q9UBY0 | SL9A2_HUMAN | 8 | CATTGGCATTGC  | 0.498 |
| + | 12 | 2408  |                     | NM_003048    | NP_003039    | Q9UBY0 | SL9A2_HUMAN | 8 | AAAAGGGCACC   | 0.542 |
| + | 2  | 347   | e_Mutation_p.G11    | NM_144632    | NP_653233    | Q6ZP80 | TM182_HUMAN | 0 | ATGAAGGGTTC   | 0.353 |
| + | 3  | 674   | Ofjd.1_Splice_Site_ | NM_024093    | NP_076998    | Q9BVC5 | ASHWN_HUMAN | 0 | CCATGGTAAGT   | 0.512 |

rs140049116

|   |    |      |                      |              |              |        |             |                                |    |               |       |             |
|---|----|------|----------------------|--------------|--------------|--------|-------------|--------------------------------|----|---------------|-------|-------------|
| - | 9  | 842  | 3_splice UXS1_uc     | NM_025076    | NP_079352    | Q8NBZ7 | UXS1_HUMAN  |                                | 2  | 3AAATACCTGCT  | 0.498 |             |
| - | 20 | 3299 |                      | NM_001144013 | NP_001137485 | A6NKT7 | RGPD3_HUMAN | RanBD1 1.                      | 1  | CCAAGCCCTT    | 0.378 |             |
| - | 2  | 1006 | p.C296Y ST6GAL:      | NM_001142351 | NP_001135823 | Q96JF0 | SIAT2_HUMAN | lenal (Potential).             | 11 | CAGCGCAGCTG   | 0.687 |             |
| - | 2  | 539  | p.W140* ST6GAL:      | NM_001142351 | NP_001135823 | Q96JF0 | SIAT2_HUMAN | lenal (Potential).             | 11 | CTGTGCCACCC   | 0.572 |             |
| + | 20 | 3830 | e_Mutation_p.D43:    | NM_182588    | NP_872394    | Q7Z3J3 | RGPD4_HUMAN |                                | 2  | AATGGGATAACT  | 0.443 |             |
| + | 20 | 3896 | e_Mutation_p.P45:    | NM_182588    | NP_872394    | Q7Z3J3 | RGPD4_HUMAN |                                | 2  | CTTCTCCATTGC  | 0.403 |             |
| + | 5  | 577  |                      | NM_001008743 | NP_001008743 | Q6IMI6 | ST1C3_HUMAN |                                | 1  | CAAAAAGACATG  | 0.468 | rs140068346 |
| + | 6  | 1169 | d.2_Missense_Mu      | NM_181453    | NP_852118    | Q8IWI2 | GCC2_HUMAN  | Potential.                     | 1  | TTAGAAGATACC  | 0.294 |             |
| + | 6  | 2048 | d.2_Missense_Mu      | NM_181453    | NP_852118    | Q8IWI2 | GCC2_HUMAN  | Potential.                     | 1  | AAGTAGAGCAA   | 0.313 | rs145077426 |
| + | 20 | 6187 |                      | NM_006267    | NP_006258    | P49792 | RBP2_HUMAN  | RanBD1 2.                      | 18 | TGCCCGAAAAA   | 0.388 |             |
| + | 20 | 7676 |                      | NM_006267    | NP_006258    | P49792 | RBP2_HUMAN  |                                | 18 | TATTGGTTCAGA  | 0.383 |             |
| + | 28 | 9431 |                      | NM_006267    | NP_006258    | P49792 | RBP2_HUMAN  | e cyclophilin-type.            | 18 | CACTGGAGAGA   | 0.403 |             |
| + | 2  | 203  | T48 CCDC138_uc       | NM_144978    | NP_659415    | Q96M89 | CC138_HUMAN |                                | 0  | TCTAACCTCCC   | 0.194 |             |
| - | 6  | 617  | tfo.3_Splice_Site_   | NM_207181    | NP_997064    | O15259 | NPHP1_HUMAN |                                | 2  | CTTTCTTAAAC   | 0.323 |             |
| - | 11 | 1590 |                      | NM_022662    | NP_073153    | Q9H1A4 | APC1_HUMAN  |                                | 2  | AGCTGGGACTCT  | 0.313 |             |
| + | 9  | 1525 | hl.1_Missense_Mt     | NM_006343    | NP_006334    | Q12866 | MERTK_HUMAN | III 2. Extracellular (Potentia | 9  | AGGGGGAGTTG   | 0.537 |             |
| + | 9  | 1214 |                      | NM_032824    | NP_116213    | Q96K49 | TM87B_HUMAN |                                | 0  | CCAAGGCTTAT   | 0.418 |             |
| + | 3  | 929  | t117N POLR1B_uc      | NM_019014    | NP_061887    | Q9H9Y6 | RPA2_HUMAN  |                                | 1  | TAGCTGATATCA  | 0.343 |             |
| + | 9  | 1932 | kp.2_Intron POLR     | NM_019014    | NP_061887    | Q9H9Y6 | RPA2_HUMAN  |                                | 1  | AGATTCTGGAC   | 0.438 |             |
| + | 15 | 3701 | p.2_Missense_Mt      | NM_019014    | NP_061887    | Q9H9Y6 | RPA2_HUMAN  |                                | 1  | AGATGGAACGG   | 0.507 |             |
| + | 4  | 1391 | e.2_Missense_Mu      | NM_012455    | NP_036587    | Q8NDX1 | PSD4_HUMAN  |                                | 2  | AGGAGTCCCTT   | 0.488 |             |
| + | 13 | 2570 | _Splice_Site_p.T4:   | NM_012455    | NP_036587    | Q8NDX1 | PSD4_HUMAN  |                                | 2  | GAACAGCGCCA   | 0.552 |             |
| + | 26 | 2769 | _p.S767N DPP10_      | NM_020868    | NP_065919    | Q8N608 | DPP10_HUMAN | ellular (Potential).           | 10 | TACAGCACAA    | 0.368 |             |
| + | 10 | 1574 |                      | NM_006773    | NP_006764    | Q9NVP1 | DDX18_HUMAN | case C-terminal.               | 4  | CATTCCTGAAG   | 0.438 |             |
| + | 12 | 1177 | ylf.1_Missense_Mt    | NM_006770    | NP_006761    | Q9UEW3 | MARCO_HUMAN | Extracellul: p.G349R(1)        | 6  | TGAAAGGAAGC   | 0.567 | rs137938144 |
| + | 2  | 87   |                      | NM_183240    | NP_899063    | Q8WXS4 | CCGL_HUMAN  |                                | 1  | GCCCCGCCGGT   | 0.617 |             |
| + | 2  | 537  |                      | NM_183240    | NP_899063    | Q8WXS4 | CCGL_HUMAN  | ical; (Potential).             | 1  | ACTGCCTCCT    | 0.557 |             |
| - | 2  | 300  |                      | NM_002980    | NP_002971    | P47872 | SCTR_HUMAN  | ellular (Potential).           | 3  | CTCCAGTCTGC   | 0.532 |             |
| + | 2  | 621  | MEM177_uc002tr       | NM_001105198 | NP_001098668 | Q53S58 | TM177_HUMAN |                                | 1  | ACTGGCCTCAG   | 0.587 |             |
| + | 9  | 1441 | pN4_uc010fj.1_5'l    | NM_002830    | NP_002821    | P29074 | PTN4_HUMAN  | FERM.                          | 2  | ACTATGCAAGG   | 0.333 |             |
| + | 2  | 181  | fil.2_Missense_Mt    | NM_020909    | NP_065960    | Q9HCM4 | E41L5_HUMAN |                                | 1  | ATGAGAGAAG    | 0.478 |             |
| + | 2  | 306  | 10fil.2_Splice_Site_ | NM_020909    | NP_065960    | Q9HCM4 | E41L5_HUMAN |                                | 1  | TGCCAGTAAGT   | 0.438 |             |
| + | 13 | 3892 | it.3_Missense_Mu     | NM_005270    | NP_005261    | P10070 | GLI2_HUMAN  |                                | 13 | CAGAAGTGCCA   | 0.637 |             |
| - | 4  | 428  | flr.2_Missense_M     | NM_014553    | NP_055368    | Q9NZI6 | TF2L1_HUMAN |                                | 3  | TGCTCCGTATACT | 0.662 |             |
| - | 2  | 277  | 0flr.2_Missense_N    | NM_014553    | NP_055368    | Q9NZI6 | TF2L1_HUMAN |                                | 3  | TTCATGCAGCTT  | 0.622 |             |
| - | 6  | 747  | uc002tnj.1_RNA       | NM_032390    | NP_115766    | Q9BYG3 | MK67I_HUMAN |                                | 0  | CTCAGGAGTGT   | 0.338 |             |
| + | 3  | 704  | flu.2_Missense_N     | NM_130773    | NP_570129    | Q8WYK1 | CNTP5_HUMAN | Extracellular (Potential).     | 10 | ACACAGGACGC   | 0.473 |             |
| + | 4  | 401  | se_Mutation_p.R6:    | NM_002101    | NP_002092    | P04921 | GLPC_HUMAN  | Cytoplasmic.                   | 1  | TGCTGCCTACA   | 0.607 | rs149400883 |
| - | 1  | 380  | w.1_Missense_Mu      | NM_139343    | NP_647593    | O00499 | BIN1_HUMAN  | action with BIN2.              | 7  | ATCTTTCCCGCC  | 0.726 |             |
| - | 4  | 566  |                      | NM_001001665 | NP_001001665 | Q4G0S4 | C27C1_HUMAN |                                | 0  | TCGGTCCATTTG  | 0.483 |             |
| - | 8  | 1189 | p.G301D ERCC3_       | NM_000122    | NP_000113    | P19447 | ERCC3_HUMAN | ase ATP-binding.               | 7  | AGTTGCCCAGC   | 0.542 |             |
| - | 9  | 2194 | 'S1_uc010yzi.1_RI    | NM_017969    | NP_060439    | Q96ST2 | IWS1_HUMAN  | ilis N-terminal.               | 1  | CTTGAGTGCAG   | 0.438 |             |
| + | 31 | 4230 | _p.R246* MYO7B_      | NM_001080527 | NP_001073996 | Q6PIF6 | MYO7B_HUMAN | FERM 1.                        | 2  | CCGTGCGAGAG   | 0.617 |             |
| - | 16 | 1942 |                      | NM_018383    | NP_060853    | Q9C0J8 | WDR33_HUMAN |                                | 0  | AAAAGGCTGGG   | 0.493 |             |
| + | 1  | 857  | uc002tpw.1_5'Flanl   | NM_032144    | NP_115520    | Q9H0N0 | RAB6C_HUMAN |                                | 1  | AGAGGCAAGTG   | 0.428 |             |
| - | 3  | 707  |                      | NM_001099771 | NP_001093241 | A5A3E0 | POTEF_HUMAN |                                | 5  | GTGGCAGCACC   | 0.617 |             |
| + | 9  | 1703 | _p.L395F ARHGEF      | NM_015320    | NP_056135    | Q9NR80 | ARHG4_HUMAN | DH.                            | 6  | CCAAGCTCAGC   | 0.572 |             |



|   |     |       |                   |              |              |        |             |                               |    |               |       |
|---|-----|-------|-------------------|--------------|--------------|--------|-------------|-------------------------------|----|---------------|-------|
| + | 5   | 870   | HB2_uc010zao.1_   | NM_001100623 | NP_001094093 | Q96CS7 | PKHB2_HUMAN | PH.                           | 2  | TTTACACTCCAAC | 0.214 |
| + | 4   | 679   |                   | NM_080386    | NP_525125    | Q13748 | TBA3C_HUMAN |                               | 0  | GACCACCCACA   | 0.542 |
| + | 1   | 704   |                   | NM_001508    | NP_001499    | O43194 | GPR39_HUMAN | Name=2; (Potential).          | 0  | GCTCGGACATC   | 0.557 |
| - | 2   | 1074  | se_Mutation_p.L49 | NM_144586    | NP_653187    | Q8N2G4 | LYPD1_HUMAN | UPAR/Ly6.                     | 0  | TTGTTTCAGCTGG | 0.552 |
| - | 18  | 5924  | ttq.2_Nonsense_M  | NM_207363    | NP_997246    | O14513 | NCKP5_HUMAN |                               | 0  | CTCCCCCAGTC   | 0.542 |
| - | 9   | 3842  | _Mutation_p.D115i | NM_025052    | NP_079328    | Q56UN5 | YSK4_HUMAN  | rotein kinase.                | 5  | CCTGTCCATGG/  | 0.507 |
| + | 1   | 39    | tion_p.S5N RAB3C  | NM_012233    | NP_036365    | Q15042 | RB3GP_HUMAN |                               | 2  | CGACAGTGAGG   | 0.428 |
| - | 15  | 1590  | ij.1_Missense_Mul | NM_001349    | NP_001340    | P14868 | SYDC_HUMAN  |                               | 1  | GTCCCTCCACCA  | 0.313 |
| + | 3   | 982   | ISD7B_uc002tvb.2  | NM_001080427 | NP_001073896 |        |             |                               | 7  | CTTTGCCAGGA   | 0.532 |
| + | 9   | 1327  | _p.A245V ACVR2A   | NM_001616    | NP_001607    | P27037 | AVR2A_HUMAN | Potential). Protein kinase.   | 13 | GTCTGCAGGGCG  | 0.388 |
| + | 12  | 4221  | BD5_uc002two.2_   | NM_018328    | NP_060798    | Q9P267 | MBD5_HUMAN  |                               | 5  | TGTGGGTGGCC   | 0.498 |
| + | 6   | 907   |                   | NM_015630    | NP_056445    | Q52LR7 | EPC2_HUMAN  |                               | 3  | AAAAAGAGTTA   | 0.333 |
| + | 5   | 501   | 1_uc002txn.2_Mis  | NM_018151    | NP_060621    | Q5UIP0 | RIF1_HUMAN  |                               | 15 | TGATATCTAAGC/ | 0.338 |
| + | 30  | 6557  | e_Mutation_p.A21k | NM_018151    | NP_060621    | Q5UIP0 | RIF1_HUMAN  | ansed chromosomes in telo     | 15 | AATAATGCATCTC | 0.443 |
| - | 100 | 14833 | .2_Missense_Muta  | NM_004543    | NP_004534    | P20929 | NEBU_HUMAN  | Nebulin 133.                  | 20 | ATGTGAGCTTTA  | 0.428 |
| - | 81  | 12516 | .2_Missense_Mutk  | NM_004543    | NP_004534    | P20929 | NEBU_HUMAN  | Nebulin 112.                  | 20 | GCATCGCTCTC   | 0.493 |
| - | 3   | 294   | _p.E58K CACNB4    | NM_000726    | NP_000717    | O00305 | CACB4_HUMAN |                               | 2  | CTCTCTCTGTCT  | 0.502 |
| - | 7   | 594   | n_p.S114F PRPF4   | NM_017892    | NP_060362    | O75400 | PR40A_HUMAN | VW 2.                         | 0  | TTTCCAGAATCT  | 0.323 |
| + | 9   | 1465  | D2_uc002tzd.3_M   | NM_001083112 | NP_001076581 | P43304 | GPDH_HUMAN  |                               | 1  | CTTCAGAAGAA   | 0.403 |
| - | 10  | 1555  | _p.A406T ACVR1_   | NM_001111067 | NP_001104537 | Q04771 | ACVR1_HUMAN | Potential). Protein kinase.   | 3  | AAAGGCCCAAA   | 0.453 |
| + | 3   | 205   |                   | NM_001017920 | NP_001017920 | A0PJW8 | DAPL1_HUMAN |                               | 0  | CAGTGCCATTG   | 0.448 |
| + | 18  | 3375  | IC1_uc010fom.1_M  | NM_033394    | NP_203752    | Q9C0D5 | TANC1_HUMAN |                               | 3  | AGGCACCCTGA   | 0.672 |
| + | 22  | 3827  | fom.1_Missense_I  | NM_033394    | NP_203752    | Q9C0D5 | TANC1_HUMAN | ANK 9.                        | 3  | GCTGGCTTGT    | 0.498 |
| - | 2   | 294   | _p.P49S WDSUB1    | NM_152528    | NP_689741    | Q8N9V3 | WSDU1_HUMAN |                               | 0  | CAATGGAGAATC  | 0.463 |
| + | 3   | 316   | Jcn.1_Missense_   | NM_022826    | NP_073737    | Q9H992 | MARH7_HUMAN | Ser-rich.                     | 0  | ATCTGCATGGT/  | 0.393 |
| - | 34  | 5054  | e_Mutation_p.P16f | NM_002349    | NP_002340    | O60449 | LY75_HUMAN  | ellular (Potential).          | 0  | CCAGAGGCACT   | 0.368 |
| - | 27  | 3766  | o.P1233S LY75_uc  | NM_002349    | NP_002340    | O60449 | LY75_HUMAN  | ellular (Potential).          | 0  | AACTGGTTTGA   | 0.328 |
| - | 15  | 2370  | TGB6_uc010zcq.1   | NM_000888    | NP_000879    | P18564 | ITB6_HUMAN  | lasmic (Potential).           | 3  | CTGTGAAAAGG   | 0.308 |
| - | 11  | 2349  |                   | NM_022168    | NP_071451    | Q9BYX4 | IFIH1_HUMAN | case C-terminal.              | 1  | TTGCTCCATTATG | 0.338 |
| - | 7   | 1685  |                   | NM_022168    | NP_071451    | Q9BYX4 | IFIH1_HUMAN | ase ATP-binding.              | 1  | AGCTGTTAGT    | 0.383 |
| - | 15  | 3438  | zcx.1_Missense_M  | NM_014900    | NP_055715    | Q53SF7 | COBL1_HUMAN |                               | 3  | TCTTTACTGAAA  | 0.463 |
| - | 12  | 1345  | p.V248M SLC38A1   | NM_173512    | NP_775783    | Q08AI6 | S38AB_HUMAN | ellular (Potential).          | 1  | AAACACATTGG   | 0.388 |
| - | 15  | 2771  | _p.P711L SCN3A_   | NM_006922    | NP_008853    | Q9NY46 | SCN3A_HUMAN | S1 of repeat II; (Potential). | 10 | CAAATGGATCC/  | 0.403 |
| - | 14  | 2588  | _p.S650F SCN3A_   | NM_006922    | NP_008853    | Q9NY46 | SCN3A_HUMAN |                               | 10 | CAGAGGAATCC   | 0.473 |
| + | 9   | 1387  | _p.S366N SCN2A_   | NM_001040142 | NP_001035232 | Q99250 | SCN2A_HUMAN | I.                            | 8  | CACGAGCTTTG/  | 0.408 |
| + | 12  | 2254  | _p.S655F SCN2A_   | NM_001040142 | NP_001035232 | Q99250 | SCN2A_HUMAN |                               | 8  | GGTCTCCCTGG   | 0.577 |
| + | 27  | 5924  | .Q1878H SCN2A_    | NM_001040142 | NP_001035232 | Q99250 | SCN2A_HUMAN |                               | 8  | ATACAGATGGA/  | 0.463 |
| + | 7   | 1272  | jdg.2_Missense_M  | NM_024969    | NP_079245    | Q8WYX3 | CSRN3_HUMAN |                               | 5  | CTCACAGTAGTT  | 0.488 |
| - | 2   | 329   | 3_5'Flank SCN1A_  | NM_006920    | NP_008851    | P35498 | SCN1A_HUMAN |                               | 13 | AGGTGGCACTG   | 0.343 |
| - | 27  | 5235  | uc002udp.2_RNA    | NM_002977    | NP_002968    | Q15858 | SCN9A_HUMAN | IV.                           | 13 | CAACGCAGGAAC  | 0.483 |
| + | 11  | 954   | _Mutation_p.S289  | NM_001039724 | NP_001034813 | Q8IV19 | NOSTN_HUMAN |                               | 0  | AGCCTCAAAG/   | 0.388 |
| - | 2   | 131   |                   | NM_003742    | NP_003733    | O95342 | ABCBB_HUMAN | lasmic (Potential).           | 5  | AGTCAGACATG   | 0.343 |
| - | 60  | 11689 |                   | NM_004525    | NP_004516    | P98164 | LRP2_HUMAN  | ntial). LDL-receptor class A  | 29 | AGACGCATCCA/  | 0.453 |
| - | 26  | 4381  |                   | NM_004525    | NP_004516    | P98164 | LRP2_HUMAN  | ig (Potential). Extracellular | 29 | TATGTCTTCA    | 0.438 |
| + | 25  | 3730  | ase_Mutation_p.Pf | NM_172070    | NP_742067    | Q62T12 | UBR3_HUMAN  |                               | 0  | GTGGCCCTCC    | 0.428 |
| + | 27  | 3370  | 3B_uc002ufz.2_Mi  | NM_138995    | NP_620482    | Q8WXR4 | MYO3B_HUMAN | IQ 1.                         | 19 | GCTTGAGGCCA   | 0.458 |
| + | 27  | 3382  | 3B_uc002ufz.2_Mi  | NM_138995    | NP_620482    | Q8WXR4 | MYO3B_HUMAN | IQ 1.                         | 19 | GAGATACAAAA   | 0.468 |

|   |     |       |                    |              |              |        |             |                            |     |                |       |
|---|-----|-------|--------------------|--------------|--------------|--------|-------------|----------------------------|-----|----------------|-------|
| + | 2   | 271   | uc010zdw.1_Spli    | NM_199227    | NP_954697    | Q6UB28 | AMP1D_HUMAN |                            | 0   | CCTAAGGTACTG   | 0.388 |
| + | 6   | 749   | dw.1_Missense_M    | NM_199227    | NP_954697    | Q6UB28 | AMP1D_HUMAN |                            | 0   | GGGCTCCCTTC    | 0.448 |
| - | 3   | 1171  |                    | NM_004405    | NP_004396    | Q07687 | DLX2_HUMAN  |                            | 1   | CCGGGGCGCCCC   | 0.672 |
| - | 4   | 1372  | f.2_Missense_Mut   | NM_003111    | NP_003102    | Q02447 | SP3_HUMAN   | ation domain (Gln-rich).   | 6   | GCTGAGACTCT    | 0.448 |
| - | 13  | 2403  | uiv.2_Missense_M   | NM_001033045 | NP_001028217 | Q7Z3F1 | GP155_HUMAN | ical; (Potential).         | 1   | TTACAGCGAAC/   | 0.423 |
| - | 6   | 1469  | uiv.2_Missense_M   | NM_001033045 | NP_001028217 | Q7Z3F1 | GP155_HUMAN | ical; (Potential).         | 1   | CAGAAACGTACA   | 0.408 |
| + | 4   | 372   | kw.2_Missense_Mi   | NM_006554    | NP_006545    | O75431 | MTX2_HUMAN  |                            | 2   | ACAGGCCTTTTI   | 0.318 |
| + | 1   | 201   |                    | NM_152945    | NP_694453    | Q8IUH3 | RBM45_HUMAN | RRM 1.                     | 0   | ACACACCTGAG    | 0.627 |
| + | 12  | 1369  | fe.1_Missense_Mt   | NM_032523    | NP_115912    | Q9BZF3 | OSBL6_HUMAN |                            | 1   | AGTTCTCTTTC/   | 0.433 |
| + | 5   | 931   | rmj.3_Missense_M   | NM_001042702 | NP_001036167 | Q0ZLH3 | PJVK_HUMAN  |                            | 0   | GAATCCCAAGG/   | 0.338 |
| - | 307 | 97509 | 010zfi.1_Missense  | NM_133378    | NP_596869    | Q8WZ42 | TITIN_HUMAN |                            | 153 | GGTGAGGACTC    | 0.473 |
| - | 307 | 94366 | 5076l TTN_uc010z   | NM_133378    | NP_596869    | Q8WZ42 | TITIN_HUMAN |                            | 153 | CTTCTGGTTTGG   | 0.388 |
| - | 300 | 90516 | 23793S TTN_uc01    | NM_133378    | NP_596869    | Q8WZ42 | TITIN_HUMAN |                            | 153 | CTGAGGTAGGT    | 0.468 |
| - | 275 | 77689 | 517F TTN_uc010z    | NM_133378    | NP_596869    | Q8WZ42 | TITIN_HUMAN |                            | 153 | CCAGGAAATT/    | 0.403 |
| - | 275 | 72214 | 92V TTN_uc010z     | NM_133378    | NP_596869    | Q8WZ42 | TITIN_HUMAN |                            | 153 | TGAGGGCACAG/   | 0.418 |
| - | 275 | 62287 | uc010zfi.1_Misser  | NM_133378    | NP_596869    | Q8WZ42 | TITIN_HUMAN |                            | 153 | AAGCAGATTTCT   | 0.428 |
| - | 201 | 39732 | i.1_Missense_Mut   | NM_133378    | NP_596869    | Q8WZ42 | TITIN_HUMAN |                            | 153 | TGCCAACTCTGT   | 0.418 |
| - | 187 | 36641 | 1_Nonsense_Mut     | NM_133378    | NP_596869    | Q8WZ42 | TITIN_HUMAN |                            | 153 | AGTTTCCAGTTC   | 0.463 |
| - | 161 | 32394 | TTN_uc010fre.1_l   | NM_133378    | NP_596869    | Q8WZ42 | TITIN_HUMAN |                            | 153 | GGGCACCTCGG    | 0.423 |
| - | 137 | 30006 | l_Missense_Mutat   | NM_133378    | NP_596869    | Q8WZ42 | TITIN_HUMAN |                            | 153 | TGACTCTTCTTC   | 0.428 |
| - | 94  | 24580 | N_uc010zfi.1_Intr  | NM_133378    | NP_596869    | Q8WZ42 | TITIN_HUMAN |                            | 153 | CGGTCAGTTTTA   | 0.443 |
| - | 89  | 23212 | v_uc010zfi.1_Intro | NM_133378    | NP_596869    | Q8WZ42 | TITIN_HUMAN |                            | 153 | CAACAGGGTTC    | 0.403 |
| - | 75  | 19221 | N_uc010zfi.1_Intr  | NM_133378    | NP_596869    | Q8WZ42 | TITIN_HUMAN |                            | 153 | TGCCTACTTTAAC  | 0.423 |
| - | 60  | 14995 | v_uc010zfi.1_Intro | NM_133378    | NP_596869    | Q8WZ42 | TITIN_HUMAN |                            | 153 | CCCTGGCACCA/   | 0.453 |
| - | 46  | 15571 | N_uc010zfi.1_Intr  | NM_133379    | NP_596870    | Q8WZ42 | TITIN_HUMAN |                            | 153 | AATATCTCTCTA   | 0.473 |
| - | 32  | 7603  | p.T2414 TTN_uc0    | NM_133378    | NP_596869    | Q8WZ42 | TITIN_HUMAN |                            | 153 | CCCTTGGTGCCT   | 0.408 |
| - | 24  | 4404  | TTN_uc010zfi.1_M   | NM_133378    | NP_596869    | Q8WZ42 | TITIN_HUMAN |                            | 153 | TGTGGGAATGT/   | 0.383 |
| - | 22  | 3885  | .E1175K TTN_uc0    | NM_133378    | NP_596869    | Q8WZ42 | TITIN_HUMAN |                            | 153 | GGCTTGtcttttca | 0.323 |
| + | 12  | 2072  |                    | NM_000885    | NP_000876    | P13612 | ITA4_HUMAN  | Extracellular (Potential). | 6   | CAGGACAAATTG   | 0.313 |
| - | 29  | 3563  | pb.2_Missense_M    | NM_013436    | NP_038464    | Q9Y2A7 | NCKP1_HUMAN |                            | 2   | TAAGACGGTCT    | 0.333 |
| - | 21  | 2671  | pb.2_Missense_M    | NM_013436    | NP_038464    | Q9Y2A7 | NCKP1_HUMAN |                            | 2   | CTGCACATAGT    | 0.353 |
| + | 16  | 1840  | 36_splice TGAV_u   | NM_002210    | NP_002201    | P06756 | ITAV_HUMAN  |                            | 4   | AACTTAGTAAGT/  | 0.264 |
| + | 8   | 2126  | p.A639T FAM171I    | NM_177454    | NP_803237    | Q6P995 | F171B_HUMAN | lasmic (Potential).        | 10  | CCAGAGCCTGG    | 0.493 |
| + | 2   | 277   |                    | NM_000090    | NP_000081    | P02461 | CO3A1_HUMAN | VWFC.                      | 13  | ATATGTGTCTGT   | 0.443 |
| + | 37  | 2674  |                    | NM_000090    | NP_000081    | P02461 | CO3A1_HUMAN | le-helical region.         | 13  | AGGGTCCTCCTC   | 0.383 |
| - | 5   | 794   |                    | NM_014585    | NP_055400    | Q9NP59 | S40A1_HUMAN |                            | 1   | TAGCAGTACTG/   | 0.239 |
| + | 5   | 2038  |                    | NM_019048    | NP_061921    | Q9NWL6 | ASND1_HUMAN | agine synthetase.          | 3   | TCTTGGTCGTG/   | 0.383 |
| + | 13  | 2768  | jqx.1_RNA ANKA     | NM_144708    | NP_653309    | Q7Z5J8 | ANKAR_HUMAN |                            | 4   | GATACAGCTTTA   | 0.284 |
| + | 7   | 1407  | p.T236I INPP1_u    | NM_001128928 | NP_001122400 | P49441 | INPP_HUMAN  |                            | 2   | GCTCACCATCT/   | 0.448 |
| - | 20  | 2054  | sk.2_Missense_Mi   | NM_007315    | NP_009330    | P42224 | STAT1_HUMAN |                            | 10  | CAAAGCCAGA/    | 0.358 |
| + | 19  | 2284  | 1B_uc002usr.2_M    | NM_001130158 | NP_001123630 | O43795 | MYO1B_HUMAN | rosin head-like.           | 8   | TGGAAAGAATAC   | 0.323 |
| + | 5   | 887   | sy.2_RNA OBFC2A    | NM_001031716 | NP_001026886 | Q96AH0 | SOSB2_HUMAN |                            | 0   | ATTCCATGAATAC  | 0.299 |
| - | 1   | 745   |                    | NM_004657    | NP_004648    | O95810 | SDPR_HUMAN  | Potential.                 | 2   | CTTACCTGTG/    | 0.612 |
| - | 6   | 972   |                    | NM_016192    | NP_057276    | Q9UIK5 | TEFF2_HUMAN | Extracellular (Potential). | 5   | AGAGGGGATTG    | 0.358 |
| - | 42  | 7614  |                    | NM_018897    | NP_061720    | Q8WXX0 | DYH7_HUMAN  | .4 (By similarity).        | 12  | CTCAGGCCATG.   | 0.408 |
| - | 14  | 1833  |                    | NM_018897    | NP_061720    | Q8WXX0 | DYH7_HUMAN  | n (By similarity).         | 12  | ATGATCTCTGA/   | 0.348 |
| - | 8   | 789   |                    | NM_018897    | NP_061720    | Q8WXX0 | DYH7_HUMAN  | n (By similarity).         | 12  | TCGAGGATCTT    | 0.318 |

|   |    |      |                    |              |              |        |             |                             |    |                |       |
|---|----|------|--------------------|--------------|--------------|--------|-------------|-----------------------------|----|----------------|-------|
| - | 9  | 1300 | 2utu.2_Missense_I  | NM_012086    | NP_036218    | Q9Y5Q9 | TF3C3_HUMAN |                             | 7  | 'AAGTGGTTCAAC  | 0.393 |
| - | 6  | 855  | _p.W255* GTF3C3    | NM_012086    | NP_036218    | Q9Y5Q9 | TF3C3_HUMAN | TPR 4.                      | 7  | 'CGCTCCCACAG   | 0.393 |
| + | 4  | 288  | .2_Missense_Mut    | NM_015387    | NP_056202    | Q9Y3A3 | MOBL3_HUMAN |                             | 0  | TAAATGGACTTG   | 0.284 |
| - | 9  | 1889 |                    | NM_144629    | NP_653230    | Q52LD8 | RFTN2_HUMAN |                             | 0  | \CCTGAGTCACT   | 0.468 |
| + | 1  | 1100 | uc002uup.2_Intr    | NM_138395    | NP_612404    | Q96GW9 | SYMM_HUMAN  |                             | 3  | .GCTTGGGCAAC   | 0.582 |
| + | 2  | 718  | uv.3_Missense_M    | NM_001114661 | NP_001108133 | Q15111 | PLCL1_HUMAN | reaction with PPP1C.        | 2  | >TTCAAGCTCTT   | 0.448 |
| + | 6  | 703  | hd.1_Missense_M    | NM_152524    | NP_689737    | Q562F6 | SGOL2_HUMAN |                             | 4  | CACAACCTTTATC  | 0.294 |
| + | 7  | 1543 | _p.T477 SGOL2_     | NM_152524    | NP_689737    | Q562F6 | SGOL2_HUMAN |                             | 4  | TTCAAAGCTGGCT  | 0.378 |
| + | 17 | 1878 | e_Mutation_p.A14   | NM_001159    | NP_001150    | Q06278 | ADO_HUMAN   |                             | 6  | AGCATGCCACGC   | 0.448 |
| + | 21 | 2410 | p.D326G AOX1_u     | NM_001159    | NP_001150    | Q06278 | ADO_HUMAN   |                             | 6  | \AATGGATGTCT   | 0.413 |
| - | 8  | 744  | h.1_Missense_Mt    | NM_006190    | NP_006181    | Q13416 | ORC2_HUMAN  |                             | 0  | 'ACGAGGTGCTG   | 0.274 |
| + | 8  | 1292 | e_Mutation_p.H24   | NM_032974    | NP_116756    | Q92851 | CASPA_HUMAN |                             | 6  | \ACAACCACAGC   | 0.428 |
| - | 5  | 921  | yc.2_Missense_Mt   | NM_015049    | NP_055864    | O60296 | TRAK2_HUMAN | Potential.                  | 0  | >TTGATCAAAGG   | 0.408 |
| - | 4  | 739  | yc.2_Missense_M    | NM_015049    | NP_055864    | O60296 | TRAK2_HUMAN |                             | 0  | CTGTGCCTAGA    | 0.333 |
| - | 10 | 1069 | e_Mutation_p.W24   | NM_033066    | NP_149055    | Q96JB8 | MPP4_HUMAN  | SH3.                        | 0  | GCCTGCCACCA    | 0.587 |
| - | 27 | 4506 | _S2_uc010ftl.2_R   | NM_020919    | NP_065970    | Q96Q42 | ALS2_HUMAN  |                             | 7  | CCTGCCCAGGG    | 0.478 |
| - | 18 | 3515 | se_Mutation_p.W1   | NM_020919    | NP_065970    | Q96Q42 | ALS2_HUMAN  | MORN 1.                     | 7  | 'GAAAGCCAGCG   | 0.433 |
| - | 9  | 2325 | S2_uc002uyq.2_M    | NM_020919    | NP_065970    | Q96Q42 | ALS2_HUMAN  |                             | 7  | \AGTCTTAGAAC   | 0.418 |
| + | 5  | 498  | _p.A99V CDK15_     | NM_139158    | NP_631897    | Q96Q40 | CDK15_HUMAN | rotein kinase.              | 5  | TCTAGCTTCTCT   | 0.338 |
| + | 8  | 882  | _p.S227F CDK15_    | NM_139158    | NP_631897    | Q96Q40 | CDK15_HUMAN | rotein kinase.              | 5  | \ATATTCTCTCTGA | 0.473 |
| + | 1  | 393  |                    | NM_003507    | NP_003498    | O75084 | FZD7_HUMAN  | acellular (Potential).      | 4  | 'GTGCACCGTGC   | 0.637 |
| + | 1  | 407  |                    | NM_003507    | NP_003498    | O75084 | FZD7_HUMAN  | acellular (Potential).      | 4  | \ATCAGGCCATC   | 0.637 |
| + | 1  | 527  |                    | NM_003507    | NP_003498    | O75084 | FZD7_HUMAN  | acellular (Potential).      | 4  | 'ACGGTGCGGGC   | 0.726 |
| + | 12 | 2812 | PR2_uc010ft.2_In   | NM_001204    | NP_001195    | Q13873 | BMPR2_HUMAN | lasmic (Potential).         | 9  | \AGACTCTATCC   | 0.373 |
| + | 7  | 1415 |                    | NM_173511    | NP_775782    | Q6P1L5 | F117B_HUMAN |                             | 1  | \AAAGGGAACCT   | 0.393 |
| + | 14 | 1893 | p.G462D ALS2CR     | NM_001104586 | NP_001098056 | Q8N187 | AL2S8_HUMAN |                             | 2  | >CAGGGGTTCTT   | 0.353 |
| + | 15 | 2112 | p.G535D ALS2CR     | NM_001104586 | NP_001098056 | Q8N187 | AL2S8_HUMAN |                             | 2  | TCCTTGGTCAAA   | 0.418 |
| - | 14 | 2833 |                    | NM_213589    | NP_998754    | Q70E73 | RAPH1_HUMAN |                             | 10 | \GGGTGAAACT    | 0.572 |
| - | 14 | 2456 |                    | NM_213589    | NP_998754    | Q70E73 | RAPH1_HUMAN |                             | 10 | GAGGAGGCGGG    | 0.517 |
| + | 9  | 1426 | p.P407S PARD3B     | NM_152526    | NP_689739    | Q8TEW8 | PAR3L_HUMAN | PDZ 2.                      | 4  | 'ATGGTCCCGGT   | 0.413 |
| + | 9  | 2086 | _p.A432V NRP2_u    | NM_201266    | NP_957718    | O60462 | NRP2_HUMAN  | ellular (Potential).        | 4  | \AGATGCTCCCT   | 0.572 |
| - | 3  | 940  | _p.T185I GPR1_u    | NM_005279    | NP_005270    | P46091 | GPR1_HUMAN  | ellular (Potential).        | 0  | CAAAGAGTATGA   | 0.418 |
| + | 2  | 440  |                    | NM_001102659 | NP_001096129 |        |             |                             | 0  | >ATGGAGCACTG   | 0.483 |
| + | 20 | 3631 | p.R839K PIKFYVE    | NM_015040    | NP_055855    | Q9Y2I7 | FYV1_HUMAN  |                             | 10 | AGCCAGAGGAG    | 0.463 |
| + | 13 | 1496 | e_Mutation_p.W43   | NM_005048    | NP_005039    | P49190 | PTH2R_HUMAN | lasmic (Potential).         | 3  | .GATGTGGAGTC   | 0.557 |
| + | 7  | 2238 | i.1_Intron MAP2_u  | NM_002374    | NP_002365    | P11137 | MAP2_HUMAN  |                             | 17 | \TTGATCCAAAAC  | 0.438 |
| + | 12 | 5178 | lg.1_Missense_Mu   | NM_002374    | NP_002365    | P11137 | MAP2_HUMAN  |                             | 17 | \AGAAGGTCGCC   | 0.532 |
| - | 2  | 1077 | vd.1_Missense_M    | NM_152519    | NP_689732    | A0AUZ9 | CB067_HUMAN |                             | 3  | \TTTCAGTGCATT  | 0.378 |
| + | 14 | 1492 | l60_splice CPS1_u  | NM_001875    | NP_001866    | P31327 | CPSM_HUMAN  |                             | 13 | >TTTCAGGAAGA   | 0.373 |
| + | 20 | 2672 | p.S853N CPS1_uc    | NM_001875    | NP_001866    | P31327 | CPSM_HUMAN  | p.S847T(1)                  | 13 | ACCAAGCAGCA    | 0.438 |
| + | 16 | 1908 | .1_Missense_Mut    | NM_024532    | NP_078808    | Q8N0X2 | SPG16_HUMAN | WD 7.                       | 2  | ACGAGGCACAC    | 0.507 |
| - | 1  | 214  | D1_uc010zjm.1_5'   | NM_000465    | NP_000456    | Q99728 | BARD1_HUMAN | ction with BRCA1.           | 2  | CGGTTCCATGG    | 0.682 |
| - | 40 | 6807 | i.2_Intron FN1_uc  | NM_212482    | NP_997647    | P02751 | FINC_HUMAN  | trand 3 (CS-3) (V region).  | 13 | CCTGGGGATGT    | 0.532 |
| - | 40 | 6658 | vfh.2_Intron FN1_u | NM_212482    | NP_997647    | P02751 | FINC_HUMAN  | trand 3 (CS-3) (V region).  | 13 | GACCAGAAGTG    | 0.527 |
| - | 25 | 4206 | 2_Intron FN1_uc0C  | NM_212482    | NP_997647    | P02751 | FINC_HUMAN  | /pe-III 8. Cell-attachment. | 13 | CAAATCTTCAA    | 0.498 |
| + | 7  | 827  | iq.2_Missense_Mu   | NM_015488    | NP_056303    | Q8N490 | PNKD_HUMAN  |                             | 0  | \ACCTGGCCACA   | 0.602 |
| + | 12 | 1554 | 02vhu.1_Missens    | NM_000578    | NP_000569    | P49279 | NRAM1_HUMAN | ical; (Potential).          | 4  | CACCCGCTCTC    | 0.647 |

rs143283518

|   |    |      |                    |              |              |        |             |                                |    |                 |       |            |
|---|----|------|--------------------|--------------|--------------|--------|-------------|--------------------------------|----|-----------------|-------|------------|
| - | 22 | 2938 | _p.E829K USP37_    | NM_020935    | NP_065986    | Q86T82 | UBP37_HUMAN | UIM 3.                         | 5  | CATCTTCTTTCTG   | 0.284 |            |
| - | 4  | 523  | 37_uc002vif.2_Mi   | NM_020935    | NP_065986    | Q86T82 | UBP37_HUMAN |                                | 5  | ATCCTTCTTTCC/   | 0.343 |            |
| - | 8  | 4428 | t.2_Missense_Mul   | NM_001105537 | NP_001099007 | P52746 | ZN142_HUMAN | :2H2-type 21.                  | 4  | AGCGGGAACAG     | 0.657 |            |
| + | 20 | 2622 | 786N STK36_uc0     | NM_015690    | NP_056505    | Q9NRP7 | STK36_HUMAN |                                | 11 | AGCAGTGACGTT/   | 0.488 |            |
| + | 26 | 3987 | iw.2_Missense_M    | NM_015690    | NP_056505    | Q9NRP7 | STK36_HUMAN |                                | 11 | AAATGGCATGTC    | 0.572 |            |
| + | 3  | 801  | LL4_uc010fvx.2_I   | NM_014640    | NP_055455    | Q14679 | TLL4_HUMAN  |                                | 3  | AAAAAAGCCCTT    | 0.537 |            |
| + | 3  | 1239 | p.A125V TLL4_u     | NM_014640    | NP_055455    | Q14679 | TLL4_HUMAN  |                                | 3  | TACCGCTAGCT     | 0.552 |            |
| - | 10 | 1088 | RNA PRKAG3_uc0     | NM_017431    | NP_059127    | Q9UGI9 | AAKG3_HUMAN | CBS 3.                         | 2  | GTCTCGGAATG     | 0.592 |            |
| + | 2  | 725  |                    | NM_025216    | NP_079492    | Q9GZT5 | WN10A_HUMAN |                                | 2  | TACAGGGCATC/    | 0.582 |            |
| - | 8  | 1079 | se_Mutation_p.     | NM_194302    | NP_919278    | Q6ZU64 | CC108_HUMAN |                                | 4  | GGATGCTGCTC/    | 0.662 |            |
| - | 16 | 2480 | we.1_Missense_M    | NM_005689    | NP_005680    | Q9NP58 | ABCB6_HUMAN | 3C transporter.                | 2  | GGCGACGCGCT     | 0.612 |            |
| - | 12 | 2174 | ATG9A_uc002vkd     | NM_001077198 | NP_001070666 | Q7Z3C6 | ATG9A_HUMAN | smic (By similarity).          | 1  | TGGGCGCCTGC     | 0.687 | rs35171882 |
| + | 2  | 257  | F1_uc010zkw.1_I    | NM_018089    | NP_060559    | Q9H8Y5 | ANKZ1_HUMAN |                                | 2  | TCAGGGCCTGA/    | 0.622 |            |
| - | 21 | 2883 | t2splice PTPRN_    | NM_002846    | NP_002837    | Q16849 | PTPRN_HUMAN |                                | 4  | TCCCTACCTTTT/   | 0.587 |            |
| - | 9  | 1401 | p.P348S PTPRN_     | NM_002846    | NP_002837    | Q16849 | PTPRN_HUMAN | ellular (Potential).           | 4  | AGGGGTCTGG      | 0.637 |            |
| + | 18 | 4300 |                    | NM_005876    | NP_005867    | Q15772 | SPEG_HUMAN  | Ig-like 7.                     | 14 | CACGGCCGGT      | 0.677 |            |
| + | 31 | 7637 |                    | NM_005876    | NP_005867    | Q15772 | SPEG_HUMAN  |                                | 14 | GCTCCGCTGGG     | 0.617 |            |
| + | 40 | 9563 |                    | NM_005876    | NP_005867    | Q15772 | SPEG_HUMAN  | otein kinase 2.                | 14 | TACATCCCAGAC    | 0.607 |            |
| + | 1  | 964  | V4_uc002vly.1_Mi   | NM_182847    | NP_878267    | Q96FT7 | ACCN4_HUMAN | ellular (Potential).           | 2  | CGCCAGCAACT     | 0.612 |            |
| - | 13 | 4264 | zli.1_Missense_Mi  | NM_015311    | NP_056126    | O75147 | OBSL1_HUMAN | Ig-like 12.                    | 0  | CTGGGGCCCTG     | 0.632 |            |
| + | 2  | 259  |                    | NM_022915    | NP_075066    | Q9H9J2 | RM44_HUMAN  |                                | 1  | AGAAGCCGAAC     | 0.343 |            |
| - | 2  | 314  | lOzlr.1_Missense_I | NM_006216    | NP_006207    | P07093 | GDN_HUMAN   |                                | 4  | ACAGAGGATTG.    | 0.537 |            |
| - | 45 | 5341 | voa.2_Missense_    | NM_014689    | NP_055504    | Q96BY6 | DOC10_HUMAN | DHR-2.                         | 2  | GCCAGGTCCTG/    | 0.498 |            |
| - | 23 | 2863 | vob.2_Missense_M   | NM_014689    | NP_055504    | Q96BY6 | DOC10_HUMAN | DHR-1.                         | 2  | GACTGAGACATA    | 0.368 |            |
| - | 1  | 1839 |                    | NM_005544    | NP_005535    | P35568 | IRS1_HUMAN  |                                | 12 | GCCCCCCCCGA     | 0.687 |            |
| - | 22 | 2207 |                    | NM_000092    | NP_000083    | P53420 | CO4A4_HUMAN | le-helical region.             | 11 | GGAGCCCCAAG     | 0.597 |            |
| - | 7  | 1118 |                    | NM_000092    | NP_000083    | P53420 | CO4A4_HUMAN | le-helical region.             | 11 | AGACTCCTCTT/    | 0.438 |            |
| + | 6  | 496  | utation_p.G112S C  | NM_000091    | NP_000082    | Q01955 | CO4A3_HUMAN | le-helical region.             | 3  | CCCCAGGCAAT/    | 0.388 |            |
| + | 51 | 5021 | .1_Intron uc002voc | NM_000091    | NP_000082    | Q01955 | CO4A3_HUMAN | ell activity of tumstatin. Col | 3  | AAGAGGAACGT/    | 0.483 |            |
| + | 3  | 516  | vpe.2_Missense_M   | NM_004504    | NP_004495    | P52594 | AGFG1_HUMAN | Arf-GAP.                       | 4  | AGGTCTGTA AAC.  | 0.308 |            |
| + | 7  | 1116 | vpe.2_Missense_M   | NM_004504    | NP_004495    | P52594 | AGFG1_HUMAN |                                | 4  | CTTCCCCAAATC    | 0.383 |            |
| - | 3  | 867  | C19A3_uc010ziv.1   | NM_025243    | NP_079519    | Q9BZV2 | S19A3_HUMAN | lasmic (Potential).            | 2  | AACGTCCACAG     | 0.473 |            |
| - | 3  | 741  | .C19A3_uc010ziv.1  | NM_025243    | NP_079519    | Q9BZV2 | S19A3_HUMAN | lasmic (Potential).            | 2  | TTTCTCTAATAC    | 0.443 |            |
| + | 2  | 165  | se_Mutation_p.S14  | NM_178821    | NP_849143    | Q8N136 | WDR69_HUMAN |                                | 1  | CTAAGTCCATAG/   | 0.353 |            |
| - | 35 | 5211 | i.G1749E TRIP12_   | NM_004238    | NP_004229    | Q14669 | TRIPC_HUMAN |                                | 9  | ATTTTCTTAAGA    | 0.418 |            |
| - | 28 | 4269 | o.A1435V TRIP12_   | NM_004238    | NP_004229    | Q14669 | TRIPC_HUMAN |                                | 9  | TACCAGCTCTG/    | 0.373 |            |
| - | 6  | 965  | qi.3_Missense_Mi   | NM_004509    | NP_004500    | Q9HB58 | SP110_HUMAN |                                | 4  | AGTGGGGCATC     | 0.448 |            |
| + | 2  | 233  | _Mutation_p.S31N   | NM_003113    | NP_003104    | P23497 | SP100_HUMAN |                                | 5  | gcacacagccacgat | 0     |            |
| + | 3  | 536  | p.G139D ITM2C_     | NM_030926    | NP_112188    | Q9NQX7 | ITM2C_HUMAN | BRICHOS.                       | 0  | CGGCGGTGACC     | 0.637 |            |
| + | 14 | 1430 | se_Mutation_p.Q4   | NM_025139    | NP_079415    | Q7Z3E5 | ARMC9_HUMAN |                                | 1  | CCCTGCAGAAG     | 0.433 |            |
| - | 3  | 575  |                    | NR_024079    |              |        |             |                                | 0  | GAACCCCTAC/     | 0.507 |            |
| - | 3  | 509  |                    | NR_024079    |              |        |             |                                | 0  | CTCCTGGTGGC     | 0.507 |            |
| + | 8  | 1147 | n.3_RNA DIS3L2_    | NM_152383    | NP_689596    | Q8IYB7 | DI3L2_HUMAN |                                | 3  | TTGTGGCACGG     | 0.507 |            |
| + | 11 | 1355 | yc.2_Missense_Mi   | NM_000751    | NP_000742    | Q07001 | ACHD_HUMAN  | lasmic (Potential).            | 3  | TGAGGGACCAG     | 0.507 |            |
| + | 27 | 3494 | .3_Missense_Muta   | NM_015575    | NP_056390    | Q6Y7W6 | PERQ2_HUMAN |                                | 7  | CTGGTCTCTT/     | 0.413 |            |
| - | 2  | 430  |                    | NM_019850    | NP_062824    | Q8N5V2 | NGEF_HUMAN  | toward RHOA, RAC1 and          | 7  | GAATTTCTCTTA/   | 0.498 |            |
| + | 28 | 3374 | se_Mutation_p.T10  | NM_152879    | NP_690618    | Q16760 | DGKD_HUMAN  |                                | 5  | TCGTGACCAAGT    | 0.517 |            |

|   |    |      |                                 |              |               |        |             |                               |    |                |       |
|---|----|------|---------------------------------|--------------|---------------|--------|-------------|-------------------------------|----|----------------|-------|
| - | 5  | 612  | .mr.1_Missense_Mutation_p.T1771 |              |               | Q9NVE5 | UBP40_HUMAN |                               | 3  | ACAATGGTTCCA   | 0.388 |
| + | 1  | 873  | UGT1A9_uc002vu                  | NM_001072    | NP_001063     | P19224 | UD16_HUMAN  |                               | 0  | TAATCACCTTATA  | 0.398 |
| + | 1  | 165  | UGT1A7_uc002vu                  | NM_007120    | NP_009051     | P22310 | UD14_HUMAN  |                               | 1  | .TGCGGGAGGCC   | 0.607 |
| + | 1  | 641  | zmy.1_intron UGT                | NM_000463    | NP_000454     | P22309 | UD11_HUMAN  |                               | 2  | GCAGCGGGTGA    | 0.527 |
| - | 8  | 1063 | p.G272R HJURP_                  | NM_018410    | NP_060880     | Q8NCD3 | HJURP_HUMAN |                               | 1  | .TGTCCTTTCA    | 0.433 |
| - | 43 | 9697 | znj.1_Missense_IV               | NM_004369    | NP_004360     | P12111 | CO6A3_HUMAN | gion. BPTI/Kunitz inhibitor.  | 18 | ATCTTGACACAGC  | 0.378 |
| - | 36 | 7649 | z_Mutation_p.T184               | NM_004369    | NP_004360     | P12111 | CO6A3_HUMAN | 1. Nonhelical region.         | 18 | .CCGTGGTCACC   | 0.552 |
| - | 9  | 4439 | p.P778L COL6A3_                 | NM_004369    | NP_004360     | P12111 | CO6A3_HUMAN | 1. Nonhelical region.         | 18 | .ATTCGGGGCTCA  | 0.617 |
| + | 10 | 1095 | r_p.T212 LRRFIP                 | NM_001137552 | NP_0011131024 | Q32MZ4 | LRRF1_HUMAN |                               | 3  | .CGACACCCTCA   | 0.398 |
| + | 4  | 855  |                                 | NM_001040445 | NP_001035535  | Q9Y576 | ASB1_HUMAN  | ANK 6.                        | 0  | .TGCTGGTAGAA   | 0.562 |
| - | 15 | 2807 | zsb.1_Missense_IV               | NM_016552    | NP_057636     | Q9P2S6 | ANKY1_HUMAN |                               | 1  | .GCTGGGGCCCT   | 0.617 |
| + | 29 | 4075 | p.E561K SNED1_                  | NM_001080437 | NP_001073906  | Q8TER0 | SNED1_HUMAN |                               | 2  | .TCTCCGAGACA   | 0.582 |
| - | 10 | 2715 | s.P875S PASK_uc                 | NM_015148    | NP_055963     | Q96RG2 | PASK_HUMAN  |                               | 6  | CACGGCGGTGG    | 0.627 |
| + | 5  | 642  |                                 | NM_001001891 | NP_001001891  | Q6IWH7 | ANO7_HUMAN  | lasmic (Potential).           | 3  | .FGCTCTGCTACT  | 0.662 |
| + | 22 | 2635 |                                 | NM_001001891 | NP_001001891  | Q6IWH7 | ANO7_HUMAN  | ical; (Potential).            | 3  | .CTACTGGAATCT  | 0.587 |
| - | 28 | 3949 | s.A1241T HDLBP_                 | NM_203346    | NP_976221     | Q00341 | VIGLN_HUMAN |                               | 4  | AGGAGCCTGTG    | 0.597 |
| + | 6  | 758  | bg.2_Missense_Mi                | NM_001008491 | NP_001008491  | Q15019 | SEPT2_HUMAN |                               | 1  | .GCAGAGATTGG   | 0.423 |
| + | 16 | 1921 | p.A602T FARP2_                  | NM_014808    | NP_055623     | Q94887 | FARP2_HUMAN | DH.                           | 3  | .GGCTGGCACTC   | 0.557 |
| - | 2  | 504  |                                 | NM_015963    | NP_057047     | Q8WY91 | THAP4_HUMAN |                               | 0  | .CTCCAGCCCCC   | 0.637 |
| - | 3  | 595  | s.2_intron PDCD1_               | NM_005018    | NP_005009     | Q15116 | PDCD1_HUMAN | ical; (Potential).            | 1  | .GCAGGCCGCC    | 0.697 |
| + | 2  | 388  |                                 | NM_080831    | NP_543021     | Q9H1M3 | DB129_HUMAN |                               | 1  | .CTCTGCCACCA   | 0.438 |
| + | 2  | 221  | 'SMF1_uc010zpp.'                | NM_178578    | NP_848693     | Q92530 | PSMF1_HUMAN |                               | 0  | .CTGCAGGCAGG   | 0.662 |
| + | 7  | 929  | pp.1_Missense_M                 | NM_178578    | NP_848693     | Q92530 | PSMF1_HUMAN | Pro-rich.                     | 0  | .CCCACCCGGGT   | 0.498 |
| + | 6  | 658  | st.2_Missense_Mu                | NM_014723    | NP_055538     | Q15079 | SNPH_HUMAN  | Potential.                    | 2  | .AAAGGAGATCA   | 0.562 |
| - | 4  | 920  | SIRPG_uc002wfo.                 | NM_018556    | NP_061026     | Q9P1W8 | SIRPG_HUMAN | otential). Ig-like C1-type 2. | 1  | .TCCGACCAGGT   | 0.537 |
| - | 4  | 832  | SIRPG_uc002wfo.                 | NM_018556    | NP_061026     | Q9P1W8 | SIRPG_HUMAN | otential). Ig-like C1-type 2. | 1  | .GAGTAACCTCC   | 0.547 |
| + | 3  | 610  | r_p.E84K SIRPA_u                | NM_001040022 | NP_001035111  | P78324 | SHPS1_HUMAN | . Extracellular (Potential).  | 1  | .AAAAAGAAGGC   | 0.542 |
| + | 12 | 1547 | ow.1_Missense_Mi                | NM_080751    | NP_542789     | Q8TDI7 | TMC2_HUMAN  | ical; (Potential).            | 3  | .CTTTGCACCTCT  | 0.537 |
| - | 6  | 517  | .E170K IDH3B_uc                 | NM_006899    | NP_008830     | Q43837 | IDH3B_HUMAN |                               | 0  | .TGACTCCCCTT   | 0.522 |
| + | 21 | 2113 | PS16_uc002whd.2                 | NM_022575    | NP_072097     | Q9H269 | VPS16_HUMAN |                               | 4  | .TGGGGGGCCAC   | 0.592 |
| - | 31 | 2921 | p.G696D C20orf19                | NM_001009984 | NP_001009984  | Q5TEA3 | CT194_HUMAN |                               | 0  | .GCCAGCCAGGA   | 0.318 |
| - | 18 | 1547 | p.S238F C20orf19                | NM_001009984 | NP_001009984  | Q5TEA3 | CT194_HUMAN |                               | 0  | .ACTACGGAGCTG  | 0.532 |
| + | 10 | 1799 | il.2_Missense_Mul               | NM_139321    | NP_647537     | Q75882 | ATRN_HUMAN  | ar (Potential). Kelch 5.      | 2  | .GTTTGGAGGAA   | 0.413 |
| - | 5  | 609  | Q0orf27_uc002wjh.               | NM_001039140 | NP_001034229  | Q9GZN8 | CT027_HUMAN |                               | 0  | .CAGTGCCACCT   | 0.612 |
| - | 1  | 1682 | 5B_uc010zql.1_5'                | NM_001810    | NP_001801     | P07199 | CENPB_HUMAN |                               | 0  | .CCTGGGCACCA   | 0.537 |
| + | 15 | 2318 | 5B_uc002wjm.2_I                 | NM_021873    | NP_068659     | P30305 | MPIP2_HUMAN | Rhodanese.                    | 5  | .CCAGCCTCTAC   | 0.592 |
| + | 3  | 534  | 2_uc002wlu.2_Mis                | NM_003818    | NP_003809     | Q95674 | CDS2_HUMAN  | ical; (Potential).            | 0  | .CCAATGGTTTTG  | 0.453 |
| + | 18 | 2626 | nl.2_Missense_Mi                | NM_032485    | NP_115874     | Q9UJA3 | MCM8_HUMAN  |                               | 1  | .FGCTAGGAACTT  | 0.393 |
| + | 3  | 1369 |                                 | NM_001200    | NP_001191     | P12643 | BMP2_HUMAN  |                               | 2  | .CACCAGGTTGG   | 0.478 |
| + | 9  | 711  | p.P192L PLCB4_                  | NM_182797    | NP_877949     | Q15147 | PLCB4_HUMAN |                               | 15 | .TCTTCCCAGTGC  | 0.313 |
| + | 17 | 1541 | p.V469I PLCB4_u                 | NM_182797    | NP_877949     | Q15147 | PLCB4_HUMAN |                               | 15 | .CTGAAGTTGAA   | 0.368 |
| - | 7  | 2064 | rnj.2_Missense_Mi               | NM_020341    | NP_065074     | Q9P286 | PAK7_HUMAN  | rotein kinase.                | 23 | .GTCAACCACATT  | 0.478 |
| + | 7  | 637  | gca.1_Missense_A                | NM_130811    | NP_570824     | P60880 | SNP25_HUMAN | coiled-coil homology 2.       | 2  | .TGCCCGAGAAA   | 0.458 |
| - | 5  | 1261 |                                 | NM_000214    | NP_000205     | P78504 | JAG1_HUMAN  | r (Potential). EGF-like 1.    | 9  | .GTCACCTGGGA   | 0.433 |
| + | 8  | 1302 |                                 | NM_018327    | NP_060797     | Q9NUV7 | SPTC3_HUMAN |                               | 0  | .TGAAGCTCACA   | 0.507 |
| - | 13 | 1268 | 3P1_uc002woh.2_I                | NM_017714    | NP_060184     | Q9H6P5 | TASP1_HUMAN |                               | 0  | .FCCTGGGCTGAC  | 0.458 |
| - | 3  | 295  | n_p.E60K TASP1_                 | NM_017714    | NP_060184     | Q9H6P5 | TASP1_HUMAN |                               | 0  | .TATACTCCTTGGC | 0.323 |

rs6077865



|   |    |      |                                              |           |           |        |             |                           |     |               |       |             |
|---|----|------|----------------------------------------------|-----------|-----------|--------|-------------|---------------------------|-----|---------------|-------|-------------|
| - | 3  | 2089 | 02wou.2_Intron FL                            | NM_198391 | NP_938205 | Q9NZU0 | FLRT3_HUMAN | ical; (Potential).        | 1   | 3CAATGGTAACC/ | 0.468 |             |
| + | 15 | 1409 | p.G147D MACRO                                | NM_080676 | NP_542407 | A1Z1Q3 | MACD2_HUMAN | Glu-rich.                 | 0   | AGAAGGTGAAA   | 0.378 | rs147212262 |
| - | 19 | 3174 | h.1_Missense_Mu                              | NM_024704 | NP_078980 | Q96L93 | KI16B_HUMAN | r-rich. Potential.        | 8   | CCGCTCCAGCG   | 0.542 |             |
| - | 3  | 366  | p.Q417Q RRBP1_uc002wpw.1_Silent_p.Q417Q RRBP |           |           | Q9P2E9 | RRBP1_HUMAN |                           | 1   | CGCTGCTGCTC   | 0.617 |             |
| - | 6  | 675  | 3NX5_uc002wqe.2                              | NM_014426 | NP_055241 | Q9Y5X3 | SNX5_HUMAN  |                           | 1   | AAGGACTTCATC  | 0.363 |             |
| - | 3  | 637  |                                              | NM_021220 | NP_067043 | Q9BRP0 | OVOL2_HUMAN | 2H2-type 1.               | 1   | CATGCGCTGCA   | 0.597 |             |
| + | 13 | 1373 | 20orf26_uc010zsf.                            | NM_015585 | NP_056400 | Q8NHU2 | CT026_HUMAN |                           | 4   | TTCTTCCTCATC  | 0.453 |             |
| - | 3  | 413  |                                              | NM_001900 | NP_001891 | P28325 | CYTD_HUMAN  |                           | 0   | CTCTTCCTGTG/  | 0.453 |             |
| - | 2  | 240  | i_p.A47T C20orf3_                            | NM_020531 | NP_065392 | Q9HDC9 | APMAP_HUMAN | type II membrane protein; | 1   | AACAGCCAGCA   | 0.522 |             |
| + | 3  | 521  |                                              | NM_002862 | NP_002853 | P11216 | PYGB_HUMAN  |                           | 2   | GCCTGGGGAGG   | 0.552 |             |
| + | 11 | 1349 |                                              | NM_002862 | NP_002853 | P11216 | PYGB_HUMAN  |                           | 2   | CACCAGCACGT   | 0.647 |             |
| - | 20 | 3561 | n.1_Missense_Mu                              | NM_025176 | NP_079452 | Q9Y2I6 | NINL_HUMAN  | Potential.                | 5   | FAGAAGCCTCT   | 0.478 |             |
| - | 9  | 1212 | o.1_Missense_Mt                              | NM_025176 | NP_079452 | Q9Y2I6 | NINL_HUMAN  |                           | 5   | GCAGGCCAGGG   | 0.642 |             |
| + | 2  | 153  |                                              | NM_153324 | NP_697019 | Q8N688 | DB123_HUMAN |                           | 0   | AGGTGGCACCC   | 0.413 |             |
| - | 2  | 575  | CL2L1_uc002wwn.                              | NM_138578 | NP_612815 | Q07817 | B2CL1_HUMAN |                           | 2   | TGTGGCCAGTG   | 0.632 |             |
| + | 10 | 1711 | iv.1_Missense_Mt                             | NM_012112 | NP_036244 | Q9ULW0 | TPX2_HUMAN  |                           | 2   | ACGAACCCCTA/  | 0.413 |             |
| + | 4  | 832  |                                              | NM_033118 | NP_149109 | Q9H1R3 | MYLK2_HUMAN |                           | 6   | AGGCCCTCTGT   | 0.662 |             |
| + | 6  | 963  | f160_uc002wxg.2_                             | NM_080625 | NP_542192 | Q9NUG4 | CT160_HUMAN |                           | 4   | GGAGTCTCGCG   | 0.552 |             |
| + | 5  | 690  | p.S59N TM9SF4_u                              | NM_014742 | NP_055557 | Q92544 | TM9S4_HUMAN |                           | 2   | AGACAGCGATG   | 0.562 |             |
| + | 7  | 2062 | w.1_Missense_Mu                              | NM_004798 | NP_004789 | O15066 | KIF3B_HUMAN | Globular.                 | 5   | CTCAGCCGTGG   | 0.512 |             |
| + | 12 | 2933 | eb.2_Missense_M                              | NM_015338 | NP_056153 | Q8IXJ9 | ASXL1_HUMAN | p.T836fs*2(2)             | 248 | ATCCCCTATGA/  | 0.493 |             |
| + | 12 | 3271 | eb.2_Missense_Mt                             | NM_015338 | NP_056153 | Q8IXJ9 | ASXL1_HUMAN | p.G949fs*5(1)             | 248 | AGGAGGGTCTA   | 0.532 |             |
| + | 9  | 1274 | J10gef.2_RNA DN                              | NM_006892 | NP_008823 | Q9UBC3 | DNM3B_HUMAN |                           | 5   | CTTCCCCAGCA   | 0.627 |             |
| - | 13 | 1661 | Ogel.2_Missense_I                            | NM_016408 | NP_057492 | Q96SZ6 | CK5P1_HUMAN | 5R1-binding.              | 5   | 3ATTGGCTTTTG  | 0.453 |             |
| + | 2  | 491  |                                              | NM_176812 | NP_789782 | Q9H444 | CHM4B_HUMAN | Potential.                | 2   | CTATGCCGCCA/  | 0.612 |             |
| + | 4  | 664  |                                              | NM_176812 | NP_789782 | Q9H444 | CHM4B_HUMAN | Potential.                | 2   | GTAGAAGAACTA  | 0.488 |             |
| - | 4  | 527  | aj.2_Missense_Mu                             | NM_000687 | NP_000678 | P23526 | SAHH_HUMAN  |                           | 0   | CGTCCAGAA     | 0.632 |             |
| - | 12 | 6625 | iw.2_Missense_Mt                             | NM_014071 | NP_054790 | Q14686 | NCOA6_HUMAN |                           | 7   | 3TTTAGGGGCTT  | 0.522 |             |
| + | 15 | 1484 | a-mir-499 MI0003                             | NM_020884 | NP_065935 | A7E2Y1 | MYH7B_HUMAN |                           | 2   | AGCAGGTGAGC   | 0.657 |             |
| + | 17 | 1683 | a-mir-499 MI0003                             | NM_020884 | NP_065935 | A7E2Y1 | MYH7B_HUMAN | rosin head-like.          | 2   | AAATTGCAGCAG  | 0.552 |             |
| + | 28 | 3477 |                                              | NM_020884 | NP_065935 | A7E2Y1 | MYH7B_HUMAN | Potential.                | 2   | 3AGAAGCTCAAG  | 0.612 |             |
| + | 13 | 1866 | slation_Start_Site                           | NM_007186 | NP_009117 | Q9BV73 | CP250_HUMAN | Potential.                | 5   | GGAGACGCCAG   | 0.512 |             |
| + | 2  | 521  | zvi.1_Missense_M                             | NM_003116 | NP_003107 | Q9NPE6 | SPAG4_HUMAN | ical; (Potential).        | 0   | GAGCTTTCTGAC  | 0.637 |             |
| - | 5  | 590  | i_Mutation_p.L116                            | NM_021100 | NP_066923 | Q9Y697 | NFS1_HUMAN  |                           | 2   | TGGGAGGTAGG   | 0.507 |             |
| - | 7  | 795  | .2_Missense_Mutε                             | NM_184234 | NP_909122 | Q14498 | RBM39_HUMAN |                           | 2   | TTGCATCTCTTT  | 0.299 |             |
| + | 16 | 2543 |                                              | NM_016436 | NP_057520 | Q9BV10 | PHF20_HUMAN |                           | 1   | TAGAACTTTGAA  | 0.567 |             |
| + | 10 | 1415 | e_Mutation_p.G420E C20orf152_uc010gfp.1_RNA  |           |           | Q96M20 | CT152_HUMAN |                           | 0   | GCAGGGAGAAA   | 0.483 |             |
| + | 3  | 409  | lxew.2_Missense_I                            | NM_012156 | NP_036288 | Q9H4G0 | E41L1_HUMAN |                           | 3   | CCACGCCCAGC   | 0.542 |             |
| + | 3  | 610  | zvp.1_Missense_I                             | NM_014902 | NP_055717 | Q9Y2H0 | DLGP4_HUMAN |                           | 3   | CTCTTTCCCTC/  | 0.677 |             |
| - | 7  | 1013 | u.2_Missense_MuI                             | NM_032214 | NP_115590 | Q9H6Q3 | SLAP2_HUMAN | LA C-terminal.            | 0   | CTCTTTCCAGTT  | 0.572 | rs139719845 |
| - | 7  | 959  |                                              | NM_015474 | NP_056289 | Q9Y3Z3 | SAMH1_HUMAN | HD.                       | 0   | 3TGATCAAGTG   | 0.348 |             |
| - | 6  | 828  | jj.1_Missense_MuI                            | NM_002895 | NP_002886 | P28749 | RBL1_HUMAN  |                           | 10  | GTACAGCAATG/  | 0.413 |             |
| - | 18 | 2225 | 2xgk.2_Missense_I                            | NM_152503 | NP_689716 | Q9H579 | CT132_HUMAN |                           | 0   | AAGGAGAAATA   | 0.433 |             |
| - | 12 | 1274 | qgm.2_Missense_I                             | NM_152503 | NP_689716 | Q9H579 | CT132_HUMAN |                           | 0   | CTCAGCCACCT   | 0.532 |             |
| - | 7  | 3031 | chm.2_Missense_I                             | NM_014657 | NP_055472 | O43156 | TTI1_HUMAN  |                           | 0   | AGTCACCACAC   | 0.542 |             |
| - | 5  | 2766 | xhm.2_Missense_I                             | NM_014657 | NP_055472 | O43156 | TTI1_HUMAN  |                           | 0   | 3TGGCTCCACAT  | 0.493 |             |
| + | 4  | 874  |                                              | NM_021215 | NP_067038 | Q9NQG5 | RPR1B_HUMAN |                           | 1   | 3AGGAGGATGAC  | 0.458 |             |

|   |    |      |                   |              |              |        |             |                                |    |               |       |             |
|---|----|------|-------------------|--------------|--------------|--------|-------------|--------------------------------|----|---------------|-------|-------------|
| - | 6  | 945  | rs.1_Missense_Mu  | NM_004613    | NP_004604    | P21980 | TGM2_HUMAN  |                                | 3  | CCACGGCGGCG   | 0.517 |             |
| - | 14 | 3814 | xhw.1_Missense_M  | NM_001029864 | NP_001025035 | Q5JYT7 | K1755_HUMAN |                                | 5  | CTGTCCCCTCTC  | 0.647 |             |
| - | 13 | 3004 | xhw.1_5'UTR KIAA  | NM_001029864 | NP_001025035 | Q5JYT7 | K1755_HUMAN |                                | 5  | CTGTAGCTCCC/  | 0.672 |             |
| + | 1  | 129  |                   | NM_004139    | NP_004130    | P18428 | LBP_HUMAN   |                                | 2  | TGGTCGCCAGG   | 0.617 | rs140031031 |
| + | 11 | 1959 | ense_Mutation_p.l | NM_020336    | NP_065069    | Q86X10 | RLGPB_HUMAN |                                | 2  | ACTCTCCTCTT   | 0.378 |             |
| + | 7  | 1334 |                   | NM_024855    | NP_079131    | Q9H9F9 | ARP5_HUMAN  |                                | 0  | ACTTGGCAGCA   | 0.398 |             |
| + | 8  | 1526 |                   | NM_024855    | NP_079131    | Q9H9F9 | ARP5_HUMAN  |                                | 0  | ATGTATCCTGGC/ | 0.433 |             |
| + | 12 | 1104 | wb.1_Missense_M   | NM_021931    | NP_068750    | Q9H5Z1 | DHX35_HUMAN | case C-terminal.               | 3  | TGAAACTCCGA/  | 0.527 |             |
| + | 15 | 1443 | wb.1_Missense_M   | NM_021931    | NP_068750    | Q9H5Z1 | DHX35_HUMAN |                                | 3  | CTGAACCGCTT/  | 0.443 |             |
| + | 16 | 1890 | z1_uc010zwe.1_M   | NM_182811    | NP_877963    | P19174 | PLCG1_HUMAN | SH2 1.                         | 8  | TGAGACCTTCG   | 0.572 |             |
| - | 3  | 2742 | e_Mutation_p.W78  | NM_015035    | NP_055850    | Q9H4I2 | ZHX3_HUMAN  | homeobox 4.                    | 3  | CTTGGCCACTG   | 0.577 |             |
| - | 3  | 1606 | e_Mutation_p.L41  | NM_015035    | NP_055850    | Q9H4I2 | ZHX3_HUMAN  | raction with NFYA. Requir      | 3  | TGGAAGAGCGG   | 0.557 |             |
| + | 18 | 2378 | se_Mutation_p.A7E | NM_022896    | NP_075047    | Q9BQK8 | LPIN3_HUMAN | C-LIP.                         | 4  | ATGCTGCCTTTC  | 0.597 |             |
| - | 4  | 2403 |                   | NM_052846    | NP_443078    | Q9NT22 | EMIL3_HUMAN | Potential.                     | 1  | CACATGGCTCC/  | 0.677 |             |
| - | 14 | 2159 | d.2_Missense_Mu   | NM_032221    | NP_115597    | Q8TD26 | CHD6_HUMAN  |                                | 14 | CGATCTCCAA/   | 0.453 |             |
| - | 25 | 3624 | o.G1166D PTPRT_   | NM_007050    | NP_008981    | O14522 | PTPRT_HUMAN | lasmic (Potential).            | 20 | TGTTGCCACAG.  | 0.512 |             |
| - | 8  | 1352 | gj.2_Missense_Mt  | NM_007050    | NP_008981    | O14522 | PTPRT_HUMAN | tential). Fibronectin type-III | 20 | CTGTGGGCCAT/  | 0.562 |             |
| - | 7  | 1307 | gj.2_Missense_Mt  | NM_007050    | NP_008981    | O14522 | PTPRT_HUMAN | tential). Fibronectin type-III | 20 | GGGAGGCCCTG   | 0.547 |             |
| + | 6  | 1051 | z_Mutation_p.R16z | NM_006275    | NP_006266    | Q13247 | SRSF6_HUMAN | r-rich (RS domain).            | 0  | ATCCAGATCAAC  | 0.493 | rs142261798 |
| + | 1  | 361  | .2_Intron SGK2_u  | NM_016276    | NP_057360    | Q9HBY8 | SGK2_HUMAN  |                                | 6  | TGCTCCTCCCT/  | 0.617 |             |
| + | 1  | 371  | .2_Intron SGK2_u  | NM_016276    | NP_057360    | Q9HBY8 | SGK2_HUMAN  |                                | 6  | TGTCCCCCAG.   | 0.617 |             |
| + | 6  | 784  | ie_Mutation_p.R1z | NM_016276    | NP_057360    | Q9HBY8 | SGK2_HUMAN  | rotein kinase.                 | 6  | GGGAGCGCCGC   | 0.642 |             |
| + | 14 | 2304 | wj.1_Missense_Mt  | NM_002466    | NP_002457    | P10244 | MYBB_HUMAN  |                                | 5  | GGACCCTCATC   | 0.602 |             |
| - | 4  | 2705 |                   | NM_020433    | NP_065166    | Q9BR39 | JPH2_HUMAN  | cytoplasmic (Potential).       | 0  | CGGGGCCCTCGG  | 0.746 |             |
| + | 6  | 1129 | zwm.1_Missense_I  | NM_024034    | NP_076939    | Q96MZO | GD1L1_HUMAN |                                | 1  | TGGGATGGGCTA  | 0.587 |             |
| - | 1  | 160  | S9F SERINC3_ucf   | NM_198941    | NP_945179    | Q13530 | SERC3_HUMAN | cellular (Potential).          | 3  | CGAGGGAGAAG   | 0.647 |             |
| - | 3  | 337  | DA_uc010ggt.2_Rf  | NM_000022    | NP_000013    | P00813 | ADA_HUMAN   |                                | 3  | ATAGCAGGCATG  | 0.542 |             |
| - | 6  | 692  | ju.2_Missense_Mt  | NM_182970    | NP_892015    | Q9H426 | RIMS4_HUMAN |                                | 5  | ACCAGCCCACG/  | 0.667 |             |
| + | 8  | 1175 | '_RNA PABPC1L_u   | NM_001124756 | NP_001118228 | Q4VXU2 | PAP1L_HUMAN | RRM 4.                         | 1  | TCTACGTGGCA/  | 0.607 |             |
| - | 2  | 115  | zj.1_Intron WFDC3 | NM_080614    | NP_542181    | Q8IUB2 | WFDC3_HUMAN |                                | 0  | AGAGTGCCTTCA/ | 0.483 |             |
| - | 5  | 431  |                   | NM_003279    | NP_003270    | P02585 | TNNC2_HUMAN | EF-hand 3.                     | 1  | CGGAGGCCCTG   | 0.632 |             |
| + | 2  | 1827 | zxcg.1_Missense_M | NM_080752    | NP_542790    | Q96MP5 | ZSWM3_HUMAN | SWIM-type.                     | 2  | ACCAGGTTAGC/  | 0.562 |             |
| - | 1  | 752  | zj.3_5'Flank CTSA | NM_080749    | NP_542787    | Q9BR09 | NEUL2_HUMAN | NHR.                           | 0  | GCGGCCACCA/   | 0.677 |             |
| + | 16 | 2041 | _p.P156L PCIF1_L  | NM_022104    | NP_071387    | Q9H4Z3 | PCIF1_HUMAN |                                | 1  | CTCACCGGAGC   | 0.622 |             |
| - | 5  | 895  | zqx.1_Missense_M  | NM_022095    | NP_071378    | Q9H4Z2 | ZN335_HUMAN | C2H2-type 1.                   | 4  | TGTGGCCTTGG   | 0.627 |             |
| + | 7  | 672  | ze_Mutation_p.P21 | NM_001250    | NP_001241    | P25942 | TNR5_HUMAN  | ical; (Potential).             | 2  | GTGATCCCATC   | 0.587 |             |
| - | 14 | 1351 | zxr.1_Missense_Mt | NM_133171    | NP_573403    | Q96JJ3 | ELMO2_HUMAN | ELMO.                          | 1  | TTTAGCCAAGT/  | 0.512 |             |
| - | 5  | 1385 | p.G363R ZNF334    | NM_018102    | NP_060572    | Q9HCZ1 | ZN334_HUMAN |                                | 2  | TTCCCTGTGT/   | 0.433 |             |
| + | 2  | 707  |                   | NM_030777    | NP_110404    | O95528 | GTR10_HUMAN | lasmic (Potential).            | 1  | AGGGAGGTGAG   | 0.637 |             |
| + | 2  | 483  | so.2_Missense_Mt  | NM_005244    | NP_005235    | O00167 | EYA2_HUMAN  |                                | 1  | GACAAAGTAGG   | 0.493 |             |
| - | 11 | 1194 | wYND8_uc002xtb.   | NM_012408    | NP_036540    | Q9ULU4 | PKCB1_HUMAN | PWWP.                          | 5  | CCAGGCCCTAG.  | 0.373 |             |
| - | 2  | 279  | on_p.D29N ZMYNl   | NM_012408    | NP_036540    | Q9ULU4 | PKCB1_HUMAN |                                | 5  | CTCACCTTGGGA  | 0.398 |             |
| + | 17 | 3330 | zm.2_Missense_Mt  | NM_181659    | NP_858045    | Q9Y6Q9 | NCOA3_HUMAN | tion with CREBBP.              | 5  | CACCTTCCAACC  | 0.448 |             |
| - | 30 | 3832 | tv.1_Missense_Mu  | NM_020820    | NP_065871    | Q8TCU6 | PREX1_HUMAN |                                | 6  | TCCGGCCACGC   | 0.547 |             |
| - | 7  | 940  |                   | NM_020820    | NP_065871    | Q8TCU6 | PREX1_HUMAN |                                | 6  | ACTCACCTGGGA  | 0.418 |             |
| + | 29 | 4134 | zyf.1_Missense_M  | NM_006420    | NP_006411    | Q9Y6D5 | BIG2_HUMAN  |                                | 4  | TCCGAGGCTGG   | 0.458 |             |
| + | 5  | 515  | zE1L_uc010ghx.2   | NM_001316    | NP_001307    | P55060 | XPO2_HUMAN  |                                | 2  | AAATGGCCTGA/  | 0.388 |             |

|   |    |      |                    |              |              |        |             |                            |     |               |       |
|---|----|------|--------------------|--------------|--------------|--------|-------------|----------------------------|-----|---------------|-------|
| + | 12 | 1392 | i_p.P364S CSE1L    | NM_001316    | NP_001307    | P55060 | XPO2_HUMAN  |                            | 2   | AAAAATCCATCTC | 0.393 |
| + | 4  | 612  |                    | NM_017895    | NP_060365    | Q96GQ7 | DDX27_HUMAN | p/Glu/Lys-rich.            | 2   | CCTCACCAAAGC  | 0.498 |
| - | 14 | 5306 |                    | NM_021035    | NP_066363    | Q9P2E3 | ZNFX1_HUMAN |                            | 2   | GCTTCTCCTTTA  | 0.532 |
| + | 8  | 1173 | /s.1_Nonsense_M    | NM_002827    | NP_002818    | P18031 | PTN1_HUMAN  |                            | 0   | CAGTGGGTGAA   | 0.542 |
| - | 14 | 1984 | 65C_uc010zyu.1_    | NM_080829    | NP_543019    | Q96MK2 | FA65C_HUMAN |                            | 2   | GTGCTCCTGCC   | 0.667 |
| - | 5  | 1038 | vm.2_Missense_M    | NM_018197    | NP_060667    | Q9NPA5 | ZF64A_HUMAN |                            | 2   | TGAAGGGCCGC   | 0.607 |
| - | 3  | 2172 | lgij.1_Missense_M  | NM_006526    | NP_006517    | O75362 | ZN217_HUMAN |                            | 6   | CCTGAGTTTCA   | 0.443 |
| - | 1  | 1205 | gij.1_Missense_Mt  | NM_006526    | NP_006517    | O75362 | ZN217_HUMAN |                            | 6   | CACTTCTTGGC   | 0.537 |
| - | 1  | 460  | lgij.1_Missense_M  | NM_006526    | NP_006517    | O75362 | ZN217_HUMAN |                            | 6   | AAGGGCATATAC  | 0.473 |
| - | 8  | 1390 | _p.T189I CYP24A    | NM_000782    | NP_000773    | Q07973 | CP24A_HUMAN |                            | 3   | TTGCTGTCTGCA  | 0.368 |
| - | 1  | 984  |                    | NM_080617    | NP_542184    | Q9NTU7 | CBLN4_HUMAN | C1q.                       | 4   | GTTGGCCGCCCI  | 0.627 |
| + | 1  | 162  |                    | NM_019888    | NP_063941    | P41968 | MC3R_HUMAN  | cellular (Potential).      | 4   | TAATGGCTCGG   | 0.582 |
| + | 6  | 1461 | xn.1_Missense_M    | NM_001033521 | NP_001028693 | Q05048 | CSTF1_HUMAN | WD 6.                      | 1   | TCAGAGCGCGG   | 0.582 |
| + | 9  | 975  | i.2_Missense_Mut   | NM_016407    | NP_057491    | Q9BY42 | CT043_HUMAN |                            | 1   | CCAAGCGCTCC   | 0.587 |
| + | 5  | 532  | yf.2_Nonsense_Mi   | NM_012444    | NP_036576    | Q9Y5K1 | SPO11_HUMAN |                            | 3   | GTAACCAGACT   | 0.274 |
| + | 4  | 558  | N RAE1_uc002xyf    | NM_003610    | NP_003601    | P78406 | RAE1L_HUMAN |                            | 0   | TTCAAGACAGT   | 0.448 |
| - | 9  | 2480 | _p.W606* CTCFL_    | NM_080618    | NP_542185    | Q8NI51 | CTCFL_HUMAN |                            | 4   | TTCTTCCATCC   | 0.498 |
| - | 9  | 2475 | _p.G605R CTCFL_    | NM_080618    | NP_542185    | Q8NI51 | CTCFL_HUMAN |                            | 4   | CCATCCCTTCG   | 0.507 |
| - | 1  | 780  | nse_Mutation_p.D   | NM_080618    | NP_542185    | Q8NI51 | CTCFL_HUMAN |                            | 4   | ATGGTCTTTCT   | 0.562 |
| - | 7  | 1182 | _p.A300T ZBP1_uc   | NM_030776    | NP_110403    | Q9H171 | ZBP1_HUMAN  |                            | 2   | CGAAGCTTCTGC  | 0.607 |
| - | 4  | 883  | ys.2_Missense_M    | NM_020182    | NP_064567    | Q969W9 | PMEPA_HUMAN | lasmic (Potential).        | 1   | GCAGGGGCCCT   | 0.652 |
| + | 1  | 841  | xzm.2_Missense_M   | NM_001001433 | NP_001001433 | O14662 | STX16_HUMAN | lasmic (Potential).        | 1   | CCAGCCCTCTG   | 0.498 |
| + | 4  | 2491 | _p.Q19* GNAS_uc    | NM_080425    | NP_536350    | P63092 | GNAS2_HUMAN |                            | 292 | AAGTGCAGGAC   | 0.478 |
| + | 6  | 676  | l1L_uc002yaf.1_Rl  | NM_198976    | NP_945327    | Q8IXH7 | NELFD_HUMAN |                            | 3   | GAGGAGAAGAA   | 0.463 |
| + | 1  | 1312 |                    | NM_178457    | NP_848552    | Q5JPB2 | ZN831_HUMAN |                            | 14  | AACAGGGCAGC   | 0.682 |
| + | 2  | 720  | _p.W117* EDN3_u    | NM_000114    | NP_000105    | P14138 | EDN3_HUMAN  |                            | 1   | ATTGGATCAAC   | 0.597 |
| - | 1  | 836  | 177_uc010zzx.1_5   | NM_006242    | NP_006233    | O95685 | PPR3D_HUMAN |                            | 0   | AATCGGGCACC   | 0.677 |
| + | 13 | 2029 | rp.1_Missense_Mu   | NM_001794    | NP_001785    | P55283 | CADH4_HUMAN | r (Potential). Cadherin 5. | 6   | ACTATGCCCAAC  | 0.542 |
| - | 3  | 846  | rf200_uc002ycy.2   | NM_152757    | NP_689970    |        |             |                            | 0   | CCACGGCTGTG   | 0.652 |
| - | 3  | 655  | rf200_uc002ycy.2   | NM_152757    | NP_689970    |        |             |                            | 0   | GCCCCCTCCGC   | 0.682 |
| + | 5  | 1218 | DA41_uc002ydc.1    | NM_016354    | NP_057438    | Q96BD0 | SO4A1_HUMAN | lasmic (Potential).        | 1   | AGGCTCCCAGC   | 0.662 |
| - | 16 | 6118 | ls.1_Missense_Mu   | NM_033081    | NP_149072    | Q9BTC0 | DIDO1_HUMAN | Pro-rich.                  | 6   | AGGCGCTTGGC   | 0.582 |
| + | 8  | 1028 | _p.P276S SLC17A1   | NM_022082    | NP_071365    | Q9BYT1 | S17A9_HUMAN | ical; (Potential).         | 2   | TTGGTTCTTGG   | 0.612 |
| + | 4  | 374  | n_p.W8* ARFGAP     | NM_018209    | NP_060679    | Q8N6T3 | ARFG1_HUMAN | Arf-GAP.                   | 1   | TCCTGGAGTCT   | 0.512 |
| - | 1  | 142  | _p.G14D EEF1A2     | NM_001958    | NP_001949    | Q05639 | EF1A2_HUMAN | (By similarity).           | 0   | CGTGGCCGATG   | 0.602 |
| + | 4  | 476  | ib.2_Intron TPD52l | NM_003288    | NP_003279    | O43399 | TPD54_HUMAN |                            | 2   | GAGAGTGAATG   | 0.463 |
| - | 15 | 1646 | L1_uc011abm.1_M    | NM_017859    | NP_060329    | Q9NWZ5 | UCKL1_HUMAN |                            | 0   | GGGGACCGCGT   | 0.667 |
| - | 5  | 733  |                    | NM_020713    | NP_065764    | Q96KM6 | Z512B_HUMAN |                            | 0   | GATGGCCTTGG   | 0.587 |
| + | 3  | 874  | gks.2_Missense_M   | NM_003195    | NP_003186    | Q15560 | TCEA2_HUMAN | ilis N-terminal.           | 0   | CTCATCAAGTC   | 0.607 |
| + | 5  | 1223 | _p.G274D OPRL1     | NM_182647    | NP_872588    | P41146 | OPRX_HUMAN  | Name=6; (Potential).       | 2   | CGTGGCTGCT    | 0.682 |
| + | 7  | 1485 | MYT1_uc002yij.2    | NM_004535    | NP_004526    | Q01538 | MYT1_HUMAN  |                            | 2   | GATGACCCGGG   | 0.627 |
| + | 2  | 258  | ym.3_Missense_M    | NM_018257    | NP_060727    | Q9NV79 | PCMD2_HUMAN |                            | 0   | TGAAAGAAGCA   | 0.373 |
| - | 22 | 1746 | TE_uc002yir.1_Mi   | NM_199261    | NP_954870    | P56180 | TPTE_HUMAN  | 2 tensin-type.             | 5   | TTTGTCTGTTGT  | 0.338 |
| - | 17 | 1387 | TE_uc002yir.1_Mi   | NM_199261    | NP_954870    | P56180 | TPTE_HUMAN  | hatase tensin-type.        | 5   | TTGCCTCCTTAC  | 0.328 |
| - | 6  | 837  | v.1_Missense_Mut   | NM_198996    | NP_945347    | Q6XZB0 | LIPI_HUMAN  |                            | 2   | CTGCTCTCTGG   | 0.318 |
| - | 28 | 5054 |                    | NM_015565    | NP_056380    | O94822 | LTN1_HUMAN  |                            | 0   | CCATTACCTCTC  | 0.348 |
| + | 2  | 275  | C21orf7_uc010gln   | NM_020152    | NP_064537    | P57077 | TAK1L_HUMAN |                            | 2   | TAGATGGTTCAG  | 0.443 |

rs142560013

|   |    |      |                    |              |              |        |             |                                |      |                |       |
|---|----|------|--------------------|--------------|--------------|--------|-------------|--------------------------------|------|----------------|-------|
| + | 5  | 2160 | ie_Mutation_p.P68  | NM_001186    | NP_001177    | O14867 | BACH1_HUMAN |                                | 2    | 'GCCTCCCTGTG'  | 0.522 |
| - | 12 | 2098 | _p.S545F GRIK1_    | NM_000830    | NP_000821    | P39086 | GRIK1_HUMAN | cellular (Potential).          | 3    | 'GTTTGGAGAAG   | 0.502 |
| - | 1  | 173  |                    | NM_181610    | NP_853641    | Q3LI73 | KR194_HUMAN |                                | 2    | 'AGAATCCATATC  | 0.463 |
| - | 13 | 2024 | glu.2_Missense_IV  | NM_020706    | NP_065757    | O95104 | SFR15_HUMAN | RRM.                           | 0    | 'CAATTGGACCA/  | 0.269 |
| + | 2  | 718  | oglw.1_Missense_   | NM_058187    | NP_478067    | P58658 | CU063_HUMAN | n 1. Extracellular (Potential  | 3    | .GCCTGCCTCCC,  | 0.468 |
| - | 24 | 3227 | .G1037D SYNJ1_u    | NM_003895    | NP_003886    | O43426 | SYNJ1_HUMAN | Pro-rich.                      | 5    | 'CAAGGCCGGAA   | 0.512 |
| - | 13 | 2349 | ie_Mutation_p.S21  | NM_016631    | NP_057715    | Q9Y5B6 | GCFC1_HUMAN | p.S720A(1)                     | 2    | 'CTACTGAAGGA'  | 0.318 |
| - | 13 | 2275 | ie_Mutation_p.M1f  | NM_016631    | NP_057715    | Q9Y5B6 | GCFC1_HUMAN |                                | 2    | GTCCACATATTI   | 0.328 |
| - | 4  | 1001 | ise_Mutation_p.Rz  | NM_016631    | NP_057715    | Q9Y5B6 | GCFC1_HUMAN |                                | 2    | 'CCGGCGTTTCTC  | 0.343 |
| - | 14 | 1793 | nd.2_Missense_Mi   | NM_000819    | NP_000810    | P22102 | PUR2_HUMAN  | AIRS.                          | 1    | 'TTCAGCAACA/   | 0.408 |
| - | 9  | 1016 | t_Site GART_uc0C   | NM_000819    | NP_000810    | P22102 | PUR2_HUMAN  | ATP-grasp.                     | 1    | 'GATCACCAAAAC  | 0.318 |
| - | 7  | 1199 | sl.2_Missense_Mu   | NM_017613    | NP_060083    | Q9NYP3 | DONS_HUMAN  |                                | 2    | GTATGTCTGGCT   | 0.363 |
| - | 3  | 638  | NSON_uc002ysl.2    | NM_017613    | NP_060083    | Q9NYP3 | DONS_HUMAN  |                                | 2    | 'TGCCCTACAATC  | 0.388 |
| - | 8  | 710  | ise_Mutation_p.C2  | NM_145858    | NP_665857    | O95825 | QORL1_HUMAN |                                | 0    | .GGCTGCATGCTI  | 0.383 |
| + | 8  | 945  | on_p.R226K ITSN    | NM_003024    | NP_003015    | Q15811 | ITSN1_HUMAN | EH 2.                          | 4    | AATACAGGCAAT   | 0.368 |
| + | 21 | 2777 | ITSN1_uc002ysx.    | NM_003024    | NP_003015    | Q15811 | ITSN1_HUMAN |                                | 4    | 'CTTTGGCAGTA,  | 0.542 |
| + | 36 | 4847 | tj.2_Missense_Mur  | NM_003024    | NP_003015    | Q15811 | ITSN1_HUMAN | PH.                            | 4    | GTTCTAGTAAAAI  | 0.493 |
| - | 5  | 1827 | :TD4_uc002yuy.2_   | NM_017438    | NP_059134    | Q9NVD3 | SETD4_HUMAN | SET.                           | 2    | 'TTTGGGAAGAAI  | 0.502 |
| + | 13 | 1592 | ieb.1_Missense_IV  | NM_005128    | NP_005119    | Q9Y3R5 | DOP2_HUMAN  |                                | 2    | 'CTCAGGTGCTCI  | 0.483 |
| + | 6  | 810  |                    | NM_015358    | NP_056173    | Q14149 | MORC3_HUMAN |                                | 2    | 'TGCCCTGAGAI   | 0.418 |
| + | 12 | 1394 |                    | NM_005441    | NP_005432    | Q13112 | CAF1B_HUMAN |                                | 2    | GGGAACCCCTG    | 0.597 |
| + | 4  | 736  | t_p.S62S DSCR6_    | NM_018962    | NP_061835    | P57055 | DSCR6_HUMAN |                                | 1    | 'CGCTCCCTCAA'  | 0.617 |
| + | 27 | 2649 | _p.W848* TTC3_u    | NM_001001894 | NP_001001894 | P53804 | TTC3_HUMAN  |                                | 9    | 'TCTTGGAAAGT'  | 0.358 |
| + | 33 | 3890 | _p.S1262F TTC3_u   | NM_001001894 | NP_001001894 | P53804 | TTC3_HUMAN  |                                | 9    | ATTCTTCTAGAC/  | 0.458 |
| + | 33 | 3946 | _p.P1281S TTC3_u   | NM_001001894 | NP_001001894 | P53804 | TTC3_HUMAN  |                                | 9    | 'CTAAACCAGGC'  | 0.458 |
| - | 4  | 480  | :R3_uc010gnl.2_M   | NM_006052    | NP_006043    | O14972 | DSCR3_HUMAN |                                | 0    | 'CCCCGGCTTCA'  | 0.418 |
| - | 4  | 1098 | wo.2_Missense_M    | NM_002240    | NP_002231    | P48051 | IRK6_HUMAN  | smic (By similarity).          | 1    | 'GTCAACTTCGT'  | 0.567 |
| - | 12 | 1388 | _p.P242S ERG_uc    | NM_001136155 | NP_001129627 | P11308 | ERG_HUMAN   | ETS.                           | 2828 | 'GTTGGGTTTGC'  | 0.572 |
| - | 40 | 5457 | _p.A416V BRWD1_    | NM_018963    | NP_061836    | Q9NSI6 | BRWD1_HUMAN |                                | 4    | 'GGCCAGCAGTT'  | 0.413 |
| - | 28 | 3395 | _Missense_Mutati   | NM_018963    | NP_061836    | Q9NSI6 | BRWD1_HUMAN |                                | 4    | 'TAAACTGTTC    | 0.373 |
| - | 29 | 5416 | :AM_uc002yyr.1_f   | NM_001389    | NP_001380    | O60469 | DSCAM_HUMAN | lasmic (Potential).            | 11   | GCAGGTCTGC'    | 0.443 |
| - | 11 | 2647 | :AM_uc002yyr.1_f   | NM_001389    | NP_001380    | O60469 | DSCAM_HUMAN | potential). lg-like C2-type 8. | 11   | 'ACTGGGGAACC   | 0.483 |
| + | 2  | 123  | X2_uc011aer.1_Rf   | NM_002463    | NP_002454    | P20592 | MX2_HUMAN   |                                | 2    | 'ACAAGCCTTGG   | 0.512 |
| + | 15 | 2109 | _p.A388T MX1_uc0   | NM_001144925 | NP_001138397 | P20591 | MX1_HUMAN   |                                | 1    | ATCACTGCTCTC.  | 0.418 |
| - | 1  | 193  |                    | NM_020639    | NP_065690    | P57078 | RIPK4_HUMAN |                                | 7    | GATGGCCAGCC,   | 0.488 |
| - | 30 | 4130 | /zp.2_Missense_M   | NM_022115    | NP_071398    | P57071 | PRD15_HUMAN |                                | 0    | 'CTGCCGAATTG'  | 0.547 |
| - | 12 | 1570 | /zp.2_Missense_IV  | NM_022115    | NP_071398    | P57071 | PRD15_HUMAN | SET.                           | 0    | 'TGCCGCACCA    | 0.637 |
| - | 9  | 1072 | :ypz.2_Missense_I  | NM_022115    | NP_071398    | P57071 | PRD15_HUMAN |                                | 0    | 'GTCGTGGTACT'  | 0.582 |
| - | 14 | 2323 | _p.P310L C2CD2_u   | NM_015500    | NP_056315    | Q9Y426 | CU025_HUMAN |                                | 1    | TGCAGGCTCC,    | 0.592 |
| - | 3  | 893  | aa.3_Missense_M    | NM_001098402 | NP_001091872 | Q9ULJ3 | ZN295_HUMAN |                                | 3    | 'ATCATCCAAAG/  | 0.398 |
| - | 3  | 780  | aa.3_Missense_M    | NM_001098402 | NP_001091872 | Q9ULJ3 | ZN295_HUMAN |                                | 3    | 'ACATGTGGCTTA' | 0.423 |
| - | 12 | 1514 | _p.T311I TMPRSE    | NM_024022    | NP_076927    | P57727 | TMPS3_HUMAN | . Extracellular (Potential).   | 3    | AGGAGGTGACA    | 0.597 |
| + | 6  | 762  | 2zbj.2_Splice_Site | NM_018964    | NP_061837    | P57057 | GLPT_HUMAN  |                                | 0    | 'CTCAGGTAGGT'  | 0.542 |
| - | 11 | 1232 | g.1_Nonsense_ML    | NM_033661    | NP_387510    | P57081 | WDR4_HUMAN  |                                | 1    | 'CCGCTGCTTCT   | 0.612 |
| - | 12 | 1608 |                    | NM_173354    | NP_775490    | P57059 | SIK1_HUMAN  |                                | 7    | TGGTGAGAGGG    | 0.632 |
| - | 3  | 400  |                    | NM_173354    | NP_775490    | P57059 | SIK1_HUMAN  |                                | 7    | 'CCTTACCTGGT'  | 0.398 |
| + | 8  | 1241 | Ogpo.2_Missense_   | NM_003274    | NP_003265    | P48553 | TPC10_HUMAN |                                | 2    | 'GCTGGGTGTTT'  | 0.572 |

rs139592933

rs149793516

|   |    |      |                    |              |              |        |             |                             |    |              |       |
|---|----|------|--------------------|--------------|--------------|--------|-------------|-----------------------------|----|--------------|-------|
| + | 18 | 2246 |                    | NM_005049    | NP_005040    | Q15269 | PWP2_HUMAN  | WD 14.                      | 1  | GGCGGCCACCA  | 0.507 |
| + | 3  | 307  | zed.3_Missense_M   | NM_004649    | NP_004640    | P30042 | ES1_HUMAN   |                             | 1  | GTGGAGGGGCTG | 0.552 |
| + | 13 | 1680 | se_Mutation_p.S32  | NM_000383    | NP_000374    | O43918 | AIRE_HUMAN  | XXLL motif 4.               | 1  | GGAGTCCCTTC  | 0.657 |
| + | 1  | 65   | .1_Intron C21orf29 | NM_198687    | NP_941960    | P60372 | KR104_HUMAN |                             | 0  | CAGCAGCCCGC  | 0.662 |
| + | 1  | 83   | .1_Intron C21orf29 | NM_198687    | NP_941960    | P60372 | KR104_HUMAN |                             | 0  | TCCTGTTCCTC  | 0.687 |
| + | 1  | 1100 | .1_Intron C21orf29 | NM_198687    | NP_941960    | P60372 | KR104_HUMAN | peats of C-C-X(3). 34.      | 0  | CAGACCCTCTC  | 0.657 |
| - | 1  | 923  | .1_Intron C21orf29 | NM_198688    | NP_941961    | P60371 | KR106_HUMAN | ts of C-C-X(3). 27. Poly-Se | 0  | AGGAGGAGGGT  | 0.677 |
| - | 3  | 421  | i.1_RNA PTTG1IP    | NM_004339    | NP_004330    | P53801 | PTTG_HUMAN  | racellular (Potential).     | 1  | TTGTAAGTGGGT | 0.438 |
| + | 10 | 2210 | B1_uc002zgv.2_R    | NM_015833    | NP_056648    | P78563 | RED1_HUMAN  | to l editase.               | 1  | TTACCACGGGG  | 0.562 |
| - | 7  | 933  | zhb.2_RNA POFU     | NM_133635    | NP_598368    | Q9Y2G5 | OFUT2_HUMAN |                             | 0  | CCTGTCTGTGAC | 0.572 |
| + | 15 | 1175 |                    | NM_001848    | NP_001839    | P12109 | CO6A1_HUMAN | le-helical region.          | 1  | ACCCCTGGCC   | 0.647 |
| - | 27 | 5737 | MCM3AP_uc002zi     | NM_003906    | NP_003897    | O60318 | MCM3A_HUMAN |                             | 5  | GAGGGGAAGGG  | 0.383 |
| - | 7  | 1780 | se_Mutation_p.P13  | NM_058180    | NP_478060    | P58505 | CU058_HUMAN |                             | 1  | CTGAGGGAGCT  | 0.488 |
| + | 11 | 1825 | ij.2_Missense_Mut  | NM_006031    | NP_006022    | O95613 | PCNT_HUMAN  | Glu-rich.                   | 8  | GAAAGGAAGAA  | 0.483 |
| + | 13 | 2142 | ij.2_Missense_Mut  | NM_006031    | NP_006022    | O95613 | PCNT_HUMAN  | r-rich. Potential.          | 8  | ACAAGGTGCAA  | 0.493 |
| + | 19 | 3926 | j.2_Missense_Mut   | NM_006031    | NP_006022    | O95613 | PCNT_HUMAN  |                             | 8  | GAGATGGCCCTC | 0.617 |
| + | 22 | 2759 | iz.1_Missense_Mu   | NM_015151    | NP_055966    | Q14689 | DIP2A_HUMAN |                             | 2  | GGTGGCTGAGC  | 0.627 |
| - | 3  | 250  | iv.1_Missense_Mt   | NM_006272    | NP_006263    | P04271 | S100B_HUMAN | EF-hand 1.                  | 0  | GATTTCTAAGA  | 0.408 |
| + | 6  | 705  | iga.1_Nonsense_M   | NM_206962    | NP_996845    | P55345 | ANM2_HUMAN  | with RB1 (By similarity).   | 1  | TCCTGCAGAAT  | 0.502 |
| - | 1  | 167  |                    | NM_001005239 | NP_001005239 | Q8NG94 | O11H1_HUMAN | Name=1; (Potential).        | 0  | CCATTCCTGT   | 0.408 |
| - | 5  | 1114 | 34_uc010gqs.1_3    | NM_001037814 | NP_001032903 | Q2WGN9 | GAB4_HUMAN  |                             | 2  | GACTCCCTCAT  | 0.557 |
| + | 16 | 3751 | IR2_uc002zml.2_M   | NM_031413    | NP_113601    | Q9BXF3 | CECR2_HUMAN | Poly-Pro.                   | 2  | AGCTCCCCCA   | 0.562 |
| - | 31 | 6168 | CAL3_uc010grd.1    | NM_015241    | NP_056056    | Q7RTP6 | MICA3_HUMAN | Potential.                  | 0  | CACTGCCATGC  | 0.627 |
| - | 3  | 744  | znk.1_Missense_M   | NM_015241    | NP_056056    | Q7RTP6 | MICA3_HUMAN |                             | 0  | GAATGGCCAGA  | 0.488 |
| - | 4  | 462  | _Mutation_p.S81N   | NM_003325    | NP_003316    | P54198 | HIRA_HUMAN  | WD 2.                       | 1  | TCCCAGTGTTC  | 0.403 |
| + | 6  | 1737 | _p.E463K DGCR8     | NM_022720    | NP_073557    | Q8WYQ5 | DGCR8_HUMAN | inding and pri-miRNA proc   | 0  | GGGCTGAGCGG  | 0.488 |
| + | 8  | 1990 | IGCR8_uc002zrz.2   | NM_022720    | NP_073557    | Q8WYQ5 | DGCR8_HUMAN | sary for heme-binding and   | 0  | GGTGACCATTG  | 0.428 |
| + | 4  | 635  | _Mutation_p.G177   | NM_013373    | NP_037505    | Q9ULC8 | ZDHC8_HUMAN | enal (Potential).           | 2  | CTGAGGGGCTG  | 0.597 |
| + | 4  | 642  | _Mutation_p.G178   | NM_013373    | NP_037505    | Q9ULC8 | ZDHC8_HUMAN | enal (Potential).           | 2  | GCTGGGAGCCG  | 0.602 |
| - | 4  | 542  | CR6L_uc010gsc.1    | NM_033257    | NP_150282    | Q9BY27 | DGC6L_HUMAN | Potential.                  | 0  | AGCCACCTTCC  | 0.677 |
| - | 41 | 4951 | sy.3_Missense_Mu   | NM_058004    | NP_477352    | P42356 | PI4KA_HUMAN |                             | 4  | GAGAGGGTGCG  | 0.667 |
| - | 23 | 2821 |                    | NM_058004    | NP_477352    | P42356 | PI4KA_HUMAN |                             | 4  | TTTATCCTCAAA | 0.373 |
| + | 2  | 185  | RPIND1_uc002ztc    | NM_000185    | NP_000176    | P05546 | HEP2_HUMAN  |                             | 0  | CAGATCCCAG   | 0.527 |
| + | 3  | 595  |                    | NM_004782    | NP_004773    | O95721 | SNP29_HUMAN |                             | 0  | GGCCAGCCACC  | 0.413 |
| + | 3  | 673  | aih.1_Missense_M   | NM_152612    | NP_689825    | Q8IYX3 | CC116_HUMAN |                             | 2  | TGCTGGAGAAG  | 0.642 |
| + | 4  | 1902 | iaiz.1_Intron LOC  | NM_153615    | NP_705843    | Q8IZJ4 | RGDSR_HUMAN | Ras-GEF.                    | 1  | TGCTTGGGCTG  | 0.572 |
| + | 12 | 1468 | RNA SLC2A11_uc     | NM_001024938 | NP_001020109 | Q9BYW1 | GTR11_HUMAN | lasmic (Potential).         | 1  | TCCTTCTCTGAG | 0.562 |
| + | 3  | 204  | _p.T26I CABIN1     | NM_012295    | NP_036427    | Q9Y6J0 | CABIN_HUMAN |                             | 5  | CAAAACCCAGA  | 0.433 |
| + | 16 | 2291 | _p.D672N CABIN1    | NM_012295    | NP_036427    | Q9Y6J0 | CABIN_HUMAN |                             | 5  | GGTTTGACCCG  | 0.582 |
| + | 5  | 1922 | _p.E539K CYTSA     | NM_015330    | NP_056145    | Q69YQ0 | CYTSA_HUMAN | Potential.                  | 0  | TCAAAGAACGC  | 0.463 |
| + | 18 | 3587 | guz.1_Missense_M   | NM_032608    | NP_115997    | Q8IUG5 | MY18B_HUMAN | rosin head-like.            | 12 | CCCTGGATGCA  | 0.602 |
| + | 43 | 7568 | C18B_uc011aka.1    | NM_032608    | NP_115997    | Q8IUG5 | MY18B_HUMAN |                             | 12 | AAGTGGACTTC  | 0.562 |
| - | 10 | 1462 | 59_splice HPS4_uc  | NM_022081    | NP_071364    | Q9NQG7 | HPS4_HUMAN  |                             | 0  | CCATTACCTTGT | 0.493 |
| - | 10 | 1449 | _Mutation_p.E55I   | NM_022081    | NP_071364    | Q9NQG7 | HPS4_HUMAN  |                             | 0  | CTGTTCCACCG  | 0.488 |
| + | 4  | 602  | cp.3_Missense_Mt   | NM_001013694 | NP_001013716 | Q9UH36 | SRR1L_HUMAN |                             | 0  | CTGTTCTCAGT  | 0.473 |
| + | 2  | 405  | akj.1_Missense_M   | NM_173510    | NP_775781    | Q8IWD4 | CC117_HUMAN |                             | 1  | AGGAGGAGGAT  | 0.373 |
| + | 8  | 1115 | ah.1_Missense_Mt   | NM_032173    | NP_115549    | Q9ULT6 | ZNRF3_HUMAN | lasmic (Potential).         | 1  | CATCCGACGT   | 0.692 |



|   |    |      |                    |              |              |        |             |                               |     |                  |       |            |
|---|----|------|--------------------|--------------|--------------|--------|-------------|-------------------------------|-----|------------------|-------|------------|
| + | 7  | 1043 | .3_Intron NF2_uc0  | NM_000268    | NP_000259    | P35240 | MERL_HUMAN  | p.?(4)                        | 728 | :CCACAGGGATG,    | 0.507 |            |
| - | 17 | 2020 | ise_Mutation_p.R6  | NM_032204    | NP_115580    | Q9H1I8 | ASCC2_HUMAN |                               | 0   | :CCTGCGGCTGA'    | 0.527 |            |
| - | 14 | 2305 |                    | NM_005877    | NP_005868    | Q15459 | SF3A1_HUMAN | Jbiquitin-like.               | 5   | 3CACCTGCCCAT     | 0.532 | rs11550685 |
| - | 6  | 902  |                    | NM_005877    | NP_005868    | Q15459 | SF3A1_HUMAN |                               | 5   | :cttctctctCACGTI | 0.443 |            |
| - | 4  | 526  |                    | NM_005877    | NP_005868    | Q15459 | SF3A1_HUMAN |                               | 5   | CTTGACCTAAG.     | 0.493 |            |
| + | 3  | 856  | 1akv.1_Missense_I  | NM_001017437 | NP_001017437 | Q569K6 | CC157_HUMAN |                               | 1   | 3GTGACCCCGAG     | 0.637 |            |
| - | 20 | 3162 |                    | NM_014941    | NP_055756    | Q9Y6X9 | MORC2_HUMAN |                               | 2   | GCTGGCCTCCTC     | 0.622 |            |
| + | 13 | 2646 | P5J_uc003ajw.2_3   | NM_001002837 | NP_001002837 | Q15735 | PI5PA_HUMAN | Ser-rich.                     | 1   | :GCACAGACAGC     | 0.647 |            |
| - | 5  | 2406 | ATZ1_uc003akr.2_   | NM_014323    | NP_055138    | Q9HBE1 | PATZ1_HUMAN |                               | 2   | 3CATTGGCACTC'    | 0.532 |            |
| - | 14 | 2121 | 3ala.1_Missense_I  | NM_019843    | NP_062817    | Q9NRA8 | 4ET_HUMAN   |                               | 1   | 'GTCCACCTGTG     | 0.448 |            |
| + | 3  | 503  | 1_uc003alg.2_Intrc | NM_001007467 | NP_001007468 | A8K8P3 | SFI1_HUMAN  |                               | 1   | ATGGTGCAGTTA'    | 0.393 |            |
| + | 8  | 1081 | se_Mutation_p.R14  | NM_001007467 | NP_001007468 | A8K8P3 | SFI1_HUMAN  |                               | 1   | :GGCAGCGACTA'    | 0.562 |            |
| - | 10 | 1351 |                    | NM_014306    | NP_055121    | Q9Y3I0 | RTCB_HUMAN  |                               | 0   | :TACAGGTTCCC/    | 0.428 |            |
| + | 3  | 923  | ims.2_Missense_Iv  | NM_012179    | NP_036311    | Q9Y3I1 | FBX7_HUMAN  |                               | 1   | TACATACCTCAG     | 0.313 |            |
| - | 4  | 709  | e_Mutation_p.P44   | NM_004737    | NP_004728    | O95461 | LARGE_HUMAN | lenal (Potential).            | 3   | :CAGCGGTGACA'    | 0.632 |            |
| + | 3  | 978  | ny.2_Missense_Mi   | NM_014310    | NP_055125    | Q96D21 | RHES_HUMAN  |                               | 3   | :GGCCCGTGAGA'    | 0.647 |            |
| - | 2  | 381  | p.P101S IMB_uc0    | NM_005368    | NP_005359    | P02144 | MYG_HUMAN   |                               | 0   | CACGGGGATCTI     | 0.348 |            |
| - | 3  | 343  | n_p.P115S APOL2    | NM_030882    | NP_112092    | Q9BQE5 | APOL2_HUMAN |                               | 0   | 'ACCTGGGTTCAT'   | 0.562 |            |
| - | 34 | 5131 |                    | NM_002473    | NP_002464    | P35579 | MYH9_HUMAN  | Potential.                    | 11  | 3TTCGTCCCAGGT    | 0.637 |            |
| - | 5  | 490  |                    | NM_000878    | NP_000869    | P14784 | IL2RB_HUMAN | cellular (Potential).         | 0   | 'GGATGGCCATC,    | 0.617 |            |
| + | 9  | 897  | nw.1_Missense_M    | NM_013385    | NP_037517    | Q9UIA0 | CYH4_HUMAN  | PH.                           | 2   | ATCCAGACCCGG     | 0.572 | rs55891452 |
| + | 7  | 1920 | atq.1_Missense_M   | NM_001039141 | NP_001034230 | Q9H2D6 | TARA_HUMAN  |                               | 1   | \ACCCACAACAT     | 0.597 |            |
| + | 7  | 1998 | atq.1_Missense_M   | NM_001039141 | NP_001034230 | Q9H2D6 | TARA_HUMAN  |                               | 1   | \ACCCAGAACAT     | 0.587 |            |
| + | 7  | 2004 | atq.1_Missense_M   | NM_001039141 | NP_001034230 | Q9H2D6 | TARA_HUMAN  |                               | 1   | 3AACATCCTGTG     | 0.597 |            |
| + | 7  | 3126 | atq.1_Missense_M   | NM_001039141 | NP_001034230 | Q9H2D6 | TARA_HUMAN  |                               | 1   | :CTCTCCCAGCAC    | 0.642 |            |
| + | 1  | 144  |                    | NM_003614    | NP_003605    | O60755 | GALR3_HUMAN | Name=1; (Potential).          | 0   | 'GCTGGCAGTGC     | 0.637 |            |
| + | 9  | 1052 | rs.2_Missense_Mu   | NM_012407    | NP_036539    | Q9NRD5 | PICK1_HUMAN | AH.                           | 0   | \GTTCCGGCATT     | 0.522 |            |
| - | 2  | 76   | 03avt.1_Translatio | NM_004981    | NP_004972    | P48050 | IRK4_HUMAN  |                               | 0   | 'GGTCACCTGGG     | 0.687 |            |
| + | 5  | 624  | _uc003awq.1_Intrc  | NM_004900    | NP_004891    | Q9UH17 | ABC3B_HUMAN |                               | 1   | 'CCACAGATACCT    | 0.532 |            |
| - | 6  | 1591 | xe.2_Missense_M    | NM_002608    | NP_002599    | P01127 | PDGFB_HUMAN |                               | 373 | 3TTTTGGCTGCA     | 0.592 |            |
| + | 23 | 3979 | aye.2_Missense_I   | NM_021096    | NP_066919    | Q9P0X4 | CAC1I_HUMAN | ellular (Potential). III.     | 2   | :CCAGCTCTTCA'    | 0.577 |            |
| + | 23 | 4006 | aye.2_Missense_Iv  | NM_021096    | NP_066919    | Q9P0X4 | CAC1I_HUMAN | ellular (Potential). III.     | 2   | 'ACTGTCTGGGC     | 0.582 |            |
| + | 20 | 4969 | /n.3_Nonsense_M    | NM_001162501 | NP_001155973 | Q9UPQ9 | TNR6B_HUMAN |                               | 0   | 3ATGTGGAAAAA'    | 0.507 |            |
| + | 12 | 1251 | DSL_uc003ayr.3_I   | NM_000026    | NP_000017    | P30566 | PUR8_HUMAN  |                               | 1   | 'CCCAGGATTGCT    | 0.463 |            |
| - | 9  | 1301 | ye.1_Missense_Mi   | NM_020831    | NP_065882    | Q969V6 | MKL1_HUMAN  | SAP.                          | 5   | 3AGACAGGCAGT     | 0.617 |            |
| + | 9  | 1331 | aq.1_Missense_M    | NM_001469    | NP_001460    | P12956 | XRCC6_HUMAN | Ku.                           | 5   | 3AGTTGGATGAC     | 0.368 |            |
| - | 1  | 49   | i.2_5'Flank CENPA  | NM_024053    | NP_076958    | Q9NSP4 | CENPM_HUMAN |                               | 0   | :CAACCGTTGCT     | 0.677 |            |
| + | 9  | 1036 | sense_Mutation_p.  | NM_145733    | NP_663786    | Q9UH03 | SEPT3_HUMAN |                               | 0   | :CCCTGCTTCGA'    | 0.423 |            |
| - | 1  | 4104 | .D1324N TCF20_I    | NM_005650    | NP_005641    | Q9UGU0 | TCF20_HUMAN |                               | 5   | 'ACTATCTGGACT    | 0.468 |            |
| - | 15 | 1668 | Jgzf.2_Missense_I  | NM_014570    | NP_055385    | Q9NP61 | ARFG3_HUMAN |                               | 1   | .TGTGGGGGGCG     | 0.567 |            |
| - | 5  | 678  | 3_Mutation_p.A10   | NM_014570    | NP_055385    | Q9NP61 | ARFG3_HUMAN |                               | 1   | 'GAGAGGCAAAA     | 0.398 |            |
| - | 24 | 3136 | Jgzi.1_Missense_I  | NM_022785    | NP_073622    | Q5THR3 | EFCB6_HUMAN | EF-hand 11.                   | 7   | 3TTTTGGTGAAT     | 0.418 |            |
| - | 5  | 860  | p.Q183* PHF21B_    | NM_138415    | NP_612424    | Q96EK2 | PF21B_HUMAN |                               | 3   | 3CACTTGAGGCT     | 0.398 |            |
| + | 4  | 456  | E1_uc011aqz.1_5'   | NM_016426    | NP_057510    | Q9NYZ3 | GTSE1_HUMAN |                               | 1   | :CGTTGCCACACA    | 0.493 |            |
| + | 11 | 2163 | Q GTSE1_uc003bh    | NM_016426    | NP_057510    | Q9NYZ3 | GTSE1_HUMAN |                               | 1   | AACTGGAACCAC     | 0.512 |            |
| - | 3  | 4247 |                    | NM_014246    | NP_055061    | Q9NYQ6 | CELR1_HUMAN | ial). EGF-like 3; calcium-bir | 11  | 3AGGTGCCCCCG     | 0.647 |            |
| - | 1  | 1768 |                    | NM_014246    | NP_055061    | Q9NYQ6 | CELR1_HUMAN | r (Potential). Cadherin 4.    | 11  | :GTCCACCGCCT     | 0.642 |            |

|   |    |      |                   |              |              |        |             |                            |    |                |       |             |
|---|----|------|-------------------|--------------|--------------|--------|-------------|----------------------------|----|----------------|-------|-------------|
| - | 1  | 1396 |                   | NM_014246    | NP_055061    | Q9NYQ6 | CELR1_HUMAN | r (Potential). C           | 11 | CTGGACCACGT    | 0.657 |             |
| + | 6  | 854  | e.2_Missense_Mu   | NM_014346    | NP_055161    | Q8WUA7 | TB22A_HUMAN | ab-GAP TBC.                | 1  | ACCTTCCC       | 0.378 |             |
| - | 9  | 3198 | o.A953V BRD1_uc   | NM_014577    | NP_055392    | O95696 | BRD1_HUMAN  |                            | 1  | TGGCCGCCTTG    | 0.647 |             |
| - | 1  | 687  | RD1_uc011arh.1_   | NM_014577    | NP_055392    | O95696 | BRD1_HUMAN  |                            | 1  | CTTGAGCAGTG/   | 0.448 |             |
| - | 2  | 287  |                   | NM_024105    | NP_077010    | Q9BV10 | ALG12_HUMAN |                            | 0  | TGACCCCTTTCC   | 0.592 |             |
| + | 10 | 1159 | ak.2_Missense_M   | NM_024324    | NP_077300    | Q6UXH1 | CREL2_HUMAN |                            | 0  | AAGGAGAAAGC    | 0.547 |             |
| + | 5  | 1244 | bjy.2_Missense_M  | NM_031454    | NP_113642    | Q9BVL4 | SELO_HUMAN  |                            | 0  | AGCCGGAACTG    | 0.657 |             |
| - | 16 | 3186 | i_p.D884N TUBGC   | NM_020461    | NP_065194    | Q96RT7 | GCP6_HUMAN  |                            | 4  | GCTGTGAGAGA    | 0.667 |             |
| - | 1  | 733  | oCP6_uc010has.1_  | NM_020461    | NP_065194    | Q96RT7 | GCP6_HUMAN  |                            | 4  | CAAAGGACAAAC   | 0.522 |             |
| - | 11 | 938  | i.D116N MAPK11_   | NM_002751    | NP_002742    | Q15759 | MK11_HUMAN  | rotein kinase.             | 2  | CTGGTCACTGT    | 0.617 |             |
| - | 8  | 687  | o MAPK11_uc010h   | NM_002751    | NP_002742    | Q15759 | MK11_HUMAN  | rotein kinase.             | 2  | TGCAGCCCACG    | 0.647 |             |
| - | 32 | 5123 | p.E465K PLXNB2_   | NM_012401    | NP_036533    | O15031 | PLXB2_HUMAN | lasmic (Potential).        | 6  | FGTCTTCATCCTC  | 0.632 |             |
| - | 28 | 4604 | p.R292C PLXNB2_   | NM_012401    | NP_036533    | O15031 | PLXB2_HUMAN | lasmic (Potential).        | 6  | oCCCACGGTACA   | 0.652 |             |
| - | 18 | 3003 | _5'flank PLXNB2_  | NM_012401    | NP_036533    | O15031 | PLXB2_HUMAN | ir (Potential). IPT/TIG 2. | 6  | oACCCCCCGTAG   | 0.662 |             |
| + | 19 | 2266 | oic.2_Missense_Mi | NM_014678    | NP_055493    | O75170 | PP6R2_HUMAN |                            | 0  | GCCCAGCGCAG    | 0.597 |             |
| - | 24 | 3280 | x.1_Missense_Mu   | NM_002972    | NP_002963    | O95248 | MTMR5_HUMAN |                            | 0  | AGAGCCCAAGG    | 0.647 |             |
| - | 20 | 2609 | _p.A469V SBF1_u   | NM_002972    | NP_002963    | O95248 | MTMR5_HUMAN |                            | 0  | TCTCGGCCACA    | 0.652 |             |
| + | 10 | 898  | _p.A257V MIOX_u   | NM_017584    | NP_060054    | Q9UGB7 | MIOX_HUMAN  |                            | 0  | oACCTGCCGGAC   | 0.652 |             |
| - | 7  | 888  | YMP_uc003bme.3    | NM_001014440 | NP_001014440 | A8MYP8 | ODF3B_HUMAN |                            | 0  | GTCCGCGTCGG    | 0.687 |             |
| - | 6  | 877  | .1_Missense_Muta  | NM_001145137 | NP_001138609 | Q92523 | CPT1B_HUMAN | lasmic (Potential).        | 2  | oCTTCCCACCA/   | 0.582 | rs111267458 |
| - | 2  | 377  | _uc011asa.1_Miss  | NM_001145137 | NP_001138609 | Q92523 | CPT1B_HUMAN | ical; (Potential).         | 2  | oAGGAGGAACCC   | 0.597 |             |
| + | 14 | 1543 | R1_uc011asu.1_In  | NM_001099952 | NP_001093422 | Q14643 | ITPR1_HUMAN | r (Potential).             | 21 | CCTGGGTTCAC/   | 0.423 |             |
| + | 16 | 1820 | R1_uc011asu.1_In  | NM_001099952 | NP_001093422 | Q14643 | ITPR1_HUMAN | lasmic (Pote p.R491W(1)    | 21 | oTTCTGGTCAAG/  | 0.453 |             |
| + | 26 | 3428 | 1_Intron ITPR1_uc | NM_001099952 | NP_001093422 | Q14643 | ITPR1_HUMAN |                            | 21 | oTTTCAGGTGCTC  | 0.418 |             |
| + | 5  | 1002 | asw.1_Missense_I  | NM_003670    | NP_003661    | O14503 | BHE40_HUMAN |                            | 1  | GAGTGGGGAGC    | 0.577 |             |
| + | 8  | 1081 | _uc003brv.2_Nons  | NM_001080517 | NP_001073986 | Q9C0A6 | SETD5_HUMAN |                            | 2  | oCTGACCAGTATC  | 0.413 |             |
| - | 2  | 738  | o ARPC4_uc003bs   | NM_006354    | NP_006345    | O75528 | TADA3_HUMAN | Potential.                 | 0  | oCTCAAGCACAC   | 0.602 |             |
| - | 4  | 378  | ation_p.P90S CIDi | NM_022094    | NP_071377    | Q96AQ7 | CIDEC_HUMAN | CIDE-N.                    | 1  | oGAAGGGCTTGT   | 0.547 |             |
| + | 2  | 365  | EC_uc003bto.2_In  | NM_032492    | NP_115881    | Q8N5M9 | JAGN1_HUMAN | ical; (Potent p.P77P(1)    | 1  | GAATACCCGTAT   | 0.522 |             |
| - | 2  | 1015 | ok.2_RNA PRRT3_   | NM_207351    | NP_997234    | Q5FWE3 | PRRT3_HUMAN | ar (Potential). Pro-rich.  | 0  | oGACACCTCAGC   | 0.657 |             |
| + | 4  | 1893 | tr.1_Missense_Mu  | NM_014760    | NP_055575    | Q93075 | TATD2_HUMAN |                            | 2  | oCCTCAGAGGAA   | 0.527 |             |
| - | 18 | 3098 | vw.2_Missense_M   | NM_001001331 | NP_001001331 | Q01814 | AT2B2_HUMAN | ical; (Potential).         | 6  | oCACCACGTTGA   | 0.597 |             |
| + | 8  | 1396 | _p.P311S TSEN2_   | NM_025265    | NP_079541    | Q8NCE0 | SEN2_HUMAN  |                            | 1  | oTTCAGCCCACG   | 0.418 |             |
| + | 11 | 1664 | _p.P400L TSEN2_   | NM_025265    | NP_079541    | Q8NCE0 | SEN2_HUMAN  |                            | 1  | oTTAAACCCTCTAC | 0.358 |             |
| - | 23 | 3295 |                   | NM_024923    | NP_079199    | Q8TEM1 | PO210_HUMAN | ienal (Probable).          | 11 | oTGGGGCTGAG    | 0.512 |             |
| - | 5  | 693  |                   | NM_024923    | NP_079199    | Q8TEM1 | PO210_HUMAN | ienal (Probable).          | 11 | oGGTGTCCCTTC   | 0.557 |             |
| - | 5  | 1012 | es.2_Missense_Mi  | NM_015150    | NP_055965    | Q14699 | RFTN1_HUMAN |                            | 4  | oATCTCCCTCTCC  | 0.627 |             |
| + | 5  | 787  | e_Mutation_p.A19i | NM_144633    | NP_653234    | Q96L42 | KCNH8_HUMAN | lasmic (Potential).        | 5  | oAACCAGCATTTC  | 0.363 |             |
| + | 2  | 690  | AB5A_uc011awg.1   | NM_004162    | NP_004153    | P20339 | RAB5A_HUMAN | region (By similarity).    | 0  | oGAGTACCATTGC  | 0.378 |             |
| - | 6  | 867  | oOL1_uc003cbx.2   | NM_001012410 | NP_001012410 | Q5FBB7 | SGOL1_HUMAN |                            | 0  | oAAAAATCCAACTC | 0.358 |             |
| + | 5  | 616  | _p.V131I UBE2E1_  | NM_003341    | NP_003332    | P51965 | UB2E1_HUMAN |                            | 0  | oCTAAAGTCTCTC  | 0.333 |             |
| - | 4  | 520  | oicl.2_Missense_I | NM_020345    | NP_065078    | Q9NYS0 | KBRS1_HUMAN | ffector region.            | 0  | oATCTTCCATTGT  | 0.403 |             |
| + | 2  | 336  | .2_RNA NR1D2_u    | NM_005126    | NP_005117    | Q14995 | NR1D2_HUMAN |                            | 3  | oTCTAGGAGGTG   | 0.388 |             |
| - | 15 | 2241 | ense_Mutation_p.E | NM_003615    | NP_003606    | Q9Y6M7 | S4A7_HUMAN  | lasmic (Potential).        | 5  | oCTCTTCTGTAA/  | 0.378 |             |
| + | 2  | 2024 |                   | NM_001137674 | NP_001131146 | A6NHJ4 | ZN860_HUMAN | :2H2-type 10.              | 1  | oCTTCCGTCACA   | 0.403 | rs143925165 |
| + | 4  | 736  | ez.1_Missense_M   | NM_138410    | NP_612419    | Q96FZ5 | CKLF7_HUMAN |                            | 0  | oGTGTGTAACCC/  | 0.512 |             |
| - | 7  | 992  | axh.1_Nonsense_   | NM_016141    | NP_057225    | Q9Y6G9 | DC1L1_HUMAN |                            | 1  | oTTTCTGAACGAT  | 0.279 |             |

|   |    |      |                    |              |              |        |              |                              |      |               |       |
|---|----|------|--------------------|--------------|--------------|--------|--------------|------------------------------|------|---------------|-------|
| - | 3  | 847  | p.P106L UBP1_uc    | NM_014517    | NP_055332    | Q9NZI7 | UBIP1_HUMAN  |                              | 2    | ATCTCAGGCATAT | 0.299 |
| - | 2  | 685  | _p.S52N UBP1_uc    | NM_014517    | NP_055332    | Q9NZI7 | UBIP1_HUMAN  |                              | 2    | GAAGGCTGGAA   | 0.428 |
| - | 2  | 660  | _p.P44S UBP1_uc    | NM_014517    | NP_055332    | Q9NZI7 | UBIP1_HUMAN  |                              | 2    | AATGGGCAATG   | 0.433 |
| + | 12 | 1753 | p.A538V PDCD6IF    | NM_013374    | NP_037506    | Q8WUM4 | PDC6_HUMAN   | ELAV p9. Self-association.   | 2    | ATGCTGCCATCC  | 0.473 |
| + | 4  | 440  | H1_uc003cgn.3_5    | NM_000249    | NP_000240    | P40692 | MLH1_HUMAN   |                              | 77   | CATACAGGTATAC | 0.368 |
| + | 14 | 1690 | _Nonsense_Mutatio  | NM_000249    | NP_000240    | P40692 | MLH1_HUMAN   | action with E p.0?(1)        | 77   | CAGCATCAAACC  | 0.463 |
| - | 8  | 959  | _p.S210N ACAA1_    | NM_001607    | NP_001598    | P09110 | THIK_HUMAN   |                              | 1    | TGGTGCTGGGG   | 0.562 |
| - | 5  | 653  | _r.2_intron ACAA1_ | NM_001607    | NP_001598    | P09110 | THIK_HUMAN   |                              | 1    | TCTTACCACAC   | 0.423 |
| + | 3  | 644  | LC22A13_uc011ay    | NM_004256    | NP_004247    | Q9Y226 | S22AD_HUMAN  | ical; (Potential).           | 1    | CTTTGCTGTGG   | 0.617 |
| - | 27 | 4834 | i.2_Missense_Mut   | NM_198056    | NP_932173    | Q14524 | SCN5A_HUMAN  | S1 of repeat IV; (Potential) | 9    | CTCCACCATCA   | 0.468 |
| - | 16 | 2899 | _p.T902I SCN5A_t   | NM_198056    | NP_932173    | Q14524 | SCN5A_HUMAN  |                              | 9    | CATGGTCTCG    | 0.552 |
| - | 27 | 5732 |                    | NM_006514    | NP_006505    | Q9Y5Y9 | SCNAA_HUMAN  |                              | 10   | AAGCAGTTTCA   | 0.453 |
| + | 2  | 143  | _uc011ayu.1_5'U'   | NM_020839    | NP_065890    | Q8TAF3 | WDR48_HUMAN  | WD 1.                        | 2    | ATAGACTTTTCA  | 0.418 |
| - | 9  | 1338 | ORASP1_uc011a      | NM_031899    | NP_114105    | Q9BQQ3 | GORS1_HUMAN  |                              | 3    | TGGTTCTCTCT   | 0.602 |
| - | 5  | 1856 | cjh.2_Missense_M   | NM_033027    | NP_149016    | Q96S65 | CSRN1_HUMAN  |                              | 5    | GCTGGCATCCC   | 0.592 |
| + | 6  | 913  | znc.1_Missense_M   | NM_001145082 | NP_001138554 | E9PCD9 | E9PCD9_HUMAN |                              | 1    | TCCACCCTG     | 0.413 |
| + | 4  | 354  | J03ckr.2_Nonsens   | NM_001904    | NP_001895    | P35222 | CTNB1_HUMAN  | _K133del(1) p.D6_K133del     | 3166 | GAGTGGGAACA   | 0.443 |
| - | 4  | 548  | _p.G116D ULK4_uc   | NM_017886    | NP_060356    | Q96C45 | ULK4_HUMAN   | rotein kinase.               | 0    | AATGCCAAGT    | 0.338 |
| + | 8  | 628  | _n.p.A51T NKTR_1   | NM_005385    | NP_005376    | P30414 | NKTR_HUMAN   | e cyclophilin-type.          | 3    | ATGCTGCAAGC   | 0.368 |
| - | 7  | 724  | _ix.2_Missense_M   | NM_020707    | NP_065758    | Q9HCP6 | HHATL_HUMAN  |                              | 3    | GCTCTCCAGTG   | 0.542 |
| - | 9  | 1108 |                    | NM_144719    | NP_653320    | Q8IYE1 | CCD13_HUMAN  | Potential.                   | 1    | TTCAGCTCTCT   | 0.527 |
| - | 2  | 652  | mr.1_Missense_M    | NM_032806    | NP_116195    | Q8NAT1 | AGO61_HUMAN  |                              | 2    | CAGGTCGTCAT   | 0.632 |
| - | 8  | 2657 | p.A758V ZNF445_    | NM_181489    | NP_852466    | P59923 | ZN445_HUMAN  | C2H2-type 8.                 | 1    | GGAAGGCCTTG   | 0.532 |
| - | 8  | 1581 | p.E399D ZNF445_    | NM_181489    | NP_852466    | P59923 | ZN445_HUMAN  |                              | 1    | AGGGATTCTCT   | 0.408 |
| + | 6  | 1853 | ise_Mutation_p.H3  | NM_018651    | NP_061121    | Q9P0L1 | ZN167_HUMAN  | C2H2-type 4.                 | 2    | GAACCCATACT   | 0.458 |
| + | 3  | 463  | cnv.1_Missense_N   | NM_145044    | NP_659481    | Q96CX3 | ZN501_HUMAN  |                              | 0    | GAAACCTTCAA   | 0.403 |
| + | 1  | 23   | ion_Start_Site KIA | NM_020242    | NP_064627    | Q9NS87 | KIF15_HUMAN  |                              | 1    | GTCACGTCCTG   | 0.637 |
| + | 5  | 481  | _iq.2_Missense_M   | NM_020242    | NP_064627    | Q9NS87 | KIF15_HUMAN  | tor. ATP (By similarity).    | 1    | ACAGACTGGCT   | 0.308 |
| + | 9  | 1006 | _Mutation_p.G189   | NM_020242    | NP_064627    | Q9NS87 | KIF15_HUMAN  | inesin-motor.                | 1    | AAGCAGGTAACA  | 0.393 |
| - | 3  | 641  | on.2_Missense_M    | NM_022842    | NP_073753    | Q9H5V8 | CDCP1_HUMAN  | ellular (Potential).         | 3    | CGGTGGCATCG   | 0.572 |
| + | 5  | 574  | hit.1_Missense_M   | NM_015340    | NP_056155    | Q15031 | SYLM_HUMAN   |                              | 2    | GGATGCTTTTG   | 0.438 |
| + | 1  | 675  |                    | NM_014240    | NP_055055    | Q9UGP4 | LIMD1_HUMAN  |                              | 1    | GTGGCCTAGCT   | 0.602 |
| - | 14 | 4143 | al.1_Missense_Mu   | NM_024513    | NP_078789    | Q9BQS8 | FYCO1_HUMAN  |                              | 1    | ITCAGCCGCA    | 0.493 |
| + | 2  | 823  | m.3_Missense_M     | NM_001123041 | NP_001116513 | P41597 | CCR2_HUMAN   | ellular (Potential).         | 2    | CAATGTGCAAA   | 0.453 |
| + | 8  | 832  | qn.2_Missense_M    | NM_000316    | NP_000307    | Q03431 | PTH1R_HUMAN  | Name=1; (Potential).         | 1    | CTGGCCTACT    | 0.493 |
| - | 12 | 5647 | e_Mutation_p.S19   | NM_014159    | NP_054878    | Q9BYW2 | SETD2_HUMAN  |                              | 32   | CTGTGCTCAGC   | 0.458 |
| - | 7  | 4963 | qv.2_Missense_M    | NM_014159    | NP_054878    | Q9BYW2 | SETD2_HUMAN  | SET.                         | 32   | FTTGGGTTTCA   | 0.353 |
| - | 3  | 3117 | iv.2_Missense_Mu   | NM_014159    | NP_054878    | Q9BYW2 | SETD2_HUMAN  |                              | 32   | TACTGTCCACT   | 0.363 |
| + | 8  | 1322 | av.1_Missense_M    | NM_025010    | NP_079286    | Q94889 | KLH18_HUMAN  | Kelch 3.                     | 0    | CAGCTCCGTGG   | 0.522 |
| + | 22 | 4177 | l11bay.1_Missens   | NM_015466    | NP_056281    | Q9H3S7 | PTN23_HUMAN  | rotein phosphatase.          | 3    | GCCTGCCGAC    | 0.617 |
| + | 4  | 1051 | _uc003csn.2_RN     | NM_016089    | NP_057173    | Q86UQ0 | ZN589_HUMAN  |                              | 1    | CAAGGGAGAAA   | 0.502 |
| - | 27 | 3578 |                    | NM_000094    | NP_000085    | Q02388 | CO7A1_HUMAN  | region (NC1). VWFA 2.        | 11   | TCCAGCCATTC   | 0.607 |
| - | 34 | 9579 | ikf.2_Missense_M   | NM_001407    | NP_001398    | Q9NYQ7 | CELR3_HUMAN  | lasmic (Potential).          | 11   | GGACCCTGGCC   | 0.662 |
| - | 14 | 1300 | QARS_uc003cvy.2    | NM_005051    | NP_005042    | P47897 | SYQ_HUMAN    |                              | 1    | ACCCACCATTT   | 0.607 |
| - | 4  | 381  | te QARS_uc011bc    | NM_005051    | NP_005042    | P47897 | SYQ_HUMAN    |                              | 1    | TCCACCTGCA    | 0.562 |
| - | 26 | 4407 | 2_5'Flank USP19_   | NM_002292    | NP_002283    | P55268 | LAMB2_HUMAN  | Domain II.                   | 3    | CAGTGCCTCTG   | 0.587 |
| + | 4  | 777  | 3cwi.1_Missense_   | NM_173546    | NP_775817    | Q8IXV7 | KLD8B_HUMAN  | Kelch 5.                     | 0    | ATCTGGAGGCC   | 0.637 |

|   |    |       |                    |              |              |        |             |                            |     |                |       |
|---|----|-------|--------------------|--------------|--------------|--------|-------------|----------------------------|-----|----------------|-------|
| - | 1  | 43    |                    | NM_001080528 | NP_001073997 |        |             |                            | 0   | 3CTGGGATGATG   | 0.537 |
| + | 3  | 1338  |                    | NM_004393    | NP_004384    | Q14118 | DAG1_HUMAN  | for laminin recognition.   | 2   | CTCTTCCCAAAC   | 0.612 |
| + | 15 | 1829  | w.1_Missense_Mu    | NM_001640    | NP_001631    | P13798 | ACPH_HUMAN  |                            | 1   | 3AGAATGTGCAG   | 0.612 |
| + | 20 | 1810  | se_Mutation_p.S2   | NM_022064    | NP_071347    | Q5XPI4 | RN123_HUMAN |                            | 7   | AGGCTTCCAATC   | 0.572 |
| - | 1  | 809   | i.2_intron RNF123  | NM_198722    | NP_942015    | Q86WK7 | AMGO3_HUMAN | cellular (Potential).      | 1   | CGCGCGCAGGC    | 0.637 |
| - | 20 | 4354  | dc.1_Missense_Mi   | NM_002447    | NP_002438    | Q04912 | RON_HUMAN   | lasmic (Potential).        | 6   | GGGGCCCAAGT    | 0.597 |
| - | 1  | 643   | _p.P127S MST1R     | NM_002447    | NP_002438    | Q04912 | RON_HUMAN   | ilar (Potential). Sema.    | 6   | iCGCGGGATCCA   | 0.687 |
| - | 3  | 853   | .2_intron MON1A    | NM_032355    | NP_115731    | Q86VX9 | MON1A_HUMAN |                            | 2   | FGGCATCCTCT    | 0.637 |
| + | 5  | 545   | cyk.2_Missense_M   | NM_004186    | NP_004177    | Q13275 | SEM3F_HUMAN | Sema.                      | 2   | AGTGTGGGAACT   | 0.637 |
| + | 13 | 1402  | lOhli.2_Missense_I | NM_004636    | NP_004627    | Q13214 | SEM3B_HUMAN | Sema.                      | 6   | TGGCACCTTCA    | 0.602 |
| - | 33 | 2785  | i_Mutation_p.S909  | NM_006030    | NP_006021    | Q9NY47 | CA2D2_HUMAN | cellular (Potential).      | 1   | CCCTCACTGAAG   | 0.547 |
| + | 5  | 865   | 03dba.1_Missense   | NM_004635    | NP_004626    | Q16644 | MAPK3_HUMAN | rotein kinase.             | 2   | CTGGCAGGCTT    | 0.542 |
| + | 9  | 717   |                    | NM_004947    | NP_004938    | Q8IZD9 | DOCK3_HUMAN |                            | 0   | iGGGAAGATACC   | 0.458 |
| + | 1  | 1428  |                    | NM_013286    | NP_037418    | Q8NDT2 | RB15B_HUMAN | RRM 3.                     | 0   | TGGGAGCATTCT   | 0.572 |
| + | 1  | 1461  |                    | NM_013286    | NP_037418    | Q8NDT2 | RB15B_HUMAN | RRM 3.                     | 0   | 3AGATAGCTTTG   | 0.587 |
| - | 14 | 2789  | lbf.1_Missense_Mi  | NM_014703    | NP_055518    | Q9Y4B6 | VRBP_HUMAN  | LisH.                      | 2   | AGGTCAGCCTCT   | 0.502 |
| + | 3  | 1483  | o.3_intron GRM2    | NM_000839    | NP_000830    | Q14416 | GRM2_HUMAN  | cellular (Potential).      | 1   | TAACGGGCGCC    | 0.592 |
| + | 4  | 2269  | se_Mutation_p.A5   | NM_000839    | NP_000830    | Q14416 | GRM2_HUMAN  | lasmic (Potential).        | 1   | iTCCTGCCTCAC   | 0.652 |
| + | 5  | 511   | CF3_uc010hlw.1_F   | NM_001085479 | NP_001078948 | P0C7M6 | IQCF3_HUMAN |                            | 1   | TGCTGCCCTCA    | 0.622 |
| - | 9  | 1070  | 91L PCBP4_uc00     | NM_033010    | NP_127503    | P57723 | PCBP4_HUMAN |                            | 0   | iCAAAGGGGACC   | 0.632 |
| - | 7  | 1087  | p.D219N POC1A      | NM_015426    | NP_056241    | Q8NBT0 | POC1A_HUMAN | WD 6.                      | 0   | CAGGTCCAGGA    | 0.597 |
| + | 6  | 1059  | _p.T241I ALAS1_u   | NM_000688    | NP_000679    | P13196 | HEM1_HUMAN  |                            | 3   | GCATCACAAAA    | 0.478 |
| - | 2  | 1910  | b.2_Missense_Mu    | NM_017442    | NP_059138    | Q9NR96 | TLR9_HUMAN  | xtracellular (Potential).  | 4   | TGATCGGGTTGT   | 0.642 |
| + | 65 | 10643 | dv.2_Missense_M    | NM_015512    | NP_056327    | Q9P2D7 | DYH1_HUMAN  |                            | 3   | iTGTGTCCGACCT  | 0.562 |
| + | 23 | 2532  |                    | NM_015136    | NP_055951    | Q9NY15 | STAB1_HUMAN | Extracellular (Potential). | 9   | CCATGGGGGAC    | 0.662 |
| + | 34 | 3661  |                    | NM_015136    | NP_055951    | Q9NY15 | STAB1_HUMAN | xtracellular (Potential).  | 9   | iGGAGGCCCTCT   | 0.627 |
| + | 54 | 5755  | 1_5'UTR STAB1_u    | NM_015136    | NP_055951    | Q9NY15 | STAB1_HUMAN | cellular (Potential).      | 9   | iGCCACCCTGTCT  | 0.637 |
| - | 24 | 4018  | _p.V135I PBRM1     | NM_181042    | NP_060635    | Q86U86 | PB1_HUMAN   |                            | 140 | CAATGACCTCAC   | 0.498 |
| - | 20 | 3316  | lew.2_Missense_M   | NM_181042    | NP_060635    | Q86U86 | PB1_HUMAN   |                            | 140 | CATTTGCCAAATAC | 0.443 |
| - | 9  | 1037  | i.D300N GLT8D1_u   | NM_152932    | NP_690909    | Q68CQ7 | GL8D1_HUMAN | renal (Potential).         | 0   | AGGATCGATGG    | 0.453 |
| - | 12 | 1607  | o.S388F ITI4_uc    | NM_002218    | NP_002209    | Q14624 | ITI4_HUMAN  |                            | 3   | iCACTGGACTCC   | 0.577 |
| + | 13 | 1295  | p.G322E CACNA2     | NM_018398    | NP_060868    | Q8ZS8  | CA2D3_HUMAN | ilar (Potential). VWFA.    | 7   | FGACAGGATTTT   | 0.483 |
| - | 3  | 972   | iD2D3_uc003dhg.1   | NM_020678    | NP_065729    | Q9HBL6 | LRTM1_HUMAN | cellular (Potential).      | 0   | iGTTGGCCGGCC   | 0.597 |
| + | 36 | 3119  | se_Mutation_p.P9   | NM_018398    | NP_060868    | Q8ZS8  | CA2D3_HUMAN | cellular (Potential).      | 7   | GGCCCCCATCA    | 0.512 |
| + | 13 | 1930  | _Splice_Site_p.D5  | NM_001141947 | NP_001135419 | A2RUB6 | CCD66_HUMAN |                            | 1   | AAACAGGTATTT   | 0.274 |
| - | 17 | 3436  | lic.3_Missense_Mi  | NM_015224    | NP_056039    | Q9UK61 | CC063_HUMAN |                            | 5   | GCAGAAGTCACC   | 0.433 |
| - | 12 | 1749  | ra.2_Missense_Mi   | NM_017563    | NP_060033    | Q8NFM7 | I17RD_HUMAN | lasmic (Potential).        | 0   | CTCGTCAATAAA   | 0.572 |
| + | 22 | 2219  | .1_intron ASB14_u  | NM_012096    | NP_036228    | Q9UKG1 | DP13A_HUMAN |                            | 1   | iCAGTAGCCAGT   | 0.443 |
| + | 7  | 1229  | nf.2_Missense_Mu   | NM_001457    | NP_001448    | O75369 | FLNB_HUMAN  | Filamin 2.                 | 19  | ATGCCAGTAAAG   | 0.507 |
| + | 19 | 3010  | nf.2_Missense_Mi   | NM_001457    | NP_001448    | O75369 | FLNB_HUMAN  | Filamin 8.                 | 19  | ATAAACTCAATC   | 0.502 |
| + | 22 | 4052  | rf.2_Missense_Mu   | NM_001457    | NP_001448    | O75369 | FLNB_HUMAN  | Interaction with FBLP1.    | 19  | iCACACCTTTG    | 0.597 |
| + | 17 | 1576  | o.1_Missense_Mut   | NM_017771    | NP_060241    | Q7Z7A4 | PXK_HUMAN   |                            | 1   | CTGGGGCCAGC    | 0.532 |
| - | 3  | 988   | i_p.V210I CADPS    | NM_003716    | NP_003707    | Q9ULU8 | CAPS1_HUMAN |                            | 3   | GAAGACCTCCCC   | 0.567 |
| + | 9  | 1893  | nv.2_Missense_Mi   | NM_000333    | NP_000324    | O15265 | ATX7_HUMAN  | Pro-rich.                  | 0   | iTAAACCTCACAC  | 0.507 |
| - | 6  | 969   | _p.T368I PSMD6_u   | NM_014814    | NP_055629    | Q15008 | PSMD6_HUMAN | PCI.                       | 2   | iCAAGGGTTAATC  | 0.368 |
| - | 25 | 3763  | dnh.1_Missense     | NM_182920    | NP_891550    | Q9P2N4 | ATS9_HUMAN  | iSP type-1 8.              | 4   | iCCAAGGCCTTC   | 0.552 |
| - | 20 | 2992  | e_Mutation_p.S81   | NM_182920    | NP_891550    | Q9P2N4 | ATS9_HUMAN  | iSP type-1 3.              | 4   | iGGTTGCTTGGT   | 0.493 |

|   |    |      |                    |              |              |        |             |                                 |    |               |       |
|---|----|------|--------------------|--------------|--------------|--------|-------------|---------------------------------|----|---------------|-------|
| - | 14 | 2757 | i_p.S744N MAGI1_   | NM_001033057 | NP_001028229 | Q96QZ7 | MAGI1_HUMAN |                                 | 6  | FGAGAACTATTCT | 0.517 |
| - | 2  | 1482 | nt.2_Missense_Mt   | NM_198271    | NP_938012    | Q0VAK6 | LMOD3_HUMAN | Potential.                      | 1  | 3CAGCCCCCAACC | 0.542 |
| - | 2  | 459  | :sense_Mutation_f  | NM_015123    | NP_055938    | Q9Y2L6 | FRM4B_HUMAN |                                 | 4  | FGCCTTCTGTCA  | 0.522 |
| - | 14 | 1938 | doq.1_Intron FOXI  | NM_032682    | NP_116071    | Q9H334 | FOXP1_HUMAN | Fork-head.                      | 2  | ATTCTACTTCATC | 0.413 |
| - | 11 | 1707 | id.2_Missense_Mu   | NM_018130    | NP_060600    | Q6PI26 | SHQ1_HUMAN  |                                 | 3  | AGACACTCCAA   | 0.512 |
| + | 1  | 1154 | i.1_Intron PPP4R2  | NM_018029    | NP_060499    | Q6P2I7 | EBLN2_HUMAN |                                 | 0  | 3GATCAGCTCAA  | 0.438 |
| - | 10 | 3004 | p.G668R PDZRN      | NM_015009    | NP_055824    | Q9UPQ7 | PZRN3_HUMAN |                                 | 7  | AGCGCCCCATCT  | 0.662 |
| + | 3  | 1182 | BO2_uc011bgj.1_f   | NM_002942    | NP_002933    | Q9HCK4 | ROBO2_HUMAN | 2. Extracellular (Potential).   | 11 | AGAAAGAATAAC  | 0.383 |
| - | 28 | 4643 | 3dqd.2_Splice_Site | NM_002941    | NP_002932    | Q9Y6N7 | ROBO1_HUMAN |                                 | 2  | 3ACTCACCATCT  | 0.463 |
| - | 27 | 4100 | dqd.2_Missense_I   | NM_002941    | NP_002932    | Q9Y6N7 | ROBO1_HUMAN | lasmic (Potential).             | 2  | AGGAGGACTCA   | 0.473 |
| - | 25 | 3740 | dqd.2_Missense_I   | NM_002941    | NP_002932    | Q9Y6N7 | ROBO1_HUMAN | lasmic (Potential).             | 2  | GCCACCCTGTT   | 0.473 |
| - | 6  | 939  | ioj.1_Missense_M   | NM_000306    | NP_000297    | P28069 | PIT1_HUMAN  | Homeobox.                       | 2  | TTTTCACCCGTT  | 0.378 |
| + | 2  | 1170 |                    | NM_000866    | NP_000857    | P30939 | 5HT1F_HUMAN | ame=7; (By similarity).         | 3  | 3GGTATCTCAAT  | 0.318 |
| - | 7  | 948  | i_p.D72N PROS1_    | NM_000313    | NP_000304    | P07225 | PROS_HUMAN  | alcium-binding (Potential).     | 1  | ATTCATCCACAT  | 0.378 |
| + | 10 | 1554 | dre.2_Missense_I   | NM_182896    | NP_878899    | Q3SXY8 | AR13B_HUMAN |                                 | 0  | 3TGATGCTCATG  | 0.413 |
| - | 2  | 236  | P24S NSUN3_uc0     | NM_176815    | NP_789785    | Q86XF0 | DYRL1_HUMAN | DHFR.                           | 0  | iCCTGGGCAGGT  | 0.498 |
| + | 14 | 2726 | idrr.3_Missense_M  | NM_001080448 | NP_001073917 | Q9UF33 | EPHA6_HUMAN | 3. Cytoplasmic (Potential).     | 16 | 3TAGCGGCTCGC  | 0.453 |
| + | 8  | 859  | 3dtb.2_Missense_I  | NM_006100    | NP_006091    | Q9Y274 | SIA10_HUMAN | lenal (Potential).              | 1  | AGAACTAATG    | 0.333 |
| - | 16 | 2597 | dte.2_Missense_I   | NM_080927    | NP_563615    | Q96PD2 | DCBD2_HUMAN | lasmic (Potential).             | 3  | CGTCTGGGGCA   | 0.507 |
| + | 8  | 754  |                    | NM_032359    | NP_115735    | Q9BQ75 | CC026_HUMAN |                                 | 1  | GAAGCGTGTGG   | 0.458 |
| + | 10 | 1201 | dts.2_Missense_I   | NM_018309    | NP_060779    | Q9NUY8 | TBC23_HUMAN | Rhodanese.                      | 2  | iTGGTGGATTGC  | 0.373 |
| + | 7  | 606  | o11bha.1_Silent_I  | NM_020202    | NP_064587    | Q9NQR4 | NIT2_HUMAN  | 3N hydrolase.                   | 1  | 3CAGGAGCTTTT  | 0.493 |
| + | 9  | 813  |                    | NM_020202    | NP_064587    | Q9NQR4 | NIT2_HUMAN  | 3N hydrolase.                   | 1  | 3ACATAGGTAAG  | 0.483 |
| - | 3  | 426  | i_p.S107L ABI3BP_  | NM_015429    | NP_056244    | Q7Z7G0 | TARSH_HUMAN |                                 | 4  | 3AACATGACTTC  | 0.393 |
| - | 24 | 3251 | uw.2_Missense_M    | NM_020654    | NP_065705    | Q9BQF6 | SENP7_HUMAN | Protease.                       | 5  | 3TGCTGCCCTTC  | 0.413 |
| - | 4  | 367  | i_p.P53S SENP7_    | NM_020654    | NP_065705    | Q9BQF6 | SENP7_HUMAN |                                 | 5  | AACAGGACACC   | 0.294 |
| + | 1  | 58   | 97_uc011bhf.1_M    | NM_024548    | NP_078824    | Q8IW35 | CEP97_HUMAN |                                 | 2  | 3CTTTGCCCTCCC | 0.537 |
| + | 4  | 602  | po.2_Missense_M    | NM_031419    | NP_113607    | Q9BYH8 | IKBZ_HUMAN  |                                 | 2  | ACAGTGGGAAA   | 0.388 |
| + | 5  | 1010 | 3_Mutation_p.C15   | NM_001627    | NP_001618    | Q13740 | CD166_HUMAN | Potential). Ig-like V-type 2.   | 3  | 3TGACTGCATTT  | 0.443 |
| - | 19 | 3054 | i_p.R126H CBLB_u   | NM_170662    | NP_733762    | Q13191 | CBLB_HUMAN  | eraction with SH3KBP1.          | 9  | iTCCTGCGCGGT  | 0.453 |
| - | 7  | 1293 | ie_Mutation_p.S32  | NM_170662    | NP_733762    | Q13191 | CBLB_HUMAN  | -PTB. SH2-like.                 | 9  | iCCCTGCTGCCA  | 0.418 |
| - | 40 | 5653 |                    | NM_014981    | NP_055796    | Q9Y2K3 | MYH15_HUMAN | Potential.                      | 7  | 3CTCTGCCTGCA  | 0.448 |
| - | 32 | 4400 |                    | NM_014981    | NP_055796    | Q9Y2K3 | MYH15_HUMAN | Potential.                      | 7  | iCAGAGCGGACC  | 0.652 |
| - | 9  | 1242 | ense_Mutation_p.I  | NM_020890    | NP_065941    | Q8TCG1 | CIP2A_HUMAN |                                 | 3  | 3AGGTGGAGACT  | 0.458 |
| + | 9  | 1354 | xx.2_Missense_M    | NM_198196    | NP_937839    | P40200 | TACT_HUMAN  | 3potential). Pro/Ser/Thr-rich.  | 3  | 3ATCTACCCTTG  | 0.368 |
| + | 3  | 626  | djn.2_Missense_I   | NM_001008272 | NP_001008273 | Q9UI15 | TAGL3_HUMAN | CH.                             | 0  | 3AGAGTCAAAGAT | 0.473 |
| - | 20 | 2692 | i_p.A87T SLC9A10   | NM_183061    | NP_898884    | Q4G0N8 | S9A10_HUMAN |                                 | 5  | CAAAAGCCTTAA  | 0.308 |
| - | 7  | 841  | _C9A10_uc010hqc    | NM_183061    | NP_898884    | Q4G0N8 | S9A10_HUMAN | ical; (Potential).              | 5  | 3GATCTCTTCAG  | 0.303 |
| - | 3  | 311  | te SLC9A10_uc01    | NM_183061    | NP_898884    | Q4G0N8 | S9A10_HUMAN |                                 | 5  | 3AAATGCTGCCAA | 0.318 |
| - | 3  | 2115 | jzg.2_Missense_I   | NM_199512    | NP_955806    | Q76M96 | CCD80_HUMAN |                                 | 2  | CTCAGCCTTGGC  | 0.423 |
| - | 2  | 2040 | jzg.2_Missense_I   | NM_199512    | NP_955806    | Q76M96 | CCD80_HUMAN | Lys-rich.                       | 2  | iCTTGGGACTCT  | 0.413 |
| + | 4  | 890  | z.2_Missense_Mu    | NM_033254    | NP_150279    | Q9BWW1 | BOC_HUMAN   | 3potential). Ig-like C2-type 1. | 6  | iCGGGACCCTCG  | 0.602 |
| - | 14 | 2044 | iDC52_uc003eah.    | NM_144718    | NP_653319    | Q8N0Z3 | SPICE_HUMAN |                                 | 0  | 3AATAGGTAAGG  | 0.408 |
| - | 5  | 607  | CDC52_uc003eah     | NM_144718    | NP_653319    | Q8N0Z3 | SPICE_HUMAN |                                 | 0  | 3ATCTTGATCTC  | 0.333 |
| - | 7  | 5885 | eal.2_Missense_M   | NM_001009899 | NP_001009899 | Q68DE3 | K2018_HUMAN |                                 | 3  | iGAGGGGCAAGT  | 0.448 |
| - | 7  | 5156 | eal.2_Missense_M   | NM_001009899 | NP_001009899 | Q68DE3 | K2018_HUMAN | Gln-rich.                       | 3  | 3TTGAAGGGTTT  | 0.498 |
| - | 7  | 1379 | ieal.2_Missense_I  | NM_001009899 | NP_001009899 | Q68DE3 | K2018_HUMAN |                                 | 3  | iGTATGCTCAGG  | 0.473 |



|   |    |      |                    |              |              |        |             |                            |    |               |       |             |
|---|----|------|--------------------|--------------|--------------|--------|-------------|----------------------------|----|---------------|-------|-------------|
| - | 1  | 155  | i_p.L3P QTRTD1_    | NM_020817    | NP_065868    | Q8NCU4 | K1407_HUMAN |                            | 2  | 3GCGCCAGGAGC  | 0.587 | rs140131124 |
| - | 7  | 1223 | oy.2_Missense_Mu   | NM_001015887 | NP_001015887 | Q5DX21 | IGS11_HUMAN | lasmic (Potential).        | 0  | CTTTTGATTGT   | 0.448 |             |
| + | 12 | 2660 |                    | NM_020754    | NP_065805    | Q2M1Z3 | RHG31_HUMAN | Pro-rich.                  | 2  | CTGCTCCAGTC   | 0.592 |             |
| - | 2  | 431  | 439A_uc003ecl.1_   | NM_018266    | NP_060736    | Q9NV64 | TM39A_HUMAN |                            | 2  | CCAAAGTCTGC   | 0.473 |             |
| + | 4  | 959  |                    | NM_005513    | NP_005504    | P29083 | T2EA_HUMAN  |                            | 1  | GTTGAGAGAAA   | 0.408 |             |
| + | 5  | 1010 |                    | NM_005513    | NP_005504    | P29083 | T2EA_HUMAN  |                            | 1  | AGGGGGCATAG   | 0.393 |             |
| - | 10 | 820  | e_Mutation_p.S19   | NM_005335    | NP_005326    | P14317 | HCLS1_HUMAN |                            | 0  | CACTAGAAGCT   | 0.522 |             |
| - | 13 | 4417 | .E1397K GOLGB1     | NM_004487    | NP_004478    | Q14789 | GOGB1_HUMAN | ic (Potential). Potential. | 10 | CTTGTCTATTAT  | 0.383 |             |
| + | 3  | 815  | iw.3_Missense_Mu   | NM_000388    | NP_000379    | P41180 | CASR_HUMAN  | cellular (Potential).      | 7  | CTCAGGCGCT    | 0.527 |             |
| + | 1  | 244  | _uc011bjs.1_5'Flar | NM_138287    | NP_612144    | Q8TDB6 | DTX3L_HUMAN |                            | 4  | CCCGGGCACCT   | 0.687 |             |
| + | 14 | 4350 | e_Mutation_p.V11   | NM_017554    | NP_060024    | Q460N5 | PAR14_HUMAN |                            | 6  | TTCGGGTGTGT   | 0.388 |             |
| - | 13 | 2485 | p.R462W ADCY5_     | NM_183357    | NP_899200    | O95622 | ADCY5_HUMAN |                            | 4  | GGACCGCACGA   | 0.403 |             |
| - | 1  | 993  |                    | NM_183357    | NP_899200    | O95622 | ADCY5_HUMAN | ical; (Potential).         | 4  | ACGGTCCACCA   | 0.687 |             |
| + | 27 | 4312 | 95_splice KALRN_   | NM_001024660 | NP_001019831 | O60229 | KALRN_HUMAN |                            | 6  | TTGATGTAAGCT  | 0.408 |             |
| + | 35 | 5405 | ehk.2_Missense_M   | NM_001024660 | NP_001019831 | O60229 | KALRN_HUMAN |                            | 6  | CGGGTCCCAAG   | 0.557 |             |
| + | 60 | 9054 | ik.2_Missense_Mu   | NM_001024660 | NP_001019831 | O60229 | KALRN_HUMAN |                            | 6  | CAAGAGCTACA   | 0.527 |             |
| - | 5  | 1040 |                    | NM_002213    | NP_002204    | P18084 | ITB5_HUMAN  | tracellular (Potential).   | 2  | AGCCCCCTCAC   | 0.572 |             |
| - | 6  | 2806 | 3.1_Missense_Mut   | NM_020733    | NP_065784    | Q9ULI3 | HEG1_HUMAN  | cellular (Potential).      | 2  | ATCAATCCAGTG  | 0.493 |             |
| - | 10 | 1688 | _p.A327V SLC12A    | NM_024628    | NP_078904    | A0AV02 | S12A8_HUMAN |                            | 0  | AGGAGGCAGCG   | 0.557 |             |
| - | 9  | 2330 | lhsa.2_Missense_I  | NM_021964    | NP_068799    | Q9UQR1 | ZN148_HUMAN |                            | 4  | TAGTTCTGTCC   | 0.463 |             |
| + | 11 | 1169 | 1sg.1_Missense_M   | NM_182628    | NP_872434    | Q494V2 | CCD37_HUMAN |                            | 2  | CGGTGGCGACT   | 0.642 |             |
| + | 13 | 1304 | 1sg.1_Missense_Iv  | NM_182628    | NP_872434    | Q494V2 | CCD37_HUMAN | Potential.                 | 2  | GAACCTGTCCG   | 0.597 |             |
| + | 28 | 5057 | 3jh.2_Missense_M   | NM_032242    | NP_115618    | Q9UIW2 | PLXA1_HUMAN | lasmic (Potential).        | 3  | ACCGGGCTCA    | 0.627 |             |
| - | 1  | 144  | UVBL1_uc010hss.    | NM_003707    | NP_003698    | Q9Y265 | RUVB1_HUMAN |                            | 1  | GATGCGCTGCC   | 0.627 |             |
| + | 5  | 1221 | ekj.2_Missense_M   | NM_021937    | NP_068756    | P57772 | SELB_HUMAN  |                            | 1  | AGGCCGACAAG   | 0.567 |             |
| + | 4  | 429  | i_p.G66E RAB7A_    | NM_004637    | NP_004628    | P51149 | RAB7A_HUMAN | (By similarity).           | 0  | AGCAGGACAGG   | 0.502 |             |
| + | 10 | 1179 | 9_uc003elb.2_Mis   | NM_014049    | NP_054768    | Q9H845 | ACAD9_HUMAN |                            | 3  | GTACGCTGCA    | 0.264 |             |
| - | 3  | 346  | e_Mutation_p.S40   | NM_003418    | NP_003409    | P62633 | CNBP_HUMAN  |                            | 0  | ACGAGGAAACA   | 0.383 |             |
| + | 6  | 495  | htb.2_Missense_M   | NM_016128    | NP_057212    | Q9Y678 | COPG_HUMAN  |                            | 4  | GATCACTGATG   | 0.562 |             |
| + | 17 | 1808 | tb.2_Missense_Mu   | NM_016128    | NP_057212    | Q9Y678 | COPG_HUMAN  |                            | 4  | AACCATCAGAA   | 0.512 |             |
| + | 24 | 2604 | 1lank C3orf37_uc0  | NM_016128    | NP_057212    | Q9Y678 | COPG_HUMAN  | with ZNF289/ARFGAP2.       | 4  | GTTCCGGGGTG   | 0.517 |             |
| - | 7  | 1798 | 3D4_uc003emk.1_    | NM_003925    | NP_003916    | O95243 | MBD4_HUMAN  |                            | 2  | TCGTTGCCATAT  | 0.418 |             |
| + | 19 | 2544 | 3mq.2_Missense_I   | NM_052989    | NP_443715    | Q9HBG6 | IF122_HUMAN |                            | 2  | 3TCAAGCCATC   | 0.522 | rs141746785 |
| + | 24 | 3139 | i_p.S769F IFT122   | NM_052989    | NP_443715    | Q9HBG6 | IF122_HUMAN |                            | 2  | CATCTCCAGGT   | 0.522 |             |
| + | 4  | 792  |                    | NM_000539    | NP_000530    | P08100 | OPSD_HUMAN  | Cytoplasmic.               | 0  | TGCAGGCCGCT   | 0.652 |             |
| - | 32 | 5342 | 3LXND1_uc011blb    | NM_015103    | NP_055918    | Q9Y4D7 | PLXD1_HUMAN | lasmic (Potential).        | 1  | CTCAGCCTGCT   | 0.577 |             |
| - | 16 | 3318 |                    | NM_015103    | NP_055918    | Q9Y4D7 | PLXD1_HUMAN | ir (Potential). IPT/TIG 3. | 1  | TGATGGCCGTG   | 0.672 |             |
| - | 5  | 1908 |                    | NM_015103    | NP_055918    | Q9Y4D7 | PLXD1_HUMAN | cellular (Potential).      | 1  | CGGTCATGGCA   | 0.657 |             |
| + | 2  | 410  |                    | NM_001102608 | NP_001096078 | A6NMZ7 | CO6A6_HUMAN | cal region. VWFA 1.        | 8  | GGAGAGACAAG   | 0.502 |             |
| + | 8  | 3725 | 3A6_uc003eni.3_5'  | NM_001102608 | NP_001096078 | A6NMZ7 | CO6A6_HUMAN | '. Nonhelical region.      | 8  | AGGTGGGCACA   | 0.458 |             |
| - | 4  | 1906 |                    | NM_014602    | NP_055417    | Q99570 | PI3R4_HUMAN | HEAT 1.                    | 12 | CTTTGGTCAAC   | 0.428 |             |
| + | 16 | 1463 | 3no.2_Missense_M   | NM_014382    | NP_055197    | P98194 | AT2C1_HUMAN | smic (By similarity).      | 1  | ATGATGCTGTAA  | 0.373 |             |
| + | 43 | 5133 |                    | NM_015268    | NP_056083    | O75165 | DJC13_HUMAN |                            | 2  | TAGGGGAGATT   | 0.338 |             |
| - | 24 | 3601 | _p.S54F NPHP3_1    | NM_153240    | NP_694972    | Q7Z494 | NPHP3_HUMAN |                            | 1  | CCAAAGAAGGG   | 0.358 |             |
| - | 21 | 3147 | pd.1_Missense_M    | NM_153240    | NP_694972    | Q7Z494 | NPHP3_HUMAN |                            | 1  | TATATGGATGGTC | 0.393 |             |
| - | 10 | 1659 | IPHP3_uc003epf.1   | NM_153240    | NP_694972    | Q7Z494 | NPHP3_HUMAN |                            | 1  | AGACACGAGAA   | 0.388 |             |
| - | 8  | 1369 | pf.1_Missense_Mu   | NM_153240    | NP_694972    | Q7Z494 | NPHP3_HUMAN |                            | 1  | 3GATCTCTGAG   | 0.269 |             |

|   |    |      |                   |              |              |        |             |                                |    |               |       |
|---|----|------|-------------------|--------------|--------------|--------|-------------|--------------------------------|----|---------------|-------|
| - | 7  | 1236 | pf.1_Missense_Mt  | NM_153240    | NP_694972    | Q7Z494 | NPHP3_HUMAN |                                | 1  | TTTCAGGGTTTTT | 0.373 |
| + | 1  | 368  |                   | NM_003571    | NP_003562    | Q13515 | BFSP2_HUMAN | Head.                          | 0  | CCGGGCCCTCG   | 0.647 |
| + | 6  | 1375 |                   | NM_003571    | NP_003562    | Q13515 | BFSP2_HUMAN | Tail.                          | 0  | GGGAGGAGAGC   | 0.532 |
| + | 4  | 1027 | _p.S191N CDV3_u   | NM_017548    | NP_060018    | Q9UKY7 | CDV3_HUMAN  |                                | 0  | CTACAGTGATAC  | 0.463 |
| + | 3  | 342  |                   | NM_021203    | NP_067026    | Q9Y5M8 | SRPRB_HUMAN |                                | 1  | ATAACAGGGTAA  | 0.393 |
| - | 10 | 1646 | _p.V382I SLCO2A   | NM_005630    | NP_005621    | Q92959 | SO2A1_HUMAN | ir (Potential), Kazal-like.    | 1  | ACAGACCCGGGT  | 0.562 |
| - | 9  | 2471 | _Mutation_p.S72E  | NM_016201    | NP_057285    | Q9Y2J4 | AMOL2_HUMAN |                                | 1  | GGGTGCTCCCA   | 0.637 |
| + | 3  | 867  | z.1_RNA EPHB1_u   | NM_004441    | NP_004432    | P54762 | EPHB1_HUMAN | ar (Potential), Cys-rich.      | 30 | AGACACATCTC   | 0.507 |
| - | 2  | 1596 | tb.1_Missense_Mt  | NM_018133    | NP_060603    | Q9HCI7 | MSL2_HUMAN  |                                | 1  | AATTAGGGCAA   | 0.433 |
| - | 1  | 807  | 2_uc011bmb.1_5'f  | NM_018133    | NP_060603    | Q9HCI7 | MSL2_HUMAN  |                                | 1  | CCTTGGGGTCT   | 0.517 |
| + | 9  | 976  | tc.1_Missense_Mt  | NM_000532    | NP_000523    | P05166 | PCCB_HUMAN  | oxyltransferase.               | 0  | CTTTGGAATCA   | 0.463 |
| - | 23 | 2573 | _p.D761N STAG1_u  | NM_005862    | NP_005853    | Q8WVM7 | STAG1_HUMAN |                                | 2  | CAAATCCTCCT   | 0.368 |
| + | 5  | 800  | 20RB_uc010hud.1   | NM_144717    | NP_653318    | Q6UXL0 | I20RB_HUMAN | tential), Fibronectin type-III | 1  | GGTGAGGAGTG   | 0.378 |
| - | 2  | 557  | err.1_Missense_M  | NM_173543    | NP_775814    | Q8IYY4 | DZ11L_HUMAN |                                | 2  | AGTTGCAGAAG   | 0.612 |
| + | 13 | 1581 | rT3_uc010hug.2_f  | NM_031913    | NP_114119    | A0FGR9 | ESYT3_HUMAN | C2.2.                          | 0  | GGAGAGTGCC    | 0.532 |
| + | 15 | 1729 | i_uc010hug.2_Spli | NM_031913    | NP_114119    | A0FGR9 | ESYT3_HUMAN |                                | 0  | GTAAGGTAAGAC  | 0.438 |
| - | 18 | 1945 | nl.1_Missense_Mu  | NM_024491    | NP_077817    | Q8NHQ1 | CEP70_HUMAN |                                | 1  | GGCATCCAAGT   | 0.279 |
| + | 5  | 651  | q.2_Missense_Mu   | NM_001033032 | NP_001028204 | Q9NVQ4 | FAIM1_HUMAN |                                | 0  | TCCAGGGTGAG   | 0.398 |
| + | 5  | 718  | q.2_Missense_Mu   | NM_001033032 | NP_001028204 | Q9NVQ4 | FAIM1_HUMAN |                                | 0  | AAAGGCTGTCA   | 0.398 |
| - | 22 | 3190 | se_Mutation_p.V5  | NM_006219    | NP_006210    | P42338 | PK3CB_HUMAN | PI3K/PI4K.                     | 5  | CCGAAGTGTGT   | 0.408 |
| - | 1  | 858  |                   | NM_001013650 | NP_001013672 | Q6ZRT6 | PR23B_HUMAN | Pro-rich.                      | 1  | GAGCACAGGGT   | 0.622 |
| - | 4  | 623  | VAT3_uc003etl.2_l | NM_178177    | NP_835471    | Q96T66 | NMNA3_HUMAN |                                | 0  | CACAGGCTCCT   | 0.542 |
| + | 2  | 294  | _Mutation_p.G20I  | NM_001104647 | NP_001098117 | Q96CQ1 | S2536_HUMAN | ical; Name=1; (Potential).     | 0  | AGTGGGAGCTA   | 0.383 |
| + | 8  | 3521 | _p.A847T ZBTB38   | NM_001080412 | NP_001073881 | Q8NAP3 | ZBT38_HUMAN |                                | 3  | ACGAAGCCATT   | 0.423 |
| + | 4  | 1507 |                   | NM_139209    | NP_631948    | Q8WTQ7 | GRK7_HUMAN  | kinase C-terminal.             | 5  | CAGACCCTTCA   | 0.428 |
| - | 36 | 4184 | .2_Missense_Mut   | NM_019001    | NP_061874    | Q8IZH2 | XRN1_HUMAN  |                                | 3  | CTTATGGTCCAC  | 0.358 |
| - | 2  | 203  | e_Mutation_p.P46I | NM_019001    | NP_061874    | Q8IZH2 | XRN1_HUMAN  |                                | 3  | ATTAGGATGGG   | 0.318 |
| - | 40 | 6949 | iy.1_Missense_Mu  | NM_001184    | NP_001175    | Q13535 | ATR_HUMAN   |                                | 20 | CATGGGTACCC   | 0.373 |
| - | 34 | 5861 |                   | NM_001184    | NP_001175    | Q13535 | ATR_HUMAN   |                                | 20 | CTGGTCTAAAG   | 0.408 |
| - | 8  | 1155 |                   | NM_013363    | NP_037495    | Q9UKZ9 | PCOC2_HUMAN | NTR.                           | 3  | CAGTCCCGGCT   | 0.438 |
| - | 12 | 1546 |                   | NM_173653    | NP_775924    | Q8IVB4 | SL9A9_HUMAN |                                | 3  | GCTGAGATTCT   | 0.463 |
| - | 18 | 2487 | nm.1_Missense_M   | NM_000935    | NP_000926    | O00469 | PLOD2_HUMAN | OG dioxygenase.                | 2  | AGAACGCTGTG   | 0.348 |
| - | 17 | 2388 | nm.1_Missense_M   | NM_000935    | NP_000926    | O00469 | PLOD2_HUMAN |                                | 2  | GAACTCCCGGA   | 0.423 |
| - | 3  | 886  | _p.P135S ZIC4_uc  | NM_032153    | NP_115529    | Q8N9L1 | ZIC4_HUMAN  | C2H2-type 3.                   | 2  | ACAAGGGAAGG   | 0.517 |
| + | 2  | 149  |                   | NM_001870    | NP_001861    | P15088 | CBPA3_HUMAN |                                | 2  | CCCAGGATGAA   | 0.383 |
| + | 17 | 3066 | .1_Missense_Mut   | NM_032383    | NP_115759    | Q969F9 | HPS3_HUMAN  |                                | 6  | TGAAGGATTTG   | 0.338 |
| - | 6  | 1410 | _uc003ewz.2_Mis   | NM_000096    | NP_000087    | P00450 | CERU_HUMAN  | in-like 3, F5/8 type A.2.      | 1  | AGGGAGCATAG   | 0.413 |
| + | 3  | 581  |                   | NM_004617    | NP_004608    | P48230 | T4S4_HUMAN  | ellular (Potential).           | 0  | CAAGGTCTCTA   | 0.517 |
| + | 8  | 585  | IF2A_uc011bnv.1   | NM_032025    | NP_114414    | Q9BY44 | EIF2A_HUMAN |                                | 0  | TCCAGGAAGTA   | 0.328 |
| - | 4  | 667  | eyh.2_Missense_l  | NM_152394    | NP_689607    | Q7L0X2 | F194A_HUMAN |                                | 3  | ATTTACCTCTAA  | 0.418 |
| - | 1  | 710  |                   | NM_005067    | NP_005058    | O43255 | SIAH2_HUMAN |                                | 2  | CCGGGACCGGA   | 0.697 |
| - | 3  | 932  | ny.1_Intron CLRN1 | NM_174878    | NP_777367    | P58418 | CLRN1_HUMAN |                                | 0  | CAAAAGGGAAC   | 0.363 |
| + | 4  | 492  | _p.P152S MED12L   | NM_053002    | NP_443728    | Q86YW9 | MD12L_HUMAN |                                | 7  | CTGTGCCAATGC  | 0.343 |
| + | 4  | 541  | _p.S168F MED12L   | NM_053002    | NP_443728    | Q86YW9 | MD12L_HUMAN |                                | 7  | ATTATTCTGCTAT | 0.358 |
| + | 14 | 2059 | yn.2_Missense_M   | NM_053002    | NP_443728    | Q86YW9 | MD12L_HUMAN |                                | 7  | GTTGGGCAGAA   | 0.388 |
| + | 35 | 5191 | _p.P1578L MED12L  | NM_053002    | NP_443728    | Q86YW9 | MD12L_HUMAN |                                | 7  | CATGCCCAAGC   | 0.577 |
| + | 39 | 5968 | 12L_uc011bnz.1_l  | NM_053002    | NP_443728    | Q86YW9 | MD12L_HUMAN | Gln-rich.                      | 7  | CACATCCAACC   | 0.582 |

|   |    |      |                                                                              |              |              |        |              |                             |    |               |       |             |
|---|----|------|------------------------------------------------------------------------------|--------------|--------------|--------|--------------|-----------------------------|----|---------------|-------|-------------|
| - | 5  | 5518 | I_5'Flank IGSF10_                                                            | NM_178822    | NP_849144    | Q6WRI0 | IGS10_HUMAN  |                             | 13 | GTGGTCTGCAA   | 0.473 |             |
| - | 4  | 4523 |                                                                              | NM_178822    | NP_849144    | Q6WRI0 | IGS10_HUMAN  |                             | 13 | TTGAGGATTCCG  | 0.493 |             |
| - | 3  | 613  |                                                                              | NM_178822    | NP_849144    | Q6WRI0 | IGS10_HUMAN  | LRR 6.                      | 13 | GGAGACCATCTC  | 0.433 |             |
| - | 22 | 3215 | p.A980T PLCH1_                                                               | NM_001130960 | NP_001124432 | Q4KWH8 | PLCH1_HUMAN  |                             | 4  | CAAAGCTCCCA   | 0.473 |             |
| + | 3  | 1242 | H1_uc003fbk.1_in                                                             | NM_002852    | NP_002843    | P26022 | PTX3_HUMAN   | Pentaxin.                   | 1  | GGTGGGGAGTC   | 0.448 |             |
| + | 3  | 534  | uc003fcw.1_intron                                                            | NM_000882    | NP_000873    | P29459 | IL12A_HUMAN  |                             | 0  | CATGAAGATATCA | 0.368 |             |
| + | 4  | 573  | lj.2_Missense_Mut                                                            | NM_001002800 | NP_001002800 | Q9NTJ3 | SMC4_HUMAN   |                             | 2  | ACAAGGACATTC  | 0.303 |             |
| - | 3  | 866  |                                                                              | NM_001040100 | NP_001035189 | Q8NFR3 | SSPTB_HUMAN  | renal (Potential).          | 0  | TAGATCGCTCCC  | 0.428 |             |
| - | 3  | 309  |                                                                              | NM_001041    | NP_001032    | P14410 | SUIS_HUMAN   | renal,IP-type 1.            | 14 | TGTTGGGAATT   | 0.289 |             |
| - | 7  | 1672 | fk.2_Missense_Mu                                                             | NM_005241    | NP_005232    | Q03112 | EV11_HUMAN   |                             | 14 | CAGCTCCTGAC   | 0.398 |             |
| - | 7  | 1746 | l1bpt.1_intron uc0                                                           | NM_020949    | NP_066000    | Q8TBB6 | S7A14_HUMAN  |                             | 5  | TGGTGCTGGG    | 0.507 |             |
| - | 16 | 2089 | .P582S TNIK_uc0                                                              | NM_015028    | NP_055843    | Q9UKE5 | TNIK_HUMAN   | interaction with NEDD4.     | 5  | GGGGGGTGTTC   | 0.527 | rs148174466 |
| + | 4  | 986  | n_p.T228I NLGN1                                                              | NM_014932    | NP_055747    | Q8N2Q7 | NLGN1_HUMAN  | cellular (Potential).       | 7  | AAGGTACTGGAA  | 0.433 |             |
| - | 5  | 484  | XR1_uc011bpz.1_                                                              | NM_024665    | NP_078941    | Q9BZK7 | TBL1R_HUMAN  | F-box-like.                 | 1  | GTCGACCATCA   | 0.363 |             |
| - | 1  | 120  | 33E NDUFB5_uc0                                                               | NM_020409    | NP_065142    | Q9HD33 | RM47_HUMAN   |                             | 0  | CTTACCCTGTGC  | 0.507 |             |
| + | 5  | 468  | DUFB5_uc003fke.:                                                             | NM_002492    | NP_002483    | O43674 | NDUB5_HUMAN  |                             | 1  | AAAAGCTGAA    | 0.383 |             |
| + | 14 | 1346 | p.P356S FXR1_uc                                                              | NM_005087    | NP_005078    | P51114 | FXR1_HUMAN   | binding RGG-box.            | 1  | GACGCCAGGA    | 0.532 |             |
| + | 3  | 311  | n_p.G6R KLHL24_                                                              | NM_017644    | NP_060114    | Q6TFL4 | KLH24_HUMAN  |                             | 1  | TATTGGGACGCA  | 0.378 |             |
| + | 3  | 426  | i.P96S DVL3_uc0C                                                             | NM_004423    | NP_004414    | Q92997 | DVL3_HUMAN   |                             | 3  | ATAACCATCGC   | 0.602 |             |
| + | 1  | 1549 | l31A_uc003foc.2_                                                             | NM_144635    | NP_653236    | Q6UXB0 | F131A_HUMAN  |                             | 1  | GTGCTCCCTGG   | 0.582 |             |
| + | 3  | 2173 | ifoc.2_Missense_M                                                            | NM_144635    | NP_653236    | Q6UXB0 | F131A_HUMAN  |                             | 1  | GGAGGCCAGG    | 0.692 |             |
| - | 2  | 248  | p.R42C CLCN2_u                                                               | NM_004366    | NP_004357    | P51788 | CLCN2_HUMAN  | smic (By similarity).       | 0  | CAGGCGAATCC   | 0.627 |             |
| + | 10 | 2296 |                                                                              | NM_004443    | NP_004434    | P54753 | EPHB3_HUMAN  | plasmic (Potential).        | 11 | TGAGGCTGTTC   | 0.542 |             |
| + | 7  | 1277 | l1bru.1_Splice_Site                                                          | NM_004721    | NP_004712    | O43283 | M3K13_HUMAN  |                             | 3  | CTGTAGGTCTT   | 0.418 |             |
| - | 10 | 1381 | ic.2_Missense_ML                                                             | NM_001346    | NP_001337    | P49619 | DGKG_HUMAN   | l-ester/DAG-type 1.         | 5  | GGTTGGTTTCT   | 0.567 |             |
| + | 4  | 644  | se_Mutation_p.R2:                                                            | NM_014375    | NP_055190    | Q9UGM5 | FETUB_HUMAN  | tin fetuin-B-type 1.        | 2  | CAAGTAGAGTTC  | 0.333 |             |
| + | 4  | 292  | c011bsb.1_5'Flank                                                            | NM_001967    | NP_001958    | Q14240 | IF4A2_HUMAN  | ase ATP-binding.            | 4  | GACAGCCACA    | 0.443 |             |
| - | 1  | 365  |                                                                              | NM_021101    | NP_066924    | O95832 | CLD1_HUMAN   | cellular (Potential).       | 1  | CAGCCCCTCGT   | 0.607 |             |
| - | 1  | 1022 | =12_uc003fsy.2_In                                                            | NM_021032    | NP_066360    | P61328 | FGF12_HUMAN  |                             | 4  | ACCTGGTCTCC   | 0.662 |             |
| - | 5  | 641  | e_p.R178_splice A                                                            | NM_032279    | NP_115655    | Q4VNC1 | AT134_HUMAN  |                             | 2  | ATGGTACCTAATC | 0.318 |             |
| - | 2  | 96   |                                                                              | NM_004488    | NP_004479    | P40197 | GPV_HUMAN    | xtracellular (Potential).   | 3  | CTGGCGGACAG   | 0.662 |             |
| - | 15 | 2072 | ftz.1_Missense_M                                                             | NM_024524    | NP_078800    | Q9H7F0 | AT133_HUMAN  |                             | 1  | GATCACCAGAG   | 0.318 |             |
| + | 3  | 961  | ie_Mutation_p.V24                                                            | NM_152673    | NP_689886    | Q8N307 | MUC20_HUMAN  | d in oligomerization.       | 0  | AAGGGTGAAG    | 0.542 |             |
| - | 19 | 2489 | zy.2_Missense_Mt                                                             | NM_003234    | NP_003225    | P02786 | TFR1_HUMAN   | Potential). Ligand-binding. | 3  | TAGAGCCAACT   | 0.463 |             |
| - | 4  | 1182 | iah.2_Missense_M                                                             | NM_152617    | NP_689830    | Q81YW5 | RN168_HUMAN  |                             | 0  | TTCTTACTTTTCT | 0.363 |             |
| + | 3  | 1233 |                                                                              | NM_198565    | NP_940967    | Q86YC3 | LR33_HUMAN   | ar (Potential). LRR 13.     | 3  | CCGGAGCGCTC   | 0.642 |             |
| + | 3  | 1750 |                                                                              | NM_198565    | NP_940967    | Q86YC3 | LR33_HUMAN   | ar (Potential). LRR 19.     | 3  | CTTGACCACCT   | 0.572 |             |
| + | 3  | 2047 |                                                                              | NM_198565    | NP_940967    | Q86YC3 | LR33_HUMAN   | cellular (Potential).       | 3  | GACCTGGGCC    | 0.627 |             |
| + | 2  | 439  | bty.1_Missense_M                                                             | NM_152699    | NP_689912    | Q96H10 | SENP5_HUMAN  |                             | 3  | AAAGCTCTCAA   | 0.403 |             |
| + | 2  | 1750 | oty.1_Missense_Mi                                                            | NM_152699    | NP_689912    | Q96H10 | SENP5_HUMAN  |                             | 3  | TGTCAGTCTGT   | 0.438 |             |
| - | 20 | 2927 | ation_p.C870Y MII                                                            | NM_014687    | NP_055502    | Q92622 | RUBIC_HUMAN  | Cys-rich.                   | 0  | GCTTTACACTCT  | 0.582 |             |
| - | 16 | 2435 | p.H706R KIAA022                                                              | NM_014687    | NP_055502    | Q92622 | RUBIC_HUMAN  |                             | 0  | TCTGTGGCAG    | 0.522 |             |
| - | 14 | 2216 | p.A633V KIAA022                                                              | NM_014687    | NP_055502    | Q92622 | RUBIC_HUMAN  |                             | 0  | TGTCAGCGTGC   | 0.577 |             |
| + | 9  | 1243 | n.1_intron LRCH3                                                             | NM_032773    | NP_116162    | Q96I18 | LRCH3_HUMAN  |                             | 1  | GCGGCGAATCT   | 0.428 |             |
| + | 6  | 1591 | lbus.1_Missense_                                                             | NM_182524    | NP_872330    | Q7Z310 | Q7Z310_HUMAN |                             | 0  | GAGAAACCTAC   | 0.393 |             |
| + | 5  | 1197 | l41_uc003gab.2_I                                                             | NM_003441    | NP_003432    | Q15928 | ZN141_HUMAN  | 2H2-type 7.                 | 0  | CTACACATGTG   | 0.408 |             |
| - | 5  | 828  | d.2_RNA ABCA11P_uc011buv.1_3'UTR ABCA11P_uc010ibd.1_Missense_Mutation_p.T98I |              |              |        |              |                             | 0  | TGGAGTAGTG    | 0.413 |             |

|   |    |      |                   |              |              |        |              |                            |    |               |       |             |
|---|----|------|-------------------|--------------|--------------|--------|--------------|----------------------------|----|---------------|-------|-------------|
| - | 3  | 1617 | ron ABCA11P_uc    | NM_133474    | NP_597731    | D9N162 | D9N162_HUMAN |                            | 1  | CCACATACTTCAC | 0.388 |             |
| + | 7  | 1361 | _Mutation_p.L320F | NM_001127178 | NP_001120650 | Q5H8A4 | PIGG_HUMAN   | renal (Potential).         | 4  | AGGTTCTCAGG   | 0.493 |             |
| + | 11 | 2707 | te PIGG_uc010ibf  | NM_001127178 | NP_001120650 | Q5H8A4 | PIGG_HUMAN   |                            | 4  | TTCAGGTAGGT   | 0.343 |             |
| - | 6  | 890  | z.2_Missense_Mu   | NM_032219    | NP_115595    | Q6UXD7 | MFSD7_HUMAN  |                            | 0  | AGTGGCCGCTT   | 0.637 |             |
| - | 16 | 2055 | bk.1_Splice_Site_ | NM_005255    | NP_005246    | O14976 | GAK_HUMAN    |                            | 4  | ACTCACCCGCAT  | 0.647 |             |
| - | 16 | 1960 | n.2_Missense_Mu   | NM_001347    | NP_001338    | P52824 | DGKQ_HUMAN   | DAGKc.                     | 1  | CTCACCCGGGA   | 0.662 |             |
| - | 4  | 2175 | z.2_Intron DUA_u  | NM_213613    | NP_998778    | Q9H2B4 | S26A1_HUMAN  | STAS.                      | 1  | GCAGCCCTGGT   | 0.711 |             |
| - | 3  | 887  | ETM1_uc011bvg.1   | NM_012318    | NP_036450    | O95202 | LETM1_HUMAN  | membrane (Potential), LET  | 1  | CCTGCCTGCGC   | 0.393 |             |
| - | 21 | 2354 | e_Mutation_p.T23: | NM_181808    | NP_861524    | Q7Z5Q5 | DPOLN_HUMAN  |                            | 4  | CTGCAGTGAAG   | 0.607 |             |
| - | 2  | 471  | nse_Mutation_p.Lf | NM_024511    | NP_078787    | Q68CZ6 | HAUS3_HUMAN  |                            | 4  | TTTTAAGAGCTT  | 0.388 |             |
| + | 15 | 2317 | o.2_3'UTR ADD1_u  | NM_001119    | NP_001110    | P35611 | ADDA_HUMAN   |                            | 1  | TGGGTCTCCAG   | 0.637 |             |
| + | 10 | 1292 |                   | NM_002111    | NP_002102    | P42858 | HD_HUMAN     |                            | 4  | TGTTGCAGCAG   | 0.557 |             |
| + | 10 | 1376 |                   | NM_002111    | NP_002102    | P42858 | HD_HUMAN     |                            | 4  | CTAAGGAGGAG   | 0.527 |             |
| + | 21 | 2843 |                   | NM_002111    | NP_002102    | P42858 | HD_HUMAN     |                            | 4  | ATTATACAGGGC  | 0.383 |             |
| + | 40 | 5234 |                   | NM_002111    | NP_002102    | P42858 | HD_HUMAN     |                            | 4  | TTTCTCGTATTC  | 0.423 |             |
| + | 54 | 7472 |                   | NM_002111    | NP_002102    | P42858 | HD_HUMAN     |                            | 4  | TCCTCCAGGAA   | 0.522 |             |
| + | 56 | 7679 |                   | NM_002111    | NP_002102    | P42858 | HD_HUMAN     |                            | 4  | CACTGGTGCTC   | 0.587 | rs3025814   |
| + | 7  | 1581 | i.P366L DOK7_uc   | NM_173660    | NP_775931    | Q18PE1 | DOK7_HUMAN   |                            | 1  | CCCTCCTTGAG   | 0.662 |             |
| - | 2  | 451  |                   | NM_177998    | NP_819056    | Q7RTM1 | OTOP1_HUMAN  | ical; (Potential).         | 3  | GACTGCAAACA   | 0.373 |             |
| + | 3  | 929  | TB49_uc010icy.2_  | NM_145291    | NP_660334    | Q6ZSB9 | ZBT49_HUMAN  |                            | 2  | CCACGGTAGAG   | 0.522 |             |
| + | 6  | 1634 | TB49_uc010icy.2_ξ | NM_145291    | NP_660334    | Q6ZSB9 | ZBT49_HUMAN  |                            | 2  | TCGAGGTACAG   | 0.413 |             |
| - | 3  | 251  |                   | NM_018659    | NP_061129    | Q9NRR1 | CYTL1_HUMAN  |                            | 1  | AAAGTCCCGCA   | 0.552 |             |
| - | 14 | 2317 | _p.Q195* EVC2_u   | NM_147127    | NP_667338    | Q86UK5 | LBN_HUMAN    | Potential.                 | 5  | GTTCTGCAGGC   | 0.652 |             |
| + | 9  | 1407 | 1_RNA CRMP1_u     | NM_153717    | NP_714928    | P57679 | EVC_HUMAN    |                            | 2  | GCTGGCTGGTG   | 0.652 |             |
| + | 14 | 2181 | 1_RNA CRMP1_u     | NM_153717    | NP_714928    | P57679 | EVC_HUMAN    |                            | 2  | ATCGGGGAAGA   | 0.677 |             |
| + | 8  | 1181 | p.G382E MAN2B2    | NM_015274    | NP_056089    | Q9Y2E5 | MA2B2_HUMAN  |                            | 2  | TGCCGGGGAGT   | 0.677 |             |
| + | 7  | 1743 | igjq.3_Missense_M | NM_014743    | NP_055558    | Q92628 | K0232_HUMAN  |                            | 2  | AAACAGACAGG   | 0.408 |             |
| + | 7  | 1883 | igjq.3_Missense_M | NM_014743    | NP_055558    | Q92628 | K0232_HUMAN  |                            | 2  | AAATGCCTGCA   | 0.368 |             |
| - | 1  | 1085 | 3_5'Flank TADA2B  | NM_153376    | NP_699207    | Q2M329 | CCD96_HUMAN  | Potential.                 | 0  | CCATGGCCTGC   | 0.627 |             |
| + | 8  | 957  | se_Mutation_p.P21 | NM_018986    | NP_061859    | Q8TE82 | S3TC1_HUMAN  |                            | 3  | GGATCCCCCAG   | 0.582 |             |
| - | 2  | 1179 |                   | NM_005114    | NP_005105    | O14792 | HS3S1_HUMAN  |                            | 1  | TTCTGTGCAGTT  | 0.493 |             |
| - | 2  | 493  |                   | NM_005114    | NP_005105    | O14792 | HS3S1_HUMAN  |                            | 1  | TGATGGTCTGCC  | 0.677 |             |
| - | 5  | 710  | _uc011bwz.1_Spli  | NM_001017979 | NP_001017979 | P51157 | RAB28_HUMAN  |                            | 2  | ACTTACAGAGTC  | 0.338 |             |
| - | 10 | 4339 | dr.1_Missense_Mu  | NM_148894    | NP_683692    | Q8NFC6 | BOD1L_HUMAN  |                            | 6  | CCATGTCCACTA  | 0.398 |             |
| - | 3  | 529  | :1_5'UTR BOD1L_   | NM_148894    | NP_683692    | Q8NFC6 | BOD1L_HUMAN  |                            | 6  | CCACAACCTGAG  | 0.378 |             |
| + | 32 | 4300 | S1244N CC2D2A_    | NM_001080522 | NP_001073991 | Q9P2K1 | C2D2A_HUMAN  |                            | 3  | CTGGAGCACAT   | 0.378 |             |
| + | 1  | 67   | D28_uc003gpj.2_F  | NM_025205    | NP_079481    | Q9H204 | MED28_HUMAN  |                            | 0  | CTCAGGCCCCG   | 0.627 |             |
| + | 18 | 2895 | xxj.1_Missense_Mi | NM_022346    | NP_071741    | Q9BPX3 | CND3_HUMAN   | HEAT 10.                   | 1  | CTGAAGCAGCA   | 0.338 |             |
| + | 27 | 3047 | is.1_Missense_Mu  | NM_004787    | NP_004778    | O94813 | SLIT2_HUMAN  | EGF-like 1.                | 11 | CATATGGTTTCA  | 0.388 |             |
| - | 19 | 3456 | p.G920E GPR125    | NM_145290    | NP_660333    | Q8IWK6 | GP125_HUMAN  | lasmic (Potential).        | 1  | TCCGTCTGGGG   | 0.517 |             |
| - | 17 | 2838 | ε_Mutation_p.A71ε | NM_145290    | NP_660333    | Q8IWK6 | GP125_HUMAN  | lasmic (Potential).        | 1  | CTTTTAGCTTTT  | 0.403 | rs145912220 |
| - | 3  | 355  | :1A_uc011bxp.1_S  | NM_013261    | NP_037393    | Q9UBK2 | PRGC1_HUMAN  |                            | 8  | TATCTTCTGCAG  | 0.448 |             |
| - | 8  | 1403 |                   | NM_018176    | NP_060646    | Q8NOV4 | LG12_HUMAN   | EAR 5.                     | 0  | TAAGGGAAAGG   | 0.532 |             |
| + | 1  | 3272 | _p.P708L PCDH7_   | NM_002589    | NP_002580    | O60245 | PCDH7_HUMAN  | r (Potential). Cadherin 7. | 4  | GCCACCTTCGA   | 0.458 |             |
| + | 2  | 4367 | w.1_Missense_Mu   | NM_002589    | NP_002580    | O60245 | PCDH7_HUMAN  |                            | 4  | GGATGCCAGTG   | 0.517 |             |
| + | 3  | 4538 | w.1_Missense_Mi   | NM_002589    | NP_002580    | O60245 | PCDH7_HUMAN  |                            | 4  | AGGAAGCCAGG   | 0.547 |             |
| + | 9  | 1863 | ifd.2_Missense_M  | NM_015173    | NP_055988    | Q86TI0 | TBCD1_HUMAN  |                            | 1  | AGAGTCTTTAG   | 0.363 |             |

|   |    |      |                    |              |              |        |             |                               |     |               |       |
|---|----|------|--------------------|--------------|--------------|--------|-------------|-------------------------------|-----|---------------|-------|
| - | 2  | 971  | p.P198S TLR10_u    | NM_030956    | NP_112218    | Q9BXR5 | TLR10_HUMAN | cellular (Potential).         | 2   | CCATTGGTAAAA  | 0.348 |
| + | 3  | 502  | M114A1_uc011by     | NM_138389    | NP_612398    | Q8IWE2 | NXP20_HUMAN |                               | 1   | AAATACCCCTGC  | 0.483 |
| + | 8  | 1753 | _p.E373K KLHL5_    | NM_015990    | NP_057074    | Q96PQ7 | KLHL5_HUMAN | Kelch 2.                      | 1   | CTACTGGAAGGT  | 0.448 |
| + | 1  | 160  | 3gtu.1_Splice_Site | NM_025132    | NP_079408    | Q8NEZ3 | WDR19_HUMAN |                               | 1   | ATGAAGGTAAT   | 0.572 |
| + | 11 | 1187 | _Mutation_p.V34E   | NM_025132    | NP_079408    | Q8NEZ3 | WDR19_HUMAN | WD 6.                         | 1   | CTTCATGTTTTCC | 0.483 |
| + | 18 | 2268 | p.G545D WDR19_     | NM_025132    | NP_079408    | Q8NEZ3 | WDR19_HUMAN |                               | 1   | ATGTTGGCATAG  | 0.358 |
| + | 30 | 3416 | p.D928N WDR19_     | NM_025132    | NP_079408    | Q8NEZ3 | WDR19_HUMAN |                               | 1   | GTCAGGATGCC   | 0.428 |
| - | 15 | 2185 | x.1_Missense_Mut   | NM_002913    | NP_002904    | P35251 | RFC1_HUMAN  |                               | 4   | AACTGCTCTTAC  | 0.408 |
| - | 5  | 818  | _p.A71T UGDH_u     | NM_003359    | NP_003350    | O60701 | UGDH_HUMAN  |                               | 4   | GATGGCTGTTC   | 0.473 |
| + | 15 | 2113 | _Mutation_p.D528   | NM_014988    | NP_055803    | Q9UPQ0 | LIMC1_HUMAN |                               | 4   | AGAATGATGTG   | 0.478 |
| + | 21 | 2686 | p.G718R LIMCH1_    | NM_014988    | NP_055803    | Q9UPQ0 | LIMC1_HUMAN |                               | 4   | TCCAGGGAGATC  | 0.403 |
| + | 1  | 205  | 0A9_uc011byx.1_!   | NM_006345    | NP_006336    | Q6PML9 | ZNT9_HUMAN  |                               | 3   | GTGCCGGCTCC   | 0.706 |
| + | 2  | 694  |                    | NM_001080505 | NP_001073974 | A0PJX4 | SHSA3_HUMAN | lasmic (Potential).           | 2   | ACCCTCCCGGC   | 0.672 |
| - | 9  | 1455 |                    | NM_173536    | NP_775807    | Q8N1C3 | GBRG1_HUMAN | lasmic (Probable).            | 2   | CAATGCGTATGT  | 0.403 |
| - | 7  | 952  |                    | NM_173536    | NP_775807    | Q8N1C3 | GBRG1_HUMAN | cellular (Probable).          | 2   | TTCTGCTCAGG   | 0.308 |
| + | 8  | 1236 | TP10D_uc003gxj.3   | NM_020453    | NP_065186    | Q9P241 | AT10D_HUMAN | cellular (Potential).         | 3   | CCGAGCCTGAT   | 0.353 |
| + | 12 | 2317 | 10D_uc003gxl.1_l   | NM_020453    | NP_065186    | Q9P241 | AT10D_HUMAN | lasmic (Potential).           | 3   | ATTGGCCTGCA   | 0.572 |
| - | 23 | 2872 | ise_Mutation_p.V8  | NM_152995    | NP_694540    | Q6ZNB6 | NFXL1_HUMAN | ical; (Potential).            | 3   | TACAACCACAA   | 0.353 |
| + | 2  | 136  |                    | NM_207330    | NP_997213    | Q6NVV3 | NIPA3_HUMAN | cellular (Potential).         | 0   | CTCTGTCCAAAC  | 0.463 |
| + | 5  | 643  |                    | NM_207330    | NP_997213    | Q6NVV3 | NIPA3_HUMAN | cellular (Potential).         | 0   | AAGAGGAAGTC   | 0.408 |
| - | 62 | 9087 | .1_Missense_Mut    | NM_015030    | NP_055845    | O94915 | FRYL_HUMAN  |                               | 1   | CCAATTCCTAGA  | 0.294 |
| - | 55 | 8160 | 'RYL_uc003gyi.1_   | NM_015030    | NP_055845    | O94915 | FRYL_HUMAN  |                               | 1   | GTCTGGTATTG   | 0.408 |
| - | 48 | 7114 | i.1_Missense_Mut   | NM_015030    | NP_055845    | O94915 | FRYL_HUMAN  |                               | 1   | GCAGGTATCTG   | 0.348 |
| + | 8  | 910  | AD1_uc003gys.2_    | NM_017830    | NP_060300    | Q9NX40 | OCAD1_HUMAN |                               | 0   | AAAGACTGACCA  | 0.348 |
| + | 11 | 1578 | zl.1_Missense_Mt   | NM_025087    | NP_079363    | Q9H720 | PG2IP_HUMAN |                               | 3   | TTTTGGAGAGTC  | 0.388 |
| - | 4  | 1713 |                    | NM_001024611 | NP_001019782 | Q68CR7 | LRC66_HUMAN |                               | 3   | TTGAGCCAGAG   | 0.502 |
| - | 4  | 1488 |                    | NM_001024611 | NP_001019782 | Q68CR7 | LRC66_HUMAN |                               | 3   | TGTCCCCGCAC   | 0.557 |
| - | 8  | 1743 | haf.3_Missense_M   | NM_001126328 | NP_001119800 | Q8TBB1 | LNX1_HUMAN  |                               | 4   | GGAGGGGCTGA   | 0.433 |
| - | 6  | 1391 | haf.3_Missense_M   | NM_001126328 | NP_001119800 | Q8TBB1 | LNX1_HUMAN  | p.A379A(1)                    | 4   | AAAGCTGTCACT  | 0.542 |
| + | 3  | 564  | se_Mutation_p.S7E  | NM_006206    | NP_006197    | P16234 | PGFRA_HUMAN | 1. Extracellular (Potential). | 674 | CAACAGCGGCC   | 0.493 |
| + | 5  | 552  | ic011bzz.1_5'Flan  | NM_020722    | NP_065773    | Q6ZU35 | K1211_HUMAN |                               | 2   | GTACACCAATG   | 0.478 |
| + | 8  | 2492 | zz.1_Missense_M    | NM_020722    | NP_065773    | Q6ZU35 | K1211_HUMAN |                               | 2   | CCAGGGGCCGG   | 0.582 |
| + | 11 | 4001 | ha.2_Missense_M    | NM_020722    | NP_065773    | Q6ZU35 | K1211_HUMAN |                               | 2   | CCCCGGATGCT   | 0.512 |
| - | 7  | 957  |                    | NM_002703    | NP_002694    | Q06203 | PUR1_HUMAN  | imidotransferase type-2.      | 0   | CTCCAGGCAAG   | 0.328 |
| + | 4  | 545  | _p.T112 PAICS_u    | NM_006452    | NP_006443    | P22234 | PUR6_HUMAN  | AR synthetase.                | 0   | TAGCAACTGGTT  | 0.393 |
| - | 6  | 1871 |                    | NM_032313    | NP_115689    | Q8NC60 | CD014_HUMAN |                               | 2   | GGAAATCCTGCC  | 0.373 |
| - | 29 | 2760 |                    | NM_018227    | NP_060697    | A0AVT1 | UBA6_HUMAN  |                               | 0   | CCAAGCCAGAA   | 0.418 |
| + | 3  | 954  | hq.2_Missense_M    | NM_001074    | NP_001065    | P16662 | UD2B7_HUMAN |                               | 2   | AAATGGTGTG    | 0.443 |
| + | 5  | 240  | iev.1_Missense_M   | NM_003154    | NP_003145    | P02808 | STAT_HUMAN  | ipitation of calcium phospi   | 1   | CAGTCCAGAA    | 0.378 |
| + | 4  | 845  | Q MUC7_uc003hjf.:  | NM_001145006 | NP_001138478 | Q8TAX7 | MUC7_HUMAN  | 1. Thr-rich.                  | 4   | TCCACCAGAGA   | 0.582 |
| + | 13 | 976  |                    | NM_016519    | NP_057603    | Q9NP70 | AMBN_HUMAN  |                               | 4   | GCGGTGACTTC   | 0.587 |
| + | 9  | 2730 |                    | NM_031889    | NP_114095    | Q9NRM1 | ENAM_HUMAN  |                               | 3   | CTGGGCTTCAG   | 0.433 |
| - | 4  | 855  | _p.P140S GRSF1_    | NM_002092    | NP_002083    | Q12849 | GRSF1_HUMAN | RRM 2.                        | 0   | TATAAGGAAGTC  | 0.398 |
| - | 11 | 1546 | 2_Missense_Mut     | NM_000583    | NP_000574    | P02774 | VTDB_HUMAN  | Albumin 3.                    | 3   | TACCTCTGAATC  | 0.428 |
| - | 2  | 111  |                    | NM_014243    | NP_055058    | O15072 | ATS3_HUMAN  |                               | 2   | CATTACCGCCT   | 0.368 |
| - | 29 | 6748 | hgq.2_Missense_M   | NM_032217    | NP_115593    | O75179 | ANR17_HUMAN |                               | 10  | TGTGAGGTCTTT  | 0.448 |
| + | 3  | 347  | iid.2_Missense_Mt  | NM_001432    | NP_001423    | O14944 | EREG_HUMAN  | cellular (Potential).         | 2   | GTGTGGCTCAA   | 0.398 |

rs143125991



|   |    |       |                     |              |              |        |             |                            |         |   |               |       |
|---|----|-------|---------------------|--------------|--------------|--------|-------------|----------------------------|---------|---|---------------|-------|
| + | 12 | 1541  | p.E291K USO1_ur     | NM_003715    | NP_003706    | O60763 | USO1_HUMAN  | ilar head.                 | JARM 9. | 3 | AGAAAGAACAG   | 0.433 |
| + | 22 | 2916  | p.A756V USO1_ur     | NM_003715    | NP_003706    | O60763 | USO1_HUMAN  | Potential.                 |         | 3 | GCTTGGCCGATC  | 0.323 |
| - | 11 | 1600  | 'EF2_uc003hiz.1_f   | NM_006239    | NP_006230    | O14830 | PPE2_HUMAN  | Catalytic.                 |         | 4 | AGGGCTCCTCTT  | 0.677 |
| - | 16 | 1420  | _p.T337I SDAD1_     | NM_018115    | NP_060585    | Q9NVU7 | SDA1_HUMAN  |                            |         | 1 | ATCAAAGTTCTAC | 0.383 |
| - | 2  | 310   | DAD1_uc011cbr.1     | NM_018115    | NP_060585    | Q9NVU7 | SDA1_HUMAN  |                            |         | 1 | ACCTGTGCCATA  | 0.353 |
| + | 2  | 1232  | ov.1_3'UTR STBD1    | NM_003943    | NP_003934    | O95210 | STBD1_HUMAN | cytoplasmic (Potential).   |         | 1 | GAATGGGGGAG   | 0.478 |
| + | 11 | 1525  | ihky.1_Missense_M   | NM_025074    | NP_079350    | Q86XX4 | FRAS1_HUMAN | extracellular (Potential). |         | 5 | AAATGCTAGTG   | 0.299 |
| + | 18 | 2566  | p.G413D FRAS1_      | NM_025074    | NP_079350    | Q86XX4 | FRAS1_HUMAN | tracellular (Potential).   |         | 5 | CACTGGCATAT   | 0.522 |
| + | 4  | 623   | IP2K_uc003hij.2_h   | NM_198892    | NP_942595    | Q9NSY1 | BMP2K_HUMAN | rotein kinase.             |         | 1 | CAGAACCGAA    | 0.363 |
| + | 10 | 1365  | IP2K_uc003hij.2_h   | NM_198892    | NP_942595    | Q9NSY1 | BMP2K_HUMAN |                            |         | 1 | CCTTGCTCCTG   | 0.433 |
| - | 1  | 640   |                     | NM_032693    | NP_116082    | Q9BSU3 | NAA11_HUMAN |                            |         | 2 | ACCCGCCCTTC   | 0.532 |
| - | 1  | 1631  |                     | NM_033214    | NP_149991    | Q14410 | GLPK2_HUMAN |                            |         | 4 | ATGCTACTCACT  | 0.403 |
| - | 4  | 401   | p.M79I SEC31A_t     | NM_001077207 | NP_001070675 | O94979 | SC31A_HUMAN | WD 1.                      |         | 8 | GGAATCCATTTT  | 0.333 |
| - | 9  | 1147  | ense_Mutation_p.F   | NM_139076    | NP_620775    | Q6UWZ7 | F175A_HUMAN |                            |         | 1 | ACAACCGAGAT   | 0.393 |
| - | 67 | 10771 | pc.2_Missense_M     | NM_014991    | NP_055806    | Q8IZQ1 | WDFY3_HUMAN | FYVE-type.                 |         | 3 | CACTTCATCCTT  | 0.542 |
| - | 60 | 9469  | pe.1_Missense_M     | NM_014991    | NP_055806    | Q8IZQ1 | WDFY3_HUMAN |                            |         | 3 | ATACAGTTCTTT  | 0.348 |
| - | 53 | 8587  | pe.1_Missense_M     | NM_014991    | NP_055806    | Q8IZQ1 | WDFY3_HUMAN | BEACH.                     |         | 3 | AGACAGGATACT  | 0.343 |
| - | 32 | 5408  |                     | NM_014991    | NP_055806    | Q8IZQ1 | WDFY3_HUMAN |                            |         | 3 | CAAAACCCAGT   | 0.343 |
| - | 21 | 3808  |                     | NM_014991    | NP_055806    | Q8IZQ1 | WDFY3_HUMAN |                            |         | 3 | ATGTTGCTCAG   | 0.398 |
| - | 15 | 2837  |                     | NM_014991    | NP_055806    | Q8IZQ1 | WDFY3_HUMAN |                            |         | 3 | AGTACCTTTTCC  | 0.413 |
| + | 3  | 1434  | ie_Mutation_p.Q3E   | NM_005935    | NP_005926    | P51825 | AFF1_HUMAN  |                            |         | 1 | CTTCTCAGTCA   | 0.483 |
| + | 11 | 2800  | k.3_Missense_Mu     | NM_005935    | NP_005926    | P51825 | AFF1_HUMAN  |                            |         | 1 | GCACAGCTCTG   | 0.582 |
| + | 15 | 3290  | iqk.3_Splice_Site_  | NM_005935    | NP_005926    | P51825 | AFF1_HUMAN  |                            |         | 1 | TTTCAGACAAC   | 0.358 |
| - | 5  | 635   | Qikk.2_Missense_f   | NM_178135    | NP_835236    | Q7Z5P4 | DHB13_HUMAN |                            |         | 0 | CAGCGCAAAT    | 0.438 |
| - | 6  | 1011  |                     | NM_016245    | NP_057329    | Q8NBQ5 | DHB11_HUMAN |                            |         | 2 | AGATGGAATAA   | 0.363 |
| - | 4  | 744   |                     | NM_016245    | NP_057329    | Q8NBQ5 | DHB11_HUMAN |                            |         | 2 | CGAAGCCACAG   | 0.403 |
| + | 6  | 1267  | iw.2_Missense_Ml    | NM_004407    | NP_004398    | Q13316 | DMP1_HUMAN  |                            |         | 2 | GGACAGCTCGC   | 0.542 |
| + | 4  | 1532  | in.2_Missense_Mu    | NM_020203    | NP_064588    | Q9NQ76 | MEPE_HUMAN  |                            |         | 3 | CCATTCCAACAC  | 0.478 |
| + | 23 | 3082  | p.V931I HERC6_u     | NM_017912    | NP_060382    | Q8IVU3 | HERC6_HUMAN | HECT.                      |         | 5 | GAAATAGTATTT  | 0.353 |
| + | 14 | 1982  | Im.1_Missense_M     | NM_016323    | NP_057407    | Q9UII4 | HERC5_HUMAN |                            |         | 9 | CAGAAGGTACTT  | 0.343 |
| + | 1  | 901   | 3A_uc003hsh.1_5     | NM_145715    | NP_663761    | Q4W5G0 | TIGD2_HUMAN | DDE.                       |         | 0 | CTGTGACATATTA | 0.423 |
| + | 9  | 1369  | g_Mutation_p.E37z   | NM_020159    | NP_064544    | Q9H4L7 | SMRCD_HUMAN |                            |         | 4 | TAGATGAGGAC   | 0.358 |
| - | 6  | 892   |                     | NM_000673    | NP_000664    | P40394 | ADH7_HUMAN  |                            |         | 3 | CAGCACCTCAC   | 0.448 |
| - | 12 | 2014  | 3hvt.2_Splice_Site  | NM_000944    | NP_000935    | Q08209 | PP2BA_HUMAN |                            |         | 2 | GTACCCTT      | 0.517 |
| + | 4  | 1037  | Qill.2_Splice_Site_ | NM_017935    | NP_060405    | Q8NDB2 | BANK1_HUMAN |                            |         | 3 | CTTTAGGTAAGA  | 0.318 |
| + | 12 | 2387  | ll.2_Nonsense_Ml    | NM_017935    | NP_060405    | Q8NDB2 | BANK1_HUMAN |                            |         | 3 | ACTGGCAGATG   | 0.438 |
| + | 23 | 3135  | p.A891T NFKB1_      | NM_003998    | NP_003989    | P19838 | NFKB1_HUMAN | teraction with CFLAR.      |         | 5 | TCCAGGCAGCC   | 0.537 |
| + | 24 | 3318  | p.L952F NFKB1_      | NM_003998    | NP_003989    | P19838 | NFKB1_HUMAN | ction with CFLAR.          |         | 5 | CTAACTCTCAAC  | 0.507 |
| - | 3  | 311   | ilir.2_Missense_Ml  | NM_020395    | NP_065128    | Q96CB8 | INT12_HUMAN |                            |         | 0 | AGAAACCTAGT   | 0.403 |
| + | 4  | 1196  | ie_Mutation_p.R2E   | NM_001031720 | NP_001026890 | Q8NEC7 | GSTCD_HUMAN |                            |         | 2 | ACCAAGACCAA   | 0.358 |
| - | 9  | 1208  | 'SS1_uc011cfh.1_I   | NM_005443    | NP_005434    | O43252 | PAPS1_HUMAN | lyl-sulfate kinase.        |         | 1 | TCAGCCAATCT   | 0.333 |
| + | 2  | 465   | nh.1_Missense_M     | NM_018983    | NP_061856    | Q9NY12 | GAR1_HUMAN  | RGG-box 1.                 |         | 0 | AGGGGTGGCC    | 0.284 |
| + | 12 | 2174  |                     | NM_001977    | NP_001968    | Q07075 | AMPE_HUMAN  | ellular (Potential).       |         | 5 | TAATCCTAGTG   | 0.398 |
| - | 12 | 3649  | rf21_uc003iav.2_F   | NM_018392    | NP_060862    | Q6ZU11 | YD002_HUMAN |                            |         | 0 | TTACCCACTTC   | 0.413 |
| - | 6  | 1888  | aw.2_Nonsense_M     | NM_018392    | NP_060862    | Q6ZU11 | YD002_HUMAN |                            |         | 0 | TTTACCCAACT   | 0.373 |
| + | 4  | 624   | ba.2_Missense_Ml    | NM_016648    | NP_057732    | Q4G0J3 | LARP7_HUMAN | i-type RNA-binding.        |         | 3 | CTCTGGGGGAA   | 0.348 |
| + | 12 | 1923  | aa.2_Missense_Ml    | NM_016648    | NP_057732    | Q4G0J3 | LARP7_HUMAN |                            |         | 3 | CTCGGAAAAG    | 0.353 |

rs80182459

|   |    |       |                   |              |              |        |              |                              |    |               |       |             |
|---|----|-------|-------------------|--------------|--------------|--------|--------------|------------------------------|----|---------------|-------|-------------|
| + | 38 | 4856  | 3_Intron ANK2_uc  | NM_001148    | NP_001139    | Q01484 | ANK2_HUMAN   |                              | 14 | AGAGAGGATTA   | 0.413 |             |
| + | 38 | 8331  | NK2_uc003ibh.3_l  | NM_001148    | NP_001139    | Q01484 | ANK2_HUMAN   |                              | 14 | TTTAGCTGAAG   | 0.418 |             |
| + | 38 | 9150  | NK2_uc003ibh.3_li | NM_001148    | NP_001139    | Q01484 | ANK2_HUMAN   |                              | 14 | CGAGCCTACTAT  | 0.398 |             |
| - | 17 | 2224  | p.W489* CAMK2D    | NM_001221    | NP_001212    | Q13557 | KCC2D_HUMAN  |                              | 1  | CGGTGCCACAC   | 0.488 |             |
| - | 2  | 571   |                   | NM_003619    | NP_003610    | P56730 | NETR_HUMAN   | SRCR 1.                      | 1  | TTTTGCCGCCAC  | 0.423 | rs72677056  |
| - | 11 | 1676  | e_Mutation_p.M4f  | NM_014822    | NP_055637    | O94855 | SC24D_HUMAN  |                              | 0  | TCCAGCATGGT   | 0.363 | rs143804876 |
| - | 10 | 1455  | e_Mutation_p.P39  | NM_014822    | NP_055637    | O94855 | SC24D_HUMAN  |                              | 0  | ATGGTGGAACTA  | 0.318 |             |
| - | 5  | 700   | d_uc003icl.2_RN   | NM_014822    | NP_055637    | O94855 | SC24D_HUMAN  | Pro-rich.                    | 0  | CAGGGGTCCC    | 0.537 |             |
| + | 6  | 905   |                   | NM_016599    | NP_057683    | Q9NPC6 | MYOZ2_HUMAN  |                              | 0  | ACGGTCCTTTA   | 0.398 |             |
| - | 8  | 1460  | p.W393* PDE5A_u   | NM_001083    | NP_001074    | O76074 | PDE5A_HUMAN  | GAF 2.                       | 0  | ACTGTCCAGGG   | 0.358 |             |
| - | 4  | 1049  | RFPFR_uc003ids.2_ | NM_198179    | NP_937822    | Q96P65 | QRFPFR_HUMAN | Name=5; (Potential).         | 0  | CAGGAGGAAGA   | 0.428 |             |
| - | 5  | 1537  | ef.2_Missense_Mu  | NM_001130698 | NP_001124170 | Q13507 | TRPC3_HUMAN  | lasmic (Potential).          | 2  | TATTGGGCAGCC  | 0.448 |             |
| + | 71 | 12544 | _p.A523T KIAA11C  | NM_015312    | NP_056127    | Q2LD37 | K1109_HUMAN  |                              | 12 | ATGAGCAGGG    | 0.418 |             |
| + | 82 | 14549 | em.2_Missense_IV  | NM_015312    | NP_056127    | Q2LD37 | K1109_HUMAN  |                              | 12 | AGATGCCAGCC   | 0.358 |             |
| + | 10 | 1277  | _p.A338T ADAD1_   | NM_139243    | NP_640336    | Q96M93 | ADAD1_HUMAN  | to I editase.                | 0  | TATCTGCATTG   | 0.363 |             |
| + | 12 | 2181  |                   | NM_145207    | NP_660208    | Q8NB90 | SPAT5_HUMAN  |                              | 0  | TGTTGGTGAATC  | 0.378 |             |
| - | 1  | 756   | NKRD50_uc010inw   | NM_020337    | NP_065070    | Q9ULJ7 | ANR50_HUMAN  |                              | 1  | TGGGTTTCTCT   | 0.408 |             |
| + | 9  | 10967 | _p.T1954I FAT4_u  | NM_024582    | NP_078858    | Q6V0I7 | FAT4_HUMAN   | ellular (Potential).         | 18 | AGTTACCAGCC   | 0.478 |             |
| + | 9  | 11464 | _p.A2120T FAT4_u  | NM_024582    | NP_078858    | Q6V0I7 | FAT4_HUMAN   | r (Potential). EGF-like 1.   | 18 | GATTGGCTGTG   | 0.502 |             |
| + | 9  | 11722 | _p.P2206S FAT4_u  | NM_024582    | NP_078858    | Q6V0I7 | FAT4_HUMAN   | g (Potential). Extracellular | 18 | AGAGTCCTTGC   | 0.463 |             |
| + | 4  | 584   | SPA4L_uc011cgr.1  | NM_014278    | NP_055093    | O95757 | HS74L_HUMAN  |                              | 4  | AGAGACCTTTT   | 0.318 |             |
| - | 6  | 880   | e_Mutation_p.A12  | NM_144643    | NP_653244    | Q96NL6 | SCLT1_HUMAN  | Potential.                   | 5  | TCATCTGCATATA | 0.353 |             |
| - | 4  | 593   |                   | NM_032623    | NP_116012    | Q8TDB4 | CD049_HUMAN  |                              | 2  | GACAGGCAGAT   | 0.547 |             |
| - | 10 | 1161  | ii.2_Missense_Mut | NM_001130675 | NP_001124147 | O14967 | CLGN_HUMAN   | umenal (Potential).          | 3  | ATCAAGCCAGCC  | 0.353 |             |
| - | 8  | 1687  |                   | NM_015130    | NP_055945    | Q6ZT07 | TBCD9_HUMAN  |                              | 1  | CCTCGGGAGAC   | 0.473 |             |
| - | 8  | 1630  |                   | NM_015130    | NP_055945    | Q6ZT07 | TBCD9_HUMAN  |                              | 1  | CTGTTGCCATTT  | 0.572 |             |
| - | 8  | 902   | P103S INPP4B_uc   | NM_003866    | NP_003857    | O15327 | INP4B_HUMAN  | C2.                          | 2  | GATGGGATACT   | 0.408 |             |
| + | 8  | 2082  | se_Mutation_p.W5  | NM_032557    | NP_115946    | Q8NB14 | UBP38_HUMAN  |                              | 5  | TCCATGGTTTACT | 0.383 |             |
| + | 9  | 2662  | ie_Mutation_p.P71 | NM_032557    | NP_115946    | Q8NB14 | UBP38_HUMAN  |                              | 5  | AGAAACCAGGA   | 0.368 |             |
| + | 5  | 1595  |                   | NM_022475    | NP_071920    | Q96QV1 | HHIP_HUMAN   |                              | 6  | TCGGGCTCAT    | 0.418 |             |
| + | 6  | 1715  |                   | NM_022475    | NP_071920    | Q96QV1 | HHIP_HUMAN   |                              | 6  | ATCTGGGAGGA   | 0.418 |             |
| + | 2  | 396   | _p.A104V MMAA_u   | NM_172250    | NP_758454    | Q8IVH4 | MMAA_HUMAN   |                              | 1  | AGAGGCCATAA   | 0.393 |             |
| - | 8  | 2426  | i827_uc010iox.2_f | NM_178835    | NP_849157    | Q17R98 | ZN827_HUMAN  |                              | 0  | CTGGAGCTGAT   | 0.403 |             |
| - | 6  | 698   | se_Mutation_p.W1  | NM_031956    | NP_114162    | Q8NA56 | TTC29_HUMAN  |                              | 0  | CCTACCCACTT   | 0.408 |             |
| - | 7  | 1158  | RMT10_uc003iid.2  | NM_138364    | NP_612373    | Q6P2P2 | ANM10_HUMAN  |                              | 2  | AATAAGCCGGA   | 0.413 |             |
| - | 51 | 7993  | .D402N LRBA_uc    | NM_006726    | NP_006717    | P50851 | LRBA_HUMAN   |                              | 7  | AACATCCTGCTC  | 0.473 |             |
| - | 23 | 3362  | .J.3_Missense_Mut | NM_006726    | NP_006717    | P50851 | LRBA_HUMAN   |                              | 7  | TATCCCTTCTAA  | 0.398 |             |
| - | 7  | 1286  | _p.G271E LRBA_uc  | NM_006726    | NP_006717    | P50851 | LRBA_HUMAN   |                              | 7  | AGCCTCCAACA   | 0.338 |             |
| - | 11 | 2307  | _p.G370E SH3D19   | NM_001009555 | NP_001009555 | Q5HYK7 | SH319_HUMAN  |                              | 2  | GGTGTCTGGT    | 0.388 |             |
| - | 4  | 524   | mm.3_Missense_f   | NM_004564    | NP_004555    | O75879 | GATB_HUMAN   |                              | 0  | TCCCTGCACAG   | 0.512 |             |
| - | 2  | 266   | imm.3_Missense_l  | NM_004564    | NP_004555    | O75879 | GATB_HUMAN   |                              | 0  | CTTGAGATCCA   | 0.388 |             |
| + | 2  | 590   |                   | NM_033393    | NP_203751    | Q9C0D6 | FHDC1_HUMAN  | FH2.                         | 2  | GGATGCAAAAC   | 0.303 |             |
| + | 11 | 1811  |                   | NM_033393    | NP_203751    | Q9C0D6 | FHDC1_HUMAN  |                              | 2  | GCAGGCCCGGC   | 0.677 |             |
| + | 11 | 2089  |                   | NM_033393    | NP_203751    | Q9C0D6 | FHDC1_HUMAN  |                              | 2  | ATTAAGGAGCAT  | 0.617 |             |
| + | 6  | 459   |                   | NM_032117    | NP_115493    | Q9BWT6 | MND1_HUMAN   | Potential.                   | 0  | GGCTAGCAAAA   | 0.353 |             |
| + | 33 | 4419  | .S1457N KIAA092   | NM_015196    | NP_056011    | A2VDJ0 | T131L_HUMAN  | lasmic (Potential).          | 2  | TTCCAGCGCAT   | 0.408 |             |
| + | 35 | 4845  | .P1599L KIAA092   | NM_015196    | NP_056011    | A2VDJ0 | T131L_HUMAN  | lasmic (Potential).          | 2  | ATTCACACTGT   | 0.423 |             |

|   |    |      |                    |              |              |        |             |                              |    |                    |       |
|---|----|------|--------------------|--------------|--------------|--------|-------------|------------------------------|----|--------------------|-------|
| - | 9  | 1370 | ax.2_Missense_Mt   | NM_017639    | NP_060109    | Q6V1P9 | PCD23_HUMAN | Cadherin 3.                  | 4  | GGGCGCTGCCG        | 0.602 |
| - | 2  | 202  | IS2_uc003inx.2_Ir  | NM_017639    | NP_060109    | Q6V1P9 | PCD23_HUMAN | Cadherin 1.                  | 4  | ycgttctctctggcttct | 0.01  |
| + | 4  | 646  | ε_Mutation_p.E141  | NM_005141    | NP_005132    | P02675 | FIBB_HUMAN  | Potential.                   | 3  | TCCTGGAAAAC        | 0.403 |
| - | 5  | 915  | εe_Mutation_p.P28  | NM_000508    | NP_000499    | P02671 | FIBA_HUMAN  | By similarity.               | 3  | TCCTGGGGCTT        | 0.557 |
| - | 8  | 1121 | α_p.D155V FGG_L    | NM_021870    | NP_068656    | P02679 | FIBG_HUMAN  | rogen C-terminal.            | 0  | AACTTGTCCTACTAC    | 0.473 |
| - | 2  | 252  |                    | NM_001334    | NP_001325    | P43234 | CATO_HUMAN  |                              | 0  | TTTATTCCATAGA      | 0.328 |
| + | 5  | 708  |                    | NM_000824    | NP_000815    | P48167 | GLRB_HUMAN  | ellular (Probable).          | 2  | GTGATGGAGATG       | 0.308 |
| + | 13 | 2704 | ciu.1_Missense_IV  | NM_001083619 | NP_001077088 | P42262 | GRIA2_HUMAN | ellular (Potential).         | 4  | ACCTGGATTCC        | 0.438 |
| + | 17 | 1896 | jd.1_Missense_Mt   | NM_021634    | NP_067647    | Q9HBX9 | RXFP1_HUMAN | lasmic (Potential).          | 0  | TTTATAGTGTTC       | 0.299 |
| + | 5  | 897  | FDH_uc011cjh.1_    | NM_004453    | NP_004444    | Q16134 | ETFD_HUMAN  |                              | 3  | CAGAAGCCCTT        | 0.358 |
| - | 4  | 581  |                    | NM_005038    | NP_005029    | Q08752 | PPID_HUMAN  | e cyclophilin-type.          | 0  | CCACTCCTATT        | 0.373 |
| - | 4  | 608  | orf45_uc010iq.1_F  | NM_152543    | NP_689756    | Q96LM5 | CD045_HUMAN |                              | 0  | CTTCGGCAGCT        | 0.408 |
| + | 2  | 485  |                    | NM_014247    | NP_055062    | Q9Y4G8 | RPGF2_HUMAN |                              | 4  | AGCAGTCTTTCT       | 0.398 |
| - | 1  | 434  | α.1_Intron KLHL2_  | NM_000167    | NP_000158    |        |             |                              | 0  | TGGTGCCTTGG        | 0.517 |
| + | 13 | 1830 | rc.2_Missense_Mt   | NM_007246    | NP_009177    | O95198 | KLHL2_HUMAN | Kelch 5.                     | 0  | ATGGAGACAGG        | 0.363 |
| + | 2  | 188  |                    | NM_007193    | NP_009124    | Q9UJ72 | ANX10_HUMAN |                              | 0  | CAGCTCCCAAT        | 0.338 |
| + | 11 | 936  | m.2_Missense_Mt    | NM_007193    | NP_009124    | Q9UJ72 | ANX10_HUMAN | Annexin 4.                   | 0  | ACTTTGGTTTCC       | 0.393 |
| + | 3  | 1227 | e_Mutation_p.T33   | NM_016081    | NP_057165    | Q8WX93 | PALLD_HUMAN | like C2-type 1.              | 1  | CGACACAGGTC        | 0.522 |
| - | 8  | 1780 | rc.1_Nonsense_M    | NM_020870    | NP_065921    | Q726J0 | SH3R1_HUMAN | on with AKT2 (By similarity) | 3  | TGAACCAGCCA        | 0.438 |
| + | 8  | 1664 |                    | NM_001034845 | NP_001030017 | Q49A17 | GLTL6_HUMAN | main B.ILumenal (Potential)  | 4  | GGTCTCCTGTT        | 0.388 |
| - | 2  | 368  | itb.2_Missense_M   | NM_001130689 | NP_001124161 | P26583 | HMGB2_HUMAN |                              | 0  | TATCACCTTTGG       | 0.408 |
| + | 2  | 561  |                    | NM_003864    | NP_003855    | O75446 | SAP30_HUMAN | COR1 (By similarity). Atypic | 1  | GGCAAGGCATC        | 0.328 |
| - | 2  | 1537 | uc003itg.1_Silent_ | NM_021973    | NP_068808    | P61296 | HAND2_HUMAN |                              | 1  | CCTTTGGTTTTC       | 0.488 |
| - | 1  | 520  |                    | NM_006792    | NP_006783    |        |             |                              | 0  | GAGATGTGGCA        | 0.448 |
| + | 6  | 911  | se_Mutation_p.T16  | NM_001040157 | NP_001035247 | Q9C0F1 | CEP44_HUMAN |                              | 0  | TATGACCTCAGC       | 0.373 |
| - | 2  | 919  | ug.2_Missense_M    | NM_201591    | NP_963885    | P51674 | GPM6A_HUMAN | ical; (Potential).           | 0  | CAACCCCGCAT        | 0.502 |
| + | 29 | 3754 | se_Mutation_p.P11  | NM_170710    | NP_733828    | Q8IZU2 | WDR17_HUMAN |                              | 6  | TCAGTACCTTTA       | 0.363 |
| + | 23 | 5297 |                    | NM_001080477 | NP_001073946 | Q9P273 | TEN3_HUMAN  | ellular (Potential).         | 0  | GAAAAGAGCAAC       | 0.527 |
| - | 9  | 1198 |                    | NM_002199    | NP_002190    | P14316 | IRF2_HUMAN  |                              | 1  | TGACGCTGGCC        | 0.582 |
| - | 4  | 552  |                    | NM_002199    | NP_002190    | P14316 | IRF2_HUMAN  |                              | 1  | AGAAGGCCGTT        | 0.393 |
| + | 4  | 671  | αa.3_Missense_Mt   | NM_001029887 | NP_001025058 | A6NFD8 | HELT_HUMAN  | Pro-rich.                    | 0  | GGGTTTCGCTCC       | 0.687 |
| - | 7  | 1621 | p.A244V LRP2BP     | NM_018409    | NP_060879    | Q9P2M1 | LR2BP_HUMAN | Sel1-like 5.                 | 0  | AGTCAGCGATCC       | 0.498 |
| - | 5  | 586  | SP2_uc003ixq.2_I   | NM_018359    | NP_060829    | Q9NUQ7 | UFSP2_HUMAN |                              | 0  | TGGAGCAACAG        | 0.438 |
| - | 13 | 1808 | 1ckv.1_Missense_I  | NM_021069    | NP_066547    | O94875 | SRBS2_HUMAN |                              | 1  | CAAAGGGATGGA       | 0.473 |
| - | 10 | 7054 |                    | NM_005245    | NP_005236    | Q14517 | FAT1_HUMAN  | (Potential). p.A2289T(1)     | 12 | TCAACCGCATAA       | 0.463 |
| - | 10 | 6219 |                    | NM_005245    | NP_005236    | Q14517 | FAT1_HUMAN  | (Potential). Cadherin 18.    | 12 | CAAAGGCTCAT        | 0.463 |
| - | 3  | 3541 |                    | NM_005245    | NP_005236    | Q14517 | FAT1_HUMAN  | r (Potential). Cadherin 9.   | 12 | AAAGAGGCACG        | 0.443 |
| + | 7  | 894  | e_Mutation_p.G21   | NM_004168    | NP_004159    | P31040 | DHSA_HUMAN  |                              | 0  | CTACGGGCGCA        | 0.597 |
| + | 7  | 709  | RR_uc010isz.2_Mi   | NM_020731    | NP_065782    | A9YTQ3 | AHRR_HUMAN  |                              | 2  | CCTGACCCGCT        | 0.667 |
| + | 12 | 1509 | p.P467S AHRR_I     | NM_020731    | NP_065782    | A9YTQ3 | AHRR_HUMAN  |                              | 2  | GCAGACCCATG        | 0.667 |
| - | 5  | 971  | αx.1_Missense_Mi   | NM_004174    | NP_004165    | P48764 | SL9A3_HUMAN | lasmic (Potential).          | 0  | GCCGGGCTCGA        | 0.622 |
| - | 2  | 488  | αx.1_Missense_Mi   | NM_004174    | NP_004165    | P48764 | SL9A3_HUMAN | ime=D/M4; (Potential).       | 0  | GGCGTCCAGCA        | 0.657 |
| + | 10 | 1633 |                    | NM_018140    | NP_060610    | Q9P209 | CEP72_HUMAN | Potential.                   | 1  | CATTAGATAAAT       | 0.363 |
| - | 3  | 1368 | h.3_Missense_Mu    | NM_007030    | NP_008961    | O94811 | TPPP_HUMAN  |                              | 0  | TGCCCCCTTGC        | 0.627 |
| - | 6  | 2240 | ERT_uc003jcc.1_I   | NM_198253    | NP_937983    | O14746 | TERT_HUMAN  | rse transcriptase.           | 12 | GATGACCTCCG        | 0.622 |
| - | 4  | 606  | nf.1_Missense_Mu   | NM_016358    | NP_057442    | P78413 | IRX4_HUMAN  | obox; TALE-type.             | 0  | GTGCTCCTGCA        | 0.622 |
| - | 2  | 846  | αC5orf38_uc011cn   | NM_001134222 | NP_001127694 | Q9BZ11 | IRX2_HUMAN  |                              | 1  | ACTCTCGTCT         | 0.652 |

|   |    |      |                   |              |              |        |              |                            |    |               |       |
|---|----|------|-------------------|--------------|--------------|--------|--------------|----------------------------|----|---------------|-------|
| + | 7  | 1286 | _p.A383V ADAMT    | NM_139056    | NP_620687    | Q8TE57 | ATS16_HUMAN  | ptidase M12B.              | 8  | ACCACGCCATCT  | 0.522 |
| - | 13 | 1458 | SUN2_uc011cmk.1   | NM_017755    | NP_060225    | Q08J23 | NSUN2_HUMAN  |                            | 1  | GTGGGTTTCC    | 0.448 |
| - | 3  | 667  |                   | NM_138809    | NP_620164    | Q96DG6 | CMBL_HUMAN   |                            | 1  | ATGGTTCTGCAA  | 0.438 |
| + | 8  | 978  | CH6_uc003jeu.1_   | NM_005885    | NP_005876    | O60337 | MARH6_HUMAN  | lasmic (Potential).        | 2  | GAATGGGACCG/  | 0.289 |
| - | 21 | 3534 | ND2_uc011cmz.1_   | NM_001332    | NP_001323    | Q9UQB3 | CTND2_HUMAN  |                            | 8  | CGGGCGCACCA   | 0.343 |
| + | 5  | 910  | .1_Missense_Mut   | NM_007118    | NP_009049    | O75962 | TRIO_HUMAN   |                            | 18 | GCAATGCGGAC   | 0.557 |
| + | 43 | 6304 | IO_uc003jfh.1_Mis | NM_007118    | NP_009049    | O75962 | TRIO_HUMAN   | DH 2.                      | 18 | TCAAACCAAGTG/ | 0.443 |
| + | 46 | 6634 | IO_uc003jfh.1_Mis | NM_007118    | NP_009049    | O75962 | TRIO_HUMAN   | PH 2.                      | 18 | CCATGCCGGGA   | 0.488 |
| + | 7  | 951  |                   | NM_019018    | NP_061891    | Q9NUU6 | F105A_HUMAN  |                            | 1  | GCTGATCCTTTG/ | 0.423 |
| - | 3  | 645  |                   | NM_054027    | NP_473368    | Q9HCJ1 | ANKH_HUMAN   | ical; (Potential).         | 1  | TATAAGCTGCA/  | 0.368 |
| - | 1  | 374  |                   | NM_033414    | NP_219482    | Q969S3 | ZN622_HUMAN  | U1-type 2.                 | 1  | TTGAGGTGGTTC  | 0.572 |
| - | 9  | 1179 | 3jfr.2_Missense_M | NM_001034850 | NP_001030022 | Q9H6L5 | F134B_HUMAN  |                            | 3  | ACTGTCCAAC/   | 0.468 |
| + | 6  | 1192 | d.1_Missense_Mu   | NM_004932    | NP_004923    | P55285 | CADH6_HUMAN  | Extracellular (Potential). | 7  | TGGCAGAATCA/  | 0.453 |
| - | 10 | 1822 | a-mir-579 MI0003  | NM_016107    | NP_057191    | Q96KR1 | ZFR_HUMAN    |                            | 0  | GGAACCGAATT/  | 0.343 |
| - | 22 | 4490 | 0iuc.1_Missense_I | NM_030955    | NP_112217    | P58397 | ATS12_HUMAN  | SP type-1 7.               | 9  | CTGAACTCCAC/  | 0.488 |
| - | 19 | 3057 | 0iuc.1_Missense_I | NM_030955    | NP_112217    | P58397 | ATS12_HUMAN  | SP type-1 4.               | 9  | GAATCCGCACT/  | 0.493 |
| + | 8  | 1005 | .2_3'UTR TTC23L   | NM_144725    | NP_653326    | Q6PF05 | TT23L_HUMAN  |                            | 1  | GAGTGCGTTACT  | 0.468 |
| - | 3  | 281  | se_Mutation_p.E6E | NM_031900    | NP_114106    | Q9BYV1 | AGT2_HUMAN   |                            | 4  | GATTTCCAGGAC  | 0.473 |
| - | 10 | 1530 | i.1_Intron PRLR_u | NM_000949    | NP_000940    | P16471 | PRLR_HUMAN   | lasmic (Potential).        | 3  | ACTTGGGTGTT   | 0.483 |
| - | 10 | 1467 | i.1_Intron PRLR_u | NM_000949    | NP_000940    | P16471 | PRLR_HUMAN   | lasmic (Potential).        | 3  | ATACTCCACCAC  | 0.443 |
| + | 32 | 4700 | p.S1016F SPEF2    | NM_024867    | NP_079143    | Q9C093 | SPEF2_HUMAN  |                            | 4  | CAACTCCGAGT   | 0.428 |
| + | 4  | 915  | _p.P40S SLC1A3    | NM_004172    | NP_004163    | P43003 | EAA1_HUMAN   | ellular (Potential).       | 0  | TCCATCCTGGG/  | 0.458 |
| + | 10 | 3017 | _p.V840I NIPBL_u  | NM_133433    | NP_597677    | Q6KC79 | NIPBL_HUMAN  |                            | 9  | CTAGGGTTCGA/  | 0.408 |
| + | 37 | 6993 | c.3_Missense_Mut  | NM_133433    | NP_597677    | Q6KC79 | NIPBL_HUMAN  |                            | 9  | CAACAGCAAGG   | 0.383 |
| - | 22 | 4126 | se_Mutation_p.A3  | NM_023073    | NP_075561    | E9PH94 | E9PH94_HUMAN |                            | 7  | CTCTTGCTTTCT  | 0.353 |
| + | 6  | 578  | va.1_Missense_Mt  | NM_018034    | NP_060504    | Q9NW82 | WDR70_HUMAN  |                            | 2  | ACTCGCATGAG   | 0.363 |
| - | 18 | 2853 | .2_Missense_Mut   | NM_001127671 | NP_001121143 | P42702 | LIFR_HUMAN   | ical; (Potential).         | 4  | GATGAGAATGG   | 0.383 |
| - | 7  | 1236 | .2_Missense_Mut   | NM_001127671 | NP_001121143 | P42702 | LIFR_HUMAN   | ellular (Poten p.R302H(1)  | 4  | TATTACGAATCTT | 0.353 |
| - | 37 | 5059 | .D1703N RICTOR    | NM_152756    | NP_689969    | Q6R327 | RICTR_HUMAN  |                            | 10 | GTACATCTTGAA/ | 0.318 |
| + | 3  | 1460 |                   | NM_000958    | NP_000949    | P35408 | PE2R4_HUMAN  |                            | 2  | TATGAGGTGCG   | 0.393 |
| - | 6  | 984  |                   | NM_000436    | NP_000427    | P55809 | SCOT1_HUMAN  |                            | 3  | TTCCTGCTCGG   | 0.413 |
| + | 7  | 1768 | E544K ZNF131_uc   | NM_003432    | NP_003423    | P52739 | ZN131_HUMAN  |                            | 0  | AGAGAGAGTCT.  | 0.483 |
| - | 7  | 1114 | MGCS1_uc003jmq.   | NM_001098272 | NP_001091742 | Q01581 | HMCS1_HUMAN  |                            | 0  | AACATCCCTGA/  | 0.328 |
| + | 8  | 679  | o.2_Missense_Mu   | NM_024615    | NP_078891    | Q8N3A8 | PARP8_HUMAN  |                            | 5  | TATATGGGCCAC/ | 0.358 |
| + | 2  | 1443 | A1_uc003jou.2_Ir  | NM_015946    | NP_057030    | Q9BRX2 | PELO_HUMAN   |                            | 0  | AGTCACTCCCA/  | 0.592 |
| + | 4  | 520  | qc.1_Missense_Mi  | NM_002203    | NP_002194    | P17301 | ITA2_HUMAN   | r (Potential). FG-GAP 2.   | 1  | AACTGGAGGTT   | 0.408 |
| + | 13 | 1717 | ic.1_Missense_Mu  | NM_002203    | NP_002194    | P17301 | ITA2_HUMAN   | Extracellular (Potential). | 1  | GGAAGGAAGAG   | 0.353 |
| + | 18 | 2446 | ic.1_Missense_Mu  | NM_002203    | NP_002194    | P17301 | ITA2_HUMAN   | ellular (Potential).       | 1  | CACTAGCCCTG   | 0.473 |
| + | 1  | 287  |                   | NM_006308    | NP_006299    | Q12988 | HSPB3_HUMAN  |                            | 0  | CACTGCCTGGG/  | 0.547 |
| + | 2  | 1892 | .18_uc011cqq.1_3' | NM_001102575 | NP_001096045 | Q96RF0 | SNX18_HUMAN  |                            | 0  | ATTCAGGATCGC  | 0.433 |
| - | 23 | 3623 | X29_uc010ivw.2_F  | NM_019030    | NP_061903    | Q72478 | DHX29_HUMAN  |                            | 4  | GATGTTCTATTAA | 0.323 |
| - | 22 | 3511 | X29_uc010ivw.2_F  | NM_019030    | NP_061903    | Q72478 | DHX29_HUMAN  |                            | 4  | ATCCGCCATGG/  | 0.403 |
| - | 15 | 2654 | X29_uc010ivw.2_F  | NM_019030    | NP_061903    | Q72478 | DHX29_HUMAN  |                            | 4  | AGTTGATTTTAT  | 0.368 |
| - | 3  | 457  | X29_uc010ivw.2_F  | NM_019030    | NP_061903    | Q72478 | DHX29_HUMAN  |                            | 4  | TCATTCTTTGT/  | 0.328 |
| - | 10 | 977  | ie_Mutation_p.G2C | NM_173514    | NP_775785    | Q8NBW4 | S38A9_HUMAN  |                            | 0  | CACTCCCGGCA   | 0.408 |
| - | 17 | 2722 | T_uc010iwd.2_Mis  | NM_002184    | NP_002175    | P40189 | IL6RB_HUMAN  | lasmic (Potential).        | 2  | TGGATTCATGCT/ | 0.398 |
| + | 19 | 4829 |                   | NM_005921    | NP_005912    | Q13233 | M3K1_HUMAN   | rotein kinase.             | 2  | AATGGCTTGTC/  | 0.348 |

rs61751714

|   |    |       |                    |              |              |        |             |                            |    |               |       |
|---|----|-------|--------------------|--------------|--------------|--------|-------------|----------------------------|----|---------------|-------|
| - | 3  | 519   | orf43_uc010iwl.1_F | NM_001048249 | NP_001041714 | Q7Z3B0 | CE043_HUMAN | ical; (Potential).         | 0  | GTGGAGTAAGG   | 0.463 |
| + | 5  | 803   | p.E236K PPWD1_     | NM_015342    | NP_056157    | Q96BP3 | PPWD1_HUMAN |                            | 1  | AACTGGGAATAT  | 0.388 |
| + | 4  | 562   | juc.3_Missense_M   | NM_024941    | NP_079217    | A5PLN9 | CE044_HUMAN |                            | 1  | TGGGAGAGACC   | 0.229 |
| - | 2  | 288   | 2_5'Flank NLN_uc   | NM_019072    | NP_061945    | Q96EQ0 | SGTB_HUMAN  | TPR 1.                     | 0  | 3TGTAAAGTGCC  | 0.353 |
| + | 20 | 2226  | 32IP_uc011cqy.1_   | NM_018695    | NP_061165    | Q96RT1 | LAP2_HUMAN  |                            | 7  | AGGAAACAGAT   | 0.313 |
| + | 5  | 832   | _p.P174S SFRS12    | NM_139168    | NP_631907    | Q8WXA9 | SREK1_HUMAN |                            | 0  | 3TGATCCTTCC   | 0.423 |
| + | 5  | 884   | _p.S191F SFRS12    | NM_139168    | NP_631907    | Q8WXA9 | SREK1_HUMAN | RRM.                       | 0  | TGAATCCCAGG   | 0.358 |
| + | 10 | 977   | p.D225N CDK7_uc    | NM_001799    | NP_001790    | P50613 | CDK7_HUMAN  | rotein kinase.             | 1  | 3CAGGAGACGAC  | 0.363 |
| + | 7  | 879   | _p.P262S RAD17_    | NM_133339    | NP_579917    | O75943 | RAD17_HUMAN |                            | 0  | TTGTTTCCCAAAC | 0.289 |
| + | 11 | 1318  | 17_uc0003jwk.2_Mi  | NM_133339    | NP_579917    | O75943 | RAD17_HUMAN |                            | 0  | TCGGTTGCCCT   | 0.313 |
| + | 2  | 136   | ELD2_uc003jwr.1_   | NM_001038603 | NP_001033692 | Q8N4S9 | MALD2_HUMAN | lasmic (Potential).        | 0  | AGATACCACCAT  | 0.547 |
| + | 11 | 822   | cre.1_Missense_N   | NM_001098728 | NP_001092198 | Q6P1K8 | T2H2L_HUMAN |                            | 0  | CTTATTCGTATGC | 0.303 |
| + | 25 | 5651  | _p.S1796_splice    | NM_018429    | NP_060899    | A6H8Y1 | BDP1_HUMAN  |                            | 2  | TATCTAGCTGTCC | 0.338 |
| + | 5  | 6132  | yx.1_Missense_Mi   | NM_005909    | NP_005900    | P46821 | MAP1B_HUMAN | MAP1B 6.                   | 5  | GACCACCAGCC   | 0.473 |
| + | 17 | 2117  | _p.S649N TNPO1_    | NM_002270    | NP_002261    | Q92973 | TNPO1_HUMAN |                            | 7  | ACTGAGTGGCC   | 0.413 |
| + | 6  | 845   | _p.S157F BTF3_uc   | NM_001037637 | NP_001032726 | P20290 | BTF3_HUMAN  |                            | 0  | GGCTTCCAAGA   | 0.318 |
| + | 10 | 1194  | _p.G395R RGNEF     | NM_001080479 | NP_001073948 | Q8N1W1 | RGNEF_HUMAN |                            | 0  | TAGAGGGAATCA  | 0.448 |
| + | 3  | 322   | CR_uc003kdq.2_M    | NM_000859    | NP_000850    | P04035 | HMDH_HUMAN  |                            | 1  | TATTAGGATGTTT | 0.294 |
| - | 15 | 1924  | 3kdt.2_Missense_I  | NM_005713    | NP_005704    | Q9Y5P4 | C43BP_HUMAN | START.                     | 1  | GAGAAGCAGGC   | 0.368 |
| - | 5  | 979   | 3kdt.2_Missense_I  | NM_005713    | NP_005704    | Q9Y5P4 | C43BP_HUMAN |                            | 1  | 3CATCAGCACAG  | 0.383 |
| + | 2  | 84    | DLK_uc010izq.2_5   | NM_016218    | NP_057302    | Q9UBT6 | POLK_HUMAN  |                            | 4  | TTTTCAGATAAG  | 0.244 |
| + | 8  | 1109  | OLK_uc010izr.2_F   | NM_016218    | NP_057302    | Q9UBT6 | POLK_HUMAN  | UmuC.                      | 4  | TCCCAATAGACA  | 0.318 |
| + | 13 | 1627  | csv.1_Missense_M   | NM_006633    | NP_006624    | Q13576 | IQGA2_HUMAN |                            | 7  | 3GGAATCCTTTG  | 0.398 |
| + | 27 | 3601  | AP2_uc003kel.2_M   | NM_006633    | NP_006624    | Q13576 | IQGA2_HUMAN | Ras-GAP.                   | 7  | CAGCTGGAGGT   | 0.463 |
| + | 2  | 921   |                    | NM_005242    | NP_005233    | P55085 | PAR2_HUMAN  | Name=5; (Potential).       | 1  | 3CATTGGGGTCT  | 0.488 |
| + | 12 | 2165  |                    | NM_018046    | NP_060516    | Q8N302 | AGGF1_HUMAN |                            | 3  | 3TGAAGGAACTT  | 0.368 |
| - | 17 | 2035  |                    | NM_003664    | NP_003655    | O00203 | AP3B1_HUMAN |                            | 1  | CAATTAGATAATT | 0.378 |
| + | 4  | 461   | MT_uc011cti.1_Int  | NM_001713    | NP_001704    | Q93088 | BHMT1_HUMAN | Hcy-binding.               | 1  | GGTAGCAGGAG   | 0.443 |
| + | 2  | 6635  |                    | NM_153610    | NP_705838    | Q8N3K9 | CMYA5_HUMAN |                            | 9  | TTTTGGATCGAC  | 0.443 |
| + | 2  | 7513  |                    | NM_153610    | NP_705838    | Q8N3K9 | CMYA5_HUMAN |                            | 9  | CTGTGGCCCCA   | 0.393 |
| - | 9  | 868   | TX3_uc003kge.3_    | NM_001010891 | NP_001010891 | Q5HYI7 | MTX3_HUMAN  |                            | 0  | 3CGAAGATTGT   | 0.463 |
| - | 4  | 547   | RINC5_uc003kgm     | NM_178276    | NP_840060    | Q86VE9 | SERC5_HUMAN | ical; (Potential).         | 1  | AGCTCCTGAGC   | 0.388 |
| + | 4  | 1381  | _p.S360F ZFYVE1    | NM_001105251 | NP_001098721 | Q7Z3T8 | ZFY16_HUMAN |                            | 0  | AGATTCCTCTTC  | 0.383 |
| - | 4  | 1884  | _p.V512I ANKRD:    | NM_001004441 | NP_001004441 | A5PLL1 | AN34B_HUMAN |                            | 1  | AGTTTACTAATTG | 0.299 |
| + | 8  | 1244  | SGRF2_uc003kht     | NM_006909    | NP_008840    | O14827 | RGRF2_HUMAN | DH.                        | 12 | AGTTTGCCAAAT  | 0.463 |
| - | 6  | 593   | J5E_uc011cto.1_Ir  | NM_130767    | NP_570123    | Q8WYK0 | AC012_HUMAN | zyme A hydrolase 2.        | 2  | AGTGCCCTTGG   | 0.507 |
| - | 13 | 1005  | nse_Mutation_p.G   | NM_012446    | NP_036578    | P81877 | SSBP2_HUMAN | rich. Pro-rich.            | 5  | TATCACCAGAG   | 0.289 |
| + | 9  | 1486  | 3khw.2_Missense_   | NM_001017971 | NP_001017971 | Q52LC2 | VAS1L_HUMAN |                            | 0  | AGTTGTCCATCC  | 0.418 |
| + | 7  | 2752  | u.2_Missense_Mu    | NM_004385    | NP_004376    | P13611 | CSPG2_HUMAN | minoglycan attachment dor  | 16 | CAGCCACTGTAT  | 0.408 |
| + | 8  | 6322  | u.2_Intron VCAN_   | NM_004385    | NP_004376    | P13611 | CSPG2_HUMAN | GAG-beta.                  | 16 | AGGACCCAGTA   | 0.512 |
| - | 3  | 959   | ilent_p.E112E LYS  | NM_198273    | NP_938014    | Q7Z3D4 | LYSM3_HUMAN | lasmic (Potential).        | 0  | 3CATTCTCTCTG  | 0.373 |
| + | 13 | 2507  | R98_uc003kjt.2_5'  | NM_032119    | NP_115495    | Q8WXG9 | GPR98_HUMAN | ellular (Potential).       | 16 | 3GGGTCCCTTG   | 0.408 |
| + | 37 | 8515  | _p.A513T GPR98_    | NM_032119    | NP_115495    | Q8WXG9 | GPR98_HUMAN | ellular (Potential).       | 16 | 3TTGATGCTCAA  | 0.438 |
| + | 59 | 12293 | it.2_Missense_Mut  | NM_032119    | NP_115495    | Q8WXG9 | GPR98_HUMAN | ellular (Potential).       | 16 | AGGAGAAAAG    | 0.438 |
| + | 64 | 12971 | _Mutation_p.S199   | NM_032119    | NP_115495    | Q8WXG9 | GPR98_HUMAN | ellular (Potential).       | 16 | 3TTCCAGTGGAG  | 0.438 |
| + | 66 | 13469 | _p.T2164I GPR98_   | NM_032119    | NP_115495    | Q8WXG9 | GPR98_HUMAN | (Potential). Calx-beta 30. | 16 | AGTCACCTTTC   | 0.393 |
| + | 74 | 15724 | _p.V2916I GPR98_   | NM_032119    | NP_115495    | Q8WXG9 | GPR98_HUMAN | ellular (Potential).       | 16 | 3CCTGTAACT    | 0.463 |



|   |    |       |                   |              |              |        |             |                          |      |               |       |
|---|----|-------|-------------------|--------------|--------------|--------|-------------|--------------------------|------|---------------|-------|
| + | 87 | 18453 | w.2_Nonsense_Mt   | NM_032119    | NP_115495    | Q8WXG9 | GPR98_HUMAN | ical; (Potential).       | 16   | ACATGGCTTTGC  | 0.383 |
| - | 5  | 1176  | kp.2_Missense_IV  | NM_001145678 | NP_001139150 | Q8IV33 | K0825_HUMAN |                          | 0    | TTTTAACACACC  | 0.343 |
| - | 10 | 1986  |                   | NM_012081    | NP_036213    | O00472 | ELL2_HUMAN  |                          | 1    | AGTCATCCTTAT  | 0.383 |
| - | 8  | 1462  |                   | NM_012081    | NP_036213    | O00472 | ELL2_HUMAN  |                          | 1    | GGATGGCAGCA   | 0.542 |
| - | 2  | 703   | P1_uc010jbm.1_fr  | NM_001040458 | NP_001035548 | Q9NZ08 | ERAP1_HUMAN | lenal (Potential).       | 2    | GCAGGGGTTCT   | 0.592 |
| + | 2  | 774   | mw.1_Missense_IV  | NM_005575    | NP_005566    | Q9UIQ6 | LCAP_HUMAN  | lasmic (Potential).      | 4    | CTCAGGCCTTC   | 0.527 |
| - | 29 | 4235  | on.2_Missense_Mt  | NM_001270    | NP_001261    | O14646 | CHD1_HUMAN  |                          | 5    | ATCAGACTTCTC  | 0.323 |
| - | 9  | 1367  |                   | NM_001270    | NP_001261    | O14646 | CHD1_HUMAN  | Chromo 2.                | 5    | ATCAGGATAACC  | 0.358 |
| + | 20 | 2887  | ense_Mutation_p.l | NM_015216    | NP_056031    | O43314 | VIP2_HUMAN  |                          | 2    | CAGACCTTCAG   | 0.363 |
| - | 3  | 514   | vb.1_Missense_M   | NM_031438    | NP_113626    | Q9BQG2 | NUD12_HUMAN |                          | 0    | TTTAGCTAGCAC  | 0.373 |
| - | 3  | 1588  | _17_uc003kon.3_5  | NM_001163315 | NP_001156787 | Q9UF56 | FXL17_HUMAN |                          | 0    | CAATCAGAAATG  | 0.338 |
| + | 4  | 700   | 1_RNA FER_uc0C    | NM_005246    | NP_005237    | P16591 | FER_HUMAN   | membranes containing pho | 5    | TTAAGGACAAGC  | 0.398 |
| - | 6  | 1701  |                   | NM_014819    | NP_055634    | O43164 | PJA2_HUMAN  |                          | 2    | CCAAGGATGTC   | 0.363 |
| - | 4  | 531   |                   | NM_014819    | NP_055634    | O43164 | PJA2_HUMAN  |                          | 2    | CACAAGTGGGA   | 0.383 |
| + | 2  | 260   | te_p.R54_splice C | NM_001744    | NP_001735    | Q16566 | KCC4_HUMAN  |                          | 5    | GGACGGTAAGG   | 0.706 |
| + | 16 | 2584  | oy.3_Missense_Mu  | NM_001127511 | NP_001120983 | P25054 | APC_HUMAN   | er-rich. ARM p.?(1)      | 2515 | GCCTCGGAAGT   | 0.443 |
| + | 1  | 343   | ie_Mutation_p.E54 | NM_022828    | NP_073739    | Q9H6S0 | YTDC2_HUMAN | R3H.                     | 3    | CGCTGGAGCGC   | 0.672 |
| + | 8  | 2108  | ion_p.V203 KCNM   | NM_021614    | NP_067627    | Q9H2S1 | KCNN2_HUMAN |                          | 2    | AGCACGTCACT   | 0.552 |
| - | 5  | 633   | l1_splice PGGT1B  | NM_005023    | NP_005014    | P53609 | PGTB1_HUMAN |                          | 0    | AACTCACCAT    | 0.338 |
| - | 5  | 566   | _p.C59Y PGGT1B    | NM_005023    | NP_005014    | P53609 | PGTB1_HUMAN | PFTB 1.                  | 0    | ATATAGCAAATAC | 0.343 |
| - | 4  | 1571  | tion_p.L358F TIC/ | NM_021649    | NP_067681    | Q86XR7 | TCAM2_HUMAN | TIR.                     | 0    | TTGGAGGGCAA   | 0.443 |
| - | 1  | 415   |                   | NM_001801    | NP_001792    | Q16878 | CDO1_HUMAN  |                          | 2    | TGATGGCCTGC   | 0.607 |
| - | 19 | 2975  | lkrv.3_Missense_l | NM_020796    | NP_065847    | Q9H2E6 | SEM6A_HUMAN | lasmic (Potential).      | 2    | GGTGGGGAGGG   | 0.627 |
| - | 3  | 344   |                   | NM_173666    | NP_775937    | Q8NBA8 | DTWD2_HUMAN |                          | 0    | TGTTTTCTTTA   | 0.328 |
| + | 18 | 3626  | l.1_Missense_Mul  | NM_005509    | NP_005500    | Q9Y485 | DMXL1_HUMAN | WD 9.                    | 2    | GAGAAGACGGT   | 0.383 |
| + | 18 | 3822  | l.1_Missense_Mul  | NM_005509    | NP_005500    | Q9Y485 | DMXL1_HUMAN | WD 10.                   | 2    | CCCACCTTTTC   | 0.453 |
| + | 43 | 9183  | XL1_uc010jcm.1_f  | NM_005509    | NP_005500    | Q9Y485 | DMXL1_HUMAN | WD 16.                   | 2    | TGATGGAAACAA  | 0.363 |
| + | 18 | 1685  | 17B4_uc003ksk.3   | NM_000414    | NP_000405    | P51659 | DHB4_HUMAN  | Enoyl-CoA hydratase 2.   | 2    | ACTTTGCTAGTC1 | 0.353 |
| + | 2  | 882   | _p.P217L PRR16_   | NM_016644    | NP_057728    | Q569H4 | PRR16_HUMAN | Pro-rich.                | 3    | CCACCCACCGG   | 0.488 |
| + | 2  | 216   | C2_uc011cwn.1_5   | NM_003100    | NP_003091    | O60749 | SNX2_HUMAN  |                          | 1    | AAACTCCAATGC  | 0.353 |
| - | 21 | 2876  | wq.1_Missense_M   | NM_153223    | NP_694955    | Q8N960 | CE120_HUMAN |                          | 1    | ATGGGGGCCAT   | 0.428 |
| - | 9  | 1214  | _p.P187S CEP120   | NM_153223    | NP_694955    | Q8N960 | CE120_HUMAN |                          | 1    | ATTTTGGCCCAG  | 0.388 |
| + | 4  | 1063  | INB1_uc010jdb.1_  | NM_005573    | NP_005564    | P20700 | LMNB1_HUMAN | rod. Linker 2.           | 2    | TGGATTCTGGGC  | 0.488 |
| - | 2  | 483   | cx.1_Missense_l   | NM_178450    | NP_848545    | Q86UD3 | MARH3_HUMAN |                          | 1    | TTCGGGCAGGT   | 0.527 |
| + | 2  | 242   | kuj.3_Missense_M  | NM_130809    | NP_570721    | Q96M27 | PRRC1_HUMAN | Pro-rich.                | 0    | TGCAGGGCTGG   | 0.403 |
| + | 25 | 3570  | C12A2_uc010jdg.2  | NM_001046    | NP_001037    | P55011 | S12A2_HUMAN | lasmic (Potential).      | 3    | ATAACAGATAATC | 0.308 |
| - | 15 | 2417  | iv.2_Missense_Mu  | NM_001999    | NP_001990    | P35556 | FBN2_HUMAN  | :10; calcium-binding.    | 15   | ATTCATCAACATC | 0.502 |
| + | 17 | 2513  | ATS19_uc010jdh.1  | NM_133638    | NP_598377    | Q8TE59 | ATS19_HUMAN | Spacer.                  | 9    | AACAGTCTATTA  | 0.393 |
| + | 22 | 3388  | ATS19_uc010jdh.1  | NM_133638    | NP_598377    | Q8TE59 | ATS19_HUMAN | SP type-1 5.             | 9    | CCTCAGAAAAAC  | 0.418 |
| + | 3  | 1141  |                   | NM_175856    | NP_787052    | Q70JA7 | CHSS3_HUMAN | lenal (Potential).       | 3    | TCCAAGACCTTC  | 0.358 |
| + | 3  | 1859  |                   | NM_175856    | NP_787052    | Q70JA7 | CHSS3_HUMAN | lenal (Potential).       | 3    | AAAGAAAGTAC   | 0.348 |
| + | 3  | 2050  |                   | NM_175856    | NP_787052    | Q70JA7 | CHSS3_HUMAN | lenal (Potential).       | 3    | CCAAAGCAGAA   | 0.438 |
| - | 25 | 4036  | Ojdi.1_Missense_l | NM_016340    | NP_057424    | Q8TEU7 | RPGF6_HUMAN | Ser-rich.                | 3    | AAATTGCTCAGC  | 0.478 |
| - | 7  | 812   | Ojdm.1_Missense_  | NM_133372    | NP_588613    | Q8TF40 | FNIP1_HUMAN |                          | 2    | GAGCGGACCCT   | 0.517 |
| + | 4  | 351   |                   | NM_000588    | NP_000579    | P08700 | IL3_HUMAN   |                          | 3    | AGAATCTCCTGC  | 0.428 |
| + | 5  | 1215  | ite_p.E341_splice | NM_003060    | NP_003051    | O76082 | S22A5_HUMAN |                          | 0    | TGAGGTAAGCA   | 0.562 |
| + | 6  | 1267  | ie_Mutation_p.L35 | NM_003060    | NP_003051    | O76082 | S22A5_HUMAN | lasmic (Potential).      | 0    | ATCTGCTTCGA   | 0.468 |

rs149837114

rs147655929

rs144768533

rs2840016

|   |    |      |                                   |              |              |        |              |    |                   |       |
|---|----|------|-----------------------------------|--------------|--------------|--------|--------------|----|-------------------|-------|
| + | 4  | 289  | iorf56_uc010jds.1                 | NM_001013717 | NP_001013739 | Q8N8D9 | CE056_HUMAN  | 0  | ataatgctctgccatcc | 0.05  |
| - | 8  | 926  | kxb.2_Missense_I                  | NM_002198    | NP_002189    | P10914 | IRF1_HUMAN   | 0  | AATTTCCCTTCC      | 0.532 |
| + | 1  | 434  | .l.1_Missense_Mut                 | NM_000589    | NP_000580    | P05112 | IL4_HUMAN    | 0  | AACCTTTGTCCAC     | 0.493 |
| - | 4  | 772  | 1cxi.1_Splice_Site                | NM_001098811 | NP_001092281 | Q92599 | SEPT8_HUMAN  | 2  | AGGATACCTTGC      | 0.547 |
| - | 11 | 2497 | p.E375K AFF4_uc                   | NM_014423    | NP_055238    | Q9UHB7 | AFF4_HUMAN   | 5  | CTCTTCCATAGC      | 0.453 |
| - | 10 | 1396 | L4_uc003kym.1_5'                  | NM_015082    | NP_055897    | Q6MZW2 | FSTL4_HUMAN  | 2  | CATTGGCTGCA       | 0.547 |
| - | 5  | 766  |                                   | NM_015082    | NP_055897    | Q6MZW2 | FSTL4_HUMAN  | 2  | CCCTGAACAGA       | 0.557 |
| - | 13 | 1860 | r.2_Intron CDKL3_1                | NM_001113575 | NP_001107047 | Q81VW4 | CDKL3_HUMAN  | 1  | CTTCCCCTCGC       | 0.348 |
| + | 5  | 501  | .l.2_Missense_Mul                 | NM_015288    | NP_056103    | Q9NQC1 | JADE2_HUMAN  | 0  | TCCCACCACTG       | 0.637 |
| + | 22 | 3412 | cxu.1_Missense_IV                 | NM_021982    | NP_068817    | O95486 | SC24A_HUMAN  | 0  | CTTGGCTTAGAC      | 0.358 |
| + | 4  | 913  | LG_uc003kzu.2_3                   | NM_001745    | NP_001736    | P49069 | CAMLG_HUMAN  | 0  | CGGAAGTCTTC       | 0.403 |
| + | 15 | 2065 | X46_uc003kzv.1_F                  | NM_014829    | NP_055644    | Q7L014 | DDX46_HUMAN  | 1  | CATGCTGATGGT      | 0.343 |
| - | 2  | 794  | _uc011cxy.1_Miss                  | NM_002653    | NP_002644    | P78337 | PITX1_HUMAN  | 1  | TCACCCGCACG       | 0.652 |
| - | 1  | 945  |                                   | NM_006161    | NP_006152    | Q92886 | NGN1_HUMAN   | 0  | GCGTTGTGTGG       | 0.592 |
| + | 4  | 565  | l3lba.2_Missense_Mutation_p.L131F |              |              | Q6ZT89 | S2548_HUMAN  | 0  | CGTTGCAGAT        | 0.642 |
| + | 3  | 268  | lbw.1_Missense_I                  | NM_014386    | NP_055201    | Q9NZM6 | PK2L2_HUMAN  | 0  | TGTGCCTGGTG       | 0.358 |
| - | 12 | 1604 | D8_uc003lch.2_Mi                  | NM_139199    | NP_631938    | Q9H0E9 | BRD8_HUMAN   | 1  | GACTGGCTCTG       | 0.507 |
| + | 6  | 1038 | yo.1_Missense_Mi                  | NM_005733    | NP_005724    | O95235 | KI20A_HUMAN  | 0  | TCTCCCCCGGT       | 0.522 |
| - | 11 | 1230 |                                   | NM_004661    | NP_004652    | Q9UJX2 | CDC23_HUMAN  | 0  | AAGCTCTGTAGT      | 0.468 |
| - | 11 | 1223 |                                   | NM_004661    | NP_004652    | Q9UJX2 | CDC23_HUMAN  | 0  | GTAGTCCCGTT       | 0.463 |
| + | 4  | 1246 | A53C_uc011cyq.1                   | NM_001135647 | NP_001129119 | Q9NYF3 | FA53C_HUMAN  | 1  | GCTGCCTGGC        | 0.672 |
| + | 7  | 691  | _p.P192L REEP2_                   | NM_016606    | NP_057690    | Q9BRK0 | REEP2_HUMAN  | 0  | TGACCTGCCC        | 0.607 |
| + | 12 | 1683 | 3ldi.2_Missense_I                 | NM_001903    | NP_001894    | P35221 | CTNA1_HUMAN  | 11 | TTGCTCTCCAAC      | 0.488 |
| - | 3  | 370  | Jo.2_Splice_Site_f                | NM_022464    | NP_071909    | Q9H173 | SIL1_HUMAN   | 0  | ACTGTACCTTTTC     | 0.403 |
| - | 6  | 825  |                                   | NM_198282    | NP_938023    | Q86WV6 | TM173_HUMAN  | 1  | TGCACCCCGTA       | 0.527 |
| + | 12 | 1998 | -ID1_uc003lft.1_M                 | NM_020690    | NP_065741    | Q81WZ2 | Q81WZ2_HUMAN | 6  | AGGTGCCAATG       | 0.373 |
| + | 29 | 6876 | 3lfw.2_Missense_I                 | NM_020690    | NP_065741    | Q81WZ2 | Q81WZ2_HUMAN | 6  | CTGGGTAACT        | 0.522 |
| - | 11 | 1446 | l3lge.1_Missense_                 | NM_133172    | NP_573418    | O95704 | APBB3_HUMAN  | 2  | CACAGGGCACT       | 0.602 |
| - | 11 | 1431 | l3lge.1_Missense_                 | NM_133172    | NP_573418    | O95704 | APBB3_HUMAN  | 2  | AATGGCTCCT        | 0.597 |
| + | 10 | 988  | .1_Missense_Mut                   | NM_006083    | NP_006074    | Q13123 | RED_HUMAN    | 1  | GGGAACCCGTA       | 0.463 |
| + | 1  | 214  |                                   | NM_017706    | NP_060176    | Q9H6Y2 | WDR55_HUMAN  | 1  | CGGAAGACATC       | 0.657 |
| - | 4  | 1071 |                                   | NM_194249    | NP_919225    | Q81YX4 | DND1_HUMAN   | 0  | CCCAGCAGACC       | 0.602 |
| - | 10 | 1145 | _p.G295S HARS_1                   | NM_002109    | NP_002100    | P12081 | SYHC_HUMAN   | 2  | ACTGCCACAC        | 0.627 |
| + | 8  | 1009 | _p.A121T HARS2                    | NM_012208    | NP_036340    | P49590 | SYHM_HUMAN   | 0  | AGGTGGCTGAT       | 0.488 |
| + | 1  | 1970 | .2_Intron PCDHA6                  | NM_018903    | NP_061726    | Q9UN75 | PCDAC_HUMAN  | 0  | CGGCGGCGGTC       | 0.687 |
| + | 3  | 2887 | i826R PCDHA7_uc                   | NM_018899    | NP_061722    | Q9Y514 | PCDC2_HUMAN  | 4  | AGGCTGGCATT       | 0.498 |
| + | 1  | 740  |                                   | NM_018938    | NP_061761    | Q9Y5E5 | PCDB4_HUMAN  | 3  | ATATGGGGTGC       | 0.493 |
| + | 1  | 868  |                                   | NM_018940    | NP_061763    | Q9Y5E2 | PCDB7_HUMAN  | 6  | ATTCTGGTTCTAC     | 0.552 |
| + | 1  | 962  |                                   | NM_018940    | NP_061763    | Q9Y5E2 | PCDB7_HUMAN  | 6  | TGTCTCCGTGT       | 0.458 |
| + | 1  | 631  | lB16_uc003liv.2_5                 | NM_019120    | NP_061993    | Q9UN66 | PCDB8_HUMAN  | 4  | GTCTCTCTGGG       | 0.418 |
| + | 3  | 1442 |                                   | NM_019119    | NP_061992    | Q9Y5E1 | PCDB9_HUMAN  | 0  | CTCAGGCACCA       | 0.652 |
| + | 1  | 1181 | lB12_uc011dak.1_                  | NM_018932    | NP_061755    | Q9Y5F1 | PCDBC_HUMAN  | 3  | AAAATCTACAGT      | 0.413 |
| - | 1  | 865  |                                   | NM_031947    | NP_114153    | Q9BXI2 | ORNT2_HUMAN  | 1  | CACTGGGAACA       | 0.418 |
| + | 1  | 1309 | dan.1_Missense_I                  | NM_018912    | NP_061735    | Q9Y5H4 | PCDG1_HUMAN  | 3  | AAACTCACATTT      | 0.443 |
| + | 1  | 2287 | fx.1_5'Flank PCDH                 | NM_018915    | NP_061738    | Q9Y5H1 | PCDG2_HUMAN  | 3  | GGTCTCTGCG        | 0.662 |
| + | 1  | 688  | _uc010jfx.1_Transl                | NM_018916    | NP_061739    | Q9Y5H0 | PCDG3_HUMAN  | 1  | ATCCAAGTGATA      | 0.547 |
| + | 1  | 1409 | l10jfx.1_Missense                 | NM_018916    | NP_061739    | Q9Y5H0 | PCDG3_HUMAN  | 1  | AGCTCCATCT        | 0.547 |

rs138917148

|   |    |       |                     |              |              |        |                                            |    |                 |       |
|---|----|-------|---------------------|--------------|--------------|--------|--------------------------------------------|----|-----------------|-------|
| + | 1  | 962   | Jfx.1_Intron PCDH   | NM_018923    | NP_061746    | Q9Y5G2 | PCDGE_HUMAN r (Potential).                 | 0  | 'CGAAGCAAAG,    | 0.378 |
| + | 1  | 1156  | DHGB2_uc003jjs.     | NM_003736    | NP_003727    | Q9UN71 | PCDGG_HUMAN Extracellular (Potential).     | 0  | TGGAAGGTGATC    | 0.403 |
| + | 1  | 1778  | 1_Intron PCDHGA     | NM_018913    | NP_061736    | Q9Y5H3 | PCDGA_HUMAN Extracellular (Potential).     | 0  | GGTGACCAAGG'    | 0.687 |
| + | 1  | 2165  | Intron PCDHGB4_     | NM_018927    | NP_061750    | Q9Y5F8 | PCDGH_HUMAN r (Potential).                 | 2  | 'TGCCCGGATTTCA  | 0.577 |
| + | 1  | 1851  | on PCDHGB4_uc       | NR_001297    |              |        |                                            | 0  | GCCTGGGGCTG     | 0.652 |
| + | 1  | 367   | GA8_uc003lkd.1_I    | NM_018928    | NP_061751    | Q9Y5F7 | PCDGL_HUMAN Extracellular (Potential).     | 4  | 'TAGAGATCGTA    | 0.567 |
| + | 1  | 688   | 1_Intron PCDHGB     | NM_018929    | NP_061752    | Q9Y5F6 | PCDGM_HUMAN r (Potential).                 | 3  | 'TCTCTGTGCATCC  | 0.557 |
| - | 3  | 1603  | p.V496M PCDH1_      | NM_002587    | NP_002578    | Q08174 | PCDH1_HUMAN r (Potential).                 | 5  | 'CACCACCTGCA    | 0.537 |
| - | 1  | 2884  |                     | NM_016580    | NP_057664    | Q9NPG4 | PCD12_HUMAN r (Potential).                 | 3  | 'CATTGGCATCCA   | 0.582 |
| - | 1  | 2736  |                     | NM_016580    | NP_057664    | Q9NPG4 | PCD12_HUMAN r (Potential).                 | 3  | CAATAGCTACTA    | 0.507 |
| - | 1  | 2556  |                     | NM_016580    | NP_057664    | Q9NPG4 | PCD12_HUMAN Extracellular (Potential).     | 3  | 'GATCTGAATGCT   | 0.488 |
| - | 3  | 986   | I0jgh.2_Splice_Sit  | NM_005471    | NP_005462    | P46926 | GNPI1_HUMAN                                | 0  | 'AAGGCCTGTGG    | 0.547 |
| - | 2  | 1295  | nse_Mutation_p.F    | NM_000176    | NP_000167    | P04150 | GCR_HUMAN Modulating.                      | 2  | TACTGGGGCTTC    | 0.428 |
| - | 3  | 596   | e_Mutation_p.P52    | NM_001024947 | NP_001020118 | Q969M3 | YIPF5_HUMAN lasmic (Potential).            | 2  | 'CTGGAGGGACA    | 0.428 |
| + | 4  | 1530  | nn.1_Missense_M     | NM_020768    | NP_065819    | Q68DU8 | KCD16_HUMAN                                | 4  | AAGAAGGGGAG,    | 0.547 |
| - | 23 | 2558  | ARS_uc011dbr.1_I    | NM_020117    | NP_064502    | Q9P2J5 | SYLC_HUMAN                                 | 0  | 'TTTCACCCCTC    | 0.478 |
| - | 20 | 2328  | or.1_Missense_Mu    | NM_020117    | NP_064502    | Q9P2J5 | SYLC_HUMAN                                 | 0  | 'TTTCACTTTGTT   | 0.383 |
| - | 5  | 582   | nse_Mutation_p.P    | NM_020117    | NP_064502    | Q9P2J5 | SYLC_HUMAN                                 | 0  | 'AATCAGGGGGG    | 0.348 |
| + | 7  | 1284  | _p.P394L TCERG1     | NM_006706    | NP_006697    | O14776 | TCRG1_HUMAN                                | 2  | 'ACATCCCCAGG'   | 0.388 |
| - | 1  | 753   |                     | NM_194251    | NP_919227    | Q8TDV0 | GP151_HUMAN lasmic (Potential).            | 2  | 'AGCAGCATCAC'   | 0.498 |
| - | 6  | 700   | 0jgx.2_Missense_I   | NM_024577    | NP_078853    | Q8TF17 | S3TC2_HUMAN                                | 2  | 'ACAGGGCTCTG    | 0.473 |
| + | 16 | 1603  | 3lqc.1_Splice_Site  | NM_014945    | NP_055760    | O94929 | ABLM3_HUMAN                                | 3  | 'CTGCAGGTGAT'   | 0.532 |
| - | 2  | 622   | iation_p.E48K CSN   | NM_001892    | NP_001883    | P48729 | KC1A_HUMAN rotein kinase.                  | 1  | 'AGATTCTAGCTI   | 0.507 |
| + | 3  | 458   | _p.A139V PPARG      | NM_133263    | NP_573570    | Q86YN6 | PRGC2_HUMAN                                | 0  | 'CCCTGCCCCGG    | 0.617 |
| + | 5  | 653   | _p.P165L PPARG      | NM_133263    | NP_573570    | Q86YN6 | PRGC2_HUMAN                                | 0  | 'GGCTCCCATGA'   | 0.582 |
| + | 8  | 2332  | _p.L725F PPARG      | NM_133263    | NP_573570    | Q86YN6 | PRGC2_HUMAN                                | 0  | 'CCAGCCTCACC    | 0.607 |
| - | 21 | 3080  | jhc.2_RNA CSF1F     | NM_005211    | NP_005202    | P07333 | CSF1R_HUMAN lasmic (Potential).            | 54 | 'GCAAGGGCTGG    | 0.478 |
| - | 9  | 1615  | F1R_uc010jhc.2_F    | NM_005211    | NP_005202    | P07333 | CSF1R_HUMAN 5. Extracellular (Potential).  | 54 | 'CTCAACAGTCA    | 0.597 |
| - | 3  | 627   | 'DGRFB_uc011dct     | NM_002609    | NP_002600    | P09619 | PGFRB_HUMAN 'otential). Ig-like C2-type 1. | 17 | 'AGCAGGTCAGA    | 0.607 |
| - | 17 | 1426  | _p.S115F CAMK2      | NM_171825    | NP_741960    | Q9UQM7 | KCC2A_HUMAN                                | 1  | TCCGGGACCAC.    | 0.607 |
| - | 2  | 1485  |                     | NM_001012301 | NP_001012301 | Q5FYB1 | ARSI_HUMAN                                 | 2  | 'GGCCACCATTG'   | 0.587 |
| + | 12 | 1997  | _p.A630V TCOF1      | NM_001135243 | NP_001128715 | Q13428 | TCOF_HUMAN                                 | 3  | TGCAGCTCAGG'    | 0.622 |
| + | 16 | 2671  | e_Mutation_p.A85    | NM_001135243 | NP_001128715 | Q13428 | TCOF_HUMAN                                 | 3  | 'CCGTGGCTACA    | 0.627 |
| - | 7  | 783   |                     | NM_018047    | NP_060517    | Q9NW64 | RBM22_HUMAN                                | 0  | 'CCGAGGCATTG    | 0.438 |
| - | 7  | 771   |                     | NM_018047    | NP_060517    | Q9NW64 | RBM22_HUMAN                                | 0  | TGAAGCCCCTG'    | 0.443 |
| + | 4  | 468   | c.2_RNA GPX3_u      | NM_002084    | NP_002075    | P22352 | GPX3_HUMAN                                 | 0  | 'GAATGCACACTA   | 0.552 |
| - | 20 | 1713  | _p.E521K ANXA6      | NM_001155    | NP_001146    | P08133 | ANXA6_HUMAN                                | 0  | 'ATCTTCCCCTG    | 0.607 |
| - | 6  | 471   | i.1_Splice_Site_p.t | NM_001155    | NP_001146    | P08133 | ANXA6_HUMAN                                | 0  | 'ATGCCCTGGGG    | 0.547 |
| - | 22 | 12465 | AT2_uc003lud.3_I    | NM_001447    | NP_001438    | Q9NYQ8 | FAT2_HUMAN lasmic (Potential).             | 6  | CCGCAGCTGGC     | 0.557 |
| - | 18 | 11189 | AT2_uc003lud.3_I    | NM_001447    | NP_001438    | Q9NYQ8 | FAT2_HUMAN ellular (Potential).            | 6  | GCAGGCACCA      | 0.577 |
| - | 9  | 7217  | 2A_uc011dcs.1_In    | NM_001447    | NP_001438    | Q9NYQ8 | FAT2_HUMAN (Potential). Cadherin 21.       | 6  | 'AGCCTGGACTT'   | 0.488 |
| - | 1  | 1271  | 'AT2_uc010jhx.1_I   | NM_001447    | NP_001438    | Q9NYQ8 | FAT2_HUMAN r (Potential). Cadherin 3.      | 6  | 'CATGAGCTTTG1   | 0.507 |
| + | 2  | 194   | on_p.P8L G3BP1_     | NM_005754    | NP_005745    | Q13283 | G3BP1_HUMAN                                | 4  | 'TAGTCCCCTGC'   | 0.483 |
| + | 10 | 1728  | IA1_uc011dcs.1_I    | NM_001114183 | NP_001107655 | P42261 | GRIA1_HUMAN ellular (Potential).           | 6  | 'CTACCGTCTGC    | 0.542 |
| - | 10 | 1586  | p.R333K FAM114      | NM_018691    | NP_061161    | Q9NRY5 | F1142_HUMAN                                | 0  | 'GTATTCTTGCC    | 0.408 |
| - | 5  | 1003  | e_Mutation_p.A13    | NM_018691    | NP_061161    | Q9NRY5 | F1142_HUMAN                                | 0  | 'TTTGGCATTG1    | 0.428 |
| + | 9  | 1399  | tation_p.Q264* uc   | NM_198321    | NP_938080    | Q86SR1 | GLT10_HUMAN enal (Potential).              | 2  | 'cgcagtcagaaaaa | 0.323 |

rs36089400

|   |    |      |                    |              |              |        |             |                                |    |                |       |
|---|----|------|--------------------|--------------|--------------|--------|-------------|--------------------------------|----|----------------|-------|
| + | 14 | 2944 | ro.2_Missense_Mu   | NM_033551    | NP_291029    | Q6PKG0 | LARP1_HUMAN |                                | 4  | ATTCCCGTGAG    | 0.557 |
| - | 20 | 2812 | ldk.1_Missense_M   | NM_015465    | NP_056280    | Q8TEQ6 | GEMI5_HUMAN |                                | 3  | CCTTTTCCTGTT   | 0.413 |
| + | 1  | 684  |                    | NM_001099293 | NP_001092763 | Q2VIQ3 | KIF4B_HUMAN | inesin-motor.                  | 1  | TGTGGGACTCA    | 0.438 |
| + | 1  | 3426 |                    | NM_001099293 | NP_001092763 | Q2VIQ3 | KIF4B_HUMAN | by similarity). Globular (By s | 1  | GTGTTCTCTGCA   | 0.453 |
| + | 1  | 581  |                    | NR_002168    |              |        |             |                                | 0  | ATACGGAAGAA    | 0.343 |
| - | 4  | 774  | vi.2_Missense_Mu   | NM_001099414 | NP_001092884 | Q96D42 | HAVR1_HUMAN | pproximate tandem repeats      | 2  | TTGTTGGAATGC   | 0.458 |
| + | 23 | 2453 | _p.S772F CYFIP2    | NM_001037333 | NP_001032410 | Q96F07 | CYFP2_HUMAN |                                | 0  | CATCTCTGCCG    | 0.448 |
| - | 3  | 299  | DAM19_uc011ddr     | NM_033274    | NP_150377    | Q9H013 | ADA19_HUMAN |                                | 8  | CAGGTCCAGGA    | 0.478 |
| - | 1  | 958  | e_Mutation_p.A20f  | NM_178424    | NP_848511    | O94993 | SOX30_HUMAN |                                | 2  | GATGGCTGCCG    | 0.652 |
| - | 2  | 401  | ddz.1_Missense_h   | NM_144726    | NP_653327    | Q96MT1 | RN145_HUMAN |                                | 5  | TGACATCCCATC   | 0.423 |
| - | 7  | 1376 | se_Mutation_p.G3z  | NM_024565    | NP_078841    | Q8IV13 | CCNJL_HUMAN |                                | 0  | ATGAGCCTGTA    | 0.622 |
| - | 25 | 4692 | jit.1_Missense_Ml  | NM_025153    | NP_079429    | O94823 | AT10B_HUMAN | ellular (Potential).           | 5  | TGGTGGGGCTG    | 0.532 |
| + | 7  | 1128 | 3lyy.3_Splice_Site | NM_000816    | NP_000807    | P18507 | GBRG2_HUMAN |                                | 5  | TTCACAGGAGAT   | 0.378 |
| + | 5  | 1130 | _p.A256V ODZ2_u    | NM_001122679 | NP_001116151 |        |             |                                | 10 | TGCTGCCCTCTC   | 0.557 |
| + | 23 | 5002 | tt.3_Missense_Mur  | NM_001122679 | NP_001116151 |        |             |                                | 10 | TGAGGCTTGGT    | 0.537 |
| + | 25 | 5424 | t.3_Missense_Mut:  | NM_001122679 | NP_001116151 |        |             |                                | 10 | CTAAACTCCATT   | 0.532 |
| + | 18 | 2682 | _p.E863D WWC1_     | NM_015238    | NP_056053    | Q8IX03 | KIBRA_HUMAN | raction with histone H3.       | 5  | ggaggaggaggagg | 0.403 |
| + | 19 | 2830 | _p.P913S WWC1_     | NM_015238    | NP_056053    | Q8IX03 | KIBRA_HUMAN | ion with histone H3.           | 5  | GCACCCCGTCC    | 0.622 |
| - | 27 | 3320 | g.2_Missense_Mut   | NM_003062    | NP_003053    | O75094 | SLIT3_HUMAN | EGF-like 2.                    | 4  | TGCCTCCATGC    | 0.498 |
| + | 47 | 4849 | e_Mutation_p.R10   | NM_004946    | NP_004937    | Q92608 | DOCK2_HUMAN | DHR-2.                         | 7  | GAAAGGGGTGT    | 0.517 |
| + | 2  | 710  | c003mbe.1_5'Flan   | NM_021025    | NP_066305    | O43711 | TLX3_HUMAN  | Homeobox.                      | 1  | CGCAGGTCAAG    | 0.642 |
| + | 3  | 766  |                    | NM_003862    | NP_003853    | O76093 | FGF18_HUMAN |                                | 0  | CCCGCGGCGAG    | 0.527 |
| - | 3  | 646  |                    | NM_005990    | NP_005981    | O94804 | STK10_HUMAN | rotein kinase.                 | 8  | GGCTCCCCCTG    | 0.572 |
| - | 12 | 1328 |                    | NM_001017995 | NP_001017995 | A1X283 | SPD2B_HUMAN | SH3 3.                         | 4  | TGATGCCGCTC    | 0.582 |
| - | 3  | 349  | 3mbs.1_Missense    | NM_001017995 | NP_001017995 | A1X283 | SPD2B_HUMAN | PX.                            | 4  | CATGGGAAATT    | 0.463 |
| + | 5  | 1710 | fd.1_Missense_Mt   | NM_153607    | NP_705835    | Q8IUR6 | CE041_HUMAN |                                | 0  | AAAATGGCTTAC   | 0.398 |
| + | 1  | 2352 | 16N CPEB4_uc01     | NM_030627    | NP_085130    | Q17RY0 | CPEB4_HUMAN |                                | 0  | GCCGAGATCAC    | 0.557 |
| - | 9  | 1151 | se_Mutation_p.A2f  | NM_020444    | NP_065177    | Q96A73 | K1191_HUMAN |                                | 1  | GGTTGGCCTGG    | 0.532 |
| + | 2  | 234  | i.2_5'Flank NOP16  | NM_138820    | NP_620175    | Q9BW72 | HIG2A_HUMAN | Helical; (Potential).          | 0  | CTACTCCTTCCA   | 0.667 |
| - | 2  | 344  |                    | NM_052899    | NP_443131    | Q7Z2K8 | GRIN1_HUMAN |                                | 2  | CCTGGGGGGTG    | 0.657 |
| - | 6  | 652  | uc003mez.2_5'F     | NM_002115    | NP_002106    | P52790 | HXK3_HUMAN  | ng (Potential). Regulatory.    | 7  | CTAAAACCTTTG   | 0.602 |
| - | 15 | 2170 | _p.S545F UIMC1_u   | NM_016290    | NP_057374    | Q96RL1 | UIMC1_HUMAN |                                | 4  | TGAAAGAACTC    | 0.398 |
| + | 5  | 3751 | s.1_Missense_Mu    | NM_022455    | NP_071900    | Q96L73 | NSD1_HUMAN  |                                | 3  | TTCCAGAGCAT    | 0.463 |
| + | 23 | 6787 | l.E1948K NSD1_u    | NM_022455    | NP_071900    | Q96L73 | NSD1_HUMAN  | Pro-rich.                      | 3  | CTGGGGAGATC    | 0.557 |
| - | 12 | 770  | 3mib.1_RNA FAM1    | NM_173663    | NP_775934    | Q9UHL3 | F153A_HUMAN |                                | 1  | CTCCTCCAGGT    | 0.522 |
| + | 2  | 531  | P3_uc003mil.1_5'f  | NM_015111    | NP_055926    | O15049 | N4BP3_HUMAN |                                | 0  | CGCGGTGACT     | 0.612 |
| - | 5  | 427  | rff45_uc011dgu.1_  | NM_016175    | NP_057259    | Q6NTE8 | CE045_HUMAN |                                | 0  | GTTTGCTGAA     | 0.537 |
| + | 3  | 649  | NL8_uc010jll.2_M   | NM_001040462 | NP_001035552 | Q6UX41 | BTNL8_HUMAN | 2. Extracellular (Potential).  | 2  | TTCCTCTCATT    | 0.532 |
| + | 9  | 1178 |                    | NM_152547    | NP_689760    | Q6UXG8 | BTNL9_HUMAN | (Potential). B30.2 SPRY.       | 2  | TGAAGCCAGG     | 0.517 |
| + | 6  | 2552 | RIM41_uc003mnf.    | NM_033549    | NP_291027    | Q8WV44 | TRI41_HUMAN | 330.2 SPRY.                    | 0  | GGGTGCTCTCC    | 0.647 |
| - | 1  | 880  | c003mnq.2_5'Flan   | NM_032765    | NP_116154    | Q96A61 | TRI52_HUMAN |                                | 0  | TGCGACGTGTA    | 0.567 |
| - | 1  | 519  | c003mnq.2_5'Flan   | NM_032765    | NP_116154    | Q96A61 | TRI52_HUMAN | Glu-rich.                      | 0  | CCCCACCGCT     | 0.393 |
| - | 21 | 2224 | _p.G697E EXOC2_    | NM_018303    | NP_060773    | Q96KP1 | EXOC2_HUMAN |                                | 7  | TACTTCCAACA    | 0.353 |
| - | 11 | 1274 | e_Mutation_p.W3f   | NM_018303    | NP_060773    | Q96KP1 | EXOC2_HUMAN |                                | 7  | AGGATCCACTT    | 0.478 |
| - | 2  | 204  | se_Mutation_p.V2z  | NM_018303    | NP_060773    | Q96KP1 | EXOC2_HUMAN | IPT/TIG.                       | 7  | TTGTGACCTTCG   | 0.542 |
| + | 1  | 605  | ltn.2_Missense_Mt  | NM_001452    | NP_001443    | Q12947 | FOXF2_HUMAN | Fork-head.                     | 0  | TAAGGGCCTCG    | 0.677 |
| - | 9  | 1094 | K4_uc003mtx.3_5'   | NM_001012418 | NP_001012418 | Q86YV6 | MYLK4_HUMAN | rotein kinase.                 | 4  | CTGGGTTCCA     | 0.443 |

rs142576280

|   |    |      |                                 |              |              |        |             |                        |   |                   |       |
|---|----|------|---------------------------------|--------------|--------------|--------|-------------|------------------------|---|-------------------|-------|
| - | 6  | 756  | 3muc.2_Missense_                | NM_030666    | NP_109591    | P30740 | ILEU_HUMAN  |                        | 5 | ACTCGTCCTCAA'     | 0.542 |
| - | 5  | 576  | 3muc.2_Missense_                | NM_030666    | NP_109591    | P30740 | ILEU_HUMAN  |                        | 5 | TGGCTTCTTTCA'     | 0.413 |
| - | 6  | 794  | VB9_uc003muf.2_l                | NM_004155    | NP_004146    | P50453 | SPB9_HUMAN  |                        | 0 | 'CAGCTCCTTCC'     | 0.652 |
| - | 6  | 2990 | IPINB6_uc003mur                 | NM_004568    | NP_004559    | P35237 | SPB6_HUMAN  |                        | 0 | 'TGGCGGCTGCA      | 0.567 |
| - | 10 | 1798 | 9Y SLC22A23_uc                  | NM_015482    | NP_056297    | A1A5C7 | S22AN_HUMAN | ical; (Potential).     | 1 | gatgtggtgcaggaagt | 0.458 |
| - | 3  | 483  | .1_Intron C6orf146              | NM_173563    | NP_775834    | Q8IXS0 | CF146_HUMAN |                        | 1 | TACCACCTGCTC      | 0.328 |
| + | 5  | 492  | 36_uc003mwz.1_R                 | NM_004271    | NP_004262    | O95711 | LY86_HUMAN  |                        | 0 | :CGTGGCCTGTG      | 0.517 |
| + | 15 | 1606 | xo.2_Missense_Mt                | NM_031480    | NP_113668    | Q9BRS2 | RIOK1_HUMAN | rotein kinase.         | 4 | TGTGAGGAGTTG      | 0.264 |
| + | 24 | 8528 | i.1_Missense_Mut                | NM_004415    | NP_004406    | P15924 | DESP_HUMAN  | in 16. Globular 2.     | 9 | 'AGAAGCCATCC'     | 0.557 |
| + | 24 | 8822 | i.1_Missense_Mut                | NM_004415    | NP_004406    | P15924 | DESP_HUMAN  | Globular 2.            | 9 | 'GAGAGGAAGCT      | 0.368 |
| + | 8  | 907  | NRNP48_uc003m                   | NM_152551    | NP_689764    | Q6IEG0 | SNR48_HUMAN |                        | 0 | 'GCAGTCTGGTG'     | 0.393 |
| + | 4  | 2880 | EP1_uc011diq.1_F                | NM_002114    | NP_002105    | P15822 | ZEP1_HUMAN  |                        | 6 | 'AAGCAGCCATA'     | 0.498 |
| + | 6  | 6453 | EP1_uc011diq.1_F                | NM_002114    | NP_002105    | P15822 | ZEP1_HUMAN  | 2H2-type 4.            | 6 | 'GTGAAGAATGTC     | 0.373 |
| + | 8  | 7009 | EP1_uc011diq.1_F                | NM_002114    | NP_002105    | P15822 | ZEP1_HUMAN  |                        | 6 | 'GAAGGCCAGGC      | 0.552 |
| - | 4  | 393  | BC1D7_uc003nac                  | NM_016495    | NP_057579    | Q9P0N9 | TBCD7_HUMAN | ab-GAP TBC.            | 1 | 'GTGTGGCATCA      | 0.502 |
| - | 2  | 567  | BD1_uc003nat.1_lr               | NM_033069    | NP_149060    |        |             |                        | 0 | 'GAAGGCAATTG'     | 0.567 |
| + | 3  | 824  | p.V136M RNF182_                 | NM_152737    | NP_689950    | Q8N6D2 | RN182_HUMAN |                        | 3 | TGGAGGTGCAG'      | 0.557 |
| + | 6  | 1062 | liv.1_Missense_Mt               | NM_004973    | NP_004964    | Q92833 | JARD2_HUMAN |                        | 4 | 'AGCGGCCCCCT      | 0.632 |
| - | 8  | 731  | nbo.2_RNA DTNB                  | NM_032122    | NP_115498    | Q96EV8 | DTBP1_HUMAN | Dysbindin.             | 0 | GCTGGGTGTGC'      | 0.517 |
| - | 9  | 2938 | e_Mutation_p.G65                | NM_000332    | NP_000323    | P54253 | ATX1_HUMAN  | USP7. RNA-binding. AXH | 4 | 'ACCAGCCCTGT      | 0.488 |
| - | 19 | 3861 | p.P1252S NUP153                 | NM_005124    | NP_005115    | P49790 | NU153_HUMAN |                        | 9 | 'AGGTGGATTGG      | 0.478 |
| - | 18 | 3187 | _p.T1027I NUP153                | NM_005124    | NP_005115    | P49790 | NU153_HUMAN |                        | 9 | 'ATGGAGTTAAAC     | 0.358 |
| + | 4  | 601  | cn.1_Missense_Mt                | NM_153042    | NP_694587    | Q8NB78 | KDM1B_HUMAN |                        | 1 | 'CTAAGGACTACC     | 0.428 |
| + | 3  | 188  | CDKAL1_uc010jpc                 | NM_017774    | NP_060244    | Q5VV42 | CDKAL_HUMAN |                        | 2 | 'TGCATCCTGTG      | 0.313 |
| - | 3  | 1025 | _p.S263N KIAA03                 | NM_014809    | NP_055624    | Q5VV43 | K0319_HUMAN | ellular (Potential).   | 2 | CAGAGCTGTTGC'     | 0.557 |
| + | 3  | 817  | ifn.2_Missense_M                | NM_006355    | NP_006346    | O00635 | TRI38_HUMAN | B box-type.            | 0 | 'CAGCTCTTGTG'     | 0.572 |
| - | 1  | 601  |                                 | NM_005325    | NP_005316    | Q02539 | H11_HUMAN   |                        | 2 | TTTACAGTTTTG'     | 0.493 |
| - | 2  | 720  | t2BF_uc003ngx.2_                | NM_003530    | NP_003521    | P68431 | H31_HUMAN   |                        | 0 | 'GGTTGGTGTCC'     | 0.582 |
| + | 9  | 1118 | e_Mutation_p.G14                | NM_005865    | NP_005856    | Q9NQE7 | TSSP_HUMAN  |                        | 5 | TGTGGGTGACC'      | 0.507 |
| + | 3  | 1584 |                                 | NM_001076781 | NP_001070249 | Q9UJN7 | ZN391_HUMAN |                        | 3 | CTTCATACTAAAC     | 0.358 |
| - | 1  | 23   | t2BN_uc003nju.1_                | NM_003510    | NP_003501    | P0C0S8 | H2A1_HUMAN  |                        | 1 | TGCCGCCCTGC'      | 0.552 |
| - | 1  | 404  |                                 | NM_005322    | NP_005313    | P16401 | H15_HUMAN   |                        | 3 | GGCTTCCCCGG       | 0.617 |
| + | 2  | 710  | kz.2_Missense_M                 | NM_032507    | NP_115896    | Q96JS3 | PGBD1_HUMAN | SCAN box.              | 4 | 'GAGAGGAGGCA      | 0.537 |
| + | 7  | 2550 | kz.2_Missense_M                 | NM_032507    | NP_115896    | Q96JS3 | PGBD1_HUMAN |                        | 4 | AACCATCCATAG'     | 0.393 |
| - | 2  | 403  | p.M11 ZNF323_uc                 | NM_001135216 | NP_001128688 | Q96LW9 | ZN323_HUMAN |                        | 2 | 'GAAGCCATTCCT     | 0.423 |
| + | 6  | 998  | ZKSCAN3_uc003r                  | NM_024493    | NP_077819    | Q9BRR0 | ZKSC3_HUMAN | KRAB.                  | 2 | GAGCAGGGACT'      | 0.488 |
| - | 7  | 2041 | p.D418N ZNF311_                 | NM_001010877 | NP_001010877 | Q5JNZ3 | ZN311_HUMAN | 2H2-type 10.           | 0 | 'CTTATCTTGGA'     | 0.468 |
| + | 3  | 978  | n_p.V179I OR2H1_                | NM_030883    | NP_112145    | Q9GZK4 | OR2H1_HUMAN | ellular (Potential).   | 0 | GTGAGGTCCCA'      | 0.507 |
| - | 15 | 2117 | 3BR1_uc003nmu.3_                | NM_001470    | NP_001461    | Q9UBS5 | GABR1_HUMAN | Name=1; (Potential).   | 7 | 'AGACGGAGATA'     | 0.468 |
| - | 11 | 1619 | 3nmu.3_Missense_                | NM_001470    | NP_001461    | Q9UBS5 | GABR1_HUMAN | ellular (Potential).   | 7 | 'GCATGACAATC1     | 0.537 |
| - | 6  | 955  | 3nmu.3_Missense_                | NM_001470    | NP_001461    | Q9UBS5 | GABR1_HUMAN | ellular (Potential).   | 7 | GTCCGGCAGGA'      | 0.687 |
| + | 2  | 221  | se_Mutation_p.G1                | NM_002127    | NP_002118    | P17693 | HLAG_HUMAN  |                        | 4 | 'TCTCGGGGGCC      | 0.592 |
| + | 3  | 333  | p.1_Intron HLA-H_uc003nod.2_RNA |              |              |        |             |                        | 0 | GGGGCCCGACG       | 0.701 |
| - | 7  | 1181 | inpn.2_Splice_Site              | NM_006778    | NP_006769    | Q9UDY6 | TRI10_HUMAN | 330.2/SPRY.            | 0 | ACTCACCACCCA'     | 0.637 |
| + | 1  | 840  |                                 | NM_033229    | NP_150232    | Q9C019 | TRI15_HUMAN |                        | 0 | 'TGACGAGGCC       | 0.582 |
| + | 6  | 1111 | _p.E267K TRIM39_                | NM_021253    | NP_067076    | Q9HCM9 | TRI39_HUMAN |                        | 3 | 'CCCTGGAAAAG'     | 0.473 |
| + | 8  | 1255 | _p.E285K TRIM39_                | NM_021253    | NP_067076    | Q9HCM9 | TRI39_HUMAN |                        | 3 | 'AGCTGAAAAG       | 0.448 |



|   |    |      |                    |              |              |        |             |                               |    |               |       |
|---|----|------|--------------------|--------------|--------------|--------|-------------|-------------------------------|----|---------------|-------|
| + | 9  | 1582 | ie_Mutation_p.P39  | NM_021253    | NP_067076    | Q9HCM9 | TRI39_HUMAN | 330.2/SPRY.                   | 3  | :CACTCCCTGAG, | 0.592 |
| + | 2  | 470  | e_Mutation_p.E274  | NM_001109938 | NP_001103408 | Q5SQH8 | CF136_HUMAN |                               | 0  | GGGAGGAGGGA   | 0.612 |
| - | 1  | 318  | 16_uc011dmo.1_li   | NM_003587    | NP_003578    | O60231 | DHX16_HUMAN |                               | 4  | :GCAGCGCTGTG  | 0.652 |
| - | 10 | 4807 | C1_uc011dmp.1_h    | NM_014641    | NP_055456    | Q14676 | MDC1_HUMAN  | on with the PRKDC comple      | 4  | :AAGGCTGGAGC  | 0.562 |
| - | 3  | 748  | MDC1_uc003nrh.1    | NM_014641    | NP_055456    | Q14676 | MDC1_HUMAN  | omplex. FHA. Interaction w    | 4  | :TAGGAGGTCTC/ | 0.502 |
| + | 4  | 384  | e_Mutation_p.I60T  | NM_013993    | NP_054699    | Q08345 | DDR1_HUMAN  | :(Potential). F5/8 type C.    | 9  | :GACCATCCCAG  | 0.597 |
| + | 9  | 1194 | 1_Missense_Mutal   | NM_013993    | NP_054699    | Q08345 | DDR1_HUMAN  | ellular (Potential).          | 9  | CATGGCCTGGG/  | 0.687 |
| + | 8  | 944  | 011dmw.1_Missen    | NM_001517    | NP_001508    | Q92759 | TF2H4_HUMAN |                               | 3  | :TCTGGGCAAGG  | 0.507 |
| + | 25 | 3262 | _p.A875V VARS2_    | NM_020442    | NP_065175    | Q5ST30 | SYVM_HUMAN  |                               | 4  | :CCCTGCCCCCA  | 0.682 |
| - | 2  | 896  |                    | NM_014070    | NP_054789    | Q6UXA7 | CF015_HUMAN | Pro-rich.                     | 0  | :GGACTCCAGGA  | 0.542 |
| - | 6  | 922  | _p.E320K CCHCR     | NM_019052    | NP_061925    | Q8TD31 | CCHCR_HUMAN | Potential.                    | 1  | :CAGTTCCTATG  | 0.532 |
| + | 3  | 765  | 1st.2_Missense_M   | NM_001077511 | NP_001070979 | Q9Y242 | TCF19_HUMAN | FHA.                          | 0  | :CAGGTACTTTGC | 0.507 |
| + | 4  | 918  | _p.V236M MICB_u    | NM_005931    | NP_005922    | Q29980 | MICB_HUMAN  | e. Extracellular (Potential). | 0  | :CCTGGGTGGCC  | 0.592 |
| + | 4  | 976  | _p.S255N MICB_u    | NM_005931    | NP_005922    | Q29980 | MICB_HUMAN  | e. Extracellular (Potential). | 0  | :ACACAGCGGGA  | 0.617 |
| + | 3  | 323  | anslation_Start_Si | NM_001159740 | NP_001153212 | P01374 | TNFB_HUMAN  |                               | 0  | :CCCTGGTGTG   | 0.612 |
| + | 3  | 329  | _uc003nuh.2_5'UT   | NM_001159740 | NP_001153212 | P01374 | TNFB_HUMAN  |                               | 0  | :TGTGGCCTCA   | 0.607 |
| + | 12 | 2014 | T2_uc003nvc.3_N    | NM_080686    | NP_542417    | P48634 | PRC2A_HUMAN | AA type A repeats.            | 0  | :GCCCAGGTATG  | 0.547 |
| + | 16 | 2824 | T2_uc003nvc.3_N    | NM_080686    | NP_542417    | P48634 | PRC2A_HUMAN | AA type A repeats.            | 0  | AGGAACCAGGG   | 0.607 |
| - | 7  | 954  | _p.V208I BAT3_uc   | NM_004639    | NP_004630    | P46379 | BAG6_HUMAN  | Pro-rich.                     | 0  | GGCTACTGGCTC  | 0.622 |
| - | 1  | 1336 |                    | NM_021184    | NP_067007    | O95873 | CF047_HUMAN |                               | 1  | TGGGCCCCCCA   | 0.657 |
| - | 4  | 302  | 5_uc003nvz.1_5'U   | NM_021160    | NP_066983    | O95870 | ABHGA_HUMAN |                               | 0  | :CTTTGGACAAA  | 0.557 |
| + | 5  | 806  | _Intron LY6G6F_u   | NM_001003693 | NP_001003693 | Q5SQ64 | LY66F_HUMAN | lasmic (Potential).           | 2  | :AGATGCCTCGA  | 0.537 |
| - | 5  | 1352 | wq.2_Missense_M    | NM_013974    | NP_039268    | O95865 | DDAH2_HUMAN |                               | 0  | :CAGATCCCCAC  | 0.587 |
| - | 5  | 1292 | wq.2_Missense_M    | NM_013974    | NP_039268    | O95865 | DDAH2_HUMAN |                               | 0  | :AAAGAGACAGT  | 0.587 |
| - | 4  | 1037 | RS_uc011doi.1_R    | NM_006295    | NP_006286    | P26640 | SYVC_HUMAN  | ST C-terminal.                | 3  | :CTTCTCCTAGC/ | 0.592 |
| + | 1  | 1880 | _Missense_Mutatic  | NM_005345    | NP_005336    | P08107 | HSP71_HUMAN |                               | 1  | :CTACGCCTTCA  | 0.597 |
| - | 2  | 322  | :U1_uc010jth.2_Inl | NM_000434    | NP_000425    | Q99519 | NEUR1_HUMAN |                               | 1  | :CAGCGGTGCA   | 0.592 |
| - | 20 | 2005 | J1_uc003nrx.3_5'F  | NM_025257    | NP_079533    | Q53GD3 | CTL4_HUMAN  | ical; (Potential).            | 4  | GGCCCCCAGGA   | 0.602 |
| + | 9  | 1467 | _p.D899Y CFB_uc    | NM_001710    | NP_001701    | P00751 | CFAB_HUMAN  | VWFA.                         | 1  | :GCGGGGACCC/  | 0.498 |
| - | 7  | 676  | se_Mutation_p.A9   | NM_002904    | NP_002895    | P18615 | NELFE_HUMAN |                               | 0  | ACCAGCCCCTG   | 0.607 |
| - | 19 | 6959 |                    | NM_019105    | NP_061978    | P22105 | TENX_HUMAN  | nectin type-III 15.           | 0  | TGGCTCCAGGC   | 0.602 |
| - | 17 | 6156 |                    | NM_019105    | NP_061978    | P22105 | TENX_HUMAN  |                               | 0  | TGATGGGGGGC   | 0.632 |
| - | 9  | 3776 |                    | NM_019105    | NP_061978    | P22105 | TENX_HUMAN  | onnectin type-III 5.          | 0  | :GTACTGGACCA  | 0.582 |
| - | 3  | 2040 |                    | NM_019105    | NP_061978    | P22105 | TENX_HUMAN  | EGF-like 15.                  | 0  | :CCTCACTCACG  | 0.657 |
| - | 4  | 760  | oax.3_Missense_M   | NM_022107    | NP_071390    | Q9Y4H4 | GPSM3_HUMAN | GoLoco 2.                     | 0  | :TGACCCTGGG   | 0.627 |
| - | 12 | 2113 | _p.D20N HLA-DO     | NM_018833    | NP_061313    | Q03519 | TAP2_HUMAN  |                               | 0  | :GGAATCCAGTC  | 0.483 |
| - | 5  | 785  | AP2_uc003ocd.2_    | NM_148919    | NP_683720    | P28062 | PSB8_HUMAN  |                               | 1  | CTCTTACTATTG/ | 0.468 |
| - | 4  | 551  | e_Mutation_p.G16E  | NM_148919    | NP_683720    | P28062 | PSB8_HUMAN  |                               | 1  | ACTGCCCATAGA  | 0.512 |
| - | 4  | 711  | :Juk.2_Missense_M  | NM_033554    | NP_291032    | P20036 | DPA1_HUMAN  | ical; (Potential).            | 1  | :CCAGGGCACAG  | 0.617 |
| - | 66 | 5401 | :y.1_Missense_Mu   | NM_080680    | NP_542411    | P13942 | COBA2_HUMAN | lar collagen NC1.             | 5  | :CCCTCCCCGCC  | 0.637 |
| - | 26 | 2314 | nse_Mutation_p.Ei  | NM_080680    | NP_542411    | P13942 | COBA2_HUMAN | le-helical region.            | 5  | :ACCTTCCTTCC  | 0.537 |
| - | 4  | 999  | s.1_Missense_Mu    | NM_021976    | NP_068811    | P28702 | RXRB_HUMAN  | Hinge.                        | 3  | :CTTACCCTCCC  | 0.592 |
| - | 3  | 757  | ation_p.P57L RXR   | NM_021976    | NP_068811    | P28702 | RXRB_HUMAN  | (By similarity). Pro-rich.    | 3  | GAGGGGGTGGA   | 0.607 |
| + | 2  | 355  | _5'Flank RXRB_uc   | NM_001077516 | NP_001070984 | Q92504 | S39A7_HUMAN | His-rich.                     | 1  | :ATCAGACCATC  | 0.537 |
| - | 7  | 886  | _p.V151M VPS52_    | NM_022553    | NP_072047    | Q8N1B4 | VPS52_HUMAN |                               | 5  | :GAGCAGCCTC   | 0.587 |
| - | 6  | 1384 | APBP_uc003odz.2    | NM_003190    | NP_003181    | O15533 | TPSN_HUMAN  | lenal (Potential).            | 1  | :TGAAAGACCTG  | 0.597 |
| - | 4  | 1455 | :011dre.1_Splice_ξ | NM_001350    | NP_001341    | Q9UER7 | DAXX_HUMAN  |                               | 23 | :CCACACCTCAC  | 0.562 |

rs149498990

|   |    |       |                              |              |              |        |             |                               |    |               |       |
|---|----|-------|------------------------------|--------------|--------------|--------|-------------|-------------------------------|----|---------------|-------|
| - | 3  | 1079  | nse_Mutation_p.A             | NM_001350    | NP_001341    | Q9UER7 | DAXX_HUMAN  |                               | 23 | CTACAGCCCGA   | 0.602 |
| + | 6  | 721   | i_2_Missense_Mut             | NM_024165    | NP_077084    | O43189 | PHF1_HUMAN  |                               | 0  | FGCTGGGTATGA  | 0.597 |
| + | 25 | 3367  |                              | NM_002224    | NP_002215    | Q14573 | ITPR3_HUMAN | lasmic (Potential).           | 19 | ATGACGAGGGC   | 0.637 |
| + | 33 | 4682  |                              | NM_002224    | NP_002215    | Q14573 | ITPR3_HUMAN | lasmic (Potential).           | 19 | GAAACAGCACTT  | 0.458 |
| + | 40 | 5689  | r3_uc003oey.2_5'F            | NM_002224    | NP_002215    | Q14573 | ITPR3_HUMAN | lasmic (Potential).           | 19 | TCGACCCCACC   | 0.657 |
| - | 1  | 96    | l_5'Flank LEMD2_             | NM_181336    | NP_851853    | Q8NC56 | LEMD2_HUMAN | LEM.                          | 1  | CATCCCGGGTG   | 0.716 |
| + | 5  | 726   | ojp.2_Missense_IV            | NM_020804    | NP_065855    | Q9BY11 | PACN1_HUMAN |                               | 0  | CACGGGAGATG   | 0.542 |
| + | 14 | 3074  | F1BP1_uc010jvn.2             | NM_017754    | NP_060224    | Q6BDS2 | URFB1_HUMAN |                               | 3  | GGAGAGGCCAC   | 0.552 |
| + | 22 | 3074  | 3ojw.1_Silent_p.L84L TAF11_u | NM_017754    | NP_060224    | Q6BDS2 | URFB1_HUMAN |                               | 3  | TTTTCAGTTTTT  | 0.368 |
| - | 9  | 1407  | cc.2_Missense_Mu             | NM_001093728 | NP_001087197 | Q8WUU5 | TCP11_HUMAN |                               | 5  | ACAAGGCCATA   | 0.448 |
| - | 7  | 936   | okc.2_Splice_Site            | NM_001093728 | NP_001087197 | Q8WUU5 | TCP11_HUMAN |                               | 5  | GAGACCTATGAC  | 0.473 |
| + | 11 | 1286  | p.L426P SCUBE3               | NM_152753    | NP_689966    | Q8IX30 | SCUB3_HUMAN |                               | 1  | TGCCCTGACCT   | 0.597 |
| + | 11 | 1888  | p.A592T DEF6_u               | NM_022047    | NP_071330    | Q9H4E7 | DEFI6_HUMAN |                               | 0  | CCCCGGCTCC    | 0.592 |
| + | 6  | 1339  | vw.1_Missense_M              | NM_021922    | NP_068741    | Q9HB96 | FANCE_HUMAN |                               | 3  | TACAACCTGCC   | 0.498 |
| - | 7  | 880   | e_Mutation_p.G47             | NM_001145776 | NP_001139248 | Q13451 | FKBP5_HUMAN | ise FKBP-type 2.              | 1  | CCCTCTCCAAA   | 0.368 |
| + | 1  | 502   |                              | NM_182548    | NP_872354    | Q8TAF8 | TMHS_HUMAN  | ical; (Potential).            | 1  | GCATGGCCCTCT  | 0.592 |
| - | 11 | 1177  | alh.2_Missense_M             | NM_003137    | NP_003128    | Q96SB4 | SRPK1_HUMAN | rotein kinase.                | 1  | TTCTGCTGCACC  | 0.353 |
| - | 3  | 357   | r_p.W82* SLC26A              | NM_052961    | NP_443193    | Q96RN1 | S26A8_HUMAN | lasmic (Potential).           | 2  | CACATCCATTCT  | 0.458 |
| + | 4  | 798   | l3olq.2_Missense_            | NM_001315    | NP_001306    | Q16539 | MK14_HUMAN  | rotein kinase.                | 6  | GGTGACCCATC   | 0.353 |
| + | 9  | 829   | K13_uc003olt.2_l             | NM_002754    | NP_002745    | O15264 | MK13_HUMAN  | rotein kinase.                | 3  | TGGCACGGAGT   | 0.607 |
| + | 6  | 2386  | tj.1_RNA BRPF3_u             | NM_015695    | NP_056510    | Q9ULD4 | BRPF3_HUMAN |                               | 2  | TTACCCTTCTC   | 0.622 |
| + | 8  | 2782  | j.1_Intron BRPF3_            | NM_015695    | NP_056510    | Q9ULD4 | BRPF3_HUMAN |                               | 2  | ATCCCCCCGG    | 0.502 |
| + | 6  | 1153  | p.P290S PNPLA1               | NM_001145717 | NP_001139189 | Q8N8W4 | PLPL1_HUMAN | Pro-rich.                     | 4  | CCACACCTGGT   | 0.577 |
| - | 6  | 1132  | p.D182N STK38_               | NM_007271    | NP_009202    | Q15208 | STK38_HUMAN | rotein kinase.                | 6  | GAGTGTCTTTTT  | 0.328 |
| + | 2  | 256   | aml.2_Missense_IV            | NM_000389    | NP_000380    | P38936 | CDN1A_HUMAN |                               | 2  | GGAGGCCCGTG   | 0.657 |
| + | 6  | 1691  | lb.2_Missense_ML             | NM_153370    | NP_699201    | Q6UXB8 | PI16_HUMAN  | ical; (Potential).            | 0  | TCCTGCCTCCT   | 0.617 |
| + | 4  | 603   | D22B_uc010jw.2               | NM_017772    | NP_060242    | Q9NU19 | TB22B_HUMAN |                               | 0  | AACAGCAATCA   | 0.542 |
| + | 20 | 2331  |                              | NM_015050    | NP_055865    | Q8N1G2 | MTR1_HUMAN  |                               | 5  | CAAGCCTAGTCC  | 0.547 |
| - | 12 | 2401  | e_Mutation_p.R57l            | NM_052893    | NP_443125    | Q96Q07 | BTBD9_HUMAN |                               | 0  | CTGCCGGTTGG   | 0.662 |
| + | 64 | 9799  | uc003oof.1_Intron            | NM_001371    | NP_001362    |        |             |                               | 21 | GAACGTATGAAT  | 0.279 |
| + | 65 | 9910  | uc003oof.1_Intron            | NM_001371    | NP_001362    |        |             |                               | 21 | CAGACGAAGTG   | 0.368 |
| + | 68 | 10402 | uc003oof.1_Intron            | NM_001371    | NP_001362    |        |             |                               | 21 | ATGTGGCTGGT   | 0.378 |
| + | 82 | 12592 | og.1_Missense_M              | NM_001371    | NP_001362    |        |             |                               | 21 | CTACGGAGCC    | 0.393 |
| + | 91 | 13985 |                              | NM_001371    | NP_001362    |        |             |                               | 21 | ATTTGACCTTCAT | 0.473 |
| + | 91 | 14053 |                              | NM_001371    | NP_001362    |        |             |                               | 21 | TGGCCCTTTTG   | 0.468 |
| + | 8  | 914   | h.2_RNA GLP1R_               | NM_002062    | NP_002053    | P43220 | GLP1R_HUMAN | Name=4; (Potential).          | 5  | CTGGGGCATTG   | 0.602 |
| + | 10 | 1051  | h.2_RNA GLP1R_               | NM_002062    | NP_002053    | P43220 | GLP1R_HUMAN | lasmic (Potential).           | 5  | GCATCGTGGTAT  | 0.562 |
| - | 3  | 343   | Qjwy.2_Splice_Site           | NM_032115    | NP_115491    | Q96T55 | KCNKG_HUMAN |                               | 3  | ATATCCTGCAAC  | 0.562 |
| + | 11 | 1333  | p.G393S DAAM2_               | NM_015345    | NP_056160    | Q86T65 | DAAM2_HUMAN | GBD/FH3.                      | 3  | ACGGTGGCTAC   | 0.592 |
| - | 2  | 451   | p.E105K MOCS1                | NM_005942    | NP_005933    | Q9NZB8 | MOCS1_HUMAN | actor biosynthesis protein    | 3  | CTCCTCTGTGG   | 0.607 |
| + | 9  | 1125  | p.G287E NFYA_u               | NM_002505    | NP_002496    | P23511 | NFYA_HUMAN  | YA/HAP2-type.                 | 0  | AGGTGGACGAT   | 0.393 |
| - | 5  | 775   | .2_Intron TRERF1             | NM_033502    | NP_277037    | Q96PN7 | TREF1_HUMAN |                               | 5  | TTTTGGAGCCA   | 0.582 |
| - | 2  | 891   |                              | NM_000322    | NP_000313    | P23942 | PRPH2_HUMAN | renal (Potential).            | 5  | ACCGCCATCC    | 0.577 |
| + | 13 | 3333  | .G1061D KIAA024              | NM_015349    | NP_056164    | Q6AI39 | K0240_HUMAN |                               | 1  | TGAAGGTGTTG   | 0.507 |
| - | 11 | 2713  | .1_Nonsense_Mut              | NM_014780    | NP_055595    | Q14999 | CUL7_HUMAN  |                               | 4  | GATCTGGCCAC   | 0.552 |
| - | 4  | 1051  | p.L334F CUL7_uc              | NM_014780    | NP_055595    | Q14999 | CUL7_HUMAN  |                               | 4  | AAGAGCACCC    | 0.552 |
| + | 2  | 317   | p.S40F PTK7_uc               | NM_002821    | NP_002812    | Q13308 | PTK7_HUMAN  | 1. Extracellular (Potential). | 3  | TCCTCCAGG     | 0.632 |

rs146698142

|   |    |       |                   |              |              |        |             |                               |    |                    |       |
|---|----|-------|-------------------|--------------|--------------|--------|-------------|-------------------------------|----|--------------------|-------|
| + | 14 | 2287  | se_Mutation_p.P5f | NM_002821    | NP_002812    | Q13308 | PTK7_HUMAN  | cellular (Potential).         | 3  | AGCCCTCCCCC        | 0.602 |
| + | 18 | 2920  | 3ouf.1_Splice_Sit | NM_002821    | NP_002812    | Q13308 | PTK7_HUMAN  |                               | 3  | CTCCAGGTGGC        | 0.557 |
| + | 19 | 3943  | _p.V1290 CUL9_u   | NM_015089    | NP_055904    | Q8IWT3 | CUL9_HUMAN  | DOC.                          | 12 | CCCGGGTTCGG        | 0.582 |
| + | 3  | 508   |                   | NM_032538    | NP_115927    | Q5TCY1 | TTBK1_HUMAN | rotein kinase.                | 9  | AGATGGAGGTG        | 0.587 |
| + | 11 | 1426  |                   | NM_032538    | NP_115927    | Q5TCY1 | TTBK1_HUMAN |                               | 9  | GGCTGGGCCCC        | 0.632 |
| - | 10 | 4702  | 318_uc003ouw.2_l  | NM_014345    | NP_055160    | Q5VUA4 | ZN318_HUMAN |                               | 7  | TGAGAGGGGTG        | 0.483 |
| - | 10 | 4309  | 318_uc003ouw.2_l  | NM_014345    | NP_055160    | Q5VUA4 | ZN318_HUMAN |                               | 7  | CCCTCCAAATG        | 0.423 |
| - | 6  | 3150  | 3_uc003ouw.2_Spl  | NM_014345    | NP_055160    | Q5VUA4 | ZN318_HUMAN |                               | 7  | TTGTTACCTTGTT      | 0.368 |
| + | 3  | 575   | ouz.1_Nonsense_f  | NM_033450    | NP_258261    | Q5T3U5 | MRP7_HUMAN  | ical; (Potential).            | 7  | CTGTGGGTGTT        | 0.657 |
| - | 3  | 501   | jjys.1_5'UTR YIPF | NM_015388    | NP_056203    | Q9GZM5 | YIPF3_HUMAN |                               | 0  | ATGTCGATGTTG       | 0.522 |
| + | 8  | 1312  | _uc011dvl.1_Splic | NM_006502    | NP_006493    | Q9Y253 | POLH_HUMAN  |                               | 2  | AACAGGTAAGC        | 0.443 |
| + | 11 | 2084  | p.G667D HSP90A    | NM_007355    | NP_031381    | P08238 | HS90B_HUMAN |                               | 4  | TTCTGGCTTTTC       | 0.522 |
| - | 6  | 1032  | 2_RNA TMEM151E    | NM_020745    | NP_065796    | Q5JTZ9 | SYAM_HUMAN  |                               | 1  | CCCTGACATCCC       | 0.632 |
| + | 4  | 1551  |                   | NM_014936    | NP_055751    | Q9Y6X5 | ENPP4_HUMAN | lasmic (Potential).           | 4  | AGAATAGACTTTC      | 0.418 |
| - | 2  | 625   | fvz.1_Nonsense_f  | NM_021572    | NP_067547    | Q9UJA9 | ENPP5_HUMAN |                               | 0  | CCGGGCCACAT        | 0.398 |
| + | 1  | 1652  | ze.2_Missense_Mt  | NM_001010870 | NP_001010870 | O60522 | TDRD6_HUMAN | Tudor 3.                      | 6  | AAAATGTTATT        | 0.428 |
| - | 3  | 412   | 2G7_uc011dwd.1_l  | NM_005084    | NP_005075    | Q13093 | PAFA_HUMAN  |                               | 0  | TTGCAGCAGCC        | 0.368 |
| - | 17 | 3350  | yp.3_Missense_M   | NM_001098518 | NP_001091988 | Q8IZF2 | GP116_HUMAN | Name=1; (Potential).          | 2  | AAAGCCCACCC        | 0.493 |
| - | 17 | 3160  | yp.3_Nonsense_f   | NM_001098518 | NP_001091988 | Q8IZF2 | GP116_HUMAN | tracellular (Potential).      | 2  | AAGTCCAGAA         | 0.483 |
| - | 12 | 1743  | nse_Mutation_p.G  | NM_001098518 | NP_001091988 | Q8IZF2 | GP116_HUMAN | xtracellular (Potential).     | 2  | TTTGTCCCTCAC       | 0.338 |
| - | 2  | 1181  |                   | NM_014452    | NP_055267    | O75509 | TNR21_HUMAN | cellular (Potential).         | 0  | GTTACCTTTGGC       | 0.478 |
| + | 4  | 374   | se_Mutation_p.P57 | NM_153839    | NP_722581    | Q8IZF7 | GP111_HUMAN | cellular (Potential).         | 1  | GCCCTCCAGAC        | 0.488 |
| - | 6  | 519   | _p.R88H CRISP2_u  | NM_001142408 | NP_001135880 | P16562 | CRIS2_HUMAN |                               | 1  | ctggtttgcggctctctg | 0.264 |
| + | 8  | 1680  | P2D_uc011dwt.1_   | NM_172238    | NP_758438    | Q7Z6R9 | AP2D_HUMAN  | span-helix), dimerization.    | 7  | ACTCCGGCAATA       | 0.433 |
| - | 58 | 9973  | i.P1216S PKHD1_   | NM_138694    | NP_619639    | P08F94 | PKHD1_HUMAN | cellular (Potential).         | 44 | GGAGGGAGCTC        | 0.488 |
| - | 35 | 5887  | ai.2_Missense_Mu  | NM_138694    | NP_619639    | P08F94 | PKHD1_HUMAN | cellular (Potential).         | 44 | CTTTTCCAATTT       | 0.398 |
| - | 32 | 5365  | ai.2_Missense_Mu  | NM_138694    | NP_619639    | P08F94 | PKHD1_HUMAN | ical. Extracellular (Potentia | 44 | GTTACCAGAGA        | 0.537 |
| - | 23 | 2665  | iai.2_Missense_Mt | NM_138694    | NP_619639    | P08F94 | PKHD1_HUMAN | cellular (Potential).         | 44 | TATTAGGAAGCTC      | 0.498 |
| - | 16 | 1655  | iai.2_Missense_Mt | NM_138694    | NP_619639    | P08F94 | PKHD1_HUMAN | cellular (Potential).         | 44 | GCTATCCCATGA       | 0.547 |
| - | 15 | 1456  | iai.2_Missense_Mt | NM_138694    | NP_619639    | P08F94 | PKHD1_HUMAN | cellular (Potential).         | 44 | TATCTGCCTGAAT      | 0.438 |
| - | 9  | 1420  | vu.1_Missense_Mt  | NM_002388    | NP_002379    | P25205 | MCM3_HUMAN  | MCM.                          | 3  | GGATGCCAGCC        | 0.542 |
| + | 5  | 1047  | _p.V187I EFHC1_u  | NM_018100    | NP_060570    | Q5JVL4 | EFHC1_HUMAN | DM10 2.                       | 3  | GAGAGGTCCAC        | 0.438 |
| - | 7  | 747   | 1_Intron TRAM2_u  | NM_012288    | NP_036420    | Q15035 | TRAM2_HUMAN | helical; (Potential).         | 0  | ATGCACCAGGT        | 0.448 |
| - | 3  | 213   | A3_uc010jqz.2_5'  | NM_000847    | NP_000838    | Q16772 | GSTA3_HUMAN | ST N-terminal.                | 0  | CCATTTCTTAACT      | 0.333 |
| - | 3  | 570   | _p.G27E ICK_uc0   | NM_016513    | NP_057597    | Q9UPZ9 | ICK_HUMAN   | rotein kinase.                | 5  | GCTCCCCAGAC        | 0.478 |
| - | 9  | 1067  | dx.1_Missense_f   | NM_019036    | NP_061909    | Q8TB92 | HMGC2_HUMAN |                               | 4  | CTGCGGAGTCC        | 0.423 |
| - | 97 | 16908 | zy.3_Missense_Mu  | NM_001144769 | NP_001138241 | Q03001 | DYST_HUMAN  |                               | 14 | CACACGGACTGG       | 0.587 |
| - | 73 | 13277 | i.E4268K DST_uc   | NM_001144769 | NP_001138241 | Q03001 | DYST_HUMAN  | Spectrin 14.                  | 14 | GTCTTTCCATTT       | 0.323 |
| - | 52 | 8073  | i.P2533L DST_uc   | NM_001144769 | NP_001138241 | Q03001 | DYST_HUMAN  | Spectrin 4.                   | 14 | CCCTCAGGAGTA       | 0.408 |
| + | 4  | 682   | jxm.1_Missense_f  | NM_020931    | NP_065982    | Q9HCI6 | K1586_HUMAN |                               | 0  | ATTGGGATCGA        | 0.363 |
| + | 2  | 400   | s.S37F PHF3_uc0   | NM_015153    | NP_055968    | Q92576 | PHF3_HUMAN  |                               | 5  | GAGATCTCCAA        | 0.378 |
| + | 15 | 5250  | i.D1654N PHF3_u   | NM_015153    | NP_055968    | Q92576 | PHF3_HUMAN  |                               | 5  | CAGGAGGATATT       | 0.383 |
| + | 36 | 2477  | cam.1_Missense_f  | NM_001858    | NP_001849    | Q14993 | COJA1_HUMAN | lical region 4 (COL4).        | 4  | GGGAAGAACTG        | 0.423 |
| + | 36 | 2492  | cam.1_Missense_f  | NM_001858    | NP_001849    | Q14993 | COJA1_HUMAN | lical region 4 (COL4).        | 4  | TCCTGGTCCCA        | 0.443 |
| + | 47 | 3002  |                   | NM_001858    | NP_001849    | Q14993 | COJA1_HUMAN | lical region 5 (COL5).        | 4  | CAGAGGCTCAC        | 0.468 |
| - | 34 | 2360  | _p.P283L COL9A1   | NM_001851    | NP_001842    | P20849 | CO9A1_HUMAN | elical region (COL2).         | 4  | CCCGGGTCCA         | 0.637 |
| - | 15 | 1340  | OL9A1_uc003pff.3  | NM_001851    | NP_001842    | P20849 | CO9A1_HUMAN | elical region (COL3).         | 4  | GGGGCCAGGG         | 0.443 |

|   |    |       |                   |              |              |        |              |                             |    |               |       |
|---|----|-------|-------------------|--------------|--------------|--------|--------------|-----------------------------|----|---------------|-------|
| + | 10 | 1317  | ao.2_Missense_Mt  | NM_001044305 | NP_001037770 | Q8IYB5 | SMAP1_HUMAN  |                             | 0  | CTTATAGGAAATC | 0.512 |
| + | 29 | 4318  | o_Mutation_p.S414 | NM_014989    | NP_055804    | Q86UR5 | RIMS1_HUMAN  |                             | 10 | CGGCAGCCAGT   | 0.517 |
| + | 7  | 1393  | p.G349D KCNQ5_    | NM_019842    | NP_062816    | Q9NR82 | KCNQ5_HUMAN  |                             | 7  | CTCAGGTTTTG   | 0.348 |
| - | 38 | 6492  | pht.2_Missense_Iv | NM_004370    | NP_004361    | Q99715 | COCA1_HUMAN  | nectin type-III 16.         | 9  | CTATTTCTCTTTA | 0.343 |
| - | 10 | 1722  | OL12A1_uc003pht   | NM_004370    | NP_004361    | Q99715 | COCA1_HUMAN  | VWFA 2.                     | 9  | TTGCCAGTATTTT | 0.388 |
| - | 5  | 1169  | i_p.Q167* FILIP1_ | NM_015687    | NP_056502    | Q7Z7B0 | FLIP1_HUMAN  | Potential.                  | 4  | TTTCTGGCTTTG  | 0.403 |
| + | 24 | 3758  | e_Mutation_p.L10r | NM_015571    | NP_056386    | Q9GZR1 | SENPE6_HUMAN | Protease.                   | 6  | CAATTCCTCAGT  | 0.308 |
| + | 4  | 477   | n_p.M66I MYO6_L   | NM_004999    | NP_004990    | Q9UM54 | MYO6_HUMAN   | rosin head-like.            | 2  | ACTAATGTATTTA | 0.274 |
| + | 16 | 1867  | p.D530N MYO6_L    | NM_004999    | NP_004990    | Q9UM54 | MYO6_HUMAN   | rosin head-like.            | 2  | ATTTTGATGAAC  | 0.343 |
| + | 32 | 3586  | p.E1080K MYO6_    | NM_004999    | NP_004990    | Q9UM54 | MYO6_HUMAN   |                             | 2  | GCAGAGAAGAA   | 0.323 |
| - | 2  | 218   | _p.D14N HMG3_     | NM_004242    | NP_004233    | Q15651 | HMG3_HUMAN   |                             | 0  | ATCCATCTTTGCC | 0.279 |
| + | 5  | 644   | pje.2_Missense_Iv | NM_000056    | NP_000047    | P21953 | ODBB_HUMAN   |                             | 0  | ATGGGGCTCTC   | 0.433 |
| - | 18 | 3208  | se_Mutation_p.S6  | NM_015525    | NP_056340    | Q9P2D0 | IBTK_HUMAN   |                             | 4  | AACAAGACAGT   | 0.343 |
| + | 3  | 1436  | p.A167V TPBG_u    | NM_006670    | NP_006661    | Q13641 | TPBG_HUMAN   | cellular (Potential).       | 1  | CAATGCCAGCG   | 0.657 |
| + | 3  | 930   | M3_uc011dyz.1_5'  | NM_033411    | NP_219479    | Q9UIY3 | RWD2A_HUMAN  |                             | 0  | ACATTTCTGTAA  | 0.468 |
| - | 23 | 2559  | kc.2_Missense_M   | NM_014841    | NP_055656    | O60641 | AP180_HUMAN  |                             | 1  | GGCTGCCATTG   | 0.453 |
| + | 8  | 7350  |                   | NM_015021    | NP_055836    | O60281 | ZN292_HUMAN  |                             | 4  | TAAAGGAAACG   | 0.358 |
| - | 3  | 461   |                   | NM_198568    | NP_940970    | Q6PEY0 | CXB7_HUMAN   | ical; (Potential).          | 0  | TGCTGCCACCA   | 0.478 |
| + | 13 | 1906  | plw.2_Missense_Iv | NM_001031743 | NP_001026913 | Q8IYR0 | CF165_HUMAN  |                             | 1  | AAAAGAGCGAAA  | 0.458 |
| + | 2  | 191   | lC35A1_uc003pl    | NM_006416    | NP_006407    | P78382 | S35A1_HUMAN  | renal (Potential).          | 0  | ACATCAGACAAA  | 0.368 |
| - | 3  | 214   | onc.2_Missense_Iv | NM_016021    | NP_057105    | Q9Y385 | UB2J1_HUMAN  | lasmic (Potential).         | 0  | ATTAACGTTTAA  | 0.313 |
| - | 97 | 16258 |                   | NM_014611    | NP_055426    | Q9NU22 | MDN1_HUMAN   |                             | 10 | ACTGGCGTTTAC  | 0.423 |
| - | 97 | 16232 |                   | NM_014611    | NP_055426    | Q9NU22 | MDN1_HUMAN   |                             | 10 | CGAAGCCAAAT   | 0.408 |
| - | 92 | 15505 |                   | NM_014611    | NP_055426    | Q9NU22 | MDN1_HUMAN   |                             | 10 | GCTCGGCATGG   | 0.552 |
| - | 14 | 2733  | p.S826F EPHA7_u   | NM_004440    | NP_004431    | Q15375 | EPHA7_HUMAN  | Potential); Protein kinase. | 28 | CATAAGACATAA  | 0.403 |
| + | 3  | 1225  |                   | NM_006581    | NP_006572    | Q9Y231 | FUT9_HUMAN   | renal (Potential).          | 5  | CTCTCCCAGTG   | 0.393 |
| - | 14 | 2058  | eaf.1_Missense_M  | NM_198468    | NP_940870    | Q6ZRQ5 | MMS22_HUMAN  |                             | 0  | AGAAAGCACATG  | 0.438 |
| - | 12 | 1697  | _splice USP45_uc  | NM_001080481 | NP_001073950 | Q70EL2 | UBP45_HUMAN  |                             | 2  | TCCTTACCCTTT  | 0.294 |
| - | 11 | 2228  | u.2_Missense_Mu   | NM_005068    | NP_005059    | P81133 | SIM1_HUMAN   | inded C-terminal.           | 4  | CTTTAGCTAGGA  | 0.463 |
| - | 8  | 1119  | .2_Nonsense_Mu    | NM_005068    | NP_005059    | P81133 | SIM1_HUMAN   | PAC.                        | 4  | CATACCCAGCC   | 0.582 |
| + | 16 | 5049  | i.2_Missense_Mut  | NM_001624    | NP_001615    | Q9Y4K1 | AIM1_HUMAN   | crystallin 'Greek key' 11.  | 9  | TAATGCAGAAAC  | 0.358 |
| + | 7  | 876   | rl.2_Missense_Mu  | NM_018292    | NP_060762    | Q9H0R6 | QRSL1_HUMAN  |                             | 0  | CCAGGGACTCT   | 0.388 |
| + | 6  | 2099  |                   | NM_018013    | NP_060483    | A7XYQ1 | SOBP_HUMAN   | Pro-rich.                   | 1  | CGTGCCCTACC   | 0.667 |
| - | 2  | 202   | su.2_Missense_M   | NM_014454    | NP_055269    | Q9Y6P5 | SESN1_HUMAN  |                             | 1  | TAATGCCAAGT   | 0.418 |
| - | 2  | 399   | _p.S92N SLC22A1   | NM_033125    | NP_149116    | Q86VW1 | S22AG_HUMAN  |                             | 1  | CCAAACTCGAT   | 0.468 |
| - | 12 | 1317  | p.G355E CDK19_u   | NM_015076    | NP_055891    | Q9BWU1 | CDK19_HUMAN  |                             | 4  | CGACCCCGGCC   | 0.692 |
| - | 20 | 7650  | √3L_uc003puz.3_1  | NM_002912    | NP_002903    | O60673 | DPOLZ_HUMAN  |                             | 6  | TTTACGCTGCAA  | 0.348 |
| - | 7  | 1174  | _p.P206L REV3L_u  | NM_002912    | NP_002903    | O60673 | DPOLZ_HUMAN  |                             | 6  | ACTCAGGTTGG   | 0.363 |
| - | 3  | 1348  | p.P245S TRAF3IP   | NM_147686    | NP_679211    | O43734 | CIKS_HUMAN   |                             | 3  | ATGCTGGATACC  | 0.562 |
| - | 16 | 2270  | _p.A647V LAMA4_   | NM_001105206 | NP_001098676 | Q16363 | LAMA4_HUMAN  | omain II and I.             | 9  | TACCGCCTACA   | 0.388 |
| + | 2  | 327   | _p.M45V DSE_uc    | NM_001080976 | NP_001074445 | Q9UL01 | DSE_HUMAN    |                             | 1  | CATCCCATGCTG  | 0.542 |
| + | 4  | 435   | .2_5'UTR RWDD1_   | NM_015952    | NP_057036    | Q9H446 | RWDD1_HUMAN  | RWD.                        | 3  | ACAGGCTGAAG   | 0.269 |
| + | 7  | 863   | _p.P138S RWDD1_   | NM_015952    | NP_057036    | Q9H446 | RWDD1_HUMAN  |                             | 3  | TATAATCCTGCTC | 0.493 |
| + | 18 | 2665  |                   | NM_173560    | NP_775831    | Q8HWS3 | RFX6_HUMAN   |                             | 3  | GAACTCCAGTC   | 0.398 |
| - | 21 | 2532  | kej.1_5'UTR C6orf | NM_152730    | NP_689943    | Q96NH3 | BROM1_HUMAN  |                             | 3  | TGGGACTTCAC   | 0.313 |
| + | 2  | 428   | 1_5'UTR GJA1_uc   | NM_000165    | NP_000156    | P17302 | CXA1_HUMAN   | cellular (Potential).       | 2  | AACCTGGTTGT   | 0.488 |
| + | 9  | 1131  | v.2_Missense_Mu   | NM_004506    | NP_004497    | Q03933 | HSF2_HUMAN   |                             | 0  | TTCAGGCAGTG   | 0.473 |

|   |     |       |                     |              |              |        |             |                           |     |                 |       |             |
|---|-----|-------|---------------------|--------------|--------------|--------|-------------|---------------------------|-----|-----------------|-------|-------------|
| + | 14  | 2737  | iqai.2_Missense_I   | NM_181782    | NP_861447    | Q8NI08 | NCOA7_HUMAN |                           | 3   | CATGCAGCTACT/   | 0.507 |             |
| - | 13  | 1816  | AP18_uc011ebw.1     | NM_033515    | NP_277050    | Q8N392 | RHG18_HUMAN |                           | 3   | .CTCCCTGAGGA/   | 0.448 |             |
| - | 12  | 2010  | ation_p.G610R EPI   | NM_001431    | NP_001422    | O43491 | E41L2_HUMAN | Hydrophilic.              | 2   | CTTTCTTCAAT     | 0.413 |             |
| - | 10  | 1591  | l3qci.2_Missense_   | NM_001431    | NP_001422    | O43491 | E41L2_HUMAN | FERM.                     | 2   | CAATGGTACTC1    | 0.403 |             |
| + | 3   | 403   | se_Mutation_p.A2f   | NM_138633    | NP_619539    | O43687 | AKA7A_HUMAN |                           | 2   | TCAAGGCTGTC     | 0.507 |             |
| - | 14  | 1738  | e_Mutation_p.P16    | NM_004830    | NP_004821    | Q9ULK4 | MED23_HUMAN |                           | 3   | TAAGGGGGTAA     | 0.398 |             |
| - | 12  | 1342  | a.1_Intron MED23    | NM_004830    | NP_004821    | Q9ULK4 | MED23_HUMAN |                           | 3   | AATCAGCTAGTG    | 0.373 |             |
| + | 21  | 2295  | PP3_uc003qcv.2_     | NM_005021    | NP_005012    | O14638 | ENPP3_HUMAN | in (Potential). Nuclease. | 4   | TCCCCCAGTTG     | 0.418 |             |
| - | 2   | 629   | fr.1_Missense_Mu    | NM_001033080 | NP_001028252 | Q9P1P5 | TAAR2_HUMAN | Name=5; (Potential).      | 1   | TGGTCCCCCAT     | 0.478 |             |
| - | 6   | 1297  | N1_uc003qdn.2_R     | NM_004666    | NP_004657    | O95497 | VNN1_HUMAN  |                           | 3   | TGAGGGAGAAC     | 0.423 |             |
| + | 20  | 2334  | on_p.D626N EYA4     | NM_004100    | NP_004091    | O95677 | EYA4_HUMAN  |                           | 2   | ACTCAGACCTC     | 0.308 |             |
| + | 1   | 590   | 21_uc003qej.2_Mi    | NM_003206    | NP_003197    | O43680 | TCF21_HUMAN | -loop-helix motif.        | 0   | GACCACCTGCG     | 0.662 |             |
| - | 6   | 910   | 3S1L_uc011ecz.1_    | NM_006620    | NP_006611    | Q9Y450 | HBS1L_HUMAN |                           | 2   | TTTCACCGGTG     | 0.493 |             |
| + | 8   | 1145  | _uc003qfe.2_RNA     | NM_005375    | NP_005366    | P10242 | MYB_HUMAN   | onal activation domain.   | 1   | TGCTACCAGTA     | 0.423 |             |
| - | 12  | 2960  | yy.1_Missense_Mu    | NM_014739    | NP_055554    | Q9NYF8 | BCLF1_HUMAN |                           | 1   | FGGTCTCTTCT     | 0.373 | rs141900019 |
| - | 2   | 356   | _Mutation_p.S59N    | NM_003980    | NP_003971    | Q14244 | MAP7_HUMAN  |                           | 0   | GGCGGCTGGAC     | 0.378 |             |
| - | 16  | 2634  | _p.P5L MAP3K5_      | NM_005923    | NP_005914    | Q99683 | M3K5_HUMAN  | rotein kinase.            | 5   | CTCCAGGGACC     | 0.378 |             |
| - | 5   | 759   | _p.T121 IL22RA2     | NM_052962    | NP_443194    | Q969J5 | I22R2_HUMAN | onnectin type-III 2.      | 0   | AGGGAGTGAAC     | 0.532 |             |
| - | 4   | 561   | i.2_Intron IL22RA2  | NM_052962    | NP_443194    | Q969J5 | I22R2_HUMAN |                           | 0   | agttacaagaatgtg | 0     |             |
| - | 1   | 648   |                     | NM_175747    | NP_786923    | Q7RTU3 | OLIG3_HUMAN |                           | 0   | CTCCTCCAGGG/    | 0.657 |             |
| + | 4   | 605   | qhs.2_Missense_I    | NM_006290    | NP_006281    | P21580 | TNAP3_HUMAN | IF-binding. C p.0?(22)    | 137 | CACACCCATGG     | 0.443 |             |
| + | 12  | 2036  |                     | NM_020340    | NP_065073    | Q5TH69 | BIG3_HUMAN  | SEC7.                     | 2   | ACAGTCCCTGG/    | 0.577 |             |
| + | 3   | 629   | n_p.A73V GPR12f     | NM_020455    | NP_065188    | Q86SQ4 | GP126_HUMAN | tracellular (Potential).  | 1   | CCGAGCCCCCA     | 0.468 |             |
| - | 6   | 6085  |                     | NM_006734    | NP_006725    | P31629 | ZEP2_HUMAN  |                           | 6   | TCCTTACCCTCC    | 0.363 |             |
| - | 5   | 2523  |                     | NM_006734    | NP_006725    | P31629 | ZEP2_HUMAN  |                           | 6   | TGCCGCTTGTC     | 0.522 |             |
| + | 2   | 260   | 31_uc011edw.1_M     | NM_016108    | NP_057192    | Q9NVV5 | AIG1_HUMAN  |                           | 0   | ACCAGGAGCAA     | 0.517 |             |
| + | 5   | 647   | Okhi.2_Missense_I   | NM_014721    | NP_055536    | O75167 | PHAR2_HUMAN |                           | 2   | AATCACCTGTG     | 0.522 |             |
| + | 5   | 737   | Okhi.2_Nonsense_    | NM_014721    | NP_055536    | O75167 | PHAR2_HUMAN |                           | 2   | GTAAGCAGGCC     | 0.582 |             |
| - | 2   | 989   | PRH_uc003qlg.1_     | NM_001042683 | NP_001036148 | Q149N8 | SHPRH_HUMAN |                           | 3   | TTTATTCTTCTC    | 0.378 |             |
| - | 2   | 602   | i.R68K SHPRH_uc     | NM_001042683 | NP_001036148 | Q149N8 | SHPRH_HUMAN |                           | 3   | TATCTCTGTGAC    | 0.383 |             |
| + | 2   | 735   |                     | NM_015278    | NP_056093    | O94885 | SASH1_HUMAN |                           | 1   | GAAACGGCGGG     | 0.542 |             |
| + | 6   | 659   | _p.A174V PCMT1      | NM_005389    | NP_005380    |        |             |                           | 1   | AAGAAGCCCTT     | 0.418 |             |
| + | 4   | 1327  | se_Mutation_p.E26f  | NM_005100    | NP_005091    | Q02952 | AKA12_HUMAN | PKC-binding (Probable).   | 8   | CGGCAGAAAGT     | 0.557 |             |
| - | 2   | 257   | ense_Mutation_p.1   | NM_017909    | NP_060379    | Q9NWS8 | RMND1_HUMAN |                           | 0   | GATGACCGATT     | 0.408 |             |
| - | 130 | 24138 | on_p.A7846T SYN     | NM_182961    | NP_892006    | Q8NF91 | SYNE1_HUMAN | Cytoplasmic (Potential).  | 45  | GCTGGCTTTAG     | 0.443 |             |
| - | 119 | 22437 | lot.3_Missense_Mi   | NM_182961    | NP_892006    | Q8NF91 | SYNE1_HUMAN | asmic (Potential).        | 45  | GCAACCTCAT      | 0.483 |             |
| - | 78  | 15021 | ou.3_Missense_M     | NM_182961    | NP_892006    | Q8NF91 | SYNE1_HUMAN | asmic (Potential).        | 45  | GCGTTTCTCAT     | 0.478 |             |
| - | 46  | 7327  | ou.3_Missense_Mi    | NM_182961    | NP_892006    | Q8NF91 | SYNE1_HUMAN | Cytoplasmic (Potential).  | 45  | CTTACAGCTGCC    | 0.338 |             |
| - | 6   | 731   | 1M_uc003qqk.2_Ir    | NM_016020    | NP_057104    | Q8WVM0 | TFB1M_HUMAN |                           | 1   | TCCACCTTCTGT    | 0.453 |             |
| + | 12  | 3297  | lqpp.2_Missense_I   | NM_017519    | NP_059989    | Q8NFD5 | ARI1B_HUMAN | ARID.                     | 2   | ATGAGCCAGAG     | 0.577 |             |
| + | 12  | 3369  | qqp.2_Missense_I    | NM_017519    | NP_059989    | Q8NFD5 | ARI1B_HUMAN | ARID.                     | 2   | GTCTGCCTGCC     | 0.577 |             |
| + | 17  | 4152  | i.P1294S ARID1B_    | NM_017519    | NP_059989    | Q8NFD5 | ARI1B_HUMAN |                           | 2   | GCCCTCCCTCG     | 0.557 |             |
| + | 20  | 5520  | i.R1750C ARID1B_    | NM_017519    | NP_059989    | Q8NFD5 | ARI1B_HUMAN |                           | 2   | TGGGGCGTGTG     | 0.498 |             |
| - | 4   | 395   | AC1_uc003qrb.2_E    | NM_032861    | NP_116250    | Q96JX3 | SRAC1_HUMAN |                           | 0   | TTTCTCCTTTGTC   | 0.328 |             |
| + | 9   | 1226  | 10kjr.1_Splice_Site | NM_020823    | NP_065874    | Q9P2C4 | TM181_HUMAN |                           | 3   | TCCAGGTGAGC     | 0.607 |             |
| + | 16  | 1776  | _p.P443L SYTL3_     | NM_001009991 | NP_001009991 | Q4VX76 | SYTL3_HUMAN | C2 2.                     | 0   | TCTGCCAGACC     | 0.552 |             |
| + | 6   | 795   | fw.1_Missense_Mi    | NM_005891    | NP_005882    | Q9BWD1 | THIC_HUMAN  |                           | 2   | AGTTTCTCGCC     | 0.438 |             |



|   |    |         |                                               |              |              |        |             |                            |    |               |       |             |
|---|----|---------|-----------------------------------------------|--------------|--------------|--------|-------------|----------------------------|----|---------------|-------|-------------|
| + | 17 | 1468    | qsy.1_Missense_M                              | NM_173516    | NP_775787    | Q8NA58 | PNDC1_HUMAN | lasmic (Potential).        | 0  | :CTGGGGTCAGC  | 0.453 |             |
| + | 27 | 4010    |                                               | NM_000876    | NP_000867    | P11717 | MPRI_HUMAN  | menal (Potential).         | 3  | :GGGAACCGCAG  | 0.428 |             |
| - | 28 | 4591    |                                               | NM_005577    | NP_005568    | P08519 | APOA_HUMAN  |                            | 6  | TTCTTACCTTGTT | 0.478 |             |
| + | 3  | 1097    | LL2_uc011egr.1_R                              | NM_031949    | NP_114155    | Q9BWV7 | TLL2_HUMAN  | TTL.                       | 3  | ATGTGGACGAT   | 0.458 |             |
| + | 2  | 263     | IF25_uc003qwl.1_                              | NM_030615    | NP_085118    | Q9UIL4 | KIF25_HUMAN | inesin-motor.              | 2  | CCCAGATGACA   | 0.582 |             |
| - | 7  | 1280    |                                               | NM_003247    | NP_003238    | P35442 | TSP2_HUMAN  |                            | 5  | CCCTCACCTTGC  | 0.562 |             |
| - | 10 | 1616    | wy.2_Missense_Mutation_p.N239D WDR27_uc003qwz | NM_003247    | NP_003238    | A2RRH5 | WDR27_HUMAN |                            | 1  | CAGGTTTGCCA   | 0.403 |             |
| + | 3  | 297     | hf.1_Missense_Mi                              | NM_003194    | NP_003185    | P20226 | TBP_HUMAN   |                            | 1  | CATGACTCCCG   | 0.483 |             |
| + | 7  | 1139    | _p.L303F TBP_ucl                              | NM_003194    | NP_003185    | P20226 | TBP_HUMAN   | 2                          | 1  | GTTCTCCTTATTT | 0.333 |             |
| - | 5  | 908     | p.D244N PDCD2_                                | NM_002598    | NP_002589    | Q16342 | PDCD2_HUMAN |                            | 0  | GAATATCCTTTTC | 0.358 |             |
| + | 2  | 1015    |                                               | NM_020223    | NP_064608    | Q8IXL6 | DMP4_HUMAN  |                            | 0  | CGTGGGTAGGT   | 0.617 |             |
| - | 5  | 564     | se_Mutation_p.A1f                             | NM_032350    | NP_115726    | Q9BRJ6 | CG050_HUMAN |                            | 0  | TCAGGGCTTCC   | 0.677 |             |
| - | 43 | 6079    | m.1_Missense_Mt                               | NM_001080453 | NP_001073922 | Q8N201 | INT1_HUMAN  |                            | 0  | GGTCACTGTTG   | 0.622 |             |
| - | 9  | 1342    | p.P321L TMEM18                                | NM_001097620 | NP_001091089 | Q6ZMB5 | T184A_HUMAN |                            | 0  | GCATGGGTGCC   | 0.667 |             |
| - | 13 | 1522    | sh.1_Missense_M                               | NM_001013836 | NP_001013858 | Q9Y6D9 | MD1L1_HUMAN | raction with NEK2. Potenti | 2  | CGCTGCTGAG    | 0.657 |             |
| + | 10 | 1522    | o.A480V EIF3B_uc                              | NM_003751    | NP_003742    | P55884 | EIF3B_HUMAN |                            | 0  | AATCGCCTTCTC  | 0.463 |             |
| + | 3  | 555     | _5'Flank TTYH3_u                              | NM_025250    | NP_079526    | Q9C0H2 | TTYH3_HUMAN | ellular (Potential).       | 0  | GCTCCGCCACG   | 0.697 |             |
| + | 13 | 1687    | o_splice TTYH3_u                              | NM_025250    | NP_079526    | Q9C0H2 | TTYH3_HUMAN |                            | 0  | CCCTCAGTAAGT  | 0.642 |             |
| - | 16 | 2365    |                                               | NM_032415    | NP_115791    | Q9BXL7 | CAR11_HUMAN |                            | 50 | CAGAGGTGACC   | 0.647 |             |
| - | 6  | 1125    |                                               | NM_032415    | NP_115791    | Q9BXL7 | CAR11_HUMAN | Potential.                 | 50 | ATTCCTCCTCCA  | 0.483 |             |
| + | 29 | 4519    | o_Mutation_p.W73                              | NM_152744    | NP_689957    | Q7Z5N4 | SDK1_HUMAN  | onnectin type-III 8.       | 6  | GGCTGGGGGGA   | 0.642 |             |
| + | 10 | 1302    | _2_RNA KIAA041E                               | NM_014855    | NP_055670    | O43299 | K0415_HUMAN |                            | 1  | ATGCTGGCCTTT  | 0.572 |             |
| - | 7  | 1828    | _p.S57N RADIL_u                               | NM_018059    | NP_060529    | Q96JH8 | RADIL_HUMAN | Dilute.                    | 7  | CCTCGCTGGCC   | 0.632 |             |
| - | 25 | 7163    |                                               | NM_001080495 | NP_001073964 | O15417 | TNC18_HUMAN |                            | 0  | GGGGATCCTGC   | 0.617 |             |
| - | 17 | 2693    | _p.P457S RNF216                               | NM_207116    | NP_996999    | Q9NWF9 | RN216_HUMAN | Pro-rich.                  | 5  | GTTGGGCAGAG   | 0.642 |             |
| - | 5  | 484     | MS2_uc010ktg.2_E                              | NM_000535    | NP_000526    | P54278 | PMS2_HUMAN  |                            | 2  | TCGAGTTCCAA   | 0.517 |             |
| - | 4  | 356     | 0ktg.2_5'UTR PM                               | NM_000535    | NP_000526    | P54278 | PMS2_HUMAN  |                            | 2  | ATCTTAGATGTG  | 0.383 |             |
| - | 2  | 143     | 0ktg.2_5'UTR PM                               | NM_000535    | NP_000526    | P54278 | PMS2_HUMAN  |                            | 2  | TTCCGATCAATAC | 0.413 |             |
| + | 13 | 2102    | _p.A660V USP42_                               | NM_032172    | NP_115548    | Q9H9J4 | UBP42_HUMAN |                            | 5  | CGGTGCTAATAC  | 0.572 |             |
| + | 15 | 2572    | wq.1_Missense_Mi                              | NM_032172    | NP_115548    | Q9H9J4 | UBP42_HUMAN | Pro-rich.                  | 5  | CCCCTGACCTG   | 0.706 |             |
| + | 16 | 3950    | .G1276D USP42_u                               | NM_032172    | NP_115548    | Q9H9J4 | UBP42_HUMAN |                            | 5  | GGGTGGCTTTC   | 0.537 |             |
| - | 2  | 863     |                                               | NM_001037163 | NP_001032240 | Q7Z4H9 | SIPAR_HUMAN |                            | 0  | CTCCTCCCAGC   | 0.622 |             |
| - | 15 | 2065    | o_Mutation_p.G50:                             | NM_139179    | NP_631918    | Q8NCG7 | DGLB_HUMAN  | lasmic (Potential).        | 3  | TCGGACCTATG   | 0.567 |             |
| - | 4  | 742     | LB_uc003sqc.2_In                              | NM_139179    | NP_631918    | Q8NCG7 | DGLB_HUMAN  | lasmic (Potential).        | 3  | ACACGCTTGTA   | 0.507 |             |
| + | 4  | 1266    | p.1_Missense_Mu                               | NM_019005    | NP_061878    | Q9NXC5 | MIO_HUMAN   |                            | 0  | TGCAACCTTGT   | 0.388 | rs141631713 |
| - | 13 | 1317    | e_Mutation_p.P41                              | NM_022307    | NP_071682    | Q05084 | ICA69_HUMAN |                            | 1  | CCTTGGGGTCT   | 0.552 |             |
| + | 9  | 2252    | rz.2_Missense_Mi                              | NM_014660    | NP_055475    | O94880 | PHF14_HUMAN |                            | 3  | GGATGGAAGGA   | 0.393 |             |
| + | 16 | 3025    | rz.2_Missense_Mi                              | NM_014660    | NP_055475    | O94880 | PHF14_HUMAN |                            | 3  | CCAAGCTGAA    | 0.383 |             |
| - | 25 | 4936    | 7A_uc003ssd.3_M                               | NM_015204    | NP_056019    | Q9UPZ6 | THS7A_HUMAN | ellular (Potential).       | 3  | GGTGGTAATAC   | 0.507 |             |
| - | 2  | 832     |                                               | NM_015204    | NP_056019    | Q9UPZ6 | THS7A_HUMAN | (Potential). TSP type-1 2. | 3  | GCAATCTTGCT   | 0.567 |             |
| - | 6  | 791_792 |                                               | NM_001004320 | NP_001004320 | Q6ZNB7 | ALKMO_HUMAN |                            | 0  | ACCAAGTTATT   | 0.307 |             |
| - | 9  | 1250    | .MY2_uc010ktz.2_                              | NM_020319    | NP_064715    | Q8IV38 | ANKY2_HUMAN | MYND-type.                 | 1  | GTAAACCAAGT   | 0.358 |             |
| + | 11 | 3047    | HR_uc003stt.3_R                               | NM_001621    | NP_001612    | P35869 | AHR_HUMAN   |                            | 3  | ACATATCCAGCT  | 0.353 |             |
| + | 11 | 1669    | o_Mutation_p.G49'                             | NM_058176    | NP_478056    | Q9UKV0 | HDAC9_HUMAN |                            | 5  | AGTTGGGGCTG   | 0.542 |             |
| + | 3  | 1042    | GB8_uc003sut.2_u                              | NM_002214    | NP_002205    | P26012 | ITB8_HUMAN  | ellular (Potential).       | 3  | GAAAATGAAATT  | 0.358 |             |
| + | 39 | 6440    |                                               | NM_003777    | NP_003768    | Q96DT5 | DYH11_HUMAN |                            | 15 | GGAGGAGGAAG   | 0.517 |             |
| + | 53 | 8646    |                                               | NM_003777    | NP_003768    | Q96DT5 | DYH11_HUMAN | .4 (By similarity).        | 15 | CTTGCCAGGC    | 0.582 |             |

|   |    |       |                     |              |              |        |             |                             |    |               |       |             |
|---|----|-------|---------------------|--------------|--------------|--------|-------------|-----------------------------|----|---------------|-------|-------------|
| + | 76 | 12358 |                     | NM_003777    | NP_003768    | Q96DT5 | DYH11_HUMAN | 6 (By similarity).          | 15 | GGCTGGAGCCG   | 0.478 |             |
| - | 17 | 1521  | 1jyl.1_Missense_    | NM_012294    | NP_036426    | Q92565 | RPGF5_HUMAN |                             | 1  | ACATAGGAGTGC  | 0.428 |             |
| + | 7  | 1424  | yw.1_RNA NUPL2      | NM_007342    | NP_031368    | O15504 | NUPL2_HUMAN | action with GLE1.           | 3  | TCACACCCAGAA  | 0.383 |             |
| + | 7  | 1479  | iyw.1_RNA NUPL2     | NM_007342    | NP_031368    | O15504 | NUPL2_HUMAN | action with GLE1.           | 3  | AATTTACTCTGGC | 0.333 |             |
| - | 15 | 1908  | swf.2_Missense_     | NM_006547    | NP_006538    | O00425 | IF2B3_HUMAN | KH 4.                       | 2  | GGCAACCTAGA   | 0.388 |             |
| - | 12 | 1644  | iswf.2_Missense_    | NM_006547    | NP_006538    | O00425 | IF2B3_HUMAN | KH 3.                       | 2  | CTCTGGTGGTC   | 0.453 |             |
| - | 1  | 1230  |                     | NR_002711    |              |        |             |                             | 0  | GTCATCCCAATC  | 0.512 |             |
| + | 4  | 631   | rr.3_Missense_Mul   | NM_199136    | NP_954587    | A4D161 | CG046_HUMAN |                             | 0  | AAAACCAGTGG   | 0.493 |             |
| + | 5  | 798   | r.3_intron C7orf46  | NM_199136    | NP_954587    | A4D161 | CG046_HUMAN |                             | 0  | TTTCAAGCATCA  | 0.348 |             |
| + | 6  | 917   | alice_Site_p.R182   | NM_199136    | NP_954587    | A4D161 | CG046_HUMAN |                             | 0  | AAAAGGGTAGGT  | 0.338 |             |
| - | 10 | 1276  | ation_p.V260 OSE    | NM_015550    | NP_056365    | Q9H4L5 | OSBL3_HUMAN |                             | 1  | CGGGACCTGAA   | 0.353 |             |
| + | 5  | 472   | utation_p.L121F C   | NM_007276    | NP_009207    | Q13185 | CBX3_HUMAN  | 2; shadow subtype.          | 1  | GAGGTCTTGAT   | 0.358 |             |
| - | 9  | 957   | _p.E50K SKAP2_L     | NM_003930    | NP_003921    | O75563 | SKAP2_HUMAN |                             | 1  | CAGATCCATATC  | 0.303 |             |
| - | 1  | 465   | syd.2_intron uc00   | NM_005522    | NP_005513    | P49639 | HXA1_HUMAN  |                             | 3  | ACTGGGGGTAC   | 0.577 |             |
| - | 1  | 331   |                     | NM_006735    | NP_006726    | O43364 | HXA2_HUMAN  |                             | 2  | ACTCAGCGAGC   | 0.473 |             |
| - | 2  | 473   | syn.1_5'Flank uc0   | NM_024014    | NP_076919    | P31267 | HXA6_HUMAN  | Homeobox.                   | 2  | GGCGGCTCGG    | 0.662 |             |
| - | 8  | 1099  | _p.L253F HIBADH     | NM_152740    | NP_689953    | P31937 | 3HIDH_HUMAN |                             | 2  | GCCAAGAAGGA   | 0.502 |             |
| + | 4  | 572   | rn_p.T28 CREB5_     | NM_182898    | NP_878901    | Q02930 | CREB5_HUMAN |                             | 2  | TCCGACCCCAA   | 0.527 |             |
| - | 12 | 1404  | _p.A429T CPVL_u     | NM_031311    | NP_112601    | Q9H3G5 | CPVL_HUMAN  |                             | 2  | ACCAGCCACTTC  | 0.493 |             |
| + | 9  | 1191  | N2_uc010kvh.2_Ir    | NM_004067    | NP_004058    | P52757 | CHIO_HUMAN  | ol-ester/DAG-type.          | 2  | TGAACGTACAC   | 0.418 | rs140638672 |
| + | 6  | 1315  |                     | NM_001080529 | NP_001073998 | A6NGB9 | WIPF3_HUMAN |                             | 1  | TATAAACCATGCC | 0.468 |             |
| + | 1  | 317   | ic.1_Missense_Mu    | NM_198098    | NP_932766    | P29972 | AQP1_HUMAN  | Cytoplasmic.                | 0  | CAGCTGCCAGA   | 0.657 |             |
| - | 7  | 1162  | _p.M291 PDE1C_      | NM_005020    | NP_005011    | Q14123 | PDE1C_HUMAN | ytic (By similarity).       | 4  | AGCGTGCATTAA  | 0.458 |             |
| + | 5  | 963   | _p.S314F FKBP9_     | NM_007270    | NP_009201    | O95302 | FKBP9_HUMAN |                             | 14 | CATTTCCATTG   | 0.468 |             |
| + | 2  | 821   |                     | NM_030636    | NP_085139    | Q7L9B9 | EEDP1_HUMAN | HhH.                        | 0  | CCGTGGCACGC   | 0.577 |             |
| + | 2  | 1466  |                     | NM_030636    | NP_085139    | Q7L9B9 | EEDP1_HUMAN |                             | 0  | AGAAGGCCAAC   | 0.617 |             |
| + | 3  | 653   | j.2_Missense_Mut    | NM_018685    | NP_061155    | Q9NQW6 | ANLN_HUMAN  | tion. Interaction with CD2A | 3  | ACTTGCAAGAGC  | 0.463 |             |
| + | 6  | 1491  | lfg.2_Splice_Site_f | NM_018685    | NP_061155    | Q9NQW6 | ANLN_HUMAN  |                             | 3  | AGCAGGTATGG   | 0.383 |             |
| - | 12 | 1256  | p.D221N ELMO1_      | NM_014800    | NP_055615    | Q92556 | ELMO1_HUMAN |                             | 6  | CTGGTCTGGG    | 0.488 |             |
| + | 6  | 683   | _p.E179K STARD3     | NM_032016    | NP_114405    | O95772 | MENTO_HUMAN | ic (Potential). MENTAL.     | 1  | CTCAAGAAGCA   | 0.473 |             |
| + | 3  | 310   | kxo.2_Missense_     | NM_007252    | NP_009183    | P78424 | PO6F2_HUMAN |                             | 1  | CATTTCAGTTC   | 0.453 | rs148094915 |
| + | 3  | 562   |                     | NM_005402    | NP_005393    | P11233 | RALA_HUMAN  |                             | 2  | GGGAGGGGTTTC  | 0.458 |             |
| + | 13 | 1135  | i_p.V360 C7orf10    | NM_024728    | NP_079004    | Q9HAC7 | CG010_HUMAN |                             | 2  | TTTCAGGTATTAC | 0.393 |             |
| + | 14 | 1247  | orf10_uc003tho.1_f  | NM_024728    | NP_079004    | Q9HAC7 | CG010_HUMAN |                             | 2  | GCCGCCCCCGC   | 0.572 |             |
| - | 10 | 1448  | g.1_Missense_Mul    | NM_000168    | NP_000159    | P10071 | GLI3_HUMAN  |                             | 19 | CTGTTCCTGAA   | 0.483 |             |
| - | 8  | 1146  | g.1_Missense_Mul    | NM_000168    | NP_000159    | P10071 | GLI3_HUMAN  |                             | 19 | GCGCGGAAGAC   | 0.537 |             |
| - | 2  | 1494  | hx.3_Missense_M     | NM_024054    | NP_076959    | Q9BPX7 | CG025_HUMAN |                             | 1  | GGCACGCTCAG   | 0.448 |             |
| - | 2  | 826   | hx.3_Missense_M     | NM_024054    | NP_076959    | Q9BPX7 | CG025_HUMAN |                             | 1  | TCCGGCCAATG   | 0.478 |             |
| - | 4  | 937   | ky.2_Missense_      | NM_006230    | NP_006221    | P49005 | DPOD2_HUMAN |                             | 2  | ACAGAGTGCCC   | 0.627 |             |
| - | 4  | 494   | TMED4_uc003tlk.2    | NM_182547    | NP_872353    | Q7Z7H5 | TMED4_HUMAN | renal (Potential).          | 0  | GCGGAGCTGTA   | 0.517 |             |
| + | 18 | 2764  | _Mutation_p.E504F   | NM_031449    | NP_113637    | Q8NF64 | ZMIZ2_HUMAN | Pro-rich.                   | 5  | CCCCAGAACCA   | 0.652 |             |
| - | 1  | 804   |                     | NM_033224    | NP_150093    | Q96QR8 | PURB_HUMAN  |                             | 0  | CCCAGGCTTTG   | 0.557 |             |
| - | 11 | 1601  | sense_Mutation_p    | NM_033054    | NP_149043    | B01T2  | MYO1G_HUMAN | rosin head-like.            | 4  | CCAGGTCTGC    | 0.657 |             |
| + | 1  | 386   | :Y1_uc003tnd.2_5'   | NM_021116    | NP_066939    | Q08828 | ADCY1_HUMAN |                             | 6  | GGTCGGCCAGC   | 0.522 |             |
| - | 30 | 4834  |                     | NM_138295    | NP_612152    | Q8TDX9 | PK1L1_HUMAN | cellular (Potential).       | 11 | AAATGCCCTTG   | 0.393 |             |
| + | 14 | 1832  | kyr.2_Missense_M    | NM_152701    | NP_689914    | Q86UQ4 | ABCAD_HUMAN |                             | 10 | CTGATCCCTCT   | 0.453 |             |
| - | 12 | 1323  | zb.2_Missense_M     | NM_005311    | NP_005302    | Q13322 | GRB10_HUMAN |                             | 6  | CGAGGGAGTTC   | 0.547 |             |

|   |    |       |                    |              |              |        |             |                                |      |               |       |
|---|----|-------|--------------------|--------------|--------------|--------|-------------|--------------------------------|------|---------------|-------|
| - | 10 | 2032  | p.3_Missense_Mur   | NM_015198    | NP_056013    | O75128 | COBL_HUMAN  |                                | 5    | ATGTTAGATAAGC | 0.502 |
| + | 6  | 929   | e_Mutation_p.P22i  | NM_005228    | NP_005219    | P00533 | EGFR_HUMAN  | Extracellul:V30_R297>G(        | 9571 | AGTCCCCCAGTG  | 0.622 |
| - | 5  | 1707  |                    | NM_033273    | NP_150376    | Q96JC4 | ZN479_HUMAN | :2H2-type 11.                  | 4    | TAAGGGTTGAGC  | 0.403 |
| + | 4  | 1013  |                    | NM_001159279 | NP_001152751 |        |             |                                | 2    | AAGAATGTGGC/  | 0.423 |
| + | 5  | 1442  |                    | NM_153363    | NP_699194    | Q8IYX0 | ZN679_HUMAN | :2H2-type 9.                   | 1    | AAGTGGTCCTC/  | 0.383 |
| + | 9  | 719   | :2_Missense_Mut:   | NM_000048    | NP_000039    | P04424 | ARLY_HUMAN  |                                | 2    | TGGGGCCATTG/  | 0.512 |
| + | 11 | 3143  | :G783D POM121      | NM_172020    | NP_742017    | Q96HA1 | P121A_HUMAN | : side (Potential).            | 0    | CTTCGGCGCTC/  | 0.652 |
| + | 3  | 200   | CF1B_uc011ker.1    | NM_000265    | NP_000256    |        |             |                                | 0    | ACCAGGGCACAC  | 0.632 |
| - | 7  | 1595  |                    | NM_032408    | NP_115784    | Q9UIG0 | BAZ1B_HUMAN | Lys-rich.                      | 7    | CTGTGGATTTCT  | 0.458 |
| - | 7  | 503   | :sense_Mutation_f  | NM_004603    | NP_004594    | Q16623 | STX1A_HUMAN | lasmic (Potential).            | 0    | TCGTGGTCCTG/  | 0.597 |
| + | 3  | 482   | an.2_Missense_M    | NM_003388    | NP_003379    | Q9UDT6 | CLIP2_HUMAN |                                | 3    | ACCCTCCTCCTC  | 0.677 |
| + | 21 | 2605  | uap.2_Missense_I   | NM_016328    | NP_057412    | Q9UHL9 | GT2D1_HUMAN | :3TF2I-like 4.                 | 4    | GTAACCCCGGC   | 0.622 |
| + | 4  | 926   | p.W242* TRIM74     | NM_198924    | NP_944606    | Q86UV6 | TRI74_HUMAN |                                | 0    | ATCTGGGTGAG   | 0.627 |
| + | 9  | 914   | _Mutation_p.P177   | NM_000941    | NP_000932    | P16435 | NCPR_HUMAN  |                                | 1    | CCAGCCCTTTT/  | 0.582 |
| + | 1  | 307   | u.p.L28M UPK3B_    | NM_030570    | NP_085047    | Q9BT76 | UPK3B_HUMAN |                                | 1    | TGAGCCTGGGT   | 0.697 |
| + | 3  | 976   | _p.M222I UPK3B_    | NM_030570    | NP_085047    | Q9BT76 | UPK3B_HUMAN | ical; (Potential).             | 1    | ACCATGCGCTTC  | 0.627 |
| - | 17 | 3193  | p.G966D MAGI2_     | NM_012301    | NP_036433    | Q86UL8 | MAGI2_HUMAN | PDZ 5.                         | 11   | ACTGGCCATTC/  | 0.502 |
| + | 5  | 830   | gt.1_Missense_Mu   | NM_002069    | NP_002060    | P63096 | GNAI1_HUMAN |                                | 3    | CTCAACCAAAT/  | 0.308 |
| - | 15 | 2121  | gw.1_Missense_M    | NM_006379    | NP_006370    | Q99985 | SEM3C_HUMAN |                                | 1    | CACAGGCTGTA   | 0.498 |
| - | 20 | 15077 | ht.1_Missense_Mt   | NM_033026    | NP_149015    | Q9Y6V0 | PCLO_HUMAN  |                                | 7    | ACTTGGTTGAAT  | 0.488 |
| - | 6  | 11192 | p.A3635T PCLO_u    | NM_033026    | NP_149015    | Q9Y6V0 | PCLO_HUMAN  |                                | 7    | TAAGGCTTTGCC  | 0.493 |
| - | 16 | 2202  |                    | NM_012431    | NP_036563    | O15041 | SEM3E_HUMAN |                                | 3    | ATCCCTTACAAC  | 0.353 |
| + | 17 | 2424  | ae_Mutation_p.P61  | NM_001142327 | NP_001135799 | Q9Y222 | DMTF1_HUMAN | similarity). Required for trar | 2    | TCGTTCTTTCAC  | 0.328 |
| - | 3  | 424   |                    | NM_024315    | NP_077291    | Q9BU79 | CG023_HUMAN | ical; (Potential).             | 0    | ACTACTCAAAC   | 0.373 |
| - | 3  | 342   |                    | NM_024315    | NP_077291    | Q9BU79 | CG023_HUMAN |                                | 0    | CGTTACCTGTATC | 0.378 |
| + | 11 | 1231  | iu.2_Missense_Mu   | NM_021151    | NP_066974    | Q9UKG9 | OCTC_HUMAN  |                                | 3    | TGCTCCTTTTG/  | 0.303 |
| - | 10 | 1371  | :hc.1_Missense_M   | NM_000927    | NP_000918    | P08183 | MDR1_HUMAN  | smembrane type-1 1.            | 7    | AGGTGGTCCCA   | 0.388 |
| - | 4  | 524   | khc.1_Missense_M   | NM_000927    | NP_000918    | P08183 | MDR1_HUMAN  | lasmic (Potential).            | 7    | AAATACACTGAC  | 0.274 |
| + | 3  | 748   | F4_uc003ujg.1_5'l  | NM_006716    | NP_006707    | Q9UBU7 | DBF4_HUMAN  | BRCT 1.                        | 2    | AGCAAAGATATC/ | 0.264 |
| + | 4  | 417   | ijl.1_Missense_Mu  | NM_021723    | NP_068369    | Q9P0K1 | ADA22_HUMAN |                                | 8    | TGCTCTGAAT/   | 0.348 |
| + | 22 | 1935  | jm.2_Missense_M    | NM_021723    | NP_068369    | Q9P0K1 | ADA22_HUMAN | :xtracellular (Potential).     | 8    | CGATGGTGAA/   | 0.373 |
| - | 6  | 554   | _p.A153T SRI_uc0   | NM_003130    | NP_003121    | P30626 | SORCN_HUMAN | EF-hand 4.                     | 1    | AAGAGCCCTCA/  | 0.443 |
| + | 9  | 1114  | kg.2_Intron C7orf6 | NM_001039706 | NP_001034795 | A5D8W1 | CG063_HUMAN |                                | 1    | TAGGGCTTTGA/  | 0.194 |
| + | 10 | 1126  | o.1_Missense_Mu/   | NM_033107    | NP_149098    | A4D1E9 | GTPBA_HUMAN |                                | 0    | ATGCACCTTCAT/ | 0.368 |
| + | 5  | 1091  | _p.I152N CLDN12    | NM_012129    | NP_036261    | P56749 | CLD12_HUMAN | ical; (Potential).             | 0    | CATCTATCTGGG  | 0.478 |
| + | 17 | 4840  | lff.2_Missense_Mu  | NM_005751    | NP_005742    | Q99996 | AKAP9_HUMAN |                                | 26   | GATATACCAAGAT | 0.318 |
| + | 21 | 5453  | :A1743V AKAP9_     | NM_005751    | NP_005742    | Q99996 | AKAP9_HUMAN |                                | 26   | AACAGCAGCTG   | 0.388 |
| + | 23 | 5900  | :S1892F AKAP9_     | NM_005751    | NP_005742    | Q99996 | AKAP9_HUMAN | ential. Glu-rich.              | 26   | AGAGTCCCTTA/  | 0.468 |
| + | 48 | 11681 | :G3442E AKAP9_     | NM_005751    | NP_005742    | Q99996 | AKAP9_HUMAN |                                | 26   | TGGTGGGCTGG   | 0.348 |
| - | 5  | 572   | ae_Mutation_p.A15  | NM_000466    | NP_000457    | O43933 | PEX1_HUMAN  |                                | 2    | ATTAGTGCAACTC | 0.388 |
| - | 3  | 4535  | ng.2_Nonsense_M    | NM_017654    | NP_060124    | Q5K651 | SAMD9_HUMAN |                                | 7    | AAACTGATAAGT  | 0.383 |
| - | 3  | 2663  | mg.2_Missense_M    | NM_017654    | NP_060124    | Q5K651 | SAMD9_HUMAN |                                | 7    | TTGTTCTTCAAA  | 0.353 |
| - | 5  | 4374  | ID9L_uc003umk.1    | NM_152703    | NP_689916    | Q8IVG5 | SAM9L_HUMAN |                                | 4    | ACAGAGTGTCT   | 0.373 |
| + | 18 | 1722  | _p.D502N CCDC1     | NM_017667    | NP_060137    | Q96JG6 | CC132_HUMAN |                                | 0    | ACAAAGATGAA/  | 0.368 |
| + | 20 | 1942  | u.p.P575L CCDC1    | NM_017667    | NP_060137    | Q96JG6 | CC132_HUMAN |                                | 0    | ATGCACCTATCT  | 0.313 |
| - | 9  | 904   | ALCR_uc003uml      | NM_001742    | NP_001733    | P30988 | CALCR_HUMAN | Name=2; (Potential).           | 9    | GGTTACCCTTTC  | 0.393 |
| - | 2  | 245   | T1_uc003une.3_R    | NM_005868    | NP_005859    | O15155 | BET1_HUMAN  | il). t-SNARE coiled-coil hon   | 0    | CTTCACAGGCA/  | 0.378 |

|   |    |       |                   |              |              |        |             |                             |    |              |       |
|---|----|-------|-------------------|--------------|--------------|--------|-------------|-----------------------------|----|--------------|-------|
| + | 14 | 1157  | 1A2_uc011kib.1_li | NM_000089    | NP_000080    | P08123 | CO1A2_HUMAN |                             | 9  | CCCTGGCCAG   | 0.398 |
| - | 4  | 341   | ih.1_Missense_Mt  | NM_000446    | NP_000437    | P27169 | PON1_HUMAN  |                             | 1  | TCCAGGACTGTT | 0.378 |
| + | 1  | 187   | unx.2_Splice_Site | NM_016116    | NP_057200    | Q9Y574 | ASB4_HUMAN  |                             | 1  | ACAAGGTAATAA | 0.308 |
| + | 11 | 3037  |                   | NM_014916    | NP_055731    | Q8IWU2 | LMTK2_HUMAN |                             | 16 | GTAGGGAGTA   | 0.532 |
| + | 11 | 3087  |                   | NM_014916    | NP_055731    | Q8IWU2 | LMTK2_HUMAN |                             | 16 | TTTCGGAAGAC  | 0.473 |
| - | 23 | 3276  |                   | NM_015395    | NP_056210    | Q7Z6L1 | TCPR1_HUMAN | TECPR 7.                    | 1  | ACCAGCAGTCA  | 0.637 |
| - | 11 | 1640  | ph.1_Missense_IV  | NM_015395    | NP_056210    | Q7Z6L1 | TCPR1_HUMAN |                             | 1  | GGGGCCGGGC   | 0.692 |
| + | 20 | 2619  | p.D804N TRRAP_    | NM_003496    | NP_003487    | Q9Y4A5 | TRRAP_HUMAN |                             | 37 | ATGAAGACCTC  | 0.587 |
| + | 24 | 3499  | o.A1097V TRRAP_   | NM_003496    | NP_003487    | Q9Y4A5 | TRRAP_HUMAN |                             | 37 | CAATTGCTATTT | 0.478 |
| + | 49 | 7411  | p.T2383I TRRAP_   | NM_003496    | NP_003487    | Q9Y4A5 | TRRAP_HUMAN |                             | 37 | TGATGACTTACA | 0.363 |
| + | 69 | 10972 | o.P3559L TRRAP_   | NM_003496    | NP_003487    | Q9Y4A5 | TRRAP_HUMAN | PI3K/PI4K.                  | 37 | ACAACCCCTCTT | 0.617 |
| - | 12 | 1645  | p.G416D SMURF     | NM_020429    | NP_065162    | Q9HCE7 | SMUF1_HUMAN | HECT.                       | 4  | CCACACCACCG  | 0.483 |
| - | 11 | 1455  | _p.V353I SMURF    | NM_020429    | NP_065162    | Q9HCE7 | SMUF1_HUMAN |                             | 4  | TCTGGACTAGAT | 0.562 |
| - | 5  | 712   | p.G131D SMURF     | NM_020429    | NP_065162    | Q9HCE7 | SMUF1_HUMAN |                             | 4  | TCTGGCCACGA  | 0.433 |
| + | 5  | 565   | upy.1_Missense_IV | NM_006409    | NP_006400    | Q92747 | ARC1A_HUMAN | WD 3.                       | 1  | AAAAGCCGATTC | 0.478 |
| + | 7  | 932   | upy.1_Missense_IV | NM_006409    | NP_006400    | Q92747 | ARC1A_HUMAN | WD 5.                       | 1  | CGTGGCTGCTG  | 0.493 |
| - | 3  | 679   | iw.1_Missense_Mt  | NM_015545    | NP_056360    | O75127 | PTCD1_HUMAN | PPR 2.                      | 1  | GCCCGCAGCCC  | 0.423 |
| + | 3  | 289   | se_Mutation_p.E2  | NM_213603    | NP_998768    | Q5FWF6 | ZN789_HUMAN | KRAB.                       | 0  | GAGAGGAGTGG  | 0.453 |
| - | 12 | 1366  | YP3A5_uc011kiy.   | NM_000777    | NP_000768    | P20815 | CP3A5_HUMAN |                             | 0  | AGGATCTATGCT | 0.383 |
| - | 8  | 863   | _Mutation_p.S14   | NM_000777    | NP_000768    | P20815 | CP3A5_HUMAN |                             | 0  | AGGCGACTTTTC | 0.308 |
| - | 6  | 595   | 3A5_uc003urs.2_li | NM_000765    | NP_000756    | P24462 | CP3A7_HUMAN |                             | 1  | TCTCTCTCCC   | 0.512 |
| + | 5  | 510   | Mutation_p.A136V  | NM_057095    | NP_476436    | Q9HB55 | CP343_HUMAN |                             | 2  | TCCAGCTTTCAC | 0.348 |
| + | 7  | 633   | G177E CYP3A43_    | NM_057095    | NP_476436    | Q9HB55 | CP343_HUMAN |                             | 2  | CTTTGGGCGCT  | 0.403 |
| - | 1  | 125   |                   | NM_181538    | NP_853516    | Q8NFK1 | CXG3_HUMAN  | ical; (Potential).          | 1  | AGACTCCAGGC  | 0.667 |
| - | 1  | 88    |                   | NM_181538    | NP_853516    | Q8NFK1 | CXG3_HUMAN  | ical; (Potential).          | 1  | GAAATCCCAGGA | 0.657 |
| - | 2  | 381   |                   | NM_001185    | NP_001176    | P25311 | ZA2G_HUMAN  |                             | 2  | ACTGACCGTTAC | 0.522 |
| + | 6  | 1187  | _p.T287I ZKSCAN   | NM_003439    | NP_003430    | P17029 | ZKSC1_HUMAN |                             | 3  | AAAAACCAGGA  | 0.488 |
| - | 6  | 1114  | AP4M1_uc010lgl    | NM_005916    | NP_005907    | P33993 | MCM7_HUMAN  |                             | 0  | CAGAGGCATGA  | 0.507 |
| + | 2  | 284   | M1_uc003utc.3_M   | NM_004722    | NP_004713    | O00189 | AP4M1_HUMAN |                             | 0  | GTGGCGGCCCG  | 0.701 |
| + | 5  | 560   | nse_Mutation_p.D  | NM_004722    | NP_004713    | O00189 | AP4M1_HUMAN |                             | 0  | ACTAGGACTATC | 0.433 |
| - | 3  | 754   | 96T STAG3_uc01C   | NM_152742    | NP_689955    | Q8N158 | GPC2_HUMAN  |                             | 2  | TGAGGCCAAGC  | 0.627 |
| + | 19 | 2086  | S_uc003uty.3_RN   | NM_012447    | NP_036579    | Q9UJ98 | STAG3_HUMAN |                             | 8  | TGAGGCTGGGG  | 0.577 |
| + | 30 | 3400  | .3_Intron GATS_uc | NM_012447    | NP_036579    | Q9UJ98 | STAG3_HUMAN |                             | 8  | GCTGCCAAGC   | 0.577 |
| + | 1  | 897   | .1_5'Flank ZCWP   | NM_019606    | NP_062552    | Q7L2J0 | MEPCE_HUMAN |                             | 1  | GGAAGCGGCAT  | 0.592 |
| - | 2  | 1512  | p.G14R TSC22D4    | NM_030935    | NP_112197    | Q9Y3Q8 | T22D4_HUMAN |                             | 2  | CTGCCCATCT   | 0.507 |
| + | 6  | 939   | GFG2_uc010lgy.2   | NM_006076    | NP_006067    | O95081 | AGFG2_HUMAN |                             | 1  | CAGTGGCCCA   | 0.493 |
| - | 2  | 316   | CH4_uc003uvi.2_F  | NM_002319    | NP_002310    | O75427 | LRCH4_HUMAN | LRR 2.                      | 2  | GCTGGCACGCC  | 0.637 |
| - | 5  | 703   | FR2_uc003uvu.1_   | NM_003227    | NP_003218    | Q9UP52 | TFR2_HUMAN  | ellular (Potential).        | 2  | GCTCTCCGACC  | 0.582 |
| - | 7  | 1565  |                   | NM_022574    | NP_072096    | O75420 | PERQ1_HUMAN |                             | 2  | CCTTGGGCCAG  | 0.552 |
| + | 14 | 3143  | ZAN_uc003uwl.2_F  | NM_003386    | NP_003377    | Q9Y493 | ZAN_HUMAN   | ate) (mucin-like domain). E | 11 | CATCCCACAG   | 0.567 |
| + | 9  | 1331  | _Mutation_p.A133  | NM_020246    | NP_064631    | Q9BXP2 | S12A9_HUMAN | ical; (Potential).          | 0  | GGGCAGCTGTA  | 0.592 |
| + | 3  | 4558  | C17_uc010lho.1_F  | NM_001040105 | NP_001035194 | Q685J3 | MUC17_HUMAN | ch. 59 X approximate tand   | 27 | AGGTACCAGCA  | 0.468 |
| + | 3  | 6355  | C17_uc010lho.1_F  | NM_001040105 | NP_001035194 | Q685J3 | MUC17_HUMAN | 3 X approximate tandem re   | 27 | AGGAAGTCCTC  | 0.507 |
| + | 3  | 8110  | C17_uc010lho.1_F  | NM_001040105 | NP_001035194 | Q685J3 | MUC17_HUMAN | 3 X approximate tandem re   | 27 | CTCAACTCCTG  | 0.483 |
| + | 3  | 8427  | C17_uc010lho.1_F  | NM_001040105 | NP_001035194 | Q685J3 | MUC17_HUMAN | ch. 59 X approximate tand   | 27 | CTCTCTCTACA  | 0.512 |
| + | 3  | 8779  | C17_uc010lho.1_F  | NM_001040105 | NP_001035194 | Q685J3 | MUC17_HUMAN | 3 X approximate tandem re   | 27 | GTTCTTCTCTA  | 0.507 |
| + | 9  | 13102 | C17_uc010lho.1_F  | NM_001040105 | NP_001035194 | Q685J3 | MUC17_HUMAN | ellular (Potential).        | 27 | GTCTCCAAGA   | 0.572 |

|   |    |      |                    |              |              |        |             |                              |    |               |       |
|---|----|------|--------------------|--------------|--------------|--------|-------------|------------------------------|----|---------------|-------|
| + | 3  | 1961 | 456_uc003uxr.2_lr  | NM_030961    | NP_112223    | Q9BRZ2 | TRI56_HUMAN |                              | 3  | CAACGGCGAAG   | 0.721 |
| - | 11 | 1633 | D3_uc010lhs.2_5'   | NM_001084    | NP_001075    | O60568 | PLOD3_HUMAN |                              | 2  | GTCGGCGTCCA   | 0.657 |
| + | 4  | 785  | H1T1_uc0003uyf.2_F | NM_006349    | NP_006340    | O43257 | ZNHI1_HUMAN |                              | 1  | CGAGGGCCCTA   | 0.672 |
| + | 17 | 2100 | _uc011kkn.1_Intror | NM_181552    | NP_853530    | P39880 | CUX1_HUMAN  |                              | 8  | AACTGGTACAG   | 0.433 |
| + | 3  | 460  | H4_uc0003uzm.2_!   | NM_152892    | NP_690852    | Q9UFC0 | LRWD1_HUMAN | LRR 4.                       | 1  | TCAATGACAAC   | 0.567 |
| - | 11 | 1386 | _uc003var.2_RNA    | NM_145032    | NP_659469    | Q8NEE6 | FXL13_HUMAN | LRR 4.                       | 0  | CATCCCCAAG    | 0.473 |
| - | 20 | 3245 | cg.3_RNA DPY19L    | NR_003561    |              |        |             |                              | 0  | GACAGCTTGAC   | 0.388 |
| + | 3  | 327  | _p.E6K PMPCB_t     | NM_004279    | NP_004270    | O75439 | MPPB_HUMAN  |                              | 4  | CAATGGAACAG   | 0.328 |
| - | 18 | 2047 | D26A5_uc003vbw.:   | NM_198999    | NP_945350    | P58743 | S26A5_HUMAN | nic (Potential). STAS.       | 1  | TTGGTAGCATCC  | 0.393 |
| - | 5  | 707  | z.2_Missense_Mut   | NM_005045    | NP_005036    | P78509 | RELN_HUMAN  | Reelin.                      | 19 | TGTTGGAGCTG   | 0.368 |
| - | 10 | 1069 | _lp.1_Missense_Mt  | NM_002553    | NP_002544    | O43913 | ORC5_HUMAN  |                              | 0  | TTGCTGGATTGT  | 0.323 |
| + | 1  | 504  | vcf.2_Missense_M   | NM_199000    | NP_945351    | Q86UP9 | LHPL3_HUMAN | ical; (Potential).           | 0  | CTTTACCCCTCTT | 0.577 |
| + | 16 | 2408 | _e.Mutation_p.A62  | NM_182931    | NP_891847    | Q81ZD2 | MLL5_HUMAN  |                              | 3  | TGATGCTGAAG   | 0.294 |
| + | 27 | 5458 | LL5_uc010l f.1_Int | NM_182931    | NP_891847    | Q81ZD2 | MLL5_HUMAN  | Pro-rich.                    | 3  | TGTACAACAG    | 0.542 |
| - | 5  | 805  | y.2_Missense_Mut   | NM_019042    | NP_061915    | Q96PZ0 | PUS7_HUMAN  |                              | 1  | CGATAACCTATTA | 0.358 |
| - | 4  | 742  | _y.2_Missense_Mut: | NM_019042    | NP_061915    | Q96PZ0 | PUS7_HUMAN  |                              | 1  | CTTTTCTTCAG   | 0.333 |
| - | 2  | 173  | _do.2_Missense_M   | NM_006754    | NP_006745    | Q16563 | SYPL1_HUMAN | c (Potential). MARVEL.       | 0  | TGGCTCCTTGA   | 0.498 |
| + | 2  | 795  | _p.P237L PIK3CG_   | NM_002649    | NP_002640    | P48736 | PK3CG_HUMAN |                              | 38 | CTCACCCGACG   | 0.532 |
| + | 2  | 1400 | _p.P439S PIK3CG_   | NM_002649    | NP_002640    | P48736 | PK3CG_HUMAN |                              | 38 | AAGCTCCAGCA   | 0.512 |
| - | 4  | 943  | _p.A140T COG5_u    | NM_181733    | NP_859422    | Q9UP83 | COG5_HUMAN  |                              | 4  | TAAAGCCCCAA   | 0.328 |
| + | 6  | 784  | DUS4L_uc011klx.1   | NM_181581    | NP_853559    | O95620 | DUS4L_HUMAN |                              | 0  | AAACCCCTGGA   | 0.348 |
| + | 5  | 757  |                    | NM_000441    | NP_000432    | O43511 | S26A4_HUMAN | ellular (Potential).         | 7  | AGACACTGCAG   | 0.428 |
| + | 6  | 838  |                    | NM_000441    | NP_000432    | O43511 | S26A4_HUMAN | ical; (Potential).           | 7  | TGGTGGCTTGC   | 0.403 |
| + | 6  | 952  | _p.P87S CBLL1_u    | NM_024814    | NP_079090    | Q75N03 | HAKAI_HUMAN | Pro-rich.                    | 5  | TCTCCTCTATTG  | 0.458 |
| + | 6  | 1423 | _p.P244S CBLL1_u   | NM_024814    | NP_079090    | Q75N03 | HAKAI_HUMAN | Pro-rich.                    | 5  | TGACTCCTCAC   | 0.527 |
| - | 10 | 1407 | ves.2_Missense_M   | NM_000111    | NP_000102    | P40879 | S26A3_HUMAN |                              | 4  | CTGATCTGGAG   | 0.478 |
| - | 4  | 549  | _ves.2_Missense_M  | NM_000111    | NP_000102    | P40879 | S26A3_HUMAN | ical; (Potential).           | 4  | TATATGGCTGGG  | 0.433 |
| - | 12 | 1765 | _ex.2_Missense_M   | NM_002291    | NP_002282    | P07942 | LAMB1_HUMAN | inin EGF-like 4.             | 8  | AGTGACCTGTC   | 0.483 |
| - | 25 | 3785 | _p.P1234L LAMB4_   | NM_007356    | NP_031382    | A4D0S4 | LAMB4_HUMAN | Domain II.                   | 8  | AAACAGGATGT   | 0.408 |
| - | 3  | 905  | _fl.2_Missense_Mu  | NM_001130475 | NP_001123947 | Q7Z6K1 | THAP5_HUMAN |                              | 0  | GAAATGGATTTTC | 0.323 |
| + | 3  | 642  |                    | NM_012328    | NP_036460    | Q9UBS3 | DNJB9_HUMAN |                              | 0  | GATGGTGGTT    | 0.348 |
| + | 4  | 2517 | LRRN3_uc003vfu.    | NM_001099660 | NP_001093130 | Q9H3W5 | LRRN3_HUMAN | Potential). Ig-like C2-type. | 8  | AAGAAGGGGGT   | 0.408 |
| - | 48 | 5443 | vw.2_Missense_M    | NM_014705    | NP_055520    | Q8N110 | DOCK4_HUMAN | Ser-rich.                    | 4  | AGATGGCACTG   | 0.468 |
| - | 46 | 5279 | K4_uc003vw.2_M     | NM_014705    | NP_055520    | Q8N110 | DOCK4_HUMAN | Ser-rich.                    | 4  | TACCTGCATGTT  | 0.403 |
| - | 25 | 2886 | _p.E314K DOCK4_    | NM_014705    | NP_055520    | Q8N110 | DOCK4_HUMAN |                              | 4  | TTCCTCCAGCAC  | 0.403 |
| - | 8  | 970  | _ce.Site DOCK4_u   | NM_014705    | NP_055520    | Q8N110 | DOCK4_HUMAN |                              | 4  | AGGTACCTGAT   | 0.423 |
| + | 8  | 1187 | _e.Mutation_p.W24  | NM_001007245 | NP_001007246 | O00458 | IFRD1_HUMAN |                              | 2  | GATGGACACT    | 0.348 |
| - | 5  | 572  | _l.3_Missense_Mut  | NM_012252    | NP_036384    | O14948 | TFEC_HUMAN  | Basic motif.                 | 1  | TAGTGTCAGTTT  | 0.318 |
| - | 3  | 707  | _ja.2_Missense_Mt  | NM_003391    | NP_003382    | P09544 | WNT2_HUMAN  |                              | 7  | CACAGGAACAG   | 0.483 |
| + | 21 | 3521 | _q.1_Missense_Mu   | NM_000492    | NP_000483    | P13569 | CFTR_HUMAN  | ntial). ABC transmembrane    | 5  | GAGTTGGTATTAT | 0.383 |
| - | 4  | 914  |                    | NM_033427    | NP_219499    | Q8WZ74 | CTTB2_HUMAN | Potential.                   | 5  | TTGCTGTCACTT  | 0.478 |
| + | 5  | 783  |                    | NM_019644    | NP_062618    | Q92527 | ANKR7_HUMAN | ANK 5.                       | 0  | AAACCACCATGT  | 0.368 |
| + | 1  | 1174 |                    | NM_012281    | NP_036413    | Q9NZV8 | KCND2_HUMAN | lasmic (Potential).          | 5  | CAGTTCTGAGAT  | 0.527 |
| + | 1  | 1321 |                    | NM_012281    | NP_036413    | Q9NZV8 | KCND2_HUMAN | lasmic (Potential).          | 5  | AGAACTGGCCT   | 0.572 |
| + | 8  | 820  | _2_Missense_Muta   | NM_019071    | NP_061944    | Q9NXR8 | ING3_HUMAN  |                              | 1  | GGCAGCTGCTC   | 0.423 |
| + | 23 | 3497 |                    | NM_024913    | NP_079189    | A4D0V7 | CG058_HUMAN |                              | 9  | TCTCAGCAGGA   | 0.458 |
| + | 12 | 5109 | _2_Intron PTPRZ1   | NM_002851    | NP_002842    | P23471 | PTPRZ_HUMAN | ellular (Potential).         | 9  | TTGCAGACACT   | 0.453 |

rs148782147



|   |    |      |                   |              |              |        |             |                              |     |               |       |
|---|----|------|-------------------|--------------|--------------|--------|-------------|------------------------------|-----|---------------|-------|
| + | 12 | 5142 | .2_Intron PTPRZ1  | NM_002851    | NP_002842    | P23471 | PTPRZ_HUMAN | cellular (Potential).        | 9   | TCCTGGCAGCA   | 0.458 |
| + | 24 | 6517 | p.S1174F PTPRZ1   | NM_002851    | NP_002842    | P23471 | PTPRZ_HUMAN | l). Tyrosine-protein phospho | 9   | ACTATTCTGCAGC | 0.338 |
| - | 18 | 2224 | b.2_Missense_Mu   | NM_005763    | NP_005754    | Q9UDR5 | AASS_HUMAN  | ipine dehydrogenase.         | 2   | AAATCTCAGCAT  | 0.428 |
| - | 4  | 1281 | ense_Mutation_p.F | NM_001024613 | NP_001019784 | A0PJY2 | FEZF1_HUMAN | 2H2-type 6.                  | 3   | .CGTGGGGCAGC  | 0.567 |
| - | 1  | 566  |                   | NM_016945    | NP_058641    | Q9NYV7 | T2R16_HUMAN | cellular (Potential).        | 2   | TTGTCACTTACAC | 0.398 |
| - | 12 | 2666 | JB_uc003vko.2_M   | NM_178827    | NP_849149    | Q8NA54 | IQUB_HUMAN  |                              | 4   | CATGACCAGATC  | 0.473 |
| - | 6  | 1533 | .2_RNA IQUB_uc0   | NM_178827    | NP_849149    | Q8NA54 | IQUB_HUMAN  |                              | 4   | TTATCAGTCATAT | 0.328 |
| + | 2  | 1302 |                   | NM_207163    | NP_997046    | Q6P5Q4 | LMOD2_HUMAN |                              | 0   | GCAAAGAGGAA   | 0.488 |
| + | 4  | 769  | 3PAM1_uc003vlf.3  | NM_153189    | NP_694859    | P38567 | HYALP_HUMAN |                              | 4   | AAGACCATCTGC  | 0.393 |
| + | 5  | 1421 | PAM1_uc003vlf.3   | NM_153189    | NP_694859    | P38567 | HYALP_HUMAN |                              | 4   | ATGGGGAACCC   | 0.318 |
| - | 8  | 935  | 1T1_uc003vll.2_RN | NM_015450    | NP_056265    | Q9NUX5 | POTE1_HUMAN |                              | 1   | AGGGGCTCCCA   | 0.428 |
| - | 1  | 699  | RM8_uc003vit.2_M  | NM_000845    | NP_000836    | O00222 | GRM8_HUMAN  | cellular (Potential).        | 23  | GCATCCGAAG    | 0.512 |
| - | 5  | 2205 | vly.1_Missense_M  | NM_176814    | NP_789784    | Q2TB10 | ZN800_HUMAN |                              | 1   | TTCAGGTGAATT  | 0.393 |
| - | 4  | 690  | g.1_Missense_Mu   | NM_006193    | NP_006184    | O43316 | PAX4_HUMAN  | Homeobox.                    | 1   | GTGGCCGGTCC   | 0.582 |
| + | 15 | 1820 | a.2_Missense_Mul  | NM_014390    | NP_055205    | Q7KZF4 | SND1_HUMAN  | Nase-like 4.                 | 3   | TGGTGAATAC    | 0.438 |
| - | 17 | 1959 | _p.P157L RBM28    | NM_018077    | NP_060547    | Q9NW13 | RBM28_HUMAN |                              | 2   | TTGCAGGCTCTC  | 0.512 |
| - | 5  | 455  | p.D192N IMPDH1    | NM_001142573 | NP_001136045 | P20839 | IMDH1_HUMAN | CBS 1.                       | 4   | AGGGTCCGTGA   | 0.602 |
| + | 4  | 589  | _p.G146E CALU_u   | NM_001130674 | NP_001124146 | O43852 | CALU_HUMAN  |                              | 0   | ATGATGGATTTA  | 0.388 |
| - | 2  | 516  |                   | NM_001708    | NP_001699    | P03999 | OPSB_HUMAN  | Name=4; (Potential).         | 0   | CGGCTCCAGCC   | 0.542 |
| + | 10 | 1803 | a.3_Missense_Mu   | NM_001458    | NP_001449    | Q14315 | FLNC_HUMAN  | Filamin 3.                   | 12  | TGGTGTGTTC    | 0.617 |
| + | 13 | 2272 | ia.3_Missense_Mu  | NM_001458    | NP_001449    | Q14315 | FLNC_HUMAN  | Filamin 5.                   | 12  | GCCCCGTGAGT   | 0.602 |
| + | 18 | 2901 | a.3_Missense_Mu   | NM_001458    | NP_001449    | Q14315 | FLNC_HUMAN  | Filamin 7.                   | 12  | GAGCCGGCAAG   | 0.592 |
| + | 44 | 7566 | a.3_Missense_Mul  | NM_001458    | NP_001449    | Q14315 | FLNC_HUMAN  | Interaction with INPPL1.     | 12  | TGGAGGAGTGC   | 0.667 |
| + | 3  | 461  | _p.P114S IRF5_uc  | NM_002200    | NP_002191    | Q13568 | IRF5_HUMAN  | ophan pentad repeat.         | 0   | CTCAGCCCTAC   | 0.637 |
| - | 1  | 378  | in_p.E2K TNPO3    | NM_012470    | NP_036602    | Q9Y5L0 | TNPO3_HUMAN |                              | 5   | TCCTTCCATGG   | 0.617 |
| + | 11 | 2148 | as.2_Missense_Mu  | NM_005631    | NP_005622    | Q99835 | SMO_HUMAN   | lasmic (Potential).          | 37  | TGTCACCAAGA   | 0.557 |
| + | 16 | 1883 | 17splice AHCYL2   | NM_015328    | NP_056143    | Q96HN2 | SAHH3_HUMAN |                              | 2   | TACAGGTGCCCT  | 0.507 |
| - | 10 | 1510 | _p.Q339* ZC3HC1   | NM_016478    | NP_057562    | Q86WB0 | NIPA_HUMAN  |                              | 0   | CCACTGCCGAA   | 0.398 |
| + | 9  | 1204 | _p.P328S KLHDC1   | NM_014997    | NP_055812    | Q6PID8 | KLD10_HUMAN | Kelch 5.                     | 0   | AGCTCCAGCT    | 0.398 |
| - | 5  | 664  | p.V181M TMEM2C    | NM_032842    | NP_116231    | Q96SK2 | TM209_HUMAN | Ser-rich.                    | 3   | GGTCACTCCAG   | 0.458 |
| + | 5  | 496  | _p.G117E CPA4_u   | NM_016352    | NP_057436    | Q9UI42 | CBPA4_HUMAN |                              | 1   | AGATTGGACATT  | 0.517 |
| + | 6  | 758  | 1_Mutation_p.T141 | NM_001868    | NP_001859    | P15085 | CBPA1_HUMAN |                              | 1   | CTTACGCACAC   | 0.562 |
| - | 2  | 615  | _p.A129V PLXNA4   | NM_020911    | NP_065962    | Q9HCM2 | PLXA4_HUMAN | lar (Potential). Sema.       | 1   | CACAGCAATC    | 0.542 |
| + | 10 | 1252 |                   | NM_020299    | NP_064695    | O60218 | AK1BA_HUMAN |                              | 5   | ACTATCCCTTCA  | 0.393 |
| + | 6  | 804  | kps.1_Missense_A  | NM_001080538 | NP_001074007 | C9JRZ8 | AK1BF_HUMAN |                              | 1   | TGGATGCCTGG   | 0.423 |
| + | 3  | 671  | n_p.Q44* BPGM_u   | NM_199186    | NP_954655    | P07738 | PMGE_HUMAN  |                              | 0   | GGAAGCAACTC   | 0.478 |
| - | 11 | 2181 | pz.1_Missense_M   | NM_001008225 | NP_001008226 | Q95628 | CNOT4_HUMAN |                              | 0   | GCTGGGGGGTC   | 0.537 |
| - | 15 | 2392 | e_Mutation_p.A56  | NM_012450    | NP_036582    | Q9UKG4 | S13A4_HUMAN |                              | 0   | CGATGGCATTAC  | 0.557 |
| - | 4  | 690  | ZP6_uc010lmv.2_F  | NM_145808    | NP_665807    | Q538Z0 | LUZP6_HUMAN |                              | 0   | GATTGCCTGGT   | 0.512 |
| - | 13 | 1361 | u.2_Missense_Mul  | NM_004717    | NP_004708    | O75912 | DGKI_HUMAN  | DAGKc.                       | 3   | AGGAGCTGAG    | 0.542 |
| + | 6  | 730  | 1D1_uc011kqf.1_1  | NM_005989    | NP_005980    | P51857 | AK1D1_HUMAN | NADP.                        | 1   | ATAGCCCTTTGG  | 0.418 |
| - | 12 | 1482 | p.G415E ATP6V0    | NM_130841    | NP_570856    | Q9HBG4 | VPP4_HUMAN  | ical; (Potential).           | 1   | CGGTTCCATGA   | 0.547 |
| - | 10 | 1133 | p.V299M ATP6V0    | NM_130841    | NP_570856    | Q9HBG4 | VPP4_HUMAN  | lasmic (Potential).          | 1   | CTGCACCTTGAT  | 0.537 |
| - | 2  | 875  | _p.G226S KIAA154  | NM_020910    | NP_065961    | Q9HCM3 | K1549_HUMAN |                              | 230 | CACACCTCTG    | 0.502 |
| - | 3  | 858  | vup.2_Missense_A  | NM_020119    | NP_064504    | Q7Z2W4 | ZCCHV_HUMAN | 3H1-type 3.                  | 1   | GCCGACCCTCT   | 0.483 |
| + | 15 | 3605 |                   | NM_173569    | NP_775840    | Q6ZU65 | UBN2_HUMAN  | Ser-rich.                    | 2   | CAAACCATTTGT  | 0.483 |
| + | 2  | 409  | 7orf55_uc003vuw.  | NM_016019    | NP_057103    | Q9Y383 | LC7L2_HUMAN |                              | 0   | CATGAGCTTCA   | 0.498 |

|   |    |                           |                     |              |              |        |             |                                 |       |               |       |
|---|----|---------------------------|---------------------|--------------|--------------|--------|-------------|---------------------------------|-------|---------------|-------|
| + | 9  | 1264                      | p.R363Q LUC7L2_     | NM_016019    | NP_057103    | Q9Y383 | LC7L2_HUMAN | Arg/Ser-rich.                   | 0     | ATCTCGGGAGA   | 0.552 |
| - | 17 | 2292                      | M1D_uc010lng.2_     | NM_030647    | NP_085150    | Q6ZMT4 | KDM7_HUMAN  |                                 | 1     | 3AGTTTCTTTCA  | 0.458 |
| - | 11 | 1343                      | M1D_uc010lng.2_     | NM_030647    | NP_085150    | Q6ZMT4 | KDM7_HUMAN  |                                 | 1     | ATACAAGCTGTAT | 0.294 |
| - | 17 | 2117                      |                     | NM_004333    | NP_004324    | P15056 | BRAF_HUMAN  | rotein kinase.                  | 18290 | CTTTTGGACAGT  | 0.403 |
| - | 15 | 1860                      |                     | NM_004333    | NP_004324    | P15056 | BRAF_HUMAN  | rotein kinas_R603>l(2)]p.T      | 18290 | 3ATTTCACTGTAC | 0.368 |
| - | 13 | 1752                      |                     | NM_004333    | NP_004324    | P15056 | BRAF_HUMAN  | rotein kinase.                  | 18290 | ACTCCATGCCCT  | 0.373 |
| - | 2  | 188                       | vve.3_Missense_†    | NM_016071    | NP_057155    | Q9Y291 | RT33_HUMAN  |                                 | 0     | GAGACATGCGG   | 0.443 |
| + | 2  | 884                       | 852_uc010lnn.2_F    | NM_001105558 | NP_001099028 | P0C1S8 | WEE2_HUMAN  |                                 | 2     | TTCACTCCAGAG  | 0.428 |
| + | 6  | 1311                      | 852_uc010lnn.2_J    | NM_001105558 | NP_001099028 | P0C1S8 | WEE2_HUMAN  | rotein kinase.                  | 2     | CTATATCTGAAA  | 0.383 |
| + | 10 | 1827                      | 352_uc010lnn.2_In   | NM_001105558 | NP_001099028 | P0C1S8 | WEE2_HUMAN  | rotein kinase.                  | 2     | ACAGAGACCTT   | 0.458 |
| + | 1  | 670                       |                     | NM_016944    | NP_058640    | Q9NYW5 | TA2R4_HUMAN | lasmic (Potential).             | 0     | CGGAAGCTCAT   | 0.443 |
| - | 1  | 395                       | 011krl.1_Missense   | NM_001008270 | NP_001008271 | A4D1T9 | PRS37_HUMAN |                                 | 1     | GGACACCCAAA   | 0.478 |
| + | 48 | 5617                      |                     | NM_004668    | NP_004659    | O43451 | MGA_HUMAN   | lenal (Potential).              | 2     | GGATAAGCACT   | 0.333 |
| + | 2  | 237                       | .2_Intron uc003wa   | NR_001296    |              |        |             |                                 | 0     | GGCTCCCTCATC  | 0.567 |
| + | 3  | 427                       | l10loj.1_Intron uc0 | NR_001296    |              |        |             |                                 | 0     | CTCCACACCTG   | 0.542 |
| + | 18 | 3481                      | bt.2_Nonsense_Mi    | NM_004445    | NP_004436    | O15197 | EPHB6_HUMAN | Potential) Protein kinase.      | 19    | ACTTGGCAGAA   | 0.587 |
| - | 7  | 1070                      | 1_p.S71F TRPV6_     | NM_018646    | NP_061116    | Q9H1D0 | TRPV6_HUMAN | lasmic (Potential).             | 2     | CTGAGGAGTCG   | 0.562 |
| + | 1  | 105                       |                     | NM_178829    | NP_849151    | Q96L11 | CG034_HUMAN |                                 | 0     | AGTGGGTGGGC   | 0.647 |
| + | 1  | 386                       |                     | NM_001001667 | NP_001001667 | Q8N148 | OR6V1_HUMAN | lasmic (Potential).             | 1     | ACTGCGCTATG   | 0.592 |
| + | 1  | 733                       |                     | NM_001001667 | NP_001001667 | Q8N148 | OR6V1_HUMAN | Name=6; (Potential).            | 1     | TCACACTGGTC   | 0.547 |
| + | 1  | 433                       |                     | NM_176881    | NP_795362    | P59534 | T2R39_HUMAN | lasmic (Potential).             | 1     | CTACCCCTTT    | 0.408 |
| + | 1  | 856                       |                     | NM_176882    | NP_795363    | P59535 | T2R40_HUMAN | Name=7; (Potential).            | 1     | TCATGGCTGCC   | 0.463 |
| + | 8  | 719                       | rcj.2_Missense_Mi   | NM_015917    | NP_057001    | Q9Y2Q3 | GSTK1_HUMAN |                                 | 0     | CAGGAGAGAAG   | 0.488 |
| + | 13 | 1535                      | ctc.1_Missense_Mi   | NM_000083    | NP_000074    | P35523 | CLCN1_HUMAN | selectivity filter part_3 (By s | 5     | CGGAGCTTCA    | 0.512 |
| - | 4  | 1953                      | nse_Mutation_p.A    | NM_014690    | NP_055505    | Q86XD5 | F131B_HUMAN |                                 | 0     | GTGGGCCACCC   | 0.587 |
| + | 8  | 1539                      | _p.A462T ZYX_uc     | NM_001010972 | NP_001010972 | Q15942 | ZYX_HUMAN   | l zinc-binding 2.               | 0     | GCAAGCCCTAT   | 0.667 |
| + | 7  | 2476                      | 1_intron uc011ktf   | NM_001130025 | NP_001123497 | A6NFQ2 | F115C_HUMAN |                                 | 0     | TCAGGCCACCG   | 0.602 |
| - | 2  | 194                       | M115A_uc003wdf      | NM_014719    | NP_055534    | Q9Y4C2 | F115A_HUMAN |                                 | 0     | TTCGGGTACATC  | 0.512 |
| + | 1  | 472                       |                     | NM_001004685 | NP_001004685 | O95006 | OR2F2_HUMAN | Name=4; (Potential).            | 4     | CTCTTGTGCAG   | 0.532 |
| + | 1  | 942                       |                     | NM_012369    | NP_036501    | Q13607 | OR2F1_HUMAN | lasmic (Potential).             | 3     | AGGGGCCTGG    | 0.423 |
| + | 14 | 4754                      | 3wem.2_Splice_Si    | NM_005435    | NP_005426    | Q12774 | ARHG5_HUMAN |                                 | 2     | TGACGGTAAGC   | 0.483 |
| + | 2  | 474                       | 3tart_Site CUL1_uc  | NM_003592    | NP_003583    | Q13616 | CUL1_HUMAN  |                                 | 1     | AACTAGCTGTAC  | 0.433 |
| + | 4  | 939                       | _p.A138V CUL1_u     | NM_003592    | NP_003583    | Q13616 | CUL1_HUMAN  |                                 | 1     | TTTGTGCCTACC  | 0.363 |
| - | 13 | 1697                      | p.D516N EZH2_uc     | NM_004456    | NP_004447    | Q15910 | EZH2_HUMAN  |                                 | 183   | 3CTAACCCTTTT  | 0.363 |
| - | 2  | 170                       | nse_Mutation_p.G    | NM_004456    | NP_004447    | Q15910 | EZH2_HUMAN  | DMT1, DNMT3A and DNMT           | 183   | TCTGGCCCATGA  | 0.423 |
| - | 4  | 954                       |                     | NM_001001661 | NP_001001661 | Q6IV72 | ZN425_HUMAN | 2H2-type 3.                     | 3     | GTAGACACAGG   | 0.662 |
| - | 3  | 321                       |                     | NM_001001661 | NP_001001661 | Q6IV72 | ZN425_HUMAN |                                 | 3     | GAGGGCTAGTT   | 0.363 |
| - | 2  | 182                       |                     | NM_001001661 | NP_001001661 | Q6IV72 | ZN425_HUMAN | KRAB.                           | 3     | TCATCTCTTGCT  | 0.433 |
| + | 2  | 417                       | NF398_uc011kum.     | NM_170686    | NP_733787    | Q8TD17 | ZN398_HUMAN |                                 | 1     | TGGTGGCCGCC   | 0.592 |
| - | 5  | 1415                      |                     | NM_015694    | NP_056509    | Q9ULD5 | ZN777_HUMAN | Glu-rich.                       | 1     | CTCTGGCTCCT   | 0.622 |
| + | 6  | 1368                      | 362_uc003wgm.2_     | NM_001099220 | NP_001092690 | O60290 | ZN862_HUMAN | KRAB 2.                         | 1     | CCCTGGATCAA   | 0.562 |
| + | 3  | 1547_15483743_uc003whg.2_ | NM_173680           | NP_775951    | Q96BV0       | Q96BV0 | ZN775_HUMAN | 2H2-type 10.                    | 0     | CCCTACCGTGC   | 0.703 |
| + | 3  | 998                       |                     | NM_175571    | NP_783161    | Q8ND71 | GIMA8_HUMAN |                                 | 7     | AGAGGGAGACA   | 0.373 |
| + | 3  | 414                       | MAP4_uc011kuv.      | NM_018326    | NP_060796    | Q9NUV9 | GIMA4_HUMAN |                                 | 1     | GACCTCCCAGC   | 0.507 |
| + | 3  | 427                       | hp.2_Missense_Iv    | NM_130759    | NP_570115    | Q8VWP7 | GIMA1_HUMAN | lasmic (Potential).             | 3     | CCACGCGCTG    | 0.622 |
| + | 16 | 2131                      | iy.1_Missense_Mu    | NM_000603    | NP_000594    | P29474 | NOS3_HUMAN  | avodoxin-like.                  | 8     | GATCGCTTCAA   | 0.607 |
| + | 3  | 1135                      | 3N3_uc003wip.2_†    | NM_004769    | NP_004760    | Q9UHC3 | ACCN3_HUMAN | ellular (Potential).            | 2     | CTTGGGGTGT    | 0.617 |

|   |    |       |                     |              |              |        |             |                           |    |               |       |
|---|----|-------|---------------------|--------------|--------------|--------|-------------|---------------------------|----|---------------|-------|
| + | 4  | 551   | i_p.P90S SLC4A2_    | NM_003040    | NP_003031    | P04920 | B3A2_HUMAN  | ic (Potential), Pro-rich. | 0  | AGACACCCCA    | 0.677 |
| + | 7  | 1104  | p.G274E SLC4A2_     | NM_003040    | NP_003031    | P04920 | B3A2_HUMAN  | ic (Potential), Pro-rich. | 0  | TCCTGGGGTGC   | 0.672 |
| - | 3  | 437   | rjo.1_Missense_Mt   | NM_007189    | NP_009120    | Q9UG63 | ABCF2_HUMAN | C transporter 1.          | 1  | CCTGAGTTTAAT  | 0.488 |
| - | 5  | 600   | p.P154S SMARCB1     | NM_001003801 | NP_001003801 | Q6STE5 | SMRD3_HUMAN |                           | 2  | CGCAGGGTTAA   | 0.577 |
| - | 3  | 601   |                     | NM_005614    | NP_005605    | Q15382 | RHEB_HUMAN  |                           | 2  | CTTGCCCGGCT   | 0.363 |
| - | 47 | 12358 | vkx.2_Splice_Site_  | NM_170606    | NP_733751    | Q8NEZ4 | MLL3_HUMAN  |                           | 63 | TTCTTACTTTTCC | 0.398 |
| - | 36 | 5659  | tz.2_Missense_Mu    | NM_170606    | NP_733751    | Q8NEZ4 | MLL3_HUMAN  |                           | 63 | GCCAGGCTGAG   | 0.408 |
| - | 32 | 5012  | vkz.2_Splice_Site_  | NM_170606    | NP_733751    | Q8NEZ4 | MLL3_HUMAN  |                           | 63 | TTGTACTCTGGC  | 0.353 |
| + | 14 | 1547  | n.2_Missense_Mu     | NM_130797    | NP_570629    | P42658 | DPP6_HUMAN  | ellular (Potential).      | 4  | CAGCAGCAACG   | 0.562 |
| + | 3  | 744   | .1_intron INSIG1_   | NM_005542    | NP_005533    | O15503 | INSI1_HUMAN | enal (Potential).         | 0  | CGCCAGTGCTG   | 0.418 |
| + | 5  | 900   | me.2_Missense_M     | NM_053043    | NP_444271    | Q96EV2 | RBM33_HUMAN | Glu-rich.                 | 1  | TTGTTAGACATC  | 0.433 |
| + | 3  | 1235  |                     | NM_138400    | NP_612409    | Q5C9Z4 | NOM1_HUMAN  | MIF4G.                    | 0  | GGGTGCCTGCG   | 0.547 |
| + | 5  | 1648  | M1_uc010lqp.1_5'F   | NM_138400    | NP_612409    | Q5C9Z4 | NOM1_HUMAN  |                           | 0  | TTGAAGATTCCG  | 0.463 |
| + | 13 | 2059  | ng.2_Missense_M     | NM_014671    | NP_055486    | Q15386 | UBE3C_HUMAN |                           | 5  | GTTACTACTAGC  | 0.363 |
| + | 22 | 3313  | rni.3_Missense_Mi   | NM_014671    | NP_055486    | Q15386 | UBE3C_HUMAN | HECT.                     | 5  | TTGTGGAAGGG   | 0.438 |
| - | 14 | 1719  | ICAPG2_uc011kwi     | NM_017760    | NP_060230    | Q86XI2 | CNDG2_HUMAN |                           | 3  | AGGAAAGAATTA  | 0.547 |
| + | 6  | 1252  | vov.2_Missense_M    | NM_173539    | NP_775810    | Q8TC21 | ZN596_HUMAN | C2H2-type 5.              | 0  | GTTACCTTAGAC  | 0.398 |
| + | 16 | 1910  | D3wpt.2_Missense_   | NM_014629    | NP_055444    | O15013 | ARHGA_HUMAN | DH.                       | 1  | TAGCAGAGAAG   | 0.483 |
| + | 17 | 2036  | _p.D582N ARHGE      | NM_014629    | NP_055444    | O15013 | ARHGA_HUMAN |                           | 1  | TGATCAGATGAT  | 0.433 |
| + | 5  | 665   | M2_uc011kwi.1_li    | NM_003970    | NP_003961    | P54296 | MYOM2_HUMAN | like C2-type 1.           | 6  | CTTCCCGTGC    | 0.557 |
| + | 34 | 4103  | lkwi.1_Splice_Site_ | NM_003970    | NP_003961    | P54296 | MYOM2_HUMAN |                           | 6  | TACACAGCTTTT  | 0.348 |
| - | 57 | 9160  | p.P2253S CSMD1      | NM_033225    | NP_150094    | Q96PZ7 | CSMD1_HUMAN | ar (Potential), Sushi 22. | 25 | CCCCGGATCAC   | 0.478 |
| - | 24 | 4138  | p.A642T CSMD1_      | NM_033225    | NP_150094    | Q96PZ7 | CSMD1_HUMAN | ar (Potential), Sushi 7.  | 25 | CATGGCGTACCC  | 0.522 |
| - | 4  | 812   |                     | NM_033225    | NP_150094    | Q96PZ7 | CSMD1_HUMAN | ellular (Potential).      | 25 | TGGCTAGGTAAA  | 0.383 |
| + | 8  | 1572  | _p.A502T MCPH1_     | NM_024596    | NP_078872    | Q8NEM0 | MCPH1_HUMAN |                           | 2  | CTTCTGCCCTC   | 0.498 |
| - | 5  | 3142  |                     | NM_001080826 | NP_001074295 | Q86YV5 | SG223_HUMAN | rotein kinase.            | 0  | GCAGTCCTGCT   | 0.627 |
| - | 2  | 1169  |                     | NM_001080826 | NP_001074295 | Q86YV5 | SG223_HUMAN |                           | 0  | TACAGCCCAAGG  | 0.652 |
| + | 25 | 3634  | rw.1_Missense_Mi    | NM_003747    | NP_003738    | O95271 | TNKS1_HUMAN | ARP catalytic.            | 7  | TGGGGCCGGG    | 0.408 |
| - | 4  | 5201  |                     | NM_178857    | NP_849188    | Q8IWN7 | RP1L1_HUMAN |                           | 8  | GCAGGGACAGA   | 0.662 |
| - | 4  | 3632  |                     | NM_178857    | NP_849188    | Q8IWN7 | RP1L1_HUMAN |                           | 8  | GGCAGGAGACC   | 0.582 |
| + | 7  | 1422  | p.Q235* MTMR9_      | NM_015458    | NP_056273    | Q96QG7 | MTMR9_HUMAN | ularin phosphatase.       | 0  | CACTCCAGGTG   | 0.483 |
| + | 1  | 624   |                     | NM_054028    | NP_473369    | Q96KT7 | AMCL2_HUMAN | . Helical; (Potential).   | 0  | TCCTAGGACTAA  | 0.582 |
| - | 2  | 742   | 3wtw.2_Missense_    | NM_053279    | NP_444509    | Q96KS9 | F167A_HUMAN |                           | 0  | TGCGGGTCTCC   | 0.682 |
| + | 2  | 670   | K_uc003wtz.2_Intl   | NM_001715    | NP_001706    | P51451 | BLK_HUMAN   |                           | 3  | CAGCGCCAAG    | 0.473 |
| + | 6  | 1641  | _p.P157S GATA4_     | NM_002052    | NP_002043    | P43694 | GATA4_HUMAN |                           | 1  | TGCGTCCCATC   | 0.642 |
| + | 1  | 231   | M FDFT1_uc011ko     | NM_004462    | NP_004453    | P37268 | FDFT_HUMAN  |                           | 0  | GGAAGGTGATG   | 0.701 |
| - | 1  | 1454  | .1_intron FAM66D    | NM_201402    | NP_958804    | Q6R6M4 | U17L2_HUMAN |                           | 3  | GCAGGGAGCTT   | 0.512 |
| + | 9  | 1159  | Mutation_p.V317I    | NM_006765    | NP_006756    | Q13454 | TUSC3_HUMAN | ical; (Potential).        | 3  | GCCTAGTGGGAT  | 0.328 |
| + | 11 | 1187  |                     | NM_181723    | NP_859074    | Q86XE3 | EFHA2_HUMAN |                           | 1  | AAATGGAATGAV  | 0.284 |
| + | 8  | 1394  | eye.1_Missense_IV   | NM_001008539 | NP_001008539 | P52569 | CTR2_HUMAN  | ellular (Potential).      | 3  | TGAAGGCCTT    | 0.502 |
| + | 4  | 767   |                     | NM_006207    | NP_006198    | Q15198 | PGFRL_HUMAN |                           | 0  | TGCAACCTCATT  | 0.567 |
| - | 4  | 2774  | Olisy.2_RNA MTUS    | NM_001001924 | NP_001001924 | Q9ULD2 | MTUS1_HUMAN |                           | 2  | TCAAGGATGTAC  | 0.443 |
| + | 7  | 1323  | yg.2_Missense_Mi    | NM_006197    | NP_006188    | Q15154 | PCM1_HUMAN  | Potential.                | 36 | GGCAGGCTGCA   | 0.403 |
| + | 12 | 2217  | ryj.3_Missense_Mi   | NM_006197    | NP_006188    | Q15154 | PCM1_HUMAN  |                           | 36 | ATGCCCTCTCT   | 0.353 |
| - | 10 | 1029  | AH1_uc003wyn.2_     | NM_177924    | NP_808592    | Q13510 | ASAH1_HUMAN |                           | 0  | CAGAATCCATTCT | 0.418 |
| + | 2  | 559   |                     | NM_000015    | NP_000006    | P11245 | ARY2_HUMAN  |                           | 2  | TTTCTGCTTGAC  | 0.443 |
| - | 3  | 1424  | g.1_Missense_Mu     | NM_021020    | NP_066300    | Q9Y250 | LZTS1_HUMAN |                           | 1  | GGCGCCCTCC    | 0.647 |

|   |    |      |                    |              |              |        |             |                                |    |                   |       |
|---|----|------|--------------------|--------------|--------------|--------|-------------|--------------------------------|----|-------------------|-------|
| - | 4  | 706  | wzz.1_Missense_M   | NM_003974    | NP_003965    | O60496 | DOK2_HUMAN  | RS-type PTB.                   | 0  | :CTTGTCCCGCC      | 0.502 |
| + | 8  | 693  | o.G130D EPB49_u    | NM_001114136 | NP_001107608 | Q08495 | DEMA_HUMAN  |                                | 1  | GGGAGGCAGCC       | 0.612 |
| - | 8  | 2752 | .2_Missense_Mut    | NM_005144    | NP_005135    | O43593 | HAIR_HUMAN  |                                | 2  | .CCCGGCATCA       | 0.627 |
| - | 3  | 1726 | .2_Missense_Mut    | NM_005144    | NP_005135    | O43593 | HAIR_HUMAN  |                                | 2  | :TGGCTCCACTG      | 0.652 |
| + | 5  | 465  | e_Mutation_p.D12   | NM_001722    | NP_001713    | P05423 | RPC4_HUMAN  |                                | 0  | (CAGTGGATGTG      | 0.463 |
| + | 9  | 1371 | xbt.2_Nonsense_M   | NM_005605    | NP_005596    | P48454 | PP2BC_HUMAN |                                | 1  | :ACATGGTCTTTG     | 0.408 |
| + | 14 | 1475 | DRBS3_uc003xbw.    | NM_005775    | NP_005766    | O60504 | VINEX_HUMAN |                                | 0  | .GGGAAGAGAAG      | 0.627 |
| - | 1  | 491  | I_5'Flank EGR3_u   | NM_004430    | NP_004421    | Q06889 | EGR3_HUMAN  |                                | 0  | GTAATGGACTAC      | 0.373 |
| + | 7  | 2171 | IRHOBTB2_uc011     | NM_015178    | NP_055993    | Q9BYZ6 | RHBT2_HUMAN | BTB 2.                         | 2  | TCCCTACACAAC      | 0.547 |
| + | 3  | 1103 | HMP7_uc003xdd.2    | NM_152272    | NP_689485    | Q8WUX9 | CHMP7_HUMAN |                                | 0  | TGTCGCTGTGG       | 0.532 |
| - | 13 | 2552 | XL2_uc010lty.1_Ini | NM_002318    | NP_002309    | Q9Y4K0 | LOXL2_HUMAN | yl-oxidase like.               | 3  | :GGTGGCCGTCA      | 0.557 |
| - | 2  | 439  |                    | NM_002318    | NP_002309    | Q9Y4K0 | LOXL2_HUMAN |                                | 3  | CTCGGGTAATC       | 0.642 |
| + | 4  | 1043 | Y10ltz.2_RNA SLC   | NM_016612    | NP_057696    | Q9NYZ2 | MFRN1_HUMAN | Solcar 3.                      | 0  | FGGCCGGCTACT      | 0.587 |
| + | 21 | 2323 | AM28_uc010lua.2    | NM_014265    | NP_055080    | Q9UKQ2 | ADA28_HUMAN | lasmic (Potential).            | 5  | :AGCCTCTTTTG      | 0.408 |
| - | 3  | 1412 |                    | NM_006158    | NP_006149    | P07196 | NFL_HUMAN   | tail, subdomain A.             | 2  | AGGAGCGGGTC       | 0.577 |
| + | 14 | 1567 | ise_Mutation_p.G1  | NM_024940    | NP_079216    | Q9H7D0 | DOCK5_HUMAN | DHR-1.                         | 3  | .GGAGGCAAGC       | 0.478 |
| + | 6  | 898  | PP2R2A_uc011laf.   | NM_002717    | NP_002708    | P63151 | 2ABA_HUMAN  | WD 3.                          | 2  | ATTTGCCGATTA      | 0.353 |
| - | 3  | 1464 |                    | NM_007257    | NP_009188    | Q9UL42 | PNMA2_HUMAN |                                | 0  | :caaacactctctacac | 0     |
| + | 5  | 867  | ie_Mutation_p.R17  | NM_001386    | NP_001377    | Q16555 | DPYL2_HUMAN |                                | 1  | AAGATCGCTTCC      | 0.453 |
| + | 12 | 1686 | 'SL2_uc010luk.1_I  | NM_001386    | NP_001377    | Q16555 | DPYL2_HUMAN |                                | 1  | :TGGTGGTCATC      | 0.552 |
| + | 13 | 1963 | 'SL2_uc010luk.1_I  | NM_001386    | NP_001377    | Q16555 | DPYL2_HUMAN |                                | 1  | AGTCTGGATTCA      | 0.607 |
| - | 3  | 468  | _U_uc003xfy.1_Mi   | NM_203339    | NP_976084    | P10909 | CLUS_HUMAN  |                                | 2  | GGCGGCCAACCC      | 0.562 |
| + | 3  | 340  | xgb.1_Missense_M   | NM_016240    | NP_057324    | Q6AZY7 | SCAR3_HUMAN | type II membrane protein;      | 4  | :TCCTGGTGCC       | 0.647 |
| + | 3  | 271  | SCO2_uc003xgh.2    | NM_001017420 | NP_001017420 | Q56NI9 | ESCO2_HUMAN |                                | 1  | AAACAAC TGAAA     | 0.353 |
| - | 3  | 461  | :gr.2_Missense_M   | NM_018660    | NP_061130    | Q9H8N7 | ZN395_HUMAN |                                | 0  | :CTCTGCCAGCC      | 0.667 |
| + | 5  | 969  | o.2_Nonsense_Mu    | NM_017412    | NP_059108    | Q9NPG1 | FZD3_HUMAN  | cellular (Potential).          | 2  | :TTTTTGGTGTCC     | 0.448 |
| - | 13 | 1648 | se_Mutation_p.T4   | NM_018250    | NP_060720    | Q9NV88 | INT9_HUMAN  |                                | 2  | GCCGGGTGTGCG      | 0.512 |
| - | 2  | 302  | M66_uc003xhu.2_    | NM_016127    | NP_057211    | Q96BY9 | TMM66_HUMAN |                                | 0  | :ATCCCGCAGCA      | 0.478 |
| + | 5  | 927  | '1_RNA RBPMS_u     | NM_006867    | NP_006858    | Q93062 | RBPMS_HUMAN | RRM.                           | 1  | TTGCATCTGAA       | 0.448 |
| - | 1  | 79   | oc.1_Missense_M    | NM_031271    | NP_112561    | Q9BXT5 | TEX15_HUMAN |                                | 7  | CATTAAGACCAC      | 0.368 |
| - | 1  | 806  | JRG_uc003xim.1_    | NM_013357    | NP_037489    | Q9UJV8 | PURG_HUMAN  | By similarity.                 | 0  | :CCCCTCTGGGA      | 0.448 |
| + | 7  | 578  | 8024_uc010lvx.1_   | NM_007175    | NP_009106    | O94905 | ERLN2_HUMAN | renal (Potential).             | 0  | :AACAGGACCTG      | 0.493 |
| + | 9  | 1464 | vy.2_Nonsense_M    | NM_032777    | NP_116166    | Q96PE1 | GP124_HUMAN | cellular (Potential).          | 5  | :AGGTGGCCCCG      | 0.662 |
| + | 19 | 3154 | lvy.2_Missense_M   | NM_032777    | NP_116166    | Q96PE1 | GP124_HUMAN | Name=5; (Potential).           | 5  | TACATCCCTGTG      | 0.612 |
| - | 4  | 1686 | FIP1_uc003xkl.1_   | NM_001002814 | NP_001002814 | Q6WKZ4 | RFIP1_HUMAN |                                | 3  | :TTGCGCCTCTG      | 0.498 |
| + | 10 | 1147 | ou.3_Nonsense_M    | NM_004674    | NP_004665    | Q9UBL3 | ASH2L_HUMAN | B30.2/SPRY.                    | 2  | :TGCTGGGCAGG      | 0.488 |
| + | 5  | 1576 | z.1_Missense_Mu    | NM_004874    | NP_004865    | O95429 | BAG4_HUMAN  | BAG.                           | 1  | :GCCAGGACTCT      | 0.403 |
| - | 4  | 356  | ixlg.3_Missense_M  | NM_001102559 | NP_001096029 | Q8NEB5 | PPC1B_HUMAN | ase sequence motif I.          | 0  | TACCTCCCTACG      | 0.493 |
| - | 17 | 3598 | p.A1027V WHSC1     | NM_023034    | NP_075447    | Q9BZ95 | NSD3_HUMAN  |                                | 1  | :CCTCAGCAAAG      | 0.443 |
| - | 16 | 2920 | se_Mutation_p.G5   | NM_023110    | NP_075598    | P11362 | FGFR1_HUMAN | Potential). Protein kinase.    | 15 | :TCGGCCCTGAA      | 0.602 |
| - | 1  | 341  |                    | NR_003129    |              |        |             |                                | 0  | :GGCGGGGTGG       | 0.567 |
| + | 1  | 194  |                    | NM_153692    | NP_710159    | P83105 | HTRA4_HUMAN |                                | 0  | :CGTCTCTGG        | 0.706 |
| + | 7  | 1235 |                    | NM_153692    | NP_710159    | P83105 | HTRA4_HUMAN |                                | 0  | :GAAAGGCGTTT      | 0.423 |
| + | 11 | 1170 | 1_Intron ADAM32    | NM_145004    | NP_659441    | Q8TC27 | ADA32_HUMAN | 'B. Extracellular (Potential). | 3  | :CCAAGGAGATA      | 0.318 |
| + | 4  | 1273 |                    | NM_178819    | NP_848934    | Q86UL3 | GPAT4_HUMAN |                                | 0  | TTCGAGCTCTCT      | 0.448 |
| + | 4  | 718  | P3M2_uc003xoq.1    | NM_001134296 | NP_001127768 | P53677 | AP3M2_HUMAN |                                | 0  | :GAACGTTGTC       | 0.463 |
| - | 4  | 369  | xt.2_Intron PLAT_u | NM_000930    | NP_000921    | P00750 | TPA_HUMAN   | ronectin type-I.               | 2  | ATGACTGATGTT      | 0.483 |

|   |    |       |                    |              |              |        |             |                            |     |               |       |
|---|----|-------|--------------------|--------------|--------------|--------|-------------|----------------------------|-----|---------------|-------|
| - | 7  | 1463  | 3xpe_2_Missense_   | NM_006749    | NP_006740    | Q08357 | S20A2_HUMAN | lasmic (Potential).        | 2   | TTTCGTCAGATA  | 0.423 |
| + | 5  | 1111  |                    | NM_000749    | NP_000740    | Q05901 | ACHB3_HUMAN | lasmic (Potential).        | 1   | :CACGTACCACCC | 0.453 |
| - | 7  | 1235  | ense_Mutation_p.T  | NM_001160223 | NP_001153695 | Q96K19 | RN170_HUMAN |                            | 0   | CTTTGGGTTATC  | 0.353 |
| + | 9  | 1081  | TA_uc003xpu.2_M    | NM_002027    | NP_002018    | P49354 | FNTA_HUMAN  |                            | 1   | ATCCTAGCTAAAC | 0.308 |
| + | 13 | 1915  | A0146_uc003xqf.2   | NM_001080394 | NP_001073863 | Q14159 | K0146_HUMAN |                            | 0   | TTAAGAGACATT  | 0.418 |
| + | 15 | 2140  | \186T KIAA0146_i   | NM_001080394 | NP_001073863 | Q14159 | K0146_HUMAN |                            | 0   | :TGGAGGCACTC  | 0.607 |
| + | 16 | 2233  | qf.2_RNA KIAA014   | NM_001080394 | NP_001073863 | Q14159 | K0146_HUMAN |                            | 0   | :TCTTGCTTCAG  | 0.517 |
| + | 16 | 2321  | qf.2_RNA KIAA014   | NM_001080394 | NP_001073863 | Q14159 | K0146_HUMAN |                            | 0   | :TGCAACACCTG  | 0.468 |
| - | 85 | 11990 | i_Mutation_p.G394  | NM_006904    | NP_008835    | P78527 | PRKDC_HUMAN | PI3K/PI4K.                 | 34  | ATAAGGCCCGTT  | 0.493 |
| - | 6  | 613   | _p.P186S PRKDC_    | NM_006904    | NP_008835    | P78527 | PRKDC_HUMAN |                            | 34  | :ACTAGGATGAA  | 0.353 |
| - | 15 | 4291  | rf.3_Missense_Mt   | NM_014781    | NP_055596    | Q8TDY2 | RBCC1_HUMAN | Potential.                 | 11  | TAGGGCAGTCT   | 0.338 |
| - | 8  | 815   | _p.M168I LYPLA1_   | NM_006330    | NP_006321    | O75608 | LYPA1_HUMAN |                            | 1   | ACTGTGCATCAT  | 0.388 |
| - | 5  | 435   | _p.D76N LYPLA1_    | NM_006330    | NP_006321    | O75608 | LYPA1_HUMAN |                            | 1   | :TGAATCTGGTG  | 0.294 |
| + | 3  | 472   |                    | NM_014175    | NP_054894    | Q9P015 | RM15_HUMAN  |                            | 0   | :ATTATGGTGTC  | 0.343 |
| + | 4  | 494   |                    | NM_014175    | NP_054894    | Q9P015 | RM15_HUMAN  |                            | 0   | TCAGGGTGCTG   | 0.378 |
| + | 4  | 4992  | 21_uc011ldy.1_Intr | NM_006269    | NP_006260    | P56715 | RP1_HUMAN   |                            | 12  | :CAGTGGCGAAC  | 0.393 |
| + | 3  | 623   | S1_uc010lyh.2_5'L  | NM_024831    | NP_079107    | Q96RS0 | TGS1_HUMAN  |                            | 3   | :CAAAGGCATAG  | 0.418 |
| - | 3  | 1944  | lyi.2_Missense_Mt  | NM_001114635 | NP_001108107 | Q6DJT9 | PLAG1_HUMAN | lack of NLS and KPNA2 int  | 129 | :GAAAAGCTTGAT | 0.433 |
| - | 3  | 1502  | lyi.2_Missense_Mt  | NM_001114635 | NP_001108107 | Q6DJT9 | PLAG1_HUMAN | tion. Repression domain; c | 129 | TTAATGGCTGTT  | 0.428 |
| - | 4  | 1126  | _p.A163V SDR16C    | NM_138969    | NP_620419    | Q8N3Y7 | RDHE2_HUMAN |                            | 3   | ATCATAGCAGGT  | 0.328 |
| - | 2  | 892   | _p.R85Q SDR16C     | NM_138969    | NP_620419    | Q8N3Y7 | RDHE2_HUMAN |                            | 3   | :CTTCCCAGGCC  | 0.502 |
| - | 4  | 990   |                    | NM_017813    | NP_060283    | Q9NX62 | IMPA3_HUMAN |                            | 1   | :TTGGGGTCTTC  | 0.458 |
| - | 2  | 160   |                    | NM_000780    | NP_000771    | P22680 | CP7A1_HUMAN |                            | 1   | :TAGAGGTGGTT  | 0.413 |
| - | 27 | 2449  | ae.1_Missense_Mt   | NM_003580    | NP_003571    | Q92636 | FAN_HUMAN   |                            | 1   | :GGCATCTCTGC  | 0.418 |
| - | 6  | 889   |                    | NM_003878    | NP_003869    | Q92820 | GGH_HUMAN   |                            | 0   | :TGATACCTTCAC | 0.343 |
| - | 4  | 643   |                    | NM_003878    | NP_003869    | Q92820 | GGH_HUMAN   |                            | 0   | TATTTACCTGTAT | 0.368 |
| + | 5  | 1875  | _p.R464H YTHDF3    | NM_152758    | NP_689971    | Q7Z739 | YTHD3_HUMAN | YTH.                       | 0   | ATATTCGCTTAG  | 0.393 |
| + | 6  | 866   | JC5B_uc003xvt.1_   | NM_033105    | NP_149096    | Q9UF47 | DNJ5B_HUMAN |                            | 0   | :AAGGATCTCGAA | 0.428 |
| + | 2  | 500   | xvw.2_Missense_I   | NM_184085    | NP_908973    | Q9BYV6 | TRI55_HUMAN |                            | 5   | :ATGGGGTATATC | 0.502 |
| - | 1  | 1247  | _5'Flank C8orf44_i | NM_025054    | NP_079330    | Q96JH7 | VCIP1_HUMAN | OTU.                       | 8   | :CTTCTCTGCAG  | 0.458 |
| + | 9  | 1115  | SPP1_uc003xxj.2_   | NM_001077204 | NP_001070672 | Q1MSJ5 | CSPP1_HUMAN |                            | 5   | AATATGCCTCCT  | 0.348 |
| + | 15 | 1772  | SPP1_uc003xxj.2_   | NM_001077204 | NP_001070672 | Q1MSJ5 | CSPP1_HUMAN |                            | 5   | CCTGCAGCTTAT  | 0.284 |
| + | 31 | 3695  | _p.E1187K CSPP1_   | NM_001077204 | NP_001070672 | Q1MSJ5 | CSPP1_HUMAN |                            | 5   | :CTTCAGAAACG  | 0.532 |
| - | 31 | 4838  | _p.A937V ARFGEF    | NM_006421    | NP_006412    | Q9Y6D6 | BIG1_HUMAN  |                            | 8   | :GCTGAGCAAAA  | 0.378 |
| - | 31 | 4790  | _p.T921I ARFGEF    | NM_006421    | NP_006412    | Q9Y6D6 | BIG1_HUMAN  |                            | 8   | :ACTGAGTGAAT  | 0.393 |
| - | 11 | 2027  | EF1_uc003xxl.1_!   | NM_006421    | NP_006412    | Q9Y6D6 | BIG1_HUMAN  |                            | 8   | :CCATCCATTTGT | 0.289 |
| - | 10 | 1371  | A6_uc003xxr.3_Int  | NM_020361    | NP_065094    | Q8N4T0 | CBPA6_HUMAN |                            | 2   | :TTGTGGAGGCT  | 0.413 |
| + | 5  | 742   | ion_p.V9I SULF1_   | NM_015170    | NP_055985    | Q8IWU6 | SULF1_HUMAN |                            | 7   | :CTCTGGTTTTG  | 0.483 |
| + | 8  | 1382  | _p.A222V SULF1_    | NM_015170    | NP_055985    | Q8IWU6 | SULF1_HUMAN |                            | 7   | CCACGCTGGCC   | 0.483 |
| - | 6  | 2316  | CO5A1_uc003xyk     | NM_030958    | NP_112220    | Q9H2Y9 | SO5A1_HUMAN | cellular (Potential).      | 4   | TATAAGGGATGT  | 0.443 |
| - | 2  | 656   |                    | NM_024504    | NP_078780    | Q9GZV8 | PRD14_HUMAN |                            | 3   | :GGGCGGTGGA   | 0.577 |
| - | 2  | 636   |                    | NM_024504    | NP_078780    | Q9GZV8 | PRD14_HUMAN |                            | 3   | :CAGGTCCACAA  | 0.587 |
| - | 7  | 919   | yp.2_Missense_M    | NM_016027    | NP_057111    | Q53H82 | LACB2_HUMAN |                            | 1   | :TGTGCTAACT   | 0.294 |
| + | 5  | 1390  | _p.P286S XKR9_u    | NM_001011720 | NP_001011720 | Q5GH70 | XKR9_HUMAN  |                            | 2   | :AGTGTCCAATG  | 0.323 |
| - | 16 | 1950  | o.G482R EYA1_uc    | NM_172058    | NP_742055    | Q99502 | EYA1_HUMAN  |                            | 5   | CATCTCTATAAC  | 0.343 |
| - | 7  | 1111  |                    | NM_007332    | NP_015628    | O75762 | TRPA1_HUMAN | cytoplasmic (Potential).   | 6   | :TGAAGCATGGT  | 0.423 |
| - | 7  | 996   |                    | NM_007332    | NP_015628    | O75762 | TRPA1_HUMAN | nic (Potential). ANK 7.    | 6   | :TGGCTGTGCAC  | 0.398 |

rs141509977



|   |    |       |                   |              |              |        |             |                       |    |               |       |             |
|---|----|-------|-------------------|--------------|--------------|--------|-------------|-----------------------|----|---------------|-------|-------------|
| + | 2  | 820   |                   | NM_004770    | NP_004761    | Q92953 | KCNB2_HUMAN | lasmic (Potential).   | 7  | 3TGTGCGACGAC  | 0.522 |             |
| - | 4  | 381   | zh.1_Missense_Mt  | NM_000971    | NP_000962    | P18124 | RL7_HUMAN   |                       | 0  | AGGTTCCATTG   | 0.428 |             |
| - | 5  | 432   | lfi.1_Missense_Mt | NM_014393    | NP_055208    | Q9NUL3 | STAU2_HUMAN | DRBM 1.               | 0  | ATTGGCAACAGC  | 0.443 |             |
| + | 2  | 362   | yac.2_Missense_Mt | NM_017866    | NP_060336    | Q9BUB7 | TMM70_HUMAN |                       | 1  | AGATGGAAGGC   | 0.358 |             |
| + | 2  | 2144  | au.1_Missense_Mt  | NM_024721    | NP_078997    | Q86UP3 | ZFHx4_HUMAN |                       | 15 | 3TTCAGCCACTC  | 0.587 |             |
| + | 10 | 4865  | u.S1538F ZFHx4_u  | NM_024721    | NP_078997    | Q86UP3 | ZFHx4_HUMAN |                       | 15 | ATCCATCTCGTC  | 0.388 |             |
| + | 10 | 8090  | p.T2613I ZFHx4_u  | NM_024721    | NP_078997    | Q86UP3 | ZFHx4_HUMAN | homeobox 3.           | 15 | GATCACCCCGG   | 0.423 |             |
| - | 6  | 1008  |                   | NM_001033723 | NP_001028895 | Q6ZNC4 | ZN704_HUMAN |                       | 0  | ACTGGGAAGGT   | 0.537 | rs147777181 |
| - | 7  | 1142  |                   | NM_018440    | NP_060910    | Q9NWX8 | PAG1_HUMAN  | lasmic (Potential).   | 0  | GCATGGTATCC   | 0.592 |             |
| - | 2  | 109   | P12_uc003ycg.3_l  | NM_001105281 | NP_001098751 | A6NFH5 | FBP12_HUMAN |                       | 0  | 3TTTGGCAAAC   | 0.368 |             |
| - | 1  | 52    |                   | NM_001010893 | NP_001010893 | Q5PT55 | NTCP5_HUMAN |                       | 0  | TTGCTTCTTCTAT | 0.299 |             |
| - | 7  | 651   | ce_Site_p.V151_sl | NM_001738    | NP_001729    | P00915 | CAH1_HUMAN  |                       | 2  | CCAACCTGGAG   | 0.333 |             |
| + | 10 | 1404  | nai.2_Missense_M  | NM_007013    | NP_008944    | Q9H0M0 | WWP1_HUMAN  | WW 1.                 | 2  | AACTACCACATC  | 0.318 |             |
| - | 10 | 1149  | raj.2_Missense_M  | NM_019098    | NP_061971    | Q9NQW8 | CNGB3_HUMAN | lame=H4; (Potential). | 3  | CACAGGCATTA   | 0.378 |             |
| - | 1  | 1100  |                   | NM_152418    | NP_689631    | Q8NA75 | DC4L2_HUMAN | WD 2.                 | 1  | GCAGTCTGGC    | 0.562 |             |
| - | 1  | 988   |                   | NM_152418    | NP_689631    | Q8NA75 | DC4L2_HUMAN | WD 1.                 | 1  | AAGTCCCACAG   | 0.498 |             |
| - | 2  | 481   | rec.2_Missense_M  | NM_005941    | NP_005932    | P51512 | MMP16_HUMAN |                       | 8  | GGTCTCTGCAG   | 0.458 |             |
| - | 1  | 326   |                   | NM_018710    | NP_061180    | Q8N4L2 | TM55A_HUMAN |                       | 0  | TCTGGGGCTGC   | 0.562 |             |
| + | 6  | 861   | ense_Mutation_p.l | NM_052832    | NP_439897    | Q8TE54 | S26A7_HUMAN | cellular (Potential). | 2  | TCACAAGTCAAA  | 0.438 |             |
| - | 10 | 1528  | _p.E455K RUNX1    | NM_175634    | NP_783552    | Q06455 | MTG8_HUMAN  |                       | 16 | CCCTCTCTGTTG  | 0.622 |             |
| - | 10 | 1495  | _p.A444T RUNX1    | NM_175634    | NP_783552    | Q06455 | MTG8_HUMAN  |                       | 16 | CTCCGCCTCAG   | 0.627 |             |
| - | 3  | 2229  |                   | NM_203390    | NP_976324    | Q8IXT5 | RB12B_HUMAN |                       | 0  | CCTCTGGGGGC   | 0.627 |             |
| - | 3  | 1466  |                   | NM_203390    | NP_976324    | Q8IXT5 | RB12B_HUMAN | RRM 3.                | 0  | AGCAAGAAGAA   | 0.373 |             |
| + | 13 | 1423  | naw.2_Missense_M  | NM_153704    | NP_714915    | Q5HYA8 | MKS3_HUMAN  |                       | 2  | TGGACGAGAAA   | 0.348 | rs75165625  |
| + | 13 | 1450  | naw.2_Missense_M  | NM_153704    | NP_714915    | Q5HYA8 | MKS3_HUMAN  |                       | 2  | GCCAAGAGTAA   | 0.368 |             |
| - | 13 | 3080  | _Mutation_p.G10z  | NM_015496    | NP_056311    | Q69YN4 | VIR_HUMAN   |                       | 2  | TCCACCTCTCAC  | 0.458 |             |
| - | 5  | 464   | ygp.2_Missense_M  | NM_015496    | NP_056311    | Q69YN4 | VIR_HUMAN   | Pro-rich.             | 2  | 3TTGTGGCTGGC  | 0.299 |             |
| + | 9  | 1184  | q.1_RNA INTS8_u   | NM_017864    | NP_060334    | Q75QN2 | INT8_HUMAN  | TPR 2.                | 0  | CTTGAGTTTACC  | 0.333 |             |
| - | 6  | 947   | u.S169N MTERFD    | NM_015942    | NP_057026    | Q96E29 | MTER1_HUMAN |                       | 1  | CCAGACTTCCA   | 0.373 |             |
| + | 8  | 1574  |                   | NM_016134    | NP_057218    | Q9Y646 | PGCP_HUMAN  |                       | 1  | TGCTGCCTAGG   | 0.438 |             |
| - | 3  | 267   |                   | NM_005836    | NP_005827    | P52758 | UK114_HUMAN |                       | 1  | TAAGAGCCTGTC  | 0.333 |             |
| + | 8  | 1166  | _p.A356T POP1_u   | NM_001145860 | NP_001139332 | Q99575 | POP1_HUMAN  |                       | 2  | AATCAGCTGTC   | 0.363 |             |
| - | 4  | 439   | u.E128K STK3_ucf  | NM_006281    | NP_006272    | Q13188 | STK3_HUMAN  | rotein kinase.        | 4  | AGTACTCCATAA  | 0.303 |             |
| + | 25 | 3952  | yiu.1_Missense_M  | NM_017890    | NP_060360    | Q7Z7G8 | VP13B_HUMAN |                       | 20 | GCAGCCCATCTC  | 0.443 |             |
| + | 57 | 11087 | riw.2_Missense_M  | NM_017890    | NP_060360    | Q7Z7G8 | VP13B_HUMAN |                       | 20 | TGGCAGCCCTGC  | 0.557 |             |
| + | 57 | 11188 | riw.2_Missense_M  | NM_017890    | NP_060360    | Q7Z7G8 | VP13B_HUMAN |                       | 20 | GTGGGTCTCC    | 0.542 |             |
| - | 9  | 1650  | u.1_Nonsense_Mut  | NM_015668    | NP_056483    | Q8NE09 | RGS22_HUMAN |                       | 7  | TTCAATCCACTG  | 0.308 |             |
| - | 2  | 2005  | _p.T397I FBXO43   | NM_001029860 | NP_001025031 | Q4G163 | FBX43_HUMAN |                       | 2  | TAAAGGTCAAAT  | 0.438 |             |
| - | 11 | 2322  | yjk.1_Missense_M  | NM_015435    | NP_056250    | Q9NV58 | RN19A_HUMAN | ction with CASR.      | 4  | CCCTGCTGTTGC  | 0.458 |             |
| - | 7  | 1466  | se_Mutation_p.T2z | NM_002568    | NP_002559    | P11940 | PABP1_HUMAN | RRM 4.                | 0  | 3ACTAGTGATT   | 0.294 |             |
| - | 3  | 459   | ykb.2_Missense_M  | NM_001042510 | NP_001035975 | Q9Y5V0 | ZN706_HUMAN |                       | 2  | TTTTTGGCATT   | 0.413 |             |
| + | 2  | 524   | _p.G65D GRHL2     | NM_024915    | NP_079191    | Q6ISB3 | GRHL2_HUMAN | ription activation.   | 3  | CCCTCGGCCTGC  | 0.527 |             |
| - | 2  | 724   | yki.2_Missense_M  | NM_032041    | NP_114430    | P61601 | NCALD_HUMAN | nd 3.12 (Potential).  | 0  | CTCTGCCTTGC   | 0.488 |             |
| - | 5  | 726   | 109I RRM2B_uc0    | NM_015713    | NP_056528    | Q7LG56 | RIR2B_HUMAN |                       | 2  | GCATGGTTTCA   | 0.274 | rs72554098  |
| - | 52 | 7396  | _Mutation_p.E245  | NM_015902    | NP_056986    | Q95071 | UBR5_HUMAN  |                       | 28 | CATTTTCCCTAA  | 0.328 |             |
| - | 40 | 5630  | s.1_Missense_Mut  | NM_015902    | NP_056986    | Q95071 | UBR5_HUMAN  |                       | 28 | GATGTCCAGGA   | 0.458 |             |
| - | 16 | 2029  | s.1_Missense_Mu   | NM_015902    | NP_056986    | Q95071 | UBR5_HUMAN  |                       | 28 | AACAGGAACAT   | 0.398 |             |

|   |    |         |                   |              |              |        |             |                             |    |               |       |
|---|----|---------|-------------------|--------------|--------------|--------|-------------|-----------------------------|----|---------------|-------|
| + | 2  | 366     | 03yla.2_Missense  | NM_001695    | NP_001686    | P21283 | VATC1_HUMAN |                             | 0  | AATATTCTGAC   | 0.428 |
| + | 5  | 1764    | r.1_Missense_Mut  | NM_003506    | NP_003497    | O60353 | FZD6_HUMAN  | Name=7; (Potential).        | 2  | TCTGGGTTGGA   | 0.353 |
| - | 2  | 556     | 5A32_uc011lhr.1_! | NM_030780    | NP_110407    | Q9H2D1 | MFTC_HUMAN  | Solcar 1.                   | 1  | GGTTACTCCTT   | 0.368 |
| + | 10 | 1914    | lo.2_Missense_Mi  | NM_015420    | NP_056235    | Q9NV06 | DCA13_HUMAN |                             | 1  | TCATCGACATC   | 0.388 |
| + | 17 | 2694    | p.P892L RIMS2_    | NM_014677    | NP_055492    | Q9UQ26 | RIMS2_HUMAN |                             | 15 | TCATCCTCGTAC  | 0.418 |
| - | 7  | 2329    | p.G726E LRP12_    | NM_013437    | NP_038465    | Q9Y561 | LRP12_HUMAN | lasmic (Potential).         | 0  | ATCGTCCTAATC  | 0.463 |
| - | 5  | 712     | e_Mutation_p.P18  | NM_013437    | NP_038465    | Q9Y561 | LRP12_HUMAN | ellular (Potential).        | 0  | TTGGAGGATTT   | 0.418 |
| + | 3  | 285     |                   | NM_012082    | NP_036214    | Q8WW38 | FOG2_HUMAN  |                             | 5  | AACCGGGGCAA   | 0.443 |
| + | 21 | 2407    |                   | NM_177531    | NP_803875    | Q86W11 | PKHL1_HUMAN | ellular (Potential).        | 14 | ACAATAGCAAGA  | 0.294 |
| + | 38 | 5323    |                   | NM_177531    | NP_803875    | Q86W11 | PKHL1_HUMAN | Extracellular (Potential).  | 14 | ACTGCACCTTTT  | 0.448 |
| + | 49 | 8149    |                   | NM_177531    | NP_803875    | Q86W11 | PKHL1_HUMAN | ar (Potential), PbH1 3.     | 14 | .GGCTGGAATTG/ | 0.438 |
| + | 5  | 606     | AG9_uc003yng.2_   | NM_198120    | NP_936056    | O00559 | RCAS1_HUMAN | lasmic (Potential).         | 0  | TGGGAGCACAG   | 0.343 |
| - | 6  | 3679    | y.2_Missense_Mut  | NM_014112    | NP_054831    | Q9UHF7 | TRPS1_HUMAN | ion with RNF4 (By similarit | 7  | CGCAGGTCTCA   | 0.438 |
| - | 6  | 3544    | y.2_Missense_Mut  | NM_014112    | NP_054831    | Q9UHF7 | TRPS1_HUMAN | ion with RNF4 (By similarit | 7  | TTTTGTGAATATC | 0.448 |
| - | 5  | 674     | b.2_Nonsense_Mi   | NM_003756    | NP_003747    | O15372 | EIF3H_HUMAN |                             | 3  | AGTCCCACATT   | 0.388 |
| - | 2  | 294     | p.D104N EIF3H_    | NM_003756    | NP_003747    | O15372 | EIF3H_HUMAN | MPN.                        | 3  | ATCATCCTCTGT  | 0.428 |
| - | 11 | 1744    |                   | NM_006265    | NP_006256    | O60216 | RAD21_HUMAN | Pro-rich.                   | 2  | AGGCTCTGGGT   | 0.448 |
| + | 2  | 400     | 11lia.1_Missense_ | NM_173851    | NP_776250    | Q8IWU4 | ZNT8_HUMAN  | lasmic (Potential).         | 4  | TGGCTCCAAGC   | 0.507 |
| + | 7  | 1189    | 1lia.1_Missense_M | NM_173851    | NP_776250    | Q8IWU4 | ZNT8_HUMAN  | lasmic (Potential).         | 4  | TGTTGCTACAGC  | 0.428 |
| - | 1  | 1183    |                   | NM_000127    | NP_000118    | Q16394 | EXT1_HUMAN  | renal (Potential).          | 4  | CGATGGCCGCT   | 0.493 |
| - | 2  | 199     | p.G38E ENPP2_t    | NM_001040092 | NP_001035181 | Q13822 | ENPP2_HUMAN |                             | 7  | CCCATCCTTCTC  | 0.353 |
| - | 16 | 2131    |                   | NM_003184    | NP_003175    | Q6P1X5 | TAf2_HUMAN  |                             | 6  | AATCAGCACTGC  | 0.299 |
| - | 8  | 1286    |                   | NM_003184    | NP_003175    | Q6P1X5 | TAf2_HUMAN  |                             | 6  | AAAGGTGTCTCA  | 0.353 |
| - | 7  | 1024    |                   | NM_024094    | NP_076999    | Q9BVC3 | DCC1_HUMAN  |                             | 1  | TTCAGGAACAC   | 0.403 |
| + | 10 | 1392    | p.A54V COL14A     | NM_021110    | NP_066933    | Q05707 | COEA1_HUMAN | nectin type-III 2.          | 12 | TCATGCCCCAG   | 0.428 |
| + | 2  | 172     | ank MTBP_uc003y   | NM_022045    | NP_071328    | Q96DY7 | MTBP_HUMAN  |                             | 3  | TCACAGCAGCA   | 0.353 |
| + | 22 | 2733    |                   | NM_022045    | NP_071328    | Q96DY7 | MTBP_HUMAN  | ith MDM2 (By similarity).   | 3  | GACTGGGTATT/  | 0.284 |
| - | 4  | 1688    |                   | NM_005328    | NP_005319    | Q92819 | HAS2_HUMAN  | Name=3; (Potential).        | 15 | AGAATCCAGTGA  | 0.448 |
| - | 2  | 742_743 |                   | NM_005328    | NP_005319    | Q92819 | HAS2_HUMAN  | lasmic (Potential).         | 15 | TTTCCGGTGCTC  | 0.401 |
| - | 2  | 539     |                   | NM_005328    | NP_005319    | Q92819 | HAS2_HUMAN  |                             | 15 | ATGCATCTGTAA  | 0.313 |
| + | 3  | 2788    |                   | NM_014943    | NP_055758    | Q9Y6X8 | ZHX2_HUMAN  |                             | 2  | AAGAGGACTTG   | 0.537 |
| + | 7  | 1055    | p.1_RNA WDR67_    | NM_145647    | NP_663622    | Q96DN5 | WDR67_HUMAN | WD 5.                       | 1  | ACATTGCATCTA  | 0.348 |
| + | 13 | 1205    | p.F382I FAM91A    | NM_144963    | NP_659400    | Q658Y4 | F91A1_HUMAN |                             | 2  | TCCTGTTTGAC   | 0.383 |
| + | 2  | 692     |                   | NM_007218    | NP_009149    | Q8WU17 | RN139_HUMAN |                             | 1  | GAATTGAGCTG   | 0.433 |
| + | 2  | 1817    |                   | NM_007218    | NP_009149    | Q8WU17 | RN139_HUMAN |                             | 1  | AGTCGGGAAGT   | 0.368 |
| + | 3  | 480     | im.1_Missense_M   | NM_005005    | NP_004996    | Q9Y6M9 | NDUB9_HUMAN |                             | 2  | GGAAAGCTGGG   | 0.483 |
| + | 3  | 442     |                   | NM_152412    | NP_689625    | Q7Z317 | ZN572_HUMAN |                             | 2  | ATTGGGGAAATT  | 0.423 |
| + | 3  | 762     |                   | NM_152412    | NP_689625    | Q7Z317 | ZN572_HUMAN | 2H2-type 3.                 | 2  | TCCCATCTTATTA | 0.468 |
| - | 9  | 1477    | 1lir.1_Missense_M | NM_014846    | NP_055661    | Q12768 | STRUM_HUMAN |                             | 2  | TACCTGAGTCTC  | 0.473 |
| + | 2  | 1108    |                   | NM_002467    | NP_002458    | P01106 | MYC_HUMAN   |                             | 6  | TGCAGGATCTG/  | 0.667 |
| - | 11 | 1148    | p.T54I FAM49B_    | NM_016623    | NP_057707    | Q9NUQ9 | FA49B_HUMAN |                             | 0  | TCAAGGTTTTTC/ | 0.393 |
| - | 28 | 3221    | 76_splice ASAP1_  | NM_018482    | NP_060952    | Q9ULH1 | ASAP1_HUMAN |                             | 4  | TTCCCTTAAAG   | 0.363 |
| - | 9  | 2379    | Y8_uc010mds.2_I   | NM_001115    | NP_001106    | P40145 | ADCY8_HUMAN | lasmic (Potential).         | 6  | GCATCCCTCATTT | 0.363 |
| + | 8  | 1021    |                   | NM_015137    | NP_055952    | Q14156 | EFR3A_HUMAN |                             | 5  | TTGCAGTTCAC   | 0.284 |
| + | 21 | 2469    |                   | NM_015137    | NP_055952    | Q14156 | EFR3A_HUMAN |                             | 5  | ATTCAGAAAGC/  | 0.378 |
| + | 10 | 1419    | 20L1_uc011lja.1_I | NM_016018    | NP_057102    | A8MW92 | P20L1_HUMAN |                             | 2  | AAAACCCCTA/   | 0.413 |
| + | 44 | 7687    | b.1_Missense_Mu   | NM_003235    | NP_003226    | P01266 | THYG_HUMAN  |                             | 15 | GGGTGGCGAGG   | 0.507 |

|   |    |       |                    |              |              |        |             |    |               |       |
|---|----|-------|--------------------|--------------|--------------|--------|-------------|----|---------------|-------|
| + | 4  | 696   | _Mutation_p.G35D   | NM_003882    | NP_003873    | O95388 | WISP1_HUMAN | 2  | TGTGGGTGAGG   | 0.592 |
| - | 7  | 1418  | yum.2_Missense_I   | NM_173344    | NP_775479    | Q11201 | SIA4A_HUMAN | 0  | CAGCTCCCGGA   | 0.582 |
| - | 11 | 3101  | _uc010meh.2_Mi     | NM_020863    | NP_065914    | Q9P243 | ZFAT_HUMAN  | 1  | CTGGGCCGCTG   | 0.542 |
| - | 63 | 4883  | ljo.1_Missense_M   | NM_152888    | NP_690848    | Q8NFW1 | COMA1_HUMAN | 13 | CGAGTCTGGCT   | 0.557 |
| - | 36 | 3203  | ljo.1_Missense_M   | NM_152888    | NP_690848    | Q8NFW1 | COMA1_HUMAN | 13 | GAGCACCTGT    | 0.547 |
| - | 2  | 519   | p.R227C TRAPP      | NM_001160372 | NP_001153844 | Q96Q05 | TPPC9_HUMAN | 2  | GGTGC CGGCT   | 0.567 |
| - | 25 | 2552  | e_Mutation_p.W3C   | NM_153831    | NP_722560    | Q05397 | FAK1_HUMAN  | 6  | ATGATTCATGA   | 0.458 |
| + | 2  | 247   | yvx.2_Missense_I   | NM_014957    | NP_055772    | A2RUS2 | DEND3_HUMAN | 1  | GGCCGGTGCCA   | 0.532 |
| + | 12 | 1791  | 66_splice DENND    | NM_014957    | NP_055772    | A2RUS2 | DEND3_HUMAN | 1  | CGCAGGTGAGG   | 0.617 |
| - | 4  | 615   | RE1_uc003ywj.2_I   | NM_145003    | NP_659440    | Q96NA8 | TSNA1_HUMAN | 0  | GGATGCGGCTC   | 0.662 |
| - | 3  | 249   | RE1_uc003ywj.2_I   | NM_145003    | NP_659440    | Q96NA8 | TSNA1_HUMAN | 0  | GCGAGGGGAAA   | 0.617 |
| + | 20 | 3317  |                    | NM_001702    | NP_001693    | O14514 | BAI1_HUMAN  | 8  | CCTCCGGAACC   | 0.657 |
| + | 2  | 94    |                    | NM_002066    | NP_002057    | Q99445 | GML_HUMAN   | 2  | TGATGCTCCTC   | 0.577 |
| - | 1  | 93    | p.A29V CYP11B1     | NM_000497    | NP_000488    | P15538 | C11B1_HUMAN | 3  | CCCGGGCGGCT   | 0.647 |
| + | 4  | 849   | p41_uc003y xv.2_F  | NM_138465    | NP_612474    | P10075 | GLI4_HUMAN  | 0  | CTTACACGAGC   | 0.682 |
| - | 5  | 3344  | 83H_uc010mfk.1_I   | NM_198488    | NP_940890    | Q6ZRV2 | FA83H_HUMAN | 3  | AGATGGCTGAA   | 0.711 |
| - | 1  | 4365  |                    | NM_031308    | NP_112598    | P58107 | EPIPL_HUMAN | 2  | TGGCCCTCAGAC  | 0.627 |
| - | 32 | 13597 | e.1_Missense_Mut   | NM_201380    | NP_958782    | Q15149 | PLEC_HUMAN  | 9  | CCAGGCCCTTG   | 0.667 |
| - | 31 | 6903  | e.1_Missense_Mut   | NM_201380    | NP_958782    | Q15149 | PLEC_HUMAN  | 9  | CCGCCGGGACT   | 0.756 |
| - | 2  | 735   | tae.1_Missense_I   | NM_201380    | NP_958782    | Q15149 | PLEC_HUMAN  | 9  | GTTGACCCACT   | 0.642 |
| + | 2  | 539   | p.P125S GRINA_1    | NM_001009184 | NP_001009184 | Q7Z429 | GRINA_HUMAN | 1  | AAGACCTGAC    | 0.677 |
| - | 14 | 2001  | \H_uc003zas.1_5'   | NM_017570    | NP_060040    | O14841 | OPLA_HUMAN  | 0  | TGCGGCCGGTG   | 0.672 |
| - | 14 | 1995  | \H_uc003zas.1_5'   | NM_017570    | NP_060040    | O14841 | OPLA_HUMAN  | 0  | CGGTGCCCCGC   | 0.667 |
| + | 7  | 1110  | p.A212T GPAA1_1    | NM_003801    | NP_003792    | O43292 | GPAA1_HUMAN | 0  | TGGTGGCAGTG   | 0.637 |
| - | 6  | 1335  | RPIN_uc003zbb.2    | NM_030974    | NP_112236    | Q9H0F6 | SHRPN_HUMAN | 1  | AAGAGGCAAGG   | 0.637 |
| + | 8  | 938   | \3zbi.3_Missense_I | NM_032450    | NP_115826    | Q8NDA8 | HTR7A_HUMAN | 0  | G CAGAGTCGAG  | 0.612 |
| + | 10 | 1118  | \3zbi.3_Missense_I | NM_032450    | NP_115826    | Q8NDA8 | HTR7A_HUMAN | 0  | G CAGACTGTGA  | 0.657 |
| + | 11 | 1474  | F1_uc003zbu.3_R    | NM_005526    | NP_005517    | Q00613 | HSF1_HUMAN  | 0  | CAGCAGCCTGG   | 0.622 |
| - | 9  | 1040  | \T1_uc010mfv.2_Ir  | NM_012079    | NP_036211    | O75907 | DGAT1_HUMAN | 0  | GGGGGCGAAGA   | 0.622 |
| - | 5  | 797   | Splice_Site_p.V19  | NM_012162    | NP_036294    | Q8N531 | FBXL6_HUMAN | 2  | TCCACCTGGGG   | 0.622 |
| + | 5  | 401   | Splice_Site ADCK   | NM_174922    | NP_777582    | Q3MIX3 | ADCK5_HUMAN | 1  | GAACAGCCCAG   | 0.657 |
| - | 18 | 1781  |                    | NM_013291    | NP_037423    | Q10570 | CPSF1_HUMAN | 1  | TGCGGCCGTCG   | 0.682 |
| - | 14 | 1438  |                    | NM_013291    | NP_037423    | Q10570 | CPSF1_HUMAN | 1  | TGTTCCCGACT   | 0.662 |
| - | 16 | 1985  | uc011lh.1_Intron   | NM_013432    | NP_038460    | Q96HA7 | TONSL_HUMAN | 0  | CCCTGGCCTTC   | 0.672 |
| - | 11 | 1352  |                    | NM_013432    | NP_038460    | Q96HA7 | TONSL_HUMAN | 0  | CCTGGGGCTGC   | 0.507 |
| + | 4  | 431   | p.P92S GPT_uc01    | NM_005309    | NP_005300    | P24298 | ALAT1_HUMAN | 2  | GTTAACCTGAT   | 0.647 |
| + | 4  | 1218  | _Mutation_p.G358   | NM_014665    | NP_055480    | Q15048 | LRC14_HUMAN | 0  | TCCAGGGTCTG   | 0.597 |
| - | 4  | 236   | ZNF34_uc003zdx.3   | NM_030580    | NP_085057    | Q8IZ26 | ZNF34_HUMAN | 0  | CCCGGAGAGAG   | 0.652 |
| + | 5  | 1333  | \303N ZNF7_uc00    | NM_003416    | NP_003407    | P17097 | ZNF7_HUMAN  | 4  | TCCAAGCCTTG   | 0.493 |
| + | 5  | 2094  | \2557* ZNF7_uc00   | NM_003416    | NP_003407    | P17097 | ZNF7_HUMAN  | 4  | TACACCAGAGA   | 0.408 |
| - | 6  | 1408  | ense_Mutation_p.A  | NM_021061    | NP_066405    | P15622 | ZN250_HUMAN | 0  | G AAGGCTTCC   | 0.572 |
| - | 1  | 479   |                    | NM_207305    | NP_997188    | Q12950 | FOXD4_HUMAN | 1  | CCCGCCCACCA   | 0.697 |
| + | 35 | 4488  | gv.2_Missense_M    | NM_203447    | NP_982272    | Q8NF50 | DOCK8_HUMAN | 6  | GCTGGGAGGTG   | 0.527 |
| + | 7  | 907   | _Mutation_p.W86*   | NM_015158    | NP_055973    | Q14678 | KANK1_HUMAN | 4  | TATATGGACTTCC | 0.493 |
| + | 12 | 4083  | imgx.1_Missense_I  | NM_015158    | NP_055973    | Q14678 | KANK1_HUMAN | 4  | TGAGGCCATTTCC | 0.552 |
| - | 3  | 218   | r_p.A40V KIAA002   | NM_014878    | NP_055693    | Q15397 | K0020_HUMAN | 1  | TCTTTAGCAACT  | 0.363 |
| - | 4  | 481   | r_p.V57M RF33_u    | NM_134428    | NP_602304    | P48380 | RF33_HUMAN  | 4  | CTGCACCTGAGC  | 0.418 |

rs144983092

|   |    |      |                    |              |              |        |             |    |               |       |             |
|---|----|------|--------------------|--------------|--------------|--------|-------------|----|---------------|-------|-------------|
| + | 7  | 1066 | hk.1_Missense_Mi   | NM_005772    | NP_005763    | Q9Y2P8 | RCL1_HUMAN  | 0  | 3CAGCAGTACTT  | 0.592 |             |
| - | 8  | 1459 | RMP1_uc010mhs.1    | NM_024896    | NP_079172    | Q7Z2K6 | ERMP1_HUMAN | 1  | 5AATGAGAACGG  | 0.413 |             |
| - | 1  | 780  |                    | NM_001017969 | NP_001017969 | Q5HYC2 | K2026_HUMAN | 3  | 2TCCAGCATCAT  | 0.597 |             |
| + | 18 | 3048 | M4C_uc011lmk.1     | NM_015061    | NP_055876    | Q9H3R0 | KDM4C_HUMAN | 1  | 7TGAGCCTGCA   | 0.522 |             |
| - | 23 | 2662 | 3zkl.2_Missense_M  | NM_002839    | NP_002830    | P23468 | PTPRD_HUMAN | 22 | 3CACTGCAGTGT  | 0.448 |             |
| - | 6  | 859  | _p.G268R MPDZ_     | NM_003829    | NP_003820    | O75970 | MPDZ_HUMAN  | 6  | 3AAATCCCAAA   | 0.388 |             |
| + | 10 | 1456 | me.2_Missense_M    | NM_173550    | NP_775821    | Q6TFL3 | CI093_HUMAN | 0  | AAGAAAGTAAT   | 0.313 |             |
| + | 24 | 4364 | _p.P732L DENND4    | NM_017925    | NP_060395    | Q5VZ89 | DEN4C_HUMAN | 2  | 3CAATCCTCCCC  | 0.353 |             |
| + | 6  | 903  | ER2_uc003znc.1     | NM_001010887 | NP_001010887 | Q5QJU3 | ACER2_HUMAN | 2  | 7TCTGGCCCAAT  | 0.517 |             |
| - | 1  | 505  | zob.1_Missense_M   | NM_020344    | NP_065077    | Q9UI40 | NCKX2_HUMAN | 3  | 3CTAAGGCTATG  | 0.458 |             |
| - | 7  | 1547 | if.1_Missense_Mu   | NM_004529    | NP_004520    | P42568 | AF9_HUMAN   | 3  | 3CATTTCAGAGT  | 0.453 |             |
| - | 1  | 497  | 14_uc003zoo.1_l    | NM_002173    | NP_002164    | P05015 | IFN16_HUMAN | 1  | .CCTCCAGGCA   | 0.408 |             |
| + | 2  | 931  |                    | NM_022160    | NP_071443    | Q5VZB9 | DMRTA_HUMAN | 2  | 4ATGGACAAGAA  | 0.408 |             |
| - | 4  | 650  | qr.1_Missense_M    | NM_018325    | NP_060795    | Q96LT7 | CI072_HUMAN | 4  | 3CAGTTCATTAC  | 0.348 |             |
| - | 2  | 443  | zqr.1_Missense_M   | NM_018325    | NP_060795    | Q96LT7 | CI072_HUMAN | 4  | GTGGAAAGTATA  | 0.363 |             |
| - | 6  | 960  | ense_Mutation_p.I  | NM_022917    | NP_075068    | Q9H6R4 | NOL6_HUMAN  | 2  | 3ACCATCCCCTG  | 0.612 |             |
| - | 29 | 3438 | _p.P864S UBAP2_    | NM_018449    | NP_060919    | Q5T6F2 | UBAP2_HUMAN | 3  | .GGCAGGTTTGG  | 0.597 |             |
| - | 7  | 1231 |                    | NM_015397    | NP_056212    | Q5T6F0 | DCA12_HUMAN | 0  | CTCACGGCAAT   | 0.488 |             |
| + | 7  | 1876 | RA_uc003zvk.2_M    | NM_004512    | NP_004503    | Q14626 | I11RA_HUMAN | 1  | 3AGGATCCCCTAC | 0.602 |             |
| + | 2  | 558  | zvv.2_Missense_M   | NM_203299    | NP_976044    | Q5VYM1 | CI131_HUMAN | 0  | 4GCTTTCCTGTG  | 0.562 |             |
| + | 2  | 1141 | zvv.2_Missense_M   | NM_203299    | NP_976044    | Q5VYM1 | CI131_HUMAN | 0  | .GGGAACCGTGG  | 0.557 |             |
| + | 2  | 1608 | zvv.2_Missense_M   | NM_203299    | NP_976044    | Q5VYM1 | CI131_HUMAN | 0  | 7TGAACCACAC   | 0.507 | rs147472233 |
| + | 2  | 1719 | zvv.2_Missense_M   | NM_203299    | NP_976044    | Q5VYM1 | CI131_HUMAN | 0  | 3TCAGCCCACCC  | 0.522 |             |
| - | 7  | 1074 | 2splice CD72_uc    | NM_001782    | NP_001773    | P21854 | CD72_HUMAN  | 0  | 4ACTTACCTAGT  | 0.443 |             |
| + | 11 | 1370 | p.3_Missense_Mu    | NM_001216    | NP_001207    | Q16790 | CAH9_HUMAN  | 5  | GGGAACCAAAG   | 0.552 |             |
| + | 4  | 1115 | lb.2_Missense_Mu   | NM_003995    | NP_003986    | P20594 | ANPRB_HUMAN | 3  | 3ACGAAGATATC  | 0.493 | rs144675513 |
| + | 3  | 517  | se_Mutation_p.E1   | NM_007096    | NP_009027    | P09496 | CLCA_HUMAN  | 1  | 3AAATGGAACGC  | 0.428 |             |
| + | 11 | 1634 | 2OLR1E_uc011lqk    | NM_022490    | NP_071935    | Q9GZS1 | RPA49_HUMAN | 0  | TGTGGCCGCCG   | 0.552 |             |
| + | 9  | 1155 | e_Mutation_p.E28   | NM_003558    | NP_003549    | O14986 | PI51B_HUMAN | 1  | 3AGAAAGAGGAG  | 0.468 |             |
| + | 47 | 6584 | _p.W2108* VPS13/   | NM_033305    | NP_150648    | Q96RL7 | VP13A_HUMAN | 10 | 7TTGTGGCCACC  | 0.333 |             |
| + | 6  | 1100 | pp.2_Missense_M    | NM_032171    | NP_115547    | Q5JTW2 | CEP78_HUMAN | 1  | 3AAAGGCTTTGC  | 0.388 |             |
| + | 16 | 2294 | _p.G94D TLE4_uc    | NM_007005    | NP_008936    | O60756 | BCE1_HUMAN  | 5  | 3AGATGGTCAGA  | 0.512 |             |
| - | 16 | 2342 |                    | NM_152573    | NP_689786    | Q8IZ41 | RASEF_HUMAN | 3  | 7TAGAACCATCT  | 0.373 |             |
| - | 3  | 942  | imw.2_Missense_M   | NM_013438    | NP_038466    | Q9UMX0 | UBQL1_HUMAN | 0  | 3TCCAGCTGTA   | 0.373 |             |
| - | 8  | 1200 | iz.2_Intron GKAP1  | NM_025211    | NP_079487    | Q5VSY0 | GKAP1_HUMAN | 0  | TCTGTTCCATTAT | 0.294 |             |
| - | 18 | 4207 | 3P1289S KIF27_u    | NM_017576    | NP_060046    | Q86VH2 | KIF27_HUMAN | 5  | 7ACAGGTGTGAC  | 0.423 |             |
| - | 1  | 435  | f64_uc004anc.2_l   | NM_032307    | NP_115683    | Q5T6V5 | CI064_HUMAN | 0  | CGCGGCTCGT    | 0.627 |             |
| + | 3  | 1420 | p.3_Missense_Mu    | NM_024945    | NP_079221    | Q9H9A7 | RMI1_HUMAN  | 0  | 7TGAACCATTG   | 0.353 |             |
| + | 15 | 1549 | 1ltg.1_Missense_M  | NM_004938    | NP_004929    | P53355 | DAPK1_HUMAN | 2  | TCAAATCCCAAT  | 0.547 |             |
| + | 5  | 581  |                    | NR_027917    |              |        |             | 1  | AAGTGGTGGGG   | 0.478 |             |
| + | 5  | 736  | e_Mutation_p.T21   | NM_024077    | NP_076982    | Q96T21 | SEBP2_HUMAN | 3  | 4ATTTACCACACT | 0.408 |             |
| - | 12 | 1347 | lice_Site SEMA4D   | NM_006378    | NP_006369    | Q92854 | SEM4D_HUMAN | 2  | 3TCCCCTAAAA   | 0.612 |             |
| + | 10 | 1550 | SYK_uc004arc.2     | NM_003177    | NP_003168    | P43405 | KSYK_HUMAN  | 5  | 3TTATGGAGATG  | 0.527 |             |
| - | 9  | 2768 | R2_uc004ari.1_Inl  | NM_004560    | NP_004551    | Q01974 | ROR2_HUMAN  | 20 | 3CTGGGGACCA   | 0.652 |             |
| - | 3  | 432  | t_Site ROR2_uc0C   | NM_004560    | NP_004551    | Q01974 | ROR2_HUMAN  | 20 | 4TTGCCGTCTGG  | 0.547 |             |
| - | 14 | 1366 | 1ltv.1_Splice_Site | NM_006415    | NP_006406    | O15269 | SPTC1_HUMAN | 2  | ACTGACCTGGG   | 0.388 |             |
| + | 3  | 1037 | _Mutation_p.A346   | NM_006648    | NP_006639    | Q9Y3S1 | WNK2_HUMAN  | 12 | 3CCTGGCCACTC  | 0.537 |             |

|   |    |      |                    |              |              |        |             |                                |     |                |       |
|---|----|------|--------------------|--------------|--------------|--------|-------------|--------------------------------|-----|----------------|-------|
| + | 3  | 175  | 1_p.T24A ZNF169_   | NM_194320    | NP_919301    | Q14929 | ZN169_HUMAN | KRAB.                          | 2   | 3CCTTCACCCAG   | 0.547 |
| + | 1  | 496  | orf3_uc004aay.2_l  | NM_032823    | NP_116212    | Q8N6M6 | AMPO_HUMAN  |                                | 1   | 3AGGAACATGCT   | 0.388 |
| - | 23 | 4267 | rq.2_Missense_Mt   | NM_000264    | NP_000255    | Q13635 | PTC1_HUMAN  | lasmic (Potential).            | 379 | 3GCACGGAGCTG   | 0.697 |
| - | 2  | 640  | 314B_uc004awl.2_   | NM_033331    | NP_201588    | O60729 | CC14B_HUMAN | A.                             | 1   | 3GTCTGCTGTAG   | 0.323 |
| + | 2  | 287  | RD7_uc011lux.1_l   | NM_014290    | NP_055105    | Q8NHU6 | TDRD7_HUMAN | us/OST-HTH 1.                  | 3   | 3GAATGGAGTAG   | 0.448 |
| + | 7  | 1171 | ux.1_Missense_Mi   | NM_014290    | NP_055105    | Q8NHU6 | TDRD7_HUMAN | us/OST-HTH 2.                  | 3   | 3AGAAAGTACCT   | 0.443 |
| - | 11 | 2588 | p.S803N TBC1D2     | NM_018421    | NP_060891    | Q9BYX2 | TBD2A_HUMAN | ab-GAP TBC.                    | 3   | ATGTTGCTAATG   | 0.552 |
| - | 2  | 835  | KS6_uc004aay.1_F   | NM_173551    | NP_775822    | Q68DC2 | ANKS6_HUMAN | ANK 7.                         | 2   | 3AAGGTCCTGT    | 0.607 |
| + | 8  | 992  | sx.2_RNA STX17_    | NM_017919    | NP_060389    | P56962 | STX17_HUMAN | cular (Potential).             | 1   | 3AGAAGCTCACT   | 0.438 |
| + | 6  | 1172 | xc.2_Missense_Mt   | NM_207299    | NP_997182    | Q8TBJ4 | LPPR1_HUMAN | ical; (Potential).             | 0   | 3CGTGATTGCTG   | 0.552 |
| - | 2  | 172  | llvj.1_Missense_M  | NM_019051    | NP_061924    | Q8N5N7 | RM50_HUMAN  |                                | 0   | 3CTCTTCTACTGT  | 0.408 |
| + | 25 | 3775 | l_Mutation_p.D116  | NM_001042551 | NP_001036016 | O95347 | SMC2_HUMAN  |                                | 9   | 3TTGTGGATGGT   | 0.348 |
| - | 1  | 440  |                    | NM_001001956 | NP_001001956 | Q8NGT0 | O13C9_HUMAN | Name=4; (Potential).           | 0   | 3AGGACCCAACA   | 0.453 |
| - | 36 | 5172 |                    | NM_005502    | NP_005493    | O95477 | ABCA1_HUMAN | Extracellular.                 | 17  | 3CTCCCTTTTGC   | 0.473 |
| + | 11 | 7428 | isense_Mutation_p  | NM_021224    | NP_067047    | Q96JM2 | ZN462_HUMAN |                                | 5   | 3CAGCAGCGATG   | 0.498 |
| - | 16 | 1936 | p.A632T CTNNAL     | NM_003798    | NP_003789    | Q9UBT7 | CTNL1_HUMAN |                                | 1   | 3CTCTGCAGCAA   | 0.353 |
| - | 11 | 1672 | lorf5_uc004bdr.3_l | NM_032012    | NP_114401    | Q9H330 | CI005_HUMAN |                                | 1   | 3TATCTCCTAGA   | 0.333 |
| - | 34 | 5868 | P1_uc010mt.2_5l    | NM_153366    | NP_699197    | Q4LDE5 | SVEP1_HUMAN |                                | 7   | 3AACAGCTTAAC   | 0.338 |
| - | 5  | 1173 | p.M306I LPAR1_u    | NM_057159    | NP_476500    | Q92633 | LPAR1_HUMAN | Name=7; (Potential).           | 2   | 3GGTTTCATGGC   | 0.522 |
| - | 43 | 5009 |                    | NM_001080398 | NP_001073867 |        |             |                                | 0   | 3TTTCGGATTTCT  | 0.423 |
| + | 9  | 1324 |                    | NM_003358    | NP_003349    | Q16739 | CEGT_HUMAN  | renal (Potential).             | 1   | 3TTTTTCAAAC    | 0.353 |
| - | 2  | 273  | se_Mutation_p.T24  | NM_000031    | NP_000022    | P13716 | HEM2_HUMAN  |                                | 0   | 3GGGTGGTGGTG   | 0.552 |
| + | 7  | 908  | hp.2_Missense_M    | NM_152786    | NP_689999    | Q8TAL5 | CI043_HUMAN |                                | 0   | 3CTCTGGAAATC   | 0.448 |
| + | 3  | 315  | l_5'Flank RGS3_uc  | NM_144488    | NP_652759    | P49796 | RGS3_HUMAN  |                                | 3   | 3CCTTTGCCAAT   | 0.512 |
| - | 2  | 444  | se_Mutation_p.D2f  | NM_001633    | NP_001624    | P02760 | AMBP_HUMAN  |                                | 1   | 3CCTGTCCATGA   | 0.602 |
| + | 8  | 2146 | 2_RNA COL27A1_     | NM_032888    | NP_116277    | Q8IZC6 | CORA1_HUMAN | Pro-rich. Triple-helical regio | 4   | 3CTGGACCGGCA   | 0.672 |
| + | 19 | 2711 | 27A1_uc004bii.2_   | NM_032888    | NP_116277    | Q8IZC6 | CORA1_HUMAN | Pro-rich. Triple-helical regio | 4   | 3TCCCGGGCCCC   | 0.527 |
| + | 51 | 4676 | 27A1_uc004bii.2_   | NM_032888    | NP_116277    | Q8IZC6 | CORA1_HUMAN | Pro-rich. Triple-helical regio | 4   | 3CCAGGGCCCTC   | 0.627 |
| - | 18 | 3797 | l_splice AKNA_ucf  | NM_030767    | NP_110394    | Q7Z591 | AKNA_HUMAN  |                                | 6   | 3GTGGCCTGGGG   | 0.507 |
| - | 10 | 2901 | biy.3_Missense_M   | NM_015404    | NP_056219    | Q9P202 | WHRN_HUMAN  |                                | 6   | 3GGTGGGAGAGC   | 0.483 |
| - | 17 | 3097 | cn_p.S51N ASTN2    | NM_198187    | NP_937830    | O75129 | ASTN2_HUMAN | cellular (Potential).          | 9   | 3TGGGGCTCAGC   | 0.582 |
| + | 2  | 178  | STN2_uc004bjt.1_   | NM_001099679 | NP_001093149 | Q13049 | TRI32_HUMAN |                                | 3   | 3AGCTTCTCACC   | 0.537 |
| - | 29 | 3775 |                    | NM_001735    | NP_001726    | P01031 | CO5_HUMAN   |                                | 2   | 3TTGTTTCTACCA  | 0.403 |
| - | 18 | 2378 | m.1_Splice_Site_f  | NM_001735    | NP_001726    | P01031 | CO5_HUMAN   |                                | 2   | 3ATAATACCTTCTG | 0.388 |
| - | 16 | 2060 | p.R677K C5_uc0f    | NM_001735    | NP_001726    | P01031 | CO5_HUMAN   |                                | 2   | 3CGCTTCTTCTTC  | 0.289 |
| - | 15 | 1979 | p.G650E C5_uc0f    | NM_001735    | NP_001726    | P01031 | CO5_HUMAN   |                                | 2   | 3TAAGTCCAGCT   | 0.448 |
| + | 28 | 4748 | 110_uc004blb.1_l   | NM_007018    | NP_008949    | Q7Z7A1 | CNTRL_HUMAN | Potential.                     | 0   | 3CTGAGGTGCTT   | 0.443 |
| - | 1  | 523  | J2_uc004bmj.1_l    | NM_001004451 | NP_001004451 | Q8NGS3 | OR1J1_HUMAN | cellular (Potential).          | 2   | 3GTGAGGGATGA   | 0.527 |
| - | 1  | 722  |                    | NM_012363    | NP_036495    | Q8NGS0 | OR1N1_HUMAN | Name=6; (Potential).           | 3   | 3GGTGGGAACTG   | 0.547 |
| + | 1  | 9    |                    | NM_001005234 | NP_001005234 | Q8NH93 | OR1L3_HUMAN | cellular (Potential).          | 1   | 3GGAATGTCCAA   | 0.413 |
| + | 1  | 701  |                    | NM_001005235 | NP_001005235 | Q8NGR5 | OR1L4_HUMAN | lasmic (Potential).            | 0   | 3AGCCGGGAAGT   | 0.512 |
| + | 1  | 604  |                    | NM_001001923 | NP_001001923 | Q8NGR4 | OR5C1_HUMAN | Name=5; (Potential).           | 1   | 3AACTCCTTCTC1  | 0.557 |
| - | 17 | 1705 | e_Mutation_p.T56f  | NM_001144877 | NP_001138349 | Q8N9R8 | SCAL_HUMAN  |                                | 5   | 3CTTGTGAGGAC   | 0.343 |
| - | 2  | 516  |                    | NM_005347    | NP_005338    | P11021 | GRP78_HUMAN |                                | 4   | 3CGGGTTGGAG    | 0.592 |
| + | 3  | 371  | lmac.1_Missense_   | NM_014636    | NP_055451    | Q5JS13 | RGPS1_HUMAN |                                | 1   | 3CTATGCCAGCA   | 0.547 |
| + | 11 | 1057 | brc.1_Missense_l   | NM_001005373 | NP_001005373 | Q6UWE0 | LRSM1_HUMAN |                                | 0   | 3ATGGGCCACG    | 0.458 |
| - | 5  | 626  | p.T129S FAM129l    | NM_022833    | NP_073744    | Q96TA1 | NIBL1_HUMAN | PH.                            | 0   | 3CGTGGTCCCTG   | 0.582 |



|   |    |      |                   |              |              |        |             |                            |     |                 |       |
|---|----|------|-------------------|--------------|--------------|--------|-------------|----------------------------|-----|-----------------|-------|
| - | 5  | 742  | _p.P208L ST6GAI   | NM_013443    | NP_038471    | Q969X2 | SIA7F_HUMAN | lenal (Potential).         | 0   | TTGTTGGGGAAC    | 0.637 |
| - | 5  | 986  | 04bst.2_Missense  | NM_175039    | NP_778204    | Q9H4F1 | SIA7D_HUMAN | lenal (Potential).         | 0   | AGTAGCTGTCC     | 0.647 |
| - | 2  | 669  |                   | NM_003863    | NP_003854    | O94777 | DPM2_HUMAN  |                            | 0   | CCGTGGCCTGG     | 0.582 |
| - | 4  | 1158 | _p.A36V PTGES2    | NM_025072    | NP_079348    | Q9H7Z7 | PGES2_HUMAN | lasmic (Potential).        | 0   | TCCTGGCCTCC     | 0.612 |
| - | 14 | 2417 | p.D672N CIZ1_uc   | NM_001131016 | NP_001124488 | Q9ULV3 | CIZ1_HUMAN  | Glu-rich.                  | 4   | ctcttcatcctcatc | 0.403 |
| - | 18 | 1799 | 3OLGA2_uc004bul   | NM_004486    | NP_004477    | Q08379 | GOGA2_HUMAN | Potential.                 | 1   | CGTTTCCTTAC     | 0.647 |
| + | 7  | 1306 | nxz.2_Missense_M  | NM_016174    | NP_057258    | Q5T4B2 | GT253_HUMAN |                            | 1   | GCAGGCCTCAG     | 0.617 |
| - | 1  | 1185 | 1_5'Flank NUP18E  | NM_014908    | NP_055723    | Q9UPQ8 | DOLK_HUMAN  | lasmic (Potential).        | 0   | CCCAGGTGCCT     | 0.577 |
| - | 11 | 1736 | _p.S464F CRAT_uc  | NM_000755    | NP_000746    | P43155 | CACP_HUMAN  |                            | 1   | CGCTGGAGTCA     | 0.517 |
| + | 7  | 1390 |                   | NM_006059    | NP_006050    | Q9Y6N6 | LAMC3_HUMAN | inin EGF-like 4.           | 3   | CTGCACCTTGCA    | 0.557 |
| + | 29 | 5053 | ense_Mutation_p.F | NM_005085    | NP_005076    | P35658 | NU214_HUMAN | 1 X 5 AA approximate repe  | 16  | CTCAGCCTCTC     | 0.602 |
| + | 16 | 4565 | ao.3_Missense_M   | NM_013318    | NP_037450    | Q5JSZ5 | PRC2B_HUMAN |                            | 0   | ACCTTCCCAG      | 0.607 |
| + | 26 | 5952 | p.S1323F BAT2L1   | NM_013318    | NP_037450    | Q5JSZ5 | PRC2B_HUMAN |                            | 0   | CACATCTCTGC     | 0.607 |
| - | 22 | 3005 | icbb.2_Missense_I | NM_005312    | NP_005303    | Q13905 | RPGF1_HUMAN | Ras-GEF.                   | 7   | CAGTGTGCAGT     | 0.577 |
| - | 10 | 4939 | .P1205S SETX_uc   | NM_015046    | NP_055861    | Q7Z333 | SETX_HUMAN  |                            | 3   | AGGAGGAGGCA     | 0.408 |
| - | 4  | 449  | idd.2_Missense_M  | NM_133640    | NP_598395    | Q15528 | MED22_HUMAN |                            | 1   | ACTCGCCGGCT     | 0.493 |
| - | 4  | 322  | 1_5'Flank SURF2   | NM_003172    | NP_003163    | Q15526 | SURF1_HUMAN |                            | 2   | GAACTCTGGAC     | 0.582 |
| - | 13 | 1789 | 3_Mutation_p.P55  | NM_001134707 | NP_001128179 | Q9UL12 | SARDH_HUMAN |                            | 0   | GGTGGGCGGG      | 0.677 |
| - | 3  | 552  | 3H_uc011mdn.1_N   | NM_001134707 | NP_001128179 | Q9UL12 | SARDH_HUMAN |                            | 0   | CGTCTCCTCTC     | 0.672 |
| - | 6  | 1079 | ix.2_Missense_Mu  | NM_007371    | NP_031397    | Q15059 | BRD3_HUMAN  |                            | 8   | GGCACCTCGCC     | 0.657 |
| - | 6  | 991  | ix.2_Missense_Mu  | NM_007371    | NP_031397    | Q15059 | BRD3_HUMAN  |                            | 8   | GGTCTGACAAC     | 0.657 |
| + | 2  | 242  | icz.2_Missense_IV | NM_017588    | NP_060058    | P61964 | WDR5_HUMAN  |                            | 0   | CGCCACTCAG      | 0.612 |
| + | 38 | 3388 |                   | NM_000093    | NP_000084    | P20908 | CO5A1_HUMAN |                            | 11  | CTCAGGTAAGC     | 0.647 |
| + | 11 | 960  | ibf.2_Missense_M  | NM_020822    | NP_065873    | Q5JUK3 | KCNT1_HUMAN |                            | 4   | GGCGGGCGGAC     | 0.677 |
| - | 11 | 3676 | p.P1116S CAMSAI   | NM_015447    | NP_056262    | Q5T5Y3 | CAMP1_HUMAN |                            | 3   | CAGAGGCTCTC     | 0.617 |
| - | 9  | 1274 | p.R315K CAMSAF    | NM_015447    | NP_056262    | Q5T5Y3 | CAMP1_HUMAN |                            | 3   | TCTGTCTCAGT     | 0.388 |
| - | 3  | 3148 | EC16A_uc010nbn.   | NM_014866    | NP_055681    | O15027 | SC16A_HUMAN |                            | 0   | TCCTGCCTTAC     | 0.493 |
| - | 3  | 1594 | p.P429S SEC16A    | NM_014866    | NP_055681    | O15027 | SC16A_HUMAN |                            | 0   | GCCTGGGAGAA     | 0.632 |
| - | 34 | 6235 |                   | NM_017617    | NP_060087    | P46531 | NOTC1_HUMAN | ytoplasmic (Potential).    | 856 | CAGCACCTTGG     | 0.677 |
| + | 18 | 2346 | mej.1_Missense_M  | NM_206920    | NP_996803    | Q6UXC1 | AEGP_HUMAN  | xtracellular (Potential).  | 7   | GCCCCCAACA      | 0.662 |
| - | 9  | 1133 | ise_Mutation_p.E3 | NM_015392    | NP_056207    | Q9NQX5 | NPDC1_HUMAN |                            | 0   | CACCTCCATTT     | 0.682 |
| - | 11 | 1282 |                   | NM_013379    | NP_037511    | Q9UHL4 | DPP2_HUMAN  |                            | 0   | GGGGTCCAGGT     | 0.493 |
| - | 6  | 1328 | clq.1_Missense_M  | NM_013366    | NP_037498    | Q9UJX6 | ANC2_HUMAN  |                            | 1   | GGCCACCTCCA     | 0.632 |
| - | 26 | 3309 | ense_Mutation_p.T | NM_152286    | NP_689499    | Q6ZV29 | PLPL7_HUMAN | Patatin.                   | 1   | AGGACGTCATG     | 0.602 |
| + | 4  | 361  | np.1_Missense_M   | NM_152285    | NP_689498    | Q8N5I2 | ARRD1_HUMAN |                            | 0   | CACTGCACCCA     | 0.627 |
| + | 7  | 1275 | np.1_Missense_M   | NM_152285    | NP_689498    | Q8N5I2 | ARRD1_HUMAN | Pro-rich.                  | 0   | TTGATTTCTCT     | 0.617 |
| + | 3  | 624  | uc004cof.1_Intron | NM_000718    | NP_000709    | Q00975 | CAC1B_HUMAN | asmic (Potential). I.      | 6   | GGGCTTTACC      | 0.592 |
| + | 13 | 1391 | .P357S CSF2RA_uc  | NM_001161529 | NP_001155001 | P15509 | CSF2R_HUMAN | :(Potential). Box 1 motif. | 2   | GTGTTCCCGCCA    | 0.547 |
| - | 2  | 406  | 35A6_uc004cpu.2   | NM_001636    | NP_001627    | P12236 | ADT3_HUMAN  |                            | 0   | CTTGTCACGCG     | 0.612 |
| - | 2  | 1099 | 3ED1_uc004cqh.1   | NM_004729    | NP_004720    | O96006 | ZBED1_HUMAN |                            | 0   | CTGCTGGATGCG    | 0.632 |
| + | 7  | 506  | 99_uc004cqn.2_R   | NM_002414    | NP_002405    | P14209 | CD99_HUMAN  | ellular (Potential).       | 1   | TGGTGGAGGCA     | 0.527 |
| + | 3  | 293  |                   | NM_001011719 | NP_001011719 | Q5FYA8 | ARSH_HUMAN  |                            | 1   | AACGACTTTTGC    | 0.552 |
| + | 9  | 1342 | f.1_Missense_Mut  | NM_004042    | NP_004033    | P54793 | ARSF_HUMAN  |                            | 2   | GGGGGCTGGG      | 0.413 |
| + | 11 | 1786 | rf.1_Missense_Mul | NM_004042    | NP_004033    | P54793 | ARSF_HUMAN  |                            | 2   | ACCTGCCACAG     | 0.532 |
| - | 5  | 5073 |                   | NM_015419    | NP_056234    | Q9NR99 | MXRA5_HUMAN |                            | 8   | GACGAGGTGAC     | 0.458 |
| - | 5  | 5045 |                   | NM_015419    | NP_056234    | Q9NR99 | MXRA5_HUMAN |                            | 8   | TCTGGAAGCGC     | 0.473 |
| + | 4  | 674  |                   | NM_001649    | NP_001640    | Q13796 | SHRM2_HUMAN |                            | 8   | CAACAGCAGCA     | 0.617 |

rs151043513

|   |    |      |                    |              |              |        |             |                               |   |               |       |             |
|---|----|------|--------------------|--------------|--------------|--------|-------------|-------------------------------|---|---------------|-------|-------------|
| + | 4  | 1563 |                    | NM_001649    | NP_001640    | Q13796 | SHRM2_HUMAN |                               | 8 | CTCTGGGCGGG   | 0.677 |             |
| + | 11 | 1363 | se_Mutation_p.V5   | NM_015691    | NP_056506    | Q9ULE0 | WWC3_HUMAN  | Ser-rich.                     | 4 | GCTCGGTCAGC   | 0.672 |             |
| + | 11 | 1493 | se_Mutation_p.G9   | NM_015691    | NP_056506    | Q9ULE0 | WWC3_HUMAN  | Ser-rich.                     | 4 | CCCAGGCCCTC   | 0.662 |             |
| + | 5  | 354  | ntron ARHGAP6_t    | NM_001142    | NP_001133    | Q99217 | AMELX_HUMAN |                               | 0 | TGATCCCCCAG   | 0.632 |             |
| + | 13 | 1654 | p.P368S MSL3_u     | NM_078629    | NP_523353    | Q8N5Y2 | MS3L1_HUMAN |                               | 1 | AGAACCCCCGG   | 0.458 |             |
| - | 1  | 566  |                    | NM_001135995 | NP_001129467 | Q9H3M9 | ATX3L_HUMAN | Josephin.                     | 6 | ATTGAGGCTAAT  | 0.423 |             |
| + | 4  | 679  | ion_p.T106 OFD1    | NM_003611    | NP_003602    | O75665 | OFD1_HUMAN  |                               | 0 | TATTTACTATGCA | 0.284 |             |
| + | 9  | 1380 | p.R350C GLRA2_     | NM_001118885 | NP_001112357 | P23416 | GLRA2_HUMAN | lasmic (Probable).            | 2 | TCCTGCGCCTC   | 0.483 |             |
| - | 4  | 511  | wv.2_Splice_Site_  | NM_003662    | NP_003653    | O00625 | PIR_HUMAN   |                               | 1 | CCCATACCTGCA  | 0.378 |             |
| - | 17 | 2353 | b.2_Missense_Mu    | NM_021804    | NP_068576    | Q9BYF1 | ACE2_HUMAN  | ellular (Potential).          | 3 | TGTTGGCTGTA   | 0.468 |             |
| - | 13 | 1946 | b.2_Missense_Mt    | NM_021804    | NP_068576    | Q9BYF1 | ACE2_HUMAN  | ellular (Potential).          | 3 | GCCAGGTAAATA  | 0.448 | rs140857723 |
| + | 11 | 1106 |                    | NM_005089    | NP_005080    | Q15696 | U2AFM_HUMAN |                               | 3 | GACTGGCTCCT   | 0.512 |             |
| + | 4  | 1323 | p.E173K NHS_uc     | NM_198270    | NP_938011    | Q6T4R5 | NHS_HUMAN   |                               | 7 | CAGAGGAGAAG   | 0.473 |             |
| + | 6  | 3864 | p.D1020N NHS_uc    | NM_198270    | NP_938011    | Q6T4R5 | NHS_HUMAN   |                               | 7 | ACTGAAGACACC  | 0.403 |             |
| + | 8  | 5091 | p.A1429T NHS_uc    | NM_198270    | NP_938011    | Q6T4R5 | NHS_HUMAN   |                               | 7 | CTCGGGCCCTC   | 0.582 |             |
| - | 3  | 874  | p.P102S RAI2_uc    | NM_021785    | NP_068557    | Q9Y5P3 | RAI2_HUMAN  |                               | 2 | CTCTGGTGCGG   | 0.622 |             |
| - | 4  | 260  | fd.1_Missense_Mt   | NM_006089    | NP_006080    | Q9UQR0 | SCML2_HUMAN | MBT 1.                        | 0 | CTCCCAGTGGA   | 0.348 |             |
| + | 12 | 2124 | yn.2_Missense_Mt   | NM_003159    | NP_003150    | O76039 | CDKL5_HUMAN |                               | 6 | CAAGGGCTTGG   | 0.512 |             |
| - | 7  | 408  | n_p.L58F GPR64_    | NM_001079858 | NP_001073327 | Q8IZP9 | GPR64_HUMAN | ellular (Potential).          | 0 | AGGGAGTAAGC   | 0.353 |             |
| - | 9  | 1786 | cg.1_Intron CXorf2 | NM_198279    | NP_938020    | A2AJT9 | CX023_HUMAN |                               | 2 | TTCTCTGCGTAG  | 0.323 |             |
| - | 9  | 706  | p.A224T RPS6KA     | NM_004586    | NP_004577    | P51812 | KS6A3_HUMAN | otein kinase 1.               | 8 | TGAGCCATAT    | 0.388 |             |
| + | 3  | 397  | mjn.1_Missense_M   | NM_014927    | NP_055742    | Q8WXI2 | CNKR2_HUMAN | CRIC.                         | 2 | AAATTGCCAAAC  | 0.453 |             |
| + | 11 | 1412 | p.W403* PHEX_uc    | NM_000444    | NP_000435    | P78562 | PHEX_HUMAN  | ellular (Potential).          | 3 | CAATGGGACAA   | 0.393 |             |
| + | 7  | 1327 | se_Mutation_p.P3   | NM_003410    | NP_003401    | P17010 | ZFX_HUMAN   |                               | 2 | TCATGCCGATT   | 0.483 |             |
| + | 9  | 2581 | se_Mutation_p.P8   | NM_003410    | NP_003401    | P17010 | ZFX_HUMAN   |                               | 2 | ACTATCCTCAC   | 0.453 |             |
| - | 1  | 757  |                    | NM_001136233 | NP_001129705 | P0C7V6 | F48B2_HUMAN |                               | 0 | AGACTGCTCCT   | 0.498 |             |
| + | 9  | 756  | p.G251R POLA1_     | NM_016937    | NP_058633    | P09884 | DPOLA_HUMAN |                               | 3 | AGTCAGGGGCA   | 0.463 |             |
| + | 22 | 2371 | IA23_uc004dbo.1_   | NM_016937    | NP_058633    | P09884 | DPOLA_HUMAN |                               | 3 | GGGTGGACGAT   | 0.378 |             |
| + | 2  | 229  | EB6_uc010ngc.1_!   | NM_173523    | NP_775794    | Q8N7X4 | MAGB6_HUMAN |                               | 3 | CACGGTCCCC    | 0.567 |             |
| - | 1  | 1110 |                    | NM_001017930 | NP_001017930 | A6NGE4 | DC8L1_HUMAN | WD 4.                         | 4 | TTCTTATCATT   | 0.423 |             |
| - | 3  | 712  |                    | NM_025159    | NP_079435    | Q9HAI6 | CX021_HUMAN |                               | 1 | CTCAGAGGGAA   | 0.428 |             |
| - | 3  | 338  |                    | NM_025159    | NP_079435    | Q9HAI6 | CX021_HUMAN |                               | 1 | AAGAGGCACAAC  | 0.443 |             |
| - | 35 | 5253 | _Mutation_p.W154   | NM_004006    | NP_003997    | P11532 | DMD_HUMAN   | ction with SYNM (By similar   | 6 | TTAACCACTCT   | 0.413 |             |
| + | 9  | 1250 |                    | NM_173695    | NP_775966    | Q8N9S7 | CX059_HUMAN |                               | 1 | TGAGAGATGGA   | 0.338 |             |
| + | 1  | 1438 |                    | NM_001013736 | NP_001013758 | Q5HY64 | FA47C_HUMAN |                               | 3 | TCTCTGCCCGG   | 0.627 |             |
| + | 1  | 1665 |                    | NM_001013736 | NP_001013758 | Q5HY64 | FA47C_HUMAN |                               | 3 | AGCCTCCTGAG   | 0.617 |             |
| + | 1  | 2193 |                    | NM_001013736 | NP_001013758 | Q5HY64 | FA47C_HUMAN |                               | 3 | ATCTCTGCCCG   | 0.637 |             |
| + | 1  | 2239 |                    | NM_001013736 | NP_001013758 | Q5HY64 | FA47C_HUMAN |                               | 3 | AGAGCCTCCCA   | 0.632 |             |
| + | 1  | 375  | ddp.1_Missense_M   | NM_198511    | NP_940913    | Q6ZV70 | LANC3_HUMAN |                               | 0 | GTGAGGAGGCG   | 0.716 |             |
| - | 4  | 650  | p.P120S BCOR_u     | NM_001123385 | NP_001116857 | Q6W2J9 | BCOR_HUMAN  |                               | 4 | TCTCTGGATTC   | 0.507 |             |
| + | 3  | 349  | 6AP2_uc011mkm.     | NM_005765    | NP_005756    | O75787 | REN_R_HUMAN | ellular (Potential).          | 0 | AGGGAGTGAAC   | 0.443 |             |
| + | 10 | 1852 | fc.2_Missense_Mt   | NM_001039590 | NP_001034679 | Q93008 | USP9X_HUMAN |                               | 6 | ATCAGCCACAG   | 0.353 |             |
| + | 18 | 3086 | lfc.2_Missense_Mt  | NM_001039590 | NP_001034679 | Q93008 | USP9X_HUMAN |                               | 6 | TCAGTCTGTT    | 0.353 |             |
| + | 9  | 1672 | _Mutation_p.A257   | NM_001356    | NP_001347    | O00571 | DDX3X_HUMAN | n with XPO1. Helicase ATP     | 6 | TATTAGCACCA   | 0.368 |             |
| + | 14 | 2356 | 485T DDX3X_uc0     | NM_001356    | NP_001347    | O00571 | DDX3X_HUMAN | ecessary for interaction with | 6 | AGGTAGCAGCA   | 0.343 |             |
| + | 3  | 838  | se_Mutation_p.G1   | NM_001097579 | NP_001091048 | Q9UPC5 | GPR34_HUMAN | Name=4; (Potential).          | 1 | TGGTGGATTCC   | 0.353 |             |
| + | 15 | 1626 | kw.1_Missense_M    | NM_000240    | NP_000231    | P21397 | AOFA_HUMAN  | Cytoplasmic.                  | 3 | GTTCCAGCGG    | 0.493 |             |

|   |    |       |                   |              |              |        |             |                           |    |               |       |
|---|----|-------|-------------------|--------------|--------------|--------|-------------|---------------------------|----|---------------|-------|
| - | 4  | 661   | Igv.1_Missense_M  | NM_032591    | NP_115980    | Q96T83 | SL9A7_HUMAN | ical; (Potential).        | 2  | TCAGTCCCCAAG  | 0.388 |
| + | 2  | 724   |                   | NM_006915    | NP_008846    | O75695 | XRP2_HUMAN  | IP/cofactor C-like.       | 0  | TTACACCTGTGT  | 0.423 |
| + | 4  | 460   |                   | NM_003446    | NP_003437    | P51786 | ZN157_HUMAN |                           | 0  | ACATTGGATCAA  | 0.348 |
| - | 4  | 1842  | rw.3_Missense_Mt  | NM_153380    | NP_700359    | P51814 | ZNF41_HUMAN |                           | 3  | TTATAGGGTTTCT | 0.418 |
| - | 4  | 673   | .1_Missense_Mut   | NM_001145252 | NP_001138724 | P27918 | PROP_HUMAN  | SP type-1 2.              | 3  | ACAGGCCTCTG   | 0.642 |
| - | 5  | 1136  | K1_uc010nhw.2_N   | NM_001114123 | NP_001107595 | P19419 | ELK1_HUMAN  |                           | 2  | CTCGGCCTTGG   | 0.657 |
| - | 4  | 278   | 8A5_uc004djk.3_5  | NM_033518    | NP_277053    | Q8WUX1 | S38A5_HUMAN | lasmic (Potential).       | 3  | CCCAGGAGCAG   | 0.592 |
| + | 9  | 915   | jn.1_Missense_ML  | NM_012280    | NP_036412    | Q9UET6 | RRMJ1_HUMAN |                           | 0  | GTCAGGGCTATC  | 0.642 |
| + | 6  | 1829  | u.P319L TBC1D25   | NM_002536    | NP_002527    | Q3MII6 | TBC25_HUMAN |                           | 1  | CTCTCCCACTG   | 0.577 |
| + | 8  | 1301  | 35_splice WDR13   | NM_017883    | NP_060353    | Q9H1Z4 | WDR13_HUMAN |                           | 2  | TACAGGTGGGT   | 0.597 |
| + | 1  | 91    |                   | NM_000377    | NP_000368    | P42768 | WASP_HUMAN  |                           | 1  | CCGGGGGCCGA   | 0.592 |
| + | 3  | 796   | e_Mutation_p.D26  | NM_003173    | NP_003164    | O43463 | SUV91_HUMAN | SET.                      | 0  | GCACGGATGATC  | 0.597 |
| + | 5  | 520   | _Mutation_p.D111  | NM_001032382 | NP_001027554 | O60828 | PQBP1_HUMAN | tandem repeats of D- R-[S | 1  | AGTCGGACAGG   | 0.587 |
| + | 4  | 647   | _Mutation_p.S47   | NM_033626    | NP_296375    | Q96HB5 | CC120_HUMAN |                           | 1  | CTCTGAGCCTGA  | 0.667 |
| - | 5  | 565   | u_p.T99 PRICKLE   | NM_006150    | NP_006141    | O43900 | PRIC3_HUMAN | PET.                      | 1  | TGATGGTCACCA  | 0.612 |
| - | 6  | 734   | _p.P122S SYP_uc   | NM_003179    | NP_003170    | P08247 | SYPH_HUMAN  | lasmic (Potential).       | 3  | CTCGGGGGCGC   | 0.711 |
| - | 4  | 592   | _p.T135N FOXP3    | NM_014009    | NP_054728    | Q9BZS1 | FOXP3_HUMAN |                           | 0  | CGGTGGTGGGT   | 0.672 |
| + | 4  | 1610  | 4dni.2_Missense_I | NM_033215    | NP_149992    | Q6ZSY5 | PPR3F_HUMAN | cellular (Potential).     | 3  | CGGACCGCGAC   | 0.692 |
| + | 3  | 282   | u.1_Intron GAGE1  | NM_001127212 | NP_001120684 | Q6NT46 | GAG2A_HUMAN |                           | 0  | TGAGGGAGCAT   | 0.403 |
| + | 6  | 2256  | .S653F CCNB3_uc   | NM_033031    | NP_149020    | Q8WWL7 | CCNB3_HUMAN |                           | 9  | AGTGTCCCTCT   | 0.433 |
| + | 4  | 1015  | p.G363D IMAGED    | NM_001005332 | NP_001005332 | Q9Y5V3 | MAGD1_HUMAN | tem repeats of W-[PQ]-X-P | 3  | CTCAGGCTGGC   | 0.632 |
| + | 2  | 93    |                   | NM_130775    | NP_570131    | Q8WWM1 | GAGD5_HUMAN |                           | 1  | TATAGACCAAGAC | 0.308 |
| - | 26 | 4954  | in KDM5C_uc004c   | NM_004187    | NP_004178    | P41229 | KDM5C_HUMAN |                           | 18 | CCTCTCGGGCT   | 0.706 |
| - | 15 | 2635  | nse_Mutation_p.P  | NM_004187    | NP_004178    | P41229 | KDM5C_HUMAN |                           | 18 | CATCTGGGAGC   | 0.522 |
| - | 24 | 3659  | oe.1_Missense_Mt  | NM_006306    | NP_006297    | Q14683 | SMC1A_HUMAN |                           | 6  | CTCTCGGCCTTG  | 0.572 |
| - | 10 | 1741  | _p.Q536* SMC1A    | NM_006306    | NP_006297    | Q14683 | SMC1A_HUMAN | lexible hinge.            | 6  | TATACTGAATACA | 0.517 |
| + | 5  | 622   | e_Mutation_p.Q15  | NM_001031745 | NP_001026915 | Q8N443 | RIBC1_HUMAN |                           | 0  | TGCAGCAGGGG   | 0.522 |
| - | 82 | 13220 | sn.2_Missense_Mt  | NM_031407    | NP_113584    | Q7Z6Z7 | HUWE1_HUMAN | HECT.                     | 17 | AGTTGGACTGG   | 0.463 |
| - | 75 | 11935 | p.P2653S HUWE1    | NM_031407    | NP_113584    | Q7Z6Z7 | HUWE1_HUMAN |                           | 17 | CAGGGTAACT    | 0.537 |
| - | 11 | 2419  | noh.1_Missense_M  | NM_017848    | NP_060318    | Q9NX05 | F120C_HUMAN |                           | 2  | TTCGGCCACCA   | 0.393 |
| - | 23 | 5663  | nse_Mutation_p.P  | NM_001002838 | NP_001002838 | Q9BYP7 | WNK3_HUMAN  |                           | 11 | TTTAGGACCAGC  | 0.438 |
| - | 5  | 1478  | tc.1_Missense_Mu  | NM_001002838 | NP_001002838 | Q9BYP7 | WNK3_HUMAN  | rotein kinase.            | 11 | AATAAGGATACT  | 0.373 |
| + | 12 | 1232  | IL3L_uc004dti.2_R | NM_019067    | NP_061940    | Q9NVN8 | GNL3L_HUMAN |                           | 1  | TGACGGCAGTG   | 0.547 |
| - | 8  | 1355  |                   | NM_198510    | NP_940912    | Q6UXX5 | ITH5L_HUMAN | VWFA. p.S442S(1)          | 6  | CCAGGGACAGG   | 0.577 |
| + | 7  | 1108  |                   | NM_174912    | NP_777572    | Q6GMR7 | FAAH2_HUMAN |                           | 3  | AATGTCCAAAGT  | 0.303 |
| - | 9  | 1122  | _p.A352T MTMR8    | NM_017677    | NP_060147    | Q96EF0 | MTMR8_HUMAN | ularin phosphatase.       | 4  | GCTAGCCACTG   | 0.443 |
| - | 10 | 1292  | _p.P390L LAS1_L   | NM_031206    | NP_112483    | Q9Y4W2 | LAS1L_HUMAN |                           | 4  | AGGCTGGCAGT   | 0.592 |
| + | 4  | 523   |                   | NM_002444    | NP_002435    | P26038 | MOES_HUMAN  | FERM.                     | 10 | AAAGAGGCATT   | 0.498 |
| - | 2  | 345   | e_Mutation_p.S73  | NM_007268    | NP_009199    | Q9Y279 | VSIG4_HUMAN | xtracellular (Potential). | 0  | CTCCAGAAGAG   | 0.552 |
| - | 9  | 1061  | p.A256D OPHN1     | NM_002547    | NP_002538    | O60890 | OPHN1_HUMAN |                           | 2  | GGGGAGCTTCT   | 0.378 |
| - | 2  | 1710  | g.2_Missense_Mu   | NM_145119    | NP_660095    | Q8NG27 | PJA1_HUMAN  |                           | 0  | TATCCCCCTCAC  | 0.478 |
| - | 2  | 852   | g.2_Intron PJA1_L | NM_145119    | NP_660095    | Q8NG27 | PJA1_HUMAN  |                           | 0  | AGCATCTTGCT   | 0.537 |
| + | 2  | 206   | 1_5'Flank PDZD11  | NM_012310    | NP_036442    | O95239 | KIF4A_HUMAN | inesin-motor.             | 4  | GCGAGGGCTGC   | 0.582 |
| + | 12 | 1436  | _p.L437F KIF4A_L  | NM_012310    | NP_036442    | O95239 | KIF4A_HUMAN | Potential.                | 4  | AAAGGCTCAGG   | 0.458 |
| + | 15 | 2199  | 9_splice DLG3_uc  | NM_021120    | NP_066943    | Q92796 | DLG3_HUMAN  |                           | 2  | TCTCTAGTTTCA  | 0.532 |
| + | 2  | 1426  | OXO4_uc004dyt.1   | NM_005938    | NP_005929    | P98177 | FOXO4_HUMAN |                           | 3  | AGAAGGGTGCT   | 0.612 |
| - | 4  | 333   | Imp.1_Splice_Sit  | NM_001025265 | NP_001020436 | A6NEN9 | CX065_HUMAN |                           | 1  | TCTTACCAAGCA  | 0.502 |

|   |    |           |                   |              |              |        |                                          |    |               |       |
|---|----|-----------|-------------------|--------------|--------------|--------|------------------------------------------|----|---------------|-------|
| + | 37 | 5226      | p.G1676D MED12    | NM_005120    | NP_005111    | Q93074 | MED12_HUMAN with CTNNB1 and GLI3.        | 4  | AGCAGGGTCTAC. | 0.463 |
| + | 7  | 2390      | ps.1_Missense_M   | NM_018977    | NP_061850    | Q9NZ94 | NLGN3_HUMAN ical; (Potential).           | 1  | GTGGGGCCTCC   | 0.637 |
| - | 13 | 2236      | nse_Mutation_p.A  | NM_201599    | NP_963893    | Q14202 | ZMYM3_HUMAN MYM-type 9.                  | 1  | GGCAGCCTGAG   | 0.597 |
| + | 10 | 844       | B1BP2_uc004dzs    | NM_012278    | NP_036410    | Q9UKP3 | ITBP2_HUMAN CS.                          | 1  | CTGGGGGGTAA   | 0.493 |
| + | 24 | 3751      | nse_Mutation_p.L  | NM_138923    | NP_620278    | P21675 | TAF1_HUMAN HMG box.                      | 17 | GGCGGCTTAAG,  | 0.468 |
| + | 36 | 5248      | onle.1_RNA TAF1   | NM_138923    | NP_620278    | P21675 | TAF1_HUMAN cidic tail), P1 p.E1733D(1)   | 17 | ATGAAGAAGGA   | 0.473 |
| + | 5  | 753       | n_p.C169Y OGT_    | NM_181672    | NP_858058    | O15294 | OGT1_HUMAN TPR 4.                        | 5  | AGGCATGTTATTT | 0.428 |
| + | 8  | 1232      | n_p.E329K OGT_L   | NM_181672    | NP_858058    | O15294 | OGT1_HUMAN TPR 9.                        | 5  | AACGAGAACAGC  | 0.438 |
| + | 8  | 1294      | RN1_uc011mpt.1_   | NM_052957    | NP_443189    | Q96QF7 | ACRC_HUMAN Asp/Ser-rich.                 | 3  | AAGCTCCCGAC   | 0.557 |
| + | 8  | 1324      | RN1_uc011mpt.1_   | NM_052957    | NP_443189    | Q96QF7 | ACRC_HUMAN Asp/Ser-rich.                 | 3  | AAGCTCCCGAC   | 0.557 |
| + | 8  | 1334_1335 | RN1_uc011mpt.1_   | NM_052957    | NP_443189    | Q96QF7 | ACRC_HUMAN Asp/Ser-rich.                 | 3  | CGACAGCAGTG,  | 0.55  |
| + | 11 | 2151      | RN1_uc011mpt.1_   | NM_052957    | NP_443189    | Q96QF7 | ACRC_HUMAN                               | 3  | AAGATGGTGAA   | 0.443 |
| - | 2  | 121       | XCR3_uc011mpx.    | NM_001504    | NP_001495    | P49682 | CXCR3_HUMAN xellular (Potential).        | 3  | GGAGGGCGGCA   | 0.572 |
| - | 2  | 3222      | C6L_uc004eap.1_   | NM_017669    | NP_060139    | Q2NKX8 | ERC6L_HUMAN                              | 3  | TTTATGCTTGAG  | 0.358 |
| - | 7  | 808       |                   | NM_001007    | NP_000998    | P62701 | RS4X_HUMAN                               | 0  | GGGAAGAGAAA   | 0.502 |
| - | 19 | 2364      | n_Mutation_p.R68  | NM_002637    | NP_002628    | P46020 | KPB1_HUMAN                               | 4  | GGAACCGACT    | 0.517 |
| + | 1  | 1813      |                   | NM_020932    | NP_065983    | Q9HCI5 | MAGE1_HUMAN MAGE 1.                      | 6  | GGCGAGCAGCA   | 0.473 |
| - | 1  | 518       | i_2_intron ATP7A_ | NM_001029891 | NP_001025062 | Q8N0Y7 | PGAM4_HUMAN                              | 0  | ATCTGGGGAACT. | 0.522 |
| + | 2  | 1439      |                   | NM_005296    | NP_005287    | Q99677 | LPAR4_HUMAN lasmic (Potential).          | 3  | GCCTTCCCTTC   | 0.408 |
| + | 2  | 1462      |                   | NM_005296    | NP_005287    | Q99677 | LPAR4_HUMAN lasmic (Potential).          | 3  | AGGAAGTGAGT   | 0.403 |
| - | 8  | 1066      | uc004edu.2_5'UTI  | NM_153252    | NP_694984    | Q6RI45 | BRWD3_HUMAN WD 4.                        | 4  | TGGAAGTAATAC  | 0.383 |
| + | 2  | 582       | Y10nm.2_Missen    | NM_003022    | NP_003013    | O75368 | SH3L1_HUMAN inding (Potential).          | 1  | CACAGTTACCI   | 0.393 |
| - | 5  | 482       | KA6_uc011mqu.1    | NM_014496    | NP_055311    | Q9UK32 | KS6A6_HUMAN otein kinase 1.              | 8  | TTTGACAATAAAT | 0.269 |
| - | 3  | 1253      | _p.A382T HDX_uc   | NM_144657    | NP_653258    | Q7Z353 | HDX_HUMAN                                | 2  | TAGATGCTGTATC | 0.338 |
| - | 6  | 844       | es.2_Missense_M   | NM_024921    | NP_079197    | Q8WVV4 | POF1B_HUMAN                              | 0  | ATCCACTATGGC  | 0.413 |
| + | 6  | 1258      | _p.G196D DACH2    | NM_053281    | NP_444511    | Q96NX9 | DACH2_HUMAN                              | 5  | AGCTGGTACCT   | 0.403 |
| + | 1  | 870       | H2_uc004efu.3_Ir  | NM_013347    | NP_037479    | Q13156 | RFA4_HUMAN                               | 0  | TGCTGGGGATA   | 0.493 |
| - | 6  | 4594      | _p.P925L PCDH1E   | NM_020766    | NP_001098713 | Q8TAB3 | PCD19_HUMAN lasmic (Pote p.P973P(1)      | 7  | TCCGGGGCATC   | 0.488 |
| - | 6  | 751       | _Mutation_p.T182  | NM_007052    | NP_008983    | Q9Y5S8 | NOX1_HUMAN tial), Ferric oxidoreductase. | 1  | GCTATTGTCATG  | 0.433 |
| + | 19 | 2236      | rg.1_Missense_M   | NM_006733    | NP_006724    | Q92674 | CENPI_HUMAN                              | 1  | CCAAACCCCTTC  | 0.358 |
| + | 22 | 2885      | h.1_Missense_M    | NM_001939    | NP_001930    | Q13474 | DRP2_HUMAN                               | 2  | CGAGGCCCGTA   | 0.607 |
| - | 8  | 796       | _p.E176K TAF7L_L  | NM_024885    | NP_079161    | Q5H9L4 | TAF7L_HUMAN                              | 1  | ATTTTCCACGTC  | 0.448 |
| - | 15 | 1655      | TK_uc010nm.2_I    | NM_000061    | NP_000052    | Q06187 | BTK_HUMAN rotein kinase.                 | 6  | CATCTCCCTCA   | 0.542 |
| - | 3  | 1475      | _p.P374S ARMCX2   | NM_177949    | NP_808818    | Q7L311 | ARMX2_HUMAN                              | 6  | AAAGGGGCGCT   | 0.542 |
| - | 3  | 626       | _p.D91N ARMCX2    | NM_177949    | NP_808818    | Q7L311 | ARMX2_HUMAN Ala-rich.                    | 6  | TGTGTCCAGAG   | 0.627 |
| - | 2  | 4741      | in.2_Missense_M   | NM_032441    | NP_115817    | Q5H9K5 | ZMAT1_HUMAN                              | 1  | CCTTGACTCTATC | 0.383 |
| + | 6  | 1618      | ejh.2_Missense_M  | NM_022838    | NP_073749    | Q6P1M9 | ARMX5_HUMAN                              | 1  | AGAAGGAAACT   | 0.473 |
| + | 6  | 2007      | ejh.2_Missense_M  | NM_022838    | NP_073749    | Q6P1M9 | ARMX5_HUMAN                              | 1  | GTATGGTGGATC  | 0.378 |
| + | 5  | 3376      | _p.G859R GPRASP   | NM_014710    | NP_055525    | Q5JY77 | GASP1_HUMAN Glu-rich.                    | 2  | TGGCAGGAGTC   | 0.532 |
| + | 4  | 1447      | P2_uc004ejm.2_I   | NM_138437    | NP_612446    | Q96D09 | GASP2_HUMAN                              | 1  | CAGACCCAAGG   | 0.572 |
| + | 4  | 1640      | mrt.1_Missense_M  | NM_001142526 | NP_001135998 | Q6PI77 | BHLH9_HUMAN                              | 2  | CATTTGCCCAAC  | 0.363 |
| + | 4  | 2036      | mrt.1_Missense_M  | NM_001142526 | NP_001135998 | Q6PI77 | BHLH9_HUMAN                              | 2  | TGGCAGCATTAC  | 0.353 |
| - | 3  | 794       |                   | NM_001012979 | NP_001012997 | Q5H9L2 | TCAL5_HUMAN                              | 2  | AAAACCACCCA   | 0.517 |
| - | 5  | 989       | ou.2_Missense_M   | NM_001024452 | NP_001019623 | Q5JXX5 | GLRA4_HUMAN xellular (Potential).        | 0  | CTCAAGCTGCA   | 0.303 |
| - | 2  | 212       |                   | NM_001012755 | NP_001012773 | Q5H9E4 | MCAR6_HUMAN                              | 0  | AAGCTCCTCCC   | 0.517 |
| + | 4  | 960       | mg.1_Missense_I   | NM_152423    | NP_689636    | Q5H9M0 | MUML1_HUMAN                              | 4  | TTTGAGTCAAGC  | 0.438 |
| + | 5  | 842       | nse_Mutation_p.C  | NM_017752    | NP_060222    | Q0IIM8 | TBC8B_HUMAN                              | 4  | CCAAGGAGAGA   | 0.358 |

|   |    |         |                                                    |              |              |        |             |    |               |       |             |
|---|----|---------|----------------------------------------------------|--------------|--------------|--------|-------------|----|---------------|-------|-------------|
| - | 4  | 539     | my.1_Missense_M                                    | NM_018301    | NP_060771    | Q96IZ5 | RBM41_HUMAN | 1  | AAGAGCCTTAAC  | 0.408 |             |
| - | 8  | 790     | iL_uc004enb.2_Sp                                   | NM_017681    | NP_060151    | Q9H1M0 | N62CL_HUMAN | 0  | 3TGGAGCTAAAA  | 0.353 |             |
| - | 3  | 438     | e_Mutation_p.A11                                   | NM_002814    | NP_002805    | O75832 | PSD10_HUMAN | 1  | CGAAGCTGCAT/  | 0.433 |             |
| - | 30 | 2970    | nsn.1_Missense_Iv                                  | NM_001847    | NP_001838    | Q14031 | CO4A6_HUMAN | 8  | 3GACTAGGTATTC | 0.547 |             |
| - | 23 | 1988    | nsn.1_Missense_Iv                                  | NM_001847    | NP_001838    | Q14031 | CO4A6_HUMAN | 8  | ACGGGGTCCAG   | 0.547 |             |
| + | 45 | 4227    | p.G1339E COL4A                                     | NM_033380    | NP_203699    | P29400 | CO4A5_HUMAN | 4  | GAAAGGACCCA/  | 0.473 |             |
| - | 1  | 125     |                                                    | NM_003604    | NP_003595    | O14654 | IRS4_HUMAN  | 10 | GGGTGGTCACC   | 0.637 |             |
| - | 17 | 3383    | Y2F_uc011msq.1_                                    | NM_001522    | NP_001513    | P51841 | GUC2F_HUMAN | 8  | 3CCTCACTCAGA/ | 0.428 |             |
| - | 4  | 675     | ok.2_Missense_M                                    | NM_022977    | NP_075266    | O60488 | ACSL4_HUMAN | 3  | TATGGACTTCCA/ | 0.403 |             |
| + | 3  | 1559    | nsr.1_Missense_Iv                                  | NM_020769    | NP_065820    | Q8NET4 | RGAG1_HUMAN | 4  | 3CATGACCACCT/ | 0.502 |             |
| - | 5  | 668     | i.2_Missense_Mut:                                  | NM_001143981 | NP_001137453 | Q9BU40 | CRDL1_HUMAN | 0  | GTTCACTGGGG/  | 0.473 |             |
| + | 17 | 2124    | 19_splice ALG13_uc011mta.1_Splice_Site_p.R593_spli |              |              | Q9NP73 | ALG13_HUMAN | 1  | ATCTCGGTAAGT/ | 0.368 |             |
| - | 2  | 426     | L1_uc010nqa.2_I                                    | NM_178175    | NP_835469    | Q86W10 | LHPL1_HUMAN | 0  | AGCCAGTAAGG   | 0.557 |             |
| + | 3  | 535     | LS3_uc004eqe.2_I                                   | NM_005032    | NP_005023    | P13797 | PLST_HUMAN  | 2  | 3CATTACCAGGA/ | 0.343 |             |
| + | 3  | 511_512 |                                                    | NM_000686    | NP_000677    | P50052 | AGTR2_HUMAN | 3  | GGGCAACCTATT  | 0.381 |             |
| - | 5  | 732     | 3.P218S KLHL13_I                                   | NM_033495    | NP_277030    | Q9P2N7 | KLH13_HUMAN | 2  | ATGCAGGAAAA/  | 0.438 |             |
| + | 18 | 2924    | nt.1_Nonsense_Iv                                   | NM_019045    | NP_061918    | Q5JSH3 | WDR44_HUMAN | 5  | 3TTCTGGGAAGG  | 0.333 |             |
| + | 8  | 898     | leqq.2_Missense_I                                  | NM_144658    | NP_653259    | Q5JSL3 | DOC11_HUMAN | 3  | AGTTTAGTTCAAC | 0.358 |             |
| + | 12 | 1400    | 3qq.2_Missense_Iv                                  | NM_144658    | NP_653259    | Q5JSL3 | DOC11_HUMAN | 3  | CTTCACCCGAAT/ | 0.473 |             |
| + | 47 | 5344    | qq.2_Missense_Mi                                   | NM_144658    | NP_653259    | Q5JSL3 | DOC11_HUMAN | 3  | CTTTTAGGCACT  | 0.299 |             |
| + | 10 | 2036    | RF3_uc004eqy.2_                                    | NM_001031855 | NP_001027026 | Q496Y0 | LONF3_HUMAN | 2  | CTCATGGGATTA/ | 0.438 |             |
| + | 2  | 330     | 1B4_uc011mtx.1_I                                   | NM_001142447 | NP_001135919 | Q9UN42 | AT1B4_HUMAN | 2  | GCCTGGTGCCA   | 0.343 |             |
| - | 3  | 855     | 4esz.2_Missense_                                   | NM_152692    | NP_689905    | Q96EU7 | C1GLC_HUMAN | 0  | GTGGCCTAGAT/  | 0.373 |             |
| + | 14 | 2425    | 3e_Mutation_p.P71                                  | NM_007325    | NP_015564    | P42263 | GRIA3_HUMAN | 5  | 3GGAGCCATCTG  | 0.453 |             |
| + | 32 | 3959    | ic.2_Missense_Mu                                   | NM_006603    | NP_006594    | Q8N3U4 | STAG2_HUMAN | 5  | AGAGAGAACAG   | 0.338 |             |
| - | 29 | 7299    | i.Y2418C ODZ1_u                                    | NM_014253    | NP_055068    | Q9UKZ4 | TEN1_HUMAN  | 23 | ACTGGGTAGTTA/ | 0.358 |             |
| - | 23 | 4332    | 3.S1429F ODZ1_u                                    | NM_014253    | NP_055068    | Q9UKZ4 | TEN1_HUMAN  | 23 | GAGTGGAGTGA/  | 0.532 |             |
| - | 5  | 974     | p.A304T ODZ1_u                                     | NM_014253    | NP_055068    | Q9UKZ4 | TEN1_HUMAN  | 23 | AAAGGCAGGTC/  | 0.522 |             |
| - | 1  | 1055    |                                                    | NM_001013628 | NP_001013650 | Q5VW00 | DC122_HUMAN | 7  | ACAGGGGCCGC   | 0.617 |             |
| - | 1  | 1084    |                                                    | NM_138289    | NP_612146    | Q8TDG2 | ACTT1_HUMAN | 5  | ATGTCTGCATAA/ | 0.522 | rs141475882 |
| - | 1  | 969     |                                                    | NM_138289    | NP_612146    | Q8TDG2 | ACTT1_HUMAN | 5  | GGGCACCTGGT/  | 0.547 |             |
| - | 19 | 2445    | muk.1_Missense_                                    | NM_003069    | NP_003060    | P28370 | SMCA1_HUMAN | 4  | 3CCGTGGAGCCT  | 0.338 |             |
| - | 2  | 509     | HC9_uc004eux.1_                                    | NM_001008222 | NP_001008223 | Q9Y397 | ZDHC9_HUMAN | 1  | ATGTCCCCAGG/  | 0.512 |             |
| - | 9  | 1613    | e.3_Missense_Mu                                    | NM_001421    | NP_001412    | Q99607 | ELF4_HUMAN  | 1  | CACGGGGGCCA   | 0.592 |             |
| + | 9  | 955     | 3T SLC25A14_uc0                                    | NM_003951    | NP_003942    | O95258 | UCP5_HUMAN  | 1  | GTTTGGCTGGG/  | 0.488 |             |
| + | 6  | 656     |                                                    | NM_016024    | NP_057108    | Q9Y388 | RBMX2_HUMAN | 4  | 3AAAAGGATGAC/ | 0.483 |             |
| - | 8  | 1142    | 3vy.2_Missense_Iv                                  | NM_182314    | NP_872114    | Q16206 | ENOX2_HUMAN | 1  | TGGGGTGGAG    | 0.438 |             |
| - | 6  | 938     | p.P223S IGSF1_u                                    | NM_001555    | NP_001546    | Q8N6C5 | IGSF1_HUMAN | 5  | 3CCAGGATGGG/  | 0.473 |             |
| - | 1  | 358     |                                                    | NM_016521    | NP_057605    | Q5H910 | TFDP3_HUMAN | 1  | 3AGTAGGAATGC/ | 0.557 |             |
| - | 1  | 327     | 27B_uc004eyg.3_                                    | NM_001078172 | NP_001071640 | Q9BWD3 | F127B_HUMAN | 0  | GTAGGGGATCA/  | 0.602 |             |
| - | 1  | 165     | 3eyg.3_Missense_I                                  | NM_001078172 | NP_001071640 | Q9BWD3 | F127B_HUMAN | 0  | 3AAAGGAATCG   | 0.662 |             |
| + | 3  | 1107    |                                                    | NM_001727    | NP_001718    | P32247 | BRS3_HUMAN  | 1  | TTGGCTTTTCAGC | 0.458 |             |
| - | 6  | 1138    | 1_p.P99S ARHG6                                     | NM_004840    | NP_004831    | Q15052 | ARHG6_HUMAN | 0  | 3TTTGGGGAGA/  | 0.318 |             |
| - | 1  | 1168    |                                                    | NM_054021    | NP_473362    | Q96P66 | GP101_HUMAN | 5  | CCTGGGCAGAG/  | 0.527 | rs41310741  |
| - | 1  | 1051    |                                                    | NM_054021    | NP_473362    | Q96P66 | GP101_HUMAN | 5  | GTTCATCTTCACC | 0.527 |             |
| + | 1  | 1218    |                                                    | NM_003413    | NP_003404    | O60481 | ZIC3_HUMAN  | 3  | 3CGGCCTTCT    | 0.642 |             |
| - | 1  | 196     |                                                    | NM_004065    | NP_004056    | P51861 | CDR1_HUMAN  | 0  | 3CCAAGCCATGT/ | 0.428 |             |



|   |    |       |                                                 |              |               |        |              |                                |    |                 |       |
|---|----|-------|-------------------------------------------------|--------------|---------------|--------|--------------|--------------------------------|----|-----------------|-------|
| + | 4  | 3068  | EC1_uc010nsl.1_ε                                | NM_005462    | NP_005453     | O60732 | MAGC1_HUMAN  | MAGE.                          | 4  | AGCAGCCTATC     | 0.473 |
| + | 5  | 781   |                                                 | NM_152578    | NP_689791     | Q8N0W7 | FMR1N_HUMAN  | lasmic (Potential).            | 1  | CGAAAGAGGA      | 0.413 |
| + | 3  | 1362  | :2_Nonsense_Mut                                 | NM_002025    | NP_002016     | P51816 | AFF2_HUMAN   |                                | 5  | ATGGCCAGGAC     | 0.483 |
| + | 13 | 3219  | b.1_Missense_Mut                                | NM_002025    | NP_002016     | P51816 | AFF2_HUMAN   |                                | 5  | CTATTCCTCCTC    | 0.433 |
| - | 9  | 1409  | j.1_Missense_Mut                                | NM_000202    | NP_000193     | P22304 | IDS_HUMAN    |                                | 0  | GAGACACAAGT     | 0.532 |
| + | 5  | 541   | CXorf40A_uc004f                                 | NM_178124    | NP_835225     | Q8TE69 | CX04A_HUMAN  |                                | 0  | CATTGGGGAAA     | 0.468 |
| - | 4  | 581   | f40B_uc011mxs.1                                 | NM_001013845 | NP_001013867  | Q96DE9 | CX04B_HUMAN  |                                | 0  | CCACAGTCTTG     | 0.607 |
| + | 5  | 648   | MGB3_uc004fer.2                                 | NM_005342    | NP_005333     | O15347 | HMGB3_HUMAN  | Glu-rich (acidic).             | 0  | agatgaagaagagga | 0.299 |
| - | 3  | 1574  | ix.2_Missense_M                                 | NM_001103151 | NP_001096621  | Q96PV4 | PNMA5_HUMAN  |                                | 2  | CCTGGGATAC      | 0.617 |
| - | 3  | 266   |                                                 | NM_004988    | NP_004979     | P43355 | MAGA1_HUMAN  |                                | 10 | CTCAAGGGCTT     | 0.632 |
| + | 4  | 469   | r_p.E98K ZNF275_uc011myn.1_Missense_Mutation_p. |              |               | A6NFS0 | A6NFS0_HUMAN |                                | 1  | CCCATAGAACAT    | 0.552 |
| + | 7  | 1001  | 3N_uc004fhq.1_Rf                                | NM_001711    | NP_001702     | P21810 | PGS1_HUMAN   | LRR 9.                         | 2  | TCCTGCCACCA     | 0.607 |
| + | 8  | 1199  | 3N_uc004fhq.1_Rf                                | NM_001711    | NP_001702     | P21810 | PGS1_HUMAN   | LRR 12.                        | 2  | CCGTGCCCTAC     | 0.592 |
| + | 15 | 2624  | ε_Mutation_p.T83                                | NM_001001344 | NP_001001344  | Q16720 | AT2B3_HUMAN  | lasmic (Potential).            | 1  | CTTACCAGCA      | 0.562 |
| + | 20 | 3553  | εnse_Mutation_p.A                               | NM_001001344 | NP_001001344  | Q16720 | AT2B3_HUMAN  | lasmic (Potential).            | 1  | TCATGGCCACG     | 0.592 |
| + | 3  | 917   | hy.3_Missense_Mt                                | NM_001395    | NP_001386     | Q99956 | DUS9_HUMAN   | protein phosphatase.           | 2  | CACCCCAACC      | 0.562 |
| + | 7  | 1798  | p.G224S PLXNB3                                  | NM_005393    | NP_005384     | Q9ULL4 | PLXB3_HUMAN  | cellular (Potential).          | 1  | AGCAGGGCCAG     | 0.677 |
| + | 25 | 4466  | zd.1_Missense_M                                 | NM_005393    | NP_005384     | Q9ULL4 | PLXB3_HUMAN  | lasmic (Potential).            | 1  | CCTGGCGGCC      | 0.642 |
| + | 27 | 4831  | NB3_uc011mzd.1                                  | NM_005393    | NP_005384     | Q9ULL4 | PLXB3_HUMAN  | lasmic (Potential).            | 1  | 3TCAAGGAGAAG    | 0.682 |
| + | 34 | 5702  | 3_uc004fik.2_5'UT                               | NM_005393    | NP_005384     | Q9ULL4 | PLXB3_HUMAN  | lasmic (Potential).            | 1  | GAACTCTGCTT     | 0.647 |
| + | 14 | 1479  | p.E407K SRPK3                                   | NM_014370    | NP_055185     | Q9UPE1 | SRPK3_HUMAN  | rotein kinase.                 | 3  | TAGTGAGCTTC     | 0.667 |
| - | 23 | 3155  | G1016E L1CAM_L                                  | NM_000425    | NP_000416     | P32004 | L1CAM_HUMAN  | III 5. Extracellular (Potentia | 9  | AGATCCCTGGG     | 0.612 |
| - | 22 | 2983  | o.D959N L1CAM_L                                 | NM_000425    | NP_000416     | P32004 | L1CAM_HUMAN  | ential). Fibronectin type-III  | 9  | CTCATCCACTG     | 0.682 |
| - | 11 | 1457  | uo.2_Missense_M                                 | NM_000425    | NP_000416     | P32004 | L1CAM_HUMAN  | potential). lg-like C2-type 5. | 9  | CGAAGGCCTTG     | 0.622 |
| - | 4  | 490   | GAP4_uc004fjl.1                                 | NM_001666    | NP_001657     | P98171 | RHG04_HUMAN  | Potential.                     | 1  | CTGCTCCAGAT     | 0.652 |
| - | 17 | 3433  |                                                 | NM_005334    | NP_005325     | P51610 | HCFC1_HUMAN  |                                | 2  | CTCCACCCAC      | 0.637 |
| - | 9  | 2099  |                                                 | NM_005334    | NP_005325     | P51610 | HCFC1_HUMAN  |                                | 2  | CCATCCGCACT     | 0.597 |
| + | 2  | 640   | 3202-2 MI0014253                                | NM_003492    | NP_003483     | Q14656 | TM187_HUMAN  |                                | 0  | AAGTGGGCTAT     | 0.652 |
| - | 4  | 1480  | jw.2_Missense_Mt                                | NM_004992    | NP_004983     | P51608 | MECP2_HUMAN  |                                | 0  | CTGGGCATCTT     | 0.667 |
| + | 5  | 826   |                                                 | NM_020061    | NP_064445     | P04000 | OPSR_HUMAN   | Cytoplasmic.                   | 0  | AGAAGGAAGTG     | 0.572 |
| + | 13 | 1879  | zm.1_Missense_M                                 | NM_012253    | NP_036385     | P51854 | TKTL1_HUMAN  |                                | 4  | TGTCGGGAGTG     | 0.522 |
| - | 37 | 6142  | .1_Missense_Mut                                 | NM_001110556 | NP_0011104026 | P21333 | FLNA_HUMAN   | Filamin 18.                    | 6  | GCCGACCTTTA     | 0.642 |
| - | 8  | 1330  | iu.1_Missense_Mu                                | NM_001110556 | NP_0011104026 | P21333 | FLNA_HUMAN   | Filamin 1.                     | 6  | GCCAGCAAAGA     | 0.647 |
| + | 3  | 261   | S RPL10_uc004fk                                 | NM_006013    | NP_006004     | P27635 | RL10_HUMAN   |                                | 0  | GCCGAGGTGTC     | 0.537 |
| + | 3  | 330   | √ DNASE1L1_uc0                                  | NM_006013    | NP_006004     | P27635 | RL10_HUMAN   |                                | 0  | TGGGAGACCTC     | 0.607 |
| + | 4  | 1455  |                                                 | NM_017514    | NP_059984     | P51805 | PLXA3_HUMAN  | tracellular (Potential).       | 3  | CTGTGGTCTTC     | 0.662 |
| - | 2  | 412   | nh.1_Missense_Mt                                | NM_020994    | NP_066274     | O75638 | CTAG2_HUMAN  |                                | 1  | CCGCCCTGGT      | 0.642 |
| - | 6  | 659   | nq.1_Missense_Mt                                | NM_002436    | NP_002427     | Q00013 | EM55_HUMAN   | SH3.                           | 3  | TCCCGCCTCCT     | 0.493 |
| - | 13 | 2252  |                                                 | NM_000132    | NP_000123     | P00451 | FA8_HUMAN    | 2. Plastocyanin-like 4.        | 11 | 3TTTCTCCTGAG    | 0.403 |
| - | 3  | 527   | κ.1_Missense_Mut                                | NM_000132    | NP_000123     | P00451 | FA8_HUMAN    | in-like 1. F5/8 type A 1.      | 11 | CAACAGCATGA     | 0.433 |
| - | 3  | 503   | κ.1_Missense_Mut                                | NM_000132    | NP_000123     | P00451 | FA8_HUMAN    | in-like 1. F5/8 type A 1.      | 11 | GGAAGCCATG      | 0.443 |
| + | 2  | 551   | nvl.1_Missense_M                                | NM_005840    | NP_005831     | O43610 | SPY3_HUMAN   |                                | 0  | CTCCAGCCCC      | 0.517 |
| + | 17 | 4502  | n_p.T475 CAMTA                                  | NM_015215    | NP_056030     | Q9Y6Y1 | CMTA1_HUMAN  |                                | 9  | TGCCACCATTAC    | 0.512 |
| - | 2  | 357   |                                                 | NM_001009611 | NP_001009611  | O60810 | PRAM4_HUMAN  |                                | 1  | GGGACGAACCC     | 0.622 |
| - | 78 | 11600 | R4_uc001bbj.1_3'l                               | NM_020765    | NP_065816     | Q5T4S7 | UBR4_HUMAN   |                                | 25 | TGTGTGGCCAC     | 0.592 |
| - | 14 | 2598  | h.1_RNA EPHA10                                  | NM_001099439 | NP_001092909  | Q5JZY3 | EPHAA_HUMAN  | Potential). Protein kinase.    | 8  | CACTCCACA       | 0.612 |
| - | 6  | 701   | H2_uc010olg.1_lr                                | NM_003738    | NP_003729     | Q9Y6C5 | PTC2_HUMAN   | cellular (Potential).          | 18 | CAAGGAGGCA      | 0.637 |

rs76269416

|   |    |      |                    |              |              |        |             |                               |      |                 |       |             |
|---|----|------|--------------------|--------------|--------------|--------|-------------|-------------------------------|------|-----------------|-------|-------------|
| - | 14 | 1740 | rr.1_Missense_Mut  | NM_021080    | NP_066566    | O75553 | DAB1_HUMAN  |                               | 3    | :CACAGTTGGCC,   | 0.652 |             |
| + | 7  | 1151 | va.1_Missense_M    | NM_001144937 | NP_001138409 | Q5VTL7 | FNDC7_HUMAN | nectin type-III 5.            | 2    | 'GGTGTCCAGTG,   | 0.517 |             |
| + | 15 | 1680 | _p.P459L FAM40A    | NM_033088    | NP_149079    | Q5VSL9 | FA40A_HUMAN |                               | 4    | AGATGCCGTGAC    | 0.502 |             |
| - | 14 | 2609 | ENND2C_uc001efr    | NM_198459    | NP_940861    | Q68D51 | DEN2C_HUMAN | DENN.                         | 3    | :GTCCAGGAGCT'   | 0.443 |             |
| - | 12 | 2659 |                    | NM_020205    | NP_064590    | Q6GQQ9 | OTU7B_HUMAN |                               | 3    | GGTAGGGGGGT     | 0.612 |             |
| - | 3  | 4628 | uc001ezv.2_Intron  | NM_001014342 | NP_001014364 | Q5D862 | FILA2_HUMAN |                               | 17   | 'GTGTCCCTGAATC  | 0.502 |             |
| - | 8  | 1539 | sn.2_RNA FCRL3     | NM_052939    | NP_443171    | Q96P31 | FCRL3_HUMAN | 5. Extracellular (Potential). | 4    | 'AAAATCGGTACA'  | 0.587 |             |
| + | 15 | 2581 | sense_Mutation_p   | NM_018240    | NP_060710    | Q96J84 | KIRR1_HUMAN | lasmic (Potential).           | 1    | 'TGACCCCATTCG'  | 0.642 |             |
| + | 2  | 557  | 1C_uc001frv.2_5'F  | NM_001765    | NP_001756    | P29017 | CD1C_HUMAN  | ellular (Pote p.R89C(1)       | 4    | TTATTTTCGTTTCT  | 0.398 | rs145638725 |
| + | 2  | 220  | 3_Mutation_p.G57I  | NM_002348    | NP_002339    | Q9HGB7 | LY9_HUMAN   | Potential). Ig-like V-type 1. | 1    | 'GTCAGGGATCC'   | 0.517 |             |
| + | 18 | 1989 | orf112_uc009wvu.   | NM_018186    | NP_060656    | Q9NSG2 | CA112_HUMAN |                               | 0    | 'ATGCAGGAAATC'  | 0.378 |             |
| - | 1  | 142  | n_p.L21F TNR_ucl   | NM_003285    | NP_003276    | Q92752 | TENR_HUMAN  |                               | 11   | :CAGAAGGATCA'   | 0.552 |             |
| + | 6  | 584  | _p.V42A FAM163f    | NM_173509    | NP_775780    | Q96GL9 | F163A_HUMAN |                               | 1    | :CGAGGTTGCAG    | 0.632 |             |
| - | 1  | 303  | gpk.2_Missense_f   | NM_021133    | NP_066956    | Q05823 | RN5A_HUMAN  | ANK 1.                        | 5    | :ACCTTCCAGCA    | 0.502 |             |
| - | 4  | 1533 | ense_Mutation_p.C  | NM_018713    | NP_061183    | Q6XR72 | ZNT10_HUMAN | lasmic (Potential).           | 0    | 'TCACTTCCGTATC' | 0.532 |             |
| - | 4  | 1462 | 695_uc009xgt.1_li  | NM_020394    | NP_065127    | Q8IW36 | ZN695_HUMAN | :2H2-type 11.                 | 0    | ACATTCATCACAT'  | 0.368 |             |
| - | 18 | 2171 | p.P732L PRKCQ_     | NM_006257    | NP_006248    | Q04759 | KPCT_HUMAN  | kinase C-terminal.            | 6    | 'TCCCAGGGGTTTC  | 0.498 |             |
| + | 3  | 992  | DC2_uc001iqh.1_J   | NM_032812    | NP_116201    | Q6UX71 | PXDC2_HUMAN | ellular (Potential).          | 4    | ATATCTCGAATAT,  | 0.333 |             |
| + | 11 | 1796 | e_Mutation_p.E33   | NM_032812    | NP_116201    | Q6UX71 | PXDC2_HUMAN | ar (Potential). Thr-rich.     | 4    | :CAGTGAAACT     | 0.423 |             |
| - | 16 | 2001 | BL_uc001iqk.2_Int  | NM_006393    | NP_006384    | O76041 | NEBL_HUMAN  | Nebulin 15.                   | 2    | TGCATTCTTTTC'   | 0.368 |             |
| + | 7  | 1156 |                    | NM_052997    | NP_443723    | Q9BXX3 | AN30A_HUMAN |                               | 9    | CGTGGGCAGCA'    | 0.408 |             |
| - | 7  | 1429 | GMS1_uc009xou.'    | NM_147156    | NP_671512    | Q86VZ5 | SMS1_HUMAN  |                               | 2    | 3TACTCGTTCGT'   | 0.483 |             |
| + | 5  | 1284 |                    | NM_000314    | NP_000305    | P60484 | PTEN_HUMAN  | atase tensio.Y27fs*1(2) p.'   | 2334 | GCAGAGGTAGG'    | 0.318 |             |
| + | 1  | 41   |                    | NM_001102469 | NP_001095939 | Q5VX19 | LIPN_HUMAN  |                               | 0    | 'CTGTGGAACCTT'  | 0.333 |             |
| - | 13 | 1831 | 9ycc.2_Missense_   | NM_021924    | NP_068743    | Q9HBB8 | CDHR5_HUMAN | tem repeats. 2. Extracellule  | 0    | 'TCTGTGCTCTGT'  | 0.667 | rs139058512 |
| + | 9  | 1050 |                    | NM_001003678 | NP_001003678 | Q9H6J7 | CK049_HUMAN |                               | 0    | :GGTACCGACGC    | 0.632 |             |
| + | 3  | 738  |                    | NM_004268    | NP_004259    | Q9NVC6 | MED17_HUMAN |                               | 1    | :TTGCTGGAGCA'   | 0.373 |             |
| - | 1  | 650  |                    | NM_001002917 | NP_001002917 | Q8WZ84 | OR8D1_HUMAN | Name=5; (Potential).          | 3    | 3CATAGGAGACA'   | 0.512 |             |
| - | 2  | 940  |                    | NM_004054    | NP_004045    | Q16581 | C3AR_HUMAN  | ellular (Potential).          | 1    | 'TATCCAGTGGG'   | 0.423 |             |
| - | 3  | 252  |                    | NM_006248    | NP_006239    |        |             |                               | 0    | AGGAGGTGGGG     | 0.607 |             |
| - | 4  | 364  | _p.R75Q RERG_u     | NM_032918    | NP_116307    | Q96A58 | RERG_HUMAN  |                               | 1    | :CCCATCGCATG'   | 0.463 |             |
| - | 4  | 1278 | p.R388Q PKP2_uc    | NM_004572    | NP_004563    | Q99959 | PKP2_HUMAN  | ARM 2.                        | 2    | :TCTTCCGAGCT'   | 0.448 |             |
| - | 6  | 1015 | 3.R290K KIF21A_u   | NM_017641    | NP_060111    | Q7Z4S6 | KI21A_HUMAN | inesin-motor.                 | 7    | TTGCCCTCTCGC'   | 0.403 |             |
| - | 6  | 1081 |                    | NM_002282    | NP_002273    | P78385 | KRT83_HUMAN | Rod. Coil 2.                  | 1    | CACCTCGGCTG'    | 0.597 |             |
| - | 9  | 1338 | sense_Mutation_p.  | NM_032496    | NP_115885    | Q9BRR9 | RHG09_HUMAN |                               | 1    | .GAGGTCGAGGG    | 0.617 |             |
| + | 10 | 2635 | ito.2_Missense_Mi  | NM_018448    | NP_060918    | Q86VP6 | CAND1_HUMAN | HEAT 17.                      | 2    | 3TGGATCCATTCT   | 0.428 |             |
| - | 2  | 611  | di.2_Missense_Mi   | NM_020698    | NP_065749    | Q9ULS5 | TMCC3_HUMAN |                               | 2    | 'AGAGCGATGTA'   | 0.498 |             |
| + | 4  | 420  | ion_p.V122I ACTR   | NM_022496    | NP_071941    | Q9GZN1 | ARP6_HUMAN  |                               | 1    | :AAGCAGTATTAA   | 0.279 |             |
| - | 9  | 2757 | 1uia.2_Missense_   | NM_133448    | NP_597705    | Q14C87 | T132D_HUMAN | ellular (Potential).          | 14   | 3TGTGTCTGCTG'   | 0.498 |             |
| + | 1  | 1360 | I_5'Flank uc001uif | NM_007197    | NP_009128    | Q9ULW2 | FZD10_HUMAN | ellular (Potential).          | 5    | .TCCAGGAGGGA'   | 0.647 |             |
| + | 7  | 703  | iUGT1_uc010thb.1   | NM_001130912 | NP_001124384 | Q9Y2Z0 | SUGT1_HUMAN |                               | 0    | 3AATGGTATGTG'   | 0.308 |             |
| - | 1  | 359  | i4P_uc001vwb.3_F   | NM_001145442 | NP_001138914 | A6NI47 | POTEM_HUMAN |                               | 0    | .GTGGCAGCACC    | 0.632 |             |
| + | 1  | 193  |                    | NM_001001912 | NP_001001912 | Q8NGC2 | OR4E2_HUMAN | Name=2; (Potential).          | 4    | :TGAGCAATCTG'   | 0.423 |             |
| + | 28 | 4473 | /bs.1_Missense_M   | NM_020818    | NP_065869    | Q9P2D8 | UNC79_HUMAN |                               | 17   | 3GGCCTGAAAAA    | 0.473 |             |
| + | 4  | 595  | L_uc001ygu.2_Mi    | NM_016337    | NP_057421    | Q9UI08 | EVL_HUMAN   |                               | 3    | :AGGCCCTCCA'    | 0.592 |             |
| - | 7  | 3074 | ypx.2_Missense_N   | NM_138420    | NP_612429    | Q8IVF2 | AHNK2_HUMAN |                               | 1    | :CCAGGACAGG     | 0.612 |             |
| + | 1  | 566  | :727924_uc001yut   | NM_001004719 | NP_001004719 | Q8NGB6 | OR4M2_HUMAN | ellular (Potential).          | 1    | 'TGCCGTGCCA,    | 0.468 |             |

|   |    |       |                    |              |              |        |             |                                |    |                   |       |             |
|---|----|-------|--------------------|--------------|--------------|--------|-------------|--------------------------------|----|-------------------|-------|-------------|
| - | 19 | 2629  | un.2_Missense_M    | NM_014080    | NP_054799    | Q9NRD8 | DUOX2_HUMAN | lasmic (Potential).            | 5  | ACTCGGCCCTG       | 0.632 |             |
| - | 6  | 834   |                    | NM_003613    | NP_003604    | O75339 | CILP1_HUMAN |                                | 7  | ATGCAGGCATCA      | 0.582 |             |
| + | 2  | 828   | ε_Mutation_p.A17C  | NM_015492    | NP_056307    | Q6ZRI6 | CO039_HUMAN |                                | 0  | CTCAGCTGAC        | 0.622 |             |
| + | 3  | 312   | βbmt.1_Missense_   | NM_207517    | NP_997400    | P82987 | ATL3_HUMAN  |                                | 27 | AAATCTCCTGGA      | 0.478 |             |
| + | 21 | 3132  | p.H970Y ADAMTS     | NM_207517    | NP_997400    | P82987 | ATL3_HUMAN  | like C2-type 1.                | 27 | AAATCCATGGTC      | 0.542 |             |
| - | 4  | 1434  | p.V279M RGMA_u     | NM_020211    | NP_064596    | Q96B86 | RGMA_HUMAN  |                                | 0  | GTTCACGTCGC       | 0.582 |             |
| + | 1  | 705   |                    | NM_012360    | NP_036492    | O43749 | OR1F1_HUMAN | lasmic (Potential).            | 0  | AGGTGAAAAGC       | 0.517 |             |
| + | 5  | 1068  | yv.1_Missense_Mt   | NM_018723    | NP_061193    | Q9NWB1 | RFOX1_HUMAN |                                | 0  | CGTTTCGGCCC       | 0.607 |             |
| + | 3  | 937   | Igb.3_Missense_M   | NM_001105248 | NP_001098718 | Q6UXY8 | TMC5_HUMAN  | cellular (Potential).          | 1  | ACGTCCAGACT       | 0.483 |             |
| - | 4  | 869   | utation_p.P140L    | NM_201575    | NP_963869    | Q6UXD5 | SE6L2_HUMAN | tracellular (Potential).       | 2  | AGCCAGGGTAG       | 0.592 |             |
| - | 4  | 541   | εiz.2_Nonsense_β   | NM_007006    | NP_008937    | O43809 | CPSF5_HUMAN | with PAPOLA and PABPN1         | 0  | ATCCTGACGAC       | 0.403 |             |
| + | 3  | 278   | RG4_uc010vig.1_    | NM_022910    | NP_075061    | Q9ULP0 | NDRG4_HUMAN |                                | 1  | ATGCAGGAGATC      | 0.567 |             |
| - | 7  | 1120  | εp.1_Missense_Mt   | NM_012091    | NP_036223    | Q9BUB4 | ADAT1_HUMAN | to l editase.                  | 2  | CATGGCTTCTC       | 0.378 |             |
| + | 1  | 266   |                    | NM_020927    | NP_065978    | Q9HCJ6 | VAT1L_HUMAN |                                | 1  | AGCTGCGGCTC       | 0.687 |             |
| - | 7  | 1203  | Igj.2_Missense_Mt  | NM_052892    | NP_443124    | Q7Z442 | PK1L2_HUMAN | cellular (Potential).          | 3  | GAGCCCTTTTG       | 0.522 |             |
| + | 2  | 103   | ι.2_intron KIAA01E | NM_014615    | NP_055430    | Q14687 | GSE1_HUMAN  |                                | 5  | CAAGTCCCCTT       | 0.662 |             |
| - | 9  | 1179  | cjf.2_intron PRDM  | NM_001098173 | NP_001091643 | Q9NQW5 | PRDM7_HUMAN |                                | 1  | CCCCATACCAG       | 0.522 |             |
| - | 9  | 1090  | cjf.2_intron PRDM  | NM_001098173 | NP_001091643 | Q9NQW5 | PRDM7_HUMAN | SET.                           | 1  | CCCCAGACCAG       | 0.532 |             |
| + | 56 | 8725  | ι2_uc010cnm.1_5    | NM_020877    | NP_065928    | Q9P225 | DYH2_HUMAN  | 4 (By similarity).             | 13 | GATCCGCCAGT       | 0.557 | rs2309808   |
| - | 19 | 2837  | 2_5'Flank PER1_u   | NM_002616    | NP_002607    | O15534 | PER1_HUMAN  | Pro-rich.                      | 9  | CCAGGGGGTGG       | 0.677 |             |
| - | 21 | 2453  | uc002gml.1_intron  | NM_017533    | NP_060003    | Q9Y623 | MYH4_HUMAN  | osin head-like.                | 13 | GCATCTCGCATTT     | 0.433 |             |
| + | 6  | 859   | hhr.2_Missense_IV  | NM_015544    | NP_056359    | Q9Y2Y6 | TMM98_HUMAN |                                | 0  | CAAGCGGATCA       | 0.587 | rs147119833 |
| - | 1  | 110   |                    | NM_033185    | NP_149441    | Q9BYR6 | KRA33_HUMAN | repeats of C-C-X(3).           | 0  | GGCAGGATTTG       | 0.587 |             |
| - | 1  | 107   |                    | NM_031959    | NP_114165    | Q9BYR7 | KRA32_HUMAN | repeats of C-C-X(3).           | 0  | GGCAGGATTTG       | 0.602 |             |
| - | 1  | 225   |                    | NM_032524    | NP_115913    | Q9BYR3 | KRA44_HUMAN | f C-C-[GRQVCH]-[SPT]- [V       | 0  | TGGGGTGGCAG       | 0.662 |             |
| + | 1  | 1312  |                    | NM_001466    | NP_001457    | Q14332 | FZD2_HUMAN  | cellular (Potential).          | 3  | AGATCGACGGC       | 0.667 |             |
| + | 2  | 356   | Q_uc002ird.2_Miss  | NM_022827    | NP_073738    | Q8TB22 | SPT20_HUMAN |                                | 0  | ACCATACCTCC       | 0.612 |             |
| + | 1  | 526   | uc010wna.1_RNA     | NM_032559    | NP_115948    | Q8N4N8 | KIF2B_HUMAN |                                | 8  | AAAACCAAACA       | 0.592 |             |
| + | 2  | 523   | ac.2_Missense_Mt   | NM_006039    | NP_006030    | Q9UBG0 | MRC2_HUMAN  | otential). Ricin B-type lectin | 3  | CAGAACCCACA       | 0.557 |             |
| - | 1  | 476   | issense_Mutation_  | NM_001039360 | NP_001034449 | A1YPRO | ZBT7C_HUMAN | i-rich. Asp-rich.              | 1  | cctctctctgctctctc | 0.284 |             |
| - | 8  | 1143  | p.E332K SERPINI    | NM_002974    | NP_002965    | P48594 | SPB4_HUMAN  |                                | 3  | ATAATTCGACTAC     | 0.463 |             |
| + | 4  | 876   | ωq.2_Missense_Mt   | NM_024967    | NP_079243    | Q9HAH1 | ZN556_HUMAN | 2H2-type 5.                    | 3  | AAGCACTGTGG       | 0.537 |             |
| + | 5  | 841   | e_Mutation_p.E13   | NM_016496    | NP_057580    | Q9P0N8 | MARH2_HUMAN |                                | 2  | GGACGGAGAAG       | 0.662 |             |
| - | 3  | 15707 |                    | NM_024690    | NP_078966    | Q8WXI7 | MUC16_HUMAN | tracellular (Potential).       | 57 | GCATTGATGTG       | 0.493 |             |
| - | 3  | 10927 |                    | NM_024690    | NP_078966    | Q8WXI7 | MUC16_HUMAN | tracellular (Potential).       | 57 | AGAAGTTGTGCC      | 0.517 |             |
| - | 5  | 600   |                    | NM_001080404 | NP_001073873 | C9JN71 | ZN878_HUMAN | 2H2-type 2.                    | 0  | GGAAACCTGAA       | 0.423 |             |
| - | 4  | 1916  | 799_uc002mts.3_I   | NM_001080821 | NP_001074290 | Q9GGE5 | ZN799_HUMAN | 2H2-type 17.                   | 6  | TTACATTCATACG     | 0.413 |             |
| - | 13 | 1897  | O8_uc010eap.2_F    | NM_020959    | NP_066010    | Q9HCE9 | ANO8_HUMAN  | ch. Cytoplasmic (Potential).   | 3  | ITGCCCCCTGG       | 0.134 |             |
| + | 4  | 1280  |                    | NM_031218    | NP_112495    | P35789 | ZNF93_HUMAN | 2H2-type 9.                    | 1  | GAGAGTTCATAC      | 0.393 |             |
| - | 4  | 827   | pc.1_Missense_M    | NM_001076675 | NP_001070143 | Q68DY1 | ZN626_HUMAN |                                | 1  | 3GTTTCTCTCCA      | 0.393 |             |
| + | 4  | 983   | ecy.2_Missense_IV  | NM_033468    | NP_258429    | Q9Y2Q1 | ZN257_HUMAN | 2H2-type 4.                    | 0  | TCACACATTACTC     | 0.393 |             |
| - | 4  | 1567  |                    | NM_138330    | NP_612203    | Q8TD23 | ZN675_HUMAN | 2H2-type 12.                   | 2  | GATTGGATAAAA      | 0.368 |             |
| + | 3  | 442   | ι_p.E37G ZNF540    | NM_152606    | NP_689819    | Q8NDQ6 | ZN540_HUMAN | KRAB.                          | 1  | TGTTGGAGAATT      | 0.418 |             |
| + | 44 | 7172  | ι_Mutation_p.E234  | NM_000540    | NP_000531    | P21817 | RYR1_HUMAN  | 6 X approximate repeats.       | 12 | ITGGAGGAGAAC      | 0.672 |             |
| - | 6  | 2022  | ense_Mutation_p.κ  | NM_001010880 | NP_001010880 | O75290 | Z780A_HUMAN | 2H2-type 16.                   | 0  | AATAAGTTGCAT      | 0.403 |             |
| - | 6  | 1350  | wb.2_Nonsense_IV   | NM_002780    | NP_002771    | Q00888 | PSG4_HUMAN  |                                | 1  | ggtaatatccagcttac | 0     |             |
| + | 8  | 1151  |                    | NM_005178    | NP_005169    | P20749 | BCL3_HUMAN  | ANK 7.                         | 2  | GGGGGAAGGCC       | 0.642 |             |

|   |     |                         |                     |              |              |             |                               |     |               |       |             |
|---|-----|-------------------------|---------------------|--------------|--------------|-------------|-------------------------------|-----|---------------|-------|-------------|
| - | 1   | 1961                    |                     | NM_032040    | NP_114429    | Q9H0W5      | CCDC8_HUMAN                   | 3   | GGCCTCTGCC    | 0.607 |             |
| - | 8   | 1014                    | H2_uc002prv.3_lr    | NR_002798    |              |             |                               | 1   | GTAATCCTGGG   | 0.537 |             |
| + | 7   | 1007                    | se_Mutation_p.S2    | NM_007121    | NP_009052    | P55055      | NR1H2_HUMAN                   | 0   | CTTCTCCGACC   | 0.607 |             |
| - | 5   | 1005                    | i77_uc010ydf.1_5'   | NM_023074    | NP_075562    | Q9BS31      | ZN649_HUMAN                   | 3   | CTGTACCTCTTG  | 0.502 |             |
| - | 4   | 495                     | 'qeo.1_Missense_I   | NM_024318    | NP_077294    | Q6PI73      | LIRA6_HUMAN                   | 2   | GGGTGGGTTTG   | 0.577 |             |
| + | 7   | 1351                    | p.A388V[LILRA1_     | NM_006863    | NP_006854    | O75019      | LIRA1_HUMAN                   | 3   | CTCAGCCCACT   | 0.587 |             |
| - | 4   | 628                     | se_Mutation_p.L7    | NM_001145971 | NP_001139443 | Q8NBN7      | RDH13_HUMAN                   | 3   | GCACCCAGGTGC  | 0.418 |             |
| - | 6   | 337                     | ft.1_Missense_Mu    | NM_000363    | NP_000354    | P19429      | TNNI3_HUMAN                   | 2   | CTATGTCGTATC  | 0.567 | rs35173650  |
| - | 4   | 2485                    | F3C_uc010ykr.1_     | NM_002254    | NP_002245    | O14782      | KIF3C_HUMAN                   | 4   | CGCGGATATACT  | 0.632 |             |
| + | 1   | 5089                    | 1_5'Flank ZNF512    | NM_032266    | NP_115642    | Q68DN1      | CB016_HUMAN                   | 1   | ATCGCGGTCCC   | 0.572 | rs112465116 |
| - | 6   | 2475                    | rx.3_Missense_Iv    | NM_001135659 | NP_001129131 | P58400      | NRX1B_HUMAN                   | 2   | GAATGGGGTTT   | 0.378 |             |
| + | 1   | 170                     | LR1A_uc002sqv.2     | NM_017952    | NP_060422    | Q96EY7      | PTCD3_HUMAN                   | 1   | CTGCAGGTAAG   | 0.602 |             |
| - | 5   | 847                     | AT4A_uc010fil.2_5   | NM_012214    | NP_036346    | Q9UM21      | MGT4A_HUMAN                   | 1   | CCTCTCCTATGA  | 0.294 |             |
| + | 13  | 2579                    | 2_Missense_Mutat    | NM_012455    | NP_036587    | Q8NDX1      | PSD4_HUMAN                    | 2   | ATGGGGCAAGC   | 0.547 |             |
| - | 3   | 707                     |                     | NM_001099771 | NP_001093241 | A5A3E0      | POTEF_HUMAN                   | 5   | GTGGCAGCACC   | 0.617 |             |
| - | 67  | 11390                   |                     | NM_018557    | NP_061027    | Q9NZR2      | LRP1B_HUMAN                   | 50  | GTCTTTTTATCTC | 0.408 |             |
| - | 2   | 496                     | lfof.2_Missense_M   | NM_145259    | NP_660302    | Q8NER5      | ACV1C_HUMAN                   | 7   | GCATTCGGTTT   | 0.403 |             |
| - | 7   | 1190                    | p.E278K BAZ2B_      | NM_013450    | NP_038478    | Q9UIF8      | BAZ2B_HUMAN                   | 4   | TTTTCTCAATACT | 0.313 |             |
| - | 26  | 5722                    |                     | NM_006920    | NP_008851    | P35498      | SCN1A_HUMAN                   | 13  | CTTGTTTTCGTT  | 0.408 |             |
| - | 275 | 66166                   | 676L TTN_uc010z     | NM_133378    | NP_596869    | Q8WZ42      | TITIN_HUMAN                   | 153 | ATTTTTGAACCTC | 0.453 |             |
| - | 225 | 45513                   | _uc010zfi.1_Misse   | NM_133378    | NP_596869    | Q8WZ42      | TITIN_HUMAN                   | 153 | TGTTTCAGCCA   | 0.423 |             |
| - | 200 | 39450                   | .1_Missense_Muta    | NM_133378    | NP_596869    | Q8WZ42      | TITIN_HUMAN                   | 153 | CTTTTCCATGTT  | 0.363 |             |
| - | 38  | 9351                    | .G2997R TTN_uc0     | NM_133378    | NP_596869    | Q8WZ42      | TITIN_HUMAN                   | 153 | TTTTCCAGCCA   | 0.388 |             |
| - | 15  | 1255                    | lfrx.2_Missense_M   | NM_000393    | NP_000384    | P05997      | CO5A2_HUMAN                   | 2   | TGACCAGTGC    | 0.373 |             |
| + | 1   | 353                     |                     | NM_003507    | NP_003498    | O75084      | FZD7_HUMAN                    | 4   | CCGAACTCCGC   | 0.637 |             |
| + | 2   | 230                     | _Mutation_p.S27N    | NM_015934    | NP_057018    | Q9Y2X3      | NOP58_HUMAN                   | 0   | TGATAGTTTATC  | 0.289 |             |
| + | 3   | 1073                    |                     | NM_025216    | NP_079492    | Q9GZT5      | WN10A_HUMAN                   | 2   | GCCCAGGCCTG   | 0.652 |             |
| + | 3   | 798                     |                     | NM_001927    | NP_001918    | P17661      | DESM_HUMAN                    | 2   | ATCGCGTTCCTT  | 0.562 |             |
| + | 4   | 539                     | mp.1_Missense_M     | NM_001017915 | NP_001017915 | Q92835      | SHIP1_HUMAN                   | 2   | CCCAAGAAACA   | 0.607 |             |
| + | 4   | 625                     |                     | NM_003245    | NP_003236    | Q08188      | TGM3_HUMAN                    | 9   | GGCTGGAACCTT  | 0.493 |             |
| + | 32  | 4146                    |                     | NM_020884    | NP_065935    | A7E2Y1      | MYH7B_HUMAN                   | 2   | TGAGCCGTGGA   | 0.637 |             |
| + | 13  | 3355                    | 02xfh.2_Missense    | NM_014902    | NP_055717    | Q9Y2H0      | DLGP4_HUMAN                   | 3   | CCGAGAGCGCA   | 0.567 |             |
| - | 2   | 1860                    | us.1_Missense_Mi    | NM_004975    | NP_004966    | Q14721      | KCNB1_HUMAN                   | 2   | GCTGGGATAC    | 0.502 |             |
| + | 10  | 1244                    | p.A325T RTEL1_      | NM_016434    | NP_057518    | Q9NZ71      | RTEL1_HUMAN                   | 0   | TCAGCGCGGAC   | 0.662 | rs144255879 |
| + | 9   | 2006                    | 31_uc002zgv.2_Rf    | NM_015833    | NP_056648    | P78563      | RED1_HUMAN                    | 1   | CAAAATAGAGT   | 0.517 |             |
| - | 17  | 1594                    | <NRD2_uc002zqp.     | NM_006440    | NP_006431    | Q9NNW7      | TRXR2_HUMAN                   | 2   | GCAGCCTGTCA   | 0.672 |             |
| + | 17  | 3621                    |                     | NM_001429    | NP_001420    | Q09472      | EP300_HUMAN                   | 64  | CCTTTCGTCAAC  | 0.348 |             |
| - | 8   | 1132                    | i.1_Splice_Site_p.I | NM_001145137 | NP_001138609 | Q92523      | CPT1B_HUMAN                   | 2   | CAGTTACCTGTG  | 0.607 |             |
| + | 2   | 245                     | HUMPD3_uc003k       | NM_001114092 | NP_001107564 | Q9BV44      | THUM3_HUMAN                   | 1   | GAAAGTGAATCT  | 0.443 |             |
| + | 3   | 355                     |                     | NM_001570    | NP_001561    | O43187      | IRAK2_HUMAN                   | 8   | TCAGGGAACCC   | 0.328 |             |
| - | 2   | 149                     | auj.1_Intron GHRL   | NM_016362    | NP_057446    | Q9UBU3      | GHRL_HUMAN                    | 1   | CGGTCCCTGGG   | 0.647 |             |
| + | 6   | 557                     | P21_uc011axy.1_     | NM_016300    | NP_057384    | Q9UBL0      | ARP21_HUMAN                   | 3   | TTTTTCCAGCC   | 0.358 |             |
| - | 8   | 973                     |                     | NM_003335    | NP_003326    | P41226      | UBA7_HUMAN                    | 2   | TGTGTCCAGGG   | 0.602 |             |
| - | 8   | 2984                    |                     | NM_198859    | NP_942559    | Q7Z3G6      | PRIC2_HUMAN                   | 5   | CAGGCGCGCTG   | 0.557 |             |
| - | 34  | 5269                    | p.K1718 ADAMT       | NM_182920    | NP_891550    | Q9P2N4      | ATS9_HUMAN                    | 4   | GCACCTTAAGT   | 0.383 |             |
| + | 4   | 1017_1018_p.G140K CADM2 | NM_153184           | NP_694854    | Q8N3J6       | CADM2_HUMAN | 1. Extracellular (Potential). | 4   | TTAGTGGATTCT  | 0.381 |             |
| + | 14  | 1659                    | EK11_uc010htn.2_    | NM_024800    | NP_079076    | Q8NG66      | NEK11_HUMAN                   | 6   | CCTATTCCTTCC  | 0.428 |             |

|   |    |         |                    |              |              |        |             |                               |       |               |       |             |
|---|----|---------|--------------------|--------------|--------------|--------|-------------|-------------------------------|-------|---------------|-------|-------------|
| - | 5  | 5231    | I_5'Flank IGSF10_  | NM_178822    | NP_849144    | Q6WRI0 | IGS10_HUMAN |                               | 13    | :TGGGAGGATAG  | 0.517 |             |
| - | 11 | 1412    | p.G298E UBXN7_     | NM_015562    | NP_056377    | O94888 | UBXN7_HUMAN | UBX.                          | 3     | :GGTATCCTTTAC | 0.383 |             |
| - | 3  | 324     | .X1_uc003gbj.2_in  | NM_006651    | NP_006642    | O14810 | CPLX1_HUMAN | Potential.                    | 0     | :CTCCTCCGCCT  | 0.612 |             |
| + | 1  | 223     |                    | NM_152679    | NP_689892    | Q96EP9 | NTCP4_HUMAN | cellular (Potential).         | 1     | :CCATGGACGGC  | 0.627 |             |
| + | 6  | 720     | LB_uc003hgu.3_IV   | NM_000477    | NP_000468    | P02768 | ALBU_HUMAN  | Albumin 2.                    | 6     | :AGGCTTCGTCTG | 0.373 |             |
| + | 6  | 774     | p.P241L AIMP1_u    | NM_001142415 | NP_001135887 | Q12904 | AIMP1_HUMAN | RNA-binding.                  | 0     | GGCTCCTCCAA   | 0.378 |             |
| - | 19 | 5144    |                    | NM_017639    | NP_060109    | Q6V1P9 | PCD23_HUMAN | Cadherin 15.                  | 4     | :TGTCTCGAATTC | 0.333 |             |
| + | 22 | 3587    |                    | NM_139056    | NP_620687    | Q8TE57 | ATS16_HUMAN | SP type-1 6.                  | 8     | :GAGGTCCGTGC  | 0.657 |             |
| + | 11 | 2152    |                    | NM_020227    | NP_064612    | Q9NQV7 | PRDM9_HUMAN | 2H2-type 6.                   | 6     | GAGGAGACACA   | 0.607 | rs112679149 |
| - | 4  | 1452    | p.H368Y ANKRD:     | NM_001004441 | NP_001004441 | A5PLL1 | AN34B_HUMAN |                               | 1     | GTAGTGATTTGC  | 0.448 |             |
| + | 7  | 1504    | xxu.1_Missense_M   | NM_021982    | NP_068817    | O95486 | SC24A_HUMAN |                               | 0     | :AACTTCCTTTGC | 0.299 |             |
| + | 1  | 2119    |                    | NM_018940    | NP_061763    | Q9Y5E2 | PCDB7_HUMAN | Extracellular (Potential).    | 6     | :ATGGCGAGCCT  | 0.716 |             |
| + | 1  | 2963    | HB9_uc003liw.1_5'  | NM_020957    | NP_066008    | Q9NRJ7 | PCDBG_HUMAN | Extracellular (Potential).    | 2     | :GCTGTCTGACC  | 0.721 |             |
| - | 8  | 1103    | b.1_Missense_Mu    | NM_000129    | NP_000120    | P00488 | F13A_HUMAN  |                               | 6     | :AGGCATCGTAAA | 0.408 | rs121913072 |
| - | 3  | 1688    |                    | NM_052923    | NP_443155    | Q6R2W3 | SCND3_HUMAN |                               | 1     | AGTTTTGAATTTT | 0.368 |             |
| - | 3  | 589     | tron uc010jub.1_5' | NM_002124    | NP_002115    | P01911 | 2B1F_HUMAN  | eta-2. Extracellular (Potenti | 1     | :AAGGTCCAGTC  | 0.557 |             |
| + | 9  | 3112    | RD2_uc003ocp.3_f   | NM_005104    | NP_005095    | P25440 | BRD2_HUMAN  |                               | 5     | :TGCCCCCTGGC  | 0.408 |             |
| + | 89 | 13586   |                    | NM_001371    | NP_001362    |        |             |                               | 21    | :GGAAGAAATGC  | 0.443 |             |
| - | 4  | 1526    | p.P492L CUL7_uc    | NM_014780    | NP_055595    | Q14999 | CUL7_HUMAN  | action with TP53.             | 4     | :CAGGAGGCACA  | 0.602 |             |
| - | 4  | 1577    | P5_uc011dvz.1_n    | NM_021572    | NP_067547    | Q9UJA9 | ENPP5_HUMAN |                               | 0     | :ACTGTGAATTA  | 0.348 |             |
| - | 3  | 1079    | lvz.1_Missense_M   | NM_021572    | NP_067547    | Q9UJA9 | ENPP5_HUMAN |                               | 0     | :ATTAGGATGAGC | 0.408 |             |
| - | 3  | 240     | ozx.2_Missense_M   | NM_001131    | NP_001122    | P54107 | CRIS1_HUMAN |                               | 0     | :ACTACTTCTCTC | 0.378 |             |
| + | 3  | 284     | RMT11_uc010kev.:   | NM_001031712 | NP_001026882 | Q7Z4G4 | TRM11_HUMAN |                               | 1     | :GCATTCCCTCTC | 0.348 |             |
| + | 23 | 2389    |                    | NM_006208    | NP_006199    | P22413 | ENPP1_HUMAN | Extracellular (Potential).    | 4     | :AAATGGTGTC   | 0.393 |             |
| - | 11 | 1526    |                    | NM_015718    | NP_056533    | Q9HBY0 | NOX3_HUMAN  | lasmic (Potential).           | 1     | ATATATGATAACT | 0.413 |             |
| + | 24 | 3578    | o.2_Nonsense_Mt    | NM_152744    | NP_689957    | Q7Z5N4 | SDK1_HUMAN  | nectin type-III 5.            | 6     | :GATTCGAATGA  | 0.537 |             |
| - | 5  | 615     | p.S143F DGKB_u     | NM_004080    | NP_004071    | Q9Y6T7 | DGKB_HUMAN  |                               | 12    | :GCAGAGACAGG  | 0.443 |             |
| + | 72 | 11549   |                    | NM_003777    | NP_003768    | Q96DT5 | DYH11_HUMAN |                               | 15    | TACAGGCAATTC  | 0.403 |             |
| + | 4  | 955_956 | zu.2_Missense_Mt   | NM_152626    | NP_689839    | Q03936 | ZNF92_HUMAN | 2H2-type 5.                   | 0     | :CTCAACCCTTAC | 0.351 |             |
| - | 4  | 4152    | v.2_Missense_Mut   | NM_033026    | NP_149015    | Q9Y6V0 | PCLO_HUMAN  |                               | 7     | GTTCCTCTCTT   | 0.413 |             |
| + | 2  | 772     |                    | NM_002523    | NP_002514    | P47972 | NPTX2_HUMAN |                               | 3     | :AGACCGAGAGC  | 0.622 |             |
| + | 5  | 1441    |                    | NM_002523    | NP_002514    | P47972 | NPTX2_HUMAN | Pentaxin.                     | 3     | :CCGTGGAGACG  | 0.587 |             |
| - | 13 | 2475    |                    | NM_022574    | NP_072096    | O75420 | PERQ1_HUMAN | GYF.                          | 2     | :TGAAGGGGCCT  | 0.637 |             |
| + | 3  | 2812    | C17_uc010lho.1_F   | NM_001040105 | NP_001035194 | Q685J3 | MUC17_HUMAN | ch. 59 X approximate tand     | 27    | TCCTGGGGAAG   | 0.512 |             |
| + | 3  | 9661    | C17_uc010lho.1_F   | NM_001040105 | NP_001035194 | Q685J3 | MUC17_HUMAN | ch. 59 X approximate tand     | 27    | CCACTTCATCTA  | 0.507 |             |
| + | 8  | 1366    | nsse_Mutation_p.S  | NM_014491    | NP_055306    | O15409 | FOXP2_HUMAN |                               | 8     | :CAGCTCGTCAC  | 0.468 |             |
| - | 9  | 1054    | p.L108F SLC35B     | NM_032826    | NP_116215    | Q969S0 | S35B4_HUMAN | ical; (Potential).            | 1     | :CATGAGGAGGT  | 0.433 |             |
| - | 13 | 4473    | o.P1425L KIAA154   | NM_020910    | NP_065961    | Q9HCM3 | K1549_HUMAN |                               | 230   | CCGGGGGGCGG   | 0.642 |             |
| + | 9  | 1603    | iv.2_Missense_Mu   | NM_173569    | NP_775840    | Q6ZU65 | UBN2_HUMAN  |                               | 2     | :ATGATCGTTTAA | 0.363 |             |
| - | 15 | 1860    |                    | NM_004333    | NP_004324    | P15056 | BRAF_HUMAN  | rotein kinase_R603>I(2)) p.T  | 18290 | :ATTTCCTACTGT | 0.368 |             |
| + | 3  | 313     | 76B_uc003whv.3     | NM_018487    | NP_060957    | Q96HP8 | T176A_HUMAN |                               | 2     | :TCCGGCAGACT  | 0.572 |             |
| - | 27 | 4454    | cz.2_Missense_Mu   | NM_170606    | NP_733751    | Q8NEZ4 | MLL3_HUMAN  |                               | 63    | :AACTAAGTAGTC | 0.343 |             |
| - | 4  | 5778    |                    | NM_178857    | NP_849188    | Q8IWN7 | RP1L1_HUMAN |                               | 8     | TCTACACCTTCT  | 0.642 |             |
| - | 10 | 2959    | t.2_Missense_Mut:  | NM_005144    | NP_005135    | O43593 | HAIR_HUMAN  |                               | 2     | CCGCGGTAGAA   | 0.647 |             |
| + | 9  | 920     | z.1_Nonsense_Mu    | NM_014265    | NP_055080    | Q9UKQ2 | ADA28_HUMAN | B. Extracellular (Potential). | 5     | AAATGGAGGGG   | 0.398 |             |
| - | 4  | 732     | ai.1_Missense_Mut  | NM_004056    | NP_004047    | P35219 | CAH8_HUMAN  |                               | 0     | :GATTCGTGCG   | 0.428 |             |
| + | 9  | 1011    | p.W328* PREX2_     | NM_024870    | NP_079146    | Q70Z35 | PREX2_HUMAN | PH.                           | 17    | :GGATGGAAGAT  | 0.318 |             |



|   |    |      |                    |              |              |        |                                            |    |               |       |
|---|----|------|--------------------|--------------|--------------|--------|--------------------------------------------|----|---------------|-------|
| + | 12 | 1340 | ixyb.2_Splice_Site | NM_052958    | NP_443190    | Q49A92 | CH034_HUMAN                                | 1  | AGAAACGTGAGT  | 0.358 |
| + | 1  | 372  | AP1_uc010mbs.1     | NR_002182    |              |        |                                            | 0  | ATACCTACATGG  | 0.423 |
| + | 7  | 888  | ense_Mutation_p.L  | NM_012082    | NP_036214    | Q8WW38 | FOG2_HUMAN                                 | 5  | ATGAAGACAGT   | 0.517 |
| - | 15 | 2593 | nt.2_Nonsense_M    | NM_198123    | NP_937756    | Q7Z407 | CSMD3_HUMAN lar (Potential). CUB 4.        | 63 | AGCCTGAAATT   | 0.393 |
| + | 7  | 678  |                    | NM_139021    | NP_620590    | Q8TD08 | MK15_HUMAN rotein kinase.                  | 2  | TGCTGCGGGGG   | 0.647 |
| - | 15 | 1928 | _p.S539F RF3_u     | NM_134428    | NP_602304    | P48380 | RF3_HUMAN                                  | 4  | CCCAGGAAGCC   | 0.478 |
| - | 44 | 6331 | .Q1467* PTPRD_     | NM_002839    | NP_002830    | P23468 | PTPRD_HUMAN ). Tyrosine-protein phospho    | 22 | AGTCTGGAAGA   | 0.418 |
| - | 2  | 841  | p.M216R LINGO2_    | NM_152570    | NP_689783    | Q7L985 | LIGO2_HUMAN (tracellular (Potential)).     | 3  | ACAGGCATATTG  | 0.468 |
| + | 1  | 321  | f79_uc004apo.1_l   | NM_178828    | NP_849150    | Q6ZUB1 | CI079_HUMAN                                | 3  | CGCCCGGGAGG   | 0.557 |
| - | 2  | 191  | M18_uc010myv.2_l   | NM_033117    | NP_149108    | Q96H35 | RBM18_HUMAN                                | 0  | CAGGGGAAGAG   | 0.448 |
| - | 7  | 1499 |                    | NM_006336    | NP_006327    | Q7Z7L7 | ZER1_HUMAN                                 | 1  | CAGCACCTGCT   | 0.592 |
| - | 1  | 154  |                    | NM_031297    | NP_112587    | Q9H0X6 | RN208_HUMAN                                | 0  | GAGGCCCGGCC   | 0.652 |
| - | 2  | 97   |                    | NM_001009616 | NP_001009616 | Q5MJ07 | SPXN5_HUMAN                                | 0  | TAAGTCCCTGT   | 0.398 |
| - | 25 | 2201 | p.R355Q TEX11_u    | NM_001003811 | NP_001003811 | Q8IYF3 | TEX11_HUMAN                                | 5  | TTTTCCGTGCA   | 0.393 |
| + | 8  | 1290 | RN1_uc011mpt.1_l   | NM_052957    | NP_443189    | Q96QF7 | ACRC_HUMAN Asp/Ser-rich.                   | 3  | TCGGAAGCTCCC  | 0.552 |
| + | 8  | 1292 | RN1_uc011mpt.1_l   | NM_052957    | NP_443189    | Q96QF7 | ACRC_HUMAN Asp/Ser-rich.                   | 3  | GGAAGCTCCCG   | 0.557 |
| + | 4  | 725  | eh.1_Missense_M    | NM_021118    | NP_066941    | P35663 | CYLC1_HUMAN p.S234*(1)                     | 5  | CCATATCAGAGAT | 0.333 |
| - | 1  | 611  | en.2_Missense_Mt   | NM_001163541 | NP_001157013 | Q86VE3 | SATL1_HUMAN Gln-rich.                      | 2  | GCTGGCTGATG   | 0.567 |
| + | 8  | 1441 |                    | NM_014467    | NP_055282    | O60687 | SRPX2_HUMAN                                | 2  | GCTCGTGAGTG   | 0.547 |
| + | 4  | 1483 | P2_uc004ejm.2_l    | NM_138437    | NP_612446    | Q96D09 | GASP2_HUMAN                                | 1  | AAGGCCAAAA    | 0.567 |
| - | 2  | 1074 |                    | NM_001009615 | NP_001009615 | Q5MJ10 | SPXN2_HUMAN                                | 1  | AAGATCCTTCA   | 0.527 |
| + | 2  | 733  | 0_uc011myc.1_Mit   | NM_004224    | NP_004215    | Q13585 | MTR1L_HUMAN Name=5; (Potential).           | 4  | TCTCTCCTCTC   | 0.547 |
| - | 3  | 476  |                    | NM_004988    | NP_004979    | P43355 | MAGA1_HUMAN                                | 10 | CCCCTCCTCTC   | 0.542 |
| + | 6  | 1318 | Y_uc011nan.1_Mit   | NM_003411    | NP_003402    | P08048 | ZFY_HUMAN                                  | 0  | TTGAGCAGACA   | 0.403 |
| - | 15 | 1762 | _1_uc009vka.2_Mi   | NM_004421    | NP_004412    | O14640 | DVL1_HUMAN                                 | 0  | CCCAGCTCCC    | 0.711 |
| + | 14 | 1600 | '207_uc010nzp.1_   | NM_207396    | NP_997279    | Q6ZRF8 | RN207_HUMAN                                | 0  | TGGACGTGCAG   | 0.617 |
| - | 5  | 516  |                    | NM_001561    | NP_001552    | Q07011 | TNR9_HUMAN (Potential). TNFR-Cys 4.        | 4  | GCCACGTTTCT   | 0.323 |
| + | 5  | 1883 |                    | NM_004285    | NP_004276    | O95479 | G6PE_HUMAN Linker.                         | 0  | GCCGGCCCCAA   | 0.622 |
| - | 4  | 1183 | p.V132M CLSTN1_    | NM_001009566 | NP_001009566 | O94985 | CSTN1_HUMAN  Extracellular (Potential).    | 1  | TTTACGTTGG    | 0.458 |
| + | 2  | 333  | '_uc010oap.1_Sile  | NM_007375    | NP_031401    | Q13148 | TADBP_HUMAN                                | 2  | ATGCTGGCTGG   | 0.488 |
| - | 4  | 1319 |                    | NM_152232    | NP_689418    | Q8TE23 | TS1R2_HUMAN ellular (Potential).           | 4  | TTGCGGGTCGA   | 0.592 |
| + | 11 | 2218 |                    | NM_020526    | NP_065387    | P29322 | EPHA8_HUMAN Potential). Protein kinase.    | 13 | CATCCGCCTCG   | 0.642 |
| + | 4  | 841  | p.R237Q CCDC21_    | NM_022778    | NP_073615    | Q6P2H3 | CEP85_HUMAN                                | 0  | TGAGCGGAATG   | 0.597 |
| + | 9  | 1403 | E290K WDTC1_uc     | NM_015023    | NP_055838    | Q8N5D0 | WDTC1_HUMAN WD 5.                          | 2  | GGGGGAACAG    | 0.527 |
| + | 5  | 553  | M222_uc001bnt.3_   | NM_032125    | NP_115501    | Q9H0R3 | TM222_HUMAN ical; (Potential).             | 0  | GGTGACGCTCT   | 0.582 |
| - | 2  | 748  |                    | NM_001003682 | NP_001003682 | Q69Y22 | T200B_HUMAN Pro-rich.                      | 0  | CAGCCCGGGG    | 0.617 |
| - | 65 | 4410 | DL16A1_uc001btj.   | NM_001856    | NP_001847    | Q07092 | COGA1_HUMAN 1 2 (COL2) with 2 imperfect    | 8  | GCCAGCTGCAC   | 0.522 |
| - | 10 | 2258 | p.R454C PABPC4_    | NM_003819    | NP_003810    | Q13310 | PABP4_HUMAN                                | 0  | ACTGGCGTATAG  | 0.547 |
| + | 4  | 481  |                    | NM_152373    | NP_689586    | Q5T5D7 | ZN684_HUMAN KRAB.                          | 0  | CGAGAGCTCTC   | 0.493 |
| + | 47 | 6394 | J467_uc001cjl.1_5  | NM_015284    | NP_056099    | Q5T011 | SZT2_HUMAN                                 | 0  | AGCGCGCCATC   | 0.607 |
| - | 14 | 3370 |                    | NM_020883    | NP_065934    | Q9P217 | ZSWM5_HUMAN                                | 0  | GCTGAGAGCAC   | 0.552 |
| + | 22 | 3964 | of.1_RNA C1orf17   | NM_001039464 | NP_001034553 | Q68CQ1 | HEAT8_HUMAN                                | 0  | CCTCCCTCCGG   | 0.557 |
| + | 41 | 5308 | DL_uc009wag.2_     | NM_176877    | NP_795352    | Q8NI35 | INADL_HUMAN PDZ 10.                        | 4  | ATTAACGGGCAA  | 0.433 |
| + | 14 | 1002 | SGIP1_uc001dct.2   | NM_032291    | NP_115667    | Q9BQI5 | SGIP1_HUMAN Pro-rich.                      | 3  | ACCCCGAACAG   | 0.468 |
| + | 5  | 1208 | c.1_RNA IL12RB2_   | NM_001559    | NP_001550    | Q99665 | I12R2_HUMAN tential). Fibronectin type-III | 3  | CCCTGAATCA    | 0.403 |
| + | 6  | 939  | PHN2_uc001div.2_   | NM_012302    | NP_036434    | O95490 | LPHN2_HUMAN otential). Olfactomedin-like   | 9  | ATGATACCTCAC  | 0.388 |
| - | 5  | 540  | YD_uc001drw.2_l    | NM_000110    | NP_000101    | Q12882 | DPYD_HUMAN                                 | 8  | ACAAAGATCAG   | 0.388 |

rs146303708

|   |    |       |                    |              |              |        |             |    |              |       |             |
|---|----|-------|--------------------|--------------|--------------|--------|-------------|----|--------------|-------|-------------|
| - | 10 | 1993  | itation_p.A617V A  | NM_006594    | NP_006585    | Q9Y6B7 | AP4B1_HUMAN | 4  | VTGAGGGCTCCA | 0.453 |             |
| - | 3  | 188   | eff.1_Missense_M   | NM_000036    | NP_000027    | P23109 | AMPD1_HUMAN | 4  | CTGACGACCT   | 0.423 | rs147972392 |
| + | 4  | 953   | 5'UTR NOTCH2NL     | NM_203458    | NP_982283    | Q7Z3S9 | NT2NL_HUMAN | 1  | ATGGAGGCACC  | 0.572 |             |
| - | 2  | 3473  | e.1_Missense_Mu    | NM_007113    | NP_009044    | Q07283 | TRHY_HUMAN  | 5  | TCTCCGGTTCC  | 0.174 | rs113946258 |
| - | 3  | 759   |                    | NM_016190    | NP_057274    | Q9UBG3 | CRNN_HUMAN  | 3  | AGATCCAGTCA  | 0.577 |             |
| + | 2  | 728   |                    | NM_001025231 | NP_001020402 | Q5T749 | KPRP_HUMAN  | 5  | GGTCCCGGACT  | 0.582 |             |
| + | 3  | 756   | ey.1_Intron HCN3   | NM_020897    | NP_065948    | Q9P1Z3 | HCN3_HUMAN  | 2  | GTGGTTGCGATC | 0.572 |             |
| - | 6  | 754   | q.2_Missense_Mu    | NM_001135050 | NP_001128522 | Q9P2J2 | TUTLA_HUMAN | 5  | CTGCACCTAGG  | 0.662 |             |
| + | 6  | 1196  | p.A230V PBX1_uc    | NM_002585    | NP_002576    | P40424 | PBX1_HUMAN  | 5  | GCACTGCTACCA | 0.448 |             |
| - | 13 | 3902  |                    | NM_000130    | NP_000121    | P12259 | FA5_HUMAN   | 6  | GCTGAGGTCTA  | 0.527 |             |
| - | 3  | 1121  | nk.1_Missense_Mt   | NM_000261    | NP_000252    | Q99972 | MYOC_HUMAN  | 1  | CTGTCCGTGGT  | 0.532 | rs74315334  |
| + | 3  | 800   | _p.R175Q ZBTB3     | NM_001122770 | NP_001116242 | Q5TC79 | ZBT37_HUMAN | 0  | CCGGCGAGGTC  | 0.522 |             |
| + | 31 | 5106  |                    | NM_031935    | NP_114141    | Q96RW7 | HMCN1_HUMAN | 23 | TGGAAGTGTGTG | 0.363 |             |
| + | 7  | 1474  | _Mutation_p.A382   | NM_005807    | NP_005798    | Q92954 | PRG4_HUMAN  | 1  | AGCCTGCACCC  | 0.657 | rs138528418 |
| + | 2  | 188   | _p.R39H CFHR4      | NM_006684    | NP_006675    | Q92496 | FHR4_HUMAN  | 3  | GTTTGCGTAGAC | 0.323 |             |
| - | 8  | 2173  | ypj.1_Missense_Mt  | NM_014875    | NP_055690    | Q15058 | KIF14_HUMAN | 7  | TGGGTATCAC   | 0.388 | rs144936292 |
| + | 11 | 1511  | _p.S403F CAMSAF    | NM_203459    | NP_982284    | Q08AD1 | CAMP2_HUMAN | 4  | AAGTCTTCAT   | 0.308 |             |
| - | 34 | 5058  | z1.1_Missense_Mu   | NM_017596    | NP_060066    | O75037 | KI21B_HUMAN | 6  | CTCACCGATGG  | 0.612 |             |
| - | 27 | 4050  | z1.1_Missense_Mut  | NM_017596    | NP_060066    | O75037 | KI21B_HUMAN | 6  | GGGCCGAGTGG  | 0.622 |             |
| - | 11 | 1746  |                    | NM_000069    | NP_000060    | Q13698 | CAC1S_HUMAN | 5  | GATACCGCTAC  | 0.572 |             |
| + | 4  | 413   | z2_RNA LGR6_uc     | NM_001017403 | NP_001017403 | Q9HBX8 | LGR6_HUMAN  | 10 | GCTGCCGAGCC  | 0.607 |             |
| + | 12 | 1727  | lgxz.1_Missense_I  | NM_002481    | NP_002472    | O60237 | MYPT2_HUMAN | 3  | TACCCGGCAGC  | 0.438 |             |
| + | 20 | 2777  | lgyb.1_Missense_   | NM_002481    | NP_002472    | O60237 | MYPT2_HUMAN | 3  | AAGACGAACA   | 0.512 |             |
| - | 2  | 394   | lgyr.3_5'UTR ADI   | NM_015999    | NP_057083    | Q96A54 | ADR1_HUMAN  | 0  | GTTGGCGATTA  | 0.522 |             |
| + | 9  | 1418  | z2_RNA CR1L_uc     | NM_175710    | NP_783641    | Q2VPA4 | CR1L_HUMAN  | 0  | TATGTTGGATCC | 0.453 |             |
| - | 2  | 464   | kv.2_Missense_M    | NM_206933    | NP_996816    | O75445 | USH2A_HUMAN | 26 | TGAAGCAAAAT  | 0.438 |             |
| - | 6  | 811   | pv.2_Missense_M    | NM_152608    | NP_689821    | Q6IQ49 | CA055_HUMAN | 1  | CCATTGCTACCA | 0.493 |             |
| + | 2  | 894   |                    | NM_020435    | NP_065168    | Q5T442 | CXG2_HUMAN  | 0  | GGTGCCACCGT  | 0.642 |             |
| + | 83 | 19162 | sr.1_Missense_Mu   | NM_001098623 | NP_001092093 | Q5VST9 | OBSCN_HUMAN | 28 | CGGAACGGCCC  | 0.632 |             |
| - | 1  | 128   |                    | NM_003493    | NP_003484    | Q16695 | H31T_HUMAN  | 0  | CGGGCCGGTAG  | 0.667 |             |
| + | 7  | 682   | se_Mutation_p.L16  | NM_004481    | NP_004472    | Q10471 | GALT2_HUMAN | 2  | CAGGCCTCATG  | 0.647 |             |
| + | 6  | 682   | hxv.1_Missense_I   | NM_145861    | NP_665860    | Q8WWZ3 | EDAD_HUMAN  | 0  | CAAGCGGGAGC  | 0.587 |             |
| - | 2  | 440   | _p.S11N CEP170     | NM_014812    | NP_055627    | Q5SW79 | CE170_HUMAN | 2  | CTCCACTGTCTC | 0.423 |             |
| + | 3  | 217   | liai.2_Missense_N  | NM_001012970 | NP_001012988 | Q5SVJ3 | CA100_HUMAN | 0  | CCCTGGGCAGC1 | 0.453 |             |
| + | 5  | 1732  | _p.A431V KIF26B    | NM_018012    | NP_060482    | Q2KJY2 | KI26B_HUMAN | 3  | CCCAGCCCCAC  | 0.607 |             |
| + | 1  | 373   |                    | NM_001001915 | NP_001001915 | Q8NGZ5 | OR2G2_HUMAN | 0  | TGACCGCTATC  | 0.527 |             |
| + | 1  | 26    |                    | NM_001004696 | NP_001004696 | Q8NH00 | OR2T4_HUMAN | 1  | GGCCAGCCACA  | 0.483 | rs140989725 |
| + | 1  | 55    |                    | NM_001004696 | NP_001004696 | Q8NH00 | OR2T4_HUMAN | 1  | TCTGTATGGGA  | 0.488 |             |
| + | 3  | 1399  | z.V167M PGBD2_u    | NM_170725    | NP_733843    | Q6P3X8 | PGBD2_HUMAN | 1  | GCAAGCGTGGTC | 0.507 |             |
| + | 15 | 3984  | orf18_uc001iik.2_I | NM_017782    | NP_060252    | Q5VWN6 | CJ018_HUMAN | 2  | AAGAGGGCACTA | 0.502 |             |
| - | 6  | 649   | z5_splice PRKCQ    | NM_006257    | NP_006248    | Q04759 | KPCT_HUMAN  | 6  | ACTTACGTCCGC | 0.378 |             |
| + | 3  | 581   | DC3_uc009xix.2_E   | NM_024693    | NP_078969    | Q96DC8 | ECHD3_HUMAN | 0  | TATTACCATGCC | 0.453 |             |
| - | 3  | 502   | mo.3_Missense_M    | NM_152751    | NP_689964    | Q8N7W2 | BEND7_HUMAN | 2  | GGCGGTAGCT   | 0.582 |             |
| - | 7  | 962   | KRD26_uc009xkl     | NM_014915    | NP_055730    | Q9UPS8 | ANR26_HUMAN | 4  | GTCTTCGTATC  | 0.328 |             |
| - | 7  | 1229  | c.3_Missense_Mut   | NM_173576    | NP_775847    | Q8IYA7 | MKX_HUMAN   | 1  | GGGACGACTTC1 | 0.463 |             |
| - | 21 | 4595  | iuu.1_Splice_Site  | NM_021738    | NP_068506    | O95425 | SVIL_HUMAN  | 6  | CCAACATCAAC  | 0.403 |             |
| - | 2  | 1708  | nse_Mutation_p.S   | NM_020848    | NP_065899    | Q9P266 | K1462_HUMAN | 4  | AGGTGCTCTCG  | 0.498 |             |

|   |    |      |                   |              |              |        |             |                                |    |              |       |
|---|----|------|-------------------|--------------|--------------|--------|-------------|--------------------------------|----|--------------|-------|
| + | 7  | 860  |                   | NM_052997    | NP_443723    | Q9BXX3 | AN30A_HUMAN |                                | 9  | CTTGGTGGAAA  | 0.502 |
| - | 1  | 737  |                   | NM_145178    | NP_660161    | Q8N100 | ATOH7_HUMAN |                                | 0  | GTCCCGCTCCG  | 0.647 |
| - | 15 | 2651 | j_1_intron DNA2_u | NM_001080449 | NP_001073918 | P51530 | DNA2L_HUMAN |                                | 0  | CTTACAGGTTT  | 0.398 |
| + | 12 | 1936 | w.1_Missense_Mt   | NM_004728    | NP_004719    | Q9NR30 | DDX21_HUMAN |                                | 3  | CACTGGCCCAT  | 0.502 |
| + | 8  | 1064 | qjd.1_Missense_IV | NM_003171    | NP_003162    | Q8IYB8 | SUV3_HUMAN  |                                | 2  | CAACGGGGGAG  | 0.478 |
| - | 14 | 2385 | RID1_uc010qmf.1_  | NM_017551    | NP_060021    | Q9ULK0 | GRID1_HUMAN | cellular (Potential).          | 10 | GTTGCCGATGA  | 0.582 |
| - | 5  | 816  | nse_Mutation_p.R  | NM_000770    | NP_000761    | P10632 | CP2C8_HUMAN |                                | 0  | ACTTCGTGTAAC | 0.373 |
| - | 17 | 3540 | .R374W PSD_uc0    | NM_002779    | NP_002770    | A5PKW4 | PSD1_HUMAN  |                                | 3  | AGCCCGGGGCT  | 0.682 |
| - | 9  | 2092 | 37_uc009yav.1_Nc  | NM_002417    | NP_002408    | P46013 | KI67_HUMAN  |                                | 7  | ACTTCGGCTGA  | 0.423 |
| + | 26 | 4551 |                   | NM_152643    | NP_689856    | Q76NI1 | VKIND_HUMAN | Ras-GEF.                       | 2  | CTTTTCGGCCA  | 0.552 |
| + | 14 | 2212 | RF1_uc010qwe.1_   | NM_020901    | NP_065952    | Q9P1Y6 | PHRF1_HUMAN |                                | 0  | CAGACGGGATG  | 0.657 |
| - | 11 | 1295 | _p.S397L CDHR5_   | NM_021924    | NP_068743    | Q9HBB8 | CDHR5_HUMAN | Extracellular (Potential).     | 0  | TGGCCGAGTTG  | 0.607 |
| - | 1  | 377  | .1_intron HBE1_uc | NM_033179    | NP_149419    | Q9Y5P0 | O51B4_HUMAN | lasmic (Potential).            | 2  | TCAGTGGTGTG  | 0.443 |
| - | 3  | 625  | rdi.1_Missense_IV | NM_194285    | NP_919261    | Q68D10 | SPT2_HUMAN  | Potential.                     | 1  | CTCTGCGTGA   | 0.478 |
| - | 2  | 459  |                   | NM_054030    | NP_473371    | Q96LB1 | MRGX2_HUMAN | lasmic (Potential).            | 1  | CGGTGCTGACG  | 0.597 |
| + | 8  | 1405 |                   | NM_020229    | NP_064614    | Q9NQV5 | PRD11_HUMAN |                                | 1  | CCCATGGTGTG  | 0.582 |
| + | 6  | 539  | 2_uc001ndg.3_RN   | NM_000506    | NP_000497    | P00734 | THRB_HUMAN  | Kringle 1.                     | 3  | CCACGGGACCC  | 0.612 |
| - | 26 | 2867 |                   | NM_000256    | NP_000247    | Q14896 | MYPC3_HUMAN | nectin type-III 2.             | 3  | CCGGGCCCCCG  | 0.662 |
| + | 2  | 646  | -CNTF_uc010rkm.   | NM_000614    | NP_000605    | P26441 | CNTF_HUMAN  |                                | 1  | AGCACGTGGGA  | 0.478 |
| + | 18 | 1929 | <_uc009ynm.1_3'l  | NM_015533    | NP_056348    | Q3LXA3 | DHAK_HUMAN  | ATP (By similarity).           | 0  | ACCCCGGGGCG  | 0.627 |
| + | 8  | 1139 | b.1_Missense_Mu   | NM_006819    | NP_006810    | P31948 | STIP1_HUMAN | TPR 6.                         | 3  | GCACCGAACCC  | 0.403 |
| + | 5  | 434  | 32_uc009yrq.2_Int | NM_003952    | NP_003943    | Q9UBS0 | KS6B2_HUMAN | rotein kinase.                 | 7  | CACGGGCTGAG  | 0.458 |
| - | 11 | 2100 | lonn.1_Missense_  | NM_017635    | NP_060105    | Q4FZB7 | SV421_HUMAN |                                | 3  | CTTGTCGTGAC  | 0.478 |
| - | 1  | 949  | c.1_RNA CREBZF    | NM_001039618 | NP_001034707 | Q9NS37 | ZHANG_HUMAN | ucine-zipper.                  | 1  | CCCATCACGTAC | 0.413 |
| + | 1  | 3048 |                   | NM_001008781 | NP_001008781 | Q8TDW7 | FAT3_HUMAN  | Extracellular (Potential).     | 5  | CTGTGCGGGCC  | 0.453 |
| - | 3  | 420  |                   | NM_022122    | NP_071405    | Q9H306 | MMP27_HUMAN |                                | 3  | ACCTTCTTGAT  | 0.388 |
| + | 39 | 6316 | e_Mutation_p.I205 | NM_001080463 | NP_001073932 | Q8NCM8 | DYHC2_HUMAN | 2 (By similarity).             | 0  | GTGATATTGACC | 0.348 |
| - | 2  | 274  | Mutation_p.T86M   | NM_033292    | NP_150634    | P29466 | CASP1_HUMAN | CARD.                          | 2  | CCAGCGTCCCT  | 0.463 |
| - | 4  | 677  |                   | NM_006235    | NP_006226    | Q16633 | OBF1_HUMAN  |                                | 1  | CATAGGTCAAC  | 0.572 |
| - | 2  | 769  | 2_Missense_Muta   | NM_012104    | NP_036236    | P56817 | BACE1_HUMAN | cellular (Potential).          | 1  | GGGCAGCACCC  | 0.562 |
| - | 13 | 2551 | _p.S185L CDON_L   | NM_016952    | NP_058648    | Q4KMG0 | CDON_HUMAN  | III 2. Extracellular (Potentia | 6  | ATGCTGAACCT  | 0.393 |
| + | 2  | 530  | {C1_uc001qja.2_R  | NM_178040    | NP_829884    | Q8IUD2 | RB6I2_HUMAN |                                | 5  | GGGGACGTCTG  | 0.507 |
| + | 5  | 1271 | se_Mutation_p.A2( | NM_018009    | NP_060479    | Q9BX59 | TPSNR_HUMAN | potential). lg-like C1-type.   | 0  | CCCCAGCCCAA  | 0.607 |
| - | 12 | 1332 | l.2_Missense_Mut  | NM_002864    | NP_002855    |        |             |                                | 5  | GTCTTCTGCTA  | 0.458 |
| - | 3  | 269  | zt.2_Missense_Mt  | NM_002723    | NP_002714    | P10163 | PRB4_HUMAN  | 'R]-[PR]-P-Q-G-G-N-Q-[PS       | 1  | TCCTTCTGGCT  | 0.622 |
| + | 14 | 1933 |                   | NM_006446    | NP_006437    | Q9Y6L6 | SO1B1_HUMAN | cellular (Potential).          | 8  | CACACGTGGGT  | 0.333 |
| - | 5  | 1638 | _Intron CAPRIN2_  | NM_001002259 | NP_001002259 | Q6IMN6 | CAPR2_HUMAN |                                | 2  | ATGTGTTCTCT  | 0.408 |
| - | 7  | 2084 |                   | NM_005164    | NP_005155    | Q9UBJ2 | ABCD2_HUMAN | 3C transporter.                | 6  | CAAGAGACATA  | 0.393 |
| - | 5  | 1220 | .C2A13_uc001rme   | NM_052885    | NP_443117    | Q96QE2 | MYCT_HUMAN  | lasmic (Potential).            | 1  | TTCTGCGGCC   | 0.383 |
| + | 2  | 122  | 1rnf.2_Missense_A | NM_016488    | NP_057572    | Q8NEY8 | PPHLN_HUMAN |                                | 2  | AGGGACGATATG | 0.383 |
| - | 36 | 5393 |                   | NM_025003    | NP_079279    | P59510 | ATS20_HUMAN | GON.                           | 19 | GTATCCAGCA   | 0.338 |
| - | 1  | 272  | th.2_Missense_Mt  | NM_000424    | NP_000415    | P13647 | K2C5_HUMAN  | Head.                          | 0  | GGACCGGGACA  | 0.677 |
| + | 2  | 333  | _p.E43K EIF4B_u   | NM_001417    | NP_001408    | P23588 | IF4B_HUMAN  |                                | 2  | CTGATGAAACG  | 0.418 |
| - | 11 | 1454 | ion_p.P467L ATF7  | NM_001130059 | NP_001123531 | P17544 | ATF7_HUMAN  | inding adenovirus 2 E1A.       | 2  | GTATCGGCATG  | 0.592 |
| - | 1  | 358  |                   | NM_001005499 | NP_001005499 | A6NIJ9 | O6C70_HUMAN | lasmic (Potential).            | 1  | CATAGCGATCAT | 0.393 |
| - | 5  | 894  | as.1_Missense_Mt  | NM_001144996 | NP_001138468 | Q13683 | ITA7_HUMAN  | Extracellular (Potential).     | 5  | TGGCCGTGCCT  | 0.677 |
| + | 57 | 9552 |                   | NM_002332    | NP_002323    | Q07954 | LRP1_HUMAN  | cellular (Potential).          | 22 | AGGAACCGTTTC | 0.597 |

rs144792493

|   |    |      |                   |              |              |        |              |                                  |    |               |       |             |
|---|----|------|-------------------|--------------|--------------|--------|--------------|----------------------------------|----|---------------|-------|-------------|
| + | 12 | 1449 | r.1_Missense_Mul  | NM_004984    | NP_004975    | Q12840 | KIF5A_HUMAN  |                                  | 3  | GGAGCGGCAG    | 0.642 |             |
| - | 18 | 2232 | sui.1_RNA PPFIA2  | NM_003625    | NP_003616    | B7Z663 | B7Z663_HUMAN |                                  | 6  | GCCTTCGAGGC   | 0.463 |             |
| - | 3  | 1569 |                   | NM_007035    | NP_008966    | O60938 | KERA_HUMAN   |                                  | 1  | CATAACTGAAG   | 0.453 |             |
| + | 20 | 2767 | se_Mutation_p.E14 | NM_130466    | NP_569733    | Q7Z3V4 | UBE3B_HUMAN  | HECT.                            | 4  | TGGACGAAGCA   | 0.507 |             |
| - | 6  | 1454 | r_p.A382T ABCB9   | NM_019625    | NP_062571    | Q9NP78 | ABCB9_HUMAN  | transmembrane type-1.            | 0  | ATTGGCGAAGC   | 0.587 |             |
| - | 3  | 697  | AP1_uc001uep.2    | NM_004642    | NP_004633    | O14519 | CDKA1_HUMAN  |                                  | 0  | TTGGGGCACCT   | 0.408 |             |
| - | 40 | 6245 | r.R2014Q NCOR2    | NM_006312    | NP_006303    | Q9Y618 | NCOR2_HUMAN  |                                  | 4  | TTTCCCGGTGC   | 0.637 |             |
| + | 10 | 1612 | ijd.1_Missense_Mi | NM_016155    | NP_057239    | Q9ULZ9 | MMP17_HUMAN  | mopexin-like 4.                  | 0  | ATGGCGAGCTG   | 0.657 |             |
| - | 7  | 847  | se_Mutation_p.P2  | NM_001161344 | NP_001154816 | Q96EP1 | CHFR_HUMAN   |                                  | 1  | CACGGGCTCCA   | 0.562 |             |
| - | 12 | 1464 | uyk.2_Missense_I  | NM_015058    | NP_055873    | A3KMH1 | K0564_HUMAN  |                                  | 6  | TTGTATCCTAAGC | 0.368 |             |
| - | 9  | 1047 | ron CPB2_uc001v   | NM_001872    | NP_001863    | Q96IY4 | CBPB2_HUMAN  |                                  | 2  | TCTTTGCTTTTAC | 0.318 |             |
| - | 16 | 3713 | r.G1121S ATP7B_t  | NM_000053    | NP_000044    | P35670 | ATP7B_HUMAN  | plasmic (Potential).             | 3  | AGATACCGTCAA  | 0.463 |             |
| + | 7  | 722  | p.A212T ATP11A    | NM_015205    | NP_056020    | P98196 | AT11A_HUMAN  | plasmic (Potential).             | 4  | TTCACGCCACC   | 0.527 |             |
| + | 13 | 1347 | p.T420K ATP11A    | NM_015205    | NP_056020    | P98196 | AT11A_HUMAN  | plasmic (Potential).             | 4  | CCTCACGAAAA   | 0.607 |             |
| + | 1  | 365  |                   | NM_001005500 | NP_001005500 | Q8NGD0 | OR4M1_HUMAN  | plasmic (Potential).             | 0  | TGACCCTATG    | 0.502 | rs143164519 |
| - | 1  | 184  |                   | NM_001005466 | NP_001005466 | Q8NGC3 | O10G2_HUMAN  | Name=2; (Potential).             | 1  | GGGGCAGCAC    | 0.512 |             |
| + | 14 | 1385 | ns.2_Nonsense_M   | NM_005132    | NP_005123    | O95072 | REC8_HUMAN   | Glu-rich.                        | 0  | AAATCCAGGAA   | 0.632 |             |
| - | 3  | 277  | uc001wnj.2_5'UTR  | NM_138476    | NP_612485    | Q86V88 | MGDP1_HUMAN  |                                  | 0  | CAGCCGCACCG   | 0.547 | rs17101962  |
| - | 8  | 1314 | V1_uc010tog.1_In  | NM_000359    | NP_000350    | P22735 | TGM1_HUMAN   |                                  | 3  | TGACAGTACGG   | 0.572 |             |
| - | 15 | 3440 | 1_Missense_Muta   | NM_007361    | NP_031387    | Q14112 | NID2_HUMAN   | immunoglobulin type-1 2.         | 7  | ACCTCTCTGCCA  | 0.632 |             |
| - | 10 | 1294 | A0831_uc001xbw    | NM_014924    | NP_055739    | Q6ZNE5 | BAKOR_HUMAN  |                                  | 0  | TATCTCCGCTCT  | 0.537 |             |
| - | 7  | 2333 | r.R779Q C14orf37  | NM_001001872 | NP_001001872 | Q86TY3 | CN037_HUMAN  | cytoplasmic (Potential).         | 0  | TCTTCGCGCA    | 0.433 | rs141152358 |
| + | 20 | 3133 | p.G1015S KIAA0    | NM_014749    | NP_055564    | E9PGW8 | E9PGW8_HUMAN |                                  | 1  | AGCAAGGTCTCT  | 0.398 |             |
| - | 5  | 2236 | se_Mutation_p.T1  | NM_021136    | NP_066959    | Q16799 | RTN1_HUMAN   | Reticulon.                       | 4  | TAGTCCGTGTAC  | 0.478 |             |
| - | 26 | 5647 | p.A1865T SPTB_u   | NM_000347    | NP_000338    | P11277 | SPTB1_HUMAN  | Spectrin 15.                     | 11 | TATATGCTGTCTC | 0.627 |             |
| + | 5  | 3369 | M1_uc001xql.3_F   | NM_019589    | NP_062535    | P49750 | YLPM1_HUMAN  | Arg-rich. p.L888fs*0(1)          | 3  | CAGAGGGTTGG   | 0.562 |             |
| + | 2  | 613  |                   | NM_003608    | NP_003599    | Q8IYL9 | PSYR_HUMAN   | Name=1; (Potential).             | 0  | AGTCAGCATTCC  | 0.363 |             |
| - | 4  | 2417 | gb.2_Missense_M   | NM_138576    | NP_612808    | Q9C0K0 | BC11B_HUMAN  |                                  | 10 | CGCAGCCGCG    | 0.677 |             |
| - | 2  | 653  | gb.2_Missense_M   | NM_138576    | NP_612808    | Q9C0K0 | BC11B_HUMAN  |                                  | 10 | TGGGTGAGAGC   | 0.617 |             |
| - | 11 | 1370 | GE_uc001ylh.2_Ir  | NM_014226    | NP_055041    | Q9UQ07 | MOK_HUMAN    |                                  | 4  | CAGCACCCGCA   | 0.587 |             |
| + | 46 | 7061 | r.2_Missense_Mut  | NM_001036    | NP_001027    | Q15413 | RYR3_HUMAN   | receptors. Cytoplasmic (By simil | 10 | TGGTTGGGATC   | 0.592 |             |
| - | 15 | 2004 | r.G436E RASGRP    | NM_005739    | NP_005730    | O95267 | GRP1_HUMAN   |                                  | 2  | CTGGCCCCACA   | 0.478 |             |
| + | 13 | 2190 | bi.2_Missense_ML  | NM_003246    | NP_003237    | P07996 | TSP1_HUMAN   | EGF-like 3.                      | 6  | TATAGCGACCCC  | 0.602 |             |
| + | 2  | 329  | p.D80N MGAP_uc    | NM_001080541 | NP_001074010 | Q8IWI9 | MGAP_HUMAN   |                                  | 12 | CCCTCGATAAC   | 0.428 |             |
| - | 6  | 1577 |                   | NM_139265    | NP_644670    | Q9H223 | EHD4_HUMAN   | EF-hand.  EH p.A505V(1)          | 2  | CCAGCGCGAAC   | 0.642 |             |
| - | 13 | 1361 | pc.2_Missense_Mi  | NM_015289    | NP_056104    | Q96JC1 | VP539_HUMAN  |                                  | 3  | GGAGAGCACAG   | 0.512 |             |
| - | 17 | 2111 |                   | NM_004998    | NP_004989    | Q12965 | MYO1E_HUMAN  | myosin head-like.                | 3  | GGGGCGTACAT   | 0.483 |             |
| + | 2  | 226  |                   | NM_015059    | NP_055874    | Q9Y4G6 | TLN2_HUMAN   |                                  | 11 | TGTTGCGGAATC  | 0.478 |             |
| + | 13 | 1534 |                   | NM_015059    | NP_055874    | Q9Y4G6 | TLN2_HUMAN   |                                  | 11 | AGCAGGCCCAG   | 0.562 |             |
| + | 5  | 512  | P3_uc010uij.1_Mi  | NM_006537    | NP_006528    | Q9Y614 | UBP3_HUMAN   |                                  | 1  | CACAGCTGACA   | 0.308 |             |
| - | 2  | 778  |                   | NM_001039614 | NP_001034703 | Q2T9L4 | CO059_HUMAN  |                                  | 1  | CGTGCCACCAT   | 0.662 |             |
| + | 3  | 1116 | m.1_Missense_Mu   | NM_001130028 | NP_001123500 | P49761 | CLK3_HUMAN   | Arg-rich.                        | 2  | CATACCGGTGT   | 0.632 |             |
| - | 2  | 814  | CYP1A1_uc002ay    | NM_000499    | NP_000490    | P04798 | CP1A1_HUMAN  |                                  | 5  | GGTTTCCAGAG   | 0.493 |             |
| - | 3  | 1405 | k.2_Intron DET1_u | NM_001144074 | NP_001137546 | Q7L5Y6 | DET1_HUMAN   |                                  | 2  | GCCTTGCAAAA   | 0.453 |             |
| - | 3  | 367  | 5orf38_uc002bou   | NM_182616    | NP_872422    | P59780 | AP3S2_HUMAN  |                                  | 0  | TACGCGGATGG   | 0.567 |             |
| + | 6  | 746  | n_p.A72T C16orf5  | NM_025108    | NP_079384    | Q7L2K0 | CP059_HUMAN  |                                  | 0  | CCGCTGCCAAA   | 0.612 |             |
| + | 2  | 415  | d.2_Missense_Mul  | NM_024339    | NP_077315    | Q86W42 | THOC6_HUMAN  | WD 1.                            | 2  | TCTGGCGGCTG   | 0.587 |             |

|   |    |      |                   |              |              |        |             |                           |    |              |       |             |
|---|----|------|-------------------|--------------|--------------|--------|-------------|---------------------------|----|--------------|-------|-------------|
| - | 5  | 1235 | ctw.1_Missense_M  | NM_032805    | NP_116194    | Q96SZ4 | ZSC10_HUMAN | 2H2-type 4.               | 1  | GCGGCCGCACT  | 0.711 |             |
| + | 8  | 1052 | p.G343S DNAJA3    | NM_005147    | NP_005138    | Q96EY1 | DNJA3_HUMAN |                           | 4  | .GGGACGGCGCA | 0.542 |             |
| + | 7  | 780  | ram.1_Missense_I  | NR_003569    |              |        |             |                           | 0  | TTTCCCGGCTT  | 0.532 |             |
| + | 2  | 295  | jfs.2_Missense_M  | NM_016138    | NP_057222    | Q99807 | COQ7_HUMAN  | ximate tandem repeats.    | 1  | .CCAGCGTCGGG | 0.547 | rs138449068 |
| - | 6  | 1441 | p.A438T UMOD_L    | NM_003361    | NP_003352    | P07911 | UROM_HUMAN  | ZP.                       | 2  | TAGGGCGGTCT  | 0.542 |             |
| - | 4  | 751  | SM1_uc010bwg.1    | NM_052956    | NP_443188    | Q08AH1 | ACSM1_HUMAN | (By similarity).          | 2  | TGGTCCCCTG   | 0.517 | rs150786519 |
| - | 5  | 1024 | _uc002dqm.2_Mis   | NM_177534    | NP_803878    | P50225 | ST1A1_HUMAN |                           | 0  | GGGTGCGGCTC  | 0.592 | rs145721404 |
| - | 3  | 980  |                   | NM_001080417 | NP_001073886 | Q9UEG4 | ZN629_HUMAN |                           | 0  | CTCGCCGGTGT  | 0.627 |             |
| + | 4  | 737  | C1_uc002ebo.2_5'  | NM_001008274 | NP_001008275 | Q6ZMU5 | TRI72_HUMAN |                           | 0  | TCCGGGGGGCC  | 0.652 |             |
| + | 6  | 676  | :6L_uc010cbe.1_3  | NM_014321    | NP_055136    | Q9Y5N6 | ORC6_HUMAN  |                           | 0  | TGGTTGAAGCC  | 0.443 |             |
| - | 14 | 2453 | C12_uc002efa.1_   | NM_033226    | NP_150229    | Q96J65 | MRP9_HUMAN  |                           | 3  | TCTCGCAGGT   | 0.483 | rs146815895 |
| - | 49 | 7390 | NOT1_uc002ent.2   | NM_016284    | NP_057368    | A5YKK6 | CNOT1_HUMAN |                           | 6  | GCTGGCCTGC   | 0.478 |             |
| - | 12 | 2552 |                   | NM_001796    | NP_001787    | P55286 | CADH8_HUMAN | lasmic (Potential).       | 9  | AGTCTGATGTG  | 0.517 |             |
| - | 13 | 2664 | oj.2_3'UTR CDH11  | NM_001797    | NP_001788    | P55287 | CAD11_HUMAN | lasmic (Potential).       | 14 | CATAACCGTAGA | 0.537 |             |
| + | 34 | 3931 | jr.1_Missense_Mul | NM_001013838 | NP_001013860 | Q6F5E8 | LR16C_HUMAN |                           | 1  | TGTCTGCTGGT  | 0.592 |             |
| - | 12 | 1348 |                   | NM_000353    | NP_000344    | P17735 | ATTY_HUMAN  |                           | 2  | CACTCGGATGA  | 0.522 | rs118203916 |
| - | 7  | 1035 | BP1_uc002fce.2_   | NM_031293    | NP_112583    | Q8TBY8 | PMFBP_HUMAN |                           | 2  | TGGCTGTACAG  | 0.468 |             |
| + | 5  | 542  | mr.1_Missense_I   | NM_002811    | NP_002802    | P51665 | PSD7_HUMAN  |                           | 0  | AGAAGCGTACA  | 0.433 |             |
| + | 5  | 1091 |                   | NM_002153    | NP_002144    | P37059 | DHB2_HUMAN  |                           | 2  | AATTCCTCCTA  | 0.532 |             |
| - | 9  | 1179 | cf.2_Intron PRDM  | NM_001098173 | NP_001091643 | Q9NQW5 | PRDM7_HUMAN |                           | 1  | CCCCATACCAG  | 0.522 |             |
| - | 2  | 501  |                   | NM_182705    | NP_874364    | Q8N5W9 | F101B_HUMAN |                           | 0  | AGTTGCGCCAC  | 0.657 |             |
| + | 10 | 1209 | lvqr.1_Missense_I | NM_000934    | NP_000925    | P08697 | A2AP_HUMAN  |                           | 0  | CCGGCGTGACG  | 0.672 |             |
| + | 1  | 991  |                   | NR_024128    |              |        |             |                           | 1  | CCTCCGATGCTC | 0.587 |             |
| - | 8  | 1121 | p.R324W ATP2A3    | NM_174955    | NP_777615    | Q93084 | AT2A3_HUMAN | smic (By similarity).     | 5  | GCGCCGCGTGC  | 0.667 |             |
| - | 5  | 596  | p.D149N ATP2A3    | NM_174955    | NP_777615    | Q93084 | AT2A3_HUMAN | smic (By similarity).     | 5  | AATGCCCTGC   | 0.438 |             |
| - | 6  | 1044 | X33_uc002gcb.2_I  | NM_020162    | NP_064547    | Q9H6R0 | DHX33_HUMAN | case C-terminal.          | 2  | TTTGCATAGCC  | 0.383 |             |
| + | 4  | 300  | nse_Mutation_p.El | NM_203415    | NP_981960    | Q8TE02 | DERP6_HUMAN |                           | 0  | TGAGCGAGGAA  | 0.458 |             |
| - | 4  | 500  | _Intron SAT2_uc0C | NM_133491    | NP_597998    | Q96F10 | SAT2_HUMAN  | etyltransfer p.?(1)       | 0  | GGTGCCTCCCT  | 0.542 |             |
| - | 14 | 1397 | uc002gml.1_Intron | NM_017533    | NP_060003    | Q9Y623 | MYH4_HUMAN  | osin head-like.           | 13 | CCAGAGCACCC  | 0.473 |             |
| - | 3  | 655  |                   | NM_031898    | NP_114104    | Q9BXF9 | TEKT3_HUMAN |                           | 2  | GATTTCCAAAAC | 0.403 |             |
| + | 3  | 742  |                   | NM_021012    | NP_066292    | Q14500 | IRK12_HUMAN | smic (By similarity).     | 4  | GCATCGTGTCA  | 0.706 |             |
| + | 20 | 2949 | p.G771R TAOK1_    | NM_020791    | NP_065842    | Q7L7X3 | TAOK1_HUMAN |                           | 4  | TCCAGGACCT   | 0.577 |             |
| - | 2  | 897  | ht.2_Missense_Mi  | NM_001094    | NP_001085    | Q16515 | ACCN1_HUMAN | llular (By similarity).   | 4  | TGACCGTGGTG  | 0.537 |             |
| - | 3  | 1736 | i_p.T469I SLFN13  | NM_144682    | NP_653283    | Q68D06 | SLN13_HUMAN |                           | 2  | TGGGGGTGCTG  | 0.537 |             |
| - | 26 | 3628 | p.S679N MYO19_I   | NM_001163735 | NP_001157207 | Q96H55 | MYO19_HUMAN | ondrial targeting.        | 1  | GAAAGCTGCCT  | 0.617 |             |
| - | 44 | 5574 | g_Mutation_p.E17E | NM_198836    | NP_942133    | Q13085 | ACACA_HUMAN | oxyltransferase.          | 2  | TTTCTCGGGTC  | 0.388 |             |
| - | 3  | 436  | T40_uc002hvq.1_F  | NM_182497    | NP_872303    | Q6A162 | K1C40_HUMAN | od. Coil 1A.              | 0  | GCATCGTCTCC  | 0.532 |             |
| - | 10 | 1264 | p.G342S STAT3_L   | NM_139276    | NP_644805    | P40763 | STAT3_HUMAN |                           | 4  | GACGCGGTCT   | 0.567 |             |
| + | 1  | 1075 | it.2_Missense_Mut | NM_009590    | NP_033720    | O75106 | AOC2_HUMAN  |                           | 2  | TGTTCCGGTTCC | 0.507 |             |
| + | 1  | 182  |                   | NM_003734    | NP_003725    | Q16853 | AOC3_HUMAN  | type II membrane protein; | 4  | TCCTCGTGCTC  | 0.552 |             |
| - | 21 | 5634 | CA1_uc002icu.2_Ii | NM_007294    | NP_009225    | P38398 | BRCA1_HUMAN | BRCT 2.                   | 52 | CTGTGCCAAGG  | 0.473 |             |
| - | 19 | 5484 | A1_uc002icu.2_M   | NM_007294    | NP_009225    | P38398 | BRCA1_HUMAN | p.R1751*(1)               | 52 | TGCTCGCTTTC  | 0.468 | rs80357442  |
| - | 9  | 930  | gg.3_Missense_M   | NM_000342    | NP_000333    | P02730 | B3AT_HUMAN  | Cytoplasmic.              | 3  | TATAGCACCG   | 0.647 |             |
| + | 4  | 509  | ie.2_5'UTR DBF4E  | NM_145663    | NP_663696    | Q8NFT6 | DBF4B_HUMAN | BRCT.                     | 0  | AGAGAGCAGTG  | 0.522 |             |
| - | 23 | 2643 | lw.1_Missense_Mi  | NM_145798    | NP_665741    | Q9BZF2 | OSBL7_HUMAN |                           | 0  | TTTCCGCTGC   | 0.637 |             |
| + | 13 | 1702 | wmn.1_Missense_   | NM_025149    | NP_079425    | Q96CM8 | ACSF2_HUMAN |                           | 0  | ACACCGAAGG   | 0.537 |             |
| + | 18 | 1920 | ise_Mutation_p.PE | NM_003835    | NP_003826    | O75916 | RGS9_HUMAN  |                           | 4  | AGTGCCCTGCT  | 0.617 |             |



|   |    |       |                                                  |              |              |        |             |                                |    |              |       |             |
|---|----|-------|--------------------------------------------------|--------------|--------------|--------|-------------|--------------------------------|----|--------------|-------|-------------|
| - | 2  | 872   | wro.1_Missense_IV                                | NM_173477    | NP_775748    | Q495M9 | USH1G_HUMAN |                                | 2  | TGAAGGTGCCT  | 0.672 |             |
| - | 18 | 3459  | wsc.1_Missense_I                                 | NM_020753    | NP_065804    | Q8WXE0 | CSKI2_HUMAN | Pro-rich.                      | 1  | GGGCGGGGGG   | 0.667 |             |
| - | 10 | 1476  | wtb.1_Missense_I                                 | NM_002766    | NP_002757    | Q14558 | KPRA_HUMAN  |                                | 1  | CTGAACCTCATC | 0.453 |             |
| + | 8  | 1630  | wense_Mutation_p.                                | NM_001142602 | NP_001136074 | Q9NYA1 | SPHK1_HUMAN |                                | 1  | GTTTGCTGCAC  | 0.632 |             |
| - | 9  | 1476  | wE247K RHBD2                                     | NM_024599    | NP_078875    | Q6PJF5 | RHDF2_HUMAN | lasmic (Potential).            | 0  | GCTCTCCAGCT  | 0.637 |             |
| + | 9  | 1359  | wth.2_Missense_M                                 | NM_198955    | NP_945193    | Q3V5L5 | MGT5B_HUMAN | lenal (Potential).             | 3  | CGCCACGCTGC  | 0.637 | rs140999399 |
| + | 30 | 8034  | wuc010dhw.1_Mis                                  | NM_020914    | NP_065965    | Q9HCF4 | ALO17_HUMAN |                                | 21 | TGCGCCGATTG  | 0.507 | rs143904490 |
| + | 20 | 3167  | wug.1_Missense_M                                 | NM_020761    | NP_065812    | Q8N122 | RPTOR_HUMAN |                                | 6  | AGATGCGCCGC  | 0.652 |             |
| - | 26 | 3436  | wuc002jzo.1_Miss                                 | NM_014984    | NP_055799    | Q9UPN4 | AZI1_HUMAN  |                                | 4  | TTGGCGTGGGC  | 0.677 |             |
| - | 6  | 569   | wp.P30L SIRT7_L                                  | NM_016538    | NP_057622    | Q9NRC8 | SIRT7_HUMAN | tylase sirtuin-type.           | 0  | TGCGCGGCAGC  | 0.637 |             |
| + | 1  | 665   |                                                  | NM_018949    | NP_061822    | Q9UKP6 | UR2R_HUMAN  | Name=5; (Potential).           | 1  | CGCGGGGCCCG  | 0.672 |             |
| - | 15 | 1415  | wD419N L3MBTL4                                   | NM_173464    | NP_775735    | Q8NA19 | LMBL4_HUMAN |                                | 3  | ACGATCGTGAA  | 0.378 |             |
| - | 19 | 2663  | wzj.1_Missense_Mt                                | NM_005559    | NP_005550    | P25391 | LAMA1_HUMAN | inin EGF-like 8.               | 21 | CGAGGGGTCCA  | 0.552 |             |
| + | 3  | 614   |                                                  | NM_001025300 | NP_001020471 | Q6IQ22 | RAB12_HUMAN |                                | 0  | CGACTTATTACA | 0.403 |             |
| + | 9  | 5629  | wknx.2_Missense_IV                               | NM_015208    | NP_056023    | Q6UB98 | ANR12_HUMAN |                                | 3  | GTCACGTGTAC  | 0.418 |             |
| - | 12 | 1792  | wcoq.2_Missense_IV                               | NM_022068    | NP_071351    | Q9H5I5 | PIEZ2_HUMAN |                                | 1  | CACTAGGTGCT  | 0.274 |             |
| - | 8  | 1363  | wp.T242M MPPE1                                   | NM_023075    | NP_075563    | Q53F39 | MPPE1_HUMAN |                                | 0  | CAGACGTGGGC  | 0.622 |             |
| + | 5  | 946   | wp.T56M C18orf1                                  | NM_181481    | NP_852146    | O15165 | CR001_HUMAN | lasmic (Potential).            | 3  | CTCCACGCGGT  | 0.642 |             |
| + | 2  | 93    | wse_Mutation_p.R31                               | NM_001390    | NP_001381    | Q9Y4J8 | DTNA_HUMAN  | h MAGEE1 (By similarity).      | 0  | CATCCGACTCT  | 0.403 |             |
| + | 3  | 317   | wse_Mutation_p.Q10                               | NM_001390    | NP_001381    | Q9Y4J8 | DTNA_HUMAN  | h MAGEE1 (By similarity).      | 0  | TGGAGCAGTCC  | 0.488 | rs140768365 |
| - | 16 | 2222  | wsc.1_Missense_Mt                                | NM_001080467 | NP_001073936 | Q9ULV0 | MYO5B_HUMAN | se. Actin-binding (Potential)  | 5  | GGGTCTCCATG  | 0.488 |             |
| - | 2  | 906   | wr.1_Missense_Mut                                | NM_003927    | NP_003918    | Q9UBB5 | MBD2_HUMAN  |                                | 0  | CGTTTCGCAGT  | 0.363 |             |
| - | 4  | 488   | wse_Mutation_p.R13                               | NM_000140    | NP_000131    | P22830 | HEMH_HUMAN  |                                | 1  | TCCTGCGGTAC  | 0.493 |             |
| + | 1  | 342   | wlik.1_Missense_M                                | NM_020854    | NP_065905    | Q9P260 | K1468_HUMAN |                                | 6  | TGGCGCCCGGA  | 0.647 |             |
| - | 31 | 4305  | wTN_uc010xfb.1_M                                 | NM_173630    | NP_775901    | Q86VV8 | RTTN_HUMAN  |                                | 8  | GAGCCACCCGG  | 0.483 |             |
| + | 1  | 4703  | wqu.1_Missense_M                                 | NM_017757    | NP_060227    | Q9C0G0 | ZN407_HUMAN | ype 14; degenerate.            | 2  | AAGCAGCAACT  | 0.502 |             |
| + | 5  | 2135  | wFATC1_uc010xfi.1                                | NM_006162    | NP_006153    | O95644 | NFAC1_HUMAN | RHD.                           | 2  | GGTACGGCTGG  | 0.597 |             |
| - | 2  | 503   | wC2_uc002lop.3_5'F                               | NM_012435    | NP_036567    | P98077 | SHC2_HUMAN  | PID.                           | 0  | GGGAGCGCATA  | 0.637 |             |
| + | 6  | 1764  |                                                  | NM_001194    | NP_001185    | Q9UL51 | HCN2_HUMAN  | rtoplasmic (Potential).        | 0  | ACTACATCATCC | 0.592 |             |
| - | 5  | 598   | wC2_uc002lqi.2_Silen                             | NM_138774    | NP_620129    | Q96D70 | CS022_HUMAN | Arg-rich.                      | 1  | CGGCTCGCAGA  | 0.647 |             |
| + | 4  | 295   | wr.p.E77K MUM1_uc002lsb.2_Missense_Mutation_p.E8 |              |              | Q2TAK8 | MUM1_HUMAN  |                                | 0  | AGAATGAGGTT  | 0.567 |             |
| - | 10 | 809   | wC3_uc002ltq.2_Miss                              | NM_003200    | NP_003191    | P15923 | TFE2_HUMAN  |                                | 7  | GAGGGGCAGCC  | 0.726 |             |
| + | 1  | 1059  |                                                  | NM_003775    | NP_003766    | O95977 | S1PR4_HUMAN | smic (By similarity).          | 2  | GGCTCACTCCG  | 0.692 |             |
| + | 5  | 824   | wr_Mutation_p.G13E                               | NM_033064    | NP_149053    | Q86WG3 | ATCAY_HUMAN |                                | 1  | TGCCCCGGGAC  | 0.667 |             |
| + | 8  | 1180  | wp.S239N ZNF557                                  | NM_001044388 | NP_001037853 | Q8N988 | ZN557_HUMAN | C2H2-type 4.                   | 2  | ATGCAGTGACT  | 0.438 |             |
| - | 3  | 26930 |                                                  | NM_024690    | NP_078966    | Q8WXI7 | MUC16_HUMAN | ch. Extracellular (Potential). | 57 | TGGGAGGTGAA  | 0.493 |             |
| + | 12 | 1318  | wp.D169N ZNF177                                  | NM_003451    | NP_003442    | Q13360 | ZN177_HUMAN | C2H2-type 4.                   | 1  | TCATCGATCAG  | 0.468 |             |
| - | 5  | 664   |                                                  | NM_001080404 | NP_001073873 | C9JN71 | ZN878_HUMAN | C2H2-type 3.                   | 0  | CACACTGCTTAC | 0.408 |             |
| + | 8  | 970   |                                                  | NM_017682    | NP_060152    | Q8NFU1 | BEST2_HUMAN | lasmic (Potential).            | 2  | TGGACGAGATG  | 0.627 |             |
| + | 2  | 333   | wr.p.E78K NFIX_uc002mwf.2_Missense_Mutation_p.E8 |              |              | Q14938 | NFIX_HUMAN  | CTF/NF-I.                      | 2  | GGCCCAGATTC  | 0.657 |             |
| + | 4  | 639   | wnaf.2_Missense_M                                | NM_012114    | NP_036246    | P31944 | CASPE_HUMAN |                                | 4  | TCGAGGCCCTG  | 0.567 |             |
| - | 7  | 2583  | wp.R721C WIZ_uc0                                 | NM_021241    | NP_067064    | O95785 | WIZ_HUMAN   |                                | 0  | TGCGCGTTCAA  | 0.617 |             |
| - | 1  | 117   | wnhx.1_Missense_I                                | NM_005535    | NP_005526    | P42701 | I12R1_HUMAN |                                | 1  | GCCTGGACAGC  | 0.582 |             |
| - | 4  | 827   | wpc.1_Missense_M                                 | NM_001076675 | NP_001070143 | Q68DY1 | ZN626_HUMAN |                                | 1  | TGTTTCTCTCAA | 0.393 |             |
| - | 7  | 2771  |                                                  | NM_001080409 | NP_001073878 |        |             |                                | 2  | TAAAAGCTTTGC | 0.368 |             |
| + | 3  | 2081  |                                                  | NM_014727    | NP_055542    | Q9UMN6 | MLL4_HUMAN  | Pro-rich.                      | 11 | GCCTGGGCAG   | 0.642 |             |
| - | 2  | 512   |                                                  | NM_001864    | NP_001855    | P24310 | CX7A1_HUMAN |                                | 0  | GGCGGTGGAG   | 0.697 |             |

|   |     |       |                   |              |              |        |              |                                |     |                 |       |             |
|---|-----|-------|-------------------|--------------|--------------|--------|--------------|--------------------------------|-----|-----------------|-------|-------------|
| + | 74  | 11027 | iv.1_Missense_Mu  | NM_000540    | NP_000531    | P21817 | RYR1_HUMAN   |                                | 12  | 3CAGTCGTGGCC    | 0.607 |             |
| - | 11  | 1301  | j.1_Missense_Mut  | NM_001626    | NP_001617    | P31751 | AKT2_HUMAN   | rotein kinase.                 | 2   | iCAGGCGGCCGC    | 0.622 | rs145305228 |
| + | 8   | 978   | p.G298R SPTBN4    | NM_020971    | NP_066022    | Q9H254 | SPTN4_HUMAN  |                                | 5   | CGTATCGGGAAG    | 0.567 |             |
| - | 4   | 679   | :F_uc002otd.3_5'U | NM_006494    | NP_006485    | P50548 | ERF_HUMAN    |                                | 4   | CAGCCGAGAAG     | 0.662 |             |
| + | 6   | 892   | wk.2_Missense_M   | NM_001130011 | NP_001123483 | Q9BY14 | TX101_HUMAN  |                                | 1   | 3TTTGGGGGTTA(   | 0.507 |             |
| + | 3   | 1737  | J2pbp.2_5'Flank C | NM_012099    | NP_036231    | O15446 | RPA34_HUMAN  |                                | 4   | AGGCAGCTCCC     | 0.493 |             |
| - | 8   | 870   | se_Mutation_p.V1  | NM_001983    | NP_001974    | P07992 | ERCC1_HUMAN  |                                | 2   | iCTTCACGGTGG    | 0.458 |             |
| - | 9   | 1137  | dp.1_Missense_M   | NM_004819    | NP_004810    | Q92797 | SYMPK_HUMAN  |                                | 1   | CTTACGCACAC1    | 0.592 |             |
| - | 8   | 1394  | e_Mutation_p.V32  | NM_002103    | NP_002094    | P13807 | GYS1_HUMAN   |                                | 2   | GCGCACAGCTT(    | 0.567 |             |
| - | 1   | 1839  |                   | NM_002152    | NP_002143    | P23327 | SRCH_HUMAN   |                                | 1   | CTTCcctcctcctc( | 0.308 |             |
| + | 2   | 195   | se_Mutation_p.G5  | NM_001030047 | NP_001025218 | P07288 | KLK3_HUMAN   | eptidase S1.                   | 3   | GCGGCGGTGTT     | 0.642 |             |
| + | 2   | 355   | p.V104M FPR2_u    | NM_001005738 | NP_001005738 | P25090 | FPR2_HUMAN   | Name=3; (Potential).           | 4   | ACATCGTGGTG(    | 0.483 | rs117415514 |
| - | 5   | 888   | i77_uc010ydf.1_5' | NM_023074    | NP_075562    | Q9BS31 | ZN649_HUMAN  | 2H2-type 2.                    | 3   | TACACACGTGG     | 0.488 |             |
| + | 4   | 1578  | po.1_Intron ZNF5  | NM_001143939 | NP_001137411 | Q76KX8 | ZN534_HUMAN  |                                | 0   | AGAAGCTTTACA    | 0.398 |             |
| + | 4   | 1695  | po.1_Intron ZNF5  | NM_001143939 | NP_001137411 | Q76KX8 | ZN534_HUMAN  | 2H2-type 13.                   | 0   | GCTTCCGTCGGA    | 0.443 |             |
| - | 5   | 976   | LRA3_uc010erk.2   | NM_006865    | NP_006856    | Q8N6C8 | LIRA3_HUMAN  | like C2-type 3.                | 1   | CGGAGGAGAGC     | 0.677 |             |
| + | 3   | 366   | l_p.G93R LILRA2   | NM_001130917 | NP_001124389 | Q8N149 | LIRA2_HUMAN  | potential). lg-like C2-type 1. | 1   | ACGCAGGGCGC     | 0.532 |             |
| + | 3   | 1653  | JF776_uc002qqa.2  | NM_173632    | NP_775903    | Q68D11 | ZN776_HUMAN  | ype 10; degenerate.            | 1   | GATTCGACATC/    | 0.448 |             |
| - | 2   | 604   | _p.R60C CHMP2A    | NM_198426    | NP_940818    | O43633 | CHM2A_HUMAN  | ction with VPS4B.              | 0   | GATGCGAACAG     | 0.522 |             |
| + | 7   | 1028  | 2qyt.2_Missense_f | NM_014746    | NP_055561    | P50876 | R144A_HUMAN  | ype 2; degenerate.             | 2   | GAGACGAAGGC     | 0.567 |             |
| - | 2   | 646   | rn_p.L4F LAPTM4   | NM_014713    | NP_055528    | Q15012 | LAP4A_HUMAN  | ical; (Potential).             | 1   | AGTCAGCAAAAT    | 0.398 |             |
| - | 23  | 3083  | iN2_uc002rfg.2_M  | NM_006277    | NP_006268    | Q9NZM3 | ITSN2_HUMAN  | SH3 2.                         | 4   | CTCTTCTCCAT     | 0.408 |             |
| + | 2   | 331   | ENPA_uc002rhs.2   | NM_001809    | NP_001800    | P49450 | CENPA_HUMAN  | H3-like.                       | 0   | TAAAGGAGATC(    | 0.547 |             |
| + | 2   | 253   | se_Mutation_p.W1  | NM_182551    | NP_872357    | Q6UWP7 | LCLT1_HUMAN  |                                | 2   | ACCCATGGTCAA    | 0.423 |             |
| + | 61  | 12279 | a-mir-558 MI0003! | NM_016252    | NP_057336    | Q9NR09 | BIRC6_HUMAN  |                                | 14  | CTCCAGGTGAT(    | 0.403 |             |
| + | 6   | 1027  | oa.1_Missense_Mi  | NM_022437    | NP_071882    | Q9H221 | ABCG8_HUMAN  | er. Cytoplasmic (Potential).   | 4   | GTCCTCGCTAC/    | 0.597 |             |
| - | 68  | 8081  |                   | NM_014709    | NP_055524    | Q70CQ2 | UBP34_HUMAN  |                                | 19  | CAGAAGATAAG(    | 0.423 |             |
| - | 42  | 5558  | '34_uc002sbf.2_5' | NM_014709    | NP_055524    | Q70CQ2 | UBP34_HUMAN  |                                | 19  | CAAATCGTAAGC    | 0.413 |             |
| - | 13  | 1347  |                   | NM_002056    | NP_002047    | Q06210 | GFPT1_HUMAN  | SIS 1.                         | 1   | CAGCTCCTCAA(    | 0.413 |             |
| + | 26  | 3095  | YSF_uc010fek.2_f  | NM_003494    | NP_003485    | O75923 | DYSF_HUMAN   | asmic (Potential).             | 7   | CTGACGTACGC(    | 0.592 |             |
| - | 7   | 501   | 1_5'UTR SFXN5_u   | NM_144579    | NP_653180    | Q8TD22 | SFXN5_HUMAN  |                                | 1   | CAAGAGAAGAC     | 0.478 |             |
| - | 7   | 1168  | _p.M213 IMMT_u    | NM_006839    | NP_006830    | Q16891 | IMMT_HUMAN   | intermembrane (Potential).     | 1   | TTGTCATGGC(     | 0.468 |             |
| - | 19  | 2487  | fhz.2_Missense_N  | NM_001115016 | NP_001108488 | Q9P2N6 | K1310_HUMAN  |                                | 0   | CACAGGAATGG     | 0.627 |             |
| + | 10  | 2081  |                   | NM_198581    | NP_940983    | P61129 | ZC3H6_HUMAN  |                                | 4   | TGAAAGTACCC/    | 0.483 |             |
| - | 3   | 707   |                   | NM_001099771 | NP_001093241 | A5A3E0 | POTEF_HUMAN  |                                | 5   | GTGGCAGCACC     | 0.617 |             |
| + | 12  | 1069  | v18_uc002trb.2_M  | NM_014369    | NP_055184    | Q99952 | PTN18_HUMAN  |                                | 4   | GACTCCCCAGG     | 0.612 |             |
| + | 1   | 1124  |                   | NM_001508    | NP_001499    | O43194 | GPR39_HUMAN  | ellular (Potential).           | 0   | GGACCGTGTT(     | 0.597 |             |
| - | 18  | 5911  | ttq.2_Missense_M  | NM_207363    | NP_997246    | O14513 | NCKP5_HUMAN  |                                | 0   | GAAGCGGCTGG     | 0.537 |             |
| - | 10  | 1535  |                   | NM_005915    | NP_005906    | Q14566 | MCM6_HUMAN   | MCM.                           | 0   | TCCTGCTTTAG1    | 0.403 |             |
| + | 9   | 1336  |                   | NM_015630    | NP_056445    | Q52LR7 | EPC2_HUMAN   |                                | 3   | TATGCTTACA/     | 0.398 |             |
| - | 7   | 682   |                   | NM_004543    | NP_004534    | P20929 | NEBU_HUMAN   | Nebulin 3.                     | 20  | GCTGCGACACT     | 0.418 |             |
| - | 14  | 2861  | aq.1_Missense_M   | NM_013450    | NP_038478    | Q9UIF8 | BAZ2B_HUMAN  | Arg-rich.                      | 4   | GATACGAGGAA     | 0.403 |             |
| - | 11  | 1441  | on.2_Missense_Mi  | NM_016836    | NP_058520    | P29558 | RBMS1_HUMAN  |                                | 0   | TGCGGGCTGTAC    | 0.493 |             |
| + | 6   | 673   | u.1_Missense_Mut  | NM_012198    | NP_036330    | P28676 | GRAN_HUMAN   | ential). EF-hand 4.            | 0   | TAAACGTTATAG    | 0.313 |             |
| - | 28  | 3928  | o.R686W ABCB11    | NM_003742    | NP_003733    | O95342 | ABCB11_HUMAN | potential). ABC transporter 2  | 5   | GGTCCGACCTT(    | 0.522 |             |
| - | 206 | 40825 | 1_Nonsense_Mut    | NM_133378    | NP_596869    | Q8WZ42 | TITIN_HUMAN  |                                | 153 | TAGTCCATGTTT    | 0.438 |             |
| - | 48  | 11692 | N_uc010zjf.1_Intr | NM_133378    | NP_596869    | Q8WZ42 | TITIN_HUMAN  |                                | 153 | TTTACAGTACTGC   | 0.358 |             |

|   |    |      |                   |              |              |        |             |                               |    |               |       |             |
|---|----|------|-------------------|--------------|--------------|--------|-------------|-------------------------------|----|---------------|-------|-------------|
| - | 8  | 758  |                   | NM_178123    | NP_835224    | Q86VW0 | SESD1_HUMAN |                               | 1  | CAACCGATGGA   | 0.294 |             |
| + | 51 | 4411 |                   | NM_000090    | NP_000081    | P02461 | CO3A1_HUMAN | lar collagen NC1.             | 13 | AATATCGAACAC  | 0.408 |             |
| - | 35 | 2613 | frx.2_Missense_Mi | NM_000393    | NP_000384    | P05997 | CO5A2_HUMAN |                               | 2  | GCCACCCTGGG   | 0.264 | rs147911170 |
| - | 4  | 626  | so.2_Splice_Site_ | NM_003151    | NP_003142    | Q14765 | STAT4_HUMAN |                               | 9  | TATTACCTGGAC  | 0.269 |             |
| - | 7  | 1703 | p.G296S SATB2_    | NM_015265    | NP_056080    | Q9UPW6 | SATB2_HUMAN |                               | 1  | AAGACCAGGGC   | 0.512 |             |
| + | 5  | 2441 |                   | NM_020923    | NP_065974    | Q9HCK1 | ZDBF2_HUMAN |                               | 3  | GTAATCTTAAAC  | 0.423 |             |
| + | 15 | 1641 | mM23_uc010ziv.1_l | NM_003812    | NP_003803    | O75077 | ADA23_HUMAN | B. Extracellular (Potential). | 3  | AATTTTCAAAGTC | 0.363 |             |
| + | 13 | 1987 |                   | NM_032726    | NP_116115    | Q9BRC7 | PLCD4_HUMAN | l-PLC Y-box.                  | 3  | ATGGCGGCTGT   | 0.517 |             |
| - | 8  | 3561 | fv.2_Missense_M   | NM_001105537 | NP_001099007 | P52746 | ZN142_HUMAN |                               | 4  | GAGAGGTAATAC  | 0.607 |             |
| + | 20 | 2655 | v797 STK36_uc0    | NM_015690    | NP_056505    | Q9NRP7 | STK36_HUMAN |                               | 11 | ATGTCGTCTCT   | 0.463 | rs148974664 |
| - | 16 | 2462 | ve.1_Missense_Mt  | NM_005689    | NP_005680    | Q9NP58 | ABCB6_HUMAN | 3C transporter.               | 2  | CCCGCGCTCA    | 0.622 |             |
| + | 26 | 2363 | xp.1_Missense_Mi  | NM_001080391 | NP_001073860 | P23497 | SP100_HUMAN |                               | 5  | GTGGAGTTGCA   | 0.493 |             |
| - | 7  | 1308 | l_p.R77C NGEF_u   | NM_019850    | NP_062824    | Q8N5V2 | NGEF_HUMAN  | DH.                           | 7  | CATAACGGTACA  | 0.567 |             |
| + | 10 | 970  | p.G276R PPP1R7    | NM_002712    | NP_002703    | Q15435 | PP1R7_HUMAN |                               | 3  | TGAAGGGAGCC   | 0.612 |             |
| - | 4  | 817  | SIRPG_uc002wfo.   | NM_018556    | NP_061026    | Q9P1W8 | SIRPG_HUMAN | ellular (Potential).          | 1  | TGGGTGGAAC    | 0.552 |             |
| + | 19 | 3401 | l.2_Missense_Mut  | NM_139321    | NP_647537    | O75882 | ATRN_HUMAN  | ntential). Laminin EGF-like   | 2  | TGAGGGGAAAT   | 0.468 |             |
| + | 20 | 3484 | il.2_Missense_Mul | NM_139321    | NP_647537    | O75882 | ATRN_HUMAN  | ntential). Laminin EGF-like   | 2  | AGGGCGTCAAG   | 0.592 |             |
| + | 3  | 636  | l_p.R87* PCSK2_   | NM_002594    | NP_002585    | P16519 | NEC2_HUMAN  |                               | 7  | TTGACCGAAAA   | 0.393 |             |
| + | 9  | 1733 | T2_uc002wzf.1_R   | NM_005093    | NP_005084    | O43439 | MTG8R_HUMAN |                               | 2  | GAAAACGGGGA   | 0.517 |             |
| - | 5  | 474  | S_uc010zup.1_Mi   | NM_000178    | NP_000169    | P48637 | GSHB_HUMAN  |                               | 3  | GCTGCGCTGGA   | 0.597 |             |
| + | 3  | 720  | OCR_uc010zuw.1    | NM_006404    | NP_006395    | Q9UNN8 | EPCR_HUMAN  | ellular (Potential).          | 0  | ACTGCGGGAAT   | 0.577 |             |
| - | 4  | 828  | p.T195M CHD6_u    | NM_032221    | NP_115597    | Q8TD26 | CHD6_HUMAN  |                               | 14 | GGTTCGTCAAG   | 0.532 |             |
| + | 20 | 2406 |                   | NM_017895    | NP_060365    | Q96GQ7 | DDX27_HUMAN |                               | 2  | GAGACGAGGAG   | 0.433 |             |
| + | 8  | 1100 | ys.1_Missense_Mi  | NM_002827    | NP_002818    | P18031 | PTN1_HUMAN  |                               | 0  | CCCACCTCCCC   | 0.552 |             |
| - | 15 | 2113 | e_Mutation_p.P60  | NM_080829    | NP_543019    | Q96MK2 | FA65C_HUMAN |                               | 2  | TGGGGGCAGGG   | 0.587 |             |
| - | 7  | 1326 | l.R168W CYP24A    | NM_000782    | NP_000773    | Q07973 | CP24A_HUMAN |                               | 3  | AAGCCGATTCTC  | 0.458 |             |
| + | 5  | 1237 | zm.2_Missense_N   | NM_001001433 | NP_001001433 | O14662 | STX16_HUMAN | lasmic (Potential).           | 1  | CGCAGGCCCTG   | 0.672 |             |
| - | 1  | 440  | CF.L5_uc002ydq.2  | NM_006602    | NP_006593    | Q9UL49 | TCFL5_HUMAN | Ala-rich.                     | 1  | CGTCGGCCGCC   | 0.488 |             |
| - | 13 | 1649 | fa.1_Missense_Mi  | NM_172107    | NP_742105    | O43526 | KCNQ2_HUMAN | lasmic (Potential).           | 2  | GTGCCCGGCTG   | 0.682 |             |
| - | 6  | 794  | ia.2_Missense_Mi  | NM_005873    | NP_005864    | P49795 | RGS19_HUMAN | RGS.                          | 1  | CGAACGTGTGT   | 0.647 |             |
| - | 10 | 1014 | .1_5'Flank MRPL3  | NM_017446    | NP_059142    | Q9NYK5 | RM39_HUMAN  |                               | 0  | TACATTCCTCTG  | 0.259 |             |
| + | 5  | 2159 | e_Mutation_p.P68  | NM_001186    | NP_001177    | O14867 | BACH1_HUMAN |                               | 2  | TGCCTCCCTGT   | 0.522 |             |
| - | 3  | 432  | mo.2_Missense_Mi  | NM_002240    | NP_002231    | P48051 | IRK6_HUMAN  | llular (By similarity).       | 1  | GAGGGGTCCCT   | 0.458 |             |
| + | 23 | 3804 | p.S923L TRAPP     | NM_003274    | NP_003265    | P48553 | TPC10_HUMAN |                               | 2  | GCAATTCGGCT   | 0.632 |             |
| - | 1  | 871  | .1_Intron C21orf2 | NM_198691    | NP_941964    | P60331 | KR101_HUMAN |                               | 1  | GCACGCGGGGC   | 0.726 |             |
| - | 1  | 581  | .1_Intron C21orf2 | NM_198696    | NP_941969    | P60369 | KR103_HUMAN | AA repeats of C-C-X(3).       | 1  | CAGGGGCACAG   | 0.721 |             |
| + | 1  | 644  | .1_Intron C21orf2 | NM_198687    | NP_941960    | P60372 | KR104_HUMAN | l repeats of C-C-X(3).        | 0  | CTGCACGCCCT   | 0.662 |             |
| - | 6  | 671  | a_Mutation_p.V15  | NM_003325    | NP_003316    | P54198 | HIRA_HUMAN  | WD 3.                         | 1  | TATCCACGCTGC  | 0.522 |             |
| + | 6  | 411  | l_p.G99R PPIL2_u  | NM_148175    | NP_680480    | Q13356 | PPIL2_HUMAN | U-box.                        | 2  | GTGAGGGTGAG   | 0.458 |             |
| - | 2  | 733  | gwa.1_Intron DUS  | NM_152511    | NP_689724    | Q8NEJ0 | DUS18_HUMAN |                               | 0  | GAGACGTGAGT   | 0.522 |             |
| + | 10 | 1398 | kj.2_Missense_Mu  | NM_005569    | NP_005560    | P53671 | LIMK2_HUMAN | rotein kinase.                | 2  | TCTGCGCAGTAT  | 0.532 | rs147975203 |
| + | 25 | 2894 | l.R740K SF11_uc0  | NM_001007467 | NP_001007468 | A8K8P3 | SF11_HUMAN  |                               | 1  | AGCCAGGAGGC   | 0.632 |             |
| - | 2  | 280  | arb.2_Missense_M  | NM_001051    | NP_001042    | P32745 | SSR3_HUMAN  | lasmic (Potential).           | 1  | TGGCCGTGTGC   | 0.647 |             |
| - | 3  | 1169 |                   | NM_052906    | NP_443138    | Q5R3F8 | LRFN6_HUMAN | tracellular (Potential).      | 2  | GCAGGCGGCTC   | 0.632 |             |
| + | 7  | 1998 | atq.1_Missense_M  | NM_001039141 | NP_001034230 | Q9H2D6 | TARA_HUMAN  |                               | 1  | ACCCAGAACAT   | 0.587 |             |
| + | 7  | 2067 | atq.1_Missense_M  | NM_001039141 | NP_001034230 | Q9H2D6 | TARA_HUMAN  |                               | 1  | ACCCACAACAT   | 0.582 |             |
| + | 7  | 2304 | atq.1_Missense_M  | NM_001039141 | NP_001034230 | Q9H2D6 | TARA_HUMAN  |                               | 1  | TGCCCTACGGG   | 0.582 |             |

|   |    |      |                    |              |              |        |             |                               |    |               |       |             |
|---|----|------|--------------------|--------------|--------------|--------|-------------|-------------------------------|----|---------------|-------|-------------|
| + | 12 | 1321 | DSL_uc003ayr.3_I   | NM_000026    | NP_000017    | P30566 | PUR8_HUMAN  |                               | 1  | GTGACAATGACC  | 0.488 | rs145750778 |
| - | 9  | 1110 |                    | NM_173050    | NP_766638    | Q8IWY4 | SCUB1_HUMAN | alcium-binding (Potential).   | 5  | GTGCCCGGGGAC  | 0.647 |             |
| + | 6  | 1046 | i_p.V1171 MPPED    | NM_001044370 | NP_001037835 | O15442 | MPPD1_HUMAN |                               | 0  | GGCGCGTCCAG   | 0.622 |             |
| + | 4  | 604  |                    | NM_015653    | NP_056468    | Q9H4K1 | RIBC2_HUMAN |                               | 0  | ATGTTCCGAATA  | 0.448 |             |
| + | 8  | 867  | _p.V261 TRABD_u    | NM_025204    | NP_079480    | Q9H4I3 | TRABD_HUMAN |                               | 0  | GCGACGTCTAC   | 0.672 |             |
| - | 16 | 4134 | CP6_uc010har.1_    | NM_020461    | NP_065194    | Q96RT7 | GCP6_HUMAN  | 'AA tandem repeats.           | 4  | CCGGGTGGGAC   | 0.622 | rs145066767 |
| - | 9  | 876  | tbl.1_Missense_M   | NM_002969    | NP_002960    | P53778 | MK12_HUMAN  | rotein kinase.                | 0  | TCCCCGTCACC   | 0.672 |             |
| - | 13 | 1826 | _p.L421F LMF2_u    | NM_033200    | NP_149977    | Q9BU23 | LMF2_HUMAN  |                               | 1  | CCTGAGCAGCG   | 0.657 |             |
| + | 9  | 1244 | ow.1_Missense_M    | NM_006614    | NP_006605    | O00533 | CHL1_HUMAN  | 3. Extracellular (Potential). | 12 | TTTCACGTTATAC | 0.398 |             |
| - | 19 | 3002 | org.1_Missense_M   | NM_014850    | NP_055665    | O43295 | SRGP2_HUMAN | SH3.                          | 9  | GGCGCGGTGGT   | 0.587 |             |
| + | 4  | 406  |                    | NM_153635    | NP_705899    | Q8IYJ1 | CPNE9_HUMAN | C2 1.                         | 2  | TTGAGGAAAAG   | 0.597 |             |
| + | 6  | 755  | h.2_Splice_Site_p. | NM_001077415 | NP_001070883 | Q96HD1 | CREL1_HUMAN |                               | 1  | TTCCGGTAGGT   | 0.622 |             |
| + | 1  | 200  | se_Mutation_p.P2l  | NM_144633    | NP_653234    | Q96L42 | KCNH8_HUMAN | lasmic (Potential).           | 5  | AAATGCCGGTTA  | 0.493 |             |
| + | 2  | 301  | awp.1_5'UTR OXS    | NM_017897    | NP_060367    | Q9NWX1 | OXSM_HUMAN  |                               | 2  | GATCGTCTTAT   | 0.463 |             |
| - | 2  | 1618 |                    | NM_033403    | NP_208382    | Q9C098 | DCLK3_HUMAN | rotein kinase.                | 9  | TCTCGCGGTGT   | 0.547 |             |
| + | 4  | 525  | ic.2_Missense_Ml   | NM_002207    | NP_002198    | Q13797 | ITA9_HUMAN  | r (Potential). FG-GAP 2.      | 6  | ATCCTACCCCAT  | 0.512 |             |
| + | 18 | 2626 | v.1_Missense_Mut   | NM_007335    | NP_031361    | Q9Y238 | DLEC1_HUMAN |                               | 9  | AGTTTGGTCTG   | 0.627 |             |
| - | 15 | 1900 | .2_Missense_Mute   | NM_002343    | NP_002334    | P02788 | TRFL_HUMAN  | ansferrin-like 2.             | 4  | CCATCCGAGAC   | 0.552 | rs142148325 |
| - | 17 | 3703 | .003csx.2_Missens  | NM_002673    | NP_002664    | O43157 | PLXB1_HUMAN | Extracellular (Potential).    | 5  | CGGCACCTCCA   | 0.667 |             |
| - | 63 | 5429 |                    | NM_000094    | NP_000085    | Q02388 | CO7A1_HUMAN | le-helical region.            | 11 | TGGAAGCCCCT   | 0.552 |             |
| + | 5  | 6893 |                    | NM_003458    | NP_003449    | Q9UPA5 | BSN_HUMAN   |                               | 8  | TGTACCCTATC   | 0.592 |             |
| - | 5  | 728  | MPPB_uc003cxl.     | NM_021971    | NP_068806    | Q9Y5P6 | GMPPB_HUMAN |                               | 0  | TATTGGACACA   | 0.592 |             |
| + | 2  | 894  |                    | NM_203370    | NP_976248    | Q96EL1 | CC054_HUMAN |                               | 0  | CCACCTCGCC    | 0.632 |             |
| - | 5  | 573  | t.1_5'UTR CAMKV    | NM_024046    | NP_076951    | Q8NCB2 | CAMKV_HUMAN | rotein kinase.                | 7  | ACTTGCCGTACC  | 0.602 |             |
| - | 2  | 1610 | T449 MST1R_uc      | NM_002447    | NP_002438    | Q04912 | RON_HUMAN   | ilar (Potential). Sema.       | 6  | ATGCAGTGACC   | 0.572 |             |
| + | 8  | 961  | 3cyk.2_Splice_Site | NM_004186    | NP_004177    | Q13275 | SEM3F_HUMAN |                               | 2  | GAACGGTAAGC   | 0.567 |             |
| + | 7  | 1132 | 1bdu.1_Missense_   | NM_015106    | NP_055921    | Q9Y4B4 | ARIP4_HUMAN | ase ATP-binding.              | 3  | TGTGCCGGTAA   | 0.512 |             |
| + | 5  | 561  | ei.1_Missense_Mu   | NM_015136    | NP_055951    | Q9NY15 | STAB1_HUMAN | Extracellular (Potential).    | 9  | AATCGGGTGAG   | 0.632 |             |
| + | 19 | 2335 | gm.2_Missense_M    | NM_006254    | NP_006245    | Q05655 | KPCD_HUMAN  | kinase C-terminal.            | 9  | ATTCTGCTGGCT  | 0.557 |             |
| + | 9  | 1276 | C66_uc003dhu.2_I   | NM_001141947 | NP_001135419 | A2RUB6 | CCD66_HUMAN |                               | 1  | CTCCTGACACT   | 0.453 |             |
| + | 9  | 1116 | e_Mutation_p.A304  | NM_007159    | NP_009090    | Q14BN4 | SLMAP_HUMAN | Cytoplasmic (Potential).      | 0  | AATTAGCCAACA  | 0.323 |             |
| - | 8  | 1903 | m.2_Nonsense_Ml    | NM_003716    | NP_003707    | Q9ULU8 | CAPS1_HUMAN |                               | 3  | CATTCGGACAG   | 0.448 |             |
| - | 35 | 5335 | p.A1740V ADAMT     | NM_182920    | NP_891550    | Q9P2N4 | ATS9_HUMAN  | GON.                          | 4  | ATCCCCGACAG   | 0.463 |             |
| - | 2  | 821  | fx.1_Missense_Mu   | NM_007114    | NP_009045    | P82094 | TMF1_HUMAN  |                               | 0  | ACTTACAGTTGC  | 0.388 |             |
| - | 16 | 2130 | p.R603W FOXP1_     | NM_032682    | NP_116071    | Q9H334 | FOXP1_HUMAN | p.R603Q(1)                    | 2  | TCCCGTATTGC   | 0.512 |             |
| - | 5  | 1590 | ense_Mutation_p.A  | NM_019895    | NP_063948    | Q9NY35 | CLDN1_HUMAN |                               | 1  | TGTGAGCAGCC   | 0.448 |             |
| - | 10 | 1335 | re.1_Missense_Ml   | NM_016247    | NP_057331    | Q9BZV3 | IMPG2_HUMAN | ellular (Potential).          | 3  | GGAATCAGGAT   | 0.378 |             |
| - | 2  | 347  | egb.1_Missense_I   | NM_001031702 | NP_001026872 | Q9P283 | SEM5B_HUMAN | ellular (Potential).          | 7  | AGGGACGAGGT   | 0.612 |             |
| - | 21 | 3718 | gg.1_Missense_Ml   | NM_183357    | NP_899200    | O95622 | ADCY5_HUMAN | lasmic (Potential).           | 4  | GACCACGCCCC   | 0.612 |             |
| - | 2  | 274  |                    | NM_033049    | NP_149038    | Q9H3R2 | MUC13_HUMAN | xtracellular (Potential).     | 0  | GAGCAGGTGTAG  | 0.453 |             |
| + | 10 | 911  | tb.2_Missense_Ml   | NM_016128    | NP_057212    | Q9Y678 | COPG_HUMAN  |                               | 4  | AAGCCGCCTCG   | 0.557 |             |
| + | 11 | 1364 | p.R402Q PLS1_uc    | NM_001145319 | NP_001138791 | Q14651 | PLS1_HUMAN  | i. Actin-binding 2.           | 1  | ATTTCGGAAC    | 0.398 | rs138340155 |
| - | 2  | 147  |                    | NM_138786    | NP_620141    | Q96CE8 | T4S18_HUMAN | lasmic (Potential).           | 1  | ACTTCGAGACC   | 0.413 |             |
| + | 4  | 1215 | wq.2_Nonsense_M    | NM_014373    | NP_055188    | Q9UJ42 | GP160_HUMAN | lasmic (Potential).           | 0  | TGGTACAGGCT   | 0.328 |             |
| + | 1  | 72   | 3fb.2_5'Flank NDI  | NM_002492    | NP_002483    | O43674 | NDUB5_HUMAN |                               | 1  | CTGCGGTGGCA   | 0.632 |             |
| - | 11 | 1244 | cj.1_Missense_Mu   | NM_016559    | NP_057643    | Q8IYB4 | PEX5R_HUMAN | TPR 1.                        | 4  | ATTCTCGCCTC   | 0.443 |             |
| - | 8  | 934  | L2_uc003fp.1_Mi    | NM_015078    | NP_055893    | Q86YR7 | MF2L2_HUMAN |                               | 5  | GTTGAGATTGA   | 0.428 |             |

|   |    |       |                    |              |              |        |             |                               |    |                 |       |             |
|---|----|-------|--------------------|--------------|--------------|--------|-------------|-------------------------------|----|-----------------|-------|-------------|
| + | 10 | 1456  | ns.2_Missense_Mi   | NM_198241    | NP_937884    | Q04637 | IF4G1_HUMAN |                               | 7  | TCAGTGAGCCA     | 0.622 |             |
| - | 6  | 730   | brs.1_Missense_M   | NM_001966    | NP_001957    | Q08426 | EHP_HUMAN   | hydratase / isomerase.        | 3  | TGCACGGACAC     | 0.537 | rs141664962 |
| - | 2  | 7133  | C4_uc003fvp.2_Inl  | NM_018406    | NP_060876    | Q99102 | MUC4_HUMAN  |                               | 0  | AAGAAGAGGGA     | 0.597 |             |
| + | 3  | 436   | se_Mutation_p.P5   | NM_017861    | NP_060331    | Q8TBF5 | PIGX_HUMAN  | lenal (Potential).            | 0  | GGATCCGTATG#    | 0.408 |             |
| + | 44 | 6002  |                    | NM_002111    | NP_002102    | P42858 | HD_HUMAN    |                               | 4  | CCAGCGGCCTG     | 0.488 |             |
| - | 1  | 1528  | 3_5'Flank TADA2E   | NM_153376    | NP_699207    | Q2M329 | CCD96_HUMAN |                               | 0  | CGTCCGACGCC     | 0.557 |             |
| + | 3  | 1423  | P2_uc003gll.2_Intr | NM_080819    | NP_543009    | Q96P69 | GPR78_HUMAN | lasmic (Potential).           | 6  | GCACCAGCTGC     | 0.647 | rs149989249 |
| + | 31 | 3466  | s.1_Missense_Mut   | NM_004787    | NP_004778    | O94813 | SLIT2_HUMAN | alcium-binding (Potential).   | 11 | AAAACGGAGCC     | 0.413 | rs144073473 |
| - | 46 | 6465  | i.1_Missense_Mul   | NM_015030    | NP_055845    | O94915 | FRYL_HUMAN  |                               | 1  | CCGCCGGTCAC     | 0.418 | rs140338334 |
| - | 26 | 3805  | .1_Missense_Mut    | NM_002253    | NP_002244    | P35968 | VGFR2_HUMAN | lasmic (Potential).           | 33 | FGCTGAGCATTAC   | 0.502 |             |
| - | 6  | 1491  | e_Mutation_p.D34   | NM_021139    | NP_066962    | P06133 | UD2B4_HUMAN |                               | 2  | GAGGTCGTGGG     | 0.493 |             |
| + | 3  | 194   |                    | NM_001133    | NP_001124    | P43652 | AFAM_HUMAN  | Albumin 1.                    | 3  | AGTATGTTCAGC    | 0.413 |             |
| - | 3  | 600   |                    | NM_001729    | NP_001720    | P35070 | BTC_HUMAN   | ar (Potential). EGF-like.     | 2  | CACCACGAAGC     | 0.557 |             |
| + | 8  | 2802  | p.E655K PRDM8      | NM_020226    | NP_064611    | Q9NQV8 | PRDM8_HUMAN |                               | 1  | CGATGGAGCCC     | 0.597 |             |
| - | 9  | 1217  | SE_uc011ccs.1_M    | NM_001098540 | NP_001092010 | Q9Y251 | HPSE_HUMAN  |                               | 1  | TTCCGGGCTGAC    | 0.443 |             |
| + | 1  | 157   |                    | NM_005390    | NP_005381    | P29803 | ODPAT_HUMAN |                               | 1  | ATGACGCTACA     | 0.502 |             |
| + | 2  | 847   | ifb.2_Missense_Mi  | NM_199327    | NP_955359    | O43609 | SPY1_HUMAN  | lys-rich. SPR.                | 3  | TGGAACCTGCAT    | 0.512 |             |
| + | 5  | 1381  | p.S347F PLK4_uc    | NM_014264    | NP_055079    | O00444 | PLK4_HUMAN  |                               | 0  | ATTCTCTGATAC    | 0.413 |             |
| + | 12 | 2514  |                    | NM_022475    | NP_071920    | Q96QV1 | HHIP_HUMAN  | EGF-like 1.                   | 6  | CCCCACGGGAA     | 0.537 |             |
| - | 2  | 1646  | e_Mutation_p.G43   | NM_000901    | NP_000892    | P08235 | MCR_HUMAN   | Modulating.                   | 1  | GGTGCCTGAAC     | 0.373 |             |
| - | 7  | 1157  | AP9_uc010iqa.1_R   | NM_001039580 | NP_001034669 | Q49MG5 | MAP9_HUMAN  | Potential.                    | 2  | CAACTGCAGTAC    | 0.368 |             |
| + | 20 | 3563  | ase_Mutation_p.V7  | NM_016081    | NP_057165    | Q8WX93 | PALLD_HUMAN | action with EZR.              | 1  | TGGACGTTTAC     | 0.423 |             |
| + | 7  | 1306  | p.T249I CLCN3      | NM_001829    | NP_001820    | P51790 | CLCN3_HUMAN | al; (By similarity).          | 3  | TAAAAACCATCAC   | 0.398 |             |
| - | 10 | 6931  |                    | NM_005245    | NP_005236    | Q14517 | FAT1_HUMAN  | (Potential). Cadherin 20.     | 12 | ATGCCGGGTGGC    | 0.473 |             |
| + | 7  | 989   | P72_uc011ciz.1_R   | NM_018140    | NP_060610    | Q9P209 | CEP72_HUMAN |                               | 1  | GGATACCGAGG     | 0.527 |             |
| + | 10 | 1333  | D2_uc010itf.1_3'U  | NM_033120    | NP_149111    | Q969F2 | NKD2_HUMAN  | His-rich.                     | 0  | caccaccaccaccac | 0.522 |             |
| + | 20 | 3214  | jdk.1_Missense_M   | NM_139056    | NP_620687    | Q8TE57 | ATS16_HUMAN | rSP type-1 4.                 | 8  | TGCTGCCCGAC     | 0.637 |             |
| - | 18 | 3125  |                    | NM_003966    | NP_003957    | Q13591 | SEM5A_HUMAN | Extracellular (Potential).    | 2  | GTTCCGAATGC     | 0.582 |             |
| - | 18 | 3204  | VD2_uc011cmz.1     | NM_001332    | NP_001323    | Q9UQB3 | CTND2_HUMAN |                               | 8  | GATCTCGGTAC     | 0.532 |             |
| - | 17 | 2948  | VD2_uc011cmz.1     | NM_001332    | NP_001323    | Q9UQB3 | CTND2_HUMAN |                               | 8  | GTCTCGCATGG     | 0.512 |             |
| - | 66 | 11419 | AH5_uc003jfc.2_In  | NM_001369    | NP_001360    | Q8TE73 | DYH5_HUMAN  | IAAA 5 (By similarity).       | 31 | CTCCTCGGCTG     | 0.458 |             |
| + | 12 | 2420  | p.L678F PDZD2      | NM_178140    | NP_835260    | O15018 | PDZD2_HUMAN |                               | 9  | CCAGCCTCACA     | 0.532 |             |
| - | 2  | 261   |                    | NM_001737    | NP_001728    | P02748 | CO9_HUMAN   | TSP type-1.                   | 0  | TCTGAGACAAGC    | 0.478 |             |
| + | 3  | 371   |                    | NM_006144    | NP_006135    | P12544 | GRAA_HUMAN  | eptidase S1.                  | 4  | CACCGGAAGGT     | 0.438 |             |
| + | 29 | 3894  | NEF_uc011csr.1_M   | NM_001080479 | NP_001073948 | Q8N1W1 | RGNEF_HUMAN | of axonal branching and sy    | 0  | TGGGCGCCGTG     | 0.428 |             |
| + | 35 | 4819  | .V1029M IQGAP2     | NM_006633    | NP_006624    | Q13576 | IQGA2_HUMAN |                               | 7  | AAAAGGTGCAA     | 0.368 |             |
| - | 8  | 2787  |                    | NM_000046    | NP_000037    | P15848 | ARSB_HUMAN  |                               | 1  | TAGCGGGACAC     | 0.542 |             |
| - | 7  | 1036  | EDH_uc011ctf.1_N   | NM_013391    | NP_037523    | Q9UI17 | M2GD_HUMAN  |                               | 4  | TGATTCGATCTAC   | 0.423 | rs143021634 |
| + | 20 | 2679  | uc003kgi.3_Intron  | NM_003248    | NP_003239    | P35443 | TSP4_HUMAN  | SP C-terminal.                | 0  | ACCTTCATGTG     | 0.453 |             |
| - | 4  | 610   |                    | NM_000439    | NP_000430    | P29120 | NEC1_HUMAN  | Catalytic.                    | 2  | ATCCTGGTATCTT   | 0.443 |             |
| + | 3  | 550   | uj.3_Missense_Mi   | NM_130809    | NP_570721    | Q96M27 | PRRC1_HUMAN | Pro-rich.                     | 0  | CTGACCCCTTI     | 0.517 | rs149336967 |
| + | 1  | 653   | DHA5_uc003lhc.     | NM_018911    | NP_061734    | Q9Y5H6 | PCDA8_HUMAN | Extracellular (Potential).    | 2  | TGGGGCAAAC      | 0.473 |             |
| + | 19 | 2869  | p.R926C WWC1       | NM_015238    | NP_056053    | Q8IX03 | KIBRA_HUMAN | ion with histone H3.          | 5  | ATCATCCGCTCT    | 0.647 |             |
| - | 9  | 1820  |                    | NM_005990    | NP_005981    | O94804 | STK10_HUMAN |                               | 8  | TCAGCGACAGG     | 0.572 |             |
| + | 4  | 2680  | 408Q CPEB4_uc0     | NM_030627    | NP_085130    | Q17RY0 | CPEB4_HUMAN |                               | 0  | TGGCGAAGGAC     | 0.353 |             |
| + | 8  | 1128  | p.R321W FGFR4      | NM_002011    | NP_002002    | P22455 | FGFR4_HUMAN | otential). Ig-like C2-type 3. | 16 | ACCTGCGGAAC     | 0.632 |             |
| - | 3  | 387   | P2_uc003mis.2_In   | NM_017838    | NP_060308    | Q9NX24 | NHP2_HUMAN  |                               | 0  | TCTGCCAAAAA     | 0.483 |             |



|   |    |      |                                  |              |              |        |                                            |    |               |       |             |
|---|----|------|----------------------------------|--------------|--------------|--------|--------------------------------------------|----|---------------|-------|-------------|
| - | 15 | 1212 | Jjkt.2_Missense_M                | NM_173465    | NP_775736    | Q86Y22 | CONA1_HUMAN ntial). Collagen-like 2. Gly-r | 2  | TGCCTCGGTGG   | 0.652 |             |
| - | 7  | 1017 | itron C5orf45_uc01               | NM_016175    | NP_057259    | Q6NTE8 | CE045_HUMAN                                | 0  | GGGTCGAGGAT   | 0.547 |             |
| - | 10 | 1199 | ntx.3_Missense_IV                | NM_001012418 | NP_001012418 | Q86YV6 | MYLK4_HUMAN rotein kinase.                 | 4  | AAGGCGACAAA   | 0.498 |             |
| - | 2  | 212  | P2L_uc011dim.1_I                 | NM_004752    | NP_004743    | O75603 | GCM2_HUMAN GCM.                            | 3  | TGAAGCGCACAA  | 0.562 | rs104893959 |
| - | 1  | 59   | _5'UTR HIST1H2E                  | NM_021065    | NP_066409    | P20671 | H2A1D_HUMAN                                | 0  | CCCGCGAAGAG   | 0.587 |             |
| + | 7  | 997  |                                  | NM_001732    | NP_001723    | Q13410 | BT1A1_HUMAN . Cytoplasmic (Potential).     | 2  | TGTTTCGACTGG  | 0.488 |             |
| - | 10 | 5112 | C1_uc011dmp.1_A                  | NM_014641    | NP_055456    | Q14676 | MDC1_HUMAN ith the PRKDC complex.          | 4  | CCTGCCCTAGT   | 0.582 |             |
| - | 9  | 1676 | p.R349* BAT1_uc0                 | NM_004640    | NP_004631    | Q13838 | DX39B_HUMAN case C-terminal.               | 0  | GCCTCGGCCAA   | 0.428 |             |
| + | 9  | 1182 | SKIV2L_uc011do                   | NM_006929    | NP_008860    | Q15477 | SKIV2_HUMAN                                | 4  | AGGAAGCGTCC   | 0.557 |             |
| + | 17 | 2316 | _p.L485F SKIV2L_                 | NM_006929    | NP_008860    | Q15477 | SKIV2_HUMAN case C-terminal.               | 4  | CCATCCTCAAG   | 0.602 |             |
| + | 6  | 563  | L8_uc003oac.1_A                  | NM_030652    | NP_085155    | Q99944 | EGFL8_HUMAN alcium-binding (Potential).    | 0  | CCTGCGGCTGC   | 0.597 |             |
| - | 2  | 178  | dqm.1_Missense_                  | NM_006120    | NP_006111    | Q31604 | Q31604_HUMAN                               | 0  | GAGTAGGAGCT   | 0.478 |             |
| - | 2  | 387  | _uc010jvx.2_Silent               | NM_003214    | NP_003205    | Q99594 | TEAD3_HUMAN TEA.                           | 1  | GGCGGGGTAGA   | 0.706 |             |
| - | 5  | 838  | <17_uc003oop.2_                  | NM_031460    | NP_113648    | Q96T54 | KCNKH_HUMAN                                | 2  | GGGAGGGGTTC   | 0.517 |             |
| - | 6  | 1143 |                                  | NM_173561    | NP_775832    | Q8IV45 | UN5CL_HUMAN . Interaction with RELA and    | 2  | CTCATCGGCTAT  | 0.517 |             |
| - | 2  | 344  | _p.S111N TREM2                   | NM_018965    | NP_061838    | Q9NZC2 | TREM2_HUMAN . Extracellular (Potential).   | 1  | CTGTGCTCCCA   | 0.602 |             |
| - | 16 | 2815 | 5'Flank PEX6_uc0                 | NM_000287    | NP_000278    | Q13608 | PEX6_HUMAN                                 | 1  | CAGCTGGGGAG   | 0.562 |             |
| + | 5  | 701  |                                  | NM_032538    | NP_115927    | Q5TCY1 | TTBK1_HUMAN rotein kinase.                 | 9  | GGAGTCCATCG   | 0.642 |             |
| - | 3  | 850  | _Intron TMEM151                  | NM_182539    | NP_872345    | Q5JU00 | TCTE1_HUMAN                                | 4  | CAGATCGCCCA   | 0.627 |             |
| - | 2  | 446  |                                  | NM_000255    | NP_000246    | P22033 | MUTA_HUMAN                                 | 0  | CTTCCGGGGTG   | 0.488 |             |
| - | 6  | 563  | zq.2_Missense_Mt                 | NM_000847    | NP_000838    | Q16772 | GSTA3_HUMAN ST C-terminal.                 | 0  | AAGTTCACCCA   | 0.502 |             |
| - | 3  | 471  | zr.2_Missense_Mt                 | NM_003643    | NP_003634    | Q9NP62 | GCM1_HUMAN GCM.                            | 1  | CTCTGCGAGAC   | 0.597 | rs150847762 |
| + | 5  | 1555 |                                  | NM_001010872 | NP_001010872 | Q5T0W9 | FA83B_HUMAN                                | 6  | ACAACGAATGC   | 0.413 |             |
| + | 34 | 5037 | zgg.2_Missense_IV                | NM_014989    | NP_055804    | Q86UR5 | RIMS1_HUMAN                                | 10 | TGATCGGATGG   | 0.542 |             |
| - | 32 | 5633 | zph.2_Missense_IV                | NM_004370    | NP_004361    | Q99715 | COCA1_HUMAN nectin type-III 13.            | 9  | GGATACGGTGA   | 0.468 |             |
| - | 3  | 860  | kcc.2_Missense_IV                | NM_021244    | NP_067067    | Q9NQL2 | RRAGD_HUMAN                                | 3  | TCTTTGGGTTTC  | 0.433 |             |
| - | 5  | 2790 |                                  | NM_001080450 | NP_001073919 | Q5T5X7 | BEND3_HUMAN                                | 3  | CACCGGGAAGT   | 0.652 |             |
| - | 17 | 7264 | z3L_uc003puz.3_A                 | NM_002912    | NP_002903    | O60673 | DPOLZ_HUMAN                                | 6  | GATCCGGTTCT   | 0.378 |             |
| + | 2  | 523  | _p.A110V DSE_uc0                 | NM_001080976 | NP_001074445 | Q9UL01 | DSE_HUMAN                                  | 1  | CCTTGGCAATGT  | 0.512 |             |
| + | 12 | 1437 | zns.2_Missense_IV                | NM_004100    | NP_004091    | O95677 | EYA4_HUMAN                                 | 2  | GATTCGATACC   | 0.388 | rs144415484 |
| - | 16 | 2227 | gv.2_Missense_Mt                 | NM_003980    | NP_003971    | Q14244 | MAP7_HUMAN                                 | 0  | GGTAACCACATC  | 0.463 | rs140358034 |
| - | 3  | 2186 | kg.2_Missense_Mt                 | NM_002656    | NP_002647    | Q9UM63 | PLAL1_HUMAN                                | 1  | AGGTAGAAGTG   | 0.552 |             |
| + | 2  | 597  | zll.2_Missense_Mu                | NM_000838    | NP_000829    | Q13255 | GRM1_HUMAN . Cellular (Potential).         | 19 | TGGACGGAGAT   | 0.597 |             |
| + | 9  | 3576 | z_3'UTR GRM1_uc                  | NM_000838    | NP_000829    | Q13255 | GRM1_HUMAN . Cytosolic (Potential).        | 19 | TCCAGGGAGTG   | 0.672 |             |
| + | 2  | 653  |                                  | NM_015278    | NP_056093    | O94885 | SASH1_HUMAN                                | 1  | ACATCGATGAC   | 0.572 |             |
| - | 6  | 844  | P43_uc011eee.1_f                 | NM_198887    | NP_942590    | Q8NFB3 | NUP43_HUMAN WD 6.                          | 1  | ACTTTTCAGCTTC | 0.373 |             |
| + | 18 | 2090 | zns.2_Missense_IV                | NM_015440    | NP_056255    | Q6UB35 | C1TM_HUMAN hydrofolate synthetase.         | 4  | TCGCAGTGGCC   | 0.607 |             |
| + | 7  | 2627 | ze.2_Missense_IV                 | NM_012454    | NP_036586    | Q8IVF5 | TIAM2_HUMAN                                | 4  | GCAGCGATCCC   | 0.502 |             |
| - | 15 | 1800 | qrb.2_Missense_IV                | NM_032861    | NP_116250    | Q96JX3 | SRAC1_HUMAN                                | 0  | CCAACGAGGGG   | 0.353 |             |
| - | 8  | 1650 | zju.2_Missense_Mt                | NM_031924    | NP_114130    | Q86UC2 | RSPH3_HUMAN                                | 2  | CACCAGGCTCA   | 0.507 |             |
| + | 2  | 822  | zns.2_Missense_IV                | NM_001098201 | NP_001091671 | Q99527 | GPBR_HUMAN Name=3; (Potential).            | 1  | GCAGCGTCTTC   | 0.607 |             |
| + | 6  | 1072 | zIN_uc003sso.3_M                 | NM_001112706 | NP_001106177 | Q9Y6U3 | ADSV_HUMAN . Actin-severing (Potential).   | 2  | ACCACGGGGCT   | 0.393 |             |
| + | 13 | 1864 | _p.R885C ABCB5_                  | NM_178559    | NP_848654    | Q2M3G0 | ABCB5_HUMAN ial). ABC tra p.R440H(1)       | 6  | AATATACGTACT  | 0.323 |             |
| + | 6  | 1179 |                                  | NM_003777    | NP_003768    | Q96DT5 | DYH11_HUMAN n (By similarity).             | 15 | GACTCGGGTTA   | 0.388 |             |
| - | 3  | 429  | 1_5'UTR TRA2A_L                  | NM_013293    | NP_037425    | Q13595 | TRA2A_HUMAN -rich (RS1 domain).            | 1  | GGGATCTGGAT   | 0.448 |             |
| - | 18 | 1955 | z_1_RNA DPY19L2P1_uc010kwz.1_RNA |              |              |        |                                            | 0  | CTGTGCGAGAG   | 0.363 |             |
| + | 2  | 753  | _p.A154T IGFBP1_                 | NM_000596    | NP_000587    | P08833 | IBP1_HUMAN                                 | 1  | GGGACCCATC    | 0.527 |             |

|   |    |      |                    |              |              |        |             |                            |     |               |       |             |
|---|----|------|--------------------|--------------|--------------|--------|-------------|----------------------------|-----|---------------|-------|-------------|
| - | 7  | 770  |                    | NM_138295    | NP_612152    | Q8TDX9 | PK1L1_HUMAN | cellular (Potential).      | 11  | TGGGGGTGCGA   | 0.577 |             |
| + | 4  | 893  |                    | NM_001159524 | NP_001152996 | P0CB33 | ZN735_HUMAN | 2H2-type 6.                | 0   | CTACAAATGTG   | 0.458 |             |
| + | 3  | 661  | 7orf42_uc003tvl.2_ | NM_017994    | NP_060464    | Q9NWD8 | CG042_HUMAN |                            | 1   | GCAACGTCACC   | 0.547 |             |
| + | 4  | 506  | P120L FKBP6_uc     | NM_003602    | NP_003593    | O75344 | FKBP6_HUMAN | ase FKBP-type.             | 0   | CCCTCCCTTGA   | 0.552 |             |
| + | 4  | 515  | P123L FKBP6_uc     | NM_003602    | NP_003593    | O75344 | FKBP6_HUMAN | ase FKBP-type.             | 0   | GATCCCCCAA    | 0.542 |             |
| + | 9  | 980  | ε_Mutation_p.E19f  | NM_000941    | NP_000932    | P16435 | NCPR_HUMAN  | -binding FR-type.          | 1   | GAACCGAGCGC   | 0.602 | rs11540674  |
| + | 10 | 2100 | j.3_Missense_Mut   | NM_020892    | NP_065943    | Q86UW9 | DTX2_HUMAN  |                            | 2   | CCATGGTATCCA  | 0.607 |             |
| - | 22 | 3044 | rc.1_Missense_Mt   | NM_000927    | NP_000918    | P08183 | MDR1_HUMAN  | smembrane type-1 2.        | 7   | TTTTCATTTCAAC | 0.353 |             |
| - | 3  | 967  | TEAP4_uc003ujt.2   | NM_024636    | NP_078912    | Q687X5 | STEA4_HUMAN | oxidoreductase.            | 0   | GCAAAGCATCC   | 0.473 |             |
| + | 8  | 1046 | _p.G220S DYNC1     | NM_004411    | NP_004402    | O14576 | DC111_HUMAN |                            | 4   | ACAGCGGCCGA   | 0.373 |             |
| + | 3  | 473  | tl3_uc011kip.1_Int | NM_015379    | NP_056194    | O95415 | BRI3_HUMAN  |                            | 0   | GAAAGCAGCAT   | 0.522 | rs137943501 |
| + | 4  | 894  | λA_uc003uup.1_M    | NM_013439    | NP_038467    | Q9UKJ1 | PILRA_HUMAN | lasmic (Potential).        | 1   | AGCAGCGGACT   | 0.637 | rs145267648 |
| + | 22 | 4300 | μwi.2_RNA ZAN_u    | NM_003386    | NP_003377    | Q9Y493 | ZAN_HUMAN   | cellular (Potential).      | 11  | TCTTCGACAGC   | 0.612 |             |
| - | 14 | 2975 | 735_splice EPHB4   | NM_004444    | NP_004435    | P54760 | EPHB4_HUMAN |                            | 15  | CACTTACGTCT   | 0.542 |             |
| + | 11 | 1125 | SLC26A5_uc003vt    | NM_002803    | NP_002794    | P35998 | PR57_HUMAN  |                            | 0   | TCGGACCCACA   | 0.333 |             |
| + | 8  | 1037 | tion_p.T297 CDH    | NM_152750    | NP_689963    | Q6ZTQ4 | CDHR3_HUMAN | Extracellular (Potential). | 1   | TCCCACCATTT   | 0.478 |             |
| - | 13 | 1603 | ey.2_Missense_Mt   | NM_007356    | NP_031382    | A4D0S4 | LAMB4_HUMAN | EGF-like 5; truncated.     | 8   | ACAGTCACAGG   | 0.388 |             |
| + | 5  | 1400 | iPAM1_uc003vlf.3   | NM_153189    | NP_694859    | P38567 | HYALP_HUMAN |                            | 4   | GGGTGCTTCTG   | 0.343 |             |
| + | 9  | 1340 | p.E315K IRF5_uc    | NM_002200    | NP_002191    | Q13568 | IRF5_HUMAN  |                            | 0   | TTGGGAAGAA    | 0.522 |             |
| - | 28 | 5105 | IA4_uc003vqz.3_5   | NM_020911    | NP_065962    | Q9HCM2 | PLXA4_HUMAN | lasmic (Potential).        | 1   | TGTACCGATCA   | 0.572 |             |
| + | 7  | 1283 | ub.2_Missense_M    | NM_015905    | NP_056989    | O15164 | TIF1A_HUMAN | Potential.                 | 8   | CAATTGGAGCA   | 0.373 |             |
| + | 19 | 3352 | jb.2_Missense_Mt   | NM_015905    | NP_056989    | O15164 | TIF1A_HUMAN |                            | 8   | GAACGCCAGT    | 0.343 |             |
| - | 2  | 503  | l_p.V102 KIAA15z   | NM_020910    | NP_065961    | Q9HCM3 | K1549_HUMAN |                            | 230 | ATTGACGGCCA   | 0.468 |             |
| + | 5  | 652  | Intron uc003wad.2  | NM_002769    | NP_002760    | P07477 | TRY1_HUMAN  | peptidase S1.              | 2   | CCAAGGAGTTG   | 0.507 |             |
| + | 1  | 466  |                    | NM_001001667 | NP_001001667 | Q8N148 | OR6V1_HUMAN | Name=4; (Potential).       | 1   | TGGTACCCACT   | 0.572 |             |
| + | 7  | 1312 | _p.R386Q ZYX_uc    | NM_001010972 | NP_001010972 | Q15942 | ZYX_HUMAN   | l zinc-binding 1.          | 0   | CGCCGATGCC    | 0.617 |             |
| - | 4  | 2130 | _p.E628K ZNF786    | NM_152411    | NP_689624    | Q8N393 | ZN786_HUMAN | 2H2-type 13.               | 4   | TGTGCTCGATG   | 0.577 |             |
| - | 4  | 1275 | R86_uc011kvk.1_λ   | NM_198285    | NP_938026    | Q86T14 | WDR86_HUMAN | WD 7.                      | 0   | GTTGCGTCTGT   | 0.627 |             |
| + | 2  | 342  | μpm.2_Missense_    | NM_004745    | NP_004736    | Q9P1A6 | DLGP2_HUMAN |                            | 0   | CTTCCCGCGGA   | 0.706 |             |
| - | 3  | 708  | l.1_RNA FGF20_u    | NM_019851    | NP_062825    | Q9NP95 | FGF20_HUMAN |                            | 1   | GTCTAGGTAA    | 0.458 |             |
| + | 18 | 2134 | p.V687M XPO7_uc    | NM_015024    | NP_055839    | Q9UIA9 | XPO7_HUMAN  |                            | 5   | TCATGGTGGAT   | 0.453 |             |
| - | 8  | 1752 | i.2_Missense_Mut   | NM_139278    | NP_644807    | Q8N145 | LG13_HUMAN  | EAR 6.                     | 1   | TGAAGGAGAAA   | 0.642 |             |
| + | 19 | 2933 | p.E646K BMP1_uc    | NM_006129    | NP_006120    | P13497 | BMP1_HUMAN  | CUB 5.                     | 3   | TGGCCGAGGAA   | 0.592 |             |
| + | 5  | 1036 | l RHOBTB2_uc011    | NM_015178    | NP_055993    | Q9BYZ6 | RHBT2_HUMAN | Rho-like.                  | 2   | CTAATGAAATCC  | 0.577 |             |
| + | 34 | 3541 | ixfp.1_Splice_Site | NM_173174    | NP_775266    | Q14289 | FAK2_HUMAN  |                            | 5   | TGAAGGTGAGA   | 0.632 |             |
| + | 9  | 1461 | Olvy.2_Splice_Site | NM_032777    | NP_116166    | Q96PE1 | GP124_HUMAN |                            | 5   | CCCCAGGTGGC   | 0.657 |             |
| - | 4  | 1515 | p.A492V JPH1_uc    | NM_020647    | NP_065698    | Q9HDC5 | JPH1_HUMAN  | lasmic (Potential).        | 1   | GCTCGCCCTC    | 0.572 |             |
| + | 23 | 2876 |                    | NM_007013    | NP_008944    | Q9H0M0 | WWP1_HUMAN  | HECT.                      | 2   | TCATGGGTAAA   | 0.378 |             |
| - | 3  | 339  |                    | NM_203390    | NP_976324    | Q8IXT5 | RB12B_HUMAN |                            | 0   | CATCTGTTGCA   | 0.428 |             |
| + | 5  | 582  | l67_uc010maw.2     | NM_153704    | NP_714915    | Q5HYA8 | MKS3_HUMAN  |                            | 2   | GGTGCGTCCGA   | 0.284 |             |
| + | 1  | 344  | ion_p.S5L GRHL2    | NM_024915    | NP_079191    | Q6ISB3 | GRHL2_HUMAN | ription activation.        | 3   | AGAGTCGGACA   | 0.438 |             |
| - | 18 | 3130 | μnt.2_Missense_M   | NM_198123    | NP_937756    | Q7Z407 | CSMD3_HUMAN | lar (Potential). CUB 5.    | 63  | GGAACGACTGT   | 0.328 |             |
| - | 18 | 3059 | μnt.2_Missense_M   | NM_198123    | NP_937756    | Q7Z407 | CSMD3_HUMAN | lar (Potential). CUB 5.    | 63  | GGGTGCCATTG   | 0.363 |             |
| + | 1  | 123  |                    | NM_006438    | NP_006429    | Q9Y6Z7 | COL10_HUMAN |                            | 3   | GCTTCAAGAA    | 0.423 |             |
| - | 1  | 37   | μ90_uc011lix.1_Int | NM_001080399 | NP_001073868 | Q02509 | OC90_HUMAN  |                            | 3   | ATGGCTGTAATG  | 0.413 |             |
| + | 10 | 2662 |                    | NM_003235    | NP_003226    | P01266 | THYG_HUMAN  | globulin type-1 7.         | 15  | AAATGGCCAAC   | 0.542 |             |
| - | 12 | 1371 | μse_Mutation_p.S1  | NM_001135242 | NP_001128714 | Q92597 | NDRG1_HUMAN |                            | 4   | GCGAGCTGTCC   | 0.517 |             |

|   |    |      |                   |              |              |        |              |                            |     |                  |       |             |
|---|----|------|-------------------|--------------|--------------|--------|--------------|----------------------------|-----|------------------|-------|-------------|
| + | 19 | 3122 |                   | NM_001702    | NP_001693    | O14514 | BAI1_HUMAN   | lasmic (Potential).        | 8   | AGAGCGTTCTG      | 0.587 |             |
| - | 1  | 6591 |                   | NM_031308    | NP_112598    | P58107 | EPIPL_HUMAN  |                            | 2   | CCTCCGTGATTA     | 0.552 |             |
| - | 1  | 4283 |                   | NM_031308    | NP_112598    | P58107 | EPIPL_HUMAN  | Plectin 25.                | 2   | GGAGTCGCACA      | 0.612 |             |
| - | 8  | 3913 | mht.2_Missense_M  | NM_001017969 | NP_001017969 | Q5HYC2 | K2026_HUMAN  |                            | 3   | CTGACCTGTGG      | 0.463 |             |
| + | 16 | 2645 | z.2_RNA UHRF2_u   | NM_152896    | NP_690856    | Q96PU4 | UHRF2_HUMAN  | RING-type.                 | 3   | CCTGCCCTGCT      | 0.443 |             |
| - | 19 | 2423 |                   | NM_000170    | NP_000161    | P23378 | GCSP_HUMAN   |                            | 2   | AGACCCGAAGT      | 0.562 |             |
| - | 1  | 669  |                   | NM_019897    | NP_063950    | Q9NQN1 | OR2S1_HUMAN  | Name=5; (Potential).       | 1   | AGATCACATTCC     | 0.478 |             |
| - | 7  | 1334 | 1_Missense_Mutat  | NM_016734    | NP_057953    | Q02548 | PAX5_HUMAN   | p.?(23)                    | 147 | CTGCGGGCCTG      | 0.617 |             |
| + | 6  | 688  | MTD3_uc0111qq.1   | NM_144964    | NP_659401    | Q6PF06 | RG9D3_HUMAN  |                            | 0   | TATTTCCCTTGG     | 0.353 |             |
| + | 68 | 9399 | ikq.3_Missense_M  | NM_033305    | NP_150648    | Q96RL7 | VP13A_HUMAN  |                            | 10  | ATGGAGTTATCA     | 0.333 |             |
| + | 26 | 4180 | o.G1282R DAPK1    | NM_004938    | NP_004929    | P53355 | DAPK1_HUMAN  | Death.                     | 2   | GTAACGGGGCT      | 0.632 |             |
| - | 5  | 678  | u.1_RNA SEMA4D    | NM_006378    | NP_006369    | Q92854 | SEM4D_HUMAN  | intracellular (Potential). | 2   | CTCACCTCTGT      | 0.627 |             |
| - | 8  | 1150 | o14B_uc004awl.2   | NM_033331    | NP_201588    | O60729 | CC14B_HUMAN  | B.                         | 1   | TGGCTCTTGAAT     | 0.353 |             |
| + | 19 | 2312 |                   | NM_002486    | NP_002477    | Q09161 | NCBP1_HUMAN  |                            | 1   | TGCTGCCGTAG      | 0.338 |             |
| - | 11 | 2573 | p.A798V TBC1D2    | NM_018421    | NP_060891    | Q9BYX2 | TBD2A_HUMAN  | ab-GAP TBC.                | 3   | TGTCCGCAAAAG     | 0.602 |             |
| + | 10 | 7332 | sense_Mutation_p  | NM_021224    | NP_067047    | Q96JM2 | ZN462_HUMAN  | 2H2-type 26.               | 5   | ACCTTCGGGATG     | 0.527 |             |
| + | 5  | 884  | o.R173W RAD23B    | NM_002874    | NP_002865    | P54727 | RD23B_HUMAN  |                            | 1   | CTTCTCGGTCA      | 0.294 |             |
| + | 6  | 1764 | 483_uc004bfg.2_li | NM_133464    | NP_597721    | Q8TF39 | ZN483_HUMAN  | 2H2-type 3.                | 1   | AACATCAGAGA      | 0.403 |             |
| + | 2  | 368  | o.1_Missense_Mt   | NM_000607    | NP_000598    | P02763 | A1AG1_HUMAN  |                            | 0   | GACCCGGTGAG      | 0.537 | rs1126866   |
| - | 4  | 1219 | e_Mutation_p.P37  | NM_198187    | NP_937830    | O75129 | ASTN2_HUMAN  | lasmic (Potential).        | 9   | GCAGGGGTGGT      | 0.597 | rs139454684 |
| - | 36 | 4499 |                   | NM_001735    | NP_001726    | P01031 | CO5_HUMAN    |                            | 2   | TGGCAGGACTG      | 0.373 |             |
| - | 16 | 1654 | e_p.D548_splice S | NM_001144877 | NP_001138349 | Q8N9R8 | SCAI_HUMAN   |                            | 5   | AGGTACCTATTC     | 0.368 |             |
| + | 6  | 746  |                   | NM_001261    | NP_001252    | P50750 | CDK9_HUMAN   | protein kinase.            | 1   | CGCCCCCCCCA      | 0.667 |             |
| - | 11 | 2081 | i.R560W CIZ1_ucC  | NM_001131016 | NP_001124488 | Q9ULV3 | CIZ1_HUMAN   |                            | 4   | GTCCCGGGGCA      | 0.632 |             |
| - | 17 | 4549 | .R1407C CAMSAF    | NM_015447    | NP_056262    | Q5T5Y3 | CAMP1_HUMAN  | CKK.                       | 3   | CATCACGAAACA     | 0.493 |             |
| - | 4  | 1159 | p.E139K CTPS2_u   | NM_001144002 | NP_001137474 | Q9NRF8 | PYRG2_HUMAN  |                            | 1   | TGGCTCTTCCT      | 0.373 |             |
| + | 1  | 634  | YY2_uc010nfg.2_I  | NM_206923    | NP_996806    | O15391 | TYY2_HUMAN   |                            | 2   | TATCCGAGTACT     | 0.493 |             |
| - | 1  | 956  |                   | NM_001017930 | NP_001017930 | A6NGE4 | DC8L1_HUMAN  |                            | 4   | CCACACGCTTAG     | 0.502 |             |
| - | 4  | 941  | lv.2_Missense_Mu  | NM_017602    | NP_060072    | Q96G74 | OTUD5_HUMAN  | OTU.                       | 1   | AGGACGGTTGT      | 0.522 |             |
| - | 7  | 628  | KFB1_uc011mol.1   | NM_002625    | NP_002616    | P16118 | F261_HUMAN   | phofructo-2-kinase.        | 1   | TTTCCCGGTCA      | 0.378 |             |
| - | 3  | 376  |                   | NM_080879    | NP_543155    | Q8WXH6 | RB40A_HUMAN  |                            | 0   | TGAAGTCATAGG     | 0.682 |             |
| - | 3  | 370  |                   | NM_080879    | NP_543155    | Q8WXH6 | RB40A_HUMAN  |                            | 0   | ATAGGCCTGGTC     | 0.672 |             |
| + | 3  | 555  | a-mir-934 MI0005  | NM_016267    | NP_057351    | Q99990 | VGLL1_HUMAN  |                            | 0   | CTGGGGAGCTG      | 0.627 |             |
| + | 4  | 1679 | EC1_uc010nsl.1_I  | NM_005462    | NP_005453    | O60732 | MAGC1_HUMAN  |                            | 4   | CTGAGAGAACT      | 0.478 |             |
| + | 4  | 2019 | EC1_uc010nsl.1_I  | NM_005462    | NP_005453    | O60732 | MAGC1_HUMAN  |                            | 4   | CTCCTCACTACT     | 0.582 |             |
| - | 2  | 1145 |                   | NM_001009615 | NP_001009615 | Q5MJ10 | SPXN2_HUMAN  |                            | 1   | TTCAGATGAGTC     | 0.527 |             |
| + | 15 | 1743 | TM1_uc011mxz.1    | NM_000252    | NP_000243    | Q13496 | MTM1_HUMAN   |                            | 3   | GCAGCGTTACA      | 0.522 |             |
| + | 9  | 1579 | 3A8_uc011myx.1_I  | NM_005629    | NP_005620    | P48029 | SC6A8_HUMAN  | lasmic (Potential).        | 1   | CCTCCGGGCCT      | 0.607 |             |
| + | 29 | 5140 | 9Y_uc010nwu.1_I   | NM_004654    | NP_004645    | O00507 | USP9Y_HUMAN  |                            | 0   | AATGCTGAAGTT     | 0.343 |             |
| + | 2  | 412  |                   | NM_198576    | NP_940978    | O00468 | AGRIN_HUMAN  | NtA.                       | 3   | TGCACCCCAT       | 0.587 |             |
| - | 4  | 460  | CK_uc001aie.2_Mi  | NM_023018    | NP_075394    | O95544 | NADK_HUMAN   |                            | 0   | ATCTCTCATCTT     | 0.602 |             |
| - | 4  | 360  | o1_uc009vmi.1_Int | NM_001428    | NP_001419    | P06733 | ENOA_HUMAN   |                            | 4   | TTTTATTGATGT     | 0.463 |             |
| - | 46 | 6594 | sc.2_Missense_Mt  | NM_004958    | NP_004949    | P42345 | MTOR_HUMAN   |                            | 29  | AAGACGGTGCT      | 0.498 |             |
| - | 1  | 678  |                   | NM_001136561 | NP_001130033 | B2RXH8 | B2RXH8_HUMAN |                            | 0   | TAGAATCCACTT     | 0.443 |             |
| + | 4  | 615  | nse_Mutation_p.G  | NM_017556    | NP_060026    | Q8WUP2 | FBLI1_HUMAN  | g-binding. Pro-rich.       | 1   | TGGCGGGGAGG      | 0.677 |             |
| + | 11 | 8440 | ip.1_Missense_Mu  | NM_015001    | NP_055816    | Q96T58 | MINT_HUMAN   | h RBPSUH (By similarity).  | 15  | TGTCCGGTACT      | 0.607 |             |
| - | 7  | 952  | p.E162G ZBTB17    | NM_003443    | NP_003434    | Q13105 | ZBT17_HUMAN  |                            | 0   | ctctgctctctgctct | 0.498 |             |

|   |     |           |                   |              |              |        |              |                                |    |               |       |
|---|-----|-----------|-------------------|--------------|--------------|--------|--------------|--------------------------------|----|---------------|-------|
| + | 3   | 246       | CLCNKB_uc001ax    | NM_000085    | NP_000076    | P51801 | CLCKB_HUMAN  | ical; (Potential).             | 1  | TTGACCCTCGGG  | 0.647 |
| - | 14  | 2515      |                   | NM_004431    | NP_004422    | P29317 | EPHA2_HUMAN  | nd ELMO2. Protein kinase.      | 10 | TGAACCTCCGG   | 0.642 |
| - | 10  | 1580      | _p.S173F FBXO42   | NM_018994    | NP_061867    | Q6P3S6 | FBX42_HUMAN  |                                | 2  | CCAAGAAGAG    | 0.557 |
| - | 5   | 585       | ADI2_uc001bag.1_  | NM_007365    | NP_031391    | Q9Y2J8 | PADI2_HUMAN  |                                | 6  | CATCACGGCAG   | 0.627 |
| + | 3   | 438       |                   | NM_013358    | NP_037490    | Q9ULC6 | PADI1_HUMAN  |                                | 0  | GCGTCGGTAAG   | 0.577 |
| - | 104 | 15279     | n_p.S726F UBR4_   | NM_020765    | NP_065816    | Q5T4S7 | UBR4_HUMAN   |                                | 25 | GGGAAGAACGG   | 0.468 |
| - | 51  | 7611      | ik.1_Missense_Mu  | NM_020765    | NP_065816    | Q5T4S7 | UBR4_HUMAN   |                                | 25 | CCGAGCGGCTG   | 0.532 |
| - | 19  | 2558      | om.1_Missense_M   | NM_020765    | NP_065816    | Q5T4S7 | UBR4_HUMAN   | ical; (Potential).             | 25 | AAGCGGCACGA   | 0.502 |
| - | 1   | 307       |                   | NM_019062    | NP_061935    | Q9NXI6 | RN186_HUMAN  | RING-type.                     | 0  | CTCCCGGCACA   | 0.647 |
| - | 2   | 580       |                   | NM_020317    | NP_064713    | Q9BUV0 | CA063_HUMAN  | Arg-rich.                      | 1  | GTACCGGAAG    | 0.672 |
| + | 6   | 688       | DLRAP1_uc009vr    | NM_015627    | NP_056442    | Q5SW96 | ARH_HUMAN    | PID.                           | 1  | GGGACGTCCTG   | 0.617 |
| + | 4   | 859       |                   | NM_031459    | NP_113647    | P58004 | SESN2_HUMAN  |                                | 7  | GTCATCGCCAT   | 0.632 |
| + | 8   | 2222      | vui.2_Nonsense_n  | NM_145238    | NP_660281    | P17040 | ZSC20_HUMAN  |                                | 4  | CAGTGGAAGA    | 0.453 |
| - | 59  | 9228      | om.1_Missense_Mi  | NM_052896    | NP_443128    | Q7Z408 | CSMD2_HUMAN  | extracellular (Potential).     | 12 | CTTACGAAAC    | 0.577 |
| + | 4   | 671       | e_Mutation_p.P78  | NM_012199    | NP_036331    | Q9UL18 | AGO1_HUMAN   |                                | 3  | TGTTCCCTTGG   | 0.542 |
| + | 1   | 4642      | i.1_Intron MACF1_ | NM_015038    | NP_055853    | O94854 | K0754_HUMAN  | Ala-rich.                      | 0  | AGCCCGCTCC    | 0.672 |
| + | 2   | 890       | i.R253Q ZNF691_   | NM_015911    | NP_056995    | Q5VV52 | ZNF691_HUMAN | ype 7; degenerate.             | 2  | TACCGGTGCA    | 0.567 |
| - | 7   | 1184      | T11_uc001cxm.1_   | NM_176782    | NP_788954    | Q8WW52 | F151A_HUMAN  |                                | 0  | CGTGCCCTGG    | 0.592 |
| - | 40  | 4553      |                   | NM_015306    | NP_056121    | Q9UPU5 | UBP24_HUMAN  |                                | 13 | CTGGGGGAAGG   | 0.453 |
| - | 32  | 3620      |                   | NM_015306    | NP_056121    | Q9UPU5 | UBP24_HUMAN  |                                | 13 | TGTTTCGAATTC  | 0.438 |
| + | 3   | 2983      | inn.2_Missense_n  | NM_001134479 | NP_001127951 | Q7L1W4 | LRC8D_HUMAN  |                                | 2  | ATATCCCTTTGC  | 0.393 |
| + | 3   | 185       | f146_uc010ote.1_  | NM_001012425 | NP_001012425 | Q5VVC0 | CA146_HUMAN  |                                | 1  | AAGTTCGATATTC | 0.299 |
| + | 15  | 2185      | .R566Q CDC14A_    | NM_003672    | NP_003663    | Q9UNH5 | CC14A_HUMAN  |                                | 1  | CCTCCGACCTT   | 0.572 |
| - | 13  | 1533      | vi.1_Missense_Mi  | NM_002959    | NP_002950    | Q99523 | SORT_HUMAN   | ellular (Potential).           | 1  | CATCCCCACG    | 0.438 |
| + | 1   | 811       | ense_Mutation_p.  | NM_022768    | NP_073605    | Q96T37 | RBM15_HUMAN  | RRM 1.                         | 3  | TGACCGGCCTC   | 0.627 |
| + | 8   | 2335      |                   | NM_020440    | NP_065173    | Q9P2B2 | FPRP_HUMAN   | 6. Extracellular (Potential).  | 1  | GTTTGCGGTGC   | 0.552 |
| + | 76  | 9461      | 3PF10_uc010oyl.1  | NM_001039703 | NP_001034792 | A6NDV3 | A6NDV3_HUMAN |                                | 0  | CTGGATGAGAA   | 0.488 |
| + | 8   | 748       | VKRD35_uc010oy    | NM_144698    | NP_653299    | Q8N283 | ANR35_HUMAN  | ANK 5.                         | 5  | CGGGGGCTGTG   | 0.617 |
| - | 3   | 278       | _p.R49C CTSS_uc   | NM_004079    | NP_004070    | P25774 | CATS_HUMAN   |                                | 0  | GAGACGTCGTA   | 0.388 |
| + | 2   | 1800      | no.2_Missense_M   | NM_020832    | NP_065883    | Q8N1G0 | ZN687_HUMAN  |                                | 4  | GCGCCCGCCGC   | 0.597 |
| - | 3   | 811       |                   | NM_016190    | NP_057274    | Q9UBG3 | CRNN_HUMAN   | Gln-rich.                      | 3  | GGCTGCTGTCC   | 0.602 |
| - | 12  | 2073      |                   | NM_014856    | NP_055671    | O75064 | DEN4B_HUMAN  |                                | 1  | CCTGCGGCCAC   | 0.637 |
| - | 7   | 985       | _p.R165* C1orf43  | NM_001098616 | NP_001092086 | Q9BWL3 | CA043_HUMAN  |                                | 0  | ATGTGCTGTAG   | 0.512 |
| + | 6   | 891       | o.E252K HAX1_uc   | NM_006118    | NP_006109    | O00165 | HAX1_HUMAN   | . Involved in GNA13 bindin     | 0  | GACACGAAGCA   | 0.498 |
| - | 12  | 1827      | md.3_Missense_n   | NM_001037533 | NP_001032622 | Q3T8J9 | GON4L_HUMAN  |                                | 3  | CTGCCGGTCA    | 0.423 |
| - | 8   | 1932      | .1_Intron NTRK1_  | NM_014215    | NP_055030    | P14616 | INSRR_HUMAN  | nectin type-III 1.             | 20 | GGTACCCCTG    | 0.617 |
| - | 6   | 1087      | phw.1_Missense_   | NM_031281    | NP_112571    | Q96RD9 | FCRL5_HUMAN  | potential). Ig-like C2-type 3. | 6  | CCTGGTTTCAC   | 0.502 |
| - | 2   | 165       | RL1_uc001fri.2_n  | NM_052938    | NP_443170    | Q96LA6 | FCRL1_HUMAN  | potential). Ig-like C2-type 1. | 7  | CTACCGGCAG    | 0.483 |
| - | 1   | 515       |                   | NM_001004475 | NP_001004475 | Q8NGX3 | O10T2_HUMAN  | ellular (Potential).           | 3  | TGTTGGGGCCA   | 0.473 |
| - | 2   | 307       | 1_Intron CRP_uc0  | NM_000567    | NP_000558    | P02741 | CRP_HUMAN    | Pentaxin.                      | 1  | AAAATACTGTACC | 0.443 |
| - | 10  | 1514      | i_p.R236* ARHGA   | NM_001025598 | NP_001020769 | Q7Z616 | RHG30_HUMAN  |                                | 3  | AGCTCGTGGTG   | 0.602 |
| - | 4   | 617       | S5_uc009wvb.2_F   | NM_003617    | NP_003608    | O15539 | RGS5_HUMAN   | RGS.                           | 0  | AGCCTCGTTT    | 0.478 |
| + | 5   | 2239      |                   | NM_001080426 | NP_001073895 | Q5VZP5 | DUS27_HUMAN  |                                | 3  | TGTCGGCTCA    | 0.537 |
| - | 19  | 3484_3485 | iv.2_Missense_Mu  | NM_172071    | NP_742068    | Q5TC82 | RC3H1_HUMAN  |                                | 2  | TTAAGGAGCAG   | 0.45  |
| + | 11  | 2656      |                   | NM_022093    | NP_071376    | Q9UQP3 | TENN_HUMAN   | nectin type-III 7.             | 9  | GCAGAGCAGCA   | 0.632 |
| - | 19  | 3354      | i.P1048S ASTN1_   | NM_004319    | NP_004310    | O14525 | ASTN1_HUMAN  | nectin type-III 1.             | 15 | TGGTGCTCTG    | 0.542 |
| + | 16  | 2129      | wxs.2_Missense_I  | NM_000721    | NP_000712    | Q15878 | CAC1E_HUMAN  | ellular (Potential). II.       | 6  | CCTGACGGGTG   | 0.537 |

|   |    |         |                    |              |              |        |             |                              |            |    |                |       |             |
|---|----|---------|--------------------|--------------|--------------|--------|-------------|------------------------------|------------|----|----------------|-------|-------------|
| - | 1  | 832     | jpk.2_Missense_M   | NM_021133    | NP_066956    | Q05823 | RN5A_HUMAN  | ANK 6.                       | p.T222S(1) | 5  | AGATGCGTAATA   | 0.527 |             |
| - | 10 | 1450    | wyh.1_Missense_I   | NM_052966    | NP_443198    | Q9BZQ8 | NIBAN_HUMAN |                              |            | 4  | GCAGGCGCTCG    | 0.522 | rs141805525 |
| - | 22 | 2208    | ND1B_uc010ppf.1    | NM_001142795 | NP_001136267 | Q6P3S1 | DEN1B_HUMAN |                              |            | 0  | VTGGAGGGAGGT   | 0.493 |             |
| + | 4  | 617     |                    | NM_198149    | NP_937792    | Q96DD7 | SHSA4_HUMAN | ic (Potential).              | Pro-rich.  | 0  | CTGGGCCCCCA    | 0.612 |             |
| + | 10 | 988     | se_Mutation_p.I22f | NM_002393    | NP_002384    | O15151 | MDM4_HUMAN  | Asp/Glu-rich (acidic).       |            | 3  | AGGTGATTGAAC   | 0.358 |             |
| - | 2  | 554     | bx.2_Missense_Mi   | NM_015375    | NP_056190    | Q6XUX3 | DUSTY_HUMAN |                              |            | 1  | CAGGCTGACCC    | 0.602 |             |
| + | 25 | 4167    | y.G893R CR1_uc0    | NM_000573    | NP_000564    | P17927 | CR1_HUMAN   | ar (Potential).              | Sushi 21.  | 3  | CCTATGGAAAAC   | 0.468 |             |
| + | 11 | 1562    | y.R523C RCOR3_L    | NM_018254    | NP_060724    | Q9P2K3 | RCOR3_HUMAN | Pro-rich.                    |            | 1  | CACCCCGTCTA    | 0.527 |             |
| - | 16 | 1689    |                    | NM_014698    | NP_055513    | O94886 | TM63A_HUMAN | ical; (Potential).           |            | 2  | TGGAGGGGAGC    | 0.597 |             |
| - | 1  | 327     | n_p.R83* LEFTY2_   | NM_003240    | NP_003231    | O00292 | LFTY2_HUMAN |                              |            | 0  | ACCTCGGAAGC    | 0.687 |             |
| + | 4  | 1357    |                    | NM_001004342 | NP_001004342 | Q6ZTA4 | TRI67_HUMAN |                              |            | 4  | CCACCGGACTG    | 0.517 |             |
| - | 13 | 2773    | se_Mutation_p.G75f | NM_002508    | NP_002499    | P14543 | NID1_HUMAN  | oglobulin type-1.            |            | 2  | GCTGCCGTGGC    | 0.716 |             |
| + | 1  | 37      |                    | NM_001013355 | NP_001013373 | Q5TZ20 | OR2G6_HUMAN | ellular (Potential).         |            | 3  | GATTTCTTCTCC   | 0.423 |             |
| - | 3  | 284     | uc009xhk.1_Silent  | NM_014974    | NP_055789    | Q9Y2E4 | DIP2C_HUMAN |                              |            | 7  | TGACAGGAGCC    | 0.567 |             |
| - | 3  | 380     | ihz.2_Missense_M   | NM_024803    | NP_079079    | A6NHL2 | TBAL3_HUMAN |                              |            | 1  | GTAACGGCCTC    | 0.632 |             |
| + | 13 | 2355    | orf18_uc001iik.2_L | NM_017782    | NP_060252    | Q5VWN6 | CJ018_HUMAN |                              |            | 2  | TTTGCAGGATA    | 0.383 |             |
| + | 15 | 3554    | AA1217_uc010qda    | NM_019590    | NP_062536    | Q5T5P2 | SKT_HUMAN   |                              |            | 7  | CGCCACCTCCT    | 0.547 |             |
| - | 9  | 2120    | p.A565V ARHGAF     | NM_021226    | NP_067049    | Q7Z5H3 | RHG22_HUMAN | Potential.                   |            | 1  | GCTCGGCCCTG    | 0.692 |             |
| - | 4  | 546     | jlk.2_Nonsense_M   | NM_014836    | NP_055651    | O94844 | RHBT1_HUMAN | Rho-like.                    |            | 1  | GTGTTGCACGC    | 0.562 |             |
| + | 10 | 2532    |                    | NM_032199    | NP_115575    | Q14865 | ARI5B_HUMAN |                              |            | 4  | TCCCTCATCTC    | 0.493 |             |
| + | 2  | 600     | yk CYP2C19_ucf     | NM_000772    | NP_000763    | P33260 | CP2C1_HUMAN |                              |            | 5  | ATGGAGAGGAG    | 0.433 |             |
| - | 7  | 1239    | nse_Mutation_p.P   | NM_000770    | NP_000761    | P10632 | CP2C8_HUMAN |                              |            | 0  | CTTGGGATGAC    | 0.453 |             |
| + | 1  | 695     | ank MRPL43_uc00    | NM_021830    | NP_068602    | Q96RR1 | PEO1_HUMAN  |                              |            | 1  | CCGAAGTGGGT    | 0.587 |             |
| + | 6  | 1265    |                    | NM_030912    | NP_112174    | Q9BZR9 | TRIM8_HUMAN |                              |            | 1  | CTCAACGGCCT    | 0.687 |             |
| + | 2  | 67      |                    | NM_004832    | NP_004823    | P78417 | GSTO1_HUMAN |                              |            | 0  | CGGTCCCGGAG    | 0.682 |             |
| + | 2  | 190     |                    | NM_001008723 | NP_001008723 | Q5T655 | CC147_HUMAN |                              |            | 5  | AGAAATGGAAAC   | 0.388 |             |
| + | 22 | 3173    | bi.1_Missense_Mu   | NM_198795    | NP_942090    | Q9BXT4 | TDRD1_HUMAN | Tudor 4.                     |            | 0  | ATTTTTGGTATCC  | 0.403 |             |
| + | 2  | 796     |                    | NM_153442    | NP_703143    | Q8NDV2 | GPR26_HUMAN | Name=6; (Potential).         |            | 1  | TCATAGGGACCT   | 0.572 |             |
| + | 4  | 1085    |                    | NM_007183    | NP_009114    | Q9Y446 | PKP3_HUMAN  | ARM 1.                       |            | 1  | TGACGGTGCTG    | 0.607 |             |
| + | 2  | 202     | n_p.P25L SYT8_u    | NM_138567    | NP_612634    | Q8NBV8 | SYT8_HUMAN  | ellular (Potential).         |            | 1  | TGCCCCGGCCC    | 0.642 |             |
| - | 9  | 1165    | i_p.P268L OSBPL    | NM_020896    | NP_065947    | Q9H0X9 | OSBL5_HUMAN |                              |            | 3  | GCACCGGGGCC    | 0.667 |             |
| - | 7  | 1075    | lyj.1_Splice_Site  | NM_016320    | NP_057404    | P52948 | NUP98_HUMAN |                              |            | 12 | tgcttACTAGTTCC | 0.254 |             |
| - | 1  | 49      |                    | NM_001004052 | NP_001004052 | Q96RD2 | O52B2_HUMAN | ellular (Potential).         |            | 0  | GCCAGGAAGGA    | 0.453 |             |
| + | 6  | 1681    | mcx.2_Missense_I   | NM_000543    | NP_000534    | P17405 | ASM_HUMAN   |                              |            | 0  | AAATAGATGGA    | 0.567 |             |
| - | 7  | 1340    | d.2_Missense_Mu    | NM_006458    | NP_006449    | O75382 | TRIM3_HUMAN | Filamin.                     |            | 5  | CGCTCGTGGTG    | 0.647 |             |
| + | 3  | 536     | i_p.S83L MICAL2    | NM_014632    | NP_055447    | O94851 | MICA2_HUMAN |                              |            | 2  | GAAAGTCGTGCA   | 0.502 |             |
| - | 6  | 1018    | cy.1_Missense_Mi   | NM_000352    | NP_000343    | Q09428 | ABCC8_HUMAN | smic (By similarity).        |            | 1  | CAGGCGCCTCC    | 0.632 | rs144705160 |
| - | 11 | 1542    | F22_uc001mpa.2_    | NM_173588    | NP_775859    | Q8N9C0 | IGS22_HUMAN | Ig-like 3.                   |            | 7  | TCTTCAGCGC     | 0.517 |             |
| + | 2  | 323     | S2_uc001mqn.2_f    | NM_001143830 | NP_001137302 | O43903 | GAS2_HUMAN  |                              |            | 2  | TCTGAGCCCAA    | 0.408 |             |
| - | 1  | 429     | LC5A12_uc001mri    | NM_178498    | NP_848593    | Q1EHB4 | SC5AC_HUMAN | lasmic (Potential).          |            | 2  | ACTCTCGGGAA    | 0.498 |             |
| + | 11 | 1363    | mvi.2_Missense_I   | NM_005898    | NP_005889    | Q14444 | CAPR1_HUMAN |                              |            | 1  | TATCTGCACAG    | 0.383 |             |
| + | 8  | 1042    | AT_uc009ykc.1_Rf   | NM_001752    | NP_001743    | P04040 | CATA_HUMAN  |                              |            | 3  | AAACCGGAATC    | 0.458 | rs139421991 |
| + | 2  | 1712    | p.S321P SLC35C     | NM_018389    | NP_060859    | Q96A29 | FUCT1_HUMAN |                              |            | 0  | GCGGCTCCTCC    | 0.637 |             |
| + | 24 | 4085    |                    | NM_002843    | NP_002834    | Q12913 | PTPRJ_HUMAN | ate binding (By similarity). | C          | 8  | GGGTCGGAAGG    | 0.453 |             |
| - | 1  | 547_548 |                    | NM_001004740 | NP_001004740 | Q8NGP8 | OR5M1_HUMAN | ellular (Pote                | p.P183P(1) | 1  | AAAGAGGAGGAT   | 0.446 |             |
| + | 1  | 461     |                    | NM_001013358 | NP_001013376 | P0C7N8 | OR9G9_HUMAN | Name=4; (Potential).         |            | 0  | TTATTAECTTTC   | 0.463 |             |
| - | 8  | 1268    |                    | NM_003146    | NP_003137    | Q08945 | SSRP1_HUMAN |                              |            | 2  | CTCACCTTGG     | 0.567 |             |



|   |    |           |                         |              |              |        |             |                                       |    |               |       |             |
|---|----|-----------|-------------------------|--------------|--------------|--------|-------------|---------------------------------------|----|---------------|-------|-------------|
| + | 6  | 1407      | Missense_Mutation       | NM_001085458 | NP_001078927 | O60716 | CTND1_HUMAN |                                       | 6  | AGAGCCTTATGC  | 0.557 |             |
| - | 1  | 272       |                         | NM_001005489 | NP_001005489 | Q8NGF7 | OR5B_HUMAN  | cellular (Potential).                 | 3  | CTGTAGGAGATG  | 0.463 |             |
| - | 4  | 674       | A2_uc010rix.1_5'UTR     | NM_004739    | NP_004730    | O94776 | MTA2_HUMAN  | BAH.                                  | 2  | CTGGCTGGTAAT  | 0.517 |             |
| - | 9  | 992       | pm.1_Missense_Mutation  | NM_015853    | NP_056937    | Q04323 | UBXN1_HUMAN | interaction with BRCA1.               | 0  | GAACAGCAGAAAC | 0.478 |             |
| + | 4  | 421       | _p.R137*IDPF2_u         | NM_006268    | NP_006259    | Q92785 | REQU_HUMAN  |                                       | 1  | ATCCCCGAGTT   | 0.562 |             |
| + | 3  | 1958      | ri.2_Silent_p.G15E      | NM_006328    | NP_006319    | Q96PK6 | RBM14_HUMAN |                                       | 3  | ACCGGCGTTTAC  | 0.572 |             |
| + | 4  | 511       | ju.2_Missense_Mutation  | NM_177963    | NP_808878    | Q8IV01 | SYT12_HUMAN | transmembrane (Potential).            | 1  | CAGCCGCAAAG   | 0.637 | rs34985365  |
| - | 8  | 1123      |                         | NM_080658    | NP_542389    | Q96HD9 | ACY3_HUMAN  |                                       | 0  | GGAAGCTGGGC   | 0.597 |             |
| - | 4  | 815       | ik.2_Missense_Mutation  | NM_001277    | NP_001268    | P35790 | CHKA_HUMAN  |                                       | 2  | CTGGGGAAAGA   | 0.488 |             |
| + | 20 | 5938      |                         | NM_014786    | NP_055601    | Q96PE2 | ARHG_HUMAN  |                                       | 0  | GCCACGTCCGC   | 0.652 |             |
| + | 3  | 226       | il.21F RELT_uc001       | NM_152222    | NP_689408    | Q969Z4 | TR19L_HUMAN |                                       | 1  | GGCCTCTCGCC   | 0.602 |             |
| + | 10 | 1259      | se_Mutation_p.S3E       | NM_152222    | NP_689408    | Q969Z4 | TR19L_HUMAN | transmembrane (Potential).            | 1  | GGTGTCTGAGG   | 0.408 |             |
| - | 5  | 448       | owf.1_Missense_Mutation | NM_004041    | NP_004032    | P49407 | ARRB1_HUMAN | similarity). Interaction with SR      | 2  | CTTGCGAAAGG   | 0.642 |             |
| + | 5  | 996       | uc001pen.1_RNA          | NM_001098672 | NP_001092142 | Q6MZM0 | HPHL1_HUMAN | secreted 2. Extracellular (Potential) | 3  | CTTCCCGGAGC   | 0.468 | rs141998596 |
| + | 5  | 654       | R3A_uc009yyx.2_family   | NM_213621    | NP_998786    | P46098 | 5HT3A_HUMAN | cellular (Potential).                 | 0  | AATATCCCGTACC | 0.532 |             |
| + | 3  | 390       | 1_Missense_Mutation     | NM_001558    | NP_001549    | Q13651 | I10R1_HUMAN | cellular (Potential).                 | 1  | TGGACGGCAGC   | 0.577 |             |
| + | 10 | 1716      | avn.2_Nonsense_Mutation | NM_014807    | NP_055622    | O14523 | C2C2L_HUMAN |                                       | 0  | CTGTCCAGTCC   | 0.597 |             |
| + | 2  | 545       | pyl.1_Missense_Mutation | NM_024806    | NP_079082    | Q6NUN7 | CK063_HUMAN |                                       | 3  | ATGGGGAAAGCC  | 0.542 |             |
| + | 18 | 2364      | lpzt.2_Splice_Site      | NM_001130142 | NP_001123614 | O00534 | VMA5A_HUMAN |                                       | 2  | GTGCAGCTTGT   | 0.507 |             |
| - | 1  | 361       |                         | NM_001005468 | NP_001005468 | Q96RD0 | OR8B2_HUMAN | transmembrane (Potential).            | 0  | AGCGATCATATGC | 0.403 |             |
| - | 2  | 189       | jat.2_Missense_Mutation | NM_014312    | NP_055127    | Q96IQ7 | VSIG2_HUMAN | (Potential). Ig-like V-type.          | 4  | CTTCCCCAGG    | 0.642 |             |
| + | 8  | 2007      |                         | NM_025004    | NP_079280    | Q0P6D6 | CCD15_HUMAN |                                       | 2  | AGGACCAGGATT  | 0.438 |             |
| + | 7  | 2234      | _p.R576Q WNK1_          | NM_018979    | NP_061852    | Q9H4A3 | WNK1_HUMAN  |                                       | 23 | GGTACGGGAGG   | 0.463 |             |
| + | 7  | 2333      | _p.A609V WNK1_          | NM_018979    | NP_061852    | Q9H4A3 | WNK1_HUMAN  |                                       | 23 | TTCTGCTAGCAC  | 0.473 |             |
| - | 31 | 3059_3060 | iqs.1_Missense_Mutation | NM_172364    | NP_758952    | Q7Z3S7 | CA2D4_HUMAN | cellular (Potential).                 | 1  | CTCAGGGTTTC   | 0.614 |             |
| - | 4  | 866       | _p.P144S PRB1_u         | NM_005039    | NP_005030    | P04280 | PRP1_HUMAN  | Protein P-[PAQ]-Q-[GE]-[GD]-[NI]      | 0  | TGGAGGAGATCC  | 0.607 |             |
| - | 3  | 852       |                         | NM_006248    | NP_006239    |        |             |                                       | 0  | AGGTTTGTTC    | 0.607 |             |
| + | 23 | 3187      | p.V1023D PLEKHh         | NM_019012    | NP_061885    | Q9HAU0 | PKHA5_HUMAN |                                       | 3  | AGGATGTTACAT  | 0.269 |             |
| + | 15 | 3113      |                         | NM_000921    | NP_000912    | Q14432 | PDE3A_HUMAN | cytic (By similarity).                | 4  | ACAGCGATGAG   | 0.468 |             |
| + | 9  | 1117      | Mutation_p.S331C        | NM_019844    | NP_062818    | Q9NPD5 | SO1B3_HUMAN | transmembrane (Potential).            | 4  | TTGAAAAGCATC  | 0.234 |             |
| - | 11 | 2367      | _p.S707L PKP2_uc        | NM_004572    | NP_004563    | Q99959 | PKP2_HUMAN  | ARM 6.                                | 2  | GCAGCGAGATG   | 0.463 |             |
| - | 4  | 1275      | _p.A387V PKP2_uc        | NM_004572    | NP_004563    | Q99959 | PKP2_HUMAN  | ARM 2.                                | 2  | TTCCGAGCTTCA  | 0.458 |             |
| + | 4  | 1836      | rpq.2_Missense_Mutation | NM_138371    | NP_612380    | Q96HM7 | F113B_HUMAN | Pro-rich.                             | 5  | TTCTTCGTCGAA  | 0.527 |             |
| - | 33 | 2357      | DL2A1_uc001rqv.2        | NM_001844    | NP_001835    | P02458 | CO2A1_HUMAN | alpha-helical region.                 | 2  | AGTGCCAGGAG   | 0.647 |             |
| + | 9  | 1756      | ATS2_uc001ruf.2         | NM_023071    | NP_075559    | Q86XZ4 | SPAS2_HUMAN |                                       | 1  | GGTATCGAGTTG  | 0.363 |             |
| + | 14 | 2404      | ATS2_uc001ruf.2         | NM_023071    | NP_075559    | Q86XZ4 | SPAS2_HUMAN |                                       | 1  | ATGACAGTATGG  | 0.507 |             |
| - | 3  | 473       | _p.P94L POU6F1          | NM_002702    | NP_002693    | Q14863 | PO6F1_HUMAN | Gln/Pro-rich.                         | 1  | GCTGGGGCAGC   | 0.612 |             |
| + | 2  | 189       |                         | NM_014191    | NP_055006    | Q9UQD0 | SCN8A_HUMAN |                                       | 7  | AGCGGGCTGC    | 0.517 |             |
| - | 27 | 3525      | i.2_Intron SMARCB1      | NM_003075    | NP_003066    | Q8TAQ2 | SMRC2_HUMAN | Pro-rich.                             | 6  | GGTTCCGCATG   | 0.637 |             |
| - | 11 | 1148      | _p.P348S SMARCB1        | NM_003075    | NP_003066    | Q8TAQ2 | SMRC2_HUMAN |                                       | 6  | GACTGGTGAGG   | 0.552 |             |
| - | 25 | 3771      | ation_p.T281I PAN       | NM_001127460 | NP_001120932 | Q504Q3 | PAN2_HUMAN  | Exonuclease.                          | 6  | TCATGGGTTTCC  | 0.512 |             |
| - | 10 | 1129      | slg.2_Missense_Mutation | NM_003920    | NP_003911    | Q9UNS1 | TIM_HUMAN   |                                       | 8  | GCGACGTTTAG   | 0.517 |             |
| - | 7  | 810       |                         | NM_001031701 | NP_001026871 | Q86UY8 | NT5D3_HUMAN | protein binding (Potential).          | 3  | GTGGAGCTCTC   | 0.393 |             |
| - | 7  | 2261      |                         | NM_014840    | NP_055655    | O60285 | NUAK1_HUMAN | protein kinase.                       | 2  | TGGCCGGCGA    | 0.547 |             |
| - | 16 | 2177      | vx.1_Missense_Mutation  | NM_014706    | NP_055521    | Q15020 | SART3_HUMAN | cytosolic or nuclear localization.    | 1  | TTTCTCGACCC   | 0.502 |             |
| + | 2  | 157       | _p.R2C DAO_uc001        | NM_001917    | NP_001908    | P14920 | OXDA_HUMAN  |                                       | 2  | CAATCGGTGTG   | 0.493 |             |
| + | 12 | 2008      | oc.2_Missense_Mutation  | NM_001093    | NP_001084    | O00763 | ACACB_HUMAN | involved in carboxylation.            | 8  | GGGAGTGACTC   | 0.552 |             |

|   |    |           |                    |              |              |        |             |                              |    |                 |       |             |
|---|----|-----------|--------------------|--------------|--------------|--------|-------------|------------------------------|----|-----------------|-------|-------------|
| + | 20 | 3508      | ae_Mutation_p.T95  | NM_170665    | NP_733765    | P16615 | AT2A2_HUMAN | ime=10; (By similarity).     | 4  | ATGAGACGCTCA    | 0.542 | rs149024535 |
| - | 2  | 672       | iu.2_Missense_Mu   | NM_138451    | NP_612460    | Q96DY2 | IQCD_HUMAN  |                              | 1  | CTCCCCAGCA      | 0.532 |             |
| + | 3  | 353       | n_p.L79F ACADS_    | NM_000017    | NP_000008    | P16219 | ACADS_HUMAN |                              | 2  | TTGGGCTTCTG     | 0.682 |             |
| - | 19 | 2872      | i.2_Missense_Mut   | NM_032590    | NP_115979    | Q8NHM5 | KDM2B_HUMAN |                              | 2  | CGGCCCTTCG      | 0.577 |             |
| - | 4  | 460       | S33A_uc001uce.2    | NM_022916    | NP_075067    | Q96AX1 | VP33A_HUMAN |                              | 1  | TACGGCGTGGC     | 0.413 |             |
| - | 2  | 386       |                    | NM_024667    | NP_078943    | Q9H9H4 | VP37B_HUMAN | inal. Interaction with IST1. | 0  | AGTTACCTAATTT   | 0.413 |             |
| - | 8  | 1225      |                    | NM_032656    | NP_116045    | Q8IY37 | DHX37_HUMAN | ase ATP-binding.             | 1  | CCTCTCGTGGG     | 0.667 |             |
| - | 1  | 1328      | irj.2_Missense_Mu  | NM_152912    | NP_690876    | Q9H2K0 | IF3M_HUMAN  |                              | 2  | ACTGTGCTGGT     | 0.413 |             |
| + | 3  | 252       | ase_Mutation_p.R1  | NM_152705    | NP_689918    | Q9Y2S0 | RPAC2_HUMAN |                              | 0  | ATAAAAGATTTCT   | 0.433 |             |
| - | 5  | 589       | D13_uc001uux.2_    | NM_178006    | NP_821074    | Q9Y3M8 | STA13_HUMAN |                              | 4  | CACACGAGACC     | 0.557 |             |
| + | 1  | 2869      |                    | NM_207361    | NP_997244    | Q5SZK8 | FREM2_HUMAN | extracellular (Potential).   | 11 | FTGCACGTGAAT    | 0.507 |             |
| - | 22 | 2197      |                    | NM_199289    | NP_954983    | Q6P3R8 | NEK5_HUMAN  |                              | 1  | GCACAGACTCA     | 0.567 |             |
| - | 1  | 561       | h.2_Missense_Mu    | NM_001922    | NP_001913    | P40126 | TYRP2_HUMAN | melanosome (Potential).      | 5  | CTGCACCCAGG     | 0.627 |             |
| - | 3  | 956       | AC2_uc001vod.2_    | NM_005292    | NP_005283    | Q14330 | GPR18_HUMAN | Name=4; (Potential).         | 0  | TGGTCGTGGTC     | 0.493 |             |
| - | 4  | 1304      |                    | NM_000452    | NP_000443    | Q12908 | NTCP2_HUMAN | ical; (Potential).           | 4  | TAACCCGCCACA    | 0.433 |             |
| + | 32 | 5174_5175 | jk.1_Missense_ML   | NM_015011    | NP_055826    | Q9Y6X6 | MYO16_HUMAN |                              | 10 | GGGAGGAGTG      | 0.649 |             |
| - | 25 | 1822      | 4A1_uc010agl.2_I   | NM_001845    | NP_001836    | P02462 | CO4A1_HUMAN | le-helical region.           | 6  | GACCCGGATGG     | 0.517 |             |
| - | 1  | 59        |                    | NM_001004712 | NP_001004712 | Q8NGD5 | OR4KE_HUMAN | ellular (Potential).         | 3  | GTCGTGAAGTG     | 0.373 |             |
| - | 2  | 755       | lahw.2_Missense_   | NM_145250    | NP_660293    | Q8TAA1 | RNS11_HUMAN |                              | 3  | CAGCTCATCAG     | 0.423 |             |
| - | 17 | 3734      | IN1_uc001wir.3_M   | NM_014977    | NP_055792    | Q9UKV3 | ACINU_HUMAN | Asp/Glu/Lys-rich.            | 4  | CTCCCCTGCT      | 0.662 |             |
| - | 1  | 1385      |                    | NM_032135    | NP_115511    | Q5H9T9 | FSCB_HUMAN  | Pro-rich.                    | 9  | CTGAAGGGGAC     | 0.493 | rs17857204  |
| - | 5  | 431       | I_Intron POLE2_uc  | NM_002692    | NP_002683    | P56282 | DPOE2_HUMAN |                              | 2  | ACTTACCTGGT     | 0.418 |             |
| - | 5  | 363       | nj.1_Intron POLE2  | NM_002692    | NP_002683    | P56282 | DPOE2_HUMAN |                              | 2  | ATTGGTGCAGC     | 0.418 |             |
| + | 4  | 2374      | dx.2_Missense_M    | NM_016651    | NP_057735    | Q9NYF0 | DACT1_HUMAN |                              | 5  | CTCCACCGTGG     | 0.647 |             |
| - | 3  | 250       | xgc.2_Missense_N   | NM_145171    | NP_660154    | Q86YW7 | GPHB5_HUMAN |                              | 1  | TAGGTACAGACT    | 0.483 |             |
| + | 67 | 13140     | py.2_Missense_M    | NM_015180    | NP_055995    | Q8WXH0 | SYNE2_HUMAN | lasmic (Potential).          | 14 | TGGGAGATAAT     | 0.413 |             |
| + | 11 | 1457      | ilt.1_Missense_Mu  | NM_022137    | NP_071420    | Q9H4F8 | SMOC1_HUMAN | EF-hand 2.                   | 2  | GTGCCCGGCGT     | 0.527 |             |
| + | 20 | 2065      | lasq.1_Missense_I  | NM_020431    | NP_065164    | Q9P1W3 | TM63C_HUMAN | ical; (Potential).           | 0  | TTGCCCCATCAT    | 0.547 |             |
| - | 4  | 512       | .1_5'UTR C14orf1C  | NM_017970    | NP_060440    | Q9H7Z3 | CN102_HUMAN | Potential.                   | 3  | GGTTTCTCCCG     | 0.478 |             |
| - | 10 | 978       |                    | NM_024764    | NP_079040    | Q9H7T0 | CTSRB_HUMAN |                              | 5  | TGCCCTGGAAA     | 0.333 |             |
| - | 3  | 534       | 3_5'Flank C14orf1C | NM_022151    | NP_071434    | Q96BY2 | MOAP1_HUMAN |                              | 3  | ctctgaacatctcca | 0     |             |
| - | 42 | 6562      |                    | NM_018036    | NP_060506    | Q96BY7 | ATG2B_HUMAN |                              | 3  | CTTGCCGGACA     | 0.537 |             |
| + | 10 | 1612      | _p.L316F MARK3_    | NM_001128918 | NP_001122390 | P27448 | MARK3_HUMAN |                              | 4  | GATGAACTCAA     | 0.363 |             |
| - | 7  | 8482      | px.2_Missense_M    | NM_138420    | NP_612429    | Q8IVF2 | AHNK2_HUMAN |                              | 1  | CTTTGCTCTCGC    | 0.612 |             |
| + | 1  | 2347      |                    | NM_018958    | NP_061831    | Q9NZP6 | CO002_HUMAN |                              | 8  | CCACTTCCATTT    | 0.493 |             |
| - | 3  | 489       | i.2_Intron BMF_uc  | NM_033503    | NP_277038    | Q96LC9 | BMF_HUMAN   | BH3.                         | 1  | CTTTTCGGGCAA    | 0.597 |             |
| + | 4  | 2040      | bp.1_Missense_M    | NM_014952    | NP_055767    | Q8TBE0 | BAHD1_HUMAN | BAH.                         | 0  | ACCCCGAGTCA     | 0.602 |             |
| - | 41 | 7330      |                    | NM_016642    | NP_057726    | Q9NRC6 | SPTN5_HUMAN | Spectrin 21.                 | 2  | ACAACACGTGTA    | 0.592 |             |
| - | 21 | 3650      | 311_uc010uei.1_N   | NM_025137    | NP_079413    | Q96J17 | SPTCS_HUMAN | ellular (Potential).         | 5  | TGGCCGCCCAT     | 0.363 |             |
| + | 11 | 1522      | _p.F445I SQRD_L    | NM_021199    | NP_067022    | Q9Y6N5 | SQRD_HUMAN  |                              | 1  | AAGTTGTTTCAT    | 0.488 |             |
| - | 11 | 1202      | xm.2_Nonsense_I    | NM_152647    | NP_689860    | Q96M60 | CO033_HUMAN |                              | 1  | GTTTCCAGTGG     | 0.318 |             |
| - | 5  | 594       | _p.R115* CYP19A    | NM_031226    | NP_112503    | P11511 | CP19A_HUMAN |                              | 3  | GAAATCGAGAGC    | 0.438 |             |
| + | 4  | 585       |                    | NM_152450    | NP_689663    | Q8TBF8 | FA81A_HUMAN |                              | 1  | TCTTCGAGGAA     | 0.463 |             |
| - | 81 | 10893     | hb.1_Missense_M    | NM_020821    | NP_065872    | Q709C8 | VP13C_HUMAN |                              | 2  | AGGACGAATGAT    | 0.443 | rs149574145 |
| + | 9  | 1029_1030 | se_Mutation_p.C2   | NM_006537    | NP_006528    | Q9Y6I4 | UBP3_HUMAN  |                              | 1  | AACAAGTGTTCG    | 0.431 |             |
| + | 9  | 1171      | 31_uc002ara.2_5'F  | NM_016166    | NP_057250    | O75925 | PIAS1_HUMAN | P-RING-type.                 | 2  | FTTGACGCAACT    | 0.378 |             |
| - | 17 | 1837      | b.2_RNA PARP6_     | NM_020214    | NP_064599    | Q2NL67 | PARP6_HUMAN | ARP catalytic.               | 0  | GGTCCGGAACC     | 0.632 |             |

|   |    |      |                    |              |              |        |              |                             |    |                |       |             |
|---|----|------|--------------------|--------------|--------------|--------|--------------|-----------------------------|----|----------------|-------|-------------|
| - | 2  | 696  | ijCYP1A1_uc002a    | NM_000499    | NP_000490    | P04798 | CP1A1_HUMAN  |                             | 5  | CTGATACCACCA   | 0.517 |             |
| + | 2  | 1771 | av.2_Missense_Mu   | NM_153271    | NP_695003    | Q8WV41 | SNX33_HUMAN  | BAR.                        | 1  | ACCAGCGGGTGC   | 0.622 |             |
| - | 11 | 985  |                    | NR_027024    |              |        |              |                             | 0  | CCTGGGATTGG,   | 0.567 |             |
| + | 3  | 2585 | unk.1_Missense_I   | NM_015206    | NP_056021    | Q9UPX6 | K1024_HUMAN  |                             | 4  | TGCACGGAATGC   | 0.627 |             |
| + | 1  | 153  | isF1_uc002bjq.2_   | NM_023003    | NP_075379    | Q9BZW5 | TM6S1_HUMAN  | ical; (Potential).          | 1  | CCTCTCGGCCA    | 0.567 |             |
| - | 4  | 1761 | is.1_Missense_Mu   | NM_001717    | NP_001708    | Q01954 | BNC1_HUMAN   |                             | 3  | TTGTGTCTTTTC   | 0.468 |             |
| + | 14 | 1753 | p.G510E ADAMTS     | NM_207517    | NP_997400    | P82987 | ATL3_HUMAN   | SP type-1 3.                | 27 | CCGCGGAGAGC    | 0.458 |             |
| + | 12 | 5113 | e_Mutation_p.A15f  | NM_013227    | NP_037359    | E7EX88 | E7EX88_HUMAN |                             | 3  | TTCAGCTTCTGC   | 0.537 |             |
| - | 6  | 810  | nn.2_Missense_M    | NM_005928    | NP_005919    | Q08431 | MFGM_HUMAN   | 5/8 type C 2.               | 1  | CAGGGGATTGG    | 0.577 |             |
| + | 10 | 1604 | L13_uc002bpe.1_I   | NM_001029964 | NP_001025135 | A6NNM8 | TTL13_HUMAN  |                             | 0  | GGAACGGCTTT    | 0.488 |             |
| + | 9  | 1943 | p.2_Missense_Mul   | NR_003659    |              |        |              |                             | 0  | GCATCGGCAAG    | 0.652 |             |
| - | 1  | 123  | icgs.1_Missense_I  | NM_006428    | NP_006419    | Q13084 | RM28_HUMAN   |                             | 0  | GCCTCCGCTCC    | 0.647 |             |
| + | 4  | 985  | ih.1_Missense_Mu   | NM_005632    | NP_005623    | O75808 | CAN15_HUMAN  |                             | 2  | GGGAAGGTGCC    | 0.736 |             |
| + | 2  | 252  | 2cnj.2_Missense_I  | NM_004548    | NP_004539    | O96000 | NDUBA_HUMAN  |                             | 0  | AGAGCGGCAGCA   | 0.483 |             |
| - | 6  | 1512 | it.1_Missense_Mu   | NM_001009944 | NP_001009944 | P98161 | PKD1_HUMAN   | Extracellular (Potential).  | 3  | AACTGCTCCTC    | 0.721 |             |
| + | 4  | 421  | l2ctz.3_5'Flank ZN | NM_001042428 | NP_001035893 | O95201 | ZN205_HUMAN  |                             | 0  | CCCCCGGATC     | 0.672 | rs140013925 |
| + | 2  | 191  | n_p.T29 CLUAP1     | NM_015041    | NP_055856    | Q96AJ1 | CLUA1_HUMAN  |                             | 3  | CCGTACACCCA    | 0.393 |             |
| + | 5  | 516  | AP1_uc002cvt.1_M   | NM_015041    | NP_055856    | Q96AJ1 | CLUA1_HUMAN  |                             | 3  | GATTTGAAGGC    | 0.353 |             |
| - | 3  | 588  | p.P131L KIAA043    | NM_014647    | NP_055462    | Q9Y4F3 | LKAP_HUMAN   |                             | 0  | CGCCCGGTGA     | 0.547 |             |
| - | 34 | 5837 | ou.2_Missense_Mi   | NM_001520    | NP_001511    | Q12789 | TF3C1_HUMAN  |                             | 5  | CTCACCGACAC    | 0.627 |             |
| + | 7  | 1656 |                    | NM_014712    | NP_055527    | O15047 | SET1A_HUMAN  | Ser-rich.                   | 3  | CCGCCTCCACG    | 0.413 |             |
| + | 2  | 269  |                    | NM_014669    | NP_055484    | Q8N1F7 | NUP93_HUMAN  |                             | 2  | TAACACGCACG    | 0.577 |             |
| + | 26 | 3859 | .1_RNA NLRC5_u     | NM_032206    | NP_115582    | Q86W13 | NLRC5_HUMAN  |                             | 7  | CCAACGAGGAG    | 0.602 |             |
| - | 5  | 1031 | oh.2_Missense_Mi   | NM_001796    | NP_001787    | P55286 | CADH8_HUMAN  | r (Potential). Cadherin 2.  | 9  | GTGTCGTGGTC    | 0.458 |             |
| + | 3  | 1493 | u_p.A165T CES2_I   | NM_003869    | NP_003860    | O00748 | EST2_HUMAN   |                             | 0  | TACCCGACAGT    | 0.567 |             |
| + | 2  | 404  | C50_uc010chi.1_I   | NM_178452    | NP_848547    | Q8NEP3 | DAAF1_HUMAN  |                             | 0  | ACTTCGCACAC    | 0.413 |             |
| - | 2  | 268  | n_p.S7L ABR_uc0    | NM_021962    | NP_068781    | Q12979 | ABR_HUMAN    |                             | 1  | TGGGCGACTCA    | 0.672 |             |
| + | 8  | 1323 | AFAH1B1_uc010v     | NM_000430    | NP_000421    | P43034 | LIS1_HUMAN   | on with dynein and dynactin | 1  | CAGCTGTTCCA    | 0.473 | rs140360173 |
| - | 1  | 79   |                    | NM_002550    | NP_002541    | P47881 | OR3A1_HUMAN  | ellular (Potential).        | 3  | TGGCTGCAGCC    | 0.567 |             |
| + | 1  | 493  |                    | NM_012373    | NP_036505    | P47888 | OR3A3_HUMAN  | Name=4; (Potential).        | 0  | CCAACGCACTG    | 0.587 |             |
| + | 3  | 587  | 11_uc010vtw.1_In   | NM_175734    | NP_783861    | Q0P670 | CQ074_HUMAN  |                             | 0  | TACACCGAGTG    | 0.567 |             |
| - | 17 | 2276 | 58_splice MYH10_   | NM_005964    | NP_005955    | P35580 | MYH10_HUMAN  |                             | 2  | CAATACCTCTGT   | 0.393 |             |
| - | 22 | 2694 | uc002gml.1_Intron  | NM_002472    | NP_002463    | P13535 | MYH8_HUMAN   | Potential.                  | 11 | CTTGGCGAGTT    | 0.443 |             |
| - | 17 | 1753 | 313M ELAC2_ucC     | NM_018127    | NP_060597    | Q9BQ52 | RN22_HUMAN   |                             | 0  | TACCGTGTGG     | 0.597 |             |
| - | 2  | 873  | 1_Intron NF1_uc0   | NM_006495    | NP_006486    | P34910 | EV12B_HUMAN  | lasmic (Potential).         | 2  | ATCTACCTGCC    | 0.348 |             |
| + | 13 | 1771 | p.R471C AP2B1_     | NM_001282    | NP_001273    | P63010 | AP2B1_HUMAN  |                             | 1  | ATTGGCGCTTC    | 0.463 |             |
| + | 14 | 2300 | 11_uc002hnd.2_5    | NM_024835    | NP_079111    | Q9H3C7 | GGNB2_HUMAN  |                             | 2  | CAAGAGGCCCA    | 0.388 |             |
| - | 10 | 1014 | huy.2_Missense_I   | NM_003079    | NP_003070    | Q969G3 | SMCE1_HUMAN  | Potential.                  | 0  | TTTTGCGGGCC    | 0.507 |             |
| - | 2  | 863  | 0cxg.2_Missense_   | NM_015515    | NP_056330    | Q9C075 | K1C23_HUMAN  | Rod. Coil 1A.               | 1  | CAGGGCGCGAA    | 0.547 |             |
| - | 6  | 1014 |                    | NM_004138    | NP_004129    | O76009 | KT33A_HUMAN  | Coil 2. Rod.                | 0  | TCTCGCCAGC     | 0.627 |             |
| - | 6  | 1068 | cd.3_Missense_Mi   | NM_021991    | NP_068831    | P14923 | PLAK_HUMAN   |                             | 5  | CTCATCCAGCA    | 0.577 |             |
| - | 7  | 1367 |                    | NM_012285    | NP_036417    | Q9UQ05 | KCNH4_HUMAN  | ir; Name=Segment S4; (Po    | 1  | cgccgcagcagccg | 0.537 |             |
| - | 4  | 899  |                    | NM_012285    | NP_036417    | Q9UQ05 | KCNH4_HUMAN  | lasmic (Potential).         | 1  | TGCCTCCCTGG    | 0.602 |             |
| - | 13 | 4631 | e_Mutation_p.Q14   | NM_007294    | NP_009225    | P38398 | BRCA1_HUMAN  |                             | 52 | ATTCTGGCTTAT   | 0.358 |             |
| - | 12 | 1649 | _Mutation_p.A507T  | NM_001256    | NP_001247    | P30260 | CDC27_HUMAN  | TPR 3.                      | 5  | ATAGGCCCTTC    | 0.348 |             |
| + | 18 | 2468 | p.P566L KPNB1_     | NM_002265    | NP_002256    | Q14974 | IMB1_HUMAN   | HEAT 8.                     | 3  | GAAGCCGACAG    | 0.388 |             |
| - | 3  | 734  | ie.3_Missense_Mi   | NM_006807    | NP_006798    | P83916 | CBX1_HUMAN   |                             | 0  | TTTGGCTTGC     | 0.328 |             |

|   |    |       |                                                |              |              |            |              |                                |                |                 |       |             |
|---|----|-------|------------------------------------------------|--------------|--------------|------------|--------------|--------------------------------|----------------|-----------------|-------|-------------|
| + | 11 | 1755  | p.A480T B4GALN                                 | NM_153446    | NP_703147    | Q8NHY0     | B4GN2_HUMAN  | lenal (Potential).             | 2              | 'GTGCCGCATAA'   | 0.512 |             |
| + | 4  | 404   | 4_uc010wou.1_Int                               | NM_000717    | NP_000708    | P22748     | CAH4_HUMAN   |                                | 0              | GAGGAGGACTG'    | 0.582 |             |
| + | 11 | 1335  | se_Mutation_p.V9f                              | NM_007372    | NP_031398    | Q86XP3     | DDX42_HUMAN  | ase ATP-binding.               | 5              | 'TGGCCGTATATG   | 0.438 |             |
| - | 4  | 200   | nse_Mutation_p.R:                              | NM_014877    | NP_055692    |            |              |                                | 2              | 'AGCTCTTCTGTG'  | 0.418 |             |
| + | 4  | 613   | _p.Q118R NUP85_                                | NM_024844    | NP_079120    | Q9BW27     | NUP85_HUMAN  |                                | 1              | 'GCACCAGGTTG'   | 0.254 |             |
| - | 22 | 3968  | p.T1269M EVPL_L                                | NM_001988    | NP_001979    | Q92817     | EVPL_HUMAN   | fibrous rod domain.            | 4              | 'CCACCGTGGGC    | 0.647 | rs145713300 |
| - | 3  | 468   | se_Mutation_p.Q8C                              | NM_001988    | NP_001979    | Q92817     | EVPL_HUMAN   | Globular 1.                    | 4              | 'TCCTGCTGGTG'   | 0.692 |             |
| + | 6  | 1121  | rud.1_RNA CARD'                                | NM_024110    | NP_077015    | Q9BXL6     | CAR14_HUMAN  | Potential.                     | 5              | GCTGCGGGAGC'    | 0.687 |             |
| + | 8  | 758   | 2jyl.1_Nonsense_I                              | NM_173627    | NP_775898    | Q8N8Q3     | ENDO_V_HUMAN |                                | 0              | 'GCTCCCGAGAG    | 0.637 |             |
| - | 5  | 1784  | ryw.1_Missense_Iv                              | NM_004746    | NP_004737    | O14490     | DLGP1_HUMAN  |                                | 4              | 'CTGTCCGTCCA    | 0.557 |             |
| + | 6  | 1310  | ub.2_Intron CABL                               | NM_001100619 | NP_001094089 | Q8TDN4     | CABL1_HUMAN  | th CDK3 (By similarity).       | 1              | 'AGGCCGGGCAA'   | 0.592 |             |
| - | 17 | 2770  | se_Mutation_p.E74                              | NM_014939    | NP_055754    | Q9Y2L5     | TPPC8_HUMAN  |                                | 0              | 'AATCATTTCCAGG' | 0.274 |             |
| + | 1  | 10    | se_Mutation_p.E3I                              | NM_001390    | NP_001381    | Q9Y4J8     | DTNA_HUMAN   | h MAGEE1 (By similarity).      | 0              | 'ATTGAAGATAGT   | 0.383 |             |
| + | 8  | 1244  | _p.A308V SLC14A:                               | NM_007163    | NP_009094    | Q15849     | UT2_HUMAN    | ical; (Potential).             | 4              | 'GGTGGCTCTGT'   | 0.557 |             |
| - | 7  | 575   | lbq.3_Missense_M                               | NM_024430    | NP_077748    | Q9H939     | PPIP2_HUMAN  | Potential.                     | 1              | 'CACTCCGGCTG'   | 0.468 |             |
| - | 19 | 2533  |                                                | NM_001080467 | NP_001073936 | Q9ULV0     | MYO5B_HUMAN  | osin head-like.                | 5              | 'TGCTCGAAAGA    | 0.557 |             |
| - | 4  | 1077  |                                                | NM_052947    | NP_443179    | Q86TB3     | ALPK2_HUMAN  |                                | 14             | 'CGGCACTGTCA    | 0.498 |             |
| + | 7  | 1442  | _p.E373K CDH7_u                                | NM_033646    | NP_387450    | Q9ULB5     | CADH7_HUMAN  | r (Potential). Cadherin 3.     | 4              | 'TAGATGAGCCCG'  | 0.498 |             |
| - | 4  | 902   | cv.2_Missense_Mu                               | NM_182511    | NP_872317    | Q8IUk8     | CBLN2_HUMAN  | C1q.                           | 0              | 'TAGAGGAAACAC   | 0.507 |             |
| - | 7  | 1111  | _p.R275Q NETO1_                                | NM_138966    | NP_620416    | Q8TDF5     | NETO1_HUMAN  | tracellular (Potential).       | 4              | 'TGTTTCGACTG'   | 0.463 |             |
| + | 10 | 1324  | _Mutation_p.D304                               | NM_018235    | NP_060705    | Q96KP4     | CNDP2_HUMAN  |                                | 3              | 'TCTCCGACTTC.   | 0.557 |             |
| - | 2  | 430   |                                                | NM_017797    | NP_060267    | Q9BX70     | BTBD2_HUMAN  | BTB.                           | 2              | GACGGCGCTGC'    | 0.652 |             |
| - | 14 | 1711  | _p.R552C PIP5K1C                               | NM_012398    | NP_036530    | O60331     | PI51C_HUMAN  |                                | 4              | 'TGTGCGCCGCC    | 0.468 |             |
| + | 3  | 614   |                                                | NM_005483    | NP_005474    | Q13111     | CAF1A_HUMAN  | 1 chromo shadow domain.        | 2              | 'CATTTCTCTGGAC' | 0.557 |             |
| - | 2  | 497   | 'F14_uc002mfj.1_                               | NM_003807    | NP_003798    | O43557     | TNF14_HUMAN  | type II membrane protein;      | 1              | CAGACCCACCC'    | 0.642 |             |
| - | 18 | 3455  | e.1_Missense_Mul                               | NM_000208    | NP_000199    | P06213     | INSR_HUMAN   | α. Cytoplasmic (Potential).    | 12             | 'AGAACGGAGGT    | 0.662 |             |
| - | 9  | 924   |                                                | NM_198492    | NP_940894    | Q6UXB4     | CLC4G_HUMAN  | (Potential). C-type lectin.    | 0              | 'CAGATCCAGCC'   | 0.637 |             |
| - | 8  | 2011  |                                                | NM_198471    | NP_940873    | Q6NY19     | KANK3_HUMAN  | ANK 1.                         | 0              | 'GACCTCGCAGG    | 0.647 |             |
| - | 3  | 18804 |                                                | NM_024690    | NP_078966    | Q8WXI7     | MUC16_HUMAN  | xtracellular (Potential).      | 57             | 'TTGTTTCATGACA' | 0.473 |             |
| - | 8  | 1730  | ws.2_Missense_M                                | NM_024106    | NP_077011    | Q9BUY5     | ZN426_HUMAN  | :2H2-type 10.                  | 1              | 'ATGAACTGGAA'   | 0.413 |             |
| - | 4  | 454   | dyn.1_RNA ZNF6z                                | NM_145233    | NP_660276    | Q96I27     | ZN625_HUMAN  | ype 1; degenerate.             | 0              | 'CACATGATTTTA   | 0.453 |             |
| + | 11 | 1873  |                                                | NM_004843    | NP_004834    | Q6UWB1     | I27RA_HUMAN  | tential). Fibronectin type-III | 0              | GGGGTCCCTGT'    | 0.542 |             |
| + | 15 | 2015  | _p.S582N CD97_u                                | NM_078481    | NP_510966    | P48960     | CD97_HUMAN   | Name=3; (Potential).           | 4              | 'GATGAGCCTCG'   | 0.687 | rs140048136 |
| + | 1  | 536   | _2_Intron GIPC1_u                              | NM_001146693 | NP_001140165 | F5H5R7     | F5H5R7_HUMAN |                                | 0              | 'ATATTGCGGGGA   | 0.398 |             |
| + | 2  | 661   | _p.L196F C19orf44                              | NM_032207    | NP_115583    | Q9H6X5     | CS044_HUMAN  |                                | 0              | 'ACTTTTGCAAAC'  | 0.428 |             |
| + | 14 | 3483  | p.D886N NWD1_uc002nev.3_Missense_Mutation_p.D8 |              | Q149M9       | NWD1_HUMAN | WD 5.        | 7                              | 'CCAGGGATGGT'  | 0.547           |       |             |
| + | 16 | 3774  | p.R983C NWD1_uc002nev.3_Missense_Mutation_p.R9 |              | Q149M9       | NWD1_HUMAN | WD 7.        | 7                              | 'GGCTTTCGCCGA' | 0.537           |       |             |
| + | 3  | 464   |                                                | NM_024656    | NP_078932    | Q8NBJ5     | GT251_HUMAN  |                                | 0              | 'AGCCCTGAAAT'   | 0.562 |             |
| + | 5  | 1684  | _p.A559T MAP1S_                                | NM_018174    | NP_060644    | Q66K74     | MAP1S_HUMAN  | tubule-organizing center loc   | 1              | AGCGGCACCC'     | 0.677 |             |
| - | 14 | 2195  | o.G287E PDE4C_u                                | NM_001098819 | NP_001092289 | Q08493     | PDE4C_HUMAN  |                                | 5              | 'GGTCTCCCTGC'   | 0.627 |             |
| + | 1  | 825   |                                                | NR_003128    |              |            |              |                                | 0              | TAGTACGAAATTC   | 0.378 |             |
| + | 2  | 1423  | _p.I509M ZNF493                                | NM_175910    | NP_787106    | Q6ZR52     | ZN493_HUMAN  | :2H2-type 13.                  | 1              | 'TAAATAATTCAT.  | 0.323 |             |
| - | 5  | 2403  | 208_uc002nqo.1_I                               | NM_007153    | NP_009084    |            |              |                                | 7              | 'TTACCTTATGTTT  | 0.373 |             |
| + | 1  | 1372  | I_5'Flank ANKRDz                               | NM_207391    | NP_997274    | Q6ZS82     | R9BP_HUMAN   | ilarity). Cytoplasmic (Poter   | 1              | GCCCCGCTGGA     | 0.706 |             |
| + | 2  | 202   | se_Mutation_p.R2:                              | NM_020895    | NP_065946    | Q96CP6     | GRM1A_HUMAN  |                                | 0              | 'GAAACGGCTGC'   | 0.622 |             |
| + | 7  | 2169  | nse_Mutation_p.H-                              | NM_198539    | NP_940941    | Q3ZCX4     | ZN568_HUMAN  | :2H2-type 12.                  | 2              | 'AAAATTCATACTG  | 0.383 |             |
| + | 12 | 1286  | u.2_Missense_Mu                                | NM_000540    | NP_000531    | P21817     | RYR1_HUMAN   | oplasmic. MIR 5.               | 12             | 'ACGACGCACTG'   | 0.637 |             |

|   |    |                                                     |                                                |              |              |             |             |                               |    |              |       |
|---|----|-----------------------------------------------------|------------------------------------------------|--------------|--------------|-------------|-------------|-------------------------------|----|--------------|-------|
| - | 6  | 453                                                 | cx.3_Missense_Mt                               | NM_004877    | NP_004868    | O60234      | GMFG_HUMAN  | ADF-H.                        | 1  | CTCTGCTGTCT  | 0.557 |
| - | 2  | 321                                                 | RB_uc010egw.1_f                                | NM_000713    | NP_000704    | P30043      | BLVRB_HUMAN |                               | 0  | CCACGGTCTTG  | 0.662 |
| - | 4  | 449                                                 | oo.2_Missense_M                                | NM_004756    | NP_004747    | Q9Y6R0      | NUMBL_HUMAN | PID. p.R94W(1)                | 5  | TTCCCGGGGAC  | 0.557 |
| + | 4  | 551                                                 | r.1_Intron CYP2S1                              | NM_030622    | NP_085125    | Q96SQ9      | CP2S1_HUMAN |                               | 1  | CAGGACGCCCA  | 0.627 |
| + | 21 | 2060                                                | osb.2_Missense_I                               | NM_004706    | NP_004697    | Q92888      | ARHG1_HUMAN | PH.                           | 4  | TCCACGAGGGC  | 0.627 |
| + | 5  | 1181                                                | 284_uc010ejd.2_f                               | NM_013361    | NP_037493    | Q9UK11      | ZN223_HUMAN | 2H2-type 5.                   | 1  | TGGTCCACACA  | 0.448 |
| + | 2  | 108                                                 |                                                | NM_000483    | NP_000474    | P02655      | APOC2_HUMAN |                               | 1  | TATGGGCACAC  | 0.612 |
| + | 13 | 1467                                                | p.P488S MARK4_uc002pbc.1_Missense_Mutation_p.P |              | Q96L34       | MARK4_HUMAN |             |                               | 3  | AGATCCCAGAG  | 0.711 |
| + | 1  | 2749                                                |                                                | NM_004491    | NP_004482    | Q9NRY4      | RHG35_HUMAN |                               | 1  | TTGACGGAAGG  | 0.453 |
| + | 2  | 688                                                 | lc.1_Missense_Mt                               | NM_014681    | NP_055496    | Q14147      | DHX34_HUMAN |                               | 5  | CACGCGGGGCT  | 0.632 |
| + | 6  | 1260                                                | phi.3_Missense_M                               | NM_015711    | NP_056526    | Q9NZM4      | GSCR1_HUMAN |                               | 3  | AGCCCGCGGGG  | 0.746 |
| - | 2  | 710                                                 | e.2_RNA IZUMO1                                 | NM_182575    | NP_872381    | Q8IYV9      | IZUM1_HUMAN | cellular (Potential).         | 1  | CTTTCCATCATC | 0.552 |
| - | 2  | 419                                                 | UVBL2_uc002plq.                                | NM_002103    | NP_002094    | P13807      | GYS1_HUMAN  |                               | 2  | GTTGTCGCCCC  | 0.667 |
| + | 6  | 4646                                                |                                                | NM_020719    | NP_065770    | Q9ULL5      | PRR12_HUMAN |                               | 2  | TCTGGCCAAAA  | 0.672 |
| - | 6  | 1152                                                | Jybi.1_Missense_M                              | NM_052884    | NP_443116    | Q96RL6      | SIG11_HUMAN | cellular (Potential).         | 6  | CTGGAGGATCT  | 0.582 |
| + | 23 | 2834                                                |                                                | NM_004533    | NP_004524    | Q14324      | MYPC2_HUMAN | like C2-type 6.               | 1  | CATCCGCGTTG  | 0.632 |
| - | 4  | 626                                                 | LK15_uc002pto.2_                               | NM_017509    | NP_059979    | Q9H2R5      | KLK15_HUMAN | peptidase S1.                 | 2  | TCTGCCTCCG   | 0.572 |
| - | 3  | 801                                                 | AS1_uc002pxn.1_                                | NM_001523    | NP_001514    | Q92839      | HAS1_HUMAN  | lasmic (Potential).           | 2  | GTCCCTCGTCCA | 0.622 |
| - | 4  | 1901                                                | 616_uc002pyn.2_I                               | NM_178523    | NP_848618    | Q08AN1      | ZN616_HUMAN | 2H2-type 13.                  | 0  | TCTCCGATGCC  | 0.443 |
| - | 4  | 422_423                                             | 2qar.3_Missense_I                              | NM_001102603 | NP_001096073 | Q9HCG1      | ZN160_HUMAN |                               | 1  | AGTAAGGGCCAT | 0.416 |
| + | 3  | 568                                                 |                                                | NM_001012728 | NP_001012746 | A6NFQ7      | DPRX_HUMAN  |                               | 0  | TTTGCGCTCCA  | 0.428 |
| + | 3  | 376                                                 | era.1_Missense_M                               | NM_031896    | NP_114102    | P62955      | CCG7_HUMAN  | ical; (Potential).            | 1  | ACATCGGCCAC  | 0.597 |
| + | 5  | 505                                                 | i.2_Missense_Mut                               | NM_001013    | NP_001004    | P46781      | RS9_HUMAN   | RNA-binding.                  | 1  | TGTCGCGCTGG  | 0.612 |
| + | 5  | 705                                                 | LRA1_uc010yfh.1_                               | NM_006863    | NP_006854    | O75019      | LIRA1_HUMAN | 2. Extracellular (Potential). | 3  | GTACCATGGG   | 0.567 |
| + | 13 | 1925                                                | e_Mutation_p.E53                               | NM_006669    | NP_006660    | Q8NHL6      | LIRB1_HUMAN | lasmic (Potential).           | 3  | CCCAGGAAGAA  | 0.612 |
| + | 6  | 735                                                 | 3_Intron KIR2DS4_                              | NM_012314    | NP_036446    | P43632      | KI2S4_HUMAN | cellular (Potential).         | 0  | GCCCTCACCCA  | 0.493 |
| + | 4  | 690                                                 | kf.2_Missense_Mt                               | NM_032430    | NP_115806    | Q8TDC3      | BRSK1_HUMAN | rotein kinase.                | 6  | CTTCGCCAGA   | 0.602 |
| + | 2  | 746                                                 | l2qls.2_Missense_                              | NM_013301    | NP_037433    | Q9BWC9      | CC106_HUMAN |                               | 0  | TGACCGGAGCA  | 0.662 |
| - | 8  | 2981                                                | b.2_Missense_Mut                               | NM_145007    | NP_659444    | P59045      | NAL11_HUMAN | LRR 3.                        | 6  | TCAGCGGATTG  | 0.498 |
| + | 2  | 534                                                 |                                                | NM_134444    | NP_604393    | Q96MN2      | NALP4_HUMAN | DAPIN.                        | 15 | AGCTTGAACTC  | 0.413 |
| + | 4  | 2365                                                | p.S573N NLRP4_                                 | NM_134444    | NP_604393    | Q96MN2      | NALP4_HUMAN | LRR 1.                        | 15 | GGACAGCACCC  | 0.562 |
| + | 7  | 1648                                                | mi.2_Missense_Mt                               | NM_153447    | NP_703148    | P59047      | NALP5_HUMAN | NACHT.                        | 7  | GTGACGACCTC  | 0.537 |
| - | 12 | 1353                                                | lqzd.2_Missense_I                              | NM_020738    | NP_065789    | Q9ULH0      | KDIS_HUMAN  | ic (Potential). ANK 12.       | 4  | CTTTGGGATTT  | 0.393 |
| + | 25 | 4681                                                | bp.1_Missense_Mt                               | NM_014668    | NP_055483    | Q4ZG55      | GREB1_HUMAN |                               | 1  | AGTACGCAGCG  | 0.577 |
| + | 18 | 2456                                                | lt.2_Missense_Mu                               | NM_145693    | NP_663731    | Q14693      | LPIN1_HUMAN | C-LIP.                        | 4  | CCATCGGGATG  | 0.537 |
| - | 2  | 562                                                 | xu.1_Nonsense_M                                | NM_002381    | NP_002372    | O15232      | MATN3_HUMAN | VWFA.                         | 0  | TGTCTGGATGG  | 0.567 |
| - | 25 | 3850                                                | nse_Mutation_p.V                               | NM_017552    | NP_060022    | Q9ULI0      | ATD2B_HUMAN |                               | 1  | GTTACCTCAA   | 0.398 |
| + | 17 | 3623                                                | rj.2_Missense_Mt                               | NM_003743    | NP_003734    | Q15788      | NCOA1_HUMAN | Gln-rich.                     | 11 | GCACCGACAGA  | 0.473 |
| + | 3  | 428                                                 |                                                | NM_001105519 | NP_001098989 | A6NJV1      | CB070_HUMAN |                               | 1  | CGTGAGGGAGC  | 0.592 |
| + | 2  | 216                                                 | rhv.3_Missense_M                               | NM_020134    | NP_064519    | Q9BPU6      | DPYL5_HUMAN |                               | 2  | TGAACGATGAC  | 0.567 |
| + | 5  | 761                                                 | u.2_RNA ABHD1_                                 | NM_032604    | NP_115993    | Q96SE0      | ABHD1_HUMAN |                               | 0  | CCGTGGGCATC  | 0.522 |
| + | 1  | 3620                                                | 1_5'Flank ZNF512                               | NM_032266    | NP_115642    | Q68DN1      | CB016_HUMAN |                               | 1  | CATACGGAGAA  | 0.453 |
| + | 8  | 1874                                                |                                                | NM_018158    | NP_060628    | Q9BWU0      | NADAP_HUMAN |                               | 0  | GTCTCCATCTC  | 0.363 |
| + | 3  | 1202                                                | jk.3_Nonsense_Mt                               | NM_015147    | NP_055962    | Q76N32      | CEP68_HUMAN |                               | 1  | TCCTGCAGGAC  | 0.557 |
| + | 10 | 1358                                                | p.R28K SEMA4F_                                 | NM_004263    | NP_004254    | Q95754      | SEM4F_HUMAN | tracellular (Potential).      | 4  | GGACAGGCCAG  | 0.577 |
| + | 3  | 010fhg.2_Splice_Site FLJ40330_uc010fh.2_Splice_Site |                                                |              |              |             |             |                               | 0  | AGAAGGTAATTA | 0.323 |
| - | 6  | 592                                                 |                                                | NM_001002036 | NP_001002036 | Q6HA08      | ASTL_HUMAN  |                               | 0  | CCGGTCGGCCC  | 0.657 |



|   |     |           |                   |              |              |        |             |                              |     |                  |       |             |
|---|-----|-----------|-------------------|--------------|--------------|--------|-------------|------------------------------|-----|------------------|-------|-------------|
| - | 2   | 574       | p.S152F IST6GAL:  | NM_001142351 | NP_001135823 | Q96JF0 | SIAT2_HUMAN | lenal (Potential).           | 11  | CGGGGGAAGGC      | 0.612 |             |
| + | 15  | 1991      | POTEE_uc002tsl.2  | NM_001083538 | NP_001077007 | Q6S8J3 | POTEE_HUMAN | Potential.                   | 0   | TTGCATGAAAT/     | 0.353 |             |
| + | 1   | 533       |                   | NM_001508    | NP_001499    | O43194 | GPR39_HUMAN | cellular (Potential).        | 0   | TCCCCGAGTTTC     | 0.542 |             |
| - | 9   | 1127      | ase_Mutation_p.D  | NM_032143    | NP_115519    | Q5FWF4 | ZRAB3_HUMAN | case C-terminal.             | 2   | CGGAATCATTCT     | 0.303 |             |
| - | 3   | 225       | _p.D35N CACNB4    | NM_000726    | NP_000717    | O00305 | CACB4_HUMAN |                              | 2   | GGAAATCCGCTG/    | 0.458 |             |
| + | 13  | 1129      | p.Q347H NOSTRI    | NM_001039724 | NP_001034813 | Q8IVI9 | NOSTN_HUMAN |                              | 0   | GAGCAAAGACC      | 0.428 |             |
| - | 39  | 7472      |                   | NM_004525    | NP_004516    | P98164 | LRP2_HUMAN  | cellular (Potential).        | 29  | ATGACAGTTCTTI    | 0.403 |             |
| - | 3   | 803       | uiv.2_Missense_M  | NM_001033045 | NP_001028217 | Q7Z3F1 | GP155_HUMAN | ical; (Potential).           | 1   | AAATAGGGAATAC    | 0.289 |             |
| - | 245 | 50368     | J410 TTN_uc010z   | NM_133378    | NP_596869    | Q8WZ42 | TITIN_HUMAN |                              | 153 | GTACAGCTGCG      | 0.353 |             |
| - | 229 | 46588     | 50Q TTN_uc010z    | NM_133378    | NP_596869    | Q8WZ42 | TITIN_HUMAN |                              | 153 | GCACCTCGGGAT/    | 0.468 |             |
| - | 46  | 13096     | N_uc010zfi.1_Intr | NM_133379    | NP_596870    | Q8WZ42 | TITIN_HUMAN |                              | 153 | GACCAGCTGGA      | 0.383 |             |
| - | 5   | 787       | '_Intron CERKL_uc | NM_001030311 | NP_001025482 | Q49MI3 | CERKL_HUMAN | DAGKc.                       | 4   | GTTCCTCGATGC     | 0.313 |             |
| + | 4   | 930       | p.A120S NAB1_uc   | NM_005966    | NP_005957    | Q13506 | NAB1_HUMAN  |                              | 0   | GCAATGCCCGG      | 0.498 |             |
| - | 2   | 913       |                   | NM_004657    | NP_004648    | O95810 | SDPR_HUMAN  |                              | 2   | GTTTTCTCCCA      | 0.557 |             |
| + | 31  | 3567_3568 | p.G712N AOX1_u    | NM_001159    | NP_001150    | Q06278 | ADO_HUMAN   |                              | 6   | CGAAGGCCAG       | 0.475 |             |
| + | 5   | 509       | hv.1_Missense_Mt  | NM_015934    | NP_057018    | Q9Y2X3 | NOP58_HUMAN |                              | 0   | GAATTCGTTTCA     | 0.363 |             |
| - | 7   | 749       |                   | NM_001093730 | NP_001087199 | A2CJ06 | DYTN_HUMAN  | p.P211L(1)                   | 2   | AGGTCGGGAGC      | 0.527 |             |
| - | 18  | 2555      | e_Mutation_p.P46  | NM_173076    | NP_775099    | Q86UK0 | ABCAC_HUMAN |                              | 11  | AAATGGTGCTG      | 0.363 |             |
| + | 4   | 932       | p.R236H CXCR2_    | NM_001557    | NP_001548    | P25025 | CXCR2_HUMAN | lasmic (Potential).          | 2   | CCTGCGTACGC      | 0.567 | rs144013681 |
| - | 11  | 1315      |                   | NM_000092    | NP_000083    | P53420 | CO4A4_HUMAN | le-helical region.           | 11  | CGGAGGTCCCT      | 0.423 |             |
| + | 14  | 1768      | p.R546H PSMD1_    | NM_002807    | NP_002798    | Q99460 | PSMD1_HUMAN |                              | 2   | TCTGCGTGCT       | 0.463 |             |
| - | 17  | 3037      | za.2_Missense_M   | NM_006037    | NP_006028    | P56524 | HDAC4_HUMAN | one deacetylase.             | 6   | AGGGAGCCGGA      | 0.602 |             |
| + | 3   | 224       | ..1_5'UTR ATG4B_  | NM_013325    | NP_037457    | Q9Y4P1 | ATG4B_HUMAN |                              | 0   | AGGACGAGATC      | 0.383 |             |
| + | 3   | 1021_1022 | dn.2_Missense_Mt  | NM_021158    | NP_066981    | Q96RU7 | TRIB3_HUMAN | rotein kinase.               | 2   | GCGCACTGTC/      | 0.639 |             |
| - | 3   | 813       | 50_splice SIRPG_  | NM_018556    | NP_061026    | Q9P1W8 | SIRPG_HUMAN |                              | 1   | CTCTACCTCGG      | 0.612 |             |
| - | 2   | 2301      | ntron UBOX5_uc0   | NM_021826    | NP_068598    | Q7L8L6 | FAKD5_HUMAN |                              | 0   | CAGAGGTACAG      | 0.532 |             |
| - | 9   | 1727      | 31_uc010gcd.1_5'  | NM_000214    | NP_000205    | P78504 | JAG1_HUMAN  | :GF-like 5; calcium-binding  | 9   | CAGTCCACTGTC     | 0.478 |             |
| - | 1   | 1449      |                   | NM_012072    | NP_036204    | Q9NPY3 | C1QR1_HUMAN | :GF-like 5; calcium-binding  | 2   | CCCCCGGGCCC      | 0.637 | rs41520247  |
| + | 6   | 683       | p.D205N PLUNC_    | NM_130852    | NP_570913    | Q9NP55 | PLUNC_HUMAN |                              | 0   | TTCTGGACAGC      | 0.537 |             |
| - | 10  | 4861      | aw.2_Missense_M   | NM_014071    | NP_054790    | Q14686 | NCOA6_HUMAN | binding region. Gln-rich. CF | 7   | CTGTCTCTGACA     | 0.557 |             |
| + | 4   | 657       | e_Mutation_p.G13  | NM_020336    | NP_065069    | Q86X10 | RLGPB_HUMAN |                              | 2   | AACAGGGTTCC      | 0.498 |             |
| - | 4   | 430       | JA_uc010ggt.2_Rf  | NM_000022    | NP_000013    | P00813 | ADA_HUMAN   |                              | 3   | TGTACCGCACC      | 0.587 | rs121908714 |
| - | 2   | 629       | 2_Missense_Mutat  | NM_173179    | NP_775271    | Q9NQQ7 | S35C2_HUMAN | ical; (Potential).           | 1   | GATGCCGATGG      | 0.612 |             |
| + | 2   | 593       | 02yav.2_Missense  | NM_080672    | NP_542403    | Q96KR7 | PHAR3_HUMAN |                              | 3   | GAGATGGACCA      | 0.582 |             |
| + | 5   | 1035      | :TR3_uc002yav.2_  | NM_080672    | NP_542403    | Q96KR7 | PHAR3_HUMAN |                              | 3   | GTGGTGAAGAA      | 0.542 |             |
| - | 16  | 6805      | s.1_Missense_Mu   | NM_033081    | NP_149072    | Q9BTC0 | DIDO1_HUMAN | Arg-rich.                    | 6   | tcgctcgctctcggtf | 0.194 |             |
| - | 22  | 4070      | p.L1200F TIAM1_u  | NM_003253    | NP_003244    | Q13009 | TIAM1_HUMAN | DH.                          | 10  | CCTGAGCAGAA      | 0.622 |             |
| - | 9   | 2426      | dl.1_Missense_Mu  | NM_003253    | NP_003244    | Q13009 | TIAM1_HUMAN |                              | 10  | GCGGCCCATGG      | 0.478 |             |
| + | 2   | 121       | DYRK1A_uc002y     | NM_001396    | NP_001387    | Q13627 | DYR1A_HUMAN |                              | 4   | CTGTTCCGGCTT     | 0.438 |             |
| - | 36  | 4193      | se_Mutation_p.D1  | NM_018963    | NP_061836    | Q9NSI6 | BRWD1_HUMAN | Bromo 2.                     | 4   | TAATATCTCTGTA    | 0.343 |             |
| + | 40  | 4784      | i1353L SLC19A1_u  | NM_130444    | NP_569711    | P39060 | COIA1_HUMAN | sal region 11 (NC11).        | 1   | CCTGTGAGGCG      | 0.756 |             |
| + | 3   | 519       | e_Mutation_p.H20  | NM_006031    | NP_006022    | O95613 | PCNT_HUMAN  |                              | 8   | GTGACCACCCA      | 0.552 |             |
| - | 1   | 1457      | sense_Mutation_p. | NM_031890    | NP_114096    | Q9BXQ6 | CECR6_HUMAN |                              | 0   | CGCGGCAGCG       | 0.706 |             |
| - | 5   | 572       | 02zmg.2_Missens   | NM_033070    | NP_149061    | Q9BXW7 | CECR5_HUMAN |                              | 0   | CTCGGGAGGG       | 0.572 |             |
| + | 9   | 1217      | X1_uc002zqc.2_Ini | NM_080646    | NP_542377    | O43435 | TBX1_HUMAN  |                              | 2   | TCTGAGGGATG      | 0.592 |             |
| + | 8   | 1113      | 3.G336D ZDHHC8    | NM_013373    | NP_037505    | Q9ULC8 | ZDHC8_HUMAN | lasmic (Potential).          | 2   | CCCAGGCAGTG      | 0.637 |             |
| - | 7   | 1119      |                   | NM_014433    | NP_055248    | Q9UHP6 | RTDR1_HUMAN |                              | 1   | CTCCACCTCCAT     | 0.622 |             |

|   |    |      |                     |              |              |        |             |                               |      |              |       |             |
|---|----|------|---------------------|--------------|--------------|--------|-------------|-------------------------------|------|--------------|-------|-------------|
| + | 13 | 3283 | y.1_Missense_Mut    | NM_004327    | NP_004318    | P11274 | BCR_HUMAN   | C2.                           | 12   | 3CATTCCGCTGA | 0.577 |             |
| - | 2  | 1402 | 70_uc002zxr.1_5'F   | NM_021916    | NP_068735    | Q9UC06 | ZNF70_HUMAN | 2H2-type 7.                   | 2    | 3CCTTCCCAC   | 0.552 |             |
| + | 42 | 6583 | itation_p.M1991 H   | NM_032608    | NP_115997    | Q8IUG5 | MY18B_HUMAN |                               | 12   | TCTAGGGATAAC | 0.398 |             |
| + | 2  | 638  | uc011akd.1_Misse    | NM_021115    | NP_066938    | Q9BYH1 | SE6L1_HUMAN | cellular (Pote p.T161M(1)     | 6    | CTCCACGGAGA  | 0.677 |             |
| - | 12 | 2434 | c.2_Missense_Mut    | NM_022081    | NP_071364    | Q9NQG7 | HPS4_HUMAN  |                               | 0    | CATCCCTGGGC  | 0.587 |             |
| + | 9  | 1280 | p.R406C KREMEH      | NM_032045    | NP_114434    | Q96MU8 | KREM1_HUMAN | lasmic (Potential).           | 5    | CCCATCGTGTTC | 0.433 |             |
| - | 10 | 1439 | Mutation_p.R41E     | NM_001127    | NP_001118    | Q10567 | AP1B1_HUMAN |                               | 2    | CTTGCGGAAGA  | 0.597 |             |
| + | 9  | 2026 | ja.1_Nonsense_Mi    | NM_030758    | NP_110385    | Q969R2 | OSBP2_HUMAN |                               | 2    | TGGCTGGAGCC  | 0.602 |             |
| + | 6  | 928  | se_Mutation_p.E9    | NM_001007467 | NP_001007468 | A8K8P3 | SFI1_HUMAN  | HAT 2.                        | 1    | GAGCCGAGGTTT | 0.453 |             |
| - | 11 | 1381 | h.1_Missense_Mu     | NM_002473    | NP_002464    | P35579 | MYH9_HUMAN  | osin head-like.               | 11   | FGAAATCGGTCA | 0.502 |             |
| - | 15 | 1936 | 3aqt.1_Missense_    | NM_153609    | NP_705837    | Q8IU80 | TMPS6_HUMAN | . Extracellular (Potential).  | 6    | GTCAGCGATGA  | 0.652 |             |
| + | 3  | 348  | t1_uc011aok.1_5'L   | NM_006116    | NP_006107    | Q15750 | TAB1_HUMAN  | PP2C-like.                    | 1    | CGAGGCCGATG  | 0.647 |             |
| + | 4  | 778  | p.Q27H MPPED1       | NM_001044370 | NP_001037835 | O15442 | MPPD1_HUMAN |                               | 0    | GTGACGTCTGT  | 0.562 |             |
| + | 4  | 577  | 3A_uc010gzy.2_Ir    | NM_006953    | NP_008884    | O75631 | UPK3A_HUMAN |                               | 0    | CCAGCGTAAGT  | 0.612 | rs145723454 |
| - | 1  | 5032 |                     | NM_006071    | NP_006062    | Q9NTG1 | PKDRE_HUMAN | lasmic (Potential).           | 5    | TCGGACGATCT  | 0.418 | rs141502138 |
| + | 2  | 504  | EC_uc003bto.2_In    | NM_032492    | NP_115881    | Q8N5M9 | JAGN1_HUMAN | lenal (Potential).            | 1    | AGATGTTCCCTG | 0.522 |             |
| - | 6  | 1954 | p.P527S IQSEC1      | NM_014869    | NP_055684    | Q6DN90 | IQEC1_HUMAN | SEC7.                         | 1    | GTCTGGGTTC   | 0.607 |             |
| + | 9  | 3448 | vd.1_Missense_Mt    | NM_001144382 | NP_001137854 | Q9UPR0 | PLCL2_HUMAN |                               | 4    | CAAACGATGAA  | 0.423 | rs144964120 |
| + | 30 | 4213 | G1401R DLEC1_L      | NM_007335    | NP_031361    | Q9Y238 | DLEC1_HUMAN |                               | 9    | CTGCTGGGGGC  | 0.597 |             |
| - | 97 | 7441 |                     | NM_000094    | NP_000085    | Q02388 | CO7A1_HUMAN |                               | 11   | ACGTACCCGGA  | 0.592 |             |
| - | 24 | 2299 | T218 QARS_uc01      | NM_005051    | NP_005042    | P47897 | SYQ_HUMAN   |                               | 1    | TGACAGTTCGG  | 0.572 |             |
| - | 2  | 310  | m.1_Missense_M      | NM_000581    | NP_000572    | P07203 | GPX1_HUMAN  |                               | 1    | TGCACGGGAAG  | 0.617 |             |
| + | 3  | 1536 |                     | NM_004393    | NP_004384    | Q14118 | DAG1_HUMAN  | ninin recognition. Mucin-lik  | 2    | GACTCGAGGCG  | 0.597 |             |
| + | 25 | 2537 | RBM5_uc003cyh.      | NM_005778    | NP_005769    | P52756 | RBM5_HUMAN  | interaction with U2AF2.       | 1    | 3CGCCGATTCC  | 0.478 |             |
| - | 2  | 3642 | c.2_Missense_Mut    | NM_017442    | NP_059138    | Q9NR96 | TLR9_HUMAN  | oplasmic (Potential).         | 4    | AGCTCGCTGA   | 0.682 |             |
| - | 5  | 623  | :1_5'Flank TWF2_    | NM_007284    | NP_009215    | Q6IBS0 | TWF2_HUMAN  |                               | 3    | AATCGGATCTC  | 0.637 |             |
| + | 8  | 957  | Mutation_p.D20z     | NM_006254    | NP_006245    | Q05655 | KPCD_HUMAN  | l-ester/DAG-type 1.           | 9    | GCATCGACAAG  | 0.617 | rs149165175 |
| + | 21 | 3328 | inf.2_Missense_Mt   | NM_001457    | NP_001448    | O75369 | FLNB_HUMAN  | Filamin 9.                    | 19   | GTCTCGTGGGC  | 0.562 | rs9813235   |
| + | 12 | 2897 | rv.2_Missense_Mt    | NM_000333    | NP_000324    | O15265 | ATX7_HUMAN  | Ser-rich.                     | 0    | CCACGGGAGC   | 0.532 | rs148498434 |
| - | 1  | 919  |                     | NM_183357    | NP_899200    | O95622 | ADCY5_HUMAN | ical; (Potential).            | 4    | CACGGCGATGA  | 0.662 |             |
| - | 3  | 299  | ie_Mutation_p.G9z   | NM_024628    | NP_078904    | A0AV02 | S12A8_HUMAN |                               | 0    | GCCAGCCAGTC  | 0.562 |             |
| + | 5  | 880  | M2_uc010hsl.2_F     | NM_004526    | NP_004517    | P49736 | MCM2_HUMAN  |                               | 4    | AGTACGACCGC  | 0.627 | rs144753488 |
| + | 8  | 3024 | p.A681V ZBTB38      | NM_001080412 | NP_001073881 | Q8NAP3 | ZBT38_HUMAN |                               | 3    | AAATGCTGTCA  | 0.463 |             |
| + | 6  | 1193 | 7_splice RNF13_u    | NM_007282    | NP_009213    | O43567 | RNF13_HUMAN |                               | 1    | CGACAGTAAGT  | 0.363 |             |
| - | 3  | 1409 | .1_Intron MED12L    | NM_023915    | NP_076404    | Q9BY21 | GPR87_HUMAN | lasmic (Potential).           | 1    | TATCGAACTTC  | 0.348 |             |
| + | 3  | 329  | rf55_uc011bot.1_F   | NM_001130002 | NP_001123474 | A1A4F0 | CC055_HUMAN |                               | 0    | AGGTGGAGACC  | 0.423 |             |
| - | 2  | 581  |                     | NM_032487    | NP_115876    | Q9BYD9 | ARPM1_HUMAN |                               | 0    | CCTACTGGGTAA | 0.418 |             |
| - | 6  | 1144 | :011bro.1_Intron Ti | NM_000460    | NP_000451    | P40225 | TPO_HUMAN   | Pro-rich.                     | 1    | TGGGTGGAAGA  | 0.592 |             |
| - | 2  | 252  |                     | NM_004488    | NP_004479    | P40197 | GPV_HUMAN   | cellular (Potential).         | 3    | GACGGTCATG   | 0.637 |             |
| - | 2  | 6794 | C4_uc003fvp.2_Int   | NM_018406    | NP_060876    | Q99102 | MUC4_HUMAN  | Ser-rich.                     | 0    | AAGACGGTGG   | 0.567 |             |
| - | 10 | 1165 | IA_uc003fwh.2_Mi    | NM_005017    | NP_005008    | P49585 | PCY1A_HUMAN | ximate. 3 X repeats.          | 0    | AGGGGAGGGG   | 0.607 |             |
| + | 8  | 1293 | rn_p.G346E FGFR     | NM_000142    | NP_000133    | P22607 | FGFR3_HUMAN | 3. Extracellular (Potential). | 2600 | TATTGGGTTTTC | 0.617 |             |
| + | 5  | 2958 | e_Mutation_p.S37    | NM_198229    | NP_937872    | O14924 | RGS12_HUMAN |                               | 1    | CGTCAGCAACA  | 0.692 |             |
| + | 2  | 164  | icw.2_Missense_M    | NM_001528    | NP_001519    | Q04756 | HGFA_HUMAN  |                               | 2    | CCCTGCGATCC  | 0.632 |             |
| + | 8  | 1985 | .E87K ZBTB49_uc     | NM_145291    | NP_660334    | Q6ZSB9 | ZBT49_HUMAN |                               | 2    | CCATCGAGACC  | 0.577 |             |
| - | 1  | 1295 | .3_Intron SORCS     | NM_001085382 | NP_001078851 | Q6NUJ1 | SAPL1_HUMAN | posin B-type 4.               | 0    | CAGCCTCTTGC  | 0.637 |             |
| - | 4  | 2381 |                     | NM_003263    | NP_003254    | Q15399 | TLR1_HUMAN  | smic (Potential). TIR.        | 5    | ACTCTGGACAA  | 0.413 |             |

|   |    |           |                    |           |           |        |                                            |    |                      |       |             |
|---|----|-----------|--------------------|-----------|-----------|--------|--------------------------------------------|----|----------------------|-------|-------------|
| - | 22 | 3055      | x.1_Missense_Mu    | NM_002913 | NP_002904 | P35251 | RFC1_HUMAN                                 | 4  | ACAATACGATCA         | 0.488 |             |
| - | 30 | 3101      | p.W183R ATP8A1_    | NM_006095 | NP_006086 | Q9Y2Q0 | AT8A1_HUMAN ical; (Potential).             | 3  | 3AAACCAAAACA         | 0.348 |             |
| - | 6  | 706       | 0iik.1_Missense_Iv | NM_201431 | NP_958834 | Q6ZTQ3 | RASF6_HUMAN                                | 2  | TCATCCTTTTTCT        | 0.413 |             |
| - | 6  | 1579      | ijt.2_Missense_Mu  | NM_194282 | NP_919258 | Q6MZP7 | LIN54_HUMAN                                | 0  | ICATCCGCACTG         | 0.328 |             |
| - | 2  | 816       | _p.M142I PPM1K_    | NM_152542 | NP_689755 | Q8N3J5 | PPM1K_HUMAN PP2C-like.                     | 0  | FTTCTCCATGTGC        | 0.453 |             |
| + | 6  | 1931      | zgf.1_Missense_Mi  | NM_004784 | NP_004775 | O95803 | NDST3_HUMAN Heparan sulfate N-deacetyl     | 1  | ICTGTGCTCCTC         | 0.428 |             |
| + | 1  | 2495      |                    | NM_024582 | NP_078858 | Q6V0I7 | FAT4_HUMAN r (Potential). Cadherin 8.      | 18 | FTACTACTGGGG         | 0.443 |             |
| + | 10 | 1646      |                    | NM_000824 | NP_000815 | P48167 | GLRB_HUMAN ical; (Probable).               | 2  | TTGTTTCCTTTCT        | 0.353 |             |
| + | 4  | 933       |                    | NM_006174 | NP_006165 | Q15761 | NPY5R_HUMAN lasmic (Potential).            | 7  | CTTGAAGAAAAT         | 0.378 |             |
| - | 1  | 698       | CH1_uc003iqs.1_I   | NM_012403 | NP_036535 | O43423 | AN32C_HUMAN                                | 0  | ltctattttcgcttctgacc | 0.085 |             |
| - | 1  | 1327      | r.1_Intron KLHL2_  | NM_000167 | NP_000158 |        |                                            | 0  | CCAAAGCGTAAT         | 0.393 |             |
| + | 4  | 1111      | e_Mutation_p.R15   | NM_012464 | NP_036596 | O43897 | TLL1_HUMAN otease (By similarity).         | 7  | CGGAAAGAATATC        | 0.393 |             |
| + | 12 | 1853      | _p.S425N FAM149    | NM_015398 | NP_056213 | A5PLN7 | F149A_HUMAN                                | 1  | IGCCAGCACAA          | 0.448 |             |
| + | 4  | 734       |                    | NM_207352 | NP_997235 | Q6ZWL3 | CP4V2_HUMAN                                | 0  | AATGGCGCTCC          | 0.323 |             |
| + | 10 | 1191      | D2_uc010itf.1_3'U  | NM_033120 | NP_149111 | Q969F2 | NKD2_HUMAN                                 | 0  | CGCCACTCAAG          | 0.716 |             |
| - | 3  | 1661      | ERT_uc003jcc.1_I   | NM_198253 | NP_937983 | O14746 | TERT_HUMAN ization. RNA-interacting do     | 12 | ICAGACGGTGCT         | 0.582 |             |
| - | 12 | 1658      |                    | NM_001044 | NP_001035 | Q01959 | SC6A3_HUMAN                                | 6  | CTGCCCGGTCA          | 0.647 |             |
| - | 9  | 1704      | IND2_uc011cmz.1    | NM_001332 | NP_001323 | Q9UQB3 | CTND2_HUMAN                                | 8  | CGGGGCGGAT           | 0.562 |             |
| + | 11 | 1984      |                    | NM_020227 | NP_064612 | Q9NQV7 | PRDM9_HUMAN C2H2-type 4.                   | 6  | GAGGACACACA          | 0.597 |             |
| - | 12 | 1997      | 1_Missense_Muta    | NM_000065 | NP_000056 | P13671 | CO6_HUMAN TSP type-1 3.                    | 7  | CTCCTCGTTGGC         | 0.502 | rs148521858 |
| + | 24 | 5592      | e_Mutation_p.V17   | NM_018429 | NP_060899 | A6H8Y1 | BDP1_HUMAN                                 | 2  | 3AAACTGTAGGA         | 0.338 |             |
| + | 2  | 10093     |                    | NM_153610 | NP_705838 | Q8N3K9 | CMYA5_HUMAN                                | 9  | CGGTTCCATTTG         | 0.493 |             |
| + | 8  | 6465      | u.2_Intron VCAN_u  | NM_004385 | NP_004376 | P13611 | CSPG2_HUMAN GAG-beta.                      | 16 | GTACAGCTTCC          | 0.473 |             |
| - | 3  | 797       | knp.2_Missense_M   | NM_173488 | NP_775759 | Q86UG4 | SO6A1_HUMAN xellular (Potential).          | 7  | TTTCTTCGCAAA         | 0.323 |             |
| - | 8  | 2209      | ase_Mutation_p.AE  | NM_020389 | NP_065122 | Q9HCX4 | TRPC7_HUMAN lasmic (Potential).            | 0  | TTTTGGCCTTAG         | 0.413 |             |
| + | 1  | 1915      | DHA4_uc003lhh.1    | NM_018909 | NP_061732 | Q9UN73 | PCDA6_HUMAN  Extracellular (Potential).    | 2  | CGGGCGAGATC          | 0.662 |             |
| + | 1  | 2389      | Idan.1_Missense_   | NM_018912 | NP_061735 | Q9Y5H4 | PCDG1_HUMAN lasmic (Potential).            | 3  | CAGTCTTACTTC         | 0.418 |             |
| - | 6  | 538       | AC3_uc010jgd.1_I   | NM_003883 | NP_003874 | O15379 | HDAC3_HUMAN one deacetylase.               | 1  | CTTGAGCAGCTC         | 0.537 |             |
| - | 16 | 1594      | se_Mutation_p.E1   | NM_033449 | NP_258260 | Q86WN1 | FCSD1_HUMAN SH3 1.                         | 4  | TACCTCGCCGT          | 0.572 |             |
| - | 3  | 3184      | .R1023C PCDH1_     | NM_002587 | NP_002578 | Q08174 | PCDH1_HUMAN lasmic (Potential).            | 5  | TGGTGCGGTAGC         | 0.632 | rs147327566 |
| + | 9  | 1814      | RF2_uc003lnu.2_I   | NM_152550 | NP_689763 | Q8TEC5 | SH3R2_HUMAN                                | 2  | GACCCCTCCAG          | 0.612 | rs146976434 |
| - | 9  | 1066      | oo.2_Missense_M    | NM_001387 | NP_001378 | Q14195 | DPYL3_HUMAN                                | 1  | AGCAAGGAGTTC         | 0.557 |             |
| + | 15 | 2066      | z_Mutation_p.R64   | NM_205836 | NP_995308 | Q6PIJ6 | FBX38_HUMAN                                | 6  | ACTTCGAAAGA          | 0.458 |             |
| + | 5  | 1211      | _p.S351L PPARG     | NM_133263 | NP_573570 | Q86YN6 | PRGC2_HUMAN                                | 0  | GTCCTCGGTGG          | 0.662 |             |
| - | 9  | 8780      | 2A_uc011dcs.1_In   | NM_001447 | NP_001438 | Q9NYQ8 | FAT2_HUMAN (Potential). Cadherin 26.       | 6  | CAGTTCGCCAG          | 0.512 |             |
| - | 2  | 136       | jii.2_Missense_M   | NM_138379 | NP_612388 | Q96H15 | TIMD4_HUMAN  Extracellular (Potential).    | 2  | GCACAACAGCT          | 0.478 |             |
| - | 12 | 1266      | M19_uc003lwy.2_I   | NM_033274 | NP_150377 | Q9H013 | ADA19_HUMAN  B. Extracellular (Potential). | 8  | CATTCCACCA           | 0.542 |             |
| + | 9  | 885       | CK2_uc011der.1_F   | NM_004946 | NP_004937 | Q92608 | DOCK2_HUMAN                                | 7  | CTAAGGAGATT          | 0.507 |             |
| + | 11 | 1731      | _p.R461K CNOT6_    | NM_015455 | NP_056270 | Q9ULM6 | CNOT6_HUMAN                                | 0  | TGGAAGGATCA          | 0.413 |             |
| + | 1  | 824       | IC5_uc003mxw.2_    | NR_027712 |           |        |                                            | 0  | CTATGCGCCGG          | 0.522 |             |
| - | 1  | 903       | _5'Flank C6orf114  | NM_018988 | NP_061861 | Q9NXC2 | GFOD1_HUMAN                                | 2  | GACAGCGATCT          | 0.602 |             |
| + | 8  | 2321      | .R521W JARID2_     | NM_004973 | NP_004964 | Q92833 | JARD2_HUMAN ARID.                          | 4  | AGGACCGGCTG          | 0.587 |             |
| + | 12 | 1499      | se_Mutation_p.C3E  | NM_006366 | NP_006357 | P40123 | CAP2_HUMAN  P/cofactor C-like.             | 1  | AAGTTGCCACA          | 0.398 |             |
| - | 10 | 1725      | p.V475M DCDC2_     | NM_016356 | NP_057440 | Q9UHG0 | DCDC2_HUMAN                                | 1  | AGCCACGGCAG          | 0.368 | rs145154884 |
| - | 3  | 172       | ense_Mutation_p.f  | NM_005074 | NP_005065 | Q14916 | NPT1_HUMAN                                 | 4  | CATAGCGAAAG          | 0.408 |             |
| + | 1  | 905       |                    | NM_013936 | NP_039224 | P58182 | O12D2_HUMAN Name=7; (Potential).           | 1  | CTACTCCTGTA          | 0.448 |             |
| + | 2  | 3595_3596 |                    | NM_080870 | NP_543146 | Q3MIW9 | DPCR1_HUMAN ar (Potential). Thr-rich.      | 0  | CCAAAGGGAAAA         | 0.48  |             |

|   |    |       |                   |              |              |        |             |                                |       |               |       |             |
|---|----|-------|-------------------|--------------|--------------|--------|-------------|--------------------------------|-------|---------------|-------|-------------|
| + | 5  | 395   | 1C1_uc003nsn.1_   | NM_014068    | NP_054787    | Q9UIG5 | PS1C1_HUMAN |                                | 1     | CCCACGTTAAT   | 0.562 |             |
| + | 7  | 1151  | 3_uc011dqu.1_5'F  | NM_001077516 | NP_001070984 | Q92504 | S39A7_HUMAN |                                | 1     | GGGCCGGGGAC   | 0.567 |             |
| + | 8  | 2198  | f.1_Missense_Mu   | NM_002263    | NP_002254    | Q9BW19 | KIFC1_HUMAN | inesin-motor.                  | 0     | GGAGCGGGAAC   | 0.657 |             |
| - | 3  | 724   | f106_uc003ojs.2_I | NM_024294    | NP_077270    | Q9H6K1 | CF106_HUMAN |                                | 3     | ACATCCGCCAC   | 0.512 |             |
| + | 1  | 123   | 1L4_uc003oqd.2_5  | NM_198153    | NP_937796    | Q6UXN2 | TRML4_HUMAN |                                | 1     | GGGTCCACACC   | 0.587 |             |
| - | 1  | 585   |                   | NM_000322    | NP_000313    | P23942 | PRPH2_HUMAN | ical; (Potential).             | 5     | GGTACGGCTTC   | 0.577 |             |
| - | 3  | 565   | 2_Intron TMEM151  | NM_182539    | NP_872345    | Q5JU00 | TCTE1_HUMAN |                                | 4     | GCGATGCATGC   | 0.597 |             |
| - | 4  | 884   | YS_uc003per.1_M   | NM_001142800 | NP_001136272 | Q5T1H1 | EYS_HUMAN   |                                | 6     | TATTTTGCACAC  | 0.353 |             |
| - | 11 | 1296  |                   | NM_001563    | NP_001554    | Q17R60 | IMPG1_HUMAN |                                | 3     | TGTCCAGGACCA  | 0.388 |             |
| - | 4  | 564   | p.R136H BVES_u    | NM_147147    | NP_671488    | Q8NE79 | POPD1_HUMAN | lasmic (Potential).            | 0     | GCACACGGAGT   | 0.438 | rs143510978 |
| + | 1  | 335   | .2_Intron BET3L_u | NM_153711    | NP_714922    | Q8N5C1 | FA26E_HUMAN |                                | 0     | AGCTGCCGTTTC  | 0.502 |             |
| - | 6  | 651   | .1_RNA GOPC_uc    | NM_002944    | NP_002935    | P08922 | ROS_HUMAN   | III 1. Extracellular (Potentia | 25    | AGGACGGTCTG   | 0.478 |             |
| - | 4  | 872   | 2_Missense_Muta   | NM_014432    | NP_055247    | Q9UHF4 | I20RA_HUMAN | tential). Fibronectin type-III | 4     | TCTCATCTGTAG  | 0.428 |             |
| - | 30 | 4338  | jb.1_Missense_Mi  | NM_182961    | NP_892006    | Q8NF91 | SYNE1_HUMAN | lasmic (Potential).            | 45    | TTCTTCGAGAG   | 0.348 | rs138915528 |
| - | 2  | 525   | .2_5'UTR RNASE1   | NM_003730    | NP_003721    | O00584 | RNT2_HUMAN  |                                | 0     | GCTGAACCATAA  | 0.418 |             |
| - | 7  | 1772  | 3ski.3_Missense_l | NM_182924    | NP_891554    | Q8IY33 | MILK2_HUMAN |                                | 1     | CTGAGGATTC    | 0.657 |             |
| - | 11 | 1673  | e_Mutation_p.S39  | NM_000535    | NP_000526    | P54278 | PMS2_HUMAN  |                                | 2     | CCTGCGAGCCC   | 0.552 |             |
| + | 3  | 1979  |                   | NM_017560    | NP_060030    | P0CG23 | ZN853_HUMAN |                                | 0     | GGAGCGACCCT   | 0.697 |             |
| + | 3  | 1213  | 'H1_uc011jxh.1_5' | NM_152745    | NP_689958    | P58417 | NXP1_HUMAN  | III.                           | 2     | GCCTCGGCCCA   | 0.473 |             |
| - | 4  | 687   | _p.R57Q TRA2A_u   | NM_013293    | NP_037425    | Q13595 | TRA2A_HUMAN | RRM.                           | 1     | GAGATCGCCCA   | 0.393 |             |
| - | 1  | 1009  |                   | NR_002711    |              |        |             |                                | 0     | GTGCTCGGTAAT  | 0.532 |             |
| - | 2  | 844   | 11_uc003syy.2_R   | NM_005523    | NP_005514    | P31270 | HXA11_HUMAN | Homeobox.                      | 2     | CTCCC GTTCCA  | 0.532 |             |
| - | 7  | 690   | _p.P191S CPVL_u   | NM_031311    | NP_112601    | Q9H3G5 | CPVL_HUMAN  |                                | 2     | TTCCAGAAATAT  | 0.333 |             |
| + | 8  | 1105  | tion_p.R87L CHN2  | NM_004067    | NP_004058    | P52757 | CHIO_HUMAN  | ol-ester/DAG-type.             | 2     | GTTCCGAGGCC   | 0.478 |             |
| - | 8  | 755   |                   | NM_015283    | NP_056098    | Q2PZ11 | D19L1_HUMAN | ical; (Potential).             | 0     | TACACGGGTAC   | 0.299 |             |
| - | 21 | 2920  | ng.2_Missense_Mi  | NM_033054    | NP_149043    | B01T2  | MYO1G_HUMAN |                                | 4     | CTGGTCTCCTC   | 0.721 |             |
| - | 2  | 734   | se_Mutation_p.S2  | NM_000598    | NP_000589    | P17936 | IBP3_HUMAN  | Ser/Thr-rich.                  | 3     | CGGAGGAGAAG   | 0.493 |             |
| - | 16 | 1944  | 33_splice TYW1B   | NM_001145440 | NP_001138912 | Q6NUM6 | TYW1B_HUMAN |                                | 0     | TTCTTACCTTTCT | 0.428 |             |
| + | 9  | 546   | itzr.2_RNA ELN_u  | NM_000501    | NP_001075224 | P15502 | ELN_HUMAN   |                                | 5     | CCCAGGTGGCG   | 0.478 |             |
| + | 9  | 549   | itzr.2_RNA ELN_u  | NM_000501    | NP_001075224 | P15502 | ELN_HUMAN   |                                | 5     | AGGTGGCGTGC   | 0.463 |             |
| + | 8  | 1189  | b.2_Missense_Mu   | NM_002314    | NP_002305    | P53667 | LIMK1_HUMAN | rotein kinase.                 | 3     | TCCACGGGGAG   | 0.677 |             |
| - | 22 | 15232 |                   | NM_033026    | NP_149015    | Q9Y6V0 | PCLO_HUMAN  |                                | 7     | TGTCCCATCTTC  | 0.323 |             |
| - | 5  | 6233  | v.2_Missense_Mut  | NM_033026    | NP_149015    | Q9Y6V0 | PCLO_HUMAN  |                                | 7     | TAAATCCATTTTC | 0.363 |             |
| - | 25 | 3345  | 1.A1090V ABCB4_   | NM_018849    | NP_061337    | P21439 | MDR3_HUMAN  | 2. Cytoplasmic (By similarit   | 6     | TCCCCGCCAAG   | 0.498 | rs143392573 |
| - | 3  | 257   | 54_splice SRI_uc0 | NM_003130    | NP_003121    | P30626 | SORCN_HUMAN |                                | 1     | AACTTACGTTTG  | 0.383 |             |
| + | 2  | 675   | _p.H94Q STEAP2    | NM_152999    | NP_694544    | Q8NFT2 | STEA2_HUMAN |                                | 2     | TATACACAGAGA  | 0.378 |             |
| + | 6  | 695   | tion_p.K170E AP4I | NM_004722    | NP_004713    | O00189 | AP4M1_HUMAN |                                | 0     | AGAGCAAAGTG   | 0.572 |             |
| + | 3  | 9234  | C17_uc010lho.1_F  | NM_001040105 | NP_001035194 | Q685J3 | MUC17_HUMAN | ch. 59 X approximate tand      | 27    | CCATTCTCTGAG  | 0.493 |             |
| - | 23 | 3189  | .2_Missense_Mut   | NM_005045    | NP_005036    | P78509 | RELN_HUMAN  |                                | 19    | TCCAGCGGAAA   | 0.488 |             |
| + | 9  | 903   | .D_uc011kmh.1_M   | NM_000108    | NP_000099    | P09622 | DLDH_HUMAN  |                                | 1     | GCATCCTTCAA   | 0.353 |             |
| + | 3  | 483   | p.C121Y IRF5_uc   | NM_002200    | NP_002191    | Q13568 | IRF5_HUMAN  | ophan pentad repeat.           | 0     | GGTCTGCTCCA   | 0.637 |             |
| - | 15 | 1860  |                   | NM_004333    | NP_004324    | P15056 | BRAF_HUMAN  | rotein kinas_R603>I(2))p.T     | 18290 | TATTTCACTGTAC | 0.368 |             |
| + | 5  | 1198  |                   | NM_014141    | NP_054860    | Q9UHC6 | CNTP2_HUMAN | 1. Extracellular (Potential).  | 11    | TGCACGGAGAA   | 0.388 |             |
| + | 13 | 1753  | PO_uc010lpl.1_Int | NM_198455    | NP_940857    | A2VEC9 | SSPO_HUMAN  | VWFD 2.                        | 0     | GGGGTGGTCAA   | 0.677 |             |
| + | 53 | 7813  |                   | NM_198455    | NP_940857    | A2VEC9 | SSPO_HUMAN  | SP type-1 5.                   | 0     | CCTGGGGCTTG   | 0.701 |             |
| + | 2  | 365   | kr.2_RNA GALNT1   | NM_145292    | NP_660335    | Q7Z4T8 | GLTL5_HUMAN | renal (Potential).             | 2     | GGTCCCCTGGA   | 0.413 |             |
| - | 2  | 268   | x.2_RNA VIPR2_u   | NM_003382    | NP_003373    | P41587 | VIPR2_HUMAN | ellular (Potential).           | 2     | CAGATGAAATCC  | 0.383 |             |

|   |    |         |                      |                |              |        |             |    |               |       |                              |
|---|----|---------|----------------------|----------------|--------------|--------|-------------|----|---------------|-------|------------------------------|
| - | 2  | 104     |                      | NM_001925      | NP_001916    | P12838 | DEF4_HUMAN  | 1  | :CTGCCCGGACC  | 0.597 |                              |
| - | 6  | 488     | ..1_intron PINX1_u   | NM_017884      | NP_060354    | Q96BK5 | PINX1_HUMAN | 3  | TTCTTACTCTGTG | 0.403 |                              |
| + | 8  | 1370    | ..p.A300V SH2D4A     | NM_022071      | NP_071354    | Q9H788 | SH24A_HUMAN | 0  | :CATAGCCCCCTG | 0.517 |                              |
| - | 7  | 1012    | ..uc010lft.1_Silent_ | NM_025232      | NP_079508    | Q9H6H4 | REEP4_HUMAN | 1  | :GGCCCCGGTACC | 0.652 |                              |
| - | 12 | 2371    | ..y.1_Missense_Mu    | NM_002318      | NP_002309    | Q9Y4K0 | LOXL2_HUMAN | 3  | :CTGATCGCCGA  | 0.592 | ..yl-oxidase like.           |
| - | 1  | 503     |                      | NM_006158      | NP_006149    | P07196 | NFL_HUMAN   | 2  | :GGAAGCGGGAT  | 0.672 | ..od. Linker 1.              |
| + | 26 | 2643    | ..p.A612V PTK2B_     | NM_173174      | NP_775266    | Q14289 | FAK2_HUMAN  | 5  | :CCCAGCCGTGT  | 0.617 | ..rotein kinase.             |
| - | 6  | 1925    | ..se_Mutation_p.R4   | NM_025115      | NP_079391    | Q6NXR4 | CH041_HUMAN | 0  | AACAGCGGTCC   | 0.448 |                              |
| + | 13 | 2345    | ..t124_uc010lvy.2_li | NM_032777      | NP_116166    | Q96PE1 | GP124_HUMAN | 5  | :CACCTCCCGCC  | 0.682 | ..ellular (Potential).       |
| - | 1  | 262     |                      | NM_000025      | NP_000016    | P13945 | ADRB3_HUMAN | 2  | :TATTGGGCGCC  | 0.716 | ..llular (By similarity).    |
| - | 19 | 4006    | ..y.R1163K WHSC1l    | NM_023034      | NP_075447    | Q9BZ95 | NSD3_HUMAN  | 1  | :TGCTCCTTTTGC | 0.498 | ..SET.                       |
| + | 16 | 1849    | ..i_p.G279R IKKBK    | NM_001556      | NP_001547    | O14920 | IKKB_HUMAN  | 7  | AGGGGGGAACG   | 0.602 |                              |
| - | 60 | 8158    | .._Mutation_p.G270   | NM_006904      | NP_008835    | P78527 | PRKDC_HUMAN | 34 | TTTTCCAAAATC  | 0.502 | ..KIP-binding.               |
| - | 6  | 1249    | ..1_Missense_Muta    | NM_014682      | NP_055497    | O60284 | ST18_HUMAN  | 5  | FGGTCTCCCTCT  | 0.527 | ..2HC-type 1.                |
| - | 3  | 718     | ..sh.1_Missense_M    | NM_152417      | NP_689630    | Q96MH6 | TMM68_HUMAN | 1  | :TCTGCGATGAC  | 0.368 |                              |
| - | 4  | 1216    |                      | NM_004820      | NP_004811    | O75881 | CP7B1_HUMAN | 3  | :GATGGGAAATC  | 0.443 |                              |
| + | 9  | 1175    | ..yhu.1_Splice_Site  | NM_014754      | NP_055569    | P48651 | PTSS1_HUMAN | 1  | :TTTGGGTGAGT  | 0.403 |                              |
| - | 22 | 3523    | ..p.E929K RGS22_u    | NM_015668      | NP_056483    | Q8NE09 | RGS22_HUMAN | 7  | :TAACTCCTTCC  | 0.358 | ..RGS 2.                     |
| - | 3  | 1437    | ..p.R336H ZHX1_u     | NM_007222      | NP_009153    | Q9UKY1 | ZHX1_HUMAN  | 1  | TTAAACGTTGGC  | 0.403 | ..obox 1. Required for inter |
| + | 3  | 409     |                      | NM_152412      | NP_689625    | Q7Z317 | ZN572_HUMAN | 2  | ATGATTCCTATGA | 0.403 |                              |
| + | 8  | 1972    |                      | NM_001702      | NP_001693    | O14514 | BAI1_HUMAN  | 8  | CAGCGGGAGAG   | 0.637 | ..ellular (Potential).       |
| + | 10 | 1074    |                      | NM_145754      | NP_665697    | Q96AC6 | KIFC2_HUMAN | 3  | :GACTTCGGGCA  | 0.652 | ..Potential.                 |
| + | 5  | 1231    |                      | NM_138431      | NP_612440    | Q96ES6 | MFSD3_HUMAN | 2  | :CCCTCAGGCCA  | 0.672 |                              |
| - | 1  | 485     |                      | NM_005454      | NP_005445    | O95813 | CER1_HUMAN  | 0  | :TGACCCCCTGA  | 0.498 |                              |
| - | 25 | 5055    | ..zk.2_5'Flank FRE   | NM_144966      | NP_659403    | Q5H8C1 | FREM1_HUMAN | 5  | :GGTCCGCAGTC  | 0.522 | ..CSPG 11.                   |
| - | 4  | 1132    | ..EM1_uc010mic.2_f   | NM_144966      | NP_659403    | Q5H8C1 | FREM1_HUMAN | 5  | :GCAGCCGAGTT  | 0.522 |                              |
| + | 7  | 1076    | ..p.R161Q C9orf93_   | NM_173550      | NP_775821    | Q6TFL3 | CI093_HUMAN | 0  | ACGGGCACAAA   | 0.348 | ..ential. Glu-rich.          |
| - | 4  | 890     | ..Jmkj.1_intron FAN  | NM_004629      | NP_004620    | O15287 | FANCG_HUMAN | 4  | :GCTCCGGCAGA  | 0.627 |                              |
| + | 11 | 1158    | ..lqm.1_Nonsense_l   | NM_014907      | NP_055722    | Q5SYB0 | FRPD1_HUMAN | 9  | :AACCCGACAG   | 0.438 | ..FERM.                      |
| + | 4  | 2479    | ..1_intron uc004amj  | NM_001145197   | NP_001138669 | Q6ZUB0 | YI020_HUMAN | 0  | :TAACTCTGAGAC | 0.468 |                              |
| - | 11 | 1174    | ..p.P281L SLC28A3    | NM_022127      | NP_071410    | Q9HAS3 | S28A3_HUMAN | 4  | :AATATGGTCGG  | 0.507 | ..ellular (Potential).       |
| - | 7  | 1010    | ..ct.2_Missense_Mu   | NM_001039803   | NP_001034892 | Q8IZL9 | CDK20_HUMAN | 1  | :AGTCCGGCAGC  | 0.572 | ..rotein kinase.             |
| + | 3  | 461     | ..s.2_RNA ANKRD19_   | uc004asr.3_RNA |              |        |             | 0  | :CAACTGTCTC   | 0.433 |                              |
| - | 1  | 520     |                      | NM_205859      | NP_995581    | Q8NGT1 | OR2K2_HUMAN | 1  | :AGTGATCGATGA | 0.537 | ..ellular (Potential).       |
| - | 8  | 785     | ..se_Mutation_p.G2   | NM_012212      | NP_036344    | Q14914 | PTGR1_HUMAN | 0  | :CTGGCCGATAAC | 0.403 | rs146199919                  |
| - | 1  | 25      | ..J2_uc004bmj.1_lr   | NM_001004451   | NP_001004451 | Q8NGS3 | OR1J1_HUMAN | 2  | GGACACGCTGC   | 0.532 | ..ellular (Potential).       |
| - | 4  | 289     |                      | NM_000476      | NP_000467    | P00568 | KAD1_HUMAN  | 0  | :GACCTCGGACC  | 0.632 |                              |
| + | 10 | 911     |                      | NM_015354      | NP_056169    | Q5SRE5 | NU188_HUMAN | 7  | :AGTTTGCGCAG  | 0.428 |                              |
| + | 2  | 496_497 |                      | NM_001012715   | NP_001012733 | Q8NAJ2 | C1106_HUMAN | 0  | CTCATGGGTGGC  | 0.609 |                              |
| - | 5  | 754     | ..ax.2_Missense_Mi   | NM_007371      | NP_031397    | Q15059 | BRD3_HUMAN  | 8  | AGACGGTGGGG   | 0.637 |                              |
| + | 3  | 210     |                      | NM_183241      | NP_899064    | Q9BUH6 | C1142_HUMAN | 0  | :AGAAAGCCCGT  | 0.657 |                              |
| - | 30 | 5226    | .._Mutation_p.R162   | NM_001606      | NP_001597    | Q9BZC7 | ABCA2_HUMAN | 0  | :CTCACCGGTGC  | 0.652 |                              |
| + | 6  | 1010    | ..XD1_uc011mgx.1_    | NM_018390      | NP_060860    | Q9NUJ7 | PLCX1_HUMAN | 0  | :CATCCGATACC1 | 0.657 |                              |
| + | 6  | 693     | ..f.1_Missense_Mut   | NM_004042      | NP_004033    | P54793 | ARSF_HUMAN  | 2  | :ATTATGGGTTTG | 0.498 |                              |
| + | 4  | 1126    |                      | NM_001649      | NP_001640    | Q13796 | SHRM2_HUMAN | 8  | :CTGCGGCACAC  | 0.677 | ..Poly-Ala.                  |
| - | 14 | 1715    | ..e_Mutation_p.D22   | NM_031892      | NP_114098    | Q96B97 | SH3K1_HUMAN | 0  | :GGAGTCAAAC   | 0.433 |                              |
| - | 1  | 649     |                      | NM_153270      | NP_695002    | Q8N239 | KLH34_HUMAN | 1  | :TGCCCTCGGTC  | 0.657 | ..BTB.                       |



|   |     |       |                    |              |              |        |              |                              |    |                  |       |
|---|-----|-------|--------------------|--------------|--------------|--------|--------------|------------------------------|----|------------------|-------|
| + | 1   | 1488  |                    | NM_001013736 | NP_001013758 | Q5HY64 | FA47C_HUMAN  |                              | 3  | :CTCCCGACT       | 0.622 |
| + | 18  | 2585  | 34_splice SYTL5_u  | NM_001163335 | NP_001156807 | Q8TDW5 | SYTL5_HUMAN  |                              | 1  | :CTTCAGGTGTG     | 0.507 |
| - | 1   | 338   |                    | NM_001013742 | NP_001013764 | Q5KSL6 | DGKK_HUMAN   | te tandem repeats of E-P-A   | 2  | :tggggccggtctgag | 0.174 |
| + | 1   | 660   |                    | NM_018094    | NP_060564    | Q81YD1 | ERF3B_HUMAN  |                              | 1  | :AATGGCCCTAG     | 0.517 |
| + | 2   | 806   |                    | NM_018969    | NP_061842    | Q9NS66 | GP173_HUMAN  | ellular (Potential).         | 1  | CAAGGCCAATG      | 0.547 |
| - | 13  | 1414  | p.R256Q PFKFB1     | NM_002625    | NP_002616    | P16118 | F261_HUMAN   | -2,6-bisphosphatase.         | 1  | TTCTCCCGGTGT     | 0.557 |
| + | 6   | 1135  | ense_Mutation_p.l  | NM_001145408 | NP_001138880 | Q15233 | NONO_HUMAN   | DBHS.                        | 4  | :TGTGCGCTTTG     | 0.512 |
| + | 4   | 781   | df.2_Missense_M    | NM_014499    | NP_055314    | O00398 | P2Y10_HUMAN  | lasmic (Potential).          | 5  | :TCAAGCCCTTC     | 0.512 |
| + | 4   | 2453  | mg.1_Missense_A    | NM_152423    | NP_689636    | Q5H9M0 | MUML1_HUMAN  |                              | 4  | TTGAGGATGAA      | 0.338 |
| + | 3   | 3433  | sr.1_Missense_Mt   | NM_020769    | NP_065820    | Q8NET4 | RGAG1_HUMAN  |                              | 4  | TGACAGCCACA      | 0.532 |
| + | 1   | 132   | lmts.1_Missense_   | NM_006667    | NP_006658    | O00264 | PGRC1_HUMAN  | lenal (Potential).           | 0  | :AGGATGTGGTG     | 0.637 |
| - | 1   | 401   | uc004fbf.1_RNA     | NM_004065    | NP_004056    | P51861 | CDR1_HUMAN   | pproximate repeats.[12.      | 0  | :CTTCCGAAAAAT    | 0.453 |
| + | 4   | 1259  | EC1_uc010nsl.1_l   | NM_005462    | NP_005453    | O60732 | MAGC1_HUMAN  |                              | 4  | :CTGAGAGAACT     | 0.468 |
| - | 2   | 2723  | fb.2_Missense_M    | NM_173078    | NP_775101    | Q8IW52 | SLIK4_HUMAN  | lasmic (Potential).          | 2  | :TTTTTCTGGATA    | 0.383 |
| + | 7   | 1338  |                    | NM_005140    | NP_005131    | Q16280 | CNGA2_HUMAN  | ellular (Potential).         | 3  | AATGTGGGCTCC     | 0.517 |
| + | 8   | 1129  |                    | NM_018558    | NP_061028    | Q9UN88 | GBRT_HUMAN   |                              | 3  | :CCGAAGAGTCA     | 0.522 |
| + | 11  | 2308  | _XNB3_uc010nuk.    | NM_005393    | NP_005384    | Q9ULL4 | PLXB3_HUMAN  | ellular (Potential).         | 1  | :ATTTCGAGTG      | 0.642 |
| + | 9   | 1009  | vf.2_Missense_Mu   | NM_001363    | NP_001354    | O60832 | DKC1_HUMAN   |                              | 0  | :ATGTGCTTGAT     | 0.433 |
| + | 2   | 367   | J4ff.2_5'UTR NLG   | NM_014893    | NP_055708    | Q8NFZ3 | NLGN_Y_HUMAN |                              | 0  | :CCCTCATTGAC     | 0.463 |
| - | 9   | 913   | ase_Mutation_p.W   | NM_017871    | NP_060341    | Q5TA45 | INT11_HUMAN  |                              | 0  | :TTGGTCCAGGG     | 0.562 |
| - | 13  | 1314  | a.2_Missense_Mu    | NM_004421    | NP_004412    | O14640 | DVL1_HUMAN   | DEP.                         | 0  | GTCCGCCCTGT      | 0.697 |
| - | 4   | 460   | JK_uc001aie.2_Mi   | NM_023018    | NP_075394    | O95544 | NADK_HUMAN   |                              | 0  | ATCTCTCATCTT     | 0.602 |
| - | 2   | 860   |                    | NM_020710    | NP_065761    | Q8N1G4 | LR47_HUMAN   |                              | 2  | :gctctctctctccGA | 0.413 |
| - | 29  | 4390  | IP4_uc001alr.1_3'l | NM_015102    | NP_055917    | O75161 | NPHP4_HUMAN  |                              | 1  | TCCTCTGAAC       | 0.612 |
| - | 21  | 3362  | na.1_RNA CHD5_u    | NM_015557    | NP_056372    | Q8TDI0 | CHD5_HUMAN   | case C-terminal.             | 12 | :GGTACCATTGA     | 0.567 |
| - | 4   | 602   | ml.2_Missense_Mt   | NM_012405    | NP_036537    | O60725 | ICMT_HUMAN   |                              | 0  | :CATGGCCGCTT     | 0.502 |
| + | 10  | 2963  | IA1_uc010nrv.1_5   | NM_015215    | NP_056030    | Q9Y6Y1 | CMTA1_HUMAN  | IPT/TIG.                     | 9  | GCCTGGGGTGC      | 0.607 |
| - | 21  | 4459  | p.L1217F RERE_u    | NM_012102    | NP_036234    | Q9P2R6 | RERE_HUMAN   |                              | 2  | :ACTGAGGCGAC     | 0.642 |
| - | 14  | 2165  | IE_uc010nrx.1_Mi   | NM_012102    | NP_036234    | Q9P2R6 | RERE_HUMAN   |                              | 2  | :GGTGCTACGA      | 0.592 |
| - | 11  | 1467  | '7_splice SLC2A5_  | NM_003039    | NP_003030    | P22732 | GTR5_HUMAN   |                              | 3  | GGGACCTGTAG      | 0.647 |
| - | 20  | 2277  | asb.2_Missense_M   | NM_001001998 | NP_001001998 | Q01780 | EXOSX_HUMAN  |                              | 1  | :AGCTGCCTTCT     | 0.453 |
| - | 3   | 325   | _p.G92E EXOSC1     | NM_001001998 | NP_001001998 | Q01780 | EXOSX_HUMAN  |                              | 1  | :GACACCCATGG     | 0.398 |
| - | 7   | 1350  | atb.1_Splice_Site_ | NM_005957    | NP_005948    | P42898 | MTHR_HUMAN   |                              | 0  | :CCTACCAGCG      | 0.562 |
| - | 1   | 678   |                    | NM_001136561 | NP_001130033 | B2RXH8 | B2RXH8_HUMAN |                              | 0  | :GAGAATCCACTT    | 0.443 |
| + | 8   | 3981  | ij.2_Intron PRDM2  | NM_012231    | NP_036363    | Q13029 | PRDM2_HUMAN  | rg (Potential). Pro-rich.    | 1  | IGATGTCTGCCG     | 0.403 |
| + | 9   | 5916  | id.179N PRDM2_u    | NM_012231    | NP_036363    | Q13029 | PRDM2_HUMAN  |                              | 1  | :GTCCCAGTGT      | 0.587 |
| + | 6   | 530   |                    | NM_015849    | NP_056933    | P08218 | CEL2B_HUMAN  | eptidase S1.                 | 1  | :GGGCTCTCCCT     | 0.567 |
| + | 11  | 7379  | p.1_Missense_Mu    | NM_015001    | NP_055816    | Q96T58 | MINT_HUMAN   | 1 with MSX2 (By similarity). | 15 | :CCATTCCACTC     | 0.502 |
| - | 6   | 886   | m.2_Missense_Mt    | NM_001136204 | NP_001129676 | Q9P258 | RCC2_HUMAN   | RCC1 4.                      | 0  | :AGGGCACCCA      | 0.418 |
| - | 6   | 1887  |                    | NM_152232    | NP_689418    | Q8TE23 | TS1R2_HUMAN  | ellular (Potential).         | 4  | :GGCAGGTGGAG     | 0.622 |
| - | 104 | 15279 | n_p.S726F UBR4_    | NM_020765    | NP_065816    | Q5T4S7 | UBR4_HUMAN   |                              | 25 | :GGGAAGAACGG     | 0.468 |
| - | 35  | 4934  | m.1_Missense_Mt    | NM_020765    | NP_065816    | Q5T4S7 | UBR4_HUMAN   |                              | 25 | :TTCCTCTCCAC     | 0.502 |
| - | 1   | 508   | :2_Intron CAPZB_   | NM_004930    | NP_004921    | P47756 | CAPZB_HUMAN  |                              | 0  | :CGAGGGACTT      | 0.552 |
| - | 8   | 1875  | KIF17_uc009vpx.2   | NM_020816    | NP_065867    | Q9P2E2 | KIF17_HUMAN  |                              | 4  | :GCCAGCGGCC      | 0.652 |
| - | 2   | 169   | l_p.V29M ECE1_u    | NM_001397    | NP_001388    | P42892 | ECE1_HUMAN   | lasmic (Potential).          | 3  | :GTCCACCAGGT     | 0.706 |
| - | 77  | 10668 | id.2_Missense_Mt   | NM_005529    | NP_005520    | P98160 | PGBM_HUMAN   | like C2-type 21.             | 9  | :CGTGGCGGATC     | 0.622 |
| - | 57  | 7343  | qd.2_Missense_Ml   | NM_005529    | NP_005520    | P98160 | PGBM_HUMAN   | like C2-type 9.              | 9  | :GGTGACCCCAA     | 0.637 |

|   |    |      |                     |              |               |        |             |                              |    |                 |       |
|---|----|------|---------------------|--------------|---------------|--------|-------------|------------------------------|----|-----------------|-------|
| - | 9  | 1065 | nf.3_Missense_Mt    | NM_001039775 | NP_001034864  | Q8N1P7 | AIM1L_HUMAN |                              | 1  | :TTACCGTCCGG/   | 0.597 |
| + | 2  | 679  |                     | NM_000911    | NP_000902     | P41143 | OPRD_HUMAN  | lasmic (Potential).          | 2  | :TGACCGCTACA    | 0.572 |
| - | 6  | 1653 | :S4_uc010ofy.1_3'   | NM_005626    | NP_005617     | Q08170 | SRSF4_HUMAN | r-rich (RS domain).          | 0  | :CTCGACCTTCC/   | 0.542 |
| - | 4  | 1011 | :d.2_Missense_Mu    | NM_014654    | NP_055469     | O75056 | SDC3_HUMAN  | cellular (Potential).        | 2  | :GCTCTTCTTCTGC  | 0.617 |
| + | 6  | 546  | :_p.A150V KPNA6     | NM_012316    | NP_036448     | O60684 | IMA7_HUMAN  | 'major) (By similarity). ARM | 0  | :ATATTCCTCTGC   | 0.453 |
| + | 11 | 1292 | :hj.1_Missense_Mt   | NM_005610    | NP_005601     | Q09028 | RBBP4_HUMAN | WD 6.                        | 1  | :AGATATCTGATTT  | 0.363 |
| + | 6  | 2076 | :522_uc010ohm.1     | NM_020888    | NP_065939     | Q9P206 | K1522_HUMAN | Pro-rich.                    | 0  | :TCAGTCCCCTC/   | 0.617 |
| - | 5  | 1243 | :_p.V414I RNF19E    | NM_153341    | NP_699172     | Q6ZM20 | RN19B_HUMAN | ical; (Potential).           | 0  | :AATAACTGGGG    | 0.463 |
| - | 13 | 2207 | :_p.G719D PHC2_u    | NM_198040    | NP_932157     | Q8IXK0 | PHC2_HUMAN  |                              | 1  | :CAGTGCCTGTT/   | 0.498 |
| - | 12 | 2058 | :69_splice PHC2_u   | NM_198040    | NP_932157     | Q8IXK0 | PHC2_HUMAN  |                              | 1  | :GTGACCTTCAG/   | 0.567 |
| + | 10 | 1334 |                     | NM_017629    | NP_060099     | Q9HCK5 | AGO4_HUMAN  |                              | 1  | :3GTGGACCTGAT   | 0.443 |
| + | 4  | 671  | :e_Mutation_p.P78   | NM_012199    | NP_036331     | Q9UL18 | AGO1_HUMAN  |                              | 3  | :TGTTCCCTTGG/   | 0.542 |
| + | 5  | 1659 | :_p.P479S THRAP3    | NM_005119    | NP_005110     | Q9Y2W1 | TR150_HUMAN |                              | 9  | :CACCTCCAGGG/   | 0.483 |
| - | 14 | 2093 |                     | NM_013285    | NP_037417     | Q13823 | NOG2_HUMAN  |                              | 2  | :TTCTTCCAGTG    | 0.333 |
| - | 2  | 368  | :_p.D82N RRAGC      | NM_022157    | NP_071440     | Q9HB90 | RRAGC_HUMAN | (By similarity).             | 1  | :GAAAATCCCATAI  | 0.408 |
| + | 10 | 1584 |                     | NM_005857    | NP_005848     | O75844 | FACE1_HUMAN |                              | 0  | :ATTATTTCTCATCC | 0.388 |
| + | 55 | 7748 | :1qj.1_Missense_IV  | NM_015284    | NP_056099     | Q5T011 | SZT2_HUMAN  |                              | 0  | :GCCTATCCATGAC  | 0.572 |
| + | 10 | 1529 | :10k1.1_Splice_Site | NM_014663    | NP_055478     | O75164 | KDM4A_HUMAN |                              | 1  | :GCCAGGTTAGT    | 0.502 |
| + | 6  | 478  | :>76S ATP6V0B_uc    | NM_004047    | NP_004038     | Q99437 | VATO_HUMAN  | lasmic (Potential).          | 1  | :CAGACCCCAAG    | 0.517 |
| - | 22 | 3524 | :lg.1_Missense_Mt   | NM_003738    | NP_003729     | Q9Y6C5 | PTC2_HUMAN  | lasmic (Potential).          | 18 | :AGGCACCAGGC/   | 0.657 |
| + | 7  | 1410 | :_uc010oll.1_5'Flan | NM_025077    | NP_079353     | Q96GM8 | TOE1_HUMAN  |                              | 1  | :TTCCAGCATGAC   | 0.577 |
| - | 6  | 633  | :T1_uc001cpg.2_IV   | NM_017739    | NP_060209     | Q8WZA1 | PMGT1_HUMAN | lenal (Potential).           | 1  | :CTCATCCTCATC   | 0.547 |
| + | 2  | 351  | :iUN4_uc009vyg.1    | NM_199044    | NP_950245     | Q96CB9 | NSUN4_HUMAN |                              | 0  | :CTTTGCTGCCTC   | 0.493 |
| - | 8  | 1027 | :3TIL_uc001crd.1_I  | NM_003035    | NP_003026     | Q15468 | STIL_HUMAN  |                              | 3  | :CTTGCCTTTCTT   | 0.348 |
| + | 10 | 1126 | :ctw.3_Missense_IV  | NM_032864    | NP_116253     | Q8NAV1 | PR38A_HUMAN |                              | 0  | :GAGCCGGAGAG    | 0.348 |
| + | 3  | 668  | :.1_Intron FAM159   | NM_001042693 | NP_001036158  | Q6UWV7 | F159A_HUMAN |                              | 0  | :CCAGTCCCATAA   | 0.498 |
| + | 16 | 3071 | :1orf175_uc010oog   | NM_001039464 | NP_001034553  | Q68CQ1 | HEAT8_HUMAN |                              | 0  | :ACTGAGGATGG/   | 0.597 |
| + | 8  | 1064 | :_ya.3_Missense_IV  | NM_001110533 | NP_0011104003 | Q3ZCV2 | CA177_HUMAN |                              | 0  | :CAAGGGGTCCAG   | 0.552 |
| - | 5  | 669  | :_p.S139F C8B_uc    | NM_000066    | NP_000057     | P07358 | CO8B_HUMAN  | MACPF.                       | 4  | :GCGGGGAGCAT/   | 0.398 |
| - | 5  | 1043 | :se_Mutation_p.H3'  | NM_145243    | NP_660286     | Q96E52 | OMA1_HUMAN  |                              | 1  | :GTTGATGAATATC  | 0.338 |
| - | 3  | 594  | :3_Intron KANK4_u   | NM_181712    | NP_859063     | Q5T7N3 | KANK4_HUMAN |                              | 6  | :GCTGAAGTTTCC/  | 0.562 |
| - | 10 | 1110 | :_p.A251V DOCK7_    | NM_033407    | NP_212132     | Q96N67 | DOCK7_HUMAN |                              | 2  | :GTTCTGCACACT   | 0.328 |
| + | 20 | 2740 | :_lbq.1_Missense_IV | NM_020925    | NP_065976     | Q5VU97 | CAHD1_HUMAN | cellular (Potential).        | 2  | :GGATCCCAGGA    | 0.498 |
| + | 7  | 832  | :_pc.1_Missense_IV  | NM_014787    | NP_055602     | O75061 | AUX1_HUMAN  |                              | 3  | :CAAGCCCTACCI   | 0.478 |
| - | 11 | 1246 |                     | NM_000329    | NP_000320     | Q16518 | RPE65_HUMAN |                              | 1  | :CTCGTCACTGC/   | 0.473 |
| - | 12 | 2338 | :73_uc001dgi.3_Mi   | NM_001002912 | NP_001002912  | Q5RHP9 | CA173_HUMAN | Glu-rich.                    | 5  | :TGCTTTCTTCCC/  | 0.478 |
| - | 3  | 1251 | :BL2_uc001dmr.2     | NM_001162536 | NP_001156008  | Q96E39 | RBMXL_HUMAN |                              | 0  | :CTTCTCCTCCCA   | 0.517 |
| - | 3  | 1011 | :CBL2_uc001dmr.2    | NM_001162536 | NP_001156008  | Q96E39 | RBMXL_HUMAN |                              | 0  | :TGGAGGTGGGG/   | 0.512 |
| + | 11 | 2046 | :st.1_Missense_Mu   | NM_198460    | NP_940862     | Q6ZN66 | GBP6_HUMAN  |                              | 2  | :TACTCCCTGGAT   | 0.393 |
| + | 3  | 2983 | :_jnn.2_Missense_IV | NM_001134479 | NP_001127951  | Q7L1W4 | LRC8D_HUMAN |                              | 2  | :ATATCCCTTTTGC  | 0.393 |
| - | 4  | 3318 | :_2_Intron ZNF644_  | NM_201269    | NP_958357     | Q9H582 | ZN644_HUMAN | 2H2-type 7.                  | 3  | :AGTGGCCTCTA/   | 0.363 |
| + | 3  | 185  | :f146_uc010ote.1_I  | NM_001012425 | NP_001012425  | Q5VVC0 | CA146_HUMAN |                              | 1  | :AAGTTCGATATTC  | 0.299 |
| - | 45 | 3760 | :.P1160S COL11A1    | NM_001854    | NP_001845     | P12107 | COBA1_HUMAN | le-helical region.           | 12 | :GGGAGGGCCCT    | 0.448 |
| - | 18 | 2156 | :OL11A1_uc001dur    | NM_001854    | NP_001845     | P12107 | COBA1_HUMAN | le-helical region.           | 12 | :TGTGACCTTTGT   | 0.299 |
| - | 5  | 602  | :e_Mutation_p.W12   | NM_001048210 | NP_001041675  | Q96S66 | CLCC1_HUMAN |                              | 1  | :CACTTCCATGT    | 0.368 |
| + | 3  | 575  | :dxw.2_3'UTR CYE    | NM_182580    | NP_872386     | Q8N8Q1 | C56D1_HUMAN | b561. Helical; (Potential).  | 0  | :GACTGGTGGTGC   | 0.592 |
| - | 1  | 1830 |                     | NM_002232    | NP_002223     | P22001 | KCNA3_HUMAN |                              | 5  | :CATACCCCTC/    | 0.517 |

rs142271220

|   |    |      |                   |              |              |        |             |    |               |       |
|---|----|------|-------------------|--------------|--------------|--------|-------------|----|---------------|-------|
| - | 2  | 694  | bp.1_Missense_I   | NM_019099    | NP_061972    | Q9NTI7 | CA183_HUMAN | 2  | TTCTCCCCACCC  | 0.592 |
| + | 8  | 1156 | ww.1_Missense_I   | NM_000701    | NP_000692    | P05023 | AT1A1_HUMAN | 1  | CCACACTTGCTT  | 0.498 |
| - | 2  | 1130 | _p.G181D TRIM45   | NM_025188    | NP_079464    | Q9H8W5 | TRI45_HUMAN | 1  | CTGTAGCCTTTC  | 0.512 |
| - | 5  | 818  | _p.S154N VTCN1_   | NM_024626    | NP_078902    | Q7Z7D3 | VTCN1_HUMAN | 0  | GGTGACTCCGC   | 0.453 |
| - | 15 | 2148 |                   | NM_206996    | NP_996879    | Q6Q759 | SPG17_HUMAN | 6  | ACTAGGATCTG   | 0.373 |
| + | 14 | 1459 |                   | NM_003568    | NP_003559    | O76027 | ANXA9_HUMAN | 0  | GAAAGGGGATT   | 0.552 |
| + | 7  | 1047 | _1_Missense_Mut   | NM_021222    | NP_067045    | Q86TP1 | PRUNE_HUMAN | 1  | CTGTCCCCATGT  | 0.502 |
| + | 9  | 3715 | _Mutation_p.G120  | NM_020832    | NP_065883    | Q8N1G0 | ZN687_HUMAN | 4  | CTGTGGCAAGA   | 0.617 |
| - | 6  | 1157 | uc010pdc.1_Mi     | NM_015100    | NP_055915    | Q7Z3K3 | POGZ_HUMAN  | 3  | GCTTGGGATTC   | 0.557 |
| - | 2  | 371  | 0pdc.1_Missense_  | NM_015100    | NP_055915    | Q7Z3K3 | POGZ_HUMAN  | 3  | ACATCACTGATT  | 0.388 |
| - | 2  | 1127 |                   | NM_001004432 | NP_001004432 | Q6UY18 | LIGO4_HUMAN | 1  | GGAGGTGAGGC   | 0.602 |
| - | 2  | 2866 | ie.1_Missense_Mu  | NM_007113    | NP_009044    | Q07283 | TRHY_HUMAN  | 5  | TTCCCGCTCCT   | 0.333 |
| - | 3  | 6755 |                   | NM_002016    | NP_002007    | P20930 | FILA_HUMAN  | 16 | TGGATCCCCGG   | 0.582 |
| - | 3  | 7173 | uc001ezv.2_Intron | NM_001014342 | NP_001014364 | Q5D862 | FILA2_HUMAN | 17 | TTCTGCTGCCA   | 0.453 |
| - | 4  | 956  |                   | NM_006694    | NP_006685    | O76095 | JTB_HUMAN   | 0  | CATATCCTGTGC  | 0.443 |
| - | 3  | 464  | nse_Mutation_p.A  | NM_152263    | NP_689476    | P06753 | TPM3_HUMAN  | 34 | TTTCAGCTTCTT  | 0.498 |
| + | 21 | 2251 |                   | NM_020452    | NP_065185    | P98198 | AT8B2_HUMAN | 2  | CCCGGGAGAAC   | 0.542 |
| - | 2  | 411  | uc001ffk.2_5'UT   | NM_001111    | NP_001102    | P55265 | DSRAD_HUMAN | 6  | CCGGAGTCCTG   | 0.562 |
| - | 3  | 456  |                   | NM_138300    | NP_612157    | Q9BRQ0 | PYGO2_HUMAN | 1  | GGGGGCTCCGA   | 0.617 |
| + | 10 | 2224 | nse_Mutation_p.L  | NM_025058    | NP_079334    | Q7Z4K8 | TRI46_HUMAN | 3  | GCTCTGGAGT    | 0.657 |
| - | 9  | 984  | _p.A321T THBS3    | NM_007112    | NP_009043    | P49746 | TSP3_HUMAN  | 5  | GTGAGCACACT   | 0.617 |
| - | 4  | 608  | tion_p.E119K SCA  | NM_005698    | NP_005689    | O14828 | SCAM3_HUMAN | 3  | CAGCTCTCGCT   | 0.577 |
| + | 2  | 329  | _2_Missense_Muta  | NM_014655    | NP_055470    | Q96H78 | S2544_HUMAN | 1  | TGGAGGACAAA   | 0.512 |
| - | 18 | 2776 | G5_uc009wrv.2_In  | NM_015327    | NP_056142    | Q9UPR3 | SMG5_HUMAN  | 5  | CACTGGTGGCC   | 0.502 |
| - | 4  | 767  | n_p.E252K C1orf   | NM_144580    | NP_653181    | Q8WVW7 | NCUG1_HUMAN | 2  | CTGCTCCTGCA   | 0.607 |
| - | 3  | 179  | 1fpl.2_Missense_I | NM_015590    | NP_056405    | Q5T3I0 | GPTC4_HUMAN | 1  | TCACCTGAGA    | 0.572 |
| - | 2  | 165  | RL1_uc001fri.2_I  | NM_052938    | NP_443170    | Q96LA6 | FCRL1_HUMAN | 7  | CTCACCGGCAG   | 0.483 |
| + | 3  | 650  | D_uc009wss.2_M    | NM_001766    | NP_001757    | P15813 | CD1D_HUMAN  | 1  | GGCTGGGGGAG   | 0.647 |
| - | 2  | 307  | 1_Intron CRP_uc0  | NM_000567    | NP_000558    | P02741 | CRP_HUMAN   | 1  | AAAATACTGTACC | 0.443 |
| + | 17 | 2476 | _p.P782S ATP1A2   | NM_000702    | NP_000693    | P50993 | AT1A2_HUMAN | 7  | ACATCCCCGAG   | 0.552 |
| + | 10 | 1239 | _p.T234I NCSTN_   | NM_015331    | NP_056146    | Q92542 | NICA_HUMAN  | 2  | TAAGAACTTCAT  | 0.483 |
| - | 4  | 561  | _p.A130T DEDD_u   | NM_001039712 | NP_001034801 | O75618 | DEDD_HUMAN  | 0  | GAGGGCTCTGG   | 0.473 |
| + | 3  | 940  | kd.1_Missense_M   | NM_001014443 | NP_001014443 | Q9UK80 | UBP21_HUMAN | 5  | ATCCGCCCGGT   | 0.577 |
| + | 6  | 843  | POX_uc001fyh.2    | NM_001122764 | NP_001116236 | P50336 | PPOX_HUMAN  | 1  | FGCTTTCACGT   | 0.542 |
| - | 4  | 617  | S5_uc009wvb.2_F   | NM_003617    | NP_003608    | O15539 | RGS5_HUMAN  | 0  | AGCCTCCGTTT   | 0.478 |
| - | 2  | 412  |                   | NM_199351    | NP_955383    | Q71H61 | ILDR2_HUMAN | 1  | CTCTGCCCTG    | 0.463 |
| + | 15 | 1700 | ie_Mutation_p.P45 | NM_002697    | NP_002688    | P14859 | PO2F1_HUMAN | 5  | AGCGCTCCAG    | 0.532 |
| + | 5  | 893  | ZL1_uc001geq.2_I  | NM_003953    | NP_003944    | O95297 | MPZL1_HUMAN | 2  | GTCTGCCTTCT   | 0.507 |
| - | 13 | 3902 |                   | NM_000130    | NP_000121    | P12259 | FA5_HUMAN   | 6  | GCTGAGGTCTA   | 0.527 |
| + | 7  | 1209 | _p.P358L FMO1_u   | NM_002021    | NP_002012    | Q01740 | FMO1_HUMAN  | 1  | CTTCCCTGCAC   | 0.483 |
| + | 4  | 1524 | gib.2_Missense_M  | NM_015935    | NP_057019    | Q8N6R0 | MTL13_HUMAN | 1  | GCAGCCCTTG    | 0.547 |
| + | 2  | 202  | c009wvf.2_Intron  | NM_014458    | NP_055273    | Q9Y2M5 | KLH20_HUMAN | 1  | GCGCAGGTAGG   | 0.348 |
| - | 11 | 1979 | jjv.2_Missense_M  | NM_172071    | NP_742068    | Q5TC82 | RC3H1_HUMAN | 2  | CAGGAGCAGAT   | 0.488 |
| + | 10 | 1264 |                   | NM_015602    | NP_056417    | Q5JTV8 | TOIP1_HUMAN | 2  | FGCCTCTGGGA   | 0.433 |
| + | 10 | 1830 |                   | NM_015602    | NP_056417    | Q5JTV8 | TOIP1_HUMAN | 2  | TTAAAGTCAAGT  | 0.418 |
| + | 38 | 9655 | _p.G1226E CEP35C  | NM_014810    | NP_055625    | Q5VT06 | CE350_HUMAN | 4  | CGACGGGATCT   | 0.443 |
| + | 28 | 5050 |                   | NM_002293    | NP_002284    | P11047 | LAMC1_HUMAN | 5  | ACCATCTGGCT   | 0.537 |

|   |    |       |                    |              |              |        |             |                           |    |               |       |
|---|----|-------|--------------------|--------------|--------------|--------|-------------|---------------------------|----|---------------|-------|
| + | 68 | 10733 |                    | NM_031935    | NP_114141    | Q96RW7 | HMCN1_HUMAN | ike C2-type 33.           | 23 | 3ATTGGGAAAG   | 0.483 |
| + | 12 | 1582  | _p.V427I CAMSAF    | NM_203459    | NP_982284    | Q08AD1 | CAMP2_HUMAN |                           | 4  | CATGGCGTATCA  | 0.294 |
| + | 28 | 5835  | rx.2_Missense_Mu   | NM_020443    | NP_065176    | Q8NEY1 | NAV1_HUMAN  |                           | 4  | .GGACAGTCAAA  | 0.502 |
| + | 4  | 617   |                    | NM_198149    | NP_937792    | Q96DD7 | SHSA4_HUMAN | ic (Potential). Pro-rich. | 0  | 3CTGGGCCCCCA  | 0.612 |
| + | 5  | 382   |                    | NM_006335    | NP_006326    | Q99595 | TI17A_HUMAN | ical; (Potential).        | 0  | iGGTCAGCCGCA  | 0.398 |
| + | 3  | 709   | 3NPEP_uc001gxf.2   | NM_020216    | NP_064601    | Q9H4A4 | AMPB_HUMAN  |                           | 1  | CCATCCCCTCCT  | 0.527 |
| + | 15 | 1304  | R6_uc009xab.2_R    | NM_001017403 | NP_001017403 | Q9HBX8 | LGR6_HUMAN  | xtracellular (Potential). | 10 | .GCTGACCACAC  | 0.572 |
| + | 20 | 3011  | p.D799N ZC3H11     | NM_014827    | NP_055642    | O75152 | ZC11A_HUMAN |                           | 2  | 3AAGATGACCTT  | 0.403 |
| - | 3  | 2183  | p.V599M LRRN2_     | NM_006338    | NP_006329    | O75325 | LRRN2_HUMAN | ellular (Potential).      | 2  | .GGCCACTTGCA  | 0.637 |
| - | 2  | 554   | bx.2_Missense_Mi   | NM_015375    | NP_056190    | Q6XUX3 | DUSTY_HUMAN |                           | 1  | :CAGGCTGACCC  | 0.602 |
| - | 17 | 1891  | _p.V261I SLC26A1   | NM_052934    | NP_443166    | Q7LBE3 | S26A9_HUMAN | STAS.                     | 2  | iGGAGACAGCTT  | 0.612 |
| + | 25 | 4167  | i.G893R CR1_uc0    | NM_000573    | NP_000564    | P17927 | CR1_HUMAN   | ar (Potential). Sushi 21. | 3  | :CCTATGGAAAAC | 0.468 |
| - | 13 | 2317  | _Missense_Mutatic  | NM_001017402 | NP_001017402 | Q13751 | LAMB3_HUMAN | Domain II.                | 6  | .TGTGACTGCGG  | 0.587 |
| + | 16 | 1849  | _p.P500L TRAF3I    | NM_025228    | NP_079504    | Q9Y228 | T3JAM_HUMAN | lasmic (Potential).       | 2  | GCCTCCCAGAG   | 0.498 |
| + | 11 | 1562  | i.R523C RCOR3_L    | NM_018254    | NP_060724    | Q9P2K3 | RCOR3_HUMAN | Pro-rich.                 | 1  | :CACCCCGTCTA  | 0.527 |
| + | 7  | 924   | e_Mutation_p.Q16   | NM_016448    | NP_057532    | Q9NZJ0 | DTL_HUMAN   |                           | 0  | AGAAACAGAAAT  | 0.388 |
| - | 7  | 653   | jh.1_Missense_Mi   | NM_006085    | NP_006076    | O95861 | BPNT1_HUMAN |                           | 1  | :ATCTGGTCTCTG | 0.428 |
| + | 11 | 1714  | jn.1_Missense_Mi   | NM_018650    | NP_061120    | Q9P0L2 | MARK1_HUMAN |                           | 10 | AAACCACCTGAA  | 0.299 |
| - | 9  | 1008  | DA_uc010pus.1_M    | NM_022831    | NP_073742    | Q96BJ3 | AIDA_HUMAN  |                           | 0  | 3GCCCAGGTTTA  | 0.358 |
| + | 3  | 679   |                    | NM_032890    | NP_116279    | Q96F81 | DISP1_HUMAN |                           | 0  | AGTTGCCAAAAA  | 0.318 |
| - | 3  | 218   | /L_uc010pve.1_5'   | NM_002533    | NP_002524    | O15381 | NVL_HUMAN   |                           | 2  | TTTCTACCTGAAT | 0.294 |
| - | 7  | 1095  | nse_Mutation_p.A   | NM_013328    | NP_037460    | Q96C36 | P5CR2_HUMAN |                           | 0  | :CAGGGCCAGGC  | 0.612 |
| - | 1  | 327   | n_p.R83* LEFTY2_   | NM_003240    | NP_003231    | O00292 | LFTY2_HUMAN |                           | 0  | :ACCTCGGAAGC  | 0.687 |
| - | 7  | 1396  |                    | NM_022735    | NP_073572    | Q9H3P7 | GCP60_HUMAN | GOLD.                     | 0  | CGCTGGACTCA   | 0.473 |
| - | 4  | 874   | 47_uc001hrf.2_5'   | NM_023007    | NP_075383    | Q9H9V9 | JMJD4_HUMAN | JmjC.                     | 0  | :AGCAAGCTGGT  | 0.647 |
| + | 55 | 14734 | zn.2_Missense_Mi   | NM_001098623 | NP_001092093 | Q5VST9 | OBSCN_HUMAN | IQ.                       | 28 | iGGAAGGGCCCA  | 0.602 |
| - | 2  | 435   | /17_uc001hsw.2_I   | NM_016102    | NP_057186    | Q9Y577 | TRI17_HUMAN | RING-type.                | 1  | :AGATGGAGCAC  | 0.403 |
| + | 4  | 2114  | d.1_Missense_Mu    | NM_014777    | NP_055592    | Q14146 | URB2_HUMAN  |                           | 3  | AAGATAGAGAAG  | 0.443 |
| + | 4  | 989   | _p.G181S C1orf12   | NM_032018    | NP_114407    | Q9H040 | CA124_HUMAN |                           | 0  | TATTACGGCTATC | 0.517 |
| + | 1  | 1829  |                    | NM_019090    | NP_061963    | Q9P2G4 | K1383_HUMAN |                           | 1  | ACCTAGCCTGGT  | 0.448 |
| - | 5  | 795   | u.2_RNA PCNXL2     | NM_014801    | NP_055616    | A6NKB5 | PCX2_HUMAN  |                           | 2  | 3AGGTAGATGAC  | 0.438 |
| - | 9  | 895   | o.2_RNA ARID4B_    | NM_015014    | NP_055829    | P42696 | RBM34_HUMAN | RRM 2.                    | 1  | :AAAAACCGATC  | 0.338 |
| - | 6  | 773   | lhws.3_Splice_Site | NM_016374    | NP_057458    | Q4LE39 | ARI4B_HUMAN |                           | 3  | :AAAAACTATGAG | 0.368 |
| - | 5  | 2142  | es.1_RNA LYST_uc   | NM_000081    | NP_000072    | Q99698 | LYST_HUMAN  |                           | 12 | AGTTTCCCTGCA  | 0.408 |
| - | 3  | 311   | ise_Mutation_p.L4  | NM_000081    | NP_000072    | Q99698 | LYST_HUMAN  |                           | 12 | 3GACAAGGTACT  | 0.428 |
| - | 13 | 2773  | 3_Mutation_p.G75   | NM_002508    | NP_002499    | P14543 | NID1_HUMAN  | oglobulin type-1.         | 2  | CTGTCGGTGGC   | 0.716 |
| + | 79 | 11187 | ya.1_Missense_M    | NM_001035    | NP_001026    | Q92736 | RYR2_HUMAN  |                           | 33 | ATATATGGCCTAT | 0.358 |
| + | 1  | 811   | ye.1_Missense_Mi   | NM_020066    | NP_064450    | Q9NZ56 | FMN2_HUMAN  | Potential.                | 12 | GATTTGCTTTCA  | 0.408 |
| - | 5  | 505   | ibk.2_Missense_M   | NM_022743    | NP_073580    | Q9H7B4 | SMYD3_HUMAN | SET.                      | 0  | CTTCAGTCAGT   | 0.368 |
| + | 1  | 340   |                    | NM_001004136 | NP_001004136 | Q6IF00 | OR2T2_HUMAN | Name=3; (Potential).      | 1  | 3AATTCCTCCTG  | 0.537 |
| + | 1  | 37    |                    | NM_001013355 | NP_001013373 | Q5TZ20 | OR2G6_HUMAN | ellular (Potential).      | 3  | 3GATTTCTTCTCC | 0.423 |
| - | 3  | 380   | ihz.2_Missense_M   | NM_024803    | NP_079079    | A6NHL2 | TBAL3_HUMAN |                           | 1  | .GTAACGGCCTC  | 0.632 |
| - | 1  | 367   | 107B_uc010qbu.1    | NM_031453    | NP_113641    | Q9H098 | F107B_HUMAN |                           | 4  | AGCCACGCCGG   | 0.552 |
| + | 2  | 558   | nse_Mutation_p.E   | NM_024670    | NP_078946    | Q9H511 | SUV92_HUMAN | Pre-SET.                  | 3  | ATCTATGAATGCA | 0.403 |
| + | 6  | 1420  | e_p.E212_splice F  | NM_032812    | NP_116201    | Q6UX71 | PXDC2_HUMAN |                           | 4  | AAAGAAGTAAGTC | 0.438 |
| - | 1  | 608   |                    | NM_001034842 | NP_001030014 | Q3KNS1 | PTHD3_HUMAN |                           | 4  | CTTCTCTTCGT   | 0.657 |
| - | 7  | 1067  | p.H211L ZNF438_I   | NM_182755    | NP_877432    | Q7Z4V0 | ZN438_HUMAN |                           | 2  | :TGCCATGGGTG  | 0.557 |

|   |    |      |                   |              |              |        |              |                        |     |               |       |             |
|---|----|------|-------------------|--------------|--------------|--------|--------------|------------------------|-----|---------------|-------|-------------|
| + | 7  | 860  |                   | NM_052997    | NP_443723    | Q9BXX3 | AN30A_HUMAN  |                        | 9   | CTTGGTGAAA    | 0.502 |             |
| + | 9  | 1532 |                   | NM_014753    | NP_055568    | Q14692 | BMS1_HUMAN   |                        | 3   | GTCGAGTGACG   | 0.438 |             |
| + | 6  | 1416 | p.S409F RET_uc0   | NM_020975    | NP_066124    | P07949 | RET_HUMAN    | cellular (Potential).  | 451 | CTACTCCCTCTC  | 0.617 |             |
| + | 7  | 787  | _p.G211D NCOA4    | NM_001145263 | NP_001138735 | Q13772 | NCOA4_HUMAN  |                        | 2   | CATCCGGTATTG  | 0.348 |             |
| - | 2  | 176  | n_p.D8N EGR2_uc   | NM_001136177 | NP_001129649 | P11161 | EGR2_HUMAN   |                        | 2   | TTTTGTCTACGG  | 0.557 |             |
| - | 15 | 2158 | mw.2_Missense_I   | NM_001127384 | NP_001120856 | Q9UI47 | CTNA3_HUMAN  |                        | 8   | GAAATCAGCAAC  | 0.378 |             |
| - | 3  | 728  | 41_splice RUFY2_  | NM_017987    | NP_060457    | Q8WXA3 | RUFY2_HUMAN  |                        | 1   | TCCTTACTTCAG  | 0.463 |             |
| + | 2  | 1640 |                   | NM_030625    | NP_085128    | Q8NFU7 | TET1_HUMAN   |                        | 9   | AACTTCCTGGT   | 0.507 |             |
| + | 5  | 804  | p.D233N DDX50_u   | NM_024045    | NP_076950    | Q9BQ39 | DDX50_HUMAN  | ase ATP-binding.       | 1   | TTCAAAGATATA  | 0.373 |             |
| + | 2  | 187  | 321R VPS26A_uc    | NM_004896    | NP_004887    | O75436 | VP26A_HUMAN  |                        | 0   | ATGATGGGGAA   | 0.348 |             |
| + | 2  | 369  |                   | NM_019058    | NP_061931    | Q9NX09 | DDIT4_HUMAN  |                        | 1   | CGAGTCCCTGG   | 0.726 |             |
| - | 18 | 3667 | p.G305D USP54_u   | NM_152586    | NP_689799    | Q70EL1 | UBP54_HUMAN  |                        | 6   | TTTCCACCATTAC | 0.512 |             |
| - | 30 | 5525 | 3.D574N DLG5_uc   | NM_004747    | NP_004738    | Q8TDM6 | DLG5_HUMAN   | ylate kinase-like.     | 8   | AATGTCCAGGA   | 0.612 |             |
| - | 8  | 1035 | _1P_uc001kbf.2_Ir | NM_003019    | NP_003010    | P35247 | SFTPD_HUMAN  | C-type lectin.         | 1   | CCAGGGACTCT   | 0.567 |             |
| + | 2  | 575  |                   | NM_002729    | NP_002720    | Q03014 | HHEX_HUMAN   | Homeobox.              | 1   | TCTGGCCAAGA   | 0.637 |             |
| + | 2  | 600  | 32K CYP2C19_uc    | NM_000772    | NP_000763    | P33260 | CP2C1_HUMAN  |                        | 5   | ATGGAGAGGAG   | 0.433 |             |
| - | 7  | 1239 | nse_Mutation_p.P  | NM_000770    | NP_000761    | P10632 | CP2C8_HUMAN  |                        | 0   | CTTGGGGATGA   | 0.453 |             |
| - | 28 | 3425 | n.2_Missense_Mu   | NM_015179    | NP_055994    | Q5JTH9 | RRP12_HUMAN  |                        | 3   | CTGCTCCTTGC   | 0.587 |             |
| - | 14 | 1715 | ou.1_Missense_M   | NM_015179    | NP_055994    | Q5JTH9 | RRP12_HUMAN  |                        | 3   | GTGGGGGAAAT   | 0.597 |             |
| - | 20 | 2147 | knr.2_Missense_I  | NM_022362    | NP_071757    | Q96T76 | MMS19_HUMAN  |                        | 0   | CTGAGGGCTCC   | 0.478 |             |
| + | 13 | 2059 | A4G_uc001krx.2_I  | NM_017893    | NP_060363    | Q9NTN9 | SEM4G_HUMAN  | ular (Potential). PSI. | 1   | CACCACCATAG   | 0.627 |             |
| + | 6  | 1519 |                   | NM_030912    | NP_112174    | Q9BZR9 | TRIM8_HUMAN  |                        | 1   | AAGATTCTCGTC  | 0.637 |             |
| - | 4  | 435  | 0qq.1_Missense_   | NM_014631    | NP_055446    | Q5TCZ1 | SPD2A_HUMAN  | PX.                    | 0   | AGTATTCATCGAT | 0.592 |             |
| + | 9  | 1071 | 3.1_Missense_Mut  | NM_014720    | NP_055535    | Q9H2G2 | SLK_HUMAN    | Glu-rich.              | 8   | TATCGCCAGCT   | 0.353 |             |
| + | 2  | 190  |                   | NM_001008723 | NP_001008723 | Q5T655 | CC147_HUMAN  |                        | 5   | AGAAATGGAAA   | 0.388 |             |
| + | 3  | 1151 | 4.2_Missense_Mut  | NM_004281    | NP_004272    | O95817 | BAG3_HUMAN   |                        | 2   | AGCCAGGAGCA   | 0.657 |             |
| + | 20 | 2453 | 3p.2_Missense_Mt  | NM_014937    | NP_055752    | Q9Y2H2 | SAC2_HUMAN   |                        | 2   | GTATCAGGTCTC  | 0.358 |             |
| - | 7  | 1005 | 1les.1_Missense_I | NM_024834    | NP_079110    | Q9BTE3 | MCMBP_HUMAN  |                        | 0   | CAGGGCCCTTC   | 0.398 |             |
| - | 9  | 2256 | .1_Missense_Mute  | NM_018180    | NP_060650    | Q7L7V1 | DHX32_HUMAN  |                        | 4   | TTCAGCTCGAA   | 0.423 |             |
| - | 19 | 2578 | qul.1_Missense_M  | NM_003474    | NP_003465    | O43184 | ADA12_HUMAN  | ical; (Potential).     | 9   | CGGCAGCAAGA   | 0.418 |             |
| - | 13 | 2828 | 3v.1_Missense_Mu  | NM_002417    | NP_002408    | P46013 | KI67_HUMAN   |                        | 7   | CTGTAGACCTTC  | 0.413 |             |
| - | 3  | 359  | 3NIP3_uc010qut.1  | NM_004052    | NP_004043    | Q12983 | BNIP3_HUMAN  |                        | 2   | 3AAGCTCTGTTG  | 0.423 | rs143231747 |
| + | 17 | 2119 | 7ba.1_Missense_I  | NM_001105521 | NP_001098991 |        |              |                        | 1   | TGGTGGATCTGC  | 0.617 |             |
| + | 18 | 2203 | 7ba.1_Nonsense_I  | NM_001105521 | NP_001098991 |        |              |                        | 1   | TGGACCAGGCC   | 0.632 |             |
| + | 3  | 886  | se_Mutation_p.S2  | NM_152911    | NP_690875    | Q6QHF9 | PAOX_HUMAN   |                        | 0   | AGTGTCCGGTAG  | 0.582 | rs139393085 |
| + | 2  | 432  | ybv.1_Missense_I  | NM_030783    | NP_110410    | Q9BVG9 | PTSS2_HUMAN  | cellular (Potential).  | 0   | 3AAACACCTCAG  | 0.562 |             |
| + | 9  | 1193 |                   | NM_002457    | NP_002448    | Q02817 | MUC2_HUMAN   |                        | 2   | CCCCGGCACCT   | 0.652 |             |
| + | 16 | 1990 |                   | NM_017511    | NP_059981    | Q9HC84 | MUC5B_HUMAN  | VWFD 2.                | 0   | GCGTGGAGAAT   | 0.657 |             |
| + | 1  | 240  | uc001lwe.2_Intron | NM_004356    | NP_004347    | P60033 | CD81_HUMAN   | lasmic (Potential).    | 0   | GGGAGTGGAGC   | 0.338 |             |
| + | 1  | 353  |                   | NM_001004759 | NP_001004759 | Q8NGJ9 | O51T1_HUMAN  | cellular (Potential).  | 3   | TCATGCCCGGG   | 0.493 |             |
| + | 1  | 847  |                   | NM_001004749 | NP_001004749 | Q8NH64 | O51A7_HUMAN  | Name=7; (Potential).   | 2   | TGGTGCCGCC    | 0.458 |             |
| + | 1  | 583  | _uc001mam.1_Int   | NM_001004756 | NP_001004756 | B2RN19 | B2RN19_HUMAN |                        | 0   | CACCAGGAAGTG  | 0.517 |             |
| - | 1  | 49   |                   | NM_001004052 | NP_001004052 | Q96RD2 | O52B2_HUMAN  | cellular (Potential).  | 0   | GCCAGGAAGGA   | 0.453 |             |
| - | 4  | 508  | f.3_5'UTR SBF2_u  | NM_030962    | NP_112224    | Q86WG5 | MTMRD_HUMAN  | DENN.                  | 3   | GGATACCAACAC  | 0.358 |             |
| - | 15 | 2146 | 5A12_uc001mrb.2   | NM_178498    | NP_848593    | Q1EHB4 | SC5AC_HUMAN  | lasmic (Potential).    | 2   | AAATGCCATATTC | 0.358 |             |
| + | 3  | 720  | 3_Mutation_p.P101 | NM_002901    | NP_002892    | Q15293 | RCN1_HUMAN   |                        | 1   | GAAACCCCGCA   | 0.453 |             |
| + | 4  | 570  | 3_Mutation_p.G101 | NM_021117    | NP_066940    | Q49AN0 | CRY2_HUMAN   | VA photolyase.         | 1   | GAATGGGCAGA   | 0.567 |             |



|   |    |                            |                                |              |              |             |                       |                               |    |               |       |
|---|----|----------------------------|--------------------------------|--------------|--------------|-------------|-----------------------|-------------------------------|----|---------------|-------|
| + | 3  | 753                        | 0652_uc001ncz.2_               | NM_001142673 | NP_001136145 | O75143      | ATG13_HUMAN           |                               | 0  | CTCAAGGTAATG  | 0.383 |
| + | 9  | 1687                       | n.1_Missense_Mu                | NM_003682    | NP_003673    | Q8WXG6      | MADD_HUMAN            | dDENN.                        | 11 | CAATTCGCCCA   | 0.522 |
| - | 1  | 269                        |                                | NM_001005245 | NP_001005245 | Q96RB7      | OR5MB_HUMAN           | cellular (Potential).         | 0  | AAATGGTCTTC   | 0.443 |
| - | 3  | 344                        | nko.1_Missense_M               | NM_004223    | NP_004214    | O14933      | UB2L6_HUMAN           |                               | 1  | ATGTGTCCGTT   | 0.547 |
| + | 6  | 1173                       | missense_Mutation              | NM_001085458 | NP_001078927 | O60716      | CTND1_HUMAN           |                               | 6  | TGCTACCCTTC   | 0.507 |
| + | 4  | 948                        | .14_uc001npg.2_M               | NM_032597    | NP_115986    | Q96JA4      | M4A14_HUMAN           | ical; (Potential).            | 1  | TTTACCATTCT   | 0.368 |
| + | 3  | 457                        | yna.2_Missense_M               | NM_152866    | NP_690605    | P11836      | CD20_HUMAN            | lasmic (Potential).           | 5  | CCCGCAGAGC    | 0.438 |
| + | 12 | 2144                       | 6_uc001nqs.2_Int               | NM_006725    | NP_006716    | P30203      | CD6_HUMAN             | lasmic (Potential).           | 1  | CTTCGGAGGAG   | 0.612 |
| - | 5  | 10006                      | IAK_uc001ntk.1_Ir              | NM_001620    | NP_001611    | Q09666      | AHNK_HUMAN            |                               | 19 | CACCTCTCCTT   | 0.403 |
| - | 19 | 1402                       | MAP4K2_uc001obi                | NM_004579    | NP_004570    | Q12851      | M4K2_HUMAN            |                               | 2  | GGGAGCTGTTG   | 0.672 |
| - | 5  | 800                        |                                | NM_080668    | NP_542399    | Q96FF9      | CDCA5_HUMAN           |                               | 0  | TCTCGGTGGT    | 0.572 |
| + | 9  | 1223                       | p.G288D FRMD8_                 | NM_031904    | NP_114110    | Q9BZ67      | FRMD8_HUMAN           | FERM.                         | 2  | CGAGGGCACAC   | 0.667 |
| + | 19 | 3831                       | M2A_uc001ojz.1_I               | NM_012308    | NP_036440    | Q9Y2K7      | KDM2A_HUMAN           | LRR 2.                        | 9  | TCTCGGTCTGC   | 0.532 |
| + | 23 | 4804                       | g.2_Missense_Mu                | NM_002335    | NP_002326    | O75197      | LRP5_HUMAN            | toplasmic (Potential). Pro-i  | 7  | CCCCACCCACG   | 0.662 |
| - | 22 | 5384                       | ation_p.L1174Q uc              | NM_012309    | NP_036441    | Q9UPX8      | SHAN2_HUMAN           |                               | 5  | GTTGCAGTATCC  | 0.512 |
| + | 1  | 2762                       |                                | NM_014786    | NP_055601    | Q96PE2      | ARHG_HUMAN            |                               | 0  | TCTGTCCCCGA   | 0.632 |
| + | 3  | 226                        | .L21F RELT_uc00                | NM_152222    | NP_689408    | Q969Z4      | TR19L_HUMAN           |                               | 1  | GGCCTCTCGCC   | 0.602 |
| + | 5  | 986                        | s.1_Missense_Mu                | NM_007256    | NP_009187    | O94956      | SO2B1_HUMAN           | Name=4; (Potential).          | 2  | GCTGGCGTGG    | 0.607 |
| - | 5  | 548                        | TS4_uc001oyu.1_I               | NM_033547    | NP_291025    | Q96HW7      | INT4_HUMAN            | HEAT 2.                       | 2  | GCCAAGTAACTC  | 0.353 |
| + | 6  | 2302                       | su.1_Missense_ML               | NM_015885    | NP_056969    | O94913      | PCF11_HUMAN           |                               | 1  | AGATTCCTAAAC  | 0.388 |
| + | 8  | 2515                       | su.1_Missense_ML               | NM_015885    | NP_056969    | O94913      | PCF11_HUMAN           | Gly-rich.                     | 1  | GATAAACCATTTG | 0.403 |
| + | 8  | 2965                       | u.1_Missense_Mu                | NM_015885    | NP_056969    | O94913      | PCF11_HUMAN           | Gly-rich.                     | 1  | CTGTGGGTGGT   | 0.542 |
| + | 4  | 755                        | to.1_RNA C11orf7.              | NM_016401    | NP_057485    | Q53FT3      | CK073_HUMAN           |                               | 0  | TCATTCGGGCA   | 0.358 |
| + | 4  | 3946                       |                                | NM_001008781 | NP_001008781 | Q8TDW7      | FAT3_HUMAN            | Extracellular (Potential).    | 5  | TAAAACCTGGGA  | 0.458 |
| + | 9  | 5593                       |                                | NM_001008781 | NP_001008781 | Q8TDW7      | FAT3_HUMAN            | Extracellular (Potential).    | 5  | TAGCCCCAAC    | 0.463 |
| + | 5  | 996                        | uc001pen.1_RNA                 | NM_001098672 | NP_001092142 | Q6MZM0      | HPHL1_HUMAN           | e 2. Extracellular (Potential | 3  | CTTCCCGGAGC   | 0.468 |
| + | 2  | 1072                       |                                | NM_015036    | NP_055851    | O94919      | ENDD1_HUMAN           |                               | 0  | TTCATGGGCTTC  | 0.428 |
| - | 2  | 253                        | 1piz.2_Missense_I              | NM_032424    | NP_115800    | Q8NCY6      | K1826_HUMAN           |                               | 1  | TCTTTCCTTTTC  | 0.348 |
| - | 6  | 865                        | z.1_Missense_Mu                | NM_015065    | NP_055880    | Q8NEV8      | EXPH5_HUMAN           |                               | 5  | ACCATGTCTGTT  | 0.403 |
| + | 2  | 825                        | pns.2_3'UTR uc010rwu.1_5'Flank |              |              | P13591      | NCAM1_HUMAN           | lasmic (Potential).           | 1  | ACAGACAAAGG   | 0.502 |
| + | 3  | 1317                       | .L_uc001psz.1_Mi               | NM_005933    | NP_005924    | Q03164      | MLL1_HUMAN            |                               | 25 | AGGATGAGGAT   | 0.458 |
| - | 2  | 1260                       | zal.2_Missense_M               | NM_182557    | NP_872363    | Q86UU0      | BCL9L_HUMAN           |                               | 2  | CCCTGCCTGGG   | 0.642 |
| + | 4  | 846                        | PC4_uc001pup.2_                | NM_016146    | NP_057230    | Q9Y296      | TPPC4_HUMAN           |                               | 0  | TATCAGGTAAGT  | 0.428 |
| - | 4  | 1259                       | p.E118K TRIM2                  | NM_012101    | NP_036233    | Q14134      | TRI29_HUMAN           |                               | 4  | CAAATTCCTACC  | 0.557 |
| - | 1  | 681                        | V29_uc001pxa.2_I               | NM_012101    | NP_036233    | Q14134      | TRI29_HUMAN           |                               | 4  | GGCAGGACTTG   | 0.662 |
| + | 7  | 1667                       |                                | NM_005422    | NP_005413    | O75443      | TECTA_HUMAN           |                               | 10 | GTGCAGTGTGA   | 0.577 |
| + | 8  | 1965                       |                                | NM_025004    | NP_079280    | Q0P6D6      | CCD15_HUMAN           |                               | 2  | AGGTGTTCTTC   | 0.423 |
| + | 8  | 2007                       |                                | NM_025004    | NP_079280    | Q0P6D6      | CCD15_HUMAN           |                               | 2  | AGGACCAGGATT  | 0.438 |
| + | 1  | 596                        | 1_5'Flank NCAPD                | NM_052875    | NP_443107    | Q4G0F5      | VP26B_HUMAN           |                               | 0  | GGTCTCCGGGA   | 0.587 |
| + | 14 | 2015                       | p.E575G B4GALN                 | NM_173593    | NP_775864    | Q6L9W6      | B4GN3_HUMAN           | renal (Potential).            | 2  | TCTGGAGGTCA   | 0.597 |
| - | 9  | 857                        | issense_Mutation_              | NM_134424    | NP_602296    | P43351      | RAD52_HUMAN           |                               | 1  | CCACGGCGGAT   | 0.463 |
| - | 31 | 3059_3060 1qjs.1_Missense_ | NM_172364                      | NP_758952    | Q7Z3S7       | CA2D4_HUMAN | cellular (Potential). |                               | 1  | CTCGAGGGTTTC  | 0.614 |
| - | 4  | 751                        | sense_Mutation_p               | NM_001065    | NP_001056    | P19438      | TNR1A_HUMAN           | Extracellular (Potential).    | 3  | CACAGGAGAGG   | 0.587 |
| - | 5  | 570                        | .p.E118K KLRC1_                | NM_002259    | NP_002250    | P26715      | NGG2A_HUMAN           | Extracellular (Potential).    | 0  | TTCTTCTTACC   | 0.373 |
| - | 4  | 866                        | .p.P144S PRB1_u                | NM_005039    | NP_005030    | P04280      | PRP1_HUMAN            | P-P-[PAQ]-Q-[GE]-[GD]- [NI    | 0  | TGGAGGAGATCC  | 0.607 |
| - | 18 | 3878                       | af.1_Intron LRP6_              | NM_002336    | NP_002327    | O75581      | LRP6_HUMAN            | cellular (Potential).         | 12 | TTGGAGTTCTT   | 0.428 |
| - | 11 | 2367                       | .p.S707L PKP2_uc               | NM_004572    | NP_004563    | Q99959      | PKP2_HUMAN            | ARM 6.                        | 2  | GCAGCGAGATG   | 0.463 |

rs141998596

|   |    |      |                     |              |               |        |             |                             |    |                |       |
|---|----|------|---------------------|--------------|---------------|--------|-------------|-----------------------------|----|----------------|-------|
| + | 12 | 1431 | p.S310N IRAK4_u     | NM_001114182 | NP_001107654  | Q9NWZ3 | IRAK4_HUMAN | rotein kinase.              | 0  | TTGCTAGTCAATC  | 0.313 |
| - | 15 | 4315 |                     | NM_003482    | NP_003473     | O14686 | MLL2_HUMAN  | rich. PHD-type 4.           | 41 | TTGAGGGGTCGG   | 0.582 |
| + | 13 | 1843 | _p.C559Y TROAP_     | NM_005480    | NP_005471     | Q12815 | TROAP_HUMAN | ate tandem repeats. Cys-rii | 1  | GTCCCTGCTGTAC  | 0.597 |
| + | 13 | 1852 | _p.S562I TROAP_     | NM_005480    | NP_005471     | Q12815 | TROAP_HUMAN | ate tandem repeats. Cys-rii | 1  | TTAGGAGTGAGC   | 0.592 |
| - | 3  | 473  | _p.P94L POU6F1      | NM_002702    | NP_002693     | Q14863 | PO6F1_HUMAN | Gln/Pro-rich.               | 1  | GCTGGGGCACAG   | 0.612 |
| + | 3  | 873  | _uc009zmb.1_M       | NM_002135    | NP_002126     | P22736 | NR4A1_HUMAN |                             | 0  | TAGCCTCCAGCC   | 0.667 |
| + | 13 | 1367 | CKAP1L_uc010so      | NM_005337    | NP_005328     | P55160 | NCKPL_HUMAN |                             | 4  | TACCACCTTCAG   | 0.393 |
| - | 1  | 475  |                     | NM_001005493 | NP_001005493  | A6NF89 | OR6C6_HUMAN | Name=4; (Potential).        | 2  | TTCATGACCAATGC | 0.413 |
| + | 13 | 1330 | sil.2_Missense_M    | NM_001345    | NP_001336     | P23743 | DGKA_HUMAN  |                             | 4  | ACCATGGATGAT   | 0.507 |
| + | 7  | 726  | ank MYL6_uc001      | NM_002475    | NP_002466     | P14649 | MYL6B_HUMAN | EF-hand 3.                  | 0  | TTCAGCCTTCT    | 0.597 |
| + | 15 | 1954 | se_Mutation_p.S4    | NM_004990    | NP_004981     | P56192 | SYMC_HUMAN  |                             | 5  | ATAATTCTGAGCT  | 0.542 |
| + | 9  | 1288 | srs.1_Missense_Iv   | NM_001146258 | NP_001139730  | Q8TBX8 | PI42C_HUMAN | PIPK.                       | 3  | TAGCAGCTCATG   | 0.478 |
| - | 2  | 810  |                     | NR_026825    |               |        |             |                             | 0  | CAGCAGCAGCC    | 0.473 |
| + | 2  | 715  |                     | NM_018656    | NP_061126     | Q7Z769 | S35E3_HUMAN | ical; (Potential).          | 0  | GTTTTAGTTACAT  | 0.308 |
| + | 3  | 949  | _uc001svy.1_5'Flanl | NM_014505    | NP_055320     | Q86W47 | KCMB4_HUMAN | ellular (Potential).        | 0  | ACTCATGATGAG   | 0.493 |
| + | 16 | 3975 | V3_uc010sub.1_A     | NM_014903    | NP_055718     | Q8IVL0 | NAV3_HUMAN  | Ser-rich.                   | 17 | CTGAGGGTGTG    | 0.498 |
| - | 4  | 706  |                     | NM_014167    | NP_054886     | Q9P031 | TAP2_HUMAN  |                             | 0  | TGGCCCTTTTAC   | 0.343 |
| - | 1  | 569  | az.2_Missense_M     | NM_001946    | NP_001937     | Q16828 | DUS6_HUMAN  | Rhodanese.                  | 0  | TGTTGCCCAGC    | 0.632 |
| + | 2  | 415  |                     | NM_005230    | NP_005221     | P41970 | ELK3_HUMAN  | ETS.                        | 1  | TGTGGGGACTC    | 0.473 |
| - | 4  | 314  | ck.1_Missense_Mt    | NM_006166    | NP_006157     | P25208 | NFYB_HUMAN  | A domain.                   | 1  | TTCATGCTGTCC   | 0.299 |
| + | 12 | 2008 | cc.2_Missense_Mt    | NM_001093    | NP_001084     | O00763 | ACACB_HUMAN | in carboxylation.           | 8  | TGGGAGTGACTC   | 0.552 |
| + | 7  | 1118 | e_Mutation_p.Q2E    | NM_153348    | NP_699179     | Q8N3Y1 | FBXW8_HUMAN |                             | 3  | TAGTTTCAGTACC  | 0.408 |
| - | 8  | 2126 |                     | NM_000620    | NP_000611     | P29475 | NOS1_HUMAN  |                             | 7  | TGAGTTCAGAC    | 0.622 |
| - | 10 | 1536 |                     | NM_173598    | NP_775869     | Q6VAB6 | KSR2_HUMAN  | Pro-rich.                   | 15 | TTCGTGGAGGAG   | 0.642 |
| + | 4  | 1791 | _p.A586T EP400_U    | NM_015409    | NP_056224     | Q96L91 | EP400_HUMAN |                             | 12 | TAGAGGCCCAG    | 0.667 |
| - | 30 | 3693 | E_uc010tbq.1_RN     | NM_006231    | NP_006222     | Q07864 | DPOE1_HUMAN |                             | 8  | TACGAGGCCCA    | 0.592 |
| + | 3  | 252  | ase_Mutation_p.R1   | NM_152705    | NP_689918     | Q9Y2S0 | RPAC2_HUMAN |                             | 0  | TAAAAAGATTTCT  | 0.433 |
| + | 7  | 694  | ALTL_uc001utn.3_    | NM_194318    | NP_919299     | Q6Y288 | B3GLT_HUMAN | renal (Potential).          | 2  | TATTCCACTTGT   | 0.403 |
| + | 9  | 1401 |                     | NM_015678    | NP_056493     | Q8NFP9 | NBEA_HUMAN  |                             | 11 | TCAACCCAGCA    | 0.378 |
| - | 1  | 1376 |                     | NM_145203    | NP_660204     | Q8N752 | KC1AL_HUMAN |                             | 1  | TGCCTGTCTGG    | 0.453 |
| - | 1  | 1349 |                     | NM_145203    | NP_660204     | Q8N752 | KC1AL_HUMAN |                             | 1  | TCCGTGCCACTG   | 0.458 |
| + | 1  | 4519 |                     | NM_207361    | NP_997244     | Q5SZK8 | FREM2_HUMAN | ir (Potential). CSPG 10.    | 11 | ATAAATCCCCTC   | 0.418 |
| + | 11 | 1477 | z.3_Missense_Mut    | NM_024561    | NP_078837     | Q6N069 | NAA16_HUMAN | TPR 5.                      | 1  | CACTTTGATAAAC  | 0.343 |
| - | 13 | 1257 | Tl1_uc001uyx.1_3    | NM_001002264 | NP_001002264  | Q96J88 | ESIP1_HUMAN |                             | 1  | TGTTGAGGAATCA  | 0.403 |
| + | 8  | 1010 | uzs.2_Missense_A    | NM_018559    | NP_061029     | Q8IXQ4 | K1704_HUMAN |                             | 2  | TTGACCGTGAT    | 0.348 |
| - | 1  | 1154 | lvce.2_Nonsense     | NM_001162498 | NP_0011155970 | P43657 | LPAR6_HUMAN | Name=1; (P p.?(4)           | 4  | TACCCATACAA    | 0.403 |
| + | 10 | 2267 | adh.2_Missense_A    | NM_031915    | NP_114121     | Q96T68 | SETB2_HUMAN | SET.                        | 2  | TAGAACTGCTA    | 0.338 |
| + | 1  | 769  | 177I TRIM13_uc0     | NM_173605    | NP_775876     | Q8N5I3 | KCNRG_HUMAN |                             | 0  | TACCTGGTTTTCC  | 0.438 |
| + | 9  | 2077 | _p.R626H CKAP2_     | NM_001098525 | NP_001091995  | Q8VWK9 | CKAP2_HUMAN |                             | 2  | TGAGAGTTCTCT   | 0.363 |
| - | 11 | 2500 | _p.I545V DACH1_     | NM_080759    | NP_542937     | Q9UI36 | DACH1_HUMAN |                             | 1  | CTTGATTGTCC    | 0.438 |
| + | 2  | 390  | _Mutation_p.V29I F  | NM_006346    | NP_006337     | Q8WXW3 | PIBF1_HUMAN |                             | 2  | TCAACAGTTCCT   | 0.343 |
| - | 15 | 2962 | C1D4_uc010aer.2     | NM_014832    | NP_055647     | O60343 | TBCD4_HUMAN |                             | 6  | TTCTGGACTGG    | 0.323 |
| + | 19 | 1299 | z_Mutation_p.D35    | NM_144777    | NP_659001     | O95171 | SECL_HUMAN  | imate tandem repeats. 7.    | 5  | AAGTGGATCCTC   | 0.333 |
| - | 1  | 2685 |                     | NM_052910    | NP_443142     | Q96PX8 | SLIK1_HUMAN | ellular (Potential).        | 5  | TCTCCGCCAAC    | 0.567 |
| - | 2  | 2755 | afe.1_Missense_Iv   | NM_032229    | NP_115605     | Q9H5Y7 | SLIK6_HUMAN | lasmic (Potential).         | 3  | TCTGAAGTTCCC   | 0.403 |
| + | 5  | 1589 |                     | NM_004466    | NP_004457     | P78333 | GPC5_HUMAN  |                             | 5  | TGCTAATGAATT   | 0.373 |
| + | 3  | 1006 | nse_Mutation_p.Ef   | NM_144778    | NP_659002     | Q5VZF2 | MBNL2_HUMAN | T3H1-type 2.                | 0  | CGAGAGAGAAC    | 0.393 |

|   |    |       |                    |              |              |        |             |                              |    |              |       |             |
|---|----|-------|--------------------|--------------|--------------|--------|-------------|------------------------------|----|--------------|-------|-------------|
| - | 4  | 1304  |                    | NM_000452    | NP_000443    | Q12908 | NTCP2_HUMAN | ical; (Potential).           | 4  | TAACCCGCCACA | 0.433 |             |
| - | 4  | 1222  |                    | NM_000452    | NP_000443    | Q12908 | NTCP2_HUMAN | ical; (Potential).           | 4  | CCACAGCTATGA | 0.458 |             |
| + | 1  | 781   |                    | NM_002929    | NP_002920    | Q15835 | RK_HUMAN    | rotein kinase.               | 2  | AGAAGCGGCTG  | 0.657 |             |
| + | 1  | 439   |                    | NM_172194    | NP_751944    | Q8NH05 | OR4Q3_HUMAN | Name=4; (Potential).         | 3  | TTGGTTCTTGCC | 0.493 |             |
| - | 22 | 3198  | i.1_RNA TEP1_uc    | NM_007110    | NP_009041    | Q99973 | TEP1_HUMAN  |                              | 5  | GTGCGGCCTCT  | 0.537 |             |
| - | 1  | 457   |                    | NM_001001968 | NP_001001968 | Q8NH40 | OR6S1_HUMAN | Name=4; (Potential).         | 2  | CCCCCCCACCC  | 0.607 | rs150354315 |
| - | 7  | 1225  | var.1_Splice_Site_ | NM_020920    | NP_065971    | Q9HCK8 | CHD8_HUMAN  |                              | 10 | CCTCACCTCCT  | 0.254 |             |
| + | 7  | 1095  | OX4_uc010tlu.1_I   | NM_014828    | NP_055643    | O94842 | TOX4_HUMAN  |                              | 1  | CAGCTTCAATAG | 0.537 |             |
| + | 2  | 497   | se_Mutation_p.A1   | NM_182908    | NP_878912    | Q13268 | DHRS2_HUMAN |                              | 2  | CTGTGCTAGGC  | 0.597 |             |
| + | 3  | 1526  | on_p.A94V NFATC    | NM_004554    | NP_004545    | Q14934 | NFAC4_HUMAN | RHD.                         | 3  | CTCTGCCCTAC  | 0.612 |             |
| + | 2  | 2631  | i.2_Missense_Mut   | NM_001173    | NP_001025226 | Q13017 | RHG05_HUMAN |                              | 5  | TTTCCACCTTCC | 0.418 |             |
| - | 1  | 1385  |                    | NM_032135    | NP_115511    | Q5H9T9 | FSCB_HUMAN  | Pro-rich.                    | 9  | CTGAAGGGGAC  | 0.493 | rs17857204  |
| + | 11 | 2029  | inf.2_Missense_Mi  | NM_020937    | NP_065988    | Q81YD8 | FANCM_HUMAN |                              | 7  | ATCACACATGGT | 0.393 |             |
| + | 20 | 5224  | we.3_Missense_M    | NM_020937    | NP_065988    | Q81YD8 | FANCM_HUMAN |                              | 7  | CAGTGCCTTCT  | 0.393 |             |
| - | 5  | 363   | nj.1_Intron POLE2  | NM_002692    | NP_002683    | P56282 | DPOE2_HUMAN |                              | 2  | ATTGGTGCAGC  | 0.418 |             |
| + | 2  | 594   | sense_Mutation_p   | NM_014315    | NP_055130    | Q9Y2U9 | KLDC2_HUMAN | Kelch 1.                     | 1  | GCCTAGAGAAG  | 0.279 |             |
| + | 2  | 1103  |                    | NM_001663    | NP_001654    | P62330 | ARF6_HUMAN  |                              | 0  | GGACGGACTCT  | 0.522 |             |
| - | 18 | 2524  | xz.2_Missense_Mi   | NM_004196    | NP_004187    | Q00532 | CDKL1_HUMAN | rotein kinase.               | 2  | CTCAGGGGAGC  | 0.587 |             |
| - | 12 | 2899  | e_Mutation_p.Q88   | NM_007361    | NP_031387    | Q14112 | NID2_HUMAN  | EGF-like 4.                  | 7  | GCACTGGTGCC  | 0.567 |             |
| - | 14 | 1718  | ie_Mutation_p.M41  | NM_020784    | NP_065835    | Q9P2K2 | TXD16_HUMAN | Thioredoxin.                 | 0  | AAATGCCATGGA | 0.318 |             |
| - | 2  | 529   |                    | NM_021136    | NP_066959    | Q16799 | RTN1_HUMAN  |                              | 4  | ATGAGAGATGTG | 0.458 |             |
| - | 2  | 450   | 2_5'Flank SLC38A   | NM_020810    | NP_065861    | Q32P41 | TRMT5_HUMAN |                              | 3  | CTGGGCGCTGC  | 0.378 |             |
| + | 49 | 10131 | p.E3301K SYNE2     | NM_015180    | NP_055995    | Q8WXH0 | SYNE2_HUMAN | ic (Potential). Potential.   | 14 | AACAAGAGGAA  | 0.448 |             |
| - | 2  | 191   | on_p.T3I ZBTB25    | NM_006977    | NP_008908    | P24278 | ZBT25_HUMAN | BTB.                         | 2  | TGGCAGTGTCC  | 0.368 |             |
| - | 1  | 502   | i'UTR VT11B_uc00   | NM_006370    | NP_006361    | Q9UEU0 | VT11B_HUMAN | Cytoplasmic (Potential).     | 0  | CCCCGCCGTCC  | 0.701 |             |
| + | 3  | 1320  |                    | NM_152331    | NP_689544    | Q8N9L9 | ACOT4_HUMAN |                              | 0  | GTTACCCTGGG  | 0.507 |             |
| + | 2  | 1432  |                    | NM_018228    | NP_060698    | Q9H8Y1 | VRTN_HUMAN  |                              | 0  | CATCTCCCTGA  | 0.572 |             |
| - | 2  | 3182  | ie_Mutation_p.R9E  | NM_001040108 | NP_001035197 | Q9UHC1 | MLH3_HUMAN  |                              | 2  | AGGCTCTGATA  | 0.388 |             |
| + | 2  | 456   | 1xrh.2_Missense_I  | NM_001042430 | NP_001035895 | Q53FD0 | F164C_HUMAN |                              | 1  | CAGCAAGATCCA | 0.473 |             |
| - | 21 | 2816  | p.P107S NEK9_uc    | NM_033116    | NP_149107    | Q8TD19 | NEK9_HUMAN  | ch. Interaction with NEK6.   | 5  | CGCAGGAGGAG  | 0.537 |             |
| + | 20 | 2065  | lasq.1_Missense_I  | NM_020431    | NP_065164    | Q9P1W3 | TM63C_HUMAN | ical; (Potential).           | 0  | TTGCCCATCAT  | 0.547 |             |
| - | 7  | 1728  | p.R429H KCNK1C     | NM_021161    | NP_066984    | P57789 | KCNKA_HUMAN | lasmic (Potential).          | 5  | TCAGCGCAGG   | 0.602 |             |
| + | 8  | 1325  | ise_Mutation_p.G1  | NM_001102366 | NP_001095836 | Q7Z3D6 | CN159_HUMAN |                              | 3  | CGGAGGTGAGC  | 0.612 |             |
| - | 10 | 978   |                    | NM_024764    | NP_079040    | Q9H7T0 | CTSRB_HUMAN |                              | 5  | TGCCCTGGAAA  | 0.333 |             |
| - | 21 | 6616  | uf.1_Missense_Mu   | NM_004239    | NP_004230    | Q15643 | TRIPB_HUMAN |                              | 13 | GCCCGGGCCCA  | 0.507 |             |
| - | 3  | 821   | ion_p.S198N DDX    | NM_020414    | NP_065147    | Q9GZR7 | DDX24_HUMAN | inding. ATP (By similarity). | 4  | TTCCCACTTCT  | 0.408 |             |
| - | 20 | 3519  |                    | NM_018036    | NP_060506    | Q96BY7 | ATG2B_HUMAN |                              | 3  | TGAGAGAAAAC  | 0.363 |             |
| + | 1  | 234   | l PPP2R5C_uc001    | NM_002719    | NP_002710    | Q13362 | 2A5G_HUMAN  |                              | 2  | ATTCGAGGTAAG | 0.468 |             |
| + | 36 | 7593  | iH1_uc001ykt.1_i   | NM_001376    | NP_001367    | Q14204 | DYHC1_HUMAN |                              | 10 | ACCATCCCGAC  | 0.622 |             |
| - | 11 | 1379  | .GE_uc001yih.2_lr  | NM_014226    | NP_055041    | Q9UQ07 | MOK_HUMAN   |                              | 4  | CAAGGTCTCA   | 0.577 |             |
| - | 12 | 2651  | 'P1R13B_uc001yo    | NM_015316    | NP_056131    | Q96KQ4 | ASPP1_HUMAN | Pro-rich.                    | 1  | GGCATCTGATGA | 0.572 |             |
| + | 1  | 2347  |                    | NM_018958    | NP_061831    | Q9NZP6 | CO002_HUMAN |                              | 8  | CCACTTCCATTT | 0.493 |             |
| - | 18 | 2672  | bl.1_Missense_Mu   | NM_004667    | NP_004658    | O95714 | HERC2_HUMAN |                              | 13 | CAGACCTAAAC  | 0.542 |             |
| + | 63 | 9078  | r.2_Missense_Mut   | NM_001036    | NP_001027    | Q15413 | RYR3_HUMAN  | lame=M'; (Potential).        | 10 | GACGTCCATCT  | 0.473 |             |
| + | 7  | 2622  | p.E851K C15orf5E   | NM_175741    | NP_786883    | Q86Y26 | NUT_HUMAN   |                              | 30 | ATCAAGAACAG  | 0.517 |             |
| + | 2  | 333   | uc001zmk.3_RNA     | NM_002875    | NP_002866    | Q06609 | RAD51_HUMAN |                              | 0  | AATGCAGATACT | 0.378 |             |
| + | 4  | 869   |                    | NM_020857    | NP_065908    | Q9P253 | VPS18_HUMAN |                              | 3  | AGCCAGCGAAG  | 0.602 |             |

|   |    |           |                   |              |              |        |              |                               |    |                |       |             |
|---|----|-----------|-------------------|--------------|--------------|--------|--------------|-------------------------------|----|----------------|-------|-------------|
| - | 7  | 1051      | 080_uc010ucu.1_F  | NM_017553    | NP_060023    | Q9ULG1 | INO80_HUMAN  | f conserved components At     | 4  | 3CCATACTTTCCCT | 0.468 |             |
| - | 23 | 4537      | _p.D714N STRC_u   | NM_153700    | NP_714544    | Q7RTU9 | STRC_HUMAN   |                               | 0  | :AAAGTCTGAGAC  | 0.547 | rs149597053 |
| + | 11 | 1522      | _p.F445I SQRD_L   | NM_021199    | NP_067022    | Q9Y6N5 | SQRD_HUMAN   |                               | 1  | AAGTTGTTTCATC  | 0.488 |             |
| - | 64 | 8358      | N1_uc010beo.1_R   | NM_000138    | NP_000129    | P35555 | FBN1_HUMAN   | 47; calcium-binding.          | 3  | \AGTAACCAGGT   | 0.493 |             |
| - | 11 | 1202      | xm.2_Nonsense_f   | NM_152647    | NP_689860    | Q96M60 | CO033_HUMAN  |                               | 1  | \GTTTCCAGTGG   | 0.318 |             |
| + | 8  | 1075      | 0D3_uc010bfc.1_F  | NM_014547    | NP_055362    | Q9NYL9 | TMOD3_HUMAN  |                               | 1  | .CCCTGGCAGAG   | 0.463 |             |
| - | 18 | 2717      | p.P859S SLTM_uc   | NM_024755    | NP_079031    | Q9NWH9 | SLTM_HUMAN   | Arg/Glu-rich.                 | 1  | 'GGAAGGATTGG   | 0.502 |             |
| - | 4  | 263       | 'A2_uc002agm.2_l  | NM_001136015 | NP_001129487 | P07355 | ANXA2_HUMAN  |                               | 1  | 3CTCAGCATCAA   | 0.403 |             |
| + | 9  | 1029_1030 | se_Mutation_p.C2  | NM_006537    | NP_006528    | Q9Y6I4 | UBP3_HUMAN   |                               | 1  | 'AACAAGTGTTC   | 0.431 |             |
| - | 8  | 1042      | PX_uc010bhg.1_N   | NM_006660    | NP_006651    | O76031 | CLPX_HUMAN   |                               | 0  | 'AGCCTGAGTCA   | 0.393 |             |
| - | 9  | 2447      |                   | NM_003613    | NP_003604    | O75339 | CILP1_HUMAN  |                               | 7  | 3CCTCACCTTAA   | 0.522 |             |
| - | 4  | 553       | _p.D41N AAGAB_    | NM_024666    | NP_078942    | Q6PD74 | AAGAB_HUMAN  |                               | 0  | 'ACCATCCTCCTC  | 0.353 |             |
| - | 1  | 669       | _uc002ard.2_RNA   | NM_033429    | NP_219501    | Q96GE6 | CALL4_HUMAN  |                               | 0  | CGCCACCTGGG    | 0.597 |             |
| - | 3  | 463       | 02aud.3_RNA PA    | NM_020214    | NP_064599    | Q2NL67 | PARP6_HUMAN  |                               | 0  | 'GATGTCTAGTC   | 0.453 |             |
| + | 12 | 1171      | _p.V330I CSK_uc   | NM_001127190 | NP_001120662 | P41240 | CSK_HUMAN    | rotein kinase.                | 3  | 3CCAAGTTCAGC   | 0.602 |             |
| + | 14 | 1388      | p.G402D CSK_uc    | NM_001127190 | NP_001120662 | P41240 | CSK_HUMAN    | rotein kinase.                | 3  | \GAAGGGCTACA   | 0.657 |             |
| - | 9  | 1056      | I2C1_uc010bkk.2_  | NM_006715    | NP_006706    | Q9NTJ4 | MA2C1_HUMAN  |                               | 0  | 3CCTCACCATGG   | 0.612 |             |
| - | 11 | 985       |                   | NR_027024    |              |        |              |                               | 0  | .CCTGGGATTGG   | 0.567 |             |
| - | 6  | 557       | 'bgu.1_Missense_l | NM_024580    | NP_078856    | Q7Z2Z2 | ETUD1_HUMAN  |                               | 1  | 3CAGAACTGCCT   | 0.363 |             |
| - | 4  | 1761      | 's.1_Missense_Mu  | NM_001717    | NP_001708    | Q01954 | BNC1_HUMAN   |                               | 3  | TTGTGTCTTTTC   | 0.468 |             |
| + | 14 | 1753      | p.G510E ADAMTS    | NM_207517    | NP_997400    | P82987 | ATL3_HUMAN   | SP type-1 3.                  | 27 | .CCGCGGAGAGC   | 0.458 |             |
| + | 12 | 5113      | e_Mutation_p.A15f | NM_013227    | NP_037359    | E7EX88 | E7EX88_HUMAN |                               | 3  | 3TTCAGCTTCTG   | 0.537 |             |
| - | 6  | 810       | nn.2_Missense_M   | NM_005928    | NP_005919    | Q08431 | MFGM_HUMAN   | 5/8 type C 2.                 | 1  | 3CAGGGGATTGG   | 0.577 |             |
| + | 10 | 1544      | utation_p.V477M l | NM_006122    | NP_006113    | P49641 | MA2A2_HUMAN  | renal (Potential).            | 3  | CAGGGGTGGAG    | 0.557 |             |
| + | 6  | 1063      | _p.G163D CHD2_L   | NM_001271    | NP_001262    | O14647 | CHD2_HUMAN   |                               | 2  | \ACAAGGCACCA   | 0.398 |             |
| + | 26 | 3951      | o.1_Missense_Mul  | NM_001271    | NP_001262    | O14647 | CHD2_HUMAN   |                               | 2  | .GGAAGGACCTC   | 0.532 |             |
| + | 2  | 1951      | urj.1_Missense_M  | NM_021005    | NP_066285    | P24468 | COT2_HUMAN   | similarity). Ligand-binding ( | 3  | \AGGTGGCCCTG   | 0.667 |             |
| + | 1  | 736       |                   | NM_001001674 | NP_001001674 | Q8NGB8 | O4F15_HUMAN  | Name=6; (Potential).          | 0  | 3TCACTGTGGTC   | 0.428 |             |
| + | 9  | 1943      | p.2_Missense_Mul  | NR_003659    |              |        |              |                               | 0  | 3GCATCGGCAAG   | 0.652 |             |
| + | 2  | 196       | .3_5'UTR NUBP2_   | NM_012225    | NP_036357    | Q9Y5Y2 | NUBP2_HUMAN  |                               | 0  | .GCTGGCCCTGG   | 0.687 |             |
| + | 3  | 641       | xc.2_Missense_Mu  | NM_005262    | NP_005253    | P55789 | ALR_HUMAN    | R sulfhydryl oxidase.         | 0  | 'CAAAAGTGGATC  | 0.607 |             |
| + | 12 | 1352      | pe.1_Missense_Ml  | NM_001761    | NP_001752    | P41002 | CCNF_HUMAN   |                               | 2  | 3TAGTCCCTGTG   | 0.672 |             |
| + | 14 | 1623      | pe.1_Missense_Ml  | NM_001761    | NP_001752    | P41002 | CCNF_HUMAN   |                               | 2  | GACCGCCGTGA    | 0.597 |             |
| - | 4  | 1376      |                   | NM_000243    | NP_000234    | O15553 | MEFV_HUMAN   |                               | 6  | 3CTTCTCCTCC    | 0.532 |             |
| + | 6  | 1136      | 75A_uc002cuv.3_l  | NM_153028    | NP_694573    | Q96N20 | ZN75A_HUMAN  | 2H2-type 2.                   | 1  | TCAGATCTTAATA  | 0.353 |             |
| - | 22 | 4261      |                   | NM_002705    | NP_002696    | O60437 | PEPL_HUMAN   | Potential.                    | 6  | :CAGCCGCCGCA   | 0.706 | rs34645685  |
| + | 9  | 1207      | za.2_Missense_N   | NM_024109    | NP_077014    | Q9BUU2 | MET22_HUMAN  |                               | 0  | TTGACTGATGCT   | 0.483 |             |
| - | 13 | 4596      | 31350N GRIN2A_u   | NM_001134407 | NP_001127879 | Q12879 | NMDE1_HUMAN  | lasmic (Potential).           | 45 | 'GCTGTCTCCCA   | 0.537 |             |
| - | 6  | 1160      |                   | NM_144674    | NP_653275    | Q96M29 | TEKT5_HUMAN  | Potential.                    | 2  | GCAGCGTCTGCC   | 0.632 | rs142647849 |
| + | 15 | 2800      | _p.P832L MKL2_u   | NM_014048    | NP_054767    | Q9ULH7 | MKL2_HUMAN   |                               | 5  | \AGATCCCCCCC   | 0.562 |             |
| - | 3  | 990       |                   | NM_022166    | NP_071449    | Q86Y38 | XYLT1_HUMAN  | renal (Potential).            | 4  | CGAGGGGGCAG    | 0.602 |             |
| + | 17 | 3313      | gd.1_Missense_Ml  | NM_001105248 | NP_001098718 | Q6UXY8 | TMC5_HUMAN   | ical; (Potential).            | 1  | 3CATCACCATCTC  | 0.453 | rs138670843 |
| + | 20 | 3624      | p.D959N TMC5_u    | NM_001105248 | NP_001098718 | Q6UXY8 | TMC5_HUMAN   | ellular (Potential).          | 1  | 3TGCAGGATATG   | 0.448 |             |
| - | 7  | 1138      | SM1_uc010bwg.1    | NM_052956    | NP_443188    | Q08AH1 | ACSM1_HUMAN  |                               | 2  | 3TCCGTCTTTTCT  | 0.448 |             |
| - | 42 | 6092      |                   | NM_017539    | NP_060009    | Q8TD57 | DYH3_HUMAN   |                               | 18 | TCTTTGGTGATA   | 0.393 |             |
| - | 1  | 702       | KSCAN2_uc002do    | NM_001012981 | NP_001012999 | Q63HK3 | ZKSC2_HUMAN  | SCAN box.                     | 4  | 'CTTCTCGGGTA   | 0.512 |             |
| + | 4  | 241       |                   | NM_015202    | NP_056017    | O60303 | K0556_HUMAN  |                               | 8  | 3TCTATGTCAACC  | 0.502 |             |

|   |    |      |                    |              |              |        |             |                            |    |               |       |             |
|---|----|------|--------------------|--------------|--------------|--------|-------------|----------------------------|----|---------------|-------|-------------|
| - | 18 | 2977 | p.P812S XPO6_u     | NM_015171    | NP_055986    | Q96QU8 | XPO6_HUMAN  |                            | 2  | AGCTGGAAGAC   | 0.527 |             |
| - | 6  | 1122 | _uc002dqm.2_Mi     | NM_177534    | NP_803878    | P50225 | ST1A1_HUMAN | PAPS.                      | 0  | CTCCTCTGGCA   | 0.552 |             |
| + | 10 | 1315 | 10bzc2_intron COI  | NM_007074    | NP_009005    | P31146 | COR1A_HUMAN |                            | 0  | CGTACCCCAAA   | 0.706 |             |
| + | 34 | 8972 | CAP_uc002dzc.1_    | NM_006662    | NP_006653    | Q6ZRS2 | SRCAP_HUMAN | hook 1. Pro-rich.          | 4  | GGAGGCCCCCC   | 0.612 |             |
| + | 14 | 4998 |                    | NM_014712    | NP_055527    | O15047 | SET1A_HUMAN | action with CFP1.          | 3  | ACTCAGAGGAC   | 0.458 |             |
| + | 3  | 1224 | C5_uc002eca.3_h    | NM_001105247 | NP_001098717 | Q96C12 | ARMC5_HUMAN | ARM 3.                     | 1  | CCTGGCCTTGG   | 0.667 |             |
| - | 4  | 701  | ETO2_uc002ees.1    | NM_018092    | NP_060562    | Q8NC67 | NETO2_HUMAN | lar (Potential). CUB 1.    | 0  | AACTTCCAAGT   | 0.393 |             |
| + | 3  | 903  | ie_Mutation_p.Y12  | NM_024335    | NP_077311    | P78412 | IRX6_HUMAN  |                            | 6  | GGAGCCTATTAT  | 0.498 |             |
| - | 10 | 1420 | iq.2_Missense_Mu   | NM_001143685 | NP_001137157 | Q6NT32 | EST5A_HUMAN |                            | 0  | CACCTCTGTGA   | 0.532 |             |
| + | 2  | 255  | rho.1_Missense_M   | NM_020312    | NP_064708    | O75208 | COQ9_HUMAN  |                            | 1  | ACCCCCAGGT    | 0.493 |             |
| + | 2  | 290  | Ovid.1_Missense_I  | NM_014157    | NP_054876    | Q9H0I3 | CC113_HUMAN |                            | 0  | TATCAGCAGCA   | 0.403 |             |
| + | 6  | 533  | Ovig.1_Missense_I  | NM_022910    | NP_075061    | Q9ULP0 | NDRG4_HUMAN |                            | 1  | CCAATGGCAAA   | 0.657 |             |
| - | 12 | 1394 | Ovis.1_Missense_I  | NM_006141    | NP_006132    | O43237 | DC1L2_HUMAN |                            | 4  | GGCTGTGCTCT   | 0.547 |             |
| - | 8  | 1059 | Ovis.1_Missense_I  | NM_006141    | NP_006132    | O43237 | DC1L2_HUMAN |                            | 4  | CGGGAGGTTTC   | 0.279 |             |
| - | 3  | 1236 | p.S134F TPPP3_u    | NM_016140    | NP_057224    | Q9BW30 | TPPP3_HUMAN |                            | 1  | TGTGGGAGCCC   | 0.597 |             |
| - | 2  | 1160 | p.A109T TPPP3_u    | NM_016140    | NP_057224    | Q9BW30 | TPPP3_HUMAN |                            | 1  | TATGGCTGGCT   | 0.622 |             |
| + | 3  | 255  | 2L_uc010vkk.1_M    | NM_017803    | NP_060273    | Q9NX74 | DUS2L_HUMAN |                            | 0  | TATGGAGCGGAC  | 0.498 |             |
| + | 5  | 473  | .A66V PRMT7_uc     | NM_019023    | NP_061896    | Q9NVM4 | ANM7_HUMAN  |                            | 0  | GAAGGCCCTTGG  | 0.522 |             |
| - | 16 | 2396 | vlu.1_Splice_Site  | NM_001605    | NP_001596    | P49588 | SYAC_HUMAN  |                            | 1  | GCTCACCTTCTC  | 0.557 |             |
| + | 9  | 1611 | p.1_intron DHX38_  | NM_014003    | NP_054722    | Q92620 | PRP16_HUMAN |                            | 1  | GGATGGGCGCA   | 0.502 |             |
| - | 7  | 1534 | fgj.2_Missense_Mi  | NM_052892    | NP_443124    | Q7Z442 | PK1L2_HUMAN | racellular (Potential).    | 3  | AACCGAACAGC   | 0.577 |             |
| - | 6  | 1116 | gj.2_Nonsense_M    | NM_052892    | NP_443124    | Q7Z442 | PK1L2_HUMAN | racellular (Potential).    | 3  | TGAATCCACAG   | 0.542 |             |
| + | 3  | 653  |                    | NM_022041    | NP_071324    | Q9H2C0 | GAN_HUMAN   | BACK.                      | 2  | ACGGAAGAATTC  | 0.423 | rs119485095 |
| + | 13 | 2182 | nt.1_Missense_Mi   | NM_001257    | NP_001248    | P55290 | CAD13_HUMAN | Cadherin 5.                | 1  | AAGTGGACTGC   | 0.542 |             |
| - | 2  | 852  | hu.1_Missense_M    | NM_172347    | NP_758857    | Q8TDN1 | KCNG4_HUMAN |                            | 3  | GGTCGGGCATG   | 0.522 |             |
| - | 12 | 1721 | :CHC14_uc002fkb    | NM_015144    | NP_055959    | Q8WYQ9 | ZCH14_HUMAN |                            | 2  | CGGACCGGGGC   | 0.557 | rs147152692 |
| + | 6  | 772  | _p.S191N BANP_u    | NM_079837    | NP_524576    | Q8N9N5 | BANP_HUMAN  | IX1 and HDAC1 (By similar  | 0  | GGCCAGCGACT   | 0.647 |             |
| - | 5  | 655  | _Site_p.R195_splic | NM_000512    | NP_000503    | P34059 | GALNS_HUMAN |                            | 2  | CATTACCTGCC   | 0.607 |             |
| - | 9  | 2020 | ifnc.1_Missense_I  | NM_013275    | NP_037407    | Q6UB99 | ANR11_HUMAN | Ser-rich.                  | 6  | AGGAGGCAGAG   | 0.632 |             |
| + | 4  | 577  | ii.2_Missense_Mut  | NM_003119    | NP_003110    | Q9UQ90 | SPG7_HUMAN  | intermembrane (Potential). | 0  | AGGTGGTGCTI   | 0.637 |             |
| + | 5  | 752  | ii.2_Missense_Mut  | NM_003119    | NP_003110    | Q9UQ90 | SPG7_HUMAN  | intermembrane (Potential). | 0  | AGTTTCTACAA   | 0.408 |             |
| - | 18 | 1727 | pn.1_Missense_Mi   | NM_000135    | NP_000126    | O15360 | FANCA_HUMAN |                            | 6  | ATGTTCCCGTA   | 0.557 |             |
| + | 3  | 300  | i.1_5'UTR TUBB3_   | NM_006086    | NP_006077    | Q13509 | TBB3_HUMAN  |                            | 3  | GCTCAGGGGCC   | 0.582 |             |
| - | 15 | 1704 | VPS53_uc002frm     | NM_018289    | NP_060759    | Q5VIR6 | VPS53_HUMAN |                            | 0  | TGTTCTGAAG    | 0.453 |             |
| + | 5  | 583  | _p.G149E FAM57/    | NM_024792    | NP_079068    | Q8TBR7 | FA57A_HUMAN | helical; (Potential).      | 0  | GAAATGGAATCC  | 0.542 |             |
| - | 4  | 382  | ru.2_Missense_Mi   | NM_016080    | NP_057164    | Q9HC38 | GLOD4_HUMAN |                            | 0  | ATTACCATAAAC  | 0.269 |             |
| - | 8  | 1333 | z.2_Missense_Mut   | NM_022463    | NP_071908    | Q6DKJ4 | NXN_HUMAN   |                            | 4  | CGGGGTGATC    | 0.572 |             |
| - | 3  | 317  | NA_uc010cju.2_5    | NM_006224    | NP_006215    | Q00169 | PIPNA_HUMAN |                            | 1  | CTGCCCACTTI   | 0.507 |             |
| + | 8  | 1056 | M2_uc010vqw.1_h    | NM_001098509 | NP_001091979 | O43147 | SGSM2_HUMAN |                            | 0  | GTGGACCCCA    | 0.607 |             |
| + | 17 | 2237 | .1_Missense_Mut    | NM_001098509 | NP_001091979 | O43147 | SGSM2_HUMAN | ab-GAP TBC.                | 0  | CTCCGGGCACC   | 0.612 |             |
| - | 5  | 1535 | _p.Q279* ZNF232_   | NM_014519    | NP_055334    | Q9UNY5 | ZN232_HUMAN |                            | 2  | CATCTGCCTGA   | 0.453 |             |
| + | 3  | 451  | ie_Mutation_p.S84  | NM_001042    | NP_001033    | P14672 | GTR4_HUMAN  | Name=2; (Potential).       | 0  | CCTCTCCGTGG   | 0.617 |             |
| - | 4  | 3066 | nd.3_Missense_Mi   | NM_001128833 | NP_001122305 | Q9P1Z0 | ZBTB4_HUMAN |                            | 4  | AAGTTACTGAAG  | 0.602 |             |
| + | 60 | 9346 | nm.1_Missense_I    | NM_020877    | NP_065928    | Q9P225 | DYH2_HUMAN  | k (By similarity).         | 13 | ATATAGGAGAGAT | 0.537 |             |
| + | 2  | 1067 | i2gjp.2_Missense_  | NM_053051    | NP_444279    | Q8N137 | CNTRB_HUMAN |                            | 2  | CGGAGCCACG    | 0.582 |             |
| + | 16 | 1975 | S_uc010cnw.1_Mi    | NM_012393    | NP_036525    | O15067 | PUR4_HUMAN  |                            | 5  | GAAATGGCCAG   | 0.597 |             |
| - | 4  | 758  | :5A35_uc002gkt.2   | NM_201520    | NP_958928    | Q3KQZ1 | S2535_HUMAN | Solcar 3.                  | 0  | CATCTGTGGGC   | 0.582 |             |



|   |    |      |                      |              |              |        |             |                              |     |                 |       |
|---|----|------|----------------------|--------------|--------------|--------|-------------|------------------------------|-----|-----------------|-------|
| - | 1  | 704  |                      | NM_152599    | NP_689812    | Q8IWD5 | MFS6L_HUMAN |                              | 1   | IGAGGAGAGCTT    | 0.552 |
| - | 19 | 2285 | uc002gml.1_intron    | NM_017533    | NP_060003    | Q9Y623 | MYH4_HUMAN  | rosin head-like.             | 13  | ACAAACCTCTGT    | 0.403 |
| - | 12 | 1169 | _Mutation_p.E347I    | NM_001100112 | NP_001093582 | Q9UKX2 | MYH2_HUMAN  | rosin head-like.             | 14  | CTTTTCTTCATT    | 0.418 |
| - | 4  | 480  | _p.P144L PMP22_      | NM_153322    | NP_696997    | Q01453 | PMP22_HUMAN | al; (By similarity).         | 0   | CCAGGGGGAAG     | 0.592 |
| - | 6  | 972  | 2gps.1_Splice_Site   | NM_006311    | NP_006302    | O75376 | NCOR1_HUMAN |                              | 5   | AGCTTACCCGAT    | 0.448 |
| + | 3  | 5003 | i.1_Missense_Mut     | NM_030665    | NP_109590    | Q7Z5J4 | RAI1_HUMAN  |                              | 2   | CCCCGGAGGGC     | 0.657 |
| - | 7  | 873  | _p.S194F TOM1L2      | NM_001082968 | NP_001076437 | Q6ZVM7 | TM1L2_HUMAN | GAT.                         | 0   | ATCTCAGACATG    | 0.527 |
| - | 6  | 2473 | 5A10_uc002gut.1_     | NM_001039999 | NP_001035088 | A6ND36 | FA83G_HUMAN |                              | 2   | TCATGGGGCGG     | 0.652 |
| - | 2  | 948  | v11_uc002gyq.2_      | NM_003876    | NP_003867    | P17152 | TMM11_HUMAN |                              | 0   | CAGTCTCTTTC     | 0.542 |
| - | 22 | 2935 |                      | NM_000625    | NP_000616    | P35228 | NOS2_HUMAN  | -binding FR-type.            | 4   | AGACACCCGCA     | 0.577 |
| - | 28 | 5341 | 02hbt.2_Splice_Sit   | NM_014680    | NP_055495    | Q14667 | K0100_HUMAN |                              | 4   | TGAATACCTTCC    | 0.398 |
| - | 6  | 828  | _p.P42S CORO6_       | NM_032854    | NP_116243    | Q6QEF8 | CORO6_HUMAN | WD 5.                        | 0   | GTCCGGATCGT     | 0.627 |
| + | 15 | 3305 | e_Mutation_p.G85I    | NM_001304    | NP_001295    | O75976 | CBPD_HUMAN  | ntial); Carboxypeptidase-lik | 2   | FAGATGGTGGTT    | 0.368 |
| - | 16 | 3262 | _p.F885L SRCIN1_     | NM_025248    | NP_079524    | Q9C0H9 | SRCN1_HUMAN | Pro-rich.                    | 0   | GGGGAAGCTCC     | 0.657 |
| + | 6  | 556  | _p.F181L MLLT6_      | NM_005937    | NP_005928    | P55198 | AF17_HUMAN  |                              | 6   | CACCTCAGCAAC    | 0.443 |
| + | 3  | 377  | e_Mutation_p.E85     | NM_006804    | NP_006795    | Q14849 | STAR3_HUMAN | ar (Potential); MENTAL.      | 0   | AGCAGGAGATC     | 0.557 |
| - | 1  | 229  | ssense_Mutation_f    | NM_001042471 | NP_001035936 | Q8TAX9 | GSDMB_HUMAN |                              | 2   | GCCCAGAATCC     | 0.502 |
| - | 1  | 355  |                      | NM_031960    | NP_114166    | Q9BYQ9 | KRA48_HUMAN | IKRQVHEC]- [SPRT]-[STC       | 0   | ctggacacacagcag | 0.204 |
| - | 5  | 841  |                      | NM_002279    | NP_002270    | Q14525 | KT33B_HUMAN | Coil 2; Rod.                 | 0   | GACTGCAGCT      | 0.607 |
| - | 6  | 1068 | cd.3_Missense_Mt     | NM_021991    | NP_068831    | P14923 | PLAK_HUMAN  |                              | 5   | CTCATCCAGCA     | 0.577 |
| - | 4  | 899  |                      | NM_012285    | NP_036417    | Q9UQ05 | KCNH4_HUMAN | lasmic (Potential).          | 1   | TGCCCTCCCTGG    | 0.602 |
| - | 17 | 2036 | _p.E591K EZH1_uc     | NM_001991    | NP_001982    | Q92800 | EZH1_HUMAN  | SET.                         | 3   | GACTCCTTTAT     | 0.532 |
| + | 2  | 1768 | _Mutation_p.P578     | NM_009590    | NP_033720    | O75106 | AOC2_HUMAN  |                              | 2   | AAGCCCCCTAC     | 0.617 |
| + | 4  | 995  | is.2_Missense_Mu     | NM_001076674 | NP_001070142 | Q71RG4 | TMUB2_HUMAN | ical; (Potential).           | 1   | TTGTGGTGCTG     | 0.587 |
| + | 1  | 389  |                      | NM_001466    | NP_001457    | Q14332 | FZD2_HUMAN  | acellular (Potential).       | 3   | CTCGCCCGAAC     | 0.632 |
| - | 11 | 1563 | _p.A488T KIF18B_     | NM_001080443 | NP_001073912 |        |             |                              | 2   | CAGTGCATGTG     | 0.572 |
| - | 43 | 3287 |                      | NM_000088    | NP_000079    | P02452 | CO1A1_HUMAN | le-helical region.           | 382 | GGGccaggggcac   | 0.552 |
| + | 8  | 1054 | _Mutation_p.S325     | NM_003786    | NP_003777    | O15438 | MRP3_HUMAN  | ity); ABC transmembrane t    | 4   | TGCTCTCCTTCA    | 0.617 |
| + | 17 | 2193 |                      | NM_003786    | NP_003777    | O15438 | MRP3_HUMAN  | 1; Cytoplasmic (By similarit | 4   | GCACTCTTCAG     | 0.607 |
| - | 1  | 1001 | A10_uc002ity.3_      | NM_020178    | NP_064563    | Q9NS85 | CAH10_HUMAN |                              | 2   | ACCTCCAGAC      | 0.517 |
| + | 8  | 2668 | _p.D813N AKAP1_      | NM_003488    | NP_003479    | Q92667 | AKAP1_HUMAN | Tudor.                       | 1   | GGTCTGACTTT     | 0.517 |
| - | 10 | 1845 | ive.1_Missense_M     | NM_017949    | NP_060419    | Q9NWM3 | CUED1_HUMAN |                              | 2   | CTTGGGTGCC      | 0.627 |
| + | 11 | 2032 |                      | NM_000502    | NP_000493    | P11678 | PERE_HUMAN  |                              | 2   | GACAGTAAGT      | 0.498 |
| - | 10 | 992  | _p.T103I MKS1_       | NM_017777    | NP_060247    | Q9NXB0 | MKS1_HUMAN  |                              | 1   | GGACAGTCTAAC    | 0.532 |
| - | 9  | 1195 | R257K SEPT4_uc       | NM_004574    | NP_004565    | O43236 | SEPT4_HUMAN |                              | 0   | GCCCTCTGGCC     | 0.572 |
| - | 8  | 1007 | vs.1_Missense_Mt     | NM_198393    | NP_938207    | Q8IWB6 | TEX14_HUMAN | rotein kinase.               | 17  | GTGTTCTGCTC     | 0.572 |
| - | 7  | 823  |                      | NM_032043    | NP_114432    | Q9BX63 | FANCF_HUMAN | ase ATP-binding.             | 1   | TGACTCTTGAC     | 0.393 |
| - | 4  | 527  | 0dds.2_Missense_     | NM_001100875 | NP_001094345 | Q8NA82 | MARHA_HUMAN |                              | 0   | TGCTGGAAGTTI    | 0.428 |
| - | 5  | 994  | 198S CYB561_uc       | NM_001915    | NP_001906    | P49447 | CY561_HUMAN | tochrome b561.               | 1   | GACACCTCGG      | 0.632 |
| - | 11 | 1708 | idea.1_Missense_     | NM_001098426 | NP_001091896 | Q92925 | SMRD2_HUMAN |                              | 0   | CCTGGGGGTCG     | 0.527 |
| - | 10 | 1128 |                      | NM_001433    | NP_001424    | O75460 | ERN1_HUMAN  | renal (Potential).           | 9   | GACGTCCGTGC     | 0.557 |
| - | 4  | 602  | .1_5'UTR SMURF       | NM_022739    | NP_073576    | Q9HAU4 | SMUF2_HUMAN | C2.                          | 4   | AATCAGACTTTC    | 0.363 |
| + | 3  | 1574 | _p.D505N BPTF_uc     | NM_182641    | NP_872579    | Q12830 | BPTF_HUMAN  |                              | 4   | TTAATTGACTGTC   | 0.363 |
| + | 11 | 4628 | e.2_Missense_Mut     | NM_182641    | NP_872579    | Q12830 | BPTF_HUMAN  |                              | 4   | TTGTCCAGAA      | 0.413 |
| - | 25 | 3570 | _P1171T ABCA8_       | NM_007168    | NP_009099    | O94911 | ABCA8_HUMAN | ical; (Potential).           | 3   | GCGAGGTGGTA     | 0.388 |
| - | 5  | 409  | ijlr.2_Splice_Site_f | NM_015654    | NP_056469    | Q9BTE0 | NAT9_HUMAN  |                              | 0   | GCGCTCTAGGA     | 0.358 |
| - | 9  | 1111 | 13D_uc002jpc.1_      | NM_199242    | NP_954712    | Q70J99 | UN13D_HUMAN | tion with RAB27A.            | 2   | CGTCCCCAGA      | 0.617 |

rs140629327

|   |    |       |                    |              |              |        |             |                                |    |              |       |             |
|---|----|-------|--------------------|--------------|--------------|--------|-------------|--------------------------------|----|--------------|-------|-------------|
| - | 4  | 465   | r_p.E43K SRP68_    | NM_014230    | NP_055045    | Q9UHB9 | SRP68_HUMAN |                                | 1  | GGCTTCCTGTT  | 0.502 |             |
| - | 4  | 539   |                    | NM_001008528 | NP_001008528 | P84157 | MXRA7_HUMAN |                                | 0  | CTGTTCCTCTC  | 0.572 | rs147040032 |
| - | 10 | 1748  | H17_uc002jvs.2_RNA |              |              |        |             |                                | 9  | CACTTCCCTTT  | 0.557 |             |
| + | 27 | 7712  | i_uc010dhw.1_Mis   | NM_020914    | NP_065965    | Q9HCF4 | ALO17_HUMAN |                                | 21 | TCGTGGACAA   | 0.498 |             |
| + | 29 | 4176  | 66_splice RPTOR    | NM_020761    | NP_065812    | Q8N122 | RPTOR_HUMAN |                                | 6  | CTCCAGGAGCTC | 0.612 |             |
| + | 24 | 7343  | ae.2_Missense_M    | NM_001080519 | NP_001073988 | Q9P281 | BAHC1_HUMAN |                                | 1  | CCTGCCCGCCC  | 0.652 |             |
| - | 42 | 7372  | SN_uc002kdv.1_R    | NM_004104    | NP_004095    | P49327 | FAS_HUMAN   | ase (By similarity).           | 1  | GGCCGCAAAGC  | 0.647 |             |
| + | 2  | 667   | _p.E166K FOXK2_    | NM_004514    | NP_004505    | Q01167 | FOXK2_HUMAN |                                | 0  | AGCAGGAGGCG  | 0.552 |             |
| + | 9  | 983   | _p.L268F TBCD_u    | NM_005993    | NP_005984    | Q9BTW9 | TBCD_HUMAN  |                                | 0  | GCAGACTCCCT  | 0.602 |             |
| - | 10 | 1200  | e_Mutation_p.A37   | NM_012307    | NP_036439    | Q9Y2J2 | E41L3_HUMAN | FERM.                          | 5  | GGCAGCTCGAT  | 0.299 |             |
| + | 2  | 477   | _p.P131S LAMA3_    | NM_198129    | NP_937762    | Q16787 | LAMA3_HUMAN | inin N-terminal.               | 11 | GCCCTCCCTCG  | 0.507 |             |
| + | 4  | 1107  | 3YR_uc002kva.2_    | NM_012189    | NP_036321    | O75952 | CABYR_HUMAN |                                | 0  | TTATCCCTTTTA | 0.383 |             |
| + | 7  | 1492  | F4B_uc002kvt.3_    | NM_005640    | NP_005631    | Q92750 | TAF4B_HUMAN | TAFH.                          | 3  | TTCTGCCTAAC  | 0.428 |             |
| + | 5  | 824   | kyf.2_Missense_M   | NM_014268    | NP_055083    | Q15555 | MARE2_HUMAN | CTN1-binding.                  | 1  | ACCAGGATCCA  | 0.398 |             |
| + | 5  | 4306  |                    | NM_015559    | NP_056374    | Q9Y6X0 | SETBP_HUMAN |                                | 3  | GCCAAGTCCCC  | 0.468 |             |
| - | 10 | 1481  | bs.1_Missense_M    | NM_004046    | NP_004037    | P25705 | ATPA_HUMAN  |                                | 0  | GCACGCCACGA  | 0.483 |             |
| - | 5  | 718   | ib.2_Missense_Mu   | NM_031939    | NP_114145    | Q9BYG7 | MSTRO_HUMAN | HEAT.                          | 0  | CTCATCTAATAA | 0.343 |             |
| - | 2  | 1130  |                    | NM_016626    | NP_057710    | Q5U5Q3 | MEX3C_HUMAN | KH 2.                          | 4  | TTTCAGGCATCC | 0.418 |             |
| + | 5  | 700   | p.A108V POLI_uc    | NM_007195    | NP_009126    | Q9UNA4 | POLI_HUMAN  | UmuC.                          | 3  | GGAAGCCATGT  | 0.408 |             |
| - | 4  | 1077  |                    | NM_052947    | NP_443179    | Q86TB3 | ALPK2_HUMAN |                                | 14 | CGGCACTGTCA  | 0.498 |             |
| - | 4  | 902   | cv.2_Missense_Mu   | NM_182511    | NP_872317    | Q8IU8  | CBLN2_HUMAN | C1q.                           | 0  | TAGAGAAACAC  | 0.507 |             |
| - | 3  | 264   |                    | NM_005035    | NP_005026    | O00411 | RPOM_HUMAN  |                                | 2  | CCGCACCCGCG  | 0.667 |             |
| + | 2  | 226   | L3_uc010drt.1_5F   | NM_005860    | NP_005851    | O95633 | FSTL3_HUMAN | TB.                            | 0  | TGCCTCCGGCA  | 0.652 |             |
| - | 2  | 225   | ES_uc002lxb.1_M    | NM_001130    | NP_001121    | Q08117 | AES_HUMAN   | rich (Q domain).               | 0  | TTGAGTTGCTC  | 0.657 |             |
| - | 2  | 357   |                    | NM_030662    | NP_109587    | P36507 | MP2K2_HUMAN |                                | 0  | GTCCACCAGGT  | 0.597 |             |
| + | 3  | 614   |                    | NM_005483    | NP_005474    | Q13111 | CAF1A_HUMAN | 1 chromo shadow domain.        | 2  | CATTCCTGGAC  | 0.557 |             |
| + | 1  | 2105  | uc002mbg.1_RNA     | NM_018708    | NP_061178    | Q9BSK4 | FEM1A_HUMAN |                                | 0  | ACAAGGGCTTC  | 0.602 |             |
| + | 4  | 677   | uf.2_RNA UHRF1_    | NM_001048201 | NP_001041666 | Q96T88 | UHRF1_HUMAN |                                | 2  | GCCCTGCAGCT  | 0.642 |             |
| - | 5  | 763   | e_Mutation_p.G1E   | NM_014649    | NP_055464    | Q14151 | SAFB2_HUMAN |                                | 0  | CTTCCCCATCC  | 0.438 |             |
| - | 20 | 1539  | _p.A33T DENND1     | NM_024898    | NP_079174    | Q8IV53 | DEN1C_HUMAN |                                | 1  | TGGGGCCCTCA  | 0.637 |             |
| - | 2  | 497   | F14_uc002mfj.1_    | NM_003807    | NP_003798    | O43557 | TNF14_HUMAN | type II membrane protein;      | 1  | CAGACCCACCC  | 0.642 |             |
| + | 18 | 2412  | _p.D773N EMR1_     | NM_001974    | NP_001965    | Q14246 | EMR1_HUMAN  | lasmic (Potential).            | 5  | TAAAAGACACC  | 0.483 |             |
| + | 11 | 1606  | _i_Mutation_p.P529 | NM_020902    | NP_065953    | Q9P1Y5 | CAMP3_HUMAN | Pro-rich.                      | 1  | CCTGCCCGAGG  | 0.682 |             |
| - | 9  | 924   |                    | NM_198492    | NP_940894    | Q6UXB4 | CLC4G_HUMAN | (Potential). C-type lectin.    | 0  | CAGATCCAGCC  | 0.637 |             |
| + | 5  | 608   | 4M_uc010dvs.2_     | NM_001144910 | NP_001138382 | Q9H2X3 | CLC4M_HUMAN | 7 X approximate tandem r       | 1  | TGACCCGGCTG  | 0.582 |             |
| - | 11 | 1403  |                    | NM_032447    | NP_115823    | Q75N90 | FBN3_HUMAN  | 3; 4; calcium-binding.         | 11 | AGTACCCTGGG  | 0.667 |             |
| - | 21 | 2299  |                    | NM_012335    | NP_036467    | O00160 | MYO1F_HUMAN |                                | 3  | TCCGCTCTTCT  | 0.652 |             |
| + | 1  | 214   |                    | NM_145208    | NP_660209    | Q8WVY6 | MB3L1_HUMAN | ription repressor.             | 0  | GAATTACACCCC | 0.512 |             |
| - | 5  | 33913 |                    | NM_024690    | NP_078966    | Q8WXI7 | MUC16_HUMAN | xtracellular (Potential).      | 57 | CCCATGAGTCTA | 0.483 |             |
| - | 3  | 27518 |                    | NM_024690    | NP_078966    | Q8WXI7 | MUC16_HUMAN | ch. Extracellular (Potential). | 57 | GGTCCCTGAC   | 0.478 |             |
| - | 3  | 27337 |                    | NM_024690    | NP_078966    | Q8WXI7 | MUC16_HUMAN | ch. Extracellular (Potential). | 57 | TGGTCTCTGTC  | 0.498 |             |
| - | 3  | 21724 |                    | NM_024690    | NP_078966    | Q8WXI7 | MUC16_HUMAN | ch. Extracellular (Potential). | 57 | CACAGCTTCTG  | 0.502 |             |
| - | 3  | 18804 |                    | NM_024690    | NP_078966    | Q8WXI7 | MUC16_HUMAN | xtracellular (Potential).      | 57 | TTGTTTCATGAC | 0.473 |             |
| - | 16 | 1638  |                    | NM_015719    | NP_056534    | P25940 | CO5A3_HUMAN | le-helical req p.G518E(1)      | 10 | AGTCCCTGCA   | 0.493 |             |
| - | 6  | 395   |                    | NM_003755    | NP_003746    | O75821 | EIF3G_HUMAN |                                | 0  | GGGTCAAACCT  | 0.602 |             |
| - | 33 | 4215  | xlq.1_Missense_M   | NM_020812    | NP_065863    | Q96HP0 | DOCK6_HUMAN |                                | 3  | CAGAACCACTA  | 0.572 |             |
| + | 4  | 1293  | lyf.2_Missense_M   | NM_145295    | NP_660338    | Q7L945 | ZN627_HUMAN |                                | 1  | AGAAACCCATAG | 0.413 |             |

|   |    |      |                    |              |              |        |             |                         |   |               |       |             |
|---|----|------|--------------------|--------------|--------------|--------|-------------|-------------------------|---|---------------|-------|-------------|
| - | 4  | 407  | i3_uc002msz.1_M    | NM_001080411 | NP_001073880 | Q8N7K0 | ZN433_HUMAN | KRAB.                   | 0 | TGATGACCTTCT  | 0.363 |             |
| - | 4  | 454  | dyn.1_RNA ZNF62    | NM_145233    | NP_660276    | Q96I27 | ZN625_HUMAN | ype 1; degenerate.      | 0 | CCACATGATTTTA | 0.453 |             |
| - | 17 | 1776 | .1_Intron HOOK2_   | NM_013312    | NP_037444    | Q96ED9 | HOOK2_HUMAN |                         | 3 | TACTTACAATGGC | 0.607 |             |
| + | 12 | 1201 | zk.3_Missense_IV   | NM_032433    | NP_115809    | Q96JL9 | ZN333_HUMAN |                         | 3 | TGTGCCCGAGA   | 0.428 |             |
| + | 5  | 715  | :2_5'UTR HSH2D_    | NM_032855    | NP_116244    | Q96JZ2 | HSH2D_HUMAN | SH2.                    | 0 | TCAGTCACAGC   | 0.587 |             |
| + | 11 | 1487 | se_Mutation_p.G1i  | NM_173544    | NP_775815    | Q86XR2 | NIBL2_HUMAN |                         | 0 | CTTGGGGCAGC   | 0.627 |             |
| + | 4  | 890  |                    | NM_000453    | NP_000444    | Q92911 | SC5A5_HUMAN |                         | 4 | CTGTGGTGAGT   | 0.602 |             |
| - | 14 | 2195 | o.G287E PDE4C_u    | NM_001098819 | NP_001092289 | Q08493 | PDE4C_HUMAN |                         | 5 | GGTCTCCCTGC   | 0.627 |             |
| + | 3  | 410  |                    | NM_004386    | NP_004377    | O14594 | NCAN_HUMAN  | g-like V-type.          | 4 | GGTGGCCAAAA   | 0.647 |             |
| + | 13 | 1339 | 892_uc010ecd.2_I   | NM_015329    | NP_056144    | Q9Y6X3 | SCC4_HUMAN  |                         | 0 | GACACCAAGAG   | 0.532 |             |
| - | 16 | 1708 | p.E505K GMIP_ur    | NM_016573    | NP_057657    | Q9P107 | GMIP_HUMAN  | ol-ester/DAG-type.      | 1 | AGTCTCCAGGC   | 0.597 |             |
| + | 1  | 825  |                    | NR_003128    |              |        |             |                         | 0 | TAGTACGAAATTC | 0.378 |             |
| - | 5  | 1871 |                    | NM_001080409 | NP_001073878 |        |             |                         | 2 | ACTGGCTAAAA   | 0.373 |             |
| - | 25 | 2654 |                    | NM_032139    | NP_115515    | Q96NW4 | ANR27_HUMAN | ANK 10.                 | 5 | AGGCCCGTGC    | 0.398 |             |
| + | 1  | 103  |                    | NM_173479    | NP_775750    | Q6ZMY6 | WDR88_HUMAN |                         | 3 | GCTCCCCGACA   | 0.612 |             |
| + | 21 | 2730 | AP33_uc010eel.2_   | NM_052948    | NP_443180    | O14559 | RHG33_HUMAN |                         | 4 | GCCACCTTCC    | 0.687 |             |
| - | 26 | 3337 | IS1_uc010eem.1_I   | NM_004646    | NP_004637    | O60500 | NPHN_HUMAN  | lasmic (Potential).     | 5 | CATATTCGTTCC  | 0.632 |             |
| - | 3  | 1095 | _Missense_Mutati   | NM_152658    | NP_689871    | Q8NA92 | THAP8_HUMAN |                         | 0 | CCGCACCCGGC   | 0.711 |             |
| - | 5  | 1413 | ti.1_Missense_Mu   | NM_020951    | NP_066002    | Q6P280 | ZN529_HUMAN | C2H2-type 7.            | 1 | CTATTTCTAAAG  | 0.388 |             |
| - | 10 | 1000 | DPF1_uc010xtu.1_   | NM_004647    | NP_004638    | Q92782 | DPF1_HUMAN  | PHD-type 2.             | 0 | ACCCGCCAGC    | 0.682 |             |
| + | 2  | 795  | gn.1_Missense_Mt   | NM_003407    | NP_003398    | P26651 | TTP_HUMAN   |                         | 1 | CCCCACCCAG    | 0.672 |             |
| - | 7  | 2463 | e_Mutation_p.V59c  | NM_181882    | NP_870998    | Q9BXM0 | PRAX_HUMAN  | L]-[LIVMAP]- [AQKHRPE]; | 2 | AGGCACCTTGG   | 0.577 |             |
| - | 2  | 321  | RB_uc010egw.1_f    | NM_000713    | NP_000704    | P30043 | BLVRB_HUMAN |                         | 0 | CCACGGTCTTG   | 0.662 |             |
| + | 8  | 1743 | ph.2_Missense_M    | NM_080732    | NP_542770    | Q96KS0 | EGLN2_HUMAN |                         | 2 | ATGAACCAGGC   | 0.672 |             |
| - | 1  | 706  | YP2A7_uc002opn     | NM_000764    | NP_000755    | P20853 | CP2A7_HUMAN |                         | 3 | AGTCACATATG   | 0.592 |             |
| + | 2  | 354  | .1_Intron CYP2S1_  | NM_030622    | NP_085125    | Q96SQ9 | CP2S1_HUMAN |                         | 1 | CAGCGCCGGG    | 0.587 |             |
| + | 3  | 688  |                    | NM_133444    | NP_597701    | Q8TF50 | ZN526_HUMAN |                         | 0 | CTTTGCCTCCC   | 0.622 |             |
| - | 4  | 612  | 2otd.3_Translation | NM_006494    | NP_006485    | P50548 | ERF_HUMAN   |                         | 4 | CAGCACCTCGG   | 0.687 |             |
| + | 5  | 1181 | :284_uc010ejd.2_f  | NM_013361    | NP_037493    | Q9UK11 | ZN223_HUMAN | C2H2-type 5.            | 1 | TGGTCCACACA   | 0.448 |             |
| - | 4  | 856  | VF285_uc010xxa.1   | NM_152354    | NP_689567    | Q96NJ3 | ZN285_HUMAN |                         | 4 | ATTTTTCTCCTAG | 0.428 |             |
| - | 6  | 1086 | NF229_uc010ejl.1_  | NM_014518    | NP_055333    | Q9UJW7 | ZN229_HUMAN |                         | 4 | CATCATCCCAGT  | 0.393 | rs146515421 |
| + | 4  | 1168 | zv.2_Missense_Mt   | NM_001042724 | NP_001036189 | Q92692 | PVRL2_HUMAN | ellular (Potential).    | 0 | CAGACCTCCT    | 0.587 |             |
| - | 3  | 183  | l_p.A36T PPP1R1    | NM_006663    | NP_006654    | Q8WUF5 | IASPP_HUMAN |                         | 1 | GGCCGCCGCG    | 0.652 |             |
| - | 9  | 1270 | dp.1_Missense_M    | NM_004819    | NP_004810    | Q92797 | SYMPK_HUMAN |                         | 1 | CTTGCTGCTC    | 0.652 |             |
| - | 1  | 318  |                    | NM_001029861 | NP_001025032 | P60321 | NANO2_HUMAN | ps-type.[C2HC 1.        | 0 | GGTGTGAGGAG   | 0.677 |             |
| - | 3  | 349  |                    | NM_002516    | NP_002507    | Q9UNW9 | NOVA2_HUMAN |                         | 0 | CCTTCTCGGCAA  | 0.562 |             |
| - | 6  | 860  | p.S276N STRN4_u    | NM_013403    | NP_037535    | Q9NRL3 | STRN4_HUMAN |                         | 0 | CGTCGCTGTCT   | 0.622 |             |
| + | 15 | 3417 | yo.1_Missense_M    | NM_014681    | NP_055496    | Q14147 | DHX34_HUMAN |                         | 5 | CTGGCCTCTTTC  | 0.587 |             |
| - | 6  | 760  | issense_Mutation_  | NM_003827    | NP_003818    | P54920 | SNA_A_HUMAN |                         | 0 | CTCGCCTTTGT   | 0.652 |             |
| - | 18 | 1768 | b.1_RNA LIG1_ucl   | NM_000234    | NP_000225    | P18858 | DNL11_HUMAN |                         | 3 | GATCCCCGGG    | 0.562 |             |
| - | 2  | 735  | e.2_Intron ZUMO1   | NM_182575    | NP_872381    | Q8IYV9 | IZUM1_HUMAN | ellular (Potential).    | 1 | GAAATCCTTAC   | 0.562 | rs147003407 |
| + | 10 | 1586 | tation_p.R374W Sl  | NM_003089    | NP_003080    | P08621 | RU17_HUMAN  | lu-rich (mixed charge). | 0 | gggggagcggggc | 0.139 |             |
| - | 1  | 166  |                    | NM_178449    | NP_848544    | Q96A98 | TIP39_HUMAN |                         | 0 | ACCACcagcagc  | 0.597 |             |
| + | 6  | 4646 |                    | NM_020719    | NP_065770    | Q9ULL5 | PRR12_HUMAN |                         | 2 | CTGGCCAAAA    | 0.672 |             |
| + | 5  | 1678 | p.H481N ZNF473_    | NM_001006656 | NP_001006657 | Q8WTR7 | ZN473_HUMAN | pre-mRNA complex.[C2H2  | 2 | CCATTCACACC   | 0.502 |             |
| - | 3  | 801  | AS1_uc002pxn.1_    | NM_001523    | NP_001514    | Q92839 | HAS1_HUMAN  | lasmic (Potential).     | 2 | GTCTCGTCCA    | 0.622 |             |
| - | 5  | 1005 | i77_uc010ydf.1_5'  | NM_023074    | NP_075562    | Q9BS31 | ZN649_HUMAN | C2H2-type 3.            | 3 | CTGTACCTCTTG  | 0.502 |             |

|   |    |         |                   |              |              |        |             |                               |    |               |       |             |
|---|----|---------|-------------------|--------------|--------------|--------|-------------|-------------------------------|----|---------------|-------|-------------|
| - | 4  | 422_423 | 2qar.3_Missense_I | NM_001102603 | NP_001096073 | Q9HCG1 | ZN160_HUMAN |                               | 1  | AGTAAGGGCCAT  | 0.416 |             |
| - | 1  | 478     | se_Mutation_p.W8  | NM_144687    | NP_653288    | P59046 | NAL12_HUMAN | DAPIN.                        | 7  | CTCTCCCACAG   | 0.507 |             |
| + | 6  | 892     | yek.1_Missense_Iv | NM_015629    | NP_056444    | Q8WVY3 | PRP31_HUMAN |                               | 1  | TCATGGTCGTC   | 0.607 |             |
| + | 5  | 705     | LRA1_uc010yfh.1_  | NM_006863    | NP_006854    | O75019 | LIRA1_HUMAN | 2. Extracellular (Potential). | 3  | GTACCCATGGG   | 0.567 |             |
| + | 13 | 1925    | e_Mutation_p.E53  | NM_006669    | NP_006660    | Q8NHL6 | LIRB1_HUMAN | lasmic (Potential).           | 3  | CCCAGGAAGAA   | 0.612 |             |
| + | 6  | 735     | 3_Intron KIR2DS4_ | NM_012314    | NP_036446    | P43632 | KI2S4_HUMAN | cellular (Potential).         | 0  | GCCTTCACCCA   | 0.493 |             |
| + | 6  | 621     | p.S155G NLRP2_u   | NM_017852    | NP_060322    | Q9NX02 | NALP2_HUMAN |                               | 2  | GAGATAGCAAA   | 0.507 |             |
| - | 5  | 834     | e_Mutation_p.R14  | NM_001145971 | NP_001139443 | Q8NBN7 | RDH13_HUMAN |                               | 3  | CAGCCGCCGGC   | 0.592 |             |
| - | 2  | 1389    |                   | NM_176820    | NP_789790    | Q7RTR0 | NALP9_HUMAN | NACHT.                        | 7  | ACATGGCGGCA   | 0.502 |             |
| + | 2  | 534     |                   | NM_134444    | NP_604393    | Q96MN2 | NALP4_HUMAN | DAPIN.                        | 15 | AGCTTGAACCT   | 0.413 |             |
| - | 2  | 218     | se_Mutation_p.    | NM_024303    | NP_077279    | Q9BUG6 | ZSA5A_HUMAN |                               | 3  | CCCAGGTCTGT   | 0.468 | rs112550672 |
| + | 3  | 166     | 2_5'UTR ZNF211_   | NM_003435    | NP_003426    | P52741 | ZN134_HUMAN |                               | 0  | ATGAAGAGTCA   | 0.448 |             |
| + | 3  | 1979    | e_Mutation_p.L52! | NM_138347    | NP_612356    | Q7Z340 | ZN551_HUMAN | 2H2-type 12.                  | 1  | TCTAGCCTCATT  | 0.458 |             |
| - | 5  | 922     | Ohp.1_Splice_Site | NM_025027    | NP_079303    | Q8WXB4 | ZN606_HUMAN |                               | 2  | CCTTACCACAC   | 0.552 |             |
| - | 10 | 1025    | we.2_Missense_Iv  | NM_015677    | NP_056492    | Q96HL8 | SH3Y1_HUMAN | SH3.                          | 1  | GTTTTTGATATAA | 0.388 |             |
| + | 1  | 657     |                   | NM_003108    | NP_003099    | P35716 | SOX11_HUMAN |                               | 3  | GCTGGGCAGCC   | 0.483 |             |
| - | 10 | 1304    | e_Mutation_p.G37. | NM_003183    | NP_003174    | P78536 | ADA17_HUMAN | B. Extracellular (Potential). | 2  | TCTTCCAACCTG  | 0.289 |             |
| + | 13 | 1394    | se_Mutation_p.E4  | NM_182625    | NP_872431    | Q17RS7 | GEN_HUMAN   |                               | 8  | ATTGAGGAAGAA  | 0.308 |             |
| - | 26 | 10384   |                   | NM_000384    | NP_000375    | P04114 | APOB_HUMAN  | parin-binding.                | 27 | ATATTTTCGTGC  | 0.388 |             |
| - | 11 | 1889    | 113_uc010eyk.1_   | NM_001145168 | NP_001138640 | Q8IZF5 | GP113_HUMAN | cellular (Potential).         | 4  | GGGGCCGAGTA   | 0.557 |             |
| + | 3  | 501     | u.2_RNA ABHD1_    | NM_032604    | NP_115993    | Q96SE0 | ABHD1_HUMAN |                               | 0  | CAGCAGCCAAG   | 0.532 |             |
| + | 1  | 3620    | 1_5'Flank ZNF512_ | NM_032266    | NP_115642    | Q68DN1 | CB016_HUMAN |                               | 1  | CATACGGAGAA   | 0.453 |             |
| + | 6  | 710     | e_Mutation_p.Q15  | NM_206876    | NP_996759    | P62140 | PP1B_HUMAN  |                               | 1  | TGGAGCAGATTC  | 0.323 |             |
| + | 7  | 1171    | nl.2_Missense_Mu  | NM_182551    | NP_872357    | Q6UWP7 | LCLT1_HUMAN |                               | 2  | TCAAGGGGAGA   | 0.473 |             |
| - | 3  | 431     | _p.G62D NLRC4_u   | NM_021209    | NP_067032    | Q9NPP4 | NLRC4_HUMAN | CARD.                         | 6  | TCTGAACCTTT   | 0.403 |             |
| - | 10 | 1226    | x.2_Missense_Mu   | NM_003162    | NP_003153    | O43815 | STRN_HUMAN  |                               | 1  | ACTTTCAGAAC   | 0.438 |             |
| - | 32 | 5300    | se_Mutation_p.S4E | NM_019024    | NP_061897    | Q9P2D3 | HTR5B_HUMAN |                               | 8  | AGTCTGACACC   | 0.453 |             |
| - | 2  | 161     | 2_5'Flank CCDC7!  | NM_019024    | NP_061897    | Q9P2D3 | HTR5B_HUMAN |                               | 8  | ACTGGTCTTTTC  | 0.378 |             |
| + | 4  | 403     | orf56_uc010ynk.1_ | NM_144736    | NP_653337    | Q7L592 | MIDA_HUMAN  |                               | 1  | AATGGATGGCC   | 0.378 |             |
| - | 2  | 94      | ik DHX57_uc002rr  | NM_198963    | NP_945314    | Q6P158 | DHX57_HUMAN |                               | 3  | TTTCACCTGCA   | 0.388 |             |
| - | 6  | 865     | OS1_uc002rrf.2_f  | NM_005633    | NP_005624    | Q07889 | SOS1_HUMAN  | DH.                           | 10 | GATGGGGACTG   | 0.353 |             |
| - | 10 | 2831    | utation_p.E923G   | NM_021097    | NP_066920    | P32418 | NAC1_HUMAN  | cellular (Potential).         | 4  | CCAGCTCACCT   | 0.557 |             |
| - | 13 | 1760    | oc.1_Missense_Iv  | NM_018079    | NP_060549    | Q8N5C6 | SRBD1_HUMAN |                               | 1  | TATGAAGTATCTG | 0.318 |             |
| + | 7  | 1253    |                   | NM_002158    | NP_002149    | P32314 | FOXN2_HUMAN |                               | 0  | CACAGCGTTGTG  | 0.458 |             |
| + | 13 | 1684    | p.D315N KIAA184   | NM_001129993 | NP_001123465 | Q6NSI8 | K1841_HUMAN |                               | 0  | TGAGGGACCAC   | 0.418 |             |
| - | 3  | 446     | cp.2_Missense_M   | NM_016516    | NP_057600    | Q9P1Q0 | VPS54_HUMAN |                               | 0  | CAATCCCCATG   | 0.383 |             |
| + | 3  | 1496    | Ik.3_Missense_Mu  | NM_015147    | NP_055962    | Q76N32 | CEP68_HUMAN |                               | 1  | ACTATAGGCAAG  | 0.642 |             |
| - | 11 | 1704    | uc010yqm.1_Miss   | NM_014911    | NP_055726    | Q2M2I8 | AAK1_HUMAN  | Gln-rich.                     | 0  | CCTGAGGTGGG   | 0.532 |             |
| - | 3  | 881     | !sns.2_Missense_I | NM_001134745 | NP_001128217 | Q86VH4 | LRRT4_HUMAN | cellular (Potential).         | 4  | CCGAAGGCCCT   | 0.393 |             |
| - | 6  | 697     | .1_Intron MRPL30  | NM_138798    | NP_620153    | Q8WV92 | MITD1_HUMAN |                               | 2  | CTGTGGTTTCT   | 0.303 |             |
| + | 10 | 1908    |                   | NM_015904    | NP_056988    | O60841 | IF2P_HUMAN  |                               | 3  | GGATTCAGGGA   | 0.303 |             |
| - | 17 | 2974    | c.2_Missense_Mu!  | NM_016316    | NP_057400    | Q9UBZ9 | REV1_HUMAN  |                               | 2  | GCACACTGACA   | 0.428 | rs3087396   |
| - | 14 | 2386    | ic.2_Missense_Mu  | NM_016316    | NP_057400    | Q9UBZ9 | REV1_HUMAN  |                               | 2  | TCTTTTGGCTATC | 0.353 |             |
| - | 22 | 5170    |                   | NM_001144013 | NP_001137485 | A6NKT7 | RGPD3_HUMAN | GRIP.                         | 1  | CAGACCTCTTI   | 0.388 | rs114550867 |
| - | 8  | 1326    | PT10_uc010yww.1   | NM_144710    | NP_653311    | Q9P0V9 | SEP10_HUMAN |                               | 0  | GCCTGGTATGG   | 0.483 |             |
| + | 11 | 2445    | fkp.2_Missense_Iv | NM_019014    | NP_061887    | Q9H9Y6 | RPA2_HUMAN  |                               | 1  | ACGGCCTGTGC   | 0.433 |             |
| + | 19 | 2108    | _p.L547F DPP10_   | NM_020868    | NP_065919    | Q8N608 | DPP10_HUMAN | cellular (Potential).         | 10 | TTGTCCCTTCC   | 0.294 |             |

|   |     |           |                                                  |              |              |        |             |                               |     |               |       |
|---|-----|-----------|--------------------------------------------------|--------------|--------------|--------|-------------|-------------------------------|-----|---------------|-------|
| + | 2   | 447       |                                                  | NM_183240    | NP_899063    | Q8WXS4 | CCGL_HUMAN  | ical; (Potent p.S138F(1)      | 1   | CCTCTCCTCCGC  | 0.557 |
| + | 3   | 464       | .2_Missense_Muta                                 | NM_002881    | NP_002872    | P11234 | RALB_HUMAN  |                               | 3   | CTTCTTGTTCTC  | 0.458 |
| + | 24  | 2874      | GAP1_uc010fng.2                                  | NM_012233    | NP_036365    | Q15042 | RB3GP_HUMAN |                               | 2   | CTGCTCCCTACTC | 0.542 |
| - | 9   | 1127      | ase_Mutation_p.D                                 | NM_032143    | NP_115519    | Q5FWF4 | ZRAB3_HUMAN | case C-terminal.              | 2   | CGGAATCATTCT  | 0.303 |
| - | 50  | 9038      |                                                  | NM_018557    | NP_061027    | Q9NZR2 | LRP1B_HUMAN | ntial). LDL-receptor class A  | 50  | CTAGGACAACATA | 0.328 |
| - | 2   | 430       | i_p.S27N STAM2_                                  | NM_005843    | NP_005834    | O75886 | STAM2_HUMAN | VHS.                          | 1   | ATAAGACTCCAAT | 0.368 |
| + | 14  | 2784      | NC1_uc010fom.1_                                  | NM_033394    | NP_203752    | Q9C0D5 | TANC1_HUMAN |                               | 3   | CCAGGTACGG    | 0.542 |
| - | 30  | 4428      | o.W1453* LY75_uc                                 | NM_002349    | NP_002340    | O60449 | LY75_HUMAN  | Potential). C-type lectin 9.  | 0   | CCAACCCATAG   | 0.393 |
| + | 13  | 1129      | p.Q347H NOSTRI                                   | NM_001039724 | NP_001034813 | Q8IVI9 | NOSTN_HUMAN |                               | 0   | GAGCAAAGACC   | 0.428 |
| - | 17  | 2633      | lf.1_Missense_Mul                                | NM_004525    | NP_004516    | P98164 | LRP2_HUMAN  | s B 7. Extracellular (Potenti | 29  | CTGATACTCTTG  | 0.418 |
| + | 4   | 558       | p.D152N GORASF                                   | NM_015530    | NP_056345    | Q9H8Y8 | GORS2_HUMAN |                               | 2   | GAGCAGATACA   | 0.358 |
| - | 11  | 1625      | K1_uc002ugq.2_F                                  | NM_012290    | NP_036422    | Q9UKI8 | TLK1_HUMAN  |                               | 1   | AATTTGGTCTAAC | 0.343 |
| + | 25  | 3108      | o.W879* OSBPL6                                   | NM_032523    | NP_115912    | Q9BZF3 | OSBL6_HUMAN |                               | 1   | GCCTGGGTTTC   | 0.423 |
| - | 307 | 98608     | o10zfi.1_Missense                                | NM_133378    | NP_596869    | Q8WZ42 | TITIN_HUMAN |                               | 153 | CTTACCAGAA    | 0.368 |
| - | 284 | 82572     | l45S TTN_uc010zi                                 | NM_133378    | NP_596869    | Q8WZ42 | TITIN_HUMAN |                               | 153 | ACAGGGTTCCC   | 0.428 |
| - | 275 | 73650     | 171* TTN_uc010zi                                 | NM_133378    | NP_596869    | Q8WZ42 | TITIN_HUMAN |                               | 153 | AACTGGTACTC   | 0.413 |
| - | 275 | 73296     | o53 TTN_uc010zi                                  | NM_133378    | NP_596869    | Q8WZ42 | TITIN_HUMAN |                               | 153 | CTTTACTCTTGT  | 0.393 |
| - | 244 | 50211     | 58R TTN_uc010zf                                  | NM_133378    | NP_596869    | Q8WZ42 | TITIN_HUMAN |                               | 153 | GGTCCATGCTC   | 0.443 |
| - | 46  | 13096     | N_uc010zfi.1_Intr                                | NM_133379    | NP_596870    | Q8WZ42 | TITIN_HUMAN |                               | 153 | GACCAGCTGGA   | 0.383 |
| - | 9   | 1378      |                                                  | NM_173648    | NP_775919    | Q6ZP82 | CC141_HUMAN |                               | 10  | CACCTCCTGGA   | 0.363 |
| + | 3   | 388       | n_p.A57T UBE2E3                                  | NM_182678    | NP_872619    | Q969T4 | UB2E3_HUMAN |                               | 1   | CCACTGCTAAG   | 0.463 |
| - | 9   | 1142      | i_p.P252S STAT1_                                 | NM_007315    | NP_009330    | P42224 | STAT1_HUMAN |                               | 10  | ATTGGCGGCC    | 0.483 |
| - | 14  | 1483      | jk.1_Missense_Mi                                 | NM_003151    | NP_003142    | Q14765 | STAT4_HUMAN |                               | 9   | CAGACTGGAC    | 0.328 |
| - | 19  | 2001      | lut.3_Missense_N                                 | NM_153697    | NP_710181    | Q8N8A2 | ANR44_HUMAN |                               | 5   | GGCATCTTTCAC  | 0.458 |
| + | 31  | 3567_3568 | p.G712N AOX1_u                                   | NM_001159    | NP_001150    | Q06278 | ADO_HUMAN   |                               | 6   | CGAAGGCCAG    | 0.475 |
| - | 3   | 571       | 2uwf.2_Splice_Site                               | NM_004071    | NP_004062    | P49759 | CLK1_HUMAN  |                               | 2   | TTTCATACCCCA  | 0.343 |
| + | 5   | 557       | hv.1_Missense_Mi                                 | NM_015934    | NP_057018    | Q9Y2X3 | NOP58_HUMAN |                               | 0   | AATGGCAGCTA   | 0.318 |
| - | 4   | 671       | p.A149V RAPH1_                                   | NM_213589    | NP_998754    | Q70E73 | RAPH1_HUMAN |                               | 10  | AGCTGGCATGG   | 0.433 |
| + | 5   | 2502      |                                                  | NM_020923    | NP_065974    | Q9HCK1 | ZDBF2_HUMAN |                               | 3   | AGTTGACTTTTG  | 0.438 |
| + | 4   | 522       | YVE_uc002vcv.2_I                                 | NM_015040    | NP_055855    | Q9Y2I7 | FYV1_HUMAN  |                               | 10  | ATGACCCTCGT   | 0.438 |
| + | 21  | 3859      | cy.1_Missense_M                                  | NM_015040    | NP_055855    | Q9Y2I7 | FYV1_HUMAN  |                               | 10  | TCCTAGTGCCT   | 0.418 |
| - | 32  | 5325      | lFN1_uc002vfh.2_                                 | NM_212482    | NP_997647    | P02751 | FINC_HUMAN  |                               | 13  | TCATTTCTGTTT  | 0.458 |
| + | 10  | 1050      | o2vhs.2_RNA uc0                                  | NM_198559    | NP_940961    | Q7Z7H3 | CB062_HUMAN |                               | 0   | AGCCGGAGGAC   | 0.701 |
| + | 6   | 940       | p.V201M CTDSP                                    | NM_021198    | NP_067021    | Q9GZU7 | CTDS1_HUMAN | CTP1 homology.                | 1   | GGCGGTGCTC    | 0.627 |
| - | 2   | 371       |                                                  | NM_002181    | NP_002172    | Q14623 | IHH_HUMAN   |                               | 1   | TCACACCGGGC   | 0.622 |
| - | 4   | 887       | w.1_Missense_Mu                                  | NM_181457    | NP_852122    | P23760 | PAX3_HUMAN  |                               | 766 | CTTCTCTCC     | 0.602 |
| - | 12  | 1140      | p.A389T FARSB_                                   | NM_005687    | NP_005678    | Q9NSD9 | SYFB_HUMAN  | B5.                           | 1   | CAATAGCTGCAT  | 0.368 |
| - | 1   | 770       |                                                  | NM_005544    | NP_005535    | P35568 | IRS1_HUMAN  | RS-type PTB.                  | 12  | ATCCACCTGCA   | 0.612 |
| - | 4   | 699       |                                                  | NM_024795    | NP_079071    | Q53R12 | T4S20_HUMAN | lasmic (Potential).           | 0   | AGAGACTCCAC   | 0.378 |
| - | 3   | 750       | iy.1_Intron TRIP12                               | NM_004238    | NP_004229    | Q14669 | TRIPC_HUMAN |                               | 9   | CAGTGGAGGAG   | 0.552 |
| + | 4   | 273       | .W75* CHRND_uc                                   | NM_000751    | NP_000742    | Q07001 | ACHD_HUMAN  | ellular (Potential).          | 3   | GGAAGTGAATG   | 0.582 |
| - | 2   | 436       |                                                  | NM_019850    | NP_062824    | Q8N5V2 | NGEF_HUMAN  | toward RHOA, RAC1 and         | 7   | AGATGGAATTT   | 0.498 |
| + | 1   | 678       | JGT1A7_uc002vul                                  | NM_007120    | NP_009051    | P22310 | UD14_HUMAN  |                               | 1   | CTACCTCTGC    | 0.473 |
| - | 11  | 2062      | se_Mutation_p.P42                                | NM_006037    | NP_006028    | P56524 | HDAC4_HUMAN |                               | 6   | TGCCGGCGGCT   | 0.672 |
| - | 5   | 1034      | _Intron ANKMY1_u                                 | NM_016552    | NP_057636    | Q9P2S6 | ANKY1_HUMAN |                               | 1   | CCCTTCTCAG    | 0.562 |
| + | 3   | 1021_1022 | in.2_Missense_Mi                                 | NM_021158    | NP_066981    | Q96RU7 | TRIB3_HUMAN | rotein kinase.                | 2   | GCGCACTGTC    | 0.639 |
| + | 5   | 478       | qd.1_Missense_Mutation_p.V40I PTPRA_uc002whl.2_I | NM_002115    | NP_002115    | P18433 | PTPRA_HUMAN | ellular (Potential).          | 1   | CTTCTGTAGGA   | 0.383 |

rs137997315



|   |    |      |                   |              |              |        |             |                                |     |                |       |
|---|----|------|-------------------|--------------|--------------|--------|-------------|--------------------------------|-----|----------------|-------|
| - | 1  | 821  | !5B_uc010zql.1_5' | NM_001810    | NP_001801    | P07199 | CENPB_HUMAN |                                | 0   | 'GGTCGGGCAGC   | 0.711 |
| + | 20 | 1763 | p.E555K PLCB4_u   | NM_182797    | NP_877949    | Q15147 | PLCB4_HUMAN |                                | 15  | 'ACTGTAGAAGATC | 0.423 |
| - | 11 | 2652 | nj.2_Missense_Mu  | NM_020341    | NP_065074    | Q9P286 | PAK7_HUMAN  |                                | 23  | 'SACCTGCTAGTT  | 0.512 |
| + | 10 | 1515 | p.E380K PCSK2_u   | NM_002594    | NP_002585    | P16519 | NEC2_HUMAN  | Catalytic.                     | 7   | 'SCTCTGGAGGCT  | 0.572 |
| + | 2  | 454  | r_p.P50S DSTN_u   | NM_006870    | NP_006861    | P60981 | DEST_HUMAN  | ADF-H.                         | 2   | 'ACTGATCCTTTCA | 0.383 |
| + | 7  | 2006 | _p.P334S CSRPE    | NM_020536    | NP_065397    | Q9H8E8 | CSR2B_HUMAN |                                | 6   | 'TATACTCCCGTG  | 0.512 |
| - | 2  | 138  | 2wtu.2_Missense_  | NM_178312    | NP_842564    | Q9BX51 | GGTL1_HUMAN |                                | 1   | 'CGGAGGTCATG'  | 0.647 |
| + | 2  | 260  | iF4_uc010zts.1_5' | NM_014742    | NP_055557    | Q92544 | TM9S4_HUMAN |                                | 2   | 'GGTTGCCGTGG   | 0.502 |
| + | 3  | 405  | FUT1_uc010ztt.1_  | NM_015352    | NP_056167    | Q9H488 | OFUT1_HUMAN |                                | 1   | 'GCCCCCTGAGA   | 0.597 |
| + | 2  | 310  | _p.G48E KIF3B_u   | NM_004798    | NP_004789    | O15066 | KIF3B_HUMAN | kinesin-motor.                 | 5   | 'CAAAGGGACGG   | 0.517 |
| + | 12 | 2929 | eb.2_Missense_Mi  | NM_015338    | NP_056153    | Q8IXJ9 | ASXL1_HUMAN |                                | 248 | 'AGTCATCCCCTG  | 0.498 |
| + | 6  | 683  | p.D205N PLUNC_    | NM_130852    | NP_570913    | Q9NP55 | PLUNC_HUMAN |                                | 0   | 'TTCTGGACAGC   | 0.537 |
| + | 9  | 1332 | '341_uc010geq.2_  | NM_032819    | NP_116208    | Q9BYN7 | ZN341_HUMAN |                                | 2   | 'AGCAGGTGGTC   | 0.592 |
| + | 4  | 652  |                   | NM_176812    | NP_789782    | Q9H444 | CHM4B_HUMAN | Potential.                     | 2   | 'TCATGGCGGAA   | 0.493 |
| + | 3  | 240  | se_Mutation_p.M1i | NM_031483    | NP_113671    | Q96J02 | ITCH_HUMAN  | C2.                            | 6   | 'ACCATGAAATC   | 0.383 |
| + | 25 | 2720 |                   | NM_020884    | NP_065935    | A7E2Y1 | MYH7B_HUMAN |                                | 2   | 'AACTGGTCATG   | 0.622 |
| - | 19 | 2391 | rPC4AP_uc002xbl   | NM_015638    | NP_056453    | Q8TEL6 | TP4AP_HUMAN |                                | 2   | 'ATGTAGGGCTCC  | 0.587 |
| + | 2  | 372  | ROCR_uc010zuw.'   | NM_006404    | NP_006395    | Q9UNN8 | EPCR_HUMAN  | cellular (Potential).          | 0   | 'AGACACCAACA   | 0.637 |
| + | 9  | 1024 | .vi.1_Missense_Mi | NM_003116    | NP_003107    | Q9NPE6 | SPAG4_HUMAN | SUN.                           | 0   | 'TCCTGGAGGTG   | 0.617 |
| + | 2  | 415  | p.V108M C20orf4_  | NM_015511    | NP_056326    | Q9Y312 | CT004_HUMAN |                                | 0   | 'CTGAGGTGGAG   | 0.592 |
| - | 13 | 1727 | iL1_uc002xgj.1_Mi | NM_002895    | NP_002886    | P28749 | RBL1_HUMAN  | ocket; binds T and E1A.        | 10  | 'CATGTCCCTTG   | 0.478 |
| - | 10 | 1532 | p.R418C TGM2_u    | NM_004613    | NP_004604    | P21980 | TGM2_HUMAN  |                                | 3   | 'CACACGGATCC   | 0.592 |
| - | 5  | 1742 | .nd.2_Missense_M  | NM_002251    | NP_002242    | Q96KK3 | KCNS1_HUMAN | =Segment S6; (Potential).      | 0   | 'TGCTACCACCA   | 0.602 |
| + | 5  | 862  | i2xqi.2_RNA CTS   | NM_001127695 | NP_001121167 | P10619 | PPGB_HUMAN  |                                | 1   | 'CCCCAGCTGGG   | 0.552 |
| - | 18 | 2791 | _p.E2K ZNF335_u   | NM_022095    | NP_071378    | Q9H4Z2 | ZN335_HUMAN |                                | 4   | 'CTCCTCCATAG   | 0.592 |
| + | 1  | 426  | 'ND8_uc002xtb.1_  | NR_024594    |              |        |             |                                | 0   | 'GGCAGGGAACG   | 0.532 |
| + | 16 | 3257 | m.2_Missense_Mi   | NM_181659    | NP_858045    | Q9Y6Q9 | NCOA3_HUMAN |                                | 5   | 'CCATGGAACAA   | 0.483 |
| - | 14 | 4772 |                   | NM_021035    | NP_066363    | Q9P2E3 | ZNFX1_HUMAN |                                | 2   | 'GCAGGGACTAC   | 0.587 |
| + | 5  | 607  | zyk.1_Missense_M  | NM_015266    | NP_056081    | Q9Y2E8 | SL9A8_HUMAN | ical; (Potential).             | 1   | 'CTTCCCCTATT   | 0.393 |
| + | 2  | 340  |                   | NM_032521    | NP_115910    | Q9BYG5 | PAR6B_HUMAN | OPR.                           | 1   | 'CGCTGGAAAGA   | 0.338 |
| - | 4  | 2855 | _p.M481I SALL4_u  | NM_020436    | NP_065169    | Q9UJQ4 | SALL4_HUMAN | C2H2-type 7.                   | 2   | 'GTGTGCATGTA   | 0.458 |
| + | 4  | 358  | i1L_uc002yaf.1_RI | NM_198976    | NP_945327    | Q8IXH7 | NELFD_HUMAN |                                | 3   | 'TGAGGTTTCTG   | 0.413 |
| + | 2  | 593  | 02yav.2_Missense  | NM_080672    | NP_542403    | Q96KR7 | PHAR3_HUMAN |                                | 3   | 'GAGATGGACCA   | 0.582 |
| + | 5  | 1035 | 'TR3_uc002yav.2_  | NM_080672    | NP_542403    | Q96KR7 | PHAR3_HUMAN |                                | 3   | 'GTGTTGAAGAA   | 0.542 |
| - | 16 | 6310 | s.1_Missense_Mu   | NM_033081    | NP_149072    | Q9BTC0 | DIDO1_HUMAN | Pro-rich.                      | 6   | 'CTGCGGGGCTC   | 0.687 |
| - | 4  | 761  | ID10_uc002yhn.2_  | NM_080621    | NP_542188    | Q9BYL1 | SAM10_HUMAN |                                | 0   | 'CTGACCTTGGC'  | 0.682 |
| + | 3  | 383  | se_Mutation_p.G8i | NM_001338    | NP_001329    | P78310 | CXAR_HUMAN  | potential), Ig-like C2-type 1. | 1   | 'TGAAGGCCCGA   | 0.333 |
| - | 2  | 1251 |                   | NM_006988    | NP_008919    | Q9UHI8 | ATS1_HUMAN  | ptidase M12B.                  | 6   | 'GTCTGCCACAA   | 0.463 |
| - | 10 | 1535 | F160_uc010gll.1_F | NM_015565    | NP_056380    | O94822 | LTN1_HUMAN  |                                | 0   | 'AGTTTCTGCTA   | 0.388 |
| - | 2  | 275  | F160_uc010gll.1_F | NM_015565    | NP_056380    | O94822 | LTN1_HUMAN  |                                | 0   | 'ACTCTGAGATG'  | 0.438 |
| - | 1  | 259  |                   | NM_001077711 | NP_001071179 | Q3LI81 | KR271_HUMAN |                                | 2   | 'AGTTACTTTGCT  | 0.478 |
| + | 1  | 339  |                   | NM_181599    | NP_853630    | Q8IUC0 | KR131_HUMAN |                                | 1   | 'CCGCTCCCTGG   | 0.597 |
| - | 9  | 2426 | dl.1_Missense_Mu  | NM_003253    | NP_003244    | Q13009 | TIAM1_HUMAN |                                | 10  | 'GCGGCCCATGG   | 0.478 |
| + | 3  | 368  | tion_p.P34S ITSN' | NM_003024    | NP_003015    | Q15811 | ITSN1_HUMAN | EH 1.                          | 4   | 'TAAAGCCAATAT  | 0.383 |
| + | 2  | 160  |                   | NM_015358    | NP_056173    | Q14149 | MORC3_HUMAN |                                | 2   | 'ACCTGGCCATT   | 0.294 |
| - | 3  | 841  | vo.2_Missense_Mi  | NM_002240    | NP_002231    | P48051 | IRK6_HUMAN  | smic (By similarity).          | 1   | 'TAATACCCTACG' | 0.502 |
| - | 36 | 4193 | se_Mutation_p.D1  | NM_018963    | NP_061836    | Q9NSI6 | BRWD1_HUMAN | Bromo 2.                       | 4   | 'TAATATCTCTGTA | 0.343 |

|   |    |      |                     |              |              |        |             |                              |    |                 |       |             |
|---|----|------|---------------------|--------------|--------------|--------|-------------|------------------------------|----|-----------------|-------|-------------|
| - | 28 | 5369 | AM_uc002yvr.1_F     | NM_001389    | NP_001380    | O60469 | DSCAM_HUMAN | lasmic (Potential).          | 11 | TTACCTCATGAG    | 0.333 |             |
| - | 12 | 1408 | p.G276R TMPRSS      | NM_024022    | NP_076927    | P57727 | TMPS3_HUMAN | . Extracellular (Potential). | 3  | GGGCCCCCGC      | 0.607 |             |
| + | 13 | 1314 | zem.2_Missense_I    | NM_002626    | NP_002617    | P17858 | K6PL_HUMAN  |                              | 0  | CCGTGCGCTCG     | 0.652 |             |
| - | 8  | 1127 | afi.1_Splice_Site_f | NM_001127491 | NP_001120963 | P05107 | ITB2_HUMAN  |                              | 9  | AGACTCACATTG    | 0.587 | rs149804560 |
| - | 1  | 1009 | f57_uc002ziw.2_5'   | NM_003906    | NP_003897    | O60318 | MCM3A_HUMAN |                              | 5  | AGGTCGTTTGT     | 0.542 |             |
| + | 5  | 638  | iq.2_Missense_Mt    | NM_014339    | NP_055154    | Q96F46 | I17RA_HUMAN | ellular (Potential).         | 2  | CCATCCCTGATC    | 0.542 |             |
| - | 5  | 572  | 02zmg.2_Missens     | NM_033070    | NP_149061    | Q9BXW7 | CECR5_HUMAN |                              | 0  | CCTCGGGAGGG     | 0.572 |             |
| + | 5  | 1023 | znq.3_Splice_Site   | NM_017929    | NP_060399    | Q7Z412 | PEX26_HUMAN |                              | 1  | TCCAGGTAAGAC    | 0.567 |             |
| - | 4  | 666  | IGCR2_uc011agr.1    | NM_005137    | NP_005128    | P98153 | IDD_HUMAN   | (Potential). C-type lectin.  | 1  | GGCATCCCAGT     | 0.627 |             |
| + | 1  | 1503 | R14_uc002zou.2_     | NM_053006    | NP_443732    | Q96PF2 | TSSK2_HUMAN |                              | 1  | GACAGGCTTGA     | 0.637 | rs17853776  |
| + | 7  | 750  | Missense_Mutation   | NM_152906    | NP_690870    | Q6ICL3 | CV025_HUMAN |                              | 0  | CTATGGGAACCC    | 0.587 |             |
| - | 3  | 452  | 3CR6L_uc010gsc.     | NM_033257    | NP_150282    | Q9BY27 | DGC6L_HUMAN | Potential.                   | 0  | CTGCTGAGCCG     | 0.687 |             |
| - | 5  | 767  | uc002ztt.1_5'Flank  | NM_001008695 | NP_001008695 | Q9BT49 | THAP7_HUMAN |                              | 0  | GGGCTGCCTCG     | 0.667 |             |
| + | 13 | 3283 | y.1_Missense_Mut    | NM_004327    | NP_004318    | P11274 | BCR_HUMAN   | C2.                          | 12 | 3CATTCCGCTGA    | 0.577 |             |
| + | 6  | 572  | p.E149K CABIN1_     | NM_012295    | NP_036427    | Q9Y6J0 | CABIN_HUMAN | TPR 3.                       | 5  | TTGAGGAAGGG     | 0.532 |             |
| + | 42 | 6583 | tation_p.M1991 A    | NM_032608    | NP_115997    | Q8IUG5 | MY18B_HUMAN |                              | 12 | TCTAGGGATAAC    | 0.398 |             |
| + | 13 | 1145 | eo.2_Missense_Mt    | NM_133455    | NP_597712    | Q96A84 | EMID1_HUMAN | Collagen-like.               | 0  | 3CAGGGGGAACC    | 0.333 |             |
| - | 13 | 1752 | p.G523D AP1B1_      | NM_001127    | NP_001118    | Q10567 | AP1B1_HUMAN |                              | 2  | TGTAGCCACGG     | 0.592 |             |
| - | 9  | 948  | n.1_Missense_Mut    | NM_014303    | NP_055118    | O00541 | PESC_HUMAN  |                              | 0  | CTCCTCTGTGG     | 0.662 |             |
| - | 6  | 5798 |                     | NM_173566    | NP_775837    | Q5THK1 | PR14L_HUMAN |                              | 0  | CCTCCTCCAATA    | 0.582 |             |
| - | 2  | 995  | 3_5'UTR RFPL2_L     | NM_001098527 | NP_001091997 | O75678 | RFPL2_HUMAN |                              | 1  | agcacatagacagat | 0.03  |             |
| - | 3  | 970  | aos.2_Missense_M    | NM_145640    | NP_663615    | O95236 | APOL3_HUMAN |                              | 0  | GCCAGGTGGTC     | 0.562 |             |
| + | 7  | 582  | H4_uc011amw.1_I     | NM_013385    | NP_037517    | Q9UIA0 | CYH4_HUMAN  | SEC7.                        | 2  | CGGGCGAGGCC     | 0.672 |             |
| - | 3  | 2096 |                     | NM_052906    | NP_443138    | Q5R3F8 | LRFN6_HUMAN | lasmic (Potential).          | 2  | GGATGGTCTTC     | 0.612 |             |
| + | 9  | 1269 | ia.1_Missense_Mt    | NM_014291    | NP_055106    | O75600 | KBL_HUMAN   |                              | 0  | ACGGGGCACTG     | 0.617 |             |
| + | 10 | 1090 | p.V287I EIF3L_u     | NM_016091    | NP_057175    | Q9Y262 | EIF3L_HUMAN |                              | 1  | TCCGGGTCTTC     | 0.512 |             |
| - | 7  | 998  | e CSNK1E_uc003      | NM_152221    | NP_689407    | P49674 | KC1E_HUMAN  |                              | 3  | TTCGGCTGGAG     | 0.582 |             |
| + | 3  | 348  | i1_uc011aok.1_5'L   | NM_006116    | NP_006107    | Q15750 | TAB1_HUMAN  | PP2C-like.                   | 1  | CGAGGCCGATG     | 0.647 |             |
| + | 17 | 3655 |                     | NM_001429    | NP_001420    | Q09472 | EP300_HUMAN | Bromo.                       | 64 | 3AATCCCTGTAA    | 0.308 |             |
| + | 28 | 4924 |                     | NM_001429    | NP_001420    | Q09472 | EP300_HUMAN |                              | 64 | CTGGCCCAATG     | 0.393 |             |
| - | 8  | 1225 | odr.1_Missense_M    | NM_015140    | NP_055955    | Q14166 | TTL12_HUMAN | TTL.                         | 1  | ACTGGGGCAGC     | 0.662 |             |
| + | 8  | 865  | p.S13N SAMM5C       | NM_015380    | NP_056195    | Q9Y512 | SAM50_HUMAN |                              | 1  | GACCAGCCACA     | 0.468 |             |
| - | 4  | 473  |                     | NM_001099294 | NP_001092764 | Q3SXP7 | K1644_HUMAN | ical; (Potential).           | 1  | CAGAACCAGCA     | 0.522 |             |
| - | 3  | 390  | 3_Mutation_p.S113   | NM_148674    | NP_683515    | Q8NDV3 | SMC1B_HUMAN |                              | 2  | 3AACGACTCACA    | 0.303 |             |
| - | 1  | 6124 |                     | NM_006071    | NP_006062    | Q9NTG1 | PKDRE_HUMAN | ellular (Potential).         | 5  | AACTGCATGAA     | 0.393 |             |
| - | 32 | 8524 |                     | NM_014246    | NP_055061    | Q9NYQ6 | CELR1_HUMAN | lasmic (Potential).          | 11 | CCTGGCCGGGT     | 0.652 |             |
| + | 5  | 607  | rad.2_Missense_M    | NM_015124    | NP_055939    | Q6IC98 | GRAM4_HUMAN |                              | 1  | ACACTGTGGAG     | 0.687 |             |
| + | 3  | 457  | ie.2_Missense_Mu    | NM_014346    | NP_055161    | Q8WUA7 | TB22A_HUMAN |                              | 1  | GCCAGCGGCAG     | 0.711 |             |
| + | 11 | 1464 | lice_Site_p.Q365    | NM_014346    | NP_055161    | Q8WUA7 | TB22A_HUMAN |                              | 1  | ACCAGGTGAGC     | 0.607 |             |
| + | 8  | 1795 | iy.2_Nonsense_Mt    | NM_031454    | NP_113642    | Q9BVL4 | SELO_HUMAN  |                              | 0  | GCCTGGCAGGC     | 0.647 |             |
| - | 8  | 2137 | uc010has.1_RN       | NM_020461    | NP_065194    | Q96RT7 | GCP6_HUMAN  |                              | 4  | CCCCGCTGTAC     | 0.488 |             |
| - | 20 | 2761 | p.P520S SBF1_u      | NM_002972    | NP_002963    | O95248 | MTMR5_HUMAN |                              | 0  | FACCTGGCACCA    | 0.597 |             |
| + | 19 | 1686 | is.3_RNA NCAPH      | NM_152299    | NP_689512    | Q6IBW4 | CNDH2_HUMAN |                              | 2  | ATGGGGACCAG     | 0.637 |             |
| + | 1  | 1576 |                     | NM_138433    | NP_612442    | Q96G42 | KLD7B_HUMAN | Kelch 4.                     | 1  | TGCCAGCCACC     | 0.657 |             |
| + | 2  | 241  | 3IP2_uc003bmy.2_    | NM_012324    | NP_036456    | Q13387 | JIP2_HUMAN  |                              | 3  | TACTACTGATGAC   | 0.557 |             |
| - | 5  | 945  | 3A_uc003bnd.3_M     | NM_001085426 | NP_001078895 | P15289 | ARSA_HUMAN  |                              | 2  | ACTGAGGGTAG     | 0.612 |             |
| + | 2  | 504  | EC_uc003bto.2_In    | NM_032492    | NP_115881    | Q8N5M9 | JAGN1_HUMAN | renal (Potential).           | 1  | GATGTTCCCTG     | 0.522 |             |

|   |    |         |                    |              |              |        |             |                              |   |              |       |
|---|----|---------|--------------------|--------------|--------------|--------|-------------|------------------------------|---|--------------|-------|
| + | 14 | 1394    | ix.2_Missense_Mi   | NM_153483    | NP_705616    | Q8NFR9 | I17RE_HUMAN | cellular (Potential).        | 1 | CCTGAGGCCAG  | 0.552 |
| - | 3  | 1287    | ik.2_RNA PRRT3_    | NM_207351    | NP_997234    | Q5FWE3 | PRRT3_HUMAN | ar (Potential). Pro-rich.    | 0 | GGGCCCCCATG  | 0.637 |
| + | 11 | 1502    |                    | NM_014229    | NP_055044    | P48066 | S6A11_HUMAN | name=10; (Potential).        | 4 | IGCTGGGTGTAT | 0.587 |
| + | 9  | 1236    | zi.2_Missense_Mi   | NM_003298    | NP_003289    | P49116 | NR2C2_HUMAN |                              | 0 | ITGGAGGAGGGA | 0.493 |
| - | 11 | 3951    | _p.T771I SATB1_u   | NM_002971    | NP_002962    | Q01826 | SATB1_HUMAN |                              | 4 | AAAAGGGTGTTA | 0.378 |
| + | 8  | 2025    | :1D2_uc011awk.1_   | NM_005126    | NP_005117    | Q14995 | NR1D2_HUMAN |                              | 3 | GCACTCTGAGG  | 0.348 |
| + | 2  | 830     |                    | NM_001137674 | NP_001131146 | A6NHJ4 | ZN860_HUMAN | KRAB.                        | 1 | ATGAAAGTCATC | 0.383 |
| + | 2  | 427     |                    | NM_005508    | NP_005499    | P51679 | CCR4_HUMAN  | Name=2; (Potential).         | 1 | ATCTGCTCTTCT | 0.502 |
| + | 2  | 970     |                    | NM_005508    | NP_005499    | P51679 | CCR4_HUMAN  | cellular (Potential).        | 1 | CCCTGGTGGAG  | 0.493 |
| - | 5  | 2297    |                    | NM_015551    | NP_056366    | O60279 | SUSD5_HUMAN | lasmic (Potential).          | 2 | CTTCTCCATCTC | 0.537 |
| + | 2  | 431     | on_p.T72I TRAK1_   | NM_001042646 | NP_001036111 | Q9UPV9 | TRAK1_HUMAN | p1 N-terminal.               | 1 | TCCATACACCTC | 0.478 |
| - | 2  | 360     | _p.D51N CCK_ucf    | NM_000729    | NP_000720    | P06307 | CCKN_HUMAN  |                              | 1 | GCCATCCGTTT  | 0.687 |
| - | 2  | 301_302 | S42_uc003cqj.2_li  | NM_182702    | NP_874361    | Q7Z5A4 | PRS42_HUMAN | peptidase S1.                | 1 | GCCTGCCTTTGG | 0.683 |
| + | 15 | 1378    | 'N23_uc011bax.1_   | NM_015466    | NP_056281    | Q9H3S7 | PTN23_HUMAN |                              | 3 | ICGGCTCTCAGC | 0.577 |
| + | 12 | 2152    | 010hly.2_5'UTR Tf  | NM_130384    | NP_569055    | Q8WXE1 | ATRIP_HUMAN |                              | 1 | IGGGACCCCAA  | 0.647 |
| - | 2  | 310     | om.1_Missense_M    | NM_000581    | NP_000572    | P07203 | GPX1_HUMAN  |                              | 1 | TGCACGGGAAG  | 0.617 |
| - | 1  | 619     | _p.D119N MST1R_    | NM_002447    | NP_002438    | Q04912 | RON_HUMAN   | ilar (Potential). Sema.      | 6 | TGTGTCTGTGTC | 0.677 |
| + | 8  | 1823    | M6_uc003cye.2_M    | NM_005777    | NP_005768    | P78332 | RBM6_HUMAN  |                              | 2 | CAAGAGAAGGT  | 0.388 |
| - | 7  | 805     | af.1_5'Flank RAS   | NM_015896    | NP_056980    | O75800 | ZMY10_HUMAN |                              | 5 | GTTCCACCAGG  | 0.597 |
| - | 14 | 3359    | bf.1_Missense_Mi   | NM_014703    | NP_055518    | Q9Y4B6 | VRBP_HUMAN  |                              | 2 | CCCTCCATACT  | 0.463 |
| - | 2  | 136     | _5'Flank PARP3_u   | NM_004704    | NP_004695    | O43818 | U3IP2_HUMAN | lization signal (Potential). | 3 | CCCCGCAGAGT  | 0.587 |
| + | 5  | 1589    | C_uc003ddp.1_Silk  | NM_145262    | NP_660305    | Q8IVS8 | GLCTK_HUMAN |                              | 0 | CCAGGGTGGGG  | 0.582 |
| - | 20 | 2236    | H4_uc011bem.1_M    | NM_002218    | NP_002209    | Q14624 | ITIH4_HUMAN |                              | 3 | GATGGCAGAGG  | 0.677 |
| - | 9  | 1141    | .E233K ITIH4_uc0   | NM_002218    | NP_002209    | Q14624 | ITIH4_HUMAN | VWFA.                        | 3 | CTCCTCTGGT   | 0.617 |
| + | 1  | 946     | iv.2_Missense_Mu   | NM_177966    | NP_808881    | Q6L8Q7 | PDE12_HUMAN |                              | 0 | CTGGGCTTGGC  | 0.582 |
| - | 8  | 2256    |                    | NM_198859    | NP_942559    | Q7Z3G6 | PRIC2_HUMAN |                              | 5 | CATCAGCAGAG  | 0.493 |
| - | 11 | 1609    | id.2_Missense_Mi   | NM_018130    | NP_060600    | Q6PI26 | SHQ1_HUMAN  |                              | 3 | GAAAGGCACTG  | 0.478 |
| + | 5  | 1415    |                    | NM_153605    | NP_705833    |        |             |                              | 0 | CTGACCCAGCC  | 0.423 |
| + | 11 | 2191    |                    | NM_153605    | NP_705833    |        |             |                              | 0 | AACTGGTGAGT  | 0.348 |
| - | 11 | 1120    | _p.S338R ABI3BP_   | NM_015429    | NP_056244    | Q7Z7G0 | TARSH_HUMAN |                              | 4 | TTTAGTGCTTCT | 0.348 |
| - | 4  | 1034    | 'BTB20_uc003eb1.   | NM_015642    | NP_056457    | Q9HC78 | ZBT20_HUMAN |                              | 5 | AGCTGGGGTCT  | 0.662 |
| + | 3  | 178     | IPK1B_uc003ecd.2   | NM_006952    | NP_008883    | O75841 | UPK1B_HUMAN | ical; (Potential).           | 0 | CCTGACTCGCG  | 0.557 |
| + | 5  | 1976    |                    | NM_001102608 | NP_001096078 | A6NMZ7 | CO6A6_HUMAN | cal region. VWFA 4.          | 8 | ACCTGGTGAGC  | 0.418 |
| - | 20 | 2942    | _Site_p.R432_splic | NM_006219    | NP_006210    | P42338 | PK3CB_HUMAN |                              | 5 | ACTCACCGGCC  | 0.413 |
| + | 2  | 619     | e_Mutation_p.S16   | NM_032383    | NP_115759    | Q969F9 | HPS3_HUMAN  |                              | 6 | TATTTAGTTTGA | 0.378 |
| + | 1  | 2101    | 3C22D2_uc003exo    | NM_014779    | NP_055594    | O75157 | T22D2_HUMAN |                              | 1 | TCAGACCCAGC  | 0.498 |
| - | 6  | 982     | .Q46_splice IFT80  | NM_020800    | NP_065851    | Q9P2H3 | IFT80_HUMAN |                              | 1 | AAAGTACCTGCA | 0.423 |
| + | 8  | 1080    | _p.S303F FNDC3E    | NM_022763    | NP_073600    | Q53EP0 | FND3B_HUMAN | nectin type-III 1.           | 3 | ACTTTCTGTGT  | 0.443 |
| + | 24 | 3228    | hz.3_Missense_Mi   | NM_022763    | NP_073600    | Q53EP0 | FND3B_HUMAN | nectin type-III 8.           | 3 | CCAGAGACTGAG | 0.468 |
| + | 10 | 1121    | e_Mutation_p.A36   | NM_033540    | NP_284941    | Q8IWA4 | MFN1_HUMAN  | lasmic (Potential).          | 3 | GTCAGCAGTGA  | 0.408 |
| - | 1  | 148     | 3C39_uc003fkn.2_   | NM_181426    | NP_852091    | Q9UFE4 | CCD39_HUMAN |                              | 4 | TCTCTCCAGTGT | 0.552 |
| + | 15 | 1911    | it.2_Missense_Mu   | NM_004423    | NP_004414    | Q92997 | DVL3_HUMAN  |                              | 3 | AGGACCCGAAG  | 0.726 |
| + | 11 | 1481    | fof.2_Missense_M   | NM_003741    | NP_003732    | Q9H2X0 | CHRD_HUMAN  | CHRD 3.                      | 3 | TTGTGGGGCTG  | 0.607 |
| + | 3  | 444     | bru.1_Intron MAP   | NM_004721    | NP_004712    | O43283 | M3K13_HUMAN |                              | 3 | AGAGCGTGAC   | 0.532 |
| + | 20 | 2095    | j.2_Nonsense_Mu    | NM_015560    | NP_056375    | O60313 | OPA1_HUMAN  | termembrane (By similarity   | 0 | ATCCTTCAACAA | 0.289 |
| - | 2  | 1494    |                    | NM_001080513 | NP_001073982 | P22792 | CPN2_HUMAN  | p.W468R(1)                   | 5 | AGATCCAGCTT  | 0.667 |
| - | 2  | 252     |                    | NM_004488    | NP_004479    | P40197 | GPV_HUMAN   | cellular (Potential).        | 3 | GGACGGTCATG  | 0.637 |

rs147690863

|   |    |       |                    |           |           |        |             |                               |      |                |       |             |
|---|----|-------|--------------------|-----------|-----------|--------|-------------|-------------------------------|------|----------------|-------|-------------|
| - | 13 | 1876  | ftz.1_Missense_IV  | NM_024524 | NP_078800 | Q9H7F0 | AT133_HUMAN |                               | 1    | ATTGAGCTGTC    | 0.343 |             |
| - | 3  | 8372  | C4_uc003fvp.2_Inl  | NM_018406 | NP_060876 | Q99102 | MUC4_HUMAN  |                               | 0    | GGTGGCGTGAC    | 0.572 |             |
| - | 3  | 8369  | C4_uc003fvp.2_Inl  | NM_018406 | NP_060876 | Q99102 | MUC4_HUMAN  |                               | 0    | GGCGTGACCTG    | 0.572 |             |
| - | 2  | 6305  | C4_uc003fvp.2_Inl  | NM_018406 | NP_060876 | Q99102 | MUC4_HUMAN  |                               | 0    | GGTGTGACCTG    | 0.597 |             |
| - | 2  | 5153  | C4_uc003fvp.2_Inl  | NM_018406 | NP_060876 | Q99102 | MUC4_HUMAN  |                               | 0    | GGTGTGACCTG    | 0.572 |             |
| - | 10 | 1165  | IA_uc003fwh.2_Mi   | NM_005017 | NP_005008 | P49585 | PCY1A_HUMAN | ximate. 3 X repeats.          | 0    | AGGGGGAGGGG    | 0.607 |             |
| + | 1  | 4077  |                    | NM_175918 | NP_787114 | Q8N1N5 | CRPAK_HUMAN | action with PAK1.             | 0    | AGTGCCCGCCT    | 0.657 |             |
| + | 8  | 1293  | n_p.G346E FGFR     | NM_000142 | NP_000133 | P22607 | FGFR3_HUMAN | 3. Extracellular (Potential). | 2600 | TATTGGGTTTTT   | 0.617 |             |
| - | 14 | 1666  | N_uc010ich.1_Intr  | NM_181808 | NP_861524 | Q7Z5Q5 | DPOLN_HUMAN |                               | 4    | GGAGCCCTTTA    | 0.433 |             |
| + | 19 | 3014  | IAN2B2_uc011bwf    | NM_015274 | NP_056089 | Q9Y2E5 | MA2B2_HUMAN |                               | 2    | CATCACCGTCC    | 0.612 |             |
| - | 2  | 373   | .1_Intron TAPT1_u  | NM_153365 | NP_699196 | Q6NXT6 | TAPT1_HUMAN |                               | 0    | TGTATACTCTTTC  | 0.348 |             |
| - | 3  | 636   | jgo.2_Missense_IV  | NM_145290 | NP_660333 | Q8IWK6 | GP125_HUMAN | ilar (Potential). LRR 2.      | 1    | AGAAGGCACCT    | 0.338 |             |
| - | 8  | 1576  | :GC1A_uc011bxp.    | NM_013261 | NP_037393 | Q9UBK2 | PRGC1_HUMAN |                               | 8    | ACTGTCCCTCA    | 0.463 |             |
| + | 8  | 695   | A74V ANAPC4_uc     | NM_013367 | NP_037499 | Q9UJX5 | APC4_HUMAN  |                               | 5    | TTTATGCTTATGC  | 0.338 |             |
| - | 4  | 2381  |                    | NM_003263 | NP_003254 | Q15399 | TLR1_HUMAN  | smic (Potential). TIR.        | 5    | ACTCTGGACAA    | 0.413 |             |
| + | 4  | 2012  | j.1_Missense_Mut   | NM_175737 | NP_783864 | Q86Z14 | KLOTB_HUMAN | ntial). Glycosyl hydrolase-   | 1    | CGATGGTCACC    | 0.647 | rs144804057 |
| - | 1  | 463   | jm.2_Missense_Mu   | NM_152540 | NP_689753 | Q8WU76 | SCFD2_HUMAN |                               | 3    | GGACAGCGTGG    | 0.612 |             |
| + | 2  | 568   | ST_uc003hcg.1_Mi   | NM_005612 | NP_005603 | Q13127 | REST_HUMAN  | ction with SIN3A.             | 9    | GATGGCAGAAC    | 0.473 |             |
| - | 2  | 392   | .1_Missense_Mut    | NM_004439 | NP_004430 | P54756 | EPHA5_HUMAN | ellular (Potential).          | 24   | AGTGCCTGAAT    | 0.308 |             |
| + | 9  | 1209  | LB_uc003hgu.3_N    | NM_000477 | NP_000468 | P02768 | ALBU_HUMAN  | Albumin 2.                    | 6    | TGAAACCACTCT   | 0.383 |             |
| + | 11 | 1549  | .2_Missense_Mut    | NM_198892 | NP_942595 | Q9NSY1 | BMP2K_HUMAN | Gln/His-rich.                 | 1    | ACcagcagcagcag | 0.244 |             |
| + | 12 | 1657  | e.1_Missense_Mu    | NM_001263 | NP_001254 | Q92903 | CDS1_HUMAN  |                               | 4    | GATTTTGCAAAAT  | 0.338 |             |
| - | 3  | 778   |                    | NM_145244 | NP_660287 | Q96D03 | DDT4L_HUMAN |                               | 1    | AGGACCCTTCA    | 0.393 |             |
| - | 39 | 6313  | e_Mutation_p.V19   | NM_001813 | NP_001804 | Q02224 | CENPE_HUMAN | Potential.                    | 9    | TTTTACTTGGTC   | 0.368 |             |
| + | 1  | 153   |                    | NM_021227 | NP_067050 | Q9NRP0 | OSTC_HUMAN  | lasmic (Potential).           | 1    | ACATGCCGTCG    | 0.587 |             |
| - | 4  | 3488  | _p.S245F PCDH1E    | NM_019035 | NP_061908 | Q9HCL0 | PCD18_HUMAN | y similarity). Cytoplasmic (I | 5    | CCAGGGAGTTG    | 0.562 |             |
| - | 3  | 1226  | _p.M393T ZNF827    | NM_178835 | NP_849157 | Q17R98 | ZN827_HUMAN | 2H2-type 1.                   | 0    | TACCATGTGCG    | 0.458 |             |
| + | 10 | 1646  |                    | NM_000824 | NP_000815 | P48167 | GLRB_HUMAN  | ical; (Probable).             | 2    | TGTTTCTTTCT    | 0.353 |             |
| + | 4  | 933   |                    | NM_006174 | NP_006165 | Q15761 | NPY5R_HUMAN | lasmic (Potential).           | 7    | CTTGAAGAAAAT   | 0.378 |             |
| + | 9  | 1489  | R17_uc003ium.3_I   | NM_170710 | NP_733828 | Q8IZU2 | WDR17_HUMAN | WD 7.                         | 6    | CTTGGGCTCCA    | 0.338 |             |
| - | 12 | 1318  | .G342R ACSL1_uc    | NM_001995 | NP_001986 | P33121 | ACSL1_HUMAN | lasmic (Potential).           | 2    | AAAATCCGATTT   | 0.448 |             |
| - | 15 | 3269  | p.Q1059* TERT_u    | NM_198253 | NP_937983 | O14746 | TERT_HUMAN  | CTE.                          | 12   | CCACTGCACGG    | 0.667 |             |
| + | 13 | 1891  |                    | NM_015325 | NP_056140 | Q9Y2F5 | K0947_HUMAN |                               | 2    | TGATGGGATCGC   | 0.423 |             |
| - | 2  | 870   | ae.3_5'Flank MTRf  | NM_024091 | NP_076996 | Q14CZ7 | FAKD3_HUMAN |                               | 4    | TTCACCTTGAAC   | 0.383 |             |
| - | 3  | 856   | P255L SLC45A2_L    | NM_016180 | NP_057264 | Q9UMX9 | S45A2_HUMAN | lasmic (Potential).           | 3    | CCTGAGGGGTT    | 0.468 |             |
| - | 12 | 2461  | v.2_Missense_Mut   | NM_001343 | NP_001334 | P98082 | DAB2_HUMAN  |                               | 3    | ATCCCAAGTGC    | 0.557 |             |
| - | 12 | 1997  | 1_Missense_Muta    | NM_000065 | NP_000056 | P13671 | CO6_HUMAN   | TSP type-1 3.                 | 7    | CTCCTCGTTGGC   | 0.502 | rs148521858 |
| - | 3  | 737   | se_Mutation_p.D8!  | NM_006451 | NP_006442 | Q9H074 | PAIP1_HUMAN | MIF4G.                        | 1    | AAAAATCCTGAA   | 0.368 |             |
| + | 1  | 1670  | _p.A494T SNX18_    | NM_052870 | NP_443102 | Q96RF0 | SNX18_HUMAN | BAR.                          | 0    | CTATCGCCTTCA   | 0.612 |             |
| - | 10 | 1010  | se_Mutation_p.S3   | NM_015084 | NP_055899 | Q92552 | RT27_HUMAN  |                               | 0    | GCTTGGACTGC    | 0.473 |             |
| + | 2  | 10093 |                    | NM_153610 | NP_705838 | Q8N3K9 | CMYA5_HUMAN |                               | 9    | CGTTCCATTTC    | 0.493 |             |
| + | 7  | 1546  | u.2_Missense_Mu    | NM_004385 | NP_004376 | P13611 | CSPG2_HUMAN | minoglycan attachment dor     | 16   | CCCTCCCGTGG    | 0.433 |             |
| - | 6  | 889   | kip.1_Splice_Site_ | NM_005711 | NP_005702 | O43854 | EDIL3_HUMAN |                               | 2    | GCACTCTGGAA    | 0.348 |             |
| + | 2  | 306   | cuc.1_Missense_M   | NM_006467 | NP_006458 | O15318 | RPC7_HUMAN  |                               | 0    | CACCCCACTA     | 0.348 |             |
| - | 10 | 1636  |                    | NM_001270 | NP_001261 | O14646 | CHD1_HUMAN  | ase ATP-binding.              | 5    | TTGACCAAGA     | 0.333 |             |
| - | 4  | 1241  | ation_p.L248F TIC  | NM_021649 | NP_067681 | Q86XR7 | TCAM2_HUMAN | TIR.                          | 0    | TTTGAGGAACA    | 0.458 |             |
| + | 36 | 8384  | .l.1_Missense_Mut  | NM_005509 | NP_005500 | Q9Y485 | DMXL1_HUMAN |                               | 2    | GCAGAGGAGCA    | 0.343 |             |

|   |    |           |                     |              |              |        |             |                                |    |                  |       |             |
|---|----|-----------|---------------------|--------------|--------------|--------|-------------|--------------------------------|----|------------------|-------|-------------|
| - | 1  | 976       | ise_Mutation_p.E2   | NM_020747    | NP_065798    | Q9ULD9 | ZN608_HUMAN | Potential.                     | 6  | CCTCTTCCTTCT     | 0.542 |             |
| - | 11 | 1422      | ə_Mutation_p.D40l   | NM_016340    | NP_057424    | Q8TEU7 | RPGF6_HUMAN |                                | 3  | CCGGTCTAGTT      | 0.373 |             |
| - | 4  | 1754      | 3kxy.1_Missense_I   | NM_133456    | NP_597713    | Q2M3G4 | SHRM1_HUMAN |                                | 1  | GTATCCTCCCCA     | 0.577 |             |
| + | 5  | 564       | tl.2_Missense_Mul   | NM_015288    | NP_056103    | Q9NQC1 | JADE2_HUMAN |                                | 0  | CCCAGCCTGAT      | 0.582 |             |
| + | 10 | 1844      | cxu.1_Missense_Iv   | NM_021982    | NP_068817    | O95486 | SC24A_HUMAN |                                | 0  | CGAAACTGGAT      | 0.328 |             |
| - | 9  | 761       | r_p.V169 BRD8_L     | NM_139199    | NP_631938    | Q9H0E9 | BRD8_HUMAN  |                                | 1  | GCCTACCTCCA      | 0.522 |             |
| - | 2  | 514       | RNA APBB3_uc01      | NM_133172    | NP_573418    | O95704 | APBB3_HUMAN | WW.                            | 2  | GTGCTACCGCTG     | 0.612 |             |
| - | 3  | 293       | ARS_uc010 fu.2_I    | NM_002109    | NP_002100    | P12081 | SYHC_HUMAN  |                                | 2  | AACTGCCATCT      | 0.448 |             |
| + | 1  | 2389      | Idan.1_Missense_    | NM_018912    | NP_061735    | Q9Y5H4 | PCDG1_HUMAN | lasmic (Potential).            | 3  | CAGTCTTTACTT     | 0.418 |             |
| + | 1  | 2038      | _Intron PCDHGA7     | NM_018913    | NP_061736    | Q9Y5H3 | PCDGA_HUMAN | Extracellular (Potential).     | 0  | ACCTCGGCAGC      | 0.652 |             |
| - | 3  | 3184      | .R1023C PCDH1_      | NM_002587    | NP_002578    | Q08174 | PCDH1_HUMAN | lasmic (Potential).            | 5  | GGTGCCGTAGC      | 0.632 | rs147327566 |
| - | 6  | 809       | or.1_Missense_Mu    | NM_020117    | NP_064502    | Q9P2J5 | SYLC_HUMAN  |                                | 0  | TTAAATCCTGAAT    | 0.323 |             |
| + | 7  | 1362      | p.A420V TCERG1      | NM_006706    | NP_006697    | O14776 | TCRG1_HUMAN | WW 2.                          | 2  | AACAGCAGATGC     | 0.383 |             |
| - | 9  | 1066      | oo.2_Missense_M     | NM_001387    | NP_001378    | Q14195 | DPYL3_HUMAN |                                | 1  | AGCAAGGAGTTG     | 0.557 |             |
| + | 8  | 991       | l_p.T287I AFAP1L    | NM_152406    | NP_689619    | Q8TED9 | AF1L1_HUMAN | PH 1.                          | 2  | TTTCAACCAGG      | 0.627 |             |
| + | 2  | 289       | dca.1_Missense_I    | NM_152407    | NP_689620    | Q8TAA5 | GRPE2_HUMAN |                                | 1  | TTGGGCCCCCT      | 0.483 |             |
| - | 10 | 1869      | jhd.2_Missense_M    | NM_002609    | NP_002600    | P09619 | PGFRB_HUMAN | potential). Ig-like C2-type 5. | 17 | GTTCCTCCAGC      | 0.617 |             |
| + | 11 | 1985      | IA1_uc011 dcx.1_I   | NM_001114183 | NP_001107655 | P42261 | GRIA1_HUMAN | ical; (Potential).             | 6  | ATTTGGATGTG      | 0.448 |             |
| + | 11 | 2294      | l_p.T545I LARP1_    | NM_033551    | NP_291029    | Q6PKG0 | LARP1_HUMAN |                                | 4  | GAACACCTTCA      | 0.507 |             |
| - | 12 | 1266      | M19_uc003 lwy.2_I   | NM_033274    | NP_150377    | Q9H013 | ADA19_HUMAN | B. Extracellular (Potential).  | 8  | CATTTCCACCA      | 0.542 |             |
| + | 5  | 1126      | p.A255S ODZ2_u      | NM_001122679 | NP_001116151 |        |             |                                | 10 | AATGTGCTGCC      | 0.562 |             |
| + | 9  | 885       | CK2_uc011 der.1_F   | NM_004946    | NP_004937    | Q92608 | DOCK2_HUMAN |                                | 7  | CTAAGGAGATT      | 0.507 |             |
| - | 2  | 1116      |                     | NM_004387    | NP_004378    | P52952 | NKX25_HUMAN |                                | 1  | ACTCCCAGAT       | 0.657 |             |
| - | 5  | 493       | p.K134K NOP16_      | NM_016391    | NP_057475    | Q9Y3C1 | NOP16_HUMAN |                                | 2  | GAAAGTCTTGCC     | 0.512 |             |
| - | 3  | 280       | uc003 mez.2_5F      | NM_002115    | NP_002106    | P52790 | HXK3_HUMAN  | Regulatory.                    | 7  | GTCCCTCAGC       | 0.622 |             |
| + | 3  | 695       | P3_uc003 mil.1_5F   | NM_015111    | NP_055926    | O15049 | N4BP3_HUMAN |                                | 0  | GCCTGCACACG      | 0.682 |             |
| + | 5  | 1209      | kz.1_Missense_Mi    | NM_182594    | NP_872400    | Q8N9F8 | ZN454_HUMAN | C2H2-type 5.                   | 3  | CAGGGCACACC      | 0.383 |             |
| - | 22 | 3436      | uc003 mjv.3_5 Flanl | NM_014244    | NP_055059    | O95450 | ATS2_HUMAN  |                                | 4  | GGAGGCATTGA      | 0.567 |             |
| - | 6  | 788       | p.A173T MAPK9_L     | NM_002752    | NP_002743    | P45984 | MK09_HUMAN  | rotein kinase.                 | 4  | CCGGCCAGGC       | 0.488 |             |
| - | 18 | 2029      |                     | NM_005110    | NP_005101    | O94808 | GFPT2_HUMAN | SIS 2.                         | 2  | GGAGGCAGTCC      | 0.532 |             |
| + | 4  | 1448      | imua.2_Splice_Site  | NM_020135    | NP_064520    | Q96S55 | WRIP1_HUMAN |                                | 2  | TTTCAAGCCCG      | 0.522 |             |
| + | 23 | 5347      | P_uc003 mq.1_Inl    | NM_004415    | NP_004406    | P15924 | DESP_HUMAN  | us rod domain. Potential.      | 9  | CGATAGAAGAT      | 0.458 |             |
| - | 10 | 1172      | myb.2_Missense_     | NM_001142541 | NP_001136013 | Q9H1N7 | S35B3_HUMAN | ical; (Potential).             | 0  | GTGTCATTGCTT     | 0.259 |             |
| + | 10 | 1689      | rag.1_Missense_Iv   | NM_030948    | NP_112210    | Q9C0D0 | PHAR1_HUMAN |                                | 0  | GGCTGGAGCTG      | 0.572 |             |
| + | 5  | 487       |                     | NM_016167    | NP_057251    | Q9UMY1 | NOL7_HUMAN  |                                | 0  | AAAAGGAAATG      | 0.294 |             |
| - | 9  | 1411      | p.C404Y NUP153      | NM_005124    | NP_005115    | P49790 | NU153_HUMAN |                                | 9  | ACTGCACTTG       | 0.308 |             |
| - | 39 | 5003      | p.T1598I KIF13A_    | NM_022113    | NP_071396    | Q9H1H9 | KI13A_HUMAN |                                | 4  | GCTCGGTGGAG      | 0.507 |             |
| - | 23 | 3029      | rch.3_Missense_M    | NM_022113    | NP_071396    | Q9H1H9 | KI13A_HUMAN |                                | 4  | TTCTTGTCTTAC     | 0.418 |             |
| - | 4  | 529       | r1_uc011 dji.1_Spli | NM_001080480 | NP_001073949 | Q6ZNC8 | MBOA1_HUMAN |                                | 0  | AATATCTGAAAC     | 0.368 |             |
| + | 1  | 35        | H2BL_uc003 njl.2_I  | NM_003536    | NP_003527    | P68431 | H31_HUMAN   | p.R9G(1)                       | 1  | CTGCTCGCAAG      | 0.587 |             |
| - | 4  | 2803      |                     | NM_052923    | NP_443155    | Q6R2W3 | SCND3_HUMAN |                                | 1  | tagcatgaactcttgg | 0     |             |
| + | 1  | 905       |                     | NM_013936    | NP_039224    | P58182 | O12D2_HUMAN | Name=7; (Potential).           | 1  | TCACTCCTGTA      | 0.448 |             |
| + | 3  | 484       | se_Mutation_p.G1    | NM_030883    | NP_112145    | Q9GZK4 | OR2H1_HUMAN | ellular (Potential).           | 0  | TCTGGGCTTCT      | 0.527 |             |
| - | 4  | 631       | nl.3_Missense_Mu    | NM_001109809 | NP_001103279 | Q9NU63 | ZFP57_HUMAN |                                | 5  | CTGTCCATAGT      | 0.577 |             |
| - | 4  | 1159      | 39_uc003 npd.2_Ir   | NM_025236    | NP_079512    | Q9H2S5 | RNF39_HUMAN | 330.2/SPRY.                    | 0  | CCACGCAATG       | 0.761 |             |
| - | 10 | 3795      | IC1_uc011 dmp.1_    | NM_014641    | NP_055456    | Q14676 | MDC1_HUMAN  | Pro-rich.                      | 4  | AGCTGGAAAGG      | 0.572 |             |
| + | 2  | 3595_3596 |                     | NM_080870    | NP_543146    | Q3MIW9 | DPCR1_HUMAN | ar (Potential). Thr-rich.      | 0  | CAAAGGGAAA       | 0.48  |             |



|   |    |       |                   |              |              |        |                                       |     |               |       |             |
|---|----|-------|-------------------|--------------|--------------|--------|---------------------------------------|-----|---------------|-------|-------------|
| - | 1  | 1031  |                   | NM_021184    | NP_067007    | O95873 | CF047_HUMAN                           | 1   | AAGCAGCCCCA   | 0.542 |             |
| + | 3  | 543   | _5'Flank RDBP_uc  | NM_006929    | NP_008860    | Q15477 | SKIV2_HUMAN                           | 4   | GTGCCCCAGAT   | 0.542 |             |
| + | 3  | 160   | 10jtu.1_3'UTR EGF | NM_030652    | NP_085155    | Q99944 | EGFL8_HUMAN                           | 0   | ACGCAGTCAGG   | 0.617 | rs143726348 |
| + | 6  | 627   | FL8_uc003oac.1_I  | NM_030652    | NP_085155    | Q99944 | EGFL8_HUMAN                           | 0   | AGAGCCCCCAA   | 0.667 |             |
| - | 66 | 5387  | cy.1_Missense_Mu  | NM_080680    | NP_542411    | P13942 | COBA2_HUMAN lar collagen NC1.         | 5   | GTGGGGCTCCC   | 0.647 |             |
| + | 41 | 5714  | r3_uc003oey.2_5'F | NM_002224    | NP_002215    | Q14573 | ITPR3_HUMAN lasmic (Potential).       | 19  | TGGCCTCCTTCT  | 0.682 |             |
| + | 6  | 470   |                   | NM_003093    | NP_003084    | P09234 | RU1C_HUMAN                            | 1   | TGGGCCCGGAA   | 0.552 |             |
| + | 12 | 1535  | K14_uc003oir.2_3  | NM_001315    | NP_001306    | Q16539 | MK14_HUMAN                            | 6   | CACCACCCCTT   | 0.478 |             |
| - | 4  | 320   |                   | NM_138493    | NP_612502    | Q9P0B6 | CF129_HUMAN ical; (Potential).        | 0   | FCAGGAGGATAA  | 0.537 |             |
| + | 14 | 2116  | 51_splice FOXP4_  | NM_001012426 | NP_001012426 | Q8IVH2 | FOXP4_HUMAN                           | 1   | ACAGGGTATGT   | 0.622 |             |
| - | 5  | 498   |                   | NM_006653    | NP_006644    | O43559 | FRS3_HUMAN RS-type PTB.               | 2   | ATATTCCTGGAC  | 0.488 |             |
| + | 13 | 2931  | _p.P927L KIAA024  | NM_015349    | NP_056164    | Q6AI39 | K0240_HUMAN                           | 1   | AGAGCCTCTGA   | 0.527 |             |
| - | 3  | 473   | rk KLHDC3_uc003   | NM_014623    | NP_055438    | Q16626 | MEA1_HUMAN                            | 2   | TTTTACCTGGG   | 0.433 | rs113749803 |
| + | 8  | 1322  | o.G409E SLC22A7   | NM_153320    | NP_696961    | Q9Y694 | S22A7_HUMAN ical; (Potential).        | 0   | AGCTGGGACAC   | 0.647 |             |
| + | 11 | 2022  | LH_uc011dvl.1_R   | NM_006502    | NP_006493    | Q9Y253 | POLH_HUMAN                            | 2   | TCCAGGGTGTG   | 0.463 |             |
| + | 5  | 670   | dvq.1_Missense_M  | NM_004955    | NP_004946    | Q99808 | S29A1_HUMAN ical; (Potential).        | 3   | CCTGGGCAGCC   | 0.602 |             |
| - | 11 | 1085  | u.p.T93I SUPT3H_  | NM_181356    | NP_852001    | O75486 | SUPT3_HUMAN p.T256T(1)                | 3   | CCCTTGGTTACC  | 0.413 |             |
| - | 2  | 157   |                   | NM_001037499 | NP_001032588 | Q30KQ6 | DB114_HUMAN                           | 1   | TCTTGGTAAGG   | 0.388 |             |
| - | 33 | 5522  | ai.2_Missense_Mu  | NM_138694    | NP_619639    | P08F94 | PKHD1_HUMAN ellular (Potential).      | 44  | TTCACCCAGG    | 0.483 |             |
| - | 22 | 2486  | iai.2_Missense_Mt | NM_138694    | NP_619639    | P08F94 | PKHD1_HUMAN ellular (Potential).      | 44  | GAGGGGATCCC   | 0.557 |             |
| - | 1  | 860   | xf.1_Missense_Mt  | NM_021073    | NP_066551    | P22003 | BMP5_HUMAN                            | 2   | TATTTCCCGTCT  | 0.453 |             |
| - | 4  | 465   | i23_uc010kac.2_M  | NM_183227    | NP_899050    | Q9ULC3 | RAB23_HUMAN                           | 1   | CACGAGCACAC   | 0.353 |             |
| - | 1  | 1005  | GAT2_uc003pfw.2   | NM_080742    | NP_542780    | Q9NPZ5 | B3GA2_HUMAN enal (Potential).         | 3   | GTCCCTCCACCA  | 0.726 |             |
| + | 1  | 543   | 3_5'Flank DDX43_  | NM_018665    | NP_061135    | Q9NXZ2 | DDX43_HUMAN KH.                       | 4   | ACGAGGAAGT    | 0.622 |             |
| + | 17 | 1994  | _p.R572K MYO6_u   | NM_004999    | NP_004990    | Q9UM54 | MYO6_HUMAN osin head-like.            | 2   | ATATCAGAGACG  | 0.338 |             |
| - | 3  | 557   | bq.1_Missense_M   | NM_001080508 | NP_001073977 | O95935 | TBX18_HUMAN T-box.                    | 5   | GCAATGTAATATT | 0.383 |             |
| + | 6  | 690   | l_Missense_Mutat  | NM_006416    | NP_006407    | P78382 | S35A1_HUMAN lasmic (Potential).       | 0   | CAGATACTTCTC  | 0.294 |             |
| - | 63 | 10189 |                   | NM_014611    | NP_055426    | Q9NU22 | MDN1_HUMAN                            | 10  | GTGGCCCATCT   | 0.602 |             |
| - | 34 | 4900  |                   | NM_014611    | NP_055426    | Q9NU22 | MDN1_HUMAN                            | 10  | TTTCTGCCAAAC  | 0.448 |             |
| + | 7  | 1544  | ense_Mutation_p.  | NM_001137667 | NP_001131139 | Q9UKL3 | C8AP2_HUMAN                           | 2   | CTAAGGAAGTT   | 0.348 |             |
| - | 3  | 933   | ac.1_Missense_Mt  | NM_004440    | NP_004431    | Q15375 | EPHA7_HUMAN ar (Potential). Cys-rich. | 28  | TCCCTCGAACC   | 0.463 |             |
| + | 3  | 1086  |                   | NM_006581    | NP_006572    | Q9Y231 | FUT9_HUMAN enal (Potential).          | 5   | CAATCCACAAG   | 0.363 |             |
| - | 6  | 1280  | oqi.1_Missense_Mt | NM_001040179 | NP_001035269 | Q969V1 | MCHR2_HUMAN lasmic (Potential).       | 8   | GCTCTTCTTTGG  | 0.423 |             |
| - | 6  | 1307  | ef.1_Missense_Mt  | NM_145062    | NP_659499    | Q96AP4 | ZUFSP_HUMAN                           | 1   | FTGTCGCCTAA   | 0.383 |             |
| + | 1  | 275   |                   | NM_173560    | NP_775831    | Q8HWS3 | RFX6_HUMAN                            | 3   | GGGGGCAGTGA   | 0.607 |             |
| - | 18 | 3003  | .1_RNA GOPC_uc    | NM_002944    | NP_002935    | P08922 | ROS_HUMAN ellular (Potential).        | 25  | GCAGGGGCTTA   | 0.363 |             |
| - | 12 | 2483  | ou.1_Missense_Mt  | NM_002844    | NP_002835    | Q15262 | PTPRK_HUMAN ellular (Potential).      | 8   | TATCCTTTGCC   | 0.512 |             |
| - | 3  | 830   | e_Mutation_p.A15  | NM_002844    | NP_002835    | Q15262 | PTPRK_HUMAN lar (Potential). MAM.     | 8   | CTACTGCTAGCT  | 0.408 |             |
| + | 41 | 6001  | o.2_Missense_Mu   | NM_000426    | NP_000417    | P24043 | LAMA2_HUMAN n II and I. Potential.    | 10  | AGGAAGATGCC   | 0.338 |             |
| + | 3  | 1920  | Okfi.2_Missense_M | NM_052913    | NP_443145    | Q86VY9 | T200A_HUMAN lasmic (Potential).       | 1   | ATAATTCATTGG  | 0.522 |             |
| - | 9  | 1569  | 3qci.2_Missense_I | NM_001431    | NP_001422    | O43491 | E41L2_HUMAN FERM.                     | 2   | TACCTCTGCCG   | 0.308 |             |
| - | 7  | 1154  | de.2_Missense_M   | NM_015529    | NP_056344    | Q6UVY6 | MOXD1_HUMAN enal (Potential).         | 1   | CTGGAGGGATG   | 0.498 |             |
| - | 11 | 1201  | ou.1_Missense_Mu  | NM_005627    | NP_005618    | O00141 | SGK1_HUMAN kinase C-terminal.         | 6   | TAAAAGGGGGA   | 0.373 |             |
| - | 3  | 431   | _p.E82K IFNGR1_   | NM_000416    | NP_000407    | P15260 | INGR1_HUMAN ellular (Potential).      | 1   | CAGATTCTTTT   | 0.343 |             |
| + | 3  | 512   | phs.2_Missense_M  | NM_006290    | NP_006281    | P21580 | TNAP3_HUMAN rF-binding. C p.0?(22)    | 137 | TCAAATCTCAGG  | 0.488 |             |
| - | 5  | 2901  |                   | NM_006734    | NP_006725    | P31629 | ZEP2_HUMAN                            | 6   | CACAGGAGTGC   | 0.512 |             |
| - | 5  | 1902  |                   | NM_006734    | NP_006725    | P31629 | ZEP2_HUMAN                            | 6   | TCAGAAGGTTGA  | 0.438 |             |

|   |    |       |                                                 |              |              |        |              |                          |    |                |       |
|---|----|-------|-------------------------------------------------|--------------|--------------|--------|--------------|--------------------------|----|----------------|-------|
| + | 8  | 868   | hq.1_Missense_Mi                                | NM_007124    | NP_009055    | P46939 | UTRO_HUMAN   | Spectrin 1.              | 5  | AAGTCACCATAG/  | 0.363 |
| - | 2  | 1680  | uc003qky.1_Intron                               | NM_032145    | NP_115521    | Q8TB52 | FBX30_HUMAN  |                          | 3  | AACGGACTTGGA   | 0.428 |
| - | 2  | 1469  | uc003qky.1_Intron                               | NM_032145    | NP_115521    | Q8TB52 | FBX30_HUMAN  |                          | 3  | TCAGATCTATTCC  | 0.413 |
| - | 8  | 995   | æe.1_RNA NUP43                                  | NM_198887    | NP_942590    | Q8NFH3 | NUP43_HUMAN  |                          | 1  | CTATGAGACAAA/  | 0.358 |
| - | 76 | 13116 | e_Mutation_p.V41                                | NM_182961    | NP_892006    | Q8NF91 | SYNE1_HUMAN  | Cytoplasmic (Potential). | 45 | GTGAAACCATGT/  | 0.438 |
| - | 69 | 11855 | qou.3_Splice_Site                               | NM_182961    | NP_892006    | Q8NF91 | SYNE1_HUMAN  |                          | 45 | GCCTACCTCCA/   | 0.428 |
| - | 57 | 9715  | NE1_uc010kja.1_ε                                | NM_182961    | NP_892006    | Q8NF91 | SYNE1_HUMAN  | lasmic (Potential).      | 45 | ACTTTTCCACTGT/ | 0.358 |
| - | 55 | 9204  | yu.3_Missense_ML                                | NM_182961    | NP_892006    | Q8NF91 | SYNE1_HUMAN  | lasmic (Potential).      | 45 | ACATATCTGACCA/ | 0.403 |
| - | 37 | 5484  | p.E1628K SYNE1_                                 | NM_182961    | NP_892006    | Q8NF91 | SYNE1_HUMAN  | lasmic (Potential).      | 45 | AGCCTCCTGAA/   | 0.582 |
| + | 6  | 1605  | qe.2_Nonsense_M                                 | NM_012454    | NP_036586    | Q8IVF5 | TIAM2_HUMAN  |                          | 4  | CTTTCTCAACTG/  | 0.557 |
| + | 13 | 4068  | .P4_uc003qrg.2_Ir                               | NM_020245    | NP_064630    | Q9NRJ4 | TULP4_HUMAN  |                          | 1  | GCCCCGCACCC    | 0.652 |
| - | 2  | 743   | .p.P185S RSPH3_                                 | NM_031924    | NP_114130    | Q86UC2 | RSPH3_HUMAN  |                          | 2  | CATAGGTTCTTC   | 0.338 |
| + | 8  | 1070  | so.2_Missense_ML                                | NM_004906    | NP_004897    | Q15007 | FL2D_HUMAN   |                          | 0  | CTCCTCCCGCC/   | 0.512 |
| + | 1  | 74    | 22A3_uc011efx.1_                                | NM_021977    | NP_068812    | O75751 | S22A3_HUMAN  |                          | 4  | CGGGCGCTTCC/   | 0.567 |
| + | 2  | 204   |                                                 | NM_000301    | NP_000292    | P00747 | PLMN_HUMAN   | PAN.                     | 4  | TATAGAAGAATGT/ | 0.473 |
| + | 2  | 333   | o.2_Missense_Mut:                               | NM_005922    | NP_005913    | Q9Y6R4 | M3K4_HUMAN   |                          | 9  | AGAGTCCTGAAT/  | 0.428 |
| - | 2  | 525   | .2_5'UTR RNASE1                                 | NM_003730    | NP_003721    | O00584 | RNT2_HUMAN   |                          | 0  | GCTGAACCATAA/  | 0.418 |
| - | 9  | 1476  |                                                 | NM_003247    | NP_003238    | P35442 | TSP2_HUMAN   | TSP type-1 1.            | 5  | GGTGACGTCAC/   | 0.657 |
| + | 2  | 928   | ie_Mutation_p.V27                               | NM_032448    | NP_115824    | Q96EK7 | F120B_HUMAN  |                          | 1  | CGAAAGTTCTTT/  | 0.338 |
| + | 2  | 1497  | snse_Mutation_p.F                               | NM_001098201 | NP_001091671 | Q99527 | GPBR_HUMAN   | lasmic (Potential).      | 1  | ATGTGAGGTTCC/  | 0.602 |
| - | 7  | 1772  | 3ski.3_Missense_M                               | NM_182924    | NP_891554    | Q8IY33 | MILK2_HUMAN  |                          | 1  | CTGAGGATTCCT/  | 0.657 |
| - | 3  | 450   | iq.2_Missense_Mu                                | NM_001080453 | NP_001073922 | Q8N201 | INT1_HUMAN   |                          | 0  | CATTACCTTCAAT  | 0.592 |
| - | 14 | 2146  | mh.3_Missense_M                                 | NM_152743    | NP_689956    | Q6PJG6 | BRAT1_HUMAN  |                          | 0  | GAAAGTCAAAGA/  | 0.622 |
| + | 18 | 2793  | so.2_Missense_ML                                | NM_152744    | NP_689957    | Q7Z5N4 | SDK1_HUMAN   | nectin type-III 3.       | 6  | CACCACCATTCC/  | 0.592 |
| - | 15 | 5147  | 18_uc003soj.2_5'                                | NM_001080495 | NP_001073964 | O15417 | TNC18_HUMAN  |                          | 0  | TTCATCCCAAGT/  | 0.537 |
| - | 2  | 221   | e_Mutation_p.R62                                | NM_001101    | NP_001092    | P60709 | ACTB_HUMAN   |                          | 0  | ATGCCTCTCTTG/  | 0.582 |
| - | 2  | 646   |                                                 | NM_001037163 | NP_001032240 | Q7Z4H9 | SIPAR_HUMAN  |                          | 0  | ATAATGCCTCAC/  | 0.507 |
| + | 1  | 608   |                                                 | NM_138426    | NP_612435    | Q86VQ1 | GLC11_HUMAN  |                          | 0  | CCCCTCATCCCC/  | 0.388 |
| + | 13 | 1957  | .p.P642L HDAC9_                                 | NM_058176    | NP_478056    | Q9UKV0 | HDAC9_HUMAN  | one deacetylase.         | 5  | TGACCCCTTGAT/  | 0.438 |
| - | 5  | 547   | wg.2_Missense_M                                 | NM_182762    | NP_877439    | Q6ZN28 | MACC1_HUMAN  |                          | 3  | TTATGTCATCCA/  | 0.348 |
| + | 3  | 704   | 4_uc003svb.2_5'U                                | NM_003112    | NP_003103    | Q02446 | SP4_HUMAN    |                          | 5  | CAGTGAAGGT/    | 0.383 |
| + | 3  | 1358  | tb.2_Missense_Mu                                | NM_003112    | NP_003103    | Q02446 | SP4_HUMAN    |                          | 5  | ATTCTCTTCAGC/  | 0.468 |
| + | 80 | 13095 |                                                 | NM_003777    | NP_003768    | Q96DT5 | DYH11_HUMAN  |                          | 15 | CCTAGCCCAGT/   | 0.512 |
| + | 7  | 1493  | yw.1_RNA NUPL2                                  | NM_007342    | NP_031368    | O15504 | NUPL2_HUMAN  | action with GLE1.        | 3  | AAAATTCATTAA/  | 0.318 |
| - | 4  | 687   | .p.R57Q TRA2A_L                                 | NM_013293    | NP_037425    | Q13595 | TRA2A_HUMAN  | RRM.                     | 1  | GAGATCGCCCA/   | 0.393 |
| - | 15 | 2137  | on_p.P547S OSBP                                 | NM_015550    | NP_056365    | Q9H4L5 | OSBL3_HUMAN  |                          | 1  | CAGGGGGCTGG/   | 0.647 |
| - | 3  | 760   | .p.G29E HOXA3_L                                 | NM_030661    | NP_109377    | O43365 | HXA3_HUMAN   |                          | 2  | CCTGCCCCGGC/   | 0.711 |
| - | 7  | 690   | .p.P191S CPVL_u                                 | NM_031311    | NP_112601    | Q9H3G5 | CPVL_HUMAN   |                          | 2  | TTCAGGAAATAT/  | 0.333 |
| - | 11 | 1655  | .p.E456K PDE1C_                                 | NM_005020    | NP_005011    | Q14123 | PDE1C_HUMAN  | ytic (By similarity).    | 4  | CTCCTCCAGGA/   | 0.433 |
| - | 22 | 2044  | '19L1_uc003tel.1_                               | NM_015283    | NP_056098    | Q2PZ11 | D19L1_HUMAN  |                          | 0  | TACATCCCAAATT  | 0.398 |
| - | 6  | 1426  | .p.D356N KIAA089                                | NM_001100425 | NP_001093895 | Q8NCT3 | K0895_HUMAN  |                          | 0  | GGAAGTCTATGG/  | 0.463 |
| + | 11 | 2098  | g.2_Missense_Mul                                | NM_018685    | NP_061155    | Q9NQW6 | ANLN_HUMAN   | ction with F-actin.      | 3  | GACTGGAATTG/   | 0.388 |
| - | 5  | 988   | ii.1_RNA TARP_uc003tgf.1_RNA TARP_uc003tgj.1_RN |              |              | A2JGV3 | A2JGV3_HUMAN |                          | 0  | TCATGGTGTTC/   | 0.398 |
| - | 5  | 978   | ii.1_RNA TARP_uc003tgf.1_RNA TARP_uc003tgj.1_RN |              |              | A2JGV3 | A2JGV3_HUMAN |                          | 0  | CCCCTCCTGGG/   | 0.418 |
| - | 21 | 2061  | .p.W622* AMPH_L                                 | NM_001635    | NP_001626    | P49418 | AMPH_HUMAN   | SH3.                     | 5  | ACCAGCCAGCC/   | 0.458 |
| + | 2  | 198   | .2_5'Flank PSMA2                                | NM_031903    | NP_114109    | Q9BYC8 | RM32_HUMAN   |                          | 0  | TACAGGGCCCA/   | 0.378 |
| + | 16 | 3660  | tbi.1_Missense_ML                               | NM_015052    | NP_055867    | Q76N89 | HECW1_HUMAN  | WW 2.                    | 23 | GGCTGGAAGTGT/  | 0.552 |

rs144973525

|   |    |      |                     |              |              |         |             |                               |       |                |       |
|---|----|------|---------------------|--------------|--------------|---------|-------------|-------------------------------|-------|----------------|-------|
| + | 7  | 589  | xv.2_Missense_Mt    | NM_000712    | NP_000703    | P53004  | BIEA_HUMAN  |                               | 1     | 'CAGCGGCATCTC  | 0.517 |
| + | 3  | 354  | ov.1_Missense_Mt    | NM_006555    | NP_006546    | O15498  | YKT6_HUMAN  | Longin.                       | 0     | 'ATCTGTGCCACG' | 0.478 |
| - | 4  | 1800 | bw.1_Missense_M     | NM_013389    | NP_037521    | Q9UHC9  | NPCL1_HUMAN | cellular (Potential).         | 5     | 'GTCCCCGGCAC   | 0.577 |
| + | 6  | 842  | oy.1_Intron OGDH    | NM_002541    | NP_002532    | Q02218  | ODO1_HUMAN  |                               | 2     | 'ATCATGCAGTTC/ | 0.577 |
| - | 16 | 2230 | ε_Mutation_p.P45f   | NM_033054    | NP_149043    | B011T2  | MYO1G_HUMAN |                               | 4     | 'CCGGGGTGAGC   | 0.647 |
| - | 16 | 2143 | ε_Mutation_p.D42f   | NM_033054    | NP_149043    | B011T2  | MYO1G_HUMAN | rosin head-like.              | 4     | 'XCTTGTCCGAGC' | 0.632 |
| + | 2  | 327  | in_p.D61N CCM2_     | NM_031443    | NP_113631    | Q9BSQ5  | CCM2_HUMAN  | PID.                          | 0     | 'CTGAGCGACTAT/ | 0.532 |
| - | 3  | 680  | lissense_Mutation_  | NM_004749    | NP_004740    | Q969Z0  | TBRG4_HUMAN |                               | 0     | 'GGAAGGCCAGG   | 0.612 |
| - | 2  | 734  | ise_Mutation_p.S2   | NM_000598    | NP_000589    | P17936  | IBP3_HUMAN  | Ser/Thr-rich.                 | 3     | 'CGGAGGAGAAG   | 0.493 |
| + | 4  | 1099 | p.P102S POM121_     | NM_172020    | NP_742017    | Q96HA1  | P121A_HUMAN | side (Potential).             | 0     | 'TTTGTGCCTAAGI | 0.468 |
| + | 32 | 2228 | zs.2_Missense_Mt    | NM_000501    | NP_001075224 | P15502  | ELN_HUMAN   |                               | 5     | 'TTGTCTCCCATTI | 0.602 |
| + | 3  | 935  | p.A209T UPK3B_1     | NM_030570    | NP_085047    | Q9BT76  | UPK3B_HUMAN | renal (Potential).            | 1     | 'CTCTGGCCGGC   | 0.622 |
| - | 18 | 2194 | m.2_Missense_Mu     | NM_000601    | NP_000592    | P14210  | HGF_HUMAN   | peptidase S1.                 | 4     | 'AACAAAGTGGGC  | 0.373 |
| - | 5  | 6233 | v.2_Missense_Mut    | NM_033026    | NP_149015    | Q9Y6V0  | PCLO_HUMAN  |                               | 7     | 'TAAATCCATTTTC | 0.363 |
| + | 4  | 3116 |                     | NM_181646    | NP_857597    | A4D1E1  | Z804B_HUMAN |                               | 11    | 'GCAATAGAGAAA/ | 0.408 |
| + | 2  | 675  | _p.H94Q STEAP2_     | NM_152999    | NP_694544    | Q8NFT2  | STEA2_HUMAN |                               | 2     | 'TATACACAGAGA/ | 0.378 |
| + | 21 | 5416 | o.L1731F AKAP9_     | NM_005751    | NP_005742    | Q99996  | AKAP9_HUMAN |                               | 26    | 'ATAGACTTTTGA  | 0.348 |
| + | 10 | 928  | 1_Intron COL1A2_    | NM_000089    | NP_000080    | P08123  | CO1A2_HUMAN |                               | 9     | 'GACGACCTGGT   | 0.413 |
| + | 43 | 3286 | 1A2_uc011kib.1_li   | NM_000089    | NP_000080    | P08123  | CO1A2_HUMAN |                               | 9     | 'GTCGCGATGGT   | 0.478 |
| - | 6  | 741  |                     | NM_018842    | NP_061330    | Q9UHR4  | BI2L1_HUMAN | IMD.                          | 1     | 'CAATTTCTTTGTC | 0.318 |
| + | 51 | 7741 | p.T2493I TRRAP_     | NM_003496    | NP_003487    | Q9Y4A5  | TRRAP_HUMAN |                               | 37    | 'TGGCACCACTCT  | 0.612 |
| + | 6  | 695  | tion_p.K170E AP4I   | NM_004722    | NP_004713    | O00189  | AP4M1_HUMAN |                               | 0     | 'AGAGCAAAGTG   | 0.572 |
| - | 7  | 1297 | 2C2_uc010lgr.2_Rl   | NM_152742    | NP_689955    | Q8N158  | GPC2_HUMAN  |                               | 2     | 'CCGCTCCTCCT   | 0.632 |
| + | 5  | 541  | .1_5'UTR STAG3_     | NM_012447    | NP_036579    | Q9UJ98  | STAG3_HUMAN |                               | 8     | 'ATGCAGGATTTCT | 0.358 |
| - | 5  | 1434 | HB4_uc011kkf.1_M    | NM_004444    | NP_004435    | P54760  | EPHB4_HUMAN | ar (Potential). Cys-rich.     | 15    | 'CCGGGGGTCTG   | 0.637 |
| + | 16 | 2184 | ε.2_Missense_Mut    | NM_015908    | NP_056992    | Q9BXP5  | SRRT_HUMAN  |                               | 2     | 'CAATCGCTGTG   | 0.587 |
| - | 2  | 376  | uya.1_Missense_M    | NM_198571    | NP_940973    | Q8N8M0  | CG052_HUMAN |                               | 1     | 'CCTCAGGCCCC   | 0.647 |
| - | 5  | 529  | ik CLDN15_uc003i    | NM_016068    | NP_057152    | Q9Y3D6  | FIS1_HUMAN  | intermembrane (Potential).    | 0     | 'ACTTGGACACA   | 0.647 |
| + | 9  | 903  | .D_uc011kmh.1_M     | NM_000108    | NP_000099    | P09622  | DLDH_HUMAN  |                               | 1     | 'GCATCCTTCAA/  | 0.353 |
| - | 11 | 1325 | _p.G280E NRCAM      | NM_001037132 | NP_001032209 | Q92823  | NRCAM_HUMAN | xtracellular (Potential).     | 5     | 'ACATTTCTCTT/  | 0.378 |
| - | 1  | 1004 |                     | NM_024523    | NP_078799    | Q96CN9  | GCC1_HUMAN  | Potential.                    | 2     | 'CTAAGTCCTGTT  | 0.527 |
| + | 13 | 1680 | lle.2_Splice_Site_1 | NM_014390    | NP_055205    | Q7KZF4  | SND1_HUMAN  |                               | 3     | 'GGCCAGGTAAGA  | 0.458 |
| - | 3  | 365  | 2_5'UTR ZC3HC1      | NM_016478    | NP_057562    | Q86WB0  | NIPA_HUMAN  | C3HC-type.                    | 0     | 'AGCATATCACATT | 0.408 |
| + | 1  | 98   | ense_Mutation_p.l   | NM_013255    | NP_037387    | Q9UL63  | MKLN1_HUMAN |                               | 1     | 'CGCCCGAGTGC   | 0.697 |
| - | 2  | 186  | 2_5'Flank WDR91_    | NM_014149    | NP_054868    | A4D1P6  | WDR91_HUMAN |                               | 4     | 'ATCCACCTGGCC  | 0.507 |
| - | 11 | 2548 | d.3_Missense_Mu     | NM_022740    | NP_073577    | Q9H2X6  | HIPK2_HUMAN | 11. Interaction with POU4F    | 7     | 'CTGCCGCATCA/  | 0.562 |
| - | 13 | 1425 | 7A3_uc003vvp.2_1    | NM_207113    | NP_996996    | Q8NCC5  | SPX3_HUMAN  |                               | 3     | 'CTTCACTGCTC/  | 0.498 |
| - | 15 | 1860 |                     | NM_004333    | NP_004324    | P15056  | BRAF_HUMAN  | rotein kinase_R603>I(2) p.T   | 18290 | 'ATTTCACTGTAC  | 0.368 |
| + | 1  | 290  |                     | NM_176881    | NP_795362    | P59534  | T2R39_HUMAN | cellular (Potential).         | 1     | 'CATCAGCTCAAC  | 0.383 |
| + | 5  | 1198 |                     | NM_014141    | NP_054860    | Q9UHC6  | CNTP2_HUMAN | 1. Extracellular (Potential). | 11    | 'TGCACGGAGAA/  | 0.388 |
| + | 6  | 1267 | o.S160N ZNF398_     | NM_170686    | NP_733787    | Q8TD17  | ZN398_HUMAN |                               | 1     | 'GGGTAGCTATC/  | 0.527 |
| + | 21 | 3704 | isense_Mutation_p.  | NM_003040    | NP_003031    | P04920  | B3A2_HUMAN  | ne (anion exchange).          | 0     | 'ACCACCCAGAT/  | 0.582 |
| - | 2  | 414  | 3wiz.1_Missense_    | NM_006712    | NP_006703    | Q14296  | FASTK_HUMAN |                               | 4     | 'GCTGGGGTTCT/  | 0.677 |
| - | 12 | 1417 | p.G426D SMARCC      | NM_001003801 | NP_001003801 | Q6STE5  | SMRD3_HUMAN |                               | 2     | 'GGTTGCCGGCT   | 0.617 |
| - | 11 | 1692 |                     | NM_170606    | NP_733751    | Q8NEZ4  | MLL3_HUMAN  | PHD-type 3.                   | 63    | 'TGAACCCACTC/  | 0.378 |
| + | 16 | 3607 | p.R890H RBM33_1     | NM_053043    | NP_444271    | Q96EV2  | RBM33_HUMAN |                               | 1     | 'GGGGCGCCTG/   | 0.617 |
| - | 16 | 1587 | n_p.L306F LMBR1     | NM_022458    | NP_071903    | Q8WVVP7 | LMBR1_HUMAN | lasmic (Potential).           | 0     | 'GAAAAGTTCTTC  | 0.338 |

|   |    |       |                   |              |              |         |             |                            |    |               |       |
|---|----|-------|-------------------|--------------|--------------|---------|-------------|----------------------------|----|---------------|-------|
| + | 13 | 1800  | DR60_uc010lqw.2_  | NM_018051    | NP_060521    | Q8WVVS4 | WDR60_HUMAN |                            | 4  | :CGGAGGAAATA  | 0.403 |
| - | 2  | 268   | x.2_RNA VIPR2_u   | NM_003382    | NP_003373    | P41587  | VIPR2_HUMAN | cellular (Potential).      | 2  | :CAGATGAAATCC | 0.383 |
| - | 24 | 4060  | p.P616S CSMD1_    | NM_033225    | NP_150094    | Q96PZ7  | CSMD1_HUMAN | ar (Potential). Sushi 7.   | 25 | :GTTAGGGATGCC | 0.493 |
| + | 3  | 441   | se_Mutation_p.L92 | NM_001081552 | NP_001075021 | Q6PDA7  | SG11A_HUMAN |                            | 0  | FGCAGACTTTTTI | 0.413 |
| + | 7  | 1511  | i4_splice MTMR9_  | NM_015458    | NP_056273    | Q96QG7  | MTMR9_HUMAN |                            | 0  | :TGCAGGTGAGA  | 0.458 |
| + | 7  | 1128  | z.2_Missense_Mut  | NM_001715    | NP_001706    | P51451  | BLK_HUMAN   | SH2.                       | 3  | :GCCTGGATGAA  | 0.592 |
| + | 18 | 2433  | p.G766S KIAA196   | NM_199205    | NP_954675    | Q8N163  | K1967_HUMAN |                            | 3  | :AGGAGGGCCTG  | 0.632 |
| + | 5  | 776   | SF10C_uc011kzr.1  | NM_003841    | NP_003832    | O14798  | TR10C_HUMAN | TAPE 3.                    | 0  | :TGCCCCAGCTG  | 0.627 |
| - | 12 | 2371  | iy.1_Missense_Mu  | NM_002318    | NP_002309    | Q9Y4K0  | LOXL2_HUMAN | yl-oxidase like.           | 3  | :CTGATCGCCGA  | 0.592 |
| - | 8  | 1021  | S9_uc011lax.1_M   | NM_018250    | NP_060720    | Q9NV88  | INT9_HUMAN  |                            | 2  | :GCAAGGAGGAT  | 0.468 |
| + | 4  | 865   | i.1_RNA RBPMS_u   | NM_006867    | NP_006858    | Q93062  | RBPMS_HUMAN | RRM.                       | 1  | FTGTCAGTTTTGT | 0.383 |
| + | 12 | 2087  | se_Mutation_p.E2f | NM_013964    | NP_039258    | Q02297  | NRG1_HUMAN  | lasmic (Potential).        | 0  | :ATGAGGAGTAT  | 0.557 |
| + | 16 | 1724  | NU1_uc003xjw.2_F  | NM_001031836 | NP_001027006 | A8MYU2  | KCNU1_HUMAN | . Cytoplasmic (Potential). | 1  | :GCTCTGCTTTC  | 0.463 |
| - | 6  | 1249  | 1_Missense_Muta   | NM_014682    | NP_055497    | O60284  | ST18_HUMAN  | 2HC-type 1.                | 5  | FGGTCTCCCTCT  | 0.527 |
| - | 1  | 85    |                   | NM_000780    | NP_000771    | P22680  | CP7A1_HUMAN |                            | 1  | FCCCCCAAATCA  | 0.373 |
| + | 1  | 735   | e.3_5'Flank ADHF  | NM_015169    | NP_055984    | Q15050  | RRS1_HUMAN  |                            | 0  | :CTACCGGACAC  | 0.657 |
| - | 10 | 1209  | czp.2_Missense_M  | NM_014393    | NP_055208    | Q9NUL3  | STAU2_HUMAN | DRBM 4.                    | 0  | :ATAATCCGGCT  | 0.403 |
| - | 1  | 162   | TPD52_uc003ybt.1  | NM_001025253 | NP_001020424 | P55327  | TPD52_HUMAN |                            | 1  | :GCGGTCCATGT  | 0.532 |
| - | 7  | 1066  |                   | NM_018440    | NP_060910    | Q9NWQ8  | PAG1_HUMAN  | lasmic (Potential).        | 0  | :GTCCTGGGAAT  | 0.537 |
| + | 3  | 428   |                   | NM_000067    | NP_000058    | P00918  | CAH2_HUMAN  |                            | 1  | :AGGACCCCTGG  | 0.264 |
| - | 1  | 444   | ydr.1_Missense_M  | NM_138817    | NP_620172    | Q8TCU3  | S7A13_HUMAN | cellular (Potential).      | 1  | :CTCAGCAAGGA  | 0.483 |
| + | 6  | 702   | P1_uc010mai.2_5'  | NM_007013    | NP_008944    | Q9H0M0  | WWP1_HUMAN  |                            | 2  | TTGATGGATTGG  | 0.338 |
| + | 22 | 2770  |                   | NM_007013    | NP_008944    | Q9H0M0  | WWP1_HUMAN  | HECT.                      | 2  | :ATTGTTTGGT   | 0.333 |
| - | 11 | 1824  | p.P490S NBN_uc    | NM_002485    | NP_002476    | O60934  | NBN_HUMAN   |                            | 7  | :CTCTGTTTGTG  | 0.353 |
| - | 14 | 2485  |                   | NM_012415    | NP_036547    | O95073  | FSBP_HUMAN  |                            | 4  | :TCTTGGTGAGG  | 0.353 |
| - | 12 | 2786  | e_Mutation_p.P92  | NM_015496    | NP_056311    | Q69YN4  | VIR_HUMAN   |                            | 2  | :TTCTGGGGTCA  | 0.383 |
| + | 2  | 305   | ibe.2_Missense_M  | NM_016134    | NP_057218    | Q9Y646  | PGCP_HUMAN  |                            | 1  | :ATGTTGCTAA   | 0.433 |
| + | 54 | 9946  | riw.2_Missense_M  | NM_017890    | NP_060360    | Q7Z7G8  | VP13B_HUMAN |                            | 20 | TTTGAGTTTATT  | 0.383 |
| - | 22 | 3523  | p.E929K RGS22_u   | NM_015668    | NP_056483    | Q8NE09  | RGS22_HUMAN | RGS 2.                     | 7  | :TAACTCCTTCC  | 0.358 |
| - | 37 | 4933  | s.1_Missense_Mut  | NM_015902    | NP_056986    | O95071  | UBR5_HUMAN  |                            | 28 | CATTATCTTGGT  | 0.423 |
| + | 1  | 289   |                   | NM_003301    | NP_003292    | P34981  | TRFR_HUMAN  | cellular (Potential).      | 3  | TCCTGGGTCTA   | 0.493 |
| - | 14 | 2201  | nse_Mutation_p.S  | NM_198123    | NP_937756    | Q7Z407  | CSMD3_HUMAN | ar (Potential). Sushi 3.   | 63 | :GATTAGAAAATC | 0.358 |
| + | 3  | 585   |                   | NM_032334    | NP_115710    | Q9BRU9  | UTP23_HUMAN |                            | 0  | :CAGTGGAGTCA  | 0.378 |
| + | 2  | 312   |                   | NM_006438    | NP_006429    | Q9Y6Z7  | COL10_HUMAN | Collagen-like.             | 3  | :GGGGCCGAAAG  | 0.413 |
| + | 37 | 5008  | uc003yqy.1_Intron | NM_001039112 | NP_001034201 | Q2WJG9  | FR1L6_HUMAN | toplasmic (Potential).     | 11 | :AGTGACCATCT  | 0.413 |
| - | 14 | 2374  | nse_Mutation_p.P  | NM_014751    | NP_055566    | O43312  | MTSS1_HUMAN | Pro-rich.                  | 1  | FCACGGGTGTCT  | 0.632 |
| + | 3  | 409   |                   | NM_152412    | NP_689625    | Q7Z317  | ZN572_HUMAN |                            | 2  | ATGATTCCTATGA | 0.403 |
| - | 12 | 1043  | x.1_Missense_Mut  | NM_001080399 | NP_001073868 | Q02509  | OC90_HUMAN  | holipase A2-like 2.        | 3  | :GATGGGACAAG  | 0.552 |
| + | 2  | 109   |                   | NM_003235    | NP_003226    | P01266  | THYG_HUMAN  |                            | 15 | TCCTAGAGTACC  | 0.542 |
| + | 29 | 5520  | i.1_Missense_Mut  | NM_003235    | NP_003226    | P01266  | THYG_HUMAN  | Type IIIB.                 | 15 | :ACATGGGGTCT  | 0.463 |
| + | 2  | 417   | P1_uc010mec.2_A   | NM_003882    | NP_003873    | O95388  | WISP1_HUMAN | BP N-terminal.             | 2  | :AGGAGTGTGTG  | 0.627 |
| - | 3  | 382   | ise_Mutation_p.T7 | NM_153831    | NP_722560    | Q05397  | FAK1_HUMAN  | FERM.                      | 6  | :CCCAGGTGGTT  | 0.408 |
| - | 32 | 13300 | e.1_Missense_Mu   | NM_201380    | NP_958782    | Q15149  | PLEC_HUMAN  | Globular 2.                | 9  | :CACCGCGTTG   | 0.672 |
| + | 7  | 976   | y.2_Nonsense_ML   | NM_001916    | NP_001907    | P08574  | CY1_HUMAN   |                            | 0  | :AAGTGGTCAGT  | 0.582 |
| + | 10 | 1086  |                   | NM_145754    | NP_665697    | Q96AC6  | KIFC2_HUMAN | Potential.                 | 3  | :GGATGGCCAGC  | 0.657 |
| + | 3  | 1066  |                   | NM_138431    | NP_612440    | Q96ES6  | MFSD3_HUMAN | . Helical; (Potential).    | 2  | :CCTTGGTCTTC  | 0.637 |
| + | 19 | 2927  | p.R943K SMARCA    | NM_003070    | NP_003061    | P51531  | SMCA2_HUMAN |                            | 3  | TGTTAAGACCAT  | 0.348 |

|   |    |           |                   |              |              |        |              |                               |    |               |       |
|---|----|-----------|-------------------|--------------|--------------|--------|--------------|-------------------------------|----|---------------|-------|
| + | 2  | 571       |                   | NM_017913    | NP_060383    | Q7L3B6 | CD37L_HUMAN  | al. Self-association.         | 0  | :AAAGAGAGAAG, | 0.438 |
| + | 13 | 2396      | M4C_uc003zkg.2    | NM_015061    | NP_055876    | Q9H3R0 | KDM4C_HUMAN  |                               | 1  | AGGAGGAAGTG   | 0.483 |
| - | 1  | 485       |                   | NM_005454    | NP_005445    | O95813 | CER1_HUMAN   |                               | 0  | TGACCCCTGA    | 0.498 |
| + | 15 | 2008      | me.2_Missense_IV  | NM_173550    | NP_775821    | Q6TFL3 | CI093_HUMAN  |                               | 0  | TGCAGGAGAAG   | 0.338 |
| + | 15 | 2545      | p.G840D CNTLN     | NM_017738    | NP_060208    | Q9NXG0 | CNTLN_HUMAN  |                               | 1  | TGTGGGTCGTC,  | 0.443 |
| + | 11 | 1334      | p.C386R ADAMT     | NM_001040272 | NP_001035362 | Q8N6G6 | ATL1_HUMAN   | SP type-1 2.                  | 5  | TTTCTGTGTG    | 0.597 |
| + | 24 | 4452      | 3znf.3_Missense_I | NM_001040272 | NP_001035362 | Q8N6G6 | ATL1_HUMAN   | like C2-type 4.               | 5  | CACAGGACTGA   | 0.512 |
| + | 21 | 2590      | zoh.1_Missense_I  | NM_017794    | NP_060264    | Q5VW36 | K1797_HUMAN  |                               | 10 | TGATGACGAT    | 0.383 |
| + | 2  | 606       | NFX1_uc003zsp.1   | NM_002504    | NP_002495    | Q12986 | NFX1_HUMAN   |                               | 1  | AGGACCAAAAG   | 0.478 |
| + | 5  | 775       | Mutation_p.G216S  | NM_007343    | NP_031369    | P35030 | TRY3_HUMAN   | peptidase S1.                 | 0  | CTGGTGGCCCT   | 0.512 |
| + | 8  | 2053      | RA_uc003zv.2_IV   | NM_004512    | NP_004503    | Q14626 | I11RA_HUMAN  | ential). Fibronectin type-III | 1  | GTTACCCCGA    | 0.627 |
| + | 2  | 1038      | zvv.2_Missense_IV | NM_203299    | NP_976044    | Q5VYM1 | CI131_HUMAN  |                               | 0  | CTTTTGAGCCT   | 0.537 |
| - | 12 | 2125      | .1_5'Flank FANCG  | NM_004629    | NP_004620    | O15287 | FANCG_HUMAN  | TPR 4.                        | 4  | ACCTGGGCACA   | 0.532 |
| - | 8  | 1679      | 2_Missense_Mutal  | NM_025182    | NP_079458    | Q7L5A3 | K1539_HUMAN  |                               | 2  | AGCAGGCATGT   | 0.547 |
| - | 1  | 150       | T1_uc003zxf.1_Rf  | NM_014450    | NP_055265    | Q9Y3P8 | SIT1_HUMAN   |                               | 0  | CTGCAGATGTG   | 0.627 |
| + | 21 | 3038      | l_Mutation_p.G98E | NM_003995    | NP_003986    | P20594 | ANPRB_HUMAN  | lasmic (Potential).           | 3  | GCTAGGATGCT   | 0.537 |
| + | 7  | 772       | MTD3_uc011lqq.1_  | NM_144964    | NP_659401    | Q6PF06 | RG9D3_HUMAN  |                               | 0  | CGGTGGGCTTG   | 0.343 |
| - | 4  | 1023      |                   | NM_001145196 | NP_001138668 | Q5VVP1 | F75A6_HUMAN  |                               | 0  | TGTGACTTGAT   | 0.453 |
| + | 8  | 1481      | e_Mutation_p.G31: | NM_006200    | NP_006191    | Q92824 | PCSK5_HUMAN  | Catalytic.                    | 3  | ATGGTGGAAGG   | 0.488 |
| + | 17 | 2588      | p.S192N TLE4_uc   | NM_007005    | NP_008936    | O60756 | BCE1_HUMAN   |                               | 5  | AAGCCAGTACTT  | 0.557 |
| + | 4  | 2479      | 1_Intron uc004amj | NM_001145197 | NP_001138669 | Q6ZUB0 | YI020_HUMAN  |                               | 0  | TAACTCTGAGAC  | 0.468 |
| - | 13 | 3052      | e_Mutation_p.E90  | NM_017576    | NP_060046    | Q86VH2 | KIF27_HUMAN  | Potential.                    | 5  | ATTTCCAGGTC   | 0.333 |
| - | 11 | 1173_1174 | p.P281L SLC28A3   | NM_022127    | NP_071410    | Q9HAS3 | S28A3_HUMAN  | ellular (Potential).          | 4  | AATATGGTCGGA  | 0.51  |
| - | 11 | 1710      | CCHC6_uc004aot    | NM_024617    | NP_078893    | Q5VYS8 | TUT7_HUMAN   |                               | 2  | TGAAGGTTGA    | 0.373 |
| + | 5  | 592       |                   | NR_027917    |              |        |              |                               | 1  | ATGAGGATCAC   | 0.483 |
| + | 4  | 1926      | apq.3_Missense_I  | NM_001145124 | NP_001138596 |        |              |                               | 0  | GAAAAGCCTGT   | 0.537 |
| + | 2  | 452       | ense_Mutation_p.A | NM_003177    | NP_003168    | P43405 | KSYK_HUMAN   | SH2 1.                        | 5  | CCCATGCCAGC   | 0.662 |
| - | 5  | 701       | .P147S FANCC_u    | NM_000136    | NP_000127    | Q00597 | FANCC_HUMAN  |                               | 1  | AACCAGGATAGT, | 0.313 |
| - | 4  | 892       | ayr.2_Missense_IV | NM_018421    | NP_060891    | Q9BYX2 | TBD2A_HUMAN  |                               | 3  | ATCTTCCCTG    | 0.597 |
| - | 15 | 2952      | p.V752M TEX10_u   | NM_017746    | NP_060216    | Q9NXF1 | TEX10_HUMAN  |                               | 2  | ATACACGTTGA   | 0.448 |
| - | 3  | 607       | p.A134V TEX10_u   | NM_017746    | NP_060216    | Q9NXF1 | TEX10_HUMAN  | HEAT.                         | 2  | GTTCAGCTCGT   | 0.388 |
| + | 5  | 724       | !18K NIPSNAP3B_   | NM_018376    | NP_060846    | Q9BS92 | NPS3B_HUMAN  |                               | 2  | TCCCAGAGTTG   | 0.408 |
| + | 8  | 1045      | r_p.T275I SLC44A  | NM_080546    | NP_536856    | Q8WWI5 | CTL1_HUMAN   | intermembrane (Potential).    | 4  | TGTTACTCCTG   | 0.453 |
| - | 8  | 1206      | wc.1_Missense_M   | NM_003640    | NP_003631    | O95163 | ELP1_HUMAN   |                               | 7  | GCAAAGCAAA    | 0.488 |
| - | 25 | 4178      | e_Mutation_p.S13C | NM_173521    | NP_775792    | Q5VXU9 | CI084_HUMAN  |                               | 2  | TTGAACCTTTCAC | 0.373 |
| - | 4  | 593       | L_uc004bna.2_3'   | NM_005388    | NP_005379    | Q13371 | PHLP_HUMAN   |                               | 0  | TCCACTGGAG    | 0.458 |
| - | 17 | 3197      | se_Mutation_p.D9  | NM_001100588 | NP_001094058 | Q9HBD1 | RC3H2_HUMAN  |                               | 4  | AAGGTCCCAG    | 0.348 |
| - | 18 | 1840      | e_Mutation_p.E61I | NM_001144877 | NP_001138349 | Q8N9R8 | SCAI_HUMAN   |                               | 5  | CTAATCCAAAAT  | 0.388 |
| + | 3  | 495       | p.E149K LMX1B_u   | NM_002316    | NP_002307    | O60663 | LMX1B_HUMAN  |                               | 0  | AGAAGGAGAAG   | 0.657 |
| + | 3  | 1162      | p.T303M LRRC8A    | NM_019594    | NP_062540    | Q8IWT6 | LRRC8A_HUMAN |                               | 0  | CTGACGGGCT.   | 0.547 |
| + | 4  | 2502      | p.V750M LRRC8A    | NM_019594    | NP_062540    | Q8IWT6 | LRRC8A_HUMAN | LRR 16.                       | 0  | CCAGGTTGGGC   | 0.677 |
| + | 4  | 1072      | dD1_uc004bwm.2    | NM_001100876 | NP_001094346 | Q5SRE7 | PHYD1_HUMAN  |                               | 0  | TTCTCTCCAC1   | 0.547 |
| + | 2  | 496_497   |                   | NM_001012715 | NP_001012733 | Q8NAJ2 | CI106_HUMAN  |                               | 0  | TCATGGGTGGC   | 0.609 |
| + | 20 | 2400      | _p.T730I USP20_u  | NM_001110303 | NP_001103773 | Q9Y2K6 | UBP20_HUMAN  | DUSP 1.                       | 2  | CATCACCACC,   | 0.672 |
| - | 1  | 389       |                   | NM_198180    | NP_937823    | P83859 | OX26_HUMAN   |                               | 0  | GGAAGCTGAAG   | 0.622 |
| - | 7  | 916       | .S263F UCK1_uc    | NM_031432    | NP_113620    | Q9HA47 | UCK1_HUMAN   |                               | 0  | TGCTGGACTCC,  | 0.652 |
| - | 8  | 980       | APGEF1_uc010m     | NM_005312    | NP_005303    | Q13905 | RPGF1_HUMAN  | SH3-binding.                  | 7  | TGCTGGTGGAG   | 0.572 |



|   |    |      |                                                  |              |              |        |              |                                |    |                |       |             |
|---|----|------|--------------------------------------------------|--------------|--------------|--------|--------------|--------------------------------|----|----------------|-------|-------------|
| + | 11 | 1633 |                                                  | NM_015456    | NP_056271    | Q8WX92 | NELFB_HUMAN  |                                | 0  | AATTTGCCCTTG/  | 0.612 |             |
| - | 5  | 1019 |                                                  | NM_015419    | NP_056234    | Q9NR99 | MXRA5_HUMAN  |                                | 8  | FGCTCCTGTTCT/  | 0.478 |             |
| + | 3  | 730  | Imij.1_Missense_M                                | NM_014728    | NP_055543    | Q14CM0 | FRPD4_HUMAN  |                                | 13 | :TCCGGCTCCTC/  | 0.527 |             |
| + | 3  | 184  |                                                  | NM_021109    | NP_066932    |        |              |                                | 0  | 3CGATTGAACAG/  | 0.393 |             |
| + | 10 | 1120 | _p.R311K BMX_uc                                  | NM_203281    | NP_975010    | P51813 | BMX_HUMAN    | SH2.                           | 5  | FACTCAGACAAA/  | 0.363 |             |
| - | 6  | 1101 | ID2_uc010nfb.2_Ir                                | NM_153346    | NP_699177    | Q8NDZ0 | BEND2_HUMAN  |                                | 5  | 3TCTCAGTGCTG   | 0.289 |             |
| - | 2  | 564  | r.1_RNA PHKA2_t                                  | NM_000292    | NP_000283    | P46019 | KPB2_HUMAN   |                                | 2  | TATCCCGCACCC   | 0.572 |             |
| - | 3  | 948  |                                                  | NM_030624    | NP_085127    | Q96M94 | KLH15_HUMAN  | BACK.                          | 2  | AAACGCTGGTTC   | 0.423 |             |
| - | 4  | 1412 |                                                  | NM_139058    | NP_620689    | Q96QS3 | ARX_HUMAN    | Pro-rich.                      | 0  | CCCCGGGAAGG    | 0.692 |             |
| + | 1  | 215  | 2_5'Flank IMAGEB1                                | NM_002367    | NP_002358    | O15481 | MAGB4_HUMAN  |                                | 1  | 3CTCATCTGTTTT  | 0.572 |             |
| - | 1  | 149  |                                                  | NM_000475    | NP_000466    | P51843 | NR0B1_HUMAN  | A tandem repeats. 1.           | 2  | 3GCTCATCGCCG   | 0.662 |             |
| - | 18 | 2423 | D_uc004ddb.1_Mi                                  | NM_004006    | NP_003997    | P11532 | DMD_HUMAN    | Spectrin 4.                    | 6  | TTATATCAACATC  | 0.333 |             |
| + | 1  | 1488 |                                                  | NM_001013736 | NP_001013758 | Q5HY64 | FA47C_HUMAN  |                                | 3  | 3CTCCCAGACT/   | 0.622 |             |
| + | 18 | 2585 | 34_splice SYTL5_t                                | NM_001163335 | NP_001156807 | Q8TDW5 | SYTL5_HUMAN  |                                | 1  | CTTCAGGTGTG/   | 0.507 |             |
| - | 4  | 473  | r.1_RNA ZNF630_                                  | NM_001037735 | NP_001032824 | Q2M218 | ZN630_HUMAN  | KRAB.                          | 2  | 3ACCTTGACAA/   | 0.418 |             |
| + | 5  | 426  | se_Mutation_p.R1                                 | NM_006044    | NP_006035    | Q9UBN7 | HDAC6_HUMAN  | ne deacetylase 1.              | 4  | 3CTGAGCGGCTC   | 0.592 |             |
| + | 6  | 1530 | .K411T CCNB3_uc                                  | NM_033031    | NP_149020    | Q8WWL7 | CCNB3_HUMAN  |                                | 9  | 3AGAGAAGTCGC   | 0.463 |             |
| - | 18 | 2931 | moe.1_Splice_Site                                | NM_006306    | NP_006297    | Q14683 | SMC1A_HUMAN  |                                | 6  | FACTCACCTCTTC  | 0.502 |             |
| - | 13 | 2177 | _p.S681F SMC1A_                                  | NM_006306    | NP_006297    | Q14683 | SMC1A_HUMAN  | Potential.                     | 6  | 3CCTGAGACTGC.  | 0.562 |             |
| - | 1  | 421  |                                                  | NM_002565    | NP_002556    | P51582 | P2RY4_HUMAN  | Name=2; (Potential).           | 1  | .GGTGTCTGACA/  | 0.567 |             |
| + | 15 | 1101 | 345S RAB41_uc0                                   | NM_004312    | NP_004303    | P36575 | ARRC_HUMAN   |                                | 4  | 3AGCTACCCCTTG/ | 0.547 | rs151266240 |
| + | 6  | 1135 | ense_Mutation_p.l                                | NM_001145408 | NP_001138880 | Q15233 | NONO_HUMAN   | DBHS.                          | 4  | 3TGTGCGCTTTG/  | 0.512 |             |
| - | 2  | 376  | 3GT1_uc004ect.3_                                 | NM_032121    | NP_115497    | Q9H0U3 | MAGT1_HUMAN  |                                | 1  | ATAACGGAGTAA/  | 0.408 |             |
| + | 4  | 781  | 3df.2_Missense_M                                 | NM_014499    | NP_055314    | O00398 | P2Y10_HUMAN  | lasmic (Potential).            | 5  | :TCAAGCCCTTC/  | 0.512 |             |
| + | 2  | 1329 | eff.1_Missense_M                                 | NM_080832    | NP_543022    | Q96DU9 | PABP5_HUMAN  |                                | 3  | 3AAAAAAGTCGG/  | 0.443 |             |
| + | 1  | 669  | 3H2_uc004efu.3_Ir                                | NM_013347    | NP_037479    | Q13156 | RFA4_HUMAN   |                                | 0  | GAGTATATGTCA/  | 0.448 |             |
| - | 2  | 508  | _p.P70Q TRMT2B_                                  | NM_024917    | NP_079193    | Q96GJ1 | TRM2_HUMAN   |                                | 1  | FGGCTTGGTTTC   | 0.478 |             |
| + | 5  | 682  | 3eib.1_Missense_M                                | NM_016607    | NP_057691    | Q9UH62 | ARMX3_HUMAN  |                                | 2  | 3TGCTGGGGACT/  | 0.502 |             |
| - | 3  | 534  | _p.T161I TSC22D                                  | NM_004089    | NP_004080    | Q99576 | T22D3_HUMAN  | 3ucine-zipper.                 | 0  | 3ACAGGTGTTC    | 0.567 |             |
| + | 4  | 576  | msz.1_Missense_Mutation_p.T103I ALG13_uc011mta.1 | NM_000640    | NP_000631    | Q9NP73 | ALG13_HUMAN  |                                | 1  | 3TCTACCTGCAC   | 0.502 |             |
| - | 5  | 585  | 3qd.1_Missense_M                                 | NM_000640    | NP_000631    | Q14627 | I13R2_HUMAN  | tential). Fibronectin type-III | 3  | AACAGAGTAAAT/  | 0.318 |             |
| + | 8  | 1727 | RF3_uc004eqy.2_                                  | NM_001031855 | NP_001027026 | Q496Y0 | LONF3_HUMAN  | Lon.                           | 2  | 3CCTATCCCACCC  | 0.458 |             |
| - | 1  | 394  |                                                  | NM_178471    | NP_848566    | Q8TDV5 | GP119_HUMAN  | Name=4; (Potential).           | 2  | 3AGACACTAACC/  | 0.542 |             |
| - | 6  | 636  | 3n_p.144T ENOX2_                                 | NM_182314    | NP_872114    | Q16206 | ENOX2_HUMAN  | Pro-rich.                      | 1  | 3GTGGAATTCCAC  | 0.398 |             |
| - | 1  | 407  |                                                  | NM_054021    | NP_473362    | Q96P66 | GP101_HUMAN  | lasmic (Potential).            | 5  | 3AGAGAGGGTGC   | 0.597 |             |
| + | 8  | 1910 | 2_3'UTR IMAGEC:                                  | NM_138702    | NP_619647    | Q8TD91 | MAGC3_HUMAN  | MAGE 2.                        | 3  | FCATGTCCACCA/  | 0.522 |             |
| - | 2  | 2723 | 3by.2_Missense_M                                 | NM_173078    | NP_775101    | Q8IW52 | SLIK4_HUMAN  | lasmic (Potential).            | 2  | 3TTTTTCTGGATA  | 0.383 |             |
| + | 14 | 1597 | 3G449S FMR1_uc                                   | NM_002024    | NP_002015    | Q06787 | FMR1_HUMAN   | 3tion with RANBP9.             | 3  | 3GAATGGGTGCA/  | 0.438 |             |
| + | 7  | 1338 |                                                  | NM_005140    | NP_005131    | Q16280 | CNGA2_HUMAN  | 3ellular (Potential).          | 3  | 3ATGTGGGCTCC   | 0.517 |             |
| + | 8  | 1129 |                                                  | NM_018558    | NP_061028    | Q9UN88 | GBRT_HUMAN   |                                | 3  | 3CCGAAGAGTCA   | 0.522 |             |
| + | 12 | 911  | 3j.1_Intron ZNF185_                              | NM_007150    | NP_009081    | O15231 | ZN185_HUMAN  |                                | 3  | CCAGGGCAGGA    | 0.602 |             |
| - | 16 | 3352 |                                                  | NM_005334    | NP_005325    | P51610 | HCFC1_HUMAN  |                                | 2  | 3CCGCCTGCCG    | 0.647 |             |
| - | 7  | 679  | 3u.1_Missense_Mu                                 | NM_021806    | NP_068578    | P98173 | FAM3A_HUMAN  |                                | 1  | 3AACTTCAACAGC  | 0.597 |             |
| - | 8  | 977  | 3fix.1_Splice_Site_                              | NM_001042351 | NP_001035810 | P11413 | G6PD_HUMAN   |                                | 4  | 3CCCTACTCTCT/  | 0.622 |             |
| + | 2  | 583  | 3BKG_uc004fmc.3                                  | NM_001099857 | NP_001093327 | Q9Y6K9 | NEMO_HUMAN   | 3h CHUK/IKBKB. Potential.      | 0  | 3TGAGGAGAAAT/  | 0.627 |             |
| + | 2  | 586  | 34ff.2_5'UTR NLGN                                | NM_014893    | NP_055708    | Q8NFZ3 | NLGN_Y_HUMAN | 3ellular (Potential).          | 0  | GCCCCAGCAC     | 0.493 |             |
| - | 36 | 4659 | 3rd.2_Missense_Ml                                | NM_005529    | NP_005520    | P98160 | PGBM_HUMAN   | GF-like 9; second part.        | 9  | 3GCAGGACAGA    | 0.657 |             |

|   |    |           |                      |              |              |        |              |                                |     |                   |       |             |
|---|----|-----------|----------------------|--------------|--------------|--------|--------------|--------------------------------|-----|-------------------|-------|-------------|
| + | 2  | 779       | GJB3_uc001bxz.2      | NM_024009    | NP_076872    | O75712 | CXB3_HUMAN   | cellular (Potential).          | 0   | CAACACCAAGC       | 0.607 |             |
| + | 34 | 4365      | 10_uc010oyl.1_Int    | NM_001039703 | NP_001034792 | A6NDV3 | A6NDV3_HUMAN |                                | 0   | TCACTGAATAGA      | 0.473 |             |
| - | 3  | 8411      |                      | NM_002016    | NP_002007    | P20930 | FILA_HUMAN   | Ser-rich.                      | 16  | TGCTTGACCCCC      | 0.587 |             |
| - | 1  | 43        |                      | NM_001004467 | NP_001004467 | Q5JRS4 | O10J3_HUMAN  | cellular (Potential).          | 2   | ACCTTCAAAGA       | 0.428 |             |
| + | 6  | 877       | POX_uc001fyh.2       | NM_001122764 | NP_001116236 | P50336 | PPOX_HUMAN   |                                | 1   | ATCGTTCCATAT      | 0.547 |             |
| + | 7  | 624       | sk.2_Missense_Mi     | NM_002927    | NP_002918    | O14921 | RGS13_HUMAN  | RGS.                           | 0   | ATTCAGGAACCC      | 0.348 |             |
| + | 8  | 2362_2363 | N1_uc001gwb.2_F      | NM_178275    | NP_840059    |        |              |                                | 3   | GGAGAGGGGCTA      | 0.614 |             |
| + | 7  | 1349_1350 | 2_uc009xch.2_Mis     | NM_001877    | NP_001868    | P20023 | CR2_HUMAN    | extracellular (Potential).     | 8   | TCAATGGGCAAA      | 0.421 |             |
| - | 1  | 538       |                      | NM_001001959 | NP_001001959 | Q8NGX0 | O11L1_HUMAN  | cellular (Potential).          | 3   | GAGGTCGCAGA       | 0.507 |             |
| + | 1  | 103       |                      | NM_001004688 | NP_001004688 | Q96R28 | OR2M2_HUMAN  | Name=1; (Potential).           | 4   | GCACTCTTTTAC      | 0.522 |             |
| - | 1  | 352       | LF6_uc010qal.1_N     | NM_001300    | NP_001291    | Q99612 | KLF6_HUMAN   |                                | 4   | CTCCTCCAGAG       | 0.557 |             |
| + | 1  | 575       |                      | NM_001005181 | NP_001005181 | Q8NH76 | O56B4_HUMAN  | cellular (Potential).          | 1   | TTATCAGCCTGG      | 0.488 |             |
| + | 1  | 427       |                      | NM_001005323 | NP_001005323 | Q8NH90 | O5AK2_HUMAN  | Name=4; (Potential).           | 3   | GCATCCGTTTGC      | 0.443 |             |
| + | 8  | 4653      |                      | NM_001008781 | NP_001008781 | Q8TDW7 | FAT3_HUMAN   | Extracellular (Potential).     | 5   | CTTATCGAAGA       | 0.358 |             |
| + | 20 | 2806      | gb.2_Missense_Mi     | NM_014361    | NP_055176    | O94779 | CNTN5_HUMAN  | nectin type-III 2.             | 8   | GGAAGGAAAAA       | 0.408 |             |
| - | 21 | 2696      | p.F793L HYOU1_       | NM_006389    | NP_006380    | Q9Y4L1 | HYOU1_HUMAN  |                                | 0   | GAGGAACATGC       | 0.567 |             |
| - | 8  | 1220      | p.R287W KIRREL3      | NM_032531    | NP_115920    | Q8IZU9 | KIRR3_HUMAN  | potential). Ig-like C2-type 3. | 3   | GCCCCGCTTGG       | 0.592 |             |
| - | 1  | 373       |                      | NM_175068    | NP_778238    | Q86Y46 | K2C73_HUMAN  | Head.                          | 6   | CCAGGAGGCTC       | 0.602 |             |
| - | 9  | 1066      |                      | NM_182496    | NP_872302    | Q502W7 | CCD38_HUMAN  |                                | 1   | AAGGACAGCTG       | 0.438 | rs139965944 |
| + | 15 | 1422      | p.L446F KIAA103      | NM_015275    | NP_056090    | Q2M389 | WAHS7_HUMAN  |                                | 2   | CTTCTGTATGC       | 0.299 |             |
| - | 10 | 1429      | p.G239R FOXN4_       | NM_213596    | NP_998761    | Q96NZ1 | FOXN4_HUMAN  |                                | 2   | TGAATCCCTCAT      | 0.572 |             |
| + | 4  | 2801      |                      | NM_001033602 | NP_001028774 | Q5JR59 | MTUS2_HUMAN  | microtubules. Mediates int     | 0   | CCAAGGGGGCC       | 0.562 |             |
| - | 2  | 3185      | hl.1_Missense_Mu     | NM_203487    | NP_982354    | Q9HC56 | PCDH9_HUMAN  | ical; (Potential).             | 6   | GTCACGAAGAT       | 0.512 |             |
| + | 10 | 2368      |                      | NM_000369    | NP_000360    | P16473 | TSHR_HUMAN   | asmic (Potential).             | 299 | AAGATGTCTATC      | 0.453 |             |
| - | 6  | 1183      | uc001zit.1_Intron    | NM_005159    | NP_005150    | P68032 | ACTC_HUMAN   |                                | 2   | CATACGATCAG       | 0.438 |             |
| + | 18 | 2237      | _Mutation_p.K645     | NM_001128608 | NP_001122080 | O60336 | MABP1_HUMAN  | WD 10.                         | 10  | AGCAGAAGAAG       | 0.527 |             |
| - | 16 | 2257      | p.E665K TRPM7_       | NM_017672    | NP_060142    | Q96QT4 | TRPM7_HUMAN  | asmic (Potential).             | 10  | TTGCTTCATATG      | 0.358 |             |
| - | 14 | 1982      | p.R614* SLTM_uc      | NM_024755    | NP_079031    | Q9NWH9 | SLTM_HUMAN   | lu-rich. Potential.            | 1   | ACCTTCAAGTT       | 0.363 |             |
| - | 10 | 1877      | .E3_uc010bil.1_Mi    | NM_005078    | NP_005069    | Q04726 | TLE3_HUMAN   | CN domain.                     | 2   | CATTGGAAACAT      | 0.527 |             |
| - | 4  | 2370      | rs.1_Missense_Mu     | NM_001717    | NP_001708    | Q01954 | BNC1_HUMAN   | C2H2-type 4.                   | 3   | TGCGGGAGGGA       | 0.323 |             |
| + | 25 | 2886      | vv.1_Missense_Mu     | NM_000548    | NP_000539    | P49815 | TSC2_HUMAN   |                                | 10  | TGACACCCCGC       | 0.637 | rs144329595 |
| + | 2  | 610       | JF213_uc010bth.2     | NM_004220    | NP_004211    | O14771 | ZN213_HUMAN  | SCAN box.                      | 0   | ACGGGGATGTG       | 0.622 |             |
| - | 5  | 2188      |                      | NM_024675    | NP_078951    | Q86YC2 | PALB2_HUMAN  |                                | 11  | CCATGCGTTTAC      | 0.433 |             |
| - | 5  | 440       | iA10P_uc002edi.1_RNA |              |              |        |              |                                | 0   | GTTTTTTGTAC       | 0.512 |             |
| + | 15 | 2022      | nl.2_Missense_Mu     | NM_003119    | NP_003110    | Q9UQ90 | SPG7_HUMAN   | trial matrix (Potential).      | 0   | GGGATGGCACC       | 0.657 |             |
| - | 1  | 896       |                      | NM_002548    | NP_002539    | P34982 | OR1D2_HUMAN  | asmic (Potential).             | 1   | CCAGAGCCCCA       | 0.463 |             |
| + | 4  | 595       | CA3_uc010cte.1_I     | NM_173847    | NP_776246    | Q8IXA5 | SACA3_HUMAN  | cellular (Potential).          | 2   | CCTAATCTCAAG      | 0.413 |             |
| - | 1  | 457       |                      | NM_033059    | NP_149048    | Q9BYQ6 | KR411_HUMAN  | -[GIKRQVHEL]-[SPTR]-[S         | 0   | ggagatgctgcagctgg | 0.129 |             |
| - | 1  | 103       |                      | NM_025237    | NP_079513    | Q9BQB4 | SOST_HUMAN   |                                | 0   | CTACACGGAAG       | 0.627 |             |
| + | 6  | 893       | .2_RNA DCAF7_u       | NM_005828    | NP_005819    | P61962 | DCAF7_HUMAN  |                                | 1   | TGCTTCGCCTC       | 0.572 |             |
| - | 1  | 69        | nse_Mutation_p.A     | NM_002059    | NP_002050    | P01242 | SOM2_HUMAN   |                                | 3   | ACCTGCAGCCA       | 0.597 | rs148779841 |
| - | 11 | 1400      | p.S448F PIP5K1C      | NM_012398    | NP_036530    | O60331 | PI51C_HUMAN  |                                | 4   | TACAGGAGTTC       | 0.652 |             |
| - | 3  | 21493     |                      | NM_024690    | NP_078966    | Q8WXI7 | MUC16_HUMAN  | ch. Extracellular (Potential). | 57  | GGAAGGGAGAG       | 0.507 |             |
| - | 3  | 15005     |                      | NM_024690    | NP_078966    | Q8WXI7 | MUC16_HUMAN  | extracellular (Potential).     | 57  | TAGAGGAAGTG       | 0.517 |             |
| - | 4  | 1258      |                      | NM_031310    | NP_112600    | Q9BX97 | PLVAP_HUMAN  | cellular (Potential).          | 0   | CCATGGGCCTT       | 0.597 |             |
| + | 5  | 1465      |                      | NM_144689    | NP_653290    | Q8TAQ5 | ZN420_HUMAN  |                                | 0   | TGAGAAACCCT       | 0.403 |             |
| - | 5  | 629       | i10xuc.1_Missense    | NM_170604    | NP_733749    | Q8TDF6 | GRP4_HUMAN   | rminal Ras-GEF.                | 3   | GGGATCCTGGT       | 0.582 |             |

|   |    |      |                                                       |              |              |        |             |                               |       |                 |       |             |
|---|----|------|-------------------------------------------------------|--------------|--------------|--------|-------------|-------------------------------|-------|-----------------|-------|-------------|
| - | 1  | 310  | 02ozg_3_Missense                                      | NM_013256    | NP_037388    | Q9UJW8 | ZN180_HUMAN |                               | 2     | 'AGCTTCCC       | 0.667 |             |
| - | 1  | 166  |                                                       | NM_178449    | NP_848544    | Q96A98 | TIP39_HUMAN |                               | 0     | ACCACcagcagcag  | 0.597 |             |
| + | 4  | 1011 | 0221E SIGLEC7_L                                       | NM_014385    | NP_055200    | Q9Y286 | SIGL7_HUMAN | 2. Extracellular (Potential). | 1     | 'GGGGATGAAGG    | 0.597 |             |
| + | 8  | 1498 | p.A453V LILRA2                                        | NM_001130917 | NP_001124389 | Q8N149 | LIRA2_HUMAN | ical; (Potential).            | 1     | TGAGGCTCAGC/    | 0.567 |             |
| + | 5  | 1578 |                                                       | NM_152677    | NP_689890    | Q8NAM6 | ZSCA4_HUMAN |                               | 1     | 'ATGAGGGAAATT'  | 0.473 |             |
| + | 5  | 494  | F512_uc010yix.1_l                                     | NM_032434    | NP_115810    | Q96ME7 | ZN512_HUMAN |                               | 1     | 'CAATCCCAAAT'   | 0.468 |             |
| + | 9  | 1831 | v.2_Missense_Mut                                      | NM_206943    | NP_996826    | Q14766 | LTBP1_HUMAN |                               | 8     | 'ATGATGGAATGC'  | 0.368 |             |
| - | 9  | 3464 | _Mutation_p.G103                                      | NM_025052    | NP_079328    | Q56UN5 | YSK4_HUMAN  | rotein kinase.                | 5     | GCCACCAGGAA'    | 0.408 |             |
| - | 3  | 581  |                                                       | NM_019850    | NP_062824    | Q8N5V2 | NGEF_HUMAN  | toward RHOA, RAC1 and         | 7     | 'GGAGGCATTCT'   | 0.468 |             |
| - | 2  | 235  | nk C20orf7_uc002                                      | NM_016649    | NP_057733    | Q9H501 | ESF1_HUMAN  |                               | 1     | 'GTCATGAAACAT   | 0.443 |             |
| + | 2  | 63   | tj.1_RNA FRG1B_uc010gdr.1_RNA FRG1B_uc010ztk.1_Intron |              |              |        |             |                               | 0     | 'GAATCGCCCTG    | 0.353 | rs7266938   |
| - | 2  | 143  |                                                       | NM_003225    | NP_003216    | P04155 | TFF1_HUMAN  | P-type.                       | 0     | ACGGGGGGCCA     | 0.522 |             |
| - | 2  | 301  | ba.2_Missense_Mi                                      | NM_001351    | NP_001342    | Q92904 | DAZL_HUMAN  |                               | 0     | 'TTGAGTAGACT'   | 0.343 |             |
| - | 7  | 3619 | eal.2_Missense_M                                      | NM_001009899 | NP_001009899 | Q68DE3 | K2018_HUMAN |                               | 3     | 'TTGATCAGGGA'   | 0.423 |             |
| - | 7  | 2195 | blc.1_Missense_M                                      | NM_001017395 | NP_001017395 | Q94876 | TMCC1_HUMAN | Potential.                    | 1     | 'GCTGCTGCAGC    | 0.572 |             |
| + | 14 | 2124 | ayn.2_Missense_M                                      | NM_053002    | NP_443728    | Q86YW9 | MD12L_HUMAN |                               | 7     | ATTTTTCCATCTA   | 0.388 |             |
| + | 7  | 932  | .S218L FAM193A                                        | NM_003704    | NP_003695    | P78312 | F193A_HUMAN |                               | 3     | 'GTTATCGTCCCC   | 0.488 |             |
| + | 11 | 1864 | _p.I443L CPZ_uc                                       | NM_001014447 | NP_001014447 | Q66K79 | CBPZ_HUMAN  |                               | 3     | 'ACTTCATTCTGC'  | 0.587 | rs149680311 |
| - | 1  | 675  | _p.R74W UGT2B4                                        | NM_021139    | NP_066962    | P06133 | UD2B4_HUMAN |                               | 2     | 'TACCCTCTCTAT   | 0.373 |             |
| + | 13 | 2363 |                                                       | NM_020840    | NP_065891    | Q9P278 | FNIP2_HUMAN | tion with PRKAA1.             | 0     | 'ATCTCCAGAGTC'  | 0.552 |             |
| - | 19 | 2230 | _p.R608C NEK1_u                                       | NM_012224    | NP_036356    | Q96PY6 | NEK1_HUMAN  |                               | 6     | 'ACCACGAAGTTI   | 0.338 |             |
| + | 15 | 2141 | 7_uc011cpn.1_RN                                       | NM_000587    | NP_000578    | P10643 | CO7_HUMAN   | Sushi 2.                      | 0     | 'CTCCAGCCTTA'   | 0.493 |             |
| - | 13 | 2318 | knp.2_Missense_M                                      | NM_173488    | NP_775759    | Q86UG4 | SO6A1_HUMAN | lasmic (Potential).           | 7     | CAGTTTCTTCTT'   | 0.269 |             |
| + | 10 | 1954 | 011cwm.1_Missen                                       | NM_005460    | NP_005451    | Q9Y6H5 | SNCAP_HUMAN |                               | 2     | 'ATGATTCTGTAGC' | 0.473 |             |
| + | 2  | 282  | jix.1_Missense_M                                      | NM_001143942 | NP_001137414 | Q9BX46 | RBM24_HUMAN |                               | 2     | 'ACCAAGGATCA'   | 0.517 |             |
| - | 5  | 1065 | _uc003ntw.2_Miss                                      | NM_004640    | NP_004631    | Q13838 | DX39B_HUMAN | ase ATP-binding.              | 0     | CAGCAACCTGCC'   | 0.498 |             |
| - | 10 | 6683 | 318_uc003ouw.2_l                                      | NM_014345    | NP_055160    | Q5VUA4 | ZN318_HUMAN |                               | 7     | 'CCAGGGAACCTA   | 0.473 |             |
| - | 5  | 756  | p.P232S RHAG_uc                                       | NM_000324    | NP_000315    | Q02094 | RHAG_HUMAN  | ellular (Potential).          | 2     | 'TCCAGGTTTCAG'  | 0.502 |             |
| + | 2  | 581  | _bm.2_Missense_M                                      | NM_153362    | NP_699193    | Q8N3Z0 | PRS35_HUMAN | peptidase S1.                 | 1     | TTCTTAACCAATI   | 0.478 |             |
| + | 5  | 1098 | .R243L ESR1_uc0                                       | NM_001122742 | NP_001116214 | P03372 | ESR1_HUMAN  | tor. Mediates interaction wi  | 5     | 'GCTCCGTAATAT'  | 0.542 |             |
| + | 3  | 1262 | _s.2_Missense_Mut                                     | NM_005922    | NP_005913    | Q9Y6R4 | M3K4_HUMAN  |                               | 9     | 'AGGCTCTTCAG'   | 0.423 |             |
| - | 6  | 669  | 02_uc003smn.3_Int                                     | NM_001100600 | NP_001094070 | Q8IY49 | PAQRA_HUMAN | lasmic (Potential).           | 1     | 'AGCTCCCTGTT'   | 0.552 |             |
| + | 19 | 2202 | S_uc003uty.3_RN/                                      | NM_012447    | NP_036579    | Q9UJ98 | STAG3_HUMAN |                               | 8     | 'AGCTTGAAGAG    | 0.572 |             |
| - | 8  | 1420 | _p.V342A CREB3L                                       | NM_194071    | NP_919047    | Q70SY1 | CR3L2_HUMAN | Potential). Leucine-zipper.   | 160   | TCTAGAACCTCT/   | 0.438 |             |
| - | 15 | 1860 |                                                       | NM_004333    | NP_004324    | P15056 | BRAF_HUMAN  | rotein kinase_R603>I(2)) p.T  | 18290 | 'ATTTCCTACTGTAC | 0.368 |             |
| - | 4  | 2553 |                                                       | NM_178857    | NP_849188    | Q8IWN7 | RP1L1_HUMAN |                               | 8     | 'GTATGGGGGCC    | 0.657 |             |
| + | 4  | 1335 | 21_uc011ldy.1_Intr                                    | NM_006269    | NP_006260    | P56715 | RP1_HUMAN   |                               | 12    | 'GGAGCGAAGCA    | 0.433 | rs141279458 |
| - | 6  | 1422 | _p.K262* SDR16C                                       | NM_138969    | NP_620419    | Q8N3Y7 | RDHE2_HUMAN |                               | 3     | ACATTTTTTCTTC   | 0.318 |             |
| + | 8  | 879  | P1_uc010mai.2_Ir                                      | NM_007013    | NP_008944    | Q9H0M0 | WWP1_HUMAN  |                               | 2     | 'AGTCCAAAACCT'  | 0.403 |             |
| - | 14 | 1651 | _s.1_Missense_Mu                                      | NM_015902    | NP_056986    | Q95071 | UBR5_HUMAN  |                               | 28    | 'AAGAGGATTATT   | 0.323 |             |
| - | 6  | 1753 | _s.2_Intron TMEM2                                     | NM_013390    | NP_037522    | Q9UHN6 | TMEM2_HUMAN |                               | 2     | 'TGAAGAGAGAAAC  | 0.368 |             |
| + | 4  | 805  |                                                       | NM_001001670 | NP_001001670 | Q6ZQQ2 | F75D1_HUMAN |                               | 0     | 'TCACATTGAGAC'  | 0.527 |             |
| - | 4  | 3084 | _bq.1_Missense_M                                      | NM_133445    | NP_597702    | Q8TCU5 | NMD3A_HUMAN | ellular (Potential).          | 7     | CCACTCCATCAG    | 0.418 |             |
| - | 7  | 1012 | 3BGT1_uc011mcx.                                       | NM_021996    | NP_068836    | Q8N5D6 | GBGT1_HUMAN | renal (Potential).            | 0     | 'CACGCCTGCGC'   | 0.597 |             |
| + | 46 | 6986 | coi.2_Missense_M                                      | NM_000718    | NP_000709    | Q00975 | CAC1B_HUMAN | lasmic (Potential).           | 6     | 'CTTTCGAGGAG'   | 0.647 |             |
| - | 5  | 4056 |                                                       | NM_015419    | NP_056234    | Q9NR99 | MXRA5_HUMAN |                               | 8     | 'TTTTCTGGTGG    | 0.368 |             |
| + | 3  | 354  | IB3_uc004doz.2_I                                      | NM_033031    | NP_149020    | Q8WWL7 | CCNB3_HUMAN |                               | 9     | 'TCAGTCCAGCA    | 0.483 |             |

|   |     |                            |                   |              |              |             |                            |                            |    |                    |       |             |
|---|-----|----------------------------|-------------------|--------------|--------------|-------------|----------------------------|----------------------------|----|--------------------|-------|-------------|
| - | 13  | 1152                       | si.1_Nonsense_Mt  | NM_022052    | NP_071335    | Q9H4D5      | NXF3_HUMAN                 | NTF2.                      | 3  | CTGTGCGATCTC       | 0.522 |             |
| - | 105 | 15336                      | se_Mutation_p.P76 | NM_020765    | NP_065816    | Q5T4S7      | UBR4_HUMAN                 |                            | 25 | TGGTAGGCACC        | 0.542 |             |
| - | 13  | 2891                       | p.D203N KIF17_u   | NM_020816    | NP_065867    | Q9P2E2      | KIF17_HUMAN                |                            | 4  | ATTGTCTGCTGC       | 0.582 |             |
| + | 19  | 2184                       | ation_p.D27A NBP  | NM_001037675 | NP_001032764 | Q3BBV1      | NBPFK_HUMAN                | NBPF 5.                    | 0  | GCTGGATGAGA        | 0.483 |             |
| - | 11  | 1575                       | nr.1_Missense_Mt  | NM_001025603 | NP_001020774 | P48382      | RFX5_HUMAN                 |                            | 1  | TCTATATCCTGCT      | 0.532 |             |
| - | 2   | 3389                       | e.1_Missense_Mu   | NM_007113    | NP_009044    | Q07283      | TRHY_HUMAN                 | 30 AA tandem repeats.      | 5  | ogccttctcttcccggtt | 0.239 |             |
| - | 3   | 4292                       | uc001ezv.2_Intron | NM_001014342 | NP_001014364 | Q5D862      | FILA2_HUMAN                |                            | 17 | CTGTCCATGAC        | 0.527 |             |
| - | 3   | 1113                       |                   | NM_016190    | NP_057274    | Q9UBG3      | CRNN_HUMAN                 | Gln-rich.                  | 3  | CTGAGTGTGTCC       | 0.592 |             |
| - | 2   | 900                        | .HDC8A_uc001hcx   | NM_018203    | NP_060673    | Q81YD2      | KLD8A_HUMAN                | Kelch 3.                   | 1  | AGCATGCCTCCTC      | 0.622 |             |
| + | 1   | 494                        |                   | NM_001004690 | NP_001004690 | A3KFT3      | OR2M5_HUMAN                | cellular (Potential).      | 3  | CATTTTCCTTCTC      | 0.443 |             |
| - | 2   | 885                        | 2_Intron RASSF4   | NM_007021    | NP_008952    | Q9NTK1      | DEPP_HUMAN                 |                            | 0  | TCTGAGGACAC        | 0.607 |             |
| - | 21  | 2892                       | ql.1_Missense_M   | NM_003474    | NP_003465    | O43184      | ADA12_HUMAN                | lasmic (Potential).        | 9  | TGCACGTGGAG        | 0.552 |             |
| + | 52  | 15620_1562b.2_Missense_Mur | NM_017511         | NP_059981    | Q9HC84       | MUC5B_HUMAN | em repeats, Ser/Thr- rich. |                            | 0  | CCAGGGACCAC        | 0.639 |             |
| - | 3   | 560                        |                   | NM_001012709 | NP_001012727 | Q6L8H1      | KRA54_HUMAN                | repeats of C-C-X-P.        | 0  | AGGAGCCACAG        | 0.677 |             |
| + | 32  | 6648                       | p.R1157Q NAV2_u   | NM_182964    | NP_892009    | Q81VL1      | NAV2_HUMAN                 |                            | 6  | ACCGTCGGATCA       | 0.582 |             |
| - | 1   | 444                        |                   | NM_001039396 | NP_001034485 | Q2M385      | MPEG1_HUMAN                | xtracellular (Potential).  | 2  | GAGTTCATCTCC       | 0.438 |             |
| - | 2   | 570                        | nsense_Mutation_j | NM_013402    | NP_037534    | O60427      | FADS1_HUMAN                | al).Cytochrome b5 heme-b   | 1  | TCTCCAATCAC        | 0.507 |             |
| - | 5   | 6119                       | IAK_uc001ntk.1_Ir | NM_001620    | NP_001611    | Q09666      | AHNK_HUMAN                 |                            | 19 | ACATCCACATCC       | 0.502 |             |
| + | 3   | 423                        |                   | NM_004585    | NP_004576    | Q9UL19      | TIG3_HUMAN                 |                            | 1  | TCACCCAGCTG        | 0.542 |             |
| - | 3   | 897                        |                   | NM_006248    | NP_006239    |             |                            |                            | 0  | TTGTGGGGGTG        | 0.617 |             |
| - | 3   | 584                        | p.G11W GJB6_uc    | NM_006783    | NP_006774    | O95452      | CXB6_HUMAN                 | lasmic (Potential).        | 1  | ACCCCGATGA         | 0.507 | rs104894415 |
| + | 1   | 461                        |                   | NM_030979    | NP_112241    | Q9H361      | PABP3_HUMAN                | RRM 2.                     | 4  | GTGATGAAAATC       | 0.363 |             |
| + | 1   | 2205                       |                   | NR_003268    |              |             |                            |                            | 0  | ATGTGCCTGAT        | 0.428 | rs57976037  |
| + | 2   | 409                        | u_p.R5W TSSK4_u   | NM_174944    | NP_777604    | Q6SA08      | TSSK4_HUMAN                | rotein kinase.             | 0  | TCTTTCGGGCAC       | 0.517 |             |
| + | 2   | 367                        | .1_5'UTR SRP54_u  | NM_003136    | NP_003127    | P61011      | SRP54_HUMAN                | G-domain.                  | 1  | CAGACCTTGGA        | 0.328 |             |
| - | 7   | 8020                       | px.2_Missense_Mi  | NM_138420    | NP_612429    | Q81VF2      | AHNK2_HUMAN                |                            | 1  | GGACAGGTCCC        | 0.597 |             |
| - | 187 |                            |                   |              |              |             |                            |                            | 0  | CTGACCTCCCC        | 0.587 | rs7146961   |
| + | 1   | 109                        |                   | NM_001080841 | NP_001074310 |             |                            |                            | 0  | TGTGTGATGC         | 0.498 |             |
| + | 2   | 87                         |                   | NM_000761    | NP_000752    | P05177      | CP1A2_HUMAN                |                            | 4  | TGTTCCCTTCTC       | 0.532 |             |
| - | 5   | 785                        | :HRNB4_uc010blh   | NM_000750    | NP_000741    | P30926      | ACHB4_HUMAN                | cellular (Potential).      | 0  | GAAGTCGTAAG        | 0.552 |             |
| + | 4   | 2161                       |                   | NM_003414    | NP_003405    | Q14586      | ZN267_HUMAN                | :2H2-type 12.              | 4  | ACATCAGAGAA        | 0.438 |             |
| + | 2   | 199                        | C2_uc010cbk.1_M   | NM_022162    | NP_071445    | Q9HC29      | NOD2_HUMAN                 | CARD 1.                    | 4  | CGCAGGAGGCT        | 0.607 |             |
| + | 1   | 213                        | P9-9_uc010wfq.1_  | NM_031963    | NP_114169    | Q9BYQ0      | KRA98_HUMAN                | C-C-[RQVSGE]- [SPSNQ];     | 1  | GCCCATCTGTG        | 0.637 |             |
| - | 9   | 1241                       | zi.3_Missense_Mt  | NM_012448    | NP_036580    | P51692      | STA5B_HUMAN                |                            | 6  | CTCCCGCCCA         | 0.587 |             |
| + | 4   | 279                        | iky.2_Missense_A  | NM_004287    | NP_004278    | O14653      | GOSR2_HUMAN                | ic (Potential). Potential. | 2  | CAGTCGGTTG         | 0.527 |             |
| + | 4   | 1858                       | e_Mutation_p.H59  | NM_144566    | NP_653167    | Q9H0M5      | ZN700_HUMAN                | :2H2-type 13.              | 0  | CCTCACACCTT        | 0.463 |             |
| + | 4   | 1651                       | ym.1_Missense_M   | NM_001136501 | NP_001129973 | Q08AG5      | ZN844_HUMAN                |                            | 0  | AAAACCTATGA        | 0.413 |             |
| - | 4   | 1523                       |                   | NM_145276    | NP_660319    | Q8TA94      | ZN563_HUMAN                | :2H2-type 11.              | 0  | ATAACGCTTTCCC      | 0.428 |             |
| - | 4   | 1355                       |                   | NM_145276    | NP_660319    | Q8TA94      | ZN563_HUMAN                | :2H2-type 9.               | 0  | ATAACGTTTTCCC      | 0.413 |             |
| - | 4   | 901                        |                   | NM_005815    | NP_005806    | Q9Y2A4      | ZN443_HUMAN                | :2H2-type 4.               | 1  | AAAAGAAAAGG        | 0.378 |             |
| - | 4   | 1409                       | 709_uc002mtx.3_J  | NM_144976    | NP_659413    | Q8TBZ8      | ZN564_HUMAN                | :2H2-type 11.              | 1  | AGGCTCTACCA        | 0.433 |             |
| + | 4   | 1543                       |                   | NM_031218    | NP_112495    | P35789      | ZNF93_HUMAN                |                            | 1  | CTGGAGAGAAA        | 0.373 |             |
| - | 7   | 1908                       | e_Mutation_p.Q40f | NM_181882    | NP_870998    | Q9BXM0      | PRAX_HUMAN                 | .L]-[LIVMAP]- [AQKHRPE];   | 2  | CAGCTGTACCT        | 0.587 |             |
| - | 4   | 2233                       | p.N652Y ZNF28_u   | NM_006969    | NP_008900    | P17035      | ZNF28_HUMAN                | :2H2-type 18.              | 1  | AAGGTTTGACAT       | 0.408 |             |
| - | 5   | 1439                       | k.1_Intron ZNF81f | NM_001031665 | NP_001026835 | Q0VGE8      | ZN816_HUMAN                | :2H2-type 6.               | 0  | TTTCTGACTGAA       | 0.398 |             |
| + | 4   | 1386                       | dw.1_Missense_N   | NM_138374    | NP_612383    | Q96IR2      | ZN845_HUMAN                | :2H2-type 8.               | 0  | FCAGATGCATCC       | 0.413 |             |
| + | 7   | 1834                       | p.R405L ZNF761_u  | NM_001008401 | NP_001008401 | Q86XN6      | ZN761_HUMAN                | :2H2-type 9.               | 1  | TAGACGTCATAC       | 0.393 |             |

|   |     |                                                      |                                                               |              |              |            |              |               |               |       |
|---|-----|------------------------------------------------------|---------------------------------------------------------------|--------------|--------------|------------|--------------|---------------|---------------|-------|
| + | 5   | .010fhg.2_Splice_Site FLJ40330_uc010fh.2_Splice_Site |                                                               |              |              |            | 0            | TTTTCAGTGTCTT | 0.313         |       |
| - | 38  | 6659                                                 | NM_004525                                                     | NP_004516    | P98164       | LRP2_HUMAN | 29           | CAATACCCCGG   | 0.393         |       |
| + | 3   | 195                                                  | RG1B_uc010gdr.1_RNA FRG1B_uc010ztk.1_Missense_Mutation_p.N7D  |              |              |            | 0            | CCCTCAAATAGC  | 0.358         |       |
| + | 3   | 222                                                  | RG1B_uc010gdr.1_RNA FRG1B_uc010ztk.1_Missense_Mutation_p.A16T |              |              |            | 0            | ATGAAGCAGGG   | 0.373         |       |
| + | 3   | 243_244                                              | RG1B_uc010gdr.1_RNA FRG1B_uc010ztk.1_Missense_Mutation_p.S23D |              |              |            | 0            | CAAAAAGTAAAA  | 0.361         |       |
| - | 12  | 1120                                                 | ON_uc002ysl.2_5'U                                             | NM_145858    | NP_665857    | O95825     | QORL1_HUMAN  | 0             | AAACACCAGTTG  | 0.378 |
| + | 5   | 1146                                                 | A2A_uc010guq.2_                                               | NM_000675    | NP_000666    | P29274     | AA2AR_HUMAN  | 0             | CATCTGCTGGG   | 0.587 |
| + | 4   | 2181                                                 | FH_uc003afp.2_5'U                                             | NM_021076    | NP_066554    | P12036     | NFH_HUMAN    | 0             | CAAAGTCCCTT   | 0.557 |
| + | 7   | 3960                                                 | tq.1_Missense_Mu                                              | NM_001039141 | NP_001034230 | Q9H2D6     | TARA_HUMAN   | 1             | CCCACCCCGCC   | 0.706 |
| - | 3   | 753                                                  |                                                               | NM_198560    | NP_940962    | Q7Z7J7     | LHPL4_HUMAN  | 3             | VTGCCCGGATG   | 0.627 |
| - | 34  | 10131                                                | kf.2_Missense_Mu                                              | NM_001407    | NP_001398    | Q9NYQ7     | CELR3_HUMAN  | 11            | GGCCCAAGCA    | 0.597 |
| - | 8   | 1164                                                 |                                                               | NM_003500    | NP_003491    | Q99424     | ACOX2_HUMAN  | 0             | GCCTGGGCCGG   | 0.637 |
| + | 11  | 1887                                                 | atm.2_Missense_Mu                                             | NM_022131    | NP_071414    | Q9H4D0     | CSTN2_HUMAN  | 7             | GCAGTCCATCC   | 0.502 |
| + | 5   | 1146                                                 | 141_uc003gab.2_I                                              | NM_003441    | NP_003432    | Q15928     | ZN141_HUMAN  | 0             | TAGGTCCACAAC  | 0.378 |
| - | 3   | 3308                                                 | tron ABCA11P_uc0                                              | NM_133474    | NP_597731    | D9N162     | D9N162_HUMAN | 1             | TAAAGGTTTTGC  | 0.418 |
| + | 1   | 1599                                                 | t.3_intron LRBA_u                                             | NM_006439    | NP_006430    | Q9Y586     | MB212_HUMAN  | 1             | GGAGCGCTATG   | 0.627 |
| + | 31  | 4597                                                 | p.D982N SPEF2_                                                | NM_024867    | NP_079143    | Q9C093     | SPEF2_HUMAN  | 4             | TGATCGATTTGC  | 0.358 |
| + | 20  | 3831                                                 | ANKHD1_uc003if                                                | NM_020690    | NP_065741    | Q8IWZ2     | Q8IWZ2_HUMAN | 6             | GGGCCGAGCAG   | 0.448 |
| - | 8   | 1174                                                 |                                                               | NM_005990    | NP_005981    | O94804     | STK10_HUMAN  | 8             | GAAGGGATGCT   | 0.632 |
| - | 5   | 698                                                  | _Missense_Mutatio                                             | NM_002020    | NP_002011    | P35916     | VGFR3_HUMAN  | 15            | GGTCTCGACT    | 0.642 |
| - | 10  | 4192                                                 | IC1_uc011dmp.1_I                                              | NM_014641    | NP_055456    | Q14676     | MDC1_HUMAN   | 4             | AAGGCTGGAGC   | 0.527 |
| - | 5   | 1864                                                 | s.M535 BCLAF1_u                                               | NM_014739    | NP_055554    | Q9NYF8     | BCLF1_HUMAN  | 1             | CGTATCATTTTC  | 0.423 |
| + | 9   | 1437                                                 | p.V278M HECW1_                                                | NM_015052    | NP_055867    | Q76N89     | HECW1_HUMAN  | 23            | CTGACGTGCTG   | 0.493 |
| - | 5   | 1584                                                 |                                                               | NM_033273    | NP_150376    | Q96JC4     | ZN479_HUMAN  | 4             | CACATTTGTAGC  | 0.453 |
| - | 6   | 763                                                  | p.S148L SMURF_                                                | NM_020429    | NP_065162    | Q9HCE7     | SMUF1_HUMAN  | 4             | CCACCGAGCCG   | 0.473 |
| + | 2   | 349                                                  | tron uc011kij.1_R                                             | NM_033506    | NP_277041    | O75426     | FBX24_HUMAN  | 4             | CTGCCCTTCTT   | 0.562 |
| + | 14  | 2798                                                 | ZAN_uc003uwl.2_F                                              | NM_003386    | NP_003377    | Q9Y493     | ZAN_HUMAN    | 11            | AAAACTACCCA   | 0.502 |
| + | 3   | 7450                                                 | C17_uc010lho.1_F                                              | NM_001040105 | NP_001035194 | Q685J3     | MUC17_HUMAN  | 27            | CACCACGCCGG   | 0.522 |
| + | 3   | 7512                                                 | C17_uc010lho.1_F                                              | NM_001040105 | NP_001035194 | Q685J3     | MUC17_HUMAN  | 27            | ACACCTATGACC  | 0.493 |
| + | 3   | 7514                                                 | C17_uc010lho.1_F                                              | NM_001040105 | NP_001035194 | Q685J3     | MUC17_HUMAN  | 27            | ACCTATGACCAC  | 0.493 |
| + | 10  | 1173                                                 |                                                               | NM_001868    | NP_001859    | P15085     | CBPA1_HUMAN  | 1             | GACTGGACCTAC  | 0.532 |
| + | 10  | 1791                                                 | ub.2_Missense_M                                               | NM_015905    | NP_056989    | O15164     | TIF1A_HUMAN  | 8             | CCAAACCCCAAT  | 0.408 |
| - | 14  | 1960                                                 | p.S208N MTMR7_                                                | NM_004686    | NP_004677    | Q9Y216     | MTMR7_HUMAN  | 1             | CTATGCTGTTG   | 0.453 |
| - | 1   | 327                                                  | A14_uc003zoo.1_f                                              | NM_002172    | NP_002163    | P01570     | IFN14_HUMAN  | 0             | ATGAGTTCTTTG  | 0.468 |
| + | 1   | 604_605                                              | 42421_uc004aed.1_RNA                                          |              |              |            | 0            | ATCGCGCAAGC   | 0.589         |       |
| + | 17  | 2060                                                 | b.1_RNA TMC1_u                                                | NM_138691    | NP_619636    | Q8TDI8     | TMC1_HUMAN   | 1             | TCACCCTGCAG   | 0.433 |
| + | 4   | 906                                                  | mij.1_Missense_M                                              | NM_014728    | NP_055543    | Q14CM0     | FRPD4_HUMAN  | 13            | CCAGAGAGCGG   | 0.512 |
| - | 4   | 399                                                  | K_uc001aie.2_Mis                                              | NM_023018    | NP_075394    | O95544     | NADK_HUMAN   | 0             | TCGCGGGGTCC   | 0.502 |
| - | 3   | 801                                                  | start_Site RERE_u                                             | NM_012102    | NP_036234    | Q9P2R6     | RERE_HUMAN   | 2             | CGCCACGTGCC   | 0.343 |
| + | 8   | 3062                                                 | od.1_Missense_Mi                                              | NM_012231    | NP_036363    | Q13029     | PRDM2_HUMAN  | 1             | AGAGGCGGACC   | 0.522 |
| + | 8   | 3807                                                 | .2_intron PRDM2_                                              | NM_012231    | NP_036363    | Q13029     | PRDM2_HUMAN  | 1             | TGCCACTCGGC   | 0.612 |
| + | 8   | 4719                                                 | .2_intron PRDM2_                                              | NM_012231    | NP_036363    | Q13029     | PRDM2_HUMAN  | 1             | ATGTTCCGATTGG | 0.408 |
| - | 13  | 1971                                                 | abr.1_Missense_M                                              | NM_003443    | NP_003434    | Q13105     | ZBT17_HUMAN  | 0             | GTGGCGAATAT   | 0.587 |
| - | 105 | 15336                                                | se_Mutation_p.P76                                             | NM_020765    | NP_065816    | Q5T4S7     | UBR4_HUMAN   | 25            | TGGTAGGCACC   | 0.542 |
| - | 13  | 2891                                                 | p.D203N KIF17_u                                               | NM_020816    | NP_065867    | Q9P2E2     | KIF17_HUMAN  | 4             | ATTGCTGCTGC   | 0.582 |
| + | 12  | 2328                                                 | gf.2_Missense_Mu                                              | NM_017449    | NP_059145    | P29323     | EPHB2_HUMAN  | 5             | GCTTCGGGGCA   | 0.542 |
| - | 5   | 541                                                  | ce_Site_p.G141_s                                              | NM_000191    | NP_000182    | P35914     | HMGL_HUMAN   | 1             | ACTACCCCGG    | 0.488 |

rs139444589

rs147944556



|   |    |       |                    |              |              |        |              |                                  |    |               |       |
|---|----|-------|--------------------|--------------|--------------|--------|--------------|----------------------------------|----|---------------|-------|
| - | 6  | 1420  | _p.R151* AHDC1_    | NM_001029882 | NP_001025053 | Q5TGY3 | AHDC1_HUMAN  | Pro-rich.                        | 1  | CGAGTCGGAGCC  | 0.632 |
| + | 5  | 930   |                    | NM_031459    | NP_113647    | P58004 | SESN2_HUMAN  |                                  | 7  | TGGCCGAGCTC   | 0.642 |
| - | 3  | 615   | _p.R164K RRAGC_    | NM_022157    | NP_071440    | Q9HB90 | RRAGC_HUMAN  |                                  | 1  | TGGCCCTTTGAT  | 0.378 |
| + | 59 | 17196 | cde.1_Missense_I   | NM_033044    | NP_149033    | Q9UPN3 | MACF1_HUMAN  | tail (By similarity). GAR.       | 16 | CAGATCGGAGAC  | 0.443 |
| - | 4  | 359   | iw.1_Missense_Mt   | NM_014571    | NP_055386    | Q9NQ87 | HEYL_HUMAN   | interaction with NCOR1 and S     | 1  | CTGTCCCACCA   | 0.363 |
| - | 12 | 2022  | nse_Mutation_p.Ai  | NM_003035    | NP_003026    | Q15468 | STIL_HUMAN   | ending (By similarity).          | 3  | GTTTTGCTCCTTC | 0.438 |
| - | 7  | 871   | mv.1_Missense_M    | NM_019073    | NP_061946    | Q9NWH7 | SPAT6_HUMAN  |                                  | 1  | CAGCCGCCGCC   | 0.408 |
| + | 1  | 456   | ation_p.C9Y ACAC   | NM_000016    | NP_000007    | P11310 | ACADM_HUMAN  |                                  | 4  | ATGCTGCAGGG   | 0.652 |
| + | 2  | 692   | orn.1_Missense_Iv  | NM_007034    | NP_008965    | Q9UDY4 | DNJB4_HUMAN  |                                  | 0  | CAAACGGATGA   | 0.413 |
| + | 3  | 210   | i09wda.1_Missens   | NM_182976    | NP_892021    | Q5BKZ1 | ZN326_HUMAN  | al activation (By similarity). i | 1  | GGATCGTGATT   | 0.353 |
| + | 7  | 1876  | p.G494R VCAM1_     | NM_001078    | NP_001069    | P19320 | VCAM1_HUMAN  | 6. Extracellular (Potential).    | 1  | AGGCTGGAAGA   | 0.383 |
| - | 2  | 1848  |                    | NM_020703    | NP_065754    | Q86WK6 | AMGO1_HUMAN  | lasmic (Potential).              | 2  | TGGGCGTATCA   | 0.587 |
| - | 7  | 2048  | bv.1_Missense_Mi   | NM_004980    | NP_004971    | Q9UK17 | KCND3_HUMAN  | lasmic (Potential).              | 3  | ATTGAACTCTCC  | 0.522 |
| + | 10 | 1618  | p.L479F MAGI3_u    | NM_001142782 | NP_001136254 | Q5TCQ9 | MAGI3_HUMAN  | in with PTEN. PDZ 2.             | 6  | CAATTGGTACCT  | 0.423 |
| - | 10 | 1414  | eff.1_Missense_Mt  | NM_000036    | NP_000027    | P23109 | AMPD1_HUMAN  |                                  | 4  | GCAGACGAACC   | 0.567 |
| + | 19 | 2184  | ation_p.D27A NBP   | NM_001037675 | NP_001032764 | Q3BBV1 | NBPFK_HUMAN  | NBPF 5.                          | 0  | GCTGGATGAGA   | 0.483 |
| + | 19 | 2193  | ation_p.E30G NBP   | NM_001037675 | NP_001032764 | Q3BBV1 | NBPFK_HUMAN  | NBPF 5.                          | 0  | GAAAGAGCCTG   | 0.483 |
| + | 6  | 892   | 1_Intron NBPF10_   | NM_001039703 | NP_001034792 | A6NDV3 | A6NDV3_HUMAN |                                  | 0  | CAGAGATGAACA  | 0.498 |
| + | 14 | 2035  | oyk.1_Translation_ | NM_001039703 | NP_001034792 | A6NDV3 | A6NDV3_HUMAN |                                  | 0  | CACAGCGTGTG   | 0.453 |
| + | 6  | 1189  | zr.1_Missense_Mu   | NM_004326    | NP_004317    | O00512 | BCL9_HUMAN   |                                  | 6  | TACAGCCCCCA   | 0.498 |
| - | 17 | 1995  | ic010pab.1_Intron  | NM_015383    | NP_056198    | Q5TI25 | NBPFE_HUMAN  | NBPF 7.                          | 1  | CTTCTTGGTACT  | 0.438 |
| - | 7  | 1140  | JP32E_uc010pbv.1   | NM_030920    | NP_112182    | Q9BTT0 | AN32E_HUMAN  | i-rich (highly acidic).          | 0  | CATCTCGTTTC   | 0.383 |
| + | 2  | 303   | 1orf51_uc001euj.2  | NM_144697    | NP_653298    | Q8N365 | CA051_HUMAN  |                                  | 0  | TTCACGGCCCA   | 0.602 |
| - | 11 | 1575  | nr.1_Missense_Mt   | NM_001025603 | NP_001020774 | P48382 | RFX5_HUMAN   |                                  | 1  | TCTATATCTGCT  | 0.532 |
| - | 4  | 761   | OGZ_uc010pdc.1_    | NM_015100    | NP_055915    | Q7Z3K3 | POGZ_HUMAN   |                                  | 3  | CCTGCGTAGTG   | 0.448 |
| + | 10 | 1798  | iR_uc001ffa.1_3'U  | NM_000565    | NP_000556    | P08887 | IL6RA_HUMAN  | lasmic (Potential).              | 4  | CCACCGAGGCC   | 0.582 |
| - | 2  | 990   | 2_Missense_Muta    | NM_001111    | NP_001102    | P55265 | DSRAD_HUMAN  |                                  | 6  | TATGACTGTCTG  | 0.488 |
| - | 5  | 1024  | se_Mutation_p.P2   | NM_183001    | NP_892113    | P29353 | SHC1_HUMAN   | PID.                             | 2  | TCACCGGATCC   | 0.532 |
| + | 5  | 490   | ie_Mutation_p.R12  | NM_022367    | NP_071762    | Q9H3S1 | SEM4A_HUMAN  | tracellular (Potential).         | 2  | CATCGTGTC     | 0.542 |
| - | 5  | 437   | hj.1_Nonsense_M    | NM_005998    | NP_005989    | P49368 | TCPG_HUMAN   |                                  | 2  | ATGCTGGACTT   | 0.443 |
| - | 5  | 485   | wsb.1_Missense_I   | NM_178229    | NP_839943    | Q86VI3 | IQGA3_HUMAN  | CH.                              | 6  | CTACCCGGGGC   | 0.478 |
| - | 4  | 949   | o10pjc.1_Missens   | NM_015726    | NP_056541    | Q5TAQ9 | DCAF8_HUMAN  | WD 1.                            | 2  | GTCATCGCTGC   | 0.582 |
| + | 5  | 723   | jbp.2_Missense_M   | NM_007240    | NP_009171    | Q9UNI6 | DUS12_HUMAN  |                                  | 1  | ATCACCGTGAAC  | 0.413 |
| + | 7  | 1189  | p.R148Q KLHL20_    | NM_014458    | NP_055273    | Q9Y2M5 | KLH20_HUMAN  | Kelch 1.                         | 1  | TGAACGATATG   | 0.438 |
| - | 11 | 2777  | u.1_Missense_Mu    | NM_003285    | NP_003276    | Q92752 | TENR_HUMAN   | onectin type-III 7.              | 11 | TGGGTCGATAT   | 0.453 |
| + | 7  | 1244  | i_Mutation_p.P305  | NM_005807    | NP_005798    | Q92954 | PRG4_HUMAN   | ats of K-X-P-X-P-T-T-X.[7.       | 1  | TGCACCCACCA   | 0.647 |
| - | 6  | 317   | vNI1_uc001gwp.2_   | NM_003281    | NP_003272    | P19237 | TNNI1_HUMAN  |                                  | 0  | CCACCACCTCC   | 0.587 |
| + | 8  | 1371  | _p.R149* RNPEP_    | NM_020216    | NP_064601    | Q9H4A4 | AMPB_HUMAN   |                                  | 1  | AATCCGAAGC    | 0.493 |
| - | 3  | 2085  | z.2_Missense_Mu    | NM_001973    | NP_001964    | P28324 | ELK4_HUMAN   |                                  | 0  | TGTGTCGATGTC  | 0.488 |
| - | 9  | 1500  | BP2_uc010puz.1_    | NM_001031685 | NP_001026855 | Q13625 | ASPP2_HUMAN  |                                  | 3  | AAGCAGCCCCA   | 0.468 |
| + | 15 | 1840  | zg.1_Missense_M    | NM_144625    | NP_653226    | B1ANS9 | WDR64_HUMAN  |                                  | 1  | TTTTCGGCTCTC  | 0.458 |
| + | 1  | 494   |                    | NM_001004690 | NP_001004690 | A3KFT3 | OR2M5_HUMAN  | ellular (Potential).             | 3  | CATTTCTCTCTC  | 0.443 |
| + | 19 | 2017  | p.V623M PFKP_uc    | NM_002627    | NP_002618    | Q01813 | K6PP_HUMAN   |                                  | 3  | AAGGCGTGTTT   | 0.493 |
| + | 8  | 929   | qbc.1_Missense_I   | NM_001001973 | NP_001001973 | P36542 | ATPG_HUMAN   |                                  | 0  | CATCACAAAAG   | 0.378 |
| + | 2  | 646   | g.2_Nonsense_Mu    | NM_005180    | NP_005171    | P35226 | BMI1_HUMAN   |                                  | 2  | TGCATCGAACA   | 0.393 |
| - | 14 | 3316  | SVIL_uc001iuu.1_I  | NM_021738    | NP_068506    | O95425 | SVIL_HUMAN   |                                  | 6  | TGTGACTGGCT   | 0.473 |
| - | 10 | 1970  | t.2_Missense_Muti  | NM_025209    | NP_079485    | Q9H2F5 | EPC1_HUMAN   |                                  | 4  | AGGTACTGCATC  | 0.418 |

|   |    |                            |                    |              |              |        |                                          |     |                 |       |
|---|----|----------------------------|--------------------|--------------|--------------|--------|------------------------------------------|-----|-----------------|-------|
| - | 12 | 1844                       | iwr.3_Splice_Site_ | NM_133376    | NP_596867    | P05556 | ITB1_HUMAN                               | 2   | TACTTACCTCCAC   | 0.383 |
| - | 20 | 2544                       | .3_Intron TTC18_u  | NM_145170    | NP_660153    | Q5T0N1 | TTC18_HUMAN                              | 3   | ATTGCTGTTGCAC   | 0.383 |
| + | 18 | 2623                       | ig.2_Missense_Mu   | NM_020338    | NP_065071    | Q9ULJ6 | ZMIZ1_HUMAN                              | 4   | ACACCGGCCCT     | 0.642 |
| + | 9  | 1218                       | 1_uc001kef.2_Spli  | NM_133447    | NP_597704    | Q8TF27 | AGA11_HUMAN                              | 0   | AATATCGTGAGTA   | 0.388 |
| + | 9  | 1421                       | _p.R425H PI4K2A_   | NM_018425    | NP_060895    | Q9BTU6 | P4K2A_HUMAN                              | 2   | GGCCCCGTTCCC    | 0.537 |
| - | 8  | 1118                       | n_p.T274M ABLM1    | NM_002313    | NP_002304    | O14639 | ABLM1_HUMAN   zinc-binding 4.            | 1   | GTCTTCGTAGAT    | 0.483 |
| - | 4  | 734                        | qsk.1_Missense_IV  | NM_002313    | NP_002304    | O14639 | ABLM1_HUMAN   zinc-binding 2.            | 1   | ACATCGGCTGT     | 0.567 |
| - | 13 | 5167                       | v.1_Missense_Mut   | NM_002417    | NP_002408    | P46013 | KI67_HUMAN AA approximate repeats.       | 7   | TAGTCTCTCCTG/   | 0.502 |
| + | 14 | 2213                       | u.3_Missense_Mu    | NM_025092    | NP_079368    | Q32M88 | ATHL1_HUMAN                              | 3   | GCTCCGAGTTCC    | 0.622 |
| - | 8  | 1058                       | nse_Mutation_p.A   | NM_024698    | NP_078974    | Q9H936 | GHC1_HUMAN e=5; (Potential). Solcar 3.   | 0   | CAGCGGCGGCA     | 0.682 |
| - | 31 | 5260                       |                    | NM_005961    | NP_005952    | Q6W4X9 | MUC6_HUMAN ated. Approximate repeats     | 1   | GCTTCGGGATTC    | 0.532 |
| + | 47 | 8276                       | tb.2_Missense_Mt   | NM_017511    | NP_059981    | Q9HC84 | MUC5B_HUMAN pproximate tandem repeat     | 0   | GCTTACCGCCAC    | 0.637 |
| + | 52 | 15620_1562b.2_Missense_Mur | NM_017511          | NP_059981    | Q9HC84       | Q9HC84 | MUC5B_HUMAN em repeats, Ser/Thr- rich.   | 0   | CCAGGGACCAC     | 0.639 |
| - | 3  | 560                        |                    | NM_001012709 | NP_001012727 | Q6L8H1 | KRA54_HUMAN \ repeats of C-C-X-P.        | 0   | AGGAGCCACAG     | 0.677 |
| - | 8  | 1479                       | l.1_RNA TRIM5_u    | NM_033034    | NP_149023    | Q9C035 | TRIM5_HUMAN 330.2/SPRY.                  | 1   | ATTTAACTCCTTC   | 0.398 |
| - | 10 | 953                        | p.R285Q ARFGAF     | NM_032389    | NP_115765    | Q8N6H7 | ARFG2_HUMAN interaction with coatomer.   | 1   | ACCTTCGGGAT     | 0.522 |
| + | 1  | 374                        |                    | NM_001005201 | NP_001005201 | Q8N146 | OR8H3_HUMAN lasmic (Potential).          | 2   | TGCAGCGATCTC    | 0.473 |
| - | 1  | 877                        |                    | NM_001004741 | NP_001004741 | Q6IEU7 | OR5MA_HUMAN lasmic (Potential).          | 0   | FGTTCCGTAGGC    | 0.393 |
| + | 4  | 1602                       | se_Mutation_p.R6   | NM_015457    | NP_056272    | Q9C0B5 | ZDHC5_HUMAN DHHC-type.                   | 1   | CCCCTCGATGT     | 0.507 |
| - | 1  | 444                        |                    | NM_001039396 | NP_001034485 | Q2M385 | MPEG1_HUMAN xtracellular (Potential).    | 2   | GAGTTCATCTCC    | 0.438 |
| + | 1  | 754                        |                    | NM_001004705 | NP_001004705 | Q8NGI6 | OR4DA_HUMAN Name=6; (Potential).         | 3   | ATTTCGTGCC      | 0.547 |
| - | 12 | 1900                       | se_Mutation_p.Pf   | NM_004630    | NP_004621    | Q15637 | SF01_HUMAN Pro-rich.                     | 3   | GTGGCGGAGGC     | 0.657 |
| - | 4  | 782                        | _p.R237C MEN1_u    | NM_130800    | NP_570712    | O00255 | MEN1_HUMAN :ition with FANCD2.           | 238 | CTTGCGGTCCAC/   | 0.483 |
| + | 8  | 1091                       | e_Mutation_p.P42   | NM_002689    | NP_002680    | Q14181 | DPOA2_HUMAN                              | 0   | GGAGCCTGTCA     | 0.493 |
| - | 1  | 977                        | jb.2_Missense_Mi   | NM_031492    | NP_113680    | Q9BQ04 | RBM4B_HUMAN RRM 2.                       | 0   | TGACCGGACCA     | 0.498 |
| + | 24 | 3374                       | c001opr.2_Nonser   | NM_003626    | NP_003617    | Q13136 | LIPA1_HUMAN SAM 3.                       | 3   | TCGCTGGATCC     | 0.413 |
| + | 15 | 1557                       | Missense_Mutatio   | NM_033388    | NP_203746    | Q8NAA4 | A16L2_HUMAN WD 5.                        | 0   | GGTCACCTCCC     | 0.622 |
| + | 7  | 914                        | e_Mutation_p.R24   | NM_015517    | NP_056332    | Q9BQA5 | HINFP_HUMAN 2H2-type 5.                  | 4   | AGAGCGGCTAT     | 0.592 |
| + | 1  | 832                        |                    | NM_032015    | NP_114404    | Q9BY78 | RNF26_HUMAN Leu-rich.                    | 1   | TGGGGGCTTGC     | 0.602 |
| + | 8  | 783                        | ion_p.V225M STT    | NM_152713    | NP_689926    | P46977 | STT3A_HUMAN ical; (Potential).           | 0   | TCTTCGTGCTG     | 0.478 |
| + | 6  | 560                        | l.S114_splice ST3  | NM_006278    | NP_006269    | Q11206 | SIA4C_HUMAN                              | 0   | CAGAGGTAAGGC    | 0.602 |
| + | 6  | 724                        | h.3_Missense_Mu    | NM_001098536 | NP_001092006 | P45974 | UBP5_HUMAN e binding. UBP-type.          | 4   | GCGACGCTACT     | 0.567 |
| + | 18 | 2319                       | e_Mutation_p.R73   | NM_001098536 | NP_001092006 | P45974 | UBP5_HUMAN UBA 2.                        | 4   | TAGAACGGGCTC    | 0.363 |
| - | 2  | 493                        |                    | NM_004054    | NP_004045    | Q16581 | C3AR_HUMAN lasmic (Potential).           | 1   | ACATTGCGATGA    | 0.478 |
| - | 3  | 897                        |                    | NM_006248    | NP_006239    |        |                                          | 0   | TTGTGGGGGTG     | 0.617 |
| + | 19 | 2103                       | ria.2_Missense_M   | NM_003622    | NP_003613    | Q86W92 | LIPB1_HUMAN                              | 5   | GATACCGCCTC     | 0.453 |
| - | 21 | 2454                       | _p.V251I IPO8_uc   | NM_006390    | NP_006381    | O15397 | IPO8_HUMAN                               | 3   | TTGAACGAAGA     | 0.418 |
| + | 11 | 1192                       | t.1_Missense_Mut   | NM_016488    | NP_057572    | Q8NEY8 | PPHLN_HUMAN                              | 2   | tcacgacggaacccc | 0.01  |
| + | 10 | 1292                       | 4A8_uc001ryp.1_    | NM_001039960 | NP_001035049 | Q2Y0W8 | S4A8_HUMAN ellular (Potential).          | 5   | TATGACGTAGCA    | 0.438 |
| - | 11 | 1187                       | s.3_Nonsense_Mt    | NM_015665    | NP_056480    | Q9NRG9 | AAAS_HUMAN                               | 1   | CAGTCGGCTGC     | 0.522 |
| + | 3  | 315                        | RNPA1_uc009zni.    | NM_031157    | NP_112420    | P09651 | ROA1_HUMAN ir A domain. RRM 1.           | 3   | TATGCAGCTATG    | 0.458 |
| + | 6  | 1911                       | z.2_Nonsense_Mt    | NM_000456    | NP_000447    | P51687 | SUOX_HUMAN terin domain (By similarity). | 0   | ACCTGCGAGGT     | 0.542 |
| + | 4  | 629                        | BB3_uc010sqc.1     | NM_001982    | NP_001973    | P21860 | ERBB3_HUMAN ellular (Potential).         | 8   | CGAGGGGTGTT     | 0.502 |
| - | 17 | 1661                       | _p.R519* SMARC     | NM_003075    | NP_003066    | Q8TAQ2 | SMRC2_HUMAN SWIRM.                       | 6   | TTGGTCGACTCT    | 0.577 |
| - | 6  | 762                        | l.R125Q CS_uc00    | NM_004077    | NP_004068    | O75390 | CISY_HUMAN                               | 0   | TGTTCGGCTG      | 0.488 |
| + | 10 | 1150                       | se_Mutation_p.R24  | NM_004990    | NP_004981    | P56192 | SYMC_HUMAN                               | 5   | GAAACGAGGTT     | 0.572 |
| - | 12 | 2401                       | p.R800W AGAP2_     | NM_001122772 | NP_001116244 | Q99490 | AGAP2_HUMAN PH.                          | 5   | ATTCCGGTCTG     | 0.572 |

rs150428018

|   |     |       |                   |              |              |        |             |     |               |       |             |
|---|-----|-------|-------------------|--------------|--------------|--------|-------------|-----|---------------|-------|-------------|
| + | 1   | 419   | 1_Missense_Mutal  | NM_015026    | NP_055841    | Q7Z3U7 | MON2_HUMAN  | 2   | AGGCGGTGAAG   | 0.562 |             |
| + | 4   | 496   | _p.G41D C12orf2   | NM_152261    | NP_689474    | Q8WUH6 | CL023_HUMAN | 0   | TGGGGGTATCT   | 0.458 |             |
| + | 2   | 444   | oc.2_Missense_Mi  | NM_001093    | NP_001084    | O00763 | ACACB_HUMAN | 8   | GTGACGCAGCA   | 0.632 |             |
| + | 6   | 1532  | sf.2_Missense_Mu  | NM_005475    | NP_005466    | Q9UQQ2 | SH2B3_HUMAN | 1   | GGTGCGGCAGAA  | 0.527 |             |
| - | 16  | 2299  | 1fts.2_Missense_A | NM_001109662 | NP_001103132 |        |             | 2   | CTGAGCGCGAA   | 0.463 |             |
| - | 46  | 6084  |                   | NM_006836    | NP_006827    | Q92616 | GCN1L_HUMAN | 4   | CTGCCGCCTCT   | 0.542 |             |
| + | 39  | 7248  | R2404C EP400_u    | NM_015409    | NP_056224    | Q96L91 | EP400_HUMAN | 12  | ACAACCGTCTC   | 0.512 |             |
| + | 1   | 461   |                   | NM_030979    | NP_112241    | Q9H361 | PABP3_HUMAN | 4   | FGTGATGAAAATC | 0.363 |             |
| + | 1   | 4006  |                   | NM_207361    | NP_997244    | Q5SZK8 | FREM2_HUMAN | 11  | AATCCCCACTC   | 0.428 |             |
| + | 15  | 1771  | v.1_Missense_Mul  | NM_031431    | NP_113619    | Q96JB2 | COG3_HUMAN  | 2   | TCCTACGGTTCC  | 0.393 |             |
| + | 20  | 2148  |                   | NM_000321    | NP_000312    | P06400 | RB_HUMAN    | 358 | ATCTCCGGCTAA  | 0.388 |             |
| - | 64  | 10907 | p.E3010K MYCBP    | NM_015057    | NP_055872    | O75592 | MYCB2_HUMAN | 14  | AGCTTCCCCGG   | 0.468 |             |
| + | 9   | 2571  | se_Mutation_p.V7  | NM_000123    | NP_000114    | P28715 | ERCC5_HUMAN | 7   | ACGACGTGGAT   | 0.512 |             |
| - | 2   | 305   | lvsf.2_Missense_A | NM_006322    | NP_006313    | Q96CW5 | GCP3_HUMAN  | 1   | GCTGCCAATCAC  | 0.428 |             |
| + | 1   | 167   | a.1_RNA POTEG_    | NM_001005356 | NP_001005356 | Q6S5H5 | POTEG_HUMAN | 1   | GGAGCGGCAAG   | 0.592 |             |
| + | 1   | 314   | a.1_RNA POTEG_    | NM_001005356 | NP_001005356 | Q6S5H5 | POTEG_HUMAN | 1   | ACGACGACTCT   | 0.617 |             |
| + | 2   | 952   | IASE4_uc001vya.z  | NM_002937    | NP_002928    | P34096 | RNAS4_HUMAN | 1   | CTAGACGTGTTG  | 0.522 |             |
| - | 7   | 687   | uc010tne.1_Trans  | NM_001077351 | NP_001070819 | Q86U06 | RBM23_HUMAN | 1   | CATCACGCTCC   | 0.517 |             |
| - | 6   | 1162  | p.G301E CDH24_u   | NM_022478    | NP_071923    | Q86UP0 | CAD24_HUMAN | 1   | CCTCCCCATCC   | 0.627 |             |
| + | 2   | 367   | .1_5'UTR SRP54_   | NM_003136    | NP_003127    | P61011 | SRP54_HUMAN | 1   | CAGACCTTGGA   | 0.328 |             |
| + | 5   | 2923  | 179B_uc010anc.2   | NM_015091    | NP_055906    | Q9Y4F4 | F179B_HUMAN | 3   | CCGACGAGGTC   | 0.423 |             |
| - | 17  | 3688  | .R1104W NID2_uc   | NM_007361    | NP_031387    | Q14112 | NID2_HUMAN  | 7   | CTCCCGGCAGT   | 0.488 | rs138581322 |
| + | 6   | 1199  | ε_Mutation_p.R31z | NM_015589    | NP_056404    | Q9UPU9 | SMAG1_HUMAN | 0   | GCCTGCGCATC   | 0.657 |             |
| + | 8   | 1039  | p.R305H DAAM1_    | NM_014992    | NP_055807    | Q9Y4D1 | DAAM1_HUMAN | 1   | ATCTTCGCTATG  | 0.289 |             |
| + | 8   | 1018  |                   | NM_152443    | NP_689656    | Q96NR8 | RDH12_HUMAN | 1   | CAGGCGTCGTC   | 0.632 |             |
| + | 7   | 1404  | .A219T SLC39A9_   | NM_018375    | NP_060845    | Q9NUM3 | S39A9_HUMAN | 0   | TGAACGCCACG   | 0.493 |             |
| + | 11  | 1458  | dt.1_Missense_Mu  | NM_022137    | NP_071420    | Q9H4F8 | SMOC1_HUMAN | 2   | TGCCCGCGGTT   | 0.527 |             |
| - | 35  | 5635  |                   | NM_000428    | NP_000419    | Q14767 | LTBP2_HUMAN | 2   | CACGCGCACAC   | 0.617 |             |
| + | 6   | 386   | p.V118M C14orf17  | NM_001102564 | NP_001096034 | Q96FT9 | IFT43_HUMAN | 0   | TGCAGGTGGCA   | 0.458 |             |
| - | 12  | 1184  | su.2_Missense_Mu  | NM_012245    | NP_036377    | Q13573 | SNW1_HUMAN  | 1   | ATATCCCGATTT  | 0.373 |             |
| + | 9   | 1045  | _p.R260* PSMC1_   | NM_002802    | NP_002793    | P62191 | PRS4_HUMAN  | 0   | CAAACCGAATA   | 0.388 |             |
| + | 4   | 389   |                   | NM_023112    | NP_075601    | Q96DC9 | OTUB2_HUMAN | 0   | AAGAACGCGTA   | 0.532 |             |
| + | 14  | 1405  | wv.1_Nonsense_M   | NM_032632    | NP_116021    | P51003 | PAPOA_HUMAN | 0   | AAATCCGAATCC  | 0.373 |             |
| - | 7   | 8498  | px.2_Missense_M   | NM_138420    | NP_612429    | Q8IVF2 | AHNK2_HUMAN | 1   | GCCGCGCACCA   | 0.602 |             |
| - | 7   | 1739  | px.2_Missense_M   | NM_138420    | NP_612429    | Q8IVF2 | AHNK2_HUMAN | 1   | CCCTGCCCGGC   | 0.592 |             |
| - | 187 |       |                   |              |              |        |             | 0   | CTGACCTCCCC   | 0.587 | rs7146961   |
| - | 9   | 1301  | zba.2_Missense_M  | NM_000814    | NP_000805    | P28472 | GBRB3_HUMAN | 5   | GGTATCGCCAAT  | 0.478 |             |
| - | 77  | 11897 |                   | NM_004667    | NP_004658    | Q95714 | HERC2_HUMAN | 13  | TTGTTTCGTCTT  | 0.408 |             |
| + | 3   | 634   | ict.1_Missense_Mu | NM_024111    | NP_077016    | Q9BUX1 | CHAC1_HUMAN | 0   | TGCCACGCAGA   | 0.622 |             |
| + | 15  | 1980  |                   | NM_006293    | NP_006284    | Q06418 | TYRO3_HUMAN | 6   | CAGGGGTAAGC   | 0.602 |             |
| + | 5   | 679   |                   | NM_024908    | NP_079184    | Q9H967 | WDR76_HUMAN | 0   | CAATGCGATTAC  | 0.373 |             |
| - | 13  | 1340  | ense_Mutation_p.l | NM_016132    | NP_057216    | Q9P2K5 | MYEF2_HUMAN | 3   | ACCACGGTACA   | 0.383 |             |
| - | 9   | 3277  | X7_uc002adn.1_M   | NM_022841    | NP_073752    | Q2KHR2 | RFX7_HUMAN  | 0   | GAAACGGTCTT   | 0.443 |             |
| - | 18  | 2696  | p.P852S SLTM_uc   | NM_024755    | NP_079031    | Q9NWH9 | SLTM_HUMAN  | 1   | TCGAGGATGTC   | 0.498 |             |
| - | 78  | 10614 | hb.1_Nonsense_M   | NM_020821    | NP_065872    | Q709C8 | VP13C_HUMAN | 2   | TGTCTCCAAAAT  | 0.423 |             |
| + | 23  | 3482  | _p.V1114 NEO1_u   | NM_002499    | NP_002490    | Q92859 | NEO1_HUMAN  | 1   | TTGGCGTCATC   | 0.493 |             |
| + | 2   | 87    |                   | NM_000761    | NP_000752    | P05177 | CP1A2_HUMAN | 4   | TGTTCCCTTCTC  | 0.532 |             |

|   |    |      |                    |              |              |        |             |                            |     |                |       |             |
|---|----|------|--------------------|--------------|--------------|--------|-------------|----------------------------|-----|----------------|-------|-------------|
| - | 5  | 785  | :HRNB4_uc010blh    | NM_000750    | NP_000741    | P30926 | ACHB4_HUMAN | cellular (Potential).      | 0   | 'GAAGTCGTAAGT  | 0.552 |             |
| - | 6  | 646  | bgn.2_Missense_I   | NM_181900    | NP_871629    | Q9NSY2 | STAR5_HUMAN | START.                     | 1   | :CACCACGTTCTC  | 0.512 |             |
| + | 9  | 2170 |                    | NM_001080435 | NP_001073904 | Q8TF30 | WHAMM_HUMAN |                            | 0   | :TGTCCGAAACA   | 0.473 |             |
| + | 7  | 1066 | p.P299L AKAP13     | NM_007200    | NP_009131    | Q12802 | AKP13_HUMAN |                            | 9   | TTATGCCCTTAAT  | 0.483 |             |
| + | 3  | 1753 |                    | NM_198526    | NP_940928    | Q8N1W2 | ZN710_HUMAN |                            | 1   | 'CGCCCGTGAAG   | 0.592 |             |
| + | 12 | 1256 | vv.1_Missense_Mu   | NM_000548    | NP_000539    | P49815 | TSC2_HUMAN  | ir interaction with TSC1.  | 10  | ACCATCGTCCATC  | 0.587 |             |
| + | 7  | 1579 | ua.2_Missense_M    | NM_001042428 | NP_001035893 | O95201 | ZN205_HUMAN | C2H2-type 7.               | 0   | :ACTGCGGCAAG   | 0.672 |             |
| + | 4  | 471  | p.V144M ALG1_u     | NM_019109    | NP_061982    | Q9BT22 | ALG1_HUMAN  | lenal (Potential).         | 2   | 'GGTTCGTGGGC   | 0.542 |             |
| + | 5  | 640  | p.R200Q ALG1_u     | NM_019109    | NP_061982    | Q9BT22 | ALG1_HUMAN  | lenal (Potential).         | 2   | :TATGCGAGAAG   | 0.592 |             |
| + | 16 | 1318 | o.R369W C16orf62   | NM_020314    | NP_064710    | Q7Z3J2 | CP062_HUMAN |                            | 1   | :CCTCCGGGCT    | 0.453 |             |
| + | 2  | 522  | .S2_uc002dlt.3_5'F | NM_019116    | NP_061989    | O14562 | UBFD1_HUMAN | Ubiquitin-like.            | 0   | :CACAGGCTCCG   | 0.602 |             |
| - | 3  | 462  | sep.2_Missense_I   | NM_005880    | NP_005871    | O60884 | DNJA2_HUMAN |                            | 1   | CCATTTTCGACTTC | 0.428 | rs143994918 |
| + | 3  | 485  | efx.2_Missense_Iv  | NM_182922    | NP_891552    | Q7Z4Q2 | HEAT3_HUMAN | HEAT 2.                    | 2   | CAGTGCTTGTGC   | 0.378 |             |
| + | 2  | 199  | C2_uc010cbk.1_M    | NM_022162    | NP_071445    | Q9HC29 | NOD2_HUMAN  | CARD 1.                    | 4   | 'CGCAGGAGGCT   | 0.607 |             |
| - | 6  | 739  | o.R42H KIFC3_ucC   | NM_005550    | NP_005541    | Q9BVG8 | KIFC3_HUMAN | Potential.                 | 3   | TGTCACGGAGC    | 0.627 |             |
| + | 7  | 1163 | on.1_Missense_Mi   | NM_001795    | NP_001786    | P33151 | CADH5_HUMAN | Extracellular (Potential). | 6   | :CTTCATCGTCG#  | 0.423 |             |
| - | 6  | 1739 | _p.E251K ZNF23_    | NM_145911    | NP_666016    | P17027 | ZNF23_HUMAN | C2H2-type 6.               | 0   | 'ACACTCGTAAGC  | 0.408 |             |
| - | 6  | 1270 | IF19_uc002fal.1_Iv | NM_006961    | NP_008892    | P17023 | ZNF19_HUMAN | C2H2-type 4.               | 0   | CTACTCGTAAAA   | 0.443 |             |
| - | 4  | 722  | nv.1_Missense_Mi   | NM_031463    | NP_113651    | Q3SXM5 | HSDL1_HUMAN |                            | 0   | 'AGCGCGGCAA    | 0.498 |             |
| + | 14 | 1596 | RISPLD2_uc002fic   | NM_031476    | NP_113664    | Q9H0B8 | CRLD2_HUMAN | LCCL 2.                    | 0   | :GTGACGTGGAC   | 0.567 |             |
| - | 31 | 3074 | p.R1011H FANCA     | NM_000135    | NP_000126    | O15360 | FANCA_HUMAN |                            | 6   | CTGTGCGGCCA    | 0.408 |             |
| - | 16 | 1934 | o VPS53_uc002fmr   | NM_018289    | NP_060759    | Q5VIR6 | VPS53_HUMAN |                            | 0   | TACATACGTGCTC  | 0.493 |             |
| - | 8  | 1335 | jr.2_Missense_Mu   | NM_016532    | NP_057616    | Q9BT40 | INP5K_HUMAN | lytic (Potential).         | 0   | CGTGCCGGAGA    | 0.587 |             |
| + | 19 | 2412 | R336K EIF4A1_uc    | NM_001416    | NP_001407    | P60842 | IF4A1_HUMAN | case C-terminal.           | 1   | GTCGAGGTGGA    | 0.502 |             |
| + | 1  | 235  | sense_Mutation_p   | NM_004870    | NP_004861    | O75352 | MPU1_HUMAN  |                            | 1   | :CGGACGGACCC   | 0.567 |             |
| + | 3  | 682  | ja.2_5'Flank CYB5  | NM_144607    | NP_653208    | Q6P9G0 | CB5D1_HUMAN | me b5 heme-binding.        | 1   | :GCGGGCCCGCT   | 0.622 |             |
| + | 39 | 5912 | _p.P1887L CHD3_    | NM_001005273 | NP_001005273 | Q12873 | CHD3_HUMAN  | ir interaction with PCNT.  | 1   | :CTACCCGCCCGG  | 0.607 |             |
| - | 4  | 524  | _p.R159C PMP22_    | NM_153322    | NP_696997    | Q01453 | PMP22_HUMAN |                            | 0   | :TTCGCGTTTCCC  | 0.547 |             |
| + | 2  | 1302 |                    | NM_000676    | NP_000667    | P29275 | AA2BR_HUMAN | smic (By similarity).      | 2   | :CTGGGTACAG    | 0.498 |             |
| + | 3  | 370  | ?_uc002gsi.1_Splic | NM_001388    | NP_001379    | P55039 | DRG2_HUMAN  |                            | 1   | :TTGAAGTAAGTC  | 0.557 |             |
| + | 39 | 8100 | I5A_uc010vxj.1_5'  | NM_016239    | NP_057323    | Q9UKN7 | MYO15_HUMAN | Tail.                      | 9   | CGTTCGGGGA     | 0.632 |             |
| + | 14 | 1670 | R1_uc002gzm.2_Iv   | NM_014238    | NP_055053    | Q8IVT5 | KSR1_HUMAN  |                            | 4   | GGCTCGATGACC   | 0.552 |             |
| + | 9  | 706  | p.R225Q GOSR1_     | NM_004871    | NP_004862    | O95249 | GOSR1_HUMAN | lasmic (Potential).        | 0   | GAAGCGCGGGG    | 0.493 |             |
| - | 3  | 436  | orf79_uc010css.2_  | NM_018405    | NP_060875    | Q9NQ92 | COPR5_HUMAN |                            | 0   | AAGATCGCCAGC   | 0.517 |             |
| + | 15 | 1756 | cc.2_Missense_Mu   | NM_139215    | NP_631961    | Q92804 | RBP56_HUMAN | tandem repeats of D-R- [S  | 35  | :TGCGCGCTATG   | 0.562 |             |
| - | 39 | 4668 | in.2_Missense_Mi   | NM_198836    | NP_942133    | Q13085 | ACACA_HUMAN |                            | 2   | 'GCTCCGCACGG   | 0.453 |             |
| + | 6  | 570  | rr.1_Missense_Mu   | NM_000981    | NP_000972    | P84098 | RL19_HUMAN  |                            | 0   | :AAGCACGCAAG   | 0.527 |             |
| + | 2  | 291  | wc.2_Missense_M    | NM_005310    | NP_005301    | Q14451 | GRB7_HUMAN  |                            | 5   | :CTCTCCGGAAG   | 0.617 |             |
| - | 2  | 351  |                    | NM_033060    | NP_149049    | Q9BYQ7 | KRA41_HUMAN | is of C-C-[GRQC]-[SPT]- [V | 0   | :TGGACGGCAGC   | 0.597 |             |
| - | 4  | 890  | P_uc010wfs.1_Intr  | NM_000422    | NP_000413    | Q04695 | K1C17_HUMAN | Coil 2. Rod.               | 2   | :GTCACGCATCTC  | 0.592 |             |
| + | 3  | 394  | i.1_Intron EIF1_uc | NM_005801    | NP_005792    | P41567 | EIF1_HUMAN  |                            | 0   | :GCATCCGGAAT/  | 0.463 |             |
| - | 13 | 2045 | 58_uc002hyw.3_5'   | NM_021078    | NP_066564    | Q92830 | KAT2A_HUMAN |                            | 2   | :GCTCCGTGTAG   | 0.557 |             |
| + | 9  | 1906 | O2ibk.1_Missense_  | NM_032387    | NP_115763    | Q96J92 | WNK4_HUMAN  |                            | 7   | TTCCACGTTCTC   | 0.547 | rs61755600  |
| - | 4  | 483  | _uc002icg.2_RNA    | NM_025267    | NP_079543    | Q9BTE6 | AASD1_HUMAN |                            | 0   | :TCCATCGGCAT   | 0.512 | rs147796875 |
| + | 10 | 1327 | TT1_uc010dad.1_I   | NM_021079    | NP_066565    | P30419 | NMT1_HUMAN  |                            | 0   | :TGAGCGACGCC   | 0.567 |             |
| - | 48 | 3775 |                    | NM_000088    | NP_000079    | P02452 | CO1A1_HUMAN | al region (C-terminal).    | 382 | AGCCCGGTAGT/   | 0.622 |             |
| - | 6  | 762  | m.2_Missense_Mi    | NM_020748    | NP_065799    | Q9H0H0 | INT2_HUMAN  |                            | 3   | TTATCAGCCCC    | 0.358 |             |

|   |    |      |                                                |              |              |        |              |                                |    |               |       |             |
|---|----|------|------------------------------------------------|--------------|--------------|--------|--------------|--------------------------------|----|---------------|-------|-------------|
| - | 13 | 2344 |                                                | NM_000334    | NP_000325    | P35499 | SCN4A_HUMAN  | II.                            | 3  | GGATCGGAAG    | 0.587 |             |
| + | 2  | 1194 | l.R378Q BPTF_uc                                | NM_182641    | NP_872579    | Q12830 | BPTF_HUMAN   |                                | 4  | TGCTCGAGAGG   | 0.423 |             |
| - | 4  | 461  | p.S102L RECQL5                                 | NM_004259    | NP_004250    | O94762 | RECQ5_HUMAN  | ase ATP-bin p.T102T(1)         | 3  | GCTTCGAGTTC   | 0.512 |             |
| - | 6  | 929  | l.H17_uc002jvs.2_RNA                           |              |              |        |              |                                | 9  | CGCCCGTGGAC   | 0.542 |             |
| - | 2  | 1031 |                                                | NM_022840    | NP_073751    | Q8N3J2 | METL4_HUMAN  |                                | 2  | AATTTTCGTGTG  | 0.393 |             |
| + | 9  | 5853 | knx.2_Missense_I                               | NM_015208    | NP_056023    | Q6UB98 | ANR12_HUMAN  |                                | 3  | TATGACGAATATC | 0.358 |             |
| + | 2  | 1434 | KNDCC2_uc002koh                                | NM_001098529 | NP_001091999 | Q86VQ3 | TXND2_HUMAN  | repeat of Q-P-K-X-G-D-I-F      | 2  | GTGACATCCCC   | 0.592 |             |
| - | 3  | 972  |                                                | NM_003927    | NP_003918    | Q9UBB5 | MBD2_HUMAN   |                                | 0  | ATGCTGTTTGT   | 0.318 |             |
| - | 11 | 6288 |                                                | NM_052947    | NP_443179    | Q86TB3 | ALPK2_HUMAN  | ype protein kinase.            | 14 | CATACGGGATA   | 0.458 |             |
| + | 4  | 1041 | p.T163M ZNF532                                 | NM_018181    | NP_060651    | Q9HCE3 | ZN532_HUMAN  |                                | 2  | GTTGACGGGGT   | 0.527 |             |
| + | 5  | 525  | p.V150I C19orf36                               | NM_001039846 | NP_001034935 | Q1ZYL8 | IZUM4_HUMAN  |                                | 0  | CGCACGTCGCC   | 0.632 |             |
| + | 2  | 219  | xp.2_Missense_M                                | NM_205843    | NP_995315    | P08651 | NFIC_HUMAN   | CTF/NF-I.                      | 0  | AGGACGAGGAG   | 0.647 |             |
| + | 3  | 320  | p.V32M KDM4B_l                                 | NM_015015    | NP_055830    | O94953 | KDM4B_HUMAN  | JmjN.                          | 1  | AATACGTGGCC   | 0.622 |             |
| - | 4  | 453  | vq.2_Missense_M                                | NM_021155    | NP_066978    | Q9NNX6 | CD209_HUMAN  | 2.17 X approximate tandem      | 1  | TCAGCCGGGTC   | 0.567 |             |
| + | 9  | 1310 | p.S305L LPPR2_l                                | NM_022737    | NP_073574    | Q96GM1 | LPPR2_HUMAN  |                                | 1  | GCATTCGACAC   | 0.647 |             |
| + | 4  | 1307 |                                                | NM_152357    | NP_689570    | Q8IYI8 | ZN440_HUMAN  | C2H2-type 9.                   | 0  | CCTTCGATATC   | 0.433 |             |
| + | 4  | 1683 | ym.1_Missense_M                                | NM_001136501 | NP_001129973 | Q08AG5 | ZN844_HUMAN  |                                | 0  | CCTCACATCTG   | 0.408 |             |
| + | 3  | 699  | p.G200R NFIX_uc002mwf.2_Missense_Mutation_p.G2 |              |              | Q14938 | NFIX_HUMAN   |                                | 2  | CCAACGGTCAG   | 0.572 |             |
| - | 6  | 716  | e.Mutation_p.D13                               | NM_032571    | NP_115960    | Q9BY15 | EMR3_HUMAN   | ellular (Pote p.D190N(1)       | 6  | CATATCGTTTTC  | 0.413 |             |
| - | 7  | 695  | lhx.1_Nonsense_I                               | NM_005535    | NP_005526    | P42701 | I12R1_HUMAN  | tential). Fibronectin type-III | 1  | TCGTCGGAGCT   | 0.602 |             |
| - | 14 | 2191 | l.Q286K PDE4C_l                                | NM_001098819 | NP_001092289 | Q08493 | PDE4C_HUMAN  |                                | 5  | TCCCTGCTGGA   | 0.627 |             |
| - | 4  | 1390 |                                                | NM_001159293 | NP_001152765 | C9JHM3 | C9JHM3_HUMAN |                                | 1  | GGCTTCGCCAC   | 0.423 |             |
| - | 4  | 1655 | p.S436P ZNF681_l                               | NM_138286    | NP_612143    | Q96N22 | ZN681_HUMAN  |                                | 0  | GTAGGATTTCTC  | 0.373 |             |
| + | 7  | 1374 | 22_uc010edv.2_N                                | NM_001771    | NP_001762    | P20273 | CD22_HUMAN   | otential). Ig-like C2-type 4.  | 9  | CGATTCGAGAA   | 0.512 |             |
| + | 9  | 1027 | ai.1_5'Flank TMEM                              | NM_014364    | NP_055179    | O14556 | G3PT_HUMAN   |                                | 0  | GATGGCGTTCC   | 0.617 |             |
| - | 14 | 2041 | 4A_uc010eee.1_5'                               | NM_000704    | NP_000695    | P20648 | ATP4A_HUMAN  | lasmic (Potential).            | 1  | CACGGCATCC    | 0.637 |             |
| + | 19 | 2376 | dd.2_Missense_M                                | NM_173636    | NP_775907    | O43379 | WDR62_HUMAN  |                                | 0  | CCACCGGCAGC   | 0.572 |             |
| - | 6  | 2022 | ense_Mutation_p.f                              | NM_001010880 | NP_001010880 | O75290 | Z780A_HUMAN  | C2H2-type 16.                  | 0  | AATAAGTTGCAT  | 0.403 |             |
| - | 3  | 670  | l1_uc002oty.2_Mis                              | NM_001712    | NP_001703    | P13688 | CEAM1_HUMAN  | 1. Extracellular (Potential).  | 2  | TGACCGGGAGG   | 0.527 | rs144709978 |
| - | 17 | 1948 | wp.1_Nonsense_I                                | NM_006297    | NP_006288    | P18887 | XRCC1_HUMAN  | BRCT 2.                        | 7  | CCATCGGGGAC   | 0.527 |             |
| + | 8  | 1838 | l2D_uc010elx.2_5                               | NM_000836    | NP_000827    | O15399 | NMDE4_HUMAN  | ical; (Potential).             | 6  | GCCCCGCCGTG   | 0.488 |             |
| - | 9  | 963  | ni.2_Missense_Mu                               | NM_003598    | NP_003589    | Q15562 | TEAD2_HUMAN  | ral activation (Potential).    | 3  | GGCCACGATC    | 0.572 |             |
| + | 10 | 1230 | _D1_uc010enx.2_f                               | NM_002691    | NP_002682    | P28340 | DPOD1_HUMAN  |                                | 2  | CCGACGTGATC   | 0.607 |             |
| - | 4  | 1361 |                                                | NM_024733    | NP_079009    | Q9H7R5 | ZN665_HUMAN  | C2H2-type 9.                   | 2  | TTCTTCGATGAT  | 0.408 |             |
| + | 7  | 1576 | p.H319R ZNF761_l                               | NM_001008401 | NP_001008401 | Q86XN6 | ZN761_HUMAN  | C2H2-type 6.                   | 1  | CCATCATAGAC   | 0.428 | rs147132093 |
| + | 7  | 1972 | p.R451Q ZNF761_l                               | NM_001008401 | NP_001008401 | Q86XN6 | ZN761_HUMAN  | C2H2-type 11.                  | 1  | TAGTCGGAAGT   | 0.418 |             |
| - | 6  | 1246 | lfi.2_Missense_Mu                              | NM_012276    | NP_036408    | P59901 | LIRA4_HUMAN  | 4. Extracellular (Potential).  | 2  | TGAGCCGTAGC   | 0.607 | rs142697594 |
| + | 5  | 1487 | se_Mutation_p.R4                               | NM_024691    | NP_078967    | Q96HQ0 | ZN419_HUMAN  | C2H2-type 8.                   | 0  | TAGTTAGACATC  | 0.428 |             |
| - | 17 | 3606 |                                                | NM_012293    | NP_036425    | Q92626 | PXDN_HUMAN   |                                | 8  | TGTCCGCCGAT   | 0.572 |             |
| - | 19 | 2197 | lR35_uc002rhd.2                                | NM_001006657 | NP_001006658 | Q9P2L0 | WDR35_HUMAN  |                                | 1  | AAGTCGGGGT    | 0.438 |             |
| + | 4  | 572  | NPA_uc002rhs.2_l                               | NM_001809    | NP_001800    | P49450 | CENPA_HUMAN  | H3-like.                       | 0  | GGCCCGGAGGA   | 0.552 |             |
| - | 37 | 4147 | l72_uc010ezb.2_F                               | NM_015662    | NP_056477    | Q9UG01 | IF172_HUMAN  | TPR 11.                        | 2  | AGCATCGATTG   | 0.507 |             |
| + | 15 | 1857 | q.2_Missense_Mu                                | NM_020744    | NP_065795    | Q9BTC8 | MTA3_HUMAN   |                                | 2  | AGTCGAAACA    | 0.478 |             |
| + | 2  | 495  | l1B_uc002rtv.2_In                              | NM_002706    | NP_002697    | O75688 | PPM1B_HUMAN  |                                | 2  | GTTTACGTTATC  | 0.413 |             |
| + | 19 | 2056 | sak.2_Missense_I                               | NM_022894    | NP_075045    | Q9BWT3 | PAPOG_HUMAN  |                                | 2  | CTACCGTAGTAC  | 0.383 |             |
| - | 16 | 2522 | lD2_uc002sha.2_I                               | NM_001617    | NP_001608    | P35612 | ADDB_HUMAN   |                                | 3  | TGACCGACTCG   | 0.537 |             |
| - | 2  | 338  | Intron LMAN2L_uc                               | NM_030805    | NP_110432    | Q9H0V9 | LMA2L_HUMAN  | like. Lumenal (Potential).     | 0  | CCACCGGTTCC   | 0.478 |             |



|   |     |         |                                                               |              |              |        |             |                             |     |                |       |
|---|-----|---------|---------------------------------------------------------------|--------------|--------------|--------|-------------|-----------------------------|-----|----------------|-------|
| + | 8   | 1697    | _p.R409H CNGA3                                                | NM_001298    | NP_001289    | Q16281 | CNGA3_HUMAN |                             | 6   | .GTTCCGCAAGG'  | 0.532 |
| + | 4   | 993     |                                                               | NM_017546    | NP_060016    | Q9UKZ1 | CB029_HUMAN |                             | 5   | CCCCACGGAGC'   | 0.493 |
| - | 2   | 401     | 2_uc010fje.2_5'U1                                             | NM_201557    | NP_963851    | Q14192 | FHL2_HUMAN  | type (Potential).           | 1   | :CTCCCGCAGGA   | 0.532 |
| - | 17  | 2492    |                                                               | NM_001144013 | NP_001137485 | A6NKT7 | RGPD3_HUMAN | Potential.                  | 1   | ATTTTCAGTAAAC  | 0.348 |
| - | 2   | 528     | _p.Q137* ST6GAL:                                              | NM_001142351 | NP_001135823 | Q96JF0 | SIAT2_HUMAN | lenal (Potential).          | 11  | :TGGCTGACCAG   | 0.557 |
| + | 3   | 670     | onsense_Mutation                                              | NM_001056    | NP_001047    | O00338 | ST1C2_HUMAN |                             | 1   | 'GCCAGCGAGCC   | 0.443 |
| - | 3   | 371     | 10fnj.1_Translator                                            | NM_001349    | NP_001340    | P14868 | SYDC_HUMAN  |                             | 1   | 'TGCACGTACCC/  | 0.343 |
| + | 10  | 1407    |                                                               | NM_001001664 | NP_001001664 | Q6IQ16 | SPOPL_HUMAN |                             | 3   | 'TGGGTGTAAGA/  | 0.358 |
| - | 6   | 832     | _p.S161L STAM2_                                               | NM_005843    | NP_005834    | O75886 | STAM2_HUMAN |                             | 1   | 'TGTTCGATGAC/  | 0.323 |
| - | 11  | 1677    | q.1_Missense_Mt                                               | NM_000888    | NP_000879    | P18564 | ITB6_HUMAN  | ).   . Cysteine-rich tandem | 3   | :CGTTACTCTGTA/ | 0.522 |
| + | 4   | 673     | gh.2_Missense_Mt                                              | NM_000817    | NP_000808    | Q99259 | DCE1_HUMAN  |                             | 1   | CGACCCGGGATG/  | 0.547 |
| - | 17  | 2786    | uiv.2_Missense_M                                              | NM_001033045 | NP_001028217 | Q7Z3F1 | GP155_HUMAN | DEP.                        | 1   | ACCACGGTCGG/   | 0.493 |
| - | 17  | 2771    | uiv.2_Missense_M                                              | NM_001033045 | NP_001028217 | Q7Z3F1 | GP155_HUMAN | DEP.                        | 1   | :AAGGCCGACTT   | 0.493 |
| - | 5   | 437     | 2_uc002ujr.2_RNA                                              | NM_001880    | NP_001871    | P15336 | ATF2_HUMAN  |                             | 3   | :ATTACGTGCTG/  | 0.348 |
| - | 277 | 79894   | :252 TTN_uc010z                                               | NM_133378    | NP_596869    | Q8WZ42 | TITIN_HUMAN |                             | 153 | 'TGGTTGTACCA/  | 0.428 |
| - | 275 | 73074   | :79C TTN_uc010z                                               | NM_133378    | NP_596869    | Q8WZ42 | TITIN_HUMAN |                             | 153 | 'GACACGGAAC/   | 0.418 |
| - | 205 | 40639   | .1_Missense_Mute                                              | NM_133378    | NP_596869    | Q8WZ42 | TITIN_HUMAN |                             | 153 | 'TCACACGGTTT'  | 0.368 |
| + | 3   | 468     | n_p.R3C GULP1_                                                | NM_016315    | NP_057399    | Q9UBP9 | GULP1_HUMAN |                             | 1   | 'TGAACCGTGCT   | 0.363 |
| + | 6   | 660     | _p.P138S MAP2_u                                               | NM_002374    | NP_002365    | P11137 | MAP2_HUMAN  |                             | 17  | 'CTCCACCCCA'   | 0.413 |
| + | 17  | 3429    | c.2_Missense_Mut                                              | NM_014640    | NP_055455    | Q14679 | TLL4_HUMAN  |                             | 3   | :TCGCCGTGGTC/  | 0.463 |
| - | 11  | 1645    | p.R429Q PTPRN_                                                | NM_002846    | NP_002837    | Q16849 | PTPRN_HUMAN | ellular (Potential).        | 4   | TGTGCCGGATG/   | 0.557 |
| - | 3   | 446     | zlm.1_Missense_M                                              | NM_004438    | NP_004429    | P54764 | EPHA4_HUMAN | ellular (Potential).        | 12  | 'TGAACGCTCT'   | 0.458 |
| + | 21  | 2494    | :KD_uc010fyh.1_N                                              | NM_152879    | NP_690618    | Q16760 | DGKD_HUMAN  |                             | 5   | :ACGGCGACCC    | 0.547 |
| - | 7   | 1219    |                                                               | NM_016652    | NP_057736    | Q9BZJ0 | CRNL1_HUMAN | HAT 6.                      | 3   | .CTTCCGTGCAT   | 0.418 |
| - | 4   | 943     | 7_uc002wvb.2_Mi                                               | NM_015655    | NP_056470    | Q9Y3M9 | ZN337_HUMAN |                             | 0   | 'AGCTTACTGCAT/ | 0.423 |
| + | 3   | 187     | 'RG1B_uc010gdr.1_RNA FRG1B_uc010ztk.1_Missense_Mutation_p.L4S |              |              |        |             |                             | 0   | :TTTGTGGCCT/   | 0.353 |
| + | 3   | 189     | 'RG1B_uc010gdr.1_RNA FRG1B_uc010ztk.1_Missense_Mutation_p.A5T |              |              |        |             |                             | 0   | 'TGTGGCCTCA    | 0.353 |
| + | 3   | 195     | 'RG1B_uc010gdr.1_RNA FRG1B_uc010ztk.1_Missense_Mutation_p.N7D |              |              |        |             |                             | 0   | :CCTCAAATAGC'  | 0.358 |
| + | 3   | 222     | RG1B_uc010gdr.1_RNA FRG1B_uc010ztk.1_Missense_Mutation_p.A16T |              |              |        |             |                             | 0   | 'ATGAAGCAGGG   | 0.373 |
| + | 3   | 243_244 | RG1B_uc010gdr.1_RNA FRG1B_uc010ztk.1_Missense_Mutation_p.S23D |              |              |        |             |                             | 0   | CAAAAAGTAAAA   | 0.361 |
| - | 3   | 2028    | dk.2_Intron CPNE                                              | NM_152838    | NP_690051    | Q9NTZ6 | RBM12_HUMAN |                             | 3   | :ACTTACGTGCA'  | 0.398 |
| + | 14  | 2179    |                                                               | NM_016436    | NP_057520    | Q9BVI0 | PHF20_HUMAN | PHD-type.                   | 1   | :TGCCCGAGAAA   | 0.453 |
| + | 4   | 639     | PEPL1_uc010gjo.1                                              | NM_024663    | NP_078939    | Q8NDH3 | PEPL1_HUMAN |                             | 0   | :TAGCAGCCCGC   | 0.617 |
| - | 7   | 600     | gju.1_Missense_M                                              | NM_014258    | NP_055073    | Q9BX26 | SYCP2_HUMAN |                             | 5   | :AAATGCGAGGT/  | 0.303 |
| - | 5   | 748     | _p.R211* SYNJ1_u                                              | NM_003895    | NP_003886    | O43426 | SYNJ1_HUMAN | SAC.                        | 5   | :AGCTCGTTCAC/  | 0.383 |
| - | 21  | 2938    | rd.2_Missense_Mt                                              | NM_000819    | NP_000810    | P22102 | PUR2_HUMAN  | GART.                       | 1   | 'GACTCCGGTTT/  | 0.398 |
| + | 22  | 5184    | c.R1651H DOPEY.                                               | NM_005128    | NP_005119    | Q9Y3R5 | DOP2_HUMAN  |                             | 2   | :CCAGCGTCACA/  | 0.423 |
| - | 3   | 2549    | zy.3_Missense_Mt                                              | NM_001098402 | NP_001091872 | Q9ULJ3 | ZN295_HUMAN | :2H2-type 5.                | 3   | 'GACTCGAGGC/   | 0.532 |
| + | 20  | 3673    | :DL1_uc002zag.1                                               | NM_001004416 | NP_001004416 | Q5DID0 | UROL1_HUMAN | llular (Potential). ZP.     | 3   | CCCCCGAGCC     | 0.453 |
| + | 26  | 2453    | a_Mutation_p.D79'                                             | NM_001849    | NP_001840    | P12110 | CO6A2_HUMAN | ?. Nonhelical region.       | 8   | 'TCTCCGACCTG/  | 0.632 |
| + | 3   | 534     | e_Mutation_p.R25                                              | NM_006031    | NP_006022    | O95613 | PCNT_HUMAN  |                             | 8   | :AACAGCGTGGG   | 0.542 |
| + | 2   | 356     | z2_uc002zml.2_5'l                                             | NM_031413    | NP_113601    | Q9BXF3 | CECR2_HUMAN |                             | 2   | 'GCACCGACTCT/  | 0.537 |
| - | 15  | 1935    | ie_Mutation_p.R57                                             | NM_003325    | NP_003316    | P54198 | HIRA_HUMAN  | ction with CCNA1.           | 1   | 'TGGACCGCTCT/  | 0.562 |
| + | 26  | 4199    | .BIN1_uc002zzl.1_                                             | NM_012295    | NP_036427    | Q9Y6J0 | CABIN_HUMAN |                             | 5   | :ACCACGATTAC/  | 0.622 |
| + | 4   | 2128    | 'H_uc003afp.2_5'l                                             | NM_021076    | NP_066554    | P12036 | NFH_HUMAN   | ats of K-S-P-[AEPV]-[EAK]-  | 0   | 'GAAGCGAGAAG   | 0.562 |
| - | 4   | 567     | iaii.1_Missense_M                                             | NM_004861    | NP_004852    | Q99999 | G3ST1_HUMAN | lenal (Potential).          | 0   | :GAAGCGCATG/   | 0.627 |
| - | 3   | 2375    |                                                               | NM_052906    | NP_443138    | Q5R3F8 | LRFN6_HUMAN | lasmic (Potential).         | 2   | CAGCCGAGCCC    | 0.607 |

|   |    |       |                   |              |              |        |              |    |                |       |
|---|----|-------|-------------------|--------------|--------------|--------|--------------|----|----------------|-------|
| + | 7  | 2384  | atq.1_Missense_M  | NM_001039141 | NP_001034230 | Q9H2D6 | TARA_HUMAN   | 1  | :GGGACGATCCC,  | 0.582 |
| + | 7  | 2415  | atq.1_Missense_N  | NM_001039141 | NP_001034230 | Q9H2D6 | TARA_HUMAN   | 1  | :AACCACCAAC,   | 0.577 |
| + | 7  | 1310  |                   | NM_004286    | NP_004277    | O00178 | GTPB1_HUMAN  | 1  | :CCCCCGCACC    | 0.567 |
| + | 12 | 1531  | ot.1_Missense_Mt  | NM_015705    | NP_056520    | Q96HU1 | SGSM3_HUMAN  | 2  | CCTGCGCGTGG    | 0.617 |
| - | 14 | 2580  | hek.1_Missense_N  | NM_022340    | NP_071735    | Q9H1K0 | RBNS5_HUMAN  | 2  | GATGCGGGCTG,   | 0.562 |
| + | 6  | 812   |                   | NM_015141    | NP_055956    | Q8N335 | GPD1L_HUMAN  | 0  | FGTCTACAGCCA   | 0.607 |
| + | 7  | 1260  |                   | NM_017875    | NP_060345    | Q96DW6 | S2538_HUMAN  | 0  | :TGGCAGCAATGC, | 0.532 |
| - | 50 | 11780 | okuk.2_Missense_I | NM_001407    | NP_001398    | Q9NYQ7 | CELR3_HUMAN  | 11 | :ATATCCGTGTCTG | 0.552 |
| - | 18 | 1756  | p.A439V QARS_uc   | NM_005051    | NP_005042    | P47897 | SYQ_HUMAN    | 1  | TGGCAGCAGGA    | 0.552 |
| + | 10 | 2150  | okc.1_Missense_M  | NM_178173    | NP_835467    | Q8IYA8 | CCD36_HUMAN  | 2  | TTGATAGCAGTG,  | 0.473 |
| + | 5  | 3415  |                   | NM_003458    | NP_003449    | Q9UPA5 | BSN_HUMAN    | 8  | :CCATCGAGGAT   | 0.662 |
| + | 20 | 1735  | se_Mutation_p.P21 | NM_022064    | NP_071347    | Q5XPI4 | RN123_HUMAN  | 7  | :CTGCCCCCTG,   | 0.547 |
| + | 8  | 1086  | nse_Mutation_p.T  | NM_002070    | NP_002061    | P04899 | GNAI2_HUMAN  | 3  | GTACACGCACT    | 0.527 |
| - | 8  | 1164  |                   | NM_003500    | NP_003491    | Q99424 | ACOX2_HUMAN  | 0  | GCCTGGGCCGG    | 0.637 |
| - | 2  | 780   | p.R92W MINA_uc    | NM_001042533 | NP_001035998 | Q8IUF8 | MINA_HUMAN   | 1  | CCCCCGGCTGC,   | 0.488 |
| + | 7  | 1480  | C_uc003dzz.2_Mit  | NM_033254    | NP_150279    | Q9BWW1 | BOC_HUMAN    | 6  | :TCATCGACACC,  | 0.632 |
| - | 4  | 605   | R1_uc003eer.2_S   | NM_175924    | NP_787120    | Q86SU0 | ILDR1_HUMAN  | 1  | :ACTTACGTAGG,  | 0.453 |
| - | 7  | 2440  | okc.1_Missense_Mt | NM_001017395 | NP_001017395 | O94876 | TMCC1_HUMAN  | 1  | :GAACCGTTCCA   | 0.498 |
| + | 17 | 3145  | _uc003epw.1_Intr  | NM_001063    | NP_001054    | P02787 | TRFE_HUMAN   | 2  | CGGCAGTTGGC,   | 0.493 |
| - | 13 | 1957  | imo.1_Missense_N  | NM_006219    | NP_006210    | P42338 | PK3CB_HUMAN  | 5  | :ACAATCAAGAA   | 0.353 |
| + | 11 | 1887  | atm.2_Missense_N  | NM_022131    | NP_071414    | Q9H4D0 | CSTN2_HUMAN  | 7  | :GCAGTCCATCC   | 0.502 |
| + | 2  | 396   | e_Mutation_p.A54  | NM_001104647 | NP_001098117 | Q96CQ1 | S2536_HUMAN  | 0  | :TGGAGCCAGTG   | 0.443 |
| + | 5  | 790   | iom.1_Missense_N  | NM_003875    | NP_003866    | P49915 | GUA_A_HUMAN  | 3  | FGCTTACACATGC  | 0.343 |
| - | 5  | 1245  | _p.R10C CCNL1_u   | NM_020307    | NP_064703    | Q9UK58 | CCNL1_HUMAN  | 5  | :GATTACGTTTCC  | 0.358 |
| + | 19 | 2318  | ifhz.3_Missense_N | NM_022763    | NP_073600    | Q53EP0 | FND3B_HUMAN  | 3  | :AAGACGTAGCC   | 0.542 |
| + | 17 | 2734  | _Mutation_p.R806  | NM_198241    | NP_937884    | Q04637 | IF4G1_HUMAN  | 7  | TTGAATCGATGTC  | 0.438 |
| - | 22 | 2585  | okc.2_Missense_Mu | NM_001346    | NP_001337    | P49619 | DGKG_HUMAN   | 5  | TTCTGCTTTCC    | 0.493 |
| - | 6  | 985   | c.2_Missense_Mu   | NM_001346    | NP_001337    | P49619 | DGKG_HUMAN   | 5  | AGACCGAGGGAA   | 0.547 |
| + | 1  | 49    | 003fqv.2_5'UTR E  | NM_001967    | NP_001958    | Q14240 | IF4A2_HUMAN  | 4  | CTGGTGGCTCC    | 0.572 |
| - | 6  | 1967  | nse_Mutation_p.l  | NM_152617    | NP_689830    | Q8IYW5 | RN168_HUMAN  | 0  | :AGCGCGTAAGT   | 0.463 |
| + | 9  | 1062  | ok.R347H LMLN_uc  | NM_033029    | NP_149018    | Q96KR4 | LMLN_HUMAN   | 1  | :GCCTCGTGTG    | 0.368 |
| - | 3  | 3294  | ron ABCA11P_uc0   | NM_133474    | NP_597731    | D9N162 | D9N162_HUMAN | 1  | CATTCTCCACAT   | 0.418 |
| - | 9  | 1657  |                   | NM_012318    | NP_036450    | O95202 | LETM1_HUMAN  | 1  | :CACCTCGGCCA   | 0.627 |
| - | 17 | 2485  | C4orf10_uc003ggi  | NM_003703    | NP_003694    | P78316 | NOP14_HUMAN  | 1  | TTCTCGAACGG    | 0.498 |
| + | 26 | 3431  |                   | NM_002111    | NP_002102    | P42858 | HD_HUMAN     | 4  | TGGCCGGAAC     | 0.512 |
| + | 2  | 371   |                   | NM_005980    | NP_005971    | P25815 | S100P_HUMAN  | 0  | :AGGCAGGACTC   | 0.522 |
| + | 10 | 1627  | il.1_Missense_Mu  | NM_182485    | NP_872291    | Q7Z5Q1 | CPEB2_HUMAN  | 1  | :ATAAACGTGTAA  | 0.398 |
| + | 8  | 878   | is.1_Missense_Mu  | NM_004787    | NP_004778    | O94813 | SLIT2_HUMAN  | 11 | :GCTTCGCCAAA   | 0.493 |
| - | 12 | 2165  | _p.R72Q DHX15_u   | NM_001358    | NP_001349    | O43143 | DHX15_HUMAN  | 1  | ATAATTCGAGATA  | 0.383 |
| + | 12 | 2215  | ax.2_Nonsense_M   | NM_020860    | NP_065911    | Q9P246 | STIM2_HUMAN  | 2  | CTTTATCGAAATC  | 0.522 |
| + | 3  | 825   | C1D1_uc010ifd.2_  | NM_015173    | NP_055988    | Q86TI0 | TBCD1_HUMAN  | 1  | :GCACTGCCGCT   | 0.617 |
| - | 1  | 1943  | ok.1_Missense_Mut | NM_006068    | NP_006059    | Q9Y2C9 | TLR6_HUMAN   | 2  | :CCCTGCGCCGA   | 0.502 |
| + | 4  | 888   |                   | NM_017581    | NP_060051    | Q9UGM1 | ACHA9_HUMAN  | 7  | :CATGCGGCCT    | 0.512 |
| + | 2  | 721   | _p.R76W NSUN7_    | NM_024677    | NP_078953    |        |              | 0  | :CCCTGCGGTCC   | 0.478 |
| + | 13 | 1956  | ay.1_Missense_Mu  | NM_001037442 | NP_001032519 | Q7L099 | RUFY3_HUMAN  | 0  | :AAGCCGCCAAT   | 0.507 |
| - | 2  | 196   | lOijq.1_Nonsense_ | NM_152545    | NP_689758    | Q0VAM2 | RGF1B_HUMAN  | 0  | :GTTTCGATTGT   | 0.428 |
| + | 46 | 7634  | qa.2_Missense_Mu  | NM_080683    | NP_542414    | Q12923 | PTN13_HUMAN  | 6  | :TCAACCGATG,   | 0.463 |

rs137931929

|   |    |       |                     |              |              |        |             |                               |    |              |       |             |
|---|----|-------|---------------------|--------------|--------------|--------|-------------|-------------------------------|----|--------------|-------|-------------|
| - | 5  | 462   |                     | NM_014485    | NP_055300    | O60760 | HPGDS_HUMAN | ST C-terminal.                | 1  | CGAGGCGCATTA | 0.368 |             |
| + | 2  | 450   | uc003hux.2_Spli     | NM_032149    | NP_115525    | Q53FE4 | CD017_HUMAN |                               | 0  | CAAAGGTAAGG  | 0.413 |             |
| - | 10 | 1699  | itz.1_Missense_Mt   | NM_006529    | NP_006520    | O75311 | GLRA3_HUMAN | lasmic (Probable).            | 3  | TTGGAGTCATG  | 0.478 |             |
| + | 8  | 920   | n_p.A255V PAPD7     | NM_006999    | NP_008930    | Q5XG87 | PAPD7_HUMAN |                               | 1  | CCATGCTGTGT  | 0.552 |             |
| + | 24 | 2603  | jeu.1_Missense_IV   | NM_005885    | NP_005876    | O60337 | MARH6_HUMAN | lasmic (Potential).           | 2  | TGTTTCGTAAC  | 0.418 |             |
| + | 15 | 2231  | i.2_RNA SLC30A5     | NM_022902    | NP_075053    | Q8TAD4 | ZNT5_HUMAN  | lasmic (Potential).           | 1  | ATACCGAGACC  | 0.373 |             |
| - | 3  | 1609  |                     | NM_152625    | NP_689838    | Q8N895 | ZN366_HUMAN |                               | 2  | GGCGCGGATGT  | 0.552 |             |
| - | 9  | 1369  | on_p.R190C MCT      | NM_024717    | NP_078993    | Q6DN14 | MCTP1_HUMAN | C2.                           | 2  | TAGGCGTAAAC  | 0.413 |             |
| - | 6  | 689   | RD4_uc010jbx.1_     | NM_139164    | NP_631903    | Q96DR4 | STAR4_HUMAN | START.                        | 1  | CTTTTCGTAAT  | 0.403 |             |
| - | 6  | 1236  |                     | NM_002715    | NP_002706    | P67775 | PP2AA_HUMAN |                               | 4  | AGTATCGTCAAC | 0.328 |             |
| + | 4  | 339   | zl.2_Missense_Mu    | NM_015288    | NP_056103    | Q9NQC1 | JADE2_HUMAN |                               | 0  | TTTCCGGACA   | 0.557 |             |
| + | 5  | 894   | leq.2_Nonsense_I    | NM_003339    | NP_003330    | P62837 | UB2D2_HUMAN | p.R90*(1)                     | 1  | TCTACGATCAC  | 0.328 |             |
| + | 1  | 1670  |                     | NM_018933    | NP_061756    | Q9Y5F0 | PCDBD_HUMAN | r (Potential). Cadherin 5.    | 3  | CCCAGGACCCG  | 0.657 |             |
| + | 1  | 1330  | o.1_Intron PCDHG    | NM_018923    | NP_061746    | Q9Y5G2 | PCDGE_HUMAN | r (Potential). Cadherin 4.    | 0  | TCTCCGACGTC  | 0.557 |             |
| + | 1  | 1718  | DHGB1_uc003ljo.     | NM_018918    | NP_061741    | Q9Y5G8 | PCDG5_HUMAN | Extracellular (Potential).    | 4  | TTCCACGGGCG  | 0.617 |             |
| - | 8  | 932   | llc.3_Missense_Mt   | NM_005219    | NP_005210    | O60610 | DIAP1_HUMAN | GBD/FH3.                      | 1  | GAGCAGAAAGC  | 0.418 |             |
| - | 3  | 385   | llc.3_Nonsense_IV   | NM_005219    | NP_005210    | O60610 | DIAP1_HUMAN |                               | 1  | TGACTGTGCTG  | 0.418 |             |
| - | 5  | 373   | j.2_5'Flank FCHSI   | NM_033449    | NP_258260    | Q86WN1 | FCSD1_HUMAN |                               | 4  | GTCACGGTATC  | 0.637 |             |
| + | 5  | 699   | ly.2_Missense_Mt    | NM_018989    | NP_061862    | Q9P2N5 | RBM27_HUMAN | Arg-rich.                     | 3  | GAGTCGCAGTA  | 0.423 |             |
| + | 5  | 1140  | p.R367H TCERG1      | NM_006706    | NP_006697    | O14776 | TCRG1_HUMAN | Pro-rich.                     | 2  | GTTTCGTGTT   | 0.463 |             |
| - | 10 | 1901  | sense_Mutation_I    | NM_014790    | NP_055605    | Q96AA8 | JKIP2_HUMAN | Potential.                    | 2  | TTCTCGTTCAG  | 0.443 |             |
| + | 1  | 615   | TC2_uc003lpp.1_I    | NM_000024    | NP_000015    | P07550 | ADRB2_HUMAN | ilical; Name=3.               | 1  | TGTGCGTGATC  | 0.488 |             |
| - | 5  | 925   | se_Mutation_p.L2z   | NM_005211    | NP_005202    | P07333 | CSF1R_HUMAN | otential). Ig-like C2-type 3. | 54 | TGCGAGCTGCA  | 0.308 |             |
| - | 23 | 12797 | AT2_uc003lud.3_IV   | NM_001447    | NP_001438    | Q9NYQ8 | FAT2_HUMAN  | lasmic (Potential).           | 6  | CAGGCCTCCC   | 0.647 |             |
| + | 16 | 1636  | p.R500W CYFIP2      | NM_001037333 | NP_001032410 | Q96F07 | CYFP2_HUMAN |                               | 0  | CGGTACGGAAG  | 0.562 |             |
| + | 23 | 4438  | zt.3_Missense_Mu    | NM_001122679 | NP_001116151 |        |             |                               | 10 | GTCTCTACATC  | 0.532 |             |
| + | 23 | 4738  | zt.3_Missense_Mu    | NM_001122679 | NP_001116151 |        |             |                               | 10 | CCCCCGGAGAG  | 0.463 |             |
| + | 16 | 1615  | nsense_Mutation_p.C | NM_004946    | NP_004937    | Q92608 | DOCK2_HUMAN | DHR-1.                        | 7  | GTTTCGACATCC | 0.498 |             |
| + | 16 | 1620  | 2_Silent_p.I40I DC  | NM_004946    | NP_004937    | Q92608 | DOCK2_HUMAN | DHR-1.                        | 7  | GACATCGGTCA  | 0.483 |             |
| - | 8  | 1174  |                     | NM_005990    | NP_005981    | O94804 | STK10_HUMAN | rotein kinase.                | 8  | GAAGGGATGCT  | 0.632 |             |
| + | 5  | 613   | ndb.1_Missense_IV   | NM_022754    | NP_073591    | Q9H9B4 | SFXN1_HUMAN | ical; (Potential).            | 1  | GTGCCGTAGCA  | 0.428 |             |
| + | 3  | 2095  | lkn.1_Missense_M    | NM_014757    | NP_055572    | Q92585 | MAML1_HUMAN |                               | 6  | CCCCTATCTCAC | 0.572 |             |
| + | 5  | 2352  | ll1_uc003mkn.1_I    | NM_014757    | NP_055572    | Q92585 | MAML1_HUMAN |                               | 6  | TGCCCGGCATG  | 0.592 |             |
| + | 24 | 8833  | l.1_Missense_Mut    | NM_004415    | NP_004406    | P15924 | DESP_HUMAN  | Globular 2.                   | 9  | TTGACGCCACA  | 0.358 |             |
| - | 3  | 728   | pn.2_Missense_Mt    | NM_006778    | NP_006769    | Q9UDY6 | TRI10_HUMAN |                               | 0  | ATCCCGTTGCC  | 0.502 | rs138056642 |
| + | 5  | 537   | Mutation_p.R111C    | NM_013993    | NP_054699    | Q08345 | DDR1_HUMAN  | (Potential). F5/8 type C.     | 9  | ACAACGACTGC  | 0.652 |             |
| + | 10 | 1680  | /380I VARS2_uc0     | NM_020442    | NP_065175    | Q5ST30 | SYVM_HUMAN  |                               | 4  | TGGCCGTTCAT  | 0.527 |             |
| + | 11 | 1720  | R393Q VARS2_uc      | NM_020442    | NP_065175    | Q5ST30 | SYVM_HUMAN  |                               | 4  | CGGGCGACAGC  | 0.592 |             |
| - | 11 | 1829  | xd.2_Missense_Mt    | NM_025258    | NP_079534    | Q9Y334 | G7C_HUMAN   |                               | 3  | GATCCGGACTG  | 0.577 |             |
| - | 2  | 1739  | te.2_Missense_Mt    | NM_005527    | NP_005518    | P34931 | HS71L_HUMAN |                               | 6  | CCATGCGCTCA  | 0.473 |             |
| - | 5  | 472   | jpg.1_Missense_IV   | NM_004381    | NP_004372    | Q99941 | ATF6B_HUMAN | lasmic (Potential).           | 0  | CTGGACGGTTT  | 0.527 |             |
| + | 7  | 1399  |                     | NM_004053    | NP_004044    | Q13895 | BYST_HUMAN  |                               | 0  | CTTACCGGTTG  | 0.562 |             |
| - | 5  | 1030  | 2_5'UTR TRERF1      | NM_033502    | NP_277037    | Q96PN7 | TREF1_HUMAN |                               | 5  | GAAATCGCAGG  | 0.567 |             |
| - | 5  | 1003  | 2_5'UTR TRERF1      | NM_033502    | NP_277037    | Q96PN7 | TREF1_HUMAN |                               | 5  | CTGGGTGAAA   | 0.552 |             |
| + | 4  | 861   | p.R125* EFHC1_I     | NM_018100    | NP_060570    | Q5JVL4 | EFHC1_HUMAN |                               | 3  | AACTCCGAAAA  | 0.378 |             |
| + | 5  | 1266  |                     | NM_024641    | NP_078917    | Q5SR19 | MANEA_HUMAN | lable). Luminal (Potential).  | 3  | GGAACCGAATC  | 0.418 |             |
| + | 2  | 1146  | p.R200L GJA1_u      | NM_000165    | NP_000156    | P17302 | CXA1_HUMAN  | lasmic (Potential).           | 2  | TGCGCAATT    | 0.502 |             |

|   |    |         |                    |              |              |        |             |                             |    |               |       |             |
|---|----|---------|--------------------|--------------|--------------|--------|-------------|-----------------------------|----|---------------|-------|-------------|
| + | 6  | 891     | e_Mutation_p.R24   | NM_152553    | NP_689766    | Q8TC41 | RN217_HUMAN |                             | 0  | AAATATCGCTACC | 0.438 |             |
| + | 5  | 618     | 1_uc010kfm.1_Sp    | NM_000045    | NP_000036    | P05089 | ARG1_HUMAN  |                             | 1  | GGAACAGTAAGC  | 0.423 |             |
| + | 1  | 482     |                    | NM_053278    | NP_444508    | Q969N4 | TAAR8_HUMAN | Name=4; (Potential).        | 1  | TCTCACGTACAC  | 0.488 | rs140382740 |
| - | 5  | 1864    | M535 BCLAF1_u      | NM_014739    | NP_055554    | Q9NYF8 | BCLF1_HUMAN |                             | 1  | CGCTATCATTTTC | 0.423 |             |
| - | 4  | 918     | S220N BCLAF1_u     | NM_014739    | NP_055554    | Q9NYF8 | BCLF1_HUMAN |                             | 1  | CTAGGACTATTAT | 0.433 |             |
| - | 93 | 18156   | 1_uc003qot.3_Mi    | NM_182961    | NP_892006    | Q8NF91 | SYNE1_HUMAN | lasmic (Potential).         | 45 | ACAGCGACCTG   | 0.502 |             |
| + | 1  | 282     |                    | NM_002377    | NP_002368    | P04201 | MAS_HUMAN   | ellular (Potential).        | 4  | TCTATCGACTATC | 0.433 |             |
| - | 7  | 1381    | te.1_Missense_IV   | NM_003058    | NP_003049    | O15244 | S22A2_HUMAN | lasmic (Potential).         | 2  | GGTAACGGCGT   | 0.502 |             |
| - | 8  | 1237    | p.T197M AGPAT4     | NM_020133    | NP_064518    | Q9NRZ5 | PLCD_HUMAN  |                             | 0  | CCAGCGTCAGG   | 0.622 |             |
| + | 24 | 3350    | vc.1_Missense_Mi   | NM_001040001 | NP_001035090 | P55196 | AFAD_HUMAN  | PDZ.                        | 5  | TCTCTCAGGAA   | 0.403 |             |
| + | 7  | 2115    | 3_Mutation_p.D13f  | NM_019005    | NP_061878    | Q9NXC5 | MIO_HUMAN   |                             | 0  | TCTTACGATGGA  | 0.338 |             |
| - | 1  | 226     |                    | NM_175886    | NP_787082    | P21108 | PRPS3_HUMAN | p.R49C(1)                   | 1  | TCCACGCACAC   | 0.488 | rs112075478 |
| + | 83 | 13362   | 2_3'UTR CDCA7I     | NM_003777    | NP_003768    | Q96DT5 | DYH11_HUMAN |                             | 15 | CGCCCCTGGG    | 0.488 |             |
| - | 5  | 726     | g.1_Missense_Mul   | NM_000168    | NP_000159    | P10071 | GLI3_HUMAN  |                             | 19 | AGAGCGATGGG   | 0.572 |             |
| - | 4  | 874     | ya.2_Missense_IV   | NM_006230    | NP_006221    | P49005 | DPOD2_HUMAN |                             | 2  | CTCCACTGCCTC  | 0.617 |             |
| - | 2  | 220     | p.A45V DDC_uc      | NM_000790    | NP_000781    | P20711 | DDC_HUMAN   |                             | 2  | GGGCAGCGGCA   | 0.562 |             |
| - | 10 | 2154    | p.3_Missense_Mul   | NM_015198    | NP_056013    | O75128 | COBL_HUMAN  |                             | 5  | CTCCCCGTCAG   | 0.483 |             |
| - | 5  | 1668    |                    | NM_033273    | NP_150376    | Q96JC4 | ZN479_HUMAN | 2H2-type 11.                | 4  | CACATGTGTAGC  | 0.428 |             |
| + | 4  | 871_872 | zu.2_Missense_Mi   | NM_152626    | NP_689839    | Q03936 | ZNF92_HUMAN | 2H2-type 4.                 | 0  | CTCAAATCTTAC  | 0.351 |             |
| + | 4  | 946     | zu.2_Missense_Mi   | NM_152626    | NP_689839    | Q03936 | ZNF92_HUMAN | 2H2-type 5.                 | 0  | TAACCGGTCTCT  | 0.368 |             |
| + | 4  | 907     | udv.1_Missense_IV  | NM_001040456 | NP_001035546 | Q6NTF9 | RHBD2_HUMAN |                             | 0  | AGCACGCCAGT   | 0.652 |             |
| + | 4  | 1101    |                    | NM_181646    | NP_857597    | A4D1E1 | Z804B_HUMAN |                             | 11 | CAAATCGACACC  | 0.413 |             |
| + | 5  | 634     | khj.1_Missense_    | NM_001039706 | NP_001034795 | A5D8W1 | CG063_HUMAN |                             | 1  | AGTGTGCGGATG  | 0.328 |             |
| - | 14 | 2480    | 3_Mutation_p.R73f  | NM_000466    | NP_000457    | O43933 | PEX1_HUMAN  |                             | 2  | AGAGTCGAGAA   | 0.393 |             |
| + | 13 | 1683    | p.R432H DYNC1      | NM_004411    | NP_004402    | O14576 | DC11I_HUMAN | WD 4.                       | 4  | TGTGTCGTCATG  | 0.443 |             |
| - | 7  | 2008    | iw.1_Missense_Mi   | NM_015545    | NP_056360    | O75127 | PTCD1_HUMAN |                             | 1  | GCTGGCGGATG   | 0.562 |             |
| - | 2  | 538     | iw.1_Missense_Mi   | NM_015545    | NP_056360    | O75127 | PTCD1_HUMAN | PPR 1.                      | 1  | AGTACGGGGTG   | 0.557 |             |
| + | 2  | 349     | tron uc011kky.1_RI | NM_033506    | NP_277041    | O75426 | FBX24_HUMAN |                             | 4  | CTGCCCTTCTT   | 0.562 |             |
| - | 6  | 1496    |                    | NM_022574    | NP_072096    | O75420 | PERQ1_HUMAN |                             | 2  | CCTCTCGCCTC   | 0.657 |             |
| + | 14 | 2315    | AN_uc003uwl.2_F    | NM_003386    | NP_003377    | Q9Y493 | ZAN_HUMAN   | ate) (mucin-like domain). E | 11 | AAAACCCACCA   | 0.507 |             |
| - | 19 | 2376    | p.S296N RBM28      | NM_018077    | NP_060547    | Q9NW13 | RBM28_HUMAN |                             | 2  | CATTTGCTCCTC  | 0.498 |             |
| + | 16 | 1793    | p.T477I AHCYL2     | NM_015328    | NP_056143    | Q96HN2 | SAHH3_HUMAN |                             | 2  | GCCTACCTTTG   | 0.498 |             |
| + | 10 | 1173    |                    | NM_001868    | NP_001859    | P15085 | CBPA1_HUMAN |                             | 1  | GACTGGACCTAC  | 0.532 |             |
| + | 10 | 1152    | h.2_Missense_Mi    | NM_013255    | NP_037387    | Q9UL63 | MKLN1_HUMAN | Kelch 2.                    | 1  | TCTATCGTTATG  | 0.413 |             |
| - | 27 | 5048    | IA4_uc003vqz.3_5   | NM_020911    | NP_065962    | Q9HCM2 | PLXA4_HUMAN | lasmic (Potential).         | 1  | CACTGCGTTATA  | 0.552 |             |
| + | 34 | 4875    | 205_uc003vsx.2_    | NM_015135    | NP_055950    | Q92621 | NU205_HUMAN |                             | 6  | GATCGCTACCC   | 0.507 | rs144088473 |
| - | 4  | 1081    | 3vtb.2_Missense_I  | NM_012450    | NP_036582    | Q9UKG4 | S13A4_HUMAN | ical; (Potential).          | 0  | ACGTGGTACAG   | 0.632 |             |
| + | 10 | 1791    | ub.2_Missense_M    | NM_015905    | NP_056989    | O15164 | TIF1A_HUMAN |                             | 8  | CCAAACCCAAAT  | 0.408 |             |
| - | 2  | 1250    | NND2A_uc003vww     | NM_015689    | NP_056504    | Q9ULE3 | DEN2A_HUMAN |                             | 4  | ATAGACGTTCTC  | 0.527 |             |
| + | 7  | 1079    | p.A213V UBE3C_     | NM_014671    | NP_055486    | Q15386 | UBE3C_HUMAN |                             | 5  | AGGTGCGAGGT   | 0.333 |             |
| - | 4  | 5778    |                    | NM_178857    | NP_849188    | Q8IWN7 | RP1L1_HUMAN |                             | 8  | TCTACACCTTCT  | 0.642 |             |
| + | 6  | 918     | 3_Mutation_p.V24f  | NM_004462    | NP_004453    | P37268 | FDFT_HUMAN  |                             | 0  | TGGCCGTGCAG   | 0.448 |             |
| - | 3  | 258     | tion_p.R32C ENTF   | NM_004901    | NP_004892    | Q9Y227 | ENTP4_HUMAN | lasmic (Potential).         | 2  | TTGGCGTAAATT  | 0.398 |             |
| - | 8  | 813     | k.2_Intron KCTD9   | NM_017634    | NP_060104    | Q7L273 | KCTD9_HUMAN |                             | 0  | GCATCGCAGTT   | 0.358 |             |
| + | 5  | 2914    |                    | NM_001440    | NP_001431    | O43909 | EXTL3_HUMAN | renal (Potential).          | 2  | TGGCCGTTACCA  | 0.542 |             |
| - | 15 | 2878    | e_Mutation_p.R55   | NM_023110    | NP_075598    | P11362 | FGFR1_HUMAN | Potential). Protein kinase. | 15 | GTCCTGTCGCA   | 0.493 |             |
| + | 6  | 827     |                    | NM_152565    | NP_689778    | Q8N8Y2 | VA0D2_HUMAN |                             | 0  | GTTGGCGCTGT   | 0.468 |             |

|   |    |         |                      |              |              |        |             |                               |    |              |       |
|---|----|---------|----------------------|--------------|--------------|--------|-------------|-------------------------------|----|--------------|-------|
| + | 3  | 1028    | .1_Intron DCAF13     | NM_015420    | NP_056235    | Q9NV06 | DCA13_HUMAN | WD 1.                         | 1  | ACTCAGCGGAAT | 0.353 |
| + | 10 | 1931    | _Mutation_p.S603     | NM_018002    | NP_060472    | Q8N573 | OXR1_HUMAN  |                               | 0  | GTGGAGTCCAG  | 0.348 |
| - | 10 | 1038    | 3E_uc003ymv.2_IV     | NM_001568    | NP_001559    | P60228 | EIF3E_HUMAN | PCI.                          | 3  | AGAGACGGGCA  | 0.368 |
| - | 2  | 983     |                      | NM_031415    | NP_113603    | Q9BYG8 | GSDMC_HUMAN |                               | 3  | AACTGACGTAAT | 0.403 |
| - | 5  | 984     | æ.1_Missense_Mt      | NM_201380    | NP_958782    | Q15149 | PLEC_HUMAN  | bular 1. Actin-binding.       | 9  | GAGGCCAAGGG  | 0.622 |
| + | 4  | 747     | p.R194Q GRINA_1      | NM_001009184 | NP_001009184 | Q7Z429 | GRINA_HUMAN |                               | 1  | TGTCCGGGAGA  | 0.552 |
| + | 3  | 1244    | kx.1_Missense_Mi     | NM_198572    | NP_940974    | Q76KD6 | SPER1_HUMAN |                               | 2  | CCACTGTCCTC  | 0.617 |
| + | 2  | 312     | F1_uc003zbu.3_R      | NM_005526    | NP_005517    | Q00613 | HSF1_HUMAN  | By similarity.                | 0  | TGTTCCGACCAG | 0.622 |
| - | 17 | 1703    |                      | NM_013291    | NP_037423    | Q10570 | CPSF1_HUMAN |                               | 1  | CCTTACGCACCC | 0.647 |
| - | 5  | 440     | æense_Mutation_p.    | NM_021061    | NP_066405    | P15622 | ZN250_HUMAN |                               | 0  | AGGCTGTAGTG  | 0.353 |
| - | 1  | 327     | A14_uc003zoo.1_f     | NM_002172    | NP_002163    | P01570 | IFN14_HUMAN |                               | 0  | ATGAGTTCTTTG | 0.468 |
| - | 1  | 450     |                      | NM_000605    | NP_000596    | P01563 | IFNA2_HUMAN |                               | 1  | TGTCACCCCCCA | 0.493 |
| - | 2  | 156     | uw.1_Missense_IV     | NM_007234    | NP_009165    | O75935 | DCTN3_HUMAN |                               | 0  | CACCTGCACCT  | 0.498 |
| + | 12 | 2540    | e_Mutation_p.R39:    | NM_004512    | NP_004503    | Q14626 | I11RA_HUMAN | lasmic (Potential).           | 1  | GAGACGGGGTG  | 0.537 |
| + | 9  | 1136    | p.E282K UNC13B       | NM_006377    | NP_006368    | O14795 | UN13B_HUMAN |                               | 5  | TATCACGAACAA | 0.502 |
| + | 5  | 599     | 2_Intron CCDC107     | NM_174923    | NP_777583    | Q8WV48 | CC107_HUMAN |                               | 0  | AGGCTCGGGAG  | 0.547 |
| - | 10 | 2745    | 15_splice FBXO10     | NM_012166    | NP_036298    | Q9UK96 | FBX10_HUMAN |                               | 5  | CACTCACTTTT  | 0.522 |
| - | 21 | 3648    | .1056T CNTNAP3_      | NM_033655    | NP_387504    | Q9BZ76 | CNTP3_HUMAN | 4. Extracellular (Potential). | 1  | GACGGCGTTGA  | 0.393 |
| + | 1  | 604_605 | 42421_uc004aed.1_RNA |              |              |        |             |                               | 0  | AGTCGCGCAAGC | 0.589 |
| - | 5  | 1661    |                      | NM_001163    | NP_001154    | Q02410 | APBA1_HUMAN | PID.                          | 1  | TGGCGGCAAAA  | 0.552 |
| - | 5  | 1762    | NF484_uc010mrb.      | NM_031486    | NP_113674    | Q5JVJ2 | ZN484_HUMAN | 2H2-type 10.                  | 0  | TGAGCCGAGAC  | 0.398 |
| - | 1  | 443     |                      | NM_001004482 | NP_001004482 | Q8NGS8 | O13C5_HUMAN | Name=4; (Potential).          | 4  | TCCAGGACCCAC | 0.463 |
| + | 1  | 389     |                      | NM_001004484 | NP_001004484 | Q8NGV5 | O13D1_HUMAN | ællular (Potential).          | 2  | CTGTGCTCTGC  | 0.483 |
| + | 1  | 721     | lzh.1_Intron RABC    | NM_005294    | NP_005285    | Q99679 | GPR21_HUMAN | lasmic (Potential).           | 1  | CTGGGGAAGTG  | 0.488 |
| - | 10 | 1649    | _Mutation_p.A247     | NM_001006617 | NP_001006618 | Q9BPZ7 | SIN1_HUMAN  |                               | 4  | CACAGGCACAG  | 0.468 |
| + | 8  | 1066    | r_p.S200N GARNI      | NM_032293    | NP_115669    | Q5VVW2 | GARL3_HUMAN | Rap-GAP.                      | 3  | TTTCAGCAATG  | 0.468 |
| + | 2  | 263     | _p.R59Q DNM1_u       | NM_004408    | NP_004399    | Q05193 | DYN1_HUMAN  |                               | 2  | GCCTCGAGGATC | 0.617 |
| + | 7  | 977     | p.R297Q DNM1_u       | NM_004408    | NP_004399    | Q05193 | DYN1_HUMAN  |                               | 2  | GCTCGGAACA   | 0.587 |
| + | 14 | 1852    | _p.R592H SPTAN1      | NM_003127    | NP_003118    | Q13813 | SPTA2_HUMAN | Spectrin 7.                   | 10 | TTTTCCGTGATC | 0.493 |
| + | 11 | 1037    | o.R276W USP20_u      | NM_001110303 | NP_001103773 | Q9Y2K6 | UBP20_HUMAN |                               | 2  | GTCACCGGAGC  | 0.662 |
| + | 3  | 501     | 11mbx.1_Missense     | NM_001136557 | NP_001130029 | Q5VW38 | GP107_HUMAN |                               | 1  | TAGACCGTACA  | 0.393 |
| + | 10 | 1341    | nzj.1_Missense_IV    | NM_013318    | NP_037450    | Q5JSZ5 | PRC2B_HUMAN |                               | 0  | GACTCGAGAGG  | 0.592 |
| + | 9  | 998     | 0ncu.2_RNA CSF:      | NM_001161529 | NP_001155001 | P15509 | CSF2R_HUMAN | ællular (Potential).          | 2  | TACCCTACGT   | 0.582 |
| - | 2  | 1660    | 3ED1_uc004cqh.1      | NM_004729    | NP_004720    | O96006 | ZBED1_HUMAN |                               | 0  | GAAGCGGAGAG  | 0.622 |
| + | 4  | 906     | mij.1_Missense_M     | NM_014728    | NP_055543    | Q14CM0 | FRPD4_HUMAN | PDZ.                          | 13 | CCAGAGAGCGG  | 0.512 |
| + | 7  | 1026    | p.R304Q PRPS2_       | NM_002765    | NP_002756    | P11908 | PRPS2_HUMAN |                               | 0  | AATCCGAAGGA  | 0.458 |
| - | 15 | 2104    | 3R_uc004dea.2_lr     | NM_001034853 | NP_001030025 | Q92834 | RPGR_HUMAN  | Glu-rich.                     | 1  | TGCTTCTCCCA  | 0.373 |
| - | 3  | 567     | j.1_Missense_Mut:    | NM_000169    | NP_000160    | P06280 | AGAL_HUMAN  |                               | 0  | AAATGTCGTAGT | 0.438 |
| + | 4  | 204     | æe_Mutation_p.R5E    | NM_006649    | NP_006640    | Q9BVJ6 | UT14A_HUMAN | Potential.                    | 2  | CAGGCGGAAAT  | 0.428 |
| + | 7  | 898     | gs.1_Missense_Mi     | NM_001129765 | NP_001123237 | Q15738 | NSDHL_HUMAN |                               | 0  | TTGGTACCCATC | 0.582 |
| + | 5  | 829     | vij.2_Missense_Mi    | NM_182752    | NP_877429    | Q5T0D9 | TPRGL_HUMAN |                               | 0  | ACGTGGGACTC  | 0.547 |
| - | 4  | 953     | pa.1_Missense_M      | NM_018948    | NP_061821    | Q9UJM3 | ERRFI_HUMAN |                               | 1  | GATTTGGATCTC | 0.483 |
| - | 2  | 253     | o.S46R MTHFR_ur      | NM_005957    | NP_005948    | P42898 | MTHR_HUMAN  |                               | 0  | CTCTCACTGCC  | 0.612 |
| - | 2  | 1354    | atl.1_Missense_M     | NM_138346    | NP_612355    | Q8IYS2 | K2013_HUMAN | ællular (Potential).          | 1  | GGTCTCGCTCC  | 0.642 |
| + | 11 | 9704    | p.1_Missense_Mu      | NM_015001    | NP_055816    | Q96T58 | MINT_HUMAN  |                               | 15 | TGTCGCTCGAG  | 0.617 |
| + | 20 | 2284    | æe_Mutation_p.A4f    | NM_018125    | NP_060595    | Q9HCE6 | ARGAL_HUMAN |                               | 3  | ACTGGCCAAC   | 0.607 |
| - | 12 | 1224    | æense_Mutation_p.    | NM_017707    | NP_060177    | Q8TDY4 | ASAP3_HUMAN | PH.                           | 3  | CACGGGTCACC  | 0.607 |

rs143564742



|   |    |      |                   |              |              |        |             |                                |      |               |       |             |
|---|----|------|-------------------|--------------|--------------|--------|-------------|--------------------------------|------|---------------|-------|-------------|
| + | 4  | 328  | hm.2_Missense_IV  | NM_000975    | NP_000966    | P62913 | RL11_HUMAN  |                                | 1    | ATACTGGAAACTT | 0.428 |             |
| - | 3  | 612  | blg.1_Missense_IV | NM_032513    | NP_115902    | Q9BRI3 | ZNT2_HUMAN  | ical; (Potential).             | 0    | CCGACGTGATC   | 0.607 | rs148861822 |
| - | 3  | 316  | l_intron UBXN11_u | NM_183008    | NP_892120    | Q5T124 | UBX11_HUMAN |                                | 1    | CAGGGGCACTT   | 0.547 |             |
| + | 2  | 759  |                   | NM_005281    | NP_005272    | P46089 | GPR3_HUMAN  | lasmic (Potential).            | 1    | TCTGCCGCCATC  | 0.597 |             |
| + | 10 | 1834 | p.V556M GMEB1_    | NM_006582    | NP_006573    | Q9Y692 | GMEB1_HUMAN |                                | 0    | ACAATGTGGAG   | 0.413 |             |
| + | 12 | 2965 | _Mutation_p.R914  | NM_005119    | NP_005110    | Q9Y2W1 | TR150_HUMAN |                                | 9    | GTTCCGGAATC   | 0.607 |             |
| - | 6  | 692  | H2_uc010oql.1_lr  | NM_003738    | NP_003729    | Q9Y6C5 | PTC2_HUMAN  | ellular (Potential).           | 18   | CAAAGGGACCC   | 0.642 |             |
| + | 5  | 589  | ym.2_Missense_IV  | NM_000779    | NP_000770    | P13584 | CP4B1_HUMAN |                                | 2    | AGTGGGAAGAG   | 0.567 |             |
| + | 3  | 1514 | orf175_uc010oof.1 | NM_001039464 | NP_001034553 | Q68CQ1 | HEAT8_HUMAN |                                | 0    | CAACCCCGCAG   | 0.597 |             |
| - | 5  | 985  | IQ3_uc001dfz.3_f  | NM_001105659 | NP_001099129 | A6PVS8 | LRIQ3_HUMAN |                                | 2    | TATCTTCATACC  | 0.299 |             |
| + | 3  | 551  | .1_intron ST6GALI | NM_030965    | NP_112227    | Q9BVH7 | SIA7E_HUMAN | lenal (Potential).             | 2    | ATGACGCCCCG   | 0.622 | rs144853725 |
| + | 5  | 656  | se_Mutation_p.R84 | NM_182976    | NP_892021    | Q5BKZ1 | ZN326_HUMAN | Gly-rich.                      | 1    | GCTCTCGGGGG   | 0.502 |             |
| + | 6  | 730  | td.2_Missense_Mt  | NM_003729    | NP_003720    | O00442 | RTC1_HUMAN  |                                | 0    | FTGTTCGAATGT  | 0.378 | rs139397880 |
| + | 12 | 2283 |                   | NM_001010898 | NP_001010898 | Q9H1V8 | S6A17_HUMAN | ellular (Potential).           | 2    | CTGCCGAGCGC   | 0.662 |             |
| + | 5  | 1008 | _Mutation_p.T276  | NM_001142782 | NP_001136254 | Q5TCQ9 | MAGI3_HUMAN | ylate kinase-like.             | 6    | CCAAACAAATAC  | 0.428 |             |
| - | 2  | 96   |                   | NM_005621    | NP_005612    | P80511 | S10AC_HUMAN |                                | 0    | AATCCCTCCAC   | 0.473 |             |
| + | 3  | 584  |                   | NM_020387    | NP_065120    | P57735 | RAB25_HUMAN |                                | 0    | TCGTCTCATGT   | 0.597 |             |
| + | 5  | 1565 |                   | NM_001080426 | NP_001073895 | Q5VZP5 | DUS27_HUMAN |                                | 3    | GGACAGCGTGG   | 0.562 |             |
| - | 1  | 443  | _p.P121L TNR_ucl  | NM_003285    | NP_003276    | Q92752 | TENR_HUMAN  |                                | 11   | TTTTTGGGGAAG  | 0.592 |             |
| + | 2  | 1333 | se_Mutation_p.R57 | NM_020318    | NP_064714    | Q9BXP8 | PAPP2_HUMAN |                                | 16   | AGGTTCGAAGA   | 0.567 |             |
| - | 13 | 2350 | d.1_Missense_Mu   | NM_004319    | NP_004310    | O14525 | ASTN1_HUMAN |                                | 15   | TTTCCCCACAG   | 0.542 |             |
| - | 7  | 841  | _p.R21* CHI3L1_u  | NM_001276    | NP_001267    | P36222 | CH3L1_HUMAN |                                | 1    | ACCTCGGAACA   | 0.572 | rs151205460 |
| - | 3  | 381  | bz.2_Missense_M   | NM_002644    | NP_002635    | P01833 | PIGR_HUMAN  | 1. Extracellular (Potential).  | 3    | TGAGGGTTATG   | 0.577 |             |
| - | 8  | 1732 | kv.2_Missense_Mt  | NM_206933    | NP_996816    | O75445 | USH2A_HUMAN | nal. Extracellular (Potential) | 26   | GCCACGGGAAT   | 0.348 |             |
| + | 3  | 445  |                   | NM_183062    | NP_898885    | A1L453 | PRS38_HUMAN | peptidase S1.                  | 2    | TCGGAGGTGAC   | 0.572 |             |
| + | 6  | 1832 | lhvs.1_Missense_I | NM_032435    | NP_115811    | Q5TCX8 | M3KL4_HUMAN |                                | 8    | GATAACCGTGC   | 0.502 |             |
| - | 2  | 732  |                   | NM_022469    | NP_071914    | Q9H772 | GREM2_HUMAN | CTCK.                          | 0    | TCACCTTCTGG   | 0.577 |             |
| + | 1  | 376  |                   | NM_001004698 | NP_001004698 | A6NFC9 | OR2W5_HUMAN |                                | 3    | TGGCCGTCTGC   | 0.587 |             |
| + | 11 | 1650 | l10qct.1_Missense | NM_012443    | NP_036575    | O75602 | SPAG6_HUMAN |                                | 1    | TGGACAGCTATC  | 0.353 |             |
| + | 10 | 987  | DSS1_uc010qdf.1   | NM_014317    | NP_055132    | Q5T2R2 | DPS1_HUMAN  |                                | 0    | CACCTCGTGT    | 0.478 |             |
| - | 1  | 852  |                   | NM_001034842 | NP_001030014 | Q3KNS1 | PTHD3_HUMAN |                                | 4    | TTCCCTTTTCCC  | 0.627 |             |
| + | 3  | 530  | _Mutation_p.R114  | NM_020975    | NP_066124    | P07949 | RET_HUMAN   | ellular (Potential).           | 451  | CAGACCGCGGC   | 0.627 |             |
| - | 4  | 718  | iAP22_uc010qgl.1  | NM_021226    | NP_067049    | Q7Z5H3 | RHG22_HUMAN | PH.                            | 1    | TCGGCGGATGG   | 0.677 | rs140701623 |
| - | 5  | 1942 | iT2_uc001jvl.1_5F | NM_003635    | NP_003626    | P52849 | NDST2_HUMAN | Heparan sulfate N-deacetyl     | 1    | TTTGCGGTGCT   | 0.577 |             |
| + | 6  | 1414 |                   | NM_000314    | NP_000305    | P60484 | PTEN_HUMAN  | atase tensib.Y27_N212>Y        | 2334 | TGAAAGGGAC    | 0.413 |             |
| + | 2  | 1004 | nx.1_Missense_Mt  | NM_016341    | NP_057425    | Q9P212 | PLCE1_HUMAN |                                | 3    | TTTTATGAAATGT | 0.398 |             |
| + | 6  | 571  | _p.S17N LCOR_u    | NM_015652    | NP_056467    | Q8N655 | CJ012_HUMAN |                                | 2    | AAATAGCTCTAC  | 0.522 |             |
| + | 38 | 5350 | .R1700C GBF1_uc   | NM_004193    | NP_004184    | Q92538 | GBF1_HUMAN  |                                | 2    | GGAACGCATT    | 0.552 |             |
| - | 13 | 1670 | lycc.2_Missense_  | NM_021924    | NP_068743    | Q9HBB8 | CDHR5_HUMAN | ellular (Potential).           | 0    | CACCCGGGGGC   | 0.677 |             |
| + | 6  | 761  |                   | NM_002457    | NP_002448    | Q02817 | MUC2_HUMAN  |                                | 2    | GGAGCGTATC    | 0.706 |             |
| + | 1  | 451  |                   | NM_001001480 | NP_001001480 | Q701N2 | KRA55_HUMAN | repeats of C-C-X-P.            | 1    | GGGGGGCTGTG   | 0.692 |             |
| - | 1  | 478  |                   | NM_001004052 | NP_001004052 | Q96RD2 | O52B2_HUMAN | Name=4; (Potential).           | 0    | GACTGGGAAGA   | 0.517 |             |
| - | 10 | 1641 | ew.1_Missense_M   | NM_001001991 | NP_001001991 | Q6UXH9 | PAMR1_HUMAN | peptidase S1.                  | 2    | CATCCCGGTCA   | 0.527 |             |
| - | 1  | 280  |                   | NM_001005282 | NP_001005282 | Q8NGP6 | OR5M8_HUMAN | ellular (Potential).           | 1    | GGCAGGATAGG   | 0.463 |             |
| - | 5  | 2828 | .A839G TNKS1Bf    | NM_033396    | NP_203754    | Q9C0C2 | TB182_HUMAN | Acidic.                        | 1    | CATCTGCCTCT   | 0.577 |             |
| + | 12 | 1236 |                   | NM_002559    | NP_002550    | P56373 | P2RX3_HUMAN | lasmic (Potential).            | 0    | GCAGTCCACCG   | 0.612 |             |
| + | 1  | 340  |                   | NM_001005283 | NP_001005283 | Q8NGE9 | OR9Q2_HUMAN | Name=3; (Potential).           | 4    | GTACTCTTCTGT  | 0.592 |             |

|   |    |      |                   |              |              |        |             |                             |    |                |       |             |
|---|----|------|-------------------|--------------|--------------|--------|-------------|-----------------------------|----|----------------|-------|-------------|
| + | 1  | 845  |                   | NM_001004728 | NP_001004728 | Q8NGJ0 | OR5A1_HUMAN | Name=7; (Potential).        | 2  | TCTATTCATTGGT  | 0.483 |             |
| - | 5  | 6754 | IAK_uc001ntk.1_lr | NM_001620    | NP_001611    | Q09666 | AHNK_HUMAN  |                             | 19 | :CACATCCACACT  | 0.498 |             |
| + | 4  | 483  | 18BP_uc001orh.1   | NM_001039659 | NP_001034748 | O95998 | I18BP_HUMAN | ]-like C2-type.             | 0  | TGGAAGTGACC    | 0.607 |             |
| + | 7  | 1168 | \_uc009yyx.2_Spli | NM_213621    | NP_998786    | P46098 | 5HT3A_HUMAN |                             | 0  | TCATTGGTAAGGC  | 0.597 |             |
| + | 13 | 4675 |                   | NM_005422    | NP_005413    | O75443 | TECTA_HUMAN | VWFD 4.                     | 10 | ACGACCGGAAC    | 0.537 |             |
| + | 14 | 1950 |                   | NM_003105    | NP_003096    | Q92673 | SORL_HUMAN  | cellular (Potential).       | 15 | GAGTTCCTGCA    | 0.537 |             |
| + | 2  | 517  | ?CR1_uc009zhu.2   | NM_058169    | NP_477517    | Q969J3 | L12R1_HUMAN |                             | 1  | AACGATCCCGAT   | 0.473 |             |
| + | 7  | 891  | .172M PPFIBP1_u   | NM_003622    | NP_003613    | Q86W92 | LIPB1_HUMAN | Potential.                  | 5  | TTGGATCTGATG   | 0.358 |             |
| + | 5  | 1094 | e_Mutation_p.R33  | NM_001714    | NP_001705    | Q96G01 | BICD1_HUMAN | Potential.                  | 2  | AGAGCGGGAAA    | 0.502 |             |
| + | 19 | 2303 | nn.1_Missense_M   | NM_001843    | NP_001834    | Q12860 | CNTN1_HUMAN | nectin type-III 2.          | 9  | CCCTTTGTCAAG   | 0.373 |             |
| + | 8  | 1073 | e_Mutation_p.P23  | NM_032256    | NP_115632    | Q9H0C3 | TM117_HUMAN |                             | 0  | GGCCCGGGGC     | 0.378 | rs141562455 |
| - | 13 | 1742 | p.P410L CALCOC    | NM_020898    | NP_065949    | Q9P1Z2 | CACO1_HUMAN | NB1 binding site) (By simil | 1  | CTGCCGGGCAG    | 0.557 |             |
| + | 3  | 1253 |                   | NM_032786    | NP_116175    | Q96K80 | ZC3HA_HUMAN | Pro-rich.                   | 0  | CCCACCCCCAC    | 0.627 |             |
| + | 11 | 1023 | r_p.T150 NUP107   | NM_020401    | NP_065134    | P57740 | NU107_HUMAN |                             | 1  | TGCATACCTTAA   | 0.318 |             |
| - | 16 | 1764 | se_Mutation_p.I55 | NM_024953    | NP_079229    | Q14CX7 | NAA25_HUMAN |                             | 3  | CTTGAATAATATA  | 0.383 |             |
| - | 55 | 7518 |                   | NM_006836    | NP_006827    | Q92616 | GCN1L_HUMAN |                             | 4  | TGCCGGCACAA    | 0.587 |             |
| + | 12 | 2036 | ot.2_Missense_Mu  | NM_014938    | NP_055753    | Q9HAP2 | MLXIP_HUMAN |                             | 2  | AGGTCGGGACT    | 0.627 |             |
| - | 1  | 469  | t81_uc001ucw.1_li | NM_177551    | NP_808219    | Q8TDS4 | HCAR2_HUMAN | lasmic (Potential).         | 0  | GGTGGGGATGG    | 0.567 |             |
| - | 1  | 550  | t81_uc001ucw.1_li | NM_006018    | NP_006009    | P49019 | HCAR3_HUMAN | lasmic (Potential).         | 2  | GGTGGGGATGG    | 0.562 |             |
| + | 21 | 4426 | G1463D EP400_u    | NM_015409    | NP_056224    | Q96L91 | EP400_HUMAN |                             | 12 | ACAGGGCCCGC    | 0.647 |             |
| - | 2  | 140  |                   | NM_006001    | NP_005992    | Q13748 | TBA3C_HUMAN |                             | 5  | GGGCTGAATTC    | 0.547 |             |
| + | 2  | 1349 |                   | NM_153456    | NP_703157    | Q8IZP7 | H6ST3_HUMAN | renal (Potential).          | 2  | GCAGCGAGAGC    | 0.612 |             |
| + | 1  | 327  | i_p.D26A ARHGEF   | NM_001113511 | NP_001106983 | Q14155 | ARHG7_HUMAN | CH.                         | 7  | CTCGGACCCGG    | 0.617 |             |
| - | 1  | 1937 |                   | NM_032135    | NP_115511    | Q5H9T9 | FSCB_HUMAN  | Ala-rich.                   | 9  | GAGACTGAGCT    | 0.498 |             |
| + | 3  | 835  | isa.1_Missense_M  | NM_006255    | NP_006246    | P24723 | KPCL_HUMAN  | l-ester/DAG-type 1.         | 6  | GGCCACGTATCT   | 0.512 |             |
| + | 9  | 1132 | p.G285R MTHFD     | NM_005956    | NP_005947    | P11586 | C1TC_HUMAN  | dehydrogenase and cycl      | 2  | CAAATGGGAGA    | 0.478 |             |
| - | 3  | 265  | IA1_uc001ybx.1_l  | NM_178013    | NP_821092    | Q86XR5 | PRIMA_HUMAN | cellular (Potential).       | 2  | CCTggggcggagag | 0.373 |             |
| + | 8  | 994  | e_Mutation_p.G18  | NM_001112726 | NP_001106197 | Q9Y4F5 | K0284_HUMAN |                             | 1  | TGGGGCGGGAG    | 0.622 |             |
| + | 6  | 529  | p.R142H CYFIP1    | NM_014608    | NP_055423    | Q7L576 | CYFP1_HUMAN |                             | 9  | GAGGCCTGT      | 0.562 |             |
| + | 1  | 3007 |                   | NM_018958    | NP_061831    | Q9NZP6 | CO002_HUMAN |                             | 8  | GGAAGGAGGAC    | 0.498 |             |
| - | 20 | 2408 |                   | NM_178034    | NP_828848    | Q86XP0 | PA24D_HUMAN | PLA2c.                      | 2  | TAGGTCATGTT    | 0.657 |             |
| - | 7  | 872  | lk.1_Missense_Mu  | NM_174916    | NP_777576    | Q8IWW7 | UBR1_HUMAN  |                             | 1  | CAGCCCGACGA    | 0.383 |             |
| + | 4  | 3279 |                   | NM_002373    | NP_002364    | P78559 | MAP1A_HUMAN |                             | 9  | GAGCTGTGGAA    | 0.507 |             |
| - | 3  | 454  | 01zsj.2_Missense_ | NM_172095    | NP_742093    | Q96P56 | CTSR2_HUMAN | lasmic (Potential).         | 1  | TCTGGGCATGT    | 0.498 |             |
| - | 12 | 1195 | ief.1_Missense_Mi | NM_032892    | NP_116281    | Q726J6 | FRMD5_HUMAN |                             | 1  | TATTTCCGGTG    | 0.488 |             |
| + | 13 | 1657 | vz.2_Missense_Mi  | NM_153618    | NP_705871    | Q8NFY4 | SEM6D_HUMAN | tracellular (Potential).    | 4  | GACCCTACCAG    | 0.512 |             |
| + | 9  | 1999 | on.2_Missense_Mi  | NM_000875    | NP_000866    | P08069 | IGF1R_HUMAN | nectin type-III 2.          | 8  | GCAGCGGCAGC    | 0.557 | rs61731172  |
| - | 8  | 2014 | p.H575Y LINS1_u   | NM_001040614 | NP_001035704 | Q8NG48 | LINES_HUMAN |                             | 0  | AACGATGGGGTA   | 0.473 |             |
| + | 6  | 554  | yh.1_Missense_M   | NM_000303    | NP_000294    | O15305 | PMM2_HUMAN  |                             | 1  | TCTACGGAAA     | 0.358 | rs104894526 |
| + | 8  | 1079 | p.V302I ABCC1_L   | NM_004996    | NP_004987    | P33527 | MRP1_HUMAN  | Cytoplasmic.                | 4  | TTGATCGTCAAG   | 0.527 |             |
| - | 4  | 398  | _p.R63Q ACSM2E    | NM_182617    | NP_872423    | Q68CK6 | ACS2B_HUMAN |                             | 5  | GGAGTCGCTTG    | 0.512 |             |
| - | 32 | 4567 |                   | NM_017539    | NP_060009    | Q8TD57 | DYH3_HUMAN  | .1 (By similarity).         | 18 | GGTTGGTTCA     | 0.517 |             |
| - | 11 | 1030 | uc002diq.3_Intron | NR_003370    |              |        |             |                             | 0  | TCTGAGGATAC    | 0.338 | rs141895991 |
| - | 6  | 982  | 41K RABEP2_uc0    | NM_024816    | NP_079092    | Q9H5N1 | RABE2_HUMAN | Potential.                  | 3  | CGCTCGCGAC     | 0.562 |             |
| + | 14 | 4932 |                   | NM_014712    | NP_055527    | O15047 | SET1A_HUMAN | n with CFP1. Pro-rich.      | 3  | ccTACGAGCCAC   | 0.398 |             |
| + | 4  | 2173 |                   | NM_003414    | NP_003405    | Q14586 | ZN267_HUMAN |                             | 4  | TCTACTGGAG     | 0.453 |             |
| - | 2  | 503  | _RNA SIAH1_uc00   | NM_003031    | NP_003022    | Q8IUQ4 | SIAH1_HUMAN | AH-type. SBD.               | 1  | GGCACGGACAG    | 0.478 |             |

|   |    |       |                      |              |              |        |             |                            |    |               |       |             |
|---|----|-------|----------------------|--------------|--------------|--------|-------------|----------------------------|----|---------------|-------|-------------|
| + | 9  | 937   |                      | NM_033119    | NP_149110    | Q969G9 | NKD1_HUMAN  |                            | 0  | .CAGCCGCTGG   | 0.562 | rs142743935 |
| - | 29 | 4778  | 1L2_uc002fgg.1_l     | NM_052892    | NP_443124    | Q7Z442 | PK1L2_HUMAN | cellular (Potential).      | 3  | .TCACCTCCTGCC | 0.572 |             |
| + | 7  | 1007  | voj.1_Missense_h     | NM_014732    | NP_055547    | O60268 | K0513_HUMAN |                            | 1  | .GGGAAGACGAG  | 0.582 |             |
| - | 6  | 1841  | tn.1_Missense_Mu     | NM_052928    | NP_443160    | Q81YR2 | SMYD4_HUMAN | SET.                       | 5  | ACGCCCGGATG   | 0.577 |             |
| - | 2  | 741   | id.1_Missense_Mu     | NM_017575    | NP_060045    | Q86US8 | EST1A_HUMAN | n with telomeric DNA.      | 4  | .TCGTGGGTTTCC | 0.612 |             |
| - | 36 | 5871  | xi.2_Missense_Mu     | NM_015113    | NP_055928    | O43149 | ZZEF1_HUMAN |                            | 4  | GGCTCCGCAGG   | 0.597 |             |
| + | 7  | 1053  | xi.2_Mutation_p.R28f | NM_001042    | NP_001033    | P14672 | GTR4_HUMAN  | plasmic (Potential).       | 0  | .CCCACCGGCAG  | 0.637 | rs140743598 |
| - | 37 | 5569  | uc002gml.1_Intron    | NM_017533    | NP_060003    | Q9Y623 | MYH4_HUMAN  | Potential.                 | 13 | .GGCCTCCAGTT  | 0.527 |             |
| - | 26 | 3396  | xi.2_Missense_Mutati | NM_001100112 | NP_001093582 | Q9UKX2 | MYH2_HUMAN  | Potential.                 | 14 | .CAAACCTCTTCC | 0.328 |             |
| - | 4  | 821   |                      | NM_031898    | NP_114104    | Q9BXF9 | TEKT3_HUMAN |                            | 2  | .ATCGTGAAGTAC | 0.398 |             |
| - | 6  | 2088  |                      | NM_020787    | NP_065838    | Q9P2J8 | ZN624_HUMAN | 2H2-type 15.               | 2  | TACATTTATATGG | 0.393 |             |
| + | 1  | 615   | xi.2_Missense_M      | NM_031456    | NP_113644    | Q5XX13 | FBW10_HUMAN |                            | 1  | GAACAGCACCC   | 0.448 |             |
| + | 16 | 2007  | xi.2_Mutation_p.R28f | NM_020791    | NP_065842    | Q7L7X3 | TAOK1_HUMAN | Potential.                 | 4  | .TTCTTCGACGTC | 0.443 |             |
| - | 11 | 4123  |                      | NM_001004334 | NP_001004334 | Q6PRD1 | GP179_HUMAN | plasmic (Potential).       | 3  | .TTCTGGGCCAG  | 0.607 |             |
| - | 14 | 1622  | xi.2_Mutation_p.R28f | NM_020405    | NP_065138    | Q81UK5 | PXDC1_HUMAN | plasmic (Potential).       | 3  | .AACTTCATGGCT | 0.627 |             |
| - | 1  | 150   |                      | NM_032524    | NP_115913    | Q9BYR3 | KRA44_HUMAN | :-C-[GRQVCH]-[SPT]- [VS1   | 0  | TGGGGCGGCAG   | 0.652 |             |
| + | 12 | 3079  | uc002irv.1_Missense  | NM_018896    | NP_061496    | O43497 | CAC1G_HUMAN | cellular (Potential),III.  | 1  | .CAGACCGGAAC  | 0.607 |             |
| - | 2  | 1041  |                      | NM_004645    | NP_004636    | P38432 | COIL_HUMAN  |                            | 1  | .CCGCAGCACAC  | 0.552 |             |
| + | 2  | 1375  | xi.2_Missense_Mu     | NM_000891    | NP_000882    | P63252 | IRK2_HUMAN  | plasmic (By similarity).   | 0  | .CCACCGCTATG  | 0.493 |             |
| + | 3  | 1747  |                      | NM_000346    | NP_000337    | P48436 | SOX9_HUMAN  |                            | 0  | .GCCAGGGCACC  | 0.647 |             |
| - | 2  | 88    | 1_5'UTR GGA3_u       | NM_138619    | NP_619525    | Q9NZ52 | GGA3_HUMAN  | o ARF1 (in long isoform).  | 2  | .GTATTCACAGTC | 0.512 |             |
| + | 16 | 2317  | xi.2_Mutation_p.R28f | NM_014738    | NP_055553    | Q12767 | K0195_HUMAN |                            | 1  | .GCCTCCCTCA   | 0.612 |             |
| + | 4  | 595   |                      | NM_001080419 | NP_001073888 | Q9C0B0 | UNK_HUMAN   |                            | 0  | .CACCTTCGTTAC | 0.567 |             |
| - | 19 | 2165  | F1_uc002jqd.1_Mi     | NM_001080542 | NP_001074011 | Q8TES7 | FBF1_HUMAN  |                            | 0  | .GATGCGGCTTC  | 0.612 |             |
| - | 11 | 1352  | p.S258P PPP4R1       | NM_001042388 | NP_001035847 | Q8TF05 | PP4R1_HUMAN |                            | 1  | .ATTCTGAGGACA | 0.443 |             |
| - | 4  | 3359  | xi.2_Mutation_p.H1   | NM_015461    | NP_056276    | Q96K83 | ZN521_HUMAN | 2H2-type 24.               | 7  | TCCCATGGATTT  | 0.532 |             |
| - | 9  | 1251  | vi.3_Missense_Mu     | NM_001941    | NP_001932    | Q14574 | DSC3_HUMAN  | Extracellular (Potential). | 4  | CATTTTCCTCTAC | 0.274 |             |
| + | 14 | 2147  | xi.2_Mutation_p.R28f | NM_001944    | NP_001935    | P32926 | DSG3_HUMAN  | plasmic (Potential).       | 9  | .TTCAGGAAATC  | 0.353 |             |
| + | 3  | 1195  | xi.2_Mutation_p.R28f | NR_024565    |              |        |             |                            | 0  | .CTCAGTCCTTAT | 0.383 |             |
| + | 23 | 2522  | D4L_uc002lhb.2_f     | NM_001144967 | NP_001138439 | Q96PU5 | NED4L_HUMAN | HECT.                      | 4  | .ACATGGAATCTC | 0.428 |             |
| + | 11 | 1972  | xi.2_Missense_Mu     | NM_031891    | NP_114097    | Q9HBT6 | CAD20_HUMAN | plasmic (Potential).       | 5  | .TCGACGACGAG  | 0.577 |             |
| + | 13 | 2068  | :CHC2_uc002liq.2     | NM_017742    | NP_060212    | Q9C0B9 | ZCHC2_HUMAN |                            | 2  | .AGCCACCTGTT  | 0.403 |             |
| + | 7  | 1487  | p.E388K CDH7_u       | NM_033646    | NP_387450    | Q9ULB5 | CADH7_HUMAN | r (Potential), Cadherin 4. | 4  | .GTGTCGAAGCT  | 0.473 |             |
| + | 15 | 2824  | xi.2_Mutation_p.R28f | NM_007345    | NP_031371    | Q9UL36 | ZN236_HUMAN |                            | 4  | .CCTTCGAACCA  | 0.473 |             |
| + | 4  | 577   | P_uc002men.1_5'f     | NM_006012    | NP_006003    | Q16740 | CLPP_HUMAN  |                            | 1  | .AGCCGCCAGC   | 0.687 |             |
| + | 9  | 1019  | p.G227D PNPLA6       | NM_006702    | NP_006693    | Q81Y17 | PLPL6_HUMAN | cytoplasmic (Potential).   | 3  | .CCAGGGTCACC  | 0.687 |             |
| - | 1  | 311   |                      | NM_024690    | NP_078966    | Q8WXI7 | MUC16_HUMAN | extracellular (Potential). | 57 | .TGGCTCCTGTC  | 0.522 |             |
| + | 9  | 1005  | xi.2_Mutation_p.R28f | NM_031209    | NP_112486    | Q9BXR0 | TGT_HUMAN   |                            | 1  | .CAGCCGCGCCT  | 0.672 |             |
| + | 11 | 1343  |                      | NM_023944    | NP_076433    |        |             |                            | 7  | GGGTCCATCAC   | 0.552 |             |
| + | 13 | 2217  | p.R689W MYO9B        | NM_004145    | NP_004136    | Q13459 | MYO9B_HUMAN | rosin head-like.           | 1  | .TGCTCCGGGCT  | 0.711 |             |
| + | 10 | 1554  |                      | NM_000453    | NP_000444    | Q92911 | SC5A5_HUMAN | ical; (Potential).         | 4  | .TGGCAGCCCTG  | 0.542 |             |
| + | 5  | 553   | xi.2_Missense_h      | NM_001136203 | NP_001129675 | Q96CT7 | CC124_HUMAN |                            | 0  | .GCATGCGGGCA  | 0.652 |             |
| + | 5  | 1407  | p.M329I ZNF431       | NM_133473    | NP_597730    | Q8TF32 | ZN431_HUMAN | 2H2-type 9.                | 2  | TAAGATGATTCAT | 0.378 |             |
| - | 6  | 3079  | 208_uc002nqo.1_l     | NM_007153    | NP_009084    |        |             |                            | 7  | TGAATTCCTTAT  | 0.393 |             |
| - | 5  | 2181  | hb.1_Missense_M      | NM_032689    | NP_116078    | Q96SK3 | ZN607_HUMAN |                            | 0  | TCTTACCACTGT  | 0.413 |             |
| + | 89 | 12368 | p.V4075I RYR1_L      | NM_000540    | NP_000531    | P21817 | RYR1_HUMAN  |                            | 12 | .ACTACGTAACG  | 0.493 |             |
| - | 5  | 546   | iu.1_Missense_Mu     | NM_172139    | NP_742151    | Q8IZI9 | IL28B_HUMAN |                            | 0  | TGAGGAGGGGG   | 0.577 |             |

|   |     |       |                                                       |              |              |        |              |                                |     |               |       |             |
|---|-----|-------|-------------------------------------------------------|--------------|--------------|--------|--------------|--------------------------------|-----|---------------|-------|-------------|
| + | 8   | 2009  | p.N629DJCEACA                                         | NM_004363    | NP_004354    | P06731 | CEAM5_HUMAN  | Ig-like 7.                     | 2   | CGTATCAATGGG  | 0.507 |             |
| - | 4   | 1311  | i.3_Missense_Mut                                      | NM_006494    | NP_006485    | P50548 | ERF_HUMAN    |                                | 4   | GCGTCCGAGTG   | 0.692 |             |
| + | 5   | 805   |                                                       | NM_015125    | NP_055940    | Q96RK0 | CIC_HUMAN    |                                | 11  | TTCCAGGTAACG  | 0.617 |             |
| - | 5   | 1938  | uc010eif.1_Intron                                     | NM_005357    | NP_005348    | Q05469 | LIPS_HUMAN   |                                | 2   | TGGCCAGAGAC   | 0.642 |             |
| - | 4   | 992   | ense_Mutation_p.F                                     | NM_002782    | NP_002773    | Q00889 | PSG6_HUMAN   | like C2-type 2.                | 2   | CATATCGGTCCC  | 0.502 |             |
| - | 2   | 479   | af.3_Missense_Mu                                      | NM_002784    | NP_002775    | Q00887 | PSG9_HUMAN   | site (Potential). Ig-like V-ty | 2   | TCACCTCGCTTT  | 0.468 |             |
| + | 12  | 1637  | \S1_uc002pfy.2_M                                      | NM_002517    | NP_002508    | Q99742 | NPAS1_HUMAN  |                                | 0   | iGCGACGAGGAT  | 0.692 |             |
| + | 5   | 734   |                                                       | NM_014475    | NP_055290    | Q9UQ10 | DHDH_HUMAN   |                                | 0   | \TCACCGTGCAG  | 0.592 |             |
| + | 3   | 411   |                                                       | NM_014419    | NP_055234    | Q9UK85 | DKKL1_HUMAN  |                                | 0   | \GCTTCGGGGCA  | 0.612 |             |
| - | 3   | 426   | ie_Mutation_p.P13                                     | NM_017509    | NP_059979    | Q9H2R5 | KLK15_HUMAN  | peptidase S1.                  | 2   | GGTGGGGGCAA   | 0.697 |             |
| + | 4   | 672   | 5'Flank TSEN34_u                                      | NM_024075    | NP_076980    | Q9BSV6 | SEN34_HUMAN  |                                | 0   | .GCTGCCACTG   | 0.657 |             |
| + | 1   | 52    | b.1_RNA KIR3DX1_uc010yfc.1_RNA KIR3DX1_uc010yfd.1_RNA |              |              |        |              |                                | 1   | AGCTCTGAAATC  | 0.517 |             |
| - | 3   | 123   | rf51_uc002qjk.1_5'UTR C19orf51_uc002qjl.1_Missense    |              |              | Q8N9W5 | CS051_HUMAN  |                                | 0   | .CAGGAGGACCT  | 0.592 |             |
| - | 7   | 5032  | 3_uc002qnv.2_Mis                                      | NM_001146186 | NP_001139658 | Q9GZU2 | PEG3_HUMAN   |                                | 12  | \CTTCTCATCAG  | 0.537 |             |
| - | 3   | 961   | N3_uc010exu.1_Ir                                      | NM_002381    | NP_002372    | O15232 | MATN3_HUMAN  | EGF-like 1.                    | 0   | \CTTGTCGGCAT  | 0.532 |             |
| - | 6   | 1280  | iTF3C2_uc002rjw.                                      | NM_001521    | NP_001512    | Q8WUA4 | TF3C2_HUMAN  |                                | 2   | \AAACAGGAGCC  | 0.483 |             |
| - | 2   | 1386  | sm.2_Missense_M                                       | NM_133329    | NP_579875    | Q8TAE7 | KCNG3_HUMAN  | =Segment S3; (Potential).      | 1   | \ATACGGCGTGAT | 0.453 |             |
| - | 8   | 1239  |                                                       | NM_018079    | NP_060549    | Q8N5C6 | SRBD1_HUMAN  |                                | 1   | \AGTTCCGAATG  | 0.378 |             |
| + | 2   | 2135  | z.1_Missense_Mut                                      | NM_144993    | NP_659430    | O43151 | TET3_HUMAN   |                                | 0   | .CTTGGGATCTG  | 0.423 |             |
| + | 2   | 243   | sq.1_Missense_M                                       | NM_198274    | NP_938015    | Q8NB12 | SMYD1_HUMAN  | MYND-type.                     | 4   | \AGAAGGATGCT  | 0.532 |             |
| + | 23  | 5204  | ense_Mutation_p.f                                     | NM_181453    | NP_852118    | Q8IWJ2 | GCC2_HUMAN   | nteraction with RAB9A.         | 1   | \GACTTCGATAG  | 0.308 |             |
| - | 5   | 632   | i_Mutation_p.G15E                                     | NM_003466    | NP_003457    | Q06710 | PAX8_HUMAN   |                                | 2   | \GTGTCGGGGAC  | 0.458 |             |
| + | 18  | 3287  | flu.2_Missense_M                                      | NM_130773    | NP_570129    | Q8WYK1 | CNTP5_HUMAN  | Extracellular (Potential).     | 10  | \GTGTGGAGAAG  | 0.562 |             |
| + | 2   | 334   | _p.R15H SCN2A_                                        | NM_001040142 | NP_001035232 | Q99250 | SCN2A_HUMAN  |                                | 8   | \CTTCCGCTTCT  | 0.468 |             |
| - | 119 | 28287 | \uc002umz.1_Mis                                       | NM_133378    | NP_596869    | Q8WZ42 | TITIN_HUMAN  |                                | 153 | CTTTTTCTTCAG  | 0.393 |             |
| - | 46  | 16178 | N_uc010zfi.1_Intr                                     | NM_133379    | NP_596870    | Q8WZ42 | TITIN_HUMAN  |                                | 153 | GTCTTTTTCACT  | 0.378 |             |
| - | 46  | 16176 | N_uc010zfi.1_Intr                                     | NM_133379    | NP_596870    | Q8WZ42 | TITIN_HUMAN  |                                | 153 | CTTTTTCACTTA  | 0.383 |             |
| - | 46  | 10722 | N_uc010zfi.1_Intr                                     | NM_133379    | NP_596870    | Q8WZ42 | TITIN_HUMAN  |                                | 153 | \ATATTCAGGCCA | 0.383 |             |
| - | 3   | 211   | zfq.1_Missense_M                                      | NM_001003683 | NP_001003683 | P54750 | PDE1A_HUMAN  | i-binding (By similarity).     | 3   | \CTTTTCCAGCT  | 0.353 |             |
| + | 3   | 431   | usr.2_Missense_M                                      | NM_001130158 | NP_001123630 | O43795 | MYO1B_HUMAN  | osin head-like.                | 8   | \ATACCCGGTCTT | 0.353 | rs146816421 |
| + | 12  | 2712  | _p.P641S NRP2_u                                       | NM_201266    | NP_957718    | O60462 | NRP2_HUMAN   | ellular (Potential).           | 4   | \AGCTCCCTTCG  | 0.493 |             |
| - | 2   | 201   | A4_uc010zlm.1_I                                       | NM_004438    | NP_004429    | P54764 | EPHA4_HUMAN  |                                | 12  | \ACTTACCCCTC  | 0.423 | rs67977689  |
| - | 6   | 1388  | \R395W ECEL1_u                                        | NM_004826    | NP_004817    | O95672 | ECEL1_HUMAN  | renal (Potential).             | 2   | \ATACCGGTGGG  | 0.587 |             |
| - | 1   | 468   | T1A6_uc002vuu.2                                       | NM_001001394 | NP_001001394 | Q8WWF6 | DNJB3_HUMAN  |                                | 0   | CCCCCCCCAAAAT | 0.547 | rs61744897  |
| - | 2   | 246   | A1_uc002vwa.1_                                        | NM_024726    | NP_079002    | Q86XH1 | IQCA1_HUMAN  |                                | 1   | CTTTATCGAGTA  | 0.373 |             |
| + | 4   | 477   | _p.A52T XRN2_u                                        | NM_012255    | NP_036387    | Q9H0D6 | XRN2_HUMAN   |                                | 1   | \TGGAAGCAGCA  | 0.408 |             |
| + | 5   | 628   | _p.W114* MYBL2_                                       | NM_002466    | NP_002457    | P10244 | MYBB_HUMAN   | H myb-type 3.                  | 5   | \TTGCTGGACCG  | 0.612 |             |
| + | 13  | 1181  | :244K ARFGAP1_u                                       | NM_018209    | NP_060679    | Q8N6T3 | ARFG1_HUMAN  |                                | 1   | CCACCGAGAGG   | 0.662 |             |
| + | 13  | 1881  | _p.R316* MX2_uc                                       | NM_002463    | NP_002454    | P20592 | MX2_HUMAN    |                                | 2   | \AAGTCCGAGAA  | 0.403 |             |
| - | 1   | 75    |                                                       | NM_020639    | NP_065690    | P57078 | RIPK4_HUMAN  |                                | 7   | \AGGGCCCATGG  | 0.726 |             |
| + | 19  | 3814  | j.2_Missense_Mut                                      | NM_006031    | NP_006022    | O95613 | PCNT_HUMAN   |                                | 8   | \TAGCAGCCACAT | 0.587 |             |
| - | 22  | 2693  |                                                       | NM_058004    | NP_477352    | P42356 | PI4KA_HUMAN  |                                | 4   | GTGCGGACACC   | 0.587 |             |
| + | 9   | 1115  | _p.R264C UPB1_L                                       | NM_016327    | NP_057411    | Q9UBR1 | BUP1_HUMAN   | N hydrolase.                   | 2   | \TGTCCTGTAGC  | 0.542 |             |
| - | 15  | 2582  | wp.2_Missense_M                                       | NM_004737    | NP_004728    | O95461 | LARGE_HUMAN  | renal (Potential).             | 3   | \ACTCGGGCAG   | 0.567 |             |
| + | 5   | 885   |                                                       | NM_002133    | NP_002124    | P09601 | HMOX1_HUMAN  |                                | 1   | \TTCTCCGATGG  | 0.562 |             |
| - | 3   | 283   | lqa.1_5'UTR EFC                                       | NM_022785    | NP_073622    | Q5THR3 | EFCB6_HUMAN  |                                | 7   | \GTCTTGAATGT  | 0.373 |             |
| - | 14  | 1763  | laxu.1_Missense_                                      | NM_015097    | NP_055912    | B2RTR1 | B2RTR1_HUMAN |                                | 4   | AATAAATCTAAA  | 0.323 |             |

|   |    |           |                     |              |              |        |              |                                |    |               |       |             |
|---|----|-----------|---------------------|--------------|--------------|--------|--------------|--------------------------------|----|---------------|-------|-------------|
| + | 6  | 820       | XOG_uc010hhe.2_     | NM_005107    | NP_005098    | Q9Y2C4 | EXOG_HUMAN   |                                | 0  | CTACCGAACCCAC | 0.517 |             |
| + | 3  | 281       | se_Mutation_p.D8    | NM_015004    | NP_055819    | Q15024 | EXOS7_HUMAN  |                                | 0  | GTTGACTGGTC   | 0.413 |             |
| - | 3  | 1900      | qv.2_Missense_Mt    | NM_014159    | NP_054878    | Q9BYW2 | SETD2_HUMAN  |                                | 32 | ATGGAGCTGGAC  | 0.318 |             |
| - | 11 | 1496      |                     | NM_000094    | NP_000085    | Q02388 | CO7A1_HUMAN  | (NC1). Fibronectin type-III    | 11 | AACCACGGTTG   | 0.652 |             |
| + | 4  | 2380      | se_Mutation_p.R9    | NM_000839    | NP_000830    | Q14416 | GRM2_HUMAN   | cellular (Potential).          | 1  | ACGGCGGGAGG   | 0.637 |             |
| - | 3  | 1112      |                     | NM_015576    | NP_056391    | O15083 | ERC2_HUMAN   | Potential.                     | 2  | CCATTTCTCTA   | 0.473 |             |
| - | 15 | 2845      | p.V582M ADCY5_      | NM_183357    | NP_899200    | O95622 | ADCY5_HUMAN  | ical; (Potential).             | 4  | TGGCACCTCCA   | 0.622 | rs151227955 |
| + | 20 | 3500      | .R1125W KALRN_      | NM_001024660 | NP_001019831 | O60229 | KALRN_HUMAN  |                                | 6  | AGCGGCGGTTA   | 0.547 |             |
| + | 3  | 962       |                     | NM_007117    | NP_009048    | P20396 | TRH_HUMAN    |                                | 1  | CAAGCGGCAGC   | 0.567 |             |
| + | 3  | 799       | 11L_uc003fdt.2_Mi   | NM_139245    | NP_640338    | Q5SGD2 | PPM1L_HUMAN  | c (Potential). PP2C-like.      | 1  | CAAGCCTTACC   | 0.498 |             |
| - | 5  | 566       | _p.W49* B3GALN      | NM_033169    | NP_149359    | O75752 | B3GL1_HUMAN  | enial (Potential).             | 1  | TACATCCAGTTC  | 0.453 |             |
| - | 3  | 8618      | C4_uc003fvp.2_Inl   | NM_018406    | NP_060876    | Q99102 | MUC4_HUMAN   |                                | 0  | AAGAGGGGTGG   | 0.587 |             |
| - | 3  | 390       | liad.1_Missense_Iv  | NM_138461    | NP_612470    | Q96DZ7 | T4S19_HUMAN  | lasmic (Potential).            | 0  | GAGCCCACTCT   | 0.423 |             |
| - | 3  | 2904      | tron ABCA11P_uc     | NM_133474    | NP_597731    | D9N162 | D9N162_HUMAN |                                | 1  | GGTTTGTGGAC   | 0.393 |             |
| - | 12 | 2134      |                     | NM_012318    | NP_036450    | O95202 | LETM1_HUMAN  | natrix (Potential). Potential. | 1  | TTGCTGCACCC   | 0.517 |             |
| + | 51 | 7061      |                     | NM_002111    | NP_002102    | P42858 | HD_HUMAN     |                                | 4  | CCCACGCCTGC   | 0.587 |             |
| + | 3  | 1368      | P_Z_uc003gll.2_Intr | NM_080819    | NP_543009    | Q96P69 | GPR78_HUMAN  | lasmic (Potential).            | 6  | GAACCCCGCGC   | 0.672 |             |
| + | 2  | 455       | xs.1_Missense_M     | NM_018323    | NP_060793    | Q8TCG2 | P4K2B_HUMAN  |                                | 4  | TTTGCCGATATP  | 0.388 |             |
| + | 11 | 1635      | zl.1_Missense_Mt    | NM_025087    | NP_079363    | Q9H720 | PG2IP_HUMAN  |                                | 3  | TAGGGGAAAAG   | 0.418 |             |
| - | 1  | 16        |                     | NM_006168    | NP_006159    | P78426 | NKX61_HUMAN  |                                | 0  | CCCCACCGCTA   | 0.721 |             |
| + | 24 | 3935      | F_uc011cfv.1_Mis    | NM_001963    | NP_001954    | P01133 | EGF_HUMAN    | lasmic (Potential).            | 4  | GTAATGGAGCG   | 0.527 |             |
| - | 13 | 1495      | e.1_Missense_Mu     | NM_176824    | NP_789794    | Q8IWZ6 | BBS7_HUMAN   |                                | 1  | AAGAAGGAAGT   | 0.323 |             |
| - | 7  | 1202      |                     | NM_030648    | NP_085151    | Q8WTS6 | SETD7_HUMAN  | SET. p.D306N(1)                | 2  | CATATCGTAGAT  | 0.502 |             |
| + | 10 | 1623      |                     | NM_018241    | NP_060711    | Q9NVA4 | T184C_HUMAN  |                                | 0  | AAGGACGGACAC  | 0.368 |             |
| - | 8  | 1379      | \P9_uc010iqa.1_R    | NM_001039580 | NP_001034669 | Q49MG5 | MAP9_HUMAN   |                                | 2  | TGGCAGATGCA   | 0.274 |             |
| - | 11 | 1157      | p.P336L SPOCK3      | NM_016950    | NP_058646    | Q9BQ16 | TICN3_HUMAN  | oglobulin type-1.              | 3  | ACAGGGGGATA   | 0.433 |             |
| + | 11 | 2037      |                     | NM_020227    | NP_064612    | Q9NQV7 | PRDM9_HUMAN  | 2H2-type 5.                    | 6  | TTAGCCGGCAG   | 0.622 | rs111393391 |
| + | 7  | 903       | ic.1_Missense_Mu    | NM_002203    | NP_002194    | P17301 | ITA2_HUMAN   | ilar (Potential). VWFA.        | 1  | CATTCCGGAGCA  | 0.323 |             |
| - | 7  | 1132      | 3DH_uc011ctf.1_Iv   | NM_013391    | NP_037523    | Q9UI17 | M2GD_HUMAN   |                                | 4  | GTCAGGAGAAT   | 0.438 |             |
| + | 5  | 2126      | v.1_Nonsense_Mu     | NM_152405    | NP_689618    | Q8N9B5 | JMY_HUMAN    | )/EP300 (By similarity). Pot   | 0  | AACTTCAGTTG   | 0.383 |             |
| + | 8  | 1761      | 11cwm.1_Missens     | NM_005460    | NP_005451    | Q9Y6H5 | SNCAP_HUMAN  | Potential.                     | 2  | CGCTGGCCTCT   | 0.552 |             |
| + | 1  | 922       | HA6_uc003lhn.2_I    | NM_018902    | NP_061725    | Q9Y511 | PCDAB_HUMAN  |                                | 1  | TCCTCGAATTCT  | 0.577 |             |
| + | 1  | 2267      |                     | NM_018938    | NP_061761    | Q9Y5E5 | PCDB4_HUMAN  | lasmic (Potential).            | 3  | GACAGGAGACT   | 0.567 |             |
| + | 1  | 974       |                     | NM_015669    | NP_056484    | Q9Y5E4 | PCDB5_HUMAN  | Extracellular (Potential).     | 5  | TGCCCGAGAAC   | 0.498 |             |
| + | 1  | 1940      |                     | NM_015669    | NP_056484    | Q9Y5E4 | PCDB5_HUMAN  | Extracellular (Potential).     | 5  | AGCTGGTGCCCI  | 0.701 |             |
| + | 1  | 410       |                     | NM_018940    | NP_061763    | Q9Y5E2 | PCDB7_HUMAN  | r (Potential). Cadherin 1.     | 6  | CGATTCGCTTAC  | 0.473 |             |
| - | 6  | 580       | <2A_uc010jhe.2_I    | NM_171825    | NP_741960    | Q9UQM7 | KCC2A_HUMAN  | rotein kinase.                 | 1  | GCACAGCCTCC   | 0.632 |             |
| - | 24 | 3517_3518 | dk.1_Missense_Mi    | NM_015465    | NP_056280    | Q8TEQ6 | GEMI5_HUMAN  |                                | 3  | TGTGGTAAGAG   | 0.545 |             |
| + | 1  | 1595      |                     | NM_001099293 | NP_001092763 | Q2VIQ3 | KIF4B_HUMAN  | Potential.                     | 1  | CAGATGAAACTC  | 0.438 |             |
| - | 2  | 615       | FIP2_uc003lwr.2_I   | NM_001001343 | NP_001001343 | Q8TBE3 | FNDC9_HUMAN  |                                | 0  | TCGGCGCTCAT   | 0.602 |             |
| + | 4  | 799       | _p.A146T ODZ2_t     | NM_001122679 | NP_001116151 |        |              |                                | 10 | CGTCCGCCAAC   | 0.622 |             |
| - | 1  | 578       |                     | NM_001001657 | NP_001001657 | Q8NGV0 | OR2Y1_HUMAN  | cellular (Potential).          | 1  | TCTGTTCTTCT   | 0.517 |             |
| + | 21 | 2038      | ow.2_Missense_M     | NM_001040274 | NP_001035364 | Q5T4T6 | SYC2L_HUMAN  |                                | 2  | TATCTCAAAGA   | 0.333 |             |
| - | 5  | 1101      | no.1_Missense_M     | NM_003587    | NP_003578    | O60231 | DHX16_HUMAN  |                                | 4  | GTAGCGATTGGI  | 0.627 |             |
| + | 2  | 1246      | C21_uc003nsi.1_F    | NM_001010909 | NP_001010909 | Q5SSG8 | MUC21_HUMAN  | tandem repeats. 21. Extra      | 2  | CACCAACTCTG   | 0.622 | rs144550410 |
| + | 2  | 229       | 2A_uc003rxz.1_5'UTR |              |              |        |              |                                | 0  | AGAAATGCAGG   | 0.552 | rs17200172  |
| - | 22 | 7907_7908 |                     | NM_019105    | NP_061978    | P22105 | TENX_HUMAN   | nectin type-III 18.            | 0  | GCCCCAACAC    | 0.683 |             |



|   |     |       |                     |              |              |        |             |                                 |       |                |       |             |
|---|-----|-------|---------------------|--------------|--------------|--------|-------------|---------------------------------|-------|----------------|-------|-------------|
| + | 49  | 7225  |                     | NM_001371    | NP_001362    |        |             |                                 | 21    | GTGGATGCCATC   | 0.353 |             |
| + | 13  | 1807  | vg.1_Missense_M     | NM_032538    | NP_115927    | Q5TCY1 | TTBK1_HUMAN | p.G510G(2)                      | 9     | CCAGTGGCCGC    | 0.657 |             |
| + | 1   | 1572  | ze.2_Nonsense_M     | NM_001010870 | NP_001010870 | O60522 | TDRD6_HUMAN |                                 | 6     | TTTCTATTCCTCT  | 0.413 |             |
| + | 8   | 920   | pje.2_Nonsense_I    | NM_000056    | NP_000047    | P21953 | ODBB_HUMAN  |                                 | 0     | GTGATCCGAGAG   | 0.388 |             |
| + | 2   | 306   | ipll.1_Nonsense_I   | NM_015021    | NP_055836    | O60281 | ZN292_HUMAN |                                 | 4     | AAGCCCGACCT    | 0.378 |             |
| + | 8   | 3600  |                     | NM_015021    | NP_055836    | O60281 | ZN292_HUMAN |                                 | 4     | AGCATGTCTCG    | 0.418 |             |
| + | 4   | 799   | go.3_Missense_Mt    | NM_021956    | NP_068775    | Q13002 | GRIK2_HUMAN | cellular (Potential).           | 5     | CTATTCGTTTG    | 0.313 |             |
| + | 8   | 1003  | rr.1_Missense_Mut   | NM_173674    | NP_775945    | Q8N8Z6 | DCBD1_HUMAN | Extracellular (Potential).      | 1     | ACTTCAGGACC    | 0.522 |             |
| + | 2   | 379   | CT1_uc003qpc.3      | NM_025107    | NP_079383    | Q8N699 | MYCT1_HUMAN |                                 | 1     | AACTGGATTTT    | 0.517 |             |
| - | 13  | 1573  | sch.1_Missense_I    | NM_001013836 | NP_001013858 | Q9Y6D9 | MD1L1_HUMAN | interaction with NEK2.  Potenti | 2     | CCTCCCGCATG    | 0.687 | rs140460596 |
| + | 9   | 1547  | zr.2_Missense_Mt    | NM_182898    | NP_878901    | Q02930 | CREB5_HUMAN | Basic motif.                    | 2     | GAACCGGGCAG    | 0.592 |             |
| - | 2   | 1008  |                     | NM_022728    | NP_073565    | Q96NK8 | NDF6_HUMAN  |                                 | 2     | TGGGGGAGTGG    | 0.527 |             |
| - | 14  | 1893  | _p.S535L PDE1C      | NM_005020    | NP_005011    | Q14123 | PDE1C_HUMAN | ytic (By similarity).           | 4     | CTGACGAGCTG    | 0.443 |             |
| - | 7   | 668   | R2J4_uc003tjc.2_RNA |              |              |        |             |                                 | 0     | TTACTCGTCATC   | 0.667 |             |
| - | 3   | 302   | o.R36Q PHKG1_uc     | NM_006213    | NP_006204    | Q16816 | PHKG1_HUMAN | rotein kinase.                  | 1     | TCATCGCCCTG    | 0.657 |             |
| + | 4   | 1558  |                     | NM_001159522 | NP_001152994 | A8MUV8 | ZN727_HUMAN | :2H2-type 11.                   | 0     | CAAAACCTTTAC   | 0.428 |             |
| + | 4   | 1576  |                     | NM_001159522 | NP_001152994 | A8MUV8 | ZN727_HUMAN | :2H2-type 11.                   | 0     | CCTCAAGCCTTA   | 0.418 |             |
| - | 2   | 602   | ez.2_Missense_Mt    | NM_001259    | NP_001250    | Q00534 | CDK6_HUMAN  | rotein kinase.                  | 2     | CAGCACCGCCA    | 0.711 |             |
| + | 2   | 198   | X6AS_uc003uol.2     | NM_005222    | NP_005213    | P56179 | DLX6_HUMAN  |                                 | 2     | gcaccaccaccacG | 0.612 |             |
| - | 5   | 1128  | o.R208W ASNS_uc     | NM_133436    | NP_597680    | P08243 | ASNS_HUMAN  |                                 | 1     | ATCCCGACAGT    | 0.448 |             |
| + | 11  | 1686  |                     | NM_014916    | NP_055731    | Q8IWU2 | LMTK2_HUMAN |                                 | 16    | TCACCGTGACC    | 0.587 |             |
| + | 5   | 564   | is.1_Missense_Mt    | NM_003496    | NP_003487    | Q9Y4A5 | TRRAP_HUMAN | p.R119C(1)                      | 37    | ATGTTTCGCTTT   | 0.348 |             |
| - | 2   | 482   |                     | NM_001004323 | NP_001004323 | Q8IZ16 | CG061_HUMAN |                                 | 0     | CGCAGGGATCT    | 0.592 |             |
| + | 3   | 9003  | C17_uc010lho.1_F    | NM_001040105 | NP_001035194 | Q685J3 | MUC17_HUMAN | ch.  48.  59 X approximate t    | 27    | CTGGCGAAAGA    | 0.512 |             |
| + | 7   | 1058  |                     | NM_014390    | NP_055205    | Q7KZF4 | SND1_HUMAN  | GNase-like 2.                   | 3     | ACCATCCTTCATC  | 0.473 |             |
| - | 4   | 1455  | C3HAV1_uc003vu      | NM_020119    | NP_064504    | Q7Z2W4 | ZCCHV_HUMAN |                                 | 1     | TGGGGGCTGAT    | 0.552 |             |
| - | 15  | 1860  |                     | NM_004333    | NP_004324    | P15056 | BRAF_HUMAN  | rotein kinase_R603>I(2) p.T     | 18290 | GATTTCACTGTAC  | 0.368 |             |
| - | 1   | 293   |                     | NM_001001658 | NP_001001658 | Q8NGT5 | OR9A2_HUMAN | cellular (Potential).           | 1     | TTGAGCGATACA   | 0.473 |             |
| + | 103 | 14390 | g.2_Intron SSPO_uc  | NM_198455    | NP_940857    | A2VEC9 | SSPO_HUMAN  | SP type-1 24.                   | 0     | GGTGGCACCAT    | 0.657 |             |
| + | 6   | 1787  | rpm.2_Missense_I    | NM_004745    | NP_004736    | Q9P1A6 | DLGP2_HUMAN |                                 | 0     | ACCAGGACAGC    | 0.662 |             |
| + | 2   | 795   |                     | NM_000015    | NP_000006    | P11245 | ARY2_HUMAN  |                                 | 2     | CAGAAGGGGTT    | 0.388 |             |
| + | 16  | 2381  | bf.2_3'UTR BMP1     | NM_006129    | NP_006120    | P13497 | BMP1_HUMAN  | alcium-binding (Potential).     | 3     | ACGGCGGCTGC    | 0.587 | rs148687489 |
| + | 3   | 1153  |                     | NM_001440    | NP_001431    | O43909 | EXTL3_HUMAN | renal (Potential).              | 2     | TTCTCGTTGCC    | 0.592 |             |
| + | 14  | 1032  | _p.A278T POLB_uc    | NM_002690    | NP_002681    | P06746 | DPOLB_HUMAN |                                 | 2     | GAGTTGCAGGA    | 0.438 |             |
| + | 10  | 1760  | lissense_Mutation   | NM_184085    | NP_908973    | Q9BYV6 | TRI55_HUMAN |                                 | 5     | GATTTGAGGCT    | 0.468 |             |
| - | 3   | 219   | ense_Mutation_p.t   | NM_001738    | NP_001729    | P00915 | CAH1_HUMAN  |                                 | 2     | ATATCCCAGTC    | 0.328 |             |
| - | 8   | 2186  | p.D729N FBXO10      | NM_012166    | NP_036298    | Q9UK96 | FBX10_HUMAN |                                 | 5     | TGGGTCGTCCT    | 0.567 |             |
| - | 5   | 701   | a.1_Missense_Mut    | NM_005077    | NP_005068    | Q04724 | TLE1_HUMAN  | Gln-rich.                       | 2     | CAAATCGTATTC   | 0.353 | rs149694150 |
| + | 3   | 489   | e_Mutation_p.Q13    | NM_024077    | NP_076982    | Q96T21 | SEBP2_HUMAN |                                 | 3     | TCCCACAAGAA    | 0.383 |             |
| - | 11  | 1447  | ask.1_Splice_Site   | NM_022755    | NP_073592    | Q9H8X2 | IPPK_HUMAN  |                                 | 2     | TGCCACCTTCG    | 0.428 |             |
| - | 22  | 2523  |                     | NM_019114    | NP_061987    | Q9H329 | E41LB_HUMAN |                                 | 3     | CAGAGGGGCTC    | 0.512 |             |
| - | 11  | 1585  | ie_Mutation_p.D44   | NM_173521    | NP_775792    | Q5VXU9 | CI084_HUMAN |                                 | 2     | AGTGATCGTTAT   | 0.328 | rs41316510  |
| + | 7   | 2985  | e_Mutation_p.M5E    | NM_002581    | NP_002572    | Q13219 | PAPP1_HUMAN |                                 | 9     | GCCATGTTGAC    | 0.567 |             |
| - | 11  | 1700  | _Mutation_p.T264    | NM_001006617 | NP_001006618 | Q9BPZ7 | SIN1_HUMAN  |                                 | 4     | AGATACGTGAGT   | 0.448 |             |
| + | 11  | 1803  | f.1_Missense_Mut    | NM_004042    | NP_004033    | P54793 | ARSF_HUMAN  |                                 | 2     | CTCCATGATTTT   | 0.557 |             |
| - | 4   | 636   |                     | NM_015419    | NP_056234    | Q9NR99 | MXRA5_HUMAN | LRR 5.                          | 8     | AGATTTCTTCC    | 0.468 |             |
| - | 1   | 290   |                     | NM_203408    | NP_981953    | Q5JRC9 | FA47A_HUMAN |                                 | 5     | CTTGGGGACCT    | 0.552 |             |

|   |    |      |                   |              |              |        |                                           |      |                  |       |             |
|---|----|------|-------------------|--------------|--------------|--------|-------------------------------------------|------|------------------|-------|-------------|
| + | 5  | 1028 | e_Mutation_p.P33  | NM_003173    | NP_003164    | O43463 | SUV91_HUMAN with MECOM (By similarity,    | 0    | GTACCCCAACC      | 0.627 |             |
| - | 20 | 2517 | nip.2_Missense_M  | NM_005183    | NP_005174    | O60840 | CAC1F_HUMAN cytoplasmic (Potential),      | 6    | tctctcttctctctct | 0.289 |             |
| - | 4  | 538  | E3_uc011mon.1_I   | NM_001017931 | NP_001017931 |        |                                           | 0    | TGACCGAGTCA      | 0.373 |             |
| + | 15 | 2082 | OGT_uc004eac.2_   | NM_181672    | NP_858058    | O15294 | OGT1_HUMAN                                | 5    | CAATGGAAAAG      | 0.348 |             |
| - | 3  | 3678 |                   | NM_001008537 | NP_001008537 | Q5QGS0 | K2022_HUMAN                               | 15   | TGATATCATCATC    | 0.478 |             |
| + | 2  | 790  |                   | NM_005296    | NP_005287    | Q99677 | LPAR4_HUMAN Name=3; (Potential),          | 3    | CTCTTCTCACC      | 0.453 |             |
| + | 3  | 903  | efc.3_Missense_M  | NM_033048    | NP_149037    | Q8N123 | CPXCR_HUMAN                               | 3    | ATCAGGAAAAT      | 0.413 |             |
| + | 38 | 4112 | qq.2_Missense_M   | NM_144658    | NP_653259    | Q5JSL3 | DOC11_HUMAN                               | 3    | AAAATCGCAAA      | 0.413 |             |
| - | 2  | 527  | uc004esi.1_Intron | NM_032498    | NP_115887    | P0C7M4 | RHF2B_HUMAN                               | 0    | AGGTTCTCTCT      | 0.677 |             |
| + | 2  | 1196 | qm.1_Missense_IV  | NM_006777    | NP_006768    | Q86T24 | KAISO_HUMAN                               | 3    | AACAGGAAACAA     | 0.418 |             |
| - | 29 | 7047 | S2334N ODZ1_u     | NM_014253    | NP_055068    | Q9UKZ4 | TEN1_HUMAN ilar (Potential). YD 23.       | 23   | GGCTGCTGAAC      | 0.418 |             |
| - | 9  | 1261 | RE_uc011myd.1_    | NM_004961    | NP_004952    | P78334 | GBRE_HUMAN lasmic (Probable),             | 2    | AGCTTCTGATC      | 0.587 |             |
| - | 3  | 396  |                   |              |              | Q8N1B3 | FA58A_HUMAN                               | 0    | GCCAGCTGTGG      | 0.647 |             |
| - | 8  | 697  | jn.1_Missense_Mu  | NM_003491    | NP_003482    | P41227 | NAA10_HUMAN                               | 1    | CTCCTCGCGAC      | 0.602 |             |
| - | 7  | 804  | q.1_Missense_Mu   | NM_002436    | NP_002427    | Q00013 | EM55_HUMAN                                | 3    | CCATACTTGCC      | 0.552 |             |
| + | 6  | 625  | in.2_Missense_Mu  | NM_001215    | NP_001206    | P23280 | CAH6_HUMAN                                | 2    | TTGACGTTGAG      | 0.582 | rs140314132 |
| + | 24 | 4029 | 1_RNA UBE4B_u     | NM_001105562 | NP_001099032 | O95155 | UBE4B_HUMAN                               | 4    | TCCAGAAGCCC      | 0.537 |             |
| - | 1  | 780  | 0obf.1_Missense_  | NM_001146181 | NP_001139653 | B7ZW38 | B7ZW38_HUMAN                              | 0    | CTTCATGGAGC      | 0.458 |             |
| - | 6  | 853  | F1_uc010oce.1_Ir  | NM_017940    | NP_060410    | Q3BBV0 | NBPF1_HUMAN                               | 0    | ACTTACTGTTGT     | 0.418 |             |
| - | 8  | 949  | 1_Intron MST1P9_  | NR_002729    |              |        |                                           | 0    | GTTCCAGCAGA      | 0.662 | rs1806514   |
| + | 15 | 2179 | u_p.A467T CROCC   | NM_014675    | NP_055490    | Q5TZA2 | CROCC_HUMAN Potential.                    | 5    | AGAAGCCGAG       | 0.657 | rs2781608   |
| + | 4  | 328  | hm.2_Missense_IV  | NM_000975    | NP_000966    | P62913 | RL11_HUMAN                                | 1    | ACTGGAAACT       | 0.428 |             |
| - | 4  | 461  | .1_Missense_Muta  | NM_001127621 | NP_001121093 | Q14376 | GALE_HUMAN                                | 0    | TGACCGCCATA      | 0.557 |             |
| - | 6  | 692  | H2_uc010olg.1_Ir  | NM_003738    | NP_003729    | Q9Y6C5 | PTC2_HUMAN ellular (Potential),           | 18   | CAAAGGGACCC      | 0.642 |             |
| + | 5  | 589  | ym.2_Missense_M   | NM_000779    | NP_000770    | P13584 | CP4B1_HUMAN                               | 2    | AGTGGGAAGAG      | 0.567 |             |
| - | 2  | 96   |                   | NM_005621    | NP_005612    | P80511 | S10AC_HUMAN                               | 0    | AATCCCTCCAC      | 0.473 |             |
| + | 4  | 675  | FDPS_uc001fke.2   | NM_002004    | NP_001995    | P14324 | FPPS_HUMAN                                | 0    | GCCTGGACTGT      | 0.582 |             |
| - | 4  | 760  | _5'Flank C1orf204 | NM_001013661 | NP_001013683 | Q5VU13 | VSIG8_HUMAN Potential). Ig-like V-type 2. | 1    | GACTCCTGGTA      | 0.582 |             |
| + | 5  | 1565 |                   | NM_001080426 | NP_001073895 | Q5VZP5 | DUS27_HUMAN                               | 3    | GGACAGCGTGG      | 0.562 |             |
| - | 1  | 443  | _p.P121L TNR_ucl  | NM_003285    | NP_003276    | Q92752 | TENR_HUMAN                                | 11   | TTTTTGGGGAAG     | 0.592 |             |
| + | 2  | 1333 | se_Mutation_p.R5  | NM_020318    | NP_064714    | Q9BXP8 | PAPP2_HUMAN                               | 16   | AGGTTCGAAGA      | 0.567 |             |
| - | 13 | 2350 | d.1_Missense_Mu   | NM_004319    | NP_004310    | O14525 | ASTN1_HUMAN                               | 15   | TTTCCCACAG       | 0.542 |             |
| + | 28 | 6121 | _p.E1912V CEP35   | NM_014810    | NP_055625    | Q5VT06 | CE350_HUMAN                               | 4    | GAAAGAACTGG      | 0.353 |             |
| - | 3  | 381  | bz.2_Missense_M   | NM_002644    | NP_002635    | P01833 | PIGR_HUMAN 1. Extracellular (Potential),  | 3    | TGAGGTTATG       | 0.577 |             |
| - | 1  | 52   |                   | NM_003493    | NP_003484    | Q16695 | H31T_HUMAN                                | 0    | CTTGCGCGCG       | 0.687 |             |
| + | 6  | 1832 | lhvs.1_Missense_I | NM_032435    | NP_115811    | Q5TCX8 | M3KL4_HUMAN                               | 8    | GATAACCGTGC      | 0.502 |             |
| + | 3  | 530  | _Mutation_p.R114  | NM_020975    | NP_066124    | P07949 | RET_HUMAN ellular (Potential),            | 451  | CAGACCGCGGC      | 0.627 |             |
| - | 6  | 741  |                   | NM_002778    | NP_002769    | P07602 | SAP_HUMAN posin B-type 2.                 | 1    | GGTCCGTACAG      | 0.537 | rs150521779 |
| + | 6  | 1414 |                   | NM_000314    | NP_000305    | P60484 | PTEN_HUMAN atase tensin).Y27_N212>Y       | 2334 | TGGAAGGGAC       | 0.413 |             |
| + | 2  | 1004 | nx.1_Missense_Mi  | NM_016341    | NP_057425    | Q9P212 | PLCE1_HUMAN                               | 3    | TTTTATGAAATGT    | 0.398 |             |
| - | 9  | 1175 | se_Mutation_p.A3E | NM_024928    | NP_079204    | Q9H668 | STN1_HUMAN                                | 1    | AGAACGCTGTG      | 0.567 | rs140449924 |
| - | 1  | 776  |                   | NM_001005164 | NP_001005164 | Q8NGJ4 | O52E2_HUMAN Name=6; (Potential),          | 3    | TAAAGGAAAAG      | 0.473 |             |
| + | 2  | 717  | uc001mbe.2_Trans  | NM_001003819 | NP_001003819 | B2RNG4 | B2RNG4_HUMAN                              | 1    | CCACAGTTCC       | 0.532 |             |
| - | 1  | 478  |                   | NM_001004052 | NP_001004052 | Q96RD2 | O52B2_HUMAN Name=4; (Potential),          | 0    | GACTGGGAAGA      | 0.517 |             |
| - | 1  | 710  |                   | NM_001004461 | NP_001004461 | Q8NH74 | O10A6_HUMAN lasmic (Potential),           | 2    | AAAAGGCCTTT      | 0.443 |             |
| + | 1  | 876  |                   | NM_001005274 | NP_001005274 | Q8NH70 | O4A16_HUMAN lasmic (Potential),           | 3    | GAGATGAAAAA      | 0.318 |             |
| - | 1  | 280  |                   | NM_001005282 | NP_001005282 | Q8NGP6 | OR5M8_HUMAN ellular (Potential),          | 1    | GCCAGGATAGG      | 0.463 |             |

|   |    |           |                   |              |              |        |             |                               |    |                   |       |             |
|---|----|-----------|-------------------|--------------|--------------|--------|-------------|-------------------------------|----|-------------------|-------|-------------|
| + | 12 | 1236      |                   | NM_002559    | NP_002550    | P56373 | P2RX3_HUMAN | lasmic (Potential).           | 0  | AGCAGTCCACCG      | 0.612 |             |
| + | 1  | 340       |                   | NM_001005283 | NP_001005283 | Q8NGE9 | OR9Q2_HUMAN | Name=3; (Potential).          | 4  | FGCTACCTTCTG      | 0.592 |             |
| + | 1  | 845       |                   | NM_001004728 | NP_001004728 | Q8NGJ0 | OR5A1_HUMAN | Name=7; (Potential).          | 2  | TCTATTCATTGGT     | 0.483 |             |
| - | 4  | 365       |                   | NM_017525    | NP_059995    | Q6DT37 | MRCKG_HUMAN | rotein kinase.                | 4  | .CGAGCACATCC      | 0.602 |             |
| + | 8  | 1062      | _p.R304H KAT5_u   | NM_006388    | NP_006379    | Q92993 | KAT5_HUMAN  | C2HC-type.                    | 0  | .CGGCCGTAGTC      | 0.592 |             |
| - | 3  | 785       | in CLCF1_uc010rp  | NM_013246    | NP_037378    | Q9UBD9 | CLCF1_HUMAN |                               | 0  | CGAGCGCCACA       | 0.597 | rs76654399  |
| + | 2  | 433       |                   | NM_153696    | NP_710163    | Q9HBA9 | FOH1B_HUMAN |                               | 6  | AGAATACGCTTAT     | 0.328 |             |
| + | 7  | 923       | fz.2_Missense_Mt  | NM_014361    | NP_055176    | O94779 | CNTN5_HUMAN | p.G195E(1)                    | 8  | ATCTGGGAAATT      | 0.423 |             |
| + | 19 | 2656_2657 | ngb.2_Missense_IV | NM_014361    | NP_055176    | O94779 | CNTN5_HUMAN | nectin type-III 2.            | 8  | AGTTCGGAAGA       | 0.426 |             |
| + | 7  | 1168      | \_uc009yyx.2_Spli | NM_213621    | NP_998786    | P46098 | 5HT3A_HUMAN |                               | 0  | TCTATTGGTAAGG     | 0.597 |             |
| - | 2  | 1003      | _p.E299K KCNJ1_   | NM_000220    | NP_000211    | P48048 | IRK1_HUMAN  | smic (By similarity).         | 4  | ACCTCCTCTG        | 0.493 |             |
| + | 8  | 1085      |                   | NM_207345    | NP_997228    | Q6UXN8 | CLC9A_HUMAN | (Potential). C-type lectin.   | 1  | TCATAGGATTTTA     | 0.398 | rs148583174 |
| - | 3  | 1038      |                   | NM_006248    | NP_006239    |        |             |                               | 0  | AGGTTTGTTCG       | 0.612 |             |
| + | 2  | 517       | CR1_uc009zhu.2    | NM_058169    | NP_477517    | Q969J3 | L12R1_HUMAN |                               | 1  | ACGATCCCGAT       | 0.473 |             |
| + | 7  | 891       | .172M PPFIBP1_u   | NM_003622    | NP_003613    | Q86W92 | LIPB1_HUMAN | Potential.                    | 5  | TTGGATCTGATG      | 0.358 |             |
| + | 19 | 2303      | nn.1_Missense_M   | NM_001843    | NP_001834    | Q12860 | CNTN1_HUMAN | nectin type-III 2.            | 9  | CCTTTGTCAAG       | 0.373 |             |
| + | 11 | 1023      | _p.T150I NUP107   | NM_020401    | NP_065134    | P57740 | NU107_HUMAN |                               | 1  | TGCATACCTTAA      | 0.318 |             |
| + | 2  | 874       | tmt.2_Missense_IV | NM_014653    | NP_055468    | Q2TBF2 | WSCD2_HUMAN |                               | 3  | AGCCCGCTGTC       | 0.612 |             |
| - | 11 | 1302      |                   | NM_018711    | NP_061181    | Q8N4V2 | SVOP_HUMAN  | ical; (Potential).            | 0  | TCACACAGCAAG      | 0.552 |             |
| - | 16 | 1764      | se_Mutation_p.I55 | NM_024953    | NP_079229    | Q14CX7 | NAA25_HUMAN |                               | 3  | CTTGAATAATATA     | 0.383 |             |
| - | 1  | 550       | 81_uc001ucw.1_I   | NM_006018    | NP_006009    | P49019 | HCAR3_HUMAN | lasmic (Potential).           | 2  | GGTGGGGATGG       | 0.562 |             |
| - | 2  | 140       |                   | NM_006001    | NP_005992    | Q13748 | TBA3C_HUMAN |                               | 5  | GGGCTGAATTC       | 0.547 |             |
| + | 2  | 1349      |                   | NM_153456    | NP_703157    | Q8IZP7 | H6ST3_HUMAN | renal (Potential).            | 2  | GCAGCGAGAGC       | 0.612 |             |
| + | 1  | 327       | _p.D26A ARHGEF    | NM_001113511 | NP_001106983 | Q14155 | ARHG7_HUMAN | CH.                           | 7  | CTCGGACCCGG       | 0.617 |             |
| + | 9  | 1151      | n_p.E257* GMPR2   | NM_001002001 | NP_001002001 | Q9P2T1 | GMPR2_HUMAN |                               | 3  | TCATCGAGAGG       | 0.552 |             |
| - | 8  | 1710      | mk.2_Missense_M   | NM_033141    | NP_149132    | P80192 | M3K9_HUMAN  |                               | 5  | ccaggttttgctgttca | 0.333 |             |
| - | 15 | 2626      |                   | NM_001080414 | NP_001073883 | Q9P219 | DAPLE_HUMAN | Potential.                    | 3  | CAGCCGCTTGG       | 0.612 |             |
| + | 3  | 639       | m.1_Missense_Mt   | NM_182923    | NP_891553    | Q07866 | KLC1_HUMAN  |                               | 0  | AGGTTTCGTCG       | 0.537 |             |
| + | 1  | 3007      |                   | NM_018958    | NP_061831    | Q9NZP6 | CO002_HUMAN |                               | 8  | GGAAGGAGGAC       | 0.498 |             |
| - | 11 | 1570      | zfr.2_Missense_M  | NM_130901    | NP_570971    | Q8TE49 | OTU7A_HUMAN |                               | 2  | cttGCCGTTCTTG     | 0.507 |             |
| - | 20 | 2408      |                   | NM_178034    | NP_828848    | Q86XP0 | PA24D_HUMAN | PLA2c.                        | 2  | TAGGTCATGTT       | 0.657 |             |
| - | 5  | 475       |                   | NM_020764    | NP_065815    | Q8WXD9 | CSK11_HUMAN | ANK 4.                        | 2  | TCTTCCCGGAG       | 0.632 |             |
| + | 3  | 1109      | sl.3_Missense_Mut | NM_152341    | NP_689554    | Q8N4S7 | PAQR4_HUMAN | ical; (Potential).            | 0  | CGCTCGTGCCC       | 0.672 |             |
| + | 4  | 427       | ense_Mutation_p.F | NM_001010845 | NP_001010845 | Q08AH3 | ACS2A_HUMAN |                               | 3  | CAAGCGACTCC       | 0.522 |             |
| - | 4  | 398       | _p.R63Q ACSM2E    | NM_182617    | NP_872423    | Q68CK6 | ACS2B_HUMAN |                               | 5  | GGAGTCGCTTG       | 0.512 |             |
| - | 32 | 4567      |                   | NM_017539    | NP_060009    | Q8TD57 | DYH3_HUMAN  | 1 (By similarity).            | 18 | GGTTGGGTTCA       | 0.517 |             |
| - | 11 | 1030      | uc002diq.3_Intron | NR_003370    |              |        |             |                               | 0  | TCTGAGGATAC       | 0.338 | rs141895991 |
| + | 11 | 1473      | _uc010byo.1_Miss  | NM_001770    | NP_001761    | P15391 | CD19_HUMAN  | lasmic (Potential).           | 3  | .CCCAGCCGGTC      | 0.577 |             |
| + | 4  | 1324      | iu.3_Missense_Mt  | NM_138736    | NP_620073    | P09471 | GNAO_HUMAN  |                               | 2  | TCAACCGTCC        | 0.607 |             |
| - | 2  | 1122      | KIAA0895L_uc00    | NM_001040715 | NP_001035805 | Q68EN5 | K895L_HUMAN |                               | 0  | AGGCTGCAGGC       | 0.642 |             |
| + | 3  | 1006      | _5'Flank PAR6A_   | NM_016948    | NP_058644    | Q9NPB6 | PAR6A_HUMAN |                               | 1  | TGCTGGGACCT       | 0.642 |             |
| + | 13 | 1868      | p.E477K TSNAXIF   | NM_018430    | NP_060900    | Q2TAA8 | TXIP1_HUMAN |                               | 0  | AGAACGAGGGG       | 0.517 |             |
| - | 1  | 76        | p.A2V NIP7_uc00   | NM_032382    | NP_115758    | Q96MW5 | COG8_HUMAN  |                               | 1  | CGGTCGCCATC       | 0.622 | rs151318611 |
| + | 12 | 1926      | p.G441E CNTNAF    | NM_033401    | NP_207837    | Q9C0A0 | CNTP4_HUMAN | potential). Laminin G-like 2. | 2  | TCAGGATGTAT       | 0.423 |             |
| - | 29 | 4778      | 1L2_uc002fgg.1_I  | NM_052892    | NP_443124    | Q72442 | PK1L2_HUMAN | ellular (Potential).          | 3  | TCACCTCCTGCC      | 0.572 |             |
| + | 7  | 1007      | voj.1_Missense_M  | NM_014732    | NP_055547    | O60268 | K0513_HUMAN |                               | 1  | .GGAAGACGAG       | 0.582 |             |
| - | 12 | 1608      | NM3_uc010clm.2_   | NM_031220    | NP_112497    | Q9BZ71 | PITM3_HUMAN | DDHD.                         | 4  | GGAAGAGGGGG       | 0.662 |             |

|   |    |       |                                                       |              |              |        |              |                                 |    |               |       |
|---|----|-------|-------------------------------------------------------|--------------|--------------|--------|--------------|---------------------------------|----|---------------|-------|
| - | 37 | 5569  | uc002gml.1_intron                                     | NM_017533    | NP_060003    | Q9Y623 | MYH4_HUMAN   | Potential.                      | 13 | GGCCTCCAGTT   | 0.527 |
| - | 26 | 3396  | _Missense_Mutati                                      | NM_001100112 | NP_001093582 | Q9UKX2 | MYH2_HUMAN   | Potential.                      | 14 | AAACTCTTTCC   | 0.328 |
| - | 4  | 821   |                                                       | NM_031898    | NP_114104    | Q9BXF9 | TEKT3_HUMAN  |                                 | 2  | ATCGTGAAGTAC  | 0.398 |
| + | 4  | 1327  | _p.P175Q MAPK7                                        | NM_139033    | NP_620602    | Q13164 | MK07_HUMAN   | zation (By similarity). Protei  | 9  | GTACCCAGGTG   | 0.647 |
| - | 14 | 2195  | 6A4_uc010csg.2_                                       | NM_001045    | NP_001036    | P31645 | SC6A4_HUMAN  | lame=11; (Potential).           | 4  | GATGAACTAAA   | 0.368 |
| - | 14 | 1622  | XLXC1_uc002hrh                                        | NM_020405    | NP_065138    | Q8IUU5 | PXDC1_HUMAN  | lasmic (Potential).             | 3  | AACTTCATGGC   | 0.627 |
| - | 1  | 150   |                                                       | NM_032524    | NP_115913    | Q9BYR3 | KRA44_HUMAN  | -C-[GRQVCH]-[SPT]- [VS1         | 0  | TGGGGCGGCAG   | 0.652 |
| + | 3  | 1747  |                                                       | NM_000346    | NP_000337    | P48436 | SOX9_HUMAN   |                                 | 0  | GCCAGGGCACC   | 0.647 |
| - | 2  | 88    | 1_5'UTR GGA3_ur                                       | NM_138619    | NP_619525    | Q9NZ52 | GGA3_HUMAN   | o ARF1 (in long isoform).       | 2  | GTATTCCCAGTC  | 0.512 |
| + | 16 | 2317  | 195_uc010wsb.1_                                       | NM_014738    | NP_055553    | Q12767 | K0195_HUMAN  |                                 | 1  | GCCTCCCCTCA   | 0.612 |
| + | 4  | 293   | g.3_Missense_Mu                                       | NM_001258    | NP_001249    | Q00526 | CDK3_HUMAN   | rotein kinase.                  | 1  | ACAACGAGAGG   | 0.572 |
| + | 5  | 1033  |                                                       | NM_005189    | NP_005180    | Q14781 | CBX2_HUMAN   |                                 | 0  | ACACCCATGGT   | 0.662 |
| + | 27 | 4342  | .C1293Y PTPRM_                                        | NM_002845    | NP_002836    | P28827 | PTPRM_HUMAN  | phatase 2. Cytoplasmic (Po      | 6  | TCACTGCACATC  | 0.458 |
| - | 10 | 1985  | TEC_uc010xaj.1_F                                      | NM_001137671 | NP_001131143 | B2RU33 | POTEC_HUMAN  | Potential.                      | 3  | ATACCTCAGAA   | 0.269 |
| - | 4  | 3359  | se_Mutation_p.H1                                      | NM_015461    | NP_056276    | Q96K83 | ZN521_HUMAN  | :2H2-type 24.                   | 7  | TCCCATGGATTT  | 0.532 |
| - | 9  | 1251  | vi.3_Missense_Mu                                      | NM_001941    | NP_001932    | Q14574 | DSC3_HUMAN   | Extracellular (Potential).      | 4  | CATTTTCTCTAC  | 0.274 |
| + | 14 | 2147  | 3_uc002kwt.2_5'F                                      | NM_001944    | NP_001935    | P32926 | DSG3_HUMAN   | lasmic (Potential).             | 9  | TGCAGGAAATC   | 0.353 |
| + | 3  | 1195  | _p.S68F ZNF271_                                       | NR_024565    |              |        |              |                                 | 0  | CTCAGTCCTTAT  | 0.383 |
| + | 23 | 2522  | D4L_uc002lhb.2_I                                      | NM_001144967 | NP_001138439 | Q96PU5 | NED4L_HUMAN  | HECT.                           | 4  | ACATGGAATCTC  | 0.428 |
| + | 11 | 1972  | if.2_Missense_Mu                                      | NM_031891    | NP_114097    | Q9HBT6 | CAD20_HUMAN  | lasmic (Potential).             | 5  | TTCGACGACGAG  | 0.577 |
| + | 7  | 1487  | _p.E388K CDH7_u                                       | NM_033646    | NP_387450    | Q9ULB5 | CADH7_HUMAN  | r (Potential). Cadherin 4.      | 4  | TGTGCGGAAGCT  | 0.473 |
| + | 2  | 1025  | 2_Intron SCAMP4_                                      | NM_138422    | NP_612431    | Q96EY9 | ADAT3_HUMAN  |                                 | 2  | CGTGCCTAAAC   | 0.731 |
| + | 22 | 2611  | uc002lvd.1_5'Flan                                     | NM_032482    | NP_115871    | Q8TEK3 | DOT1L_HUMAN  |                                 | 4  | GCAGCGGGGAC   | 0.672 |
| - | 3  | 12038 |                                                       | NM_024690    | NP_078966    | Q8WXI7 | MUC16_HUMAN  | xtracellular (Potential).       | 57 | AAGGTGAATTC   | 0.488 |
| - | 1  | 311   |                                                       | NM_024690    | NP_078966    | Q8WXI7 | MUC16_HUMAN  | xtracellular (Potential).       | 57 | TGGCTCCTGTC   | 0.522 |
| - | 1  | 500   |                                                       | NM_001005191 | NP_001005191 | Q8NG98 | OR7D4_HUMAN  | ellular (Potential).            | 4  | AGAAGGTCAAC   | 0.493 |
| + | 11 | 1343  |                                                       | NM_023944    | NP_076433    |        |              |                                 | 7  | GGGTCCATCAC   | 0.552 |
| - | 2  | 645   |                                                       | NM_138454    | NP_612463    | Q96CM4 | NXNL1_HUMAN  | Poly-Gly.                       | 0  | acccccccccggg | 0.448 |
| + | 4  | 1014  | i.1_intron ZNF90_u                                    | NM_007138    | NP_009069    | Q03938 | ZNF90_HUMAN  | :2H2-type 5.                    | 2  | TGGCAGAGCAT   | 0.383 |
| - | 4  | 1319  |                                                       | NM_001159293 | NP_001152765 | C9JHM3 | C9JHM3_HUMAN |                                 | 1  | AGGACCAGTTG   | 0.418 |
| - | 6  | 3079  | 208_uc002nqo.1_I                                      | NM_007153    | NP_009084    |        |              |                                 | 7  | TGAATTCTCTTAT | 0.393 |
| + | 8  | 2009  | _p.N629D CEACA                                        | NM_004363    | NP_004354    | P06731 | CEAM5_HUMAN  | Ig-like 7.                      | 2  | GTATCAATGGG   | 0.507 |
| - | 2  | 479   | vf.3_Missense_Mu                                      | NM_002784    | NP_002775    | Q00887 | PSG9_HUMAN   | site (Potential). Ig-like V-typ | 2  | TCACCTCGCTTT  | 0.468 |
| + | 12 | 1637  | s1_uc002pfy.2_M                                       | NM_002517    | NP_002508    | Q99742 | NPAS1_HUMAN  |                                 | 0  | GCGACGAGGAT   | 0.692 |
| + | 3  | 331   | X_uc010elm.1_RI                                       | NM_000554    | NP_000545    | Q43186 | CRX_HUMAN    | Homeobox.                       | 2  | GCGAGCGCACC   | 0.642 |
| - | 3  | 426   | ie_Mutation_p.P13                                     | NM_017509    | NP_059979    | Q9H2R5 | KLK15_HUMAN  | eptidase S1.                    | 2  | GGTGGGGGCAA   | 0.697 |
| - | 9  | 3289  | S966R NLRP12_u                                        | NM_144687    | NP_653288    | P59046 | NAL12_HUMAN  |                                 | 7  | GATGGCTCAG    | 0.557 |
| + | 4  | 672   | 5'Flank TSEN34_u                                      | NM_024075    | NP_076980    | Q9BSV6 | SEN34_HUMAN  |                                 | 0  | GCTGGCCACTG   | 0.657 |
| + | 1  | 52    | b.1_RNA KIR3DX1_uc010yfc.1_RNA KIR3DX1_uc010yfd.1_RNA |              |              |        |              |                                 | 1  | AGCTCTGAAATC  | 0.517 |
| - | 7  | 5032  | 3_uc002qnv.2_Mis                                      | NM_001146186 | NP_001139658 | Q9GZU2 | PEG3_HUMAN   |                                 | 12 | CTTCTCATCAGC  | 0.537 |
| + | 3  | 1623  | 47_uc002qpm.3_I                                       | NM_001023561 | NP_001018855 | Q43361 | ZN749_HUMAN  | :2H2-type 10.                   | 0  | AGCACCAGAAA   | 0.423 |
| - | 2  | 521   |                                                       | NM_001037160 | NP_001032237 | Q717R9 | CYS1_HUMAN   |                                 | 0  | GTGCTCTGCTC   | 0.527 |
| - | 1  | 232   |                                                       | NM_018263    | NP_060733    | Q76L83 | ASXL2_HUMAN  |                                 | 1  | GTCCCTTTTCC   | 0.667 |
| - | 6  | 1280  | iTF3C2_uc002rjw.                                      | NM_001521    | NP_001512    | Q8WU44 | TF3C2_HUMAN  |                                 | 2  | AAACAGGAGCC   | 0.483 |
| + | 1  | 174   | qh.2_Missense_Mi                                      | NM_012413    | NP_036545    | Q16769 | QPCT_HUMAN   |                                 | 1  | TGCTGCTGGTG   | 0.682 |
| - | 2  | 1386  | sm.2_Missense_M                                       | NM_133329    | NP_579875    | Q8TAE7 | KCNG3_HUMAN  | =Segment S3; (Potential).       | 1  | ATACGGCGTGAT  | 0.453 |
| + | 2  | 2135  | z.1_Missense_Mul                                      | NM_144993    | NP_659430    | Q43151 | TET3_HUMAN   |                                 | 0  | CTTGGGATCTGC  | 0.423 |

rs140567861

|   |     |       |                    |              |              |        |                                        |     |                     |       |            |
|---|-----|-------|--------------------|--------------|--------------|--------|----------------------------------------|-----|---------------------|-------|------------|
| - | 6   | 937   | se_Mutation_p.A27  | NM_138804    | NP_620159    | Q8TC57 | CB065_HUMAN                            | 2   | 'GCCAGCGAGTA'       | 0.483 |            |
| + | 2   | 243   | sq.1_Missense_M    | NM_198274    | NP_938015    | Q8NB12 | SMYD1_HUMAN MYND-type.                 | 4   | 'AGAAGGATGCT'       | 0.532 |            |
| - | 41  | 5887  | e_Mutation_p.G54   | NM_014014    | NP_054733    | O75643 | U520_HUMAN SEC63 2.                    | 10  | 'GCCACCCATTG'       | 0.552 |            |
| + | 23  | 5204  | ense_Mutation_p.f  | NM_181453    | NP_852118    | Q8IWJ2 | GCC2_HUMAN nteraction with RAB9A.      | 1   | 'GACTTCGATAG'       | 0.308 |            |
| + | 18  | 3287  | flu.2_Missense_Iv  | NM_130773    | NP_570129    | Q8WYK1 | CNTP5_HUMAN Extracellular (Potential). | 10  | 'GTGTGGAGAAG'       | 0.562 |            |
| - | 78  | 13088 |                    | NM_018557    | NP_061027    | Q9NZR2 | LRP1B_HUMAN                            | 50  | 'ACCTACCCTCTI'      | 0.368 |            |
| - | 26  | 3627  | :21B_uc002udj.1_I  | NM_024753    | NP_079029    | Q7Z4L5 | TT21B_HUMAN                            | 5   | 'AAGCCGTTGCC/       | 0.393 |            |
| - | 16  | 2884  | uc002udp.2_Intror  | NM_002977    | NP_002968    | Q15858 | SCN9A_HUMAN II.                        | 13  | 'TTACCAATGATC'      | 0.408 | rs80356474 |
| - | 119 | 28287 | uc002umz.1_Mit     | NM_133378    | NP_596869    | Q8WZ42 | TITIN_HUMAN                            | 153 | 'CTTTTCTTCAGC'      | 0.393 |            |
| - | 46  | 16178 | N_uc010zfi.1_Intri | NM_133379    | NP_596870    | Q8WZ42 | TITIN_HUMAN                            | 153 | 'GTCTTTTCACTI'      | 0.378 |            |
| - | 46  | 16176 | N_uc010zfi.1_Intri | NM_133379    | NP_596870    | Q8WZ42 | TITIN_HUMAN                            | 153 | 'CTTTTTCACTTA/      | 0.383 |            |
| - | 46  | 10722 | N_uc010zfi.1_Intri | NM_133379    | NP_596870    | Q8WZ42 | TITIN_HUMAN                            | 153 | 'ATATTCAGGCCA'      | 0.383 |            |
| - | 3   | 211   | zfq.1_Missense_I   | NM_001003683 | NP_001003683 | P54750 | PDE1A_HUMAN i-binding (By similarity). | 3   | 'TCTTTCCAGCTC'      | 0.353 |            |
| + | 3   | 542   | o.2_Missense_ML    | NM_001136039 | NP_001129511 | Q9GZT8 | NIF3L_HUMAN                            | 1   | 'CCTCCAGGCCCC'      | 0.418 |            |
| + | 12  | 2712  | p.P641S NRP2_u     | NM_201266    | NP_957718    | O60462 | NRP2_HUMAN xellular (Potential).       | 4   | 'AGCTCCCTTCG'       | 0.493 |            |
| - | 1   | 468   | T1A6_uc002vuu.2    | NM_001001394 | NP_001001394 | Q8WWF6 | DNJB3_HUMAN                            | 0   | 'CCCCCCCCAAAAT.     | 0.547 | rs61744897 |
| - | 2   | 246   | A1_uc002vwa.1_     | NM_024726    | NP_079002    | Q86XH1 | IQCA1_HUMAN                            | 1   | 'CTTTATCGAGTA/      | 0.373 |            |
| - | 5   | 651   | fu.2_Nonsense_Mi   | NM_032214    | NP_115590    | Q9H6Q3 | SLAP2_HUMAN SH2.                       | 0   | 'GCCCTCATACAC'      | 0.328 |            |
| - | 17  | 2678  | d.2_Missense_Mu'   | NM_032221    | NP_115597    | Q8TD26 | CHD6_HUMAN case C-terminal.            | 14  | 'TCCCCGTACTCC'      | 0.532 |            |
| - | 3   | 248   | n_p.S2P CHD6_uc    | NM_032221    | NP_115597    | Q8TD26 | CHD6_HUMAN                             | 14  | 'ATCAGACATTGC'      | 0.383 |            |
| - | 1   | 87    | .GE_uc002yix.2_R   | NM_182482    | NP_872288    |        |                                        | 0   | 'acgagccacgggtgtac' | 0     |            |
| - | 26  | 5163  | :AM_uc002yyr.1_Ir  | NM_001389    | NP_001380    | O60469 | DSCAM_HUMAN                            | 11  | 'AGCTTACTGCC.       | 0.582 |            |
| + | 13  | 1881  | _p.R316* MX2_uc    | NM_002463    | NP_002454    | P20592 | MX2_HUMAN                              | 2   | 'AAGTCCGAGAA'       | 0.403 |            |
| - | 1   | 75    |                    | NM_020639    | NP_065690    | P57078 | RIPK4_HUMAN                            | 7   | 'AGGGCCCATGG'       | 0.726 |            |
| - | 11  | 1253  | se_Mutation_p.V34  | NM_003325    | NP_003316    | P54198 | HIRA_HUMAN WD 7.                       | 1   | 'GCATACCAAGAT'      | 0.587 |            |
| - | 22  | 2693  |                    | NM_058004    | NP_477352    | P42356 | PI4KA_HUMAN                            | 4   | 'GTGCGGACACC'       | 0.587 |            |
| + | 23  | 3423  | .R1049Q CABIN1_    | NM_012295    | NP_036427    | Q9Y6J0 | CABIN_HUMAN                            | 5   | 'GGCCCGGGCCA'       | 0.537 |            |
| + | 5   | 885   |                    | NM_002133    | NP_002124    | P09601 | HMOX1_HUMAN                            | 1   | 'TTCTCCGATGG'       | 0.562 |            |
| - | 5   | 604   | _p.R202G APOL2_    | NM_030882    | NP_112092    | Q9BQE5 | APOL2_HUMAN                            | 0   | 'CTCCCTTTTCA/       | 0.507 |            |
| - | 7   | 1038  | re.1_Missense_ML   | NM_020831    | NP_065882    | Q969V6 | MKL1_HUMAN Gln-rich.                   | 5   | 'TGCTGCTGGTTI'      | 0.657 |            |
| - | 2   | 410   | uk.2_RNA PRRT3     | NM_207351    | NP_997234    | Q5FWE3 | PRRT3_HUMAN xellular (Potential).      | 0   | 'GGCTGGGCCAA/       | 0.602 |            |
| + | 16  | 1360  | e_Mutation_p.V35   | NM_001134367 | NP_001127839 | P31641 | SC6A6_HUMAN                            | 1   | 'AAGGGGTGGAC'       | 0.537 |            |
| - | 9   | 1055  | :lx.2_Missense_ML  | NM_020707    | NP_065758    | Q9HCP6 | HHATL_HUMAN ical; (Potential).         | 3   | 'CGGCCGCTTC'        | 0.617 |            |
| + | 6   | 780   | C2_uc003cpu.3_5'   | NM_003212    | NP_003203    | P13385 | TDGF1_HUMAN                            | 0   | 'ACTACCACCGTI'      | 0.448 |            |
| - | 3   | 1112  |                    | NM_015576    | NP_056391    | O15083 | ERC2_HUMAN Potential.                  | 2   | 'CCATTTCTCTA/       | 0.473 |            |
| - | 15  | 2677  | _p.S463F C3orf63_  | NM_015224    | NP_056039    | Q9UK61 | CC063_HUMAN                            | 5   | 'TGGTAGAAAATAC'     | 0.403 |            |
| + | 3   | 799   | l1L_uc003fdt.2_Mi  | NM_139245    | NP_640338    | Q5SGD2 | PPM1L_HUMAN c (Potential). PP2C-like.  | 1   | 'CAAGCCTTACC/       | 0.498 |            |
| + | 12  | 2344  | p.G549D MAP3K1     | NM_004721    | NP_004712    | O43283 | M3K13_HUMAN                            | 3   | 'GCCCCGCTCGA'       | 0.622 |            |
| - | 3   | 2904  | tron ABCA11P_ucC   | NM_133474    | NP_597731    | D9N162 | D9N162_HUMAN                           | 1   | 'GGTTTGTGGAC'       | 0.393 |            |
| - | 4   | 832   | 0_uc003ggb.1_Mi    | NM_001120    | NP_001111    | Q14728 | MFS10_HUMAN                            | 0   | 'GACTGCGGGCC.'      | 0.632 |            |
| + | 6   | 739   | p.V235M MAN2B2     | NM_015274    | NP_056089    | Q9Y2E5 | MA2B2_HUMAN                            | 2   | 'ATGGCGTGGCT'       | 0.383 |            |
| - | 4   | 540   | EL1_uc003gjz.1_3   | NM_025196    | NP_079472    | Q9HAV7 | GRPE1_HUMAN                            | 0   | 'GGCTCCGACAG'       | 0.527 |            |
| + | 3   | 1368  | P2_uc003gll.2_Intr | NM_080819    | NP_543009    | Q96P69 | GPR78_HUMAN lasmic (Potential).        | 6   | 'GAACCCCGCGC'       | 0.672 |            |
| + | 11  | 1635  | zL1_Missense_ML    | NM_025087    | NP_079363    | Q9H720 | PG2IP_HUMAN                            | 3   | 'TAGGGGAAAAG'       | 0.418 |            |
| + | 11  | 1546  | .2_Missense_Mutε   | NM_198892    | NP_942595    | Q9NSY1 | BMP2K_HUMAN Gln/His-rich.              | 1   | 'CTCACcagcagcag'    | 0.254 |            |
| - | 1   | 220   | i_p.M22I UNC5C_    | NM_003728    | NP_003719    | O95185 | UNC5C_HUMAN                            | 4   | 'ACGAGCATTTG'       | 0.652 |            |
| + | 24  | 3935  | F_uc011cfv.1_Mis:  | NM_001963    | NP_001954    | P01133 | EGF_HUMAN lasmic (Potential).          | 4   | 'GTAATGGAGCG.'      | 0.527 |            |



|   |    |      |                    |              |              |        |             |       |               |       |
|---|----|------|--------------------|--------------|--------------|--------|-------------|-------|---------------|-------|
| - | 13 | 1495 | e.1_Missense_Mu    | NM_176824    | NP_789794    | Q8IWZ6 | BBS7_HUMAN  | 1     | :AAGAAGGAAGT  | 0.323 |
| - | 8  | 1379 | AP9_uc010iqa.1_R   | NM_001039580 | NP_001034669 | Q49MG5 | MAP9_HUMAN  | 2     | :TGGCAGATGCA  | 0.274 |
| + | 12 | 1995 |                    | NM_014247    | NP_055062    | Q9Y4G8 | RPGF2_HUMAN | 4     | ATGACAGCATAG  | 0.368 |
| - | 11 | 1157 | p.P336L SPOCK3     | NM_016950    | NP_058646    | Q9BQ16 | TICN3_HUMAN | 3     | :ACAGGGGGATA  | 0.433 |
| + | 3  | 561  |                    | NM_003248    | NP_003239    | P35443 | TSP4_HUMAN  | 0     | FACTCTTCAACTG | 0.393 |
| + | 1  | 922  | HA6_uc003lhn.2_l   | NM_018902    | NP_061725    | Q9Y5I1 | PCDAB_HUMAN | 1     | :TCCTCGAATTCT | 0.577 |
| + | 1  | 2267 |                    | NM_018938    | NP_061761    | Q9Y5E5 | PCDB4_HUMAN | 3     | GACAGGAGACT   | 0.567 |
| + | 1  | 410  |                    | NM_018940    | NP_061763    | Q9Y5E2 | PCDB7_HUMAN | 6     | FCAGTTCGCTTAC | 0.473 |
| + | 3  | 2013 | _p.R303* SYNPO_    | NM_001109974 | NP_001103444 | Q8N3V7 | SYNPO_HUMAN | 1     | GGCAGCGAAGC   | 0.652 |
| + | 1  | 1595 |                    | NM_001099293 | NP_001092763 | Q2VIQ3 | KIF4B_HUMAN | 1     | :CAGATGAAACTC | 0.438 |
| - | 2  | 615  | IP2_uc003lwr.2_l   | NM_001001343 | NP_001001343 | Q8TBE3 | FNDC9_HUMAN | 0     | ATCGCGGCTCAT  | 0.602 |
| - | 1  | 578  |                    | NM_001001657 | NP_001001657 | Q8NGV0 | OR2Y1_HUMAN | 1     | TCTGTTCCCTCT  | 0.517 |
| + | 21 | 2038 | ow.2_Missense_M    | NM_001040274 | NP_001035364 | Q5T4T6 | SYC2L_HUMAN | 2     | :ATCTCCAAAGA  | 0.333 |
| - | 5  | 1101 | no.1_Missense_M    | NM_003587    | NP_003578    | O60231 | DHX16_HUMAN | 4     | :GTAGCGATTGG  | 0.627 |
| + | 49 | 7225 |                    | NM_001371    | NP_001362    |        |             | 21    | :TGGATGCCATC  | 0.353 |
| + | 11 | 1693 | _p.P410L FOXP4_    | NM_001012426 | NP_001012426 | Q8IVH2 | FOXP4_HUMAN | 1     | :CCCCCGACCT   | 0.677 |
| + | 1  | 1572 | ze.2_Nonsense_M    | NM_001010870 | NP_001010870 | O60522 | TDRD6_HUMAN | 6     | TTTCTATTCTCT  | 0.413 |
| + | 2  | 306  | ipl.1_Nonsense_M   | NM_015021    | NP_055836    | O60281 | ZN292_HUMAN | 4     | :AAGCCCGACCT  | 0.378 |
| + | 8  | 3600 |                    | NM_015021    | NP_055836    | O60281 | ZN292_HUMAN | 4     | :AGCATGTCTCG  | 0.418 |
| + | 8  | 6765 |                    | NM_015021    | NP_055836    | O60281 | ZN292_HUMAN | 4     | :ACCACGGGATT  | 0.423 |
| + | 4  | 799  | o.3_Missense_Mt    | NM_021956    | NP_068775    | Q13002 | GRIK2_HUMAN | 5     | :TCATTTCGTTTG | 0.313 |
| - | 5  | 547  | D23_uc003qct.1_f   | NM_004830    | NP_004821    | Q9ULK4 | MED23_HUMAN | 3     | CAATTATTTTCCG | 0.353 |
| + | 2  | 379  | CT1_uc003qpc.3_    | NM_025107    | NP_079383    | Q8N699 | MYCT1_HUMAN | 1     | :AACTGGATTTT  | 0.517 |
| + | 18 | 2598 | vc.1_Missense_Mt   | NM_001040001 | NP_001035090 | P55196 | AFAD_HUMAN  | 5     | TTATCCGTCAGC  | 0.547 |
| + | 39 | 5810 | o.Q1147K SDK1_u    | NM_152744    | NP_689957    | Q7Z5N4 | SDK1_HUMAN  | 6     | :AGCTCCAAGCC  | 0.597 |
| - | 1  | 272  | atron HOXA6_uc0    | NM_024014    | NP_076919    | P31267 | HXA6_HUMAN  | 2     | TGCCCGAGGGC   | 0.622 |
| - | 2  | 1008 |                    | NM_022728    | NP_073565    | Q96NK8 | NDF6_HUMAN  | 2     | TGGGGGAGTGG   | 0.527 |
| - | 14 | 1893 | _p.S535L PDE1C_    | NM_005020    | NP_005011    | Q14123 | PDE1C_HUMAN | 4     | :CTGACGAGCTG  | 0.443 |
| + | 17 | 1973 |                    | NM_016616    | NP_057700    | Q8N427 | TXND3_HUMAN | 3     | :GAGACGATTGAT | 0.458 |
| - | 3  | 226  |                    | NM_032014    | NP_114403    | Q96EL2 | RT24_HUMAN  | 0     | GTGCGGCGCGT   | 0.587 |
| + | 1  | 1130 |                    | NR_003595    |              |        |             | 0     | GGCTGGAAGGG   | 0.507 |
| - | 3  | 302  | o.R36Q PHKG1_u     | NM_006213    | NP_006204    | Q16816 | PHKG1_HUMAN | 1     | ATGCATCGCCTG  | 0.657 |
| + | 4  | 1558 |                    | NM_001159522 | NP_001152994 | A8MUV8 | ZN727_HUMAN | 0     | :CAAAACCTTTAC | 0.428 |
| + | 4  | 1576 |                    | NM_001159522 | NP_001152994 | A8MUV8 | ZN727_HUMAN | 0     | CCTCAAGCCTTA  | 0.418 |
| - | 13 | 2690 | og.3_RNA DPY19L    | NR_003561    |              |        |             | 0     | :CATGGGAAATA  | 0.249 |
| + | 1  | 39   | o3vbm.2_5'UTR P    | NM_004279    | NP_004270    | O75439 | MPPB_HUMAN  | 4     | AATGGCGGCTG   | 0.652 |
| + | 15 | 2273 | n_p.L709* CDHR3    | NM_152750    | NP_689963    | Q6ZTQ4 | CDHR3_HUMAN | 1     | CCATATTGCTTCT | 0.512 |
| - | 6  | 894  | lmc.1_Missense_M   | NM_032842    | NP_116231    | Q96SK2 | TM209_HUMAN | 3     | :CCCAGCTTAAC  | 0.343 |
| + | 8  | 768  |                    | NM_001869    | NP_001860    | P48052 | CBPA2_HUMAN | 1     | :TGTGGTGTGG   | 0.547 |
| - | 8  | 2048 | d.3_Missense_Mt    | NM_022740    | NP_073577    | Q9H2X6 | HIPK2_HUMAN | 7     | :TGGATGCCGCT  | 0.572 |
| - | 15 | 1860 |                    | NM_004333    | NP_004324    | P15056 | BRAF_HUMAN  | 18290 | :ATTTCCTGTAC  | 0.368 |
| + | 6  | 1787 | rpm.2_Missense_M   | NM_004745    | NP_004736    | Q9P1A6 | DLGP2_HUMAN | 0     | :ACCAGGACAGC  | 0.662 |
| + | 24 | 3544 | rw.1_Missense_Mt   | NM_003747    | NP_003738    | Q95271 | TNKS1_HUMAN | 7     | ATGAGCGCATGT  | 0.473 |
| + | 10 | 1760 | lissense_Mutation_ | NM_184085    | NP_908973    | Q9BYV6 | TRI55_HUMAN | 5     | :GATTTGAGGCT  | 0.468 |
| - | 3  | 219  | ense_Mutation_p.f  | NM_001738    | NP_001729    | P00915 | CAH1_HUMAN  | 2     | :ATATCCCAGTC  | 0.328 |
| + | 3  | 649  |                    | NM_002514    | NP_002505    | P48745 | NOV_HUMAN   | 5     | GCCCCGCTGTC   | 0.542 |
| + | 3  | 409  | w.2_Missense_Mu    | NM_004972    | NP_004963    | O60674 | JAK2_HUMAN  | 28641 | :ACCCAACCATG  | 0.348 |

|   |    |      |                   |              |              |        |             |                            |     |               |       |             |
|---|----|------|-------------------|--------------|--------------|--------|-------------|----------------------------|-----|---------------|-------|-------------|
| - | 8  | 2186 | p.D729N FBXO10    | NM_012166    | NP_036298    | Q9UK96 | FBX10_HUMAN |                            | 5   | GTGGGTCGTCCT  | 0.567 |             |
| + | 4  | 498  | se_Mutation_p.P37 | NM_001010940 | NP_001010940 | Q5VTT2 | CI135_HUMAN | lasmic (Potential).        | 1   | ATCCACCGGAT   | 0.413 |             |
| - | 22 | 2523 |                   | NM_019114    | NP_061987    | Q9H329 | E41LB_HUMAN |                            | 3   | CAGAGGGGCTC   | 0.512 |             |
| + | 14 | 2463 | ez.1_Missense_Mu  | NM_005592    | NP_005583    | O15146 | MUSK_HUMAN  | cytoplasmic (Potential).   | 6   | CCCTATGGCGTG  | 0.507 |             |
| - | 11 | 1585 | se_Mutation_p.D44 | NM_173521    | NP_775792    | Q5VXU9 | CI084_HUMAN |                            | 2   | AGTGATCGTTAT  | 0.328 | rs41316510  |
| + | 11 | 3313 | v.2_Missense_Mut  | NM_005157    | NP_005148    | P00519 | ABL1_HUMAN  | actin-binding.             | 817 | CGACAGCAGGC   | 0.542 |             |
| - | 2  | 218  |                   | NM_002003    | NP_001994    | O00602 | FCN1_HUMAN  |                            | 2   | GAGCCCTCCAG   | 0.642 |             |
| - | 13 | 1997 | A2_uc004ckm.1_f   | NM_001606    | NP_001597    | Q9BZC7 | ABCA2_HUMAN |                            | 0   | CGGGAGCGAGC   | 0.453 |             |
| + | 11 | 1803 | f.1_Missense_Mut  | NM_004042    | NP_004033    | P54793 | ARSF_HUMAN  |                            | 2   | CTCCATGATTTT  | 0.557 |             |
| - | 4  | 636  |                   | NM_015419    | NP_056234    | Q9NR99 | MXRA5_HUMAN | LRR 5.                     | 8   | AGATTTCTTCC   | 0.468 |             |
| - | 11 | 1730 |                   | NM_000216    | NP_000207    | P23352 | KALM_HUMAN  |                            | 4   | TCCCTTAAGAC   | 0.502 |             |
| + | 6  | 3209 | OM2_uc011mic.1_   | NM_001649    | NP_001640    | Q13796 | SHRM2_HUMAN |                            | 8   | CTCACCCCTGC   | 0.672 |             |
| - | 1  | 290  |                   | NM_203408    | NP_981953    | Q5JRC9 | FA47A_HUMAN |                            | 5   | CTTGGGGACCT   | 0.552 |             |
| + | 5  | 1028 | e_Mutation_p.P33  | NM_003173    | NP_003164    | O43463 | SUV91_HUMAN | with MECOM (By similarity) | 0   | TGACCCCAACC   | 0.627 |             |
| + | 7  | 974  | se_Mutation_p.G27 | NM_014008    | NP_054727    | O60826 | CCD22_HUMAN |                            | 1   | CCTGGGAGAAC   | 0.647 |             |
| + | 6  | 3092 | A932T CCNB3_uc    | NM_033031    | NP_149020    | Q8WWL7 | CCNB3_HUMAN |                            | 9   | TGATAGCTCTG   | 0.463 |             |
| + | 1  | 1371 | R_uc011mpe.1_RI   | NM_000044    | NP_000035    | P10275 | ANDR_HUMAN  | Modulating. Gln-rich.      | 8   | ccccaggcagcag | 0.289 |             |
| + | 15 | 2082 | OGT_uc004eac.2_   | NM_181672    | NP_858058    | O15294 | OGT1_HUMAN  |                            | 5   | CAATGGAAAAG   | 0.348 |             |
| - | 3  | 3678 |                   | NM_001008537 | NP_001008537 | Q5QGS0 | K2022_HUMAN |                            | 15  | TGATATCATCATC | 0.478 |             |
| + | 3  | 903  | efc.3_Missense_M  | NM_033048    | NP_149037    | Q8N123 | CPXCR_HUMAN |                            | 3   | ATCAGGAAAAT   | 0.413 |             |
| + | 1  | 303  | 128_uc004emk.2_   | NM_194463    | NP_919445    | Q8TEB7 | RN128_HUMAN |                            | 2   | CTTTTCCAGAT   | 0.721 |             |
| + | 38 | 4112 | qq.2_Missense_M   | NM_144658    | NP_653259    | Q5JSL3 | DOC11_HUMAN |                            | 3   | AAAAATCGAAA   | 0.413 |             |
| - | 2  | 527  | uc004esi.1_Intron | NM_032498    | NP_115887    | P0C7M4 | RHF2B_HUMAN |                            | 0   | AGGTTCTTCT    | 0.677 |             |
| + | 2  | 1196 | qm.1_Missense_M   | NM_006777    | NP_006768    | Q86T24 | KAISO_HUMAN |                            | 3   | AACAGGAAACAA  | 0.418 |             |
| - | 9  | 1261 | IRE_uc011myd.1_   | NM_004961    | NP_004952    | P78334 | GBRE_HUMAN  | lasmic (Probable).         | 2   | AGCTTCTGATC   | 0.587 |             |
| - | 15 | 1814 | za.1_Missense_Mi  | NM_018216    | NP_060686    | Q9NVE7 | PANK4_HUMAN |                            | 3   | TGTAGGAATCC   | 0.617 |             |
| - | 14 | 2304 | a.1_RNA CHD5_u    | NM_015557    | NP_056372    | Q8TDI0 | CHD5_HUMAN  | ase ATP-binding.           | 12  | CGATGGTCTGC   | 0.652 |             |
| + | 2  | 307  | mw.2_Missense_M   | NM_032341    | NP_115717    | Q5TDH0 | DDI2_HUMAN  | Jbiquitin-like.            | 0   | GGGACGTTGTG   | 0.468 |             |
| + | 11 | 6232 | p.1_Missense_Mut  | NM_015001    | NP_055816    | Q96T58 | MINT_HUMAN  |                            | 15  | CTACACGTCTC   | 0.582 |             |
| - | 61 | 8925 | rk.1_Missense_Mu  | NM_020765    | NP_065816    | Q5T4S7 | UBR4_HUMAN  |                            | 25  | ATTAGACGGACC  | 0.512 |             |
| - | 16 | 3374 | OCD1_uc001btu.2   | NM_144569    | NP_653170    | Q6ZMY3 | SPOC1_HUMAN |                            | 6   | CCCAGGATGCT   | 0.647 |             |
| - | 9  | 1755 | 1_5'Flank YARS_u  | NM_003680    | NP_003671    | P54577 | SYYC_HUMAN  |                            | 2   | GATTGGATCCAA  | 0.498 |             |
| - | 11 | 1943 | 631_splice PHC2_  | NM_198040    | NP_932157    | Q8IXK0 | PHC2_HUMAN  |                            | 1   | GATTCTGAAAA   | 0.547 |             |
| - | 24 | 3762 | 1R1285W CSMD2     | NM_052896    | NP_443128    | Q7Z408 | CSMD2_HUMAN | extracellular (Potential). | 12  | ACCCCGCAGGC   | 0.602 |             |
| - | 6  | 912  | cm.1_Missense_M   | NM_052896    | NP_443128    | Q7Z408 | CSMD2_HUMAN | extracellular (Potential). | 12  | CTGCCGGTGGT   | 0.607 |             |
| + | 6  | 902  |                   | NM_004559    | NP_004550    | P67809 | YBOX1_HUMAN |                            | 5   | ACCACGATTCCG  | 0.443 | rs150137463 |
| + | 18 | 3383 | ky.2_Missense_Mi  | NM_014652    | NP_055467    | O94829 | IPO13_HUMAN |                            | 1   | CGGTCGTATGC   | 0.612 |             |
| + | 7  | 911  | 1H_uc001cpv.2_In  | NM_001441    | NP_001432    | O00519 | FAAH1_HUMAN | smic (By similarity).      | 2   | CAGTGCCTCTC   | 0.657 |             |
| + | 6  | 794  | e_Mutation_p.A24i | NM_001010969 | NP_001010969 | Q5TCH4 | CP4AM_HUMAN |                            | 4   | CTCTGCTGGCC   | 0.547 |             |
| + | 1  | 403  |                   | NM_012183    | NP_036315    | Q9UJU5 | FOXD3_HUMAN |                            | 0   | GCAAGCCAAG    | 0.373 |             |
| + | 4  | 477  | aq.2_Missense_M   | NM_002303    | NP_002294    | P48357 | LEPR_HUMAN  | cellular (Potential).      | 1   | CTTTGGAGTG    | 0.348 |             |
| + | 1  | 223  |                   | NM_032291    | NP_115667    | Q9BQI5 | SGIP1_HUMAN |                            | 3   | ATGATGGAAGG   | 0.488 |             |
| + | 16 | 1730 | C7_uc009wbg.2_Ii  | NM_020794    | NP_065845    | Q96NW7 | LRRC7_HUMAN |                            | 14  | TAAAACGATATCC | 0.323 |             |
| - | 12 | 1991 | 73_uc001dgi.3_Mi  | NM_001002912 | NP_001002912 | Q5RHP9 | CA173_HUMAN | Glu-rich.                  | 5   | CACTAGAATAAC  | 0.423 |             |
| - | 16 | 1331 | p.A354V SLC44A1   | NM_152697    | NP_689910    | Q8NCS7 | CTL5_HUMAN  | lasmic (Potential).        | 4   | ATGTGCCCAAG   | 0.393 | rs148437935 |
| - | 46 | 6421 |                   | NM_000350    | NP_000341    | P78363 | ABCA4_HUMAN | porter 2. Cytoplasmic.     | 12  | TGCGCGTGCC    | 0.632 |             |
| - | 6  | 774  | leal.1_Nonsense_  | NM_024901    | NP_079177    | Q9H6A0 | DEN2D_HUMAN | DENN.                      | 1   | CTCTGGAGGC    | 0.567 |             |

|   |    |       |                    |              |              |        |              |                           |    |              |       |             |
|---|----|-------|--------------------|--------------|--------------|--------|--------------|---------------------------|----|--------------|-------|-------------|
| - | 12 | 1938  | dm.2_Missense_M    | NM_006608    | NP_006599    | Q9UMS5 | PHTF1_HUMAN  |                           | 1  | GGAAAAGTCGAT | 0.403 |             |
| - | 20 | 2460  | edt.2_Missense_M   | NM_015967    | NP_057051    | Q9Y2R2 | PTN22_HUMAN  |                           | 4  | TTATTTGACTGA | 0.318 |             |
| - | 1  | 94    | VTCN1_uc009whf.    | NM_024626    | NP_078902    | Q7Z7D3 | VTCN1_HUMAN  |                           | 0  | GAAGAGGATCT  | 0.557 |             |
| - | 3  | 667   | VGCS2_uc001eie.    | NM_005518    | NP_005509    | P54868 | HMCS2_HUMAN  |                           | 2  | GGGACGAGCAT  | 0.512 |             |
| - | 25 | 4523  |                    | NM_024408    | NP_077719    | Q04721 | NOTC2_HUMAN  | cellular (Potential).     | 27 | GGTGGCAGGAG  | 0.622 |             |
| + | 19 | 2193  | ition_p.E30G NBP   | NM_001037675 | NP_001032764 | Q3BBV1 | NBPFK_HUMAN  | NBPF 5.                   | 0  | GAAAGAGCCTG  | 0.483 |             |
| - | 11 | 2037  | p.R414* CELF3_u    | NM_007185    | NP_009116    | Q5SZQ8 | CELF3_HUMAN  | RRM 3.                    | 2  | GGCTCGGTCAA  | 0.433 |             |
| - | 2  | 5696  | e.1_Missense_Mu    | NM_007113    | NP_009044    | Q07283 | TRHY_HUMAN   |                           | 5  | TCTCCCCGACTT | 0.582 |             |
| - | 3  | 1749  |                    | NM_001122965 | NP_001116437 | Q6XPR3 | RPTN_HUMAN   | Gln-rich.                 | 0  | GTCTGTCTGAC  | 0.498 |             |
| - | 2  | 196   | R2D_uc009wnz.2_    | NM_006945    | NP_008876    | P22532 | SPR2D_HUMAN  | peats of P-K-C-P-[EQ]-P-C | 0  | AGGTGGGCAGG  | 0.602 |             |
| - | 10 | 6742  | ASH1L_uc001fkt.2   | NM_018489    | NP_060959    | Q9NR48 | ASH1L_HUMAN  |                           | 11 | AGAAAGGGGTT  | 0.413 |             |
| - | 1  | 1219  |                    | NM_145167    | NP_660150    | Q9H3S5 | PIGM_HUMAN   | ical; (Potential).        | 3  | AAATGGACGTA  | 0.443 |             |
| + | 2  | 478   |                    | NM_004983    | NP_004974    | Q92806 | IRK9_HUMAN   | me=M1; (By similarity).   | 2  | CATCTGGTGGC  | 0.662 |             |
| - | 5  | 620   | _p.L187F ITLN2_u   | NM_080878    | NP_543154    | Q8WWU7 | ITLN2_HUMAN  | rogen C-terminal.         | 1  | CTGGAGGAAGC  | 0.572 |             |
| - | 3  | 440   |                    | NM_182581    | NP_872387    | Q5T0L3 | CA111_HUMAN  |                           | 1  | GTCCCCTTGC   | 0.567 |             |
| + | 1  | 279   | uc001gev.2_Misse   | NM_001017977 | NP_001017977 | Q58WW2 | DCAF6_HUMAN  |                           | 3  | TGTGGGACGTG  | 0.726 |             |
| + | 1  | 435   | sense_Mutation_p   | NM_015935    | NP_057019    | Q8N6R0 | MTL13_HUMAN  |                           | 1  | CTTTCGAGTGG  | 0.512 |             |
| + | 20 | 2460  | jmp.2_Missense_    | NM_144696    | NP_653297    | Q5T1B0 | AXDN1_HUMAN  |                           | 0  | GTAATCCACTA  | 0.368 |             |
| + | 11 | 1616  | ie_Mutation_p.P47  | NM_004736    | NP_004727    | Q9UBH6 | XPR1_HUMAN   | l; (Potential), EXS.      | 0  | CCTTTCCTCATT | 0.458 |             |
| - | 1  | 742   | pk.2_Missense_M    | NM_021133    | NP_066956    | Q05823 | RN5A_HUMAN   | ANK 5.                    | 5  | CTGCCCCATC   | 0.517 |             |
| + | 1  | 995   |                    | NM_005298    | NP_005289    | O00155 | GPR25_HUMAN  | lasmic (Potential).       | 1  | GCGAAGGATCA  | 0.711 |             |
| - | 3  | 275   | lI3L1_uc001gzj.2_  | NM_001276    | NP_001267    | P36222 | CH3L1_HUMAN  |                           | 1  | CTTCCCGGTAC  | 0.562 | rs146010120 |
| - | 57 | 11618 |                    | NM_206933    | NP_996816    | O75445 | USH2A_HUMAN  |                           | 26 | AGTTTACCTGCT | 0.371 | rs111033382 |
| + | 1  | 1475  |                    | NM_152610    | NP_689823    | Q8N715 | CA065_HUMAN  | Potential.                | 2  | TCCAGCGGTCC  | 0.617 |             |
| + | 4  | 821   | .1_Intron ZNF678_  | NM_178549    | NP_848644    | F5GXA7 | F5GXA7_HUMAN |                           | 1  | AATGTGGCAAAG | 0.333 | rs145397350 |
| + | 4  | 938   | .1_Intron ZNF678_  | NM_178549    | NP_848644    | F5GXA7 | F5GXA7_HUMAN |                           | 1  | TAAGTAGCCATA | 0.363 |             |
| - | 4  | 625   | itr.2_Missense_Mu  | NM_014409    | NP_055224    | O75529 | TAF5L_HUMAN  |                           | 1  | AAGCTTGAAGTT | 0.473 |             |
| - | 17 | 5555  | b.1_RNA LYST_uc    | NM_000081    | NP_000072    | Q99698 | LYST_HUMAN   |                           | 12 | TAGTTGGAGAT  | 0.373 |             |
| - | 2  | 202   | 130331_uc010pyc    | NM_021186    | NP_067009    | Q12836 | ZP4_HUMAN    | cellular (Potential).     | 3  | ATTCTGCAGCT  | 0.562 |             |
| - | 8  | 1228  |                    | NM_000143    | NP_000134    | P07954 | FUMH_HUMAN   |                           | 5  | CATTGCTGCCTC | 0.413 |             |
| + | 12 | 3249  | p.D555N KIF26B_    | NM_018012    | NP_060482    | Q2KJY2 | KI26B_HUMAN  |                           | 3  | GCATCGACGGC  | 0.637 |             |
| - | 3  | 249   | Jqay.1_Missense_I  | NM_001029880 | NP_001025051 | Q5VUG0 | SMBT2_HUMAN  | MBT 1.                    | 8  | CTCCTGTCTCT  | 0.438 |             |
| - | 15 | 1867  | iks.1_Missense_M   | NM_014688    | NP_055503    | Q92738 | US6NL_HUMAN  |                           | 0  | AACTGCGAGCG  | 0.592 |             |
| + | 4  | 473   | ict.1_Missense_Mt  | NM_012443    | NP_036575    | O75602 | SPAG6_HUMAN  | ARM 2.                    | 1  | CAGTTGGTAAA  | 0.448 |             |
| + | 11 | 2688  | g_Mutation_p.G57   | NM_019590    | NP_062536    | Q5T5P2 | SKT_HUMAN    |                           | 7  | AGTGGGAGAGG  | 0.517 |             |
| - | 6  | 518   | _uc001jka.1_Splic  | NM_007057    | NP_008988    | O95229 | ZWINT_HUMAN  |                           | 0  | TTCTCCTGCCAC | 0.537 |             |
| + | 2  | 269   |                    | NM_003338    | NP_003329    | P51668 | UB2D1_HUMAN  |                           | 2  | AGCGGATCCAC  | 0.388 |             |
| + | 4  | 569   | q.1_Missense_Mu    | NM_018344    | NP_060814    | Q9BZD2 | S29A3_HUMAN  | ical; (Potential).        | 0  | GTGTCTGCATGG | 0.547 |             |
| - | 15 | 2777  | LG5_uc009xru.1_I   | NM_004747    | NP_004738    | Q8TDM6 | DLG5_HUMAN   |                           | 8  | GCCACGGTCCC  | 0.682 |             |
| - | 2  | 758   | nc.1_Nonsense_M    | NM_001017924 | NP_001017924 | A6NDA9 | LRIT2_HUMAN  | LRRCT.                    | 2  | CTTCATGCAAGC | 0.547 |             |
| + | 12 | 1863  | .P11_uc001kef.2_I  | NM_133447    | NP_597704    | Q8TF27 | AGA11_HUMAN  | PH.                       | 0  | GCTGGGTGACT  | 0.542 |             |
| + | 2  | 703   | .3_Intron LIPA_ucl | NM_001010987 | NP_001010987 | Q5T764 | IFT1B_HUMAN  | TPR 4.                    | 0  | AAAACGAGCTG  | 0.438 |             |
| - | 1  | 641   |                    | NR_002319    |              |        |              |                           | 0  | TGTGGGTAATG  | 0.502 |             |
| - | 3  | 145   | .Intron SORBS1_u   | NM_001034954 | NP_001030126 | Q9BX66 | SRBS1_HUMAN  |                           | 1  | AGAGCGTGCGC  | 0.478 |             |
| - | 5  | 827   | f.1_Missense_Mut   | NM_012465    | NP_036597    | Q9Y6L7 | TLL2_HUMAN   | otease (By similarity).   | 3  | TTTCTCATCCG  | 0.483 |             |
| + | 5  | 1136  | RC1_uc010qqj.1_I   | NM_015062    | NP_055877    | Q5VV67 | PPRC1_HUMAN  |                           | 3  | GGTGCGACAGG  | 0.587 |             |
| - | 1  | 441   | IC2_uc009xxx.2_Ir  | NR_026715    |              |        |              |                           | 0  | CCAGGTGCCCC  | 0.537 |             |

|   |    |      |                                                  |              |              |        |             |                               |     |               |       |             |
|---|----|------|--------------------------------------------------|--------------|--------------|--------|-------------|-------------------------------|-----|---------------|-------|-------------|
| + | 12 | 1327 |                                                  | NM_000936    | NP_000927    | P16233 | LIPP_HUMAN  | PLAT.                         | 3   | AACCTTACCTAGA | 0.368 |             |
| + | 3  | 182  | PRP1_uc001cn.2_                                  | NM_006229    | NP_006220    | P54315 | LIPR1_HUMAN |                               | 2   | ACACCCGCTTCC  | 0.542 | rs115887041 |
| - | 13 | 946  | N4_uc001dz.2_iv                                  | NM_213649    | NP_998814    | Q6P4A7 | SFXN4_HUMAN | ical; (Potential).            | 1   | AAATGGCACCA   | 0.393 |             |
| + | 15 | 1927 |                                                  | NM_014937    | NP_055752    | Q9Y2H2 | SAC2_HUMAN  |                               | 2   | AGCTTTGCATAAC | 0.393 |             |
| - | 9  | 1547 | XM2_uc001lhj.2_F                                 | NM_198148    | NP_937791    | Q8N436 | CPXM2_HUMAN |                               | 2   | GTGGACGATGC   | 0.652 |             |
| + | 8  | 1009 | _p.T292M PHRF1_                                  | NM_020901    | NP_065952    | Q9P1Y6 | PHRF1_HUMAN | Arg-rich.                     | 0   | CTCCACGGCCA   | 0.667 |             |
| - | 21 | 2666 |                                                  | NM_005961    | NP_005952    | Q6W4X9 | MUC6_HUMAN  | VWFD 3.                       | 1   | CCTCCCCGTAG   | 0.662 |             |
| - | 2  | 790  |                                                  | NM_030774    | NP_110401    | Q9H255 | O51E2_HUMAN | ellular (Potential).          | 5   | ATTACATCCTGC  | 0.512 | rs146553571 |
| + | 5  | 1385 | BR_uc001mcr.2_l                                  | NM_176875    | NP_795344    | P32239 | GASR_HUMAN  | lasmic (Potential).           | 8   | GCTTTCGCCAG   | 0.642 |             |
| + | 12 | 3149 | p.R843W NAV2_u                                   | NM_145117    | NP_660093    | Q8IVL1 | NAV2_HUMAN  |                               | 6   | TGGTACGGGAG   | 0.567 |             |
| - | 18 | 2971 | rk.3_Missense_Mu                                 | NM_018490    | NP_060960    | Q9BXB1 | LGR4_HUMAN  | lasmic (Potential).           | 1   | TGATGGAAACT   | 0.448 |             |
| + | 14 | 1701 | n.1_Missense_ML                                  | NM_024662    | NP_078938    | Q9H0A0 | NAT10_HUMAN |                               | 2   | GCTGTGCCTGG   | 0.557 |             |
| - | 10 | 1314 |                                                  | NM_002334    | NP_002325    | O75096 | LRP4_HUMAN  | GF-like 1; calcium-binding    | 4   | TGTGCCCATCT   | 0.552 |             |
| - | 3  | 253  |                                                  | NM_006093    | NP_006084    | Q9Y2Y8 | PRG3_HUMAN  |                               | 0   | AGTCTCTCTCC   | 0.547 |             |
| + | 2  | 234  | i_p.S32L CLP1_uc                                 | NM_006831    | NP_006822    | Q92989 | CLP1_HUMAN  |                               | 1   | TACAGTCAGTTC  | 0.473 |             |
| + | 8  | 1284 | i.2_Missense_Mut                                 | NM_207341    | NP_997224    | P60852 | ZP1_HUMAN   | llular (Potential). ZP.       | 0   | ACTATGGGGAG   | 0.602 |             |
| + | 12 | 2131 | M2A_uc001ojy.2_                                  | NM_012308    | NP_036440    | Q9Y2K7 | KDM2A_HUMAN |                               | 9   | TGGCTGGGGAC   | 0.527 |             |
| - | 21 | 3328 | l1opz.2_Missense_                                | NM_012309    | NP_036441    | Q9UPX8 | SHAN2_HUMAN |                               | 5   | GGCTCCGGCGA   | 0.701 |             |
| + | 1  | 363  |                                                  | NM_001012710 | NP_001012728 | Q6L8G5 | KR510_HUMAN | repeats of C-C-X-P.           | 1   | GGGGGGCTGTG   | 0.657 |             |
| + | 15 | 1751 | n_p.R132* UVRAC                                  | NM_003369    | NP_003360    | Q9P2Y5 | UVRAG_HUMAN |                               | 6   | GACATCGAAAAC  | 0.532 |             |
| + | 2  | 433  |                                                  | NM_153696    | NP_710163    | Q9HBA9 | FOH1B_HUMAN |                               | 6   | GAATACGCTTAT  | 0.328 |             |
| + | 11 | 1343 | AD2_uc009yvy.2_                                  | NM_005467    | NP_005458    | Q9Y3Q0 | NALD2_HUMAN | (Potential). NAALADase.       | 2   | GCTGGGATGCA   | 0.378 |             |
| + | 9  | 1350 | s.1_RNA PIWIL4_u                                 | NM_152431    | NP_689644    | Q7Z3Z4 | PIWL4_HUMAN | PAZ.                          | 1   | AGCTCTGCTTTC  | 0.473 |             |
| - | 15 | 2165 | ofs.2_Missense_M                                 | NM_016156    | NP_057240    | Q13614 | MTMR2_HUMAN |                               | 1   | GACAGGAGTGA   | 0.443 |             |
| + | 31 | 5075 | M_uc001pke.1_M                                   | NM_000051    | NP_000042    | Q13315 | ATM_HUMAN   |                               | 240 | TTAGATCCTTTTC | 0.294 |             |
| + | 7  | 1201 | i.2_Missense_Mut                                 | NM_015157    | NP_055972    | Q86UU1 | PHLB1_HUMAN |                               | 0   | GCCCCGCTGG    | 0.627 | rs141040260 |
| - | 5  | 1559 | Orzi.1_Missense_n                                | NM_012101    | NP_036233    | Q14134 | TRI29_HUMAN |                               | 4   | TCTTACCTTTGGC | 0.572 |             |
| + | 23 | 3417 |                                                  | NM_003105    | NP_003096    | Q92673 | SORL_HUMAN  |                               | 15  | CTGCCGTGAGT   | 0.532 |             |
| - | 7  | 1130 | ize.1_Missense_M                                 | NM_003455    | NP_003446    | O95125 | ZN202_HUMAN | KRAB.                         | 1   | GCATACGGCCA   | 0.458 | rs140595866 |
| - | 7  | 1000 | SD4_uc009z bz.2_                                 | NM_032795    | NP_116184    | Q96CM3 | RUSD4_HUMAN |                               | 1   | GTAGCGGGCCT   | 0.582 |             |
| + | 11 | 1637 | p.R282W APLP2_                                   | NM_001642    | NP_001633    | Q06481 | APLP2_HUMAN | ellular (Potential).          | 3   | CCCTTACGGCGT  | 0.443 |             |
| - | 1  | 226  |                                                  | NM_020996    | NP_066276    | P10767 | FGF6_HUMAN  |                               | 3   | CGCGAGACCTG   | 0.647 |             |
| + | 15 | 3043 | e.2_Missense_Mu                                  | NM_004426    | NP_004417    | P78364 | PHC1_HUMAN  | SAM.                          | 2   | AAATTCGCTCAC  | 0.453 |             |
| - | 2  | 372  | hl.1_Missense_Mu                                 | NM_002336    | NP_002327    | O75581 | LRP6_HUMAN  | tracellular (Potential). Beta | 12  | TGTTCGTTTAA   | 0.443 | rs74887171  |
| + | 1  | 149  | i_p.A43P ETNK1_                                  | NM_018638    | NP_061108    | Q9HBU6 | EK1_HUMAN   |                               | 0   | CTGCCGCTCGC   | 0.632 |             |
| - | 4  | 788  | rjc.1_Missense_Mi                                | NM_175861    | NP_787057    | Q8IUR5 | TMTC1_HUMAN | ical; (Potential).            | 0   | CACAGGTCCCC   | 0.498 |             |
| - | 25 | 3240 | PO8_uc010s jt.1_M                                | NM_006390    | NP_006381    | O15397 | IPO8_HUMAN  |                               | 3   | AGAGGACTCCTT  | 0.403 |             |
| - | 5  | 766  | qj.3_Missense_Mutation_p.P223L HDAC7_uc001rqk.3_ | NM_015270    | NP_056085    | Q8WUI4 | HDAC7_HUMAN | pression 1 (By similarity).   | 2   | GGCTGGGGGGC   | 0.647 |             |
| - | 6  | 2123 | Y6_uc001rsi.3_Mi                                 | NM_175736    | NP_783863    | O43306 | ADCY6_HUMAN | lasmic (Potential).           | 0   | ATTTCCGCAAG   | 0.637 |             |
| - | 11 | 1270 | IL3_uc001rut.1_5f                                | NM_014033    | NP_054752    | Q8IVF7 | FMNL3_HUMAN | GBD/FH3.                      | 4   | AAACTCATACTG  | 0.542 |             |
| + | 1  | 377  | ismv.1_Nonsense_                                 | NM_175053    | NP_778223    | Q9H8H3 | MET7A_HUMAN |                               | 0   | GAGCTGGATAT   | 0.473 |             |
| - | 2  | 622  |                                                  | NM_175053    | NP_778223    | Q7RTS7 | K2C74_HUMAN | rod. Linker 1.                | 2   | GCCCTCAAGGAT  | 0.572 |             |
| - | 3  | 660  | s.1_Missense_Mut                                 | NM_032345    | NP_115721    | Q9BRP8 | WIBG_HUMAN  | ntial. eIF2A-like.            | 0   | GATCCGCTGCT   | 0.537 |             |
| + | 11 | 2096 |                                                  | NM_002332    | NP_002323    | Q07954 | LRP1_HUMAN  | ellular (Potential).          | 22  | ATATGGGGGCC   | 0.592 |             |
| + | 2  | 628  |                                                  | NM_031435    | NP_113623    | Q9H0W7 | THAP2_HUMAN | THAP-type.                    | 1   | TTAGGCGAAAA   | 0.368 |             |
| - | 3  | 479  | ldo.3_Missense_M                                 | NM_003297    | NP_003288    | P13056 | NR2C1_HUMAN | ction with KAT2B (By simila   | 1   | TGCATCTGGAG   | 0.433 |             |
| - | 2  | 388  |                                                  | NM_001031701 | NP_001026871 | Q86UY8 | NT5D3_HUMAN |                               | 3   | TCAGCGTGTGG   | 0.433 |             |

|   |    |           |                        |              |              |        |                                           |    |                 |       |             |
|---|----|-----------|------------------------|--------------|--------------|--------|-------------------------------------------|----|-----------------|-------|-------------|
| + | 4  | 471_472   | OLA>FS TCP11L2         | NM_152772    | NP_689985    | Q8N4U5 | T11L2_HUMAN                               | 3  | AGTTTGGCTGGT    | 0.292 |             |
| + | 20 | 2689      | se_Mutation_p.E12      | NM_130466    | NP_569733    | Q7Z3V4 | UBE3B_HUMAN                               | 4  | AGCTACGAGCAG    | 0.562 | rs145812083 |
| + | 24 | 2151      | af.1_Missense_Mu       | NM_014708    | NP_055523    | P50748 | KNTC1_HUMAN                               | 10 | AGTTGGGATTGG    | 0.368 |             |
| + | 19 | 2871      | p.E491G DNAH10         | NM_207437    | NP_997320    | Q8IVF4 | DYH10_HUMAN / similarity). Poly-Glu.      | 6  | GGGGGAGGAAG     | 0.388 |             |
| + | 2  | 294       | AM5_uc010tbr.1_F       | NM_018663    | NP_061133    | Q9NR77 | PXMP2_HUMAN ical; (Potential).            | 0  | GATGCCGTTTACC   | 0.498 |             |
| - | 3  | 434       |                        | NM_003045    | NP_003036    | P30825 | CTR1_HUMAN lasmic (Potential).            | 0  | CCCTCCGCCCGC    | 0.567 |             |
| - | 1  | 268       | RD13_uc010tec.1_       | NM_178006    | NP_821074    | Q9Y3M8 | STA13_HUMAN                               | 4  | CTGATGGCGTG     | 0.473 |             |
| - | 1  | 1876      | uc001uxv.1_Intron      | NM_032138    | NP_115514    | Q8WVZ9 | KBTB7_HUMAN Kelch 3.                      | 1  | GTTTCATCATTGAA  | 0.433 |             |
| + | 12 | 1642      | A16_uc010tfg.1_R       | NM_024561    | NP_078837    | Q6N069 | NAA16_HUMAN TPR 6.                        | 1  | ACACAGCTGAT     | 0.358 |             |
| - | 9  | 1459      | p.E321K CAB39L         | NM_030925    | NP_112187    | Q9H9S4 | CB39L_HUMAN                               | 0  | CTTCTCGTCAGC    | 0.468 |             |
| + | 12 | 2512      | idh.2_Missense_M       | NM_031915    | NP_114121    | Q96T68 | SETB2_HUMAN SET.                          | 2  | AGGGAGCACAA     | 0.403 |             |
| + | 7  | 1881      |                        | NM_005708    | NP_005699    | Q9Y625 | GPC6_HUMAN                                | 0  | GCACGTCCAAC     | 0.537 |             |
| + | 5  | 966       | ca.1_Missense_Ml       | NM_005561    | NP_005552    | P11279 | LAMP1_HUMAN ial). Second lumenal domai    | 2  | CCAACGGGACC     | 0.677 |             |
| - | 1  | 260       | i4P_uc001vwb.3_F       | NM_001145442 | NP_001138914 | A6NI47 | POTEM_HUMAN                               | 0  | CCAGGGGAAGC     | 0.592 |             |
| + | 3  | 443       | 9A2_uc001vys.2_!       | NM_014579    | NP_055394    | Q9NP94 | S39A2_HUMAN xellular (Potential).         | 3  | GATCAGCAAGT     | 0.463 |             |
| - | 2  | 428       | _p.E56D CDH24_!        | NM_022478    | NP_071923    | Q86UP0 | CAD24_HUMAN Extracellular (Potential).    | 1  | AGCATATTCCTC/   | 0.602 |             |
| - | 2  | 675       | wjb.2_Missense_M       | NM_020834    | NP_065885    | Q8IX15 | HOMEZ_HUMAN Pro-rich.                     | 0  | TCTGGGTAGGC     | 0.562 |             |
| + | 19 | 1701      | 16B_uc001wk.2_!        | NM_138360    | NP_612369    | Q8ND23 | LR16B_HUMAN LRR 10.                       | 5  | GTTTTTGGGCA/    | 0.562 |             |
| - | 27 | 3003      | p.R822C IPO4_uc        | NM_024658    | NP_078934    | Q8TEX9 | IPO4_HUMAN HEAT 6.                        | 1  | GTACCGGACAC/    | 0.617 |             |
| - | 9  | 1257      | S2_uc010tqm.1_F        | NM_006939    | NP_008870    | Q07890 | SOS2_HUMAN DH.                            | 2  | AATTCGGTCCAT    | 0.418 |             |
| + | 49 | 10122     | _p.R3298* SYNE2        | NM_015180    | NP_055995    | Q8WXH0 | SYNE2_HUMAN ic (Potential). Potential.    | 14 | CTCTTCGAAAA/    | 0.463 |             |
| - | 19 | 4301      | p.R1416Q SPTB_!        | NM_000347    | NP_000338    | P11277 | SPTB1_HUMAN Spectrin 11.                  | 11 | ACATCCGATTG/    | 0.522 |             |
| - | 32 | 5972      | VE26_uc001xkc.3        | NM_015346    | NP_056161    | Q68DK2 | ZFY26_HUMAN p.R1945Q(1)                   | 11 | GTCCTCCGTGCA    | 0.627 |             |
| + | 6  | 1576      | _p.R377Q PCNX_!        | NM_014982    | NP_055797    | Q96RV3 | PCX1_HUMAN                                | 1  | CACACGGAGTA/    | 0.478 |             |
| - | 24 | 3934      |                        | NM_000428    | NP_000419    | Q14767 | LTBP2_HUMAN 12; calcium-binding (Poten    | 2  | CTCCTCCCCCA     | 0.642 |             |
| - | 4  | 1407      |                        | NM_000428    | NP_000419    | Q14767 | LTBP2_HUMAN                               | 2  | TACCCAGGGC      | 0.617 |             |
| + | 8  | 1028      |                        | NM_014239    | NP_055054    | P49770 | EI2BB_HUMAN                               | 1  | ACTACGTTCCCC    | 0.488 |             |
| + | 6  | 665       | _p.P154S TLL5_u        | NM_015072    | NP_055887    | Q6EMB2 | TLL5_HUMAN TTL.                           | 3  | TCCTCCCCCAG/    | 0.463 |             |
| + | 8  | 823       | LL5_uc010ask.1_!       | NM_015072    | NP_055887    | Q6EMB2 | TLL5_HUMAN TTL.                           | 3  | ATTTTGGTCTCC    | 0.393 |             |
| + | 15 | 3276      | _p.R297C NRXN!         | NM_004796    | NP_004787    | Q9Y4C0 | NRX3A_HUMAN xellular (Potential).         | 10 | AGAATCGCTCT/    | 0.418 |             |
| - | 4  | 794       | xvg.1_Missense_!       | NM_015859    | NP_056943    | P52655 | TF2AA_HUMAN                               | 1  | AATCTGGAACA/    | 0.353 |             |
| - | 4  | 368       | l4orf143_uc001xx!      | NM_145231    | NP_660274    | Q9BUY7 | EFC11_HUMAN EF-hand 2.                    | 0  | TACTTCGTTCC/    | 0.333 |             |
| + | 1  | 624       |                        | NM_003403    | NP_003394    | P25490 | TYY1_HUMAN Glu-rich (acidic).             | 0  | aggaggacgacgacg | 0.289 |             |
| - | 2  | 410       | qb.2_Missense_M        | NM_145701    | NP_663747    | Q9BXL8 | CDCA4_HUMAN                               | 1  | CCCACGCTGCA/    | 0.667 |             |
| + | 15 | 1710      | P1_uc010aya.1_M        | NM_014608    | NP_055423    | Q7L576 | CYFP1_HUMAN                               | 9  | GGGGCGAGAAG     | 0.627 |             |
| - | 9  | 1170      | C2P2_uc010ayf.1_Intron |              |              |        |                                           | 0  | GATGACAGGAG/    | 0.388 |             |
| + | 68 | 9948      | r.2_Missense_Mut       | NM_001036    | NP_001027    | Q15413 | RYR3_HUMAN                                | 10 | CTTCGCGATGG     | 0.418 |             |
| - | 3  | 2346      | uck.1_Missense_!       | NM_007223    | NP_009154    | Q14439 | GP176_HUMAN lasmic (Potential).           | 6  | GCCTACCTTGG/    | 0.527 |             |
| - | 22 | 2682      | ase_Mutation_p.A!      | NM_004573    | NP_004564    | Q00722 | PLCB2_HUMAN                               | 8  | AGAGCGCAGGC     | 0.607 |             |
| - | 5  | 1036      |                        | NM_013309    | NP_037441    | O14863 | ZNT4_HUMAN ic (Potential). His-rich.      | 0  | GTGACGGTGAC     | 0.438 |             |
| - | 26 | 3775_3776 | 'Flank MYO5A_uc        | NM_000259    | NP_000250    | Q9Y411 | MYO5A_HUMAN Potential.                    | 4  | CTTGCGGTCCAC    | 0.569 |             |
| - | 82 | 10955     | ha.2_Missense_M        | NM_020821    | NP_065872    | Q709C8 | VP13C_HUMAN                               | 2  | TCCTCCAACCTT!   | 0.343 |             |
| + | 6  | 3854      |                        | NM_015042    | NP_055857    | O15014 | ZN609_HUMAN                               | 3  | AGCCAGCCCCA     | 0.517 |             |
| + | 4  | 686       | x.1_Missense_Mu        | NM_016166    | NP_057250    | O75925 | PIAS1_HUMAN PINIT.                        | 2  | AGTACAGGTCC/    | 0.353 |             |
| + | 10 | 1862      | _p.D235N THSD4_        | NM_024817    | NP_079093    | Q6ZMP0 | THSD4_HUMAN                               | 2  | CATCCAGACAGA    | 0.587 |             |
| - | 5  | 334       | bis.2_Missense_M       | NM_001012642 | NP_001012660 | Q8IUY3 | GRAM2_HUMAN GRAM.                         | 0  | AGCCGGCCCT/     | 0.567 |             |
| - | 10 | 6608      |                        | NM_001897    | NP_001888    | Q6UVK1 | CSPG4_HUMAN intaining. Neurite growth inl | 3  | CCACGCTGTAG/    | 0.682 |             |



|   |    |      |                     |              |              |        |             |                               |    |                 |       |             |
|---|----|------|---------------------|--------------|--------------|--------|-------------|-------------------------------|----|-----------------|-------|-------------|
| - | 7  | 545  | 'bdo.2_Splice_Site  | NM_025234    | NP_079510    | Q9GZS3 | WDR61_HUMAN |                               | 2  | :GGACTCTGTTC/   | 0.418 |             |
| + | 9  | 845  | 2bem.2_Splice_Si    | NM_206839    | NP_996670    | Q9UBU8 | MO4L1_HUMAN |                               | 0  | :AACAGGTAACT    | 0.333 |             |
| + | 2  | 941  | 1qa.1_Missense_IV   | NM_001039958 | NP_001035047 | Q0VG99 | MESP2_HUMAN |                               | 0  | :GTCTCCAGAGC/   | 0.587 |             |
| - | 7  | 1049 | 1o.2_Nonsense_Mi    | NM_003981    | NP_003972    | O43663 | PRC1_HUMAN  | itial. Dimerization.          | 2  | :CACTCGAATTG/   | 0.448 |             |
| + | 38 | 4931 | 1uc002cio.1_Misse   | NM_145294    | NP_660337    | Q96KV7 | WDR90_HUMAN |                               | 1  | :TGCCACCACGG    | 0.652 |             |
| - | 13 | 1346 | 3_3'UTR CCDC78      | NM_001031737 | NP_001026907 | A2IDD5 | CCD78_HUMAN |                               | 1  | :CCATCGTGGCC/   | 0.657 |             |
| - | 1  | 130  |                     | NM_001010878 | NP_001010878 | Q4G0I0 | CSMT1_HUMAN |                               | 0  | :GGCTCGGCTTC    | 0.652 |             |
| + | 1  | 1027 | 1o10uwy.1_5'Flank   | NM_003450    | NP_003441    | Q15697 | ZN174_HUMAN | SCAN box.                     | 0  | :GCTCTGCCGTC    | 0.582 |             |
| - | 2  | 1495 |                     | NM_001116    | NP_001107    | O60503 | ADCY9_HUMAN | lasmic (Potential).           | 6  | :TCCCGTGCATA/   | 0.542 |             |
| - | 11 | 2556 | 1uzv.1_Missense_I   | NM_014647    | NP_055462    | Q9Y4F3 | LKAP_HUMAN  |                               | 0  | :CATTTGCAAATC   | 0.498 |             |
| - | 16 | 2113 | 1dx.2_Missense_Mi   | NM_002474    | NP_002465    | P35749 | MYH11_HUMAN | . Actin-binding (By similarit | 15 | :TGTTCGCGTAGC/  | 0.647 |             |
| - | 6  | 651  | 1A2_uc010bxo.1_F    | NM_015044    | NP_055859    | Q9UJY4 | GGA2_HUMAN  | GAT.                          | 2  | :ACCTTGAGACTTT/ | 0.458 |             |
| - | 6  | 1169 | 1240D SEZ6L2_uc     | NM_201575    | NP_963869    | Q6UXD5 | SE6L2_HUMAN | xtracellular (Potential).     | 2  | :CAGTGCCCCCA    | 0.652 |             |
| - | 5  | 410  | 1EPT1_uc010veq.1_   | NM_052838    | NP_443070    | Q8WYJ6 | SEPT1_HUMAN |                               | 1  | :AATCTCTACGCC   | 0.582 |             |
| + | 19 | 3288 | 1se_Mutation_p.R8   | NM_006662    | NP_006653    | Q6ZRS2 | SRCAP_HUMAN |                               | 4  | :GCACCCGCTCT    | 0.557 |             |
| + | 6  | 644  | 1ag.2_Intron HSD3I  | NM_025193    | NP_079469    | Q9H2F3 | 3BHS7_HUMAN |                               | 0  | :TCCGTGGGGGG    | 0.677 |             |
| + | 7  | 665  | 1p.1_Missense_Mu    | NM_005353    | NP_005344    | Q13349 | ITAD_HUMAN  | ilar (Potential). VWFA.       | 1  | :AATCCGGACC/    | 0.587 | rs145982469 |
| + | 2  | 569  | 1M2_uc010cdu.2_I    | NM_144673    | NP_653274    | Q8TAZ6 | CKLF2_HUMAN | MARVEL.                       | 1  | :GCCATTCATAGAT  | 0.488 |             |
| + | 7  | 2160 | 1_p.P387L CES2_u    | NM_003869    | NP_003860    | O00748 | EST2_HUMAN  |                               | 0  | :GCACCCCAGG     | 0.572 |             |
| + | 3  | 628  | 1Start_Site SLC9A   | NM_004594    | NP_004585    | Q14940 | SL9A5_HUMAN | ical; (Potential).            | 2  | :TGGCCGTGCTA    | 0.572 |             |
| + | 3  | 1495 | 1utation_p.G429* N  | NM_173165    | NP_775188    | Q12968 | NFAC3_HUMAN | RHD.                          | 3  | :CATTTTGACAAI   | 0.428 |             |
| - | 4  | 634  |                     | NM_144676    | NP_653277    | Q8WW62 | TMED6_HUMAN | ical; (Potential).            | 1  | :AGTTCACGTAGT   | 0.418 |             |
| - | 3  | 1605 | 1p.A400V FTSJD1_    | NM_001099642 | NP_001093112 | Q8IYT2 | FTSJ1_HUMAN |                               | 1  | :GTATAGCACAAAT  | 0.303 |             |
| - | 4  | 742  | 1NF23_uc002fag.2_   | NM_145911    | NP_666016    | P17027 | ZNF23_HUMAN |                               | 0  | :GCCACGTCCCTC   | 0.557 |             |
| - | 14 | 2225 | 1.2_Intron PMFBP1   | NM_031293    | NP_112583    | Q8TBY8 | PMFBP_HUMAN | Potential.                    | 2  | :GTTGAGAGAGG/   | 0.448 |             |
| + | 2  | 167  | 1ZFP1_uc010cgs.2_   | NM_153688    | NP_710155    | Q6P2D0 | ZFP1_HUMAN  |                               | 2  | :AAAAATGAACAA/  | 0.368 |             |
| + | 11 | 1077 | 1rg.1_Missense_Mi   | NM_002661    | NP_002652    | P16885 | PLCG2_HUMAN |                               | 8  | :ACGCGGTGGAC    | 0.493 |             |
| + | 8  | 1566 | 1nw.1_Missense_M    | NM_178452    | NP_848547    | Q8NEP3 | DAAF1_HUMAN | Pro-rich.                     | 0  | :AGATCAAGAGC/   | 0.612 |             |
| - | 9  | 894  | 1LHDC4_uc002fkk.:   | NM_017566    | NP_060036    | Q8TBB5 | KLDC4_HUMAN | Kelch 4.                      | 2  | :GAGTCCAAACCI   | 0.587 |             |
| + | 8  | 1208 |                     | NM_030928    | NP_112190    | Q9H211 | CDT1_HUMAN  |                               | 1  | :CCTGCGCTCTG/   | 0.672 | rs143840572 |
| - | 9  | 2020 | 1Zfnc.1_Missense_I  | NM_013275    | NP_037407    | Q6UB99 | ANR11_HUMAN | Ser-rich.                     | 6  | :AGGAGGCAGAG    | 0.632 |             |
| + | 4  | 550  | 1Zfpi.1_Missense_IV | NM_006086    | NP_006077    | Q13509 | TBB3_HUMAN  |                               | 3  | :CGACCGCATCAT   | 0.642 |             |
| - | 42 | 6910 | 1.P_uc002ftd.2_5'Fl | NM_006445    | NP_006436    | Q6P2Q9 | PRP8_HUMAN  |                               | 6  | :GAAACGGTCCG    | 0.572 |             |
| + | 6  | 999  | 1.1_Intron PAFAH1   | NM_000430    | NP_000421    | P43034 | LIS1_HUMAN  | on with dynein and dynactin   | 1  | :TTGAACGAAACT   | 0.423 |             |
| - | 1  | 79   |                     | NM_002550    | NP_002541    | P47881 | OR3A1_HUMAN | ellular (Potential).          | 3  | :TGGCTGCAGCC/   | 0.567 |             |
| - | 33 | 5339 | 1EF1_uc002fxi.2_Int | NM_015113    | NP_055928    | O43149 | ZZEF1_HUMAN |                               | 4  | :TGGATCTTCCTC   | 0.473 |             |
| + | 3  | 343  | 1utation_p.D39N A   | NM_004313    | NP_004304    | P32121 | ARRB2_HUMAN |                               | 0  | :CCTGTAGGTAAG   | 0.577 |             |
| - | 16 | 2842 | 1_p.A911S CAMTA     | NM_015099    | NP_055914    | O94983 | CMTA2_HUMAN |                               | 1  | :GAGGGCAGGAA    | 0.592 |             |
| + | 5  | 451  | 1e_Mutation_p.G65   | NM_000747    | NP_000738    | P11230 | ACHB_HUMAN  | ellular (Potential).          | 2  | :CGACGGCTCCG    | 0.522 |             |
| + | 2  | 292  | 1.5'Flank CYB5D1    | NM_203411    | NP_981956    | Q6PEY1 | TMM88_HUMAN | ical; (Potential).            | 0  | :TCACCGGATTC/   | 0.692 |             |
| + | 16 | 2609 | 1p.G830* ARHGEF     | NM_173728    | NP_776089    | O94989 | ARHGF_HUMAN |                               | 3  | :CTGTTGGATCT    | 0.602 |             |
| + | 49 | 9345 | 1o.2_Missense_Mu    | NM_001372    | NP_001363    | Q9NYC9 | DYH9_HUMAN  | ' similarity). Potential.     | 20 | :CTGCCAGGAA     | 0.507 |             |
| - | 2  | 195  | 1O2gqt.1_Intron TN  | NM_012452    | NP_036584    | O14836 | TR13B_HUMAN | . Extracellular (Potential).  | 2  | :CACAGGTGCGC    | 0.597 |             |
| + | 14 | 2031 | 1_p.V659I MPRIP_    | NM_201274    | NP_958431    | Q6WCQ1 | MPRIP_HUMAN | iction with RHOA.             | 0  | :CCCCGTCCAC     | 0.602 |             |
| - | 12 | 1473 | 1on.1_Missense_Mi   | NM_000386    | NP_000377    | Q13867 | BLMH_HUMAN  |                               | 1  | :CACTCATCTGT/   | 0.473 |             |
| - | 2  | 982  | 1.2_Intron NF1_uc   | NM_002544    | NP_002535    | P23515 | OMGP_HUMAN  | Ser/Thr-rich.                 | 2  | :ATATTTGGGTAG/  | 0.398 |             |
| + | 12 | 1940 | 1j.2_Missense_Muti  | NM_013975    | NP_039269    | P49916 | DNL13_HUMAN |                               | 9  | :TCTGTGTGAGC/   | 0.478 |             |

|   |    |      |                   |              |              |        |             |                                |     |                 |       |             |
|---|----|------|-------------------|--------------|--------------|--------|-------------|--------------------------------|-----|-----------------|-------|-------------|
| + | 18 | 2378 | ηjc.2_Missense_M  | NM_173167    | NP_775259    | Q8IWX7 | UN45B_HUMAN | ARM 3.                         | 6   | AGGAGAGGGCC     | 0.547 |             |
| + | 8  | 1208 | cwb.2_Missense_f  | NM_004448    | NP_004439    | P04626 | ERBB2_HUMAN | cellular (Potential).          | 143 | GTGACAGCAGAG    | 0.592 |             |
| - | 4  | 963  |                   | NM_019016    | NP_061889    | Q2M2I5 | K1C24_HUMAN | od. Linker 12.                 | 0   | AGCATTGATTTCT   | 0.507 |             |
| - | 3  | 693  |                   | NM_181535    | NP_853513    | Q7Z3Y7 | K1C28_HUMAN | od. Coil 1B.                   | 1   | CTCTGGTTCGGT    | 0.502 |             |
| - | 1  | 394  |                   | NM_031854    | NP_114060    | Q9BQ66 | KR412_HUMAN | C-[GRQVIL]-[SPTR]-[VST         | 0   | ctggggcggcagcaA | 0.313 |             |
| - | 1  | 120  |                   | NM_002278    | NP_002269    | Q14532 | K1H2_HUMAN  | Head.                          | 0   | CAGGCCGGGGGC    | 0.622 |             |
| - | 8  | 1479 | e_Mutation_p.S40  | NM_021991    | NP_068831    | P14923 | PLAK_HUMAN  | ARM 5.                         | 5   | CCACACTCAGC     | 0.582 |             |
| - | 14 | 1601 | e_Mutation_p.P53  | NM_001096    | NP_001087    | P53396 | ACLY_HUMAN  |                                | 3   | ACTTGGGACTG     | 0.562 |             |
| - | 11 | 1224 | n_p.R221H EZH1    | NM_001991    | NP_001982    | Q92800 | EZH1_HUMAN  |                                | 3   | GGCGACGACCA     | 0.557 |             |
| + | 5  | 679  | nf.1_Missense_Mu  | NM_000151    | NP_000142    | P35575 | G6PC_HUMAN  | ical; (Potential).             | 4   | CCACAGCATCTA    | 0.468 |             |
| - | 2  | 544  | ldab.1_Missense_l | NM_024819    | NP_079095    | Q8WVC6 | DCAKD_HUMAN | DPCK.                          | 0   | CTCCTTCATCAT    | 0.617 |             |
| + | 5  | 1630 |                   | NM_014726    | NP_055541    | A7MCY6 | TBKB1_HUMAN | Potential.                     | 0   | GGGAGCTGAAG     | 0.697 |             |
| + | 4  | 427  | _p.H28N LUC7L3    | NM_006107    | NP_006098    | O95232 | LC7L3_HUMAN |                                | 0   | GAGGCCATGCT     | 0.433 |             |
| + | 1  | 383  |                   | NM_203425    | NP_982249    | Q86X59 | CQ082_HUMAN |                                | 0   | GGCGGGATCCC     | 0.721 |             |
| + | 12 | 2157 | _p.V622M TANC2    | NM_025185    | NP_079461    | Q9HCD6 | TANC2_HUMAN |                                | 2   | TGGCAGTGGCC     | 0.493 |             |
| - | 3  | 716  | Mutation_p.G162F  | NM_000873    | NP_000864    | P13598 | ICAM2_HUMAN | 2. Extracellular (Potential).  | 1   | CTTCCGAAGG      | 0.617 | rs149059683 |
| - | 6  | 1224 | EKHM1P_uc010wc    | NR_024386    |              |        |             |                                | 0   | CTGCTGAGGCC     | 0.667 |             |
| + | 13 | 992  | nse_Mutation_p.M  | NM_003835    | NP_003826    | O75916 | RGS9_HUMAN  |                                | 4   | AAGATGCGAGT     | 0.522 |             |
| + | 10 | 1270 | wrg.1_Intron TMEI | NM_017728    | NP_060198    | Q8NE00 | TM104_HUMAN | ical; (Potential).             | 0   | AATCCCCATC      | 0.622 |             |
| - | 4  | 1114 | e_Mutation_p.P23i | NM_032134    | NP_115510    | Q9H0J4 | QRIC2_HUMAN |                                | 5   | GCCAGGAAATG     | 0.498 |             |
| + | 4  | 1781 | _p.T394I TNR6C6   | NM_018996    | NP_061869    | Q9HCJ0 | TNR6C_HUMAN | ith argonaute family proteir   | 2   | AACTACAGCAA     | 0.532 |             |
| + | 2  | 133  | 3R2_uc002juv.1_l  | NM_004710    | NP_004701    | O43760 | SGN2_HUMAN  | .. Helical; (Potential).       | 0   | TCTTCGCCTTG     | 0.622 |             |
| - | 4  | 1387 | TL4_uc010dkj.2_5  | NM_022840    | NP_073751    | Q8N3J2 | METL4_HUMAN |                                | 2   | CCATTTACATA     | 0.378 |             |
| - | 11 | 1997 | se_Mutation_p.R4  | NM_024899    | NP_079175    | Q8TAP6 | CEP76_HUMAN |                                | 0   | CTTACCGAAGA     | 0.348 |             |
| - | 1  | 581  | TEC_uc010xaj.1_f  | NM_001137671 | NP_001131143 | B2RU33 | POTEC_HUMAN |                                | 3   | GCCCATGTTGC     | 0.587 |             |
| - | 2  | 217  |                   | NM_145756    | NP_665699    | Q96N95 | ZN396_HUMAN |                                | 0   | CTTCTCTTCCA     | 0.483 |             |
| + | 5  | 448  | ATNAL2_uc002lcr   | NM_031303    | NP_112593    | Q8IYT4 | KATL2_HUMAN |                                | 4   | CACTCGCCTGG     | 0.483 | rs148023825 |
| - | 2  | 1271 |                   | NM_016626    | NP_057710    | Q5U5Q3 | MEX3C_HUMAN | p.A424D(1)                     | 4   | GCCACGCAGAG     | 0.448 |             |
| + | 3  | 1209 | lr.1_Missense_Mu  | NM_005215    | NP_005206    | P43146 | DCC_HUMAN   | potential). Ig-like C2-type 2. | 17  | GACATTGGAATT    | 0.498 |             |
| - | 3  | 593  | nse_Mutation_p.P1 | NM_021153    | NP_066976    | Q9H159 | CAD19_HUMAN | Extracellular (Potential).     | 2   | TCATAAGGTTC     | 0.363 |             |
| + | 1  | 1564 | lqu.1_Nonsense_l  | NM_017757    | NP_060227    | Q9C0G0 | ZN407_HUMAN |                                | 2   | AGGGCCAGGGG     | 0.577 |             |
| + | 2  | 1679 | ra.2_Missense_Ml  | NM_171999    | NP_741996    | Q9BXA9 | SALL3_HUMAN |                                | 4   | CGCCTCCAGCG     | 0.756 |             |
| - | 2  | 369  | _p.R39C SLC39A    | NM_144564    | NP_653165    | Q9BRY0 | S39A3_HUMAN | lasmic (Potential).            | 0   | CGAGCGATGGG     | 0.547 |             |
| - | 6  | 736  | o.R160W DPP9_uc   | NM_139159    | NP_631898    | Q86TI2 | DPP9_HUMAN  |                                | 1   | TTCCTCCCTCC     | 0.632 |             |
| - | 12 | 1622 | _p.T267I GTF2F1   | NM_002096    | NP_002087    | P35269 | T2FA_HUMAN  |                                | 0   | TGGGTGTTGTC     | 0.637 |             |
| + | 6  | 806  | _Mutation_p.V218  | NM_145245    | NP_660288    | Q96CN4 | EVI5L_HUMAN | ab-GAP TBC.                    | 1   | TCTGTGTGTTCC    | 0.652 |             |
| + | 5  | 1298 | uc002mnr.1_5'Flan | NM_000201    | NP_000192    | P05362 | ICAM1_HUMAN | 4. Extracellular (Potential).  | 1   | GACCAGAGGTG     | 0.642 | rs143008699 |
| + | 4  | 1932 | e_Mutation_p.S62  | NM_144566    | NP_653167    | Q9H0M5 | ZN700_HUMAN | :2H2-type 14.                  | 0   | TTCAGTTGTGC     | 0.483 |             |
| + | 4  | 1934 | e_Mutation_p.C62  | NM_144566    | NP_653167    | Q9H0M5 | ZN700_HUMAN | :2H2-type 14.                  | 0   | TAGTTGTGCTC     | 0.483 |             |
| + | 5  | 1163 | ng.1_Missense_M   | NM_023072    | NP_075560    | Q9H7M6 | ZSWM4_HUMAN |                                | 2   | CGCGGCATGA      | 0.692 |             |
| + | 7  | 994  | 15_uc002mxu.2_5   | NM_138353    | NP_612362    | Q66K64 | DCA15_HUMAN |                                | 1   | TCCCGCGGCC      | 0.687 |             |
| - | 13 | 1231 | S15L1_uc002nea    | NM_021235    | NP_067058    | Q9UBC2 | EP15R_HUMAN |                                | 5   | CTTTTCTCGAAT    | 0.403 |             |
| + | 7  | 1309 |                   | NM_000453    | NP_000444    | Q92911 | SC5A5_HUMAN | cellular (Pot)21L(1) p.P321    | 4   | TGCCCAGACC      | 0.468 | rs149570759 |
| - | 13 | 1397 | p.G427D GMIP_uc   | NM_016573    | NP_057657    | Q9P107 | GMIP_HUMAN  |                                | 1   | CGCCACCCACG     | 0.642 |             |
| + | 4  | 1708 |                   | NM_031218    | NP_112495    | P35789 | ZNF93_HUMAN |                                | 1   | ATACTAGAGAG     | 0.358 |             |
| - | 4  | 1447 | p.K353E ZNF708    | NM_021269    | NP_067092    | P17019 | ZN708_HUMAN |                                | 6   | GTTTCTTCCAG     | 0.343 |             |
| + | 4  | 1693 | 429_uc010ecu.1_l  | NM_001001415 | NP_001001415 | Q86V71 | ZN429_HUMAN | :2H2-type 14.                  | 2   | CTTTATCCTGTC    | 0.378 |             |

|   |    |           |                                                                               |              |              |        |             |                               |    |               |       |             |
|---|----|-----------|-------------------------------------------------------------------------------|--------------|--------------|--------|-------------|-------------------------------|----|---------------|-------|-------------|
| + | 4  | 1578      | cy.2_Missense_Mi                                                              | NM_033468    | NP_258429    | Q9Y2Q1 | ZN257_HUMAN | :2H2-type 11.                 | 0  | TTAACCAGTCTTC | 0.408 |             |
| - | 3  | 1913      |                                                                               | NM_001001411 | NP_001001411 | Q8N7Q3 | ZN676_HUMAN |                               | 0  | TTGTAGGGTTTCT | 0.418 |             |
| - | 7  | 2699      |                                                                               | NM_001080409 | NP_001073878 |        |             |                               | 2  | GTCCGAGAAATTG | 0.353 | rs55891931  |
| - | 4  | 1027      | rj.1_Missense_Mu                                                              | NM_003430    | NP_003421    | Q05481 | ZNF91_HUMAN | :2H2-type 6.                  | 0  | AAAGAATGGCTA  | 0.413 |             |
| - | 4  | 1655      | p.S436P ZNF681                                                                | NM_138286    | NP_612143    | Q96N22 | ZN681_HUMAN |                               | 0  | GTAGGATTTCTC  | 0.373 |             |
| + | 1  | 133       | Intron C19orf2_ucf                                                            | NM_003796    | NP_003787    | O94763 | RMP_HUMAN   |                               | 2  | TGCGCGAGGAG   | 0.781 |             |
| - | 2  | 2575      |                                                                               | NM_020856    | NP_065907    | Q63HK5 | TSH3_HUMAN  |                               | 8  | GCGGCGAGTTT   | 0.532 |             |
| - | 1  | 217       | Jxrq.1_Missense_I                                                             | NM_019849    | NP_062823    | Q9NS82 | AAA1_HUMAN  |                               | 2  | CCCTGGGACTG   | 0.751 |             |
| + | 4  | 690       | A165V LSM14A_uc                                                               | NM_001114093 | NP_001107565 | Q8ND56 | LS14A_HUMAN |                               | 1  | TTCTGCCTTTAC  | 0.358 |             |
| + | 15 | 1773      | D1A_uc010xsf.1_                                                               | NM_020895    | NP_065946    | Q96CP6 | GRM1A_HUMAN |                               | 0  | ATGCCCGGGGC   | 0.692 |             |
| + | 3  | 576       |                                                                               | NM_015073    | NP_055888    | O60292 | SI1L3_HUMAN |                               | 2  | GGGTGGGCGAT   | 0.647 |             |
| - | 2  | 519       | e_Mutation_p.R13                                                              | NM_002781    | NP_002772    | Q15238 | PSG5_HUMAN  | g-like V-type.                | 3  | TAGTCTATCAC   | 0.473 |             |
| - | 2  | 1433      | iv.2_Missense_Mu                                                              | NM_001007561 | NP_001007562 | Q8WZA9 | IRGQ_HUMAN  |                               | 2  | TGGGAGTCCGC   | 0.716 |             |
| - | 4  | 719       | p.P126S C19orf6                                                               | NM_019108    | NP_061981    | Q9H0W8 | SMG9_HUMAN  | Pro-rich.                     | 0  | AGGGGGTGGTG   | 0.682 |             |
| + | 5  | 1748      | p.H419L ZNF225                                                                | NM_013362    | NP_037494    | Q9UK10 | ZN225_HUMAN | :2H2-type 12.                 | 0  | TACCCATCGTAG  | 0.373 |             |
| + | 6  | 985       | yl.3_Missense_Mi                                                              | NM_006630    | NP_006621    | Q14588 | ZN234_HUMAN | :2H2-type 3.                  | 0  | TCCACACTGT    | 0.413 |             |
| - | 1  | 1902_1903 |                                                                               | NM_032040    | NP_114429    | Q9H0W5 | CCDC8_HUMAN | Potential.                    | 3  | CCCTCCTCAGC   | 0.609 |             |
| + | 3  | 409       | X_uc010elm.1_Rl                                                               | NM_000554    | NP_000545    | O43186 | CRX_HUMAN   | Homeobox.                     | 2  | ATGCCCGTGAG   | 0.632 |             |
| + | 12 | 2549      | lx.2_Missense_M                                                               | NM_000836    | NP_000827    | O15399 | NMDE4_HUMAN | cellular (Potential).         | 6  | TGAGCGGCTG    | 0.507 |             |
| - | 4  | 943       | A4_uc002pjo.2_5'                                                              | NM_017708    | NP_060178    | Q2M2I3 | FA83E_HUMAN |                               | 1  | GCGCAGGTGGG   | 0.721 |             |
| - | 10 | 2685      | kh.2_Missense_M                                                               | NM_017805    | NP_060275    | Q5U651 | RAIN_HUMAN  | Dilute.                       | 1  | TTTCCGGAAGA   | 0.572 |             |
| + | 4  | 255       | BL2_uc002pls.1_F                                                              | NM_006666    | NP_006657    | Q9Y230 | RUVB2_HUMAN | ATP.                          | 0  | GGGCACGGGGA   | 0.562 |             |
| - | 3  | 498       | p.L102P PIH1D1                                                                | NM_017916    | NP_060386    | Q9NWS0 | PIHD1_HUMAN |                               | 0  | GGGGGAGTGGC   | 0.542 | rs146926384 |
| + | 3  | 512       | pyv.3_Missense_Mutation_p.D168N SIGLECP3_uc002pvz.3_Missense_Mutation_p.D168N |              |              |        |             |                               | 0  | GCCCCGACATC   | 0.622 |             |
| - | 5  | 1819      |                                                                               | NM_014650    | NP_055465    | O94892 | ZN432_HUMAN | :2H2-type 11.                 | 3  | TAAACATCAGTCC | 0.433 |             |
| + | 6  | 1245      |                                                                               | NM_001099694 | NP_001093164 | Q96N58 | ZN578_HUMAN | :2H2-type 4.                  | 0  | CCATCATAGGTC  | 0.428 |             |
| + | 4  | 2549      | dw.1_Missense_M                                                               | NM_138374    | NP_612383    | Q96IR2 | ZN845_HUMAN | :2H2-type 22.                 | 0  | CAAGAACTTCC   | 0.418 |             |
| - | 2  | 299       | x.2_Intron ZNF154                                                             | NM_001085384 | NP_001078853 | Q13106 | ZN154_HUMAN | KRAB.                         | 0  | TGTACGGCCACA  | 0.512 |             |
| - | 6  | 1006      | hp.1_Missense_Iv                                                              | NM_025027    | NP_079303    | Q8WXB4 | ZN606_HUMAN | KRAB.                         | 2  | AGTGCCTGAG    | 0.532 |             |
| + | 7  | 540       | G2_uc010ewi.2_Ir                                                              | NM_018968    | NP_061841    | Q9NY99 | SNTG2_HUMAN |                               | 3  | TGACAGGTGCA   | 0.428 |             |
| + | 1  | 417_418   |                                                                               | NM_080657    | NP_542388    | Q8WXG1 | RSAD2_HUMAN |                               | 0  | CACAGCCAAAAC  | 0.51  |             |
| + | 3  | 482       | yjc.1_Missense_M                                                              | NM_003597    | NP_003588    | O14901 | KLF11_HUMAN |                               | 2  | CATAACTCCTCC  | 0.408 |             |
| + | 15 | 2460      | bo.1_Missense_M                                                               | NM_014668    | NP_055483    | Q4ZG55 | GREB1_HUMAN |                               | 1  | GTTTTCTGCTGGA | 0.363 |             |
| - | 6  | 723       |                                                                               | NM_000384    | NP_000375    | P04114 | APOB_HUMAN  | Vitellogenin.                 | 27 | TGCCACATTGCT  | 0.507 |             |
| - | 2  | 1508      | ya.2_Missense_M                                                               | NM_025203    | NP_079479    | Q9H6R7 | CB044_HUMAN |                               | 2  | TTTTCTATTGCT  | 0.373 |             |
| - | 6  | 836       | REF1_uc010eyr.                                                                | NM_006569    | NP_006560    | Q99674 | CGRE1_HUMAN |                               | 1  | TCTTTAGCCTC   | 0.677 | rs11889832  |
| + | 1  | 5330      | 1_5'Flank ZNF512                                                              | NM_032266    | NP_115642    | Q68DN1 | CB016_HUMAN | m repeat of P-S-E-R-S-H-I     | 1  | TTCAGTCCCTC   | 0.537 |             |
| + | 49 | 3508      | B1_uc002rme.1_I                                                               | NM_153021    | NP_694566    | Q6P1J6 | PLB1_HUMAN  | ate repeats. Extracellular (F | 9  | TGGCAGCGGAA   | 0.567 |             |
| - | 10 | 959       |                                                                               | NM_000379    | NP_000370    | P47989 | XDH_HUMAN   | inding PCMH-type.             | 8  | GTCCGGTCCAT   | 0.517 |             |
| - | 4  | 1270      | qf.1_Missense_Mi                                                              | NM_005813    | NP_005804    | Q94806 | KPCD3_HUMAN |                               | 4  | TACCTCTTCACT  | 0.408 |             |
| - | 32 | 5144      | DA_uc002rsx.3_M                                                               | NM_001083953 | NP_001077422 | Q6YHU6 | THADA_HUMAN |                               | 3  | GATTTTCTTCAT  | 0.493 |             |
| - | 1  | 219       | P2_uc002rxq.3_Ir                                                              | NM_001003937 | NP_001003937 | Q8N831 | TSYL6_HUMAN |                               | 0  | CTCTGTGCC     | 0.617 |             |
| + | 5  | 1808      |                                                                               | NM_019002    | NP_061875    | Q9NY74 | ETAA1_HUMAN |                               | 4  | ATCTAGGCAGT   | 0.338 |             |
| - | 17 | 1894      | sj.2_Nonsense_IV                                                              | NM_015189    | NP_056004    | Q9Y2D4 | EXC6B_HUMAN |                               | 2  | TGTCTCTGGAA   | 0.418 |             |
| + | 2  | 260       |                                                                               | NM_001080474 | NP_001073943 | A6NCI8 | CB078_HUMAN | Ser-rich.                     | 2  | ATTCTCGGCAG   | 0.438 |             |
| - | 1  | 194       | nse_Mutation_p.F                                                              | NM_001015055 | NP_001015055 | Q9BST9 | RTKN_HUMAN  |                               | 1  | GGAAGCGGCC    | 0.701 |             |
| + | 13 | 1947      | p.D648Y CTNNA2                                                                | NM_004389    | NP_004380    | P26232 | CTNA2_HUMAN |                               | 9  | GATTATGATGTC  | 0.458 |             |

|   |    |           |                     |              |              |        |             |                               |    |                   |       |             |
|---|----|-----------|---------------------|--------------|--------------|--------|-------------|-------------------------------|----|-------------------|-------|-------------|
| - | 8  | 1106      |                     | NM_005735    | NP_005726    | P42025 | ACTY_HUMAN  |                               | 1  | GTGAGACACGA       | 0.592 |             |
| - | 5  | 604       | nse_Mutation_p.P'   | NM_175735    | NP_783862    | Q86SG7 | LYG2_HUMAN  |                               | 1  | CACGTGGGGAAT      | 0.478 |             |
| + | 2  | 674       |                     | NM_001099289 | NP_001092759 | Q8TEJ3 | SH3R3_HUMAN | SH3 1.                        | 1  | GCGGCACAAGG       | 0.607 |             |
| + | 3  | 1315      | e.2_Missense_Mu     | NM_012455    | NP_036587    | Q8NDX1 | PSD4_HUMAN  |                               | 2  | ggatgtgtcgatctgat | 0.139 |             |
| - | 35 | 4352      | ry.1_RNA CLASP1     | NM_015282    | NP_056097    | Q7Z460 | CLAP1_HUMAN | DB2 and RSN. Potential. In    | 2  | CCTTCCGTTCC'      | 0.567 |             |
| - | 3  | 707       |                     | NM_001099771 | NP_001093241 | A5A3E0 | POTEF_HUMAN |                               | 5  | GTGGCAGCACCC      | 0.617 |             |
| - | 11 | 1628      | _p.P430L ACVR1_     | NM_001111067 | NP_001104537 | Q04771 | ACVR1_HUMAN | Potential). Protein kinase.   | 3  | AGAACGGTGGC       | 0.458 |             |
| - | 26 | 3656      | :21B_uc002udj.1_I   | NM_024753    | NP_079029    | Q7Z4L5 | TT21B_HUMAN |                               | 5  | GGCTCGTGGAG       | 0.403 |             |
| - | 27 | 5786      | uc002udp.2_Intror   | NM_002977    | NP_002968    | Q15858 | SCN9A_HUMAN |                               | 13 | CAGATCCATGGC      | 0.463 |             |
| - | 66 | 12371     |                     | NM_004525    | NP_004516    | P98164 | LRP2_HUMAN  | ellular (Potential).          | 29 | AAGGAGAGCTA'      | 0.363 |             |
| - | 47 | 8966      |                     | NM_004525    | NP_004516    | P98164 | LRP2_HUMAN  | : A 21. Extracellular (Potent | 29 | IGATGCACCTC'      | 0.448 |             |
| + | 31 | 3748      | _Mutation_p.G117    | NM_138995    | NP_620482    | Q8WXR4 | MYO3B_HUMAN |                               | 19 | AAAAGGGTGCG       | 0.358 |             |
| + | 6  | 808       | zdm.1_Missense_     | NM_015530    | NP_056345    | Q9H8Y8 | GORS2_HUMAN |                               | 2  | GTACACCTATTAC     | 0.403 |             |
| - | 10 | 1562      |                     | NM_173648    | NP_775919    | Q6ZP82 | CC141_HUMAN |                               | 10 | GCTGAGCAAGG       | 0.433 |             |
| - | 10 | 1327      | rp.2_Missense_Mt    | NM_020943    | NP_065994    | Q9HCG8 | CWC22_HUMAN | MIF4G.                        | 0  | TTTCCGTACAG'      | 0.388 |             |
| - | 2  | 1044      | :KL_uc002uod.1_I    | NM_002500    | NP_002491    | Q13562 | NDF1_HUMAN  |                               | 1  | TCCATCAAAGG'      | 0.547 |             |
| + | 13 | 3176      | jd.1_Missense_Mt    | NM_000534    | NP_000525    | P54277 | PMS1_HUMAN  |                               | 4  | CAGTGCCTCTA'      | 0.393 | rs142159998 |
| - | 11 | 958       | rv.2_Missense_Mt    | NM_014362    | NP_055177    | Q6NVY1 | HIBCH_HUMAN |                               | 0  | CTAGGGCAAAA'      | 0.398 |             |
| - | 38 | 6274      |                     | NM_018897    | NP_061720    | Q8WXX0 | DYH7_HUMAN  | 3 (By similarity).            | 12 | TGGGAGGTTGA'      | 0.403 |             |
| - | 11 | 2764      | itl.1_Missense_Mu   | NM_020760    | NP_065811    | Q9P2P5 | HECW2_HUMAN | 1 with TP73. Potential.       | 18 | CCGCCGGTTCA'      | 0.493 |             |
| + | 3  | 341       | Ofsl.1_Missense_M   | NM_025147    | NP_079423    | Q9H8M1 | CQ10B_HUMAN |                               | 0  | AGTATCGGGAGT      | 0.279 |             |
| + | 23 | 3484      | nse_Mutation_p.F    | NM_152526    | NP_689739    | Q8TEW8 | PAR3L_HUMAN |                               | 4  | CAGATCCTGTA'      | 0.433 |             |
| + | 3  | 493       | 2vfw.2_Missense_I   | NM_001142310 | NP_001135782 | Q96HH4 | TM169_HUMAN | ellular (Pote p.R56H(1)       | 1  | CTACCGCTCAG'      | 0.517 | rs143856543 |
| - | 4  | 908       | 269K TUBA4B_ucf     | NM_006000    | NP_005991    | P68366 | TBA4A_HUMAN |                               | 3  | CTGCTCGTGGT.      | 0.582 |             |
| + | 2  | 228       |                     | NM_080671    | NP_542402    | Q8WWG9 | KCNE4_HUMAN |                               | 1  | CCGTGCGGCCG       | 0.612 |             |
| - | 4  | 1338      | 'SMD1_uc002vrm.1    | NM_000867    | NP_000858    | P41595 | 5HT2B_HUMAN | smic (By similarity).         | 0  | TTTCCGGTGAC'      | 0.463 |             |
| + | 14 | 1956_1957 | n.3_RNA DIS3L2_     | NM_152383    | NP_689596    | Q8IYB7 | DI3L2_HUMAN |                               | 3  | ACTCTGGACCAC      | 0.426 |             |
| + | 10 | 2079      | _Missense_Mutati    | NM_023083    | NP_075571    | Q9HC96 | CAN10_HUMAN | Domain III 2.                 | 6  | CCTGCCGGACA'      | 0.672 |             |
| + | 2  | 1199      | 110A_uc002weh.1     | NM_001042353 | NP_001035812 | Q9BQ89 | F110A_HUMAN |                               | 0  | GGCTCGGGAGA       | 0.627 |             |
| + | 4  | 688       | 3B_uc010zqz.1_In    | NM_001819    | NP_001810    | P05060 | SCG1_HUMAN  |                               | 6  | GAGGCGGGCAC       | 0.617 |             |
| - | 2  | 223       | uc002wqu.1_RNA      | NM_001099407 | NP_001092877 | Q9NVP4 | CT012_HUMAN |                               | 1  | CACTGAACCA'       | 0.323 |             |
| + | 22 | 2774      | e_Mutation_p.D88    | NM_015585    | NP_056400    | Q8NHU2 | CT026_HUMAN |                               | 4  | ACCGGATGCG.       | 0.642 |             |
| - | 11 | 905       |                     | NM_080675    | NP_542406    | Q8TC36 | SUN5_HUMAN  | SUN.                          | 1  | ITGGACAGGTAA      | 0.572 |             |
| - | 7  | 491       |                     | NM_080675    | NP_542406    | Q8TC36 | SUN5_HUMAN  |                               | 1  | TTTATGCTGTCAT     | 0.413 |             |
| + | 21 | 2408      | 98_splice ITCH_uc   | NM_031483    | NP_113671    | Q96J02 | ITCH_HUMAN  |                               | 6  | TCAGGTGAGAG'      | 0.333 |             |
| + | 10 | 1027      | l2vi.1_Splice_Site_ | NM_003116    | NP_003107    | Q9NPE6 | SPAG4_HUMAN |                               | 0  | CTGCAGCCCA'       | 0.502 |             |
| + | 17 | 1728      | NBL1_uc002xhi.2_    | NM_030877    | NP_110517    | Q8WYA6 | CTBL1_HUMAN |                               | 2  | GAGCCCGGAGT       | 0.602 |             |
| - | 3  | 1821      | xhm.2_Missense_     | NM_014657    | NP_055472    | Q43156 | TTI1_HUMAN  |                               | 0  | CTCAACCTCCAC      | 0.408 |             |
| + | 4  | 609       | ljo.1_Missense_Mt   | NM_182811    | NP_877963    | P19174 | PLCG1_HUMAN | EF-hand.                      | 8  | TTTACTCAGTGG'     | 0.567 |             |
| + | 19 | 2315      | we.1_Missense_M     | NM_182811    | NP_877963    | P19174 | PLCG1_HUMAN | SH2 2.                        | 8  | AGTTGCACAGC       | 0.527 |             |
| - | 31 | 6087      |                     | NM_032221    | NP_115597    | Q8TD26 | CHD6_HUMAN  |                               | 14 | TTTTTACTTTTGA     | 0.433 |             |
| + | 2  | 343       | xlv.2_Missense_Mt   | NM_000457    | NP_000448    | P41235 | HNF4A_HUMAN | uclear receptor.              | 3  | CTTCCGGAGGA'      | 0.542 |             |
| - | 2  | 280       | aj.3_Missense_Mu    | NM_001336    | NP_001327    | Q9UBR2 | CATZ_HUMAN  |                               | 1  | AGGCCGGGGGT       | 0.642 |             |
| + | 6  | 876       | H26_uc010zzy.1_F    | NM_177980    | NP_817089    | Q8IXH8 | CAD26_HUMAN | Extracellular (Potential).    | 4  | CATTGGATGA'       | 0.373 |             |
| + | 28 | 1510      | A3_uc002ydn.2_5     | NM_001853    | NP_001844    | Q14050 | CO9A3_HUMAN | ical region 3 (COL3).         | 0  | AGGGCGTCCCG       | 0.657 |             |
| - | 16 | 6390_6391 | s.1_Missense_Mu     | NM_033081    | NP_149072    | Q9BTC0 | DIDO1_HUMAN |                               | 6  | GGCCTCCTCCC'      | 0.738 |             |
| + | 10 | 1901      | _p.A215S MYT1_u     | NM_004535    | NP_004526    | Q01538 | MYT1_HUMAN  |                               | 2  | CCATTGCTGCC'      | 0.547 |             |

|   |    |      |                   |              |              |        |              |                             |    |              |       |             |
|---|----|------|-------------------|--------------|--------------|--------|--------------|-----------------------------|----|--------------|-------|-------------|
| - | 8  | 2514 |                   | NM_006988    | NP_008919    | Q9UHI8 | ATS1_HUMAN   | Cys-rich.                   | 6  | AGTGGAATCTG  | 0.423 |             |
| - | 1  | 1107 |                   | NM_006988    | NP_008919    | Q9UHI8 | ATS1_HUMAN   |                             | 6  | CCCTTCGCCTC  | 0.677 |             |
| + | 2  | 834  |                   | NM_030891    | NP_112153    | Q9BY71 | LRR3_HUMAN   |                             | 0  | AGTTTGTGGGG  | 0.652 |             |
| + | 3  | 530  |                   | NM_001848    | NP_001839    | P12109 | CO6A1_HUMAN  | terminal globular domain.   | 1  | CGTGGGGTGAG  | 0.662 |             |
| + | 4  | 1755 | FH_uc003afp.2_inr | NM_021076    | NP_066554    | P12036 | NFH_HUMAN    | -S-P-[AEPV]-[EAK]-[AEVK]    | 0  | CACCCCTGAG   | 0.567 |             |
| + | 12 | 1378 | uc003aht.2_RNA f  | NM_012429    | NP_036561    | O76054 | S14L2_HUMAN  |                             | 0  | CACCCCGAAAT  | 0.512 |             |
| - | 7  | 800  | RP7A_uc003bcp.2   | NM_015703    | NP_056518    | Q9Y3A4 | RRP7A_HUMAN  |                             | 2  | CTCCTCGAACT  | 0.662 |             |
| - | 1  | 2837 |                   | NM_014246    | NP_055061    | Q9NYQ6 | CELR1_HUMAN  | r (Potential). Cadherin 7.  | 11 | CGGACGTGGGC  | 0.647 |             |
| + | 4  | 664  | e.2_Intron TBC1D; | NM_014346    | NP_055161    | Q8WUA7 | TB22A_HUMAN  |                             | 1  | CGCTGGGTGGC  | 0.642 |             |
| - | 11 | 1481 |                   | NM_001080447 | NP_001073916 |        |              |                             | 2  | CCCTGGGCCACC | 0.627 |             |
| - | 7  | 623  | K11_uc010hay.1_f  | NM_002751    | NP_002742    | Q15759 | MK11_HUMAN   | rotein kinase.              | 2  | TGCCCGGTACC  | 0.632 |             |
| - | 1  | 296  | _uc011asa.1_Miss  | NM_001145137 | NP_001138609 | Q92523 | CPT1B_HUMAN  | lasmic (Potential).         | 2  | TGATGCGGATC  | 0.607 |             |
| + | 10 | 1736 | r_p.C443Y TLL3    | NM_001025930 | NP_001021100 | Q9Y4R7 | TLL3_HUMAN   | TTL.                        | 2  | CAACTGTGACA  | 0.607 |             |
| - | 2  | 590  | ww.2_Missense_IV  | NM_001001331 | NP_001001331 | Q01814 | AT2B2_HUMAN  | lasmic (Potential).         | 6  | TGCCCCATAAG  | 0.597 |             |
| - | 12 | 1620 | xx.2_Missense_IV  | NM_024923    | NP_079199    | Q8TEM1 | PO210_HUMAN  | lenal (Probable).           | 11 | GATCACACTGA  | 0.572 |             |
| + | 13 | 1833 | zi.2_Missense_Mu  | NM_003298    | NP_003289    | P49116 | NR2C2_HUMAN  | inding (By similarity).     | 0  | CTACCCGTGAG  | 0.448 |             |
| - | 5  | 822  | n_p.R70* ZFYVE2   | NM_022340    | NP_071735    | Q9H1K0 | RBNS5_HUMAN  |                             | 2  | TGCTCGATCAT  | 0.423 |             |
| + | 2  | 298  | TAC_uc011aya.1_I  | NM_003149    | NP_003140    | Q99469 | STAC_HUMAN   |                             | 4  | CACCTCCTGCT  | 0.557 | rs149439391 |
| + | 10 | 1348 | sense_Mutation_p  | NM_001248    | NP_001239    | O75355 | ENTP3_HUMAN  | ellular (Potential).        | 1  | TGCCCGCTCTT  | 0.438 | rs144319630 |
| - | 10 | 1394 |                   | NM_144719    | NP_653320    | Q8IYE1 | CCD13_HUMAN  | Potential.                  | 1  | CAGCTACCATG  | 0.597 |             |
| - | 1  | 1541 | mg.2_Intron CYP8  | NM_004391    | NP_004382    | Q9UNU6 | CP8B1_HUMAN  |                             | 2  | ACGATCGTACT  | 0.557 |             |
| + | 4  | 361  | _p.R111Q EXOSC    | NM_015004    | NP_055819    | Q15024 | EXOS7_HUMAN  |                             | 0  | TCTATCGGATAT | 0.453 |             |
| - | 8  | 1112 | VT_uc003cwy.2_IV  | NM_000481    | NP_000472    | P48728 | GCST_HUMAN   |                             | 1  | TGGGGGCCCCC  | 0.622 |             |
| + | 2  | 558  | o.3_Intron GRM2_  | NM_000839    | NP_000830    | Q14416 | GRM2_HUMAN   | ellular (Potential).        | 1  | TTGTGCGTGCC  | 0.622 |             |
| - | 1  | 36   | H_uc003ded.3_5'   | NM_003280    | NP_003271    | P63316 | TNNC1_HUMAN  |                             | 0  | TGTAGATGTATC | 0.607 |             |
| + | 18 | 2044 | H_uc011bek.1_Inl  | NM_002217    | NP_002208    | Q06033 | ITI3_HUMAN   |                             | 3  | ACATCGATGAAC | 0.592 |             |
| - | 11 | 2459 | rt.1_Missense_Mu  | NM_015576    | NP_056391    | O15083 | ERC2_HUMAN   | Potential.                  | 2  | CACCTCCTTGAC | 0.468 |             |
| + | 21 | 3780 | se_Mutation_p.Y2f | NM_002841    | NP_002832    | P23470 | PTPRG_HUMAN  | ), Tyrosine-protein phosphi | 7  | ATCCAGTATCAC | 0.507 |             |
| - | 7  | 1691 | _p.G444V CADPS_   | NM_003716    | NP_003707    | Q9ULU8 | CAPS1_HUMAN  | C2.                         | 3  | GGGTGCCCCAG  | 0.517 |             |
| - | 9  | 1074 | _G2_uc010hob.2_   | NM_003848    | NP_003839    | Q96I99 | SUCB2_HUMAN  |                             | 2  | CTGTGAGCAAT  | 0.413 |             |
| - | 8  | 1051 | M86D_uc003dpq.    | NR_024241    |              |        |              |                             | 0  | CATAGGGAAC   | 0.527 |             |
| + | 5  | 1410 | ipn.2_Missense_IV | NM_145037    | NP_659474    | Q969Y0 | FA55C_HUMAN  |                             | 3  | TTGACAGCAGCA | 0.493 |             |
| - | 3  | 1321 | dn.2_Missense_Mu  | NM_001146156 | NP_001139628 | P49841 | GSK3B_HUMAN  | rotein kinase.              | 2  | AATAACGCAATC | 0.343 |             |
| - | 9  | 2136 |                   | NM_022776    | NP_073613    | Q9BXB4 | OSB11_HUMAN  |                             | 5  | TACCTCGCTTTI | 0.453 |             |
| + | 3  | 881  |                   | NM_007117    | NP_009048    | P20396 | TRH_HUMAN    |                             | 1  | gggggCTGTGGG | 0.428 |             |
| - | 3  | 1166 | L2_uc003eqh.1_A   | NM_016201    | NP_057285    | Q9Y2J4 | AMOL2_HUMAN  |                             | 1  | CCACAGCAGGT  | 0.672 |             |
| - | 14 | 1587 | RN1_uc003euu.2_   | NM_019001    | NP_061874    | Q8IZH2 | XRN1_HUMAN   |                             | 3  | TAAAAGGTTTTT | 0.358 |             |
| + | 1  | 1602 |                   | NM_003412    | NP_003403    | Q15915 | ZIC1_HUMAN   | 2-type 2; atypical.         | 2  | TCCGCGTGCAC  | 0.577 |             |
| - | 2  | 551  | ECOM_uc010hwn.    | NM_004991    | NP_004982    | Q03112 | EVI1_HUMAN   |                             | 14 | TGTGGCAGGAG  | 0.483 |             |
| + | 8  | 782  | _p.E168* FXR1_uc  | NM_005087    | NP_005078    | P51114 | FXR1_HUMAN   |                             | 1  | CCATTGAGCTAC | 0.418 |             |
| - | 16 | 1859 | _p.R562C CLCN2_   | NM_004366    | NP_004357    | P51788 | CLCN2_HUMAN  | smic (By similarity).       | 0  | CACACGCACCC  | 0.642 |             |
| - | 12 | 1466 | y.2_Missense_Mul  | NM_004454    | NP_004445    | P41161 | ETV5_HUMAN   | ETS.                        | 5  | CCAGCGCCGAG  | 0.542 |             |
| + | 6  | 984  | 11bus.1_Missense  | NM_182524    | NP_872330    | Q7Z310 | Q7Z310_HUMAN |                             | 0  | AAGAAAATTCAT | 0.378 |             |
| + | 5  | 1197 | 141_uc003gab.2_I  | NM_003441    | NP_003432    | Q15928 | ZN141_HUMAN  | 2H2-type 7.                 | 0  | CTACACATGTG  | 0.408 |             |
| - | 8  | 1056 | k.1_Missense_Mul  | NM_005255    | NP_005246    | O14976 | GAK_HUMAN    | rotein kinase.              | 4  | AGACCGTGTAC  | 0.607 |             |
| - | 5  | 909  | bwe.1_Missense_   | NM_020416    | NP_065149    | Q9Y2T4 | 2ABG_HUMAN   | WD 3.                       | 4  | TGACGGAGATG  | 0.572 |             |
| + | 15 | 2419 | o.R795W MAN2B2    | NM_015274    | NP_056089    | Q9Y2E5 | MA2B2_HUMAN  |                             | 2  | TCCACCGCGG   | 0.647 |             |



|   |    |         |                   |              |              |        |              |                            |    |              |       |             |
|---|----|---------|-------------------|--------------|--------------|--------|--------------|----------------------------|----|--------------|-------|-------------|
| - | 7  | 842     | Missense_Mutat    | NM_000320    | NP_000311    | P09417 | DHPR_HUMAN   |                            | 1  | TCGGTCGGTTT  | 0.458 |             |
| - | 3  | 416     |                   | NM_018176    | NP_060646    | Q8N0V4 | LG12_HUMAN   | LRR 1.                     | 0  | GTCCAGCAAAA  | 0.388 |             |
| + | 3  | 271     | C4_uc003grp.2_5   | NM_013367    | NP_037499    | Q9UJX5 | APC4_HUMAN   |                            | 5  | TTCATCGACTGC | 0.348 |             |
| - | 9  | 1426    |                   | NM_173536    | NP_775807    | Q8N1C3 | GBRG1_HUMAN  | lasmic (Probable).         | 2  | AAGATCCTGTT  | 0.408 | rs75184362  |
| + | 12 | 2443    | gxl.1_Missense_I  | NM_020453    | NP_065186    | Q9P241 | AT10D_HUMAN  | lasmic (Potential).        | 3  | TTTGGGACCAT  | 0.502 |             |
| - | 4  | 2304    |                   | NM_001024611 | NP_001019782 | Q68CR7 | LRC66_HUMAN  |                            | 3  | ATTTCCTGGA   | 0.468 |             |
| + | 2  | 1090    | RA_uc003haa.2_    | NM_133267    | NP_573574    | Q9BZM3 | GSX2_HUMAN   |                            | 0  | GCGTCGGGAGC  | 0.612 |             |
| - | 15 | 2180    | hgl.2_Missense_I  | NM_014243    | NP_055058    | O15072 | ATS3_HUMAN   | Spacer.                    | 2  | CTTCACGGTT   | 0.433 |             |
| + | 62 | 9831    | ic.1_Missense_Mt  | NM_025074    | NP_079350    | Q86XX4 | FRAS1_HUMAN  | Extracellular (Potential). | 5  | CACTAGTCCTTG | 0.488 |             |
| - | 8  | 748     | Mutation_p.S177   | NM_016242    | NP_057326    | Q9ULC0 | MUCEN_HUMAN  | extracellular (Potential). | 0  | ATAATACCTAAA | 0.398 |             |
| - | 4  | 511     | _p.T111 EMCN_u    | NM_016242    | NP_057326    | Q9ULC0 | MUCEN_HUMAN  | extracellular (Potential). | 0  | GAAAGTGAACA  | 0.363 |             |
| + | 2  | 542     | ihk.1_Missense_I  | NM_012118    | NP_036250    | Q9UK39 | NOCT_HUMAN   |                            | 1  | GGGCCGTCCTG  | 0.557 |             |
| + | 3  | 1382    | _p.S388F TLR2_uc  | NM_003264    | NP_003255    | O60603 | TLR2_HUMAN   | extracellular (Potential). | 3  | GCCCTCTCTAC  | 0.348 |             |
| + | 7  | 1129    | _p.E302K FGB_uc   | NM_005141    | NP_005132    | P02675 | FIBB_HUMAN   | rogen C-terminal.          | 3  | AGAATGAAGCC  | 0.463 |             |
| + | 17 | 2042    | jd.1_Nonsense_M   | NM_021634    | NP_067647    | Q9HBX9 | RXFP1_HUMAN  | Name=7; (Potential).       | 0  | TGCTTCAGGTA  | 0.274 |             |
| + | 5  | 2981    | irr.2_Missense_Mt | NM_014269    | NP_055084    | Q9UKF5 | ADA29_HUMAN  | . 4. 9 X 9 AA approximate  | 16 | AACCTCGGGTG  | 0.577 | rs144239698 |
| - | 10 | 1094    | mk.1_Missense_M   | NM_017755    | NP_060225    | Q08J23 | NSUN2_HUMAN  |                            | 1  | AGCTCAAAGC   | 0.333 |             |
| + | 19 | 2391    | _p.R720H TARS_u   | NM_152295    | NP_689508    | P26639 | SYTC_HUMAN   |                            | 2  | GGAACGCACCA  | 0.423 |             |
| - | 32 | 6402    | ejC5orf42_uc011c  | NM_023073    | NP_075561    | E9PH94 | E9PH94_HUMAN |                            | 7  | TGCTTACCTGAA | 0.343 |             |
| - | 32 | 4252    | R1434W RICTOR     | NM_152756    | NP_689969    | Q6R327 | RICTR_HUMAN  |                            | 10 | GGACCGCACTG  | 0.383 |             |
| - | 26 | 2587    | o.R855W RICTOR    | NM_152756    | NP_689969    | Q6R327 | RICTR_HUMAN  |                            | 10 | CTTCCGGTAAG  | 0.343 | rs140964083 |
| - | 10 | 1543    | v.2_Missense_Mut  | NM_001343    | NP_001334    | P98082 | DAB2_HUMAN   |                            | 3  | ATCACCATTAC  | 0.483 |             |
| - | 1  | 774     | 4_uc003jng.2_5'F  | NM_001014279 | NP_001014301 | Q3ZCQ2 | AX2R_HUMAN   |                            | 0  | CGGGAGGTGGC  | 0.612 |             |
| - | 7  | 921     | p.Q125K POC5_u    | NM_001099271 | NP_001092741 | Q8NA72 | POC5_HUMAN   | n-binding (CBR) 2.         | 1  | CTTTTGCTTGCC | 0.398 |             |
| + | 2  | 8668    |                   | NM_153610    | NP_705838    | Q8N3K9 | CMYA5_HUMAN  |                            | 9  | AATCTGTTCTTC | 0.398 |             |
| + | 1  | 676     | uc011ctk.1_Intron | NM_032567    | NP_115956    | Q9BXG8 | SPZ1_HUMAN   |                            | 1  | GGAGATGATATT | 0.358 |             |
| + | 10 | 1749    | khw.2_Missense_   | NM_001017971 | NP_001017971 | Q52LC2 | VAS1L_HUMAN  |                            | 0  | ACTGCGCCTCC  | 0.547 |             |
| - | 3  | 786_787 | in.2_Missense_M   | NM_001884    | NP_001875    | P10915 | HPLN1_HUMAN  | Link 1. p.G239E(1)         | 5  | AAAATCCGTAGT | 0.455 | rs139074313 |
| - | 1  | 305     | 129716_uc003kka   | NM_020801    | NP_065852    | Q96B67 | ARRD3_HUMAN  |                            | 2  | ACACAGGGACA  | 0.368 |             |
| - | 8  | 707     | bf.1_Missense_Mt  | NM_014639    | NP_055454    | Q6PGP7 | TTC37_HUMAN  |                            | 4  | CTGCGCGTGTT  | 0.353 |             |
| - | 8  | 1290    | SK1_uc010jbi.1_In | NM_000439    | NP_000430    | P29120 | NEC1_HUMAN   | Catalytic.                 | 2  | CTGGTCGGTGT  | 0.517 |             |
| + | 4  | 838     | _Intron SNCAIP_u  | NM_005460    | NP_005451    | Q9Y6H5 | SNCAP_HUMAN  |                            | 2  | TCTTTCTCCCG  | 0.483 |             |
| - | 3  | 564     | cx1.1_Missense_M  | NM_001098811 | NP_001092281 | Q92599 | SEPT8_HUMAN  |                            | 2  | TCTGATCCCCA  | 0.617 |             |
| - | 2  | 1479    | RNA1_uc003ldj.2   | NM_015564    | NP_056379    | O43300 | LRRT2_HUMAN  | lar (Potential). LRRCT.    | 0  | CAGGACTGTGG  | 0.522 |             |
| + | 12 | 1738    | ldi.2_Missense_I  | NM_001903    | NP_001894    | P35221 | CTNA1_HUMAN  |                            | 11 | AGGCCGGGCAG  | 0.522 | rs143060269 |
| + | 1  | 2396    |                   | NM_015669    | NP_056484    | Q9Y5E4 | PCDB5_HUMAN  | lasmic (Potential).        | 5  | CGGTGCCCGAG  | 0.667 |             |
| + | 1  | 2915    | B9_uc003liw.1_5'  | NM_020957    | NP_066008    | Q9NRJ7 | PCDBG_HUMAN  | Extracellular (Potential). | 2  | GGTGACCAAGG  | 0.701 |             |
| + | 1  | 2357    | x.1_Intron PCDHG  | NM_018922    | NP_061745    | Q9Y5G3 | PCDGD_HUMAN  | lasmic (Potential).        | 0  | TGTATGTGCCA  | 0.403 |             |
| + | 5  | 1271    | _p.R371H PPARG    | NM_133263    | NP_573570    | Q86YN6 | PRGC2_HUMAN  |                            | 0  | CTGCGCCAC    | 0.532 |             |
| - | 1  | 541     |                   | NM_000440    | NP_000431    | P16499 | PDE6A_HUMAN  | GAF 1.                     | 2  | GCCCACGATGC  | 0.547 |             |
| + | 19 | 2916    | 41_splice WWC1_   | NM_015238    | NP_056053    | Q8IX03 | KIBRA_HUMAN  |                            | 5  | GCCGGTAAGT   | 0.478 |             |
| + | 5  | 1033    |                   | NM_003862    | NP_003853    | O76093 | FGF18_HUMAN  |                            | 0  | AGACCCGGGAG  | 0.617 |             |
| - | 6  | 799     | se_Mutation_p.Y11 | NM_001001502 | NP_001001502 | Q16143 | SYUB_HUMAN   |                            | 1  | TCCTCATAACTC | 0.612 |             |
| - | 7  | 799     | uc003mez.2_5'F    | NM_002115    | NP_002106    | P52790 | HXK3_HUMAN   | Regulatory.                | 7  | CACACGGCCTG  | 0.582 | rs147991837 |
| - | 3  | 265     | se_Mutation_p.C44 | NM_018303    | NP_060773    | Q96KP1 | EXOC2_HUMAN  | IPT/TIG.                   | 7  | GTCCACAATGC  | 0.368 |             |
| + | 3  | 354_355 |                   | NM_004271    | NP_004262    | O95711 | LY86_HUMAN   |                            | 0  | TGTGCCAAGT   | 0.46  |             |
| - | 8  | 1545    | se_Mutation_p.G19 | NM_000332    | NP_000323    | P54253 | ATX1_HUMAN   |                            | 4  | GTGTCGGGCG   | 0.378 |             |

|   |    |           |                   |              |              |        |              |    |               |       |                                |
|---|----|-----------|-------------------|--------------|--------------|--------|--------------|----|---------------|-------|--------------------------------|
| + | 6  | 700       | .G127C CAP2_uc    | NM_006366    | NP_006357    | P40123 | CAP2_HUMAN   | 1  | AAACCTGGTCCT  | 0.408 |                                |
| + | 15 | 1909      | cp.1_Missense_M   | NM_153042    | NP_694587    | Q8NB78 | KDM1B_HUMAN  | 1  | TTTCGAGAAGCA  | 0.398 |                                |
| - | 1  | 313       | H3B_uc003nfs.1_!  | NM_003513    | NP_003504    | P04908 | H2A1B_HUMAN  | 0  | ACCCTGCGCGA   | 0.537 |                                |
| + | 5  | 1131      | _p.E155K BTN2A1   | NM_007049    | NP_008980    | Q7KYR7 | BT2A1_HUMAN  | 2  | AGGAAGAACTT   | 0.229 | lasmic (Potential).            |
| + | 6  | 1300      | ZKSCAN3_uc003r    | NM_024493    | NP_077819    | Q9BRR0 | ZKSC3_HUMAN  | 2  | ATCAGAGAGTCC  | 0.488 | 2H2-type 2.                    |
| + | 26 | 3702      | 003nyt.2_5'Flank  | NM_006929    | NP_008860    | Q15477 | SKIIV2_HUMAN | 4  | TGCGGCTGAG    | 0.617 |                                |
| - | 20 | 7337      |                   | NM_019105    | NP_061978    | P22105 | TENX_HUMAN   | 0  | CACACGCTGGC   | 0.627 | nectin type-III 16.            |
| - | 11 | 1326      | ra.1_Missense_Mt  | NM_005452    | NP_005443    | O15213 | WDR46_HUMAN  | 0  | CTGCCCTGCC    | 0.637 | WD 6.                          |
| + | 13 | 1530      | i.2_Intron PHF1_u | NM_024165    | NP_077084    | O43189 | PHF1_HUMAN   | 0  | GCAGCGGCTAC   | 0.572 |                                |
| - | 4  | 272       |                   | NM_138493    | NP_612502    | Q9P0B6 | CF129_HUMAN  | 0  | TTGCCGAAGAA   | 0.542 | Potential.                     |
| - | 8  | 3449      | 318_uc003ouw.2_I  | NM_014345    | NP_055160    | Q5VUA4 | ZN318_HUMAN  | 7  | CTTTTGCAGGA   | 0.453 |                                |
| - | 5  | 749       |                   | NM_152688    | NP_689901    | Q5VWX1 | KHDR2_HUMAN  | 11 | CTGACGAATTT   | 0.403 |                                |
| - | 8  | 2450      | y.2_Nonsense_Mt   | NM_001122769 | NP_001116241 | Q86VQ0 | LCA5_HUMAN   | 0  | FGTTTTAATCGGT | 0.383 |                                |
| + | 5  | 644       | _p.L128F DOPEY1   | NM_015018    | NP_055833    | Q5JWR5 | DOP1_HUMAN   | 4  | CAGTTTGTATGA  | 0.378 |                                |
| - | 50 | 7800      |                   | NM_014611    | NP_055426    | Q9NU22 | MDN1_HUMAN   | 10 | AGATGCAGCAC   | 0.328 |                                |
| - | 7  | 2535      | p.R576W BACH2_    | NM_021813    | NP_068585    | Q9BYV9 | BACH2_HUMAN  | 6  | GGGCCGCACTT   | 0.537 |                                |
| - | 10 | 1260      | _p.S106G C6orf16  | NM_198468    | NP_940870    | Q6ZRQ5 | MMS22_HUMAN  | 0  | GTCACTTGATT   | 0.343 |                                |
| - | 6  | 782       | ACE1_uc010kcz.1   | NM_020771    | NP_065822    | Q8IYU2 | HACE1_HUMAN  | 7  | AACATGCAGTG   | 0.458 | ANK 4.                         |
| - | 5  | 2779      |                   | NM_001080450 | NP_001073919 | Q5T5X7 | BEND3_HUMAN  | 3  | CAGGCGAGGGG   | 0.647 |                                |
| + | 4  | 684       | _5'Flank PPI6_u   | NM_003080    | NP_003071    | O60906 | NSMA_HUMAN   | 0  | GCACATCTACA   | 0.512 |                                |
| + | 1  | 577       |                   | NM_175067    | NP_778237    | Q96R18 | TAAR6_HUMAN  | 3  | AGACCGTTGTA   | 0.418 | cellular (Potential).          |
| - | 3  | 427       | 010kgh.2_Translat | NM_022568    | NP_072090    | Q9H2A2 | AL8A1_HUMAN  | 4  | CTGACGTGTGG   | 0.592 |                                |
| - | 1  | 303       | I244_uc003qhu.2_  | NM_021635    | NP_067648    | Q9GZY1 | PBOV1_HUMAN  | 0  | AATAATCAATGA  | 0.284 |                                |
| - | 3  | 614       |                   | NM_020861    | NP_065912    | Q8N680 | ZBTB2_HUMAN  | 1  | GTGGCCGTGGA   | 0.522 |                                |
| + | 8  | 1713      | L46P ESR1_uc010   | NM_001122742 | NP_001116214 | P03372 | ESR1_HUMAN   | 5  | TGTGCCTCAAT   | 0.413 | g. Interaction with AKAP13.    |
| + | 2  | 1352_1353 | e_Mutation_p.M41  | NM_032448    | NP_115824    | Q96EK7 | F120B_HUMAN  | 1  | TCCCATGTGTAC  | 0.53  |                                |
| - | 8  | 1898      | MICAL2_uc003sk    | NM_182924    | NP_891554    | Q8IY33 | MILK2_HUMAN  | 1  | CTGCCGGCCCG   | 0.542 | rs139452103                    |
| - | 12 | 1978      |                   | NM_032415    | NP_115791    | Q9BXL7 | CAR11_HUMAN  | 50 | GCCCCCTGGCT   | 0.363 |                                |
| + | 4  | 953       | e_Mutation_p.V15z | NM_001037165 | NP_001032242 | P85037 | FOXK1_HUMAN  | 2  | TGATCGTGCA    | 0.627 | Fork-head.                     |
| - | 11 | 1069      | vs.1_Missense_Mt  | NM_004227    | NP_004218    | O43739 | CYH3_HUMAN   | 0  | GTTTCCGGGGG   | 0.617 | PH.                            |
| + | 5  | 584       | rw.2_Missense_Mt  | NM_006908    | NP_008839    | P63000 | RAC1_HUMAN   | 2  | TGGGAACTAAA   | 0.493 | g. (By similarity).            |
| - | 2  | 308       | xy.1_Missense_Mt  | NM_006408    | NP_006399    | O95994 | AGR2_HUMAN   | 0  | CTGGGCAGTT    | 0.498 |                                |
| + | 8  | 1837      | DC129_uc011kae    | NM_194300    | NP_919276    | Q6ZRS4 | CC129_HUMAN  | 0  | AAGGATGAAGTT  | 0.438 |                                |
| + | 14 | 4106      | e_Mutation_p.K88  | NM_194300    | NP_919276    | Q6ZRS4 | CC129_HUMAN  | 0  | AGAAAAGGATG   | 0.443 |                                |
| + | 12 | 1288      |                   | NM_016616    | NP_057700    | Q8N427 | TXND3_HUMAN  | 3  | TCCCCGATTTT   | 0.358 |                                |
| + | 21 | 3159      | p.R527C AEBP1_u   | NM_001129    | NP_001120    | Q8IUX7 | AEBP1_HUMAN  | 0  | AGTACCGCGTG   | 0.557 | required for transcriptional r |
| + | 17 | 5082      | yr.2_Missense_Mt  | NM_152701    | NP_689914    | Q86UQ4 | ABCAD_HUMAN  | 10 | AAGTTAGTGTA   | 0.388 |                                |
| + | 6  | 953       |                   | NM_001099435 | NP_001092905 | A6N1Y4 | SPDE5_HUMAN  | 0  | AGCGTCGGTTC   | 0.562 | Arg-rich.                      |
| + | 6  | 969       |                   | NM_001099435 | NP_001092905 | A6N1Y4 | SPDE5_HUMAN  | 0  | AGGCCGTTCCA   | 0.572 | Arg-rich.                      |
| + | 5  | 1200      | _p.R215H DTX2_u   | NM_020892    | NP_065943    | Q86UW9 | DTX2_HUMAN   | 2  | CTACCGCCACT   | 0.657 |                                |
| - | 18 | 2795      | gw.1_Missense_M   | NM_006379    | NP_006370    | Q99985 | SEM3C_HUMAN  | 1  | GATTCCTCTGT   | 0.403 | Lys-rich (basic).              |
| - | 14 | 2044      | kgz.1_Missense_I  | NM_001142749 | NP_001136221 | A8MYY0 | K132L_HUMAN  | 7  | GGCAGGGGACA   | 0.522 | cellular (Potential).          |
| + | 2  | 721       | ujh.1_5'UTR DBF4  | NM_006716    | NP_006707    | Q9UBU7 | DBF4A_HUMAN  | 2  | TGGGAGGGGTA   | 0.343 | BRCT 1.                        |
| - | 6  | 952       | p.R159W CYP51A    | NM_000786    | NP_000777    | Q16850 | CP51A_HUMAN  | 0  | TTCGGATGAGC   | 0.348 |                                |
| - | 6  | 661       | mu.1_Missense_I   | NM_001742    | NP_001733    | P30988 | CALCR_HUMAN  | 9  | AAACACCTTTTT  | 0.323 | cellular (Potential).          |
| + | 47 | 3577      | 1A2_uc011kib.1_I  | NM_000089    | NP_000080    | P08123 | CO1A2_HUMAN  | 9  | TTTAAAGGGTC   | 0.423 | rs112557463                    |
| + | 14 | 2378      | AN_uc003uwl.2_F   | NM_003386    | NP_003377    | Q9Y493 | ZAN_HUMAN    | 11 | AAAACCCACCA   | 0.522 | ate) (mucin-like domain). E    |

|   |    |           |                    |              |              |        |             |                                |       |               |       |             |
|---|----|-----------|--------------------|--------------|--------------|--------|-------------|--------------------------------|-------|---------------|-------|-------------|
| + | 3  | 302       | C17_uc010lho.1_F   | NM_001040105 | NP_001035194 | Q685J3 | MUC17_HUMAN | cellular (Potential).          | 27    | 3TATTTGAGTTGC | 0.448 |             |
| + | 3  | 1291      | KL13_uc003var.2    | NM_001031692 | NP_001026862 | Q8N6Y2 | LRC17_HUMAN | LRR 5.                         | 1     | TCAGCAGCAATG  | 0.383 |             |
| - | 9  | 1138      | _Mutation_p.T301I  | NM_198999    | NP_945350    | P58743 | S26A5_HUMAN | Name=7; (Potential).           | 1     | ATGCCAGTTCCC  | 0.373 |             |
| + | 14 | 2560_2561 | q.1_Missense_Mu    | NM_000492    | NP_000483    | P13569 | CFTR_HUMAN  | asmic (Potential).             | 5     | ATCAAGAAGGT   | 0.416 |             |
| - | 18 | 2165      | p.R226W RBM28      | NM_018077    | NP_060547    | Q9NW13 | RBM28_HUMAN |                                | 2     | GTCCCACAACC   | 0.493 |             |
| + | 10 | 1019      | qf.2_Missense_Mu   | NM_002402    | NP_002393    | Q5EB52 | MEST_HUMAN  | ical; (Potential).             | 2     | GTGGGAGCTCTT  | 0.408 |             |
| - | 15 | 1860      |                    | NM_004333    | NP_004324    | P15056 | BRAF_HUMAN  | rotein kinas_R603>I(2)]p.T     | 18290 | 3ATTTCACTGTAC | 0.368 |             |
| - | 1  | 654       |                    | NM_001098834 | NP_001092304 | Q14549 | GBX1_HUMAN  | Pro-rich.                      | 0     | GTCCGGCCGCCT  | 0.562 |             |
| + | 1  | 757       |                    | NM_138400    | NP_612409    | Q5C9Z4 | NOM1_HUMAN  | ization and for targeting PF   | 0     | TCCCCAGAAAGT  | 0.338 | rs151324588 |
| + | 11 | 2788      | vpm.2_Missense_M   | NM_004745    | NP_004736    | Q9P1A6 | DLGP2_HUMAN |                                | 0     | ATGATGGAGTCA  | 0.582 |             |
| - | 4  | 936       | xbj.3_Missense_M   | NM_001099335 | NP_001092805 | Q92561 | PHYIP_HUMAN | onectin type-III.              | 0     | CCGTGCGGGGG   | 0.637 |             |
| - | 8  | 603       | p.R121Q BIN3_uc    | NM_018688    | NP_061158    | Q9NQY0 | BIN3_HUMAN  | BAR.                           | 0     | CCTCCGCACAC   | 0.617 |             |
| + | 19 | 2039      | f.q.1_Nonsense_M   | NM_173174    | NP_775266    | Q14289 | FAK2_HUMAN  |                                | 5     | CCCTGCGAAGG   | 0.582 |             |
| - | 10 | 1936      | xrf.3_Missense_M   | NM_014781    | NP_055596    | Q8TDY2 | RBCC1_HUMAN |                                | 11    | CATGAAGCATTAC | 0.358 |             |
| + | 11 | 1217      | yb.2_Missense_M    | NM_052958    | NP_443190    | Q49A92 | CH034_HUMAN |                                | 1     | GAGTAGGACAC   | 0.408 |             |
| + | 2  | 934       | u.1_Missense_M     | NM_024721    | NP_078997    | Q86UP3 | ZFHX4_HUMAN |                                | 15    | CTTCTGCACCT   | 0.488 |             |
| - | 1  | 755       | oe.2_Missense_M    | NM_021021    | NP_066301    | Q13884 | SNTB1_HUMAN | PH 1. PDZ.                     | 5     | CTGCACCCGCT   | 0.592 |             |
| + | 16 | 2393      | lja.1_Missense_M   | NM_016018    | NP_057102    | A8MW92 | P20L1_HUMAN | PHD-type.                      | 2     | TGGATGAGGAG   | 0.388 |             |
| - | 4  | 842       | 3LC39A4_uc003zc    | NM_130849    | NP_570901    | Q6P5W5 | S39A4_HUMAN | cellular (Potential).          | 0     | GCTGGCTCCCC   | 0.667 |             |
| + | 11 | 2168      | p.P419S GPT_uc     | NM_032902    | NP_116291    | Q96I34 | PP16A_HUMAN |                                | 0     | GCTCCCCAGTG   | 0.657 |             |
| - | 5  | 1126      | 1_5'Flank LRRC14   | NM_004260    | NP_004251    | O94761 | RECQ4_HUMAN |                                | 4     | GGCCCCGCACG   | 0.632 |             |
| + | 15 | 2565      | LR_uc003zhm.1_F    | NM_003383    | NP_003374    | P98155 | VLDLR_HUMAN | r (Potential). EGF-like 3.     | 3     | CAGCACCACAGA  | 0.403 |             |
| - | 3  | 1315      | if.1_Missense_Mu   | NM_152629    | NP_689842    | Q8NEA6 | GLIS3_HUMAN |                                | 1     | CTTTGCGCTGG   | 0.592 |             |
| - | 20 | 2177      | p.S479F PTPRD_     | NM_002839    | NP_002830    | P23468 | PTPRD_HUMAN | III 2. Extracellular (Potentia | 22    | TTGACAGAATAT  | 0.433 |             |
| + | 27 | 5064      | _p.S347* ADAMT3    | NM_001040272 | NP_001035362 | Q8N6G6 | ATL1_HUMAN  |                                | 5     | ACCATCAGAGCA  | 0.522 |             |
| - | 1  | 424       | zob.1_Missense_M   | NM_020344    | NP_065077    | Q9UI40 | NCKX2_HUMAN | cellular (Potential).          | 3     | CTTTCCGGGTAG  | 0.423 |             |
| - | 1  | 2752      | uc003zrh.1_5'Flanl | NM_153809    | NP_722516    | Q8IZX4 | TAF1L_HUMAN |                                | 26    | 3TAAACGAAAATC | 0.478 |             |
| + | 8  | 1661      | NFX1_uc003zsp.1    | NM_002504    | NP_002495    | Q12986 | NFX1_HUMAN  |                                | 1     | ATTGCGGCAGCA  | 0.358 |             |
| + | 6  | 1061      | zvr.2_Missense_M   | NM_015297    | NP_056112    | Q9UPV7 | K1045_HUMAN |                                | 1     | AGGAGCGGGAG   | 0.567 |             |
| - | 38 | 5395      |                    | NM_006289    | NP_006280    | Q9Y490 | TLN1_HUMAN  | action with SYNM.              | 13    | TGCAGCGAGGG   | 0.537 |             |
| - | 9  | 2173      |                    | NM_001163    | NP_001154    | Q02410 | APBA1_HUMAN | PID.                           | 1     | 3CAGGTCACTAT  | 0.493 |             |
| - | 8  | 1156      | C14B_uc004awl.2    | NM_033331    | NP_201588    | O60729 | CC14B_HUMAN | B.                             | 1     | CAAGTCTGGCT   | 0.358 |             |
| + | 15 | 2284      | 366_splice SMC2    | NM_001042551 | NP_001036016 | O95347 | SMC2_HUMAN  |                                | 9     | 3TGGAGGTAAGT  | 0.383 |             |
| - | 1  | 318       |                    | NM_006686    | NP_006677    | Q9Y614 | ACL7B_HUMAN |                                | 1     | CGCCTCGGGGC   | 0.652 |             |
| - | 13 | 4282      | f.2_Missense_Mut   | NM_002160    | NP_002151    | P24821 | TENA_HUMAN  | onectin type-III 8.            | 7     | GCAGGCTGCCA   | 0.587 |             |
| - | 5  | 797       | p.Q259* LHX6_uc    | NM_014368    | NP_055183    | Q9UPM6 | LHX6_HUMAN  | Homeobox.                      | 0     | CAGCTGTTCCG   | 0.602 |             |
| - | 1  | 300       |                    | NM_001004450 | NP_001004450 | Q8NGR6 | OR1B1_HUMAN | Name=3; (Potential).           | 0     | TGAGCCAAGCA   | 0.517 |             |
| + | 6  | 1325      | p.G205S GTF3C3     | NM_012087    | NP_036219    | Q9Y5Q8 | TF3C5_HUMAN |                                | 0     | AAACACGGTAAA  | 0.403 |             |
| - | 3  | 234       | 1_5'Flank SURF2    | NM_003172    | NP_003163    | Q15526 | SURF1_HUMAN | ical; (Potential).             | 2     | GATGAGGAGCA   | 0.577 |             |
| + | 22 | 2471      |                    | NM_000093    | NP_000084    | P20908 | CO5A1_HUMAN | le-helical region.             | 11    | CACAGGTGTC    | 0.542 |             |
| - | 2  | 204       | ZBED1_uc004cqh.    | NM_004729    | NP_004720    | O96006 | ZBED1_HUMAN |                                | 0     | TTCTCCATTGCT  | 0.597 |             |
| + | 2  | 352       | in_p.V87I SYAP1    | NM_032796    | NP_116185    | Q96A49 | SYAP1_HUMAN |                                | 1     | AATCCGTAGAAC  | 0.308 |             |
| - | 9  | 1325      | p.H367Y RBBP7      | NM_002893    | NP_002884    | Q16576 | RBBP7_HUMAN | WD 6.                          | 2     | ACCAGTGACCT   | 0.398 |             |
| + | 9  | 2221      | ase_Mutation_p.VE  | NM_003410    | NP_003401    | P17010 | ZFX_HUMAN   | C2H2-type 8.                   | 2     | TTTCAGTTTACA  | 0.443 |             |
| + | 1  | 1990      |                    | NM_001136234 | NP_001129706 |        |             |                                | 1     | 3CAGTGACGGCA  | 0.617 |             |
| + | 1  | 47        |                    | NM_004651    | NP_004642    | P51784 | UBP11_HUMAN |                                | 3     | TTTCCGGGACC   | 0.512 |             |
| + | 20 | 3013      | ase_Mutation_p.V1  | NM_138923    | NP_620278    | P21675 | TAF1_HUMAN  |                                | 17    | AGACAGTGACA   | 0.433 |             |

|   |    |                          |              |              |        |             |                             |    |               |       |
|---|----|--------------------------|--------------|--------------|--------|-------------|-----------------------------|----|---------------|-------|
| + | 8  | 1304_1305RN1_uc011mpt.1_ | NM_052957    | NP_443189    | Q96QF7 | ACRC_HUMAN  | Asp/Ser-rich.               | 3  | CGACAGCAGTG   | 0.554 |
| - | 17 | 4932_29_splice ATRX_ur   | NM_000489    | NP_000480    | P46100 | ATRX_HUMAN  |                             | 30 | AAACACCTAAAA  | 0.351 |
| - | 5  | 572_o.2_Missense_Mu      | NM_000061    | NP_000052    | Q06187 | BTK_HUMAN   | PH.                         | 6  | GAGCTGGTGAA   | 0.328 |
| - | 5  | 413_nsn.1_Missense_M     | NM_001847    | NP_001838    | Q14031 | CO4A6_HUMAN | le-helical region.          | 8  | GATGCCAAGAA   | 0.433 |
| + | 4  | 843_EC1_uc010nsl.1_      | NM_005462    | NP_005453    | O60732 | MAGC1_HUMAN |                             | 4  | AGAGTACTCAAA  | 0.502 |
| - | 9  | 1525_g.1_Nonsense_Mu     | NM_000202    | NP_000193    | P22304 | IDS_HUMAN   |                             | 0  | GAATCGAAAA    | 0.542 |
| - | 6  | 976_u.1_Intron IDS_uc    | NM_000202    | NP_000193    | P22304 | IDS_HUMAN   |                             | 0  | AGGGGGTAGGC   | 0.527 |
| - | 3  | 808_r.p.1_Nonsense_M     | NM_080701    | NP_542432    | Q9BQ50 | TREX2_HUMAN |                             | 1  | CGGCTGAGTGG   | 0.726 |
| + | 3  | 553                      | NM_020061    | NP_064445    | P04000 | OPSR_HUMAN  | Name=4; (Potential).        | 0  | GCATTGCCTTC   | 0.577 |
| - | 3  | 758                      | NM_006014    | NP_006005    | Q14657 | LAGE3_HUMAN |                             | 0  | CGGGGGGCCCA   | 0.592 |
| + | 8  | 2600_p.R569Q ZFY_uc0     | NM_003411    | NP_003402    | P08048 | ZFY_HUMAN   | :2H2-type 12.               | 0  | TTAAACGGCACG  | 0.413 |
| - | 4  | 334_uc001aeh.1_Intro     | NM_017871    | NP_060341    | Q5TA45 | INT11_HUMAN |                             | 0  | TGAGTCATGTA   | 0.617 |
| - | 9  | 972_ey.2_Nonsense_Mt     | NM_002074    | NP_002065    | P62873 | GBB1_HUMAN  |                             | 0  | TTCCTGCACATC  | 0.567 |
| - | 15 | 1814_za.1_Missense_Mi    | NM_018216    | NP_060686    | Q9NVE7 | PANK4_HUMAN |                             | 3  | TGTAGGAATCC   | 0.617 |
| - | 2  | 376_IAA0562_uc001ak      | NM_014704    | NP_055519    | O60308 | CE104_HUMAN |                             | 0  | CAAAATCCAATCT | 0.483 |
| - | 5  | 719_i.2_RNA ACOT7_L      | NM_181864    | NP_863654    | O00154 | BACH_HUMAN  |                             | 0  | CTCCTCCTCTCT  | 0.642 |
| + | 2  | 481                      | NM_004285    | NP_004276    | O95479 | G6PE_HUMAN  | :3 1-dehydrogenase.         | 0  | CAGCCCCAAG    | 0.572 |
| + | 46 | 5180_iz.2_Missense_Mu    | NM_015074    | NP_055889    | O60333 | KIF1B_HUMAN |                             | 3  | CTAGTCCCTGCT  | 0.423 |
| - | 2  | 381_3.2_5'UTR CASP9      | NM_001229    | NP_001220    | P55211 | CASP9_HUMAN |                             | 2  | CTTTGCTGCTTC  | 0.532 |
| + | 6  | 1310_dn.2_Missense_M     | NM_032409    | NP_115785    | Q9BXM7 | PINK1_HUMAN | :3 Cytoplasmic (Potential). | 3  | ACGTGGATCGGC  | 0.627 |
| - | 23 | 3048_rqc.2_Missense_M    | NM_032236    | NP_115612    | Q86UV5 | UBP48_HUMAN | Jbiquitin-like.             | 2  | TATGTCGCATAC  | 0.373 |
| + | 15 | 2533_p.P782L SRRM1_      | NM_005839    | NP_005830    | Q8IYB3 | SRRM1_HUMAN | Pro-rich.                   | 3  | ATCCCCCGTCC   | 0.577 |
| - | 3  | 263_YF2_uc010eoo.1_      | NM_015484    | NP_056299    | O95926 | SYF2_HUMAN  | Potential.                  | 0  | TTTGCTTCCC    | 0.353 |
| + | 8  | 872_es.1_Missense_Mt     | NM_020451    | NP_065184    | Q9NZV5 | SELN_HUMAN  |                             | 2  | CTCAGGGAGCT   | 0.637 |
| - | 2  | 764                      | NM_021969    | NP_068804    | Q15466 | NR0B2_HUMAN | inding (By similarity).     | 0  | TGGGCTGCTG    | 0.632 |
| + | 4  | 1300_ofx.1_Missense_M    | NM_016258    | NP_057342    | Q9Y5A9 | YTHD2_HUMAN |                             | 2  | ACCCCCGATAA   | 0.488 |
| - | 42 | 3111_p.G729S COL16A      | NM_001856    | NP_001847    | Q07092 | COGA1_HUMAN | :4 (COL4) with 2 imperfect  | 8  | GGGGCCTGGTG   | 0.622 |
| + | 4  | 446                      | NM_001099434 | NP_001092904 | A2VCK2 | DCD2B_HUMAN | oublecortin 2.              | 0  | GCTGTCCCAGG   | 0.552 |
| + | 6  | 1653_522_uc010ohm.1_     | NM_020888    | NP_065939    | Q9P206 | K1522_HUMAN | Pro-rich.                   | 0  | TCCGGGTGGTT   | 0.677 |
| - | 9  | 1755_1_5'Flank YARS_u    | NM_003680    | NP_003671    | P54577 | SYYC_HUMAN  |                             | 2  | GATTGGATCCCA  | 0.498 |
| + | 8  | 1881_p.A585V NCDN_u      | NM_001014839 | NP_001014839 | Q9UBB6 | NCDN_HUMAN  |                             | 3  | TGCAGCTCTTCA  | 0.597 |
| - | 9  | 1357_vj.1_Missense_Mu    | NM_005955    | NP_005946    | Q14872 | MTF1_HUMAN  |                             | 2  | AAACATCACTGA  | 0.458 |
| - | 2  | 302_RAGC_uc001ccr.2      | NM_022157    | NP_071440    | Q9HB90 | RRAGC_HUMAN |                             | 1  | ACTTTCCAAAAA  | 0.343 |
| + | 29 | 12558_a.1_Missense_Mu    | NM_033044    | NP_149033    | Q9UPN3 | MACF1_HUMAN |                             | 16 | GATACCCCCAG   | 0.478 |
| - | 5  | 582_5'UTR TRIT1_uc0      | NM_017646    | NP_060116    | Q9H3H1 | MOD5_HUMAN  |                             | 1  | AACTTGCAAGC   | 0.408 |
| - | 8  | 7217_e_Mutation_p.E20i   | NM_024503    | NP_078779    | Q5T1R4 | ZEP3_HUMAN  |                             | 6  | TGGTTCTCGGG   | 0.632 |
| - | 8  | 935_J3_uc001chg.2_M      | NM_014947    | NP_055762    | Q9UPW0 | FOXJ3_HUMAN |                             | 2  | TGTTAGTCACAC  | 0.328 |
| + | 3  | 216_IH_uc009vwl.2_5'L    | NM_006347    | NP_006338    | O43447 | PPIH_HUMAN  | e cyclophilin-type.         | 0  | CACCGGAGAAT   | 0.483 |
| + | 9  | 1215_iT2_uc001coz.1_N    | NM_015112    | NP_055927    | Q6P0Q8 | MAST2_HUMAN |                             | 11 | TGACAGTGAAA   | 0.408 |
| - | 4  | 1515_p.R70W TAL1_uc      | NM_003189    | NP_003180    | P17542 | TAL1_HUMAN  |                             | 1  | GGCCGTGTGT    | 0.687 |
| - | 16 | 2146_uc001cte.2_Splic    | NM_002525    | NP_002516    | O43847 | NRDC_HUMAN  |                             | 0  | AAATCTGTGAA   | 0.214 |
| - | 17 | 2667_tu.2_Missense_Mt    | NM_004153    | NP_004144    | Q13415 | ORC1_HUMAN  | ient for ORC complex asse   | 0  | TCTGACATGGTC  | 0.537 |
| - | 2  | 722_i163E ZCCHC11_u      | NM_015269    | NP_056084    | Q5TAX3 | TUT4_HUMAN  |                             | 3  | TGGGTCCCTTT   | 0.373 |
| + | 4  | 1146                     | NM_000098    | NP_000089    | P23786 | CPT2_HUMAN  | ial matrix (By similarity). | 0  | CGTATCCCTGT   | 0.493 |
| - | 6  | 692_w.2_RNA YIPF1_u      | NM_018982    | NP_061855    | Q9Y548 | YIPF1_HUMAN | lasmic (Potential).         | 2  | GAGATCTGGAT   | 0.403 |
| + | 9  | 1226_oya.3_Missense_N    | NM_001110533 | NP_001104003 | Q3ZCV2 | CA177_HUMAN |                             | 0  | CCGGGACATGC   | 0.602 |
| - | 46 | 5449                     | NM_015306    | NP_056121    | Q9UPU5 | UBP24_HUMAN |                             | 13 | CTGTCTTAAT    | 0.517 |

|   |    |      |                   |              |              |        |             |                               |    |               |       |             |
|---|----|------|-------------------|--------------|--------------|--------|-------------|-------------------------------|----|---------------|-------|-------------|
| - | 10 | 1619 | p.G456R C8B_ucf   | NM_000066    | NP_000057    | P07358 | CO8B_HUMAN  | EGF-like.                     | 4  | GGTACCTTTCA   | 0.537 |             |
| - | 2  | 544  | se_Mutation_p.M1  | NM_145243    | NP_660286    | Q96E52 | OMA1_HUMAN  |                               | 1  | AGAATCATCAAC  | 0.343 |             |
| + | 4  | 517  | au.2_Missense_M   | NM_178221    | NP_835739    | Q96DT6 | ATG4C_HUMAN |                               | 1  | AGATGCTCTTG   | 0.388 |             |
| + | 3  | 472  | lice_Site ALG6_ur | NM_013339    | NP_037471    | Q9Y672 | ALG6_HUMAN  |                               | 0  | ACAATGGTATGA  | 0.328 |             |
| - | 12 | 1991 | 73_uc001dgi.3_Mi  | NM_001002912 | NP_001002912 | Q5RHP9 | CA173_HUMAN | Glu-rich.                     | 5  | GCACTAGAATAAC | 0.423 |             |
| + | 10 | 1659 | iq.2_Missense_Mu  | NM_001001933 | NP_001001933 | Q68G74 | LHX8_HUMAN  |                               | 3  | TGTAGCTCATTC  | 0.358 |             |
| - | 16 | 1331 | p.A354V SLC44A1   | NM_152697    | NP_689910    | Q8NCS7 | CTL5_HUMAN  | lasmic (Potential).           | 4  | ATGTCGCCAAG   | 0.393 | rs148437935 |
| + | 6  | 677  | HN2_uc001div.2_l  | NM_012302    | NP_036434    | O95490 | LPHN2_HUMAN | otential). Olfactomedin-like  | 9  | TTCAGGCTGCA   | 0.418 |             |
| - | 4  | 3579 | .2_Intron ZNF644_ | NM_201269    | NP_958357    | Q9H582 | ZN644_HUMAN |                               | 3  | GTCAGCCCTCT   | 0.363 |             |
| + | 12 | 1525 | p.P426S CDC7_u    | NM_003503    | NP_003494    | O00311 | CDC7_HUMAN  | rotein kinase.                | 5  | AAGTTCAGCA    | 0.353 |             |
| - | 7  | 1302 | p.V237A TGFB3     | NM_003243    | NP_003234    | Q03167 | TGBR3_HUMAN | ellular (Potential).          | 3  | AGTTGACAGAC   | 0.353 |             |
| - | 5  | 786  | ense_Mutation_p.  | NM_003567    | NP_003558    | O75815 | BCAR3_HUMAN | SH2.                          | 3  | ACCATCTCGCT   | 0.483 |             |
| + | 4  | 546  | p.V110I RTCD1_    | NM_003729    | NP_003720    | O00442 | RTC1_HUMAN  |                               | 0  | CGTGTGTTCT    | 0.418 |             |
| - | 61 | 4838 | G1519D COL11A1    | NM_001854    | NP_001845    | P12107 | COBA1_HUMAN | le-helical region.            | 12 | GAGGACCCTAC   | 0.338 |             |
| - | 12 | 1938 | dm.2_Missense_M   | NM_006608    | NP_006599    | Q9UMS5 | PHTF1_HUMAN |                               | 1  | GAAAAGTCGAT   | 0.403 |             |
| - | 1  | 94   | VTCN1_uc009whf.   | NM_024626    | NP_078902    | Q7Z7D3 | VTCN1_HUMAN |                               | 0  | GAGAGGATCT    | 0.557 |             |
| - | 2  | 177  | oxg.1_Missense_h  | NM_015836    | NP_056651    | Q9UGM6 | SYWM_HUMAN  |                               | 0  | AATTGCCCAGG   | 0.453 |             |
| + | 8  | 872  | G1A10_uc009wiw.4  | NM_003637    | NP_003628    | O75578 | ITA10_HUMAN | tracellular (Potential).      | 8  | GACCCGAGGCT   | 0.502 |             |
| - | 7  | 786  | p.P215S ARNT_u    | NM_001668    | NP_001659    | P27540 | ARNT_HUMAN  | PAS 1.                        | 9  | ATCTGGGTGCA   | 0.473 |             |
| - | 4  | 1150 | mx.1_Missense_M   | NM_007185    | NP_009116    | Q5SZQ8 | CELF3_HUMAN | RRM 2.                        | 2  | TGTTCCCGAAG   | 0.617 |             |
| - | 4  | 687  | M4_uc001ezk.1_f   | NM_053055    | NP_444283    | Q5T1C6 | THEM4_HUMAN |                               | 0  | AGCCATCATTG   | 0.373 |             |
| - | 2  | 196  | R2D_uc009wnz.2_   | NM_006945    | NP_008876    | P22532 | SPR2D_HUMAN | peats of P-K-C-P-[EQ]- P-C    | 0  | AGGTGGGCAGG   | 0.602 |             |
| + | 23 | 2919 | p.P928S UBAP2L    | NM_014847    | NP_055662    | Q14157 | UBP2L_HUMAN |                               | 2  | GGGTCCCGGGC   | 0.587 |             |
| + | 5  | 593  | _Mutation_p.V185  | NM_080429    | NP_536354    | Q96PS8 | AQP10_HUMAN | lasmic (Potential).           | 1  | AGGGAGTCCCT   | 0.617 |             |
| - | 8  | 2340 | fo.2_Missense_Mt  | NM_002249    | NP_002240    | Q9UGI6 | KCNN3_HUMAN |                               | 1  | GATGAGCAGCG   | 0.632 |             |
| + | 1  | 173  | sense_Mutation_p. | NM_018845    | NP_061333    | Q9BRV3 | SWET1_HUMAN | MtN3/slv 1.                   | 0  | TCTCCGCCGGC   | 0.637 |             |
| - | 23 | 8566 | ASH1L_uc001fkt.2  | NM_018489    | NP_060959    | Q9NR48 | ASH1L_HUMAN | BAH.                          | 11 | TATCTCGGTTAAT | 0.502 |             |
| - | 10 | 6742 | ASH1L_uc001fkt.2  | NM_018489    | NP_060959    | Q9NR48 | ASH1L_HUMAN |                               | 11 | AGAAAGGGGTT   | 0.413 |             |
| - | 3  | 684  | J4L_uc001fmc.2_h  | NM_001037533 | NP_001032622 | Q3T8J9 | GON4L_HUMAN |                               | 3  | ATTTCTGGGG    | 0.478 |             |
| - | 13 | 2176 | rv.2_Missense_Mu  | NM_015327    | NP_056142    | Q9UPR3 | SMG5_HUMAN  |                               | 5  | CTGCGCACAC.   | 0.607 |             |
| - | 5  | 756  | L3_uc009wsn.2_R   | NM_052939    | NP_443171    | Q96P31 | FCRL3_HUMAN | 2. Extracellular (Potential). | 4  | CCCTGGAGACT   | 0.333 |             |
| + | 2  | 886  | p.3_Missense_Mu   | NM_002036    | NP_002027    | Q16570 | DUFFY_HUMAN | Name=5; (Potential).          | 2  | TGCTTGCCATC   | 0.567 |             |
| - | 1  | 1219 |                   | NM_145167    | NP_660150    | Q9H3S5 | PIGM_HUMAN  | ical; (Potential).            | 3  | AAATGGACGTAT  | 0.443 |             |
| + | 2  | 478  |                   | NM_004983    | NP_004974    | Q92806 | IRK9_HUMAN  | me=M1; (By similarity).       | 2  | CATCTGGTGGC   | 0.662 |             |
| + | 9  | 1632 | wc.1_Missense_M   | NM_020335    | NP_065068    | Q9ULK5 | VANG2_HUMAN | lasmic (Potential).           | 1  | CGGCTGGACCT   | 0.547 |             |
| - | 4  | 369  | p.G103E ITLN2_t   | NM_080878    | NP_543154    | Q8WWU7 | ITLN2_HUMAN | rogen C-terminal.             | 1  | ACTTCCCACGC   | 0.582 |             |
| + | 4  | 1199 | e_Mutation_p.V10  | NM_152366    | NP_689579    | Q8NEP7 | KLDC9_HUMAN | Kelch 3.                      | 0  | CACAGGTTTGC   | 0.478 |             |
| - | 5  | 845  | pkz.1_Missense_f  | NM_000696    | NP_000687    | P49189 | AL9A1_HUMAN |                               | 0  | ATCGGGATGC    | 0.532 |             |
| + | 2  | 139  | .1_5'UTR POGK_t   | NM_017542    | NP_060012    | Q9P215 | POGK_HUMAN  |                               | 1  | CCCTACCTCTC   | 0.527 |             |
| - | 21 | 6084 |                   | NM_000130    | NP_000121    | P12259 | FA5_HUMAN   | 5/8 type C 1.                 | 6  | TGGCACCTTGG   | 0.458 |             |
| - | 18 | 5836 |                   | NM_000130    | NP_000121    | P12259 | FA5_HUMAN   | 3. Plastocyanin-like 6.       | 6  | GCGTTTGCATC   | 0.403 |             |
| + | 3  | 256  | ense_Mutation_p.E | NM_001002294 | NP_001002294 | P31513 | FMO3_HUMAN  |                               | 1  | CAGAGGAGGGC.  | 0.408 |             |
| + | 6  | 863  | nd.1_Missense_M   | NM_001460    | NP_001451    | Q99518 | FMO2_HUMAN  |                               | 1  | GCCACGAACAG   | 0.453 | rs147029269 |
| + | 18 | 2589 | d.2_Missense_Mu   | NM_014283    | NP_055098    | Q9UBS9 | OSPT_HUMAN  |                               | 2  | GCGAGGACATA   | 0.378 |             |
| - | 23 | 3170 | wve.2_Missense_f  | NM_178527    | NP_848622    | Q5TAH2 | S9A11_HUMAN | cNMP.                         | 2  | GATAAACTATGC  | 0.388 |             |
| + | 9  | 1521 | e_Mutation_p.Q61  | NM_004841    | NP_004832    | Q9UJF2 | NGAP_HUMAN  | Ras-GAP.                      | 5  | GCAAGCAAGAC   | 0.463 |             |
| + | 5  | 856  | p.A138S CACNA1    | NM_000721    | NP_000712    | Q15878 | CAC1E_HUMAN | Name=S5 of repeat I.          | 6  | TTCTTTGCCATC  | 0.458 |             |



|   |    |      |                     |              |              |        |              |                                |    |                 |       |             |
|---|----|------|---------------------|--------------|--------------|--------|--------------|--------------------------------|----|-----------------|-------|-------------|
| - | 1  | 742  | jpk.2_Missense_M    | NM_021133    | NP_066956    | Q05823 | RN5A_HUMAN   | ANK 5.                         | 5  | 'CTGCCCCATC'    | 0.517 |             |
| - | 6  | 795  | _p.G149R NMNAT:     | NM_015039    | NP_055854    | Q9BZQ4 | NMNA2_HUMAN  |                                | 1  | 'CTTCCCCAAGA'   | 0.582 |             |
| + | 5  | 918  | _e.Mutation_p.V15   | NM_007212    | NP_009143    | Q99496 | RING2_HUMAN  |                                | 1  | 'AATTAGTATTCA   | 0.383 |             |
| + | 7  | 1460 | _i.Mutation_p.T377  | NM_005807    | NP_005798    | Q92954 | PRG4_HUMAN   | : 8 AA repeats of K-X-P-X-F    | 1  | 'ACCCACCACCA'   | 0.662 |             |
| + | 6  | 871  | _p.P514S CFHR4_     | NM_006684    | NP_006675    | Q92496 | FHR4_HUMAN   | Sushi 5.                       | 3  | 'TCAGATCCATGT'  | 0.259 |             |
| + | 1  | 172  |                     | NM_030787    | NP_110414    | Q9BXR6 | FHR5_HUMAN   |                                | 2  | 'ATCCACTGTTGC'  | 0.343 |             |
| + | 8  | 2936 | _p.P822L CRB1_uc    | NM_201253    | NP_957705    | P82279 | CRUM1_HUMAN  | (Potential), EGF-like 14.      | 9  | 'GTGTCTCCTCACG' | 0.527 |             |
| + | 12 | 4241 | _se.Mutation_p.T1:  | NM_201253    | NP_957705    | P82279 | CRUM1_HUMAN  | lasmic (Potential).            | 9  | 'GTGTCACTCCCA'  | 0.527 |             |
| - | 23 | 3954 | _i.D1316N KDM5B_    | NM_006618    | NP_006609    | Q9UGL1 | KDM5B_HUMAN  |                                | 5  | 'CTCGATCTTGCA'  | 0.473 |             |
| - | 5  | 2529 |                     | NM_001973    | NP_001964    | P28324 | ELK4_HUMAN   |                                | 0  | 'TAGGTCTGGGG'   | 0.453 |             |
| - | 4  | 754  | _xca.1_Missense_M   | NM_001122980 | NP_001116452 | Q8WVV6 | FCAMR_HUMAN  | cellular (Potential).          | 1  | 'CCATGGCCCCGG'  | 0.597 |             |
| - | 5  | 753  | _i_p.P69S IRF6_uc   | NM_006147    | NP_006138    | O14896 | IRF6_HUMAN   |                                | 2  | 'GAAGGGGAAGG'   | 0.498 |             |
| + | 4  | 392  | _p.S111N TRAF5_     | NM_004619    | NP_004610    | O00463 | TRAF5_HUMAN  |                                | 5  | 'TTGCAGCAATGC'  | 0.373 | rs143951452 |
| - | 13 | 2750 | _oty.1_Missense_M   | NM_005401    | NP_005392    | Q15678 | PTN14_HUMAN  |                                | 5  | 'TCTCTCTTCA'    | 0.547 |             |
| - | 30 | 6398 |                     | NM_206933    | NP_996816    | O75445 | USH2A_HUMAN  | tential), Fibronectin type-III | 26 | 'TGGCAGAGGGC'   | 0.433 |             |
| - | 21 | 4796 | _kv.2_Missense_ML   | NM_206933    | NP_996816    | O75445 | USH2A_HUMAN  | cellular (Potential).          | 26 | 'GCCTCAGTTGT'   | 0.383 |             |
| - | 33 | 3859 | _sense.Mutation_p   | NM_012414    | NP_036546    | Q9H2M9 | RBGPR_HUMAN  |                                | 1  | 'CCTTTGTGGCT'   | 0.443 |             |
| - | 2  | 1997 | _jh.2_Missense_ML   | NM_002221    | NP_002212    | P27987 | IP3KB_HUMAN  |                                | 5  | 'CTTGTCCGGAT'   | 0.607 |             |
| + | 4  | 821  | _i.1_Intron ZNF678_ | NM_178549    | NP_848644    | F5GXA7 | F5GXA7_HUMAN |                                | 1  | 'AATGTGGCAAAG'  | 0.333 | rs145397350 |
| + | 4  | 938  | _i.1_Intron ZNF678_ | NM_178549    | NP_848644    | F5GXA7 | F5GXA7_HUMAN |                                | 1  | 'TAAGTCCGATA'   | 0.363 |             |
| + | 3  | 1124 | _hrd.2_Missense_M   | NM_053052    | NP_444280    | Q5SQN1 | SNP47_HUMAN  |                                | 1  | 'AAAGCCCAGGG'   | 0.458 |             |
| - | 1  | 386  |                     | NM_003493    | NP_003484    | Q16695 | H31T_HUMAN   |                                | 0  | 'TACGGCGTGCC'   | 0.602 |             |
| - | 23 | 6543 | _b.1_RNA LYST_uc    | NM_000081    | NP_000072    | Q99698 | LYST_HUMAN   |                                | 12 | 'AAACTTCCAGTC'  | 0.418 |             |
| + | 1  | 454  | _pxx.1_Missense_M   | NM_000254    | NP_000245    | Q99707 | METH_HUMAN   |                                | 3  | 'CGCAACCCGGT'   | 0.627 |             |
| + | 1  | 421  | _L13_uc001ids.2_    | NM_001004686 | NP_001004686 | Q8NH16 | OR2L2_HUMAN  | Name=3; (Potential).           | 3  | 'CAGTTGCAGAAC'  | 0.313 |             |
| - | 22 | 3273 | _xjf.1_Missense_M   | NM_018027    | NP_060497    | Q9P2Q2 | FRM4A_HUMAN  | Ser-rich.                      | 3  | 'TCCTGGTGACC'   | 0.667 |             |
| - | 6  | 880  | _m.2_Missense_ML    | NM_152724    | NP_689937    | Q15404 | RSU1_HUMAN   | LRR 7.                         | 1  | 'GAACGGTGAGG'   | 0.468 |             |
| - | 40 | 6140 |                     | NM_001081    | NP_001072    | O60494 | CUBN_HUMAN   | CUB 14.                        | 19 | 'CGTTCGGTGAG'   | 0.448 |             |
| + | 3  | 364  |                     | NM_012228    | NP_036360    | Q9Y3D2 | MSRB2_HUMAN  |                                | 0  | 'AGGAAGCAGGA'   | 0.433 |             |
| + | 2  | 563  | _A1217_uc010qcy     | NM_019590    | NP_062536    | Q5T5P2 | SKT_HUMAN    |                                | 7  | 'GTCGTGGTTCA'   | 0.483 |             |
| + | 11 | 2688 | _e.Mutation_p.G57   | NM_019590    | NP_062536    | Q5T5P2 | SKT_HUMAN    |                                | 7  | 'AGTGGGAGAGG'   | 0.517 |             |
| + | 15 | 3560 | _A1217_uc010qda     | NM_019590    | NP_062536    | Q5T5P2 | SKT_HUMAN    |                                | 7  | 'CTCCTCGTCGA'   | 0.557 |             |
| - | 4  | 730  | _vb.3_Missense_ML   | NM_018109    | NP_060579    | Q9NVV4 | PAPD1_HUMAN  |                                | 1  | 'GTCTGGAAAAA'   | 0.453 |             |
| - | 23 | 2935 |                     | NM_004521    | NP_004512    | P33176 | KINH_HUMAN   |                                | 5  | 'CTCCGGTGTC'    | 0.343 |             |
| + | 9  | 1461 |                     | NM_014753    | NP_055568    | Q14692 | BMS1_HUMAN   |                                | 3  | 'GGGGCCACCC'    | 0.498 |             |
| - | 1  | 2092 |                     | NM_002900    | NP_002891    | P10745 | RET3_HUMAN   | mate tandem repeats. 3.        | 2  | 'ACTGGTCTGCC'   | 0.667 |             |
| - | 3  | 174  | _NT_uc001jka.1_Mi   | NM_007057    | NP_008988    | Q95229 | ZWINT_HUMAN  |                                | 0  | 'TCTGAGAGTCC'   | 0.542 |             |
| - | 4  | 733  | _FY2_uc001jod.1_M   | NM_017987    | NP_060457    | Q8WXA3 | RUFY2_HUMAN  | RUN.                           | 1  | 'CAGAGGGGTCC'   | 0.428 |             |
| - | 11 | 1372 | _orf27_uc009xqh.1   | NM_152710    | NP_689923    | Q96M53 | SPATL_HUMAN  |                                | 1  | 'AGCTTCTCCA'    | 0.587 |             |
| + | 8  | 837  | _V HECTD2_uc001     | NM_182765    | NP_877497    | Q5U5R9 | HECD2_HUMAN  |                                | 1  | 'CATCTACGTATG'  | 0.323 |             |
| - | 1  | 2107 |                     | NR_002319    |              |        |              |                                | 0  | 'CTCAGGGTTGC'   | 0.522 |             |
| - | 5  | 827  | _f.1_Missense_Mut   | NM_012465    | NP_036597    | Q9Y6L7 | TLL2_HUMAN   | otease (By similarity).        | 3  | 'TTTCTCATCCG'   | 0.483 |             |
| + | 4  | 928  | _PDSL_uc001knz.2    | NM_138413    | NP_612422    | Q86XE5 | HOGA1_HUMAN  |                                | 0  | 'GCACCCGAATA'   | 0.587 |             |
| + | 4  | 2362 | _e.Mutation_p.D10   | NM_021830    | NP_068602    | Q96RR1 | PEO1_HUMAN   | :F4 helicase.                  | 1  | 'AAGAGGATGAT'   | 0.502 |             |
| - | 1  | 777  | _D01ktk.1_5'UTR PC  | NM_013274    | NP_037406    | Q9UGP5 | DPOLL_HUMAN  |                                | 0  | 'ATACCCTGGGA'   | 0.512 |             |
| + | 9  | 2007 | _q.1_Missense_Mu    | NM_006951    | NP_008882    | Q15542 | TAF5_HUMAN   | WD 4.                          | 2  | 'ACTGTGTAAGG'   | 0.388 |             |
| - | 11 | 1605 | _ih.3_Missense_Mu   | NM_001329    | NP_001320    | P56545 | CTBP2_HUMAN  |                                | 0  | 'GTGCTCTCGAT'   | 0.512 |             |

|   |    |       |                   |              |              |        |                                         |   |               |       |             |
|---|----|-------|-------------------|--------------|--------------|--------|-----------------------------------------|---|---------------|-------|-------------|
| + | 13 | 1233  | un.1_Missense_M   | NM_001380    | NP_001371    | Q14185 | DOCK1_HUMAN                             | 9 | TCCTGGAGATA   | 0.413 |             |
| - | 1  | 684   | i_p.P215S FAM19   | NM_001039762 | NP_001034851 | Q6ZSG2 | F196A_HUMAN                             | 2 | TGGAGGCCGAG   | 0.637 |             |
| + | 12 | 1158  | p.E304K INPP5A    | NM_005539    | NP_005530    | Q14642 | I5P1_HUMAN                              | 1 | TCTTTGGAGTTTC | 0.488 |             |
| + | 10 | 1418  | e_Mutation_p.E41  | NM_012305    | NP_036437    | O94973 | AP2A2_HUMAN                             | 0 | TATCTGGAGACA  | 0.617 | rs11538724  |
| + | 51 | 14906 | b.2_Missense_Mu   | NM_017511    | NP_059981    | Q9HC84 | MUC5B_HUMAN em repeats, Ser/Thr- rich.  | 0 | GCCGAGCACTA   | 0.662 |             |
| + | 51 | 14909 | tb.2_Missense_Mt  | NM_017511    | NP_059981    | Q9HC84 | MUC5B_HUMAN em repeats, Ser/Thr- rich.  | 0 | GAGCACTACAG   | 0.667 |             |
| - | 3  | 557   |                   | NM_001012709 | NP_001012727 | Q6L8H1 | KRA54_HUMAN \ repeats of C-C-X-P.       | 0 | AGCCACAGCCC   | 0.672 |             |
| - | 7  | 1581  | se_Mutation_p.T2  | NM_018073    | NP_060543    | Q6AZZ1 | TRI68_HUMAN 330.2/SPRY.                 | 1 | GGAAAGTGAAG   | 0.552 |             |
| + | 1  | 688   |                   | NM_001004755 | NP_001004755 | Q8NGJ5 | O51L1_HUMAN lasmic (Potential).         | 1 | TGGATATTGCA   | 0.408 |             |
| + | 1  | 146   | _uc001mam.1_Int   | NM_001004757 | NP_001004757 | Q8NH59 | O51Q1_HUMAN lasmic (Potential).         | 1 | TCTCACTGTCA   | 0.567 |             |
| + | 18 | 2009  | NTL_uc001mkt.2_   | NM_001178    | NP_001169    | O00327 | BMAL1_HUMAN                             | 0 | TCTTCTCCAGC   | 0.493 |             |
| + | 6  | 946   | p.A193V BBOX1_u   | NM_003986    | NP_003977    | O75936 | BODG_HUMAN                              | 1 | TGTGGCTTACA   | 0.418 |             |
| - | 25 | 3286  | '5_uc001ndj.1_Mis | NM_001008938 | NP_001008938 | Q14008 | CKAP5_HUMAN                             | 2 | GTTTCCCAGTAC  | 0.323 |             |
| - | 7  | 918   | ylr.1_Missense_Mt | NM_002804    | NP_002795    | P17980 | PRS6A_HUMAN                             | 4 | CTGTGCGGCAC   | 0.587 | rs139347167 |
| + | 1  | 418   |                   | NM_001004703 | NP_001004703 | A6NHA9 | O4C46_HUMAN lasmic (Potential).         | 1 | TGTGTGCCCTG   | 0.478 |             |
| + | 1  | 152   |                   | NM_001005274 | NP_001005274 | Q8NH70 | O4A16_HUMAN lasmic (Potential).         | 3 | CAGCCCTCCTT   | 0.413 |             |
| + | 1  | 668   |                   | NM_001005200 | NP_001005200 | Q8N162 | OR8H2_HUMAN lasmic (Potential).         | 2 | TCTCTTTACCAT  | 0.393 |             |
| - | 1  | 893   |                   | NM_001004740 | NP_001004740 | Q8NGP8 | OR5M1_HUMAN lasmic (Potential).         | 1 | CAAGGATTACA   | 0.388 |             |
| - | 3  | 253   |                   | NM_006093    | NP_006084    | Q9Y2Y8 | PRG3_HUMAN                              | 0 | AGTCTCTCTCC   | 0.547 |             |
| - | 11 | 1357  | S329N SLC43A3_u   | NM_014096    | NP_054815    | Q8NBI5 | S43A3_HUMAN                             | 1 | AGGTGCTGACT   | 0.527 |             |
| - | 1  | 572   |                   | NM_001001954 | NP_001001954 | Q8NGI9 | OR5A2_HUMAN xellular (Potential).       | 0 | TATCAGAGCAG   | 0.463 |             |
| - | 18 | 2224  | TA2_uc010rlx.1_f  | NM_004739    | NP_004730    | O94776 | MTA2_HUMAN                              | 2 | TAGGGCCCTGG   | 0.567 |             |
| - | 10 | 1286  | x.1_Missense_Mut  | NM_004739    | NP_004730    | O94776 | MTA2_HUMAN SANT.                        | 2 | TATGCTGGCA    | 0.547 |             |
| - | 14 | 1666  | nse_Mutation_p.E  | NM_198334    | NP_938148    | Q14697 | GANAB_HUMAN                             | 5 | TGGTTCGTTCA   | 0.527 |             |
| - | 4  | 772   | L12_uc001nuh.2_   | NM_024099    | NP_077004    | Q9BQE6 | CK048_HUMAN                             | 0 | TCTAGGGTCCCT  | 0.423 |             |
| + | 11 | 1897  | I79B_uc001nvd.3_  | NM_006473    | NP_006464    | Q9Y6J9 | TAF6L_HUMAN                             | 3 | ACTGCCCATGAT  | 0.697 |             |
| - | 2  | 447   |                   | NM_014067    | NP_054786    | Q9BQ69 | MACD1_HUMAN                             | 0 | TCCCCGCTGCT   | 0.607 | rs140541432 |
| + | 2  | 223   | nk NUDT22_uc00f   | NM_032344    | NP_115720    | Q9BRQ3 | NUD22_HUMAN                             | 0 | GCGGGGGCCTG   | 0.692 |             |
| + | 10 | 1540  | obz.2_Missense_n  | NM_006244    | NP_006235    | Q15173 | 2A5B_HUMAN                              | 2 | TCCGGGGGCTG   | 0.597 |             |
| - | 5  | 840   | 1odr.1_Missense_  | NM_001077241 | NP_001070709 | Q8N413 | S2545_HUMAN Solcar 2.                   | 0 | TGGGGGGCTCC   | 0.647 |             |
| + | 7  | 1557  | p.H464Y SIPA1_u   | NM_006747    | NP_006738    | Q96FS4 | SIPA1_HUMAN Rap-GAP.                    | 0 | TGGCACACACA   | 0.647 |             |
| - | 4  | 694   | i_Mutation_p.G154 | NM_005507    | NP_005498    | P23528 | COF1_HUMAN                              | 0 | TCCCCCAGCT    | 0.597 |             |
| - | 6  | 777   | EMP2_uc001oga.2   | NM_016938    | NP_058634    | O95967 | FBLN4_HUMAN alcium-binding (Potential). | 1 | AGGCCCCAGCT   | 0.667 |             |
| - | 4  | 954   | os.1_Missense_Mt  | NM_005438    | NP_005429    | P15407 | FOSL1_HUMAN                             | 0 | TGGTCTCCGCTG  | 0.612 |             |
| - | 29 | 6082  | IN2_uc001ojc.1_5' | NM_006946    | NP_008877    | O15020 | SPTN2_HUMAN Spectrin 16.                | 4 | TCTTCTCTGCC   | 0.632 |             |
| - | 1  | 1165  | Flank CABP4_uc0f  | NM_206997    | NP_996880    | Q8TDT2 | GP152_HUMAN lasmic (Potential).         | 0 | TGGCTGTGGGA   | 0.637 |             |
| - | 3  | 266   | T1orf51_uc001orv  | NM_014042    | NP_054761    | P60006 | CK051_HUMAN                             | 0 | TACAGAGTCTCA  | 0.507 |             |
| - | 2  | 504   |                   | NM_173582    | NP_775853    | Q6PCE3 | PGM2L_HUMAN                             | 1 | TCTCTGCAGTCC  | 0.413 |             |
| - | 1  | 806   |                   | NM_001005285 | NP_001005285 | A6NND4 | O2AT4_HUMAN xellular (Potential).       | 1 | TGGTCAGCCCTG  | 0.522 |             |
| - | 1  | 262   | ALM_uc001pbn.2_   | NM_007166    | NP_009097    | Q13492 | PICAL_HUMAN                             | 2 | TCCCCCCTGCT   | 0.716 |             |
| + | 11 | 1343  | AD2_uc009yvy.2_   | NM_005467    | NP_005458    | Q9Y3Q0 | NALD2_HUMAN (Potential). NAALADase.     | 2 | TGCTGGGATGCA  | 0.378 |             |
| - | 9  | 1243  | IR1B_uc001rwl.1_  | NM_002716    | NP_002707    | P30154 | 2AAB_HUMAN HEAT 10.                     | 0 | TCTCATCTTTA   | 0.343 |             |
| + | 7  | 1260  | 2_Missense_Muta   | NM_015157    | NP_055972    | Q86UU1 | PHLB1_HUMAN                             | 0 | TCCGCCCAAGT   | 0.672 |             |
| - | 5  | 1559  | Orzi.1_Missense_n | NM_012101    | NP_036233    | Q14134 | TRI29_HUMAN                             | 4 | TCTTACCTTTGGC | 0.572 |             |
| - | 1  | 731   |                   | NM_001005188 | NP_001005188 | Q8NH79 | OR6X1_HUMAN Name=6; (Potential).        | 3 | TCAACTGTCAGG  | 0.448 |             |
| + | 1  | 802   |                   | NM_001004464 | NP_001004464 | Q8NGN5 | O10G8_HUMAN xellular (Potential).       | 2 | TGTGTGGATGGA  | 0.527 |             |
| + | 8  | 1965  |                   | NM_025004    | NP_079280    | Q0P6D6 | CCD15_HUMAN                             | 2 | TAGGTGTTCTTC  | 0.423 |             |

|   |    |      |                    |              |               |        |             |                             |    |                 |       |
|---|----|------|--------------------|--------------|---------------|--------|-------------|-----------------------------|----|-----------------|-------|
| - | 1  | 91   |                    | NM_001142685 | NP_001136157  | A7KAX9 | RHG32_HUMAN |                             | 5  | TTCTCTTCACA     | 0.463 |
| - | 11 | 3516 | i_p.V370I SNX19_   | NM_014758    | NP_055573     | Q92543 | SNX19_HUMAN |                             | 4  | GGAGACACCCA     | 0.537 |
| - | 23 | 4000 | ie.1_Missense_Mu   | NM_001042603 | NP_001036068  | P29375 | KDM5A_HUMAN | PHD-type 2.                 | 3  | AAGAGGGCAAA     | 0.483 |
| + | 19 | 5714 | _p.T1489I WNK1_    | NM_018979    | NP_061852     | Q9H4A3 | WNK1_HUMAN  |                             | 23 | TTTCTACCCCGA    | 0.448 |
| - | 13 | 2163 | qmw.2_Missense_M   | NM_001038    | NP_001029     | P37088 | SCNNA_HUMAN | smic (By similarity).       | 0  | ggacaaggacagaga | 0.214 |
| + | 8  | 1453 | .1_Missense_Mut    | NM_000616    | NP_000607     | P01730 | CD4_HUMAN   | ical; (Potential).          | 0  | CTGGGGGGCG      | 0.622 |
| + | 9  | 1248 | X5_uc001qsu.2_In   | NM_001131026 | NP_001124498  | P50542 | PEX5_HUMAN  |                             | 1  | GATTGGCGAAG     | 0.582 |
| - | 16 | 3487 | .3_intron CD163_t  | NM_004244    | NP_004235     | Q86VB7 | C163A_HUMAN | lasmic (Potential).         | 8  | CAGCTGACTCA     | 0.388 |
| - | 10 | 2497 | p.G790E CD163_t    | NM_004244    | NP_004235     | Q86VB7 | C163A_HUMAN | extracellular (Potential).  | 8  | TCTTTTCCATTG    | 0.522 |
| - | 6  | 1372 | ran.1_Missense_M   | NM_030640    | NP_085143     | Q9BY84 | DUS16_HUMAN | protein phosphatase.        | 0  | AGATCCCAGCT     | 0.448 |
| + | 2  | 151  |                    | NM_006205    | NP_006196     | Q13956 | CNCG_HUMAN  | Lys-rich (basic).           | 2  | AAGGCCCTCCC     | 0.483 |
| + | 19 | 2493 | ε_Mutation_p.D79   | NM_019012    | NP_061885     | Q9HAU0 | PKHA5_HUMAN |                             | 3  | GTCCAGATTAT     | 0.333 |
| - | 22 | 2758 | _p.P352L IPO8_uc   | NM_006390    | NP_006381     | O15397 | IPO8_HUMAN  |                             | 3  | TTGAGGGAACA     | 0.443 |
| - | 15 | 1839 | _p.D46Y IPO8_uc    | NM_006390    | NP_006381     | O15397 | IPO8_HUMAN  |                             | 3  | CATCATCATTTT    | 0.383 |
| + | 26 | 2889 | .1_Missense_Mut    | NM_152438    | NP_689651     | Q96FC9 | DDX11_HUMAN |                             | 3  | GCCCGTGTGGA     | 0.597 |
| - | 11 | 2836 | _p.S535F SFRS2lf   | NM_004719    | NP_004710     | Q99590 | SCAFB_HUMAN | Arg-rich.                   | 0  | TTGGGGACTGAC    | 0.468 |
| + | 2  | 241  | rd.2_Translation_S | NM_000289    | NP_000280     | P08237 | K6PF_HUMAN  |                             | 4  | CTCTGGTGGAG     | 0.453 |
| + | 13 | 1843 | _p.C559Y TROAP_    | NM_005480    | NP_005471     | Q12815 | TROAP_HUMAN | ate tandem repeats.[Cys-ri  | 1  | GTCCTGCTGTAC    | 0.597 |
| - | 10 | 1120 | IL3_uc001rut.1_5f  | NM_175736    | NP_783863     | Q8IVF7 | FMNL3_HUMAN | GBD/FH3.                    | 4  | GCATACCTGAAT    | 0.517 |
| + | 5  | 425  | uy.2_Missense_M    | NM_003217    | NP_003208     | P55061 | BI1_HUMAN   | ical; (Potential).          | 0  | AGTTGGCCTGG     | 0.408 |
| + | 22 | 3172 | yo.2_Missense_M    | NM_001039960 | NP_001035049  | Q2Y0W8 | S4A8_HUMAN  | lasmic (Potential).         | 5  | TCTAAGCGAGAC    | 0.408 |
| + | 2  | 1455 | ch.1_Missense_M    | NM_032889    | NP_116278     | Q6N075 | MFSD5_HUMAN | ical; (Potential).          | 3  | TGCTGGCAGTG     | 0.557 |
| - | 16 | 1685 | s.3_Missense_Mu    | NM_015665    | NP_056480     | Q9NRG9 | AAAS_HUMAN  |                             | 1  | TCCACCCCAAG     | 0.612 |
| - | 9  | 1548 | se_Mutation_p.Q2   | NM_001098815 | NP_001092285  | A2RU30 | K0748_HUMAN |                             | 2  | TGGCTGCTGGC     | 0.517 |
| + | 1  | 841  |                    | NM_001005490 | NP_001005490  | A6NCV1 | O6C74_HUMAN | Name=7; (Potential).        | 1  | TTGCCCCCATG     | 0.358 |
| + | 7  | 934  | _p.P117L SLC39Aε   | NM_173596    | NP_775867     | Q6ZMH5 | S39A5_HUMAN | ical; (Potential).          | 2  | CTCCCTTCTC      | 0.642 |
| + | 2  | 666  | 'H4_uc009zpj.2_5'  | NM_007224    | NP_009155     | O95158 | NXPH4_HUMAN | (linker domain).            | 0  | GTTCGGAGGAG     | 0.657 |
| - | 2  | 229  | i_p.G23C TSPAN8    | NM_004616    | NP_004607     | P19075 | TSN8_HUMAN  | ical; (Potential).          | 4  | GATACCACATAG    | 0.373 |
| - | 5  | 862  | n.2_Nonsense_Mu    | NM_203394    | NP_976328     | Q96AV8 | E2F7_HUMAN  | Potential.                  | 3  | CATGCCAGCCA     | 0.502 |
| - | 4  | 769  | m.2_Missense_Mu    | NM_203394    | NP_976328     | Q96AV8 | E2F7_HUMAN  | Potential.                  | 3  | CAAGACTGACAC    | 0.473 |
| - | 3  | 479  | ldo.3_Missense_M   | NM_003297    | NP_003288     | P13056 | NR2C1_HUMAN | ction with KAT2B (By simila | 1  | TGCATCTGGAG     | 0.433 |
| + | 10 | 1574 | _p.P323L NEDD1_    | NM_152905    | NP_690869     | Q8NHV4 | NEDD1_HUMAN |                             | 0  | GTCACCTATCAC    | 0.373 |
| + | 27 | 3425 |                    | NM_014503    | NP_055318     | O75691 | UTP20_HUMAN |                             | 4  | TTCTTCTTTAGC    | 0.418 |
| + | 8  | 928  |                    | NM_017564    | NP_060034     | Q8WWQ8 | STAB2_HUMAN | r (Potential). EGF-like 4.  | 14 | GCCACCCTCATC    | 0.507 |
| + | 3  | 314  | utation_p.R70K L   | NM_003299    | NP_003290     | P14625 | ENPL_HUMAN  |                             | 3  | ACTTAGAGAGAG    | 0.353 |
| - | 14 | 1952 | g.1_Missense_Mu    | NM_018984    | NP_061857     | Q8WYL5 | SSH1_HUMAN  |                             | 4  | CTTTGCTGTTG     | 0.567 |
| + | 17 | 2558 |                    | NM_015267    | NP_056082     | O14529 | CUX2_HUMAN  | Poly-Ser.                   | 6  | CGCCTCCGTGT     | 0.721 |
| - | 11 | 1499 | 1tts.2_Missense_M  | NM_001109662 | NP_001103132  |        |             |                             | 2  | GGGTGGCAAGA     | 0.403 |
| - | 20 | 2561 | DDX54_uc001tuq:    | NM_024072    | NP_076977     | Q8TDD1 | DDX54_HUMAN |                             | 3  | GCCACCACGCT     | 0.701 |
| - | 4  | 417  | wy.3_Missense_M    | NM_016281    | NP_057365     | Q9H2K8 | TAOK3_HUMAN | rotein kinase.              | 6  | TTGTAGCCTGT     | 0.348 |
| + | 28 | 4796 |                    | NM_207437    | NP_997320     | Q8IVF4 | DYH10_HUMAN | n (By similarity).          | 6  | AGGAGCACATG     | 0.542 |
| + | 40 | 7387 | .P2450L EP400_u    | NM_015409    | NP_056224     | Q96L91 | EP400_HUMAN |                             | 12 | GAATCCCTTTCA    | 0.388 |
| - | 3  | 317  | ice_Site_p.S78_sf  | NM_001161344 | NP_0011154816 | Q96EP1 | CHFR_HUMAN  |                             | 1  | TACTCACTGGT     | 0.468 |
| + | 4  | 783  | _p.R162K ZMYM2     | NM_003453    | NP_003444     | Q9UBW7 | ZMYM2_HUMAN |                             | 6  | TTCAAGAAGTA     | 0.383 |
| - | 10 | 4401 | R1124K SACS_uc     | NM_014363    | NP_055178     | Q9NZJ4 | SACS_HUMAN  |                             | 12 | AGGCTCTAAAAC    | 0.373 |
| - | 15 | 3956 | _uc010aae.2_Splii  | NM_018451    | NP_060921     | Q9HC77 | CENPJ_HUMAN |                             | 2  | TTTGTACTATTT    | 0.398 |
| - | 1  | 1301 | _p.P282S FAM123    | NM_152704    | NP_689917     | Q8N7J2 | F123A_HUMAN |                             | 4  | CCCGGGGACAT     | 0.577 |

|   |    |      |                   |              |              |        |             |                               |    |                   |       |
|---|----|------|-------------------|--------------|--------------|--------|-------------|-------------------------------|----|-------------------|-------|
| + | 2  | 461  | n_p.P72L NUPL1_   | NM_014089    | NP_054808    | Q9BVL2 | NUPL1_HUMAN | AA repeats of F-G.            | 0  | TAACCTGCCAC       | 0.453 |
| - | 30 | 4148 | q_2_Missense_Mu   | NM_002019    | NP_002010    | P17948 | VGFR1_HUMAN | lasmic (Potential).           | 24 | GCCTGCTGACA       | 0.473 |
| + | 6  | 3060 |                   | NM_001033602 | NP_001028774 | Q5JR59 | MTUS2_HUMAN | ig distal tip of microtubules | 0  | GGCCCGTGAGG       | 0.632 |
| + | 14 | 1206 | ba_2_Missense_M   | NM_130806    | NP_570718    | Q8WXD0 | RXFP2_HUMAN | ellular (Potential).          | 0  | AAGAATCTTTCTC     | 0.358 |
| + | 6  | 1073 | RY_uc010tdw.1_Rf  | NM_023037    | NP_075463    | Q5TBA9 | FRY_HUMAN   |                               | 7  | GTAATAGACAGT      | 0.313 |
| + | 26 | 3659 | RY_uc010tdw.1_Rf  | NM_023037    | NP_075463    | Q5TBA9 | FRY_HUMAN   |                               | 7  | CCCTAGAGCGG       | 0.383 |
| + | 11 | 4524 |                   | NM_000059    | NP_000050    | P51587 | BRCA2_HUMAN | BRCA2 3.                      | 64 | CAAGTGGGAAA       | 0.289 |
| - | 5  | 641  | D13_uc001uux.2_   | NM_178006    | NP_821074    | Q9Y3M8 | STA13_HUMAN |                               | 4  | CTCCCGGTGAC       | 0.577 |
| - | 5  | 1328 | vo_2_Missense_Mi  | NM_001142296 | NP_001135768 | Q8N0X7 | SPG20_HUMAN |                               | 0  | TAGTTCTTCCA       | 0.408 |
| + | 17 | 2064 | i_p.V645i LRCH1_  | NM_015116    | NP_055931    | Q9Y2L9 | LRCH1_HUMAN | CH.                           | 2  | ATGGTGTCTGT       | 0.512 |
| - | 1  | 484  | TR2A_uc010acr.2_  | NM_000621    | NP_000612    | P28223 | 5HT2A_HUMAN | ame=2; (By similarity).       | 6  | TATGGCAAGT        | 0.453 |
| + | 8  | 1164 | se_Mutation_p.R27 | NM_052950    | NP_443182    | Q96P53 | WDFY2_HUMAN | WD 6.                         | 0  | GGAGAGGCAGG       | 0.547 |
| - | 18 | 3954 | o.G1201E ATP7B_   | NM_000053    | NP_000044    | P35670 | ATP7B_HUMAN | lasmic (Potential).           | 3  | CATCCCCACC        | 0.597 |
| + | 4  | 4151 | p.D1086N PCDH1    | NM_001040429 | NP_001035519 | O14917 | PCD17_HUMAN | lasmic (Potential).           | 7  | CAAGAGACCCCT      | 0.532 |
| - | 2  | 971  | _p.P183L DACH1_   | NM_080759    | NP_542937    | Q9UI36 | DACH1_HUMAN |                               | 1  | TCTGAGGGGTG       | 0.483 |
| + | 4  | 391  | _p.R74K SCEL_uc   | NM_144777    | NP_659001    | O95171 | SCEL_HUMAN  |                               | 5  | GGACAGGTGGG       | 0.408 |
| - | 14 | 1599 | OCK9_uc010tis.1_  | NM_015296    | NP_056111    | Q9BZ29 | DOCK9_HUMAN |                               | 1  | TTTGGCATGCC       | 0.438 |
| - | 43 | 3990 | 4A1_uc010agl.2_I  | NM_001845    | NP_001836    | P02462 | CO4A1_HUMAN | le-helical region.            | 6  | CATGCCCTGGA       | 0.413 |
| - | 6  | 854  | vsf.2_Missense_IV | NM_006322    | NP_006313    | Q96CW5 | GCP3_HUMAN  |                               | 1  | ACTGGGGACAC       | 0.493 |
| - | 10 | 972  | i.G249S RASA3_u   | NM_007368    | NP_031394    | Q14644 | RASA3_HUMAN |                               | 4  | GGAGCCCAGGT       | 0.582 |
| - | 3  | 384  | p.V53I RASA3_uc   | NM_007368    | NP_031394    | Q14644 | RASA3_HUMAN | C2 1.                         | 4  | GGAAAACGTCTC      | 0.448 |
| - | 1  | 260  | i4P_uc001vwb.3_F  | NM_001145442 | NP_001138914 | A6NI47 | POTEM_HUMAN |                               | 0  | CCAGGGGAAGC       | 0.592 |
| - | 4  | 1298 | _Missense_Mutatic | NM_012244    | NP_036376    | Q9UHI5 | LAT2_HUMAN  | ical; (Potential).            | 1  | CAGCTGTGAAG       | 0.527 |
| - | 33 | 4927 |                   | NM_002471    | NP_002462    | P13533 | MYH6_HUMAN  | Potential.                    | 4  | TCCTCCATCTT       | 0.607 |
| + | 4  | 1045 | SSK4_uc001wnf.2_  | NM_174944    | NP_777604    | Q6SA08 | TSSK4_HUMAN | rotein kinase.                | 0  | CCTGGGTGCTC       | 0.542 |
| + | 5  | 447  | i_p.C52Y G2E3_u   | NM_017769    | NP_060239    | Q7L622 | G2E3_HUMAN  | PHD-type 1.                   | 3  | CCGATGTAACA       | 0.353 |
| - | 9  | 1243 | L1_uc001wxz.2_Ir  | NM_004196    | NP_004187    | Q00532 | CDKL1_HUMAN |                               | 2  | tataataggatgaggtt | 0     |
| + | 9  | 1212 | p.G324D ATL1_uc   | NM_015915    | NP_056999    | Q8WXF7 | ATLA1_HUMAN | Cytoplasmic.                  | 4  | CCGGGTCTGG        | 0.368 |
| + | 5  | 985  | wzt.3_Nonsense_J  | NM_001099652 | NP_001093122 | Q8N3F9 | G137C_HUMAN | lasmic (Potential).           | 0  | TTAAACCAGAATI     | 0.363 |
| + | 2  | 678  | se_Mutation_p.T2  | NM_015589    | NP_056404    | Q9UPU9 | SMAG1_HUMAN |                               | 0  | CCCCACCACAA       | 0.507 |
| - | 7  | 600  | bn.1_Nonsense_M   | NM_007086    | NP_009017    | O75717 | WDHD1_HUMAN |                               | 1  | AGTGGCCAACT       | 0.333 |
| - | 1  | 539  |                   | NM_030791    | NP_110418    | Q9BX95 | SGPP1_HUMAN | ical; (Potential).            | 1  | GAAGGGGAAGA       | 0.622 |
| + | 35 | 5298 | jl.2_Missense_Mu  | NM_015180    | NP_055995    | Q8WXH0 | SYNE2_HUMAN | ic (Potential). Potential.    | 14 | TCCATGAACAA       | 0.284 |
| + | 8  | 1171 | HG3_uc001xhp.2_   | NM_015549    | NP_056364    | A1L390 | PKHG3_HUMAN | PH.                           | 1  | CTACGGGGAGC       | 0.577 |
| - | 19 | 4301 | p.R1416Q SPTB_i   | NM_000347    | NP_000338    | P11277 | SPTB1_HUMAN | Spectrin 11.                  | 11 | AACATCCGATTG      | 0.522 |
| + | 5  | 548  |                   | NM_020715    | NP_065766    | Q9ULM0 | PKHH1_HUMAN | Potential.                    | 0  | GGGTGACTCTC       | 0.532 |
| - | 2  | 2073 | se_Mutation_p.A44 | NM_183002    | NP_892114    | P57103 | NAC3_HUMAN  | Cytoplasmic (Potential).      | 7  | CATTGGCAGAA       | 0.522 |
| - | 6  | 2043 | _p.R53Q ZFYVE1_   | NM_021260    | NP_067083    | Q9HBF4 | ZFYV1_HUMAN |                               | 1  | IACACTCGGTTG      | 0.517 |
| - | 24 | 3934 |                   | NM_000428    | NP_000419    | Q14767 | LTBP2_HUMAN | 12; calcium-binding (Poten    | 2  | CTCCTCCCCCA       | 0.642 |
| - | 4  | 1407 |                   | NM_000428    | NP_000419    | Q14767 | LTBP2_HUMAN |                               | 2  | TTACCCAGGGC       | 0.617 |
| - | 12 | 1941 | _p.T318I KIAA031  | NM_001039479 | NP_001034568 | O15033 | K0317_HUMAN |                               | 5  | TCCGAGTGGCT       | 0.403 |
| + | 5  | 299  | se_Mutation_p.Q8  | NM_001102564 | NP_001096034 | Q96FT9 | IFT43_HUMAN |                               | 0  | GACCACAGAGC       | 0.453 |
| + | 9  | 1297 | se_Mutation_p.A3  | NM_020421    | NP_065154    | Q86TW2 | ADCK1_HUMAN | rotein kinase.                | 3  | TCACTGCCACT       | 0.617 |
| + | 15 | 3276 | i_p.R297C NRXN    | NM_004796    | NP_004787    | Q9Y4C0 | NRX3A_HUMAN | ellular (Potential).          | 10 | AGAATCGCTCT       | 0.418 |
| - | 4  | 368  | I4orf143_uc001xxi | NM_145231    | NP_660274    | Q9BUY7 | EFC11_HUMAN | EF-hand 2.                    | 0  | TTACTTCGTTCC      | 0.333 |
| + | 11 | 1693 | se_Mutation_p.R   | NM_001102366 | NP_001095836 | Q7Z3D6 | CN159_HUMAN |                               | 3  | GGAACGGGGGG       | 0.363 |
| - | 9  | 873  |                   | NM_024764    | NP_079040    | Q9H7T0 | CTSRB_HUMAN | ical; (Potential).            | 5  | TATCCACCAATG      | 0.343 |

rs143773668

|   |    |           |                    |              |              |        |                                          |    |                    |       |
|---|----|-----------|--------------------|--------------|--------------|--------|------------------------------------------|----|--------------------|-------|
| + | 3  | 215       | 0twm.1_Splice_Si   | NM_153646    | NP_705932    | Q8NFF2 | NCKX4_HUMAN                              | 3  | TTCCAGCGATT        | 0.532 |
| - | 1  | 35        | r7_uc001ybn.3_5'l  | NM_032490    | NP_115879    | Q9BXV9 | CN142_HUMAN                              | 0  | CGCCACCCGGA        | 0.632 |
| + | 17 | 4000      |                    | NM_001376    | NP_001367    | Q14204 | DYHC1_HUMAN n (By similarity).           | 10 | TTCAGGCTCTCA       | 0.502 |
| + | 68 | 12558     |                    | NM_001376    | NP_001367    | Q14204 | DYHC1_HUMAN 6 (By similarity).           | 10 | TTCAACCCCAAG       | 0.597 |
| + | 3  | 378       | e.2_Missense_Mu    | NM_152328    | NP_689541    | Q8N142 | PURA1_HUMAN                              | 2  | ACGGGGTGGTC        | 0.488 |
| - | 7  | 12965     | px.2_Missense_Mi   | NM_138420    | NP_612429    | Q8IVF2 | AHMK2_HUMAN                              | 1  | GGTCAACCCTCC       | 0.612 |
| - | 7  | 9176      | px.2_Missense_Mi   | NM_138420    | NP_612429    | Q8IVF2 | AHMK2_HUMAN                              | 1  | GGTCCCCCTGC        | 0.647 |
| + | 5  | 1451      | 1_uc010axg.1_Intr  | NM_033271    | NP_150374    | Q96KE9 | BTBD6_HUMAN                              | 0  | GGAGGGGATGA        | 0.612 |
| - | 3  | 2346      | uck.1_Missense_Iv  | NM_007223    | NP_009154    | Q14439 | GP176_HUMAN lasmic (Potential).          | 6  | GCCTACCTTGG        | 0.527 |
| - | 5  | 427       | zkr.2_3'UTR uc00   | NM_003134    | NP_003125    | P37108 | SRP14_HUMAN Ala/Thr-rich.                | 0  | tgtgctgctggcagggtg | 0.234 |
| - | 22 | 3290      | oc.2_Missense_M    | NM_015540    | NP_056355    | Q9BWH6 | RPAP1_HUMAN Leu-rich.                    | 1  | GTTGCGGATGC        | 0.642 |
| + | 30 | 4496      | PKBP1_uc010udt     | NM_001128608 | NP_001122080 | O60336 | MABP1_HUMAN                              | 10 | CAGGGGCAGCC        | 0.622 |
| - | 3  | 1316      | 389V ZSCAN29_L     | NM_152455    | NP_689668    | Q8IWI8 | ZSC29_HUMAN                              | 1  | GGGTGCGCTCT        | 0.552 |
| + | 13 | 1608      | p.P467L PDIA3_u    | NM_005313    | NP_005304    | P30101 | PDIA3_HUMAN                              | 2  | AAACCCCTCTG        | 0.383 |
| + | 1  | 210       | 4_uc001ztd.1_5'F   | NM_016400    | NP_057484    | Q9NX55 | HYPK_HUMAN                               | 0  | CGACCGAGGGG        | 0.657 |
| + | 14 | 1842      | e_Mutation_p.T49   | NM_017434    | NP_059130    | Q9NRD9 | DUOX1_HUMAN oxidase activity. Extracellu | 8  | CAGCACCATCG        | 0.607 |
| - | 26 | 3775_3776 | 'Flank MYO5A_uc    | NM_000259    | NP_000250    | Q9Y411 | MYO5A_HUMAN Potential.                   | 4  | CTTGCGGTCCAC       | 0.569 |
| + | 13 | 3198      | w.2_Missense_Mu    | NM_032866    | NP_116255    | Q0VF96 | CGNL1_HUMAN Potential.                   | 11 | GCAGACGCTGA        | 0.547 |
| - | 3  | 1456      | M10_uc010ugz.1_    | NR_002927    |              |        |                                          | 0  | TGTCACCCGCT        | 0.468 |
| - | 8  | 1130      |                    | NM_004998    | NP_004989    | Q12965 | MYO1E_HUMAN osin head-like.              | 3  | ACTCCCGCCTG        | 0.527 |
| + | 19 | 2620      |                    | NM_015059    | NP_055874    | Q9Y4G6 | TLN2_HUMAN Ala-rich.                     | 11 | GCATGGTGAA         | 0.448 |
| + | 10 | 1862      | p.D235N THSD4_     | NM_024817    | NP_079093    | Q6ZMP0 | THSD4_HUMAN                              | 2  | CATCCAGACAGA       | 0.587 |
| - | 6  | 1306      | se_Mutation_p.S1:  | NM_000499    | NP_000490    | P04798 | CP1A1_HUMAN                              | 5  | TTCAAATTGTG        | 0.517 |
| - | 5  | 1558      | fRNA3_uc002beb.    | NM_000743    | NP_000734    | P32297 | ACHA3_HUMAN lasmic (Potential).          | 4  | CATTTTGTGCTT       | 0.368 |
| + | 22 | 3141      |                    | NM_152336    | NP_689549    | Q96MI9 | CBPC4_HUMAN                              | 0  | AGGACGCTCTG        | 0.532 |
| - | 11 | 2352      | bnr.3_Splice_Site_ | NM_002693    | NP_002684    | P54098 | DPOG1_HUMAN                              | 2  | CCCTCACCGTTT       | 0.617 |
| + | 10 | 1038      |                    | NM_003870    | NP_003861    | P46940 | IQGA1_HUMAN                              | 8  | AATATCGACCTG       | 0.473 |
| + | 9  | 1388      | xqd.2_Missense_M   | NM_018671    | NP_061141    | Q9H3U1 | UN45A_HUMAN                              | 2  | TGGAAGTGGGG        | 0.507 |
| + | 2  | 373       | p.G108D IGF1R_u    | NM_000875    | NP_000866    | P08069 | IGF1R_HUMAN                              | 8  | CCGCGGTGGA         | 0.552 |
| - | 2  | 643       | jq.1_Missense_Mu   | NM_003502    | NP_003493    | O15169 | AXIN1_HUMAN RGS.                         | 2  | GGACACGATGC        | 0.537 |
| - | 1  | 9         | se_Mutation_p.A2   | NM_172168    | NP_751908    | Q8NFA2 | NOXO1_HUMAN PX.                          | 0  | GGCCTGCCATG        | 0.617 |
| - | 15 | 6879      | t.1_Missense_Mut   | NM_001009944 | NP_001009944 | P98161 | PKD1_HUMAN ular (Potential). REJ.        | 3  | CACAGGCAGCG        | 0.706 |
| - | 4  | 805       | e_Mutation_p.E47   | NM_001103175 | NP_001096645 | A1A5D9 | BICR2_HUMAN Potential.                   | 0  | CACCTCCAGGC        | 0.657 |
| + | 7  | 1538      | ua.2_Missense_M    | NM_001042428 | NP_001035893 | O95201 | ZN205_HUMAN C2H2-type 6.                 | 0  | CAACCGCACAC        | 0.657 |
| - | 2  | 2169      |                    | NM_001116    | NP_001107    | O60503 | ADCY9_HUMAN lasmic (Potential).          | 6  | CATTCGTACCC        | 0.532 |
| + | 3  | 1023      | IP2_uc010uyp.1_I   | NM_024997    | NP_079273    | Q5U623 | MCAF2_HUMAN                              | 0  | GTGCAGACTCA        | 0.328 |
| - | 1  | 199       | r75_uc002daq.1_    | NM_005425    | NP_005416    | Q05952 | STP2_HUMAN                               | 0  | TGGCCGGGCTC        | 0.627 |
| - | 42 | 7308      | bwa.2_Splice_Site  | NM_015092    | NP_055907    | Q96Q15 | SMG1_HUMAN                               | 16 | CACATACCTGCG       | 0.463 |
| - | 6  | 651       | iA2_uc010bxo.1_F   | NM_015044    | NP_055859    | Q9UJY4 | GGA2_HUMAN GAT.                          | 2  | ACCTTGACTTTT       | 0.458 |
| - | 8  | 2967      |                    | NM_024675    | NP_078951    | Q86YC2 | PALB2_HUMAN on with RAD51 and BRCA2      | 11 | CTGGAACATCT        | 0.343 |
| + | 6  | 2880      | W669* TNRC6A_      | NM_014494    | NP_055309    | Q8NDV7 | TNR6A_HUMAN ction with EIF2C1 and EIF2   | 2  | GGATGGGGAGA        | 0.433 |
| + | 2  | 587       |                    | NM_152288    | NP_689501    | Q9BRQ5 | ORAI3_HUMAN                              | 0  | GTGAGCAACAT        | 0.607 |
| - | 44 | 6726      | NOT1_uc002ent.L    | NM_016284    | NP_057368    | A5YKK6 | CNOT1_HUMAN                              | 6  | GAATGGGTCCG        | 0.388 |
| - | 42 | 6421      | S2038F CNOT1_      | NM_016284    | NP_057368    | A5YKK6 | CNOT1_HUMAN                              | 6  | GATGGGAAATC        | 0.443 |
| + | 5  | 1125      | p.G84R ZFP90_uc    | NM_133458    | NP_597715    | Q8TF47 | ZFP90_HUMAN                              | 1  | CACTGGGGAGA        | 0.453 |
| - | 2  | 746       | 38_uc002ewy.2_3'   | NM_022341    | NP_071736    | Q9HBH1 | DEFM_HUMAN                               | 0  | CATTCACCTTCAT      | 0.498 |
| + | 16 | 2617      | 38_uc010vmp.1_I    | NM_014003    | NP_054722    | Q92620 | PRP16_HUMAN                              | 1  | TTGAGGTGCGT        | 0.577 |

rs143368771



|   |    |      |                   |              |              |        |             |                           |    |                   |       |             |
|---|----|------|-------------------|--------------|--------------|--------|-------------|---------------------------|----|-------------------|-------|-------------|
| + | 8  | 1566 | nw.1_Missense_M   | NM_178452    | NP_848547    | Q8NEP3 | DAAF1_HUMAN | Pro-rich.                 | 0  | AGATCAAGAGC       | 0.612 |             |
| + | 6  | 980  | voj.1_Missense_M  | NM_014732    | NP_055547    | O60268 | K0513_HUMAN |                           | 1  | TGAAGGGGCC        | 0.657 |             |
| + | 3  | 494  | E7_uc002fnq.2_lr  | NM_014427    | NP_055242    | Q9UBL6 | CPNE7_HUMAN |                           | 0  | CAGCCCCAAAAG      | 0.527 |             |
| - | 8  | 996  | p.V303M SLC43A1   | NM_152346    | NP_689559    | Q8N370 | LAT4_HUMAN  |                           | 0  | CTTCACCTCCA       | 0.687 |             |
| - | 2  | 790  |                   | NM_020310    | NP_064706    | Q99583 | MNT_HUMAN   |                           | 1  | TCCAGGGTGTG       | 0.642 |             |
| + | 1  | 716  | 3_Intron ITGAE_u  | NM_031965    | NP_114171    | Q8TF76 | HASP_HUMAN  |                           | 0  | AGGAGCCAAGG       | 0.617 |             |
| - | 12 | 1642 | _p.T535I ANKFY1   | NM_016376    | NP_057460    | Q9P2R3 | ANFY1_HUMAN |                           | 3  | AGCTGGTCAGG       | 0.612 |             |
| - | 24 | 3313 | l2fy.3_Missense_  | NM_014520    | NP_055335    | Q9BQG0 | MBB1A_HUMAN |                           | 2  | GGGAGGACAGT       | 0.647 |             |
| + | 23 | 4099 |                   | NM_000937    | NP_000928    | P24928 | RPB1_HUMAN  |                           | 1  | TGCATCGAGTCC      | 0.572 |             |
| + | 2  | 550  | ja.2_5'Flank CYB5 | NM_144607    | NP_653208    | Q6P9G0 | CB5D1_HUMAN | me b5 heme-binding.       | 1  | TCAAGGGAACC       | 0.572 |             |
| - | 6  | 1177 | l16_uc002gow.2_!  | NM_006470    | NP_006461    | O95361 | TR116_HUMAN |                           | 3  | ACACCGACACC       | 0.512 |             |
| - | 28 | 4030 | OR1_uc010vwb.1    | NM_006311    | NP_006302    | O75376 | NCOR1_HUMAN | action with ETO.          | 5  | TACAGGAGACT       | 0.348 |             |
| + | 2  | 487  |                   | NM_018019    | NP_060489    | Q9NWA0 | MED9_HUMAN  |                           | 0  | AATCCCCAAGG       | 0.562 |             |
| - | 11 | 1392 | DP3A_uc002gsw.1   | NM_004618    | NP_004609    | Q13472 | TOP3A_HUMAN |                           | 3  | CCCAGCGTGG        | 0.547 |             |
| - | 3  | 382  | Jcqw.1_Missense_  | NM_007202    | NP_009133    | O43572 | AKA10_HUMAN |                           | 1  | AAAAGGAGTCC       | 0.453 |             |
| + | 7  | 1127 | p.A313T CCDC55    | NM_032141    | NP_115517    | Q9H0G5 | NSRP1_HUMAN |                           | 0  | CAAGGGCGAGG       | 0.323 |             |
| - | 1  | 922  |                   | NM_152462    | NP_689675    | Q8N808 | AMAC1_HUMAN | DUF6 2.                   | 0  | GGGCAGGGTGG       | 0.577 |             |
| + | 4  | 749  | 2_5'Flank MRM1_u  | NM_024308    | NP_077284    | Q6UWP2 | DHR11_HUMAN |                           | 0  | CAGAGGGACTG       | 0.642 |             |
| + | 4  | 1033 | TF_uc002hnj.2_Rl  | NM_012138    | NP_036270    | Q9NY61 | AATF_HUMAN  |                           | 0  | TTTTCCCATTGT      | 0.423 |             |
| + | 6  | 507  | 7 TBC1D3_uc002    | NM_032258    | NP_115634    | Q8IZP1 | TBC3A_HUMAN | ab-GAP TBC.               | 0  | GAACTGAGAG        | 0.557 | rs143321126 |
| - | 17 | 3990 | 3_Mutation_p.P10f | NM_004774    | NP_004765    | Q15648 | MED1_HUMAN  | Interaction with TP53.    | 8  | TGGGGGAGTTT       | 0.478 |             |
| - | 17 | 3907 | 3_Mutation_p.S10f | NM_004774    | NP_004765    | Q15648 | MED1_HUMAN  | Ser-rich.                 | 8  | TATGAGAACCAC      | 0.502 |             |
| - | 21 | 2708 |                   | NM_001067    | NP_001058    | P11388 | TOP2A_HUMAN |                           | 7  | TGCAGGACCAC       | 0.423 |             |
| - | 4  | 963  |                   | NM_019016    | NP_061889    | Q2M2I5 | K1C24_HUMAN | od.  Linker 12.           | 0  | AGCATTCAATTC      | 0.507 |             |
| - | 25 | 3014 | 3.D1005N ACLY_u   | NM_001096    | NP_001087    | P53396 | ACLY_HUMAN  |                           | 3  | ACTGTCAAAGG       | 0.498 |             |
| + | 5  | 485  | iky.2_Missense_M  | NM_004287    | NP_004278    | O14653 | GOSR2_HUMAN | lasmic (Potential).       | 2  | GCATGGATGAC       | 0.502 |             |
| - | 22 | 3075 | ld.2_Missense_Mu  | NM_001130528 | NP_001124000 | O60271 | JIP4_HUMAN  |                           | 5  | CCAAGTCTTGT       | 0.388 |             |
| - | 6  | 776  |                   | NM_012329    | NP_036461    | Q15546 | PAQRB_HUMAN | ical; (Potential).        | 0  | CTGGAGAGAAT       | 0.333 |             |
| - | 1  | 318  |                   | NM_003916    | NP_003907    |        |             |                           | 0  | cgatagtgggacatacc | 0.249 |             |
| + | 4  | 323  | ense_Mutation_p.L | NM_001099432 | NP_001092902 | Q9H6U6 | BCAS3_HUMAN | WD 1.                     | 5  | TTAAATGGTATGC     | 0.348 |             |
| + | 5  | 430  | ice_Site_p.P107_s | NM_001099432 | NP_001092902 | Q9H6U6 | BCAS3_HUMAN |                           | 5  | ATCCCTGTAAGT      | 0.333 |             |
| - | 27 | 6088 |                   | NM_005121    | NP_005112    | Q9UHV7 | MED13_HUMAN |                           | 2  | TCATCTCCTGTG      | 0.408 |             |
| + | 8  | 1158 | AF7_uc010wpn.1_   | NM_005828    | NP_005819    | P61962 | DCAF7_HUMAN |                           | 1  | TGAAGGAGAGA       | 0.547 |             |
| + | 10 | 1270 | wrg.1_Intron TMEI | NM_017728    | NP_060198    | Q8NE00 | TM104_HUMAN | ical; (Potential).        | 0  | AACTTCCCATC       | 0.622 |             |
| - | 18 | 3922 | jl.3_Missense_Mu  | NM_022066    | NP_071349    | Q9C0C9 | UBE2O_HUMAN |                           | 5  | ACTCCGGCATG       | 0.632 |             |
| - | 10 | 971  | xs.2_Missense_Mt  | NM_014740    | NP_055555    | P38919 | IF4A3_HUMAN | case C-terminal.          | 1  | AGTTGGCTTCCC      | 0.512 |             |
| + | 9  | 1237 | 3jyd.1_Missense_M | NM_173626    | NP_775897    | Q86WA9 | S2611_HUMAN | ical; (Potential).        | 0  | CATTCGGGTGG       | 0.632 |             |
| - | 5  | 458  | _p.P137L C17orf62 | NM_001100407 | NP_001093877 | Q9BQA9 | CQ062_HUMAN |                           | 0  | TGAGGGGGTGG       | 0.622 |             |
| + | 4  | 496  | wvr.1_Missense_M  | NM_024619    | NP_078895    | Q9HA64 | KT3K_HUMAN  |                           | 0  | GGTGACGTGCT       | 0.547 | rs139863997 |
| + | 4  | 1051 |                   | NM_032048    | NP_114437    | Q9BXX0 | EMIL2_HUMAN | Potential.                | 3  | AGCTCCAGGAA       | 0.512 |             |
| - | 23 | 3384 | zj.1_Missense_Mt  | NM_005559    | NP_005550    | P25391 | LAMA1_HUMAN | inin EGF-like 13.         | 21 | CCGACGTCCCC       | 0.582 |             |
| + | 6  | 1110 | p.G323D KIAA080   | NM_015210    | NP_056025    | Q9Y4B5 | CC165_HUMAN | Potential.                | 0  | AGAGGGTGCAA       | 0.632 |             |
| + | 2  | 1161 | ND2_uc002koh.:    | NM_001098529 | NP_001091999 | Q86VQ3 | TXND2_HUMAN | repeat of Q-P-K-X-G-D-I-P | 2  | AGAGTGATATC       | 0.557 |             |
| - | 9  | 1492 | PPE1_uc002kqk.2   | NM_023075    | NP_075563    | Q53F39 | MPPE1_HUMAN |                           | 0  | CCTCCGTGAA        | 0.502 | rs145870573 |
| - | 17 | 2374 | B6_uc002kqy.2_3'  | NM_006796    | NP_006787    | Q9Y4W6 | AFG32_HUMAN |                           | 0  | FAGGTAGATTTTT     | 0.423 |             |
| - | 9  | 1228 | _p.P310L ABHD3_   | NM_138340    | NP_612213    | Q8WU67 | ABHD3_HUMAN |                           | 1  | ACATTAGGATTT      | 0.378 |             |
| + | 4  | 1462 | 3YR_uc002kva.2_l  | NM_012189    | NP_036321    | O75952 | CABYR_HUMAN |                           | 0  | GTCTGGGGAAA       | 0.488 |             |

|   |    |         |                   |              |              |        |             |                               |    |                |       |             |
|---|----|---------|-------------------|--------------|--------------|--------|-------------|-------------------------------|----|----------------|-------|-------------|
| - | 11 | 1021    | 2kvf.3_Missense_I | NM_080597    | NP_542164    | Q9BXW6 | OSBL1_HUMAN | PH.                           | 4  | TCAGGTGTTTGC   | 0.363 |             |
| + | 1  | 797     | \F4B_uc002kvt.3_  | NM_005640    | NP_005631    | Q92750 | TAF4B_HUMAN |                               | 3  | CCACGACAATCC   | 0.577 |             |
| + | 10 | 1558    |                   | NM_001942    | NP_001933    | Q02413 | DSG1_HUMAN  | r (Potential). Cadherin 4.    | 7  | AGTTACCAAGG#   | 0.338 |             |
| + | 15 | 2249    | 33_uc002kwt.2_5'l | NM_001944    | NP_001935    | P32926 | DSG3_HUMAN  | lasmic (Potential).           | 9  | iCGGTGGAAGGC   | 0.443 |             |
| + | 11 | 1311    |                   | NM_005925    | NP_005916    | Q16820 | MEP1B_HUMAN | ilar (Potential). MAM.        | 2  | ATCAATCTTTTCGC | 0.438 |             |
| - | 15 | 1790    | rf34_uc010dmf.1_I | NM_001105528 | NP_001098998 | Q5BJE1 | CR034_HUMAN |                               | 1  | AAAGCACCATTCT  | 0.318 |             |
| - | 4  | 1342    | 2_Intron ZNF397C  | NM_001112734 | NP_001106205 | Q86W11 | ZSC30_HUMAN | 2H2-type 3.                   | 0  | TGATGAGCTCTG   | 0.468 |             |
| + | 9  | 866     | .P2_uc010xch.1_A  | NM_018255    | NP_060725    | Q6IA86 | ELP2_HUMAN  | WD 6.                         | 4  | ACTGGGTAATCT   | 0.398 |             |
| + | 3  | 1209    | fr.1_Missense_Mu  | NM_005215    | NP_005206    | P43146 | DCC_HUMAN   | otential). Ig-like C2-type 2. | 17 | GACATTGGAATT   | 0.498 |             |
| - | 11 | 1397    | 3.R389Q NARS_uc   | NM_004539    | NP_004530    | O43776 | SYNC_HUMAN  |                               | 0  | TCATCCGTTTGA   | 0.323 |             |
| + | 8  | 1442    | if.2_Missense_Mu  | NM_031891    | NP_114097    | Q9HBT6 | CAD20_HUMAN | Extracellular (Potential).    | 5  | TTGGAAGTGTTCT  | 0.413 |             |
| - | 3  | 593     | se_Mutation_p.P1  | NM_021153    | NP_066976    | Q9H159 | CAD19_HUMAN | Extracellular (Potential).    | 2  | TCATAAGGTTCA   | 0.363 |             |
| + | 5  | 983     | .p.V254I CCDC10   | NM_001093729 | NP_001087198 | Q68D86 | C102B_HUMAN |                               | 3  | AATGAAGTAACT   | 0.378 |             |
| + | 1  | 1564    | lqu.1_Nonsense_A  | NM_017757    | NP_060227    | Q9C0G0 | ZN407_HUMAN |                               | 2  | AGGGCCAGGGG    | 0.577 |             |
| - | 8  | 1109    | 3.G164D MBP_uc    | NM_001025101 | NP_001020272 | P02686 | MBP_HUMAN   |                               | 1  | GCGTGCCCTGG    | 0.552 |             |
| + | 14 | 1948    | R413C HMHA1_uc    | NM_012292    | NP_036424    | Q92619 | HMHA1_HUMAN |                               | 1  | TCATGCGTGCC    | 0.647 |             |
| - | 6  | 829     | .2_RNA ATP8B3_t   | NM_138813    | NP_620168    | O60423 | AT8B3_HUMAN | lasmic (Potential).           | 0  | GTCCCGGGTGG    | 0.657 |             |
| + | 4  | 1228    | wn.3_Missense_M   | NM_152791    | NP_690004    | Q8NEP9 | ZN555_HUMAN | 2H2-type 8.                   | 1  | TTATCCCCAGTC   | 0.463 |             |
| + | 4  | 1395    | wn.3_Missense_M   | NM_152791    | NP_690004    | Q8NEP9 | ZN555_HUMAN | 2H2-type 10.                  | 1  | AATTGGCCCATAT  | 0.453 |             |
| + | 1  | 338     | :LN_uc002lxh.1_R  | NM_020170    | NP_064555    | Q969V3 | NCLN_HUMAN  | renal (Potential).            | 0  | CCCTACGGTGCG   | 0.756 |             |
| - | 2  | 282     | lye.1_Missense_IV | NM_001060    | NP_001051    | P21731 | TA2R_HUMAN  | ellular (Potential).          | 0  | ATCAGCCGTCTC   | 0.697 |             |
| - | 2  | 240     | 3D37_uc002lzf.1_E | NM_001961    | NP_001952    | P13639 | EF2_HUMAN   |                               | 0  | ITGTCTCCCCGG   | 0.632 |             |
| + | 13 | 2433    |                   | NM_005483    | NP_005474    | Q13111 | CAF1A_HUMAN | inds to p60.                  | 2  | CTCCACCACCT    | 0.647 |             |
| + | 1  | 1647    | uc002mbg.1_RNA    | NM_018708    | NP_061178    | Q9BSK4 | FEM1A_HUMAN |                               | 0  | GCTCTACCTGCT   | 0.652 |             |
| + | 8  | 1180    | .p.S239N ZNF557_  | NM_001044388 | NP_001037853 | Q8N988 | ZN557_HUMAN | 2H2-type 4.                   | 2  | ATGCAGTGACTC   | 0.438 |             |
| - | 4  | 658_659 | q.2_Missense_Mu   | NM_021155    | NP_066978    | Q9NNX6 | CD209_HUMAN | 5. 7 X approximate tandem     | 1  | AGCCCGGGTAC    | 0.564 | rs141131967 |
| + | 3  | 395     | 2_uc002mix.1_Spl  | NM_003083    | NP_003074    | Q13487 | SNPC2_HUMAN |                               | 0  | CGCAGGTACCG    | 0.363 |             |
| - | 33 | 4279    |                   | NM_032447    | NP_115823    | Q75N90 | FBN3_HUMAN  | 22; calcium-binding.          | 11 | 3GTTCTCACAGC   | 0.617 |             |
| - | 1  | 2462    |                   | NM_024690    | NP_078966    | Q8WXI7 | MUC16_HUMAN | xtracellular (Potential).     | 57 | CTGTGGTAATA    | 0.473 |             |
| - | 2  | 80      | nou.1_Missense_I  | NM_030760    | NP_110387    | Q9H228 | S1PR5_HUMAN | llular (By similarity).       | 2  | GCGCCGCCCGC    | 0.716 |             |
| + | 5  | 805     | nse_Mutation_p.T. | NM_001005361 | NP_001005361 | P50570 | DYN2_HUMAN  |                               | 6  | GGGCACCGACG    | 0.567 |             |
| + | 4  | 1932    | e_Mutation_p.S62  | NM_144566    | NP_653167    | Q9H0M5 | ZN700_HUMAN | 2H2-type 14.                  | 0  | CTCAGTTGTGCT   | 0.483 |             |
| + | 4  | 1934    | e_Mutation_p.C62  | NM_144566    | NP_653167    | Q9H0M5 | ZN700_HUMAN | 2H2-type 14.                  | 0  | TCAGTTGTGCTCT  | 0.483 |             |
| - | 4  | 1148    | 799_uc002mts.3_I  | NM_001080821 | NP_001074290 | Q96GE5 | ZN799_HUMAN |                               | 6  | CATCTCTCGTG    | 0.413 |             |
| + | 4  | 1289    | yu.1_Missense_M   | NM_153358    | NP_699189    | Q3KP31 | ZN791_HUMAN | 2H2-type 10.                  | 2  | TGAAAGGACTCT   | 0.378 |             |
| + | 5  | 532     | 2mfv.1_Missense_  | NM_006397    | NP_006388    | O75792 | RNH2A_HUMAN |                               | 3  | AGTTTTCCCGGG   | 0.537 |             |
| - | 6  | 1128    | mr.1_Missense_IV  | NM_001375    | NP_001366    | O00115 | DNS2A_HUMAN |                               | 0  | CTGGGCACACA    | 0.597 |             |
| + | 3  | 210     | r_p.W29* CD97_u   | NM_078481    | NP_510966    | P48960 | CD97_HUMAN  | r (Potential). EGF-like 1.    | 4  | CGGTGGTGCCC    | 0.597 |             |
| - | 19 | 2687    | IR2_uc002mzr.1_A  | NM_013447    | NP_038475    | Q9UHX3 | EMR2_HUMAN  | Name=6; (Potential).          | 4  | ACCACGTGCAG    | 0.552 |             |
| - | 12 | 1603    | _Missense_Mutatic | NM_013447    | NP_038475    | Q9UHX3 | EMR2_HUMAN  | ellular (Potential).          | 4  | 3CATCTGCCTCT   | 0.502 |             |
| - | 3  | 1963    | 26_uc002nee.2_I   | NM_004831    | NP_004822    | O95402 | MED26_HUMAN |                               | 2  | ITGTGTCCTGAC   | 0.617 |             |
| + | 9  | 1440    | .p.E438K GTPBP3   | NM_032620    | NP_116009    | Q969Y2 | GTPB3_HUMAN |                               | 1  | CGGCAGAGGCG    | 0.657 |             |
| + | 3  | 320     | l29C_uc010xps.1_  | NM_173544    | NP_775815    | Q86XR2 | NIBL2_HUMAN |                               | 0  | CTGCCTTGCT     | 0.622 |             |
| + | 16 | 2574    | .p.E756K UPF1_u   | NM_002911    | NP_002902    | Q92900 | RENT1_HUMAN |                               | 2  | AAAGAGGAGATT   | 0.582 |             |
| + | 10 | 1018    | 3_5'Flank KIAA089 | NM_015329    | NP_056144    | Q9Y6X3 | SCC4_HUMAN  |                               | 0  | TGCTGGACTGCT   | 0.637 |             |
| + | 8  | 2367    | aw.3_Missense_M   | NM_153221    | NP_694953    | Q8IUL8 | CILP2_HUMAN |                               | 1  | TGGTCAGCTGG    | 0.701 |             |
| + | 4  | 1601    |                   | NM_031218    | NP_112495    | P35789 | ZNF93_HUMAN | 2H2-type 13.                  | 1  | CCCTTACTAAAC   | 0.358 |             |

|   |    |      |                                                     |              |              |        |              |                               |   |               |       |             |
|---|----|------|-----------------------------------------------------|--------------|--------------|--------|--------------|-------------------------------|---|---------------|-------|-------------|
| + | 4  | 1708 |                                                     | NM_031218    | NP_112495    | P35789 | ZNF93_HUMAN  |                               | 1 | ATACTAGAGAG   | 0.358 |             |
| - | 4  | 1673 |                                                     | NM_001159293 | NP_001152765 | C9JHM3 | C9JHM3_HUMAN |                               | 1 | TTATGTCTAGTA  | 0.408 | rs151059862 |
| - | 4  | 1447 | p.K353E ZNF708_                                     | NM_021269    | NP_067092    | P17019 | ZN708_HUMAN  |                               | 6 | GTTTCTTTCCAG  | 0.343 |             |
| + | 4  | 1693 | 429_uc010ecu.1_I                                    | NM_001001415 | NP_001001415 | Q86V71 | ZN429_HUMAN  | :2H2-type 14.                 | 2 | CTTTTATCCTGT  | 0.378 |             |
| + | 4  | 1696 | 429_uc010ecu.1_I                                    | NM_001001415 | NP_001001415 | Q86V71 | ZN429_HUMAN  | :2H2-type 14.                 | 2 | TTATCCTGTCTC  | 0.378 |             |
| - | 5  | 1579 | qh.2_Missense_M                                     | NM_173531    | NP_775802    | Q81YN0 | ZN100_HUMAN  | :2H2-type 11.                 | 0 | ACATTCGTGACA  | 0.408 |             |
| - | 5  | 1789 | 208_uc002nqo.1_I                                    | NM_007153    | NP_009084    |        |              |                               | 7 | ACCTTAATAAAG  | 0.398 |             |
| - | 4  | 762  | 1_Intron ZNF208_                                    | NM_007153    | NP_009084    |        |              |                               | 7 | CACCTTCTTCAC  | 0.363 |             |
| + | 4  | 1578 | cy.2_Missense_Mi                                    | NM_033468    | NP_258429    | Q9Y2Q1 | ZN257_HUMAN  | :2H2-type 11.                 | 0 | TTAACCAGTCTT  | 0.408 |             |
| - | 3  | 1913 |                                                     | NM_001001411 | NP_001001411 | Q8N7Q3 | ZN676_HUMAN  |                               | 0 | TTGTAGGGTTTCT | 0.418 |             |
| - | 7  | 2699 |                                                     | NM_001080409 | NP_001073878 |        |              |                               | 2 | GTCGAGAAATTG  | 0.353 | rs55891931  |
| - | 4  | 1027 | rj.1_Missense_Mu                                    | NM_003430    | NP_003421    | Q05481 | ZNF91_HUMAN  | :2H2-type 6.                  | 0 | TAAGAATGGCTA  | 0.413 |             |
| + | 3  | 1819 | rn.1_Missense_Mi                                    | NM_001136156 | NP_001129628 | Q8TCN5 | ZN507_HUMAN  |                               | 5 | TCTGGGGCACT   | 0.423 |             |
| + | 3  | 1827 | rn.1_Nonsense_M                                     | NM_001136156 | NP_001129628 | Q8TCN5 | ZN507_HUMAN  |                               | 5 | TCACTATGGAGAT | 0.418 |             |
| + | 10 | 2834 |                                                     | NM_014686    | NP_055501    | O15063 | K0355_HUMAN  |                               | 1 | ACATGGGGCCAG  | 0.517 |             |
| + | 10 | 1082 | p.D211N UBA2_ur                                     | NM_005499    | NP_005490    | Q9UBT2 | SAE2_HUMAN   |                               | 1 | AGGGGGATGGA   | 0.408 |             |
| + | 3  | 432  | se_Mutation_p.E81                                   | NM_001037    | NP_001028    | Q07699 | SCN1B_HUMAN  | Potential). Ig-like C2-type.  | 2 | TAGCTGGAGGAG  | 0.577 |             |
| + | 10 | 2335 | Jefi.2_Missense_Mutation_p.T411 uc010efj.2_Missense | NM_001001411 | NP_001001411 | Q3ZCX4 | ZN568_HUMAN  |                               | 2 | TACTCACACATC  | 0.463 |             |
| - | 5  | 899  | p.F168Y ZNF585_                                     | NM_199126    | NP_954577    | Q6P3V2 | Z585A_HUMAN  | :2H2-type 3.                  | 3 | TAGAGAAGCCTT  | 0.423 |             |
| + | 9  | 3018 |                                                     | NM_015073    | NP_055888    | O60292 | SI1L3_HUMAN  |                               | 2 | TACACCCCATC   | 0.582 |             |
| + | 2  | 996  | gn.1_Missense_Mi                                    | NM_003407    | NP_003398    | P26651 | TTP_HUMAN    |                               | 1 | TAGCCCCCGGC   | 0.617 |             |
| + | 10 | 911  | nse_Mutation_p.V                                    | NM_138392    | NP_612401    | Q8TBC3 | SHKB1_HUMAN  | WD 2.                         | 2 | TGGGGGTGCCT   | 0.602 |             |
| + | 6  | 935  |                                                     | NM_000766    | NP_000757    | Q16696 | CP2AD_HUMAN  |                               | 3 | TACCACCCTGC   | 0.562 |             |
| + | 3  | 1127 | .2_Missense_Muta                                    | NM_199285    | NP_954979    | A6NJB7 | PRR19_HUMAN  | Pro-rich.                     | 0 | CACTGCGCACAC  | 0.587 |             |
| - | 2  | 519  | e_Mutation_p.R13                                    | NM_002781    | NP_002772    | Q15238 | PSG5_HUMAN   | g-like V-type.                | 3 | TAGTCTATCAC   | 0.473 |             |
| - | 2  | 754  | v.2_Nonsense_Mu                                     | NM_001007561 | NP_001007562 | Q8WZA9 | IRGQ_HUMAN   |                               | 2 | TGACCCACGAC   | 0.672 |             |
| - | 4  | 719  | p.P126S C19orf6                                     | NM_019108    | NP_061981    | Q9H0W8 | SMG9_HUMAN   | Pro-rich.                     | 0 | AGGGGGTGGTG   | 0.682 |             |
| - | 2  | 602  | .2_5'Flank KCNN4                                    | NM_002250    | NP_002241    | O15554 | KCNN4_HUMAN  | =Segment S2; (Potential).     | 2 | TAGAAGGTGGAA  | 0.607 |             |
| - | 4  | 1994 | p.R632K ZNF45_                                      | NM_003425    | NP_003416    | Q02386 | ZNF45_HUMAN  | :2H2-type 17.                 | 1 | TGAACTCTTTGAT | 0.483 |             |
| + | 5  | 971  | p.G256R ZNF155_                                     | NM_003445    | NP_003436    | Q12901 | ZN155_HUMAN  |                               | 2 | ACACAGGAGAG   | 0.423 |             |
| + | 3  | 518  | y.1_Missense_Mul                                    | NM_177417    | NP_803136    | Q6P597 | KLC3_HUMAN   | Potential.                    | 1 | TGCGAGGAGTCC  | 0.721 |             |
| + | 8  | 1004 | se_Site SAE1_uc0                                    | NM_016402    | NP_057486    | Q9UBE0 | SAE1_HUMAN   |                               | 1 | TGTGAAGTAAAA  | 0.453 |             |
| + | 3  | 409  | X_uc010elm.1_RI                                     | NM_000554    | NP_000545    | O43186 | CRX_HUMAN    | Homeobox.                     | 2 | TATGCCGTGAG   | 0.632 |             |
| - | 4  | 943  | AA4_uc002pjo.2_5'                                   | NM_017708    | NP_060178    | Q2M2I3 | FA83E_HUMAN  |                               | 1 | TGCGCAGGTGGG  | 0.721 |             |
| - | 2  | 498  | UVBL2_uc002plq.                                     | NM_002103    | NP_002094    | P13807 | GYS1_HUMAN   |                               | 2 | TGAGGGCCGGG   | 0.667 |             |
| - | 3  | 325  |                                                     | NM_000894    | NP_000885    | P01229 | LSHB_HUMAN   |                               | 0 | TGCTGAGAGCCA  | 0.662 |             |
| - | 2  | 214  | H2_uc002prv.3_Ir                                    | NM_004851    | NP_004842    | O96009 | NAPSA_HUMAN  |                               | 0 | TACTGGGGGAGC  | 0.587 |             |
| - | 5  | 944  | yc.1_Missense_I                                     | NM_001245    | NP_001236    | O43699 | SIGL6_HUMAN  | 2. Extracellular (Potential). | 1 | TGGAGGGACGAC  | 0.602 |             |
| + | 4  | 1894 | po.1_Intron ZNF5                                    | NM_001143939 | NP_001137411 | Q76KX8 | ZN534_HUMAN  | :2H2-type 15.                 | 0 | TAGGAAAATTCAT | 0.423 |             |
| + | 6  | 1245 |                                                     | NM_001099694 | NP_001093164 | Q96N58 | ZN578_HUMAN  | :2H2-type 4.                  | 0 | TCCATCATAGGT  | 0.428 |             |
| - | 7  | 2083 | p.S520N ZNF611_                                     | NM_030972    | NP_112234    | Q8N823 | ZN611_HUMAN  |                               | 1 | TCACTACTATGAA | 0.433 |             |
| - | 7  | 1479 | au.2_Missense_M                                     | NR_028343    |              | Q09FC8 | ZN415_HUMAN  | :2H2-type 5.                  | 1 | TTACATGTGTAA  | 0.403 | rs147077991 |
| + | 3  | 178  | dw.1_Missense_I                                     | NM_138374    | NP_612383    | Q96IR2 | ZN845_HUMAN  | KRAB.                         | 0 | TGGAAGAGTGG   | 0.463 |             |
| + | 11 | 1218 | fr.2_Missense_Mi                                    | NM_020659    | NP_065710    | Q9H313 | TTYH1_HUMAN  | ellular (Potential).          | 0 | TCTCAGGACTAT  | 0.587 |             |
| + | 6  | 1237 | e_Mutation_p.G38                                    | NM_001130917 | NP_001124389 | Q8N149 | LIRA2_HUMAN  | 4. Extracellular (Potential). | 1 | TATGGGTCTCTG  | 0.597 |             |
| - | 7  | 823  | 0_splice C19orf51_uc002qjk.1_Splice_Site_p.Y209_spl | NM_001130917 | NP_001124389 | Q8N9W5 | CS051_HUMAN  |                               | 0 | TACGCAGTAGC   | 0.652 |             |
| + | 2  | 1207 | _Mutation_p.S164                                    | NM_016535    | NP_057619    | Q9P0T4 | ZN581_HUMAN  | :2H2-type 3.                  | 0 | TGCACAGCCGGG  | 0.667 |             |

|   |    |      |                    |              |              |        |             |                                |     |               |       |             |
|---|----|------|--------------------|--------------|--------------|--------|-------------|--------------------------------|-----|---------------|-------|-------------|
| - | 3  | 239  |                    | NM_001002836 | NP_001002836 | Q6DD87 | ZN787_HUMAN | Pro-rich.                      | 1   | GGAGGCCAGCT   | 0.463 |             |
| - | 3  | 228  |                    | NM_001002836 | NP_001002836 | Q6DD87 | ZN787_HUMAN |                                | 1   | GGGGACGTCGT   | 0.468 |             |
| + | 4  | 1463 | gu.1_Missense_M    | NM_001023563 | NP_001018857 | Q5CZA5 | ZN805_HUMAN | 2H2-type 8.                    | 0   | ACCAGCGGATTC  | 0.512 |             |
| + | 4  | 1342 | uid.1_Intron ZNF5  | NM_153263    | NP_694995    | Q6P9A3 | ZN549_HUMAN | 2H2-type 6.                    | 1   | GTATGGAATGTC  | 0.443 |             |
| - | 2  | 299  | 2_Intron ZNF154    | NM_001085384 | NP_001078853 | Q13106 | ZN154_HUMAN | KRAB.                          | 0   | GTACGGCCACA   | 0.512 |             |
| + | 7  | 540  | G2_uc010ewi.2_Ir   | NM_018968    | NP_061841    | Q9NY99 | SNTG2_HUMAN |                                | 3   | TGACAGGTGCAI  | 0.428 |             |
| + | 9  | 727  | ewi.2_Missense_IV  | NM_018968    | NP_061841    | Q9NY99 | SNTG2_HUMAN | p.S200L(1)                     | 3   | CCCATCGTCAC   | 0.567 | rs6751090   |
| + | 20 | 2748 | ct.2_Missense_Mu   | NM_145693    | NP_663731    | Q14693 | LPIN1_HUMAN | C-LIP.                         | 4   | TAAAGGAGAGC   | 0.348 |             |
| - | 17 | 1918 | R35_uc002rdh.2_    | NM_001006657 | NP_001006658 | Q9P2L0 | WDR35_HUMAN |                                | 1   | TATTATCTTTGGC | 0.398 |             |
| - | 37 | 4927 | f.2_Missense_Mut:  | NM_006277    | NP_006268    | Q9NZM3 | ITSN2_HUMAN | C2.                            | 4   | GTAAAGCTTTCTC | 0.617 |             |
| - | 33 | 4307 | f.2_Missense_Mut:  | NM_006277    | NP_006268    | Q9NZM3 | ITSN2_HUMAN | DH.                            | 4   | GCATGGGTTTCA  | 0.577 |             |
| - | 3  | 314  |                    | NM_194248    | NP_919224    | Q9HC10 | OTOF_HUMAN  | lasmic (Potential).            | 7   | AAATCTCCAGCA  | 0.577 |             |
| - | 10 | 959  |                    | NM_000379    | NP_000370    | P47989 | XDH_HUMAN   | inding PCMH-type.              | 8   | GTCGGGTCCAT   | 0.517 |             |
| - | 8  | 1074 | zq.2_Missense_Mt   | NM_015955    | NP_057039    | Q9Y316 | MEMO1_HUMAN |                                | 2   | TAAAGATACAC   | 0.249 |             |
| + | 46 | 9054 |                    | NM_016252    | NP_057336    | Q9NR09 | BIRC6_HUMAN |                                | 14  | GTGTTCAAGGA   | 0.453 |             |
| + | 13 | 2405 | v.2_Missense_Mut   | NM_206943    | NP_996826    | Q14766 | LTBP1_HUMAN |                                | 8   | AACTGCACCCC   | 0.289 |             |
| - | 12 | 2082 | JA_uc010fat.1_5F   | NM_001083953 | NP_001077422 | Q6YHU6 | THADA_HUMAN |                                | 3   | TTGTCTGAAAC   | 0.383 |             |
| + | 4  | 2601 | p.D515N MSH6_u     | NM_000179    | NP_000170    | P52701 | MSH6_HUMAN  |                                | 168 | TTCAGATCTTC   | 0.413 |             |
| + | 16 | 3491 | xx.2_Missense_M    | NM_003128    | NP_003119    | Q01082 | SPTB2_HUMAN | Spectrin 8.                    | 8   | TAGACCCAGAC   | 0.582 |             |
| - | 3  | 1136 | p.A74T RTN4_uc     | NM_020532    | NP_065393    | Q9NQC3 | RTN4_HUMAN  | lasmic (Potential).            | 3   | TTTTTGCCTTCTC | 0.373 |             |
| - | 12 | 1426 | p.G276D CCT4_u     | NM_006430    | NP_006421    | P50991 | TCPD_HUMAN  |                                | 2   | GAGCACCACCT   | 0.328 |             |
| + | 6  | 1034 | p.G232D UGP2_uc    | NM_006759    | NP_006750    | Q16851 | UGPA_HUMAN  |                                | 0   | AGAAGGCAAAG   | 0.403 |             |
| + | 3  | 945  | iLC1A4_uc010fcv.   | NM_003038    | NP_003029    | P43007 | SATT_HUMAN  | ellular (Potential).           | 1   | ATGTAACCCATG  | 0.378 |             |
| + | 11 | 1009 | se_Mutation_p.P21  | NM_006062    | NP_006053    | Q6GMV2 | SMYD5_HUMAN | SET.                           | 0   | CTTTCCAGAAA   | 0.478 |             |
| + | 7  | 1421 | jf.1_Missense_Mu   | NM_015120    | NP_055935    | Q8TCU4 | ALMS1_HUMAN |                                | 9   | TTGTATGCAGTG  | 0.388 |             |
| - | 16 | 2251 | se_Mutation_p.L7:  | NM_021196    | NP_067019    | Q9BY07 | S4A5_HUMAN  | ical; (Potential).             | 9   | AGAAAAGGATG   | 0.532 |             |
| - | 25 | 4083 | p.G601D POLR1A     | NM_015425    | NP_056240    | O95602 | RPA1_HUMAN  |                                | 3   | CTCTGCCTGCA   | 0.632 |             |
| - | 5  | 1073 |                    | NM_004836    | NP_004827    | Q9NZJ5 | E2AK3_HUMAN | lenal (Potential).             | 3   | AGACTCTTCTGT  | 0.403 |             |
| + | 23 | 2615 | M2_uc002suk.2_1    | NM_144707    | NP_653308    | Q8N271 | PROM2_HUMAN | lasmic (Potential).            | 1   | TCCCCCGGGTT   | 0.592 |             |
| - | 27 | 3195 |                    | NM_015348    | NP_056163    | Q92545 | TM131_HUMAN |                                | 6   | GTAAGGAGCTT   | 0.423 |             |
| + | 4  | 969  |                    | NM_015904    | NP_056988    | O60841 | IF2P_HUMAN  |                                | 3   | AACAGGTAAAA   | 0.388 |             |
| - | 6  | 1086 | SD9_uc010fja.2_F   | NM_032718    | NP_116107    | Q8NBP5 | MFSD9_HUMAN | ical; (Potential).             | 4   | TGGCCCCAGGG   | 0.632 |             |
| - | 22 | 5171 |                    | NM_001144013 | NP_001137485 | A6NKT7 | RGPD3_HUMAN | GRIP.                          | 1   | CAGACACCTCT   | 0.393 | rs143574937 |
| + | 11 | 3499 | ed.2_Splice_Site_I | NM_181453    | NP_852118    | Q8IWJ2 | GCC2_HUMAN  |                                | 1   | ATAAAGGTAAAA  | 0.294 |             |
| + | 20 | 6923 |                    | NM_006267    | NP_006258    | P49792 | RBP2_HUMAN  |                                | 18  | AACAGGATTTA   | 0.413 |             |
| + | 9  | 1531 | hl.1_Missense_ML   | NM_006343    | NP_006334    | Q12866 | MERTK_HUMAN | III 2. Extracellular (Potentia | 9   | AGTTGGGCCCT   | 0.532 |             |
| + | 1  | 597  | R6Q POLR1B_uc0     | NM_019014    | NP_061887    | Q9H9Y6 | RPA2_HUMAN  |                                | 1   | CAGCCGGTGGC   | 0.642 |             |
| + | 15 | 3942 | kp.2_Missense_M    | NM_019014    | NP_061887    | Q9H9Y6 | RPA2_HUMAN  |                                | 1   | TGTAGCTGAACT  | 0.383 |             |
| - | 8  | 1254 | 35F5_uc002tk.2_    | NM_025181    | NP_079457    | Q8WV83 | S35F5_HUMAN | Helical; (Potential).          | 0   | TACCGGAAGTTC  | 0.284 |             |
| + | 16 | 1393 | yf.1_Missense_M    | NM_006770    | NP_006761    | Q9UEW3 | MARCO_HUMAN | ellular (Potential).           | 6   | AAAACTCAGTG   | 0.512 |             |
| - | 3  | 707  |                    | NM_001099771 | NP_001093241 | A5A3E0 | POTEF_HUMAN |                                | 5   | GTGGCAGCACC   | 0.617 |             |
| + | 5  | 377  | tua.2_Missense_I   | NM_138326    | NP_612199    | Q8TDX5 | ACMSD_HUMAN |                                | 1   | GCACCGTTGTG   | 0.562 |             |
| - | 28 | 5578 | il.1_Missense_Mu   | NM_018557    | NP_061027    | Q9NZR2 | LRP1B_HUMAN | ellular (Potential).           | 50  | CTTTGCCATCAT  | 0.468 |             |
| - | 8  | 3358 | e_Mutation_p.G93   | NM_014795    | NP_055610    | O60315 | ZEB2_HUMAN  |                                | 9   | AAATCCTTGTTI  | 0.388 |             |
| + | 6  | 834  |                    | NM_004522    | NP_004513    | O60282 | KIF5C_HUMAN | inesin-motor.                  | 1   | TTGGCTGTTCAT  | 0.333 |             |
| + | 13 | 1707 | s.1_RNA KIF5C_uc   | NM_004522    | NP_004513    | O60282 | KIF5C_HUMAN |                                | 1   | TGAAGCAACAG   | 0.343 |             |
| + | 5  | 653  | vz.2_RNA LYPD6_    | NM_194317    | NP_919298    | Q86Y78 | LYPD6_HUMAN |                                | 0   | GCACCCACGCT   | 0.473 |             |

|   |     |       |                     |              |              |        |             |                            |     |               |       |
|---|-----|-------|---------------------|--------------|--------------|--------|-------------|----------------------------|-----|---------------|-------|
| + | 18  | 3266  | C1_uc010fom.1_N     | NM_033394    | NP_203752    | Q9C0D5 | TANC1_HUMAN |                            | 3   | ACTTGGATAAG/  | 0.587 |
| + | 3   | 1248  | yy.2_Missense_Mu    | NM_006593    | NP_006584    | Q16650 | TBR1_HUMAN  | T-box.                     | 2   | ACAAAGGAGCT   | 0.478 |
| - | 27  | 5786  | uc002udp.2_Intror   | NM_002977    | NP_002968    | Q15858 | SCN9A_HUMAN |                            | 13  | CAGATCCATGGC  | 0.463 |
| + | 8   | 4081  | e_Mutation_p.E11i   | NM_152381    | NP_689594    | A4UGR9 | XIRP2_HUMAN | Xin 23.                    | 14  | CTTTTTGAAACA/ | 0.378 |
| + | 1   | 758   | iD10_uc010zdh.1_    | NM_006063    | NP_006054    | O60662 | KBTBA_HUMAN |                            | 0   | CCTTATGACAGA/ | 0.358 |
| - | 2   | 464   | ufp.2_Missense_Iv   | NM_014168    | NP_054887    | Q9NRN9 | METL5_HUMAN |                            | 1   | CCTGCTCCTAAC/ | 0.378 |
| + | 27  | 3926  | p.C130Y UBR3_uc     | NM_172070    | NP_742067    | Q6ZT12 | UBR3_HUMAN  | -type; degenerate.         | 0   | CTTCATGTCTCTT | 0.303 |
| + | 2   | 153   | !_Missense_Mutati   | NM_138995    | NP_620482    | Q8WXR4 | MYO3B_HUMAN |                            | 19  | AAACATCTGTATC | 0.393 |
| + | 3   | 456   | .2_Missense_Mutε    | NM_138995    | NP_620482    | Q8WXR4 | MYO3B_HUMAN | rotein kinase.             | 19  | GGCTGGTCCTG   | 0.448 |
| + | 31  | 3748  | _Mutation_p.G117    | NM_138995    | NP_620482    | Q8WXR4 | MYO3B_HUMAN |                            | 19  | AAAAGGGTGCG   | 0.358 |
| - | 10  | 1092  | 0fqh.2_Missense_    | NM_003705    | NP_003696    | O75746 | CMC1_HUMAN  | ical; Name=1; (Potential). | 0   | AGCAACTGAGC   | 0.473 |
| + | 22  | 3027  | o.1_Missense_Mu     | NM_001079818 | NP_001073286 | P23229 | ITA6_HUMAN  | ellular (Potential).       | 2   | CGCTGCGGGGG   | 0.473 |
| + | 6   | 845   | 2uld.2_Missense_I   | NM_194247    | NP_919223    | P51991 | ROA3_HUMAN  | Gly-rich.                  | 2   | GAAGAGGTAGG   | 0.408 |
| - | 112 | 27716 | ↓_uc002umz.1_Mi     | NM_133378    | NP_596869    | Q8WZ42 | TITIN_HUMAN |                            | 153 | TGGAACTTTCT   | 0.343 |
| - | 56  | 13947 | N_uc010zjf.1_Intrc  | NM_133378    | NP_596869    | Q8WZ42 | TITIN_HUMAN |                            | 153 | CTTTTACTGAGA  | 0.423 |
| - | 30  | 7137  | TN_uc010zjf.1_Mi    | NM_133378    | NP_596869    | Q8WZ42 | TITIN_HUMAN |                            | 153 | TAAGCTCCACAT  | 0.403 |
| + | 4   | 839   | iP19_uc010zfr.1_F   | NM_080876    | NP_543152    | Q8WTR2 | DUS19_HUMAN | protein phosphatase.       | 5   | CGTTTCCAGGG   | 0.338 |
| - | 4   | 639   | se_Mutation_p.R8z   | NM_007315    | NP_009330    | P42224 | STAT1_HUMAN |                            | 10  | CTTTTCCTTATG  | 0.373 |
| - | 22  | 1934  | Missense_Mutation   | NM_033066    | NP_149055    | Q96JB8 | MPP4_HUMAN  | kinase-like. Potential.    | 0   | TAGGTCTTCATC  | 0.358 |
| - | 17  | 1490  | P4_uc010zhs.1_M     | NM_033066    | NP_149055    | Q96JB8 | MPP4_HUMAN  | ylate kinase-like.         | 0   | GAGGCGGTACT   | 0.557 |
| + | 23  | 3484  | ense_Mutation_p.F   | NM_152526    | NP_689739    | Q8TEW8 | PAR3L_HUMAN |                            | 4   | CAGATCCTGTA   | 0.433 |
| - | 11  | 1520  | p.E488K MDH1B_      | NM_001039845 | NP_001034934 | Q510G3 | MDH1B_HUMAN |                            | 4   | AAACTCTGCTG   | 0.343 |
| - | 2   | 1287  |                     | NM_003468    | NP_003459    | Q13467 | FZD5_HUMAN  | ellular (Potential).       | 3   | GGCATGGCCCA   | 0.627 |
| + | 32  | 5185  |                     | NM_015040    | NP_055855    | Q9Y2I7 | FYV1_HUMAN  |                            | 10  | CTCTCAGGTATT  | 0.353 |
| - | 3   | 376   | eb.2_Missense_Mt    | NM_079420    | NP_524144    | P05976 | MYL1_HUMAN  | EF-hand 1.                 | 1   | TGTGCCCAGAG   | 0.468 |
| + | 11  | 1179  | l_p.Q61* VIL1_uc    | NM_007127    | NP_009058    | P09327 | VIL1_HUMAN  | Core.                      | 1   | TGGAACAGGTG   | 0.443 |
| + | 11  | 1537  |                     | NM_031313    | NP_112603    | P10696 | PPBN_HUMAN  |                            | 1   | CGACCTGGCGC   | 0.736 |
| + | 5   | 598   | yh.1_Missense_M     | NM_152879    | NP_690618    | Q16760 | DGKD_HUMAN  | l-ester/DAG-type 1.        | 5   | GCGAGGGTACG   | 0.537 |
| + | 4   | 2098  | p.V569M SH3BP4      | NM_014521    | NP_055336    | Q9P0V3 | SH3B4_HUMAN |                            | 4   | GCAAGGTGAGC   | 0.562 |
| + | 7   | 1041  | p.D124N COPS8_      | NM_006710    | NP_006701    | Q99627 | CSN8_HUMAN  |                            | 1   | CCCTGGATGTT   | 0.299 |
| - | 36  | 7540  | _Mutation_p.G181    | NM_004369    | NP_004360    | P12111 | CO6A3_HUMAN | 1. Nonhelical region.      | 18  | CCGGCCGAAAG   | 0.567 |
| + | 7   | 1041  | Missense_Mutatio    | NM_024101    | NP_077006    | Q9BV36 | MELPH_HUMAN |                            | 1   | ACGGCGCCCTG   | 0.667 |
| + | 10  | 2079  | _Missense_Mutati    | NM_023083    | NP_075571    | Q9HC96 | CAN10_HUMAN | Domain III 2.              | 6   | CCTGCCGGACA   | 0.672 |
| - | 7   | 1694  | se_Mutation_p.A2    | NM_016143    | NP_057227    | Q9UNZ2 | NSF1C_HUMAN |                            | 0   | TGAAGGCTCCT   | 0.577 |
| + | 14  | 1869  | rw.1_Nonsense_M     | NM_080751    | NP_542789    | Q8TDI7 | TMC2_HUMAN  | lasmic (Potential).        | 3   | TGCTGGGACTT   | 0.493 |
| + | 5   | 1174  | wkp.2_Missense_I    | NM_175839    | NP_787033    | Q9NWM0 | SMOX_HUMAN  |                            | 1   | TCCCGGCGGAC   | 0.637 |
| + | 2   | 991   | l_p.V210I PRNP_L    | NM_001080122 | NP_001073591 | P04156 | PRIOR_HUMAN | 2, ERI3 and SYN1 (By simi  | 1   | CGGTGGTTGAG   | 0.537 |
| + | 1   | 660   | Mutation_p.G40S l   | NM_014962    | NP_055777    | Q9Y2F9 | BTBD3_HUMAN |                            | 3   | GCGAGGTCTT    | 0.483 |
| + | 4   | 1293  | l_zrf.1_Missense_Iv | NM_014962    | NP_055777    | Q9Y2F9 | BTBD3_HUMAN |                            | 3   | GCAAGTTCTAC   | 0.458 |
| - | 8   | 1720  | zrn.1_Nonsense_Iv   | NM_001195    | NP_001186    | Q12934 | BFSP1_HUMAN | Tail.                      | 1   | ACCCTCACGTT   | 0.557 |
| - | 8   | 1597  | zrn.1_Missense_M    | NM_001195    | NP_001186    | Q12934 | BFSP1_HUMAN | Tail.                      | 1   | TAAAGGGGCTT   | 0.542 |
| + | 7   | 1111  | N2_uc010gcv.1_Iv    | NM_018993    | NP_061866    | Q8WYP3 | RIN2_HUMAN  |                            | 5   | CTCCACCCGG    | 0.612 |
| + | 22  | 2774  | e_Mutation_p.D88    | NM_015585    | NP_056400    | Q8NHU2 | CT026_HUMAN |                            | 4   | ACCGGATGCG    | 0.642 |
| + | 10  | 1633  | lv.1_Missense_Mu    | NM_012112    | NP_036244    | Q9ULW0 | TPX2_HUMAN  |                            | 2   | CCAAGGAAAGA   | 0.423 |
| + | 11  | 1804  | eb.2_Missense_Mt    | NM_015338    | NP_056153    | Q8IXJ9 | ASXL1_HUMAN |                            | 248 | CAGCAGGGCTG   | 0.567 |
| + | 15  | 2442  | se_Mutation_p.A71   | NM_032819    | NP_116208    | Q9BYN7 | ZN341_HUMAN |                            | 2   | GTGGTGCGGTG   | 0.706 |
| + | 17  | 1884  | 23_splice ITCH_uc   | NM_031483    | NP_113671    | Q96J02 | ITCH_HUMAN  |                            | 6   | AACAGGTACTG   | 0.408 |

rs74315407



|   |    |           |                    |              |              |        |             |                               |    |               |       |
|---|----|-----------|--------------------|--------------|--------------|--------|-------------|-------------------------------|----|---------------|-------|
| - | 12 | 6301      | aw.2_Missense_Mi   | NM_014071    | NP_054790    | Q14686 | NCOA6_HUMAN | 1-binding region.             | 7  | CATTGAGTCTTT  | 0.483 |
| + | 27 | 4273      | APB_uc002xiy.1_    | NM_020336    | NP_065069    | Q86X10 | RLGPB_HUMAN | Rap-GAP.                      | 2  | TGGACCTGAGA   | 0.458 |
| + | 2  | 798       |                    | NM_080552    | NP_542119    | Q9H598 | VIAAT_HUMAN | I, vesicle (Potential).       | 0  | GCGAGGTGGTG   | 0.627 |
| + | 7  | 866       | tm.2_Missense_M    | NM_181659    | NP_858045    | Q9Y6Q9 | NCOA3_HUMAN |                               | 5  | CAGAGATATGAA  | 0.408 |
| + | 15 | 1846      | _p.E246K SLC9A8    | NM_015266    | NP_056081    | Q9Y2E8 | SL9A8_HUMAN |                               | 1  | CGCAGGAGGTG   | 0.647 |
| - | 9  | 754       | e_Mutation_p.G18   | NM_003859    | NP_003850    | O60762 | DPM1_HUMAN  |                               | 1  | ATAATCCTTTCAA | 0.308 |
| + | 7  | 1448      | zzi.1_Missense_Mi  | NM_003222    | NP_003213    | Q92754 | AP2C_HUMAN  | span-helix), dimerization.    | 1  | TGGCAGCCAGG   | 0.552 |
| - | 3  | 691       | :xys.2_Missense_M  | NM_020182    | NP_064567    | Q969W9 | PMEPA_HUMAN | lasmic (Potential).           | 1  | GCCTGACACTG   | 0.642 |
| + | 6  | 819       | ip.1_Missense_Mu   | NM_001794    | NP_001785    | P55283 | CADH4_HUMAN | Extracellular (Potential).    | 6  | TCATCGCATG    | 0.567 |
| + | 7  | 921       | ip.1_Missense_Mu   | NM_001794    | NP_001785    | P55283 | CADH4_HUMAN | r (Potential). Cadherin 2.    | 6  | CCAACGATGCT   | 0.632 |
| - | 1  | 283       | CFL5_uc002ydq.2    | NM_006602    | NP_006593    | Q9UL49 | TCFL5_HUMAN |                               | 1  | CATGTGCGAGC   | 0.443 |
| - | 16 | 6390_6391 | s.1_Missense_Mu    | NM_033081    | NP_149072    | Q9BTC0 | DIDO1_HUMAN |                               | 6  | GGCCTCCTCCC   | 0.738 |
| + | 18 | 2580      | cm.1_Nonsense_M    | NM_006447    | NP_006438    | Q9Y5T5 | UBP16_HUMAN |                               | 4  | GCAGTGGTTTC   | 0.343 |
| - | 5  | 834       | M1_uc011adl.1_M    | NM_003253    | NP_003244    | Q13009 | TIAM1_HUMAN |                               | 10 | CAGAGGCTGCT   | 0.562 |
| - | 3  | 578       | _p.P34L RCAN1_u    | NM_004414    | NP_004405    | P53805 | RCAN1_HUMAN |                               | 0  | CCACTGGCGGA   | 0.542 |
| - | 3  | 432       | wo.2_Missense_Mi   | NM_002240    | NP_002231    | P48051 | IRK6_HUMAN  | llular (By similarity).       | 1  | GGAGGGGTCTC   | 0.458 |
| - | 22 | 4408      | AM_uc002yyr.1_f    | NM_001389    | NP_001380    | O60469 | DSCAM_HUMAN | otential). Ig-like C2-type 10 | 11 | TCATCCATTTGA  | 0.458 |
| + | 3  | 456       | 2_5'UTR PCNT_u     | NM_006031    | NP_006022    | O95613 | PCNT_HUMAN  |                               | 8  | AGCAGTGTGGG   | 0.547 |
| + | 5  | 674       | jq.2_Missense_Mi   | NM_014339    | NP_055154    | Q96F46 | I17RA_HUMAN | ellular (Potential).          | 2  | ATTTCCTTGTC   | 0.572 |
| - | 3  | 687       | issense_Mutation_  | NM_015241    | NP_056056    | Q7RTP6 | MICA3_HUMAN | AD (Potential).               | 0  | AACCACCTTGG   | 0.527 |
| + | 3  | 353       | 1_5'UTR MYO18E     | NM_032608    | NP_115997    | Q8IUG5 | MY18B_HUMAN |                               | 12 | TCCCAGGGGGC   | 0.542 |
| + | 4  | 1755      | FH_uc003afp.2_in   | NM_021076    | NP_066554    | P12036 | NFH_HUMAN   | -S-P-[AEPV]-[EAK]-[AEVK       | 0  | CACCGCTGAG    | 0.567 |
| - | 3  | 231       | 14L3_uc003aia.2_   | NM_174975    | NP_777635    | Q9UDX4 | S14L3_HUMAN |                               | 5  | CAAGTCAAAAT   | 0.532 |
| + | 5  | 633       | se_Mutation_p.R1   | NM_005569    | NP_005560    | P53671 | LIMK2_HUMAN | PDZ.                          | 2  | CAGCGGGGGCT   | 0.562 |
| - | 2  | 182       | 03alb.1_Missense_  | NM_019843    | NP_062817    | Q9NRA8 | 4ET_HUMAN   |                               | 1  | TCACCCTACT    | 0.443 |
| + | 22 | 1854      | 3alt.2_Missense_M  | NM_014662    | NP_055477    | O75140 | DEPD5_HUMAN |                               | 8  | CAGTGACCAG    | 0.522 |
| + | 2  | 1207      | g.1_Missense_Mu    | NM_001008494 | NP_001008494 | Q2M1V0 | ISX_HUMAN   | Homeobox.                     | 5  | AGGTTCTGTACC  | 0.557 |
| - | 13 | 1853      | xp.2_Missense_Mi   | NM_001098504 | NP_001091974 | Q92841 | DDX17_HUMAN |                               | 4  | ACTCATCTGAT   | 0.473 |
| - | 10 | 1194      | p.R304W SUN2_u     | NM_015374    | NP_056189    | Q9UH99 | SUN2_HUMAN  | inuclear space.               | 2  | CAGCCGATGG    | 0.642 |
| + | 30 | 5431      |                    | NM_001429    | NP_001420    | Q09472 | EP300_HUMAN | or E1A adenovirus. ZZ-type    | 64 | GGAGACACGCT   | 0.582 |
| + | 4  | 722       |                    | NM_014460    | NP_055275    | Q9Y534 | CSDC2_HUMAN |                               | 0  | CACTCCCACG    | 0.652 |
| - | 8  | 956       | p.W273* NAGA_u     | NM_000262    | NP_000253    | P17050 | NAGAB_HUMAN |                               | 1  | ACCGTCCACAG   | 0.557 |
| - | 2  | 363       |                    | NM_002490    | NP_002481    | P56556 | NDUA6_HUMAN |                               | 0  | GGGTCTGTGA    | 0.438 |
| - | 19 | 2436      | se_Mutation_p.E5   | NM_022785    | NP_073622    | Q5THR3 | EFCB6_HUMAN | EF-hand 8.                    | 7  | TGACTCCTTCA   | 0.562 |
| - | 13 | 1149      |                    | NM_001001694 | NP_001001694 | Q6ZVW7 | I17EL_HUMAN |                               | 1  | TGTGACTTCT    | 0.647 |
| + | 16 | 2201      | e_Mutation_p.R68   | NM_018995    | NP_061868    | Q9BXT6 | M10L1_HUMAN |                               | 3  | GAGAGCGTGT    | 0.473 |
| + | 5  | 496       | CNTN4_uc003bpd.    | NM_175607    | NP_783200    | Q8IWW2 | CNTN4_HUMAN | like C2-type p.K92N(1)        | 7  | ATAAAACCCAA   | 0.413 |
| + | 2  | 298       | TAC_uc011aya.1_I   | NM_003149    | NP_003140    | Q99469 | STAC_HUMAN  |                               | 4  | CACTCCCTGCT   | 0.557 |
| - | 8  | 3747      |                    | NM_014831    | NP_055646    | O15050 | TRNK1_HUMAN | TPR 3.                        | 2  | CGCAGGAGTTG   | 0.458 |
| - | 10 | 1394      |                    | NM_144719    | NP_653320    | Q8IYE1 | CCD13_HUMAN | Potential.                    | 1  | CAGCTACCATG   | 0.597 |
| - | 1  | 1541      | mg.2_Intron CYP8   | NM_004391    | NP_004382    | Q9UNU6 | CP8B1_HUMAN |                               | 2  | CGGATCGTACT   | 0.557 |
| - | 1  | 715       | _2_5'Flank ARIH2_L | NM_001123040 | NP_001116512 | Q8N7S6 | CC071_HUMAN |                               | 0  | GAATAGTGCT    | 0.592 |
| + | 2  | 1640      | hkn.2_Missense_M   | NM_018031    | NP_060501    | Q9NNW5 | WDR6_HUMAN  | WD 7.                         | 1  | CGCACCTCTG    | 0.607 |
| - | 5  | 588       | vr.2_Missense_Mu   | NM_003363    | NP_003354    | Q13107 | UBP4_HUMAN  |                               | 4  | GCTTCGCGATC   | 0.488 |
| + | 6  | 483       | 1_5'Flank RNF123   | NM_022064    | NP_071347    | Q5XPI4 | RN123_HUMAN |                               | 7  | CAAAGGTGAGA   | 0.557 |
| - | 18 | 3916      | dc.1_Missense_M    | NM_002447    | NP_002438    | Q04912 | RON_HUMAN   | Potential). Protein kinase.   | 6  | TGACTCGTCCA   | 0.517 |
| - | 11 | 2459      | it.1_Missense_Mu   | NM_015576    | NP_056391    | O15083 | ERC2_HUMAN  | Potential.                    | 2  | CACCTCCTTGA   | 0.468 |

rs144669656

rs149439391

rs117411669

|   |    |       |                   |              |              |        |             |                              |    |               |       |
|---|----|-------|-------------------|--------------|--------------|--------|-------------|------------------------------|----|---------------|-------|
| - | 12 | 1617  | 7_uc003dkv.1_Mis  | NM_198463    | NP_940865    | Q6ZVT6 | CC067_HUMAN |                              | 0  | CACTGCTGTCCG  | 0.423 |
| + | 28 | 4692  | ise_Mutation_p.P5 | NM_002841    | NP_002832    | P23470 | PTPRG_HUMAN | ) Tyrosine-protein phosph    | 7  | ATGCCCCATA    | 0.423 |
| - | 15 | 2192  | m.1_Nonsense_M    | NM_000158    | NP_000149    | Q04446 | GLGB_HUMAN  |                              | 3  | AACTCGGTAGT   | 0.363 |
| - | 16 | 3441  | e_Mutation_p.R94: | NM_016247    | NP_057331    | Q9BZV3 | IMPG2_HUMAN | ding motif involved in chonc | 3  | CACCCGGCACCC  | 0.507 |
| - | 2  | 89    |                   | NM_018338    | NP_060808    | Q96MT7 | WDR52_HUMAN |                              | 1  | ATGTAAGTATT   | 0.328 |
| + | 2  | 314   | oe PLA1A_uc003e   | NM_015900    | NP_056984    | Q53H76 | PLA1A_HUMAN |                              | 3  | ATTCAGGTGGGA  | 0.433 |
| - | 3  | 598   |                   | NM_001039783 | NP_001034872 | Q6F5E7 | TR3N_HUMAN  |                              | 0  | CAGTGGTGTGG   | 0.552 |
| - | 9  | 1610  | q.1_Missense_Mu   | NM_002950    | NP_002941    | P04843 | RPN1_HUMAN  | lasmic (Potential).          | 3  | GTTGAGGGTGG   | 0.532 |
| + | 37 | 4406  |                   | NM_015268    | NP_056083    | O75165 | DJC13_HUMAN |                              | 2  | TAGAGGTAATAC  | 0.418 |
| - | 6  | 1787  | sqh.1_Missense_Iv | NM_016201    | NP_057285    | Q9Y2J4 | AMOL2_HUMAN | Potential.                   | 1  | CACAGGCTGCC   | 0.657 |
| + | 5  | 666   | iA36_uc003etq.2_! | NM_001104647 | NP_001098117 | Q96CQ1 | S2536_HUMAN | Solcar 2.                    | 0  | AAAGACTCGGT   | 0.303 |
| + | 3  | 1915  |                   | NM_003412    | NP_003403    | Q15915 | ZIC1_HUMAN  | Ser-rich. p.S399C(1)         | 2  | CAGCTCTGGCT   | 0.617 |
| + | 6  | 2032  | aw.2_Missense_M   | NM_015508    | NP_056323    | Q7Z3E1 | PARPT_HUMAN | ARP catalytic.               | 2  | GGGCAGATACA   | 0.353 |
| + | 7  | 960   | i.W238* CHRD_uc   | NM_003741    | NP_003732    | Q9H2X0 | CHRD_HUMAN  | CHRD 1.                      | 3  | GTGTGGCGGGC   | 0.597 |
| + | 7  | 832   |                   | NM_000412    | NP_000403    | P04196 | HRG_HUMAN   |                              | 2  | ATGAGCGTTCTT  | 0.512 |
| - | 2  | 303   | _p.G27E RFC4_uc   | NM_002916    | NP_002907    | P35249 | RFC4_HUMAN  |                              | 5  | TACTTCCCAGCA  | 0.443 |
| - | 17 | 14793 | i.p.A470V MUC4_   | NM_018406    | NP_060876    | Q99102 | MUC4_HUMAN  | VWFD.                        | 0  | GTTCAGCCAGC   | 0.522 |
| - | 15 | 14553 | n.p.P390L MUC4_   | NM_018406    | NP_060876    | Q99102 | MUC4_HUMAN  | VWFD.                        | 0  | GGGCGGGAGG    | 0.721 |
| - | 6  | 758   | je.1_Intron DLG1_ | NM_001098424 | NP_001091894 | Q12959 | DLG1_HUMAN  | in with SH3 domains.         | 3  | GGTGGGTAGGA   | 0.383 |
| + | 12 | 2783  | GG_uc010ibf.2_M   | NM_001127178 | NP_001120650 | Q5H8A4 | PIGG_HUMAN  | ical; (Potential).           | 4  | TCCCAGCCGTG   | 0.587 |
| - | 4  | 410   | ense_Mutation_p.l | NM_006527    | NP_006518    | Q14493 | SLBP_HUMAN  | calization signal NLS2.      | 0  | FGAGGAGTTTCC  | 0.353 |
| + | 8  | 1079  | gfk.3_Missense_M  | NM_001122681 | NP_001116153 | P78314 | 3BP2_HUMAN  |                              | 1  | CAGTCTGCCA    | 0.667 |
| - | 5  | 909   | bwe.1_Missense_   | NM_020416    | NP_065149    | Q9Y2T4 | 2ABG_HUMAN  | WD 3.                        | 4  | TGACGGAGATG   | 0.572 |
| + | 11 | 1696  | p.E554K MAN2B2    | NM_015274    | NP_056089    | Q9Y2E5 | MA2B2_HUMAN |                              | 2  | .CCCAGGAGCCG  | 0.612 |
| + | 12 | 2734  | R802Q SH3TC1_u    | NM_018986    | NP_061859    | Q8TE82 | S3TC1_HUMAN | TPR 5.                       | 3  | GGGCCGGACGA   | 0.677 |
| - | 24 | 4242  |                   | NM_015230    | NP_056045    | Q8WZ64 | ARAP2_HUMAN |                              | 3  | CTTGATCTTCTT  | 0.303 |
| - | 9  | 1426  |                   | NM_173536    | NP_775807    | Q8N1C3 | GBRG1_HUMAN | lasmic (Probable).           | 2  | AAGATCCTGTT   | 0.408 |
| + | 12 | 1798  | zli.1_Missense_Mu | NM_025087    | NP_079363    | Q9H720 | PG2IP_HUMAN |                              | 3  | TTCGGCAAGC    | 0.458 |
| - | 4  | 1506  |                   | NM_001024611 | NP_001019782 | Q68CR7 | LR66_HUMAN  |                              | 3  | CACTTCCTGCC   | 0.542 |
| - | 7  | 868   |                   | NM_005420    | NP_005411    | P49888 | ST1E1_HUMAN |                              | 1  | AGGGCGACAAT   | 0.398 |
| + | 7  | 1379  | _p.D280N RUFY3_   | NM_014961    | NP_055776    | Q7L099 | RUFY3_HUMAN |                              | 0  | TTCTGGACCAG   | 0.378 |
| + | 19 | 2738  | ce_Site_p.R874_s  | NM_001098484 | NP_001091954 | Q9Y6R1 | S4A4_HUMAN  |                              | 5  | GTGAGGTGTGT   | 0.468 |
| + | 7  | 5643  | hkg.2_Missense_M  | NM_020859    | NP_065910    | Q8TF72 | SHRM3_HUMAN |                              | 3  | AGGATCCCAGC   | 0.622 |
| + | 62 | 9831  | ilc.1_Missense_Mu | NM_025074    | NP_079350    | Q86XX4 | FRAS1_HUMAN | Extracellular (Potential).   | 5  | CACTAGTCTTTC  | 0.488 |
| + | 16 | 3425  | PAQR3_uc003hln.   | NM_198892    | NP_942595    | Q9NSY1 | BMP2K_HUMAN |                              | 1  | ATCAGGGCCTG   | 0.522 |
| + | 2  | 397   | .2_5'UTR ENOPH    | NM_021204    | NP_067027    | Q9UHY7 | ENOPH_HUMAN |                              | 0  | ACATTGGGAAG   | 0.383 |
| - | 8  | 976   | j.2_Missense_Mut  | NM_001077207 | NP_001070675 | Q94979 | SC31A_HUMAN | in with SEC13. WD 5.         | 8  | GATCTGCCATG   | 0.398 |
| - | 9  | 1227  | ense_Mutation_p.F | NM_139076    | NP_620775    | Q6UWZ7 | F175A_HUMAN |                              | 1  | TTCTGGGCTGC   | 0.358 |
| - | 60 | 9460  | ipe.1_Missense_M  | NM_014991    | NP_055806    | Q8IZQ1 | WDFY3_HUMAN |                              | 3  | CTTGAGTTCTAC  | 0.338 |
| - | 3  | 516   | \N5_uc011cdz.1_5  | NM_005723    | NP_005714    | P62079 | TSN5_HUMAN  | ellular (Potential).         | 0  | GCCGAGATCGG   | 0.502 |
| - | 8  | 748   | i_Mutation_p.S177 | NM_016242    | NP_057326    | Q9ULC0 | MUCEN_HUMAN | ellular (Potential).         | 0  | ATAATACCTAAAA | 0.398 |
| + | 38 | 7859  | .3_Intron ANK2_uc | NM_001148    | NP_001139    | Q01484 | ANK2_HUMAN  |                              | 14 | AAGAGGAGATG   | 0.383 |
| - | 3  | 712   |                   | NM_003619    | NP_003610    | P56730 | NETR_HUMAN  | SRCR 1.                      | 1  | ACGGGGTTTGT   | 0.373 |
| + | 19 | 2293  | 0ins.1_Missense_I | NM_015312    | NP_056127    | Q2LD37 | K1109_HUMAN |                              | 12 | ATATAGAAAAC   | 0.343 |
| + | 4  | 963   | lLK2_uc003ilo.3_N | NM_001040260 | NP_001035350 | Q8N568 | DCLK2_HUMAN |                              | 3  | AGAATGTCGTG   | 0.408 |
| + | 9  | 944   | 98_splice KIAA092 | NM_015196    | NP_056011    | A2VDJ0 | T131L_HUMAN |                              | 2  | CTCAGGTAAGG   | 0.303 |
| + | 3  | 1382  | p.S388F TLR2_uc   | NM_003264    | NP_003255    | O60603 | TLR2_HUMAN  | tracellular (Potential).     | 3  | GGCCTCTCTAC   | 0.348 |

rs75184362

|   |    |         |                    |              |              |        |             |                              |      |                 |       |             |
|---|----|---------|--------------------|--------------|--------------|--------|-------------|------------------------------|------|-----------------|-------|-------------|
| + | 7  | 1129    | p.E302K FGB_uc     | NM_005141    | NP_005132    | P02675 | FIBB_HUMAN  | rogen C-terminal.            | 3    | :AGAATGAAGCC/   | 0.463 |             |
| + | 17 | 2042    | jd.1_Nonsense_M    | NM_021634    | NP_067647    | Q9HBX9 | RXFP1_HUMAN | Name=7; (Potential).         | 0    | :TGCTTCAGGTA/   | 0.274 |             |
| - | 2  | 625     | se_Mutation_p.S14  | NM_138386    | NP_612395    | Q96HR8 | NAF1_HUMAN  | Ser-rich.                    | 2    | ACAagaggaagaag: | 0.249 |             |
| - | 4  | 553     |                    | NM_001100389 | NP_001093859 | Q81Y95 | TM192_HUMAN | ical; (Potential).           | 1    | GAGGAGAAGCA/    | 0.408 |             |
| + | 12 | 2038    | p.G464D TLL1_uc    | NM_012464    | NP_036596    | O43897 | TLL1_HUMAN  | CUB 2.                       | 7    | :ITGGAGGTGAGA/  | 0.388 |             |
| + | 31 | 4096    | se_Mutation_p.G12  | NM_170710    | NP_733828    | Q8IZU2 | WDR17_HUMAN |                              | 6    | :CTTTAGGGGACT/  | 0.393 |             |
| + | 12 | 1560    | 35_splice KLKB1_u  | NM_000892    | NP_000883    | P03952 | KLKB1_HUMAN |                              | 1    | :ACTGGTATGTAC/  | 0.383 |             |
| + | 5  | 736     | .2_Missense_Mutε   | NM_000128    | NP_000119    | P03951 | FA11_HUMAN  | Apple 2.                     | 0    | :CTCAAGAATGC/   | 0.478 | rs121965063 |
| + | 20 | 4872    | k.3_Missense_Mu    | NM_133433    | NP_597677    | Q6KC79 | NIPBL_HUMAN |                              | 9    | TTTTTACTTCACT   | 0.289 |             |
| - | 7  | 1208    | mb.2_Missense_M    | NM_006251    | NP_006242    | Q13131 | AAPK1_HUMAN |                              | 1    | :TTACACCTTGG/   | 0.403 |             |
| + | 3  | 2483    |                    | NM_032587    | NP_115976    | Q9BX69 | CARD6_HUMAN |                              | 5    | :AATTTCCAGAG/   | 0.468 |             |
| + | 24 | 2777    | p.W869* TNPO1_     | NM_002270    | NP_002261    | Q92973 | TNPO1_HUMAN |                              | 7    | :AAATTGGAGGC/   | 0.353 |             |
| + | 11 | 1522    | p.E476K HMGCR_     | NM_000859    | NP_000850    | P04035 | HMDH_HUMAN  | Catalytic.                   | 1    | :ATGCAGAGGTG/   | 0.348 |             |
| + | 1  | 292     | uc011ctk.1_RNA     | NM_032567    | NP_115956    | Q9BXG8 | SPZ1_HUMAN  |                              | 1    | :CAAAACCGTTA/   | 0.483 |             |
| - | 3  | 786_787 | cin.2_Missense_M   | NM_001884    | NP_001875    | P10915 | HPLN1_HUMAN | Link 1. p.G239E(1)           | 5    | AAAATCCGTAGT    | 0.455 | rs139074313 |
| - | 8  | 1290    | 3K1_uc010jbi.1_In  | NM_000439    | NP_000430    | P29120 | NEC1_HUMAN  | Catalytic.                   | 2    | :CTGGTCGGTGT/   | 0.517 |             |
| - | 6  | 953     | se_Mutation_p.R14  | NM_017676    | NP_060146    | Q9NXP7 | GIN1_HUMAN  | grase catalytic.             | 2    | GATTTTCGACTAA/  | 0.299 |             |
| + | 13 | 1672    | R36_uc010jbu.2_f   | NM_139281    | NP_644810    | Q8NI36 | WDR36_HUMAN | WD 6.                        | 2    | :ACTGTAGATGTA/  | 0.338 |             |
| + | 7  | 638     | ε_Mutation_p.P18(  | NM_001744    | NP_001735    | Q16566 | KCC4_HUMAN  | rotein kinase.               | 5    | :ATGCACCACTCA.  | 0.373 |             |
| + | 16 | 4317    | y.3_Missense_Mu    | NM_001127511 | NP_001120983 | P25054 | APC_HUMAN   | through a p) p.T1313fs*8(    | 2515 | :TTGGAACTAGG/   | 0.428 |             |
| - | 6  | 1064    | p.G267E CCDC11     | NM_152549    | NP_689762    | Q8NEF3 | CC112_HUMAN |                              | 0    | :GCTTCCCTTTA/   | 0.388 |             |
| + | 2  | 109     |                    | NM_016144    | NP_057228    | Q9Y6G5 | COMDA_HUMAN |                              | 1    | :AGGAAGATTTCC   | 0.348 |             |
| + | 4  | 1125    | _Intron SNCAIP_u   | NM_005460    | NP_005451    | Q9Y6H5 | SNCAP_HUMAN |                              | 2    | :GCTCCCAAGGC    | 0.473 |             |
| - | 6  | 642     | CEP120_uc010jcz.   | NM_153223    | NP_694955    | Q8N960 | CE120_HUMAN |                              | 1    | :AGTCAGTACAG    | 0.448 |             |
| - | 6  | 4414    | F608_uc003ktp.1_   | NM_020747    | NP_065798    | Q9ULD9 | ZN608_HUMAN |                              | 6    | AGCAGGAGACT/    | 0.428 |             |
| - | 1  | 317     | se_Mutation_p.     | NM_001182    | NP_001173    | P49419 | AL7A1_HUMAN |                              | 3    | :CTTTCAGCCAC/   | 0.607 |             |
| + | 5  | 1250    | cxu.1_Missense_M   | NM_021982    | NP_068817    | O95486 | SC24A_HUMAN |                              | 0    | :ITGGGCCACAAG   | 0.403 |             |
| - | 1  | 529     | _Intron HNRNPA0    | NM_006805    | NP_006796    | Q13151 | ROAO_HUMAN  | RRM 1.                       | 0    | :ACACCCGCCGC    | 0.652 |             |
| - | 2  | 1479    | ΓNNA1_uc003ldj.2   | NM_015564    | NP_056379    | O43300 | LRRT2_HUMAN | lar (Potential), LRRCT.      | 0    | :CAGGACTGTGG/   | 0.522 |             |
| + | 1  | 1706    | lhk.1_Intron PCDH  | NM_031857    | NP_114063    | Q9Y5H5 | PCDA9_HUMAN | Extracellular (Potential).   | 5    | GCTTCCCACCC/    | 0.463 |             |
| - | 20 | 3066    | be.1_Missense_M    | NM_022481    | NP_071926    | Q8WWN8 | ARAP3_HUMAN | Rho-GAP.                     | 7    | :GGCAGCAACCG    | 0.577 |             |
| + | 2  | 936     |                    | NM_002700    | NP_002691    | Q15319 | PO4F3_HUMAN | Homeobox.                    | 0    | TCGCGGCGCCG     | 0.587 |             |
| + | 1  | 278     | raj.3_Missense_M   | NM_012188    | NP_036320    | Q12951 | FOXI1_HUMAN | Pro-rich.                    | 4    | GCCCGGCCCCA.    | 0.731 |             |
| - | 7  | 799     | ξ_uc003mez.2_5F    | NM_002115    | NP_002106    | P52790 | HXK3_HUMAN  | Regulatory.                  | 7    | CACACGGCCTG.    | 0.582 | rs147991837 |
| + | 23 | 8074    | υ.A2377T NSD1_u    | NM_022455    | NP_071900    | Q96L73 | NSD1_HUMAN  |                              | 3    | :CACTGGCACAG    | 0.547 |             |
| + | 1  | 868     | nua.2_Missense_M   | NM_020135    | NP_064520    | Q96S55 | WRIP1_HUMAN |                              | 2    | :CAAGCGCTGG/    | 0.572 |             |
| + | 9  | 1650    | p.G408D RIPK1_u    | NM_003804    | NP_003795    | Q13546 | RIPK1_HUMAN | tion with SQSTM1.            | 5    | :ACATGGCTTTG/   | 0.498 |             |
| - | 4  | 1480    | se_Mutation_p.     | NM_178012    | NP_821080    | Q9BVA1 | TBB2B_HUMAN |                              | 1    | CGTCGGCCGTG/    | 0.642 |             |
| + | 3  | 354_355 |                    | NM_004271    | NP_004262    | O95711 | LY86_HUMAN  |                              | 0    | :TCTGCCAAGT/    | 0.46  |             |
| + | 4  | 845     | q.1_Missense_Mu    | NM_004415    | NP_004406    | P15924 | DESP_HUMAN  | plakophilin 1 and junction p | 9    | :CACCAGTGAAT/   | 0.572 |             |
| + | 26 | 2460    | Qjow.2_Splice_Site | NM_001040274 | NP_001035364 | Q5T4T6 | SYC2L_HUMAN |                              | 2    | :ATTTAGCTTAGG   | 0.323 |             |
| + | 8  | 1209    | rag.1_Missense_M   | NM_030948    | NP_112210    | Q9C0D0 | PHAR1_HUMAN |                              | 0    | :GCCACGGCCAG    | 0.642 |             |
| + | 2  | 939     |                    | NM_016255    | NP_057339    | Q9UBU6 | FA8A1_HUMAN | Helical; (Potential).        | 0    | :ATTATGCACCTC   | 0.353 |             |
| + | 36 | 4317    | υ.S1269N LRRC16    | NM_017640    | NP_060110    | Q5VZK9 | LR16A_HUMAN |                              | 4    | :CCAGAGTAGCC/   | 0.483 |             |
| - | 1  | 312     | l2AE_uc003nha.1_   | NM_003518    | NP_003509    | P62807 | H2B1C_HUMAN |                              | 1    | :CTCCGGGAAGC.   | 0.557 |             |
| + | 6  | 1498    | 2A3_uc011dkm.1_RNA |              |              |        |             |                              | 0    | GAGCAGGGACC     | 0.557 |             |
| - | 1  | 65      | l2BM_uc003njo.2_   | NM_021066    | NP_066544    | Q99878 | H2A1J_HUMAN |                              | 0    | GCCCGGCCCGA     | 0.622 |             |

|   |    |      |                    |              |              |        |             |                              |     |               |       |             |
|---|----|------|--------------------|--------------|--------------|--------|-------------|------------------------------|-----|---------------|-------|-------------|
| + | 2  | 1594 | C21_uc003nsi.1_F   | NM_001010909 | NP_001010909 | Q5SSG8 | MUC21_HUMAN | acellular (Potential).       | 2   | CTCTGGAACAG   | 0.582 |             |
| + | 3  | 659  | obi.2_Nonsense_I   | NM_019111    | NP_061984    | P01903 | DRA_HUMAN   | tracellular (Potential).     | 2   | GCACTGGGGCT   | 0.522 |             |
| + | 12 | 3549 | wc.2_Intron BRPF   | NM_015695    | NP_056510    | Q9ULD4 | BRPF3_HUMAN | PWWP.                        | 2   | ATGGCGTTCC    | 0.587 |             |
| + | 24 | 2968 | ioox.2_Splice_Site | NM_015345    | NP_056160    | Q86T65 | DAAM2_HUMAN |                              | 3   | TGACAGTTCGC   | 0.562 |             |
| - | 2  | 326  | ogq.1_Missense_IV  | NM_018643    | NP_061113    | Q9NP99 | TREM1_HUMAN | (Potential). Ig-like V-type. | 1   | AGTCTTCTAGTA  | 0.498 |             |
| - | 7  | 1583 |                    | NM_006653    | NP_006644    | O43559 | FRS3_HUMAN  |                              | 2   | AGGGTGGGTGG   | 0.637 |             |
| + | 11 | 2364 | LH_uc011dvl.1_R    | NM_006502    | NP_006493    | Q9Y253 | POLH_HUMAN  |                              | 2   | CAAGAGCCCTT   | 0.473 |             |
| + | 14 | 1220 | M63B_uc003ows.2    | NM_018426    | NP_060896    | Q5T3F8 | TM63B_HUMAN |                              | 3   | GCCAGGGCTGC   | 0.592 |             |
| + | 14 | 1557 | lvn.1_Missense_M   | NM_007058    | NP_008989    | Q9UMQ6 | CAN11_HUMAN | Domain III.                  | 2   | CACGGGAGGTG   | 0.498 |             |
| - | 11 | 2514 | fwl.1_Missense_M   | NM_153840    | NP_722582    | Q5T601 | GP110_HUMAN | lasmic (Potential).          | 3   | CAGTCGGCCTC   | 0.562 | rs143941431 |
| - | 8  | 942  | 110_uc011dwl.1_5   | NM_153840    | NP_722582    | Q5T601 | GP110_HUMAN | tracellular (Potential).     | 3   | TGAAAGAGCCG   | 0.458 | rs61740071  |
| + | 1  | 383  |                    | NM_018214    | NP_060684    | Q9BTT6 | LRR1_HUMAN  | LRR 2.                       | 1   | ATGCCCGGAGC   | 0.667 |             |
| - | 5  | 749  |                    | NM_152688    | NP_689901    | Q5VWX1 | KHDR2_HUMAN |                              | 11  | CTGACGAATTC   | 0.403 |             |
| - | 11 | 1329 |                    | NM_001563    | NP_001554    | Q17R60 | IMPG1_HUMAN |                              | 3   | TAAACAGCAAAAC | 0.383 |             |
| + | 8  | 992  | pje.2_Missense_IV  | NM_000056    | NP_000047    | P21953 | ODBB_HUMAN  |                              | 0   | ATAATACCTTGGC | 0.363 |             |
| - | 6  | 1055 | tp.D74N SYNCR1     | NM_006372    | NP_006363    | O60506 | HNRPQ_HUMAN | RRM 1.                       | 2   | TAGATCTCTTGC  | 0.358 |             |
| + | 14 | 1430 | nse_Mutation_p.M   | NM_012381    | NP_036513    | Q9UBD5 | ORC3_HUMAN  |                              | 0   | AGGATGTTGGC   | 0.328 |             |
| - | 17 | 2706 | P45_uc003ppw.2_    | NM_001080481 | NP_001073950 | Q70EL2 | UBP45_HUMAN |                              | 2   | TATCTCCCACACT | 0.358 |             |
| + | 4  | 684  | 2_5'Flank PPI6_u   | NM_003080    | NP_003071    | O60906 | NSMA_HUMAN  |                              | 0   | GCACATCTACA   | 0.512 |             |
| + | 7  | 948  | 34_uc011eau.1_Int  | NM_014845    | NP_055660    | Q92562 | FIG4_HUMAN  | SAC.                         | 1   | ATCGTGACTGG   | 0.328 |             |
| + | 4  | 950  |                    | NM_138459    | NP_612468    | Q96E22 | NGBR_HUMAN  | lasmic (Potential).          | 1   | AGTTCGGTCTC   | 0.378 |             |
| + | 3  | 582  |                    | NM_014034    | NP_054753    | Q9Y294 | ASF1A_HUMAN | stone H3, CHAF1B, and HII    | 0   | TCCAGGACTCA   | 0.383 |             |
| - | 21 | 1349 | ON_uc003pzl.1_Mi   | NM_006073    | NP_006064    | Q13061 | TRDN_HUMAN  | Luminal.                     | 1   | TCCAGGTACAGC  | 0.363 |             |
| + | 7  | 1913 | zhs.2_Missense_IV  | NM_006290    | NP_006281    | P21580 | TNAP3_HUMAN | AF1 (By simi p.0?(22)        | 137 | TTTTGGGACTCC  | 0.547 |             |
| + | 9  | 2326 | zhs.2_Missense_IV  | NM_006290    | NP_006281    | P21580 | TNAP3_HUMAN | with NAF1 (E p.0?(22)        | 137 | CTGCCCCGAA    | 0.627 |             |
| + | 14 | 2417 | khe.2_Missense_I   | NM_020455    | NP_065188    | Q86SQ4 | GP126_HUMAN | ellular (Potential).         | 1   | TAGCACATCAC   | 0.348 |             |
| - | 3  | 421  |                    | NM_020861    | NP_065912    | Q8N680 | ZBTB2_HUMAN |                              | 1   | CTGTTCTAATCC  | 0.537 |             |
| + | 21 | 3374 | k.1_Missense_Mul   | NM_014892    | NP_055707    | Q9UPN6 | SCAF8_HUMAN | Pro-rich.                    | 0   | GAGAAGGTCTC   | 0.483 |             |
| + | 20 | 2897 | wc.1_Missense_Mi   | NM_001040001 | NP_001035090 | P55196 | AFAD_HUMAN  |                              | 5   | GAAGGGAAGTG   | 0.433 |             |
| + | 29 | 4269 | vc.1_Missense_Mi   | NM_001040001 | NP_001035090 | P55196 | AFAD_HUMAN  | Pro-rich.                    | 5   | TGCCCGTGATT   | 0.627 |             |
| - | 9  | 1873 |                    | NM_005618    | NP_005609    | O00548 | DLL1_HUMAN  | GF-like 7; calcium-binding   | 5   | GGCAGGTGCAG   | 0.692 |             |
| + | 5  | 1071 | siz.2_Missense_M   | NM_017802    | NP_060272    | Q86Y56 | HEAT2_HUMAN |                              | 1   | GCCGGGAGCTC   | 0.572 |             |
| - | 14 | 2042 | imh.3_Missense_I   | NM_152743    | NP_689956    | Q6PJG6 | BRAT1_HUMAN |                              | 0   | GCGGCCCAAAA   | 0.716 |             |
| - | 11 | 1430 | e_Mutation_p.G31   | NM_000535    | NP_000526    | P54278 | PMS2_HUMAN  |                              | 2   | TCTGTCTAGAC   | 0.527 |             |
| - | 3  | 337  | uc010ktg.2_Splice  | NM_000535    | NP_000526    | P54278 | PMS2_HUMAN  |                              | 2   | AACTTACTTAAGC | 0.328 |             |
| - | 1  | 203  | .B_uc003sqc.2_5'l  | NM_139179    | NP_631918    | Q8NCG7 | DGLB_HUMAN  | lasmic (Potential).          | 3   | ATGGCCCAGCG   | 0.677 |             |
| - | 5  | 840  | NF12_uc003sqc.1    | NM_016265    | NP_057349    | P17014 | ZNF12_HUMAN |                              | 0   | TATTTTCCTCTC  | 0.358 |             |
| + | 7  | 1208 | uh.2_Missense_M    | NM_178559    | NP_848654    | Q2M3G0 | ABCB5_HUMAN | ellular (Potential).         | 6   | AATCCACCCAAT  | 0.353 |             |
| - | 6  | 856  | n_p.E151K OSBP1    | NM_015550    | NP_056365    | Q9H4L5 | OSBL3_HUMAN |                              | 1   | CAATTTTATTCTC | 0.403 |             |
| + | 8  | 1837 | DC129_uc011kae     | NM_194300    | NP_919276    | Q6ZRS4 | CC129_HUMAN |                              | 0   | AAGGATGAAGTT  | 0.438 |             |
| - | 4  | 1170 | 3tes.3_Missense_I  | NM_022373    | NP_071768    | Q9BSE4 | HERP2_HUMAN | Ser-rich.                    | 3   | TGGAGTTGTT    | 0.373 |             |
| - | 9  | 932  | p.V113M ELMO1_     | NM_014800    | NP_055615    | Q92556 | ELMO1_HUMAN |                              | 6   | GAGCACCATCG   | 0.507 |             |
| + | 12 | 1288 |                    | NM_016616    | NP_057700    | Q8N427 | TXND3_HUMAN |                              | 3   | TCCCCGATTTT   | 0.358 |             |
| - | 9  | 730  | 3_Mutation_p.G21   | NM_014396    | NP_055211    | P49754 | VPS41_HUMAN |                              | 4   | TAGTCCCCCAG   | 0.473 |             |
| - | 17 | 2247 | w.2_Missense_Mu    | NM_022748    | NP_073585    | Q68CZ2 | TENS3_HUMAN |                              | 4   | CTCTGGGCTGG   | 0.657 |             |
| + | 13 | 1605 | kyr.2_Missense_IV  | NM_152701    | NP_689914    | Q86UQ4 | ABCAD_HUMAN |                              | 10  | GGGTGGTCTCC   | 0.453 |             |
| - | 3  | 218  |                    | NM_207366    | NP_997249    | Q6ZU15 | SEP14_HUMAN |                              | 0   | CAAAACCAAAAT  | 0.303 |             |

|   |    |           |                    |              |              |        |              |                              |       |               |       |
|---|----|-----------|--------------------|--------------|--------------|--------|--------------|------------------------------|-------|---------------|-------|
| - | 5  | 1598      |                    | NM_033273    | NP_150376    | Q96JC4 | ZN479_HUMAN  | :2H2-type 10.                | 4     | CTTTGCCACATT  | 0.433 |
| + | 6  | 953       |                    | NM_001099435 | NP_001092905 | A6NIY4 | SPDE5_HUMAN  | Arg-rich.                    | 0     | AGCGTCGGTTC   | 0.562 |
| + | 6  | 969       |                    | NM_001099435 | NP_001092905 | A6NIY4 | SPDE5_HUMAN  | Arg-rich.                    | 0     | AGGCCGTTCCA   | 0.572 |
| - | 31 | 2624      | p.A170T PION_      | NM_017439    | NP_059135    | A4D1B5 | GSAP_HUMAN   |                              | 1     | CATCGCGGTGT   | 0.413 |
| - | 18 | 2627      | cgw.1_Missense_I   | NM_006379    | NP_006370    | Q99985 | SEM3C_HUMAN  |                              | 1     | CGGGTGAAGG    | 0.488 |
| - | 5  | 7736      | _Mutation_p.P248   | NM_033026    | NP_149015    | Q9Y6V0 | PCLO_HUMAN   | Pro-rich.                    | 7     | AGGAGGTGCAC   | 0.463 |
| - | 14 | 2044      | kgz.1_Missense_I   | NM_001142749 | NP_001136221 | A8MWY0 | K132L_HUMAN  | cellular (Potential).        | 7     | GGCAGGGGACA   | 0.522 |
| + | 12 | 2236      | g.1_Missense_Mu    | NM_006716    | NP_006707    | Q9UBU7 | DBF4A_HUMAN  |                              | 2     | GAAAAGTGAAA   | 0.333 |
| - | 2  | 223       | te_p.W31_splICE F  | NM_152789    | NP_690002    | Q5BKY9 | F133B_HUMAN  |                              | 1     | AAATACCAGGT   | 0.368 |
| - | 6  | 661       | mu.1_Missense_I    | NM_001742    | NP_001733    | P30988 | CALCR_HUMAN  | cellular (Potential).        | 9     | AAACACTTTTT   | 0.323 |
| + | 20 | 1535      | 1A2_uc011kib.1_l   | NM_000089    | NP_000080    | P08123 | CO1A2_HUMAN  |                              | 9     | CAAAGGAGAGA   | 0.433 |
| - | 13 | 1699      |                    | NM_018842    | NP_061330    | Q9UHR4 | BI2L1_HUMAN  |                              | 1     | CAGTCCCCTGT   | 0.418 |
| + | 39 | 5719      | .T1819M TRRAP_     | NM_003496    | NP_003487    | Q9Y4A5 | TRRAP_HUMAN  |                              | 37    | CGCCACGCTGC   | 0.627 |
| + | 7  | 1766      | p.P548S ZKSCAN     | NM_145102    | NP_659570    | Q9Y2L8 | ZKSC5_HUMAN  |                              | 1     | AGAGACCACAT   | 0.423 |
| + | 14 | 2378      | 'AN_uc003uwl.2_F   | NM_003386    | NP_003377    | Q9Y493 | ZAN_HUMAN    | ate) (mucin-like domain). E  | 11    | AAAACCCACCA   | 0.522 |
| + | 18 | 2546      | a.2_Missense_Mut   | NM_015908    | NP_056992    | Q9BXP5 | SRRT_HUMAN   | Pro-rich.                    | 2     | AGCGCCAGCT    | 0.507 |
| - | 1  | 583       | uc010lhm.1_5'Flan  | NM_001015072 | NP_001015072 | Q6NVU6 | UFSP1_HUMAN  |                              | 0     | CAGCTCCCCGT   | 0.692 |
| + | 18 | 2872      | _uc011kkn.1_Intro  | NM_181552    | NP_853530    | P39880 | CUX1_HUMAN   | CUT 2.                       | 8     | GGACACCATCG   | 0.612 |
| + | 27 | 5336      | LL5_uc010ljf.1_Int | NM_182931    | NP_891847    | Q8IZD2 | MLL5_HUMAN   | Pro-rich.                    | 3     | TCCAGGACACC   | 0.498 |
| - | 10 | 1639      | _p.V372I COG5_u    | NM_181733    | NP_859422    | Q9UP83 | COG5_HUMAN   |                              | 4     | CCTTAACTATTC  | 0.313 |
| - | 21 | 2882      | a_Mutation_p.S93   | NM_007356    | NP_031382    | A4D0S4 | LAMB4_HUMAN  | inin EGF-like 9.             | 8     | CTGAGCTCCAC   | 0.423 |
| - | 5  | 515       | ie_Mutation_p.T15  | NM_130768    | NP_570124    | Q8WWH4 | ASZ1_HUMAN   | ANK 4.                       | 3     | TTGGGGTCATA   | 0.418 |
| + | 14 | 2560_2561 | q.1_Missense_Mu    | NM_000492    | NP_000483    | P13569 | CFTR_HUMAN   | lasmic (Potential).          | 5     | ATCAAGAAGGT   | 0.416 |
| + | 27 | 4438      | iq.1_Missense_Mu   | NM_000492    | NP_000483    | P13569 | CFTR_HUMAN   | otential). ABC transporter 2 | 5     | GGAGCCTCTCT   | 0.527 |
| - | 2  | 2174      |                    | NM_024523    | NP_078799    | Q96CN9 | GCC1_HUMAN   | Potential.                   | 2     | CTTGTGCAGCT   | 0.647 |
| + | 3  | 460       |                    | NM_014390    | NP_055205    | Q7KZF4 | SND1_HUMAN   | GNase-like 1.                | 3     | CCCTGGGCATT   | 0.403 |
| + | 2  | 616       | a.3_Missense_Mu    | NM_001458    | NP_001449    | Q14315 | FLNC_HUMAN   | 1. Actin-binding.            | 12    | CTGGACGCTGA   | 0.622 |
| + | 11 | 2202      | s.2_Missense_Mu    | NM_005631    | NP_005622    | Q99835 | SMO_HUMAN    | lasmic (Potential).          | 37    | CACCCCTGTGG   | 0.597 |
| + | 12 | 1658      | CPA5_uc010lme.1    | NM_001127441 | NP_001120913 | Q8WXQ8 | CBPA5_HUMAN  |                              | 2     | AGTTGGTGAGA   | 0.517 |
| - | 4  | 1223      | qx.3_Missense_M    | NM_001018111 | NP_001018121 | O00592 | PODXL_HUMAN  | xtracellular (Potential).    | 3     | TAGTTGATGCT   | 0.597 |
| + | 5  | 848       | 1_uc011kpt.1_Intrc | NM_033138    | NP_149129    | Q05682 | CALD1_HUMAN  | odulin-binding (By similarit | 0     | AAGTCTGTGCG   | 0.498 |
| - | 13 | 2931      |                    | NM_020119    | NP_064504    | Q7Z2W4 | ZCCHV_HUMAN  | ARP catalytic.               | 1     | ACTTTCCAACCA  | 0.423 |
| - | 15 | 1860      |                    | NM_004333    | NP_004324    | P15056 | BRAF_HUMAN   | rotein kinase_R603>I(2))p.T  | 18290 | GATTTCACTGTAC | 0.368 |
| - | 12 | 1575      |                    | NM_004333    | NP_004324    | P15056 | BRAF_HUMAN   | rotein kinase.               | 18290 | CACCTGAGTACT  | 0.393 |
| + | 4  | 313       | AK_uc011krg.1_Rf   | NM_018238    | NP_060708    | Q53H12 | AGK_HUMAN    |                              | 2     | TTTAGGTGTTTC  | 0.368 |
| + | 18 | 3435      | 'bt.2_Missense_Mi  | NM_004445    | NP_004436    | O15197 | EPHB6_HUMAN  | mic (Potential). Protein kin | 19    | CCCGCTCCAG    | 0.532 |
| + | 7  | 931       | _p.P146S CASP2     | NM_032982    | NP_116764    | P42575 | CASP2_HUMAN  |                              | 3     | AGTTACCTGCAC  | 0.493 |
| - | 7  | 1962      | pi.2_Missense_Mi   | NM_152557    | NP_689770    | Q6NUN9 | ZN746_HUMAN  |                              | 3     | AGGGCCGCACG   | 0.667 |
| + | 13 | 1727      | wjj.1_Missense_M   | NM_031946    | NP_114152    | Q96P47 | AGAP3_HUMAN  | PH.                          | 3     | TCTCTCCCACT   | 0.507 |
| - | 3  | 445       | YGN_uc003wkg.2_    | NM_144727    | NP_653328    | Q8WXF5 | CRGN_HUMAN   | a crystallin 'Greek key' 3.  | 0     | GAAGGGGCTGT   | 0.587 |
| - | 14 | 2109      |                    | NM_170606    | NP_733751    | Q8NEZ4 | MLL3_HUMAN   |                              | 63    | GAAAGACATTTTC | 0.348 |
| + | 14 | 2221      | ng.2_Missense_M    | NM_014671    | NP_055486    | Q15386 | UBE3C_HUMAN  |                              | 5     | AAGCAGATAAGC  | 0.318 |
| - | 21 | 3632      | p.A473V CSMD1_     | NM_033225    | NP_150094    | Q96PZ7 | CSMD1_HUMAN  | xtracellular (Potential).    | 25    | TGGTGGCACCT   | 0.542 |
| + | 3  | 388       | tron PRSS55_uc0    | NM_198464    | NP_940866    | Q6UWB4 | PRSS55_HUMAN | (Potential). Peptidase S1.   | 1     | TGCTGGGGACC   | 0.512 |
| - | 1  | 632       |                    | NM_173683    | NP_775954    | Q5GH73 | XKR6_HUMAN   |                              | 2     | GGCCCGGCTC    | 0.766 |
| - | 2  | 1903      | ase_Mutation_p.P4  | NM_001001924 | NP_001001924 | Q9ULD2 | MTUS1_HUMAN  |                              | 2     | ACTGGGTTTACA  | 0.403 |
| + | 9  | 934       | a_Mutation_p.A26   | NM_199205    | NP_954675    | Q8N163 | K1967_HUMAN  |                              | 3     | TACAGCCTTCCC  | 0.577 |



|   |    |       |                    |              |              |        |             |                                 |    |               |       |             |
|---|----|-------|--------------------|--------------|--------------|--------|-------------|---------------------------------|----|---------------|-------|-------------|
| - | 9  | 1080  |                    | NM_003844    | NP_003835    | O00220 | TR10A_HUMAN | lasmic (Potential).             | 6  | CGGTCCCTGTA   | 0.368 |             |
| - | 13 | 1834  | ITPD4_uc003xdm.    | NM_004901    | NP_004892    | Q9Y227 | ENTP4_HUMAN | lenal (Potential).              | 2  | AAACGCCCCGC   | 0.587 |             |
| - | 5  | 640   | y_1_Missense_Mut   | NM_018492    | NP_060962    | Q96KB5 | TOPK_HUMAN  | rotein kinase.                  | 0  | CAAAGCAACTT   | 0.313 |             |
| - | 1  | 4231  |                    | NM_031271    | NP_112561    | Q9BXT5 | TEX15_HUMAN |                                 | 7  | CTACATCCAAC   | 0.358 |             |
| + | 3  | 303   | i_p.Q63R ERLIN2    | NM_007175    | NP_009106    | O94905 | ERLN2_HUMAN | lenal (Potential).              | 0  | TGTGCAGGTAT   | 0.502 |             |
| - | 3  | 1006  | 21E RAB11FIP1_u    | NM_001002814 | NP_001002814 | Q6WKZ4 | RFIP1_HUMAN |                                 | 3  | GGTCCCATTG    | 0.512 |             |
| + | 2  | 569   | 34_uc003xkz.1_in   | NM_004874    | NP_004865    | O95429 | BAG4_HUMAN  |                                 | 1  | CATATCCTAGCT  | 0.363 |             |
| + | 6  | 625   | D1_uc003xnn.2_R    | NM_002164    | NP_002155    | P14902 | I23O1_HUMAN |                                 | 2  | TGGTGAAATAG   | 0.408 |             |
| - | 14 | 1490  | se_Mutation_p.D4f  | NM_020476    | NP_065209    | P16157 | ANK1_HUMAN  | 4.189 kDa domain.               | 9  | GGTCATCCTGG   | 0.363 | rs78606390  |
| + | 21 | 2215  |                    | NM_032410    | NP_115786    | Q86VS8 | HOOK3_HUMAN | with MSR1.  Required for as     | 2  | TCAGAGAGAGA   | 0.244 |             |
| + | 2  | 209   |                    | NM_152419    | NP_689632    | Q68CP4 | HGNAT_HUMAN | I, vesicle (Potential).         | 0  | TCAGGCTTTGC   | 0.378 |             |
| - | 85 | 12096 | e_Mutation_p.W39   | NM_006904    | NP_008835    | P78527 | PRKDC_HUMAN | PI3K/PI4K.                      | 34 | TACTTTCCAATCA | 0.493 |             |
| + | 9  | 1041  | _p.E316K MCM4_u    | NM_182746    | NP_877423    | P33991 | MCM4_HUMAN  |                                 | 4  | GGGTGGAGATG   | 0.617 |             |
| - | 8  | 1013  |                    | NM_003878    | NP_003869    | Q92820 | GGH_HUMAN   | -glutamyl hydrolase.            | 0  | TGGATGCCACT   | 0.343 |             |
| + | 5  | 615   | vt.2_Missense_Mu   | NM_001033578 | NP_001028750 | Q96BR1 | SGK3_HUMAN  | PX.                             | 4  | TATCCAGAACTT  | 0.289 |             |
| + | 11 | 1217  | yb.2_Missense_Mi   | NM_052958    | NP_443190    | Q49A92 | CH034_HUMAN |                                 | 1  | GAGTAGGACAC   | 0.408 |             |
| - | 2  | 545   | _p.E169Q JPH1_uc   | NM_020647    | NP_065698    | Q9HDC5 | JPH1_HUMAN  | lasmic (Potential).             | 1  | CTGCTCGCTGC   | 0.711 |             |
| + | 6  | 641   | P1_uc010mai.2_5'   | NM_007013    | NP_008944    | Q9H0M0 | WWP1_HUMAN  |                                 | 2  | TAAAACTTTCC   | 0.333 |             |
| + | 4  | 496   | M67_uc010maw.2_    | NM_153704    | NP_714915    | Q5HYA8 | MKS3_HUMAN  |                                 | 2  | TTAATGGAACAT  | 0.333 |             |
| - | 24 | 5321  | 1429_uc010maz.1    | NM_015496    | NP_056311    | Q69YN4 | VIR_HUMAN   |                                 | 2  | AGCACGGTCCC   | 0.468 |             |
| - | 3  | 526   | hf.2_Intron TP53In | NM_033285    | NP_150601    | Q96A56 | T5311_HUMAN | Glu-rich.                       | 0  | TTCTTCTTCTC   | 0.458 |             |
| - | 59 | 8365  | _p.S2777P UBR5_u   | NM_015902    | NP_056986    | O95071 | UBR5_HUMAN  | HECT.                           | 28 | AGAGGAATAGAC  | 0.378 |             |
| + | 2  | 592   | _p.L147F RIMS2_    | NM_014677    | NP_055492    | Q9UQ26 | RIMS2_HUMAN |                                 | 15 | AAATTTGGCCCG  | 0.458 |             |
| - | 7  | 704   | nv.2_Missense_Mi   | NM_001568    | NP_001559    | P60228 | EIF3E_HUMAN |                                 | 3  | TTTGGGGTGAT   | 0.358 |             |
| - | 2  | 510   | 3F11B_uc010mdc.    | NM_002546    | NP_002537    | O00300 | TR11B_HUMAN |                                 | 2  | AGGGGCGCACA   | 0.517 | rs116321565 |
| + | 4  | 903   |                    | NM_002514    | NP_002505    | P48745 | NOV_HUMAN   | TSP type-1.                     | 5  | CCCGGTCACC    | 0.532 |             |
| - | 5  | 791   |                    | NM_003184    | NP_003175    | Q6P1X5 | TAF2_HUMAN  |                                 | 6  | GAGCACCTCTC   | 0.338 |             |
| + | 2  | 155   | se_Mutation_p.E32  | NM_144963    | NP_659400    | Q658Y4 | F91A1_HUMAN |                                 | 2  | GAGAGAATATC   | 0.338 |             |
| - | 20 | 2096  |                    | NM_013291    | NP_037423    | Q10570 | CPSF1_HUMAN |                                 | 1  | CGTAGGAGTCA   | 0.692 |             |
| - | 20 | 2177  | _p.S479F PTPRD_    | NM_002839    | NP_002830    | P23468 | PTPRD_HUMAN | III 2.  Extracellular (Potentia | 22 | TGACAGAATAT   | 0.433 |             |
| - | 3  | 2056  |                    | NM_020702    | NP_065753    | Q6NSJ0 | K1161_HUMAN | ellular (Potential).            | 3  | GGTACCCCGT    | 0.662 |             |
| - | 41 | 5830  |                    | NM_006289    | NP_006280    | Q9Y490 | TLN1_HUMAN  | ction with SYNM.                | 13 | CATGCCACCCA   | 0.617 |             |
| - | 5  | 537   | ZNF484_uc010mrt    | NM_031486    | NP_113674    | Q5JVG2 | ZN484_HUMAN |                                 | 0  | GGTTTTCTCCAC  | 0.343 |             |
| + | 9  | 2144  | e_Mutation_p.T71f  | NM_006648    | NP_006639    | Q9Y3S1 | WNK2_HUMAN  |                                 | 12 | CAGCACCCCA    | 0.741 |             |
| + | 2  | 292   | _p.R63W NIPSNAf    | NM_015469    | NP_056284    | Q9UFN0 | NPS3A_HUMAN |                                 | 0  | ATCTTCGGACA   | 0.373 |             |
| + | 7  | 959   | hnp.2_Missense_M   | NM_152786    | NP_689999    | Q8TAL5 | CI043_HUMAN |                                 | 0  | GCCTCCCCAA    | 0.478 |             |
| - | 3  | 1932  | f.2_Missense_Mut   | NM_002160    | NP_002151    | P24821 | TENA_HUMAN  | EGF-like 12.                    | 7  | AGGGCCGGTGA   | 0.597 |             |
| + | 4  | 908   | yv.1_Missense_Mi   | NM_054107    | NP_473448    | Q8NGS2 | OR1J2_HUMAN | ellular (Potential).            | 5  | CTCCCATCC     | 0.562 |             |
| + | 19 | 2457  | ABGAP1_uc0111zj.   | NM_012197    | NP_036329    | Q9Y3P9 | RBGP1_HUMAN |                                 | 5  | TGACAGACTTT   | 0.358 |             |
| + | 33 | 3611  | wu.2_Missense_M    | NM_015354    | NP_056169    | Q5SRE5 | NU188_HUMAN |                                 | 7  | ACCAGCAACTC   | 0.507 |             |
| - | 11 | 1687  | _p.R448C CRAT_u    | NM_000755    | NP_000746    | P43155 | CACP_HUMAN  |                                 | 1  | CGAGCGGATGG   | 0.612 |             |
| - | 8  | 1045  | _5'Flank SETX_uc   | NM_015046    | NP_055861    | Q7Z333 | SETX_HUMAN  |                                 | 3  | CGCTGGCCAGA   | 0.368 |             |
| + | 22 | 2471  |                    | NM_000093    | NP_000084    | P20908 | COSA1_HUMAN | le-helical region.              | 11 | CACAGGGTGTC   | 0.542 |             |
| - | 4  | 632   | iz.2_Missense_Mu   | NM_178138    | NP_835258    | Q9UBR4 | LHX3_HUMAN  | Homeobox.                       | 1  | GGCGAGGTGT    | 0.726 |             |
| - | 22 | 4388  | 1_5'Flank CARD9_   | NM_003086    | NP_003077    | Q5SXM2 | SNPC4_HUMAN |                                 | 0  | TGTGCTGGCA    | 0.612 |             |
| - | 6  | 837   | V51 WDR85_uc0i     | NM_138778    | NP_620133    | Q9BTV6 | WDR85_HUMAN | WD 1.                           | 0  | GGGTACCCTGG   | 0.587 |             |
| + | 5  | 1010  | AT1_uc004cob.1_I   | NM_024757    | NP_079033    | Q9H9B1 | EHMT1_HUMAN |                                 | 3  | CTGTGGGTCC    | 0.443 |             |

|   |    |      |                                                 |              |              |        |              |    |                   |       |
|---|----|------|-------------------------------------------------|--------------|--------------|--------|--------------|----|-------------------|-------|
| - | 2  | 622  | J11mha.1_Transl                                 | NM_013239    | NP_037371    | Q9Y5P8 | P2R3B_HUMAN  | 0  | ATCCACGTTGAC      | 0.617 |
| - | 5  | 2694 |                                                 | NM_015419    | NP_056234    | Q9NR99 | MXRA5_HUMAN  | 8  | AGTAGAGGTACA      | 0.473 |
| - | 6  | 962  |                                                 | NM_000216    | NP_000207    | P23352 | KALM_HUMAN   | 4  | CTCGAGTTCCA       | 0.517 |
| + | 14 | 1563 | _p.Q459*BMX_uc                                  | NM_203281    | NP_975010    | P51813 | BMX_HUMAN    | 5  | TCTTTCAGGAGC      | 0.433 |
| + | 9  | 1276 | ey.1_Missense_Mi                                | NM_018360    | NP_060830    | Q9NUQ3 | TXLNG_HUMAN  | 1  | AATAAGCACTTC      | 0.398 |
| + | 1  | 264  | lnfu.1_Missense_N                               | NM_173495    | NP_775766    | Q96NR3 | PTHD1_HUMAN  | 6  | ACTCGGACCTGC      | 0.622 |
| + | 1  | 1665 |                                                 | NM_001013736 | NP_001013758 | Q5HY64 | FA47C_HUMAN  | 3  | AGCCTCCTGAG       | 0.617 |
| - | 4  | 606  | orf38_uc004dev.1_                               | NM_144970    | NP_659407    | Q8TB03 | CX038_HUMAN  | 1  | AGTATACTGCCA      | 0.358 |
| + | 19 | 3221 | _p.R904L KDM6A                                  | NM_021140    | NP_066963    | O15550 | KDM6A_HUMAN  | 84 | ATAAACGTGATG      | 0.323 |
| + | 7  | 760  | gy.2_Missense_M                                 | NM_001077445 | NP_001070913 | Q92613 | JADE3_HUMAN  | 0  | TCAAGGTCCCA       | 0.537 |
| - | 2  | 221  |                                                 | NM_015698    | NP_056513    | Q92917 | GPKOW_HUMAN  | 2  | CAAAGGGATGA       | 0.632 |
| - | 7  | 930  | lnip.2_Missense_N                               | NM_005183    | NP_005174    | O60840 | CAC1F_HUMAN  | 6  | CGCACGCCCTG       | 0.617 |
| + | 6  | 2210 | E638K CCNB3_uc                                  | NM_033031    | NP_149020    | Q8WWL7 | CCNB3_HUMAN  | 9  | CCCAGGAACCA       | 0.453 |
| - | 11 | 2470 | noh.1_Missense_I                                | NM_017848    | NP_060318    | Q9NX05 | F120C_HUMAN  | 2  | GGGTAGACTG        | 0.448 |
| - | 21 | 2200 | N1_uc011mpg.1_I                                 | NM_002547    | NP_002538    | O60890 | OPHN1_HUMAN  | 2  | TTTGGGGTGT        | 0.517 |
| - | 12 | 1462 | z.1_Missense_Mu                                 | NM_000390    | NP_000381    | P24386 | RAE1_HUMAN   | 1  | TGCTGGCACTG       | 0.368 |
| + | 1  | 1360 | lefm.1_Missense_I                               | NM_032968    | NP_116750    | Q9BZA7 | PC11X_HUMAN  | 2  | AAACGGAGTTC       | 0.323 |
| + | 8  | 1717 |                                                 | NM_017416    | NP_059112    | Q9NP60 | IRPL2_HUMAN  | 3  | ACTCAGTTGTG       | 0.403 |
| + | 2  | 208  | 5'UTR ATG4A_uc                                  | NM_052936    | NP_443168    | Q8WYN0 | ATG4A_HUMAN  | 1  | AGCTGGTATGG       | 0.388 |
| + | 15 | 1745 | _p.G493S ALG13_uc011mta.1_Missense_Mutation_p.G |              |              | Q9NP73 | ALG13_HUMAN  | 1  | CTGGGGGTAT        | 0.418 |
| - | 9  | 2426 | _uc011mtc.1_Miss                                | NM_001113490 | NP_001106962 | Q4VCS5 | AMOT_HUMAN   | 1  | TGATGGGGGAG       | 0.517 |
| + | 5  | 561  | _p.C173Y IL13RA1                                | NM_001560    | NP_001551    | P78552 | I13R1_HUMAN  | 0  | TCAATGTGAAA       | 0.343 |
| - | 16 | 3315 | _p.T1020 IGSF1_u                                | NM_001555    | NP_001546    | Q8N6C5 | IGSF1_HUMAN  | 5  | TATTGGTGATGG      | 0.517 |
| - | 3  | 758  |                                                 | NM_006014    | NP_006005    | Q14657 | LAGE3_HUMAN  | 0  | CGGGGGGCCCA       | 0.592 |
| - | 2  | 532  |                                                 | NM_171998    | NP_741995    | Q96DA2 | RB39B_HUMAN  | 0  | AAGACCACCTA       | 0.433 |
| - | 2  | 913  | _uc009vno.2_Sile                                | NM_001013631 | NP_001013653 | O60812 | HNRCL_HUMAN  | 0  | TTTCTCATGGAC      | 0.468 |
| - | 3  | 765  | _l_5'Flank ARHGEF                               | NM_153213    | NP_694945    | Q8IW93 | ARHGJ_HUMAN  | 3  | CAGGCGCAGAG       | 0.672 |
| - | 18 | 2279 | 1bbm.1_Translatio                               | NM_020765    | NP_065816    | Q5T4S7 | UBR4_HUMAN   | 25 | GAGGCGTGAAA       | 0.507 |
| - | 2  | 1170 |                                                 | NM_052943    | NP_443175    | Q96A09 | FA46B_HUMAN  | 1  | CTGCCCCACCG       | 0.657 |
| + | 7  | 1093 | _p.R328H PTPRU                                  | NM_005704    | NP_005695    | Q92729 | PTPRU_HUMAN  | 7  | GCGCGCGGGC        | 0.632 |
| - | 9  | 1432 | _j.1_Missense_Mu                                | NM_005955    | NP_005946    | Q14872 | MTF1_HUMAN   | 2  | CTGGGGTGCT        | 0.572 |
| + | 15 | 2736 | _wt.2_Missense_M                                | NM_002840    | NP_002831    | P10586 | PTPRF_HUMAN  | 10 | TTGCTGCCTATAC     | 0.592 |
| - | 2  | 522  | F53L CCDC163P                                   | NM_001102601 | NP_001096071 |        |              | 0  | CAAGAAGATAC       | 0.483 |
| + | 17 | 1964 | _p.Y617S RAD54L                                 | NM_001142548 | NP_001136020 | Q92698 | RAD54_HUMAN  | 3  | CTTGCTATATCTA     | 0.522 |
| - | 12 | 1803 | b.1_RNA uc001de                                 | NM_001002292 | NP_001002292 | Q5T9L3 | WLS_HUMAN    | 0  | tcttcctcgattacatg | 0     |
| + | 3  | 4043 |                                                 | NM_001408    | NP_001399    | Q9HCU4 | CELR2_HUMAN  | 8  | TGCTCGCTCA        | 0.592 |
| + | 3  | 515  | _jxw.2_3'UTR CYB                                | NM_182580    | NP_872386    | Q8N8Q1 | C56D1_HUMAN  | 0  | GTCGCCGGGCA       | 0.612 |
| + | 4  | 1338 |                                                 | NM_020440    | NP_065173    | Q9P2B2 | FPRP_HUMAN   | 1  | TGGGTGTGACC       | 0.562 |
| + | 13 | 2317 | _g_Mutation_p.R71                               | NM_019032    | NP_061905    | Q6UY14 | ATL4_HUMAN   | 2  | CTCCCGTGAGT       | 0.657 |
| + | 3  | 406  | _p.G117E ZBTB7B                                 | NM_015872    | NP_056956    | O15156 | ZBTB7B_HUMAN | 0  | TGGGGGAGCAG       | 0.632 |
| - | 4  | 1220 | _p.R392Q IGSF8_u                                | NM_052868    | NP_443100    | Q969P0 | IGSF8_HUMAN  | 0  | CTAGCCGTAGC       | 0.642 |
| + | 11 | 3021 | N1_uc001gwb.2_F                                 | NM_178275    | NP_840059    |        |              | 3  | CTGGTGCATCC       | 0.662 |
| + | 6  | 1122 | _p.A66T RNPEP                                   | NM_020216    | NP_064601    | Q9H4A4 | AMPB_HUMAN   | 1  | CAGGCCTGCG        | 0.562 |
| - | 17 | 3115 | lpqv.1_Missense_N                               | NM_002646    | NP_002637    | O00750 | P3C2B_HUMAN  | 7  | TGTGGTCCAC        | 0.597 |
| - | 6  | 1180 | vx.1_Missense_M                                 | NM_145214    | NP_660215    | Q96F44 | TRI11_HUMAN  | 4  | CTGCACGCTCC       | 0.697 |
| - | 4  | 818  | itv.2_Missense_M                                | NM_024554    | NP_078830    | Q8N414 | PGBD5_HUMAN  | 4  | GCCCCGTGAAA       | 0.587 |
| + | 15 | 5870 | liik.2_Missense_N                               | NM_017782    | NP_060252    | Q5VWN6 | CJ018_HUMAN  | 2  | TGGGGTTTCC        | 0.458 |

|   |    |       |                                |              |              |        |             |                                |     |                  |       |             |
|---|----|-------|--------------------------------|--------------|--------------|--------|-------------|--------------------------------|-----|------------------|-------|-------------|
| - | 4  | 718   | e_Mutation_p.R15               | NM_001080449 | NP_001073918 | P51530 | DNA2L_HUMAN |                                | 0   | TTGGCGTGTGG      | 0.353 |             |
| + | 20 | 2584  | p.R352Q CDH23_                 | NM_022124    | NP_071407    | Q9H251 | CAD23_HUMAN | Extracellular (Potential).     | 11  | TGACCGAGAGA      | 0.527 |             |
| + | 9  | 863   | _Mutation_p.G129               | NM_018063    | NP_060533    | Q9NRZ9 | HELLS_HUMAN | ity). Helicase ATP-binding.    | 2   | ATTGGGTAAGA      | 0.378 |             |
| - | 28 | 2983  | kk2_Intron SORE                | NM_001034954 | NP_001030126 | Q9BX66 | SRBS1_HUMAN |                                | 1   | CATCTCGGGGG      | 0.562 |             |
| - | 3  | 462   | 74M ALDH18A1_u                 | NM_002860    | NP_002851    | P54886 | P5CS_HUMAN  | amate 5-kinase.                | 3   | GCACCACGATTC     | 0.562 | rs143330350 |
| + | 6  | 1114  | RRC27_uc001lil.2               | NM_030626    | NP_085129    | Q9C0I9 | LRC27_HUMAN |                                | 1   | AGACACGTTTTC     | 0.403 |             |
| - | 8  | 1175  | 7_uc010qwg.1_5'l               | NM_001572    | NP_001563    | Q92985 | IRF7_HUMAN  |                                | 0   | GTACGGCTCTG      | 0.697 |             |
| + | 31 | 12230 |                                | NM_002457    | NP_002448    | Q02817 | MUC2_HUMAN  |                                | 2   | caccactacggtgacc | 0.015 | rs147438840 |
| + | 51 | 14906 | b.2_Missense_Mu                | NM_017511    | NP_059981    | Q9HC84 | MUC5B_HUMAN | em repeats, Ser/Thr- rich.     | 0   | GCCGAGCACTA      | 0.662 |             |
| - | 6  | 621   | v.2_Intron OSBPL!              | NM_020896    | NP_065947    | Q9H0X9 | OSBL5_HUMAN | PH.                            | 3   | GATGAGCAGCA      | 0.657 |             |
| + | 11 | 2844  | _p.P741L NAV2_u                | NM_145117    | NP_660093    | Q8IVL1 | NAV2_HUMAN  |                                | 6   | GTATCCCCCTCC     | 0.632 |             |
| + | 11 | 2903  | _p.A761T NAV2_u                | NM_145117    | NP_660093    | Q8IVL1 | NAV2_HUMAN  |                                | 6   | ACTCCGCCCTC      | 0.597 |             |
| + | 14 | 3557  | mpt.2_Missense_l               | NM_145117    | NP_660093    | Q8IVL1 | NAV2_HUMAN  |                                | 6   | TGACAGCTCAG      | 0.602 |             |
| - | 6  | 853   | _p.S198L ELF5_uc               | NM_198381    | NP_938195    | Q9UKW6 | ELF5_HUMAN  | ETS.                           | 1   | GCTCCGATTTA      | 0.418 |             |
| - | 8  | 1113  | \DL1_uc010rnw.1_               | NM_005468    | NP_005459    | Q9UQQ1 | NALDL_HUMAN | Extracellular (Potential).     | 0   | FGGTTCCCATAC     | 0.662 |             |
| - | 7  | 706   | e_Mutation_p.P13               | NM_021975    | NP_068810    | Q04206 | TF65_HUMAN  | RHD.                           | 4   | TGTTGGGGGCA      | 0.592 |             |
| + | 6  | 942   | gz.1_Missense_Mt               | NM_018026    | NP_060496    | Q6VY07 | PACS1_HUMAN |                                | 6   | CAGATCGTTCTC     | 0.443 |             |
| + | 6  | 619   | TN3_uc010rpi.1_F               | NM_001104    | NP_001095    | Q08043 | ACTN3_HUMAN | n-binding. CH 2.               | 0   | GACACCGCCCT      | 0.647 |             |
| - | 9  | 1451  | ense_Mutation_p.v              | NM_004910    | NP_004901    | O00562 | PITM1_HUMAN |                                | 3   | CCTCAGCCCCC      | 0.647 |             |
| + | 13 | 1714  | v.A506T PPFIA1_u               | NM_003626    | NP_003617    | Q13136 | LIPA1_HUMAN | Potential.                     | 3   | TGAAGCACTGA      | 0.413 |             |
| - | 7  | 1339  | uv.2_Missense_Mt               | NM_015531    | NP_056346    | Q4AC94 | C2CD3_HUMAN | p.R371P(1)                     | 7   | TAAACCGATTCC     | 0.388 |             |
| - | 12 | 2631  |                                | NM_020693    | NP_065744    | Q8TD84 | DSCL1_HUMAN | potential). Ig-like C2-type 9. | 8   | GATGGGCCGCTC     | 0.642 |             |
| - | 6  | 2184  | al.2_Missense_Mu               | NM_182557    | NP_872363    | Q86UU0 | BCL9L_HUMAN | teraction with CTNNB1 (By      | 2   | TCCCGATGCTC      | 0.687 |             |
| - | 6  | 948   | p.P153L PRDM10_                | NM_020228    | NP_064613    | Q9NQV6 | PRD10_HUMAN | SET.                           | 1   | CGAGAGGCCCC      | 0.567 |             |
| + | 14 | 2340  | ATS2_uc001ruf.2_               | NM_023071    | NP_075559    | Q86XZ4 | SPAS2_HUMAN |                                | 1   | GAGGAGGACAG      | 0.473 |             |
| + | 24 | 3113  | lt.2_Missense_Mu               | NM_173602    | NP_775873    | Q9P265 | DIP2B_HUMAN |                                | 6   | GGTGAGGAAGG      | 0.458 |             |
| - | 8  | 923   | s.3_Missense_Mu                | NM_015665    | NP_056480    | Q9NRG9 | AAAS_HUMAN  | WD 3.                          | 1   | ACTGGGGGCC       | 0.607 |             |
| - | 1  | 31    | nse_Mutation_p.D               | NM_001130059 | NP_001123531 | P17544 | ATF7_HUMAN  | activation domain.             | 2   | TCTGTCTCTC       | 0.418 |             |
| - | 3  | 525   | e.1_Missense_Mu                | NM_032345    | NP_115721    | Q9BRP8 | WIBG_HUMAN  |                                | 0   | ACTGGGGAGTT      | 0.567 |             |
| - | 18 | 3991  |                                | NM_144982    | NP_659419    | O60293 | ZC3H1_HUMAN |                                | 5   | GTTTTCGGCTA      | 0.323 |             |
| - | 7  | 898   | yg.1_Missense_M                | NM_020841    | NP_065892    | Q9BZF1 | OSBL8_HUMAN |                                | 1   | ACTGAGCAGCTC     | 0.338 |             |
| + | 7  | 705   | sn.1_Missense_Mutation_p.V953I |              |              | Q8N1T3 | MYO1H_HUMAN |                                | 0   | GATGCCGTTTTG     | 0.453 |             |
| + | 11 | 1659  | tw.1_Missense_Mt               | NM_002834    | NP_002825    | Q06124 | PTN11_HUMAN | protein phos p.G427G(1)        | 392 | ACCACGGCGTGG     | 0.567 |             |
| - | 1  | 257   | _p.W73* FBXO21_                | NM_033624    | NP_296373    | O94952 | FBX21_HUMAN | F-box.                         | 1   | GCTTCCACACC      | 0.443 |             |
| + | 77 | 13281 | ifu.3_Missense_M               | NM_207437    | NP_997320    | Q8IVF4 | DYH10_HUMAN |                                | 6   | CCATCGCCTCA      | 0.532 |             |
| - | 35 | 4498  | _p.R289H POLE_L                | NM_006231    | NP_006222    | Q07864 | DPOE1_HUMAN |                                | 8   | TATGGCGGATA      | 0.592 |             |
| - | 5  | 1489  | n.1_Missense_Mu                | NM_153371    | NP_699202    | Q8N448 | LNX2_HUMAN  | PDZ 2.                         | 6   | CAGGTCGTGCC      | 0.522 | rs144420848 |
| + | 1  | 649   |                                | NM_207361    | NP_997244    | Q5SZK8 | FREM2_HUMAN | ellular (Potential).           | 11  | ACGACGCACTG      | 0.687 |             |
| - | 5  | 2461  | gz.1_Missense_Mt               | NM_018676    | NP_061146    | Q9NS62 | THSD1_HUMAN | lasmic (Potential).            | 4   | CGGACGGGCC       | 0.607 |             |
| - | 1  | 447   | RP1_uc001vni.2_l               | NM_178861    | NP_849192    | Q8IZP6 | R113B_HUMAN |                                | 3   | GACCCCGCAGT      | 0.642 |             |
| - | 5  | 966   |                                | NM_004093    | NP_004084    | P52799 | EFNB2_HUMAN | lasmic (Potential).            | 1   | ACACGGGTGC       | 0.592 |             |
| - | 2  | 239   | :P1_uc010tlg.1_Mi              | NM_007110    | NP_009041    | Q99973 | TEP1_HUMAN  | >1 N-terminal 3.               | 5   | ACACATATCCATC    | 0.502 |             |
| - | 26 | 3407  | ia-mir-208b MI000!             | NM_000257    | NP_000248    | P12883 | MYH7_HUMAN  | Potential.                     | 4   | GCTGCCGAGGG      | 0.592 |             |
| + | 10 | 752   | mh.2_Missense_M                | NM_006263    | NP_006254    | Q06323 | PSME1_HUMAN |                                | 1   | GATCCGCAAT       | 0.627 |             |
| - | 1  | 664   | on_p.A138V NKX2                | NM_003317    | NP_003308    | P43699 | NKX21_HUMAN |                                | 1   | CAGAGGCGCTC      | 0.706 |             |
| - | 8  | 3419  | e_Mutation_p.G88               | NM_183002    | NP_892114    | P57103 | NAC3_HUMAN  | ellular (Potential).           | 7   | CTCCCTCCCA       | 0.597 |             |
| + | 3  | 1353  | TR4_uc010tua.1_l               | NM_024644    | NP_078920    | Q9H6W3 | NO66_HUMAN  | JmjC.                          | 0   | CCAGCGCAATA      | 0.542 |             |

|   |    |      |                   |              |              |        |             |                                   |    |              |       |
|---|----|------|-------------------|--------------|--------------|--------|-------------|-----------------------------------|----|--------------|-------|
| - | 3  | 536  | mutation_p.E63K P | NM_002632    | NP_002623    | P49763 | PLGF_HUMAN  |                                   | 1  | GTACTCGGACA  | 0.657 |
| + | 6  | 1471 | ie_Mutation_p.R4E | NM_001161476 | NP_001154948 | Q64LD2 | WDR25_HUMAN | WD 5.                             | 0  | CCTACCGGATG  | 0.632 |
| - | 1  | 2323 | a-mir-432 MI0003  | NM_001134888 | NP_001128360 | A6NKG5 | RTL1_HUMAN  |                                   | 1  | GGAAGCGGACC  | 0.562 |
| - | 23 | 3324 | se_Mutation_p.T3i | NM_002226    | NP_002217    | Q9Y219 | JAG2_HUMAN  | ellular (Potential).              | 5  | CAAGGTGAGGC  | 0.662 |
| - | 4  | 897  | h.2_Nonsense_Mt   | NM_002226    | NP_002217    | Q9Y219 | JAG2_HUMAN  | ellular (Potential).              | 5  | CACTCGCTCGA  | 0.667 |
| - | 27 | 3907 | e_Mutation_p.R11  | NM_002420    | NP_002411    | Q7Z4N2 | TRPM1_HUMAN | asmic (Potential).                | 4  | TTTGCCGGAGA  | 0.473 |
| - | 15 | 2193 | nse_Mutation_p.Ri | NM_133647    | NP_598408    | Q9UHW9 | S12A6_HUMAN | asmic (Potential).                | 7  | GTAGCGGAATC  | 0.413 |
| - | 31 | 3847 | e_Mutation_p.A11E | NM_001130858 | NP_001124330 | Q6PFW1 | VIP1_HUMAN  |                                   | 0  | TTGTGCTCCAC  | 0.532 |
| - | 2  | 491  | ABPB1_uc001zyd    | NM_005254    | NP_005245    | Q06547 | GABP1_HUMAN | ANK 1.                            | 1  | AAATACGAACCT | 0.368 |
| - | 13 | 1549 | ib.2_Missense_Mt  | NM_001004439 | NP_001004439 | Q9UKX5 | ITA11_HUMAN | ntial. Extracellular (Potentia    | 3  | GATGTCCACCG  | 0.612 |
| + | 2  | 109  | ibic.2_Missense_M | NM_006091    | NP_006082    | Q9UQ03 | COR2B_HUMAN |                                   | 6  | CAACCGGGAGC  | 0.602 |
| - | 24 | 3751 | _Missense_Mutatio | NM_006901    | NP_008832    | B2RTY4 | MYO9A_HUMAN | or regulatory domain.             | 3  | AGTACCGCTGC  | 0.507 |
| - | 26 | 3034 | 3LJ MAN2C1_uc0C   | NM_006715    | NP_006706    | Q9NTJ4 | MA2C1_HUMAN |                                   | 0  | GGTCTGGTCGC  | 0.632 |
| - | 5  | 507  | :1_uc010bkk.2_Mi  | NM_006715    | NP_006706    | Q9NTJ4 | MA2C1_HUMAN |                                   | 0  | AGGGGCTGCAA  | 0.597 |
| + | 5  | 1331 | vj.2_Missense_Mu  | NM_198243    | NP_937886    | Q9H672 | ASB7_HUMAN  | ANK 6.                            | 1  | ACGCCGTGATC  | 0.478 |
| - | 3  | 461  |                   | NM_001025190 | NP_001020361 | Q96KJ4 | MSLNL_HUMAN |                                   | 4  | TGCACGGGTAG  | 0.557 |
| - | 3  | 1318 |                   | NM_001013658 | NP_001013680 | Q96A99 | PTX4_HUMAN  | Pentaxin.                         | 0  | TTTCCCGATGG  | 0.627 |
| - | 15 | 2079 | iz.2_Missense_Mt  | NM_014714    | NP_055529    | Q96RY7 | IF140_HUMAN |                                   | 5  | AGAAGCGATGC  | 0.672 |
| - | 22 | 2893 | p.A929V MYH11_    | NM_002474    | NP_002465    | P35749 | MYH11_HUMAN | Potential.                        | 15 | GGCGGGCCTCC  | 0.622 |
| - | 16 | 2189 | p.2_Missense_Mu   | NM_033266    | NP_150296    | Q76MJ5 | ERN2_HUMAN  | ellular. Cytoplasmic (Potential). | 6  | GTGGGCCAGGC  | 0.617 |
| - | 7  | 1100 | FR_uc002eix.2_5'l | NM_001144    | NP_001135    | Q9UKV5 | AMFR2_HUMAN |                                   | 2  | GTAAACGCAGCT | 0.458 |
| + | 3  | 467  | p.V106M CPNE2_    | NM_152727    | NP_689940    | Q96FN4 | CPNE2_HUMAN | C2 1.                             | 2  | AGTTCGTGCTT  | 0.542 |
| + | 5  | 438  | ALB2_uc002fac.3_  | NM_001740    | NP_001731    | P22676 | CALB2_HUMAN | nd 3. 3 (Probable).               | 0  | AGACAGGAGTG  | 0.542 |
| + | 19 | 2922 | np.1_Missense_Mi  | NM_014003    | NP_054722    | Q92620 | PRP16_HUMAN | case C-terminal.                  | 1  | AGGGCGAGCCG  | 0.637 |
| + | 1  | 1055 | fdl.1_Missense_Mt | NM_032268    | NP_115644    | Q8ND25 | ZNRF1_HUMAN |                                   | 0  | TCGCACCCAGG  | 0.677 |
| + | 2  | 1528 | p.A491T HIC1_uc   | NM_001098202 | NP_001091672 | Q14526 | HIC1_HUMAN  | 2H2-type 2.                       | 1  | GCTGCGCTCG   | 0.716 |
| + | 3  | 672  | fye.2_Missense_M  | NM_001114974 | NP_001108446 | Q2TAL5 | SMTL2_HUMAN |                                   | 0  | CACCCGAGTCT  | 0.637 |
| + | 12 | 1995 |                   | NM_020877    | NP_065928    | Q9P225 | DYH2_HUMAN  | n (By similarity).                | 13 | TGAACGTAGCT  | 0.542 |
| + | 19 | 2536 | _Mutation_p.V375  | NM_012393    | NP_036525    | O15067 | PUR4_HUMAN  |                                   | 5  | TGGCAGTGGAT  | 0.667 |
| + | 6  | 1420 | _uc002gvg.1_Splic | NM_014964    | NP_055779    | O95208 | EPN2_HUMAN  |                                   | 1  | AGAGGTAAGAG  | 0.507 |
| - | 2  | 1229 |                   | NM_198147    | NP_937790    | Q6UXT9 | ABH15_HUMAN |                                   | 0  | GCCTCCGTGGC  | 0.607 |
| + | 1  | 239  |                   | NM_001146041 | NP_001139513 | Q9BYQ8 | KRA49_HUMAN | -[RQVHIEK]-[SPTR]-[VST            | 0  | CTGCTACCGCC  | 0.657 |
| - | 1  | 611  |                   | NM_031854    | NP_114060    | Q9BQ66 | KR412_HUMAN |                                   | 0  | GGCAGGTGGAC  | 0.468 |
| - | 5  | 1192 | P_uc010wfs.1_Int  | NM_000226    | NP_000217    | P35527 | K1C9_HUMAN  | Rod. Coil 2.                      | 3  | GACACCGTGCC  | 0.547 |
| + | 11 | 1813 | 391K STAT5A_ucC   | NM_003152    | NP_003143    | P42229 | STA5A_HUMAN |                                   | 1  | GCAGCGAGTGC  | 0.642 |
| + | 1  | 1066 |                   | NM_001466    | NP_001457    | Q14332 | FZD2_HUMAN  | ellular (Potential).              | 3  | TCTCCGAGGAC  | 0.597 |
| + | 7  | 1330 | 1.1_Missense_Mut  | NM_016428    | NP_057512    | Q9P2A4 | AB13_HUMAN  | Pro-rich.                         | 0  | ACCTGCCTCT   | 0.592 |
| + | 6  | 548  | p.D103E MSI2_u    | NM_138962    | NP_620412    | Q96DH6 | MSI2H_HUMAN | RRM 2.                            | 2  | GGAAGATGTAAC | 0.458 |
| - | 3  | 607  | 137_uc002ixa.3_5' | NM_001005207 | NP_001005207 | O94972 | TRI37_HUMAN | -type; degenerate.                | 7  | TTACCGGCAAT  | 0.373 |
| - | 19 | 3010 | ie ABCA10_uc010   | NM_080282    | NP_525021    | Q8WWZ4 | ABCAA_HUMAN |                                   | 4  | TTTATACCTGGT | 0.323 |
| + | 3  | 303  | jpi.3_Missense_Mt | NM_000213    | NP_000204    | P16144 | ITB4_HUMAN  | racellular (Potential).           | 4  | CTGCACGGAGT  | 0.607 |
| - | 18 | 3376 | jrl.3_Missense_Mu | NM_022066    | NP_071349    | Q9C0C9 | UBE2O_HUMAN |                                   | 5  | ATCAGCGCCATC | 0.577 |
| + | 19 | 2746 | p.G855E GAA_ucI   | NM_001079803 | NP_001073271 | P10253 | LYAG_HUMAN  |                                   | 1  | CCGAGGGGAGC  | 0.652 |
| + | 2  | 1425 | NDC2_uc002koh.    | NM_001098529 | NP_001091999 | Q86VQ3 | TXND2_HUMAN | repeat of Q-P-K-X-G-D-I-F         | 2  | CCAAGGAGGGT  | 0.592 |
| + | 16 | 2324 | p.2_Missense_MuI  | NM_020774    | NP_065825    | Q86YT6 | MIB1_HUMAN  |                                   | 4  | TCAATCGCCAC  | 0.433 |
| + | 4  | 1290 | 3YR_uc002kva.2_I  | NM_012189    | NP_036321    | O75952 | CABYR_HUMAN |                                   | 0  | ATATGGAGGCAC | 0.438 |
| - | 5  | 796  | e_Mutation_p.R12i | NM_004775    | NP_004766    | Q9UBX8 | B4GT6_HUMAN | renal (Potential).                | 0  | ATGGCGATTACC | 0.358 |

rs139444439

|   |    |      |                    |              |              |        |              |                                |    |               |       |             |
|---|----|------|--------------------|--------------|--------------|--------|--------------|--------------------------------|----|---------------|-------|-------------|
| - | 8  | 1010 | p.R304Q FECH_u     | NM_000140    | NP_000131    | P22830 | HEMH_HUMAN   |                                | 1  | CCAGTCGGTAG   | 0.493 | rs141888884 |
| - | 3  | 978  |                    | NM_001044369 | NP_001037834 | Q0P6D2 | FA69C_HUMAN  | lenal (Potential).             | 0  | TCAAAAGAAATTC | 0.468 |             |
| + | 11 | 1235 | BP1_uc002lps.2_l   | NM_031991    | NP_114368    | P26599 | PTBP1_HUMAN  | RRM 3.                         | 2  | AGAACGCCCTA   | 0.677 |             |
| - | 2  | 394  | dsr.1_Missense_M   | NM_020695    | NP_065746    | Q8N1G1 | REXO1_HUMAN  | Potential.                     | 0  | CCTCACTGCGC   | 0.607 |             |
| + | 4  | 1228 | wn.3_Missense_M    | NM_152791    | NP_690004    | Q8NEP9 | ZN555_HUMAN  | C2H2-type 8.                   | 1  | TTATCCCCAGTC  | 0.463 |             |
| + | 10 | 1158 | Mutation_p.A34E    | NM_021938    | NP_068757    | Q8N6W0 | CELF5_HUMAN  |                                | 2  | CGCGGCCATCA   | 0.766 |             |
| + | 10 | 1362 | 33L3_uc010xib.1_   | NM_032607    | NP_115996    | Q68CJ9 | CR3L3_HUMAN  | lenal (Potential).             | 2  | CGACGGAGGAG   | 0.672 |             |
| - | 8  | 2029 |                    | NM_198471    | NP_940873    | Q6NY19 | KANK3_HUMAN  |                                | 0  | GGCTCGTTTCT   | 0.627 |             |
| - | 1  | 689  |                    | NM_178525    | NP_848620    | Q8TC94 | ACTL9_HUMAN  |                                | 3  | GACACGACCGT   | 0.652 |             |
| - | 16 | 1603 | p.R151C KRI1_uc    | NM_023008    | NP_075384    | Q8N9T8 | KRI1_HUMAN   |                                | 1  | TGTGCGGTACT   | 0.617 |             |
| + | 4  | 1932 | e_Mutation_p.S62   | NM_144566    | NP_653167    | Q9H0M5 | ZN700_HUMAN  | C2H2-type 14.                  | 0  | TTCAGTTGTGC   | 0.483 |             |
| + | 1  | 286  |                    | NM_001098622 | NP_001092092 | P60323 | NANO3_HUMAN  |                                | 1  | AGTGCCGGGAC   | 0.662 |             |
| + | 10 | 774  | 1_p.R61Q TECR_L    | NM_138501    | NP_612510    | Q9NZ01 | TECR_HUMAN   |                                | 0  | CCTGCGGGACC   | 0.677 |             |
| - | 10 | 1518 | 2_5'Flank RASAL3   | NM_022904    | NP_075055    | Q86YV0 | RASL3_HUMAN  | Ras-GAP.                       | 0  | CAGCGCCTAGG   | 0.632 |             |
| + | 8  | 1011 | p.E292K AP1M1_     | NM_032493    | NP_115882    | Q9BXS5 | AP1M1_HUMAN  | MHD.                           | 4  | GGATCGAGTCG   | 0.587 |             |
| + | 40 | 6220 | 2_3'UTR MYO9B_l    | NM_004145    | NP_004136    | Q13459 | MYO9B_HUMAN  | Tail.                          | 1  | CCCTGCGCCTG   | 0.711 |             |
| - | 4  | 935  |                    | NM_001159293 | NP_001152765 | C9JHM3 | C9JHM3_HUMAN |                                | 1  | TCTCCACTATGA  | 0.403 |             |
| - | 4  | 984  | p.N198K ZNF708_    | NM_021269    | NP_067092    | P17019 | ZN708_HUMAN  | C2H2-type 5.                   | 6  | GACCCGGTTAAA  | 0.368 |             |
| + | 2  | 1395 | p.Q500R ZNF493_    | NM_175910    | NP_787106    | Q6ZR52 | ZN493_HUMAN  | C2H2-type 13.                  | 1  | TTAACCAATCTT  | 0.343 |             |
| + | 4  | 1693 | 429_uc010ecu.1_l   | NM_001001415 | NP_001001415 | Q86V71 | ZN429_HUMAN  | C2H2-type 14.                  | 2  | CTTTTATCCTGT  | 0.378 |             |
| + | 4  | 1696 | 429_uc010ecu.1_l   | NM_001001415 | NP_001001415 | Q86V71 | ZN429_HUMAN  | C2H2-type 14.                  | 2  | TTATCCTGTCTC  | 0.378 |             |
| - | 3  | 1694 |                    | NM_001001411 | NP_001001411 | Q8N7Q3 | ZN676_HUMAN  | C2H2-type 11.                  | 0  | ACCAGGTGAAG   | 0.433 |             |
| + | 4  | 1398 |                    | NM_020855    | NP_065906    | Q9P255 | ZN492_HUMAN  | C2H2-type 9.                   | 0  | ATAAGAGAATTC  | 0.378 |             |
| - | 4  | 1876 |                    | NM_175872    | NP_787068    | Q3KQV3 | ZN792_HUMAN  | C2H2-type 10.                  | 0  | TCTCCGATGGC   | 0.493 |             |
| + | 2  | 618  | a.2_Missense_Mu    | NM_005306    | NP_005297    | O15552 | FFAR2_HUMAN  | Name=5; (Potential).           | 1  | CCGTGCGGCTG   | 0.542 |             |
| + | 3  | 1828 |                    | NM_014727    | NP_055542    | Q9UMN6 | MLL4_HUMAN   | Pro-rich.                      | 11 | CATTTGCTGG    | 0.408 |             |
| + | 2  | 505  | '9A_uc002oru.2_lr  | NM_001783    | NP_001774    | P11912 | CD79A_HUMAN  | Extracellular (Potential).     | 3  | GTGCCGGGTCC   | 0.642 | rs143511203 |
| - | 2  | 155  | tq.3_Missense_Mu   | NM_032488    | NP_115877    | Q9BYD5 | CNFN_HUMAN   | Cys-rich.                      | 0  | CATGTCGTTGC   | 0.612 |             |
| - | 1  | 1961 |                    | NM_032040    | NP_114429    | Q9H0W5 | CCDC8_HUMAN  |                                | 3  | GGCCTCTGCC    | 0.607 |             |
| - | 3  | 1092 | EC10_uc010ycy.1_   | NM_033130    | NP_149121    | Q96LC7 | SIG10_HUMAN  | Potential). lg-like C2-type 1. | 1  | TCACCGGCTGC   | 0.607 | rs143118289 |
| - | 5  | 1005 | i77_uc010ydf.1_5'  | NM_023074    | NP_075562    | Q9BS31 | ZN649_HUMAN  | C2H2-type 3.                   | 3  | CTGTACCTCTTG  | 0.502 |             |
| - | 5  | 785  | i.2_Intron uc002py | NM_021632    | NP_067645    | Q9GZX5 | ZN350_HUMAN  |                                | 1  | TTAGTGCTGATG  | 0.408 |             |
| - | 4  | 2192 | p.Y638C ZNF28_l    | NM_006969    | NP_008900    | P17035 | ZNF28_HUMAN  | C2H2-type 18.                  | 1  | ACTTGTAAGGT   | 0.403 |             |
| + | 4  | 2549 | dw.1_Missense_M    | NM_138374    | NP_612383    | Q96IR2 | ZN845_HUMAN  | C2H2-type 22.                  | 0  | CAAGAACTTCC   | 0.418 |             |
| + | 7  | 2551 | p.N644T ZNF761_    | NM_001008401 | NP_001008401 | Q86XN6 | ZN761_HUMAN  | C2H2-type 18.                  | 1  | CAAGAACTTTAC  | 0.393 |             |
| + | 3  | 1110 |                    | NM_021216    | NP_067039    | Q9NQZ8 | ZNF71_HUMAN  | C2H2-type 6.                   | 1  | GCGCACGCACA   | 0.657 |             |
| + | 6  | 861  |                    | NM_182572    | NP_872378    | Q8NBB4 | ZSCA1_HUMAN  |                                | 2  | CCGGGCCCGCT   | 0.662 |             |
| + | 14 | 1725 | zpz.1_Missense_M   | NM_016207    | NP_057291    | Q9UKF6 | CPSF3_HUMAN  |                                | 2  | ATGGTGGTATTAC | 0.313 |             |
| - | 34 | 4364 | f.2_Missense_Mut   | NM_006277    | NP_006268    | Q9NZM3 | ITSN2_HUMAN  | DH.                            | 4  | TCTCCGGGGTG   | 0.597 |             |
| - | 3  | 490  | rkj.2_Missense_M   | NM_144631    | NP_653232    | Q8N8E2 | ZN513_HUMAN  | Gly-rich.                      | 1  | TCTCCGCACTT   | 0.662 | rs35554630  |
| + | 1  | 5038 | 1_5'Flank ZNF512_  | NM_032266    | NP_115642    | Q68DN1 | CB016_HUMAN  | am repeat of P-S-E-R-S-H-I     | 1  | GCATCGCAGT    | 0.577 |             |
| + | 3  | 1197 | mi.1_Missense_Mu   | NM_005253    | NP_005244    | P15408 | FOSL2_HUMAN  | Basic motif.                   | 3  | GCATCCGGCGG   | 0.557 | rs139808662 |
| - | 2  | 353  | e_Mutation_p.P10   | NM_019885    | NP_063938    | Q9NR63 | CP26B_HUMAN  |                                | 2  | TGCGAGGCCAC   | 0.562 |             |
| + | 2  | 662  | Intron TEKT4_uc0   | NM_144705    | NP_653306    | Q8VW24 | TEKT4_HUMAN  |                                | 3  | GATCCGGTGGG   | 0.597 |             |
| - | 16 | 2457 |                    | NM_018383    | NP_060853    | Q9C0J8 | WDR33_HUMAN  | Collagen-like.                 | 0  | CCTTGGATCCC   | 0.622 |             |
| + | 29 | 3290 | r.2_Missense_Mu    | NM_020120    | NP_064505    | Q9NYU2 | UGGG1_HUMAN  |                                | 1  | TTTTACCGTTAT  | 0.383 |             |
| - | 3  | 687  |                    | NM_001099771 | NP_001093241 | A5A3E0 | POTEF_HUMAN  |                                | 5  | ATCTTGTCTCTG  | 0.607 |             |



|   |     |       |                    |              |              |        |              |                             |      |              |       |             |
|---|-----|-------|--------------------|--------------|--------------|--------|--------------|-----------------------------|------|--------------|-------|-------------|
| + | 8   | 9907  | dy.2_Missense_Mt   | NM_152381    | NP_689594    | A4UGR9 | XIRP2_HUMAN  |                             | 14   | TCATCCGCAAGC | 0.458 |             |
| - | 214 | 42435 | _uc010zfi.1_Misse  | NM_133378    | NP_596869    | Q8WZ42 | TITIN_HUMAN  |                             | 153  | ACTGGGTTCCAC | 0.483 |             |
| + | 2   | 941   |                    | NM_005383    | NP_005374    | Q9Y3R4 | NEUR2_HUMAN  |                             | 0    | CCCGCGACCTC  | 0.692 |             |
| - | 28  | 7111  | znj.1_Missense_IV  | NM_004369    | NP_004360    | P12111 | CO6A3_HUMAN  | I region. Collagen-like 4.  | 18   | CTCTCCGGGCT  | 0.597 |             |
| + | 2   | 93    | ense_Mutation_p.v  | NM_080741    | NP_542779    | Q8WWR8 | NEUR4_HUMAN  |                             | 0    | TGGGGGTCCCT  | 0.697 |             |
| + | 4   | 639   | ozrc.1_Missense_I  | NM_012261    | NP_036393    | Q9UJQ1 | CT103_HUMAN  | ellular (Potential).        | 3    | TTGGAGGCTGA  | 0.577 |             |
| + | 5   | 781   |                    | NM_080820    | NP_543010    | Q8TEA8 | DTD1_HUMAN   |                             | 2    | TGAACGGGAGC  | 0.537 |             |
| + | 2   | 273   | se_Mutation_p.R6   | NM_022896    | NP_075047    | Q9BQK8 | LPIN3_HUMAN  | N-LIP.                      | 4    | GTCGCGGGAGA  | 0.642 |             |
| - | 37  | 7689  | jz.1_Missense_Mt   | NM_032221    | NP_115597    | Q8TD26 | CHD6_HUMAN   |                             | 14   | GCATCGTGGCA  | 0.572 | rs150243429 |
| + | 4   | 496   | gp.2_Missense_Mi   | NM_001098798 | NP_001092268 | Q96NM4 | TOX2_HUMAN   |                             | 1    | TGACTCGGGCC  | 0.627 | rs139062099 |
| - | 4   | 376   | ih.1_Nonsense_M    | NM_006045    | NP_006036    | O75110 | ATP9A_HUMAN  | lasmic (Potential).         | 4    | GCATCGGATCT  | 0.612 |             |
| + | 3   | 497   |                    | NM_080821    | NP_543011    | Q96KR6 | CT108_HUMAN  | DUF1279.                    | 0    | CTGGTACAGTCA | 0.483 |             |
| + | 1   | 566   |                    | NM_174981    | NP_778146    | Q86YR6 | POTED_HUMAN  | ANK 1.                      | 6    | ACAAGGAAAAG  | 0.577 |             |
| - | 4   | 452   | p.W143* TMPRSE     | NM_005656    | NP_005647    | O15393 | TMPS2_HUMAN  | ellular (Potential).        | 2524 | AACTTCCAGAG  | 0.592 |             |
| + | 14  | 2652  | j.2_Missense_Mut   | NM_006031    | NP_006022    | O95613 | PCNT_HUMAN   |                             | 8    | AGGACGGGGAC  | 0.667 |             |
| + | 14  | 1836  | _p.Q520* MED15_    | NM_001003891 | NP_001003891 | Q96RN5 | MED15_HUMAN  |                             | 1    | CCTTGCAAAA   | 0.562 |             |
| + | 5   | 1661  |                    | NM_152612    | NP_689825    | Q8IYX3 | CC116_HUMAN  |                             | 2    | AGAGACACCTC  | 0.667 |             |
| - | 3   | 573   | s.1_3'UTR uc003a   | NM_002309    | NP_002300    | P15018 | LIF_HUMAN    |                             | 0    | ACAGCGGCAC   | 0.612 |             |
| + | 4   | 515   | z.3_Missense_Mt    | NM_000631    | NP_000622    | Q15080 | NCF4_HUMAN   | PX.                         | 1    | CAACGCCTAC   | 0.582 |             |
| + | 7   | 1164  |                    | NM_015653    | NP_056468    | Q9H4K1 | RIBC2_HUMAN  |                             | 0    | CTCGCGCCACC  | 0.647 |             |
| - | 15  | 6058  | arc.1_Missense_M   | NM_014246    | NP_055061    | Q9NYQ6 | CELR1_HUMAN  | otential). Laminin EGF-like | 11   | CTGCCCGGTGG  | 0.642 |             |
| - | 16  | 4300  | iCP6_uc010har.1_   | NM_020461    | NP_065194    | Q96RT7 | GCP6_HUMAN   | A tandem repeats. 9.        | 4    | GTGGCCGGGTG  | 0.647 | rs145170543 |
| + | 10  | 1391  | _p.R328Q TLL3_     | NM_001025930 | NP_001021100 | Q9Y4R7 | TLL3_HUMAN   | TTL.                        | 2    | CCATCGGCATC  | 0.572 | rs141771643 |
| + | 3   | 1207  | tr.1_Missense_Mu   | NM_014760    | NP_055575    | Q93075 | TATD2_HUMAN  |                             | 2    | CACTCGGGCAA  | 0.567 |             |
| + | 8   | 1149  | zi.2_Missense_Mt   | NM_003298    | NP_003289    | P49116 | NR2C2_HUMAN  |                             | 0    | AACTCGGTACG  | 0.502 |             |
| + | 1   | 140   |                    | NM_145166    | NP_660149    | Q9UFB7 | ZBT47_HUMAN  |                             | 0    | CCGGGTACCC   | 0.721 |             |
| - | 8   | 2376  | ial.1_Missense_Mt  | NM_024513    | NP_078789    | Q9BQS8 | FYCO1_HUMAN  | Potential.                  | 1    | GGCTTCTGCCA  | 0.602 |             |
| - | 5   | 783   | 31_splice PRKAR2   | NM_004157    | NP_004148    | P13861 | KAP2_HUMAN   |                             | 1    | CTCTACCGTTC  | 0.428 |             |
| - | 8   | 1123  | VT_uc003cwy.2_IV   | NM_000481    | NP_000472    | P48728 | GCST_HUMAN   |                             | 1    | GTGTGCCCGCA  | 0.617 |             |
| + | 10  | 1335  | aw.1_Missense_Mt   | NM_001640    | NP_001631    | P13798 | ACPH_HUMAN   |                             | 1    | CCAATGTCGCA  | 0.612 |             |
| - | 6   | 847   |                    | NM_003335    | NP_003326    | P41226 | UBA7_HUMAN   | roximate repeats.           | 2    | AGACCGGGGAT  | 0.562 |             |
| + | 12  | 1177  | o.S321N SLC38A3    | NM_006841    | NP_006832    | Q99624 | S38A3_HUMAN  |                             | 1    | CTACAGTACGG  | 0.602 |             |
| + | 5   | 2400  | _p.P719S COL8A1    | NM_001850    | NP_001841    | P27658 | CO8A1_HUMAN  | helic region (NC1).         | 0    | AGATGCCCTCA  | 0.502 |             |
| + | 8   | 735   | _Mutation_p.A191'  | NM_172027    | NP_742024    | Q969K4 | ABTB1_HUMAN  |                             | 0    | AGTGGCGTCTA  | 0.667 |             |
| - | 3   | 1205  | 1blk.1_5'Flank NEI | NM_014065    | NP_054784    | Q2TB18 | ASTE1_HUMAN  |                             | 0    | GATTCGGTGGT  | 0.433 |             |
| + | 2   | 626   | si.3_Missense_Mt   | NM_012219    | NP_036351    | O14807 | RASM_HUMAN   | (By similarity).            | 4    | GGATGGGGGTG  | 0.552 |             |
| + | 2   | 810   |                    | NM_152616    | NP_689829    | Q8IWZ5 | TRI42_HUMAN  |                             | 7    | TGCCCAGAAC   | 0.617 |             |
| - | 5   | 1197  | e_Mutation_p.V26   | NM_033169    | NP_149359    | O75752 | B3GL1_HUMAN  | renal (Potential).          | 1    | TTTTACGTGAC  | 0.378 |             |
| + | 8   | 2148  |                    | NM_004443    | NP_004434    | P54753 | EPHB3_HUMAN  | ical; (Potential).          | 11   | TCTTCGTGGTG  | 0.627 | rs147361564 |
| - | 3   | 1712  | tron ABCA11P_uc    | NM_133474    | NP_597731    | D9N162 | D9N162_HUMAN |                             | 1    | AAAGGTTTTG   | 0.433 |             |
| - | 3   | 1698  | ron ABCA11P_uc0    | NM_133474    | NP_597731    | D9N162 | D9N162_HUMAN |                             | 1    | CATTCTCCACAT | 0.428 |             |
| + | 17  | 3319  | 3gee.3_RNA WHS     | NM_001042424 | NP_001035889 | O96028 | NSD2_HUMAN   | AWS.                        | 9    | TCCCGCGGGCG  | 0.562 |             |
| + | 27  | 3453  |                    | NM_002111    | NP_002102    | P42858 | HD_HUMAN     |                             | 4    | CAGTGCTCCCA  | 0.542 |             |
| - | 3   | 557   | i.1_Missense_Mut   | NM_001290    | NP_001281    | O43679 | LDB2_HUMAN   |                             | 0    | CTGCGGATAG   | 0.478 |             |
| + | 4   | 472   | D28_uc003gpj.2_F   | NM_025205    | NP_079481    | Q9H204 | MED28_HUMAN  |                             | 0    | AGCCCGCCGAC  | 0.567 | rs139145192 |
| + | 4   | 370   | _p.G96R SLC34A     | NM_006424    | NP_006415    | O95436 | NPT2B_HUMAN  | lasmic (Potential).         | 5    | TCCAAGGGATTG | 0.473 |             |
| - | 13  | 1732  | XL1_uc003gxq.3_    | NM_152995    | NP_694540    | Q6ZNB6 | NFXL1_HUMAN  | IF-X1-type 7.               | 3    | GCAGGATAGC   | 0.333 |             |

|   |    |      |                   |              |              |        |             |       |               |       |             |
|---|----|------|-------------------|--------------|--------------|--------|-------------|-------|---------------|-------|-------------|
| - | 42 | 5691 | YL_uc003gyi.1_Mi  | NM_015030    | NP_055845    | O94915 | FRYL_HUMAN  | 1     | TAAAATCGTTAAT | 0.388 |             |
| + | 9  | 1589 | ju.1_Missense_Mt  | NM_001510    | NP_001501    | O43424 | GRID2_HUMAN | 6     | TTCTACGTGTAG  | 0.388 |             |
| - | 13 | 2132 | 1ckv.1_Missense_I | NM_021069    | NP_066547    | O94875 | SRBS2_HUMAN | 1     | CGTAGGGGGGAC  | 0.597 |             |
| + | 10 | 1715 | p.A526D ADAMT     | NM_139056    | NP_620687    | Q8TE57 | ATS16_HUMAN | 8     | AGAAAGCCAAGC  | 0.408 |             |
| + | 4  | 1361 |                   | NM_012304    | NP_036436    | Q9UJT9 | FBXL7_HUMAN | 3     | CCATCGCGGCG   | 0.607 |             |
| - | 14 | 2067 |                   | NM_198566    | NP_940968    | Q96MH7 | CE034_HUMAN | 1     | AAATCTGGTTTAC | 0.308 |             |
| + | 4  | 948  |                   | NM_014979    | NP_055794    | Q496J9 | SV2C_HUMAN  | 1     | TGCCCCGGGAA   | 0.562 |             |
| - | 1  | 473  | _uc011cxy.1_Miss  | NM_002653    | NP_002644    | P78337 | PITX1_HUMAN | 1     | GGCCCATGTCA   | 0.706 |             |
| + | 4  | 1152 |                   | NM_032289    | NP_115665    | Q9BQI7 | PSD2_HUMAN  | 1     | TCATCGGCTGG   | 0.647 |             |
| + | 1  | 1930 | Idaj.1_Missense_I | NM_018931    | NP_061754    | Q9Y5F2 | PCDBB_HUMAN | 6     | TGCTGGTCAAG   | 0.711 |             |
| + | 1  | 1880 | dak.1_Missense_I  | NM_018932    | NP_061755    | Q9Y5F1 | PCDBC_HUMAN | 3     | GTACCCGCTGC   | 0.716 |             |
| + | 1  | 694  | DHGA3_uc010jfx.   | NM_018916    | NP_061739    | Q9Y5H0 | PCDG3_HUMAN | 1     | TGATAGTCTCTG  | 0.537 |             |
| + | 4  | 776  | ncf.2_Missense_Iv | NM_153607    | NP_705835    | Q8IUR6 | CE041_HUMAN | 0     | ACCCCGATTCA   | 0.403 |             |
| - | 3  | 748  | D1_uc003mcr.2_In  | NM_138369    | NP_612378    | Q96IK1 | BOD1_HUMAN  | 2     | CCTGGCCTTCG   | 0.512 |             |
| - | 18 | 3045 | Idjq.1_Nonsense_  | NM_014809    | NP_055624    | Q5VV43 | K0319_HUMAN | 2     | TCATCCATAAC   | 0.522 |             |
| - | 3  | 755  | w.2_Missense_Mu   | NM_002586    | NP_002577    | P40425 | PBX2_HUMAN  | 1     | GCTGCGATAGT   | 0.602 |             |
| - | 7  | 1094 | p.R319Q MOCs1_    | NM_005942    | NP_005933    | Q9NZB8 | MOCs1_HUMAN | 3     | TGATTCGCAGG   | 0.572 | rs104893969 |
| - | 6  | 587  | RPS18A_uc003ow    | NM_018135    | NP_060605    | Q9NVS2 | RT18A_HUMAN | 0     | GCTTCCAAGGT   | 0.567 |             |
| + | 26 | 1918 | cam.1_Missense_I  | NM_001858    | NP_001849    | Q14993 | COJA1_HUMAN | 4     | CTGGTCCACGT   | 0.308 |             |
| - | 26 | 2843 | ckc.2_Missense_Iv | NM_014841    | NP_055656    | O60641 | AP180_HUMAN | 1     | ACTCACCATTC   | 0.313 |             |
| + | 7  | 1916 | 5E_uc010kbr.2_Inl | NM_002526    | NP_002517    | P21589 | 5NTD_HUMAN  | 4     | TGGGCGGTAAG   | 0.373 |             |
| - | 8  | 1383 | Izv.1_Missense_M  | NM_002042    | NP_002033    | P24046 | GBRR1_HUMAN | 1     | AGGCACGGCTC   | 0.478 |             |
| + | 3  | 710  | g_Mutation_p.G17  | NM_018593    | NP_061063    | Q8TF71 | MOT10_HUMAN | 0     | CCTGCGGCTGC   | 0.448 |             |
| + | 1  | 204  | ense_Mutation_p.  | NM_001127715 | NP_001121187 | Q5T5C0 | STXB5_HUMAN | 0     | TGACCGCCGGC   | 0.682 |             |
| + | 1  | 51   |                   | NM_025218    | NP_079494    | Q9BZM6 | N2DL1_HUMAN | 1     | GCGAGCGCCG    | 0.652 |             |
| - | 14 | 1483 | g.G333R RPS6KA    | NM_021135    | NP_066958    | Q15349 | KS6A2_HUMAN | 8     | CCACCCGATGT   | 0.557 |             |
| + | 16 | 2290 | ih.2_Missense_Mu  | NM_178559    | NP_848654    | Q2M3G0 | ABCB5_HUMAN | 6     | CATGTCGCCCA   | 0.468 |             |
| - | 5  | 1584 |                   | NM_033273    | NP_150376    | Q96JC4 | ZN479_HUMAN | 4     | CACATTTGTAG   | 0.453 |             |
| - | 10 | 1604 | It.1_Missense_Mu  | NM_000181    | NP_000172    | P08236 | BGLR_HUMAN  | 0     | GTAGTCGTGAT   | 0.507 | rs146011906 |
| + | 7  | 1142 | 3tvz.2_Missense_I | NM_022479    | NP_071924    | Q6IS24 | GLTL3_HUMAN | 7     | TGAGCGGAAGA   | 0.488 |             |
| + | 6  | 894  |                   | NM_001099435 | NP_001092905 | A6NIY4 | SPDE5_HUMAN | 0     | AGGCCGTTCCA   | 0.592 |             |
| - | 15 | 1860 |                   | NM_004333    | NP_004324    | P15056 | BRAF_HUMAN  | 18290 | GATTTCACTGAT  | 0.368 |             |
| - | 4  | 1707 |                   | NM_001001661 | NP_001001661 | Q6IV72 | ZN425_HUMAN | 3     | GCCTCGTGTGC   | 0.637 |             |
| + | 11 | 1287 | in_p.V404M NUB1   | NM_016118    | NP_057202    | Q9Y5A7 | NUB1_HUMAN  | 0     | GGAACGTGGAT   | 0.478 |             |
| + | 2  | 2554 | iu.1_Missense_Mt  | NM_024721    | NP_078997    | Q86UP3 | ZFHx4_HUMAN | 15    | ACAAGCACCTG   | 0.507 |             |
| + | 6  | 1055 | p.A297T GRINA_1   | NM_001009184 | NP_001009184 | Q72429 | GRINA_HUMAN | 1     | ATCTTCGCCATT  | 0.612 |             |
| - | 6  | 397  | p.P115L VPS28_    | NM_016208    | NP_057292    | Q9UK41 | VPS28_HUMAN | 0     | TGATGGGCGCG   | 0.667 |             |
| + | 2  | 675  |                   | NM_212558    | NP_997723    | Q68D42 | TM215_HUMAN | 0     | AATCCGGCAAG   | 0.602 |             |
| + | 10 | 1634 | SK1_uc010mks.2    | NM_006285    | NP_006276    | Q15569 | TESK1_HUMAN | 7     | TGCCCGCCGCT   | 0.672 |             |
| + | 6  | 668  | omf.1_Missense_Iv | NM_000962    | NP_000953    | P23219 | PGH1_HUMAN  | 2     | GGCCCGCCGCT   | 0.552 |             |
| - | 4  | 1121 | p.E24K PTGES2     | NM_025072    | NP_079348    | Q9H7Z7 | PGES2_HUMAN | 0     | CTTCTCGTTGA   | 0.597 |             |
| + | 33 | 4338 | g.G1409R SPTAN1   | NM_003127    | NP_003118    | Q13813 | SPTA2_HUMAN | 10    | CTCACGGACAC   | 0.547 |             |
| - | 2  | 1981 | ED1_uc004cqh.1    | NM_004729    | NP_004720    | O96006 | ZBED1_HUMAN | 0     | CAGGCGGTCTG   | 0.642 |             |
| - | 6  | 3690 | OM4_uc004dpd.3    | NM_020717    | NP_065768    | Q9ULL8 | SHRM4_HUMAN | 1     | CAAGTGACCCC   | 0.547 |             |
| + | 3  | 2072 | 2_Intron ZCCHC1E  | NM_001143978 | NP_001137450 | POCG32 | ZCC18_HUMAN | 0     | GCCAGCCAAT    | 0.493 |             |
| + | 4  | 1679 | EC1_uc010nsl.1_I  | NM_005462    | NP_005453    | O60732 | MAGC1_HUMAN | 4     | CTGAGAGAACT   | 0.478 |             |
| + | 4  | 2019 | EC1_uc010nsl.1_I  | NM_005462    | NP_005453    | O60732 | MAGC1_HUMAN | 4     | CTCCTACTACT   | 0.582 |             |

|   |    |      |                    |              |              |        |             |    |                 |       |
|---|----|------|--------------------|--------------|--------------|--------|-------------|----|-----------------|-------|
| - | 2  | 122  | V22I CPSF3L_uc     | NM_017871    | NP_060341    | Q5TA45 | INT11_HUMAN | 0  | GGAGACCAGGA'    | 0.647 |
| - | 3  | 689  | vkq.1_Splice_Site  | NM_014188    | NP_054907    | Q9NP77 | SSU72_HUMAN | 0  | FCCTCACCTTCC/   | 0.582 |
| - | 9  | 935  | IFRSF25_uc009v1    | NM_003790    | NP_003781    | Q93038 | TNR25_HUMAN | 3  | GCCAGGGGTCC     | 0.617 |
| - | 13 | 1550 | 0nzc.1_Splice_Site | NM_001042663 | NP_001036128 | O94827 | PKHG5_HUMAN | 1  | CCCGTACCATCT    | 0.721 |
| + | 7  | 1942 | apc.2_Missense_M   | NM_001080397 | NP_001073866 | Q9Y2W3 | S45A1_HUMAN | 4  | ACCTTGCCTTAC'   | 0.547 |
| - | 21 | 4732 |                    | NM_001079843 | NP_001073312 | Q86V15 | CASZ1_HUMAN | 1  | GCGTGCGCCCG     | 0.607 |
| - | 35 | 5057 |                    | NM_004958    | NP_004949    | P42345 | MTOR_HUMAN  | 29 | ATGAGGGCTGA(    | 0.537 |
| + | 1  | 72   | _Translation_Start | NM_018090    | NP_060560    | Q9NVZ3 | NECP2_HUMAN | 0  | GTTTCGGTGGGC    | 0.662 |
| + | 8  | 911  |                    | NM_207421    | NP_997304    | Q6TGC4 | PADI6_HUMAN | 1  | FGGCTCCCTGTG    | 0.537 |
| - | 6  | 825  | im.2_Missense_Mt   | NM_001136204 | NP_001129676 | Q9P258 | RCC2_HUMAN  | 0  | CACAGGCCATTT    | 0.403 |
| + | 4  | 959  |                    | NM_032409    | NP_115785    | Q9BXM7 | PINK1_HUMAN | 3  | GTGCTGCCAGGG    | 0.602 |
| + | 8  | 1783 |                    | NM_020526    | NP_065387    | P29322 | EPHA8_HUMAN | 13 | CACGGGCCTGG     | 0.647 |
| - | 11 | 1793 | bgs.3_Missense_M   | NM_005826    | NP_005817    | O43390 | HNRPR_HUMAN | 2  | CTCTGCCACCC     | 0.622 |
| + | 9  | 1195 | uc009vrc.2_Miss    | NM_020448    | NP_065181    | Q6P499 | NPAL3_HUMAN | 0  | TCAGCCTCAC/     | 0.463 |
| + | 12 | 1785 | ε_Mutation_p.R48   | NM_005839    | NP_005830    | Q8IYB3 | SRRM1_HUMAN | 3  | GGCGGCGGAG#     | 0.483 |
| + | 12 | 1164 | nse_Mutation_p.G   | NM_006314    | NP_006305    | Q969H4 | CNKR1_HUMAN | 2  | TCCAGGGCTCC     | 0.632 |
| + | 3  | 800  | _p.L157F PIGV_uc   | NM_017837    | NP_060307    | Q9NUD9 | PIGV_HUMAN  | 1  | TCTGTCTCAGC(    | 0.527 |
| - | 12 | 2869 | _p.P252L SLC9A1    | NM_003047    | NP_003038    | P19634 | SL9A1_HUMAN | 2  | TTGCAGGATCC(    | 0.607 |
| + | 7  | 977  | ogj.1_Missense_M   | NM_022164    | NP_071447    | Q9GZM7 | TINAL_HUMAN | 0  | GCGTCGCCGAG     | 0.637 |
| - | 6  | 1410 |                    | NM_003680    | NP_003671    | P54577 | SYYC_HUMAN  | 2  | ATGGACCCGTT'    | 0.433 |
| - | 9  | 1682 | se_Mutation_p.S5   | NM_198040    | NP_932157    | Q8IXK0 | PHC2_HUMAN  | 1  | AGGCAGAGTTT'    | 0.552 |
| + | 6  | 1101 | _p.Y258H ZSCAN2    | NM_145238    | NP_660281    | P17040 | ZSC20_HUMAN | 4  | AAACAATACCAG'   | 0.483 |
| - | 11 | 2131 | ux.2_Missense_Mt   | NM_022111    | NP_071394    | Q9HAW4 | CLSPN_HUMAN | 8  | CTTCACTACTAA    | 0.353 |
| + | 3  | 630  | IRIN1_uc010i0i.1   | NM_024595    | NP_078871    | Q9H9L7 | AKIR1_HUMAN | 0  | AACTAGCAGGT#    | 0.403 |
| + | 1  | 1293 | .1_Intron MACF1_   | NM_033044    | NP_149033    | Q9UPN3 | MACF1_HUMAN | 16 | TACCGTGACG(     | 0.448 |
| + | 8  | 3743 | l.3_Missense_Mut   | NM_012421    | NP_036553    | Q13129 | RLF_HUMAN   | 3  | GTAGTAACCTCT    | 0.373 |
| + | 8  | 1061 | ki.1_Missense_Mt   | NM_014663    | NP_055478    | O75164 | KDM4A_HUMAN | 1  | TGAGTACGGC,     | 0.428 |
| + | 21 | 2228 | c.1_Missense_Mut   | NM_006845    | NP_006836    | Q99661 | KIF2C_HUMAN | 1  | CCTTGCGCCTG     | 0.527 |
| + | 26 | 3744 | ε_Mutation_p.G11   | NM_015112    | NP_055927    | Q6P0Q8 | MAST2_HUMAN | 11 | TCAGGTGACC      | 0.592 |
| + | 17 | 1964 | p.Y617S RAD54L_    | NM_001142548 | NP_001136020 | Q92698 | RAD54_HUMAN | 3  | CTTGCTATATCTA   | 0.522 |
| - | 13 | 1517 | p.A435V SPATA6_    | NM_019073    | NP_061946    | Q9NWH7 | SPAT6_HUMAN | 1  | AAGAGGCTGCC(    | 0.428 |
| - | 6  | 1120 | ctu.2_Missense_M   | NM_004153    | NP_004144    | Q13415 | ORC1_HUMAN  | 0  | AGAGAGTCCAG'    | 0.463 |
| - | 57 | 6659 |                    | NM_015306    | NP_056121    | Q9UPU5 | UBP24_HUMAN | 13 | GGAGGGGCAAC,    | 0.453 |
| - | 1  | 1323 | _5'Flank uc010oo   | NM_002228    | NP_002219    | P05412 | JUN_HUMAN   | 0  | GGTGGGGGTGCG    | 0.667 |
| + | 5  | 576  | ddf.2_Missense_M   | NM_001077700 | NP_001071168 | Q8N108 | MIER1_HUMAN | 1  | agaagaaggtgaage | 0.269 |
| - | 12 | 1851 | tron WLS_uc001de   | NM_024911    | NP_079187    | Q5T9L3 | WLS_HUMAN   | 0  | TGGGTCCGTCC     | 0.572 |
| + | 6  | 1073 | ls.1_Missense_Mt   | NM_001285    | NP_001276    | A8K714 | CLCA1_HUMAN | 1  | ATCTGGAAGCAT    | 0.433 |
| + | 4  | 877  | p.A253T VCAM1_     | NM_001078    | NP_001069    | P19320 | VCAM1_HUMAN | 1  | TACCAGCTCCA(    | 0.433 |
| - | 6  | 1317 | FM3_uc001dui.2_I   | NM_058170    | NP_477518    | Q96PB7 | NOE3_HUMAN  | 3  | ATACACCTTGGC    | 0.453 |
| - | 1  | 467  | FM3_uc001dui.2_R   | NM_058170    | NP_477518    | Q96PB7 | NOE3_HUMAN  | 3  | TCCGGCAAACA/    | 0.398 |
| - | 6  | 1204 | OL11A1_uc001dur    | NM_001854    | NP_001845    | P12107 | COBA1_HUMAN | 12 | TCTGTGCTATTG1   | 0.443 |
| + | 12 | 2142 | 1dur.2_Missense_I  | NM_020978    | NP_066188    | P19961 | AMY2B_HUMAN | 0  | GCTGAATCtaaatt  | 0.279 |
| + | 14 | 1789 | _p.W464* KIAA132   | NM_020775    | NP_065826    | Q6UXG2 | K1324_HUMAN | 5  | ACCTGGGCCTT(    | 0.522 |
| + | 12 | 1618 | gn.1_Missense_Mt   | NM_014813    | NP_055628    | O94898 | LRIG2_HUMAN | 3  | CACACCCTGAA'    | 0.363 |
| - | 1  | 1650 |                    | NM_021794    | NP_068566    | Q9UKF2 | ADA30_HUMAN | 3  | TGCACCCCTTC(    | 0.468 |
| + | 1  | 601  | bs.1_Intron VPS4   | NM_007259    | NP_009190    | Q9NRW7 | VPS45_HUMAN | 2  | AGCAGTACATT1    | 0.478 |
| + | 4  | 321  | _p.P95S C1orf54    | NM_024579    | NP_078855    | Q8WVW1 | CA054_HUMAN | 0  | TGAAACCAGTA/    | 0.498 |

rs140388455

|   |    |      |                    |              |              |        |             |                           |    |               |       |
|---|----|------|--------------------|--------------|--------------|--------|-------------|---------------------------|----|---------------|-------|
| - | 2  | 942  | ə_Mutation_p.G16   | NM_021960    | NP_068779    | Q07820 | MCL1_HUMAN  | BH1.                      | 0  | AGGCACCAAAA   | 0.443 |
| - | 6  | 885  | vq.1_Missense_Mt   | NM_000396    | NP_000387    | P43235 | CATK_HUMAN  |                           | 1  | AGGAGGTCAGG   | 0.502 |
| + | 2  | 224  | NE_uc010pco.1_5    | NM_021222    | NP_067045    | Q86TP1 | PRUNE_HUMAN |                           | 1  | ATTGGACTCC/   | 0.343 |
| - | 3  | 589  | dc.1_intron POGz   | NM_015100    | NP_055915    | Q7Z3K3 | POGZ_HUMAN  |                           | 3  | CACTTACCATTG/ | 0.468 |
| - | 3  | 2954 |                    | NM_001009931 | NP_001009931 | Q86YZ3 | HORN_HUMAN  | 10                        | 3  | GCCGTGTTGTT/  | 0.547 |
| - | 3  | 1743 | uc001evz.2_5'Flanl | NM_002016    | NP_002007    | P20930 | FILA_HUMAN  | Ser-rich.                 | 16 | GTTTTGTCTGCT/ | 0.537 |
| - | 6  | 457  | k.2_Missense_Mu    | NM_004515    | NP_004506    | Q12905 | ILF2_HUMAN  | DZF.                      | 0  | GCTTGAGTATCAC | 0.413 |
| + | 1  | 693  | 7A3_uc009won.2_    | NM_024330    | NP_077306    | Q5K4L6 | S27A3_HUMAN |                           | 1  | CCGCCCTCTG    | 0.726 |
| - | 5  | 403  | G86E PBXIP1_ucl    | NM_020524    | NP_065385    | Q96AQ6 | PBIP1_HUMAN |                           | 1  | CTGGTCCCAGG   | 0.612 |
| - | 3  | 1360 | P1_uc001ffs.2_5'F  | NM_138300    | NP_612157    | Q9BRQ0 | PYGO2_HUMAN | PHD-type.                 | 1  | CCTGGTCTTG/   | 0.587 |
| + | 15 | 2008 | 636D ADAM15_uc     | NM_207197    | NP_997080    | Q13444 | ADA15_HUMAN | ar (Potential). Cys-rich. | 6  | CTGTGGCCCTG   | 0.587 |
| + | 10 | 2139 | nse_Mutation_p.F   | NM_025058    | NP_079334    | Q7Z4K8 | TRI46_HUMAN | 330.2/SPRY.               | 3  | CAGTGCCCTG    | 0.647 |
| - | 11 | 1885 | e_Mutation_p.P49.  | NM_005920    | NP_005911    | Q14814 | MEF2D_HUMAN |                           | 1  | GGCTGGGCGCA   | 0.652 |
| + | 4  | 777  | hq.1_Missense_M    | NM_021817    | NP_068589    | Q9GZV7 | HPLN2_HUMAN | g-like V-type.            | 0  | ACGAGGGCCGC   | 0.711 |
| - | 4  | 3356 |                    | NM_006617    | NP_006608    | P48681 | NEST_HUMAN  | Tail.                     | 6  | GTCACCCCTG/   | 0.682 |
| + | 2  | 137  | 1fza.1_Missense_f  | NM_004106    | NP_004097    | P30273 | FCERG_HUMAN | ical; (Potential).        | 0  | GAAATGTCCCTC/ | 0.592 |
| - | 2  | 204  |                    | NM_182581    | NP_872387    | Q5T0L3 | CA111_HUMAN |                           | 1  | CTGGGCTGGAT/  | 0.547 |
| + | 2  | 790  | 0794_uc001gdd.2    | NM_001005214 | NP_001005214 | Q8N7C0 | LRC52_HUMAN | ical; (Potential).        | 1  | AGACTACATCT/  | 0.607 |
| - | 3  | 910  | 1_RNA FAM78B_t     | NM_001017961 | NP_001017961 | Q5VT40 | FA78B_HUMAN |                           | 2  | CATCTGAGTCA/  | 0.522 |
| - | 16 | 5521 |                    | NM_000130    | NP_000121    | P12259 | FA5_HUMAN   | 3. Plastocyanin-like 6.   | 6  | AGTCTCCAAGA/  | 0.383 |
| + | 29 | 7813 | 0pmi.1_Missense_   | NM_015172    | NP_055987    | Q9Y520 | PRC2C_HUMAN | Gln-rich.                 | 0  | AAATACTCAGC/  | 0.478 |
| + | 8  | 1399 | p.G218D KLHL20_    | NM_014458    | NP_055273    | Q9Y2M5 | KLH20_HUMAN | Kelch 2.                  | 1  | TGTTGGTGTA/   | 0.458 |
| + | 18 | 2368 | wxs.2_Missense_    | NM_000721    | NP_000712    | Q15878 | CAC1E_HUMAN | lasmic (Potential).       | 6  | AGGAGGTCAGC   | 0.522 |
| + | 37 | 5218 | 1gox.1_Missense_   | NM_000721    | NP_000712    | Q15878 | CAC1E_HUMAN | llular (Potential). IV.   | 6  | CCGCACCATCA/  | 0.552 |
| + | 8  | 942  | ps.2_Missense_Mi   | NM_001357    | NP_001348    | Q08211 | DHX9_HUMAN  | ction with BRCA1.         | 2  | TTACTCCGGAC   | 0.413 |
| + | 25 | 4014 |                    | NM_031935    | NP_114141    | Q96RW7 | HMCN1_HUMAN | ike C2-type 10.           | 23 | ACCACCCACAG   | 0.393 |
| + | 5  | 1208 | w.2_Missense_Mu    | NM_004600    | NP_004591    | P10155 | RO60_HUMAN  | TROVE.                    | 0  | GGCGCCCTGAT/  | 0.333 |
| + | 7  | 1427 | sw.2_Missense_M    | NM_004600    | NP_004591    | P10155 | RO60_HUMAN  |                           | 0  | CCGATGAAATGC  | 0.343 |
| + | 11 | 1856 |                    | NM_000186    | NP_000177    | P08603 | CFAH_HUMAN  | Sushi 9.                  | 6  | ATGATGGTTATG/ | 0.289 |
| + | 8  | 1333 |                    | NM_030787    | NP_110414    | Q9BXR6 | FHR5_HUMAN  | Sushi 7.                  | 2  | ATATGACAACCAC | 0.333 |
| + | 6  | 2263 | pb.1_Splice_Site_  | NM_201253    | NP_957705    | P82279 | CRUM1_HUMAN |                           | 9  | GAGAGGTGAGA/  | 0.512 |
| + | 9  | 1354 | p.P351S CAMSAF     | NM_203459    | NP_982284    | Q08AD1 | CAMP2_HUMAN |                           | 4  | TCAATTCCTGTC  | 0.328 |
| - | 5  | 609  | RP1_uc010ppr.1_    | NM_004078    | NP_004069    | P21291 | CSRP1_HUMAN | l zinc-binding 2.         | 1  | CCTATGCCAGG.  | 0.527 |
| + | 3  | 658  | NPEP_uc001gxf.2    | NM_020216    | NP_064601    | Q9H4A4 | AMPB_HUMAN  |                           | 1  | CACCTGGGAGA.  | 0.473 |
| - | 2  | 489  | OD_uc010pqi.1_R    | NM_002023    | NP_002014    | Q06828 | FMOD_HUMAN  | LRR 1.                    | 3  | TGGAGGTGATC   | 0.537 |
| + | 2  | 1047 | zt.2_Missense_Mi   | NM_002725    | NP_002716    | P51888 | PRELP_HUMAN | LRR 9.                    | 3  | GGGGACTCCCC   | 0.498 |
| + | 2  | 595  | Splice_Site SOX13  | NM_005686    | NP_005677    | Q9UN79 | SOX13_HUMAN |                           | 2  | CCCCAGGATGT/  | 0.597 |
| - | 2  | 2421 |                    | NM_032833    | NP_116222    | Q5SWA1 | PR15B_HUMAN |                           | 2  | TTCTGGAACCT/  | 0.393 |
| - | 22 | 3728 | pqv.1_Splice_Site  | NM_002646    | NP_002637    | O00750 | P3C2B_HUMAN |                           | 7  | TCTCACCTTGAA/ | 0.522 |
| - | 6  | 1836 | p.T591I DSTYK      | NM_015375    | NP_056190    | Q6XUX3 | DUSTY_HUMAN |                           | 1  | GCCGAGTCCGG   | 0.542 |
| - | 3  | 1917 | z.2_Missense_Mu    | NM_001973    | NP_001964    | P28324 | ELK4_HUMAN  |                           | 0  | AGCTTGGATAG   | 0.478 |
| - | 5  | 938  |                    | NM_001007544 | NP_001007545 | Q6ZWK4 | CA186_HUMAN |                           | 0  | GCGAACTGCAG   | 0.507 |
| - | 3  | 572  | bz.2_Splice_Site_  | NM_002644    | NP_002635    | P01833 | PIGR_HUMAN  |                           | 3  | CTTACCCTGG/   | 0.562 |
| - | 4  | 739  | xca.1_Missense_N   | NM_001122980 | NP_001116452 | Q8WVV6 | FCAMR_HUMAN | ellular (Potential).      | 1  | GGGTCCTGGAG/  | 0.592 |
| + | 11 | 1801 |                    | NM_000715    | NP_000706    | P04003 | C4BPA_HUMAN | Sushi 8.                  | 3  | GGTGCCAAGT/   | 0.507 |
| + | 9  | 898  | p.Y266H CAMK1C     | NM_020439    | NP_065172    | Q96NX5 | KCC1G_HUMAN | rotein kinase.            | 1  | AGCGGTACACC   | 0.493 |
| + | 5  | 630  | OR3_uc010psw.1     | NM_018254    | NP_060724    | Q9P2K3 | RCOR3_HUMAN |                           | 1  | TCAGGGTGACA/  | 0.383 |

|   |    |       |                    |              |              |        |             |                               |    |               |       |             |
|---|----|-------|--------------------|--------------|--------------|--------|-------------|-------------------------------|----|---------------|-------|-------------|
| - | 5  | 1297  | hiv.2_Missense_M   | NM_014873    | NP_055688    | Q92604 | LGAT1_HUMAN |                               | 2  | GAGAAGCAGCA   | 0.393 |             |
| - | 13 | 2612  | Opuz.1_Missense_   | NM_001031685 | NP_001026855 | Q13625 | ASPP2_HUMAN |                               | 3  | ATGATGGGACAG  | 0.478 |             |
| - | 14 | 1413  |                    | NM_014698    | NP_055513    | O94886 | TM63A_HUMAN |                               | 2  | .GCTCCCTGCTAT | 0.547 |             |
| - | 2  | 1025  | ih.2_Nonsense_M    | NM_002221    | NP_002212    | P27987 | IP3KB_HUMAN |                               | 5  | CACCTGCGAGG   | 0.607 |             |
| - | 2  | 651   | ih.2_Missense_Ml   | NM_002221    | NP_002212    | P27987 | IP3KB_HUMAN |                               | 5  | .GGCGACCAGCC  | 0.587 |             |
| + | 20 | 5844  | _Mutation_p.D193   | NM_001098623 | NP_001092093 | Q5VST9 | OBSCN_HUMAN | Ig-like 19.                   | 28 | TCCGGGACGGT   | 0.642 |             |
| + | 45 | 12178 | sn.2_Missense_Ml   | NM_001098623 | NP_001092093 | Q5VST9 | OBSCN_HUMAN | Ig-like 41.                   | 28 | AGGATGCGGGTG  | 0.632 |             |
| - | 1  | 1477  |                    | NM_020808    | NP_065859    | Q9P2F8 | SI1L2_HUMAN |                               | 6  | AAGAGCAGCTT   | 0.507 |             |
| - | 1  | 137   | RF2BP2_uc001hw     | NM_182972    | NP_892017    | Q7Z5L9 | I2BP2_HUMAN |                               | 0  | GCAGACGGGTT   | 0.726 |             |
| + | 14 | 1417  | kr.1_Missense_Mu   | NM_003193    | NP_003184    | Q15813 | TBCE_HUMAN  |                               | 0  | ATTGGGAACCT   | 0.333 |             |
| + | 22 | 2767  | x.1_Missense_Mur   | NM_000254    | NP_000245    | Q99707 | METH_HUMAN  | B12-binding.                  | 3  | TTAAAGGCGACA  | 0.507 |             |
| - | 3  | 980   | b.2_RNA OPN3_u     | NM_014322    | NP_055137    | Q9H1Y3 | OPN3_HUMAN  | Name=6; (Potential).          | 0  | ATTAACCACCA   | 0.368 |             |
| + | 2  | 133   | e_Mutation_p.T25l  | NM_001130957 | NP_001124429 | Q5SY80 | CA101_HUMAN | cellular (Potential).         | 2  | TTCCACTAACAC  | 0.323 |             |
| - | 7  | 1032  |                    | NM_022366    | NP_071761    | Q9H5Q4 | TFB2M_HUMAN |                               | 1  | ACGAGGAATCA   | 0.323 |             |
| - | 32 | 5951  | TF1_uc009xgs.1_    | NM_015446    | NP_056261    | Q8WYP5 | ELYS_HUMAN  | r nuclear localization (By si | 7  | GATGGATTGA    | 0.428 |             |
| - | 1  | 538   |                    | NM_001001959 | NP_001001959 | Q8NGX0 | O11L1_HUMAN | cellular (Potential).         | 3  | GAGGTCGCAGA   | 0.507 |             |
| + | 1  | 795   | L13_uc001ids.2_l   | NR_002145    |              |        |             |                               | 0  | CCTGCGATCTC   | 0.522 |             |
| - | 4  | 925   | Opzq.1_Missense_   | NM_030645    | NP_085148    | Q7L8J4 | 3BP5L_HUMAN | Potential.                    | 0  | ATACCTCCTTAGC | 0.512 |             |
| + | 6  | 670   | ib.2_Splice_Site_f | NM_001047160 | NP_001040625 | Q7Z628 | ARHG8_HUMAN |                               | 1  | GTTTTTAGGCAA  | 0.244 | rs12219587  |
| - | 9  | 1073  | _p.R229* PHYH_u    | NM_006214    | NP_006205    | O14832 | PAHX_HUMAN  |                               | 0  | AAGTCGAGCTC   | 0.363 |             |
| - | 64 | 10414 |                    | NM_001081    | NP_001072    | O60494 | CUBN_HUMAN  |                               | 19 | ATACACCTCCA   | 0.373 |             |
| - | 3  | 280   | 'S TRDMT1_uc00f    | NM_004412    | NP_004403    | O14717 | TRDMT_HUMAN |                               | 1  | GCAGGGAGGGC   | 0.264 |             |
| + | 10 | 1782  | ie_Mutation_p.E37  | NM_003380    | NP_003371    | P08670 | VIME_HUMAN  | Tail.                         | 4  | ATCAACGAAACT  | 0.303 |             |
| + | 1  | 356   | 128811_uc010qde.   | NM_020752    | NP_065803    | Q5T848 | GP158_HUMAN | cellular (Potential).         | 8  | CAACTGCTCCG   | 0.682 |             |
| - | 8  | 1128  |                    | NM_004521    | NP_004512    | P33176 | KINH_HUMAN  | inesin-motor.                 | 5  | TTGTTCGGTTTC  | 0.313 |             |
| + | 7  | 860   |                    | NM_052997    | NP_443723    | Q9BXX3 | AN30A_HUMAN |                               | 9  | CTTGGTGGAAN   | 0.502 |             |
| - | 3  | 1061  | p.A303T EGR2_uc    | NM_001136177 | NP_001129649 | P11161 | EGR2_HUMAN  | Poly-A1a.                     | 2  | GGCTGCTGCTG   | 0.687 |             |
| - | 1  | 202   | on_p.A23T PPP3C    | NM_021132    | NP_066955    | P16298 | PP2BB_HUMAN | Catalytic.                    | 1  | GTCAGCCCCGG   | 0.662 |             |
| - | 6  | 680   | an.3_Missense_M    | NM_006926    | NP_008857    | Q8IWL1 | SFPA2_HUMAN | C-type lectin.                | 0  | TCCAGGGCTGG   | 0.532 |             |
| + | 9  | 1199  | p.R263Q GHITM_l    | NM_014394    | NP_055209    | Q9H3K2 | GHITM_HUMAN | intermembrane (Potential).    | 0  | TATGCGAGTTGC  | 0.358 |             |
| + | 1  | 478   | lkny.2_Missense_f  | NM_018425    | NP_060895    | Q9BTU6 | P4K2A_HUMAN |                               | 2  | CTACCCCTCTG   | 0.592 |             |
| + | 10 | 1515  | A4G_uc001krx.2_l   | NM_017893    | NP_060363    | Q9NTN9 | SEM4G_HUMAN | lar (Potential) Sema.         | 1  | AGGATGGTTCCC  | 0.632 |             |
| + | 29 | 3765  | W1175* GBF1_uc     | NM_004193    | NP_004184    | Q92538 | GBF1_HUMAN  |                               | 2  | GTGTGGCAGAC   | 0.552 |             |
| - | 11 | 913   | wq.2_Missense_M    | NM_012229    | NP_036361    | P49902 | 5NTC_HUMAN  |                               | 0  | TTTCCCTACTTC  | 0.343 |             |
| + | 2  | 326   | K11_uc010qrc.1_M   | NM_005962    | NP_005953    | P50539 | MX11_HUMAN  |                               | 0  | GAGCCCCGAC    | 0.532 |             |
| + | 6  | 434   |                    | NM_005445    | NP_005436    | Q9UQE7 | SMC3_HUMAN  |                               | 3  | TATTGGTGCCA   | 0.264 |             |
| + | 6  | 1047  | lcc.2_Missense_l   | NM_020940    | NP_065991    | Q5W0V3 | F16B1_HUMAN |                               | 1  | CCACAAGCTTG   | 0.453 |             |
| - | 4  | 490   |                    | NM_006793    | NP_006784    | P30048 | PRDX3_HUMAN |                               | 0  | CCATACCTTTCT  | 0.418 |             |
| + | 4  | 1142  | qtc.1_Missense_M   | NM_007190    | NP_009121    | Q9Y6Y8 | S23IP_HUMAN | tion with SEC23A.             | 3  | TTATCCCTATAC  | 0.418 |             |
| + | 1  | 860   | jug.1_Nonsense_l   | NM_017580    | NP_060050    | Q9UGI0 | ZRAN1_HUMAN | anBP2-type 3.                 | 2  | AACTGGGCCAA   | 0.383 |             |
| + | 2  | 162   |                    | NM_002412    | NP_002403    | P16455 | MGMT_HUMAN  |                               | 2  | ACAGCCCTTTG   | 0.473 |             |
| - | 16 | 2799  | c001lr.1_Missens   | NM_145886    | NP_665893    | Q9HB75 | PIDD_HUMAN  |                               | 0  | CCATGCGTCGG   | 0.687 | rs147404421 |
| + | 2  | 928   | RTAP5-2_uc001ltv.  | NR_021489    |              |        |             |                               | 0  | AGCTGGACTGG   | 0.622 |             |
| + | 4  | 975   | wk.2_Missense_Ml   | NM_005706    | NP_005697    | Q9Y5U2 | TSSC4_HUMAN |                               | 0  | GGATCCCTCCA   | 0.647 |             |
| - | 3  | 306   | PL5_uc001lxl.2_l   | NM_020896    | NP_065947    | Q9H0X9 | OSBL5_HUMAN |                               | 3  | GGCTCCATGT    | 0.657 |             |
| + | 1  | 946   |                    | NM_001005169 | NP_001005169 | Q8NGK6 | O5211_HUMAN | lasmic (Potential).           | 2  | ACTTCTCTTTT   | 0.458 |             |
| + | 1  | 674   | v5_uc001mbq.1_l    | NM_001005165 | NP_001005165 | Q8NGH9 | O52E4_HUMAN | lasmic (Potential).           | 2  | TAGAGCTGTTTT  | 0.403 |             |



|   |    |      |                   |              |              |        |             |                               |    |               |       |             |
|---|----|------|-------------------|--------------|--------------|--------|-------------|-------------------------------|----|---------------|-------|-------------|
| + | 1  | 520  |                   | NM_001004684 | NP_001004684 | Q8NGH3 | OR2D3_HUMAN | Name=4; (Potential).          | 0  | TCTTTAGTAGATA | 0.502 |             |
| + | 2  | 592  |                   | NM_176822    | NP_789792    | Q86W24 | NAL14_HUMAN | DAPIN.                        | 8  | GTGAGAGAGCGA  | 0.473 |             |
| - | 18 | 2491 | p.C776Y SCUBE2    | NM_020974    | NP_066025    | Q9NQ36 | SCUB2_HUMAN |                               | 2  | CTTTTACACTGGG | 0.483 |             |
| - | 21 | 2955 | p.A883V COPB1     | NM_016451    | NP_057535    | P53618 | COPB_HUMAN  |                               | 2  | AAAGGGCCTGG   | 0.358 |             |
| - | 25 | 4132 | cw.1_Missense_M   | NM_002645    | NP_002636    | O00443 | P3C2A_HUMAN | PI3K/PI4K.                    | 10 | GTGCATCTCTAA  | 0.313 |             |
| + | 5  | 660  | DHC_uc001moo.3    | NM_017448    | NP_059144    | P07864 | LDHC_HUMAN  |                               | 0  | CCCCACAAGCT   | 0.318 |             |
| + | 2  | 363  | reh.1_Missense_I  | NM_001077242 | NP_001070710 | Q96QD5 | DEPD7_HUMAN | DEP.                          | 2  | ATATTCCCTCGAC | 0.378 |             |
| + | 17 | 3859 | p.P1176S HIPK3    | NM_005734    | NP_005725    | Q9H422 | HIPK3_HUMAN |                               | 5  | GCATCACCTGCA  | 0.423 |             |
| - | 1  | 369  |                   | NM_145804    | NP_665803    | Q8N961 | ABTB2_HUMAN |                               | 2  | CCAGGCGGTGA   | 0.667 |             |
| + | 5  | 628  |                   | NM_020229    | NP_064614    | Q9NQV5 | PRD11_HUMAN |                               | 1  | GCCCCCGGTG    | 0.612 |             |
| + | 5  | 709  |                   | NM_020229    | NP_064614    | Q9NQV5 | PRD11_HUMAN | SET.                          | 1  | AGGTGGTCAA    | 0.622 |             |
| + | 10 | 1722 | p.S485N CRY2_u    | NM_021117    | NP_066940    | Q49AN0 | CRY2_HUMAN  |                               | 1  | GAGCAGTGCA    | 0.547 |             |
| + | 5  | 1839 | gw.1_Missense_M   | NM_024741    | NP_079017    | Q9H9D4 | ZN408_HUMAN | ZH2-type 7.                   | 0  | AGCTGCCTGAA   | 0.672 |             |
| - | 4  | 492  | lh.1_Missense_Mu  | NM_002334    | NP_002325    | O75096 | LRP4_HUMAN  | ntial). LDL-receptor class /  | 4  | GCAGGGAAACT   | 0.617 | rs35025381  |
| - | 3  | 368  | rhi.1_5'UTR ACP2  | NM_001610    | NP_001601    | P11117 | PPAL_HUMAN  | renal (Potential).            | 1  | GCTGCCGACGG   | 0.582 |             |
| + | 4  | 963  | n.1_Missense_Mu   | NM_003682    | NP_003673    | Q8WXG6 | MADD_HUMAN  | DENN.                         | 11 | GCTCCCCAGTA   | 0.557 |             |
| + | 6  | 623  |                   | NM_002559    | NP_002550    | P56373 | P2RX3_HUMAN | ellular (Potential).          | 0  | TTCCCCCTCTC   | 0.537 |             |
| - | 7  | 734  | nkl.2_Missense_I  | NM_003627    | NP_003618    | O75387 | LAT3_HUMAN  | ical; (Potential).            | 0  | GCAGGCCAGGC   | 0.602 |             |
| - | 1  | 700  |                   | NM_001001954 | NP_001001954 | Q8NGI9 | OR5A2_HUMAN | lasmic (Potential).           | 0  | CCTACCTGTAGC  | 0.478 |             |
| + | 18 | 1957 | uc009ynm.1_3'l    | NM_015533    | NP_056348    | Q3LXA3 | DHAK_HUMAN  | DhaL.                         | 0  | CCTCCGGGCCA   | 0.602 |             |
| - | 3  | 246  | nuk.2_Nonsense_I  | NM_015853    | NP_056937    | Q04323 | UBXN1_HUMAN | UBA.                          | 0  | ATCAGCCTGGC   | 0.642 |             |
| + | 2  | 1207 | OD1_uc001nyh.2    | NM_013280    | NP_037412    | Q9NZU1 | FLRT1_HUMAN | tracellular (Potential).      | 0  | CAACACGCTGG   | 0.652 |             |
| - | 10 | 1460 |                   | NM_015104    | NP_055919    | Q2TAZ0 | ATG2A_HUMAN |                               | 2  | GTGAGGTGGTC   | 0.612 |             |
| + | 2  | 684  | p.G173S SIPA1_u   | NM_006747    | NP_006738    | Q96FS4 | SIPA1_HUMAN |                               | 0  | GTGAGGGTGAC   | 0.677 |             |
| - | 11 | 1642 | p.T512I RELA_uc   | NM_021975    | NP_068810    | Q04206 | TF65_HUMAN  |                               | 4  | GGCGAGTTATAC  | 0.627 |             |
| + | 2  | 432  |                   | NM_153266    | NP_694998    | Q8N4L1 | T151A_HUMAN | ical; (Potential).            | 1  | CGTCTCCCTCC   | 0.721 |             |
| - | 2  | 520  | HC24_uc001oim.    | NM_207340    | NP_997223    | Q6UX98 | ZDH24_HUMAN | DHHC-type.                    | 0  | AGTGTCGGCTG   | 0.647 |             |
| + | 2  | 392  | 5_uc009ysg.2_5'l  | NM_002335    | NP_002326    | O75197 | LRP5_HUMAN  | ptor class B 1. Extracellular | 7  | CTCCGGCCTGG   | 0.637 |             |
| + | 2  | 531  | se_Mutation_p.N4  | NM_018043    | NP_060513    | Q5XXA6 | ANO1_HUMAN  | lasmic (Potential).           | 2  | CGGGCAACCGG   | 0.662 |             |
| + | 1  | 544  |                   | NM_003824    | NP_003815    | Q13158 | FADD_HUMAN  |                               | 3  | GACTTCgaggcgg | 0.498 |             |
| + | 2  | 208  |                   | NM_001002035 | NP_001002035 | Q8NET1 | D108B_HUMAN |                               | 0  | CTACACCCAAA   | 0.338 |             |
| + | 11 | 2132 | rs.1_Missense_Mu  | NM_007256    | NP_009187    | O94956 | SO2B1_HUMAN | lame=10; (Potential).         | 2  | ACCCTCCTTCA   | 0.617 |             |
| - | 5  | 1042 |                   | NM_001039548 | NP_001034637 | Q6PF15 | KLH35_HUMAN | Kelch 5.                      | 0  | ACCCCCCATGA   | 0.592 |             |
| - | 3  | 555  | .2_RNA TAF1D_u    | NM_024116    | NP_077021    | Q9H5J8 | TAF1D_HUMAN |                               | 0  | ATTAGTGAGTATA | 0.368 |             |
| - | 7  | 886  | vi.1_Intron CASP1 | NM_033292    | NP_150634    | P29466 | CASP1_HUMAN |                               | 2  | CACCAGGGCTG   | 0.388 |             |
| - | 16 | 3106 | p.P905S ARHGAP    | NM_020809    | NP_065860    | Q9P2F6 | RHG20_HUMAN | Ser-rich.                     | 5  | GCCTGGGGAGC   | 0.493 |             |
| + | 4  | 835  |                   | NM_198498    | NP_940900    | Q8IXP5 | CK053_HUMAN |                               | 0  | GGTCATATGAAT  | 0.512 |             |
| + | 13 | 2439 | p.E489K DLAT_uc   | NM_001931    | NP_001922    | P10515 | ODP2_HUMAN  | ytic (By similarity).         | 0  | CTTCAGAGGAT   | 0.348 |             |
| - | 1  | 44   | /10_uc009yyv.2_R  | NM_004724    | NP_004715    | O43264 | ZW10_HUMAN  | INT1. Interaction with ZWIF   | 2  | GAACGAGGCCA   | 0.662 |             |
| - | 3  | 855  |                   | NM_000482    | NP_000473    |        |             |                               | 0  | GAGCTCCTCGG   | 0.662 |             |
| + | 5  | 862  | ar.2_Missense_Mu  | NM_022169    | NP_071452    | Q9H172 | ABCG4_HUMAN | potential). ABC transporter.  | 2  | AGGAGGTGAAG   | 0.592 |             |
| - | 6  | 1343 | yp.2_Missense_M   | NM_006597    | NP_006588    | P11142 | HSP7C_HUMAN |                               | 8  | GCTTGGTAGGA   | 0.448 |             |
| + | 11 | 2956 | .3_Intron WNK1_u  | NM_018979    | NP_061852    | Q9H4A3 | WNK1_HUMAN  |                               | 23 | TTGTCCAGTCA   | 0.522 |             |
| + | 19 | 5291 | p.P1348L WNK1_u   | NM_018979    | NP_061852    | Q9H4A3 | WNK1_HUMAN  |                               | 23 | TATTACCCCAAGT | 0.498 |             |
| + | 23 | 6053 | .S1601N WNK1_u    | NM_018979    | NP_061852    | Q9H4A3 | WNK1_HUMAN  |                               | 23 | AACTAGTTCAGC  | 0.393 |             |
| + | 13 | 2648 | f.2_Missense_Mut  | NM_178040    | NP_829884    | Q8IUD2 | RB612_HUMAN | Potential.                    | 5  | AGGTGAAAAA    | 0.433 |             |
| + | 6  | 729  | se_Mutation_p.P4  | NM_018463    | NP_060933    | Q969R8 | ITFG2_HUMAN |                               | 0  | CCCTCCTGCCT   | 0.577 | rs150956987 |

|   |    |         |                    |              |              |        |             |                               |    |              |       |            |
|---|----|---------|--------------------|--------------|--------------|--------|-------------|-------------------------------|----|--------------|-------|------------|
| - | 4  | 1026    | p.R254K FOX1_u     | NM_021953    | NP_068772    | Q08050 | FOX1_HUMAN  | Fork-head.                    | 2  | CGCTTCCTCTCA | 0.507 |            |
| - | 38 | 7048    | vF_uc010set.1_Int  | NM_000552    | NP_000543    | P04275 | VWF_HUMAN   |                               | 12 | TCCTACCTGGT  | 0.552 | rs61750624 |
| - | 16 | 2318    | vF_uc010set.1_Int  | NM_000552    | NP_000543    | P04275 | VWF_HUMAN   | TIL 2.                        | 12 | TGGGGGGCAGA  | 0.612 |            |
| + | 4  | 935     | se_Mutation_p.G9   | NM_018009    | NP_060479    | Q9BX59 | TPSNR_HUMAN | 'otential). Ig-like V-type.   | 0  | ACAAGGGCAGG  | 0.652 |            |
| - | 5  | 539     | BP_uc010sfg.1_Ir   | NM_032489    | NP_115878    | Q8NEB7 | ACRBP_HUMAN |                               | 1  | GGAAGGTCTGG  | 0.562 |            |
| + | 7  | 3136    | x.1_Missense_Mu    | NM_001007026 | NP_001007027 | P54259 | ATN1_HUMAN  |                               | 6  | GGCCGGGCTTG  | 0.667 |            |
| - | 15 | 3858    | ige.1_Missense_M   | NM_174941    | NP_777601    | Q9NR16 | C163B_HUMAN | Extracellular (Potential).    | 11 | CTCGCCAGGT   | 0.612 |            |
| - | 10 | 695     | p.P151L MFAP5_u    | NM_003480    | NP_003471    | Q13361 | MFAP5_HUMAN |                               | 1  | CACAGGGAGGA  | 0.473 |            |
| + | 26 | 3213    | p.A619T A2ML1_u    | NM_144670    | NP_653271    | A8K2U0 | A2ML1_HUMAN |                               | 3  | TGACAGCGTTT  | 0.438 |            |
| - | 4  | 526     | e_Mutation_p.P14   | NM_001781    | NP_001772    | Q07108 | CD69_HUMAN  | . Extracellular (Potential).  | 0  | ACCAGGTTCCCT | 0.418 |            |
| - | 1  | 218     | H1_uc001qzc.2_Ir   | NM_176885    | NP_795366    | P59538 | T2R31_HUMAN | lasmic (Potential).           | 0  | GAGCAGTGAGA  | 0.373 |            |
| - | 3  | 747     |                    | NM_006248    | NP_006239    |        |             |                               | 0  | TGGAGGAGATC  | 0.612 |            |
| + | 15 | 2211    | zip.2_Nonsense_Iv  | NM_017435    | NP_059131    | Q9NYB5 | SO1C1_HUMAN | ellular (Potential).          | 7  | TCAAATGGGGAT | 0.373 |            |
| - | 7  | 958     | p.V314I LDHB_u     | NM_002300    | NP_002291    | P07195 | LDHB_HUMAN  |                               | 3  | AGCAACCTCAT  | 0.448 |            |
| - | 2  | 429     |                    | NM_004982    | NP_004973    | Q15842 | IRK8_HUMAN  | smic (By similarity).         | 0  | GGGGAGGCGGT  | 0.597 |            |
| - | 10 | 1402    | p.P48S SOX5_uc     | NM_006940    | NP_008871    | P35711 | SOX5_HUMAN  |                               | 6  | TGCTGGGACAG  | 0.483 |            |
| + | 4  | 1303    | p.T361I IRASSF8    | NM_007211    | NP_009142    | Q8NHQ8 | RASF8_HUMAN |                               | 0  | AGTTACCGTTT  | 0.438 |            |
| - | 55 | 8206    | ig.1_Missense_Ml   | NM_002223    | NP_002214    | Q14571 | ITPR2_HUMAN | lasmic (Potential).           | 14 | CAGGACTATGA  | 0.368 |            |
| - | 53 | 7919    | g.1_Missense_Mu    | NM_002223    | NP_002214    | Q14571 | ITPR2_HUMAN | ellular (Potential).          | 14 | CATCCCCACA   | 0.428 |            |
| + | 4  | 3778    | rf35_uc001rkt.2_5' | NM_018169    | NP_060639    | Q9HCM1 | CL035_HUMAN |                               | 2  | AACAGGATGAT  | 0.428 |            |
| - | 1  | 425_426 | '10_uc009zju.1_5'  | NM_198992    | NP_945343    | Q6XYQ8 | SYT10_HUMAN | cular (Potential).            | 2  | TGGCTGCCCTC  | 0.683 |            |
| + | 10 | 1879    | zjz.2_Missense_Iv  | NM_013377    | NP_037509    | Q6ZMN7 | PZRN4_HUMAN |                               | 11 | TTGTAGCGCTG  | 0.512 |            |
| - | 53 | 16433   |                    | NM_003482    | NP_003473    | O14686 | MLL2_HUMAN  | SET.                          | 41 | TAGGGGCACAG  | 0.502 |            |
| + | 13 | 2074    | p.C636Y TROAP_u    | NM_005480    | NP_005471    | Q12815 | TROAP_HUMAN | IA approximate tandem rep     | 1  | GCCCTGCCCTA  | 0.647 |            |
| - | 9  | 1822    |                    | NM_005554    | NP_005545    | P02538 | K2C6A_HUMAN | Tail.                         | 5  | TGAGGCCACCC  | 0.577 |            |
| - | 7  | 1459    |                    | NM_057088    | NP_476429    | P12035 | K2C3_HUMAN  | Rod. Coil 2.                  | 0  | CTCTTGAGCT   | 0.612 |            |
| + | 5  | 507     | T2_uc009zms.2_f    | NM_003578    | NP_003569    | O75908 | SOAT2_HUMAN | icat; (Potential).            | 1  | CCTGGCCATCG  | 0.587 |            |
| - | 3  | 426     | cs.3_Missense_Ml   | NM_015665    | NP_056480    | Q9NRG9 | AAAS_HUMAN  |                               | 1  | AAAGGCCACA   | 0.423 |            |
| + | 6  | 898     | my.1_Missense_M    | NM_020547    | NP_065434    | Q16671 | AMHR2_HUMAN | (Potential). Protein kinase.  | 2  | TCTCTGGGCC   | 0.493 |            |
| + | 8  | 1398    | E160K TRBP2_u      | NM_134323    | NP_599150    | Q15633 | TRBP2_HUMAN | I. DRBM 3. Sufficient for int | 1  | CTGAGGAGCAG  | 0.627 |            |
| - | 6  | 784     | p.E214K CALCO      | NM_020898    | NP_065949    | Q9P1Z2 | CACO1_HUMAN |                               | 1  | TCTTCTGTGAT  | 0.527 |            |
| + | 1  | 203     | C13_uc010sop.1_u   | NM_017410    | NP_059106    | P31276 | HXC13_HUMAN | Gly-rich.                     | 1  | catcgcgcgcg  | 0.493 |            |
| + | 23 | 2888    | ERBB3_uc009zok.:   | NM_001982    | NP_001973    | P21860 | ERBB3_HUMAN | Potential). Protein kinase.   | 8  | CAGGTGTGACA  | 0.507 |            |
| - | 3  | 577     |                    | NM_012064    | NP_036196    | P30301 | MIP_HUMAN   |                               | 1  | TCATGCCTGCA  | 0.537 |            |
| - | 4  | 601     | nq.2_Missense_Ml   | NM_145064    | NP_659501    | Q96MF2 | STAC3_HUMAN | ol-ester/DAG-type.            | 3  | CATTTCCACATA | 0.373 |            |
| + | 5  | 1165    |                    | NM_032230    | NP_115606    | Q8N6Q8 | CL026_HUMAN |                               | 0  | TGATGGTGGGT  | 0.308 |            |
| + | 25 | 4011    | G1091E APAF1_uc    | NM_181861    | NP_863651    | O14727 | APAF_HUMAN  | WD 12.                        | 3  | AACGGAGATG   | 0.522 |            |
| + | 42 | 5674    |                    | NM_014503    | NP_055318    | O75691 | UTP20_HUMAN |                               | 4  | TTATGGAAGCT  | 0.368 |            |
| + | 3  | 398     | vP1_uc009zuu.1_f   | NM_007062    | NP_008993    | Q13610 | PWP1_HUMAN  |                               | 0  | GGAAGGTGACC  | 0.438 |            |
| - | 2  | 551     | )_splice SELPLG_u  | NM_003006    | NP_002997    | Q14242 | SELPL_HUMAN | rtial). 12 X 10 AA tandem re  | 0  | CTGTGCCCTCCG | 0.612 |            |
| + | 10 | 1157    | p.N271I RAD9B_u    | NM_152442    | NP_689655    | Q6WBX8 | RAD9B_HUMAN |                               | 2  | GAAAACGTGTG  | 0.453 |            |
| - | 6  | 1084    |                    | NM_002710    | NP_002701    | P36873 | PP1G_HUMAN  |                               | 3  | TGGCACCTGCA  | 0.393 |            |
| + | 2  | 539     | ib.2_Missense_Mu   | NM_016816    | NP_058132    | P00973 | OAS1_HUMAN  | r for binding to dsRNA.       | 2  | AGGGGTGGAC   | 0.572 |            |
| - | 7  | 893     | zy.2_Missense_Ml   | NM_006549    | NP_006540    | Q96RR4 | KKCC2_HUMAN | rotein kinase.                | 3  | GGGTCATCCAC  | 0.572 |            |
| - | 18 | 3264    |                    | NM_015347    | NP_056162    | O15034 | RIMB2_HUMAN | p.Q1034E(1)                   | 11 | TATCTTGAGAGT | 0.448 |            |
| - | 7  | 753     | e_Mutation_p.G10   | NM_015347    | NP_056162    | O15034 | RIMB2_HUMAN | SH3 1.                        | 11 | TTTTCCGCCG   | 0.547 |            |
| - | 2  | 303     |                    | NM_152726    | NP_689939    | Q8IYU8 | EFHA1_HUMAN |                               | 0  | TGAAGAAAAC   | 0.348 |            |

|   |     |         |                    |              |              |        |              |                               |    |                |       |
|---|-----|---------|--------------------|--------------|--------------|--------|--------------|-------------------------------|----|----------------|-------|
| - | 8   | 1272    | op.1_Missense_Mi   | NM_014363    | NP_055178    | Q9NZJ4 | SACS_HUMAN   |                               | 12 | CATTGGCCTGAT   | 0.383 |
| - | 8   | 2221    | se_Mutation_p.R5f  | NM_178006    | NP_821074    | Q9Y3M8 | STA13_HUMAN  | Rho-GAP.                      | 4  | ATTTGCGAAAAAC  | 0.498 |
| - | 1   | 2179    | uc001uxv.1_Intron  | NM_032138    | NP_115514    | Q8WVZ9 | KBTB7_HUMAN  |                               | 1  | :AGGTTCAAGGC,  | 0.443 |
| + | 7   | 767     |                    | NM_016248    | NP_057332    | Q9UKA4 | AKA11_HUMAN  |                               | 2  | :AGGAAGAGACT   | 0.358 |
| - | 7   | 904     |                    | NM_012345    | NP_036477    | Q9UHK0 | NUFP1_HUMAN  |                               | 0  | TCSTTGGCCATTTG | 0.388 |
| - | 13  | 2593    | ense_Mutation_p.l  | NM_015070    | NP_055885    | Q5T200 | ZC3HD_HUMAN  |                               | 2  | TCAAGAGTCTGT   | 0.393 |
| - | 1   | 92      | u_p.R29K ZC3H13    | NM_015070    | NP_055885    | Q5T200 | ZC3HD_HUMAN  |                               | 2  | CCAAGCCTCTCA   | 0.398 |
| + | 3   | 509     |                    | NM_021999    | NP_068839    | Q9Y287 | ITM2B_HUMAN  | lenal (Potential).            | 0  | ATCAAAGATGATC  | 0.363 |
| + | 4   | 857     | _Splice_Site PIBF1 | NM_006346    | NP_006337    | Q8WXW3 | PIBF1_HUMAN  |                               | 2  | STATCTGTAAGTA  | 0.289 |
| - | 57  | 9506    | vkg.1_Missense_M   | NM_015057    | NP_055872    | O75592 | MYCB2_HUMAN  |                               | 14 | AAGCAGCTTTGA   | 0.299 |
| - | 55  | 7910    | _p.V2011 MYCBF     | NM_015057    | NP_055872    | O75592 | MYCB2_HUMAN  |                               | 14 | ACTCTACCATGC   | 0.458 |
| - | 2   | 1956    |                    | NM_033132    | NP_149123    | Q96T25 | ZIC5_HUMAN   | 2H2-type 4.                   | 0  | ITGCTTCTCAGC   | 0.557 |
| + | 7   | 723     | _p.A212V ATP11A_   | NM_015205    | NP_056020    | P98196 | AT11A_HUMAN  | lasmic (Potential).           | 4  | TCACGCCACCA    | 0.527 |
| + | 1   | 728     |                    | NM_001004479 | NP_001004479 | Q8NGC9 | O11H4_HUMAN  | lasmic (Potential).           | 1  | :AGCTGGTCGGA   | 0.423 |
| + | 6   | 489     | 41_splice PARP2_   | NM_005484    | NP_005475    | Q9UGN5 | PARP2_HUMAN  |                               | 2  | TTGCAGTTGGG,   | 0.463 |
| + | 3   | 537     | APEX1_uc001vxi.    | NM_001641    | NP_001632    | P27695 | APEX1_HUMAN  | export signal (NES).          | 4  | GGAATGTGGATC   | 0.483 |
| - | 4   | 501     | u_p.A86V HNRNP     | NM_031314    | NP_112604    | P07910 | HNRPC_HUMAN  | RRM.                          | 0  | GCTCTGCAGCC,   | 0.388 |
| - | 23  | 2786    |                    | NM_000257    | NP_000248    | P12883 | MYH7_HUMAN   | Potential.                    | 4  | :TTGTTCTGAAC   | 0.522 |
| - | 13  | 1347    |                    | NM_000257    | NP_000248    | P12883 | MYH7_HUMAN   | rosin head-like.              | 4  | TCTGCCCTTGT    | 0.567 |
| + | 2   | 711     |                    | NM_203402    | NP_981947    | A5D6W6 | FITM1_HUMAN  | ical; (Potential).            | 0  | ITGTTCCGCAAG   | 0.637 |
| - | 4   | 238     | l1_uc001wmm.1_E    | NM_002818    | NP_002809    | Q9UL46 | PSME2_HUMAN  |                               | 0  | VGGAAGTCAAG    | 0.577 |
| + | 11  | 2209    | lg.1_Missense_Mi   | NM_017999    | NP_060469    | Q96EP0 | RNF31_HUMAN  |                               | 2  | CACTCCCCAGC    | 0.607 |
| + | 6   | 848     | e GMPR2_uc010a     | NM_001002001 | NP_001002001 | Q9P2T1 | GMPR2_HUMAN  |                               | 3  | ITCTCAGGCAGG   | 0.463 |
| - | 3   | 335     | B_uc001wop.2_Mi    | NM_014430    | NP_055245    | Q9UHD4 | CIDEB_HUMAN  | CIDE-N.                       | 0  | :CACTCCATTCAC  | 0.547 |
| + | 1   | 1820    | ense_Mutation_p.C  | NM_019839    | NP_062813    | Q9NPC1 | LT4R2_HUMAN  | Name=1; (Potential).          | 0  | TCCTTGCAACG    | 0.721 |
| + | 16  | 1372    | nf.1_Missense_Mi   | NM_016106    | NP_057190    | Q8WVM8 | SCFD1_HUMAN  |                               | 0  | GAAGTCCAGAA    | 0.343 |
| - | 22  | 3627    | ami.2_Missense_M   | NM_015473    | NP_056288    | Q86XA9 | HTR5A_HUMAN  |                               | 1  | :AGGAAGTTGGG,  | 0.328 |
| - | 2   | 326     | iEC23A_uc010tqb.   | NM_006364    | NP_006355    | Q15436 | SC23A_HUMAN  |                               | 5  | GAACAACCATTC   | 0.443 |
| + | 2   | 212     |                    | NM_002687    | NP_002678    | Q9H307 | PININ_HUMAN  | ternative 5' splicing. Neces: | 1  | ACAGGCCCATCC   | 0.423 |
| - | 1   | 1271    |                    | NM_032135    | NP_115511    | Q5H9T9 | FSCB_HUMAN   | Pro-rich.                     | 9  | CTTCAGCAGGT    | 0.507 |
| - | 1   | 412     |                    | NM_080746    | NP_542784    | Q96L21 | RL10L_HUMAN  |                               | 1  | :TGTCAGCCCCA   | 0.542 |
| - | 20  | 2836    | L1_uc001wxz.2_Ir   | NM_004196    | NP_004187    | Q00532 | CDKL1_HUMAN  |                               | 2  | ITGATACGTGG/   | 0.542 |
| + | 44  | 4266    | _p.E1294K KTN1_    | NM_182926    | NP_891556    | Q86UP2 | KTN1_HUMAN   | (Potential). Potential.       | 7  | :AGAAGGAGACA,  | 0.388 |
| + | 15  | 2306    | u_p.T739 KIAA05i   | NM_014749    | NP_055564    | E9PGW8 | E9PGW8_HUMAN |                               | 1  | :ACAAACCCAAA   | 0.378 |
| + | 15  | 2091    | ea.1_Nonsense_M    | NM_014992    | NP_055807    | Q9Y4D1 | DAAM1_HUMAN  | FH2.                          | 1  | .GACAGCAGGTA/  | 0.438 |
| - | 11  | 1654    | :R5E_uc001xge.2_   | NM_006246    | NP_006237    | Q16537 | 2A5E_HUMAN   |                               | 1  | :AATGGGGGCTA/  | 0.368 |
| + | 42  | 6555    | jl.2_Missense_Mu   | NM_015180    | NP_055995    | Q8WXH0 | SYNE2_HUMAN  | lasmic (Potential).           | 14 | GCGAGGCCCCG    | 0.473 |
| + | 109 | 19975   | SYNE2_uc001xgc     | NM_015180    | NP_055995    | Q8WXH0 | SYNE2_HUMAN  | c (Potential). Spectrin 9.    | 14 | :AAAGCCTCCCT/  | 0.438 |
| + | 2   | 1114    | 325_uc001xhc.2_I   | NM_004857    | NP_004848    | P24588 | AKAP5_HUMAN  |                               | 0  | CCCAGCAAGCA/   | 0.408 |
| + | 11  | 2026    | _p.R456H EXD2_L    | NM_018199    | NP_060669    | Q9NVH0 | EXD2_HUMAN   |                               | 0  | .GAGCCGCTGGC   | 0.587 |
| + | 2   | 966     | OT2_uc001xom.L     | NM_006821    | NP_006812    | P49753 | ACOT2_HUMAN  |                               | 1  | :AGACGCTCCAT/  | 0.478 |
| + | 11  | 1486    | nse_Mutation_p.Sr  | NM_021188    | NP_067011    | Q86VK4 | ZN410_HUMAN  |                               | 1  | :CCTGTCTTCAG   | 0.438 |
| + | 3   | 1328    | lvd.1_Splice_Site  | NM_017791    | NP_060261    | Q9UPI3 | FLVC2_HUMAN  |                               | 0  | :CTATGGTAAGG1  | 0.443 |
| + | 10  | 1392    | .E431* C14orf118_  | NM_017926    | NP_060396    | Q9NWX4 | CN118_HUMAN  |                               | 3  | :CAGTGGAGCCA   | 0.463 |
| - | 3   | 202_203 | asu.2_Intron SNW   | NM_012245    | NP_036377    | Q13573 | SNW1_HUMAN   |                               | 1  | :CATCTCCAAAAT  | 0.317 |
| + | 6   | 806     | se_Mutation_p.V1f  | NM_020421    | NP_065154    | Q86TW2 | ADCK1_HUMAN  | rotein kinase.                | 3  | :GAAGGTGTCCC   | 0.507 |
| + | 13  | 2691    | n_p.A102T NRXN     | NM_004796    | NP_004787    | Q9Y4C0 | NRX3A_HUMAN  | potential). Laminin G-like 6. | 10 | :GCCAGCCAAT/   | 0.572 |

rs141701958

|   |    |      |                    |              |              |        |             |                               |    |               |       |
|---|----|------|--------------------|--------------|--------------|--------|-------------|-------------------------------|----|---------------|-------|
| - | 3  | 388  | 1xva.1_Missense_   | NM_152446    | NP_689659    | Q6ZU80 | CE128_HUMAN |                               | 0  | ACCCGCCTGTC   | 0.438 |
| + | 2  | 1918 | td.2_Missense_Mt   | NM_013231    | NP_037363    | O43155 | FLRT2_HUMAN | cellular (Potential).         | 4  | GCCTCCCACCC   | 0.542 |
| - | 13 | 1823 | \LC_uc010tv.1_M    | NM_000153    | NP_000144    | P54803 | GALC_HUMAN  |                               | 0  | FAGCTGCCTTTG  | 0.463 |
| - | 13 | 1604 | wc.1_Missense_M    | NM_007039    | NP_008970    | Q16825 | PTN21_HUMAN |                               | 4  | GACGTCACTCC   | 0.587 |
| - | 9  | 1183 | 30_splice PTPN21_  | NM_007039    | NP_008970    | Q16825 | PTN21_HUMAN |                               | 4  | FACTCACAGTTT  | 0.413 |
| - | 15 | 1846 | tion_p.A2V TTC7B   | NM_001010854 | NP_001010854 | Q86TV6 | TTC7B_HUMAN | TPR 7.                        | 2  | TCAGGGCCATG   | 0.473 |
| - | 3  | 802  |                    | NM_173850    | NP_776249    | Q8IW75 | SPA12_HUMAN |                               | 4  | GTGGGGTTTCAT  | 0.453 |
| + | 17 | 2146 |                    | NM_152327    | NP_689540    | Q96M32 | KAD7_HUMAN  | DPY-30.                       | 1  | TTGCAACGTCC   | 0.318 |
| + | 8  | 1269 | se_Mutation_p.N2I  | NM_001128918 | NP_001122390 | P27448 | MARK3_HUMAN | rotein kinase.                | 4  | TAGCAATGAATTT | 0.423 |
| + | 5  | 975  | m.1_Missense_Mt    | NM_182923    | NP_891553    | Q07866 | KLC1_HUMAN  | TPR 1.                        | 0  | TCAGTACGCC    | 0.682 |
| + | 6  | 554  | e_Mutation_p.P16:  | NM_001312    | NP_001303    | P52943 | CRIP2_HUMAN | l zinc-binding 2.             | 0  | GACCCCGGCG    | 0.716 |
| - | 4  | 503  | te NIPA1_uc001yv   | NM_144599    | NP_653200    | Q7RTP0 | NIPA1_HUMAN |                               | 0  | 3GAATTACCTGG  | 0.498 |
| - | 1  | 150  | 1_5'UTR MTMR1C     | NM_017762    | NP_060232    | Q9NXD2 | MTMRA_HUMAN |                               | 1  | GGGCGGTGGCA   | 0.701 |
| - | 7  | 1003 | zfr.2_Missense_M   | NM_130901    | NP_570971    | Q8TE49 | OTU7A_HUMAN | larity). TRAF-binding (By si  | 2  | CTCTTCCAGGC   | 0.483 |
| + | 2  | 1227 | bp.1_Missense_Mi   | NM_014952    | NP_055767    | Q8TBE0 | BAHD1_HUMAN |                               | 0  | GCCAAGAGGGG   | 0.647 |
| + | 7  | 2320 | bp.1_Missense_Mi   | NM_014952    | NP_055767    | Q8TBE0 | BAHD1_HUMAN | BAH.                          | 0  | CCACCGCACAG   | 0.617 |
| + | 2  | 588  | p.G166D MGa_uc     | NM_001080541 | NP_001074010 | Q8IWI9 | MGAP_HUMAN  | T-box.                        | 12 | CACAGGTCATT   | 0.433 |
| - | 4  | 614  |                    | NM_139265    | NP_644670    | Q9H223 | EHD4_HUMAN  |                               | 2  | CCACCTCTCG    | 0.562 |
| - | 36 | 5440 | yr.2_Missense_Mt   | NM_017672    | NP_060142    | Q96QT4 | TRPM7_HUMAN | ital). Alpha-type protein kin | 10 | TAAATCTCCAGT  | 0.348 |
| - | 5  | 702  | 51_splice CYP19A   | NM_031226    | NP_112503    | P11511 | CP19A_HUMAN |                               | 3  | TGCTTACCTTTC  | 0.313 |
| - | 8  | 1357 | afd.2_Splice_Site_ | NM_138792    | NP_620147    | Q8WVC0 | LEO1_HUMAN  |                               | 0  | ACATGCTGGAA   | 0.348 |
| + | 4  | 1166 | FAM63B_uc002af     | NM_001040450 | NP_001035540 | Q8NBR6 | FA63B_HUMAN |                               | 1  | TTTTCAGAATATG | 0.328 |
| - | 18 | 2755 | _p.M871I SLTM_uc   | NM_024755    | NP_079031    | Q9NWH9 | SLTM_HUMAN  | Arg/Glu-rich.                 | 1  | GTGGACATGCT   | 0.443 |
| - | 27 | 3482 |                    | NM_004998    | NP_004989    | Q12965 | MYO1E_HUMAN |                               | 3  | CTGGGGGAGGC   | 0.622 |
| + | 6  | 670  | JX1_uc002amx.2_    | NM_003099    | NP_003090    | Q13596 | SNX1_HUMAN  | PX.                           | 0  | CGCCCCGGAG    | 0.433 |
| - | 9  | 2228 |                    | NM_003613    | NP_003604    | O75339 | CILP1_HUMAN |                               | 7  | CGAGTCAAGGT   | 0.507 |
| - | 4  | 667  | ujb.1_Missense_I   | NM_030800    | NP_110427    | Q96SY0 | CO044_HUMAN | VWFA.                         | 1  | 3GACAACCTGTT  | 0.448 |
| + | 4  | 2011 | IAD6_uc002aaqg.2_  | NM_005585    | NP_005576    | O43541 | SMAD6_HUMAN | MH2.                          | 1  | TCAGGGCAGCG   | 0.667 |
| + | 3  | 1096 |                    | NM_001031807 | NP_001026977 | P84550 | SKOR1_HUMAN |                               | 0  | AAAAGGACGAC   | 0.478 |
| + | 2  | 965  | arh.2_Missense_I   | NM_015322    | NP_056137    | Q9UK73 | FEM1B_HUMAN |                               | 0  | ACCATACCACAG  | 0.463 |
| - | 38 | 7128 | \R132C MYO9A_t     | NM_006901    | NP_008832    | B2RTY4 | MYO9A_HUMAN | ail. Rho-GAP.                 | 3  | GCAGCGGAGAA   | 0.453 |
| - | 16 | 1763 | ib.2_RNA PARP6_    | NM_020214    | NP_064599    | Q2NL67 | PARP6_HUMAN | ARP catalytic.                | 0  | CCCTGCTGAGA   | 0.418 |
| + | 14 | 1958 | axq.2_Missense_I   | NM_025055    | NP_079331    | Q8N5R6 | CCD33_HUMAN | Potential.                    | 5  | AGAAGGAGCTG   | 0.612 |
| + | 9  | 1763 | se_Mutation_p.T52  | NM_006465    | NP_006456    | Q8IVW6 | ARI3B_HUMAN |                               | 0  | CATCACGGGGT   | 0.547 |
| - | 5  | 490  | r_p.M1R EDC3_uc    | NM_001142443 | NP_001135915 | Q96F86 | EDC3_HUMAN  | and interaction with DCP1/    | 1  | 3TAGCCATGTTT  | 0.443 |
| - | 4  | 553  |                    | NM_004255    | NP_004246    | P20674 | COX5A_HUMAN |                               | 0  | 3AGATCCCAGT   | 0.458 |
| + | 9  | 1591 | tion_p.G448E MIR   | NM_024608    | NP_078884    | Q96F14 | NEIL1_HUMAN |                               | 1  | GAAGGGGCGAC   | 0.617 |
| - | 8  | 952  | \2C1_uc010bkk.2_   | NM_006715    | NP_006706    | Q9NTJ4 | MA2C1_HUMAN |                               | 0  | ACAGGCCAGGG   | 0.632 |
| - | 25 | 3289 | bbx.2_Missense_I   | NM_020843    | NP_065894    | Q9BY12 | SCAPE_HUMAN |                               | 3  | TTGGGGTAGCTC  | 0.438 |
| - | 5  | 742  | _p.D98N CIB2_uc0   | NM_006383    | NP_006374    | O75838 | CIB2_HUMAN  |                               | 0  | CTCATCCAGCT   | 0.562 |
| - | 25 | 3898 | blm.1_Missense_I   | NM_002891    | NP_002882    | Q13972 | RGRF1_HUMAN | Ras-GEF.                      | 6  | CTCTGAGATTCT  | 0.433 |
| + | 7  | 606  | r.1_Missense_Mut   | NM_000137    | NP_000128    | P16930 | FAAA_HUMAN  |                               | 0  | CGAAGGCCCA    | 0.582 |
| - | 2  | 369  | .:2_RNA MESDC2     | NM_015154    | NP_055969    | Q14696 | MESD_HUMAN  | domain (By similarity).       | 0  | 3GCTTGCTTGGG  | 0.423 |
| + | 3  | 1376 | Mutation_p.H234Y   | NM_181877    | NP_870992    | Q7Z7L9 | ZSCA2_HUMAN | 2H2-type 6.                   | 2  | GAATCCACACA   | 0.507 |
| + | 14 | 5865 | cc.1_Missense_Mt   | NM_020778    | NP_065829    | Q96L96 | ALPK3_HUMAN |                               | 12 | AGGAGGGCTCC   | 0.632 |
| + | 14 | 1538 | LC28A1_uc010upf    | NM_004213    | NP_004204    | O00337 | S28A1_HUMAN | ical; (Potential).            | 3  | CTGCCCTCTCC   | 0.602 |
| + | 2  | 788  |                    | NM_152259    | NP_689472    | Q7Z2Z1 | TICRR_HUMAN |                               | 7  | 3GAGTGAATAA   | 0.473 |

rs1803317

|   |    |      |                   |              |               |        |             |    |              |       |             |
|---|----|------|-------------------|--------------|---------------|--------|-------------|----|--------------|-------|-------------|
| + | 2  | 500  | L13_uc002bpe.1_   | NM_001029964 | NP_001025135  | A6NNM8 | TTL13_HUMAN | 0  | TTGACACAGGCG | 0.502 |             |
| - | 8  | 769  | x.2_RNA SNRPA1    | NM_003090    | NP_003081     | P09661 | RU2A_HUMAN  | 1  | CTCTGCCAGGG  | 0.468 |             |
| - | 1  | 878  |                   | NM_001004195 | NP_001004195  | Q96R69 | OR4F4_HUMAN | 0  | TCAGCCGTCTT  | 0.343 | rs149105772 |
| - | 7  | 450  | DF1_uc010utz.1_   | NM_022450    | NP_071895     | Q96CC6 | RHDF1_HUMAN | 2  | GCTGCCATTTCT | 0.657 | rs11547503  |
| + | 37 | 4675 | _uc002cio.1_Misse | NM_145294    | NP_660337     | Q96KV7 | WDR90_HUMAN | 1  | CTGTCTCTCTCT | 0.637 |             |
| - | 7  | 1718 |                   | NM_001025190 | NP_001020361  | Q96KJ4 | MSLNL_HUMAN | 4  | TCCCACCCGGCC | 0.701 |             |
| + | 27 | 3431 | p.S1098F MAPK8I   | NM_015133    | NP_055948     | Q9UPT6 | JIP3_HUMAN  | 3  | GGTGTCCATCC  | 0.617 |             |
| + | 11 | 7405 | l.1_Missense_Mut  | NM_016333    | NP_057417     | Q9UQ35 | SRRM2_HUMAN | 4  | TGGCTGACCTT  | 0.637 |             |
| + | 1  | 166  | RSF12A_uc002ce    | NM_016639    | NP_057723     | Q9NP84 | TNR12_HUMAN | 0  | GGCCGGGGAGC  | 0.746 |             |
| + | 4  | 757  | ows.3_Nonsense_I  | NM_001127206 | NP_001120678  | P30519 | HMOX2_HUMAN | 0  | ATGCCCCAGCAG | 0.572 |             |
| - | 22 | 4887 |                   | NM_002705    | NP_002696     | O60437 | PEPL_HUMAN  | 6  | ACGGTTCATGTT | 0.557 |             |
| + | 8  | 807  | g.2_Missense_Mut  | NM_000246    | NP_000237     | P33076 | C2TA_HUMAN  | 1  | TGAGGGACCCA  | 0.537 |             |
| + | 17 | 3426 | p.P1041S MKL2_L   | NM_014048    | NP_054767     | Q9ULH7 | MKL2_HUMAN  | 5  | TAGACCCACAG  | 0.478 |             |
| - | 26 | 5163 | uzv.1_Missense_I  | NM_014647    | NP_055462     | Q9Y4F3 | LKAP_HUMAN  | 0  | CTTGAGGGCGC  | 0.527 |             |
| - | 12 | 2676 | uzv.1_Missense_I  | NM_014647    | NP_055462     | Q9Y4F3 | LKAP_HUMAN  | 0  | TATGGGGGCTG  | 0.448 |             |
| - | 9  | 2282 | uzv.1_Missense_I  | NM_014647    | NP_055462     | Q9Y4F3 | LKAP_HUMAN  | 0  | AACGGTTCTGC  | 0.483 |             |
| + | 9  | 1435 |                   | NM_001039    | NP_001030     | P51170 | SCNNG_HUMAN | 6  | CTCAGTGATTG  | 0.567 |             |
| - | 17 | 1857 |                   | NM_015044    | NP_055859     | Q9UJY4 | GGA2_HUMAN  | 2  | TGAAAGGCTGT  | 0.498 |             |
| - | 5  | 2386 |                   | NM_024675    | NP_078951     | Q86YC2 | PALB2_HUMAN | 11 | AGATGGGGAAAC | 0.468 |             |
| + | 15 | 2723 | l_Missense_Mutal  | NM_016151    | NP_057235     | Q9UL54 | TAOK2_HUMAN | 1  | TACAAGCGCA   | 0.647 |             |
| - | 4  | 1129 | lank INO80E_uc0   | NM_003609    | NP_003600     | Q9BW71 | HIRP3_HUMAN | 1  | GTTCACCTTCC  | 0.373 |             |
| - | 1  | 296  | dxs.2_Missense_I  | NM_006110    | NP_006101     | O95400 | CD2B2_HUMAN | 1  | ATCCTCTCATC  | 0.532 |             |
| + | 11 | 1321 | e_Mutation_p.A29  | NM_002209    | NP_002200     | P20701 | ITAL_HUMAN  | 10 | GAAGGCAGACC  | 0.547 |             |
| - | 3  | 1798 | ao.2_Missense_M   | NM_024706    | NP_078982     | Q96K58 | ZN668_HUMAN | 4  | CTCCACCGTCA  | 0.692 |             |
| + | 8  | 2836 | 10cbo.1_RNA NOI   | NM_022162    | NP_071445     | Q9HC29 | NOD2_HUMAN  | 4  | ACAGAGTGGGT  | 0.522 |             |
| - | 3  | 425  | m.2_Missense_M    | NM_001012398 | NP_001012398  | Q9H8T0 | AKTIP_HUMAN | 0  | GAAGGTCCTAT  | 0.408 |             |
| + | 5  | 1113 | p.D192N MMP2_L    | NM_004530    | NP_004521     | P08253 | MMP2_HUMAN  | 11 | AGAAGGATGGC  | 0.567 |             |
| - | 5  | 376  | p.T104I CNGB1_    | NM_001297    | NP_001288     | Q14028 | CNGB1_HUMAN | 4  | GCCAGGTCAGT  | 0.632 |             |
| - | 2  | 1086 | n_p.T84I TPPP3_   | NM_016140    | NP_057224     | Q9BW30 | TPPP3_HUMAN | 1  | TCTTGGTCGCC  | 0.577 |             |
| - | 3  | 424  |                   | NM_000229    | NP_000220     | P04180 | LCAT_HUMAN  | 0  | TGCTGCTGTCC  | 0.652 |             |
| - | 12 | 1758 | RP2_uc002evq.1_   | NM_024939    | NP_079215     | Q9H6T0 | ESRP2_HUMAN | 1  | CATCTGAATGA  | 0.552 |             |
| - | 9  | 2323 | p.S617F SMPD3_    | NM_018667    | NP_061137     | Q9NY59 | NSMA2_HUMAN | 1  | GGCCGGACAGC  | 0.622 | rs147387314 |
| + | 3  | 267  |                   | NM_013245    | NP_037377     | Q9UN37 | VPS4A_HUMAN | 0  | ATGAGGCCACAC | 0.607 |             |
| + | 9  | 818  | _Mutation_p.D286  | NM_145059    | NP_659496     | Q8N0W3 | FUK_HUMAN   | 1  | GCTTGACTCC   | 0.582 |             |
| + | 2  | 1155 | ao.2_Missense_M   | NM_005769    | NP_005760     | Q8NCG5 | CHST4_HUMAN | 0  | TGCCAGGGATG  | 0.532 |             |
| + | 2  | 116  | DDH_uc010cgk.2_   | NM_001361    | NP_001352     | Q02127 | PYRD_HUMAN  | 0  | CACGGGAGATG  | 0.597 |             |
| - | 9  | 7358 | l.2_Missense_Mut  | NM_006885    | NP_008816     | Q15911 | ZFH3_HUMAN  | 4  | CGAAGGGGGCC  | 0.527 |             |
| - | 3  | 1357 | IST6_uc002feh.1_  | NM_021615    | NP_067628     | Q9GZX3 | CHST6_HUMAN | 0  | CGGGGGTGCG   | 0.637 |             |
| + | 3  | 479  | hl.2_Missense_M   | NM_024731    | NP_079007     | Q8N4N3 | KLH36_HUMAN | 2  | GGATGGCGGCA  | 0.612 |             |
| + | 10 | 1542 |                   | NM_004933    | NP_004924     | P55291 | CAD15_HUMAN | 1  | CGCCGGGCAGC  | 0.726 |             |
| + | 13 | 2106 |                   | NM_004933    | NP_004924     | P55291 | CAD15_HUMAN | 1  | CGACAGCGCTG  | 0.706 |             |
| - | 1  | 118  |                   | NM_002550    | NP_002541     | P47881 | OR3A1_HUMAN | 3  | CGTGACCAGGT  | 0.577 |             |
| - | 3  | 367  | zfx.3_Missense_I  | NM_014520    | NP_055335     | Q9BQG0 | MBB1A_HUMAN | 2  | CAAAAGACTGT  | 0.527 |             |
| + | 5  | 956  | ye.2_Missense_M   | NM_001114974 | NP_0011108446 | Q2TAL5 | SMTL2_HUMAN | 0  | AGCGTCCGAGG  | 0.677 | rs142209104 |
| - | 5  | 732  | p.A172V SLC13A5   | NM_177550    | NP_808218     | Q86YT5 | S13A5_HUMAN | 0  | TGGCCGCGTAG  | 0.617 |             |
| - | 5  | 1276 | PHF23_uc010vtt.1_ | NM_024297    | NP_077273     | Q9BUL5 | PHF23_HUMAN | 0  | GCCGCCCTGCA  | 0.493 |             |
| + | 5  | 1128 |                   | NM_001406    | NP_001397     | Q15768 | EFNB3_HUMAN | 1  | GGCAGGGGCTG  | 0.726 |             |



|   |    |       |                   |              |              |        |             |                              |    |                   |       |             |
|---|----|-------|-------------------|--------------|--------------|--------|-------------|------------------------------|----|-------------------|-------|-------------|
| + | 24 | 4012  | e_Mutation_p.V12  | NM_001005273 | NP_001005273 | Q12873 | CHD3_HUMAN  |                              | 1  | TCAAGGTGGCA       | 0.517 |             |
| - | 2  | 219   | orf68_uc010cnv.2  | NM_025099    | NP_079375    | Q2NKJ3 | CTC1_HUMAN  |                              | 0  | CCTTCCCTGGG       | 0.517 |             |
| + | 7  | 1425  | p.S435F ARHGFEF   | NM_173728    | NP_776089    | O94989 | ARHGF_HUMAN | DH.                          | 3  | GCGCTCCCTGCG      | 0.607 |             |
| - | 8  | 847   | uc002gml.1_Intron | NM_017533    | NP_060003    | Q9Y623 | MYH4_HUMAN  | rosin head-like.             | 13 | AAAGCGAGAGG       | 0.448 |             |
| + | 64 | 12284 | p.W3290* DNAH9    | NM_001372    | NP_001363    | Q9NYC9 | DYH9_HUMAN  | 6 (By similarity).           | 20 | GGATGGAATCG       | 0.493 |             |
| + | 1  | 420   |                   | NM_014695    | NP_055510    | A2RUR9 | C144A_HUMAN |                              | 0  | AAGAGGTAATG       | 0.652 |             |
| - | 13 | 1703  | _p.P22S TOP3A_u   | NM_004618    | NP_004609    | Q13472 | TOP3A_HUMAN |                              | 3  | GACAGGGAGGA       | 0.552 |             |
| + | 3  | 1028  | ul.2_Missense_M   | NM_031456    | NP_113644    | Q5XX13 | FBW10_HUMAN |                              | 1  | TCAGAGACCTG       | 0.468 |             |
| + | 5  | 476   | gun.2_Missense_I  | NM_016078    | NP_057162    | Q9NYZ1 | F18B1_HUMAN |                              | 0  | TCAGAGTAAAG       | 0.393 |             |
| + | 2  | 395   | I_Intron WSB1_uc  | NM_015626    | NP_056441    | Q9Y6I7 | WSB1_HUMAN  |                              | 0  | CTGCAGCTCCT       | 0.378 |             |
| + | 4  | 521   | wan.1_Missense_   | NM_003984    | NP_003975    | Q13183 | S13A2_HUMAN |                              | 0  | CCATCGCACAT       | 0.612 |             |
| - | 3  | 1015  | way.1_Missense_I  | NM_018182    | NP_060652    | Q8WU58 | CQ063_HUMAN |                              | 1  | AAGGGGGATAG       | 0.602 |             |
| + | 2  | 490   | AP2_uc002hfy.2_I  | NM_018404    | NP_060874    | Q9NPF8 | ADAP2_HUMAN | Arf-GAP. p.(1)               | 1  | GGGACGACAGT       | 0.507 |             |
| + | 15 | 2106  | hjc.2_Missense_Iv | NM_173167    | NP_775259    | Q8IWX7 | UN45B_HUMAN |                              | 6  | CACCATTGTGG       | 0.537 |             |
| - | 2  | 628   | _p.S84N SLFN12_   | NM_018042    | NP_060512    | Q8IYM2 | SLN12_HUMAN |                              | 1  | ATGTTACTAAAAC     | 0.373 |             |
| - | 11 | 5687  |                   | NM_001004334 | NP_001004334 | Q6PRD1 | GP179_HUMAN | lasmic (Potential).          | 3  | CTTTGGGGGCC       | 0.498 |             |
| + | 6  | 933   | c002hsc.2_Missen  | NM_032192    | NP_115568    | Q9UD71 | PPR1B_HUMAN |                              | 0  | CCTGTGGCCAG       | 0.582 | rs142405059 |
| + | 8  | 869   | htm.1_Splice_Site | NM_178171    | NP_835465    | Q96QA5 | GSDMA_HUMAN |                              | 0  | TGTTGGTAAGG       | 0.438 |             |
| - | 14 | 1658  | se_Mutation_p.D4K | NM_014815    | NP_055630    | O75448 | MED24_HUMAN | XXLL motif 3.                | 1  | CAAGTCCAGAC       | 0.607 |             |
| + | 2  | 389   | start_Site RARA_u | NM_000964    | NP_000955    | P10276 | RARA_HUMAN  |                              | 3  | GAGGGGTGGTC       | 0.662 |             |
| - | 11 | 1241  | ion_p.G338R SMA   | NM_003079    | NP_003070    | Q969G3 | SMCE1_HUMAN | Glu-rich.                    | 0  | GACCCCTCCTC       | 0.522 |             |
| - | 2  | 659   | cxg.2_Missense_I  | NM_015515    | NP_056330    | Q9C075 | K1C23_HUMAN | Head.                        | 1  | GGGCCGGCCCC       | 0.706 |             |
| - | 1  | 62    | 39_uc010wfm.1_5   | NM_213656    | NP_998821    | Q6A163 | K1C39_HUMAN | Head.                        | 0  | GAATTGGTTGT       | 0.473 |             |
| + | 1  | 271   |                   | NM_033061    | NP_149050    |        |             |                              | 0  | agctgctgtatgccagc | 0.189 | rs148949542 |
| - | 1  | 150   |                   | NM_032524    | NP_115913    | Q9BYR3 | KRA44_HUMAN | :-C-[GRQVCH]-[SPT]- [VS1     | 0  | TGGGCGGCAG        | 0.652 |             |
| - | 1  | 628   | EKHH3_uc010cyr    | NM_024927    | NP_079203    | Q7Z736 | PKHH3_HUMAN |                              | 2  | TTACCCTCCCG       | 0.687 |             |
| + | 13 | 2080  | JAP1_uc010wgs.1   | NM_003632    | NP_003623    | P78357 | CNTP1_HUMAN | ential). Fibrinogen C-termir | 8  | ACCGAGCGTGG       | 0.587 |             |
| - | 10 | 2624  | tron BRCA1_uc01   | NM_007294    | NP_009225    | P38398 | BRCA1_HUMAN |                              | 52 | TATTTGGTTCTG      | 0.398 |             |
| + | 1  | 215   | HX8_uc010wig.1_   | NM_004941    | NP_004932    | Q14562 | DHX8_HUMAN  |                              | 4  | ACAAGGACCTT       | 0.557 |             |
| + | 14 | 2132  | p.A596T DHX8_uc   | NM_004941    | NP_004932    | Q14562 | DHX8_HUMAN  | . Helicase ATP-binding.      | 4  | ACGAGGCACAT       | 0.448 |             |
| - | 4  | 330   | n_p.A29T ETV4_u   | NM_001986    | NP_001977    | P43268 | ETV4_HUMAN  | Glu-rich (acidic).           | 7  | CTCACCTTCAGC      | 0.527 |             |
| + | 5  | 1346  | e_Mutation_p.P28  | NM_001145080 | NP_001138552 | A2RUB1 | CQ104_HUMAN |                              | 1  | CTGATCCCCCAC      | 0.368 |             |
| + | 15 | 2083  | _p.I462V C17orf57 | NM_152347    | NP_689560    | Q8IY85 | CQ057_HUMAN | EF-hand 2.                   | 3  | TTTGGTATTACC      | 0.338 |             |
| + | 19 | 2669  | p.G633E KPNB1_    | NM_002265    | NP_002256    | Q14974 | IMB1_HUMAN  |                              | 3  | AAAGGGGGATCA      | 0.483 |             |
| + | 7  | 1535  | _T2_uc010dbo.2_F  | NM_022167    | NP_071450    | Q9H1B5 | XYLT2_HUMAN | renal (Potential).           | 1  | TTGTGGACTGG       | 0.627 |             |
| + | 6  | 548   | _p.D103E MSI2_u   | NM_138962    | NP_620412    | Q96DH6 | MSI2H_HUMAN | RRM 2.                       | 2  | GAAGATGTAAC       | 0.458 |             |
| - | 6  | 713   | 14_uc002iws.1_M   | NM_198393    | NP_938207    | Q8IWB6 | TEX14_HUMAN |                              | 17 | AAATGACTCCAG      | 0.413 |             |
| + | 7  | 2256  | dd.2_Missense_M   | NM_014906    | NP_055721    | Q8WY54 | PPM1E_HUMAN |                              | 5  | TGGAAGTGGGA       | 0.413 |             |
| - | 12 | 1515  | yn.1_Missense_Mi  | NM_032582    | NP_115971    | Q8NFA0 | UBP32_HUMAN | DUSP.                        | 5  | TGACATATTCTT      | 0.423 |             |
| - | 9  | 1498  | izp.2_Missense_Iv | NM_005121    | NP_005112    | Q9UHV7 | MED13_HUMAN |                              | 2  | AAGGAGTCAAG       | 0.468 |             |
| - | 17 | 2320  |                   | NM_001433    | NP_001424    | O75460 | ERN1_HUMAN  | Potential). Protein kinase.  | 9  | TCAGCCTTCTC       | 0.537 |             |
| - | 27 | 3939  | LZ_uc002jfx.3_Mi  | NM_014877    | NP_055692    |        |             |                              | 2  | CATAAGGAATAC      | 0.453 |             |
| + | 2  | 604   | jjr.2_Missense_ML | NM_000891    | NP_000882    | P63252 | IRK2_HUMAN  | smic (By similarity).        | 0  | ACGGTACCTCG       | 0.517 |             |
| + | 14 | 1608  | _p.R505K TTYH2_   | NM_032646    | NP_116035    | Q9BSA4 | TTYH2_HUMAN | lasmic (Potential).          | 4  | CTGAGGCACT        | 0.517 |             |
| + | 6  | 550   | wrg.1_Missense_I  | NM_017728    | NP_060198    | Q8NE00 | TM104_HUMAN | lasmic (Potential).          | 0  | ACCGGTGGAA        | 0.532 |             |
| + | 8  | 1714  | 1_5'Flank OTOP3_  | NM_178160    | NP_835454    | Q7RTS6 | OTOP2_HUMAN | ical; (Potential).           | 4  | CTCCCTTTCTG       | 0.607 |             |
| - | 6  | 480   | fz.2_Intron ATP5H | NM_006356    | NP_006347    | O75947 | ATP5H_HUMAN |                              | 0  | GGAAAGCTTCA       | 0.388 |             |

|   |    |           |                   |              |              |        |             |                           |    |                |       |
|---|----|-----------|-------------------|--------------|--------------|--------|-------------|---------------------------|----|----------------|-------|
| - | 15 | 2054      | e_Mutation_p.P60  | NM_004259    | NP_004250    | O94762 | RECQ5_HUMAN |                           | 3  | 'CCGGGGGCTCA   | 0.607 |
| - | 4  | 1984      | e_Mutation_p.Q52  | NM_032134    | NP_115510    | Q9H0J4 | QRIC2_HUMAN | Gln-rich.                 | 5  | 'ATGCTGATCTGC  | 0.413 |
| + | 12 | 1737      | jth.2_Missense_M  | NM_198955    | NP_945193    | Q3V5L5 | MGT5B_HUMAN | lenal (Potential).        | 3  | 'iCTTCCCCTACG# | 0.652 |
| + | 8  | 1007      | _p.Y247C SEC14L   | NM_003003    | NP_002994    | Q92503 | S14L1_HUMAN |                           | 2  | 'GAGATACCTGGC  | 0.498 |
| - | 16 | 2583      | .1_Intron USP36_u | NM_025090    | NP_079366    | Q9P275 | UBP36_HUMAN |                           | 5  | 'AGGGGGGTTGTC  | 0.632 |
| + | 3  | 517       | .2_Missense_Mut   | NM_024110    | NP_077015    | Q9BXL6 | CAR14_HUMAN |                           | 5  | 'CTGCAGCTGAT   | 0.577 |
| - | 2  | 157       | 6G_uc002kaz.3_l   | NM_002602    | NP_002593    | P18545 | CNRG_HUMAN  |                           | 0  | 'GGGCGGTTCCA   | 0.657 |
| - | 9  | 1428      | _p.G88R P4HB_uc   | NM_000918    | NP_000909    | P07237 | PDIA1_HUMAN | hiorodoxin 2.             | 0  | 'TCTCTCCCAGTT' | 0.527 |
| - | 4  | 275       | 2kfb.3_Missense_l | NM_001100407 | NP_001093877 | Q9BQA9 | CQ062_HUMAN |                           | 0  | '\CCCTTCCCTGTG | 0.602 |
| - | 8  | 1499      | 4q.2_Missense_M   | NM_003803    | NP_003794    | P52179 | MYOM1_HUMAN |                           | 5  | 'GAGGGGCATGG   | 0.398 |
| + | 2  | 979       | <NDC2_uc002koh.   | NM_001098529 | NP_001091999 | Q86VQ3 | TXND2_HUMAN | eat of Q-P-K-X-G-D-I-P-K. | 2  | 'GGAGGGTGACA   | 0.567 |
| + | 6  | 1029_1030 | 2_Nonsense_M      | NM_194434    | NP_919415    | Q9P0L0 | VAPA_HUMAN  | IV membrane protein; (Pc  | 0  | 'TCTTTTCTAGGGA | 0.371 |
| + | 2  | 478       | _p.P131L LAMA3_u  | NM_198129    | NP_937762    | Q16787 | LAMA3_HUMAN | inin N-terminal.          | 11 | 'CCCTCCCCTGT   | 0.512 |
| + | 31 | 3918      | r.2_Missense_Mu   | NM_198129    | NP_937762    | Q16787 | LAMA3_HUMAN | 3F-like 9. Domain III B.  | 11 | 'CTCACTGCAGC   | 0.652 |
| - | 2  | 864       |                   | NM_020805    | NP_065856    | Q9P2G3 | KLH14_HUMAN |                           | 1  | 'TGACCGACAGC.  | 0.612 |
| + | 17 | 1779      | _p.S533F DTNA_u   | NM_001390    | NP_001381    | Q9Y4J8 | DTNA_HUMAN  |                           | 0  | 'GGACTCCCTCA   | 0.557 |
| - | 3  | 438       | eb.1_RNA NARS_u   | NM_004539    | NP_004530    | O43776 | SYNC_HUMAN  |                           | 0  | 'CCTATGCCACAT  | 0.388 |
| - | 4  | 702       |                   | NM_052947    | NP_443179    | Q86TB3 | ALPK2_HUMAN |                           | 14 | 'GGGAGGAGTCA   | 0.473 |
| + | 13 | 2018      | CHC2_uc002liq.2   | NM_017742    | NP_060212    | Q9C0B9 | ZCHC2_HUMAN |                           | 2  | 'AACAACTAGGT   | 0.398 |
| + | 13 | 3059      | CHC2_uc002liq.2   | NM_017742    | NP_060212    | Q9C0B9 | ZCHC2_HUMAN |                           | 2  | 'GTGCAGCTGTG   | 0.502 |
| - | 18 | 2466      | .2_RNA RTTN_uc    | NM_173630    | NP_775901    | Q86VV8 | RTTN_HUMAN  |                           | 8  | 'GAGAACTCTGG   | 0.413 |
| - | 3  | 978       |                   | NM_001044369 | NP_001037834 | Q0P6D2 | FA69C_HUMAN | lenal (Potential).        | 0  | 'TCAAAGAAATTC  | 0.468 |
| - | 3  | 505       | XNL4A_uc010drf.2  | NM_006701    | NP_006692    | P83876 | TXN4A_HUMAN |                           | 0  | 'GGGCCCCGCGG   | 0.587 |
| + | 4  | 883       |                   | NM_014913    | NP_055728    | Q6IQ32 | ADNP2_HUMAN |                           | 8  | 'TTTAGGTGAAAC  | 0.398 |
| + | 4  | 269       | _p.G55S PTBP1_uc  | NM_031991    | NP_114368    | P26599 | PTBP1_HUMAN |                           | 2  | 'GTGCAGGCGTC   | 0.582 |
| - | 16 | 1457      | F3_uc002ltq.2_Mi  | NM_003200    | NP_003191    | P15923 | TFE2_HUMAN  |                           | 7  | 'GAGGGCCGCGT   | 0.682 |
| - | 6  | 2490      | _uc010xgs.1_Spli  | NM_020695    | NP_065746    | Q8N1G1 | REXO1_HUMAN |                           | 0  | 'AAACTCTAGAGG  | 0.572 |
| + | 6  | 903       | gz.1_Missense_M   | NM_003249    | NP_003240    | P52888 | THOP1_HUMAN |                           | 3  | 'GCAAGGAGGTG   | 0.612 |
| + | 6  | 764       | _Mutation_p.P24   | NM_021938    | NP_068757    | Q8N6W0 | CELF5_HUMAN |                           | 2  | 'TCAGCCCTCAC   | 0.647 |
| - | 4  | 361       | _p.V102M PIP5K1C  | NM_012398    | NP_036530    | O60331 | PI51C_HUMAN | PIPK.                     | 4  | 'GAGCACGTCCG   | 0.657 |
| - | 3  | 627       |                   | NM_030662    | NP_109587    | P36507 | MP2K2_HUMAN | rotein kinase.            | 0  | 'AGTTGCATTCTG  | 0.612 |
| - | 7  | 683       | _p.D136G SIRT6_u  | NM_016539    | NP_057623    | Q8N6T7 | SIRT6_HUMAN | tylase sirtuin-type.      | 1  | 'ACAGGTCCGCG   | 0.692 |
| + | 3  | 209       |                   | NM_018074    | NP_060544    | Q9BW85 | CCD94_HUMAN |                           | 0  | 'TGCTCGGAAGG   | 0.557 |
| + | 6  | 2310      | .2_Missense_Mut   | NM_020209    | NP_064594    | Q96IW2 | SHD_HUMAN   | SH2.                      | 0  | 'GCCAGGGCTTC   | 0.657 |
| - | 7  | 757       | 20_splice STAP2_u | NM_001013841 | NP_001013863 | Q9UGK3 | STAP2_HUMAN |                           | 1  | 'GCTCACCGGCT   | 0.622 |
| - | 2  | 435       |                   | NM_182919    | NP_891549    | Q8IUC6 | TCAM1_HUMAN |                           | 1  | 'TGCCCTTAGAG   | 0.662 |
| - | 6  | 1199      | ense_Mutation_p.C | NM_020175    | NP_064560    | Q96G46 | DUS3L_HUMAN |                           | 0  | 'GGCGCCCTCCA   | 0.652 |
| - | 20 | 2595      |                   | NM_000064    | NP_000055    | P01024 | CO3_HUMAN   |                           | 5  | 'TTCCACCTGCT   | 0.577 |
| + | 8  | 1285      | _p.R274H ZNF557_u | NM_001044388 | NP_001037853 | Q8N988 | ZN557_HUMAN | 2H2-type 5.               | 2  | 'AGTTCCGCACTC. | 0.458 |
| + | 11 | 1484      | 2mgp.2_Splice_Si  | NM_020533    | NP_065394    | Q9GZU1 | MCLN1_HUMAN |                           | 1  | 'TGAAGGTACAT   | 0.582 |
| + | 14 | 1842      | VPLA6_uc010xjq.1  | NM_020533    | NP_065394    | Q9GZU1 | MCLN1_HUMAN |                           | 1  | 'CCTCGGAGGAC   | 0.592 |
| + | 10 | 999       | .G268R HNRNPM_u   | NM_005968    | NP_005959    | P52272 | HNRPM_HUMAN |                           | 0  | 'GCATGGGGTTAC  | 0.468 |
| - | 19 | 2041      |                   | NM_012335    | NP_036467    | O00160 | MYO1F_HUMAN | osin head-like.           | 3  | 'CCGCGGCCACG   | 0.652 |
| - | 4  | 385       | _p.D91N MYO1F_u   | NM_012335    | NP_036467    | O00160 | MYO1F_HUMAN | osin head-like.           | 3  | 'GTTGTCCGTGAC  | 0.582 |
| - | 3  | 19939     |                   | NM_024690    | NP_078966    | Q8WXI7 | MUC16_HUMAN | xtracellular (Potential). | 57 | 'AATGTCTTCTGA  | 0.458 |
| - | 6  | 2027      | F846_uc010dww.2   | NM_001077624 | NP_001071092 | Q147U1 | ZN846_HUMAN | 2H2-type 13.              | 1  | 'GTGTGAGTTCGT  | 0.398 |
| - | 55 | 4062      |                   | NM_015719    | NP_056534    | P25940 | CO5A3_HUMAN | le-helical region.        | 10 | 'CTTCTCCCTTC   | 0.607 |

|   |    |      |                    |              |              |        |              |                                |    |               |       |
|---|----|------|--------------------|--------------|--------------|--------|--------------|--------------------------------|----|---------------|-------|
| - | 43 | 3235 |                    | NM_015719    | NP_056534    | P25940 | CO5A3_HUMAN  | le-helical region.             | 10 | CAGTGGGGCCA   | 0.657 |
| + | 5  | 893  |                    | NM_015725    | NP_056540    | Q9NYR8 | RDH8_HUMAN   |                                | 4  | GCACACTTCCC   | 0.612 |
| + | 3  | 454  | mnv.3_Missense_M   | NM_003259    | NP_003250    | Q9UMF0 | ICAM5_HUMAN  | potential). lg-like C2-type 1. | 3  | GCCTCCCTGGC   | 0.682 |
| - | 3  | 543  | Site CDC37_uc00    | NM_007065    | NP_008996    | Q16543 | CDC37_HUMAN  |                                | 0  | CCTCACCTCTC   | 0.577 |
| + | 4  | 753  | splice_Site_p.G197 | NM_001005361 | NP_001005361 | P50570 | DYN2_HUMAN   |                                | 6  | CCAAGGTAACC   | 0.592 |
| - | 3  | 420  |                    | NM_006858    | NP_006849    | Q13445 | TMED1_HUMAN  | tracellular (l p.D102N(1)      | 4  | GTAGTCCCCGG   | 0.592 |
| + | 4  | 979  | asn.3_Missense_M   | NM_152355    | NP_689568    | Q8N8Z8 | ZN441_HUMAN  | ype 4; degenerate.             | 1  | CTTCAGTTGTT   | 0.393 |
| - | 10 | 1112 | ise_Mutation_p.R3  | NM_004461    | NP_004452    | Q9Y285 | SYFA_HUMAN   |                                | 1  | AATACGCGGTCG  | 0.602 |
| - | 3  | 551  | xnj.1_Missense_M   | NM_024825    | NP_079101    | Q6PEZ8 | PONL1_HUMAN  | u-rich. LRR 1.                 | 1  | CAGCTCATTGT   | 0.607 |
| + | 10 | 1588 | yq.2_Missense_Mi   | NM_002741    | NP_002732    | Q16512 | PKN1_HUMAN   |                                | 8  | CCCAGGTCACC   | 0.597 |
| - | 11 | 1469 | p.G389S EMR3_u     | NM_032571    | NP_115960    | Q9BY15 | EMR3_HUMAN   | lasmic (Potential).            | 6  | CACACCCTCCA   | 0.557 |
| + | 10 | 1177 |                    | NM_023944    | NP_076433    |        |              |                                | 7  | CTTAGGGACGA   | 0.517 |
| + | 9  | 1521 | t12_splice SLC27A  | NM_198580    | NP_940982    | Q6PCB7 | S27A1_HUMAN  |                                | 0  | CTCAGGTGCGC   | 0.647 |
| + | 5  | 975  | ihu.2_Missense_IV  | NM_015683    | NP_056498    | Q8TBH0 | ARRD2_HUMAN  |                                | 1  | TACACGTGGAC   | 0.677 |
| - | 8  | 800  | ihx.1_Missense_IV  | NM_005535    | NP_005526    | P42701 | I12R1_HUMAN  | tential). Fibronectin type-III | 1  | CTGCTCCACCG   | 0.478 |
| - | 4  | 935  |                    | NM_001159293 | NP_001152765 | C9JHM3 | C9JHM3_HUMAN |                                | 1  | TCTCCACTATGA  | 0.403 |
| - | 4  | 1480 | pc.1_Missense_M    | NM_001076675 | NP_001070143 | Q68DY1 | ZN626_HUMAN  | 2H2-type 10.                   | 1  | TTCTCCTATGTG  | 0.373 |
| - | 5  | 1723 | 208_uc002nqo.1_I   | NM_007153    | NP_009084    |        |              |                                | 7  | GTGTAGTAAGGC  | 0.368 |
| - | 4  | 1395 | 1_Intron ZNF208_   | NM_007153    | NP_009084    |        |              |                                | 7  | GCCTCATGTT    | 0.368 |
| - | 3  | 503  |                    | NM_001001411 | NP_001001411 | Q8N7Q3 | ZN676_HUMAN  |                                | 0  | GGAAAGAATCT   | 0.308 |
| - | 7  | 2771 |                    | NM_001080409 | NP_001073878 |        |              |                                | 2  | GTAAAAGCTTTGC | 0.368 |
| - | 5  | 905  |                    | NM_001080409 | NP_001073878 |        |              |                                | 2  | TTCTGTCCAGTA  | 0.363 |
| + | 4  | 3808 | ld.1_Missense_Mt   | NM_014717    | NP_055532    | O15090 | ZN536_HUMAN  |                                | 11 | CTCTCACCTTTAT | 0.667 |
| + | 3  | 2256 | xrn.1_Missense_M   | NM_001136156 | NP_001129628 | Q8TCN5 | ZN507_HUMAN  | 2H2-type 4.                    | 5  | GTACGAGTCCATC | 0.502 |
| + | 7  | 1018 |                    | NM_018025    | NP_060495    | Q9BRR8 | GPTC1_HUMAN  |                                | 1  | GCATGGTCTAG   | 0.463 |
| + | 5  | 1147 | dq.1_Missense_Mt   | NM_194325    | NP_919306    | P17039 | ZNF30_HUMAN  |                                | 2  | CTGGTGAAAAA   | 0.448 |
| + | 5  | 1301 | dq.1_Missense_Mt   | NM_194325    | NP_919306    | P17039 | ZNF30_HUMAN  | 2H2-type 7.                    | 2  | ATCAGAGAATTC  | 0.448 |
| + | 9  | 1711 | s.1_Missense_Mu    | NM_002361    | NP_002352    | P20916 | MAG_HUMAN    | ical; (Potential).             | 7  | CGTGGTCGCCT   | 0.592 |
| + | 9  | 1125 | ai.1_5'Flank TMEN  | NM_014364    | NP_055179    | O14556 | G3PT_HUMAN   |                                | 0  | AAGCAGCAGCC   | 0.642 |
| + | 2  | 1312 |                    | NM_024509    | NP_078785    | Q9BTN0 | LRFN3_HUMAN  | xtracellular (Potential).      | 0  | GGTGGGCGAGG   | 0.726 |
| - | 6  | 1279 | 345_uc002oez.2_I   | NM_001037232 | NP_001032309 | Q3KNS6 | ZN829_HUMAN  | 2H2-type 6.                    | 0  | GGTTGAGTAAAG  | 0.383 |
| - | 2  | 210  | 2_Missense_Mutat   | NM_152360    | NP_689573    | Q86YE8 | ZN573_HUMAN  | KRAB.                          | 1  | ACCAGGTTTCTAT | 0.408 |
| + | 3  | 1812 |                    | NM_015073    | NP_055888    | O60292 | SI1L3_HUMAN  |                                | 2  | AGATCGGGGGC   | 0.657 |
| + | 17 | 4978 |                    | NM_015073    | NP_055888    | O60292 | SI1L3_HUMAN  |                                | 2  | GCAACCGAGGT   | 0.537 |
| + | 3  | 509  | p.P119S NFKBIB_    | NM_002503    | NP_002494    | Q15653 | IKBB_HUMAN   | ANK 3.                         | 2  | CCCCCCCCCGG   | 0.721 |
| + | 3  | 458  |                    | NM_172140    | NP_742152    | Q8IU54 | IL29_HUMAN   |                                | 0  | CACACCTGCAC   | 0.682 |
| + | 2  | 186  | 2olq.3_Missense_   | NM_001111020 | NP_001104490 | O00267 | SPT5H_HUMAN  |                                | 4  | GTGCGGACAGC   | 0.657 |
| - | 7  | 836  | p.D130N AKT2_uc    | NM_001626    | NP_001617    | P31751 | AKT2_HUMAN   | rotein kinase.                 | 2  | CTTCATCCTGCA  | 0.617 |
| - | 7  | 1728 | 3_Mutation_p.P34   | NM_181882    | NP_870998    | Q9BXM0 | PRAX_HUMAN   | DKL]-[LIVMAP]- [AQKHRP         | 2  | CTCCGGCACAG   | 0.592 |
| + | 1  | 70   | P4_uc002oog.1_lr   | NM_001042544 | NP_001036009 | Q8N2S1 | LTBP4_HUMAN  |                                | 1  | CAGCCGCCACC   | 0.672 |
| + | 1  | 728  | K4_uc002oor.2_5'   | NM_025194    | NP_079470    | Q96DU7 | IP3KC_HUMAN  |                                | 0  | CTCCAGGACAC   | 0.512 |
| + | 1  | 775  |                    | NM_001410    | NP_001401    | Q7Z7M0 | MEGF8_HUMAN  | lar (Potential). CUB 1.        | 1  | GGATGGTGCGG   | 0.667 |
| + | 6  | 593  | 227_uc010xww.1_I   | NM_182490    | NP_872296    | Q86WZ6 | ZN227_HUMAN  |                                | 1  | CCAGGTGTCTTC  | 0.373 |
| + | 5  | 550  | xf.1_Missense_Mi   | NM_001294    | NP_001285    | O96005 | CLPT1_HUMAN  | ellular (Potential).           | 1  | CAGACCCCGG    | 0.622 |
| + | 7  | 1225 | kn.2_Missense_Mi   | NM_017659    | NP_060129    | Q9NXS2 | QPCTL_HUMAN  |                                | 1  | TTCAGGGGTAC   | 0.597 |
| - | 2  | 582  | rdk.1_Missense_M   | NM_004943    | NP_004934    | Q09019 | DMWD_HUMAN   |                                | 0  | AGATGGTCTCG   | 0.542 |
| + | 4  | 369  |                    | NM_022142    | NP_071425    | Q96BH3 | ESPB1_HUMAN  | onectin type-II 2.             | 0  | ATTACCCACGC   | 0.463 |

|   |    |       |                    |              |              |        |              |                               |     |               |       |
|---|----|-------|--------------------|--------------|--------------|--------|--------------|-------------------------------|-----|---------------|-------|
| + | 2  | 563   | nc.2_Missense_Mt   | NM_001097638 | NP_001091107 | Q10981 | FUT2_HUMAN   | renal (Potential).            | 1   | CTACCCCTGCT   | 0.647 |
| - | 4  | 452   | nu.1_Missense_Mt   | NM_025129    | NP_079405    | Q9BT04 | FUZZY_HUMAN  |                               | 0   | ATATTGGTCAGT  | 0.458 |
| - | 8  | 1615  | p.D521N IL4I1_ucl  | NM_152899    | NP_690863    | Q96RQ9 | OXLA_HUMAN   |                               | 3   | CGTGTCCGATG   | 0.692 |
| - | 3  | 300   | _uc002puj.2_Intror | NM_001012964 | NP_001012982 | Q92876 | KLK6_HUMAN   |                               | 0   | CCCACCTGCAG   | 0.423 |
| + | 2  | 725   |                    | NM_002030    | NP_002021    | P25089 | FPR3_HUMAN   | cellular (Potential).         | 6   | ACTTTGCATTCT  | 0.433 |
| + | 5  | 2096  | .2_RNA ZNF808_u    | NM_001039886 | NP_001034975 | Q8N4W9 | ZN808_HUMAN  | :2H2-type 15.                 | 0   | GGCACGACATA   | 0.408 |
| - | 3  | 2019  |                    | NM_198457    | NP_940859    | Q6ZNG1 | ZN600_HUMAN  |                               | 0   | TTCTCTCCAGTAT | 0.433 |
| - | 4  | 527   | gae.2_Missense_Mt  | NM_001008801 | NP_001008801 | Q5VIY5 | ZN468_HUMAN  |                               | 2   | ATCATGTTGGCC  | 0.438 |
| + | 7  | 1151  | _p.A271T LILRB1_   | NM_006669    | NP_006660    | Q8NHL6 | LIRB1_HUMAN  | 3. Extracellular (Potential). | 3   | CTGGCGCACAG   | 0.607 |
| - | 1  | 159   |                    | NM_176820    | NP_789790    | Q7RTR0 | NALP9_HUMAN  | DAPIN.                        | 7   | CAGCCCAGGGG   | 0.453 |
| + | 4  | 1907  | uid.1_Intron ZNF5  | NM_153263    | NP_694995    | Q6P9A3 | ZN549_HUMAN  |                               | 1   | CACTGGCGAAA   | 0.448 |
| - | 2  | 247   | F550_uc002qpc.2    | NM_001039654 | NP_001034743 | Q7Z398 | ZN550_HUMAN  |                               | 0   | TCTCCCCAACCT  | 0.532 |
| + | 3  | 1601  | VF776_uc002qqa.2   | NM_173632    | NP_775903    | Q68D11 | ZN776_HUMAN  | ype 10; degenerate.           | 1   | GGCCACATGAG   | 0.453 |
| + | 12 | 1385  | izi.2_Missense_Mt  | NM_003887    | NP_003878    | O43150 | ASAP2_HUMAN  | PH.                           | 0   | CAAAGCTCAAC   | 0.483 |
| - | 17 | 2646  | _p.V735I PUM2_u    | NM_015317    | NP_056132    | Q8TB72 | PUM2_HUMAN   | ilio 5. PUM-HD.               | 1   | AAATACCTGAG   | 0.363 |
| + | 10 | 836   | _p.S257F GCKR_     | NM_001486    | NP_001477    | Q14397 | GCKR_HUMAN   | SIS 1.                        | 2   | CGGCTCCTCCC   | 0.552 |
| + | 5  | 247   | zj.1_Missense_Mu   | NM_153021    | NP_694566    | Q6P1J6 | PLB1_HUMAN   | ate repeats. Extracellular (F | 9   | AGCCTCCAGAC   | 0.408 |
| - | 1  | 3247  |                    | NM_001029883 | NP_001025054 | A6NGG8 | CB071_HUMAN  | Pro-rich.                     | 1   | GAAAGGGGGGC   | 0.607 |
| - | 8  | 3028  | p.G928S NLRC4_u    | NM_021209    | NP_067032    | Q9NPP4 | NLRC4_HUMAN  | LRR 11.                       | 6   | ACCTACCTAAAA  | 0.413 |
| - | 36 | 6263  | _p.P368L HEATR5    | NM_019024    | NP_061897    | Q9P2D3 | HTR5B_HUMAN  |                               | 8   | TGGCGGGGGCT   | 0.423 |
| + | 5  | 638   | rk.1_Intron C2orf5 | NM_144736    | NP_653337    | Q7L592 | MIDA_HUMAN   |                               | 1   | GAAAGGTGTAC   | 0.403 |
| - | 7  | 960   | UMPD2_uc010ynt     | NM_025264    | NP_079540    | Q9BTF0 | THUM2_HUMAN  |                               | 1   | CAAGTCCACAC   | 0.323 |
| - | 16 | 2785  | se_Mutation_p.M5   | NM_001083953 | NP_001077422 | Q6YHU6 | THADA_HUMAN  |                               | 3   | TAATTCATCAG   | 0.343 |
| - | 37 | 4044  |                    | NM_133259    | NP_573566    | P42704 | LPPRC_HUMAN  |                               | 3   | TGAGACTGACA   | 0.368 |
| - | 7  | 1069  | REPL_uc002ruj.3    | NM_006036    | NP_006027    | Q4J6C6 | PPCEL_HUMAN  |                               | 1   | TATTTCTCTTCA  | 0.363 |
| + | 2  | 578   | t6_uc010fbj.2_5'U  | NM_000179    | NP_000170    | P52701 | MSH6_HUMAN   | PWWP.                         | 168 | GGCTGGGTTAG   | 0.373 |
| + | 4  | 1714  | _p.T219I MSH6_u    | NM_000179    | NP_000170    | P52701 | MSH6_HUMAN   |                               | 168 | GGGTACACAGA   | 0.438 |
| + | 4  | 2346  | _p.R430* MSH6_u    | NM_000179    | NP_000170    | P52701 | MSH6_HUMAN   |                               | 168 | TATCAACGAATG  | 0.398 |
| + | 8  | 3808  | xi.1_Missense_Mut  | NM_000179    | NP_000170    | P52701 | MSH6_HUMAN   | p.T1219(4)                    | 168 | GAGGTACTGCAA  | 0.323 |
| + | 1  | 753   | TTF2A1L_uc002rv    | NM_006873    | NP_006864    | B7ZL16 | B7ZL16_HUMAN |                               | 5   | AACATCTCCAG   | 0.408 |
| + | 14 | 1719  | se_Mutation_p.S4   | NM_015701    | NP_056516    | Q96DZ1 | ERLEC_HUMAN  |                               | 2   | TTCTTTCTCTCC  | 0.358 |
| - | 80 | 10083 | od.2_Missense_Mt   | NM_014709    | NP_055524    | Q70CQ2 | UBP34_HUMAN  |                               | 19  | GCCGCCTTTTAA  | 0.488 |
| - | 3  | 1171  | se_Mutation_p.A1   | NM_032180    | NP_115556    | Q3B820 | F161A_HUMAN  |                               | 3   | TCTGGCTTTAA   | 0.418 |
| - | 3  | 1610  | l2sit.3_Missense_M | NM_015470    | NP_056285    | Q9BXF6 | RFIP5_HUMAN  |                               | 0   | GCGTTCCTCT    | 0.652 |
| + | 10 | 1276  | _p.A350S CCT7_uc   | NM_006429    | NP_006420    | Q99832 | TCPH_HUMAN   |                               | 0   | CATGATGCCATC  | 0.542 |
| - | 12 | 1832  | _p.G392R GGCX_u    | NM_000821    | NP_000812    | P38435 | VKGC_HUMAN   | renal (Potential).            | 1   | TTCTCCCTCTCG  | 0.353 |
| - | 4  | 2210  | l02srm.2_Missense  | NM_005667    | NP_005658    | O00237 | RN103_HUMAN  | ical; (Potential).            | 1   | TGTAAGAGTAA   | 0.388 |
| - | 39 | 5584  | ae_Mutation_p.S44  | NM_014014    | NP_054733    | O75643 | U520_HUMAN   | SEC63 2.                      | 10  | ACATGCTGAAG   | 0.517 |
| + | 8  | 1137  | _p.W222* CNGA3     | NM_001298    | NP_001289    | Q16281 | CNGA3_HUMAN  |                               | 6   | CTGTGGCAGCA   | 0.483 |
| + | 6  | 535   | szt.1_RNA MRPL3    | NM_145213    | NP_660214    | Q8TCC3 | RM30_HUMAN   |                               | 1   | AGTTGCCACAA   | 0.343 |
| + | 10 | 857   | ae_Mutation_p.G2E  | NM_145687    | NP_663720    | O95819 | M4K4_HUMAN   | rotein kinase.                | 4   | TAGAAGGGTGCC  | 0.373 |
| + | 13 | 2579  | 2_Missense_Mutal   | NM_012455    | NP_036587    | Q8NDX1 | PSD4_HUMAN   | PH.                           | 2   | ATGGGGCAAGC   | 0.547 |
| + | 2  | 269   | ofil.2_Missense_M  | NM_020909    | NP_065960    | Q9HCM4 | E41L5_HUMAN  | FERM.                         | 1   | GGTGTCCCTTC   | 0.473 |
| - | 79 | 13097 |                    | NM_018557    | NP_061027    | Q9NZR2 | LRP1B_HUMAN  | ntial). LDL-receptor class B  | 50  | TCCAGTACATC   | 0.388 |
| + | 1  | 1684  | .NT5_uc010zci.1_I  | NM_014568    | NP_055383    | Q7Z7M9 | GALT5_HUMAN  | renal (Potential).            | 4   | TATAGAGCCATT  | 0.443 |
| + | 15 | 2766  | ense_Mutation_p.E  | NM_003628    | NP_003619    | Q99569 | PKP4_HUMAN   | ARM 7.                        | 7   | TAGCAGAAAGT   | 0.527 |
| - | 6  | 1278  | _p.Y357* PLA2R1    | NM_007366    | NP_031392    | Q13018 | PLA2R_HUMAN  | cellular (Potential).         | 3   | GTTTAGATATTT  | 0.343 |

rs149159527

rs63751127

rs63750949

|   |     |       |                     |              |              |        |             |                               |     |               |       |
|---|-----|-------|---------------------|--------------|--------------|--------|-------------|-------------------------------|-----|---------------|-------|
| + | 22  | 4285  | .G1332E SCN2A_      | NM_001040142 | NP_001035232 | Q99250 | SCN2A_HUMAN | III.                          | 8   | TTTAGGAGCCA'  | 0.333 |
| - | 4   | 629   |                     | NM_013233    | NP_037365    | Q9UEW8 | STK39_HUMAN | rotein kinase.                | 2   | TTCTCCTCGGT'  | 0.363 |
| - | 55  | 10880 |                     | NM_004525    | NP_004516    | P98164 | LRP2_HUMAN  | ; A 27. Extracellular (Potent | 29  | ACTGTCCCAGT'  | 0.532 |
| - | 8   | 1055  | ff.1_Missense_Mu    | NM_004525    | NP_004516    | P98164 | LRP2_HUMAN  | s A 7. Extracellular (Potenti | 29  | AAATGGAGATGC  | 0.423 |
| + | 4   | 512   | L23_uc002ufh.1_l    | NM_001008489 | NP_001008489 | Q8TCD6 | PHOP2_HUMAN |                               | 1   | :GAAAAGGATTTT | 0.368 |
| - | 272 | 61110 | _uc010zfi.1_Misser  | NM_133378    | NP_596869    | Q8WZ42 | TITIN_HUMAN |                               | 153 | AGGTTTCAGTCC/ | 0.388 |
| - | 207 | 40893 | .1_Missense_Mute    | NM_133378    | NP_596869    | Q8WZ42 | TITIN_HUMAN |                               | 153 | ATAAGTACTCTTT | 0.368 |
| - | 46  | 15496 | 'N_uc010zfi.1_Intri | NM_133379    | NP_596870    | Q8WZ42 | TITIN_HUMAN |                               | 153 | 'CCAGAGTCTCTC | 0.527 |
| - | 46  | 15409 | 'N_uc010zfi.1_Intri | NM_133379    | NP_596870    | Q8WZ42 | TITIN_HUMAN |                               | 153 | 3TGGAGTATCTC' | 0.512 |
| + | 8   | 1140  | NAJC10_uc002uo.     | NM_018981    | NP_061854    | Q8IXB1 | DJC10_HUMAN |                               | 4   | TTTGGACAGGTA  | 0.328 |
| + | 8   | 1738  | 'AR_uc002uqu.2_l    | NM_144708    | NP_653309    | Q7Z5J8 | ANKAR_HUMAN | ANK 4.                        | 4   | CAGGAGCACTG'  | 0.333 |
| + | 10  | 2666  | i.1_Nonsense_Mu     | NM_000534    | NP_000525    | P54277 | PMS1_HUMAN  |                               | 4   | :AGAAACAAAAC/ | 0.333 |
| - | 16  | 1656  | _p.P423L STAT1_     | NM_007315    | NP_009330    | P42224 | STAT1_HUMAN |                               | 10  | TGAGAGGACCCC  | 0.408 |
| - | 41  | 7132  |                     | NM_018897    | NP_061720    | Q8WXX0 | DYH7_HUMAN  | al) AAA 4 (By similarity).    | 12  | :CACTCCCTCCA/ | 0.473 |
| + | 4   | 699   | D1_uc002uuk.2_5'    | NM_002157    | NP_002148    | P61604 | CH10_HUMAN  |                               | 0   | TTGAGGATTATT  | 0.333 |
| - | 6   | 590   | _3_uc002uwj.2_3'l   | NM_130906    | NP_570981    | Q9H2H8 | PPIL3_HUMAN | e cyclophilin-type.           | 0   | CAAATACGGTGT/ | 0.383 |
| + | 4   | 619   | CASP8_uc010ftd.1    | NM_033355    | NP_203519    | Q14790 | CASP8_HUMAN | DED 2.                        | 5   | ATGACATGGTAAc | 0.413 |
| + | 8   | 904   | 'uxv.1_Missense_f   | NM_033355    | NP_203519    | Q14790 | CASP8_HUMAN |                               | 5   | :CAAACCTCGGG  | 0.428 |
| + | 10  | 1175  | _Mutation_p.G354    | NM_001875    | NP_001866    | P31327 | CPSM_HUMAN  | imidotransferase type-1.      | 13  | :TGCTGGCTGGA  | 0.423 |
| + | 12  | 1481  | er.2_Nonsense_M     | NM_024532    | NP_078808    | Q8N0X2 | SPG16_HUMAN | WD 3.                         | 2   | AATTTGGGATGT  | 0.413 |
| - | 40  | 6675  | fh.2_Intron FN1_u   | NM_212482    | NP_997647    | P02751 | FINC_HUMAN  | trand 3 (CS-3) (V region).    | 13  | :CCCAACACTGG' | 0.532 |
| - | 31  | 5281  | FN1_uc002vfh.2_     | NM_212482    | NP_997647    | P02751 | FINC_HUMAN  | ype-III 12; extra domain.     | 13  | :CTGGTCCATTTI | 0.358 |
| - | 22  | 3781  | f.2_Missense_Mut    | NM_212482    | NP_997647    | P02751 | FINC_HUMAN  | onnectin type-III 6.          | 13  | TTACGTGTCACC/ | 0.383 |
| - | 9   | 755   | fw.2_Splice_Site_   | NM_022453    | NP_071898    | Q96BH1 | RNF25_HUMAN |                               | 2   | :AGCTCCTGGAA' | 0.562 |
| - | 8   | 894   | te PRKAG3_uc010     | NM_017431    | NP_059127    | Q9UGI9 | AAKG3_HUMAN |                               | 2   | CACCCACCTATC. | 0.582 |
| - | 15  | 1712  | zlx.1_Splice_Site_  | NM_024506    | NP_078782    | Q6UWU2 | GLB1L_HUMAN |                               | 0   | :GCTCACCTTGA/ | 0.443 |
| - | 4   | 458   | 119S TUBA4B_uc0     | NM_006000    | NP_005991    | P68366 | TBA4A_HUMAN |                               | 3   | :GAAGCCCTGAA  | 0.542 |
| - | 7   | 1197  | p.G280S PTPRN_      | NM_002846    | NP_002837    | Q16849 | PTPRN_HUMAN | ellular (Potential).          | 4   | :TGCACCCCTGG' | 0.627 |
| + | 18  | 2228  |                     | NM_052902    | NP_443134    | Q8N1F8 | S11IP_HUMAN |                               | 1   | TTCTCCTCGCT'  | 0.622 |
| + | 21  | 2587  | SMD1_uc010fxu.1     | NM_002807    | NP_002798    | Q99460 | PSMD1_HUMAN |                               | 2   | :GGAAGTACCAA/ | 0.343 |
| - | 12  | 5932  | p.P1677S COL6A3     | NM_004369    | NP_004360    | P12111 | CO6A3_HUMAN | 0. Nonhelical region.         | 18  | GGTGGGCGAGC   | 0.602 |
| + | 11  | 1484  | 02vxd.2_Missense    | NM_001137552 | NP_001131024 | Q32MZ4 | LRRF1_HUMAN |                               | 3   | :CACCAGATGAC. | 0.498 |
| - | 3   | 401   | se_Mutation_p.E1    | NM_016552    | NP_057636    | Q9P2S6 | ANKY1_HUMAN |                               | 1   | :GCCTTCTCGGT' | 0.562 |
| + | 10  | 1080  | ab.3_Missense_M     | NM_000030    | NP_000021    | P21549 | SPYA_HUMAN  |                               | 0   | TTCCCACAGTCA' | 0.622 |
| - | 10  | 1602  | p.A504T PASK_uc     | NM_015148    | NP_055963    | Q96RG2 | PASK_HUMAN  |                               | 6   | :CAGCGCCTGTT' | 0.562 |
| - | 7   | 1077  | _Mutation_p.A329T   | NM_015148    | NP_055963    | Q96RG2 | PASK_HUMAN  |                               | 6   | :GGCCGCTCAC   | 0.612 |
| - | 16  | 2131  | p.N635Y HDLBP_      | NM_203346    | NP_976221    | Q00341 | VIGLN_HUMAN | KH 7.                         | 4   | :GCAGTTGGCTC' | 0.458 |
| - | 2   | 422   | wee.2_Missense_     | NM_033409    | NP_212134    | Q9NQ40 | RFT2_HUMAN  |                               | 2   | :GCAGGGGCAGC  | 0.647 |
| + | 3   | 1154  | 'K35_uc002wfw.3     | NM_080836    | NP_543026    | Q8TDR2 | STK35_HUMAN | rotein kinase.                | 1   | :ACTAAGCAAGG' | 0.527 |
| + | 15  | 1897  | gg.1_Missense_Mi    | NM_080751    | NP_542789    | Q8TDI7 | TMC2_HUMAN  | lasmic (Potential).           | 3   | TCATATGCTGAG' | 0.343 |
| - | 4   | 730   | _p.L244F SIGLEC'    | NM_023068    | NP_075556    | Q9BZZ2 | SN_HUMAN    | 2. Extracellular (Potential). | 10  | FGAGGAGGATCT  | 0.577 |
| - | 37  | 8249  | z.1_Missense_Mu     | NM_032221    | NP_115597    | Q8TD26 | CHD6_HUMAN  |                               | 14  | :CAAAGGGGCAC  | 0.542 |
| - | 36  | 7410  | D6_uc002xjz.1_5'l   | NM_032221    | NP_115597    | Q8TD26 | CHD6_HUMAN  |                               | 14  | :CCTTGGGGATG' | 0.537 |
| - | 4   | 398   | UTR SYS1-DBNDI      | NM_014477    | NP_055292    | Q9Y2B4 | T5G5_HUMAN  |                               | 1   | TCTCGGAGCAC'  | 0.493 |
| - | 2   | 2548  | us.1_Missense_Mi    | NM_004975    | NP_004966    | Q14721 | KCNB1_HUMAN | lasmic (Potential).           | 2   | :AGTGGTTTTTCT | 0.537 |
| + | 7   | 2228  | ze.1_Missense_Mi    | NM_001164116 | NP_001157588 | Q9NQ75 | CASS4_HUMAN |                               | 3   | :TGAGAGGAAAC' | 0.532 |
| - | 3   | 1181  | _p.A218T BMP7_u     | NM_001719    | NP_001710    | P18075 | BMP7_HUMAN  |                               | 1   | CGAGGCCCAGA   | 0.632 |

rs61730410



|   |     |      |                   |              |              |        |             |                                |    |               |       |
|---|-----|------|-------------------|--------------|--------------|--------|-------------|--------------------------------|----|---------------|-------|
| + | 6   | 708  | iL1_uc002ybz.1_R  | NM_198935    | NP_945173    | O75177 | CREST_HUMAN | intra-molecular domain (By     | 2  | GATGGGGCAGG   | 0.706 |
| + | 4   | 936  |                   | NM_178463    | NP_848558    | Q9H1L0 | CT166_HUMAN |                                | 0  | AAAAGGAAATC   | 0.483 |
| + | 2   | 255  | r_p.S46N CXADR    | NM_001338    | NP_001329    | P78310 | CXAR_HUMAN  | potential). Ig-like C2-type 1. | 1  | GCTTAGTCCCGA  | 0.458 |
| + | 3   | 399  | se_Mutation_p.T9  | NM_001338    | NP_001329    | P78310 | CXAR_HUMAN  | potential). Ig-like C2-type 1. | 1  | ATTTTACGAGTA  | 0.343 |
| - | 3   | 1593 |                   | NM_006988    | NP_008919    | Q9UHI8 | ATS1_HUMAN  | ptidase M12B.                  | 6  | FCGGATCACACA  | 0.443 |
| + | 14  | 2116 | icm.1_Nonsense_I  | NM_006447    | NP_006438    | Q9Y5T5 | UBP16_HUMAN |                                | 4  | TTTATATCAGTTC | 0.378 |
| + | 5   | 564  | e_Mutation_p.G12  | NM_000454    | NP_000445    | P00441 | SODC_HUMAN  |                                | 0  | GACAGGAAACG   | 0.418 |
| + | 11  | 1559 | Jgpo.2_Missense_  | NM_003274    | NP_003265    | P48553 | TPC10_HUMAN |                                | 2  | CCCATGCCACC   | 0.348 |
| - | 6   | 997  | p.P308S CLTCL1    | NM_007098    | NP_009029    | P53675 | CLH2_HUMAN  | ar terminal domain.            | 5  | GTGTGGAGCAG   | 0.428 |
| - | 2   | 1399 | zqzh.2_Missense_  | NM_024627    | NP_078903    | Q7L3V2 | CV029_HUMAN | Pro-rich.                      | 0  | CCTGGGCCCA    | 0.617 |
| - | 17  | 1508 | NRD2_uc002zqp.    | NM_006440    | NP_006431    | Q9NNW7 | TRXR2_HUMAN |                                | 2  | CGGTCCGCATC   | 0.657 |
| + | 2   | 852  | e_Mutation_p.V16  | NM_022720    | NP_073557    | Q8WYQ5 | DGCR8_HUMAN | nd retention. Necessary for    | 0  | GGAGTGTGGT    | 0.582 |
| - | 3   | 715  | 67Q TRMT2A_uc     | NM_182984    | NP_892029    | Q8IZ69 | TRM2A_HUMAN |                                | 1  | CCACTCGTGT    | 0.642 |
| - | 3   | 385  | 57L TRMT2A_uc0    | NM_182984    | NP_892029    | Q8IZ69 | TRM2A_HUMAN |                                | 1  | GCCCGGGCTGA   | 0.652 |
| + | 6   | 763  | _p.P184L ZNF74_   | NM_003426    | NP_003417    | Q16587 | ZNF74_HUMAN |                                | 1  | GTGTCCCCTCT   | 0.677 |
| - | 3   | 1176 | ue.2_Missense_M   | NM_004173    | NP_004164    | O43246 | CTR4_HUMAN  | ical; (Potential).             | 2  | GGTGCCGCCCA   | 0.642 |
| - | 2   | 879  | 6610_uc011aim.1   | NM_080740    | NP_542778    | P59817 | Z280A_HUMAN |                                | 1  | FGTGAGGGTGTA  | 0.433 |
| + | 366 |      | uc002zws.2_Intron |              |              |        |             |                                | 0  | FCTTCTCCCCTC  | 0.542 |
| - | 7   | 1363 | iT5_uc002zzq.3_M  | NM_004121    | NP_004112    | P36269 | GGT5_HUMAN  | ellular (Potential).           | 3  | GTTCACCCCTCC  | 0.572 |
| + | 10  | 1224 | p.G246D GGT1_uc   | NM_013430    | NP_038347    | P19440 | GGT1_HUMAN  | ellular (Potential).           | 0  | AGGGGGCATTG   | 0.612 |
| - | 3   | 748  | S4_uc003acn.2_f   | NM_022081    | NP_071364    | Q9NQG7 | HPS4_HUMAN  |                                | 0  | GATCGCCTTCT   | 0.443 |
| - | 6   | 945  | p.G191R TFIP11_   | NM_012143    | NP_036275    | Q9UBB9 | TFP11_HUMAN | G-patch.                       | 0  | AGCCCCCACAG   | 0.468 |
| - | 5   | 418  | 3aia.2_Missense_I | NM_174975    | NP_777635    | Q9UDX4 | S14L3_HUMAN | CRAL-TRIO.                     | 5  | GCAACCCCTTG   | 0.577 |
| + | 16  | 2054 | k.2_Missense_M    | NM_005569    | NP_005560    | P53671 | LIMK2_HUMAN |                                | 2  | ACTCACCTCCC   | 0.672 |
| - | 6   | 945  | lo.1_3'UTR PIK3IF | NM_052880    | NP_443112    | Q96FE7 | P3IP1_HUMAN | lasmic (Potential).            | 1  | GGGGGTGGTG    | 0.642 |
| - | 1   | 1637 | ense_Mutation_p.L | NM_014323    | NP_055138    | Q9HBE1 | PATZ1_HUMAN |                                | 2  | AGGAAGTGCGA   | 0.622 |
| - | 3   | 1145 | p.S346F FOXREC    | NM_024955    | NP_079231    | Q8IWF2 | FXRD2_HUMAN |                                | 2  | AAATGGAGAAG   | 0.577 |
| + | 13  | 1569 | te.2_Missense_M   | NM_013365    | NP_037497    | Q9UJY5 | GGA1_HUMAN  | structured hinge.              | 3  | AGGCCCCAGT    | 0.647 |
| + | 9   | 5170 | lu.2_Nonsense_M   | NM_001039141 | NP_001034230 | Q9H2D6 | TARA_HUMAN  |                                | 1  | GGCTGGGCCGA   | 0.662 |
| + | 2   | 424  | us.2_Missense_M   | NM_012407    | NP_036539    | Q9NRD5 | PICK1_HUMAN |                                | 0  | AAGAGGATAAA   | 0.517 |
| - | 6   | 976  | 3NK1E_uc003avo.   | NM_152221    | NP_689407    | P49674 | KC1E_HUMAN  | rotein kinase.                 | 3  | GAGGACCTCGA   | 0.597 |
| - | 2   | 831  | vt.1_Missense_M   | NM_004981    | NP_004972    | P48050 | IRK4_HUMAN  | smic (By similarity).          | 0  | CATAGCCCACG   | 0.622 |
| - | 13  | 2046 | jxp.2_Missense_M  | NM_001098504 | NP_001091974 | Q92841 | DDX17_HUMAN |                                | 4  | TGGTGCCATAAC  | 0.498 |
| + | 2   | 413  |                   | NM_004286    | NP_004277    | O00178 | GTPB1_HUMAN |                                | 1  | GGATGGACGAG   | 0.423 |
| + | 3   | 299  | EC3D_uc011aoc.1   | NM_014508    | NP_055323    | Q9NRW3 | ABC3C_HUMAN |                                | 0  | TATTGTCATGCA  | 0.572 |
| - | 2   | 272  |                   | NM_194326    | NP_919307    | Q86WX3 | AROS_HUMAN  |                                | 0  | CGAGTTCGGCA   | 0.662 |
| + | 8   | 988  | _p.P193L SGSM3    | NM_015705    | NP_056520    | Q96HU1 | SGSM3_HUMAN | ab-GAP TBC.                    | 2  | .CTGCCTCGCC   | 0.632 |
| + | 9   | 1368 | ie_Mutation_p.L34 | NM_022098    | NP_071381    | Q9NQH7 | XPP3_HUMAN  |                                | 0  | ACTACCTCGGG   | 0.502 |
| + | 2   | 897  |                   | NM_001429    | NP_001420    | Q09472 | EP300_HUMAN |                                | 64 | ACACAGGGATG   | 0.507 |
| + | 14  | 2934 |                   | NM_001429    | NP_001420    | Q09472 | EP300_HUMAN |                                | 64 | .CTCCCCAAGC   | 0.592 |
| - | 2   | 108  | OLR3H_uc003bai.   | NM_138338    | NP_612211    | Q9Y535 | RPC8_HUMAN  |                                | 1  | AACTGCCAAGG   | 0.637 |
| + | 8   | 1058 | iaq.1_Missense_M  | NM_001469    | NP_001460    | P12956 | XRCC6_HUMAN | lu-rich (acidic). Ku.          | 5  | TACTGGAGAAAC  | 0.438 |
| + | 11  | 1541 | iaq.1_Missense_M  | NM_001469    | NP_001460    | P12956 | XRCC6_HUMAN |                                | 5  | ACCTGGAGGCC   | 0.443 |
| + | 12  | 1436 | onj MEI1_uc003ba  | NM_152513    | NP_689726    | Q5TIA1 | MEI1_HUMAN  |                                | 2  | GTGCGGAGTTT   | 0.512 |
| - | 1   | 5433 | o.E1767K TCF20_   | NM_005650    | NP_005641    | Q9UGU0 | TCF20_HUMAN |                                | 5  | TTCCTCCTCTC   | 0.582 |
| - | 1   | 3778 | o.P1215L TCF20_   | NM_005650    | NP_005641    | Q9UGU0 | TCF20_HUMAN |                                | 5  | CATGGGGCGGC   | 0.498 |
| - | 1   | 2347 | p.G738D TCF20_    | NM_005650    | NP_005641    | Q9UGU0 | TCF20_HUMAN |                                | 5  | CATGGCCAGTG   | 0.493 |

|   |    |      |                    |              |              |        |                                        |      |               |       |
|---|----|------|--------------------|--------------|--------------|--------|----------------------------------------|------|---------------|-------|
| - | 4  | 667  |                    | NM_145912    | NP_666017    | Q8NET5 | NFAM1_HUMAN mic (Potential). ITAM.     | 0    | TGGGGCTGCTG   | 0.592 |
| - | 4  | 401  | RP7A_uc003bcp.2    | NM_015703    | NP_056518    | Q9Y3A4 | RRP7A_HUMAN                            | 2    | GTGACACCCAC   | 0.597 |
| + | 5  | 924  | uc011aqp.1_5'Fla   | NM_001104595 | NP_001098065 | Q9NWS6 | F118A_HUMAN                            | 0    | TCACAGCGGATG  | 0.423 |
| - | 11 | 1859 | _p.P603S SMC1B_    | NM_148674    | NP_683515    | Q8NDV3 | SMC1B_HUMAN lexible hinge.             | 2    | CTGAGGAAACT   | 0.378 |
| + | 4  | 499  | _p.A118T FBLN1_    | NM_006486    | NP_006477    | P23142 | FBLN1_HUMAN phylatoxin-like 3.         | 2    | GGAGGGCGGCC   | 0.647 |
| - | 1  | 1922 |                    | NM_006071    | NP_006062    | Q9NTG1 | PKDRE_HUMAN ular (Potential). REJ.     | 5    | TATTGACTAGCC  | 0.483 |
| + | 21 | 2359 | onf.1_Missense_M   | NM_001080420 | NP_001073889 | F2Z3L0 | F2Z3L0_HUMAN                           | 1    | TGCCGGGCTCC   | 0.667 |
| + | 4  | 580  |                    | NM_001097    | NP_001088    | P10323 | ACRO_HUMAN eptidase S1.                | 0    | TAGCCCCCAGG   | 0.567 |
| + | 19 | 2527 | _p.P441L CNTN4_    | NM_175607    | NP_783200    | Q8IWW2 | CNTN4_HUMAN nectin type-III 2.         | 7    | GCACCCCTCTT   | 0.517 |
| + | 7  | 1453 | _p.F219L EDEM1_    | NM_014674    | NP_055489    | Q92611 | EDEM1_HUMAN enal (Potential).          | 3    | AGGCCTTTTTCC  | 0.463 |
| + | 19 | 3512 | _p.S915F SETD5_    | NM_001080517 | NP_001073986 | Q9C0A6 | SETD5_HUMAN                            | 2    | GATTTTCCAGCA  | 0.512 |
| + | 13 | 2465 | C4_uc003btc.1_Ir   | NM_001025930 | NP_001021100 | Q9Y4R7 | TTL3_HUMAN                             | 2    | TTGACTCCATTG  | 0.557 |
| + | 11 | 1446 | e_Mutation_p.P31   | NM_153461    | NP_703191    | Q8NAC3 | I17RC_HUMAN ellular (Potential).       | 2    | GGGCTCCGGGT   | 0.682 |
| + | 19 | 2473 | _p.G645E IL17RC_   | NM_153461    | NP_703191    | Q8NAC3 | I17RC_HUMAN lasmic (Potential).        | 2    | TTCCGGGCGGC   | 0.711 |
| - | 5  | 615  | EM111_uc003buo.:   | NM_018447    | NP_060917    | Q9P0I2 | TM111_HUMAN                            | 0    | ACGGAGGGTCA   | 0.383 |
| + | 9  | 902  | _p.S262F ATG7_uc   | NM_006395    | NP_006386    | O95352 | ATG7_HUMAN                             | 1    | CCAGTCTGTTG   | 0.423 |
| - | 14 | 2956 | hek.1_Missense_I   | NM_022340    | NP_071735    | Q9H1K0 | RBNS5_HUMAN AB5A. Necessary for the in | 2    | TGCCCCCTTC    | 0.622 |
| - | 4  | 683  | ssense_Mutation_I  | NM_004844    | NP_004835    | O60239 | 3BP5_HUMAN                             | 0    | TATACCCTTGAC  | 0.642 |
| + | 9  | 3328 | vd.1_Missense_Mi   | NM_001144382 | NP_001137854 | Q9UPR0 | PLCL2_HUMAN                            | 4    | TATTGGAGAAC   | 0.383 |
| - | 9  | 1724 | _p.G205E OSBPL1    | NM_017784    | NP_060254    | Q9BXB5 | OSB10_HUMAN                            | 1    | TGGCCCCAGCG   | 0.552 |
| + | 2  | 1606 |                    | NM_001137674 | NP_001131146 | A6NHJ4 | ZN860_HUMAN C2H2-type 5.               | 1    | TTCAGGCGTGAT  | 0.393 |
| + | 3  | 469  | e_Mutation_p.F72I  | NM_015442    | NP_056257    | Q9H9A5 | CNOTA_HUMAN                            | 2    | TCTGAGTTTTTT  | 0.289 |
| - | 6  | 686  | _uc003cgr.2_Intro  | NM_006309    | NP_006300    | Q9Y608 | LRRF2_HUMAN V/L3-binding.              | 1    | GACTGGACCGG   | 0.403 |
| + | 14 | 4619 | _i_Mutation_p.S146 | NM_002078    | NP_002069    | Q13439 | GOGA4_HUMAN ential. Glu-rich.          | 4    | TACTGGTCCAAT  | 0.353 |
| + | 14 | 6233 | _i_Mutation_p.E199 | NM_002078    | NP_002069    | Q13439 | GOGA4_HUMAN ential. Glu-rich.          | 4    | TGGGAAGAGAAA  | 0.308 |
| + | 28 | 3114 | uc003che.2_Intron  | NM_002207    | NP_002198    | Q13797 | ITA9_HUMAN lasmic (Potential).         | 6    | TAGAACCGGAAA  | 0.463 |
| + | 19 | 2615 | I.2_Missense_Mut   | NM_015873    | NP_056957    | O15195 | VILL_HUMAN                             | 0    | TAGTCGGCTGGC  | 0.662 |
| - | 4  | 557  | :.2_Intron ACAA1_I | NM_001607    | NP_001598    | P09110 | THIK_HUMAN                             | 1    | CAGTGGACAAAC  | 0.532 |
| + | 12 | 2041 | _Splice_Site_p.K5  | NM_015460    | NP_056275    | Q8NFW9 | MYRIP_HUMAN                            | 5    | TAAACAGAAAGTT | 0.438 |
| + | 11 | 1774 | .540F CTNNB1_uc    | NM_001904    | NP_001895    | P35222 | CTNB1_HUMAN ARM 10.                    | 3166 | TAGTTGCTTGTT  | 0.488 |
| - | 3  | 534  | :pu.3_Missense_M   | NM_024512    | NP_078788    | Q9BYS8 | LRRC2_HUMAN                            | 1    | TGGATGCCCTTC  | 0.532 |
| + | 11 | 1239 | qn.2_Missense_Mi   | NM_000316    | NP_000307    | Q03431 | PTH1R_HUMAN ellular (Potential).       | 1    | TCTACCCTGGCC  | 0.622 |
| - | 12 | 6063 | e_Mutation_p.D20   | NM_014159    | NP_054878    | Q9BYW2 | SETD2_HUMAN                            | 32   | TTATATCCACTG  | 0.413 |
| - | 3  | 1555 | :ro.3_Missense_M   | NM_006574    | NP_006565    | O95196 | CSPG5_HUMAN OPC. Cytoplasmic (Potenti  | 2    | TACTGGTCCTAC  | 0.592 |
| - | 26 | 3504 |                    | NM_000094    | NP_000085    | Q02388 | CO7A1_HUMAN region (NC1). VWFA 2.      | 11   | TCAAGGGTTCA   | 0.587 |
| - | 3  | 479  | uq.2_Missense_Mi   | NM_001005909 | NP_001005909 | Q9UHH9 | IP6K2_HUMAN                            | 0    | TCCTGTCTTCAT  | 0.408 |
| - | 9  | 1190 | MT_uc003cwy.2_I    | NM_000481    | NP_000472    | P48728 | GCST_HUMAN                             | 1    | TAGAGGGGGAG   | 0.597 |
| - | 28 | 2372 | _e_Mutation_p.W77  | NM_006030    | NP_006021    | Q9NY47 | CA2D2_HUMAN ellular (Potential).       | 1    | TCTGTCCAGTC   | 0.607 |
| + | 7  | 1133 | 11bdu.1_Splice_Si  | NM_015106    | NP_055921    | Q9Y4B4 | ARIP4_HUMAN                            | 3    | TCCGGTAAGAG   | 0.502 |
| + | 5  | 362  | ACY1_uc011beb.     | NM_000666    | NP_000657    | Q03154 | ACY1_HUMAN                             | 2    | TCAAGGATTCTC  | 0.547 |
| + | 5  | 980  | Jdn.2_Intron GLYC  | NM_145262    | NP_660305    | Q8IVS8 | GLCTK_HUMAN                            | 0    | TGACCCCATG    | 0.602 |
| - | 15 | 2047 | Jgg.2_Missense_I   | NM_001005159 | NP_001005159 | Q9UJH3 | SMBT1_HUMAN                            | 1    | TACCTGACTCTC  | 0.383 |
| + | 6  | 883  | CC66_uc003dhx.2    | NM_001141947 | NP_001135419 | A2RUB6 | CCD66_HUMAN Potential.                 | 1    | AAGCCAGTGG    | 0.313 |
| - | 14 | 2182 | _p.S298N C3orf63_  | NM_015224    | NP_056039    | Q9UK61 | CC063_HUMAN                            | 5    | TCCACTCTTTT   | 0.378 |
| + | 2  | 968  | TREF3_uc003dih.2   | NM_181727    | NP_859078    | Q7Z6I5 | SPT12_HUMAN                            | 0    | TATCCCAAATAA  | 0.398 |
| - | 13 | 2199 | _p.E680K IL17RD_I  | NM_017563    | NP_060033    | Q8NFM7 | I17RD_HUMAN lasmic (Potential).        | 0    | TCTCTCACCTA   | 0.537 |
| - | 7  | 1404 |                    | NM_198859    | NP_942559    | Q7Z3G6 | PRIC2_HUMAN I zinc-binding 3.          | 5    | TGTTGGCCATCA  | 0.522 |

rs75893100

|   |    |      |                   |              |              |        |              |                                          |      |                |       |             |
|---|----|------|-------------------|--------------|--------------|--------|--------------|------------------------------------------|------|----------------|-------|-------------|
| - | 15 | 2220 | lmh.1_Missense_M  | NM_182920    | NP_891550    | Q9P2N4 | ATS9_HUMAN   | Cys-rich.                                | 4    | ATGATCGCATCC   | 0.338 |             |
| + | 2  | 305  | 19A1_uc003dng.2   | NM_213609    | NP_998774    | Q7Z5A9 | F19A1_HUMAN  |                                          | 1    | GCACACTTTCC/   | 0.498 |             |
| + | 8  | 714  | dpi.1_Missense_M  | NM_174907    | NP_777567    | Q9NY27 | PP4R2_HUMAN  |                                          | 1    | GTGACTCTTCGA/  | 0.343 |             |
| - | 30 | 5010 | p.P1501L ROBO1    | NM_002941    | NP_002932    | Q9Y6N7 | ROBO1_HUMAN  | lasmic (Potential).                      | 2    | AACTGGGATCT/   | 0.383 |             |
| - | 16 | 2300 | e_Mutation_p.D66  | NM_002941    | NP_002932    | Q9Y6N7 | ROBO1_HUMAN  | lasmic (Potential). Fibronectin type-III | 2    | GTTGATCTACCT/  | 0.318 |             |
| + | 4  | 1229 | rp.1_Missense_Mi  | NM_001080448 | NP_001073917 | Q9UF33 | EPHA6_HUMAN  | cellular (Potential).                    | 16   | AGTTTAAACATAC/ | 0.373 |             |
| - | 3  | 931  |                   | NM_014820    | NP_055635    | O94826 | TOM70_HUMAN  | nic (Potential). TPR 2.                  | 1    | ATTTTTGCTGTA/  | 0.328 |             |
| - | 11 | 1396 | re.1_Missense_Mi  | NM_016247    | NP_057331    | Q9BZV3 | IMPG2_HUMAN  | cellular (Potential).                    | 3    | GTGTTCCAAACT/  | 0.398 |             |
| - | 24 | 3251 | uw.2_Missense_M   | NM_020654    | NP_065705    | Q9BQF6 | SENPF7_HUMAN | Protease.                                | 5    | GTGCTGCCCTTC   | 0.413 |             |
| - | 5  | 846  |                   | NM_018010    | NP_060480    | Q9NWB7 | IFT57_HUMAN  |                                          | 3    | CATTATCTGTCTC  | 0.274 |             |
| - | 14 | 2079 | 524_uc010hvp.1_   | NM_020890    | NP_065941    | Q8TCG1 | CIP2A_HUMAN  |                                          | 3    | ACTGAAGTTTCT   | 0.333 |             |
| - | 1  | 216  | lzb.3_Missense_M  | NM_181780    | NP_861445    | Q7Z6A9 | BTLA_HUMAN   |                                          | 0    | GGCAGGCAATG    | 0.438 |             |
| - | 15 | 2461 | DC52_uc003eah.    | NM_144718    | NP_653319    | Q8N0Z3 | SPICE_HUMAN  |                                          | 0    | ACCTGGTGTTAC   | 0.373 |             |
| + | 14 | 1599 | AMD1C_uc003eas    | NM_017577    | NP_060047    | Q8IYS0 | GRM1C_HUMAN  |                                          | 3    | TACTGGCCTACC   | 0.403 |             |
| + | 6  | 1390 | se_Mutation_p.S1  | NM_017554    | NP_060024    | Q460N5 | PAR14_HUMAN  |                                          | 6    | GCCAAAGCATTG/  | 0.368 |             |
| + | 4  | 518  | hfh.1_Missense_Mi | NM_001024660 | NP_001019831 | O60229 | KALRN_HUMAN  | CRAL-TRIO.                               | 6    | ATTAACCCCGAC/  | 0.507 |             |
| + | 6  | 644  | i1L2_uc010hth.2_  | NM_001136152 | NP_001129624 | C9J202 | AG1L2_HUMAN  |                                          | 0    | CACGTCCTCCA/   | 0.602 |             |
| + | 30 | 3471 |                   | NM_015268    | NP_056083    | O75165 | DJC13_HUMAN  |                                          | 2    | GCCAAATGTGCTT/ | 0.328 |             |
| + | 20 | 3574 | v.1_Missense_Mut  | NM_001063    | NP_001054    | P02787 | TRFE_HUMAN   | transferrin-like 2.                      | 2    | CTTGCGTCCAC    | 0.527 | rs146055081 |
| - | 8  | 1152 |                   | NM_013363    | NP_037495    | Q9UKZ9 | PCOC2_HUMAN  | NTR.                                     | 3    | GTGCCGGCTAAT/  | 0.433 |             |
| - | 3  | 456  | se_Mutation_p.L1E | NM_021105    | NP_066928    | O15162 | PLS1_HUMAN   | 1 (Potential). WWW-binding 1             | 2    | ACTGAGGAGGA    | 0.313 |             |
| - | 5  | 5731 | I_5'Flank IGSF10_ | NM_178822    | NP_849144    | Q6WR10 | IGS10_HUMAN  | like C2-type 5.                          | 13   | CCTGTCTGAAG    | 0.438 |             |
| - | 1  | 397  | .2_Intron MBNL1_  | NM_001123228 | NP_001116700 | Q6UXP3 | TM14E_HUMAN  |                                          | 0    | TACTTCCAAGTT   | 0.388 |             |
| - | 9  | 851  | 76_splice ZBBX_u  | NM_024687    | NP_078963    | A8MT70 | ZBBX_HUMAN   |                                          | 2    | CCATACCTGCA/   | 0.343 |             |
| - | 2  | 638  | ECOM_uc010hwn.    | NM_004991    | NP_004982    | Q03112 | EVI1_HUMAN   |                                          | 14   | AAACTCAGCAG/   | 0.488 |             |
| + | 3  | 1292 |                   | NM_001080460 | NP_001073929 | A6NIV6 | LRIQ4_HUMAN  | LRR 18.                                  | 0    | GCACAATTTGC    | 0.458 |             |
| + | 16 | 2489 |                   | NM_006218    | NP_006209    | P42336 | PK3CA_HUMAN  |                                          | 3553 | AAAGGCCACTG    | 0.348 |             |
| + | 12 | 2063 | e_Mutation_p.E28E | NM_003907    | NP_003898    | Q13144 | EI2BE_HUMAN  | W2.                                      | 5    | AAAGAGGAGAAC   | 0.473 |             |
| + | 8  | 928  | L3_uc003fmt.2_5'  | NM_004423    | NP_004414    | Q92997 | DVL3_HUMAN   | PDZ.                                     | 3    | CATCTCCATTGT   | 0.507 |             |
| + | 6  | 755  | n_p.P170L LPP_u   | NM_005578    | NP_005569    | Q93052 | LPP_HUMAN    | Pro-rich.                                | 165  | CCAACCCCTC     | 0.517 |             |
| - | 4  | 771  |                   | NM_021101    | NP_066924    | O95832 | CLD1_HUMAN   | ical; (Potential).                       | 1    | AGGAACAGCAA    | 0.522 |             |
| - | 8  | 1089 | RC_uc010hzy.2_M   | NM_003234    | NP_003225    | P02786 | TFR1_HUMAN   | lular (Potential). PA.                   | 3    | CATTTGCAACC    | 0.353 |             |
| - | 23 | 2456 | _p.D439N DLG1_u   | NM_001098424 | NP_001091894 | Q12959 | DLG1_HUMAN   | ylate kinase-like.                       | 3    | TCCATCTACCT/   | 0.303 |             |
| + | 5  |      |                   |              |              | Q7Z310 | Q7Z310_HUMAN |                                          | 0    | CTCTAGAAGCA/   | 0.383 |             |
| - | 3  | 3298 | ron ABCA11P_ucC   | NM_133474    | NP_597731    | D9N162 | D9N162_HUMAN |                                          | 1    | CCACATTCTCC/   | 0.413 |             |
| - | 3  | 2373 | ron ABCA11P_ucC   | NM_133474    | NP_597731    | D9N162 | D9N162_HUMAN |                                          | 1    | CCACATTCTTCAC  | 0.413 |             |
| - | 3  | 312  | o.P66L SLBP_uc0   | NM_006527    | NP_006518    | Q14493 | SLBP_HUMAN   |                                          | 0    | GTTTAGGGCCT    | 0.408 |             |
| + | 8  | 1122 | DD1_uc003gfg.2_   | NM_001119    | NP_001110    | P35611 | ADDA_HUMAN   |                                          | 1    | GCGTTGAGGAG    | 0.512 |             |
| + | 23 | 3093 |                   | NM_002111    | NP_002102    | P42858 | HD_HUMAN     |                                          | 4    | CAATAACCAGGT/  | 0.438 |             |
| + | 4  | 453  | C7_uc003ghe.2_5'  | NM_173660    | NP_775931    | Q18PE1 | DOK7_HUMAN   | RS-type PTB.                             | 1    | CGCCCGGCTA     | 0.488 |             |
| + | 17 | 2640 | 1_RNA CRMP1_u     | NM_153717    | NP_714928    | P57679 | EVC_HUMAN    |                                          | 2    | GTGAGAGGATGG   | 0.567 |             |
| - | 7  | 906  | i.G255S ABLM2_u   | NM_001130084 | NP_001123556 | Q6H8Q1 | ABLM2_HUMAN  | I zinc-binding 4.                        | 3    | TGTACCTTGAAC   | 0.498 |             |
| + | 5  | 541  | se_Mutation_p.T7  | NM_018986    | NP_061859    | Q8TE82 | S3TC1_HUMAN  |                                          | 3    | TTAAGACTTTTG/  | 0.502 |             |
| - | 1  | 207  | 9A9_uc003gmd.2_   | NM_020041    | NP_064425    | Q9NRM0 | GTR9_HUMAN   | lasmic (Potential).                      | 3    | ACCTTCTTCTCC   | 0.632 |             |
| - | 11 | 694  | np.2_Missense_Mi  | NM_052964    | NP_443196    | Q7Z7G1 | CLNK_HUMAN   | Pro-rich.                                | 1    | ATAAAGGTGGC/   | 0.532 |             |
| + | 16 | 1854 | .1_RNA CC2D2A_    | NM_001080522 | NP_001073991 | Q9P2K1 | C2D2A_HUMAN  | Potential.                               | 3    | AAAGGGAAAAAC   | 0.294 |             |
| - | 3  | 1161 | rF16_uc003gpo.2_  | NM_017741    | NP_060211    | Q9NXF7 | DCA16_HUMAN  |                                          | 1    | AGGAATCCCACT/  | 0.438 |             |

|   |    |      |                    |              |              |        |              |                               |    |               |       |
|---|----|------|--------------------|--------------|--------------|--------|--------------|-------------------------------|----|---------------|-------|
| - | 14 | 2402 | eo.1_Missense_M    | NM_145290    | NP_660333    | Q8IWK6 | GP125_HUMAN  | ular (Potential). GPS.        | 1  | AGCCTCCTTGTC  | 0.458 |
| - | 12 | 2268 | HX15_uc003gqw.     | NM_001358    | NP_001349    | O43143 | DHX15_HUMAN  |                               | 1  | TACATACCTGCAT | 0.328 |
| + | 9  | 1121 | _p.L211F PGM2_u    | NM_018290    | NP_060760    | Q96G03 | PGM2_HUMAN   |                               | 1  | GGGCCCTCCTG   | 0.448 |
| + | 3  | 423  | tg.2_Missense_Mu   | NM_016531    | NP_057615    | P57682 | KLF3_HUMAN   | or domain. Pro-rich.          | 2  | ATGAAGCCTAAC  | 0.418 |
| - | 2  | 458  | _p.E27K TLR10_u    | NM_030956    | NP_112218    | Q9BXR5 | TLR10_HUMAN  | ilar (Potential). LRR 1.      | 2  | CCCTTCTTCTGC  | 0.433 |
| - | 23 | 2874 | rk.2_Missense_Mu   | NM_015030    | NP_055845    | O94915 | FRYL_HUMAN   |                               | 1  | AATAGAGCAAAG  | 0.318 |
| - | 9  | 2155 | jm.2_Missense_Mi   | NM_152540    | NP_689753    | Q8WU76 | SCFD2_HUMAN  |                               | 3  | TCAGTTGCAAA   | 0.502 |
| - | 15 | 2548 | t.1_Missense_Mut   | NM_002253    | NP_002244    | P35968 | VGFR2_HUMAN  | 7. Extracellular (Potential). | 33 | ATGCCTCCACT   | 0.328 |
| + | 9  | 1234 | p.G359D EXOC1_     | NM_018261    | NP_060731    | Q9NV70 | EXOC1_HUMAN  |                               | 6  | TTAGGGTCATG   | 0.373 |
| + | 21 | 2941 | rbj.2_Missense_M   | NM_025009    | NP_079285    | Q66GS9 | CP135_HUMAN  | Potential.                    | 5  | AGGGAGAAAGC   | 0.398 |
| + | 14 | 2662 | p.G830D LPHN3_     | NM_015236    | NP_056051    | Q9HAR2 | LPHN3_HUMAN  | tracellular (Potential).      | 18 | GCAGGTTATT    | 0.398 |
| - | 6  | 1024 | ln.2_RNA PAQR3_    | NM_001040202 | NP_001035292 | Q6TCH7 | PAQR3_HUMAN  | lasmic (Potential).           | 0  | TTGGTGGCTTG   | 0.368 |
| - | 6  | 314  | 1ccj.1_Missense_I  | NM_001080506 | NP_001073975 | B9EJG8 | T150C_HUMAN  | ical; (Potential).            | 1  | CAAGGGCTAGG   | 0.388 |
| - | 3  | 550  | of.2_RNA COQ2_1    | NM_015697    | NP_056512    | Q96H96 | COQ2_HUMAN   | ical; (Potential).            | 2  | CCAGGGTTAGC   | 0.383 |
| - | 4  | 549  |                    | NM_144645    | NP_653246    | Q96KX1 | CD036_HUMAN  |                               | 0  | ACTCCCTTTCCG  | 0.363 |
| - | 11 | 940  | p.S241F EMCN_u     | NM_016242    | NP_057326    | Q9ULC0 | MUCEN_HUMAN  | lasmic (Potential).           | 0  | GTGCAGAGTGC   | 0.378 |
| - | 5  | 1287 | wa.1_Missense_N    | NM_022154    | NP_071437    | Q9C0K1 | S39A8_HUMAN  | ellular (Potential).          | 0  | TCACACCATTG   | 0.373 |
| - | 3  | 510  | DT6_uc003lex.2_5'  | NM_007083    | NP_009014    | P53370 | NUDT6_HUMAN  | idix hydrolase.               | 0  | ATACAACCAGTA  | 0.274 |
| + | 1  | 3182 | gz.2_Missense_M    | NM_032961    | NP_116586    | Q9P2E7 | PCD10_HUMAN  | lasmic (Potential).           | 2  | AGTCAGACATC   | 0.622 |
| - | 2  | 1918 | 4L3_uc011chd.1_I   | NM_018717    | NP_061187    | Q96JK9 | MAML3_HUMAN  |                               | 1  | CCGTGGAGACA   | 0.567 |
| - | 3  | 267  | l_Mutation_p.P38E  | NM_014885    | NP_055700    | Q9UM13 | APC10_HUMAN  | DOC.                          | 0  | ACTGGTTTGC    | 0.368 |
| - | 13 | 2480 | _p.V405I SH3D19_   | NM_001009555 | NP_001009555 | Q5HYK7 | SH319_HUMAN  | SH3 1.                        | 2  | GTGAACTCTGC   | 0.423 |
| + | 13 | 2672 |                    | NM_020840    | NP_065891    | Q9P278 | FNIP2_HUMAN  | tion with PRKAA1.             | 0  | AACGGGAGGGA   | 0.637 |
| + | 11 | 1919 |                    | NM_014247    | NP_055062    | Q9Y4G8 | RPGF2_HUMAN  |                               | 4  | AGATACTCGAC   | 0.368 |
| + | 7  | 1555 | _p.T303I TLL1_uc   | NM_012464    | NP_036596    | O43897 | TLL1_HUMAN   | otease (By similarity).       | 7  | GAAACCTTCT    | 0.403 |
| + | 15 | 2511 | _p.L645F TLL1_uc   | NM_012464    | NP_036596    | O43897 | TLL1_HUMAN   | CUB 3.                        | 7  | GACTTCTTACC   | 0.458 |
| + | 13 | 2196 | uc003jbb.1_5'Flanl | NM_007277    | NP_009208    | O60645 | EXOC3_HUMAN  |                               | 0  | CCAGGGATGAC   | 0.642 |
| - | 10 | 1496 | c.2_RNA ZDHHC1     | NM_024786    | NP_079062    | Q9H8X9 | ZDH11_HUMAN  |                               | 2  | CACGAGTGGAG   | 0.577 |
| + | 10 | 1715 | _p.A526D ADAMT3    | NM_139056    | NP_620687    | Q8TE57 | ATS16_HUMAN  | Disintegrin.                  | 8  | GAAAGCCAAGC   | 0.408 |
| + | 13 | 1636 |                    | NM_015325    | NP_056140    | Q9Y2F5 | K0947_HUMAN  |                               | 2  | CCATGAGTGAT   | 0.413 |
| - | 1  | 238  |                    | NM_033414    | NP_219482    | Q969S3 | ZN622_HUMAN  |                               | 1  | TGGGCCCATGC   | 0.687 |
| - | 7  | 1569 | 3jhi.2_Missense_N  | NM_013235    | NP_037367    | Q9NRR4 | RNC_HUMAN    |                               | 0  | CTTCTTCTCCTC  | 0.473 |
| + | 1  | 535  |                    | NM_016568    | NP_057652    | Q9NSD7 | RL3R1_HUMAN  | ellular (Potential).          | 1  | ACGGCGCGCCG   | 0.697 |
| + | 8  | 1144 | _p.E345K SPEF2_1   | NM_024867    | NP_079143    | Q9C093 | SPEF2_HUMAN  | Potential.                    | 4  | AGCAGGAGCGC   | 0.463 |
| + | 10 | 2663 | p.P722S NIPBL_u    | NM_133433    | NP_597677    | Q6KC79 | NIPBL_HUMAN  |                               | 9  | GGCATCCTGAA   | 0.468 |
| + | 17 | 4387 | c.3_Nonsense_Mut   | NM_133433    | NP_597677    | Q6KC79 | NIPBL_HUMAN  |                               | 9  | TTATGGAGAGA   | 0.313 |
| - | 29 | 5999 | rf42_uc003jks.2_F  | NM_023073    | NP_075561    | E9PH94 | E9PH94_HUMAN |                               | 7  | GACTTCTGAAA   | 0.338 |
| - | 1  | 1045 | 2_Nonsense_Mut     | NM_199335    | NP_955367    | O15117 | FYB_HUMAN    |                               | 2  | TGGCCCCATGG   | 0.537 |
| - | 9  | 1444 | mb.2_Missense_N    | NM_006251    | NP_006242    | Q13131 | AAPK1_HUMAN  |                               | 1  | TAATTTTCTCTGC | 0.403 |
| + | 20 | 3146 | i.2_Missense_Mut   | NM_012343    | NP_036475    | Q13423 | NNTM_HUMAN   | chondrial matrix.             | 3  | TCACCAGTTGC   | 0.458 |
| - | 19 | 3083 | X29_uc010ivw.2_F   | NM_019030    | NP_061903    | Q72478 | DHX29_HUMAN  | case C-terminal.              | 4  | AGAAGCCATCT   | 0.438 |
| - | 6  | 1174 | PAP2A_uc003jpb.    | NM_003711    | NP_003702    | O14494 | LPP1_HUMAN   | lasmic (Potential).           | 2  | GAAGTCTTCTT   | 0.348 |
| - | 2  | 165  | n_p.R31Q DEPDC     | NM_018369    | NP_060839    | Q8WUY9 | DEP1B_HUMAN  | DEP.                          | 1  | GTTTCCGTAAC   | 0.453 |
| - | 5  | 1913 |                    | NM_152625    | NP_689838    | Q8N895 | ZN366_HUMAN  |                               | 2  | CTGTGCCAGG    | 0.597 |
| - | 9  | 1353 | 3kdt.2_Missense_I  | NM_005713    | NP_005704    | Q9Y5P4 | C43BP_HUMAN  |                               | 1  | GCTTCTCTATT   | 0.328 |
| + | 22 | 3279 |                    | NM_002439    | NP_002430    | P20585 | MSH3_HUMAN   |                               | 4  | TTGCACCCATT   | 0.328 |
| + | 5  | 754  | _p.P109S ATG10_    | NM_001131028 | NP_001124500 | Q9H0Y0 | ATG10_HUMAN  |                               | 0  | GAAGTCCCTGTA  | 0.353 |

rs148021233

|   |    |       |                    |              |              |        |             |                            |    |               |       |
|---|----|-------|--------------------|--------------|--------------|--------|-------------|----------------------------|----|---------------|-------|
| + | 8  | 8206  | i.2_Intron VCAN_u  | NM_004385    | NP_004376    | P13611 | CSPG2_HUMAN | GAG-beta.                  | 16 | ACAGCACTCAAG  | 0.413 |
| - | 1  | 481   | ip.1_Missense_Mt   | NM_005711    | NP_005702    | O43854 | EDIL3_HUMAN |                            | 2  | CTTTGCCGAAC   | 0.701 |
| + | 54 | 11315 | p.T1446I GPR98_u   | NM_032119    | NP_115495    | Q8WXG9 | GPR98_HUMAN | cellular (Pote p.T3740T(1) | 16 | CCCTCACCCGTA  | 0.408 |
| - | 24 | 2842  |                    | NM_014639    | NP_055454    | Q6PGP7 | TTC37_HUMAN | TPR 14.                    | 4  | CAATTTGTTCTGA | 0.313 |
| - | 16 | 2646  | m.1_Missense_Mt    | NM_001040458 | NP_001035548 | Q9NZ08 | ERAP1_HUMAN | renal (Potential).         | 2  | GGTCACGTCGA   | 0.453 |
| - | 27 | 3992  | ibn.2_Missense_M   | NM_001270    | NP_001261    | O14646 | CHD1_HUMAN  |                            | 5  | ACTGAGGTCAG   | 0.303 |
| - | 6  | 1269  | nse_Mutation_p.C   | NM_173488    | NP_775759    | Q86UG4 | SO6A1_HUMAN | plasmic (Potential).       | 7  | TAGTTCCAAGTT  | 0.299 |
| + | 12 | 1798  | nse_Mutation_p.P   | NM_015216    | NP_056031    | O43314 | VIP2_HUMAN  |                            | 2  | AAAAACCAAAA   | 0.224 |
| + | 13 | 1694  | R36_uc010jbu.2_f   | NM_139281    | NP_644810    | Q8NI36 | WDR36_HUMAN | WD 6.                      | 2  | GTCTGGCATA    | 0.353 |
| + | 28 | 7308  | cl.1_Missense_Mu   | NM_005509    | NP_005500    | Q9Y485 | DMXL1_HUMAN |                            | 2  | AAAAACTTTACC  | 0.338 |
| - | 5  | 740   |                    | NM_000943    | NP_000934    | P45877 | PPIC_HUMAN  |                            | 1  | GTCCACCAATCA  | 0.373 |
| + | 12 | 1986  | p.V391I CSNK1G:    | NM_004384    | NP_004375    | Q9Y6M4 | KC1G3_HUMAN |                            | 0  | CTGAAGTAGAA   | 0.353 |
| - | 1  | 602   | se_Mutation_p.G1   | NM_020747    | NP_065798    | Q9ULD9 | ZN608_HUMAN |                            | 6  | TGCCGCCGCTG   | 0.612 |
| + | 20 | 2836  | kui.3_Missense_M   | NM_032446    | NP_115822    | Q96KG7 | MEG10_HUMAN | P2M1, self-assembly and f  | 4  | GAAAGGAGCGA   | 0.373 |
| + | 9  | 1309  | tC1_uc003kuj.3_3'  | NM_130809    | NP_570721    | Q96M27 | PRRC1_HUMAN |                            | 0  | CACAGGCTCAA   | 0.363 |
| + | 5  | 1258  | C12A2_uc010jdg.2   | NM_001046    | NP_001037    | P55011 | S12A2_HUMAN | plasmic (Potential).       | 3  | AATTTGGTGGTG  | 0.373 |
| - | 13 | 1951  | wk.2_Missense_M    | NM_004199    | NP_004190    | O15460 | P4HA2_HUMAN | OG dioxygenase.            | 0  | CACCAGCTTCTA  | 0.483 |
| + | 3  | 189   |                    | NM_144723    | NP_653324    | Q96NC0 | ZMAT2_HUMAN |                            | 0  | ACTTGGGAATCC  | 0.458 |
| + | 1  | 761   |                    | NM_015669    | NP_056484    | Q9Y5E4 | PCDB5_HUMAN | Extracellular (Potential). | 5  | TTGCTACGCAT   | 0.498 |
| + | 1  | 1265  | 3lka.1_Intron PCD  | NM_018914    | NP_061737    | Q9Y5H2 | PCDGB_HUMAN | r (Potential). Cadherin 3. | 0  | GTTGATCACTGT  | 0.408 |
| - | 1  | 1875  |                    | NM_016580    | NP_057664    | Q9NPG4 | PCD12_HUMAN | r (Potential). Cadherin 2. | 3  | GGGGGGTTCC    | 0.478 |
| + | 13 | 1282  | s.C384W SPINK5_    | NM_006846    | NP_006837    | Q9NQ38 | ISK5_HUMAN  | Kazal-like 6.              | 4  | TATGTGTGAGGT  | 0.413 |
| - | 17 | 3987  | ps.2_RNA SH3TC     | NM_024577    | NP_078853    | Q8TF17 | S3TC2_HUMAN |                            | 2  | CCACCCGCCCC   | 0.612 |
| - | 17 | 3870  | lps.2_RNA SH3TC    | NM_024577    | NP_078853    | Q8TF17 | S3TC2_HUMAN | TPR 8.                     | 2  | CGCTGCTGCCA   | 0.592 |
| + | 3  | 1308  |                    | NM_000112    | NP_000103    | P50443 | S26A2_HUMAN | ical; (Potential).         | 0  | TAGCCTCTCATT  | 0.388 |
| - | 1  | 274   | p.G20D CAMK2A      | NM_171825    | NP_741960    | Q9UQM7 | KCC2A_HUMAN | ase. ATP (By similarity).  | 1  | ACTTGCCCAAT   | 0.632 |
| + | 23 | 3793  | p.P1191S TCOF1_    | NM_001135243 | NP_001128715 | Q13428 | TCOF_HUMAN  |                            | 3  | CCAGCCCCTCA   | 0.547 |
| - | 8  | 886   | TN4_uc010jhi.2_l   | NM_016221    | NP_057305    | Q9UJW0 | DCTN4_HUMAN |                            | 1  | TATAGAGCTGTG  | 0.463 |
| - | 6  | 1511  | 3M_uc011dcl.1_Int  | NM_052860    | NP_443092    | Q96RE9 | ZN300_HUMAN | 2H2-type 6.                | 2  | CTTTCCACAT    | 0.463 |
| - | 7  | 973   | _uc003lua.2_Splic  | NM_181776    | NP_861441    | Q495M3 | S36A2_HUMAN |                            | 2  | ACTTACCACAC   | 0.498 |
| - | 1  | 2466  | AT2_uc010jhx.1_l   | NM_001447    | NP_001438    | Q9NYQ8 | FAT2_HUMAN  | r (Potential). Cadherin 6. | 6  | TCTGGGTGCG    | 0.498 |
| + | 22 | 2348  | _p.I737T CYFIP2_   | NM_001037333 | NP_001032410 | Q96F07 | CYFP2_HUMAN |                            | 0  | TCATCATTCCGT  | 0.478 |
| + | 3  | 280   | yk.2_Missense_Mi   | NM_004219    | NP_004210    | O95997 | PTTG1_HUMAN |                            | 0  | CCAAGGGACCC   | 0.413 |
| - | 11 | 1477  | 2_Missense_Muta    | NM_003062    | NP_003053    | O75094 | SLIT3_HUMAN | LRR 8.                     | 4  | CAGCCCTGGA    | 0.527 |
| + | 49 | 5157  | se_Mutation_p.V1'  | NM_004946    | NP_004937    | Q92608 | DOCK2_HUMAN |                            | 7  | CTGAGGTCAAG   | 0.587 |
| - | 3  | 748   | D1_uc003mcr.2_In   | NM_138369    | NP_612378    | Q96IK1 | BOD1_HUMAN  |                            | 2  | CTGGCCTTCG    | 0.512 |
| + | 1  | 1428  | ijiv.2_Missense_Mi | NM_030627    | NP_085130    | Q17RY0 | CPEB4_HUMAN |                            | 0  | TTGGAGTGCTA   | 0.448 |
| + | 14 | 1689  | GRK6_uc003mgs.     | NM_002082    | NP_002073    | P43250 | GRK6_HUMAN  | kinase C-terminal.         | 3  | CATCCCTGGC    | 0.632 |
| + | 5  | 3142  | IL1_uc003mkn.1_l   | NM_014757    | NP_055572    | Q92585 | MAML1_HUMAN |                            | 6  | CCAGGCCTACC   | 0.687 |
| - | 11 | 1711  | ition_p.A223V MG   | NM_014275    | NP_055090    | Q9UQ53 | MG14B_HUMAN | renal (Potential).         | 0  | TGACCCTCCA    | 0.552 |
| + | 4  | 1186  | p.E284K FARS2_u    | NM_006567    | NP_006558    | O95363 | SYFM_HUMAN  |                            | 0  | TATGGAGAATGG  | 0.428 |
| + | 1  | 692   | IC5_uc003mxw.2_    | NR_027712    |              |        |             |                            | 0  | GGGGAGCCTGA   | 0.493 |
| + | 1  | 809   | IC5_uc003mxw.2_    | NR_027712    |              |        |             |                            | 0  | CTTCGGTTTCA   | 0.532 |
| + | 3  | 587   | n_p.L85F EDN1_u    | NM_001955    | NP_001946    | P05305 | EDN1_HUMAN  |                            | 1  | TATGGACTTGGA  | 0.403 |
| + | 9  | 1134  | iax.2_Missense_M   | NM_012241    | NP_036373    | Q9NXA8 | SIRT5_HUMAN | tylase sirtuin-type.       | 3  | CCACCCAGCT    | 0.562 |
| + | 3  | 1055  | _p.V213I RNF182_   | NM_152737    | NP_689950    | Q8N6D2 | RN182_HUMAN | ical; (Potential).         | 3  | TTGGGTGCGTC   | 0.473 |
| + | 26 | 2625  | ijpy.2_Missense_M  | NM_017640    | NP_060110    | Q5VZK9 | LR16A_HUMAN |                            | 4  | CCAGTGGCTTAC  | 0.393 |

rs140781660

rs149772768



|   |    |      |                    |              |              |        |             |                               |    |                |       |
|---|----|------|--------------------|--------------|--------------|--------|-------------|-------------------------------|----|----------------|-------|
| + | 1  | 344  | i03njt.1_RNA HIST  | NM_003520    | NP_003511    | Q99877 | H2B1N_HUMAN |                               | 0  | GGAGGGCACCA    | 0.647 |
| + | 1  | 82   | _5'Flank HIST1H2J  | NM_003527    | NP_003518    | P23527 | H2B1O_HUMAN |                               | 0  | GGGCTCCAAGA    | 0.522 |
| - | 1  | 589  |                    | NM_033057    | NP_149046    | Q9GZK3 | OR2B2_HUMAN | Name=5; (Potential).          | 0  | TTTCAGCCTCAT   | 0.433 |
| - | 1  | 904  | uc003nlp.1_5'Flanl | NM_052923    | NP_443155    | Q6R2W3 | SCND3_HUMAN | SCAN box.                     | 1  | CAGCACCAACA    | 0.562 |
| + | 5  | 551  | RPS18B_uc010jsc    | NM_014046    | NP_054765    | Q9Y676 | RT18B_HUMAN | p.G132C(1)                    | 1  | CACACGGGTATC   | 0.502 |
| - | 5  | 1133 | imo.1_Splice_Site  | NM_003587    | NP_003578    | O60231 | DHX16_HUMAN |                               | 4  | CCTCACCTGTCC   | 0.622 |
| + | 4  | 1424 | p.G426E TUBB_uc    | NM_178014    | NP_821133    | P07437 | TBB5_HUMAN  |                               | 1  | AAGAGGAGGAG    | 0.577 |
| - | 3  | 228  | lmr.1_Missense_Iv  | NM_005803    | NP_005794    | O75955 | FLOT1_HUMAN |                               | 0  | CATGACTGGGG    | 0.602 |
| + | 2  | 229  | A_uc003rxz.1_5'UTR |              |              |        |             |                               | 0  | AGAAATGCAGG    | 0.552 |
| + | 3  | 409  | i.3_Missense_Mut   | NM_080686    | NP_542417    | P48634 | PRC2A_HUMAN | A type A repeats.[1-1.        | 0  | TTGCCCGCGCT    | 0.557 |
| + | 14 | 2241 | t2_uc003nvc.3_N    | NM_080686    | NP_542417    | P48634 | PRC2A_HUMAN | X 57 AA type A repeats.       | 0  | caccagtgagcagc | 0.483 |
| - | 3  | 519  | l.2_5'UTR C6orf27  | NM_025258    | NP_079534    | Q9Y334 | G7C_HUMAN   |                               | 3  | AACCAGGTCCA    | 0.597 |
| + | 28 | 4095 | Flank STK19_uc01   | NM_006929    | NP_008860    | Q15477 | SKIV2_HUMAN |                               | 4  | GGCGGGACATC    | 0.567 |
| - | 4  | 1368 | FR DOM3Z_uc010     | NM_005510    | NP_005501    | O77932 | DOM3Z_HUMAN |                               | 0  | TGAGCCCACCA    | 0.542 |
| - | 1  | 800  | ation_p.P89L STK1  | NM_005510    | NP_005501    | O77932 | DOM3Z_HUMAN |                               | 0  | GATCCGGGTATC   | 0.632 |
| - | 25 | 8957 |                    | NM_019105    | NP_061978    | P22105 | TENX_HUMAN  | nectin type-III 21.           | 0  | GCCCACGCGCT    | 0.637 |
| - | 24 | 8474 |                    | NM_019105    | NP_061978    | P22105 | TENX_HUMAN  | nectin type-III 20.           | 0  | GGGGATGGTCC    | 0.672 |
| - | 7  | 3245 |                    | NM_019105    | NP_061978    | P22105 | TENX_HUMAN  | nectin type-III 3.            | 0  | CAGAGCCTGGC    | 0.657 |
| - | 9  | 1761 | dpv.1_RNA NOTC1    | NM_004557    | NP_004548    | Q99466 | NOTC4_HUMAN | ng (Potential). Extracellular | 22 | CACCAGGCAGG    | 0.597 |
| - | 2  | 289  | 1_5'Flank HLA-DV   | NM_002118    | NP_002109    | P28068 | DMB_HUMAN   | Luminal (Potential).          | 0  | AGCCACCTAGA    | 0.403 |
| + | 6  | 1171 | xl.2_Missense_Mi   | NM_002931    | NP_002922    | Q06587 | RING1_HUMAN | nteraction with CBX2 (By s    | 2  | TGACACCGGAG    | 0.677 |
| - | 6  | 2083 | ition_p.P552S DA   | NM_001350    | NP_001341    | Q9UER7 | DAXX_HUMAN  | action with SPOP.             | 23 | GGGGGGACCAC    | 0.512 |
| + | 7  | 878  | AP1_uc010juy.2_    | NM_006772    | NP_006763    | Q96PV0 | SYGP1_HUMAN | PH.                           | 4  | AGGAACAAAAT    | 0.517 |
| + | 9  | 1354 | RF1BP1_uc010jvr    | NM_017754    | NP_060224    | Q6BDS2 | URFB1_HUMAN |                               | 3  | GGCAGGTTAGG    | 0.478 |
| - | 3  | 461  | o.1_RNA MTCH1_     | NM_014341    | NP_055156    | Q9NZJ7 | MTCH1_HUMAN | Solcar 1.                     | 0  | GCCGGGGACTC    | 0.557 |
| + | 1  | 477  | l1_uc011dtw.1_5'F  | NM_002648    | NP_002639    | P11309 | PIM1_HUMAN  |                               | 2  | CGCGCCCTGCA    | 0.716 |
| + | 35 | 5056 |                    | NM_001371    | NP_001362    |        |             |                               | 21 | TCCTCAGATATA   | 0.363 |
| + | 42 | 6238 |                    | NM_001371    | NP_001362    |        |             |                               | 21 | TCAGAGGCCTA    | 0.353 |
| + | 2  | 154  | 10jxx.1_Intron PTC | NM_138296    | NP_612153    | Q6ISU1 | PTCRA_HUMAN | ellular (Potential).          | 2  | GCACACCCTTT    | 0.567 |
| + | 11 | 2749 | _p.E892K CUL9_u    | NM_015089    | NP_055904    | Q8IWT3 | CUL9_HUMAN  |                               | 12 | CCCAGAGCTGA    | 0.512 |
| - | 32 | 3797 | R1C_uc003ovo.1_    | NM_020750    | NP_065801    | Q9HAV4 | XPO5_HUMAN  |                               | 4  | GCCACCCCCAT    | 0.483 |
| + | 7  | 1131 | XLH_uc011dvl.1_R   | NM_006502    | NP_006493    | Q9Y253 | POLH_HUMAN  |                               | 2  | CATGGGTGAAC    | 0.418 |
| + | 10 | 1751 | p.S556N HSP90A     | NM_007355    | NP_031381    | P08238 | HS90B_HUMAN |                               | 4  | AGAGAGCAAGG    | 0.458 |
| - | 16 | 1774 | ai.2_Missense_Mi   | NM_138694    | NP_619639    | P08F94 | PKHD1_HUMAN | ellular (Potential).          | 44 | TGGAAGCCTCT    | 0.537 |
| + | 2  | 260  |                    | NM_133367    | NP_588608    | Q8TEZ7 | MPRB_HUMAN  | lasmic (Potential).           | 0  | GGATGGGCTTC    | 0.672 |
| + | 2  | 393  | FHC1_uc011dww.     | NM_018100    | NP_060570    | Q5JVL4 | EFHC1_HUMAN |                               | 3  | CCCAGGCTGAG    | 0.537 |
| + | 29 | 2047 | am.1_Missense_M    | NM_001858    | NP_001849    | Q14993 | COJA1_HUMAN | lcal region 3 (COL3).         | 4  | TCCAGGTCTCT    | 0.458 |
| + | 3  | 617  | ite IRAK1BP1_uc0   | NM_001010844 | NP_001010844 | Q5VVH5 | IKBP1_HUMAN |                               | 0  | CTTCGGTAAGT    | 0.338 |
| + | 8  | 2805 |                    | NM_015021    | NP_055836    | O60281 | ZN292_HUMAN |                               | 4  | GTTTGGA AAAAC  | 0.443 |
| - | 8  | 1383 | jzv.1_Missense_M   | NM_002042    | NP_002033    | P24046 | GBRR1_HUMAN | lcal; (Probable).             | 1  | AGGCACGGCTC    | 0.478 |
| + | 4  | 759  | Intron KLHL32_uc   | NM_052904    | NP_443136    | Q96NJ5 | KLH32_HUMAN | BTB.                          | 4  | GCAGGCTCTGG    | 0.423 |
| - | 31 | 5208 |                    | NM_006828    | NP_006819    | Q8N3C0 | HELC1_HUMAN | ase C-terminal 2.             | 6  | TCGGTCCCTCT    | 0.373 |
| - | 31 | 5161 |                    | NM_006828    | NP_006819    | Q8N3C0 | HELC1_HUMAN | ase C-terminal 2.             | 6  | CAAGGTCAGC     | 0.368 |
| - | 40 | 5506 | as.1_Missense_Mi   | NM_001145128 | NP_001138600 | Q5TCS8 | AKD1_HUMAN  |                               | 1  | GAGAAGTTGCA    | 0.373 |
| + | 2  | 587  | _p.P151L GPR6_u    | NM_005284    | NP_005275    | P46095 | GPR6_HUMAN  | ellular (Potential).          | 0  | GGTGCCCTCGG    | 0.637 |
| + | 7  | 800  | MT11_uc010kev.2    | NM_001031712 | NP_001026882 | Q7Z4G4 | TRM11_HUMAN |                               | 1  | GGAACAGGTATT   | 0.289 |
| - | 6  | 704  | Mutation_p.A142V   | NM_001139510 | NP_001132982 | Q9NXT5 | ECHD1_HUMAN |                               | 0  | TTTAGAGCATTTT  | 0.443 |

rs17200172

|   |    |       |                    |              |              |        |             |                                |       |              |       |             |
|---|----|-------|--------------------|--------------|--------------|--------|-------------|--------------------------------|-------|--------------|-------|-------------|
| - | 17 | 2979  | i41L2_uc011eby.1   | NM_001431    | NP_001422    | O43491 | E41L2_HUMAN | xyl-terminal (CTD).            | 2     | TGACACGGACT  | 0.453 | rs145851233 |
| - | 17 | 2266  | yv.2_Missense_Mu   | NM_003980    | NP_003971    | Q14244 | MAP7_HUMAN  |                                | 0     | ATCGGGAGTGC  | 0.264 |             |
| + | 53 | 7902  |                    | NM_007124    | NP_009055    | P46939 | UTRO_HUMAN  |                                | 5     | TGAAAGGCCCTC | 0.448 |             |
| - | 2  | 745   | _p.R66K LATS1_u    | NM_004690    | NP_004681    | O95835 | LATS1_HUMAN |                                | 6     | GGATTTCTGACT | 0.408 |             |
| + | 4  | 3826  | _Mutation_p.E109   | NM_005100    | NP_005091    | Q02952 | AKA12_HUMAN |                                | 8     | ATCCATGAGGAG | 0.547 |             |
| + | 24 | 5275  | _p.W710* TIAM2_u   | NM_012454    | NP_036586    | Q8IVF5 | TIAM2_HUMAN |                                | 4     | TTCTGGTTGAA  | 0.433 |             |
| + | 7  | 2486  | _e_Mutation_p.D78  | NM_005922    | NP_005913    | Q9Y6R4 | M3K4_HUMAN  |                                | 9     | GTGCGGATGAC  | 0.448 |             |
| + | 6  | 1369  | siz.2_Missense_M   | NM_017802    | NP_060272    | Q86Y56 | HEAT2_HUMAN |                                | 1     | CTCTGCCTCCG  | 0.642 |             |
| + | 16 | 1913  | e_Mutation_p.G51   | NM_001130965 | NP_001124437 | O94901 | SUN1_HUMAN  | inuclear space.                | 0     | AGACCGGGATG  | 0.507 |             |
| + | 5  | 1052  | i.1_intron AMZ1_u  | NM_133463    | NP_597720    | Q400G9 | AMZ1_HUMAN  |                                | 0     | CAGCAGCAGAC  | 0.687 |             |
| - | 9  | 1021  | _p.P71L SKAP2_u    | NM_003930    | NP_003921    | O75563 | SKAP2_HUMAN |                                | 1     | GTAGAGGATGAT | 0.303 |             |
| - | 1  | 86    | A10_uc003syw.3_u   | NM_018951    | NP_061824    | P31260 | HXA10_HUMAN |                                | 0     | AGCATGACATT  | 0.458 |             |
| + | 7  | 712   | RHR_uc003tby.2_u   | NM_000823    | NP_000814    | Q02643 | GHRHR_HUMAN | Name=3; (Potential).           | 5     | TGTTGGCAGAA  | 0.627 |             |
| + | 2  | 336   | _Mutation_p.D64T   | NM_015060    | NP_055875    | Q8NBF6 | AVL9_HUMAN  |                                | 0     | TACCAGATGGC  | 0.428 |             |
| - | 3  | 274   |                    | NM_203288    | NP_976033    | Q8TA86 | RP9_HUMAN   | ending (By similarity).        | 0     | TGCATGAGCCA  | 0.453 |             |
| + | 2  | 248   |                    | NM_133468    | NP_597725    | Q8N8U9 | BMPER_HUMAN |                                | 3     | TTTCAGTTCTGT | 0.368 |             |
| + | 4  | 925   | g.2_Missense_Mut   | NM_018685    | NP_061155    | Q9NQW6 | ANLN_HUMAN  | ction with F-actin.            | 3     | CCTCTGCAAGTC | 0.428 |             |
| + | 12 | 3436  | _D1052N CDK13_u    | NM_003718    | NP_003709    | Q14004 | CDK13_HUMAN |                                | 5     | GCTTGGATGAC  | 0.498 |             |
| - | 7  | 915   | ense_Mutation_p.C  | NM_032158    | NP_115534    |        |             |                                | 0     | CTCACCCTTGG  | 0.542 |             |
| - | 15 | 2809  | _p.G838E MAGI2_u   | NM_012301    | NP_036433    | Q86UL8 | MAGI2_HUMAN | PDZ 4.                         | 11    | CCTGCCATTGC  | 0.532 |             |
| + | 32 | 8282  | _Mutation_p.G230   | NM_005751    | NP_005742    | Q99996 | AKAP9_HUMAN | ential. Glu-rich.              | 26    | AAAGTGGATTTT | 0.353 |             |
| - | 15 | 2009  | p.G613D KRIT1_u    | NM_194456    | NP_919438    | O00522 | KRIT1_HUMAN | ·RAP1A binding. FERM.          | 3     | TGACACCTTCAC | 0.328 | rs35311859  |
| + | 9  | 1760  |                    | NM_019004    | NP_061877    | Q9P2G1 | AKIB1_HUMAN | ype; degenerate.               | 1     | AAGGACACCTC  | 0.418 |             |
| - | 5  | 622   | mu.1_Missense_M    | NM_001742    | NP_001733    | P30988 | CALCR_HUMAN | ellular (Potential).           | 9     | TGGATCAAAATC | 0.403 |             |
| - | 4  | 663   |                    | NM_001185    | NP_001176    | P25311 | ZA2G_HUMAN  | u-like C1-type.                | 2     | AGAGGGAGGAT  | 0.577 |             |
| + | 2  | 243   | _TAG3_uc011kjk.1   | NM_012447    | NP_036579    | Q9UJ98 | STAG3_HUMAN |                                | 8     | TTGATGACAGG  | 0.527 |             |
| + | 33 | 3816  | a.3_intron GATS_u  | NM_012447    | NP_036579    | Q9UJ98 | STAG3_HUMAN |                                | 8     | AGCTGGATATTC | 0.502 |             |
| - | 14 | 2849  | _p.W693* EPHB4_u   | NM_004444    | NP_004435    | P54760 | EPHB4_HUMAN | Potential). Protein kinase.    | 15    | GCAGTCCATCG  | 0.582 |             |
| + | 9  | 13152 | C17_uc010lho.1_F   | NM_001040105 | NP_001035194 | Q685J3 | MUC17_HUMAN | ellular (Potential).           | 27    | CTCAGTGCCTG  | 0.607 |             |
| + | 27 | 5099  | LL5_uc010lhf.1_Int | NM_182931    | NP_891847    | Q8IZD2 | MLL5_HUMAN  | Pro-rich.                      | 3     | ACAGACACCTC  | 0.493 |             |
| + | 6  | 831   |                    | NM_002736    | NP_002727    | P31323 | KAP3_HUMAN  | cAMP 1.                        | 1     | TCGTGGGAGTTT | 0.423 |             |
| - | 4  | 935   | _p.R137K COG5_u    | NM_181733    | NP_859422    | Q9UP83 | COG5_HUMAN  |                                | 4     | CCAATTCCTGCT | 0.323 |             |
| - | 3  | 983   | _fl.2_Missense_Mu  | NM_001130475 | NP_001123947 | Q7Z6K1 | THAP5_HUMAN |                                | 0     | AGCAGGTACAA  | 0.323 |             |
| + | 4  | 2833  | LRRN3_uc003vfu     | NM_001099660 | NP_001093130 | Q9H3W5 | LRRN3_HUMAN | otential). Fibronectin type-II | 8     | ATATCCCACCAT | 0.348 |             |
| - | 4  | 2793  |                    | NM_002711    | NP_002702    | Q16821 | PPR3A_HUMAN |                                | 34    | ATTCAGTATGAT | 0.378 |             |
| - | 5  | 1195  | a.2_Missense_Mut   | NM_003391    | NP_003382    | P09544 | WNT2_HUMAN  | p.N295_D302del                 | 7     | GCCCCGGGAAG  | 0.572 | rs148046128 |
| + | 12 | 4192  | _2_intron PTPRZ1_u | NM_002851    | NP_002842    | P23471 | PTPRZ_HUMAN | ellular (Potential).           | 9     | TGCAAGTGAGA  | 0.403 |             |
| - | 9  | 1157  |                    | NM_003941    | NP_003932    | O00401 | WASL_HUMAN  | Pro-rich.                      | 0     | TGGTGGTGCTG  | 0.279 |             |
| + | 6  | 770   | ca.1_Missense_Mu   | NM_005011    | NP_005002    | Q16656 | NRF1_HUMAN  |                                | 1     | TACAGTCGGG   | 0.527 |             |
| - | 12 | 1495  | _lmc.1_Missense_I  | NM_032842    | NP_116231    | Q96SK2 | TM209_HUMAN |                                | 3     | ATCAAGGTAGG  | 0.373 |             |
| + | 18 | 2784  | _G527S EXOC4_u     | NM_021807    | NP_068579    | Q96A65 | EXOC4_HUMAN |                                | 9     | ACCAGGTGTG   | 0.582 |             |
| + | 15 | 2231  |                    | NM_015135    | NP_055950    | Q92621 | NU205_HUMAN |                                | 6     | TTTGACCTTAT  | 0.468 | rs150179196 |
| + | 14 | 1881  | AS1_uc003vvi.2_u   | NM_001130966 | NP_001124438 | P24557 | THAS_HUMAN  | lasmic (Potential).            | 3     | AATGGTGTCTAT | 0.398 |             |
| - | 15 | 1860  |                    | NM_004333    | NP_004324    | P15056 | BRAF_HUMAN  | rotein kinase_R603>I(2) p.T    | 18290 | ATTTCACTGTAC | 0.368 |             |
| + | 5  | 1230  | _852_uc010lhn.2_u  | NM_001105558 | NP_001099028 | P0C1S8 | WEE2_HUMAN  | rotein kinase.                 | 2     | TACGTTACTATC | 0.408 |             |
| + | 21 | 3898  |                    | NM_014141    | NP_054860    | Q9UHC6 | CNTP2_HUMAN |                                | 11    | CTGCAGCTCGA  | 0.458 |             |
| + | 46 | 6680  |                    | NM_198455    | NP_940857    | A2VEC9 | SSPO_HUMAN  |                                | 0     | CACAGGTCCTC  | 0.672 |             |

|   |    |       |                    |              |              |        |             |                       |    |                |       |
|---|----|-------|--------------------|--------------|--------------|--------|-------------|-----------------------|----|----------------|-------|
| - | 58 | 14801 | cx.2_Missense_Mu   | NM_170606    | NP_733751    | Q8NEZ4 | MLL3_HUMAN  | SET.                  | 63 | 'CAAAAGTCACC/  | 0.433 |
| - | 36 | 6721  | z.2_Missense_Mu    | NM_170606    | NP_733751    | Q8NEZ4 | MLL3_HUMAN  | Pro-rich.             | 63 | 'AGTAGGCCGGG   | 0.478 |
| - | 27 | 4439  | cz.2_Missense_Mu   | NM_170606    | NP_733751    | Q8NEZ4 | MLL3_HUMAN  |                       | 63 | 'CTAAGGAAGGA'  | 0.343 |
| + | 6  | 633   | ir.2_Missense_Mu   | NM_030936    | NP_112198    | Q9H0A6 | RNF32_HUMAN | 3-type 1; atypical.   | 0  | 'TTCAGGCATGT   | 0.358 |
| + | 9  | 2218  |                    | NM_138400    | NP_612409    | Q5C9Z4 | NOM1_HUMAN  | MI.                   | 0  | 'TTCGGGACTTG   | 0.383 |
| - | 7  | 1375  |                    | NM_033225    | NP_150094    | Q96PZ7 | CSMD1_HUMAN | cellular (Potential). | 25 | 'TTCATCCTTGCT  | 0.453 |
| + | 5  | 840   | ie_Mutation_p.P13i | NM_152415    | NP_689628    | Q8NEZ2 | VP37A_HUMAN |                       | 0  | 'ATCCTCCACAAC  | 0.413 |
| + | 20 | 2529  | p.G794D PIWIL2_    | NM_018068    | NP_060538    | Q8TC59 | PIWL2_HUMAN | Piwi.                 | 1  | 'CGTGGGCTCCT   | 0.403 |
| + | 6  | 1103  | 3xbp.3_Missense_   | NM_001128431 | NP_001121903 | Q15043 | S39AE_HUMAN | lasmic (Potential).   | 0  | '3GCTCGCTCTCT  | 0.602 |
| + | 18 | 2083  | 3xbw.3_Splice_Site | NM_005775    | NP_005766    | O60504 | VINEX_HUMAN |                       | 0  | 'CCAGGTGAGGT.  | 0.662 |
| + | 2  | 1159  | 3_Mutation_p.E37E  | NM_005382    | NP_005373    | P07197 | NFM_HUMAN   | Rod.]Coil 2B.         | 1  | 'AGTGGGAAATG   | 0.507 |
| - | 6  | 1712  | p.G353E CHRNA2     | NM_000742    | NP_000733    | Q15822 | ACHA2_HUMAN | Cytoplasmic.          | 1  | 'GGGCCCCCGCG   | 0.647 |
| - | 1  | 655   |                    | NM_031271    | NP_112561    | Q9BXT5 | TEX15_HUMAN |                       | 7  | '3AAAACTGTAG,  | 0.363 |
| - | 24 | 4627  | 3lwe.2_Missense_I  | NM_023034    | NP_075447    | Q9BZ95 | NSD3_HUMAN  |                       | 1  | 'TGTCTGCACTCA' | 0.363 |
| + | 6  | 936   | 3M2_uc003xoq.1_    | NM_001134296 | NP_001127768 | P53677 | AP3M2_HUMAN | MHD.                  | 0  | 'GGCATGCCAGA   | 0.448 |
| + | 13 | 906   | _p.Y236H POLB_L    | NM_002690    | NP_002681    | P06746 | DPOLB_HUMAN |                       | 2  | '3ATCAGTATTACT | 0.343 |
| - | 8  | 1790  | xpe.2_Missense_I   | NM_006749    | NP_006740    | Q08357 | S20A2_HUMAN | lasmic (Potential).   | 2  | 'GGGGCCCTGT    | 0.587 |
| + | 3  | 309   | uc003xql.1_Misser  | NM_182746    | NP_877423    | P33991 | MCM4_HUMAN  |                       | 4  | 'CCAGCCCTCCC   | 0.547 |
| + | 19 | 1656  | p.A429T SNTG1_L    | NM_018967    | NP_061840    | Q9NSN8 | SNTG1_HUMAN |                       | 5  | 'CTTTAGGCTGT   | 0.318 |
| - | 12 | 1485  |                    | NM_144651    | NP_653252    | A1KZ92 | PXDNL_HUMAN | like C2-type 3.       | 2  | 'GCCTTCCACAG   | 0.517 |
| - | 5  | 785   | eo.1_Missense_M    | NM_018120    | NP_060590    | Q9NVT9 | ARMC1_HUMAN |                       | 1  | '3ACCACACACC'  | 0.333 |
| - | 13 | 1406  | DE7A_uc003xvp.2_   | NM_002604    | NP_002595    | Q13946 | PDE7A_HUMAN |                       | 0  | '3AGCATCAGTG'  | 0.483 |
| + | 1  | 729   | e.3_5'Flank ADHF   | NM_015169    | NP_055984    | Q15050 | RRS1_HUMAN  |                       | 0  | 'TGCACCCATCC   | 0.662 |
| + | 2  | 2554  | iu.1_Missense_ML   | NM_024721    | NP_078997    | Q86UP3 | ZFHx4_HUMAN | 3H2-type 3.           | 15 | '3ACAAGCACCTG  | 0.507 |
| + | 2  | 2578  | iu.1_Missense_Mu   | NM_024721    | NP_078997    | Q86UP3 | ZFHx4_HUMAN |                       | 15 | '3ATCTCCAAAATC | 0.517 |
| + | 6  | 1187  | eh.2_Missense_M    | NM_004337    | NP_004328    | Q9Y236 | OSG12_HUMAN |                       | 0  | '3CTTTTGTGTTTC | 0.463 |
| - | 2  | 162   | 3D54B_uc003ygn.    | NM_012415    | NP_036547    | O95073 | FSBP_HUMAN  |                       | 4  | 'CTGGAGGTATAA. | 0.368 |
| - | 7  | 654   | _Mutation_p.R214   | NM_015496    | NP_056311    | Q69YN4 | VIR_HUMAN   | Glu-rich.             | 2  | 'CTTCTCTATGAG  | 0.343 |
| - | 3  | 334   | ..1_RNA UQCRB_L    | NM_006294    | NP_006285    | P14927 | QCR7_HUMAN  |                       | 1  | 'CTTTTAGGCAAG, | 0.408 |
| + | 7  | 1446  | 3H_uc010mbf.2_Ir   | NM_178812    | NP_848927    | Q86UE4 | LYRIC_HUMAN | lasmic (Potential).   | 2  | 'ATCAACCCATAT  | 0.348 |
| + | 10 | 1845  | DH_uc010mbf.2_F    | NM_178812    | NP_848927    | Q86UE4 | LYRIC_HUMAN | lasmic (Potential).   | 2  | 'AAAATAGCCAGG  | 0.239 |
| + | 7  | 1061  | p.P321S POP1_u     | NM_001145860 | NP_001139332 | Q99575 | POP1_HUMAN  |                       | 2  | '3GTGACCCCTCT  | 0.488 |
| + | 13 | 1979  | p.G627S POP1_u     | NM_001145860 | NP_001139332 | Q99575 | POP1_HUMAN  |                       | 2  | '3GCTGGGGCATG  | 0.408 |
| - | 2  | 1878  | p.E355K FBXO43_    | NM_001029860 | NP_001025031 | Q4G163 | FBX43_HUMAN |                       | 2  | 'TTGTTCCCGAAC  | 0.493 |
| + | 9  | 979   | 303yla.2_Splice_S  | NM_001695    | NP_001686    | P21283 | VATC1_HUMAN |                       | 0  | 'AACAAGTAAGAT' | 0.343 |
| + | 5  | 1416  | 303ylr.2_Missense_ | NM_014677    | NP_055492    | Q9UQ26 | RIMS2_HUMAN | PDZ.                  | 15 | '3ATCAGGTCGGC  | 0.338 |
| + | 47 | 7224  |                    | NM_177531    | NP_803875    | Q86W11 | PKHL1_HUMAN | cellular (Potential). | 14 | '3ACTCCCTGAT   | 0.358 |
| - | 13 | 1246  | s.1_Missense_Mu    | NM_001040092 | NP_001035181 | Q13822 | ENPP2_HUMAN |                       | 7  | '3TCCAGGCACT/  | 0.338 |
| - | 25 | 3529  |                    | NM_003184    | NP_003175    | Q6P1X5 | TAF2_HUMAN  |                       | 6  | '3CTGGGGTATTA/ | 0.438 |
| + | 2  | 215   | ank MTBP_uc003y    | NM_022045    | NP_071328    | Q96DY7 | MTBP_HUMAN  |                       | 3  | '3TGCTTCAATTAA | 0.338 |
| + | 13 | 1465  |                    | NM_022045    | NP_071328    | Q96DY7 | MTBP_HUMAN  |                       | 3  | '3ATGTTCAAGTTI | 0.323 |
| + | 16 | 2369  | R67_uc003yps.1_I   | NM_145647    | NP_663622    | Q96DN5 | WDR67_HUMAN | Potential.            | 1  | '3AGCTGCTGTGA. | 0.368 |
| - | 25 | 3650  | 3_Mutation_p.R97Z  | NM_014109    | NP_054828    | Q6PL18 | ATAD2_HUMAN |                       | 2  | 'ATCTTCTTCGC'  | 0.358 |
| + | 24 | 2471  | 3lil.1_Missense_Mi | NM_144963    | NP_659400    | Q658Y4 | F91A1_HUMAN |                       | 2  | '3ACATGGGTGTT  | 0.393 |
| - | 14 | 2648  | nse_Mutation_p.A   | NM_014751    | NP_055566    | O43312 | MTSS1_HUMAN | Pro-rich.             | 1  | '3AGTGGCACTT   | 0.582 |
| + | 3  | 640   | si.2_Missense_Mu   | NM_002467    | NP_002458    | P01106 | MYC_HUMAN   |                       | 6  | 'AGCCCCGGCG    | 0.637 |
| + | 37 | 6445  | 3.1_Missense_Mut   | NM_003235    | NP_003226    | P01266 | THYG_HUMAN  | Type IIIA.            | 15 | '3ATGTTCCCAAC/ | 0.423 |

|   |    |      |                     |              |              |        |             |                                |    |               |       |
|---|----|------|---------------------|--------------|--------------|--------|-------------|--------------------------------|----|---------------|-------|
| - | 64 | 5065 | l jo.1_Missense_M   | NM_152888    | NP_690848    | Q8NFW1 | COMA1_HUMAN | y-rich. Collagen-like 15.      | 13 | :TCGCTCACCTG( | 0.612 |
| - | 5  | 680  | iyvt.2_Splice_Site_ | NM_153831    | NP_722560    | Q05397 | FAK1_HUMAN  |                                | 6  | CTAATACCTGTT( | 0.274 |
| + | 3  | 561  | se_Mutation_p.P7f   | NM_032611    | NP_116000    | O75365 | TP4A3_HUMAN |                                | 0  | :GCCCCCGCCCG  | 0.692 |
| - | 15 | 1788 | zo.1_Missense_M     | NM_015356    | NP_056171    | Q14160 | SCRIB_HUMAN | 'ens junction and to inhibit t | 5  | GCAGGGTCCAG(  | 0.642 |
| - | 11 | 3578 | :003zdr.1_5'Flank   | NM_025251    | NP_079527    | Q9C0H5 | RHG39_HUMAN | Rho-GAP.                       | 0  | \CCATGCGGTTG, | 0.517 |
| - | 16 | 2177 | _p.S622F RF3_u      | NM_134428    | NP_602304    | P48380 | RF3_HUMAN   |                                | 4  | 'GGAAGGAGCCA  | 0.438 |
| - | 2  | 1008 | zob.1_Missense_Iv   | NM_020344    | NP_065077    | Q9UI40 | NCKX2_HUMAN | lasmic (Potential).            | 3  | :CTTGTCCCTGG( | 0.458 |
| - | 1  | 2372 | v.2_Intron KLHL9_   | NM_018847    | NP_061335    | Q9P2J3 | KLHL9_HUMAN |                                | 4  | \CCCAGGGTTTT  | 0.438 |
| + | 4  | 363  | TAP_uc011nk.1_Iv    | NM_002451    | NP_002442    | Q13126 | MTAP_HUMAN  |                                | 1  | AGGAAGAGGGC   | 0.483 |
| - | 1  | 477  | _5'UTR CHMP5_u      | NM_004323    | NP_004314    | Q99933 | BAG1_HUMAN  | lem repeat of E-E-X(4). 6.     | 1  | GCTCCGGGTCG   | 0.662 |
| + | 2  | 719  | NFX1_uc003zsp.'     | NM_002504    | NP_002495    | Q12986 | NFX1_HUMAN  |                                | 1  | CTTCAGAGGCA'  | 0.512 |
| - | 8  | 1134 | ense_Mutation_p.(   | NM_022917    | NP_075068    | Q9H6R4 | NOL6_HUMAN  |                                | 2  | .CCCACCCTGGC( | 0.577 |
| - | 30 | 4339 |                     | NM_006289    | NP_006280    | Q9Y490 | TLN1_HUMAN  | ction with SYNM.               | 13 | GTTAGGGGCAG(  | 0.577 |
| - | 5  | 1366 | _p.P405L ZNF658_    | NM_033160    | NP_149350    | Q5TYW1 | ZN658_HUMAN | ype 3; degenerate.             | 1  | \AGTGGGGCCTC  | 0.403 |
| + | 15 | 1812 | .1_Intron PIP5K1E   | NM_003558    | NP_003549    | O14986 | PI51B_HUMAN |                                | 1  | \GCAAAGGGTTA( | 0.478 |
| + | 1  | 144  | _Site C9orf135_ucl  | NM_001010940 | NP_001010940 | Q5VTT2 | CI135_HUMAN | ellular (Potential).           | 1  | \ACTTGGTGGAG  | 0.592 |
| - | 2  | 829  | 4ail.2_Missense_I   | NM_001025780 | NP_001020951 | Q5VST6 | F108B_HUMAN |                                | 0  | :TGTTGCCTTTAC | 0.413 |
| + | 12 | 1994 | e_Mutation_p.R48i   | NM_006200    | NP_006191    | Q92824 | PCSK5_HUMAN | Homo B/P.                      | 3  | \CAGTGCCTCC   | 0.542 |
| + | 3  | 342  | e_Mutation_p.H88    | NM_024077    | NP_076982    | Q96T21 | SEBP2_HUMAN |                                | 3  | \ACTTTCATCCAT | 0.398 |
| - | 10 | 1000 | ltv.1_Missense_Mt   | NM_006415    | NP_006406    | O15269 | SPTC1_HUMAN | lasmic (Potential).            | 2  | AAGACCTGCCA(  | 0.378 |
| - | 5  | 788  | 04asb.2_Missense    | NM_014057    | NP_054776    | P20774 | MIME_HUMAN  | LRR 4.                         | 0  | \AGGAAGAACTG  | 0.303 |
| + | 10 | 1857 | _p.G410D FGD3_u     | NM_001083536 | NP_001077005 | Q5JSP0 | FGD3_HUMAN  | PH 1.                          | 2  | CATGGGCCAGA   | 0.607 |
| - | 3  | 441  | th.3_Missense_Mt    | NM_004148    | NP_004139    | Q92982 | NINJ1_HUMAN | ical; (Potential).             | 1  | CAGGCCCGTGG   | 0.587 |
| + | 31 | 3706 | \1529_uc004axh.1    | NM_020893    | NP_065944    |        |             |                                | 7  | \AGAGCATTGTAC | 0.428 |
| - | 12 | 1757 |                     | NM_005502    | NP_005493    | O95477 | ABCA1_HUMAN | Extracellular.                 | 17 | \GGTGACACAG,  | 0.488 |
| - | 4  | 311  | q.1_Missense_Mu     | NM_003329    | NP_003320    | P10599 | THIO_HUMAN  | Thioredoxin.                   | 0  | TTTTGTCCCTT(  | 0.393 |
| + | 17 | 2810 | 10_uc004bla.1_Mi    | NM_007018    | NP_008949    | Q7Z7A1 | CNTRL_HUMAN | Potential.                     | 0  | \GTATGGAGGAA, | 0.393 |
| + | 8  | 1811 | ow.2_Nonsense_I     | NM_182487    | NP_872293    | Q68BL7 | OLM2A_HUMAN | actomedin-like.                | 0  | \ACGTGGAAGAC, | 0.657 |
| - | 6  | 1019 | \AP1_uc004bpy.2_    | NM_001006617 | NP_001006618 | Q9BPZ7 | SIN1_HUMAN  |                                | 4  | \AGTAGGCACTG  | 0.488 |
| + | 3  | 277  | lmx.2_Missense_I    | NM_014007    | NP_054726    | O43298 | ZBT43_HUMAN |                                | 1  | \AAATGGAGCCT( | 0.398 |
| - | 3  | 275  |                     | NM_015679    | NP_056494    | O95900 | TRUB2_HUMAN |                                | 1  | :CTTGAGATGGG( | 0.512 |
| + | 4  | 710  |                     | NM_014506    | NP_055321    | O14657 | TOR1B_HUMAN |                                | 0  | :TGAGGCGGGG   | 0.373 |
| + | 3  | 361  | in_p.V84I NUP214    | NM_005085    | NP_005076    | P35658 | NU214_HUMAN |                                | 16 | \ATAAAGTCCAAC | 0.398 |
| + | 2  | 341  | am.1_Missense_Iv    | NM_013318    | NP_037450    | Q5JSZ5 | PRC2B_HUMAN |                                | 0  | \AAGACCCAAAG, | 0.567 |
| + | 13 | 2006 | _p.P234S BAT2L1     | NM_013318    | NP_037450    | Q5JSZ5 | PRC2B_HUMAN |                                | 0  | \TGACCCCCCG   | 0.627 |
| + | 2  | 1212 | 3C4_uc010mzw.2_     | NM_012204    | NP_036336    | Q9UKN8 | TF3C4_HUMAN |                                | 2  | \TTTTGGTGGGA, | 0.433 |
| - | 8  | 1180 | e_Mutation_p.A32    | NM_016172    | NP_057256    | Q9BSL1 | UBAC1_HUMAN | UBA 2.                         | 2  | :TACC CGGCA   | 0.313 |
| - | 9  | 1285 | \85_uc004cnm.1_I    | NM_138778    | NP_620133    | Q9BTV6 | WDR85_HUMAN |                                | 0  | GACAGGGTGT(   | 0.582 |
| + | 29 | 4466 | _p.D971N CACNA'     | NM_000718    | NP_000709    | Q00975 | CAC1B_HUMAN | lasmic (Potential).            | 6  | GCATTGACTT(   | 0.567 |
| + | 12 | 1346 | .L342F CSF2RA_u     | NM_001161529 | NP_001155001 | P15509 | CSF2R_HUMAN | ical; (Potential).             | 2  | \TCGTCTCGGC   | 0.542 |
| + | 7  | 1100 |                     | NM_001011719 | NP_001011719 | Q5FYA8 | ARSH_HUMAN  |                                | 1  | \GCCGTGAGTCT  | 0.517 |
| - | 9  | 1325 |                     | NM_000292    | NP_000283    | P46019 | KPB2_HUMAN  |                                | 2  | ACCATCTCGAAG  | 0.388 |
| + | 3  | 353  | njn.1_Missense_Iv   | NM_014927    | NP_055742    | Q8WXI2 | CNKR2_HUMAN | CRIC.                          | 2  | AGGAAGGAGAA(  | 0.408 |
| + | 1  | 499  |                     | NM_152631    | NP_689844    | Q8NA70 | FA47B_HUMAN |                                | 4  | :TGAGGACGCT   | 0.582 |
| + | 4  | 441  | ahl.2_Missense_M    | NM_001129898 | NP_001123370 | Q5JUW0 | ZN673_HUMAN | KRAB.                          | 0  | CCGTGGGTGAG   | 0.557 |
| - | 47 | 5707 | nip.2_Missense_M    | NM_005183    | NP_005174    | O60840 | CAC1F_HUMAN | lasmic (Potential).            | 6  | 'GGTTCCAGGC   | 0.637 |
| - | 16 | 2239 | lnip.2_Missense_Iv  | NM_005183    | NP_005174    | O60840 | CAC1F_HUMAN | ellular (Potential). II.       | 6  | \AGGGGCCACCA' | 0.522 |

rs138893749

|   |    |      |                    |              |              |        |              |                                |     |                   |       |
|---|----|------|--------------------|--------------|--------------|--------|--------------|--------------------------------|-----|-------------------|-------|
| - | 2  | 262  | Onip.2_Missense_   | NM_005183    | NP_005174    | O60840 | CAC1F_HUMAN  | lasmic (Potential).            | 6   | iGTGACCGCTGG      | 0.622 |
| - | 2  | 187  | OM4_uc004dpd.3     | NM_020717    | NP_065768    | Q9ULL8 | SHRM4_HUMAN  | PDZ.                           | 1   | GCACCAGTCCCTC     | 0.473 |
| - | 17 | 3304 |                    | NM_004463    | NP_004454    | P98174 | FGD1_HUMAN   | PH 2.                          | 6   | GGGCTCCGTAC       | 0.532 |
| + | 15 | 1779 | IL3L_uc004dti.2_R  | NM_019067    | NP_061940    | Q9NVN8 | GNL3L_HUMAN  |                                | 1   | FGAAAAATAAGA/     | 0.527 |
| - | 2  | 2882 |                    | NM_152424    | NP_689637    | Q5JTC6 | F123B_HUMAN  | p.0?(40)                       | 112 | ATCGAGGGAGG       | 0.577 |
| + | 5  | 2266 |                    | NM_001010888 | NP_001010888 | Q5HYM0 | ZC12B_HUMAN  |                                | 3   | GGAGCGTGCCT       | 0.507 |
| - | 21 | 2227 | N1_uc011mpg.1_l    | NM_002547    | NP_002538    | O60890 | OPHN1_HUMAN  | Pro-rich.                      | 2   | AGTTTCCCCAC       | 0.532 |
| + | 5  | 1640 | xe.2_Missense_Mi   | NM_004429    | NP_004420    | P98172 | EFNB1_HUMAN  | lasmic (Potential).            | 0   | GGCCAGTCCCA/      | 0.602 |
| + | 35 | 5033 | p.A1612T MED12     | NM_005120    | NP_005111    | Q93074 | MED12_HUMAN  |                                | 4   | AGCGTGCATAC,      | 0.517 |
| + | 3  | 284  | ao.1_Missense_Mt   | NM_006223    | NP_006214    | Q9Y237 | PIN4_HUMAN   | PpiC.                          | 0   | AAGTTAAAGTCT      | 0.383 |
| - | 9  | 3951 | cr.2_Missense_Mu   | NM_000489    | NP_000480    | P46100 | ATRX_HUMAN   |                                | 30  | AAAATCCAGTAT      | 0.338 |
| - | 1  | 713  | r.2_Intron ATP7A_u | NM_001029891 | NP_001025062 | Q8N0Y7 | PGAM4_HUMAN  |                                | 0   | ACACCGTCTCT       | 0.557 |
| + | 3  | 309  | iK1_uc011mq.1_l    | NM_000291    | NP_000282    | P00558 | PGK1_HUMAN   |                                | 2   | TCCAAGCATCA       | 0.463 |
| - | 9  | 2045 | p.E646K HDX_uc     | NM_144657    | NP_653258    | Q7Z353 | HDX_HUMAN    |                                | 2   | GTTGTTCTTATC      | 0.338 |
| - | 1  | 318  | h.2_Intron TSC22I  | NM_004089    | NP_004080    | Q99576 | T22D3_HUMAN  | ding (By similarity).          | 0   | AGAAGGAGATG       | 0.607 |
| - | 12 | 2581 | Y2F_uc011msq.1_    | NM_001522    | NP_001513    | P51841 | GUC2F_HUMAN  | ]. Cytoplasmic (Potential).    | 8   | CACAGGAGGAG       | 0.463 |
| + | 2  | 293  | oz.2_Missense_M    | NM_001128173 | NP_001121645 | O75914 | PAK3_HUMAN   | ity). Linker. GTPase-bindin    | 10  | GCACCGGGAAT       | 0.418 |
| + | 23 | 2563 | oqq.2_Missense_M   | NM_144658    | NP_653259    | Q5JSL3 | DOC11_HUMAN  | DHR-1.                         | 3   | TCCATCATTGCC      | 0.403 |
| - | 1  | 223  | uc004esi.1_Intron  | NM_139282    | NP_644811    | Q8NHV9 | RHXF1_HUMAN  |                                | 0   | CCTCAGGGTTC/      | 0.617 |
| + | 15 | 1613 |                    | NM_003399    | NP_003390    | O43895 | XPP2_HUMAN   |                                | 0   | ATAGGGACGGG,      | 0.582 |
| + | 20 | 1992 |                    | NM_003399    | NP_003390    | O43895 | XPP2_HUMAN   |                                | 0   | .CCAGGGAGCT,      | 0.577 |
| - | 12 | 2201 | uy.1_Missense_M    | NM_194277    | NP_919253    | Q6ZUT3 | FRMD7_HUMAN  |                                | 1   | TCTGGCCATGG/      | 0.413 |
| - | 2  | 2202 | fb.2_Missense_M    | NM_173078    | NP_775101    | Q8IW52 | SLIK4_HUMAN  | ellular (Potential).           | 2   | iGAGGACTTCGA,     | 0.428 |
| + | 5  | 1963 | nwr.1_Missense_N   | NM_032539    | NP_115928    | Q9H156 | SLIK2_HUMAN  | ellular (Potential).           | 7   | AGTTTTGGACCC      | 0.537 |
| + | 5  | 3271 | se_Mutation_p.E7f  | NM_032539    | NP_115928    | Q9H156 | SLIK2_HUMAN  | lasmic (Potential).            | 7   | .TTGCTGAGCGA/     | 0.488 |
| - | 22 | 5990 |                    | NM_005334    | NP_005325    | P51610 | HCFC1_HUMAN  |                                | 2   | ATTGGTGCCC        | 0.542 |
| + | 24 | 3945 | 1_RNA UBE4B_uc     | NM_001105562 | NP_001099032 | O95155 | UBE4B_HUMAN  |                                | 4   | .TTGCTCAGGATC     | 0.587 |
| + | 5  | 842  | qb.2_Missense_Mi   | NM_032264    | NP_115640    | Q9H094 | NBPF3_HUMAN  | Potential.                     | 2   | iACCCAGTTAAG/     | 0.502 |
| - | 51 | 6522 | pd.2_Missense_Mt   | NM_005529    | NP_005520    | P98160 | PGBM_HUMAN   | like C2-type 7.                | 9   | CGTGTGAGGAG/      | 0.687 |
| + | 5  | 1161 | utation_p.S339F l  | NM_017449    | NP_059145    | P29323 | EPHB2_HUMAN  | tential). Fibronectin type-III | 5   | .GACCTCCCTCAT     | 0.657 |
| - | 16 | 2416 | xm.1_Missense_M    | NM_052896    | NP_443128    | Q7Z408 | CSMD2_HUMAN  | tracellular (Potential).       | 12  | .AGCACCTGTGC/     | 0.587 |
| - | 5  | 6389 | e_Mutation_p.E17:  | NM_024503    | NP_078779    | Q5T1R4 | ZEP3_HUMAN   |                                | 6   | .CGGCTCCCTC       | 0.552 |
| + | 8  | 883  |                    | NM_178134    | NP_835235    | Q86W10 | CP4Z1_HUMAN  | renal (Potential).             | 1   | AGAGCGAAAAC/      | 0.368 |
| + | 3  | 655  | orf175_uc010oof.1  | NM_001039464 | NP_001034553 | Q68CQ1 | HEAT8_HUMAN  |                                | 0   | .CCAAGGATGTC      | 0.433 |
| - | 10 | 731  | p.G154E SLC44A     | NM_152697    | NP_689910    | Q8NCS7 | CTL5_HUMAN   | ellular (Potential).           | 4   | TTACTTCTTATC      | 0.328 |
| + | 13 | 2372 |                    | NM_006536    | NP_006527    | Q9UQC9 | CLCA2_HUMAN  | ellular (Potential).           | 3   | .GGAGCGAAAGT/     | 0.448 |
| + | 6  | 706  | se_Mutation_p.T1!  | NM_001114106 | NP_001107578 | Q8N4M1 | CTL3_HUMAN   |                                | 1   | TGACACCCCTCC/     | 0.388 |
| - | 32 | 4743 |                    | NM_206996    | NP_996879    | Q6Q759 | SPG17_HUMAN  |                                | 6   | AAAAGGATAGT/      | 0.438 |
| + | 4  | 1005 | shw.2_Missense_M   | NM_000862    | NP_000853    | P14060 | 3BHS1_HUMAN  |                                | 2   | GCTTTCCTTTATC     | 0.473 |
| + | 12 | 1400 | i_RNA NBPF9_uc     | NM_001037675 | NP_001032764 | Q3BBV1 | NBPFK_HUMAN  | NBPF 2.                        | 0   | ATGACAATGAA/      | 0.423 |
| + | 76 | 9493 | EPF10_uc010oyl.1   | NM_001039703 | NP_001034792 | A6NDV3 | A6NDV3_HUMAN |                                | 0   | .ACTCACTGGATA/    | 0.478 |
| - | 2  | 3373 | e.1_Missense_Mu    | NM_007113    | NP_009044    | Q07283 | TRHY_HUMAN   | 30 AA tandem repeats.          | 5   | gttctctctcagcagct | 0.224 |
| - | 3  | 883  |                    | NM_016190    | NP_057274    | Q9UBG3 | CRNN_HUMAN   | Gln-rich.                      | 3   | .CGTGGTCTCA/      | 0.612 |
| + | 13 | 1163 |                    | NM_020452    | NP_065185    | P98198 | AT8B2_HUMAN  | lasmic (Potential).            | 2   | ACAGCTACTTCA      | 0.597 |
| - | 2  | 858  | 2_Missense_Muta    | NM_001111    | NP_001102    | P55265 | DSRAD_HUMAN  |                                | 6   | TGGGGCTCCTT/      | 0.527 |
| - | 2  | 843  | 2_Missense_Muta    | NM_001111    | NP_001102    | P55265 | DSRAD_HUMAN  |                                | 6   | TATGACCGTCTG/     | 0.522 |
| - | 9  | 1479 | ST2_uc009wpb.2_l   | NM_144622    | NP_653223    | Q5T1A1 | DCST2_HUMAN  | ellular (Potential).           | 3   | GGTCACGATAAA      | 0.522 |

rs140029775

rs3814301



|   |    |      |                   |              |              |         |             |                                |    |               |       |             |
|---|----|------|-------------------|--------------|--------------|---------|-------------|--------------------------------|----|---------------|-------|-------------|
| - | 1  | 260  |                   | NM_001004476 | NP_001004476 | Q6IF99  | O10K2_HUMAN | cellular (Potential).          | 1  | TCTGGGACAGC/  | 0.488 |             |
| + | 3  | 336  | SD1_uc010pii.1_in | NM_052862    | NP_443094    | Q6JBY9  | CPZIP_HUMAN |                                | 5  | CTGTTCCCTCC/  | 0.567 |             |
| + | 37 | 5233 | 1gox.1_Missense_  | NM_000721    | NP_000712    | Q15878  | CAC1E_HUMAN | cellular (Potential). IV.      | 6  | AGAACGAGAAC   | 0.557 |             |
| - | 7  | 587  | o.A176V KCNT2_u   | NM_198503    | NP_940905    | Q6UVM3  | KCNT2_HUMAN | =Segment S4; (Potential).      | 7  | CCAAGGCATGTT  | 0.284 |             |
| + | 4  | 633  | gtr.1_Missense_Mi | NM_005666    | NP_005657    | P36980  | FHR2_HUMAN  | Sushi 3.                       | 3  | TTGAGGGTAAAC  | 0.383 |             |
| + | 10 | 1704 |                   | NM_030787    | NP_110414    | Q9BXR6  | FHR5_HUMAN  | Sushi 9.                       | 2  | GAAACGATGGA   | 0.328 |             |
| + | 6  | 1495 | 31_uc010ppb.1_M   | NM_201253    | NP_957705    | P82279  | CRUM1_HUMAN | (Potential). EGF-like 11.      | 9  | AATAATGGAACAT | 0.468 |             |
| + | 2  | 825  | zt.2_Missense_Mt  | NM_002725    | NP_002716    | P51888  | PRELP_HUMAN | LRR 6.                         | 3  | TGAGCGACGGC   | 0.597 |             |
| + | 6  | 1165 | o.3_Missense_Mut  | NM_152609    | NP_689822    | Q6PJW8  | CNST_HUMAN  |                                | 0  | TTGAACGGCTT/  | 0.323 |             |
| - | 2  | 304  |                   | NM_000242    | NP_000233    | P11226  | MBL2_HUMAN  | Collagen-like.                 | 1  | GATTTCTGGA/   | 0.542 |             |
| - | 8  | 1175 | p.G351E CTNNA3    | NM_001127384 | NP_001120856 | Q9UI47  | CTNA3_HUMAN | Potential.                     | 8  | TTTTTCCAGCCT  | 0.358 |             |
| - | 6  | 746  | _p.R208Q CTNNA    | NM_001127384 | NP_001120856 | Q9UI47  | CTNA3_HUMAN |                                | 8  | AAGCTCGGGCT   | 0.418 |             |
| - | 4  | 512  | 9xqi.1_RNA C10o   | NM_152710    | NP_689923    | Q96M53  | SPATL_HUMAN |                                | 1  | ATCACCAGTTCT  | 0.592 |             |
| + | 4  | 512  | 89_splice PCGF5   | NM_032373    | NP_115749    | Q86SE9  | PCGF5_HUMAN |                                | 1  | AGAACGTAAGT/  | 0.338 |             |
| + | 5  | 583  | gd.1_Missense_M   | NM_144587    | NP_653188    | Q32M84  | BTBDG_HUMAN |                                | 1  | GAAAGCCCTGG/  | 0.607 |             |
| - | 13 | 1831 | 9ycc.2_Missense_  | NM_021924    | NP_068743    | Q9HBB8  | CDHR5_HUMAN | stem repeats. 2. Extracellular | 0  | TCCTGGCTCTG/  | 0.667 | rs139058512 |
| - | 2  | 1485 |                   | NM_176821    | NP_789791    | Q86W26  | NAL10_HUMAN |                                | 9  | GGACTCCTTCC/  | 0.498 |             |
| - | 2  | 1171 | p.R84S STK33_uc   | NM_030906    | NP_112168    | Q9BYT3  | STK33_HUMAN |                                | 7  | TGCTTTTCTCTC  | 0.353 |             |
| - | 2  | 348  | 1_5'Flank C11orf7 | NM_000536    | NP_000527    | P55895  | RAG2_HUMAN  |                                | 5  | TGACATGGTTATC | 0.453 |             |
| - | 14 | 1926 |                   | NM_002334    | NP_002325    | O75096  | LRP4_HUMAN  | ntial). LDL-receptor class E   | 4  | GGTATCGGCAA   | 0.552 |             |
| - | 1  | 66   | IA13_uc001nfd.2_! | NM_000256    | NP_000247    | Q14896  | MYPC3_HUMAN |                                | 3  | TCCCCGGCTCA/  | 0.582 |             |
| - | 5  | 6868 | IAK_uc001ntk.1_lr | NM_001620    | NP_001611    | Q09666  | AHNK_HUMAN  |                                | 19 | TAAGTTCACATC  | 0.473 | rs1634804   |
| - | 5  | 6673 | IAK_uc001ntk.1_lr | NM_001620    | NP_001611    | Q09666  | AHNK_HUMAN  |                                | 19 | CAAGTGTAAGTC  | 0.522 |             |
| - | 5  | 6640 | IAK_uc001ntk.1_lr | NM_001620    | NP_001611    | Q09666  | AHNK_HUMAN  |                                | 19 | GGGGGCCCTTGA/ | 0.507 | rs1298288   |
| - | 17 | 2066 | yp.2_Intron INTS4 | NM_033547    | NP_291025    | Q96HW7  | INT4_HUMAN  |                                | 2  | CTACATTCCACA  | 0.453 |             |
| - | 2  | 976  | _p.P184L TRPC6_   | NM_004621    | NP_004612    | Q9Y210  | TRPC6_HUMAN | nic (Potential). ANK 3.        | 4  | AAGCCGGATGA/  | 0.453 |             |
| + | 13 | 2373 | iw.2_Missense_Mt  | NM_000829    | NP_000820    | P48058  | GRIA4_HUMAN | ical; (Potential).             | 8  | ACCTCGTGCT    | 0.403 |             |
| - | 1  | 942  |                   | NM_001005187 | NP_001005187 | Q8NGN1  | OR6T1_HUMAN | lasmic (Potential).            | 1  | AGTTTCATCAC/  | 0.428 |             |
| + | 8  | 1632 |                   | NM_025004    | NP_079280    | Q0P6D6  | CCD15_HUMAN |                                | 2  | TCTCCACAAAG/  | 0.418 | rs113451248 |
| - | 6  | 1375 | n.1_RNA NCAPD3    | NM_015261    | NP_056076    | P42695  | CNDD3_HUMAN |                                | 5  | ATTCATGAAGAAC | 0.353 |             |
| + | 18 | 3380 | C1_uc001qid.2_Rf  | NM_178040    | NP_829884    | Q8IUD2  | RB6I2_HUMAN | FIP-RBD.                       | 5  | CTCACTCCACCA/ | 0.502 |             |
| + | 7  | 1284 | ic001qkn.2_Misse  | NM_199460    | NP_955630    | Q13936  | CAC1C_HUMAN | icellular (Potential).         | 11 | CGGGCGGCAGT   | 0.602 |             |
| + | 2  | 997  | hDC5_uc009zjj.2_f | NM_020782    | NP_065833    | Q9P2K6  | KLDC5_HUMAN | Kelch 3.                       | 2  | CATCGGAGGGC/  | 0.478 |             |
| - | 1  | 705  | ih.2_Missense_Mt  | NM_000424    | NP_000415    | P13647  | K2C5_HUMAN  | Coil 1A. Rod.                  | 0  | TGAAGGAGGCA   | 0.478 |             |
| - | 1  | 351  |                   | NM_175068    | NP_778238    | Q86Y46  | K2C73_HUMAN | Head.                          | 6  | TGACCTGATGGA  | 0.627 |             |
| + | 10 | 2283 | p.R704C NAV3_uc   | NM_014903    | NP_055718    | Q8IVL0  | NAV3_HUMAN  | Potential.                     | 17 | GTCTTCGTGGG   | 0.328 |             |
| + | 9  | 1362 | u.2_Missense_Mut  | NM_001135805 | NP_001129277 | P21579  | SYT1_HUMAN  | hospholipid binding (Probe     | 6  | GTATATGATTTTC | 0.388 |             |
| + | 1  | 604  | S1B_uc001tgf.1_I  | NM_153364    | NP_699195    | Q8NEG0  | FA71C_HUMAN |                                | 0  | TGATTGACGTGC  | 0.527 |             |
| + | 38 | 4189 |                   | NM_017564    | NP_060034    | Q8VWWQ8 | STAB2_HUMAN | cellular (Potential).          | 14 | CGAGAGAATGC   | 0.527 |             |
| + | 11 | 1105 | iu.1_Nonsense_Mi  | NM_007062    | NP_008993    | Q13610  | PWP1_HUMAN  |                                | 0  | TGTGGCGATTCT/ | 0.423 |             |
| + | 10 | 1036 | A_uc009zwe.1_Mi   | NM_001143854 | NP_001137326 | Q9Y2J0  | RP3A_HUMAN  | Pro-rich.                      | 7  | TCCCGGGCGAG   | 0.562 |             |
| - | 8  | 1115 | e_Mutation_p.W2z  | NM_015347    | NP_056162    | O15034  | RIMB2_HUMAN | onectin type-III 1.            | 11 | GGCTCCAGCC    | 0.562 |             |
| - | 4  | 621  |                   | NM_005932    | NP_005923    | Q99797  | MIPEP_HUMAN |                                | 1  | CAAGGGAATCC/  | 0.279 |             |
| + | 2  | 1012 |                   | NM_153456    | NP_703157    | Q8IZP7  | H6ST3_HUMAN | renal (Potential).             | 2  | TGAACGAGAGTC  | 0.493 |             |
| + | 1  | 803  |                   | NM_001005500 | NP_001005500 | Q8NGD0  | OR4M1_HUMAN | cellular (Potential).          | 0  | CATTTCCCTAG/  | 0.418 |             |
| + | 1  | 449  |                   | NM_001004723 | NP_001004723 | Q8NGD1  | OR4N2_HUMAN | Name=4; (Potential).           | 4  | TGGGCTTGGGG   | 0.532 |             |
| - | 2  | 734  | wih.2_Missense_A  | NM_021944    | NP_068763    | Q9H972  | CN093_HUMAN |                                | 1  | CTCTCCACGG/   | 0.632 |             |

|   |    |       |                    |              |              |        |             |                                |    |                  |       |             |
|---|----|-------|--------------------|--------------|--------------|--------|-------------|--------------------------------|----|------------------|-------|-------------|
| + | 4  | 387   | IUBPL_uc010tpl.1   | NM_025152    | NP_079428    | Q8TB37 | NUBPL_HUMAN |                                | 0  | ATGGACCTTCAG     | 0.274 |             |
| + | 3  | 896   | bp.2_Missense_Mt   | NM_199421    | NP_955453    | Q8WXH5 | SOCS4_HUMAN |                                | 2  | GTAGTCGGCAC      | 0.428 |             |
| - | 4  | 1102  | cmk.2_Missense_Mt  | NM_033141    | NP_149132    | P80192 | M3K9_HUMAN  | rotein kinase.                 | 5  | AGGAAGGGCGA      | 0.512 |             |
| - | 7  | 1513  | p.S437F FOXN3      | NM_001085471 | NP_001078940 | O00409 | FOXN3_HUMAN |                                | 3  | GGAGGGACCCCT     | 0.522 |             |
| + | 1  | 124   |                    | NM_001080841 | NP_001074310 |        |             |                                | 0  | TTTGACCGCTAC     | 0.498 | rs267613    |
| - | 33 | 6106  | -4310 MI0015840    | NM_016642    | NP_057726    | Q9NRC6 | SPTN5_HUMAN | Spectrin 16.                   | 2  | GCGGGCTGCC       | 0.682 |             |
| + | 10 | 1585  | p.R429Q CKMT1A     | NM_001015001 | NP_001015001 | P12532 | KCRU_HUMAN  | jen kinase C-terminal.         | 0  | TGAACGGCGTC      | 0.493 |             |
| + | 4  | 597   | zxr.2_Missense_Mt  | NM_020234    | NP_064619    | Q8N5C7 | DTWD1_HUMAN |                                | 0  | AAAGTACTGCTA     | 0.214 |             |
| + | 5  | 1270  | p.W293* SLC27A     | NM_003645    | NP_003636    | O14975 | S27A2_HUMAN | lasmic (Potential).            | 2  | GTGTGGAGACA      | 0.433 |             |
| - | 11 | 1721  | zza.3_Missense_Mt  | NM_031226    | NP_112503    | P11511 | CP19A_HUMAN |                                | 3  | AAAGATCATTTCC    | 0.448 |             |
| - | 61 | 12014 |                    | NM_003922    | NP_003913    | Q15751 | HERC1_HUMAN |                                | 19 | AGGTTCTAGAT      | 0.428 |             |
| + | 18 | 2547  |                    | NM_152336    | NP_689549    | Q96MI9 | CBPC4_HUMAN |                                | 0  | TTTCTCCAGTC      | 0.473 |             |
| - | 9  | 2439  | luyn.1_Missense_Mt | NM_001134407 | NP_001127879 | Q12879 | NMDE1_HUMAN | lasmic (Potential).            | 45 | AGATACCATGAT     | 0.478 |             |
| + | 2  | 299   |                    | NM_003498    | NP_003489    | O75324 | SNN_HUMAN   | Cytoplasmic.                   | 0  | TCAGCGCATC       | 0.647 |             |
| + | 6  | 873   | p.2_Missense_Mu    | NM_024847    | NP_079123    | Q7Z402 | TMCT7_HUMAN | ellular (Potential).           | 3  | TTACGGACATTA     | 0.493 |             |
| - | 5  | 1060  |                    | NM_020718    | NP_065769    | Q70CQ4 | UBP31_HUMAN |                                | 10 | CATAGACACTGC     | 0.443 |             |
| - | 27 | 4125  | C12_uc002efa.1     | NM_033226    | NP_150229    | Q96J65 | MRP9_HUMAN  | C transporter 2.               | 3  | GTTCCCTACTC      | 0.413 |             |
| + | 11 | 1346  | IA GPR114_uc002    | NM_153837    | NP_722579    | Q8IZF4 | GP114_HUMAN | Name=5; (Potential).           | 1  | ACGGCGCCCTC      | 0.697 |             |
| + | 4  | 2048  | nn.1_Missense_Mt   | NM_015251    | NP_056066    | O43313 | ATMIN_HUMAN |                                | 0  | ACTTCTTACTCG     | 0.458 |             |
| - | 1  | 205   | fgj.2_Missense_Mt  | NM_052892    | NP_443124    | Q7Z442 | PK1L2_HUMAN | (Potential). C-type lectin.    | 3  | GCCTTCGCTCT      | 0.562 |             |
| + | 3  | 574   | chl.2_Missense_Mt  | NM_024731    | NP_079007    | Q8N4N3 | KLH36_HUMAN |                                | 2  | TGAGCGAGGAC      | 0.577 |             |
| - | 5  | 591   | se_Mutation_p.G1   | NM_000512    | NP_000503    | P34059 | GALNS_HUMAN |                                | 2  | AGGTCCAAAGTC     | 0.587 |             |
| - | 5  | 669   | i.1_RNA TRPV3_u    | NM_145068    | NP_659505    | Q8NET8 | TRPV3_HUMAN | lasmic (Potential).            | 4  | CGCTCTTTTTCT     | 0.552 |             |
| - | 12 | 1524  | p.P211S C17orf85   | NM_001114118 | NP_001107590 | Q53F19 | CQ085_HUMAN |                                | 1  | TTCCGGAGAATC     | 0.502 |             |
| - | 4  | 626   |                    | NM_003342    | NP_003333    | P62253 | UB2G1_HUMAN |                                | 0  | AATGCACACATC     | 0.368 |             |
| - | 9  | 1206  | p.E359K ALOX15     | NM_001140    | NP_001131    | P16050 | LOX15_HUMAN | ipoxygenase.                   | 5  | TAATTTCCAGGG     | 0.522 |             |
| + | 33 | 5258  | p.Q1010* JUSP6_u   | NM_004505    | NP_004496    | P35125 | UBP6_HUMAN  |                                | 5  | CATCCAGGAA       | 0.413 |             |
| - | 14 | 1420  | _Mutation_p.A431   | NM_001100112 | NP_001093582 | Q9UKX2 | MYH2_HUMAN  | rosin head-like.               | 14 | CTTTGGCCAGA      | 0.483 |             |
| + | 9  | 2181  | e_Mutation_p.R17   | NM_014695    | NP_055510    | A2RUR9 | C144A_HUMAN | Potential.                     | 0  | ATTTGAGGTATG     | 0.323 |             |
| + | 8  | 1229  | hgo.2_Missense_Mt  | NM_032932    | NP_116321    | Q86YS3 | RFIP4_HUMAN | 11A, subcellular location, h   | 1  | GCATTGACTCT      | 0.602 |             |
| - | 3  | 1568  | p.W413* SLFN1      | NM_144682    | NP_653283    | Q68D06 | SLN13_HUMAN |                                | 2  | CCTCCAGAGG       | 0.423 |             |
| + | 1  | 1130  | p.E182K CDK12_u    | NM_016507    | NP_057591    | Q9NYV4 | CDK12_HUMAN |                                | 19 | ACAAGGAGAAG      | 0.493 |             |
| - | 1  | 183   |                    | NM_033059    | NP_149048    | Q9BYQ6 | KR411_HUMAN | GIKRQVHEL]-[SPTR]-[ST          | 0  | CAGCAGCTGGA      | 0.672 |             |
| - | 1  | 422   |                    | NM_031854    | NP_114060    | Q9BQ66 | KR412_HUMAN | f C-C-[GRQVIL]-[SPTR]-[V       | 0  | gggtctgcagcagctg | 0.219 |             |
| + | 18 | 2053  | hjd.1_Missense_Mt  | NM_173626    | NP_775897    | Q86WA9 | S2611_HUMAN | ellular (Potential).           | 0  | AGACTCCATTC      | 0.502 |             |
| + | 2  | 187   | p.W66* CLUL1_u     | NM_014410    | NP_055225    | Q15846 | CLUL1_HUMAN |                                | 2  | CTGTGGTTGAA      | 0.443 |             |
| + | 2  | 1128  | NDC2_uc002koh.     | NM_001098529 | NP_001091999 | Q86VQ3 | TXND2_HUMAN | repeat of Q-P-K-X-G-D-I-P      | 2  | CCAAGACCTCAC     | 0.562 |             |
| - | 2  | 1637  |                    | NM_016626    | NP_057710    | Q5U5Q3 | MEX3C_HUMAN |                                | 4  | ATGTAGGAGAC      | 0.498 |             |
| + | 13 | 2640  | p.G533R DCC_ucl    | NM_005215    | NP_005206    | P43146 | DCC_HUMAN   | tential). Fibronectin type-III | 17 | TCACAGGTCAG      | 0.403 |             |
| + | 4  | 530   | 2liy.2_Missense_Mt | NM_002639    | NP_002630    | P36952 | SPB5_HUMAN  |                                | 1  | CGAAAGGTCAG      | 0.388 |             |
| - | 2  | 359   |                    | NM_001080523 | NP_001073992 | A6NEK1 | ARRD5_HUMAN |                                | 0  | TAGAAGGAAGC      | 0.448 |             |
| - | 18 | 2353  |                    | NM_000064    | NP_000055    | P01024 | CO3_HUMAN   | p.R764Q(1)                     | 5  | CACTTCGGGAA      | 0.478 | rs143642234 |
| - | 5  | 33071 |                    | NM_024690    | NP_078966    | Q8WXI7 | MUC16_HUMAN | xtracellular (Potential).      | 57 | CACCAAGAGAA      | 0.498 |             |
| - | 5  | 33064 |                    | NM_024690    | NP_078966    | Q8WXI7 | MUC16_HUMAN | xtracellular (Potential).      | 57 | AGAAAAAGTCA      | 0.483 |             |
| - | 3  | 13802 |                    | NM_024690    | NP_078966    | Q8WXI7 | MUC16_HUMAN | xtracellular (Potential).      | 57 | TGGAAGGATGA      | 0.453 |             |
| - | 10 | 2291  | wr.1_Missense_Mt   | NM_152476    | NP_689689    | Q96MR9 | ZN560_HUMAN |                                | 6  | AAATTCGAAAG      | 0.378 | rs148650284 |
| + | 4  | 1515  | ym.1_Missense_Mt   | NM_001136501 | NP_001129973 | Q08AG5 | ZN844_HUMAN |                                | 0  | CTTCAGATCTG      | 0.423 |             |

|   |    |         |                                |              |              |        |             |                               |     |               |       |             |
|---|----|---------|--------------------------------|--------------|--------------|--------|-------------|-------------------------------|-----|---------------|-------|-------------|
| + | 3  | 295     | r_p.P58S CD97_u                | NM_078481    | NP_510966    | P48960 | CD97_HUMAN  | r (Potential). EGF-like 1.    | 4   | CCACCCCGACG   | 0.592 |             |
| + | 3  | 267     | r_p.P69L CYP4F1                | NM_023944    | NP_076433    |        |             |                               | 7   | CACTCCTACAG   | 0.358 |             |
| + | 1  | 169     |                                | NM_013939    | NP_039227    | O60403 | O10H2_HUMAN | lasmic (Potential).           | 3   | CGTCTGGAGCG   | 0.607 |             |
| - | 6  | 3184    | 208_uc002nqo.1_l               | NM_007153    | NP_009084    |        |             |                               | 7   | TGTAGGGTTTC   | 0.368 |             |
| - | 3  | 325     |                                | NM_001098626 | NP_001092096 | A6NK75 | ZNF98_HUMAN | KRAB.                         | 2   | GCTTTTCCTTGC  | 0.423 |             |
| - | 4  | 1961    | p.G538R ZNF681                 | NM_138286    | NP_612143    | Q96N22 | ZN681_HUMAN | :2H2-type 16.                 | 0   | FATGTCCAGTAAC | 0.338 |             |
| + | 5  | 738     | 14A_uc010xru.1_l               | NM_001114093 | NP_001107565 | Q8ND56 | LS14A_HUMAN |                               | 1   | AGGTCGCCTAAC  | 0.423 |             |
| + | 4  | 702     | p.G114R KIRREL                 | NM_199180    | NP_954649    | Q6UWL6 | KIRR2_HUMAN | 2. Extracellular (Potential). | 3   | GAGATGGGGTC   | 0.582 |             |
| - | 7  | 1908    | s_Mutation_p.Q40               | NM_181882    | NP_870998    | Q9BXM0 | PRAX_HUMAN  | L_ [LIVMAP]- [AQKHRPE];       | 2   | CAGCTGTACCT   | 0.587 |             |
| + | 7  | 1010    | rse_Mutation_p.G               | NM_021913    | NP_068713    | P30530 | UFO_HUMAN   | ential). Fibronectin type-III | 13  | AGGCGGGAGAA   | 0.612 |             |
| + | 14 | 1573    | ba.1_Missense_Mutation_p.P523L |              |              | Q96L34 | MARK4_HUMAN |                               | 3   | GCGCCCGTCAC   | 0.587 |             |
| - | 5  | 2254    | ydj.1_Missense_M               | NM_001102657 | NP_001096127 | Q6ZNA1 | ZN836_HUMAN | :2H2-type 15.                 | 0   | TTATGATTTGAAA | 0.408 |             |
| - | 5  | 2067    | rdj.1_Missense_Mi              | NM_001102657 | NP_001096127 | Q6ZNA1 | ZN836_HUMAN | :2H2-type 13.                 | 0   | ACTGTAATTGAA  | 0.388 |             |
| - | 5  | 1439    | k.1_intron ZNF81               | NM_001031665 | NP_001026835 | Q0VGE8 | ZN816_HUMAN | :2H2-type 6.                  | 0   | ATTTCTGACTGA  | 0.398 |             |
| + | 4  | 1386    | rdw.1_Missense_IV              | NM_138374    | NP_612383    | Q96IR2 | ZN845_HUMAN | :2H2-type 8.                  | 0   | GCAGATGTCATC  | 0.413 |             |
| + | 4  | 2950    | dw.1_Missense_M                | NM_138374    | NP_612383    | Q96IR2 | ZN845_HUMAN | :2H2-type 27.                 | 0   | TACAAGTGTATC  | 0.348 |             |
| + | 7  | 1834    | p.R405L ZNF761                 | NM_001008401 | NP_001008401 | Q86XN6 | ZN761_HUMAN | :2H2-type 9.                  | 1   | TAGACGTCATAC  | 0.393 |             |
| + | 7  | 1848    | p.Q410K ZNF761                 | NM_001008401 | NP_001008401 | Q86XN6 | ZN761_HUMAN |                               | 1   | GAGAGCAACCT   | 0.393 | rs146851069 |
| - | 3  | 976     |                                | NM_001101401 | NP_001094871 | P0C263 | SBK2_HUMAN  | rotein kinase.                | 0   | GCGCCCCAGGT   | 0.731 |             |
| + | 3  | 1610    | JF776_uc002qqa.2               | NM_173632    | NP_775903    | Q68D11 | ZN776_HUMAN | ype 10; degenerate.           | 1   | AGTGTGGAGAA   | 0.448 |             |
| + | 3  | 1653    | JF776_uc002qqa.2               | NM_173632    | NP_775903    | Q68D11 | ZN776_HUMAN | ype 10; degenerate.           | 1   | CATTCGACATCA  | 0.448 |             |
| - | 17 | 3650    |                                | NM_012293    | NP_036425    | Q92626 | PXDN_HUMAN  |                               | 8   | GATCTCAGGGT   | 0.527 |             |
| - | 3  | 382     | 10yiv.1_Missense               | NM_001002006 | NP_001002006 | Q96P26 | 5NT1B_HUMAN |                               | 3   | GCTGGCCCTGC   | 0.527 |             |
| - | 6  | 836     | 3REF1_uc010eyr.                | NM_006569    | NP_006560    | Q99674 | CGRE1_HUMAN |                               | 1   | TCCCTTAGCCCT  | 0.677 | rs11889832  |
| + | 1  | 5246    | 1_5'Flank ZNF512               | NM_032266    | NP_115642    | Q68DN1 | CB016_HUMAN | m repeat of P-S-E-R-S-H-I     | 1   | AGAGAGAAGCC   | 0.562 |             |
| - | 27 | 3116    |                                | NM_000379    | NP_000370    | P47989 | XDH_HUMAN   |                               | 8   | AAAAGGAACTG   | 0.388 |             |
| + | 1  | 378_379 | i.2_intron SPTBN1              | NR_002229    |              |        |             |                               | 0   | TGAGTTTGCCAT  | 0.48  |             |
| - | 10 | 1288    | l2scg.2_Missense               | NM_015910    | NP_056994    | O95876 | FRITZ_HUMAN |                               | 0   | CTGTGCGGACA   | 0.428 | rs3738877   |
| - | 6  | 1224    | svl.2_Missense_IV              | NM_020151    | NP_064536    | Q9NQZ5 | STAR7_HUMAN | START.                        | 0   | GTTGGGACGGGA  | 0.468 |             |
| + | 12 | 2402    |                                | NM_003048    | NP_003039    | Q9UBY0 | SL9A2_HUMAN | lasmic (Pote p.E754K(1)       | 8   | GCAGAAAAAG    | 0.532 | rs147224345 |
| + | 4  | 564     | 3H2P_uc002tkd.2                | NM_182905    | NP_878908    |        |             |                               | 0   | CATCCGCCAAG   | 0.522 |             |
| + | 14 | 2558    | Jflu.2_Nonsense_I              | NM_130773    | NP_570129    | Q8WYK1 | CNTP5_HUMAN | ential). Fibrinogen C-termir  | 10  | CACATTCAGCAC  | 0.488 |             |
| - | 3  | 279     | p.E53K CACNB4                  | NM_000726    | NP_000717    | O00305 | CACB4_HUMAN |                               | 2   | TGCTTCCCGGT   | 0.483 |             |
| - | 12 | 1858    | e_Mutation_p.W3                | NM_004490    | NP_004481    | Q14449 | GRB14_HUMAN | SH2.                          | 7   | TGAAACCATGG   | 0.388 |             |
| - | 58 | 11467   |                                | NM_004525    | NP_004516    | P98164 | LRP2_HUMAN  | : A 31. Extracellular (Potent | 29  | AGTTTTCTCATC  | 0.448 |             |
| - | 46 | 13983   | N_uc010zfi.1_Intr              | NM_133379    | NP_596870    | Q8WZ42 | TITIN_HUMAN |                               | 153 | CACATCTGTGTC  | 0.318 | rs149720053 |
| - | 40 | 2947    | frx.2_Missense_Mi              | NM_000393    | NP_000384    | P05997 | CO5A2_HUMAN |                               | 2   | GAAACACCATTAC | 0.438 |             |
| - | 2  | 237     |                                | NM_014617    | NP_055432    | P11844 | CRGA_HUMAN  | a crystallin 'Greek key' 2.   | 0   | CGAGTCGCTGA   | 0.517 |             |
| + | 11 | 1286    | s_Mutation_p.I391              | NM_001875    | NP_001866    | P31327 | CPSM_HUMAN  | imidotransferase type-1.      | 13  | GCCAATAGACA   | 0.423 |             |
| - | 7  | 954     | Jfuw.2_Missense_I              | NM_016260    | NP_057344    | Q9UKS7 | IKZF2_HUMAN |                               | 0   | CAGGTCTCTCA   | 0.388 |             |
| - | 1  | 1392    |                                | NM_005544    | NP_005535    | P35568 | IRS1_HUMAN  |                               | 12  | AATCCGGAGTG   | 0.627 |             |
| - | 8  | 1375    | p.R376* HJURP                  | NM_018410    | NP_060880    | Q8NCD3 | HJURP_HUMAN |                               | 1   | AAATCGGATTT   | 0.488 |             |
| + | 17 | 2342    | M8_uc010fyj.2_In               | NM_024080    | NP_076985    | Q7Z2W7 | TRPM8_HUMAN | Name=3; (Potential).          | 4   | CCCCGAGCTG    | 0.572 |             |
| - | 40 | 8938    | znj.1_Missense_IV              | NM_004369    | NP_004360    | P12111 | CO6A3_HUMAN | ical region. Thr-rich.        | 18  | TGTGGTGGTCAC  | 0.493 |             |
| - | 6  | 2167    | p.R560Q ZNF343                 | NM_024325    | NP_077301    | Q6P1L6 | ZN343_HUMAN | :2H2-type 11.                 | 3   | ATTTCCGGCTA   | 0.512 |             |
| - | 14 | 1298    | rf194_uc002wik.2               | NM_001009984 | NP_001009984 | Q5TEA3 | CT194_HUMAN |                               | 0   | TAAACGGAATC   | 0.378 | rs73577662  |
| - | 14 | 3758    | GLEC1_uc002wiz.                | NM_023068    | NP_075556    | Q9BZZ2 | SN_HUMAN    | ellular (Potential).          | 10  | CCAGGACGCTG   | 0.692 |             |

|   |    |           |                                                               |              |              |        |             |                               |              |               |       |                    |
|---|----|-----------|---------------------------------------------------------------|--------------|--------------|--------|-------------|-------------------------------|--------------|---------------|-------|--------------------|
| + | 6  | 1239      | _p.G216D MAVS_u                                               | NM_020746    | NP_065797    | Q7Z434 | MAVS_HUMAN  | lasmic (Probable).            | 0            | GTGCTGGCATGG  | 0.562 |                    |
| + | 26 | 2525      | _p.R809* PLCB4_u                                              | NM_182797    | NP_877949    | Q15147 | PLCB4_HUMAN |                               | 15           | GGATATCGACAC  | 0.448 |                    |
| + | 2  | 120       | tj.1_RNA FRG1B_uc010gdr.1_RNA FRG1B_uc010ztk.1_Intron         |              |              |        |             |                               | 0            | TTGGGCATTCA   | 0.338 |                    |
| + | 2  | 127       | tj.1_RNA FRG1B_uc010gdr.1_RNA FRG1B_uc010ztk.1_Intron         |              |              |        |             |                               | 0            | ATTCAGATGCCA  | 0.333 |                    |
| + | 2  | 133       | tj.1_RNA FRG1B_uc010gdr.1_RNA FRG1B_uc010ztk.1_Intron         |              |              |        |             |                               | 0            | ATGCAATTGGAC  | 0.343 |                    |
| + | 2  | 142       | tj.1_RNA FRG1B_uc010gdr.1_RNA FRG1B_uc010ztk.1_Intron         |              |              |        |             |                               | 0            | ACCAAGAGAAAC  | 0.338 | rs147809085        |
| + | 3  | 187       | RG1B_uc010gdr.1_RNA FRG1B_uc010ztk.1_Missense_Mutation_p.L4S  |              |              |        |             |                               | 0            | TTTGTGGCCTC   | 0.353 |                    |
| + | 3  | 189       | RG1B_uc010gdr.1_RNA FRG1B_uc010ztk.1_Missense_Mutation_p.A5T  |              |              |        |             |                               | 0            | TTGTTGGCCTCA  | 0.353 |                    |
| + | 3  | 240       | RG1B_uc010gdr.1_RNA FRG1B_uc010ztk.1_Nonsense_Mutation_p.K22* |              |              |        |             |                               | 0            | AAGCAAAAAGT   | 0.363 |                    |
| + | 11 | 1423      | ggc.2_Missense_                                               | NM_015568    | NP_056383    | Q96T49 | PP16B_HUMAN |                               | 3            | GAATTCCTACCA  | 0.567 |                    |
| - | 4  | 488       |                                                               | NM_182482    | NP_872288    |        |             |                               | 0            | TCCTTCGCTATA  | 0.368 | rs28441174         |
| + | 3  | 523       | CAM2_uc011acc.1                                               | NM_004540    | NP_004531    | O15394 | NCAM2_HUMAN | 1. Extracellular (Potential). | 4            | ATATATCGTTGTC | 0.348 |                    |
| + | 21 | 3495      | 1afa.1_Missense_                                              | NM_003274    | NP_003265    | P48553 | TPC10_HUMAN |                               | 2            | ATTTTTCGACAA  | 0.299 |                    |
| - | 1  | 1815      |                                                               | NM_014406    | NP_055221    | Q96SF2 | TCPQM_HUMAN |                               | 1            | CGATTCATCTAC  | 0.473 |                    |
| + | 14 | 1837      | _p.Q520P MED15_                                               | NM_001003891 | NP_001003891 | Q96RN5 | MED15_HUMAN |                               | 1            | CTTGCAAAAGT   | 0.557 |                    |
| - | 2  | 1461      | 6610_uc011aim.1_                                              | NM_080740    | NP_542778    | P59817 | Z280A_HUMAN |                               | 1            | ACCGACGATCTG  | 0.408 |                    |
| + | 3  | 1474      | IR1_uc002zwt.2_Ir                                             | NM_002073    | NP_002064    | P19086 | GNAZ_HUMAN  |                               | 2            | TGAACCGCAAC   | 0.567 |                    |
| - | 11 | 1188_1189 | n_p.K416E CHEK1                                               | NM_007194    | NP_009125    | O96017 | CHK2_HUMAN  | rotein kinase73E(2) p.S372    | 20           | AATCTTGGAGTG  | 0.416 | 470496;rs146546850 |
| + | 6  | 461       | jyz.2_Missense_M                                              | NM_014509    | NP_055324    | Q9H4I8 | SEHL2_HUMAN |                               | 0            | CTGTACCTTCCC  | 0.527 |                    |
| - | 11 | 1624      | bde.3_Missense_                                               | NM_007229    | NP_009160    | Q9UNF0 | PACN2_HUMAN | SH3.                          | 0            | CAAGCGTCCCT   | 0.617 |                    |
| + | 16 | 1945      | _p.D610Y ATG7_uc                                              | NM_006395    | NP_006386    | O95352 | ATG7_HUMAN  |                               | 1            | GTGACGATCGG   | 0.478 |                    |
| - | 3  | 873       | _p.M166I IQSEC1_                                              | NM_014869    | NP_055684    | Q6DN90 | IQEC1_HUMAN |                               | 1            | TGGTCCATGCC   | 0.667 |                    |
| - | 15 | 2844      | 11A_uc010hhn.1_                                               | NM_014139    | NP_054858    | Q9UI33 | SCNBA_HUMAN |                               | 9            | CCAGGGGAATG   | 0.507 |                    |
| - | 2  | 360       | R3_uc003cpg.1_In                                              | NM_001295    | NP_001286    | P32246 | CCR1_HUMAN  | ellular (Potential).          | 3            | AGTCATCCTTCA  | 0.463 |                    |
| - | 83 | 6621      |                                                               | NM_000094    | NP_000085    | Q02388 | CO7A1_HUMAN | le-helical region.            | 11           | GCTCCCCTGTC   | 0.607 |                    |
| - | 12 | 1414      | ASSF1_uc003daf.                                               | NM_015896    | NP_056980    | O75800 | ZMY10_HUMAN | MYND-type.                    | 5            | TTTCCCAGTGC   | 0.567 |                    |
| - | 5  | 619       | KT_uc011beq.1_M                                               | NM_001135055 | NP_001128527 | P29401 | TKT_HUMAN   |                               | 2            | TGCTGGCGAAG   | 0.577 |                    |
| - | 14 | 2663      | R2_uc003dht.1_                                                | NM_015576    | NP_056391    | O15083 | ERC2_HUMAN  | Potential.                    | 2            | TTCCTCTATCTC  | 0.488 |                    |
| - | 2  | 168       | i.3_Intron THOC7_                                             | NM_025075    | NP_079351    | Q6I9Y2 | THOC7_HUMAN |                               | 3            | GAGACGCTTCC   | 0.433 |                    |
| + | 19 | 3398      | BO2_uc011bgk.1_                                               | NM_002942    | NP_002933    | Q9HCK4 | ROBO2_HUMAN | lasmic (Potential).           | 11           | GTGATCCCAGC   | 0.458 |                    |
| + | 2  | 698       |                                                               | NM_017819    | NP_060289    | Q7L0Y3 | MRRP1_HUMAN |                               | 1            | CTTTGGGATAGG  | 0.408 |                    |
| + | 4  | 2218      | dvg.2_Missense_                                               | NM_001134438 | NP_001127910 | Q86SQ0 | PHLB2_HUMAN | Potential.                    | 6            | TCGAGGAACTT   | 0.408 |                    |
| + | 3  | 1940      |                                                               | NM_016298    | NP_057382    | Q9UH90 | FBX40_HUMAN | F-box.                        | 5            | CTGCCCCTGG    | 0.522 |                    |
| - | 15 | 1919      | p.G513E CPNE4_                                                | NM_130808    | NP_570720    | Q96A23 | CPNE4_HUMAN | VWFA.                         | 3            | GCTCTCCCTTG   | 0.517 |                    |
| - | 6  | 7502      | _p.R528K IGSF10_                                              | NM_178822    | NP_849144    | Q6WRI0 | IGS10_HUMAN | ike C2-type 11.               | 13           | TTCTCTGTGCAT  | 0.393 |                    |
| + | 17 | 2651      |                                                               | NM_006218    | NP_006209    | P42336 | PK3CA_HUMAN | PI3K/PI4K.                    | 3553         | ATCTTCGGTAGC  | 0.308 |                    |
| + | 18 | 2333      |                                                               | NM_003940    | NP_003931    | Q92995 | UBP13_HUMAN | UBA 2.                        | 1            | ACTACGAGCAA   | 0.368 |                    |
| - | 3  | 564       | r.2_Missense_Mut                                              | NM_139248    | NP_640341    | Q8WVY8 | LIPH_HUMAN  |                               | 2            | TTACTCCGATCA  | 0.443 |                    |
| + | 10 | 1401      | c.1_RNA SDHAP2_uc003fuv.2_RNA                                 |              |              |        |             |                               | 0            | CACGAATCTTGA  | 0.413 |                    |
| - | 3  | 1350      | 732_uc010ibb.1_Ir                                             | NM_001137608 | NP_001131080 | B4DXR9 | ZN732_HUMAN | :2H2-type 12.                 | 0            | CACATTTGTAAGC | 0.418 |                    |
| + | 1  | 1630      |                                                               | NM_000798    | NP_000789    | P21918 | DRD5_HUMAN  | lasmic (Potential).           | 1            | TACATCCACATG  | 0.577 |                    |
| - | 18 | 2858      | p.S721F APBB2_u                                               | NM_173075    | NP_775098    | Q92870 | APBB2_HUMAN |                               | 3            | TGAGGGATAAG   | 0.488 |                    |
| + | 8  | 658       |                                                               | NM_016519    | NP_057603    | Q9NP70 | AMBN_HUMAN  | 1                             | GAATGGATTTTC | 0.194         |       |                    |
| - | 6  | 649       | Oiik.1_Missense_                                              | NM_201431    | NP_958834    | Q6ZTQ3 | RASF6_HUMAN |                               | 2            | TGTTTCACTCT   | 0.428 |                    |
| - | 1  | 142       |                                                               | NM_033214    | NP_149991    | Q14410 | GLPK2_HUMAN |                               | 4            | TTAATCCACTTT  | 0.468 |                    |
| + | 14 | 3228      | k.3_Missense_Mu                                               | NM_005935    | NP_005926    | P51825 | AFF1_HUMAN  |                               | 1            | CTTTTCCAGTGC  | 0.378 |                    |
| - | 34 | 2368      | 25A1_uc003hzd.2_                                              | NM_198721    | NP_942014    | Q9BXS0 | COPA1_HUMAN | Potential). Collagen-like 7.  | 2            | TTTCTCCCTTTTC | 0.438 |                    |

|   |     |           |                    |              |              |        |             |                                |       |               |       |             |
|---|-----|-----------|--------------------|--------------|--------------|--------|-------------|--------------------------------|-------|---------------|-------|-------------|
| + | 6   | 599       | IRR_uc010isy.2_in  | NM_013232    | NP_037364    | O75340 | PDCD6_HUMAN | EF-hand 5.                     | 1     | TCAGACGTTACG  | 0.502 |             |
| + | 2   | 437       |                    | NM_153610    | NP_705838    | Q8N3K9 | CMYA5_HUMAN |                                | 9     | ATGTTTCCTTTAT | 0.423 |             |
| - | 8   | 2244      | on.3_Missense_Mi   | NM_001163315 | NP_001156787 | Q9UF56 | FXL17_HUMAN |                                | 0     | ATCGCCCAATGG  | 0.458 |             |
| + | 9   | 1582      | ATS19_uc010jdh.1   | NM_133638    | NP_598377    | Q8TE59 | ATS19_HUMAN | ptidase M12B.                  | 9     | AAGGAAGATTTGC | 0.363 |             |
| + | 4   | 777       | P103S FAM53C_u     | NM_001135647 | NP_001129119 | Q9NYF3 | FA53C_HUMAN |                                | 1     | ACAGATCCAGAG  | 0.657 |             |
| + | 7   | 1485      | e_Mutation_p.S85   | NM_016604    | NP_057688    | Q7LBC6 | KDM3B_HUMAN |                                | 11    | ACCAGCTCCACC  | 0.587 |             |
| + | 1   | 352       | p.H118Y PCDHA1     | NM_018900    | NP_061723    | Q9Y5I3 | PCDA1_HUMAN | Extracellular (Potential).     | 1     | ATTTTCCATGTGC | 0.512 |             |
| + | 5   | 1179      | tbl.1_Missense_M   | NM_152550    | NP_689763    | Q8TEC5 | SH3R2_HUMAN |                                | 2     | CCATTCTCCTTC  | 0.572 |             |
| + | 8   | 1873      | p.P572S PPARG      | NM_133263    | NP_573570    | Q86YN6 | PRGC2_HUMAN |                                | 0     | CACCACCGTAC   | 0.522 |             |
| + | 7   | 1264      |                    | NM_014228    | NP_055043    | Q99884 | SC6A7_HUMAN | Name=6; (Potential).           | 0     | CTATTCCTGGG   | 0.562 |             |
| + | 12  | 1417      | n_p.R234* G3BP1    | NM_005754    | NP_005745    | Q13283 | G3BP1_HUMAN |                                | 4     | AGACTCGAGCT   | 0.572 |             |
| + | 24  | 2689      | p.L851V CYFIP2     | NM_001037333 | NP_001032410 | Q96F07 | CYFP2_HUMAN |                                | 0     | ACTTTTCTCCCC  | 0.587 |             |
| - | 12  | 1061      | l_uc010jkt.2_Silen | NM_173465    | NP_775736    | Q86Y22 | CONA1_HUMAN | ntial). Collagen-like 1. Gly-r | 2     | CTCACCTGGG    | 0.607 |             |
| + | 3   | 1184      |                    | NM_001718    | NP_001709    | P22004 | BMP6_HUMAN  |                                | 3     | GGGATGGTAAGT  | 0.507 |             |
| + | 26  | 2495      | ow.2_Missense_M    | NM_001040274 | NP_001035364 | Q5T4T6 | SYC2L_HUMAN |                                | 2     | GAAATGCAAAC   | 0.343 |             |
| - | 1   | 733       |                    | NM_030903    | NP_112165    | Q9Y3N9 | OR2W1_HUMAN | Name=6; (Potential).           | 3     | AGTAAGATGAG   | 0.428 | rs143534892 |
| - | 2   | 1136      |                    | NM_020737    | NP_065788    | Q9ULH4 | LRFN2_HUMAN | ellular (Potential).           | 3     | AAGCCGAAGCC   | 0.592 |             |
| - | 2   | 228       | iqg.1_Nonsense_N   | NM_018643    | NP_061113    | Q9NP99 | TREM1_HUMAN | (Potential). Ig-like V-type.   | 1     | TCTGCCAAGCTT  | 0.478 |             |
| - | 7   | 1949      | df.1_Missense_Mu   | NM_021073    | NP_066551    | P22003 | BMP5_HUMAN  |                                | 2     | TACGTGGTCAG   | 0.308 |             |
| - | 4   | 911       | hgz.2_Missense_M   | NM_015687    | NP_056502    | Q7Z7B0 | FLIP1_HUMAN |                                | 4     | GTATACGGTGCC  | 0.502 |             |
| + | 5   | 824       | 3psx.3_Missense_   | NM_001083535 | NP_001077004 | Q8IYX8 | CE57L_HUMAN | Potential.                     | 0     | ACATTTCTTTCC  | 0.368 |             |
| + | 64  | 9352      | ense_Mutation_p.f  | NM_000426    | NP_000417    | P24043 | LAMA2_HUMAN | minin G-like 5.                | 10    | GTATTCGGTTCC  | 0.493 |             |
| - | 5   | 906       |                    | NM_004666    | NP_004657    | O95497 | VNN1_HUMAN  | 2N hydrolase.                  | 3     | TCCCTCTTCTGT  | 0.438 |             |
| - | 125 | 23307     | ct.3_Missense_Mu   | NM_182961    | NP_892006    | Q8NF91 | SYNE1_HUMAN | cytoplasmic (Potential).       | 45    | TCTCCCTATAGCC | 0.527 |             |
| - | 2   | 487       | rf118_uc011egi.1_  | NM_144980    | NP_659417    | Q5T5N4 | CF118_HUMAN |                                | 0     | GACAGCCTCCA   | 0.617 |             |
| + | 3   | 1736      | LL2_uc011egr.1_R   | NM_031949    | NP_114155    | Q9BWV7 | TTLL2_HUMAN |                                | 3     | CTCCAGATCCC   | 0.502 |             |
| - | 6   | 747       | leg.1_Missense_    | NM_024919    | NP_079195    | Q8N878 | FRMD1_HUMAN | FERM. p.R228W(1)               | 1     | GTGCCGGAGGA   | 0.657 |             |
| + | 75  | 12167     |                    | NM_003777    | NP_003768    | Q96DT5 | DYH11_HUMAN | 6 (By similarity).             | 15    | CTCCTGGAAAAT  | 0.473 |             |
| + | 12  | 1544      | oe.1_Missense_Mu   | NM_031414    | NP_113602    | Q9BXU1 | STK31_HUMAN |                                | 9     | TCTGATGAAATAC | 0.368 |             |
| + | 9   | 1723      |                    | NM_021116    | NP_066939    | Q08828 | ADCY1_HUMAN | lasmic (Potential).            | 6     | GGTACATCAGCC  | 0.522 |             |
| - | 25  | 4047      | v.2_Missense_Mut   | NM_022748    | NP_073585    | Q68CZ2 | TENS3_HUMAN | SH2.                           | 4     | AATCTCCAGCT   | 0.433 |             |
| + | 4   | 1510      |                    | NM_001159522 | NP_001152994 | A8MUV8 | ZN727_HUMAN | 2H2-type 10.                   | 0     | TAAGAGAATTC   | 0.393 |             |
| - | 2   | 116       |                    | NM_002991    | NP_002982    | O00175 | CCL24_HUMAN |                                | 0     | TCTTGGAAACA   | 0.557 |             |
| + | 14  | 2315      | AN_uc003uwl.2_F    | NM_003386    | NP_003377    | Q9Y493 | ZAN_HUMAN   | ate) (mucin-like domain). E    | 11    | AAAACCCACCA   | 0.507 |             |
| + | 3   | 5881      | C17_uc010lho.1_F   | NM_001040105 | NP_001035194 | Q685J3 | MUC17_HUMAN | 3 X approximate tandem re      | 27    | TGAAATCAACAC  | 0.498 |             |
| + | 3   | 7512      | C17_uc010lho.1_F   | NM_001040105 | NP_001035194 | Q685J3 | MUC17_HUMAN | 3 X approximate tandem re      | 27    | ACACCTATGACC  | 0.493 | rs139444589 |
| - | 27  | 3731      | kg.3_Nonsense_N    | NM_017954    | NP_060424    | Q86UW7 | CAPS2_HUMAN |                                | 2     | TTTCTCGAAGAA  | 0.368 |             |
| - | 18  | 2418      | M1D_uc010lng.2_    | NM_030647    | NP_085150    | Q6ZMT4 | KDM7_HUMAN  |                                | 1     | AGGAGGAAGTC   | 0.318 |             |
| - | 15  | 1860      |                    | NM_004333    | NP_004324    | P15056 | BRAF_HUMAN  | rotein kinase_R603>I(2)) p.T   | 18290 | ATTTCACTGTAC  | 0.368 |             |
| + | 7   | 1371      | p.H406Y ZYX_uc     | NM_001010972 | NP_001010972 | Q15942 | ZYX_HUMAN   | I zinc-binding 1.              | 0     | TGTTCCACATCC  | 0.642 |             |
| + | 8   | 1391      | kr.2_RNA GALNTL    | NM_145292    | NP_660335    | Q7Z4T8 | GLTL5_HUMAN | renal (Potential).             | 2     | TGGATGAATAT   | 0.468 |             |
| + | 2   | 371       | .2_5'UTR ADAMDI    | NM_014479    | NP_055294    | O15204 | ADEC1_HUMAN |                                | 2     | AAACTTCACATTI | 0.343 |             |
| - | 8   | 877       |                    | NM_144651    | NP_653252    | A1KZ92 | PXNHL_HUMAN | like C2-type 1.                | 2     | GGTTTCTTCCC   | 0.443 |             |
| - | 6   | 1140_1141 | i_p.G267K PCMTL    | NM_052937    | NP_443169    | Q96MG8 | PCMD1_HUMAN |                                | 0     | GAATCCCCTTGG  | 0.421 |             |
| + | 39  | 7232      | iw.2_Missense_Mi   | NM_017890    | NP_060360    | Q7Z7G8 | VP13B_HUMAN |                                | 20    | ATGTGCTACAGG  | 0.378 |             |
| + | 9   | 1781      | p.R235C DCAF13     | NM_015420    | NP_056235    | Q9NV06 | DCA13_HUMAN | WD 7.                          | 1     | ACATTCGCCTGT  | 0.328 |             |
| + | 69  | 11265     |                    | NM_177531    | NP_803875    | Q86W11 | PKHL1_HUMAN | ellular (Potential).           | 14    | GAATTCCTAAGC  | 0.438 |             |



|   |    |           |                    |              |              |        |              |                                |      |                 |       |
|---|----|-----------|--------------------|--------------|--------------|--------|--------------|--------------------------------|------|-----------------|-------|
| + | 35 | 4881      | uc003yqy.1_Intron  | NM_001039112 | NP_001034201 | Q2WGJ9 | FR1L6_HUMAN  | lasmic (Pote p.D1559Y(1)       | 11   | :ACAAGGATAAGC   | 0.428 |
| - | 10 | 1733      | yum.2_Missense_I   | NM_173344    | NP_775479    | Q11201 | SIA4A_HUMAN  | renal (Potential).             | 0    | :GTTCTCCCAAGT/  | 0.572 |
| - | 13 | 1991      | .M135B_uc003yva    | NM_015912    | NP_056996    | Q49AJ0 | F135B_HUMAN  |                                | 9    | :TGTCTGAAGAG/   | 0.468 |
| + | 13 | 1390      |                    | NM_139021    | NP_620590    | Q8TD08 | MK15_HUMAN   |                                | 2    | :GAGGGGAGCTG    | 0.687 |
| + | 9  | 1423      | .p.S466F CNTLN_    | NM_017738    | NP_060208    | Q9NXG0 | CNTLN_HUMAN  |                                | 1    | :GAAGTCTGAAA    | 0.338 |
| - | 1  | 3013      | uc003zrh.1_5'Flanl | NM_153809    | NP_722516    | Q8IZX4 | TAF1L_HUMAN  |                                | 26   | :TGTGGGATCTG/   | 0.498 |
| + | 3  | 307       |                    | NM_019592    | NP_062538    | Q5VTR2 | BRE1A_HUMAN  | Potential.                     | 8    | :AACTTCGTGAG/   | 0.453 |
| + | 1  | 70        |                    | NM_001004485 | NP_001004485 | Q8NGS4 | O13F1_HUMAN  | cellular (Potential).          | 3    | :AAAGTTCAGGTC   | 0.418 |
| - | 1  | 256       |                    | NM_001001956 | NP_001001956 | Q8NGT0 | O13C9_HUMAN  | cellular (Potential).          | 0    | :TGAAAGGAAGC    | 0.512 |
| - | 2  | 167       | llwl.1_Missense_Iv | NM_001003936 | NP_001003936 | Q6A555 | TXND8_HUMAN  | Thioredoxin.                   | 0    | :AACAGGAAACA    | 0.353 |
| - | 8  | 2383      |                    | NM_014618    | NP_055433    | O60477 | DBC1_HUMAN   |                                | 8    | :GGAGGGATCCG/   | 0.562 |
| + | 1  | 22        | : GOLGA2_uc004b    | NM_001040011 | NP_001035100 | Q1ZZU3 | SWI5_HUMAN   |                                | 0    | :AGAGGGACCTG    | 0.642 |
| + | 61 | 5045      | uc004cff.2_Intron  | NM_000093    | NP_000084    | P20908 | CO5A1_HUMAN  | le-helical region.             | 11   | :CGAAGGGTGAG    | 0.592 |
| + | 26 | 3954      | .p.A800V CACNA     | NM_000718    | NP_000709    | Q00975 | CAC1B_HUMAN  | ismic (Potential). III.        | 6    | :GCAGGCTGTGT    | 0.562 |
| - | 2  | 640       | 0ndi.2_Missense_   | NM_181332    | NP_851849    | Q8N0W4 | NLGNX_HUMAN  | cellular (Potential).          | 4    | :GCAACTGGAT/    | 0.502 |
| + | 13 | 1500      | .p.D327N TBL1X_1   | NM_001139466 | NP_001132938 | O60907 | TBL1X_HUMAN  | WD 4.                          | 1    | :ATGTGGACTGG/   | 0.527 |
| + | 15 | 2667      | mij.1_Missense_M   | NM_014728    | NP_055543    | Q14CM0 | FRPD4_HUMAN  |                                | 13   | :TAGGCGATGTG/   | 0.522 |
| - | 3  | 1112_1113 | wh.1_Missense_M    | NM_001018113 | NP_001018123 | Q8NB91 | FANCB_HUMAN  |                                | 1    | :GATCTCCAAATG   | 0.391 |
| - | 3  | 357       | wh.1_Missense_Iv   | NM_001018113 | NP_001018123 | Q8NB91 | FANCB_HUMAN  |                                | 1    | :AAATTTCTTTTAC  | 0.368 |
| - | 7  | 1013      | :9_uc004cwm.2_3    | NM_001031739 | NP_001026909 | Q96DX5 | ASB9_HUMAN   | SOCS box.                      | 0    | :AGAAGGGGGCC    | 0.393 |
| - | 2  | 230       | :A9L_uc010nfp.2_   | NM_001412    | NP_001403    | P47813 | IF1AX_HUMAN  |                                | 1    | :ACCTCCTTTACC   | 0.308 |
| - | 27 | 3959      | _Mutation_p.E123   | NM_004006    | NP_003997    | P11532 | DMD_HUMAN    | Spectrin 8.                    | 6    | :AAGTTCCTTTT/   | 0.433 |
| + | 4  | 409       | 7S ATP6AP2_uc0     | NM_005765    | NP_005756    | O75787 | RENRR_HUMAN  | cellular (Potential).          | 0    | :CAGTTCCTTTT/   | 0.353 |
| - | 19 | 1796      | .p.A220V TEX11_u   | NM_001003811 | NP_001003811 | Q8IYF3 | TEX11_HUMAN  |                                | 5    | :GGGCAGCTAAA/   | 0.328 |
| - | 1  | 457       | .p.L147F SERPIN,   | NM_000354    | NP_000345    | P05543 | THBG_HUMAN   |                                | 0    | :ATCATTCAAGAA/  | 0.423 |
| + | 2  | 939       | :mk.2_Missense_Iv  | NM_194463    | NP_919445    | Q8TEB7 | RN128_HUMAN  |                                | 2    | :TTATTCTGCTCG   | 0.363 |
| - | 24 | 4657      | .p.M1537 ODZ1_u,   | NM_014253    | NP_055068    | Q9UKZ4 | TEN1_HUMAN   | cellular (Potential).          | 23   | :AATGTTTCATGCT/ | 0.483 |
| - | 3  | 581       | .p.Q173* ODZ1_u,   | NM_014253    | NP_055068    | Q9UKZ4 | TEN1_HUMAN   | inal. Cytoplasmic (Potential   | 23   | :AGCTTGAGCCT/   | 0.413 |
| + | 12 | 4813      | :vc.1_Missense_Iv  | NM_021946    | NP_068765    | Q5H9F3 | BCORL_HUMAN  |                                | 7    | :CAGAGGAAAAAC   | 0.473 |
| - | 6  | 921       | n.1_Missense_Mu    | NM_005369    | NP_005360    | P10911 | MCF2_HUMAN   |                                | 2    | :TGATGTTTTTCC   | 0.323 |
| + | 7  | 1354      |                    | NM_005140    | NP_005131    | Q16280 | CNGA2_HUMAN  | cellular (Potential).          | 3    | :CTCCAACATGA/   | 0.502 |
| - | 4  | 470       | :011mye.1_RNA M    | NM_004961    | NP_004952    | P78334 | GBRE_HUMAN   | cellular (Probable).           | 2    | :CAAGAGACTCA/   | 0.488 |
| + | 4  | 363       | se_Mutation_p.T1:  | NM_153478    | NP_705611    | Q6PB30 | CSAG1_HUMAN  |                                | 1    | :cttCACTGCTCTG  | 0.303 |
| - | 10 | 973       | 4fir.2_Missense_M  | NM_004135    | NP_004126    | P51553 | IDH3G_HUMAN  |                                | 0    | :GGCCGGGACA     | 0.632 |
| - | 51 | 6522      | :d.2_Missense_M,   | NM_005529    | NP_005520    | P98160 | PGBM_HUMAN   | like C2-type 7.                | 9    | :CGTGTGAGGAG/   | 0.687 |
| + | 5  | 1161      | utation_p.S339F l  | NM_017449    | NP_059145    | P29323 | EPHB2_HUMAN  | tential). Fibronectin type-III | 5    | :GACCTCCCTCAT   | 0.657 |
| - | 16 | 2416      | xm.1_Missense_M    | NM_052896    | NP_443128    | Q72408 | CSMD2_HUMAN  | tracellular (Potential).       | 12   | :AGCACCTGTGCG/  | 0.587 |
| - | 10 | 731       | .p.G154E SLC44A    | NM_152697    | NP_689910    | Q8NCS7 | CTL5_HUMAN   | cellular (Potential).          | 4    | :TTACTTCTTATTC  | 0.328 |
| + | 13 | 2372      |                    | NM_006536    | NP_006527    | Q9UQC9 | CLCA2_HUMAN  | cellular (Potential).          | 3    | :GGAGCGAAAGT/   | 0.448 |
| - | 3  | 437       |                    | NM_002524    | NP_002515    | P01111 | RASN_HUMAN   | GTP. ) p.Q61P(21) f            | 2607 | :TCTTCTTGTTCC/  | 0.463 |
| - | 32 | 4743      |                    | NM_206996    | NP_996879    | Q6Q759 | SPG17_HUMAN  |                                | 6    | :AAAAGGATAGT/   | 0.438 |
| + | 4  | 1005      | :hw.2_Missense_Iv  | NM_000862    | NP_000853    | P14060 | 3BHS1_HUMAN  |                                | 2    | :GCTTCTCTTATC   | 0.473 |
| + | 74 | 9249      | :.1_Intron NBP10,  | NM_001039703 | NP_001034792 | A6NDV3 | A6NDV3_HUMAN |                                | 0    | :GGCCTAAAGTC    | 0.473 |
| + | 13 | 1163      |                    | NM_020452    | NP_065185    | P98198 | AT8B2_HUMAN  | lasmic (Potential).            | 2    | :ACAGCTACTTCA   | 0.597 |
| - | 2  | 858       | 2_Missense_Muta    | NM_001111    | NP_001102    | P55265 | DSRAD_HUMAN  |                                | 6    | :TGGGGCTCCTT/   | 0.527 |
| - | 2  | 843       | 2_Missense_Muta    | NM_001111    | NP_001102    | P55265 | DSRAD_HUMAN  |                                | 6    | :ATGACCGTCTG/   | 0.522 |
| - | 9  | 1479      | :T2_uc009wpb.2_I   | NM_144622    | NP_653223    | Q5T1A1 | DCST2_HUMAN  | cellular (Potential).          | 3    | :GGTACGATAAAA   | 0.522 |

rs147167664

rs121913255

|   |    |      |                   |              |              |        |             |                                   |      |               |       |             |
|---|----|------|-------------------|--------------|--------------|--------|-------------|-----------------------------------|------|---------------|-------|-------------|
| - | 1  | 260  |                   | NM_001004476 | NP_001004476 | Q6IF99 | O10K2_HUMAN | cellular (Potential).             | 1    | TCTGGGACAGC/  | 0.488 |             |
| + | 3  | 336  | SD1_uc010pii.1_in | NM_052862    | NP_443094    | Q6JBY9 | CPZIP_HUMAN |                                   | 5    | CTGTTCCCTCC/  | 0.567 |             |
| + | 37 | 5233 | 1gox.1_Missense_  | NM_000721    | NP_000712    | Q15878 | CAC1E_HUMAN | cellular (Potential). IV.         | 6    | AGAACGAGAAAC  | 0.557 |             |
| + | 5  | 580  | qh.2_Missense_Mi  | NM_173156    | NP_775179    | Q92540 | SMG7_HUMAN  | TPR 1.                            | 3    | CCAGCACTGCC'  | 0.443 |             |
| + | 26 | 4229 |                   | NM_031935    | NP_114141    | Q96RW7 | HMCN1_HUMAN | like C2-type 10.                  | 23   | ACAATGGGGAG   | 0.423 |             |
| - | 7  | 587  | o.A176V KCNT2_u   | NM_198503    | NP_940905    | Q6UVM3 | KCNT2_HUMAN | =Segment S4; (Potential).         | 7    | CCAAGGCATGTT  | 0.284 |             |
| + | 4  | 633  | gtr.1_Missense_Mi | NM_005666    | NP_005657    | P36980 | FHR2_HUMAN  | Sushi 3.                          | 3    | TTGAGGGTAAAC  | 0.383 |             |
| + | 6  | 1495 | 31_uc010ppb.1_M   | NM_201253    | NP_957705    | P82279 | CRUM1_HUMAN | (Potential). EGF-like 11.         | 9    | AATAATGGAACAT | 0.468 |             |
| - | 2  | 304  |                   | NM_000242    | NP_000233    | P11226 | MBL2_HUMAN  | Collagen-like.                    | 1    | GATTTCCCTGGA/ | 0.542 |             |
| - | 8  | 1175 | p.G351E CTNNA3    | NM_001127384 | NP_001120856 | Q9UI47 | CTNA3_HUMAN | Potential.                        | 8    | TTTTTCCAGCCT  | 0.358 |             |
| - | 6  | 746  | p.R208Q CTNNA3    | NM_001127384 | NP_001120856 | Q9UI47 | CTNA3_HUMAN |                                   | 8    | AAGCTCGGGCT   | 0.418 |             |
| - | 4  | 512  | 9xqi.1_RNA C10o   | NM_152710    | NP_689923    | Q96M53 | SPATL_HUMAN |                                   | 1    | ATCACCAGTTCT  | 0.592 |             |
| + | 8  | 1728 |                   | NM_000314    | NP_000305    | P60484 | PTEN_HUMAN  | 2 tensin-tyr) p.?(1) p.R233       | 2334 | CCACACGACGG   | 0.423 | rs121909219 |
| - | 15 | 1986 | 10orf79_uc001kxx  | NM_025145    | NP_079421    | Q8NDM7 | WDR96_HUMAN |                                   | 0    | GATACCGGTATC  | 0.383 |             |
| + | 5  | 583  | gd.1_Missense_M   | NM_144587    | NP_653188    | Q32M84 | BTBDG_HUMAN |                                   | 1    | GAAAGCCCTGG/  | 0.607 |             |
| - | 13 | 1831 | 9ycc.2_Missense_  | NM_021924    | NP_068743    | Q9HBB8 | CDHR5_HUMAN | stem repeats. 2. Extracellular    | 0    | TCCTGGCTCTG/  | 0.667 | rs139058512 |
| + | 1  | 793  |                   | NM_178168    | NP_835462    | Q9H207 | O10A5_HUMAN | cellular (Potential).             | 3    | CTAAATCAAAT/  | 0.418 |             |
| - | 2  | 1485 |                   | NM_176821    | NP_789791    | Q86W26 | NAL10_HUMAN |                                   | 9    | GGACTCCTTCC/  | 0.498 |             |
| - | 2  | 1171 | p.R84S STK33_uc   | NM_030906    | NP_112168    | Q9BYT3 | STK33_HUMAN |                                   | 7    | TGCTTTTCTCTC' | 0.353 |             |
| - | 2  | 348  | 1_5'Flank C11orf7 | NM_000536    | NP_000527    | P55895 | RAG2_HUMAN  |                                   | 5    | TGACATGGTTATC | 0.453 |             |
| - | 14 | 1926 |                   | NM_002334    | NP_002325    | O75096 | LRP4_HUMAN  | (Potential). LDL-receptor class E | 4    | GGTATCGGCAA'  | 0.552 |             |
| + | 2  | 247  | p.S83A C11orf8    | NM_001100388 | NP_001093858 | Q6PI97 | CKO88_HUMAN |                                   | 0    | CGCAGTCTTTTC  | 0.338 |             |
| - | 1  | 942  |                   | NM_001005187 | NP_001005187 | Q8NGN1 | OR6T1_HUMAN | plasmic (Potential).              | 1    | AGTTTCATCAC/  | 0.428 |             |
| + | 1  | 19   |                   | NM_001001953 | NP_001001953 | Q8NGN4 | O10G9_HUMAN | cellular (Potential).             | 2    | GCCTCGTGACA'  | 0.532 |             |
| + | 8  | 1632 |                   | NM_025004    | NP_079280    | Q0P6D6 | CCD15_HUMAN |                                   | 2    | TCTCCACAAAG/  | 0.418 | rs113451248 |
| + | 8  | 1722 |                   | NM_025004    | NP_079280    | Q0P6D6 | CCD15_HUMAN |                                   | 2    | TCTCCCAAAG/   | 0.403 | rs112861775 |
| - | 6  | 1375 | n.1_RNA NCAPD3    | NM_015261    | NP_056076    | P42695 | CNDD3_HUMAN |                                   | 5    | ATTCATGAAGAAC | 0.353 |             |
| + | 18 | 3380 | C1_uc001qid.2_Rf  | NM_178040    | NP_829884    | Q8IUD2 | RB6I2_HUMAN | FIP-RBD.                          | 5    | CTCACTCCACCA/ | 0.502 |             |
| + | 2  | 997  | hDC5_uc009zjj.2_f | NM_020782    | NP_065833    | Q9P2K6 | KLDC5_HUMAN | Kelch 3.                          | 2    | CATCGGAGGGC/  | 0.478 |             |
| + | 13 | 1852 | p.S562I TROAP_    | NM_005480    | NP_005471    | Q12815 | TROAP_HUMAN | ate tandem repeats. Cys-ri        | 1    | TAGGAGTGAGC/  | 0.592 |             |
| - | 1  | 705  | h.2_Missense_Mi   | NM_000424    | NP_000415    | P13647 | K2C5_HUMAN  | Coil 1A. Rod.                     | 0    | TGAAGGAGGCA   | 0.478 |             |
| - | 1  | 351  |                   | NM_175068    | NP_778238    | Q86Y46 | K2C73_HUMAN | Head.                             | 6    | TGACCTGATGGA' | 0.627 |             |
| + | 9  | 1362 | u.2_Missense_Mul  | NM_001135805 | NP_001129277 | P21579 | SYT1_HUMAN  | phospholipid binding (Probe       | 6    | GTATATGATTTTC | 0.388 |             |
| + | 1  | 604  | S1B_uc001tgf.1_I  | NM_153364    | NP_699195    | Q8NEG0 | FA71C_HUMAN |                                   | 0    | TGATTGACGTGC. | 0.527 |             |
| + | 38 | 4189 |                   | NM_017564    | NP_060034    | Q8VWQ8 | STAB2_HUMAN | cellular (Potential).             | 14   | CGAGAGAATGC'  | 0.527 |             |
| + | 10 | 1036 | A_uc009zwe.1_Mi   | NM_001143854 | NP_001137326 | Q9Y2J0 | RP3A_HUMAN  | Pro-rich.                         | 7    | TCCCGGGCGAG   | 0.562 |             |
| - | 8  | 1115 | e_Mutation_p.W2   | NM_015347    | NP_056162    | O15034 | RIMB2_HUMAN | nectin type-III 1.                | 11   | GGCTCCAGCC    | 0.562 |             |
| - | 4  | 621  |                   | NM_005932    | NP_005923    | Q99797 | MIPEP_HUMAN |                                   | 1    | CAAGGGAATCC/  | 0.279 |             |
| + | 2  | 1012 |                   | NM_153456    | NP_703157    | Q8IZP7 | H6ST3_HUMAN | renal (Potential).                | 2    | TGAACGAGAGTC  | 0.493 |             |
| + | 1  | 803  |                   | NM_001005500 | NP_001005500 | Q8NGD0 | OR4M1_HUMAN | cellular (Potential).             | 0    | CATTTTCCCTAG/ | 0.418 |             |
| + | 1  | 449  |                   | NM_001004723 | NP_001004723 | Q8NGD1 | OR4N2_HUMAN | Name=4; (Potential).              | 4    | TGGGCTTGGGG   | 0.532 |             |
| - | 2  | 734  | wih.2_Missense_M  | NM_021944    | NP_068763    | Q9H972 | CN093_HUMAN |                                   | 1    | CTCTTCCACGG/  | 0.632 |             |
| - | 12 | 1959 |                   | NM_002742    | NP_002733    | Q15139 | KPCD1_HUMAN | ilarity). Protein kinase.         | 8    | CAAAGTGTCCAC  | 0.323 |             |
| + | 4  | 387  | IUBPL_uc010tpl.1  | NM_025152    | NP_079428    | Q8TB37 | NUBPL_HUMAN |                                   | 0    | TGACCTTCAG'   | 0.274 |             |
| + | 3  | 896  | bp.2_Missense_Mi  | NM_199421    | NP_955453    | Q8WXH5 | SOCS4_HUMAN |                                   | 2    | TGATGCGGCAC'  | 0.428 |             |
| - | 4  | 1102 | cmk.2_Missense_M  | NM_033141    | NP_149132    | P80192 | M3K9_HUMAN  | rotein kinase.                    | 5    | AGGAAGGGCGA   | 0.512 |             |
| - | 7  | 1513 | p.S437F FOXN3_    | NM_001085471 | NP_001078940 | O00409 | FOXN3_HUMAN |                                   | 3    | GGAGGACCTCT   | 0.522 |             |

|   |    |       |                   |              |              |        |              |                                |    |                 |       |             |
|---|----|-------|-------------------|--------------|--------------|--------|--------------|--------------------------------|----|-----------------|-------|-------------|
| + | 8  | 988   | ε_Mutation_p.G18  | NM_001112726 | NP_001106197 | Q9Y4F5 | K0284_HUMAN  |                                | 1  | GGCAGGTGGGG     | 0.642 |             |
| + | 1  | 124   |                   | NM_001080841 | NP_001074310 |        |              |                                | 0  | TTTGACCGCTAC    | 0.498 | rs267613    |
| - | 33 | 6106  | -4310 MI0015840_  | NM_016642    | NP_057726    | Q9NRC6 | SPTN5_HUMAN  | Spectrin 16.                   | 2  | GCGGGCTGCC      | 0.682 |             |
| + | 4  | 597   | zxr.2_Missense_M  | NM_020234    | NP_064619    | Q8N5C7 | DTWD1_HUMAN  |                                | 0  | AAAGTACTGCTA    | 0.214 |             |
| + | 5  | 1270  | _p.W293* SLC27A   | NM_003645    | NP_003636    | O14975 | S27A2_HUMAN  | lasmic (Potential).            | 2  | GTGTGGAGACA     | 0.433 |             |
| - | 11 | 1721  | zza.3_Missense_M  | NM_031226    | NP_112503    | P11511 | CP19A_HUMAN  |                                | 3  | AAAGATCATTTCC   | 0.448 |             |
| - | 61 | 12014 |                   | NM_003922    | NP_003913    | Q15751 | HERC1_HUMAN  |                                | 19 | AGGTTCTAGATC    | 0.428 |             |
| + | 18 | 2547  |                   | NM_152336    | NP_689549    | Q96MI9 | CBPC4_HUMAN  |                                | 0  | TTTCTCCCACTC    | 0.473 |             |
| - | 9  | 2439  | luyn.1_Missense_M | NM_001134407 | NP_001127879 | Q12879 | NMDE1_HUMAN  | lasmic (Potential).            | 45 | AGATACCATGAT    | 0.478 |             |
| + | 6  | 873   | p.2_Missense_Mu   | NM_024847    | NP_079123    | Q7Z402 | TMC7_HUMAN   | cellular (Potential).          | 3  | TTACGGACATTA    | 0.493 |             |
| + | 12 | 1647  | lhg.3_Missense_M  | NM_001010845 | NP_001010845 | Q08AH3 | ACS2A_HUMAN  | zyme A binding.                | 3  | CCAGCGGGTGA     | 0.498 |             |
| - | 12 | 1618  | p.G470R ACSM2E    | NM_182617    | NP_872423    | Q68CK6 | ACS2B_HUMAN  | A binding (By similarity).     | 5  | TACCCCGCTGG     | 0.507 | rs150327444 |
| - | 5  | 1060  |                   | NM_020718    | NP_065769    | Q70CQ4 | UBP31_HUMAN  |                                | 10 | CATAGACACTGC    | 0.443 |             |
| - | 27 | 4125  | C12_uc002efa.1_   | NM_033226    | NP_150229    | Q96J65 | MRP9_HUMAN   | C transporter 2.               | 3  | GTCCCTACTC      | 0.413 |             |
| + | 11 | 1346  | IA GPR114_uc002   | NM_153837    | NP_722579    | Q8IZF4 | GP114_HUMAN  | Name=5; (Potential).           | 1  | ACGGCGCCTC      | 0.697 |             |
| + | 4  | 2048  | nn.1_Missense_Mi  | NM_015251    | NP_056066    | O43313 | ATMIN_HUMAN  |                                | 0  | ACTTCTACTCGC    | 0.458 |             |
| - | 1  | 205   | !fgj.2_Missense_M | NM_052892    | NP_443124    | Q7Z442 | PK1L2_HUMAN  | (Potential). C-type lectin.    | 3  | GCCTTCGTCTC     | 0.562 |             |
| - | 5  | 591   | se_Mutation_p.G1  | NM_000512    | NP_000503    | P34059 | GALNS_HUMAN  |                                | 2  | AGGTCCAAAGTC    | 0.587 |             |
| - | 12 | 1524  | p.P211S C17orf85  | NM_001114118 | NP_001107590 | Q53F19 | CQ085_HUMAN  |                                | 1  | TTCCGGAGAATC    | 0.502 |             |
| - | 4  | 626   |                   | NM_003342    | NP_003333    | P62253 | UB2G1_HUMAN  |                                | 0  | AATGCACACATC    | 0.368 |             |
| - | 9  | 1206  | p.E359K ALOX15    | NM_001140    | NP_001131    | P16050 | LOX15_HUMAN  | ipoxygenase.                   | 5  | TAATTTCCAGGG    | 0.522 |             |
| + | 33 | 5258  | p.Q1010* JUSP6_u  | NM_004505    | NP_004496    | P35125 | UBP6_HUMAN   |                                | 5  | CATCCAGGAA      | 0.413 |             |
| + | 11 | 2472  | gix.2_Missense_M  | NM_001080424 | NP_001073893 | O15054 | KDM6B_HUMAN  | Pro-rich.                      | 2  | CATCATGAAGAT    | 0.572 |             |
| - | 14 | 1420  | _Mutation_p.A431  | NM_001100112 | NP_001093582 | Q9UKX2 | MYH2_HUMAN   | rosin head-like.               | 14 | CTTTGGCCAGA     | 0.483 |             |
| + | 9  | 2181  | e_Mutation_p.R17  | NM_014695    | NP_055510    | A2RUR9 | C144A_HUMAN  | Potential.                     | 0  | ATTGAGGTATG     | 0.323 |             |
| - | 2  | 171   | se_Mutation_p.A3  | NM_001042685 | NP_001036150 | Q3B8N2 | LEG9B_HUMAN  | Galectin 1.                    | 1  | AACGGCCCCAT     | 0.562 | rs144269928 |
| - | 3  | 1568  | _p.W413* SLFN1    | NM_144682    | NP_653283    | Q68D06 | SLN13_HUMAN  |                                | 2  | CCTCCAGAGG      | 0.423 |             |
| + | 1  | 1130  | p.E182K CDK12_u   | NM_016507    | NP_057591    | Q9NYV4 | CDK12_HUMAN  |                                | 19 | ACAAGGAGAAG     | 0.493 |             |
| - | 1  | 393   |                   | NM_033059    | NP_149048    | Q9BYQ6 | KR411_HUMAN  | IKRQVHEL]- [SPTR]-[ST          | 0  | gcagcagctggacac | 0.129 |             |
| - | 1  | 183   |                   | NM_033059    | NP_149048    | Q9BYQ6 | KR411_HUMAN  | GKRQVHEL]- [SPTR]-[ST          | 0  | CAGCAGCTGGA     | 0.672 |             |
| + | 18 | 2053  | zjd.1_Missense_M  | NM_173626    | NP_775897    | Q86WA9 | S2611_HUMAN  | cellular (Potential).          | 0  | AGACTCCATTC     | 0.502 |             |
| + | 2  | 187   | _p.W66* CLUL1_u   | NM_014410    | NP_055225    | Q15846 | CLUL1_HUMAN  |                                | 2  | CTGTGGTTGAA     | 0.443 |             |
| - | 2  | 1637  |                   | NM_016626    | NP_057710    | Q5U5Q3 | MEX3C_HUMAN  |                                | 4  | ATGTAGGAGAC     | 0.498 |             |
| + | 13 | 2640  | p.G533R DCC_ucl   | NM_005215    | NP_005206    | P43146 | DCC_HUMAN    | tential). Fibronectin type-III | 17 | TCACAGGTCAG     | 0.403 |             |
| + | 4  | 530   | 2liy.2_Missense_M | NM_002639    | NP_002630    | P36952 | SPB5_HUMAN   |                                | 1  | CGAAAGGTCAG     | 0.388 |             |
| - | 1  | 327   | 2luv.2_Missense_I | NM_130807    | NP_570719    | Q96BX8 | MOL2A_HUMAN  |                                | 1  | TTCAGGTCTCC     | 0.667 |             |
| - | 2  | 359   |                   | NM_001080523 | NP_001073992 | A6NEK1 | ARRD5_HUMAN  |                                | 0  | TAGAAGGAAGC     | 0.448 |             |
| - | 18 | 2353  |                   | NM_000064    | NP_000055    | P01024 | CO3_HUMAN    | p.R764Q(1)                     | 5  | CACTTCGGGAA     | 0.478 | rs143642234 |
| - | 4  | 659   | q.2_Missense_Mu   | NM_021155    | NP_066978    | Q9NNX6 | CD209_HUMAN  | [5,]7 X approximate tandem     | 1  | CAGCCGGGTCA     | 0.562 | rs141131967 |
| - | 3  | 13802 |                   | NM_024690    | NP_078966    | Q8WXI7 | MUC16_HUMAN  | xtracellular (Potential).      | 57 | TGGAAGGATGA     | 0.453 |             |
| - | 10 | 2291  | wr.1_Missense_M   | NM_152476    | NP_689689    | Q96MR9 | ZN560_HUMAN  |                                | 6  | AAATTCGAAAG     | 0.378 | rs148650284 |
| + | 4  | 1651  | ym.1_Missense_M   | NM_001136501 | NP_001129973 | Q08AG5 | ZN844_HUMAN  |                                | 0  | AAACCCTATGA     | 0.413 |             |
| + | 3  | 295   | _p.P58S CD97_u    | NM_078481    | NP_510966    | P48960 | CD97_HUMAN   | r (Potential). EGF-like 1.     | 4  | CCACCCGACG      | 0.592 |             |
| + | 3  | 267   | _p.P69L CYP4F1    | NM_023944    | NP_076433    |        |              |                                | 7  | CACTCCTACAG     | 0.358 |             |
| + | 1  | 169   |                   | NM_013939    | NP_039227    | O60403 | O10H2_HUMAN  | lasmic (Potential).            | 3  | CGTCTGGAGCG     | 0.607 |             |
| - | 4  | 935   |                   | NM_001159293 | NP_001152765 | C9JHM3 | C9JHM3_HUMAN |                                | 1  | TCTCCACTATGA    | 0.403 |             |
| - | 3  | 325   |                   | NM_001098626 | NP_001092096 | A6NK75 | ZNF98_HUMAN  | KRAB.                          | 2  | TCTTTCTTGC1     | 0.423 |             |

|   |    |           |                                                               |              |              |        |             |     |                               |       |                   |       |                    |
|---|----|-----------|---------------------------------------------------------------|--------------|--------------|--------|-------------|-----|-------------------------------|-------|-------------------|-------|--------------------|
| + | 4  | 1251      | rk.1_Missense_M                                               | NM_203282    | NP_975011    | O75437 | ZN254_HUMAN | 0   | ATTCATACTGGAC                 | 0.378 |                   |       |                    |
| + | 4  | 702       | p.G114R KIRREL                                                | NM_199180    | NP_954649    | Q6UWL6 | KIRR2_HUMAN | 2   | : Extracellular (Potential).  | 3     | :GAGATGGGGTC      | 0.582 |                    |
| - | 4  | 529_530   | 8KN>NY ZNF573                                                 | NM_152360    | NP_689573    | Q86YE8 | ZN573_HUMAN | 2   | :H2-type 2.                   | 1     | AAAGTTCTTCCC      | 0.366 |                    |
| + | 7  | 1010      | se_Mutation_p.G                                               | NM_021913    | NP_068713    | P30530 | UFO_HUMAN   | 13  | ential). Fibronectin type-III | 13    | AGGCGGGAGAA       | 0.612 |                    |
| + | 14 | 1573      | ba.1_Missense_Mutation_p.P523L                                |              |              | Q96L34 | MARK4_HUMAN | 3   |                               | 3     | :GCGCCCGTCAC      | 0.587 |                    |
| - | 5  | 1038      | i77_uc010ydf.1_5'                                             | NM_023074    | NP_075562    | Q9BS31 | ZN649_HUMAN | 3   |                               | 3     | :CTCCTTTGTGAC     | 0.507 |                    |
| + | 4  | 2950      | dw.1_Missense_M                                               | NM_138374    | NP_612383    | Q96IR2 | ZN845_HUMAN | 2   | :H2-type 27.                  | 0     | TACAAGTGTAATC     | 0.348 |                    |
| - | 3  | 976       |                                                               | NM_001101401 | NP_001094871 | P0C263 | SBK2_HUMAN  | 0   | rotein kinase.                | 0     | :GCGCCCCAGGT      | 0.731 |                    |
| - | 9  | 1992      | DH14_uc002rcx.3                                               | NM_033253    | NP_150278    | Q96P26 | 5NT1B_HUMAN | 3   |                               | 3     | :ATCCATAGCTTT     | 0.423 |                    |
| - | 3  | 382       | 10yiv.1_Missense                                              | NM_001002006 | NP_001002006 | Q96P26 | 5NT1B_HUMAN | 3   |                               | 3     | :GCTGGCCCTGC      | 0.527 |                    |
| + | 1  | 378_379   | i.2_Intron SPTBN1                                             | NR_002229    |              |        |             | 0   |                               | 0     | TGAGTTTGCCAT      | 0.48  |                    |
| - | 6  | 1224      | !svl.2_Missense_M                                             | NM_020151    | NP_064536    | Q9NQZ5 | STAR7_HUMAN | 0   | START.                        | 0     | :GTGGGGACGGA      | 0.468 |                    |
| + | 12 | 2402      |                                                               | NM_003048    | NP_003039    | Q9UBY0 | SL9A2_HUMAN | 8   | lasmic (Pote p.E754K(1)       | 8     | :GCAGAGAAAAG      | 0.532 | rs147224345        |
| + | 4  | 564       | 3H2P_uc002tkd.2                                               | NM_182905    | NP_878908    |        |             | 0   |                               | 0     | :CATCCGCAAG       | 0.522 |                    |
| - | 34 | 4076      | yy.1_RNA CLASP                                                | NM_015282    | NP_056097    | Q7Z460 | CLAP1_HUMAN | 2   |                               | 2     | CCCCCGGCC         | 0.637 |                    |
| + | 14 | 2558      | flu.2_Nonsense_M                                              | NM_130773    | NP_570129    | Q8WYK1 | CNTP5_HUMAN | 10  | ential). Fibrinogen C-termin  | 10    | :ACATTCAGCAC      | 0.488 |                    |
| - | 3  | 279       | _p.E53K CACNB4                                                | NM_000726    | NP_000717    | O00305 | CACB4_HUMAN | 2   |                               | 2     | :TGCTTCCCGGT      | 0.483 |                    |
| - | 12 | 1858      | e_Mutation_p.W3f                                              | NM_004490    | NP_004481    | Q14449 | GRB14_HUMAN | 7   | SH2.                          | 7     | :TGA AACCATGG     | 0.388 |                    |
| - | 58 | 11467     |                                                               | NM_004525    | NP_004516    | P98164 | LRP2_HUMAN  | 29  | : A 31. Extracellular (Potent | 29    | :AGTTTTCTCATC     | 0.448 |                    |
| - | 46 | 13983     | N_uc010zfi.1_Intr                                             | NM_133379    | NP_596870    | Q8WZ42 | TITIN_HUMAN | 153 |                               | 153   | :GCATCTGTGTC      | 0.318 | rs149720053        |
| - | 40 | 2947      | rx.2_Missense_Mt                                              | NM_000393    | NP_000384    | P05997 | CO5A2_HUMAN | 2   |                               | 2     | :GAACACCATTAC     | 0.438 |                    |
| + | 3  | 285       | 10ziu.1_5'Flank E                                             | NM_001037663 | NP_001032752 | P24534 | EF1B_HUMAN  | 0   | ST C-terminal.                | 0     | :TGTCCAGCCCA      | 0.468 |                    |
| - | 2  | 237       |                                                               | NM_014617    | NP_055432    | P11844 | CRGA_HUMAN  | 0   | : a crystallin 'Greek key' 2. | 0     | :CGAGTCGCTGA      | 0.517 |                    |
| - | 7  | 954       | fuw.2_Missense_M                                              | NM_016260    | NP_057344    | Q9UKS7 | IKZF2_HUMAN | 0   |                               | 0     | :CAGGCTCTCTCA     | 0.388 |                    |
| - | 8  | 1375      | _p.R376* HJURP                                                | NM_018410    | NP_060880    | Q8NCD3 | HJURP_HUMAN | 1   |                               | 1     | :AAATCGGATTT      | 0.488 |                    |
| + | 17 | 2342      | M8_uc010fyj.2_In                                              | NM_024080    | NP_076985    | Q7Z2W7 | TRPM8_HUMAN | 4   | Name=3; (Potential).          | 4     | :CCCCGAGCTG       | 0.572 |                    |
| - | 40 | 8938      | znj.1_Missense_M                                              | NM_004369    | NP_004360    | P12111 | CO6A3_HUMAN | 18  | ical region. Thr-rich.        | 18    | TGTGGTGGTCAC      | 0.493 |                    |
| - | 14 | 1298      | rf194_uc002wik.2                                              | NM_001009984 | NP_001009984 | Q5TEA3 | CT194_HUMAN | 0   |                               | 0     | :TAAACGGAATC      | 0.378 | rs73577662         |
| - | 14 | 3758      | GLEC1_uc002wiz                                                | NM_023068    | NP_075556    | Q9BZZ2 | SN_HUMAN    | 10  | : ellular (Potential).        | 10    | :CCAGGACGCTG      | 0.692 |                    |
| + | 26 | 2525      | _p.R809* PLCB4_u                                              | NM_182797    | NP_877949    | Q15147 | PLCB4_HUMAN | 15  |                               | 15    | GGATATCGACAC      | 0.448 |                    |
| + | 2  | 120       | tj.1_RNA FRG1B_uc010gdr.1_RNA FRG1B_uc010ztk.1_Intron         |              |              |        |             | 0   |                               | 0     | :TTGGGCATTCA      | 0.338 |                    |
| + | 2  | 127       | tj.1_RNA FRG1B_uc010gdr.1_RNA FRG1B_uc010ztk.1_Intron         |              |              |        |             | 0   |                               | 0     | ATTCAGATGCAA      | 0.333 |                    |
| + | 2  | 133       | tj.1_RNA FRG1B_uc010gdr.1_RNA FRG1B_uc010ztk.1_Intron         |              |              |        |             | 0   |                               | 0     | :TGCAATTGGAC      | 0.343 |                    |
| + | 3  | 187       | :RG1B_uc010gdr.1_RNA FRG1B_uc010ztk.1_Missense_Mutation_p.L4S |              |              |        |             | 0   |                               | 0     | :TTTGTGGCCT       | 0.353 |                    |
| + | 3  | 189       | :RG1B_uc010gdr.1_RNA FRG1B_uc010ztk.1_Missense_Mutation_p.A5T |              |              |        |             | 0   |                               | 0     | :TGTGGCCTCA       | 0.353 |                    |
| + | 11 | 1423      | ggc.2_Missense                                                | NM_015568    | NP_056383    | Q96T49 | PP16B_HUMAN | 3   |                               | 3     | GAATTTCTTACC      | 0.567 |                    |
| - | 4  | 488       |                                                               | NM_182482    | NP_872288    |        |             | 0   |                               | 0     | TCCTTCGCTATA      | 0.368 | rs28441174         |
| - | 4  | 488       |                                                               | NM_182482    | NP_872288    |        |             | 0   |                               | 0     | CTTCGCTATAAT      | 0.368 | rs28537865         |
| - | 2  | 297       | .GE_uc002yix.2_R                                              | NM_182482    | NP_872288    |        |             | 0   |                               | 0     | gctccaacctccagctc | 0.09  |                    |
| + | 3  | 523       | CAM2_uc011acc.1                                               | NM_004540    | NP_004531    | O15394 | NCAM2_HUMAN | 4   | 1. Extracellular (Potential). | 4     | ATATATCGTTGTC     | 0.348 |                    |
| + | 21 | 3495      | 1afa.1_Missense                                               | NM_003274    | NP_003265    | P48553 | TPC10_HUMAN | 2   |                               | 2     | ATTTTCGACAA       | 0.299 |                    |
| + | 3  | 1474      | R1_uc002zwt.2_Ir                                              | NM_002073    | NP_002064    | P19086 | GNAZ_HUMAN  | 2   |                               | 2     | :TGAACCGCAAC      | 0.567 |                    |
| - | 11 | 1188_1189 | n_p.K416E CHEK                                                | NM_007194    | NP_009125    | O96017 | CHK2_HUMAN  | 20  | rotein kinase73E(2) p.S372    | 20    | AATCTTGGAGTG      | 0.416 | 470496;rs146546850 |
| + | 6  | 461       | yyz.2_Missense_M                                              | NM_014509    | NP_055324    | Q9H418 | SEHL2_HUMAN | 0   |                               | 0     | :CTGTACCTTCCC     | 0.527 |                    |
| + | 16 | 1945      | _p.D610Y ATG7_uc                                              | NM_006395    | NP_006386    | O95352 | ATG7_HUMAN  | 1   |                               | 1     | :GTGACGATCGG      | 0.478 |                    |
| - | 3  | 873       | _p.M166 IQSEC1                                                | NM_014869    | NP_055684    | Q6DN90 | IQEC1_HUMAN | 1   |                               | 1     | :TGGTCCATGCC      | 0.667 |                    |
| - | 15 | 2844      | 11A_uc010hhn.1_E                                              | NM_014139    | NP_054858    | Q9UI33 | SCNBA_HUMAN | 9   |                               | 9     | :CCAGGGGAATG      | 0.507 |                    |

|   |    |      |                               |              |              |        |             |                                |              |              |       |
|---|----|------|-------------------------------|--------------|--------------|--------|-------------|--------------------------------|--------------|--------------|-------|
| - | 2  | 360  | R3_uc003cpg.1_In              | NM_001295    | NP_001286    | P32246 | CCR1_HUMAN  | cellular (Potential).          | 3            | AGTCATCCTTCA | 0.463 |
| - | 83 | 6621 |                               | NM_000094    | NP_000085    | Q02388 | CO7A1_HUMAN | le-helical region.             | 11           | GTCCCCCTGC   | 0.607 |
| - | 12 | 1414 | ASSF1_uc003daf.               | NM_015896    | NP_056980    | O75800 | ZMY10_HUMAN | MYND-type.                     | 5            | TTTCCCAGTGC  | 0.567 |
| - | 14 | 2663 | RC2_uc003dht.1_n              | NM_015576    | NP_056391    | O15083 | ERC2_HUMAN  | Potential.                     | 2            | TTCTCTATCTC  | 0.488 |
| + | 19 | 3398 | BO2_uc011bgk.1                | NM_002942    | NP_002933    | Q9HCK4 | ROBO2_HUMAN | lasmic (Potential).            | 11           | GTGATCCCAGC  | 0.458 |
| + | 2  | 698  |                               | NM_017819    | NP_060289    | Q7L0Y3 | MRRP1_HUMAN |                                | 1            | CTTTGGGATAGG | 0.408 |
| + | 3  | 171  | hpu.2_Missense_f              | NM_007072    | NP_009003    | Q9UM44 | HLA2_HUMAN  |                                | 1            | ACATGAAGGCA  | 0.303 |
| + | 4  | 2218 | dyg.2_Missense_n              | NM_001134438 | NP_001127910 | Q86SQ0 | PHLB2_HUMAN | Potential.                     | 6            | TCGAGGAACTT  | 0.408 |
| + | 7  | 1310 | C_uc003dzz.2_Mi               | NM_033254    | NP_150279    | Q9BWW1 | BOC_HUMAN   | cellular (Potential).          | 6            | TCGCCGCATCA  | 0.622 |
| + | 3  | 1940 |                               | NM_016298    | NP_057382    | Q9UH90 | FBX40_HUMAN | F-box.                         | 5            | CCTGCCCTGG   | 0.522 |
| - | 15 | 1919 | p.G513E CPNE4_                | NM_130808    | NP_570720    | Q96A23 | CPNE4_HUMAN | VWFA.                          | 3            | GCTCTCCCTTG  | 0.517 |
| - | 6  | 7502 | p.R528K IGSF10_               | NM_178822    | NP_849144    | Q6WRI0 | IGS10_HUMAN | like C2-type 11.               | 13           | TTCTCTGTTCAT | 0.393 |
| - | 3  | 564  | r.2_Missense_Mut              | NM_139248    | NP_640341    | Q8WWY8 | LIPH_HUMAN  |                                | 2            | TTACTCCGATCA | 0.443 |
| + | 1  | 119  |                               | NM_001083308 | NP_001076777 | Q56P42 | PYDC2_HUMAN | DAPIN.                         | 0            | GCTACAGACCG  | 0.542 |
| + | 10 | 1401 | c.1_RNA SDHAP2_uc003fuv.2_RNA |              |              |        |             |                                | 0            | CACGAATCTTGA | 0.413 |
| + | 1  | 1630 |                               | NM_000798    | NP_000789    | P21918 | DRD5_HUMAN  | lasmic (Potential).            | 1            | TACATCCACATG | 0.577 |
| - | 18 | 2858 | p.S721F APBB2_t               | NM_173075    | NP_775098    | Q92870 | APBB2_HUMAN |                                | 3            | TGAGGGATAAG  | 0.488 |
| + | 8  | 658  |                               | NM_016519    | NP_057603    | Q9NP70 | AMBN_HUMAN  | 1                              | 3GAATGGATTTT | 0.194        |       |
| - | 6  | 649  | oijk.1_Missense_n             | NM_201431    | NP_958834    | Q6ZTQ3 | RASF6_HUMAN |                                | 2            | CTGGTTCATCCT | 0.428 |
| - | 6  | 744  | e_Mutation_p.S22              | NM_014435    | NP_055250    | Q02083 | NAAA_HUMAN  |                                | 1            | TTTCCGACTCA  | 0.517 |
| - | 1  | 142  |                               | NM_033214    | NP_149991    | Q14410 | GLPK2_HUMAN |                                | 4            | TTAATTCCTCTT | 0.468 |
| + | 14 | 3228 | k.3_Missense_Mu               | NM_005935    | NP_005926    | P51825 | AFF1_HUMAN  |                                | 1            | CTTTTCCAGTGC | 0.378 |
| - | 34 | 2368 | 25A1_uc003hzd.2               | NM_198721    | NP_942014    | Q9BXS0 | COPA1_HUMAN | Potential). Collagen-like 7.   | 2            | TTTCTCCCTTTT | 0.438 |
| + | 2  | 437  |                               | NM_153610    | NP_705838    | Q8N3K9 | CMYA5_HUMAN |                                | 9            | ATGTTTCTTTAT | 0.423 |
| + | 9  | 1582 | ITS19_uc010jdh.1              | NM_133638    | NP_598377    | Q8TE59 | ATS19_HUMAN | ptidase M12B.                  | 9            | AGGAAGATTTGC | 0.363 |
| + | 4  | 777  | P103S FAM53C_u                | NM_001135647 | NP_001129119 | Q9NYF3 | FA53C_HUMAN |                                | 1            | CAGATCCAGAG  | 0.657 |
| + | 7  | 1485 | e_Mutation_p.S85              | NM_016604    | NP_057688    | Q7LBC6 | KDM3B_HUMAN |                                | 11           | CCAGCTCCACC  | 0.587 |
| + | 1  | 352  | p.H118Y PCDHA1                | NM_018900    | NP_061723    | Q9Y5I3 | PCDA1_HUMAN | Extracellular (Potential).     | 1            | TTTTCCATGTGC | 0.512 |
| + | 5  | 1179 | tbl.1_Missense_M              | NM_152550    | NP_689763    | Q8TEC5 | SH3R2_HUMAN |                                | 2            | CCATTCTCCTTC | 0.572 |
| + | 8  | 1873 | p.P572S PPARG                 | NM_133263    | NP_573570    | Q86YN6 | PRGC2_HUMAN |                                | 0            | CACCACCGTAC  | 0.522 |
| + | 7  | 1264 |                               | NM_014228    | NP_055043    | Q99884 | SC6A7_HUMAN | Name=6; (Potential).           | 0            | CTATTCCTGGG  | 0.562 |
| + | 12 | 1417 | r_p.R234* G3BP1               | NM_005754    | NP_005745    | Q13283 | G3BP1_HUMAN |                                | 4            | AGACTCGAGCT  | 0.572 |
| + | 24 | 2689 | p.L851V CYFIP2                | NM_001037333 | NP_001032410 | Q96F07 | CYFP2_HUMAN |                                | 0            | ACTTTCTCCCC  | 0.587 |
| - | 12 | 1061 | l_uc010jkt.2_Silen            | NM_173465    | NP_775736    | Q86Y22 | CONA1_HUMAN | ntial). Collagen-like 1. Gly-t | 2            | CTCACCTGGG   | 0.607 |
| + | 3  | 1184 |                               | NM_001718    | NP_001709    | P22004 | BMP6_HUMAN  |                                | 3            | GGGATGGTAAGT | 0.507 |
| + | 26 | 2495 | ow.2_Missense_M               | NM_001040274 | NP_001035364 | Q5T4T6 | SYC2L_HUMAN |                                | 2            | GAAAATGCAAAC | 0.343 |
| - | 1  | 733  |                               | NM_030903    | NP_112165    | Q9Y3N9 | OR2W1_HUMAN | Name=6; (Potential).           | 3            | AGTAAGATGAG  | 0.428 |
| + | 25 | 3380 |                               | NM_002224    | NP_002215    | Q14573 | ITPR3_HUMAN | lasmic (Potential).            | 19           | CCGCATGTTCC  | 0.647 |
| - | 2  | 1136 |                               | NM_020737    | NP_065788    | Q9ULH4 | LRFN2_HUMAN | cellular (Potential).          | 3            | AAGCCGAAGCC  | 0.592 |
| - | 2  | 228  | vgg.1_Nonsense_n              | NM_018643    | NP_061113    | Q9NP99 | TREM1_HUMAN | (Potential). Ig-like V-type.   | 1            | CTGCCAAGCTT  | 0.478 |
| - | 7  | 1949 | rf.1_Missense_Mu              | NM_021073    | NP_066551    | P22003 | BMP5_HUMAN  |                                | 2            | TACGTGGTCAG  | 0.308 |
| + | 5  | 824  | 3psx.3_Missense_              | NM_001083535 | NP_001077004 | Q8IYX8 | CE57L_HUMAN | Potential.                     | 0            | ACATTCCTTCCA | 0.368 |
| + | 64 | 9352 | ense_Mutation_p.f             | NM_000426    | NP_000417    | P24043 | LAMA2_HUMAN | minin G-like 5.                | 10           | GTATTCGGTTCC | 0.493 |
| - | 5  | 906  |                               | NM_004666    | NP_004657    | Q95497 | VNN1_HUMAN  | YN hydrolase.                  | 3            | TTCCCTCTTCTG | 0.438 |
| + | 2  | 1381 |                               | NM_016217    | NP_057301    | Q9UBI9 | HDC_HUMAN   |                                | 0            | TCCACGTGCGC  | 0.602 |
| - | 2  | 487  | rf118_uc011egi.1_             | NM_144980    | NP_659417    | Q5T5N4 | CF118_HUMAN |                                | 0            | GACAGCCTCCA  | 0.617 |
| + | 3  | 1736 | LL2_uc011egr.1_R              | NM_031949    | NP_114155    | Q9BWW7 | TLL2_HUMAN  |                                | 3            | CTCCAGATCCC  | 0.502 |

rs143534892



|   |    |           |                    |              |              |        |             |                              |       |               |       |
|---|----|-----------|--------------------|--------------|--------------|--------|-------------|------------------------------|-------|---------------|-------|
| + | 75 | 12167     |                    | NM_003777    | NP_003768    | Q96DT5 | DYH11_HUMAN | 6 (By similarity).           | 15    | CTCCTGGAAAAT  | 0.473 |
| + | 12 | 1544      | ae.1_Missense_Mu   | NM_031414    | NP_113602    | Q9BXU1 | STK31_HUMAN |                              | 9     | TCTGATGAAATAC | 0.368 |
| + | 9  | 1723      |                    | NM_021116    | NP_066939    | Q08828 | ADCY1_HUMAN | lasmic (Potential).          | 6     | GGTACATCAGC   | 0.522 |
| - | 25 | 4047      | v.2_Missense_Mut   | NM_022748    | NP_073585    | Q68CZ2 | TENS3_HUMAN | SH2.                         | 4     | AAATCTCCAGCT  | 0.433 |
| + | 4  | 1510      |                    | NM_001159522 | NP_001152994 | A8MUV8 | ZN727_HUMAN | :2H2-type 10.                | 0     | ATAAGAGAATTC  | 0.393 |
| - | 2  | 116       |                    | NM_002991    | NP_002982    | O00175 | CCL24_HUMAN |                              | 0     | TCTTGAAAACA   | 0.557 |
| + | 14 | 2315      | AN_uc003uwl.2_F    | NM_003386    | NP_003377    | Q9Y493 | ZAN_HUMAN   | ate) (mucin-like domain). E  | 11    | AAAACCCACCA   | 0.507 |
| - | 27 | 3731      | kg.3_Nonsense_M    | NM_017954    | NP_060424    | Q86UW7 | CAPS2_HUMAN |                              | 2     | TTTCTCGAAGAA  | 0.368 |
| - | 18 | 2418      | M1D_uc010lmg.2_    | NM_030647    | NP_085150    | Q6ZMT4 | KDM7_HUMAN  |                              | 1     | AGGAGGAAGTC   | 0.318 |
| - | 15 | 1860      |                    | NM_004333    | NP_004324    | P15056 | BRAF_HUMAN  | rotein kinas_R603>I(2) p.T   | 18290 | ATTTCACTGTAC  | 0.368 |
| + | 7  | 1371      | p.H406Y ZYX_uc     | NM_001010972 | NP_001010972 | Q15942 | ZYX_HUMAN   | I zinc-binding 1.            | 0     | TGTTCCACATC   | 0.642 |
| + | 8  | 1391      | kr.2_RNA GALNTL    | NM_145292    | NP_660335    | Q7Z4T8 | GLTL5_HUMAN | ienal (Potential).           | 2     | CTGGATGAATAT  | 0.468 |
| + | 2  | 371       | .2_5'UTR ADAMD     | NM_014479    | NP_055294    | O15204 | ADEC1_HUMAN |                              | 2     | AAACTTCACATTI | 0.343 |
| - | 8  | 877       |                    | NM_144651    | NP_653252    | A1KZ92 | PXDNL_HUMAN | like C2-type 1.              | 2     | GGTTTCTTCCC   | 0.443 |
| - | 6  | 1140_1141 | i_p.G267K PCMTI    | NM_052937    | NP_443169    | Q96MG8 | PCMD1_HUMAN |                              | 0     | GAATCCCCTTGG  | 0.421 |
| + | 69 | 11265     |                    | NM_177531    | NP_803875    | Q86W11 | PKHL1_HUMAN | ellular (Potential).         | 14    | GAATTCCTAAGC  | 0.438 |
| - | 4  | 835       | x.1_Missense_Mu    | NM_198123    | NP_937756    | Q7Z407 | CSMD3_HUMAN | ar (Potential). Sushi 1.     | 63    | CGAAGCTGTAT   | 0.423 |
| + | 35 | 4881      | uc003yqy.1_Intron  | NM_001039112 | NP_001034201 | Q2WGJ9 | FR1L6_HUMAN | lasmic (Pote p.D1559Y(1)     | 11    | ACAAGGATAAGC  | 0.428 |
| - | 13 | 1991      | M135B_uc003yva     | NM_015912    | NP_056996    | Q49AJ0 | F135B_HUMAN |                              | 9     | TGTCTGAAGAG   | 0.468 |
| + | 13 | 1390      |                    | NM_139021    | NP_620590    | Q8TD08 | MK15_HUMAN  |                              | 2     | GAGGGGAGCTG   | 0.687 |
| + | 9  | 1423      | p.S466F CNTLN_     | NM_017738    | NP_060208    | Q9NXG0 | CNTLN_HUMAN |                              | 1     | GAAGTCTGAAA   | 0.338 |
| - | 1  | 3013      | uc003zrh.1_5'Flanl | NM_153809    | NP_722516    | Q8IZX4 | TAF1L_HUMAN |                              | 26    | TGTGGGATCTG   | 0.498 |
| + | 3  | 307       |                    | NM_019592    | NP_062538    | Q5VTR2 | BRE1A_HUMAN | Potential.                   | 8     | AACTTCGTGAG   | 0.453 |
| + | 1  | 70        |                    | NM_001004485 | NP_001004485 | Q8NGS4 | O13F1_HUMAN | ellular (Potential).         | 3     | AAAGTTCAGGTC  | 0.418 |
| - | 1  | 256       |                    | NM_001001956 | NP_001001956 | Q8NGT0 | O13C9_HUMAN | ellular (Potential).         | 0     | TGAAAGGAAGC   | 0.512 |
| - | 2  | 167       | llwl.1_Missense_M  | NM_001003936 | NP_001003936 | Q6A555 | TXND8_HUMAN | Thioredoxin.                 | 0     | AACAGGAAACA   | 0.353 |
| - | 8  | 2383      |                    | NM_014618    | NP_055433    | O60477 | DBC1_HUMAN  |                              | 8     | GGAGGGATCCG   | 0.562 |
| + | 1  | 22        | GOLGA2_uc004b      | NM_001040011 | NP_001035100 | Q1ZZU3 | SWI5_HUMAN  |                              | 0     | AGAGGGACCTG   | 0.642 |
| + | 61 | 5045      | uc004cff.2_Intron  | NM_000093    | NP_000084    | P20908 | CO5A1_HUMAN | le-helical region.           | 11    | CGAAGGGTGAG   | 0.592 |
| + | 26 | 3954      | p.A800V CACNA      | NM_000718    | NP_000709    | Q00975 | CAC1B_HUMAN | ismic (Potential). III.      | 6     | GCAGGCTGTGT   | 0.562 |
| - | 2  | 640       | 0ndi.2_Missense_   | NM_181332    | NP_851849    | Q8N0W4 | NLGNX_HUMAN | ellular (Potential).         | 4     | GACAACCTGGAT  | 0.502 |
| + | 13 | 1500      | p.D327N TBL1X_1    | NM_001139466 | NP_001132938 | O60907 | TBL1X_HUMAN | WD 4.                        | 1     | ATGTGGACTGG   | 0.527 |
| + | 15 | 2667      | mij.1_Missense_M   | NM_014728    | NP_055543    | Q14CM0 | FRPD4_HUMAN |                              | 13    | TAGGCGATGTG   | 0.522 |
| - | 3  | 1112_1113 | mh.1_Missense_M    | NM_001018113 | NP_001018123 | Q8NB91 | FANCB_HUMAN |                              | 1     | GATCTCCAATAG  | 0.391 |
| - | 3  | 357       | wh.1_Missense_M    | NM_001018113 | NP_001018123 | Q8NB91 | FANCB_HUMAN |                              | 1     | AAATTTCTTTTAC | 0.368 |
| - | 7  | 1013      | 39_uc004cwm.2_3    | NM_001031739 | NP_001026909 | Q96DX5 | ASB9_HUMAN  | SOCS box.                    | 0     | AGAAGGGGGCC   | 0.393 |
| - | 2  | 230       | VA9L_uc010nfp.2_   | NM_001412    | NP_001403    | P47813 | IF1AX_HUMAN |                              | 1     | ACCTCCTTTACC  | 0.308 |
| - | 27 | 3959      | _Mutation_p.E123   | NM_004006    | NP_003997    | P11532 | DMD_HUMAN   | Spectrin 8.                  | 6     | CAAGTTCCTTTI  | 0.433 |
| + | 1  | 1956      |                    | NM_001013736 | NP_001013758 | Q5HY64 | FA47C_HUMAN |                              | 3     | CTCCCAACTACT  | 0.642 |
| + | 4  | 409       | 7S ATP6AP2_uc0     | NM_005765    | NP_005756    | O75787 | REN_R_HUMAN | ellular (Potential).         | 0     | GCAGTTCCTTTT  | 0.353 |
| - | 19 | 1796      | p.A220V TEX11_u    | NM_001003811 | NP_001003811 | Q8IYF3 | TEX11_HUMAN |                              | 5     | GGGCAGCTAAA   | 0.328 |
| - | 1  | 457       | p.L147F SERPIN     | NM_000354    | NP_000345    | P05543 | THBG_HUMAN  |                              | 0     | ATCATTCAAGAA  | 0.423 |
| + | 2  | 939       | mk.2_Missense_M    | NM_194463    | NP_919445    | Q8TEB7 | RN128_HUMAN |                              | 2     | TATTCTGCTCG   | 0.363 |
| - | 24 | 4657      | p.M1537 ODZ1_u     | NM_014253    | NP_055068    | Q9UKZ4 | TEN1_HUMAN  | ellular (Potential).         | 23    | ATGTTTCATGTC  | 0.483 |
| - | 3  | 581       | p.Q173* ODZ1_u     | NM_014253    | NP_055068    | Q9UKZ4 | TEN1_HUMAN  | inal. Cytoplasmic (Potential | 23    | AGCTTGAGCCT   | 0.413 |
| + | 12 | 4813      | vc.1_Missense_M    | NM_021946    | NP_068765    | Q5H9F3 | BCORL_HUMAN |                              | 7     | CAGAGGAAAAAC  | 0.473 |
| + | 4  | 1679      | EC1_uc010nsl.1_I   | NM_005462    | NP_005453    | O60732 | MAGC1_HUMAN |                              | 4     | CTGAGAGAACT   | 0.478 |

rs147167664

rs145580328

|   |    |             |                   |              |              |        |              |                           |    |                     |       |             |
|---|----|-------------|-------------------|--------------|--------------|--------|--------------|---------------------------|----|---------------------|-------|-------------|
| + | 7  | 1354        |                   | NM_005140    | NP_005131    | Q16280 | CNGA2_HUMAN  | cellular (Potential).     | 3  | 'CTCCAACATGA'       | 0.502 |             |
| - | 4  | 470         | :011mye.1_RNA     | NM_004961    | NP_004952    | P78334 | GBRE_HUMAN   | cellular (Probable).      | 2  | 'CAAGAGACTCA'       | 0.488 |             |
| + | 4  | 363         | se_Mutation_p.T1: | NM_153478    | NP_705611    | Q6PB30 | CSAG1_HUMAN  |                           | 1  | 'cttCACTGTCCTG'     | 0.303 |             |
| + | 10 | 1079        | k.1_Missense_Mu   | NM_002631    | NP_002622    | P52209 | 6PGD_HUMAN   |                           | 1  | '\CGCTTCCAAGA'      | 0.498 |             |
| - | 11 | 2941        | p.S874L CASZ1_    | NM_001079843 | NP_001073312 | Q86V15 | CASZ1_HUMAN  |                           | 1  | TGGGCGAGATG'        | 0.662 |             |
| + | 11 | 4450        | p.1_Missense_Mul  | NM_015001    | NP_055816    | Q96T58 | MINT_HUMAN   | Potential.                | 15 | '\AGTACGTGAG'       | 0.398 |             |
| + | 3  | 379         |                   | NM_016183    | NP_057267    | Q9UKD2 | MRT4_HUMAN   |                           | 0  | CTTTTCATCTTCT       | 0.557 |             |
| + | 13 | 1157        | :R316C RPS6KA'    | NM_002953    | NP_002944    | Q15418 | KS6A1_HUMAN  | kinase C-terminal.        | 1  | 'ACCGTCGTGAG,       | 0.597 |             |
| - | 9  | 7977        | e_Mutation_p.S22  | NM_024503    | NP_078779    | Q5T1R4 | ZEP3_HUMAN   |                           | 6  | CAGGCACACG          | 0.687 | rs146175722 |
| + | 49 | 6741_6742 1 | cj .1_Missense_   | NM_015284    | NP_056099    | Q5T011 | SZT2_HUMAN   |                           | 0  | '\ATCATCCTCATG'     | 0.574 |             |
| + | 8  | 1227        | p.S325F CYP4X1    | NM_178033    | NP_828847    | Q8N118 | CP4X1_HUMAN  |                           | 2  | '\CATCTCCTGGA'      | 0.512 |             |
| - | 14 | 1723        | _p.P69S CC2D1B_   | NM_032449    | NP_115825    | Q5T0F9 | C2D1B_HUMAN  |                           | 2  | '\ACTCGGTGACT'      | 0.632 |             |
| + | 9  | 1175        | ya.3_Missense_M   | NM_001110533 | NP_001104003 | Q3ZCV2 | CA177_HUMAN  |                           | 0  | GATATCGATCCC'       | 0.592 |             |
| - | 5  | 769         | _p.V76I DHC24_    | NM_014762    | NP_055577    | Q15392 | DHC24_HUMAN  | binding PCMH-type.        | 1  | '\GGGTACGGCAT,      | 0.572 |             |
| + | 3  | 484         | _p.Q15* RAVER2_   | NM_018211    | NP_060681    | Q9HCJ3 | RAVR2_HUMAN  | RRM 1.                    | 1  | '\TAGTCCAGCTTC'     | 0.368 |             |
| - | 14 | 3346        |                   | NM_001002912 | NP_001002912 | Q5RHP9 | CA173_HUMAN  | Glu-rich.                 | 5  | '\ATCTTCCCTATT'     | 0.468 |             |
| - | 2  | 378         | _p.A35T BCAR3_    | NM_003567    | NP_003558    | O75815 | BCAR3_HUMAN  |                           | 3  | CTCAGCGAGAG'        | 0.537 |             |
| + | 8  | 727         | 53_uc010owa.1_M   | NM_001040033 | NP_001035122 | P19397 | CD53_HUMAN   | ical; (Potential).        | 0  | TATATCGGAATC/       | 0.259 |             |
| + | 5  | 279         | 'F10_uc009wir.2_  | NM_001037675 | NP_001032764 | Q3BBV1 | NBPFK_HUMAN  |                           | 0  | TCATAAGATTTAT       | 0.537 |             |
| + | 12 | 1400        | _i_RNA NBPF9_uc   | NM_001037675 | NP_001032764 | Q3BBV1 | NBPFK_HUMAN  | NBPF 2.                   | 0  | '\ATGACAATGAA'      | 0.423 |             |
| + | 76 | 9469        | 3PF10_uc010oyl.1  | NM_001039703 | NP_001034792 | A6NDV3 | A6NDV3_HUMAN |                           | 0  | '\GAAAGGGCCTG'      | 0.483 | rs78186669  |
| - | 2  | 2983        | ae.1_Missense_Ml  | NM_007113    | NP_009044    | Q07283 | TRHY_HUMAN   | A tandem repeats.[4-3.    | 5  | 'jctgcaactcctctctc' | 0.065 |             |
| - | 3  | 5721        |                   | NM_001009931 | NP_001009931 | Q86YZ3 | HORN_HUMAN   | 20                        | 3  | '\AACAGAGGAC'       | 0.557 |             |
| - | 3  | 7594        |                   | NM_002016    | NP_002007    | P20930 | FILA_HUMAN   | Ser-rich.                 | 16 | '\TTTCATCGTTACC'    | 0.587 |             |
| - | 3  | 883         |                   | NM_016190    | NP_057274    | Q9UBG3 | CRNN_HUMAN   | Gln-rich.                 | 3  | '\CGTGGGTCTCA'      | 0.612 | rs3814301   |
| - | 2  | 858         | 2_Missense_Muta   | NM_001111    | NP_001102    | P55265 | DSRAD_HUMAN  |                           | 6  | '\TGGGGTCTCTT'      | 0.527 |             |
| - | 2  | 843         | 2_Missense_Muta   | NM_001111    | NP_001102    | P55265 | DSRAD_HUMAN  |                           | 6  | '\ATGACCGTCTG'      | 0.522 |             |
| - | 11 | 1558        | 1fmd.3_Missense_  | NM_001037533 | NP_001032622 | Q3T8J9 | GON4L_HUMAN  |                           | 3  | '\CTGTCATCCATC'     | 0.468 |             |
| + | 2  | 234         | 1_Intron MAEL_uc  | NM_032858    | NP_116247    | Q96JY0 | MAEL_HUMAN   | HMG box.                  | 1  | '\AAATACGCAGAA,     | 0.527 |             |
| + | 12 | 1273        | se_Mutation_p.S37 | NM_032858    | NP_116247    | Q96JY0 | MAEL_HUMAN   |                           | 1  | GCAATTTCCAATT'      | 0.413 |             |
| - | 10 | 1553        | :2_5'UTR SLC9A1   | NM_178527    | NP_848622    | Q5TAH2 | S9A11_HUMAN  | ical; (Potential).        | 2  | '\CAGACCACGTG'      | 0.383 |             |
| + | 6  | 1174        | _p.H83R RNPEP_    | NM_020216    | NP_064601    | Q9H4A4 | AMPB_HUMAN   |                           | 1  | '\TCAGCACATGG'      | 0.577 |             |
| - | 31 | 6282        | igy.2_Missense_M  | NM_025179    | NP_079455    | O75051 | PLXA2_HUMAN  | lasmic (Potential).       | 3  | CTCCACGGCGGT'       | 0.562 | rs139305640 |
| - | 21 | 4710        |                   | NM_025179    | NP_079455    | O75051 | PLXA2_HUMAN  | lasmic (Potential).       | 3  | '\GGTACGATAGTC'     | 0.582 |             |
| - | 8  | 1274        | se_Mutation_p.P2: | NM_001017402 | NP_001017402 | Q13751 | LAMB3_HUMAN  | inin EGF-like 1.          | 6  | AGAAGGGTGCA'        | 0.602 |             |
| - | 2  | 812         | :1_5'UTR SUSD4_   | NM_017982    | NP_060452    | Q5VX71 | SUSD4_HUMAN  | xtracellular (Potential). | 0  | GCCGGGGTCCAG        | 0.507 |             |
| + | 1  | 339         |                   | NR_002141    |              |        |              |                           | 0  | '\GAGTTACCTTC'      | 0.413 |             |
| - | 1  | 492         |                   | NM_001004693 | NP_001004693 | Q8NGZ9 | O2T10_HUMAN  | cellular (Potential).     | 1  | '\AAGCTCATGGC'      | 0.512 |             |
| + | 4  | 653         |                   | NM_018706    | NP_061176    | Q96HY7 | DHTK1_HUMAN  |                           | 2  | '\GTTCTCGACAG'      | 0.522 | rs149544379 |
| + | 1  | 98          |                   | NM_032517    | NP_115906    | Q6UWQ5 | LYZL1_HUMAN  |                           | 0  | '\TAAGTGGAGCA'      | 0.512 |             |
| - | 6  | 905         | \NF248_uc001izc.2 | NM_021045    | NP_066383    | Q8NDW4 | ZN248_HUMAN  |                           | 1  | TATAGGGATAATT       | 0.323 |             |
| - | 3  | 460         | P103S SYT15_ucC   | NM_031912    | NP_114118    | Q9BQS2 | SYT15_HUMAN  | lasmic (Potential).       | 0  | '\GCAGGGGTCCC'      | 0.682 |             |
| - | 8  | 842         | p.Q222K ZWINT_L   | NM_007057    | NP_008988    | O95229 | ZWINT_HUMAN  |                           | 0  | '\AGGTTGTAGAC'      | 0.517 |             |
| + | 3  | 479         | _p.L152F CYP2C9   | NM_000771    | NP_000762    | P11712 | CP2C9_HUMAN  |                           | 6  | '\GCTGCCTTGTG'      | 0.498 |             |
| - | 9  | 1393        | P2C8_uc010qob.1   | NM_000770    | NP_000761    | P10632 | CP2C8_HUMAN  |                           | 0  | '\CAAATTCGTTTTC'    | 0.363 |             |
| - | 2  | 746         | uc010qpy.1_5'Flan | NM_006562    | NP_006553    | P52954 | LBX1_HUMAN   |                           | 0  | CTGCCCGTGGG'        | 0.672 |             |
| - | 27 | 3537        | xxq.2_Missense_M  | NM_025145    | NP_079421    | Q8NDM7 | WDR96_HUMAN  |                           | 0  | '\TTGAGGAATCA'      | 0.328 |             |

|   |    |           |                   |              |              |        |             |                             |     |                    |       |             |
|---|----|-----------|-------------------|--------------|--------------|--------|-------------|-----------------------------|-----|--------------------|-------|-------------|
| - | 2  | 464       | BE1_uc001mam.1    | NM_005330    | NP_005321    | P02100 | HBE_HUMAN   |                             | 0   | :AAAGGAAGTCA       | 0.512 |             |
| + | 1  | 342       | ense_Mutation_p.F | NM_176875    | NP_795344    | P32239 | GASR_HUMAN  | cellular (Potential).       | 8   | :GACACGAGGTG       | 0.647 |             |
| + | 1  | 164       |                   | NM_001001955 | NP_001001955 | Q8NGP0 | OR4CD_HUMAN | lasmic (Potential).         | 4   | :GAGATCCCCCA       | 0.428 |             |
| + | 4  | 943       | 9F TMEM132A_uc    | NM_024092    | NP_076997    | Q9BVC6 | TM109_HUMAN | ical; (Potential).          | 0   | :TGCTACTCCTG       | 0.677 |             |
| - | 5  | 6667      | IAK_uc001ntk.1_lr | NM_001620    | NP_001611    | Q09666 | AHNK_HUMAN  |                             | 19  | :TAAGTCCACATC      | 0.522 |             |
| - | 5  | 6640      | IAK_uc001ntk.1_lr | NM_001620    | NP_001611    | Q09666 | AHNK_HUMAN  |                             | 19  | :GGGGGCCTTGA       | 0.507 | rs1298288   |
| - | 5  | 6119      | IAK_uc001ntk.1_lr | NM_001620    | NP_001611    | Q09666 | AHNK_HUMAN  |                             | 19  | :ACATCCACATCC      | 0.502 |             |
| - | 5  | 6042      | IAK_uc001ntk.1_lr | NM_001620    | NP_001611    | Q09666 | AHNK_HUMAN  |                             | 19  | :TGCATGTCTGG       | 0.507 | rs147590412 |
| - | 9  | 1366      | 3.G330D SF1_uc0   | NM_004630    | NP_004621    | Q15637 | SF01_HUMAN  | Pro-rich.                   | 3   | :TGAGGCCACA        | 0.612 |             |
| + | 4  | 347       | i2_uc009yrq.2_5'U | NM_003952    | NP_003943    | Q9UBS0 | KS6B2_HUMAN | rotein kinase.              | 7   | :TGCAAGGCACC       | 0.393 |             |
| + | 59 | 8989_8990 | 1_intron C11orf65 | NM_000051    | NP_000042    | Q13315 | ATM_HUMAN   | PI3K/PI4K.                  | 240 | :GACTTGGTGAT       | 0.302 |             |
| + | 8  | 1115      | _p.V166A TMEM28   | NM_032780    | NP_116169    | Q86YD3 | TMM25_HUMAN | lasmic (Potential).         | 0   | :AGCAGTGAAAC       | 0.602 |             |
| + | 31 | 4404      | _p.R288* SORL1    | NM_003105    | NP_003096    | Q92673 | SORL1_HUMAN | ntial);LDL-receptor class / | 15  | :GGTACCGAGAT       | 0.597 |             |
| + | 9  | 908       | _p.R230Q ST3GAL   | NM_006278    | NP_006269    | Q11206 | SIA4C_HUMAN | ienal (Potential).          | 0   | :GATTCGGATTC       | 0.512 |             |
| - | 4  | 655       |                   | NM_020373    | NP_065106    | Q9NQ90 | ANO2_HUMAN  | lasmic (Potential).         | 7   | :TGCCCTCTCTGG      | 0.468 |             |
| - | 8  | 2008      | _p.G627E CD163_t  | NM_004244    | NP_004235    | Q86VB7 | C163A_HUMAN | :extracellular (Potential). | 8   | :GCAACTCCACAT      | 0.517 |             |
| - | 7  | 1735      | _p.G536E CD163_t  | NM_004244    | NP_004235    | Q86VB7 | C163A_HUMAN | :extracellular (Potential). | 8   | :CATTTCCCTCT       | 0.532 |             |
| - | 4  | 352       | _3_5'UTR PLCZ1_t  | NM_033123    | NP_149114    | Q86YW0 | PLCZ1_HUMAN | EF-hand.                    | 3   | :TGATTCCTCTCT      | 0.308 |             |
| - | 38 | 4585      | rfg.2_Missense_M  | NM_020297    | NP_064693    | Q60706 | ABCC9_HUMAN | otential);ABC transporter 2 | 6   | :ATATTCCTCGCT      | 0.408 |             |
| + | 4  | 1816      | rfq.2_Missense_N  | NM_138371    | NP_612380    | Q96HM7 | F113B_HUMAN | Pro-rich.                   | 5   | :CTCATCAGCCC       | 0.542 |             |
| - | 33 | 8365      |                   | NM_003482    | NP_003473    | Q14686 | MLL2_HUMAN  |                             | 41  | :TCACCGGCTGT       | 0.567 |             |
| - | 3  | 314       | _p.D85N CPM_ucf   | NM_198320    | NP_938079    | P14384 | CBPM_HUMAN  |                             | 0   | :CTCATCTCCAT       | 0.463 |             |
| + | 15 | 1807      |                   | NM_017564    | NP_060034    | Q8WWQ8 | STAB2_HUMAN | lar (Potential);FAS1 2.     | 14  | :ATTGGGACATC       | 0.388 |             |
| - | 9  | 1094      | tki.1_Missense_Mi | NM_031302    | NP_112592    | Q9H1C3 | GL8D2_HUMAN | ienal (Potential).          | 2   | :AATCACACCA        | 0.488 |             |
| + | 21 | 2563      | tlq.2_Nonsense_N  | NM_018082    | NP_060552    | Q9NW08 | RPC2_HUMAN  |                             | 2   | :TGAAACGATAC       | 0.408 |             |
| - | 65 | 11164     |                   | NM_001109662 | NP_001103132 |        |             |                             | 2   | :CAGCGGGACGT       | 0.632 |             |
| - | 31 | 3707      |                   | NM_006836    | NP_006827    | Q92616 | GCN1L_HUMAN |                             | 4   | :GGCTTCCCACT       | 0.527 |             |
| + | 6  | 885       | _p.E252G ACADS    | NM_000017    | NP_000008    | P16219 | ACADS_HUMAN |                             | 2   | :GGGGGAGCCAG       | 0.657 |             |
| + | 6  | 892       | _p.Mutation_p.P49 | NM_014938    | NP_055753    | Q9HAP2 | MLXIP_HUMAN | cytoplasmic localization.   | 2   | :CTGGCCCAAT        | 0.602 |             |
| - | 10 | 10625     | P3199S SACS_uc    | NM_014363    | NP_055178    | Q9NZJ4 | SACS_HUMAN  |                             | 12  | :CAAAGGAACAA       | 0.383 |             |
| - | 5  | 1684      | ise_Mutation_p.R4 | NM_183044    | NP_898865    | Q9Y252 | RNF6_HUMAN  |                             | 2   | :CTACGAAGAG        | 0.438 |             |
| - | 20 | 3019      | se_Mutation_p.G1  | NM_198968    | NP_945319    | Q86YF9 | DZIP1_HUMAN |                             | 2   | :GGTCCCGTCCG       | 0.552 |             |
| - | 1  | 215       | RIPK3_uc010toi.1  | NM_006871    | NP_006862    | Q9Y572 | RIPK3_HUMAN |                             | 4   | :CGCAGCATC         | 0.582 |             |
| - | 9  | 1244      | _L1_uc001wxz.2_lr | NM_004196    | NP_004187    | Q00532 | CDKL1_HUMAN |                             | 2   | :ctataataggatgaggl | 0     |             |
| + | 8  | 951       |                   | NM_003082    | NP_003073    | Q16533 | SNPC1_HUMAN |                             | 0   | :GGCATCGTCAA       | 0.358 |             |
| - | 3  | 284       | _p.G52E RDH11     | NM_016026    | NP_057110    | Q8TC12 | RDH11_HUMAN | lasmic (Potential).         | 1   | :GAGCTCCTGTC       | 0.423 |             |
| - | 1  | 1313      |                   | NR_003951    |              |        |             |                             | 0   | :CATGATCCCTGG      | 0.443 |             |
| + | 15 | 1423      | lasq.1_Missense_I | NM_020431    | NP_065164    | Q9P1W3 | TM63C_HUMAN |                             | 0   | :CCGCTTCTTTT       | 0.512 |             |
| - | 8  | 719       | XN3_uc010auh.2    | NM_004993    | NP_004984    | P54252 | ATX3_HUMAN  |                             | 0   | :AGCCATCATTT       | 0.423 | rs75188275  |
| + | 11 | 1679      |                   | NM_017437    | NP_059133    | Q9P210 | CPSF2_HUMAN |                             | 2   | :ATCAAGTATGTG      | 0.333 |             |
| - | 8  | 1231      | _1_uc001yqo.2_Mi  | NM_001519    | NP_001510    | Q92994 | TF3B_HUMAN  |                             | 4   | :GGGGTCGCACT       | 0.577 |             |
| + | 32 | 4313      | r.2_Missense_Mut  | NM_001036    | NP_001027    | Q15413 | RYR3_HUMAN  | 0.2/SPRY 3. Cytoplasmic (   | 10  | :GTCTCGTGGAT       | 0.562 |             |
| - | 10 | 1383      |                   | NM_000138    | NP_000129    | P35555 | FBN1_HUMAN  | TB 2.                       | 3   | :TTATGGACTGTG      | 0.542 |             |
| + | 3  | 406       |                   | NM_014547    | NP_055362    | Q9NYL9 | TMOD3_HUMAN |                             | 1   | :CAGGGCCATTT       | 0.453 |             |
| + | 27 | 5951      |                   | NM_001080534 | NP_001074003 | Q8NB66 | UN13C_HUMAN | MHD2.                       | 7   | :GGCTACCATCA       | 0.468 |             |
| + | 8  | 1150      |                   | NM_152450    | NP_689663    | Q8TBF8 | FA81A_HUMAN |                             | 1   | :GAAATGAAAGC       | 0.423 |             |
| - | 4  | 530       | 22_uc002anc.1_3'  | NM_000942    | NP_000933    | P23284 | PIIB_HUMAN  | e cyclophilin-type.         | 0   | :GCGCTCACCGT       | 0.572 |             |

|   |    |      |                   |              |              |        |              |    |              |       |             |
|---|----|------|-------------------|--------------|--------------|--------|--------------|----|--------------|-------|-------------|
| + | 12 | 5392 | ə_Mutation_p.S16  | NM_013227    | NP_037359    | E7EX88 | E7EX88_HUMAN | 3  | AGCCTCCACTG  | 0.537 |             |
| + | 4  | 1059 |                   | NM_001013657 | NP_001013679 | Q6ZNW5 | VTC2_HUMAN   | 0  | CCCGGGGAGCT  | 0.557 |             |
| + | 9  | 2564 | .H_uc002chj.2_5'F | NM_005632    | NP_005623    | O75808 | CAN15_HUMAN  | 2  | TCTGCGGCTCC  | 0.697 |             |
| + | 11 | 1286 | qe.1_Missense_M   | NM_001761    | NP_001752    | P41002 | CCNF_HUMAN   | 2  | TCTCCGCCTTG  | 0.527 |             |
| - | 2  | 228  | _p.R23K PRSS33    | NM_152891    | NP_690851    | Q8NF86 | PRS33_HUMAN  | 0  | TCTCCCTTCCC  | 0.617 |             |
| + | 7  | 1467 | lfy.2_Missense_Mt | NM_016524    | NP_057608    | Q9BSW7 | SYT17_HUMAN  | 1  | GTCTCTTTAAG  | 0.423 |             |
| - | 3  | 218  | _p.R30K UMOD_t    | NM_003361    | NP_003352    | P07911 | UROM_HUMAN   | 2  | ACCATCCTGTG  | 0.572 |             |
| - | 5  | 831  | SM1_uc010bwwg.1   | NM_052956    | NP_443188    | Q08AH1 | ACSM1_HUMAN  | 2  | TGCTCCGTAATT | 0.438 |             |
| + | 19 | 2153 | _uc002dji.2_Miss  | NM_144672    | NP_653273    | Q7RTW8 | OTOAN_HUMAN  | 3  | GCCCAGACCTC  | 0.607 |             |
| - | 37 | 6314 | ou.2_Missense_Mt  | NM_001520    | NP_001511    | Q12789 | TF3C1_HUMAN  | 5  | CAGCCGGAGGG  | 0.637 |             |
| - | 2  | 277  | n.2_Missense_Mu   | NM_024816    | NP_079092    | Q9H5N1 | RABE2_HUMAN  | 3  | CTGCCGCTGCA  | 0.637 |             |
| + | 3  | 1532 | C5_uc002eca.3_M   | NM_001105247 | NP_001098717 | Q96C12 | ARMC5_HUMAN  | 1  | AGCGCCGGGAT  | 0.652 |             |
| + | 4  | 2329 |                   | NM_003414    | NP_003405    | Q14586 | ZN267_HUMAN  | 4  | ACATCGGAGAA  | 0.433 | rs146914846 |
| - | 5  | 605  | VPS35_uc002eee    | NM_018206    | NP_060676    | Q96QK1 | VPS35_HUMAN  | 0  | TACTACTCTGTT | 0.358 |             |
| + | 2  | 589  | in_p.T17I MMP2_L  | NM_004530    | NP_004521    | P08253 | MMP2_HUMAN   | 11 | GAATACCATCG  | 0.527 |             |
| - | 5  | 652  | n.1_Missense_Mu   | NM_002080    | NP_002071    | P00505 | AATM_HUMAN   | 2  | TATACCATAACC | 0.473 |             |
| - | 17 | 2466 | w.3_Missense_Mu   | NM_001145667 | NP_001139139 | Q92896 | GSLG1_HUMAN  | 2  | CACACGGAGCT  | 0.632 |             |
| - | 3  | 373  | -IST6_uc002feh.1  | NM_021615    | NP_067628    | Q9GZX3 | CHST6_HUMAN  | 0  | GACGTCGGGGT  | 0.687 |             |
| - | 9  | 4401 | _Mutation_p.E131  | NM_013275    | NP_037407    | Q6UB99 | ANR11_HUMAN  | 6  | CGGCTCCTGCC  | 0.567 |             |
| - | 1  | 635  |                   | NM_002551    | NP_002542    | P47893 | OR3A2_HUMAN  | 1  | TGCTGGAGCAG  | 0.552 | rs140935076 |
| - | 4  | 1603 | _p.A350T NLRP1    | NM_033004    | NP_127497    | Q9C000 | NALP1_HUMAN  | 9  | CCAGGCTTCCCT | 0.582 |             |
| + | 30 | 4848 |                   | NM_020877    | NP_065928    | Q9P225 | DYH2_HUMAN   | 13 | TTGCGCATGTG  | 0.607 |             |
| - | 12 | 2052 | orf68_uc010cnv.2  | NM_025099    | NP_079375    | Q2NKK3 | CTC1_HUMAN   | 0  | TCTCACGCTCCC | 0.547 |             |
| - | 1  | 357  |                   | NM_152599    | NP_689812    | Q8IWD5 | MFS6L_HUMAN  | 1  | TTTTGGCCAGG  | 0.627 |             |
| - | 15 | 1701 | _Mutation_p.E525I | NM_001100112 | NP_001093582 | Q9UKX2 | MYH2_HUMAN   | 14 | GAGCTCGATGC  | 0.433 |             |
| + | 36 | 7170 | o.2_Missense_Mt   | NM_001372    | NP_001363    | Q9NYC9 | DYH9_HUMAN   | 20 | CCTAAGGAAATT | 0.493 | rs140313224 |
| - | 19 | 2408 | pp.1_Missense_M   | NM_006311    | NP_006302    | O75376 | NCOR1_HUMAN  | 5  | TCTTCTGGATTT | 0.388 |             |
| - | 1  | 111  | 10vyc.1_RNA CCC   | NM_182568    | NP_872374    |        |              | 2  | TCTCCCGCTTT  | 0.642 |             |
| - | 21 | 2828 |                   | NM_000625    | NP_000616    | P35228 | NOS2_HUMAN   | 4  | TGTCTCTCAGGC | 0.637 |             |
| - | 39 | 5913 | p.Q1461* MYO18f   | NM_078471    | NP_510880    | Q92614 | MY18A_HUMAN  | 0  | AGCCTGCAGGC  | 0.562 |             |
| + | 6  | 594  | K1_uc010wbf.1_M   | NM_020791    | NP_065842    | Q7L7X3 | TAOK1_HUMAN  | 4  | CACATGGTGCT  | 0.284 |             |
| + | 20 | 3905 | ə_Mutation_p.P10f | NM_001304    | NP_001295    | O75976 | CBPD_HUMAN   | 2  | TTTGCCAAGGG  | 0.378 |             |
| - | 11 | 4189 |                   | NM_001004334 | NP_001004334 | Q6PRD1 | GP179_HUMAN  | 3  | TATCCTCGCCTC | 0.562 |             |
| + | 5  | 751  | JAP1_uc010wgs.1   | NM_003632    | NP_003623    | P78357 | CNTP1_HUMAN  | 8  | TCGACGGCGAC  | 0.627 |             |
| - | 3  | 237  | 1_5'UTR GPATCH    | NM_001002909 | NP_001002909 | Q9UKJ3 | GPTC8_HUMAN  | 4  | CCAATCCCTGGC | 0.388 |             |
| + | 10 | 777  | fd.2_Missense_Mt  | NM_003835    | NP_003826    | O75916 | RGS9_HUMAN   | 4  | CAGCTGTTGCT  | 0.353 |             |
| - | 4  | 902  | kv.2_Missense_Mt  | NM_182511    | NP_872317    | Q8IUK8 | CBLN2_HUMAN  | 0  | TAGAGGAAACAC | 0.507 |             |
| - | 8  | 772  |                   | NM_017550    | NP_060020    | Q8N344 | MIER2_HUMAN  | 0  | AGGCCGGCCA   | 0.677 |             |
| + | 17 | 3032 | 413_uc002lvx.1_3' | NM_182973    | NP_892018    | Q72410 | TMPS9_HUMAN  | 2  | TGGGGGACCCC  | 0.622 |             |
| + | 4  | 1336 | ia.1_Missense_Mt  | NM_173480    | NP_775751    | Q68EA5 | ZNF57_HUMAN  | 3  | GAACAATGTGGC | 0.428 |             |
| + | 4  | 1371 | ia.1_Missense_Mt  | NM_173480    | NP_775751    | Q68EA5 | ZNF57_HUMAN  | 3  | TATCCGAGGTC  | 0.428 | rs149690257 |
| + | 4  | 1386 | ia.1_Missense_Mt  | NM_173480    | NP_775751    | Q68EA5 | ZNF57_HUMAN  | 3  | GAGGACGCACA  | 0.438 | rs148390269 |
| - | 5  | 533  | _p.R146G STAP2    | NM_001013841 | NP_001013863 | Q9UGK3 | STAP2_HUMAN  | 1  | TGCACGGCGCG  | 0.647 | rs143484969 |
| + | 1  | 998  | uc002mbg.1_RNA    | NM_018708    | NP_061178    | Q9BSK4 | FEM1A_HUMAN  | 0  | TCTTACGAAAGC | 0.607 |             |
| - | 32 | 5006 | w.2_Missense_Mt   | NM_002850    | NP_002841    | Q13332 | PTPRS_HUMAN  | 4  | CACCGGCACTG  | 0.642 |             |
| - | 5  | 738  | .C25A41_uc010du   | NM_173637    | NP_775908    | Q8N5S1 | S2541_HUMAN  | 0  | CGTCCGACGCA  | 0.502 |             |
| - | 40 | 4797 | 2_Missense_Muta   | NM_000064    | NP_000055    | P01024 | CO3_HUMAN    | 5  | TGTCCAACCTC  | 0.602 |             |

|   |    |           |                    |              |              |        |             |                                |      |               |       |
|---|----|-----------|--------------------|--------------|--------------|--------|-------------|--------------------------------|------|---------------|-------|
| + | 18 | 2380      | 1_p.S762F EMR1_    | NM_001974    | NP_001965    | Q14246 | EMR1_HUMAN  | lasmic (Potential).            | 5    | 3GCTTTCCAGTG  | 0.423 |
| - | 3  | 18371     |                    | NM_024690    | NP_078966    | Q8WXI7 | MUC16_HUMAN | xtracellular (Potential).      | 57   | 3GTGTTGATGTG  | 0.483 |
| - | 3  | 17651     |                    | NM_024690    | NP_078966    | Q8WXI7 | MUC16_HUMAN | xtracellular (Potential).      | 57   | CTGTCCTGGAG   | 0.498 |
| - | 1  | 8092      |                    | NM_024690    | NP_078966    | Q8WXI7 | MUC16_HUMAN | ch. Extracellular (Potential). | 57   | TACTTGGAAATT  | 0.473 |
| + | 4  | 511       | _Mutation_p.R74C   | NM_000527    | NP_000518    | P01130 | LDLR_HUMAN  | ntial). LDL-receptor class /   | 4    | 3AGTTTCGCTGC  | 0.622 |
| - | 7  | 1560      |                    | NM_138783    | NP_620138    | Q96CK0 | ZN653_HUMAN | 2H2-type 2.                    | 0    | .GCCAGGATGAG  | 0.572 |
| + | 4  | 1300      | lyf.2_Missense_Mi  | NM_145295    | NP_660338    | Q7L945 | ZN627_HUMAN | 2H2-type 9.                    | 1    | CTATGATTGTAAC | 0.413 |
| + | 4  | 1027      | ym.1_Missense_N    | NM_001136501 | NP_001129973 | Q08AG5 | ZN844_HUMAN | 2H2-type 7.                    | 0    | TCCATTCCTTTC  | 0.398 |
| + | 4  | 1651      | ym.1_Missense_M    | NM_001136501 | NP_001129973 | Q08AG5 | ZN844_HUMAN |                                | 0    | 3AAACCCATGAC  | 0.413 |
| - | 4  | 1382      |                    | NM_005815    | NP_005806    | Q9Y2A4 | ZN443_HUMAN | 2H2-type 10.                   | 1    | FGCTTGCATTCAI | 0.413 |
| - | 4  | 1409      | 709_uc002mtx.3_I   | NM_144976    | NP_659413    | Q8TBZ8 | ZN564_HUMAN | 2H2-type 11.                   | 1    | AGGCTCTACCA   | 0.433 |
| + | 2  | 281_282   | 1_p.P48S MAST1_    | NM_014975    | NP_055790    | Q9Y2H9 | MAST1_HUMAN |                                | 7    | CACTCCCCGCTC  | 0.644 |
| + | 12 | 1706      | 1zk.3_Missense_M   | NM_032433    | NP_115809    | Q96JL9 | ZN333_HUMAN | 2H2-type 6.                    | 3    | GTGCACAAGAG   | 0.512 |
| - | 6  | 1134_1135 | .C1A6_uc010xod.    | NM_005071    | NP_005062    | P48664 | EAA4_HUMAN  | ical; (Potential).             | 6    | 3CATGCCCCCAA  | 0.584 |
| - | 2  | 381       | 2nbg.3_Missense_   | NM_052890    | NP_443122    | Q96PD5 | PGRP2_HUMAN |                                | 3    | .GGCAGGGATCC  | 0.592 |
| - | 9  | 1083      | p.A196S CYP4F2     | NM_001082    | NP_001073    | P78329 | CP4F2_HUMAN |                                | 2    | 3CTTTGCAAGGT  | 0.597 |
| - | 9  | 1059      | itation_p.L188F C\ | NM_001082    | NP_001073    | P78329 | CP4F2_HUMAN |                                | 2    | .GGAGAGACCAC  | 0.602 |
| + | 3  | 428       | 1_p.R69Q RAB8A_    | NM_005370    | NP_005361    | P61006 | RAB8A_HUMAN |                                | 1    | .GGAACGGTTTC  | 0.458 |
| + | 9  | 1164      | 3B_uc002nez.1_M    | NM_015260    | NP_056075    | O75182 | SIN3B_HUMAN | th NCOR1 (By similarity).      | 2    | GGGACGGGATA   | 0.542 |
| + | 4  | 1003      |                    | NM_052852    | NP_443084    | Q96H40 | ZN486_HUMAN | 2H2-type 5.                    | 1    | AAATTCATACTG  | 0.378 |
| - | 4  | 1480      | pc.1_Missense_M    | NM_001076675 | NP_001070143 | Q68DY1 | ZN626_HUMAN | 2H2-type 10.                   | 1    | TTCTCCTATGTG  | 0.373 |
| - | 7  | 2712      |                    | NM_001080409 | NP_001073878 |        |             |                                | 2    | VTGTTTCATAAGG | 0.353 |
| - | 5  | 689       |                    | NM_001080409 | NP_001073878 |        |             |                                | 2    | TAATAAGCTTTGC | 0.388 |
| + | 2  | 354       | 1_p.R53H LSM14A    | NM_001114093 | NP_001107565 | Q8ND56 | LS14A_HUMAN |                                | 1    | CAGATCGTCCAA  | 0.428 |
| - | 13 | 1051      | oig.1_Missense_M   | NM_007181    | NP_009112    | Q92918 | M4K1_HUMAN  |                                | 8    | CCGAGGGATAG   | 0.617 |
| + | 4  | 561       | i.2_Intron CYP2B6  | NM_000767    | NP_000758    | P20813 | CP2B6_HUMAN |                                | 2    | CTTTGGAAAAC   | 0.502 |
| + | 11 | 1535      | nse_Mutation_p.P.  | NM_021913    | NP_068713    | P30530 | UFO_HUMAN   | cellular (Potential).          | 13   | CGTGGCCCTGG   | 0.567 |
| - | 7  | 803       | 3_5'Flank PHLDB3   | NM_014297    | NP_055112    | O95571 | ETHE1_HUMAN |                                | 0    | ACAGCGCATGT   | 0.522 |
| - | 1  | 44        | 10eip.1_Missense_  | NM_001102597 | NP_001096067 | Q6UY09 | CEA20_HUMAN |                                | 2    | CCAGTGGTGTG   | 0.552 |
| + | 3  | 729       | 02pbp.2_5'Flank C  | NM_012099    | NP_036231    | O15446 | RPA34_HUMAN |                                | 4    | CGTATCGAGTC   | 0.632 |
| - | 7  | 805       | bu.1_Missense_Mi   | NM_001983    | NP_001974    | P07992 | ERCC1_HUMAN |                                | 2    | AGTCCGCTGGT   | 0.627 |
| - | 5  | 2086      | ydj.1_Missense_M   | NM_001102657 | NP_001096127 | Q6ZNA1 | ZN836_HUMAN | 2H2-type 13.                   | 0    | TTATGAATTGAAA | 0.383 |
| - | 5  | 2067      | rdj.1_Missense_Mi  | NM_001102657 | NP_001096127 | Q6ZNA1 | ZN836_HUMAN | 2H2-type 13.                   | 0    | ACTGTAATTGAA  | 0.388 |
| - | 4  | 2233      | p.N652Y ZNF28_t    | NM_006969    | NP_008900    | P17035 | ZNF28_HUMAN | 2H2-type 18.                   | 1    | AAGGTTTGACAT  | 0.408 |
| - | 5  | 1439      | k.1_Intron ZNF81E  | NM_001031665 | NP_001026835 | Q0VGE8 | ZN816_HUMAN | 2H2-type 6.                    | 0    | ATTTCTGACTGAA | 0.398 |
| + | 7  | 1666      | p.L349R ZNF761_    | NM_001008401 | NP_001008401 | Q86XN6 | ZN761_HUMAN | 2H2-type 7.                    | 1    | 3TAGACTTCATAC | 0.373 |
| + | 7  | 1680      | p.K354Q ZNF761_    | NM_001008401 | NP_001008401 | Q86XN6 | ZN761_HUMAN |                                | 1    | 3GAGAGAAACCT  | 0.368 |
| + | 7  | 1911      | p.R431W ZNF761_    | NM_001008401 | NP_001008401 | Q86XN6 | ZN761_HUMAN | 2H2-type 10.                   | 1    | AGACATAGGAGA  | 0.413 |
| + | 4  | 517       | 2qid.2_Missense_M  | NM_004829    | NP_004820    | O76036 | NCTR1_HUMAN | ar (Potential). Ig-like 2.     | 2    | .GGGAAGATCCA  | 0.582 |
| + | 7  | 2143      | p.P662L NLRP2_t    | NM_017852    | NP_060322    | Q9NX02 | NALP2_HUMAN |                                | 2    | CTTCTTTCTC    | 0.453 |
| - | 6  | 1176      | p.V190E PTPRH_     | NM_002842    | NP_002833    | Q9HD43 | PTPRH_HUMAN | tential). Fibronectin type-III | 4    | TCCCCACCCACA  | 0.512 |
| - | 7  | 2854      | b.2_Missense_Mu    | NM_145007    | NP_659444    | P59045 | NAL11_HUMAN |                                | 6    | GGGCTCGTGCA   | 0.498 |
| - | 6  | 2226      |                    | NM_004304    | NP_004295    | Q9UM73 | ALK_HUMAN   | ss A. Extracellular (Potentie  | 1218 | ITGAAGGAGCTC  | 0.587 |
| - | 23 | 4009      | p.P643S DHX57_     | NM_198963    | NP_945314    | Q6P158 | DHX57_HUMAN |                                | 3    | :CAGCGGGTACA  | 0.493 |
| - | 1  | 521       |                    | NM_148962    | NP_683765    | Q8TDS5 | OXER1_HUMAN | Name=2; (Potential).           | 1    | GCGGAGGGGCA   | 0.617 |
| - | 17 | 4881      | 1N1_uc002rxe.3_N   | NM_001135659 | NP_001129131 | P58400 | NRX1B_HUMAN |                                | 2    | ACACCTTGATTG  | 0.443 |
| + | 1  | 70        | sda.2_Missense_M   | NM_203437    | NP_982261    | Q6ULP2 | AFTIN_HUMAN |                                | 2    | ATCCCCACCAC   | 0.383 |



|   |     |           |                                                       |              |              |         |             |                               |     |                |       |             |
|---|-----|-----------|-------------------------------------------------------|--------------|--------------|---------|-------------|-------------------------------|-----|----------------|-------|-------------|
| + | 1   | 1831      | z.1_Nonsense_Mu                                       | NM_144993    | NP_659430    | O43151  | TET3_HUMAN  |                               | 0   | CCCCCTGAGAGC   | 0.572 |             |
| - | 8   | 1379      | XL3_uc002smq.1                                        | NM_032603    | NP_115992    | P58215  | LOXL3_HUMAN | SRCR 4.                       | 0   | CCAGGTCCCCCT   | 0.632 |             |
| + | 5   | 494       | i_p.P137S REG3G                                       | NM_198448    | NP_940850    | Q6UW15  | REG3G_HUMAN | C-type lectin.                | 0   | AAAAATCCCTCC   | 0.517 |             |
| + | 1   | 232       | .2_intron SH2D6_1                                     | NM_198482    | NP_940884    | Q7Z4S9  | SH2D6_HUMAN | Pro-rich.                     | 1   | cccccccccccccc | 0.517 |             |
| + | 6   | 1346      | Intron TEKT4_uc0                                      | NM_144705    | NP_653306    | Q8WWW24 | TEKT4_HUMAN |                               | 3   | AGAAGTGCATGG   | 0.612 |             |
| - | 8   | 844       | IKRD23_uc002sxc                                       | NM_144994    | NP_659431    | Q86SG2  | ANR23_HUMAN |                               | 1   | CGTTCGCGACC    | 0.682 |             |
| - | 10  | 3146      |                                                       | NM_207362    | NP_997245    | Q6NV74  | CB055_HUMAN |                               | 0   | GCTTGAGATTTT   | 0.468 |             |
| + | 5   | 1047      | fiz.2_Missense_IV                                     | NM_003853    | NP_003844    | O95256  | I18RA_HUMAN | 1. Extracellular (Potential). | 5   | CTCAGCGGTAA    | 0.294 | rs139554960 |
| + | 12  | 1775      | i.2_5'UTR RGPD4                                       | NM_182588    | NP_872394    | Q7Z3J3  | RGPD4_HUMAN |                               | 2   | TAAGAGCCCAG    | 0.333 |             |
| + | 2   | 428       |                                                       | NM_002410    | NP_002401    | Q09328  | MGT5A_HUMAN | renal (Potential).            | 3   | TTTTGCAGCGC    | 0.428 |             |
| - | 6   | 1029      | s.2_Missense_ML                                       | NM_002349    | NP_002340    | O60449  | LY75_HUMAN  | Potential). C-type lectin 1.  | 0   | GCATCCATTCTT   | 0.453 |             |
| + | 3   | 901       | .1_uc002uhm.2_3'                                      | NM_178120    | NP_835221    | P56177  | DLX1_HUMAN  |                               | 0   | TATATCCCAGCT   | 0.632 |             |
| - | 275 | 72987     | 50R TTN_uc010zl                                       | NM_133378    | NP_596869    | Q8WZ42  | TITIN_HUMAN |                               | 153 | AGTTCCTTTGGC   | 0.463 |             |
| - | 266 | 59479     | _uc010zfi.1_Misse                                     | NM_133378    | NP_596869    | Q8WZ42  | TITIN_HUMAN |                               | 153 | CACAGCGCAAG    | 0.398 |             |
| - | 208 | 41052     | .1_Missense_Mut                                       | NM_133378    | NP_596869    | Q8WZ42  | TITIN_HUMAN |                               | 153 | AGGTGGATCCC    | 0.438 |             |
| - | 46  | 13024     | N_uc010zfi.1_Intr                                     | NM_133379    | NP_596870    | Q8WZ42  | TITIN_HUMAN |                               | 153 | TATTTTCCATAA   | 0.388 |             |
| + | 10  | 2478      | fr.2_Missense_Mu                                      | NM_001204    | NP_001195    | Q13873  | BMPR2_HUMAN | 3. Cytoplasmic (Potential).   | 9   | ACCATCCCCT     | 0.413 |             |
| + | 3   | 285       | 10ziu.1_5'Flank E                                     | NM_001037663 | NP_001032752 | P24534  | EF1B_HUMAN  | ST C-terminal.                | 0   | TGTCCAGCCCA    | 0.468 |             |
| + | 8   | 653       | 3_Mutation_p.G10                                      | NM_015575    | NP_056390    | Q6Y7W6  | PERQ2_HUMAN | Poly-Gly.                     | 7   | TGACAGGACGA    | 0.378 |             |
| - | 7   | 700       | iba.1_intron ADAM                                     | NM_025220    | NP_079496    | Q9BZ11  | ADA33_HUMAN | cellular (Potential).         | 4   | GCGCGCTTCTC    | 0.622 |             |
| - | 4   | 512       | p.V120M C20orf27                                      | NM_001039140 | NP_001034229 | Q9GZN8  | CT027_HUMAN |                               | 0   | CACCACGCTGA    | 0.617 | rs148088379 |
| - | 7   | 619       | 02wmd.3_Translat                                      | NM_019593    | NP_062539    | Q9NPB8  | GPCP1_HUMAN |                               | 0   | CAAAACGTAATC   | 0.308 |             |
| + | 25  | 2345      | p.E749K PLCB4_u                                       | NM_182797    | NP_877949    | Q15147  | PLCB4_HUMAN | C2. p.E737K(1)                | 15  | GTAAGGAATTC    | 0.408 |             |
| - | 3   | 1149      | se_Mutation_p.F8                                      | NM_018848    | NP_061336    | Q9NPJ1  | MKKS_HUMAN  |                               | 0   | ACTGAAGCTTG    | 0.423 |             |
| + | 4   | 1716      | zrf.1_Missense_IV                                     | NM_014962    | NP_055777    | Q9Y2F9  | BTBD3_HUMAN |                               | 3   | TTCCCGTATGG    | 0.493 |             |
| - | 10  | 1999      |                                                       | NM_016649    | NP_057733    | Q9H501  | ESF1_HUMAN  | Lys-rich.                     | 1   | CCAAGGGGTCA    | 0.284 |             |
| + | 2   | 63        | tj.1_RNA FRG1B_uc010gdr.1_RNA FRG1B_uc010ztk.1_intron |              |              |         |             |                               | 0   | GAATCGCCCTG    | 0.353 | rs7266938   |
| - | 2   | 1748      | _Missense_Mutatio                                     | NM_000557    | NP_000548    | P43026  | GDF5_HUMAN  |                               | 0   | GAAGAGGATGC    | 0.567 |             |
| + | 16  | 2750      |                                                       | NM_016436    | NP_057520    | Q9BV10  | PHF20_HUMAN |                               | 1   | CTTTCCCGCC     | 0.607 |             |
| - | 4   | 635       | s.1_Missense_Mut                                      | NM_004613    | NP_004604    | P21980  | TGM2_HUMAN  |                               | 3   | TCCAAGGTATGT   | 0.582 |             |
| + | 2   | 464       |                                                       | NM_030777    | NP_110404    | O95528  | GTR10_HUMAN | Name=4; (Potential).          | 1   | TCTACGTGCAC    | 0.642 |             |
| - | 15  | 2491      | ND8_uc002xtb.1                                        | NM_012408    | NP_036540    | Q9ULU4  | PKCB1_HUMAN |                               | 5   | GTGGAGTTTTA    | 0.557 |             |
| + | 18  | 3650      | m.2_Missense_Mu                                       | NM_181659    | NP_858045    | Q9Y6Q9  | NCOA3_HUMAN | tyltransferase.               | 5   | AATTTTCTCTCC   | 0.517 |             |
| + | 13  | 1298      | 283S ARFGAP1_u                                        | NM_018209    | NP_060679    | Q8N6T3  | ARFG1_HUMAN |                               | 1   | CCGTGCCCACT    | 0.697 |             |
| - | 5   | 849       | d.2_Nonsense_Mu                                       | NM_006806    | NP_006797    | Q14201  | BTG3_HUMAN  |                               | 0   | CCCTCATACAT    | 0.413 |             |
| + | 3   | 1528      | f.1_Missense_Mu                                       | NM_053277    | NP_444507    | Q96NY7  | CLIC6_HUMAN |                               | 2   | CAGTGGACCTG    | 0.378 |             |
| + | 3   | 397       | X2_uc011aer.1_Rf                                      | NM_002463    | NP_002454    | P20592  | MX2_HUMAN   |                               | 2   | GGTGCGCCCT     | 0.637 |             |
| + | 19  | 1796      | bx.2_Missense_M                                       | NM_002606    | NP_002597    | O76083  | PDE9A_HUMAN |                               | 2   | GAAGTCCAGAG    | 0.502 |             |
| - | 1   | 321       |                                                       | NM_014406    | NP_055221    | Q96SF2  | TCPQM_HUMAN |                               | 1   | GCTCTCCCTTG    | 0.657 |             |
| + | 16  | 3211      | R2_uc002zml.2_A                                       | NM_031413    | NP_113601    | Q9BXF3  | CECR2_HUMAN |                               | 2   | GGGGCGCTCTA    | 0.622 |             |
| - | 3   | 1594      | ue.2_Missense_M                                       | NM_004173    | NP_004164    | O43246  | CTR4_HUMAN  | ical; (Potential).            | 2   | TGTAACCCAG     | 0.562 |             |
| + | 43  | 7629      | 18B_uc011aka.1                                        | NM_032608    | NP_115997    | Q8IUJ5  | MY18B_HUMAN |                               | 12  | TGATCAGCCA     | 0.527 |             |
| - | 1   | 1710      | nse_Mutation_p.F                                      | NM_014323    | NP_055138    | Q9HBE1  | PATZ1_HUMAN |                               | 2   | TGGTCCGGCTC    | 0.597 |             |
| - | 18  | 2529      | iaqt.1_Nonsense_I                                     | NM_153609    | NP_705837    | Q8IU80  | TMPS6_HUMAN | . Extracellular (Potential).  | 6   | TGGATCCAGCT    | 0.647 |             |
| + | 10  | 1879      | aye.2_Missense_I                                      | NM_021096    | NP_066919    | Q9P0X4  | CAC11_HUMAN | plasmic (Potential).          | 2   | TGTGGCGGGAG    | 0.542 |             |
| + | 5   | 2054_2055 | nse_Mutation_p.F                                      | NM_001162501 | NP_001155973 | Q9UPQ9  | TNR6B_HUMAN |                               | 0   | GACCCAGGC      | 0.52  |             |
| + | 7   | 789       | k.1_Missense_Mut                                      | NM_152613    | NP_689826    | Q6ICG8  | WBP2L_HUMAN | eat of Y-G-X-P-P-X-G.[9.]C    | 2   | TCTCGGATATGC   | 0.612 |             |

|   |    |           |                     |              |              |        |             |                            |    |               |       |             |
|---|----|-----------|---------------------|--------------|--------------|--------|-------------|----------------------------|----|---------------|-------|-------------|
| + | 11 | 1444      | e_2_Missense_Mu     | NM_014346    | NP_055161    | Q8WUA7 | TB22A_HUMAN | ab-GAP TBC.                | 1  | CCATCCGCCTGT  | 0.637 |             |
| + | 5  | 619       | AC_uc011aya.1_l     | NM_003149    | NP_003140    | Q99469 | STAC_HUMAN  |                            | 4  | GTGGCAATAAG   | 0.582 |             |
| + | 11 | 1201      | a_1_Missense_Mu     | NM_003149    | NP_003140    | Q99469 | STAC_HUMAN  |                            | 4  | TCAGTGGAAAA   | 0.443 |             |
| + | 10 | 1763_1764 | e_Mutation_p.S57    | NM_004803    | NP_004794    | Q9Y267 | S22AE_HUMAN | lasmic (Potential).        | 0  | CCACTCCTCAC   | 0.619 |             |
| + | 6  | 777_778   | se_Mutation_p.G6    | NM_145755    | NP_665698    | Q8NDW8 | TT21A_HUMAN | TPR 4.                     | 1  | CCCTGGAGGTC   | 0.559 |             |
| - | 1  | 836       | mg_2_Intron CYP8    | NM_004391    | NP_004382    | Q9UNU6 | CP8B1_HUMAN |                            | 2  | GAAGCGAAAGA   | 0.512 |             |
| + | 1  | 642       | wh_2_Missense_M     | NM_177939    | NP_808808    | Q9NXG6 | P4HTM_HUMAN | lenal (Potential).         | 2  | ACACCGTGCCC   | 0.687 |             |
| + | 4  | 309       | 1_5'Flank RNF123    | NM_022064    | NP_071347    | Q5XPI4 | RN123_HUMAN | 330.2/SPRY.                | 7  | AGGTGGACAAT   | 0.582 |             |
| - | 17 | 3501_3502 | AGI1_uc003dmp.2     | NM_001033057 | NP_001028229 | Q96QZ7 | MAGI1_HUMAN | raction with FCHSD2.       | 6  | CTTCGGGCCTC   | 0.569 |             |
| + | 5  | 1062      | pn_2_Missense_IV    | NM_145037    | NP_659474    | Q969Y0 | FA55C_HUMAN |                            | 3  | ITGGAGACTACC  | 0.498 |             |
| - | 9  | 1426      |                     | NM_199420    | NP_955452    | O75417 | DPOLQ_HUMAN | case C-terminal.           | 11 | TTGACGAAAGG   | 0.388 | rs140193287 |
| + | 34 | 5232      | ehi_2_Missense_M    | NM_001024660 | NP_001019831 | O60229 | KALRN_HUMAN | SH3 1.                     | 6  | GGTCCCCAGCA   | 0.652 |             |
| - | 4  | 798       | 11blv.1_Intron SLC  | NM_005630    | NP_005621    | Q92959 | SO2A1_HUMAN | Name=4; (Potential).       | 1  | GGGCAACCACC   | 0.592 |             |
| - | 5  | 1014      | 3_Mutation_p.H19    | NM_033169    | NP_149359    | O75752 | B3GL1_HUMAN | lenal (Potential).         | 1  | TGAGTGGTTTAC  | 0.348 |             |
| - | 10 | 1546      | 49_uc011bpd.1_l     | NM_178824    | NP_849146    | Q8IV35 | WDR49_HUMAN | WD 6.                      | 3  | AAATTCAGCCA   | 0.383 |             |
| - | 5  | 1030      | ow.1_Missense_Mt    | NM_001146276 | NP_001139748 | Q6PIU2 | NCEH1_HUMAN | lenal (Potential).         | 0  | GTTGCCTTTGA   | 0.458 |             |
| - | 6  | 798       | O_uc003fop.2_Int    | NM_000460    | NP_000451    | P40225 | TPO_HUMAN   | p.L195P(1)                 | 1  | TGGGAGCTCGT   | 0.567 |             |
| - | 26 | 2984      | 13A4_uc010hzi.2_    | NM_032279    | NP_115655    | Q4VNC1 | AT134_HUMAN | ellular (Potential).       | 2  | TGAAAGGCACC   | 0.398 |             |
| - | 2  | 7089      | C4_uc003fvp.2_Inl   | NM_018406    | NP_060876    | Q99102 | MUC4_HUMAN  |                            | 0  | TGACAGGAAGA   | 0.597 |             |
| - | 2  | 6974      | C4_uc003fvp.2_Inl   | NM_018406    | NP_060876    | Q99102 | MUC4_HUMAN  |                            | 0  | TGACCTGTGG    | 0.577 |             |
| - | 2  | 5443      | C4_uc003fvp.2_Inl   | NM_018406    | NP_060876    | Q99102 | MUC4_HUMAN  |                            | 0  | TGGCGTGACC    | 0.587 | rs76596008  |
| - | 8  | 1549      | GC1A_uc011bxp.      | NM_013261    | NP_037393    | Q9UBK2 | PRGC1_HUMAN |                            | 8  | TGCTTCGTCGT   | 0.473 |             |
| + | 1  | 195       | idf.2_Missense_M    | NM_012108    | NP_036240    | Q9ULZ2 | STAP1_HUMAN | PH.                        | 0  | GTGAGGATACC   | 0.378 |             |
| - | 32 | 7607      | hgq.2_Missense_l    | NM_032217    | NP_115593    | O75179 | ANR17_HUMAN |                            | 10 | CTTGATGTTGTC  | 0.463 |             |
| + | 6  | 816_817   | p.A255V AIMP1_u     | NM_001142415 | NP_001135887 | Q12904 | AIMP1_HUMAN |                            | 0  | TGATGCTTCCC   | 0.366 |             |
| + | 3  | 1147      |                     | NM_001977    | NP_001968    | Q07075 | AMPE_HUMAN  | ellular (Potential).       | 5  | TGGATGATAAAT  | 0.353 |             |
| + | 27 | 4540      | ins.1_Missense_l    | NM_015312    | NP_056127    | Q2LD37 | K1109_HUMAN |                            | 12 | AACCCGTGATG   | 0.393 |             |
| - | 2  | 1085      | ie_Mutation_p.L34   | NM_178835    | NP_849157    | Q17R98 | ZN827_HUMAN | Pro-rich.                  | 0  | AATTCCAGGGAT  | 0.333 |             |
| + | 2  | 907       | e_Mutation_p.G87    | NM_012464    | NP_036596    | O43897 | TLL1_HUMAN  |                            | 7  | CTTTGGAAACC   | 0.333 |             |
| + | 9  | 1354      |                     | NM_000128    | NP_000119    | P03951 | FA11_HUMAN  | Apple 4.                   | 0  | GCAACGAAGGG   | 0.502 |             |
| + | 17 | 2770      | 3jdk.1_Missense_l   | NM_139056    | NP_620687    | Q8TE57 | ATS16_HUMAN | rSP type-1 2.              | 8  | TCGTGCGCTCT   | 0.637 |             |
| + | 34 | 5027      | p.P1125R SPEF2      | NM_024867    | NP_079143    | Q9C093 | SPEF2_HUMAN |                            | 4  | CCACCAGACA    | 0.463 |             |
| - | 5  | 939       |                     | NM_173489    | NP_775760    | Q7Z745 | HTRB2_HUMAN |                            | 8  | AGAAAGTCCCC   | 0.453 |             |
| + | 1  | 2052      | j.1_Intron SNX18    | NM_052870    | NP_443102    | Q96RF0 | SNX18_HUMAN | BAR.                       | 0  | AGTACCTTTGAT  | 0.413 |             |
| + | 6  | 1752      | l3jrj.3_Splice_Site | NM_022913    | NP_075064    | Q86WP2 | GPBP1_HUMAN |                            | 2  | TGTGGGTAAGT   | 0.328 |             |
| + | 4  | 599       | L21_uc003lbc.2_f    | NM_012159    | NP_036291    | Q9UKT6 | FXL21_HUMAN | LRR 2.                     | 1  | ATGATCCTTCATT | 0.358 |             |
| + | 1  | 1678      | DHA1_uc003lgz.2     | NM_018900    | NP_061723    | Q9Y5I3 | PCDA1_HUMAN | Extracellular (Potential). | 1  | AGAACGACAAC   | 0.672 |             |
| + | 3  | 1945      |                     | NM_019119    | NP_061992    | Q9Y5E1 | PCDB9_HUMAN | r (Potential). Cadherin 6. | 0  | ATGGCGAGCCT   | 0.711 |             |
| + | 1  | 397       | B12_uc011dak.1_     | NM_018932    | NP_061755    | Q9Y5F1 | PCDBC_HUMAN | r (Potential). Cadherin 1. | 3  | TCTAATGATAACA | 0.527 |             |
| + | 1  | 2216      | DHGB2_uc003ljs.     | NM_003736    | NP_003727    | Q9UN71 | PCDGG_HUMAN | lasmic (Potential).        | 0  | TCCCCCAACT    | 0.517 |             |
| - | 5  | 1216      | 1_5'UTR GRM6_uc     | NM_000843    | NP_000834    | O15303 | GRM6_HUMAN  | ellular (Potential).       | 8  | GGGATCGAGTC   | 0.532 |             |
| + | 10 | 1055      | ie_Mutation_p.W9    | NM_001040274 | NP_001035364 | Q5T4T6 | SYC2L_HUMAN |                            | 2  | TAAATGGTTTGAT | 0.368 |             |
| + | 4  | 740       | p.E136K EDN1_u      | NM_001955    | NP_001946    | P05305 | EDN1_HUMAN  |                            | 1  | ATTATGGAGAAAC | 0.353 |             |
| + | 5  | 762       | 2_3'UTR MOG_uc      | NM_206809    | NP_996532    | Q16653 | MOG_HUMAN   | lasmic (Potential).        | 1  | CCACCGGACTT   | 0.443 |             |
| + | 18 | 2370      | _uc011dna.1_Miss    | NM_020442    | NP_065175    | Q5ST30 | SYVM_HUMAN  |                            | 4  | CAGATCCTGATC  | 0.557 |             |
| - | 6  | 874       | awq.2_5'Flank CLI   | NM_001288    | NP_001279    | O00299 | CLIC1_HUMAN | ST C-terminal.             | 2  | TCCCCGGAAGG   | 0.577 |             |
| + | 34 | 4792      |                     | NM_002224    | NP_002215    | Q14573 | ITPR3_HUMAN | lasmic (Pote p.C1525F(1)   | 19 | AGGCCTGCATC   | 0.652 |             |

|   |    |       |                   |              |              |        |             |                              |       |                  |       |             |
|---|----|-------|-------------------|--------------|--------------|--------|-------------|------------------------------|-------|------------------|-------|-------------|
| - | 4  | 1063  | ojs.2_Missense_IV | NM_024294    | NP_077270    | Q9H6K1 | CF106_HUMAN |                              | 3     | GTGCTGGGAGAC     | 0.502 |             |
| + | 14 | 2891  | F1BP1_uc010jvn.2  | NM_017754    | NP_060224    | Q6BDS2 | URFB1_HUMAN |                              | 3     | GCATCCTGCACC     | 0.512 |             |
| - | 5  | 1502  |                   | NM_003740    | NP_003731    | O95279 | KCNK5_HUMAN |                              | 2     | AGGGGCCCGTG      | 0.617 |             |
| - | 5  | 642   |                   | NM_002630    | NP_002621    | P20142 | PEPC_HUMAN  |                              | 0     | ACCATGCCCTGC     | 0.627 |             |
| + | 2  | 162   | u.2_Missense_Mur  | NM_201521    | NP_958929    | Q9NSK0 | KLC4_HUMAN  |                              | 4     | GGCTGGTCAGC      | 0.652 |             |
| - | 4  | 1663  | 318_uc003ouw.2    | NM_014345    | NP_055160    | Q5VUA4 | ZN318_HUMAN |                              | 7     | GTCGGGAAAGC      | 0.488 |             |
| - | 7  | 1333  | rp.1_Missense_Mt  | NM_014611    | NP_055426    | Q9NU22 | MDN1_HUMAN  |                              | 10    | AGGGGGCATAG      | 0.463 |             |
| - | 1  | 307   |                   | NM_175747    | NP_786923    | Q7RTU3 | OLIG3_HUMAN | Poly-His.                    | 0     | ggtggtggcgtggtgg | 0.493 |             |
| - | 2  | 517   | _p.P118L GNA12    | NM_007353    | NP_031379    | Q03113 | GNA12_HUMAN |                              | 1     | GCCAAGGAATG      | 0.483 |             |
| - | 3  | 573   |                   | NM_001004320 | NP_001004320 | Q6ZNB7 | ALKMO_HUMAN | istidine box-1.              | 0     | ATGAGCCATACC     | 0.313 |             |
| - | 2  | 328   |                   | NM_022150    | NP_071433    | Q9HCQ7 | RFRP_HUMAN  |                              | 1     | CGTTCCTCCCA      | 0.448 |             |
| - | 2  | 1326  | hr.2_Missense_Mu  | NM_002192    | NP_002183    | P08476 | INHBA_HUMAN |                              | 6     | GTGAGGACCCG      | 0.567 |             |
| + | 3  | 1320  |                   | NM_198570    | NP_940972    | Q2TAL6 | VWC2_HUMAN  | VWFC 2.                      | 0     | GTGTCCCCAGA      | 0.567 |             |
| + | 2  | 114   | _p.V39M MRPS17    | NM_182633    | NP_872439    | Q8N859 | ZN713_HUMAN | KRAB.                        | 2     | GTGGCCGTGGAC     | 0.517 |             |
| - | 4  | 1195  | zr.2_Missense_Mt  | NM_178558    | NP_848653    | Q8NEM1 | ZN680_HUMAN | C2H2-type 6.                 | 1     | ATTTTCTTATGTT    | 0.348 |             |
| - | 4  | 1188  | zr.2_Missense_Mt  | NM_178558    | NP_848653    | Q8NEM1 | ZN680_HUMAN | C2H2-type 6.                 | 1     | TATGTTTAGTAAC    | 0.348 |             |
| + | 4  | 533   | turn.2_RNA ZNF4   | NM_145115    | NP_660090    | Q6NSZ9 | ZN498_HUMAN | SCAN box.                    | 2     | TCGTCCGTGGC      | 0.612 |             |
| + | 3  | 1893  | C17_uc010lho.1_F  | NM_001040105 | NP_001035194 | Q685J3 | MUC17_HUMAN | X approximate tandem rep     | 27    | CAACTGCTGAAC     | 0.483 |             |
| + | 3  | 7480  | C17_uc010lho.1_F  | NM_001040105 | NP_001035194 | Q685J3 | MUC17_HUMAN | ch.159 X approximate tand    | 27    | CCACCTTTCCA      | 0.522 |             |
| + | 3  | 9432  | C17_uc010lho.1_F  | NM_001040105 | NP_001035194 | Q685J3 | MUC17_HUMAN | ch.150,159 X approximate t   | 27    | CTTTCAACAAC      | 0.498 |             |
| + | 3  | 9658  | C17_uc010lho.1_F  | NM_001040105 | NP_001035194 | Q685J3 | MUC17_HUMAN | ch.159 X approximate tand    | 27    | AGCCACTTCAT      | 0.507 |             |
| + | 5  | 1788  | ET_uc011kng.1_M   | NM_000245    | NP_000236    | P08581 | MET_HUMAN   | cellular (Potential).        | 159   | CCCACCTTTG       | 0.532 |             |
| - | 15 | 1860  |                   | NM_004333    | NP_004324    | P15056 | BRAF_HUMAN  | rotein kinase_R603>1(2) p.T  | 18290 | ATTTCACTGTAC     | 0.368 |             |
| - | 52 | 13651 | α.2_Nonsense_Mt   | NM_170606    | NP_733751    | Q8NEZ4 | MLL3_HUMAN  |                              | 63    | GCATCGAAATC1     | 0.438 |             |
| - | 42 | 6736  | p.P1508S CSMD1    | NM_033225    | NP_150094    | Q96PZ7 | CSMD1_HUMAN | ar (Potential). Sushi 12.    | 25    | CCCAGGATAAC      | 0.448 |             |
| - | 5  | 4018  |                   | NM_001080826 | NP_001074295 | Q86YV5 | SG223_HUMAN |                              | 0     | CTCCTCCGAGG      | 0.677 |             |
| - | 3  | 1897  |                   | NM_173683    | NP_775954    | Q5GH73 | XKR6_HUMAN  |                              | 2     | GATATCGAATGCC    | 0.458 |             |
| + | 1  | 348   |                   | NM_054028    | NP_473369    | Q96KT7 | AMCL2_HUMAN | . Helical; (Potential).      | 0     | CTGTGCGATGCC     | 0.637 |             |
| + | 9  | 1530  | kye.1_Missense_IV | NM_001008539 | NP_001008539 | P52569 | CTR2_HUMAN  | lasmic (Potential).          | 3     | GGGATCGTCTC      | 0.507 |             |
| - | 3  | 617   | _p.T55R REEP4_L   | NM_025232    | NP_079508    | Q9H6H4 | REEP4_HUMAN | ical; (Potential).           | 1     | ATGTCTGTAACG     | 0.597 |             |
| + | 5  | 617   | _p.E54K ADAMDI    | NM_014479    | NP_055294    | O15204 | ADEC1_HUMAN |                              | 2     | CTAAATGAAAAG     | 0.289 |             |
| + | 6  | 520   | CK5_uc003xef.2_I  | NM_024940    | NP_079216    | Q9H7D0 | DOCK5_HUMAN |                              | 3     | GTGGCGGTCCC      | 0.483 |             |
| + | 2  | 689   | p.E58K NRG1_uc    | NM_013964    | NP_039258    | Q02297 | NRG1_HUMAN  | Potential). Ig-like C2-type. | 0     | GGTGTGAAACC      | 0.383 |             |
| - | 9  | 808   | AM2_uc011lck.1_M  | NM_001464    | NP_001455    | Q99965 | ADAM2_HUMAN | potential). Peptidase M12B.  | 2     | ATAACTCATTAGC    | 0.284 |             |
| - | 6  | 984   | xrf.3_Missense_M  | NM_014781    | NP_055596    | Q8TDY2 | RBCC1_HUMAN |                              | 11    | ATGTTCATCATG     | 0.353 |             |
| + | 12 | 1447  | _p.E474K PREX2    | NM_024870    | NP_079146    | Q70Z35 | PREX2_HUMAN |                              | 17    | GAAATGAGATG      | 0.348 |             |
| + | 9  | 1099  | ar.2_Missense_Mu  | NM_004133    | NP_004124    | Q14541 | HNF4G_HUMAN |                              | 1     | ATGATCGGCAG      | 0.453 |             |
| + | 27 | 4097  | p.E1275K RIMS2    | NM_014677    | NP_055492    | Q9UQ26 | RIMS2_HUMAN | C2 2.                        | 15    | CTTTCGAAGAGA     | 0.368 |             |
| - | 1  | 535   |                   | NM_015193    | NP_056008    | Q7LC44 | ARC_HUMAN   |                              | 1     | CATCTCGCGCT      | 0.692 |             |
| - | 2  | 310   |                   | NM_015117    | NP_055932    | Q8IXZ2 | ZC3H3_HUMAN |                              | 1     | GCAACGGCCGC      | 0.642 |             |
| - | 4  | 1087  |                   | NM_001145196 | NP_001138668 | Q5VVP1 | F75A6_HUMAN |                              | 0     | GTCATTTGATTT     | 0.428 |             |
| - | 4  | 1083  |                   | NM_001145196 | NP_001138668 | Q5VVP1 | F75A6_HUMAN |                              | 0     | TTTGATTTGTAA     | 0.418 |             |
| + | 4  | 1135  | itk.2_Missense_Mt | NM_006648    | NP_006639    | Q9Y3S1 | WNK2_HUMAN  | rotein kinase.               | 12    | GTGACGTCTAT      | 0.602 |             |
| + | 30 | 3580  | _p.S121T KIAA15   | NM_020893    | NP_065944    |        |             |                              | 7     | AAGAGAGTTTAT     | 0.264 |             |
| + | 1  | 698   |                   | NM_001004483 | NP_001004483 | Q8NGS7 | O13C8_HUMAN | lasmic (Pote p.G233E(1)      | 2     | TGAAGGAAAAC      | 0.418 | rs150858980 |
| - | 1  | 115   |                   | NM_001001956 | NP_001001956 | Q8NGT0 | O13C9_HUMAN | Name=1; (Potential).         | 0     | CAGAAGGATGA      | 0.433 | rs150686997 |
| - | 2  | 696   | f.2_Missense_Mut  | NM_002160    | NP_002151    | P24821 | TENA_HUMAN  |                              | 7     | ACAGCCACAGG      | 0.587 |             |

|   |    |                             |                   |              |              |            |              |                             |      |               |       |                    |
|---|----|-----------------------------|-------------------|--------------|--------------|------------|--------------|-----------------------------|------|---------------|-------|--------------------|
| + | 17 | 2283                        | nvs.1_Missense_I  | NM_000177    | NP_000168    | P06396     | GELS_HUMAN   | , Ca-sensitive (Potential). | 3    | TCGGCGGACGC   | 0.572 | rs141510612        |
| + | 11 | 1890                        | uu.2_Missense_I   | NM_005094    | NP_005085    | Q6P1M0     | S27A4_HUMAN  |                             | 0    | TGGCCGTGTAT   | 0.642 |                    |
| - | 1  | 446                         |                   | NM_033387    | NP_203745    | Q5JUQ0     | FA78A_HUMAN  |                             | 1    | CCCTTCCCGGA   | 0.572 |                    |
| - | 2  | 769                         | 1mdf.1_Missense_  | NM_020385    | NP_065118    | Q9GZR2     | REXO4_HUMAN  |                             | 0    | ACTCGGTGGGTC  | 0.542 |                    |
| + | 5  | 567                         | IA1_uc011mjd.1_I  | NM_000284    | NP_000275    | P08559     | ODPA_HUMAN   |                             | 1    | AGGACGAAAAG   | 0.488 |                    |
| + | 2  | 373                         | _p.R59H MBTPS2    | NM_206923    | NP_996806    | O15391     | TY22_HUMAN   |                             | 2    | GCAATCGTGCC   | 0.403 |                    |
| - | 5  | 723                         | _Mutation_p.S189  | NM_018684    | NP_061154    | Q9NQZ6     | ZC4H2_HUMAN  |                             | 1    | TCCGGGACCGA   | 0.488 |                    |
| + | 6  | 250                         | ya.2_Missense_Mt  | NM_004312    | NP_004303    | P36575     | ARRC_HUMAN   |                             | 4    | TGGCCGTGATG   | 0.542 |                    |
| - | 2  | 1104                        |                   | NM_152694    | NP_689907    | Q8N8U3     | ZCHC5_HUMAN  |                             | 1    | AGTGGGATACA   | 0.507 |                    |
| + | 5  | 1226                        | _V142G GPRASP     | NM_014710    | NP_055525    | Q5JY77     | GASP1_HUMAN  |                             | 2    | AACTGGTTAATAC | 0.458 |                    |
| - | 5  | 820                         | 4ffl.2_Missense_M | NM_001011543 | NP_001011543 | P43363     | MAGAA_HUMAN  | MAGE.                       | 0    | AGTACACCTTTTC | 0.458 |                    |
| + | 2  | 868                         | 3202-2 MI0014253  | NM_003492    | NP_003483    | Q14656     | TM187_HUMAN  |                             | 0    | TGCGCCGGGTG   | 0.687 |                    |
| + | 10 | 1079                        | k.1_Missense_Mu   | NM_002631    | NP_002622    | P52209     | 6PGD_HUMAN   |                             | 1    | ACGCTTCCAAGA  | 0.498 |                    |
| - | 11 | 2941                        | _p.S874L CASZ1_U  | NM_001079843 | NP_001073312 | Q86V15     | CASZ1_HUMAN  |                             | 1    | TGGGCGAGATG   | 0.662 |                    |
| - | 6  | 853                         | 'F1_uc010oce.1_Ir | NM_017940    | NP_060410    | Q3BBV0     | NBPF1_HUMAN  |                             | 0    | ACTTACTGTTGT  | 0.418 |                    |
| + | 3  | 379                         |                   | NM_016183    | NP_057267    | Q9UKD2     | MRT4_HUMAN   |                             | 0    | CTTTTCATCTTCT | 0.557 |                    |
| + | 13 | 1157                        | _R316C RPS6KA     | NM_002953    | NP_002944    | Q15418     | KS6A1_HUMAN  | kinase C-terminal.          | 1    | ACCGTCGTGAG   | 0.597 |                    |
| + | 49 | 6741_6742 1cjl.1_Missense_I | NM_015284         | NP_056099    | Q5T011       | SZT2_HUMAN |              |                             | 0    | TATCATCTCATG  | 0.574 |                    |
| + | 8  | 1227                        | _p.S325F CYP4X1   | NM_178033    | NP_828847    | Q8N118     | CP4X1_HUMAN  |                             | 2    | TATCTCTCTGGA  | 0.512 |                    |
| - | 14 | 1723                        | _p.P69S CC2D1B    | NM_032449    | NP_115825    | Q5T0F9     | C2D1B_HUMAN  |                             | 2    | TACTCGGTGACT  | 0.632 |                    |
| + | 9  | 1175                        | ya.3_Missense_I   | NM_001110533 | NP_001104003 | Q3ZCV2     | CA177_HUMAN  |                             | 0    | GATATCGATCCC  | 0.592 |                    |
| + | 3  | 484                         | _p.Q15* RAVER2    | NM_018211    | NP_060681    | Q9HCJ3     | RAVR2_HUMAN  | RRM 1.                      | 1    | TAGTCCAGCTTC  | 0.368 |                    |
| - | 14 | 3346                        |                   | NM_001002912 | NP_001002912 | Q5RHP9     | CA173_HUMAN  | Glu-rich.                   | 5    | TATCTTCCCTATT | 0.468 |                    |
| + | 8  | 727                         | 53_uc010owa.1_M   | NM_001040033 | NP_001035122 | P19397     | CD53_HUMAN   | ical; (Potential).          | 0    | TATATCGGAATC  | 0.259 |                    |
| - | 3  | 435_436                     |                   | NM_002524    | NP_002515    | P01111     | RASN_HUMAN   | GTP. i) p.Q61P(21)          | 2607 | CTTCTTGCCAG   | 0.46  | i54290;rs121913254 |
| + | 3  | 183                         | oyd.1_Intron NBPF | NM_001037675 | NP_001032764 | Q3BBV1     | NBPFK_HUMAN  |                             | 0    | AGTTCGTAACC   | 0.478 | rs77154268         |
| + | 4  | 571                         | 'F9_uc010oyg.1_Ir | NM_001039703 | NP_001034792 | A6NDV3     | A6NDV3_HUMAN |                             | 0    | TGGAGGCTGAGA  | 0.433 | rs4068083          |
| - | 3  | 5721                        |                   | NM_001009931 | NP_001009931 | Q86YZ3     | HORN_HUMAN   | 20                          | 3    | TACCAGAGGAC   | 0.557 |                    |
| - | 3  | 7594                        |                   | NM_002016    | NP_002007    | P20930     | FILA_HUMAN   | Ser-rich.                   | 16   | TTCATCGTTACC  | 0.587 |                    |
| - | 16 | 2228                        | nc.2_Missense_M   | NM_001037533 | NP_001032622 | Q3T8J9     | GON4L_HUMAN  |                             | 3    | TGTGCAGGTGG   | 0.438 |                    |
| - | 11 | 1558                        | 1fmd.3_Missense_  | NM_001037533 | NP_001032622 | Q3T8J9     | GON4L_HUMAN  |                             | 3    | TGTGCATCCATC  | 0.468 |                    |
| + | 2  | 234                         | 1_Intron MAEL_uc  | NM_032858    | NP_116247    | Q96JY0     | MAEL_HUMAN   | HMG box.                    | 1    | TAAATACGCAGAA | 0.527 |                    |
| + | 12 | 1273                        | se_Mutation_p.S37 | NM_032858    | NP_116247    | Q96JY0     | MAEL_HUMAN   |                             | 1    | TGATTTCCAATC  | 0.413 |                    |
| - | 10 | 1553                        | _2_5'UTR SLC9A1   | NM_178527    | NP_848622    | Q5TAH2     | S9A11_HUMAN  | ical; (Potential).          | 2    | TACAGACCAGTG  | 0.383 |                    |
| + | 24 | 5463                        | xl.2_Missense_Mt  | NM_014810    | NP_055625    | Q5VT06     | CE350_HUMAN  |                             | 4    | TAAATGAGGGCA  | 0.428 |                    |
| + | 6  | 1174                        | _p.H83R RNPEP     | NM_020216    | NP_064601    | Q9H4A4     | AMPB_HUMAN   |                             | 1    | TTCAGCACATGG  | 0.577 |                    |
| - | 8  | 1274                        | se_Mutation_p.P25 | NM_001017402 | NP_001017402 | Q13751     | LAMB3_HUMAN  | inin EGF-like 1.            | 6    | TAAAGGGTGCA   | 0.602 |                    |
| - | 1  | 492                         |                   | NM_001004693 | NP_001004693 | Q8NGZ9     | O2T10_HUMAN  | ellular (Potential).        | 1    | TAAAGCTCATGGC | 0.512 |                    |
| + | 1  | 98                          |                   | NM_032517    | NP_115906    | Q6UWQ5     | LYZL1_HUMAN  |                             | 0    | TAAAGTGGAGCA  | 0.512 |                    |
| - | 6  | 905                         | NF248_uc001izc.2  | NM_021045    | NP_066383    | Q8NDW4     | ZN248_HUMAN  |                             | 1    | TATAGGGATAATT | 0.323 |                    |
| + | 3  | 479                         | _p.L152F CYP2C9   | NM_000771    | NP_000762    | P11712     | CP2C9_HUMAN  |                             | 6    | TGCTGCCTTGTG  | 0.498 |                    |
| - | 9  | 1393                        | P2C8_uc010qob.1   | NM_000770    | NP_000761    | P10632     | CP2C8_HUMAN  |                             | 0    | TAAATTCGTTTTC | 0.363 |                    |
| - | 12 | 934                         |                   | NM_024541    | NP_078817    | Q5T2E6     | CJ076_HUMAN  |                             | 0    | TCCACCTGTGGA  | 0.458 |                    |
| - | 27 | 3537                        | xxq.2_Missense_I  | NM_025145    | NP_079421    | Q8NDM7     | WDR96_HUMAN  |                             | 0    | TTTGAGGAATCA  | 0.328 |                    |
| - | 2  | 464                         | BE1_uc001mam.1    | NM_005330    | NP_005321    | P02100     | HBE_HUMAN    |                             | 0    | TAAAGGAAGTCA  | 0.512 |                    |
| + | 1  | 342                         | ense_Mutation_p.f | NM_176875    | NP_795344    | P32239     | GASR_HUMAN   | ellular (Potential).        | 8    | TGACACGAGGTG  | 0.647 |                    |
| - | 7  | 950                         | bt.2_Missense_Mt  | NM_004813    | NP_004804    | Q9Y5Y5     | PEX16_HUMAN  | lasmic (Potential).         | 3    | TCCCCAGGGGG   | 0.672 |                    |

|   |     |           |                    |              |              |        |              |                               |     |                  |       |             |
|---|-----|-----------|--------------------|--------------|--------------|--------|--------------|-------------------------------|-----|------------------|-------|-------------|
| + | 1   | 164       |                    | NM_001001955 | NP_001001955 | Q8NGP0 | OR4CD_HUMAN  | lasmic (Potential).           | 4   | FGAGATCCCCCA     | 0.428 |             |
| + | 59  | 8989_8990 | 1_Intron C11orf65  | NM_000051    | NP_000042    | Q13315 | ATM_HUMAN    | PI3K/PI4K.                    | 240 | GGACTTGGTGAT     | 0.302 |             |
| - | 4   | 655       |                    | NM_020373    | NP_065106    | Q9NQ90 | ANO2_HUMAN   | lasmic (Potential).           | 7   | TGCCTCTCTGGC     | 0.468 |             |
| - | 8   | 2008      | p.G627E CD163_u    | NM_004244    | NP_004235    | Q86VB7 | C163A_HUMAN  | extracellular (Potential).    | 8   | CAACTCCACAT      | 0.517 |             |
| - | 7   | 1735      | p.G536E CD163_u    | NM_004244    | NP_004235    | Q86VB7 | C163A_HUMAN  | extracellular (Potential).    | 8   | CCATTTCCCTCTC    | 0.532 |             |
| - | 4   | 352       | 3_5'UTR PLCZ1_u    | NM_033123    | NP_149114    | Q86YW0 | PLCZ1_HUMAN  | EF-hand.                      | 3   | GTGATTCCTCTT     | 0.308 |             |
| - | 38  | 4585      | rfg.2_Missense_M   | NM_020297    | NP_064693    | O60706 | ABCC9_HUMAN  | potential), ABC transporter 2 | 6   | ATATTCCTCGCT     | 0.408 |             |
| + | 4   | 1816      | rpq.2_Missense_N   | NM_138371    | NP_612380    | Q96HM7 | F113B_HUMAN  | Pro-rich.                     | 5   | CTCATCAGCCC      | 0.542 |             |
| + | 15  | 1807      |                    | NM_017564    | NP_060034    | Q8WWW8 | STAB2_HUMAN  | lar (Potential), FAS1 2.      | 14  | AATTTGGGACATC    | 0.388 |             |
| + | 3   | 1119      | 01tpe.2_Intron C1  | NM_032829    | NP_116218    | Q5U5X8 | CL034_HUMAN  | Pro-rich.                     | 1   | GGGCCGGGGCC      | 0.741 |             |
| - | 65  | 11164     |                    | NM_001109662 | NP_001103132 |        |              |                               | 2   | CAGCGGGACGT      | 0.632 |             |
| + | 6   | 885       | p.E252G ACADS_u    | NM_000017    | NP_000008    | P16219 | ACADS_HUMAN  |                               | 2   | GGGGGAGCCAG      | 0.657 |             |
| + | 6   | 892       | g_Mutation_p.P49f  | NM_014938    | NP_055753    | Q9HAP2 | MLXIP_HUMAN  | cytoplasmic localization.     | 2   | CCCTGGCCCAATC    | 0.602 |             |
| - | 10  | 10625     | P3199S SACS_uc     | NM_014363    | NP_055178    | Q9NZJ4 | SACS_HUMAN   |                               | 12  | CAAAGGAACAA      | 0.383 |             |
| + | 7   | 1548      | p.V159M HNRNPf     | NM_001011724 | NP_001011724 | Q32P51 | RA1L2_HUMAN  | r B domain, RRM 2.            | 0   | ACTCCGTGGATC     | 0.438 |             |
| + | 2   | 338       | _Mutation_p.T102   | NM_021004    | NP_066284    | Q9BTZ2 | DHRS4_HUMAN  |                               | 1   | GGCCACGGTGA      | 0.652 |             |
| - | 9   | 1244      | L1_uc001wxz.2_lf   | NM_004196    | NP_004187    | Q00532 | CDKL1_HUMAN  |                               | 2   | ctataatgatgaggl  | 0     |             |
| - | 3   | 284       | i_p.G52E RDH1_u    | NM_016026    | NP_057110    | Q8TC12 | RDH1_HUMAN   | lasmic (Potential).           | 1   | GAGCTCCTGTC      | 0.423 |             |
| - | 1   | 1313      |                    | NR_003951    |              |        |              |                               | 0   | CATGATCCCTGG     | 0.443 |             |
| + | 15  | 1423      | lasq.1_Missense_l  | NM_020431    | NP_065164    | Q9P1W3 | TM63C_HUMAN  |                               | 0   | CCGCTTCTTTTC     | 0.512 |             |
| - | 8   | 719       | XN3_uc010auh.2_u   | NM_004993    | NP_004984    | P54252 | ATX3_HUMAN   |                               | 0   | AGCCATCATTTTC    | 0.423 | rs75188275  |
| + | 11  | 1679      |                    | NM_017437    | NP_059133    | Q9P2I0 | CPSF2_HUMAN  |                               | 2   | TATCAAGTATGTG    | 0.333 |             |
| - | 111 |           |                    |              |              |        |              |                               | 0   | ACTGCGTCTTTC     | 0.527 | rs144392595 |
| - | 10  | 1383      |                    | NM_000138    | NP_000129    | P35555 | FBN1_HUMAN   | TB 2.                         | 3   | TTATGGACTGTG     | 0.542 |             |
| + | 12  | 5392      | g_Mutation_p.S16f  | NM_013227    | NP_037359    | E7EX88 | E7EX88_HUMAN |                               | 3   | AGCCTCCACTG      | 0.537 |             |
| + | 4   | 1059      |                    | NM_001013657 | NP_001013679 | Q6ZNW5 | VTC2_HUMAN   |                               | 0   | CCCGGGGAGCTC     | 0.557 |             |
| - | 2   | 228       | _p.R23K PRSS33_u   | NM_152891    | NP_690851    | Q8NF86 | PRS33_HUMAN  |                               | 0   | ACTTCTCTCCC      | 0.617 |             |
| + | 7   | 1467      | lfy.2_Missense_Ml  | NM_016524    | NP_057608    | Q9BSW7 | SYT17_HUMAN  | C2 2.                         | 1   | GTCTCTCTTAAG     | 0.423 |             |
| - | 3   | 218       | i_p.R30K JUMOD_u   | NM_003361    | NP_003352    | P07911 | UROM_HUMAN   | EGF-like 1.                   | 2   | ACCATCCTGTGC     | 0.572 |             |
| + | 19  | 2153      | i_uc002dji.2_Missf | NM_144672    | NP_653273    | Q7RTW8 | OTOAN_HUMAN  |                               | 3   | GCCCAGACCTC      | 0.607 |             |
| + | 2   | 4265      |                    | NM_014699    | NP_055514    | O15015 | ZN646_HUMAN  | 2H2-type 24.                  | 2   | GCCAGTACAGC      | 0.687 |             |
| - | 5   | 605       | VPS35_uc002eee     | NM_018206    | NP_060676    | Q96QK1 | VPS35_HUMAN  |                               | 0   | ACTTACTCTGTT     | 0.358 |             |
| + | 2   | 589       | in_p.T17 JMP2_u    | NM_004530    | NP_004521    | P08253 | MMP2_HUMAN   |                               | 11  | GAATACCATCG      | 0.527 |             |
| + | 3   | 523       | CF_uc010cek.2_In   | NM_006565    | NP_006556    | P49711 | CTCF_HUMAN   |                               | 1   | AGTAATGGAGGC     | 0.498 |             |
| - | 17  | 2466      | w.3_Missense_Mu    | NM_001145667 | NP_001139139 | Q92896 | GSLG1_HUMAN  | 12, Extracellular (Potential) | 2   | CACACGGAGCTC     | 0.632 |             |
| - | 9   | 4401      | _Mutation_p.E131f  | NM_013275    | NP_037407    | Q6UB99 | ANR11_HUMAN  | Lys-rich.                     | 6   | CGGCTCCTGCC      | 0.567 |             |
| - | 1   | 635       |                    | NM_002551    | NP_002542    | P47893 | OR3A2_HUMAN  | cellular (Pote p.S199F(1)     | 1   | TGCTGGAGCAG      | 0.552 | rs140935076 |
| - | 4   | 1603      | _p.A350T NLRP1_u   | NM_033004    | NP_127497    | Q9C000 | NALP1_HUMAN  | NACHT.                        | 9   | CCAGGCTTCCT      | 0.582 |             |
| - | 1   | 357       |                    | NM_152599    | NP_689812    | Q8IWD5 | MFS6L_HUMAN  | ical; (Potential).            | 1   | TTTTGGCCAGG      | 0.627 |             |
| - | 15  | 1701      | _Mutation_p.E525f  | NM_001100112 | NP_001093582 | Q9UKX2 | MYH2_HUMAN   | rosin head-like.              | 14  | GAGCTCGATGC      | 0.433 |             |
| + | 36  | 7170      | so.2_Missense_Ml   | NM_001372    | NP_001363    | Q9NYC9 | DYH9_HUMAN   | p.E2368K(1)                   | 20  | CCTAAGGAAATT     | 0.493 | rs140313224 |
| - | 19  | 2408      | ppp.1_Missense_N   | NM_006311    | NP_006302    | O75376 | NCOR1_HUMAN  |                               | 5   | TCTTCTGGATTT     | 0.388 |             |
| - | 1   | 401       |                    | NM_033059    | NP_149048    | Q9BYQ6 | KR411_HUMAN  | C-[GIKRVHEL]- [SPTR]-[        | 0   | actggggtctgcagca | 0.1   | rs79388709  |
| - | 1   | 436       |                    | NM_033188    | NP_149445    | Q9BYR2 | KRA45_HUMAN  | -C-[GRQVCHIEK]- [SPTR]        | 0   | acagcaagaggggtg  | 0.313 |             |
| - | 3   | 237       | 1_5'UTR GPATCH     | NM_001002909 | NP_001002909 | Q9UKJ3 | GPTC8_HUMAN  | G-patch.                      | 4   | CCAATCCCTGGC     | 0.388 |             |
| - | 5   | 386       | cs.2_Missense_Ml   | NM_014740    | NP_055555    | P38919 | IF4A3_HUMAN  | ase ATP-binding.              | 1   | TTCACGAACCTC     | 0.393 |             |
| - | 5   | 860_861   | i_p.T80 SLC38A1f   | NM_001037984 | NP_001033073 | Q9HBR0 | S38AA_HUMAN  | ical; (Potential).            | 2   | AACACGGTGTAG     | 0.634 | rs150309813 |



|   |     |           |                    |              |              |         |              |                                |      |                |       |             |
|---|-----|-----------|--------------------|--------------|--------------|---------|--------------|--------------------------------|------|----------------|-------|-------------|
| + | 5   | 405       | s.1_Missense_Mu    | NM_004712    | NP_004703    | O14964  | HGS_HUMAN    | VHS.                           | 1    | ATCCTGTACCTG/  | 0.597 |             |
| - | 4   | 902       | v.2_Missense_Mu    | NM_182511    | NP_872317    | Q8IUUK8 | CBLN2_HUMAN  | C1q.                           | 0    | ATAGAGGAAACAC  | 0.507 |             |
| - | 5   | 533       | p.R146G STAP2_     | NM_001013841 | NP_001013863 | Q9UGK3  | STAP2_HUMAN  | SH2.                           | 1    | ATGACGGCGCG    | 0.647 | rs143484969 |
| - | 40  | 4797      | 2_Missense_Muta    | NM_000064    | NP_000055    | P01024  | CO3_HUMAN    | NTR.                           | 5    | ATCTGTCCAACCT/ | 0.602 |             |
| + | 18  | 2380      | r.p.S762F EMR1_    | NM_001974    | NP_001965    | Q14246  | EMR1_HUMAN   | lasmic (Potential).            | 5    | ATGCTTTCCAGTG  | 0.423 |             |
| - | 3   | 18371     |                    | NM_024690    | NP_078966    | Q8WXI7  | MUC16_HUMAN  | xtracellular (Potential).      | 57   | ATGTGTTGATGTG/ | 0.483 |             |
| - | 3   | 17651     |                    | NM_024690    | NP_078966    | Q8WXI7  | MUC16_HUMAN  | xtracellular (Potential).      | 57   | ATCTGCTGGAG/   | 0.498 |             |
| - | 1   | 8092      |                    | NM_024690    | NP_078966    | Q8WXI7  | MUC16_HUMAN  | ch. Extracellular (Potential). | 57   | ATACTTGGAAATT/ | 0.473 |             |
| + | 4   | 511       | _Mutation_p.R74C   | NM_000527    | NP_000518    | P01130  | LDLR_HUMAN   | ntial). LDL-receptor class /   | 4    | ATAGTTTCGCTGC  | 0.622 |             |
| - | 7   | 1560      |                    | NM_138783    | NP_620138    | Q96CK0  | ZN653_HUMAN  | 2H2-type 2.                    | 0    | ATGCCAGGATGAG/ | 0.572 |             |
| + | 4   | 1027      | ym.1_Missense_M    | NM_001136501 | NP_001129973 | Q08AG5  | ZN844_HUMAN  | 2H2-type 7.                    | 0    | ATCCATTCCTTTC/ | 0.398 |             |
| - | 4   | 1523      |                    | NM_145276    | NP_660319    | Q8TA94  | ZN563_HUMAN  | 2H2-type 11.                   | 0    | ATAACGCTTTCCC  | 0.428 |             |
| - | 4   | 1382      |                    | NM_005815    | NP_005806    | Q9Y2A4  | ZN443_HUMAN  | 2H2-type 10.                   | 1    | ATGCTTGCAATCAT | 0.413 |             |
| + | 2   | 281_282   | r.p.P48S MAST1_    | NM_014975    | NP_055790    | Q9Y2H9  | MAST1_HUMAN  |                                | 7    | ATACTCCCCGCTC  | 0.644 |             |
| - | 6   | 1134_1135 | .C1A6_uc010xod.    | NM_005071    | NP_005062    | P48664  | EAA4_HUMAN   | ical; (Potential).             | 6    | ATCATGCCCCCAA  | 0.584 |             |
| - | 2   | 381       | 2nbg.3_Missense_   | NM_052890    | NP_443122    | Q96PD5  | PGRP2_HUMAN  |                                | 3    | ATGGCAGGATCCC  | 0.592 |             |
| - | 9   | 1059      | itation_p.L188F C\ | NM_001082    | NP_001073    | P78329  | CP4F2_HUMAN  |                                | 2    | ATGGAGAGACCAC  | 0.602 |             |
| + | 4   | 1003      |                    | NM_052852    | NP_443084    | Q96H40  | ZN486_HUMAN  | 2H2-type 5.                    | 1    | ATAAATTCATACTG | 0.378 |             |
| - | 4   | 1319      |                    | NM_001159293 | NP_001152765 | C9JHM3  | C9JHM3_HUMAN |                                | 1    | ATAGGACCAGTTG  | 0.418 |             |
| - | 5   | 2403      | 208_uc002nqo.1_    | NM_007153    | NP_009084    |         |              |                                | 7    | ATTACCTTATGTTT | 0.373 |             |
| - | 7   | 2712      |                    | NM_001080409 | NP_001073878 |         |              |                                | 2    | ATGTTTCATAAGG  | 0.353 |             |
| - | 5   | 689       |                    | NM_001080409 | NP_001073878 |         |              |                                | 2    | ATAAAGCTTTTGC  | 0.388 |             |
| - | 13  | 1051      | oiy.1_Missense_M   | NM_007181    | NP_009112    | Q92918  | M4K1_HUMAN   |                                | 8    | ATCCGAGGGATAG/ | 0.617 |             |
| + | 4   | 561       | i.2_Intron CYP2B6  | NM_000767    | NP_000758    | P20813  | CP2B6_HUMAN  |                                | 2    | ATCTTTGGAAAAC/ | 0.502 |             |
| + | 11  | 1535      | nse_Mutation_p.P.  | NM_021913    | NP_068713    | P30530  | UFO_HUMAN    | cellular (Potential).          | 13   | ATCGTGGCCCTGG  | 0.567 |             |
| - | 1   | 44        | 10ejp.1_Missense_  | NM_001102597 | NP_001096067 | Q6UY09  | CEA20_HUMAN  |                                | 2    | ATCCAGTGGTGTC/ | 0.552 |             |
| + | 7   | 1911      | p.R431W ZNF761_    | NM_001008401 | NP_001008401 | Q86XN6  | ZN761_HUMAN  | 2H2-type 10.                   | 1    | ATGACATAGGAGA  | 0.413 |             |
| + | 4   | 517       | 2qid.2_Missense_M  | NM_004829    | NP_004820    | O76036  | NCTR1_HUMAN  | ar (Potential). Ig-like 2.     | 2    | ATGGGAAGATCCA/ | 0.582 |             |
| + | 7   | 2143      | p.P662L NLRP2_     | NM_017852    | NP_060322    | Q9NX02  | NALP2_HUMAN  |                                | 2    | ATGCTTCCTTTCTC | 0.453 |             |
| - | 6   | 1176      | p.V190E PTPRH_     | NM_002842    | NP_002833    | Q9HD43  | PTPRH_HUMAN  | tential). Fibronectin type-III | 4    | ATCCCCACCACCA/ | 0.512 |             |
| - | 7   | 2854      | b.2_Missense_Mu    | NM_145007    | NP_659444    | P59045  | NAL11_HUMAN  |                                | 6    | ATGGGCTCGTGCA/ | 0.498 |             |
| + | 3   | 1841_1842 | i47_uc002qpm.3_    | NM_001023561 | NP_001018855 | O43361  | ZN749_HUMAN  | 2H2-type 12.                   | 0    | ATCAGCATGAGAAA | 0.45  |             |
| - | 3   | 1484      | c.2_Intron ZNF814  | NM_001144989 | NP_001138461 | B7Z6K7  | ZN814_HUMAN  |                                | 0    | ATTTTTGTGAGTC  | 0.393 |             |
| - | 6   | 2226      |                    | NM_004304    | NP_004295    | Q9UM73  | ALK_HUMAN    | ss A. Extracellular (Potentie  | 1218 | ATGAAGGAGCTC   | 0.587 |             |
| - | 17  | 4881      | N1_uc002rxe.3_M    | NM_001135659 | NP_001129131 | P58400  | NRX1B_HUMAN  |                                | 2    | ATCACCTTGATTG/ | 0.443 |             |
| - | 8   | 1379      | XL3_uc002smq.1_    | NM_032603    | NP_115992    | P58215  | LOXL3_HUMAN  | SRCR 4.                        | 0    | ATCAGGTCCCCCT  | 0.632 |             |
| + | 5   | 494       | r.p.P137S REG3G    | NM_198448    | NP_940850    | Q6UW15  | REG3G_HUMAN  | 2-type lectin.                 | 0    | ATAAAATCCCTCC  | 0.517 |             |
| - | 10  | 3146      |                    | NM_207362    | NP_997245    | Q6NV74  | CB055_HUMAN  |                                | 0    | ATGCTTGAGATTT/ | 0.468 |             |
| + | 12  | 1775      | i.2_5'UTR RGPD4    | NM_182588    | NP_872394    | Q7Z3J3  | RGPD4_HUMAN  |                                | 2    | ATAAGAGCCAG/   | 0.333 |             |
| - | 3   | 709       |                    |              |              |         |              |                                | 0    | ATCTTAGTGAA/   | 0.567 | rs115341812 |
| - | 6   | 1029      | as.2_Missense_Mu   | NM_002349    | NP_002340    | O60449  | LY75_HUMAN   | Potential). C-type lectin 1.   | 0    | ATGCATCCATTCT/ | 0.453 |             |
| + | 3   | 901       | i.1_uc002uhm.2_3   | NM_178120    | NP_835221    | P56177  | DLX1_HUMAN   |                                | 0    | ATATATCCCCAGC/ | 0.632 |             |
| - | 275 | 72987     | i50R TTN_uc010zl   | NM_133378    | NP_596869    | Q8WZ42  | TITIN_HUMAN  |                                | 153  | ATAGTTCTTTGGC/ | 0.463 |             |
| - | 208 | 41052     | .1_Missense_Mut    | NM_133378    | NP_596869    | Q8WZ42  | TITIN_HUMAN  |                                | 153  | ATAGGTGGATCCC/ | 0.438 |             |
| - | 46  | 13024     | TN_uc010zfi.1_Intr | NM_133379    | NP_596870    | Q8WZ42  | TITIN_HUMAN  |                                | 153  | ATATTTTCCATAA/ | 0.388 |             |
| + | 10  | 2478      | fr.2_Missense_Mu   | NM_001204    | NP_001195    | Q13873  | BMPR2_HUMAN  | e. Cytoplasmic (Potential).    | 9    | ATAACATCCCCTC  | 0.413 |             |
| + | 25  | 2345      | p.E749K PLCB4_     | NM_182797    | NP_877949    | Q15147  | PLCB4_HUMAN  | C2. p.E737K(1)                 | 15   | ATGTAAGGAATTCC | 0.408 |             |

|   |    |           |                                                       |              |              |        |             |                              |    |                |       |             |
|---|----|-----------|-------------------------------------------------------|--------------|--------------|--------|-------------|------------------------------|----|----------------|-------|-------------|
| - | 3  | 1149      | se_Mutation_p.F8                                      | NM_018848    | NP_061336    | Q9NPJ1 | MKKS_HUMAN  |                              | 0  | :ACTGAAGCTTG/  | 0.423 |             |
| - | 10 | 1999      |                                                       | NM_016649    | NP_057733    | Q9H501 | ESF1_HUMAN  | Lys-rich.                    | 1  | :CCAAGGGGTCA   | 0.284 |             |
| + | 2  | 63        | tj.1_RNA FRG1B_uc010gdr.1_RNA FRG1B_uc010ztk.1_Intron |              |              |        |             |                              | 0  | \GAATCGCCCTG.  | 0.353 | rs7266938   |
| - | 2  | 1748      | _Missense_Mutat                                       | NM_000557    | NP_000548    | P43026 | GDF5_HUMAN  |                              | 0  | 'GAAGAGGATGC'  | 0.567 |             |
| + | 16 | 2750      |                                                       | NM_016436    | NP_057520    | Q9BVI0 | PHF20_HUMAN |                              | 1  | :CCTTTCCCGCC   | 0.607 |             |
| - | 4  | 635       | s.1_Missense_Mu                                       | NM_004613    | NP_004604    | P21980 | TGM2_HUMAN  |                              | 3  | 'CCAAGGTATGTI  | 0.582 |             |
| + | 18 | 3650      | m.2_Missense_Mt                                       | NM_181659    | NP_858045    | Q9Y6Q9 | NCOA3_HUMAN | ethyltransferase.            | 5  | AATTTTCTCTCC   | 0.517 |             |
| - | 5  | 849       | d.2_Nonsense_Mu                                       | NM_006806    | NP_006797    | Q14201 | BTG3_HUMAN  |                              | 0  | 'CCCTCGATACA'  | 0.413 |             |
| + | 3  | 1528      | lf.1_Missense_Mu                                      | NM_053277    | NP_444507    | Q96NY7 | CLIC6_HUMAN |                              | 2  | 'CAGTGGACCTG   | 0.378 |             |
| + | 19 | 1796      | bx.2_Missense_M                                       | NM_002606    | NP_002597    | O76083 | PDE9A_HUMAN |                              | 2  | 'GAAGTCCAGAG   | 0.502 |             |
| - | 1  | 321       |                                                       | NM_014406    | NP_055221    | Q96SF2 | TCPQM_HUMAN |                              | 1  | 'GCTCTCCCTTG   | 0.657 |             |
| + | 43 | 7629      | D18B_uc011aka.1                                       | NM_032608    | NP_115997    | Q8IUG5 | MY18B_HUMAN |                              | 12 | 'TGATCAGCCA'   | 0.527 |             |
| - | 18 | 2529      | iaqt.1_Nonsense_I                                     | NM_153609    | NP_705837    | Q8IU80 | TMPS6_HUMAN | . Extracellular (Potential). | 6  | 'TGATCCAGCTI   | 0.647 |             |
| + | 5  | 2054_2055 | ense_Mutation_p.F                                     | NM_001162501 | NP_001155973 | Q9UPQ9 | TNR6B_HUMAN |                              | 0  | 'GGACCCAGGC    | 0.52  |             |
| + | 7  | 789       | k.1_Missense_Mut                                      | NM_152613    | NP_689826    | Q6ICG8 | WBP2L_HUMAN | eat of Y-G-X-P-P-X-G.[9].[C  | 2  | 'TCTCGGATATGC  | 0.612 |             |
| + | 21 | 2767      | R1_uc011asu.1_In                                      | NM_001099952 | NP_001093422 | Q14643 | ITPR1_HUMAN | lasmic (Potential).          | 21 | CCCCTCTCTGG'   | 0.557 |             |
| + | 11 | 1201      | a.1_Missense_Mu                                       | NM_003149    | NP_003140    | Q99469 | STAC_HUMAN  |                              | 4  | 'TCAGTGGAAAA   | 0.443 |             |
| + | 10 | 1763_1764 | e_Mutation_p.S57                                      | NM_004803    | NP_004794    | Q9Y267 | S22AE_HUMAN | lasmic (Potential).          | 0  | CCACTCCTCAC#   | 0.619 |             |
| + | 6  | 777_778   | se_Mutation_p.G6                                      | NM_145755    | NP_665698    | Q8NDW8 | TT21A_HUMAN | TPR 4.                       | 1  | 'CCCTGGAGGTC   | 0.559 |             |
| - | 1  | 836       | mg.2_Intron CYP8                                      | NM_004391    | NP_004382    | Q9UNU6 | CP8B1_HUMAN |                              | 2  | 'GAAGCGAAAGA'  | 0.512 |             |
| - | 17 | 3501_3502 | AGI1_uc003dmp.2                                       | NM_001033057 | NP_001028229 | Q96QZ7 | MAGI1_HUMAN | eraction with FCHSD2.        | 6  | 'CTTCGGGCTCT   | 0.569 |             |
| + | 5  | 1062      | pn.2_Missense_IV                                      | NM_145037    | NP_659474    | Q969Y0 | FA55C_HUMAN |                              | 3  | 'TGAGACTACCT'  | 0.498 |             |
| - | 9  | 1426      |                                                       | NM_199420    | NP_955452    | O75417 | DPOLQ_HUMAN | case C-terminal.             | 11 | 'TTGACGAAAGG   | 0.388 | rs140193287 |
| + | 34 | 5232      | ehi.2_Missense_M                                      | NM_001024660 | NP_001019831 | O60229 | KALRN_HUMAN | SH3 1.                       | 6  | 'GGTCCCCAGCA'  | 0.652 |             |
| - | 4  | 798       | 11blv.1_Intron SLC                                    | NM_005630    | NP_005621    | Q92959 | SO2A1_HUMAN | Name=4; (Potential).         | 1  | 'GGGCAACCACC   | 0.592 |             |
| - | 5  | 1014      | e_Mutation_p.H19                                      | NM_033169    | NP_149359    | O75752 | B3GL1_HUMAN | renal (Potential).           | 1  | 'TGAGTGGTTTAC  | 0.348 |             |
| - | 10 | 1546      | r49_uc011bpd.1_h                                      | NM_178824    | NP_849146    | Q8IV35 | WDR49_HUMAN | WD 6.                        | 3  | 'AAATTCAGCCA'  | 0.383 |             |
| - | 26 | 2984      | 13A4_uc010hzi.2_                                      | NM_032279    | NP_115655    | Q4VNC1 | AT134_HUMAN | ellular (Potential).         | 2  | 'TGAAAGGCACC   | 0.398 |             |
| - | 2  | 6974      | C4_uc003fvp.2_Inl                                     | NM_018406    | NP_060876    | Q99102 | MUC4_HUMAN  |                              | 0  | 'GTGACCTGTGG   | 0.577 |             |
| + | 1  | 195       | idf.2_Missense_Mi                                     | NM_012108    | NP_036240    | Q9ULZ2 | STAP1_HUMAN | PH.                          | 0  | 'GTCAGGATACCC  | 0.378 |             |
| - | 32 | 7607      | hgq.2_Missense_h                                      | NM_032217    | NP_115593    | O75179 | ANR17_HUMAN |                              | 10 | 'CTTGATGTTGTC  | 0.463 |             |
| + | 6  | 816_817   | p.A255V AIMP1_u                                       | NM_001142415 | NP_001135887 | Q12904 | AIMP1_HUMAN |                              | 0  | 'TGATGCTTTCCC  | 0.366 |             |
| + | 3  | 1147      |                                                       | NM_001977    | NP_001968    | Q07075 | AMPE_HUMAN  | ellular (Potential).         | 5  | 'TGGATGATAAAT  | 0.353 |             |
| + | 2  | 907       | e_Mutation_p.G87                                      | NM_012464    | NP_036596    | O43897 | TLL1_HUMAN  |                              | 7  | 'CTTTGGAAACC'  | 0.333 |             |
| + | 34 | 5027      | p.P1125R SPEF2_                                       | NM_024867    | NP_079143    | Q9C093 | SPEF2_HUMAN |                              | 4  | 'CCACCAGACA'   | 0.463 |             |
| - | 5  | 939       |                                                       | NM_173489    | NP_775760    | Q72745 | HTRB2_HUMAN |                              | 8  | 'AGAAAGTCCCC'  | 0.453 |             |
| + | 1  | 2052      | j.1_Intron SNX18_                                     | NM_052870    | NP_443102    | Q96RF0 | SNX18_HUMAN | BAR.                         | 0  | 'AGTACCTTTGAT  | 0.413 |             |
| + | 17 | 2272      | uc003kgi.3_Intron                                     | NM_003248    | NP_003239    | P35443 | TSP4_HUMAN  | SP type-3 6.                 | 0  | 'CAGTGCCAGCT'  | 0.547 |             |
| + | 4  | 599       | L21_uc003lbc.2_f                                      | NM_012159    | NP_036291    | Q9UKT6 | FXL21_HUMAN | LRR 2.                       | 1  | 'ATGATCCTTCATT | 0.358 |             |
| + | 1  | 1678      | DHA1_uc003lgz.2                                       | NM_018900    | NP_061723    | Q9Y5I3 | PCDA1_HUMAN | Extracellular (Potential).   | 1  | 'AGAACGACAAC'  | 0.672 |             |
| + | 1  | 397       | B12_uc011dak.1_                                       | NM_018932    | NP_061755    | Q9Y5F1 | PCDBC_HUMAN | r (Potential). Cadherin 1.   | 3  | 'CTAATGATAACA' | 0.527 |             |
| + | 1  | 2216      | DHGB2_uc003ljs.                                       | NM_003736    | NP_003727    | Q9UN71 | PCDGG_HUMAN | lasmic (Potential).          | 0  | 'TCCCCCAACT/   | 0.517 |             |
| - | 8  | 906       | oo.2_Nonsense_IV                                      | NM_001387    | NP_001378    | Q14195 | DPYL3_HUMAN |                              | 1  | 'GGCTTGTGAGAT  | 0.507 |             |
| - | 5  | 1216      | 1_5'UTR GRM6_u                                        | NM_000843    | NP_000834    | O15303 | GRM6_HUMAN  | ellular (Potential).         | 8  | 'GGGATCGAGTC   | 0.532 |             |
| + | 10 | 1055      | e_Mutation_p.W9                                       | NM_001040274 | NP_001035364 | Q5T4T6 | SYC2L_HUMAN |                              | 2  | 'TAAATGGTTTGAT | 0.368 |             |
| + | 4  | 740       | p.E136K EDN1_u                                        | NM_001955    | NP_001946    | P05305 | EDN1_HUMAN  |                              | 1  | 'ATTATGGAGAAAC | 0.353 |             |
| + | 18 | 2370      | _uc011dna.1_Miss                                      | NM_020442    | NP_065175    | Q5ST30 | SYVM_HUMAN  |                              | 4  | 'CAGATCCTGATC  | 0.557 |             |

|   |    |      |                      |              |              |        |              |       |              |       |                              |
|---|----|------|----------------------|--------------|--------------|--------|--------------|-------|--------------|-------|------------------------------|
| - | 4  | 1063 | ojs.2_Missense_IV    | NM_024294    | NP_077270    | Q9H6K1 | CF106_HUMAN  | 3     | GTGCTGGGAGAC | 0.502 |                              |
| + | 14 | 2891 | F1BP1_uc010jvn.2     | NM_017754    | NP_060224    | Q6BDS2 | URFB1_HUMAN  | 3     | GCATCCTGCACC | 0.512 |                              |
| - | 5  | 1502 |                      | NM_003740    | NP_003731    | O95279 | KCNK5_HUMAN  | 2     | AGGGGCCCGTG  | 0.617 |                              |
| - | 5  | 642  |                      | NM_002630    | NP_002621    | P20142 | PEPC_HUMAN   | 0     | ACCATGCCCTGC | 0.627 |                              |
| + | 2  | 162  | u.2_Missense_Mur     | NM_201521    | NP_958929    | Q9NSK0 | KLC4_HUMAN   | 4     | GGCTGGTCAGC  | 0.652 |                              |
| - | 4  | 1663 | 318_uc003ouw.2       | NM_014345    | NP_055160    | Q5VUA4 | ZN318_HUMAN  | 7     | GTCGGGAAAGC  | 0.488 |                              |
| - | 2  | 517  | _p.P118L GNA12       | NM_007353    | NP_031379    | Q03113 | GNA12_HUMAN  | 1     | GCCAAGGAATG  | 0.483 |                              |
| - | 3  | 573  |                      | NM_001004320 | NP_001004320 | Q6ZNB7 | ALKMO_HUMAN  | 0     | ATGAGCCATACC | 0.313 | istidine box-1.              |
| - | 2  | 328  |                      | NM_022150    | NP_071433    | Q9HCQ7 | RFRP_HUMAN   | 1     | CGTTCCTCCCA  | 0.448 |                              |
| - | 2  | 1326 | hr.2_Missense_Mu     | NM_002192    | NP_002183    | P08476 | INHBA_HUMAN  | 6     | GTGAGGACCCG  | 0.567 |                              |
| + | 3  | 1320 |                      | NM_198570    | NP_940972    | Q2TAL6 | VWC2_HUMAN   | 0     | GTGTCCCCAGA  | 0.567 | VWFC 2.                      |
| + | 5  | 1788 | ET_uc011kng.1_IV     | NM_000245    | NP_000236    | P08581 | MET_HUMAN    | 159   | CCCACCCTTTG  | 0.532 | cellular (Potential).        |
| - | 15 | 1860 |                      | NM_004333    | NP_004324    | P15056 | BRAF_HUMAN   | 18290 | ATTTCACTGTAC | 0.368 | rotein kinas_R603>I(2) p.T   |
| - | 42 | 6736 | p.P1508S CSMD1       | NM_033225    | NP_150094    | Q96PZ7 | CSMD1_HUMAN  | 25    | CCCAGGATAAC  | 0.448 | ar (Potential), Sushi 12.    |
| - | 5  | 4018 |                      | NM_001080826 | NP_001074295 | Q86YV5 | SG223_HUMAN  | 0     | CTCCTCCGAGG  | 0.677 |                              |
| - | 3  | 1897 |                      | NM_173683    | NP_775954    | Q5GH73 | XKR6_HUMAN   | 2     | ATATCGAATGC  | 0.458 |                              |
| + | 9  | 1530 | kye.1_Missense_IV    | NM_001008539 | NP_001008539 | P52569 | CTR2_HUMAN   | 3     | GGGATCGTCTC  | 0.507 | lasmic (Potential).          |
| - | 3  | 617  | _p.T55R REEP4_L      | NM_025232    | NP_079508    | Q9H6H4 | REEP4_HUMAN  | 1     | ATGTCTGTAACG | 0.597 | ical; (Potential).           |
| + | 5  | 617  | _p.E54K ADAMDI       | NM_014479    | NP_055294    | O15204 | ADEC1_HUMAN  | 2     | CTAAATGAAAAG | 0.289 |                              |
| + | 2  | 689  | p.E58K NRG1_ucC      | NM_013964    | NP_039258    | Q02297 | NRG1_HUMAN   | 0     | GGTGTGAAACC  | 0.383 | Potential). Ig-like C2-type. |
| - | 9  | 808  | AM2_uc011lck.1_IV    | NM_001464    | NP_001455    | Q99965 | ADAM2_HUMAN  | 2     | ATAACTATTAGC | 0.284 | Potential). Peptidase M12B.  |
| + | 12 | 1447 | _p.E474K PREX2       | NM_024870    | NP_079146    | Q70Z35 | PREX2_HUMAN  | 17    | GAAATGAGATG  | 0.348 |                              |
| + | 9  | 1099 | ar.2_Missense_Mu     | NM_004133    | NP_004124    | Q14541 | HNF4G_HUMAN  | 1     | ATGATCGGCAG  | 0.453 |                              |
| + | 27 | 4097 | p.E1275K RIMS2       | NM_014677    | NP_055492    | Q9UQ26 | RIMS2_HUMAN  | 15    | CTTTCGAAGAGA | 0.368 | C2 2.                        |
| - | 1  | 535  |                      | NM_015193    | NP_056008    | Q7LC44 | ARC_HUMAN    | 1     | CATCTCGCGCT  | 0.692 |                              |
| + | 1  | 698  |                      | NM_001004483 | NP_001004483 | Q8NGS7 | O13C8_HUMAN  | 2     | TGAAGGAAAAC  | 0.418 | lasmic (Pote p.G233E(1)      |
| - | 1  | 115  |                      | NM_001001956 | NP_001001956 | Q8NGT0 | O13C9_HUMAN  | 0     | CAGAAGGATGA  | 0.433 | Name=1; (Potential).         |
| - | 2  | 696  | f.2_Missense_Mut     | NM_002160    | NP_002151    | P24821 | TENA_HUMAN   | 7     | ACAGCCACAGG  | 0.587 |                              |
| + | 24 | 2778 | lyt.1_Missense_Mu    | NM_001110303 | NP_001103773 | Q9Y2K6 | UBP20_HUMAN  | 2     | CGCCATGTCC   | 0.657 | DUSP 2.                      |
| - | 1  | 446  |                      | NM_033387    | NP_203745    | Q5JUQ0 | FA78A_HUMAN  | 1     | CCCTTCCCGGA  | 0.572 |                              |
| + | 4  | 1084 | 3P5_uc010ncq.2_3'UTR |              |              |        |              | 0     | TCCCCGACAAC  | 0.512 |                              |
| - | 5  | 723  | i_Mutation_p.S189    | NM_018684    | NP_061154    | Q9NQZ6 | ZC4H2_HUMAN  | 1     | TCCGGGACCGA  | 0.488 |                              |
| - | 2  | 1104 |                      | NM_152694    | NP_689907    | Q8N8U3 | ZCHC5_HUMAN  | 1     | AGTGGGATACA  | 0.507 |                              |
| + | 5  | 1226 | o.V142G GPRASP       | NM_014710    | NP_055525    | Q5JY77 | GASP1_HUMAN  | 2     | AACTGGTAATAC | 0.458 |                              |
| - | 5  | 820  | 4fl.2_Missense_M     | NM_001011543 | NP_001011543 | P43363 | MAGAA_HUMAN  | 0     | AGTCACCTTTT  | 0.458 | MAGE.                        |
| - | 2  | 319  | 5F CASP9_uc001e      | NM_001229    | NP_001220    | P55211 | CASP9_HUMAN  | 2     | AGCAGGAGATG  | 0.547 | CARD.                        |
| - | 6  | 707  | p.Y168H ATP13A       | NM_022089    | NP_071372    | Q9NQ11 | AT132_HUMAN  | 4     | GATATAGCGCTC | 0.537 | lasmic (Potential).          |
| - | 17 | 2464 | xm.1_Missense_M      | NM_052896    | NP_443128    | Q72408 | CSMD2_HUMAN  | 12    | AAGTCCGCCCA  | 0.502 | tracellular (Potential).     |
| - | 5  | 826  | _p.P95S DHC24        | NM_014762    | NP_055577    | Q15392 | DHC24_HUMAN  | 1     | GGCAGGGATGA  | 0.582 | inding PCMH-type.            |
| + | 6  | 746  | R_uc009waq.2_Ir      | NM_002303    | NP_002294    | P48357 | LEPR_HUMAN   | 1     | AGTTTTCAGATG | 0.368 | cellular (Potential).        |
| - | 14 | 3116 |                      | NM_001002912 | NP_001002912 | Q5RHP9 | CA173_HUMAN  | 5     | TCCTCTCTTTT  | 0.522 | Glu-rich.                    |
| + | 9  | 1318 | o.2_Missense_Mut     | NM_174858    | NP_777283    | Q9Y6K8 | KAD5_HUMAN   | 1     | ACAGGGTGATG  | 0.294 |                              |
| + | 21 | 2777 | g.1_Missense_Mu      | NM_020775    | NP_065826    | Q6UXG2 | K1324_HUMAN  | 5     | CTTACGTGTGG  | 0.507 | cellular (Potential).        |
| - | 2  | 1046 | _p.G72R SLC16A       | NM_003051    | NP_003042    | P53985 | MOT1_HUMAN   | 1     | ACTCCACCATA  | 0.378 | ical; (Potential).           |
| + | 34 | 4365 | 10_uc010oyl.1_Int    | NM_001039703 | NP_001034792 | A6NDV3 | A6NDV3_HUMAN | 0     | TCACTGAATAGA | 0.473 |                              |
| + | 13 | 2422 | uc010ozk.1_5'UTF     | NM_017940    | NP_060410    | A6NDV3 | A6NDV3_HUMAN | 0     | CCGACAAGTC   | 0.587 |                              |
| - | 3  | 400  |                      | NM_001008536 | NP_001008536 | Q5QJ38 | TCHL1_HUMAN  | 2     | CCCTGAACATCC | 0.433 |                              |

|   |    |           |                   |              |              |        |              |                                 |      |               |       |             |
|---|----|-----------|-------------------|--------------|--------------|--------|--------------|---------------------------------|------|---------------|-------|-------------|
| - | 24 | 8732_8733 | ASH1L_uc001fkt.2  | NM_018489    | NP_060959    | Q9NR48 | ASH1L_HUMAN  | BAH.                            | 11   | :TCCAAGGGAATC | 0.431 |             |
| - | 41 | 5873      |                   | NM_003126    | NP_003117    | P02549 | SPTA1_HUMAN  | Spectrin 18.                    | 8    | TTCTCTCTGCA   | 0.428 |             |
| - | 5  | 609       |                   | NM_000537    | NP_000528    | P00797 | REN1_HUMAN   |                                 | 4    | :AAACTCGGCCA  | 0.557 |             |
| - | 8  | 1172      | ε_Mutation_p.L25  | NM_025160    | NP_079436    | Q9H7D7 | WDR26_HUMAN  | WD 2.                           | 0    | CAACAAGATAG   | 0.428 |             |
| - | 12 | 1545      | i_2_RNA NEBL_uc   | NM_006393    | NP_006384    | O76041 | NEBL_HUMAN   | Nebulin 10.                     | 2    | CCTTTAATCTCCT | 0.333 |             |
| - | 7  | 1309      | GMS1_uc009xou.    | NM_147156    | NP_671512    | Q86VZ5 | SMS1_HUMAN   |                                 | 2    | CATGGGGATCT   | 0.502 |             |
| + | 1  | 144       | uc001kwr.2_Intron | NM_001143909 | NP_001137381 | Q2QD12 | Q2QD12_HUMAN |                                 | 0    | CCATCCTCAAC   | 0.542 |             |
| + | 14 | 2550      | RF1_uc010qwe.1_   | NM_020901    | NP_065952    | Q9P1Y6 | PHRF1_HUMAN  |                                 | 0    | ATAAGGAGCAG   | 0.577 |             |
| - | 31 | 5326      |                   | NM_005961    | NP_005952    | Q6W4X9 | MUC6_HUMAN   | Approximate repeats.            | 1    | TTCAGGATGGT   | 0.562 |             |
| + | 51 | 14903     | b_2_Missense_Mu   | NM_017511    | NP_059981    | Q9HC84 | MUC5B_HUMAN  | em repeats, Ser/Thr- rich.      | 0    | AGAGCCGAGCA   | 0.662 |             |
| - | 1  | 488       |                   | NM_001005238 | NP_001005238 | Q8NGK0 | O51G2_HUMAN  | Name=4; (Potential).            | 2    | GTAAATGAAAA   | 0.473 |             |
| + | 11 | 2849      | _p.R743* NAV2_u   | NM_145117    | NP_660093    | Q8IVL1 | NAV2_HUMAN   |                                 | 6    | CCCCTCGAGCC   | 0.632 |             |
| + | 29 | 3169      | itation_p.L826P D | NM_001105540 | NP_001099010 | Q13574 | DGKZ_HUMAN   | ANK 1.                          | 3    | CACGCTCCTGC   | 0.692 |             |
| + | 11 | 1281      | D13D_uc001okg.    | NM_207354    | NP_997237    | Q6ZTN6 | AN13D_HUMAN  |                                 | 1    | GTCACGGAACA   | 0.637 | rs78983123  |
| + | 9  | 1346      | _p.R376K BCO2_u   | NM_031938    | NP_114144    | Q9BYV7 | BCDO2_HUMAN  |                                 | 0    | TCAAGGTTTG    | 0.413 |             |
| - | 17 | 2565      | ε_Mutation_p.G72  | NM_032531    | NP_115920    | Q8IZU9 | KIRR3_HUMAN  | ic (Potential).  Ser-rich.      | 3    | GCTTGCCGCTG   | 0.607 |             |
| + | 9  | 1468      | v.1_Missense_Mu   | NM_002017    | NP_002008    | Q01543 | FLI1_HUMAN   |                                 | 2273 | CGAGTCGTCCA   | 0.493 |             |
| - | 3  | 857       | o.R198C FOXM1_u   | NM_021953    | NP_068772    | Q08050 | FOXM1_HUMAN  |                                 | 2    | GCTGCGGGAGC   | 0.493 |             |
| - | 3  | 276       |                   | NM_006248    | NP_006239    |        |              |                                 | 0    | GGGTGGTCCTT   | 0.612 |             |
| + | 11 | 2149      | ow.1_Missense_Mi  | NM_030667    | NP_109592    | Q16827 | PTPRO_HUMAN  | III 7.  Extracellular (Potentia | 9    | CAACGGACTTG   | 0.413 |             |
| - | 4  | 444       | 3_5'UTR PLCZ1_u   | NM_033123    | NP_149114    | Q86YW0 | PLCZ1_HUMAN  |                                 | 3    | AAATTTCCGGT   | 0.333 |             |
| - | 11 | 3652      | _p.S807F SFRS2IF  | NM_004719    | NP_004710    | Q99590 | SCAFB_HUMAN  |                                 | 0    | TTATAGGATTGCT | 0.428 |             |
| - | 1  | 183       |                   | NM_012064    | NP_036196    | P30301 | MIP_HUMAN    | al; (By similarity).            | 1    | CAGGGCCAAGC   | 0.582 |             |
| + | 14 | 2031      | ense_Mutation_p.f | NM_182947    | NP_891992    | Q86VW2 | ARHGP_HUMAN  |                                 | 0    | TCTCCCTCTC    | 0.577 |             |
| - | 2  | 1182      | _p.V275I ZFC3H1_  | NM_144982    | NP_659419    | O60293 | ZC3H1_HUMAN  |                                 | 5    | TACTGACATTATC | 0.358 |             |
| + | 24 | 3023_3024 | tlq.2_Missense_M  | NM_018082    | NP_060552    | Q9NW08 | RPC2_HUMAN   |                                 | 2    | CGGCTTCCATC   | 0.5   |             |
| + | 12 | 1215      | t.2_Missense_Mut  | NM_213594    | NP_998759    | Q33E94 | RFX4_HUMAN   | ary for dimerization.           | 1    | CAGGAGTTTGAC  | 0.458 |             |
| - | 8  | 2201_2202 | ε_Mutation_p.P65E | NM_016179    | NP_057263    | Q9UBN4 | TRPC4_HUMAN  | and ITPR3.   p.P656P(1)         | 6    | GGAAGGGAGTAG  | 0.431 |             |
| + | 2  | 2484      | i.2_Missense_Mut  | NM_001173    | NP_001025226 | Q13017 | RHG05_HUMAN  |                                 | 5    | AGCAAGCTCTCA  | 0.413 |             |
| + | 13 | 5940      |                   | NM_004274    | NP_004265    | Q13023 | AKAP6_HUMAN  |                                 | 21   | CACATGGGAAA   | 0.383 |             |
| - | 2  | 538       |                   | NM_021136    | NP_066959    | Q16799 | RTN1_HUMAN   |                                 | 4    | GTGCAGAAATG   | 0.458 |             |
| - | 2  | 886       | orf43_uc010tud.1_ | NM_194278    | NP_919254    | Q6PJG2 | CN043_HUMAN  |                                 | 5    | CTGGGGGGGCT   | 0.662 |             |
| + | 2  | 671       | 4orf109_uc001ybl  | NM_001098621 | NP_001092091 | Q8N6I4 | CN109_HUMAN  | ical; (Potential).              | 0    | CTTGCCCTTTT   | 0.453 |             |
| + | 23 | 2577      |                   | NM_058237    | NP_478144    | Q6NUP7 | PP4R4_HUMAN  |                                 | 4    | GTTAGGAAAGA   | 0.303 | rs150367623 |
| + | 4  | 538       | _p.R145C EML1_u   | NM_004434    | NP_004425    | O00423 | EMAL1_HUMAN  |                                 | 5    | GGAATCGCACAA  | 0.507 |             |
| + | 3  | 239       | 7924_uc001yua.2   | NM_001005241 | NP_001005241 | Q8N0Y3 | OR4N4_HUMAN  |                                 | 5    | TCTAACGTGAC   | 0.328 |             |
| + | 1  | 2045      |                   | NM_018958    | NP_061831    | Q9NZP6 | CO002_HUMAN  | Pro-rich.                       | 8    | ATCCCTCCTC    | 0.547 |             |
| - | 9  | 828       | pc.2_Missense_M   | NM_015289    | NP_056104    | Q96JC1 | VPS39_HUMAN  | CNH.                            | 3    | CCACGGTGAGA   | 0.527 |             |
| - | 14 | 2239      | RNA CDAN1_uc00    | NM_138477    | NP_612486    | Q8IWY9 | CDAN1_HUMAN  |                                 | 2    | CAAGGGAACAA   | 0.607 |             |
| - | 3  | 560       |                   | NM_207381    | NP_997264    | Q5GJ75 | TP8L3_HUMAN  |                                 | 0    | GTGCTCTTTGG   | 0.448 |             |
| + | 1  | 1499      |                   | NM_001080534 | NP_001074003 | Q8NB66 | UN13C_HUMAN  |                                 | 7    | CAGCAGAATTT   | 0.388 |             |
| + | 9  | 1837      | IL21R_uc002dos.   | NM_181078    | NP_851564    | Q9HBE5 | IL21R_HUMAN  | lasmic (Potential).             | 4    | TGGACCCAGG    | 0.642 |             |
| - | 10 | 1091      |                   | NM_001896    | NP_001887    | P19784 | CSK22_HUMAN  | rotein kinase.                  | 1    | CTCTTTGGCAG   | 0.468 |             |
| + | 3  | 704       |                   | NM_001124758 | NP_001118230 | Q8IVW8 | SPNS2_HUMAN  |                                 | 0    | GCGACCGCTTC   | 0.632 | rs139404093 |
| + | 3  | 605       | fy.2_Missense_M   | NM_001114974 | NP_001108446 | Q2TAL5 | SMTL2_HUMAN  |                                 | 0    | CAGATCCCCCC   | 0.632 |             |
| + | 4  | 442       | o.R143H DNAH2_u   | NM_020877    | NP_065928    | Q9P225 | DYH2_HUMAN   | n (By similarity).              | 13   | CATTCGCAAGC   | 0.587 |             |
| + | 9  | 1020      |                   | NM_004140    | NP_004131    | Q15334 | L2GL1_HUMAN  | WD 6.                           | 6    | TGACCGCCACT   | 0.577 |             |

|   |    |      |                   |              |              |        |             |    |                          |       |             |
|---|----|------|-------------------|--------------|--------------|--------|-------------|----|--------------------------|-------|-------------|
| + | 6  | 544  | splice TBC1D3_uc  | NM_032258    | NP_115634    | Q8IZP1 | TBC3A_HUMAN | 0  | 'ACCAGGTACGC'            | 0.587 |             |
| - | 1  | 329  |                   | NM_030966    | NP_112228    | Q8IUG1 | KRA13_HUMAN | 0  | 'TCCACTGCTGC'            | 0.652 |             |
| - | 1  | 416  |                   | NM_031960    | NP_114166    | Q9BYQ9 | KRA48_HUMAN | 0  | '-C-[IKRQVHEC]- [SPRT]-[ | 0.09  | rs144672535 |
| - | 19 | 2195 | p.R610Q EFTUD2    | NM_004247    | NP_004238    | Q15029 | U5S1_HUMAN  | 1  | 'ATCTTCCGCAAA'           | 0.517 |             |
| + | 3  | 498  | ix.1_Missense_Mt  | NM_003396    | NP_003387    | O14905 | WNT9B_HUMAN | 2  | 'GAGCCGGCAGG'            | 0.662 |             |
| + | 2  | 664  | .F_uc002iuh.2_5'U | NM_002126    | NP_002117    | Q16534 | HLF_HUMAN   | 2  | 'ACAAGGAAAAG'            | 0.433 |             |
| - | 7  | 801  | r_p.F39L MKSL_u   | NM_017777    | NP_060247    | Q9NXB0 | MKS1_HUMAN  | 1  | 'CCCGTGAAGTC'            | 0.473 |             |
| - | 8  | 1079 | xa.3_Missense_M   | NM_001005207 | NP_001005207 | O94972 | TRI37_HUMAN | 7  | 'CTTGGGTTAGA'            | 0.328 |             |
| - | 4  | 2132 | e_Mutation_p.V57  | NM_032134    | NP_115510    | Q9H0J4 | QRIC2_HUMAN | 5  | 'acgctgaactgcacc'        | 0.015 | rs113162124 |
| + | 17 | 2812 | p.G712S CCDC4     | NM_017950    | NP_060420    | Q4G0X9 | CCD40_HUMAN | 3  | 'AGATCGGCCAG'            | 0.567 | rs59896146  |
| - | 8  | 1464 | i_p.S383L CSNK1l  | NM_001893    | NP_001884    | P48730 | KC1D_HUMAN  | 2  | 'CGGACGAGGAC'            | 0.672 |             |
| + | 2  | 1128 | (NDC2_uc002koh.   | NM_001098529 | NP_001091999 | Q86VQ3 | TXND2_HUMAN | 2  | 'CCAAGACCTCAC'           | 0.562 |             |
| - | 6  | 1782 | md.1_Missense_N   | NM_020805    | NP_065856    | Q9P2G3 | KLH14_HUMAN | 1  | 'CTCCCGCATGA'            | 0.463 |             |
| + | 4  | 1322 | ra.1_Missense_Mt  | NM_173480    | NP_775751    | Q68EA5 | ZNF57_HUMAN | 3  | 'CAGCTCTATAAA'           | 0.438 |             |
| + | 4  | 1336 | ra.1_Missense_Mt  | NM_173480    | NP_775751    | Q68EA5 | ZNF57_HUMAN | 3  | 'GAACAATGTGGC'           | 0.428 |             |
| + | 4  | 1371 | ra.1_Missense_Mt  | NM_173480    | NP_775751    | Q68EA5 | ZNF57_HUMAN | 3  | 'ATTCCGAGGTC'            | 0.428 | rs149690257 |
| + | 4  | 1386 | ra.1_Missense_Mt  | NM_173480    | NP_775751    | Q68EA5 | ZNF57_HUMAN | 3  | 'GAGGACGCACA'            | 0.438 | rs148390269 |
| + | 13 | 1292 | g.2_Missense_Mut  | NM_024760    | NP_079036    | Q9H808 | TLE6_HUMAN  | 1  | 'GTTATCCTGATC'           | 0.567 |             |
| + | 6  | 2416 | .2_Missense_Mut   | NM_020209    | NP_064594    | Q96IW2 | SHD_HUMAN   | 0  | 'CAGTTCACGCC'            | 0.662 |             |
| + | 4  | 1515 | ym.1_Missense_M   | NM_001136501 | NP_001129973 | Q08AG5 | ZN844_HUMAN | 0  | 'CTTCAGATCTG'            | 0.423 |             |
| - | 4  | 1523 |                   | NM_145276    | NP_660319    | Q8TA94 | ZN563_HUMAN | 0  | 'ATAACGCTTTCCC'          | 0.428 |             |
| - | 4  | 1355 |                   | NM_145276    | NP_660319    | Q8TA94 | ZN563_HUMAN | 0  | 'ATAACGTTTTCCC'          | 0.413 |             |
| - | 4  | 1409 | 709_uc002mtx.3_l  | NM_144976    | NP_659413    | Q8TBZ8 | ZN564_HUMAN | 1  | 'AGGCTCTACCA'            | 0.433 |             |
| - | 2  | 504  | lzi.2_Missense_Mt | NM_002918    | NP_002909    | P22670 | RFX1_HUMAN  | 2  | 'CGGGAGCTCCG'            | 0.438 |             |
| + | 8  | 2027 | p.G599R SYDE1_    | NM_033025    | NP_149014    | Q6ZW31 | SYDE1_HUMAN | 2  | 'CCTGTGGGCGG'            | 0.697 |             |
| + | 12 | 1425 |                   | NM_023944    | NP_076433    |        |             | 7  | 'GTCACCTCTGG'            | 0.557 |             |
| + | 9  | 1057 | l2nkr.1_RNA DDX   | NM_019070    | NP_061943    | Q9Y6V7 | DDX49_HUMAN | 1  | 'ACATCCACCGAC'           | 0.657 |             |
| - | 2  | 468  | i_p.L110* LPAR2_i | NM_004720    | NP_004711    | Q9HBW0 | LPAR2_HUMAN | 2  | 'CCAGCAAGCCC'            | 0.667 |             |
| + | 2  | 1049 | p.A385T ZNF493    | NM_175910    | NP_787106    | Q6ZR52 | ZN493_HUMAN | 1  | 'GCAAAAGCCTTT'           | 0.363 |             |
| - | 4  | 1333 | 1_Intron ZNF208_  | NM_007153    | NP_009084    |        |             | 7  | 'AGGGTTTCTCTC'           | 0.383 |             |
| - | 4  | 1187 | p.Q280K ZNF681_   | NM_138286    | NP_612143    | Q96N22 | ZN681_HUMAN | 0  | 'GGACTGGTTAA'            | 0.433 |             |
| + | 5  | 1060 | s.Q328L CD22_uc   | NM_001771    | NP_001762    | P20273 | CD22_HUMAN  | 9  | 'AGTGCAGTGTG'            | 0.652 |             |
| + | 39 | 6573 | _Mutation_p.S214  | NM_000540    | NP_000531    | P21817 | RYR1_HUMAN  | 12 | 'GTCCTCCGTGG'            | 0.662 |             |
| - | 7  | 1908 | e_Mutation_p.Q40  | NM_181882    | NP_870998    | Q9BXM0 | PRAX_HUMAN  | 2  | 'CAGCTGTACCT'            | 0.587 |             |
| - | 5  | 368  | hjp.1_Missense_N  | NM_000979    | NP_000970    | Q07020 | RL18_HUMAN  | 0  | 'GGATGCGGCTG'            | 0.667 | rs1804326   |
| + | 4  | 1553 | /dw.1_Missense_N  | NM_138374    | NP_612383    | Q96IR2 | ZN845_HUMAN | 0  | 'TCAGACATCATC'           | 0.378 |             |
| - | 5  | 979  | LRA3_uc010erk.2   | NM_006865    | NP_006856    | Q8N6C8 | LIRA3_HUMAN | 1  | 'ACTCGGAGGAG'            | 0.677 |             |
| + | 4  | 1330 | ZIK1_uc002qpi.2   | NM_001010879 | NP_001010879 | Q3SY52 | ZIK1_HUMAN  | 2  | 'GGTGACTGTGG'            | 0.448 |             |
| + | 4  | 1339 | ZIK1_uc002qpi.2   | NM_001010879 | NP_001010879 | Q3SY52 | ZIK1_HUMAN  | 2  | 'GGGAAATCCTT'            | 0.453 |             |
| + | 1  | 5246 | 1_5'Flank ZNF512  | NM_032266    | NP_115642    | Q68DN1 | CB016_HUMAN | 1  | 'AGAGAGAAGCC'            | 0.562 |             |
| - | 8  | 1027 | 'sij.2_Nonsense_N | NM_015189    | NP_056004    | Q9Y2D4 | EXC6B_HUMAN | 2  | 'ACATCGATAAAC'           | 0.368 |             |
| + | 7  | 2842 |                   | NM_144993    | NP_659430    | O43151 | TET3_HUMAN  | 0  | 'CATAACCTCTAC'           | 0.617 |             |
| - | 2  | 782  | OLN2_uc002spb.    | NM_006464    | NP_006455    | O43493 | TGON2_HUMAN | 0  | 'GCTAGGGCTGT'            | 0.597 |             |
| + | 4  | 1894 | yuy.1_Missense_N  | NM_020184    | NP_064569    | Q6P4Q7 | CNNM4_HUMAN | 3  | 'GCCCCGCCATT'            | 0.567 |             |
| - | 2  | 531  | ve.1_RNA ANKRD    | NM_025190    | NP_079466    | Q8N2N9 | AN36B_HUMAN | 0  | 'CTTACGGTCTG'            | 0.463 |             |
| - | 4  | 729  | s.2_Nonsense_Mt   | NM_002349    | NP_002340    | O60449 | LY75_HUMAN  | 0  | 'CTTTCCCAATT'            | 0.353 |             |
| + | 8  | 4574 | e_Mutation_p.P13  | NM_152381    | NP_689594    | A4UGR9 | XIRP2_HUMAN | 14 | 'CCCTCTTCTG'             | 0.358 |             |



|   |     |                             |                                                       |              |              |             |                    |     |               |       |             |
|---|-----|-----------------------------|-------------------------------------------------------|--------------|--------------|-------------|--------------------|-----|---------------|-------|-------------|
| - | 307 | 7342_9734:010zfi.1_Missense | NM_133378                                             | NP_596869    | Q8WZ42       | TITIN_HUMAN |                    | 153 | AGAGGGGCATGC  | 0.431 |             |
| - | 41  | 7488                        | NM_018897                                             | NP_061720    | Q8WXX0       | DYH7_HUMAN  | 4 (By similarity). | 12  | AATGATCAATAA  | 0.468 |             |
| + | 14  | 2159                        | p.A651V PARD3B                                        | NM_152526    | NP_689739    | Q8TEW8      | PAR3L_HUMAN        | 4   | ATGGGCCGAGA   | 0.438 |             |
| + | 3   | 429                         | 1486_uc010fxa.1_                                      | NM_020864    | NP_065915    | Q9P242      | K1486_HUMAN        | 3   | CGAAGGAAGTT   | 0.478 |             |
| + | 21  | 1404                        | utation_p.M414 C                                      | NM_000091    | NP_000082    | Q01955      | CO4A3_HUMAN        | 3   | GCCATGGGGAC   | 0.602 |             |
| + | 2   | 61                          | tj.1_RNA FRG1B_uc010gdr.1_RNA FRG1B_uc010ztk.1_Intron |              |              |             |                    | 0   | CAGAATCGCCC   | 0.353 | rs143761036 |
| - | 3   | 1038                        | xdk.2_Intron CPNE                                     | NM_152838    | NP_690051    | Q9NTZ6      | RBM12_HUMAN        | 3   | TTATTGTTCAAAT | 0.512 |             |
| + | 6   | 1242                        | K2_uc010ggp.2_M                                       | NM_001098798 | NP_001092268 | Q96NM4      | TOX2_HUMAN         | 1   | CAGCCCCCAG    | 0.677 |             |
| + | 10  | 1244                        | _p.A325T RTEL1_                                       | NM_016434    | NP_057518    | Q9NZ71      | RTEL1_HUMAN        | 0   | TCAGCGCGGAC   | 0.662 | rs144255879 |
| + | 26  | 5528                        | eb.1_Missense_M                                       | NM_005128    | NP_005119    | Q9Y3R5      | DOP2_HUMAN         | 2   | GAACTCCCAAC   | 0.403 |             |
| - | 25  | 4734                        | CAM_uc002yvr.1_f                                      | NM_001389    | NP_001380    | O60469      | DSCAM_HUMAN        | 11  | FGATTGAAAAAC  | 0.488 |             |
| + | 5   | 478                         | L12_uc003ato.1_l                                      | NM_001039141 | NP_001034230 | Q9H2D6      | TARA_HUMAN         | 1   | ATCCACGGAGA   | 0.627 |             |
| + | 7   | 2403                        | atq.1_Missense_M                                      | NM_001039141 | NP_001034230 | Q9H2D6      | TARA_HUMAN         | 1   | CTCTCCTAACAC  | 0.582 |             |
| + | 2   | 379                         | R8_uc003cjm.2_In                                      | NM_005201    | NP_005192    | P51685      | CCR8_HUMAN         | 2   | CTGTCTGACCTG  | 0.488 |             |
| - | 2   | 1226                        | ro.3_Missense_Mt                                      | NM_006574    | NP_006565    | O95196      | CSPG5_HUMAN        | 2   | GAGGCCAAGTC   | 0.637 |             |
| + | 4   | 620                         | .S21L ARIH2_uc0                                       | NM_006321    | NP_006312    | O95376      | ARI2_HUMAN         | 1   | AAGTTTCAGAGA  | 0.363 |             |
| + | 5   | 7708                        |                                                       | NM_003458    | NP_003449    | Q9UPA5      | BSN_HUMAN          | 8   | GTCTCCCCAGC   | 0.632 |             |
| + | 1   | 379                         |                                                       | NM_001005482 | NP_001005482 | Q8NGV7      | OR5H2_HUMAN        | 3   | TATGATCGCTATC | 0.378 |             |
| + | 3   | 237                         | ia.1_Missense_Mu                                      | NM_020202    | NP_064587    | Q9NQR4      | NIT2_HUMAN         | 1   | TATTTTCCTGAAT | 0.373 |             |
| + | 8   | 1414                        |                                                       | NM_020754    | NP_065805    | Q2M1Z3      | RHG31_HUMAN        | 2   | CTTTTAGCGCA   | 0.378 |             |
| - | 7   | 1562                        | er.2_Missense_Mt                                      | NM_175924    | NP_787120    | Q86SU0      | ILDR1_HUMAN        | 1   | CCCTCTCCTGT   | 0.672 |             |
| + | 12  | 1699_1700                   |                                                       | NM_001004316 | NP_001004316 | Q6ZMV7      | LEKR1_HUMAN        | 0   | TTAAGGAAGAAA  | 0.347 |             |
| - | 10  | 1211                        | .1_3'UTR LRRC34                                       | NM_153353    | NP_699184    | Q8IZ02      | LRC34_HUMAN        | 0   | ATTCTCCATAAC  | 0.378 |             |
| + | 4   | 467                         | e_Mutation_p.R67                                      | NM_182610    | NP_872416    | Q7Z3H4      | SAMD7_HUMAN        | 1   | CAGTCGGATCT   | 0.428 | rs138236130 |
| + | 11  | 1911                        | rw.1_Missense_Mt                                      | NM_198485    | NP_940887    | Q6ZUI0      | TPRG1_HUMAN        | 0   | CACAAGAATTC   | 0.408 |             |
| + | 12  | 1714                        | se_Mutation_p.P44                                     | NM_003722    | NP_003713    | Q9H3D4      | P63_HUMAN          | 12  | CACCTCCGTATC  | 0.607 |             |
| - | 11  | 2052                        | ifsg.2_Missense_M                                     | NM_018192    | NP_060662    | Q8IVL5      | P3H2_HUMAN         | 4   | GTATAGAAAAAT  | 0.433 |             |
| - | 9   | 1067_1068                   | p.S183F UBXN7_                                        | NM_015562    | NP_056377    | O94888      | UBXN7_HUMAN        | 3   | CAAACGGATATG  | 0.416 |             |
| - | 1   | 668                         | 168_uc010iah.2_5                                      | NM_152617    | NP_689830    | Q8IYW5      | RN168_HUMAN        | 0   | TTCGACGGTCG   | 0.577 |             |
| + | 5   | 978                         | 141_uc003gab.2_l                                      | NM_003441    | NP_003432    | Q15928      | ZN141_HUMAN        | 0   | TAGGTTCCACAAC | 0.363 | rs140024736 |
| - | 22  | 3199                        |                                                       | NM_001042784 | NP_001036249 | Q5M9N0      | CD158_HUMAN        | 6   | CTTAGGAGAAG   | 0.358 |             |
| - | 12  | 1661                        | .1_Nonsense_Mut                                       | NM_000204    | NP_000195    | P05156      | CFAI_HUMAN         | 0   | CCACTGAAGTG   | 0.333 |             |
| + | 2   | 524                         | TU_uc011cqq.1_R                                       | NM_015693    | NP_056508    | Q9ULD6      | PDZD6_HUMAN        | 1   | CAGGAGTCATT   | 0.393 |             |
| + | 1   | 2889                        | gz.2_Missense_M                                       | NM_032961    | NP_116586    | Q9P2E7      | PCD10_HUMAN        | 2   | CAGggcgggggcg | 0.587 |             |
| - | 1   | 1990                        | .1_Intron PCDH18                                      | NM_019035    | NP_061908    | Q9HCL0      | PCD18_HUMAN        | 5   | CTTCATGATCAA  | 0.418 |             |
| - | 2   | 323                         | FS6_uc003jcy.2_5'                                     | NM_032479    | NP_115868    | Q9P0J6      | RM36_HUMAN         | 0   | ACCACCGACCC   | 0.562 |             |
| - | 28  | 4403                        |                                                       | NM_001369    | NP_001360    | Q8TE73      | DYH5_HUMAN         | 31  | AGCTTTCGACAT  | 0.468 |             |
| + | 1   | 672                         | uc011ctk.1_Intron                                     | NM_032567    | NP_115956    | Q9BXG8      | SPZ1_HUMAN         | 1   | AAACAGGAGATG  | 0.358 |             |
| + | 1   | 816                         | uc011ctk.1_RNA                                        | NM_032567    | NP_115956    | Q9BXG8      | SPZ1_HUMAN         | 1   | AAACAGCAGATG  | 0.353 |             |
| - | 2   | 1200                        |                                                       | NM_203406    | NP_981951    | Q68D91      | MBLC2_HUMAN        | 0   | CAATCGAAAAAC  | 0.408 |             |
| - | 5   | 647                         | ikpw.1_Nonsense_                                      | NM_022140    | NP_071423    | Q9HCS5      | E41LA_HUMAN        | 1   | GCCCTGAAGGA   | 0.468 |             |
| - | 14  | 1547                        | 3lwy.2_Missense_M                                     | NM_033274    | NP_150377    | Q9H013      | ADA19_HUMAN        | 8   | GGTAGGGCAGT   | 0.622 |             |
| + | 9   | 7204                        | EP1_uc011diq.1_f                                      | NM_002114    | NP_002105    | P15822      | ZEP1_HUMAN         | 6   | CAGCCCCCAGA   | 0.512 |             |
| - | 30  | 4190                        | '27_uc003nxd.2_5'                                     | NM_006295    | NP_006286    | P26640      | SYVC_HUMAN         | 3   | CGATGGCCTCA   | 0.572 |             |
| - | 32  | 4462                        | ai.2_Missense_Mu                                      | NM_138694    | NP_619639    | P08F94      | PKHD1_HUMAN        | 44  | CGATGGGAAGA   | 0.507 |             |
| + | 17  | 1964                        | Splice_Site STXBF                                     | NM_001127715 | NP_001121187 | Q5T5C0      | STXB5_HUMAN        | 0   | ATTTAGAGTTAA  | 0.313 |             |
| + | 7   | 1005                        | 3_uc003quc.2_Mi                                       | NM_152410    | NP_689623    | Q96M98      | PACRG_HUMAN        | 0   | AACATTGGGGAC  | 0.507 |             |

|   |    |           |                     |              |              |        |              |                             |       |               |       |             |
|---|----|-----------|---------------------|--------------|--------------|--------|--------------|-----------------------------|-------|---------------|-------|-------------|
| + | 3  | 1358      | LL2_uc011egr.1_R    | NM_031949    | NP_114155    | Q9BWW7 | TTL2_HUMAN   | TTL.                        | 3     | ATGAGGGGAGA   | 0.433 | rs141172576 |
| + | 6  | 1057      | .3_Missense_Muta    | NM_000600    | NP_000591    | P05231 | IL6_HUMAN    |                             | 0     | TTTAAGGAGTTC  | 0.527 |             |
| + | 4  | 1320      |                     | NM_001159522 | NP_001152994 | A8MUV8 | ZN727_HUMAN  | 2H2-type 8.                 | 0     | GGTTCCTCAGAC  | 0.388 |             |
| + | 4  | 1390      |                     | NM_001159522 | NP_001152994 | A8MUV8 | ZN727_HUMAN  | 2H2-type 9.                 | 0     | CAAAAAGCTTTAC | 0.388 |             |
| + | 4  | 1488      |                     | NM_001159522 | NP_001152994 | A8MUV8 | ZN727_HUMAN  | 2H2-type 10.                | 0     | GGTCCCAGAC    | 0.393 |             |
| + | 4  | 1558      |                     | NM_001159522 | NP_001152994 | A8MUV8 | ZN727_HUMAN  | 2H2-type 11.                | 0     | CAAAAACCTTTAC | 0.428 |             |
| - | 9  | 1318      | UN5_uc003bxx.2_     | NM_018044    | NP_060514    | Q96P11 | NSUN5_HUMAN  |                             | 0     | CTTGGCACCT    | 0.607 |             |
| + | 14 | 2315      | AN_uc003uwl.2_F     | NM_003386    | NP_003377    | Q9Y493 | ZAN_HUMAN    | ate) (mucin-like domain). E | 11    | AAAACCCACCA   | 0.507 |             |
| + | 14 | 2903      | AN_uc003uwl.2_F     | NM_003386    | NP_003377    | Q9Y493 | ZAN_HUMAN    | ate) (mucin-like domain). E | 11    | AAAACCCACCA   | 0.507 |             |
| + | 14 | 2911      | AN_uc003uwl.2_F     | NM_003386    | NP_003377    | Q9Y493 | ZAN_HUMAN    | ate) (mucin-like domain). E | 11    | CCATCTCCACG   | 0.502 |             |
| + | 3  | 2023      | C17_uc010lho.1_F    | NM_001040105 | NP_001035194 | Q685J3 | MUC17_HUMAN  | X approximate tandem rep    | 27    | CTCCAACACTC   | 0.473 |             |
| + | 3  | 6777      | C17_uc010lho.1_F    | NM_001040105 | NP_001035194 | Q685J3 | MUC17_HUMAN  | X approximate tandem re     | 27    | TTTCAGCAACT   | 0.498 |             |
| + | 3  | 6811      | C17_uc010lho.1_F    | NM_001040105 | NP_001035194 | Q685J3 | MUC17_HUMAN  | ch. 59 X approximate tandi  | 27    | FGACCCTTCTA   | 0.478 |             |
| + | 3  | 7480      | C17_uc010lho.1_F    | NM_001040105 | NP_001035194 | Q685J3 | MUC17_HUMAN  | ch. 59 X approximate tandi  | 27    | CCCTTTTCCA    | 0.522 |             |
| + | 3  | 9657_9658 | C17_uc010lho.1_F    | NM_001040105 | NP_001035194 | Q685J3 | MUC17_HUMAN  | ch. 59 X approximate tandi  | 27    | AAGCCACTTCAT  | 0.505 |             |
| - | 2  | 257       |                     | NM_001024607 | NP_001019778 | A4D0T2 | CG066_HUMAN  |                             | 2     | GCAGATATTGAC  | 0.418 |             |
| - | 2  | 476       | T2_uc003vja.2_5'l   | NM_003391    | NP_003382    | P09544 | WNT2_HUMAN   |                             | 7     | CATCTGGATGTC  | 0.597 |             |
| - | 15 | 1860      |                     | NM_004333    | NP_004324    | P15056 | BRAF_HUMAN   | rotein kinas_R603>1(2) p.T  | 18290 | ATTTCACTGTAC  | 0.368 |             |
| - | 4  | 776       | B3B_uc003wig.3_F    | NM_173681    | NP_775952    | Q674R7 | ATG9B_HUMAN  | nal (By similarity).        | 1     | GCATCGAAGGA   | 0.537 |             |
| - | 3  | 452       |                     | NM_014420    | NP_055235    | Q9UBT3 | DKK4_HUMAN   |                             | 1     | TTGTTCTTCTC   | 0.458 |             |
| - | 3  | 1741      | CO5A1_uc003xyk      | NM_030958    | NP_112220    | Q9H2Y9 | SO5A1_HUMAN  | Name=6; (Potential).        | 4     | AGTTTCCAATG   | 0.348 |             |
| - | 8  | 1926      | M1_uc010mic.2_f     | NM_144966    | NP_659403    | Q5H8C1 | FREM1_HUMAN  | CSPG 2.                     | 5     | CAGCCAATGT    | 0.488 |             |
| - | 10 | 2369      |                     | NM_001163    | NP_001154    | Q02410 | APBA1_HUMAN  | PDZ 1.                      | 1     | GCTTCCCAGAT   | 0.527 |             |
| + | 1  | 805       |                     | NM_001004484 | NP_001004484 | Q8NGV5 | O13D1_HUMAN  | lasmic (Potential).         | 2     | AGAAAGCCTTC   | 0.383 |             |
| + | 1  | 863       |                     | NM_001004484 | NP_001004484 | Q8NGV5 | O13D1_HUMAN  | Name=6; (Potential).        | 2     | CAGCCCTTTTAT  | 0.413 |             |
| + | 12 | 1648      | p.R476Q SLC44A      | NM_080546    | NP_536856    | Q8WWI5 | CTL1_HUMAN   | membrane (Potential). Cys-  | 4     | TGCACGATGTG   | 0.289 |             |
| + | 11 | 1721      | mf.1_Missense_M     | NM_000962    | NP_000953    | P23219 | PGH1_HUMAN   |                             | 2     | CTTTTCCCTCA   | 0.512 |             |
| - | 2  | 422       | R34_uc004bvr.1_M    | NM_052844    | NP_443076    | Q96EX3 | WDR34_HUMAN  |                             | 3     | GGACGGGGGCT   | 0.627 |             |
| - | 28 | 7018      | 6A_uc004cht.2_M     | NM_014866    | NP_055681    | O15027 | SC16A_HUMAN  | action with SEC23A. Pro-ri  | 0     | CTGTGGTTCTT   | 0.622 |             |
| + | 4  | 859       | P5_uc010ncq.2_3'UTR |              |              |        |              |                             | 0     | TTGCCCCACTG   | 0.622 |             |
| - | 2  | 231       | A9L_uc010nfp.2_     | NM_001412    | NP_001403    | P47813 | IF1AX_HUMAN  |                             | 1     | TACCTCCTTTAC  | 0.313 |             |
| + | 19 | 2411      | p.F754L UBA1_uc     | NM_153280    | NP_695012    | P22314 | UBA1_HUMAN   |                             | 1     | CTCACCTTTGAT  | 0.557 |             |
| - | 2  | 2186      |                     | NM_152424    | NP_689637    | Q5JTC6 | F123B_HUMAN  | p.0?(40)                    | 112   | ACTTGAGTCTCT  | 0.617 |             |
| - | 25 | 2239      | p.E368K TEX11_u     | NM_001003811 | NP_001003811 | Q8IYF3 | TEX11_HUMAN  |                             | 5     | CTTGCTCTAGAT  | 0.393 |             |
| + | 4  | 551       | EC1_uc010nsl.1_I    | NM_005462    | NP_005453    | O60732 | MAGC1_HUMAN  |                             | 4     | CTGAGGGCGAC   | 0.582 |             |
| + | 4  | 564       | EC1_uc010nsl.1_I    | NM_005462    | NP_005453    | O60732 | MAGC1_HUMAN  |                             | 4     | ACCCCAGTCTC   | 0.582 | rs141277731 |
| - | 2  | 319       | 5F CASP9_uc001e     | NM_001229    | NP_001220    | P55211 | CASP9_HUMAN  | CARD.                       | 2     | AGCAGGAGATG   | 0.547 |             |
| - | 6  | 707       | p.Y168H ATP13A      | NM_022089    | NP_071372    | Q9NQ11 | AT132_HUMAN  | lasmic (Potential).         | 4     | GATATAGCGCTC  | 0.537 |             |
| - | 17 | 2464      | xm.1_Missense_M     | NM_052896    | NP_443128    | Q72408 | CSMD2_HUMAN  | tracellular (Potential).    | 12    | AAGTCGCCCA    | 0.502 |             |
| - | 5  | 826       | p.P95S DHC24_       | NM_014762    | NP_055577    | Q15392 | DHC24_HUMAN  | inding PCMH-type.           | 1     | GGCAGGGATGAT  | 0.582 |             |
| + | 6  | 746       | R_uc009waq.2_lr     | NM_002303    | NP_002294    | P48357 | LEPR_HUMAN   | ellular (Potential).        | 1     | AGTTTTCAGATG  | 0.368 |             |
| - | 14 | 3116      |                     | NM_001002912 | NP_001002912 | Q5RHP9 | CA173_HUMAN  | Glu-rich.                   | 5     | TCCTCTCTTTT   | 0.522 |             |
| + | 9  | 1318      | .2_Missense_Mut     | NM_174858    | NP_777283    | Q9Y6K8 | KAD5_HUMAN   |                             | 1     | ACAGGGTGATG   | 0.294 |             |
| - | 2  | 1046      | p.G72R SLC16A       | NM_003051    | NP_003042    | P53985 | MOT1_HUMAN   | ical; (Potential).          | 1     | GACCTCCACCAT  | 0.378 |             |
| - | 3  | 436       |                     | NM_002524    | NP_002515    | P01111 | RASN_HUMAN   | GTP. ) p.Q61P(21) f         | 2607  | CTTCTTGTCAC   | 0.458 | rs11554290  |
| + | 8  | 663       | q NBPF9_uc010oy     | NM_001037675 | NP_001032764 | Q3BBV1 | NBPFK_HUMAN  | NBPF 1.                     | 0     | TGAAGTGAGCA   | 0.512 | rs71527379  |
| + | 3  | 405       | F9_uc010oyg.1_lr    | NM_001039703 | NP_001034792 | A6NDV3 | A6NDV3_HUMAN |                             | 0     | TCATTGTATGAG  | 0.562 | rs4996268   |

|   |    |           |                                 |                           |               |        |                                            |      |                   |       |             |
|---|----|-----------|---------------------------------|---------------------------|---------------|--------|--------------------------------------------|------|-------------------|-------|-------------|
| + | 9  | 1402      | .1_Missense_Muta                | NM_001039703              | NP_001034792  | A6NDV3 | A6NDV3_HUMAN                               | 0    | AGAAATCATCTGC     | 0.438 |             |
| - | 3  | 400       |                                 | NM_001008536              | NP_001008536  | Q5QJ38 | TCHL1_HUMAN                                | 2    | CCCTGAACATCC      | 0.433 |             |
| - | 24 | 8732_8733 | ASH1L_uc001fkt.2                | NM_018489                 | NP_060959     | Q9NR48 | ASH1L_HUMAN BAH.                           | 11   | TCCAAGGGAATC      | 0.431 |             |
| - | 41 | 5873      |                                 | NM_003126                 | NP_003117     | P02549 | SPTA1_HUMAN Spectrin 18.                   | 8    | TTCTCTCTGCA       | 0.428 |             |
| - | 8  | 1172      | e_Mutation_p.L25                | NM_025160                 | NP_079436     | Q9H7D7 | WDR26_HUMAN WD 2.                          | 0    | CAACAAGATAG       | 0.428 |             |
| - | 12 | 1545      | i_2_RNA NEBL_uc                 | NM_006393                 | NP_006384     | O76041 | NEBL_HUMAN Nebulin 10.                     | 2    | CCTTTAATCTCTC     | 0.333 |             |
| + | 5  | 599       | lizo.1_RNA HSD17B7P2_uc001izp.1 | Missense_Mutation_p.N173S |               |        |                                            | 0    | TCGCAATGCAAC      | 0.453 | rs2257765   |
| - | 7  | 1309      | GMS1_uc009xou.                  | NM_147156                 | NP_671512     | Q86VZ5 | SMS1_HUMAN                                 | 2    | CCATGGGGATCT      | 0.502 |             |
| + | 1  | 144       | uc001kwr.2_Intron               | NM_001143909              | NP_0011137381 | Q2QD12 | Q2QD12_HUMAN                               | 0    | CCATCCTCAAC       | 0.542 |             |
| + | 20 | 3052      | CS3_uc010qqz.1                  | NM_014978                 | NP_055793     | Q9UPU3 | SORC3_HUMAN enal (Potential).              | 10   | CTCAACTGGGGA      | 0.463 |             |
| - | 1  | 441       | C2_uc009xxx.2_Ir                | NR_026715                 |               |        |                                            | 0    | CCAGGTGCCCC       | 0.537 |             |
| + | 14 | 2550      | RF1_uc010qwe.1                  | NM_020901                 | NP_065952     | Q9P1Y6 | PHRF1_HUMAN                                | 0    | ATAAGGAGCAG       | 0.577 |             |
| - | 1  | 488       |                                 | NM_001005238              | NP_001005238  | Q8NGK0 | O51G2_HUMAN Name=4; (Potential).           | 2    | GTAATGGAAAA       | 0.473 |             |
| - | 11 | 1231      | .2_RNA SERGEF                   | NM_012139                 | NP_036271     | Q9UGK8 | SRGEF_HUMAN RCC1 7.                        | 1    | CTGACGATGAC       | 0.617 |             |
| + | 11 | 2849      | _p.R743* NAV2_u                 | NM_145117                 | NP_660093     | Q8IVL1 | NAV2_HUMAN                                 | 6    | CCCCTCGAGCC       | 0.632 |             |
| + | 29 | 3169      | itation_p.L826P D               | NM_001105540              | NP_001099010  | Q13574 | DGKZ_HUMAN ANK 1.                          | 3    | CACGCTCCTGC       | 0.692 |             |
| + | 9  | 1346      | _p.R376K BCO2_u                 | NM_031938                 | NP_114144     | Q9BYV7 | BCDO2_HUMAN                                | 0    | TCGAAGGTTTG       | 0.413 |             |
| + | 9  | 1468      | v.1_Missense_Mu                 | NM_002017                 | NP_002008     | Q01543 | FLI1_HUMAN                                 | 2273 | CGAGTCGTCCA       | 0.493 |             |
| - | 3  | 857       | o.R198C FOXN1_u                 | NM_021953                 | NP_068772     | Q08050 | FOXN1_HUMAN                                | 2    | GCTGCGGGAGC       | 0.493 |             |
| + | 11 | 2149      | ow.1_Missense_Mi                | NM_030667                 | NP_109592     | Q16827 | PTPRO_HUMAN III 7. Extracellular (Potentia | 9    | CAACGGACTTG       | 0.413 |             |
| - | 4  | 444       | 3_5'UTR PLCZ1_u                 | NM_033123                 | NP_149114     | Q86YW0 | PLCZ1_HUMAN                                | 3    | AAATTTCCGGT       | 0.333 |             |
| - | 11 | 3652      | _p.S807F SFRS2IF                | NM_004719                 | NP_004710     | Q99590 | SCAFB_HUMAN                                | 0    | TTATAGGATTGCT     | 0.428 |             |
| - | 1  | 183       |                                 | NM_012064                 | NP_036196     | P30301 | MIP_HUMAN al; (By similarity).             | 1    | CAGGGCCAAGC       | 0.582 |             |
| + | 14 | 2031      | ense_Mutation_p.f               | NM_182947                 | NP_891992     | Q86VW2 | ARHGP_HUMAN                                | 0    | CTCCCTCTC         | 0.577 |             |
| - | 2  | 1182      | _p.V275 ZFC3H1                  | NM_144982                 | NP_659419     | O60293 | ZC3H1_HUMAN                                | 5    | TACTGACATTATC     | 0.358 |             |
| + | 24 | 3023_3024 | tlq.2_Missense_M                | NM_018082                 | NP_060552     | Q9NW08 | RPC2_HUMAN                                 | 2    | CGGCTCCCATC       | 0.5   |             |
| + | 12 | 1215      | t.2_Missense_Mut                | NM_213594                 | NP_998759     | Q33E94 | RFX4_HUMAN ary for dimerization.           | 1    | CAGGAGTTTGAC      | 0.458 |             |
| - | 8  | 2201_2202 | e_Mutation_p.P65E               | NM_016179                 | NP_057263     | Q9UBN4 | TRPC4_HUMAN and ITPR3.  p.P656P(1)         | 6    | GGAAGGGAGTAG      | 0.431 |             |
| + | 2  | 2484      | i.2_Missense_Mut                | NM_001173                 | NP_001025226  | Q13017 | RHG05_HUMAN                                | 5    | AGCAAGCTCTCA      | 0.413 |             |
| + | 13 | 5940      |                                 | NM_004274                 | NP_004265     | Q13023 | AKAP6_HUMAN                                | 21   | CACATGGGAAA       | 0.383 |             |
| - | 2  | 538       |                                 | NM_021136                 | NP_066959     | Q16799 | RTN1_HUMAN                                 | 4    | GTGCAGAAATG       | 0.458 |             |
| - | 2  | 886       | orf43_uc010tud.1                | NM_194278                 | NP_919254     | Q6PJG2 | CN043_HUMAN                                | 5    | CTGGGGGGGCT       | 0.662 |             |
| + | 2  | 671       | 4orf109_uc001ybl                | NM_001098621              | NP_001092091  | Q8N6I4 | CN109_HUMAN ical; (Potential).             | 0    | CTTGCCCTTTT       | 0.453 |             |
| + | 23 | 2577      |                                 | NM_058237                 | NP_478144     | Q6NUP7 | PP4R4_HUMAN                                | 4    | GTTAGGAAAGA       | 0.303 | rs150367623 |
| + | 4  | 538       | _p.R145C EML1_u                 | NM_004434                 | NP_004425     | O00423 | EMAL1_HUMAN                                | 5    | GGAATCGCACA       | 0.507 |             |
| + | 1  | 2045      |                                 | NM_018958                 | NP_061831     | Q9NZP6 | CO002_HUMAN Pro-rich.                      | 8    | ATCCCCCTCTC       | 0.547 |             |
| - | 9  | 828       | pc.2_Missense_M                 | NM_015289                 | NP_056104     | Q96JC1 | VPS39_HUMAN CNH.                           | 3    | CCACGGTGAGA       | 0.527 |             |
| - | 3  | 560       |                                 | NM_207381                 | NP_997264     | Q5GJ75 | TP8L3_HUMAN                                | 0    | GTGCTCTTTGG       | 0.448 |             |
| + | 1  | 1499      |                                 | NM_001080534              | NP_001074003  | Q8NB66 | UN13C_HUMAN                                | 7    | CAGCAGAATTT       | 0.388 |             |
| - | 14 | 1581      | 'Flank uc002bcw.1               | NR_027024                 |               |        |                                            | 0    | GATGTTCTCTCT      | 0.627 | rs56290535  |
| - | 10 | 1091      |                                 | NM_001896                 | NP_001887     | P19784 | CSK22_HUMAN rotein kinase.                 | 1    | CTCTTTGGCAG       | 0.468 |             |
| + | 3  | 605       | 'fye.2_Missense_M               | NM_001114974              | NP_001108446  | Q2TAL5 | SMTL2_HUMAN                                | 0    | CAGATCCCCCC       | 0.632 |             |
| + | 6  | 544       | splice TBC1D3_uc                | NM_032258                 | NP_115634     | Q8IZP1 | TBC3A_HUMAN                                | 0    | ACCAGGTACGC       | 0.587 |             |
| - | 1  | 457       |                                 | NM_033059                 | NP_149048     | Q9BYQ6 | KR411_HUMAN -[GIKRQVHEL]-[SPTR]-[S         | 0    | ggagatgctgcagctgg | 0.129 |             |
| + | 3  | 498       | ix.1_Missense_M                 | NM_003396                 | NP_003387     | O14905 | WNT9B_HUMAN                                | 2    | GAGCCGGCAGG       | 0.662 |             |
| + | 2  | 664       | .F_uc002iuh.2_5'U               | NM_002126                 | NP_002117     | Q16534 | HLF_HUMAN                                  | 2    | ACAAGGAAAAA       | 0.433 |             |
| - | 8  | 1079      | xa.3_Missense_M                 | NM_001005207              | NP_001005207  | O94972 | TRI37_HUMAN Potential.                     | 7    | CTTGGGTTAGAC      | 0.328 |             |

|   |    |           |                                                       |              |              |        |              |                                |    |               |       |             |
|---|----|-----------|-------------------------------------------------------|--------------|--------------|--------|--------------|--------------------------------|----|---------------|-------|-------------|
| - | 8  | 1464      | i_p.S383L CSNK1I                                      | NM_001893    | NP_001884    | P48730 | KC1D_HUMAN   |                                | 2  | TCGACGAGGAC   | 0.672 |             |
| - | 6  | 1782      | md.1_Missense_Iv                                      | NM_020805    | NP_065856    | Q9P2G3 | KLH14_HUMAN  | Kelch 3.                       | 1  | CTCCCGCATGAC  | 0.463 |             |
| + | 13 | 1292      | g.2_Missense_Mut                                      | NM_024760    | NP_079036    | Q9H808 | TLE6_HUMAN   | WD 4.                          | 1  | GTATATCCTGATC | 0.567 |             |
| + | 6  | 2416      | u.2_Missense_Mut                                      | NM_020209    | NP_064594    | Q96IW2 | SHD_HUMAN    | SH2.                           | 0  | CAGTTCACGCCA  | 0.662 |             |
| + | 8  | 2027      | p.G599R SYDE1_                                        | NM_033025    | NP_149014    | Q6ZW31 | SYDE1_HUMAN  |                                | 2  | CCTGTGGGCGCG  | 0.697 |             |
| + | 12 | 1425      |                                                       | NM_023944    | NP_076433    |        |              |                                | 7  | GTACACCTCTGC  | 0.557 |             |
| - | 2  | 468       | i_p.L110* LPAR2_u                                     | NM_004720    | NP_004711    | Q9HBW0 | LPAR2_HUMAN  | Name=3; (Potential).           | 2  | CCAGCAAGCCC   | 0.667 |             |
| + | 5  | 1060      | y.Q328L CD22_ucf                                      | NM_001771    | NP_001762    | P20273 | CD22_HUMAN   | cellular (Potential).          | 9  | AGTGCAGTGTG   | 0.652 |             |
| + | 39 | 6573      | _Mutation_p.S214i                                     | NM_000540    | NP_000531    | P21817 | RYR1_HUMAN   | 6 X approximate repeats.       | 12 | GTCCTCCGTGG   | 0.662 |             |
| - | 5  | 979       | LRA3_uc010erk.2                                       | NM_006865    | NP_006856    | Q8N6C8 | LIRA3_HUMAN  | like C2-type 3.                | 1  | ACTCGGAGGAG   | 0.677 |             |
| - | 8  | 1027      | 'sij.2_Nonsense_Iv                                    | NM_015189    | NP_056004    | Q9Y2D4 | EXC6B_HUMAN  |                                | 2  | ACATCGATAAAC  | 0.368 |             |
| + | 7  | 2842      |                                                       | NM_144993    | NP_659430    | O43151 | TET3_HUMAN   |                                | 0  | CATAACCTCTAC  | 0.617 |             |
| - | 4  | 729       | s.2_Nonsense_Mt                                       | NM_002349    | NP_002340    | O60449 | LY75_HUMAN   | cellular (Potential).          | 0  | CTTTTCCCAATT  | 0.353 |             |
| + | 8  | 4574      | e_Mutation_p.P13                                      | NM_152381    | NP_689594    | A4UGR9 | XIRP2_HUMAN  |                                | 14 | CCCTCCTTCTG   | 0.358 |             |
| - | 41 | 7488      |                                                       | NM_018897    | NP_061720    | Q8WXX0 | DYH7_HUMAN   | 4 (By similarity).             | 12 | AATGATCAATAA  | 0.468 |             |
| + | 14 | 2159      | p.A651V PARD3B                                        | NM_152526    | NP_689739    | Q8TEW8 | PAR3L_HUMAN  |                                | 4  | ATGGGCCGAGA   | 0.438 |             |
| + | 3  | 429       | 1486_uc010fxa.1_                                      | NM_020864    | NP_065915    | Q9P242 | K1486_HUMAN  |                                | 3  | CGAAGGAAGTT   | 0.478 |             |
| + | 21 | 1404      | utation_p.M414 C                                      | NM_000091    | NP_000082    | Q01955 | CO4A3_HUMAN  | le-helical region.             | 3  | GCCATGGGGAC   | 0.602 |             |
| - | 2  | 225       | wtu.2_Missense_Iv                                     | NM_178312    | NP_842564    | Q9BX51 | GGTL1_HUMAN  |                                | 1  | CCGGCATGTAG   | 0.622 |             |
| + | 2  | 61        | tj.1_RNA FRG1B_uc010gdr.1_RNA FRG1B_uc010ztk.1_Intron |              |              |        |              |                                | 0  | CAGAATCGCCC   | 0.353 | rs143761036 |
| + | 6  | 1242      | <2_uc010gpp.2_M                                       | NM_001098798 | NP_001092268 | Q96NM4 | TOX2_HUMAN   | Pro-rich.                      | 1  | CAGCCCCCAG    | 0.677 |             |
| + | 26 | 5528      | eb.1_Missense_M                                       | NM_005128    | NP_005119    | Q9Y3R5 | DOP2_HUMAN   |                                | 2  | GAACTCCCAAC   | 0.403 |             |
| - | 25 | 4734      | AM_uc002ypr.1_f                                       | NM_001389    | NP_001380    | O60469 | DSCAM_HUMAN  | III 5. Extracellular (Potentia | 11 | TGATTGGAAAAAC | 0.488 |             |
| - | 1  | 4437      |                                                       | NM_015672    | NP_056487    |        |              |                                | 0  | GGTGCCCATGTC  | 0.557 |             |
| + | 2  | 954       | D221G RFPL3S_u                                        | NM_001098535 | NP_001092005 | O75679 | RFPL3_HUMAN  | 330.2/SPRY.                    | 1  | TCTGGATATGGC  | 0.512 |             |
| + | 7  | 2403      | atq.1_Missense_M                                      | NM_001039141 | NP_001034230 | Q9H2D6 | TARA_HUMAN   |                                | 1  | CTCTCCTAACAC  | 0.582 |             |
| + | 2  | 379       | R8_uc003cjm.2_In                                      | NM_005201    | NP_005192    | P51685 | CCR8_HUMAN   | Name=2; (Potential).           | 2  | CTGTCTGACCTG  | 0.488 |             |
| + | 4  | 620       | .S21L ARIH2_uc0                                       | NM_006321    | NP_006312    | O95376 | ARI2_HUMAN   |                                | 1  | AAGTTTCAGAGA  | 0.363 |             |
| + | 5  | 7708      |                                                       | NM_003458    | NP_003449    | Q9UPA5 | BSN_HUMAN    |                                | 8  | GTCTCCCAGC    | 0.632 |             |
| + | 1  | 379       |                                                       | NM_001005482 | NP_001005482 | Q8NGV7 | OR5H2_HUMAN  | lasmic (Potential).            | 3  | TATGATCGCTATC | 0.378 |             |
| + | 3  | 237       | ia.1_Missense_Mu                                      | NM_020202    | NP_064587    | Q9NQR4 | NIT2_HUMAN   | N hydrolase.                   | 1  | TATTTTCTGAAT  | 0.373 |             |
| + | 8  | 1414      |                                                       | NM_020754    | NP_065805    | Q2M1Z3 | RHG31_HUMAN  |                                | 2  | CTTTTAGGCGA   | 0.378 |             |
| - | 7  | 1562      | er.2_Missense_Mt                                      | NM_175924    | NP_787120    | Q86SU0 | ILDR1_HUMAN  | lasmic (Potential).            | 1  | CCCTCTCCTGT   | 0.672 |             |
| + | 12 | 1699_1700 |                                                       | NM_001004316 | NP_001004316 | Q6ZMV7 | LEKR1_HUMAN  |                                | 0  | TTAAGGAAGAAA  | 0.347 |             |
| - | 10 | 1211      | .1_3'UTR LRRC34                                       | NM_153353    | NP_699184    | Q8IZ02 | LRRC34_HUMAN |                                | 0  | ATTCTCCATAAC  | 0.378 |             |
| + | 4  | 467       | e_Mutation_p.R67                                      | NM_182610    | NP_872416    | Q7Z3H4 | SAMD7_HUMAN  | p.R67W(1)                      | 1  | CAGTCGGATCT   | 0.428 | rs138236130 |
| + | 11 | 1911      | w.1_Missense_Mt                                       | NM_198485    | NP_940887    | Q6ZUI0 | TPRG1_HUMAN  |                                | 0  | CACAAGAATTC   | 0.408 |             |
| + | 12 | 1714      | se_Mutation_p.P44                                     | NM_003722    | NP_003713    | Q9H3D4 | P63_HUMAN    | SAM.                           | 12 | ACCTCCGTATC   | 0.607 |             |
| - | 11 | 2052      | ifsg.2_Missense_Iv                                    | NM_018192    | NP_060662    | Q8IVL5 | P3H2_HUMAN   |                                | 4  | GTATAGGAAAAA  | 0.433 |             |
| - | 9  | 1067_1068 | p.S183F UBXN7_                                        | NM_015562    | NP_056377    | Q94888 | UBXN7_HUMAN  |                                | 3  | CAAACGGATATG  | 0.416 |             |
| - | 22 | 3199      |                                                       | NM_001042784 | NP_001036249 | Q5M9N0 | CD158_HUMAN  | Ser-rich.                      | 6  | CTTAGGAGAAG   | 0.358 |             |
| - | 12 | 1661      | .1_Nonsense_Mut                                       | NM_000204    | NP_000195    | P05156 | CFAI_HUMAN   | peptidase S1.                  | 0  | CCACTGAAGTG   | 0.333 |             |
| + | 2  | 524       | TU_uc011cqq.1_R                                       | NM_015693    | NP_056508    | Q9ULD6 | PDZD6_HUMAN  |                                | 1  | CAGGAGTCATT   | 0.393 |             |
| + | 1  | 2889      | gz.2_Missense_M                                       | NM_032961    | NP_116586    | Q9P2E7 | PCD10_HUMAN  | Extracellular (Potential).     | 2  | Cagggcggggcgg | 0.587 |             |
| - | 1  | 1990      | .1_Intron PCDH18                                      | NM_019035    | NP_061908    | Q9HCL0 | PCD18_HUMAN  | r (Potential). Cadherin 5.     | 5  | CTCATGATCAA   | 0.418 |             |
| - | 1  | 46        | \ GYPE_uc003ijk.2                                     | NM_198682    | NP_941391    | P15421 | GLPE_HUMAN   |                                | 0  | GATCACGAGCT   | 0.398 |             |
| - | 28 | 4403      |                                                       | NM_001369    | NP_001360    | Q8TE73 | DYH5_HUMAN   | . Stem (By similarity).        | 31 | AGCTTTCGACAT  | 0.468 |             |

|   |    |      |                   |              |              |        |              |                             |       |               |       |
|---|----|------|-------------------|--------------|--------------|--------|--------------|-----------------------------|-------|---------------|-------|
| - | 2  | 1200 |                   | NM_203406    | NP_981951    | Q68D91 | MBLC2_HUMAN  |                             | 0     | CCAATCGAAAAA  | 0.408 |
| - | 14 | 1547 | 3lwy.2_Missense_  | NM_033274    | NP_150377    | Q9H013 | ADA19_HUMAN  | Extracellular (Potential).  | 8     | GGTAGGGCAGT   | 0.622 |
| + | 9  | 7204 | EP1_uc011diq.1_F  | NM_002114    | NP_002105    | P15822 | ZEP1_HUMAN   |                             | 6     | ACAGCCCCAGA   | 0.512 |
| - | 30 | 4190 | '27_uc003nxd.2_5' | NM_006295    | NP_006286    | P26640 | SYVC_HUMAN   |                             | 3     | CGATGGCCTCA   | 0.572 |
| - | 32 | 4462 | ai.2_Missense_Mu  | NM_138694    | NP_619639    | P08F94 | PKHD1_HUMAN  | Extracellular (Potential).  | 44    | CGATGGGAAGA   | 0.507 |
| - | 16 | 3591 | I2A1_uc003pht.2_  | NM_004370    | NP_004361    | Q99715 | COCA1_HUMAN  | nectin type-III 8.          | 9     | AAACAACCTGTG  | 0.418 |
| + | 17 | 1964 | Splice_Site STXBF | NM_001127715 | NP_001121187 | Q5T5C0 | STXB5_HUMAN  |                             | 0     | ATTTTAGAGTTAA | 0.313 |
| + | 7  | 1005 | 3_uc003quc.2_Mi   | NM_152410    | NP_689623    | Q96M98 | PACRG_HUMAN  |                             | 0     | ACATTGGGGAC   | 0.507 |
| + | 3  | 1358 | LL2_uc011egr.1_R  | NM_031949    | NP_114155    | Q9BWW7 | TTL2_HUMAN   | TTL.                        | 3     | ATGAGGGGAGA   | 0.433 |
| + | 6  | 1057 | .3_Missense_Muta  | NM_000600    | NP_000591    | P05231 | IL6_HUMAN    |                             | 0     | TTAAGGAGTTCC  | 0.527 |
| - | 9  | 1318 | 3UN5_uc003bxx.2_  | NM_018044    | NP_060514    | Q96P11 | NSUN5_HUMAN  |                             | 0     | CCTTGGCACCTC  | 0.607 |
| - | 2  | 257  |                   | NM_001024607 | NP_001019778 | A4D0T2 | CG066_HUMAN  |                             | 2     | GACGATATTGAC  | 0.418 |
| + | 14 | 1470 | 2_3'UTR ST7_uc0   | NM_021908    | NP_068708    | Q9NRC1 | ST7_HUMAN    |                             | 2     | ACCTCACCCGCA  | 0.507 |
| - | 2  | 476  | T2_uc003vja.2_5'l | NM_003391    | NP_003382    | P09544 | WNT2_HUMAN   |                             | 7     | CATCTGGATGTC  | 0.597 |
| + | 5  | 634  | 1_Mutation_p.S10C | NM_001868    | NP_001859    | P15085 | CBPA1_HUMAN  |                             | 1     | AGCCAGTGGG    | 0.652 |
| - | 15 | 1860 |                   | NM_004333    | NP_004324    | P15056 | BRAF_HUMAN   | rotein kinase_R603>I(2))p.T | 18290 | ATTTCACTGTAC  | 0.368 |
| - | 4  | 776  | 39B_uc003wig.3_F  | NM_173681    | NP_775952    | Q674R7 | ATG9B_HUMAN  | nal (By similarity).        | 1     | GCATCGAAGGA   | 0.537 |
| - | 3  | 452  |                   | NM_014420    | NP_055235    | Q9UBT3 | DKK4_HUMAN   |                             | 1     | TTGTTCCCTTCT  | 0.458 |
| - | 3  | 1741 | CO5A1_uc003xyk    | NM_030958    | NP_112220    | Q9H2Y9 | SO5A1_HUMAN  | Name=6; (Potential).        | 4     | AGTTTCCAATGA  | 0.348 |
| - | 10 | 2369 |                   | NM_001163    | NP_001154    | Q02410 | APBA1_HUMAN  | PDZ 1.                      | 1     | GCTTCCCAGAT   | 0.527 |
| + | 1  | 805  |                   | NM_001004484 | NP_001004484 | Q8NGV5 | O13D1_HUMAN  | lasmic (Potential).         | 2     | AGAAAGCCTTC   | 0.383 |
| + | 11 | 1721 | mf.1_Missense_M   | NM_000962    | NP_000953    | P23219 | PGH1_HUMAN   |                             | 2     | CTTTTCCCTCA   | 0.512 |
| - | 2  | 422  | R34_uc004bvr.1_M  | NM_052844    | NP_443076    | Q96EX3 | WDR34_HUMAN  |                             | 3     | GACGGGGGCT    | 0.627 |
| - | 28 | 7018 | 6A_uc004cht.2_M   | NM_014866    | NP_055681    | O15027 | SC16A_HUMAN  | action with SEC23A. Pro-ri  | 0     | CTGTGGTTCTT   | 0.622 |
| - | 2  | 231  | VA9L_uc010nfp.2_  | NM_001412    | NP_001403    | P47813 | IF1AX_HUMAN  |                             | 1     | TACCTCCTTTAC  | 0.313 |
| - | 2  | 2186 |                   | NM_152424    | NP_689637    | Q5JTC6 | F123B_HUMAN  | p.0?(40)                    | 112   | ACTTGAGTCTCT  | 0.617 |
| - | 25 | 2239 | p.E368K TEX11_u   | NM_001003811 | NP_001003811 | Q8IYF3 | TEX11_HUMAN  |                             | 5     | CTTGCTCTAGAT  | 0.393 |
| + | 25 | 4487 |                   | NM_198576    | NP_940978    | O00468 | AGRIN_HUMAN  | minin G-like 1.             | 3     | GGCGAGAGTCC   | 0.692 |
| + | 8  | 916  | nse_Mutation_p.G  | NM_153339    | NP_699170    | Q8N0Z8 | PUSL1_HUMAN  |                             | 1     | TGCAGGGGCCA   | 0.662 |
| - | 38 | 5594 | 3_Mutation_p.V68E | NM_015557    | NP_056372    | Q8TDI0 | CHD5_HUMAN   |                             | 12    | CTCCACTTCAG   | 0.652 |
| - | 6  | 672  |                   | NM_001561    | NP_001552    | Q07011 | TNR9_HUMAN   | ellular (Potential).        | 4     | AGTTACCTGGCT  | 0.537 |
| - | 12 | 1431 |                   | NM_207420    | NP_997303    | Q6PXP3 | GTR7_HUMAN   | lasmic (Potential).         | 0     | CGGTTTATCTCC  | 0.483 |
| + | 35 | 3967 | z.2_Nonsense_Mu   | NM_015074    | NP_055889    | O60333 | KIF1B_HUMAN  |                             | 3     | GTGGTTTGA     | 0.373 |
| - | 3  | 234  | 1_p.L77F C1orf127 | NM_173507    | NP_775778    | B7ZLG7 | B7ZLG7_HUMAN |                             | 1     | AAGAAGGCCTT   | 0.607 |
| + | 8  | 2164 | asi.1_Missense_M  | NM_020780    | NP_065831    | Q9P2K9 | PTHD2_HUMAN  | lasmic (Potential).         | 7     | AGGTCGAGGAA   | 0.632 |
| - | 2  | 397  | 1_1_Intron CLCN6_ | NM_006172    | NP_006163    | P01160 | ANF_HUMAN    |                             | 2     | GGGGCCCCGCC   | 0.672 |
| + | 1  | 307  |                   | NM_001080830 | NP_001074299 | Q95522 | PRA12_HUMAN  |                             | 3     | AGGTTGCGCCC   | 0.592 |
| - | 1  | 317  | 10obf.1_Missense  | NM_001146181 | NP_001139653 | B7ZW38 | B7ZW38_HUMAN |                             | 0     | AGCAATCATTCT  | 0.502 |
| + | 7  | 787  |                   | NM_033440    | NP_254275    | P08217 | CEL2A_HUMAN  | eptidase S1.                | 2     | CACGGGGTCT    | 0.622 |
| + | 11 | 1654 | JC16_uc001awt.2_  | NM_015291    | NP_056106    | Q9Y2G8 | DJC16_HUMAN  | lasmic (Potential).         | 3     | TCTTCGATGG    | 0.468 |
| + | 1  | 408  | C7A_uc009vpg.2_   | NM_152375    | NP_689588    | Q5VTJ3 | KLD7A_HUMAN  |                             | 3     | CCAGAGAAAAG   | 0.627 |
| + | 1  | 1307 | vpg.2_Missense_   | NM_152375    | NP_689588    | Q5VTJ3 | KLD7A_HUMAN  |                             | 3     | ATATCCCCTCA   | 0.647 |
| - | 2  | 117  | G2D_uc009vpo.2_   | NM_012400    | NP_036532    | Q9UNK4 | PA2GD_HUMAN  |                             | 0     | TTTCCAGTCA    | 0.552 |
| - | 4  | 954  |                   | NM_024544    | NP_078820    | Q969V5 | MUL1_HUMAN   | lasmic (Potential).         | 0     | CTGCGCTGC     | 0.607 |
| - | 8  | 964  | ei.2_Nonsense_Mu  | NM_001397    | NP_001388    | P42892 | ECE1_HUMAN   | ellular (Potential).        | 3     | CTCCTCGTCCC   | 0.622 |
| - | 15 | 1286 | bew.2_Missense_   | NM_002885    | NP_002876    | P47736 | RPGP1_HUMAN  | Rap-GAP.                    | 3     | AGAAGGGCACA   | 0.647 |
| + | 10 | 1997 | ogf.2_Missense_M  | NM_017449    | NP_059145    | P29323 | EPHB2_HUMAN  | lasmic (Potential).         | 5     | ATTGACATCTCT  | 0.532 |

rs141172576



|   |    |           |                   |              |              |        |             |                                |    |               |       |             |
|---|----|-----------|-------------------|--------------|--------------|--------|-------------|--------------------------------|----|---------------|-------|-------------|
| + | 10 | 1299      | p.R413Q GRHL3_    | NM_021180    | NP_067003    | Q8TE85 | GRHL3_HUMAN |                                | 1  | .CGAGCGGAAGC  | 0.627 |             |
| + | 2  | 967       | vry.1_Missense_Iv | NM_020379    | NP_065112    | Q9NR34 | MA1C1_HUMAN | renal (Potential).             | 1  | VTGTTCCGGTGAG | 0.502 |             |
| - | 24 | 3586      | sw.1_Missense_Mt  | NM_004672    | NP_004663    | O95382 | M3K6_HUMAN  |                                | 9  | VTGCCCGCACAG  | 0.662 | rs143876994 |
| - | 17 | 2467      | p.P732S MAP3K6    | NM_004672    | NP_004663    | O95382 | M3K6_HUMAN  | rotein kinase.                 | 9  | CAGGGGTCCCC   | 0.582 | rs138197184 |
| - | 2  | 203       |                   | NM_207397    | NP_997280    | Q6UWJ8 | C16L2_HUMAN | ellular (Potential).           | 0  | CAGGCGGATCAC  | 0.622 |             |
| - | 6  | 1602_1603 | S4_uc010ofy.1_3'  | NM_005626    | NP_005617    | Q08170 | SRSF4_HUMAN | r-rich (RS domain).            | 0  | ACACGGAGCGC   | 0.446 | rs146685214 |
| + | 31 | 4434      | rtq.2_Missense_M  | NM_005704    | NP_005695    | Q92729 | PTPRU_HUMAN | lasmic (Potential).            | 7  | TGGAGGGGCTG   | 0.602 |             |
| - | 1  | 126       | Flank ZCCHC17_u   | NM_004814    | NP_004805    | Q96DI7 | SNR40_HUMAN |                                | 0  | CCGCTCCCAAC   | 0.637 |             |
| - | 4  | 529       | to.2_Missense_Mt  | NM_001703    | NP_001694    | O60241 | BAI2_HUMAN  | ellular (Potential).           | 13 | GGTAGGAAAGA   | 0.677 |             |
| - | 2  | 900       | e_Mutation_p.G28  | NM_144569    | NP_653170    | Q6ZMY3 | SPOC1_HUMAN |                                | 6  | CAGTCCCTGAG   | 0.637 |             |
| + | 13 | 1540      | z.2_Missense_Mut  | NM_005356    | NP_005347    | P06239 | LCK_HUMAN   | rotein kinase.                 | 6  | CAGAGGAGCTG   | 0.597 |             |
| - | 5  | 825       | xm.1_Missense_Iv  | NM_052896    | NP_443128    | Q7Z408 | CSMD2_HUMAN | tracellular (Potential).       | 12 | CCAGAGGGAGG   | 0.542 |             |
| - | 2  | 150       | xm.1_Missense_Iv  | NM_052896    | NP_443128    | Q7Z408 | CSMD2_HUMAN | tracellular (Potential).       | 12 | GAACCCTGGGC   | 0.537 |             |
| + | 5  | 796       | y_Mutation_p.E12C | NM_012199    | NP_036331    | Q9UL18 | AGO1_HUMAN  |                                | 3  | GGCGGAGGTC    | 0.632 |             |
| - | 4  | 672       | nse_Mutation_p.S: | NM_017850    | NP_060320    | Q9NX04 | CA109_HUMAN |                                | 0  | ATAGACGAAAGA  | 0.438 |             |
| - | 2  | 232       | e_Mutation_p.H49  | NM_004468    | NP_004459    | Q13643 | FHL3_HUMAN  | I zinc-binding 1.              | 0  | ATCATGCCCGA   | 0.607 |             |
| + | 1  | 3712      | i.1_Intron MACF1_ | NM_015038    | NP_055853    | O94854 | K0754_HUMAN | Ala-rich.                      | 0  | ATGCTCCAGAG   | 0.617 |             |
| - | 2  | 265       |                   | NM_032526    | NP_115915    | Q9BXI3 | 5NT1A_HUMAN |                                | 1  | GGGTTTCGTTCT  | 0.448 |             |
| - | 3  | 305       | AL4_uc010oix.1_I  | NM_016257    | NP_057341    | Q9UM19 | HPCL4_HUMAN | EF-hand 2.                     | 1  | ACTTGAGAGCG   | 0.692 |             |
| + | 9  | 770       | IE_uc001cdv.2_Mi: | NM_006112    | NP_006103    | Q9UNP9 | PIIE_HUMAN  | e cyclophilin-type.            | 0  | CAAACACCAAT   | 0.547 |             |
| + | 4  | 385       | o01cfy.3_Missens  | NM_001142588 | NP_001136060 | Q13952 | NFYC_HUMAN  |                                | 3  | ACCTCAAAGC    | 0.423 |             |
| - | 5  | 6392      | e_Mutation_p.P17: | NM_024503    | NP_078779    | Q5T1R4 | ZEP3_HUMAN  |                                | 6  | CGCCGGCTCCC   | 0.562 |             |
| - | 9  | 1723      |                   | NM_006516    | NP_006507    | P11166 | GTR1_HUMAN  | lasmic (Potential).            | 5  | TGGACGTGGAC   | 0.552 | rs80359839  |
| + | 13 | 2096      | iq.2_Missense_Mu  | NM_005424    | NP_005415    | P35590 | TIE1_HUMAN  | III 3. Extracellular (Potentia | 7  | CTGGGCCAATA   | 0.637 |             |
| + | 11 | 2137_2138 | p.R171C PTPRF_1   | NM_002840    | NP_002831    | P10586 | PTPRF_HUMAN | ential). Fibronectin type-III  | 10 | AGGCCCGCAC    | 0.545 |             |
| + | 7  | 936       | s.1_Missense_Mu   | NM_001034024 | NP_001029196 | Q9NPF5 | DMAP1_HUMAN |                                | 0  | CGGAACGCAAG   | 0.617 |             |
| + | 10 | 1654      | y_Mutation_p.R148 | NM_018150    | NP_060620    | Q5VTB9 | RN220_HUMAN |                                | 2  | CACCTCGGGGC   | 0.592 |             |
| - | 2  | 557       | is.3_Missense_Mu  | NM_005897    | NP_005888    | Q9Y573 | IPP_HUMAN   | BTB.                           | 1  | ATACCTGTGTAA  | 0.274 |             |
| + | 5  | 842       | AH_uc001cpv.2_R   | NM_001441    | NP_001432    | O00519 | FAAH1_HUMAN | smic (By similarity).          | 2  | GCGGCCTCAAG   | 0.517 |             |
| - | 3  | 429       | e_Mutation_p.W1z  | NM_000778    | NP_000769    | Q02928 | CP4AB_HUMAN |                                | 4  | CCAATCCATGG   | 0.458 |             |
| + | 7  | 854       | iA9_uc010omt.1_I  | NM_001011547 | NP_001011547 | Q2M3M2 | SC5A9_HUMAN | ellular (Potential).           | 3  | CTTTCCACATTC  | 0.612 |             |
| - | 5  | 461       | fA6_uc010omv.1_I  | NM_019073    | NP_061946    | Q9NWH7 | SPAT6_HUMAN |                                | 1  | ACGTAGACAGT   | 0.363 |             |
| - | 3  | 808       |                   | NM_147193    | NP_671726    | Q8NBF1 | GLIS1_HUMAN |                                | 1  | GGCACAGGGTG   | 0.677 |             |
| - | 9  | 1016      | w.2_RNA YIPF1_u   | NM_018982    | NP_061855    | Q9Y548 | YIPF1_HUMAN | renal (Potential).             | 2  | CCAACGAACAG   | 0.483 | rs77267196  |
| + | 5  | 553       |                   | NM_006252    | NP_006243    | P54646 | AAPK2_HUMAN | rotein kinase.                 | 6  | GATTATCTAATAT | 0.333 |             |
| - | 2  | 1157      | orf168_uc009vzv:  | NM_001004303 | NP_001004303 | Q5VWT5 | CA168_HUMAN |                                | 5  | TGGGCCTGAC    | 0.507 |             |
| - | 2  | 1071      | orf168_uc009vzv:  | NM_001004303 | NP_001004303 | Q5VWT5 | CA168_HUMAN |                                | 5  | CTTTTCTGATAT  | 0.512 |             |
| + | 4  | 575       |                   | NM_000562    | NP_000553    | P07357 | CO8A_HUMAN  | MACPF.                         | 3  | TCCAGGATCAC   | 0.498 |             |
| - | 11 | 1656      | p.Q468R C8B_ucC   | NM_000066    | NP_000057    | P07358 | CO8B_HUMAN  | EGF-like.                      | 4  | GGCCTTGGGAT   | 0.498 |             |
| - | 2  | 286       | 8B_uc010ooo.1_N   | NM_000066    | NP_000057    | P07358 | CO8B_HUMAN  | SP type-1 1.                   | 4  | GTGGTCCAAGA   | 0.522 |             |
| - | 14 | 1620      | rr.1_Missense_Mul | NM_021080    | NP_066566    | O75553 | DAB1_HUMAN  |                                | 3  | GACGAGGGGCT   | 0.617 |             |
| + | 8  | 1642_1643 | uc001dbl.2_Intron | NM_005012    | NP_005003    | Q01973 | ROR1_HUMAN  | ical; (Potential).             | 19 | CCATCCCCTGC   | 0.446 |             |
| + | 9  | 3086      | c001dbm.2_5'Flan  | NM_005012    | NP_005003    | Q01973 | ROR1_HUMAN  | lasmic (Potential).            | 19 | TGGTGGAATGG   | 0.428 |             |
| + | 4  | 563       | aq.2_Nonsense_M   | NM_002303    | NP_002294    | P48357 | LEPR_HUMAN  | ellular (Potential).           | 1  | TTTTTCAACAA   | 0.313 |             |
| + | 3  | 1083      | uc001dim.2_Silent | NM_000959    | NP_000950    | P43088 | PF2R_HUMAN  | ellular (Potε273*(1) p.L296    | 6  | AACATTGGAATA  | 0.343 |             |
| + | 9  | 1814      | se_Mutation_p.E5: | NM_012302    | NP_036434    | O95490 | LPHN2_HUMAN | ellular (Potential).           | 9  | CCAATGAACTG   | 0.403 |             |
| + | 14 | 2810      | .L877F LPHN2_uc   | NM_012302    | NP_036434    | O95490 | LPHN2_HUMAN | Name=2; (Potential).           | 9  | ATCAACCTTTTC  | 0.378 |             |

|   |    |           |                    |              |              |        |             |                            |    |               |       |             |
|---|----|-----------|--------------------|--------------|--------------|--------|-------------|----------------------------|----|---------------|-------|-------------|
| - | 5  | 1606      | lose.1_RNA COL2    | NM_152890    | NP_690850    | Q17RW2 | COOA1_HUMAN | ollagen-like 1.            | 5  | 3ATTTCCATGTGC | 0.393 |             |
| + | 7  | 1377      | 9524_uc001dme.1    | NM_012262    | NP_036394    | Q7LGA3 | HS2ST_HUMAN | ienal (Potential).         | 1  | CCATGCCGTTCC  | 0.383 |             |
| - | 3  | 1761      | BL2_uc001dmr.2     | NM_001162536 | NP_001156008 | Q96E39 | RBMXL_HUMAN | Ser-rich.                  | 0  | AGGGGGAAGCC   | 0.537 |             |
| + | 2  | 370       | P6_uc010ost.1_Inl  | NM_198460    | NP_940862    | Q6ZN66 | GBP6_HUMAN  |                            | 2  | GCTTGAAAAGAT  | 0.468 |             |
| + | 3  | 573       | P6_uc010ost.1_Inl  | NM_198460    | NP_940862    | Q6ZN66 | GBP6_HUMAN  | (By similarity).           | 2  | CGAAGGTCTGG   | 0.507 |             |
| - | 3  | 2255      | Inx.2_intron ZNF6  | NM_201269    | NP_958357    | Q9H582 | ZN644_HUMAN |                            | 3  | ATGAGGAGAGC   | 0.378 |             |
| + | 6  | 614       | w.1_Missense_Mu    | NM_003503    | NP_003494    | O00311 | CDC7_HUMAN  | rotein kinase.             | 5  | TCTTTCTTTTCA  | 0.294 |             |
| + | 7  | 986       |                    | NM_173567    | NP_775838    | Q8IUS5 | EPHX4_HUMAN |                            | 1  | CACATGGTGAC   | 0.413 |             |
| - | 18 | 2304      | f.1_Missense_Mut   | NM_005665    | NP_005656    | O60447 | EV15_HUMAN  | is. Interaction with AURKB | 2  | ACATCGAACCA   | 0.458 |             |
| - | 8  | 1144      | tn.1_Missense_Mt   | NM_000350    | NP_000341    | P78363 | ABCA4_HUMAN | Extracellular.             | 12 | AGAAAGGCCTTA  | 0.473 |             |
| - | 5  | 567       | tn.1_Missense_Mt   | NM_000350    | NP_000341    | P78363 | ABCA4_HUMAN | Extracellular.             | 12 | AGATATCCCTTAT | 0.408 |             |
| - | 13 | 1775      | RHGAP29_uc001c     | NM_004815    | NP_004806    | Q52LW3 | RHG29_HUMAN |                            | 11 | TTGTGGCCTTG/  | 0.373 |             |
| - | 5  | 516       | YD_uc001drw.2_     | NM_000110    | NP_000101    | Q12882 | DPYD_HUMAN  |                            | 8  | CATCCACAAGT   | 0.353 |             |
| + | 7  | 775_776   |                    | NM_033055    | NP_149044    | Q96MC6 | HIAT1_HUMAN | Name=7; (Potential).       | 0  | CCTACCGGAGG   | 0.386 |             |
| - | 16 | 2055      | e COL11A1_uc00     | NM_001854    | NP_001845    | P12107 | COBA1_HUMAN |                            | 12 | CCATACCCTTTT  | 0.353 |             |
| - | 8  | 1555      | _p.E425K COL11A    | NM_001854    | NP_001845    | P12107 | COBA1_HUMAN | helicl regi p.F413V(1)     | 12 | TTGTTTCTGTAA  | 0.328 |             |
| + | 7  | 1259      | ense_Mutation_p.L  | NM_013296    | NP_037428    | P81274 | GPSM2_HUMAN | TPR 6.                     | 1  | TATTTCTTGGTG  | 0.318 |             |
| + | 1  | 698       |                    | NM_001408    | NP_001399    | Q9HCU4 | CELR2_HUMAN | Extracellular (Potential). | 8  | GTGAGGCAGGT   | 0.627 |             |
| + | 10 | 1702      | 561D1_uc001dxu.    | NM_153340    | NP_699171    | Q5T6C5 | AT7L2_HUMAN |                            | 2  | ACGGGGTGGAG   | 0.602 | rs148343235 |
| + | 2  | 1323      |                    | NM_031936    | NP_114142    | Q9BZJ8 | GPR61_HUMAN | Name=5; (Potential).       | 2  | TTTGCTGCCTT   | 0.602 |             |
| + | 2  | 1532      | e_Mutation_p.R49.  | NM_004978    | NP_004969    | Q03721 | KCNC4_HUMAN | lasmic (Potential).        | 3  | GAAACGGAAGA   | 0.617 | rs140378578 |
| + | 1  | 1834      | ense_Mutation_p.   | NM_022768    | NP_073605    | Q96T37 | RBM15_HUMAN |                            | 3  | TGACTCTGATTG  | 0.567 |             |
| - | 11 | 1432      | _p.S421F OVGP1_    | NM_002557    | NP_002548    | Q12889 | OVGP1_HUMAN |                            | 5  | CAAGGGATACA   | 0.502 |             |
| - | 2  | 571       | bv.1_Missense_M    | NM_004980    | NP_004971    | Q9UK17 | KCND3_HUMAN | lasmic (Potential).        | 3  | GCCGGGGCCA    | 0.677 |             |
| - | 5  | 435       |                    | NM_005725    | NP_005716    | O60636 | TSN2_HUMAN  | ellular (Potential).       | 0  | CTCTTCATACAT  | 0.403 |             |
| + | 10 | 2007      | vhg.1_Missense_M   | NM_006699    | NP_006690    | O60476 | MA1A2_HUMAN | ienal (Potential).         | 0  | TGTAGGCTATAG/ | 0.353 |             |
| - | 11 | 1530      | hg.2_Missense_M    | NM_017686    | NP_060156    | Q9NXN4 | GDAP2_HUMAN | CRAL-TRIO.                 | 2  | ACATCGTAGA    | 0.363 |             |
| - | 19 | 2687      |                    | NM_206996    | NP_996879    | Q6Q759 | SPG17_HUMAN |                            | 6  | CTCATTCTTTTA  | 0.328 |             |
| + | 6  | 915       | tr.1_Missense_Mu   | NM_001005783 | NP_001005783 | Q9NYQ3 | HAOX2_HUMAN | xy acid dehydrogenase.     | 4  | TATAGGGAAATG  | 0.418 |             |
| + | 19 | 2193      | tion_p.E30G NBP    | NM_001037675 | NP_001032764 | Q3BBV1 | NBPFK_HUMAN | NBPF 5.                    | 0  | GAAAGAGCCTG   | 0.483 |             |
| + | 10 | 4827      | .1_Missense_Mut    | NM_004326    | NP_004317    | O00512 | BCL9_HUMAN  | Pro-rich.                  | 6  | AGGATCGGGGG   | 0.597 |             |
| + | 12 | 1536      | vkt.1_Missense_M   | NM_001102663 | NP_001096133 |        |             |                            | 0  | CCTTCAGATTATC | 0.483 |             |
| - | 19 | 2487_2488 | vw.2_Missense_M    | NM_030913    | NP_112175    | Q9H3T2 | SEM6C_HUMAN | lasmic (Potential).        | 2  | ACCCTCCTTGGC  | 0.604 |             |
| - | 3  | 205       |                    | NM_001122965 | NP_001116437 | Q6XPR3 | RPTN_HUMAN  | by similarity). EF-hand 1. | 0  | TTGGTCTCTGT   | 0.433 |             |
| - | 3  | 8357      |                    | NM_002016    | NP_002007    | P20930 | FILA_HUMAN  | Ser-rich.                  | 16 | GCCTGGAGCTG   | 0.592 |             |
| - | 3  | 2615      | uc001ezv.2_5'Flanl | NM_002016    | NP_002007    | P20930 | FILA_HUMAN  | Ser-rich.                  | 16 | CTACCGATTGCT  | 0.592 |             |
| - | 3  | 3984      | uc001ezv.2_intron  | NM_001014342 | NP_001014364 | Q5D862 | FILA2_HUMAN |                            | 17 | TGGATCCTGAC   | 0.478 |             |
| + | 2  | 175_176   |                    | NM_001025231 | NP_001020402 | Q5T749 | KPRP_HUMAN  | Gln-rich.                  | 5  | CAAGCCCCCTGT  | 0.574 |             |
| + | 2  | 81        |                    | NM_005547    | NP_005538    | P07476 | INVO_HUMAN  |                            | 3  | CTCTCCCTGT    | 0.532 |             |
| - | 2  | 444       |                    | NM_005978    | NP_005969    | P29034 | S10A2_HUMAN | EF-hand 1.                 | 1  | GAAGTTCTTCA   | 0.577 |             |
| + | 25 | 2969      |                    | NM_020452    | NP_065185    | P98198 | AT8B2_HUMAN | ical; (Potential).         | 2  | CATCTGCATCGC  | 0.572 |             |
| - | 2  | 1302      | _p.L25F KCNN3_u    | NM_002249    | NP_002240    | Q9UGI6 | KCNN3_HUMAN | =Segment S2; (Potential).  | 1  | CAAAAGGATGA   | 0.542 |             |
| + | 7  | 842       | p.S274C DCST1_u    | NM_152494    | NP_689707    | Q5T197 | DCST1_HUMAN | ellular (Potential).       | 2  | TTGCTCCTGTG/  | 0.617 | rs56354873  |
| + | 17 | 2015      | ADAM15_uc001fg     | NM_152494    | NP_689707    | Q5T197 | DCST1_HUMAN | lasmic (Potential).        | 2  | GCGCGCTGGC    | 0.721 |             |
| + | 9  | 2666_2667 | fkq.2_Missense_M   | NM_001105203 | NP_001098673 | Q9BVN2 | RUSC1_HUMAN |                            | 2  | TGCCCCGACAC   | 0.579 |             |
| - | 3  | 4601      | .S1374F ASH1L_u    | NM_018489    | NP_060959    | Q9NR48 | ASH1L_HUMAN |                            | 11 | TACTAGAAAGAC  | 0.438 |             |
| + | 3  | 939       | jb.2_Missense_Mu   | NM_005973    | NP_005964    | Q92733 | PRCC_HUMAN  |                            | 27 | CTAAGCCCTCC/  | 0.562 |             |

|   |    |           |                   |              |              |        |             |                               |    |               |       |
|---|----|-----------|-------------------|--------------|--------------|--------|-------------|-------------------------------|----|---------------|-------|
| + | 11 | 1371      | p.L138F INTRK1_u  | NM_002529    | NP_002520    | P04629 | NTRK1_HUMAN | ical; (Potential).            | 17 | CTGTGCTCAAC   | 0.577 |
| + | 20 | 2628      | fqk.1_Splice_Site | NM_001080471 | NP_001073940 | Q5VY43 | PEAR1_HUMAN |                               | 3  | CTCTTAGGTTCC  | 0.642 |
| + | 2  | 446       | 1C_uc001frv.2_5'F | NM_001765    | NP_001756    | P29017 | CD1C_HUMAN  | ellular (Potential).          | 4  | TGGACGAGTTG   | 0.498 |
| - | 1  | 509       |                   | NM_001005279 | NP_001005279 | Q8NGY2 | OR6K2_HUMAN | ellular (Potential).          | 1  | FGATTCGAACCA  | 0.483 |
| - | 1  | 122       |                   | NM_001005279 | NP_001005279 | Q8NGY2 | OR6K2_HUMAN | Name=1; (Potential).          | 1  | AGGTTTCCAACA  | 0.428 |
| + | 4  | 814       | p.S181F PYHIN1_u  | NM_152501    | NP_689714    | Q6K0P9 | IFIX_HUMAN  |                               | 4  | ACACTTCCTCAAC | 0.502 |
| + | 1  | 149       | uc001fts.3_intron | NM_012351    | NP_036483    | P30954 | O10J1_HUMAN | Name=1; (Potential).          | 1  | AACCTTAGCAGC  | 0.433 |
| + | 1  | 568       | uc001fts.3_intron | NM_012351    | NP_036483    | P30954 | O10J1_HUMAN | ellular (Potential).          | 1  | TCTGTGACATCC  | 0.493 |
| + | 9  | 1221      | L6_uc009wsz.1_S   | NM_001004310 | NP_001004310 | Q6DN72 | FCRL6_HUMAN |                               | 3  | AAAGGTGAGCT   | 0.542 |
| + | 16 | 2249      | p.G706E ATP1A2_u  | NM_000702    | NP_000693    | P50993 | AT1A2_HUMAN | lasmic (Potential).           | 7  | CCAGGGAGCCA   | 0.612 |
| + | 6  | 1150      | 1A4_uc001fv.3_F   | NM_144699    | NP_653300    | Q13733 | AT1A4_HUMAN | lasmic (Potential).           | 4  | ACAACCTCATCCT | 0.498 |
| + | 5  | 664       | wc.1_Missense_M   | NM_020335    | NP_065068    | Q9ULK5 | VANG2_HUMAN | Name=1; (Potential).          | 1  | CCTCACGCCTCT  | 0.662 |
| + | 11 | 1467      | 289F NDUFS2_uc    | NM_004550    | NP_004541    | O75306 | NDUS2_HUMAN |                               | 1  | CCAGTCCCTGA   | 0.522 |
| + | 9  | 1469      | 1_Mutation_p.G321 | NM_002585    | NP_002576    | P40424 | PBX1_HUMAN  |                               | 5  | TGGAGGTTGGC   | 0.458 |
| - | 10 | 1553      | p.G389E ALDH9A    | NM_000696    | NP_000687    | P49189 | AL9A1_HUMAN |                               | 0  | ATATATCCACCAA | 0.448 |
| - | 19 | 2651      | plj.1_Missense_M  | NM_018417    | NP_060887    | Q96PN6 | ADCYA_HUMAN |                               | 3  | ACTATGGAGAGT  | 0.373 |
| - | 13 | 3234      |                   | NM_000130    | NP_000121    | P12259 | FA5_HUMAN   | B.                            | 6  | TTTTTTCGTGTC  | 0.408 |
| - | 14 | 2413      | ELP_uc009wvr.2_u  | NM_003005    | NP_002996    | P16109 | LYAM3_HUMAN | ical; (Potential).            | 4  | GACCTATCGTAC  | 0.443 |
| - | 2  | 399       | nk C1orf112_uc00  | NM_033418    | NP_219486    | O95568 | MET18_HUMAN |                               | 0  | CTTCTCCTTTTTC | 0.423 |
| + | 6  | 799       | 1b.1_Missense_Mt  | NM_001002294 | NP_001002294 | P31513 | FMO3_HUMAN  |                               | 1  | GTATATCCTTGGC | 0.463 |
| - | 8  | 632       | 1hy.1_Missense_M  | NM_003762    | NP_003753    | O75379 | VAMP4_HUMAN | ular (Potential).             | 0  | AGTACGGTATTI  | 0.289 |
| - | 2  | 693_694   | p.P205S TNR_uc    | NM_003285    | NP_003276    | Q92752 | TENR_HUMAN  | Cys-rich.                     | 11 | GCGGGCAGTA    | 0.589 |
| - | 1  | 97        | 1n_p.E6K TNR_uc   | NM_003285    | NP_003276    | Q92752 | TENR_HUMAN  |                               | 11 | GTGTTCCCCATC  | 0.532 |
| + | 8  | 4135      | 2A2_uc009www.2_u  | NM_020318    | NP_064714    | Q9BXP8 | PAPP2_HUMAN |                               | 16 | AAAACAAGGAG   | 0.552 |
| + | 19 | 2275      | orf125_uc001gmp.  | NM_144696    | NP_653297    | Q5T1B0 | AXDN1_HUMAN |                               | 0  | TTTAATGATACCC | 0.368 |
| + | 24 | 5501      | 1xl.2_Missense_Mt | NM_014810    | NP_055625    | Q5VT06 | CE350_HUMAN |                               | 4  | CGTGAAAAGGC   | 0.393 |
| + | 14 | 2207      | 1n.2_Missense_Mt  | NM_004736    | NP_004727    | Q9UBH6 | XPR1_HUMAN  | lasmic (Potential).           | 0  | CCGGCCTCGCC   | 0.463 |
| + | 18 | 2323      | wxs.2_Missense_I  | NM_000721    | NP_000712    | Q15878 | CAC1E_HUMAN | ic (Potential); Poly-Glu.     | 6  | AGGAAGAAGAG   | 0.552 |
| + | 7  | 1086      | e_Mutation_p.L25f | NM_005562    | NP_005553    | Q13753 | LAMC2_HUMAN | ninin IV type A.              | 3  | AAATTTCTTGGG  | 0.463 |
| + | 7  | 1118      | 1_Mutation_p.S26f | NM_005562    | NP_005553    | Q13753 | LAMC2_HUMAN | ninin IV type A.              | 3  | CAAAGCCTGTC   | 0.478 |
| - | 2  | 1272      | .2_intron RGL1_u  | NM_203454    | NP_982279    | Q8WW27 | ABEC4_HUMAN |                               | 0  | CCCTTCCAAGGT  | 0.438 |
| - | 8  | 1150      | vyh.1_Nonsense_I  | NM_052966    | NP_443198    | Q9BZQ8 | NIBAN_HUMAN |                               | 4  | TCCTTTGAGTTC  | 0.418 |
| - | 3  | 381       | _Site_p.P63_splic | NM_052966    | NP_443198    | Q9BZQ8 | NIBAN_HUMAN |                               | 4  | GGTGGCTTAAAC  | 0.343 |
| + | 7  | 1474      | _Mutation_p.A382  | NM_005807    | NP_005798    | Q92954 | PRG4_HUMAN  | ats of K-X-P-X-P-T-T-X. 17    | 1  | AGCCTGCACCC   | 0.657 |
| + | 15 | 1785      | 0pos.1_Splice_Sit | NM_024420    | NP_077734    | P47712 | PA24A_HUMAN |                               | 3  | TTTTAAGATCCTC | 0.308 |
| - | 6  | 1055      | 1ot.1_Missense_Mt | NM_199051    | NP_950252    | Q76B58 | FAM5C_HUMAN |                               | 5  | CATTTTCTTGGC  | 0.448 |
| + | 7  | 1202      | 1.2_Missense_Mut  | NM_000186    | NP_000177    | P08603 | CFAH_HUMAN  | Sushi 5.                      | 6  | GATGTACCTGTA  | 0.358 |
| + | 7  | 2615      | B1_uc010ppb.1_in  | NM_201253    | NP_957705    | P82279 | CRUM1_HUMAN | potential); Laminin G-like 2. | 9  | AAAGGAGATG    | 0.373 |
| - | 2  | 1445      | 14_uc010ppj.1_5'l | NM_014875    | NP_055690    | Q15058 | KIF14_HUMAN | d for PRC1-binding.           | 7  | TCGGGAAGAA    | 0.383 |
| - | 2  | 1443      | 14_uc010ppj.1_5'l | NM_014875    | NP_055690    | Q15058 | KIF14_HUMAN | d for PRC1-binding.           | 7  | CGGGAAGAATT   | 0.383 |
| - | 7  | 1202_1203 |                   | NM_000069    | NP_000060    | Q13698 | CAC1S_HUMAN | 1=S6 of repeat I; (Potential) | 5  | GTTGAGGATGAA  | 0.401 |
| - | 5  | 176       | NN11_uc001gwp.2   | NM_003281    | NP_003272    | P19237 | TNNI1_HUMAN | ed in binding TNC.            | 0  | GAGCATTCTTGC  | 0.667 |
| - | 2  | 75        | 1TNNI1_uc001gwr   | NM_003281    | NP_003272    | P19237 | TNNI1_HUMAN |                               | 0  | GAGCACCCTAGG  | 0.592 |
| + | 14 | 3718      | p.R725H NAV1_u    | NM_020443    | NP_065176    | Q8NEY1 | NAV1_HUMAN  | Potential.                    | 4  | ATCCGCCTGCG   | 0.582 |
| + | 21 | 2850      |                   | NM_018085    | NP_060555    | Q96P70 | IPO9_HUMAN  |                               | 2  | ATGCCGCTCGC   | 0.507 |
| + | 17 | 1630      | R6_uc009xab.2_R   | NM_001017403 | NP_001017403 | Q9HBX8 | LGR6_HUMAN  | ellular (Potential).          | 10 | GTGTCCAGTGT   | 0.562 |
| + | 17 | 2530      | 11gyb.1_Nonsense  | NM_002481    | NP_002472    | O60237 | MYPT2_HUMAN |                               | 3  | CCATCCGAGAG   | 0.463 |

rs138528418

|   |    |           |                    |              |              |        |             |                                 |    |                  |       |             |
|---|----|-----------|--------------------|--------------|--------------|--------|-------------|---------------------------------|----|------------------|-------|-------------|
| - | 4  | 472       | zk.1_5'Flank CHI3L | NM_001276    | NP_001267    | P36222 | CH3L1_HUMAN |                                 | 1  | ACCCAAAGTTCC     | 0.552 |             |
| + | 17 | 2478      | naf.2_Missense_M   | NM_014827    | NP_055642    | O75152 | ZC11A_HUMAN |                                 | 2  | .GGTGGAGGTAG     | 0.478 |             |
| + | 3  | 1150      | orf.1_Missense_Mt  | NM_014858    | NP_055673    | O75069 | TMCC2_HUMAN |                                 | 1  | AGCAACGTGTAC     | 0.677 | rs146720283 |
| + | 4  | 519       | h.P130L C4BPB_ur   | NM_001017365 | NP_001017365 | P20851 | C4BPB_HUMAN | Sushi 2.                        | 1  | CACCTCCCTTTC     | 0.453 |             |
| + | 3  | 208       | hhk.2_Missense_I   | NM_181755    | NP_861420    | P28845 | DHI1_HUMAN  | lenal (Potential).              | 1  | CCAAGGAAAGA      | 0.517 |             |
| - | 8  | 1706_1707 | ic.2_Missense_Mt   | NM_172362    | NP_758872    | O95259 | KCNH1_HUMAN | lasmic (Potential).             | 5  | CTCATGGTATCT     | 0.465 |             |
| - | 13 | 2672      | oty.1_Missense_Mi  | NM_005401    | NP_005392    | Q15678 | PTN14_HUMAN |                                 | 5  | .GGCCCCGTTGA     | 0.612 | rs142432691 |
| - | 68 | 15292     |                    | NM_206933    | NP_996816    | O75445 | USH2A_HUMAN | II 35.[Extracellular (Potenti   | 26 | CCCTCCGTCGG      | 0.542 |             |
| - | 63 | 13471     |                    | NM_206933    | NP_996816    | O75445 | USH2A_HUMAN | ential). Fibronectin type-III ; | 26 | ATCTGGAGGGC      | 0.478 |             |
| - | 27 | 3982      |                    | NM_004446    | NP_004437    | P07814 | SYEP_HUMAN  |                                 | 2  | CCCTCCCTAAAAT    | 0.318 |             |
| + | 4  | 979       | a.1_Missense_Mu    | NM_198551    | NP_940953    | Q5JRA6 | MIA3_HUMAN  | ellular (Potential).            | 5  | AAAGAGACTTT      | 0.388 |             |
| + | 8  | 2803      |                    | NM_032890    | NP_116279    | Q96F81 | DISP1_HUMAN |                                 | 0  | AGATTTTTGAAC     | 0.483 |             |
| - | 2  | 879       | .1_5'UTR SUSD4_    | NM_017982    | NP_060452    | Q5VX71 | SUSD4_HUMAN | xtracellular (Potential).       | 0  | GAAATCGGGCT      | 0.517 |             |
| - | 5  | 1102      | od.1_Missense_Mt   | NM_001008493 | NP_001008493 | Q8N8S7 | ENAH_HUMAN  | Potential.                      | 2  | ctgccgtccaggcgtt | 0.264 |             |
| - | 33 | 5691      | p.P1555L CDC42I    | NM_003607    | NP_003598    | Q5VT25 | MRCKA_HUMAN |                                 | 11 | CCATGGGCAGA      | 0.383 |             |
| + | 39 | 10431     | p.E3463K OBSCN     | NM_001098623 | NP_001092093 | Q5VST9 | OBSCN_HUMAN | Ig-like 35.                     | 28 | CCGTGGAAGGG      | 0.582 |             |
| - | 7  | 2566      | 1L2_uc001hvf.2_5'  | NM_020808    | NP_065859    | Q9P2F8 | SI1L2_HUMAN | Rap-GAP.                        | 6  | TCGTTTCGAGTG     | 0.483 |             |
| - | 7  | 2451      | 1L2_uc001hvf.2_5'  | NM_020808    | NP_065859    | Q9P2F8 | SI1L2_HUMAN | Rap-GAP.                        | 6  | TTTGGGAATCG      | 0.408 |             |
| + | 2  | 1201      | hvs.1_Missense_M   | NM_032435    | NP_115811    | Q5TCX8 | M3KL4_HUMAN | rotein kinase.                  | 8  | CCCCGAAGTG       | 0.473 |             |
| - | 4  | 1162      | d.2_Missense_Mu    | NM_002508    | NP_002499    | P14543 | NID1_HUMAN  |                                 | 2  | CAACTGGAAG       | 0.557 |             |
| + | 5  | 3190      | re.1_Missense_Mu   | NM_020066    | NP_064450    | Q9NZ56 | FMN2_HUMAN  | Pro-rich.[FH1.                  | 12 | CCCTCCTCCC       | 0.711 |             |
| + | 5  | 3322      | re.1_Missense_Mu   | NM_020066    | NP_064450    | Q9NZ56 | FMN2_HUMAN  | Pro-rich.[FH1.                  | 12 | CCCTCCGCC        | 0.731 |             |
| - | 7  | 710       | z.1_Missense_Mu    | NM_005465    | NP_005456    | Q9Y243 | AKT3_HUMAN  | rotein kinase.                  | 4  | TCAAGGACTTG      | 0.299 |             |
| + | 2  | 118       | J1iai.2_Missense_  | NM_001012970 | NP_001012988 | Q5SVJ3 | CA100_HUMAN |                                 | 0  | CATGACTGCCAT     | 0.453 |             |
| - | 4  | 1221      | cf.2_Missense_Mt   | NM_024804    | NP_079080    | Q96BR6 | ZN669_HUMAN | 2H2-type 6.                     | 0  | GTAACGAAGGG      | 0.408 |             |
| + | 1  | 784       |                    | NM_001004698 | NP_001004698 | A6NFC9 | OR2W5_HUMAN |                                 | 3  | CTGAAGCCGGC      | 0.517 |             |
| + | 3  | 423       | czb.1_Missense_M   | NM_001001957 | NP_001001957 | Q7Z3T1 | OR2W3_HUMAN | lasmic (Potential).             | 3  | GGCTGGACCCC      | 0.592 |             |
| + | 1  | 124       | L13_uc001ids.2_I   | NM_001004686 | NP_001004686 | Q8NH16 | OR2L2_HUMAN | ellular (Potential).            | 3  | TCAACTGATTT      | 0.328 |             |
| + | 1  | 519       |                    | NM_001004689 | NP_001004689 | Q8NG83 | OR2M3_HUMAN | ellular (Potential).            | 2  | CGGAAATAGC       | 0.423 |             |
| - | 1  | 785       |                    | NM_001004695 | NP_001004695 | Q8NG76 | O2T33_HUMAN | ellular (Potential).            | 2  | TATGGGATTTG      | 0.478 |             |
| - | 1  | 166       |                    | NM_001004695 | NP_001004695 | Q8NG76 | O2T33_HUMAN | Name=2; (Potential).            | 2  | CATGGCGTGT       | 0.522 |             |
| - | 1  | 136       |                    | NM_001004734 | NP_001004734 | A6ND48 | O14I1_HUMAN | Name=1; (Potential).            | 0  | TGATGACTGCAA     | 0.507 |             |
| + | 12 | 1266      | PBP4_uc010qad.1    | NM_012341    | NP_036473    | Q9BZE4 | NOG1_HUMAN  |                                 | 2  | AGGAACGAGAT      | 0.388 |             |
| + | 2  | 277       | T1_uc010qar.1_5'   | NM_001047160 | NP_001040625 | Q7Z628 | ARHG8_HUMAN | lear localization (By similar   | 1  | CCCTTCGAGAC      | 0.358 |             |
| + | 10 | 1095      |                    | NM_017782    | NP_060252    | Q5VWN6 | CJ018_HUMAN |                                 | 2  | TATTCGTTCAAC     | 0.254 |             |
| + | 15 | 4299      | 1iik.2_Missense_M  | NM_017782    | NP_060252    | Q5VWN6 | CJ018_HUMAN |                                 | 2  | CATTCGTCAG       | 0.438 |             |
| - | 2  | 365       | lp.G69E IL2RA_u    | NM_000417    | NP_000408    | P01589 | IL2RA_HUMAN | xtracellular (Potential).       | 2  | AGTTTCCTGTAC     | 0.463 |             |
| + | 4  | 394       |                    | NM_002216    | NP_002207    | P19823 | ITIH2_HUMAN | VIT.                            | 3  | VAAGTCCAGTCT     | 0.413 |             |
| + | 6  | 662       | qbc.1_Missense_M   | NM_001001973 | NP_001001973 | P36542 | ATPG_HUMAN  |                                 | 0  | TCTCTCTATAA      | 0.299 |             |
| - | 10 | 1376      | o.1_Missense_Mut   | NM_004808    | NP_004799    | O60551 | NMT2_HUMAN  |                                 | 1  | .GGGGCGTCTCT     | 0.547 |             |
| - | 44 | 6813      |                    | NM_001081    | NP_001072    | O60494 | CUBN_HUMAN  | CUB 16.                         | 19 | CCGGTGGAGCC      | 0.458 |             |
| + | 5  | 1208      | se_Mutation_p.R1   | NM_032812    | NP_116201    | Q6UX71 | PXDC2_HUMAN | ellular (Potential).            | 4  | TACATCGAATG      | 0.333 |             |
| - | 4  | 617       |                    | NM_213569    | NP_998734    | O76041 | NEBL_HUMAN  |                                 | 2  | AAATCTTTTTGT     | 0.488 |             |
| + | 13 | 3251      | se_Mutation_p.I76  | NM_019590    | NP_062536    | Q5T5P2 | SKT_HUMAN   |                                 | 7  | TTGTTCAATTGAA    | 0.517 |             |
| + | 21 | 5758      | 6N KIAA1217_uc0    | NM_019590    | NP_062536    | Q5T5P2 | SKT_HUMAN   |                                 | 7  | AAGAAATCTGGT     | 0.507 |             |
| - | 10 | 2925      | ense_Mutation_p.I  | NM_020824    | NP_065875    | Q5T5U3 | RHG21_HUMAN |                                 | 8  | TGCTAGGGCTAC     | 0.393 |             |
| + | 3  | 2284      | UR_uc001ish.1_Ir   | NM_024838    | NP_079114    | Q8IYQ7 | THNS1_HUMAN |                                 | 1  | AGATAGGGTGC      | 0.418 |             |

|   |    |           |                    |              |              |        |             |                            |    |                |       |             |
|---|----|-----------|--------------------|--------------|--------------|--------|-------------|----------------------------|----|----------------|-------|-------------|
| + | 11 | 1639      | q_2_Nonsense_Mu    | NM_001134366 | NP_001127838 | Q05329 | DCE2_HUMAN  |                            | 2  | (CAAGTGGAAC    | 0.383 |             |
| + | 16 | 2118      | q_2_Missense_Mu    | NM_001134366 | NP_001127838 | Q05329 | DCE2_HUMAN  |                            | 2  | ATGATGGAGTATC  | 0.502 |             |
| - | 1  | 317_318   |                    | NM_001034842 | NP_001030014 | Q3KNS1 | PTHD3_HUMAN |                            | 4  | 3CAGGGGTGCAI   | 0.703 |             |
| - | 7  | 1310      | t_2_Missense_Mut   | NM_025209    | NP_079485    | Q9H2F5 | EPC1_HUMAN  |                            | 4  | 3CAGACGATGGT   | 0.443 |             |
| + | 10 | 1179_1180 | se_Mutation_p.P21  | NM_024688    | NP_078964    | Q9H943 | CJ068_HUMAN |                            | 3  | CGTTTCCTTTAG   | 0.322 |             |
| + | 31 | 2746      |                    | NM_052997    | NP_443723    | Q9BXX3 | AN30A_HUMAN |                            | 9  | 3TGTGTGTACCC/  | 0.299 |             |
| - | 5  | 2139      | NF33B_uc001jag.    | NM_006955    | NP_008886    | Q06732 | ZN33B_HUMAN | 2H2-type 13.               | 0  | ITCACACAGAAA   | 0.393 |             |
| + | 17 | 3308      |                    | NM_014753    | NP_055568    | Q14692 | BMS1_HUMAN  |                            | 3  | TTTGGGGTAAAA   | 0.398 |             |
| - | 11 | 1408      | 1jao.1_Missense_   | NM_145313    | NP_660356    | Q8N9B8 | RGF1A_HUMAN | Ras-GEF.                   | 0  | 3GGCGCCGTGA/   | 0.567 |             |
| - | 9  | 1041      | 1jao.1_Missense_   | NM_145313    | NP_660356    | Q8N9B8 | RGF1A_HUMAN | Ras-GEF.                   | 0  | 3AGGTTTCATGCC/ | 0.607 |             |
| - | 3  | 1691      | se_Mutation_p.     | NM_001098208 | NP_001091678 | P52597 | HNRPF_HUMAN |                            | 0  | 3GGCCCCGTAA/   | 0.537 |             |
| - | 7  | 1711      | iL1_uc009xmu.2_1   | NM_001128324 | NP_001121796 | Q86XD8 | ANUB1_HUMAN |                            | 0  | 3TCTCTGGTTTC/  | 0.418 |             |
| - | 5  | 901_902   | T15_uc001jeb.2_1v  | NM_031912    | NP_114118    | Q9BQS2 | SYT15_HUMAN | lasmic (Potential).        | 0  | 3CAAGGGGAAGA   | 0.604 |             |
| - | 17 | 2334      | _p.D711N FRMPD;    | NM_001018071 | NP_001018081 | Q68DX3 | FRPD2_HUMAN |                            | 1  | 3AGAGTCCCAGC   | 0.577 |             |
| - | 6  | 757       |                    | NM_001080520 | NP_001073989 | A6NNA5 | DRGX_HUMAN  |                            | 0  | ICTTTTTCTGGC   | 0.672 |             |
| + | 1  | 1416      | _5'Flank CHAT_uc   | NM_003055    | NP_003046    | Q16572 | VACHT_HUMAN | ical; (Potential).         | 2  | 3AGTGGGAGATG/  | 0.657 |             |
| + | 3  | 278       | .1_3'UTR C10orf5;  | NM_001042427 | NP_001035892 | Q8N6V4 | CJ053_HUMAN |                            | 0  | CCTAGGAGGCG.   | 0.438 |             |
| + | 1  | 475       |                    | NM_001077665 | NP_001071133 | Q5VW22 | AGAP6_HUMAN | p.P26L(1)                  | 1  | FGTGTCCCTCTG   | 0.597 | rs148430930 |
| - | 2  | 200       | os.2_Missense_M    | NM_019893    | NP_063946    | Q9NR71 | ASAH2_HUMAN | renal (Potential).         | 0  | 3CTGTGGAGCGT   | 0.507 |             |
| - | 2  | 179       | os.2_Missense_M    | NM_019893    | NP_063946    | Q9NR71 | ASAH2_HUMAN | renal (Potential).         | 0  | 3TGAGCCCTGG    | 0.502 | rs142364715 |
| - | 1  | 929       | KG1_uc001jfn.2_1r  | NM_015235    | NP_056050    | Q9H0L4 | CSTFT_HUMAN | Gly-rich.                  | 1  | 3GCCAACCCCTG   | 0.592 |             |
| - | 27 | 3967      | se_Mutation_p.G1'  | NM_033056    | NP_149045    | Q96QU1 | PCD15_HUMAN | Extracellular (Potential). | 13 | TCTTTTCCCTCT   | 0.368 |             |
| - | 18 | 2368      | _p.Q720K ANK3_u    | NM_020987    | NP_066267    | Q12955 | ANK3_HUMAN  |                            | 19 | TGTCTGGGCGT/   | 0.498 |             |
| + | 10 | 2161      |                    | NM_032199    | NP_115575    | Q14865 | ARI5B_HUMAN |                            | 4  | 3TGGCTCCCAC/   | 0.537 |             |
| + | 2  | 1062      | jmx.3_Intron CTNI  | NM_178011    | NP_821079    | Q86VH5 | LRRT3_HUMAN | ilar (Potential);LRR 5.    | 3  | 3GAGAACCATCC/  | 0.488 |             |
| - | 7  | 1129      | _p.R336C CTNNA3    | NM_001127384 | NP_001120856 | Q9UI47 | CTNA3_HUMAN | Potential. p.R336C(1)      | 8  | 3CTGGCGAATGG   | 0.512 |             |
| - | 4  | 466       | e_Mutation_p.A88'  | NM_022129    | NP_071412    | P30039 | PBLD_HUMAN  |                            | 3  | GCACAGCTGCA/   | 0.418 |             |
| - | 3  | 697       | 5A16_uc010qiy.1_   | NM_152707    | NP_689920    | P16260 | GDC_HUMAN   | Solcar 1.                  | 0  | 3GAACAGCACGC   | 0.338 |             |
| + | 5  | 1083      | rp.2_Missense_Mu   | NM_170744    | NP_734465    | Q8IZJ1 | UNC5B_HUMAN | 3 Extracellu p.R213C(1)    | 3  | CATCCGCCAGG/   | 0.602 |             |
| + | 10 | 1997      | rp.2_Missense_Mu   | NM_170744    | NP_734465    | Q8IZJ1 | UNC5B_HUMAN | lasmic (Potential).        | 3  | 3CCGGGACACC    | 0.687 |             |
| + | 7  | 883       | ense_Mutation_p.f  | NM_138357    | NP_612366    | Q8NE86 | MCU_HUMAN   | trial matrix (Potential).  | 0  | TTTTAGGAATATC  | 0.328 |             |
| - | 1  | 113       | 'LA2G12B_uc010q    | NM_032562    | NP_115951    | Q9BX93 | PG12B_HUMAN |                            | 1  | 3GCCACCCCAA    | 0.592 |             |
| - | 21 | 2577      | 3_5'UTR TTC18_u    | NM_145170    | NP_660153    | Q5T0N1 | TTC18_HUMAN |                            | 3  | 3CAGCTCCTGGT/  | 0.328 |             |
| - | 18 | 3886      | p.S378F USP54_u    | NM_152586    | NP_689799    | Q70EL1 | UBP54_HUMAN |                            | 6  | 3TATGGGAATCAT  | 0.473 |             |
| - | 12 | 2202      | G5_uc009xru.1_R    | NM_004747    | NP_004738    | Q8TDM6 | DLG5_HUMAN  | PDZ 2.                     | 8  | 3CCAGGACTTC/   | 0.607 |             |
| - | 8  | 1022      | _1P_uc001kbf.2_1r  | NM_003019    | NP_003010    | P35247 | SFTPD_HUMAN | C-type lectin.             | 1  | 3TGTGGGGTAGG   | 0.567 |             |
| - | 6  | 1427      | _1p.E77K MMRN2     | NM_024756    | NP_079032    | Q9H8L6 | MMRN2_HUMAN | Potential.                 | 1  | 3CTCCTCCACTC/  | 0.587 |             |
| + | 5  | 561       | \F1_uc009xua.1_F   | NM_003972    | NP_003963    | O14981 | BTAF1_HUMAN |                            | 3  | 3TTGGCCTTAAT/  | 0.373 |             |
| - | 29 | 3143      | e_Mutation_p.S99-  | NM_013451    | NP_038479    | Q9NZM1 | MYOF_HUMAN  | lasmic (Potential).        | 4  | 3CCAGGATTTG/   | 0.478 |             |
| + | 6  | 867       | iq.3_Missense_Mu   | NM_001127182 | NP_001120654 | Q53EZ4 | CEP55_HUMAN | tion with TSG101.          | 0  | 3GTTATCTTCAAC  | 0.328 |             |
| + | 8  | 1623      | i11_uc001kjd.3_Int | NM_005097    | NP_005088    | Q95970 | LG11_HUMAN  | EAR 5.                     | 4  | 3ACATGGAGGA/   | 0.423 |             |
| - | 1  | 1509_1510 |                    | NR_002319    |              |        |             |                            | 0  | 3GCCACCCATATC  | 0.515 |             |
| - | 3  | 462       | 74M ALDH18A1_u     | NM_002860    | NP_002851    | P54886 | P5CS_HUMAN  | amate 5-kinase.            | 3  | 3CACACAGATTC   | 0.562 | rs143330350 |
| - | 12 | 1599      | p.G296E TCTN3_u    | NM_015631    | NP_056446    | Q6NUS6 | TECT3_HUMAN | ellular (Potential).       | 0  | 3GCCTTCCATGA/  | 0.488 |             |
| - | 15 | 2202      |                    | NM_012465    | NP_036597    | Q9Y6L7 | TLL2_HUMAN  | CUB 3.                     | 3  | 3GAAGGAGATC/   | 0.517 |             |
| - | 15 | 2141      |                    | NM_012465    | NP_036597    | Q9Y6L7 | TLL2_HUMAN  | CUB 3.                     | 3  | 3ATACTCCTTCG/  | 0.527 |             |
| - | 4  | 499       | 3AP19_uc009xvi.2   | NM_032900    | NP_116289    | Q14CB8 | RHG19_HUMAN | Rho-GAP.                   | 0  | 3TGAGAGCATCC/  | 0.438 |             |



|   |    |           |                    |              |              |        |                                           |    |               |       |             |
|---|----|-----------|--------------------|--------------|--------------|--------|-------------------------------------------|----|---------------|-------|-------------|
| + | 1  | 564       | sense_Mutation_p   | NM_018121    | NP_060591    | Q8IX21 | F178A_HUMAN                               | 0  | TCGCCGCTAGG   | 0.682 |             |
| - | 8  | 2369_2370 | se_Mutation_p.E2:  | NM_002779    | NP_002770    | A5PKW4 | PSD1_HUMAN SEC7.                          | 3  | CAGCTCCTTCAC  | 0.579 |             |
| + | 6  | 1553      |                    | NM_030912    | NP_112174    | Q9BZR9 | TRIM8_HUMAN                               | 1  | TTCTTCGGTGG   | 0.647 |             |
| - | 14 | 2280      | ense_Mutation_p.v  | NM_014631    | NP_055446    | Q5TCZ1 | SPD2A_HUMAN                               | 0  | CGTTCGCATCAG  | 0.592 |             |
| + | 10 | 1206      | 3P2_uc010qrx.1_F   | NM_004132    | NP_004123    | Q14520 | HABP2_HUMAN peptidase S1.                 | 3  | TAAAAACCAGAC  | 0.303 |             |
| + | 2  | 573       | 310D C10orf81_uc   | NM_024889    | NP_079165    | Q5SXH7 | CJ081_HUMAN                               | 1  | TATTAGGCAAAC  | 0.338 |             |
| + | 5  | 1158      | se_Mutation_p.H2:  | NM_207303    | NP_997186    | Q5VV63 | ATRN1_HUMAN ellular (Potential).          | 7  | CGATCACGGT    | 0.403 |             |
| + | 20 | 3630_3631 | se_Mutation_p.G2:  | NM_207303    | NP_997186    | Q5VV63 | ATRN1_HUMAN e 2. Extracellular (Potential | 7  | CTAAAGGAATAA  | 0.322 |             |
| + | 11 | 1417      |                    | NM_001011709 | NP_001011709 | Q17RR3 | LIPR3_HUMAN PLAT.                         | 1  | TGATAAATACATC | 0.308 |             |
| - | 19 | 3483      | p.L1079M EIF3A_t   | NM_003750    | NP_003741    | Q14152 | EIF3A_HUMAN [DE]-R-[SEVGFPILV]-[HP        | 0  | ATCCAACCTCC   | 0.607 |             |
| - | 3  | 759       | _p.P38S FGFR2_L    | NM_000141    | NP_000132    | P21802 | FGFR2_HUMAN 1. Extracellular (Potential). | 96 | TGGTGGCTCTG   | 0.557 |             |
| + | 16 | 8468      | CG2_uc0011fy.2_Inl | NM_206862    | NP_996744    | O95359 | TACC2_HUMAN Potential.                    | 10 | TTCCCGCAGCC   | 0.587 |             |
| + | 20 | 2439      | tz.1_Nonsense_Mi   | NM_007329    | NP_015568    | Q9UGM3 | DMBT1_HUMAN SRCR 6.                       | 7  | TGGCTGGGCCA   | 0.612 |             |
| + | 52 | 6662      | 185_splice DMBT1   | NM_007329    | NP_015568    | Q9UGM3 | DMBT1_HUMAN                               | 7  | TCCTAGGCAGA   | 0.522 |             |
| - | 8  | 1756      | p.G194E CUZD1_     | NM_022034    | NP_071317    | Q86UP6 | CUZD1_HUMAN llular (Potential). ZP.       | 2  | AGTGTCCAAATA  | 0.363 |             |
| - | 4  | 1649      | _p.H379L CHST15    | NM_015892    | NP_056976    | Q7LFX5 | CHSTF_HUMAN enal (Potential).             | 1  | AGCGGTGGATG   | 0.527 |             |
| - | 1  | 709       | _p.E66K CHST15     | NM_015892    | NP_056976    | Q7LFX5 | CHSTF_HUMAN lasmic (Potential).           | 1  | AGTTTTCGTTCC  | 0.463 |             |
| + | 22 | 2306      | un.1_Missense_M    | NM_001380    | NP_001371    | Q14185 | DOCK1_HUMAN                               | 9  | TCAAGTTCATCC  | 0.473 |             |
| + | 22 | 2312      | un.1_Missense_M    | NM_001380    | NP_001371    | Q14185 | DOCK1_HUMAN                               | 9  | TCATCGTGCGC   | 0.458 |             |
| - | 1  | 71        | x.1_Intron LOC33E  | NM_001005922 | NP_001005922 | Q6L8H4 | KRA51_HUMAN                               | 0  | ACAGCTGGAGC   | 0.672 |             |
| + | 16 | 983       | iq.3_Nonsense_M    | NM_006757    | NP_006748    | P45378 | TNNT3_HUMAN                               | 1  | CGCTGGAAGTA   | 0.647 |             |
| + | 4  | 601_602   | wk.2_Missense_M    | NM_005706    | NP_005697    | Q9Y5U2 | TSSC4_HUMAN                               | 0  | CCATTCCATCTG  | 0.658 |             |
| - | 20 | 3005      | u.N999S TRPM5_L    | NM_014555    | NP_055370    | Q9NZQ8 | TRPM5_HUMAN lasmic (Potential).           | 4  | TCAGGTTGTAGC  | 0.642 |             |
| - | 6  | 1908      | 5_uc010qxr.1_Mis   | NM_001130520 | NP_001123992 | O14628 | ZN195_HUMAN                               | 0  | TGTAGGGTTTCT  | 0.398 |             |
| + | 1  | 919_920   |                    | NM_001005172 | NP_001005172 | Q8NGK3 | O52K2_HUMAN lasmic (Potential).           | 2  | TCTTGGGAGTAT  | 0.485 |             |
| + | 2  | 665       |                    | NM_152430    | NP_689643    | Q8TCB6 | O51E1_HUMAN ellular (Potential).          | 4  | CCGCTCCAATA   | 0.537 | rs148260821 |
| + | 2  | 797       |                    | NM_152430    | NP_689643    | Q8TCB6 | O51E1_HUMAN Name=5; (Potential).          | 4  | TCATCTCCTTCT  | 0.498 |             |
| - | 2  | 909       |                    | NM_030774    | NP_110401    | Q9H255 | O51E2_HUMAN lasmic (Potential).           | 5  | ACCGTTCGTATT  | 0.488 |             |
| - | 2  | 554       |                    | NM_030774    | NP_110401    | Q9H255 | O51E2_HUMAN Name=3; (Potential).          | 5  | CGCATGAATAA   | 0.517 |             |
| - | 1  | 1163      |                    | NM_001005177 | NP_001005177 | Q8NGF1 | O52R1_HUMAN lasmic (Potential).           | 1  | CAACATCCTTGG  | 0.448 |             |
| + | 1  | 406       |                    | NM_001004753 | NP_001004753 | Q8NH61 | O51F2_HUMAN lasmic (Potential).           | 2  | TTTGATCGTTTTC | 0.463 |             |
| + | 1  | 478       |                    | NM_001001916 | NP_001001916 | Q8NH60 | O52J3_HUMAN Name=4; (Potential).          | 3  | CACTTCCCATGC  | 0.468 |             |
| - | 2  | 649       | BG2_uc001maj.1_    | NM_000559    | NP_000550    | P69892 | HBG2_HUMAN p.S71F(1)                      | 1  | CCAAGGAAGTC   | 0.532 | rs151258456 |
| - | 1  | 778       | .1_Intron HBE1_uc  | NM_001005567 | NP_001005567 | Q9H339 | O51B5_HUMAN ellular (Potential).          | 1  | ACGATGAATCAC  | 0.428 |             |
| - | 1  | 908       | .1_Intron TRIM22   | NM_001001913 | NP_001001913 | Q8NH53 | O52N1_HUMAN lasmic (Potential).           | 1  | CTTCTCGTACCT  | 0.388 |             |
| - | 1  | 758       | .1_Intron TRIM22   | NM_001001913 | NP_001001913 | Q8NH53 | O52N1_HUMAN Name=6; (Potential).          | 1  | ACATAGGTGAGG  | 0.443 |             |
| - | 1  | 685       |                    | NM_001004052 | NP_001004052 | Q96RD2 | O52B2_HUMAN lasmic (Potential).           | 0  | CAAACGAAACA   | 0.478 |             |
| - | 1  | 25        |                    | NM_001004490 | NP_001004490 | A6NM03 | O2AG2_HUMAN ellular (Potential).          | 4  | GCTTCCCAAGG   | 0.438 |             |
| + | 8  | 2899      |                    | NM_176822    | NP_789792    | Q86W24 | NAL14_HUMAN LRR 5.                        | 8  | TGGTGGAGTAA   | 0.413 |             |
| + | 9  | 3096      |                    | NM_176822    | NP_789792    | Q86W24 | NAL14_HUMAN                               | 8  | TCTTTCGGCATC  | 0.428 |             |
| - | 8  | 643       | lrcu.1_Missense_M  | NM_175058    | NP_778228    | Q6IQ23 | PKHA7_HUMAN PH.                           | 3  | CAAGGGGATGC   | 0.537 |             |
| - | 1  | 605       | J11_uc001mnb.3_l   | NM_000525    | NP_000516    | B4DWI4 | B4DWI4_HUMAN                              | 1  | GCAGCAGTATTC  | 0.677 | rs139079635 |
| - | 5  | 759       | cy.1_Missense_Mi   | NM_000352    | NP_000343    | Q09428 | ABCC8_HUMAN smic (By similarity).         | 1  | AGGTCTTGCCAG  | 0.567 |             |
| - | 2  | 699       |                    | NM_054030    | NP_473371    | Q96LB1 | MARGX2_HUMAN Name=5; (Potential).         | 1  | GCAGGGCCAGA   | 0.532 |             |
| + | 16 | 4397      | on_p.V409M NAV2    | NM_145117    | NP_660093    | Q8IVL1 | NAV2_HUMAN                                | 6  | ATTTCGGTGGTC  | 0.527 |             |
| + | 16 | 1740      | s.1_Missense_Mu    | NM_031418    | NP_113606    | Q9BYT9 | ANO3_HUMAN lasmic (Potential).            | 4  | CACGGGAAAAC   | 0.398 |             |
| - | 2  | 1297      | uc009yiz.2_Intro   | NM_001143816 | NP_001137288 | P23560 | BDNF_HUMAN                                | 0  | CTGCCGTTACCT  | 0.547 |             |

|   |    |           |                     |              |              |        |             |    |               |       |                              |
|---|----|-----------|---------------------|--------------|--------------|--------|-------------|----|---------------|-------|------------------------------|
| - | 14 | 2331      |                     | NM_031217    | NP_112494    | Q8NI77 | K118A_HUMAN | 2  | TAGACGGATTTTC | 0.363 |                              |
| + | 4  | 616       | _Mutation_p.R117    | NM_001076786 | NP_001070254 | Q2KHR3 | QSER1_HUMAN | 6  | TTGAGCGCCTGC  | 0.423 |                              |
| + | 13 | 2851      | _p.D840N HIPK3_     | NM_005734    | NP_005725    | Q9H422 | HIPK3_HUMAN | 5  | TTGCCGACTCCC  | 0.473 | in to nuclear speckles (By s |
| - | 11 | 1957      |                     | NM_145804    | NP_665803    | Q8N961 | ABTB2_HUMAN | 2  | CCACCCGAGTAC  | 0.612 |                              |
| - | 6  | 825       | _p.E189K ELF5_u     | NM_198381    | NP_938195    | Q9UKW6 | ELF5_HUMAN  | 1  | CTTGTTCCCTATC | 0.428 | ETS.                         |
| + | 9  | 1219_1220 | R5L_uc009ykk.2_I    | NM_001160167 | NP_001153639 | Q6MZQ0 | PRR5L_HUMAN | 1  | CGAGGGGGAAG   | 0.629 |                              |
| + | 9  | 1326      | R5L_uc009ykk.2_I    | NM_001160167 | NP_001153639 | Q6MZQ0 | PRR5L_HUMAN | 1  | GCCTGGGGGAG   | 0.662 |                              |
| + | 2  | 1109      | G1_uc001mwt.2_F     | NM_000448    | NP_000439    | P15918 | RAG1_HUMAN  | 5  | TATTGTCCCTCTT | 0.498 | RING-type.                   |
| + | 8  | 898       | 18_uc001myg.2_Ir    | NM_130783    | NP_570139    | Q96SJ8 | TSN18_HUMAN | 0  | CCGGGGCATCC   | 0.597 | lasmic (Potential).          |
| + | 8  | 1667      |                     | NM_020229    | NP_064614    | Q9NQV5 | PRD11_HUMAN | 1  | TGAGCCCCCG    | 0.522 |                              |
| - | 2  | 376       | 13_uc009yku.1_5'    | NM_020826    | NP_065877    | Q7L8C5 | SYT13_HUMAN | 1  | TGGGTCCATAGA  | 0.532 | lasmic (Potential).          |
| + | 10 | 1417      | _Mutation_p.A43f    | NM_152312    | NP_689525    | Q8N3Y3 | LARG2_HUMAN | 3  | TGTGTGCCCAG   | 0.637 | lenal (Potential).           |
| + | 8  | 1541      | n.1_Missense_Mul    | NM_003682    | NP_003673    | Q8WXG6 | MADD_HUMAN  | 11 | CATGAGGGCCAC  | 0.502 |                              |
| + | 9  | 1764      | n.1_Missense_Mul    | NM_003682    | NP_003673    | Q8WXG6 | MADD_HUMAN  | 11 | TTCAAGCTGGC   | 0.557 | dDENN.                       |
| - | 10 | 1739      | ise_Mutation_p.E5   | NM_024783    | NP_079059    | Q5U5Z8 | CBPC2_HUMAN | 2  | TTCTTCAAGAAC  | 0.383 |                              |
| + | 3  | 491       | igo.3_Missense_M    | NM_002843    | NP_002834    | Q12913 | PTPRJ_HUMAN | 8  | CTGACCCCTCAC  | 0.423 | cellular (Potential).        |
| + | 1  | 520       |                     | NM_001004726 | NP_001004726 | Q8NH49 | OR4X1_HUMAN | 3  | TGACCACACTAC  | 0.567 | cellular (Potential).        |
| + | 1  | 245       |                     | NM_001004702 | NP_001004702 | Q8NH37 | OR4C3_HUMAN | 1  | FGGCTTCCCCTG  | 0.458 | lasmic (Potential).          |
| - | 1  | 358       |                     | NM_001005272 | NP_001005272 | Q8NH83 | OR4A5_HUMAN | 3  | TATAGCGATCAC  | 0.468 | lasmic (Potential).          |
| + | 1  | 546       |                     | NM_001004703 | NP_001004703 | A6NHA9 | O4C46_HUMAN | 1  | CCCTTGCTCAAC  | 0.458 | cellular (Potential).        |
| - | 1  | 844       |                     | NM_001004700 | NP_001004700 | Q6IEV9 | OR4CB_HUMAN | 1  | GAGTGGATTGAC  | 0.413 | Name=7; (Potential).         |
| + | 1  | 656       |                     | NM_001004735 | NP_001004735 | Q8NGL3 | OR5DE_HUMAN | 3  | TCACTTCTATGT  | 0.478 | Name=5; (Potential).         |
| + | 1  | 545       |                     | NM_001005200 | NP_001005200 | Q8N162 | OR8H2_HUMAN | 2  | ACACTTCCCCAA  | 0.398 | cellular (Potential).        |
| + | 1  | 586       |                     | NM_001005200 | NP_001005200 | Q8N162 | OR8H2_HUMAN | 2  | ACACCGAAATCC  | 0.388 | cellular (Potential).        |
| - | 1  | 767       |                     | NM_001005199 | NP_001005199 | Q8NGG4 | OR8H1_HUMAN | 3  | TAAGTAAAAATCA | 0.358 | Name=6; (Potential).         |
| + | 1  | 797       |                     | NM_001005202 | NP_001005202 | Q8NH51 | OR8K3_HUMAN | 4  | TTCATTCCTTTG  | 0.423 | cellular (Potential).        |
| + | 1  | 364       |                     | NM_001004730 | NP_001004730 | Q8NGP9 | O5AR1_HUMAN | 0  | TATGGTCGTTTTC | 0.512 | lasmic (Potential).          |
| - | 6  | 905       | jq.1_Missense_Mu    | NM_003146    | NP_003137    | Q08945 | SSRP1_HUMAN | 2  | CATAACGACCAC  | 0.527 |                              |
| + | 1  | 898       |                     | NM_001004458 | NP_001004458 | Q8NH92 | OR1S1_HUMAN | 1  | ATAAACCCCTTC  | 0.453 | Name=7; (Potential).         |
| - | 5  | 515       | ymq.2_Missense_f    | NM_145016    | NP_659453    | Q8WU03 | GLYL2_HUMAN | 2  | GGTTTTCATGTA  | 0.388 |                              |
| + | 1  | 347       |                     | NM_001004705 | NP_001004705 | Q8NGI6 | OR4DA_HUMAN | 3  | TCTTTCGGTGAT  | 0.478 | Name=3; (Potential).         |
| + | 1  | 90        | 9ynx.2_Missense_    | NM_002411    | NP_002402    | Q13296 | SG2A2_HUMAN | 1  | TGGCGGCCCTC   | 0.612 |                              |
| + | 3  | 342       | R2G_uc001nvb.2_     | NM_002696    | NP_002687    | P62487 | RPB7_HUMAN  | 0  | TTTTTCCGGCCA  | 0.473 |                              |
| - | 2  | 778       |                     | NM_000738    | NP_000729    | P11229 | ACM1_HUMAN  | 0  | TCACGGAGAAG   | 0.632 | lasmic (Potential).          |
| + | 6  | 1240      | 2A9_uc001nwx.2_     | NM_080866    | NP_543142    | Q8IVM8 | S22A9_HUMAN | 3  | ACCATGAAAAAA  | 0.413 | lasmic (Potential).          |
| + | 9  | 1764      | 2A9_uc001nwx.2_     | NM_080866    | NP_543142    | Q8IVM8 | S22A9_HUMAN | 3  | TGCCCTGGATCA  | 0.502 | ical; (Potential).           |
| - | 3  | 288       | T MRPL49_uc001      | NM_001997    | NP_001988    | P35544 | UBIM_HUMAN  | 0  | CAGGGCCTCCA   | 0.607 |                              |
| + | 2  | 1075      |                     | NM_006779    | NP_006770    | O14613 | BORG1_HUMAN | 0  | AGATCCCCACA   | 0.657 |                              |
| - | 5  | 1739      | rol.1_Splice_Site_I | NM_002419    | NP_002410    | Q16584 | M3K11_HUMAN | 6  | AGTTCCTGCGCC  | 0.716 |                              |
| + | 4  | 588       | lrot.1_Missense_M   | NM_005146    | NP_005137    | O43290 | SNUT1_HUMAN | 1  | GAGAGGAGCTG   | 0.657 | Potential.                   |
| + | 16 | 1991      |                     | NM_006842    | NP_006833    | Q13435 | SF3B2_HUMAN | 3  | AAATCCCTGGG   | 0.498 |                              |
| - | 16 | 3206_3207 |                     | NM_006946    | NP_008877    | O15020 | SPTN2_HUMAN | 4  | CAGCCGGTCTGC  | 0.688 | Spectrin 7.                  |
| - | 2  | 313       |                     | NM_005995    | NP_005986    | O75333 | TBX10_HUMAN | 0  | TCCTCCCACAG   | 0.642 | T-box.                       |
| - | 13 | 1707_1708 | e_Mutation_p.P51    | NM_001876    | NP_001867    | P50416 | CPT1A_HUMAN | 2  | GGTACGGAATGT  | 0.495 | lasmic (Potential).          |
| - | 1  | 45        | 21_uc001ooh.2_Tr    | NM_181514    | NP_852615    | Q7Z2W9 | RM21_HUMAN  | 0  | TGACCGTCAGG   | 0.687 |                              |
| + | 1  | 284_285   |                     | NM_005553    | NP_005544    | P26371 | KRA59_HUMAN | 0  | TGGAGGCTGTG   | 0.639 |                              |
| - | 3  | 477       | uq.1_Missense_Ml    | NM_003355    | NP_003346    | P55851 | UCP2_HUMAN  | 0  | CAGAGGAAAGG   | 0.542 | Solcar 1.                    |

rs141762692

rs146533704

|   |    |           |                   |              |              |        |             |                                |    |               |       |             |
|---|----|-----------|-------------------|--------------|--------------|--------|-------------|--------------------------------|----|---------------|-------|-------------|
| - | 10 | 1584      |                   | NM_173582    | NP_775853    | Q6PCE3 | PGM2L_HUMAN |                                | 1  | CAAAAAGGACTT  | 0.323 |             |
| - | 6  | 1172      |                   | NM_001039548 | NP_001034637 | Q6PF15 | KLH35_HUMAN | Kelch 6.                       | 0  | CCC GCCCGCCA  | 0.597 |             |
| + | 1  | 470_471   | i_2_Intron CAPN5_ | NM_006189    | NP_006180    | P47874 | OMP_HUMAN   |                                | 0  | GGCCTCCGTGG   | 0.604 | rs2233550   |
| + | 5  | 1859      | u_1_Missense_Mu   | NM_015885    | NP_056969    | O94913 | PCF11_HUMAN |                                | 1  | CAAACGAAGGC   | 0.458 |             |
| - | 14 | 1892      | ak_2_Missense_M   | NM_001364    | NP_001355    | Q15700 | DLG2_HUMAN  |                                | 6  | GCAGGGATCCG   | 0.473 |             |
| - | 3  | 1252      | m_2_Missense_Mt   | NM_001143831 | NP_001137303 | P41594 | GRM5_HUMAN  | cellular (Potential).          | 9  | GGTTTCGGTGG   | 0.458 |             |
| + | 1  | 699       |                   | NM_001008781 | NP_001008781 | Q8TDW7 | FAT3_HUMAN  | Extracellular (Potential).     | 5  | AGGTATGATCTG  | 0.388 |             |
| + | 1  | 1525      |                   | NM_001008781 | NP_001008781 | Q8TDW7 | FAT3_HUMAN  | Extracellular (Potential).     | 5  | AGGAGAAAATG   | 0.388 |             |
| + | 15 | 10153     |                   | NM_001008781 | NP_001008781 | Q8TDW7 | FAT3_HUMAN  | (Potential). Cadherin 31.      | 5  | ATTTTTCCATTGT | 0.408 |             |
| + | 4  | 467       | N5_uc001pfz.2_iv  | NM_014361    | NP_055176    | O94779 | CNTN5_HUMAN |                                | 8  | CATCTTCATCTC  | 0.398 |             |
| + | 5  | 777       | KIAA1377_uc010n   | NM_020802    | NP_065853    | Q9P2H0 | K1377_HUMAN |                                | 4  | TCACAGAGCTA   | 0.318 |             |
| + | 6  | 2075      | run.1_Missense_M  | NM_020802    | NP_065853    | Q9P2H0 | K1377_HUMAN |                                | 4  | GTTTGGAATC    | 0.294 |             |
| - | 4  | 679       | 1_uc010ruv.1_Mis  | NM_002421    | NP_002412    | P03956 | MMP1_HUMAN  | metalloprotease.               | 4  | GATTTCTCCAC   | 0.438 |             |
| - | 2  | 326       |                   | NM_002427    | NP_002418    | P45452 | MMP13_HUMAN | switch (By s p.D100N(1)        | 3  | CACATCAGGAA   | 0.408 | rs148152034 |
| + | 26 | 4091      | e_Mutation_p.P13  | NM_001080463 | NP_001073932 | Q8NCM8 | DYHC2_HUMAN | n (By similarity).             | 0  | ATTCTCCTTATT  | 0.338 |             |
| - | 7  | 1453      | hp_2_Missense_M   | NM_025208    | NP_079484    | Q9GZP0 | PDGFD_HUMAN |                                | 2  | TACAATCACATCC | 0.458 | rs146343067 |
| + | 1  | 566       | .2_Intron PDGFD_  | NM_001001711 | NP_001001711 | Q8WTU0 | DDI1_HUMAN  |                                | 5  | CTCCCGTCCAC   | 0.672 | rs138983347 |
| - | 6  | 4283      | z.1_Missense_Mul  | NM_015065    | NP_055880    | Q8NEV8 | EXPH5_HUMAN |                                | 5  | GTTTCACTTTGC  | 0.348 |             |
| + | 16 | 2364      | kl.1_Missense_Mt  | NM_004398    | NP_004389    | Q13206 | DDX10_HUMAN |                                | 4  | GACAAGCAAAG   | 0.338 |             |
| + | 2  | 348       | .1_5'Flank HSPB2  | NM_001541    | NP_001532    | Q16082 | HSPB2_HUMAN |                                | 3  | TACCCAGACG    | 0.657 |             |
| + | 14 | 1320      | ogq.2_Splice_Site | NM_001040455 | NP_001035545 | Q8NBJ9 | SIDT2_HUMAN |                                | 0  | CCCCAGCAATA   | 0.582 |             |
| + | 3  | 434       | se_Mutation_p.P1  | NM_207343    | NP_997226    | Q8ND24 | RN214_HUMAN |                                | 0  | CCATCCAGTCA   | 0.542 |             |
| - | 32 | 5563      |                   | NM_020693    | NP_065744    | Q8TD84 | DSCL1_HUMAN | lasmic (Potential).            | 8  | TCCTTCTTTGT   | 0.597 |             |
| + | 8  | 1012      | e_Mutation_p.L21  | NM_019894    | NP_063947    | Q9NRS4 | TMPS4_HUMAN | (Potential). Peptidase S1.     | 2  | GGGTCTCACG    | 0.612 |             |
| + | 7  | 3865      | 1281L MLL_uc001   | NM_005933    | NP_005924    | Q03164 | MLL1_HUMAN  |                                | 25 | TGGGCCCTGAAT  | 0.582 |             |
| + | 7  | 1215      | i_2_Missense_Mut  | NM_015157    | NP_055972    | Q86UU1 | PHLB1_HUMAN |                                | 0  | CTGCCGTTCC    | 0.637 |             |
| + | 7  | 1737      | 462S PHLDB1_uc    | NM_015157    | NP_055972    | Q86UU1 | PHLB1_HUMAN |                                | 0  | TTAAGTCCATCT  | 0.652 |             |
| + | 2  | 348       | uf.2_Missense_Mi  | NM_001716    | NP_001707    | P32302 | CXCR5_HUMAN | lasmic (Potential).            | 1  | GGCACCGGCAG   | 0.647 |             |
| + | 8  | 2200      |                   | NM_005422    | NP_005413    | O75443 | TECTA_HUMAN | VWFD 2.                        | 10 | CTCCGAGTTC    | 0.617 |             |
| + | 9  | 2429      |                   | NM_005422    | NP_005413    | O75443 | TECTA_HUMAN | VWFD 2.                        | 10 | TTTATCGAAACA  | 0.433 |             |
| + | 16 | 5318      |                   | NM_005422    | NP_005413    | O75443 | TECTA_HUMAN |                                | 10 | CAACCGAACTT   | 0.542 |             |
| + | 45 | 6148      | p.S869L SORL1_    | NM_003105    | NP_003096    | Q92673 | SORL_HUMAN  | tential). Fibronectin type-III | 15 | AGTTTCATTATC  | 0.249 |             |
| - | 9  | 1972      | yp_2_Missense_M   | NM_006597    | NP_006588    | P11142 | HSP7C_HUMAN |                                | 8  | AGAGGGAGGAG   | 0.512 |             |
| + | 10 | 1374      | ID1B_uc010rx.1_   | NM_020716    | NP_065767    | Q3KR37 | GRM1B_HUMAN |                                | 1  | ACATCCCCACT   | 0.498 |             |
| - | 1  | 899       |                   | NM_001005188 | NP_001005188 | Q8NH79 | OR6X1_HUMAN | lasmic (Potential).            | 3  | CTTTCTTAAGC   | 0.388 |             |
| + | 1  | 47        |                   | NM_001001965 | NP_001001965 | Q8NGN0 | OR4D5_HUMAN | cellular (Potential).          | 1  | ACTGGGGCTCT   | 0.418 |             |
| + | 1  | 86        |                   | NM_001001965 | NP_001001965 | Q8NGN0 | OR4D5_HUMAN | Name=1; (Potential).           | 1  | CTTCACTGTTTI  | 0.458 |             |
| + | 3  | 237       | r_p.L10F VWA5A_   | NM_001130142 | NP_001123614 | O00534 | VMA5A_HUMAN | VIT.                           | 2  | TCACCTCCACC   | 0.448 |             |
| + | 18 | 2427      | zt.2_Missense_Mt  | NM_001130142 | NP_001123614 | O00534 | VMA5A_HUMAN |                                | 2  | GTAAGGACTTG   | 0.562 |             |
| - | 1  | 10        |                   | NM_001002917 | NP_001002917 | Q8WZ84 | OR8D1_HUMAN | cellular (Potential).          | 3  | AATTTCCATGG   | 0.413 |             |
| - | 1  | 535       |                   | NM_001005195 | NP_001005195 | Q8NGG6 | OR8BC_HUMAN | cellular (Potential).          | 3  | GATGTCACACA   | 0.507 |             |
| + | 5  | 481_482   |                   | NM_017425    | NP_059121    | Q15506 | SP17_HUMAN  | IQ.                            | 0  | AAGAGGTTGCT   | 0.391 |             |
| + | 13 | 1404      | osav.1_Missense_  | NM_001145290 | NP_001138762 | Q8TED4 | SPX2_HUMAN  |                                | 2  | GCCAGGACGGG   | 0.622 |             |
| + | 7  | 1601      | i_p.P324S NTM_u   | NM_016522    | NP_057606    | Q9P121 | NTRI_HUMAN  |                                | 6  | CAGGTCCAGGC   | 0.597 |             |
| - | 1  | 122       |                   | NM_174927    | NP_777587    | Q7Z5L4 | SPT19_HUMAN |                                | 0  | AACTGGTTATT   | 0.433 |             |
| - | 11 | 1543      | on_p.G334R SLC    | NM_003044    | NP_003035    | P48065 | S6A12_HUMAN | Name=7; (Potential).           | 1  | AAACCCAGCCA   | 0.502 |             |
| + | 5  | 1465_1466 | 1_Intron LRTM2_u  | NM_001039029 | NP_001034118 | Q8N967 | LRTM2_HUMAN | xtracellular (Potential).      | 1  | GTAGGGGGACC   | 0.589 |             |

|   |    |           |                     |              |              |        |              |                          |    |               |       |             |
|---|----|-----------|---------------------|--------------|--------------|--------|--------------|--------------------------|----|---------------|-------|-------------|
| + | 7  | 1257      | uc001qkn.2_Missense | NM_199460    | NP_955630    | Q13936 | CAC1C_HUMAN  | cellular (Potential).    | 11 | TTCCCTTGTG    | 0.592 |             |
| + | 8  | 1447      | VA1C_uc001qkn.2     | NM_199460    | NP_955630    | Q13936 | CAC1C_HUMAN  | cellular (Potential).    | 11 | GGAAGGGACTG   | 0.517 |             |
| + | 2  | 210_211   | see.1_Missense_IV   | NR_027363    |              |        |              |                          | 0  | AAAGCCCCGCTC  | 0.559 |             |
| + | 4  | 290       | _p.L159F DYRK4_     | NM_003845    | NP_003836    | Q9NR20 | DYRK4_HUMAN  |                          | 3  | CTAAAGCTTTTT  | 0.517 |             |
| + | 1  | 1383      |                     | NM_002235    | NP_002226    | P17658 | KCNA6_HUMAN  |                          | 3  | GGCCGGCCAGG   | 0.617 |             |
| + | 1  | 615       | ik.3_Missense_Mu    | NM_002527    | NP_002518    | P20783 | NTF3_HUMAN   |                          | 1  | TGGGGGAGATC   | 0.522 |             |
| - | 21 | 2228      |                     | NM_020373    | NP_065106    | Q9NQ90 | ANO2_HUMAN   | cellular (Potential).    | 7  | GTTTCGAATGG   | 0.453 |             |
| - | 5  | 788       | lquh.2_Missense_    | NM_018088    | NP_060558    | Q86YD7 | F90A1_HUMAN  |                          | 1  | CCCTTCTTTTC   | 0.552 |             |
| - | 26 | 3205      | .2_Missense_Mut     | NM_002864    | NP_002855    |        |              |                          | 5  | AGGATCGAGCC   | 0.488 |             |
| - | 1  | 566       |                     | NM_023919    | NP_076408    | Q9NYW3 | TA2R7_HUMAN  | cellular (Potential).    | 1  | AACTCCAAGTT   | 0.423 |             |
| - | 3  | 285       | _p.Q83P PRB1_u      | NM_005039    | NP_005030    | P04280 | PRP1_HUMAN   | -P-[PAQ]-Q-[GE]-[GD]-[NK | 0  | CCCCTTGTGGG   | 0.622 |             |
| + | 1  | 416       |                     | NR_003932    |              |        |              |                          | 0  | AGCCTGCAAGA   | 0.567 |             |
| - | 13 | 4359      |                     | NM_000834    | NP_000825    | Q13224 | NMDE2_HUMAN  | lasmic (Potential).      | 12 | CTGGTCGTCCC   | 0.612 |             |
| - | 8  | 1856      |                     | NM_000834    | NP_000825    | Q13224 | NMDE2_HUMAN  | ical; (Potential).       | 12 | ATCACCATACC   | 0.463 |             |
| - | 12 | 1868      | Osio.1_Missense_f   | NM_021094    | NP_066580    | P46721 | SO1A2_HUMAN  | lasmic (Potential).      | 4  | AGATTCATACAC  | 0.299 |             |
| - | 5  | 793       | _p.S49F SLCO1A      | NM_021094    | NP_066580    | P46721 | SO1A2_HUMAN  | Name=4; (Potential).     | 4  | ATATAGGAAATAC | 0.343 |             |
| - | 5  | 530       |                     | NM_183378    | NP_899234    | Q7RTY7 | OVCH1_HUMAN  | aptidase S1 1.           | 10 | CCCATCCACTG   | 0.413 |             |
| - | 10 | 2696      | lrj.1_Missense_M    | NM_001002259 | NP_001002259 | Q6IMN6 | CAPR2_HUMAN  |                          | 2  | CGTTGGAATTG   | 0.388 |             |
| - | 26 | 3940      | p.G432R ADAMT       | NM_025003    | NP_079279    | P59510 | ATS20_HUMAN  | SP type-1 9.             | 19 | TGATCCCCATGC  | 0.353 |             |
| - | 4  | 1127_1128 |                     | NM_001004329 | NP_001004329 | Q6ZNG2 | DBX2_HUMAN   |                          | 0  | GGCACCTTGCA   | 0.47  | rs149681179 |
| - | 7  | 689       | _p.T144I SLC38A     | NM_030674    | NP_109599    | Q9H2H9 | S38A1_HUMAN  | lasmic (Potential).      | 5  | CTGTGGTGCCA   | 0.383 |             |
| + | 4  | 753       | AM113B_uc001rpc     | NM_138371    | NP_612380    | Q96HM7 | F113B_HUMAN  |                          | 5  | CCTCCGAAGTG   | 0.587 |             |
| + | 4  | 1128      | _p.P13S FAM113B     | NM_138371    | NP_612380    | Q96HM7 | F113B_HUMAN  |                          | 5  | TATGGTCCGAAC  | 0.592 |             |
| + | 4  | 1393      | p.A101V FAM113E     | NM_138371    | NP_612380    | Q96HM7 | F113B_HUMAN  |                          | 5  | CCACGCGAGGG   | 0.597 |             |
| - | 14 | 1752      | _p.P387A RPAP3_u    | NM_024604    | NP_078880    | Q9H6T3 | RPAP3_HUMAN  |                          | 1  | TGCAGGAATTG   | 0.403 |             |
| - | 23 | 2742      | _Missense_Mutati    | NM_001098532 | NP_001092002 | A8K2G5 | A8K2G5_HUMAN |                          | 4  | GACAGGAGGGG   | 0.413 |             |
| - | 54 | 4613      | 2A1_uc009zkw.2_f    | NM_001844    | NP_001835    | P02458 | CO2A1_HUMAN  | lar collagen NC1.        | 2  | CACACCGAATTC  | 0.517 |             |
| - | 6  | 1270      | _p.P355S ZNF641_    | NM_152320    | NP_689533    | Q96N77 | ZN641_HUMAN  |                          | 2  | CTTTGGCACTGC  | 0.592 |             |
| - | 5  | 1970      | Y6_uc001rsi.3_Mi    | NM_015270    | NP_056085    | O43306 | ADCY6_HUMAN  | lasmic (Potential).      | 0  | CCTCCGGCAGC   | 0.552 |             |
| - | 48 | 15620     |                     | NM_003482    | NP_003473    | O14686 | MLL2_HUMAN   | rR N-terminal.           | 41 | CCACGGGATAG   | 0.607 |             |
| - | 48 | 15358     |                     | NM_003482    | NP_003473    | O14686 | MLL2_HUMAN   | ype 4; degenerate.       | 41 | GGCACGGATGG   | 0.537 |             |
| - | 21 | 5117      |                     | NM_003482    | NP_003473    | O14686 | MLL2_HUMAN   |                          | 41 | TGTGGGATTTG   | 0.637 |             |
| + | 8  | 1669      | 'ATS2_uc001ruf.2_   | NM_023071    | NP_075559    | Q86XZ4 | SPAS2_HUMAN  |                          | 1  | TGTTCCCTCTCG  | 0.428 |             |
| - | 3  | 606       |                     | NM_030809    | NP_110436    | Q9H175 | CSRN2_HUMAN  |                          | 0  | AGCTCCGTACAC  | 0.537 |             |
| + | 10 | 1380      | 4A8_uc001ryp.1_c    | NM_001039960 | NP_001035049 | Q2Y0W8 | S4A8_HUMAN   | cellular (Potential).    | 5  | AGAGTGGGATC   | 0.493 |             |
| + | 7  | 1744      | zt.2_Missense_Mu    | NM_002135    | NP_002126    | P22736 | NR4A1_HUMAN  |                          | 0  | TGCCCGTGGCT   | 0.612 |             |
| - | 7  | 1472      |                     | NM_033045    | NP_149034    | Q9NSB2 | KRT84_HUMAN  | Tail.                    | 1  | CTCACCGGCTC   | 0.557 |             |
| - | 2  | 633       |                     | NM_005555    | NP_005546    | P04259 | K2C6B_HUMAN  | Coil 1A. Rod.            | 2  | AGGGTCCACTT   | 0.542 |             |
| - | 1  | 74        |                     | NM_005555    | NP_005546    | P04259 | K2C6B_HUMAN  | Head.                    | 2  | GGCTCCTGATG   | 0.632 |             |
| - | 4  | 818       |                     | NM_173352    | NP_775487    | Q8N1N4 | K2C78_HUMAN  | Coil 1B. Rod.            | 2  | TCACTTCTTCAT  | 0.547 |             |
| + | 8  | 926       | 2T2_uc009zms.2_f    | NM_003578    | NP_003569    | O75908 | SOAT2_HUMAN  | ical; (Potential).       | 1  | CAACACTCATC   | 0.493 |             |
| + | 29 | 3251      | p.E600K NCKAP1l     | NM_005337    | NP_005328    | P55160 | NCKPL_HUMAN  |                          | 4  | TCAAGGAATTT   | 0.418 |             |
| - | 1  | 184       |                     | NM_001005499 | NP_001005499 | A6NIJ9 | O6C70_HUMAN  | lasmic (Potential).      | 1  | ATTACGGAGGA   | 0.403 |             |
| - | 2  | 902       | zob.1_Missense_M    | NM_032364    | NP_115740    | Q6Y2X3 | DJC14_HUMAN  |                          | 4  | CCTTTGCGCTTA  | 0.567 |             |
| - | 19 | 2410      | 10splice STAT6_u    | NM_003153    | NP_003144    | P42226 | STAT6_HUMAN  |                          | 4  | ACTTACTCCTGC  | 0.522 |             |
| - | 7  | 1002      | ion_p.R199H ARH     | NM_032496    | NP_115885    | Q9BRR9 | RHG09_HUMAN  |                          | 1  | GACAGCGGCGA   | 0.652 | rs139154961 |
| + | 3  | 670       | sts.3_Missense_M    | NM_006482    | NP_006473    | Q92630 | DYRK2_HUMAN  |                          | 4  | TCCAGGTTCAA   | 0.488 | rs138020482 |

|   |    |           |                   |              |               |        |             |                              |    |               |       |             |
|---|----|-----------|-------------------|--------------|---------------|--------|-------------|------------------------------|----|---------------|-------|-------------|
| + | 2  | 817       |                   | NM_014505    | NP_055320     | Q86W47 | KCMB4_HUMAN | cellular (Potential).        | 0  | AGAGAGAAAATC  | 0.328 |             |
| - | 14 | 1439      | xi.3_Missense_Mu  | NM_032606    | NP_115995     | Q9BXY5 | CAYP2_HUMAN |                              | 2  | TCATCCTCCTGT  | 0.333 |             |
| - | 7  | 992       |                   | NM_004950    | NP_004941     | Q99645 | EPYC_HUMAN  | LRR 6.                       | 1  | TTAATAGGGTTTC | 0.393 |             |
| - | 3  | 235       | 2_5'Flank CLLU1_  | NM_001025232 | NP_001020403  | Q5K130 | CLU1O_HUMAN |                              | 0  | TCACATTTCTT   | 0.438 |             |
| - | 5  | 1132      | KS1B_uc009ztt.1   | NM_152788    | NP_690001     | Q7Z6G8 | ANS1B_HUMAN | ANK 7.                       | 0  | ATCCACCTTTCC  | 0.378 |             |
| - | 17 | 3801      | 1tgp.2_Missense_  | NM_015054    | NP_055869     | A0JNW5 | UH1BL_HUMAN |                              | 2  | ACAACGGACATC  | 0.338 |             |
| + | 26 | 2741      | p.P886L KIAA103   | NM_015275    | NP_056090     | Q2M389 | WAHS7_HUMAN |                              | 2  | AGTATCCTTTTGA | 0.373 |             |
| - | 10 | 2289      | se_Mutation_p.H2  | NM_012406    | NP_036538     | Q9UKN5 | PRDM4_HUMAN | 2H2-type 2.                  | 2  | CTTGTGGGGCT   | 0.473 |             |
| + | 4  | 1355      | mt.2_Missense_Mi  | NM_014653    | NP_055468     | Q2TBF2 | WSCD2_HUMAN | WSC 1.                       | 3  | GCGAGGCAGCG   | 0.692 |             |
| - | 2  | 968       | M119_uc001tnf.2_  | NM_181724    | NP_859075     | Q4V9L6 | TM119_HUMAN | lasmic (Potential).          | 1  | GGGGGGACCCA   | 0.667 |             |
| + | 18 | 1877      |                   | NM_001101421 | NP_001094891  | Q8N1T3 | MYO1H_HUMAN |                              | 0  | CCGAAGGAAAT   | 0.443 |             |
| + | 10 | 1454      | p.K380R CCDC6     | NM_152591    | NP_689804     | Q8NA47 | CCD63_HUMAN | Potential.                   | 8  | CAAGAAGATAA   | 0.502 |             |
| + | 16 | 2095      |                   | NM_015267    | NP_056082     | O14529 | CUX2_HUMAN  |                              | 6  | GCTCAGACGAC   | 0.622 |             |
| - | 16 | 2186_2187 | orf51_uc001tts.2_ | NM_001109662 | NP_001103132  |        |             |                              | 2  | TTAAGGAAGGG   | 0.396 |             |
| + | 19 | 2028      | e.1_Missense_Mu   | NM_001143854 | NP_0011137326 | Q9Y2J0 | RP3A_HUMAN  | C2 2.                        | 7  | ATCCTGGTCTCC  | 0.592 |             |
| + | 2  | 338_339   | tux.2_Missense_M  | NM_017901    | NP_060371     | Q9ULQ1 | TPC1_HUMAN  | lasmic (Potential).          | 3  | CCTGACCTTGGA  | 0.569 |             |
| - | 20 | 3727      |                   | NM_000620    | NP_000611     | P29475 | NOS1_HUMAN  | -binding FR-type.            | 7  | CCTACCTGGATT  | 0.522 |             |
| - | 2  | 1188      |                   | NM_000620    | NP_000611     | P29475 | NOS1_HUMAN  | arity). PIN (nNOS-inhibiting | 7  | AGCCTCCTGCC   | 0.682 |             |
| - | 3  | 363       | p.S75F PITPNM     | NM_020845    | NP_065896     | Q9BZ72 | PITM2_HUMAN |                              | 3  | GGATGGAGCGG   | 0.622 |             |
| + | 2  | 717       | IP35_uc009zxx.2_  | NM_022717    | NP_073208     | Q16560 | U1SBP_HUMAN | Arg-rich.                    | 0  | GGGATCGAGAC   | 0.552 | rs140144369 |
| + | 7  | 903       | ya.2_Nonsense_M   | NM_024809    | NP_079085     | Q96GX1 | TECT2_HUMAN | cellular (Potential).        | 1  | CCAAACAGGAC   | 0.323 |             |
| + | 43 | 7252      |                   | NM_207437    | NP_997320     | Q8IVF4 | DYH10_HUMAN |                              | 6  | CCCATGGAGTAA  | 0.408 |             |
| - | 3  | 1335      |                   | NM_133448    | NP_597705     | Q14C87 | T132D_HUMAN | cellular (Potential).        | 14 | TGGCTCGCACG   | 0.547 | rs147819967 |
| + | 18 | 2451      | o.2_Intron GPR13  | NM_198827    | NP_942122     | Q6QNK2 | GP133_HUMAN | cellular (Potential).        | 10 | GACCCCTGCC    | 0.582 |             |
| - | 12 | 995       | i2_uc001ume.2_N   | NM_199254    | NP_954863     | Q6XPS3 | TPTE2_HUMAN | atase tensin-type.           | 0  | GACTCGATAGTC  | 0.338 |             |
| + | 3  | 862       | PH8_uc001umg.2    | NM_017520    | NP_059990     | Q99549 | MPP8_HUMAN  |                              | 0  | ATCCGACAGC    | 0.443 |             |
| - | 9  | 1010      | dc.1_Missense_Mi  | NM_006437    | NP_006428     | Q9UKK3 | PARP4_HUMAN | alpha-helical.               | 4  | TAGAAGGAGAAT  | 0.383 |             |
| + | 15 | 2113      | VF17_uc010tde.1_  | NM_031277    | NP_112567     | Q9BXT8 | RNF17_HUMAN |                              | 2  | TCCTGGAGATT   | 0.284 |             |
| - | 1  | 1359      | p.G301E FAM123    | NM_152704    | NP_689917     | Q8N7J2 | F123A_HUMAN |                              | 4  | CGCCTCCTTGG   | 0.637 |             |
| + | 1  | 1368      |                   | NM_001033602 | NP_001028774  | Q5JR59 | MTUS2_HUMAN |                              | 0  | GACATCCAGCA   | 0.507 |             |
| + | 17 | 1910      | ba.2_Missense_M   | NM_130806    | NP_570718     | Q8WXD0 | RXFP2_HUMAN | Name=5; (Potential).         | 0  | TATGTTCTGTTCC | 0.393 | rs139736966 |
| + | 61 | 9385      | se_Mutation_p.Y4E | NM_023037    | NP_075463     | Q5TBA9 | FRY_HUMAN   |                              | 7  | TACTTATGCCCTC | 0.522 |             |
| + | 11 | 2718      |                   | NM_000059    | NP_000050     | P51587 | BRCA2_HUMAN | action with NPM1.            | 64 | AAAACGTTGAGC  | 0.313 |             |
| + | 1  | 4322      |                   | NM_207361    | NP_997244     | Q5SZK8 | FREM2_HUMAN | ar (Potential). CSPG 9.      | 11 | ACAAATCTTTGG  | 0.343 |             |
| - | 10 | 1233_1234 | uyk.2_Missense_M  | NM_015058    | NP_055873     | A3KMH1 | K0564_HUMAN |                              | 6  | GCTTGGGACAC   | 0.366 |             |
| - | 4  | 354       | iLC25A30_uc010tf  | NM_001010875 | NP_001010875  | Q5SVS4 | KMCP1_HUMAN | e=2; (Potential). Solcar 1.  | 1  | GGGGGAATCC    | 0.473 |             |
| + | 6  | 1062      | p.Y127H CYSLTR    | NM_020377    | NP_065110     | Q9NS75 | CLTR2_HUMAN | Name=3; (Potential).         | 2  | AGTATTTATTTCC | 0.483 |             |
| - | 11 | 2821_2822 | p.H889Y ATP7B_1   | NM_000053    | NP_000044     | P35670 | ATP7B_HUMAN | lasmic (Potential).          | 3  | CACGTGGGTAGC  | 0.441 |             |
| + | 5  | 748       | M4_uc001vhk.1_Ir  | NM_006418    | NP_006409     | Q6UX06 | OLFM4_HUMAN | actomedin-like.              | 1  | ATGGTGGTGTG   | 0.423 |             |
| - | 6  | 1858      | .1_Intron DACH1_  | NM_080759    | NP_542937     | Q9UI36 | DACH1_HUMAN |                              | 1  | ACTACGGATTC   | 0.488 |             |
| - | 15 | 2292      | e_Mutation_p.H61  | NM_014953    | NP_055768     | Q9Y2L1 | RRP44_HUMAN |                              | 1  | CATGTGGAATC   | 0.318 |             |
| - | 1  | 1775      |                   | NM_052910    | NP_443142     | Q96PX8 | SLIK1_HUMAN | cellular (Potential).        | 5  | CATGATCCTTTC  | 0.557 |             |
| - | 2  | 2890      | afe.1_Missense_M  | NM_032229    | NP_115605     | Q9H5Y7 | SLIK6_HUMAN | lasmic (Potential).          | 3  | TAATACCTTCCT  | 0.403 |             |
| + | 2  | 2528      | tic.1_Missense_Mi | NM_015567    | NP_056382     | Q94991 | SLIK5_HUMAN | lasmic (Potential).          | 5  | AGAGGGCAACT   | 0.493 |             |
| + | 3  | 1004      |                   | NM_004466    | NP_004457     | P78333 | GPC5_HUMAN  |                              | 5  | AATGGGACAGAT  | 0.517 |             |
| - | 12 | 1744      | p.R467Q ABCC4_    | NM_005845    | NP_005836     | O15439 | MRP4_HUMAN  | C transporter 1.             | 4  | TTTACCGGTGCT  | 0.493 |             |
| + | 13 | 1113      | CA_uc010tiz.1_M   | NM_000282    | NP_000273     | P05165 | PCCA_HUMAN  | . Biotin carboxylation.      | 2  | AGCATCCTGTC   | 0.433 |             |



|   |     |           |                    |              |              |        |              |                                |    |                  |       |
|---|-----|-----------|--------------------|--------------|--------------|--------|--------------|--------------------------------|----|------------------|-------|
| - | 39  | 3489      | 4A1_uc010agl.2_I   | NM_001845    | NP_001836    | P02462 | CO4A1_HUMAN  | le-helical region.             | 6  | TCCTGGGAGGC      | 0.498 |
| + | 41  | 4110      |                    | NM_001846    | NP_001837    | P08572 | CO4A2_HUMAN  | le-helical region.             | 6  | CCCTTCCAACA      | 0.527 |
| + | 20  | 2480      | r.3_intron ARHGGEI | NM_001113511 | NP_001106983 | Q14155 | ARHG7_HUMAN  |                                | 7  | ATCACGTCTTGC     | 0.587 |
| + | 8   | 782       | gr.1_Missense_Mu   | NM_003891    | NP_003882    | P22891 | PROZ_HUMAN   | peptidase S1.                  | 0  | CGGGGGAGAAT      | 0.567 |
| + | 13  | 2343      |                    | NM_017905    | NP_060375    | Q6UWJ1 | TMCO3_HUMAN  |                                | 0  | GTGGAGAGCTG      | 0.597 |
| - | 6   | 650       | s6_uc001vuf.2_5'F  | NM_000820    | NP_000811    | Q14393 | GAS6_HUMAN   | calcium-binding (Potential).   | 4  | GGCAGCCCCCG      | 0.612 |
| + | 1   | 343       |                    | NM_001005483 | NP_001005483 | Q8NGD3 | OR4K5_HUMAN  | Name=3; (Potential).           | 2  | TGCTACTTGT       | 0.438 |
| + | 1   | 650       |                    | NM_001004063 | NP_001004063 | Q8NGD4 | OR4K1_HUMAN  | Name=5; (Potential).           | 3  | TATTTCTACAC      | 0.433 |
| - | 8   | 966       | i_p.S241F HNRNF    | NM_031314    | NP_112604    | P07910 | HNRPC_HUMAN  | Glu-rich (acidic).             | 0  | TCACGGAGCTG      | 0.488 |
| - | 1   | 238       |                    | NM_001005465 | NP_001005465 | Q8NGC4 | O10G3_HUMAN  | cellular (Potential).          | 2  | GCGAGGGACAA      | 0.498 |
| + | 6   | 1225      |                    | NM_004995    | NP_004986    | P50281 | MMP14_HUMAN  | 1. Extracellular (Potential)   | 0  | TCCGAGGGGAG      | 0.433 |
| - | 6   | 2591_2592 | c010akt.2_5'Flank  | NM_032452    | NP_115828    | Q96J6  | JPH4_HUMAN   | lasmic (Potential).            | 2  | CTGGGGCCCTC      | 0.673 |
| + | 2   | 558       |                    | NM_203402    | NP_981947    | A5D6W6 | FITM1_HUMAN  | cellular (Potential).          | 0  | GCTTCGAGCCA      | 0.692 |
| + | 8   | 1720      | s1_uc010alg.1_Mis  | NM_017999    | NP_060469    | Q96EP0 | RNF31_HUMAN  |                                | 2  | TCCAGCTAGTG      | 0.582 |
| - | 4   | 578       | r.1_intron GZMH_u  | NM_033423    | NP_219491    | P20718 | GRAH_HUMAN   | peptidase S1.                  | 2  | AATTGCCATGG      | 0.517 |
| - | 5   | 749       | e_Mutation_p.R21   | NM_004131    | NP_004122    | P10144 | GRAB_HUMAN   | peptidase S1.                  | 0  | AGGCTCGTGGA      | 0.498 |
| + | 11  | 1279      | sense_Mutation_p   | NM_004086    | NP_004077    | O43405 | COCH_HUMAN   | VWFA 2. p.S400L(1)             | 3  | AATCTCGGACAT     | 0.433 |
| + | 6   | 4320      | _p.P1361S ARHG     | NM_001173    | NP_001025226 | Q13017 | RHG05_HUMAN  | Rho-GAP.                       | 5  | AAATCCCGGAT      | 0.294 |
| + | 13  | 4483      |                    | NM_004274    | NP_004265    | Q13023 | AKAP6_HUMAN  |                                | 21 | AAATGGAAAAG      | 0.368 |
| - | 37  | 6179      | LGAPA1_uc010tp     | NM_014990    | NP_055805    | Q6GYQ0 | RGPA1_HUMAN  | to TCF3/E12 (By similarity)    | 4  | AATAAGGACATC     | 0.343 |
| + | 5   | 3308      | na.2_Missense_Mi   | NM_152447    | NP_689660    | Q96NI6 | LRFN5_HUMAN  | lasmic (Potential).            | 8  | TGCTGACTAATC     | 0.294 |
| + | 7   | 3420      | e_Mutation_p.H10   | NM_015091    | NP_055906    | Q9Y4F4 | F179B_HUMAN  | Ser-rich.                      | 3  | ATTCTCATATTG     | 0.299 |
| - | 1   | 168       |                    | NM_080746    | NP_542784    | Q96L21 | RL10L_HUMAN  |                                | 1  | ATCAGGAACCC      | 0.542 |
| - | 14  | 1782      | p.T518M PYGL_uc    | NM_002863    | NP_002854    | P06737 | PYGL_HUMAN   |                                | 1  | ACTCGTCTCC       | 0.453 |
| + | 2   | 1131      |                    | NM_000956    | NP_000947    | P43116 | PE2R2_HUMAN  | cellular (Potential).          | 2  | GAAAGGAAAAA      | 0.398 |
| - | 16  | 1869      | ltrg.1_Missense_M  | NM_006544    | NP_006535    | O00471 | EXOC5_HUMAN  |                                | 3  | AATTAATGTCCT     | 0.269 |
| - | 2   | 945       |                    | NM_021136    | NP_066959    | Q16799 | RTN1_HUMAN   |                                | 4  | TCCCTCCACAGC     | 0.448 |
| - | 11  | 2152      | IH5_uc001xfy.2_3'  | NM_139318    | NP_647479    | Q8NCM2 | KCNH5_HUMAN  | lasmic (Potential).            | 9  | CACGGGAATGC      | 0.532 |
| - | 4   | 362       | xfz.1_Missense_M   | NM_139318    | NP_647479    | Q8NCM2 | KCNH5_HUMAN  | toplasmic (Potential).         | 9  | AAACAGGGGTT      | 0.443 |
| + | 30  | 4263      | gl.2_Missense_Mu   | NM_015180    | NP_055995    | Q8WXH0 | SYNE2_HUMAN  | lasmic (Potential).            | 14 | CAGACCTTTCAC     | 0.443 |
| + | 113 | 20571     | SYNE2_uc001xgq.    | NM_015180    | NP_055995    | Q8WXH0 | SYNE2_HUMAN  | lasmic (Potential).            | 14 | GCTTCGACGAG      | 0.527 |
| + | 11  | 1507      | _p.V410M MTHFD     | NM_005956    | NP_005947    | P11586 | C1TC_HUMAN   | hydrofolate synthetase.        | 2  | TGGTGGTGACT      | 0.458 |
| - | 3   | 1123      | TB25_uc001xhg.2    | NM_006977    | NP_008908    | P24278 | ZBT25_HUMAN  |                                | 2  | ACCCCGTTGG       | 0.453 |
| - | 15  | 2980      | rs.2_Missense_Mu   | NM_000347    | NP_000338    | P11277 | SPTB1_HUMAN  | Spectrin 7.                    | 11 | CACTACCTTTG      | 0.612 |
| - | 31  | 5907      | VE26_uc001xkc.3    | NM_015346    | NP_056161    | Q68DK2 | ZFY26_HUMAN  |                                | 11 | CACTCCGCACCA     | 0.408 |
| - | 2   | 2510      | e_Mutation_p.E58   | NM_183002    | NP_892114    | P57103 | NAC3_HUMAN   | Cytoplasmic (Potential).       | 7  | CAACTCCCAT       | 0.502 |
| - | 2   | 327       | I2BP_uc010arc.2_   | NM_018373    | NP_060843    | P57105 | SYJ2B_HUMAN  | toplasmic (Potential).         | 0  | TCACCGAAAGG      | 0.542 |
| + | 12  | 1603      | EN1_uc010ark.2_A   | NM_000021    | NP_000012    | P49768 | PSN1_HUMAN   | 1 with CTNNB1. Helical; (P     | 2  | CATCACCTTTGC     | 0.398 |
| - | 31  | 4871      |                    | NM_000428    | NP_000419    | Q14767 | LTBP2_HUMAN  | calcium-binding (Potential).   | 2  | AGAGACCAGGC      | 0.473 |
| + | 5   | 2507      | M1_uc001xql.3_F    | NM_019589    | NP_062535    | P49750 | YLP1_HUMAN   |                                | 3  | CAAGACCCAGA      | 0.512 |
| + | 2   | 188       | se_Mutation_p.A41  | NM_004452    | NP_004443    | A2VDJ2 | A2VDJ2_HUMAN |                                | 2  | CCGACGCCAGC      | 0.701 |
| - | 4   | 885       | se_Mutation_p.E1:  | NM_199296    | NP_954993    | Q6H9L7 | ISM2_HUMAN   |                                | 1  | ctctgtctctctttcc | 0.284 |
| + | 2   | 2169      | td.2_Missense_ML   | NM_013231    | NP_037363    | O43155 | FLRT2_HUMAN  | -III. Extracellular (Potential | 4  | TTCAGGAGCGC      | 0.493 |
| - | 43  | 6064      | d.2_Missense_Mu    | NM_183387    | NP_899243    | Q05BV3 | EMAL5_HUMAN  | WD 29.                         | 3  | TCCAGCACTAA      | 0.413 |
| - | 18  | 3259      |                    | NM_001080414 | NP_001073883 | Q9P219 | DAPLE_HUMAN  | Potential.                     | 3  | CACTCGGAGAA      | 0.622 |
| - | 12  | 1301      |                    | NM_001080414 | NP_001073883 | Q9P219 | DAPLE_HUMAN  | Potential.                     | 3  | TGTCCCGGTCC      | 0.542 |
| - | 10  | 1552      | v5_uc010aue.2_M    | NM_006329    | NP_006320    | Q9UBX5 | FBLN5_HUMAN  |                                | 6  | GAACGGAGCGT      | 0.542 |

rs150644129

|   |      |            |                    |              |              |        |             |                               |    |               |       |
|---|------|------------|--------------------|--------------|--------------|--------|-------------|-------------------------------|----|---------------|-------|
| + | 12   | 2275       | 3A5_uc001yba.1_    | NM_005113    | NP_005104    | Q8TBA6 | GOGA5_HUMAN | lasmic (Potential).           | 3  | TAGCGCGAGTTT  | 0.323 |
| - | 11   | 3225       | vo.1_Missense_Mu   | NM_001002860 | NP_001002860 | Q9P203 | BTBD7_HUMAN |                               | 1  | CGAAGGGGAAG   | 0.493 |
| + | 45   | 7110       | rbs.1_Nonsense_Mu  | NM_020818    | NP_065869    | Q9P2D8 | UNC79_HUMAN |                               | 17 | CAAAATCAGAAAT | 0.493 |
| - | 2    | 742        | _uc010twr.1_Intron | NM_020414    | NP_065147    | Q9GZR7 | DDX24_HUMAN | Q motif.                      | 4  | TGTGGGTGCAG,  | 0.547 |
| - | 5    | 1490       | nse_Mutation_p.C   | NM_000295    | NP_000286    | P01009 | A1AT_HUMAN  |                               | 1  | ACTTTTCCCATG/ | 0.498 |
| - | 3    | 862        | ydg.2_Missense_I   | NM_175739    | NP_783866    | Q86WD7 | SPA9_HUMAN  |                               | 2  | GGTGAAAGGGC   | 0.428 |
| + | 4    | 1113       | nse_Mutation_p.C   | NM_001085    | NP_001076    | P01011 | AACT_HUMAN  |                               | 6  | GTCAGGGATCA   | 0.507 |
| + | 2    | 784        |                    | NR_015340    |              |        |             |                               | 2  | GCCTGGGAGAA   | 0.577 |
| - | 24   | 5116       | o.P1635L DICER1    | NM_030621    | NP_085124    | Q9UPY3 | DICER_HUMAN |                               | 5  | TTGGTGGAATC   | 0.393 |
| + | 3    | 741        | nse_Mutation_p.V   | NM_000623    | NP_000614    | P30411 | BKRB2_HUMAN | Name=4; (Potential).          | 5  | GATCTGGGGGT   | 0.607 |
| + | 11   | 1199       | twv.1_Missense_M   | NM_032632    | NP_116021    | P51003 | PAPOA_HUMAN |                               | 0  | TGTGTCCGTTTC  | 0.408 |
| - | 3    | 416        | t_Site SLC25A29    | NM_001039355 | NP_001034444 | Q8N8R3 | MCATL_HUMAN | Solcar 1.                     | 1  | GCAACGTCCCG   | 0.632 |
| + | 37   | 7753       | 1ykt.1_Missense_   | NM_001376    | NP_001367    | Q14204 | DYHC1_HUMAN |                               | 10 | TGCGCCCAACA   | 0.507 |
| - | 12   | 1757       |                    | NM_006035    | NP_006026    | Q9Y5S2 | MRCKB_HUMAN | Potential.                    | 11 | CTGTCTCGCA    | 0.522 |
| + | 12   | 2814_2815  |                    | NM_015656    | NP_056471    | Q9ULI4 | KI26A_HUMAN |                               | 1  | GAAAAGGCTGC/  | 0.668 |
| + | 8    | 1162       | l.1_Missense_Mut   | NM_138790    | NP_620145    | Q96BZ4 | PLD4_HUMAN  |                               | 2  | TGATGGAGTAT   | 0.687 |
| - | 3164 |            |                    |              |              |        |             |                               | 0  | CAGCAGGAGGG   | 0.592 |
| + | 8    | 945        | t_Mutation_p.R272  | NM_052903    | NP_443135    | Q96RT8 | GCP5_HUMAN  |                               | 1  | TTATTCGGGAAA  | 0.353 |
| - | 4    | 423        | IIPA1_uc001yve.2   | NM_144599    | NP_653200    | Q7RTP0 | NIPA1_HUMAN | ical; (Potential).            | 0  | CGACGGAGCCT   | 0.473 |
| + | 1    | 2276       |                    | NM_018958    | NP_061831    | Q9NZP6 | CO002_HUMAN |                               | 8  | TCTCCCAAATTC  | 0.468 |
| - | 1    | 479        | 89A1_uc010azk.1    | NM_138704    | NP_619649    | Q96MG7 | MAGG1_HUMAN | MAGE.                         | 0  | GGTCGGGGAAC   | 0.532 |
| - | 21   | 3722       | .2_Missense_Mut    | NM_003257    | NP_003248    | Q07157 | ZO1_HUMAN   |                               | 6  | GACGCGATCTT   | 0.483 |
| - | 14   | 2390       | .2_Nonsense_Mu     | NM_003257    | NP_003248    | Q07157 | ZO1_HUMAN   | ylate kinase-like.            | 6  | TTCTCGAAGAA   | 0.363 |
| - | 9    | 1199       | lissense_Mutation  | NM_139320    | NP_647536    | Q494W8 | CRFM7_HUMAN | ical; (Potential).            | 1  | TATGATCATGGTC | 0.622 |
| + | 10   | 1217       | utation_p.G201E    | NM_000746    | NP_000737    | P36544 | ACHA7_HUMAN | lasmic (Potential).           | 1  | CAACGGGAACC   | 0.721 |
| + | 3    | 783        | zhl.1_Missense_M   | NM_012125    | NP_036257    | P08912 | ACM5_HUMAN  | ame=1; (By similarity).       | 2  | GACTGCTGTGG   | 0.493 |
| - | 29   | 3597       |                    | NM_014691    | NP_055506    | O60306 | AQR_HUMAN   |                               | 1  | TCTTGCTCTC    | 0.413 |
| + | 20   | 3485       | bi.2_Nonsense_Mu   | NM_003246    | NP_003237    | P07996 | TSP1_HUMAN  | SP C-terminal.                | 6  | GGCTGAAAGA    | 0.468 |
| + | 3    | 1626       | bp.1_Missense_Mu   | NM_014952    | NP_055767    | Q8TBE0 | BAHD1_HUMAN |                               | 0  | CCGTCGCCCAT   | 0.657 |
| + | 4    | 1965       | bp.1_Missense_M    | NM_014952    | NP_055767    | Q8TBE0 | BAHD1_HUMAN | BAH.                          | 0  | TACACCGTCTT   | 0.587 |
| + | 3    | 1420       |                    | NM_152260    | NP_689473    | Q8IZ73 | RUSD2_HUMAN |                               | 1  | TCTAGGAGTTG   | 0.562 |
| - | 26   | 3266       | 80_uc010ucc.1_F    | NM_017553    | NP_060023    | Q9ULG1 | INO80_HUMAN | erved components INO80        | 4  | CTGCGGTAACC   | 0.453 |
| + | 10   | 1188       | n_Mutation_p.T29E  | NM_001128608 | NP_001122080 | O60336 | MABP1_HUMAN | WD 4.                         | 10 | TGGCACCCGTGC  | 0.592 |
| - | 2    | 349        | uc010bcp.1_RNA     | NM_016642    | NP_057726    | Q9NRC6 | SPTN5_HUMAN | actin-binding.                | 2  | CGTCTCGTACT   | 0.622 |
| - | 15   | 1668       |                    | NM_178034    | NP_828848    | Q86XP0 | PA24D_HUMAN |                               | 2  | CCTCACCTTCC   | 0.627 |
| - | 2    | 1254       | n ZFP106_uc010u    | NM_022473    | NP_071918    | Q9H2Y7 | ZF106_HUMAN |                               | 3  | TGAAGGAAATT   | 0.418 |
| - | 2    | 904        | px.2_Intron ZFP10  | NM_022473    | NP_071918    | Q9H2Y7 | ZF106_HUMAN |                               | 3  | CTGCTCCACTAT  | 0.473 |
| - | 10   | 1272       | pp.2_Missense_Mu   | NM_173500    | NP_775771    | Q6IQ55 | TTBK2_HUMAN | rotein kinase.                | 7  | CACGGATGTA/   | 0.378 |
| - | 12   | 2078       | _p.Q649* TP53BP    | NM_005657    | NP_005648    | Q12888 | TP53B_HUMAN |                               | 7  | CTCCTGATCTA/  | 0.478 |
| + | 15   | 1928       | n_Mutation_p.E528  | NM_017434    | NP_059130    | Q9NRD9 | DUOX1_HUMAN | roxidase activity. Extracellu | 8  | AGAAGGAGATT   | 0.527 |
| + | 3    | 211        |                    | NM_004212    | NP_004203    | O43868 | S28A2_HUMAN |                               | 4  | GGATGGACTGG   | 0.522 |
| - | 15   | 2332       | phi.1_Missense_Mu  | NM_182758    | NP_877435    | Q3MJ13 | WDR72_HUMAN |                               | 2  | GCATCATTTTC   | 0.408 |
| + | 7    | 3667       | zaci.2_Missense_I  | NM_001080534 | NP_001074003 | Q8NB66 | UN13C_HUMAN | C2 1.                         | 7  | AAAATAACCATTA | 0.313 |
| + | 31   | 6508       | acm.2_Missense_I   | NM_001080534 | NP_001074003 | Q8NB66 | UN13C_HUMAN |                               | 7  | TGGTATCTCTTC  | 0.398 |
| - | 7    | 948_949    |                    | NM_004998    | NP_004989    | Q12965 | MYO1E_HUMAN | rosin head-like.              | 3  | TAGAAGGAAGTT  | 0.441 |
| - | 81   | 10863_1086 | hb.1_Missense_M    | NM_020821    | NP_065872    | Q709C8 | VP13C_HUMAN |                               | 2  | GGAGGGGGAC    | 0.441 |
| + | 1    | 167        | nh.2_5'UTR USP3    | NM_006537    | NP_006528    | Q9Y6I4 | UBP3_HUMAN  |                               | 1  | TATTGCTCCGG,  | 0.726 |

rs35392254

|   |    |           |                    |              |              |        |              |                            |     |              |       |
|---|----|-----------|--------------------|--------------|--------------|--------|--------------|----------------------------|-----|--------------|-------|
| - | 31 | 5882      |                    | NM_003922    | NP_003913    | Q15751 | HERC1_HUMAN  |                            | 19  | CTCTGCGAAGAA | 0.403 |
| + | 7  | 4058      |                    | NM_015042    | NP_055857    | O15014 | ZN609_HUMAN  |                            | 3   | TGACCGGCCCC  | 0.612 |
| - | 10 | 1281_1282 | PX_uc010uiu.1_R    | NM_006660    | NP_006651    | O76031 | CLPX_HUMAN   |                            | 0   | FCCACGGAGCTT | 0.361 |
| - | 9  | 2460      |                    | NM_003613    | NP_003604    | O75339 | CILP1_HUMAN  |                            | 7   | CACTCCGGTAG  | 0.547 |
| - | 9  | 2163      |                    | NM_003613    | NP_003604    | O75339 | CILP1_HUMAN  |                            | 7   | CCACAGAGAAC  | 0.522 |
| - | 22 | 4148      | o.P1300L DENND2    | NM_005848    | NP_005839    | Q7Z401 | MYCPP_HUMAN  |                            | 4   | CGCTTAGGAGAA | 0.418 |
| - | 10 | 1295_1296 | p.W310* MEGF11     | NM_032445    | NP_115821    | A6BM72 | MEG11_HUMAN  |                            | 1   | CCAGACCAGCCT | 0.584 |
| + | 16 | 1644      | iqw.2_Missense_Iv  | NM_145160    | NP_660143    | Q13163 | MP2K5_HUMAN  | rotein kinase.             | 2   | CAGGGGAGCAG  | 0.433 |
| + | 2  | 340       | i.1_intron NOX5_u  | NM_145658    | NP_663633    | Q6UW49 | SPESP_HUMAN  |                            | 0   | CAAAGGGATCAA | 0.393 |
| + | 15 | 2163      | se_Mutation_p.P6i  | NM_024505    | NP_078781    | Q96PH1 | NOX5_HUMAN   | ellular (Potential).       | 2   | CCCAGCCTGGG  | 0.607 |
| + | 5  | 705       | C49_uc010ukf.1_A   | NM_017691    | NP_060161    | Q8IUZ0 | LRC49_HUMAN  | LRR 2.                     | 1   | CGCTTTCGACTC | 0.343 |
| + | 2  | 268       |                    | NM_145805    | NP_665804    | Q96A47 | ISL2_HUMAN   | I zinc-binding 1.          | 0   | TGGACGAGACG  | 0.667 |
| - | 2  | 366       | T50M TSPAN3_uc     | NM_005724    | NP_005715    | O60637 | TSN3_HUMAN   | ellular (Potential).       | 0   | ATGAGCGTGTAC | 0.473 |
| - | 8  | 1090      | mx.1_Missense_A    | NM_015162    | NP_055977    | Q96GR2 | ACBG1_HUMAN  |                            | 1   | GGGCCCCCCAC  | 0.622 |
| + | 7  | 603       | i.1_Missense_Mut   | NM_000137    | NP_000128    | P16930 | FAAA_HUMAN   |                            | 0   | AATCCGAAGGC  | 0.582 |
| + | 12 | 1711      | unn.1_Missense_A   | NM_018689    | NP_061159    | Q8WUJ3 | K1199_HUMAN  |                            | 3   | AGACGGCGTGG  | 0.552 |
| - | 3  | 348       | orf40_uc010uop.1   | NM_001160115 | NP_001153587 | Q8WUR7 | CO040_HUMAN  |                            | 1   | AGATACCGACAG | 0.388 |
| + | 7  | 744       | upe.1_Missense_I   | NM_004213    | NP_004204    | O00337 | S28A1_HUMAN  | ical; (Potential).         | 3   | GGTGTCTTCG   | 0.582 |
| + | 7  | 1468      | p.P433L AKAP13     | NM_007200    | NP_009131    | Q12802 | AKP13_HUMAN  |                            | 9   | AATGCCACAG   | 0.522 |
| + | 7  | 3951      | 13_uc002blu.1_Mi   | NM_007200    | NP_009131    | Q12802 | AKP13_HUMAN  |                            | 9   | TCATCGAACAA  | 0.572 |
| - | 2  | 1465      |                    | NM_022480    | NP_071925    | Q9H0H3 | ENC2_HUMAN   | Kelch 3.                   | 2   | TGTTGGCCCCA  | 0.587 |
| - | 19 | 2639      | p.A804V NTRK3      | NM_001012338 | NP_001012338 | Q16288 | NTRK3_HUMAN  | Potential) Protein kinase. | 281 | CCAAAGCATGG  | 0.537 |
| - | 2  | 1138      | ik.2_RNA DET1_u    | NM_001144074 | NP_001137546 | Q7L5Y6 | DET1_HUMAN   |                            | 2   | TTCGCAGCTGC  | 0.488 |
| + | 4  | 352       |                    | NM_001013657 | NP_001013679 | Q6ZNW5 | VTC2_HUMAN   |                            | 0   | AATCTCCCTTTG | 0.557 |
| + | 5  | 997       | 2brb.2_Splice_Site | NM_006011    | NP_006002    | Q92186 | SIA8B_HUMAN  |                            | 0   | CGCGGGTGAGC  | 0.547 |
| - | 2  | 537       | 174B_uc002bsl.3    | NM_207446    | NP_997329    | Q3ZCQ3 | F174B_HUMAN  | lasmic (Potential).        | 0   | CTGCTGGAGTG  | 0.473 |
| + | 3  | 425       | _5'Flank uc002bur  | NM_173499    | NP_775770    | Q6RVD6 | SPAT8_HUMAN  |                            | 2   | TCACGGAAGGA  | 0.458 |
| - | 16 | 2326      |                    | NM_139057    | NP_620688    | Q8TE56 | ATS17_HUMAN  | Spacer.                    | 3   | TTCTCCCACAG  | 0.552 |
| - | 3  | 392       | S1_uc002bwh.2_A    | NM_001040614 | NP_001035704 | Q8NG48 | LINES_HUMAN  |                            | 0   | CTGCTGGGTTG  | 0.433 |
| + | 6  | 1214      | DIA2_uc002cgo.1    | NM_006849    | NP_006840    | Q13087 | PDIA2_HUMAN  | hioredoxin 1.              | 2   | CAGAGGAGGAA  | 0.657 |
| - | 3  | 566       | v8A_uc002cgv.3_f   | NM_021259    | NP_067082    | Q9HCN3 | TMM8A_HUMAN  | ellular (Potential).       | 3   | GGTGGGAAACC  | 0.687 |
| - | 3  | 1614      | D8_uc002cix.1_5'   | NM_032259    | NP_115635    | Q96S15 | WDR24_HUMAN  | WD 5.                      | 2   | AGGGCCGGCGC  | 0.652 |
| + | 8  | 758       | va.1_Missense_Mt   | NM_003933    | NP_003924    | O94812 | BAIP3_HUMAN  | C2 1.                      | 1   | TGGACCCCTGC  | 0.672 |
| - | 2  | 654_655   |                    | NM_001009606 | NP_001009606 | C9JH64 | C9JH64_HUMAN |                            | 0   | ACGCTCCCCGCT | 0.663 |
| - | 15 | 5785      | t.1_Missense_Mut   | NM_001009944 | NP_001009944 | P98161 | PKD1_HUMAN   | xtracellular (Potential).  | 3   | TGCCAGCATCC  | 0.662 |
| + | 9  | 1382      | rl.1_Missense_Mu   | NM_016333    | NP_057417    | Q9UQ35 | SRRM2_HUMAN  | Ser-rich.                  | 4   | CAGTCGGTAA   | 0.433 |
| + | 11 | 5350      | l.1_Missense_Mut   | NM_016333    | NP_057417    | Q9UQ35 | SRRM2_HUMAN  | Ser-rich.                  | 4   | GTTCCTCCCT   | 0.567 |
| - | 5  | 736       | cz.1_Missense_M    | NM_022119    | NP_071402    | Q9GZN4 | BSSP4_HUMAN  | eptidase S1.               | 1   | CATGTCCTCAG  | 0.642 |
| - | 2  | 394       |                    | NM_021195    | NP_067018    | P56747 | CLD6_HUMAN   | lasmic (Potential).        | 0   | GGAATCCTTCT  | 0.612 |
| - | 5  | 1898      | ctw.1_Missense_A   | NM_032805    | NP_116194    | Q96SZ4 | ZSC10_HUMAN  |                            | 1   | CTTCTCCCTG   | 0.716 |
| - | 10 | 2126      |                    | NM_000243    | NP_000234    | O15553 | MEFV_HUMAN   | 330.2/SPRY.                | 6   | CATTTCTTCAT  | 0.537 |
| - | 7  | 2479      | C3_uc010bto.1_5'   | NM_178844    | NP_849172    | Q7RTR2 | NLRC3_HUMAN  |                            | 6   | CAAGAGGGATC  | 0.502 |
| - | 13 | 2500_2501 | vw.2_Missense_A    | NM_004380    | NP_004371    | Q92793 | CBP_HUMAN    |                            | 127 | GGGAAGGAGAAA | 0.55  |
| - | 8  | 877       | ie_Mutation_p.P20  | NM_144605    | NP_653206    | Q8IYM1 | SEP12_HUMAN  |                            | 1   | AAAAGGGATTC  | 0.587 |
| - | 22 | 4303      |                    | NM_002705    | NP_002696    | O60437 | PEPL_HUMAN   | Potential.                 | 6   | TAGCTCCTCCA  | 0.706 |
| + | 7  | 668       | uyh.1_Missense_A   | NM_000303    | NP_000294    | O15305 | PMM2_HUMAN   |                            | 1   | AATGACGGTTAT | 0.463 |
| - | 13 | 3694      | uyn.1_Missense_A   | NM_001134407 | NP_001127879 | Q12879 | NMDE1_HUMAN  | lasmic (Potential).        | 45  | FACCTAGGGCTC | 0.507 |

rs114446918

|   |    |           |                   |              |              |        |             |                                 |     |                  |       |             |
|---|----|-----------|-------------------|--------------|--------------|--------|-------------|---------------------------------|-----|------------------|-------|-------------|
| - | 9  | 2538      | uyn.1_Missense_M  | NM_001134407 | NP_001127879 | Q12879 | NMDE1_HUMAN | cellular (Potential).           | 45  | GAGGCCGGTCA      | 0.502 |             |
| + | 3  | 675       | NFRSF17_uc010bi   | NM_0011192   | NP_0011183   | Q02223 | TNR17_HUMAN | plasmic (Potential).            | 0   | AAAGGCGCAACC     | 0.483 | rs150352299 |
| + | 8  | 1262      | C4_uc010uyz.1_5   | NM_005236    | NP_005227    | Q92889 | XPF_HUMAN   |                                 | 10  | ATGTTCCCGAGC     | 0.428 |             |
| + | 21 | 2140      | CC1_uc002ddb.3_   | NM_015027    | NP_055842    | Q6P996 | PDXD1_HUMAN |                                 | 1   | FGTTGCGGCAGA     | 0.597 |             |
| - | 35 | 5100      | H11_uc010bvg.2_l  | NM_002474    | NP_002465    | P35749 | MYH11_HUMAN | Potential.                      | 15  | GGCACGGGCAT      | 0.517 |             |
| - | 5  | 1241      |                   | NM_001012991 | NP_001013009 | Q1ED39 | CP088_HUMAN | with ZFP106 (By similarity).    | 0   | TGTGTCAGCCGCC    | 0.627 |             |
| - | 6  | 1001      |                   | NM_174924    | NP_777584    | Q8N807 | PDILT_HUMAN |                                 | 1   | TGTATTCGATCAC    | 0.443 |             |
| - | 4  | 516_517   | _p.L103V ACSM2E   | NM_182617    | NP_872423    | Q68CK6 | ACS2B_HUMAN |                                 | 5   | TGCGAGGCCACG     | 0.569 |             |
| - | 3  | 224       | _n.p.R5Q ACSM2E   | NM_182617    | NP_872423    | Q68CK6 | ACS2B_HUMAN |                                 | 5   | ACTTTTCGCGAGC    | 0.498 | rs144570025 |
| - | 8  | 1248      | :SM1_uc010bwg.1   | NM_052956    | NP_443188    | Q08AH1 | ACSM1_HUMAN |                                 | 2   | GGGTGGAGTGG      | 0.537 |             |
| - | 2  | 432       | :SM1_uc010bwg.1   | NM_052956    | NP_443188    | Q08AH1 | ACSM1_HUMAN |                                 | 2   | CTCAGGAACCTC     | 0.587 |             |
| - | 62 | 12160     | d.1_Missense_Mu   | NM_017539    | NP_060009    | Q8TD57 | DYH3_HUMAN  |                                 | 18  | CTCCCCAGGTT      | 0.517 |             |
| + | 6  | 356       | A_uc010vbj.1_Miss | NM_144672    | NP_653273    | Q7RTW8 | OTOAN_HUMAN |                                 | 3   | AGTTCGCGACT      | 0.587 |             |
| + | 32 | 3593      | ase_Mutation_p.S2 | NM_173615    | NP_775886    | A6NCI4 | VWA3A_HUMAN |                                 | 1   | CCCAATCCTTCA     | 0.577 |             |
| + | 8  | 1282      | :2K_uc002dkh.2_F  | NM_013302    | NP_037434    | O00418 | EF2K_HUMAN  | type protein kinase.            | 1   | GCGTTCGGGCC      | 0.572 |             |
| + | 5  | 1467      | p.D143N RBBP6_    | NM_006910    | NP_008841    | Q7Z6E9 | RBBP6_HUMAN |                                 | 4   | AAATACGACCCA     | 0.368 |             |
| + | 15 | 2763      | e_Mutation_p.P57! | NM_006910    | NP_008841    | Q7Z6E9 | RBBP6_HUMAN |                                 | 4   | cttctctccctcgggt | 0.308 |             |
| + | 7  | 841       | _p.R185Q IL4R_u   | NM_000418    | NP_000409    | P24394 | IL4RA_HUMAN | potential). Fibronectin type-II | 2   | GGCACGGGTGA      | 0.547 | rs147547377 |
| - | 7  | 1213      | _p.L224F XPO6_u   | NM_015171    | NP_055986    | Q96QU8 | XPO6_HUMAN  |                                 | 2   | ATCAAGGATGG      | 0.483 |             |
| + | 9  | 2120      | _uc002drl.2_Misse | NM_001145795 | NP_001139267 | Q9NRF2 | SH2B1_HUMAN | SH2.                            | 2   | CAAGGCGGGGT      | 0.612 |             |
| + | 4  | 527       | _uc002dsc.2_Miss  | NM_014387    | NP_055202    | O43561 | LAT_HUMAN   | plasmic (Potential).            | 0   | TTGCCCCCTGG      | 0.612 |             |
| + | 6  | 971       | .P248L KIF22_uc0  | NM_007317    | NP_015556    | Q14807 | KIF22_HUMAN |                                 | 0   | CCCTCCCTCGTG     | 0.582 |             |
| + | 2  | 88        | c010bzb.1_Intron  | NM_001109660 | NP_001103130 | Q96LL3 | CP092_HUMAN |                                 | 0   | AGCTTCCGCCT      | 0.602 |             |
| + | 10 | 1217_1218 | utation_p.264_265 | NM_002209    | NP_002200    | P20701 | ITAL_HUMAN  | Extracellular (Potential).      | 10  | AACATGGAGCTC     | 0.569 |             |
| + | 14 | 4653      |                   | NM_014712    | NP_055527    | O15047 | SET1A_HUMAN |                                 | 3   | TGCCCGCACCC      | 0.706 |             |
| - | 8  | 749       | fd.1_Missense_Mu  | NM_052874    | NP_443106    | P61266 | STX1B_HUMAN | homology. Cytoplasmic (Pot      | 0   | CATATCGTGAC      | 0.562 |             |
| + | 5  | 543       | _p.Q105* STX4_u   | NM_004604    | NP_004595    | Q12846 | STX4_HUMAN  | ic (Potential). Potential.      | 0   | AGCCCCAGAAG      | 0.418 |             |
| - | 3  | 2020      | ao.2_Missense_M   | NM_024706    | NP_078982    | Q96K58 | ZN668_HUMAN | ZH2-type 15.                    | 4   | CCGGTCAGAGA      | 0.652 |             |
| - | 15 | 2569      | fig.1_Missense_M  | NM_173502    | NP_775773    | Q5K4E3 | POLS2_HUMAN |                                 | 1   | ATCCCCAGGCC      | 0.642 |             |
| + | 14 | 1524      | _p.R276* FUS_uc   | NM_004960    | NP_004951    | P35637 | FUS_HUMAN   | Arg/Gly-rich.                   | 958 | TATGATCGAGGC     | 0.612 |             |
| + | 13 | 1434      | _p.S456F ITGAX_u  | NM_000887    | NP_000878    | P20702 | ITAX_HUMAN  | Extracellular (Potential).      | 4   | CGGCTCCTACT      | 0.677 |             |
| + | 18 | 2252      | bt.2_Missense_Mu  | NM_000887    | NP_000878    | P20702 | ITAX_HUMAN  | cellular (Potential).           | 4   | TGACCCCAT        | 0.627 |             |
| - | 20 | 3057      | :C12_uc002efa.1_l | NM_033226    | NP_150229    | Q96J65 | MRP9_HUMAN  | membrane type-1 2.              | 3   | CAGTGGGAGTC      | 0.478 |             |
| + | 7  | 1047      | efx.2_Missense_M  | NM_182922    | NP_891552    | Q7Z4Q2 | HEAT3_HUMAN |                                 | 2   | CAAATGAAAGAG     | 0.368 |             |
| - | 7  | 1177      | p.E331K TOX3_uc   | NM_001080430 | NP_001073899 | O15405 | TOX3_HUMAN  |                                 | 0   | GGCTTCTGCTG      | 0.423 |             |
| - | 4  | 530       | p.G142E CES1_uc   | NM_001025194 | NP_001020365 | P23141 | EST1_HUMAN  |                                 | 0   | CCCTCCGTGG       | 0.562 |             |
| - | 14 | 2002      |                   | NM_031885    | NP_114091    | Q9BXC9 | BBS2_HUMAN  |                                 | 1   | CTCAAAATAGAC     | 0.368 |             |
| + | 6  | 747       | p.G199E CPNE2_l   | NM_152727    | NP_689940    | Q96FN4 | CPNE2_HUMAN | C2 2.                           | 2   | CTTTGGGAAGT      | 0.612 |             |
| - | 10 | 1006      |                   | NM_001896    | NP_001887    | P19784 | CSK22_HUMAN | rotein kinase.                  | 1   | TTCTCTACTATG     | 0.443 |             |
| + | 2  | 232       | on.1_Missense_M   | NM_001795    | NP_001786    | P33151 | CADH5_HUMAN |                                 | 6   | CAGCAGCAGGT      | 0.612 |             |
| + | 4  | 509       | _uc002eqj.2_Miss  | NM_005182    | NP_005173    | P43166 | CAH7_HUMAN  |                                 | 0   | CTTTTGGGGAG      | 0.582 |             |
| + | 4  | 846       |                   | NM_000196    | NP_000187    | P80365 | DH12_HUMAN  |                                 | 0   | TGATGGACACA      | 0.502 |             |
| - | 1  | 372       | ex.2_Missense_M   | NM_022357    | NP_071752    | Q9H4B8 | DPEP3_HUMAN |                                 | 3   | TGAGGCTGGG       | 0.711 |             |
| - | 8  | 1075      | RP2_uc002evq.1    | NM_024939    | NP_079215    | Q9H6T0 | ESRP2_HUMAN | RRM 1.                          | 1   | TTCTGCGGCC       | 0.632 | rs146812395 |
| - | 77 | 13320     | DIN_uc010cfy.2_R  | NM_032821    | NP_116210    | Q4G0P3 | HYDIN_HUMAN |                                 | 2   | TGAGAGCCCAT      | 0.438 |             |
| - | 3  | 276       | nse_Mutation_p.E  | NM_032821    | NP_116210    | Q4G0P3 | HYDIN_HUMAN |                                 | 2   | GAACTCTGAGG      | 0.403 |             |
| - | 16 | 2743      | _p.R363Q ADAMT!   | NM_199355    | NP_955387    | Q8TE60 | ATS18_HUMAN | Spacer.                         | 18  | TGCTCGGGCG       | 0.502 |             |

|   |    |         |                    |              |              |        |              |                              |    |                   |       |
|---|----|---------|--------------------|--------------|--------------|--------|--------------|------------------------------|----|-------------------|-------|
| - | 15 | 2598    | _p.H315Y ADAMT:    | NM_199355    | NP_955387    | Q8TE60 | ATS18_HUMAN  | Cys-rich.                    | 18 | 3TTCATGATCAC/     | 0.393 |
| + | 7  | 1049    |                    | NM_020927    | NP_065978    | Q9HCJ6 | VAT1L_HUMAN  |                              | 1  | 5TTTTCCCTTTTA/    | 0.507 |
| - | 2  | 648     |                    | NM_152342    | NP_689555    | Q8N8U2 | CDYL2_HUMAN  |                              | 1  | ATCATTCAAATCC     | 0.502 |
| + | 4  | 684     | _p.E156K BCMO1     | NM_017429    | NP_059125    | Q9HAY6 | BCDO1_HUMAN  |                              | 0  | ACCTGGGAGAAG      | 0.507 |
| + | 5  | 1005    |                    | NM_022041    | NP_071324    | Q9H2C0 | GAN_HUMAN    | Kelch 1. p.R286Q(1)          | 2  | 5TTCACGGAAAC(     | 0.403 |
| + | 25 | 2856    |                    | NM_002661    | NP_002652    | P16885 | PLCG2_HUMAN  |                              | 8  | FTTCAGAGCATC(     | 0.582 |
| - | 23 | 3651    | fhh.2_Missense_IV  | NM_003791    | NP_003782    | Q14703 | MBTP1_HUMAN  | asic). Cytoplasmic (Potent   | 2  | .CCGAAGGGGTC      | 0.627 |
| - | 5  | 1178    |                    | NM_003791    | NP_003782    | Q14703 | MBTP1_HUMAN  | ase. Luminal (Potential).    | 2  | .GTGGGGATGCT      | 0.453 |
| + | 8  | 1540    | sense_Mutation_p.  | NM_001145400 | NP_001138872 | Q8NCV1 | ADAD2_HUMAN  | to l editase.                | 0  | 5CTCCGAACCC.      | 0.697 |
| + | 8  | 720     | fhy.2_Missense_M   | NM_014861    | NP_055676    | O75185 | AT2C2_HUMAN  | lasmic (Potential).          | 2  | 5TCACGGACCTC      | 0.532 |
| + | 4  | 618     | _p.P78S KIAA018.   | NM_014615    | NP_055430    | Q14687 | GSE1_HUMAN   |                              | 5  | 5CCTACCCCTTC(     | 0.667 |
| + | 9  | 1508    |                    | NM_030928    | NP_112190    | Q9H211 | CDT1_HUMAN   |                              | 1  | 5GGGCAGCTGTT      | 0.647 |
| + | 2  | 240     | n_p.V13 DPEP1_i    | NM_001128141 | NP_001121613 | P16444 | DPEP1_HUMAN  |                              | 1  | 5TGCCCGTCTGC.     | 0.637 |
| - | 5  | 858_859 | on_p.P7F NXN_uc    | NM_022463    | NP_071908    | Q6DKJ4 | NXN_HUMAN    | Thioredoxin.                 | 4  | 5TAGGGGACGG       | 0.639 |
| - | 14 | 1767    | _p.T481 MYO1C_     | NM_001080779 | NP_001074248 | O00159 | MYO1C_HUMAN  | osin head-like.              | 0  | FTGACAGTATCC1     | 0.652 |
| - | 1  | 859     |                    | NM_003553    | NP_003544    | P30953 | OR1E1_HUMAN  | Name=7; (Potential).         | 0  | GAAGGGGTTC(       | 0.448 |
| + | 15 | 2490    | se_Mutation_p.G71  | NM_004703    | NP_004694    | Q15276 | RABE1_HUMAN  | Potential.                   | 2  | 5AAAAGGACAG       | 0.244 |
| + | 11 | 1509    | ron ALOX12_uc00    | NM_000697    | NP_000688    | P18054 | LOX12_HUMAN  | ipoxygenase.                 | 1  | 5AAAGGATGAC.      | 0.592 |
| + | 3  | 437     | 11_uc010vtw.1_In   | NM_175734    | NP_783861    | Q0P670 | CQ074_HUMAN  | Arg-rich.                    | 0  | CTTCTTCGCTGT      | 0.428 |
| - | 41 | 5923    | R1974W MYH10_      | NM_005964    | NP_005955    | P35580 | MYH10_HUMAN  | Potential.                   | 2  | GCGCCGGCCAG       | 0.577 |
| - | 15 | 1563    | vf.1_Missense_Mt   | NM_003802    | NP_003793    | Q9UKX3 | MYH13_HUMAN  | osin head-like.              | 6  | 5TGGTTGAAAAA      | 0.483 |
| - | 37 | 5480    | uc002gml.1_Intron  | NM_005963    | NP_005954    | P12882 | MYH1_HUMAN   | Potential.                   | 21 | 5CAGGTCCCTCA(     | 0.562 |
| - | 26 | 3402    | _Missense_Mutati   | NM_001100112 | NP_001093582 | Q9UKX2 | MYH2_HUMAN   | Potential.                   | 14 | TGATTTCAAACTC     | 0.328 |
| + | 17 | 3183    | oo.2_Missense_M    | NM_001372    | NP_001363    | Q9NYC9 | DYH9_HUMAN   | n (By similarity).           | 20 | 5CGGAAGAAATTC     | 0.498 |
| - | 7  | 1488    | ow.2_Missense_IV   | NM_006470    | NP_006461    | O95361 | TRI16_HUMAN  |                              | 3  | TTTGCGGATGCC      | 0.453 |
| + | 11 | 2459    | se_Mutation_p.E26  | NM_014695    | NP_055510    | A2RUR9 | C144A_HUMAN  | Potential.                   | 0  | 5AAAAGGAACTA(     | 0.333 |
| + | 65 | 10914   | uc002gsl.2_3'UTR   | NM_016239    | NP_057323    | Q9UKN7 | MYO15_HUMAN  | Tail. FERM.                  | 9  | 5CCAGCGAGATC      | 0.423 |
| - | 2  | 282     | 5A10_uc002gut.1_   | NM_001039999 | NP_001035088 | A6ND36 | FA83G_HUMAN  |                              | 2  | 5GGCCACCAGGG      | 0.637 |
| + | 10 | 1320    | _p.P374L RNF112_   | NM_007148    | NP_009079    | Q7Z5V9 | Q7Z5V9_HUMAN |                              | 2  | AAGCCTGGTG(       | 0.642 |
| - | 2  | 135     | se_Mutation_p.G24  | NM_001042685 | NP_001036150 | Q3B8N2 | LEG9B_HUMAN  | Galectin 1.                  | 1  | 5GAGACCCCTT       | 0.582 |
| + | 5  | 604     | rt.2_Missense_M    | NM_003170    | NP_003161    | Q7KZ85 | SPT6H_HUMAN  | Asp/Glu-rich.                | 3  | AGGAGGAGGAA       | 0.522 |
| + | 8  | 1285    | tv.2_Missense_Mt   | NM_003250    | NP_003241    | P10827 | THA_HUMAN    | gand-binding.                | 0  | 5GCTACGACCTC(     | 0.632 |
| - | 1  | 301     | 39_uc010wfm.1_5    | NM_213656    | NP_998821    | Q6A163 | K1C39_HUMAN  | Head.                        | 0  | 5TTCACCATACCA/    | 0.498 |
| + | 1  | 289     |                    | NM_001146041 | NP_001139513 | Q9BYQ8 | KRA49_HUMAN  | -C-[RQVHIEK]- [SPTR]-[V      | 0  | 5GCCAGCCTGCG      | 0.542 |
| - | 1  | 363_364 |                    | NM_032524    | NP_115913    | Q9BYR3 | KRA44_HUMAN  | -C-[GRQVCH]-[SPT]- [VST      | 0  | CACTGGGGCCTC(     | 0.658 |
| - | 1  | 281     | T13_uc010wfr.1_Ir  | NM_153490    | NP_705694    | P13646 | K1C13_HUMAN  | ily-rich. Head.              | 5  | cacctccatagccaact | 0.179 |
| - | 2  | 662     | T14_uc010cxp.1_I   | NM_000526    | NP_000517    | P02533 | K1C14_HUMAN  | Coil 1B. Rod.                | 1  | 5GGTGCGGAAGT      | 0.517 |
| + | 11 | 1882    | 5'Flank CNP_uc0    | NM_031421    | NP_113609    | Q96NG3 | TTC25_HUMAN  |                              | 1  | 5AGGCAGGAAGC      | 0.488 |
| + | 14 | 2444    | _p.G472E WNK4_i    | NM_032387    | NP_115763    | Q96J92 | WNK4_HUMAN   |                              | 7  | 5TCCTGGAACCTC(    | 0.577 |
| + | 4  | 2166    | _Mutation_p.P684   | NM_009590    | NP_033720    | O75106 | AOC2_HUMAN   |                              | 2  | 5AGGACCCCTCC      | 0.572 |
| + | 3  | 621     | ifs.2_Intron TMUB: | NM_001076674 | NP_001070142 | Q71RG4 | TMUB2_HUMAN  |                              | 1  | 5CAGTCCAGAGG      | 0.612 |
| - | 7  | 2233    | _p.S163F PLEKHA    | NM_014798    | NP_055613    | Q9Y4G2 | PKHM1_HUMAN  | PH 2.                        | 0  | 5GCAGGGACTCC      | 0.552 |
| + | 4  | 341     | iky.2_Missense_M   | NM_004287    | NP_004278    | O14653 | GOSR2_HUMAN  | ic (Potential). Potential.   | 2  | 5AGCATCGGCGC      | 0.542 |
| - | 5  | 691     | RN2_uc002imf.2_I   | NM_138355    | NP_612364    | Q96FV2 | SCRN2_HUMAN  |                              | 1  | 5GTTGCGGGCCC      | 0.438 |
| - | 1  | 753     | se_Mutation_p.G1   | NM_002146    | NP_002137    | P14651 | HXB3_HUMAN   |                              | 0  | 5CGGGACCGCAC      | 0.617 |
| + | 15 | 3368    | ic002irv.1_Missens | NM_018896    | NP_061496    | O43497 | CAC1G_HUMAN  | lasmic (Potential).          | 1  | 5CAAGTCCGAATC     | 0.597 |
| + | 29 | 4246    | sn.2_Missense_Mt   | NM_003786    | NP_003777    | O15438 | MRP3_HUMAN   | similarity). ABC transporter | 4  | 5CGGCAGCTACTC     | 0.622 |

rs146392947

rs147081637



|   |    |         |                                              |              |              |            |             |                                |      |               |       |
|---|----|---------|----------------------------------------------|--------------|--------------|------------|-------------|--------------------------------|------|---------------|-------|
| + | 7  | 2606    | o.R792Q AKAP1_u                              | NM_003488    | NP_003479    | Q92667     | AKAP1_HUMAN | Tudor.                         | 1    | AGATTCGATACG  | 0.602 |
| + | 18 | 1806    | i_p.P547L BCAS3                              | NM_001099432 | NP_001092902 | Q9H6U6     | BCAS3_HUMAN |                                | 5    | ACCTCCTCCAC   | 0.353 |
| + | 10 | 1351    | r.p.1_Missense_M                             | NM_173503    | NP_775774    | Q8N7B9     | EFCB3_HUMAN |                                | 1    | ACTCAGGAAGA   | 0.338 |
| - | 6  | 1318    | _Mutation_p.M398                             | NM_001100875 | NP_001094345 | Q8NA82     | MARHA_HUMAN |                                | 0    | GGCTCCATTGC   | 0.478 |
| + | 13 | 1501    | _uc010deu.1_Mis                              | NM_015462    | NP_056277    | Q9H8H0     | NOL11_HUMAN |                                | 0    | AATCAGTCACC   | 0.358 |
| - | 23 | 3211    | z.2_Missense_Mu                              | NM_080283    | NP_525022    | Q8IUA7     | ABCA9_HUMAN |                                | 6    | TTACTTCGGTAC  | 0.418 |
| - | 20 | 2808    | ez.2_Nonsense_M                              | NM_080283    | NP_525022    | Q8IUA7     | ABCA9_HUMAN |                                | 6    | TTTTCTGATATGA | 0.368 |
| - | 2  | 131     | plice_Site ABCA9                             | NM_080283    | NP_525022    | Q8IUA7     | ABCA9_HUMAN |                                | 6    | TGTTTCCTTTAA  | 0.373 |
| + | 3  | 1024    | i_p.S277F C17orf                             | NM_017941    | NP_060411    | Q9BSJ5     | CQ080_HUMAN | cellular (Potential).          | 1    | CAGAATCCCTCA  | 0.423 |
| + | 1  | 301     | _p.G133R GPRC5                               | NM_018653    | NP_061123    | Q9NQ84     | GPC5C_HUMAN | Name=2; (Potential).           | 5    | TGCTGGGGACC   | 0.622 |
| - | 3  | 528     |                                              | NM_181449    | NP_852114    | Q496F6     | CLM2_HUMAN  | cellular (Potential).          | 4    | ATTTTGGGTCA   | 0.622 |
| + | 11 | 1343    | '85_uc010wrv.1_M                             | NM_024844    | NP_079120    | Q9BW27     | NUP85_HUMAN |                                | 1    | GTAATCAAAGAC  | 0.498 |
| - | 13 | 1912    | o.D431N SLC38A1                              | NM_001037984 | NP_001033073 | Q9HBR0     | S38AA_HUMAN |                                | 2    | TCGGTCTTGGC   | 0.647 |
| + | 5  | 877_878 | z_5'Flank STRA13                             | NM_144999    | NP_659436    | Q96CN5     | LRC45_HUMAN |                                | 1    | ACATCCCTGGAC  | 0.653 |
| - | 2  | 418     |                                              | NM_014646    | NP_055461    | Q92539     | LPIN2_HUMAN | N-LIP.                         | 2    | CTTTGGATCTCA  | 0.478 |
| - | 4  | 1194    | _p.A345T ZFP161                              | NM_003409    | NP_003400    | O43829     | ZF161_HUMAN | C2H2-type 3.                   | 1    | TGGGGCACGG    | 0.448 |
| - | 1  | 1717    |                                              | NM_001080209 | NP_001073678 | A6NKL6     | T200C_HUMAN |                                | 0    | AGTCTCGCGTT   | 0.677 |
| + | 2  | 1662    | 'NDC2_uc002koh.                              | NM_001098529 | NP_001091999 | Q86VQ3     | TXND2_HUMAN | eat of Q-P-K-X-G-D-I-P-K-      | 2    | ACATCCCCAAG   | 0.552 |
| - | 3  | 542     | 519_uc002ksr.1_Ir                            | NM_145287    | NP_660330    | Q8TB69     | ZN519_HUMAN |                                | 0    | ACAGAAACTGA   | 0.284 |
| - | 1  | 872     | TEC_uc010xaj.1_F                             | NM_001137671 | NP_001131143 | B2RU33     | POTEC_HUMAN | ANK 1.                         | 3    | GTCCAGATCTT   | 0.597 |
| + | 36 | 3448    | 0xal.1_Missense_M                            | NM_001145029 | NP_001138501 | Q9BXX2     | AN30B_HUMAN | Potential.                     | 2    | AAAAGGAAATT   | 0.303 |
| + | 57 | 7547    | kus.3_Missense_M                             | NM_198129    | NP_937762    | Q16787     | LAMA3_HUMAN | minin G-like 1.                | 11   | AGTTATGGATCG  | 0.493 |
| - | 4  | 452     |                                              | NM_080597    | NP_542164    | Q9BXW6     | OSBL1_HUMAN | ANK 2.                         | 4    | ACCTTCGTCTC   | 0.418 |
| - | 7  | 4153    | alice_Site_p.Q130                            | NM_015461    | NP_056276    | Q96K83     | ZN521_HUMAN |                                | 7    | ACATTACCTGCA  | 0.438 |
| - | 6  | 833     | _p.P200L SS18_u                              | NM_001007559 | NP_001007560 | Q15532     | SSXT_HUMAN  | Gln-rich.                      | 1884 | TATAGGGAGGA   | 0.413 |
| - | 5  | 1003    | z.2_Missense_Mu                              | NM_001650    | NP_001641    | P55087     | AQP4_HUMAN  | lasmic (Potential).            | 0    | ATTGGTCTTTCC  | 0.478 |
| - | 13 | 2540    | n.1_Missense_M                               | NM_001792    | NP_001783    | P19022     | CADH2_HUMAN | r (Potential). Cadherin 5.     | 4    | AGGATGGAATA   | 0.463 |
| - | 11 | 1866    | m.2_Missense_M                               | NM_024421    | NP_077739    | Q08554     | DSC1_HUMAN  | r (Potential). Cadherin 4.     | 4    | GATTCTCTATCTA | 0.318 |
| - | 1  | 887     |                                              | NM_001034172 | NP_001029344 | Q3SY17     | MCAR2_HUMAN | e=5; (Potential). Solcar 3.    | 1    | ACATGGCACCC   | 0.443 |
| - | 3  | 584     | _p.L143F ZNF24_u                             | NM_006965    | NP_008896    | P17028     | ZNF24_HUMAN |                                | 0    | ACGGAGAGAAA   | 0.418 |
| + | 4  | 843     |                                              | NM_015559    | NP_056374    | Q9Y6X0     | SETBP_HUMAN |                                | 3    | CTTACGAGAGG   | 0.408 |
| - | 1  | 631_632 | issense_Mutation                             | NM_001039360 | NP_001034449 | A1YPR0     | ZBT7C_HUMAN |                                | 1    | AAAGTCCCTGGC  | 0.574 |
| + | 2  | 1191    | IAPK4_uc010doz.                              | NM_002747    | NP_002738    | P31152     | MK04_HUMAN  | rotein kinase.                 | 6    | GCTCCGAGAGA   | 0.602 |
| + | 20 | 3649    | p.R849Q DCC_uc                               | NM_005215    | NP_005206    | P43146     | DCC_HUMAN   | tential). Fibronectin type-III | 17   | CTTTCGAATTCA  | 0.373 |
| - | 18 | 2137    | .1_RNA uc002lgr                              | NM_005603    | NP_005594    | O43520     | AT8B1_HUMAN | lasmic (Potential).            | 10   | AACTCCATCTC   | 0.363 |
| + | 2  | 135     | 10dpv.2_Missense                             | NM_003839    | NP_003830    | Q9Y6Q6     | TNR11_HUMAN | cellular (Potential).          | 3    | CTCCTCCATGT   | 0.473 |
| - | 6  | 652     | _Mutation_p.S209F SERPINB3_uc010dqa.2_Intron |              | P48594       | SPB4_HUMAN |             | p.S209Y(1)                     | 3    | GTATGGACTTG   | 0.373 |
| + | 7  | 950     | n_p.G136E SERPI                              | NM_001143818 | NP_001137290 | P05120     | PAI2_HUMAN  |                                | 2    | CAAAGGAAAGT   | 0.383 |
| + | 12 | 2464    | b.2_Missense_Mu                              | NM_033646    | NP_387450    | Q9ULB5     | CADH7_HUMAN | lasmic (Potential).            | 4    | TGGGAAAGATTA  | 0.438 |
| - | 4  | 1210    | m.3_Missense_M                               | NM_006566    | NP_006557    | Q15762     | CD226_HUMAN | ical; (Potential).             | 0    | CCCTCCAGCCA   | 0.363 |
| + | 12 | 1706    | lls.2_Missense_M                             | NM_032649    | NP_116038    | Q96KN2     | CNDP1_HUMAN |                                | 0    | CTGCCCTTTTCT  | 0.408 |
| + | 2  | 1720    | ra.2_Missense_M                              | NM_171999    | NP_741996    | Q9BXA9     | SALL3_HUMAN |                                | 4    | ACGTGGAGTCC   | 0.741 |
| + | 2  | 253     | n_p.R80K ATP9B                               | NM_198531    | NP_940933    | O43861     | ATP9B_HUMAN | lasmic (Potential).            | 3    | GCAAAGGAAAAC  | 0.428 |
| + | 2  | 502     |                                              | NM_014913    | NP_055728    | Q6IQ32     | ADNP2_HUMAN |                                | 8    | GGTGCGAAAAA   | 0.368 |
| - | 3  | 312     | _p.T97M MBD3_u                               | NM_003926    | NP_003917    | O95983     | MBD3_HUMAN  |                                | 3    | CGCCGTGTTC    | 0.597 |
| + | 3  | 338_339 | lvv.1_Missense_M                             | NM_182973    | NP_892018    | Q72410     | TMPS9_HUMAN | cellular (Potential).          | 2    | CGAGGGATCCC   | 0.624 |
| - | 2  | 234     |                                              | NM_145173    | NP_660156    | O95057     | DIRA1_HUMAN |                                | 1    | GAAGCGCAGCA   | 0.557 |

rs148053646

|   |    |           |                   |              |              |        |             |                                |    |               |       |             |
|---|----|-----------|-------------------|--------------|--------------|--------|-------------|--------------------------------|----|---------------|-------|-------------|
| - | 5  | 481       | p.R142C PIP5K1C   | NM_012398    | NP_036530    | O60331 | PI51C_HUMAN | PIPK.                          | 4  | :GTAGCGGAAGG  | 0.493 |             |
| + | 2  | 240       |                   | NM_015897    | NP_056981    | Q8N2W9 | PIAS4_HUMAN |                                | 1  | :ACAGCCGCACC  | 0.637 | rs142623244 |
| + | 10 | 1270      | B3L3_uc010xib.1_  | NM_032607    | NP_115996    | Q68CJ9 | CR3L3_HUMAN | enal (Potential).              | 2  | :ACCCCGACCCG  | 0.647 | rs138185635 |
| + | 18 | 2192      | p.G610E ANKRD2    | NM_133475    | NP_597732    | Q8TF21 | ANR24_HUMAN |                                | 0  | :CATGGGGTGG   | 0.557 |             |
| + | 19 | 3368      |                   | NM_133475    | NP_597732    | Q8TF21 | ANR24_HUMAN | Potential.                     | 0  | :GCTACGGACCG  | 0.667 |             |
| + | 2  | 66        |                   | NM_018074    | NP_060544    | Q9BW85 | CCD94_HUMAN |                                | 0  | :TACTACCCGCC  | 0.552 |             |
| - | 2  | 284       | dvtv.1_Missense_I | NM_144615    | NP_653216    | Q96BF3 | TMIG2_HUMAN | ilar (Potential). Ig-like.     | 0  | :GCAGACCCCA   | 0.657 |             |
| + | 3  | 524_525   |                   | NM_005483    | NP_005474    | Q13111 | CAF1A_HUMAN | 1 chromo shadow domain.        | 2  | :CCTCTCCCTCCA | 0.5   | rs150150583 |
| - | 5  | 1017      | mfi.1_Missense_IV | NM_003807    | NP_003798    | O43557 | TNF14_HUMAN | ellular (Potential).           | 1  | :TCTCCCAGCC   | 0.627 |             |
| + | 26 | 2509_2510 | a.1_Missense_Mul  | NM_005428    | NP_005419    | P15498 | VAV_HUMAN   | SH3 2.                         | 16 | :CTCAAGGAGGG  | 0.569 |             |
| + | 18 | 2335      | r.p.S747F EMR1_   | NM_001974    | NP_001965    | Q14246 | EMR1_HUMAN  | Name=5; (Potential).           | 5  | :GCAACTCCCTTC | 0.323 |             |
| + | 8  | 1194      | p.T244S ZNF557_   | NM_001044388 | NP_001037853 | Q8N988 | ZN557_HUMAN | 2H2-type 4.                    | 2  | :GGAAAACCTTC  | 0.453 |             |
| + | 7  | 802       | S4_uc002mji.2_5'  | NM_024552    | NP_078828    | Q9HA82 | CERS4_HUMAN | TLC.                           | 1  | :GCTGTGGGCAC  | 0.572 |             |
| + | 4  | 686       | p.C82Y MARCKS     | NM_016496    | NP_057580    | Q9P0N8 | MARH2_HUMAN | ING-CH-type p.C82S(1)          | 2  | :TGGCTGCACCG  | 0.582 |             |
| - | 3  | 542       | 42_splice ZNF414  | NM_032370    | NP_115746    | Q96IQ9 | ZN414_HUMAN |                                | 0  | :CCCTACCTTCC  | 0.632 |             |
| - | 61 | 41292     | fwj2_Missense_M   | NM_024690    | NP_078966    | Q8WXI7 | MUC16_HUMAN | lar (Potential). SEA 11.       | 57 | :CCATCCTTTTCA | 0.562 |             |
| - | 21 | 37694     |                   | NM_024690    | NP_078966    | Q8WXI7 | MUC16_HUMAN | ilar (Potential). SEA 3.       | 57 | :TGTTCTGTCTC  | 0.517 |             |
| - | 4  | 31574     |                   | NM_024690    | NP_078966    | Q8WXI7 | MUC16_HUMAN | xtracellular (Potential).      | 57 | :CAGGCGAAGTG  | 0.448 |             |
| - | 3  | 29368     |                   | NM_024690    | NP_078966    | Q8WXI7 | MUC16_HUMAN | ch. Extracellular (Potential). | 57 | :TGTTTCCACAA  | 0.488 |             |
| - | 3  | 26554     |                   | NM_024690    | NP_078966    | Q8WXI7 | MUC16_HUMAN | ch. Extracellular (Potential). | 57 | :CATTCTGTCTG  | 0.507 |             |
| - | 3  | 23335     |                   | NM_024690    | NP_078966    | Q8WXI7 | MUC16_HUMAN | ch. Extracellular (Potential). | 57 | :GGGGGGGATAT  | 0.547 |             |
| - | 3  | 19093     |                   | NM_024690    | NP_078966    | Q8WXI7 | MUC16_HUMAN | xtracellular (Potential).      | 57 | :AGAAGGATGCAT | 0.443 |             |
| - | 3  | 11488     |                   | NM_024690    | NP_078966    | Q8WXI7 | MUC16_HUMAN | xtracellular (Potential).      | 57 | :GAGTTCCTGGG  | 0.532 |             |
| - | 1  | 8251      |                   | NM_024690    | NP_078966    | Q8WXI7 | MUC16_HUMAN | ch. Extracell p.E2683K(1)      | 57 | :AGTCTCTGGGA  | 0.488 |             |
| + | 1  | 251       |                   | NM_001004456 | NP_001004456 | Q8NGA1 | OR1M1_HUMAN | ellular (Potential).           | 3  | :GGTGAGCCTTC  | 0.527 |             |
| - | 1  | 158       |                   | NM_001005192 | NP_001005192 | Q8NGA0 | OR7G1_HUMAN | lasmic (Potential).            | 2  | :GGTGGGAGTCA  | 0.488 |             |
| + | 1  | 957       |                   | NM_175883    | NP_787079    | Q96RA2 | OR7D2_HUMAN | Name=6; (Potential).           | 3  | :GCATTGGGGTC  | 0.498 |             |
| + | 1  | 332       |                   | NM_001079935 | NP_001073404 | Q6IFN5 | O7E24_HUMAN | ellular (Potential).           | 1  | :CATCTCCTATGA | 0.493 |             |
| - | 10 | 1276      | wr.1_Missense_M   | NM_152476    | NP_689689    | Q96MR9 | ZN560_HUMAN | 2H2-type 2.                    | 6  | :TAAATCTTTTCC | 0.393 |             |
| - | 8  | 689       | dwr.1_Missense_IV | NM_152476    | NP_689689    | Q96MR9 | ZN560_HUMAN | KRAB 2.                        | 6  | :GCCAAGAGATC  | 0.468 |             |
| + | 6  | 933       | g_Mutation_p.A174 | NM_022737    | NP_073574    | Q96GM1 | LPPR2_HUMAN |                                | 1  | :CGTGGCCGCGG  | 0.701 |             |
| - | 6  | 933       | mk.1_Missense_I   | NM_030824    | NP_110451    | Q9H7R0 | ZN442_HUMAN | KRAB.                          | 4  | :GTTTTTCATTCA | 0.348 |             |
| - | 6  | 665       | ase_Mutation_p.P' | NM_004461    | NP_004452    | Q9Y285 | SYFA_HUMAN  |                                | 1  | :TGAAGGGCCGG  | 0.687 |             |
| + | 1  | 207       | lyz.1_Missense_IV | NM_152654    | NP_689867    | Q8N907 | DAND5_HUMAN |                                | 1  | :AGCTTCTGCC   | 0.672 |             |
| + | 3  | 867_868   |                   | NM_173482    | NP_775753    | Q8IYK2 | CC105_HUMAN |                                | 1  | :TTCTGGAGCAG  | 0.614 |             |
| - | 13 | 1717      | KAP8L_uc002nax.   | NM_014371    | NP_055186    | Q9LUX6 | AKP8L_HUMAN |                                | 1  | :GCGCTCCAGCT  | 0.627 |             |
| + | 2  | 133       | g_Mutation_p.S28f | NM_000896    | NP_000887    | Q08477 | CP4F3_HUMAN | ical; (Potential).             | 3  | :GGCCTCCTGGC  | 0.637 |             |
| + | 8  | 994_995   |                   | NM_023944    | NP_076433    |        |             |                                | 7  | :GGGAAGGCATTG | 0.386 |             |
| + | 1  | 28        |                   | NM_013939    | NP_039227    | O60403 | O10H2_HUMAN | ellular (Potential).           | 3  | :GCTGGGGCTAA  | 0.557 |             |
| - | 7  | 901       | 26_uc002nee.2_I   | NM_006387    | NP_006378    | Q8IWX8 | CHERP_HUMAN | CID.                           | 2  | :TGATGGAGTCA  | 0.637 |             |
| + | 6  | 975       |                   | NM_024074    | NP_076979    | Q9H6F2 | TM38A_HUMAN | lasmic (Potential).            | 3  | :GAAGGCCAAGA  | 0.632 |             |
| - | 22 | 2901      |                   | NM_015692    | NP_056507    | Q8IZJ3 | CPMD8_HUMAN |                                | 13 | :ATTCTCCTCAG  | 0.562 |             |
| - | 16 | 2054      |                   | NM_015692    | NP_056507    | Q8IZJ3 | CPMD8_HUMAN |                                | 13 | :CCAGACCTGAG  | 0.607 |             |
| - | 11 | 1246      |                   | NM_015692    | NP_056507    | Q8IZJ3 | CPMD8_HUMAN |                                | 13 | :GCCCCGGCTTG  | 0.632 |             |
| + | 39 | 6148      | S1999L MYO9B_     | NM_004145    | NP_004136    | Q13459 | MYO9B_HUMAN | Tail.                          | 1  | :GGACTCGGAGA  | 0.647 |             |
| - | 1  | 55        |                   | NM_138454    | NP_612463    | Q96CM4 | NXNL1_HUMAN | Thioredoxin.                   | 0  | :ACAGGGAGGCC  | 0.602 |             |
| - | 5  | 454       |                   | NM_001080421 | NP_001073890 | Q9UPW8 | UN13A_HUMAN | C2 1.                          | 3  | :CCACACCTCCAC | 0.517 |             |

|   |    |           |                     |              |              |        |             |                                |    |               |       |             |
|---|----|-----------|---------------------|--------------|--------------|--------|-------------|--------------------------------|----|---------------|-------|-------------|
| - | 8  | 824       | p.G230E COMP_1      | NM_000095    | NP_000086    | P49747 | COMP_HUMAN  | EGF-like 4.                    | 0  | GGATCCCCTTG   | 0.706 |             |
| - | 5  | 2079      | p.R645* SFRS14      | NM_014884    | NP_055699    | Q8IX01 | SUGP2_HUMAN |                                | 0  | TCCTCGCAAGT   | 0.498 |             |
| - | 4  | 1452      |                     | NM_021030    | NP_066358    | P17017 | ZNF14_HUMAN | :2H2-type 12.                  | 3  | GAAGGGAACCTT  | 0.383 |             |
| - | 4  | 1562      | top.2_Missense_M    | NM_033196    | NP_149973    | O95780 | ZN682_HUMAN |                                | 2  | TGCAGGATTTCT  | 0.353 |             |
| + | 3  | 315       | rs.1_RNA ZNF90_1    | NM_007138    | NP_009069    | Q03938 | ZNF90_HUMAN | KRAB.                          | 2  | GCAAGGAAAAA   | 0.398 |             |
| + | 4  | 524       | rs.1_intron ZNF90_1 | NM_007138    | NP_009069    | Q03938 | ZNF90_HUMAN |                                | 2  | AAAAGAGGTTAT  | 0.328 |             |
| - | 4  | 1600      | ipc.1_Missense_M    | NM_001076675 | NP_001070143 | Q68DY1 | ZN626_HUMAN | ype 12; degenerate.            | 1  | ATTCTTCACATT  | 0.388 |             |
| - | 4  | 1432      | ipc.1_Missense_M    | NM_001076675 | NP_001070143 | Q68DY1 | ZN626_HUMAN | :2H2-type 10.                  | 1  | ATTCTTCACATT  | 0.388 |             |
| - | 3  | 2081      |                     | NM_001001411 | NP_001001411 | Q8N7Q3 | ZN676_HUMAN |                                | 0  | FTTTAGGGATTCT | 0.348 |             |
| - | 5  | 1966      |                     | NM_001080409 | NP_001073878 |        |             |                                | 2  | FAAGTTTTGAGG  | 0.363 |             |
| + | 4  | 2501      | dd.1_Missense_M     | NM_014717    | NP_055532    | O15090 | ZN536_HUMAN | :2H2-type 9.                   | 11 | TGCCGGCACGC   | 0.507 |             |
| + | 4  | 3694      | dd.1_Missense_M     | NM_014717    | NP_055532    | O15090 | ZN536_HUMAN |                                | 11 | AAACCGAACCG   | 0.567 |             |
| - | 4  | 448       | 1_intron RHPN2_1    | NM_033103    | NP_149094    | Q8IUC4 | RHPN2_HUMAN | BRO1.                          | 6  | GAGGACGACTG   | 0.383 | rs149250532 |
| + | 4  | 513       | iM42_uc002oap.2     | NM_024321    | NP_077297    | Q9BTD8 | RBM42_HUMAN |                                | 0  | CGCGCGGGCAG   | 0.562 |             |
| + | 4  | 443       | ense_Mutation_p.F   | NM_007000    | NP_008931    | O00322 | UPK1A_HUMAN | ellular (Potential).           | 0  | GACCCGCCTCT   | 0.647 |             |
| - | 28 | 3542      |                     | NM_004646    | NP_004637    | O60500 | NPHN_HUMAN  | :2.Cytoplasmic (Potential).    | 5  | TACGTTCTTCT   | 0.547 |             |
| + | 8  | 1431      | rs.Mutation_p.R33   | NM_001013659 | NP_001013681 | Q6ZN11 | ZN793_HUMAN | :2H2-type 4.                   | 0  | FACATCGAAAAAT | 0.458 |             |
| + | 5  | 666       | p.R112C ZNF540      | NM_152606    | NP_689819    | Q8NDQ6 | ZN540_HUMAN |                                | 1  | CTCTTCGTCTG   | 0.333 |             |
| - | 5  | 2218      | hnb.1_Missense_M    | NM_032689    | NP_116078    | Q96SK3 | ZN607_HUMAN | :2H2-type 15.                  | 0  | TAAAAGACTTCC  | 0.428 |             |
| + | 53 | 8463      | _Mutation_p.G277    | NM_000540    | NP_000531    | P21817 | RYR1_HUMAN  | :16 X approximate repeats.     | 12 | CTATGGAGAGA   | 0.607 |             |
| + | 73 | 10827     | div.1_Missense_M    | NM_000540    | NP_000531    | P21817 | RYR1_HUMAN  |                                | 12 | AGGCTCCCCGT   | 0.637 |             |
| + | 89 | 12293     | p.E4050K RYS1_1     | NM_000540    | NP_000531    | P21817 | RYR1_HUMAN  |                                | 12 | ATGTGGAGATG   | 0.567 |             |
| + | 3  | 377       | SARS2_uc010xur.     | NM_033362    | NP_203526    | O15235 | RT12_HUMAN  |                                | 0  | TTCCCCGGCTC   | 0.607 | rs150096976 |
| - | 6  | 3019      |                     | NM_003890    | NP_003881    | Q9Y6R7 | FCGBP_HUMAN | VWFD 2.                        | 9  | AGTTCCCACAG   | 0.597 |             |
| - | 6  | 926       | rsense_Mutation_p   | NM_001010880 | NP_001010880 | O75290 | Z780A_HUMAN | :2H2-type 3.                   | 0  | GCAGGGTAAGA   | 0.388 |             |
| + | 16 | 3662_3663 | 3N4_uc002onz.2_1    | NM_020971    | NP_066022    | Q9H254 | SPTN4_HUMAN | Spectrin 9.                    | 5  | CGCAGGGAGGC   | 0.658 |             |
| + | 16 | 2230      | 10xvo.1_intron LTI  | NM_001042544 | NP_001036009 | Q8N2S1 | LTBP4_HUMAN | n-binding (Potential). Cys-r   | 1  | GCTCCCGAGGG   | 0.657 |             |
| - | 2  | 291       | IF_uc002otd.3_5'U   | NM_006494    | NP_006485    | P50548 | ERF_HUMAN   | ETS.                           | 4  | AATGACGCCCT   | 0.602 |             |
| + | 41 | 8208      | p.V2133M MEGF8      | NM_001410    | NP_001401    | Q7Z7M0 | MEGF8_HUMAN | ellular (Potential).           | 1  | GCGCGGTGCGG   | 0.692 | rs148860986 |
| - | 3  | 736       | rg.1_intron PSG3_1  | NM_021016    | NP_066296    | Q16557 | PSG3_HUMAN  | like C2-type 1.                | 2  | AAAGAGGGTCC   | 0.507 |             |
| - | 3  | 685       | rs.Mutation_p.S74F  | NM_182707    | NP_874366    | Q9UQ74 | PSG8_HUMAN  | like C2-type 1.                | 0  | TTTCAGACAAAC  | 0.522 |             |
| - | 4  | 894_895   | rsense_Mutation_p.  | NM_006905    | NP_008836    | P11464 | PSG1_HUMAN  | like C2-type 2.                | 2  | ATTCTCCCTGGG  | 0.49  |             |
| - | 2  | 526       | lion_p.G130R PSC    | NM_006905    | NP_008836    | P11464 | PSG1_HUMAN  | g-like V-type.                 | 2  | FAGTCCCATCATC | 0.502 | rs34055642  |
| - | 4  | 804_805   | ense_Mutation_p.l   | NM_002782    | NP_002773    | Q00889 | PSG6_HUMAN  | like C2-type 2.                | 2  | TTCTCCCTGGGC  | 0.51  |             |
| + | 6  | 2489      | 226_uc010ejg.2_3    | NM_001032373 | NP_001027545 | Q9NYT6 | ZN226_HUMAN |                                | 0  | ATAAATCCTATAA | 0.358 |             |
| - | 4  | 884       | VF285_uc010xxa.1    | NM_152354    | NP_689567    | Q96NJ3 | ZN285_HUMAN | ype 2; degenerate.             | 4  | TTCTTTCCATACT | 0.433 |             |
| - | 4  | 707       | VF285_uc010xxa.1    | NM_152354    | NP_689567    | Q96NJ3 | ZN285_HUMAN |                                | 4  | AGTTGGGATGT   | 0.468 |             |
| + | 7  | 865       | zt.1_Missense_M     | NM_005581    | NP_005572    | P50895 | BCAM_HUMAN  | otential). Ilg-like C2-type 1. | 1  | CAGCCCGTCCA   | 0.647 |             |
| + | 7  | 1636      |                     | NM_001042724 | NP_001036189 | Q92692 | PVRL2_HUMAN | lasmic (Potential).            | 0  | AGCTGGAGGCA   | 0.577 |             |
| + | 10 | 1327      |                     | NM_006509    | NP_006500    | Q01201 | RELB_HUMAN  | RHD.                           | 1  | CTCGCGACCAT   | 0.552 |             |
| + | 4  | 300       | FRS16_uc002pam.     | NM_007056    | NP_008987    | Q8N2M8 | CLASR_HUMAN |                                | 0  | GGATGCCCTGG   | 0.587 |             |
| - | 3  | 514       | se_Mutation_p.P9f   | NM_005619    | NP_005610    | O75298 | RTN2_HUMAN  |                                | 3  | TCGTGGTTCCG   | 0.677 |             |
| + | 3  | 242       | eb.2_Missense_M     | NM_001135113 | NP_001128585 | Q6UWQ7 | IGFL2_HUMAN |                                | 0  | TCCCCCTGCA    | 0.552 |             |
| - | 2  | 950       | per.3_Missense_M    | NM_018215    | NP_060685    | Q86V59 | PNML1_HUMAN |                                | 0  | TGTTGGGGGTG   | 0.557 |             |
| - | 3  | 1080      |                     | NM_000960    | NP_000951    | P43119 | PI2R_HUMAN  | lasmic (Potential).            | 0  | GGAAGGGGTG    | 0.657 |             |
| + | 6  | 4412      |                     | NM_004491    | NP_004482    | Q9NRY4 | RHG35_HUMAN | Pro-rich.                      | 1  | TCAGCCGTGCG   | 0.677 |             |
| - | 8  | 1059      | 3H4_uc002pgb.1_f    | NM_015168    | NP_055983    | Q9UPT8 | ZC3H4_HUMAN | Gly-rich.                      | 6  | GCCCCGACCCA   | 0.627 |             |

|   |    |           |                    |              |              |        |             |                                |    |                 |       |
|---|----|-----------|--------------------|--------------|--------------|--------|-------------|--------------------------------|----|-----------------|-------|
| + | 4  | 474       |                    | NM_022142    | NP_071425    | Q96BH3 | ESPB1_HUMAN | nectin type-II 2.              | 0  | CTCTTCGATGAG    | 0.517 |
| + | 9  | 2085      | v2D_uc010elx.2_5   | NM_000836    | NP_000827    | O15399 | NMDE4_HUMAN | ical; (Potential).             | 6  | GCTTCGCCGTCA    | 0.587 |
| - | 4  | 374       |                    | NM_001080434 | NP_001073903 |        |             |                                | 6  | GCAGCGACTGT     | 0.622 |
| + | 2  | 287_288   | pjm.2_Missense_I   | NM_177973    | NP_814444    | O00204 | ST2B1_HUMAN |                                | 1  | CTACCCCAAGTC    | 0.644 |
| + | 4  | 1131      | n.1_5'Flank FGF21  | NM_019113    | NP_061986    | Q9NSA1 | FGF21_HUMAN |                                | 1  | CCCCCGATGTG     | 0.682 |
| + | 3  | 662       | 10yaf.1_Missense_  | NM_033378    | NP_203696    |        |             |                                | 0  | AGCCTTCCAAGC    | 0.642 |
| - | 5  | 938       | _Mutation_p.P235L  | NM_014037    | NP_054756    | Q9GZN6 | S6A16_HUMAN | ellular (Potential).           | 4  | ATTCAGGATCTG    | 0.388 |
| + | 7  | 814       | 7_uc002pqp.2_5'U   | NM_024682    | NP_078958    | Q9HA65 | TBC17_HUMAN |                                | 0  | CTACTCCACCA     | 0.692 |
| - | 3  | 116       | t_p.P21L IL4I1_ucl | NM_152899    | NP_690863    | Q96RQ9 | OXLA_HUMAN  |                                | 3  | gaggatggggcagag | 0.453 |
| + | 5  | 2132      | _p.S632F ZNF473    | NM_001006656 | NP_001006657 | Q8WTR7 | ZN473_HUMAN |                                | 2  | TCGCTCCCTTA     | 0.478 |
| - | 7  | 734       |                    | NM_152358    | NP_689571    | Q6UXV1 | IZUM2_HUMAN | lasmic (Potential).            | 0  | AGTTTTCGGTTT    | 0.403 |
| - | 1  | 271       |                    | NM_152358    | NP_689571    | Q6UXV1 | IZUM2_HUMAN | ellular (Potential).           | 0  | AGGCCCTCCA      | 0.677 |
| + | 13 | 1622      | p.W533C MYH14_     | NM_024729    | NP_079005    | Q7Z406 | MYH14_HUMAN | osin head-like.                | 1  | CCCTGGACCTT     | 0.592 |
| + | 26 | 3412      | o.A1163V MYH14_    | NM_024729    | NP_079005    | Q7Z406 | MYH14_HUMAN | Potential.                     | 1  | TGGGGCCCGGG     | 0.652 |
| - | 3  | 249       | o.2_Missense_Mu    | NM_017509    | NP_059979    | Q9H2R5 | KLK15_HUMAN | peptidase S1.                  | 2  | GCTCTCCCAGG     | 0.622 |
| - | 2  | 601       |                    | NM_002029    | NP_002020    | P21462 | FPR1_HUMAN  | ellular (Potential).           | 3  | GTTTTACCAGGT    | 0.537 |
| + | 6  | 1703      | ya.1_Missense_M    | NM_001031721 | NP_001026891 | Q6PF04 | ZN613_HUMAN |                                | 1  | AGAAACCTATG     | 0.418 |
| + | 4  | 596       | dn.1_Missense_M    | NM_018260    | NP_060730    | Q9NV72 | ZN701_HUMAN |                                | 0  | ACCCCGAAGGG     | 0.413 |
| + | 4  | 1353      | dn.1_Missense_M    | NM_018260    | NP_060730    | Q9NV72 | ZN701_HUMAN |                                | 0  | AGAAACGTTACA    | 0.373 |
| - | 5  | 1222      | p.R386C ZNF347_    | NM_032584    | NP_115973    | Q96SE7 | ZN347_HUMAN | C2H2-type 5.                   | 0  | TGAACGAGCTC     | 0.413 |
| + | 3  | 537       | a-mir-935 MI0005   | NM_031895    | NP_114101    | Q8WXS5 | CCG8_HUMAN  | ical; (Potential).             | 0  | TGTGTGCGTGG     | 0.637 |
| - | 4  | 473       | j.2_RNA LILRB2_t   | NM_005874    | NP_005865    | Q8N423 | LIRB2_HUMAN | potential). Ig-like C2-type 1. | 1  | TGTAATCCAAGAT   | 0.527 |
| + | 7  | 1141      | 18_splice LILRA1_  | NM_006863    | NP_006854    | O75019 | LIRA1_HUMAN |                                | 3  | CTCCAGGACAG     | 0.597 |
| + | 16 | 2261      | RB1_uc002qgm.2_    | NM_006669    | NP_006660    | Q8NHL6 | LIRB1_HUMAN | lasmic (Potential).            | 3  | CTGTGCCCAGC     | 0.652 |
| - | 4  | 1537_1538 | p.E488K NLRP7_t    | NM_206828    | NP_996611    | Q8WX94 | NALP7_HUMAN | NACHT.                         | 3  | GTCCTCCCCCTC    | 0.574 |
| - | 2  | 1151      | nse_Mutation_p.A   | NM_003180    | NP_003171    | O00445 | SYT5_HUMAN  | ical; (Potential).             | 0  | CAGGGCCAGG      | 0.602 |
| - | 4  | 504       | PRH_uc002qjs.2_    | NM_002842    | NP_002833    | Q9HD43 | PTPRH_HUMAN | III 2. Extracellular (Potentia | 4  | CTGGCCGTCG      | 0.597 |
| - | 2  | 361       |                    | NM_176820    | NP_789790    | Q7RTR0 | NALP9_HUMAN |                                | 7  | CTTCTCCATATG    | 0.373 |
| + | 5  | 572       | P5_uc002qmi.2_lr   | NM_153447    | NP_703148    | P59047 | NALP5_HUMAN |                                | 7  | AAATTTACAAG     | 0.408 |
| + | 4  | 2057      |                    | NM_213598    | NP_998763    | Q08ER8 | ZN543_HUMAN |                                | 2  | GAAGACCTTTTA    | 0.418 |
| + | 3  | 1809      | _p.P521L ZNF304_   | NM_020657    | NP_065708    | Q9HCX3 | ZN304_HUMAN |                                | 1  | CAAGGCCTTATG    | 0.488 |
| + | 3  | 1043      |                    | NM_152677    | NP_689890    | Q8NAM6 | ZSCA4_HUMAN | SCAN box.                      | 1  | ACTTGGAGAGA     | 0.413 |
| + | 5  | 1853      |                    | NM_152677    | NP_689890    | Q8NAM6 | ZSCA4_HUMAN | C2H2-type 3.                   | 1  | CGGTCTCATGAG    | 0.463 |
| + | 3  | 359       | so.2_Missense_Mt   | NM_001009    | NP_001000    | P46782 | RS5_HUMAN   |                                | 0  | GCATGCCTTCG     | 0.577 |
| - | 3  | 359       |                    | NM_003310    | NP_003301    | Q53HC9 | TSSC1_HUMAN |                                | 0  | TTTTATTATAAT    | 0.413 |
| + | 8  | 1089      | zi.2_Missense_ML   | NM_003887    | NP_003878    | O43150 | ASAP2_HUMAN |                                | 0  | TGTCTACGGATC    | 0.418 |
| + | 18 | 2077      | i.T258M AH1_uc0    | NM_016207    | NP_057291    | Q9UKF6 | CPSF3_HUMAN |                                | 2  | CTGACGCCAG      | 0.458 |
| + | 19 | 3396      | rbp.1_Missense_M   | NM_014668    | NP_055483    | Q4ZG55 | GREB1_HUMAN |                                | 1  | GGGATGGACCC     | 0.592 |
| - | 14 | 2280      | _p.P613S PUM2_u    | NM_015317    | NP_056132    | Q8TB72 | PUM2_HUMAN  | ilio 1. PUM-HD.                | 1  | AGCTGGAGTAG     | 0.343 |
| - | 26 | 8008      |                    | NM_000384    | NP_000375    | P04114 | APOB_HUMAN  |                                | 27 | CTGATGGAATC     | 0.413 |
| - | 26 | 6802      |                    | NM_000384    | NP_000375    | P04114 | APOB_HUMAN  |                                | 27 | TGGATTGTTTTTA   | 0.274 |
| - | 26 | 4512      |                    | NM_000384    | NP_000375    | P04114 | APOB_HUMAN  |                                | 27 | TGGTCCCAGG      | 0.378 |
| + | 12 | 1641      | hv.3_Missense_M    | NM_020134    | NP_064519    | Q9BPU6 | DPYL5_HUMAN |                                | 2  | TGGGGGATGTC     | 0.567 |
| - | 3  | 706       |                    | NM_178553    | NP_848648    | Q53S27 | CB053_HUMAN | Pro-rich.                      | 0  | AGGCCCTGATG     | 0.617 |
| - | 8  | 1307      | o.R220W SLC30A     | NM_003459    | NP_003450    | Q99726 | ZNT3_HUMAN  | lasmic (Potential).            | 0  | ATCTCCGGCTGA    | 0.667 |
| - | 11 | 1630      | k.2_5'Flank PPM1   | NM_002707    | NP_002698    | O15355 | PPM1G_HUMAN |                                | 1  | TGTTTCGGGGC     | 0.527 |
| + | 27 | 1876      | c.2_Missense_Mu    | NM_153021    | NP_694566    | Q6P1J6 | PLB1_HUMAN  | ate repeats. 2. Extracellular  | 9  | CTGTGTTGTGC     | 0.473 |

|   |    |           |                    |              |              |        |             |                               |      |                |       |             |
|---|----|-----------|--------------------|--------------|--------------|--------|-------------|-------------------------------|------|----------------|-------|-------------|
| + | 13 | 2065      | 1_p.E517K FAM17    | NM_199280    | NP_954974    | Q6ZUX3 | F179A_HUMAN |                               | 4    | icCGAGGAGATC   | 0.587 |             |
| - | 7  | 2357      |                    | NM_004304    | NP_004295    | Q9UM73 | ALK_HUMAN   | xtracellular (Potential).     | 1218 | AGCCATCTTCAA   | 0.522 |             |
| - | 36 | 4070      |                    | NM_000379    | NP_000370    | P47989 | XDH_HUMAN   |                               | 8    | :CCTCACAGACC/  | 0.498 |             |
| + | 13 | 884       | 3LC30A6_uc002ro    | NM_017964    | NP_060434    | Q6NXT4 | ZNT6_HUMAN  | lasmic (Potential).           | 0    | :AAGTCCGAAATC  | 0.318 |             |
| - | 7  | 849       | lynd.1_Missense_I  | NM_015475    | NP_056290    | Q8NCA5 | FA98A_HUMAN |                               | 1    | TTTTAGGGGATA/  | 0.403 |             |
| - | 29 | 2385      | p.W744* MAP4K3     | NM_003618    | NP_003609    | Q8IVH8 | M4K3_HUMAN  | CNH.                          | 8    | :TAAACCATGAAC  | 0.348 |             |
| - | 2  | 1930      | 002rrz.2_Intron SL | NM_021097    | NP_066920    | P32418 | NAC1_HUMAN  | lasmic (Potential).           | 4    | TCTTCTCACTCAI  | 0.507 |             |
| + | 4  | 428       | oa.1_Missense_M    | NM_022437    | NP_071882    | Q9H221 | ABCG8_HUMAN | er. Cytoplasmic (Potential).  | 4    | :AGCCTCCTTGC   | 0.607 |             |
| - | 8  | 1197_1198 | REPL_uc002rui.3    | NM_006036    | NP_006027    | Q4J6C6 | PPCEL_HUMAN |                               | 1    | CCCAAGGAGGG/   | 0.371 |             |
| + | 3  | 755       |                    | NM_002158    | NP_002149    | P32314 | FOXN2_HUMAN | Fork-head.                    | 0    | :ATTTTCCATATTT | 0.393 | rs147349434 |
| - | 27 | 3073      | SME4_uc010fbu.1    | NM_014614    | NP_055429    | Q14997 | PSME4_HUMAN | HEAT 2.                       | 5    | :CCAAGGGAATG   | 0.338 |             |
| - | 4  | 552       | i.2_Intron C2orf63 | NM_152385    | NP_689598    | Q8NHS4 | CB063_HUMAN |                               | 3    | :AGAATGGATTTG  | 0.303 |             |
| - | 11 | 1751      | zj.2_Missense_Mt   | NM_004105    | NP_004096    | Q12805 | FBLN3_HUMAN | nteraction with TIMP3.        | 6    | AAGTCCCTATA    | 0.438 |             |
| + | 6  | 2109      |                    | NM_001080433 | NP_001073902 | Q96PX6 | CC85A_HUMAN |                               | 5    | :AGGTTTCGTGTC  | 0.408 |             |
| - | 3  | 274       | se_Mutation_p.R7:  | NM_144709    | NP_653310    | Q3MIT2 | PUS10_HUMAN | Potential.                    | 4    | :CAGTCGAATTTI  | 0.368 |             |
| + | 3  | 461       | le.2_Missense_Mu   | NM_002664    | NP_002655    | P08567 | PLEK_HUMAN  | PH 1.                         | 1    | AGGCCATTAAAT   | 0.468 |             |
| - | 4  | 828       |                    | NM_001024680 | NP_001019851 | Q5FWF7 | FBX48_HUMAN |                               | 0    | :GCATCCATTGGC  | 0.378 |             |
| - | 3  | 370       |                    | NM_002056    | NP_002047    | Q06210 | GFPT1_HUMAN | imidotransferase type-2.      | 1    | ACTTTTCCTTTCT  | 0.413 |             |
| - | 10 | 1907      |                    | NM_017880    | NP_060350    | Q9NWW7 | CB042_HUMAN |                               | 0    | :GGGAAGGATATC  | 0.507 |             |
| + | 4  | 626       | p.G110E PCYOX1     | NM_016297    | NP_057381    | Q9UHG3 | PCYOX_HUMAN |                               | 1    | :TCTAGGAGGAG.  | 0.403 |             |
| + | 13 | 1393      | V1B1_uc010fdw.2    | NM_001692    | NP_001683    | P15313 | VATB1_HUMAN |                               | 1    | GGGAGGAGGCC    | 0.607 |             |
| + | 3  | 1184      |                    | NM_001080474 | NP_001073943 | A6NCI8 | CB078_HUMAN |                               | 2    | :GCCAGGAAAAA   | 0.428 |             |
| + | 14 | 1943      | rb.1_Missense_Mt   | NM_004263    | NP_004254    | O95754 | SEM4F_HUMAN | 3. Extracellular (Potential). | 4    | CCGGCGGGATG    | 0.622 |             |
| + | 11 | 3590      |                    | NM_000189    | NP_000180    | P52789 | HXK2_HUMAN  | Catalytic.                    | 2    | TGGAGATGCACA   | 0.612 |             |
| + | 13 | 1908      | p.E635K CTNNA2     | NM_004389    | NP_004380    | P26232 | CTNA2_HUMAN |                               | 9    | :CAGAAGAACTA   | 0.443 |             |
| + | 8  | 1267      | HNSL2_uc002sta.:   | NM_018271    | NP_060741    | Q86YJ6 | THNS2_HUMAN |                               | 1    | TGGATGAAGCC    | 0.562 |             |
| + | 6  | 1603      | e.1_Missense_Mu    | NM_021088    | NP_066574    | Q9BSG1 | ZNF2_HUMAN  | 2H2-type 8.                   | 0    | :CCAGCGGTGC    | 0.502 |             |
| - | 5  | 633       | V131_uc010yvg.1    | NM_015348    | NP_056163    | Q92545 | TM131_HUMAN |                               | 6    | GAAGTAGGATTAT  | 0.289 |             |
| - | 4  | 471       | se_Mutation_p.G1   | NM_175735    | NP_783862    | Q86SG7 | LYG2_HUMAN  |                               | 1    | AAGTCCCCTGTC   | 0.517 |             |
| + | 7  | 821       | vt.1_Missense_Mt   | NM_002518    | NP_002509    | Q99743 | NPAS2_HUMAN |                               | 4    | TTGAACCCAAAG   | 0.393 |             |
| - | 2  | 494_495   |                    | NM_153836    | NP_722578    | Q8IUH2 | CREG2_HUMAN |                               | 1    | GCAGTCTTGG/    | 0.51  |             |
| + | 11 | 1459      | wd.1_Missense_Iv   | NM_003855    | NP_003846    | Q13478 | IL18R_HUMAN | oplasmic (Potential).         | 3    | :AAAGCCGAAGA   | 0.348 |             |
| - | 4  | 994       | p.G74R TGFBR1      | NM_004257    | NP_004248    | Q8WUH2 | TGFA1_HUMAN |                               | 2    | :AACTCCTTACT   | 0.418 |             |
| - | 16 | 2320      |                    | NM_001144013 | NP_001137485 | A6NKT7 | RGPD3_HUMAN |                               | 1    | :GTTTTCGAGTTC  | 0.368 |             |
| + | 6  | 802       |                    | NM_001008743 | NP_001008743 | Q6IMI6 | ST1C3_HUMAN | PAPS.                         | 1    | :GGAAAGGTAGA   | 0.403 | rs139414825 |
| - | 20 | 3464      | p.W989* RGPD5      | NM_005054    | NP_005045    | Q99666 | RGPD5_HUMAN | RanBD1 1.                     | 0    | CCACATCCATGC   | 0.438 |             |
| + | 10 | 2312      | anse_Mutation_p.L  | NM_019014    | NP_061887    | Q9H9Y6 | RPA2_HUMAN  |                               | 1    | GATTCTCTCGTI   | 0.512 |             |
| + | 3  | 128       |                    | NM_014440    | NP_055255    | Q9UHA7 | IL36A_HUMAN |                               | 0    | :AGTCACTATTGC  | 0.498 |             |
| + | 12 | 2525      | _uc002tjf.2_Misse  | NM_012455    | NP_036587    | Q8NDX1 | PSD4_HUMAN  | PH.                           | 2    | GCAGGCATCC     | 0.612 |             |
| + | 2  | 518       | PP10_uc002tle.2    | NM_020868    | NP_065919    | Q8N608 | DPP10_HUMAN | KCND2. Cytoplasmic (Pote      | 10   | GGTAGGAACTGC   | 0.388 |             |
| + | 20 | 2158      | p.M563I DPP10      | NM_020868    | NP_065919    | Q8N608 | DPP10_HUMAN | ellular (Potential).          | 10   | TGCAGGGATGA/   | 0.388 |             |
| + | 15 | 1555      | yq.1_Missense_Mi   | NM_001029996 | NP_001025167 | Q4G0U5 | PCDP1_HUMAN |                               | 0    | ATCAAGGAATTT   | 0.343 |             |
| + | 2  | 954_955   | 1_p.L161* TMEM1    | NM_001105198 | NP_001098668 | Q53S58 | TM177_HUMAN |                               | 1    | TGTACCTGGAAA   | 0.658 |             |
| + | 13 | 4739      | it.3_Missense_Mul  | NM_005270    | NP_005261    | P10070 | GLI2_HUMAN  |                               | 13   | :GAGCTCCATGC   | 0.642 |             |
| - | 8  | 953       | l0fr.2_Splice_Site | NM_014553    | NP_055368    | Q9NZI6 | TF2L1_HUMAN |                               | 3    | :ACGTACCCCTTC  | 0.552 |             |
| - | 2  | 208       | fls.2_Missense_M   | NM_032390    | NP_115766    | Q9BYG3 | MK67I_HUMAN |                               | 0    | :CTCCAGGAGTA/  | 0.413 |             |
| + | 6  | 1215      | flu.2_Missense_Iv  | NM_130773    | NP_570129    | Q8WYK1 | CNTP5_HUMAN | 1. Extracellular (Potential). | 10   | :CTTACGGTGG.   | 0.602 |             |



|   |     |                           |                     |              |              |             |             |                              |                |                 |       |
|---|-----|---------------------------|---------------------|--------------|--------------|-------------|-------------|------------------------------|----------------|-----------------|-------|
| + | 13  | 1552                      |                     | NM_001080527 | NP_001073996 | Q6PIF6      | MYO7B_HUMAN | osin head-like.              | 2              | 'GCTGGCCCTCA    | 0.602 |
| + | 15  | 1863                      |                     | NM_001080527 | NP_001073996 | Q6PIF6      | MYO7B_HUMAN | osin head-like.              | 2              | 'TGGGCCATGGG    | 0.552 |
| - | 1   | 2051                      |                     | NR_002826    |              |             |             |                              | 0              | 'TCTTTCCAAGA'   | 0.428 |
| - | 7   | 1707                      | SK4_uc010zbg.1_I    | NM_025052    | NP_079328    | Q56UN5      | YSK4_HUMAN  |                              | 5              | 'TTAATGGGACCT'  | 0.418 |
| - | 8   | 3118                      |                     | NM_002299    | NP_002290    | P09848      | LPH_HUMAN   | ential), 4 X approximate ref | 13             | 'AGGCAGGATTC'   | 0.488 |
| + | 6   | 653                       | vf.2_Missense_Mu    | NM_006895    | NP_008826    | P50135      | HNMT_HUMAN  |                              | 1              | 'AAGATGCTCATT'  | 0.353 |
| - | 60  | 10576                     |                     | NM_018557    | NP_061027    | Q9NZR2      | LRP1B_HUMAN | ntial), LDL-receptor class B | 50             | 'ATCCATCCATGT'  | 0.294 |
| - | 6   | 1672                      | 31B_uc010fnl.1_In   | NM_018557    | NP_061027    | Q9NZR2      | LRP1B_HUMAN | ellular (Potential).         | 50             | 'GAATTCATTTC'   | 0.294 |
| + | 2   | 206                       | _p.D26N KYNU_uc     | NM_003937    | NP_003928    | Q16719      | KYNU_HUMAN  |                              | 2              | 'CAACGGATGAG'   | 0.488 |
| + | 8   | 830                       | p.P234S KYNU_uc     | NM_003937    | NP_003928    | Q16719      | KYNU_HUMAN  |                              | 2              | 'ATATTCCTGCCA'  | 0.418 |
| + | 2   | 231                       | 10zbl.1_Missense_   | NM_018460    | NP_060930    | Q53QZ3      | RHG15_HUMAN |                              | 2              | 'AAATGAGAATCA'  | 0.443 |
| + | 23  | 2827                      | 55C_uc002twu.1_I    | NM_004522    | NP_004513    | O60282      | KIF5C_HUMAN |                              | 1              | 'AGTTGGACAACG'  | 0.527 |
| + | 2   | 1843                      | .NT5_uc010zci.1_I   | NM_014568    | NP_055383    | Q7Z7M9      | GALT5_HUMAN | main A. Lumenal (Potential   | 4              | 'TCAAGGAGATTC'  | 0.448 |
| + | 19  | 2603                      | p.G777S SLC4A1I     | NM_022058    | NP_071341    | Q6U841      | S4A10_HUMAN | ellular (Potential).         | 5              | 'CTTTAGGTCCA'   | 0.373 |
| - | 13  | 2456                      | .2_Intron SCN3A_I   | NM_006922    | NP_008853    | Q9NY46      | SCN3A_HUMAN |                              | 10             | 'CCAAGGAAACC.'  | 0.488 |
| - | 26  | 4821                      | uc002udp.2_Intron   | NM_002977    | NP_002968    | Q15858      | SCN9A_HUMAN |                              | 13             | 'ATCCTTGGATTTT' | 0.313 |
| - | 14  | 2235                      | 47A_uc010fpm.1_I    | NM_002976    | NP_002967    | Q01118      | SCN7A_HUMAN |                              | 1              | 'ACCAGGATTGGC'  | 0.403 |
| + | 8   | 2000                      | udy.2_Missense_I    | NM_152381    | NP_689594    | A4UGR9      | XIRP2_HUMAN | Xin 4.                       | 14             | 'AACAGGCCATT'   | 0.438 |
| + | 8   | 8534                      | _p.R2664K XIRP2     | NM_152381    | NP_689594    | A4UGR9      | XIRP2_HUMAN |                              | 14             | 'TGAAGAAAAAC'   | 0.383 |
| + | 22  | 3030                      | io.1_Missense_Mu    | NM_001079818 | NP_001073286 | P23229      | ITA6_HUMAN  | ellular (Potential).         | 2              | 'TGCGGGGGCTG'   | 0.468 |
| + | 9   | 1227                      | ej.1_Nonsense_Mi    | NM_145810    | NP_665809    | Q9BWT1      | CDCA7_HUMAN | transcriptional activity.    | 1              | 'AAACAGGAATTT'  | 0.323 |
| + | 9   | 1229                      | ej.1_Missense_ML    | NM_145810    | NP_665809    | Q9BWT1      | CDCA7_HUMAN | transcriptional activity.    | 1              | 'ACAGGAATTTGA'  | 0.323 |
| - | 12  | 1645                      | ijj.2_Missense_Mu   | NM_001822    | NP_001813    | P15882      | CHIN_HUMAN  | Rho-GAP.                     | 3              | 'TCATCCGGATCC.' | 0.408 |
| - | 284 | 3277_8327880K TTN_uc010zi | NM_133378           | NP_596869    | Q8WZ42       | TITIN_HUMAN |             | 153                          | 'CTCCTCCATTAT' | 0.446           |       |
| - | 284 | 82243                     | 35E TTN_uc010zi     | NM_133378    | NP_596869    | Q8WZ42      | TITIN_HUMAN |                              | 153            | 'TATTTTCTGTAT'  | 0.403 |
| - | 275 | 71598                     | 87C TTN_uc010zi     | NM_133378    | NP_596869    | Q8WZ42      | TITIN_HUMAN |                              | 153            | 'TTATACGGAAAA'  | 0.413 |
| - | 275 | 71377                     | 13K TTN_uc010zi     | NM_133378    | NP_596869    | Q8WZ42      | TITIN_HUMAN |                              | 153            | 'CCTGGTCTATCT.' | 0.413 |
| - | 200 | 39408                     | .1_Missense_Muta    | NM_133378    | NP_596869    | Q8WZ42      | TITIN_HUMAN |                              | 153            | 'GTCTCCTTCTCT'  | 0.358 |
| - | 124 | 28730                     | _I_Intron TTN_uc0C  | NM_133378    | NP_596869    | Q8WZ42      | TITIN_HUMAN |                              | 153            | 'CACACCTTCTCT'  | 0.388 |
| - | 124 | 28701                     | _I_Intron TTN_uc0C  | NM_133378    | NP_596869    | Q8WZ42      | TITIN_HUMAN |                              | 153            | 'ATTCCTCCTCTG'  | 0.398 |
| - | 80  | 20556                     | _uc010zjf.1_Intro   | NM_133378    | NP_596869    | Q8WZ42      | TITIN_HUMAN |                              | 153            | 'ATTTCATCTCTG'  | 0.512 |
| - | 74  | 18751                     | _uc010zjf.1_Intro   | NM_133378    | NP_596869    | Q8WZ42      | TITIN_HUMAN |                              | 153            | 'CAAAGAAGGTC'   | 0.408 |
| - | 67  | 16791                     | _uc010zjf.1_Intro   | NM_133378    | NP_596869    | Q8WZ42      | TITIN_HUMAN |                              | 153            | 'AGGAGGGAAGC'   | 0.373 |
| - | 61  | 15172                     | _uc010zjf.1_Intro   | NM_133378    | NP_596869    | Q8WZ42      | TITIN_HUMAN |                              | 153            | 'CAAACGGAGGT'   | 0.443 |
| - | 46  | 11885_11886G3821S TTN_uc0 | NM_133437           | NP_597681    | Q8WZ42       | TITIN_HUMAN |             | 153                          | 'GGGACCCTTTAA' | 0.46            |       |
| - | 46  | 13152                     | _N_uc010zfi.1_Intri | NM_133379    | NP_596870    | Q8WZ42      | TITIN_HUMAN |                              | 153            | 'GCTTTGAAAAAT'  | 0.408 |
| - | 31  | 7306                      | _TN_uc010zfi.1_Mi   | NM_133378    | NP_596869    | Q8WZ42      | TITIN_HUMAN |                              | 153            | 'CTAAGTCCTTGT'  | 0.428 |
| - | 18  | 3066                      | p.G902S TTN_uc0     | NM_133378    | NP_596869    | Q8WZ42      | TITIN_HUMAN |                              | 153            | 'TAAGCCCTGAAC'  | 0.388 |
| - | 13  | 2455                      | une.1_Nonsense_     | NM_173648    | NP_775919    | Q6ZP82      | CC141_HUMAN |                              | 10             | 'TGATTGAAACC1'  | 0.488 |
| - | 9   | 1019                      | fq.1_Missense_Mi    | NM_001003683 | NP_001003683 | P54750      | PDE1A_HUMAN | ytic (By similarity).        | 3              | 'TCTTTGGATAAA'  | 0.343 |
| + | 3   | 872_873                   |                     | NM_194250    | NP_919226    | Q7Z570      | Z804A_HUMAN |                              | 11             | 'ACAAAGGGAATT'  | 0.351 |
| + | 4   | 1154                      |                     | NM_194250    | NP_919226    | Q7Z570      | Z804A_HUMAN |                              | 11             | 'AGATCCAGAAA'   | 0.368 |
| - | 5   | 770                       |                     | NM_182521    | NP_872327    | Q8NEG5      | ZSWM2_HUMAN | ZZ-type.                     | 3              | 'CTTCCCCTCAAT'  | 0.358 |
| - | 5   | 539                       |                     | NM_182521    | NP_872327    | Q8NEG5      | ZSWM2_HUMAN | RING-type 1.                 | 3              | 'ACAGCCAAACC'   | 0.274 |
| + | 9   | 809                       | 3A1_uc010frw.1_5'   | NM_000090    | NP_000081    | P02461      | CO3A1_HUMAN | le-helical region.           | 13             | 'CTAGGGAGAATC'  | 0.403 |
| + | 22  | 2567                      | 3_Mutation_p.R77'   | NM_001130158 | NP_001123630 | O43795      | MYO1B_HUMAN | IQ 3.                        | 8              | 'TCTGCGGGAAC'   | 0.463 |
| - | 43  | 7902                      |                     | NM_018897    | NP_061720    | Q8WXX0      | DYH7_HUMAN  | k (By similarity).           | 12             | 'TACTTGAGATG'   | 0.363 |

|   |    |           |                   |              |              |        |             |                               |    |               |       |             |
|---|----|-----------|-------------------|--------------|--------------|--------|-------------|-------------------------------|----|---------------|-------|-------------|
| - | 41 | 6983      |                   | NM_018897    | NP_061720    | Q8WXX0 | DYH7_HUMAN  |                               | 12 | TACTATCATTCGA | 0.383 |             |
| - | 31 | 5112      |                   | NM_018897    | NP_061720    | Q8WXX0 | DYH7_HUMAN  | 2 (By similarity).            | 12 | AGCAAGGACCC   | 0.378 |             |
| - | 22 | 3992      | utl.1_Missense_Mt | NM_020760    | NP_065811    | Q9P2P5 | HECW2_HUMAN | HECT.                         | 18 | GCTCTGGATACC  | 0.358 |             |
| - | 14 | 2056      |                   | NM_213589    | NP_998754    | Q70E73 | RAPH1_HUMAN |                               | 10 | TTGCGGGGATA   | 0.343 |             |
| + | 5  | 4094      |                   | NM_020923    | NP_065974    | Q9HCK1 | ZDBF2_HUMAN |                               | 3  | CTACAGATTCC   | 0.393 |             |
| + | 5  | 659       | zjb.1_Missense_M  | NM_005048    | NP_005039    | P49190 | PTH2R_HUMAN | Name=1; (Potential).          | 3  | GTATACCGTTGC  | 0.423 |             |
| + | 8  | 925       | ir.2_Missense_Mul | NM_001875    | NP_001866    | P31327 | CPSM_HUMAN  | imidotransferase type-1.      | 13 | GAGGACCGGGG   | 0.498 |             |
| - | 32 | 5060_5061 | p.G1296K ABCA1;   | NM_173076    | NP_775099    | Q86UK0 | ABCAC_HUMAN |                               | 11 | GCTCTCCCCCA   | 0.5   |             |
| - | 2  | 799       |                   | NM_000634    | NP_000625    | P25024 | CXCR1_HUMAN | lasmic (Potential).           | 2  | GTGTACGCAGG   | 0.547 | rs140085060 |
| - | 8  | 1397      | ozlr.1_Missense_A | NM_006216    | NP_006207    | P07093 | GDN_HUMAN   |                               | 4  | CTGTAGGATTAT  | 0.418 |             |
| - | 1  | 690       |                   | NM_005544    | NP_005535    | P35568 | IRS1_HUMAN  | RS-type PTB.                  | 12 | CACAGCGCCTG   | 0.597 |             |
| - | 46 | 5323      |                   | NM_000092    | NP_000083    | P53420 | CO4A4_HUMAN | ilagen IV NC1.                | 11 | CGCCTCTTCAG   | 0.652 |             |
| + | 37 | 3322      | tation_p.G1054R   | NM_000091    | NP_000082    | Q01955 | CO4A3_HUMAN | le-helical region.            | 3  | ATAAGGGAGAG   | 0.493 |             |
| + | 25 | 2336_2337 | xp.1_Missense_Mi  | NM_001080391 | NP_001073860 | P23497 | SP100_HUMAN |                               | 5  | CCCATCCGTGG   | 0.505 |             |
| + | 1  | 374       | UGT1A9_uc002vu    | NM_001072    | NP_001063    | P19224 | UD16_HUMAN  |                               | 0  | ATCTATCCAGTGC | 0.423 |             |
| - | 2  | 288       | lyp.1_Missense_M  | NM_212556    | NP_997721    | Q6ZVZ8 | ASB18_HUMAN |                               | 1  | CCATTCCATCTC  | 0.488 |             |
| + | 13 | 3010      |                   | NM_001080504 | NP_001073973 | Q6ZP01 | RBM44_HUMAN |                               | 4  | TTTTTCCCTTCC  | 0.413 |             |
| - | 13 | 2488      | za.2_Missense_Mt  | NM_006037    | NP_006028    | P56524 | HDAC4_HUMAN |                               | 6  | CTCATCGCTCTC  | 0.701 |             |
| - | 1  | 923       |                   | NM_001080835 | NP_001074304 | Q8WXC7 | PRR21_HUMAN | Pro-rich.                     | 2  | CGTGGGTGAAG   | 0.622 |             |
| + | 7  | 1293      | z_Mutation_p.F14C | NM_018226    | NP_060696    | Q9HAU8 | RNPL1_HUMAN |                               | 2  | ATGACTTTCTCC  | 0.642 |             |
| + | 12 | 1699      |                   | NM_001080437 | NP_001073906 | Q8TER0 | SNED1_HUMAN | EGF-like 7.                   | 2  | GCGAGTGCCCG   | 0.716 |             |
| - | 14 | 2263      | as.2_Missense_M   | NM_019609    | NP_062555    | Q96SM3 | CPXM1_HUMAN |                               | 4  | CAATCCTTCTGT  | 0.612 |             |
| - | 7  | 936       | as.2_Missense_M   | NM_019609    | NP_062555    | Q96SM3 | CPXM1_HUMAN |                               | 4  | CAGAGGATCCCG  | 0.537 |             |
| - | 18 | 2536      | 4A11_uc002wih.2   | NM_032034    | NP_114423    | Q8NBS3 | S4A11_HUMAN | bicarbonate transporter).     | 1  | AGTAGTGGATCT  | 0.617 |             |
| - | 13 | 3475      | GLEC1_uc002wiz    | NM_023068    | NP_075556    | Q9BZZ2 | SN_HUMAN    | 11. Extracellular (Potential) | 10 | GAGGCGGGGTG   | 0.652 |             |
| - | 18 | 1771      | vmd.3_Missense_f  | NM_019593    | NP_062539    | Q9NPB8 | GPCP1_HUMAN | GDPD.                         | 0  | TATCGGATATTT  | 0.363 |             |
| + | 2  | 121       | .CB1_uc002wmz.1   | NM_015192    | NP_056007    | Q9NQ66 | PLCB1_HUMAN |                               | 12 | GTTACTCCAATT  | 0.318 |             |
| + | 5  | 388       | rmz.1_Splice_Site | NM_015192    | NP_056007    | Q9NQ66 | PLCB1_HUMAN |                               | 12 | TTTCAGGAATGC  | 0.388 |             |
| + | 5  | 813       | zrc.1_Missense_f  | NM_012261    | NP_036393    | Q9UJQ1 | CT103_HUMAN | ellular (Potential).          | 3  | TGATCCGCAGAG  | 0.512 | rs137866690 |
| - | 5  | 1093      | nj.2_Missense_Mu  | NM_020341    | NP_065074    | Q9P286 | PAK7_HUMAN  | Linker.                       | 23 | CTCAGAATAGT   | 0.458 |             |
| + | 2  | 249       | _uc010gca.1_Mis   | NM_130811    | NP_570824    | P60880 | SNP25_HUMAN | ith CENPF (By similarity).    | 2  | TGGAGGAGATG   | 0.597 |             |
| - | 18 | 1838      | .H447Y SEL1L2_u   | NM_025229    | NP_079505    | Q5TEA6 | SE1L2_HUMAN | (Potential). Sel1-like 10.    | 2  | CGTTGTGGTATT  | 0.398 |             |
| + | 2  | 448       | rn_p.A2V SEC23B   | NM_006363    | NP_006354    | Q15437 | SC23B_HUMAN |                               | 1  | TATGGCGACAT   | 0.418 |             |
| + | 22 | 2757      | e_Mutation_p.G87  | NM_015585    | NP_056400    | Q8NHU2 | CT026_HUMAN |                               | 4  | CGCCGGAGTCA   | 0.652 |             |
| + | 28 | 2716      | sk.1_Missense_Mi  | NM_012255    | NP_036387    | Q9H0D6 | XRN2_HUMAN  |                               | 1  | CTCTCCCTTTT   | 0.378 |             |
| - | 3  | 813       | sm.2_Missense_M   | NM_153675    | NP_710141    | Q9Y261 | FOXA2_HUMAN | Fork-head.                    | 4  | AGTGGCGGATG   | 0.617 |             |
| + | 8  | 889       | _p.A259S HM13_L   | NM_030789    | NP_110416    | Q8TCT9 | HM13_HUMAN  | ical; (Potential).            | 1  | ACTTTGCCATGC  | 0.562 | rs1044419   |
| + | 4  | 776       |                   | NM_033118    | NP_149109    | Q9H1R3 | MYLK2_HUMAN |                               | 6  | CACCTCGAGGG   | 0.577 |             |
| + | 7  | 762       | xb.1_RNA TLL9     | NM_001008409 | NP_001008409 | Q3SXZ7 | TLL9_HUMAN  | TTL.                          | 2  | GGTAGCCCGGT   | 0.607 |             |
| + | 9  | 1103      | _p.T290I HCK_uc   | NM_002110    | NP_002101    | P08631 | HCK_HUMAN   | rotein kinase.                | 9  | GAAAACTCTGC   | 0.567 |             |
| + | 14 | 1995      | se_Mutation_p.G5  | NM_032819    | NP_116208    | Q9BYN7 | ZN341_HUMAN | :2H2-type 11.                 | 2  | CACACAGGCTGC  | 0.597 |             |
| - | 6  | 797       | aj.2_Missense_Mu  | NM_000687    | NP_000678    | P23526 | SAHH_HUMAN  |                               | 0  | TAGCCTGCTAC   | 0.602 |             |
| + | 17 | 1874      | _p.S520F ITCH_uc  | NM_031483    | NP_113671    | Q96J02 | ITCH_HUMAN  |                               | 6  | GGATTCTTTCA   | 0.403 |             |
| - | 6  | 664       | S_uc010zup.1_Mi   | NM_000178    | NP_000169    | P48637 | GSHB_HUMAN  |                               | 3  | CCCAGGCTTTG   | 0.488 |             |
| - | 4  | 1551      | 1_5'Flank EIF6_uc | NM_178468    | NP_848563    | Q9BQN1 | FA83C_HUMAN |                               | 2  | GCAGGGGGCTG   | 0.642 |             |
| + | 3  | 240       | 4L_uc002xgw.2_R   | NM_022077    | NP_071360    | Q9NQG1 | MANBL_HUMAN |                               | 0  | CACCTCCGGAG   | 0.557 |             |
| - | 11 | 1841      | _p.D500N TGM2_u   | NM_004613    | NP_004604    | P21980 | TGM2_HUMAN  |                               | 3  | GAGGTCCCTCT   | 0.597 |             |

|   |    |         |                    |              |              |        |             |     |               |       |             |
|---|----|---------|--------------------|--------------|--------------|--------|-------------|-----|---------------|-------|-------------|
| + | 4  | 584     | gp.2_Missense_M    | NM_001098798 | NP_001092268 | Q96NM4 | TOX2_HUMAN  | 1   | TCAGATGGGCATC | 0.682 |             |
| - | 2  | 1872    |                    | NM_020433    | NP_065166    | Q9BR39 | JPH2_HUMAN  | 0   | TTGGCCGTCGGG  | 0.667 |             |
| - | 2  | 1870    |                    | NM_020433    | NP_065166    | Q9BR39 | JPH2_HUMAN  | 0   | GCCGTCGGGCA   | 0.662 |             |
| + | 9  | 1239    | p.H362Y HNF4A_u    | NM_000457    | NP_000448    | P41235 | HNF4A_HUMAN | 3   | TCACCCCATGCC  | 0.592 |             |
| + | 2  | 427     | p.H124Y SEMG2_     | NM_003008    | NP_002999    | Q02383 | SEMG2_HUMAN | 1   | CATTTTCACATG  | 0.398 |             |
| - | 1  | 47      |                    | NM_080608    | NP_542175    | Q9BR10 | CT165_HUMAN | 0   | TCAGAGGACCT   | 0.597 |             |
| + | 8  | 1307    |                    | NM_004994    | NP_004985    | P14780 | MMP9_HUMAN  | 2   | TGGCCCCCCTTG  | 0.632 |             |
| - | 5  | 1817    | p.E507K ZNF334_    | NM_018102    | NP_060572    | Q9HCZ1 | ZN334_HUMAN | 2   | TGCATTCATATGC | 0.453 |             |
| - | 5  | 1232    | p.E312K ZNF334_    | NM_018102    | NP_060572    | Q9HCZ1 | ZN334_HUMAN | 2   | TGCATTCGTAAG  | 0.438 |             |
| + | 34 | 4740    | p.zyf.1_Missense_h | NM_006420    | NP_006411    | Q9Y6D5 | BIG2_HUMAN  | 4   | TCTAACCCAACA  | 0.408 |             |
| - | 2  | 1107    | p.Mutation_p.P33f  | NM_020436    | NP_065169    | Q9UJQ4 | SALL4_HUMAN | 2   | TCTGAGGAAGCA  | 0.647 |             |
| - | 2  | 393     | e_Mutation_p.P98   | NM_020436    | NP_065169    | Q9UJQ4 | SALL4_HUMAN | 2   | TAGGTGGATTTT  | 0.537 |             |
| - | 2  | 1147    |                    | NM_080617    | NP_542184    | Q9NTU7 | CBLN4_HUMAN | 4   | TGAAACTGTAA   | 0.343 |             |
| + | 1  | 832_833 |                    | NM_019888    | NP_063941    | P41968 | MC3R_HUMAN  | 4   | TAGGGGGCAGT   | 0.609 |             |
| + | 5  | 969     | xn.1_Missense_M    | NM_001033521 | NP_001028693 | Q05048 | CSTF1_HUMAN | 1   | TGCAATCCTCAA  | 0.403 |             |
| + | 6  | 1507    | e_Mutation_p.E42i  | NM_001164116 | NP_001157588 | Q9NQ75 | CASS4_HUMAN | 3   | TCGAGGAGTCA   | 0.567 |             |
| + | 8  | 2816    | p.R127H GNAS_uc    | NM_080425    | NP_536350    | P63092 | GNAS2_HUMAN | 292 | TCTGCCGTGTCC  | 0.423 | rs121913495 |
| + | 1  | 2711    |                    | NM_178457    | NP_848552    | Q5JPB2 | ZN831_HUMAN | 14  | TGGCTACCCCAC  | 0.652 |             |
| + | 1  | 3649    |                    | NM_178457    | NP_848552    | Q5JPB2 | ZN831_HUMAN | 14  | TGCCTCCGAGAT  | 0.627 |             |
| + | 2  | 3760    |                    | NM_178457    | NP_848552    | Q5JPB2 | ZN831_HUMAN | 14  | TCCCAGGGGTG   | 0.507 |             |
| - | 4  | 329     | P2_uc010gju.1_5f   | NM_014258    | NP_055073    | Q9BX26 | SYCP2_HUMAN | 5   | CATTGTGGATATC | 0.284 |             |
| + | 7  | 964     | p.1_Missense_Mu    | NM_001794    | NP_001785    | P55283 | CADH4_HUMAN | 6   | TGTACCGGATCG  | 0.612 | rs147810745 |
| - | 16 | 4145    | s.1_Missense_Mu    | NM_033081    | NP_149072    | Q9BTC0 | DIDO1_HUMAN | 6   | TCTGCCGTGCT   | 0.602 |             |
| - | 1  | 192_193 |                    | NM_080823    | NP_543013    | Q9H3Y6 | SRMS_HUMAN  | 2   | TGAAGGGGCTGC  | 0.708 |             |
| + | 3  | 594     | e_Mutation_p.R84   | NM_016434    | NP_057518    | Q9NZ71 | RTEL1_HUMAN | 0   | TGGATCGGGCCT  | 0.642 |             |
| + | 23 | 2294    | _Mutation_p.R675   | NM_016434    | NP_057518    | Q9NZ71 | RTEL1_HUMAN | 0   | TCCCCACGCATG  | 0.657 |             |
| - | 23 | 1824    | 'TE_uc002yir.1_Mi  | NM_199261    | NP_954870    | P56180 | TPTE_HUMAN  | 5   | TGTAGGAAGATT  | 0.264 |             |
| - | 19 | 1506    | 'TE_uc002yir.1_Mi  | NM_199261    | NP_954870    | P56180 | TPTE_HUMAN  | 5   | TTTTTTCGCTGTG | 0.393 |             |
| + | 5  | 818     | p.S145N RBM11_     | NM_144770    | NP_658983    | P57052 | RBM11_HUMAN | 0   | TAGTAGCACAGA  | 0.378 |             |
| - | 5  | 825     | d.2_Missense_Mu    | NM_006806    | NP_006797    | Q14201 | BTG3_HUMAN  | 0   | TCTGGGCAAAAG  | 0.388 |             |
| + | 3  | 523     | CAM2_uc011acc.1    | NM_004540    | NP_004531    | O15394 | NCAM2_HUMAN | 4   | ATATATCGTTGTC | 0.348 |             |
| + | 4  | 909     | p.p.E86K JAM2_u    | NM_021219    | NP_067042    | P57087 | JAM2_HUMAN  | 0   | TACCTGGAAGAG  | 0.478 |             |
| + | 11 | 1925    |                    | NM_014586    | NP_055401    | P57058 | HUNK_HUMAN  | 2   | TATCCCCGTGCT  | 0.552 |             |
| - | 4  | 561     | p.p.V51M C21orf5f  | NM_021254    | NP_067077    | P57076 | CUO59_HUMAN | 0   | TATCACCGCGCT  | 0.498 |             |
| - | 2  | 1091    | yw.2_Missense_h    | NM_017833    | NP_060303    | Q9NX36 | DJC28_HUMAN | 0   | TCTCTCTTTTGCT | 0.378 |             |
| + | 2  | 847     | S6_uc002ytp.2_lr   | NM_006933    | NP_008864    | P53794 | SC5A3_HUMAN | 2   | TGAATACTTTGTC | 0.453 |             |
| + | 2  | 874     | S6_uc002ytp.2_lr   | NM_006933    | NP_008864    | P53794 | SC5A3_HUMAN | 2   | TCCATAGGATTC  | 0.448 |             |
| - | 4  | 1592    | iETD4_uc002yuy.2   | NM_017438    | NP_059134    | Q9NVD3 | SETD4_HUMAN | 2   | AATAATCATCTGT | 0.463 |             |
| + | 12 | 1548    | ae.1_Missense_h    | NM_005128    | NP_005119    | Q9Y3R5 | DOP2_HUMAN  | 2   | TGATTCCTTTGGT | 0.532 |             |
| + | 6  | 543_544 | e_Mutation_p.L14   | NM_001001894 | NP_001001894 | P53804 | TTC3_HUMAN  | 9   | TCATTCCTTATTG | 0.337 |             |
| + | 34 | 4556    | f.2_Missense_Mu    | NM_001001894 | NP_001001894 | P53804 | TTC3_HUMAN  | 9   | TAAATCCTTTTGA | 0.308 |             |
| - | 3  | 430     |                    | NM_005867    | NP_005858    | P56555 | DSCR4_HUMAN | 1   | TCTTGTCCTTCT  | 0.328 |             |
| - | 26 | 4996    | CAM_uc002yir.1_f   | NM_001389    | NP_001380    | O60469 | DSCAM_HUMAN | 11  | TCAAAGGGCCTG  | 0.557 |             |
| - | 24 | 4602    | CAM_uc002yir.1_f   | NM_001389    | NP_001380    | O60469 | DSCAM_HUMAN | 11  | TAGCCGAGGCT   | 0.428 |             |
| + | 2  | 199     | p.zyd.1_Missense_  | NM_058186    | NP_478066    | P58499 | FAM3B_HUMAN | 0   | TGCCTCCTTGTG  | 0.627 |             |
| - | 10 | 1165    | M15_uc002yyp.2_    | NM_022115    | NP_071398    | P57071 | PRD15_HUMAN | 0   | TGTGCAGGTGTC  | 0.637 |             |
| - | 1  | 137     | 2yyp.2_Missense_   | NM_022115    | NP_071398    | P57071 | PRD15_HUMAN | 0   | TGCACGGAAgccc | 0.338 |             |

|   |    |           |                      |              |              |        |             |    |                    |       |             |
|---|----|-----------|----------------------|--------------|--------------|--------|-------------|----|--------------------|-------|-------------|
| - | 10 | 1158      | 3_uc002zcv.3_Mis     | NM_000071    | NP_000062    | P35520 | CBS_HUMAN   | 0  | AGATCCCTTCCAC      | 0.637 |             |
| + | 2  | 362       |                      | NM_000394    | NP_000385    | P02489 | CRYAA_HUMAN | 2  | CCACGGAAAGC        | 0.647 |             |
| - | 12 | 1820      |                      | NM_173354    | NP_775490    | P57059 | SIK1_HUMAN  | 7  | GACAGGGAGCA        | 0.682 |             |
| + | 7  | 679_680   | n_p.P46F RRP1_u      | NM_003683    | NP_003674    | P56182 | RRP1_HUMAN  | 0  | TCGACCCCTTCT       | 0.614 |             |
| - | 2  | 259       | rf29_uc010gpv.1_f    | NM_144991    | NP_659428    | Q8WU66 | TSEAR_HUMAN | 0  | GGGGGCGGCTA        | 0.562 | rs76207741  |
| + | 1  | 1166      | .1_Intron C21orf29   | NM_198687    | NP_941960    | P60372 | KR104_HUMAN | 0  | CCCTTCTCTGCT       | 0.711 |             |
| + | 23 | 1660_1661 | 3A1_uc010gqd.1_f     | NM_001848    | NP_001839    | P12109 | CO6A1_HUMAN | 1  | CGAGGGCTTCC        | 0.663 |             |
| + | 31 | 2147      | 1A1_uc002zhv.1_N     | NM_001848    | NP_001839    | P12109 | CO6A1_HUMAN | 1  | CATCCGGAACG        | 0.697 | rs148962954 |
| + | 3  | 588       | 6A2_uc002zhz.1_I     | NM_001849    | NP_001840    | P12110 | CO6A2_HUMAN | 8  | CAGCCCTGCG         | 0.711 |             |
| - | 10 | 1101      | 1.2_Missense_Mut     | NM_001001438 | NP_001001438 | P48449 | ERG7_HUMAN  | 0  | TTGATGGTTTTCC      | 0.602 |             |
| + | 8  | 1315      | 3_p.R285_splice P    | NM_006031    | NP_006022    | O95613 | PCNT_HUMAN  | 8  | TTCTAGGGGCC        | 0.52  |             |
| + | 22 | 4415      | 1.2_Missense_Mut     | NM_006031    | NP_006022    | O95613 | PCNT_HUMAN  | 8  | CAGATGAAGAT        | 0.572 |             |
| + | 34 | 4219      | P2A_uc002zjs.2_N     | NM_015151    | NP_055966    | Q14689 | DIP2A_HUMAN | 2  | GGTTCTGTTTG        | 0.458 |             |
| - | 9  | 1431      | 1.5e_Mutation_p.G1   | NM_001136213 | NP_001129685 | Q6S545 | POTEH_HUMAN | 1  | CTACTCCGTGC        | 0.358 |             |
| - | 4  | 1053      | 1.5e_Mutation_p.N    | NM_001136213 | NP_001129685 | Q6S545 | POTEH_HUMAN | 1  | TTTAAATTTGCTT      | 0.318 |             |
| - | 1  | 703       |                      | NM_001005239 | NP_001005239 | Q8NG94 | O11H1_HUMAN | 0  | 3GACAAGAGTAT       | 0.418 |             |
| - | 7  | 1071      |                      | NM_014433    | NP_055248    | Q9UHP6 | RTDR1_HUMAN | 1  | GCGGCCCTCGG        | 0.647 |             |
| + | 5  | 555       | 1.1_Missense_Mut     | NM_004914    | NP_004905    | O95755 | RAB36_HUMAN | 2  | TTCCCTATAGCC       | 0.507 |             |
| + | 7  | 1110      | 1.2_Intron MMP11_    | NM_005940    | NP_005931    | P24347 | MMP11_HUMAN | 3  | ctcagtactgggtgtacg | 0.453 |             |
| + | 12 | 1508      | 1.1_uc003aav.1_Sp    | NM_013430    | NP_038347    | P19440 | GGT1_HUMAN  | 0  | CGGCAGGTGGT        | 0.637 |             |
| + | 39 | 6259      | 1_p.M1883 MYO1i      | NM_032608    | NP_115997    | Q8IU55 | MY18B_HUMAN | 12 | AAGATGGGGGA        | 0.627 |             |
| + | 2  | 702       | L1S_uc003afm.1_      | NM_021026    | NP_066306    | O75677 | RFPL1_HUMAN | 0  | TTTGACGTGTCC       | 0.572 |             |
| + | 4  | 576       |                      | NM_182527    | NP_872333    | Q86V35 | CABP7_HUMAN | 0  | GTGTCCCCTGG        | 0.637 |             |
| - | 6  | 564       | 1.2_Missense_Mut     | NM_174975    | NP_777635    | Q9UDX4 | S14L3_HUMAN | 5  | CAGTCCCAGGC        | 0.517 |             |
| + | 3  | 354       | 1.3_Missense_Mut     | NM_000631    | NP_000622    | Q15080 | NCF4_HUMAN  | 1  | CTACCGCCGCT        | 0.592 |             |
| - | 2  | 181       | 1_p.G14R TMPRSS      | NM_153609    | NP_705837    | Q8IU80 | TMPS6_HUMAN | 6  | GTCCCCTGCG         | 0.657 |             |
| + | 7  | 1932      | 1.1_Missense_Mut     | NM_001039141 | NP_001034230 | Q9H2D6 | TARA_HUMAN  | 1  | CTGTGCCAGCC        | 0.607 |             |
| + | 9  | 5253_5254 | 1.2_Missense_Mut     | NM_001039141 | NP_001034230 | Q9H2D6 | TARA_HUMAN  | 1  | CACCTCCACCCA       | 0.673 |             |
| + | 9  | 1151      | 1.1_Missense_Mut     | NM_006116    | NP_006107    | Q15750 | TAB1_HUMAN  | 1  | GCTACCCGCTG        | 0.657 |             |
| + | 28 | 4765      | 1.2_Missense_Mut     | NM_021096    | NP_066919    | Q9P0X4 | CAC11_HUMAN | 2  | TGAGGGTTCTG        | 0.597 |             |
| + | 20 | 4066      |                      | NM_001429    | NP_001420    | Q09472 | EP300_HUMAN | 64 | TCAAACGTAAGT       | 0.373 |             |
| + | 16 | 2018      | RNA POLR3H_uc0       | NM_001098    | NP_001089    | Q99798 | ACON_HUMAN  | 4  | ACTACGGCGAG        | 0.622 |             |
| + | 10 | 1478      | 1.1_Missense_Mut     | NM_001469    | NP_001460    | P12956 | XRCC6_HUMAN | 5  | AAGCTTCGCTTC       | 0.448 |             |
| - | 2  | 637       | 1.2_Missense_Mut     | NM_058238    | NP_478679    | P56706 | WNT7B_HUMAN | 1  | TCTCGCCGAGG        | 0.652 |             |
| + | 17 | 2118      | 1.2_Missense_Mut     | NM_014678    | NP_055493    | O75170 | PP6R2_HUMAN | 0  | CTGACTACCAG        | 0.453 |             |
| + | 19 | 2442      | 1.5e_Mutation_p.P41  | NM_175607    | NP_783200    | Q8IWW2 | CNTN4_HUMAN | 7  | TTCCGGCCCTAC       | 0.512 |             |
| - | 8  | 1239      | 1.1_RA_uc011asm.1_   | NM_000564    | NP_000555    | Q01344 | IL5RA_HUMAN | 1  | CCTGGGAAACC        | 0.478 |             |
| + | 33 | 4570      | 1.1_RA_uc011asu.1_Ir | NM_001099952 | NP_001093422 | Q14643 | ITPR1_HUMAN | 21 | TCGTTCGCGTG        | 0.597 |             |
| + | 1  | 637       | 1.1_DEM1_uc003bqh.2  | NM_014674    | NP_055489    | Q92611 | EDEM1_HUMAN | 3  | GCGGGGACCCG        | 0.612 |             |
| - | 6  | 682       | 1.2_Intron OGG       | NM_003656    | NP_003647    | Q14012 | KCC1A_HUMAN | 2  | CTCTCCATCTT        | 0.602 |             |
| - | 3  | 279       | 1.1atm.1_Missense    | NM_173659    | NP_775930    | Q6P087 | RUSD3_HUMAN | 1  | TCAACGTCACT        | 0.512 |             |
| + | 6  | 936       | S254F PPARG_uc       | NM_015869    | NP_056953    | P37231 | PPARG_HUMAN | 2  | TGAATTCCTAAT       | 0.448 |             |
| - | 27 | 3691      |                      | NM_024923    | NP_079199    | Q8TEM1 | PO210_HUMAN | 11 | CGGCATTGCCA        | 0.617 | rs147038229 |
| - | 10 | 1206      | P2_uc011avh.1_5'     | NM_001080423 | NP_001073892 | Q9C0E4 | GRIP2_HUMAN | 1  | GTGTTCCATGCT       | 0.642 |             |
| + | 1  | 1095      | 1.1_Missense_Mut     | NM_152536    | NP_689749    | Q6ZNL6 | FGD5_HUMAN  | 5  | ATTGTCCCTTTT       | 0.552 |             |
| + | 5  | 535       | 1_p.V26I PLCL2_u     | NM_001144382 | NP_001137854 | Q9UPR0 | PLCL2_HUMAN | 4  | AAAAGTTTCG         | 0.418 | rs141837634 |
| - | 1  | 710       | 1.1B_uc003cbm.2_Ir   | NM_144715    | NP_653316    | Q8N7U6 | EFHB_HUMAN  | 0  | CTTTTCCATTTC       | 0.507 |             |

|   |    |           |                   |              |              |        |             |                             |    |               |       |
|---|----|-----------|-------------------|--------------|--------------|--------|-------------|-----------------------------|----|---------------|-------|
| - | 36 | 4781      | _p.R451Q TOP2B    | NM_001068    | NP_001059    | Q02880 | TOP2B_HUMAN |                             | 5  | :CGGTTCTGGGC  | 0.413 |
| - | 6  | 759       | ense_Mutation_p.L | NM_003615    | NP_003606    | Q9Y6M7 | S4A7_HUMAN  | ellular (Potential).        | 5  | :AACAAAGAGGAA | 0.413 |
| - | 9  | 1661      | _p.S184C OSBPL1   | NM_017784    | NP_060254    | Q9BXB5 | OSB10_HUMAN |                             | 1  | :GCAAAGATCGC  | 0.512 |
| + | 12 | 1648      | se_Mutation_p.L46 | NM_015442    | NP_056257    | Q9H9A5 | CNOTA_HUMAN |                             | 2  | ATATGTCTCAGA/ | 0.408 |
| - | 4  | 560       | B1_uc003cfj.1_Int | NM_000404    | NP_000395    | P16278 | BGAL_HUMAN  |                             | 1  | :AGGAGCGGAGA  | 0.368 |
| + | 7  | 691       | P21_uc011axy.1_n  | NM_016300    | NP_057384    | Q9UBL0 | ARP21_HUMAN |                             | 3  | :ACACGGATTCTA | 0.388 |
| + | 21 | 2352      |                   | NM_002207    | NP_002198    | Q13797 | ITA9_HUMAN  | ellular (Potential).        | 6  | :TGATGCACGAG  | 0.562 |
| + | 22 | 3195      | se_Mutation_p.M1  | NM_007335    | NP_031361    | Q9Y238 | DLEC1_HUMAN |                             | 9  | :GGCATGAAGAA  | 0.567 |
| - | 28 | 5589      | i.2_Missense_Mut  | NM_198056    | NP_932173    | Q14524 | SCN5A_HUMAN |                             | 9  | ATTTCTCCCAGAT | 0.532 |
| - | 27 | 5218      |                   | NM_006514    | NP_006505    | Q9Y5Y9 | SCNAA_HUMAN |                             | 10 | :AAAGTCGCCTC  | 0.493 |
| - | 5  | 1334      | cjh.2_Missense_M  | NM_033027    | NP_149016    | Q96S65 | CSRN1_HUMAN |                             | 5  | TGGGTGGGTGG   | 0.582 |
| + | 2  | 1129      | m.2_Missense_Mu   | NM_005201    | NP_005192    | P51685 | CCR8_HUMAN  | lasmic (Potential).         | 2  | :AAATGCCTAGGC | 0.393 |
| - | 2  | 358       |                   | NM_144634    | NP_653235    | Q96KX0 | LYZL4_HUMAN |                             | 1  | :ATAATCCAGGCC | 0.552 |
| + | 1  | 227       |                   | NM_152393    | NP_689606    | Q2TBA0 | KBTB5_HUMAN | BTB.                        | 1  | :AGCGCGAGTTC  | 0.682 |
| - | 11 | 1388      | lx.2_Missense_Mu  | NM_020707    | NP_065758    | Q9HCP6 | HHATL_HUMAN |                             | 3  | :CAATTCGTGCTA | 0.577 |
| + | 7  | 2073      | ik.2_Missense_Mu  | NM_017719    | NP_060189    | Q9NRH2 | SNRK_HUMAN  |                             | 6  | :ATGGCGGGGGC  | 0.662 |
| + | 1  | 264       |                   | NM_014240    | NP_055055    | Q9UGP4 | LIMD1_HUMAN | tes nuclear export.         | 1  | GCCCAGGGGGGA  | 0.632 |
| + | 17 | 1659      | bah.1_Missense_n  | NM_014016    | NP_054735    | Q9NTJ5 | SAC1_HUMAN  |                             | 1  | :AACAACTTTTCC | 0.343 |
| + | 17 | 1664_1665 | bah.1_Missense_n  | NM_014016    | NP_054735    | Q9NTJ5 | SAC1_HUMAN  |                             | 1  | :CTTTTCCGATGC | 0.342 |
| - | 13 | 1576      | .2_Missense_Mut   | NM_002343    | NP_002334    | P02788 | TRFL_HUMAN  | ansferrin-like 2.           | 4  | :CAGGGGCACAG  | 0.517 |
| - | 2  | 455       | pu.3_Missense_M   | NM_024512    | NP_078788    | Q9BYS8 | LRRC2_HUMAN |                             | 1  | :CACCTCCTCTT  | 0.458 |
| - | 21 | 4292_4293 | 3csx.2_Missense_  | NM_002673    | NP_002664    | O43157 | PLXB1_HUMAN | ir (Potential). IPT/TIG 3.  | 5  | :GGAGGGCAGG   | 0.574 |
| - | 4  | 980       | ense_Mutation_p.C | NM_024661    | NP_078937    | Q96ER9 | CCD51_HUMAN |                             | 0  | :ACTACCTGCCT  | 0.557 |
| - | 34 | 9637      | lkf.2_Missense_M  | NM_001407    | NP_001398    | Q9NYQ7 | CELR3_HUMAN | lasmic (Potential).         | 11 | :GGGTGCTGCC   | 0.682 |
| - | 21 | 2055      | _p.P539S QARS_u   | NM_005051    | NP_005042    | P47897 | SYQ_HUMAN   |                             | 1  | :CAAAGGCTGTG  | 0.567 |
| - | 18 | 1674      | _p.V412L QARS_u   | NM_005051    | NP_005042    | P47897 | SYQ_HUMAN   |                             | 1  | :ACGCACACAGG  | 0.547 |
| + | 6  | 9236      |                   | NM_003458    | NP_003449    | Q9UPA5 | BSN_HUMAN   |                             | 8  | :CGCTGCTCCTG  | 0.642 |
| - | 21 | 2854      |                   | NM_003335    | NP_003326    | P41226 | UBA7_HUMAN  |                             | 2  | :ATAGCGGATGAC | 0.587 |
| + | 23 | 2320      |                   | NM_004947    | NP_004938    | Q8IZD9 | DOCK3_HUMAN |                             | 0  | :CCAGTCCATCCC | 0.468 |
| - | 5  | 445       |                   | NM_003280    | NP_003271    | P63316 | TNNC1_HUMAN | EF-hand 4.                  | 0  | :TTGTCTCCGTCC | 0.577 |
| + | 6  | 1047      | A1D_uc003dgy.3_I  | NM_001128840 | NP_001122312 | Q01668 | CAC1D_HUMAN | ellular (Potential). I.     | 11 | :TATTGGAAAAAT | 0.318 |
| + | 42 | 5361      | se_Mutation_p.G17 | NM_001128840 | NP_001122312 | Q01668 | CAC1D_HUMAN | lasmic (Potential).         | 11 | :AGCAGGAAATTC | 0.463 |
| + | 25 | 2273      | in_p.G648E CACN   | NM_018398    | NP_060868    | Q8IZS8 | CA2D3_HUMAN | ellular (Potential).        | 7  | TGTCGGGGCTG   | 0.517 |
| - | 15 | 2909      | RC2_uc003dht.1_n  | NM_015576    | NP_056391    | O15083 | ERC2_HUMAN  | Potential.                  | 2  | :TTCTTCCTGCG  | 0.463 |
| - | 13 | 2579      | RC2_uc003dht.1_n  | NM_015576    | NP_056391    | O15083 | ERC2_HUMAN  | Potential.                  | 2  | :CTTTTCCAACTC | 0.443 |
| + | 9  | 1234      | C66_uc003dhu.2_I  | NM_001141947 | NP_001135419 | A2RUB6 | CCD66_HUMAN |                             | 1  | :TTCTCTCAGTCA | 0.443 |
| - | 3  | 740       |                   | NM_003865    | NP_003856    | Q9UBX0 | HESX1_HUMAN | Homeobox.                   | 1  | :AATATCGATACC | 0.289 |
| + | 21 | 3814      | if.2_Missense_Mul | NM_001457    | NP_001448    | O75369 | FLNB_HUMAN  | with FBLP1. Filamin 10.     | 19 | :ACTTCCCCGCC  | 0.537 |
| - | 3  | 398       | ense_Mutation_p.  | NM_004944    | NP_004935    | Q13609 | DNSL3_HUMAN |                             | 3  | :CATATTGTTCTT | 0.363 |
| - | 2  | 1636      | int.2_Missense_M  | NM_198271    | NP_938012    | Q0VAK6 | LMOD3_HUMAN |                             | 1  | :ACTTCGGGGCC  | 0.557 |
| + | 15 | 2726      | A3_uc010hon.1_f   | NM_005233    | NP_005224    | P29320 | EPHA3_HUMAN | Potential). Protein kinase. | 33 | AGGTAATTAAGC  | 0.478 |
| - | 2  | 567       | 2_5'UTR PROS1_    | NM_000313    | NP_000304    | P07225 | PROS_HUMAN  | Gla.                        | 1  | :TTCCGGGTCAT  | 0.388 |
| + | 1  | 331       |                   | NM_001005514 | NP_001005514 | A6NHG9 | O5H14_HUMAN | Name=3; (Potential).        | 1  | :CCACGGAATGT  | 0.413 |
| + | 1  | 728       |                   | NM_001005515 | NP_001005515 | A6NDH6 | O5H15_HUMAN | Name=6; (Potential).        | 2  | :TGGAGCCCATC  | 0.428 |
| + | 3  | 563       |                   | NM_032787    | NP_116176    | Q96K78 | GP128_HUMAN | ellular (Potential).        | 4  | AGATATGGACCA  | 0.343 |
| - | 2  | 436       | G2_uc011bhe.1_5'  | NM_016247    | NP_057331    | Q9BZV3 | IMPG2_HUMAN | ellular (Potential).        | 3  | :GCCTTCTGATT  | 0.428 |
| + | 15 | 1807      | _p.L325F ZPLD1_L  | NM_175056    | NP_778226    | Q8TCW7 | ZPLD1_HUMAN | acellular (Potential).      | 5  | :CCTTCTTATGC  | 0.388 |

rs146661016



|   |    |           |                    |              |              |        |              |                                |    |               |       |             |
|---|----|-----------|--------------------|--------------|--------------|--------|--------------|--------------------------------|----|---------------|-------|-------------|
| + | 1  | 676_677   |                    | NM_032600    | NP_115989    | Q8NEL0 | CCD54_HUMAN  | Potential.                     | 0  | GAAGTGGAAATT  | 0.391 |             |
| - | 38 | 5513      |                    | NM_014981    | NP_055796    | Q9Y2K3 | MYH15_HUMAN  | Potential.                     | 7  | TACTCCCCATCA  | 0.468 |             |
| - | 27 | 3406      |                    | NM_014981    | NP_055796    | Q9Y2K3 | MYH15_HUMAN  | Potential.                     | 7  | GCTTCTGAAGCTC | 0.343 |             |
| - | 6  | 625       |                    | NM_014981    | NP_055796    | Q9Y2K3 | MYH15_HUMAN  | rosin head-like.               | 7  | GAGACTGATTTTC | 0.308 |             |
| + | 2  | 294       | xx.2_Missense_Mt   | NM_198196    | NP_937839    | P40200 | TACT_HUMAN   | Potential).  lg-like V-type 1. | 3  | TATGTCAACCTG/ | 0.408 |             |
| + | 12 | 1510      | bhr.1_Missense_A   | NM_001042575 | NP_001036040 | Q7RTY8 | TMPS7_HUMAN  | ntial). LDL-receptor class /   | 2  | TCTTTAGGAAAC/ | 0.378 |             |
| - | 2  | 1458      | jzg.2_Missense_Iv  | NM_199512    | NP_955806    | Q76M96 | CCD80_HUMAN  |                                | 2  | GGTAAAGATTCTC | 0.607 |             |
| - | 1  | 913       | F80_uc003ebf.2_F   | NM_007136    | NP_009067    | P51504 | ZNF80_HUMAN  | 2H2-type 4.                    | 0  | TACACTCGCTGC/ | 0.527 |             |
| - | 5  | 665       | D_uc003edv.2_5'F   | NM_000187    | NP_000178    | Q93099 | HGD_HUMAN    |                                | 0  | TAAATGGTTTCC/ | 0.378 |             |
| - | 2  | 143       |                    | NM_173825    | NP_776186    | Q5HYI8 | RABL3_HUMAN  | all GTPase-like.               | 0  | TCCACAGTCCATC | 0.363 |             |
| - | 14 | 8470      | i.D2787N GOLGB1    | NM_004487    | NP_004478    | Q14789 | GOGB1_HUMAN  | ic (Potential). Potential.     | 10 | TAGCATCTCTCTC | 0.418 |             |
| + | 6  | 1064      | on.p.S80L PARP1    | NM_001113523 | NP_001106995 | Q460N3 | PAR15_HUMAN  | Macro 2.                       | 5  | TGAAATCAGGTA  | 0.313 |             |
| - | 10 | 1313      | jq.2_Missense_Mt   | NM_053025    | NP_444253    | Q15746 | MYLK_HUMAN   |                                | 9  | TGATGGAGCTG   | 0.627 |             |
| + | 9  | 1605      | zhf.1_Missense_M   | NM_001024660 | NP_001019831 | O60229 | KALRN_HUMAN  |                                | 6  | TGAAATCCCTCAC | 0.572 |             |
| - | 3  | 188       | se_Mutation_p.W5   | NM_024628    | NP_078904    | A0AV02 | S12A8_HUMAN  |                                | 0  | TCCACCAGGGC   | 0.572 |             |
| + | 11 | 1913_1914 | 2M2_uc010hsl.2_F   | NM_004526    | NP_004517    | P49736 | MCM2_HUMAN   | MCM.                           | 4  | TACCTCCCTGCA  | 0.604 |             |
| - | 3  | 1917      | uc003ekl.1_5'Flan  | NM_153330    | NP_699161    | Q8NHS0 | DNJB8_HUMAN  |                                | 0  | TGAAGGGGCTGT  | 0.592 |             |
| - | 13 | 2362_2363 |                    | NM_007027    | NP_008958    | Q92547 | TOPB1_HUMAN  |                                | 7  | AACCTTCTTTAG  | 0.361 |             |
| - | 2  | 220       | .1_Missense_Mut    | NM_178554    | NP_848649    | Q8NBH2 | KY_HUMAN     |                                | 2  | TGGACTCCATTTT | 0.388 |             |
| + | 3  | 650       | YHB1_uc011bly.1_I  | NM_004441    | NP_004432    | P54762 | EPHB1_HUMAN  | cellular (Potential).          | 30 | TGAGATGAGAGC  | 0.493 |             |
| + | 2  | 741       | YR3A_uc011blz.1_   | NM_002718    | NP_002709    | Q06190 | P2R3A_HUMAN  |                                | 7  | TATCCCTGTGTG  | 0.463 |             |
| + | 3  | 471       | ne.1_Missense_M    | NM_006153    | NP_006144    | P16333 | NCK1_HUMAN   | SH3 2.                         | 1  | TGAGAGAGAGGAT | 0.453 |             |
| - | 4  | 476       | ui.2_Missense_Mt   | NM_004766    | NP_004757    | P35606 | COPB2_HUMAN  | WD 3.                          | 2  | TGCTAGTTAGAA  | 0.393 |             |
| + | 2  | 690       |                    | NM_152616    | NP_689829    | Q8IWZ5 | TRI42_HUMAN  | RING-type.                     | 7  | TGTGCGGAGAAG  | 0.602 |             |
| + | 3  | 1413      |                    | NM_152616    | NP_689829    | Q8IWZ5 | TRI42_HUMAN  |                                | 7  | TAGAAGGAAATT  | 0.453 |             |
| - | 21 | 3942      |                    | NM_001184    | NP_001175    | Q13535 | ATR_HUMAN    |                                | 20 | GGTCTCCTATAT  | 0.368 |             |
| + | 3  | 283       | i_p.E42K PLS1_uc   | NM_001145319 | NP_001138791 | Q14651 | PLS1_HUMAN   | EF-hand 1.                     | 1  | TTAAGGAAGCA   | 0.368 |             |
| + | 10 | 1772      | i_p.L512F TRPC1    | NM_003304    | NP_003295    | P48995 | TRPC1_HUMAN  | ical; (Potential).             | 2  | TTTCTTCTTGT   | 0.348 |             |
| + | 15 | 2226      | L590F P2RY12_uc    | NM_053002    | NP_443728    | Q86YW9 | MD12L_HUMAN  |                                | 7  | ATCCTTCTCTATG | 0.423 |             |
| - | 5  | 5258      | i_5'Flank IGSF10_  | NM_178822    | NP_849144    | Q6WRI0 | IGS10_HUMAN  | like C2-type 4.                | 13 | ATCTCTTTGGTAC | 0.493 |             |
| - | 9  | 1506      | p.G410E PLCH1_I    | NM_001130960 | NP_001124432 | Q4KWH8 | PLCH1_HUMAN  | 'I-PLC X-box.                  | 4  | AATATTCCTTTCA | 0.438 |             |
| - | 5  | 569       | am.1_Missense_M    | NM_173657    | NP_775928    | Q96NB5 | Q96NB5_HUMAN |                                | 0  | TGTTGGAACCAT  | 0.403 |             |
| - | 1  | 1123      | fao.1_Nonsense_M   | NM_004733    | NP_004724    | O00400 | ACATN_HUMAN  | cellular (Potential).          | 4  | TAGGCTGAAACC  | 0.408 |             |
| + | 4  | 1346      |                    | NM_001080440 | NP_001073909 | A6NHN0 | OTOL1_HUMAN  | C1q.                           | 0  | TAGATTGGAATGC | 0.443 |             |
| - | 1  | 220       | n_p.L64F SERPIN    | NM_006217    | NP_006208    | O75830 | SPI2_HUMAN   |                                | 3  | TAGAACCAAAGT  | 0.393 |             |
| - | 7  | 1215      | fk.2_Missense_Mt   | NM_005241    | NP_005232    | Q03112 | EV11_HUMAN   |                                | 14 | CAAAGGAGGCC   | 0.478 |             |
| - | 7  | 1162      | fk.2_Missense_Mu   | NM_005241    | NP_005232    | Q03112 | EV11_HUMAN   |                                | 14 | TAAAATCCAGGAC | 0.473 |             |
| - | 2  | 768       | COM_uc010hwn.2     | NM_004991    | NP_004982    | Q03112 | EV11_HUMAN   |                                | 14 | TATCCATAACTGC | 0.393 |             |
| + | 2  | 1422      | .2_Missense_Mut    | NM_005414    | NP_005405    | P12757 | SKIL_HUMAN   |                                | 3  | TGCCACGAACCT  | 0.443 |             |
| - | 5  | 674       | 2_Missense_Muta    | NM_015028    | NP_055843    | Q9UKE5 | TNIK_HUMAN   | rotein kinase.                 | 5  | TAGCCAGCACCA  | 0.448 |             |
| + | 19 | 2360      | ifhz.3_Missense_Iv | NM_022763    | NP_073600    | Q53EP0 | FND3B_HUMAN  | nectin type-III 5.             | 3  | TGCACGTCGGC   | 0.557 | rs138991587 |
| + | 10 | 1138      | e_Mutation_p.E36   | NM_033540    | NP_284941    | Q8IWA4 | MFN1_HUMAN   | lasmic (Potential).            | 3  | TAGTTCGAACAG  | 0.403 |             |
| + | 10 | 1249      |                    | NM_018023    | NP_060493    | Q9ULM3 | YETS2_HUMAN  |                                | 4  | TATGCCCTCCA   | 0.488 |             |
| - | 22 | 2498      | LCN2_uc011brl.1_   | NM_004366    | NP_004357    | P51788 | CLCN2_HUMAN  | oplasmic (By similarity).      | 0  | TAGCAGGATCAA  | 0.552 |             |
| - | 9  | 1458      | p.G376R MASP1_     | NM_001879    | NP_001870    | P48740 | MASP1_HUMAN  | Sushi 2.                       | 4  | TAGCCCGTGTTC  | 0.478 | rs139378189 |
| - | 4  | 1286      | ifsg.2_Missense_Iv | NM_018192    | NP_060662    | Q8IVL5 | P3H2_HUMAN   |                                | 4  | GATGGGAGAGAC  | 0.507 |             |
| - | 30 | 3634      | 13A4_uc010hzi.2_   | NM_032279    | NP_115655    | Q4VNC1 | AT134_HUMAN  | cellular (Potential).          | 2  | TCTCCGGCATGT  | 0.468 |             |

|   |    |           |                               |              |              |        |             |                            |     |                |       |
|---|----|-----------|-------------------------------|--------------|--------------|--------|-------------|----------------------------|-----|----------------|-------|
| - | 21 | 2584      | 13A4_uc011bsr.1_              | NM_032279    | NP_115655    | Q4VNC1 | AT134_HUMAN | cellular (Potential).      | 2   | 3CCCAGGAGACA   | 0.428 |
| - | 8  | 1215      | x.3_RNA SDHAP1_uc011btp.1_RNA |              |              |        |             |                            | 0   | 3CTGCACGACTC   | 0.537 |
| + | 1  | 204       | 1btu.1_Missense_              | NM_152672    | NP_689885    | Q86UW1 | OSTA_HUMAN  |                            | 1   | 3GCGATGGAGCC   | 0.736 |
| + | 12 | 1524      | _p.E491K PDE6B_               | NM_000283    | NP_000274    | P35913 | PDE6B_HUMAN |                            | 0   | 3AGAAGGAGGAG   | 0.562 |
| + | 7  | 489       | _p.V49M TMEM1                 | NM_032326    | NP_115702    | Q9BSA9 | TM175_HUMAN | ical; (Potential).         | 0   | 3TAATGGTGACC1  | 0.542 |
| - | 3  | 796       | p.R100W WHSC2_                | NM_005663    | NP_005654    | Q9H3P2 | NELFA_HUMAN |                            | 1   | 3GCCCCGACGCG   | 0.567 |
| + | 9  | 1195      | p.G336E ADD1_u                | NM_001119    | NP_001110    | P35611 | ADDA_HUMAN  |                            | 1   | 3TGCAGGAGGAC   | 0.507 |
| - | 3  | 580       |                               | NM_177998    | NP_819056    | Q7RTM1 | OTOP1_HUMAN | ical; (Potential).         | 3   | 3CCCAAAGAAAAT  | 0.323 |
| + | 5  | 710       | _p.S225F MAN2B2               | NM_015274    | NP_056089    | Q9Y2E5 | MA2B2_HUMAN |                            | 2   | 3TTTCTCCAACAC  | 0.537 |
| - | 14 | 2012_2013 | _Mutation_p.A664I             | NM_198595    | NP_940997    | Q8N556 | AFAP1_HUMAN | Potential.                 | 0   | 3GCAGGGCCTCT   | 0.559 |
| - | 10 | 6730      | fr.1_Missense_Mu              | NM_148894    | NP_683692    | Q8NFC6 | BOD1L_HUMAN |                            | 6   | 3GGCAAGAGGAC   | 0.522 |
| + | 37 | 4781      | s.1_Missense_Mul              | NM_004787    | NP_004778    | O94813 | SLIT2_HUMAN | CTCK.                      | 11  | 3TACGAGGTGTG   | 0.498 |
| - | 10 | 2062      | GC1A_uc003gqt.2               | NM_013261    | NP_037393    | Q9UBK2 | PRGC1_HUMAN |                            | 8   | 3TTCTTCCCTCTT  | 0.468 |
| - | 9  | 1756      | 15_uc003gqw.2_5'              | NM_001358    | NP_001349    | O43143 | DHX15_HUMAN |                            | 1   | 3TGGTGGATCCA'  | 0.299 |
| - | 2  | 695       |                               | NM_015187    | NP_056002    | Q68CR1 | SE1L3_HUMAN |                            | 0   | 3CCACTGTATTTC  | 0.428 |
| - | 18 | 3348      |                               | NM_015230    | NP_056045    | Q8WZ64 | ARAP2_HUMAN |                            | 3   | 3TAAGGGAACAA   | 0.358 |
| + | 3  | 835       | g.2_Missense_Mul              | NM_016531    | NP_057615    | P57682 | KLF3_HUMAN  | Pro-rich.                  | 2   | 3GGTCTCCTTATC  | 0.567 |
| - | 4  | 1758      | 3M47_uc011bys.1_              | NM_001098634 | NP_001092104 | A0AV96 | RBM47_HUMAN |                            | 3   | 3GGGTGCGCAGG   | 0.632 |
| - | 6  | 2160      | 34_uc003gwm.2_3'              | NM_207406    | NP_997289    | Q6ZU67 | BEND4_HUMAN |                            | 0   | 3GGGAACTTTTAT  | 0.517 |
| - | 13 | 1424      | _p.E398K ATP8A1               | NM_006095    | NP_006086    | Q9Y2Q0 | AT8A1_HUMAN | lasmic (Potential).        | 3   | 3GTTCTCATTCA'  | 0.358 |
| - | 4  | 1007      | bzc.1_Nonsense_M              | NM_001114175 | NP_001107647 | P47869 | GBRA2_HUMAN | cellular (Probable).       | 4   | 3TAGTCGAAGGA'  | 0.289 |
| + | 6  | 942       | 3ze.1_Missense_M              | NM_000812    | NP_000803    | P18505 | GBRB1_HUMAN | cellular (Probable).       | 2   | 3ACATTGAATTTT  | 0.373 |
| + | 4  | 2856      | _p.L837F REST_u               | NM_005612    | NP_005603    | Q13127 | REST_HUMAN  |                            | 9   | 3CAAGTCCTTATC  | 0.458 |
| - | 5  | 1205      | 32A3_uc010ihp.1_1             | NM_024743    | NP_079019    | Q6UWM9 | UD2A3_HUMAN | cellular (Potential).      | 2   | 3ATATGGAACTCC  | 0.408 |
| - | 1  | 581       | uc003hei.1_Intron             | NM_001073    | NP_001064    | O75310 | UDB11_HUMAN |                            | 3   | 3AGGAAGGAGGG   | 0.403 |
| - | 1  | 80        | uc003hei.1_RNA                | NM_001073    | NP_001064    | O75310 | UDB11_HUMAN |                            | 3   | 3ACTTTCCACAA'  | 0.453 |
| - | 6  | 1625      | _p.G521E UGT2A'               | NM_006798    | NP_006789    | Q9Y4X1 | UD2A1_HUMAN | lasmic (Potential).        | 1   | 3TTCTTCTATCT   | 0.323 |
| + | 5  | 667       | 4_splice SLC4A4_1             | NM_001098484 | NP_001091954 | Q9Y6R1 | S4A4_HUMAN  |                            | 5   | 3GGTGGTAAGT    | 0.428 |
| - | 3  | 300       |                               | NM_014243    | NP_055058    | O15072 | ATS3_HUMAN  |                            | 2   | 3CTTTTCCAATG   | 0.488 |
| - | 29 | 7073      | hgq.2_Missense_M              | NM_032217    | NP_115593    | O75179 | ANR17_HUMAN |                            | 10  | 3CTGAGGGACTC'  | 0.383 |
| - | 5  | 701       | 'EF2_uc003hiz.1_1'            | NM_006239    | NP_006230    | O14830 | PPE2_HUMAN  |                            | 4   | 3GCCCCGTGTAA   | 0.537 |
| - | 4  | 557       | 10ijq.1_Missense_             | NM_152545    | NP_689758    | Q0VAM2 | RGF1B_HUMAN | rminal Ras-GEF.            | 0   | 3GGTGAGCCAGA'  | 0.473 |
| + | 4  | 525       | p.G103R AGPAT9                | NM_032717    | NP_116106    | Q53EU6 | GPAT3_HUMAN |                            | 1   | 3AGAAGGGATTG'  | 0.443 |
| - | 14 | 1881      | n_p.S218F FAM13               | NM_014883    | NP_055698    | O94988 | FA13A_HUMAN |                            | 2   | 3CTTCGGAGACA   | 0.483 |
| + | 6  | 1392      | vRN1_uc011cds.1               | NM_007351    | NP_031377    | Q13201 | MMRN1_HUMAN |                            | 4   | 3CCCAGCAAAAG   | 0.398 |
| + | 10 | 1131      | p.S286F BMPR1B                | NM_001203    | NP_001194    | O00238 | BMR1B_HUMAN | Potential) Protein kinase. | 8   | 3ATGGTTCCCTTT' | 0.403 |
| - | 7  | 775       | se_Mutation_p.S1C             | NM_181887    | NP_871616    | P61077 | UB2D3_HUMAN |                            | 0   | 3AAATGGATAAAA' | 0.353 |
| + | 3  | 1453      | ET2_uc010iip.1_Mi             | NM_001127208 | NP_001120680 | Q6N021 | TET2_HUMAN  | p.S356fs*18(1)             | 733 | 3AGTTCCAGCA'   | 0.418 |
| + | 3  | 2937      | ET2_uc010iip.1_Mi             | NM_001127208 | NP_001120680 | Q6N021 | TET2_HUMAN  | Gln-rich.                  | 733 | 3CACATCCTGAA'  | 0.373 |
| + | 11 | 1676      | se_Mutation_p.G4I             | NM_001033047 | NP_001028219 | Q6UXI9 | NPNT_HUMAN  | MAM.                       | 1   | 3TGACGGGGCTG   | 0.602 |
| - | 10 | 1301      | _p.D334N AGXT2L               | NM_031279    | NP_112569    | Q8TBG4 | AT2L1_HUMAN |                            | 1   | 3ATGGTCTTCA'   | 0.468 |
| + | 1  | 692       |                               | NM_001977    | NP_001968    | Q07075 | AMPE_HUMAN  | cellular (Potential).      | 5   | 3CACGGCACCG    | 0.627 |
| + | 31 | 3780      | ic.1_Missense_Mu              | NM_001148    | NP_001139    | Q01484 | ANK2_HUMAN  |                            | 14  | 3AAGAAGAAAAT1  | 0.423 |
| - | 4  | 2157      |                               | NM_024574    | NP_078850    | Q8TB73 | CD031_HUMAN | onnectin type-III 2.       | 0   | 3AACATCCAGCAC  | 0.388 |
| + | 60 | 10619     | iel.1_Missense_Mi             | NM_015312    | NP_056127    | Q2LD37 | K1109_HUMAN |                            | 12  | 3ATCTGCTAGCC'  | 0.408 |
| + | 1  | 3328      |                               | NM_024582    | NP_078858    | Q6V017 | FAT4_HUMAN  | Extracellular (Potential). | 18  | 3ACTTCGAAGAAG  | 0.388 |
| + | 3  | 5545      | p.1_Missense_Mul              | NM_024582    | NP_078858    | Q6V017 | FAT4_HUMAN  | Extracellular (Potential). | 18  | 3CTTTTGACATTC  | 0.413 |

|   |    |           |                     |              |              |        |             |                            |     |               |       |
|---|----|-----------|---------------------|--------------|--------------|--------|-------------|----------------------------|-----|---------------|-------|
| + | 4  | 5612      | p.1_Missense_Mut    | NM_024582    | NP_078858    | Q6V0I7 | FAT4_HUMAN  | Extracellular (Potential). | 18  | ACTCTGGTGTGA  | 0.328 |
| + | 13 | 2703_2704 | _p.P788F PLK4_ur    | NM_014264    | NP_055079    | O00444 | PLK4_HUMAN  |                            | 0   | CTCCTCCTTCTG  | 0.347 |
| + | 15 | 2186      |                     | NM_057175    | NP_476516    | Q9BXJ9 | NAA15_HUMAN |                            | 2   | TTATTCCAGAGA  | 0.179 |
| - | 12 | 2401      |                     | NM_015130    | NP_055945    | Q6ZT07 | TBCD9_HUMAN |                            | 1   | CTAGGGCCAAC   | 0.438 |
| + | 2  | 980       | r.1_Missense_Mut    | NM_022475    | NP_071920    | Q96QV1 | HHIP_HUMAN  |                            | 6   | TGGAGGAAATC   | 0.398 |
| + | 4  | 419       |                     | NM_001080531 | NP_001074000 | C9J302 | CD051_HUMAN |                            | 0   | ATTATGGAAAATA | 0.299 |
| - | 11 | 1894      | h.1_Missense_Mut    | NM_033632    | NP_361014    | Q969H0 | FBXW7_HUMAN | WD 6.  S2L(6) p.S582       | 308 | TTAACGACTGGT  | 0.413 |
| + | 8  | 1120      | _p.R250C ARFIP1     | NM_001025595 | NP_001020766 | P53367 | ARFP1_HUMAN | AH.                        | 1   | GACCACGTGAC   | 0.383 |
| + | 11 | 2906      |                     | NM_033393    | NP_203751    | Q9C0D6 | FHDC1_HUMAN |                            | 2   | GAACTCCGTGC   | 0.711 |
| + | 34 | 4500      | s.P1484L KIAA092    | NM_015196    | NP_056011    | A2VDJ0 | T131L_HUMAN | lasmic (Potential).        | 2   | CTGTCTGCAG    | 0.448 |
| - | 3  | 334       | ix.2_Missense_Mut   | NM_017639    | NP_060109    | Q6V1P9 | PCD23_HUMAN | Cadherin 1.                | 4   | AGGGTCGATCC   | 0.463 |
| + | 11 | 2463      | ie_Mutation_p.P4C   | NM_000856    | NP_000847    | Q02108 | GCYA3_HUMAN |                            | 4   | GAACTCCACCA   | 0.398 |
| + | 12 | 1767_1768 | _p.G462K GUCY1E     | NM_000857    | NP_000848    | Q02153 | GCYB1_HUMAN | anylate cyclase.           | 0   | TCATAGGACAGC  | 0.386 |
| + | 3  | 431       |                     | NM_000824    | NP_000815    | P48167 | GLRB_HUMAN  | cellular (Probable).       | 2   | TCAAAGGTTTGT  | 0.333 |
| + | 5  | 710       |                     | NM_000824    | NP_000815    | P48167 | GLRB_HUMAN  | cellular (Probable).       | 2   | ATGGAGATGTC   | 0.308 |
| - | 34 | 4957_4958 | iro.2_Missense_Mut  | NM_017631    | NP_060101    | Q8IY21 | DDX60_HUMAN |                            | 3   | CAATGGGAGTTC  | 0.327 |
| - | 6  | 947       |                     | NM_017631    | NP_060101    | Q8IY21 | DDX60_HUMAN |                            | 3   | TCTTTCCAATC   | 0.249 |
| - | 14 | 1996      | _p.S592F DDX60L     | NM_001012967 | NP_001012985 | Q5H9U9 | DDX6L_HUMAN |                            | 1   | CAATAGAAAACA  | 0.338 |
| - | 1  | 478       |                     | NM_006792    | NP_006783    |        |             |                            | 0   | ACAATCTGCAA   | 0.443 |
| - | 1  | 290       |                     | NM_006792    | NP_006783    |        |             |                            | 0   | CGGCAGGAAGA   | 0.378 |
| + | 5  | 815       | oirr.2_Missense_Mut | NM_014269    | NP_055084    | Q9UKF5 | ADA29_HUMAN |                            | 16  | CACCTCCAGGC   | 0.512 |
| + | 7  | 1438      | Z3_uc003ive.1_5'F   | NM_001080477 | NP_001073946 | Q9P273 | TEN3_HUMAN  | cellular (Potential).      | 0   | GAGAGAGCCGG   | 0.547 |
| + | 25 | 7178      |                     | NM_001080477 | NP_001073946 | Q9P273 | TEN3_HUMAN  | cellular (Potential).      | 0   | CCAGCTCCTTTT  | 0.403 |
| + | 3  | 753       | _p.E170K ZFP42_1    | NM_174900    | NP_777560    | Q96MM3 | ZFP42_HUMAN |                            | 2   | TCGCAGAATTT   | 0.463 |
| + | 1  | 450       |                     | NM_178556    | NP_848651    | Q8N9V2 | TRIML_HUMAN |                            | 4   | GGGTGGAAGCC   | 0.622 |
| + | 4  | 494       | V127M SDHA_ucC      | NM_004168    | NP_004159    | P31040 | DHSA_HUMAN  |                            | 0   | ACACCGTGAAG   | 0.607 |
| - | 15 | 1803      | 1.2_RNA BRD9_uc     | NM_023924    | NP_076413    | Q9H8M2 | BRD9_HUMAN  |                            | 0   | CGACGCCGAG    | 0.657 |
| - | 72 | 12496     | fc.2_Missense_Mut   | NM_001369    | NP_001360    | Q8TE73 | DYH5_HUMAN  | 6 (By similarity).         | 31  | AGGATCGTTGG   | 0.453 |
| - | 14 | 1853      |                     | NM_001369    | NP_001360    | Q8TE73 | DYH5_HUMAN  | n (By similarity).         | 31  | AGCTTTGAAATC  | 0.393 |
| + | 50 | 7915      | RIO_uc003jfg.2_Rf   | NM_007118    | NP_009049    | O75962 | TRIO_HUMAN  |                            | 18  | CACTCCGTTTA   | 0.448 |
| - | 2  | 578_579   | 8MG>IR CDH18_1      | NM_004934    | NP_004925    | Q13634 | CAD18_HUMAN | r (Potential). Cadherin 1. | 7   | TGGTCCCATATC  | 0.391 |
| + | 4  | 277       | 1.1_RNA GUSBP1      | NR_027028    |              |        |             |                            | 0   | GATCTCCGTCA   | 0.527 |
| + | 3  | 612       | id.1_Missense_Mut   | NM_004932    | NP_004923    | P55285 | CADH6_HUMAN | r (Potential). Cadherin 1. | 7   | GAGATGGAGCA   | 0.393 |
| - | 4  | 876       | _p.P74S RAD1_uc     | NM_002853    | NP_002844    | O60671 | RAD1_HUMAN  |                            | 0   | TGCAGGAGACA   | 0.393 |
| - | 10 | 1740      | RLR_uc003jji.1_In   | NM_000949    | NP_000940    | P16471 | PRLR_HUMAN  | lasmic (Potential).        | 3   | ATAGGGGATTTI  | 0.493 |
| - | 10 | 1707      | RLR_uc003jji.1_Ini  | NM_000949    | NP_000940    | P16471 | PRLR_HUMAN  | lasmic (Potential).        | 3   | GGGGTCCCAGG   | 0.507 |
| + | 9  | 1321      | _p.L404F SPEF2_1    | NM_024867    | NP_079143    | Q9C093 | SPEF2_HUMAN |                            | 4   | CAATTCCTTAAAC | 0.303 |
| + | 8  | 1337_1338 | 7R_uc011cop.1_RI    | NM_002185    | NP_002176    | P16871 | IL7RA_HUMAN | lasmic (Potential).        | 5   | CTGCCCCCTCC   | 0.52  |
| - | 2  | 188       | _Intron UGT3A2_u    | NM_174914    | NP_777574    | Q3SY77 | UD3A2_HUMAN |                            | 6   | TCCACCTAGGA   | 0.431 |
| + | 7  | 1066      | FLAM_uc003jle.1_    | NM_152403    | NP_689616    | Q63HQ2 | EGFLA_HUMAN |                            | 7   | GCTATGGACCC   | 0.483 |
| + | 2  | 732       |                     | NM_000958    | NP_000949    | P35408 | PE2R4_HUMAN | lasmic (Potential).        | 2   | GCGCAAGGAGC   | 0.622 |
| + | 4  | 338       | 7_uc011cpn.1_RN     | NM_000587    | NP_000578    | P10643 | CO7_HUMAN   | SP type-1 1.               | 0   | TGAACCTACAAC  | 0.473 |
| - | 39 | 4899      | ijmi.3_Missense_Mut | NM_173489    | NP_775760    | Q72745 | HTRB2_HUMAN |                            | 8   | TATACCCATAGA  | 0.502 |
| - | 17 | 2767      | 1_Missense_Muta     | NM_000065    | NP_000056    | P13671 | CO6_HUMAN   | -binding domain.           | 7   | TGGATGAAAGTC  | 0.428 |
| + | 13 | 1110      | oo.2_Missense_Mut   | NM_024615    | NP_078891    | Q8N3A8 | PARP8_HUMAN |                            | 5   | AGGACCGAATC   | 0.478 |
| + | 1  | 1712      | _p.A508T SNX18_     | NM_052870    | NP_443102    | Q96RF0 | SNX18_HUMAN | BAR.                       | 0   | TCTTCGCGGAG   | 0.602 |
| + | 7  | 873       | e_Mutation_p.V16    | NM_004520    | NP_004511    | O00139 | KIF2A_HUMAN | ular (Potential).          | 0   | AGGACGTTGATC  | 0.284 |

rs79789213

|   |    |           |                    |              |              |        |             |                              |    |               |       |
|---|----|-----------|--------------------|--------------|--------------|--------|-------------|------------------------------|----|---------------|-------|
| - | 19 | 3130      | 3jtg.2_RNA ADAM    | NM_197941    | NP_922932    | Q9UKP5 | ATS6_HUMAN  | Spacer.                      | 0  | ATAGTCCAGGC   | 0.373 |
| - | 16 | 2786_2787 | 3jtg.2_RNA ADAM    | NM_197941    | NP_922932    | Q9UKP5 | ATS6_HUMAN  |                              | 0  | TATAACCTTCAG  | 0.446 |
| + | 3  | 425       |                    | NM_006633    | NP_006624    | Q13576 | IQGA2_HUMAN | CH.                          | 7  | AGAAGGGCTCC   | 0.383 |
| + | 15 | 2849      | R98_uc003kjt.2_5'  | NM_032119    | NP_115495    | Q8WXG9 | GPR98_HUMAN | cellular (Potential).        | 16 | AGTAAGAAATCC  | 0.343 |
| + | 74 | 15803     | G2942D GPR98_      | NM_032119    | NP_115495    | Q8WXG9 | GPR98_HUMAN | cellular (Potential).        | 16 | GAATGGCACAT   | 0.428 |
| - | 12 | 1887      | bi.1_Missense_Mu   | NM_000439    | NP_000430    | P29120 | NEC1_HUMAN  |                              | 2  | GTTCTCTCCCC   | 0.398 |
| - | 2  | 255       | na.3_Missense_M    | NM_018343    | NP_060813    | Q9BVS4 | RIOK2_HUMAN |                              | 1  | TATTACAGCCACC | 0.358 |
| - | 9  | 1822      |                    | NM_180991    | NP_851322    | Q6ZQN7 | SO4C1_HUMAN | Extracellular (Potential).   | 4  | GGATAATAATATG | 0.418 |
| + | 11 | 973       | AK4_uc010jv.2_N    | NM_001744    | NP_001735    | Q16566 | KCC4_HUMAN  | rotein kinase.               | 5  | ACTACATTTCAAC | 0.423 |
| - | 3  | 1995      |                    | NM_020177    | NP_064562    | Q96JP0 | FEM1C_HUMAN |                              | 3  | TTCCCCTTGGAT  | 0.388 |
| + | 3  | 485       | ksn.2_Missense_M   | NM_182761    | NP_877438    | A1A519 | F170A_HUMAN |                              | 1  | GGAACGAGGAG   | 0.507 |
| + | 1  | 373       |                    | NM_177478    | NP_803431    | Q8N4E7 | FTMT_HUMAN  | ritin-like diiron.           | 1  | GGGAGGAGACC   | 0.577 |
| + | 4  | 580       | _Intron SNCAIP_u   | NM_005460    | NP_005451    | Q9Y6H5 | SNCAP_HUMAN |                              | 2  | AGATGGAGTGG   | 0.557 |
| + | 5  | 1254      | 1_Intron SNCAIP_u  | NM_005460    | NP_005451    | Q9Y6H5 | SNCAP_HUMAN | ANK 1.                       | 2  | AAAATGGAAAC   | 0.438 |
| + | 5  | 1356      | 1_Intron SNCAIP_u  | NM_005460    | NP_005451    | Q9Y6H5 | SNCAP_HUMAN | ANK 2.                       | 2  | ACACTGAGAAG   | 0.483 |
| + | 7  | 1129      | uj.3_Missense_Mt   | NM_130809    | NP_570721    | Q96M27 | PRRC1_HUMAN |                              | 0  | GCTTGCCTCGA   | 0.378 |
| - | 50 | 6851      |                    | NM_001999    | NP_001990    | P35556 | FBN2_HUMAN  | TB 8.                        | 15 | GGGGTCCCCCC   | 0.458 |
| + | 15 | 2119      | X46_uc003kzv.1_F   | NM_014829    | NP_055644    | Q7L014 | DDX46_HUMAN | case C-terminal.             | 1  | CTTCATGGAGGT  | 0.353 |
| + | 8  | 1281      | p.D200N TGFB1_u    | NM_000358    | NP_000349    | Q15582 | BGH3_HUMAN  |                              | 4  | TCCCAGACTCAC  | 0.572 |
| + | 13 | 1941_1942 | BI_uc011cyb.1_Mi   | NM_000358    | NP_000349    | Q15582 | BGH3_HUMAN  | FAS1 4.                      | 4  | TCCAAGGTGACA  | 0.53  |
| - | 5  | 850       | LHL3_uc010jem.1    | NM_017415    | NP_059111    | Q9UH77 | KLHL3_HUMAN |                              | 0  | CTGCCGAACAT   | 0.547 |
| - | 2  | 1524      | NNA1_uc003ldj.2    | NM_015564    | NP_056379    | O43300 | LRRT2_HUMAN | lar (Potential). LRRCT.      | 0  | GAAATCCATGG   | 0.473 |
| - | 3  | 1196      | w.1_Missense_Mu    | NM_004883    | NP_004874    | O14511 | NRG2_HUMAN  | extracellular (Potential).   | 6  | GCCGGCCCCGG   | 0.632 |
| + | 20 | 2796      | p.V834I SLC4A9     | NM_031467    | NP_113655    | Q96Q91 | B3A4_HUMAN  | ne (anion exchange).         | 1  | TGGGGTCCCGA   | 0.488 |
| + | 1  | 116_117   | 2_Intron PCDHA4    | NM_018907    | NP_061730    | Q9UN74 | PCDA4_HUMAN |                              | 6  | CCTGGGGAAGC   | 0.515 |
| + | 1  | 1849      | J3lhf.2_Intron PCD | NM_018907    | NP_061730    | Q9UN74 | PCDA4_HUMAN | cellular (Potential).        | 6  | GCCATGGTCCGG  | 0.667 |
| + | 1  | 190       | lhf.1_Intron PCD   | NM_018910    | NP_061733    | Q9UN72 | PCDA7_HUMAN | Extracellular (Potential).   | 4  | GCCTGTTCCGG   | 0.612 |
| + | 1  | 1987      | DHA5_uc003lhc.     | NM_018911    | NP_061734    | Q9Y5H6 | PCDA8_HUMAN | Extracellular (Potential).   | 2  | CCACGGCCACG   | 0.647 |
| + | 1  | 1993      | l.2_Intron PCDHA   | NM_018901    | NP_061724    | Q9Y5I2 | PCDAA_HUMAN | r (Potential). Cadherin 6.   | 5  | CTGTGCTTGTG   | 0.672 |
| + | 1  | 1760      | l_Intron PCDHA8_   | NM_018899    | NP_061722    | Q9Y5I4 | PCDC2_HUMAN | Extracellular (Potential).   | 4  | CTACTCCCTTC1  | 0.488 |
| + | 1  | 353       | HB2_uc003lim.1_I   | NM_018936    | NP_061759    | Q9Y5E7 | PCDB2_HUMAN | r (Potential). Cadherin 1.   | 6  | CAAAGGAAAAA   | 0.522 |
| + | 1  | 1496      | uc003lin.2_RNA     | NM_018937    | NP_061760    | Q9Y5E6 | PCDB3_HUMAN | r (Potential). Cadherin 5.   | 2  | CTGCCCTCT     | 0.667 |
| + | 1  | 454       | dah.1_Missense_M   | NM_018939    | NP_061762    | Q9Y5E3 | PCDB6_HUMAN | Extracellular (Potential).   | 1  | ATATTTCTTTG   | 0.478 |
| + | 1  | 2164      | lah.1_Missense_M   | NM_018939    | NP_061762    | Q9Y5E3 | PCDB6_HUMAN | asmic (Potential).           | 1  | TGGGTCGCTAC   | 0.657 |
| + | 1  | 1804      |                    | NM_018940    | NP_061763    | Q9Y5E2 | PCDB7_HUMAN | r (Potential). Cadherin 5.   | 6  | GCAGCGAGGCG   | 0.706 |
| + | 1  | 1585      | B16_uc010jfw.1_    | NM_020957    | NP_066008    | Q9NRJ7 | PCDBG_HUMAN | r (Potential). Cadherin 2.   | 2  | TACCGGAAAC    | 0.388 |
| + | 1  | 1931      | B16_uc010jfw.1_    | NM_020957    | NP_066008    | Q9NRJ7 | PCDBG_HUMAN | r (Potential). Cadherin 3.   | 2  | TGGCTCCCTGG   | 0.488 |
| + | 1  | 511       |                    | NM_018930    | NP_061753    | Q9UN67 | PCDBA_HUMAN | r (Potential). Cadherin 1.   | 2  | ATGATCCCTTT   | 0.418 |
| + | 1  | 2056      | dan.1_Missense_I   | NM_018912    | NP_061735    | Q9Y5H4 | PCDG1_HUMAN | cellular (Potential).        | 3  | CCAACGATTCC   | 0.692 |
| + | 1  | 666       | DHGA2_uc011dac     | NM_018915    | NP_061738    | Q9Y5H1 | PCDG2_HUMAN | r (Potential). Cadherin 2.   | 3  | ATGCAGACGTAC  | 0.512 |
| + | 1  | 373       | ju.1_Intron PCDHC  | NM_018921    | NP_061744    | Q9Y5G4 | PCDG9_HUMAN | Extracellular (Potential).   | 0  | GTAAGTATATTA  | 0.478 |
| - | 20 | 2902      | ne.1_Missense_Mt   | NM_022481    | NP_071926    | Q8WWW8 | ARAP3_HUMAN | Rho-GAP.                     | 7  | CTTCCGGTATA   | 0.657 |
| + | 5  | 1231      | p.A358T PPARG      | NM_133263    | NP_573570    | Q86YN6 | PRGC2_HUMAN |                              | 0  | GGATCGCAGCT   | 0.657 |
| - | 20 | 3179      | jhd.2_Missense_M   | NM_002609    | NP_002600    | P09619 | PGFRB_HUMAN | Potential). Protein kinase.  | 17 | TGGGTAAGGGG   | 0.582 |
| - | 2  | 405       | e_Mutation_p.D40   | NM_001146040 | NP_001139512 | P23415 | GLRA1_HUMAN | cellular (Probable).         | 2  | GAAATCCGAGG   | 0.502 |
| + | 1  | 180       |                    | NM_001099293 | NP_001092763 | Q2VIQ3 | KIF4B_HUMAN | inesin-motor.                | 1  | TGAAGGGAATTC  | 0.592 |
| + | 1  | 2960      |                    | NM_001099293 | NP_001092763 | Q2VIQ3 | KIF4B_HUMAN | RC1 (By similarity). Potenti | 1  | CTATACCTTGTC  | 0.463 |

|   |    |           |                    |              |              |        |             |                               |    |               |       |             |
|---|----|-----------|--------------------|--------------|--------------|--------|-------------|-------------------------------|----|---------------|-------|-------------|
| + | 33 | 3818      | lws.2_Missense_A   | NM_001037333 | NP_001032410 | Q96F07 | CYFP2_HUMAN |                               | 0  | GAAGTCCGTGG   | 0.522 |             |
| - | 11 | 1542      | p.R404W GABRB2     | NM_021911    | NP_068711    | P47870 | GBRB2_HUMAN | lasmic (Probable).            | 0  | CTTCCGATACTC  | 0.517 |             |
| + | 5  | 1011_1012 | p.P217S ODZ2_u     | NM_001122679 | NP_001116151 |        |             |                               | 10 | GGATACCCCTTTC | 0.569 |             |
| + | 5  | 650       | idf.1_Missense_Mi  | NM_006650    | NP_006641    | Q6PUV4 | CPLX2_HUMAN |                               | 1  | CCATCCCTGCG   | 0.622 |             |
| - | 6  | 1002      | Silent_p.L206L MX  | NM_031300    | NP_112590    | Q9BW11 | MAD3_HUMAN  |                               | 0  | ACCCCAACA     | 0.701 |             |
| + | 5  | 1242      | kz.1_Missense_Mt   | NM_182594    | NP_872400    | Q8N9F8 | ZN454_HUMAN |                               | 3  | CAGTGAGAGA    | 0.388 |             |
| + | 14 | 1727      | ikc.1_Missense_M   | NM_025158    | NP_079434    | Q96T51 | RUFY1_HUMAN | Potential.                    | 5  | ACTCAGGATGG   | 0.517 |             |
| - | 20 | 2966      | mf.2_Missense_A    | NM_198868    | NP_942568    | Q66K14 | TBC9B_HUMAN |                               | 2  | CTCTTCTGTG    | 0.498 |             |
| - | 8  | 1264      | p.A323T RASGEF     | NM_175062    | NP_778232    | Q8N431 | RGF1C_HUMAN | Ras-GEF.                      | 1  | CTTGCCGCTC    | 0.617 |             |
| + | 3  | 593       | q.1_Missense_Mu    | NM_004415    | NP_004406    | P15924 | DESP_HUMAN  | plakophilin 1 and junction p  | 9  | GAGTCGAGAAT   | 0.463 |             |
| + | 12 | 1796      | q.1_Missense_Mu    | NM_004415    | NP_004406    | P15924 | DESP_HUMAN  | plakophilin 1 and junction p  | 9  | TGTTCCCTCTGT  | 0.557 |             |
| - | 13 | 1974      | l10jot.2_RNA MAK   | NM_005906    | NP_005897    | P20794 | MAK_HUMAN   |                               | 3  | GCCCCGACCA    | 0.403 |             |
| + | 13 | 1625      | i_p.T397I CAP2_u   | NM_006366    | NP_006357    | P40123 | CAP2_HUMAN  |                               | 1  | CAAGACAGCAT   | 0.403 |             |
| + | 1  | 266       |                    | NM_138574    | NP_612641    | Q5TGJ6 | HDGL1_HUMAN | PWWP.                         | 0  | CCCACGAGACG   | 0.602 |             |
| + | 11 | 1565      | p.G420E BTN3A3     | NM_006994    | NP_008925    | O00478 | BT3A3_HUMAN | Cytoplasmic (Potential).      | 0  | AGTGGGGATCT   | 0.498 |             |
| - | 3  | 1381      |                    | NM_052923    | NP_443155    | Q6R2W3 | SCND3_HUMAN | Potential.                    | 1  | CACTTCTTTAT   | 0.353 |             |
| + | 1  | 691       |                    | NM_030905    | NP_112167    | O76002 | OR2J2_HUMAN | Name=5; (Potential).          | 0  | CAAATGAGCTG   | 0.478 |             |
| + | 3  | 852       | i_p.R137C OR2H1    | NM_030883    | NP_112145    | Q9GZK4 | OR2H1_HUMAN | lasmic (Potential).           | 0  | ACCCCGCCTG    | 0.597 | rs141663433 |
| + | 7  | 970       |                    | NR_027822    |              |        |             |                               | 0  | GTTCTGGTGCT   | 0.478 | rs145231932 |
| - | 4  | 2060      | inrb.3_Missense_A  | NM_001134870 | NP_001128342 | Q6NYC8 | PHTNS_HUMAN |                               | 0  | GCGAGACTCA    | 0.537 |             |
| - | 2  | 262       | 1_5'Flank PSORS    | NM_014070    | NP_054789    | Q6UXA7 | CF015_HUMAN |                               | 0  | AGGTGGGAAGC   | 0.607 |             |
| + | 16 | 3766      | T2_uc003nvc.3_M    | NM_080686    | NP_542417    | P48634 | PRC2A_HUMAN | AA type A repeats.            | 0  | GCCGAGGAGGA   | 0.672 |             |
| + | 2  | 315_316   | uc003nwb.1_Miss    | NM_001003693 | NP_001003693 | Q5SQ64 | LY66F_HUMAN | (Potential). Ig-like V-type.  | 2  | TACTGGTGCGC   | 0.569 |             |
| - | 6  | 1240      | J1_uc010jth.2_No   | NM_000434    | NP_000425    | Q99519 | NEUR1_HUMAN |                               | 1  | TAGCTGGACTG   | 0.597 |             |
| + | 23 | 3201      | p.E780* SKIV2L     | NM_006929    | NP_008860    | Q15477 | SKIV2_HUMAN |                               | 4  | ATGGGGAGAAG   | 0.577 |             |
| + | 25 | 3263      | i.1_Missense_Mut   | NM_007293    | NP_009224    | P0C0L4 | CO4A_HUMAN  |                               | 0  | GTTGTCACGGG   | 0.622 |             |
| - | 15 | 2508      | u.1_RNA NOTCH2     | NM_004557    | NP_004548    | Q99466 | NOTC4_HUMAN | Extracellular (Potential).    | 22 | GCGAGAGAAG    | 0.632 |             |
| - | 12 | 1644      | f10_uc011dpx.1_I   | NM_006781    | NP_006772    | Q5SRN2 | CF010_HUMAN | Lys-rich.                     | 1  | AACTCTCTCT    | 0.244 |             |
| - | 3  | 456_457   | lL2_uc010jtz.1_Int | NM_019602    | NP_062548    | Q9UIR0 | BTNL2_HUMAN | 2 Extracellular (Potential).  | 1  | TCCCTCCATGT   | 0.604 |             |
| - | 4  | 767       | 03obo.1_Intron uc  | NM_002124    | NP_002115    | P01911 | 2B1F_HUMAN  | ical; (Potential).            | 1  | CCAAGGAAGA    | 0.547 |             |
| - | 46 | 3631      | se_Mutation_p.G1   | NM_080680    | NP_542411    | P13942 | COBA2_HUMAN | le-helical region.            | 5  | GTGTCCTGGG    | 0.592 |             |
| - | 6  | 2099      | ation_p.S557F DA   | NM_001350    | NP_001341    | Q9UER7 | DAXX_HUMAN  | al (Potential). Interaction w | 23 | TCCGAGATTTT   | 0.502 |             |
| + | 3  | 472       |                    | NM_002224    | NP_002215    | Q14573 | ITPR3_HUMAN | lasmic (Potential).           | 19 | AGATCGCTGAT   | 0.562 |             |
| + | 49 | 6814      | ey.2_Missense_Mu   | NM_002224    | NP_002215    | Q14573 | ITPR3_HUMAN | lasmic (Potential).           | 19 | TCTCCGCCCGC   | 0.617 |             |
| - | 6  | 565       | kw.3_Missense_Mi   | NM_003322    | NP_003313    | O00294 | TULP1_HUMAN |                               | 3  | GAGCTTCTTAT   | 0.582 |             |
| + | 76 | 11600     | sense_Mutation_p   | NM_001371    | NP_001362    |        |             |                               | 21 | TGTGGCTGCAG   | 0.502 |             |
| + | 6  | 712       | h.2_RNA GLP1R      | NM_002062    | NP_002053    | P43220 | GLP1R_HUMAN | ellular (Potential).          | 5  | GGCTCCTCTCC   | 0.617 |             |
| - | 4  | 627_628   | se_Mutation_p.P21  | NM_018965    | NP_061838    | Q9NZC2 | TREM2_HUMAN | ical; (Potential).            | 1  | GAGAAGGATGG   | 0.554 |             |
| - | 3  | 613       |                    | NM_024807    | NP_079083    | Q5T2D2 | TRML2_HUMAN | ellular (Potential).          | 2  | CAGTCCACTC    | 0.527 |             |
| + | 3  | 358       | _Intron PPP2R5D    | NM_006245    | NP_006236    | Q14738 | 2A5D_HUMAN  |                               | 2  | CTCCCGCTTCA   | 0.572 |             |
| + | 5  | 529       |                    | NM_033112    | NP_149103    | Q96EU6 | RRP36_HUMAN | Potential.                    | 0  | TCAGCGAATGG   | 0.433 |             |
| - | 3  | 889       | o.R280W CUL7_uc    | NM_014780    | NP_055595    | Q14999 | CUL7_HUMAN  |                               | 4  | AGTCCGGGTCC   | 0.502 |             |
| + | 14 | 2566      |                    | NM_032538    | NP_115927    | Q5TCY1 | TTBK1_HUMAN | i-rich. Potential.            | 9  | ggaagaagaggag | 0.259 |             |
| - | 3  | 1046      | 318_uc003ouw.2     | NM_014345    | NP_055160    | Q5VUA4 | ZN318_HUMAN | Potential.                    | 7  | GCTTTCGTCTG   | 0.517 |             |
| + | 7  | 1103      | e_Mutation_p.P34   | NM_007355    | NP_031381    | P08238 | HS90B_HUMAN |                               | 4  | GGCTCCCTTTG   | 0.403 |             |
| - | 5  | 1588      | i_Intron TMEM151   | NM_182539    | NP_872345    | Q5JU00 | TCTE1_HUMAN |                               | 4  | CTGGCGGCTC    | 0.562 |             |
| - | 2  | 416       | p.G80E RCAN2       | NM_005822    | NP_005813    | Q14206 | RCAN2_HUMAN |                               | 0  | AACAGTCCCTCA  | 0.393 |             |



|   |    |             |                   |              |              |        |             |                              |    |               |       |             |
|---|----|-------------|-------------------|--------------|--------------|--------|-------------|------------------------------|----|---------------|-------|-------------|
| - | 7  | 918         | e_Mutation_p.G21  | NM_001098518 | NP_001091988 | Q8IZF2 | GP116_HUMAN | racellular (Potential).      | 2  | AAAATTCGGTAA  | 0.373 |             |
| + | 5  | 689         | e_Mutation_p.D16  | NM_153839    | NP_722581    | Q8IZF7 | GP111_HUMAN | ellular (Potential).         | 1  | GTGTTGATGAG   | 0.398 |             |
| + | 6  | 1634        | e_Mutation_p.Y47  | NM_153839    | NP_722581    | Q8IZF7 | GP111_HUMAN | Name=3; (Potential).         | 1  | ATCCTCTATGGA  | 0.448 |             |
| + | 7  | 2216        | _p.T710I GPR115   | NM_153838    | NP_722580    | Q8IZF3 | GP115_HUMAN | Name=7; (Potential).         | 8  | TTGGAACCATTAT | 0.398 |             |
| + | 2  | 154         | I5_uc003ozd.2_5F  | NM_181744    | NP_859528    | Q6U736 | OPN5_HUMAN  | Name=1; (Potential).         | 1  | CATTTGGAAATG  | 0.358 |             |
| - | 61 | 10807_10808 |                   | NM_138694    | NP_619639    | P08F94 | PKHD1_HUMAN | ellular (Potential).         | 44 | TTTCCCCTAAGA  | 0.431 | rs112030234 |
| - | 3  | 417_418     | MGCLL1_uc011dx    | NM_019036    | NP_061909    | Q8TB92 | HMGC2_HUMAN |                              | 4  | TCCATCCCTAGG  | 0.317 |             |
| - | 4  | 891         | se_Mutation_p.R2  | NM_030820    | NP_110447    | Q96P44 | COLA1_HUMAN |                              | 2  | GAATTCGTGTT   | 0.323 |             |
| + | 3  | 282         | 586_uc011dxm.1    | NM_020931    | NP_065982    | Q9HCI6 | K1586_HUMAN |                              | 0  | AAGGACCATCG   | 0.348 |             |
| + | 5  | 1359        | k.2_Missense_Mu   | NM_001704    | NP_001695    | O60242 | BAI3_HUMAN  | . Extracellular (Potential). | 50 | CATGTTCCGGTTA | 0.468 |             |
| + | 12 | 2423        | k.2_Missense_Mu   | NM_001704    | NP_001695    | O60242 | BAI3_HUMAN  | ellular (Potential).         | 50 | ACAAGGAAAAAT  | 0.289 |             |
| - | 11 | 1166        | OL9A1_uc003pff.   | NM_001851    | NP_001842    | P20849 | CO9A1_HUMAN | egical region (COL3).        | 4  | CAATGGAGCCCA  | 0.388 |             |
| - | 6  | 725         |                   | NM_001563    | NP_001554    | Q17R60 | IMPG1_HUMAN |                              | 3  | AGTGAGAGGGA   | 0.398 |             |
| - | 12 | 1382        | p.G351R ME1_ucl   | NM_002395    | NP_002386    | P48163 | MAOX_HUMAN  |                              | 2  | ACGTCCTTACA   | 0.393 |             |
| - | 4  | 695_696     | bq.1_Missense_M   | NM_001080508 | NP_001073977 | O95935 | TBX18_HUMAN | T-box.                       | 5  | TCTCCCCCGAG   | 0.51  |             |
| + | 3  | 1119        | p.G188E NT5E_u    | NM_002526    | NP_002517    | P21589 | 5NTD_HUMAN  |                              | 4  | CTTAGGGACAA   | 0.229 |             |
| - | 16 | 3034        | p.W926* EPAH7_    | NM_004440    | NP_004431    | Q15375 | EPHA7_HUMAN | mic (Potential). SAM.        | 28 | TTGTAGCCATTCT | 0.373 |             |
| - | 15 | 2925        | p.R890Q EPAH7_    | NM_004440    | NP_004431    | Q15375 | EPHA7_HUMAN | lasmic (Potential).          | 28 | GGTTTCGAATC   | 0.408 |             |
| + | 18 | 2209        | 0776_uc010kck.2   | NM_015323    | NP_056138    | O94874 | UFL1_HUMAN  |                              | 1  | AAATTCAGAG    | 0.368 |             |
| - | 14 | 2248        | af.1_Missense_M   | NM_198468    | NP_940870    | Q6ZRQ5 | MMS22_HUMAN |                              | 0  | ATTCTCGACATC  | 0.378 |             |
| + | 10 | 1684        | o.3_Missense_Mt   | NM_021956    | NP_068775    | Q13002 | GRIK2_HUMAN | ellular (Potential).         | 5  | CATATGAAATTA  | 0.388 |             |
| + | 12 | 2023        | p.P592S GRIK2_    | NM_021956    | NP_068775    | Q13002 | GRIK2_HUMAN | lasmic (Potential).          | 5  | TATAATCCACACC | 0.398 |             |
| + | 4  | 839         | pre.2_Missense_M  | NM_001198    | NP_001189    | O75626 | PRDM1_HUMAN | SET.                         | 56 | TTGTCGGGACT   | 0.453 |             |
| + | 3  | 788         | rw.1_Missense_M   | NM_018013    | NP_060483    | A7XYQ1 | SOBP_HUMAN  |                              | 1  | TTTCACCATACA  | 0.403 |             |
| + | 7  | 989         | ao.1_Missense_M   | NM_032131    | NP_115507    | Q8NEN0 | ARMC2_HUMAN | ARM 1.                       | 0  | TACAAGGATTGT  | 0.343 |             |
| - | 8  | 1952        |                   | NM_002031    | NP_002022    | P42685 | FRK_HUMAN   |                              | 6  | TGAAGTTATTTG  | 0.343 |             |
| + | 6  | 2899        | t.2_Missense_Mut  | NM_001080976 | NP_001074445 | Q9UL01 | DSE_HUMAN   |                              | 1  | TACCAGGTTGTI  | 0.468 |             |
| + | 11 | 1245        |                   | NM_173560    | NP_775831    | Q8HWS3 | RFX6_HUMAN  |                              | 3  | CCAGGTATGT    | 0.302 |             |
| + | 17 | 2273        |                   | NM_173560    | NP_775831    | Q8HWS3 | RFX6_HUMAN  |                              | 3  | TTCAAGAGACT   | 0.547 |             |
| - | 4  | 1227        | kei.1_Missense_M  | NM_005907    | NP_005898    | P33908 | MA1A1_HUMAN | enal (Potential).            | 4  | CCCATGATTTTC  | 0.303 |             |
| - | 24 | 2782        | ense_Mutation_p.3 | NM_152730    | NP_689943    | Q96NH3 | BROMI_HUMAN |                              | 3  | GATATGATGAA   | 0.303 |             |
| + | 6  | 992         |                   | NM_001010905 | NP_001010905 | Q6P5S2 | CF058_HUMAN |                              | 0  | GTTATGGAAATA  | 0.264 |             |
| - | 23 | 3630        | c.2_Missense_Mu   | NM_002844    | NP_002835    | Q15262 | PTPRK_HUMAN | ine-protein phosphatase 1.   | 8  | CAGTTCGTCCA   | 0.383 |             |
| + | 54 | 7787        | ense_Mutation_p.1 | NM_000426    | NP_000417    | P24043 | LAMA2_HUMAN | minin G-like 3.              | 10 | GTCGGCATCA    | 0.488 |             |
| - | 2  | 175         |                   | NM_001010876 | NP_001010876 | Q5VVB8 | CF191_HUMAN | ical; (Potential).           | 1  | TCAGGGACACA   | 0.373 |             |
| + | 5  | 651         | o.1_RNA ENPP3_    | NM_005021    | NP_005012    | O14638 | ENPP3_HUMAN | lar (Potential). SMB 2.      | 4  | AATTCGTTGTG   | 0.378 |             |
| + | 9  | 1035        | o.1_RNA ENPP3_    | NM_005021    | NP_005012    | O14638 | ENPP3_HUMAN | tential). Phosphodiesterasi  | 4  | ATGTATGATGTAA | 0.318 |             |
| + | 1  | 943         |                   | NM_053278    | NP_444508    | Q969N4 | TAAR8_HUMAN | lasmic (Potential).          | 1  | TTTTATCCTTGGT | 0.333 |             |
| - | 16 | 2543        | _p.S720F AH11_uc  | NM_001134831 | NP_001128303 | Q8N157 | AH11_HUMAN  | WD 3.                        | 3  | ATCATGGAATCAT | 0.363 |             |
| - | 4  | 582         | o.S108L BCLAF1_   | NM_014739    | NP_055554    | Q9NYF8 | BCLF1_HUMAN |                              | 1  | AACGTGAACGA   | 0.468 |             |
| - | 15 | 2153        | ju.2_Missense_Mu  | NM_003980    | NP_003971    | Q14244 | MAP7_HUMAN  |                              | 0  | CTGTTCTCCAC   | 0.358 |             |
| - | 13 | 2042        | ju.2_Missense_Mu  | NM_003980    | NP_003971    | Q14244 | MAP7_HUMAN  | Potential.                   | 0  | TCTTTCTCCA    | 0.542 |             |
| + | 22 | 3664        |                   | NM_020340    | NP_065073    | Q5TH69 | BIG3_HUMAN  |                              | 2  | ATAAGGAAAGA   | 0.473 |             |
| - | 9  | 7098        |                   | NM_006734    | NP_006725    | P31629 | ZEP2_HUMAN  | ts of S-P-[RGMKC]-[RK]. e    | 6  | CCCAGGAGACA   | 0.463 |             |
| - | 3  | 2135        | kg.2_Missense_M   | NM_002656    | NP_002647    | Q9UM63 | PLAL1_HUMAN |                              | 1  | CAGGGATACCA   | 0.602 |             |
| + | 69 | 9780        |                   | NM_007124    | NP_009055    | P46939 | UTRO_HUMAN  |                              | 5  | TCATCCAGCAG   | 0.512 |             |
| - | 3  | 1827        | ion.3_Missense_M  | NM_024963    | NP_079239    | Q96ME1 | FXL18_HUMAN | LRR 11.                      | 3  | GCGGGGCATG    | 0.657 |             |

|   |    |         |                   |              |              |        |              |                              |    |               |       |             |
|---|----|---------|-------------------|--------------|--------------|--------|--------------|------------------------------|----|---------------|-------|-------------|
| - | 3  | 1542    | on.3_Missense_M   | NM_024963    | NP_079239    | Q96ME1 | FXL18_HUMAN  | LRR 8.                       | 3  | .GGAAGGGCAGC  | 0.657 |             |
| + | 4  | 917     | _p.T209 C7orf26   | NM_024067    | NP_076972    | Q96N11 | CG026_HUMAN  |                              | 1  | ACCTGACCCGAGA | 0.587 |             |
| - | 27 | 2224    | p.P386S COL28A    | NM_001037763 | NP_001032852 | Q2UY09 | COSA1_HUMAN  |                              | 3  | AGGGGGGCCAG   | 0.468 |             |
| - | 9  | 1335    | se_Mutation_p.P1! | NM_004956    | NP_004947    | P50549 | ETV1_HUMAN   |                              | 35 | AGCAAAGGAGGA  | 0.478 |             |
| + | 22 | 2966    | p.N978K HDAC9     | NM_058176    | NP_478056    | Q9UKV0 | HDAC9_HUMAN  | one deacetylase.             | 5  | GGAAATGAGGT/  | 0.413 |             |
| - | 1  | 143     |                   | NM_001002926 | NP_001002926 | Q3B726 | RPA43_HUMAN  |                              | 1  | TGTTCCACCAGC/ | 0.647 |             |
| + | 15 | 2906    |                   | NM_003777    | NP_003768    | Q96DT5 | DYH11_HUMAN  | n (By similarity).           | 15 | TTTAAACCTTCC/ | 0.408 |             |
| + | 45 | 7295    |                   | NM_003777    | NP_003768    | Q96DT5 | DYH11_HUMAN  |                              | 15 | TCTTTTGGAGGC. | 0.418 |             |
| - | 3  | 422     | 1_5'UTR TRA2A_t   | NM_013293    | NP_037425    | Q13595 | TRA2A_HUMAN  | -rich (RS1 domain).          | 1  | GGATCGAGTGT/  | 0.448 |             |
| + | 21 | 2628    | p.S854L STK31_t   | NM_031414    | NP_113602    | Q9BXU1 | STK31_HUMAN  | rotein kinase.               | 9  | TGGATCACTTC/  | 0.353 |             |
| + | 12 | 1489    |                   | NM_133468    | NP_597725    | Q8N8U9 | BMPER_HUMAN  | VWFD.                        | 3  | ACCTGGATGGC   | 0.652 |             |
| + | 6  | 1024    |                   | NM_007252    | NP_009183    | P78424 | PO6F2_HUMAN  | Gln-rich.                    | 1  | CCAGTCTTCAGC  | 0.517 |             |
| + | 3  | 559     |                   | NM_020192    | NP_064577    | Q9NRH1 | CG036_HUMAN  |                              | 0  | TATGTAGAATGTT | 0.393 |             |
| - | 8  | 1146    | g.1_Missense_Mul  | NM_000168    | NP_000159    | P10071 | GLI3_HUMAN   |                              | 19 | GCGCGGAAGAC   | 0.537 |             |
| - | 3  | 140     | 3tim.1_RNA C7orf  | NM_018224    | NP_060694    | Q9GZY4 | CG044_HUMAN  | ical; (Potential).           | 1  | TGCTCCCAGAG/  | 0.488 |             |
| - | 1  | 1       |                   | NM_000290    | NP_000281    | P15259 | PGAM2_HUMAN  |                              | 0  | ACGGGGACGGC   | 0.617 |             |
| - | 2  | 981     | bw.1_Missense_M   | NM_013389    | NP_037521    | Q9UHC9 | NPCL1_HUMAN  | lasmic (Potential).          | 5  | GCGGGGGGCCA   | 0.592 |             |
| - | 22 | 3604    |                   | NM_138295    | NP_612152    | Q8TDX9 | PK1L1_HUMAN  | ular (Potential). REJ.       | 11 | GTGGGGCTGCA   | 0.547 |             |
| + | 5  | 580_581 | _uc011kcg.1_Miss  | NM_181597    | NP_853628    | Q16831 | UPP1_HUMAN   |                              | 0  | GATTGCCCCGTC  | 0.416 |             |
| + | 17 | 3722    | yr.2_Missense_M   | NM_152701    | NP_689914    | Q86UQ4 | ABCAD_HUMAN  |                              | 10 | TTCAGGGATTTT/ | 0.383 |             |
| + | 23 | 9342    | ys.1_Missense_M   | NM_152701    | NP_689914    | Q86UQ4 | ABCAD_HUMAN  |                              | 10 | CCACTCCAAGG1  | 0.448 | rs139183809 |
| - | 7  | 990     | o.G233E ZPBP_uc   | NM_007009    | NP_008940    | Q9BS86 | ZPBP1_HUMAN  |                              | 0  | TTCATTCATATC  | 0.338 |             |
| + | 4  | 1257    | e_Mutation_p.H42C | NM_182633    | NP_872439    | Q8N859 | ZN713_HUMAN  | 2H2-type 5.                  | 2  | AAAATCCATACTC | 0.393 |             |
| - | 5  | 1641    |                   | NM_033273    | NP_150376    | Q96JC4 | ZN479_HUMAN  | 2H2-type 10.                 | 4  | TGAATTCCTTGT  | 0.433 |             |
| + | 4  | 1206    |                   | NM_001159522 | NP_001152994 | A8MUV8 | ZN727_HUMAN  | 2H2-type 7.                  | 0  | TTTGTGAAGAAT  | 0.388 |             |
| + | 7  | 2081    | tte.2_Missense_M  | NM_016220    | NP_057304    | Q9UII5 | ZN107_HUMAN  | 2H2-type 13.                 | 1  | ATAAGAAAATTC/ | 0.348 |             |
| - | 5  | 1008    | p.E203K CALN1_    | NM_001017440 | NP_001017440 | Q9BXU9 | CABP8_HUMAN  | lasmic (Potential).          | 1  | TCTCTTCTCAT   | 0.517 |             |
| + | 2  | 186     |                   | NM_000941    | NP_000932    | P16435 | NCPR_HUMAN   |                              | 1  | TGTTTTCGTCAT  | 0.502 |             |
| - | 10 | 1977    | ly.1_Missense_Mu  | NM_012301    | NP_036433    | Q86UL8 | MAGI2_HUMAN  |                              | 11 | ACCATCAGTTG/  | 0.488 |             |
| - | 20 | 15033   | ht.1_Missense_Mt  | NM_033026    | NP_149015    | Q9Y6V0 | PCLO_HUMAN   |                              | 7  | TCTATGGCAGCC/ | 0.498 |             |
| - | 7  | 11487   | p.S3733F PCLO_t   | NM_033026    | NP_149015    | Q9Y6V0 | PCLO_HUMAN   |                              | 7  | TCTGTGAAATC   | 0.443 |             |
| - | 5  | 4487    | v.2_Missense_Mul  | NM_033026    | NP_149015    | Q9Y6V0 | PCLO_HUMAN   |                              | 7  | TGCTTTCTTGTG. | 0.403 |             |
| - | 3  | 3053    | w.2_Missense_Mu   | NM_033026    | NP_149015    | Q9Y6V0 | PCLO_HUMAN   | Pro-rich.                    | 7  | AGGAGTTGTAG/  | 0.502 |             |
| - | 3  | 2447    | w.2_Missense_Mu   | NM_033026    | NP_149015    | Q9Y6V0 | PCLO_HUMAN   | Pro-rich.                    | 7  | TCTGGCCTTGG   | 0.542 |             |
| - | 2  | 1064    | w.2_Nonsense_Mt   | NM_033026    | NP_149015    | Q9Y6V0 | PCLO_HUMAN   | r-rich. Pro-rich.            | 7  | TACCCTGAATTG/ | 0.473 | rs10251512  |
| - | 29 | 4211    | ic.1_Missense_Mu  | NM_000927    | NP_000918    | P08183 | MDR1_HUMAN   | otential). ABC transporter 2 | 7  | GATGCCTTTCTC  | 0.443 |             |
| - | 2  | 234     | n_p.Y43* STEAP4   | NM_024636    | NP_078912    | Q687X5 | STEAP4_HUMAN |                              | 0  | TACAGAATAACC/ | 0.433 |             |
| - | 5  | 4383    | ID9L_uc003umk.1   | NM_152703    | NP_689916    | Q8IVG5 | SAM9L_HUMAN  |                              | 4  | ATGGGGAAAAC/  | 0.393 |             |
| + | 20 | 1535    | 1A2_uc011kib.1_li | NM_000089    | NP_000080    | P08123 | CO1A2_HUMAN  |                              | 9  | :CAAAGGAGAGA/ | 0.433 |             |
| + | 11 | 1609    | nj.3_Missense_Mt  | NM_022900    | NP_075051    | Q96PB1 | CASD1_HUMAN  |                              | 2  | TCAATCGAGTTC/ | 0.353 |             |
| + | 3  | 1060    |                   | NM_002523    | NP_002514    | P47972 | NPTX2_HUMAN  | Pentaxin.                    | 3  | TCAACGACAAG/  | 0.667 |             |
| - | 11 | 1357    | p.R377K CYP3A4    | NM_017460    | NP_059488    | P08684 | CP3A4_HUMAN  |                              | 4  | TTGTACCTTTCAC | 0.502 |             |
| - | 4  | 441     | uc003uuu.1_Misse  | NM_017984    | NP_060454    | Q9H0M4 | ZCPW1_HUMAN  |                              | 0  | CTTTTTCTCTTI  | 0.468 |             |
| + | 12 | 1586    | ZAN_uc003uwl.2_f  | NM_003386    | NP_003377    | Q9Y493 | ZAN_HUMAN    | xtracellular (Potential).    | 11 | TGCGGGGAGTC   | 0.617 |             |
| + | 3  | 4275    | C17_uc010lho.1_F  | NM_001040105 | NP_001035194 | Q685J3 | MUC17_HUMAN  | approximate tandem repea     | 27 | TGCCGGTAGTC   | 0.507 |             |
| + | 3  | 9154    | C17_uc010lho.1_F  | NM_001040105 | NP_001035194 | Q685J3 | MUC17_HUMAN  | ch. 59 X approximate tand    | 27 | TAGGTACCGGCA  | 0.507 |             |
| + | 3  | 12117   | C17_uc010lho.1_F  | NM_001040105 | NP_001035194 | Q685J3 | MUC17_HUMAN  | ellular (Potential).         | 27 | TGCTGCACTACT  | 0.532 |             |

|   |    |           |                   |              |              |        |             |                               |       |               |       |             |
|---|----|-----------|-------------------|--------------|--------------|--------|-------------|-------------------------------|-------|---------------|-------|-------------|
| + | 17 | 1470      | _uc003uyv.2_Splic | NM_001913    | NP_001904    | P39880 | CUX1_HUMAN  |                               | 8     | :TGCTAGGACCTC | 0.657 |             |
| - | 8  | 1086      | _Mutation_p.E284I | NM_198999    | NP_945350    | P58743 | S26A5_HUMAN | lasmic (Potential).           | 1     | :ATTTCTCTTAA/ | 0.448 |             |
| - | 42 | 6594      | .2_Missense_Mut   | NM_005045    | NP_005036    | P78509 | RELN_HUMAN  | EGF-like 5.                   | 19    | :TTGGTCCATTG/ | 0.458 |             |
| - | 13 | 1631      | z.2_Missense_Mut  | NM_005045    | NP_005036    | P78509 | RELN_HUMAN  |                               | 19    | :CATTTCATGAG/ | 0.343 |             |
| - | 9  | 998       | z.2_Missense_Mut  | NM_005045    | NP_005036    | P78509 | RELN_HUMAN  |                               | 19    | :GCTGGGGTCTG  | 0.323 |             |
| - | 33 | 3738      | _p.R64C DOCK4_u   | NM_014705    | NP_055520    | Q8N110 | DOCK4_HUMAN | DHR-2.                        | 4     | :TAGACGAGTTAC | 0.403 |             |
| + | 4  | 706       | D1_uc003vgj.2_M   | NM_001007245 | NP_001007246 | O00458 | IFRD1_HUMAN |                               | 2     | :GATTAATTGACC | 0.368 |             |
| - | 4  | 3051      |                   | NM_002711    | NP_002702    | Q16821 | PPR3A_HUMAN |                               | 34    | :CCTAGAGATTTT | 0.378 |             |
| + | 17 | 2472      | DXP2_uc011kmu.1   | NM_014491    | NP_055306    | O15409 | FOXP2_HUMAN |                               | 8     | :AATTAGAAGACC | 0.438 |             |
| + | 3  | 1549_1550 | 455NL>KF MET_u    | NM_000245    | NP_000236    | P08581 | MET_HUMAN   | ilar (Potential). Sema.       | 159   | :GCTAATCTTGGG | 0.431 |             |
| - | 5  | 1351      | a.2_Missense_Mu   | NM_003391    | NP_003382    | P09544 | WNT2_HUMAN  |                               | 7     | :CTTGGGGGCCT  | 0.577 |             |
| + | 14 | 2074      | q.1_Missense_Mt   | NM_000492    | NP_000483    | P13569 | CFTR_HUMAN  | lasmic (Potential).           | 5     | :GATGTGATTCT  | 0.383 |             |
| + | 27 | 4465      | q.1_Missense_Mu   | NM_000492    | NP_000483    | P13569 | CFTR_HUMAN  | lasmic (Potential).           | 5     | :CCTCCGACAGG  | 0.522 | rs148783445 |
| - | 8  | 1009      | 0lkj.2_Missense_l | NM_012338    | NP_036470    | O95859 | TSN12_HUMAN | ellular (Potential).          | 0     | :AAAAGGAATAC/ | 0.398 |             |
| - | 1  | 638       | PS2_uc010lkq.2_   | NM_198085    | NP_932351    | Q8N7C7 | RN148_HUMAN | PA.                           | 0     | :ACATGGGAAATA | 0.448 |             |
| - | 7  | 1691      | UB_uc010lkt.2_Rf  | NM_178827    | NP_849149    | Q8NA54 | IQUB_HUMAN  |                               | 4     | :TGTTCCTCCATT | 0.343 |             |
| + | 3  | 1175      | _p.S185F FSCN3_   | NM_020369    | NP_065102    | Q9NQT6 | FSCN3_HUMAN |                               | 1     | :CCTATCCCAGGT | 0.498 |             |
| + | 2  | 401       |                   | NM_014390    | NP_055205    | Q7KZF4 | SND1_HUMAN  | GNase-like 1.                 | 3     | :GAAATCTTGCTC | 0.582 |             |
| + | 3  | 549       | _p.C106Y METTL2   | NM_018396    | NP_060866    | Q6P1Q9 | MTL2B_HUMAN |                               | 1     | :AATTTGTGCTG/ | 0.423 |             |
| + | 21 | 3442      | a.3_Missense_Mut  | NM_001458    | NP_001449    | Q14315 | FLNC_HUMAN  | Filamin 9.                    | 12    | :GGTAGGCACCC/ | 0.652 |             |
| + | 21 | 3834      | a.3_Missense_Mut  | NM_001458    | NP_001449    | Q14315 | FLNC_HUMAN  | Filamin 10.                   | 12    | :ACGCGGATGGC  | 0.602 |             |
| + | 38 | 6427      | a.3_Missense_Mut  | NM_001458    | NP_001449    | Q14315 | FLNC_HUMAN  | Filamin 19.                   | 12    | :TGGGGGCTTGG/ | 0.587 |             |
| - | 28 | 5101      | IA4_uc003vqz.3_5  | NM_020911    | NP_065962    | Q9HCM2 | PLXA4_HUMAN | lasmic (Potential).           | 1     | :CGGATCATGTT  | 0.572 |             |
| - | 22 | 4373      |                   | NM_020911    | NP_065962    | Q9HCM2 | PLXA4_HUMAN | lasmic (Potential).           | 1     | :ACGGTCGCGCA  | 0.577 | rs118107843 |
| - | 22 | 4337      |                   | NM_020911    | NP_065962    | Q9HCM2 | PLXA4_HUMAN | lasmic (Potential).           | 1     | :CGTGCGGATGA  | 0.602 |             |
| - | 2  | 818       | _p.P197S PLXNA4   | NM_020911    | NP_065962    | Q9HCM2 | PLXA4_HUMAN | ilar (Potential). Sema.       | 1     | :GGTGGGAAAT/  | 0.537 |             |
| + | 4  | 1416      | CHRM2_uc003vtm    | NM_001006630 | NP_001006631 | P08172 | ACM2_HUMAN  | smic (By similarity).         | 5     | :GCAAAGCCCCC/ | 0.493 |             |
| - | 8  | 930       | tu.2_Missense_Mu  | NM_004717    | NP_004708    | O75912 | DGKI_HUMAN  |                               | 3     | :CCAGGGAGCAG  | 0.488 |             |
| - | 15 | 4864_4865 | o.Q1556* KIAA154  | NM_020910    | NP_065961    | Q9HCM3 | K1549_HUMAN |                               | 230   | :GACCTGGTGT   | 0.554 |             |
| - | 7  | 2117      | _p.R38W ZC3HAV1   | NM_020119    | NP_064504    | Q7Z2W4 | ZCCHV_HUMAN |                               | 1     | :TACCCGAAAT   | 0.423 | rs144346512 |
| - | 2  | 830       | d.3_Missense_Mu   | NM_022740    | NP_073577    | Q9H2X6 | HIPK2_HUMAN | pression (By similarity). Int | 7     | :TGCCCGTTC/   | 0.557 |             |
| + | 2  | 349       | rc.1_Missense_Mi  | NM_001008749 | NP_001008749 | A4D1S5 | RAB19_HUMAN | region (By similarity).       | 0     | :CGATTGGAGTG/ | 0.468 |             |
| + | 3  | 518       | rc.1_Missense_Mi  | NM_001008749 | NP_001008749 | A4D1S5 | RAB19_HUMAN |                               | 0     | :CGAGTCCATCC/ | 0.502 |             |
| - | 1  | 570       | NND2A_uc003vww    | NM_015689    | NP_056504    | Q9ULE3 | DEN2A_HUMAN |                               | 4     | :CTCGCCTCGG   | 0.592 |             |
| + | 1  | 947       | vz.2_Missense_M   | NM_052853    | NP_443085    | Q7Z695 | ADCK2_HUMAN | rotein kinase.                | 0     | :GATACCTTGGA/ | 0.562 |             |
| - | 15 | 1860      |                   | NM_004333    | NP_004324    | P15056 | BRAF_HUMAN  | rotein kinas_R603>(2) p.T     | 18290 | :ATTTCACTGTAC | 0.368 |             |
| - | 11 | 1461      |                   | NM_004333    | NP_004324    | P15056 | BRAF_HUMAN  | ilarity). Pro p.S467L(1)      | 18290 | :CAAATGATCCAC | 0.383 |             |
| + | 1  | 576       | 852_uc010lnn.2_I  | NM_001105558 | NP_001099028 | P0C1S8 | WEE2_HUMAN  |                               | 2     | :ACCTTGGACTC/ | 0.493 |             |
| + | 32 | 3903      |                   | NM_004668    | NP_004659    | O43451 | MGA_HUMAN   | se. Luminal (Potential).      | 2     | :TACATGGAGCG/ | 0.562 |             |
| - | 4  | 617       | TRPV6_uc010lou.   | NM_018646    | NP_061116    | Q9H1D0 | TRPV6_HUMAN | ytoplasmic (Potential).       | 2     | :GGGCTCGCACC  | 0.572 | rs150734746 |
| - | 8  | 1241      | bz.2_Missense_Mi  | NM_019841    | NP_062815    | Q9NQA5 | TRPV5_HUMAN | lasmic (Potential).           | 6     | :ACGGCCGGCCA  | 0.552 | rs149241771 |
| - | 6  | 934       | bz.2_Missense_Mi  | NM_019841    | NP_062815    | Q9NQA5 | TRPV5_HUMAN | lasmic (Potential).           | 6     | :ATGTCCATCGT/ | 0.567 |             |
| + | 1  | 82        |                   | NM_176881    | NP_795362    | P59534 | T2R39_HUMAN | ellular (Potential).          | 1     | :AAAGTGAATTG  | 0.418 |             |
| + | 1  | 701       |                   | NM_176881    | NP_795362    | P59534 | T2R39_HUMAN | lasmic (Potential).           | 1     | :CTCTCTCTCA/  | 0.512 |             |
| + | 20 | 2461      | tc.1_Missense_Mu  | NM_000083    | NP_000074    | P35523 | CLCN1_HUMAN | smic (By similarity).         | 5     | :CCACAGATTTAC | 0.428 |             |
| - | 4  | 910       |                   | NM_005232    | NP_005223    | P21709 | EPHA1_HUMAN | ar (Potential). Cys-rich.     | 5     | :TGCTTCGCCAC  | 0.627 |             |
| + | 1  | 575       | uc003wda.2_Intror | NM_176883    | NP_795364    | P59536 | T2R41_HUMAN | Name=5; (Potential).          | 2     | :CAATTCCTTTTC | 0.408 |             |

|   |    |           |                   |              |              |        |             |                               |    |                   |       |
|---|----|-----------|-------------------|--------------|--------------|--------|-------------|-------------------------------|----|-------------------|-------|
| + | 1  | 350       |                   | NM_012369    | NP_036501    | Q13607 | OR2F1_HUMAN | Name=3; (Potential).          | 3  | GTTATTTTTCTCC     | 0.527 |
| + | 1  | 777       |                   | NM_001005480 | NP_001005480 | Q6IF42 | OR2A2_HUMAN | cellular (Potential).         | 2  | TTACATGGTCCC      | 0.507 |
| + | 2  | 680       | wek.2_Missense_I  | NM_005435    | NP_005426    | Q12774 | ARHG5_HUMAN |                               | 2  | GCGAAGAGCAT       | 0.502 |
| + | 2  | 2646      | _Mutation_p.P843  | NM_005435    | NP_005426    | Q12774 | ARHG5_HUMAN |                               | 2  | CACTACCCATCA      | 0.607 |
| + | 7  | 1465      |                   | NM_014141    | NP_054860    | Q9UHC6 | CNTP2_HUMAN | 1. Extracellular (Potential). | 11 | .CCTTTGGAGGC      | 0.378 |
| + | 2  | 601       |                   | NM_145304    | NP_660347    | Q8WU49 | CG033_HUMAN |                               | 1  | GGGATGGAATT       | 0.473 |
| - | 4  | 1709_1710 | p.R488C ZNF786    | NM_152411    | NP_689624    | Q8N393 | ZN786_HUMAN | 2H2-type 8.                   | 4  | CTCACGGAGCTT      | 0.653 |
| + | 6  | 1437      | p.T217A ZNF398    | NM_170686    | NP_733787    | Q8TD17 | ZN398_HUMAN | type 2; degenerate.           | 1  | .GCAGCACCTCC      | 0.567 |
| - | 2  | 510       |                   | NM_015694    | NP_056509    | Q9ULD5 | ZN777_HUMAN |                               | 1  | GAAGGGAGACT       | 0.607 |
| + | 1  | 31        | 467_uc003wgd.2    | NM_198455    | NP_940857    | A2VEC9 | SSPO_HUMAN  |                               | 0  | GGATGGCGTGG       | 0.647 |
| + | 43 | 6302      |                   | NM_198455    | NP_940857    | A2VEC9 | SSPO_HUMAN  | F5/8 type C.                  | 0  | CCAGGGGCCCA       | 0.682 |
| + | 4  | 998       | p.P227L REPIN1    | NM_013400    | NP_037532    | Q9BWE0 | REPI1_HUMAN |                               | 1  | CCCTCCCGCCC       | 0.652 |
| + | 5  | 1640      |                   | NM_175571    | NP_783161    | Q8ND71 | GIMA8_HUMAN |                               | 7  | TGACAGAAACC       | 0.498 |
| + | 5  | 1846      |                   | NM_175571    | NP_783161    | Q8ND71 | GIMA8_HUMAN |                               | 7  | AAAAGGACCCA       | 0.537 |
| + | 3  | 296       | 76B_uc003whv.3    | NM_018487    | NP_060957    | Q96HP8 | T176A_HUMAN | ical; (Potential).            | 2  | TAGGAGGATTTT      | 0.572 |
| - | 14 | 2636      |                   | NM_170606    | NP_733751    | Q8NEZ4 | MLL3_HUMAN  | p.S806S(1)                    | 63 | CAGAGGAACTA       | 0.438 |
| - | 3  | 584       |                   | NM_170606    | NP_733751    | Q8NEZ4 | MLL3_HUMAN  |                               | 63 | CAACAGAGACC       | 0.423 |
| - | 3  | 566       |                   | NM_170606    | NP_733751    | Q8NEZ4 | MLL3_HUMAN  |                               | 63 | TTTGCCGATTC       | 0.433 |
| + | 1  | 87        | 1_Intron uc003wlt | NM_024012    | NP_076917    | P47898 | 5HT5A_HUMAN | llular (By similarity).       | 3  | ACCTAACCTCCT      | 0.612 |
| + | 2  | 963       |                   | NM_024012    | NP_076917    | P47898 | 5HT5A_HUMAN | ame=6; (By similarity).       | 3  | GGATCCCCTTCT      | 0.592 |
| - | 4  | 1019_1020 | vpe.1_Missense_I  | NM_207332    | NP_997215    | Q86X53 | ERIC1_HUMAN | Glu-rich.                     | 2  | CTCCTCCCCGG       | 0.54  |
| - | 68 | 10743     | p.F2765L CSMD1    | NM_033225    | NP_150094    | Q96PZ7 | CSMD1_HUMAN | cellular (Potential).         | 25 | ACCTTGAAAAGT      | 0.333 |
| - | 2  | 854       |                   | NM_001080826 | NP_001074295 | Q86YV5 | SG223_HUMAN |                               | 0  | TGGGTGAGCAG       | 0.682 |
| - | 4  | 4169_4170 |                   | NM_178857    | NP_849188    | Q8IWN7 | RP1L1_HUMAN |                               | 8  | cttgcagccctctcttc | 0.198 |
| - | 3  | 1246      | v.2_Intron FAM167 | NM_053279    | NP_444509    | Q96KS9 | F167A_HUMAN |                               | 0  | ACCTCCGAGAG       | 0.597 |
| - | 7  | 1400      | s.2_Missense_Mu   | NM_139167    | NP_631906    | Q96LD1 | SGCZ_HUMAN  | cellular (Potential).         | 3  | ACCTCCCCTTCT      | 0.493 |
| - | 13 | 1739      | ya.1_Nonsense_I   | NM_004686    | NP_004677    | Q9Y216 | MTMR7_HUMAN | ularin phosphatase.           | 1  | CCACTCCAAAAC      | 0.448 |
| + | 7  | 847       | O7_uc010lj.1_R    | NM_015024    | NP_055839    | Q9UIA9 | XPO7_HUMAN  |                               | 5  | AGATTCACCAC       | 0.498 |
| - | 2  | 580       |                   | NM_002318    | NP_002309    | Q9Y4K0 | LOXL2_HUMAN | SRCR 1.                       | 3  | GGTGCCCCACT       | 0.657 |
| + | 11 | 1101      | se_Mutation_p.E1  | NM_014265    | NP_055080    | Q9UKQ2 | ADA28_HUMAN | B. Extracellular (Potential). | 5  | CACATGAAATGC      | 0.408 |
| + | 6  | 567       | ea.1_Missense_Mi  | NM_003817    | NP_003808    | Q9H2U9 | ADAM7_HUMAN | cellular (Potential).         | 5  | AGGGAGAACAT       | 0.398 |
| + | 14 | 2262      | DCA2_uc003xeq.    | NM_152562    | NP_689775    | Q69YH5 | CDCA2_HUMAN |                               | 0  | TTCCCGAGCTG       | 0.433 |
| - | 13 | 1348      | kek.2_Intron EBF2 | NM_022659    | NP_073150    | Q9HAK2 | COE2_HUMAN  |                               | 4  | TTATTTCTTGTG      | 0.473 |
| + | 14 | 2032      | SL2_uc010luk.1_I  | NM_001386    | NP_001377    | Q16555 | DPYL2_HUMAN |                               | 1  | GGCGCCCCCG        | 0.642 |
| - | 18 | 2312      |                   | NM_001010906 | NP_001010906 | Q68CJ6 | SLIP_HUMAN  |                               | 2  | ACCTTCTCCAC       | 0.517 |
| - | 2  | 186       |                   | NM_001010906 | NP_001010906 | Q68CJ6 | SLIP_HUMAN  |                               | 2  | GTTACCTGGATC      | 0.423 |
| - | 3  | 7453      |                   | NM_031271    | NP_112561    | Q9BXT5 | TEX15_HUMAN |                               | 7  | GATCTGGGGAAT      | 0.413 |
| + | 13 | 2365      | 54_splice WRN_uc  | NM_000553    | NP_000544    | Q14191 | WRN_HUMAN   |                               | 7  | TTCCAGACTTTT      | 0.348 |
| + | 33 | 4737      | k.2_Missense_Mut  | NM_000553    | NP_000544    | Q14191 | WRN_HUMAN   |                               | 7  | ATTATTGCTGAT      | 0.488 |
| + | 10 | 1221      | u.3_Missense_Mu   | NM_004674    | NP_004665    | Q9UBL3 | ASH2L_HUMAN | 330.2/SPRY.                   | 2  | ATGATCGAGGTA      | 0.458 |
| + | 1  | 130       | O1_uc003xnn.2_R   | NM_002164    | NP_002155    | P14902 | I23O1_HUMAN |                               | 2  | CTATGGAAAAC       | 0.458 |
| - | 3  | 270       | xns.2_Missense_I  | NM_024645    | NP_078921    | Q9H898 | ZMAT4_HUMAN | Matrin-type 1.                | 3  | TCGGACTTTGC       | 0.473 |
| + | 8  | 1833_1834 |                   | NM_178819    | NP_848934    | Q86UL3 | GPAT4_HUMAN |                               | 0  | ATCGCCACCTG       | 0.54  |
| - | 29 | 3545      | K1_uc003xoj.2_M   | NM_020476    | NP_065209    | P16157 | ANK1_HUMAN  |                               | 9  | TCCAGGAAGGA       | 0.657 |
| + | 3  | 512       | qa.1_Missense_Mi  | NM_001005365 | NP_001005365 | Q6S8J7 | POTEA_HUMAN | ANK 2.                        | 1  | GGACTGATCCA       | 0.393 |
| + | 11 | 1489      | p.A465V MCM4_I    | NM_182746    | NP_877423    | P33991 | MCM4_HUMAN  | MCM.                          | 4  | TTCAGCCTTGG       | 0.373 |
| + | 4  | 407       |                   | NM_001007176 | NP_001007177 | Q8WWR9 | PDFFL_HUMAN |                               | 0  | CTGTCTGTCTAC      | 0.393 |

rs144313074

|   |    |           |                      |              |              |        |             |                                |     |               |       |
|---|----|-----------|----------------------|--------------|--------------|--------|-------------|--------------------------------|-----|---------------|-------|
| - | 6  | 1180      | i_p.R280K PCMTI      | NM_052937    | NP_443169    | Q96MG8 | PCMD1_HUMAN |                                | 0   | TTAACTCTCTTT  | 0.343 |
| + | 4  | 5198      | p1_uc011ldy.1_intr   | NM_006269    | NP_006260    | P56715 | RP1_HUMAN   |                                | 12  | TCTTCTGAACAG  | 0.413 |
| + | 4  | 5358      | p1_uc011ldy.1_intr   | NM_006269    | NP_006260    | P56715 | RP1_HUMAN   |                                | 12  | AGAGGAAGGAG   | 0.413 |
| + | 3  | 1918      |                      | NM_052898    | NP_443130    | Q5GH76 | XKR4_HUMAN  |                                | 2   | ATCTCCTCCAAC  | 0.458 |
| - | 3  | 1742      | lyi.2_Missense_Mi    | NM_001114635 | NP_001108107 | Q6DJT9 | PLAG1_HUMAN | lack of NLS and KPNA2 int      | 129 | GATAGGGAGGAC  | 0.453 |
| - | 3  | 571_572   |                      | NM_000780    | NP_000771    | P22680 | CP7A1_HUMAN |                                | 1   | ACATCCCTTCTG  | 0.46  |
| + | 26 | 3299      |                      | NM_024870    | NP_079146    | Q70Z35 | PREX2_HUMAN |                                | 17  | AGCAGGAGATG   | 0.383 |
| + | 6  | 686       | p.D213Y C8orf34_     | NM_052958    | NP_443190    | Q49A92 | CH034_HUMAN |                                | 1   | AAAATGACCAAT  | 0.443 |
| + | 4  | 760       | .1_5'UTR CRISPLI     | NM_031461    | NP_113649    | Q9H336 | CRLD1_HUMAN |                                | 2   | ATAGGCCCCCG   | 0.363 |
| - | 6  | 890       |                      | NM_018440    | NP_060910    | Q9NWX8 | PAG1_HUMAN  | lasmic (Potential).            | 0   | TCTGAAGGCTG   | 0.418 |
| + | 4  | 459_460   | P1_uc010mai.2_5'     | NM_007013    | NP_008944    | Q9H0M0 | WWP1_HUMAN  | cell.                          | 2   | TTCTTCTAATCC  | 0.332 |
| - | 10 | 1109      | aj.2_Nonsense_IV     | NM_019098    | NP_061971    | Q9NQW8 | CNGB3_HUMAN | ellular (Potential).           | 3   | TTGTTTGAATAAC | 0.363 |
| + | 9  | 1191      | nse_Mutation_p.L     | NM_052832    | NP_439897    | Q8TE54 | S26A7_HUMAN | lasmic (Potential).            | 2   | ACATCCTCTCTC  | 0.438 |
| + | 4  | 554       | p.P152S POP1_u       | NM_001145860 | NP_001139332 | Q99575 | POP1_HUMAN  |                                | 2   | GCCCTCCAGAA   | 0.458 |
| + | 13 | 1978      | p.W626* POP1_u       | NM_001145860 | NP_001139332 | Q99575 | POP1_HUMAN  |                                | 2   | GGCTGGGGCAT   | 0.408 |
| + | 2  | 600       | iq.2_Missense_Mi     | NM_001142462 | NP_001135934 | Q8N2R0 | OSR2_HUMAN  |                                | 1   | TTACTCCTTCTC  | 0.647 |
| - | 4  | 388       | yjc.1_Missense_M     | NM_015668    | NP_056483    | Q8NE09 | RGS22_HUMAN |                                | 7   | TTTTTCCAGAA   | 0.323 |
| - | 16 | 1945      | is.1_Missense_Mu     | NM_015902    | NP_056986    | O95071 | UBR5_HUMAN  |                                | 28  | TGCAGGGGTTG   | 0.383 |
| + | 3  | 753       |                      | NM_001100117 | NP_001093587 | Q9UQ26 | RIMS2_HUMAN |                                | 15  | AAGTCGATCTC   | 0.453 |
| + | 24 | 3741      | p.G1156D RIMS2_      | NM_014677    | NP_055492    | Q9UQ26 | RIMS2_HUMAN |                                | 15  | AGATGGTAGCAT  | 0.493 |
| + | 8  | 1278      | nse_Mutation_p.E     | NM_012082    | NP_036214    | Q8VW38 | FOG2_HUMAN  |                                | 5   | GAAAGCGAACTT  | 0.498 |
| - | 6  | 1456      | no.2_Missense_M      | NM_001146    | NP_001137    | Q15389 | ANGP1_HUMAN | rogen C-terminal.              | 7   | CTTCACGATGTT  | 0.338 |
| + | 2  | 998       |                      | NM_003301    | NP_003292    | P34981 | TRFR_HUMAN  | lasmic (Potential).            | 3   | AATCCCGTGCA   | 0.438 |
| + | 38 | 5815      |                      | NM_177531    | NP_803875    | Q86W11 | PKHL1_HUMAN | r (Potential). IPT/TIG 11.     | 14  | TTATCCACCTTT  | 0.403 |
| + | 49 | 8241      |                      | NM_177531    | NP_803875    | Q86W11 | PKHL1_HUMAN | ellular (Potential).           | 14  | GCCATCTTGAT   | 0.468 |
| - | 69 | 10939     | nt.2_Missense_Mi     | NM_198123    | NP_937756    | Q7Z407 | CSMD3_HUMAN | ellular (Potential).           | 63  | TAAATCCTTGAA  | 0.353 |
| - | 29 | 4972      | it.2_Missense_Mu     | NM_198123    | NP_937756    | Q7Z407 | CSMD3_HUMAN | lar (Potential). CUB 9.        | 63  | ATGAGGGAAGT   | 0.373 |
| - | 8  | 1529      | p.R417K CSMD3_       | NM_198123    | NP_937756    | Q7Z407 | CSMD3_HUMAN | ellular (Potential).           | 63  | AATCCTCTAGATT | 0.289 |
| - | 6  | 595       | p.S170F ENPP2_u      | NM_001040092 | NP_001035181 | Q13822 | ENPP2_HUMAN |                                | 7   | CCACGGAGAAG   | 0.373 |
| + | 3  | 560       | DC6_uc011lid.1_li    | NM_022783    | NP_073620    | Q8TB45 | DPTOR_HUMAN |                                | 0   | ACCTTCCCATTG  | 0.408 |
| + | 10 | 1107      |                      | NM_001039112 | NP_001034201 | Q2WVJ9 | FR1L6_HUMAN | toplasmic (Potential).         | 11  | TGTGCTGATCTC  | 0.502 |
| + | 31 | 4245      | uc003yqy.1_Intron    | NM_001039112 | NP_001034201 | Q2WVJ9 | FR1L6_HUMAN | toplasmic (Potential).         | 11  | AGCAAGGGATTC  | 0.488 |
| - | 13 | 1928      | M135B_uc003yva.      | NM_015912    | NP_056996    | Q49AJ0 | F135B_HUMAN |                                | 9   | TCTAATCCATAC  | 0.448 |
| + | 7  | 942       | nep.2_Missense_A     | NM_014957    | NP_055772    | A2RUS2 | DEND3_HUMAN | DENN.                          | 1   | CCTCGGACTGG   | 0.542 |
| + | 3  | 837       | .1_3'UTR LY6K_uc     | NM_017527    | NP_059997    | Q17RY6 | LY6K_HUMAN  | UPAR/Ly6.                      | 1   | AGCATGGGTGA   | 0.547 |
| + | 3  | 1031_1032 | kx.1_Missense_M      | NM_198572    | NP_940974    | Q76KD6 | SPER1_HUMAN |                                | 2   | CCAGCCCAGTGC  | 0.396 |
| - | 8  | 1526      | MP1_uc010mhs.1       | NM_024896    | NP_079172    | Q7Z2K6 | ERMP1_HUMAN | ical; (Potential).             | 1   | AAACGGAGACA   | 0.368 |
| - | 20 | 1970      | p.A410V PTPRD_       | NM_002839    | NP_002830    | P23468 | PTPRD_HUMAN | III 2. Extracellular (Potentia | 22  | TCGGGGCACTG   | 0.507 |
| - | 16 | 2381      | i_p.P775L MPDZ_      | NM_003829    | NP_003820    | O75970 | MPDZ_HUMAN  | PDZ 5.                         | 6   | CTGACGGTGCT   | 0.428 |
| + | 3  | 403       | ite_p.K4_splice St   | NM_003026    | NP_003017    | Q99962 | SH3G2_HUMAN |                                | 1   | TTTTCAGAAAGTC | 0.383 |
| - | 14 | 1847      | nl.1_Missense_Mu     | NM_017645    | NP_060115    | Q7Z4H7 | HAUS6_HUMAN |                                | 2   | AAATGGATCAC   | 0.313 |
| + | 18 | 2446      | '93S DENND4C_u       | NM_017925    | NP_060395    | Q5VZ89 | DEN4C_HUMAN |                                | 2   | ATTTTCTGAG    | 0.393 |
| - | 1  | 5395      |                      | NM_153809    | NP_722516    | Q8IZX4 | TAF1L_HUMAN |                                | 26  | CTTCTCTTCAG   | 0.473 |
| + | 8  | 815       |                      | NM_012144    | NP_036276    | Q9UI46 | DNAI1_HUMAN |                                | 0   | CTTTTAGGATCG  | 0.502 |
| - | 4  | 1773      |                      | NM_003028    | NP_003019    | Q15464 | SHB_HUMAN   | with LAT, FAK1, JAK1 and       | 3   | GGACGGCAGG    | 0.552 |
| + | 1  | 526       | 42421_uc004aed.1_RNA |              |              |        |             |                                | 0   | AGCCCAATCTG   | 0.607 |
| + | 2  | 521       |                      | NM_021965    | NP_068800    | Q15124 | PGM5_HUMAN  |                                | 2   | ATGGCATCTTG   | 0.478 |

rs141617852



|   |    |           |                    |              |              |        |                                             |     |                 |       |
|---|----|-----------|--------------------|--------------|--------------|--------|---------------------------------------------|-----|-----------------|-------|
| + | 8  | 1076      | ə_p.R257_splice P  | NM_003558    | NP_003549    | O14986 | PI51B_HUMAN                                 | 1   | GCCGGGTAAGG     | 0.403 |
| + | 10 | 1799      | ə_Mutation_p.A421  | NM_006200    | NP_006191    | Q92824 | PCSK5_HUMAN Catalytic.                      | 3   | CCCGTGCGGGA     | 0.398 |
| + | 19 | 3029_3030 | :SK5_uc004akb.2_   | NM_006200    | NP_006191    | Q92824 | PCSK5_HUMAN I (Cys-rich motif).             | 3   | AGAATGGATACA    | 0.426 |
| + | 3  | 1168      | akf.3_Missense_IV  | NM_001490    | NP_001481    | Q02742 | GCNT1_HUMAN tial). Catalytic (By similarity | 0   | GCTTCCTCCAC1    | 0.453 |
| - | 8  | 4085      |                    | NM_015225    | NP_056040    | Q8WUY3 | PRUN2_HUMAN                                 | 0   | TCCATCGCCATC    | 0.542 |
| - | 5  | 692       | əkn.2_Missense_IV  | NM_015225    | NP_056040    | Q8WUY3 | PRUN2_HUMAN                                 | 0   | AAATTCCTCTC     | 0.433 |
| + | 8  | 870       | ıkq.3_Missense_M   | NM_033305    | NP_150648    | Q96RL7 | VP13A_HUMAN                                 | 10  | TGGTTCGTAAG     | 0.323 |
| - | 6  | 692       | mr.1_Missense_M    | NM_174938    | NP_777598    | A2A2Y4 | FRMD3_HUMAN FERM.                           | 2   | AGGATCGTAATC    | 0.388 |
| - | 9  | 1916      | ımw.2_Missense_IV  | NM_013438    | NP_038466    | Q9UMX0 | UBQL1_HUMAN                                 | 0   | TATCAGGATTCTC   | 0.398 |
| - | 6  | 466       | ation_p.S81N HNR   | NM_031262    | NP_112552    | P61978 | HNRPK_HUMAN n with DDX1. 2 X 22 AA ap       | 1   | CACTGCTGCTC     | 0.438 |
| + | 15 | 2221      | p.P575S PHF2_uc    | NM_005392    | NP_005383    | O75151 | PHF2_HUMAN                                  | 1   | AGTTTCCCATC/    | 0.597 |
| - | 1  | 79        | ımsc.1_Missense_   | NM_000197    | NP_000188    | P37058 | DHB3_HUMAN                                  | 0   | TGTGAGGATGA     | 0.547 |
| - | 2  | 252_253   | uc004awu.2_5'UT    | NM_001333    | NP_001324    | O60911 | CATL2_HUMAN                                 | 0   | ATTTTGGAACAG    | 0.431 |
| + | 1  | 1060      |                    | NM_004473    | NP_004464    | O00358 | FOXE1_HUMAN Fork-head.                      | 0   | ACGCGGAGGAC     | 0.647 |
| - | 4  | 617_618   | ion_p.P200L TRIM   | NM_033220    | NP_150089    | Q14142 | TRI14_HUMAN                                 | 1   | GCACGGGATGC     | 0.594 |
| + | 7  | 1282      | c.2_Missense_Mu    | NM_207299    | NP_997182    | Q8TBJ4 | LPPR1_HUMAN                                 | 0   | ATCCCCGTGGA     | 0.488 |
| - | 2  | 1691      | ıbq.1_Missense_M   | NM_133445    | NP_597702    | Q8TCU5 | NMD3A_HUMAN  ellular (Potential).           | 7   | TCAGTTCTCCA     | 0.512 |
| + | 4  | 324       |                    | NM_001340    | NP_001331    | Q14093 | CYLC2_HUMAN  A repeats of K-K-X.            | 1   | AAATTTCTGAGAC   | 0.393 |
| + | 5  | 644       |                    | NM_001340    | NP_001331    | Q14093 | CYLC2_HUMAN epeats. 31 X 3 AA repeats       | 1   | caaaaaagataaaaa | 0.164 |
| + | 1  | 578       |                    | NM_001004485 | NP_001004485 | Q8NGS4 | O13F1_HUMAN  ellular (Potential).           | 3   | CACCTCCCTGG     | 0.438 |
| - | 1  | 842       |                    | NM_001001956 | NP_001001956 | Q8NGT0 | O13C9_HUMAN Name=7; (Potential).            | 0   | AACATGGATATA/   | 0.393 |
| - | 14 | 2019      | ımc.1_Missense_Mı  | NM_003640    | NP_003631    | O95163 | ELP1_HUMAN                                  | 7   | TCAGCGGGTTT/    | 0.408 |
| - | 2  | 167       | ııwl.1_Missense_IV | NM_001003936 | NP_001003936 | Q6A555 | TXND8_HUMAN Thioredoxin.                    | 0   |  AACAGGAAACA    | 0.353 |
| - | 3  | 245       | ə_Mutation_p.P48   | NM_012212    | NP_036344    | Q14914 | PTGR1_HUMAN                                 | 0   | GTAGGGATCCAC    | 0.353 |
| - | 3  | 359       | LAD_uc004bhl.3_ı   | NM_000031    | NP_000022    | P13716 | HEM2_HUMAN                                  | 0   | GGCCACTCCTGC    | 0.522 |
| - | 13 | 3005      | ıA_uc004bir.3_Mis  | NM_030767    | NP_110394    | Q7Z591 | AKNA_HUMAN                                  | 6   | ıCAAAGGGCTGG    | 0.622 |
| - | 15 | 4867      | C_uc010mvf.2_ınt   | NM_002160    | NP_002151    | P24821 | TENA_HUMAN nectin type-III 10.              | 7   | AATCAGTACTAG    | 0.458 |
| - | 9  | 1807      | p.G569D ASTN2_ı    | NM_198187    | NP_937830    | O75129 | ASTN2_HUMAN  ellular (Potential).           | 9   | TCATAGCCCCTC    | 0.493 |
| - | 8  | 1654      | p.A239V TRAF1_ı    | NM_005658    | NP_005649    | Q13077 | TRAF1_HUMAN MATH.                           | 3   | ıGGAAGCGTCA     | 0.602 |
| - | 5  | 1118      | _p.M60ı TRAF1_u    | NM_005658    | NP_005649    | Q13077 | TRAF1_HUMAN                                 | 3   | TCTTCATGAAC     | 0.627 |
| - | 1  | 510_511   |                    | NM_012363    | NP_036495    | Q8NGS0 | OR1N1_HUMAN  ellular (Potential).           | 3   | AAATTTCCCGAGT   | 0.5   |
| + | 15 | 2109      | ıı.3_RNAı RABGAF   | NM_012197    | NP_036329    | Q9Y3P9 | RBGP1_HUMAN ab-GAP TBC.                     | 5   | TGCTCCTTCTCı    | 0.413 |
| + | 3  | 414       | ı.V122Mı LMX1B_ı   | NM_002316    | NP_002307    | O60663 | LMX1B_HUMAN I zinc-binding 2.               | 0   | GCTGCGTGTGTı    | 0.632 |
| + | 2  | 643       |                    | NM_006059    | NP_006050    | Q9Y6N6 | LAMC3_HUMAN ıinin N-terminal.               | 3   | CCCCGGCGAGG     | 0.706 |
| + | 2  | 870       |                    | NM_032536    | NP_115925    | Q96CW9 | NTNG2_HUMAN                                 | 0   | AGGGCCCCACC     | 0.617 |
| - | 10 | 2516      | p.R397Qı SETX_uc   | NM_015046    | NP_055861    | Q7Z333 | SETX_HUMAN                                  | 3   | TTTTTTCGTTTTG   | 0.348 |
| + | 28 | 4493_4494 | ITS13_uc004cdz.3   | NM_139025    | NP_620594    | Q76LX8 | ATS13_HUMAN CUB 2.                          | 6   | ıGGACCAGGı      | 0.624 |
| + | 9  | 1443      |                    | NM_000787    | NP_000778    | P09172 | DOPO_HUMAN                                  | 4   | ıCAGTGGTAAGTı   | 0.587 |
| + | 36 | 3228      |                    | NM_000093    | NP_000084    | P20908 | CO5A1_HUMAN le-helical region.              | 11  | CCAGGGACCCA     | 0.607 |
| - | 15 | 4295      | ı.P1322Lı CAMSAı   | NM_015447    | NP_056262    | Q5T5Y3 | CAMP1_HUMAN                                 | 3   | ıGTATGGGCAGG    | 0.627 |
| - | 3  | 443       | SEC16A_uc010hıı    | NM_014866    | NP_055681    | O15027 | SC16A_HUMAN                                 | 0   | ıGGCAAGTTGTCı   | 0.567 |
| - | 34 | 6964      |                    | NM_017617    | NP_060087    | P46531 | NOTC1_HUMAN lasmic (Potential).             | 856 | ıGTATTGGTTTCı   | 0.647 |
| - | 12 | 2225      | ıq.1_Missense_M    | NM_013366    | NP_037498    | Q9UJX6 | ANC2_HUMAN                                  | 1   | TCTCCTCTCAA     | 0.662 |
| - | 6  | 1308      | ıq.1_Missense_M    | NM_013366    | NP_037498    | Q9UJX6 | ANC2_HUMAN                                  | 1   | ıTGAAGGGTCC.    | 0.622 |
| + | 7  | 943       | ıes.1_Missense_M   | NM_014434    | NP_055249    | Q9UHB4 | NDOR1_HUMAN ı-binding FR-type.              | 0   | TGCAGCCCGGG     | 0.697 |
| - | 8  | 1332      | ı.1_Intronı ENTPD  | NM_001033113 | NP_001028285 | Q5MY95 | ENTP8_HUMAN  ellular (Potential).           | 1   | AGGGCCTCTGG     | 0.632 |
| + | 2  | 782       | ıpi.2_Missense_Mı  | NM_000451    | NP_000442    | O15266 | SHOX_HUMAN                                  | 0   | ıAGAAGGATTCC.   | 0.617 |

rs75075472

|   |    |         |                   |              |              |         |             |    |                    |       |             |
|---|----|---------|-------------------|--------------|--------------|---------|-------------|----|--------------------|-------|-------------|
| + | 3  | 380     | _p.G79R ASMT_u    | NM_004043    | NP_004034    | P46597  | HIOM_HUMAN  | 1  | CGAGGGGAGGA        | 0.493 |             |
| + | 6  | 593     | p.E150K ASMT_u    | NM_004043    | NP_004034    | P46597  | HIOM_HUMAN  | 1  | GGTCCGAGGGC        | 0.567 | rs147969184 |
| - | 5  | 557     | RSD_uc0004cra.1_I | NM_001669    | NP_001660    | P51689  | ARSD_HUMAN  | 0  | IGCAGTGATCCC       | 0.557 |             |
| - | 5  | 3806    |                   | NM_015419    | NP_056234    | Q9NR99  | MXRA5_HUMAN | 8  | ICATTTCCAAC        | 0.463 |             |
| - | 2  | 743     | 0ndi.2_Missense_I | NM_181332    | NP_851849    | Q8N0W4  | NLGNX_HUMAN | 4  | ITGGGGGGTGAC       | 0.567 |             |
| + | 3  | 754     |                   | NM_013452    | NP_038480    | Q9H320  | VCX1_HUMAN  | 0  | IGAGCGGAGATG       | 0.577 |             |
| + | 4  | 1637    |                   | NM_001649    | NP_001640    | Q13796  | SHRM2_HUMAN | 8  | IGAGCCCACGCC       | 0.682 |             |
| + | 2  | 1482    | d.2_Missense_Mu   | NM_138636    | NP_619542    | Q9NR97  | TLR8_HUMAN  | 7  | ITCACCCGTCTT       | 0.388 |             |
| + | 2  | 2823    | d.2_Missense_Mu   | NM_138636    | NP_619542    | Q9NR97  | TLR8_HUMAN  | 7  | ITAGAGGAGAGG       | 0.438 |             |
| + | 5  | 737     | _p.A166V EGFL6_   | NM_015507    | NP_056322    | Q8IUX8  | EGFL6_HUMAN | 2  | ICCTGGCCCCAA       | 0.493 |             |
| + | 9  | 1212    | p.E337K PHEX_u    | NM_000444    | NP_000435    | P78562  | PHEX_HUMAN  | 3  | ICCTCCGAGAAT       | 0.458 |             |
| + | 17 | 1921    | p.A573V PHEX_u    | NM_000444    | NP_000435    | P78562  | PHEX_HUMAN  | 3  | ITGGTGCTATAG       | 0.323 |             |
| + | 4  | 714     | h.2_Missense_Mu   | NM_005391    | NP_005382    | Q15120  | PDK3_HUMAN  | 6  | ICTTTCCGCATGC      | 0.373 |             |
| + | 3  | 201     | ie_Mutation_p.E6E | NM_016937    | NP_058633    | P09884  | DPOLA_HUMAN | 3  | ITATGAAGAAGTTC     | 0.443 |             |
| - | 3  | 710     |                   | NM_025159    | NP_079435    | Q9HAI6  | CX021_HUMAN | 1  | ITCAGAGGGAAAA      | 0.428 |             |
| - | 1  | 1742    |                   | NM_203408    | NP_981953    | Q5JRC9  | FA47A_HUMAN | 5  | ICGCTCCGAGAAT      | 0.522 |             |
| + | 7  | 1011    |                   | NM_173695    | NP_775966    | Q8N9S7  | CX059_HUMAN | 1  | ICGATGGACAGA       | 0.333 |             |
| - | 4  | 550     | 2X_uc011mkh.1_Ir  | NM_006307    | NP_006298    | P78539  | SRPX_HUMAN  | 0  | ICGCTCCCTTTC       | 0.527 |             |
| - | 19 | 2489    | a.2_RNA RPGR_u    | NM_000328    | NP_000319    | Q92834  | RPGR_HUMAN  | 1  | ICCTATGGATTTT      | 0.368 |             |
| - | 15 | 2004    |                   | NM_004229    | NP_004220    | O60244  | MED14_HUMAN | 4  | ICTACTGGACATGC     | 0.323 |             |
| + | 3  | 1187    | ise_Mutation_p.WK | NM_001097579 | NP_001091048 | Q9UPC5  | GPR34_HUMAN | 1  | ICTACTGGAAAGA      | 0.343 |             |
| + | 10 | 1936    | hnil.2_Missense_M | NM_033626    | NP_296375    | Q96HB5  | CC120_HUMAN | 1  | ICTCTCCGCCCG       | 0.697 |             |
| - | 4  | 491     |                   | NM_015698    | NP_056513    | Q92917  | GPKOW_HUMAN | 2  | ICGGGACCCGCT       | 0.582 |             |
| - | 9  | 1380    | nmw.1_Missense_   | NM_006150    | NP_006141    | O43900  | PRIC3_HUMAN | 1  | IGGACTCTGGGG       | 0.682 |             |
| - | 24 | 3302    |                   | NM_001013742 | NP_001013764 | Q5KSL6  | DGKK_HUMAN  | 2  | ICGAGCTAAGTGC      | 0.502 |             |
| - | 2  | 224     | sw.2_Missense_Mt  | NM_015107    | NP_055922    | Q9UPP1  | PHF8_HUMAN  | 3  | ITCACATCGTAAG      | 0.637 |             |
| + | 1  | 222     |                   | NM_174912    | NP_777572    | Q6GMR7  | FAAH2_HUMAN | 3  | ITAGTAGGCCGAC      | 0.562 |             |
| + | 6  | 900     |                   | NM_174912    | NP_777572    | Q6GMR7  | FAAH2_HUMAN | 3  | ITGGTTCCCAAC       | 0.463 |             |
| - | 7  | 867     | _p.R267C MTMR8    | NM_017677    | NP_060147    | Q96EF0  | MTMR8_HUMAN | 4  | IGAAGCGAATGTI      | 0.488 |             |
| - | 5  | 732     | !_Mutation_p.P192 | NM_018684    | NP_061154    | Q9NQZ6  | ZC4H2_HUMAN | 1  | ITTTTTGGGGTTC      | 0.502 |             |
| - | 12 | 1816    | n_p.E523K LAS1L   | NM_031206    | NP_112483    | Q9Y4W2  | LAS1L_HUMAN | 4  | ITtctcctcctcctcTAC | 0.338 |             |
| + | 2  | 259     | 3N_uc010nkp.1_R   | NM_002444    | NP_002435    | P26038  | MOES_HUMAN  | 10 | ICCATCCAGCCC       | 0.517 |             |
| + | 17 | 2908    | kr.2_Missense_Mu  | NM_138737    | NP_620074    | Q9BQS7  | HEPH_HUMAN  | 9  | ICCCAGGATCCAC      | 0.413 |             |
| + | 3  | 2950    | R_uc011mpf.1_Mi   | NM_000044    | NP_000035    | P10275  | ANDR_HUMAN  | 8  | IAAAATTGTCCATC     | 0.333 |             |
| + | 1  | 846_847 |                   | NM_207320    | NP_997203    | Q7L8S5  | OTU6A_HUMAN | 2  | ICAACTCCGTGAC      | 0.678 |             |
| + | 3  | 333     |                   | NM_198512    | NP_940914    | Q6ZPD8  | DG2L6_HUMAN | 1  | ICCCATGGAAGT       | 0.552 |             |
| - | 1  | 748     |                   | NM_002565    | NP_002566    | P51582  | P2RY4_HUMAN | 1  | AGGCCGAGTGG        | 0.572 |             |
| + | 13 | 2066    | yz.2_Missense_M   | NM_005120    | NP_005111    | Q93074  | MED12_HUMAN | 4  | IGAGGGGACCTT       | 0.537 |             |
| + | 18 | 2649    | yz.2_Missense_M   | NM_005120    | NP_005111    | Q93074  | MED12_HUMAN | 4  | IGCGACGCAACC       | 0.562 |             |
| + | 1  | 193     | TAF1_uc004dzt.3   | NM_138923    | NP_620278    | P21675  | TAF1_HUMAN  | 17 | ITCAATGGAGCCC      | 0.617 |             |
| + | 6  | 978     | TAF1_uc004dzt.3   | NM_138923    | NP_620278    | P21675  | TAF1_HUMAN  | 17 | ITGATGATGAAGTA     | 0.423 | rs139324935 |
| - | 1  | 1205    | AG4_uc004eaj.1_F  | NM_001024455 | NP_001019626 | Q5HYW3  | RGAG4_HUMAN | 3  | IGAAATCCGACAC      | 0.498 |             |
| - | 22 | 2756    | _p.E819K PHKA1_   | NM_002637    | NP_002628    | P46020  | KPB1_HUMAN  | 4  | IGAAATTTCTCCCA     | 0.413 |             |
| - | 21 | 2538    | _p.S746F PHKA1_   | NM_002637    | NP_002628    | P46020  | KPB1_HUMAN  | 4  | IGAACAGAGGGA       | 0.388 |             |
| - | 21 | 2534    | _p.P745S PHKA1_   | NM_002637    | NP_002628    | P46020  | KPB1_HUMAN  | 4  | IGAGAGGGAACCT      | 0.388 |             |
| + | 3  | 496     | se_Mutation_p.P12 | NM_001039840 | NP_001034929 | Q5VXU3  | CHIC1_HUMAN | 0  | IGCCCCAGAAG        | 0.403 |             |
| + | 1  | 331     |                   | NM_203303    | NP_976048    | Q8VWW36 | ZCH13_HUMAN | 0  | ITAAACGAGAGAC      | 0.502 | rs142122114 |

|   |    |           |                   |              |              |        |             |                                |    |               |       |             |
|---|----|-----------|-------------------|--------------|--------------|--------|-------------|--------------------------------|----|---------------|-------|-------------|
| - | 9  | 1788      | cr.2_Missense_Mi  | NM_000489    | NP_000480    | P46100 | ATRX_HUMAN  |                                | 30 | 3GAACAGACAC#  | 0.398 |             |
| + | 5  | 1611      | w.2_Missense_Mi   | NM_000052    | NP_000043    | Q04656 | ATP7A_HUMAN | lasmic (Potential).            | 0  | AGGAAGGAAAGA  | 0.418 |             |
| + | 5  | 380       | edm.1_Missense_I  | NM_152630    | NP_689843    | Q8NEK8 | FA46D_HUMAN |                                | 2  | TTATAACACTGC  | 0.358 |             |
| - | 32 | 3981      | nse_Mutation_p.R  | NM_153252    | NP_694984    | Q6RI45 | BRWD3_HUMAN |                                | 4  | AAATCGAAGTA#  | 0.289 |             |
| - | 18 | 1821      | p.P582S RPS6KA    | NM_014496    | NP_055311    | Q9UK32 | KS6A6_HUMAN | otein kinase 2.                | 8  | GCATGGAGTTA#  | 0.363 |             |
| - | 1  | 2116      | p.R147H PCDH1E    | NM_020766    | NP_001098713 | Q8TAB3 | PCD19_HUMAN | Extracellular (Potential).     | 7  | GGATGCGCGTG   | 0.597 |             |
| - | 7  | 806       | ina.1_Missense_M  | NM_003270    | NP_003261    | O43657 | TSN6_HUMAN  | lasmic (Potential).            | 1  | GCACGAGAGA#   | 0.388 | rs149522304 |
| + | 5  | 733       | rh.1_Missense_Mi  | NM_001939    | NP_001930    | Q13474 | DRP2_HUMAN  | Spectrin 1.                    | 2  | AAAAGGATGAG   | 0.537 |             |
| - | 2  | 3817      | r.2_Missense_Mut  | NM_032441    | NP_115817    | Q5H9K5 | ZMAT1_HUMAN |                                | 1  | TGTCCGGAAAG   | 0.403 |             |
| - | 19 | 2476      | eja.3_Missense_M  | NM_001099686 | NP_001093156 | Q9GZY0 | NXF2_HUMAN  | RRM.                           | 1  | GTAGGGCGCAG   | 0.483 |             |
| + | 5  | 3170      | o.R790K GPRASP    | NM_014710    | NP_055525    | Q5JY77 | GASP1_HUMAN | Glu-rich.                      | 2  | GGACAGACTAG   | 0.512 |             |
| + | 4  | 3118      | P2_uc004ejm.2_n   | NM_138437    | NP_612446    | Q96D09 | GASP2_HUMAN |                                | 1  | TGTTCTGAAG#   | 0.418 |             |
| - | 2  | 356       |                   | NM_153448    | NP_703149    | Q8N693 | ESX1_HUMAN  |                                | 1  | CGGCTCCTCCT   | 0.716 |             |
| - | 2  | 218_219   |                   | NM_153448    | NP_703149    | Q8N693 | ESX1_HUMAN  |                                | 1  | CTGTTCCGTACT  | 0.594 | rs76590545  |
| + | 23 | 4165      | c.1_Missense_Mut  | NM_198465    | NP_940867    | Q7Z2Y5 | NRK_HUMAN   | CNH.                           | 14 | ATAATGATCCAG  | 0.373 |             |
| + | 4  | 2403      | mg.1_Missense_I   | NM_152423    | NP_689636    | Q5H9M0 | MUML1_HUMAN |                                | 4  | TGAAATCATTTT  | 0.398 |             |
| - | 16 | 2786      | nse_Mutation_p.R  | NM_024657    | NP_078933    | Q8TE76 | MORC4_HUMAN | Potential.                     | 1  | TGTTCTTTCC#   | 0.488 |             |
| + | 4  | 634       | sk.1_Missense_Mi  | NM_182607    | NP_872413    | Q86XK7 | VSIG1_HUMAN | Potential).Ilg-like C2-type 2. | 2  | CTATTTCCCTTTC | 0.438 |             |
| + | 7  | 1165      | sk.1_Missense_Mi  | NM_182607    | NP_872413    | Q86XK7 | VSIG1_HUMAN | lasmic (Potential).            | 2  | cccagGATCAGAC | 0.378 |             |
| - | 35 | 3519      | sn.1_Missense_M   | NM_001847    | NP_001838    | Q14031 | CO4A6_HUMAN | le-helical region.             | 8  | GTTCTCCTCTC#  | 0.493 |             |
| - | 23 | 1976      | sn.1_Missense_M   | NM_001847    | NP_001838    | Q14031 | CO4A6_HUMAN | le-helical region.             | 8  | AAGTCCTGGTA#  | 0.547 |             |
| - | 22 | 1791      | sn.1_Missense_I   | NM_001847    | NP_001838    | Q14031 | CO4A6_HUMAN | le-helical region.             | 8  | AGCCAGAATCA#  | 0.547 |             |
| + | 7  | 588       | so.1_Missense_I   | NM_033380    | NP_203699    | P29400 | CO4A5_HUMAN | le-helical region.             | 4  | CTAGGGAGAACC  | 0.363 |             |
| + | 33 | 3029      | _p.K943* COL4A5   | NM_033380    | NP_203699    | P29400 | CO4A5_HUMAN | le-helical region.             | 4  | GTAGTAAAGGAC  | 0.478 |             |
| - | 4  | 1315      | Y2F_uc011msq.1_   | NM_001522    | NP_001513    | P51841 | GUC2F_HUMAN | ellular (Potential).           | 8  | CAACGGTGAAA   | 0.408 |             |
| - | 4  | 1167_1168 | p.A251V DCX_uc    | NM_000555    | NP_000546    | O43602 | DCX_HUMAN   | oublecortin 2.                 | 4  | CCACAGGCAAT#  | 0.401 |             |
| - | 2  | 213       | LHL13_uc011mp.    | NM_033495    | NP_277030    | Q9P2N7 | KLH13_HUMAN |                                | 2  | CATTTGCTGCTC# | 0.433 |             |
| + | 18 | 2910      | ntr.1_Missense_M  | NM_019045    | NP_061918    | Q5JSH3 | WDR44_HUMAN |                                | 5  | AGATCGTAAT#   | 0.353 |             |
| + | 2  | 270       |                   | NM_144658    | NP_653259    | Q5JSL3 | DOC11_HUMAN | ivated CDC42 (By similari      | 3  | CCAATGGAAGA   | 0.398 |             |
| + | 28 | 3140      | qq.2_Missense_I   | NM_144658    | NP_653259    | Q5JSL3 | DOC11_HUMAN |                                | 3  | ACTATAGTTTGGC | 0.408 |             |
| + | 4  | 1181      | RF3_uc004eqy.2_   | NM_001031855 | NP_001027026 | Q496Y0 | LONF3_HUMAN |                                | 2  | TGAAGGGGGAT#  | 0.532 |             |
| - | 3  | 446       | sa.1_Missense_Mi  | NM_080632    | NP_542199    | Q9BZ17 | REN3B_HUMAN | C core. Necessary for inter    | 3  | CTCACCTTTATT  | 0.358 |             |
| - | 12 | 2297      | p.P744S ODZ1_u    | NM_014253    | NP_055068    | Q9UKZ4 | TEN1_HUMAN  | Extracellular (Potential).     | 23 | TCCAGGGCTAC#  | 0.458 |             |
| - | 1  | 846       |                   | NM_138289    | NP_612146    | Q8TDG2 | ACTT1_HUMAN |                                | 5  | ACTTCTCTTGA#  | 0.537 |             |
| + | 15 | 1759      | jr.2_Missense_Mu  | NM_000276    | NP_000267    | Q01968 | OCRL_HUMAN  |                                | 4  | CTCTTCATATTG  | 0.378 |             |
| - | 4  | 719       | leux.1_Missense_I | NM_001008222 | NP_001008223 | Q9Y397 | ZDHC9_HUMAN | lasmic (Potential).            | 1  | CCTGGGGCACC   | 0.468 |             |
| - | 8  | 1484      | e.3_Missense_Mu   | NM_001421    | NP_001412    | Q99607 | ELF4_HUMAN  |                                | 1  | CGGTCCCAATT#  | 0.587 |             |
| + | 5  | 1051      | fewb.2_Missense_  | NM_144967    | NP_659404    | Q6ZR18 | RHG36_HUMAN | Rho-GAP.                       | 3  | AAATCCCCCAG#  | 0.458 |             |
| - | 16 | 3407      | o.E1051K IGSF1_u  | NM_001555    | NP_001546    | Q8N6C5 | IGSF1_HUMAN | otential).Ilg-like C2-type 10  | 5  | GAGTCCAGGG    | 0.498 |             |
| - | 1  | 107       | nr.1_RNA MBNL3    | NM_018388    | NP_060858    | Q9NUK0 | MBNL3_HUMAN |                                | 0  | TATCACGAATCAC | 0.398 |             |
| - | 6  | 2148      | vf.1_Missense_Mi  | NM_031907    | NP_114113    | Q9BXU7 | UBP26_HUMAN |                                | 8  | CAAGGGAAGAG#  | 0.378 |             |
| - | 4  | 611       | vw.1_Missense_I   | NM_173470    | NP_775741    | Q8N4V1 | MMGT1_HUMAN | lasmic (Potential).            | 0  | TATCCGAAGGC#  | 0.358 | rs150859420 |
| + | 2  | 250       | se_Mutation_p.H6  | NM_000074    | NP_000065    | P29965 | CD40L_HUMAN | ellular (Potential).           | 1  | AATCTTCATGAA# | 0.348 |             |
| + | 4  | 416       | EC1_uc010nsl.1_   | NM_005462    | NP_005453    | O60732 | MAGC1_HUMAN |                                | 4  | CTGAGAGCGAC#  | 0.587 | rs147626195 |
| + | 4  | 914       | EC1_uc010nsl.1_I  | NM_005462    | NP_005453    | O60732 | MAGC1_HUMAN |                                | 4  | TCCACTTTATTG# | 0.502 |             |
| + | 4  | 1517      | EC1_uc010nsl.1_I  | NM_005462    | NP_005453    | O60732 | MAGC1_HUMAN |                                | 4  | GATTCCTATG#   | 0.478 |             |
| + | 4  | 2019      | EC1_uc010nsl.1_I  | NM_005462    | NP_005453    | O60732 | MAGC1_HUMAN |                                | 4  | CTCCTCACTACT# | 0.582 |             |

|   |    |           |                    |              |               |        |              |                          |     |               |       |             |
|---|----|-----------|--------------------|--------------|---------------|--------|--------------|--------------------------|-----|---------------|-------|-------------|
| + | 5  | 398       | n.2_Intron MAGE/   | NM_005366    | NP_005357     | P43364 | MAGAB_HUMAN  |                          | 2   | TATTTCCACAGT  | 0.532 |             |
| + | 5  | 1328_1329 | i.2_Intron MAGEA   | NM_005366    | NP_005357     | P43364 | MAGAB_HUMAN  | MAGE.                    | 2   | TGGGAGGGATCC  | 0.545 |             |
| + | 2  | 988       | GPR50_uc011my      | NM_004224    | NP_004215     | Q13585 | MTR1L_HUMAN  | Name=7; (Potential).     | 4   | CTACTTCAACA   | 0.502 |             |
| - | 5  | 994       | 4ffl.2_Missense_IV | NM_001011543 | NP_001011543  | P43363 | MAGAA_HUMAN  | MAGE.                    | 0   | AGTGGGATCCA   | 0.493 |             |
| + | 9  | 1488_1489 |                    | NM_018558    | NP_061028     | Q9UN88 | GBRT_HUMAN   |                          | 3   | CCCATGGCCATC  | 0.55  |             |
| + | 3  | 567       | e_Mutation_p.R12!  | NM_005363    | NP_005354     | P43360 | MAGA6_HUMAN  | MAGE.                    | 0   | AGTATCGAGCC/  | 0.527 |             |
| - | 3  | 1057      | AGEA12_uc004fgc    | NM_005367    | NP_005358     | P43365 | MAGAC_HUMAN  | MAGE.                    | 1   | GTCTCCCTCC    | 0.562 |             |
| - | 5  | 531       | fgr.2_Missense_M   | NM_004344    | NP_004335     | P41208 | CETN2_HUMAN  | EF-hand 4.               | 0   | CAGGAACTCTT   | 0.393 |             |
| - | 1  | 662       | hn.1_Missense_Mi   | NM_017518    | NP_059988     | Q99871 | HAUS7_HUMAN  |                          | 0   | CCCTGGACACG   | 0.736 |             |
| - | 21 | 5897      |                    | NM_005334    | NP_005325     | P51610 | HCFC1_HUMAN  |                          | 2   | CCAGGGACTCG   | 0.647 |             |
| - | 9  | 1978      |                    | NM_005334    | NP_005325     | P51610 | HCFC1_HUMAN  |                          | 2   | AGCAGGGACAC   | 0.607 |             |
| - | 9  | 1510      | u.1_Nonsense_Mt    | NM_001110556 | NP_0011104026 | P21333 | FLNA_HUMAN   | Filamin 2.               | 6   | GTCTGGATCA    | 0.682 |             |
| + | 6  | 1686      |                    | NM_017514    | NP_059984     | P51805 | PLXA3_HUMAN  | cellular (Potential).    | 3   | CCGGGGACCCG   | 0.711 |             |
| + | 10 | 2196      |                    | NM_017514    | NP_059984     | P51805 | PLXA3_HUMAN  | cellular (Potential).    | 3   | AGGAGGGCAGG   | 0.667 |             |
| + | 21 | 3855      |                    | NM_017514    | NP_059984     | P51805 | PLXA3_HUMAN  | ical; (Potential).       | 3   | CGGGGGTGGC    | 0.677 |             |
| + | 25 | 4487      |                    | NM_198576    | NP_940978     | O00468 | AGRIN_HUMAN  | minin G-like 1.          | 3   | GGCGAGAGTCC   | 0.692 |             |
| - | 10 | 1151      | JK_uc001aie.2_Mi   | NM_023018    | NP_075394     | O95544 | NADK_HUMAN   |                          | 0   | GATCATGATGG   | 0.672 |             |
| - | 38 | 5594      | e_Mutation_p.V68f  | NM_015557    | NP_056372     | Q8TDI0 | CHD5_HUMAN   |                          | 12  | CTCCACTTCAG   | 0.652 |             |
| - | 12 | 1431      |                    | NM_207420    | NP_997303     | Q6PXP3 | GTR7_HUMAN   | lasmic (Potential).      | 0   | CGTTTATCTCC   | 0.483 |             |
| + | 35 | 3967      | z.2_Nonsense_Mt    | NM_015074    | NP_055889     | O60333 | KIF1B_HUMAN  |                          | 3   | GTGGTTTGA     | 0.373 |             |
| - | 3  | 234       | l_p.L77FIC1orf127  | NM_173507    | NP_775778     | B7ZLG7 | B7ZLG7_HUMAN |                          | 1   | AAGAAGCCCTT   | 0.607 |             |
| + | 8  | 2164      | asi.1_Missense_M   | NM_020780    | NP_065831     | Q9P2K9 | PTHD2_HUMAN  | lasmic (Potential).      | 7   | AGGTCGAGGAA   | 0.632 |             |
| - | 2  | 397       | ..1_Intron CLCN6_  | NM_006172    | NP_006163     | P01160 | ANF_HUMAN    |                          | 2   | GGGGCCCCGCC   | 0.672 |             |
| + | 1  | 307       |                    | NM_001080830 | NP_001074299  | O95522 | PRA12_HUMAN  |                          | 3   | AGTTTCGCCCC   | 0.592 |             |
| - | 1  | 317       | 10obf.1_Missense_  | NM_001146181 | NP_001139653  | B7ZW38 | B7ZW38_HUMAN |                          | 0   | AGCAATCATTTCT | 0.502 |             |
| + | 11 | 1654      | JC16_uc001awt.2_   | NM_015291    | NP_056106     | Q9Y2G8 | DJC16_HUMAN  | lasmic (Potential).      | 3   | TCTTCGATGG    | 0.468 |             |
| - | 7  | 844       | 1_Intron MST1P9_   | NR_002729    |               |        |              |                          | 0   | GATGTGGGATT   | 0.647 |             |
| + | 1  | 408       | C7A_uc009vpg.2_    | NM_152375    | NP_689588     | Q5VTJ3 | KLD7A_HUMAN  |                          | 3   | CCAGAAAAAG    | 0.627 |             |
| + | 1  | 1307      | vpg.2_Missense_f   | NM_152375    | NP_689588     | Q5VTJ3 | KLD7A_HUMAN  |                          | 3   | TATCCCCGCTC/  | 0.647 |             |
| - | 2  | 117       | :G2D_uc009vpo.2_   | NM_012400    | NP_036532     | Q9UNK4 | PA2GD_HUMAN  |                          | 0   | TTTCCAGTCA    | 0.552 |             |
| - | 8  | 964       | ei.2_Nonsense_Mi   | NM_001397    | NP_001388     | P42892 | ECE1_HUMAN   | cellular (Potential).    | 3   | CTCCTCGTCCC   | 0.622 |             |
| - | 15 | 1286      | bew.2_Missense_    | NM_002885    | NP_002876     | P47736 | RPGP1_HUMAN  | Rap-GAP.                 | 3   | AGAAGGGCACA   | 0.647 |             |
| + | 10 | 1997      | ogf.2_Missense_M   | NM_017449    | NP_059145     | P29323 | EPHB2_HUMAN  | lasmic (Potential).      | 5   | ATTGACATCTCC  | 0.532 |             |
| + | 10 | 1299      | p.R413Q GRHL3_     | NM_021180    | NP_067003     | Q8TE85 | GRHL3_HUMAN  |                          | 1   | CGAGCGGAAGC   | 0.627 |             |
| + | 20 | 6860      | _p.C1009R ARID1,   | NM_006015    | NP_006006     | O14497 | ARI1A_HUMAN  |                          | 142 | CGGTGTGCCGG   | 0.597 |             |
| - | 17 | 2467      | _p.P732S MAP3K6    | NM_004672    | NP_004663     | O95382 | M3K6_HUMAN   | rotein kinase.           | 9   | CAGGGTCCCC    | 0.582 | rs138197184 |
| - | 2  | 203       |                    | NM_207397    | NP_997280     | Q6UWJ8 | C16L2_HUMAN  | cellular (Potential).    | 0   | CAGCGGATCAC   | 0.622 |             |
| - | 6  | 1602_1603 | S4_uc010ofy.1_3'   | NM_005626    | NP_005617     | Q08170 | SRSF4_HUMAN  | r-rich (RS domain).      | 0   | ACACGGAGCGC   | 0.446 | rs146685214 |
| + | 3  | 532       | _p.R141H PTPRU_    | NM_005704    | NP_005695     | Q92729 | PTPRU_HUMAN  | lar (Potential);MAM.     | 7   | CGCCGTCTAGT   | 0.652 |             |
| + | 31 | 4434      | rtq.2_Missense_M   | NM_005704    | NP_005695     | Q92729 | PTPRU_HUMAN  | lasmic (Potential).      | 7   | TGGAGGGGCTG   | 0.602 |             |
| - | 2  | 900       | e_Mutation_p.G28   | NM_144569    | NP_653170     | Q6ZMY3 | SPOC1_HUMAN  |                          | 6   | CAGTCCCTGAG   | 0.637 |             |
| + | 13 | 1540      | z.2_Missense_Mut   | NM_005356    | NP_005347     | P06239 | LCK_HUMAN    | rotein kinase.           | 6   | CAGAGGAGCTG   | 0.597 |             |
| - | 5  | 825       | xm.1_Missense_IV   | NM_052896    | NP_443128     | Q72408 | CSMD2_HUMAN  | tracellular (Potential). | 12  | CCAGAGGGAGG   | 0.542 |             |
| - | 2  | 150       | xm.1_Missense_IV   | NM_052896    | NP_443128     | Q72408 | CSMD2_HUMAN  | tracellular (Potential). | 12  | GAACCCTGGGC   | 0.537 |             |
| + | 5  | 796       | e_Mutation_p.E12C  | NM_012199    | NP_036331     | Q9UL18 | AGO1_HUMAN   |                          | 3   | GGCGGAGGTC    | 0.632 |             |
| - | 4  | 672       | nse_Mutation_p.S:  | NM_017850    | NP_060320     | Q9NX04 | CA109_HUMAN  |                          | 0   | ATAGACGAAAGA  | 0.438 |             |
| + | 1  | 3712      | i.1_Intron MACF1_  | NM_015038    | NP_055853     | O94854 | K0754_HUMAN  | Ala-rich.                | 0   | ATGCTCCAGAG   | 0.617 |             |

|   |    |           |                    |              |              |        |                                            |    |               |       |             |
|---|----|-----------|--------------------|--------------|--------------|--------|--------------------------------------------|----|---------------|-------|-------------|
| - | 2  | 265       |                    | NM_032526    | NP_115915    | Q9BXI3 | 5NT1A_HUMAN                                | 1  | AGGGTTCGTTCT  | 0.448 |             |
| - | 3  | 305       | AL4_uc010ix.1_I    | NM_016257    | NP_057341    | Q9UM19 | HPCL4_HUMAN EF-hand 2.                     | 1  | ACTTGGAGGCG   | 0.692 |             |
| + | 9  | 770       | IE_uc001cdv.2_Mi   | NM_006112    | NP_006103    | Q9UNP9 | PPIE_HUMAN e cyclophilin-type.             | 0  | CAAAACACCAAT  | 0.547 |             |
| + | 4  | 385       | 001cfy.3_Missens   | NM_001142588 | NP_001136060 | Q13952 | NFYC_HUMAN                                 | 3  | ACCTCCAAAGC   | 0.423 |             |
| + | 13 | 2096      | q.2_Missense_Mu    | NM_005424    | NP_005415    | P35590 | TIE1_HUMAN III 3. Extracellular (Potentia  | 7  | CTGGGCCAATA   | 0.637 |             |
| + | 11 | 2137_2138 | p.R171C PTPRF_I    | NM_002840    | NP_002831    | P10586 | PTPRF_HUMAN tential). Fibronectin type-III | 10 | AGGCCCGCAC    | 0.545 |             |
| + | 7  | 936       | s.1_Missense_Mu    | NM_001034024 | NP_001029196 | Q9NPF5 | DMAP1_HUMAN                                | 0  | CGGAACGCAAG   | 0.617 |             |
| + | 10 | 1654      | _Mutation_p.R148   | NM_018150    | NP_060620    | Q5VTB9 | RN220_HUMAN                                | 2  | CACCTCGGGGC   | 0.592 |             |
| + | 5  | 842       | AH_uc001cpv.2_R    | NM_001441    | NP_001432    | O00519 | FAAH1_HUMAN smic (By similarity).          | 2  | GCGGCCTCAAG   | 0.517 |             |
| - | 3  | 429       | e_Mutation_p.W1z   | NM_000778    | NP_000769    | Q02928 | CP4AB_HUMAN                                | 4  | CCAATCCATGG   | 0.458 |             |
| + | 4  | 485       |                    | NM_178134    | NP_835235    | Q86W10 | CP4Z1_HUMAN ienal (Potential).             | 1  | TGTTCCGGATG   | 0.483 |             |
| + | 7  | 854       | iA9_uc010omt.1_I   | NM_001011547 | NP_001011547 | Q2M3M2 | SC5A9_HUMAN ellular (Potential).           | 3  | CTTTCCACATT   | 0.612 |             |
| - | 5  | 461       | A6_uc010omv.1_I    | NM_019073    | NP_061946    | Q9NWH7 | SPAT6_HUMAN                                | 1  | ACGTAGACAGT   | 0.363 |             |
| - | 3  | 808       |                    | NM_147193    | NP_671726    | Q8NBF1 | GLIS1_HUMAN                                | 1  | GGCACAGGGTG   | 0.677 |             |
| - | 9  | 1016      | w.2_RNA YIPF1_u    | NM_018982    | NP_061855    | Q9Y548 | YIPF1_HUMAN ienal (Potential).             | 2  | CCAACGAACAG   | 0.483 | rs77267196  |
| + | 5  | 553       |                    | NM_006252    | NP_006243    | P54646 | AAPK2_HUMAN rotein kinase.                 | 6  | GATTATCTAATAT | 0.333 |             |
| - | 2  | 1071      | orf168_uc009vzv.   | NM_001004303 | NP_001004303 | Q5VWT5 | CA168_HUMAN                                | 5  | CTTTTCTGATAT  | 0.512 |             |
| + | 4  | 575       |                    | NM_000562    | NP_000553    | P07357 | CO8A_HUMAN MACPF.                          | 3  | TCCAGGATCAC   | 0.498 |             |
| - | 11 | 1656      | p.Q468R C8B_uc     | NM_000066    | NP_000057    | P07358 | CO8B_HUMAN EGF-like.                       | 4  | GGCCTTGGGAT   | 0.498 |             |
| - | 2  | 286       | 8B_uc010ooo.1_N    | NM_000066    | NP_000057    | P07358 | CO8B_HUMAN SP type-1 1.                    | 4  | GTGGTCCAAGA   | 0.522 |             |
| - | 14 | 1620      | r.1_Missense_Mul   | NM_021080    | NP_066566    | O75553 | DAB1_HUMAN                                 | 3  | GACGAGGGGCT   | 0.617 |             |
| - | 9  | 1371      |                    | NM_000775    | NP_000766    | P51589 | CP2J2_HUMAN                                | 1  | CTCAGTCCTGG   | 0.453 |             |
| + | 8  | 1642_1643 | uc001dbl.2_Intron  | NM_005012    | NP_005003    | Q01973 | ROR1_HUMAN ical; (Potential).              | 19 | CCATTC CCTGC  | 0.446 |             |
| + | 9  | 3086      | c001dbm.2_5'Flan   | NM_005012    | NP_005003    | Q01973 | ROR1_HUMAN lasmic (Potential).             | 19 | TGGTGAATGG    | 0.428 |             |
| + | 3  | 1083      | uc001dim.2_Silent  | NM_000959    | NP_000950    | P43088 | PF2R_HUMAN ellular (Pote273*(1) p.L296     | 6  | AACATTGGAATA  | 0.343 |             |
| + | 9  | 1814      | se_Mutation_p.E5z  | NM_012302    | NP_036434    | O95490 | LPHN2_HUMAN ellular (Potential).           | 9  | CCAATGAACTG   | 0.403 |             |
| + | 14 | 2810      | .L877F LPHN2_uc    | NM_012302    | NP_036434    | O95490 | LPHN2_HUMAN Name=2; (Potential).           | 9  | CAACCTTTTCA   | 0.378 |             |
| - | 5  | 1606      | lose.1_RNA COL2    | NM_152890    | NP_690850    | Q17RW2 | COA1_HUMAN ollagen-like 1.                 | 5  | TATTCATGTGC   | 0.393 |             |
| + | 7  | 1377      | 9524_uc001dme.1    | NM_012262    | NP_036394    | Q7LGA3 | HS2ST_HUMAN ienal (Potential).             | 1  | CCATGCCGTTCT  | 0.383 |             |
| - | 3  | 1761      | BL2_uc001dmr.2     | NM_001162536 | NP_001156008 | Q96E39 | RBMXL_HUMAN Ser-rich.                      | 0  | AGGGGGAAGCC   | 0.537 |             |
| + | 3  | 573       | P6_uc010ost.1_Inl  | NM_198460    | NP_940862    | Q6ZN66 | GBP6_HUMAN (By similarity).                | 2  | CGAAGGTCTGG   | 0.507 |             |
| - | 3  | 2255      | lnx.2_Intron ZNF6z | NM_201269    | NP_958357    | Q9H582 | ZN644_HUMAN                                | 3  | ATGAGGAGAGC   | 0.378 |             |
| + | 6  | 614       | w.1_Missense_Mu    | NM_003503    | NP_003494    | O00311 | CDC7_HUMAN rotein kinase.                  | 5  | CTTTCTTTTCA   | 0.294 |             |
| + | 7  | 986       |                    | NM_173567    | NP_775838    | Q8IUS5 | EPHX4_HUMAN                                | 1  | CACATGGTGAC   | 0.413 |             |
| - | 18 | 2304      | f.1_Missense_Mut   | NM_005665    | NP_005656    | O60447 | EVI5_HUMAN s. Interaction with AURKB       | 2  | ACATCGAACCA   | 0.458 |             |
| - | 8  | 1144      | tn.1_Missense_Mi   | NM_000350    | NP_000341    | P78363 | ABCA4_HUMAN Extracellular.                 | 12 | AGAAAGGCCTTA  | 0.473 |             |
| - | 5  | 567       | tn.1_Missense_Mi   | NM_000350    | NP_000341    | P78363 | ABCA4_HUMAN Extracellular.                 | 12 | AGATATCCCTTAT | 0.408 |             |
| - | 13 | 1775      | RHGAP29_uc001c     | NM_004815    | NP_004806    | Q52LW3 | RHG29_HUMAN                                | 11 | TTGTGGCCTTG   | 0.373 |             |
| - | 5  | 516       | YD_uc001drw.2_I    | NM_000110    | NP_000101    | Q12882 | DPYD_HUMAN                                 | 8  | CATCCACAAGT   | 0.353 |             |
| + | 7  | 775_776   |                    | NM_033055    | NP_149044    | Q96MC6 | HIAT1_HUMAN Name=7; (Potential).           | 0  | ACTACCGGAGG   | 0.386 |             |
| - | 16 | 2055      | e COL11A1_uc00     | NM_001854    | NP_001845    | P12107 | COBA1_HUMAN                                | 12 | CCATAC CCTTTT | 0.353 |             |
| - | 8  | 1555      | _p.E425K COL11A    | NM_001854    | NP_001845    | P12107 | COBA1_HUMAN helical regi p.F413V(1)        | 12 | TGTTCTGTAA    | 0.328 |             |
| + | 10 | 1702      | 561D1_uc001dxu.    | NM_153340    | NP_699171    | Q5T6C5 | AT7L2_HUMAN                                | 2  | ACGGGTTGGAG   | 0.602 | rs148343235 |
| + | 1  | 1834      | sense_Mutation_p.  | NM_022768    | NP_073605    | Q96T37 | RBM15_HUMAN                                | 3  | TGACTCTGATTG  | 0.567 |             |
| - | 11 | 1432      | p.S421F OVGP1_     | NM_002557    | NP_002548    | Q12889 | OVGP1_HUMAN                                | 5  | CAAGGATACA    | 0.502 |             |
| - | 2  | 571       | sbv.1_Missense_M   | NM_004980    | NP_004971    | Q9UK17 | KCND3_HUMAN lasmic (Potential).            | 3  | GCCGGGGCCA    | 0.677 |             |
| - | 5  | 435       |                    | NM_005725    | NP_005716    | O60636 | TSN2_HUMAN ellular (Potential).            | 0  | CTCTTCATACAT  | 0.403 |             |



|   |    |           |                    |              |              |        |             |                               |    |                |       |
|---|----|-----------|--------------------|--------------|--------------|--------|-------------|-------------------------------|----|----------------|-------|
| + | 10 | 2007      | vhg.1_Missense_M   | NM_006699    | NP_006690    | O60476 | MA1A2_HUMAN | lenal (Potential).            | 0  | TGTAGGCTATAG   | 0.353 |
| - | 19 | 2687      |                    | NM_206996    | NP_996879    | Q6Q759 | SPG17_HUMAN |                               | 6  | CTCATTCAATTTTA | 0.328 |
| + | 6  | 915       | tr.1_Missense_Mu   | NM_001005783 | NP_001005783 | Q9NYQ3 | HAOX2_HUMAN | xy acid dehydrogenase.        | 4  | TATAGGGAAATG   | 0.418 |
| + | 10 | 4827      | :1_Missense_Mut    | NM_004326    | NP_004317    | O00512 | BCL9_HUMAN  | Pro-rich.                     | 6  | AGGATCGGGGG    | 0.597 |
| - | 6  | 1182      | jj.1_Missense_Mut  | NM_016361    | NP_057445    | Q9NPH0 | PPA6_HUMAN  |                               | 4  | AAATGCCCATCC   | 0.468 |
| + | 12 | 1536      | vkt.1_Missense_M   | NM_001102663 | NP_001096133 |        |             |                               | 0  | CCTTCAGATTATC  | 0.483 |
| - | 19 | 2487_2488 | www.2_Missense_M   | NM_030913    | NP_112175    | Q9H3T2 | SEM6C_HUMAN | lasmic (Potential).           | 2  | ACCCTCCTTGG    | 0.604 |
| - | 3  | 205       |                    | NM_001122965 | NP_001116437 | Q6XPR3 | RPTN_HUMAN  | 3y similarity). EF-hand 1.    | 0  | TTTGGTCTCTGT   | 0.433 |
| - | 3  | 8357      |                    | NM_002016    | NP_002007    | P20930 | FILA_HUMAN  | Ser-rich.                     | 16 | GCCTGGAGCTG    | 0.592 |
| - | 3  | 2615      | uc001ezv.2_5'Flanl | NM_002016    | NP_002007    | P20930 | FILA_HUMAN  | Ser-rich.                     | 16 | CTACCGATTGCT   | 0.592 |
| - | 3  | 3984      | uc001ezv.2_Intron  | NM_001014342 | NP_001014364 | Q5D862 | FILA2_HUMAN |                               | 17 | TGGATCCTGAC    | 0.478 |
| + | 2  | 175_176   |                    | NM_001025231 | NP_001020402 | Q5T749 | KPRP_HUMAN  | Gln-rich.                     | 5  | CAAGCCCCCTTGT  | 0.574 |
| + | 2  | 81        |                    | NM_005547    | NP_005538    | P07476 | INVO_HUMAN  |                               | 3  | CCTCTCCCCTG    | 0.532 |
| - | 2  | 444       |                    | NM_005978    | NP_005969    | P29034 | S10A2_HUMAN | EF-hand 1.                    | 1  | GAAGTTCCTCA    | 0.577 |
| - | 2  | 1302      | _p.L25F KCNN3_u    | NM_002249    | NP_002240    | Q9UGI6 | KCNN3_HUMAN | =Segment S2; (Potential).     | 1  | CAAAAAGGATGA   | 0.542 |
| + | 9  | 2666_2667 | fkq.2_Missense_M   | NM_001105203 | NP_001098673 | Q9BVN2 | RUSC1_HUMAN |                               | 2  | TGCCCCGACAC    | 0.579 |
| - | 3  | 4601      | .S1374F ASH1L_u    | NM_018489    | NP_060959    | Q9NR48 | ASH1L_HUMAN |                               | 11 | TACTAGAAAGAC   | 0.438 |
| + | 2  | 789       | '11_uc010pgq.1_Ir  | NM_152280    | NP_689493    | Q9BT88 | SYT11_HUMAN | mic (Potential). C2 1.        | 2  | TGGTGGTGACA    | 0.532 |
| + | 1  | 568       |                    | NM_181885    | NP_871001    | Q8TDU9 | RL3R2_HUMAN | ellular (Potential).          | 0  | TGGAGGGTGAG    | 0.662 |
| - | 22 | 2597      |                    | NM_178229    | NP_839943    | Q86VI3 | IQGA3_HUMAN | IQ 4.                         | 6  | AATATCCTGTAG   | 0.542 |
| + | 3  | 939       | jb.2_Missense_Mu   | NM_005973    | NP_005964    | Q92733 | PRCC_HUMAN  |                               | 27 | CTAAGCCCTCC    | 0.562 |
| + | 20 | 2628      | fqk.1_Splice_Site  | NM_001080471 | NP_001073940 | Q5VY43 | PEAR1_HUMAN |                               | 3  | TCTTAGGTTCC    | 0.642 |
| - | 5  | 921       | _p.H270Y FCRL1_    | NM_052938    | NP_443170    | Q96LA6 | FCRL1_HUMAN | 3. Extracellular (Potential). | 7  | AGAATGTTCTTC   | 0.557 |
| + | 2  | 446       | 1C_uc001frv.2_5'F  | NM_001765    | NP_001756    | P29017 | CD1C_HUMAN  | ellular (Potential).          | 4  | TGGACGAGTTG    | 0.498 |
| - | 1  | 509       |                    | NM_001005279 | NP_001005279 | Q8NGY2 | OR6K2_HUMAN | ellular (Potential).          | 1  | TGATTCGAACCA   | 0.483 |
| - | 1  | 122       |                    | NM_001005279 | NP_001005279 | Q8NGY2 | OR6K2_HUMAN | Name=1; (Potential).          | 1  | AGGTTTCCAACA   | 0.428 |
| + | 1  | 1024_1025 |                    | NM_001005184 | NP_001005184 | Q8NGW6 | OR6K6_HUMAN | lasmic (Potential).           | 1  | GGGCTGGGAAA    | 0.416 |
| + | 4  | 814       | _p.S181F PYHIN1_   | NM_152501    | NP_689714    | Q6K0P9 | IFIX_HUMAN  |                               | 4  | CACTTCTCTCAA   | 0.502 |
| + | 5  | 1113      | g_Mutation_p.P16   | NM_005531    | NP_005522    | Q16666 | IF16_HUMAN  |                               | 1  | TCTCTCCAAGA    | 0.532 |
| + | 1  | 149       | uc001fts.3_Intron  | NM_012351    | NP_036483    | P30954 | O10J1_HUMAN | Name=1; (Potential).          | 1  | AACCTTAGCAGC   | 0.433 |
| + | 1  | 568       | uc001fts.3_Intron  | NM_012351    | NP_036483    | P30954 | O10J1_HUMAN | ellular (Potential).          | 1  | TCTGTGACATCC   | 0.493 |
| + | 9  | 1221      | L6_uc009wsz.1_S    | NM_001004310 | NP_001004310 | Q6DN72 | FCRL6_HUMAN |                               | 3  | AAAGGTGAGCT    | 0.542 |
| + | 16 | 2249      | _p.G706E ATP1A2_   | NM_000702    | NP_000693    | P50993 | AT1A2_HUMAN | lasmic (Potential).           | 7  | CCAGGGAGCCA    | 0.612 |
| + | 6  | 1150      | 1A4_uc001fvf.3_F   | NM_144699    | NP_653300    | Q13733 | AT1A4_HUMAN | lasmic (Potential).           | 4  | CAACTCATCCT    | 0.498 |
| + | 11 | 1467      | 289F NDUFS2_uc     | NM_004550    | NP_004541    | O75306 | NDUS2_HUMAN |                               | 1  | CCAGTCCCTGA    | 0.522 |
| + | 9  | 1469      | g_Mutation_p.G32   | NM_002585    | NP_002576    | P40424 | PBX1_HUMAN  |                               | 5  | TGGAGGTTGGC    | 0.458 |
| - | 10 | 1553      | _p.G389E ALDH9A    | NM_000696    | NP_000687    | P49189 | AL9A1_HUMAN |                               | 0  | TATATCCACCAA   | 0.448 |
| + | 4  | 236       | ense_Mutation_p.C  | NM_002697    | NP_002688    | P14859 | PO2F1_HUMAN |                               | 5  | CAATGGTCTGG    | 0.428 |
| - | 19 | 2651      | plj.1_Missense_M   | NM_018417    | NP_060887    | Q96PN6 | ADCYA_HUMAN |                               | 3  | ACTATGGAGAG    | 0.373 |
| - | 13 | 3234      |                    | NM_000130    | NP_000121    | P12259 | FA5_HUMAN   | B.                            | 6  | TTTTTTCGTGTC   | 0.408 |
| - | 14 | 2413      | ELP_uc009wvr.2_I   | NM_003005    | NP_002996    | P16109 | LYAM3_HUMAN | ical; (Potential).            | 4  | GACCTATCGTAG   | 0.443 |
| - | 2  | 399       | nk C1orf112_uc00   | NM_033418    | NP_219486    | O95568 | MET18_HUMAN |                               | 0  | CTTCTCTTTTTT   | 0.423 |
| + | 6  | 799       | rb.1_Missense_Mu   | NM_001002294 | NP_001002294 | P31513 | FMO3_HUMAN  |                               | 1  | GTTATCCTTGG    | 0.463 |
| - | 2  | 693_694   | _p.P205S TNR_uc    | NM_003285    | NP_003276    | Q92752 | TENR_HUMAN  | Cys-rich.                     | 11 | AGCGGGCAGTA    | 0.589 |
| - | 1  | 97        | on_p.E6K TNR_uc    | NM_003285    | NP_003276    | Q92752 | TENR_HUMAN  |                               | 11 | TGTTTCCCCTAT   | 0.532 |
| + | 8  | 4135      | PA2_uc009www.2_    | NM_020318    | NP_064714    | Q9BXP8 | PAPP2_HUMAN |                               | 16 | AAAACAAGGAG    | 0.552 |
| + | 19 | 2275      | orf125_uc001gmp.   | NM_144696    | NP_653297    | Q5T1B0 | AXDN1_HUMAN |                               | 0  | TTTAATGATACCC  | 0.368 |

|   |    |           |                    |              |              |        |             |                                 |    |                |       |
|---|----|-----------|--------------------|--------------|--------------|--------|-------------|---------------------------------|----|----------------|-------|
| + | 24 | 5501      | xl.2_Missense_Mt   | NM_014810    | NP_055625    | Q5VT06 | CE350_HUMAN |                                 | 4  | :CGTGAAAAGGC   | 0.393 |
| + | 14 | 2207      | n.2_Missense_Mt    | NM_004736    | NP_004727    | Q9UBH6 | XPR1_HUMAN  | lasmic (Potential).             | 0  | :CCGGCCTCGCC   | 0.463 |
| + | 18 | 2323      | wxs.2_Missense_I   | NM_000721    | NP_000712    | Q15878 | CAC1E_HUMAN | ic (Potential). Poly-Glu.       | 6  | :AGGAAGAAGAG   | 0.552 |
| + | 7  | 1086      | e_Mutation_p.L25f  | NM_005562    | NP_005553    | Q13753 | LAMC2_HUMAN | inin IV type A.                 | 3  | AAATTTCTTGGG   | 0.463 |
| + | 7  | 1118      | e_Mutation_p.S26f  | NM_005562    | NP_005553    | Q13753 | LAMC2_HUMAN | inin IV type A.                 | 3  | CAAAGCCTGTC    | 0.478 |
| - | 2  | 1272      | .2_Intron RGL1_u   | NM_203454    | NP_982279    | Q8WW27 | ABEC4_HUMAN |                                 | 0  | :CCTTCCAAGGT   | 0.438 |
| - | 8  | 1150      | vyh.1_Nonsense_I   | NM_052966    | NP_443198    | Q9BZQ8 | NIBAN_HUMAN |                                 | 4  | TTCTTTGAGTTC   | 0.418 |
| - | 3  | 381       | _Site_p.P63_splic  | NM_052966    | NP_443198    | Q9BZQ8 | NIBAN_HUMAN |                                 | 4  | GGTGGCTTAAAC   | 0.343 |
| + | 15 | 1785      | opos.1_Splice_Sit  | NM_024420    | NP_077734    | P47712 | PA24A_HUMAN |                                 | 3  | TTTTAAGATCCTC  | 0.308 |
| - | 6  | 1055      | ot.1_Missense_Mt   | NM_199051    | NP_950252    | Q76B58 | FAM5C_HUMAN |                                 | 5  | CATTTTCCTTGC   | 0.448 |
| + | 7  | 1202      | v.2_Missense_Mul   | NM_000186    | NP_000177    | P08603 | CFAH_HUMAN  | Sushi 5.                        | 6  | GATGTACCTGTA   | 0.358 |
| + | 2  | 345       | R1_uc001gtm.2_li   | NM_002113    | NP_002104    | Q03591 | FHR1_HUMAN  | Sushi 1.                        | 0  | :GATGGTCACC    | 0.388 |
| + | 7  | 2615      | B1_uc010ppb.1_In   | NM_201253    | NP_957705    | P82279 | CRUM1_HUMAN | potential). Laminin G-like 2.   | 9  | AAAGGAGATG     | 0.373 |
| - | 2  | 1445      | 14_uc010ppj.1_5'l  | NM_014875    | NP_055690    | Q15058 | KIF14_HUMAN | d for PRC1-binding.             | 7  | :TTCGGGAAGAA   | 0.383 |
| - | 2  | 1443      | 14_uc010ppj.1_5'l  | NM_014875    | NP_055690    | Q15058 | KIF14_HUMAN | d for PRC1-binding.             | 7  | CGGGAAGAATT    | 0.383 |
| - | 7  | 1202_1203 |                    | NM_000069    | NP_000060    | Q13698 | CAC1S_HUMAN | =S6 of repeat I; (Potential)    | 5  | GTTGAGGATGAA   | 0.401 |
| - | 5  | 176       | NNI1_uc001gwp.2    | NM_003281    | NP_003272    | P19237 | TNNI1_HUMAN | ed in binding TNC.              | 0  | :AGCATTCTTGT   | 0.667 |
| - | 2  | 75        | :TNNI1_uc001gwr    | NM_003281    | NP_003272    | P19237 | TNNI1_HUMAN |                                 | 0  | :CAGCACCTAGG   | 0.592 |
| + | 17 | 1630      | R6_uc009xab.2_R    | NM_001017403 | NP_001017403 | Q9HBX8 | LGR6_HUMAN  | cellular (Potential).           | 10 | :GTGCCAGTGT    | 0.562 |
| + | 17 | 2530      | Y1gyb.1_Nonsense   | NM_002481    | NP_002472    | O60237 | MYPT2_HUMAN |                                 | 3  | CCATCCGAGAG    | 0.463 |
| - | 4  | 472       | zk.1_5'Flank CHI3l | NM_001276    | NP_001267    | P36222 | CH3L1_HUMAN |                                 | 1  | :ACCCAAAGTTCC  | 0.552 |
| + | 15 | 1488      | _p.R362 IPFKFB2    | NM_001018053 | NP_001018063 | O60825 | F262_HUMAN  |                                 | 1  | GCGCAGACGCC    | 0.527 |
| + | 4  | 519       | :P130L C4BPB_ur    | NM_001017365 | NP_001017365 | P20851 | C4BPB_HUMAN | Sushi 2.                        | 1  | CACCTCCCTTTC   | 0.453 |
| + | 3  | 208       | hhk.2_Missense_I   | NM_181755    | NP_861420    | P28845 | DH1_HUMAN   | renal (Potential).              | 1  | CCAAGGAAAGA    | 0.517 |
| - | 8  | 1706_1707 | ic.2_Missense_Mt   | NM_172362    | NP_758872    | O95259 | KCNH1_HUMAN | lasmic (Potential).             | 5  | CTCATGGTATCT   | 0.465 |
| + | 8  | 862       | D3_uc010pub.1_A    | NM_016121    | NP_057205    | Q9Y597 | KCTD3_HUMAN |                                 | 3  | CTAATAGTAGCTC  | 0.323 |
| - | 63 | 13471     |                    | NM_206933    | NP_996816    | O75445 | USH2A_HUMAN | ential). Fibronectin type-III : | 26 | :ATCTGGAGGGC   | 0.478 |
| - | 27 | 3982      |                    | NM_004446    | NP_004437    | P07814 | SYEP_HUMAN  |                                 | 2  | CTCCCTAAAAT    | 0.318 |
| - | 6  | 812       | p.Y208C TAF1A_u    | NM_139352    | NP_647603    | Q15573 | TAF1A_HUMAN |                                 | 0  | :CATTGTAAGCA   | 0.333 |
| + | 4  | 979       | a.1_Missense_Mu    | NM_198551    | NP_940953    | Q5JRA6 | MIA3_HUMAN  | cellular (Potential).           | 5  | :AAGAAGACTTT   | 0.388 |
| + | 8  | 2803      |                    | NM_032890    | NP_116279    | Q96F81 | DISP1_HUMAN |                                 | 0  | :AGATTTTTGAAC  | 0.483 |
| - | 2  | 879       | :1_5'UTR SUSD4_    | NM_017982    | NP_060452    | Q5VX71 | SUSD4_HUMAN | xtracellular (Potential).       | 0  | GAATCGGGCT     | 0.517 |
| - | 33 | 5691      | _p.P1555L CDC42i   | NM_003607    | NP_003598    | Q5VT25 | MRCKA_HUMAN |                                 | 11 | :CATGGGCAGA    | 0.383 |
| + | 39 | 10431     | p.E3463K OBSCN     | NM_001098623 | NP_001092093 | Q5VST9 | OBSCN_HUMAN | Ig-like 35.                     | 28 | :CCGTGGAAGGG   | 0.582 |
| - | 7  | 2451      | 1L2_uc001hvf.2_5'  | NM_020808    | NP_065859    | Q9P2F8 | SI1L2_HUMAN | Rap-GAP.                        | 6  | :TTTGGGAATCG   | 0.408 |
| + | 2  | 1201      | hvs.1_Missense_I   | NM_032435    | NP_115811    | Q5TCX8 | M3KL4_HUMAN | rotein kinase.                  | 8  | :CCCCGAAGTG    | 0.473 |
| - | 7  | 917       |                    | NM_018072    | NP_060542    | Q9H583 | HEAT1_HUMAN |                                 | 3  | :ACATATTATCATC | 0.308 |
| + | 5  | 3190      | re.1_Missense_Mu   | NM_020066    | NP_064450    | Q9NZ56 | FMN2_HUMAN  | ro-rich. FH1.                   | 12 | :CCCCTCCTCCC   | 0.711 |
| - | 4  | 1221      | cf.2_Missense_Mt   | NM_024804    | NP_079080    | Q96BR6 | ZN669_HUMAN | :2H2-type 6.                    | 0  | :GTAACGAAGGG   | 0.408 |
| + | 1  | 784       |                    | NM_001004698 | NP_001004698 | A6NFC9 | OR2W5_HUMAN |                                 | 3  | CTGAAGCCGGC    | 0.517 |
| + | 3  | 423       | czb.1_Missense_I   | NM_001001957 | NP_001001957 | Q7Z3T1 | OR2W3_HUMAN | lasmic (Potential).             | 3  | :GGCTGGACCCC   | 0.592 |
| + | 1  | 124       | :L13_uc001ids.2_li | NM_001004686 | NP_001004686 | Q8NH16 | OR2L2_HUMAN | cellular (Potential).           | 3  | TCAACTGATTTCT  | 0.328 |
| + | 1  | 519       |                    | NM_001004689 | NP_001004689 | Q8NG83 | OR2M3_HUMAN | cellular (Potential).           | 2  | CGGGAATAGCT    | 0.423 |
| - | 1  | 785       |                    | NM_001004695 | NP_001004695 | Q8NG76 | O2T33_HUMAN | cellular (Potential).           | 2  | CTATGGGATTTGT  | 0.478 |
| - | 1  | 166       |                    | NM_001004695 | NP_001004695 | Q8NG76 | O2T33_HUMAN | Name=2; (Potential).            | 2  | CATGGCGTGTCT   | 0.522 |
| - | 1  | 136       |                    | NM_001004734 | NP_001004734 | A6ND48 | O1411_HUMAN | Name=1; (Potential).            | 0  | FGATGACTGCAA   | 0.507 |
| + | 12 | 1266      | PBP4_uc010qad.1    | NM_012341    | NP_036473    | Q9BZE4 | NOG1_HUMAN  |                                 | 2  | :AGGAACGAGAT   | 0.388 |

|   |    |           |                    |              |              |        |             |                            |    |                |       |             |
|---|----|-----------|--------------------|--------------|--------------|--------|-------------|----------------------------|----|----------------|-------|-------------|
| - | 6  | 750       | .V165_splice AKR'  | NM_205845    | NP_995317    | P52895 | AK1C2_HUMAN |                            | 0  | CCACCTGCAGAC   | 0.373 |             |
| + | 15 | 4299      | 1iik.2_Missense_IV | NM_017782    | NP_060252    | Q5VWN6 | CJ018_HUMAN |                            | 2  | 3CATTTCGTGAGC  | 0.438 |             |
| - | 2  | 365       | 1_p.G69E IL2RA_u   | NM_000417    | NP_000408    | P01589 | IL2RA_HUMAN | xtracellular (Potential).  | 2  | 3AGTTTCCTGTAC  | 0.463 |             |
| + | 4  | 394       |                    | NM_002216    | NP_002207    | P19823 | ITIH2_HUMAN | VIT.                       | 3  | 3AAGTCCAGTCT/  | 0.413 |             |
| + | 6  | 662       | qbc.1_Missense_IV  | NM_001001973 | NP_001001973 | P36542 | ATPG_HUMAN  |                            | 0  | TCATCTCCTATAA  | 0.299 |             |
| - | 44 | 6813      |                    | NM_001081    | NP_001072    | O60494 | CUBN_HUMAN  | CUB 16.                    | 19 | CCGGTGGAGGCC   | 0.458 |             |
| + | 5  | 1208      | se_Mutation_p.R14  | NM_032812    | NP_116201    | Q6UX71 | PXDC2_HUMAN | cellular (Potential).      | 4  | 3TACATCGAATG/  | 0.333 |             |
| - | 4  | 617       |                    | NM_213569    | NP_998734    | O76041 | NEBL_HUMAN  |                            | 2  | AAATCTCTTTTGT  | 0.488 |             |
| + | 21 | 5758      | 6N KIAA1217_uc0    | NM_019590    | NP_062536    | Q5T5P2 | SKT_HUMAN   |                            | 7  | 3AAGAAATCTGGT  | 0.507 |             |
| - | 10 | 2925      | ense_Mutation_p.I  | NM_020824    | NP_065875    | Q5T5U3 | RHG21_HUMAN |                            | 8  | 3TGTAGGGGCTAC  | 0.393 |             |
| + | 3  | 2284      | UR_uc001ish.1_lr   | NM_024838    | NP_079114    | Q8IYQ7 | THNS1_HUMAN |                            | 1  | 3AGATAGGGTGC/  | 0.418 |             |
| + | 16 | 2118      | q.2_Missense_Mu    | NM_001134366 | NP_001127838 | Q05329 | DCE2_HUMAN  |                            | 2  | 3TGTATGGAGTATC | 0.502 |             |
| - | 1  | 317_318   |                    | NM_001034842 | NP_001030014 | Q3KNS1 | PTHD3_HUMAN |                            | 4  | 3CAGGGGTGCAT   | 0.703 |             |
| - | 19 | 3079      | qdt.1_Missense_IV  | NM_018076    | NP_060546    | Q5T2S8 | ARMC4_HUMAN | ARM 10.                    | 6  | TTATCGGCCTCT   | 0.468 |             |
| + | 10 | 1179_1180 | se_Mutation_p.P21  | NM_024688    | NP_078964    | Q9H943 | CJ068_HUMAN |                            | 3  | CGTTTCCTTTAG   | 0.322 |             |
| + | 5  | 869       | 33A_uc010qev.1_I   | NM_006974    | NP_008905    | Q06730 | ZN33A_HUMAN |                            | 3  | 3AAAAGGCAGTA   | 0.383 |             |
| - | 5  | 2139      | NF33B_uc001jag.    | NM_006955    | NP_008886    | Q06732 | ZN33B_HUMAN | 2H2-type 13.               | 0  | 3TCACACAGAAA/  | 0.393 |             |
| - | 11 | 1408      | 1jao.1_Missense_   | NM_145313    | NP_660356    | Q8N9B8 | RGF1A_HUMAN | Ras-GEF.                   | 0  | 3GGCGCCGTGA/   | 0.567 |             |
| - | 9  | 1041      | 1jao.1_Missense_   | NM_145313    | NP_660356    | Q8N9B8 | RGF1A_HUMAN | Ras-GEF.                   | 0  | 3AGGTTTCATGCC/ | 0.607 |             |
| - | 5  | 901_902   | T15_uc001jeb.2_IV  | NM_031912    | NP_114118    | Q9BQS2 | SYT15_HUMAN | lasmic (Potential).        | 0  | 3CAAGGGGAAGA   | 0.604 |             |
| - | 17 | 2334      | p.D711N FRMPD;     | NM_001018071 | NP_001018081 | Q68DX3 | FRPD2_HUMAN |                            | 1  | 3AGAGTCCCAGC   | 0.577 |             |
| - | 6  | 757       |                    | NM_001080520 | NP_001073989 | A6NNA5 | DRGX_HUMAN  |                            | 0  | 3CTTTTCCTGGC   | 0.672 |             |
| + | 1  | 1416      | _5'Flank CHAT_uc   | NM_003055    | NP_003046    | Q16572 | VACHT_HUMAN | ical; (Potential).         | 2  | 3AGTGGGAGATG/  | 0.657 |             |
| + | 3  | 278       | .1_3'UTR C10orf5;  | NM_001042427 | NP_001035892 | Q8N6V4 | CJ053_HUMAN |                            | 0  | 3CCTAGGAGGCG.  | 0.438 |             |
| + | 1  | 475       |                    | NM_001077665 | NP_001071133 | Q5VW22 | AGAP6_HUMAN | p.P26L(1)                  | 1  | 3TGTGCCCTCTG   | 0.597 | rs148430930 |
| - | 2  | 200       | cos.2_Missense_M   | NM_019893    | NP_063946    | Q9NR71 | ASAH2_HUMAN | renal (Potential).         | 0  | 3CTGTGGAGCGT   | 0.507 |             |
| - | 1  | 929       | KG1_uc001jijn.2_lr | NM_015235    | NP_056050    | Q9H0L4 | CSTFT_HUMAN | Gly-rich.                  | 1  | 3GCCAACCCCTG   | 0.592 |             |
| - | 27 | 3967      | se_Mutation_p.G1'  | NM_033056    | NP_149045    | Q96QU1 | PCD15_HUMAN | Extracellular (Potential). | 13 | 3TCTTTCCCTCT   | 0.368 |             |
| - | 18 | 2368      | p.Q720K ANK3_u     | NM_020987    | NP_066267    | Q12955 | ANK3_HUMAN  |                            | 19 | 3TGTCTGGGCGT/  | 0.498 |             |
| + | 10 | 2161      |                    | NM_032199    | NP_115575    | Q14865 | ARI5B_HUMAN |                            | 4  | 3TGGCTCCCCACC  | 0.537 |             |
| + | 2  | 1062      | jmx.3_Intron CTNI  | NM_178011    | NP_821079    | Q86VH5 | LRRT3_HUMAN | ilar (Potential); LRR 5.   | 3  | 3GAGAACCATCC/  | 0.488 |             |
| - | 7  | 1129      | p.R336C CTNNA;     | NM_001127384 | NP_001120856 | Q9UI47 | CTNA3_HUMAN | Potential. p.R336C(1)      | 8  | 3CTGGCGAATGG   | 0.512 |             |
| + | 10 | 1997      | rp.2_Missense_Mu   | NM_170744    | NP_734465    | Q8IZJ1 | UNC5B_HUMAN | lasmic (Potential).        | 3  | 3CCCGGACACC    | 0.687 |             |
| + | 7  | 883       | ense_Mutation_p.f  | NM_138357    | NP_612366    | Q8NE86 | MCU_HUMAN   | trial matrix (Potential).  | 0  | 3TTTAGGAATATC  | 0.328 |             |
| - | 18 | 3886      | p.S378F USP54_u    | NM_152586    | NP_689799    | Q70EL1 | UBP54_HUMAN |                            | 6  | 3TATGGGAATCAT  | 0.473 |             |
| - | 12 | 2202      | G5_uc009xru.1_R    | NM_004747    | NP_004738    | Q8TDM6 | DLG5_HUMAN  | PDZ 2.                     | 8  | 3CCAGGGACTTC/  | 0.607 |             |
| - | 8  | 1022      | _1P_uc001kbf.2_lr  | NM_003019    | NP_003010    | P35247 | SFTPD_HUMAN | C-type lectin.             | 1  | 3TGTGGGGTAGG   | 0.567 |             |
| - | 5  | 788       |                    | NM_000429    | NP_000420    | Q00266 | METK1_HUMAN |                            | 0  | 3AGTCAGGCCGC.  | 0.552 |             |
| + | 3  | 371       | lkce.3_Missense_I  | NM_032333    | NP_115709    | Q9BRX8 | CJ058_HUMAN |                            | 0  | 3TATGGGAAAAA.  | 0.483 |             |
| - | 6  | 1427      | 1_p.E77K MMRN2     | NM_024756    | NP_079032    | Q9H8L6 | MMRN2_HUMAN | Potential.                 | 1  | 3CTCCTCCACTC/  | 0.587 |             |
| + | 5  | 561       | 1F1_uc009xua.1_F   | NM_003972    | NP_003963    | O14981 | BTAF1_HUMAN |                            | 3  | 3TTGGCCTTAATA  | 0.373 |             |
| - | 29 | 3143      | e_Mutation_p.S99   | NM_013451    | NP_038479    | Q9NZM1 | MYOF_HUMAN  | lasmic (Potential).        | 4  | 3CCAGGATTTG/   | 0.478 |             |
| + | 6  | 867       | iq.3_Missense_Mu   | NM_001127182 | NP_001120654 | Q53EZ4 | CEP55_HUMAN | tion with TSG101.          | 0  | 3GTTATCTTCAAC  | 0.328 |             |
| + | 8  | 1623      | i11_uc001kjd.3_Int | NM_005097    | NP_005088    | Q95970 | LG11_HUMAN  | EAR 5.                     | 4  | 3AACATGGAGGAT  | 0.423 |             |
| - | 1  | 1509_1510 |                    | NR_002319    |              |        |             |                            | 0  | 3GCCACCCATATC  | 0.515 |             |
| - | 12 | 1599      | p.G296E TCTN3_I    | NM_015631    | NP_056446    | Q6NUS6 | TECT3_HUMAN | cellular (Potential).      | 0  | 3GCCTTCCATGA/  | 0.488 |             |
| - | 15 | 2202      |                    | NM_012465    | NP_036597    | Q9Y6L7 | TLL2_HUMAN  | CUB 3.                     | 3  | 3GAAGGGAGATC/  | 0.517 |             |

|   |    |           |                                                  |              |              |        |             |                               |    |               |       |             |
|---|----|-----------|--------------------------------------------------|--------------|--------------|--------|-------------|-------------------------------|----|---------------|-------|-------------|
| - | 15 | 2141      |                                                  | NM_012465    | NP_036597    | Q9Y6L7 | TLL2_HUMAN  | CUB 3.                        | 3  | 3ATACTCCTTCG  | 0.527 |             |
| + | 3  | 2251      | se_Mutation_p.Q7                                 | NM_021830    | NP_068602    | Q96RR1 | PEO1_HUMAN  | 3F4 helicase.                 | 1  | ACGAGCAGCTG   | 0.498 |             |
| + | 6  | 1553      |                                                  | NM_030912    | NP_112174    | Q9BZR9 | TRIM8_HUMAN |                               | 1  | TTCTTCCGTGG   | 0.647 |             |
| + | 10 | 1206      | 3P2_uc010qrz.1_F                                 | NM_004132    | NP_004123    | Q14520 | HABP2_HUMAN | peptidase S1.                 | 3  | TAAAAACCAGAC  | 0.303 |             |
| + | 5  | 1158      | se_Mutation_p.H2!                                | NM_207303    | NP_997186    | Q5VV63 | ATRN1_HUMAN | ellular (Potential).          | 7  | CAGATCACGGT   | 0.403 |             |
| + | 20 | 3630_3631 | se_Mutation_p.G2'                                | NM_207303    | NP_997186    | Q5VV63 | ATRN1_HUMAN | e 2. Extracellular (Potential | 7  | CTAAAGGAATAA  | 0.322 |             |
| + | 11 | 1417      |                                                  | NM_001011709 | NP_001011709 | Q17RR3 | LIPR3_HUMAN | PLAT.                         | 1  | TGATAAATACATC | 0.308 |             |
| + | 4  | 5563      | se_Mutation_p.V1                                 | NM_206862    | NP_996744    | O95359 | TACC2_HUMAN |                               | 10 | TCTCCGTTGTGC  | 0.602 |             |
| + | 52 | 6662      | 185_splice DMBT1                                 | NM_007329    | NP_015568    | Q9UGM3 | DMBT1_HUMAN |                               | 7  | TCCTAGGCAGAGA | 0.522 |             |
| - | 8  | 1756      | p.G194E CUZD1_                                   | NM_022034    | NP_071317    | Q86UP6 | CUZD1_HUMAN | llular (Potential). ZP.       | 2  | FAGTGTCCAATA  | 0.363 |             |
| - | 4  | 1649      | p.H379L CHST15_                                  | NM_015892    | NP_056976    | Q7LFX5 | CHSTF_HUMAN | lenal (Potential).            | 1  | AGCGGTGGATG   | 0.527 |             |
| - | 1  | 709       | p.E66K CHST15_                                   | NM_015892    | NP_056976    | Q7LFX5 | CHSTF_HUMAN | lasmic (Potential).           | 1  | AGTTTTCGTTCC  | 0.463 |             |
| + | 3  | 354       | CP2_uc001lmh.1_intron ZNF511_uc001lmj.1_Missense |              |              | Q8NB15 | ZN511_HUMAN | 2H2-type 2.                   | 0  | FTTGCTCCTTTTC | 0.617 |             |
| + | 16 | 983       | iq.3_Nonsense_M                                  | NM_006757    | NP_006748    | P45378 | TNNT3_HUMAN |                               | 1  | CGCTGGAAGTA   | 0.647 |             |
| - | 20 | 3005      | y.N999S TRPM5_L                                  | NM_014555    | NP_055370    | Q9NZQ8 | TRPM5_HUMAN | lasmic (Potential).           | 4  | TCAGGTTGTAG   | 0.642 |             |
| - | 6  | 1908      | 5_uc010qxr.1_Mis                                 | NM_001130520 | NP_001123992 | O14628 | ZN195_HUMAN |                               | 0  | TTGTAGGGTTTCT | 0.398 |             |
| - | 7  | 975       |                                                  | NM_003141    | NP_003132    | P19474 | RO52_HUMAN  | 330.2/SPRY.                   | 4  | GATGTGGACTG   | 0.532 |             |
| + | 1  | 919_920   |                                                  | NM_001005172 | NP_001005172 | Q8NGK3 | O52K2_HUMAN | lasmic (Potential).           | 2  | CTTTGGGAGTAT  | 0.485 |             |
| + | 2  | 665       |                                                  | NM_152430    | NP_689643    | Q8TCB6 | O51E1_HUMAN | ellular (Potential).          | 4  | CCGCTCCAATA   | 0.537 | rs148260821 |
| + | 2  | 797       |                                                  | NM_152430    | NP_689643    | Q8TCB6 | O51E1_HUMAN | Name=5; (Potential).          | 4  | TCATCTCCTTCT  | 0.498 |             |
| - | 2  | 909       |                                                  | NM_030774    | NP_110401    | Q9H255 | O51E2_HUMAN | lasmic (Potential).           | 5  | ACCGTTCGTATT  | 0.488 |             |
| - | 2  | 554       |                                                  | NM_030774    | NP_110401    | Q9H255 | O51E2_HUMAN | Name=3; (Potential).          | 5  | GGCATGAATAA   | 0.517 |             |
| - | 1  | 1163      |                                                  | NM_001005177 | NP_001005177 | Q8NGF1 | O52R1_HUMAN | lasmic (Potential).           | 1  | CAACATCCTTGG  | 0.448 |             |
| + | 1  | 406       |                                                  | NM_001004753 | NP_001004753 | Q8NH61 | O51F2_HUMAN | lasmic (Potential).           | 2  | TTTGATCGTTTTC | 0.463 |             |
| + | 1  | 478       |                                                  | NM_001001916 | NP_001001916 | Q8NH60 | O52J3_HUMAN | Name=4; (Potential).          | 3  | CACTTCCCATG   | 0.468 |             |
| - | 2  | 649       | BG2_uc001maj.1_                                  | NM_000559    | NP_000550    | P69892 | HBG2_HUMAN  | p.S71F(1)                     | 1  | CCAAGGAAGTC   | 0.532 | rs151258456 |
| - | 1  | 778       | .1_intron HBE1_uc                                | NM_001005567 | NP_001005567 | Q9H339 | O51B5_HUMAN | ellular (Potential).          | 1  | ACGATGAATCAC  | 0.428 |             |
| - | 1  | 758       | .1_intron TRIM22_                                | NM_001001913 | NP_001001913 | Q8NH53 | O52N1_HUMAN | Name=6; (Potential).          | 1  | ACATAGGTGAGG  | 0.443 |             |
| - | 1  | 685       |                                                  | NM_001004052 | NP_001004052 | Q96RD2 | O52B2_HUMAN | lasmic (Potential).           | 0  | CAAAACGAAACA  | 0.478 |             |
| - | 1  | 25        |                                                  | NM_001004490 | NP_001004490 | A6NM03 | O2AG2_HUMAN | ellular (Potential).          | 4  | GCTTCCCAAGG   | 0.438 |             |
| + | 8  | 2899      |                                                  | NM_176822    | NP_789792    | Q86W24 | NAL14_HUMAN | LRR 5.                        | 8  | ATGGTGGAGTAA  | 0.413 |             |
| + | 9  | 3096      |                                                  | NM_176822    | NP_789792    | Q86W24 | NAL14_HUMAN |                               | 8  | CTTTTCGGCATC  | 0.428 |             |
| - | 18 | 2326      | gcf.2_Missense_Mt                                | NM_001418    | NP_001409    | P78344 | IF4G2_HUMAN | MI.                           | 2  | CAAAGGGATGT   | 0.428 |             |
| - | 8  | 643       | lrcu.1_Missense_A                                | NM_175058    | NP_778228    | Q6IQ23 | PKHA7_HUMAN | PH.                           | 3  | CAAGGGGATGC   | 0.537 |             |
| - | 5  | 759       | cy.1_Missense_Mt                                 | NM_000352    | NP_000343    | Q09428 | ABCC8_HUMAN | smic (By similarity).         | 1  | AGGTCTTGCAG   | 0.567 |             |
| - | 2  | 699       |                                                  | NM_054030    | NP_473371    | Q96LB1 | MRGX2_HUMAN | Name=5; (Potential).          | 1  | GCAGGGCCAGA   | 0.532 |             |
| + | 16 | 4397      | on_p.V409M NAV2                                  | NM_145117    | NP_660093    | Q8IVL1 | NAV2_HUMAN  |                               | 6  | ATTTCGGTGGTC  | 0.527 |             |
| + | 16 | 1740      | s.1_Missense_Mu                                  | NM_031418    | NP_113606    | Q9BYT9 | ANO3_HUMAN  | lasmic (Potential).           | 4  | CACGGGAAAAC   | 0.398 |             |
| - | 6  | 825       | p.E189K ELF5_u                                   | NM_198381    | NP_938195    | Q9UKW6 | ELF5_HUMAN  | ETS.                          | 1  | CTTGTCCCTATC  | 0.428 |             |
| + | 9  | 1219_1220 | R5L_uc009ykk.2_I                                 | NM_001160167 | NP_001153639 | Q6MZQ0 | PRR5L_HUMAN |                               | 1  | GGAGGGGGAAG   | 0.629 |             |
| + | 9  | 1326      | R5L_uc009ykk.2_I                                 | NM_001160167 | NP_001153639 | Q6MZQ0 | PRR5L_HUMAN |                               | 1  | GCCTGGGGGAG   | 0.662 |             |
| + | 2  | 1109      | G1_uc001mwt.2_F                                  | NM_000448    | NP_000439    | P15918 | RAG1_HUMAN  | RING-type.                    | 5  | TATTGTCCCTCTT | 0.498 |             |
| + | 8  | 898       | 18_uc001myg.2_Ir                                 | NM_130783    | NP_570139    | Q96SJ8 | TSN18_HUMAN | lasmic (Potential).           | 0  | CCGGGGCATCC   | 0.597 |             |
| + | 8  | 1667      |                                                  | NM_020229    | NP_064614    | Q9NQV5 | PRD11_HUMAN |                               | 1  | TGAGCCCCCG    | 0.522 |             |
| - | 2  | 376       | 13_uc009yku.1_5'                                 | NM_020826    | NP_065877    | Q7L8C5 | SYT13_HUMAN | lasmic (Potential).           | 1  | TGGTCCATAGA   | 0.532 |             |
| + | 10 | 1417      | se_Mutation_p.A43f                               | NM_152312    | NP_689525    | Q8N3Y3 | LARG2_HUMAN | lenal (Potential).            | 3  | TTGTGGCCAG    | 0.637 |             |
| + | 9  | 1764      | n.1_Missense_Mul                                 | NM_003682    | NP_003673    | Q8WXG6 | MADD_HUMAN  | dDENN.                        | 11 | TTCAAGCTGGC   | 0.557 |             |

|   |    |           |                   |              |              |        |             |    |               |       |             |
|---|----|-----------|-------------------|--------------|--------------|--------|-------------|----|---------------|-------|-------------|
| - | 18 | 2705      | BL2_uc001ngf.2_F  | NM_024783    | NP_079059    | Q5U5Z8 | CBPC2_HUMAN | 2  | ACCTGGAGCTG   | 0.458 |             |
| - | 10 | 1739      | ise_Mutation_p.E5 | NM_024783    | NP_079059    | Q5U5Z8 | CBPC2_HUMAN | 2  | TTCTTCAAGAAC  | 0.383 |             |
| + | 3  | 491       | igo.3_Missense_M  | NM_002843    | NP_002834    | Q12913 | PTPRJ_HUMAN | 8  | CTGACCCCTTCA  | 0.423 |             |
| + | 1  | 520       |                   | NM_001004726 | NP_001004726 | Q8NH49 | OR4X1_HUMAN | 3  | ATGACCACACTAC | 0.567 |             |
| - | 1  | 358       |                   | NM_001005272 | NP_001005272 | Q8NH83 | OR4A5_HUMAN | 3  | ATAGCGATCAC   | 0.468 | rs141762692 |
| - | 1  | 844       |                   | NM_001004700 | NP_001004700 | Q6IEV9 | OR4CB_HUMAN | 1  | GAGTGGATTGAC  | 0.413 |             |
| + | 1  | 656       |                   | NM_001004735 | NP_001004735 | Q8NGL3 | OR5DE_HUMAN | 3  | TCACCTCCTATG  | 0.478 |             |
| + | 1  | 823       |                   | NM_001001921 | NP_001001921 | Q8N127 | O5AS1_HUMAN | 5  | TGGTGGCAGTG   | 0.383 |             |
| + | 1  | 545       |                   | NM_001005200 | NP_001005200 | Q8N162 | OR8H2_HUMAN | 2  | ACACTTCCCCAA  | 0.398 |             |
| + | 1  | 586       |                   | NM_001005200 | NP_001005200 | Q8N162 | OR8H2_HUMAN | 2  | ACACCCGAAATC  | 0.388 |             |
| - | 1  | 767       |                   | NM_001005199 | NP_001005199 | Q8NGG4 | OR8H1_HUMAN | 3  | TAAGTAAAAATCA | 0.358 |             |
| + | 1  | 797       |                   | NM_001005202 | NP_001005202 | Q8NH51 | OR8K3_HUMAN | 4  | TTCATTCCTTTG  | 0.423 |             |
| + | 1  | 364       |                   | NM_001004730 | NP_001004730 | Q8NGP9 | O5AR1_HUMAN | 0  | TATGGTCGTTTT  | 0.512 |             |
| + | 1  | 898       |                   | NM_001004458 | NP_001004458 | Q8NH92 | OR1S1_HUMAN | 1  | ATAAACCCCTTC  | 0.453 |             |
| - | 5  | 515       | ymq.2_Missense_M  | NM_145016    | NP_659453    | Q8WU03 | GLYL2_HUMAN | 2  | GGTTTTTCATGTA | 0.388 |             |
| - | 2  | 778       |                   | NM_000738    | NP_000729    | P11229 | ACM1_HUMAN  | 0  | TTCACGGAGAAG  | 0.632 |             |
| + | 9  | 1764      | 2A9_uc001nwx.2_   | NM_080866    | NP_543142    | Q8IVM8 | S22A9_HUMAN | 3  | TGCCCTGGATCA  | 0.502 |             |
| + | 2  | 1075      |                   | NM_006779    | NP_006770    | O14613 | BORG1_HUMAN | 0  | TAGATCCCCACA  | 0.657 |             |
| + | 16 | 1991      |                   | NM_006842    | NP_006833    | Q13435 | SF3B2_HUMAN | 3  | AAATCCCTGGG   | 0.498 |             |
| - | 16 | 3206_3207 |                   | NM_006946    | NP_008877    | O15020 | SPTN2_HUMAN | 4  | CAGCCGGTCTGC  | 0.688 |             |
| - | 2  | 313       |                   | NM_005995    | NP_005986    | O75333 | TBX10_HUMAN | 0  | TCCTCCCACAG   | 0.642 |             |
| - | 13 | 1707_1708 | e_Mutation_p.P51  | NM_001876    | NP_001867    | P50416 | CPT1A_HUMAN | 2  | GGTACGGAATG   | 0.495 | rs146533704 |
| + | 1  | 284_285   |                   | NM_005553    | NP_005544    | P26371 | KRA59_HUMAN | 0  | TGGAGGCTGTG   | 0.639 |             |
| - | 3  | 477       | uq.1_Missense_M   | NM_003355    | NP_003346    | P55851 | UCP2_HUMAN  | 0  | CAGAGGAAAGG   | 0.542 |             |
| - | 10 | 1584      |                   | NM_173582    | NP_775853    | Q6PCE3 | PGM2L_HUMAN | 1  | AAAAAGGACTT   | 0.323 |             |
| - | 6  | 1172      |                   | NM_001039548 | NP_001034637 | Q6PF15 | KLH35_HUMAN | 0  | CCCGCCCGCCA   | 0.597 |             |
| + | 1  | 470_471   | i.2_Intron CAPN5_ | NM_006189    | NP_006180    | P47874 | OMP_HUMAN   | 0  | GGCCTCCGTGG   | 0.604 | rs2233550   |
| + | 32 | 4557      | se_Mutation_p.E14 | NM_000260    | NP_000251    | Q13402 | MYO7A_HUMAN | 4  | CGCTGGAGAAG   | 0.592 |             |
| - | 14 | 1892      | ak.2_Missense_M   | NM_001364    | NP_001355    | Q15700 | DLG2_HUMAN  | 6  | GCAGGGATCCG   | 0.473 |             |
| - | 3  | 1252      | m.2_Missense_M    | NM_001143831 | NP_001137303 | P41594 | GRM5_HUMAN  | 9  | TGGTTTCGGTGG  | 0.458 |             |
| + | 1  | 699       |                   | NM_001008781 | NP_001008781 | Q8TDW7 | FAT3_HUMAN  | 5  | TGGTATGATCTG  | 0.388 |             |
| + | 1  | 1525      |                   | NM_001008781 | NP_001008781 | Q8TDW7 | FAT3_HUMAN  | 5  | TAGGAGAAAATG  | 0.388 |             |
| + | 15 | 10153     |                   | NM_001008781 | NP_001008781 | Q8TDW7 | FAT3_HUMAN  | 5  | ATTTTCCATTGT  | 0.408 |             |
| + | 4  | 467       | N5_uc001pf.2_M    | NM_014361    | NP_055176    | O94779 | CNTN5_HUMAN | 8  | CATCTTCATCTC  | 0.398 |             |
| + | 5  | 777       | KIAA1377_uc010r   | NM_020802    | NP_065853    | Q9P2H0 | K1377_HUMAN | 4  | TTCACAGAGCTA  | 0.318 |             |
| + | 6  | 2075      | run.1_Missense_M  | NM_020802    | NP_065853    | Q9P2H0 | K1377_HUMAN | 4  | TGTTGGAAATC   | 0.294 |             |
| - | 4  | 679       | 1_uc010ruv.1_Mis  | NM_002421    | NP_002412    | P03956 | MMP1_HUMAN  | 4  | TGATTTCTCCAC  | 0.438 |             |
| - | 2  | 326       |                   | NM_002427    | NP_002418    | P45452 | MMP13_HUMAN | 3  | TACATCAGGAAC  | 0.408 | rs148152034 |
| + | 26 | 4091      | e_Mutation_p.P131 | NM_001080463 | NP_001073932 | Q8NCM8 | DYHC2_HUMAN | 0  | TATCTCCTTATT  | 0.338 |             |
| - | 7  | 1453      | hp.2_Missense_M   | NM_025208    | NP_079484    | Q9GZP0 | PDGFD_HUMAN | 2  | TACAATCACATCC | 0.458 | rs146343067 |
| - | 6  | 4283      | z.1_Missense_Mul  | NM_015065    | NP_055880    | Q8NEV8 | EXPH5_HUMAN | 5  | GTTTCACTTTGC  | 0.348 |             |
| + | 2  | 348       | .1_5'Flank HSPB2  | NM_001541    | NP_001532    | Q16082 | HSPB2_HUMAN | 3  | TACCCAGACG    | 0.657 |             |
| + | 3  | 434       | se_Mutation_p.P13 | NM_207343    | NP_997226    | Q8ND24 | RN214_HUMAN | 0  | TCCATCCAGTCA  | 0.542 |             |
| - | 32 | 5563      |                   | NM_020693    | NP_065744    | Q8TD84 | DSCL1_HUMAN | 8  | TTCTTCTTTGT   | 0.597 |             |
| + | 8  | 1012      | e_Mutation_p.L216 | NM_019894    | NP_063947    | Q9NRS4 | TMPS4_HUMAN | 2  | GGGTCTCACG    | 0.612 |             |
| + | 7  | 3865      | 1281L MLL_uc001   | NM_005933    | NP_005924    | Q03164 | MLL1_HUMAN  | 25 | TGGGCCTGAAT   | 0.582 |             |
| + | 7  | 1215      | i.2_Missense_Mut  | NM_015157    | NP_055972    | Q86UU1 | PHLB1_HUMAN | 0  | CTGCCGTTCC    | 0.637 |             |



|   |    |           |                   |              |              |        |              |                               |    |               |       |
|---|----|-----------|-------------------|--------------|--------------|--------|--------------|-------------------------------|----|---------------|-------|
| + | 7  | 1737      | 462S PHLDB1_uc    | NM_015157    | NP_055972    | Q86UU1 | PHLB1_HUMAN  |                               | 0  | TTAAGTCCATCTC | 0.652 |
| + | 8  | 2200      |                   | NM_005422    | NP_005413    | O75443 | TECTA_HUMAN  | VWFD 2.                       | 10 | CCCTCCGAGTTC  | 0.617 |
| + | 9  | 2429      |                   | NM_005422    | NP_005413    | O75443 | TECTA_HUMAN  | VWFD 2.                       | 10 | TTATATCGAAACA | 0.433 |
| + | 45 | 6148      | _p.S869L SORL1_   | NM_003105    | NP_003096    | Q92673 | SORL_HUMAN   | ential). Fibronectin type-III | 15 | AGTTTCATTATC  | 0.249 |
| - | 9  | 1972      | yp.2_Missense_M   | NM_006597    | NP_006588    | P11142 | HSP7C_HUMAN  |                               | 8  | AGAGGGAGGAG   | 0.512 |
| + | 10 | 1374      | ID1B_uc010rx.1_   | NM_020716    | NP_065767    | Q3KR37 | GRM1B_HUMAN  |                               | 1  | ACATCCCCACTC  | 0.498 |
| - | 1  | 899       |                   | NM_001005188 | NP_001005188 | Q8NH79 | OR6X1_HUMAN  | lasmic (Potential).           | 3  | CCCTTCTTAAGC  | 0.388 |
| + | 1  | 47        |                   | NM_001001965 | NP_001001965 | Q8NGN0 | OR4D5_HUMAN  | ellular (Potential).          | 1  | ACTGGGGCTCTC  | 0.418 |
| + | 1  | 86        |                   | NM_001001965 | NP_001001965 | Q8NGN0 | OR4D5_HUMAN  | Name=1; (Potential).          | 1  | CTTCACTGTTTI  | 0.458 |
| + | 3  | 237       | _p.L10F VWA5A_    | NM_001130142 | NP_001123614 | O00534 | VMA5A_HUMAN  | VIT.                          | 2  | TCACCCTCCACC  | 0.448 |
| + | 18 | 2427      | zt.2_Missense_Mt  | NM_001130142 | NP_001123614 | O00534 | VMA5A_HUMAN  |                               | 2  | GTAAGGACTTG/  | 0.562 |
| - | 1  | 10        |                   | NM_001002917 | NP_001002917 | Q8WZ84 | OR8D1_HUMAN  | ellular (Potential).          | 3  | AATTTTCCATGGI | 0.413 |
| + | 5  | 481_482   |                   | NM_017425    | NP_059121    | Q15506 | SP17_HUMAN   | IQ.                           | 0  | AAAGAGGTGCT   | 0.391 |
| + | 13 | 1404      | osav.1_Missense_  | NM_001145290 | NP_001138762 | Q8TED4 | SPX2_HUMAN   |                               | 2  | GCCAGGACGGG   | 0.622 |
| + | 7  | 1601      | _p.P324S NTM_u    | NM_016522    | NP_057606    | Q9P121 | NTRI_HUMAN   |                               | 6  | CAGGTCCAGGC   | 0.597 |
| - | 1  | 122       |                   | NM_174927    | NP_777587    | Q7Z5L4 | SPT19_HUMAN  |                               | 0  | AACTGGTTATTC  | 0.433 |
| - | 11 | 1543      | on_p.G334R SLC    | NM_003044    | NP_003035    | P48065 | S6A12_HUMAN  | Name=7; (Potential).          | 1  | AAACCCAGCCA   | 0.502 |
| + | 5  | 1465_1466 | 1_Intron LRTM2_u  | NM_001039029 | NP_001034118 | Q8N967 | LRTM2_HUMAN  | xtracellular (Potential).     | 1  | GTAGGGGGGACC  | 0.589 |
| + | 8  | 1447      | A1C_uc001qkn.2    | NM_199460    | NP_955630    | Q13936 | CAC1C_HUMAN  | icellular (Potential).        | 11 | GGAAGGGACTG   | 0.517 |
| + | 2  | 210_211   | see.1_Missense_M  | NR_027363    |              |        |              |                               | 0  | AAAGCCCCGCTC  | 0.559 |
| + | 4  | 290       | _p.L159F DYRK4_   | NM_003845    | NP_003836    | Q9NR20 | DYRK4_HUMAN  |                               | 3  | CTAAAGCTTTTT/ | 0.517 |
| + | 1  | 1383      |                   | NM_002235    | NP_002226    | P17658 | KCNA6_HUMAN  |                               | 3  | GGCCGGCCAGG   | 0.617 |
| + | 1  | 615       | ik.3_Missense_Mu  | NM_002527    | NP_002518    | P20783 | NTF3_HUMAN   |                               | 1  | TGGGGGAGATC   | 0.522 |
| - | 21 | 2228      |                   | NM_020373    | NP_065106    | Q9NQ90 | ANO2_HUMAN   | ellular (Potential).          | 7  | GTTTCGAATGGC  | 0.453 |
| + | 2  | 1235      | 2_uc001qxx.1_Intr | NM_019858    | NP_062832    | Q16538 | GP162_HUMAN  | lasmic (Potential).           | 3  | CCTTGGGTACC   | 0.687 |
| - | 10 | 1525      |                   | NM_001733    | NP_001724    | P00736 | C1R_HUMAN    | peptidase S1.                 | 0  | GGGCCCCGCC    | 0.627 |
| - | 5  | 788       | lquh.2_Missense_  | NM_018088    | NP_060558    | Q86YD7 | F90A1_HUMAN  |                               | 1  | CCCTTCTTTTTC  | 0.552 |
| - | 26 | 3205      | .2_Missense_Mut   | NM_002864    | NP_002855    |        |              |                               | 5  | AGGATCGAGCC   | 0.488 |
| - | 1  | 566       |                   | NM_023919    | NP_076408    | Q9NYW3 | TA2R7_HUMAN  | ellular (Potential).          | 1  | AACTCCAAGTT/  | 0.423 |
| - | 4  | 943       | B4_uc001qzf.1_Inl | NM_006249    | NP_006240    | Q04118 | PRB3_HUMAN   | Pro-rich.                     | 1  | GGGGAGGTCTG   | 0.537 |
| - | 3  | 285       | _p.Q83P PRB1_u    | NM_005039    | NP_005030    | P04280 | PRP1_HUMAN   | -P-[PAQ]-Q-[GE]-[GD]-[NK      | 0  | CCCCTGTGGGC   | 0.622 |
| + | 2  | 1056      | raz.2_Missense_M  | NM_003979    | NP_003970    | Q8NFJ5 | RAI3_HUMAN   | Name=4; (Potential).          | 0  | TTCTGGGTCTG   | 0.517 |
| - | 13 | 4359      |                   | NM_000834    | NP_000825    | Q13224 | NMDE2_HUMAN  | lasmic (Potential).           | 12 | CTGGTCGTCCC   | 0.612 |
| - | 8  | 1856      |                   | NM_000834    | NP_000825    | Q13224 | NMDE2_HUMAN  | ical; (Potential).            | 12 | ATCACCCATACC  | 0.463 |
| - | 5  | 793       | _p.S49F SLCO1A    | NM_021094    | NP_066580    | P46721 | SO1A2_HUMAN  | Name=4; (Potential).          | 4  | ATATAGGAAATAC | 0.343 |
| - | 10 | 2696      | lrj.1_Missense_M  | NM_001002259 | NP_001002259 | Q6IMN6 | CAPR2_HUMAN  |                               | 2  | AGTTGGGAATTG  | 0.388 |
| - | 4  | 1127_1128 |                   | NM_001004329 | NP_001004329 | Q6ZNG2 | DBX2_HUMAN   |                               | 0  | GGCACCTTGCA   | 0.47  |
| - | 7  | 689       | _p.T144I SLC38A   | NM_030674    | NP_109599    | Q9H2H9 | S38A1_HUMAN  | lasmic (Potential).           | 5  | CTGTGGTGCCA   | 0.383 |
| + | 4  | 753       | AM113B_uc001rpc   | NM_138371    | NP_612380    | Q96HM7 | F113B_HUMAN  |                               | 5  | CCCTCGAAGTG   | 0.587 |
| + | 4  | 1128      | _p.P13S FAM113B   | NM_138371    | NP_612380    | Q96HM7 | F113B_HUMAN  |                               | 5  | FATGGTCCGAAC  | 0.592 |
| - | 14 | 1752      | _p.P387A RPAP3_u  | NM_024604    | NP_078880    | Q9H6T3 | RPAP3_HUMAN  |                               | 1  | TGCAGGAATTG   | 0.403 |
| - | 23 | 2742      | _Missense_Mutati  | NM_001098532 | NP_001092002 | A8K2G5 | A8K2G5_HUMAN |                               | 4  | GACAGGAGGGG   | 0.413 |
| - | 54 | 4613      | 2A1_uc009zkw.2_F  | NM_001844    | NP_001835    | P02458 | CO2A1_HUMAN  | lar collagen NC1.             | 2  | CACACCGAATTC  | 0.517 |
| - | 6  | 1270      | _p.P355S ZNF641   | NM_152320    | NP_689533    | Q96N77 | ZN641_HUMAN  |                               | 2  | CTTTGGCACTGC  | 0.592 |
| - | 5  | 1970      | Y6_uc001rsi.3_Mi  | NM_015270    | NP_056085    | O43306 | ADCY6_HUMAN  | lasmic (Potential).           | 0  | CCCTCCGGCAGC  | 0.552 |
| - | 48 | 15620     |                   | NM_003482    | NP_003473    | O14686 | MLL2_HUMAN   | r N-terminal.                 | 41 | CCACGGGATAG/  | 0.607 |
| - | 21 | 5117      |                   | NM_003482    | NP_003473    | O14686 | MLL2_HUMAN   |                               | 41 | TGTGGGATTTCC  | 0.637 |

rs149681179

|   |    |           |                   |              |              |        |             |                              |    |                |       |             |
|---|----|-----------|-------------------|--------------|--------------|--------|-------------|------------------------------|----|----------------|-------|-------------|
| + | 8  | 1669      | 'ATS2_uc001ruf.2_ | NM_023071    | NP_075559    | Q86XZ4 | SPAS2_HUMAN |                              | 1  | ATGTTCCCCTCG   | 0.428 |             |
| - | 8  | 1713      | ICKAP5L_uc001rv   | NM_001037806 | NP_001032895 | Q9HCH0 | NCK5L_HUMAN | Pro-rich.                    | 1  | GACCCCTTCGG    | 0.682 |             |
| - | 3  | 606       |                   | NM_030809    | NP_110436    | Q9H175 | CSRN2_HUMAN |                              | 0  | AGCTCCGTACAC   | 0.537 |             |
| + | 10 | 1380      | 4A8_uc001ryp.1_   | NM_001039960 | NP_001035049 | Q2Y0W8 | S4A8_HUMAN  | cellular (Potential).        | 5  | AGAGTGGGATC    | 0.493 |             |
| + | 18 | 2518      | ryo.2_Nonsense_   | NM_001039960 | NP_001035049 | Q2Y0W8 | S4A8_HUMAN  | ical; (Potential).           | 5  | CCCTGGTGGAC    | 0.398 |             |
| - | 2  | 633       |                   | NM_005555    | NP_005546    | P04259 | K2C6B_HUMAN | Coil 1A, Rod.                | 2  | AGGGTCCACTT    | 0.542 |             |
| - | 1  | 74        |                   | NM_005555    | NP_005546    | P04259 | K2C6B_HUMAN | Head.                        | 2  | GGCTCCTGATG    | 0.632 |             |
| - | 1  | 476       |                   | NM_015848    | NP_056932    | Q01546 | K22O_HUMAN  | Head.                        | 2  | aggaccaccaagct | 0.249 |             |
| - | 4  | 818       |                   | NM_173352    | NP_775487    | Q8N1N4 | K2C78_HUMAN | Coil 1B, Rod.                | 2  | TCATCTTTCAT    | 0.547 |             |
| + | 8  | 926       | AT2_uc009zms.2_   | NM_003578    | NP_003569    | O75908 | SOAT2_HUMAN | ical; (Potential).           | 1  | CAACTCATC      | 0.493 |             |
| + | 29 | 3251      | p.E600K NCKAP1    | NM_005337    | NP_005328    | P55160 | NCKPL_HUMAN |                              | 4  | TCAAGGAATTC    | 0.418 |             |
| - | 1  | 184       |                   | NM_001005499 | NP_001005499 | A6NIJ9 | O6C70_HUMAN | lasmic (Potential).          | 1  | ATTACGGAGGA    | 0.403 |             |
| - | 7  | 1002      | ion_p.R199H ARH   | NM_032496    | NP_115885    | Q9BRR9 | RHG09_HUMAN |                              | 1  | GACAGCGGCGA    | 0.652 | rs139154961 |
| + | 7  | 826       | sy.1_Missense_Mu  | NM_007199    | NP_009130    | Q9Y616 | IRAK3_HUMAN | rotein kinase.               | 8  | ATTTATCCATACA  | 0.383 |             |
| + | 3  | 670       | sts.3_Missense_M  | NM_006482    | NP_006473    | Q92630 | DYRK2_HUMAN |                              | 4  | TCCAGTTCAA     | 0.488 | rs138020482 |
| + | 1  | 140       |                   | NM_000239    | NP_000230    | P61626 | LYSC_HUMAN  |                              | 0  | CCAGAACTCTG    | 0.468 |             |
| + | 2  | 817       |                   | NM_014505    | NP_055320    | Q86W47 | KCMB4_HUMAN | cellular (Potential).        | 0  | AGAGAGAAAAT    | 0.328 |             |
| - | 14 | 1439      | xi.3_Missense_Mu  | NM_032606    | NP_115995    | Q9BXY5 | CAYP2_HUMAN |                              | 2  | TCATCCTCCTGT   | 0.333 |             |
| - | 7  | 992       |                   | NM_004950    | NP_004941    | Q99645 | EPYC_HUMAN  | LRR 6.                       | 1  | TTAATAGGGTTTC  | 0.393 |             |
| - | 3  | 235       | 2_5'Flank CLLU1_  | NM_001025232 | NP_001020403 | Q5K130 | CLU1O_HUMAN |                              | 0  | TACATTTCTCT    | 0.438 |             |
| - | 17 | 3801      | Y1tpg.2_Missense_ | NM_015054    | NP_055869    | A0JNW5 | UH1BL_HUMAN |                              | 2  | CAACGGACATC    | 0.338 |             |
| + | 26 | 2741      | p.P886L KIAA103   | NM_015275    | NP_056090    | Q2M389 | WAHS7_HUMAN |                              | 2  | AGTATCCTTTTG   | 0.373 |             |
| - | 10 | 2289      | se_Mutation_p.H2  | NM_012406    | NP_036538    | Q9UKN5 | PRDM4_HUMAN | 2H2-type 2.                  | 2  | CTTGTTGGGGCT   | 0.473 |             |
| + | 4  | 1355      | mt.2_Missense_Mt  | NM_014653    | NP_055468    | Q2TBF2 | WSCD2_HUMAN | WSC 1.                       | 3  | GCGAGGCAGCC    | 0.692 |             |
| - | 2  | 968       | M119_uc001tnf.2_  | NM_181724    | NP_859075    | Q4V9L6 | TM119_HUMAN | lasmic (Potential).          | 1  | GGGGGGACCCA    | 0.667 |             |
| + | 18 | 1877      |                   | NM_001101421 | NP_001094891 | Q8N1T3 | MYO1H_HUMAN |                              | 0  | CCAAGGAAAT     | 0.443 |             |
| + | 10 | 1454      | p.K380R CCDC63    | NM_152591    | NP_689804    | Q8NA47 | CCD63_HUMAN | Potential.                   | 8  | CAAGAAGATAA    | 0.502 |             |
| + | 16 | 2095      |                   | NM_015267    | NP_056082    | O14529 | CUX2_HUMAN  |                              | 6  | GCTCAGACGAC    | 0.622 |             |
| - | 16 | 2186_2187 | orf51_uc001tts.2_ | NM_001109662 | NP_001103132 |        |             |                              | 2  | TTAAGGAAGGG    | 0.396 |             |
| + | 2  | 338_339   | tux.2_Missense_M  | NM_017901    | NP_060371    | Q9ULQ1 | TPC1_HUMAN  | lasmic (Potential).          | 3  | CCTGACCTTGGA   | 0.569 |             |
| - | 20 | 3727      |                   | NM_000620    | NP_000611    | P29475 | NOS1_HUMAN  | -binding FR-type.            | 7  | CCTACCTGGAT    | 0.522 |             |
| - | 2  | 1188      |                   | NM_000620    | NP_000611    | P29475 | NOS1_HUMAN  | arity), PIN (nNOS-inhibiting | 7  | AGCCTCCTGCC    | 0.682 |             |
| - | 30 | 3784      | T_uc001txj.1_Miss | NM_007174    | NP_009105    | O14578 | CTRO_HUMAN  | teraction with Rho/Rac.      | 10 | CTTTCCGTCGA    | 0.493 |             |
| + | 7  | 1042      | D2_uc001udy.1_M   | NM_024623    | NP_078899    | Q6N063 | OGFD2_HUMAN |                              | 1  | AGGAGCCCGCC    | 0.657 |             |
| - | 3  | 363       | r_p.S75F PITPNM   | NM_020845    | NP_065896    | Q9BZ72 | PITM2_HUMAN |                              | 3  | GATGGAGCGG     | 0.622 |             |
| + | 7  | 903       | ya.2_Nonsense_M   | NM_024809    | NP_079085    | Q96GX1 | TECT2_HUMAN | cellular (Potential).        | 1  | CCAAACAGGAC    | 0.323 |             |
| + | 43 | 7252      |                   | NM_207437    | NP_997320    | Q8IVF4 | DYH10_HUMAN |                              | 6  | CCCATGGAGTAA   | 0.408 |             |
| - | 3  | 1335      |                   | NM_133448    | NP_597705    | Q14C87 | T132D_HUMAN | cellular (Potential).        | 14 | TGGCTCGCACG    | 0.547 | rs147819967 |
| + | 18 | 2451      | o.2_Intron GPR13: | NM_198827    | NP_942122    | Q6QNK2 | GP133_HUMAN | cellular (Potential).        | 10 | GACCCCTGCC     | 0.582 |             |
| + | 5  | 761       | VF268_uc010tcb.1  | NM_003415    | NP_003406    | Q14587 | ZN268_HUMAN | KRAB.                        | 1  | GAGGCCCAAG     | 0.403 |             |
| - | 9  | 1010      | dc.1_Missense_Mt  | NM_006437    | NP_006428    | Q9UKK3 | PARP4_HUMAN | IP alpha-helical.            | 4  | TAGAAGGAGAAT   | 0.383 |             |
| - | 1  | 1359      | p.G301E FAM123    | NM_152704    | NP_689917    | Q8N7J2 | F123A_HUMAN |                              | 4  | CGCTCCTTGG     | 0.637 |             |
| + | 1  | 1368      |                   | NM_001033602 | NP_001028774 | Q5JR59 | MTUS2_HUMAN |                              | 0  | GACATCCAGCA    | 0.507 |             |
| + | 17 | 1910      | ba.2_Missense_M   | NM_130806    | NP_570718    | Q8WXD0 | RXFP2_HUMAN | Name=5; (Potential).         | 0  | TATGTTCTGTTC   | 0.393 | rs139736966 |
| + | 61 | 9385      | se_Mutation_p.Y4E | NM_023037    | NP_075463    | Q5TBA9 | FRY_HUMAN   |                              | 7  | TACTTATGCCCTC  | 0.522 |             |
| + | 1  | 4322      |                   | NM_207361    | NP_997244    | Q5SZK8 | FREM2_HUMAN | ar (Potential), CSPG 9.      | 11 | ACAAATCTTTGG   | 0.343 |             |
| - | 10 | 1233_1234 | uyk.2_Missense_M  | NM_015058    | NP_055873    | A3KMH1 | K0564_HUMAN |                              | 6  | GCTTGGGACAC    | 0.366 |             |

|   |    |           |                   |              |              |        |             |                                |    |                  |       |
|---|----|-----------|-------------------|--------------|--------------|--------|-------------|--------------------------------|----|------------------|-------|
| + | 6  | 1062      | p.Y127H CYSLTR    | NM_020377    | NP_065110    | Q9NS75 | CLTR2_HUMAN | Name=3; (Potential).           | 2  | AGTATTTATTTC     | 0.483 |
| - | 11 | 2821_2822 | p.H889Y ATP7B_u   | NM_000053    | NP_000044    | P35670 | ATP7B_HUMAN | lasmic (Potential).            | 3  | CACGTGGGTAGC     | 0.441 |
| + | 5  | 748       | M4_uc001vhk.1_lr  | NM_006418    | NP_006409    | Q6UX06 | OLFM4_HUMAN | actomedin-like.                | 1  | ATGGTGGTGTG      | 0.423 |
| - | 6  | 1858      | .1_intron DACH1_  | NM_080759    | NP_542937    | Q9UI36 | DACH1_HUMAN |                                | 1  | ACCTACGGATTC     | 0.488 |
| - | 15 | 2292      | e_Mutation_p.H61  | NM_014953    | NP_055768    | Q9Y2L1 | RRP44_HUMAN |                                | 1  | CATGTGGAATC      | 0.318 |
| - | 1  | 1775      |                   | NM_052910    | NP_443142    | Q96PX8 | SLIK1_HUMAN | cellular (Potential).          | 5  | CATGATCCTCTC     | 0.557 |
| - | 2  | 2890      | afe.1_Missense_M  | NM_032229    | NP_115605    | Q9H5Y7 | SLIK6_HUMAN | lasmic (Potential).            | 3  | CTAATACCTTCCT    | 0.403 |
| + | 2  | 2528      | tic.1_Missense_Mi | NM_015567    | NP_056382    | O94991 | SLIK5_HUMAN | lasmic (Potential).            | 5  | AGAGGGCAACT      | 0.493 |
| + | 3  | 1004      |                   | NM_004466    | NP_004457    | P78333 | GPC5_HUMAN  |                                | 5  | AATGGACAGAT      | 0.517 |
| - | 12 | 1744      | p.R467Q ABCC4_    | NM_005845    | NP_005836    | O15439 | MRP4_HUMAN  | C transporter 1.               | 4  | TTTACCCGTGCT     | 0.493 |
| - | 8  | 1768      | nl.2_Missense_Mu  | NM_198968    | NP_945319    | Q86YF9 | DZIP1_HUMAN | Potential.                     | 2  | CATCTCCTTGAC     | 0.308 |
| + | 13 | 1113      | CA_uc010tiz.1_M   | NM_000282    | NP_000273    | P05165 | PCCA_HUMAN  | Biotin carboxylation.          | 2  | AGCATCCTGTCA     | 0.433 |
| - | 39 | 3489      | 4A1_uc010agl.2_I  | NM_001845    | NP_001836    | P02462 | CO4A1_HUMAN | le-helical region.             | 6  | TCCTGGGAGGC      | 0.498 |
| + | 8  | 782       | gr.1_Missense_Mu  | NM_003891    | NP_003882    | P22891 | PROZ_HUMAN  | peptidase S1.                  | 0  | CGGGGGAGAAT      | 0.567 |
| + | 13 | 2343      |                   | NM_017905    | NP_060375    | Q6UWJ1 | TMCO3_HUMAN |                                | 0  | GTGGAGAGCTG      | 0.597 |
| + | 1  | 343       |                   | NM_001005483 | NP_001005483 | Q8NGD3 | OR4K5_HUMAN | Name=3; (Potential).           | 2  | TGCTACTTGTTT     | 0.438 |
| + | 1  | 650       |                   | NM_001004063 | NP_001004063 | Q8NGD4 | OR4K1_HUMAN | Name=5; (Potential).           | 3  | TATTTCTTACAC     | 0.433 |
| + | 1  | 395       |                   | NM_001004479 | NP_001004479 | Q8NGC9 | O11H4_HUMAN | lasmic (Potential).            | 1  | TGATCGATACCT     | 0.468 |
| - | 8  | 966       | _p.S241F HNRNF    | NM_031314    | NP_112604    | P07910 | HNRPC_HUMAN | Glu-rich (acidic).             | 0  | TCACGGAGCTG      | 0.488 |
| - | 2  | 213       | .010tx.1_Missense | NM_019852    | NP_062826    | Q86U44 | MTA70_HUMAN |                                | 2  | CAATGCTGCCT      | 0.468 |
| - | 1  | 238       |                   | NM_001005465 | NP_001005465 | Q8NGC4 | O10G3_HUMAN | cellular (Potential).          | 2  | GCGAGGGACAA      | 0.498 |
| + | 6  | 1225      |                   | NM_004995    | NP_004986    | P50281 | MMP14_HUMAN | 1.Extracellular (Potential)    | 0  | TCCGAGGGGAG      | 0.433 |
| - | 6  | 2591_2592 | c010akt.2_5'Flank | NM_032452    | NP_115828    | Q96JJ6 | JPH4_HUMAN  | lasmic (Potential).            | 2  | CTGGGGCCCTC      | 0.673 |
| + | 2  | 558       |                   | NM_203402    | NP_981947    | A5D6W6 | FITM1_HUMAN | cellular (Potential).          | 0  | GCTTCGAGCCA      | 0.692 |
| + | 10 | 1416      | n_p.S345N GMPR    | NM_001002001 | NP_001002001 | Q9P2T1 | GMPR2_HUMAN |                                | 3  | CTTCAGTGAGGC     | 0.552 |
| + | 2  | 473       | RS1_uc001woj.1_f  | NM_174913    | NP_777573    | Q86U38 | CN021_HUMAN |                                | 4  | TGTGGCCTGTC      | 0.488 |
| - | 5  | 749       | e_Mutation_p.R21  | NM_004131    | NP_004122    | P10144 | GRAB_HUMAN  | peptidase S1.                  | 0  | AGGCTCGTGGA      | 0.498 |
| + | 3  | 4102      | se_Mutation_p.T1: | NM_001173    | NP_001025226 | Q13017 | RHG05_HUMAN | Rho-GAP.                       | 5  | AGATACAGGTAC     | 0.353 |
| + | 13 | 4483      |                   | NM_004274    | NP_004265    | Q13023 | AKAP6_HUMAN |                                | 21 | AAATGGAAAAGT     | 0.368 |
| - | 37 | 6179      | LGAPA1_uc010tp    | NM_014990    | NP_055805    | Q6GYQ0 | RGPA1_HUMAN | to TCF3/E12 (By similarity)    | 4  | AATAAGGACATC     | 0.343 |
| + | 5  | 3308      | na.2_Missense_Mi  | NM_152447    | NP_689660    | Q96NI6 | LRFN5_HUMAN | lasmic (Potential).            | 8  | ITGCTGACTAATC    | 0.294 |
| + | 7  | 3420      | e_Mutation_p.H10  | NM_015091    | NP_055906    | Q9Y4F4 | F179B_HUMAN | Ser-rich.                      | 3  | ATTTCTCATATTG    | 0.299 |
| - | 1  | 168       |                   | NM_080746    | NP_542784    | Q96L21 | RL10L_HUMAN |                                | 1  | ATCAGGAACCC      | 0.542 |
| - | 2  | 945       |                   | NM_021136    | NP_066959    | Q16799 | RTN1_HUMAN  |                                | 4  | TCCCTCCACAGC     | 0.448 |
| - | 11 | 2152      | IH5_uc001xfy.2_3' | NM_139318    | NP_647479    | Q8NCM2 | KCNH5_HUMAN | lasmic (Potential).            | 9  | CACGGGAATGC      | 0.532 |
| - | 4  | 362       | xfz.1_Missense_M  | NM_139318    | NP_647479    | Q8NCM2 | KCNH5_HUMAN | toplasmic (Potential).         | 9  | AAACAGGGGTT      | 0.443 |
| + | 30 | 4263      | gl.2_Missense_Mu  | NM_015180    | NP_055995    | Q8WXH0 | SYNE2_HUMAN | lasmic (Potential).            | 14 | CAGACCTTTCAC     | 0.443 |
| - | 3  | 1123      | TB25_uc001xhg.2   | NM_006977    | NP_008908    | P24278 | ZBT25_HUMAN |                                | 2  | ACCCCGGTTGG      | 0.453 |
| - | 15 | 2980      | rs.2_Missense_Mu  | NM_000347    | NP_000338    | P11277 | SPTB1_HUMAN | Spectrin 7.                    | 11 | CACTACCTTTG      | 0.612 |
| - | 2  | 2510      | ie_Mutation_p.E58 | NM_183002    | NP_892114    | P57103 | NAC3_HUMAN  | Cytoplasmic (Potential).       | 7  | CAACTCCCATAT     | 0.502 |
| - | 2  | 327       | I2BP_uc010arc.2_  | NM_018373    | NP_060843    | P57105 | SYJ2B_HUMAN | toplasmic (Potential).         | 0  | TCACCGAAAAGG     | 0.542 |
| + | 12 | 1603      | EN1_uc010ark.2_M  | NM_000021    | NP_000012    | P49768 | PSN1_HUMAN  | with CTNNB1.Helical; (Pr       | 2  | CATCACCTTTGC     | 0.398 |
| - | 31 | 4871      |                   | NM_000428    | NP_000419    | Q14767 | LTBP2_HUMAN | calcium-binding (Potential).   | 2  | AGAGACCAGGC      | 0.473 |
| + | 5  | 2507      | M1_uc001xql.3_F   | NM_019589    | NP_062535    | P49750 | YLPM1_HUMAN |                                | 3  | CAAGACCCAGA      | 0.512 |
| - | 4  | 885       | se_Mutation_p.E1: | NM_199296    | NP_954993    | Q6H9L7 | ISM2_HUMAN  |                                | 1  | ctctgtctctctttcc | 0.284 |
| + | 2  | 2169      | td.2_Missense_Mu  | NM_013231    | NP_037363    | O43155 | FLRT2_HUMAN | -III.Extracellular (Potential) | 4  | TTCAGGAGGCG      | 0.493 |
| - | 18 | 3259      |                   | NM_001080414 | NP_001073883 | Q9P219 | DAPLE_HUMAN | Potential.                     | 3  | CACTGGAGAA       | 0.622 |

|   |      |           |                    |              |              |        |             |                              |    |               |       |
|---|------|-----------|--------------------|--------------|--------------|--------|-------------|------------------------------|----|---------------|-------|
| - | 10   | 1552      | v5_uc010aue.2_M    | NM_006329    | NP_006320    | Q9UBX5 | FBLN5_HUMAN |                              | 6  | GAACGGAGCGT   | 0.542 |
| + | 7    | 864       | p.G134R UBR7_u     | NM_175748    | NP_786924    | Q8N806 | UBR7_HUMAN  |                              | 0  | ATGATGGATTGC  | 0.393 |
| - | 11   | 3225      | vo.1_Missense_Mt   | NM_001002860 | NP_001002860 | Q9P203 | BTBD7_HUMAN |                              | 1  | CGAAGGGGAAG   | 0.493 |
| + | 45   | 7110      | bs.1_Nonsense_l    | NM_020818    | NP_065869    | Q9P2D8 | UNC79_HUMAN |                              | 17 | CAAAATCAGAAAT | 0.493 |
| - | 5    | 1490      | nse_Mutation_p.C   | NM_000295    | NP_000286    | P01009 | A1AT_HUMAN  |                              | 1  | ACTTTTCCCATG/ | 0.498 |
| - | 3    | 862       | ydg.2_Missense_l   | NM_175739    | NP_783866    | Q86WD7 | SPA9_HUMAN  |                              | 2  | GGTGAAAGGGC   | 0.428 |
| + | 4    | 1113      | nse_Mutation_p.C   | NM_001085    | NP_001076    | P01011 | AACT_HUMAN  |                              | 6  | GTCAGGGATCA/  | 0.507 |
| + | 2    | 784       |                    | NR_015340    |              |        |             |                              | 2  | GCCTGGGAGAA   | 0.577 |
| - | 24   | 5116      | o.P1635L DICER1_   | NM_030621    | NP_085124    | Q9UPY3 | DICER_HUMAN |                              | 5  | TTGGTGGAATC   | 0.393 |
| + | 3    | 741       | nse_Mutation_p.V   | NM_000623    | NP_000614    | P30411 | BKRB2_HUMAN | Name=4; (Potential).         | 5  | GATCTGGGGGT/  | 0.607 |
| + | 11   | 1199      | twv.1_Missense_M   | NM_032632    | NP_116021    | P51003 | PAPOA_HUMAN |                              | 0  | TGTGTCCGTTTC  | 0.408 |
| - | 12   | 1757      |                    | NM_006035    | NP_006026    | Q9Y5S2 | MRCKB_HUMAN | Potential.                   | 11 | CTGTGCTCGA/   | 0.522 |
| - | 3164 |           |                    |              |              |        |             |                              | 0  | CAGCAGGAGGG   | 0.592 |
| - | 4    | 423       | IIPA1_uc001yve.2_  | NM_144599    | NP_653200    | Q7RTP0 | NIPA1_HUMAN | ical; (Potential).           | 0  | CGACGGAGCCT   | 0.473 |
| + | 1    | 2276      |                    | NM_018958    | NP_061831    | Q9NZP6 | CO002_HUMAN |                              | 8  | CTCCCAAATTC   | 0.468 |
| - | 1    | 479       | 89A1_uc010azk.1_   | NM_138704    | NP_619649    | Q96MG7 | MAGG1_HUMAN | MAGE.                        | 0  | GGTCGGGGAAC   | 0.532 |
| - | 21   | 3722      | .2_Missense_Mut    | NM_003257    | NP_003248    | Q07157 | ZO1_HUMAN   |                              | 6  | GACGCGATCTT   | 0.483 |
| - | 9    | 1199      | lissense_Mutation_ | NM_139320    | NP_647536    | Q494W8 | CRFM7_HUMAN | ical; (Potential).           | 1  | ATGATCATGGTC  | 0.622 |
| - | 29   | 3597      |                    | NM_014691    | NP_055506    | O60306 | AQR_HUMAN   |                              | 1  | CTCTGGCTCTC/  | 0.413 |
| + | 20   | 3485      | bi.2_Nonsense_Mt   | NM_003246    | NP_003237    | P07996 | TSP1_HUMAN  | SP C-terminal.               | 6  | GGCTGAAAGA    | 0.468 |
| + | 3    | 1626      | bp.1_Missense_Mt   | NM_014952    | NP_055767    | Q8TBEO | BAHD1_HUMAN |                              | 0  | CCGTCGCCCAT   | 0.657 |
| + | 3    | 1420      |                    | NM_152260    | NP_689473    | Q8IZ73 | RUSD2_HUMAN |                              | 1  | CTCAGGAGTTG/  | 0.562 |
| + | 10   | 1188      | n_Mutation_p.T29   | NM_001128608 | NP_001122080 | O60336 | MABP1_HUMAN | WD 4.                        | 10 | TGGCACCGTGC   | 0.592 |
| - | 2    | 349       | uc010bcp.1_RNA     | NM_016642    | NP_057726    | Q9NRC6 | SPTN5_HUMAN | actin-binding.               | 2  | CGTCTCGTACT/  | 0.622 |
| - | 15   | 1668      |                    | NM_178034    | NP_828848    | Q86XP0 | PA24D_HUMAN |                              | 2  | CTCACCTTCC/   | 0.627 |
| - | 2    | 1254      | n ZFP106_uc010u    | NM_022473    | NP_071918    | Q9H2Y7 | ZF106_HUMAN |                              | 3  | CTGAAGAAATT   | 0.418 |
| - | 2    | 904       | px.2_Intron ZFP1(  | NM_022473    | NP_071918    | Q9H2Y7 | ZF106_HUMAN |                              | 3  | CTGCTCCACTAT  | 0.473 |
| - | 10   | 1272      | qp.2_Missense_Mt   | NM_173500    | NP_775771    | Q6IQ55 | TTBK2_HUMAN | rotein kinase.               | 7  | CACGGATGTA/   | 0.378 |
| - | 12   | 2078      | p.Q649* TP53BP     | NM_005657    | NP_005648    | Q12888 | TP53B_HUMAN |                              | 7  | CTCCTGATCTA/  | 0.478 |
| + | 3    | 282       |                    | NM_152448    | NP_689661    | Q8NHR7 | CO043_HUMAN |                              | 0  | TTCTTCTCTCTG  | 0.413 |
| + | 15   | 1928      | n_Mutation_p.E528  | NM_017434    | NP_059130    | Q9NRD9 | DUOX1_HUMAN | oxidase activity. Extracellu | 8  | AGAAGGAGATT/  | 0.527 |
| + | 3    | 211       |                    | NM_004212    | NP_004203    | O43868 | S28A2_HUMAN |                              | 4  | GGATGGACTGG   | 0.522 |
| - | 11   | 1275      | p.S133F HDC_uc     | NM_002112    | NP_002103    | P19113 | DCHS_HUMAN  |                              | 6  | CCAGAGATTC/   | 0.418 |
| - | 15   | 2332      | fi.1_Missense_Mt   | NM_182758    | NP_877435    | Q3MJ13 | WDR72_HUMAN |                              | 2  | GCATCATTTTC   | 0.408 |
| + | 31   | 6508      | acm.2_Missense_l   | NM_001080534 | NP_001074003 | Q8NB66 | UN13C_HUMAN |                              | 7  | TGGTATCTCTTC  | 0.398 |
| - | 7    | 948_949   |                    | NM_004998    | NP_004989    | Q12965 | MYO1E_HUMAN | rosin head-like.             | 3  | AGAAGGAAGTT   | 0.441 |
| - | 31   | 5882      |                    | NM_003922    | NP_003913    | Q15751 | HERC1_HUMAN |                              | 19 | CTGCGAAGAA    | 0.403 |
| - | 10   | 1281_1282 | PX_uc010uiu.1_R    | NM_006660    | NP_006651    | O76031 | CLPX_HUMAN  |                              | 0  | CCACGGAGCTT   | 0.361 |
| - | 9    | 2163      |                    | NM_003613    | NP_003604    | O75339 | CILP1_HUMAN |                              | 7  | CCACAGAGAAC   | 0.522 |
| - | 22   | 4148      | o.P1300L DENND2    | NM_005848    | NP_005839    | Q72401 | MYCPP_HUMAN |                              | 4  | GCTTAGGAGAA   | 0.418 |
| - | 10   | 1295_1296 | p.W310* MEGF11     | NM_032445    | NP_115821    | A6BM72 | MEG11_HUMAN |                              | 1  | CCAGACCGCCT   | 0.584 |
| + | 16   | 1644      | iqw.2_Missense_l   | NM_145160    | NP_660143    | Q13163 | MP2K5_HUMAN | rotein kinase.               | 2  | CAGGGGAGCAG   | 0.433 |
| + | 5    | 705       | C49_uc010ukf.1_l   | NM_017691    | NP_060161    | Q8IUZ0 | LR49_HUMAN  | LRR 2.                       | 1  | GCTTTCGACTC   | 0.343 |
| - | 4    | 547       | p.A33T CIB2_ucf    | NM_006383    | NP_006374    | O75838 | CIB2_HUMAN  | EF-hand 1.                   | 0  | CGCCGCCACGA   | 0.547 |
| - | 8    | 1090      | mx.1_Missense_l    | NM_015162    | NP_055977    | Q96GR2 | ACBG1_HUMAN |                              | 1  | GGCCCCCAC     | 0.622 |
| + | 12   | 1711      | unn.1_Missense_l   | NM_018689    | NP_061159    | Q8WUJ3 | K1199_HUMAN |                              | 3  | AGACGGCGTGG   | 0.552 |
| - | 3    | 348       | rf40_uc010uop.1_   | NM_001160115 | NP_001153587 | Q8WUR7 | CO040_HUMAN |                              | 1  | GATACCGACAG   | 0.388 |

rs35392254

|   |    |           |                    |              |              |        |              |                            |     |                   |       |
|---|----|-----------|--------------------|--------------|--------------|--------|--------------|----------------------------|-----|-------------------|-------|
| + | 7  | 744       | upe.1_Missense_I   | NM_004213    | NP_004204    | O00337 | S28A1_HUMAN  | ical; (Potential).         | 3   | 'GGTGTCTTCG       | 0.582 |
| + | 7  | 1468      | p.P433L AKAP13     | NM_007200    | NP_009131    | Q12802 | AKP13_HUMAN  |                            | 9   | 'AATGCCACAG       | 0.522 |
| - | 2  | 1465      |                    | NM_022480    | NP_071925    | Q9H0H3 | ENC2_HUMAN   | Kelch 3.                   | 2   | 'TGTTGGCCCCA      | 0.587 |
| - | 2  | 1138      | ik.2_RNA DET1_u    | NM_001144074 | NP_001137546 | Q7L5Y6 | DET1_HUMAN   |                            | 2   | 'TTCGCAGCTGC      | 0.488 |
| + | 12 | 4846      | e_Mutation_p.P14!  | NM_013227    | NP_037359    | E7EX88 | E7EX88_HUMAN |                            | 3   | 'GCTTCTCTCTG      | 0.507 |
| + | 2  | 191       |                    | NM_198526    | NP_940928    | Q8N1W2 | ZN710_HUMAN  |                            | 1   | 'GGCCGCCGTGC      | 0.637 |
| + | 4  | 352       |                    | NM_001013657 | NP_001013679 | Q6ZNW5 | VTC2_HUMAN   |                            | 0   | 'AATCTCCCTTTG     | 0.557 |
| + | 16 | 1951      |                    | NM_003870    | NP_003861    | P46940 | IQGA1_HUMAN  |                            | 8   | 'AGACACCCAAG      | 0.423 |
| + | 5  | 997       | 2brb.2_Splice_Site | NM_006011    | NP_006002    | Q92186 | SIA8B_HUMAN  |                            | 0   | 'CGCGGGTGAGC      | 0.547 |
| - | 2  | 537       | 174B_uc002bsl.3_   | NM_207446    | NP_997329    | Q3ZCQ3 | F174B_HUMAN  | lasmic (Potential).        | 0   | 'CTGCTGGAGTG      | 0.473 |
| + | 3  | 425       | _5'Flank uc002bur  | NM_173499    | NP_775770    | Q6RVD6 | SPAT8_HUMAN  |                            | 2   | 'TCACGGAAGGA      | 0.458 |
| - | 16 | 2326      |                    | NM_139057    | NP_620688    | Q8TE56 | ATS17_HUMAN  | Spacer.                    | 3   | 'TTCTCCCACAG      | 0.552 |
| - | 3  | 392       | S1_uc002bwh.2_n    | NM_001040614 | NP_001035704 | Q8NG48 | LINES_HUMAN  |                            | 0   | 'CTGCTGGGTTG      | 0.433 |
| - | 3  | 566       | v8A_uc002cgv.3_!   | NM_021259    | NP_067082    | Q9HCN3 | TMM8A_HUMAN  | ellular (Potential).       | 3   | 'GGTGGGAAACC      | 0.687 |
| + | 8  | 758       | va.1_Missense_Mt   | NM_003933    | NP_003924    | O94812 | BAIP3_HUMAN  | C2 1.                      | 1   | 'TGGACCCCTGC      | 0.672 |
| + | 6  | 422_423   |                    | NM_032520    | NP_115909    | Q9UJJ9 | GNPTG_HUMAN  |                            | 1   | 'CCCTGCCGTTCC     | 0.683 |
| + | 7  | 1142      | MRPS34_uc002ci     | NM_001010865 | NP_001010865 | A4GXA9 | EME2_HUMAN   |                            | 3   | 'CTTCCCTCCCT      | 0.692 |
| - | 2  | 654_655   |                    | NM_001009606 | NP_001009606 | C9JH64 | C9JH64_HUMAN |                            | 0   | 'ACGCTCCCCGCT     | 0.663 |
| - | 5  | 736       | crz.1_Missense_M   | NM_022119    | NP_071402    | Q9GZN4 | BSSP4_HUMAN  | peptidase S1.              | 1   | 'CATGTCCTCAG      | 0.642 |
| - | 2  | 394       |                    | NM_021195    | NP_067018    | P56747 | CLD6_HUMAN   | lasmic (Potential).        | 0   | 'GGAATCCTTCT      | 0.612 |
| - | 5  | 1898      | ctw.1_Missense_n   | NM_032805    | NP_116194    | Q96SZ4 | ZSC10_HUMAN  |                            | 1   | 'CTTCTCCCCTG      | 0.716 |
| - | 10 | 2126      |                    | NM_000243    | NP_000234    | O15553 | MEFV_HUMAN   | 330.2/SPRY.                | 6   | 'CATTTTCTTCAT     | 0.537 |
| - | 7  | 2479      | C3_uc010bto.1_5'l  | NM_178844    | NP_849172    | Q7RTR2 | NLRC3_HUMAN  |                            | 6   | 'CAAGAGGGATC      | 0.502 |
| - | 13 | 2500_2501 | crw.2_Missense_n   | NM_004380    | NP_004371    | Q92793 | CBP_HUMAN    |                            | 127 | 'GGGAAGGAGAAA     | 0.55  |
| - | 8  | 877       | ie_Mutation_p.P20  | NM_144605    | NP_653206    | Q8IYM1 | SEP12_HUMAN  |                            | 1   | 'AAAAGGGATTC      | 0.587 |
| - | 22 | 4303      |                    | NM_002705    | NP_002696    | O60437 | PEPL_HUMAN   | Potential.                 | 6   | 'TAGCTCCTCCAC     | 0.706 |
| - | 13 | 3694      | uyn.1_Missense_n   | NM_001134407 | NP_001127879 | Q12879 | NMDE1_HUMAN  | lasmic (Potential).        | 45  | 'ACCTAGGGGCTC     | 0.507 |
| - | 9  | 2538      | uyn.1_Missense_n   | NM_001134407 | NP_001127879 | Q12879 | NMDE1_HUMAN  | ellular (Potential).       | 45  | 'GAGGCCGGTCA      | 0.502 |
| + | 11 | 2093      | g.2_Missense_Mut   | NM_000246    | NP_000237    | P33076 | C2TA_HUMAN   | NACHT.                     | 1   | 'GCCCCCCGGGG      | 0.682 |
| + | 8  | 1262      | C4_uc010uyz.1_5    | NM_005236    | NP_005227    | Q92889 | XPF_HUMAN    |                            | 10  | 'ATGTTCCAGC       | 0.428 |
| - | 5  | 1241      |                    | NM_001012991 | NP_001013009 | Q1ED39 | CP088_HUMAN  | th ZFP106 (By similarity). | 0   | 'TGTGACCCGCC      | 0.627 |
| - | 6  | 1001      |                    | NM_174924    | NP_777584    | Q8N807 | PDILT_HUMAN  |                            | 1   | 'TGATTTCGATCAC    | 0.443 |
| + | 4  | 545_546   | nse_Mutation_p.L   | NM_001010845 | NP_001010845 | Q08AH3 | ACS2A_HUMAN  |                            | 3   | 'GTGGCCCTGCAC     | 0.579 |
| - | 4  | 516_517   | p.L103V ACSM2E     | NM_182617    | NP_872423    | Q68CK6 | ACS2B_HUMAN  |                            | 5   | 'TGCAGGCCACA      | 0.569 |
| - | 8  | 1248      | :SM1_uc010bwg.1    | NM_052956    | NP_443188    | Q08AH1 | ACSM1_HUMAN  |                            | 2   | 'GGGTGGAGTGG      | 0.537 |
| - | 2  | 432       | :SM1_uc010bwg.1    | NM_052956    | NP_443188    | Q08AH1 | ACSM1_HUMAN  |                            | 2   | 'CTCAGGAACTCC     | 0.587 |
| + | 6  | 356       | _uc010vbj.1_Miss   | NM_144672    | NP_653273    | Q7RTW8 | OTOAN_HUMAN  |                            | 3   | 'AGTTCGCGACT      | 0.587 |
| + | 29 | 3225      | Splice_Site_p.L12' | NM_173615    | NP_775886    | A6NCI4 | VWA3A_HUMAN  |                            | 1   | 'TGCTGGCAAGT      | 0.517 |
| + | 32 | 3593      | nse_Mutation_p.Sz  | NM_173615    | NP_775886    | A6NCI4 | VWA3A_HUMAN  |                            | 1   | 'CCCAATCCTTCA     | 0.577 |
| + | 8  | 1282      | '2K_uc002dkh.2_F   | NM_013302    | NP_037434    | O00418 | EF2K_HUMAN   | ype protein kinase.        | 1   | 'GCGTTCGGGCC      | 0.572 |
| + | 15 | 2763      | e_Mutation_p.P57!  | NM_006910    | NP_008841    | Q726E9 | RBBP6_HUMAN  |                            | 4   | 'ctctctccctccgggt | 0.308 |
| - | 7  | 1213      | _p.L224F XPO6_u    | NM_015171    | NP_055986    | Q96QU8 | XPO6_HUMAN   |                            | 2   | 'ATCAAGGATGG      | 0.483 |
| + | 4  | 527       | _uc002dsc.2_Miss   | NM_014387    | NP_055202    | O43561 | LAT_HUMAN    | lasmic (Potential).        | 0   | 'TTGCCCCCTGG      | 0.612 |
| + | 6  | 971       | .P248L KIF22_uc0   | NM_007317    | NP_015556    | Q14807 | KIF22_HUMAN  |                            | 0   | 'CCTCCTCGTG       | 0.582 |
| + | 10 | 1217_1218 | ntation_p.264_265  | NM_002209    | NP_002200    | P20701 | ITAL_HUMAN   | Extracellular (Potential). | 10  | 'AACATGGAGCTC     | 0.569 |
| - | 8  | 749       | fd.1_Missense_Mu   | NM_052874    | NP_443106    | P61266 | STX1B_HUMAN  | omology. Cytoplasmic (Pot  | 0   | 'CATATCGTGAC      | 0.562 |
| + | 5  | 543       | _p.Q105* STX4_ur   | NM_004604    | NP_004595    | Q12846 | STX4_HUMAN   | ic (Potential). Potential. | 0   | 'AGCCCCAGAAG      | 0.418 |



|   |    |         |                   |              |              |        |              |                             |     |               |       |             |
|---|----|---------|-------------------|--------------|--------------|--------|--------------|-----------------------------|-----|---------------|-------|-------------|
| - | 3  | 2020    | ao.2_Missense_M   | NM_024706    | NP_078982    | Q96K58 | ZN668_HUMAN  | :2H2-type 15.               | 4   | :CCGGTCAGAGA  | 0.652 |             |
| - | 15 | 2569    | rfg.1_Missense_M  | NM_173502    | NP_775773    | Q5K4E3 | POLS2_HUMAN  |                             | 1   | :ATCCCAGGCC   | 0.642 |             |
| + | 14 | 1524    | i_p.R276* FUS_uc  | NM_004960    | NP_004951    | P35637 | FUS_HUMAN    | Arg/Gly-rich.               | 958 | FATGATCGAGGC  | 0.612 |             |
| + | 13 | 1434    | _p.S456F ITGAX_u  | NM_000887    | NP_000878    | P20702 | ITAX_HUMAN   | Extracellular (Potential).  | 4   | :CGGCTCCTACTT | 0.677 |             |
| + | 18 | 2252    | bt.2_Missense_M   | NM_000887    | NP_000878    | P20702 | ITAX_HUMAN   | Extracellular (Potential).  | 4   | :TGACCCCCATT  | 0.627 |             |
| - | 20 | 3057    | :C12_uc002efa.1_  | NM_033226    | NP_150229    | Q96J65 | MRP9_HUMAN   | membrane type-1 2.          | 3   | :CAGTGGGAGTC  | 0.478 |             |
| + | 7  | 1047    | efx.2_Missense_M  | NM_182922    | NP_891552    | Q7Z4Q2 | HEAT3_HUMAN  |                             | 2   | CAAATGAAAGAG  | 0.368 |             |
| - | 4  | 530     | p.G142E CES1_uc   | NM_001025194 | NP_001020365 | P23141 | EST1_HUMAN   |                             | 0   | :CCCCTCCGTGG  | 0.562 |             |
| - | 2  | 329     | _p.W75* CES1_uc   | NM_001025194 | NP_001020365 | P23141 | EST1_HUMAN   |                             | 0   | :AGCTCCATGGT  | 0.537 |             |
| - | 14 | 2002    |                   | NM_031885    | NP_114091    | Q9BXC9 | BBS2_HUMAN   |                             | 1   | :CTCAAATAGAC  | 0.368 |             |
| + | 6  | 747     | p.G199E CPNE2_u   | NM_152727    | NP_689940    | Q96FN4 | CPNE2_HUMAN  | C2.                         | 2   | :CTTTGGGAAGT  | 0.612 |             |
| - | 10 | 1006    |                   | NM_001896    | NP_001887    | P19784 | CSK22_HUMAN  | protein kinase.             | 1   | :GTTCTCACTATG | 0.443 |             |
| + | 2  | 232     | on.1_Missense_M   | NM_001795    | NP_001786    | P33151 | CADH5_HUMAN  |                             | 6   | :CAGCAGCAGGT  | 0.612 |             |
| + | 4  | 509     | _uc002eqj.2_Miss  | NM_005182    | NP_005173    | P43166 | CAH7_HUMAN   |                             | 0   | :CTTTTGGGGAG  | 0.582 |             |
| - | 8  | 1191    |                   | NM_013304    | NP_037436    | Q8WTX9 | ZDHC1_HUMAN  |                             | 0   | :GCTCCCTGTGA  | 0.632 |             |
| + | 4  | 846     |                   | NM_000196    | NP_000187    | P80365 | DHI2_HUMAN   |                             | 0   | :TCATGGACACA  | 0.502 |             |
| - | 1  | 372     | ex.2_Missense_M   | NM_022357    | NP_071752    | Q9H4B8 | DPEP3_HUMAN  |                             | 3   | :TGAGGCTGGGG  | 0.711 |             |
| - | 77 | 13320   | DIN_uc010cfy.2_R  | NM_032821    | NP_116210    | Q4G0P3 | HYDIN_HUMAN  |                             | 2   | :TGAGAGCCCAT  | 0.438 |             |
| - | 3  | 276     | inse_Mutation_p.E | NM_032821    | NP_116210    | Q4G0P3 | HYDIN_HUMAN  |                             | 2   | :GAACTCTGAGG  | 0.403 |             |
| - | 16 | 2743    | _p.R363Q ADAMT    | NM_199355    | NP_955387    | Q8TE60 | ATS18_HUMAN  | Spacer.                     | 18  | :TGCTTCGGGCG  | 0.502 |             |
| + | 7  | 1049    |                   | NM_020927    | NP_065978    | Q9HCJ6 | VAT1L_HUMAN  |                             | 1   | :TTTTCCCTTTTA | 0.507 |             |
| + | 4  | 684     | _p.E156K BCMO1    | NM_017429    | NP_059125    | Q9HAY6 | BCDO1_HUMAN  |                             | 0   | :CCCTGGAGAAG  | 0.507 |             |
| + | 25 | 2856    |                   | NM_002661    | NP_002652    | P16885 | PLCG2_HUMAN  |                             | 8   | :TTTCAGAGCATC | 0.582 |             |
| - | 23 | 3651    | fhh.2_Missense_M  | NM_003791    | NP_003782    | Q14703 | MBTP1_HUMAN  | basic). Cytoplasmic (Potent | 2   | :CCGAAGGGGTC  | 0.627 |             |
| - | 5  | 1178    |                   | NM_003791    | NP_003782    | Q14703 | MBTP1_HUMAN  | ase.  Luminal (Potential).  | 2   | :GTGGGGATGCT  | 0.453 |             |
| + | 8  | 1540    | ense_Mutation_p.  | NM_001145400 | NP_001138872 | Q8NCV1 | ADAD2_HUMAN  | to l editase.               | 0   | :CTTCCGAACCC  | 0.697 |             |
| + | 8  | 720     | fhy.2_Missense_M  | NM_014861    | NP_055676    | O75185 | AT2C2_HUMAN  | asmic (Potential).          | 2   | :TCACGGACCTC  | 0.532 |             |
| + | 4  | 618     | _p.P78S KIAA018   | NM_014615    | NP_055430    | Q14687 | GSE1_HUMAN   |                             | 5   | :CCTACCCCTTC  | 0.667 |             |
| - | 5  | 858_859 | on_p.P7F NXN_uc   | NM_022463    | NP_071908    | Q6DKJ4 | NXN_HUMAN    | Thioredoxin.                | 4   | :GTAGGGGACGG  | 0.639 |             |
| - | 1  | 859     |                   | NM_003553    | NP_003544    | P30953 | OR1E1_HUMAN  | Name=7; (Potential).        | 0   | GAAGGGGTTC    | 0.448 |             |
| + | 15 | 2490    | ie_Mutation_p.G71 | NM_004703    | NP_004694    | Q15276 | RABE1_HUMAN  | Potential.                  | 2   | :AAAAAGGACAG  | 0.244 |             |
| + | 11 | 1509    | ron ALOX12_uc00   | NM_000697    | NP_000688    | P18054 | LOX12_HUMAN  | lipoxygenase.               | 1   | :AAAGGATGAC   | 0.592 |             |
| - | 12 | 2127    | _p.S707F NEURL    | NM_032442    | NP_115818    | Q96JN8 | NEUL4_HUMAN  |                             | 2   | :ACGGAGAGCTT  | 0.612 |             |
| + | 3  | 437     | :11_uc010vtw.1_In | NM_175734    | NP_783861    | Q0P670 | CQ074_HUMAN  | Arg-rich.                   | 0   | CTTCTTCGCTGT  | 0.428 |             |
| + | 27 | 3685    | p.G758S PFAS_uc   | NM_012393    | NP_036525    | O15067 | PUR4_HUMAN   | imidotransferase type-1.    | 5   | :AGATGGGCCCT  | 0.677 |             |
| - | 15 | 1563    | vf.1_Missense_M   | NM_003802    | NP_003793    | Q9UKX3 | MYH13_HUMAN  | rosin head-like.            | 6   | :TGTTGAAAAA   | 0.483 |             |
| - | 5  | 548     |                   | NM_003802    | NP_003793    | Q9UKX3 | MYH13_HUMAN  | rosin head-like.            | 6   | TGTGGGGCGGG   | 0.502 |             |
| - | 37 | 5480    | uc002gml.1_Intron | NM_005963    | NP_005954    | P12882 | MYH1_HUMAN   | Potential.                  | 21  | :CAGGTCTTCA   | 0.562 |             |
| - | 26 | 3402    | _Missense_Mutati  | NM_001100112 | NP_001093582 | Q9UKX2 | MYH2_HUMAN   | Potential.                  | 14  | TGATTTCAAAC   | 0.328 |             |
| - | 21 | 2551    |                   | NM_002470    | NP_002461    | P11055 | MYH3_HUMAN   |                             | 7   | FGCTTGACGTTC  | 0.473 | rs121913620 |
| + | 17 | 3183    | oo.2_Missense_M   | NM_001372    | NP_001363    | Q9NYC9 | DYH9_HUMAN   | n (By similarity).          | 20  | :CGGAAGAAATC  | 0.498 |             |
| + | 20 | 4199    | oo.2_Missense_M   | NM_001372    | NP_001363    | Q9NYC9 | DYH9_HUMAN   | n (By similarity).          | 20  | :CTGCAGAATCC  | 0.617 |             |
| - | 7  | 1488    | ow.2_Missense_M   | NM_006470    | NP_006461    | O95361 | TRI16_HUMAN  |                             | 3   | TTTGCGGATGCC  | 0.453 | rs146392947 |
| + | 65 | 10914   | uc002gsl.2_3'UTR  | NM_016239    | NP_057323    | Q9UKN7 | MYO15_HUMAN  | Tail.  FERM.                | 9   | :CCAGCGAGATC  | 0.423 |             |
| - | 2  | 282     | 5A10_uc002gut.1_  | NM_001039999 | NP_001035088 | A6ND36 | FA83G_HUMAN  |                             | 2   | :GGCCACCAGGG  | 0.637 |             |
| + | 10 | 1320    | _p.P374L RNF112_  | NM_007148    | NP_009079    | Q7Z5V9 | Q7Z5V9_HUMAN |                             | 2   | AAGCCCTGGTG   | 0.642 |             |
| - | 2  | 135     | se_Mutation_p.G2  | NM_001042685 | NP_001036150 | Q3B8N2 | LEG9B_HUMAN  | Galectin 1.                 | 1   | :GAGACCCCTT   | 0.582 |             |

|   |    |         |                                              |              |              |        |                                           |      |               |       |             |
|---|----|---------|----------------------------------------------|--------------|--------------|--------|-------------------------------------------|------|---------------|-------|-------------|
| + | 5  | 604     | crt.2_Missense_M                             | NM_003170    | NP_003161    | Q7KZ85 | SPT6H_HUMAN Asp/Glu-rich.                 | 3    | AGGAGGAGGAA   | 0.522 |             |
| - | 1  | 283     | mdi.1_Missense_M                             | NM_000458    | NP_000449    | P35680 | HNF1B_HUMAN ation (By similarity).        | 3    | TGGTGACCCCG   | 0.637 |             |
| + | 8  | 1285    | tv.2_Missense_Mu                             | NM_003250    | NP_003241    | P10827 | THA_HUMAN gand-binding.                   | 0    | GCTACGACCCCT  | 0.632 |             |
| - | 1  | 301     | 39_uc010wfm.1_5                              | NM_213656    | NP_998821    | Q6A163 | K1C39_HUMAN Head.                         | 0    | TTCACCATAACC  | 0.498 |             |
| - | 1  | 363_364 |                                              | NM_032524    | NP_115913    | Q9BYR3 | KRA44_HUMAN -C-[GRQVCH]-[SPT]- [VST       | 0    | CACTGGGGCCCT  | 0.658 |             |
| - | 2  | 662     | r14_uc010cxp.1_n                             | NM_000526    | NP_000517    | P02533 | K1C14_HUMAN Coil 1B. Rod.                 | 1    | GGTGCGGAAGT   | 0.517 |             |
| + | 14 | 2444    | _p.G472E WNK4_u                              | NM_032387    | NP_115763    | Q96J92 | WNK4_HUMAN                                | 7    | TCTCTGGAACCT  | 0.577 | rs147081637 |
| + | 4  | 2166    | _Mutation_p.P684                             | NM_009590    | NP_033720    | O75106 | AOC2_HUMAN                                | 2    | AGGACCCCTCC   | 0.572 |             |
| - | 7  | 2233    | _p.S163F PLEKHA                              | NM_014798    | NP_055613    | Q9Y4G2 | PKHM1_HUMAN PH 2.                         | 0    | GCAGGGACTCC   | 0.552 |             |
| + | 4  | 341     | 'iky.2_Missense_M                            | NM_004287    | NP_004278    | O14653 | GOSR2_HUMAN ic (Potential). Potential.    | 2    | AGCATCGGCGC   | 0.542 |             |
| + | 15 | 3368    | ic002irv.1_Missense                          | NM_018896    | NP_061496    | O43497 | CAC1G_HUMAN lasmic (Potential).           | 1    | CAAGTCCGAAT   | 0.597 |             |
| + | 29 | 4246    | sn.2_Missense_Mu                             | NM_003786    | NP_003777    | O15438 | MRP3_HUMAN similarity). ABC transporter   | 4    | CGGCAGCTACT   | 0.622 |             |
| + | 10 | 1351    | rpc.1_Missense_M                             | NM_173503    | NP_775774    | Q8N7B9 | EFCB3_HUMAN                               | 1    | ACTCAGGAAGA   | 0.338 |             |
| - | 6  | 1318    | _Mutation_p.M398                             | NM_001100875 | NP_001094345 | Q8NA82 | MARHA_HUMAN                               | 0    | GGCTCCATTGC   | 0.478 |             |
| + | 13 | 1501    | _uc010deu.1_Missense                         | NM_015462    | NP_056277    | Q9H8H0 | NOL11_HUMAN                               | 0    | AATCAGTCACCT  | 0.358 |             |
| - | 23 | 3211    | z.2_Missense_Mu                              | NM_080283    | NP_525022    | Q8IUA7 | ABCA9_HUMAN                               | 6    | TTACTTCGGTAC  | 0.418 |             |
| - | 20 | 2808    | ez.2_Nonsense_M                              | NM_080283    | NP_525022    | Q8IUA7 | ABCA9_HUMAN                               | 6    | TTTTCTGATATGA | 0.368 |             |
| - | 2  | 131     | splice_Site ABCA9_                           | NM_080283    | NP_525022    | Q8IUA7 | ABCA9_HUMAN                               | 6    | TGTTTCCTTTAA  | 0.373 |             |
| + | 3  | 1024    | _p.S277F C17orf                              | NM_017941    | NP_060411    | Q9BSJ5 | CQ080_HUMAN xellular (Potential).         | 1    | CAGAATCCCTCA  | 0.423 |             |
| + | 1  | 301     | _p.G133R GPRC5                               | NM_018653    | NP_061123    | Q9NQ84 | GPC5C_HUMAN Name=2; (Potential).          | 5    | TGCTGGGGACC   | 0.622 |             |
| - | 13 | 1912    | o.D431N SLC38A1                              | NM_001037984 | NP_001033073 | Q9HBR0 | S38AA_HUMAN                               | 2    | TCTGGTCTTGGC  | 0.647 |             |
| + | 5  | 877_878 | z_5'Flank STRA13                             | NM_144999    | NP_659436    | Q96CN5 | LRC45_HUMAN                               | 1    | ACATCCCTGGAC  | 0.653 |             |
| - | 6  | 1714    |                                              | NM_130386    | NP_569057    | Q5KU26 | COL12_HUMAN 2. Extracellular (Potential). | 2    | TGATGCCTTTGC  | 0.701 |             |
| - | 2  | 418     |                                              | NM_014646    | NP_055461    | Q92539 | LPIN2_HUMAN N-LIP.                        | 2    | CTTTGGATCTCA  | 0.478 |             |
| - | 4  | 1194    | _p.A345T ZFP161_                             | NM_003409    | NP_003400    | O43829 | ZF161_HUMAN C2H2-type 3.                  | 1    | TGGGGCACCGG   | 0.448 |             |
| - | 1  | 1717    |                                              | NM_001080209 | NP_001073678 | A6NKL6 | T200C_HUMAN                               | 0    | AGTCTCGCGTT   | 0.677 |             |
| + | 2  | 1662    | 'NDC2_uc002koh.                              | NM_001098529 | NP_001091999 | Q86VQ3 | TXND2_HUMAN eat of Q-P-K-X-G-D-I-P-K-     | 2    | ACATCCCCAAG   | 0.552 |             |
| - | 3  | 542     | 519_uc002ksr.1_lr                            | NM_145287    | NP_660330    | Q8TB69 | ZN519_HUMAN                               | 0    | ACAGAAACTGA   | 0.284 |             |
| + | 36 | 3448    | Oxal.1_Missense_M                            | NM_001145029 | NP_001138501 | Q9BXX2 | AN30B_HUMAN Potential.                    | 2    | AAAAAGGAAAT   | 0.303 |             |
| + | 57 | 7547    | kus.3_Missense_M                             | NM_198129    | NP_937762    | Q16787 | LAMA3_HUMAN minin G-like 1.               | 11   | AGTTATGGATCG  | 0.493 |             |
| - | 7  | 4153    | splice_Site_p.Q130                           | NM_015461    | NP_056276    | Q96K83 | ZN521_HUMAN                               | 7    | ACATTACCTGCA  | 0.438 |             |
| - | 6  | 833     | _p.P200L SS18_u                              | NM_001007559 | NP_001007560 | Q15532 | SSXT_HUMAN Gln-rich.                      | 1884 | TATAGGGAGGA   | 0.413 |             |
| - | 5  | 1003    | z.2_Missense_Mu                              | NM_001650    | NP_001641    | P55087 | AQP4_HUMAN lasmic (Potential).            | 0    | ATTGGTCTTTCC  | 0.478 |             |
| - | 13 | 2540    | sn.1_Missense_Mu                             | NM_001792    | NP_001783    | P19022 | CADH2_HUMAN r (Potential). Cadherin 5.    | 4    | AGGATGGAATA   | 0.463 |             |
| - | 11 | 1866    | m.2_Missense_Mu                              | NM_024421    | NP_077739    | Q08554 | DSC1_HUMAN r (Potential). Cadherin 4.     | 4    | GATTCTCTATCTA | 0.318 |             |
| - | 3  | 584     | _p.L143F ZNF24_u                             | NM_006965    | NP_008896    | P17028 | ZNF24_HUMAN                               | 0    | ACGGAGAGAAA   | 0.418 | rs148053646 |
| + | 4  | 843     |                                              | NM_015559    | NP_056374    | Q9Y6X0 | SETBP_HUMAN                               | 3    | CTTACGAGAGG   | 0.408 |             |
| - | 1  | 631_632 | issense_Mutation_                            | NM_001039360 | NP_001034449 | A1YPR0 | ZBT7C_HUMAN                               | 1    | AAAGTCCCTGGC  | 0.574 |             |
| + | 2  | 1191    | IAPK4_uc010doz.2                             | NM_002747    | NP_002738    | P31152 | MK04_HUMAN rotein kinase.                 | 6    | GCTCCGAGAGA   | 0.602 |             |
| + | 20 | 3649    | p.R849Q DCC_uc                               | NM_005215    | NP_005206    | P43146 | DCC_HUMAN tential). Fibronectin type-III  | 17   | CTTTCGAATTCA  | 0.373 |             |
| - | 18 | 2137    | .1_RNA uc002lgy.                             | NM_005603    | NP_005594    | O43520 | AT8B1_HUMAN lasmic (Potential).           | 10   | AACTCCATCCT   | 0.363 |             |
| + | 2  | 135     | 10dpv.2_Missense                             | NM_003839    | NP_003830    | Q9Y6Q6 | TNR11_HUMAN xellular (Potential).         | 3    | CTCCTCCATGT   | 0.473 |             |
| - | 6  | 652     | _Mutation_p.S209F SERPINB3_uc010dqa.2_Intron |              |              | P48594 | SPB4_HUMAN p.S209Y(1)                     | 3    | GTATGGACTTG   | 0.373 |             |
| + | 7  | 950     | n_p.G136E SERPI                              | NM_001143818 | NP_001137290 | P05120 | PAI2_HUMAN                                | 2    | CAAAGGAAAGT   | 0.383 |             |
| + | 12 | 2464    | b.2_Missense_Mu                              | NM_033646    | NP_387450    | Q9ULB5 | CADH7_HUMAN lasmic (Potential).           | 4    | TGGGAAAGATTA  | 0.438 |             |
| - | 4  | 1210    | m.3_Missense_Mu                              | NM_006566    | NP_006557    | Q15762 | CD226_HUMAN ical; (Potential).            | 0    | CCCTCCAGCCA   | 0.363 |             |
| + | 2  | 502     |                                              | NM_014913    | NP_055728    | Q6IQ32 | ADNP2_HUMAN                               | 8    | GGTGCGAAAAA   | 0.368 |             |

|   |    |           |                   |              |              |        |             |    |               |       |             |
|---|----|-----------|-------------------|--------------|--------------|--------|-------------|----|---------------|-------|-------------|
| - | 2  | 234       |                   | NM_145173    | NP_660156    | O95057 | DIRA1_HUMAN | 1  | GAAGCGCAGCA   | 0.557 |             |
| - | 3  | 630       |                   | NM_030662    | NP_109587    | P36507 | MP2K2_HUMAN | 0  | CGAGTTGCATT   | 0.612 |             |
| + | 18 | 2192      | p.G610E ANKRD     | NM_133475    | NP_597732    | Q8TF21 | ANR24_HUMAN | 0  | CATGGGGGTGG   | 0.557 |             |
| + | 2  | 66        |                   | NM_018074    | NP_060544    | Q9BW85 | CCD94_HUMAN | 0  | TACTACCCGCC   | 0.552 |             |
| - | 2  | 284       | dtv.1_Missense_I  | NM_144615    | NP_653216    | Q96BF3 | TMIG2_HUMAN | 0  | GCAGACCCCA    | 0.657 |             |
| + | 3  | 524_525   |                   | NM_005483    | NP_005474    | Q13111 | CAF1A_HUMAN | 2  | CTCTCCCTCCA   | 0.5   | rs150150583 |
| - | 22 | 3830      | w.2_Missense_Mt   | NM_002850    | NP_002841    | Q13332 | PTPRS_HUMAN | 4  | GACGCGAGTGC   | 0.627 |             |
| + | 18 | 2500      | p.P815L SAFB      | NM_002967    | NP_002958    | Q15424 | SAFB1_HUMAN | 3  | CTCTCCCCCA    | 0.701 |             |
| - | 5  | 1017      | mfi.1_Missense_IV | NM_003807    | NP_003798    | O43557 | TNF14_HUMAN | 1  | TCTCCCAGCC    | 0.627 |             |
| + | 26 | 2509_2510 | a.1_Missense_Mul  | NM_005428    | NP_005419    | P15498 | VAV_HUMAN   | 16 | CTCAAGGAGGG   | 0.569 |             |
| + | 18 | 2335      | p.S747F EMR1      | NM_001974    | NP_001965    | Q14246 | EMR1_HUMAN  | 5  | CAACTCCCTTC   | 0.323 |             |
| + | 8  | 1194      | p.T244S ZNF557    | NM_001044388 | NP_001037853 | Q8N988 | ZN557_HUMAN | 2  | GGAAAACCTTC   | 0.453 |             |
| + | 7  | 802       | S4_uc002mji.2_5'  | NM_024552    | NP_078828    | Q9HA82 | CERS4_HUMAN | 1  | GCTGTGGGCAC   | 0.572 |             |
| - | 4  | 352       | p.Y80H MYO1F      | NM_012335    | NP_036467    | O00160 | MYO1F_HUMAN | 3  | CTCATACTGGG   | 0.612 |             |
| - | 61 | 41292     | twj.2_Missense_M  | NM_024690    | NP_078966    | Q8WXI7 | MUC16_HUMAN | 57 | CCATCCTTTTCA  | 0.562 |             |
| - | 21 | 37694     |                   | NM_024690    | NP_078966    | Q8WXI7 | MUC16_HUMAN | 57 | TGTTCTGTCTC   | 0.517 |             |
| - | 4  | 31574     |                   | NM_024690    | NP_078966    | Q8WXI7 | MUC16_HUMAN | 57 | CAGGCGAAGTG   | 0.448 |             |
| - | 3  | 29368     |                   | NM_024690    | NP_078966    | Q8WXI7 | MUC16_HUMAN | 57 | TGTTTCCACAA   | 0.488 |             |
| - | 3  | 26554     |                   | NM_024690    | NP_078966    | Q8WXI7 | MUC16_HUMAN | 57 | TCAATTTCTGCTG | 0.507 |             |
| - | 3  | 23335     |                   | NM_024690    | NP_078966    | Q8WXI7 | MUC16_HUMAN | 57 | GGGGGGGATAT   | 0.547 |             |
| - | 3  | 19093     |                   | NM_024690    | NP_078966    | Q8WXI7 | MUC16_HUMAN | 57 | AGAAGGATGCAT  | 0.443 |             |
| - | 3  | 11488     |                   | NM_024690    | NP_078966    | Q8WXI7 | MUC16_HUMAN | 57 | GAGTTCCTGGG   | 0.532 |             |
| - | 1  | 8251      |                   | NM_024690    | NP_078966    | Q8WXI7 | MUC16_HUMAN | 57 | TGCTCTGGGA    | 0.488 |             |
| - | 1  | 158       |                   | NM_001005192 | NP_001005192 | Q8NGA0 | OR7G1_HUMAN | 2  | GGTGGGAGTCA   | 0.488 |             |
| + | 1  | 957       |                   | NM_175883    | NP_787079    | Q96RA2 | OR7D2_HUMAN | 3  | GCATTGGGGTC   | 0.498 |             |
| + | 1  | 332       |                   | NM_001079935 | NP_001073404 | Q6IFN5 | O7E24_HUMAN | 1  | TCATCTCCTATG  | 0.493 |             |
| - | 10 | 1276      | wr.1_Missense_M   | NM_152476    | NP_689689    | Q96MR9 | ZN560_HUMAN | 6  | TAAATCTTTTCC  | 0.393 |             |
| - | 8  | 689       | dwr.1_Missense_IV | NM_152476    | NP_689689    | Q96MR9 | ZN560_HUMAN | 6  | GCCAAGAGATC   | 0.468 |             |
| + | 6  | 933       | Mutation_p.A174   | NM_022737    | NP_073574    | Q96GM1 | LPPR2_HUMAN | 1  | CGTGGCCGCCG   | 0.701 |             |
| - | 6  | 933       | mk.1_Missense_I   | NM_030824    | NP_110451    | Q9H7R0 | ZN442_HUMAN | 4  | GTTTTTCATTC   | 0.348 |             |
| + | 1  | 207       | Jyz.1_Missense_IV | NM_152654    | NP_689867    | Q8N907 | DAND5_HUMAN | 1  | AGCTTCTGCC    | 0.672 |             |
| + | 3  | 452       | I1_uc002mxf.2_Inl | NM_001031727 | NP_001026897 | Q9BV20 | MTNA_HUMAN  | 1  | CTGCACCGAGG   | 0.642 |             |
| + | 3  | 867_868   |                   | NM_173482    | NP_775753    | Q8IYK2 | CC105_HUMAN | 1  | TCTCTGGAGCAG  | 0.614 |             |
| + | 2  | 133       | Mutation_p.S28f   | NM_000896    | NP_000887    | Q08477 | CP4F3_HUMAN | 3  | GGCCTCCTGGC   | 0.637 |             |
| + | 8  | 994_995   |                   | NM_023944    | NP_076433    |        |             | 7  | GGAAGGCATTG   | 0.386 |             |
| + | 1  | 28        |                   | NM_013939    | NP_039227    | O60403 | O10H2_HUMAN | 3  | GCTGGGGCTAA   | 0.557 |             |
| - | 7  | 901       | I26_uc002nee.2_I  | NM_006387    | NP_006378    | Q8IWX8 | CHERP_HUMAN | 2  | TGATGGAGTCA   | 0.637 |             |
| - | 22 | 2901      |                   | NM_015692    | NP_056507    | Q8IZJ3 | CPMD8_HUMAN | 13 | ATTCTCTCAGC   | 0.562 |             |
| - | 1  | 55        |                   | NM_138454    | NP_612463    | Q96CM4 | NXNL1_HUMAN | 0  | CAGGAGGAGCC   | 0.602 |             |
| - | 5  | 454       |                   | NM_001080421 | NP_001073890 | Q9UPW8 | UN13A_HUMAN | 3  | CCACACCTCCAC  | 0.517 |             |
| - | 8  | 824       | p.G230E COMP_I    | NM_000095    | NP_000086    | P49747 | COMP_HUMAN  | 0  | GGATCCCCTTGC  | 0.706 |             |
| - | 3  | 912       | e_Mutation_p.P25f | NM_014884    | NP_055699    | Q8IX01 | SUGP2_HUMAN | 0  | GGTGGGTATTT   | 0.498 |             |
| - | 4  | 1452      |                   | NM_021030    | NP_066358    | P17017 | ZNF14_HUMAN | 3  | GAAGGGAACCT   | 0.383 |             |
| - | 4  | 1562      | top.2_Missense_IV | NM_033196    | NP_149973    | O95780 | ZN682_HUMAN | 2  | TGCAGGATTTCT  | 0.353 |             |
| + | 3  | 315       | s.1_RNA ZNF90_I   | NM_007138    | NP_009069    | Q03938 | ZNF90_HUMAN | 2  | GCAAGGAAAAA   | 0.398 |             |
| - | 4  | 1600      | ipc.1_Missense_M  | NM_001076675 | NP_001070143 | Q68DY1 | ZN626_HUMAN | 1  | ATCTTCACATTT  | 0.388 |             |
| - | 4  | 1432      | ipc.1_Missense_M  | NM_001076675 | NP_001070143 | Q68DY1 | ZN626_HUMAN | 1  | ATCTTCACATTT  | 0.388 |             |

|   |    |         |                    |              |              |        |             |    |                 |       |            |
|---|----|---------|--------------------|--------------|--------------|--------|-------------|----|-----------------|-------|------------|
| - | 3  | 2081    |                    | NM_001001411 | NP_001001411 | Q8N7Q3 | ZN676_HUMAN | 0  | TTTAGGGATTCT    | 0.348 |            |
| - | 5  | 1966    |                    | NM_001080409 | NP_001073878 |        |             | 2  | FAAGTTTTGAGG/   | 0.363 |            |
| + | 4  | 3694    | dd.1_Missense_Mi   | NM_014717    | NP_055532    | O15090 | ZN536_HUMAN | 11 | AAACCGAACCG     | 0.567 |            |
| - | 28 | 3542    |                    | NM_004646    | NP_004637    | O60500 | NPHN_HUMAN  | 5  | TACGTTCTTTCT/   | 0.547 |            |
| + | 8  | 1431    | ε_Mutation_p.R33(  | NM_001013659 | NP_001013681 | Q6ZN11 | ZN793_HUMAN | 0  | GACATCGAAAAAT   | 0.458 |            |
| + | 5  | 666     | _p.R112C ZNF540    | NM_152606    | NP_689819    | Q8NDQ6 | ZN540_HUMAN | 1  | CTCTTCGTCTG/    | 0.333 |            |
| - | 5  | 2218    | hnb.1_Missense_M   | NM_032689    | NP_116078    | Q96SK3 | ZN607_HUMAN | 0  | TAAAAGACTTCC    | 0.428 |            |
| + | 53 | 8463    | _Mutation_p.G277   | NM_000540    | NP_000531    | P21817 | RYR1_HUMAN  | 12 | CTATGGAGAGA     | 0.607 |            |
| + | 73 | 10827   | iv.1_Missense_Mi   | NM_000540    | NP_000531    | P21817 | RYR1_HUMAN  | 12 | AGGCTCCCCGT     | 0.637 |            |
| + | 89 | 12293   | p.E4050K RYR1_t    | NM_000540    | NP_000531    | P21817 | RYR1_HUMAN  | 12 | ATGTGGAGATG/    | 0.567 |            |
| - | 6  | 3019    |                    | NM_003890    | NP_003881    | Q9Y6R7 | FCGBP_HUMAN | 9  | AGTCCCACAG/     | 0.597 |            |
| - | 3  | 444     | K4_uc002oos.2_l    | NM_024876    | NP_079152    | Q96D53 | ADCK4_HUMAN | 0  | CCCATCTGGT.     | 0.602 |            |
| - | 3  | 374     | ib.1_Missense_Mi   | NM_002088    | NP_002079    | Q16478 | GRIK5_HUMAN | 0  | ACCTCCTTCTC1    | 0.617 |            |
| - | 3  | 736     | g.1_Intron PSG3_   | NM_021016    | NP_066296    | Q16557 | PSG3_HUMAN  | 2  | AAAGAGGGTCC     | 0.507 |            |
| - | 3  | 685     | ε_Mutation_p.S74F  | NM_182707    | NP_874366    | Q9UQ74 | PSG8_HUMAN  | 0  | TTCAGACAACT     | 0.522 |            |
| - | 4  | 894_895 | sense_Mutation_p.  | NM_006905    | NP_008836    | P11464 | PSG1_HUMAN  | 2  | ATTCTCCCTGGG    | 0.49  |            |
| - | 2  | 526     | tion_p.G130R PSC   | NM_006905    | NP_008836    | P11464 | PSG1_HUMAN  | 2  | GAGTCCCATCATC   | 0.502 | rs34055642 |
| - | 4  | 804_805 | ense_Mutation_p.l  | NM_002782    | NP_002773    | Q00889 | PSG6_HUMAN  | 2  | TTCTCCCTGGGC    | 0.51  |            |
| + | 6  | 2489    | 226_uc010ejg.2_3   | NM_001032373 | NP_001027545 | Q9NYT6 | ZN226_HUMAN | 0  | ATAAATCCTATAA   | 0.358 |            |
| - | 4  | 884     | VF285_uc010xxa.1   | NM_152354    | NP_689567    | Q96NJ3 | ZN285_HUMAN | 4  | TTCTTTCCATACT   | 0.433 |            |
| - | 4  | 707     | VF285_uc010xxa.1   | NM_152354    | NP_689567    | Q96NJ3 | ZN285_HUMAN | 4  | GATTTGGGATGT    | 0.468 |            |
| - | 9  | 1501    | 0ejp.1_Missense_   | NM_001102597 | NP_001096067 | Q6UY09 | CEA20_HUMAN | 2  | TCTCTCTTCGGI    | 0.388 |            |
| + | 7  | 1636    |                    | NM_001042724 | NP_001036189 | Q92692 | PVRL2_HUMAN | 0  | AGCTGGAGGCA     | 0.577 |            |
| + | 10 | 1327    |                    | NM_006509    | NP_006500    | Q01201 | RELB_HUMAN  | 1  | CTCGGACCATI     | 0.552 |            |
| + | 4  | 300     | RS16_uc002pam.     | NM_007056    | NP_008987    | Q8N2M8 | CLASR_HUMAN | 0  | GGATGCCCTGGI    | 0.587 |            |
| + | 3  | 242     | eb.2_Missense_M    | NM_001135113 | NP_001128585 | Q6UWQ7 | IGFL2_HUMAN | 0  | TCCCCCCTGCA     | 0.552 |            |
| - | 2  | 950     | per.3_Missense_M   | NM_018215    | NP_060685    | Q86V59 | PNML1_HUMAN | 0  | TGTTGGGGGTC     | 0.557 |            |
| - | 3  | 1080    |                    | NM_000960    | NP_000951    | P43119 | PI2R_HUMAN  | 0  | GGAAGGGGTG      | 0.657 |            |
| + | 6  | 4412    |                    | NM_004491    | NP_004482    | Q9NRY4 | RHG35_HUMAN | 1  | TCCAGCCGTCCG    | 0.677 |            |
| - | 8  | 1059    | H4_uc002pgb.1_F    | NM_015168    | NP_055983    | Q9UPT8 | ZC3H4_HUMAN | 6  | GCCCCGACCCA     | 0.627 |            |
| + | 4  | 474     |                    | NM_022142    | NP_071425    | Q96BH3 | ESPB1_HUMAN | 0  | TCTTCGATGAG/    | 0.517 |            |
| - | 5  | 582     |                    | NM_019855    | NP_062829    | Q9NP86 | CABP5_HUMAN | 1  | AGCCTCCCGGA     | 0.612 |            |
| + | 9  | 2085    | V2D_uc010elx.2_5   | NM_000836    | NP_000827    | O15399 | NMDE4_HUMAN | 6  | GCTTCGCCGTCA    | 0.587 |            |
| + | 2  | 287_288 | pjm.2_Missense_l   | NM_177973    | NP_814444    | O00204 | ST2B1_HUMAN | 1  | CTACCCCAAGTC    | 0.644 |            |
| + | 3  | 662     | 10yaf.1_Missense_  | NM_033378    | NP_203696    |        |             | 0  | GCTTCCAAGC      | 0.642 |            |
| - | 5  | 938     | _Mutation_p.P235L  | NM_014037    | NP_054756    | Q9GZN6 | S6A16_HUMAN | 4  | ATTCAGGATCTG    | 0.388 |            |
| + | 7  | 814     | 7_uc002ppp.2_5'U   | NM_024682    | NP_078958    | Q9HA65 | TBC17_HUMAN | 0  | CTACTCCACCA     | 0.692 |            |
| - | 3  | 116     | i_p.P21L IL411_ucl | NM_152899    | NP_690863    | Q96RQ9 | OXLA_HUMAN  | 3  | gaggatggggagcag | 0.453 |            |
| + | 5  | 2132    | _p.S632F ZNF473    | NM_001006656 | NP_001006657 | Q8WTR7 | ZN473_HUMAN | 2  | TGCCTCCCTTA     | 0.478 |            |
| - | 7  | 734     |                    | NM_152358    | NP_689571    | Q6UXV1 | IZUM2_HUMAN | 0  | AGTTTTCGGTTT    | 0.403 |            |
| - | 1  | 271     |                    | NM_152358    | NP_689571    | Q6UXV1 | IZUM2_HUMAN | 0  | AGGCCCTCCA      | 0.677 |            |
| + | 13 | 1622    | p.W533C MYH14_     | NM_024729    | NP_079005    | Q72406 | MYH14_HUMAN | 1  | CCCTGGACCTT     | 0.592 |            |
| + | 26 | 3412    | o.A1163V MYH14_    | NM_024729    | NP_079005    | Q72406 | MYH14_HUMAN | 1  | TGGGGCCCGGG     | 0.652 |            |
| + | 2  | 56      | e_Mutation_p.G11   | NM_003121    | NP_003112    | Q01892 | SPIB_HUMAN  | 2  | TGACGGGCCA      | 0.647 |            |
| - | 3  | 249     | o.2_Missense_Mu    | NM_017509    | NP_059979    | Q9H2R5 | KLK15_HUMAN | 2  | GCTCTCCAGG      | 0.622 |            |
| - | 2  | 601     |                    | NM_002029    | NP_002020    | P21462 | FPR1_HUMAN  | 3  | TTTTACCAGGT/    | 0.537 |            |
| + | 6  | 1703    | ya.1_Missense_M    | NM_001031721 | NP_001026891 | Q6PF04 | ZN613_HUMAN | 1  | AGAAACCCATAG    | 0.418 |            |

|   |    |           |                    |              |              |        |             |      |               |       |
|---|----|-----------|--------------------|--------------|--------------|--------|-------------|------|---------------|-------|
| + | 4  | 596       | dn.1_Missense_M    | NM_018260    | NP_060730    | Q9NV72 | ZN701_HUMAN | 0    | ACCCCGAAGGG   | 0.413 |
| - | 5  | 1222      | p.R386C ZNF347_    | NM_032584    | NP_115973    | Q96SE7 | ZN347_HUMAN | 0    | TTGAACGAGCTC  | 0.413 |
| + | 3  | 1134      | i.2_Intron CACNGt  | NM_145814    | NP_665813    | Q9BXT2 | CCG6_HUMAN  | 2    | CTCTCAGGTGAG  | 0.577 |
| - | 4  | 473       | j.2_RNA LILRB2_t   | NM_005874    | NP_005865    | Q8N423 | LIRB2_HUMAN | 1    | GTGAATCCAAGAT | 0.527 |
| + | 7  | 1141      | 18_splice LILRA1_  | NM_006863    | NP_006854    | O75019 | LIRA1_HUMAN | 3    | CTCCAGGACAG   | 0.597 |
| + | 16 | 2261      | RB1_uc002qgm.2_    | NM_006669    | NP_006660    | Q8NHL6 | LIRB1_HUMAN | 3    | CTGTGCCCCAGC  | 0.652 |
| - | 4  | 1537_1538 | p.E488K NLRP7_t    | NM_206828    | NP_996611    | Q8WX94 | NALP7_HUMAN | 3    | GTCCTCCCCCTC  | 0.574 |
| - | 2  | 1151      | nse_Mutation_p.A   | NM_003180    | NP_003171    | O00445 | SYT5_HUMAN  | 0    | CAGGGCCCAGG   | 0.602 |
| - | 4  | 504       | TPRH_uc002qjs.2_   | NM_002842    | NP_002833    | Q9HD43 | PTPRH_HUMAN | 4    | CTGGGCCGTCG   | 0.597 |
| - | 2  | 361       |                    | NM_176820    | NP_789790    | Q7RTR0 | NALP9_HUMAN | 7    | CTTCTCCCATATG | 0.373 |
| + | 5  | 572       | P5_uc002qmi.2_Ir   | NM_153447    | NP_703148    | P59047 | NALP5_HUMAN | 7    | AAATTTCACAGI  | 0.408 |
| - | 7  | 4220      | i.S1261F PEG3_uc   | NM_001146186 | NP_001139658 | Q9GZU2 | PEG3_HUMAN  | 12   | ACGAAAGATTCTC | 0.468 |
| + | 4  | 2057      |                    | NM_213598    | NP_998763    | Q08ER8 | ZN543_HUMAN | 2    | GAAGACCTTTTA  | 0.418 |
| + | 3  | 1809      | _p.P521L ZNF304    | NM_020657    | NP_065708    | Q9HCX3 | ZN304_HUMAN | 1    | CAAGGCCTTATG  | 0.488 |
| + | 3  | 1043      |                    | NM_152677    | NP_689890    | Q8NAM6 | ZSCA4_HUMAN | 1    | ACTTGGAGAGA   | 0.413 |
| + | 5  | 1853      |                    | NM_152677    | NP_689890    | Q8NAM6 | ZSCA4_HUMAN | 1    | CGGTCTCATGAG  | 0.463 |
| + | 3  | 359       | so.2_Missense_Mi   | NM_001009    | NP_001000    | P46782 | RS5_HUMAN   | 0    | AGCATGCCTTCG  | 0.577 |
| - | 3  | 359       |                    | NM_003310    | NP_003301    | Q53HC9 | TSSC1_HUMAN | 0    | TTTTATTTATAAT | 0.413 |
| + | 6  | 1095      |                    | NM_080657    | NP_542388    | Q8WXG1 | RSAD2_HUMAN | 0    | AGGACCTTCCA   | 0.383 |
| + | 6  | 1072      | nse_Mutation_p.R   | NM_198182    | NP_937825    | Q9NZI5 | GRHL1_HUMAN | 2    | AAGTTCGAGTA   | 0.478 |
| + | 8  | 1041      |                    | NM_001034    | NP_001025    | P31350 | RIR2_HUMAN  | 0    | ACAAACCATCGC  | 0.398 |
| + | 9  | 797       | 2rat.2_Nonsense_j  | NM_001039362 | NP_001034451 | Q8NEY4 | VATC2_HUMAN | 1    | CTGTTTCGAAAA  | 0.517 |
| - | 14 | 2280      | _p.P613S PUM2_u    | NM_015317    | NP_056132    | Q8TB72 | PUM2_HUMAN  | 1    | AGCTGGAGTAG   | 0.343 |
| - | 26 | 8008      |                    | NM_000384    | NP_000375    | P04114 | APOB_HUMAN  | 27   | ACTGATGGAATC  | 0.413 |
| - | 26 | 4512      |                    | NM_000384    | NP_000375    | P04114 | APOB_HUMAN  | 27   | TGGTCCCCAGG   | 0.378 |
| + | 12 | 1641      | hv.3_Missense_M    | NM_020134    | NP_064519    | Q9BPU6 | DPYL5_HUMAN | 2    | TGGGGGATGTC   | 0.567 |
| - | 4  | 1069      | kj.2_Missense_Mi   | NM_144631    | NP_653232    | Q8N8E2 | ZN513_HUMAN | 1    | AGTGCCACAG    | 0.607 |
| + | 27 | 1876      | c.2_Missense_Mu    | NM_153021    | NP_694566    | Q6P1J6 | PLB1_HUMAN  | 9    | CTGTGTTGTGC   | 0.473 |
| + | 13 | 2065      | _p.E517K FAM17     | NM_199280    | NP_954974    | Q6ZUX3 | F179A_HUMAN | 4    | CCGAGGAGATC   | 0.587 |
| - | 7  | 2357      |                    | NM_004304    | NP_004295    | Q9UM73 | ALK_HUMAN   | 1218 | AGCCATCTTCAA  | 0.522 |
| - | 36 | 4070      |                    | NM_000379    | NP_000370    | P47989 | XDH_HUMAN   | 8    | CCACAGACC     | 0.498 |
| - | 7  | 849       | lynd.1_Missense_f  | NM_015475    | NP_056290    | Q8NCA5 | FA98A_HUMAN | 1    | TTTTAGGGGATA  | 0.403 |
| - | 29 | 2385      | p.W744* MAP4K3     | NM_003618    | NP_003609    | Q8IVH8 | M4K3_HUMAN  | 8    | TAAACCATGAAC  | 0.348 |
| - | 2  | 1930      | 002rrz.2_Intron SL | NM_021097    | NP_066920    | P32418 | NAC1_HUMAN  | 4    | TCTTCTCACTCAT | 0.507 |
| - | 1  | 316       | HH2_uc002rtf.3_I   | NM_001101330 | NP_001094800 |        |             | 0    | AATTATCATTTTT | 0.393 |
| + | 4  | 428       | oa.1_Missense_M    | NM_022437    | NP_071882    | Q9H221 | ABCG8_HUMAN | 4    | AGCCTCCTTGC   | 0.607 |
| - | 8  | 1197_1198 | REPL_uc002rui.3_   | NM_006036    | NP_006027    | Q4J6C6 | PPCEL_HUMAN | 1    | CCCAAGGAGGG   | 0.371 |
| + | 3  | 755       |                    | NM_002158    | NP_002149    | P32314 | FOXN2_HUMAN | 0    | ATTTTCCATATTT | 0.393 |
| - | 27 | 3073      | SME4_uc010fbu.1    | NM_014614    | NP_055429    | Q14997 | PSME4_HUMAN | 5    | ACCAAGGGAATG  | 0.338 |
| - | 4  | 552       | i.2_Intron C2orf63 | NM_152385    | NP_689598    | Q8NHS4 | CB063_HUMAN | 3    | AGATGGATTTG   | 0.303 |
| - | 11 | 1751      | zj.2_Missense_Mi   | NM_004105    | NP_004096    | Q12805 | FBLN3_HUMAN | 6    | AAGTCCCTATA   | 0.438 |
| + | 6  | 2109      |                    | NM_001080433 | NP_001073902 | Q96PX6 | CC85A_HUMAN | 5    | AGGTTCGTGTC   | 0.408 |
| + | 3  | 461       | le.2_Missense_Mu   | NM_002664    | NP_002655    | P08567 | PLEK_HUMAN  | 1    | AGGCCATTAATC  | 0.468 |
| - | 4  | 828       |                    | NM_001024680 | NP_001019851 | Q5FWF7 | FBX48_HUMAN | 0    | GCATCCATTGGC  | 0.378 |
| - | 3  | 370       |                    | NM_002056    | NP_002047    | Q06210 | GFPT1_HUMAN | 1    | ACTTTTCCITTCI | 0.413 |
| - | 10 | 1907      |                    | NM_017880    | NP_060350    | Q9NWW7 | CB042_HUMAN | 0    | GGGAAGGATATC  | 0.507 |
| + | 4  | 626       | p.G110E PCYOX1     | NM_016297    | NP_057381    | Q9UHG3 | PCYOX_HUMAN | 1    | CTAGGAGGAG    | 0.403 |

rs147349434



|   |    |         |                    |              |              |        |             |                              |    |               |       |
|---|----|---------|--------------------|--------------|--------------|--------|-------------|------------------------------|----|---------------|-------|
| + | 13 | 1393    | V1B1_uc010fdw.2    | NM_001692    | NP_001683    | P15313 | VATB1_HUMAN |                              | 1  | GGGAGGAGGCC   | 0.607 |
| + | 3  | 2586    |                    | NM_001080474 | NP_001073943 | A6NCI8 | CB078_HUMAN |                              | 2  | TTCTTCTCTGCA  | 0.403 |
| + | 3  | 445_446 | sense_Mutation_p   | NM_001381    | NP_001372    | Q99704 | DOK1_HUMAN  |                              | 0  | ATGCTGGAGAAC  | 0.574 |
| + | 5  | 875     | missense_Mutation  | NM_001381    | NP_001372    | Q99704 | DOK1_HUMAN  | Pro-rich.                    | 0  | CTGGCCCCCAA   | 0.627 |
| + | 11 | 3590    |                    | NM_000189    | NP_000180    | P52789 | HXK2_HUMAN  | Catalytic.                   | 2  | GGAGATGCACA   | 0.612 |
| + | 13 | 1908    | p.E635K CTNNA2     | NM_004389    | NP_004380    | P26232 | CTNA2_HUMAN |                              | 9  | CAGAAGAACTA   | 0.443 |
| + | 8  | 1267    | HNSL2_uc002sta.:   | NM_018271    | NP_060741    | Q86YJ6 | THNS2_HUMAN |                              | 1  | TCGGATGAAGCC  | 0.562 |
| - | 5  | 633     | V131_uc010yvg.1    | NM_015348    | NP_056163    | Q92545 | TM131_HUMAN |                              | 6  | AACTAGGATTAT  | 0.289 |
| + | 6  | 699     | RPL30_uc002szst.   | NM_145213    | NP_660214    | Q8TCC3 | RM30_HUMAN  |                              | 1  | AGATGGTGAGAA  | 0.269 |
| - | 4  | 471     | se_Mutation_p.G1   | NM_175735    | NP_783862    | Q86SG7 | LYG2_HUMAN  |                              | 1  | AAGTCCCCTGTG  | 0.517 |
| + | 7  | 821     | vt.1_Missense_Mt   | NM_002518    | NP_002509    | Q99743 | NPAS2_HUMAN |                              | 4  | TTGAACCCAAAG  | 0.393 |
| - | 2  | 494_495 |                    | NM_153836    | NP_722578    | Q8IUH2 | CREG2_HUMAN |                              | 1  | GCAGTCCCTGG   | 0.51  |
| + | 11 | 1459    | wd.1_Missense_Iv   | NM_003855    | NP_003846    | Q13478 | IL18R_HUMAN | oplasmic (Potential).        | 3  | AAAGCCGAAGA   | 0.348 |
| - | 4  | 994     | p.G74R TGFBRA1     | NM_004257    | NP_004248    | Q8WUW2 | TGFA1_HUMAN |                              | 2  | AACTCCTTTACT  | 0.418 |
| - | 16 | 2320    |                    | NM_001144013 | NP_001137485 | A6NKT7 | RGPD3_HUMAN |                              | 1  | GTTTTCGAGTTC  | 0.368 |
| + | 6  | 802     |                    | NM_001008743 | NP_001008743 | Q6IMI6 | ST1C3_HUMAN | PAPS.                        | 1  | GAAAAGGTAGA   | 0.403 |
| - | 20 | 3464    | p.W989* RGPD5_     | NM_005054    | NP_005045    | Q99666 | RGPD5_HUMAN | RanBD1 1.                    | 0  | CCACATCCATGC  | 0.438 |
| + | 10 | 2312    | ense_Mutation_p.L  | NM_019014    | NP_061887    | Q9H9Y6 | RPA2_HUMAN  |                              | 1  | GATTCTCTCGTI  | 0.512 |
| + | 3  | 128     |                    | NM_014440    | NP_055255    | Q9UHA7 | IL36A_HUMAN |                              | 0  | CAGTCACTATTG  | 0.498 |
| + | 12 | 2525    | _uc002tjf.2_Misse  | NM_012455    | NP_036587    | Q8NDX1 | PSD4_HUMAN  | PH.                          | 2  | GCAGGGCATCC   | 0.612 |
| + | 2  | 518     | JPP10_uc002tle.2   | NM_020868    | NP_065919    | Q8N608 | DPP10_HUMAN | KCND2. Cytoplasmic (Pote     | 10 | GGTAGGAACTGC  | 0.388 |
| + | 20 | 2158    | p.M563I DPP10_     | NM_020868    | NP_065919    | Q8N608 | DPP10_HUMAN | ellular (Potential).         | 10 | TGCAGGGATGA   | 0.388 |
| + | 13 | 4739    | it.3_Missense_Mul  | NM_005270    | NP_005261    | P10070 | GLI2_HUMAN  |                              | 13 | GAGCTCCATGC   | 0.642 |
| - | 11 | 1133    | _Mutation_p.V347   | NM_014553    | NP_055368    | Q9NZI6 | TF2L1_HUMAN |                              | 3  | ATCTGGACCAA   | 0.557 |
| - | 8  | 953     | l0fr.2_Splice_Site | NM_014553    | NP_055368    | Q9NZI6 | TF2L1_HUMAN |                              | 3  | ACGTACCCTTC   | 0.552 |
| - | 2  | 208     | fls.2_Missense_M   | NM_032390    | NP_115766    | Q9BYG3 | MK67I_HUMAN |                              | 0  | CTCCAGGAGTA   | 0.413 |
| + | 13 | 1552    |                    | NM_001080527 | NP_001073996 | Q6PIF6 | MYO7B_HUMAN | osin head-like.              | 2  | GCTGGCCCTCA   | 0.602 |
| + | 15 | 1863    |                    | NM_001080527 | NP_001073996 | Q6PIF6 | MYO7B_HUMAN | osin head-like.              | 2  | TGGGCCATGGG   | 0.552 |
| - | 7  | 1707    | K4_uc010zbg.1_I    | NM_025052    | NP_079328    | Q56UN5 | YSK4_HUMAN  |                              | 5  | TAATGGGACCT   | 0.418 |
| - | 8  | 3118    |                    | NM_002299    | NP_002290    | P09848 | LPH_HUMAN   | ential). 4 X approximate ref | 13 | AGGCAGGATTC   | 0.488 |
| + | 6  | 653     | vf.2_Missense_Mu   | NM_006895    | NP_008826    | P50135 | HNMT_HUMAN  |                              | 1  | AAGATGCTCATT  | 0.353 |
| - | 60 | 10576   |                    | NM_018557    | NP_061027    | Q9NZR2 | LRP1B_HUMAN | ntial). LDL-receptor class B | 50 | ATCCATCCATGT  | 0.294 |
| + | 2  | 206     | p.D26N KYNU_uc     | NM_003937    | NP_003928    | Q16719 | KYNU_HUMAN  |                              | 2  | CAACGGATGAG   | 0.488 |
| + | 8  | 830     | p.P234S KYNU_uc    | NM_003937    | NP_003928    | Q16719 | KYNU_HUMAN  |                              | 2  | ATATTCTCGCCA  | 0.418 |
| + | 2  | 231     | l0zbl.1_Missense_  | NM_018460    | NP_060930    | Q53QZ3 | RHG15_HUMAN |                              | 2  | AAATGAGAATCA  | 0.443 |
| + | 23 | 2827    | 5C_uc002twu.1_I    | NM_004522    | NP_004513    | O60282 | KIF5C_HUMAN |                              | 1  | AGTTGGACAACG  | 0.527 |
| + | 2  | 1843    | .NT5_uc010zci.1_I  | NM_014568    | NP_055383    | Q7Z7M9 | GALT5_HUMAN | main A. Lumenal (Potential   | 4  | TAAGGAGATTG   | 0.448 |
| - | 1  | 515     | S1_uc002ubm.2_E    | NM_016836    | NP_058520    | P29558 | RBMS1_HUMAN |                              | 0  | CCTTGGCTTGC   | 0.677 |
| - | 13 | 2456    | .2_Intron SCN3A_I  | NM_006922    | NP_008853    | Q9NY46 | SCN3A_HUMAN |                              | 10 | CCAAGGAAACC   | 0.488 |
| + | 14 | 2665    | p.S792F SCN2A_     | NM_001040142 | NP_001035232 | Q99250 | SCN2A_HUMAN | =S2 of repeat II; (Potential | 8  | FACTGTCTGTTG  | 0.408 |
| - | 26 | 4821    | uc002udp.2_Intror  | NM_002977    | NP_002968    | Q15858 | SCN9A_HUMAN |                              | 13 | ATCCTTGGATTTT | 0.313 |
| - | 15 | 2703    | uc002udp.2_Intror  | NM_002977    | NP_002968    | Q15858 | SCN9A_HUMAN | II.                          | 13 | TGGATCCATGG   | 0.343 |
| - | 14 | 2235    | 7A_uc010fpm.1_f    | NM_002976    | NP_002967    | Q01118 | SCN7A_HUMAN |                              | 1  | ACCAGGATTGG   | 0.403 |
| + | 8  | 2000    | udy.2_Missense_I   | NM_152381    | NP_689594    | A4UGR9 | XIRP2_HUMAN | Xin 4.                       | 14 | AACAAGGCCAT   | 0.438 |
| + | 8  | 8534    | p.R2664K XIRP2     | NM_152381    | NP_689594    | A4UGR9 | XIRP2_HUMAN |                              | 14 | TGAAAGAAAAC   | 0.383 |
| + | 22 | 3030    | io.1_Missense_Mu   | NM_001079818 | NP_001073286 | P23229 | ITA6_HUMAN  | ellular (Potential).         | 2  | TGCGGGGGCTG   | 0.468 |
| + | 9  | 1227    | ej.1_Nonsense_M    | NM_145810    | NP_665809    | Q9BWT1 | CDCA7_HUMAN | transcriptional activity.    | 1  | AAACAGGAATTT  | 0.323 |

rs139414825

|   |     |                            |                    |              |              |        |             |                             |     |                |       |
|---|-----|----------------------------|--------------------|--------------|--------------|--------|-------------|-----------------------------|-----|----------------|-------|
| + | 9   | 1229                       | ej.1_Missense_Mu   | NM_145810    | NP_665809    | Q9BWT1 | CDCA7_HUMAN | transcriptional activity.   | 1   | ACAGGAATTTGA/  | 0.323 |
| - | 284 | 33277_8327880K TTN_uc010z  |                    | NM_133378    | NP_596869    | Q8WZ42 | TITIN_HUMAN |                             | 153 | :CTCCTCCATTAT/ | 0.446 |
| - | 284 | 82243                      | 35E TTN_uc010z     | NM_133378    | NP_596869    | Q8WZ42 | TITIN_HUMAN |                             | 153 | TATTTTCCTGTAT  | 0.403 |
| - | 275 | 71598                      | 87C TTN_uc010z     | NM_133378    | NP_596869    | Q8WZ42 | TITIN_HUMAN |                             | 153 | .TTATACGGAAAA/ | 0.413 |
| - | 275 | 71377                      | 13K TTN_uc010z     | NM_133378    | NP_596869    | Q8WZ42 | TITIN_HUMAN |                             | 153 | CCTGGTCTATCT/  | 0.413 |
| - | 200 | 39408                      | .1_Missense_Muta   | NM_133378    | NP_596869    | Q8WZ42 | TITIN_HUMAN |                             | 153 | GTCTCCTTTCTT   | 0.358 |
| - | 124 | 28701                      | l_Intron TTN_uc0   | NM_133378    | NP_596869    | Q8WZ42 | TITIN_HUMAN |                             | 153 | ATTCTCCTCTGT/  | 0.398 |
| - | 80  | 20556                      | uc010z fj.1_Intro  | NM_133378    | NP_596869    | Q8WZ42 | TITIN_HUMAN |                             | 153 | ATTTCATCCTCTG  | 0.512 |
| - | 74  | 18751                      | uc010z fj.1_Intro  | NM_133378    | NP_596869    | Q8WZ42 | TITIN_HUMAN |                             | 153 | CAAAGAAGGTC    | 0.408 |
| - | 67  | 16791                      | uc010z fj.1_Intro  | NM_133378    | NP_596869    | Q8WZ42 | TITIN_HUMAN |                             | 153 | AGGAGGGAAGC    | 0.373 |
| - | 61  | 15172                      | uc010z fj.1_Intro  | NM_133378    | NP_596869    | Q8WZ42 | TITIN_HUMAN |                             | 153 | CAAACGGAGGT/   | 0.443 |
| - | 46  | 11885_11886 G3821S TTN_uc0 |                    | NM_133437    | NP_597681    | Q8WZ42 | TITIN_HUMAN |                             | 153 | GGGACCCTTTAA   | 0.46  |
| - | 46  | 13152                      | N_uc010z fj.1_Intr | NM_133379    | NP_596870    | Q8WZ42 | TITIN_HUMAN |                             | 153 | GGCTTTGAAAA/   | 0.408 |
| - | 31  | 7306                       | TN_uc010z fj.1_Mi  | NM_133378    | NP_596869    | Q8WZ42 | TITIN_HUMAN |                             | 153 | TAAGTCCTTGT/   | 0.428 |
| - | 13  | 2455                       | une.1_Nonsense_    | NM_173648    | NP_775919    | Q6ZP82 | CC141_HUMAN |                             | 10  | GTATTGAAACCT   | 0.488 |
| + | 3   | 872_873                    |                    | NM_194250    | NP_919226    | Q7Z570 | Z804A_HUMAN |                             | 11  | ACAAAGGGGAATT  | 0.351 |
| - | 5   | 770                        |                    | NM_182521    | NP_872327    | Q8NEG5 | ZSWM2_HUMAN | ZZ-type.                    | 3   | CTTCCCCTCAAT   | 0.358 |
| - | 5   | 539                        |                    | NM_182521    | NP_872327    | Q8NEG5 | ZSWM2_HUMAN | RING-type 1.                | 3   | ACAGCCAAACC    | 0.274 |
| + | 9   | 809                        | 3A1_uc010 frw.1_5' | NM_000090    | NP_000081    | P02461 | CO3A1_HUMAN | le-helical region.          | 13  | CTAGGGAGAATC   | 0.403 |
| + | 22  | 2567                       | 3_Mutation_p.R77'  | NM_001130158 | NP_001123630 | O43795 | MYO1B_HUMAN | IQ 3.                       | 8   | TCTGCGGGAAC    | 0.463 |
| - | 43  | 7902                       |                    | NM_018897    | NP_061720    | Q8WXX0 | DYH7_HUMAN  | k (By similarity).          | 12  | CTACTTGAGATG/  | 0.363 |
| - | 41  | 6983                       |                    | NM_018897    | NP_061720    | Q8WXX0 | DYH7_HUMAN  |                             | 12  | TACTATCATTCCA  | 0.383 |
| - | 31  | 5112                       |                    | NM_018897    | NP_061720    | Q8WXX0 | DYH7_HUMAN  | 2 (By similarity).          | 12  | AGCAAGGACCC    | 0.378 |
| - | 22  | 3992                       | utl.1_Missense_Mu  | NM_020760    | NP_065811    | Q9P2P5 | HECW2_HUMAN | HECT.                       | 18  | CTCTGGATACC/   | 0.358 |
| + | 13  | 1907                       | p.E519K SPATS2L    | NM_015535    | NP_056350    | Q9NUQ6 | SPS2L_HUMAN |                             | 3   | CCTCGGAGGCC.   | 0.597 |
| - | 14  | 2055_2056                  |                    | NM_213589    | NP_998754    | Q70E73 | RAPH1_HUMAN |                             | 10  | TTGCGGGGATAA   | 0.342 |
| + | 5   | 4094                       |                    | NM_020923    | NP_065974    | Q9HCK1 | ZDBF2_HUMAN |                             | 3   | CTACAGATTCC/   | 0.393 |
| + | 5   | 659                        | zjb.1_Missense_M   | NM_005048    | NP_005039    | P49190 | PTH2R_HUMAN | Name=1; (Potential).        | 3   | GTATACCGTTGC   | 0.423 |
| + | 8   | 925                        | ir.2_Missense_Mul  | NM_001875    | NP_001866    | P31327 | CPSM_HUMAN  | imidotransferase type-1.    | 13  | GAGGACCGGGG    | 0.498 |
| - | 32  | 5060_5061                  | p.G1296K ABCA1:    | NM_173076    | NP_775099    | Q86UK0 | ABCAC_HUMAN |                             | 11  | GCTCTCCCCCA/   | 0.5   |
| - | 8   | 1397                       | 0zlr.1_Missense_A  | NM_006216    | NP_006207    | P07093 | GDN_HUMAN   |                             | 4   | CTGTAGGATTAT   | 0.418 |
| - | 46  | 5323                       |                    | NM_000092    | NP_000083    | P53420 | CO4A4_HUMAN | collagen IV NC1.            | 11  | CGCCTCTTCAG/   | 0.652 |
| + | 37  | 3322                       | tation_p.G1054R    | NM_000091    | NP_000082    | Q01955 | CO4A3_HUMAN | le-helical region.          | 3   | ATAAGGGAGAG/   | 0.493 |
| + | 25  | 2336                       | xp.1_Missense_Mu   | NM_001080391 | NP_001073860 | P23497 | SP100_HUMAN |                             | 5   | CCCATCCGTGG/   | 0.507 |
| + | 1   | 374                        | UGT1A9_uc002vu     | NM_001072    | NP_001063    | P19224 | UD16_HUMAN  |                             | 0   | ATCATCCAGTGC   | 0.423 |
| - | 2   | 288                        | fyp.1_Missense_M   | NM_212556    | NP_997721    | Q6ZVZ8 | ASB18_HUMAN |                             | 1   | CCATCCCATCTC/  | 0.488 |
| + | 13  | 3010                       |                    | NM_001080504 | NP_001073973 | Q6ZP01 | RBM44_HUMAN |                             | 4   | TTTTTCCCTTCCC  | 0.413 |
| + | 7   | 1293                       | 3_Mutation_p.F14C  | NM_018226    | NP_060696    | Q9HAU8 | RNPL1_HUMAN |                             | 2   | ATGACTTTTCTCC  | 0.642 |
| + | 12  | 1699                       |                    | NM_001080437 | NP_001073906 | Q8TER0 | SNED1_HUMAN | EGF-like 7.                 | 2   | GCGAGTGCCCG/   | 0.716 |
| - | 14  | 2263                       | as.2_Missense_M    | NM_019609    | NP_062555    | Q96SM3 | CPXM1_HUMAN |                             | 4   | CAATCCTTCTGT   | 0.612 |
| - | 7   | 936                        | as.2_Missense_M    | NM_019609    | NP_062555    | Q96SM3 | CPXM1_HUMAN |                             | 4   | CAGAGGATCCC/   | 0.537 |
| - | 18  | 2536                       | 4A11_uc002wih.2    | NM_032034    | NP_114423    | Q8NBS3 | S4A11_HUMAN | bicarbonate transporter).   | 1   | AGTAGTGGATCT   | 0.617 |
| - | 18  | 1771                       | vmd.3_Missense_M   | NM_019593    | NP_062539    | Q9NPB8 | GPCP1_HUMAN | GDPD.                       | 0   | TATCGGATATTT   | 0.363 |
| + | 2   | 121                        | .CB1_uc002wmz.1    | NM_015192    | NP_056007    | Q9NQ66 | PLCB1_HUMAN |                             | 12  | GTTACTCCAATT/  | 0.318 |
| + | 5   | 388                        | rmz.1_Splice_Site  | NM_015192    | NP_056007    | Q9NQ66 | PLCB1_HUMAN |                             | 12  | TTTCAGGAATGC   | 0.388 |
| - | 5   | 1093                       | nj.2_Missense_Mu   | NM_020341    | NP_065074    | Q9P286 | PAK7_HUMAN  | Linker.                     | 23  | CTCAGAATAG1    | 0.458 |
| + | 2   | 249                        | uc010gca.1_Miss    | NM_130811    | NP_570824    | P60880 | SNP25_HUMAN | with CENPF (By similarity). | 2   | TGGAGGAGATG/   | 0.597 |

|   |    |         |                   |              |              |        |             |                               |     |               |       |
|---|----|---------|-------------------|--------------|--------------|--------|-------------|-------------------------------|-----|---------------|-------|
| - | 18 | 1838    | ›.H447Y SEL1L2_u  | NM_025229    | NP_079505    | Q5TEA6 | SE1L2_HUMAN | (Potential). Sel1-like 10.    | 2   | CGTTGTGGTATT  | 0.398 |
| - | 19 | 2343    | jch.1_Missense_IV | NM_024704    | NP_078980    | Q96L93 | K116B_HUMAN | i-rich. Potential.            | 8   | CCAGTTCCTTGAA | 0.448 |
| + | 22 | 2757    | e_Mutation_p.G87  | NM_015585    | NP_056400    | Q8NHU2 | CT026_HUMAN |                               | 4   | ›CGCCGGAGTCA  | 0.652 |
| + | 1  | 1555    |                   | NM_002196    | NP_002187    | Q01101 | INSM1_HUMAN | ›2H2-type 5.                  | 1   | ›TGTTCCCTGTC  | 0.657 |
| + | 28 | 2716    | sk.1_Missense_Mi  | NM_012255    | NP_036387    | Q9H0D6 | XRN2_HUMAN  |                               | 1   | ›TCCTCCCTTT   | 0.378 |
| - | 3  | 813     | sm.2_Missense_M   | NM_153675    | NP_710141    | Q9Y261 | FOXA2_HUMAN | Fork-head.                    | 4   | ›AGTGGCGGATG  | 0.617 |
| + | 4  | 776     |                   | NM_033118    | NP_149109    | Q9H1R3 | MYLK2_HUMAN |                               | 6   | ›CACCTCGAGGG  | 0.577 |
| + | 7  | 762     | ›b.1_RNA TTL9     | NM_001008409 | NP_001008409 | Q3SXZ7 | TTL9_HUMAN  | TTL.                          | 2   | ›GGTAGCCCGGT  | 0.607 |
| + | 14 | 1995    | se_Mutation_p.G5  | NM_032819    | NP_116208    | Q9BYN7 | ZN341_HUMAN | ›2H2-type 11.                 | 2   | ›ACACAGGCTGC  | 0.597 |
| + | 17 | 1874    | _p.S520F ITCH_uc  | NM_031483    | NP_113671    | Q96J02 | ITCH_HUMAN  |                               | 6   | ›GGATTCCCTTCA | 0.403 |
| - | 6  | 664     | S_uc010zup.1_Mi   | NM_000178    | NP_000169    | P48637 | GSHB_HUMAN  |                               | 3   | ›CCCAGGCTTTG  | 0.488 |
| - | 4  | 1551    | 1_5'Flank EIF6_uc | NM_178468    | NP_848563    | Q9BQN1 | FA83C_HUMAN |                               | 2   | GCAGGGGGCTG   | 0.642 |
| + | 3  | 240     | ›L_uc002xgw.2_R   | NM_022077    | NP_071360    | Q9NQG1 | MANBL_HUMAN |                               | 0   | CACCTCCGGAG   | 0.557 |
| - | 11 | 1841    | _p.D500N TGM2_u   | NM_004613    | NP_004604    | P21980 | TGM2_HUMAN  |                               | 3   | ›GAGGTCCCTCT  | 0.597 |
| + | 4  | 392     | _p.P48S L3MBTL    | NM_015478    | NP_056293    | Q9Y468 | LMBL1_HUMAN |                               | 0   | ›AGCCCCGAGC   | 0.682 |
| + | 4  | 584     | gp.2_Missense_M   | NM_001098798 | NP_001092268 | Q96NM4 | TOX2_HUMAN  |                               | 1   | ›CAGATGGGCAT  | 0.682 |
| - | 2  | 1872    |                   | NM_020433    | NP_065166    | Q9BR39 | JPH2_HUMAN  | ›cytoplasmic (Potential).     | 0   | ›TGCCGTCGGGG  | 0.667 |
| - | 2  | 1870    |                   | NM_020433    | NP_065166    | Q9BR39 | JPH2_HUMAN  | ›cytoplasmic (Potential).     | 0   | GCCGTCGGGCA   | 0.662 |
| + | 9  | 1239    | p.H362Y HNF4A_u   | NM_000457    | NP_000448    | P41235 | HNF4A_HUMAN |                               | 3   | ›CACCCCATGCC  | 0.592 |
| + | 2  | 427     | _p.H124Y SEMG2    | NM_003008    | NP_002999    | Q02383 | SEMG2_HUMAN | at-rich region. 3-1.          | 1   | CATTTTCACATG  | 0.398 |
| + | 8  | 1307    |                   | NM_004994    | NP_004985    | P14780 | MMP9_HUMAN  |                               | 2   | ›GGCCCCCTTG   | 0.632 |
| - | 5  | 1817    | _p.E507K ZNF334   | NM_018102    | NP_060572    | Q9HCZ1 | ZN334_HUMAN | ›2H2-type 10.                 | 2   | ›GCATTCATATGC | 0.453 |
| - | 5  | 1232    | _p.E312K ZNF334   | NM_018102    | NP_060572    | Q9HCZ1 | ZN334_HUMAN | ›2H2-type 5.                  | 2   | ›GCATTCGTAAGC | 0.438 |
| + | 34 | 4740    | ›zfy.1_Missense_N | NM_006420    | NP_006411    | Q9Y6D5 | BIG2_HUMAN  |                               | 4   | ›CTAACCCAACA  | 0.408 |
| - | 2  | 1107    | ›_Mutation_p.P33E | NM_020436    | NP_065169    | Q9UJQ4 | SALL4_HUMAN |                               | 2   | ›CTGAGGAAGCA  | 0.647 |
| - | 2  | 393     | e_Mutation_p.P98  | NM_020436    | NP_065169    | Q9UJQ4 | SALL4_HUMAN |                               | 2   | ›AGGTGGATTTT  | 0.537 |
| - | 2  | 1147    |                   | NM_080617    | NP_542184    | Q9NTU7 | CBLN4_HUMAN | C1q.                          | 4   | ›TGAAACTGTAA  | 0.343 |
| + | 1  | 832_833 |                   | NM_019888    | NP_063941    | P41968 | MC3R_HUMAN  | ›plasmic (Potential).         | 4   | ›AGGGGGCAGT   | 0.609 |
| + | 5  | 969     | xn.1_Missense_M   | NM_001033521 | NP_001028693 | Q05048 | CSTF1_HUMAN |                               | 1   | ›GCAATCCTCAA  | 0.403 |
| + | 6  | 1507    | e_Mutation_p.E42I | NM_001164116 | NP_001157588 | Q9NQ75 | CASS4_HUMAN | Ser-rich.                     | 3   | CGGAGGAGTCA   | 0.567 |
| + | 8  | 2816    | ›.R127H GNAS_uc   | NM_080425    | NP_536350    | P63092 | GNAS2_HUMAN | › (By similar7) p.R201L(1)    | 292 | ›CTGCCGTGTCC  | 0.423 |
| + | 1  | 2711    |                   | NM_178457    | NP_848552    | Q5JPB2 | ZN831_HUMAN |                               | 14  | ›GGCTACCCAC   | 0.652 |
| + | 1  | 3649    |                   | NM_178457    | NP_848552    | Q5JPB2 | ZN831_HUMAN |                               | 14  | GCCTCCGAGAT   | 0.627 |
| + | 2  | 3760    |                   | NM_178457    | NP_848552    | Q5JPB2 | ZN831_HUMAN |                               | 14  | ›TCCCAGGGGTG  | 0.507 |
| - | 4  | 329     | P2_uc010gju.1_5'f | NM_014258    | NP_055073    | Q9BX26 | SYCP2_HUMAN |                               | 5   | CATTGTGGATAT  | 0.284 |
| - | 1  | 192_193 |                   | NM_080823    | NP_543013    | Q9H3Y6 | SRMS_HUMAN  | SH3.                          | 2   | ›GAAGGGGCTGC  | 0.708 |
| + | 3  | 523     | ›AM2_uc011acc.1   | NM_004540    | NP_004531    | O15394 | NCAM2_HUMAN | 1. Extracellular (Potential). | 4   | ATATATCGTTGTC | 0.348 |
| + | 4  | 909     | ›_p.E86K JAM2_u   | NM_021219    | NP_067042    | P57087 | JAM2_HUMAN  | ›. Extracellular (Potential). | 0   | ›ACCTGGAAGAG  | 0.478 |
| - | 10 | 1499    | ›glu.2_Missense_N | NM_020706    | NP_065757    | Q95104 | SFR15_HUMAN |                               | 0   | ›GAAGTGGAAACC | 0.373 |
| + | 11 | 1925    |                   | NM_014586    | NP_055401    | P57058 | HUNK_HUMAN  |                               | 2   | ›CATCCCCGTGC  | 0.552 |
| - | 4  | 561     | _p.V51M C21orf59  | NM_021254    | NP_067077    | P57076 | CU059_HUMAN |                               | 0   | ›CATCACCGCGC  | 0.498 |
| - | 2  | 1091    | yw.2_Missense_N   | NM_017833    | NP_060303    | Q9NX36 | DJC28_HUMAN |                               | 0   | ›TCTCCTTTTGC  | 0.378 |
| + | 2  | 847     | ›S6_uc002ytp.2_Ir | NM_006933    | NP_008864    | P53794 | SC5A3_HUMAN | ›cellular (Potential).        | 2   | ›TGAATACTTGTC | 0.453 |
| + | 2  | 874     | ›S6_uc002ytp.2_Ir | NM_006933    | NP_008864    | P53794 | SC5A3_HUMAN | ›cellular (Potential).        | 2   | ›CCATAGGATTC  | 0.448 |
| - | 4  | 1592    | ›ETD4_uc002yuy.2  | NM_017438    | NP_059134    | Q9NVD3 | SETD4_HUMAN | SET.                          | 2   | AATAATCATCTGT | 0.463 |
| + | 12 | 1548    | ›eb.1_Missense_N  | NM_005128    | NP_005119    | Q9Y3R5 | DOP2_HUMAN  |                               | 2   | ›CATTCTTTGG1  | 0.532 |
| + | 6  | 543_544 | ›e_Mutation_p.L14 | NM_001001894 | NP_001001894 | P53804 | TTC3_HUMAN  |                               | 9   | TCATTCTTATTG  | 0.337 |

rs121913495

|   |    |           |                      |              |              |        |             |    |                   |       |             |
|---|----|-----------|----------------------|--------------|--------------|--------|-------------|----|-------------------|-------|-------------|
| + | 34 | 4556      | nf.2_Missense_Mu     | NM_001001894 | NP_001001894 | P53804 | TTC3_HUMAN  | 9  | ATAATCCTTTTGA     | 0.308 |             |
| - | 3  | 430       |                      | NM_005867    | NP_005858    | P56555 | DSCR4_HUMAN | 1  | CTTGTCCCTTC1      | 0.328 |             |
| - | 26 | 4996      | DAM_uc002yvr.1_f     | NM_001389    | NP_001380    | O60469 | DSCAM_HUMAN | 11 | CAAAGGGCCTG       | 0.557 |             |
| - | 24 | 4602      | DAM_uc002yvr.1_f     | NM_001389    | NP_001380    | O60469 | DSCAM_HUMAN | 11 | AAGCCGAGGCT       | 0.428 |             |
| + | 2  | 199       | lyzd.1_Missense_     | NM_058186    | NP_478066    | P58499 | FAM3B_HUMAN | 0  | CGCCTCCTGTG       | 0.627 |             |
| - | 1  | 137       | 2yzp.2_Missense_     | NM_022115    | NP_071398    | P57071 | PRD15_HUMAN | 0  | GCACCGGAAgcc      | 0.338 |             |
| + | 2  | 362       |                      | NM_000394    | NP_000385    | P02489 | CRYAA_HUMAN | 2  | CCACGGAAAGC       | 0.647 |             |
| - | 12 | 1820      |                      | NM_173354    | NP_775490    | P57059 | SIK1_HUMAN  | 7  | GACAGGGAGCA       | 0.682 |             |
| + | 7  | 679_680   | n_p.P46F RRP1_u      | NM_003683    | NP_003674    | P56182 | RRP1_HUMAN  | 0  | TCGACCCCTTCT      | 0.614 |             |
| - | 2  | 259       | rf29_uc010gpv.1_     | NM_144991    | NP_659428    | Q8WU66 | TSEAR_HUMAN | 0  | GGGGGCGGCTA       | 0.562 | rs76207741  |
| + | 1  | 1166      | .1_Intron C21orf29   | NM_198687    | NP_941960    | P60372 | KR104_HUMAN | 0  | CCCTTCTGCTG       | 0.711 |             |
| + | 23 | 1660_1661 | A1_uc010gqd.1_       | NM_001848    | NP_001839    | P12109 | CO6A1_HUMAN | 1  | CGAGGGCTTCC       | 0.663 |             |
| + | 3  | 588       | 6A2_uc002zhz.1_      | NM_001849    | NP_001840    | P12110 | CO6A2_HUMAN | 8  | CAGCCCTGCG        | 0.711 |             |
| - | 10 | 1101      | I.2_Missense_Mut:    | NM_001001438 | NP_001001438 | P48449 | ERG7_HUMAN  | 0  | TTGATGGTTTTCC     | 0.602 |             |
| + | 8  | 1315      | p.R285_splice P      | NM_006031    | NP_006022    | O95613 | PCNT_HUMAN  | 8  | TTCTAGGGGCC       | 0.52  |             |
| + | 22 | 4415      | j.2_Missense_Mut     | NM_006031    | NP_006022    | O95613 | PCNT_HUMAN  | 8  | CAGATGAAGAT       | 0.572 |             |
| + | 34 | 4219      | P2A_uc002zjs.2_      | NM_015151    | NP_055966    | Q14689 | DIP2A_HUMAN | 2  | GGTTCTGTTTG       | 0.458 |             |
| - | 9  | 1431      | se_Mutation_p.G1     | NM_001136213 | NP_001129685 | Q6S545 | POTEH_HUMAN | 1  | TTACTTCCGTGC      | 0.358 |             |
| - | 4  | 1053      | nse_Mutation_p.N     | NM_001136213 | NP_001129685 | Q6S545 | POTEH_HUMAN | 1  | TTTAAATTTGCTT     | 0.318 |             |
| - | 1  | 703       |                      | NM_001005239 | NP_001005239 | Q8NG94 | O11H1_HUMAN | 0  | GACAAGAGTAT       | 0.418 |             |
| - | 7  | 1071      |                      | NM_014433    | NP_055248    | Q9UHP6 | RTDR1_HUMAN | 1  | GCGGCCCTCGG       | 0.647 |             |
| + | 5  | 555       | tw.1_Missense_Mt     | NM_004914    | NP_004905    | O95755 | RAB36_HUMAN | 2  | TTCCCTATAGCC1     | 0.507 |             |
| + | 7  | 1110      | y.2_Intron MMP11_    | NM_005940    | NP_005931    | P24347 | MMP11_HUMAN | 3  | tcagtactgggtgtacg | 0.453 |             |
| + | 22 | 3384_3385 | P1036L CABIN1_       | NM_012295    | NP_036427    | Q9Y6J0 | CABIN_HUMAN | 5  | CTGCCCAATAG       | 0.52  |             |
| + | 12 | 1508      | Gamma1_uc003aav.1_Sp | NM_013430    | NP_038347    | P19440 | GGT1_HUMAN  | 0  | CGGCAGGTGGT       | 0.637 |             |
| + | 39 | 6259      | u_p.M1883 MYO1i      | NM_032608    | NP_115997    | Q8IU55 | MY18B_HUMAN | 12 | AAGATGGGGGA       | 0.627 |             |
| + | 4  | 576       |                      | NM_182527    | NP_872333    | Q86V35 | CABP7_HUMAN | 0  | GTGTCCCGTGG       | 0.637 |             |
| - | 6  | 564       | ia.2_Missense_M      | NM_174975    | NP_777635    | Q9UDX4 | S14L3_HUMAN | 5  | CAGTCCCAGGC       | 0.517 |             |
| + | 3  | 354       | z.3_Missense_Mt      | NM_000631    | NP_000622    | Q15080 | NCF4_HUMAN  | 1  | CTACCGCCGCT       | 0.592 |             |
| - | 2  | 181       | _p.G14R TMPRSS       | NM_153609    | NP_705837    | Q8IU80 | TMPS6_HUMAN | 6  | GTCCCCCTGCC       | 0.657 |             |
| + | 7  | 1932      | atq.1_Missense_M     | NM_001039141 | NP_001034230 | Q9H2D6 | TARA_HUMAN  | 1  | CTGTGCCAGCC       | 0.607 |             |
| + | 9  | 5253_5254 | tu.2_Missense_Mt     | NM_001039141 | NP_001034230 | Q9H2D6 | TARA_HUMAN  | 1  | CACCTCCACCCA      | 0.673 |             |
| + | 9  | 1151      | k.1_Missense_Mut     | NM_006116    | NP_006107    | Q15750 | TAB1_HUMAN  | 1  | GCTACCCGCTG       | 0.657 |             |
| + | 28 | 4765      | aye.2_Missense_M     | NM_021096    | NP_066919    | Q9P0X4 | CAC11_HUMAN | 2  | TGAGGGTTCTG       | 0.597 |             |
| + | 10 | 1478      | aq.1_Missense_M      | NM_001469    | NP_001460    | P12956 | XRCC6_HUMAN | 5  | AAGCTTCGCTTC      | 0.448 |             |
| - | 2  | 637       | aa.2_Missense_M      | NM_058238    | NP_478679    | P56706 | WNT7B_HUMAN | 1  | TCTCGCCGAGG       | 0.652 |             |
| + | 19 | 2442      | e_Mutation_p.P41:    | NM_175607    | NP_783200    | Q8IWW2 | CNTN4_HUMAN | 7  | TTCCGGCCCTAC      | 0.512 |             |
| - | 8  | 1239      | iRA_uc011asm.1_      | NM_000564    | NP_000555    | Q01344 | IL5RA_HUMAN | 1  | CTGGGAAACC        | 0.478 |             |
| + | 33 | 4570      | R1_uc011asu.1_       | NM_001099952 | NP_001093422 | Q14643 | ITPR1_HUMAN | 21 | TCGTTTCGCGTG      | 0.597 |             |
| - | 4  | 721       | i.2_RNA C3orf31_     | NM_138807    | NP_620162    | Q96BW9 | MMP37_HUMAN | 0  | TCACAGCACTC       | 0.448 | rs146141760 |
| + | 6  | 936       | S254F PPARG_uc       | NM_015869    | NP_056953    | P37231 | PPARG_HUMAN | 2  | TGAATTCCTAAT      | 0.448 |             |
| - | 27 | 3691      |                      | NM_024923    | NP_079199    | Q8TEM1 | PO210_HUMAN | 11 | CGGCATTGCCA       | 0.617 | rs147038229 |
| - | 10 | 1206      | P2_uc011avh.1_5'     | NM_001080423 | NP_001073892 | Q9C0E4 | GRIP2_HUMAN | 1  | TGTTCCATGCT       | 0.642 |             |
| + | 1  | 1095      | k.1_Missense_Mu      | NM_152536    | NP_689749    | Q6ZNL6 | FGD5_HUMAN  | 5  | ATTGTCCCTTTTC     | 0.552 |             |
| + | 5  | 535       | r_p.V26I PLCL2_u     | NM_001144382 | NP_001137854 | Q9UPR0 | PLCL2_HUMAN | 4  | AAAAGGTTTCG       | 0.418 | rs141837634 |
| - | 1  | 710       | IB_uc003cbm.2_       | NM_144715    | NP_653316    | Q8N7U6 | EFHB_HUMAN  | 0  | CTTTTTCCATTTC     | 0.507 |             |
| - | 6  | 759       | nse_Mutation_p.L     | NM_003615    | NP_003606    | Q9Y6M7 | S4A7_HUMAN  | 5  | AACAAGAGGAA       | 0.413 |             |

|   |    |           |                   |              |              |        |             |     |               |       |
|---|----|-----------|-------------------|--------------|--------------|--------|-------------|-----|---------------|-------|
| - | 9  | 1661      | p.S184C OSBPL1    | NM_017784    | NP_060254    | Q9BXB5 | OSB10_HUMAN | 1   | AGCAAAGATCGC  | 0.512 |
| + | 12 | 1648      | se_Mutation_p.L46 | NM_015442    | NP_056257    | Q9H9A5 | CNOTA_HUMAN | 2   | ATATGTCTCAGA  | 0.408 |
| + | 7  | 691       | P21_uc011axy.1_n  | NM_016300    | NP_057384    | Q9UBL0 | ARP21_HUMAN | 3   | ACACGGATTCTA  | 0.388 |
| + | 21 | 2352      |                   | NM_002207    | NP_002198    | Q13797 | ITA9_HUMAN  | 6   | TGATGCACGAG   | 0.562 |
| + | 22 | 3195      | se_Mutation_p.M1  | NM_007335    | NP_031361    | Q9Y238 | DLEC1_HUMAN | 9   | GGCATGAAGAA   | 0.567 |
| - | 28 | 5589      | i.2_Missense_Mut  | NM_198056    | NP_932173    | Q14524 | SCN5A_HUMAN | 9   | ATTTCTCCCAGAT | 0.532 |
| - | 27 | 5218      |                   | NM_006514    | NP_006505    | Q9Y5Y9 | SCNAA_HUMAN | 10  | AAAGTCGCCTC   | 0.493 |
| - | 5  | 1334      | cjh.2_Missense_M  | NM_033027    | NP_149016    | Q96S65 | CSRN1_HUMAN | 5   | TGGGTGGGTGG   | 0.582 |
| + | 17 | 1659      | bah.1_Missense_n  | NM_014016    | NP_054735    | Q9NTJ5 | SAC1_HUMAN  | 1   | AACAACCTTTTCC | 0.343 |
| + | 17 | 1664_1665 | bah.1_Missense_n  | NM_014016    | NP_054735    | Q9NTJ5 | SAC1_HUMAN  | 1   | CTTTTCCGATGC  | 0.342 |
| - | 2  | 455       | pu.3_Missense_M   | NM_024512    | NP_078788    | Q9BYS8 | LRRC2_HUMAN | 1   | CACCTCCTCTT   | 0.458 |
| - | 21 | 4292_4293 | 3csx.2_Missense_  | NM_002673    | NP_002664    | O43157 | PLXB1_HUMAN | 5   | GGAGGGCAGG    | 0.574 |
| - | 4  | 980       | nse_Mutation_p.C  | NM_024661    | NP_078937    | Q96ER9 | CCD51_HUMAN | 0   | ACTACCTGCCT   | 0.557 |
| - | 21 | 2055      | p.P539S QARS_u    | NM_005051    | NP_005042    | P47897 | SYQ_HUMAN   | 1   | CAAAGGCTGTG   | 0.567 |
| - | 5  | 445       |                   | NM_003280    | NP_003271    | P63316 | TNNC1_HUMAN | 0   | FTGTCTCCGTCC  | 0.577 |
| - | 7  | 743       | ev.2_RNA PBRM1    | NM_181042    | NP_060635    | Q86U86 | PB1_HUMAN   | 140 | TGAATACTTTTGT | 0.318 |
| + | 42 | 5361      | Mutation_p.G17    | NM_001128840 | NP_001122312 | Q01668 | CAC1D_HUMAN | 11  | AGCAGGAAATTC  | 0.463 |
| - | 13 | 2579      | R2_uc003dht.1_n   | NM_015576    | NP_056391    | O15083 | ERC2_HUMAN  | 2   | CTTTTCCAACCTC | 0.443 |
| + | 9  | 1234      | C66_uc003dhu.2_l  | NM_001141947 | NP_001135419 | A2RUB6 | CCD66_HUMAN | 1   | FTCTCTCAGTCA  | 0.443 |
| + | 21 | 3814      | if.2_Missense_Mut | NM_001457    | NP_001448    | O75369 | FLNB_HUMAN  | 19  | ACTCCCCCGCC   | 0.537 |
| - | 3  | 398       | ense_Mutation_p.  | NM_004944    | NP_004935    | Q13609 | DNSL3_HUMAN | 3   | CATATTGTTCTT  | 0.363 |
| - | 24 | 3674      | dqd.2_Missense_n  | NM_002941    | NP_002932    | Q9Y6N7 | ROBO1_HUMAN | 2   | ACTGCCCCGGT   | 0.418 |
| + | 15 | 2726      | A3_uc010hon.1_f   | NM_005233    | NP_005224    | P29320 | EPHA3_HUMAN | 33  | AGGTAATTAAGC  | 0.478 |
| - | 2  | 567       | 2_5'UTR PROS1_    | NM_000313    | NP_000304    | P07225 | PROS_HUMAN  | 1   | TTCCGGGTCAT   | 0.388 |
| + | 1  | 331       |                   | NM_001005514 | NP_001005514 | A6NHG9 | O5H14_HUMAN | 1   | CCACGGAATGT   | 0.413 |
| + | 1  | 728       |                   | NM_001005515 | NP_001005515 | A6NDH6 | O5H15_HUMAN | 2   | TGGAGCCCATC   | 0.428 |
| + | 3  | 563       |                   | NM_032787    | NP_116176    | Q96K78 | GP128_HUMAN | 4   | AGATATGGACCA  | 0.343 |
| - | 2  | 436       | G2_uc011bhe.1_5'  | NM_016247    | NP_057331    | Q9BZV3 | IMPG2_HUMAN | 3   | CGCTTCTGATT   | 0.428 |
| + | 15 | 1807      | p.L325F ZPLD1_u   | NM_175056    | NP_778226    | Q8TCW7 | ZPLD1_HUMAN | 5   | CCCTTCTTATGC  | 0.388 |
| + | 1  | 676_677   |                   | NM_032600    | NP_115989    | Q8NEL0 | CCD54_HUMAN | 0   | GAAGTGGAAATT  | 0.391 |
| - | 38 | 5513      |                   | NM_014981    | NP_055796    | Q9Y2K3 | MYH15_HUMAN | 7   | TACTCCCCATCA  | 0.468 |
| - | 27 | 3406      |                   | NM_014981    | NP_055796    | Q9Y2K3 | MYH15_HUMAN | 7   | CTTCTGAAGCT   | 0.343 |
| - | 6  | 625       |                   | NM_014981    | NP_055796    | Q9Y2K3 | MYH15_HUMAN | 7   | GACTGATTTTC   | 0.308 |
| + | 2  | 294       | xx.2_Missense_Mu  | NM_198196    | NP_937839    | P40200 | TACT_HUMAN  | 3   | TGTCAACCTGA   | 0.408 |
| + | 12 | 1510      | bhr.1_Missense_n  | NM_001042575 | NP_001036040 | Q7RTY8 | TMPS7_HUMAN | 2   | CTTTAGGAAAC   | 0.378 |
| - | 2  | 1458      | Jzg.2_Missense_M  | NM_199512    | NP_955806    | Q76M96 | CCD80_HUMAN | 2   | GGTAAAGATTCT  | 0.607 |
| - | 1  | 913       | F80_uc003ebf.2_F  | NM_007136    | NP_009067    | P51504 | ZNF80_HUMAN | 0   | CACTCGCTGC    | 0.527 |
| - | 2  | 143       |                   | NM_173825    | NP_776186    | Q5HYI8 | RABL3_HUMAN | 0   | CCACAGTCCAT   | 0.363 |
| - | 14 | 8470      | .D2787N GOLGB1    | NM_004487    | NP_004478    | Q14789 | GOGB1_HUMAN | 10  | AGCATCTCTCT   | 0.418 |
| + | 6  | 1064      | n_p.S80L PARP1!   | NM_001113523 | NP_001106995 | Q460N3 | PAR15_HUMAN | 5   | GAAATCAGGTA   | 0.313 |
| - | 10 | 1313      | gq.2_Missense_Mu  | NM_053025    | NP_444253    | Q15746 | MYLK_HUMAN  | 9   | TGATGGAGCTG   | 0.627 |
| + | 9  | 1605      | hf.1_Missense_M   | NM_001024660 | NP_001019831 | O60229 | KALRN_HUMAN | 6   | CGAATCCCTCAC  | 0.572 |
| - | 3  | 188       | se_Mutation_p.W5  | NM_024628    | NP_078904    | A0AV02 | S12A8_HUMAN | 0   | TCCACCAGGGC   | 0.572 |
| + | 11 | 1913_1914 | M2_uc010hsl.2_F   | NM_004526    | NP_004517    | P49736 | MCM2_HUMAN  | 4   | ACCTCCTTGCA   | 0.604 |
| - | 3  | 1917      | uc003ekl.1_5'Flan | NM_153330    | NP_699161    | Q8NHS0 | DNJB8_HUMAN | 0   | GAGGGGCTGT    | 0.592 |
| - | 13 | 2362_2363 |                   | NM_007027    | NP_008958    | Q92547 | TOPB1_HUMAN | 7   | AACCTTCTTAG   | 0.361 |
| - | 2  | 220       | .1_Missense_Mut   | NM_178554    | NP_848649    | Q8NBH2 | KY_HUMAN    | 2   | GACTCCATTT    | 0.388 |



|   |    |                            |                   |              |              |             |             |                           |    |               |       |
|---|----|----------------------------|-------------------|--------------|--------------|-------------|-------------|---------------------------|----|---------------|-------|
| + | 3  | 650                        | PHB1_uc011bly.1_l | NM_004441    | NP_004432    | P54762      | EPHB1_HUMAN | cellular (Potential).     | 30 | GCAGATGAGAGC  | 0.493 |
| + | 2  | 741                        | R3A_uc011blz.1_   | NM_002718    | NP_002709    | Q06190      | P2R3A_HUMAN |                           | 7  | ACATCCCTGTGT  | 0.463 |
| + | 3  | 471                        | ne.1_Missense_M   | NM_006153    | NP_006144    | P16333      | NCK1_HUMAN  | SH3 2.                    | 1  | AGAGAGAGGAT   | 0.453 |
| - | 4  | 476                        | ui.2_Missense_Mt  | NM_004766    | NP_004757    | P35606      | COPB2_HUMAN | WD 3.                     | 2  | TGCTAGTTAGAA  | 0.393 |
| + | 2  | 690                        |                   | NM_152616    | NP_689829    | Q8IWZ5      | TRI42_HUMAN | RING-type.                | 7  | TGTGCGAGAAG   | 0.602 |
| + | 3  | 1413                       |                   | NM_152616    | NP_689829    | Q8IWZ5      | TRI42_HUMAN |                           | 7  | CAGAAGGAAATT  | 0.453 |
| + | 3  | 283                        | i_p.E42K PLS1_uc  | NM_001145319 | NP_001138791 | Q14651      | PLS1_HUMAN  | EF-hand 1.                | 1  | TTAAGGAAGCA   | 0.368 |
| + | 10 | 1772                       | i_p.L512F TRPC1   | NM_003304    | NP_003295    | P48995      | TRPC1_HUMAN | ical; (Potential).        | 2  | TTTCTTCTGT    | 0.348 |
| + | 15 | 2226                       | L590F P2RY12_uc   | NM_053002    | NP_443728    | Q86YW9      | MD12L_HUMAN |                           | 7  | ATCCTTCTCTATG | 0.423 |
| - | 5  | 5258                       | I_5'Flank IGSF10_ | NM_178822    | NP_849144    | Q6WRI0      | IGS10_HUMAN | like C2-type 4.           | 13 | ATCTCTTTGGTAC | 0.493 |
| - | 9  | 1506                       | p.G410E PLCH1_l   | NM_001130960 | NP_001124432 | Q4KWH8      | PLCH1_HUMAN | 'l-PLC X-box.             | 4  | AATATTCCTTCA  | 0.438 |
| - | 1  | 1123                       | fao.1_Nonsense_M  | NM_004733    | NP_004724    | O00400      | ACATN_HUMAN | cellular (Potential).     | 4  | AGGCTGAAACC   | 0.408 |
| + | 4  | 1346                       |                   | NM_001080440 | NP_001073909 | A6NHN0      | OTOL1_HUMAN | C1q.                      | 0  | AGATTGGAATGC  | 0.443 |
| - | 7  | 1215                       | fk.2_Missense_Mt  | NM_005241    | NP_005232    | Q03112      | EVI1_HUMAN  |                           | 14 | CAAAGGAGGCC   | 0.478 |
| - | 7  | 1162                       | fk.2_Missense_Mu  | NM_005241    | NP_005232    | Q03112      | EVI1_HUMAN  |                           | 14 | AAAATCCAGGA   | 0.473 |
| - | 2  | 768                        | COM_uc010hwn.2    | NM_004991    | NP_004982    | Q03112      | EVI1_HUMAN  |                           | 14 | ATCCATAACTGC  | 0.393 |
| + | 2  | 1422                       | v.2_Missense_Mut  | NM_005414    | NP_005405    | P12757      | SKIL_HUMAN  |                           | 3  | GCCACGAACCT   | 0.443 |
| + | 10 | 1249                       |                   | NM_018023    | NP_060493    | Q9ULM3      | YETS2_HUMAN |                           | 4  | ATGCCCTCCA    | 0.488 |
| - | 22 | 2498                       | LCN2_uc011brl.1_  | NM_004366    | NP_004357    | P51788      | LCN2_HUMAN  | oplasmic (By similarity). | 0  | AGCAGGATCAA   | 0.552 |
| - | 9  | 1458                       | p.G376R MASP1_    | NM_001879    | NP_001870    | P48740      | MASP1_HUMAN | Sushi 2.                  | 4  | CAGCCGTGTT    | 0.478 |
| - | 4  | 1286                       | ifsg.2_Missense_M | NM_018192    | NP_060662    | Q8IVL5      | P3H2_HUMAN  |                           | 4  | GATGGGAGAGAC  | 0.507 |
| - | 30 | 3634                       | 13A4_uc010hzi.2_  | NM_032279    | NP_115655    | Q4VNC1      | AT134_HUMAN | cellular (Potential).     | 2  | CTCCGGCATGT   | 0.468 |
| - | 21 | 2584                       | 13A4_uc011bsr.1_  | NM_032279    | NP_115655    | Q4VNC1      | AT134_HUMAN | cellular (Potential).     | 2  | CCCAGGAGACA   | 0.428 |
| + | 12 | 1524                       | p.E491K PDE6B_    | NM_000283    | NP_000274    | P35913      | PDE6B_HUMAN |                           | 0  | AGAAGGAGGAG   | 0.562 |
| + | 7  | 489                        | i_p.V49M TMEM1    | NM_032326    | NP_115702    | Q9BSA9      | TM175_HUMAN | ical; (Potential).        | 0  | TAATGGTGACCT  | 0.542 |
| - | 3  | 580                        |                   | NM_177998    | NP_819056    | Q7RTM1      | OTOP1_HUMAN | ical; (Potential).        | 3  | CCCAAAGAAAAT  | 0.323 |
| + | 5  | 710                        | p.S225F MAN2B2    | NM_015274    | NP_056089    | Q9Y2E5      | MA2B2_HUMAN |                           | 2  | TTTCTCCAACAC  | 0.537 |
| - | 14 | 2012_2013_Mutation_p.A664I | NM_198595         | NP_940997    | Q8N556       | AFAP1_HUMAN | Potential.  |                           | 0  | GCAGGGCCTCT   | 0.559 |
| - | 10 | 6730                       | Jr.1_Missense_Mu  | NM_148894    | NP_683692    | Q8NFC6      | BOD1L_HUMAN |                           | 6  | GGCAAGAGGAC   | 0.522 |
| + | 37 | 4781                       | s.1_Missense_Mut  | NM_004787    | NP_004778    | O94813      | SLIT2_HUMAN | CTCK.                     | 11 | TACGAGGTGTG   | 0.498 |
| - | 10 | 2062                       | GC1A_uc003gqt.2   | NM_013261    | NP_037393    | Q9UBK2      | PRGC1_HUMAN |                           | 8  | TTCTTCCCTCT   | 0.468 |
| - | 18 | 3348                       |                   | NM_015230    | NP_056045    | Q8WZ64      | ARAP2_HUMAN |                           | 3  | TAAGGGAACAA   | 0.358 |
| + | 7  | 978                        | p.V163A PGM2_u    | NM_018290    | NP_060760    | Q96G03      | PGM2_HUMAN  |                           | 1  | AGGTGTCTTGG   | 0.363 |
| - | 4  | 1758                       | M47_uc011bys.1_   | NM_001098634 | NP_001092104 | A0AV96      | RBM47_HUMAN |                           | 3  | GGGTCGCAGG    | 0.632 |
| - | 6  | 2160                       | D4_uc003gwm.2_    | NM_207406    | NP_997289    | Q6ZU67      | BEND4_HUMAN |                           | 0  | GGGAACTTTTAT  | 0.517 |
| - | 4  | 1007                       | bzc.1_Nonsense_M  | NM_001114175 | NP_001107647 | P47869      | GBRA2_HUMAN | cellular (Probable).      | 4  | TAGTCGAAGGA   | 0.289 |
| + | 6  | 942                        | ze.1_Missense_M   | NM_000812    | NP_000803    | P18505      | GBRB1_HUMAN | cellular (Probable).      | 2  | CACATTGAATTT  | 0.373 |
| + | 4  | 2856                       | p.L837F REST_u    | NM_005612    | NP_005603    | Q13127      | REST_HUMAN  |                           | 9  | CAAGTCCTTATT  | 0.458 |
| - | 5  | 1205                       | 2A3_uc010ihp.1_l  | NM_024743    | NP_079019    | Q6UWM9      | UD2A3_HUMAN | cellular (Potential).     | 2  | TATGGGAACCTC  | 0.408 |
| - | 1  | 581                        | uc003hei.1_Intron | NM_001073    | NP_001064    | O75310      | UDB11_HUMAN |                           | 3  | AGGAAGGAGGG   | 0.403 |
| - | 1  | 80                         | uc003hei.1_RNA    | NM_001073    | NP_001064    | O75310      | UDB11_HUMAN |                           | 3  | ACTTTCCACAA   | 0.453 |
| - | 6  | 1625                       | p.G521E UGT2A'    | NM_006798    | NP_006789    | Q9Y4X1      | UD2A1_HUMAN | lasmic (Potential).       | 1  | TTCTTCTATCT   | 0.323 |
| - | 3  | 300                        |                   | NM_014243    | NP_055058    | O15072      | ATS3_HUMAN  |                           | 2  | CTTTCCAAATG   | 0.488 |
| - | 29 | 7073                       | hgq.2_Missense_M  | NM_032217    | NP_115593    | O75179      | ANR17_HUMAN |                           | 10 | CTGAGGGACTT   | 0.383 |
| - | 4  | 557                        | 10ijq.1_Missense_ | NM_152545    | NP_689758    | Q0VAM2      | RGF1B_HUMAN | rminal Ras-GEF.           | 0  | GGTGACCAGA    | 0.473 |
| + | 4  | 525                        | p.G103R AGPAT9    | NM_032717    | NP_116106    | Q53EU6      | GPAT3_HUMAN |                           | 1  | AGAAGGGATTG   | 0.443 |
| - | 14 | 1881                       | n_p.S218F FAM13   | NM_014883    | NP_055698    | O94988      | FA13A_HUMAN |                           | 2  | CTTCGGAGACA   | 0.483 |

rs139378189

|   |    |                           |                    |              |              |             |                  |                             |     |                |       |
|---|----|---------------------------|--------------------|--------------|--------------|-------------|------------------|-----------------------------|-----|----------------|-------|
| + | 10 | 1131                      | p.S286F BMPR1B     | NM_001203    | NP_001194    | O00238      | BMR1B_HUMAN      | Potential). Protein kinase. | 8   | ATGGTTCCTTT/   | 0.403 |
| - | 7  | 775                       | se_Mutation_p.S1C  | NM_181887    | NP_871616    | P61077      | UB2D3_HUMAN      |                             | 0   | AAATGGATAAAA   | 0.353 |
| + | 3  | 1453                      | ET2_uc010ilp.1_Mi  | NM_001127208 | NP_001120680 | Q6N021      | TET2_HUMAN       | p.S356fs*18(1)              | 733 | AGGTTCCAGCA/   | 0.418 |
| + | 3  | 2937                      | ET2_uc010ilp.1_Mi  | NM_001127208 | NP_001120680 | Q6N021      | TET2_HUMAN       | Gln-rich.                   | 733 | ACACATCCTGAA/  | 0.373 |
| + | 11 | 1676                      | se_Mutation_p.G4I  | NM_001033047 | NP_001028219 | Q6UXI9      | NPNT_HUMAN       | MAM.                        | 1   | ITGACGGGGCTG   | 0.602 |
| - | 10 | 1301                      | p.D334N AGXT2L     | NM_031279    | NP_112569    | Q8TBG4      | AT2L1_HUMAN      |                             | 1   | ATGGTCTTCA/    | 0.468 |
| + | 31 | 3780                      | ic.1_Missense_Mu   | NM_001148    | NP_001139    | Q01484      | ANK2_HUMAN       |                             | 14  | AAGAAGAAAAAT/  | 0.423 |
| - | 4  | 2157                      |                    | NM_024574    | NP_078850    | Q8TB73      | CD031_HUMAN      | nectin type-III 2.          | 0   | AACATCCAGCAC/  | 0.388 |
| + | 60 | 10619                     | iel.1_Missense_Mi  | NM_015312    | NP_056127    | Q2LD37      | K1109_HUMAN      |                             | 12  | ATCTGCTAGCC/   | 0.408 |
| + | 1  | 3328                      |                    | NM_024582    | NP_078858    | Q6V0I7      | FAT4_HUMAN       | Extracellular (Potential).  | 18  | ACTTCGAAGAAG   | 0.388 |
| + | 3  | 5545                      | p.1_Missense_Mul   | NM_024582    | NP_078858    | Q6V0I7      | FAT4_HUMAN       | Extracellular (Potential).  | 18  | TCTTTTGACATTC  | 0.413 |
| + | 4  | 5612                      | p.1_Missense_Mul   | NM_024582    | NP_078858    | Q6V0I7      | FAT4_HUMAN       | Extracellular (Potential).  | 18  | CTCTGGTGTGA/   | 0.328 |
| + | 13 | 2703_2704_p.P788F PLK4_uc | NM_014264          | NP_055079    | O00444       | PLK4_HUMAN  |                  |                             | 0   | CTCCTCCTTCTG   | 0.347 |
| - | 12 | 2401                      |                    | NM_015130    | NP_055945    | Q6ZT07      | TBCD9_HUMAN      |                             | 1   | CTAGGGCCAAC    | 0.438 |
| + | 2  | 980                       | r.1_Missense_Mut   | NM_022475    | NP_071920    | Q96QV1      | HHIP_HUMAN       |                             | 6   | TGGAGGAAATC/   | 0.398 |
| + | 11 | 2906                      |                    | NM_033393    | NP_203751    | Q9C0D6      | FHDC1_HUMAN      |                             | 2   | GAACTCCGTGC/   | 0.711 |
| - | 3  | 334                       | ix.2_Missense_Mt   | NM_017639    | NP_060109    | Q6V1P9      | PCD23_HUMAN      | Cadherin 1.                 | 4   | AGGGTCGATCC/   | 0.463 |
| + | 11 | 2463                      | se_Mutation_p.P4C  | NM_000856    | NP_000847    | Q02108      | GCYA3_HUMAN      |                             | 4   | GAACTCCACCA    | 0.398 |
| + | 12 | 1767_1768_p.G462K GUCY1E  | NM_000857          | NP_000848    | Q02153       | GCYB1_HUMAN | anylate cyclase. |                             | 0   | TCATAGGACAGC   | 0.386 |
| + | 3  | 431                       |                    | NM_000824    | NP_000815    | P48167      | GLRB_HUMAN       | ellular (Probable).         | 2   | TTCAAAGGTTTGT/ | 0.333 |
| + | 5  | 710                       |                    | NM_000824    | NP_000815    | P48167      | GLRB_HUMAN       | ellular (Probable).         | 2   | ATGGAGATGTC/   | 0.308 |
| - | 34 | 4957_4958                 | iro.2_Missense_Mi  | NM_017631    | NP_060101    | Q8IY21      | DDX60_HUMAN      |                             | 3   | CAATGGGAGTTC   | 0.327 |
| - | 1  | 478                       |                    | NM_006792    | NP_006783    |             |                  |                             | 0   | ACAATCTGCAA/   | 0.443 |
| - | 1  | 290                       |                    | NM_006792    | NP_006783    |             |                  |                             | 0   | CGGCAGGAAGA    | 0.378 |
| + | 5  | 815                       | oirr.2_Missense_Iv | NM_014269    | NP_055084    | Q9UKF5      | ADA29_HUMAN      |                             | 16  | CACCTCCAGGC    | 0.512 |
| + | 7  | 1438                      | Z3_uc003ive.1_5'F  | NM_001080477 | NP_001073946 | Q9P273      | TEN3_HUMAN       | ellular (Potential).        | 0   | GAGAGAGCCGG    | 0.547 |
| + | 25 | 7178                      |                    | NM_001080477 | NP_001073946 | Q9P273      | TEN3_HUMAN       | ellular (Potential).        | 0   | CCAGCTCCTTTT/  | 0.403 |
| + | 9  | 1008                      | _Site_p.I278_splic | NM_021942    | NP_068761    | Q7Z392      | CD041_HUMAN      |                             | 0   | TTGCAGATCTGT/  | 0.313 |
| + | 3  | 753                       | p.E170K ZFP42_1    | NM_174900    | NP_777560    | Q96MM3      | ZFP42_HUMAN      |                             | 2   | CTCGCAGAATTT/  | 0.463 |
| + | 1  | 450                       |                    | NM_178556    | NP_848651    | Q8N9V2      | TRIML_HUMAN      |                             | 4   | GGGTGGAAGCC    | 0.622 |
| + | 5  | 913                       |                    | NM_052909    | NP_443141    | Q96PX9      | PKH4B_HUMAN      |                             | 2   | TCATAGTATCTT/  | 0.308 |
| - | 15 | 1803                      | 1.2_RNA BRD9_uc    | NM_023924    | NP_076413    | Q9H8M2      | BRD9_HUMAN       |                             | 0   | CGACGGCCGAG    | 0.657 |
| - | 72 | 12496                     | fc.2_Missense_Mu   | NM_001369    | NP_001360    | Q8TE73      | DYH5_HUMAN       | 6 (By similarity).          | 31  | AGGATCGTTGG    | 0.453 |
| - | 14 | 1853                      |                    | NM_001369    | NP_001360    | Q8TE73      | DYH5_HUMAN       | n (By similarity).          | 31  | AGCTTTGAAATC/  | 0.393 |
| + | 50 | 7915                      | RIO_uc003jfg.2_Rf  | NM_007118    | NP_009049    | O75962      | TRIO_HUMAN       |                             | 18  | CACTCCGTTTA/   | 0.448 |
| + | 3  | 612                       | id.1_Missense_ML   | NM_004932    | NP_004923    | P55285      | CADH6_HUMAN      | r (Potential). Cadherin 1.  | 7   | GAGATGGAGCA/   | 0.393 |
| - | 4  | 876                       | p.P74S RAD1_uc     | NM_002853    | NP_002844    | O60671      | RAD1_HUMAN       |                             | 0   | GTGAGAGAGACA   | 0.393 |
| - | 10 | 1740                      | RLR_uc003jij.1_In  | NM_000949    | NP_000940    | P16471      | PRLR_HUMAN       | lasmic (Potential).         | 3   | ATAGGGGATTTI/  | 0.493 |
| - | 10 | 1707                      | RLR_uc003jij.1_Inl | NM_000949    | NP_000940    | P16471      | PRLR_HUMAN       | lasmic (Potential).         | 3   | GGGGTCCCAGG    | 0.507 |
| + | 9  | 1321                      | p.L404F SPEF2_1    | NM_024867    | NP_079143    | Q9C093      | SPEF2_HUMAN      |                             | 4   | CAATTCCTTAAAC  | 0.303 |
| + | 8  | 1337_1338                 | 7R_uc011cop.1_RI   | NM_002185    | NP_002176    | P16871      | IL7RA_HUMAN      | lasmic (Potential).         | 5   | CTGCCCTCC/     | 0.52  |
| - | 2  | 188                       | _Intron UGT3A2_u   | NM_174914    | NP_777574    | Q3SY77      | UD3A2_HUMAN      |                             | 6   | TCCACCTAGGA    | 0.431 |
| + | 7  | 1066                      | FLAM_uc003jle.1_   | NM_152403    | NP_689616    | Q63HQ2      | EGFLA_HUMAN      |                             | 7   | GCTATGGACCC    | 0.483 |
| + | 2  | 732                       |                    | NM_000958    | NP_000949    | P35408      | PE2R4_HUMAN      | lasmic (Potential).         | 2   | GCGCAAGGAGC    | 0.622 |
| + | 4  | 338                       | 7_uc011cpn.1_RN    | NM_000587    | NP_000578    | P10643      | CO7_HUMAN        | rSP type-1 1.               | 0   | ITGAACCTACAAC  | 0.473 |
| - | 39 | 4899                      | ijmi.3_Missense_Iv | NM_173489    | NP_775760    | Q72745      | HTRB2_HUMAN      |                             | 8   | ATACCCCATAGA   | 0.502 |
| - | 17 | 2767                      | 1_Missense_Muta    | NM_000065    | NP_000056    | P13671      | CO6_HUMAN        | -binding domain.            | 7   | GGATGAAAGTC    | 0.428 |

rs79789213

|   |    |           |                    |              |              |        |             |                              |    |               |       |
|---|----|-----------|--------------------|--------------|--------------|--------|-------------|------------------------------|----|---------------|-------|
| + | 13 | 1110      | o.2_Missense_Mt    | NM_024615    | NP_078891    | Q8N3A8 | PARP8_HUMAN |                              | 5  | AGGACGGAATC   | 0.478 |
| - | 19 | 3130      | 3jtq.2_RNA ADAM    | NM_197941    | NP_922932    | Q9UKP5 | ATS6_HUMAN  | Spacer.                      | 0  | ATAGTCCAGGC   | 0.373 |
| - | 16 | 2786_2787 | 3jtq.2_RNA ADAM    | NM_197941    | NP_922932    | Q9UKP5 | ATS6_HUMAN  |                              | 0  | TATAACCTTCAG  | 0.446 |
| + | 3  | 425       |                    | NM_006633    | NP_006624    | Q13576 | IQGA2_HUMAN | CH.                          | 7  | AGAAGGGCTCC   | 0.383 |
| + | 74 | 15803     | i.G2942D GPR98_    | NM_032119    | NP_115495    | Q8WXG9 | GPR98_HUMAN | cellular (Potential).        | 16 | GAATGGCACAT   | 0.428 |
| - | 12 | 1887      | bi.1_Missense_Mu   | NM_000439    | NP_000430    | P29120 | NEC1_HUMAN  |                              | 2  | GTTCTCTCCCC   | 0.398 |
| - | 2  | 255       | na.3_Missense_M    | NM_018343    | NP_060813    | Q9BVS4 | RIOK2_HUMAN |                              | 1  | TATTACAGCCACC | 0.358 |
| - | 9  | 1822      |                    | NM_180991    | NP_851322    | Q6ZQN7 | SO4C1_HUMAN | Extracellular (Potential).   | 4  | GGATAATAATATG | 0.418 |
| + | 11 | 973       | AK4_uc010jv.2_N    | NM_001744    | NP_001735    | Q16566 | KCC4_HUMAN  | rotein kinase.               | 5  | ACTACATTTCAAC | 0.423 |
| - | 3  | 1995      |                    | NM_020177    | NP_064562    | Q96JP0 | FEM1C_HUMAN |                              | 3  | TCCCCCTTGAT   | 0.388 |
| - | 19 | 2628      | 3krv.3_Missense_I  | NM_020796    | NP_065847    | Q9H2E6 | SEM6A_HUMAN | cellular (Potential).        | 2  | GGCCTTTGAGG   | 0.537 |
| + | 3  | 485       | ksn.2_Missense_I   | NM_182761    | NP_877438    | A1A519 | F170A_HUMAN |                              | 1  | GGAACGAGGAG   | 0.507 |
| + | 1  | 373       |                    | NM_177478    | NP_803431    | Q8N4E7 | FTMT_HUMAN  | ritin-like diiron.           | 1  | GGGAGGAGACC   | 0.577 |
| + | 4  | 580       | _Intron SNCAIP_u   | NM_005460    | NP_005451    | Q9Y6H5 | SNCAP_HUMAN |                              | 2  | AGATGGAGTGG   | 0.557 |
| + | 5  | 1254      | 1_Intron SNCAIP_i  | NM_005460    | NP_005451    | Q9Y6H5 | SNCAP_HUMAN | ANK 1.                       | 2  | AAAATGGA AAC  | 0.438 |
| + | 5  | 1356      | 1_Intron SNCAIP_t  | NM_005460    | NP_005451    | Q9Y6H5 | SNCAP_HUMAN | ANK 2.                       | 2  | ACACTGAGAAG   | 0.483 |
| - | 50 | 6851      |                    | NM_001999    | NP_001990    | P35556 | FBN2_HUMAN  | TB 8.                        | 15 | GGGGTCCCCC    | 0.458 |
| + | 15 | 2119      | X46_uc003kzv.1_F   | NM_014829    | NP_055644    | Q7L014 | DDX46_HUMAN | case C-terminal.             | 1  | CTTCATGGAGGT  | 0.353 |
| + | 8  | 1281      | p.D200N TGFB1_u    | NM_000358    | NP_000349    | Q15582 | BGH3_HUMAN  |                              | 4  | TCCCAGACTCAC  | 0.572 |
| - | 5  | 850       | LHL3_uc010jem.1    | NM_017415    | NP_059111    | Q9UH77 | KLHL3_HUMAN |                              | 0  | TGCCGAACAT    | 0.547 |
| - | 2  | 1524      | NNA1_uc003ldj.2    | NM_015564    | NP_056379    | O43300 | LRRT2_HUMAN | lar (Potential). LRRCT.      | 0  | GAAATCCATGG   | 0.473 |
| + | 5  | 399       | .1_Missense_Mut    | NM_006083    | NP_006074    | Q13123 | RED_HUMAN   |                              | 1  | TAGCAGAGAAG   | 0.468 |
| + | 1  | 116_117   | 2_Intron PCDHA4    | NM_018907    | NP_061730    | Q9UN74 | PCDA4_HUMAN |                              | 6  | CCTGGGGAAGC   | 0.515 |
| + | 1  | 1849      | J3lhf.2_Intron PCD | NM_018907    | NP_061730    | Q9UN74 | PCDA4_HUMAN | cellular (Potential).        | 6  | GCCATGGTCGG   | 0.667 |
| + | 1  | 190       | 3lhf.1_Intron PCD  | NM_018910    | NP_061733    | Q9UN72 | PCDA7_HUMAN | Extracellular (Potential).   | 4  | GCCTGTTCCGG   | 0.612 |
| + | 1  | 1987      | CDHA5_uc003lhk.    | NM_018911    | NP_061734    | Q9Y5H6 | PCDA8_HUMAN | Extracellular (Potential).   | 2  | CCACGGCCACG   | 0.647 |
| + | 1  | 1993      | l.2_Intron PCDHA   | NM_018901    | NP_061724    | Q9Y5I2 | PCDAA_HUMAN | r (Potential). Cadherin 6.   | 5  | CTGTGCTTGTG   | 0.672 |
| + | 1  | 1760      | 2_Intron PCDHA8_   | NM_018899    | NP_061722    | Q9Y5I4 | PCDC2_HUMAN | Extracellular (Potential).   | 4  | CTACTCCCTTC1  | 0.488 |
| + | 1  | 753       |                    | NM_013340    | NP_037472    | Q9Y5F3 | PCDB1_HUMAN | Extracellular (Potential).   | 0  | GCACAGCTCAC   | 0.592 |
| + | 1  | 1497      |                    | NM_013340    | NP_037472    | Q9Y5F3 | PCDB1_HUMAN | Extracellular (Potential).   | 0  | GCAAAGTCCATC  | 0.398 |
| + | 1  | 353       | HB2_uc003lim.1_I   | NM_018936    | NP_061759    | Q9Y5E7 | PCDB2_HUMAN | r (Potential). Cadherin 1.   | 6  | CAAAGGAAAAA   | 0.522 |
| + | 1  | 1496      | uc003lin.2_RNA     | NM_018937    | NP_061760    | Q9Y5E6 | PCDB3_HUMAN | r (Potential). Cadherin 5.   | 2  | CTGCCCTCT     | 0.667 |
| + | 1  | 454       | dah.1_Missense_I   | NM_018939    | NP_061762    | Q9Y5E3 | PCDB6_HUMAN | Extracellular (Potential).   | 1  | ATATTTCTTTG   | 0.478 |
| + | 1  | 2164      | lah.1_Missense_N   | NM_018939    | NP_061762    | Q9Y5E3 | PCDB6_HUMAN | lasmic (Potential).          | 1  | TGGGTCGCTAC   | 0.657 |
| + | 1  | 1804      |                    | NM_018940    | NP_061763    | Q9Y5E2 | PCDB7_HUMAN | r (Potential). Cadherin 5.   | 6  | GCAGCGAGGCG   | 0.706 |
| + | 1  | 1585      | HB16_uc010jfw.1_   | NM_020957    | NP_066008    | Q9NRJ7 | PCDBG_HUMAN | r (Potential). Cadherin 2.   | 2  | TACCGGAAAC    | 0.388 |
| + | 1  | 1931      | HB16_uc010jfw.1_   | NM_020957    | NP_066008    | Q9NRJ7 | PCDBG_HUMAN | r (Potential). Cadherin 3.   | 2  | TGGCTCCCTGG   | 0.488 |
| + | 1  | 337       |                    | NM_019119    | NP_061992    | Q9Y5E1 | PCDB9_HUMAN | r (Potential). Cadherin 1.   | 0  | ATGATCCCTTT   | 0.428 |
| + | 1  | 1129      |                    | NM_019119    | NP_061992    | Q9Y5E1 | PCDB9_HUMAN | r (Potential). Cadherin 4.   | 0  | CCGGAGAAAT    | 0.388 |
| + | 1  | 511       |                    | NM_018930    | NP_061753    | Q9UN67 | PCDBA_HUMAN | r (Potential). Cadherin 1.   | 2  | ATGATCCCTTT   | 0.418 |
| + | 1  | 2056      | dan.1_Missense_I   | NM_018912    | NP_061735    | Q9Y5H4 | PCDG1_HUMAN | cellular (Potential).        | 3  | CCAACGATTCC   | 0.692 |
| + | 1  | 666       | DHGA2_uc011dac     | NM_018915    | NP_061738    | Q9Y5H1 | PCDG2_HUMAN | r (Potential). Cadherin 2.   | 3  | ATGCAGACGTAC  | 0.512 |
| + | 1  | 373       | ju.1_Intron PCDHC  | NM_018921    | NP_061744    | Q9Y5G4 | PCDG9_HUMAN | Extracellular (Potential).   | 0  | GTAAGTATATTA  | 0.478 |
| + | 3  | 886       | lbl.1_Missense_M   | NM_152550    | NP_689763    | Q8TEC5 | SH3R2_HUMAN | SH3 2.                       | 2  | CTCAAGGTAGG   | 0.512 |
| - | 20 | 3179      | jhd.2_Missense_M   | NM_002609    | NP_002600    | P09619 | PGFRB_HUMAN | Potential). Protein kinase.  | 17 | TGGGTAAGGGG   | 0.582 |
| - | 2  | 405       | e_Mutation_p.D40   | NM_001146040 | NP_001139512 | P23415 | GLRA1_HUMAN | cellular (Probable).         | 2  | GAAATCCGAGG   | 0.502 |
| + | 4  | 697       | LNT10_uc010jic.2   | NM_198321    | NP_938080    | Q86SR1 | GLT10_HUMAN | main A.  Lumenal (Potential) | 2  | GTGATCGAGGT   | 0.587 |

|   |    |             |                    |              |              |        |             |                               |    |                 |       |             |
|---|----|-------------|--------------------|--------------|--------------|--------|-------------|-------------------------------|----|-----------------|-------|-------------|
| + | 1  | 180         |                    | NM_001099293 | NP_001092763 | Q2VIQ3 | KIF4B_HUMAN | inesin-motor.                 | 1  | TGAAGGGAATTC    | 0.592 |             |
| + | 1  | 2960        |                    | NM_001099293 | NP_001092763 | Q2VIQ3 | KIF4B_HUMAN | RC1 (By similarity). Potenti  | 1  | CTATACCTTGTC    | 0.463 |             |
| + | 33 | 3818        | lws.2_Missense_A   | NM_001037333 | NP_001032410 | Q96F07 | CYFP2_HUMAN |                               | 0  | GAAGTCCGTGG     | 0.522 |             |
| - | 11 | 1542        | p.R404W GABRB      | NM_021911    | NP_068711    | P47870 | GBRB2_HUMAN | lasmic (Probable).            | 0  | CTTCCGATACTC    | 0.517 |             |
| + | 5  | 1011_1012   | p.P217S ODZ2_u     | NM_001122679 | NP_001116151 |        |             |                               | 10 | GGATACCCCTTTC   | 0.569 |             |
| + | 5  | 650         | idf.1_Missense_Mi  | NM_006650    | NP_006641    | Q6PUV4 | CPLX2_HUMAN |                               | 1  | CCATCCCTGCG     | 0.622 |             |
| - | 6  | 1002        | Silent_p.L206L MX  | NM_031300    | NP_112590    | Q9BW11 | MAD3_HUMAN  |                               | 0  | ACCCCAAAACA     | 0.701 |             |
| + | 5  | 1242        | kz.1_Missense_Mt   | NM_182594    | NP_872400    | Q8N9F8 | ZN454_HUMAN |                               | 3  | CAGTGGAGAGA     | 0.388 |             |
| + | 14 | 1727        | ikc.1_Missense_M   | NM_025158    | NP_079434    | Q96T51 | RUFY1_HUMAN | Potential.                    | 5  | ACTCAGGATGG     | 0.517 |             |
| - | 20 | 2966        | mf.2_Missense_A    | NM_198868    | NP_942568    | Q66K14 | TBC9B_HUMAN |                               | 2  | CTCTTCTGTGC     | 0.498 |             |
| - | 8  | 1264        | p.A323T RASGEF     | NM_175062    | NP_778232    | Q8N431 | RGF1C_HUMAN | Ras-GEF.                      | 1  | CTTGCCCGTCC     | 0.617 |             |
| + | 12 | 1796        | q.1_Missense_Mu    | NM_004415    | NP_004406    | P15924 | DESP_HUMAN  | plakophilin 1 and junction p  | 9  | TGTTCCCTCTGT    | 0.557 |             |
| + | 1  | 266         |                    | NM_138574    | NP_612641    | Q5TGJ6 | HDGL1_HUMAN | PWWP.                         | 0  | CCCACGAGACG     | 0.602 |             |
| - | 1  | 306         |                    | NM_005320    | NP_005311    | P16402 | H13_HUMAN   | H15.                          | 1  | TGAGGCCAAGC     | 0.547 |             |
| + | 11 | 1565        | p.G420E BTN3A3     | NM_006994    | NP_008925    | O00478 | BT3A3_HUMAN | . Cytoplasmic (Potential).    | 0  | AGTGGGGATCT     | 0.498 |             |
| - | 3  | 1381        |                    | NM_052923    | NP_443155    | Q6R2W3 | SCND3_HUMAN | Potential.                    | 1  | TCACTTCCTTAT    | 0.353 |             |
| + | 1  | 691         |                    | NM_030905    | NP_112167    | O76002 | OR2J2_HUMAN | Name=5; (Potential).          | 0  | CAAATGAGCTG     | 0.478 |             |
| + | 3  | 852         | p.R137C OR2H1      | NM_030883    | NP_112145    | Q9GZK4 | OR2H1_HUMAN | lasmic (Potential).           | 0  | ACCCCGCCTG      | 0.597 | rs141663433 |
| + | 7  | 970         |                    | NR_027822    |              |        |             |                               | 0  | GTTCTGGTGTC     | 0.478 | rs145231932 |
| - | 4  | 2060        | inrb.3_Missense_A  | NM_001134870 | NP_001128342 | Q6NYC8 | PHTNS_HUMAN |                               | 0  | GGCAGGACTCA     | 0.537 |             |
| - | 2  | 262         | 1_5'Flank PSORS    | NM_014070    | NP_054789    | Q6UXA7 | CF015_HUMAN |                               | 0  | AGGTGGGAAGC     | 0.607 |             |
| + | 2  | 315_316     | uc003nwb.1_Miss    | NM_001003693 | NP_001003693 | Q5SQ64 | LY66F_HUMAN | (Potential). Ig-like V-type.  | 2  | TACTGGTGCCT     | 0.569 |             |
| - | 6  | 1240        | J1_uc010jth.2_No   | NM_000434    | NP_000425    | Q99519 | NEUR1_HUMAN |                               | 1  | TAGCTGGACTG     | 0.597 |             |
| + | 23 | 3201        | p.E780* SKIV2L     | NM_006929    | NP_008860    | Q15477 | SKIV2_HUMAN |                               | 4  | ATGGGGAGAAG     | 0.577 |             |
| + | 25 | 3263        | i.1_Missense_Mut   | NM_007293    | NP_009224    | P0C0L4 | CO4A_HUMAN  |                               | 0  | GTTGTCACGGG     | 0.622 |             |
| - | 15 | 2508        | u.1_RNA NOTCH      | NM_004557    | NP_004548    | Q99466 | NOTC4_HUMAN | Extracellular (Potential).    | 22 | GGCAGGAGAAG     | 0.632 |             |
| - | 12 | 1644        | f10_uc011dpx.1_I   | NM_006781    | NP_006772    | Q5SRN2 | CF010_HUMAN | Lys-rich.                     | 1  | AACTCTCCTCT     | 0.244 |             |
| - | 12 | 1611        | f10_uc011dpx.1_I   | NM_006781    | NP_006772    | Q5SRN2 | CF010_HUMAN | Lys-rich.                     | 1  | TAGTACACCTG     | 0.328 |             |
| - | 12 | 1375        | px.1_Missense_M    | NM_006781    | NP_006772    | Q5SRN2 | CF010_HUMAN |                               | 1  | ACTCCCTCTTC     | 0.483 |             |
| - | 4  | 767         | 03obo.1_Intron ucl | NM_002124    | NP_002115    | P01911 | 2B1F_HUMAN  | ical; (Potential).            | 1  | CCCAAGGAAGA     | 0.547 |             |
| - | 46 | 3631        | se_Mutation_p.G1   | NM_080680    | NP_542411    | P13942 | COBA2_HUMAN | le-helical region.            | 5  | GTGTCCTGGG      | 0.592 |             |
| - | 6  | 2099        | ation_p.S557F DA   | NM_001350    | NP_001341    | Q9UER7 | DAXX_HUMAN  | al (Potential). Interaction w | 23 | TCCGAGATTTT     | 0.502 |             |
| - | 6  | 565         | w.3_Missense_Mi    | NM_003322    | NP_003313    | O00294 | TULP1_HUMAN |                               | 3  | GAGCTTCCTTAT    | 0.582 |             |
| + | 76 | 11600       | sense_Mutation_p   | NM_001371    | NP_001362    |        |             |                               | 21 | TGTGGCTGCAG     | 0.502 |             |
| + | 77 | 11830       | sense_Mutation_p   | NM_001371    | NP_001362    |        |             |                               | 21 | TATGAAGTTTTT    | 0.373 |             |
| + | 91 | 13985       |                    | NM_001371    | NP_001362    |        |             |                               | 21 | ATTTGACCTTCAT   | 0.473 |             |
| + | 6  | 712         | h.2_RNA GLP1R      | NM_002062    | NP_002053    | P43220 | GLP1R_HUMAN | ellular (Potential).          | 5  | GGCTCCTCTCC     | 0.617 |             |
| - | 4  | 627_628     | se_Mutation_p.P21  | NM_018965    | NP_061838    | Q9NZC2 | TREM2_HUMAN | ical; (Potential).            | 1  | GAGAAGGATGG     | 0.554 |             |
| - | 3  | 613         |                    | NM_024807    | NP_079083    | Q5T2D2 | TRML2_HUMAN | ellular (Potential).          | 2  | CAGTCCACTC      | 0.527 |             |
| + | 14 | 2566        |                    | NM_032538    | NP_115927    | Q5TCY1 | TTBK1_HUMAN | i-rich. Potential.            | 9  | ggaagaagaggagge | 0.259 |             |
| + | 7  | 1103        | e_Mutation_p.P34   | NM_007355    | NP_031381    | P08238 | HS90B_HUMAN |                               | 4  | GGCTCCCTTTG     | 0.403 |             |
| - | 7  | 918         | e_Mutation_p.G21   | NM_001098518 | NP_001091988 | Q8IZF2 | GP116_HUMAN | racellular (Potential).       | 2  | AAAATCCGTAA     | 0.373 |             |
| + | 5  | 689         | e_Mutation_p.D16   | NM_153839    | NP_722581    | Q8IZF7 | GP111_HUMAN | ellular (Potential).          | 1  | GTGTTGATGAG     | 0.398 |             |
| + | 6  | 1634        | e_Mutation_p.Y47   | NM_153839    | NP_722581    | Q8IZF7 | GP111_HUMAN | Name=3; (Potential).          | 1  | ATCCTCTATGGA    | 0.448 |             |
| + | 7  | 2216        | p.T710I GPR115     | NM_153838    | NP_722580    | Q8IZF3 | GP115_HUMAN | Name=7; (Potential).          | 8  | TGGAACCATTAT    | 0.398 |             |
| - | 61 | 10807_10808 |                    | NM_138694    | NP_619639    | P08F94 | PKHD1_HUMAN | ellular (Potential).          | 44 | TTCCCTAAGA      | 0.431 | rs112030234 |
| + | 5  | 1359        | k.2_Missense_Mu    | NM_001704    | NP_001695    | O60242 | BAI3_HUMAN  | . Extracellular (Potential).  | 50 | CATGTTCGGTTA    | 0.468 |             |

|   |    |         |                    |              |              |        |             |                             |    |                |       |
|---|----|---------|--------------------|--------------|--------------|--------|-------------|-----------------------------|----|----------------|-------|
| - | 11 | 1166    | COL9A1_uc003pff.   | NM_001851    | NP_001842    | P20849 | CO9A1_HUMAN | αical region (COL3).        | 4  | :CAATGGAGCCA   | 0.388 |
| - | 8  | 989     | COL9A1_uc003pff    | NM_001851    | NP_001842    | P20849 | CO9A1_HUMAN | αical region (COL3).        | 4  | GCCCCGGGAGGA   | 0.607 |
| - | 6  | 725     |                    | NM_001563    | NP_001554    | Q17R60 | IMPG1_HUMAN |                             | 3  | :AGTGAGAGGGGA  | 0.398 |
| - | 1  | 44      |                    | NM_000863    | NP_000854    | P28222 | 5HT1B_HUMAN | llular (By similarity).     | 0  | CGGAGCCCCGCG   | 0.642 |
| - | 12 | 1382    | p.G351R ME1_uc     | NM_002395    | NP_002386    | P48163 | MAOX_HUMAN  |                             | 2  | :ACGTCCCTACA   | 0.393 |
| - | 4  | 695_696 | bq.1_Missense_M    | NM_001080508 | NP_001073977 | O95935 | TBX18_HUMAN | T-box.                      | 5  | :TCTCCCCCGAG   | 0.51  |
| + | 3  | 1119    | p.G188E NT5E_u     | NM_002526    | NP_002517    | P21589 | 5NTD_HUMAN  |                             | 4  | :CTTAGGGACAA   | 0.229 |
| - | 16 | 3034    | p.W926* EPAH7_     | NM_004440    | NP_004431    | Q15375 | EPAH7_HUMAN | mic (Potential); SAM.       | 28 | TTGTAGCCATTCT  | 0.373 |
| - | 15 | 2925    | p.R890Q EPAH7_     | NM_004440    | NP_004431    | Q15375 | EPAH7_HUMAN | lasmic (Potential).         | 28 | :GGTTTCGAATC   | 0.408 |
| + | 18 | 2209    | 0776_uc010kck.2_   | NM_015323    | NP_056138    | O94874 | UFL1_HUMAN  |                             | 1  | :AAATTCAGAGC   | 0.368 |
| + | 10 | 1684    | zo.3_Missense_Mt   | NM_021956    | NP_068775    | Q13002 | GRIK2_HUMAN | ellular (Potential).        | 5  | :ACATATGAAATTA | 0.388 |
| + | 12 | 2023    | p.P592S GRIK2_     | NM_021956    | NP_068775    | Q13002 | GRIK2_HUMAN | lasmic (Potential).         | 5  | TATAATCCACACC  | 0.398 |
| + | 3  | 788     | rw.1_Missense_M    | NM_018013    | NP_060483    | A7XYQ1 | SOBP_HUMAN  |                             | 1  | :TTTCACCATACA  | 0.403 |
| - | 1  | 301     |                    | NM_007214    | NP_009145    | Q9UGP8 | SEC63_HUMAN | lenal (Potential).          | 2  | TTCCCACTGTCA   | 0.637 |
| + | 7  | 989     | ao.1_Missense_M    | NM_032131    | NP_115507    | Q8NEN0 | ARMC2_HUMAN | ARM 1.                      | 0  | :ATACAAGGATTGT | 0.343 |
| - | 6  | 830     | p.G153D HDAC2_     | NM_001527    | NP_001518    | Q92769 | HDAC2_HUMAN | one deacetylase.            | 4  | :CAACACCATCAC  | 0.348 |
| - | 8  | 1952    |                    | NM_002031    | NP_002022    | P42685 | FRK_HUMAN   |                             | 6  | :ATGAAGTTATTTG | 0.343 |
| + | 6  | 2899    | t.2_Missense_Mut   | NM_001080976 | NP_001074445 | Q9UL01 | DSE_HUMAN   |                             | 1  | :TACCAGGTTGTT  | 0.468 |
| + | 11 | 1245    |                    | NM_173560    | NP_775831    | Q8HWS3 | RFX6_HUMAN  |                             | 3  | :GCCAGGTATGT   | 0.302 |
| + | 17 | 2273    |                    | NM_173560    | NP_775831    | Q8HWS3 | RFX6_HUMAN  |                             | 3  | TTTCAAGAGACT   | 0.547 |
| - | 24 | 2782    | ense_Mutation_p.5  | NM_152730    | NP_689943    | Q96NH3 | BROMI_HUMAN |                             | 3  | :GGATATGATGAA  | 0.303 |
| + | 1  | 251     |                    | NM_001010905 | NP_001010905 | Q6P5S2 | CF058_HUMAN |                             | 0  | :TGCACCAGATA   | 0.378 |
| - | 23 | 3630    | c.2_Missense_Mu    | NM_002844    | NP_002835    | Q15262 | PTPRK_HUMAN | ine-protein phosphatase 1.  | 8  | :CAGTTCGTCCA   | 0.383 |
| + | 54 | 7787    | ense_Mutation_p.1  | NM_000426    | NP_000417    | P24043 | LAMA2_HUMAN | minin G-like 3.             | 10 | :GTCCGGCATCA   | 0.488 |
| - | 2  | 175     |                    | NM_001010876 | NP_001010876 | Q5VVB8 | CF191_HUMAN | ical; (Potential).          | 1  | :TCAGGGACACA   | 0.373 |
| + | 5  | 651     | o.1_RNA ENPP3_     | NM_005021    | NP_005012    | O14638 | ENPP3_HUMAN | lar (Potential); SMB 2.     | 4  | :AATTCGTTGTG   | 0.378 |
| + | 9  | 1035    | o.1_RNA ENPP3_     | NM_005021    | NP_005012    | O14638 | ENPP3_HUMAN | ntential); Phosphodiesteras | 4  | :ATGTATGATGTAA | 0.318 |
| + | 1  | 943     |                    | NM_053278    | NP_444508    | Q969N4 | TAAR8_HUMAN | lasmic (Potential).         | 1  | TTTTATCCTTGGT  | 0.333 |
| - | 16 | 2543    | _p.S720F AH11_uc   | NM_001134831 | NP_001128303 | Q8N157 | AH11_HUMAN  | WD 3.                       | 3  | :ATCATGGAATCAT | 0.363 |
| - | 4  | 582     | i.S108L BCLAF1_    | NM_014739    | NP_055554    | Q9NYF8 | BCLF1_HUMAN |                             | 1  | :AACGTGAACGA   | 0.468 |
| - | 15 | 2153    | iv.2_Missense_Mu   | NM_003980    | NP_003971    | Q14244 | MAP7_HUMAN  |                             | 0  | :CTGTTCTCCAC   | 0.358 |
| - | 13 | 2042    | iv.2_Missense_Mu   | NM_003980    | NP_003971    | Q14244 | MAP7_HUMAN  | Potential.                  | 0  | :TCTTTCTCCCA   | 0.542 |
| + | 22 | 3664    |                    | NM_020340    | NP_065073    | Q5TH69 | BIG3_HUMAN  |                             | 2  | :ATAAGGAAAGA   | 0.473 |
| - | 3  | 2135    | kg.2_Missense_M    | NM_002656    | NP_002647    | Q9UM63 | PLAL1_HUMAN |                             | 1  | :CAGGGGATACC   | 0.602 |
| + | 69 | 9780    |                    | NM_007124    | NP_009055    | P46939 | UTRO_HUMAN  |                             | 5  | CTCATCCAGCAG   | 0.512 |
| - | 3  | 1542    | on.3_Missense_M    | NM_024963    | NP_079239    | Q96ME1 | FXL18_HUMAN | LRR 8.                      | 3  | :GGAAGGGCAGC   | 0.657 |
| + | 4  | 917     | _p.T209I C7orf26_  | NM_024067    | NP_076972    | Q96N11 | CG026_HUMAN |                             | 1  | :CTGACCCGAGA   | 0.587 |
| - | 27 | 2224    | p.P386S COL28A     | NM_001037763 | NP_001032852 | Q2UY09 | COSA1_HUMAN |                             | 3  | :AGGGGGGCCAG   | 0.468 |
| - | 9  | 1335    | se_Mutation_p.P1!  | NM_004956    | NP_004947    | P50549 | ETV1_HUMAN  |                             | 35 | :GCAAAGGAGGA   | 0.478 |
| + | 2  | 866     | _uc003stt.3_Splice | NM_001621    | NP_001612    | P35869 | AHR_HUMAN   |                             | 3  | :TGATGGTAAGAC  | 0.358 |
| + | 22 | 2966    | p.N978K HDAC9_     | NM_058176    | NP_478056    | Q9UKV0 | HDAC9_HUMAN | one deacetylase.            | 5  | :GGAATGAGGT/   | 0.413 |
| - | 1  | 143     |                    | NM_001002926 | NP_001002926 | Q3B726 | RPA43_HUMAN |                             | 1  | :TGTTCAACCAGC  | 0.647 |
| + | 15 | 2906    |                    | NM_003777    | NP_003768    | Q96DT5 | DYH11_HUMAN | n (By similarity).          | 15 | TTTAAACCTTCCC  | 0.408 |
| + | 21 | 2628    | _p.S854L STK31_    | NM_031414    | NP_113602    | Q9BXU1 | STK31_HUMAN | rotein kinase.              | 9  | :TGATCACTTCA   | 0.353 |
| + | 10 | 1552    |                    | NM_002047    | NP_002038    | P41250 | SYG_HUMAN   |                             | 1  | :TTTAGGGTGTG   | 0.413 |
| + | 12 | 1489    |                    | NM_133468    | NP_597725    | Q8N8U9 | BMPER_HUMAN | VWFD.                       | 3  | :ACCTGGATGGC   | 0.652 |
| + | 6  | 1024    |                    | NM_007252    | NP_009183    | P78424 | PO6F2_HUMAN | Gln-rich.                   | 1  | :CCAGTCTTCAGC  | 0.517 |



|   |    |                          |                   |              |              |        |             |                              |     |               |       |             |
|---|----|--------------------------|-------------------|--------------|--------------|--------|-------------|------------------------------|-----|---------------|-------|-------------|
| + | 3  | 559                      |                   | NM_020192    | NP_064577    | Q9NRH1 | CG036_HUMAN |                              | 0   | TATGTAGAATGTT | 0.393 |             |
| - | 8  | 1146                     | g.1_Missense_Mu   | NM_000168    | NP_000159    | P10071 | GLI3_HUMAN  |                              | 19  | CGCGCGAAGAC   | 0.537 |             |
| - | 3  | 140                      | 3tim.1_RNA C7orf  | NM_018224    | NP_060694    | Q9GZY4 | CG044_HUMAN | ical; (Potential).           | 1   | TGCTCCCAGAG   | 0.488 |             |
| - | 1  | 1                        |                   | NM_000290    | NP_000281    | P15259 | PGAM2_HUMAN |                              | 0   | ACGGGGACGGC   | 0.617 |             |
| - | 2  | 981                      | bw.1_Missense_M   | NM_013389    | NP_037521    | Q9UHC9 | NPCL1_HUMAN | lasmic (Potential).          | 5   | GGCGGGGGCCA   | 0.592 |             |
| - | 22 | 3604                     |                   | NM_138295    | NP_612152    | Q8TDX9 | PK1L1_HUMAN | ular (Potential). REJ.       | 11  | GTGGGGCTGCA   | 0.547 |             |
| + | 5  | 580_581                  | _uc011kcg.1_Miss  | NM_181597    | NP_853628    | Q16831 | UPP1_HUMAN  |                              | 0   | GATTGCCCCGTC  | 0.416 |             |
| + | 17 | 2749                     | kyr.2_Missense_M  | NM_152701    | NP_689914    | Q86UQ4 | ABCAD_HUMAN |                              | 10  | ATTTTGGAGCAC  | 0.393 |             |
| + | 23 | 9342                     | ys.1_Missense_M   | NM_152701    | NP_689914    | Q86UQ4 | ABCAD_HUMAN |                              | 10  | CCACTCCAAGG   | 0.448 | rs139183809 |
| - | 7  | 990                      | o.G233E ZPBP_uc   | NM_007009    | NP_008940    | Q9BS86 | ZPBP1_HUMAN |                              | 0   | TTCAATCCATATC | 0.338 |             |
| + | 4  | 1257                     | e_Mutation_p.H42C | NM_182633    | NP_872439    | Q8N859 | ZN713_HUMAN | 2H2-type 5.                  | 2   | AAAATCCACTCTC | 0.393 |             |
| - | 5  | 1641                     |                   | NM_033273    | NP_150376    | Q96JC4 | ZN479_HUMAN | 2H2-type 10.                 | 4   | TGAATTCCTTGT  | 0.433 |             |
| + | 4  | 1206                     |                   | NM_001159522 | NP_001152994 | A8MUV8 | ZN727_HUMAN | 2H2-type 7.                  | 0   | ATTTGTGAAGAAT | 0.388 |             |
| - | 5  | 1008                     | p.E203K CALN1_    | NM_001017440 | NP_001017440 | Q9BXU9 | CABP8_HUMAN | lasmic (Potential).          | 1   | TCTCTTCTCAT   | 0.517 |             |
| + | 2  | 186                      |                   | NM_000941    | NP_000932    | P16435 | NCPR_HUMAN  |                              | 1   | GTTTTCGCTCAT  | 0.502 |             |
| - | 10 | 1977                     | ly.1_Missense_Mu  | NM_012301    | NP_036433    | Q86UL8 | MAGI2_HUMAN |                              | 11  | ACCATCAGTTG   | 0.488 |             |
| - | 20 | 15033                    | ht.1_Missense_Mu  | NM_033026    | NP_149015    | Q9Y6V0 | PCLO_HUMAN  |                              | 7   | CTATGGCAGCC   | 0.498 |             |
| - | 7  | 11487                    | p.S3733F PCLO_1   | NM_033026    | NP_149015    | Q9Y6V0 | PCLO_HUMAN  |                              | 7   | CTGTGGAAATC   | 0.443 |             |
| - | 3  | 3053                     | iv.2_Missense_Mu  | NM_033026    | NP_149015    | Q9Y6V0 | PCLO_HUMAN  | Pro-rich.                    | 7   | AGGAGTTGTAG   | 0.502 |             |
| - | 3  | 2447                     | iv.2_Missense_Mu  | NM_033026    | NP_149015    | Q9Y6V0 | PCLO_HUMAN  | Pro-rich.                    | 7   | CTTGCCCTTGG   | 0.542 |             |
| - | 2  | 1064                     | iv.2_Nonsense_Mu  | NM_033026    | NP_149015    | Q9Y6V0 | PCLO_HUMAN  | r-rich. Pro-rich.            | 7   | ACCCTGAATTG   | 0.473 | rs10251512  |
| - | 10 | 1417                     |                   | NM_006080    | NP_006071    | Q14563 | SEM3A_HUMAN | Sema.                        | 4   | ATAAGGCACCC   | 0.433 | rs139931613 |
| - | 29 | 4211                     | ic.1_Missense_Mu  | NM_000927    | NP_000918    | P08183 | MDR1_HUMAN  | otential). ABC transporter 2 | 7   | GATGCCTTTCTG  | 0.443 |             |
| + | 9  | 1283                     | p.R274Q RUNDC     | NM_138290    | NP_612147    | Q96NL0 | RUN3B_HUMAN |                              | 1   | CTTACGACTTCC  | 0.368 |             |
| - | 2  | 234                      | n_p.Y43* STEAP4   | NM_024636    | NP_078912    | Q687X5 | STEA4_HUMAN |                              | 0   | ACAGAATAACC   | 0.433 |             |
| - | 22 | 3580                     | r.2_Missense_Mut  | NM_000466    | NP_000457    | O43933 | PEX1_HUMAN  |                              | 2   | CTCAGGCAAAAT  | 0.453 |             |
| - | 5  | 4383                     | ID9L_uc003umk.1   | NM_152703    | NP_689916    | Q8IVG5 | SAM9L_HUMAN |                              | 4   | ATGGGGAAAAC   | 0.393 |             |
| + | 20 | 1535                     | 1A2_uc011kib.1_I  | NM_000089    | NP_000080    | P08123 | CO1A2_HUMAN |                              | 9   | CAAAGGAGAGA   | 0.433 |             |
| + | 3  | 1060                     |                   | NM_002523    | NP_002514    | P47972 | NPTX2_HUMAN | Pentaxin.                    | 3   | TCAACGACAAG   | 0.667 |             |
| - | 11 | 1357                     | p.R377K CYP3A4    | NM_017460    | NP_059488    | P08684 | CP3A4_HUMAN |                              | 4   | TTGTACCTTTCAC | 0.502 |             |
| + | 12 | 1586                     | ZAN_uc003uwl.2_f  | NM_003386    | NP_003377    | Q9Y493 | ZAN_HUMAN   | xtracellular (Potential).    | 11  | TGCGGGGAGTC   | 0.617 |             |
| + | 3  | 4275                     | C17_uc010lho.1_F  | NM_001040105 | NP_001035194 | Q685J3 | MUC17_HUMAN | approximate tandem repea     | 27  | CGCCGGTAGTC   | 0.507 |             |
| + | 3  | 9154                     | C17_uc010lho.1_F  | NM_001040105 | NP_001035194 | Q685J3 | MUC17_HUMAN | ch. 59 X approximate tand    | 27  | AGGTACCGGCA   | 0.507 |             |
| + | 3  | 12117                    | C17_uc010lho.1_F  | NM_001040105 | NP_001035194 | Q685J3 | MUC17_HUMAN | ellular (Potential).         | 27  | GGTGCCTACT    | 0.532 |             |
| + | 4  | 905                      | HIT1_uc003uyf.2_f | NM_006349    | NP_006340    | O43257 | ZNHI1_HUMAN | HIT-type.                    | 1   | CACTGTGCCTC   | 0.662 |             |
| + | 17 | 1470                     | _uc003uyv.2_Splic | NM_001913    | NP_001904    | P39880 | CUX1_HUMAN  |                              | 8   | TGTAGGACCTC   | 0.657 |             |
| - | 8  | 1086                     | _Mutation_p.E284I | NM_198999    | NP_945350    | P58743 | S26A5_HUMAN | lasmic (Potential).          | 1   | ATTTCTCTTTAA  | 0.448 |             |
| - | 42 | 6594                     | .2_Missense_Mut   | NM_005045    | NP_005036    | P78509 | RELN_HUMAN  | EGF-like 5.                  | 19  | TTGGTTCCATTG  | 0.458 |             |
| - | 13 | 1631                     | z.2_Missense_Mut  | NM_005045    | NP_005036    | P78509 | RELN_HUMAN  |                              | 19  | CATTTTCATGAG  | 0.343 |             |
| - | 9  | 998                      | z.2_Missense_Mut  | NM_005045    | NP_005036    | P78509 | RELN_HUMAN  |                              | 19  | GCTGGGTCTG    | 0.323 |             |
| + | 4  | 706                      | D1_uc003vgj.2_M   | NM_001007245 | NP_001007246 | O00458 | IFRD1_HUMAN |                              | 2   | GATTAATTGACC  | 0.368 |             |
| - | 4  | 3051                     |                   | NM_002711    | NP_002702    | Q16821 | PPR3A_HUMAN |                              | 34  | CCTAGAGATTTT  | 0.378 |             |
| - | 1  | 810                      |                   | NM_002711    | NP_002702    | Q16821 | PPR3A_HUMAN |                              | 34  | CACCTTGATTTT  | 0.294 |             |
| + | 17 | 2472                     | XP2_uc011kmu.1    | NM_014491    | NP_055306    | O15409 | FOXP2_HUMAN |                              | 8   | AATTAGAAGACC  | 0.438 |             |
| + | 3  | 1549_1550_455NL>KF MET_u |                   | NM_000245    | NP_000236    | P08581 | MET_HUMAN   | ilar (Potential). Sema.      | 159 | GCTAATCTGGG   | 0.431 |             |
| - | 5  | 1351                     | a.2_Missense_Mu   | NM_003391    | NP_003382    | P09544 | WNT2_HUMAN  |                              | 7   | CTTGGGGCCT    | 0.577 |             |
| + | 14 | 2074                     | iq.1_Missense_Mu  | NM_000492    | NP_000483    | P13569 | CFTR_HUMAN  | lasmic (Potential).          | 5   | GATGTGATTCT   | 0.383 |             |

|   |    |           |                   |              |              |        |             |                               |       |               |       |             |
|---|----|-----------|-------------------|--------------|--------------|--------|-------------|-------------------------------|-------|---------------|-------|-------------|
| + | 27 | 4465      | q.1_Missense_Mu   | NM_000492    | NP_000483    | P13569 | CFTR_HUMAN  | lasmic (Potential).           | 5     | :CCTCCGACAGG  | 0.522 | rs148783445 |
| - | 8  | 1009      | 0lkj.2_Missense_l | NM_012338    | NP_036470    | O95859 | TSN12_HUMAN | ellular (Potential).          | 0     | AAAAAGGAATAC  | 0.398 |             |
| - | 1  | 638       | PS2_uc010lkq.2_   | NM_198085    | NP_932351    | Q8N7C7 | RN148_HUMAN | PA.                           | 0     | ACATGGGAAATA  | 0.448 |             |
| - | 7  | 1691      | UB_uc010lkt.2_Rf  | NM_178827    | NP_849149    | Q8NA54 | IQUB_HUMAN  |                               | 4     | 3TGTTCCTCCATT | 0.343 |             |
| + | 3  | 1175      | _p.S185F FSCN3_   | NM_020369    | NP_065102    | Q9NQT6 | FSCN3_HUMAN |                               | 1     | .CCTATCCCAGGT | 0.498 |             |
| + | 2  | 401       |                   | NM_014390    | NP_055205    | Q7KZF4 | SND1_HUMAN  | GNase-like 1.                 | 3     | 3GAAATCTTGCTC | 0.582 |             |
| + | 21 | 3442      | a.3_Missense_Mut  | NM_001458    | NP_001449    | Q14315 | FLNC_HUMAN  | Filamin 9.                    | 12    | GGTAGGCACCC   | 0.652 |             |
| + | 21 | 3834      | a.3_Missense_Mut  | NM_001458    | NP_001449    | Q14315 | FLNC_HUMAN  | Filamin 10.                   | 12    | ACGCGGATGGC   | 0.602 |             |
| + | 38 | 6427      | a.3_Missense_Mut  | NM_001458    | NP_001449    | Q14315 | FLNC_HUMAN  | Filamin 19.                   | 12    | TGGGGGCTTGG   | 0.587 |             |
| - | 28 | 5101      | IA4_uc003vqz.3_5  | NM_020911    | NP_065962    | Q9HCM2 | PLXA4_HUMAN | lasmic (Potential).           | 1     | :CGGATCATGTT  | 0.572 |             |
| - | 22 | 4373      |                   | NM_020911    | NP_065962    | Q9HCM2 | PLXA4_HUMAN | lasmic (Potential).           | 1     | ACGGTCGCGCA   | 0.577 | rs118107843 |
| - | 22 | 4337      |                   | NM_020911    | NP_065962    | Q9HCM2 | PLXA4_HUMAN | lasmic (Potential).           | 1     | :CGTCCGATGA   | 0.602 |             |
| - | 2  | 818       | _p.P197S PLXNA4   | NM_020911    | NP_065962    | Q9HCM2 | PLXA4_HUMAN | ilar (Potential). Sema.       | 1     | TGGTGGGAAAA   | 0.537 |             |
| + | 4  | 1416      | CHRM2_uc003vtrm   | NM_001006630 | NP_001006631 | P08172 | ACM2_HUMAN  | smic (By similarity).         | 5     | GCAAAGCCCC    | 0.493 |             |
| - | 8  | 930       | tu.2_Missense_Mu  | NM_004717    | NP_004708    | O75912 | DGKI_HUMAN  |                               | 3     | :CCAGGGAGCAG  | 0.488 |             |
| - | 15 | 4864_4865 | Q1556* KIAA154    | NM_020910    | NP_065961    | Q9HCM3 | K1549_HUMAN |                               | 230   | 3ACCTGGTGT    | 0.554 |             |
| + | 2  | 349       | rc.1_Missense_Mi  | NM_001008749 | NP_001008749 | A4D1S5 | RAB19_HUMAN | region (By similarity).       | 0     | CGATTGGAGTG   | 0.468 |             |
| + | 3  | 518       | rc.1_Missense_Mi  | NM_001008749 | NP_001008749 | A4D1S5 | RAB19_HUMAN |                               | 0     | CGAGTCCATCC   | 0.502 |             |
| - | 1  | 570       | NND2A_uc003vww    | NM_015689    | NP_056504    | Q9ULE3 | DEN2A_HUMAN |                               | 4     | CTCGGCTCGG    | 0.592 |             |
| + | 1  | 947       | vz.2_Missense_M   | NM_052853    | NP_443085    | Q7Z695 | ADCK2_HUMAN | rotein kinase.                | 0     | 3GATACCTTGGA  | 0.562 |             |
| - | 15 | 1860      |                   | NM_004333    | NP_004324    | P15056 | BRAF_HUMAN  | rotein kinas_R603>(2) p.T     | 18290 | 3ATTTCACTGTAC | 0.368 |             |
| - | 11 | 1461      |                   | NM_004333    | NP_004324    | P15056 | BRAF_HUMAN  | ilarity). Pro p.S467L(1)      | 18290 | 3CAAATGATCCAC | 0.383 |             |
| + | 1  | 576       | 852_uc010lnn.2_l  | NM_001105558 | NP_001099028 | P0C1S8 | WEE2_HUMAN  |                               | 2     | :ACCTTGGA     | 0.493 |             |
| + | 32 | 3903      |                   | NM_004668    | NP_004659    | O43451 | MGA_HUMAN   | se. Lumenal (Potential).      | 2     | :TACATGGAGCG  | 0.562 |             |
| - | 4  | 617       | TRPV6_uc010lou.   | NM_018646    | NP_061116    | Q9H1D0 | TRPV6_HUMAN | ytoplasmic (Potential).       | 2     | .GGGCTCGCACC  | 0.572 | rs150734746 |
| - | 6  | 934       | bz.2_Missense_Mi  | NM_019841    | NP_062815    | Q9NQA5 | TRPV5_HUMAN | lasmic (Potential).           | 6     | :ATGTCCATCGT  | 0.567 |             |
| + | 1  | 82        |                   | NM_176881    | NP_795362    | P59534 | T2R39_HUMAN | ellular (Potential).          | 1     | 3AAAGTGAATTG  | 0.418 |             |
| + | 1  | 701       |                   | NM_176881    | NP_795362    | P59534 | T2R39_HUMAN | lasmic (Potential).           | 1     | CTCTCTCTCA    | 0.512 |             |
| + | 20 | 2461      | tc.1_Missense_Mu  | NM_000083    | NP_000074    | P35523 | CLCN1_HUMAN | smic (By similarity).         | 5     | CCACAGATTTAC  | 0.428 |             |
| - | 4  | 910       |                   | NM_005232    | NP_005223    | P21709 | EPHA1_HUMAN | ar (Potential). Cys-rich.     | 5     | ATGCTTCGCCAC  | 0.627 |             |
| + | 1  | 575       | uc003wda.2_Intror | NM_176883    | NP_795364    | P59536 | T2R41_HUMAN | Name=5; (Potential).          | 2     | CAATTCCTTTTT  | 0.408 |             |
| + | 1  | 350       |                   | NM_012369    | NP_036501    | Q13607 | OR2F1_HUMAN | Name=3; (Potential).          | 3     | GTTATTTTTCTCC | 0.527 |             |
| + | 1  | 777       |                   | NM_001005480 | NP_001005480 | Q6IF42 | OR2A2_HUMAN | ellular (Potential).          | 2     | ATACATGGTCCC  | 0.507 |             |
| + | 2  | 680       | wek.2_Missense_l  | NM_005435    | NP_005426    | Q12774 | ARHG5_HUMAN |                               | 2     | GCGAAGAGCAT   | 0.502 |             |
| + | 2  | 2646      | _Mutation_p.P843  | NM_005435    | NP_005426    | Q12774 | ARHG5_HUMAN |                               | 2     | CACTACCCATCA  | 0.607 |             |
| + | 6  | 3732      | _p.S1205L ARHGGE  | NM_005435    | NP_005426    | Q12774 | ARHG5_HUMAN | DH.                           | 2     | :AACTTCACTCCG | 0.507 |             |
| + | 7  | 1465      |                   | NM_014141    | NP_054860    | Q9UHC6 | CNTP2_HUMAN | 1. Extracellular (Potential). | 11    | .CCTTTGGAGGC  | 0.378 |             |
| + | 2  | 601       |                   | NM_145304    | NP_660347    | Q8WU49 | CG033_HUMAN |                               | 1     | 3GGGATGGAATT  | 0.473 |             |
| - | 4  | 1709_1710 | _p.R488C ZNF786   | NM_152411    | NP_689624    | Q8N393 | ZN786_HUMAN | 2H2-type 8.                   | 4     | CTCACGGAGCTI  | 0.653 |             |
| + | 6  | 1437      | _p.T217A ZNF398   | NM_170686    | NP_733787    | Q8TD17 | ZN398_HUMAN | ype 2; degenerate.            | 1     | .GCAGCACCTCC  | 0.567 |             |
| - | 2  | 510       |                   | NM_015694    | NP_056509    | Q9ULD5 | ZN777_HUMAN |                               | 1     | GAAGGGAGACT   | 0.607 |             |
| + | 10 | 1655      | ga.2_RNA KRBA1    | NM_032534    | NP_115923    | A5PL33 | KRBA1_HUMAN |                               | 2     | ACTTAGGTCTC   | 0.607 |             |
| + | 1  | 31        | 467_uc003wgd.2    | NM_198455    | NP_940857    | A2VEC9 | SSPO_HUMAN  |                               | 0     | GGATGGCGTGG   | 0.647 |             |
| + | 43 | 6302      |                   | NM_198455    | NP_940857    | A2VEC9 | SSPO_HUMAN  | F5/8 type C.                  | 0     | CCAGGGGCCCA   | 0.682 |             |
| + | 4  | 998       | _p.P227L REPIN1   | NM_013400    | NP_037532    | Q9BWE0 | REPI1_HUMAN |                               | 1     | CCCTCCCGCC    | 0.652 |             |
| + | 5  | 1640      |                   | NM_175571    | NP_783161    | Q8ND71 | GIMA8_HUMAN |                               | 7     | TGACAGAAACC   | 0.498 |             |
| + | 5  | 1846      |                   | NM_175571    | NP_783161    | Q8ND71 | GIMA8_HUMAN |                               | 7     | :AAAAGGACCCA  | 0.537 |             |

|   |    |           |                    |              |              |         |             |                               |     |                |       |
|---|----|-----------|--------------------|--------------|--------------|---------|-------------|-------------------------------|-----|----------------|-------|
| + | 3  | 296       | 76B_uc003whv.3_    | NM_018487    | NP_060957    | Q96HP8  | T176A_HUMAN | ical; (Potential).            | 2   | TAGGAGGATTTT   | 0.572 |
| + | 9  | 1299      | p.A335T NOS3_u     | NM_000603    | NP_000594    | P29474  | NOS3_HUMAN  | ction with NOSIP.             | 8   | TCCCAGCAGTG    | 0.642 |
| - | 3  | 584       |                    | NM_170606    | NP_733751    | Q8NEZ4  | MLL3_HUMAN  |                               | 63  | CAACAGAGACC/   | 0.423 |
| + | 1  | 87        | .1_Intron uc003wit | NM_024012    | NP_076917    | P47898  | 5HT5A_HUMAN | llular (By similarity).       | 3   | ACCTAACCTCCT   | 0.612 |
| + | 2  | 963       |                    | NM_024012    | NP_076917    | P47898  | 5HT5A_HUMAN | ame=6; (By similarity).       | 3   | TGATCCCCTTCT   | 0.592 |
| + | 3  | 216       | p.D12N RNF32_u     | NM_030936    | NP_112198    | Q9H0A6  | RNF32_HUMAN |                               | 0   | AGAAAGATAACT   | 0.328 |
| - | 4  | 1019_1020 | vpe.1_Missense_Iv  | NM_207332    | NP_997215    | Q86X53  | ERIC1_HUMAN | Glu-rich.                     | 2   | CTCCTCCCCGG#   | 0.54  |
| - | 68 | 10743     | p.F2765L CSMD1_    | NM_033225    | NP_150094    | Q96PZ7  | CSMD1_HUMAN | ellular (Potential).          | 25  | ACCTTGAAAAGT/  | 0.333 |
| - | 17 | 2803      | e_Mutation_p.Q19   | NM_033225    | NP_150094    | Q96PZ7  | CSMD1_HUMAN | lar (Potential). CUB 5.       | 25  | TGTCTGAAATC1   | 0.502 |
| - | 2  | 854       |                    | NM_001080826 | NP_001074295 | Q86YV5  | SG223_HUMAN |                               | 0   | TGGGTGAGCAG    | 0.682 |
| - | 3  | 1246      | v.2_Intron FAM16i  | NM_053279    | NP_444509    | Q96KS9  | F167A_HUMAN |                               | 0   | ACCTCCGAGAG    | 0.597 |
| - | 7  | 1400      | s.2_Missense_Mu    | NM_139167    | NP_631906    | Q96LD1  | SGCZ_HUMAN  | ellular (Potential).          | 3   | ACCTCCCCTTCT   | 0.493 |
| + | 6  | 970       | C3_uc003www.2_f    | NM_006765    | NP_006756    | Q13454  | TUSC3_HUMAN |                               | 3   | TGTGGACCTCCA   | 0.378 |
| - | 13 | 1739      | ya.1_Nonsense_f    | NM_004686    | NP_004677    | Q9Y216  | MTMR7_HUMAN | ularin phosphatase.           | 1   | CCACTCCAAAAC   | 0.448 |
| + | 7  | 847       | O7_uc010lj.1_RN    | NM_015024    | NP_055839    | Q9UIA9  | XPO7_HUMAN  |                               | 5   | TAGATCCCACC/   | 0.498 |
| - | 2  | 580       |                    | NM_002318    | NP_002309    | Q9Y4K0  | LOXL2_HUMAN | SRCR 1.                       | 3   | TGGTGCCCCACT   | 0.657 |
| + | 11 | 1101      | se_Mutation_p.E1   | NM_014265    | NP_055080    | Q9UKQ2  | ADA28_HUMAN | B. Extracellular (Potential). | 5   | TACATGAAATGC   | 0.408 |
| + | 6  | 567       | ea.1_Missense_Mi   | NM_003817    | NP_003808    | Q9H2U9  | ADAM7_HUMAN | ellular (Potential).          | 5   | TAGGGAGAACAT   | 0.398 |
| - | 13 | 1348      | kek.2_Intron EBF2  | NM_022659    | NP_073150    | Q9HAK2  | COE2_HUMAN  |                               | 4   | TTATTTCTTTGTG  | 0.473 |
| + | 14 | 2032      | SL2_uc010luk.1_l   | NM_001386    | NP_001377    | Q16555  | DPYL2_HUMAN |                               | 1   | TGCGCCCCCG     | 0.642 |
| - | 2  | 186       |                    | NM_001010906 | NP_001010906 | Q68CJ6  | SLIP_HUMAN  |                               | 2   | TGTACCTGGATC   | 0.423 |
| - | 3  | 7453      |                    | NM_031271    | NP_112561    | Q9BXT5  | TEX15_HUMAN |                               | 7   | TATCTGGGGAAT   | 0.413 |
| - | 3  | 270       | xns.2_Missense_Iv  | NM_024645    | NP_078921    | Q9H898  | ZMAT4_HUMAN | Matrin-type 1.                | 3   | TTCGGACTTTGC   | 0.473 |
| + | 8  | 1833_1834 |                    | NM_178819    | NP_848934    | Q86UL3  | GPAT4_HUMAN |                               | 0   | TATCGCCACCTG   | 0.54  |
| - | 29 | 3545      | JK1_uc003xoj.2_M   | NM_020476    | NP_065209    | P16157  | ANK1_HUMAN  |                               | 9   | TCCAGGAAGGA    | 0.657 |
| + | 3  | 512       | qa.1_Missense_Mi   | NM_001005365 | NP_001005365 | Q6S8J7  | POTEA_HUMAN | ANK 2.                        | 1   | TGCACTGATCCA   | 0.393 |
| + | 11 | 1489      | p.A465V MCM4_u     | NM_182746    | NP_877423    | P33991  | MCM4_HUMAN  | MCM.                          | 4   | TTCAGCCTTGG    | 0.373 |
| + | 4  | 407       |                    | NM_001007176 | NP_001007177 | Q8WWR9  | PDPFL_HUMAN |                               | 0   | TCTGTCTGCTAC   | 0.393 |
| + | 4  | 5198      | 1_uc011ldy.1_Intr  | NM_006269    | NP_006260    | P56715  | RP1_HUMAN   |                               | 12  | TCTTCTGAACAG   | 0.413 |
| + | 4  | 5358      | 1_uc011ldy.1_Intr  | NM_006269    | NP_006260    | P56715  | RP1_HUMAN   |                               | 12  | TAGAGGAAGGAG   | 0.413 |
| + | 3  | 1918      |                    | NM_052898    | NP_443130    | Q5GH76  | XKR4_HUMAN  |                               | 2   | TATCTCTCCAAC   | 0.458 |
| - | 3  | 1742      | lyi.2_Missense_Mi  | NM_001114635 | NP_001108107 | Q6DJT9  | PLAG1_HUMAN | lack of NLS and KPNA2 int     | 129 | TATAGGGAGGAC   | 0.453 |
| - | 3  | 571_572   |                    | NM_000780    | NP_000771    | P22680  | CP7A1_HUMAN |                               | 1   | ACATCCCTTCTG   | 0.46  |
| + | 26 | 3299      |                    | NM_024870    | NP_079146    | Q70Z35  | PREX2_HUMAN |                               | 17  | TAGCAGGAGATG/  | 0.383 |
| + | 4  | 760       | .1_5'UTR CRISPLI   | NM_031461    | NP_113649    | Q9H336  | CRLD1_HUMAN |                               | 2   | TATAGCCCCCG/   | 0.363 |
| + | 10 | 4753      | i.P1501S ZFHx4_u   | NM_024721    | NP_078997    | Q86UP3  | ZFHx4_HUMAN |                               | 15  | TCAAGTCTGTAC   | 0.473 |
| - | 6  | 890       |                    | NM_018440    | NP_060910    | Q9NWX8  | PAG1_HUMAN  | lasmic (Potential).           | 0   | TCTGAAGGCTG    | 0.418 |
| + | 4  | 459_460   | P1_uc010mai.2_5'   | NM_007013    | NP_008944    | Q9H0M0  | WWP1_HUMAN  | C2.                           | 2   | TCTTCTAATCC    | 0.332 |
| - | 10 | 1109      | raj.2_Nonsense_Iv  | NM_019098    | NP_061971    | Q9NQW8  | CNGB3_HUMAN | ellular (Potential).          | 3   | TTGTTCAATAAC   | 0.363 |
| + | 9  | 1191      | nse_Mutation_p.L   | NM_052832    | NP_439897    | Q8TE54  | S26A7_HUMAN | lasmic (Potential).           | 2   | TACATCCTCTCT   | 0.438 |
| + | 4  | 554       | p.P152S POP1_u     | NM_001145860 | NP_001139332 | Q99575  | POP1_HUMAN  |                               | 2   | TGCTTCCCAGA/   | 0.458 |
| + | 13 | 1978      | p.W626* POP1_u     | NM_001145860 | NP_001139332 | Q99575  | POP1_HUMAN  |                               | 2   | TGGCTGGGGCAT   | 0.408 |
| + | 2  | 600       | riq.2_Missense_Mi  | NM_001142462 | NP_001135934 | Q8N2R0  | OSR2_HUMAN  |                               | 1   | TACTCTCTCCT    | 0.647 |
| - | 16 | 1945      | is.1_Missense_Mu   | NM_015902    | NP_056986    | Q95071  | UBR5_HUMAN  |                               | 28  | TGCAGGGGTTG.   | 0.383 |
| + | 3  | 753       |                    | NM_001100117 | NP_001093587 | Q9UQ26  | RIMS2_HUMAN |                               | 15  | TAAAGTCGATCTC/ | 0.453 |
| + | 24 | 3741      | p.G1156D RIMS2     | NM_014677    | NP_055492    | Q9UQ26  | RIMS2_HUMAN |                               | 15  | TAGATGGTAGCAT  | 0.493 |
| + | 8  | 1278      | nse_Mutation_p.E   | NM_012082    | NP_036214    | Q8VWV38 | FOG2_HUMAN  |                               | 5   | TGAAGCGAACTT/  | 0.498 |

|   |    |           |                      |              |              |         |             |                                 |    |               |       |
|---|----|-----------|----------------------|--------------|--------------|---------|-------------|---------------------------------|----|---------------|-------|
| - | 6  | 1456      | no.2_Missense_M      | NM_001146    | NP_001137    | Q15389  | ANGP1_HUMAN | rogen C-terminal.               | 7  | CTTCACGATGTT  | 0.338 |
| + | 2  | 998       |                      | NM_003301    | NP_003292    | P34981  | TRFR_HUMAN  | lasmic (Potential).             | 3  | AAATCCCGTGCA  | 0.438 |
| + | 49 | 8241      |                      | NM_177531    | NP_803875    | Q86W11  | PKHL1_HUMAN | ellular (Potential).            | 14 | GGCCATCTTGAT  | 0.468 |
| - | 69 | 10939     | nt.2_Missense_Mt     | NM_198123    | NP_937756    | Q7Z407  | CSMD3_HUMAN | ellular (Potential).            | 63 | TAAATCCTTGAA  | 0.353 |
| - | 29 | 4972      | nt.2_Missense_Mu     | NM_198123    | NP_937756    | Q7Z407  | CSMD3_HUMAN | lar (Potential). CUB 9.         | 63 | ATGAGGGAAGT   | 0.373 |
| - | 8  | 1529      | p.R417K CSMD3_       | NM_198123    | NP_937756    | Q7Z407  | CSMD3_HUMAN | ellular (Potential).            | 63 | AATCCTCTAGATT | 0.289 |
| - | 6  | 595       | p.S170F ENPP2_       | NM_001040092 | NP_001035181 | Q13822  | ENPP2_HUMAN |                                 | 7  | CCACGGAGAAG   | 0.373 |
| + | 3  | 560       | DC6_uc011lid.1_l     | NM_022783    | NP_073620    | Q8TB45  | DPTOR_HUMAN |                                 | 0  | ACCTTCCCATTG  | 0.408 |
| + | 10 | 1107      |                      | NM_001039112 | NP_001034201 | Q2WVGJ9 | FR1L6_HUMAN | toplasmic (Potential).          | 11 | GTGCTGATCCT   | 0.502 |
| + | 31 | 4245      | uc003yqy.1_Intron    | NM_001039112 | NP_001034201 | Q2WVGJ9 | FR1L6_HUMAN | toplasmic (Potential).          | 11 | AGCAAGGGATT   | 0.488 |
| - | 13 | 1928      | M135B_uc003yva.      | NM_015912    | NP_056996    | Q49AJ0  | F135B_HUMAN |                                 | 9  | TCTAATCCATAC  | 0.448 |
| + | 7  | 942       | nep.2_Missense_l     | NM_014957    | NP_055772    | A2RUS2  | DEND3_HUMAN | DENN.                           | 1  | CCTCGGACTGG   | 0.542 |
| + | 3  | 837       | .1_3'UTR LY6K_uc     | NM_017527    | NP_059997    | Q17RY6  | LY6K_HUMAN  | UPAR/Ly6.                       | 1  | AGCATGGGTGA   | 0.547 |
| + | 3  | 1031_1032 | kx.1_Missense_M      | NM_198572    | NP_940974    | Q76KD6  | SPERI_HUMAN |                                 | 2  | CCAGCCCAGTGC  | 0.396 |
| - | 8  | 1526      | MP1_uc010mhs.1       | NM_024896    | NP_079172    | Q7Z2K6  | ERMP1_HUMAN | ical; (Potential).              | 1  | AAACGGAGACA   | 0.368 |
| - | 20 | 1970      | p.A410V PTPRD_       | NM_002839    | NP_002830    | P23468  | PTPRD_HUMAN | III 2. Extracellular (Potentia  | 22 | TCGGGGCACTG   | 0.507 |
| - | 6  | 1501      | se_Mutation_p.G3i    | NM_017637    | NP_060107    | Q6ZN30  | BNC2_HUMAN  | C2H2-type 1.                    | 3  | AGAGTACCTTTG  | 0.433 |
| + | 3  | 403       | ite_p.K4_splice St   | NM_003026    | NP_003017    | Q99962  | SH3G2_HUMAN |                                 | 1  | TTTCAGAAAGTC  | 0.383 |
| - | 14 | 1847      | nl.1_Missense_Mu     | NM_017645    | NP_060115    | Q7Z4H7  | HAUS6_HUMAN |                                 | 2  | AAATGGATCAC   | 0.313 |
| + | 18 | 2446      | '93S DENND4C_u       | NM_017925    | NP_060395    | Q5VZ89  | DEN4C_HUMAN |                                 | 2  | ATTTTCTGAG    | 0.393 |
| - | 1  | 5395      |                      | NM_153809    | NP_722516    | Q8IZX4  | TAF1L_HUMAN |                                 | 26 | TTCTCCTTCAG   | 0.473 |
| + | 8  | 815       |                      | NM_012144    | NP_036276    | Q9UI46  | DNAI1_HUMAN |                                 | 0  | CTTTAGGATCG   | 0.502 |
| - | 4  | 1773      |                      | NM_003028    | NP_003019    | Q15464  | SHB_HUMAN   | with LAT, FAK1, JAK1 and        | 3  | GGACGGCAGG    | 0.552 |
| + | 1  | 526       | 42421_uc004aed.1_RNA |              |              |         |             |                                 | 0  | AGCCCAATCTG   | 0.607 |
| + | 10 | 1799      | e_Mutation_p.A421    | NM_006200    | NP_006191    | Q92824  | PCSK5_HUMAN | Catalytic.                      | 3  | CCCGTGCGGGA   | 0.398 |
| + | 14 | 2426      | e_Mutation_p.E63i    | NM_006200    | NP_006191    | Q92824  | PCSK5_HUMAN |                                 | 3  | GCACAGAGGAT   | 0.478 |
| + | 19 | 3029_3030 | :SK5_uc004akb.2_     | NM_006200    | NP_006191    | Q92824  | PCSK5_HUMAN | I (Cys-rich motif).             | 3  | AGAATGGATACA  | 0.426 |
| + | 3  | 1168      | akf.3_Missense_l     | NM_001490    | NP_001481    | Q02742  | GCNT1_HUMAN | tial). Catalytic (By similarity | 0  | GCTTCTCCACT   | 0.453 |
| - | 8  | 4085      |                      | NM_015225    | NP_056040    | Q8WUY3  | PRUN2_HUMAN |                                 | 0  | TCCATCGCCATC  | 0.542 |
| - | 5  | 692       | akn.2_Missense_l     | NM_015225    | NP_056040    | Q8WUY3  | PRUN2_HUMAN |                                 | 0  | AAATTCCTCCT   | 0.433 |
| + | 8  | 870       | ikq.3_Missense_M     | NM_033305    | NP_150648    | Q96RL7  | VP13A_HUMAN |                                 | 10 | TGGTTCGTAAG   | 0.323 |
| - | 6  | 692       | mr.1_Missense_M      | NM_174938    | NP_777598    | A2A2Y4  | FRMD3_HUMAN | FERM.                           | 2  | AGGATCGTAATC  | 0.388 |
| - | 4  | 1403      | i_p.T420I KIF27_u    | NM_017576    | NP_060046    | Q86VH2  | KIF27_HUMAN |                                 | 5  | GGAAGGTAAG    | 0.448 |
| + | 15 | 2221      | p.P575S PHF2_uc      | NM_005392    | NP_005383    | O75151  | PHF2_HUMAN  |                                 | 1  | AGTTTCCCATC   | 0.597 |
| - | 1  | 79        | msc.1_Missense_      | NM_000197    | NP_000188    | P37058  | DHB3_HUMAN  |                                 | 0  | TGTGAGGATGA   | 0.547 |
| - | 2  | 252_253   | uc004awu.2_5'UT      | NM_001333    | NP_001324    | O60911  | CATL2_HUMAN |                                 | 0  | ATTTTGAACAG   | 0.431 |
| + | 1  | 1060      |                      | NM_004473    | NP_004464    | O00358  | FOXE1_HUMAN | Fork-head.                      | 0  | ACGCGGAGGAC   | 0.647 |
| - | 4  | 617_618   | ion_p.P200L TRIM     | NM_033220    | NP_150089    | Q14142  | TRI14_HUMAN |                                 | 1  | GCACGGGATGC   | 0.594 |
| + | 7  | 1282      | c.2_Missense_Mu      | NM_207299    | NP_997182    | Q8TBJ4  | LPPR1_HUMAN |                                 | 0  | ATCCCGTGGA    | 0.488 |
| - | 2  | 1691      | ibq.1_Missense_M     | NM_133445    | NP_597702    | Q8TCU5  | NMD3A_HUMAN | ellular (Potential).            | 7  | TCAGTTCTCCA   | 0.512 |
| + | 4  | 324       |                      | NM_001340    | NP_001331    | Q14093  | CYLC2_HUMAN | VA repeats of K-K-X.            | 1  | AAATTTCTGAGAC | 0.393 |
| + | 1  | 578       |                      | NM_001004485 | NP_001004485 | Q8NGS4  | O13F1_HUMAN | ellular (Potential).            | 3  | CACCTCCCTGG   | 0.438 |
| - | 1  | 842       |                      | NM_001001956 | NP_001001956 | Q8NGT0  | O13C9_HUMAN | Name=7; (Potential).            | 0  | AACATGGATATA  | 0.393 |
| - | 2  | 167       | lwl.1_Missense_l     | NM_001003936 | NP_001003936 | Q6A555  | TXND8_HUMAN | Thioredoxin.                    | 0  | AAACAGAAACA   | 0.353 |
| + | 12 | 1267      | e_p.E357_splice Zl   | NM_133374    | NP_588615    | Q5T7W0  | ZN618_HUMAN |                                 | 0  | CAGCGGTGAGT   | 0.612 |
| - | 13 | 3005      | JA_uc004bir.3_Mis    | NM_030767    | NP_110394    | Q72591  | AKNA_HUMAN  |                                 | 6  | CAAAGGCTGG    | 0.622 |
| - | 15 | 4867      | C_uc010mvf.2_Int     | NM_002160    | NP_002151    | P24821  | TENA_HUMAN  | nectin type-III 10.             | 7  | AATCAGTACTAG  | 0.458 |

rs141617852

rs138516740

|   |    |           |                   |              |              |        |             |                            |     |                  |       |             |
|---|----|-----------|-------------------|--------------|--------------|--------|-------------|----------------------------|-----|------------------|-------|-------------|
| - | 9  | 1807      | p.G569D ASTN2_u   | NM_198187    | NP_937830    | O75129 | ASTN2_HUMAN | cellular (Potential).      | 9   | TCATAGCCCCTC     | 0.493 |             |
| - | 8  | 1654      | p.A239V TRAF1_u   | NM_005658    | NP_005649    | Q13077 | TRAF1_HUMAN | MATH.                      | 3   | GGAAGCGTCA       | 0.602 |             |
| - | 5  | 1118      | _p.M60I TRAF1_u   | NM_005658    | NP_005649    | Q13077 | TRAF1_HUMAN |                            | 3   | TCCTTCATGAAC     | 0.627 |             |
| - | 1  | 510_511   |                   | NM_012363    | NP_036495    | Q8NGS0 | OR1N1_HUMAN | cellular (Potential).      | 3   | AATTTCCCAGT      | 0.5   |             |
| + | 15 | 2109      | il.3_RNA RABGAF   | NM_012197    | NP_036329    | Q9Y3P9 | RBGP1_HUMAN | ab-GAP TBC.                | 5   | TGCTCCTTCTC      | 0.413 |             |
| + | 52 | 6966      | _p.H2265Y SPTA    | NM_003127    | NP_003118    | Q13813 | SPTA2_HUMAN | Spectrin 23.               | 10  | CGGAGCACAGC      | 0.632 |             |
| + | 2  | 643       |                   | NM_006059    | NP_006050    | Q9Y6N6 | LAMC3_HUMAN | inin N-terminal.           | 3   | CCCCGGCGAGG      | 0.706 |             |
| + | 2  | 870       |                   | NM_032536    | NP_115925    | Q96CW9 | NTNG2_HUMAN |                            | 0   | AGGGCCCCACC      | 0.617 |             |
| - | 10 | 2516      | p.R397Q SETX_uc   | NM_015046    | NP_055861    | Q7Z333 | SETX_HUMAN  |                            | 3   | TTTTTCGTTTTG     | 0.348 |             |
| + | 28 | 4493_4494 | ITS13_uc004cdz.3  | NM_139025    | NP_620594    | Q76LX8 | ATS13_HUMAN | CUB 2.                     | 6   | FGGGACCAGGG      | 0.624 |             |
| + | 9  | 1443      |                   | NM_000787    | NP_000778    | P09172 | DOPO_HUMAN  |                            | 4   | CAGTGGTAAGT      | 0.587 | rs75075472  |
| - | 15 | 4295      | _p.P1322L CAMSAF  | NM_015447    | NP_056262    | Q5T5Y3 | CAMP1_HUMAN |                            | 3   | GATGGGCAGG       | 0.627 |             |
| - | 3  | 443       | SEC16A_uc010nb    | NM_014866    | NP_055681    | O15027 | SC16A_HUMAN |                            | 0   | GGCAAGTTGTC      | 0.567 |             |
| - | 12 | 2225      | clq.1_Missense_M  | NM_013366    | NP_037498    | Q9UJX6 | ANC2_HUMAN  |                            | 1   | CTCCTCCTCAA      | 0.662 |             |
| - | 6  | 1308      | clq.1_Missense_M  | NM_013366    | NP_037498    | Q9UJX6 | ANC2_HUMAN  |                            | 1   | TGGAAGGGTCC      | 0.622 |             |
| - | 8  | 1332      | v.1_intron ENTPDE | NM_001033113 | NP_001028285 | Q5MY95 | ENTP8_HUMAN | cellular (Potential).      | 1   | AGGGCCTCTGG      | 0.632 |             |
| + | 2  | 782       | pi.2_Missense_Mt  | NM_000451    | NP_000442    | O15266 | SHOX_HUMAN  |                            | 0   | AGAAGGATTCC      | 0.617 |             |
| + | 3  | 380       | _p.G79R ASMT_u    | NM_004043    | NP_004034    | P46597 | HIOM_HUMAN  |                            | 1   | CGAGGGGAGGA      | 0.493 |             |
| + | 6  | 593       | p.E150K ASMT_u    | NM_004043    | NP_004034    | P46597 | HIOM_HUMAN  |                            | 1   | GGTCCGAGGGC      | 0.567 | rs147969184 |
| - | 5  | 557       | RSD_uc004cra.1_I  | NM_001669    | NP_001660    | P51689 | ARSD_HUMAN  |                            | 0   | GCAGTGATCCC      | 0.557 |             |
| - | 5  | 3806      |                   | NM_015419    | NP_056234    | Q9NR99 | MXRA5_HUMAN |                            | 8   | CATTTCCAACTC     | 0.463 |             |
| - | 2  | 743       | Indi.2_Missense_I | NM_181332    | NP_851849    | Q8N0W4 | NLGNX_HUMAN | cellular (Potential).      | 4   | TGGGGGGTGAG      | 0.567 |             |
| + | 3  | 754       |                   | NM_013452    | NP_038480    | Q9H320 | VCX1_HUMAN  | of L-S-Q-E-S- [EQ]-V-E-E-I | 0   | AGAGCGAGATG      | 0.577 |             |
| + | 4  | 1637      |                   | NM_001649    | NP_001640    | Q13796 | SHRM2_HUMAN |                            | 8   | GAGCCCACGCC      | 0.682 |             |
| + | 2  | 1482      | d.2_Missense_Mu   | NM_138636    | NP_619542    | Q9NR97 | TLR8_HUMAN  | cellular (Potential).      | 7   | TCACCCGTCTT      | 0.388 |             |
| + | 2  | 2823      | d.2_Missense_Mu   | NM_138636    | NP_619542    | Q9NR97 | TLR8_HUMAN  | mic (Potential). TIR.      | 7   | TAGAGGAGAGG      | 0.438 |             |
| + | 5  | 737       | _p.A166V EGFL6_u  | NM_015507    | NP_056322    | Q8IUX8 | EGFL6_HUMAN | EGF-like 3.                | 2   | CCTGGCCCCAA      | 0.493 |             |
| + | 9  | 1212      | p.E337K PHEX_uc   | NM_000444    | NP_000435    | P78562 | PHEX_HUMAN  | cellular (Potential).      | 3   | CCTCCGAGAAT      | 0.458 |             |
| + | 17 | 1921      | p.A573V PHEX_uc   | NM_000444    | NP_000435    | P78562 | PHEX_HUMAN  | cellular (Potential).      | 3   | TGGTGCTATAGC     | 0.323 |             |
| + | 3  | 201       | se_Mutation_p.E6E | NM_016937    | NP_058633    | P09884 | DPOLA_HUMAN |                            | 3   | TATGAAGAAGTTC    | 0.443 |             |
| - | 3  | 710       |                   | NM_025159    | NP_079435    | Q9HAI6 | CX021_HUMAN |                            | 1   | CAGAGGGAAAA      | 0.428 |             |
| - | 1  | 1742      |                   | NM_203408    | NP_981953    | Q5JRC9 | FA47A_HUMAN |                            | 5   | GCTCCGAGAAT      | 0.522 |             |
| + | 7  | 1011      |                   | NM_173695    | NP_775966    | Q8N9S7 | CX059_HUMAN |                            | 1   | GCATGGACAGA      | 0.333 |             |
| - | 4  | 550       | X_uc011mkh.1_Ir   | NM_006307    | NP_006298    | P78539 | SRPX_HUMAN  | Sushi 2.                   | 0   | GCTCCCCTTTC      | 0.527 |             |
| - | 19 | 2489      | a.2_RNA RPGR_u    | NM_000328    | NP_000319    | Q92834 | RPGR_HUMAN  |                            | 1   | CCTATGGATTTT     | 0.368 |             |
| + | 3  | 1187      | se_Mutation_p.WK  | NM_001097579 | NP_001091048 | Q9UPC5 | GPR34_HUMAN | cellular (Potential).      | 1   | CTACTGGAAAGA     | 0.343 |             |
| - | 13 | 988       | p.S208F GRIPAP1   | NM_020137    | NP_064522    | Q4V328 | GRAP1_HUMAN | Potential.                 | 3   | GGATGGATACCT     | 0.512 |             |
| - | 5  | 1115      | e_Mutation_p.P18  | NM_006521    | NP_006512    | P19532 | TFE3_HUMAN  |                            | 197 | GCTGGGGAGCT      | 0.507 |             |
| + | 10 | 1936      | nil.2_Missense_M  | NM_033626    | NP_296375    | Q96HB5 | CC120_HUMAN | Pro-rich.                  | 1   | TCTCCCGCCGG      | 0.697 |             |
| - | 4  | 491       |                   | NM_015698    | NP_056513    | Q92917 | GPKOW_HUMAN |                            | 2   | GGGGACCGCCT      | 0.582 |             |
| - | 9  | 1380      | nmw.1_Missense_   | NM_006150    | NP_006141    | O43900 | PRIC3_HUMAN |                            | 1   | GGACTCTGGGG      | 0.682 |             |
| - | 24 | 3302      |                   | NM_001013742 | NP_001013764 | Q5KSL6 | DGKK_HUMAN  |                            | 2   | GAGCTAAGTGC      | 0.502 |             |
| - | 2  | 224       | sw.2_Missense_Mt  | NM_015107    | NP_055922    | Q9UPP1 | PHF8_HUMAN  | PHD-type.                  | 3   | CACATCGTAAG      | 0.637 |             |
| + | 1  | 222       |                   | NM_174912    | NP_777572    | Q6GMR7 | FAAH2_HUMAN | ical; (Potential).         | 3   | TAGTAGGCCGAG     | 0.562 |             |
| - | 7  | 867       | _p.R267C MTMR8    | NM_017677    | NP_060147    | Q96EF0 | MTMR8_HUMAN | ularin phosphatase.        | 4   | GAAGCGAATGT      | 0.488 |             |
| - | 12 | 1816      | n_p.E523K LAS1L   | NM_031206    | NP_112483    | Q9Y4W2 | LAS1L_HUMAN |                            | 4   | ttcttctctctctTAC | 0.338 |             |
| + | 2  | 259       | N_uc010nkp.1_R    | NM_002444    | NP_002435    | P26038 | MOES_HUMAN  | FERM.                      | 10  | CCATCCAGCCC      | 0.517 |             |



|   |    |           |                   |              |              |         |             |                                 |    |                 |       |             |
|---|----|-----------|-------------------|--------------|--------------|---------|-------------|---------------------------------|----|-----------------|-------|-------------|
| + | 17 | 2908      | kr.2_Missense_Mu  | NM_138737    | NP_620074    | Q9BQS7  | HEPH_HUMAN  | potential). Plastocyanin-like f | 9  | 'CCCAGGATCCA'   | 0.413 |             |
| + | 3  | 2950      | R_uc011mpf.1_Mi   | NM_000044    | NP_000035    | P10275  | ANDR_HUMAN  | hipk3 (By similarity). Nuc      | 8  | AAAATTGTCCAT'   | 0.333 |             |
| + | 1  | 846_847   |                   | NM_207320    | NP_997203    | Q7L8S5  | OTU6A_HUMAN | OTU.                            | 2  | AACTCCGTGAC     | 0.678 |             |
| + | 3  | 333       |                   | NM_198512    | NP_940914    | Q6ZPD8  | DG2L6_HUMAN |                                 | 1  | CCCTATGGAAGT.   | 0.552 |             |
| - | 1  | 748       |                   | NM_002565    | NP_002556    | P51582  | P2RY4_HUMAN | cellular (Potential).           | 1  | AGGCCGAGTGG     | 0.572 |             |
| + | 13 | 2066      | yz.2_Missense_M   | NM_005120    | NP_005111    | Q93074  | MED12_HUMAN |                                 | 4  | 'GAGGGGACCTT    | 0.537 |             |
| + | 1  | 193       | TAF1_uc004dzt.3   | NM_138923    | NP_620278    | P21675  | TAF1_HUMAN  | protein kinase 1.               | 17 | 'TCAATGGAGCC'   | 0.617 |             |
| + | 6  | 978       | TAF1_uc004dzt.3   | NM_138923    | NP_620278    | P21675  | TAF1_HUMAN  | protein kinase 1.               | 17 | 'GATGATGAAGT'   | 0.423 | rs139324935 |
| + | 8  | 1070      | RN1_uc011mpt.1_   | NM_052957    | NP_443189    | Q96QF7  | ACRC_HUMAN  | Asp/Ser-rich.                   | 3  | 'TCCCAGCAGACA   | 0.493 |             |
| - | 1  | 1205      | \G4_uc004eaj.1_F  | NM_001024455 | NP_001019626 | Q5HYW3  | RGAG4_HUMAN |                                 | 3  | 'GAATTCGGACA'   | 0.498 |             |
| - | 22 | 2756      | _p.E819K PHKA1_   | NM_002637    | NP_002628    | P46020  | KPB1_HUMAN  | lin-binding (Potential).        | 4  | GAATTTCTCCCA'   | 0.413 |             |
| - | 21 | 2538      | _p.S746F PHKA1_   | NM_002637    | NP_002628    | P46020  | KPB1_HUMAN  |                                 | 4  | 'GAACAGAGGGA    | 0.388 |             |
| - | 21 | 2534      | _p.P745S PHKA1_   | NM_002637    | NP_002628    | P46020  | KPB1_HUMAN  |                                 | 4  | 'AGAGGGAACCT    | 0.388 |             |
| + | 1  | 331       |                   | NM_203303    | NP_976048    | Q8WWV36 | ZCH13_HUMAN |                                 | 0  | 'TAAACGAGAGAC'  | 0.502 | rs142122114 |
| - | 9  | 1788      | ocr.2_Missense_Mi | NM_000489    | NP_000480    | P46100  | ATRX_HUMAN  |                                 | 30 | 'GGAACAGACACA'  | 0.398 |             |
| + | 5  | 1611      | ow.2_Missense_Mi  | NM_000052    | NP_000043    | Q04656  | ATP7A_HUMAN | plasmic (Potential).            | 0  | 'GGAAGGAAAGA    | 0.418 |             |
| + | 5  | 380       | edm.1_Missense_I  | NM_152630    | NP_689843    | Q8NEK8  | FA46D_HUMAN |                                 | 2  | 'TTATAACACTGC   | 0.358 |             |
| - | 18 | 1821      | _p.P582S RPS6KA   | NM_014496    | NP_055311    | Q9UK32  | KS6A6_HUMAN | protein kinase 2.               | 8  | 'GCATGGAGTTA'   | 0.363 |             |
| - | 7  | 806       | ina.1_Missense_M  | NM_003270    | NP_003261    | O43657  | TSN6_HUMAN  | plasmic (Potential).            | 1  | 'GACACGAGAGAC'  | 0.388 | rs149522304 |
| + | 5  | 733       | rh.1_Missense_Mi  | NM_001939    | NP_001930    | Q13474  | DRP2_HUMAN  | Spectrin 1.                     | 2  | 'AAAAGGATGAG'   | 0.537 |             |
| - | 19 | 2476      | eja.3_Missense_M  | NM_001099686 | NP_001093156 | Q9GZY0  | NXF2_HUMAN  | RRM.                            | 1  | 'GTAGGGCGCAG    | 0.483 |             |
| + | 5  | 3170      | o.R790K GPRASP    | NM_014710    | NP_055525    | Q5JY77  | GASP1_HUMAN | Glu-rich.                       | 2  | 'GGACAGACTAG.   | 0.512 |             |
| + | 4  | 3118      | P2_uc004ejm.2_    | NM_138437    | NP_612446    | Q96D09  | GASP2_HUMAN |                                 | 1  | 'TGGTTCTGAAG'   | 0.418 |             |
| + | 1  | 745       |                   | NM_001031834 | NP_001027004 | P0C0E4  | RB40L_HUMAN |                                 | 2  | 'GAATGCCAGGA    | 0.577 |             |
| - | 2  | 356       |                   | NM_153448    | NP_703149    | Q8N693  | ESX1_HUMAN  |                                 | 1  | 'CGGCTCCTCCT    | 0.716 |             |
| - | 2  | 218_219   |                   | NM_153448    | NP_703149    | Q8N693  | ESX1_HUMAN  |                                 | 1  | 'CTGTTCCGTACT   | 0.594 | rs76590545  |
| - | 16 | 2786      | nse_Mutation_p.R  | NM_024657    | NP_078933    | Q8TE76  | MORC4_HUMAN | Potential.                      | 1  | 'TGGTTCTTTCC'   | 0.488 |             |
| + | 4  | 634       | sk.1_Missense_Mi  | NM_182607    | NP_872413    | Q86XK7  | VSIG1_HUMAN | potential). Ig-like C2-type 2.  | 2  | 'CTATTTCCCTTTC  | 0.438 |             |
| + | 7  | 1165      | sk.1_Missense_Mi  | NM_182607    | NP_872413    | Q86XK7  | VSIG1_HUMAN | plasmic (Potential).            | 2  | 'cccagGATCAGAC  | 0.378 |             |
| - | 35 | 3519      | sn.1_Missense_M   | NM_001847    | NP_001838    | Q14031  | CO4A6_HUMAN | le-helical region.              | 8  | 'GTTCTCCTCTC'   | 0.493 |             |
| - | 23 | 1976      | sn.1_Missense_M   | NM_001847    | NP_001838    | Q14031  | CO4A6_HUMAN | le-helical region.              | 8  | 'AAGTCTCGGTA.   | 0.547 |             |
| - | 22 | 1791      | sn.1_Missense_M   | NM_001847    | NP_001838    | Q14031  | CO4A6_HUMAN | le-helical region.              | 8  | 'AGCCGAATCA'    | 0.547 |             |
| + | 7  | 588       | so.1_Missense_M   | NM_033380    | NP_203699    | P29400  | CO4A5_HUMAN | le-helical region.              | 4  | 'CTAGGGAGAACC'  | 0.363 |             |
| + | 33 | 3029      | _p.K943* COL4A5   | NM_033380    | NP_203699    | P29400  | CO4A5_HUMAN | le-helical region.              | 4  | 'GTAGTAAAGGAC'  | 0.478 |             |
| - | 4  | 1315      | Y2F_uc011msq.1_   | NM_001522    | NP_001513    | P51841  | GUC2F_HUMAN | cellular (Potential).           | 8  | 'CAACGGTGAAA    | 0.408 |             |
| - | 4  | 1167_1168 | _p.A251V DCX_uc   | NM_000555    | NP_000546    | O43602  | DCX_HUMAN   | doublecortin 2.                 | 4  | 'CCACAGGCAAT'   | 0.401 |             |
| + | 14 | 1926      |                   | NM_007231    | NP_009162    | Q9UN76  | S6A14_HUMAN | plasmic (Potential).            | 3  | 'GGGGTCCATACC'  | 0.403 |             |
| - | 2  | 213       | LHL13_uc011mtp.   | NM_033495    | NP_277030    | Q9P2N7  | KLH13_HUMAN |                                 | 2  | 'CATTTTCGCTGC'  | 0.433 |             |
| + | 18 | 2910      | ntr.1_Missense_M  | NM_019045    | NP_061918    | Q5JSH3  | WDR44_HUMAN |                                 | 5  | 'AGAGATCGTAAT'  | 0.353 |             |
| + | 2  | 270       |                   | NM_144658    | NP_653259    | Q5JSL3  | DOC11_HUMAN | activated CDC42 (By similari    | 3  | 'CCAATGGAAGA    | 0.398 |             |
| + | 28 | 3140      | sq.2_Missense_M   | NM_144658    | NP_653259    | Q5JSL3  | DOC11_HUMAN |                                 | 3  | 'ACTATAGTTTGGC' | 0.408 |             |
| + | 4  | 1181      | RF3_uc004eqy.2_   | NM_001031855 | NP_001027026 | Q496Y0  | LONF3_HUMAN |                                 | 2  | 'GAAGGGGGGAT'   | 0.532 |             |
| - | 3  | 446       | sa.1_Missense_Mi  | NM_080632    | NP_542199    | Q9BZ17  | REN3B_HUMAN | C core. Necessary for inter     | 3  | 'CTCACCTTTATT'  | 0.358 |             |
| + | 4  | 398       | n_p.S87L AKAP14   | NM_178813    | NP_848928    | Q86UN6  | AKA28_HUMAN |                                 | 0  | 'ATTTTTCGGTAAC' | 0.413 |             |
| - | 12 | 2297      | _p.P744S ODZ1_u   | NM_014253    | NP_055068    | Q9UKZ4  | TEN1_HUMAN  | Extracellular (Potential).      | 23 | 'TCCAGGGCTAC.   | 0.458 |             |
| - | 1  | 846       |                   | NM_138289    | NP_612146    | Q8TDG2  | ACTT1_HUMAN |                                 | 5  | 'ACTTCTCTTGA'   | 0.537 |             |
| + | 15 | 1759      | ur.2_Missense_Mu  | NM_000276    | NP_000267    | Q01968  | OCRL_HUMAN  |                                 | 4  | 'CTCTCCATATTG'  | 0.378 |             |

|   |    |           |                    |              |              |        |             |                               |    |                   |       |                              |
|---|----|-----------|--------------------|--------------|--------------|--------|-------------|-------------------------------|----|-------------------|-------|------------------------------|
| - | 4  | 719       | leux.1_Missense_   | NM_001008222 | NP_001008223 | Q9Y397 | ZDHC9_HUMAN | lasmic (Potential).           | 1  | :CTGGGGCACC       | 0.468 |                              |
| - | 8  | 1484      | e.3_Missense_Mu    | NM_001421    | NP_001412    | Q99607 | ELF4_HUMAN  |                               | 1  | :CGGTCCCAATT      | 0.587 |                              |
| + | 5  | 1051      | lewb.2_Missense_   | NM_144967    | NP_659404    | Q6ZRI8 | RHG36_HUMAN | Rho-GAP.                      | 3  | :AAATCCCCCAG      | 0.458 |                              |
| - | 16 | 3407      | o.E1051K IGSF1_u   | NM_001555    | NP_001546    | Q8N6C5 | IGSF1_HUMAN | otential). lg-like C2-type 10 | 5  | :GAGTTCACAGG      | 0.498 |                              |
| - | 1  | 107       | nr1.1_RNA MBNL3    | NM_018388    | NP_060858    | Q9NUK0 | MBNL3_HUMAN |                               | 0  | :ATCACGAATCAC     | 0.398 |                              |
| - | 6  | 2148      | vf.1_Missense_Mt   | NM_031907    | NP_114113    | Q9BXU7 | UBP26_HUMAN |                               | 8  | :CAAGGGAAGAG      | 0.378 |                              |
| - | 4  | 611       | vw.1_Missense_Iv   | NM_173470    | NP_775741    | Q8N4V1 | MMGT1_HUMAN | lasmic (Potential).           | 0  | :TATCCGAAGGC      | 0.358 | rs150859420                  |
| + | 6  | 6097      | o.A1731T GPR112    | NM_153834    | NP_722576    | Q8IZF6 | GP112_HUMAN | ellular (Potential).          | 12 | :TCATGGCAATG      | 0.423 |                              |
| + | 4  | 914       | EC1_uc010nsl.1_l   | NM_005462    | NP_005453    | O60732 | MAGC1_HUMAN |                               | 4  | :TCCACTTTATTG     | 0.502 |                              |
| + | 4  | 1517      | EC1_uc010nsl.1_l   | NM_005462    | NP_005453    | O60732 | MAGC1_HUMAN |                               | 4  | :GATTCCTATGA      | 0.478 |                              |
| + | 5  | 398       | n.2_Intron MAGEf   | NM_005366    | NP_005357    | P43364 | MAGAB_HUMAN |                               | 2  | :ATTTCCCACAGT     | 0.532 |                              |
| + | 5  | 1328_1329 | i.2_Intron MAGEA   | NM_005366    | NP_005357    | P43364 | MAGAB_HUMAN | MAGE.                         | 2  | :TGGGAGGGATCC     | 0.545 |                              |
| + | 2  | 988       | : GPR50_uc011my    | NM_004224    | NP_004215    | Q13585 | MTR1L_HUMAN | Name=7; (Potential).          | 4  | :CCTACTTCAACA     | 0.502 |                              |
| - | 5  | 994       | 4ff.2_Missense_Iv  | NM_001011543 | NP_001011543 | P43363 | MAGAA_HUMAN | MAGE.                         | 0  | :AGTGGGATCCA      | 0.493 |                              |
| + | 9  | 1488_1489 |                    | NM_018558    | NP_061028    | Q9UN88 | GBRT_HUMAN  |                               | 3  | :CCCATGGCCATC     | 0.55  |                              |
| + | 3  | 567       | e_Mutation_p.R12   | NM_005363    | NP_005354    | P43360 | MAGA6_HUMAN | MAGE.                         | 0  | :AGTATCGAGCC      | 0.527 |                              |
| - | 3  | 1057      | AGEA12_uc004fgr    | NM_005367    | NP_005358    | P43365 | MAGAC_HUMAN | MAGE.                         | 1  | :GTCTCCTCCTC      | 0.562 |                              |
| - | 5  | 531       | fgr.2_Missense_M   | NM_004344    | NP_004335    | P41208 | CETN2_HUMAN | EF-hand 4.                    | 0  | :CAGGAACTCTT      | 0.393 |                              |
| - | 21 | 5897      |                    | NM_005334    | NP_005325    | P51610 | HCFC1_HUMAN |                               | 2  | :CCAGGGACTCG      | 0.647 |                              |
| - | 9  | 1978      |                    | NM_005334    | NP_005325    | P51610 | HCFC1_HUMAN |                               | 2  | :AGCAGGGACAC      | 0.607 |                              |
| - | 9  | 1510      | u.1_Nonsense_Mt    | NM_001110556 | NP_001104026 | P21333 | FLNA_HUMAN  | Filamin 2.                    | 6  | :GTCCTGGATCA      | 0.682 |                              |
| + | 6  | 1686      |                    | NM_017514    | NP_059984    | P51805 | PLXA3_HUMAN | ellular (Potential).          | 3  | :CCGGGGACCCG      | 0.711 |                              |
| + | 10 | 2196      |                    | NM_017514    | NP_059984    | P51805 | PLXA3_HUMAN | ellular (Potential).          | 3  | :AGGAGGGCAGG      | 0.667 |                              |
| + | 21 | 3855      |                    | NM_017514    | NP_059984    | P51805 | PLXA3_HUMAN | ical; (Potential).            | 3  | :CGGGGGTGGC       | 0.677 |                              |
| - | 10 | 1724      | z.1_Frame_Shift    | NM_012102    | NP_036234    | Q9P2R6 | RERE_HUMAN  | ELM2. NA                      | 2  | :CATCTGGAGAA      | 0.433 |                              |
| - | 13 | 2591      | ie_Shift_Del_p.Q5  | NM_003819    | NP_003810    | Q13310 | PABP4_HUMAN | PABC. NA                      | 0  | :TTCCTGGGGGG      | 0.602 |                              |
| + | 1  | 136_137   |                    | NM_001008740 | NP_001008740 | Q7Z6W1 | TMCO2_HUMAN | NA                            | 1  | :TAGAGTCTCTCT     | 0.406 |                              |
| - | 2  | 659_661   | h.2_In_Frame_Del   | NM_014849    | NP_055664    | Q7L0J3 | SV2A_HUMAN  | Interaction v NA              | 7  | :GGAAGTCATCAT     | 0.542 |                              |
| + | 1  | 156_161   |                    | NM_178354    | NP_848131    | Q5T754 | LCE1F_HUMAN | NA                            | 0  | :CTGTGGCTCCAC     | 0.485 |                              |
| - | 7  | 811       | ohj.1_Frame_Shift  | NM_005998    | NP_005989    | P49368 | TCPG_HUMAN  | NA                            | 2  | :TGCATATTTTTT     | 0.393 |                              |
| + | 1  | 259       |                    | NM_001004478 | NP_001004478 | Q8NGY1 | O10Z1_HUMAN | ellular (Pote NA              | 2  | :TGGCTGGGGGG      | 0.552 |                              |
| + | 8  | 1288_1290 | 1AP_uc010pks.1_l   | NM_014697    | NP_055512    | O75052 | CAPON_HUMAN | Poly-Gln. NA                  | 3  | :ctctccagcagcAGC  | 0.512 |                              |
| + | 4  | 635_646   |                    | NM_001104548 | NP_001098018 |        |             | NA                            | 0  | :jTagcagcagcagca  | 0.283 | 30217;rs72359595;rs150848171 |
| - | 19 | 2298_2299 | p.C122fs DIP2C_u   | NM_014974    | NP_055789    | Q9Y2E4 | DIP2C_HUMAN | NA                            | 7  | :AACTGCACACAC     | 0.54  |                              |
| - | 25 | 4223      | o.N1311fs NUP98_   | NM_016320    | NP_057404    | P52948 | NUP98_HUMAN | NA                            | 12 | :GGCTGTTTTTTT     | 0.512 |                              |
| - | 8  | 2041_2043 | ime_Del_p.D596d    | NM_015213    | NP_056028    | Q6IQ26 | DEN5A_HUMAN | Poly-Asp. NA                  | 1  | :TCTTTATCATCAT    | 0.453 |                              |
| + | 6  | 1274      | plice_Site AMPD3_  | NM_001025389 | NP_001020560 | Q01432 | AMPD3_HUMAN | NA                            | 2  | :AAAGGTGCCTT      | 0.541 |                              |
| + | 3  | 479       | alice NDUVF1_uc0   | NM_007103    | NP_009034    | P49821 | NDUV1_HUMAN | NA                            | 1  | :GGCAGGTGTGT      | 0.599 |                              |
| - | 6  | 1081_1083 | ne_Del_p.D183del   | NM_002576    | NP_002567    | Q13153 | PAK1_HUMAN  | ction with CF NA              | 4  | :GGGTAGcatcatc    | 0.429 |                              |
| - | 4  | 519_521   | o.K112del CHD4_u   | NM_001273    | NP_001264    | Q14839 | CHD4_HUMAN  | Poly-Lys. NA                  | 2  | :CAAGCTTCTTC      | 0.468 |                              |
| - | 12 | 4127_4129 | w.2_In_Frame_De    | NM_004719    | NP_004710    | Q99590 | SCAFB_HUMAN | Pro-rich. NA                  | 0  | :AGGGGTGGTG       | 0.483 |                              |
| - | 6  | 1097      | me_Shift_Del_p.R:  | NM_198521    | NP_940923    | Q96LP6 | CL042_HUMAN | NA                            | 2  | :TGGGCGGGGGC      | 0.587 |                              |
| + | 3  | 353_355   | ne_Del_p.D88del F  | NM_018559    | NP_061029    | Q8IXQ4 | K1704_HUMAN | Poly-Asp. NA                  | 2  | :atgatgacgatgatg  | 0.286 | rs138421508                  |
| - | 14 | 3949_3950 | C3H13_uc001vas.    | NM_015070    | NP_055885    | Q5T200 | ZC3HD_HUMAN | Potential. NA                 | 2  | :gatctctctctctctc | 0.178 |                              |
| - | 22 | 3270      | hift_Del_p.K282fsj | NM_198968    | NP_945319    | Q86YF9 | DZIP1_HUMAN | NA                            | 2  | :CCAGATTTTTTT     | 0.433 |                              |
| + | 2  | 609       | 3C_uc001wss.2_5    | NM_014672    | NP_055487    | O15091 | MRRP3_HUMAN | NA                            | 0  | :TCCTCATTTTTT     | 0.423 |                              |
| + | 20 | 3443_3444 | xdq.2_Frame_Shif   | NM_002892    | NP_002883    | P29374 | ARI4A_HUMAN | NA                            | 6  | :TACAAGAGAGA      | 0.381 |                              |

|   |    |           |                    |              |              |        |             |                 |    |     |                   |       |                      |
|---|----|-----------|--------------------|--------------|--------------|--------|-------------|-----------------|----|-----|-------------------|-------|----------------------|
| + | 12 | 1371_1372 | .3_In_Frame_Ins_   | NM_030943    | NP_112205    | Q9BXJ7 | AMNLS_HUMAN | lasmic (Pote    | NA | 0   | CTGTTCCGCCGGC     | 0.713 | rs36040113           |
| - | 13 | 1716      | bf.1_Frame_Shift   | NM_182758    | NP_877435    | Q3MJ13 | WDR72_HUMAN | WD 8.           | NA | 2   | ACAGGAAAAAG       | 0.463 |                      |
| + | 2  | 2259      | arh.2_Frame_Shift  | NM_015322    | NP_056137    | Q9UK73 | FEM1B_HUMAN | ANK 8.          | NA | 0   | CAGTGATTTTTTC     | 0.463 |                      |
| + | 3  | 434_436   |                    | NM_001030005 | NP_001025176 | Q8VWH0 | CPLX3_HUMAN |                 | NA | 0   | CACAGAGGAGG       | 0.616 |                      |
| + | 7  | 1037_1039 | del K238del UBN1_u | NM_001079514 | NP_001072982 | Q9NPG3 | UBN1_HUMAN  | Lys-rich.       | NA | 2   | AAGGAGAAGAA       | 0.453 |                      |
| + | 17 | 1308      | ime_Shift_Del_p.C  | NM_025187    | NP_079463    | Q9BSU1 | CP070_HUMAN |                 | NA | 2   | TATGGCCCCCC       | 0.597 |                      |
| - | 8  | 826       | p.M262fs FANCA_    | NM_000135    | NP_000126    | O15360 | FANCA_HUMAN |                 | NA | 6   | CGGCATTTTTTC      | 0.368 |                      |
| - | 15 | 2000_2002 | 15_uc002ghy.1_5'   | NM_004860    | NP_004851    | P51116 | FXR2_HUMAN  | Poly-Arg.       | NA | 0   | GTTACGGCGGC       | 0.547 |                      |
| + | 8  | 1209_1211 | 2gnp.1_In_Frame_   | NM_153604    | NP_705832    | Q8IZQ8 | MYCD_HUMAN  | Gln-rich.       | NA | 5   | TCAGCcagcagc      | 0.527 |                      |
| - | 5  | 1214_1216 | del CXXC1_u        | NM_014593    | NP_055408    | Q9P0U4 | CXXC1_HUMAN | CXXC-type.      | NA | 2   | GTTTGATctgctgct   | 0.468 |                      |
| + | 14 | 1794      | ebw.2_Frame_Shif   | NM_015321    | NP_056136    | Q6UUU9 | CRTC1_HUMAN |                 | NA | 519 | AGAGTCCCCCC       | 0.617 |                      |
| + | 2  | 252_254   | 0eea.2_In_Frame_   | NM_005306    | NP_005297    | O15552 | FFAR2_HUMAN | Name=2; (P      | NA | 1   | CCTCTGCTGC        | 0.645 |                      |
| + | 3  | 844_846   | 2F1_uc010xvw.1_I   | NM_052848    | NP_443080    | Q96F63 | CCD97_HUMAN | Potential.      | NA | 0   | AACagcaggaggag    | 0.384 |                      |
| + | 3  | 136_138   | In_Frame_Del_p.L   | NM_001459    | NP_001450    | P49771 | FLT3L_HUMAN |                 | NA | 0   | CCTCTGCTGCT       | 0.621 |                      |
| - | 3  | 316       | _p.P92fs HS1BP3    | NM_022460    | NP_071905    | Q53T59 | H1BP3_HUMAN | PX.             | NA | 1   | GTAGTGGGGGG       | 0.537 | rs77941615           |
| + | 7  | 1476_1477 | BL5_uc002rid.2_F   | NM_021831    | NP_068603    | Q8NDL9 | CBPC5_HUMAN |                 | NA | 2   | TACCATCCCCCC      | 0.515 |                      |
| + | 1  | 145_146   |                    | NM_178457    | NP_848552    | Q5JPB2 | ZN831_HUMAN | Pro-rich.       | NA | 14  | GCCTGGCCCCC       | 0.728 |                      |
| - | 1  | 108       | ame_Shift_Del_p.   | NM_006585    | NP_006576    | P50990 | TCPO_HUMAN  |                 | NA | 0   | ACGTGAAGCGC       | 0.627 |                      |
| - | 1  | 167_168   | .1_Intron C21orf29 | NM_198688    | NP_941961    | P60371 | KR106_HUMAN | A repeats o     | NA | 0   | GGGCCGGGGC        | 0.688 |                      |
| - | 1  | 498       | p.Q122fs TCF20_u   | NM_005650    | NP_005641    | Q9UGU0 | TCF20_HUMAN |                 | NA | 5   | CCCCTGGGGGG       | 0.567 | rs138734341          |
| + | 7  | 1060      | IP_uc003ctg.1_Fr   | NM_130384    | NP_569055    | Q8WXE1 | ATRIP_HUMAN |                 | NA | 1   | TGGCACCCCCC       | 0.537 |                      |
| - | 2  | 497_499   | XP1_uc003dop.2_    | NM_032682    | NP_116071    | Q9H334 | FOXP1_HUMAN | Gln-rich.       | NA | 2   | CTGTTGCTGCT       | 0.586 |                      |
| - | 9  | 1978_1979 | p.N554fs VEPH1_u   | NM_024621    | NP_078897    | Q14D04 | MELT_HUMAN  |                 | NA | 5   | CTGAGGTTTTTT      | 0.396 |                      |
| + | 7  | 802_803   | iEIF4A2_uc011bsl   | NM_001967    | NP_001958    | Q14240 | IF4A2_HUMAN | case C-term     | NA | 4   | TGTTGAGAGAG       | 0.351 |                      |
| + | 7  | 1596_1597 | gcg.2_Frame_Shif   | NM_021923    | NP_068742    | Q8N441 | FGRL1_HUMAN | cytoplasmic (   | NA | 0   | agacatccacacac    | 0.46  |                      |
| + | 1  | 251_253   | hme.2_In_Frame_    | NM_004464    | NP_004455    | P12034 | FGF5_HUMAN  |                 | NA | 2   | TCCTTCTCTCT       | 0.631 |                      |
| - | 3  | 473_475   | 1_In_Frame_Del_r   | NM_016107    | NP_057191    | Q96KR1 | ZFR_HUMAN   | Ala-rich.       | NA | 0   | TGGGGGTGGTG       | 0.483 |                      |
| + | 17 | 2312_2314 | uc003kgl.3_Intron  | NM_003248    | NP_003239    | P35443 | TSP4_HUMAN  | rSP type-3 7    | NA | 0   | CAGTGTGATGAT      | 0.562 |                      |
| - | 2  | 321_322   | H2AFY_uc003lar.1   | NM_138610    | NP_613258    | O75367 | H2AY_HUMAN  | histone H2A     | NA | 0   | TACTTGGGGTG       | 0.579 |                      |
| + | 5  | 378_379   | k.1_Frame_Shift_I  | NM_006083    | NP_006074    | Q13123 | RED_HUMAN   |                 | NA | 1   | AAATTGAGAGAG      | 0.46  |                      |
| - | 17 | 2665      | 53_splice NUP153   | NM_005124    | NP_005115    | P49790 | NU153_HUMAN |                 | NA | 9   | CTTCTAAAAAA       | 0.406 | rs127788;rs147103527 |
| + | 2  | 128_130   | p.L24del BTN2A2_   | NM_006995    | NP_008926    | Q8VWV5 | BT2A2_HUMAN |                 | NA | 0   | CAGCCTCctctctc    | 0.483 |                      |
| - | 3  | 688_690   | r.2_In_Frame_Del_  | NM_002586    | NP_002577    | P40425 | PBX2_HUMAN  | Poly-Ala.       | NA | 1   | TGCAGCTGCTG       | 0.616 |                      |
| + | 7  | 1165      | p.A234fs FOXP4_    | NM_001012426 | NP_001012426 | Q8IVH2 | FOXP4_HUMAN |                 | NA | 1   | GGGTGCCCCCG       | 0.682 |                      |
| - | 1  | 320_322   |                    | NM_175747    | NP_786923    | Q7RTU3 | OLIG3_HUMAN | Poly-His.       | NA | 0   | GCTCTCctgtggtg    | 0.502 |                      |
| - | 11 | 1417      | J03qty.3_Frame_S   | NM_004562    | NP_004553    | O60260 | PRKN2_HUMAN | RING-type 2     | NA | 1   | TCACCATTTTTTT     | 0.393 |                      |
| + | 3  | 679       | I_p.A74fs CCDC12   | NM_138771    | NP_620126    | Q96EE4 | CC126_HUMAN |                 | NA | 2   | GGTGCTTCTATC      | 0.373 |                      |
| - | 1  | 725_727   | A10_uc003syw.3_I   | NM_018951    | NP_061824    | P31260 | HXA10_HUMAN | Poly-Gly.       | NA | 0   | TGCGCGCCGCC       | 0.759 |                      |
| - | 2  | 1021_1023 | :.2_In_Frame_Del_  | NM_002192    | NP_002183    | P08476 | INHBA_HUMAN |                 | NA | 6   | ctctcttcttctctctc | 0.355 |                      |
| - | 5  | 1204      | r.2_Frame_Shift_D  | NM_000466    | NP_000457    | O43933 | PEX1_HUMAN  |                 | NA | 2   | ACCTAATTTTTTT     | 0.353 |                      |
| - | 6  | 836_838   |                    | NM_001080392 | NP_001073861 | A4D1U4 | LCHN_HUMAN  | Poly-Cys.       | NA | 1   | GCCAAGCAGCA       | 0.606 |                      |
| + | 1  | 528       |                    | NM_001001656 | NP_001001656 | Q8NGU2 | OR9A4_HUMAN | cellular (Pote  | NA | 1   | GAACAATTTTTTT     | 0.383 |                      |
| - | 6  | 1281      |                    | NM_005232    | NP_005223    | P21709 | EPHA1_HUMAN | tential). Fibri | NA | 5   | GTGAGCCCCCG       | 0.617 | rs67794922           |
| - | 2  | 530       |                    | NM_015694    | NP_056509    | Q9ULD5 | ZN777_HUMAN |                 | NA | 1   | GTGGTGGGGGG       | 0.617 |                      |
| - | 14 | 2088      |                    | NM_005502    | NP_005493    | O95477 | ABCA1_HUMAN | Extracellular   | NA | 17  | CGAAGCCCCCC       | 0.542 |                      |
| - | 6  | 1155_1156 | p.D59fs ENG_uc     | NM_001114753 | NP_001108225 | P17813 | EGLN_HUMAN  | cellular (Pote  | NA | 0   | CGGCATCGAGAT      | 0.653 |                      |
| + | 5  | 716_718   | 04eib.1_In_Frame_  | NM_016607    | NP_057691    | Q9UH62 | ARMX3_HUMAN |                 | NA | 2   | FGGTCTGATGAT      | 0.448 |                      |

|   |    |           |                    |              |              |        |             |                               |    |                  |       |                              |
|---|----|-----------|--------------------|--------------|--------------|--------|-------------|-------------------------------|----|------------------|-------|------------------------------|
| + | 5  | 1770_1772 | A_uc001bvm.2_3'    | NM_001040441 | NP_001035531 | Q96BR9 | ZBT8A_HUMAN | Poly-Glu.                     | 0  | VTAGTGAAGAAG/    | 0.414 |                              |
| - | 2  | 279       | 0oio.1_Frame_Shi   | NM_017821    | NP_060291    | Q9NX52 | RHBL2_HUMAN |                               | 0  | CTCTCTCCCAT/     | 0.502 |                              |
| + | 3  | 511       | u.2_Frame_Shift_I  | NM_001136493 | NP_001129965 | Q8NA29 | MFS2A_HUMAN |                               | 2  | ACAGACCCCCCT/    | 0.582 |                              |
| + | 1  | 136_137   |                    | NM_001008740 | NP_001008740 | Q7Z6W1 | TMCO2_HUMAN |                               | 1  | TAGAGTCTCTCT     | 0.406 |                              |
| + | 15 | 2422      | 44A_uc010oki.1_Ir  | NM_014663    | NP_055478    | O75164 | KDM4A_HUMAN | PHD-type 1.                   | 1  | GGGGTCCCCCC      | 0.493 | rs141609782                  |
| + | 18 | 2455      | _Shift_Del_p.P398  | NM_015112    | NP_055927    | Q6P0Q8 | MAST2_HUMAN | rotein kinase.                | 11 | CGTCCCTTTTTTI    | 0.552 |                              |
| - | 2  | 136       | _p.L34fs DOCK7_    | NM_033407    | NP_212132    | Q96N67 | DOCK7_HUMAN |                               | 2  | TTTTTTGAGCAGI    | 0.393 |                              |
| - | 1  | 145       | way.2_5'Flank MIE  | NM_024763    | NP_079039    | Q5VTH9 | WDR78_HUMAN |                               | 2  | CACCCCTTTTTTI    | 0.622 |                              |
| - | 1  | 178_179   | 3wcj.1_Frame_Shil  | NM_012152    | NP_036284    | Q9UBY5 | LPAR3_HUMAN | Name=1; (Potential).          | 5  | 3AATTAGAAAAAA    | 0.401 | rs76299065                   |
| - | 2  | 3480_3482 | vne.1_In_Frame_C   | NM_007113    | NP_009044    | Q07283 | TRHY_HUMAN  | 30 AA tandem repeats.         | 5  | 3CCTTCTCTCTCT    | 0.172 |                              |
| - | 2  | 1111_1113 | wne.1_In_Frame_I   | NM_007113    | NP_009044    | Q07283 | TRHY_HUMAN  | of R-R-E-Q-E-E- E-R-R-E-      | 5  | tcgcgcctctctctct | 0     | rs71757496                   |
| + | 4  | 1420_1421 | CC_uc001fqb.2_In   | NM_005973    | NP_005964    | Q92733 | PRCC_HUMAN  |                               | 27 | CCTGGTCCCCCC     | 0.53  |                              |
| + | 8  | 1158      | 1AP_uc010pks.1_I   | NM_014697    | NP_055512    | O75052 | CAPON_HUMAN |                               | 3  | TCGCACCCCCCA/    | 0.597 | rs146738391                  |
| - | 2  | 718       | _p.V213fs TNR_ucl  | NM_003285    | NP_003276    | Q92752 | TENR_HUMAN  | Cys-rich.                     | 11 | ACACACCCCCCA/    | 0.607 |                              |
| + | 17 | 2127      | ips.2_Frame_Shift  | NM_001357    | NP_001348    | Q08211 | DHX9_HUMAN  | case C-terminal.              | 2  | TGTTGGTTTTTTI    | 0.378 |                              |
| + | 5  | 828       | i_uc009wyw.2_Fra   | NM_000186    | NP_000177    | P08603 | CFAH_HUMAN  | Sushi 3.                      | 6  | CGATGGTTTTTGT/   | 0.343 |                              |
| + | 4  | 635_646   |                    | NM_001104548 | NP_001098018 |        |             |                               | 0  | jTagcagcagcagca  | 0.283 | 30217;rs72359595;rs150848171 |
| - | 7  | 997       | Opte.1_Frame_Sh    | NM_018252    | NP_060722    | Q9H813 | TM206_HUMAN | cellular (Potential).         | 1  | 3AGCACTTTTTTT    | 0.398 |                              |
| - | 4  | 643       | Opty.1_Frame_Shi   | NM_005401    | NP_005392    | Q15678 | PTN14_HUMAN | FERM.                         | 5  | CACATCTTTTTTC    | 0.423 |                              |
| + | 27 | 7308      | CN_uc001hsp.1_F    | NM_001098623 | NP_001092093 | Q5VST9 | OBSCN_HUMAN |                               | 28 | AGGCTGGGGGG      | 0.662 |                              |
| - | 5  | 1053      |                    | NM_194298    | NP_919274    | Q7RTY1 | MOT9_HUMAN  | cellular (Potential).         | 3  | GAGCTATTTTTTT    | 0.378 |                              |
| + | 2  | 232       | 1jsw.2_Frame_St    | NM_173473    | NP_775744    | Q96DE5 | APC16_HUMAN |                               | 1  | ACCTACCCCAA/     | 0.458 |                              |
| - | 7  | 1352      | 3fs APBB1_uc01C    | NM_001164    | NP_001155    | O00213 | APBB1_HUMAN | PID 1.                        | 2  | TACTTCCCCCA/     | 0.582 |                              |
| + | 6  | 1274      | plice_Site AMPD3_  | NM_001025389 | NP_001020560 | Q01432 | AMPD3_HUMAN |                               | 2  | 3AAAGGTGCCTT/    | 0.541 |                              |
| - | 9  | 829_831   | vA1_uc010rcp.1_F   | NM_002786    | NP_002777    | P25786 | PSA1_HUMAN  |                               | 2  | AGACACATCATC/    | 0.36  |                              |
| + | 2  | 423       |                    | NM_152316    | NP_689529    | Q8N8R7 | CK046_HUMAN |                               | 0  | TTAGCCAAAAAA/    | 0.338 |                              |
| + | 6  | 858_860   |                    | NM_024081    | NP_076986    | Q9BZD6 | TMG4_HUMAN  | ic (Potential). Poly-Pro.     | 0  | TGTTTACCACCA/    | 0.463 |                              |
| + | 1  | 241       |                    | NM_001005201 | NP_001005201 | Q8N146 | OR8H3_HUMAN | cellular (Potential).         | 2  | 3CACCTAAAACC'    | 0.428 |                              |
| + | 5  | 886       | rlo.1_Frame_Shift  | NM_004265    | NP_004256    | O95864 | FADS2_HUMAN | lasmic (Potential).           | 2  | GGCAGCCCATC/     | 0.527 |                              |
| + | 4  | 544       |                    | NM_004585    | NP_004576    | Q9UL19 | TIG3_HUMAN  |                               | 1  | 3ATACCAAAAAA/    | 0.537 |                              |
| + | 7  | 810       | 2_5'Flank C11orf6  | NM_006442    | NP_006433    | Q14919 | NC2A_HUMAN  | Pro-rich.                     | 0  | CAGCGCCCCCG      | 0.627 |                              |
| - | 22 | 3672_3674 | 1qfl.2_In_Frame_C  | NM_020228    | NP_064613    | Q9NQV6 | PRD10_HUMAN | Poly-Thr.                     | 1  | CCGTTGGTGGT/     | 0.547 |                              |
| - | 8  | 761       | LN1_uc001rmy.2_I   | NM_033114    | NP_149105    | Q8TBF4 | ZCRB1_HUMAN |                               | 1  | TTTTCCATTTTTI    | 0.328 |                              |
| - | 12 | 4127_4129 | w.2_In_Frame_De    | NM_004719    | NP_004710    | Q99590 | SCAFB_HUMAN | Pro-rich.                     | 0  | 3AGGGGTGGTG      | 0.483 |                              |
| - | 13 | 4059_4061 |                    | NM_003482    | NP_003473    | O14686 | MLL2_HUMAN  | Poly-Glu.                     | 41 | TTCTTCTCTCTC     | 0.478 |                              |
| + | 2  | 157       | 40B_uc001ruq.1_f   | NM_001031698 | NP_001026868 | Q6NWX9 | PR40B_HUMAN | Pro-rich.                     | 5  | 3GCTATCCCCCA/    | 0.607 |                              |
| + | 6  | 1083      | siz.2_Frame_Shift  | NM_000456    | NP_000447    | P51687 | SUOX_HUMAN  | terin domain (By similarity). | 0  | 3ACAACITTTCCCA/  | 0.527 |                              |
| + | 3  | 881_882   | ltoc.2_Frame_Shif  | NM_001093    | NP_001084    | O00763 | ACACB_HUMAN |                               | 8  | CGCTTTGGGGGC     | 0.574 |                              |
| + | 3  | 353_355   | re_Del_p.D88del K  | NM_018559    | NP_061029    | Q8IXQ4 | K1704_HUMAN | Poly-Asp.                     | 2  | atgatgacgatgatg  | 0.286 | rs138421508                  |
| + | 3  | 707_710   | vbk.2_Frame_Shil   | NM_015116    | NP_055931    | Q9Y2L9 | LRCH1_HUMAN | LRR 3.                        | 2  | CGCCCTGCCTC      | 0.436 |                              |
| + | 5  | 668_670   | A IRF9_uc010alj.2  | NM_006084    | NP_006075    | Q00978 | IRF9_HUMAN  | Poly-Ser.                     | 1  | ATTGGGagcagca    | 0.448 |                              |
| - | 10 | 1018      | 1wmy.1_Frame_St    | NM_024658    | NP_078934    | Q8TEX9 | IPO4_HUMAN  |                               | 1  | TGGGAAAAGG       | 0.567 |                              |
| + | 2  | 609       | 3C_uc001wss.2_5    | NM_014672    | NP_055487    | O15091 | MRRP3_HUMAN |                               | 0  | TCCTCATTTTTTI    | 0.423 |                              |
| + | 20 | 3443_3444 | xdq.2_Frame_Shif   | NM_002892    | NP_002883    | P29374 | ARI4A_HUMAN |                               | 6  | 3TACAAGAGAGA/    | 0.381 |                              |
| - | 2  | 365_367   | c010twr.1_Intron I | NM_020414    | NP_065147    | Q9GZR7 | DDX24_HUMAN | Poly-Glu.                     | 4  | TTCCCTCTCTC/     | 0.443 |                              |
| - | 3  | 684       | 3AA1_uc001ykw.1_   | NM_005348    | NP_005339    | P07900 | HS90A_HUMAN |                               | 7  | CTGCTGAGGAC      | 0.502 |                              |
| + | 12 | 1371_1372 | .3_In_Frame_Ins_   | NM_030943    | NP_112205    | Q9BXJ7 | AMNLS_HUMAN | lasmic (Potential).           | 0  | CGTTCCCGGG       | 0.713 | rs36040113                   |

|   |    |           |                    |              |              |        |             |                              |     |                    |       |                                    |
|---|----|-----------|--------------------|--------------|--------------|--------|-------------|------------------------------|-----|--------------------|-------|------------------------------------|
| - | 1  | 70_72     | .2_5'UTR NIPA1_u   | NM_144599    | NP_653200    | Q7RTP0 | NIPA1_HUMAN | cellular (Potential).        | 0   | TCCCCGgccgccgr     | 0.626 |                                    |
| + | 5  | 839       | B_uc010ugg.1_5'l   | NM_004855    | NP_004846    | Q92521 | PIGB_HUMAN  |                              | 0   | GCTTAGTTTTTTTT     | 0.338 |                                    |
| + | 6  | 1825_1827 | 2afu.2_In_Frame_   | NM_017610    | NP_060080    | Q6ZNA4 | RN111_HUMAN | His-rich.                    | 2   | ATCATCACCACCA/     | 0.512 |                                    |
| - | 2  | 378       | ogx.1_Frame_Shift  | NM_000942    | NP_000933    | P23284 | PPIB_HUMAN  | e cyclophilin-type.          | 0   | ATTTTTGGAACA/      | 0.463 |                                    |
| + | 5  | 794       | 0unn.1_Frame_Sh    | NM_018689    | NP_061159    | Q8WUJ3 | K1199_HUMAN |                              | 3   | AGGCATTTTTTTT      | 0.498 |                                    |
| + | 10 | 1146_1148 | 3ch.2_In_Frame_C   | NM_014048    | NP_054767    | Q9ULH7 | MKL2_HUMAN  |                              | 5   | GCTCCAGCAGC.       | 0.542 | rs146244364                        |
| + | 11 | 1356_1358 | xy.2_In_Frame_D    | NM_000418    | NP_000409    | P24394 | IL4RA_HUMAN | Cytoplasmic (Potential).     | 2   | GTGTGAGGAGG        | 0.591 |                                    |
| + | 9  | 1776      | IL21R_uc002dos.    | NM_181078    | NP_851564    | Q9HBE5 | IL21R_HUMAN | plasmic (Potential).         | 4   | AAGGACCCCCC        | 0.637 |                                    |
| - | 2  | 430       | 2dxs.2_Frame_Sh    | NM_006110    | NP_006101    | O95400 | CD2B2_HUMAN |                              | 1   | CTGGACCCCCC        | 0.532 |                                    |
| + | 10 | 1565      | 10vjk.1_Intron LR  | NM_018296    | NP_060766    | Q1X8D7 | LRC36_HUMAN |                              | 0   | ACAGTCCCCCC        | 0.512 |                                    |
| + | 12 | 1273_1274 | _Shift_Ins_p.S279  | NM_007014    | NP_008945    | O00308 | WWP2_HUMAN  |                              | 6   | GTCTTCGAGTGC       | 0.49  |                                    |
| - | 15 | 2000_2002 | 15_uc002ghy.1_5'l  | NM_004860    | NP_004851    | P51116 | FXR2_HUMAN  | Poly-Arg.                    | 0   | GTTACGGCGGC/       | 0.547 |                                    |
| + | 10 | 1439      | 6B_uc002gix.2_5'l  | NM_001080424 | NP_001073893 | O15054 | KDM6B_HUMAN | Pro-rich.                    | 2   | CCCGTCCCCCC/       | 0.706 |                                    |
| - | 22 | 2902_2904 | 1.E967del MYH10_   | NM_005964    | NP_005955    | P35580 | MYH10_HUMAN | Potential.                   | 2   | TTTCTTTCTTCTT      | 0.35  |                                    |
| - | 1  | 233_235   | dx.3_In_Frame_Del  | NM_020772    | NP_065823    | Q7Z417 | NUFP2_HUMAN | His-rich.                    | 4   | ggtgatgatggtggtggt | 0.276 | rs1054145                          |
| - | 13 | 1679      | TLL6_uc002ioc.2_   | NM_001130918 | NP_001124390 | Q8N841 | TLL6_HUMAN  |                              | 0   | CTTCTTCTTCATT      | 0.512 |                                    |
| - | 5  | 1187_1189 | 1.1_In_Frame_Del   | NM_007146    | NP_009077    | Q14119 | VEZF1_HUMAN | Poly-Gln.                    | 2   | gttgttgtgtgctgctgt | 0.305 | 731354;rs73995411                  |
| - | 2  | 311_313   | _47EE>E TEX2_uc    | NM_018469    | NP_060939    | Q8IWB9 | TEX2_HUMAN  | Poly-Glu.                    | 1   | ccctccttccctcctc   | 0.468 |                                    |
| - | 3  | 758       | _Shift_Del_p.K109  | NM_001098801 | NP_001092271 | Q96ND0 | CR019_HUMAN |                              | 2   | TCTTCCTTTTTTT      | 0.433 | rs143162930                        |
| + | 20 | 1970      | 3xay.1_Frame_Shi   | NM_013326    | NP_037458    | Q96DM3 | MIC1_HUMAN  | Mic1.                        | 1   | TTTTTTGAACAG/      | 0.448 | rs80213848                         |
| - | 5  | 1214_1216 | 3161del CXXC1_u    | NM_014593    | NP_055408    | Q9P0U4 | CXXC1_HUMAN | CXXC-type.                   | 2   | GTTTGTGctgtgctgt   | 0.468 |                                    |
| + | 1  | 1359      |                    | NM_000455    | NP_000446    | Q15831 | STK11_HUMAN | rotein kinaso.?(3) p.G52_P   | 266 | TCAAGAAGAAG.       | 0.617 |                                    |
| + | 2  | 252_254   | 0eea.2_In_Frame_   | NM_005306    | NP_005297    | O15552 | FFAR2_HUMAN | Name=2; (Potential).         | 1   | CCTCCTGCTGC        | 0.645 |                                    |
| + | 18 | 2356      | 3HG2_uc002olj.2_I  | NM_022835    | NP_073746    | Q9H7P9 | PKHG2_HUMAN |                              | 4   | AGTGTCCCCAAC       | 0.577 |                                    |
| + | 2  | 531       | k PPP1R13L_uc0f    | NM_012099    | NP_036231    | O15446 | RPA34_HUMAN |                              | 4   | CTTGTCCCCCC.       | 0.612 |                                    |
| - | 20 | 2714      | c.1_5'Flank PLEKf  | NM_020904    | NP_065955    | Q9H4M7 | PKHA4_HUMAN |                              | 3   | .GATCTGGGGGG       | 0.687 |                                    |
| - | 5  | 1156_1157 | ak.1_Intron ZNF81  | NM_001031665 | NP_001026835 | Q0VGE8 | ZN816_HUMAN | 2H2-type 3.                  | 0   | ACACTTGTAAAGT      | 0.386 |                                    |
| - | 14 | 1524      | 2rcp.1_Frame_Shif  | NM_001142286 | NP_001135758 | Q96SB8 | SMC6_HUMAN  | Potential.                   | 6   | AAGATATTTTTTT      | 0.343 |                                    |
| + | 3  | 628_629   |                    | NM_002158    | NP_002149    | P32314 | FOXN2_HUMAN |                              | 0   | ACCCAGAAAAA/       | 0.431 |                                    |
| + | 11 | 1709      | sbz.2_Frame_Shift  | NM_015252    | NP_056067    | Q8NDI1 | EHBP1_HUMAN |                              | 2   | TCACCAAAAAA/       | 0.373 |                                    |
| + | 1  | 96_98     | 2sda.2_In_Frame_   | NM_203437    | NP_982261    | Q6ULP2 | AFTIN_HUMAN |                              | 2   | AGAGGATGATG        | 0.409 |                                    |
| - | 6  | 1386      | p.M392fs REV1_uc   | NM_016316    | NP_057400    | Q9UBZ9 | REV1_HUMAN  |                              | 2   | TTTTTCATTTTTTT     | 0.348 |                                    |
| + | 1  | 35        |                    | NM_001008743 | NP_001008743 | Q6IMI6 | ST1C3_HUMAN |                              | 1   | AGATGAAAAAA/       | 0.353 |                                    |
| + | 4  | 610       |                    | NM_007115    | NP_009046    | P98066 | TSG6_HUMAN  | CUB.                         | 0   | TTTTTTAGATTTT      | 0.408 |                                    |
| - | 6  | 1192_1194 | _In_Frame_Del_p    | NM_003387    | NP_003378    | O43516 | WIPF1_HUMAN | Pro-rich.                    | 2   | TTCTGAGGAGG/       | 0.685 |                                    |
| + | 2  | 422       | el_p.N45fs PPP1R   | NM_001080545 | NP_001074014 | Q8WV17 | PPR1C_HUMAN |                              | 0   | ACATAACCCCC/       | 0.388 |                                    |
| + | 7  | 2047_2048 | p.N645fs SGOL2_    | NM_152524    | NP_689737    | Q562F6 | SGOL2_HUMAN |                              | 4   | AGGTAATTTTTTT      | 0.337 |                                    |
| - | 15 | 3165      | 1vdt.2_Frame_Shift | NM_152519    | NP_689732    | A0AUZ9 | CB067_HUMAN |                              | 3   | CACCTATTTTTTT      | 0.418 |                                    |
| + | 4  | 350       | _p.L117fs RQCD1_   | NM_005444    | NP_005435    | Q92600 | RCD1_HUMAN  |                              | 2   | TCCCACTTTTTTT      | 0.413 |                                    |
| + | 19 | 2288_2290 | 3_In_Frame_Del_I   | NM_015575    | NP_056390    | Q6Y7W6 | PERQ2_HUMAN | Gln-rich.                    | 7   | TTCCAGCAGC/        | 0.424 |                                    |
| - | 16 | 2137      | p.E637fs HDLBP_    | NM_203346    | NP_976221    | Q00341 | VIGLN_HUMAN | KH 7.                        | 4   | AGCTTCGCAGT        | 0.458 |                                    |
| - | 2  | 297_298   |                    | NM_001899    | NP_001890    | P01036 | CYTS_HUMAN  |                              | 1   | AATTCACCCCC        | 0.554 | rs140501583                        |
| - | 1  | 108       | ame_Shift_Del_p.   | NM_006585    | NP_006576    | P50990 | TCPQ_HUMAN  |                              | 0   | ACGTGAAGCGC        | 0.627 |                                    |
| + | 7  | 817_819   |                    | NM_005049    | NP_005040    | Q15269 | PWP2_HUMAN  | Poly-Glu.                    | 1   | gaggaagaggaggag    | 0.527 |                                    |
| - | 4  | 542       | el_p.G31fs TBC1D   | NM_031937    | NP_114143    | Q9BX16 | TB10A_HUMAN | ab-GAP TBC.                  | 1   | CGTGCCCCCC/        | 0.607 |                                    |
| + | 3  | 1161_1181 |                    | NM_152243    | NP_689449    | Q00587 | BORG5_HUMAN | s of [PT]-[AT]-A- [ENT]-[PT] | 0   | CCCTGCTGCAAAA      | 0.665 | 0;rs62235033;rs13056859;rs62235034 |
| + | 8  | 2694      | Del_p.L807fs GRM   | NM_000844    | NP_000835    | Q14831 | GRM7_HUMAN  | Name=6; (Potential).         | 7   | TTCCAATTTTTTT      | 0.383 |                                    |



|   |    |           |                   |              |              |        |             |                                |    |               |       |
|---|----|-----------|-------------------|--------------|--------------|--------|-------------|--------------------------------|----|---------------|-------|
| - | 23 | 4302      | I1_uc003dmm.2_3   | NM_001033057 | NP_001028229 | Q96QZ7 | MAGI1_HUMAN |                                | 6  | 3CCCGCTTTTCC  | 0.587 |
| - | 13 | 1581_1583 | _Frame_Del_p.S1   | NM_015541    | NP_056356    | Q96JA1 | LRIG1_HUMAN | tial). Ig-like C2-type 1. Poly | 5  | GGGAGCTGCTG   | 0.547 |
| - | 2  | 497_499   | XP1_uc003dop.2_   | NM_032682    | NP_116071    | Q9H334 | FOXP1_HUMAN | Gln-rich.                      | 2  | CTGTTGCTGCT   | 0.586 |
| - | 7  | 2698      | me_Shift_Del_p.Gi | NM_199512    | NP_955806    | Q76M96 | CCD80_HUMAN |                                | 2  | ACACTCCCCCA   | 0.373 |
| + | 2  | 249       | 3ehf.1_Frame_Shi  | NM_001024660 | NP_001019831 | O60229 | KALRN_HUMAN | CRAL-TRIO.                     | 6  | AAAGGAAAAGG   | 0.458 |
| + | 4  | 325       | 1_Frame_Shift_De  | NM_023943    | NP_076432    | Q6UXF1 | TM108_HUMAN |                                | 4  | CTGCTGATCTTC  | 0.552 |
| - | 9  | 1978      | p.N554fs VEPH1_u  | NM_024621    | NP_078897    | Q14D04 | MELT_HUMAN  |                                | 5  | CTGAGGTTTTTT  | 0.393 |
| + | 16 | 2019      | p.M503fs PSMD2_   | NM_002808    | NP_002799    | Q13200 | PSMD2_HUMAN |                                | 0  | GCTATGGGGGAC  | 0.463 |
| - | 2  | 1425_1426 | vp.2_Intron MUC4  | NM_018406    | NP_060876    | Q99102 | MUC4_HUMAN  |                                | 0  | TTCTTAGAAAAA  | 0.46  |
| - | 10 | 1345      | p.R276fs UBXN7_   | NM_015562    | NP_056377    | Q94888 | UBXN7_HUMAN | UBX.                           | 3  | TTCCCTTTTTTC  | 0.308 |
| + | 21 | 2524_2526 | buy.1_In_Frame_   | NM_000283    | NP_000274    | P35913 | PDE6B_HUMAN |                                | 0  | GAGAAGGAGGA   | 0.562 |
| + | 1  | 3718_3719 |                   | NM_175918    | NP_787114    | Q8N1N5 | CRPAK_HUMAN | 7                              | 0  | GCTCACGTGCC   | 0.683 |
| + | 1  | 3948      |                   | NM_175918    | NP_787114    | Q8N1N5 | CRPAK_HUMAN | 9                              | 0  | GAGTGCCCGCC   | 0.672 |
| - | 4  | 678       | EL1_uc003gjz.1_3  | NM_025196    | NP_079472    | Q9HAV7 | GRPE1_HUMAN |                                | 0  | CACCACCCCA    | 0.537 |
| - | 6  | 913_914   | yl.1_Frame_Shift_ | NM_015030    | NP_055845    | O94915 | FRYL_HUMAN  |                                | 1  | CCCTTAGACTTT  | 0.406 |
| + | 11 | 2218      | D2_uc011cdg.1_Fr  | NM_000297    | NP_000288    | Q13563 | PKD2_HUMAN  | in. Cytoplasmic (Potential).   | 1  | AACTGAAAAAA   | 0.348 |
| + | 22 | 2560_2562 | cgc.1_In_Frame_I  | NM_001148    | NP_001139    | Q01484 | ANK2_HUMAN  |                                | 14 | AGGTCACCACC   | 0.443 |
| + | 8  | 1369      | U_uc011cgq.1_Inl  | NM_015693    | NP_056508    | Q9ULD6 | PDZD6_HUMAN |                                | 1  | GGATCATTTTTT  | 0.433 |
| + | 15 | 2957      | ve.1_Frame_Shift  | NM_001080477 | NP_001073946 | Q9P273 | TEN3_HUMAN  | ellular (Potential).           | 0  | CCACCTTTTTCA  | 0.408 |
| - | 27 | 4142_4143 | p.G582fs MYO10_   | NM_012334    | NP_036466    | Q9HD67 | MYO10_HUMAN | PH 1. p.S1226fs*25(1           | 3  | GAGGAGCCCC    | 0.564 |
| + | 46 | 8393_8395 | E2636del NIPBL_u  | NM_133433    | NP_597677    | Q6KC79 | NIPBL_HUMAN |                                | 9  | TGATGAAGAAG   | 0.379 |
| + | 3  | 342       |                   | NM_002104    | NP_002095    | P49863 | GRAK_HUMAN  | eptidase S1.                   | 0  | GAGATCAAAAA   | 0.393 |
| + | 14 | 2276_2277 | p.T671fs BDP1_u   | NM_018429    | NP_060899    | A6H8Y1 | BDP1_HUMAN  |                                | 2  | ACTACAGAGAG   | 0.302 |
| + | 17 | 2312_2314 | uc003kgi.3_Intron | NM_003248    | NP_003239    | P35443 | TSP4_HUMAN  | SP type-3 7.                   | 0  | AGTGTGATGAT   | 0.562 |
| - | 2  | 321_322   | H2AFY_uc003lar.1  | NM_138610    | NP_613258    | O75367 | H2AY_HUMAN  | istone H2A.                    | 0  | TACTTGGGGTG   | 0.579 |
| - | 8  | 1002      | p.K244fs CDC25C   | NM_001790    | NP_001781    | P30307 | MPIP3_HUMAN |                                | 3  | AAACTACTTTTT  | 0.388 |
| + | 2  | 128_130   | p.L24del BTN2A2_  | NM_006995    | NP_008926    | Q8WVV5 | BT2A2_HUMAN |                                | 0  | CAGCCTCctctct | 0.483 |
| - | 1  | 523_524   |                   | NM_052967    | NP_443199    | P35410 | MAS1L_HUMAN | asmic (Potential).             | 9  | AGAGGACACAC   | 0.495 |
| - | 20 | 3367      | Ojsc.1_Frame_Shi  | NM_002714    | NP_002705    | Q96QC0 | PP1RA_HUMAN |                                | 4  | GGGAGGGGGGG   | 0.572 |
| + | 1  | 180       | nrc.1_Frame_Shift | NM_178014    | NP_821133    | P07437 | TBB5_HUMAN  |                                | 1  | CGGTGCCAAGG   | 0.413 |
| - | 10 | 1618      | p.P429fs BAT3_uc  | NM_004639    | NP_004630    | P46379 | BAG6_HUMAN  | ximate repeats. 2. Pro-rich    | 0  | CTGGCGGGGGA   | 0.627 |
| + | 15 | 5496      | p.P1736fs PHF3_u  | NM_015153    | NP_055968    | Q92576 | PHF3_HUMAN  | Pro-rich.                      | 5  | ATTTTCCCCCAC  | 0.507 |
| + | 3  | 679       | p.A74fs CCDC14    | NM_138771    | NP_620126    | Q96EE4 | CC126_HUMAN |                                | 2  | GGTGCTTCTATC  | 0.373 |
| + | 3  | 358_360   | F1_uc011kpa.1_In  | NM_005011    | NP_005002    | Q16656 | NRF1_HUMAN  | Poly-Ala.                      | 1  | GGCCGCTGCTG   | 0.453 |
| - | 1  | 103       | B_uc003wig.3_5'l  | NM_173681    | NP_775952    | Q674R7 | ATG9B_HUMAN | smic (By similarity).          | 1  | CTTCTCCCCCC   | 0.642 |
| + | 9  | 940_941   | M9_uc011cg.1_F    | NM_003816    | NP_003807    | Q13443 | ADAM9_HUMAN | potential). Peptidase M12B.    | 2  | AGTGGCGGAA    | 0.376 |
| + | 6  | 690_691   | p.L221fs PREX2_   | NM_024870    | NP_079146    | Q70Z35 | PREX2_HUMAN |                                | 17 | AAGTTAGAAGTT  | 0.465 |
| + | 9  | 1115      | yar.2_Frame_Shift | NM_004133    | NP_004124    | Q14541 | HNF4G_HUMAN |                                | 1  | CTCCGGGGGGA   | 0.463 |
| + | 2  | 694       | p.V167fs PDP1_u   | NM_018444    | NP_060914    | Q9P0J1 | PDP1_HUMAN  |                                | 4  | GGGGTTTTTTG   | 0.483 |
| - | 1  | 2929      | p.N621fs RANBP6   | NM_012416    | NP_036548    | O60518 | RNBP6_HUMAN | HEAT 7.                        | 3  | ATGACATTTTTT  | 0.358 |
| - | 11 | 1166_1168 | p>P HNRNPK_uc0    | NM_031262    | NP_112552    | P61978 | HNRPK_HUMAN | epeats. 2 X 22 AA approxin     | 1  | TCTAGGTGGTG   | 0.522 |
| + | 48 | 6083      | _Shift_Del_p.L163 | NM_020893    | NP_065944    |        |             |                                | 7  | CTTCTCCAGCC   | 0.522 |
| + | 13 | 3791_3793 |                   | NM_173689    | NP_775960    | Q5IJ48 | CRUM2_HUMAN | ical; (Potential).             | 1  | CGCTGCCTCCTC  | 0.67  |
| + | 13 | 2206      | 5fs DDX3X_uc011   | NM_001356    | NP_001347    | O00571 | DDX3X_HUMAN | ecessary for interaction with  | 6  | AGACCAAAAAG   | 0.433 |
| + | 5  | 716_718   | 04eib.1_In_Frame  | NM_016607    | NP_057691    | Q9UH62 | ARMX3_HUMAN |                                | 2  | GGTCTGATGAT   | 0.448 |
| - | 8  | 1013      | mwc.1_Frame_Shi   | NM_024597    | NP_078873    | Q8IWC1 | MA7D3_HUMAN |                                | 4  | CACCTGGGGGG   | 0.532 |
| + | 7  | 512_514   | j.1_In_Frame_Del  | NM_007150    | NP_009081    | O15231 | ZN185_HUMAN | Poly-Glu.                      | 3  | GACACCgaggagg | 0.522 |

rs142449465

|   |    |           |              |              |        |              |                |    |                 |                      |       |                    |
|---|----|-----------|--------------|--------------|--------|--------------|----------------|----|-----------------|----------------------|-------|--------------------|
| + | 1  | 1337_1339 | NM_207334    | NP_997217    | Q6ZT52 | FA43B_HUMAN  | NA             | 0  | gaggacgaggaggag | 0.567                |       |                    |
| - | 11 | 1675_1676 | NM_030816    | NP_110443    | Q8N6S4 | AN13C_HUMAN  | NA             | 0  | :GTAGCTTTAAAC   | 0.361                |       |                    |
| + | 23 | 2276_2278 | NM_015978    | NP_057062    | Q59H18 | TNI3K_HUMAN  | Poly-Ser.      | NA | 10              | :TCACCTTCTTC         | 0.473 |                    |
| - | 25 | 4510      | NM_024408    | NP_077719    | Q04721 | NOTC2_HUMAN  | cellular (Pote | NA | 27              | :GTGCTGGGGGG         | 0.632 |                    |
| + | 7  | 1724_1726 | NM_005807    | NP_005798    | Q92954 | PRG4_HUMAN   | repeats of K-  | NA | 1               | :ACCAAGGAGCC         | 0.635 |                    |
| - | 20 | 2528_2530 | NM_001029880 | NP_001025051 | Q5VUG0 | SMBT2_HUMAN  |                | NA | 8               | :AGTCTCTCCTCC        | 0.596 |                    |
| - | 26 | 3234      | NM_003075    | NP_003066    | Q8TAQ2 | SMRC2_HUMAN  | Pro-rich.      | NA | 6               | :GTCCAGGGGGGG        | 0.577 |                    |
| + | 16 | 2686_2688 | NM_004592    | NP_004583    | Q12872 | SFSWA_HUMAN  | g/Ser-rich (f  | NA | 0               | :CACGAGAAGAA         | 0.493 |                    |
| + | 3  | 707_710   | NM_015116    | NP_055931    | Q9Y2L9 | LRCH1_HUMAN  | LRR 3.         | NA | 2               | :CGCCCTGCCTC         | 0.436 |                    |
| + | 20 | 3706_3707 | NM_015842    | NP_056667    | Q8WW11 | LMO7_HUMAN   |                | NA | 5               | :AGGCAGAGAG/         | 0.386 |                    |
| - | 1  | 61_63     | NM_020154    | NP_064539    | Q9NPA0 | CO024_HUMAN  |                | NA | 0               | :CGATAGCAGCA         | 0.665 |                    |
| + | 1  | 97_98     | NM_004048    | NP_004039    | P61769 | B2MG_HUMAN   |                | NA | 3               | :CGCTACTCTCTC        | 0.614 |                    |
| + | 7  | 4096_4098 | NM_015042    | NP_055857    | O15014 | ZN609_HUMAN  | Poly-His.      | NA | 3               | :CACACACCACC/        | 0.576 |                    |
| - | 22 | 3911      | NM_002705    | NP_002696    | O60437 | PEPL_HUMAN   | Potential.     | NA | 6               | :ATTTCCTTTTTCA       | 0.522 |                    |
| - | 8  | 907_909   | NM_017777    | NP_060247    | Q9NXB0 | MKS1_HUMAN   |                | NA | 1               | :CCCGCTCCTCC         | 0.532 |                    |
| + | 13 | 2443      | NM_182973    | NP_892018    | Q7Z410 | TMPS9_HUMAN  | cellular (Pote | NA | 2               | :AGCTACCAGGT/        | 0.567 |                    |
| - | 5  | 915       | NM_016581    | NP_057665    | Q9BQ95 | ECSIT_HUMAN  |                | NA | 1               | :GGGCTGGGGGG         | 0.582 |                    |
| + | 13 | 1487      | NM_020895    | NP_065946    | Q96CP6 | GRM1A_HUMAN  |                | NA | 0               | :CGCGCCCCCA          | 0.692 |                    |
| + | 17 | 1944_1945 | NM_000540    | NP_000531    | P21817 | RYR1_HUMAN   | micr./B30.2/   | NA | 12              | :CTCCCTGTGTGT        | 0.53  |                    |
| - | 3  | 305       | NM_144994    | NP_659431    | Q86SG2 | ANR23_HUMAN  |                | NA | 1               | :TTCCTGGGGGG         | 0.527 |                    |
| + | 3  | 1075_1077 | NM_022482    | NP_071927    | Q9H116 | GZF1_HUMAN   |                | NA | 1               | gaggaagaggaggag      | 0.384 |                    |
| + | 6  | 641       | NM_021067    | NP_066545    | Q14691 | PSF1_HUMAN   |                | NA | 2               | :CCTATTAATAAAA/      | 0.299 |                    |
| - | 12 | 5661_5663 | NM_014071    | NP_054790    | Q14686 | NCOA6_HUMAN  | . Gln-rich. C  | NA | 7               | :TCATTtggtgctgctgc   | 0.498 | 895426;rs140426729 |
| - | 60 | 8252_8253 | NM_005560    | NP_005551    | O15230 | LAMA5_HUMAN  | omain II and   | NA | 3               | :GGCAGCCCCCC         | 0.663 |                    |
| + | 2  | 378_380   | NM_033318    | NP_201575    | Q9H4I9 | CV032_HUMAN  | asp/Glu-rich   | NA | 1               | :AGAGGATGATG,        | 0.478 | rs141840500        |
| + | 22 | 3696      | NM_001080420 | NP_001073889 | F2Z3L0 | F2Z3L0_HUMAN |                | NA | 1               | :ACCAGCAACGG/        | 0.692 |                    |
| - | 3  | 713_715   | NM_015472    | NP_056287    | Q9GZV5 | WWTR1_HUMAN  | ential. Gln-r  | NA | 4               | :AGTTTCTGCTGC        | 0.581 |                    |
| + | 1  | 3808_3809 | NM_175918    | NP_787114    | Q8N1N5 | CRPAK_HUMAN  | 8              | NA | 0               | :CTCACATGTGCC        | 0.683 | 123539;rs79888804  |
| - | 4  | 1088_1090 | NM_001031732 | NP_001026902 | Q96MU7 | YTDC1_HUMAN  | Glu-rich.      | NA | 2               | :tcttcttctctctctctcc | 0.202 | rs141105019        |
| + | 11 | 1625_1627 | NM_198892    | NP_942595    | Q9NSY1 | BMP2K_HUMAN  | Gln/His-rich.  | NA | 1               | :cagcagcaccaccac     | 0.172 |                    |
| - | 2  | 1076_1078 | NM_178835    | NP_849157    | Q17R98 | ZN827_HUMAN  | Pro-rich.      | NA | 0               | :AGGATTgtgtgtgt      | 0.35  |                    |
| - | 7  | 1662      | NM_001009555 | NP_001009555 | Q5HYK7 | SH319_HUMAN  | Pro-rich.      | NA | 2               | :GAACTGGGGGG         | 0.557 |                    |
| - | 7  | 1606_1608 | NM_020870    | NP_065921    | Q7Z6J0 | SH3R1_HUMAN  | Poly-Ala.      | NA | 3               | :ATTCCAGCAGC/        | 0.601 |                    |
| + | 11 | 1893      | NM_052909    | NP_443141    | Q96PX9 | PKH4B_HUMAN  |                | NA | 2               | :CCCTTGCCAG.         | 0.662 |                    |
| + | 3  | 292_299   | NM_175921    | NP_787117    | A6NDU8 | CE051_HUMAN  |                | NA | 0               | :AAGAGCTGATTA        | 0.298 |                    |
| + | 13 | 2025      | NM_012343    | NP_036475    | Q13423 | NNTM_HUMAN   | chondrial m:   | NA | 3               | :ACTGACCCCCC         | 0.463 |                    |
| + | 1  | 725_727   | NM_001046    | NP_001037    | P55011 | S12A2_HUMAN  | cytoplasmic    | NA | 3               | :ACTCCGGCGGC         | 0.65  |                    |
| + | 1  | 184_185   | NM_032454    | NP_115830    | P49842 | STK19_HUMAN  |                | NA | 4               | :CGGGCAAACCC/        | 0.634 |                    |
| - | 5  | 1557_1559 | NM_001350    | NP_001341    | Q9UER7 | DAXX_HUMAN   | ial. Necessa   | NA | 23              | :tcttcttctctctctctcc | 0.251 |                    |
| + | 19 | 4224      | NM_017754    | NP_060224    | Q6BDS2 | URFB1_HUMAN  |                | NA | 3               | :TGATATCCCCCC/       | 0.517 |                    |
| - | 4  | 1648      | NM_014345    | NP_055160    | Q5VUA4 | ZN318_HUMAN  |                | NA | 7               | :TCGCCTTTTTTC        | 0.493 |                    |
| - | 22 | 2918      | NM_001144769 | NP_001138241 | Q03001 | DYST_HUMAN   | Spectrin 1.    | NA | 14              | :CCACTGCGTCT         | 0.448 |                    |
| - | 7  | 1235_1236 | NM_000416    | NP_000407    | P15260 | INGR1_HUMAN  | lasmic (Pote   | NA | 1               | :AAGAACTCTCTC        | 0.431 |                    |
| - | 2  | 458       | NM_032936    | NP_116325    | Q9H2L4 | TMM60_HUMAN  |                | NA | 0               | :CCAGGCTTTTTT        | 0.408 |                    |
| + | 8  | 1031      | NM_004411    | NP_004402    | O14576 | DC111_HUMAN  |                | NA | 4               | :GACATCTTTTTTC       | 0.383 |                    |
| + | 2  | 163       | NM_145102    | NP_659570    | Q9Y2L8 | ZKSC5_HUMAN  |                | NA | 1               | :TTAGACCCCCC/        | 0.483 |                    |
| - | 3  | 838_842   | NM_003391    | NP_003382    | P09544 | WNT2_HUMAN   |                | NA | 7               | :TCTGGCActcttcc      | 0.424 |                    |

|   |    |           |                                             |              |              |             |             |                            |    |               |                    |       |                    |
|---|----|-----------|---------------------------------------------|--------------|--------------|-------------|-------------|----------------------------|----|---------------|--------------------|-------|--------------------|
| - | 20 | 2915      | _p.P781fs TNPO3                             | NM_012470    | NP_036602    | Q9Y5L0      | TNPO3_HUMAN | NA                         | 5  | :GTATAGGGGGG  | 0.483              |       |                    |
| + | 6  | 1464      | o.P226fs ZNF398                             | NM_170686    | NP_733787    | Q8TD17      | ZN398_HUMAN | NA                         | 1  | :AGACACCCCCC  | 0.587              |       |                    |
| + | 1  | 793_795   |                                             | NM_138400    | NP_612409    | Q5C9Z4      | NOM1_HUMAN  | ization and i              | NA | 0             | gaaagtggaggagg     | 0.236 |                    |
| - | 3  | 1464      | fs RAB11FIP1_uc                             | NM_001002814 | NP_001002814 | Q6WKZ4      | RFIP1_HUMAN |                            | NA | 3             | :GTCCCTCCCCCG      | 0.567 |                    |
| + | 12 | 1710_1711 | o.H509fs ESRP1_L                            | NM_017697    | NP_060167    | Q6NXG1      | ESRP1_HUMAN | RRM 3.                     | NA | 4             | :GTGCATAAAAAA      | 0.436 |                    |
| - | 1  | 315       | mcx.1_Frame_Shi                             | NM_198123    | NP_937756    | Q7Z407      | CSMD3_HUMAN | ical; (Potent              | NA | 63            | :GTCAATAAAAAAC     | 0.498 |                    |
| + | 3  | 610_612   | ysi.2_In_Frame_D                            | NM_002467    | NP_002458    | P01106      | MYC_HUMAN   | Poly-Gln.                  | NA | 6             | :CTACCAGCAGC/      | 0.611 | rs61752959         |
| + | 1  | 511_513   |                                             | NM_001013735 | NP_001013757 | Q5VYV0      | FOXB2_HUMAN | Poly-Pro.                  | NA | 0             | ycgcccccgccgcg     | 0.315 |                    |
| - | 8  | 2229      | o.KNA_uc004bis.3_                           | NM_030767    | NP_110394    | Q7Z591      | AKNA_HUMAN  |                            | NA | 6             | :GGCATGGGGGC       | 0.577 |                    |
| - | 22 | 6093      | rf.2_Frame_Shift_l                          | NM_002160    | NP_002151    | P24821      | TENA_HUMAN  | nectin type-l              | NA | 7             | TGCCCGGGGGGG       | 0.478 | rs148674204        |
| + | 2  | 218_219   |                                             | NM_001145249 | NP_001138721 | P0CG42      | F157B_HUMAN | Gln-rich.                  | NA | 0             | cagcggcgccagcag    | 0.386 |                    |
| + | 5  | 716_718   | 04eib.1_In_Frame                            | NM_016607    | NP_057691    | Q9UH62      | ARMX3_HUMAN |                            | NA | 2             | FGGTCTGATGAT       | 0.448 |                    |
| + | 3  | 1864_1866 | Q581del MAMLD1                              | NM_005491    | NP_005482    | Q13495      | MAMD1_HUMAN | Poly-Gln.                  | NA | 0             | Tgcagctgcagcagca   | 0.488 |                    |
| - | 3  | 274_276   | fen.2_Intron CD9E                           | NM_031462    | NP_113650    | Q8TCZ2      | C99L2_HUMAN | ar (Potential              | NA | 3             | GGTTGTGGTGGT       | 0.552 |                    |
| - | 8  | 877_879   |                                             | NM_001561    | NP_001552    | Q07011      | TNR9_HUMAN  | ential). Inter: p.E250G(1) |    | 4             | TCCTCCTTCTCT       | 0.379 |                    |
| - | 7  | 868_869   | p.F153fs C1orf201_uc001bjd.2_Frame_Shift_De | p.F24        | Q5TH74       | CA201_HUMAN |             |                            | 2  | ACGGGAAAAGAC  | 0.455              |       |                    |
| - | 8  | 728_730   | 142del EYA3_uc0                             | NM_001990    | NP_001981    | Q99504      | EYA3_HUMAN  |                            | 3  | :GCTACTGCTGCT | 0.404              |       |                    |
| - | 1  | 702_704   |                                             | NM_001080418 | NP_001073887 | O95886      | DLGP3_HUMAN | Poly-His.                  |    | 3             | :CGGGACtgggtgt     | 0.537 |                    |
| + | 7  | 798_799   |                                             | NM_033055    | NP_149044    | Q96MC6      | HIAT1_HUMAN | lasmic (Potential).        |    | 0             | TCCAGCTTTTTT       | 0.386 |                    |
| + | 8  | 2280      | zr.1_Frame_Shift                            | NM_004326    | NP_004317    | O00512      | BCL9_HUMAN  | y-Pro. Pro-rich.           |    | 6             | :GAGGACCCCCC       | 0.582 |                    |
| + | 8  | 3460      | zr.1_Frame_Shift                            | NM_004326    | NP_004317    | O00512      | BCL9_HUMAN  | Pro-rich.                  |    | 6             | TAAGTCCCCCC        | 0.622 |                    |
| - | 11 | 2245_2247 | H700del PBXIP1_u                            | NM_020524    | NP_065385    | Q96AQ6      | PBIP1_HUMAN | His-rich.                  |    | 1             | CCCCGGTGGTG        | 0.64  | rs143592003        |
| - | 2  | 1126      | 1fpt.1_Frame_Shif                           | NM_030980    | NP_112242    | Q9H9L3      | I20L2_HUMAN | Exonuclease.               |    | 2             | GTTGAGGGGGGG       | 0.557 |                    |
| - | 1  | 356_358   |                                             | NM_030916    | NP_112178    | Q96NY8      | PVRL4_HUMAN |                            |    | 2             | :CAGTAGCAGCA       | 0.512 |                    |
| - | 2  | 1361_1363 | .2_Intron RGL1_u                            | NM_203454    | NP_982279    | Q8WW27      | ABEC4_HUMAN |                            |    | 0             | TCCTTTCTTCTT       | 0.419 | rs141411396        |
| - | 1  | 89_91     |                                             | NM_000537    | NP_000528    | P00797      | RENI_HUMAN  |                            |    | 4             | :CCAGAGCAGCA       | 0.581 | 917743;rs142739309 |
| - | 1  | 479       |                                             | NM_032833    | NP_116222    | Q5SWA1      | PR15B_HUMAN |                            |    | 2             | GAGGGAAAAAG        | 0.622 |                    |
| - | 2  | 253       | 10pte.1_Frame_St                            | NM_018252    | NP_060722    | Q9H813      | TM206_HUMAN | lasmic (Potential).        |    | 1             | :CTGCTCGTCTGC      | 0.542 |                    |
| - | 38 | 5610      | hgh.1_Frame_Shi                             | NM_018072    | NP_060542    | Q9H583      | HEAT1_HUMAN |                            |    | 3             | TGTAAGTTTTTTT      | 0.438 |                    |
| - | 16 | 6375      | 1843fs JMJD1C_u                             | NM_032776    | NP_116165    | Q15652      | JHD2C_HUMAN |                            |    | 6             | TTTACCTTTTTTT      | 0.373 |                    |
| - | 5  | 848_849   |                                             | NM_004969    | NP_004960    | P14735      | IDE_HUMAN   |                            |    | 3             | CTAAACACAAA        | 0.337 |                    |
| - | 7  | 1155_1156 | spo.1_Frame_Shift                           | NM_021828    | NP_068600    | Q8WWQ2      | HPSE2_HUMAN |                            |    | 1             | CACTTCTGAAT        | 0.465 |                    |
| + | 1  | 655       | _p.1177fs CNNM2                             | NM_017649    | NP_060119    | Q9H8M5      | CNNM2_HUMAN |                            |    | 2             | :GAGATCAAACCC      | 0.637 |                    |
| + | 21 | 3110      | CS3_uc010qqz.1_                             | NM_014978    | NP_055793    | Q9UPU3      | SORC3_HUMAN | renal (Potential).         |    | 10            | :ACTTTGGACAGC      | 0.453 |                    |
| + | 3  | 305       | 10qsx.1_RNA FAM                             | NM_207009    | NP_996892    | Q8TCE6      | FA45A_HUMAN |                            |    | 1             | GACTCATTTTTT       | 0.299 |                    |
| - | 22 | 2979      | 01nts.1_Frame_S                             | NM_153265    | NP_694997    | Q32P44      | EMAL3_HUMAN |                            |    | 1             | GGAGCGGGGGC        | 0.512 |                    |
| + | 4  | 308       | TS_uc009yyo.2_Rf                            | NM_000317    | NP_000308    | Q03393      | PTPS_HUMAN  |                            |    | 0             | :GATCTCAAAAAA      | 0.408 |                    |
| - | 22 | 3672_3674 | 1qfl.2_In_Frame_C                           | NM_020228    | NP_064613    | Q9NQV6      | PRD10_HUMAN | Poly-Thr.                  |    | 1             | :CCGTTGGTGGT       | 0.547 |                    |
| - | 3  | 257_259   |                                             | NM_006248    | NP_006239    |             |             |                            |    | 0             | TCCTGGAGGAG        | 0.601 |                    |
| + | 3  | 968       | v1_uc009zmb.1_Fr                            | NM_002135    | NP_002126    | P22736      | NR4A1_HUMAN |                            |    | 0             | CAGCTGGGGGA        | 0.632 |                    |
| + | 1  | 592       |                                             | NM_001005497 | NP_001005497 | A6NL08      | O6C75_HUMAN | Name=5; (Potential).       |    | 3             | ATGGCATTTTTTT      | 0.393 |                    |
| + | 3  | 344_345   | i_p.S78fs RFC3_u                            | NM_002915    | NP_002906    | P40938      | RFC3_HUMAN  |                            |    | 0             | TCATCTAAAAAA       | 0.267 |                    |
| - | 14 | 3949_3950 | C3H13_uc001vas.                             | NM_015070    | NP_055885    | Q5T200      | ZC3HD_HUMAN | Potential.                 |    | 2             | gtatctctctctctctc  | 0.178 |                    |
| + | 4  | 541       | 1_Frame_Shift_De                            | NM_144595    | NP_653196    | Q8ND83      | SLA11_HUMAN |                            |    | 2             | TCAGGAAAAAA/       | 0.388 |                    |
| - | 2  | 2153_2154 | p.K560fs LIG4_uc                            | NM_002312    | NP_002303    | P49917      | DNLI4_HUMAN |                            |    | 0             | TTCCGCTTTTTT       | 0.386 |                    |
| - | 16 | 1016      | 4A1_uc010agl.2_l                            | NM_001845    | NP_001836    | P02462      | CO4A1_HUMAN | le-helical region.         |    | 6             | ACTCCCTTTTTCT      | 0.398 |                    |
| - | 19 | 4102_4104 | iq.3_In_Frame_Dr                            | NM_014977    | NP_055792    | Q9UKV3      | ACINU_HUMAN | Asp/Glu/Lys-rich.          |    | 4             | ctctttgtctctctctct | 0.36  |                    |

|   |    |           |                    |              |              |         |             |                                |    |                 |       |
|---|----|-----------|--------------------|--------------|--------------|---------|-------------|--------------------------------|----|-----------------|-------|
| + | 16 | 1812_1813 | SS6_uc001xmy.3_    | NM_004296    | NP_004287    | P49758  | RGS6_HUMAN  | RGS.                           | 3  | ICATCTACAAGCT   | 0.49  |
| + | 8  | 3011_3013 | .Q981del MGA_uc    | NM_001080541 | NP_001074010 | Q81WI9  | MGAP_HUMAN  | Gln-rich.                      | 12 | .GGCACAGCAGC    | 0.458 |
| - | 4  | 744_746   | 2azg.2_In_Frame_   | NM_020447    | NP_065180    | Q5XKK7  | CO017_HUMAN |                                | 0  | CTCTGCAGATG.    | 0.547 |
| + | 15 | 1993_1995 | .S436del SLC5A1    | NM_052944    | NP_443176    | Q8WWWX8 | SC5AB_HUMAN | lasmic (Potential).            | 2  | AGGCCAGCAGC     | 0.542 |
| + | 3  | 625       | .2_Frame_Shift_D   | NM_004937    | NP_004928    | O60931  | CTNS_HUMAN  | lenal (Potential).             | 0  | TTATCCTTTTTCC   | 0.393 |
| + | 1  | 158_160   | ime_Del_p.K7del z  | NM_003457    | NP_003448    | O43670  | ZN207_HUMAN |                                | 0  | TCGCAAGAAGA/    | 0.542 |
| - | 2  | 440_442   |                    | NM_052850    | NP_443082    | Q8TAE8  | G45IP_HUMAN | γ-Gln. Potential.              | 2  | TCCCGCTGCTG/    | 0.635 |
| + | 7  | 1022      | oxru.1_Frame_Shi   | NM_001114093 | NP_001107565 | Q8ND56  | LS14A_HUMAN |                                | 1  | GTCATCGGGGT/    | 0.438 |
| + | 2  | 268_269   | odk.2_In_Frame_l   | NM_001749    | NP_001740    | P04632  | CPNS1_HUMAN | ch (hydrophobic).              | 0  | GGCcgggggcggc   | 0.322 |
| - | 1  | 1653_1654 | IF3C_uc010ykr.1_   | NM_002254    | NP_002245    | O14782  | KIF3C_HUMAN | inesin-motor.                  | 4  | GCAATCCCCCC     | 0.614 |
| - | 5  | 1569_1570 | !sud.1_Frame_Shi   | NM_032788    | NP_116177    | Q96K75  | ZN514_HUMAN |                                | 0  | ATAGGGTTTTTTT   | 0.396 |
| - | 1  | 128       | ime_Shift_Del_p.P  | NM_001087    | NP_001078    | Q13685  | AAMP_HUMAN  |                                | 1  | CCAGTGGGGGG     | 0.617 |
| - | 6  | 760       | p.G168fs DOCK10    | NM_014689    | NP_055504    | Q96BY6  | DOC10_HUMAN |                                | 2  | CTCCACCCCC      | 0.498 |
| + | 1  | 52_54     | .p.L14del CHRN3    | NM_005199    | NP_005190    | P07510  | ACHG_HUMAN  |                                | 0  | CCTCTGCTGC      | 0.655 |
| + | 19 | 2288_2290 | 3_In_Frame_Del_l   | NM_015575    | NP_056390    | Q6Y7W6  | PERQ2_HUMAN | Gln-rich.                      | 7  | TTCCCAGCAGC/    | 0.424 |
| - | 2  | 743       | 13A3_uc010gho.1_   | NM_033550    | NP_291028    | Q96S44  | PRPK_HUMAN  | rotein kinase.                 | 0  | TTCCAGGGGGG     | 0.493 |
| - | 3  | 428_430   | _19DD>D TFIP11_    | NM_012143    | NP_036275    | Q9UBB9  | TFP11_HUMAN | Poly-Asp.                      | 0  | GCTCGTCATCAT/   | 0.532 |
| - | 13 | 2272_2274 | p.2_In_Frame_Del   | NM_001098504 | NP_001091974 | Q92841  | DDX17_HUMAN | Poly-Pro.                      | 4  | ggaggggaggaggag | 0.36  |
| + | 18 | 4729      | ayn.3_Frame_Shif   | NM_001162501 | NP_001155973 | Q9UPQ9  | TNR6B_HUMAN |                                | 0  | GTGCTGGGGGG     | 0.483 |
| + | 3  | 244       | .p.G43fs KCTD6_1   | NM_001128214 | NP_001121686 | Q8NC69  | KCTD6_HUMAN | BTB.                           | 1  | TGTTTGGGGGG     | 0.468 |
| - | 13 | 1581_1583 | _Frame_Del_p.S1'   | NM_015541    | NP_056356    | Q96JA1  | LRIG1_HUMAN | tial). Ig-like C2-type 1. Poly | 5  | GGGAGCTGCTG     | 0.547 |
| - | 5  | 1231      |                    | NM_000097    | NP_000088    | P36551  | HEM6_HUMAN  |                                | 0  | CTCCTGGGGGG     | 0.498 |
| + | 2  | 1293_1295 | y.3_RNA LNP1_uc    | NM_001085451 | NP_001078920 | A1A4G5  | LNP1_HUMAN  | Poly-Asp.                      | 0  | ACAAGATGATG     | 0.507 |
| + | 13 | 2408      | p.K358fs BBX_uc    | NM_001142568 | NP_001136040 | Q8WY36  | BBX_HUMAN   | Lys-rich.                      | 4  | AATTTGAAAAAA/   | 0.383 |
| - | 15 | 2113      | .D11_uc011blr.1_3' | NM_032169    | NP_115545    | Q709F0  | ACD11_HUMAN |                                | 1  | TTACTCCAGGTC    | 0.353 |
| - | 4  | 535       | N1_uc003euu.1_Fi   | NM_019001    | NP_061874    | Q8IZH2  | XRN1_HUMAN  |                                | 3  | TCTGTGGAAT      | 0.284 |
| - | 3  | 271_272   | .1_Frame_Shift_In  | NM_000460    | NP_000451    | P40225  | TPO_HUMAN   |                                | 1  | GACAGCGTTAGC    | 0.515 |
| + | 1  | 425_427   |                    | NM_020368    | NP_065101    | Q9NQZ2  | SAS10_HUMAN | Glu-rich.                      | 0  | gatggcaggaggag  | 0.291 |
| - | 3  | 747_748   | ε_Shift_Ins_p.K74f | NM_003948    | NP_003939    | Q92772  | CDKL2_HUMAN | rotein kinase.                 | 7  | CCATCGTTTTTT    | 0.322 |
| + | 7  | 1570      | hqa.2_Frame_Shil   | NM_080683    | NP_542414    | Q12923  | PTN13_HUMAN |                                | 6  | ATATATCACACTC   | 0.443 |
| + | 3  | 335       | 3C9_uc003ieb.2_F   | NM_005033    | NP_005024    | Q06265  | EXOS9_HUMAN | ARE binding.                   | 0  | GTATTCTTTTTTI   | 0.383 |
| - | 17 | 2126      | .2_Frame_Shift_D   | NM_144643    | NP_653244    | Q96NL6  | SCLT1_HUMAN | Potential.                     | 5  | TTGGCTTTTTTTT   | 0.353 |
| - | 10 | 1909      | -110_uc011cnu.1_F  | NM_006727    | NP_006718    | Q9Y6N8  | CAD10_HUMAN | Extracellular (Potential).     | 12 | AAACTGAAAAAA.   | 0.313 |
| + | 2  | 418       |                    | NM_016048    | NP_057132    | Q96CN7  | ISOC1_HUMAN |                                | 0  | TATTTTGGGGAT.   | 0.378 |
| + | 9  | 1679      | uc003kwr.3_Intron  | NM_003059    | NP_003050    | Q9H015  | S22A4_HUMAN | Δname=12; (Potential).         | 0  | TCACCCTTTTTTT   | 0.418 |
| + | 6  | 912_914   | ame_Del_p.G153d    | NM_001903    | NP_001894    | P35221  | CTNA1_HUMAN |                                | 11 | GGGTGGAGGAG     | 0.512 |
| + | 3  | 227       | .p.G16fs TMEM14    | NM_016462    | NP_057546    | Q9P0S9  | TM14C_HUMAN | ical; (Potential).             | 0  | GCTTTGGCTACC    | 0.453 |
| - | 12 | 1998      | lnba.2_Frame_Shi   | NM_005493    | NP_005484    | Q96S59  | RANB9_HUMAN | action with FMR1.              | 2  | TCAACATTTTTTT   | 0.378 |
| - | 3  | 374       | .p.P100fs FAM65B   | NM_014722    | NP_055537    | Q9Y4F9  | FA65B_HUMAN | cell filopodia formation.      | 1  | TCTTTGGGGGG     | 0.428 |
| - | 1  | 175_176   | 1_RNA HIST1H2A     | NM_021058    | NP_066402    | P06899  | H2B1J_HUMAN |                                | 0  | AACCTGTACAC     | 0.54  |
| + | 4  | 759_761   | me_Del_p.Q194dε    | NM_005007    | NP_004998    | Q9UBC1  | IKBL1_HUMAN |                                | 0  | GTGCCAGCAGC.    | 0.645 |
| - | 12 | 1315      | l009_uc003pkk.2_   | NM_014895    | NP_055710    | Q5TB80  | QN1_HUMAN   |                                | 1  | TTGTCAAAAAAA    | 0.358 |
| - | 10 | 1313_1314 |                    | NM_015718    | NP_056533    | Q9HBY0  | NOX3_HUMAN  | ical; (Potential).             | 1  | CAAGCACACAC/    | 0.53  |
| - | 4  | 864_866   |                    | NM_001002926 | NP_001002926 | Q3B726  | RPA43_HUMAN | Lys-rich.                      | 1  | GCTTTTTCTTCT/   | 0.433 |
| + | 11 | 2523_2524 | yh.1_Frame_Shift   | NM_002214    | NP_002205    | P26012  | ITB8_HUMAN  | m repeats. Extracellular (Pr   | 3  | GACAGTGTGTG     | 0.554 |
| + | 3  | 1631_1632 |                    | NM_147128    | NP_667339    | Q8NHG8  | ZNRF2_HUMAN |                                | 0  | TGAGTAAAGATG    | 0.356 |
| - | 6  | 928_930   | 3tri.2_In_Frame_D  | NM_004577    | NP_004568    | P78330  | SERB_HUMAN  |                                | 2  | CAGCAGGAGGA/    | 0.246 |

rs145794160

|   |    |             |                   |              |              |        |             |                              |    |                 |       |             |
|---|----|-------------|-------------------|--------------|--------------|--------|-------------|------------------------------|----|-----------------|-------|-------------|
| - | 2  | 83_85       | _uc010bj.1_In_Fr  | NM_004603    | NP_004594    | Q16623 | STX1A_HUMAN | lasmic (Potential).          | 0  | AGCGACATCATC    | 0.586 |             |
| - | 5  | 964         | 2_Intron GPC2_uc  | NM_152742    | NP_689955    | Q8N158 | GPC2_HUMAN  |                              | 2  | GGGGACCCCCC     | 0.642 |             |
| + | 5  | 572         | ca.2_Frame_Shift  | NM_015908    | NP_056992    | Q9BXP5 | SRRT_HUMAN  |                              | 2  | ATGCTGGGGGG     | 0.607 |             |
| - | 4  | 3398_3401   | ame_Shift_Del_p.1 | NM_001002814 | NP_001002814 | Q6WKZ4 | RFIP1_HUMAN |                              | 3  | TGTGGTGAGTG1    | 0.549 |             |
| - | 21 | 1921        | lee.1_Frame_Shift | NM_003580    | NP_003571    | Q92636 | FAN_HUMAN   | BEACH.                       | 1  | FGGTGTCACAAA    | 0.423 |             |
| - | 5  | 987_989     |                   | NM_014729    | NP_055544    | Q94900 | TOX_HUMAN   | lization signal (Potential). | 4  | GGATCCTTCTTC    | 0.453 |             |
| - | 1  | 468_469     | Flank COPS5_uc0   | NM_006837    | NP_006828    | Q92905 | CSN5_HUMAN  |                              | 2  | TCCTTAGTCCAG    | 0.545 |             |
| + | 10 | 1740        | LF1_uc003xyf.2_F  | NM_015170    | NP_055985    | Q8IWU6 | SULF1_HUMAN |                              | 7  | TGTGCCTTTTTT    | 0.408 |             |
| - | 14 | 1846_1847   | p.P525fs EIF2C2_  | NM_012154    | NP_036286    | Q9UKV8 | AGO2_HUMAN  | Piwi.                        | 0  | :CCGGCGGGGGG    | 0.644 | rs148575703 |
| - | 2  | 136_138     | _Del_p.24_25AA>   | NM_078480    | NP_510965    | Q9UHX1 | PUF60_HUMAN | homodimerization.            | 0  | :accactgccgccgc | 0.404 |             |
| - | 1  | 592         | _Shift_Del_p.P12f | NM_152572    | NP_689785    | Q96MA6 | KAD8_HUMAN  | p.E13fs*40(2)                | 0  | ATCTCGGGGGG     | 0.697 |             |
| + | 6  | 1019_1020   | Shift_Del_p.Q191f | NM_018360    | NP_060830    | Q9NUQ3 | TXLNG_HUMAN | Potential.                   | 1  | ACATCAGAGAGA    | 0.386 |             |
| + | 20 | 2671_2673   | .E837del CNKSR2   | NM_014927    | NP_055742    | Q8WXI2 | CNKR2_HUMAN | ential. Poly-Glu.            | 2  | gaggaagaggaggag | 0.379 |             |
| + | 8  | 2280        | zr.1_Frame_Shift  | NM_004326    | NP_004317    | O00512 | BCL9_HUMAN  | y-Pro. Pro-rich.             | 6  | :GAGGACCCCCC    | 0.582 |             |
| - | 2  | 3480_3482   | vne.1_In_Frame_C  | NM_007113    | NP_009044    | Q07283 | TRHY_HUMAN  | 30 AA tandem repeats.        | 5  | CCCTTCTCTTCT    | 0.172 |             |
| + | 2  | 672         |                   | NM_001025231 | NP_001020402 | Q5T749 | KPRP_HUMAN  | Gln-rich.                    | 5  | CTACACCCCCC     | 0.572 |             |
| - | 21 | 4220_4223   | ON4L_uc001fmb.:   | NM_001037533 | NP_001032622 | Q3T8J9 | GON4L_HUMAN |                              | 3  | AAGACTGTCTGT    | 0.49  |             |
| - | 2  | 1126        | 1fpt.1_Frame_Shif | NM_030980    | NP_112242    | Q9H9L3 | I20L2_HUMAN | Exonuclease.                 | 2  | GTTGAGGGGGGG    | 0.557 |             |
| - | 6  | 775         | _p.E211fs CALCO   | NM_020898    | NP_065949    | Q9P1Z2 | CACO1_HUMAN |                              | 1  | GATCTCCCATC     | 0.527 |             |
| + | 87 | 13755_13757 |                   | NM_002332    | NP_002323    | Q07954 | LRP1_HUMAN  | ical; (Potential).           | 22 | CTGTTGCTGCT     | 0.557 |             |
| + | 12 | 2732        | q.2_Frame_Shift   | NM_005269    | NP_005260    | P08151 | GLI1_HUMAN  |                              | 15 | TTGATTCCTCCCA   | 0.567 |             |
| - | 21 | 3042        | lbb.1_Frame_Shif  | NM_001077261 | NP_001070729 | Q9Y618 | NCOR2_HUMAN |                              | 4  | ACGATGGGGGG     | 0.652 | rs12321697  |
| + | 1  | 40_42       | uc010brm.1_5'     | NM_012217    | NP_036349    | Q9BZJ3 | TRYD_HUMAN  |                              | 0  | GAGCCTGCTGC     | 0.685 |             |
| + | 13 | 3813_3815   |                   | NM_014712    | NP_055527    | O15047 | SET1A_HUMAN | Ser-rich.                    | 3  | Gctcctcatcctcct | 0.389 |             |
| + | 11 | 2629_2631   | 2gix.2_In_Frame_  | NM_001080424 | NP_001073893 | O15054 | KDM6B_HUMAN | rich. Thr-rich.              | 2  | CGCCGTcaccacc   | 0.369 |             |
| + | 7  | 894         |                   | NM_178170    | NP_835464    | Q86SG6 | NEK8_HUMAN  |                              | 6  | GGTATCCCCCG     | 0.617 |             |
| + | 7  | 1069        | _p.G237fs AP2B1_  | NM_001282    | NP_001273    | P63010 | AP2B1_HUMAN |                              | 1  | TGTCTGGGGAG     | 0.403 |             |
| - | 3  | 1648_1650   | 02sit.3_In_Frame  | NM_015470    | NP_056285    | Q9BXF6 | RFIP5_HUMAN |                              | 0  | GCCTTGTTGGT     | 0.635 |             |
| + | 6  | 641         | IS1_uc010zte.1_F  | NM_021067    | NP_066545    | Q14691 | PSF1_HUMAN  |                              | 2  | CCTATTAAAAAA    | 0.299 |             |
| - | 16 | 5191_5192   | ds.1_Frame_Shift  | NM_033081    | NP_149072    | Q9BTC0 | DIDO1_HUMAN |                              | 6  | GGGGCGGGTGT     | 0.728 |             |
| + | 5  | 1304_1306   |                   | NM_152612    | NP_689825    | Q8IYX3 | CC116_HUMAN |                              | 2  | :CCCTGCAGCAG    | 0.606 |             |
| - | 7  | 789_791     |                   | NM_016449    | NP_057533    | Q6PGQ1 | CV043_HUMAN | Asp-rich.                    | 1  | CTGGGcatcatca   | 0.261 |             |
| - | 30 | 4280_4282   |                   | NM_002473    | NP_002464    | P35579 | MYH9_HUMAN  | Potential.                   | 11 | TTGGCCTCCTC     | 0.65  |             |
| + | 1  | 221_223     |                   | NM_014240    | NP_055055    | Q9UGP4 | LIMD1_HUMAN | tes nuclear export.          | 1  | CCTCCAGCAGC     | 0.626 |             |
| - | 4  | 1613_1615   | 40QQ>Q QRICH1     | NM_198880    | NP_942581    | Q2TAL8 | QRIC1_HUMAN | Gln-rich.                    | 1  | :TTGGAgttgctgtg | 0.36  |             |
| + | 2  | 1293_1295   | y.3_RNA LNP1_uc   | NM_001085451 | NP_001078920 | A1A4G5 | LNP1_HUMAN  | Poly-Asp.                    | 0  | ACAAGATGATG     | 0.507 |             |
| - | 13 | 5978        | .N1917fs GOLGB1   | NM_004487    | NP_004478    | Q14789 | G0GB1_HUMAN | ic (Potential). Potential.   | 10 | AGCTCATTTTTTA   | 0.358 |             |
| + | 1  | 425_427     |                   | NM_020368    | NP_065101    | Q9NQZ2 | SAS10_HUMAN | Glu-rich.                    | 0  | gatggcaggaggag  | 0.291 |             |
| + | 7  | 1407        | _p.G204fs SLC1A3  | NM_004172    | NP_004163    | P43003 | EAA1_HUMAN  |                              | 0  | TGATTGGGGGG     | 0.517 |             |
| + | 11 | 2401        | _p.G581fs LARP1_  | NM_033551    | NP_291029    | Q6PKG0 | LARP1_HUMAN |                              | 4  | ACCCAGGGGGGG    | 0.547 |             |
| - | 5  | 372_374     | aw.3_In_Frame_De  | NM_003322    | NP_003313    | O00294 | TULP1_HUMAN | Poly-Glu.                    | 3  | ctctctctctctctc | 0.389 |             |
| - | 12 | 1315        | l009_uc003pkk.2_  | NM_014895    | NP_055710    | Q5TB80 | QN1_HUMAN   |                              | 1  | TTGTCAAAAAAA    | 0.358 |             |
| - | 17 | 2245        | _p.G723fs ABCB4_  | NM_018849    | NP_061337    | P21439 | MDR3_HUMAN  | ). ABC transmembrane typ     | 6  | TGAAGCCCCC      | 0.453 |             |
| - | 15 | 1860        | s TAF6_uc011kji.1 | NM_139315    | NP_647476    | P49848 | TAF6_HUMAN  |                              | 2  | GTGCTGGGGGG     | 0.657 |             |
| + | 14 | 2288        | z247fs SLC12A9_L  | NM_020246    | NP_064631    | Q9BXP2 | S12A9_HUMAN | ellular (Potential).         | 0  | GGTCTGGGGGC     | 0.692 |             |
| + | 3  | 751         | _Shift_Del_p.W155 | NM_057168    | NP_476509    | Q9UBV4 | WNT16_HUMAN |                              | 5  | GCACTGGGGGG     | 0.532 |             |
| - | 4  | 3398_3401   | ame_Shift_Del_p.1 | NM_001002814 | NP_001002814 | Q6WKZ4 | RFIP1_HUMAN |                              | 3  | TGTGGTGAGTG1    | 0.549 |             |



|   |    |           |                             |              |              |        |             |                             |     |                 |       |            |
|---|----|-----------|-----------------------------|--------------|--------------|--------|-------------|-----------------------------|-----|-----------------|-------|------------|
| + | 1  | 804_805   | 1463_uc003xvh.2             | NM_152414    | NP_689627    | Q8NFJ8 | BHE22_HUMAN | Gly-rich.                   | 0   | cggaagtggcggcg  | 0.584 |            |
| - | 2  |           | P_uc011lwc.1_Intron IKBKAP_ | NM_003640    | NP_003631    | O95163 | ELP1_HUMAN  |                             | 7   | TCGCATGATGA     | 0.404 |            |
| + | 20 | 4967      | 1aoj.2_Frame_Shif           | NM_015215    | NP_056030    | Q9Y6Y1 | CMTA1_HUMAN | IQ 2.                       | 9   | ATGAACAAAAAA    | 0.473 |            |
| - | 19 | 3629_3631 | 0oag.1_In_Frame_            | NM_001009566 | NP_001009566 | O94985 | CSTN1_HUMAN | idic). Cytoplasmic (Potenti | 1   | CCCCCTCCTC      | 0.557 |            |
| + | 9  | 1342      | BLIM1_uc001axh.             | NM_017556    | NP_060026    | Q8WUP2 | FBL1_HUMAN  | nding. LIM zinc-binding 2.  | 1   | ATTCGCCCCCG     | 0.488 |            |
| - | 7  | 894       | 1_Intron MST1P9_            | NR_002729    |              |        |             |                             | 0   | CCCCGCCCCAC     | 0.657 | rs3982176  |
| + | 1  | 528_529   | uc001bve.1_RNA              | NM_052841    | NP_443073    | Q96PN8 | TSSK3_HUMAN | rotein kinase.              | 1   | TTTTCCAAAAA     | 0.52  |            |
| + | 15 | 2319      |                             | NM_017629    | NP_060099    | Q9HCK5 | AGO4_HUMAN  | Piwi.                       | 1   | GGTGCAAAAAA     | 0.383 |            |
| + | 34 | 4444_4446 | 5.E504del MACF1_            | NM_012090    | NP_036222    | Q9UPN3 | MACF1_HUMAN | Poly-Glu.                   | 16  | GTCTGGAGGAG     | 0.389 |            |
| + | 10 | 1573_1575 | .L513del MPL_uc             | NM_005373    | NP_005364    | P40238 | TPOR_HUMAN  | (Potential). F p.L510P(1)   | 363 | GGCCTGCTGC      | 0.65  |            |
| + | 12 | 2824      |                             | NM_014652    | NP_055467    | O94829 | IPO13_HUMAN |                             | 1   | TTCAGGTGGTG     | 0.562 |            |
| - | 4  | 577       | 3mv.1_Frame_Shif            | NM_020365    | NP_065098    | Q9NR50 | EI2BG_HUMAN |                             | 1   | ACCTGCTTTTTT    | 0.318 |            |
| + | 18 | 2455      | _Shift_Del_p.P398           | NM_015112    | NP_055927    | Q6P0Q8 | MAST2_HUMAN | rotein kinase.              | 11  | CGTCCCTTTTTT    | 0.552 |            |
| + | 1  | 333_334   | 1_RNA PCSK9_uc              | NM_174936    | NP_777596    | Q8NBP7 | PCSK9_HUMAN |                             | 4   | ccgctgcactgtct  | 0.574 | rs67610340 |
| - | 1  | 1343      | _5'Flank uc010oo            | NM_002228    | NP_002219    | P05412 | JUN_HUMAN   |                             | 0   | TTCTTGGGGCA     | 0.672 |            |
| + | 15 | 1294      | 3GIP1_uc001dct.2            | NM_032291    | NP_115667    | Q9BQI5 | SGIP1_HUMAN | Pro-rich.                   | 3   | ACAGGCCCCCC     | 0.572 |            |
| - | 1  | 145       | way.2_5'Flank MIE           | NM_024763    | NP_079039    | Q5VTH9 | WDR78_HUMAN |                             | 2   | CACCCCTTTTTT    | 0.622 |            |
| - | 5  | 924_925   | 3IQ3_uc001dfz.3_f           | NM_001105659 | NP_001099129 | A6PVS8 | LRIQ3_HUMAN |                             | 2   | CTGCTGTTTTTT    | 0.327 |            |
| - | 3  | 606       | 3IQ3_uc001dfz.3_f           | NM_001105659 | NP_001099129 | A6PVS8 | LRIQ3_HUMAN | LRRCT.                      | 2   | ATATCCTTTTTT    | 0.378 |            |
| + | 23 | 2276_2278 | 1dge.1_In_Frame_            | NM_015978    | NP_057062    | Q59H18 | TNI3K_HUMAN | Poly-Ser.                   | 10  | CTCACCTTCTCT    | 0.473 |            |
| + | 2  | 248_249   | 3sw.1_Frame_Shif            | NM_003503    | NP_003494    | O00311 | CDC7_HUMAN  |                             | 5   | CTCTTTAAAAAA    | 0.406 |            |
| + | 14 | 1823      | 1dqw.3_Frame_Sh             | NM_001114106 | NP_001107578 | Q8N4M1 | CTL3_HUMAN  | ical; (Potential).          | 1   | GTAGCTTTTTTT    | 0.423 |            |
| + | 5  | 1085      | 1dur.2_Frame_Shi            | NM_020978    | NP_066188    | P19961 | AMY2B_HUMAN |                             | 0   | AATGTAAACTC     | 0.393 |            |
| + | 1  | 654_656   | .2_Intron WNT2B_            | NM_024494    | NP_078613    | Q93097 | WNT2B_HUMAN |                             | 5   | GCTCCTGCTGC     | 0.744 |            |
| - | 5  | 473       |                             | NM_005725    | NP_005716    | O60636 | TSN2_HUMAN  | ellular (Potential).        | 0   | ATTGCCTTTTCC    | 0.418 |            |
| + | 1  | 33        | el_p.F4fs PSMB4_            | NM_002796    | NP_002787    | P28070 | PSB4_HUMAN  |                             | 2   | AAGCGTTTTTGC    | 0.547 |            |
| + | 2  | 73_75     |                             | NM_173080    | NP_775103    | Q96P11 | SPRR4_HUMAN | Gln-rich.                   | 0   | TCTCCcagcagca   | 0.433 |            |
| - | 2  | 140_142   |                             | NM_001014291 | NP_001014313 | Q9BYE4 | SPR2G_HUMAN |                             | 0   | TGCACTGCTGC     | 0.552 |            |
| - | 3  | 201       |                             | NM_002964    | NP_002955    | P05109 | S10A8_HUMAN | EF-hand 2.                  | 0   | CACCCCTTTTCT    | 0.507 |            |
| - | 1  | 422_424   | ox.1_In_Frame_De            | NM_002249    | NP_002240    | Q9UGI6 | KCNN3_HUMAN | Poly-Gln.                   | 1   | gctgtgtgctgctg  | 0.236 |            |
| - | 8  | 668       | GPATCH4_uc001fj             | NM_015590    | NP_056405    | Q5T3I0 | GPTC4_HUMAN | Potential.                  | 1   | TTTTCTTTTTTT    | 0.537 |            |
| - | 4  | 1309      |                             | NM_006617    | NP_006608    | P48681 | NEST_HUMAN  | Tail.                       | 6   | GGTGTGGGGGG     | 0.597 |            |
| - | 6  | 1404_1406 | 3.V48del PVRL4_u            | NM_030916    | NP_112178    | Q96NY8 | PVRL4_HUMAN | ical; (Potential).          | 2   | TGAGCACCACC     | 0.571 |            |
| + | 3  | 338_340   |                             | NM_001102566 | NP_001096036 | A6NKN8 | PC4L1_HUMAN |                             | 0   | AGGCGGAGGAG     | 0.488 |            |
| - | 6  | 1020_1021 | 3A11_uc010pmq.1             | NM_178527    | NP_848622    | Q5TAH2 | S9A11_HUMAN |                             | 2   | ATTTCCAAAAAA    | 0.282 |            |
| + | 17 | 2127      | 3ps.2_Frame_Shift           | NM_001357    | NP_001348    | Q08211 | DHX9_HUMAN  | case C-terminal.            | 2   | TGTTGGTTTTTT    | 0.378 |            |
| + | 22 | 2922_2924 |                             | NM_018085    | NP_060555    | Q96P70 | IP09_HUMAN  |                             | 2   | gaggaagaggaggag | 0.33  |            |
| + | 5  | 642_643   | 111A_uc001haf.2_f           | NM_014827    | NP_055642    | O75152 | ZC11A_HUMAN | 3H1-type 1.                 | 2   | ACTGCTATTTTT    | 0.371 |            |
| - | 4  | 1497      | C2B_uc001hax.1_             | NM_002646    | NP_002637    | O00750 | P3C2B_HUMAN |                             | 7   | TGTGGCAAAATG    | 0.512 |            |
| + | 5  | 701       | z.2_RNA CR1L_uc             | NM_175710    | NP_783641    | Q2VPA4 | CR1L_HUMAN  | Sushi 3.                    | 0   | GAGGGAAAAAG     | 0.507 |            |
| + | 2  | 420       | _Shift_Del_p.S42fs          | NM_016121    | NP_057205    | Q9Y597 | KCTD3_HUMAN | BTB.                        | 3   | AGATTCTTTTTT    | 0.229 |            |
| - | 6  | 886       | _Shift_Del_p.K69fs          | NM_001031685 | NP_001026855 | Q13625 | ASPP2_HUMAN |                             | 3   | TCTCACTTTTTT    | 0.368 |            |
| + | 27 | 7308      | CN_uc001hsp.1_F             | NM_001098623 | NP_001092093 | Q5VST9 | OBSCN_HUMAN |                             | 28  | AGGCTGGGGGG     | 0.662 |            |
| + | 3  | 1325      |                             | NM_021205    | NP_067028    | Q7L0Q8 | RHOU_HUMAN  |                             | 0   | GAACTCTAAAA     | 0.458 |            |
| + | 15 | 3795      | orf18_uc001iik.2_li         | NM_017782    | NP_060252    | Q5VWN6 | CJ018_HUMAN |                             | 2   | CCTTTGAAAAAA    | 0.413 |            |
| + | 21 | 2931      |                             | NM_002216    | NP_002207    | P19823 | ITIH2_HUMAN |                             | 3   | AGTGGAAAAGG     | 0.438 |            |
| - | 14 | 1771      | BL_uc001iqk.2_Int           | NM_006393    | NP_006384    | O76041 | NEBL_HUMAN  | Nebulin 12.                 | 2   | TTTCCCTTAATT    | 0.453 |            |

|   |    |             |                    |              |              |        |             |                              |    |                 |       |
|---|----|-------------|--------------------|--------------|--------------|--------|-------------|------------------------------|----|-----------------|-------|
| - | 17 | 1780        | p.N459fs MPP7_u    | NM_173496    | NP_775767    | Q5T2T1 | MPP7_HUMAN  | ylate kinase-like.           | 1  | ACTTTGTTTTTAC   | 0.363 |
| - | 15 | 1912        | p.K570fs FRMPD:    | NM_001018071 | NP_001018081 | Q68DX3 | FRPD2_HUMAN | FERM.                        | 1  | 3TGAACTTTTTTI   | 0.463 |
| - | 12 | 1806_1808   | jh.2_in_Frame_De   | NM_138932    | NP_620310    | Q9NQ94 | A1CF_HUMAN  |                              | 1  | Aagcagtagcagcag | 0.433 |
| + | 10 | 3102        |                    | NM_032199    | NP_115575    | Q14865 | ARI5B_HUMAN |                              | 4  | CAGGGAAAAAG     | 0.607 |
| + | 10 | 1226_1228   | p.Q98del ZMIZ1_u   | NM_020338    | NP_065071    | Q9ULJ6 | ZMIZ1_HUMAN |                              | 4  | CGGGGCAGCAG     | 0.65  |
| + | 22 | 3201        | p.P753fs ZMIZ1_    | NM_020338    | NP_065071    | Q9ULJ6 | ZMIZ1_HUMAN | Pro-rich.                    | 4  | CGCCTCCCCCA     | 0.652 |
| + | 10 | 1630        | STAMBPL1_uc001     | NM_020799    | NP_065850    | Q96FJ0 | STALP_HUMAN |                              | 1  | 3CTTGTAAAAAA    | 0.423 |
| + | 4  | 743         | c010qnb.1_Intron   | NM_000043    | NP_000034    | P25445 | TNR6_HUMAN  | . Extracellular (Potential). | 2  | CCAAACTTTTTTT   | 0.368 |
| + | 11 | 1237        | HECTD2_uc001kh     | NM_182765    | NP_877497    | Q5U5R9 | HECD2_HUMAN |                              | 1  | AGCTGCAAAAAA    | 0.318 |
| + | 9  | 6800        | :001lfz.2_Frame_S  | NM_206862    | NP_996744    | O95359 | TACC2_HUMAN |                              | 10 | AGAGACCCCCC     | 0.522 |
| + | 16 | 1588_1589   | iT1_uc009xzz.1_F   | NM_007329    | NP_015568    | Q9UGM3 | DMBT1_HUMAN | SRCR 4.                      | 7  | 3CCCTGAGGCTC    | 0.535 |
| + | 48 | 4948        | 3.R1649fs DOCK1    | NM_001380    | NP_001371    | Q14185 | DOCK1_HUMAN |                              | 9  | AGCCGCCCCCG     | 0.587 |
| + | 6  | 663_665     | me_Del_p.E180de    | NM_020901    | NP_065952    | Q9P1Y6 | PHRF1_HUMAN | Poly-Glu.                    | 0  | GAGCGAGGAGG     | 0.616 |
| + | 1  | 483         | _uc001mam.1_Int    | NM_001004750 | NP_001004750 | Q9H340 | O51B6_HUMAN | ellular (Potential).         | 2  | CGCCTACACTG     | 0.478 |
| - | 9  | 829_831     | 4A1_uc010rcp.1_f   | NM_002786    | NP_002777    | P25786 | PSA1_HUMAN  |                              | 2  | AGACACATCATC    | 0.36  |
| - | 3  | 345         | 0rew.1_Frame_Shi   | NM_001001991 | NP_001001991 | Q6UXH9 | PAMR1_HUMAN |                              | 2  | AGGTACCCCCC     | 0.517 |
| - | 8  | 778         |                    | NM_004308    | NP_004299    | Q07960 | RHG01_HUMAN | SH3-binding.                 | 1  | 3GGCAGGGGGG     | 0.642 |
| - | 15 | 2895_2897   | 229PP>P FNBP4_     | NM_015308    | NP_056123    | Q8N3X1 | FNBP4_HUMAN | Pro-rich.                    | 1  | gggggggaggaggag | 0.32  |
| - | 13 | 2405        | 3P4_uc001ngj.2_Fi  | NM_015308    | NP_056123    | Q8N3X1 | FNBP4_HUMAN |                              | 1  | GGGCAGGGGGC     | 0.428 |
| + | 2  | 222_224     | 01nkr.1_In_Frame_  | NM_000062    | NP_000053    | P05155 | IC1_HUMAN   |                              | 1  | 3CCTCTGCTGC     | 0.709 |
| - | 8  | 877         | 1_Frame_Shift_D    | NM_015853    | NP_056937    | Q04323 | UBXN1_HUMAN | raction with BRCA1.          | 0  | 3TTCCTCCCCACC   | 0.637 |
| - | 12 | 1894_1896   | del SF1_uc001obc   | NM_004630    | NP_004621    | Q15637 | SF01_HUMAN  | Pro-rich.                    | 3  | 3GGAGGCTGCTG    | 0.66  |
| + | 10 | 3373        | 11oep.1_Frame_Si   | NM_001099409 | NP_001092879 | Q8N3D4 | EH1L1_HUMAN |                              | 1  | 3GCCCTGGTCAG    | 0.602 |
| + | 4  | 382         | 3NX32_uc010rop.1   | NM_152760    | NP_689973    | Q86XE0 | SNX32_HUMAN | PX.                          | 0  | 3CAGATCCCCCC    | 0.612 |
| - | 15 | 4531        | 1UMA1_uc001om.2    | NM_006185    | NP_006176    | Q14980 | NUMA1_HUMAN | Potential.                   | 8  | 3CCAGCCCCCG     | 0.622 |
| + | 7  | 1097        | 3xb.2_Frame_Shift  | NM_032564    | NP_115953    | Q96PD7 | DGAT2_HUMAN | asmic (Potential).           | 0  | 3CCTTTGGAGAG    | 0.527 |
| - | 6  | 1081_1083   | ne_Del_p.D183del   | NM_002576    | NP_002567    | Q13153 | PAK1_HUMAN  | ction with CRIPAK.           | 4  | 3GGGTAGcatcatc  | 0.429 |
| + | 10 | 2065_2067   | Orsp.1_In_Frame_   | NM_020798    | NP_065849    | Q9P2H5 | UBP35_HUMAN |                              | 3  | 3CTGCGCCGCC     | 0.665 |
| + | 9  | 4910_4912   |                    | NM_001008781 | NP_001008781 | Q8TDW7 | FAT3_HUMAN  | Extracellular (Potential).   | 5  | 3ACATGACGACG    | 0.463 |
| + | 10 | 1135        | p.H268fs C11orf5   | NM_014039    | NP_054758    | Q9H0W9 | CK054_HUMAN |                              | 0  | CACTCATTTTTTI   | 0.378 |
| - | 20 | 2272_2274   | .D667del MRE11A    | NM_005591    | NP_005582    | P49959 | MRE11_HUMAN |                              | 5  | 3AAGATCATCAT    | 0.325 |
| + | 1  | 184         |                    | NM_003658    | NP_003649    | Q9UMQ3 | BARX2_HUMAN |                              | 0  | 3CCTCTACTCCG    | 0.577 |
| - | 27 | 3275        |                    | NM_004963    | NP_004954    | P25092 | GUC2C_HUMAN | asmic (Potential).           | 6  | 3CTGGGTTTTTG    | 0.428 |
| - | 17 | 2565        | p.N609fs NELL2_    | NM_001145108 | NP_001138580 | Q99435 | NELL2_HUMAN | VWFC 3.                      | 4  | 3GTGCATTTTCC    | 0.323 |
| - | 12 | 4127_4129   | 3w.2_In_Frame_De   | NM_004719    | NP_004710    | Q99590 | SCAFB_HUMAN | Pro-rich.                    | 0  | 3AGGGGTGGTG     | 0.483 |
| - | 11 | 3063_3064   | p.E611fs SFRS2IP   | NM_004719    | NP_004710    | Q99590 | SCAFB_HUMAN | Arg-rich.                    | 0  | 3TCTTTCTCTCT    | 0.446 |
| + | 2  | 157         | 40B_uc001ruq.1_f   | NM_001031698 | NP_001026868 | Q6NWY9 | PR40B_HUMAN | Pro-rich.                    | 5  | 3GTATCCCCCC     | 0.607 |
| + | 1  | 298         |                    | NM_001005497 | NP_001005497 | A6NL08 | O6C75_HUMAN | Name=3; (Potential).         | 3  | 3AGCTATTTTTTI   | 0.438 |
| + | 30 | 3307        | 3jr.2_Frame_Shift_ | NM_015292    | NP_056107    | Q9BSJ8 | ESYT1_HUMAN |                              | 5  | 3CCTTTCCCAGG    | 0.458 |
| + | 23 | 2669        | 3rr.1_Frame_Shift_ | NM_004984    | NP_004975    | Q12840 | KIF5A_HUMAN |                              | 3  | 3ACAGTGGGGGC    | 0.502 |
| - | 3  | 695_696     | ame_Shift_Ins_p.   | NM_001478    | NP_001469    | Q00973 | B4GN1_HUMAN | renal (Potential).           | 0  | 3GGAGCCCCC      | 0.589 |
| - | 9  | 979_980     | .2_5'Flank CEP29   | NM_025114    | NP_079390    | O15078 | CE290_HUMAN | Potential.                   | 7  | 3TCATAGTTTTTT   | 0.317 |
| + | 5  | 577_578     | Osye.1_Frame_Sh    | NM_152591    | NP_689804    | Q8NA47 | CCD63_HUMAN | Potential.                   | 8  | AGATGGAAAAAA    | 0.416 |
| - | 64 | 11032_11034 |                    | NM_001109662 | NP_001103132 |        |             |                              | 2  | 3GCACAGCAGC     | 0.64  |
| - | 10 | 1574        |                    | NM_173598    | NP_775869    | Q6VAB6 | KSR2_HUMAN  | Pro-rich.                    | 15 | AGGGAGGGGGG     | 0.632 |
| + | 5  | 848_850     |                    | NM_014730    | NP_055545    | Q14165 | MLEC_HUMAN  | . Luminal (Potential).       | 1  | gaagaggaagaaga  | 0.404 |
| + | 7  | 941         | 3F3_uc001uqw.2_l   | NM_006646    | NP_006637    | Q9UPY6 | WASF3_HUMAN |                              | 1  | ACTAGGTGTGTG    | 0.475 |

rs111325595

|   |    |           |                    |              |              |         |              |                              |     |                   |       |                    |
|---|----|-----------|--------------------|--------------|--------------|---------|--------------|------------------------------|-----|-------------------|-------|--------------------|
| + | 10 | 1588      | uqw.2_Frame_Shif   | NM_006646    | NP_006637    | Q9UPY6  | WASF3_HUMAN  | WH2.                         | 1   | :AACTGAAAAAGC     | 0.507 |                    |
| + | 9  | 2007      | p.K603fs CKAP2_    | NM_001098525 | NP_001091995 | Q8WWWK9 | CKAP2_HUMAN  |                              | 2   | :GTGTGAAAAAAA/    | 0.318 |                    |
| - | 5  | 1255      |                    | NM_012158    | NP_036290    | Q9UKT7  | FBXL3_HUMAN  |                              | 0   | TCATATAAAAAAA     | 0.418 |                    |
| - | 38 | 5521      | laev.2_Frame_Shif  | NM_015057    | NP_055872    | O75592  | MYCB2_HUMAN  |                              | 14  | :\ACTGTGGTCAT     | 0.443 |                    |
| + | 2  | 950_951   | RK5_uc010tic.1_li  | NM_015567    | NP_056382    | O94991  | SLIK5_HUMAN  | Extracellular (Potential).   | 5   | GCTGATCTCTCT      | 0.525 |                    |
| + | 5  | 928       | C2_uc001vod.2_F    | NM_001144072 | NP_001137544 | Q8NBM4  | UBAC2_HUMAN  | ellular (Potential).         | 1   | AGAGTCCAAGTC      | 0.358 |                    |
| - | 2  | 2808_2810 | 6PP>P SALL2_uc(    | NM_005407    | NP_005398    | Q9Y467  | SALL2_HUMAN  | Poly-Pro.                    | 3   | :GTCAGGTGGGTG     | 0.571 | rs113881459        |
| - | 13 | 1508      | p.Q403fs RBM23_    | NM_001077351 | NP_001070819 | Q86U06  | RBM23_HUMAN  |                              | 1   | GGTCTGGGGGG       | 0.507 |                    |
| + | 12 | 1197      | E6_uc001wlm.2_F    | NM_006032    | NP_006023    | O95741  | CPNE6_HUMAN  | VWFA.                        | 3   | FCGAATCCCCCC      | 0.602 |                    |
| - | 5  | 904       | _Shift_Del_p.A188  | NM_001099274 | NP_001092744 | Q9BSI4  | TINF2_HUMAN  |                              | 0   | CCAGGCAAGAG,      | 0.517 |                    |
| - | 4  | 510_511   | 1xae.2_Frame_Sh    | NM_006832    | NP_006823    | Q96AC1  | FERM2_HUMAN  |                              | 0   | :TTCTTCTTTTTT     | 0.381 |                    |
| - | 18 | 1872      | 0apo.2_Frame_Sh    | NM_174978    | NP_777638    | Q08AQ4  | Q08AQ4_HUMAN |                              | 4   | TAGCTCAAAAAA/     | 0.289 |                    |
| + | 4  | 1996      | p.Q522fs ZBTB1_    | NM_001123329 | NP_001116801 | Q9Y2K1  | ZBTB1_HUMAN  |                              | 1   | :TATCCAAAAAA      | 0.378 |                    |
| + | 2  | 1168      |                    | NM_018228    | NP_060698    | Q9H8Y1  | VRTN_HUMAN   |                              | 0   | CCACCGGGGGG       | 0.642 |                    |
| - | 16 | 2283      | ALC_uc010tvy.1_    | NM_000153    | NP_000144    | P54803  | GALC_HUMAN   |                              | 0   | ATACCATTTTTTT     | 0.308 |                    |
| - | 10 | 982_984   | .Q250del ATXN3_1   | NM_004993    | NP_004984    | P54252  | ATX3_HUMAN   | Poly-Gln.                    | 0   | :GTCCCCctgtgct    | 0.325 | l74612;rs147904130 |
| + | 7  | 2314_2316 | .T650del RIN3_uc   | NM_024832    | NP_079108    | Q8TB24  | RIN3_HUMAN   | h RAB5B. Poly-Thr. VPS9.     | 3   | :CTGGCCACCAC      | 0.567 |                    |
| + | 6  | 1030      | n.2_RNA CHGA_u     | NM_001275    | NP_001266    | P10645  | CMGA_HUMAN   |                              | 2   | :CCCCACCCGA       | 0.517 |                    |
| - | 7  | 2023      | wo.1_Frame_Shift   | NM_001002860 | NP_001002860 | Q9P203  | BTBD7_HUMAN  |                              | 1   | :CAGCATTTTTTT     | 0.383 |                    |
| - | 24 | 4984      | .K1591fs DICER1_   | NM_030621    | NP_085124    | Q9UPY3  | DICER_HUMAN  |                              | 5   | :\GGGCCTTTTCC     | 0.522 |                    |
| + | 31 | 6475_6476 |                    | NM_001376    | NP_001367    | Q14204  | DYHC1_HUMAN  |                              | 10  | TGTGAAGAGAG/      | 0.46  |                    |
| + | 5  | 799_800   | ic001ymt.2_Frame   | NM_001969    | NP_001960    | P55010  | IF5_HUMAN    |                              | 3   | :GATTCATTAATA     | 0.406 |                    |
| - | 5  | 903_905   | KT1_uc001ypm.2_    | NM_005163    | NP_005154    | P31749  | AKT1_HUMAN   |                              | 134 | TCCATCTCCTCC      | 0.631 |                    |
| - | 8  | 1515_1517 |                    | NM_024490    | NP_077816    | O60312  | AT10A_HUMAN  | Cytoplasmic (Potential).     | 5   | :ACCACCTCCTC      | 0.695 |                    |
| - | 14 | 1621      | MTMR10_uc001zf     | NM_017762    | NP_060232    | Q9NXD2  | MTMRA_HUMAN  | ularin phosphatase.          | 1   | GGTGAGGGGAG       | 0.473 |                    |
| - | 1  | 420       | uc001zib.2_Frame   | NM_133647    | NP_598408    | Q9UHW9  | S12A6_HUMAN  | lasmic (Potential).          | 7   | :ATCCTGGGGGT      | 0.498 |                    |
| + | 10 | 2201      | PAK6_uc010bbn.2_   | NM_001128628 | NP_001122100 | Q9NQU5  | PAK6_HUMAN   | rotein kinase.               | 8   | :TCTCTGGGCAT      | 0.602 |                    |
| - | 12 | 2445_2446 | p.P771fs TP53BP    | NM_005657    | NP_005648    | Q12888  | TP53B_HUMAN  |                              | 7   | :ACTCTGGGAGAT     | 0.45  |                    |
| + | 8  | 1883      | p.K109fs TRIM69_   | NM_182985    | NP_892030    | Q86WT6  | TRIM69_HUMAN | 330.2/SPRY.                  | 0   | :ACCCTAAAACA      | 0.448 |                    |
| + | 18 | 2010_2011 |                    | NM_004212    | NP_004203    | O43868  | S28A2_HUMAN  |                              | 4   | ACTGCTGTGGAT      | 0.421 |                    |
| - | 2  | 1306      |                    | NM_004498    | NP_004489    | Q9UBC0  | HNF6_HUMAN   | Homeobox.                    | 0   | :CATCTGTGAAG/     | 0.448 |                    |
| - | 11 | 1368_1369 | 384fs ZNF280D_u    | NM_017661    | NP_060131    | Q6N043  | Z280D_HUMAN  |                              | 3   | AATTCATGGGGC      | 0.381 |                    |
| - | 3  | 347_349   | C5_uc002apt.1_5    | NM_006049    | NP_006040    | O75971  | SNPC5_HUMAN  | Poly-Glu.                    | 0   | :cttctcttctctctcc | 0.384 |                    |
| + | 2  | 929_931   | l.1_Intron NOX5_u  | NM_145658    | NP_663633    | Q6UW49  | SPESP_HUMAN  | Poly-Ala.                    | 0   | :CTTAGCAGCA       | 0.384 |                    |
| + | 24 | 2916      |                    | NM_003870    | NP_003861    | P46940  | IQGA1_HUMAN  |                              | 8   | CTTACCAAAAAA/     | 0.363 |                    |
| + | 7  | 1780_1782 | .D191del BLM_uc(   | NM_000057    | NP_000048    | P54132  | BLM_HUMAN    | Poly-Asp.                    | 6   | :ACTTTTGATGATC    | 0.374 |                    |
| - | 9  | 996_998   | .E123del VPS33B_   | NM_018668    | NP_061138    | Q9H267  | VP33B_HUMAN  |                              | 2   | :GCCATCCTCCT      | 0.522 | rs147271815        |
| + | 1  | 40_42     | C1_uc010brm.1_5'   | NM_012217    | NP_036349    | Q9BZJ3  | TRYD_HUMAN   |                              | 0   | GAGCCTGCTGC       | 0.685 |                    |
| - | 7  | 1227      | lbsl.1_Frame_Shift | NM_001089    | NP_001080    | Q99758  | ABCA3_HUMAN  |                              | 16  | TCAGGAAAAAGC      | 0.493 |                    |
| - | 1  | 929_930   | rr.2_3'UTR TIGD7_  | NM_033208    | NP_149985    | Q6NT04  | TIGD7_HUMAN  | y similarity). HTH psq-type. | 0   | :TCTTATTTTTT      | 0.361 |                    |
| + | 3  | 184_186   | f62_uc010vas.1_ε   | NM_020314    | NP_064710    | Q7Z3J2  | CP062_HUMAN  | Ser-rich.                    | 1   | :CACGCTCCTCT      | 0.562 |                    |
| + | 22 | 3160      | hft_Del_p.G998fs   | NM_007245    | NP_009176    | Q8WWW7  | ATX2L_HUMAN  |                              | 2   | :GTCATGGGGGG      | 0.682 |                    |
| + | 16 | 2756      | ne_Shift_Del_p.F6  | NM_006662    | NP_006653    | Q6ZRS2  | SRCAP_HUMAN  | ase ATP-binding.             | 4   | :ATGCACTTTTTG/    | 0.512 |                    |
| + | 10 | 1333_1334 | p.C352fs RSPPRY1   | NM_133368    | NP_588609    | Q96DX4  | RSPPRY_HUMAN | 330.2/SPRY.                  | 1   | GCGTTGCACCTI      | 0.485 |                    |
| - | 13 | 1866      | p.P392fs FHOD1_    | NM_013241    | NP_037373    | Q9Y613  | FHOD1_HUMAN  | H1. Poly-Prp.P585fs*43(1)    | 3   | GGGGAGGGGGG       | 0.622 |                    |
| - | 3  | 888_890   | jt.1_In_Frame_De   | NM_001082486 | NP_001075955 | Q96AP0  | ACD_HUMAN    |                              | 1   | :TCCTGCAGCAG      | 0.65  |                    |
| + | 16 | 2002_2004 | ne_Del_p.S549del   | NM_014329    | NP_055144    | Q6P2E9  | EDC4_HUMAN   | Ser-rich.                    | 4   | CTCTCCcagcagc     | 0.453 |                    |

|   |    |           |                                                 |           |           |        |             |                             |              |   |                   |       |             |
|---|----|-----------|-------------------------------------------------|-----------|-----------|--------|-------------|-----------------------------|--------------|---|-------------------|-------|-------------|
| + | 10 | 2333      | vli.1_Frame_Shift                               | NM_001793 | NP_001784 | P22223 | CADH3_HUMAN | r (Potential).              | p.?(1)       | 5 | AGGCCAAAAAC       | 0.522 |             |
| + | 3  | 992_994   |                                                 | NM_018975 | NP_061848 | Q9NYB0 | TE2IP_HUMAN | Glu-rich (acidic).          |              | 1 | 'gaggaggaagaaga   | 0.369 | rs140846731 |
| + | 5  | 718       | _p.L86fs CNTNAP                                 | NM_033401 | NP_207837 | Q9C0A0 | CNTP4_HUMAN | (Potential).                | F5/8 type C. | 2 | CTCCTGATGTT       | 0.493 |             |
| - | 6  | 1365      |                                                 | NM_020310 | NP_064706 | Q99583 | MNT_HUMAN   |                             |              | 1 | gtgggtgctgggggtgc | 0.353 |             |
| - | 3  | 1104_1105 | gat.2_Frame_Shif                                | NM_014519 | NP_055334 | Q9UNY5 | ZN232_HUMAN | SCAN box.                   |              | 2 | CTCTTAGGGTGA      | 0.55  |             |
| - | 1  | 143_145   | HX33_uc010cif.2_                                | NM_020162 | NP_064547 | Q9H6R0 | DHX33_HUMAN |                             |              | 2 | 'CCGGCCTCCTC      | 0.724 |             |
| + | 4  | 597       | clt.1_Frame_Shift                               | NM_181844 | NP_862827 | Q8N143 | BCL6B_HUMAN | Pro-rich.                   |              | 1 | 'CAAGGCCCCCC      | 0.617 |             |
| - | 7  | 934       | ggo.1_Frame_Shif                                | NM_020360 | NP_065093 | Q9NRY6 | PLS3_HUMAN  | smic (By similarity).       |              | 0 | .CCAGGCCCCCC      | 0.612 |             |
| - | 16 | 2205_2207 | PER1_uc010vur.1_                                | NM_002616 | NP_002607 | O15534 | PER1_HUMAN  | binding domain (By similar  |              | 9 | GTATAGGAGGA       | 0.586 |             |
| + | 9  | 1165_1167 | .2_3'UTR NDEL1_                                 | NM_030808 | NP_110435 | Q9GZM8 | NDEL1_HUMAN | Interaction with NEFL (By s |              | 0 | :CCCGCTCCTCC'     | 0.576 |             |
| + | 4  | 797_798   | ame_Shift_Del_p.L                               | NM_153210 | NP_694942 | Q70EL4 | UBP43_HUMAN |                             |              | 5 | TTTCCTGTGTGT      | 0.515 |             |
| + | 5  | 454       | ocrt.2_Frame_Shif                               | NM_003170 | NP_003161 | Q7KZ85 | SPT6H_HUMAN | Asp/Glu-rich.               |              | 3 | CGTGTCAAAAAA      | 0.483 |             |
| + | 12 | 1137      | HOT1_uc002hgx.2                                 | NM_018307 | NP_060777 | Q8IXI2 | MIRO1_HUMAN | intermembrane (Potential).  |              | 4 | ACTACTGAATTA      | 0.239 |             |
| + | 1  | 158_160   | ime_Del_p.K7del z                               | NM_003457 | NP_003448 | O43670 | ZN207_HUMAN |                             |              | 0 | iTCGCAAGAAGA      | 0.542 |             |
| - | 3  | 300       | hks.1_Frame_Shil                                | NM_145898 | NP_665905 | P55773 | CCL23_HUMAN |                             |              | 0 | \GCACTCGCTGT      | 0.532 |             |
| + | 7  | 712       | STAR3_uc010w                                    | NM_006804 | NP_006795 | Q14849 | STAR3_HUMAN | Cytoplasmic (Potential).    |              | 0 | \CCCCTGCTGTT      | 0.627 |             |
| + | 10 | 1737_1738 | cyb.1_Frame_Shil                                | NM_003152 | NP_003143 | P42229 | STA5A_HUMAN |                             |              | 1 | ATGAATCCCCCC      | 0.564 | rs146398782 |
| - | 22 | 3004_3005 | iff.1_Frame_Shift                               | NM_005474 | NP_005465 | Q9UQL6 | HDAC5_HUMAN | one deacetylase.            |              | 1 | TCCAATGGGGGC      | 0.609 |             |
| + | 4  | 641_642   | :103_uc002ihp.1_£                               | NM_213607 | NP_998772 | Q8IW40 | CC103_HUMAN |                             |              | 1 | GGGCAGAGAG        | 0.644 |             |
| - | 8  | 1173      |                                                 | NM_032043 | NP_114432 | Q9BX63 | FANCI_HUMAN | ase ATP-binding.            |              | 1 | TTCTTCCCAGC       | 0.388 |             |
| + | 6  | 911       | .2_RNA DCAF7_u                                  | NM_005828 | NP_005819 | P61962 | DCAF7_HUMAN |                             |              | 1 | \ACAAGCAGGAC      | 0.562 |             |
| - | 11 | 1158_1160 | i.2_In_Frame_Del_                               | NM_017647 | NP_060117 | Q8IY81 | RRMJ3_HUMAN |                             |              | 1 | ccctcttctctctctc  | 0.463 |             |
| + | 14 | 2846_2847 | 3'UTR FAM104A_u                                 | NM_018714 | NP_061184 | Q8WTV3 | COG1_HUMAN  |                             |              | 1 | GTGTGCCCCCC       | 0.584 |             |
| + | 7  | 895_897   | 02jyd.1_In_Frame_                               | NM_173626 | NP_775897 | Q86WA9 | S2611_HUMAN | ical; (Potential).          |              | 0 | GTGATGCTGCT       | 0.675 |             |
| - | 7  | 1099_1100 | :koq.2_Frame_Shil                               | NM_022068 | NP_071351 | Q9H5I5 | PIEZ2_HUMAN | ical; (Potential).          |              | 1 | GAGCTGGACAGC      | 0.53  |             |
| - | 4  | 1755_1756 | CO1_uc002kti.1_F                                | NM_052911 | NP_443143 | Q5FWF5 | ESCO1_HUMAN |                             |              | 0 | AGTGTGTGTTT       | 0.436 | rs151000067 |
| + | 2  | 125       | 1_5'Flank HAUS1_                                | NM_138443 | NP_612452 | Q96CS2 | HAUS1_HUMAN |                             |              | 1 | GTGGTTAAAAAA      | 0.393 |             |
| - | 1  | 700       | ift_Del_p.P157fs £                              | NM_003927 | NP_003918 | Q9UBB5 | MBD2_HUMAN  | MBD.                        |              | 0 | CATCCGGGGGG       | 0.687 |             |
| + | 8  | 995       | VDR7_uc002lgl.1_                                | NM_015285 | NP_056100 | Q9Y4E6 | WDR7_HUMAN  |                             |              | 3 | GGACCGGGGGG       | 0.418 |             |
| - | 2  | 2579      |                                                 | NM_032160 | NP_115536 | Q8IZU8 | DSEL_HUMAN  |                             |              | 6 | CTCGTCCCCCC       | 0.458 |             |
| - | 7  | 1036_1038 | :K72del GTF2F1_                                 | NM_002096 | NP_002087 | P35269 | T2FA_HUMAN  |                             |              | 0 | AAACCCTTCTC'      | 0.611 |             |
| - | 6  | 1269_1270 | xmk.1_Frame_Shil                                | NM_030824 | NP_110451 | Q9H7R0 | ZN442_HUMAN | C2H2-type 2.                |              | 4 | TAGGCCAAAAAA      | 0.401 |             |
| + | 16 | 3826      | :V1000fs NWD1_uc002nev.3_Frame_Shift_Del_p.V92£ | NM_003423 | NP_003414 | P17038 | ZNF43_HUMAN | WD 8.                       |              | 7 | CGGCTGTTTTTG      | 0.552 |             |
| - | 2  | 134       | Splice_Site ZNF43                               | NM_003423 | NP_003414 | P17038 | ZNF43_HUMAN |                             |              | 2 | GTCCTAAAAAA       | 0.386 |             |
| + | 11 | 1438_1440 |                                                 | NM_173479 | NP_775750 | Q6ZMY6 | WDR88_HUMAN | Poly-Ser.                   |              | 3 | CATCGTCATCAT      | 0.527 |             |
| + | 2  | 252_254   | 0eea.2_In_Frame_                                | NM_005306 | NP_005297 | O15552 | FFAR2_HUMAN | Name=2; (Potential).        |              | 1 | 'CCTCTGCTGC'      | 0.645 |             |
| - | 18 | 2238_2240 | !_5YE>* CAPN12_                                 | NM_144691 | NP_653292 | Q6ZSI9 | CAN12_HUMAN | Domain IV. Potential.       |              | 2 | CGACTCGTAGG       | 0.581 | rs150655757 |
| - | 8  | 1256      | 1_5'Flank CAPN12                                | NM_144691 | NP_653292 | Q6ZSI9 | CAN12_HUMAN | alpain catalytic.           |              | 2 | TCCTCTTTTTTC      | 0.652 |             |
| - | 7  | 695       | Q MED29_uc010xt                                 | NM_019088 | NP_061961 | Q8N7H5 | PAF1_HUMAN  |                             |              | 1 | CTGGCTATCCC'      | 0.502 |             |
| + | 8  | 1917      | p.S598fs CEACA                                  | NM_004363 | NP_004354 | P06731 | CEAM5_HUMAN | Ig-like 7.                  |              | 2 | 'CATTTCCTCCC'     | 0.547 |             |
| + | 3  | 1121_1123 | 002ppb.2_5'Flank                                | NM_012099 | NP_036231 | O15446 | RPA34_HUMAN | Poly-Lys.                   |              | 4 | iTCGGAAGAAG.      | 0.581 |             |
| + | 9  | 1037_1039 | ekw.2_RNA SAE1                                  | NM_016402 | NP_057486 | Q9UBE0 | SAE1_HUMAN  |                             |              | 1 | AACAACCTTCTC'     | 0.493 |             |
| - | 9  | 974_975   | pni.2_Frame_Shift                               | NM_003598 | NP_003589 | Q15562 | TEAD2_HUMAN | al activation (Potential).  |              | 3 | \GGCATGGGGGC      | 0.564 |             |
| - | 11 | 1285_1287 | pt.1_RNA FUZ_uc                                 | NM_025129 | NP_079405 | Q9BT04 | FUZZY_HUMAN | Leu-rich.                   |              | 0 | GAGACAGCAGC.      | 0.635 |             |
| + | 4  | 817       | JP62_uc002pqz.2_                                | NM_012068 | NP_036200 | Q9Y2D1 | ATF5_HUMAN  |                             |              | 2 | :CCTTACCCCCC'     | 0.567 |             |
| - | 5  | 1658      | 2_5'Flank ZNF577                                | NM_023074 | NP_075562 | Q9BS31 | ZN649_HUMAN |                             |              | 3 | GATTTTCCACTC'     | 0.403 | rs61731262  |
| - | 3  | 429       |                                                 | NM_024316 | NP_077292 | Q96BZ8 | LENG1_HUMAN |                             |              | 1 | iGGGGGCCCCCT      | 0.642 |             |

|   |     |           |                     |              |              |         |             |                               |     |                |       |
|---|-----|-----------|---------------------|--------------|--------------|---------|-------------|-------------------------------|-----|----------------|-------|
| + | 1   | 728_730   |                     | NM_003108    | NP_003099    | P35716  | SOX11_HUMAN | Poly-Asp.                     | 3   | GATGAGgacgacg  | 0.606 |
| + | 14  | 2400_2401 | 2rbo.1_Frame_Shif   | NM_014668    | NP_055483    | Q4ZG55  | GREB1_HUMAN |                               | 1   | TGCATTCCCCCC   | 0.52  |
| + | 18  | 3087      | Shift_Del_p.L563fe  | NM_014668    | NP_055483    | Q4ZG55  | GREB1_HUMAN |                               | 1   | ACGCTGGAGAT    | 0.657 |
| - | 11  | 1472_1474 | 1_In_Frame_Del_     | NM_015317    | NP_056132    | Q8TB72  | PUM2_HUMAN  | Ala-rich.                     | 1   | TCCAGCTGCTG    | 0.424 |
| - | 32  | 4055_4057 | .K543del OTOF_u     | NM_194248    | NP_919224    | Q9HC10  | OTOF_HUMAN  | ic (Potential). Poly-Lys.     | 7   | CAGTGCCcttctcl | 0.507 |
| - | 3   | 1787_1788 | .l291fs RTN4_uc0    | NM_020532    | NP_065393    | Q9NQC3  | RTN4_HUMAN  | lasmic (Potential).           | 3   | CTTCTATTTTTT   | 0.381 |
| + | 1   | 96_98     | 2sda.2_In_Frame_    | NM_203437    | NP_982261    | Q6ULP2  | AFTIN_HUMAN |                               | 2   | AGAGGATGATG    | 0.409 |
| + | 8   | 2887      |                     | NM_000189    | NP_000180    | P52789  | HXK2_HUMAN  | Regulatory.                   | 2   | TCTTTGGGGGG    | 0.547 |
| - | 13  | 1977      | _p.K440fs GGCX_t    | NM_000821    | NP_000812    | P38435  | VKGC_HUMAN  | ional (Potential).            | 1   | CCACCTTTTCC    | 0.438 |
| + | 5   | 1704_1705 |                     | NM_001011552 | NP_001011552 | Q6AI14  | SL9A4_HUMAN | cellular (Potential).         | 3   | CCCCTTCTCCAT   | 0.441 |
| + | 8   | 824       |                     | NM_182640    | NP_872578    | P82933  | RT09_HUMAN  |                               | 0   | TGAATCAAAAAA   | 0.403 |
| + | 3   | 766       | _1C4_uc010ywr.1_    | NM_006588    | NP_006579    | O75897  | ST1C4_HUMAN |                               | 0   | TGTAAGGTAAA    | 0.378 |
| + | 6   | 2252_2253 | ied.2_Frame_Shift   | NM_181453    | NP_852118    | Q8IWIJ2 | GCC2_HUMAN  | Potential.                    | 1   | GTTCAGAAAAAA   | 0.307 |
| + | 14  | 3080      | fkp.2_Frame_Shif    | NM_019014    | NP_061887    | Q9H9Y6  | RPA2_HUMAN  |                               | 1   | ACACCGGGGAA    | 0.338 |
| - | 12  | 2147      | 9A_uc002uds.1_Fi    | NM_002977    | NP_002968    | Q15858  | SCN9A_HUMAN |                               | 13  | TTGGCTGATGTT   | 0.557 |
| - | 65  | 12348     |                     | NM_004525    | NP_004516    | P98164  | LRP2_HUMAN  | ng (Potential). Extracellular | 29  | CATCGTTTTTCC   | 0.438 |
| + | 5   | 719_721   | ozej.1_In_Frame_I   | NM_145810    | NP_665809    | Q9BWT1  | CDCA7_HUMAN |                               | 1   | CCATGGAGGAG    | 0.537 |
| - | 277 | 79729     | 197fs TTN_uc010:    | NM_133378    | NP_596869    | Q8WZ42  | TITIN_HUMAN |                               | 153 | GTTTTTCCAGAG   | 0.393 |
| - | 15  | 1903      | _Shift_Del_p.l1816  | NM_152525    | NP_689738    | Q53TS8  | AL2SA_HUMAN |                               | 3   | TTTTAATTTTTT   | 0.323 |
| + | 16  | 1908      | _p.L519fs ATIC_ucf  | NM_004044    | NP_004035    | P31939  | PUR9_HUMAN  |                               | 29  | CGAACTGGGAAT   | 0.498 |
| + | 1   | 94_96     | _p.L_uc002vsu.3_5'L | NM_001631    | NP_001622    | P09923  | PPBI_HUMAN  |                               | 1   | TGGGTGCTGCT    | 0.66  |
| + | 2   | 97        |                     | NM_054112    | NP_473453    | Q96PH6  | DB118_HUMAN |                               | 4   | TGGTGAAAAAA    | 0.398 |
| + | 2   | 265       | IFS1_uc010zvl.1_!   | NM_080748    | NP_542786    | P60602  | ROMO1_HUMAN | ical; (Potential).            | 0   | CGCACCTTTTCC   | 0.657 |
| + | 5   | 768_769   | _p.S71fs SFRS6_u    | NM_006275    | NP_006266    | Q13247  | SRSF6_HUMAN | r-rich (RS domain).           | 0   | CTCGATCTAGAA   | 0.421 |
| + | 6   | 686       | ozyk.1_Frame_Sh     | NM_015266    | NP_056081    | Q9Y2E8  | SL9A8_HUMAN | ical; (Potential).            | 1   | TGCTGTTTTTGC   | 0.383 |
| - | 2   | 597       | Shift_Del_p.Q166f   | NM_020436    | NP_065169    | Q9UJQ4  | SALL4_HUMAN |                               | 2   | TCTCTGGGGGG    | 0.577 |
| - | 32  | 3210_3211 |                     | NM_014258    | NP_055073    | Q9BX26  | SYCP2_HUMAN |                               | 5   | TTTATAGTTTTT   | 0.327 |
| + | 3   | 617_619   | me_Del_p.A96del     | NM_016434    | NP_057518    | Q9NZ71  | RTEL1_HUMAN | ase ATP-binding.              | 0   | CAACGCTGCTG    | 0.645 |
| - | 5   | 1145      | _Shift_Del_p.l278   | NM_152505    | NP_689718    | O95447  | LCA5L_HUMAN |                               | 0   | CCTGATTTTTTT   | 0.383 |
| - | 3   | 2043      | ne_Shift_Del_p.S    | NM_001098402 | NP_001091872 | Q9ULJ3  | ZN295_HUMAN |                               | 3   | CATGTGAACTAC   | 0.443 |
| + | 11  | 1360      | laex.1_Frame_Shi    | NM_004571    | NP_004562    | P55347  | PKNX1_HUMAN |                               | 2   | CGGGGCCACCC    | 0.622 |
| + | 6   | 711_713   | 15_uc002zsr.2_In    | NM_001003891 | NP_001003891 | Q96RN5  | MED15_HUMAN | Poly-Gln.                     | 1   | cgagccagcagcag | 0.187 |
| + | 8   | 1169_1171 | .Q341del MED15_     | NM_001003891 | NP_001003891 | Q96RN5  | MED15_HUMAN | r-rich. Poly-Gln.             | 1   | AGGTGCAGCAG    | 0.616 |
| + | 4   | 415_417   | 336_uc010gtw.1_Ir   | NM_004914    | NP_004905    | O95755  | RAB36_HUMAN |                               | 2   | CCAAGGTGGTG    | 0.586 |
| - | 3   | 496_498   |                     | NM_005877    | NP_005868    | Q15459  | SF3A1_HUMAN | Poly-Gln.                     | 5   | TGGTCTGCTGC    | 0.596 |
| + | 6   | 1651_1652 | 0gxz.1_Frame_Sh     | NM_019008    | NP_061881    | Q9NQG6  | SMC7L_HUMAN |                               | 1   | GCCAGCTAACCA   | 0.604 |
| - | 5   | 623       | _p.P162fs NAGA_u    | NM_000262    | NP_000253    | P17050  | NAGAB_HUMAN |                               | 1   | TCTCTGGGGGT    | 0.642 |
| + | 29  | 2853_2854 | CD2_uc003buy.1_     | NM_033084    | NP_149075    | Q9BXW9  | FACD2_HUMAN | p.R926fs*6(2)                 | 4   | TTTTTCCGAGAG   | 0.396 |
| - | 11  | 1376      | 11axh.1_Frame_St    | NM_016141    | NP_057225    | Q9Y6G9  | DC1L1_HUMAN |                               | 1   | GATCAATTTTTT   | 0.398 |
| + | 9   | 1492      | Shift_Del_p.G491f   | NM_007335    | NP_031361    | Q9Y238  | DLEC1_HUMAN |                               | 9   | TCAATGGGGGA    | 0.473 |
| + | 13  | 3220_3222 | NKTR_uc003clq.1     | NM_005385    | NP_005376    | P30414  | NKTR_HUMAN  |                               | 3   | TGAAGAGGAGG    | 0.355 |
| - | 6   | 513_515   | x.2_In_Frame_Del    | NM_020707    | NP_065758    | Q9HCP6  | HHATL_HUMAN |                               | 3   | ACCAAGCAGCA    | 0.621 |
| + | 6   | 1945      | i8_splice ZNF167_   | NM_018651    | NP_061121    | Q9POL1  | ZN167_HUMAN |                               | 2   | ACTGGTAAGAA    | 0.448 |
| - | 7   | 719       | 3dap.2_Frame_St     | NM_006030    | NP_006021    | Q9NY47  | CA2D2_HUMAN | cellular (Potential).         | 1   | TCTGTCCAGTT    | 0.612 |
| - | 1   | 499       | _5'Flank NT5DC2_    | NM_022908    | NP_075059    | Q9H857  | NT5D2_HUMAN |                               | 0   | TGCTGTGGTCTT   | 0.592 |
| + | 21  | 3869      | OBO2_uc011bgk.1     | NM_002942    | NP_002933    | Q9HCK4  | ROBO2_HUMAN | lasmic (Potential).           | 11  | TACCTCCCCCC    | 0.433 |
| - | 5   | 499       | PPA4_uc011bhp.'     | NM_018189    | NP_060659    | Q7L190  | DPPA4_HUMAN |                               | 1   | CTTTAATTTTTT   | 0.413 |

rs141985009



|   |    |           |                   |              |              |        |              |                               |    |                  |       |                    |
|---|----|-----------|-------------------|--------------|--------------|--------|--------------|-------------------------------|----|------------------|-------|--------------------|
| - | 7  | 850       | 03eal.2_Frame_Sl  | NM_001009899 | NP_001009899 | Q68DE3 | K2018_HUMAN  |                               | 3  | CAATAATTTTTTTT   | 0.373 |                    |
| + | 1  | 197       | JTR HSPBAP1_uc    | NM_032839    | NP_116228    | Q96SL1 | DIRC2_HUMAN  |                               | 0  | GGCTCGGGCCT      | 0.577 |                    |
| + | 2  | 200_201   | !_Intron ABTB1_uc | NM_172027    | NP_742024    | Q969K4 | ABTB1_HUMAN  | ANK 2.                        | 0  | ACAGCACCCCC      | 0.624 |                    |
| + | 3  | 470       | NEK11_uc011blk.1  | NM_024800    | NP_079076    | Q8NG66 | NEK11_HUMAN  | rotein kinase.                | 6  | TCAGACAAGAA      | 0.403 |                    |
| + | 4  | 288       | :011bnv.1_Frame_  | NM_032025    | NP_114414    | Q9BY44 | EIF2A_HUMAN  |                               | 0  | CCTGGCAACGT      | 0.398 |                    |
| + | 22 | 2900      | bqm.1_Frame_Shi   | NM_014616    | NP_055431    | Q9Y2G3 | AT11B_HUMAN  | ical; (Potential).            | 3  | ACAGTATTTTTTTI   | 0.269 |                    |
| + | 10 | 1570_1572 | 3fns.2_In_Frame_  | NM_198241    | NP_937884    | Q04637 | IF4G1_HUMAN  | Poly-Glu.                     | 7  | GAAATGgaagaag    | 0.443 |                    |
| - | 7  | 1021_1023 | 3A2B_uc010hym.2   | NM_004593    | NP_004584    | P62995 | TRA2B_HUMAN  | -rich (RS2 domain).           | 2  | CTCTCCActcctctc  | 0.32  |                    |
| + | 3  | 644       | gtg.2_Frame_Shift | NM_016531    | NP_057615    | P57682 | KLF3_HUMAN   | Pro-rich.                     | 2  | ACCGATAAAAAA     | 0.617 |                    |
| - | 7  | 944       |                   | NM_173536    | NP_775807    | Q8N1C3 | GBRG1_HUMAN  | ellular (Probable).           | 2  | AGGTCAAAAAA      | 0.294 |                    |
| + | 4  | 418       |                   | NM_005212    | NP_005203    | P07498 | CASK_HUMAN   |                               | 4  | GCCATCCCCC       | 0.488 |                    |
| - | 3  | 416_418   | .1_5'UTR NUP54_   | NM_017426    | NP_059122    | Q7Z3B4 | NUP54_HUMAN  | ch.19 X 2 AA repeats of F-G   | 2  | AGTTTGCTGCTC     | 0.394 |                    |
| + | 8  | 1473_1475 | Q.217del PRDM8_   | NM_020226    | NP_064611    | Q9NQV8 | PRDM8_HUMAN  | -rich. Poly-Gln.              | 1  | aaagaccagcagcag  | 0.384 |                    |
| - | 11 | 1436_1438 | hnj.2_In_Frame_D  | NM_001077207 | NP_001070675 | O94979 | SC31A_HUMAN  | ction with SEC13.             | 8  | ATGGTGCTGCT      | 0.448 | 843621;rs140634448 |
| + | 8  | 1279      | ike.1_Frame_Shift | NM_001263    | NP_001254    | Q92903 | CDS1_HUMAN   |                               | 4  | TTTGGATTTTTTT    | 0.308 |                    |
| - | 9  | 2145_2146 | 3hqs.3_Frame_Sh   | NM_001128310 | NP_001121782 | Q14515 | SPRL1_HUMAN  |                               | 1  | TCCGTAGAGGAA     | 0.401 |                    |
| - | 1  | 538_540   | 3C3_uc011cdn.1_l  | NM_153757    | NP_715638    | Q96NT1 | NP1L5_HUMAN  | Glu-rich.                     | 1  | actctctctctctctc | 0.369 |                    |
| + | 8  | 1187_1189 | p.P363del NPNT_   | NM_001033047 | NP_001028219 | Q6UXI9 | NPNT_HUMAN   | Pro-rich.                     | 1  | TACTCCACCACC     | 0.522 |                    |
| + | 4  | 1196_1198 | 3.E415del SEC24B  | NM_006323    | NP_006314    | O95487 | SC24B_HUMAN  | Poly-Glu.                     | 3  | gaggaagaggagga   | 0.369 |                    |
| + | 39 | 6607      | 3.G123fs KIAA110! | NM_015312    | NP_056127    | Q2LD37 | K1109_HUMAN  |                               | 12 | ACAATGGGGGT      | 0.438 |                    |
| + | 1  | 413_414   |                   | NM_004575    | NP_004566    | Q12837 | PO4F2_HUMAN  |                               | 1  | CTgtgtgtggtggtg  | 0.386 | 907220;rs72269802  |
| - | 5  | 1095      | p.F207fs LRBA_uc  | NM_006726    | NP_006717    | P50851 | LRBA_HUMAN   |                               | 7  | AAAGTTAAAAAA     | 0.408 |                    |
| + | 5  | 1107      |                   | NM_001873    | NP_001864    | P16870 | CBPE_HUMAN   |                               | 3  | CGCCATTTTCC      | 0.483 |                    |
| - | 7  | 919       | AH5_uc003jfe.1_F  | NM_001369    | NP_001360    | Q8TE73 | DYH5_HUMAN   | . Stem (By similarity).       | 31 | AGAGTCTTTTTTTI   | 0.517 |                    |
| + | 2  | 689_690   | jhm.2_Frame_Shif  | NM_178140    | NP_835260    | O15018 | PDZD2_HUMAN  | PDZ 1.                        | 9  | CGCGAGGGGGC      | 0.574 |                    |
| + | 46 | 8393_8395 | E2636del NIPBL_   | NM_133433    | NP_597677    | Q6KC79 | NIPBL_HUMAN  |                               | 9  | TGATGAAGAAG      | 0.379 |                    |
| - | 3  | 564       | 1B_uc011cpy.1_Fr  | NM_198449    | NP_940851    | Q6PCB8 | EMB_HUMAN    | Potential). Ig-like V-type 1. | 0  | ACCATCTTTTTTTC   | 0.358 |                    |
| - | 12 | 2426      | 03jtq.2_RNA ADA   | NM_197941    | NP_922932    | Q9UKP5 | ATS6_HUMAN   | Disintegrin.                  | 0  | CTTTTTCAATATT    | 0.418 |                    |
| + | 8  | 1149      |                   | NM_003248    | NP_003239    | P35443 | TSP4_HUMAN   |                               | 0  | TGGTGCCCCCG      | 0.562 |                    |
| + | 7  | 2288      | au.2_Frame_Shift  | NM_004385    | NP_004376    | P13611 | CSPG2_HUMAN  | minoglycan attachment dor     | 16 | TACACCTTTTCC     | 0.368 |                    |
| + | 13 | 1510_1512 | 3.E383del PAM_uc  | NM_000919    | NP_000910    | P19021 | AMD_HUMAN    | ooxygenase (By similarity)    | 0  | AACGAGAAGAA      | 0.325 |                    |
| + | 2  | 237_240   | p.K19fs AP3S1_L   | NM_001284    | NP_001275    | Q92572 | AP3S1_HUMAN  |                               | 0  | ATCTAAGAGAGA     | 0.304 | rs80118146         |
| - | 1  | 991_993   | Frame_Del_p.E29   | NM_020747    | NP_065798    | Q9ULD9 | ZN608_HUMAN  | Potential.                    | 6  | TGGCTCTCCTCC     | 0.522 |                    |
| + | 10 | 2028_2030 | MNB1_uc011cxb.    | NM_005573    | NP_005564    | P20700 | LMNB1_HUMAN  | d be involved in chromatin t  | 2  | AGAAGAGGAGG      | 0.325 |                    |
| + | 17 | 3181      | kxh.2_Frame_Shif  | NM_005732    | NP_005723    | Q92878 | RAD50_HUMAN  | Potential.                    | 4  | TCAACAAAAAA      | 0.269 |                    |
| - | 4  | 248       |                   | NM_000590    | NP_000581    | P15248 | IL9_HUMAN    |                               | 0  | ATGGTGGTATT      | 0.388 |                    |
| + | 18 | 3428      | 03lft.1_Frame_Shi | NM_020690    | NP_065741    | Q8IWZ2 | Q8IWZ2_HUMAN |                               | 6  | CATGTTGGAGTT     | 0.368 |                    |
| + | 1  | 2394_2395 | ic003lhc.1_Frame_ | NM_018905    | NP_061728    | Q9Y5H9 | PCDA2_HUMAN  | ial). 5 X 4 AA repeats of P-) | 4  | 3GAGGACCCCC      | 0.619 |                    |
| + | 1  | 2373      |                   | NM_018930    | NP_061753    | Q9UN67 | PCDBA_HUMAN  | lasmic (Potential).           | 2  | GGTCCTTTTCC      | 0.662 |                    |
| + | 1  | 2174      | :.1_Intron PCDHG  | NM_002588    | NP_002579    | Q9UN70 | PCDGK_HUMAN  | ellular (Potential).          | 2  | AGCAGAAAAAA      | 0.502 |                    |
| - | 16 | 2249      | p.P694fs DIAPH1_  | NM_005219    | NP_005210    | O60610 | DIAP1_HUMAN  | FH1.                          | 1  | GAGGTGGGGGC      | 0.637 |                    |
| + | 11 | 2401      | p.G581fs LARP1_   | NM_033551    | NP_291029    | Q6PKG0 | LARP1_HUMAN  |                               | 4  | ACCCAGGGGGG      | 0.547 |                    |
| - | 5  | 813       | ddz.1_Frame_Shi   | NM_144726    | NP_653327    | Q96MT1 | RN145_HUMAN  |                               | 5  | CAATTGTCTCCA     | 0.373 |                    |
| - | 2  | 129       | _Frame_Shift_Del_ | NM_005520    | NP_005511    | P31943 | HNRH1_HUMAN  |                               | 0  | CCTCTCCACT       | 0.567 |                    |
| - | 4  | 1405_1407 | .E433del TUBB2A   | NM_001069    | NP_001060    | Q13885 | TBB2A_HUMAN  |                               | 1  | TGCCCTCCTC       | 0.532 |                    |
| + | 4  | 615       | _uc003mwk.2_Intrc | NM_001143971 | NP_001137443 | Q9Y232 | CDYL1_HUMAN  |                               | 0  | AATCCAAAAAC      | 0.488 |                    |
| - | 12 | 1998      | lnba.2_Frame_Shi  | NM_005493    | NP_005484    | Q96S59 | RANB9_HUMAN  | action with FMR1.             | 2  | TCAACATTTTTTTI   | 0.378 |                    |

|   |    |           |                    |              |              |        |             |                           |      |               |       |            |
|---|----|-----------|--------------------|--------------|--------------|--------|-------------|---------------------------|------|---------------|-------|------------|
| - | 31 | 3928      | Shift_Del_p.A1275f | NM_022113    | NP_071396    | Q9H1H9 | K113A_HUMAN |                           | 4    | 'GGCTGCAATTC  | 0.423 |            |
| + | 12 | 1504      | ncp.1_Frame_Sh     | NM_153042    | NP_694587    | Q8NB78 | KDM1B_HUMAN |                           | 1    | GCTGACTTTTTT  | 0.463 |            |
| - | 2  | 149       | ame_Shift_Del_p.   | NM_005074    | NP_005065    | Q14916 | NPT1_HUMAN  |                           | 4    | CTACCTTTTTTG  | 0.403 |            |
| - | 3  | 544       | 3BR1_uc011dlr.1_!  | NM_001470    | NP_001461    | Q9UBS5 | GABR1_HUMAN | xtracellular (Potential). | 7    | GCGCTCCCCC    | 0.632 |            |
| - | 7  | 1054      | M26_uc010jry.2_5'  | NM_003449    | NP_003440    | Q12899 | TRI26_HUMAN |                           | 3    | CCGGTCTTTTTT  | 0.483 |            |
| - | 20 | 3367      | 0jsc.1_Frame_Shi   | NM_002714    | NP_002705    | Q96QC0 | PP1RA_HUMAN |                           | 4    | GGCAGGGGGG    | 0.572 |            |
| - | 19 | 2712_2714 | sc.1_In_Frame_De   | NM_002714    | NP_002705    | Q96QC0 | PP1RA_HUMAN | Gly-rich.                 | 4    | CGGAATggaggag | 0.601 |            |
| + | 13 | 1843      | ru.2_Intron DDR1_  | NM_013993    | NP_054699    | Q08345 | DDR1_HUMAN  | Cytoplasmic (Potential).  | 9    | :CCGGGCCCCCC  | 0.682 |            |
| - | 5  | 1078      | uc003ntw.2_Fram    | NM_004640    | NP_004631    | Q13838 | DX39B_HUMAN | ase ATP-binding.          | 0    | \CCACCAAAAAA  | 0.512 |            |
| - | 22 | 3361_3362 | T3_uc003nvi.3_Fr   | NM_004639    | NP_004630    | P46379 | BAG6_HUMAN  |                           | 0    | TTACTGGGGG    | 0.554 |            |
| - | 2  | 1369_1371 | l0jte.2_In_Frame_  | NM_005527    | NP_005518    | P34931 | HS71L_HUMAN |                           | 6    | .CGTCCAGCAGC. | 0.596 |            |
| + | 7  | 739       | p.G244fs SCUBE3    | NM_152753    | NP_689966    | Q8IX30 | SCUB3_HUMAN | EGF-like 6.               | 1    | ACAACGGGGGC   | 0.557 |            |
| - | 4  | 1648      | 318_uc003ouw.2_    | NM_014345    | NP_055160    | Q5VUA4 | ZN318_HUMAN |                           | 7    | CTGCCTTTTTT   | 0.493 |            |
| - | 10 | 1967      |                    | NM_000255    | NP_000246    | P22033 | MUTA_HUMAN  |                           | 0    | ATACCTTTTTCA  | 0.368 |            |
| + | 1  | 341       | v.2_RNA HCRTR2     | NM_001526    | NP_001517    | O43614 | OX2R_HUMAN  | ellular (Potential).      | 6    | GGACTCCCCC    | 0.567 | rs76774128 |
| - | 75 | 13615     | .V4380fs DST_uc    | NM_001144769 | NP_001138241 | Q03001 | DYST_HUMAN  | Spectrin 15.              | 14   | TTTATTAACGGC  | 0.368 |            |
| + | 7  | 2884      | en.2_Frame_Shift   | NM_015153    | NP_055968    | Q92576 | PHF3_HUMAN  | FIIS central.             | 5    | AGAGGAAAAGG   | 0.279 |            |
| + | 11 | 3428      | en.2_Frame_Shift   | NM_015153    | NP_055968    | Q92576 | PHF3_HUMAN  |                           | 5    | TTCCAAAAAA    | 0.358 |            |
| - | 1  | 195_197   | ob.1_In_Frame_C    | NM_145331    | NP_663304    | O43318 | M3K7_HUMAN  | Poly-Ser.                 | 6    | AGACGAGGAGG   | 0.655 |            |
| + | 2  | 848_849   |                    | NM_002356    | NP_002347    | P29966 | MARCS_HUMAN | ulin-binding (PSD).       | 0    | ACCCGAAAAA    | 0.614 |            |
| - | 2  | 1019      |                    | NM_145176    | NP_660159    | Q8TD20 | GTR12_HUMAN | ical; (Potential).        | 1    | GTGTTAGTCTC   | 0.383 |            |
| - | 7  | 1235_1236 | edm.1_Frame_Shi    | NM_000416    | NP_000407    | P15260 | INGR1_HUMAN | lasmic (Potential).       | 1    | AAGAACTCTCTC  | 0.431 |            |
| - | 3  | 1001      | _Shift_Del_p.K141f | NM_031922    | NP_114128    | Q96D71 | REPS1_HUMAN |                           | 2    | ATCCCTTTTTC   | 0.478 |            |
| + | 6  | 1390      | qqe.2_Frame_Shif   | NM_012454    | NP_036586    | Q8IVF5 | TIAM2_HUMAN |                           | 4    | AAAGAGGAAAA   | 0.463 |            |
| - | 4  | 366       | _p.P87fs PRKAR1    | NM_002735    | NP_002726    | P31321 | KAP1_HUMAN  | in and phosphorylation.   | 0    | GGTTCCGGGGG   | 0.617 |            |
| + | 8  | 2004_2005 | srz.2_Frame_Shift  | NM_014660    | NP_055475    | O94880 | PHF14_HUMAN |                           | 3    | TTGCAAGAGAGA  | 0.376 |            |
| - | 4  | 864_866   |                    | NM_001002926 | NP_001002926 | Q3B726 | RPA43_HUMAN | Lys-rich.                 | 1    | GCTTTTTCTCT   | 0.433 |            |
| + | 5  | 601_603   | 0kxo.2_In_Frame_   | NM_007252    | NP_009183    | P78424 | PO6F2_HUMAN | Gln-rich.                 | 1    | cagctccagcagc | 0.365 |            |
| - | 5  | 540       | me_Shift_Del_p.*   | NM_012412    | NP_036544    | Q71UI9 | H2AV_HUMAN  |                           | 0    | CTCTAAGCAG    | 0.363 |            |
| + | 17 | 2184_2185 | _p.l601fs EGFR_u   | NM_005228    | NP_005219    | P00533 | EGFR_HUMAN  | ical; (Potential).        | 9571 | TCCATCGCCACT  | 0.619 |            |
| - | 2  | 83_85     | _uc010laj.1_In_Fr  | NM_004603    | NP_004594    | Q16623 | STX1A_HUMAN | lasmic (Potential).       | 0    | AGCGACATCATC  | 0.586 |            |
| - | 2  | 458       |                    | NM_032936    | NP_116325    | Q9H2L4 | TMM60_HUMAN |                           | 0    | CCAGGCTTTTT   | 0.408 |            |
| + | 13 | 1827_1828 | _p.F529fs PHTF2_   | NM_001127357 | NP_001120829 | Q8N3S3 | PHTF2_HUMAN |                           | 1    | ATTTTTTTTTT   | 0.307 |            |
| - | 24 | 15477     |                    | NM_033026    | NP_149015    | Q9Y6V0 | PCLO_HUMAN  | C2 2.                     | 7    | ATCACCTTTTTT  | 0.313 |            |
| - | 6  | 11286     | _p.P3666fs PCLO_   | NM_033026    | NP_149015    | Q9Y6V0 | PCLO_HUMAN  |                           | 7    | TTGCTGGGGGA   | 0.473 |            |
| + | 19 | 5175_5176 | .S1650fs AKAP9_    | NM_005751    | NP_005742    | Q99996 | AKAP9_HUMAN |                           | 26   | GTTTCAGAGAGA  | 0.411 |            |
| - | 15 | 1860      | _p.TAF6_uc011kji.1 | NM_139315    | NP_647476    | P49848 | TAF6_HUMAN  |                           | 2    | GTGCTGGGGG    | 0.657 |            |
| - | 1  | 220_222   | _p.L22del ACHE_u   | NM_000665    | NP_000656    | P22303 | ACES_HUMAN  |                           | 2    | GCCAGAGGAGG   | 0.685 |            |
| - | 20 | 2704_2705 | liz.2_Frame_Shift  | NM_005045    | NP_005036    | P78509 | RELN_HUMAN  |                           | 19   | TCTCTGGGAAG   | 0.396 |            |
| + | 15 | 2282      | _p.L359fs EXOC4_   | NM_021807    | NP_068579    | Q96A65 | EXOC4_HUMAN |                           | 9    | GATCTCCCCC    | 0.458 | rs34608222 |
| - | 44 | 11828     | .3_uc003wkk.2_5'   | NM_170606    | NP_733751    | Q8NEZ4 | MLL3_HUMAN  |                           | 63   | TCGTCTTTTTT   | 0.458 |            |
| - | 3  | 436       |                    | NM_005431    | NP_005422    | O43543 | XRCC2_HUMAN |                           | 2    | TACACCAAAAA   | 0.393 |            |
| - | 1  | 668_673   | kwg.1_In_Frame_    | NM_175075    | NP_778250    | Q86YL5 | CH042_HUMAN | Poly-Ala.                 | 0    | CCCTGggcgcg   | 0.65  |            |
| + | 2  | 273_275   | lank BMP1_uc003    | NM_003018    | NP_003009    | P11686 | PSPC_HUMAN  |                           | 0    | TATCGTGGTGG   | 0.601 |            |
| + | 12 | 2305_2307 | me_Del_p.E38del    | NM_000553    | NP_000544    | Q14191 | WRN_HUMAN   | Poly-Glu.                 | 7    | CTACTAagaagaa | 0.266 |            |
| + | 13 | 2412      | _p.V690fs UNC5D_   | NM_080872    | NP_543148    | Q6UXZ4 | UNC5D_HUMAN | lasmic (Potential).       | 6    | 'GGCGTTTTT    | 0.488 |            |
| - | 16 | 3521_3523 | .E993del MYST3_    | NM_001099412 | NP_001092882 | Q92794 | MYST3_HUMAN | Poly-Glu.                 | 7    | 'CCGGCTCCTC'  | 0.567 |            |

|   |    |           |                               |              |        |             |                              |    |                 |       |             |
|---|----|-----------|-------------------------------|--------------|--------|-------------|------------------------------|----|-----------------|-------|-------------|
| - | 5  | 987_989   | NM_014729                     | NP_055544    | O94900 | TOX_HUMAN   | lization signal (Potential). | 4  | 3GATCCTTCTTC    | 0.453 |             |
| - | 10 | 1666_1667 | p.N420fs MYBL1_u NM_001080416 | NP_001073885 | P10243 | MYBA_HUMAN  | atory domain (By similarity) | 3  | CAAGTGTTTTTT    | 0.406 |             |
| - | 33 | 5045_5046 | p.P1006fs ARFGFE NM_006421    | NP_006412    | Q9Y6D6 | BIG1_HUMAN  |                              | 8  | 3GAGGTGGGGG     | 0.421 | rs142098461 |
| + | 9  | 1450_1451 | RRCC1_uc003ycx NM_033402      | NP_208325    | Q9C099 | LRCC1_HUMAN | Potential.                   | 0  | 3ACCAAGAGAGA    | 0.267 |             |
| - | 7  | 1378      | yec.2_Frame_Shif NM_005941    | NP_005932    | P51512 | MMP16_HUMAN | otential). Hemopexin-like 1  | 8  | TCGCCAAAACC     | 0.483 |             |
| - | 6  | 1241      | yec.2_Frame_Shif NM_005941    | NP_005932    | P51512 | MMP16_HUMAN | ellular (Potential).         | 8  | CTGTCAATTTTTCC  | 0.517 |             |
| - | 11 | 1761      | p.R469fs NBN_ucl NM_002485    | NP_002476    | O60934 | NBN_HUMAN   |                              | 7  | TTTCCCTTTTTTI   | 0.323 |             |
| - | 8  | 1296      | _Shift_Del_p.K377i NM_175634  | NP_783552    | Q06455 | MTG8_HUMAN  |                              | 16 | GCCACCTTTTTTT   | 0.517 |             |
| - | 45 | 6393_6394 | ks.1_Frame_Shift_ NM_015902   | NP_056986    | O95071 | UBR5_HUMAN  |                              | 28 | CCCTTCTTTTTTT   | 0.381 |             |
| - | 7  | 1943      | _p.G597fs LRP12_ NM_013437    | NP_038465    | Q9Y561 | LRP12_HUMAN | lasmic (Potential).          | 0  | 3AATGACCCAGA    | 0.438 |             |
| - | 13 | 1637_1639 | p.I506del TSNARE NM_145003    | NP_659440    | Q96NA8 | TSNA1_HUMAN | . Helical; (Potential).      | 0  | 3TGGCGATGATG    | 0.414 | rs142964918 |
| - | 2  | 331       |                               | NP_055932    | Q8IXZ2 | ZC3H3_HUMAN |                              | 1  | GCTGGCCCCCC     | 0.632 |             |
| - | 5  | 1434      |                               | NP_612376    | Q9BRH9 | ZN251_HUMAN | 2H2-type 7.                  | 0  | GGAGGAAAAGG     | 0.458 |             |
| - | 3  | 284       | _p.K62fs KIAA002 NM_014878    | NP_055693    | Q15397 | K0020_HUMAN |                              | 1  | CACCCTTTTTCC    | 0.388 |             |
| - | 4  | 387       | 3zjd.2_Frame_Shi NM_018465    | NP_060935    | Q9HBL7 | CI046_HUMAN | ical; (Potential).           | 1  | VAGCCAAAAAA     | 0.383 |             |
| + | 7  | 1228_1230 | 03zvr.2_In_Frame_ NM_015297   | NP_056112    | Q9UPV7 | K1045_HUMAN |                              | 1  | CAGCCAGCAGC     | 0.596 |             |
| - | 7  | 1190_1192 | kh.1_5'UTR VCP_ NM_007126     | NP_009057    | P55072 | TERA_HUMAN  |                              | 1  | GATCAAGAAGA     | 0.463 |             |
| - | 2  | 2007      |                               | NP_001197    | Q13886 | KLF9_HUMAN  |                              | 0  | AGCGCCTTTTTC    | 0.582 |             |
| - | 26 | 2978      | _p.Y312fs GOLGA: NM_004486    | NP_004477    | Q08379 | GOGA2_HUMAN |                              | 1  | CCGGTAAAAAA     | 0.562 |             |
| + | 5  | 629       |                               | NP_001798    | P19835 | CEL_HUMAN   |                              | 1  | CCTTCGGGGGG     | 0.642 |             |
| - | 17 | 2544_2546 | :841del RALGDS_ NM_006266     | NP_006257    | Q12967 | GNDS_HUMAN  | ociating). Poly-Glu.         | 3  | CCGGCTCCTCC     | 0.606 | rs35200098  |
| + | 10 | 813       | ez.2_Frame_Shift NM_017588    | NP_060058    | P61964 | WDR5_HUMAN  | WD 5.                        | 0  | GACAACCCCCC     | 0.627 |             |
| + | 1  | 214_216   | _p.V11del MBTPS2 NM_206923    | NP_996806    | O15391 | TY2_HUMAN   |                              | 2  | TCGCTGGTGGT     | 0.685 |             |
| + | 12 | 1252_1254 | IL3L_uc004dti.2_R NM_019067   | NP_061940    | Q9NVN8 | GNL3L_HUMAN |                              | 1  | TGGGGAAGAAG     | 0.557 |             |
| + | 12 | 1981      | _p.Y312fs GOLGA: NM_004486    | NP_004477    | Q08379 | GOGA2_HUMAN |                              | 1  | CCGGTAAAAAA     | 0.562 |             |
| + | 12 | 1981      | _p.Y312fs GOLGA: NM_004486    | NP_004477    | Q08379 | GOGA2_HUMAN |                              | 1  | CCGGTAAAAAA     | 0.562 |             |
| + | 12 | 1981      | _p.Y312fs GOLGA: NM_004486    | NP_004477    | Q08379 | GOGA2_HUMAN |                              | 1  | CCGGTAAAAAA     | 0.562 |             |
| + | 12 | 1981      | _p.Y312fs GOLGA: NM_004486    | NP_004477    | Q08379 | GOGA2_HUMAN |                              | 1  | CCGGTAAAAAA     | 0.562 |             |
| - | 3  | 4075      |                               | NP_001008537 | Q5QGS0 | K2022_HUMAN |                              | 15 | 3AAGGGTTTTTTI   | 0.403 |             |
| - | 41 | 5293      | _p.G1347fs BRW NM_153252      | NP_694984    | Q6RI45 | BRWD3_HUMAN | Gly-rich.                    | 4  | 3ATCTTCCCATC    | 0.259 |             |
| - | 6  | 731       | _p.K154fs TAF7L_ NM_024885    | NP_079161    | Q5H9L4 | TAF7L_HUMAN |                              | 1  | CTAACCTTTTTTT   | 0.363 |             |
| + | 5  | 1012_1014 | 4elx.2_In_Frame_ NM_207318    | NP_997201    | Q6PEV8 | F199X_HUMAN | Ser-rich.                    | 1  | .GCGCCAGCAGC    | 0.567 |             |
| + | 6  | 604_606   | eo.2_In_Frame_I NM_001128173  | NP_001121645 | O75914 | PAK3_HUMAN  | Linker.                      | 10 | 3aagaggaagaagaa | 0.325 |             |
| + | 9  | 1338      |                               | NP_009162    | Q9UN76 | S6A14_HUMAN | Name=8; (Potential).         | 3  | 3ATATTATTTTTTT  | 0.363 |             |
| - | 2  | 574_575   | _p.Y312fs GOLGA: NM_004486    | NP_004477    | Q08379 | GOGA2_HUMAN |                              | 1  | CCGGTAAAAAA     | 0.562 |             |
| - | 3  | 474_475   | lexp.1_Frame_Shi NM_021796    | NP_068568    | Q9HBJ0 | PLAC1_HUMAN |                              | 1  | FGGTTTGGGGGC    | 0.51  |             |
| + | 12 | 1535      | lezk.2_Frame_Shi NM_006359    | NP_006350    | Q92581 | SL9A6_HUMAN | ical; (Potential).           | 1  | ATTGTGTTTTTTA   | 0.453 |             |
| + | 3  | 1065      |                               | NP_001718    | P32247 | BRS3_HUMAN  | ellular (Potential).         | 1  | CCCTCTGCCATG    | 0.468 |             |
| + | 6  | 1104_1106 | 4ezx.2_In_Frame_ NM_001163280 | NP_001156752 | O43719 | HTSF1_HUMAN | Poly-Lys.                    | 3  | CTCAAAGAAGA     | 0.335 |             |
| - | 11 | 886_888   | n.2_In_Frame_Del NM_031462    | NP_113650    | Q8TCZ2 | C99L2_HUMAN | ic (Potential). Poly-Pro.    | 3  | TTCGGCGGCG      | 0.611 | rs7877654   |
| - | 19 | 3629_3631 | 0oag.1_In_Frame_ NM_001009566 | NP_001009566 | O94985 | CSTN1_HUMAN | idic). Cytoplasmic (Potenti  | 1  | TCCCCCTCCTC     | 0.557 |             |
| - | 24 | 2622      | 1asb.2_Frame_St NM_001001998  | NP_001001998 | Q01780 | EXOSX_HUMAN |                              | 1  | GTTTAATTTTTTT   | 0.478 |             |
| + | 11 | 10149     | op.1_Frame_Shift_ NM_015001   | NP_055816    | Q96T58 | MINT_HUMAN  | Pro-rich.                    | 15 | 3TACCACCCCCC    | 0.627 |             |
| - | 7  | 894       | 1_Intron MST1P9_ NR_002729    |              |        |             |                              | 0  | 3CCCCGCCAC      | 0.657 | rs3982176   |
| + | 2  | 482       |                               | NP_116269    | Q96ID5 | IGS21_HUMAN | Ig-like 1.                   | 4  | 3CTCTCCCCC      | 0.572 |             |
| - | 3  | 649       | 1bfc.2_Frame_Shi NM_032236    | NP_115612    | Q86UV5 | UBP48_HUMAN |                              | 2  | 3CCACCTTTTTC    | 0.358 |             |
| - | 2  | 275       | 01btg.1_Frame_S NM_012392     | NP_036524    | Q9UBV8 | PEF1_HUMAN  | m repeat of [AP]-P-G-G-P-    | 0  | AGGGGCCCCCG     | 0.602 |             |
| - | 9  | 1711      | _Shift_Del_p.Q554 NM_198040   | NP_932157    | Q8IXK0 | PHC2_HUMAN  |                              | 1  | 3ATTCTGGGGG     | 0.587 |             |
| - | 4  | 577       | cmv.1_Frame_Shif NM_020365    | NP_065098    | Q9NR50 | EI2BG_HUMAN |                              | 1  | 3CCTGCTTTTTTI   | 0.318 |             |
| + | 1  | 333_334   | 1_RNA PCSK9_uc NM_174936      | NP_777596    | Q8NBP7 | PCSK9_HUMAN |                              | 4  | 3ccgtgccactgtct | 0.574 | rs67610340  |

|   |    |           |                    |              |              |        |             |                                |    |                    |       |             |
|---|----|-----------|--------------------|--------------|--------------|--------|-------------|--------------------------------|----|--------------------|-------|-------------|
| + | 4  | 624       | p.G138fs FGGY_u    | NM_018291    | NP_060761    | Q96C11 | FGGY_HUMAN  |                                | 1  | 'ACGTCGGGGGG       | 0.502 |             |
| - | 5  | 924_925   | IQ3_uc001dfz.3_f   | NM_001105659 | NP_001099129 | A6PVS8 | LRIQ3_HUMAN |                                | 2  | :CTGCTGTTTTT       | 0.327 |             |
| + | 23 | 2276_2278 | ldge.1_In_Frame_   | NM_015978    | NP_057062    | Q59H18 | TNI3K_HUMAN | Poly-Ser.                      | 10 | :TCACCTTCTCT       | 0.473 |             |
| - | 9  | 1732_1734 | rows.1_In_Frame_   | NM_015906    | NP_056990    | Q9UPN9 | TRI33_HUMAN | Poly-Thr.                      | 11 | IGTTGTGTTGTT       | 0.429 |             |
| + | 8  | 2428_2429 |                    | NM_020440    | NP_065173    | Q9P2B2 | FPRP_HUMAN  | 6. Extracellular (Potential).  | 1  | 3AAGAGCGACCT       | 0.584 |             |
| - | 4  | 796       | epj.2_Frame_Shift  | NM_001461    | NP_001452    | P49326 | FMO5_HUMAN  |                                | 3  | ATCTCCTTTTTCC      | 0.473 |             |
| - | 3  | 270       | wmr.1_Frame_Shif   | NM_001025603 | NP_001020774 | P48382 | RFX5_HUMAN  |                                | 1  | CACCTGGGGGG        | 0.557 |             |
| - | 2  | 3480_3482 | vne.1_In_Frame_C   | NM_007113    | NP_009044    | Q07283 | TRHY_HUMAN  | 30 AA tandem repeats.          | 5  | 3CCTTCTCTCTC       | 0.172 |             |
| - | 2  | 1035_1036 | ie.1_In_Frame_Ins  | NM_007113    | NP_009044    | Q07283 | TRHY_HUMAN  | :-E-Q-E-E- E-R-R-E-Q-Q-L.      | 5  | ictcggcctctcctcctg | 0     |             |
| - | 6  | 410       | ok.2_Frame_Shift   | NM_004515    | NP_004506    | Q12905 | ILF2_HUMAN  | DZF.                           | 0  | 3TCCCTTTTTTAT      | 0.453 |             |
| - | 1  | 422_424   | ox.1_In_Frame_De   | NM_002249    | NP_002240    | Q9UGI6 | KCNN3_HUMAN | Poly-Gln.                      | 1  | gctgctgtgctgctgctg | 0.236 |             |
| - | 4  | 1309      |                    | NM_006617    | NP_006608    | P48681 | NEST_HUMAN  | Tail.                          | 6  | GGTGTGGGGGG        | 0.597 |             |
| - | 6  | 1404_1406 | v.V48del PVRL4_u   | NM_030916    | NP_112178    | Q96NY8 | PVRL4_HUMAN | ical; (Potential).             | 2  | ATGAGCACCACC       | 0.571 |             |
| + | 3  | 338_340   |                    | NM_001102566 | NP_001096036 | A6NKN8 | PC4L1_HUMAN |                                | 0  | AGGCGGAGGAG        | 0.488 |             |
| - | 12 | 1922_1924 |                    | NM_000069    | NP_000060    | Q13698 | CAC1S_HUMAN | of repeat II; (Potential). Pol | 5  | :GAAGAGCAGCA       | 0.562 |             |
| + | 22 | 2922_2924 |                    | NM_018085    | NP_060555    | Q96P70 | IPO9_HUMAN  |                                | 2  | gaggaagaggaggag    | 0.33  |             |
| + | 2  | 1350_1352 |                    | NM_004767    | NP_004758    | O60883 | ETBR2_HUMAN | ic (Potential). Cys-rich.      | 2  | GCCTGGActgctgct    | 0.557 |             |
| + | 5  | 643       | l11A_uc001haf.2_f  | NM_014827    | NP_055642    | O75152 | ZC11A_HUMAN | 3H1-type 1.                    | 2  | :CTGCTATTTTTTI     | 0.373 |             |
| + | 1  | 791_793   |                    | NM_000707    | NP_000698    | P47901 | V1BR_HUMAN  | Name=5; (Potential).           | 3  | :TGCCGGTGACC       | 0.621 | rs150659663 |
| + | 3  | 1066      | DYRK3_uc001hei.2   | NM_003582    | NP_003573    | O43781 | DYRK3_HUMAN | rotein kinase.                 | 3  | CTGATTAATAAAA      | 0.403 |             |
| + | 7  | 1133      | _Shift_Del_p.L312I | NM_017898    | NP_060368    | Q969Z3 | MOSC2_HUMAN | MOSC.                          | 0  | :TCCACTTTTTTGC     | 0.413 |             |
| + | 1  | 255       |                    | NM_001004698 | NP_001004698 | A6NFC9 | OR2W5_HUMAN |                                | 3  | :AACCTGGGGGG       | 0.532 |             |
| - | 1  | 235       |                    | NM_001004695 | NP_001004695 | Q8NG76 | O2T33_HUMAN | ellular (Potential).           | 2  | :CGCCATTTTGGC      | 0.577 |             |
| + | 10 | 1321_1324 | ib.2_Frame_Shift_  | NM_001047160 | NP_001040625 | Q7Z628 | ARHG8_HUMAN | PH.                            | 1  | 3CGGAGCAAGAC       | 0.525 |             |
| + | 8  | 1448_1449 | al_p.E431fs NCOA   | NM_001145263 | NP_001138735 | Q13772 | NCOA4_HUMAN |                                | 2  | 3CAGAGTGTGTG       | 0.485 |             |
| - | 4  | 520_521   |                    | NM_213606    | NP_998771    | Q6ZSM3 | MOT12_HUMAN | lasmic (Potential).            | 1  | :CTCCACAAAAAA      | 0.361 |             |
| + | 16 | 2153_2154 |                    | NM_025235    | NP_079511    | Q9H2K2 | TNKS2_HUMAN | ANK 12.                        | 8  | :CCCTACAAAAAA      | 0.391 |             |
| + | 9  | 1586      | p.P323fs PAX2_uc   | NM_003990    | NP_003981    | Q02962 | PAX2_HUMAN  |                                | 0  | :ACGTGCCCCCC       | 0.612 |             |
| + | 27 | 4250      | _Shift_Del_p.V417  | NM_207303    | NP_997186    | Q5VV63 | ATRN1_HUMAN | lasmic (Potential).            | 7  | GAAGTGGGAGC        | 0.463 |             |
| - | 3  | 1541      | D9xyz.1_Frame_Si   | NM_014904    | NP_055719    | Q7L804 | RFIP2_HUMAN |                                | 0  | 3CTATCTTTTTTT      | 0.343 |             |
| - | 8  | 1956      | p.R261fs CUZD1_    | NM_022034    | NP_071317    | Q86UP6 | CUZD1_HUMAN | ellular (Potential).           | 2  | 3ATCCCTTTTTCAC     | 0.413 |             |
| + | 19 | 2126_2128 | Q620del PTPRE_     | NM_006504    | NP_006495    | P23469 | PTPRE_HUMAN | hataase 2. Cytoplasmic (Po     | 1  | :CAGAAGCAGCA       | 0.65  |             |
| + | 6  | 663_665   | me_Del_p.E180de    | NM_020901    | NP_065952    | Q9P1Y6 | PHRF1_HUMAN | Poly-Glu.                      | 0  | GAGCGAGGAGG        | 0.616 |             |
| + | 13 | 1667      | RNA BRSK2_uc0C     | NM_003957    | NP_003948    | Q8IWQ3 | BRSK2_HUMAN | Pro-rich.                      | 0  | AGCAGCCCCCG        | 0.701 |             |
| - | 12 | 2561      | ND5A_uc010rbw.1    | NM_015213    | NP_056028    | Q6IQ26 | DEN5A_HUMAN |                                | 1  | CCCATCTTTTCC/      | 0.517 |             |
| - | 11 | 2014      | mtf.3_Frame_Shift  | NM_001127612 | NP_001121084 | P26367 | PAX6_HUMAN  | o/Ser/Thr-rich.                | 9  | ATATGTGGGGGG       | 0.587 |             |
| - | 3  | 345       | Drew.1_Frame_Shi   | NM_001001991 | NP_001001991 | Q6UXH9 | PAMR1_HUMAN |                                | 2  | :AGGTACCCCCC       | 0.517 |             |
| + | 30 | 3229      | 3KZ_uc009yky.1_!   | NM_001105540 | NP_001099010 | Q13574 | DGKZ_HUMAN  |                                | 3  | :TCCAGCCCCCC       | 0.649 | rs3832759   |
| - | 1  | 1385      |                    | NM_000741    | NP_000732    | P08173 | ACM4_HUMAN  | smic (By similarity).          | 0  | AAGGTCTTTTTTA/     | 0.587 |             |
| - | 6  | 909_911   | v.P302del CPSF7_   | NM_001136040 | NP_001129512 | Q8N684 | CPSF7_HUMAN | Pro-rich.                      | 1  | ATACCAGGAGGA/      | 0.611 |             |
| + | 7  | 1936_1938 | .L366del SLC22A    | NM_144585    | NP_653186    | Q96S37 | S22AC_HUMAN |                                | 1  | :CGCCCTGCTGCTC     | 0.66  |             |
| + | 4  | 634       | ccu.2_Frame_Shift  | NM_003273    | NP_003264    | O76062 | ERG24_HUMAN |                                | 1  | :CACCTGGGGGG       | 0.587 |             |
| + | 1  | 356_358   | RFN4_uc001ojq.1    | NM_024036    | NP_076941    | Q6PJG9 | LRFN4_HUMAN |                                | 0  | :GCTCCTGCTGCTC     | 0.719 |             |
| + | 12 | 1367      | ne_Shift_Del_p.F4  | NM_003369    | NP_003360    | Q9P2Y5 | UVRAG_HUMAN |                                | 6  | ATTTCTTTTTTCC      | 0.383 |             |
| - | 22 | 3331      | n.1_RNA NCAPD      | NM_015261    | NP_056076    | P42695 | CNDD3_HUMAN |                                | 5  | GACCTGGGGGG        | 0.522 | rs138442478 |
| + | 2  | 451       | _Shift_Del_p.S19f  | NM_019854    | NP_062828    | Q9NR22 | ANM8_HUMAN  |                                | 5  | :AACAGCCCCCC       | 0.657 |             |
| - | 1  | 80        | :H1_uc001qzc.2_Ir  | NM_176890    | NP_795371    | P59544 | T2R50_HUMAN | Name=1; (Potential).           | 2  | 3AATTGAAAAAAA      | 0.318 |             |

|   |    |             |                   |              |              |        |             |                       |     |                   |       |             |
|---|----|-------------|-------------------|--------------|--------------|--------|-------------|-----------------------|-----|-------------------|-------|-------------|
| - | 48 | 7101_7102   | zjg.1_Frame_Shift | NM_002223    | NP_002214    | Q14571 | ITPR2_HUMAN | ical; (Potential).    | 14  | CCCCAGAGAG        | 0.441 |             |
| - | 11 | 2355        | p.K703fs PKP2_uc  | NM_004572    | NP_004563    | Q99959 | PKP2_HUMAN  | ARM 6.                | 2   | CTGTCTTTTTC       | 0.473 |             |
| - | 12 | 4127_4129   | w.2_In_Frame_De   | NM_004719    | NP_004710    | Q99590 | SCAFB_HUMAN | Pro-rich.             | 0   | AGGGGGTGGTG       | 0.483 |             |
| - | 11 | 3063_3064   | p.E611fs SFRS2IP  | NM_004719    | NP_004710    | Q99590 | SCAFB_HUMAN | Arg-rich.             | 0   | TCCTTCTCTCT       | 0.446 |             |
| + | 2  | 157         | 40B_uc001ruq.1_f  | NM_001031698 | NP_001026868 | Q6NWX9 | PR40B_HUMAN | Pro-rich.             | 5   | AGCTATCCCCC       | 0.607 |             |
| + | 2  | 245_247     | :N2_uc009zln.2_5' | NM_001095    | NP_001086    | P78348 | ACCN2_HUMAN | smic (By similarity). | 1   | GGCCGAGGAGG       | 0.616 |             |
| - | 1  | 170_172     | 77_uc009zmi.2_5'  | NM_175078    | NP_778253    | Q7Z794 | K2C1B_HUMAN | Head.                 | 1   | TATACCACCAC       | 0.552 | rs149726101 |
| - | 3  | 695_696     | ame_Shift_Ins_p.  | NM_001478    | NP_001469    | Q00973 | B4GN1_HUMAN | lenal (Potential).    | 0   | GGAGGCCCCC        | 0.589 |             |
| + | 10 | 2681        | sto.2_Frame_Shift | NM_018448    | NP_060918    | Q86VP6 | CAND1_HUMAN | HEAT 17.              | 2   | TTGCAGGGGGG       | 0.428 |             |
| + | 5  | 706         | lice_Site ZDHHC1  | NM_015336    | NP_056151    | Q8IUH5 | ZDH17_HUMAN |                       | 0   | ACAGGTAAAAA       | 0.351 | rs137909589 |
| - | 9  | 979_980     | .2_5'Flank CEP29  | NM_025114    | NP_079390    | O15078 | CE290_HUMAN | Potential.            | 7   | TATAGTTTTTT       | 0.317 |             |
| + | 5  | 541         | ztz.1_Frame_Shift | NM_014503    | NP_055318    | O75691 | UTP20_HUMAN |                       | 4   | CAGAGTTTTTT       | 0.398 |             |
| + | 5  | 474         | 3PIC_uc010svp.1_  | NM_152323    | NP_689536    | Q8N5J4 | SPIC_HUMAN  |                       | 1   | GGGGGAAAAGG       | 0.393 |             |
| + | 17 | 2575_2577   |                   | NM_015267    | NP_056082    | O14529 | CUX2_HUMAN  | Poly-Ser.             | 6   | GCTGTCTCTCT       | 0.749 |             |
| - | 64 | 11032_11034 |                   | NM_001109662 | NP_001103132 |        |             |                       | 2   | GGCACAGCAGC       | 0.64  |             |
| + | 7  | 941         | iF3_uc001uqw.2_l  | NM_006646    | NP_006637    | Q9UPY6 | WASF3_HUMAN |                       | 1   | ACTAGGTGTGTG      | 0.475 |             |
| + | 10 | 1588        | uqw.2_Frame_Shif  | NM_006646    | NP_006637    | Q9UPY6 | WASF3_HUMAN | WH2.                  | 1   | AACTGAAAAAGC      | 0.507 |             |
| - | 2  | 312         | igt.1_Frame_Shift | NM_000053    | NP_000044    | P35670 | ATP7B_HUMAN | lasmic (Potential).   | 3   | AAGGGCCAGG        | 0.493 |             |
| - | 5  | 1255        |                   | NM_012158    | NP_036290    | Q9UKT7 | FBXL3_HUMAN |                       | 0   | TCATATAAAAAA      | 0.418 |             |
| - | 3  | 1088        | IBAC2_uc001vod.2  | NM_005292    | NP_005283    | Q14330 | GPR18_HUMAN | Name=5; (Potential).  | 0   | ATCAAGAAAAAA      | 0.438 |             |
| + | 1  | 678         |                   | NM_001004717 | NP_001004717 | Q8NH43 | OR4L1_HUMAN | lasmic (Potential).   | 5   | TGTACCAAAAAA      | 0.438 |             |
| - | 20 | 2986        | EP1_uc010tif.1_R  | NM_007110    | NP_009041    | Q99973 | TEP1_HUMAN  |                       | 5   | TAGCTGGGGGG       | 0.557 |             |
| - | 19 | 4208_4209   | uc001wiq.3_Fram   | NM_014977    | NP_055792    | Q9UKV3 | ACINU_HUMAN | Asp/Glu/Lys-rich.     | 4   | cgctcccttctctctct | 0.436 |             |
| + | 10 | 1639        | l_p.F369fs PCK2_  | NM_004563    | NP_004554    | Q16822 | PCKGM_HUMAN |                       | 1   | GGCCCTTTTTTC      | 0.577 |             |
| + | 3  | 688_689     | ame_Shift_Del_p   | NM_014315    | NP_055130    | Q9Y2U9 | KLDC2_HUMAN |                       | 1   | TGTGCTGTGTG       | 0.396 |             |
| + | 20 | 3442_3443   | xdq.2_Frame_Shif  | NM_002892    | NP_002883    | P29374 | ARI4A_HUMAN |                       | 6   | GTACAAGAGAG       | 0.386 |             |
| - | 11 | 2941        | IH5_uc001xfy.2_3' | NM_139318    | NP_647479    | Q8NCM2 | KCNH5_HUMAN | lasmic (Potential).   | 9   | TATCTGGGGGG       | 0.383 |             |
| + | 7  | 910_912     | l0ttu.1_In_Frame_ | NM_021239    | NP_067062    | P49756 | RBM25_HUMAN |                       | 4   | CCAGGAAGAAG       | 0.384 |             |
| - | 1  | 1802_1804   |                   | NM_006029    | NP_006020    | Q8ND90 | PNMA1_HUMAN | Poly-Glu.             | 1   | GCCTCagcctctcc    | 0.256 |             |
| - | 16 | 2283        | iALC_uc010tv.1_   | NM_000153    | NP_000144    | P54803 | GALC_HUMAN  |                       | 0   | ATACCATTTTTTT     | 0.308 |             |
| - | 7  | 1217_1219   | 339SS->S FOXN3    | NM_001085471 | NP_001078940 | O00409 | FOXN3_HUMAN |                       | 3   | GGCTGAGGAGG       | 0.65  | rs139532153 |
| - | 5  | 903_905     | KT1_uc001ypm.2    | NM_005163    | NP_005154    | P31749 | AKT1_HUMAN  |                       | 134 | TCCATCTCCTCC      | 0.631 |             |
| - | 7  | 3802        | zpv.2_Frame_Shif  | NM_022473    | NP_071918    | Q9H2Y7 | ZF106_HUMAN |                       | 3   | GTGGGAAAAAG       | 0.522 |             |
| - | 15 | 4136        | ie_Shift_Del_p.Q1 | NM_173500    | NP_775771    | Q6IQ55 | TTBK2_HUMAN |                       | 7   | CCCTTGGGGGG       | 0.537 |             |
| - | 5  | 646         | .T29fs TEX9_uc00  | NM_018365    | NP_060835    | Q8NEH6 | MNS1_HUMAN  | ential. Glu-rich.     | 1   | TCATGTTTTTGG      | 0.328 |             |
| + | 6  | 3071        |                   | NM_020778    | NP_065829    | Q96L96 | ALPK3_HUMAN |                       | 12  | TTCCCAAAAAA       | 0.537 |             |
| + | 9  | 1102        |                   | NM_002569    | NP_002560    | P09958 | FURIN_HUMAN |                       | 7   | GGAACGGGGGC       | 0.627 |             |
| - | 7  | 1108        |                   | NM_003223    | NP_003214    | Q01664 | TFAP4_HUMAN |                       | 1   | CTGTCTTTTCC       | 0.667 |             |
| + | 17 | 2056        | l2dan.3_Frame_St  | NM_015226    | NP_056041    | Q2KHT3 | CL16A_HUMAN |                       | 2   | AAGACATTTTTTT     | 0.433 |             |
| + | 24 | 3260        | l2dap.2_Frame_St  | NM_015226    | NP_056041    | Q2KHT3 | CL16A_HUMAN |                       | 2   | CTTGTCCCCCC       | 0.701 |             |
| - | 10 | 895         | NTAN1_uc010uzo.   | NM_173474    | NP_775745    | Q96AB6 | NTAN1_HUMAN |                       | 0   | TCTTCATTTTTTT     | 0.383 |             |
| + | 19 | 3331        | ie_Shift_Del_p.D8 | NM_006662    | NP_006653    | Q6ZRS2 | SRCAP_HUMAN | Pro-rich.             | 4   | CCTGACCCCCC       | 0.567 |             |
| + | 28 | 3281        | ap.1_Frame_Shift  | NM_005353    | NP_005344    | Q13349 | ITAD_HUMAN  | ellular (Potential).  | 1   | AGCTTCCAGGA       | 0.552 |             |
| + | 9  | 1264        | Shift_Del_p.N29of | NM_133443    | NP_597700    | Q8TD30 | ALAT2_HUMAN |                       | 2   | GTGAACCCCCC       | 0.632 |             |
| - | 1  | 196         | 2_5'Flank OGFOD   | NM_007006    | NP_008937    | O43809 | CPSF5_HUMAN | ary for RNA-binding.  | 0   | AGTGACCCCCC       | 0.652 |             |
| + | 2  | 113_115     | p.E13del CCDC13   | NM_032269    | NP_115645    | Q8IY82 | CC135_HUMAN | Potential.            | 1   | gaaggtggaggagga   | 0.448 |             |
| - | 3  | 888_890     | jt.1_In_Frame_De  | NM_001082486 | NP_001075955 | Q96AP0 | ACD_HUMAN   |                       | 1   | TCTCTGCAGCAG      | 0.65  |             |



|   |    |           |                     |                       |              |        |             |                                |    |                    |       |             |
|---|----|-----------|---------------------|-----------------------|--------------|--------|-------------|--------------------------------|----|--------------------|-------|-------------|
| + | 8  | 1053      | el_p.W274fs TSN/    | NM_018430             | NP_060900    | Q2TAA8 | TXIP1_HUMAN |                                | 0  | icATCTGGGGGG       | 0.597 |             |
| + | 15 | 2438      | :38_uc010vmp.1_li   | NM_014003             | NP_054722    | Q92620 | PRP16_HUMAN | ase ATP-binding.               | 1  | icTGCCTTTTTTC      | 0.562 |             |
| - | 2  | 1059      | p.D301fs MYO18A     | NM_078471             | NP_510880    | Q92614 | MY18A_HUMAN | PDZ.                           | 0  | icGTGTCCCCCTG      | 0.622 |             |
| - | 2  | 759       | IP2_uc002hdx.3_l    | NM_020772             | NP_065823    | Q7Z417 | NUFP2_HUMAN |                                | 4  | icTTTCCTTTTTTT     | 0.388 |             |
| - | 5  | 891       |                     | NM_139285             | NP_644814    | Q8NHY3 | GA2L2_HUMAN |                                | 2  | icGGCCGGGGGGC      | 0.597 | rs139867246 |
| + | 14 | 4452      | irw.3_Frame_Shift   | NM_016507             | NP_057591    | Q9NYV4 | CDK12_HUMAN |                                | 19 | icAGCGCCCCCC       | 0.647 |             |
| - | 6  | 825_826   | 2iam.1_Frame_Sh     | NM_178126             | NP_835227    | Q86VR2 | F134C_HUMAN |                                | 2  | icATTGTCTCTCT      | 0.515 |             |
| - | 18 | 1593      | _Shift_Del_p.N501   | NM_001932             | NP_001923    | Q13368 | MPP3_HUMAN  | ylate kinase-like.             | 2  | icACTTTGTTTTTGC    | 0.443 |             |
| - | 5  | 690       | C43_uc010czw.1_c    | NM_144609             | NP_653210    | Q96MW1 | CCD43_HUMAN | Potential.                     | 0  | icGTGTCCTTTTTT     | 0.463 |             |
| + | 4  | 641_642   | :103_uc002ihp.1_f   | NM_213607             | NP_998772    | Q8IW40 | CC103_HUMAN |                                | 1  | icGGGCAGAGAG       | 0.644 |             |
| - | 2  | 684       | _5'Flank HOXB6_l    | NM_004502             | NP_004493    | P09629 | HXB7_HUMAN  | Homeobox.                      | 0  | icTTCTCCTTTTTCC    | 0.473 |             |
| - | 3  | 722_723   |                     | NM_052855             | NP_443087    | Q6AI12 | ANR40_HUMAN | Pro-rich.                      | 0  | icGTGCAGGGGGG      | 0.574 |             |
| - | 8  | 907_909   | p.E75del MKS1_u     | NM_017777             | NP_060247    | Q9NXB0 | MKS1_HUMAN  |                                | 1  | icCCCGCTCCTCC      | 0.532 |             |
| + | 9  | 1470      | :lank ACE_uc010d    | NM_000789             | NP_000780    | P12821 | ACE_HUMAN   | Potential), Peptidase M2 1.    | 4  | icGCGTACCCCCC      | 0.562 |             |
| - | 1  | 452_453   | 13_uc010wqh.1_5'    | NM_006572             | NP_006563    | Q14344 | GNA13_HUMAN |                                | 0  | icCTCTCGCGCGC      | 0.436 |             |
| - | 5  | 1364_1365 | C16A6_uc002jha.     | NM_004694             | NP_004685    | O15403 | MOT7_HUMAN  | ical; (Potential).             | 0  | icAAACCAAAAAA      | 0.436 |             |
| + | 4  | 505_507   | 10wsa.1_In_Fram     | NM_014738             | NP_055553    | Q12767 | K0195_HUMAN | ical; (Potential).             | 1  | icGCCGTGCTGCT      | 0.675 |             |
| + | 20 | 2951      | 1195_uc010wsb.1_    | NM_014738             | NP_055553    | Q12767 | K0195_HUMAN |                                | 1  | icGAGATCCCCCC      | 0.612 |             |
| - | 21 | 3612      | _Shift_Del_p.P415fs | DNAH17_uc002jvs.2_RNA |              |        |             |                                | 9  | icAGTTTGGGGGG      | 0.582 |             |
| + | 4  | 641_643   | _Frame_Del_p.E1f    | NM_032868             | NP_116257    | Q8N594 | MPND_HUMAN  | Poly-Glu.                      | 1  | icatggaagaggaggag  | 0.532 |             |
| - | 9  | 1261_1263 | :E147del GTF2F1     | NM_002096             | NP_002087    | P35269 | T2FA_HUMAN  | Glu-rich.                      | 0  | icGccttctctcctctcc | 0.542 |             |
| - | 1  | 186       | 5A41_uc010dut.2_    | NM_173637             | NP_775908    | Q8N5S1 | S2541_HUMAN | Pro-rich.                      | 0  | icggagggtggggggga  | 0.428 |             |
| - | 7  | 1203      | ie_Shift_Del_p.K3'  | NM_021155             | NP_066978    | Q9NNX6 | CD209_HUMAN | ellular (Probable).            | 1  | icCGGACTTTTTTG     | 0.532 |             |
| - | 3  | 567_570   | _p.L56fs FBXL12_    | NM_017703             | NP_060173    | Q9NXX8 | FXL12_HUMAN | LRR 2.                         | 2  | icAGTGCAGGCAC      | 0.647 | rs150413068 |
| - | 9  | 1445_1447 | 2_In_Frame_Del_l    | NM_002918             | NP_002909    | P22670 | RFX1_HUMAN  | Gly-rich.                      | 2  | icgcctccccgcgcgcgc | 0.365 |             |
| + | 2  | 309       |                     | NM_003950             | NP_003941    | Q96RI0 | PAR4_HUMAN  |                                | 0  | icGCCTGCCCCCCC     | 0.667 |             |
| - | 2  | 134       | Splice_Site ZNF43   | NM_003423             | NP_003414    | P17038 | ZNF43_HUMAN |                                | 2  | icGTCCCTAAAAAA     | 0.386 |             |
| + | 2  | 252_254   | 0eea.2_In_Frame_    | NM_005306             | NP_005297    | O15552 | FFAR2_HUMAN | Name=2; (Potential).           | 1  | icCTCCTGCTGC'      | 0.645 |             |
| - | 9  | 974_975   | pni.2_Frame_Shift   | NM_003598             | NP_003589    | Q15562 | TEAD2_HUMAN | al activation (Potential).     | 3  | icAGCATGGGGGGC     | 0.564 |             |
| - | 11 | 1285_1287 | ipt.1_RNA FUZ_uc    | NM_025129             | NP_079405    | Q9BT04 | FUZZY_HUMAN | Leu-rich.                      | 0  | icGAGACAGCAGC      | 0.635 |             |
| + | 12 | 1412      | '1_uc002pqa.2_RN    | NM_017432             | NP_059128    | Q86YD1 | PTOV1_HUMAN | ction with FLOT1.              | 0  | icTAGATGGGGGGG     | 0.657 |             |
| - | 4  | 864       | ic47_uc002qpm.3_l   | NM_017879             | NP_060349    | Q9BWM5 | ZN416_HUMAN |                                | 0  | icGGGTGAAAAAA      | 0.453 |             |
| + | 4  | 717       | sjZIK1_uc002qpi.2   | NM_001010879          | NP_001010879 | Q3SY52 | ZIK1_HUMAN  |                                | 2  | icCAGTCAAAAAA      | 0.483 |             |
| - | 11 | 1472_1474 | 1_In_Frame_Del_     | NM_015317             | NP_056132    | Q8TB72 | PUM2_HUMAN  | Ala-rich.                      | 1  | icTCCAGCTGCTG      | 0.424 |             |
| - | 3  | 316       | _p.P92fs HS1BP3     | NM_022460             | NP_071905    | Q53T59 | H1BP3_HUMAN | PX.                            | 1  | icGTAGTGGGGGGG     | 0.537 | rs77941615  |
| - | 20 | 2931      | icTF3C2_uc002rju.   | NM_001521             | NP_001512    | Q8WU44 | TF3C2_HUMAN | WD 4.                          | 2  | icGACTGCCCCCCC     | 0.537 |             |
| + | 1  | 105_107   |                     | NM_016441             | NP_057525    | Q9NZV1 | CRIM1_HUMAN |                                | 3  | icTGGGGCTGCTG      | 0.714 |             |
| + | 1  | 96_98     | 2sda.2_In_Frame_    | NM_203437             | NP_982261    | Q6ULP2 | AFTIN_HUMAN |                                | 2  | icAGAGGATGATG      | 0.409 |             |
| - | 2  | 550       | il_p.G10fs MOGS_    | NM_006302             | NP_006293    | Q13724 | MOGS_HUMAN  | renal (Potential).             | 0  | icGGAGTCCCGGG      | 0.652 |             |
| + | 6  | 662       | 151_splice SEMA4    | NM_004263             | NP_004254    | O95754 | SEM4F_HUMAN |                                | 4  | icTGCAGGGGGGG      | 0.587 |             |
| - | 6  | 747_749   | 1.2_In_Frame_Del    | NM_016079             | NP_057163    | Q9Y3E7 | CHMP3_HUMAN | T-interacting motif. Interacti | 1  | icCTCTTCTCTCT      | 0.616 |             |
| + | 6  | 2252_2253 | ied.2_Frame_Shift   | NM_181453             | NP_852118    | Q8IWJ2 | GCC2_HUMAN  | Potential.                     | 1  | icGTTCAGAAAAAA     | 0.307 |             |
| + | 12 | 2858_2860 |                     | NM_198581             | NP_940983    | P61129 | ZC3H6_HUMAN |                                | 4  | icAGGCGATGATG      | 0.429 |             |
| + | 5  | 719_721   | 0zej.1_In_Frame_l   | NM_145810             | NP_665809    | Q9BWT1 | CDCA7_HUMAN |                                | 1  | icCATGGAGGAGC      | 0.537 |             |
| - | 2  | 852       | :KL_uc002uod.1_li   | NM_002500             | NP_002491    | Q13562 | NDF1_HUMAN  |                                | 1  | icCAGGTGGGGGG      | 0.617 |             |
| - | 4  | 1344      | PSMD1_uc002vrn.     | NM_000867             | NP_000858    | P41595 | 5HT2B_HUMAN | smic (By similarity).          | 0  | icCCACCTTTTCCC     | 0.463 | rs61731724  |
| + | 8  | 835       | Shift_Del_p.H142f   | NM_152879             | NP_690618    | Q16760 | DGKD_HUMAN  | I-ester/DAG-type 2.            | 5  | icAGGTTACACAT      | 0.562 |             |

|   |    |           |                     |              |              |        |              |                              |    |                   |       |                   |
|---|----|-----------|---------------------|--------------|--------------|--------|--------------|------------------------------|----|-------------------|-------|-------------------|
| - | 14 | 1577      | V33_uc002wiu.2_f    | NM_025220    | NP_079496    | Q9BZ11 | ADA33_HUMAN  | r (Potential). Disintegrin.  | 4  | CGTCTGGGGGA       | 0.657 |                   |
| - | 7  | 1256      | _Shift_Del_p.K301   | NM_001042576 | NP_001036041 | Q9P2E9 | RRBP1_HUMAN  | lasmic (Potential).          | 1  | TTGGCCTTTTCTC     | 0.622 |                   |
| - | 1  | 5735      | E2_uc002yyx.2_li    | NM_182832    | NP_878252    | Q8WY50 | PLAC4_HUMAN  |                              | 0  | GTGTCTGGGGT       | 0.517 | rs5019194         |
| - | 3  | 453_455   | ne_Del_p.L72del E   | NM_194255    | NP_919231    | P41440 | S19A1_HUMAN  | ical; (Probable).            | 0  | GGCCAGCAGC        | 0.645 |                   |
| - | 5  | 573       | zil.2_Frame_Shift   | NM_001001438 | NP_001001438 | P48449 | ERG7_HUMAN   | PFTB 1.                      | 0  | CAACACCCAGA       | 0.542 |                   |
| + | 6  | 588_590   | Y15_uc002zsr.2_In   | NM_001003891 | NP_001003891 | Q96RN5 | MED15_HUMAN  | Poly-Gln.                    | 1  | gcagttccagcagcagc | 0.217 |                   |
| + | 6  | 711_713   | Y15_uc002zsr.2_In   | NM_001003891 | NP_001003891 | Q96RN5 | MED15_HUMAN  | Poly-Gln.                    | 1  | gcagttccagcagcagc | 0.187 |                   |
| - | 5  | 615       | me_Shift_Del_p.K'   | NM_032204    | NP_115580    | Q9H1I8 | ASCC2_HUMAN  |                              | 0  | TTGCCTTTTCC/      | 0.483 |                   |
| - | 11 | 1370      | ic003ahi.2_Intron E | NM_031937    | NP_114143    | Q9BXI6 | TB10A_HUMAN  |                              | 1  | GGGCTGGGGGC       | 0.652 |                   |
| - | 3  | 496_498   |                     | NM_005877    | NP_005868    | Q15459 | SF3A1_HUMAN  | Poly-Gln.                    | 5  | TGGTCTGCTGC       | 0.596 | rs141985009       |
| + | 21 | 2500      | i.1_Frame_Shift_D   | NM_001007467 | NP_001007468 | A8K8P3 | SFI1_HUMAN   |                              | 1  | AAGCCAAAAAA       | 0.512 |                   |
| + | 7  | 686_688   | Del_p.E197del SH    | NM_018957    | NP_061830    | Q9Y3L3 | 3BP1_HUMAN   | BAR.                         | 1  | CTGAAGGAGGA       | 0.498 |                   |
| - | 5  | 895_896   | 2_5'UTR CYP2D6      | NM_000106    | NP_000097    | Q6NWU0 | Q6NWU0_HUMAN |                              | 2  | GTCTCGGGGGC       | 0.629 | rs72549352        |
| - | 1  | 5454_5456 | Q1774del TCF20_u    | NM_005650    | NP_005641    | Q9UGU0 | TCF20_HUMAN  |                              | 5  | CCTCTGCTGC        | 0.601 |                   |
| - | 22 | 3893_3895 | 3brg.1_In_Frame_    | NM_014850    | NP_055665    | O43295 | SRGP2_HUMAN  |                              | 9  | CCGAGCTGCTG       | 0.739 |                   |
| - | 17 | 2137      | iRIP2_uc011avh.1    | NM_001080423 | NP_001073892 | Q9C0E4 | GRIP2_HUMAN  | PDZ 5.                       | 1  | AGTTGTCCAGGC      | 0.617 |                   |
| - | 3  | 2472      |                     | NM_014831    | NP_055646    | O15050 | TRNK1_HUMAN  |                              | 2  | CACCCGGGGGT       | 0.483 |                   |
| - | 16 | 2122      | h.2_Frame_Shift_I   | NM_002343    | NP_002334    | P02788 | TRFL_HUMAN   | ansferrin-like 2.            | 4  | AGCACTTTTTC/      | 0.463 |                   |
| - | 20 | 3495      | s SCAP_uc003crg.    | NM_012235    | NP_036367    | Q12770 | SCAP_HUMAN   | milarity). Cytoplasmic (By s | 1  | ATGGGTTTTTGC      | 0.607 |                   |
| + | 3  | 580_581   | Y03cwi.1_Frame_S    | NM_173546    | NP_775817    | Q8IXV7 | KLD8B_HUMAN  | Kelch 4.                     | 0  | GCTCTGGGGGC       | 0.609 |                   |
| + | 21 | 3869      | OBO2_uc011bgk.1     | NM_002942    | NP_002933    | Q9HCK4 | ROBO2_HUMAN  | lasmic (Potential).          | 11 | TACCTCCCCCC       | 0.433 |                   |
| - | 7  | 850       | O3eal.2_Frame_Sl    | NM_001009899 | NP_001009899 | Q68DE3 | K2018_HUMAN  |                              | 3  | CAATAATTTTTTT     | 0.373 |                   |
| + | 6  | 776       | 1bik.1_Frame_Shi    | NM_001690    | NP_001681    | P38606 | VATA_HUMAN   |                              | 3  | ATGCCCTTTTTTC     | 0.423 |                   |
| + | 5  | 2486      | edk.2_Frame_Shift   | NM_003889    | NP_003880    | O75469 | NR1I2_HUMAN  | gand-binding.                | 2  | GCTGCGGGGGG       | 0.587 |                   |
| + | 8  | 1209      | p.G128fs PARP15     | NM_001113523 | NP_001106995 | Q460N3 | PAR15_HUMAN  | Macro 2.                     | 5  | GGGGGAAAAAG       | 0.413 |                   |
| + | 10 | 1570_1572 | 3fns.2_In_Frame_    | NM_198241    | NP_937884    | Q04637 | IF4G1_HUMAN  | Poly-Glu.                    | 7  | GAAATGgaagaag:    | 0.443 |                   |
| - | 18 | 2192      | p.E673fs CLCN2      | NM_004366    | NP_004357    | P51788 | CLCN2_HUMAN  | smic (By similarity).        | 0  | GGTCTCCCCCC       | 0.622 | rs143415674       |
| - | 12 | 1572      | gmd.2_Frame_Shi     | NM_020041    | NP_064425    | Q9NRM0 | GTR9_HUMAN   | lasmic (Potential).          | 3  | TCTGTTTTTTGC      | 0.413 |                   |
| + | 5  | 567       | 31fs ANAPC4_uc0     | NM_013367    | NP_037499    | Q9UJX5 | APC4_HUMAN   |                              | 5  | CTGCCAAAAAA       | 0.294 |                   |
| - | 7  | 944       |                     | NM_173536    | NP_775807    | Q8N1C3 | GBRG1_HUMAN  | ellular (Probable).          | 2  | AGGTCAAAAAA       | 0.294 |                   |
| - | 23 | 3204_3206 | ame_Del_p.Q760d     | NM_004898    | NP_004889    | O15516 | CLOCK_HUMAN  | Gln-rich.                    | 3  | gggagctctgctgctgc | 0.315 |                   |
| + | 8  | 1473_1475 | Q217del PRDM8       | NM_020226    | NP_064611    | Q9NQV8 | PRDM8_HUMAN  | r-rich. Poly-Gln.            | 1  | aaagaccagcagcag   | 0.384 |                   |
| + | 8  | 1279      | ike.1_Frame_Shift   | NM_001263    | NP_001254    | Q92903 | CDS1_HUMAN   |                              | 4  | TTTGGATTTTTTT     | 0.308 |                   |
| - | 1  | 538_540   | ic3_uc011cdn.1_li   | NM_153757    | NP_715638    | Q96NT1 | NP1L5_HUMAN  | Glu-rich.                    | 1  | lactctctctctctctc | 0.369 |                   |
| + | 8  | 1187_1189 | p.P363del NPNT      | NM_001033047 | NP_001028219 | Q6UXI9 | NPNT_HUMAN   | Pro-rich.                    | 1  | TACTCCACCACC      | 0.522 |                   |
| + | 39 | 6607      | c.G123fs KIAA110!   | NM_015312    | NP_056127    | Q2LD37 | K1109_HUMAN  |                              | 12 | ACAATGGGGGT       | 0.438 |                   |
| - | 3  | 3529      | c.N909fs ANKRD5     | NM_020337    | NP_065070    | Q9ULJ7 | ANR50_HUMAN  | ANK 19.                      | 1  | GTCCATTTTTTGC     | 0.408 |                   |
| + | 1  | 413_414   |                     | NM_004575    | NP_004566    | Q12837 | PO4F2_HUMAN  |                              | 1  | CTggtggtggtggtg   | 0.386 | 907220;rs72269802 |
| - | 5  | 1095      | p.F207fs LRBA_uc    | NM_006726    | NP_006717    | P50851 | LRBA_HUMAN   |                              | 7  | AAAGTTAAAAAA      | 0.408 |                   |
| + | 9  | 1176      |                     | NM_033393    | NP_203751    | Q9C0D6 | FHDC1_HUMAN  |                              | 2  | TCTTTTAGATTAT     | 0.423 |                   |
| + | 20 | 3494      | p.V972fs TLL1_uc    | NM_012464    | NP_036596    | O43897 | TLL1_HUMAN   | CUB 5.                       | 7  | TATGTGGAGCT       | 0.448 |                   |
| - | 8  | 993_995   | O3jcg.2_In_Frame    | NM_030782    | NP_110409    | Q96KA5 | CLP1L_HUMAN  | lasmic (Potential).          | 2  | CATGCTCTTCTT      | 0.537 |                   |
| + | 46 | 8393_8395 | E2636del NIPBL_u    | NM_133433    | NP_597677    | Q6KC79 | NIPBL_HUMAN  |                              | 9  | TGATGAAGAAG.      | 0.379 |                   |
| - | 1  | 68_70     |                     | NM_004465    | NP_004456    | O15520 | FGF10_HUMAN  |                              | 3  | AAAAAGCAGCA       | 0.537 |                   |
| - | 10 | 1303      | 256fs FAM172A_u     | NM_032042    | NP_114431    | Q8WUF8 | F172A_HUMAN  |                              | 0  | GACCCGGGGGC       | 0.388 | rs140492306       |
| + | 2  | 237_240   | p.K19fs AP3S1_L     | NM_001284    | NP_001275    | Q92572 | AP3S1_HUMAN  |                              | 0  | ATCTAAGAGAGA      | 0.304 | rs80118146        |
| - | 37 | 5307      |                     | NM_001999    | NP_001990    | P35556 | FBN2_HUMAN   | TB 6.                        | 15 | TGACAGGGGGG       | 0.507 |                   |

|   |    |             |                    |              |              |        |             |                          |     |                   |       |            |
|---|----|-------------|--------------------|--------------|--------------|--------|-------------|--------------------------|-----|-------------------|-------|------------|
| + | 1  | 453_455     | cyu.1_In_Frame_I   | NM_001964    | NP_001955    | P18146 | EGR1_HUMAN  | Gly/Ser-rich.            | 1   | cagcaacagcagcag   | 0.394 |            |
| - | 3  | 630         | 'ame_Shift_Del_p.  | NM_014790    | NP_055605    | Q96AA8 | JKIP2_HUMAN | Potential.               | 2   | AGCTCCTTCATC'     | 0.532 |            |
| - | 23 | 12701_12701 | FAT2_uc003lud.3_   | NM_001447    | NP_001438    | Q9NYQ8 | FAT2_HUMAN  | lasmic (Potential).      | 6   | 'CTCCAGGGGGGA     | 0.644 |            |
| + | 5  | 668_670     | mdf.1_In_Frame_    | NM_006650    | NP_006641    | Q6PUV4 | CPLX2_HUMAN |                          | 1   | GGACGAGGAGG       | 0.645 |            |
| + | 3  | 266         |                    | NM_002114    | NP_002105    | P15822 | ZEP1_HUMAN  |                          | 6   | AGTTTTCAAAAAA     | 0.259 |            |
| + | 5  | 798_799     | _uc003nanz.3_Frar  | NM_002127    | NP_002118    | P17693 | HLAG_HUMAN  | ar (Potential). Alpha-3. | 4   | ITCAGACCCCCC      | 0.54  |            |
| - | 7  | 1054        | M26_uc010jry.2_5'  | NM_003449    | NP_003440    | Q12899 | TRI26_HUMAN |                          | 3   | CCGGTCTTTTTTI     | 0.483 |            |
| + | 4  | 545         | _Shift_Del_p.l57fs | NM_001517    | NP_001508    | Q92759 | TF2H4_HUMAN |                          | 3   | \CCCCATTTTCCC     | 0.577 |            |
| + | 5  | 800         | Shift_Del_p.E332fs | NM_001710    | NP_001701    | P00751 | CFAB_HUMAN  |                          | 1   | ATCATGAAAATG      | 0.468 |            |
| + | 4  | 1107_1108   | lvw.1_Frame_Shif   | NM_021922    | NP_068741    | Q9HB96 | FANCE_HUMAN | ction with FANCC.        | 3   | AGGATGCCCCCC      | 0.54  |            |
| + | 2  | 314_316     | PK13_uc003olt.2_1  | NM_002754    | NP_002745    | O15264 | MK13_HUMAN  | rotein kinase.           | 3   | GGGAGCTGCTG       | 0.67  |            |
| - | 6  | 995         |                    | NM_152688    | NP_689901    | Q5VWX1 | KHDR2_HUMAN | Pro-rich.                | 11  | TGGTGCCCCC        | 0.542 |            |
| - | 1  | 195_197     | job.1_In_Frame_I   | NM_145331    | NP_663304    | O43318 | M3K7_HUMAN  | Poly-Ser.                | 6   | AGACGAGGAGG       | 0.655 |            |
| - | 13 | 1854        | 'k.2_Frame_Shift_  | NM_002037    | NP_002028    | P06241 | FYN_HUMAN   | rotein kinase.           | 7   | CGCTCTTTTTC       | 0.562 |            |
| + | 12 | 1829        | Shift_Del_p.K213fs | NM_015278    | NP_056093    | O94885 | SASH1_HUMAN |                          | 1   | 'TTGGGAAAAAG      | 0.408 |            |
| - | 13 | 2067        |                    | NM_032415    | NP_115791    | Q9BXL7 | CAR11_HUMAN |                          | 50  | GCTCCGGGGGG       | 0.592 |            |
| - | 7  | 678         | 'A1_uc003srq.2_F   | NM_022307    | NP_071682    | Q05084 | ICA69_HUMAN | AH.                      | 1   | TCAAAGTTTTTTT     | 0.378 |            |
| + | 8  | 2004_2005   | srz.2_Frame_Shift  | NM_014660    | NP_055475    | O94880 | PHF14_HUMAN |                          | 3   | ITGCAAGAGAGA      | 0.376 |            |
| - | 8  | 1153        | _p.P138fs ETV1_L   | NM_004956    | NP_004947    | P50549 | ETV1_HUMAN  |                          | 35  | GGTGTGGGGGG       | 0.527 |            |
| - | 2  | 279         | jxy.1_Frame_Shift  | NM_006408    | NP_006399    | O95994 | AGR2_HUMAN  |                          | 0   | 'TGTCCTTTTTC      | 0.493 |            |
| - | 5  | 684_685     | _Del_p.E93fs OSB   | NM_015550    | NP_056365    | Q9H4L5 | OSBL3_HUMAN | PH.                      | 1   | 'CAGCTTCTCTCT     | 0.5   |            |
| - | 1  | 310_312     | 'ame_Del_p.72_73   | NM_005522    | NP_005513    | P49639 | HXA1_HUMAN  | Poly-His.                | 3   | ggggggcgatggg     | 0.527 | rs10951154 |
| - | 5  | 936         | izm.2_Frame_Shift  | NM_175061    | NP_778231    | Q86VZ6 | JAZF1_HUMAN |                          | 131 | 'ACACCGGGGGA      | 0.493 |            |
| + | 1  | 403_405     | uc003tbl.3_5'Flank | NM_002047    | NP_002038    | P41250 | SYG_HUMAN   |                          | 1   | CGCTCTGCTGC       | 0.749 |            |
| + | 5  | 601_603     | okxo.2_In_Frame_   | NM_007252    | NP_009183    | P78424 | PO6F2_HUMAN | Gln-rich.                | 1   | 'cagctccagcagcagc | 0.365 |            |
| + | 18 | 7753        | \13_uc010kys.1_5   | NM_152701    | NP_689914    | Q86UQ4 | ABCAD_HUMAN |                          | 10  | TACTTTAAAAAA      | 0.313 |            |
| - | 2  | 83_85       | _uc010lby.1_In_Fri | NM_004603    | NP_004594    | Q16623 | STX1A_HUMAN | lasmic (Potential).      | 0   | AGCGACATCATC.     | 0.586 |            |
| - | 30 | 3061        | fz.1_Frame_Shift_  | NM_005338    | NP_005329    | O00291 | HIP1_HUMAN  | l/LWEQ.                  | 8   | IAGTGCTTTTTTC     | 0.507 |            |
| - | 2  | 458         |                    | NM_032936    | NP_116325    | Q9H2L4 | TMM60_HUMAN |                          | 0   | CCAGGCTTTTTT      | 0.408 |            |
| + | 13 | 1828        | _p.F530fs PHTF2_I  | NM_001127357 | NP_001120829 | Q8N3S3 | PHTF2_HUMAN |                          | 1   | 'ATTTTCTTTTTTT    | 0.303 |            |
| + | 19 | 5175_5176   | .S1650fs AKAP9_    | NM_005751    | NP_005742    | Q99996 | AKAP9_HUMAN |                          | 26  | GTTTCAGAGAGA      | 0.411 |            |
| - | 7  | 1188        | _p.K237fs CYP51A   | NM_000786    | NP_000777    | Q16850 | CP51A_HUMAN |                          | 0   | ATAACATTTTTTT     | 0.398 |            |
| + | 23 | 4102        | LL5_uc010ljj.1_RN  | NM_182931    | NP_891847    | Q8IZD2 | MLL5_HUMAN  |                          | 3   | 'CAAGTGGAAGC'     | 0.473 |            |
| + | 26 | 3637        | 05_uc003vsx.2_5    | NM_015135    | NP_055950    | Q92621 | NU205_HUMAN |                          | 6   | GTTGGATTTTTTI     | 0.373 |            |
| + | 3  | 363         | 'me_Shift_Del_p.E  | NM_015917    | NP_057001    | Q9Y2Q3 | GSTK1_HUMAN |                          | 0   | 'GCTTGAAAAAG      | 0.478 |            |
| + | 2  | 1926        | wjq.1_Frame_Shift  | NM_019015    | NP_061888    | Q9P2E5 | CHPF2_HUMAN | renal (Potential).       | 1   | GCAGCGGGGGG       | 0.632 |            |
| - | 38 | 8744        | .N1903fs MLL3_u    | NM_170606    | NP_733751    | Q8NEZ4 | MLL3_HUMAN  |                          | 63  | TCATCATTTTTTT     | 0.378 |            |
| - | 3  | 436         |                    | NM_005431    | NP_005422    | O43543 | XRCC2_HUMAN |                          | 2   | TACACCAAAAAA.     | 0.393 |            |
| + | 12 | 1730_1731   | 'DR60_uc010lqw.2   | NM_018051    | NP_060521    | Q8WVS4 | WDR60_HUMAN | p.G524R(1)               | 4   | 'TTTGGGAAAAAA     | 0.332 |            |
| + | 2  | 273_275     | 'lank BMP1_uc003   | NM_003018    | NP_003009    | P11686 | PSPC_HUMAN  |                          | 0   | TATCGTGGTGGI      | 0.601 |            |
| + | 12 | 2305_2307   | 'me_Del_p.E38del   | NM_000553    | NP_000544    | Q14191 | WRN_HUMAN   | Poly-Glu.                | 7   | CTACTAaagaagaa    | 0.266 |            |
| + | 10 | 6850        | _p.I2200fs ZFHx4_u | NM_024721    | NP_078997    | Q86UP3 | ZFHx4_HUMAN |                          | 15  | CTCCTATAACGC      | 0.368 |            |
| + | 9  | 1450_1451   | RRCC1_uc003ycx     | NM_033402    | NP_208325    | Q9C099 | LRCC1_HUMAN | Potential.               | 0   | ACCAAGAGAGA       | 0.267 |            |
| + | 4  | 567         |                    | NM_000067    | NP_000058    | P00918 | CAH2_HUMAN  |                          | 1   | GGGGATTTTGGC      | 0.388 |            |
| - | 3  | 492         |                    | NM_018710    | NP_061180    | Q8N4L2 | TM55A_HUMAN |                          | 0   | 'GGGGGTTTTTG.     | 0.393 |            |
| - | 8  | 1296        | _Shift_Del_p.K377f | NM_175634    | NP_783552    | Q06455 | MTG8_HUMAN  |                          | 16  | GCCACCTTTTTT'     | 0.517 |            |
| - | 6  | 468         | yhd.2_Frame_Shif   | NM_057749    | NP_477097    | O96020 | CCNE2_HUMAN |                          | 0   | CTCTCCTTTTTT'     | 0.323 |            |

|   |    |            |                    |              |              |        |             |                           |              |                |       |             |
|---|----|------------|--------------------|--------------|--------------|--------|-------------|---------------------------|--------------|----------------|-------|-------------|
| + | 62 | 12067      | yiw.2_Frame_Shift  | NM_017890    | NP_060360    | Q7Z7G8 | VP13B_HUMAN |                           | 20           | AAACCTCCCCC    | 0.468 |             |
| + | 6  | 1430       | _p.K118fs DCAF1    | NM_015420    | NP_056235    | Q9NV06 | DCA13_HUMAN | WD 4.                     | 1            | CTTTGAAAAAGC   | 0.338 |             |
| - | 19 | 1853       | .K224fs ENPP2_ur   | NM_001040092 | NP_001035181 | Q13822 | ENPP2_HUMAN |                           | 7            | AGACCCTTTTGT/  | 0.358 |             |
| + | 2  | 165_166    |                    | NM_152412    | NP_689625    | Q7Z3I7 | ZN572_HUMAN |                           | 2            | AGCAAGAAAAAA   | 0.396 |             |
| - | 19 | 4091       | _Shift_Del_p.N120  | NM_015912    | NP_056996    | Q49AJ0 | F135B_HUMAN |                           | 9            | ACGACGTTTTTA   | 0.428 |             |
| - | 13 | 1637_1639  | .I506del TSNARE    | NM_145003    | NP_659440    | Q96NA8 | TSNA1_HUMAN | . Helical; (Potential).   | 0            | TTGGCGATGATG   | 0.414 | rs142964918 |
| - | 2  | 529        | 'AX5_uc010mlo.1_   | NM_016734    | NP_057953    | Q02548 | PAX5_HUMAN  | Paired. p.?(31)           | 147          | ATTCACAAAAACC  | 0.522 |             |
| - | 3  | 732        | nr1.2_Frame_Shift  | NM_000507    | NP_000498    | P09467 | F16P1_HUMAN |                           | 0            | TGGTTCCAACG    | 0.398 |             |
| + | 1  | 175        | 10mnt.1_Frame_Sl   | NM_018112    | NP_060582    | Q9NVV0 | TM38B_HUMAN | lenal (Potential).        | 2            | TTTCCCTTTTTTC  | 0.627 |             |
| - | 22 | 6093       | rf.2_Frame_Shift_l | NM_002160    | NP_002151    | P24821 | TENA_HUMAN  | nectin type-III 15.       | 7            | TGCCCGGGGGG    | 0.478 | rs148674204 |
| + | 13 | 3791_3793  |                    | NM_173689    | NP_775960    | Q5IJ48 | CRUM2_HUMAN | ical; (Potential).        | 1            | CCTGCCTCCTC    | 0.67  |             |
| - | 11 | 1559       | p.H440fs FAM129I   | NM_022833    | NP_073744    | Q96TA1 | NIBL1_HUMAN |                           | 0            | CTGGTGCAGGA    | 0.657 |             |
| - | 26 | 2978       | _p.Y312fs GOLGA    | NM_004486    | NP_004477    | Q08379 | GOGA2_HUMAN |                           | 1            | CCGGTAAAAAA    | 0.562 |             |
| + | 5  | 629        |                    | NM_001807    | NP_001798    | P19835 | CEL_HUMAN   |                           | 1            | CCTCGGGGGG     | 0.642 |             |
| + | 13 | 2099       | :orf86_uc004cjl.1  | NM_024718    | NP_078994    | Q3YEC7 | PARF_HUMAN  |                           | 0            | CCCCACCCCC     | 0.652 |             |
| + | 12 | 1352_1353  | cyn.2_Frame_Shif   | NM_003159    | NP_003150    | O76039 | CDKL5_HUMAN |                           | 6            | GCTTCTAAATG    | 0.525 |             |
| - | 8  | 951        | :28fs DMD_uc010r   | NM_004006    | NP_003997    | P11532 | DMD_HUMAN   | 2. Actin-binding.         | 6            | CTTGAAGAGT     | 0.378 |             |
| - | 1  | 1710_1712  | _p.L12del PCDH1E   | NM_020766    | NP_001098713 | Q8TAB3 | PCD19_HUMAN |                           | 7            | TGGCCAGCAGC    | 0.665 |             |
| - | 1  | 3739_3741  |                    | NM_003604    | NP_003595    | O14654 | IRS4_HUMAN  |                           | 10           | GAGTGTCTCG     | 0.542 |             |
| - | 2  | 574_575    | .P_uc004esg.2_5F   | NM_024528    | NP_078804    | Q8N5F7 | NKAP_HUMAN  |                           | 2            | CCAATTCTCTC    | 0.317 |             |
| + | 4  | 726_727    | Onrd.1_Frame_Shi   | NM_021946    | NP_068765    | Q5H9F3 | BCORL_HUMAN | Pro-rich.                 | 7            | ATCTGTCCCCCT   | 0.594 |             |
| + | 13 | 5150       | tevc.1_Frame_Shi   | NM_021946    | NP_068765    | Q5H9F3 | BCORL_HUMAN |                           | 7            | CAGATCCCCC     | 0.602 | rs137862942 |
| - | 11 | 886_888    | n.2_In_Frame_Del   | NM_031462    | NP_113650    | Q8TCZ2 | C99L2_HUMAN | ic (Potential). Poly-Pro. | 3            | TTCGGGCGGCG    | 0.611 | rs7877654   |
| + | 3  | 2011_2012  | mu.1_Frame_Shif    | NM_006015    | NP_006006    | O14497 | ARI1A_HUMAN | p.Q546*(1)                | 142          | CCAGAGCCAC     | 0.649 |             |
| - | 16 | 1769       | cnh.2_Frame_Shif   | NM_012222    | NP_036354    | Q9UIF7 | MUTYH_HUMAN |                           | 0            | GGGGCTTTTTC    | 0.547 |             |
| - | 7  | 758_760    | 10_uc001emp.3_     | NM_001012758 | NP_001012776 | P0C025 | NUD17_HUMAN |                           | 0            | TCCATCCTCT     | 0.409 |             |
| - | 1  | 566_568    | 1jqs.2_In_Frame_   | NM_173555    | NP_775826    | Q2T9J0 | TYSD1_HUMAN |                           | 1            | AGCTCAGCAGC    | 0.739 |             |
| + | 5  | 471_473    | _p.L92del TSPAN4   | NM_003271    | NP_003262    | O14817 | TSN4_HUMAN  | ical; (Potential).        | 1            | CTTCTGTGTC     | 0.65  | rs61867552  |
| + | 5  | 1941_1943  | 1nno.2_In_Frame_   | NM_001142521 | NP_001135993 | Q96PZ2 | F111A_HUMAN |                           | 3            | TATCATTGAGTT   | 0.419 |             |
| - | 3  | 258_259    | _74P>PPI PRB1_u    | NM_005039    | NP_005030    | P04280 | PRP1_HUMAN  | -P-[PAQ]-Q-[GE]-[GD]-[NK  | 0            | TTTCTGGAGGT    | 0.619 |             |
| - | 3  | 812_814    |                    | NM_006248    | NP_006239    |        |             |                           | 0            | TCCTGGAGGAG    | 0.606 |             |
| - | 4  | 601_603    |                    | NM_032656    | NP_116045    | Q8IY37 | DHX37_HUMAN |                           | 1            | ATTCGActcctcct | 0.601 |             |
| + | 15 | 1832       | luj.1_Frame_Shift  | NM_004764    | NP_004755    | Q96J94 | PIWL1_HUMAN | ng (By similarity). Piwi. | 2            | CCCTACCCCAA    | 0.453 |             |
| - | 3  | 170_172    |                    | NM_001025190 | NP_001020361 | Q96KJ4 | MSLNL_HUMAN |                           | 4            | GTGAAAGCTGT    | 0.596 | rs3765330   |
| - | 10 | 11379_1138 | (3_uc002fcl.2_Fran | NM_006885    | NP_008816    | Q15911 | ZFHX3_HUMAN |                           | 4            | AAACTAGGGTGC   | 0.584 |             |
| - | 21 | 2724_2725  |                    | NM_002208    | NP_002199    | P38570 | ITAE_HUMAN  | ellular (Potential).      | 4            | GTTTCTGGGGT    | 0.53  |             |
| + | 2  | 737        | .P226fs BPTF_uc    | NM_182641    | NP_872579    | Q12830 | BPTF_HUMAN  |                           | 4            | TCCC GCCCTT    | 0.423 |             |
| - | 2  | 202_204    |                    | NM_013376    | NP_037508    | Q9UHV2 | SRTD1_HUMAN |                           | 0            | TCCTTCTCCTC    | 0.453 |             |
| - | 14 | 2382_2384  | H4_uc002pgb.1_lr   | NM_015168    | NP_055983    | Q9UPT8 | ZC3H4_HUMAN | Potential.                | 6            | CTCTCTCCTC     | 0.7   |             |
| - | 3  | 1648_1650  | 02sit.3_In_Frame   | NM_015470    | NP_056285    | Q9BXF6 | RFIP5_HUMAN |                           | 0            | GCCTTGGTGGT    | 0.635 |             |
| - | 24 | 3343_3344  | _p.F771fs RALGAF   | NM_020343    | NP_065076    | Q2PPJ7 | RGPA2_HUMAN |                           | 1            | AGGAGAAAAAG    | 0.45  |             |
| - | 19 | 1979       | kw.2_Frame_Shift   | NM_017886    | NP_060356    | Q96C45 | ULK4_HUMAN  |                           | 0            | GGTCTTTTTTT    | 0.448 |             |
| + | 1  | 3375_3376  |                    | NM_175918    | NP_787114    | Q8N1N5 | CRPAK_HUMAN | 3                         | CTGCTCACACGT | 0.708          |       |             |
| + | 1  | 3654_3655  |                    | NM_175918    | NP_787114    | Q8N1N5 | CRPAK_HUMAN | 6                         | CTGCTCACACGT | 0.678          |       |             |
| + | 15 | 2494_2495  |                    | NM_001977    | NP_001968    | Q07075 | AMPE_HUMAN  | ellular (Potential).      | 5            | TTCAGGAATACT   | 0.337 |             |
| + | 3  | 1067_1068  | _p.S44fs TPBG_u    | NM_006670    | NP_006661    | Q13641 | TPBG_HUMAN  | ar (Potential). Ser-rich. | 1            | tcctcGGCGCCGT  | 0.55  |             |
| - | 36 | 4449_4450  | NK1_uc003xoj.2_f   | NM_020476    | NP_065209    | P16157 | ANK1_HUMAN  | ulatory domain. Death.    | 9            | ACGGATGACCCA   | 0.535 |             |

|   |     |           |                    |              |              |        |              |                |    |                |                   |             |             |
|---|-----|-----------|--------------------|--------------|--------------|--------|--------------|----------------|----|----------------|-------------------|-------------|-------------|
| + | 7   | 1112      | mep.2_Splice_Siti  | NM_014957    | NP_055772    | A2RUS2 | DEND3_HUMAN  |                | 1  | AGCAAGGTTAGC   | 0.559             | rs143399544 |             |
| - | 3   | 523       | mvu.1_Frame_Sh     | NM_001007551 | NP_001007552 | Q6NSH3 | CT455_HUMAN  |                | 0  | CCACAGGTGCA    | 0.443             |             |             |
| - | 9   | 1115_1116 | 33fs RBMX_uc004    | NM_002139    | NP_002130    | P38159 | HNRPG_HUMAN  |                | 1  | FAAGATGGCGGG   | 0.465             |             |             |
| - | 1   | 105_113   | v52_uc001aii.2_5'  | NM_178545    | NP_848640    | Q8NDY8 | TMM52_HUMAN  | NA             | 0  | ggcagcggcaggag | 0.569             |             |             |
| - | 2   | 317_319   | EL1_uc009vlg.1_F   | NM_033467    | NP_258428    | Q495T6 | MMEL1_HUMAN  | type II mem    | NA | 0              | GGTCACcagcagc     | 0.665       |             |
| - | 7   | 901_902   | 1_Intron MST1P9_   | NR_002729    |              |        |              |                | NA | 0              | GCCCCGCCCCC       | 0.658       |             |
| - | 14  | 3810      |                    | NM_001002912 | NP_001002912 | Q5RHP9 | CA173_HUMAN  | Glu-rich.      | NA | 5              | CTGCTGGACAG       | 0.557       |             |
| - | 2   | 283_285   |                    | NM_052941    | NP_443173    | Q96PP9 | GBP4_HUMAN   | Poly-Val.      | NA | 0              | ATGGCCACCAC       | 0.483       |             |
| + | 9   | 1146_1147 | .2_Intron KIAA132  | NM_020775    | NP_065826    | Q6UXG2 | K1324_HUMAN  | cellular (Pote | NA | 5              | TTTCTACACACA      | 0.49        |             |
| - | 5   | 580       |                    | NM_183058    | NP_898881    | Q7Z4W2 | LYZL2_HUMAN  |                | NA | 0              | ACAGTCTTTTTTC     | 0.522       |             |
| - | 3   | 1279_1281 | 172PP>PIPOLL_u     | NM_013274    | NP_037406    | Q9UGP5 | DPOLL_HUMAN  |                | NA | 0              | GGTGGGAGGAG       | 0.591       |             |
| + | 5   | 471_473   | .p.L92del TSPAN4   | NM_003271    | NP_003262    | O14817 | TSN4_HUMAN   | ical; (Potent  | NA | 1              | CTTCTGCTGCT       | 0.65        | rs61867552  |
| + | 1   | 800       |                    | NM_001004706 | NP_001004706 | Q8NGI4 | OR4DB_HUMAN  | cellular (Pote | NA | 2              | CCCCACAGAAA       | 0.527       |             |
| + | 2   | 598       |                    | NM_145719    | NP_663771    | Q6B0B8 | TIGD3_HUMAN  |                | NA | 0              | TCATTCCCCCT       | 0.612       |             |
| - | 3   | 539_541   |                    | NM_006248    | NP_006239    |        |              |                | NA | 0              | GGACTTGTGTG       | 0.596       |             |
| + | 2   | 1283      |                    | NM_021191    | NP_067014    | Q9HD90 | NDF4_HUMAN   |                | NA | 4              | CTGGTACCCCC       | 0.468       |             |
| + | 18  | 2925_2926 |                    | NM_015267    | NP_056082    | O14529 | CUX2_HUMAN   | CUT 2.         | NA | 6              | GTGCTGGGCTC       | 0.629       |             |
| - | 2   | 307       | ACAD10_uc001t      | NM_006768    | NP_006759    | Q7Z569 | BRAP_HUMAN   |                | NA | 1              | GTCGCTTTTTT       | 0.428       |             |
| + | 15  | 1832      | luj.1_Frame_Shif   | NM_004764    | NP_004755    | Q96J94 | PIWL1_HUMAN  | ng (By simil   | NA | 2              | CCCTACCCCAA       | 0.453       |             |
| - | 18  | 1872      | Qapo.2_Frame_Sh    | NM_174978    | NP_777638    | Q08AQ4 | Q08AQ4_HUMAN |                | NA | 4              | TAGCTCAAAAA       | 0.289       |             |
| + | 9   | 1035      | p.G310fs EML1_u    | NM_004434    | NP_004425    | O00423 | EMAL1_HUMAN  |                | NA | 5              | AATAGGTTTTTT      | 0.428       |             |
| - | 430 |           |                    |              |              |        |              |                | NA | 0              | TTGCACGTGTCC      | 0.55        |             |
| - | 8   | 1119      | LPX_uc010bhg.1_    | NM_006660    | NP_006651    | O76031 | CLPX_HUMAN   |                | NA | 0              | TTGTGCTTTTTCC     | 0.363       |             |
| - | 1   | 196       | .2_5'Flank OGFOD   | NM_007006    | NP_008937    | O43809 | CPSF5_HUMAN  | ary for RNA-   | NA | 0              | AGTGACCCCCC       | 0.652       |             |
| - | 3   | 888_890   | jt.1_In_Frame_De   | NM_001082486 | NP_001075955 | Q96AP0 | ACD_HUMAN    |                | NA | 1              | TCCTGCAGCAG       | 0.65        |             |
| - | 10  | 1370_1372 | .363SS>S RANBF     | NM_020850    | NP_065901    | Q6VN20 | RBP10_HUMAN  | Ser-rich.      | NA | 1              | gaggacgaggaggag   | 0.414       |             |
| + | 8   | 1209_1211 | 2gnp.1_In_Frame_   | NM_153604    | NP_705832    | Q8IZQ8 | MYCD_HUMAN   | Gln-rich.      | NA | 5              | CTCAGCccagcagc    | 0.527       |             |
| + | 2   | 737       | .p.P226fs BPTF_uc  | NM_182641    | NP_872579    | Q12830 | BPTF_HUMAN   |                | NA | 4              | ATCCCCCCTT        | 0.423       |             |
| + | 1   | 288       |                    | NM_001079935 | NP_001073404 | Q6IFN5 | O7E24_HUMAN  | cellular (Pote | NA | 1              | ACGGTCCCAA        | 0.507       |             |
| + | 6   | 1151      | uc002oyi.2_RNA     | NM_013398    | NP_037530    | Q9NZL3 | ZN224_HUMAN  |                | NA | 2              | CATACGGGGGA       | 0.428       | rs13346417  |
| - | 14  | 2382_2384 | H4_uc002pgb.1_Ir   | NM_015168    | NP_055983    | Q9UPT8 | ZC3H4_HUMAN  | Potential.     | NA | 6              | CTCTCTCCTCC       | 0.7         |             |
| + | 4   | 510       | Shift_Del.p.R102fs | NM_152359    | NP_689572    | Q8TCG5 | CPT1C_HUMAN  | intermembra    | NA | 3              | GCTCCGGGGGG       | 0.672       |             |
| - | 7   | 1078      | .p.P143fs SLC30A3  | NM_003459    | NP_003450    | Q99726 | ZNT3_HUMAN   | lasmic (Pote   | NA | 0              | ATTGCGGGGGG       | 0.607       | rs146572471 |
| + | 5   | 5867      |                    | NM_020923    | NP_065974    | Q9HCK1 | ZDBF2_HUMAN  |                | NA | 3              | AGGGGAAAAAA       | 0.413       |             |
| - | 24  | 3343_3344 | p.F771fs RALGAF    | NM_020343    | NP_065076    | Q2PPJ7 | RGPA2_HUMAN  |                | NA | 1              | AGGGAGAAAAAG      | 0.45        |             |
| - | 20  | 3610_3611 | .D1040fs SFRS15    | NM_020706    | NP_065757    | O95104 | SFR15_HUMAN  |                | NA | 0              | TAGAATCTCTCT      | 0.525       |             |
| - | 1   | 1860_1862 |                    | NM_002430    | NP_002421    | Q10571 | MN1_HUMAN    | Poly-Gln.      | NA | 10             | tgctggggctgctgctg | 0.483       |             |
| - | 11  | 3554_3556 | .Q639del SATB1_u   | NM_002971    | NP_002962    | Q01826 | SATB1_HUMAN  | Poly-Gln.      | NA | 4              | CGGTGCctgctgc     | 0.468       |             |
| + | 14  | 1647      | Jgm.2_Frame_Shif   | NM_006254    | NP_006245    | Q05655 | KPCD_HUMAN   | rotein kinas   | NA | 9              | TCAACGGGGGG       | 0.602       |             |
| - | 25  | 4571      | se_Site.p.E1361_ε  | NM_053025    | NP_444253    | Q15746 | MYLK_HUMAN   |                | NA | 9              | GCTCTGGGGGC       | 0.624       | rs41431347  |
| - | 3   | 799_800   | 80_uc003fda.2_R    | NM_173084    | NP_775107    | Q8IWR1 | TRI59_HUMAN  | Potential.     | NA | 0              | GGAACCTTTTTT      | 0.342       |             |
| + | 7   | 1210      | p.G315fs SAMD7_    | NM_182610    | NP_872416    | Q7Z3H4 | SAMD7_HUMAN  |                | NA | 1              | CAATTGGGGGG       | 0.378       |             |
| + | 5   | 386       | .p.K36fs FXR1_uc   | NM_005087    | NP_005078    | P51114 | FXR1_HUMAN   |                | NA | 1              | CTGTCAAAAAA       | 0.333       |             |
| + | 1   | 3375_3376 |                    | NM_175918    | NP_787114    | Q8N1N5 | CRPAK_HUMAN  | 3              | NA | 0              | CTGCTCACACGT      | 0.708       |             |
| + | 12  | 1317_1318 | gwa.3_Frame_Shif   | NM_014988    | NP_055803    | Q9UPQ0 | LIMC1_HUMAN  | Potential.     | NA | 4              | AGCGGAGAGAC       | 0.465       |             |
| + | 15  | 2494_2495 |                    | NM_001977    | NP_001968    | Q07075 | AMPE_HUMAN   | cellular (Pote | NA | 5              | TTCAGGAATACT      | 0.337       |             |
| + | 3   | 269       | 3A1_uc003jov.2_R   | NM_181501    | NP_852478    | P56199 | ITA1_HUMAN   | r (Potential). | NA | 3              | AACCCAAAAAC       | 0.343       |             |



|   |    |           |                    |              |              |             |                            |    |              |                    |                   |             |
|---|----|-----------|--------------------|--------------|--------------|-------------|----------------------------|----|--------------|--------------------|-------------------|-------------|
| + | 1  | 616_617   | NM_021614          | NP_067627    | Q9H2S1       | KCNN2_HUMAN | NA                         | 2  | 3CCGCTGCCGCC | 0.658              | 038013;rs34838882 |             |
| + | 1  | 989       | IB12_uc011dak.1_   | NM_018932    | NP_061755    | Q9Y5F1      | PCDBC_HUMAN r (Potential). | NA | 3            | 3AGCCTGGGATT       | 0.428             |             |
| - | 2  | 331_333   | e_Del_p.46_47EE    | NM_003472    | NP_003463    | P35659      | DEK_HUMAN i-rich (highly   | NA | 1            | 3ACTTTTTctctctc    | 0.365             |             |
| - | 2  | 1324      | odz.2_5'Flank TAP  | NM_005453    | NP_005444    | O15209      | ZBT22_HUMAN                | NA | 1            | 3CAGGACCCCCCA      | 0.597             |             |
| - | 5  | 1557_1559 | 6_377EE>E DAX>     | NM_001350    | NP_001341    | Q9UER7      | DAXX_HUMAN ial. Necessa    | NA | 23           | ctctctctctctctctcc | 0.251             |             |
| - | 3  | 436       | p.Q109fs SLC26A    | NM_052961    | NP_443193    | Q96RN1      | S26A8_HUMAN ical; (Potent  | NA | 2            | 3ACCTTGGGGAA       | 0.418             |             |
| + | 24 | 4729      | o.Y1552fs CUL9_u   | NM_015089    | NP_055904    | Q8IWT3      | CUL9_HUMAN                 | NA | 12           | 3CCAGGTACATT       | 0.562             |             |
| + | 7  | 581       | ime_Shift_Del_p.V  | NM_005588    | NP_005579    | Q16819      | MEP1A_HUMAN 3potential). M | NA | 3            | 3CTGGTGGGACC       | 0.478             |             |
| + | 1  | 570_572   |                    | NM_138426    | NP_612435    | Q86VQ1      | GLC11_HUMAN Poly-Ser.      | NA | 0            | TCCACTGcctctctc    | 0.527             |             |
| - | 2  | 83_85     | _uc010lbj.1_In_Fri | NM_004603    | NP_004594    | Q16623      | STX1A_HUMAN lasmic (Pote   | NA | 0            | AGCGACATCATC       | 0.586             |             |
| + | 15 | 1890      | bl.1_RNA LIMK1_    | NM_002314    | NP_002305    | P53667      | LIMK1_HUMAN rotein kinase  | NA | 3            | 3AACTGCCCCC        | 0.657             |             |
| + | 2  | 163       | _Shift_Del_p.D13fs | NM_145102    | NP_659570    | Q9Y2L8      | ZKSC5_HUMAN                | NA | 1            | 3TTAGACCCCCA       | 0.483             |             |
| + | 25 | 4379      | ILL5_uc010ljj.1_St | NM_182931    | NP_891847    | Q8IZD2      | MLL5_HUMAN                 | NA | 3            | 3CTTAGGGGGGA       | 0.463             |             |
| + | 3  | 293       | PO_uc010lpl.1_Int  | NM_198455    | NP_940857    | A2VEC9      | SSPO_HUMAN EMI.            | NA | 0            | AGGCTGGGGGG        | 0.622             |             |
| - | 36 | 4449_4450 | NK1_uc003xoj.2_f   | NM_020476    | NP_065209    | P16157      | ANK1_HUMAN ulatory dom     | NA | 9            | 3CGGATGACCCA       | 0.535             |             |
| - | 4  | 1442      |                    | NM_005328    | NP_005319    | Q92819      | HAS2_HUMAN lasmic (Pote    | NA | 15           | 3TTCTTGATTGTA      | 0.458             |             |
| - | 1  | 20_21     | 3ziz.1_Frame_Shif  | NM_134441    | NP_604390    | P04090      | REL2_HUMAN                 | NA | 0            | AGGTGGAAAAAA       | 0.535             |             |
| - | 15 | 2022      | ic010mjv.2_Frame   | NM_022917    | NP_075068    | Q9H6R4      | NOL6_HUMAN                 | NA | 2            | 3ATCCAGGGGGC       | 0.512             |             |
| - | 2  | 1659_1661 | .2_In_Frame_Del_   | NM_173691    | NP_775962    | Q4KMQ1      | TPRN_HUMAN Glu-rich.       | NA | 0            | ctctctctctctctctc  | 0.374             |             |
| + | 15 | 2792      | 1mij.1_Frame_Shil  | NM_014728    | NP_055543    | Q14CM0      | FRPD4_HUMAN                | NA | 13           | GTGGTGGGGGA        | 0.572             |             |
| - | 54 | 7719_7721 | .2_In_Frame_Del_   | NM_031407    | NP_113584    | Q7Z6Z7      | HUWE1_HUMAN p-rich. Glu-ri | NA | 17           | cctcatctctctctctc  | 0.438             |             |
| - | 15 | 4609_4611 | 422EE>E ATRX_uc    | NM_000489    | NP_000480    | P46100      | ATRX_HUMAN Poly-Glu.       | NA | 30           | ccctctctctctctctc  | 0.212             |             |
| + | 4  | 753       | vni.2_Frame_Shift  | NM_014874    | NP_055689    | O95140      | MFN2_HUMAN lasmic (Pote    | NA | 1            | 3GTGGCTTTTTTI      | 0.537             |             |
| + | 20 | 3859_3861 | 9vwt.2_In_Frame_   | NM_002840    | NP_002831    | P10586      | PTPRF_HUMAN xellular (Pote | NA | 10           | AGCAGCGGGCG        | 0.631             |             |
| + | 7  | 1141_1142 | p.V299fs SNX7_uc   | NM_015976    | NP_057060    | Q9UNH6      | SNX7_HUMAN                 | NA | 3            | AAAGTTGAAGTT       | 0.287             |             |
| + | 9  | 1376      |                    | NM_018420    | NP_060890    | Q8IZD6      | S22AF_HUMAN ical; (Potent  | NA | 2            | GCCTTTAACATT       | 0.473             |             |
| + | 3  | 335       | ECM1_uc001euu.2    | NM_004425    | NP_004416    | Q16610      | ECM1_HUMAN                 | NA | 3            | 3CAGCTCCCCC        | 0.587             |             |
| + | 2  | 99        |                    | NM_178428    | NP_848515    | Q5TA79      | LCE2A_HUMAN Cys-rich.      | NA | 0            | 3AAGTGCCCCC        | 0.572             | rs138365632 |
| + | 11 | 2233      | p.D350fs NPR1_u    | NM_000906    | NP_000897    | P16066      | ANPRA_HUMAN Potential). F  | NA | 7            | 3ACCGACCCCC        | 0.493             |             |
| + | 9  | 2365      |                    | NM_021948    | NP_068767    | Q96GW7      | PGCB_HUMAN EGF-like.       | NA | 2            | 3GCTATGGGGGG       | 0.622             |             |
| - | 4  | 515       | fun.1_Frame_Shif   | NM_003564    | NP_003555    | P37802      | TAGL2_HUMAN                | NA | 0            | 3TCCTTGATTTC       | 0.468             |             |
| + | 7  | 1327_1328 | Ins_p.333_334ins   | NM_005807    | NP_005798    | Q92954      | PRG4_HUMAN C-X-P-X-P-T     | NA | 1            | CCACCAAGTCTG       | 0.658             |             |
| + | 11 | 1627      | 32_splice SRGAP2   | NM_015326    | NP_056141    | O75044      | FNBP2_HUMAN                | NA | 0            | ACACGGTAAGCA       | 0.441             |             |
| - | 13 | 1224      | p.L298fs RGS7_uc   | NM_002924    | NP_002915    | P49802      | RGS7_HUMAN 3protein gamr   | NA | 7            | 3GGTGGCAAAAG       | 0.438             |             |
| - | 2  | 211_213   | 1del SYT15_uc001   | NM_031912    | NP_114118    | Q9BQS2      | SYT15_HUMAN type III merr  | NA | 0            | 3TCAACAGCAGC       | 0.631             |             |
| - | 13 | 8094_8095 | v.1_Frame_Shift_I  | NM_002417    | NP_002408    | P46013      | KI67_HUMAN AA approxir     | NA | 7            | 3TTCTTTGTGTGT      | 0.5               |             |
| + | 16 | 1890      | ren.1_Frame_Shift  | NM_024662    | NP_078938    | Q9H0A0      | NAT10_HUMAN                | NA | 2            | 3GCTCTCCGATG       | 0.537             |             |
| - | 2  | 331_333   |                    | NM_000256    | NP_000247    | Q14896      | MYPC3_HUMAN                | NA | 3            | GACCTTGAGGT        | 0.581             |             |
| - | 1  | 68        |                    | NM_001004471 | NP_001004471 | Q8NGQ4      | O10Q1_HUMAN xellular (Pote | NA | 2            | 3TGGCTGTGGTG       | 0.512             |             |
| - | 23 | 2714_2715 | uc.2_Frame_Shift   | NM_198334    | NP_938148    | Q14697      | GANAB_HUMAN                | NA | 5            | 3CCTATTATCACC      | 0.535             |             |
| + | 15 | 2573_2575 |                    | NM_015191    | NP_056006    | Q9H0K1      | SIK2_HUMAN                 | NA | 3            | 3GCTACAGCAGC       | 0.498             |             |
| - | 4  | 792       | ime_Shift_Del_p.P  | NM_003455    | NP_003446    | O95125      | ZN202_HUMAN                | NA | 1            | 3GCCTTGGTCTC       | 0.602             |             |
| - | 3  | 441_442   | i.1_Intron PRB1_u  | NM_005039    | NP_005030    | P04280      | PRP1_HUMAN -[PAQ]-Q-[G     | NA | 0            | TTTCTTGAGGT        | 0.604             |             |
| - | 3  | 502_503   |                    | NM_006248    | NP_006239    |             |                            | NA | 0            | TTTCTTGAGGT        | 0.594             |             |
| + | 14 | 1837      | 00_splice SLC4A8   | NM_001039960 | NP_001035049 | Q2Y0W8      | S4A8_HUMAN                 | NA | 5            | 3TTTCAGAGACT       | 0.448             |             |
| + | 1  | 270_271   |                    | NM_014212    | NP_055027    | O43248      | HXC11_HUMAN                | NA | 1            | 3CCTGCCCCAGG       | 0.644             |             |
| + | 7  | 948_950   | .L125del SLC39A4   | NM_173596    | NP_775867    | Q6ZMH5      | S39A5_HUMAN lasmic (Pote   | NA | 2            | 3ATCCCTGCTGC1      | 0.635             |             |

|   |    |           |                    |              |              |        |              |                |    |    |                  |       |            |
|---|----|-----------|--------------------|--------------|--------------|--------|--------------|----------------|----|----|------------------|-------|------------|
| + | 4  | 496_497   | TSPAN31_uc010s:    | NM_005981    | NP_005972    | Q12999 | TSN31_HUMAN  | cellular (Pote | NA | 0  | TGGGTCATGAGC     | 0.421 |            |
| + | 5  | 1001_1003 | 1vhk.1_In_Frame_   | NM_006418    | NP_006409    | Q6UX06 | OLFM4_HUMAN  | actomedin-li   | NA | 1  | AGTTTACAACAA     | 0.433 |            |
| + | 20 | 3706_3707 | 5.A881fs LMO7_uc   | NM_015842    | NP_056667    | Q8WW11 | LMO7_HUMAN   |                | NA | 5  | 3AGGCAGAGAG      | 0.386 |            |
| - | 4  | 459_460   | ABCC4_uc001vmf     | NM_005845    | NP_005836    | O15439 | MRP4_HUMAN   | membrane       | NA | 4  | atTTTTCCAAAAA    | 0.337 |            |
| - | 2  | 2145      |                    | NM_033132    | NP_149123    | Q96T25 | ZIC5_HUMAN   |                | NA | 0  | iTGGCTGGGGGC     | 0.567 |            |
| + | 1  | 690_692   |                    | NM_007129    | NP_009060    | O95409 | ZIC2_HUMAN   | criptional a   | NA | 0  | CGCGGCccaccac    | 0.522 |            |
| + | 44 | 4468      |                    | NM_001846    | NP_001837    | P08572 | CO4A2_HUMAN  | le-helical req | NA | 6  | iGGAATCCCCCA     | 0.687 |            |
| + | 1  | 1556_1557 | PABPN1_uc001wj     | NM_004643    | NP_004634    | Q86U42 | PABP2_HUMAN  | acts with Si   | NA | 2  | iGGGAGCCCCCC     | 0.564 |            |
| + | 3  | 506_507   | i4L2_uc001wlg.3_l  | NM_198083    | NP_932349    | D5KJA1 | D5KJA1_HUMAN |                | NA | 1  | GAAGCCTAATGG     | 0.53  | rs61999853 |
| - | 13 | 3190_3192 |                    | NM_001103184 | NP_001096654 | Q68DA7 | FMN1_HUMAN   | FH2.           | NA | 1  | TGCACACCACC      | 0.355 |            |
| + | 17 | 1702      | 65_splice JMJ07-f  | NM_001114633 | NP_001108105 | P0C869 | PA24B_HUMAN  |                | NA | 1  | TGTGTAGACAAG     | 0.594 |            |
| + | 9  | 1421      | _Shift_Del_p.P432  | NM_024505    | NP_078781    | Q96PH1 | NOX5_HUMAN   | rmic (Potent   | NA | 2  | GCCCCCTTTTTT     | 0.537 |            |
| - | 17 | 2199      | iFTUD1_uc002bgt    | NM_024580    | NP_078856    | Q7Z2Z2 | ETUD1_HUMAN  |                | NA | 1  | CACCTAACCTTT     | 0.421 |            |
| - | 2  | 158_159   | cyh.2_RNA NAGF     | NM_016256    | NP_057340    | Q9UK23 | NAGPA_HUMAN  | ienal (Poten   | NA | 0  | iGGAGGCGCGCC     | 0.767 |            |
| + | 3  | 184_186   | f62_uc010vas.1_e   | NM_020314    | NP_064710    | Q7Z3J2 | CP062_HUMAN  | Ser-rich.      | NA | 1  | iCACGTCCTCCT     | 0.562 |            |
| - | 16 | 2205      | /PS35_uc002eee.;   | NM_018206    | NP_060676    | Q96QK1 | VPS35_HUMAN  |                | NA | 0  | iAGAGCTTTTTTT    | 0.368 |            |
| + | 15 | 1643_1644 | p.L371fs PLD2_uc   | NM_002663    | NP_002654    | O14939 | PLD2_HUMAN   | Catalytic.     | NA | 5  | iAATCTTATCACC    | 0.614 |            |
| + | 11 | 2629_2631 | i2gix.2_In_Frame_  | NM_001080424 | NP_001073893 | O15054 | KDM6B_HUMAN  | rich. Thr-ri   | NA | 2  | CGCCGTcaccacc    | 0.369 |            |
| + | 1  | 24_26     |                    | NM_001005271 | NP_001005271 | Q12873 | CHD3_HUMAN   |                | NA | 1  | AGggacgaggagga   | 0.094 |            |
| - | 3  | 355_356   |                    | NM_031898    | NP_114104    | Q9BXF9 | TEKT3_HUMAN  |                | NA | 2  | iGACTTTGTAGTA    | 0.535 |            |
| + | 5  | 401       | p.L120fs SLC5A10   | NM_001042450 | NP_001035915 | A0PJK1 | SC5AA_HUMAN  | ical; (Potent  | NA | 1  | iACCTTACCTGA     | 0.577 |            |
| + | 1  | 443       |                    | NM_181710    | NP_859061    | Q8WWF5 | ZNRF4_HUMAN  | cellular (Pote | NA | 2  | GGCGTCCCCCT      | 0.687 |            |
| - | 2  | 120_122   |                    | NM_000704    | NP_000695    | P20648 | ATP4A_HUMAN  | lasmic (Pote   | NA | 1  | iCCGCTTCTTTC     | 0.601 |            |
| + | 5  | 711       | 7_splice DMRTC2    | NM_001040283 | NP_001035373 | Q8IXT2 | DMRTD_HUMAN  |                | NA | 0  | iCCCTGGTAAGAT    | 0.386 |            |
| - | 2  | 46_48     |                    | NM_000894    | NP_000885    | P01229 | LSHB_HUMAN   |                | NA | 0  | iTGCTCAGCAGC     | 0.655 |            |
| - | 22 | 3498_3500 | i2psw.1_In_Frame_  | NM_016148    | NP_057232    | Q9Y566 | SHAN1_HUMAN  |                | NA | 2  | iGCCTTGATGAT     | 0.498 |            |
| - | 3  | 1626      | c.2_intron ZNF814  | NM_001144989 | NP_001138461 | B7Z6K7 | ZN814_HUMAN  | 2H2-type 9     | NA | 0  | iGCCTTAAGATC     | 0.443 |            |
| - | 1  | 1978_1980 | iIF3C_uc010ykr.1   | NM_002254    | NP_002245    | O14782 | KIF3C_HUMAN  | /-Asn. Poter   | NA | 4  | iGGTGGTTGTGT     | 0.621 |            |
| - | 4  | 1987      | RAB11FIP5_uc002    | NM_015470    | NP_056285    | Q9BXF6 | RFIP5_HUMAN  |                | NA | 0  | iCTTTTGGTGTC     | 0.612 |            |
| + | 4  | 698       | NBP1_uc002slk.1    | NM_012477    | NP_036609    | Q96G27 | WBP1_HUMAN   |                | NA | 0  | iGAGTGCCCCCC     | 0.602 |            |
| + | 3  | 759_761   | i2svy.2_In_Frame_  | NM_001008949 | NP_001008949 | Q6GPH6 | IPIL1_HUMAN  | lasmic (Pote   | NA | 3  | CAGTGAGGAGG      | 0.532 |            |
| + | 1  | 590       |                    | NM_014213    | NP_055028    | P28356 | HXD9_HUMAN   |                | NA | 0  | iCCCGCCCCCG      | 0.597 |            |
| - | 7  | 1769_1770 | p.G574fs SPHKAf    | NM_001142644 | NP_001136116 | Q2M3C7 | SPKAP_HUMAN  |                | NA | 10 | TCTTTCACCCAG     | 0.55  |            |
| - | 8  | 937_939   | zpi.1_In_Frame_Di  | NM_153269    | NP_695001    | Q9NUD7 | CT096_HUMAN  | y-Lys. Poten   | NA | 0  | iTTTTTTCTTCTT    | 0.562 |            |
| + | 7  | 904       | 3yrl.1_Frame_Shift | NM_000628    | NP_000619    | Q08334 | I10R2_HUMAN  | lasmic (Pote   | NA | 0  | iCACAGTTTTTGC    | 0.378 |            |
| - | 9  | 2028_2030 | 216HH>H C21orf5    | NM_058180    | NP_478060    | P58505 | CU058_HUMAN  | Poly-His.      | NA | 1  | iCACAGCAtggtgt   | 0.631 |            |
| - | 35 | 5235      |                    | NM_002473    | NP_002464    | P35579 | MYH9_HUMAN   | Potential.     | NA | 11 | iTCTTTGGCCTGC    | 0.647 |            |
| + | 18 | 4729      | ayn.3_Frame_Shif   | NM_001162501 | NP_001155973 | Q9UPQ9 | TNR6B_HUMAN  |                | NA | 0  | iGTGCTGGGGGG     | 0.483 |            |
| - | 11 | 1200_1202 | i.1_In_Frame_Del_  | NM_139202    | NP_631941    | Q15049 | MLC1_HUMAN   | ical; (Potent  | NA | 1  | iagcactagcagcagc | 0.542 |            |
| - | 9  | 669       | 3bxi.1_Frame_Shi   | NM_018306    | NP_060776    | Q8WWA1 | TMM40_HUMAN  |                | NA | 0  | iCACCTGCGTAA     | 0.587 |            |
| + | 3  | 392       | _Shift_Del_p.F74fs | NM_207404    | NP_997287    | Q6ZS27 | ZN662_HUMAN  | KRAB.          | NA | 0  | iCAGCATTTCCAT    | 0.587 |            |
| + | 7  | 802       | 3css.2_Splice_Site | NM_207102    | NP_996985    | Q6X9E4 | FBW12_HUMAN  |                | NA | 0  | GGTTTCAGGTTG     | 0.421 |            |
| + | 7  | 761       | 3cyk.2_Frame_Shi   | NM_004186    | NP_004177    | Q13275 | SEM3F_HUMAN  | Sema.          | NA | 2  | iCTTCTACCTGG     | 0.612 |            |
| - | 17 | 3301_3302 | dic.3_Frame_Shift  | NM_015224    | NP_056039    | Q9UK61 | CC063_HUMAN  |                | NA | 5  | TTGTTGAAGTCA     | 0.436 |            |
| + | 21 | 3869      | OBO2_uc011bgk.1    | NM_002942    | NP_002933    | Q9HCK4 | ROBO2_HUMAN  | lasmic (Pote   | NA | 11 | iTACCTCCCCCC     | 0.433 |            |
| - | 4  | 2231      |                    | NM_001038705 | NP_001033794 | Q86SP6 | GP149_HUMAN  | lasmic (Pote   | NA | 6  | iCTCCTGGTAGCC    | 0.423 |            |
| + | 21 | 2524_2526 | 1buy.1_In_Frame_   | NM_000283    | NP_000274    | P35913 | PDE6B_HUMAN  |                | NA | 0  | GAGAAGGAGGA      | 0.562 |            |

|   |    |                           |              |              |        |             |   |                                |    |              |                |                   |             |
|---|----|---------------------------|--------------|--------------|--------|-------------|---|--------------------------------|----|--------------|----------------|-------------------|-------------|
| + | 1  | 3808_3809                 | NM_175918    | NP_787114    | Q8N1N5 | CRPAK_HUMAN | 8 | NA                             | 0  | CTCACATGTGCC | 0.683          | 123539;rs79888804 |             |
| + | 9  | 1034_1035_p.S317fs SLC34A | NM_006424    | NP_006415    | O95436 | NPT2B_HUMAN |   | cellular (Pote                 | NA | 5            | TCCCTCGACTGC   | 0.515             |             |
| - | 6  | 908_909                   | NM_018699    | NP_061169    | Q9NQX1 | PRDM5_HUMAN |   | 2-type 2; aty                  | NA | 2            | TGCACTGAAGA/   | 0.376             |             |
| - | 21 | 2813_2814                 | NM_139199    | NP_631938    | Q9H0E9 | BRD8_HUMAN  |   |                                | NA | 1            | TAGGTTCTCTCT(  | 0.545             |             |
| - | 8  | 986_987                   | NM_004134    | NP_004125    | P38646 | GRP75_HUMAN |   |                                | NA | 0            | CTCACCTCTCTC   | 0.431             |             |
| - | 8  | 1648_1649                 | NM_000332    | NP_000323    | P54253 | ATX1_HUMAN  |   |                                | NA | 4            | TGCTGAGGtgctgc | 0.366             |             |
| - | 22 | 3298_3300                 | NM_005923    | NP_005914    | Q99683 | M3K5_HUMAN  |   |                                | NA | 5            | CTCACTGCCTGC   | 0.483             |             |
| + | 16 | 4100                      | NM_017519    | NP_059989    | Q8NFD5 | ARI1B_HUMAN |   |                                | NA | 2            | GCCAGTTACGA(   | 0.502             |             |
| + | 13 | 3999                      | NM_020245    | NP_064630    | Q9NRJ4 | TULP4_HUMAN |   |                                | NA | 1            | CCAGACCCCCC    | 0.657             |             |
| + | 5  | 714                       | NM_002314    | NP_002305    | P53667 | LIMK1_HUMAN |   | PDZ                            | NA | 3            | ATTGACCCCCC(   | 0.677             | rs150491142 |
| - | 5  | 964                       | NM_152742    | NP_689955    | Q8N158 | GPC2_HUMAN  |   |                                | NA | 2            | GGGGACCCCCC    | 0.642             |             |
| + | 4  | 467                       | NM_001283    | NP_001274    | P61966 | AP1S1_HUMAN |   |                                | NA | 0            | TTGATGGGGGG(   | 0.562             |             |
| - | 4  | 481                       | NM_178176    | NP_835470    | Q86VF5 | MOGT3_HUMAN |   |                                | NA | 2            | GATCCGGGGGGC   | 0.582             |             |
| + | 18 | 2819                      | NM_181552    | NP_853530    | P39880 | CUX1_HUMAN  |   |                                | NA | 8            | TCGGTCCCCCCC   | 0.642             |             |
| - | 5  | 1108_1109                 | NM_001146210 | NP_001139682 | P0CI01 | SPDE6_HUMAN |   |                                | NA | 0            | CGCTATGACCAT/  | 0.52              |             |
| - | 3  | 498                       | NM_033427    | NP_219499    | Q8WZ74 | CTTB2_HUMAN |   | Potential.                     | NA | 5            | GCTTTTGTCTGCT  | 0.458             |             |
| - | 2  | 1009                      | NM_001098834 | NP_001092304 | Q14549 | GBX1_HUMAN  |   |                                | NA | 0            | GCTTTTCCCCC(   | 0.577             |             |
| - | 3  | 436                       | NM_005431    | NP_005422    | O43543 | XRCC2_HUMAN |   |                                | NA | 2            | TACACCAAAAAA   | 0.393             |             |
| + | 12 | 1380                      | NM_199205    | NP_954675    | Q8N163 | K1967_HUMAN |   |                                | NA | 3            | CGGGACCCCCC    | 0.582             |             |
| + | 9  | 2311                      | NM_001136562 | NP_001130034 | Q9Y2D5 | AKAP2_HUMAN |   | Potential.                     | NA | 6            | GGAATCCCCC(    | 0.512             |             |
| + | 13 | 2110_2112                 | NM_007327    | NP_015566    | Q05586 | NMDZ1_HUMAN |   | lasmic (Pote                   | NA | 1            | CAGCGAGGAGG    | 0.739             |             |
| + | 3  | 1008                      | NM_001097579 | NP_001091048 | Q9UPC5 | GPR34_HUMAN |   | lasmic (Pote                   | NA | 1            | AGATTGGGAAG/   | 0.313             |             |
| + | 5  | 731                       | NM_001493    | NP_001484    | P31150 | GDIA_HUMAN  |   |                                | NA | 0            | TCCTTAGATCTG   | 0.545             |             |
| + | 31 | 5454                      | NM_017514    | NP_059984    | P51805 | PLXA3_HUMAN |   | lasmic (Pote                   | NA | 3            | GCTCTACATCCC   | 0.587             |             |
| - | 3  | 1058                      | NM_012102    | NP_036234    | Q9P2R6 | RERE_HUMAN  |   |                                | NA | 2            | GAGACTTTTTTT   | 0.453             |             |
| + | 4  | 753                       | NM_014874    | NP_055689    | O95140 | MFN2_HUMAN  |   | lasmic (Potential).            | NA | 1            | GTGGCTTTTTTT   | 0.537             |             |
| + | 8  | 1361_1362                 | NM_005095    | NP_005086    | Q5VZL5 | ZMYM4_HUMAN |   | MYM-type 2.                    | NA | 5            | AACTGAAAAAA    | 0.342             |             |
| - | 4  | 1243_1245                 | NM_024700    | NP_078976    | Q8TAD8 | SNIP1_HUMAN |   | Poly-Glu.                      | NA | 2            | CTTCTCCTCCT(   | 0.448             |             |
| - | 8  | 1192                      | NM_021080    | NP_066566    | O75553 | DAB1_HUMAN  |   | PID.                           | NA | 3            | TGTGCCTTTTTT   | 0.393             |             |
| + | 2  | 574                       | NM_002633    | NP_002624    | P36871 | PGM1_HUMAN  |   |                                | NA | 3            | ACCCAGGGGGC    | 0.433             |             |
| + | 4  | 780                       | NM_138959    | NP_620409    | Q8TAA9 | VANG1_HUMAN |   | Name=2; (Potential).           | NA | 1            | GGCACTTTTTTT   | 0.493             |             |
| + | 9  | 3614                      | NM_020832    | NP_065883    | Q8N1G0 | ZN687_HUMAN |   |                                | NA | 4            | GGGCTGGGGGA    | 0.622             |             |
| + | 6  | 739                       | NM_002796    | NP_002787    | P28070 | PSB4_HUMAN  |   |                                | NA | 2            | CACCGAAAAAG    | 0.443             |             |
| - | 4  | 633                       | NM_005698    | NP_005689    | O14828 | SCAM3_HUMAN |   | lasmic (Potential).            | NA | 3            | CTGTGCCCCC(    | 0.517             |             |
| + | 8  | 1428                      | NM_014388    | NP_055203    | Q68CQ4 | DIEXF_HUMAN |   |                                | NA | 0            | TGCTTCCCCCCT   | 0.468             |             |
| + | 20 | 2533                      | NM_017433    | NP_059129    | Q8NEV4 | MYO3A_HUMAN |   | rosin head-like.               | NA | 18           | AATTTCAAAAAA/  | 0.338             |             |
| + | 1  | 78_80                     | NM_014720    | NP_055535    | Q9H2G2 | SLK_HUMAN   |   | Poly-Lys.                      | NA | 8            | AGCGAGAAGAA    | 0.448             |             |
| + | 14 | 2026_2027                 | NM_016824    | NP_058432    | Q9UEY8 | ADDG_HUMAN  |   |                                | NA | 5            | CGAACGTAACA    | 0.406             | rs141186367 |
| - | 24 | 2496_2498                 | NM_000256    | NP_000247    | Q14896 | MYPC3_HUMAN |   | nectin type-III 1.             | NA | 3            | GTAGCTCTCTT(   | 0.601             |             |
| + | 1  | 94                        | NM_001004711 | NP_001004711 | Q8NGE8 | OR4D9_HUMAN |   | Name=1; (Potential).           | NA | 0            | TCCTGTTTTTGC   | 0.428             |             |
| - | 12 | 1314                      | NM_016931    | NP_058627    | Q9NPH5 | NOX4_HUMAN  |   |                                | NA | 2            | GACACTAAAAAA   | 0.292             | rs56022003  |
| + | 10 | 1135                      | NM_014039    | NP_054758    | Q9H0W9 | CK054_HUMAN |   |                                | NA | 0            | CACTCATTTTTT   | 0.378             |             |
| - | 7  | 1531                      | NM_032725    | NP_116114    | Q9BRD0 | BUD13_HUMAN |   | Potential.                     | NA | 2            | TTACCTTTTCCC   | 0.448             |             |
| + | 7  | 774_776                   | NM_001040455 | NP_001035545 | Q8NBJ9 | SIDT2_HUMAN |   | cellular (Potential).          | NA | 0            | TTATGTGGTGG1   | 0.463             |             |
| - | 6  | 2413                      | NM_182557    | NP_872363    | Q86UU0 | BCL9L_HUMAN |   | teraction with CTNNB1 (By      | NA | 2            | CCAGCGGGGGG    | 0.642             | rs147951163 |
| - | 7  | 687                       | NM_001145018 | NP_001138490 | Q494R4 | CC153_HUMAN |   |                                | NA | 0            | ATCCAGGGGGG    | 0.567             |             |
| - | 28 | 4472_4474                 | NM_000552    | NP_000543    | P04275 | VWF_HUMAN   |   | site for platelet glycoprotein | NA | 12           | ATGACCTTCTCT   | 0.611             | rs141990425 |

|   |    |           |                    |              |              |        |              |                                |    |                  |       |             |
|---|----|-----------|--------------------|--------------|--------------|--------|--------------|--------------------------------|----|------------------|-------|-------------|
| + | 2  | 157       | 40B_uc001ruq.1_f   | NM_001031698 | NP_001026868 | Q6NWH9 | PR40B_HUMAN  | Pro-rich.                      | 5  | AGCTATCCCCC      | 0.607 |             |
| - | 26 | 3234      | p.P1074fs SMARC    | NM_003075    | NP_003066    | Q8TAQ2 | SMRC2_HUMAN  | Pro-rich.                      | 6  | GTCCAGGGGGG      | 0.577 |             |
| + | 7  | 948_950   | .L125del SLC39A4   | NM_173596    | NP_775867    | Q6ZMH5 | S39A5_HUMAN  | lasmic (Potential).            | 2  | TATCCCTGCTGC     | 0.635 |             |
| + | 1  | 123_124   | s_p.A30fs EP400_1  | NM_015409    | NP_056224    | Q96L91 | EP400_HUMAN  |                                | 12 | AGCCGGCCCCAC     | 0.649 | rs71453134  |
| - | 10 | 1917_1918 | p.R637fs ZC3H13    | NM_015070    | NP_055885    | Q5T200 | ZC3HD_HUMAN  | Arg/Ser-rich.                  | 2  | CAAACCTCTCTC     | 0.337 |             |
| + | 3  | 707_710   | vbk.2_Frame_Shift  | NM_015116    | NP_055931    | Q9Y2L9 | LRCH1_HUMAN  | LRR 3.                         | 2  | CCGCCCTGCCTC     | 0.436 |             |
| + | 6  | 1323      | p.F214fs CYSLTR    | NM_020377    | NP_065110    | Q9NS75 | CLTR2_HUMAN  | Name=5; (Potential).           | 2  | CTGCCATTTTTTC    | 0.488 |             |
| - | 4  | 579_580   | r.2_RNA EBPL_uc    | NM_032565    | NP_115954    | Q9BY08 | EBPL_HUMAN   | ical; (Potential).             | 0  | ACCGTTAAAAAA     | 0.48  |             |
| - | 16 | 2406      | _Shift_Del_p.I648f | NM_014953    | NP_055768    | Q9Y2L1 | RRP44_HUMAN  |                                | 1  | CATGAATTTTTTT    | 0.358 |             |
| + | 20 | 3706_3707 | s.A881fs LMO7_uc   | NM_015842    | NP_056667    | Q8WW11 | LMO7_HUMAN   |                                | 5  | AGGCAGAGAGAG     | 0.386 |             |
| + | 1  | 690_692   |                    | NM_007129    | NP_009060    | O95409 | ZIC2_HUMAN   | criptional activation or rep   | 0  | CGCGGCccaccac    | 0.522 |             |
| + | 14 | 4097      | wwe.3_Frame_Shift  | NM_020937    | NP_065988    | Q81YD8 | FANCM_HUMAN  |                                | 7  | AGTGCAAAAAAA     | 0.328 | rs143681767 |
| + | 4  | 371       | D12B_uc001wyr.2    | NM_181533    | NP_853511    | Q7Z5M8 | AB12B_HUMAN  |                                | 1  | CTGCCGGGGGGC     | 0.493 |             |
| - | 14 | 2876      | twc.1_Frame_Shift  | NM_007039    | NP_008970    | Q16825 | PTN21_HUMAN  |                                | 4  | GACCAATTTTTTT    | 0.393 |             |
| - | 3  | 499       | lybp.2_Intron BTB  | NM_001002860 | NP_001002860 | Q9P203 | BTBD7_HUMAN  |                                | 1  | GTTCTCTTTTTTT    | 0.438 |             |
| + | 8  | 1064_1066 | vK_uc001ygg.3_In   | NM_001099402 | NP_001092872 | O75909 | CCNK_HUMAN   | Poly-Gln.                      | 0  | AGCCCAGCAGC      | 0.621 |             |
| + | 3  | 400       | IREB2_uc002bdq.    | NM_004136    | NP_004127    | P48200 | IREB2_HUMAN  |                                | 0  | GTGCCCTTTTTTC    | 0.358 |             |
| - | 1  | 253_255   | CHRNA3_uc002bk     | NM_000743    | NP_000734    | P32297 | ACHA3_HUMAN  |                                | 4  | cagagacagcagcag  | 0.601 | rs66793222  |
| - | 1  | 929_930   | r.2_3'UTR TIGD7    | NM_033208    | NP_149985    | Q6NT04 | TIGD7_HUMAN  | y similarity). HTH psq-type.   | 0  | CTTCTATTTTTTT    | 0.361 |             |
| + | 3  | 184_186   | f62_uc010vas.1_E   | NM_020314    | NP_064710    | Q7Z3J2 | CP062_HUMAN  | Ser-rich.                      | 1  | CACGCTCCTCTC     | 0.562 |             |
| - | 2  | 423_425   | 2dxs.2_In_Frame    | NM_006110    | NP_006101    | O95400 | CD2B2_HUMAN  |                                | 1  | CCCCCATCATC      | 0.532 |             |
| + | 10 | 1762      | gjf.2_Frame_Shift  | NM_001005273 | NP_001005273 | Q12873 | CHD3_HUMAN   | Chromo 1.                      | 1  | TCCCACCCCCC      | 0.577 |             |
| - | 5  | 891       |                    | NM_139285    | NP_644814    | Q8NHY3 | GA2L2_HUMAN  |                                | 2  | GGGCCGGGGGC      | 0.597 | rs139867246 |
| - | 9  | 1016      | :18orf34_uc002kxc  | NM_001105528 | NP_001098998 | Q5BJE1 | CR034_HUMAN  | Potential.                     | 1  | CCTCCATTTTTTT    | 0.318 |             |
| + | 4  | 443_444   | PC2_uc002mix.1_    | NM_003083    | NP_003074    | Q13487 | SNPC2_HUMAN  |                                | 0  | TCCAAGCCCCCC     | 0.644 |             |
| + | 2  | 813_814   |                    | NM_001105570 | NP_001099040 | A8MXV4 | NUD19_HUMAN  |                                | 0  | TTTGCCTCTCTC     | 0.45  |             |
| - | 2  | 120_122   |                    | NM_000704    | NP_000695    | P20648 | ATP4A_HUMAN  | lasmic (Potential).            | 1  | CCCGCCTTCTTC     | 0.601 |             |
| - | 5  | 492       | oeb.3_Frame_Shift  | NM_032838    | NP_116227    | Q969W8 | ZN566_HUMAN  |                                | 0  | AATGTCCCCCC      | 0.393 |             |
| + | 4  | 1303_1305 | 2qlt.2_In_Frame_I  | NM_007279    | NP_009210    | P26368 | U2AF2_HUMAN  |                                | 1  | ACAGGAAAGAA      | 0.645 |             |
| - | 2  | 234_236   | HX57_uc002rrg.2    | NM_198963    | NP_945314    | Q6P158 | DHX57_HUMAN  | Gly-rich.                      | 3  | gccacctccaccacc  | 0.384 |             |
| - | 4  | 737_739   | 2svr.2_In_Frame    | NM_017849    | NP_060319    | O75204 | TM127_HUMAN  |                                | 0  | CTTATGCTGCTC     | 0.557 |             |
| + | 3  | 759_761   | 2svy.2_In_Frame    | NM_001008949 | NP_001008949 | Q6GPH6 | IPIL1_HUMAN  | lasmic (Potential).            | 3  | CAGTGAGGAGG      | 0.532 |             |
| + | 30 | 4637      | Shift_Del_p.K1503  | NM_018151    | NP_060621    | Q5UIP0 | RIF1_HUMAN   |                                | 15 | AAAAATAAAAAAA    | 0.408 |             |
| + | 1  | 982       | _uc002ukn.2_Intron | NM_019558    | NP_062458    | P13378 | HXD8_HUMAN   | Poly-Pro.                      | 0  | gccacctccccCTGC  | 0.502 |             |
| - | 20 | 3322      |                    | NM_018897    | NP_061720    | Q8WXX0 | DYH7_HUMAN   | n (By similarity).             | 12 | TGGACAAAAAA      | 0.318 |             |
| - | 15 | 1903      | _Shift_Del_p.I1816 | NM_152525    | NP_689738    | Q53TS8 | AL2SA_HUMAN  |                                | 3  | TTTTAATTTTTTT    | 0.323 |             |
| - | 3  | 493       |                    | NM_014617    | NP_055432    | P11844 | CRGA_HUMAN   | a crystallin 'Greek key' 4.    | 0  | CTGCACCCCCC      | 0.532 |             |
| - | 31 | 4618_4620 | 2yzp.2_In_Frame    | NM_022115    | NP_071398    | P57071 | PRD15_HUMAN  | Poly-Gln.                      | 0  | TACATCTGCTGC     | 0.611 |             |
| - | 1  | 912_914   | zma.2_Intron uc00  | NM_031890    | NP_114096    | Q9BXQ6 | CECR6_HUMAN  |                                | 0  | CAGCCCACCAC      | 0.709 |             |
| - | 21 | 3201_3203 | 1agl.1_In_Frame    | NM_015241    | NP_056056    | Q7RTP6 | MICA3_HUMAN  | Glu-rich.                      | 0  | CGGAGGctctccc    | 0.453 |             |
| + | 7  | 1464      | :39674_uc003bba.   | NM_004599    | NP_004590    | Q12772 | SRBP2_HUMAN  | iy similarity). Cytoplasmic (l | 4  | GATGTCCCCCC      | 0.522 |             |
| + | 5  | 477_479   |                    | NM_001197    | NP_001188    | Q13323 | BIK_HUMAN    | Potential). Helical; (Potentie | 0  | tgctggcgtgctgctg | 0.562 |             |
| - | 27 | 3223      | t.2_RNA CLASP2     | NM_015097    | NP_055912    | B2RTR1 | B2RTR1_HUMAN |                                | 4  | CACCCATTTTTTT    | 0.343 |             |
| - | 2  | 2200_2203 | Shift_Del_p.R660f  | NM_194293    | NP_919269    | Q702N8 | XIRP1_HUMAN  | Xin 15.                        | 8  | GACGTGTCTGTC     | 0.618 |             |
| + | 52 | 5572      |                    | NM_004947    | NP_004938    | Q8IZD9 | DOCK3_HUMAN  |                                | 0  | TGATACCCCCC      | 0.597 |             |
| - | 14 | 3144      | dbf.1_Frame_Shift  | NM_014703    | NP_055518    | Q9Y4B6 | VPRBP_HUMAN  |                                | 2  | CAGCTGTTTTTTT    | 0.498 |             |
| - | 5  | 2710_2711 | ts_p.K325fs FILIP  | NM_182909    | NP_878913    | Q4L180 | FIL1L_HUMAN  | Potential.                     | 1  | TATTAGTTTTTTT    | 0.406 |             |

|   |    |           |                    |              |              |        |             |                            |    |                    |       |                  |
|---|----|-----------|--------------------|--------------|--------------|--------|-------------|----------------------------|----|--------------------|-------|------------------|
| - | 3  | 713_715   | lbns.1_In_Frame_   | NM_015472    | NP_056287    | Q9GZV5 | VWTR1_HUMAN | ential. Gln-rich.          | 4  | AGTTTCTGCTGC       | 0.581 |                  |
| - | 28 | 3481_3482 | 3A3_uc003ftx.3_5'  | NM_024524    | NP_078800    | Q9H7F0 | AT133_HUMAN |                            | 1  | TGACCCAAAAAA       | 0.381 |                  |
| + | 21 | 2524_2526 | 1buy.1_In_Frame_   | NM_000283    | NP_000274    | P35913 | PDE6B_HUMAN |                            | 0  | GAGAAGGAGGA        | 0.562 |                  |
| + | 1  | 3591_3592 |                    | NM_175918    | NP_787114    | Q8N1N5 | CRPAK_HUMAN | 5                          | 0  | CCTGCTCACACC       | 0.663 |                  |
| + | 16 | 2842      | (853fs FAM193A_u   | NM_003704    | NP_003695    | P78312 | F193A_HUMAN |                            | 3  | CAACCTAAAAAA       | 0.453 |                  |
| + | 4  | 1265      | :D1_uc010ifd.2_I   | NM_015173    | NP_055988    | Q86T10 | TBCD1_HUMAN | PID.                       | 1  | ACACCAAAAAAA       | 0.313 |                  |
| - | 61 | 9721_9722 |                    | NM_014991    | NP_055806    | Q8IZQ1 | WDFY3_HUMAN | WD 1.                      | 3  | .TCTCCACACAC       | 0.51  |                  |
| - | 1  | 538_540   | {C3_uc011cdn.1_Ir  | NM_153757    | NP_715638    | Q96NT1 | NP1L5_HUMAN | Glu-rich.                  | 1  | lactccttctcctcctc  | 0.369 |                  |
| + | 8  | 1187_1189 | p.P363del NPNT_    | NM_001033047 | NP_001028219 | Q6UXI9 | NPNT_HUMAN  | Pro-rich.                  | 1  | :TACTCCACCACC      | 0.522 |                  |
| + | 3  | 335       | {C9_uc003ieb.2_F   | NM_005033    | NP_005024    | Q06265 | EXOS9_HUMAN | ARE binding.               | 0  | :GTATTCTTTTTT      | 0.383 |                  |
| + | 5  | 535_536   |                    | NM_004477    | NP_004468    | Q14331 | FRG1_HUMAN  |                            | 0  | VTGGAAATATCT       | 0.361 |                  |
| + | 1  | 878_879   |                    | NM_024563    | NP_078839    |        |             |                            | 0  | TTTGGGTGTGTG       | 0.421 |                  |
| - | 4  | 512_513   |                    | NM_001737    | NP_001728    | P02748 | CO9_HUMAN   | MACPF.                     | 0  | CTGCAGGGGGGC       | 0.46  |                  |
| - | 12 | 2431      | 03jtq.2_RNA ADA    | NM_197941    | NP_922932    | Q9UKP5 | ATS6_HUMAN  | Disintegrin.               | 0  | TACCCCTTTTTCT      | 0.408 |                  |
| - | 2  | 1109_1111 | 60DD>D TAF9_uc     | NM_003187    | NP_003178    | Q16594 | TAF9_HUMAN  | Poly-Asp.                  | 0  | latcatagtcatcatcat | 0.256 |                  |
| - | 8  | 1648_1649 | :_Ins_p.225_226in  | NM_000332    | NP_000323    | P54253 | ATX1_HUMAN  |                            | 4  | TGCTGAGGtctgctg    | 0.366 |                  |
| - | 5  | 1078      | _uc003ntw.2_Frame  | NM_004640    | NP_004631    | Q13838 | DX39B_HUMAN | ase ATP-binding.           | 0  | CCACCAAAAAAA       | 0.512 |                  |
| - | 2  | 1047      | _Shift_Del_p.G134  | NM_033177    | NP_149417    | O95872 | GPAN1_HUMAN | ANK 1.                     | 0  | ATATTCCTCCCCC      | 0.632 |                  |
| - | 4  | 1648      | 318_uc003ouw.2_    | NM_014345    | NP_055160    | Q5VUA4 | ZN318_HUMAN |                            | 7  | TCGCCTTTTTTTC      | 0.493 |                  |
| + | 23 | 2346_2348 | ame_Del_p.A667d    | NM_018426    | NP_060896    | Q5T3F8 | TM63B_HUMAN |                            | 3  | CCCACTGCTGCTGC     | 0.591 |                  |
| - | 14 | 1681_1682 | ame_Shift_Del_p.E  | NM_001144769 | NP_001138241 | Q03001 | DYST_HUMAN  |                            | 14 | GGCCTTCTCTCT       | 0.441 |                  |
| + | 22 | 2625_2626 | jb.3_Frame_Shift_  | NM_003318    | NP_003309    | P33981 | TTK_HUMAN   | p.R838fs*4(3)              | 11 | .CTTTTGAAAAAA      | 0.302 |                  |
| + | 3  | 1448      | p.A171fs TPBG_u    | NM_006670    | NP_006661    | Q13641 | TPBG_HUMAN  | ellular (Potential).       | 1  | CTCGGCCCCCA        | 0.647 |                  |
| - | 16 | 1855      | psb.3_Frame_Shif   | NM_007214    | NP_009145    | Q9UGP8 | SEC63_HUMAN | Cytoplasmic (Potential).   | 2  | GGTTTCTTTTTTT      | 0.368 |                  |
| - | 1  | 310_312   | ame_Del_p.72_73    | NM_005522    | NP_005513    | P49639 | HXA1_HUMAN  | Poly-His.                  | 3  | ggggggcgalgggtgg   | 0.527 | rs10951154       |
| - | 49 | 7301      | toa.1_Intron PKD1  | NM_138295    | NP_612152    | Q8TDX9 | PK1L1_HUMAN | ellular (Potential).       | 11 | CACAGCCCCCA        | 0.582 |                  |
| - | 2  | 83_85     | _uc010lbj.1_In_Fri | NM_004603    | NP_004594    | Q16623 | STX1A_HUMAN | lasmic (Potential).        | 0  | AGCGACATCATC       | 0.586 |                  |
| - | 12 | 2387      | _p.G539fs EPHB4    | NM_004444    | NP_004435    | P54760 | EPHB4_HUMAN | Potential) Protein kinase. | 15 | AGCCGCCCCCG        | 0.642 |                  |
| - | 5  | 745       | 0lhr.2_Frame_Shif  | NM_178176    | NP_835470    | Q86VF5 | MOGT3_HUMAN |                            | 2  | GCGCACCCCCC        | 0.677 |                  |
| - | 4  | 543       | 3ves.2_Frame_St    | NM_000111    | NP_000102    | P40879 | S26A3_HUMAN | ical; (Potential).         | 4  | CTGGGAAAAAG        | 0.448 | rs75733585       |
| - | 2  | 110       | 3vey.2_Frame_Sh    | NM_007356    | NP_031382    | A4D0S4 | LAMB4_HUMAN |                            | 8  | .GGTGCAAAAAA       | 0.308 |                  |
| - | 9  | 1235_1237 |                    | NM_003941    | NP_003932    | O00401 | WASL_HUMAN  | Pro-rich.                  | 0  | CCTagcaggaggag     | 0.443 |                  |
| - | 10 | 1741_1743 | 3vtb.2_In_Frame_   | NM_012450    | NP_036582    | Q9UKG4 | S13A4_HUMAN |                            | 0  | TTTGGTCTTCTT       | 0.409 |                  |
| - | 10 | 976       | vue.2_Frame_Shif   | NM_001139456 | NP_001132928 | Q8N434 | SVOPL_HUMAN |                            | 0  | :TGAGTCCCCCC       | 0.557 |                  |
| - | 13 | 2898      |                    | NM_020119    | NP_064504    | Q7Z2W4 | ZCCHV_HUMAN | ARP catalytic.             | 1  | CGACGTTTTTGC       | 0.383 |                  |
| - | 2  | 227       | ic003wda.2_5'Flan  | NM_005232    | NP_005223    | P21709 | EPHA1_HUMAN | ellular (Potential).       | 5  | CTTTTGGGGGA        | 0.542 |                  |
| + | 1  | 162_164   | _uc010luh.1_5'UTi  | NM_004331    | NP_004322    | O60238 | BNI3L_HUMAN |                            | 0  | CTGCACAACAA        | 0.655 |                  |
| - | 7  | 969_971   | ij PBK_uc011lap.1_ | NM_018492    | NP_060962    | Q96KB5 | TOPK_HUMAN  | rotein kinase.             | 0  | TACCTTCATCATC      | 0.3   | rs116080983      |
| + | 1  | 804_805   | 1463_uc003xvh.2    | NM_152414    | NP_689627    | Q8NFJ8 | BHE22_HUMAN | Gly-rich.                  | 0  | cgggaagtggcggcg    | 0.584 |                  |
| + | 10 | 1740      | LF1_uc003xyf.2_F   | NM_015170    | NP_055985    | Q8IWU6 | SULF1_HUMAN |                            | 7  | TGTGCCTTTTTT       | 0.408 |                  |
| + | 9  | 1450_1451 | RRCC1_uc003ycx     | NM_033402    | NP_208325    | Q9C099 | LRCC1_HUMAN | Potential.                 | 0  | ACCAAGAGAGA        | 0.267 |                  |
| - | 8  | 1394_1396 |                    | NM_000498    | NP_000489    | P19099 | C11B2_HUMAN |                            | 0  | TGGTGACAGAG        | 0.685 |                  |
| + | 9  | 2311      | el_p.P333fs AKAP   | NM_001136562 | NP_001130034 | Q9Y2D5 | AKAP2_HUMAN | Potential.                 | 6  | GGAATCCCCCG        | 0.512 |                  |
| - | 15 | 1633_1635 |                    | NM_003086    | NP_003077    | Q5SXM2 | SNPC4_HUMAN |                            | 0  | CTCCTCgctgctg      | 0.473 | 266724;rs3422232 |
| + | 20 | 2671_2673 | .E837del CNKSR     | NM_014927    | NP_055742    | Q8WXI2 | CNKR2_HUMAN | ential. Poly-Glu.          | 2  | jaggaagaggaggag    | 0.379 |                  |
| - | 10 | 4018_4020 | 3_In_Frame_Del_I   | NM_000489    | NP_000480    | P46100 | ATRX_HUMAN  | Poly-Asp.                  | 30 | FGTCGTATCATC       | 0.379 |                  |
| + | 5  | 716_718   | 04eib.1_In_Frame   | NM_016607    | NP_057691    | Q9UH62 | ARMX3_HUMAN |                            | 2  | FGGTCTGATGAT       | 0.448 |                  |



|   |    |             |                    |              |              |        |             |                             |     |                     |       |                     |
|---|----|-------------|--------------------|--------------|--------------|--------|-------------|-----------------------------|-----|---------------------|-------|---------------------|
| + | 7  | 512_514     | j_1_In_Frame_Del   | NM_007150    | NP_009081    | O15231 | ZN185_HUMAN | Poly-Glu.                   | 3   | GACACCgaggagg       | 0.522 |                     |
| - | 14 | 4550        |                    | NM_000132    | NP_000123    | P00451 | FA8_HUMAN   | B.                          | 11  | AGGTTATTTTTTT       | 0.413 |                     |
| - | 19 | 3543_3545   | ig_1_In_Frame_De   | NM_001009566 | NP_001009566 | O94985 | CSTN1_HUMAN | idic). Cytoplasmic (Potenti | 1   | tcttctctctctctctctc | 0.537 |                     |
| + | 4  | 817         | 1aug_1_Frame_Sh    | NM_001103170 | NP_001096640 | Q5VUY0 | ADCL3_HUMAN |                             | 0   | CTACTGTTTTTTT       | 0.458 | rs7513079           |
| - | 28 | 3551_3553   | 1bab_2_In_Frame_   | NM_022089    | NP_071372    | Q9NQ11 | AT132_HUMAN | ical; (Potential).          | 4   | GACCCAGCAGC         | 0.675 |                     |
| + | 9  | 1046_1047   | pc_2_Frame_Shift   | NM_012387    | NP_036519    | Q9UM07 | PADI4_HUMAN |                             | 2   | CTGAGGAGGAG/        | 0.55  |                     |
| - | 16 | 1782_1783   | ins_p.383_384in:   | NM_183008    | NP_892120    | Q5T124 | UBX11_HUMAN | em repeats of P-G-P-G-P-C   | 1   | ccgggaccgggactgc    | 0.287 | rs151149897         |
| + | 16 | 4351_4353   | v.1_In_Frame_Del   | NM_006015    | NP_006006    | O14497 | ARI1A_HUMAN | Gln-rich. 334_R1335ins      | 142 | CCCCCgcagcagc       | 0.512 |                     |
| + | 1  | 136_137     |                    | NM_001008740 | NP_001008740 | Q7Z6W1 | TMCO2_HUMAN |                             | 1   | TAGAGTCTCTCT        | 0.406 |                     |
| + | 20 | 3859_3861   | 9vwt_2_In_Frame_   | NM_002840    | NP_002831    | P10586 | PTPRF_HUMAN | ellular (Potential).        | 10  | AGCAGCGGCGG         | 0.631 |                     |
| + | 1  | 2682_2683   |                    | NM_004474    | NP_004465    | O60548 | FOXD2_HUMAN | Fork-head.                  | 0   | CAAGATCCCCCG        | 0.644 |                     |
| - | 2  | 1873_1875   | wne.1_In_Frame_I   | NM_007113    | NP_009044    | Q07283 | TRHY_HUMAN  | roximate tandem repeats.    | 5   | CCTCCGGCTCC1        | 0.68  |                     |
| + | 8  | 1233_1234   | 9wxs_2_Frame_St    | NM_000721    | NP_000712    | Q15878 | CAC1E_HUMAN | lasmic (Potential).         | 6   | CCAAAGAGAGA         | 0.51  |                     |
| + | 7  | 922_923     |                    | NM_024529    | NP_078805    | Q6P1J9 | CDC73_HUMAN |                             | 49  | TCAGCAGAGAGA        | 0.401 | rs56649;rs145694828 |
| + | 4  | 474         | hpl.2_Frame_Shift  | NM_001136018 | NP_001129490 | P07099 | HYEP_HUMAN  |                             | 4   | TGAAGCCCCCC         | 0.627 |                     |
| - | 20 | 2528_2530   | E813del SFMBT2_    | NM_001029880 | NP_001025051 | Q5VUG0 | SMBT2_HUMAN |                             | 8   | CTCTCTCTCTC         | 0.596 |                     |
| - | 2  | 551         | ime_Shift_Del_p.N  | NM_020848    | NP_065899    | Q9P266 | K1462_HUMAN |                             | 4   | CTTCTTCATCAC/       | 0.557 |                     |
| + | 11 | 1139        | p.P292fs NFKB2_    | NM_001077494 | NP_001070962 | Q00653 | NFKB2_HUMAN | RHD.                        | 3   | GGACACCCCCC         | 0.567 |                     |
| - | 16 | 2264        | p.G617fs ADAM1     | NM_003474    | NP_003465    | O43184 | ADA12_HUMAN | ar (Potential). Cys-rich.   | 9   | TGGGTCCCCCG         | 0.552 |                     |
| + | 1  | 167_168     |                    | NM_001001480 | NP_001001480 | Q701N2 | KRA55_HUMAN |                             | 1   | gctgtggaggctgtgg    | 0.139 | rs144216147         |
| - | 2  | 955_957     | 32_uc001mak.1_Ir   | NM_017481    | NP_059509    | Q9H347 | UBQL3_HUMAN |                             | 3   | TGGCTGGTGGT         | 0.537 | rs2234451           |
| + | 1  | 268_270     |                    | NM_001004460 | NP_001004460 | Q9H208 | O10A2_HUMAN | Name=3; (Potential).        | 1   | TGTATTCTTCTT        | 0.517 |                     |
| - | 3  | 502_503     |                    | NM_006248    | NP_006239    |        |             |                             | 0   | TTTCTGGAGGT         | 0.594 |                     |
| - | 12 | 4127_4129   | w.2_In_Frame_De    | NM_004719    | NP_004710    | Q99590 | SCAFB_HUMAN | Pro-rich.                   | 0   | AGGGGTGGTG          | 0.483 |                     |
| + | 23 | 5212_5213   | 3cj_2_Frame_Shift  | NM_012291    | NP_036423    | Q14674 | ESPL1_HUMAN |                             | 3   | GTGACTGTGTG1        | 0.436 |                     |
| + | 2  | 164         | 116_uc010sqx.1_Ir  | NM_007264    | NP_009195    | O15218 | GP182_HUMAN | ellular (Potential).        | 1   | ACCTTGGAGAG         | 0.602 |                     |
| - | 21 | 3042        | ttbb.1_Frame_Shif  | NM_001077261 | NP_001070729 | Q9Y618 | NCOR2_HUMAN |                             | 4   | ACGATGGGGGG         | 0.652 | rs12321697          |
| + | 1  | 1529_1531   |                    | NM_030979    | NP_112241    | Q9H361 | PABP3_HUMAN |                             | 4   | TCctgcagctgctgct    | 0.414 |                     |
| + | 9  | 1488        | jqw_2_Frame_Shif   | NM_006646    | NP_006637    | Q9UPY6 | WASF3_HUMAN |                             | 1   | CATGCCCCCC          | 0.667 |                     |
| + | 4  | 341         |                    | NM_194318    | NP_919299    | Q6Y288 | B3GLT_HUMAN | enal (Potential).           | 2   | CCAGTTAAAAAA/       | 0.373 | rs141154947         |
| - | 1  | 1241_1243   |                    | NM_024496    | NP_078772    | Q9H1B7 | I2BPL_HUMAN | γ-Gln. Potential.           | 0   | gctgctgctgtgctgct   | 0.266 | rs28718623          |
| + | 6  | 1530        | p.P385fs RIN3_uc   | NM_024832    | NP_079108    | Q8TB24 | RIN3_HUMAN  | Pro-rich.                   | 3   | TCCCGCCCCC          | 0.622 |                     |
| - | 30 | 5230_5231   | 3.K1733fs SPG11_   | NM_025137    | NP_079413    | Q96J17 | SPTCS_HUMAN | ellular (Potential).        | 5   | ATGGCATTTTTT(       | 0.391 |                     |
| + | 2  | 2046_2048   | 3.L591del SLC24A   | NM_004727    | NP_004718    | O60721 | NCKX1_HUMAN | ical; (Potential).          | 0   | GAGCCTGCTGC         | 0.547 |                     |
| + | 6  | 864_865     | cts.3_Frame_Shift  | NM_004221    | NP_004212    | P24001 | IL32_HUMAN  |                             | 1   | GGGACAAGG/          | 0.574 | rs2981599           |
| + | 8  | 1669_1671   |                    | NM_139170    | NP_631909    | Q8IYS4 | CP071_HUMAN |                             | 1   | CAGTGAGGAGG         | 0.611 |                     |
| + | 15 | 1993_1995   | 3.S436del SLC5A1   | NM_052944    | NP_443176    | Q8WWX8 | SC5AB_HUMAN | lasmic (Potential).         | 2   | AGGCCAGCAGC         | 0.542 |                     |
| + | 2  | 594         | p.Y109fs ADCY7_    | NM_001114    | NP_001105    | P51828 | ADCY7_HUMAN | ical; (Potential).          | 1   | GGCTATGTGC          | 0.642 |                     |
| + | 4  | 874         |                    | NM_000196    | NP_000187    | P80365 | DHI2_HUMAN  |                             | 0   | TCCCTGGGGGG         | 0.428 |                     |
| + | 16 | 2021_2023   | ne_Del_p.S561del   | NM_014329    | NP_055144    | Q6P2E9 | EDC4_HUMAN  | Ser-rich.                   | 4   | agcggtagcagcagc     | 0.458 |                     |
| - | 10 | 11252_11253 | 3_uc002fcl.2_In_F  | NM_006885    | NP_008816    | Q15911 | ZFH3_HUMAN  | Poly-Gly.                   | 4   | GTACGAgcccgcg       | 0.394 |                     |
| + | 16 | 1881_1882   | mq.1_Frame_Shift   | NM_198390    | NP_938204    | Q8IY22 | CMIP_HUMAN  |                             | 0   | CAACTGCAGATC        | 0.589 |                     |
| + | 4  | 1276_1278   | SMCR7_uc010vxc     | NM_139162    | NP_631901    | Q96C03 | SMCR7_HUMAN |                             | 0   | GCGGCTGCTG          | 0.685 |                     |
| - | 7  | 830         |                    | NM_001008777 | NP_001008777 | Q5MNV8 | FBX47_HUMAN |                             | 0   | TCCAGTTTTTGC        | 0.363 |                     |
| + | 5  | 1150        | 310_uc002hwx.1_ε   | NM_021939    | NP_068758    | Q96AY3 | FKB10_HUMAN |                             | 1   | GAGCTCCCCC          | 0.632 |                     |
| - | 28 | 3121_3122   | p.D919fs EFTUD2    | NM_004247    | NP_004238    | Q15029 | U5S1_HUMAN  |                             | 1   | GATCATCGAAGA        | 0.52  |                     |
| + | 3  | 312         | ie_Shift_Del_p.P5: | NM_003110    | NP_003101    | Q02086 | SP2_HUMAN   |                             | 0   | CTGCTCCCCCA(        | 0.547 |                     |

|   |    |           |                               |              |              |        |             |    |                   |       |                                                |
|---|----|-----------|-------------------------------|--------------|--------------|--------|-------------|----|-------------------|-------|------------------------------------------------|
| + | 20 | 2950_2951 | 1195_uc010wsb.1_              | NM_014738    | NP_055553    | Q12767 | K0195_HUMAN | 1  | CGAGATCCCCC       | 0.614 |                                                |
| + | 9  | 1159      | _p.I335fs EVI5L_u             | NM_145245    | NP_660288    | Q96CN4 | EVI5L_HUMAN | 1  | AGTGATCCCCCA      | 0.627 |                                                |
| + | 5  | 712       | .2_RNA CARM1_L                | NM_199141    | NP_954592    | Q86X55 | CARM1_HUMAN | 0  | GGCTCTGGGATC      | 0.597 |                                                |
| - | 1  | 1072      | xa.1_Frame_Shif               | NM_017506    | NP_059976    | Q15622 | OR7A5_HUMAN | 2  | AGCATGGGGGT       | 0.453 |                                                |
| - | 5  | 1002_1052 | uc010xsw.1_5'Flan             | NM_033317    | NP_201574    | Q6E0U4 | DMKN_HUMAN  | 3  | ggccacctgctgccgc  | 0.303 | 79970;rs144877871;rs147522263;rs140071083;rs13 |
| - | 1  | 207_208   | oad.1_Frame_Shif              | NM_198538    | NP_940940    | Q6UWP8 | SBSN_HUMAN  | 1  | CCCACCTCTCTC      | 0.579 |                                                |
| + | 7  | 712_714   |                               | NM_001039887 | NP_001034976 | Q2NL68 | CS055_HUMAN | 1  | CCCATCTCTCC       | 0.631 |                                                |
| - | 9  | 1206      |                               | NM_145296    | NP_660339    | Q8NFZ8 | CADM4_HUMAN | 0  | ATGAAGAATTCC      | 0.577 |                                                |
| + | 12 | 1271_1273 | Q407del NUCB1_                | NM_006184    | NP_006175    | Q02818 | NUCB1_HUMAN | 0  | agcggaagcagcagc   | 0.522 |                                                |
| + | 4  | 1303_1305 | I2qIt.2_In_Frame_I            | NM_007279    | NP_009210    | P26368 | U2AF2_HUMAN | 1  | CACGAGAAGAA       | 0.645 |                                                |
| - | 2  | 234_236   | HX57_uc002rrg.2_              | NM_198963    | NP_945314    | Q6P158 | DHX57_HUMAN | 3  | gccacctccaccacca  | 0.384 |                                                |
| + | 5  | 1121_1123 | ypt.1_In_Frame_D              | NM_014562    | NP_055377    | P32242 | OTX1_HUMAN  | 2  | CTCAGGccaccacc    | 0.537 |                                                |
| - | 2  | 855       | GOLN2_uc002spb                | NM_006464    | NP_006455    | O43493 | TGON2_HUMAN | 0  | CTTTTGGGGTC       | 0.572 |                                                |
| - | 23 | 3871      |                               | NM_018897    | NP_061720    | Q8WXX0 | DYH7_HUMAN  | 12 | CTAATATTTTTTT     | 0.418 |                                                |
| + | 6  | 915_916   | 2vch.2_Frame_Shi              | NM_001142300 | NP_001135772 | Q8N7R7 | CCYL1_HUMAN | 0  | GTTCTGGGAGCC      | 0.431 |                                                |
| - | 3  | 493       |                               | NM_014617    | NP_055432    | P11844 | CRGA_HUMAN  | 0  | CTGCACCCCCC       | 0.532 |                                                |
| - | 11 | 1963_1964 | fwe.1_Frame_Shif              | NM_005689    | NP_005680    | Q9NP58 | ABCB6_HUMAN | 2  | CATGTTCTCCAT      | 0.49  |                                                |
| + | 6  | 641       | IS1_uc010zte.1_R              | NM_021067    | NP_066545    | Q14691 | PSF1_HUMAN  | 2  | CCTATTAACAAA      | 0.299 |                                                |
| + | 5  | 716       | _Shift_Del_p.P210             | NM_022896    | NP_075047    | Q9BQK8 | LPIN3_HUMAN | 4  | AGTGGCCCCCC       | 0.458 |                                                |
| - | 3  | 453_455   | ne_Del_p.L72del E             | NM_194255    | NP_919231    | P41440 | S19A1_HUMAN | 0  | GGCCCAGCAGC       | 0.645 |                                                |
| - | 3  | 428_430   | _19DD>D TFIP11_               | NM_012143    | NP_036275    | Q9UBB9 | TFP11_HUMAN | 0  | GCTCGTCATCAT      | 0.532 | rs145794160                                    |
| + | 4  | 2301_2318 | H_uc003afp.2_5'l              | NM_021076    | NP_066554    | P12036 | NFH_HUMAN   | 0  | AGTCCCCAGAC       | 0.55  | 148451;rs57188573;rs117283469                  |
| + | 2  | 372_374   | _Intron LOC33967              | NM_004599    | NP_004590    | Q12772 | SRBP2_HUMAN | 4  | gcagtgccagcagca   | 0.365 |                                                |
| + | 1  |           | Translation_Start_Site CACNA1 | NM_001128840 | NP_001122312 | Q01668 | CAC1D_HUMAN | 11 | gttcgtGgatgatgatg | 0.246 |                                                |
| - | 7  | 1127      |                               | NM_013363    | NP_037495    | Q9UKZ9 | PCOC2_HUMAN | 3  | ACAATAATTGCC      | 0.383 |                                                |
| + | 21 | 2524_2526 | 1buy.1_In_Frame_              | NM_000283    | NP_000274    | P35913 | PDE6B_HUMAN | 0  | GAGAAGGAGGA       | 0.562 |                                                |
| + | 4  | 994_996   | Q279del MMRN1                 | NM_007351    | NP_031377    | Q13201 | MMRN1_HUMAN | 4  | GCTGAGCAGCA       | 0.448 |                                                |
| + | 13 | 1713_1714 | _p.K518fs PAPD7               | NM_006999    | NP_008930    | Q5XG87 | PAPD7_HUMAN | 1  | AAAAAACACACA      | 0.653 |                                                |
| - | 3  | 512_514   | Qjii.2_In_Frame_D             | NM_138379    | NP_612388    | Q96H15 | TIMD4_HUMAN | 2  | GGGCTTGTGT        | 0.537 |                                                |
| - | 2  | 742       | _5'Flank ATF6B_u              | NM_022110    | NP_071393    | Q9UIM3 | FKBPL_HUMAN | 0  | GAGCTCCCCC        | 0.587 |                                                |
| + | 11 | 1688      | _p.H408fs FOXP4               | NM_001012426 | NP_001012426 | Q8IVH2 | FOXP4_HUMAN | 1  | GTGCACCCCC        | 0.682 |                                                |
| - | 17 | 3632      | _Shift_Del_p.P119             | NM_014780    | NP_055595    | Q14999 | CUL7_HUMAN  | 4  | CAGGAGGGGGT       | 0.632 |                                                |
| - | 24 | 2621      | 3pkc.2_Frame_Shi              | NM_014841    | NP_055656    | O60641 | AP180_HUMAN | 1  | AATTCCAAGATC      | 0.259 |                                                |
| + | 6  | 1344      | sna.1_Frame_Shif              | NM_001037165 | NP_001032242 | P85037 | FOXK1_HUMAN | 2  | GGGCTCCCCA        | 0.647 |                                                |
| + | 8  | 2132_2134 |                               | NM_138426    | NP_612435    | Q86VQ1 | GLC1_HUMAN  | 0  | ATCCCAGCAGC       | 0.562 |                                                |
| - | 6  | 853_854   | 3sxa.1_Frame_Shi              | NM_001127453 | NP_001120925 | O60443 | DFNA5_HUMAN | 1  | GGGTCCAGGT        | 0.47  |                                                |
| + | 5  | 601_603   | 0kxo.2_In_Frame_              | NM_007252    | NP_009183    | P78424 | PO6F2_HUMAN | 1  | cagctccagcagcagc  | 0.365 |                                                |
| - | 2  | 382       | ALM_uc003ika.1_5              | NM_013284    | NP_037416    | Q9NP87 | DPOLM_HUMAN | 3  | GAGCTGGGGGG       | 0.637 |                                                |
| - | 7  | 981       | QK270fs KRIT1_uc              | NM_194456    | NP_919438    | O00522 | KRIT1_HUMAN | 3  | TGCCATTTTTCC      | 0.338 |                                                |
| - | 15 | 1860      | 3TAF6_uc011kji.1              | NM_139315    | NP_647476    | P49848 | TAF6_HUMAN  | 2  | GTGCTGGGGGG       | 0.657 |                                                |
| - | 8  | 1217      | 3y.2_Frame_Shift_             | NM_019042    | NP_061915    | Q96PZ0 | PUS7_HUMAN  | 1  | AGTGGTTTTTT       | 0.398 |                                                |
| + | 1  | 431_433   | IC_uc003vhg.2_5'l             | NM_199072    | NP_951038    | Q9P1T7 | MDFIC_HUMAN | 1  | GCggaagaggagg     | 0.616 |                                                |
| + | 1  | 528       |                               | NM_001001656 | NP_001001656 | Q8NGU2 | OR9A4_HUMAN | 1  | GAACAATTTTTTT     | 0.383 |                                                |
| + | 1  | 162_164   | _uc010luh.1_5'UTi             | NM_004331    | NP_004322    | O60238 | BNI3L_HUMAN | 0  | CTGCACAACAA       | 0.655 |                                                |
| - | 11 | 2018_2019 | Is.1_Frame_Shift_             | NM_014682    | NP_055497    | O60284 | ST18_HUMAN  | 5  | ATTTCGATTTTT      | 0.411 |                                                |
| - | 6  | 1265_1266 | _Shift_Ins_p.K209             | NM_002568    | NP_002559    | P11940 | PABP1_HUMAN | 0  | AGCTCCTTCCC       | 0.371 | rs140822921                                    |
| - | 11 | 2666_2668 |                               | NM_015117    | NP_055932    | Q8IXZ2 | ZC3H3_HUMAN | 1  | ggggatgaggaggag   | 0.552 | rs2272753;rs137878905                          |

|   |    |           |                    |              |              |        |             |                          |    |                   |       |                                                 |
|---|----|-----------|--------------------|--------------|--------------|--------|-------------|--------------------------|----|-------------------|-------|-------------------------------------------------|
| + | 20 | 2671_2673 | 3E837del CNKSR2    | NM_014927    | NP_055742    | Q8WXI2 | CNKR2_HUMAN | ential. Poly-Glu.        | 2  | jaggaagaggaggag   | 0.379 |                                                 |
| + | 4  | 621_623   | 2_In_Frame_Del_p   | NM_005676    | NP_005667    | P98175 | RBM10_HUMAN | Poly-Arg.                | 5  | CGTAGGCGGGCG      | 0.65  |                                                 |
| - | 1  |           |                    | NM_018159    | NP_060629    | Q96G61 | NUD11_HUMAN |                          | 0  | CTCGAGGCAGC       | 0.584 |                                                 |
| + | 20 | 4967      | 1aoj.2_Frame_Shift | NM_015215    | NP_056030    | Q9Y6Y1 | CMTA1_HUMAN | IQ 2.                    | 9  | ATGAACAAAAAA      | 0.473 |                                                 |
| + | 1  | 136_137   |                    | NM_001008740 | NP_001008740 | Q7Z6W1 | TMCO2_HUMAN |                          | 1  | TAGAGTCTCTCT      | 0.406 |                                                 |
| - | 1  | 145       | way.2_5'Flank MIE  | NM_024763    | NP_079039    | Q5VTH9 | WDR78_HUMAN |                          | 2  | CACCCCTTTTTT      | 0.622 |                                                 |
| + | 6  | 814_816   | W3_uc010oqx.1_li   | NM_138467    | NP_612476    | Q6IPR3 | TYW3_HUMAN  |                          | 2  | TGAAAATGATGA      | 0.33  | rs112765232                                     |
| + | 4  | 581       | .2_Intron CLCA4_t  | NM_012128    | NP_036260    | Q14CN2 | CLCA4_HUMAN |                          | 2  | TAAGTCAAAAAA      | 0.403 |                                                 |
| - | 3  | 680_681   | .p.R48fs GBP5_u    | NM_052942    | NP_443174    | Q96PP8 | GBP5_HUMAN  | (By similarity).         | 1  | CAGTGCAGATAG      | 0.495 | *825788;rs61732537                              |
| - | 2  | 873       | .p.P14fs SLC16A    | NM_003051    | NP_003042    | P53985 | MOT1_HUMAN  | lasmic (Potential).      | 1  | CATCTGGGGGG       | 0.423 |                                                 |
| + | 9  | 2365      |                    | NM_021948    | NP_068767    | Q96GW7 | PGCB_HUMAN  | EGF-like.                | 2  | GCTATGGGGGG       | 0.622 |                                                 |
| + | 23 | 3123      | fqk.1_Frame_Shift  | NM_001080471 | NP_001073940 | Q5VY43 | PEAR1_HUMAN | Pro-rich.                | 3  | GCCTACCCCCC       | 0.607 |                                                 |
| + | 1  | 259       |                    | NM_001004478 | NP_001004478 | Q8NGY1 | O10Z1_HUMAN | ellular (Potential).     | 2  | TGGCTGGGGGG       | 0.552 |                                                 |
| + | 17 | 2658_2659 | 3qh.2_Frame_Shift  | NM_173156    | NP_775179    | Q92540 | SMG7_HUMAN  |                          | 3  | CTCTAGAAAAAA      | 0.45  |                                                 |
| - | 2  | 1361_1363 | .2_Intron RGL1_u   | NM_203454    | NP_982279    | Q8WW27 | ABEC4_HUMAN |                          | 0  | CCCTTTCTTCTT      | 0.419 | rs141411396                                     |
| - | 3  | 527       | 2_Shift_Del_p.D63  | NM_003929    | NP_003920    | O14966 | RAB7L_HUMAN | (By similarity).         | 1  | CAATATCCACAC      | 0.393 |                                                 |
| + | 1  | 268_270   |                    | NM_001004460 | NP_001004460 | Q9H208 | O10A2_HUMAN | Name=3; (Potential).     | 1  | TGTATTCTTCTT      | 0.517 |                                                 |
| + | 2  | 423       |                    | NM_152316    | NP_689529    | Q8N8R7 | CK046_HUMAN |                          | 0  | TTAGCCAAAAAA      | 0.338 |                                                 |
| + | 10 | 1316      | 3hift_Del_p.W322fs | NM_001975    | NP_001966    | P09104 | ENOG_HUMAN  |                          | 0  | TGGCTGGGGGG       | 0.587 |                                                 |
| + | 3  | 524       | .uc001qub.1_Intro  | NM_016184    | NP_057268    | Q9UMR7 | CLC4A_HUMAN | ellular (Potential).     | 0  | TGTGTGAAAAAA      | 0.333 |                                                 |
| + | 10 | 2681      | sto.2_Frame_Shift  | NM_018448    | NP_060918    | Q86VP6 | CAND1_HUMAN | HEAT 17.                 | 2  | TTGCAGGGGGG       | 0.428 |                                                 |
| + | 14 | 3311      | A1091fs EP400_u    | NM_015409    | NP_056224    | Q96L91 | EP400_HUMAN | and RUVBL2. Helicase AT  | 12 | CATTGCTTTTTT      | 0.433 |                                                 |
| - | 1  | 1994_1996 | zo.1_In_Frame_De   | NM_183422    | NP_904358    | Q15714 | T22D1_HUMAN | Gln-rich.                | 0  | gttgtgtgtgctgctg  | 0.409 | 613609;rs146722477                              |
| - | 5  | 1255      |                    | NM_012158    | NP_036290    | Q9UKT7 | FBXL3_HUMAN |                          | 0  | TCATATAAAAAA      | 0.418 |                                                 |
| - | 72 | 12231     | .p.P3451fs MYCBP   | NM_015057    | NP_055872    | O75592 | MYCB2_HUMAN |                          | 14 | CTGCTGGGGGG       | 0.433 |                                                 |
| + | 13 | 3186      | RCC5_uc010tjc.1_   | NM_000123    | NP_000114    | P28715 | ERCC5_HUMAN |                          | 7  | AAAGTGAAAAAA      | 0.428 |                                                 |
| - | 30 | 5230_5231 | .K1733fs SPG11_    | NM_025137    | NP_079413    | Q96JI7 | SPTCS_HUMAN | ellular (Potential).     | 5  | ATGGCATTTTTT      | 0.391 |                                                 |
| - | 30 | 7699      | fy.1_Frame_Shift   | NM_015263    | NP_056078    | Q8TDJ6 | DMXL2_HUMAN |                          | 9  | TATCTGAAAAAA      | 0.313 |                                                 |
| + | 6  | 1825_1827 | 2afu.2_In_Frame_   | NM_017610    | NP_060080    | Q6ZNA4 | RN111_HUMAN | His-rich.                | 2  | ATCATCACCACC      | 0.512 |                                                 |
| + | 2  | 2046_2048 | .L591del SLC24A    | NM_004727    | NP_004718    | O60721 | NCKX1_HUMAN | ical; (Potential).       | 0  | GAGCCTGCTGC       | 0.547 |                                                 |
| - | 2  | 435_440   | .3_In_Frame_Del_   | NM_002693    | NP_002684    | P54098 | DPOG1_HUMAN | Poly-Gln.                | 2  | ctgctgtgctgctgct  | 0.466 |                                                 |
| - | 5  | 549_551   | uc010vct.1_Intron  | NM_145659    | NP_663634    | Q8NEV9 | IL27A_HUMAN | Glu-rich.                | 0  | CCCTtcctctcctcctc | 0.547 |                                                 |
| + | 16 | 2002_2004 | ne_Del_p.S549del   | NM_014329    | NP_055144    | Q6P2E9 | EDC4_HUMAN  | Ser-rich.                | 4  | CTCTCCcagcagc     | 0.453 |                                                 |
| - | 4  | 756       | _Shift_Del_p.D67fs | NM_006470    | NP_006461    | O95361 | TRI16_HUMAN |                          | 3  | AGGATCCCCCT       | 0.567 |                                                 |
| - | 7  | 830       |                    | NM_001008777 | NP_001008777 | Q5MNV8 | FBX47_HUMAN |                          | 0  | TCCAGTTTTTGG      | 0.363 |                                                 |
| - | 1  | 262_264   |                    | NM_002145    | NP_002136    | P14652 | HXB2_HUMAN  |                          | 0  | CGAAAGGAGGAG      | 0.542 |                                                 |
| - | 17 | 2036      | K1C_uc010xhq.1_    | NM_012398    | NP_036530    | O60331 | PI51C_HUMAN | interaction with TLN2.   | 4  | AGGCCGGGGGG       | 0.701 |                                                 |
| - | 1  | 625_627   | ixz.1_5'Flank LGI4 | NM_139284    | NP_644813    | Q8N135 | LGI4_HUMAN  |                          | 1  | CAGCCAGCAGC       | 0.695 |                                                 |
| - | 5  | 1002_1052 | uc010xsw.1_5'Flai  | NM_033317    | NP_201574    | Q6E0U4 | DMKN_HUMAN  | Gly-rich. S274_S290del   | 3  | jccgccactgctgccgc | 0.303 | 79970;rs144877871;rs147522263;rs140071083;rs131 |
| - | 9  | 1206      |                    | NM_145296    | NP_660339    | Q8NFZ8 | CADM4_HUMAN | lasmic (Potential).      | 0  | ATGAAGAATTCC      | 0.577 |                                                 |
| - | 14 | 2382_2384 | H4_uc002pgb.1_lr   | NM_015168    | NP_055983    | Q9UPT8 | ZC3H4_HUMAN | Potential.               | 6  | CTCTCTCCTCC       | 0.7   |                                                 |
| - | 5  | 1643      | 2_5'Flank ZNF577   | NM_023074    | NP_075562    | Q9BS31 | ZN649_HUMAN |                          | 3  | TGAATCCCCCC       | 0.448 |                                                 |
| - | 11 | 1472_1474 | 1_In_Frame_Del_    | NM_015317    | NP_056132    | Q8TB72 | PUM2_HUMAN  | Ala-rich.                | 1  | TCCAGCTGCTG       | 0.424 |                                                 |
| - | 3  | 316       | .p.P92fs HS1BP3    | NM_022460    | NP_071905    | Q53T59 | H1BP3_HUMAN | PX.                      | 1  | GTAGTGGGGGG       | 0.537 | rs77941615                                      |
| - | 11 | 2183      | 113_uc010eyk.1_    | NM_001145168 | NP_001138640 | Q8IZF5 | GP113_HUMAN | tracellular (Potential). | 4  | ACCAACCCCCC       | 0.612 |                                                 |
| - | 2  | 234_236   | HX57_uc002rrg.2_   | NM_198963    | NP_945314    | Q6P158 | DHX57_HUMAN | Gly-rich.                | 3  | gccacctccaccacca  | 0.384 |                                                 |
| + | 5  | 719_721   | Jzej.1_In_Frame_I  | NM_145810    | NP_665809    | Q9BWT1 | CDCA7_HUMAN |                          | 1  | CCATGGAGGAG       | 0.537 |                                                 |

|   |    |           |                    |              |              |        |             |                             |    |                 |       |             |
|---|----|-----------|--------------------|--------------|--------------|--------|-------------|-----------------------------|----|-----------------|-------|-------------|
| + | 21 | 2503_2505 | Q713del PTPRA_u    | NM_002836    | NP_002827    | P18433 | PTPRA_HUMAN | l). Tyrosine-protein phosph | 1  | iCAGAAGCAGCA    | 0.621 |             |
| + | 8  | 1092      | lzys.1_Frame_Shif  | NM_002827    | NP_002818    | P18031 | PTN1_HUMAN  |                             | 0  | 3CATATCCCCC     | 0.567 |             |
| + | 19 | 4651      | 6A6_uc003eni.3_5   | NM_001102608 | NP_001096078 | A6NMZ7 | CO6A6_HUMAN | le-helical region.          | 8  | CCAGGCCCCCC     | 0.498 | rs112135798 |
| - | 7  | 1127      |                    | NM_013363    | NP_037495    | Q9UKZ9 | PCOC2_HUMAN | NTR.                        | 3  | AACAATAATTGCC   | 0.383 |             |
| + | 17 | 2670      | 3_Shift_Del_p.K85: | NM_001002800 | NP_001002800 | Q9NTJ3 | SMC4_HUMAN  | Potential.                  | 2  | CTGACAAAAAA     | 0.323 |             |
| - | 3  | 541_543   |                    | NM_024524    | NP_078800    | Q9H7F0 | AT133_HUMAN | ical; (Potential).          | 1  | AATAGAGGAGG     | 0.463 |             |
| - | 29 | 6861      | 3hgq.2_Frame_Sh    | NM_032217    | NP_115593    | O75179 | ANR17_HUMAN |                             | 10 | GGTAAGGGGGC     | 0.458 |             |
| - | 3  | 416_418   | .1_5'UTR NUP54_    | NM_017426    | NP_059122    | Q7Z3B4 | NUP54_HUMAN | ch.19 X 2 AA repeats of F-G | 2  | AGTTTGCTGCTC    | 0.394 |             |
| + | 4  | 994_996   | i.Q279del MMRN1    | NM_007351    | NP_031377    | Q13201 | MMRN1_HUMAN | Poly-Gln.                   | 4  | GCTGAGCAGCA     | 0.448 |             |
| - | 17 | 2126      | i.2_Frame_Shift_D  | NM_144643    | NP_653244    | Q96NL6 | SCLT1_HUMAN | Potential.                  | 5  | FTTGGCTTTTTT    | 0.353 |             |
| - | 9  | 1430      | p.G258fs FGG_uc    | NM_021870    | NP_068656    | P02679 | FIBG_HUMAN  | 1 and Staphylococcus clum   | 0  | TGGCTCCCCC      | 0.448 |             |
| - | 19 | 3988      | _p.E436fs SORBS    | NM_021069    | NP_066547    | O94875 | SRBS2_HUMAN | SH3 3.                      | 1  | CGGTTCCCCC      | 0.358 |             |
| - | 12 | 2431      | 03jtq.2_RNA ADA    | NM_197941    | NP_922932    | Q9UKP5 | ATS6_HUMAN  | Disintegrin.                | 0  | TACCCCTTTTTC    | 0.408 |             |
| + | 9  | 1679      | uc003kwr.3_Intron  | NM_003059    | NP_003050    | Q9H015 | S22A4_HUMAN | name=12; (Potential).       | 0  | TCACCCTTTTTT    | 0.418 |             |
| + | 3  | 266       |                    | NM_002114    | NP_002105    | P15822 | ZEP1_HUMAN  |                             | 6  | AGTTTCAAAAAA    | 0.259 |             |
| + | 7  | 1520      |                    | NM_001732    | NP_001723    | Q13410 | BT1A1_HUMAN | lasmic (Potential).         | 2  | CCCATGGGGGA     | 0.537 |             |
| - | 2  | 797_799   | l.1_Intron PSORS   | NM_001264    | NP_001255    | Q15517 | CDSN_HUMAN  | Ser-rich.                   | 2  | TGGTCCACCAC     | 0.635 |             |
| - | 11 | 1174      | p.K307fs CDK19_u   | NM_015076    | NP_055891    | Q9BWU1 | CDK19_HUMAN |                             | 4  | TCACCTTTTCT     | 0.358 |             |
| + | 8  | 2132_2134 |                    | NM_138426    | NP_612435    | Q86VQ1 | GLC1_HUMAN  | Poly-Gln.                   | 0  | ATCCCAGCAGC     | 0.562 |             |
| + | 8  | 1031      | _p.F215fs DYNC1    | NM_004411    | NP_004402    | O14576 | DC11I_HUMAN |                             | 4  | GACATCTTTTTT    | 0.383 |             |
| - | 2  | 313       | _Site_p.S68_splice | NM_198990    | NP_945341    | Q6IQ20 | NAPEP_HUMAN |                             | 1  | AGAACTAAAAAA    | 0.337 |             |
| - | 2  | 110       | 3vey.2_Frame_Sh    | NM_007356    | NP_031382    | A4D0S4 | LAMB4_HUMAN |                             | 8  | GGTGCAAAAAA     | 0.308 |             |
| - | 5  | 3497_3498 |                    | NM_001080826 | NP_001074295 | Q86YV5 | SG223_HUMAN | rotein kinase.              | 0  | gggagccggggcgg  | 0.609 | rs143409664 |
| + | 9  | 1531_1533 | l CDCA2_uc003xe    | NM_152562    | NP_689775    | Q69YH5 | CDCA2_HUMAN |                             | 0  | CTCTATGATGAT    | 0.325 | rs116332536 |
| + | 12 | 2305_2307 | ime_Del_p.E38del   | NM_000553    | NP_000544    | Q14191 | WRN_HUMAN   | Poly-Glu.                   | 7  | CTACTAaagaagaa  | 0.266 |             |
| - | 2  | 1116      | 10lwe.2_Frame_Sl   | NM_023034    | NP_075447    | Q9BZ95 | NSD3_HUMAN  |                             | 1  | TGTTGCTTTTTT    | 0.378 |             |
| - | 45 | 6393_6394 | ks.1_Frame_Shift_  | NM_015902    | NP_056986    | O95071 | UBR5_HUMAN  |                             | 28 | CCCTCTTTTTT     | 0.381 |             |
| + | 20 | 2671_2673 | i.E837del CNKSR    | NM_014927    | NP_055742    | Q8WXI2 | CNKR2_HUMAN | ential. Poly-Glu.           | 2  | jaggaagaggaggag | 0.379 |             |
| + | 6  | 1104_1106 | l4exz.2_In_Frame_  | NM_001163280 | NP_001156752 | O43719 | HTSF1_HUMAN | Poly-Lys.                   | 3  | CTCAAAGAAGA     | 0.335 |             |
| + | 1  | 500       | ihkw.2_Frame_Shi   | NM_025074    | NP_079350    | Q86XX4 | FRAS1_HUMAN | NA NA                       | 5  | AGTATTGCCTCA    | 0.453 |             |
| + | 2  | 203       |                    | NM_024869    | NP_079145    | Q8TAY7 | GRPP1_HUMAN | NA                          | 0  | CCCCTCCCTCC     | 0.617 |             |
| - | 7  | 708_709   | lwdz.2_Frame_Shi   | NM_194292    | NP_919268    | Q6UVJ0 | SAS6_HUMAN  | Potential. NA               | 2  | TTCTTGTTTTTT    | 0.317 |             |
| + | 6  | 1846      | 3'UTR TCL6_uc00    | NM_020554    | NP_065579    |        |             | NA                          | 0  | AAGCTGGGGAG     | 0.557 |             |
| - | 2  | 84        | 2bcu.1_Frame_Sh    | NM_032808    | NP_116197    | Q96FE5 | LIGO1_HUMAN | NA                          | 2  | TCACGCCCCC      | 0.697 |             |
| + | 1  | 70        | l4_uc002mnt.1_Fr   | NM_001544    | NP_001535    | Q14773 | ICAM4_HUMAN | NA                          | 1  | CTGCTGTTTTTT    | 0.677 |             |
| + | 9  | 1040      | _Shift_Del_p.P156f | NM_014516    | NP_055331    | O75175 | CNOT3_HUMAN | NA                          | 3  | TCCCCTCCCAG     | 0.632 | rs36665     |
| - | 5  | 929       |                    | NM_176810    | NP_789780    | Q86W25 | NAL13_HUMAN | NACHT. NA                   | 9  | TGTTGAGACAT     | 0.428 |             |
| + | 2  | 688_689   | .1_Intron C21orf29 | NM_198689    | NP_941962    | P60409 | KR107_HUMAN | epeats of C. NA             | 0  | ACCTCCTCCCC     | 0.653 |             |
| + | 1  | 497_499   | lc003tbl.3_5'Flank | NM_002047    | NP_002038    | P41250 | SYG_HUMAN   | NA                          | 1  | TTGCCCGCCGC     | 0.729 |             |
| - | 3  | 3173      | ihv.2_Frame_Shift  | NM_033026    | NP_149015    | Q9Y6V0 | PCLO_HUMAN  | Pro-rich. NA                | 7  | TGGGGCCCTGT     | 0.517 |             |
| + | 8  | 1177      |                    | NM_002486    | NP_002477    | Q09161 | NCBP1_HUMAN | MIF4G. NA                   | 1  | AATTGAAAAAGC    | 0.373 |             |
| - | 18 | 3406      |                    | NM_004463    | NP_004454    | P98174 | FGD1_HUMAN  | PH 2. NA                    | 6  | TGATCTTGAAG     | 0.652 |             |
| - | 8  | 1013      | mwc.1_Frame_Shi    | NM_024597    | NP_078873    | Q8IWC1 | MA7D3_HUMAN | NA                          | 4  | CACCTGGGGGG     | 0.532 |             |
| - | 19 | 3629_3631 | l0ag.1_In_Frame_   | NM_001009566 | NP_001009566 | O94985 | CSTN1_HUMAN | idic). Cytoplasmic (Potenti | 1  | TCCCCCTCCTC     | 0.557 |             |
| + | 3  | 1056_1058 | obp.1_In_Frame_I   | NM_015001    | NP_055816    | Q96T58 | MINT_HUMAN  | ich). By similarity.        | 15 | CAATCAGCAGC     | 0.468 |             |
| + | 6  | 814_816   | W3_uc010oqx.1_l    | NM_138467    | NP_612476    | Q6IPR3 | TYW3_HUMAN  |                             | 2  | TGAAAATGATGAT   | 0.33  | rs112765232 |
| - | 23 | 3684      | AP29_uc009wdq.1    | NM_004815    | NP_004806    | Q52LW3 | RHG29_HUMAN |                             | 11 | ACTCCTTTTTC     | 0.463 |             |

|   |    |           |                    |              |              |        |              |                            |    |                  |       |
|---|----|-----------|--------------------|--------------|--------------|--------|--------------|----------------------------|----|------------------|-------|
| + | 8  | 3460      | zr.1_Frame_Shift   | NM_004326    | NP_004317    | O00512 | BCL9_HUMAN   | Pro-rich.                  | 6  | TAAGTCCCCC       | 0.622 |
| - | 18 | 1926      | ib.1_Frame_Shift   | NM_001668    | NP_001659    | P27540 | ARNT_HUMAN   |                            | 9  | CGGCCGGGGG       | 0.527 |
| - | 2  | 2734_2736 | wne.1_In_Frame_I   | NM_007113    | NP_009044    | Q07283 | TRHY_HUMAN   | 30 AA tandem repeats.      | 5  | GTAGCTCTCC       | 0.586 |
| - | 3  | 8141_8142 |                    | NM_001009931 | NP_001009931 | Q86YZ3 | HORN_HUMAN   | 29                         | 3  | AGTGACCCAAGC     | 0.579 |
| + | 9  | 1992      | !7A3_uc009won.2    | NM_024330    | NP_077306    | Q5K4L6 | S27A3_HUMAN  |                            | 1  | TGCGTCCCCC       | 0.617 |
| + | 6  | 1160      | _p.P108fs TDRD1    | NM_001098475 | NP_001091945 | Q5VZ19 | TDR10_HUMAN  |                            | 1  | AAAGGCCCCC       | 0.522 |
| - | 13 | 3761_3762 |                    | NM_000130    | NP_000121    | P12259 | FA5_HUMAN    | tandem repeats of [TNP]-L  | 6  | GGTCTGGAGAG      | 0.54  |
| + | 14 | 1753_1755 | Opos.1_In_Frame    | NM_024420    | NP_077734    | P47712 | PA24A_HUMAN  | PLA2c.                     | 3  | TCCTTTGATGAT     | 0.433 |
| - | 13 | 2418_2420 | 0pty.1_In_Frame_   | NM_005401    | NP_005392    | Q15678 | PTN14_HUMAN  | Poly-Glu.                  | 5  | GGAGCCTCCTC      | 0.626 |
| + | 20 | 2516      | TR_uc010pxx.1_InI  | NM_000254    | NP_000245    | Q99707 | METH_HUMAN   | inding N-terminal.         | 3  | TAAACCAAAAA      | 0.279 |
| - | 9  | 1366      | Del_p.1412fs PARI  | NM_019619    | NP_062565    | Q8TEW0 | PARD3_HUMAN  |                            | 1  | TGCCTATTTTTT     | 0.433 |
| + | 10 | 3102      |                    | NM_032199    | NP_115575    | Q14865 | ARI5B_HUMAN  |                            | 4  | CAGGGAAAAAG      | 0.607 |
| - | 19 | 3018      | _p.S792fs FGFR2    | NM_000141    | NP_000132    | P21802 | FGFR2_HUMAN  | lasmic (Potential).        | 96 | TGAAGAACAAG      | 0.433 |
| + | 25 | 8653_8655 | idel DNHD1_uc00    | NM_144666    | NP_653267    | Q96M86 | DNHD1_HUMAN  | Glu-rich.                  | 2  | AGAGTgaggagg     | 0.507 |
| + | 1  | 268_270   |                    | NM_001004460 | NP_001004460 | Q9H208 | O10A2_HUMAN  | Name=3; (Potential).       | 1  | TGTATTTCTTCT     | 0.517 |
| - | 3  | 345       | 0rew.1_Frame_Shi   | NM_001001991 | NP_001001991 | Q6UXH9 | PAMR1_HUMAN  |                            | 2  | AGGTACCCCC       | 0.517 |
| - | 38 | 5650      | 4_uc001ndm.3_Fri   | NM_002334    | NP_002325    | O75096 | LRP4_HUMAN   | lasmic (Potential).        | 4  | GGAGGCCCCCC      | 0.562 |
| - | 24 | 2496_2498 | PC3_uc010rhl.1_I   | NM_000256    | NP_000247    | Q14896 | MYPC3_HUMAN  | nectin type-III 1.         | 3  | GTAGCTCTTCTT     | 0.601 |
| + | 2  | 352       | _Shift_Del_p.P56l  | NM_006656    | NP_006647    | A8K327 | A8K327_HUMAN |                            | 2  | TACATACCCCC      | 0.567 |
| + | 2  | 185_187   |                    | NM_015516    | NP_056331    | Q8WUA8 | TSK_HUMAN    |                            | 0  | GCCCCGCTGCTG     | 0.616 |
| + | 17 | 2405_2407 | 1pkl.1_In_Frame_I  | NM_004398    | NP_004389    | Q13206 | DDX10_HUMAN  |                            | 4  | ATTGGAGtgatgatg  | 0.31  |
| - | 3  | 382       | _p.K73fs CHD4_u    | NM_001273    | NP_001264    | Q14839 | CHD4_HUMAN   |                            | 2  | ACCTCTTTTTTT     | 0.468 |
| - | 3  | 441_442   | i.1_Intron PRB1_u  | NM_005039    | NP_005030    | P04280 | PRP1_HUMAN   | -[PAQ]-Q-[GE]-[GD]-[NKS]   | 0  | TTTCTGGAGGT      | 0.604 |
| - | 7  | 1320      | Shift_Del_p.G270fs | NM_001144996 | NP_001138468 | Q13683 | ITA7_HUMAN   | Extracellular (Potential). | 5  | AGTGACCCCC       | 0.602 |
| - | 23 | 3886      | KN2_uc001tsk.2_F   | NM_002973    | NP_002964    | Q99700 | ATX2_HUMAN   |                            | 2  | CATGTGGGGTG      | 0.512 |
| - | 3  | 359       | /PS33A_uc001uce    | NM_022916    | NP_075067    | Q96AX1 | VP33A_HUMAN  |                            | 1  | TCTGACAAAAA      | 0.383 |
| + | 16 | 2686_2688 | 1tbn.1_In_Frame_I  | NM_004592    | NP_004583    | Q12872 | SFSWA_HUMAN  | g/Ser-rich (RS domain).    | 0  | CACGAGAAGAA      | 0.493 |
| + | 18 | 2223      | aba.2_Frame_Shif   | NM_130806    | NP_570718    | Q8WXD0 | RXFP2_HUMAN  | lasmic (Potential).        | 0  | AAATTAATAAAAA    | 0.348 |
| + | 9  | 893       | p.A333fs C13orf34  | NM_024808    | NP_079084    | Q6PGQ7 | BORA_HUMAN   | Ser-rich.                  | 0  | TAGTGCAAAAAA     | 0.383 |
| - | 3  | 331       | VIN_uc010tqp.1_F   | NM_182946    | NP_891991    | Q8N4C6 | NIN_HUMAN    | EF-hand 2.                 | 6  | GCACTGGGGCC      | 0.587 |
| + | 2  | 1168      |                    | NM_018228    | NP_060698    | Q9H8Y1 | VRTN_HUMAN   |                            | 0  | CCACCGGGGGG      | 0.642 |
| - | 23 | 2338      | !ahb.1_Frame_Shi   | NM_020821    | NP_065872    | Q709C8 | VP13C_HUMAN  |                            | 2  | TGTACATTTTTTA    | 0.328 |
| + | 4  | 746       | iqp.2_Frame_Shift  | NM_002434    | NP_002425    | P29372 | 3MG_HUMAN    |                            | 2  | GAGACCCCCC       | 0.602 |
| + | 3  | 422_424   | PS34_uc002cmo.2    | NM_001010865 | NP_001010865 | A4GXA9 | EME2_HUMAN   |                            | 3  | GAAATTGCTGCT     | 0.655 |
| - | 2  | 667_668   | !_5'Flank IQCK_uc  | NM_001012991 | NP_001013009 | Q1ED39 | CP088_HUMAN  | Lys-rich.                  | 0  | GGTGGATTTTTT     | 0.535 |
| + | 17 | 2641      | Shift_Del_p.R819fs | NM_173201    | NP_775293    | O14983 | AT2A1_HUMAN  | smic (By similarity).      | 4  | GACCGCCCCC       | 0.657 |
| + | 30 | 3476_3478 | L1022del ITGAL_u   | NM_002209    | NP_002200    | P20701 | ITAL_HUMAN   | ical; (Potential).         | 10 | GGGGGCTGCTG      | 0.601 |
| + | 2  | 117       | fji.2_Frame_Shift  | NM_002163    | NP_002154    | Q02556 | IRF8_HUMAN   | ophan pentad repeat.       | 3  | TGACAGTAGCAT     | 0.483 |
| + | 4  | 1366      | SMCR7_uc010vxq     | NM_139162    | NP_631901    | Q96C03 | SMCR7_HUMAN  |                            | 0  | CGTCTGGGGGA      | 0.687 |
| - | 6  | 2548_2550 |                    | NM_139285    | NP_644814    | Q8NHY3 | GA2L2_HUMAN  |                            | 2  | tcttctctctctctct | 0.527 |
| - | 4  | 1433      |                    | NM_032865    | NP_116254    | Q8IZW8 | TENS4_HUMAN  |                            | 4  | GTAAGGGGGC       | 0.512 |
| + | 7  | 954       |                    | NM_178160    | NP_835454    | Q7RTS6 | OTOP2_HUMAN  | ical; (Potential).         | 4  | GAGACCTTTTTT     | 0.607 |
| + | 6  | 826       | SD_uc002kfy.1_5'F  | NM_022158    | NP_071441    | Q9H479 | FN3K_HUMAN   |                            | 0  | GGGTTCCCCAG      | 0.572 |
| + | 8  | 627       | ift_Del_p.G205fs E | NM_006949    | NP_008880    | Q15833 | STXB2_HUMAN  |                            | 1  | AGGGGCCCAGA      | 0.672 |
| - | 7  | 1272      | ie_Shift_Del_p.P3! | NM_021155    | NP_066978    | Q9NNX6 | CD209_HUMAN  | ellular (Probable).        | 1  | CAGGAGGGGGG      | 0.498 |
| - | 3  | 627       | I_p.K126fs TRMT1   | NM_017722    | NP_060192    | Q9NXH9 | TRM1_HUMAN   |                            | 2  | TCAACCTTTTCC     | 0.552 |
| - | 1  | 90_92     | EC8_uc002pwu.2     | NM_014442    | NP_055257    | Q9NYZ4 | SIGL8_HUMAN  |                            | 5  | agcaggggcagcagc  | 0.493 |

rs143222885



|   |    |           |                    |              |              |        |             |                                |    |                   |       |                    |
|---|----|-----------|--------------------|--------------|--------------|--------|-------------|--------------------------------|----|-------------------|-------|--------------------|
| - | 3  | 1334      | 'NF552_uc010yhg    | NM_024762    | NP_079038    | Q9H707 | ZN552_HUMAN | C2H2-type 9.                   | 0  | CCTAAATTTTTTT     | 0.413 |                    |
| - | 1  | 1479_1481 |                    | NM_001029883 | NP_001025054 | A6NGG8 | CB071_HUMAN |                                | 1  | 'GTCTTCTCCTC      | 0.542 |                    |
| + | 6  | 2252_2253 | ied.2_Frame_Shift  | NM_181453    | NP_852118    | Q8IWJ2 | GCC2_HUMAN  | Potential.                     | 1  | GTTCCAGAAAAAA     | 0.307 |                    |
| - | 6  | 926       | 02tpm.2_Frame_S    | NM_031445    | NP_113633    | Q6DCA0 | AMERL_HUMAN | AMMECR1.                       | 1  | GACACCTTTTTTC     | 0.388 |                    |
| - | 1  | 158_159   | c002uiq.2_5'Flank  | NM_004882    | NP_004873    | Q86X95 | CIR1_HUMAN  | action with RBPJ.              | 1  | TTTTTTGATATTG     | 0.505 |                    |
| - | 23 | 3871      |                    | NM_018897    | NP_061720    | Q8WXX0 | DYH7_HUMAN  | n (By similarity).             | 12 | iCTAATATTTTTTT    | 0.418 |                    |
| + | 1  | 164       | 3P2_uc010zju.1_5'  | NM_000597    | NP_000588    | P18065 | IBP2_HUMAN  |                                | 0  | cgcgccgcccgcgtgc  | 0.337 |                    |
| - | 1  | 986       |                    | NM_012072    | NP_036204    | Q9NPY3 | C1QR1_HUMAN | Extracellular (Potential).     | 2  | \GCCATCCCCCC      | 0.627 |                    |
| + | 2  | 1083_1085 |                    | NM_024893    | NP_079169    | Q9H7V2 | SYNG1_HUMAN | Cytoplasmic (Potential).       | 0  | ATGTGGAGGAG       | 0.547 |                    |
| - | 2  | 236       | 2xot.2_Frame_Sh    | NM_020398    | NP_065131    | O95925 | EPPI_HUMAN  | WAP. p.C53fs*28(2)             | 1  | TAAACATTTTTTT     | 0.453 |                    |
| + | 4  | 301       |                    | NM_178456    | NP_848551    | Q9H1P6 | CT085_HUMAN |                                | 1  | TCCATCCCCCC       | 0.582 |                    |
| - | 23 | 2501_2502 |                    | NM_014258    | NP_055073    | Q9BX26 | SYCP2_HUMAN |                                | 5  | TCACCATTTTTTT     | 0.322 |                    |
| + | 9  | 1213_1223 | bp.1_Frame_Shift   | NM_001794    | NP_001785    | P55283 | CADH4_HUMAN | Extracellular (Potential).     | 6  | \AGTCCCCCGAA      | 0.412 |                    |
| + | 4  | 1162      | 0gma.2_Frame_S     | NM_005534    | NP_005525    | P38484 | INGR2_HUMAN | tential). Fibronectin type-III | 0  | ACGGCCTTTTTTT     | 0.458 |                    |
| + | 2  | 688_689   | .1_Intron C21orf29 | NM_198689    | NP_941962    | P60409 | KR107_HUMAN | peats of C-C-X(3). 16.         | 0  | ACCTCCTCCCC       | 0.653 |                    |
| + | 38 | 4673_4675 | P2A_uc002zjs.2_I   | NM_015151    | NP_055966    | Q14689 | DIP2A_HUMAN | Poly-Val.                      | 2  | :CTGCTGGTGGT      | 0.596 |                    |
| - | 5  | 732       | ARVCF_uc002zra.    | NM_001670    | NP_001661    | O00192 | ARVC_HUMAN  |                                | 1  | :CTAGTGGGGGG      | 0.647 |                    |
| + | 13 | 1533_1535 | aus.2_In_Frame_I   | NM_012407    | NP_036539    | Q9NRD5 | PICK1_HUMAN | Poly-Glu.                      | 0  | \GATGGggaggagg    | 0.562 |                    |
| + | 5  | 477_479   |                    | NM_001197    | NP_001188    | Q13323 | BIK_HUMAN   | potential). Helical; (Potentia | 0  | :tgctggcgtgctgctg | 0.562 |                    |
| - | 11 | 1334      |                    | NM_173050    | NP_766638    | Q8IWI4 | SCUB1_HUMAN |                                | 5  | GGCCCGGGGGG       | 0.647 |                    |
| + | 13 | 1986_1987 | NKTR_uc003clq.1    | NM_005385    | NP_005376    | P30414 | NKTR_HUMAN  |                                | 3  | GACAGTCCCCC       | 0.421 |                    |
| - | 28 | 3481      | 3A3_uc003ftx.3_5'  | NM_024524    | NP_078800    | Q9H7F0 | AT133_HUMAN |                                | 1  | 'GACCCAAAAAA      | 0.383 |                    |
| - | 3  | 1028      | 168_uc010iah.2_5   | NM_152617    | NP_689830    | Q8IYW5 | RN168_HUMAN | Glu-rich.                      | 0  | TTCCGCTTTTTTC     | 0.448 |                    |
| - | 1  | 340_348   |                    | NM_177998    | NP_819056    | Q7RTM1 | OTOP1_HUMAN | ical; (Potential).             | 3  | TCACAGCAGC        | 0.727 | 245977;rs75328065  |
| - | 5  | 763       | l3hkd.2_Frame_St   | NM_001042784 | NP_001036249 | Q5M9N0 | CD158_HUMAN |                                | 6  | CACATATTTTTTT     | 0.393 |                    |
| + | 1  | 3100_3102 | l3igz.2_In_Frame_  | NM_032961    | NP_116586    | Q9P2E7 | PCD10_HUMAN | Cytoplasmic (Potential).       | 2  | GCCTCTGCTGC       | 0.581 |                    |
| + | 2  | 930       | on.1_Frame_Shift   | NM_004744    | NP_004735    | O95237 | LRAT_HUMAN  | ical; (Potential).             | 1  | \GTCTTGGGATT      | 0.403 |                    |
| + | 12 | 2085      | p.D480fs TLL1_uc   | NM_012464    | NP_036596    | O43897 | TLL1_HUMAN  | CUB 2.                         | 7  | TATCCTGATGACT     | 0.423 |                    |
| + | 22 | 3425_3426 | f.2_Frame_Shift_I  | NM_012343    | NP_036475    | Q13423 | NNTM_HUMAN  | chondrial matrix.              | 3  | :AATCTTCTACAA     | 0.426 |                    |
| + | 5  | 794       | 3kcy.1_Frame_Shi   | NM_001080479 | NP_001073948 | Q8N1W1 | RGNEF_HUMAN |                                | 0  | TTGTGTGGAGGC      | 0.463 |                    |
| - | 5  | 537       | _p.P109fs SSBP2    | NM_012446    | NP_036578    | P81877 | SSBP2_HUMAN | Pro-rich.                      | 5  | 'CTCCTGGGGGA      | 0.458 |                    |
| + | 1  | 616_617   |                    | NM_021614    | NP_067627    | Q9H2S1 | KCNN2_HUMAN |                                | 2  | CCGCTGCCGCC       | 0.658 | l038013;rs34838882 |
| + | 6  | 1394_1395 | NB1_uc010jdb.1_F   | NM_005573    | NP_005564    | P20700 | LMNB1_HUMAN | Rod. Coil 2.                   | 2  | GACAAAGAGAG       | 0.426 |                    |
| - | 15 | 5611      |                    | NM_019105    | NP_061978    | P22105 | TENX_HUMAN  | nectin type-III 11.            | 0  | iGAGTCAAAGT       | 0.662 |                    |
| - | 3  | 1887      |                    | NM_019105    | NP_061978    | P22105 | TENX_HUMAN  | EGF-like 14.                   | 0  | GGCAGCCCCCG       | 0.692 |                    |
| + | 2  | 246       | oei.2_Frame_Shift  | NM_024165    | NP_077084    | O43189 | PHF1_HUMAN  |                                | 0  | CGCAGCCCCCC       | 0.557 |                    |
| + | 14 | 2112      |                    | NM_001371    | NP_001362    |        |             |                                | 21 | \GATGACCCCCC      | 0.383 |                    |
| - | 4  | 1648      | 318_uc003ouw.2_    | NM_014345    | NP_055160    | Q5VUA4 | ZN318_HUMAN |                                | 7  | TCGCTTTTTTT       | 0.493 |                    |
| + | 26 | 3021_3022 | p.Q914fs MYO6_u    | NM_004999    | NP_004990    | Q9UM54 | MYO6_HUMAN  | Potential.                     | 2  | TTACAGAAAAAA      | 0.381 |                    |
| - | 8  | 1307_1309 | ldzv.1_In_Frame_   | NM_002042    | NP_002033    | P24046 | GBRR1_HUMAN | ical; (Probable).              | 1  | GAGCAAGAAGA       | 0.522 |                    |
| + | 1  | 570_572   |                    | NM_138426    | NP_612435    | Q86VQ1 | GLC1_HUMAN  | Poly-Ser.                      | 0  | TCCACTGcctctcc    | 0.527 |                    |
| + | 5  | 1249      | _p.P231fs DTX2_u   | NM_020892    | NP_065943    | Q86UW9 | DTX2_HUMAN  |                                | 2  | :CCCCACACAG       | 0.657 | rs147779783        |
| - | 2  | 390_392   | lkiw.1_In_Frame_I  | NM_015545    | NP_056360    | O75127 | PTCD1_HUMAN |                                | 1  | \AACTCTCCTCC      | 0.606 |                    |
| + | 7  | 1118_1119 | vuy.2_Frame_Shifi  | NM_016019    | NP_057103    | Q9Y383 | LC7L2_HUMAN | Arg/Ser-rich.                  | 0  | \GAGAAGAGAG       | 0.391 |                    |
| - | 2  | 698       | vd.3_Frame_Shift   | NM_022740    | NP_073577    | Q9H2X6 | HIPK2_HUMAN | corepression (By similarity)   | 7  | CGCTGTTTTTG       | 0.577 |                    |
| + | 3  | 293       | PO_uc010lpl.1_Int  | NM_198455    | NP_940857    | A2VEC9 | SSPO_HUMAN  | EMI.                           | 0  | AGGCTGGGGGG       | 0.622 |                    |
| - | 60 | 8167      | Shift_Del_p.R2704  | NM_006904    | NP_008835    | P78527 | PRKDC_HUMAN | KIP-binding.                   | 34 | CCAGCCTTTTTT      | 0.498 |                    |

|   |    |             |                            |                        |              |             |             |                                   |              |                   |       |             |
|---|----|-------------|----------------------------|------------------------|--------------|-------------|-------------|-----------------------------------|--------------|-------------------|-------|-------------|
| - | 11 | 1327        | ixzp.2_Frame_Shif          | NM_014393              | NP_055208    | Q9NUL3      | STAU2_HUMAN | DRBM 4.                           | 0            | 3CAGCATTTTTTT     | 0.328 |             |
| + | 12 | 1710_1711   | rs.H509fs ESRP1_L          | NM_017697              | NP_060167    | Q6NXG1      | ESRP1_HUMAN | RRM 3.                            | 4            | 3TGTCATAAAAA      | 0.436 |             |
| + | 7  | 2374        | izgp.1_Frame_Shi           | NM_015158              | NP_055973    | Q14678      | KANK1_HUMAN |                                   | 4            | 3AGGGTGGAAAT      | 0.498 |             |
| - | 5  | 410         |                            | NM_004669              | NP_004660    | O95833      | CLIC3_HUMAN | ST C-terminal.                    | 0            | 3TGGTACAGGGC      | 0.771 |             |
| - | 6  | 1226_1227   |                            | NM_005044              | NP_005035    | P51817      | PRKX_HUMAN  | rotein kinase.                    | 3            | 3TTCCTAATCGCC     | 0.426 |             |
| + | 11 | 1419        | p.Y289fs MSL3_u            | NM_078629              | NP_523353    | Q8N5Y2      | MS3L1_HUMAN |                                   | 1            | 3AATTACCCCCC      | 0.458 |             |
| + | 1  | 1125        |                            | NM_001013736           | NP_001013758 | Q5HY64      | FA47C_HUMAN |                                   | 3            | 3TGCCTCCCCGAG     | 0.632 |             |
| - | 14 | 1420        | rs.2_5'UTR BTK_u           | NM_000061              | NP_000052    | Q06187      | BTK_HUMAN   | ase.[ATP (By similarity).         | 6            | 3CCAGTCCCCCAG     | 0.438 |             |
| - | 5  | 1312        | .1_Intron TEX13A           | NM_031274              | NP_112564    | Q9BXU3      | TX13A_HUMAN | rsanBP2-type.                     | 2            | 3CCCTTCCCACAC     | 0.478 |             |
| - | 8  | 1013        | mwc.1_Frame_Shi            | NM_024597              | NP_078873    | Q8IWC1      | MA7D3_HUMAN |                                   | 4            | 3CACCTGGGGGG      | 0.532 |             |
| + | 6  | 1104_1106   | rs.4ezx.2_In_Frame         | NM_001163280           | NP_001156752 | O43719      | HTSF1_HUMAN | Poly-Lys.                         | 3            | 3CTCAAAGAAGA      | 0.335 |             |
| + | 4  | 2131_2133   | EC1_uc010nsl.1_I           | NM_005462              | NP_005453    | O60732      | MAGC1_HUMAN |                                   | 4            | 3GTCCTCTTCAGC     | 0.571 |             |
| - | 1  | 159         |                            | NM_001009609           | NP_001009609 | Q5MJ09      | SPXN3_HUMAN |                                   | 2            | 3TCATCATTTTTT     | 0.239 |             |
| + | 10 | 1280_1282   | 73_uc009vfk.1_In           | NM_005427              | NP_005418    | O15350      | P73_HUMAN   | Poly-Gln.                         | 2            | 3ATCGGCAGCAGC     | 0.606 |             |
| - | 4  | 1104        | apa.1_Frame_Shif           | NM_018948              | NP_061821    | Q9UJM3      | ERRF1_HUMAN |                                   | 1            | 3ACTCTGGGGGG      | 0.478 |             |
| - | 23 | 3755        | E887fs EIF4G3_u            | NM_003760              | NP_003751    | O43432      | IF4G3_HUMAN |                                   | 1            | 3CTCTTCTTGAG      | 0.522 |             |
| + | 12 | 2906_2908   | rs.9vqi.1_In_Frame         | NM_001083621           | NP_001077090 | Q9NUA8      | ZBT40_HUMAN |                                   | 1            | 3CCCCAAGAAGA      | 0.517 |             |
| - | 1  | 1028        |                            | NM_000864              | NP_000855    | P28221      | 5HT1D_HUMAN | rs.ame=4; (By similarity).        | 0            | 3AGAGCGGGGGC      | 0.597 |             |
| + | 4  | 449_450     | rs.ihift_Del_p.L80fs F     | NM_002953              | NP_002944    | Q15418      | KS6A1_HUMAN | rotein kinase 1.                  | 1            | 3AGGTGCTGAAGA     | 0.599 |             |
| + | 7  | 1951        | rs.9vui.2_Frame_Shi        | NM_145238              | NP_660281    | P17040      | ZSC20_HUMAN |                                   | 4            | 3TAGTGCTGAGA      | 0.582 |             |
| + | 5  | 713         | rs.oyy.1_Frame_Shif        | NM_006099              | NP_006090    | Q9Y6X2      | PIAS3_HUMAN | PINIT.                            | 1            | 3ATTTTCCCCCC      | 0.463 |             |
| - | 1  | 185         | rs.VCL1_uc001eva.2         | NM_021960              | NP_068779    | Q07820      | MCL1_HUMAN  |                                   | 0            | 3GCCGGCCCCCC      | 0.682 |             |
| - | 2  | 1111_1113   | rs.wne.1_In_Frame_I        | NM_007113              | NP_009044    | Q07283      | TRHY_HUMAN  | rs.of R-R-E-Q-E-E- E-R-R-E-       | 5            | 3tcgcgcctctctctcc | 0     | rs71757496  |
| - | 3  | 11637_11638 |                            | NM_002016              | NP_002007    | P20930      | FILA_HUMAN  | rs.igrin 23. Ser-rich.            | 16           | 3ACTGTCACTGTCT    | 0.574 |             |
| + | 14 | 1756        | rs.p.S522fs UBAP2L         | NM_014847              | NP_055662    | Q14157      | UBP2L_HUMAN |                                   | 2            | 3TCCTTCTGATT      | 0.532 |             |
| - | 7  | 811         | rs.chj.1_Frame_Shif        | NM_005998              | NP_005989    | P49368      | TCPG_HUMAN  |                                   | 2            | 3TGCATATTTTTT     | 0.393 |             |
| - | 11 | 2418        | rs.vsm.2_Frame_Shif        | NM_031281              | NP_112571    | Q96RD9      | FCRL5_HUMAN | rs.potential). Ig-like C2-type 8. | 6            | 3GGTGAAGACCG      | 0.512 |             |
| - | 7  | 805         | rs.el_p.E178fs CCDC        | NM_012337              | NP_036469    | Q9UL16      | CCD19_HUMAN | Potential.                        | 1            | 3CTGTTCACAAAT     | 0.542 |             |
| - | 1  | 507         |                            | NM_172000              | NP_741997    | Q5T9Z0      | TEDM1_HUMAN |                                   | 2            | 3CAGCTCCACCC      | 0.522 |             |
| + | 21 | 3318        | rs.lgrr.1_Frame_Shif       | NM_031935              | NP_114141    | Q96RW7      | HMCN1_HUMAN | rs.like C2-type 7.                | 23           | 3TTCAGCAGGAG      | 0.453 |             |
| + | 8  | 1331_1332   | rs.D55_uc009xcf.2_F        | NM_000574              | NP_000565    | P08174      | DAF_HUMAN   | rs.Ser/Thr-rich.                  | 1            | 3CCCAAATAAAGG     | 0.421 |             |
| - | 3  | 2320        |                            | NM_002221              | NP_002212    | P27987      | IP3KB_HUMAN |                                   | 5            | 3ATGACGAAGGG      | 0.468 |             |
| - | 10 | 1052        | rs.C13_uc001hug.3_         | NM_024525              | NP_078801    | Q8NBPO      | TTC13_HUMAN | rs.TPR 5.                         | 2            | 3CCTTTTGAAAGC     | 0.423 |             |
| - | 1  | 63_65       | rs.ne_Del_p.C11del         | NM_024525              | NP_078801    | Q8NBPO      | TTC13_HUMAN |                                   | 2            | 3CCcagaagcagcag   | 0.557 |             |
| + | 3  | 1545        | rs.p.K278fs RPP38_         | NM_183005              | NP_892117    | P78345      | RPP38_HUMAN |                                   | 1            | 3AAAAGTAAAAAA     | 0.358 |             |
| + | 6  | 1209        |                            | NM_030912              | NP_112174    | Q9BZR9      | TRIM8_HUMAN |                                   | 1            | 3AGTGTCCCCCT      | 0.647 |             |
| + | 12 | 2642        | rs.p.1_Frame_Shif          | NM_014720              | NP_055535    | Q9H2G2      | SLK_HUMAN   | Potential.                        | 8            | 3AGAGTAAAAAGC     | 0.348 |             |
| - | 11 | 1772        | rs.1mda.2_Splice_Si        | NM_001164              | NP_001155    | O00213      | APBB1_HUMAN |                                   | 2            | 3ACATACCAACA      | 0.483 |             |
| - | 17 | 2371        | rs.Jrcv.1_Frame_Shif       | NM_175058              | NP_778228    | Q6IQ23      | PKHA7_HUMAN | Potential.                        | 3            | 3CTGTTCACAT       | 0.458 |             |
| + | 3  | 514         | rs.J1nqk.2_Frame_Si        | NM_178031              | NP_821174    | Q24JP5      | T132A_HUMAN | rs.exllular (Potential).          | 1            | 3GTGGTCCCCCC      | 0.587 |             |
| - | 5  | 6102        | rs.IAK_uc001ntk.1_Ir       | NM_001620              | NP_001611    | Q09666      | AHNK_HUMAN  |                                   | 19           | 3ACTTTGGGGCC      | 0.502 |             |
| - | 3  | 1341        | rs.loop.3_Frame_Sh         | NM_001098515           | NP_001091985 | Q96AM1      | MRGRF_HUMAN | rs.lasmic (Potential).            | 0            | 3TGCTGCCCCCG      | 0.716 |             |
| - | 9  | 1311_1312   | rs.Shift_Del_p.R353fs CHRD | L2_uc001ovj.1_RNA CHRD | Q6WN34       | CRDL2_HUMAN |             | 0                                 | 3GCAAAGCGACG | 0.614             |       |             |
| + | 66 | 10279       | rs.Shift_Del_p.I3386       | NM_001080463           | NP_001073932 | Q8NCM8      | DYHC2_HUMAN | rs.5 (By similarity).             | 0            | 3CTTTTATTCAC      | 0.358 |             |
| - | 13 | 1569        | rs.p.Q477fs TREH_u         | NM_007180              | NP_009111    | O43280      | TREA_HUMAN  |                                   | 1            | 3GACTTCTGCGA      | 0.607 |             |
| + | 6  | 1157        |                            | NM_032873              | NP_116262    | Q8TF42      | UBS3B_HUMAN | rs.SH3.                           | 1            | 3CTATACCCCA       | 0.552 | rs141920402 |
| - | 3  | 350         | rs.ARP11_uc001qmr          | NM_020367              | NP_065100    | Q9NR21      | PAR11_HUMAN | rs.WWE.                           | 2            | 3GGGCTCTTTT       | 0.343 |             |

|   |    |           |                    |              |              |        |             |                                |     |                  |       |
|---|----|-----------|--------------------|--------------|--------------|--------|-------------|--------------------------------|-----|------------------|-------|
| + | 11 | 1217      | 353fs DYRK4_uc     | NM_003845    | NP_003836    | Q9NR20 | DYRK4_HUMAN | rotein kinase.                 | 3   | AGGGGGAAAAAA     | 0.398 |
| + | 2  | 413_414   | C23_uc001qrq.2_F   | NM_001135217 | NP_001128689 | Q53EV4 | LRC23_HUMAN |                                | 1   | GATCTAGAAGAC     | 0.322 |
| + | 5  | 882       | /6_uc001raa.1_5'L  | NM_001987    | NP_001978    | P41212 | ETV6_HUMAN  |                                | 250 | CCGGTCCCCC       | 0.632 |
| + | 18 | 1962_1963 | BP1_uc001ria.2_F   | NM_003622    | NP_003613    | Q86W92 | LIPB1_HUMAN |                                | 5   | GGGGCTTTTTT      | 0.495 |
| - | 9  | 944       | p.E280fs SMARCB1   | NM_003075    | NP_003066    | Q8TAQ2 | SMRC2_HUMAN |                                | 6   | CACCTCATCTGT     | 0.433 |
| - | 2  | 164_166   | p.V29del STAT2_u   | NM_005419    | NP_005410    | P52630 | STAT2_HUMAN |                                | 3   | ATGTCCACAGG      | 0.542 |
| - | 1  | 323_325   |                    | NM_139283    | NP_644812    | Q8NI37 | PPTC7_HUMAN | Gly-rich.                      | 0   | CGTAGTcgccgccg   | 0.611 |
| - | 18 | 2045_2046 | 3_Shift_Del_p.H64  | NM_024953    | NP_079229    | Q14CX7 | NAA25_HUMAN |                                | 3   | TTTCTTATGTTT     | 0.356 |
| - | 3  | 558_559   | _Shift_Del_p.G99f  | NM_032314    | NP_115690    | Q5HYK3 | COQ5_HUMAN  |                                | 1   | GCTTTCCAACCT     | 0.46  |
| + | 4  | 502       | _uc001tzo.2_RNA    | NM_002562    | NP_002553    | Q99572 | P2RX7_HUMAN |                                | 5   | 3GTTGTAAAAAG     | 0.522 |
| - | 4  | 841       | 2AP1_uc001uep.2    | NM_004642    | NP_004633    | O14519 | CDKA1_HUMAN |                                | 0   | TTCTGCCAAGC      | 0.498 |
| + | 6  | 2495_2496 | p.T222fs ZNF664    | NM_152437    | NP_689650    | Q8N3J9 | ZN664_HUMAN |                                | 0   | CCACACAGGAG      | 0.515 |
| + | 2  | 812_813   | k CMTM5_uc010a     | NM_022789    | NP_073626    | Q9H293 | IL25_HUMAN  |                                | 1   | TAGCTTGTGTGT     | 0.604 |
| - | 1  | 173       | 1xki.1_Frame_Sh    | NM_004926    | NP_004917    | Q07352 | TISB_HUMAN  |                                | 1   | AACTTCGCTCA      | 0.532 |
| + | 21 | 3242      | 0tty.1_Frame_Shil  | NM_173462    | NP_775733    | O95428 | PPN_HUMAN   |                                | 3   | CTGCTGGGCC       | 0.667 |
| - | 8  | 1077_1078 | 9_uc001xrk.2_5'L   | NM_033116    | NP_149107    | Q8TD19 | NEK9_HUMAN  | rotein kinase.                 | 5   | TCCTGAGAAGA      | 0.396 |
| - | 2  | 865       | ic001ynj.1_Frame_  | NM_004873    | NP_004864    | Q9UL15 | BAG5_HUMAN  | BAG 3.                         | 2   | AGGTCTCATTGT     | 0.527 |
| + | 7  | 1741_1742 | p.S557fs C15orf5E  | NM_175741    | NP_786883    | Q86Y26 | NUT_HUMAN   |                                | 30  | TTCTTCAGGAAA     | 0.604 |
| - | 13 | 1716      | Jbfi.1_Frame_Shift | NM_182758    | NP_877435    | Q3MJ13 | WDR72_HUMAN | WD 8.                          | 2   | ACAGAAAAAG       | 0.463 |
| - | 2  | 158_159   | cyh.2_RNA NAGF     | NM_016256    | NP_057340    | Q9UK23 | NAGPA_HUMAN | renal (Potential).             | 0   | GGAGGCGCGC       | 0.767 |
| + | 12 | 1765_1766 | p.L545fs TMC7_uc   | NM_024847    | NP_079123    | Q7Z402 | TMC7_HUMAN  | cellular (Potential).          | 3   | GTCCTGGGGATA     | 0.49  |
| + | 24 | 4368      |                    | NM_015202    | NP_056017    | O60303 | K0556_HUMAN |                                | 8   | TCCTGGAGGG       | 0.627 |
| + | 1  | 694       | 2eca.3_Frame_Sh    | NM_001105247 | NP_001098717 | Q96C12 | ARMC5_HUMAN |                                | 1   | GCAGCGGGGGG      | 0.746 |
| - | 2  | 214_215   | .1_5'UTR SALL1_u   | NM_002968    | NP_002959    | Q9NSC2 | SALL1_HUMAN |                                | 8   | CTTCTGTGGAG      | 0.485 |
| + | 3  | 466_467   | 25_uc002fpc.2_5'l  | NM_014972    | NP_055787    | Q9BQ70 | TCF25_HUMAN |                                | 0   | AAGAAGAAAAA      | 0.406 |
| + | 15 | 1616      | p.F362fs PLD2_uc   | NM_002663    | NP_002654    | O14939 | PLD2_HUMAN  | Catalytic.                     | 5   | TTCTTCTGGCTC     | 0.617 |
| + | 6  | 794       | HBG_uc010cmw.2     | NM_001040    | NP_001031    | P04278 | SHBG_HUMAN  | minin G-like p.0?(1) p.?(1)    | 0   | TCTTTGGACCTC     | 0.567 |
| + | 54 | 8561_8562 |                    | NM_020877    | NP_065928    | Q9P225 | DYH2_HUMAN  | 4 (By similarity).             | 13  | CTGATGAATTT      | 0.51  |
| - | 27 | 3596_3597 | uc002gml.1_Intron  | NM_002472    | NP_002463    | P13535 | MYH8_HUMAN  | Potential.                     | 11  | CTTCTGTTCAA      | 0.589 |
| - | 23 | 2989_2990 | .3_Frame_Shift_D   | NM_001100112 | NP_001093582 | Q9UKX2 | MYH2_HUMAN  | Potential.                     | 14  | AGTTCTGAACAT     | 0.436 |
| - | 33 | 4838      |                    | NM_002470    | NP_002461    | P11055 | MYH3_HUMAN  | Potential.                     | 7   | CTCTTCAGCTG      | 0.502 |
| - | 8  | 974       | IGS_uc010wap.1_    | NM_005165    | NP_005156    | P09972 | ALDOC_HUMAN |                                | 1   | TTCTTCGCTCTC     | 0.572 |
| - | 4  | 1109_1110 | iEZ6_uc002hdq.1_   | NM_178860    | NP_849191    | Q53EL9 | SEZ6_HUMAN  | cellular (Potential).          | 2   | TCAGGCCCCCC      | 0.614 |
| - | 6  | 1221      |                    | NM_181534    | NP_853512    | Q7Z3Z0 | K1C25_HUMAN | Rod.1 Coil 2.                  | 2   | CTCCTATAAGGA     | 0.468 |
| + | 16 | 2610      | JAP1_uc010wgs.1    | NM_003632    | NP_003623    | P78357 | CNTP1_HUMAN | cellular (Potential).          | 8   | CGTTCCCCCC       | 0.567 |
| - | 5  | 632       | ARSD1_uc002icg     | NM_025267    | NP_079543    | Q9BTE6 | AASD1_HUMAN |                                | 0   | CACCTTGATATC     | 0.512 |
| + | 4  | 312       | rame_Shift_Del_p   | NM_144608    | NP_653209    | Q96MH2 | HEX12_HUMAN |                                | 0   | CCTCTGGTGCC      | 0.587 |
| + | 5  | 1488      | p.L249fs NFE2L1    | NM_003204    | NP_003195    | Q14494 | NF2L1_HUMAN | Glu-rich (acidic).             | 1   | AGCATAACAGAA     | 0.493 |
| - | 4  | 643_644   |                    | NM_005121    | NP_005112    | Q9UHV7 | MED13_HUMAN |                                | 2   | TCACTGAGAAG      | 0.361 |
| - | 10 | 1809_1811 | .N582del UBE2O_    | NM_022066    | NP_071349    | Q9C0C9 | UBE2O_HUMAN |                                | 5   | ACTCGTTGTTG      | 0.611 |
| - | 16 | 2567      | dw.1_Frame_Shif    | NM_004104    | NP_004095    | P49327 | FAS_HUMAN   | 1 transferases (By similarity) | 1   | CAGGTGGGAAC      | 0.657 |
| + | 13 | 2103      | _uc010xbp.1_Splic  | NM_001942    | NP_001933    | Q02413 | DSG1_HUMAN  |                                | 7   | TCAGGTAAGAA      | 0.284 |
| - | 1  | 976       | Del_p.G320fs ZBT   | NM_001039360 | NP_001034449 | A1YPR0 | ZBT7C_HUMAN | Pro-rich.                      | 1   | AGAGGCCCCCC      | 0.627 |
| + | 33 | 7140      | .P2352fs SPTBN4    | NM_020971    | NP_066022    | Q9H254 | SPTN4_HUMAN |                                | 5   | AGCTTCCCCCA      | 0.488 |
| + | 14 | 2665_2666 | NRNPUL1_uc002c     | NM_007040    | NP_008971    | Q9BUJ2 | HNRL1_HUMAN | ecessary for interaction with  | 2   | GGTTACACCCG      | 0.629 |
| + | 16 | 2323_2325 | 3_uc002qdk.1_J     | NM_014516    | NP_055331    | O75175 | CNOT3_HUMAN |                                | 3   | GACACTTCTTT      | 0.69  |
| + | 11 | 1757_1759 | me_Del_p.L480del   | NM_006669    | NP_006660    | Q8NHL6 | LIRB1_HUMAN | ical; (Potent p.L479del(1))    | 3   | ctctactgctctctcc | 0.458 |

rs113275715

|   |    |           |                    |              |              |        |             |                              |    |                 |       |             |
|---|----|-----------|--------------------|--------------|--------------|--------|-------------|------------------------------|----|-----------------|-------|-------------|
| - | 2  | 269_270   | 2qwk.2_RNA uc00    | NM_152834    | NP_690047    | Q96B42 | TMM18_HUMAN | ical; (Potential).           | 1  | 3ACCTAGACACA    | 0.48  |             |
| + | 3  | 545       |                    | NM_016441    | NP_057525    | Q9NZV1 | CRIM1_HUMAN |                              | 3  | CTTTTAGAAGAG    | 0.48  |             |
| - | 11 | 2105_2107 | 3A1L_uc002rwt.2_   | NM_000233    | NP_000224    | P22888 | LSHR_HUMAN  | lasmic (Potential).          | 8  | 3ACAAC TTCAAG   | 0.409 |             |
| + | 1  | 1649      | T10_uc002tex.2_5   | NM_023016    | NP_075392    | Q53LP3 | ANR57_HUMAN |                              | 0  | GGGCAGGGGGGG    | 0.517 |             |
| + | 12 | 2021      | nt.3_Frame_Shift_  | NM_005270    | NP_005261    | P10070 | GLI2_HUMAN  |                              | 13 | GTCCCTGCAGCA    | 0.662 |             |
| - | 9  | 1835_1836 | 2uiv.2_Frame_Shif  | NM_001033045 | NP_001028217 | Q7Z3F1 | GP155_HUMAN | ical; (Potential).           | 1  | TTATTCCAACAG    | 0.366 |             |
| - | 4  | 1604_1605 | _p.E71fs PDE11A    | NM_016953    | NP_058649    | Q9HCR9 | PDE11_HUMAN | GAF 2.                       | 4  | ATGTCCTCTAGG    | 0.347 |             |
| + | 48 | 3839      |                    | NM_000090    | NP_000081    | P02461 | CO3A1_HUMAN | lar collagen NC1.            | 13 | GTCTGTTAATGC    | 0.423 |             |
| + | 10 | 1952      | uxm.1_Frame_Shi    | NM_032974    | NP_116756    | Q92851 | CASPA_HUMAN |                              | 6  | CTCGACCCCCC     | 0.572 |             |
| + | 46 | 7217      | AL1_uc002uzs.3_    | NM_001114132 | NP_001107604 | Q6ZS30 | NBEL1_HUMAN |                              | 2  | GCCCAACCAAAA    | 0.333 |             |
| - | 4  | 763_764   | _p.E166fs FN1_uc   | NM_212482    | NP_997647    | P02751 | FINC_HUMAN  | -binding 1. Fibronectin type | 13 | ACACACTCTAAC    | 0.49  |             |
| + | 1  | 602_603   |                    | NM_001927    | NP_001918    | P17661 | DESM_HUMAN  | Rod. Coil 1B.                | 2  | ACCAGCGCGCG     | 0.693 | rs60538473  |
| - | 2  | 256       | 119_uc002wvs.2_    | NM_153289    | NP_695021    | Q8N690 | DB119_HUMAN |                              | 0  | GAGGTAGGGCT     | 0.443 |             |
| - | 13 | 1134      |                    | NM_080675    | NP_542406    | Q8TC36 | SUN5_HUMAN  | SUN.                         | 1  | GGGTTCCCCCA     | 0.587 |             |
| - | 3  | 2376_2377 | 3_Shift_Ins_p.K66  | NM_015035    | NP_055850    | Q9H4I2 | ZHX3_HUMAN  | homeobox 3.                  | 3  | ATTCACTTTTTT    | 0.5   |             |
| + | 5  | 759       | _p.T88fs DBNDD     | NM_001048225 | NP_001041690 |        |             |                              | 0  | ACCAACCCCCC     | 0.562 |             |
| + | 4  | 1167      | J02xpx.2_Frame_    | NM_033421    | NP_219489    | Q969T3 | SNX21_HUMAN |                              | 2  | CACCACCCCCC     | 0.617 |             |
| + | 14 | 1882_1883 |                    | NM_005049    | NP_005040    | Q15269 | PWP2_HUMAN  |                              | 1  | AGATTACAGCCA    | 0.594 |             |
| - | 21 | 3374_3376 | agl.1_In_Frame_    | NM_015241    | NP_056056    | Q7RTP6 | MICA3_HUMAN | Glu-rich.                    | 0  | cgctatagctctct  | 0.33  |             |
| - | 8  | 995       | _Shift_Del_p.E241  | NM_022719    | NP_073210    | Q96DF8 | DGC14_HUMAN |                              | 1  | AACCTCCCCC      | 0.597 |             |
| + | 7  | 872       | ua.1_Frame_Shift   | NM_014291    | NP_055106    | O75600 | KBL_HUMAN   |                              | 0  | TCCCTGCTGCG     | 0.657 |             |
| - | 3  | 292_294   | M40_uc003bxi.1_    | NM_018306    | NP_060776    | Q8WWA1 | TMM40_HUMAN | Ser-rich.                    | 0  | jaggaagaggaggag | 0.256 |             |
| - | 23 | 2605      | .1_Frame_Shift_D   | NM_015199    | NP_056014    | O15084 | ANR28_HUMAN |                              | 1  | CTTTTGAATCTC    | 0.259 |             |
| + | 1  | 158       | uc010hhd.2_5'UTR   | NM_005107    | NP_005098    | Q9Y2C4 | EXOG_HUMAN  |                              | 0  | CTTCGTGGCTG     | 0.657 |             |
| - | 3  | 337_338   |                    | NM_000094    | NP_000085    | Q02388 | CO7A1_HUMAN | region (NC1). VWFA 1.        | 11 | CCCCTTG TAGCT   | 0.614 |             |
| + | 49 | 5198_5199 |                    | NM_004947    | NP_004938    | Q8IZD9 | DOCK3_HUMAN |                              | 0  | CAAGGCTCAGTC    | 0.55  | rs114813991 |
| - | 5  | 1184_1185 |                    | NM_000097    | NP_000088    | P36551 | HEM6_HUMAN  |                              | 0  | ATGTAAGAAGG     | 0.51  |             |
| - | 41 | 5882      |                    | NM_014981    | NP_055796    | Q9Y2K3 | MYH15_HUMAN | Potential.                   | 7  | CATACCTTTTCC    | 0.368 |             |
| + | 4  | 1562      |                    | NM_139209    | NP_631948    | Q8WTQ7 | GRK7_HUMAN  | kinase C-terminal.           | 5  | GGTTCGGGGGG     | 0.463 |             |
| - | 2  | 826       | .1_Intron MED12L   | NM_176894    | NP_795713    | Q9BPV8 | P2Y13_HUMAN | Name=6; (Potential).         | 4  | TGGAGCAAAAC     | 0.353 |             |
| + | 12 | 1339_1340 | 2_Frame_Shift_De   | NM_004068    | NP_004059    | Q96CW1 | AP2M1_HUMAN | MHD.                         | 0  | CCATTCGCGCCC    | 0.559 |             |
| + | 14 | 2416      | .711fs FAM193A_u   | NM_003704    | NP_003695    | P78312 | F193A_HUMAN |                              | 3  | CACCTGCCTCC     | 0.627 |             |
| + | 10 | 1533_1534 | Shift_Ins_p.P205f  | NM_001113361 | NP_001106832 | Q9P2M4 | TBC14_HUMAN | ab-GAP TBC.                  | 2  | TGGTCCATATCA    | 0.416 |             |
| - | 1  | 457       | uc003hei.1_Intron  | NM_001073    | NP_001064    | O75310 | UDB11_HUMAN |                              | 3  | TATCTGCAAAAA    | 0.383 |             |
| - | 1  | 122_124   | 20del NAAA_uc00    | NM_014435    | NP_055250    | Q02083 | NAAA_HUMAN  |                              | 1  | CGGCCAGCAGC     | 0.764 |             |
| - | 3  | 2689_2691 | ML3_uc011chd.1_    | NM_018717    | NP_061187    | Q96JK9 | MAML3_HUMAN | Gln-rich.                    | 1  | GTGGCGgctgctg   | 0.419 |             |
| - | 2  | 565       | ae.3_5'Flank MTRF  | NM_024091    | NP_076996    | Q14CZ7 | FAKD3_HUMAN |                              | 4  | CCATCCTTTTTT    | 0.418 |             |
| + | 1  | 402       |                    | NM_031916    | NP_114122    | Q96C74 | ROP1L_HUMAN |                              | 1  | CGGGGTAAGCG     | 0.683 |             |
| - | 6  | 1423      | l3jie.2_Frame_Shif | NM_016180    | NP_057264    | Q9UMX9 | S45A2_HUMAN | lame=10; (Potential).        | 3  | TGAGGTAAAGC     | 0.527 |             |
| + | 11 | 1863      | _p.E534fs BDP1_uc  | NM_018429    | NP_060899    | A6H8Y1 | BDP1_HUMAN  |                              | 2  | GCCACTGAAAAA    | 0.313 |             |
| - | 3  | 913       | ame_Shift_Del_p.f  | NM_014790    | NP_055605    | Q96AA8 | JKIP2_HUMAN | Potential.                   | 2  | GATTTTATCTGCT   | 0.517 |             |
| - | 13 | 1336      | _p.E355fs DCTN4_   | NM_016221    | NP_057305    | Q9UJW0 | DCTN4_HUMAN |                              | 1  | ACCCTCCTCAC     | 0.428 | rs139876545 |
| + | 11 | 2401      | _p.G581fs LARP1_   | NM_033551    | NP_291029    | Q6PKG0 | LARP1_HUMAN |                              | 4  | ACCCAGGGGGGG    | 0.547 |             |
| + | 19 | 2885      | _p.S931fs WWC1_    | NM_015238    | NP_056053    | Q8IX03 | KIBRA_HUMAN | ion with histone H3.         | 5  | CTTCTCCCAGC     | 0.582 |             |
| - | 16 | 2462_2464 | L795del FLT4_uc    | NM_002020    | NP_002011    | P35916 | VGFR3_HUMAN | ical; (Potential).           | 15 | AGATGAGGAGG     | 0.581 |             |
| + | 1  | 669_670   |                    | NM_138574    | NP_612641    | Q5TGJ6 | HDGL1_HUMAN | rich. Glu-rich.              | 0  | jcgagagggcgcg   | 0.51  |             |
| + | 51 | 7150_7151 | ey.2_Frame_Shift   | NM_002224    | NP_002215    | Q14573 | ITPR3_HUMAN | ellular (Potential).         | 19 | GGGGCTATAAGC    | 0.559 |             |

|   |    |           |                    |              |              |        |             |                                |      |                  |       |             |
|---|----|-----------|--------------------|--------------|--------------|--------|-------------|--------------------------------|------|------------------|-------|-------------|
| + | 4  | 612       | ljwu.2_Frame_Shif  | NM_015050    | NP_055865    | Q8N1G2 | MTR1_HUMAN  | G-patch.                       | 5    | (GGCTTCCAGTC,    | 0.527 |             |
| - | 6  | 706       | ie_Shift_Del_p.L2C | NM_145027    | NP_659464    | Q6ZMV9 | KIF6_HUMAN  | kinesin-motor.                 | 3    | TCTCCTAAAAAA     | 0.398 |             |
| + | 46 | 5073      | UBR2_uc011dut.1    | NM_015255    | NP_056070    | Q8IWW8 | UBR2_HUMAN  |                                | 4    | AGGCTGTTTTTA     | 0.458 |             |
| + | 6  | 1837      | vf.1_Frame_Shift_  | NM_003131    | NP_003122    | P11831 | SRF_HUMAN   |                                | 3    | GGCGTCCCCCA      | 0.502 |             |
| - | 2  | 110_111   | TA3_uc010jzq.2_In  | NM_000847    | NP_000838    | Q16772 | GSTA3_HUMAN | ST N-terminal.                 | 0    | :GTCCATTGAAGT    | 0.406 |             |
| - | 2  | 4936_4937 | o.K458fs CNR1_uc   | NM_001160260 | NP_001153732 | P21554 | CNR1_HUMAN  | lasmic (Potential).            | 2    | :GTTACCTTGGCA    | 0.515 |             |
| - | 2  | 1027      | T5_uc003pwh.3_F    | NM_153612    | NP_705840    | Q8IZT8 | HS3S5_HUMAN | enal (Potential).              | 2    | TTTTGATTAATAA    | 0.423 |             |
| - | 8  | 1254_1267 | _p.K73fs HBS1L_u   | NM_006620    | NP_006611    | Q9Y450 | HBS1L_HUMAN |                                | 2    | FGGAATGAAGTC     | 0.364 | rs113799065 |
| - | 4  | 366       | _p.P87fs PRKAR1    | NM_002735    | NP_002726    | P31321 | KAP1_HUMAN  | n and phosphorylation.         | 0    | GGTTCCGGGGGG     | 0.617 |             |
| - | 2  | 967_968   | \11_uc003syy.2_R   | NM_005523    | NP_005514    | P31270 | HXA11_HUMAN | Homeobox.                      | 2    | :TGTTAATTTTTT    | 0.446 |             |
| + | 13 | 1877      | 1_Splice_Site_p.G  | NM_005228    | NP_005219    | P00533 | EGFR_HUMAN  |                                | 9571 | :AGGGGTAGGAG     | 0.517 |             |
| - | 2  | 106_107   |                    | NR_003949    |              |        |             |                                | 0    | ACCTTCATCCAT     | 0.505 |             |
| - | 5  | 5233      | hv.2_Frame_Shift_  | NM_033026    | NP_149015    | Q9Y6V0 | PCLO_HUMAN  |                                | 7    | ACTTTTAGTTTCT    | 0.398 |             |
| + | 5  | 890_892   | _p.L86del CLDN12   | NM_012129    | NP_036261    | P56749 | CLD12_HUMAN | ellular (Potential).           | 0    | :CGTGTCTCCA      | 0.576 |             |
| - | 2  | 390_392   | lkiw.1_In_Frame_I  | NM_015545    | NP_056360    | O75127 | PTCD1_HUMAN |                                | 1    | \AACTCTCCTCC     | 0.606 |             |
| + | 10 | 1125_1126 | 3A43_uc003usa.1    | NM_057095    | NP_476436    | Q9HB55 | CP343_HUMAN |                                | 2    | \ACCAATAAGGT     | 0.495 |             |
| - | 16 | 1707      | PW1_uc003uus.2     | NM_017984    | NP_060454    | Q9H0M4 | ZCPW1_HUMAN |                                | 0    | :CTTGGTTTTTTC    | 0.478 |             |
| - | 15 | 1785      | _p.*336fs PSMC2_L  | NM_206884    | NP_996767    | P58743 | S26A5_HUMAN | lasmic (Potential).            | 1    | lccccACGGTCTC    | 0.065 |             |
| + | 11 | 2589      | MET_uc011kni.1_f   | NM_000245    | NP_000236    | P08581 | MET_HUMAN   | ir (Potential), IPT/TIG 3.     | 159  | :CTGTTGTACCAC    | 0.408 |             |
| + | 1  | 3         |                    | NM_001004488 | NP_001004488 | A4D2G3 | O2A25_HUMAN | ellular (Potential).           | 0    | :GAAATGGGGGG     | 0.443 |             |
| - | 9  | 1803      |                    | NM_004911    | NP_004902    | P13667 | PDIA4_HUMAN | hioiredoxin 3.                 | 6    | CTCACCTTTTTT     | 0.612 |             |
| + | 1  | 793_795   |                    | NM_138400    | NP_612409    | Q5C9Z4 | NOM1_HUMAN  | ization and for targeting PF   | 0    | gaaagtgaggaggag  | 0.236 |             |
| - | 1  | 1080_1081 |                    | NM_000025    | NP_000016    | P13945 | ADRB3_HUMAN | ame=6; (By similarity).        | 2    | FGAGACCCAAGC     | 0.589 |             |
| + | 8  | 1064      | yhu.1_Frame_Shif   | NM_014754    | NP_055569    | P48651 | PTSS1_HUMAN | ical; (Potential).             | 1    | FAAGTTGGGGTA     | 0.408 |             |
| + | 2  | 176       | \1_uc010mec.2_Fi   | NM_003882    | NP_003873    | O95388 | WISP1_HUMAN |                                | 2    | \TGGACTTTACCC    | 0.672 |             |
| - | 3  | 413       | 1kh.1_Frame_Shif   | NM_145201    | NP_660202    | Q6XQN6 | PNCB_HUMAN  |                                | 1    | CACCACCAGGA      | 0.741 |             |
| + | 11 | 2242_2243 | :D7_uc010msp.1_!   | NM_014290    | NP_055105    | Q8NHU6 | TDRD7_HUMAN |                                | 3    | TGCCTTGTAAGC     | 0.426 |             |
| - | 3  | 1008_1009 | iaxz.2_Frame_Shif  | NM_197978    | NP_932095    | Q9BXL5 | HEMGN_HUMAN |                                | 1    | :TTGATTTTAGG     | 0.366 |             |
| + | 1  | 9         |                    | NM_001004457 | NP_001004457 | Q8NGR9 | OR1N2_HUMAN | ellular (Potential).           | 4    | :GAAGGTTTTTAT    | 0.274 |             |
| - | 1  | 681       | 2_uc004btl.2_Intro | NM_025072    | NP_079348    | Q9H7Z7 | PGES2_HUMAN | ical; (Potential).             | 0    | GGGCTCCCCCC      | 0.677 |             |
| - | 8  | 993_994   | RAPGEF1_uc010r     | NM_005312    | NP_005303    | Q13905 | RPGF1_HUMAN | SH3-binding.                   | 7    | TTCTTGGGTGGC     | 0.574 |             |
| - | 15 | 3936_3938 | :C2_uc004dsc.2_3   | NM_001111125 | NP_001104595 | Q5JU85 | IQEC2_HUMAN | o-rich. His-rich.              | 3    | GCCAtgatggtggtg  | 0.586 |             |
| + | 10 | 1256_1257 | i PIAS3_uc001eod   | NM_006099    | NP_006090    | Q9Y6X2 | PIAS3_HUMAN |                                | 1    | \TTCTTAGTTCCCT   | 0.465 |             |
| - | 1  | 299       | h2BE_uc001etc.2_   | NM_175065    | NP_778235    | Q8IUE6 | H2A2B_HUMAN |                                | 2    | :TGACACCCCCG     | 0.557 | rs149336231 |
| + | 2  | 672       |                    | NM_001025231 | NP_001020402 | Q5T749 | KPRP_HUMAN  | Gln-rich.                      | 5    | \CTACACCCCC      | 0.572 |             |
| - | 11 | 2245_2247 | H700del PBXIP1_!   | NM_020524    | NP_065385    | Q96AQ6 | PBIP1_HUMAN | His-rich.                      | 1    | CCCCGGTGGTG      | 0.64  | rs143592003 |
| + | 7  | 817       | 2_Frame_Shift_De   | NM_001005388 | NP_001005388 | O94856 | NFASC_HUMAN | otential), Ilg-like C2-type 2. | 6    | :TGCAACCCCC      | 0.562 |             |
| - | 2  | 1141_1142 |                    | NM_004778    | NP_004769    | Q9Y5Y4 | GPR44_HUMAN | lasmic (Potential).            | 1    | :GAGGTGCGGCC     | 0.748 | rs55642873  |
| - | 2  | 598_600   | 1orf95_uc001nxs.:  | NM_001144936 | NP_001138408 | C9JLR9 | CK095_HUMAN | Glu-rich.                      | 0    | tctcttctctctctct | 0.532 |             |
| - | 1  | 372_374   | _p.L35del LTBP3_!  | NM_001130144 | NP_001123616 | Q9NS15 | LTBP3_HUMAN | Gly-rich.                      | 3    | caggcccagcagcag  | 0.325 |             |
| + | 3  | 321_323   | me_Del_p.E98del    | NM_033388    | NP_203746    | Q8NAA4 | A16L2_HUMAN |                                | 0    | TGGCAGGAGGA      | 0.591 |             |
| + | 8  | 1729      | p.H104fs USPL1_!   | NM_005800    | NP_005791    | Q5W0Q7 | USPL1_HUMAN |                                | 3    | TTGCAGCACTAT     | 0.348 |             |
| + | 6  | 2499      | 10ujg.1_Frame_St   | NM_004727    | NP_004718    | O60721 | NCKX1_HUMAN | lasmic (Potential).            | 0    | :ATCAGAAGGAG     | 0.522 |             |
| + | 2  | 249       | ewp.1_5'Flank CIF  | NM_032830    | NP_116219    | Q969X6 | CIR1A_HUMAN | WD 1.                          | 0    | :TTTCAGGAGAA     | 0.368 |             |
| + | 15 | 2559      | h18_uc010chw.2     | NM_144604    | NP_653205    | Q86VM9 | ZCH18_HUMAN |                                | 1    | CAGCAGGGGGG      | 0.547 | rs139579046 |
| - | 32 | 5122      |                    | NM_006445    | NP_006436    | Q6P2Q9 | PRP8_HUMAN  | on with pre-mRNA 5' splice     | 6    | :ATAGTCCCCCC     | 0.532 |             |
| - | 21 | 2677_2678 |                    | NM_002208    | NP_002199    | P38570 | ITAE_HUMAN  | ellular (Potential).           | 4    | CGGAGTTAGTTA     | 0.465 |             |



|   |    |           |                    |              |              |        |             |                              |              |                   |       |             |
|---|----|-----------|--------------------|--------------|--------------|--------|-------------|------------------------------|--------------|-------------------|-------|-------------|
| + | 2  | 303_304   | _p.A12fs EIF5A_u   | NM_001970    | NP_001961    | P63241 | IF5A1_HUMAN | OHH-binding.                 | 0            | CAGTGCTCAGC/      | 0.525 |             |
| + | 4  | 522       | 72fs ENGASE_uc     | NM_001042573 | NP_001036038 | Q8NFI3 | ENASE_HUMAN | p.P172L(1)                   | 1            | CCATTCCCCCA/      | 0.587 |             |
| + | 2  | 125       | 1_5'Flank HAUS1_   | NM_138443    | NP_612452    | Q96CS2 | HAUS1_HUMAN |                              | 1            | GTGGTTAAAAAA      | 0.393 |             |
| - | 9  | 864       | _p.R276fs SEMA6f   | NM_032108    | NP_115484    | Q9H3T3 | SEM6B_HUMAN | ilar (Potential). Sema.      | 1            | CACGCGGGGGGG      | 0.647 |             |
| + | 14 | 2665_2666 | NRNPUL1_uc002c     | NM_007040    | NP_008971    | Q9BUJ2 | HNRL1_HUMAN | cessary for interaction with | 2            | GGTTACAACCCC      | 0.629 |             |
| - | 2  | 459       | _Shift_Del_p.Q11   | NM_002781    | NP_002772    | Q15238 | PSG5_HUMAN  | g-like V-type.               | 3            | ATTCTGGATCAC      | 0.418 |             |
| + | 2  | 480       | _Shift_Del_p.A14fs | NM_003089    | NP_003080    | P08621 | RU17_HUMAN  |                              | 0            | CTTTGCCCCCC/      | 0.542 |             |
| - | 1  | 1911_1913 |                    | NM_002152    | NP_002143    | P23327 | SRCH_HUMAN  |                              | 1            | tcagccctctctct/   | 0.409 |             |
| + | 11 | 1757_1759 | me_Del_p.L480del   | NM_006669    | NP_006660    | Q8NHL6 | LIRB1_HUMAN | ical; (Potent p.L479del(1)   | 3            | ctactgctctctctcc  | 0.458 |             |
| - | 3  | 316       | _p.P92fs HS1BP3    | NM_022460    | NP_071905    | Q53T59 | H1BP3_HUMAN | PX.                          | 1            | GTAGTGGGGGGG      | 0.537 | rs77941615  |
| - | 29 | 5686_5687 | fnl.1_Frame_Shift  | NM_018557    | NP_061027    | Q9NZR2 | LRP1B_HUMAN | ellular (Potential).         | 50           | TTTTTCATTCTTA/    | 0.302 | rs142525375 |
| + | 48 | 3839      |                    | NM_000090    | NP_000081    | P02461 | CO3A1_HUMAN | lar collagen NC1.            | 13           | AGTCTGTTAATGC     | 0.423 |             |
| - | 18 | 3175      | 108_uc002vjm.3_!   | NM_194302    | NP_919278    | Q6ZU64 | CC108_HUMAN |                              | 4            | CTGCTCCAGGT/      | 0.612 |             |
| + | 15 | 3131      | tm.2_Frame_Shift   | NM_181659    | NP_858045    | Q9Y6Q9 | NCOA3_HUMAN | Poly-Gln.                    | 5            | TATTGCAACAGC/     | 0.428 |             |
| - | 1  | 3347_3348 |                    | NM_014246    | NP_055061    | Q9NYQ6 | CELR1_HUMAN | r (Potential). Cadherin 9.   | 11           | CTGTTGGACTTC      | 0.599 |             |
| - | 7  | 2103      | 3cbe.2_Frame_Shi   | NM_014744    | NP_055559    | Q92609 | TBCD5_HUMAN | ab-GAP TBC.                  | 1            | ACCCCTTCATCC      | 0.378 |             |
| + | 1  | 158       | uc010hhd.2_5'UTR   | NM_005107    | NP_005098    | Q9Y2C4 | EXOG_HUMAN  |                              | 0            | CTTCGTGGCTG/      | 0.657 |             |
| + | 1  | 3375_3376 |                    | NM_175918    | NP_787114    | Q8N1N5 | CRPAK_HUMAN | 3                            | CTGCTCACACGT | 0.708             |       |             |
| + | 10 | 1533_1534 | Shift_Ins_p.P205f  | NM_001113361 | NP_001106832 | Q9P2M4 | TBC14_HUMAN | ab-GAP TBC.                  | 2            | TGGTCCATATCA      | 0.416 |             |
| - | 9  | 1111      | _p.T322fs RASGE    | NM_152545    | NP_689758    | Q0VAM2 | RGF1B_HUMAN | Ras-GEF.                     | 0            | CCCAGTTTTTTT      | 0.383 |             |
| - | 27 | 13517     | _p.P90fs FAT1_uc   | NM_005245    | NP_005236    | Q14517 | FAT1_HUMAN  | lasmic (Potential).          | 12           | GCTGCGGGGAA       | 0.542 |             |
| - | 2  | 624_625   | _Shift_Del_p.S47f  | NM_006451    | NP_006442    | Q9H074 | PAIP1_HUMAN | eracting motif-2 (PAM2).     | 1            | AGCTTAGACATT      | 0.46  |             |
| + | 26 | 5893      | vc.3_Frame_Shift_  | NM_080686    | NP_542417    | P48634 | PRC2A_HUMAN |                              | 0            | ACCTACCCCCCC      | 0.522 |             |
| + | 3  | 761       |                    | NM_003221    | NP_003212    | Q92481 | AP2B_HUMAN  |                              | 0            | GTCATTAATAAAC     | 0.343 |             |
| + | 2  | 172_174   | X6AS_uc003uol.2_   | NM_005222    | NP_005213    | P56179 | DLX6_HUMAN  |                              | 2            | GGCTCGcaccacc     | 0.571 |             |
| + | 1  | 138       | _uc003utj.2_5'Fla  | NM_152755    | NP_689968    | Q8N129 | CNPY4_HUMAN |                              | 0            | TTTTCTTTTTTT      | 0.527 |             |
| + | 4  | 451       | _p.R104fs TMEM     | NM_153345    | NP_699176    | Q8IV31 | TM139_HUMAN | lasmic (Potential).          | 0            | TGCCGCCCCCA       | 0.567 |             |
| - | 7  | 1685_1687 | 1kvs.1_In_Frame_   | NM_007349    | NP_031375    | Q6ZW49 | PAX11_HUMAN | Gln-rich.                    | 5            | TTTGCATctgctgct   | 0.227 |             |
| - | 6  | 1034      | l1lir.1_Frame_Shi  | NM_014846    | NP_055661    | Q12768 | STRUM_HUMAN |                              | 2            | CTGTTGTAAAT/      | 0.388 |             |
| + | 3  | 244       |                    | NM_183241    | NP_899064    | Q9BUH6 | CI142_HUMAN |                              | 0            | ATCACCCCCCC       | 0.657 |             |
| - | 9  | 1541_1542 | ank ENTPD2_uc0C    | NM_203468    | NP_982293    | Q9Y5L3 | ENTP2_HUMAN |                              | 0            | CCCCTAAATGGT      | 0.416 | rs17853460  |
| - | 2  | 1659_1661 | .2_In_Frame_Del_   | NM_173691    | NP_775962    | Q4KMQ1 | TPRN_HUMAN  | Glu-rich.                    | 0            | ctctctctctctctct/ | 0.374 |             |
| - | 5  | 1775_1776 | Ondi.2_Frame_Shi   | NM_181332    | NP_851849    | Q8N0W4 | NLGNX_HUMAN | ellular (Potential).         | 4            | CAGTCTGTGTAC      | 0.579 |             |
| - | 11 | 1496      | lid.2_Frame_Shift_ | NM_006950    | NP_008881    | P17600 | SYN1_HUMAN  | Pro-rich linker.             | 1            | GAGCCGGGGGC       | 0.672 |             |
| + | 4  | 763       | l TSPY4_uc004frq   | NM_001077697 | NP_001071165 | P0CW01 | TSPYA_HUMAN |                              | 0            | GTATCTGGATTAT     | 0.493 |             |
| - | 13 | 2591      | ie_Shift_Del_p.Q5  | NM_003819    | NP_003810    | Q13310 | PABP4_HUMAN | PABC. NA                     | 0            | TTCCTGGGGGG/      | 0.602 |             |
| - | 2  | 393_395   | P2_uc001dmy.1_F    | NM_004120    | NP_004111    | P32456 | GBP2_HUMAN  | NA                           | 1            | ATCGCCACCAC/      | 0.527 |             |
| - | 2  | 2734_2736 | wne.1_In_Frame_I   | NM_007113    | NP_009044    | Q07283 | TRHY_HUMAN  | 30 AA tandem NA              | 5            | TAGTCTCCTCTC      | 0.586 | rs143222885 |
| + | 2  | 1416      | _Shift_Del_p.V84f  | NM_020318    | NP_064714    | Q9BXP8 | PAPP2_HUMAN | NA                           | 16           | CCCGTGGGGGA       | 0.567 |             |
| - | 14 | 2554      | l29A_uc001grb.1_   | NM_052966    | NP_443198    | Q9BZQ8 | NIBAN_HUMAN | Glu-rich. NA                 | 4            | GAAATCCCCCC       | 0.672 |             |
| - | 5  | 1798      | AGT_uc009xff.2_F   | NM_000029    | NP_000020    | P01019 | ANGT_HUMAN  | NA                           | 0            | AGCTCAAAAAA/      | 0.562 |             |
| + | 30 | 4013_4015 | f.2_Intron CEP164  | NM_014956    | NP_055771    | Q9UPV0 | CE164_HUMAN | NA                           | 2            | CAGTCGCCGCC/      | 0.67  |             |
| - | 2  | 1302      | raq.2_Frame_Shift  | NM_006143    | NP_006134    | Q15760 | GPR19_HUMAN | lasmic (Pote NA              | 1            | ACGTAGTTTTTTI     | 0.398 |             |
| + | 18 | 1613      | fs TENC1_uc001sl   | NM_170754    | NP_736610    | Q63HR2 | TENC1_HUMAN | Pro-rich. NA                 | 2            | GAGACCCCCCC       | 0.677 | rs142183380 |
| - | 6  | 959       | p.K272fs RBM19_    | NM_001146699 | NP_001140171 | Q9Y4C8 | RBM19_HUMAN | NA                           | 6            | GTCTCTTTTTTCC     | 0.637 |             |
| - | 15 | 2654      | vfj.2_Frame_Shift_ | NM_012141    | NP_036273    | Q9UL03 | INT6_HUMAN  | NA                           | 2            | FGGTCTTTTTCC/     | 0.398 |             |
| + | 3  | 481_483   | p.E95del APBA2_    | NM_005503    | NP_005494    | Q99767 | APBA2_HUMAN | Poly-Glu. NA                 | 0            | CCCTGAGGAGG       | 0.601 |             |

|   |    |           |                                                  |              |              |        |              |                           |      |              |                 |       |             |
|---|----|-----------|--------------------------------------------------|--------------|--------------|--------|--------------|---------------------------|------|--------------|-----------------|-------|-------------|
| + | 11 | 1617_1622 | ve.2_In_Frame_C                                  | NM_005587    | NP_005578    | Q02078 | MEF2A_HUMAN  | Gln/Pro-rich              | NA   | 1            | GCTTCcagcagcag  | 0.495 |             |
| + | 12 | 3846_3848 | ie_Del_p.Q812del                                 | NM_006599    | NP_006590    | O94916 | NFAT5_HUMAN  | Poly-Gln.                 | NA   | 0            | AATcaacagcagcaç | 0.389 |             |
| + | 8  | 912_914   | i.L222del CHRN1                                  | NM_000747    | NP_000738    | P11230 | ACHB_HUMAN   | ical; (Potent             | NA   | 2            | GTTCTGCTGCT     | 0.498 |             |
| - | 5  | 1364      | C16A6_uc002jha.                                  | NM_004694    | NP_004685    | O15403 | MOT7_HUMAN   | ical; (Potent             | NA   | 0            | AACCCCAAAAAA    | 0.438 |             |
| + | 20 | 2951      | 1195_uc010wsb.1_                                 | NM_014738    | NP_055553    | Q12767 | K0195_HUMAN  |                           | NA   | 1            | GAGATCCCCCC     | 0.612 |             |
| + | 4  | 988       | 5'Flank ICAM4_uc                                 | NM_000201    | NP_000192    | P05362 | ICAM1_HUMAN  | ellular (Pote             | NA   | 1            | GTCAGCCCCCG     | 0.637 |             |
| + | 20 | 1991_1993 | p.F341del SLC44                                  | NM_020428    | NP_065161    | Q81WA5 | CTL2_HUMAN   | ellular (Pote             | NA   | 1            | TGGCTTTCTCT     | 0.493 |             |
| + | 6  | 841       | 2_Frame_Shift_De                                 | NM_002255    | NP_002246    | Q99706 | KI2L4_HUMAN  |                           | NA   | 1            | FGTCCAAAAAA     | 0.532 | rs66505238  |
| - | 4  | 557       | 0yoq.1_Splice_Sit                                | NM_014614    | NP_055429    | Q14997 | PSME4_HUMAN  |                           | NA   | 5            | GAACTGGGGGG     | 0.347 |             |
| + | 5  | 1137_1139 | ypt.1_In_Frame_D                                 | NM_014562    | NP_055377    | P32242 | OTX1_HUMAN   | His-rich.                 | NA   | 2            | caccatcaccaccac | 0.542 |             |
| + | 3  | 782_783   | Intron TEKT4_uc0                                 | NM_144705    | NP_653306    | Q8WW24 | TEKT4_HUMAN  |                           | NA   | 3            | TCATCCGTACTC    | 0.663 | rs35031477  |
| - | 28 | 4326      | zcp.1_Frame_Shift                                | NM_007366    | NP_031392    | Q13018 | PLA2R_HUMAN  | Potential). C             | NA   | 3            | AAGCCTTTTTTT    | 0.403 |             |
| - | 13 | 1637_1639 | ame_Del_p.E417c                                  | NM_001030311 | NP_001025482 | Q49MI3 | CERKL_HUMAN  |                           | NA   | 4            | TTTCATCCTCCT    | 0.369 |             |
| - | 9  | 1595      | p.K507fs CLTCL1_                                 | NM_007098    | NP_009029    | P53675 | CLH2_HUMAN   | lexible linke             | NA   | 5            | GTTACCTTTTTG    | 0.428 |             |
| + | 5  | 1304_1306 |                                                  | NM_152612    | NP_689825    | Q8IYX3 | CC116_HUMAN  |                           | NA   | 2            | CCCTGCAGCAG     | 0.606 |             |
| + | 11 | 1513      | o.K344fs CNTN6_u                                 | NM_014461    | NP_055276    | Q9UQ52 | CNTN6_HUMAN  | like C2-type              | NA   | 8            | CAGTTAAAAAA     | 0.393 |             |
| - | 6  | 1160      | GOL1_uc003cbx.2                                  | NM_001012410 | NP_001012410 | Q5FBB7 | SGOL1_HUMAN  |                           | NA   | 0            | FGTGCATTTTTT    | 0.214 |             |
| - | 2  | 2200_2203 | Shift_Del_p.R660l                                | NM_194293    | NP_919269    | Q702N8 | XIRP1_HUMAN  | Xin 15.                   | NA   | 8            | GACGTGTCTGTC    | 0.618 |             |
| - | 7  | 802_804   | 3cx.2_In_Frame_I                                 | NM_020707    | NP_065758    | Q9HCP6 | HHATL_HUMAN  |                           | NA   | 3            | GCCCCAAGAAG     | 0.552 |             |
| - | 20 | 7299      | o.A2410fs CELSR3                                 | NM_001407    | NP_001398    | Q9NYQ7 | CELR3_HUMAN  | ellular (Pote             | NA   | 11           | ACGGGCCCCCC     | 0.632 |             |
| - | 2  | 758       |                                                  | NM_016206    | NP_057290    | A8MV65 | VGLL3_HUMAN  |                           | NA   | 0            | CCATAGGGGGG     | 0.512 |             |
| - | 5  | 1637      | o FILIP1L_uc010hf                                | NM_182909    | NP_878913    | Q4L180 | FIL1L_HUMAN  | Potential.                | NA   | 1            | CCTCCATTTTTAT   | 0.408 |             |
| + | 2  | 398       | _p.K62fs TMMEM22                                 | NM_001097600 | NP_001091069 | Q8TBE7 | TMM22_HUMAN  |                           | NA   | 1            | AAATGAAAAAA     | 0.413 |             |
| - | 6  | 873       |                                                  | NM_014465    | NP_055280    | O43704 | ST1B1_HUMAN  |                           | NA   | 0            | TAGTACAAAAAA    | 0.348 |             |
| + | 1  | 251_253   | hme.2_In_Frame_                                  | NM_004464    | NP_004455    | P12034 | FGF5_HUMAN   |                           | NA   | 2            | TCCTTCTCTCT     | 0.631 |             |
| - | 61 | 9721_9722 |                                                  | NM_014991    | NP_055806    | Q8IZQ1 | WDFY3_HUMAN  | WD 1.                     | NA   | 3            | TCTCCACACAC     | 0.51  |             |
| + | 3  | 714       | NL8_uc010jll.2_Fi                                | NM_001040462 | NP_001035552 | Q6UX41 | BTNL8_HUMAN  | 2. Extracellu             | NA   | 2            | TGGTTCCCCCG     | 0.532 |             |
| + | 1  | 209_211   | 3mtn.2_In_Frame_                                 | NM_001452    | NP_001443    | Q12947 | FOXF2_HUMAN  | Poly-Ala.                 | NA   | 0            | ccgccgccgccgcc  | 0.172 | rs78728576  |
| + | 11 | 2086      | p.F668fs HSP90Al                                 | NM_007355    | NP_031381    | P08238 | HS90B_HUMAN  |                           | NA   | 4            | CTGGCTTTTCCC    | 0.527 |             |
| - | 8  | 1483      | 18_uc010kbq.1_lr                                 | NM_001080508 | NP_001073977 | O95935 | TBX18_HUMAN  |                           | NA   | 5            | GAGCTGGGGGG     | 0.537 |             |
| + | 1  | 939_941   | .G270del ARID1B_                                 | NM_017519    | NP_059989    | Q8NFD5 | ARI1B_HUMAN  | Gly-rich.                 | NA   | 2            | ggcagcgaggagga  | 0.158 |             |
| + | 5  | 833_835   | TTYH3_uc003smc                                   | NM_025250    | NP_079526    | Q9C0H2 | TTYH3_HUMAN  | Name=3; (P                | NA   | 0            | GGCCTGCTGC      | 0.709 | rs146815577 |
| + | 11 | 1744      |                                                  | NM_152744    | NP_689957    | Q7Z5N4 | SDK1_HUMAN   | like C2-type              | NA   | 6            | GAATCGGGGGG     | 0.542 |             |
| - | 1  | 915_917   |                                                  | NM_033224    | NP_150093    | Q96QR8 | PURB_HUMAN   |                           | NA   | 0            | TCTTCGCCGCC     | 0.576 |             |
| + | 2  | 334       | 3ule.2_Frame_Shift                               | NM_005751    | NP_005742    | Q99996 | AKAP9_HUMAN  |                           | NA   | 26           | AGCAGAAAAAA     | 0.353 |             |
| - | 44 | 11828     | 3_uc003wkw.2_5'F                                 | NM_170606    | NP_733751    | Q8NEZ4 | MLL3_HUMAN   |                           | NA   | 63           | TCGTCTTTTTTC    | 0.458 |             |
| - | 15 | 2965      | vy.2_Frame_Shift                                 | NM_015310    | NP_056125    | Q9NYI0 | PSD3_HUMAN   |                           | NA   | 3            | TGTGCGGGGGG     | 0.483 | rs28651847  |
| + | 8  | 761       | o.P153fs EPB49_u                                 | NM_001114136 | NP_001107608 | Q08495 | DEMA_HUMAN   |                           | NA   | 1            | CCCAGCCCCCA     | 0.597 |             |
| - | 7  | 735       | p.K193fs PTPLAD                                  | NM_001010915 | NP_001010915 | Q5VWC8 | HACD4_HUMAN  | ic (Potential             | NA   | 1            | ATCTCTTTTTTT    | 0.368 |             |
| - | 54 | 7719_7721 | .2_In_Frame_Del_                                 | NM_031407    | NP_113584    | Q7Z6Z7 | HUWE1_HUMAN  | p-rich. Glu-ri            | NA   | 17           | cctcatctctctctc | 0.438 |             |
| - | 10 | 4018_4020 | 3_In_Frame_Del_j                                 | NM_000489    | NP_000480    | P46100 | ATRX_HUMAN   | Poly-Asp.                 | NA   | 30           | GTCTGTATCATC    | 0.379 |             |
| - | 4  | 447       | P5_uc001hbw.1_F                                  | NM_005057    | NP_005048    | Q15291 | RBBP5_HUMAN  |                           | NA   | 1            | AAGGGAATCGA     | 0.453 |             |
| + | 3  | 712       | 2_uc009xch.2_Fra                                 | NM_001877    | NP_001868    | P20023 | CR2_HUMAN    | xtracellular (Potential). | NA   | 8            | FGTGTCCCCCC     | 0.398 |             |
| - | 18 | 2120      | uc009xhv.1_Frame_Shift_Del_p.K360fs PITRM1_uc001 | NM_000314    | NP_000305    | E7ES23 | E7ES23_HUMAN |                           | NA   | 1            | ACCGCTTTTTCT    | 0.478 |             |
| + | 6  | 1517_1518 |                                                  | NM_000314    | NP_000305    | P60484 | PTEN_HUMAN   | atase tensi) p.D162G(1) f | 2334 | AGAGACAAAAAC | 0.332           |       |             |
| + | 9  | 1359      | Shift_Del_p.F428f                                | NM_004055    | NP_004046    | O15484 | CAN5_HUMAN   | Domain III.               | NA   | 0            | TACATCTCGAAG    | 0.308 |             |
| + | 3  | 493_494   | _p.Q51fs FGFR1O                                  | NM_015633    | NP_056448    | Q9NVK5 | FGOP2_HUMAN  | Potential.                | NA   | 0            | AAATCAAGAAC     | 0.282 |             |

|   |    |             |                                                  |              |              |        |              |                             |    |                  |       |                  |
|---|----|-------------|--------------------------------------------------|--------------|--------------|--------|--------------|-----------------------------|----|------------------|-------|------------------|
| + | 3  | 707_710     | vbk.2_Frame_Shif                                 | NM_015116    | NP_055931    | Q9Y2L9 | LRCH1_HUMAN  | LRR 3.                      | 2  | CCGCCCTGCCTC     | 0.436 |                  |
| - | 1  | 113_115     | xml.2_In_Frame                                   | NM_033141    | NP_149132    | P80192 | M3K9_HUMAN   | rich. Poly-Glu.             | 5  | CCCGCCGcctcctc   | 0.68  | rs3832971        |
| - | 14 | 1783_1784   | ib.2_Frame_Shif                                  | NM_001004439 | NP_001004439 | Q9UKX5 | ITA11_HUMAN  | Extracellular (Potential).  | 3  | CTCCAGGGGGC      | 0.574 |                  |
| + | 13 | 3220_3222   | INKTR_uc003clq.1                                 | NM_005385    | NP_005376    | P30414 | NKTR_HUMAN   |                             | 3  | TGAAGAGGAGG/     | 0.355 |                  |
| - | 1  | 538_540     | C3_uc011cdn.1_l                                  | NM_153757    | NP_715638    | Q96NT1 | NP1L5_HUMAN  | Glu-rich.                   | 1  | lactcctctcctcctc | 0.369 |                  |
| + | 4  | 994_996     | Q279del MMRN1                                    | NM_007351    | NP_031377    | Q13201 | MMRN1_HUMAN  | Poly-Gln.                   | 4  | .GCTGAGCAGCA/    | 0.448 |                  |
| + | 7  | 1675_1676   |                                                  | NM_001718    | NP_001709    | P22004 | BMP6_HUMAN   |                             | 3  | 'ATTCTGAAAAAA'   | 0.446 |                  |
| - | 13 | 3188        | p.K631fs TRERF1                                  | NM_033502    | NP_277037    | Q96PN7 | TREF1_HUMAN  | cts with CREBBP.            | 5  | ATGACATTTTAAC    | 0.517 |                  |
| - | 4  | 765         | .1_intron TARP_uc003tgr.1_RNA TARP_uc003tgj.1_RN |              |              | A2JGV3 | A2JGV3_HUMAN |                             | 0  | CTTGATTTTTTT     | 0.264 |                  |
| - | 2  | 317_319     | EL1_uc009vlg.1_F                                 | NM_033467    | NP_258428    | Q495T6 | MMEL1_HUMAN  | type II membrane protein;   | 0  | GGTCACcagcagc    | 0.665 |                  |
| - | 8  | 1405_1406   |                                                  | NR_026567    |              |        |              |                             | 0  | ggcggcggcagcTGC  | 0.653 | 78439;rs67547754 |
| - | 9  | 1126_1131   | 1_intron MST1P9                                  | NR_002729    |              |        |              |                             | 0  | CCAGCGCTGGC/     | 0.704 |                  |
| + | 7  | 1510_1511   | os.1_Frame_Shift                                 | NM_001134673 | NP_001128145 | Q12857 | NFIA_HUMAN   |                             | 2  | TCCTGGGAACC      | 0.554 |                  |
| + | 9  | 1992        | ?7A3_uc009won.2                                  | NM_024330    | NP_077306    | Q5K4L6 | S27A3_HUMAN  |                             | 1  | TGCGTCCCCC       | 0.617 |                  |
| + | 3  | 619         | p.S161fs HAX1_uc                                 | NM_006118    | NP_006109    | O00165 | HAX1_HUMAN   | d in HCLS1 binding.         | 0  | GTGAATCCCCC      | 0.532 |                  |
| - | 2  | 718         | p.V213fs TNR_ucl                                 | NM_003285    | NP_003276    | Q92752 | TENR_HUMAN   | Cys-rich.                   | 11 | ACACACCCCC       | 0.607 |                  |
| + | 7  | 2540        | Shift_Del_p.T737fs                               | NM_005807    | NP_005798    | Q92954 | PRG4_HUMAN   | <-X-P-X-P-T-T-X. 56; appro  | 1  | AACTACCCCCA/     | 0.592 |                  |
| - | 3  | 615_616     |                                                  | NM_022735    | NP_073572    | Q9H3P7 | GCP60_HUMAN  | ential.  Glu-rich.          | 0  | TTCACCTTTTTT     | 0.411 |                  |
| - | 5  | 1984_1986   | E107del PSD_uc                                   | NM_002779    | NP_002770    | A5PKW4 | PSD1_HUMAN   | Poly-Glu.                   | 3  | CTCTGCCTCCTC     | 0.66  |                  |
| - | 2  | 586_588     | ime_Del_p.E162d                                  | NM_001164    | NP_001155    | O00213 | APBB1_HUMAN  | Glu-rich. p.E162K(1)        | 2  | catcatcatcctcctc | 0.404 | rs145320037      |
| + | 1  | 268_270     |                                                  | NM_001004460 | NP_001004460 | Q9H208 | O10A2_HUMAN  | Name=3; (Potential).        | 1  | TGTATTCTTCTT     | 0.517 |                  |
| - | 10 | 1315        | .Q434fs PLEKHA7                                  | NM_175058    | NP_778228    | Q6IQ23 | PKHA7_HUMAN  |                             | 3  | CACCTGGGCCA      | 0.537 |                  |
| - | 14 | 1235        | _Shift_Del_p.E357                                | NM_005709    | NP_005700    | Q9Y6N9 | USH1C_HUMAN  | Potential.                  | 1  | AGTCTTCTTCCC     | 0.498 |                  |
| - | 1  | 355         |                                                  | NM_001005284 | NP_001005284 | Q8NGQ1 | OR9G4_HUMAN  | Name=3; (Potential).        | 3  | ACAGGAAAAAA/     | 0.473 |                  |
| - | 9  | 1377        | ntt.1_Frame_Shift                                | NM_153265    | NP_694997    | Q32P44 | EMAL3_HUMAN  | WD 2.                       | 1  | GAAGGCCCCCA      | 0.592 |                  |
| + | 10 | 2065_2067   | Orsp.1_In_Frame                                  | NM_020798    | NP_065849    | Q9P2H5 | UBP35_HUMAN  |                             | 3  | CTGTGCCGCC       | 0.665 |                  |
| + | 6  | 1228        |                                                  | NM_004268    | NP_004259    | Q9NVC6 | MED17_HUMAN  |                             | 1  | TTCAAATTAATC     | 0.418 |                  |
| - | 4  | 670         | :9B_uc001qgy.1_5                                 | NM_014987    | NP_055802    | Q9UPX0 | TUTLB_HUMAN  | xtracellular (Potential).   | 0  | GTACTGGGGGG      | 0.572 |                  |
| - | 3  | 812_814     |                                                  | NM_006248    | NP_006239    |        |              |                             | 0  | TCCTGGAGGAG      | 0.606 |                  |
| + | 88 | 13864       |                                                  | NM_002332    | NP_002323    | Q07954 | LRP1_HUMAN   | Interaction with MAFB (By : | 22 | AACTGGAGAT       | 0.567 |                  |
| + | 3  | 444         | 10srs.1_Frame_Sh                                 | NM_001146258 | NP_001139730 | Q8TBX8 | PI42C_HUMAN  | PIPK.                       | 3  | TATTGTCCCCAG     | 0.388 |                  |
| + | 3  | 552_553     |                                                  | NM_012240    | NP_036372    | Q9Y6E7 | SIRT4_HUMAN  | tylase sirtuin-type.        | 0  | CTCCCCGGGGC      | 0.579 |                  |
| + | 11 | 1513        | 1_5'UTR DNAH10                                   | NM_207437    | NP_997320    | Q8IVF4 | DYH10_HUMAN  | n (By similarity).          | 6  | GTGACGGGGGA      | 0.478 | rs148982654      |
| + | 46 | 8279_8281   | JO_uc001ujm.2_In                                 | NM_015409    | NP_056224    | Q96L91 | EP400_HUMAN  | ith ZNF42 (By similarity).  | 12 | aacagACGACGAC    | 0.34  |                  |
| - | 23 | 3282        | f.1_RNA TEP1_ucl                                 | NM_007110    | NP_009041    | Q99973 | TEP1_HUMAN   |                             | 5  | CCACACCCCC       | 0.587 |                  |
| + | 6  | 1186        | Shift_Del_p.E307f                                | NM_015589    | NP_056404    | Q9UPU9 | SMAG1_HUMAN  |                             | 0  | ATCGAGGGGGG      | 0.637 | rs137951039      |
| - | 65 | 12542_12543 |                                                  | NM_003922    | NP_003913    | Q15751 | HERC1_HUMAN  | RCC1 10.                    | 19 | CTCCTTGTAAAG     | 0.465 |                  |
| - | 11 | 1628_1630   | h3_uc002die.2_l                                  | NM_017539    | NP_060009    | Q8TD57 | DYH3_HUMAN   | n (By similarity).          | 18 | CGATCAGCAGC/     | 0.498 |                  |
| - | 2  | 210         | 199_uc002hba.2_                                  | NM_015584    | NP_056399    | Q9Y2S7 | PDIP2_HUMAN  |                             | 0  | CGCTTTGCCACC     | 0.762 | rs113730440      |
| - | 5  | 891         |                                                  | NM_139285    | NP_644814    | Q8NHY3 | GA2L2_HUMAN  |                             | 2  | GGCCGGGGGC       | 0.597 | rs139867246      |
| + | 1  | 118         | :002ibf.3_5'Flank f                              | NM_005854    | NP_005845    | O60895 | RAMP2_HUMAN  |                             | 0  | :TAGGACCCGAG     | 0.791 |                  |
| - | 3  | 1258        | _p.G91fs CA10_uc                                 | NM_020178    | NP_064563    | Q9NS85 | CAH10_HUMAN  |                             | 2  | TCCTGCCCC        | 0.493 |                  |
| - | 2  | 452_455     | .2_5'UTR TIMP2_l                                 | NM_003255    | NP_003246    | P16035 | TIMP2_HUMAN  | NTR.                        | 2  | TCTCACTGACCG     | 0.51  |                  |
| + | 12 | 6027        | xq.2_Frame_Shift                                 | NM_030632    | NP_085135    | Q9C0F0 | ASXL3_HUMAN  |                             | 3  | TGTTATCCCCCA/    | 0.413 |                  |
| - | 5  | 640         |                                                  | NM_020714    | NP_065765    | Q9ULM2 | ZN490_HUMAN  | 2H2-type 1.                 | 0  | FATTAAGGGAGAC    | 0.433 |                  |
| - | 2  | 120_122     |                                                  | NM_000704    | NP_000695    | P20648 | ATP4A_HUMAN  | lasmic (Potential).         | 1  | CCGCCTTCTTC      | 0.601 |                  |
| + | 4  | 656_658     | E183del KLC3_uc                                  | NM_177417    | NP_803136    | Q6P597 | KLC3_HUMAN   | Poly-Glu.                   | 1  | CAGCGAGGAGG      | 0.645 |                  |

|   |    |                             |                    |              |              |        |             |                             |      |                   |       |                     |
|---|----|-----------------------------|--------------------|--------------|--------------|--------|-------------|-----------------------------|------|-------------------|-------|---------------------|
| - | 11 | 1735                        |                    | NM_021733    | NP_068379    | Q9UJT2 | TSKS_HUMAN  |                             | 2    | GTGCCTCCCCC       | 0.552 |                     |
| + | 10 | 1050                        |                    | NM_033068    | NP_149059    | Q9BZG2 | PPAT_HUMAN  | cellular (Potential).       | 0    | AGCCTCCCCGG       | 0.682 |                     |
| - | 5  | 1962                        |                    | NM_014650    | NP_055465    | O94892 | ZN432_HUMAN | 2H2-type 13.                | 3    | AAAGCCTTTTCC      | 0.398 |                     |
| - | 1  | 206                         |                    | NM_176820    | NP_789790    | Q7RTR0 | NALP9_HUMAN | DAPIN.                      | 7    | TTTGTCCAGCA       | 0.468 |                     |
| - | 8  | 1077                        | ijy.1_Frame_Shift  | NM_015317    | NP_056132    | Q8TB72 | PUM2_HUMAN  | Ala-rich.                   | 1    | ATACACCCCCC       | 0.507 |                     |
| + | 37 | 5895                        | w.2_Frame_Shift    | NM_004341    | NP_004332    | P27708 | PYR1_HUMAN  | Linker.                     | 10   | CTGCACCCCCA       | 0.622 |                     |
| + | 2  | 1350_1352.1_Intron KIF3B_u  |                    | NM_004798    | NP_004789    | O15066 | KIF3B_HUMAN | γ-Glu. Potential.           | 5    | GGgaagaggagg      | 0.433 |                     |
| - | 1  | 912_914                     | zma.2_Intron uc00  | NM_031890    | NP_114096    | Q9BXQ6 | CECR6_HUMAN |                             | 0    | CAGCCACCAC        | 0.709 |                     |
| - | 1  | 2553_2554                   |                    | NM_002430    | NP_002421    | Q10571 | MN1_HUMAN   | Poly-Gln.                   | 10   | tgctgctgtgctgctgc | 0.391 | rs34890218          |
| + | 13 | 1587                        | p.T420fs MTMR3_    | NM_021090    | NP_066576    | Q13615 | MTMR3_HUMAN | ularin phosphatase.         | 5    | CCGCACCCCC        | 0.547 |                     |
| + | 2  | 1890                        | i.3_Intron SYNGR1  | NM_006116    | NP_006107    | Q15750 | TAB1_HUMAN  |                             | 1    | TGGGACCCCC        | 0.592 |                     |
| - | 7  | 1050_1052                   | gye.1_In_Frame_I   | NM_020831    | NP_065882    | Q969V6 | MKL1_HUMAN  | Gln-rich.                   | 5    | GTGGTGCTGCT       | 0.66  |                     |
| - | 6  | 1160                        | GOL1_uc003cbx.2    | NM_001012410 | NP_001012410 | Q5FBB7 | SGOL1_HUMAN |                             | 0    | GTGTCATTTTTT      | 0.214 |                     |
| + | 19 | 1660                        | iy.1_Frame_Shift   | NM_005108    | NP_005099    | O75191 | XYLB_HUMAN  |                             | 1    | CCTTCTCCCCCA      | 0.502 |                     |
| + | 1  | 261                         |                    | NM_004617    | NP_004608    | P48230 | T4S4_HUMAN  | ical; (Potential).          | 0    | TGCCTGGGGGG       | 0.537 |                     |
| + | 42 | 6369_6371                   | bnz.1_In_Frame_I   | NM_053002    | NP_443728    | Q86YW9 | MD12L_HUMAN | Gln-rich.                   | 7    | GACCCAGCAGC       | 0.527 |                     |
| + | 1  | 251_253                     | hme.2_In_Frame_    | NM_004464    | NP_004455    | P12034 | FGF5_HUMAN  |                             | 2    | CTCTTCTCTCT       | 0.631 |                     |
| - | 13 | 1850                        | ft.1_Frame_Shift_I | NM_000204    | NP_000195    | P05156 | CFAI_HUMAN  | peptidase S1.               | 0    | AGTTTTCCCCC       | 0.463 | rs7437875           |
| + | 15 | 2297_2299                   | 3RF2_uc011ctn.1_   | NM_006909    | NP_008840    | O14827 | RGRF2_HUMAN |                             | 12   | AGTCCACCAC        | 0.562 |                     |
| + | 1  | 41_46                       | CDHGB2_uc003lj;    | NM_003736    | NP_003727    | Q9UN71 | PCDGG_HUMAN |                             | 0    | GGTGCCAGTG        | 0.617 |                     |
| - | 2  | 779                         | lji.1_Frame_Shift  | NM_001127496 | NP_001120968 | Q9C004 | SPY4_HUMAN  | ys-rich. SPR.               | 2    | CGTCCGGGGGC       | 0.607 |                     |
| + | 4  | 387_388                     | 3_uc003owo.2_In    | NM_153246    | NP_694978    | Q8N319 | CF223_HUMAN | Ala-rich.                   | 0    | AGAGCGCgcgcg      | 0.639 | rs72369323          |
| - | 12 | 2478                        | OL12A1_uc003ph     | NM_004370    | NP_004361    | Q99715 | COCA1_HUMAN | nectin type-III 4.          | 9    | TGGGTGGGGTG       | 0.413 |                     |
| + | 9  | 1421                        | 3tvz.2_Frame_Sh    | NM_022479    | NP_071924    | Q6IS24 | GLTL3_HUMAN | ectin. Lumenal (Potential). | 7    | CAAGGCAAAAG       | 0.542 |                     |
| + | 4  | 1128                        | 3uve.1_Frame_Shi   | NM_173564    | NP_775835    | Q6ZVC0 | CG051_HUMAN | Pro-rich.                   | 1    | GAAATCCCCC        | 0.682 |                     |
| + | 8  | 1077_1079                   | ixa.2_In_Frame_D   | NM_015908    | NP_056992    | Q9BXP5 | SRRT_HUMAN  | Glu-rich.                   | 2    | GAGCAGGAGGA       | 0.596 |                     |
| + | 6  | 972                         | ce_Site_p.Q108_s   | NM_014491    | NP_055306    | O15409 | FOXP2_HUMAN |                             | 8    | TGATACcagcagca    | 0.414 | rs111544687         |
| - | 6  | 468                         | yhd.2_Frame_Shif   | NM_057749    | NP_477097    | O96020 | CCNE2_HUMAN |                             | 0    | CTCTCCTTTTTT      | 0.323 |                     |
| - | 3  | 2403                        |                    | NM_001017969 | NP_001017969 | Q5HYC2 | K2026_HUMAN | Lys-rich.                   | 3    | TTTTGCTTTTTT      | 0.323 |                     |
| + | 3  | 2665                        | USC2_uc003zwx.     | NM_014806    | NP_055621    | Q8N2Y8 | RUSC2_HUMAN |                             | 1    | CCCCTCCCCCA       | 0.667 |                     |
| + | 15 | 2792                        | 1mij.1_Frame_Shil  | NM_014728    | NP_055543    | Q14CM0 | FRPD4_HUMAN |                             | 13   | GTGGTGGGGGA       | 0.572 |                     |
| + | 1  | 1263_1265                   |                    | NM_004455    | NP_004446    | Q92935 | EXTL1_HUMAN | renal (Potential).          | 1    | CCCTGCCTCCTC      | 0.606 |                     |
| + | 14 | 1261                        | p.I350fs RPS6KA    | NM_002953    | NP_002944    | Q15418 | KS6A1_HUMAN | kinase C-terminal.          | 1    | GGCATCCCCC        | 0.672 |                     |
| + | 23 | 3277                        |                    | NM_015284    | NP_056099    | Q5T011 | SZT2_HUMAN  |                             | 0    | GCCTGCCCCGC       | 0.602 |                     |
| + | 2  | 99                          |                    | NM_178428    | NP_848515    | Q5TA79 | LCE2A_HUMAN | Cys-rich.                   | 0    | AAGTGCCCCC        | 0.572 | rs138365632         |
| - | 9  | 1705                        |                    | NM_020699    | NP_065750    | Q8WXI9 | P66B_HUMAN  |                             | 0    | GTAGTGGGGGA       | 0.498 |                     |
| - | 10 | 1559                        | ne_Shift_Del_p.P4  | NM_183001    | NP_892113    | P29353 | SHC1_HUMAN  | ro-rich. CH1.               | 2    | GGATTGGGGGG       | 0.567 |                     |
| - | 11 | 1713                        | lfmd.3_Frame_Shi   | NM_001037533 | NP_001032622 | Q3T8J9 | GON4L_HUMAN | Asp-rich.                   | 3    | TAAGTCCCCC        | 0.423 |                     |
| + | 1  | 267_268                     | _5'Flank EFCAB2_   | NR_026586    |              | Q5VUJ9 | EFCB2_HUMAN |                             | 0    | CAGGGCGCGC        | 0.777 | rs10536649          |
| + | 1  | 666                         | .IN_uc009xti.2_5'F | NM_000314    | NP_000305    | P60484 | PTEN_HUMAN  |                             | 2334 | CGGCGGCTGGC       | 0.505 | rs71022512          |
| + | 1  | 51_53                       |                    | NM_178537    | NP_848632    | Q76KP1 | B4GN4_HUMAN | type II membrane protein;   | 1    | AGATGAAgctgctg    | 0.429 |                     |
| - | 4  | 1598_1600.2_Intron C11orf95 |                    | NM_001144936 | NP_001138408 | C9JLR9 | CK095_HUMAN | rich. Glu-rich.             | 0    | CACCCActctcct     | 0.547 |                     |
| + | 5  | 1036                        | _Shift_Del_p.A243  | NM_020155    | NP_064540    | Q96N19 | G137A_HUMAN | cellular (Potential).       | 1    | CTTGGCCCCC        | 0.637 |                     |
| - | 1  | 189                         |                    | NM_003793    | NP_003784    | Q9UBX1 | CATF_HUMAN  |                             | 0    | GGCGCCCCCA        | 0.781 |                     |
| + | 1  | 55_56                       |                    | NM_021046    | NP_066384    | O75690 | KRA58_HUMAN |                             | 0    | TCTGGAGGCTG1      | 0.649 | rs379698;rs72145325 |
| + | 6  | 1228                        |                    | NM_004268    | NP_004259    | Q9NVC6 | MED17_HUMAN |                             | 1    | TCAAATTAATC       | 0.418 |                     |
| - | 2  | 672                         | .2_Intron EFS_uc0  | NM_005864    | NP_005855    | O43281 | EFS_HUMAN   | SH3.                        | 1    | CTCCTGGGGGG       | 0.627 |                     |

|   |    |           |                   |              |              |        |             |                          |     |                    |       |             |
|---|----|-----------|-------------------|--------------|--------------|--------|-------------|--------------------------|-----|--------------------|-------|-------------|
| + | 9  | 5934      |                   | NM_025081    | NP_079357    | Q9P2P1 | NYNRI_HUMAN |                          | 3   | AAAGCTGGGGTG       | 0.597 |             |
| - | 5  | 903_905   | KT1_uc001ypm.2    | NM_005163    | NP_005154    | P31749 | AKT1_HUMAN  |                          | 134 | TCCATCTCCTCC       | 0.631 |             |
| - | 1  | 196       | _5'Flank OGFOD    | NM_007006    | NP_008937    | O43809 | CPSF5_HUMAN | ary for RNA-binding.     | 0   | AGTGACCCCCC        | 0.652 |             |
| - | 9  | 1687      | 2gai.1_Frame_Shi  | NM_015099    | NP_055914    | O94983 | CMTA2_HUMAN |                          | 1   | CAGCTGGGGGG        | 0.562 | rs149765180 |
| + | 1  | 267       | .1_5'UTR WNK4_u   | NM_032387    | NP_115763    | Q96J92 | WNK4_HUMAN  |                          | 7   | CCGGACCCCC         | 0.716 |             |
| - | 2  | 452_455   | .2_5'UTR TIMP2_L  | NM_003255    | NP_003246    | P16035 | TIMP2_HUMAN | NTR.                     | 2   | TCTCACTGACCG       | 0.51  |             |
| + | 4  | 1882_1883 | Shift_Del_p.H604  | NM_144566    | NP_653167    | Q9H0M5 | ZN700_HUMAN | :2H2-type 13.            | 0   | GGACTCACACTG       | 0.47  |             |
| + | 8  | 2673_2674 | 2phi.3_Frame_Sh   | NM_015711    | NP_056526    | Q9NZM4 | GSCR1_HUMAN |                          | 3   | CCCAGGCCCCC        | 0.723 |             |
| - | 1  | 437_439   | 2xys.2_intron PME | NM_020182    | NP_064567    | Q969W9 | PMEPA_HUMAN | ellular (Potential).     | 1   | IGTgccggcgcg       | 0.369 |             |
| - | 1  | 2553_2554 |                   | NM_002430    | NP_002421    | Q10571 | MN1_HUMAN   | Poly-Gln.                | 10  | ctgctgtgtgctgctgc  | 0.391 | rs34890218  |
| + | 3  | 439       | 2_uc003adw.1_5'   | NM_172002    | NP_741999    | Q8IWL3 | HSC20_HUMAN | J.                       | 1   | CCTGGCCCCC         | 0.493 |             |
| + | 13 | 1587      | p.T420fs MTMR3_   | NM_021090    | NP_066576    | Q13615 | MTMR3_HUMAN | ularin phosphatase.      | 5   | CCGCACCCCC         | 0.547 |             |
| - | 6  | 6180      | .P1795fs C22orf3C | NM_173566    | NP_775837    | Q5THK1 | PR14L_HUMAN |                          | 0   | GTTCTGGGGGG        | 0.532 |             |
| - | 7  | 1050_1052 | gye.1_in_Frame_I  | NM_020831    | NP_065882    | Q969V6 | MKL1_HUMAN  | Gln-rich.                | 5   | GTGGTGCTGCT        | 0.66  |             |
| - | 1  | 200_202   |                   | NM_183357    | NP_899200    | O95622 | ADCY5_HUMAN | lasmic (Potential).      | 4   | AGCGCTGCTG         | 0.734 |             |
| - | 1  | 200_202   |                   | NM_002994    | NP_002985    | P42830 | CXCL5_HUMAN |                          | 0   | GCGTCAGCAGC        | 0.7   | rs139966143 |
| + | 1  | 184_185   | _uc003nyt.2_5'UT  | NM_032454    | NP_115830    | P49842 | STK19_HUMAN |                          | 4   | CGGGCAAACCC        | 0.634 |             |
| + | 14 | 1595      | p.S529fs SCUBE3   | NM_152753    | NP_689966    | Q8IX30 | SCUB3_HUMAN |                          | 1   | TGACTCCTCTC        | 0.612 |             |
| + | 7  | 1611      |                   | NM_004053    | NP_004044    | Q13895 | BYST_HUMAN  |                          | 0   | GCAGTCCCCCG        | 0.582 |             |
| + | 1  | 499_501   | _Del_p.17_18LL>   | NM_006586    | NP_006577    | Q9BT09 | CNPY3_HUMAN |                          | 1   | CTTCCCTgtgctgctg   | 0.606 |             |
| + | 4  | 387_388   | 3_uc003owo.2_in   | NM_153246    | NP_694978    | Q8N319 | CF223_HUMAN | Ala-rich.                | 0   | AGAGCGCgcgcgcg     | 0.639 | rs72369323  |
| - | 2  | 872       |                   | NM_014452    | NP_055267    | O75509 | TNR21_HUMAN | (Potential), TNFR-Cys 3. | 0   | CGTATGGGGGG        | 0.557 |             |
| + | 16 | 2396      |                   | NM_002047    | NP_002038    | P41250 | SYG_HUMAN   |                          | 1   | CAAGACCCCCC        | 0.502 |             |
| + | 10 | 1401_1402 | G2_uc010lgy.2_in  | NM_006076    | NP_006067    | O95081 | AGFG2_HUMAN | Pro-rich.                | 1   | GCTGTTCCCCC        | 0.594 |             |
| + | 8  | 1077_1079 | ixa.2_in_Frame_D  | NM_015908    | NP_056992    | Q9BXP5 | SRRT_HUMAN  | Glu-rich.                | 2   | GAGCAGGAGGA        | 0.596 |             |
| + | 10 | 1861      | oa.3_Frame_Shift  | NM_001458    | NP_001449    | Q14315 | FLNC_HUMAN  | Filamin 3.               | 12  | CACGTGGGGCG        | 0.652 |             |
| + | 14 | 4653      | 3wem.2_Frame_Sl   | NM_005435    | NP_005426    | Q12774 | ARHG5_HUMAN |                          | 2   | AGACTCCCCC         | 0.557 |             |
| + | 6  | 1464      | .P2226fs ZNF398_  | NM_170686    | NP_733787    | Q8TD17 | ZN398_HUMAN |                          | 1   | AGACACCCCC         | 0.587 |             |
| + | 8  | 1236      | p.P314fs NOS3_u   | NM_000603    | NP_000594    | P29474 | NOS3_HUMAN  | ction with NOSIP.        | 8   | AGGTGCCCTG         | 0.647 |             |
| - | 2  | 129       | Shift_Del_p.N23fs | NM_004935    | NP_004926    | Q00535 | CDK5_HUMAN  | rotein kinase.           | 2   | CCCGTTTTTGT        | 0.582 |             |
| - | 3  | 346       | M1_uc003xkx.2_R   | NM_014462    | NP_055277    | O15116 | LSM1_HUMAN  |                          | 0   | TTTTTGCCACAT       | 0.393 |             |
| - | 3  | 618       | p.A59fs TPD52_u   | NM_001025252 | NP_001020423 | P55327 | TPD52_HUMAN | Potential.               | 1   | CTTTTTGCTGCT       | 0.408 |             |
| - | 16 | 2344      | on DDX58_uc011lr  | NM_014314    | NP_055129    | O95786 | DDX58_HUMAN |                          | 4   | CTGCCTATTAGA       | 0.315 |             |
| - | 10 | 1827_1829 | imc.3_in_Frame_I  | NM_006521    | NP_006512    | P19532 | TFE3_HUMAN  |                          | 197 | ACCCCCTCCTC        | 0.66  |             |
| + | 20 | 4967      | 1aoj.2_Frame_Shil | NM_015215    | NP_056030    | Q9Y6Y1 | CMTA1_HUMAN | IQ 2.                    | 9   | TGAACAAAAAA        | 0.473 |             |
| - | 5  | 1096      | AGBL4_uc001crv.   | NM_024603    | NP_078879    | Q7L4P6 | BEND5_HUMAN | BEN.                     | 1   | TCTTTCTTTTTT       | 0.463 |             |
| + | 2  | 301_302   | _Ins_p.48_49insC  | NM_030965    | NP_112227    | Q9BVH7 | SLA7E_HUMAN | lLuminal (Potential).    | 2   | agcagcagcagcagc    | 0.594 | rs62637703  |
| + | 8  | 2280      | xr.1_Frame_Shift  | NM_004326    | NP_004317    | O00512 | BCL9_HUMAN  | y-Pro. Pro-rich.         | 6   | GAGGACCCCC         | 0.582 |             |
| + | 6  | 739       | B4_uc001eyb.1_3   | NM_002796    | NP_002787    | P28070 | PSB4_HUMAN  |                          | 2   | CACCGAAAAAG        | 0.443 |             |
| - | 2  | 3390_3392 | me.1_in_Frame_C   | NM_007113    | NP_009044    | Q07283 | TRHY_HUMAN  | 30 AA tandem repeats.    | 5   | ggcgctctctctcccc   | 0.241 |             |
| - | 2  | 1111_1113 | wne.1_in_Frame_I  | NM_007113    | NP_009044    | Q07283 | TRHY_HUMAN  | of R-R-E-Q-E-E- E-R-R-E- | 5   | tcgctctctctctctcc  | 0     | rs71757496  |
| - | 3  | 5776_5777 | uc001ezv.2_intron | NM_001014342 | NP_001014364 | Q5D862 | FILA2_HUMAN |                          | 17  | TTGGCTGTGTGT       | 0.515 | rs140875805 |
| - | 8  | 2374_2376 | lfo.2_in_Frame_I  | NM_002249    | NP_002240    | Q9UGI6 | KCNN3_HUMAN | Poly-Gln.                | 1   | AGGAGCTGCTG        | 0.64  |             |
| - | 1  | 422_424   | ox.1_in_Frame_De  | NM_002249    | NP_002240    | Q9UGI6 | KCNN3_HUMAN | Poly-Gln.                | 1   | gctgctgtgctgctgctg | 0.236 |             |
| - | 11 | 2245_2247 | H700del PBXIP1_u  | NM_020524    | NP_065385    | Q96AQ6 | PBIP1_HUMAN | His-rich.                | 1   | CCCCGGTGGTG        | 0.64  | rs143592003 |
| - | 1  | 313_314   | _Shift_Ins_p.P31i | NM_183001    | NP_892113    | P29353 | SHC1_HUMAN  |                          | 2   | TCCTCCGGGGG        | 0.619 | rs115641580 |
| + | 9  | 2365      |                   | NM_021948    | NP_068767    | Q96GW7 | PGCB_HUMAN  | EGF-like.                | 2   | IGTATGGGGGG        | 0.622 |             |



|   |    |                             |              |              |        |              |                             |    |                    |       |                              |
|---|----|-----------------------------|--------------|--------------|--------|--------------|-----------------------------|----|--------------------|-------|------------------------------|
| - | 4  | 1309                        | NM_006617    | NP_006608    | P48681 | NEST_HUMAN   | Tail.                       | 6  | GGTGTGGGGGG        | 0.597 |                              |
| + | 1  | 259                         | NM_001004478 | NP_001004478 | Q8NGY1 | O10Z1_HUMAN  | cellular (Potential).       | 2  | TGGCTGGGGGG        | 0.552 |                              |
| - | 6  | 1357_1359 p.V32del PVRL4_u  | NM_030916    | NP_112178    | Q96NY8 | PVRL4_HUMAN  | ical; (Potential).          | 2  | ACACCCACCAC        | 0.606 |                              |
| + | 3  | 338_340                     | NM_001102566 | NP_001096036 | A6NKN8 | PC4L1_HUMAN  |                             | 0  | AGGCGGAGGAG        | 0.488 |                              |
| + | 20 | 6213 p.A2_uc009www.2_       | NM_020318    | NP_064714    | Q9BXP8 | PAPP2_HUMAN  | Sushi 5.                    | 16 | GTAATCCCCCC        | 0.468 |                              |
| + | 8  | 1233_1234 9wxs.2_Frame_Sf   | NM_000721    | NP_000712    | Q15878 | CAC1E_HUMAN  | lasmic (Potential).         | 6  | CCAAAGAGAGA        | 0.51  |                              |
| + | 7  | 1843_1845 ie_Del_p.K506del  | NM_005807    | NP_005798    | Q92954 | PRG4_HUMAN   | 8 AA repeats of K-X-P-X-F   | 1  | CACCAAGAAGC        | 0.65  |                              |
| - | 1  | 1610                        | NM_032833    | NP_116222    | Q5SWA1 | PR15B_HUMAN  |                             | 2  | CTACACTTATTC       | 0.458 |                              |
| + | 4  | 635_646                     | NM_001104548 | NP_001098018 |        |              |                             | 0  | Tagcagcagcagca     | 0.283 | 30217;rs72359595;rs150848171 |
| - | 13 | 2418_2420 0pty.1_In_Frame_  | NM_005401    | NP_005392    | Q15678 | PTN14_HUMAN  | Poly-Glu.                   | 5  | GGAGCCTCCTC        | 0.626 |                              |
| + | 28 | 5556_5557 im.2_Frame_Shift  | NM_198551    | NP_940953    | Q5JRA6 | MIA3_HUMAN   | cytoplasmic (Potential).    | 5  | CTTGCCCCAAGA       | 0.545 |                              |
| - | 5  | 1798 AGT_uc009xxf.2_F       | NM_000029    | NP_000020    | P01019 | ANGT_HUMAN   |                             | 0  | AGCTCAAAAAA        | 0.562 |                              |
| + | 3  | 629_631 ame_Del_p.S197d     | NM_032429    | NP_115805    | Q9BRK4 | LZTS2_HUMAN  | ntosomal localization (By s | 4  | GGCCCTGcctcctc     | 0.557 |                              |
| - | 4  | 533                         | NM_001080998 | NP_001074467 | Q96QU4 | FRG2B_HUMAN  |                             | 0  | CGAGACCTATG        | 0.557 |                              |
| + | 1  | 735_736                     | NM_001127389 | NP_001120861 | F5GZ66 | F5GZ66_HUMAN |                             | 0  | GGGCCAGGCAC        | 0.708 | rs138894859                  |
| + | 3  | 548_550 rlo.1_In_Frame_C    | NM_004265    | NP_004256    | O95864 | FADS2_HUMAN  | ical; (Potential).          | 2  | TTCTTCTCCTC        | 0.537 |                              |
| + | 8  | 941 1oxd.2_Splice_Sit       | NM_003369    | NP_003360    | Q9P2Y5 | UVRAG_HUMAN  |                             | 6  | ATTTAGAAAAAA       | 0.302 |                              |
| - | 8  | 1187_1189 CADM1_uc001ppj.   | NM_014333    | NP_055148    | Q9BY67 | CADM1_HUMAN  | cellular (Potential).       | 2  | gtaaggatgggtgggt   | 0.266 |                              |
| - | 1  | 355 FX_uc001pvh.1_f         | NM_002105    | NP_002096    | P16104 | H2AX_HUMAN   |                             | 0  | TTGTTGAGCTC        | 0.672 | rs141798641                  |
| - | 3  | 539_541                     | NM_006248    | NP_006239    |        |              |                             | 0  | GGACTTGTGTG        | 0.596 |                              |
| - | 3  | 314_315                     | NM_006248    | NP_006239    |        |              |                             | 0  | GGAGGTGGGGC        | 0.614 |                              |
| - | 2  | 1302 raq.2_Frame_Shift      | NM_006143    | NP_006134    | Q15760 | GPR19_HUMAN  | lasmic (Potential).         | 1  | ACGTAGTTTTTTT      | 0.398 |                              |
| - | 12 | 1271_1273 DM2_uc001sns.2_   | NM_014925    | NP_055740    | Q9Y2K5 | R3HD2_HUMAN  | Gln-rich.                   | 2  | AGGAAGTtgctgctg    | 0.488 |                              |
| + | 1  | 1317_1319 ).E437del EP400_u | NM_015409    | NP_056224    | Q96L91 | EP400_HUMAN  | Poly-Glu.                   | 12 | gaagaagaggaggag    | 0.286 | rs62635809                   |
| + | 46 | 8261_8262 J0_uc001ujm.2_In  | NM_015409    | NP_056224    | Q96L91 | EP400_HUMAN  | ith ZNF42 (By similarity).  | 12 | agcagcaacagcagc    | 0.327 | rs111782215                  |
| - | 1  | 410 uc001uxv.1_Intron       | NM_032138    | NP_115514    | Q8WVZ9 | KBTB7_HUMAN  |                             | 1  | CCGTGAAAAAG        | 0.632 |                              |
| - | 1  | 1994_1996 zo.1_In_Frame_De  | NM_183422    | NP_904358    | Q15714 | T22D1_HUMAN  | Gln-rich.                   | 0  | gttgtgtgctgctgctg  | 0.409 | 613609;rs146722477           |
| + | 22 | 2792 rh.2_Frame_Shift       | NM_005766    | NP_005757    | Q9Y4F1 | FARP1_HUMAN  | PH 1.                       | 2  | CGAGTGGGGGG        | 0.617 |                              |
| - | 1  | 1123                        | NM_001080396 | NP_001073865 | B1AL88 | F155A_HUMAN  |                             | 1  | CCCGTCCCCCC        | 0.607 |                              |
| - | 1  | 772_774                     | NM_001080396 | NP_001073865 | B1AL88 | F155A_HUMAN  | Poly-Gln.                   | 1  | cgctgcctctgctgctgc | 0.404 |                              |
| + | 2  | 348 sjAPEX1_uc001vx         | NM_001641    | NP_001632    | P27695 | APEX1_HUMAN  | iation with rRNA, endoriboi | 4  | GTGGGAAAAAG        | 0.557 |                              |
| - | 2  | 306 EXOC5_uc010trh.         | NM_006544    | NP_006535    | O00471 | EXOC5_HUMAN  |                             | 3  | GACGTCAATAT        | 0.333 |                              |
| - | 13 | 2476_2478 0twc.1_In_Frame_  | NM_007039    | NP_008970    | Q16825 | PTN21_HUMAN  | Poly-Glu.                   | 4  | CTCGTCTCCTC        | 0.704 |                              |
| - | 7  | 2023 wo.1_Frame_Shift       | NM_001002860 | NP_001002860 | Q9P203 | BTBD7_HUMAN  |                             | 1  | CCAGCATTTTTTT      | 0.383 |                              |
| - | 6  | 1584 jo.2_Frame_Shift       | NM_170675    | NP_733775    | O14770 | MEIS2_HUMAN  |                             | 2  | GGGCATTTTCC        | 0.478 |                              |
| - | 69 | 13096                       | NM_003922    | NP_003913    | Q15751 | HERC1_HUMAN  | :C1 14. WD 11.              | 19 | TTGCTCCCCCA        | 0.438 |                              |
| - | 3  | 553_555 20GG>G KIAA043      | NM_014647    | NP_055462    | Q9Y4F3 | LKAP_HUMAN   | Poly-Gly.                   | 0  | ACCGCACCCAC        | 0.532 |                              |
| - | 2  | 667 ?_5'Flank IQCK_uc       | NM_001012991 | NP_001013009 | Q1ED39 | CP088_HUMAN  | Lys-rich.                   | 0  | GGTGGATTTTTT       | 0.532 |                              |
| + | 9  | 1622_1633 )C100132247_ucC   | NM_001135865 | NP_001129337 | A8MRT5 | K220L_HUMAN  | Pro-rich.                   | 0  | TCCACCCTCAGC       | 0.571 |                              |
| + | 13 | 3813_3815                   | NM_014712    | NP_055527    | O15047 | SET1A_HUMAN  | Ser-rich.                   | 3  | Gctcctcatcctcctc   | 0.389 |                              |
| + | 2  | 113_115 p.E13del CCDC13     | NM_032269    | NP_115645    | Q8IY82 | CC135_HUMAN  | Potential.                  | 1  | gaagggtgaggagga    | 0.448 |                              |
| - | 3  | 888_890 jt.1_In_Frame_De    | NM_001082486 | NP_001075955 | Q96AP0 | ACD_HUMAN    |                             | 1  | TCCTGCAGCAG        | 0.65  |                              |
| - | 14 | 2504 _p.F283fs ADAMT:       | NM_199355    | NP_955387    | Q8TE60 | ATS18_HUMAN  | Cys-rich. p.A696fs*18(2)    | 18 | CATTGCAAAAAA       | 0.403 |                              |
| + | 3  | 433 l_p.T16fs KIAA01E       | NM_014615    | NP_055430    | Q14687 | GSE1_HUMAN   |                             | 5  | CAGCACCCCCC        | 0.687 |                              |
| - | 5  | 772                         | NM_015982    | NP_057066    | Q9Y2T7 | YBOX2_HUMAN  | quired for mRNA-binding.    | 0  | AGGCCGGGGGC        | 0.622 |                              |
| + | 8  | 912_914 ).L222del CHRN1     | NM_000747    | NP_000738    | P11230 | ACHB_HUMAN   | ical; (Potential).          | 2  | GTTCCTGCTGCT       | 0.498 |                              |
| + | 11 | 2629_2631 )2gix.2_In_Frame_ | NM_001080424 | NP_001073893 | O15054 | KDM6B_HUMAN  | rich. Thr-rich.             | 2  | CGCCGTcaccacc      | 0.369 |                              |

|   |    |           |                                 |              |              |        |             |                               |    |                  |       |                     |
|---|----|-----------|---------------------------------|--------------|--------------|--------|-------------|-------------------------------|----|------------------|-------|---------------------|
| + | 10 | 1762      | gjf.2_Frame_Shift               | NM_001005273 | NP_001005273 | Q12873 | CHD3_HUMAN  | Chromo 1.                     | 1  | TCACCCCCCC       | 0.577 |                     |
| + | 2  | 137       | R11_uc002ixg.1_F                | NM_018304    | NP_060774    | Q96HE9 | PRR11_HUMAN |                               | 2  | TTATTCAAAAAA     | 0.348 |                     |
| - | 19 | 3481      | p.V1052fs USP36                 | NM_025090    | NP_079366    | Q9P275 | UBP36_HUMAN |                               | 5  | TGACTGACCCG      | 0.567 |                     |
| + | 11 | 1445_1447 |                                 | NM_015897    | NP_056981    | Q8N2W9 | PIAS4_HUMAN | Glu-rich (acidic).            | 1  | gaggatgaggagga   | 0.552 |                     |
| - | 6  | 1132_1134 |                                 | NM_005934    | NP_005925    | Q03111 | ENL_HUMAN   | Poly-Ser.                     | 1  | GAGAAGGAGGA      | 0.65  |                     |
| - | 2  | 440_442   |                                 | NM_052850    | NP_443082    | Q8TAE8 | G45IP_HUMAN | γ-Gln. Potential.             | 2  | TCCCGCTGCTG      | 0.635 |                     |
| - | 3  | 909       | _Shift_Del_p.I255f              | NM_014884    | NP_055699    | Q8IX01 | SUGP2_HUMAN |                               | 0  | TGGGTATTTTTT     | 0.502 |                     |
| - | 2  | 120_122   |                                 | NM_000704    | NP_000695    | P20648 | ATP4A_HUMAN | lasmic (Potential).           | 1  | CCCGCCTCTTC      | 0.601 |                     |
| + | 10 | 765       |                                 | NM_015302    | NP_056117    | O94927 | HAUS5_HUMAN |                               | 0  | AACCACCCCCC      | 0.642 |                     |
| - | 2  | 231       | 1_Frame_Shift_D                 | NM_006905    | NP_008836    | P11464 | PSG1_HUMAN  |                               | 2  | GTGGTGGGCAG      | 0.493 | rs77328225          |
| - | 9  | 974_975   | pni.2_Frame_Shift               | NM_003598    | NP_003589    | Q15562 | TEAD2_HUMAN | ral activation (Potential).   | 3  | AGGCATGGGGG      | 0.564 |                     |
| + | 11 | 1757_1759 | me_Del_p.L480del                | NM_006669    | NP_006660    | Q8NHL6 | LIRB1_HUMAN | ical; (Potent p.L479del(1))   | 3  | tctactgctcctctcc | 0.458 |                     |
| + | 1  | 230       | i.2_intron SPTBN1               | NR_002229    |              |        |             |                               | 0  | GCCACAAAAA       | 0.537 |                     |
| - | 4  | 737_739   | 02svr.2_In_Frame                | NM_017849    | NP_060319    | O75204 | TM127_HUMAN |                               | 0  | CTTATGCTGCTC     | 0.557 |                     |
| + | 8  | 1145      | 2_intron ANKRD3                 | NM_001164315 | NP_001157787 | A6QL64 | AN36A_HUMAN |                               | 0  | ACAGGTATTTTC     | 0.302 |                     |
| + | 10 | 1092      |                                 | NM_182640    | NP_872578    | P82933 | RT09_HUMAN  |                               | 0  | AGGCTGGAGCA      | 0.562 |                     |
| + | 9  | 1518      | 20A1_uc002uzy.3                 | NM_177538    | NP_803882    | Q6UW02 | CP20A_HUMAN |                               | 0  | AAGTTCAAAAAA     | 0.348 |                     |
| + | 1  | 182_184   | P_uc002vsr.2_5F                 | NM_001632    | NP_001623    | P05187 | PPB1_HUMAN  |                               | 1  | CCCTGCAtgctgct   | 0.542 |                     |
| + | 2  | 175_177   |                                 | NM_022134    | NP_071417    | Q9H3Q3 | G3ST2_HUMAN | type II membrane protein;     | 0  | GTTCATCCTCCT     | 0.631 |                     |
| - | 14 | 2158      | _p.K662fs ZMYNC                 | NM_012408    | NP_036540    | Q9ULU4 | PKCB1_HUMAN |                               | 5  | TTGGGCTTTTTT     | 0.488 |                     |
| - | 1  | 737       | ie_Shift_Del_p.K2!              | NM_080618    | NP_542185    | Q8NI51 | CTCFL_HUMAN |                               | 4  | AGGCCTTTTTTC     | 0.502 |                     |
| - | 11 | 905       | TPE_uc002yir.1_f                | NM_199261    | NP_954870    | P56180 | TPTE_HUMAN  | ical; (Potential).            | 5  | ATGTCAAAAAA      | 0.299 |                     |
| + | 4  | 1162      | igma.2_Frame_S                  | NM_005534    | NP_005525    | P38484 | INGR2_HUMAN | ential). Fibronectin type-III | 0  | ACGGCCTTTTTT     | 0.458 |                     |
| - | 2  | 1210      | 2yrw.2_Frame_Sh                 | NM_017833    | NP_060303    | Q9NX36 | DJC28_HUMAN |                               | 0  | ATTCTGGTTGG      | 0.393 |                     |
| - | 1  | 5854      | E2_uc002yyx.2_l                 | NM_182832    | NP_878252    | Q8WY50 | PLAC4_HUMAN |                               | 0  | gagggtatccagggtg | 0.159 |                     |
| - | 8  | 995       | _Shift_Del_p.E241               | NM_022719    | NP_073210    | Q96DF8 | DGC14_HUMAN |                               | 1  | AACCTCCCCCC      | 0.597 |                     |
| - | 30 | 4280_4282 |                                 | NM_002473    | NP_002464    | P35579 | MYH9_HUMAN  | Potential.                    | 11 | TTGGCCTCCTC      | 0.65  |                     |
| - | 1  | 5454_5456 | 21774del TCF20_i                | NM_005650    | NP_005641    | Q9UGU0 | TCF20_HUMAN |                               | 5  | CTTCTGCTGC       | 0.601 |                     |
| + | 4  | 842       | pk.1_Frame_Shift                | NM_178329    | NP_847899    | P51677 | CCR3_HUMAN  | ellular (Potential).          | 8  | CTGGGTTTTTGC     | 0.488 |                     |
| + | 6  | 9506      |                                 | NM_003458    | NP_003449    | Q9UPA5 | BSN_HUMAN   |                               | 8  | CCACCCTTTTTC     | 0.607 |                     |
| - | 6  | 1104_1105 | 2A1_uc011blv.1_                 | NM_005630    | NP_005621    | Q92959 | SO2A1_HUMAN | Name=6; (Potential).          | 1  | GGGAAGAAAAAA     | 0.49  | rs141736851         |
| + | 21 | 2524_2526 | 1buy.1_In_Frame                 | NM_000283    | NP_000274    | P35913 | PDE6B_HUMAN |                               | 0  | GAGAAGGAGGA      | 0.562 |                     |
| - | 17 | 2126      | i.2_Frame_Shift_D               | NM_144643    | NP_653244    | Q96NL6 | SCLT1_HUMAN | Potential.                    | 5  | TTTGGCTTTTTT     | 0.353 |                     |
| + | 6  | 626_627   |                                 | NM_004477    | NP_004468    | Q14331 | FRG1_HUMAN  |                               | 0  | TAGGGGAAAATG     | 0.351 |                     |
| - | 3  | 318       |                                 | NM_032286    | NP_115662    | Q9BTT4 | MED10_HUMAN |                               | 1  | TGCTCATTTTTAG    | 0.418 |                     |
| - | 11 | 1838_1839 | il.1_Frame_Shift_L              | NM_000065    | NP_000056    | P13671 | CO6_HUMAN   | EGF-like.                     | 7  | CTCTGACACACA     | 0.475 |                     |
| - | 4  | 1093      | 3kin.2_Frame_Shif               | NM_001884    | NP_001875    | P10915 | HPLN1_HUMAN | Link 2.                       | 5  | TTATGCTTTTTAT    | 0.493 |                     |
| - | 1  | 479_480   |                                 | NM_001085377 | NP_001078846 | P23508 | CRCM_HUMAN  |                               | 1  | ctgccgctgccgccc  | 0.391 |                     |
| + | 4  | 1770      | 3lnn.1_Frame_Shif               | NM_020768    | NP_065819    | Q68DU8 | KCD16_HUMAN |                               | 4  | GCAGCAAAAAA      | 0.468 |                     |
| - | 8  | 1648_1649 | 3_Ins_p.225_226in               | NM_000332    | NP_000323    | P54253 | ATX1_HUMAN  |                               | 4  | TGCTGAGGtctgctg  | 0.366 |                     |
| + | 14 | 2219_2221 | 3AT2_uc003nvc.3                 | NM_080686    | NP_542417    | P48634 | PRC2A_HUMAN | X 57 AA type A repeats.       | 0  | TCCTGAagcagcag   | 0.453 |                     |
| + | 8  | 1034_1035 | 1dpb.1_Frame_Shift_Ins_p.V276fs |              |              | P08686 | CP21A_HUMAN |                               | 0  | CCGTGGTTTTTT     | 0.614 |                     |
| + | 6  | 808       | 10khi.2_Frame_St                | NM_014721    | NP_055536    | O75167 | PHAR2_HUMAN |                               | 2  | TCATTCAAAAAA     | 0.398 |                     |
| - | 10 | 1313_1314 |                                 | NM_015718    | NP_056533    | Q9HBY0 | NOX3_HUMAN  | ical; (Potential).            | 1  | CAACGCACACAC     | 0.53  |                     |
| - | 4  | 864_866   |                                 | NM_001002926 | NP_001002926 | Q3B726 | RPA43_HUMAN | Lys-rich.                     | 1  | GCTTTTTCTTCT     | 0.433 |                     |
| + | 11 | 3191_3192 | 800insS POM121                  | NM_172020    | NP_742017    | Q96HA1 | P121A_HUMAN | side (Potential).             | 0  | TGCTTCTTCGG      | 0.663 | rs686669;rs67569765 |
| - | 2  | 390_392   | 1kiw.1_In_Frame_I               | NM_015545    | NP_056360    | O75127 | PTCD1_HUMAN |                               | 1  | AACTCTCCTCC      | 0.606 |                     |

|   |    |           |                   |              |               |         |             |                             |    |                  |       |                              |
|---|----|-----------|-------------------|--------------|---------------|---------|-------------|-----------------------------|----|------------------|-------|------------------------------|
| - | 5  | 964       | 2_Intron GPC2_uc  | NM_152742    | NP_689955     | Q8N158  | GPC2_HUMAN  |                             | 2  | GGGGACCCCC       | 0.642 |                              |
| + | 6  | 972       | ce_Site_p.Q108_s  | NM_014491    | NP_055306     | O15409  | FOXP2_HUMAN |                             | 8  | TGATACcagcagca   | 0.414 | rs111544687                  |
| - | 9  | 1235_1237 |                   | NM_003941    | NP_003932     | O00401  | WASL_HUMAN  | Pro-rich.                   | 0  | CCTagcaggaggag   | 0.443 |                              |
| + | 7  | 1118_1119 | vuy.2_Frame_Shif  | NM_016019    | NP_057103     | Q9Y383  | LC7L2_HUMAN | Arg/Ser-rich.               | 0  | AGAGAAGAGAGA     | 0.391 |                              |
| + | 1  | 528       |                   | NM_001001656 | NP_001001656  | Q8NGU2  | OR9A4_HUMAN | cellular (Potential).       | 1  | GAACAATTTTTTT    | 0.383 |                              |
| - | 2  | 129       | Shift_Del_p.N23fs | NM_004935    | NP_004926     | Q00535  | CDK5_HUMAN  | rotein kinase.              | 2  | CCCCGTTTTTGT     | 0.582 |                              |
| + | 5  | 504       | PB49_uc011kyu.1   | NM_001114136 | NP_0011107608 | Q08495  | DEMA_HUMAN  |                             | 1  | CACATCCCCCC      | 0.602 |                              |
| + | 2  | 273_275   | lank BMP1_uc003   | NM_003018    | NP_003009     | P11686  | PSPC_HUMAN  |                             | 0  | TATCGTGGTGGT     | 0.601 |                              |
| + | 13 | 1644      | p.P503fs KIAA196  | NM_199205    | NP_954675     | Q8N163  | K1967_HUMAN |                             | 3  | CTCCACCCCC       | 0.572 |                              |
| + | 34 | 7676_7678 |                   | NM_017780    | NP_060250     | Q9P2D1  | CHD7_HUMAN  | ential. Poly-Arg.           | 9  | CAGCGGAGGAG      | 0.512 |                              |
| + | 2  | 604       |                   | NM_004770    | NP_004761     | Q92953  | KCNB2_HUMAN | lasmic (Potential).         | 7  | AGGCTCCCCCG      | 0.502 |                              |
| - | 13 | 1637_1639 | .I506del TSNARE   | NM_145003    | NP_659440     | Q96NA8  | TSNA1_HUMAN | . Helical; (Potential).     | 0  | TTGGCGATGATG     | 0.414 | rs142964918                  |
| - | 2  | 1659_1661 | .2_In_Frame_Del_  | NM_173691    | NP_775962     | Q4KMQ1  | TPRN_HUMAN  | Glu-rich.                   | 0  | tcttcttcttctctct | 0.374 |                              |
| - | 8  | 1013      | mwc.1_Frame_Shi   | NM_024597    | NP_078873     | Q8IWC1  | MA7D3_HUMAN |                             | 4  | CACCTGGGGGG      | 0.532 |                              |
| + | 4  | 1735_1737 | EC1_uc010nsl.1_I  | NM_005462    | NP_005453     | O60732  | MAGC1_HUMAN |                             | 4  | TGAGCTCCTCT      | 0.473 | rs144357389                  |
| + | 4  | 2131_2133 | EC1_uc010nsl.1_I  | NM_005462    | NP_005453     | O60732  | MAGC1_HUMAN |                             | 4  | .GTCCTTTCAGC     | 0.571 |                              |
| + | 11 | 9934_9935 | bp.1_Frame_Shift  | NM_015001    | NP_055816     | Q96T58  | MINT_HUMAN  | Pro-rich.                   | 15 | CTGccccacccccac  | 0.416 |                              |
| - | 7  | 967       | F1_uc010oce.1_Ir  | NM_017940    | NP_060410     | Q3BBV0  | NBPF1_HUMAN |                             | 0  | CAGCTGGGGGC      | 0.488 |                              |
| - | 13 | 2591      | ie_Shift_Del_p.Q5 | NM_003819    | NP_003810     | Q13310  | PABP4_HUMAN | PABC.                       | 0  | TTCTGGGGGG       | 0.602 |                              |
| + | 2  | 301_302   | Ins_p.48_49insC   | NM_030965    | NP_112227     | Q9BVH7  | SIA7E_HUMAN | . Luminal (Potential).      | 2  | agcagcagcagcagc  | 0.594 | rs62637703                   |
| - | 6  | 852       |                   | NM_206996    | NP_996879     | Q6Q759  | SPG17_HUMAN |                             | 6  | TGCCAGGTGTG      | 0.423 |                              |
| - | 34 | 7254_7255 |                   | NM_024408    | NP_077719     | Q04721  | NOTC2_HUMAN | lasmic (Potential).         | 27 | GGCCCGCAAC/      | 0.629 |                              |
| + | 6  | 700       | hift_Del_p.F167fs | NM_004425    | NP_004416     | Q16610  | ECM1_HUMAN  | roximate repeats. 1.        | 3  | GGCTTCCCCC       | 0.602 |                              |
| - | 25 | 3397      | p.Q18fs NUP210L   | NM_207308    | NP_997191     | Q5VU65  | P210L_HUMAN |                             | 11 | GGGCTGGGGGC      | 0.458 |                              |
| - | 1  | 422_424   | ox.1_In_Frame_De  | NM_002249    | NP_002240     | Q9UGI6  | KCNN3_HUMAN | Poly-Gln.                   | 1  | gctgtgtgtgtgtgt  | 0.236 |                              |
| + | 1  | 259       |                   | NM_001004478 | NP_001004478  | Q8NGY1  | O10Z1_HUMAN | cellular (Potential).       | 2  | TGGCTGGGGGG      | 0.552 |                              |
| + | 2  | 652_654   |                   | NM_004983    | NP_004974     | Q92806  | IRK9_HUMAN  | me=M2; (By similarity).     | 2  | TATCGTCTGCT      | 0.64  |                              |
| + | 56 | 8916      |                   | NM_031935    | NP_114141     | Q96RW7  | HMCN1_HUMAN | like C2-type 27.            | 23 | TTTATCCAGTGC     | 0.463 |                              |
| + | 4  | 635_646   |                   | NM_001104548 | NP_001098018  |         |             |                             | 0  | Tagcagcagcagca   | 0.283 | 30217;rs72359595;rs150848171 |
| + | 4  | 1558      | fd.1_Frame_Shift  | NM_014777    | NP_055592     | Q14146  | URB2_HUMAN  |                             | 3  | GTTTTGGGGGT      | 0.567 |                              |
| + | 5  | 2472      |                   | NM_000740    | NP_000731     | P20309  | ACM3_HUMAN  | smic (By similarity).       | 5  | GTGACAAAAAA/     | 0.502 |                              |
| + | 1  | 153_154   |                   | NM_001004688 | NP_001004688  | Q96R28  | OR2M2_HUMAN | lasmic (Potential).         | 4  | TACCTGGACACC     | 0.53  |                              |
| - | 20 | 2528_2530 | E813del SFMBT2_   | NM_001029880 | NP_001025051  | Q5VUG0  | SMBT2_HUMAN |                             | 8  | GTCTCTCCTCT      | 0.596 |                              |
| - | 9  | 1622_1624 | RNA uc001ive.1_   | NM_018109    | NP_060579     | Q9NVV4  | PAPD1_HUMAN |                             | 1  | TGATGTCTCCTC     | 0.507 |                              |
| - | 2  | 1199      | p.F229fs CHST15   | NM_015892    | NP_056976     | Q7LFX5  | CHSTF_HUMAN | lenal (Potential).          | 1  | CGTCGAAGGTG      | 0.647 |                              |
| - | 2  | 598_600   | 1orf95_uc001nxs.  | NM_001144936 | NP_001138408  | C9JLR9  | CK095_HUMAN | Glu-rich.                   | 0  | tcttcttcttctctct | 0.532 |                              |
| + | 2  | 185_187   |                   | NM_015516    | NP_056331     | Q8WUA8  | TSK_HUMAN   |                             | 0  | GCCCCGCTGCTGC    | 0.616 |                              |
| - | 3  | 369       | _p.P46fs PRDM1C   | NM_020228    | NP_064613     | Q9NQV6  | PRD10_HUMAN |                             | 1  | GCTGTGGGGGG      | 0.547 |                              |
| + | 9  | 608_610   | 1ruq.1_In_Frame   | NM_001031698 | NP_001026868  | Q6NWWY9 | PR40B_HUMAN |                             | 5  | GAAACAGCAGC.     | 0.64  |                              |
| + | 1  | 546       | 1_Intron GEFT_uc  | NM_182947    | NP_891992     | Q86VW2  | ARHGP_HUMAN |                             | 0  | GCCCCGGGGGG      | 0.607 |                              |
| + | 17 | 2575_2577 |                   | NM_015267    | NP_056082     | O14529  | CUX2_HUMAN  | Poly-Ser.                   | 6  | GCTGTCTCTCT      | 0.749 |                              |
| - | 13 | 2476_2478 | 0twc.1_In_Frame_  | NM_007039    | NP_008970     | Q16825  | PTN21_HUMAN | Poly-Glu.                   | 4  | CTCGTCTCTCT      | 0.704 |                              |
| - | 8  | 942       | C2_uc001zbl.1_5'  | NM_004667    | NP_004658     | O95714  | HERC2_HUMAN |                             | 13 | ATGCTTCTGGC      | 0.592 |                              |
| + | 12 | 2039      | bbi.2_Frame_Shif  | NM_003246    | NP_003237     | P07996  | TSP1_HUMAN  | alcium-binding (Potential). | 6  | CCCTGCCCCC       | 0.572 |                              |
| - | 1  | 694       |                   | NM_203349    | NP_976224     | Q6S5L8  | SHC4_HUMAN  | CH2.                        | 5  | CATGGGGGGA       | 0.627 |                              |
| - | 5  | 1150_1151 | ue.1_Frame_Shif   | NM_001079533 | NP_001073001  | Q9BZB8  | CPEB1_HUMAN |                             | 2  | CTGGCCTCTCT      | 0.579 |                              |
| - | 2  | 292_294   | 02cpi.1_In_Frame  | NM_182563    | NP_872369     | Q6PL45  | CP079_HUMAN | . Helical; (Potential).     | 1  | Cagcaccagcagca   | 0.562 |                              |

|   |    |           |                    |              |              |        |             |                             |    |                  |       |             |
|---|----|-----------|--------------------|--------------|--------------|--------|-------------|-----------------------------|----|------------------|-------|-------------|
| - | 3  | 385_387   | P2_uc010byn.2_lr   | NM_024816    | NP_079092    | Q9H5N1 | RABE2_HUMAN | $\gamma$ -Gln.   Potential. | 3  | :AGTCCTGCTGC     | 0.527 |             |
| + | 10 | 1584      | 10vjk.1_intron LRF | NM_018296    | NP_060766    | Q1X8D7 | LRC36_HUMAN |                             | 0  | :CAGAACCCCCC     | 0.527 |             |
| - | 3  | 888_890   | j1.1_in_Frame_De   | NM_001082486 | NP_001075955 | Q96AP0 | ACD_HUMAN   |                             | 1  | :TCCTGCAGCAG     | 0.65  |             |
| + | 3  | 433       | l_p.T16fs KIAA01e  | NM_014615    | NP_055430    | Q14687 | GSE1_HUMAN  |                             | 5  | :CAGCACCCCCC     | 0.687 |             |
| - | 16 | 2618      | vsf.1_Frame_Shift  | NM_014389    | NP_055204    | Q8IZL8 | PELP1_HUMAN | Pro-rich.                   | 2  | :TGGCAGGGGGG     | 0.617 |             |
| - | 1  | 338_340   | P1_uc010vsf.1_5'   | NM_014389    | NP_055204    | Q8IZL8 | PELP1_HUMAN |                             | 2  | :TCTCCAGCAGC/    | 0.695 |             |
| - | 1  | 143_145   | HX33_uc010clf.2_   | NM_020162    | NP_064547    | Q9H6R0 | DHX33_HUMAN |                             | 2  | :CCGGCCTCCTC     | 0.724 |             |
| - | 7  | 934       | ggo.1_Frame_Shif   | NM_020360    | NP_065093    | Q9NRY6 | PLS3_HUMAN  | smic (By similarity).       | 0  | :CCAGGCCCCCC     | 0.612 |             |
| + | 1  | 24_26     |                    | NM_001005271 | NP_001005271 | Q12873 | CHD3_HUMAN  |                             | 1  | AGggcagcaggagga  | 0.094 |             |
| - | 1  | 233_235   | dx.3_in_Frame_Dt   | NM_020772    | NP_065823    | Q7Z417 | NUFP2_HUMAN | His-rich.                   | 4  | ggtgatgatggtggtg | 0.276 | rs1054145   |
| - | 5  | 975       |                    | NM_012285    | NP_036417    | Q9UQ05 | KCNH4_HUMAN | lasmic (Potential).         | 1  | :CGAGACCCCCC     | 0.607 |             |
| + | 4  | 505_507   | 10wsa.1_in_Fram    | NM_014738    | NP_055553    | Q12767 | K0195_HUMAN | ical; (Potential).          | 1  | GCCGTGCTGCT      | 0.675 |             |
| - | 5  | 1361_1363 |                    | NM_003655    | NP_003646    | O00257 | CBX4_HUMAN  | interaction with BMI1.      | 2  | :GACGGCgtggtgg   | 0.507 | rs3833850   |
| - | 2  | 117       | N5_uc002mat.1_in   | NM_052972    | NP_443204    | P02750 | A2GL_HUMAN  |                             | 1  | GGTGACCCCCC      | 0.597 |             |
| - | 1  | 186       | 5A41_uc010dut.2_   | NM_173637    | NP_775908    | Q8N5S1 | S2541_HUMAN | Pro-rich.                   | 0  | ggagggtggggggga  | 0.428 |             |
| + | 5  | 714       | l2mcp.2_Frame_S    | NM_020533    | NP_065394    | Q9GZU1 | MCLN1_HUMAN |                             | 1  | :TGGATCCCCC      | 0.637 | rs145706318 |
| - | 20 | 2254      |                    | NM_012335    | NP_036467    | O00160 | MYO1F_HUMAN | IQ.                         | 3  | :CTCCTCGTACTT    | 0.637 |             |
| - | 1  | 207_208   | oad.1_Frame_Shif   | NM_198538    | NP_940940    | Q6UWP8 | SBSN_HUMAN  |                             | 1  | CCCACCTCTCTC     | 0.579 |             |
| + | 9  | 1289      |                    | NM_005178    | NP_005169    | P20749 | BCL3_HUMAN  | Pro/Ser-rich.               | 2  | :AGTCTCCCCC      | 0.498 |             |
| + | 13 | 1642      | 16_uc010xxh.1_5'   | NM_006509    | NP_006500    | Q01201 | RELB_HUMAN  |                             | 1  | :TGCTGCCCCCG     | 0.697 |             |
| - | 1  | 1911_1913 |                    | NM_002152    | NP_002143    | P23327 | SRCH_HUMAN  |                             | 1  | :tcagcccctcctctc | 0.409 |             |
| + | 6  | 694       | uc002pqp.2_5'UT    | NM_024682    | NP_078958    | Q9HA65 | TBC17_HUMAN |                             | 0  | :GGACTCCCGCC     | 0.627 |             |
| + | 1  | 69_71     | J10yct.1_in_Frame  | NM_014441    | NP_055256    | Q9Y336 | SIGL9_HUMAN |                             | 1  | :GACATGCTGCT     | 0.611 |             |
| + | 12 | 1349      | RE_uc002rft.2_Fr   | NM_199194    | NP_954664    | Q9NXR7 | BRE_HUMAN   | UEV-like 2.                 | 3  | :AGGCCCAAAAAA    | 0.448 |             |
| + | 1  | 1958_1959 |                    | NM_000189    | NP_000180    | P52789 | HXK2_HUMAN  | hydrophobic.                | 2  | CTTCTTCACGGA     | 0.653 |             |
| + | 2  | 175_177   |                    | NM_022134    | NP_071417    | Q9H3Q3 | G3ST2_HUMAN | type II membrane protein;   | 0  | :GTCATCCTCCT     | 0.631 |             |
| + | 6  | 588_590   | J15_uc002zsr.2_in  | NM_001003891 | NP_001003891 | Q96RN5 | MED15_HUMAN | Poly-Gln.                   | 1  | gcagttccagcagcag | 0.217 |             |
| - | 53 | 6184      | p.D376fs PI4KA_u   | NM_058004    | NP_477352    | P42356 | PI4KA_HUMAN | PI3K/PI4K.                  | 4  | :CGTGTCCAACA     | 0.617 |             |
| - | 3  | 428_430   | _19DD>D TFIP11_    | NM_012143    | NP_036275    | Q9UBB9 | TFP11_HUMAN | Poly-Asp.                   | 0  | GCTCGTCATCAT     | 0.532 | rs145794160 |
| + | 5  | 474       | 2_3'UTR POLR2F_    | NM_021974    | NP_068809    | P61218 | RPAB2_HUMAN |                             | 1  | AGACTGGGGGG      | 0.512 |             |
| + | 14 | 1647      | Jgm.2_Frame_Shif   | NM_006254    | NP_006245    | Q05655 | KPCD_HUMAN  | rotein kinase.              | 9  | TCAACGGGGGG      | 0.602 |             |
| + | 21 | 2524_2526 | lbuy.1_in_Frame_   | NM_000283    | NP_000274    | P35913 | PDE6B_HUMAN |                             | 0  | GAGAAGGAGGA      | 0.562 |             |
| + | 1  | 3191_3192 |                    | NM_175918    | NP_787114    | Q8N1N5 | CRPAK_HUMAN |                             | 0  | :CCTGCTCATGTC    | 0.644 |             |
| + | 1  | 3654_3655 |                    | NM_175918    | NP_787114    | Q8N1N5 | CRPAK_HUMAN | 6                           | 0  | CTGCTCACACGT     | 0.678 |             |
| - | 7  | 944       |                    | NM_173536    | NP_775807    | Q8N1C3 | GBRG1_HUMAN | ellular (Probable).         | 2  | :AGGTCAAAAAA     | 0.294 |             |
| + | 2  | 205       | l3ifb.2_Frame_Shif | NM_199327    | NP_955359    | O43609 | SPY1_HUMAN  |                             | 3  | :AAATCAACATGC    | 0.428 |             |
| + | 14 | 1615      | S14_uc003mgi.2_    | NM_006480    | NP_006471    | O43566 | RGS14_HUMAN |                             | 1  | :AGCGTCCCCCA     | 0.577 |             |
| - | 8  | 1648_1649 | _3_Ins_p.225_226in | NM_000332    | NP_000323    | P54253 | ATX1_HUMAN  |                             | 4  | TGCTGAGGtgctgc   | 0.366 |             |
| - | 3  | 1001      | _Shift_Del_p.K141  | NM_031922    | NP_114128    | Q96D71 | REPS1_HUMAN |                             | 2  | :ATCCCTTTTTTC/   | 0.478 |             |
| + | 9  | 3522_3524 | _2_3'UTR GRM1_uc   | NM_000838    | NP_000829    | Q13255 | GRM1_HUMAN  | Cytoplasmic (Potential).    | 19 | :TCTCCAGCAGC/    | 0.66  |             |
| + | 13 | 1711      | ze.1_Frame_Shift   | NM_031414    | NP_113602    | Q9BXU1 | STK31_HUMAN |                             | 9  | CGCAATGGATAA     | 0.363 |             |
| - | 1  | 310_312   | ame_Del_p.72_73    | NM_005522    | NP_005513    | P49639 | HXA1_HUMAN  | Poly-His.                   | 3  | ggggtggcagtggtgg | 0.527 | rs10951154  |
| + | 1  | 539_540   | .1_5'Flank ZCWP    | NM_019606    | NP_062552    | Q7L2J0 | MEPCE_HUMAN | Gly-rich.                   | 1  | :CACCTGGGGGC     | 0.693 |             |
| + | 6  | 972       | ce_Site_p.Q108_s   | NM_014491    | NP_055306    | O15409 | FOXP2_HUMAN |                             | 8  | TGATACcagcagca   | 0.414 | rs111544687 |
| - | 12 | 1351_1352 | koj.1_Frame_Shift  | NM_018077    | NP_060547    | Q9NW13 | RBM28_HUMAN | RRM 3.                      | 2  | :AACCTTGAGCTG    | 0.45  |             |
| + | 1  | 528       |                    | NM_001001656 | NP_001001656 | Q8NGU2 | OR9A4_HUMAN | ellular (Potential).        | 1  | GAACAATTTTTTT    | 0.383 |             |
| - | 7  | 1282_1284 | 1kvs.1_in_Frame_   | NM_007349    | NP_031375    | Q6ZW49 | PAXI1_HUMAN | Gln-rich.                   | 5  | :ACCGGtgctgctc   | 0.369 |             |

|   |     |                             |              |              |         |              |                             |     |                    |       |                       |
|---|-----|-----------------------------|--------------|--------------|---------|--------------|-----------------------------|-----|--------------------|-------|-----------------------|
| + | 11  | 2081_2082 kvv.1_Frame_Shift | NM_053043    | NP_444271    | Q96EV2  | RBM33_HUMAN  | Pro-rich.                   | 1   | CTGCCACACAC        | 0.53  |                       |
| + | 1   | 210 _p.P59fs NEFM_u         | NM_005382    | NP_005373    | P07197  | NFM_HUMAN    | Head.                       | 1   | GCCCCGCGCCT        | 0.706 |                       |
| - | 9   | 1219                        | NM_152413    | NP_689626    | Q8NHS2  | AATC2_HUMAN  |                             | 1   | STTCTTGGGGAT       | 0.468 |                       |
| + | 4   | 327_328  _p.L53fs SDCBP_    | NM_005625    | NP_005616    | O00560  | SDCB1_HUMAN  |                             | 0   | GGGCTGAGTTT        | 0.342 |                       |
| + | 34  | 7676_7678                   | NM_017780    | NP_060250    | Q9P2D1  | CHD7_HUMAN   | ential. Poly-Arg.           | 9   | CAGCGGAGGAG        | 0.512 |                       |
| + | 11  | 9751_9753                   | NM_024721    | NP_078997    | Q86UP3  | ZFHX4_HUMAN  | Pro-rich.                   | 15  | ctccaccacctctctctc | 0.379 |                       |
| - | 13  | 1637_1639  .I506del TSNARE  | NM_145003    | NP_659440    | Q96NA8  | TSNA1_HUMAN  | . Helical; (Potential).     | 0   | TTGGCGATGATG       | 0.414 | rs142964918           |
| - | 11  | 2666_2668                   | NM_015117    | NP_055932    | Q8IXZ2  | ZC3H3_HUMAN  | Poly-Ser. p.S879F(1)        | 1   | ggggatgaggaggag    | 0.552 | rs2272753;rs137878905 |
| + | 3   | 411 zay.2_Frame_Shift       | NM_001916    | NP_001907    | P08574  | CY1_HUMAN    | ytochrome c.                | 0   | CGCCTCTGCC         | 0.602 |                       |
| - | 4   | 3699                        | NM_001145196 | NP_001138668 | Q5VVP1  | F75A6_HUMAN  |                             | 0   | .GGCATGGTGCG       | 0.493 |                       |
| + | 3   | 1021_1023  bag.1_In_Frame_  | NM_006981    | NP_008912    | Q92570  | NR4A3_HUMAN  | Poly-His.                   | 173 | tcaccatcaccaccacc  | 0.483 |                       |
| - | 8   | 1013 mwc.1_Frame_Shift      | NM_024597    | NP_078873    | Q8IWC1  | MA7D3_HUMAN  |                             | 4   | CACCTGGGGGG        | 0.532 |                       |
| - | 28  | 4158  c001ayw.2_5'Flan      | NM_017940    | NP_060410    | Q3BBV0  | NBPF1_HUMAN  | NBPF 7.                     | 0   | AGAAAAGCCAAC       | 0.433 |                       |
| + | 1   | 1263_1265                   | NM_004455    | NP_004446    | Q92935  | EXTL1_HUMAN  | enial (Potential).          | 1   | CTCGCTCTCTC        | 0.606 |                       |
| - | 4   | 983  sd.2_Frame_Shift       | NM_014654    | NP_055469    | O75056  | SDC3_HUMAN   | ellular (Potential).        | 2   | .CTGGGCCCCC        | 0.607 |                       |
| + | 2   | 278  D1_uc001cab.2_F        | NM_018067    | NP_060537    | Q3KQU3  | MA7D1_HUMAN  | Pro-rich.                   | 5   | .CAGGACCCCC        | 0.612 | rs145462639           |
| + | 7   | 799                         | NM_033055    | NP_149044    | Q96MC6  | HIAT1_HUMAN  | lasmic (Potential).         | 0   | TCCAGCTTTTTT       | 0.388 |                       |
| - | 4   | 296_297                     | NM_001010979 | NP_001010979 | Q5VU69  | CA189_HUMAN  |                             | 0   | .CATCTGATTTAG      | 0.475 |                       |
| - | 2   | 1126  fpt.1_Frame_Shift     | NM_030980    | NP_112242    | Q9H9L3  | I20L2_HUMAN  | Exonuclease.                | 2   | GTTGAGGGGGG        | 0.557 |                       |
| + | 105 | 16580  grs.1_Frame_Shift    | NM_031935    | NP_114141    | Q96RW7  | HMCN1_HUMAN  | alcium-binding (Potential). | 23  | ACCTTTGGAAGT       | 0.398 |                       |
| - | 21  | 3806  Shift_Del_p.A955      | NM_003607    | NP_003598    | Q5VT25  | MRCCKA_HUMAN |                             | 11  | AAATGCCAAGA        | 0.338 |                       |
| + | 10  | 3102                        | NM_032199    | NP_115575    | Q14865  | ARI5B_HUMAN  |                             | 4   | CAGGAAAAAG         | 0.607 |                       |
| + | 2   | 234_235  sz.2_5'UTR LDB3_   | NM_007078    | NP_009009    | O75112  | LDB3_HUMAN   | PDZ.                        | 1   | TCAAGTCTGCCA       | 0.614 |                       |
| + | 1   | 842  B_uc010rcr.1_Fr        | NM_000922    | NP_000913    | Q13370  | PDE3B_HUMAN  | ical; (Potential).          | 0   | TACCTGGGGGA        | 0.731 |                       |
| + | 6   | 878  nse.1_Frame_Shift      | NM_001127392 | NP_001120864 | Q9Y2G1  | MRF_HUMAN    | DT80. Pro-rich.             | 1   | .TGAATCCCCC        | 0.637 |                       |
| - | 4   | 752  ame_Shift_Del_p.(      | NM_001077241 | NP_001070709 | Q8N413  | S2545_HUMAN  | e=3; (Potential). Solcar 2. | 0   | .AGGAACCCCC        | 0.657 |                       |
| + | 5   | 700_701  V1_uc001omk.3_f    | NM_007103    | NP_009034    | P49821  | NDUV1_HUMAN  |                             | 1   | TGATTGGCAAG        | 0.569 |                       |
| - | 3   | 310  _5'UTR C15orf52_       | NM_207380    | NP_997263    | Q6ZUT6  | CO052_HUMAN  |                             | 1   | .GCCATCCCCC        | 0.647 |                       |
| - | 36  | 6678  4310 MI0015840_       | NM_016642    | NP_057726    | Q9NRC6  | SPTN5_HUMAN  | Spectrin 18.                | 2   | .GCCATCAGCAG       | 0.682 |                       |
| + | 7   | 1780_1782.D191del BLM_uc    | NM_000057    | NP_000048    | P54132  | BLM_HUMAN    | Poly-Asp.                   | 6   | ACTTTGATGATC       | 0.374 |                       |
| - | 3   | 494  X33_uc002gcb.2_        | NM_020162    | NP_064547    | Q9H6R0  | DHX33_HUMAN  | ase ATP-binding.            | 2   | .CTGGTGTCTTCT      | 0.363 |                       |
| - | 1   | 175_177  2hdx.3_In_Frame_   | NM_020772    | NP_065823    | Q7Z417  | NUFP2_HUMAN  | His-rich.                   | 4   | tggtgctgctgctgctg  | 0.251 |                       |
| + | 4   | 370  TXBP4_uc010dca         | NM_178509    | NP_848604    | Q6ZWJ1  | STXB4_HUMAN  | PDZ.                        | 1   | TTCTGGAGGAC        | 0.383 |                       |
| + | 3   | 285_286  Shift_Ins_p.I60fs  | NM_018696    | NP_061166    | Q9H777  | RNZ1_HUMAN   |                             | 0   | CTTCATCACACA       | 0.411 |                       |
| + | 6   | 1225  SMAD4_uc002lfb.:      | NM_005359    | NP_005350    | Q13485  | SMAD4_HUMAN  | p.0?(35) p.?(2)             | 369 | .ATACTGGGGGG       | 0.443 |                       |
| - | 4   | 734_735  xhl.1_Frame_Shift  | NM_031304    | NP_112594    | Q9BU89  | DOHH_HUMAN   | G-like PBS-type 3.          | 0   | .CAGGGCGGCC        | 0.723 |                       |
| - | 8   | 1079_1081  26_uc002nee.2_   | NM_006387    | NP_006378    | Q8IWX8  | CHERP_HUMAN  | Gln-rich.                   | 2   | gctgctgtgctgctgctg | 0.552 |                       |
| + | 23  | 5029_5030  Oegx.2_Frame_St  | NM_020971    | NP_066022    | Q9H254  | SPTN4_HUMAN  | Spectrin 14.                | 5   | TGAGGACAAGGC       | 0.708 |                       |
| - | 2   | 1150_1151                   | NM_152600    | NP_689813    | Q8NAF0  | ZN579_HUMAN  | Gly-rich.                   | 0   | TTCTGCCCTTCT       | 0.574 | 478862;rs144853314    |
| + | 7   | 1477  iBL5_uc002rid.2_F     | NM_021831    | NP_068603    | Q8NDL9  | CBPC5_HUMAN  |                             | 2   | .ACCATCCCCC        | 0.512 |                       |
| - | 9   | 1691  uc002rjw.1_Frame      | NM_001521    | NP_001512    | Q8WUA4  | TF3C2_HUMAN  |                             | 2   | .CAAGGCCCCAG       | 0.597 |                       |
| + | 6   | 2201  ed.2_Frame_Shift      | NM_181453    | NP_852118    | Q8IWIJ2 | GCC2_HUMAN   | Potential.                  | 1   | .AAGTATTGTAC       | 0.333 |                       |
| + | 27  | 3301  Ozgs.1_Frame_Sh       | NM_001080539 | NP_001074008 | Q8NCX0  | CC150_HUMAN  |                             | 0   | .CTTCTGGGGAA       | 0.423 |                       |
| + | 17  | 2335  M8_uc010fyj.2_In      | NM_024080    | NP_076985    | Q7Z2W7  | TRPM8_HUMAN  | Name=3; (Potential).        | 4   | .CCACACCCCC        | 0.577 |                       |
| + | 4   | 1167  O2px.2_Frame_ξ        | NM_033421    | NP_219489    | Q969T3  | SNX21_HUMAN  |                             | 2   | .ACCACCCCCC        | 0.617 |                       |
| + | 1   | 237_239  3PB_uc002xvh.2_f   | NM_005194    | NP_005185    | P17676  | CEBPB_HUMAN  | or Lys-174 sumoylation.     | 0   | CCCTGCCCGCG        | 0.65  |                       |
| - | 2   | 208  zzv.1_Frame_Shift      | NM_016045    | NP_057129    | Q9Y3B1  | SLMO2_HUMAN  | REL/MSF1.                   | 1   | .CACTTGGGTTTC      | 0.453 |                       |



|   |    |           |                    |              |              |        |             |                              |    |                    |       |             |
|---|----|-----------|--------------------|--------------|--------------|--------|-------------|------------------------------|----|--------------------|-------|-------------|
| + | 5  | 751       | p.F183fs SLC17A1   | NM_022082    | NP_071365    | Q9BYT1 | S17A9_HUMAN | ical; (Potential).           | 2  | :TATTTCTCCGGC      | 0.642 |             |
| + | 2  | 256       |                    | NM_172201    | NP_751951    | Q9Y6J6 | KCNE2_HUMAN |                              | 0  | FCCAAGCCAAAG       | 0.458 |             |
| - | 4  | 571_573   | i.1_RNA PTTG1IP    | NM_004339    | NP_004330    | P53801 | PTTG_HUMAN  | Cytoplasmic (Potential).     | 1  | TCCTGCAGCAGC       | 0.616 |             |
| + | 2  | 378_380   |                    | NM_033318    | NP_201575    | Q9H4I9 | CV032_HUMAN | Asp/Glu-rich.                | 1  | :AGAGGATGATG       | 0.478 | rs141840500 |
| - | 2  | 498_500   | odm.1_In_Frame_I   | NM_173467    | NP_775738    | Q8IVS2 | FABD_HUMAN  |                              | 1  | :AATCCAGCAGC       | 0.532 |             |
| - | 1  | 2125_2126 | 3cuf.1_Frame_Shif  | NM_001407    | NP_001398    | Q9NYQ7 | CELR3_HUMAN | r (Potential). Cadherin 3.   | 11 | :GCATACTCTCTC      | 0.589 |             |
| - | 7  | 1792      | iedn.2_Frame_Shif  | NM_001146156 | NP_001139628 | P49841 | GSK3B_HUMAN | rotein kinase.               | 2  | ACCTTGATTATTT      | 0.254 |             |
| - | 7  | 2209_2211 | 1blc.1_In_Frame_   | NM_001017395 | NP_001017395 | O94876 | TMCC1_HUMAN | Potential.                   | 1  | :CCACCTGCTGCT      | 0.581 |             |
| + | 7  | 1596_1597 | igcg.2_Frame_Shif  | NM_021923    | NP_068742    | Q8N441 | FGRL1_HUMAN | Cytoplasmic (Potential).     | 0  | agacatccacacac     | 0.46  |             |
| + | 1  | 3991_3992 |                    | NM_175918    | NP_787114    | Q8N1N5 | CRPAK_HUMAN |                              | 0  | CTGCTCACACGT       | 0.658 |             |
| - | 15 | 1909      | o.N566fs PROM1_    | NM_006017    | NP_006008    | O43490 | PROM1_HUMAN | ellular (Potential).         | 7  | CCTCTATTTTTTT      | 0.428 |             |
| - | 15 | 2846_2847 | cah.1_Frame_Shif   | NM_004439    | NP_004430    | P54756 | EPHA5_HUMAN | Potential). Protein kinase.  | 24 | :CATTTGATTGG       | 0.401 |             |
| + | 3  | 948       | orf35_uc003jqy.2_F | NM_153706    | NP_714917    | Q8NE22 | CE035_HUMAN |                              | 1  | :GATATCAAAGG       | 0.373 |             |
| + | 5  | 378_379   | k.1_Frame_Shift_I  | NM_006083    | NP_006074    | Q13123 | RED_HUMAN   |                              | 1  | AAATTGAGAGAG       | 0.46  |             |
| + | 1  | 1027      |                    | NM_018938    | NP_061761    | Q9Y5E5 | PCDB4_HUMAN | Extracellular (Potential).   | 3  | :ACAATCCCCCA       | 0.443 |             |
| - | 2  | 570_572   | 0jgi.1_In_Frame_C  | NM_001127496 | NP_001120968 | Q9C004 | SPY4_HUMAN  | Poly-Ser.                    | 2  | :GATGTGCTGCT       | 0.66  |             |
| + | 15 | 2605_2606 | 3lny.2_Frame_Shif  | NM_018989    | NP_061862    | Q9P2N5 | RBM27_HUMAN | Potential.                   | 3  | :GTGCTTAAAAAA      | 0.351 |             |
| + | 10 | 987       | 134_uc003rdd.2_F   | NM_024909    | NP_079185    | Q5SQI0 | ATAT_HUMAN  |                              | 0  | ACCCTGGGGGGC       | 0.602 |             |
| - | 3  | 1236_1237 | me_Shift_Del_p.Y   | NM_001350    | NP_001341    | Q9UER7 | DAXX_HUMAN  |                              | 23 | :TGGCCTATAGTC      | 0.525 |             |
| - | 2  | 168       | .2_5'UTR SRPK1_    | NM_003137    | NP_003128    | Q96SB4 | SRPK1_HUMAN |                              | 1  | :GCGCTTGGCTCT      | 0.547 |             |
| - | 27 | 8038_8040 |                    | NM_001080495 | NP_001073964 | O15417 | TNC18_HUMAN | Ser-rich.                    | 0  | :gccactactgctgctgc | 0.483 |             |
| - | 2  | 601_602   |                    | NM_022728    | NP_073565    | Q96NK8 | NDF6_HUMAN  | lization signal (Potential). | 2  | :GTTGCTTTTTTT      | 0.396 |             |
| + | 3  | 358_359   | 4K1_uc003uab.2_f   | NM_002314    | NP_002305    | P53667 | LIMK1_HUMAN | l zinc-binding 1.            | 3  | ACTATGAGAAGG       | 0.614 |             |
| + | 6  | 569_571   | RIP1_uc011kkq.1_   | NM_024653    | NP_078929    | Q9H875 | PKRI1_HUMAN | Poly-Glu.                    | 1  | AACAGAGGAGG        | 0.567 |             |
| - | 20 | 2915      | _p.P781fs TNPO3    | NM_012470    | NP_036602    | Q9Y5L0 | TNPO3_HUMAN |                              | 5  | :GTATAGGGGGGG      | 0.483 |             |
| - | 60 | 8167      | Shift_Del_p.R2704  | NM_006904    | NP_008835    | P78527 | PRKDC_HUMAN | KIP-binding.                 | 34 | CCAGCCTTTTTT       | 0.498 |             |
| - | 14 | 1846      | p.P525fs EIF2C2_   | NM_012154    | NP_036286    | Q9UKV8 | AGO2_HUMAN  | Piwi.                        | 0  | :CGGCGGGGGGG       | 0.647 | rs148575703 |
| - | 5  | 474       | _p.A146fs TSTA3_   | NM_003313    | NP_003304    | Q13630 | FCL_HUMAN   |                              | 1  | :CTCTTGGCATA       | 0.672 |             |
| + | 1  | 475_476   | msh.2_Frame_Shif   | NM_014282    | NP_055097    | Q5JVS0 | HABP4_HUMAN |                              | 1  | :GCCCCGGGGGGC      | 0.782 |             |
| + | 14 | 1354_1356 |                    | NM_015354    | NP_056169    | Q5SRE5 | NU188_HUMAN |                              | 7  | :TTCTCTCCCCA       | 0.483 |             |
| + | 6  | 1104_1106 | 4ezx.2_In_Frame_   | NM_001163280 | NP_001156752 | O43719 | HTSF1_HUMAN | Poly-Lys.                    | 3  | :CTCAAAGAAGA       | 0.335 |             |
| - | 4  | 1161      |                    | NM_005334    | NP_005325    | P51610 | HCFC1_HUMAN |                              | 2  | :ATTGCTTTTTTCG     | 0.582 |             |
| - | 8  | 877_879   |                    | NM_001561    | NP_001552    | Q07011 | TNR9_HUMAN  | ential). Interz p.E250G(1)   | 4  | TCCTCCTTCTCT       | 0.379 |             |
| + | 11 | 2611_2612 | ibp.1_Frame_Shif   | NM_015001    | NP_055816    | Q96T58 | MINT_HUMAN  | Arg-rich.                    | 15 | :AGTGAGAGAGAC      | 0.431 |             |
| - | 2  | 497_498   | t.1_RNA FUCA1_t    | NM_000147    | NP_000138    | P04066 | FUCO_HUMAN  |                              | 1  | :AGTTCGAAGAC       | 0.51  |             |
| + | 1  | 1263_1265 |                    | NM_004455    | NP_004446    | Q92935 | EXTL1_HUMAN | renal (Potential).           | 1  | :CCTGCCTCCTC       | 0.606 |             |
| + | 34 | 4444_4446 | o.E504del MACF1_   | NM_012090    | NP_036222    | Q9UPN3 | MACF1_HUMAN | Poly-Glu.                    | 16 | GTCTGGAGGAG        | 0.389 |             |
| + | 18 | 2455      | _Shift_Del_p.P398  | NM_015112    | NP_055927    | Q6P0Q8 | MAST2_HUMAN | rotein kinase.               | 11 | :GTCCCTTTTTTTI     | 0.552 |             |
| - | 1  | 145       | way.2_5'Flank MIE  | NM_024763    | NP_079039    | Q5VTH9 | WDR78_HUMAN |                              | 2  | :ACCCCTTTTTTTI     | 0.622 |             |
| - | 7  | 727       | 1dfs.2_Frame_Shif  | NM_203350    | NP_976225    | O95218 | ZRAB2_HUMAN | quired for nuclear targeting | 2  | CTTGAGGGGGGA       | 0.383 |             |
| - | 2  | 1873_1875 | wne.1_In_Frame_I   | NM_007113    | NP_009044    | Q07283 | TRHY_HUMAN  | roximate tandem repeats.     | 5  | CCTCCGGCTCC1       | 0.68  |             |
| - | 3  | 928_931   |                    | NM_001122965 | NP_001116437 | Q6XPR3 | RPTN_HUMAN  | Gln-rich.                    | 0  | GCCTTGCTGTGTC      | 0.49  |             |
| - | 3  | 5776_5777 | uc001ezv.2_Intron  | NM_001014342 | NP_001014364 | Q5D862 | FILA2_HUMAN |                              | 17 | TTGGCTGTGTGT       | 0.515 | rs140875805 |
| - | 2  | 1126      | 1fpt.1_Frame_Shif  | NM_030980    | NP_112242    | Q9H9L3 | I20L2_HUMAN | Exonuclease.                 | 2  | :GTTGAGGGGGGG      | 0.557 |             |
| + | 1  | 903_904   | uc001fso.1_RNA     | NM_001004472 | NP_001004472 | Q8NGX6 | O10R2_HUMAN | Name=7; (Potential).         | 3  | :ATTGTCACTCC       | 0.416 |             |
| + | 3  | 338_340   |                    | NM_001102566 | NP_001096036 | A6NKN8 | PC4L1_HUMAN |                              | 0  | AGGCGGAGGAG        | 0.488 |             |
| + | 7  | 1574_1576 | ie_Del_p.T418del   | NM_005807    | NP_005798    | Q92954 | PRG4_HUMAN  | ats of K-X-P-X-P-T-T-X. 21   | 1  | :GCACCCACCAC       | 0.645 |             |

|   |    |                             |              |              |        |              |                             |             |                    |       |                    |
|---|----|-----------------------------|--------------|--------------|--------|--------------|-----------------------------|-------------|--------------------|-------|--------------------|
| - | 32 | 4715_4717Del_p.1437_1438F   | NM_033056    | NP_149045    | Q96QU1 | PCD15_HUMAN  | Cytoplasmic (Potential).    | 13          | Gggcggaggcgcggr    | 0.438 | rs12246234         |
| + | 2  | 234_235 sz.2_5'UTR LDB3_    | NM_007078    | NP_009009    | O75112 | LDB3_HUMAN   | PDZ.                        | 1           | TCAAGTCTGCCA       | 0.614 |                    |
| + | 7  | 559 Shift_Del_p.K28fs       | NM_018063    | NP_060533    | Q9NRZ9 | HELLS_HUMAN  |                             | 2           | GTGGCTAAAAAA       | 0.214 |                    |
| + | 1  | 758                         | NM_001127389 | NP_001120861 | F5GZ66 | F5GZ66_HUMAN |                             | 0           | TGGCAGGGCGCG       | 0.736 |                    |
| + | 1  | 268_270                     | NM_001004460 | NP_001004460 | Q9H208 | O10A2_HUMAN  | Name=3; (Potential).        | 1           | TGTATTTCTTCTT      | 0.517 |                    |
| + | 3  | 514 J1nqk.2_Frame_Sl        | NM_178031    | NP_821174    | Q24JP5 | T132A_HUMAN  | cellular (Potential).       | 1           | GTGGTCCCCCC        | 0.587 |                    |
| - | 2  | 285_286 .2_Splice_Site ST>  | NM_003164    | NP_003155    | Q13190 | STX5_HUMAN   | asmic (Potential).          | 2           | TCACTGGGGGC        | 0.629 |                    |
| + | 17 | 3442_3444 rpn.1_In_Frame_D  | NM_012308    | NP_036440    | Q9Y2K7 | KDM2A_HUMAN  |                             | 9           | gaggaagaggaggag    | 0.473 |                    |
| - | 3  | 626_628                     | NM_006248    | NP_006239    |        |              |                             | 0           | TCCTGGAGGAG        | 0.591 |                    |
| - | 3  | 319_320                     | NM_006248    | NP_006239    |        |              |                             | 0           | TTTCTGGAGGT        | 0.614 |                    |
| - | 3  | 314_315                     | NM_006248    | NP_006239    |        |              |                             | 0           | TGGAGGTGGGGC       | 0.614 |                    |
| - | 3  | 189_191                     | NM_006248    | NP_006239    |        |              |                             | 0           | GAGGAGATGGG        | 0.557 |                    |
| + | 10 | 1001_1002>_Shift_Ins_p.l294 | NM_003667    | NP_003658    | O75473 | LGR5_HUMAN   | lar (Potential), LRR 11.    | 9           | TACAAATAACTGA      | 0.356 |                    |
| - | 16 | 2240 teh.1_Frame_Shift      | NM_004734    | NP_004725    | O15075 | DCLK1_HUMAN  |                             | 9           | TGTGTTGAAATG       | 0.373 |                    |
| - | 1  | 772_774                     | NM_001080396 | NP_001073865 | B1AL88 | F155A_HUMAN  | Poly-Gln.                   | 1           | cgctgcctctgctgctgc | 0.404 |                    |
| + | 2  | 678_680 1_Intron NAA30_u    | NM_001011713 | NP_001011713 | Q147X3 | NAA30_HUMAN  |                             | 1           | GAGCAGGAGGA        | 0.675 |                    |
| - | 6  | 961_963 .E208del BEGAIN     | NM_001159531 | NP_001153003 | Q9BUH8 | BEGIN_HUMAN  |                             | 0           | TTCGGCCTCCTC       | 0.724 |                    |
| + | 3  | 434_436                     | NM_001030005 | NP_001025176 | Q8VWH0 | CPLX3_HUMAN  |                             | 0           | CACAGAGGAGG        | 0.616 |                    |
| - | 2  | 158_159 cyh.2_RNA NAGF      | NM_016256    | NP_057340    | Q9UK23 | NAGPA_HUMAN  | renal (Potential).          | 0           | TGGAGGCGCGC        | 0.767 |                    |
| + | 3  | 433 l_p.T16fs KIAA01E       | NM_014615    | NP_055430    | Q14687 | GSE1_HUMAN   |                             | 5           | CAGCACCCCCC        | 0.687 |                    |
| + | 4  | 370 TTXBP4_uc010dca         | NM_178509    | NP_848604    | Q6ZWJ1 | STXB4_HUMAN  | PDZ.                        | 1           | TTCTGGAGGAC        | 0.383 |                    |
| - | 8  | 1079_1081 Y26_uc002nee.2_l  | NM_006387    | NP_006378    | Q8IWX8 | CHERP_HUMAN  | Gln-rich.                   | 2           | gctgctgtgctgctgctg | 0.552 |                    |
| - | 9  | 974_975 pni.2_Frame_Shift   | NM_003598    | NP_003589    | Q15562 | TEAD2_HUMAN  | ral activation (Potential). | 3           | TGGCATGGGGGC       | 0.564 |                    |
| - | 2  | 1150_1151                   | NM_152600    | NP_689813    | Q8NAF0 | ZN579_HUMAN  | Gly-rich.                   | 0           | TTCTGCCCTTCT       | 0.574 | 478862;rs144853314 |
| + | 19 | 2288_2290 3_In_Frame_Del_   | NM_015575    | NP_056390    | Q6Y7W6 | PERQ2_HUMAN  | Gln-rich.                   | 7           | TTCACAGCAGC        | 0.424 |                    |
| + | 4  | 1167 J02xpx.2_Frame_S       | NM_033421    | NP_219489    | Q969T3 | SNX21_HUMAN  |                             | 2           | TACCACCCCCC        | 0.617 |                    |
| - | 3  | 332_333                     | NM_020820    | NP_065871    | Q8TCU6 | PREX1_HUMAN  | DH.                         | 6           | GTCTTCGATGTT       | 0.48  | rs141887028        |
| + | 17 | 2126                        | NM_017895    | NP_060365    | Q96GQ7 | DDX27_HUMAN  |                             | 2           | TATGCCAAAAAA       | 0.488 |                    |
| - | 2  | 208 Jzzv.1_Frame_Shi        | NM_016045    | NP_057129    | Q9Y3B1 | SLMO2_HUMAN  | REL1/MSF1.                  | 1           | TACTTGGGTTCT       | 0.453 |                    |
| - | 9  | 2380 adl.1_Frame_Shift      | NM_003253    | NP_003244    | Q13009 | TIAM1_HUMAN  |                             | 10          | TCTTTTGGGGTT       | 0.507 |                    |
| - | 4  | 571_573 j.1_RNA PTTG1IP     | NM_004339    | NP_004330    | P53801 | PTTG_HUMAN   | Cytoplasmic (Potential).    | 1           | TCCTGCAGCAGC       | 0.616 |                    |
| + | 38 | 4673_4675 P2A_uc002zjs.2_l  | NM_015151    | NP_055966    | Q14689 | DIP2A_HUMAN  | Poly-Val.                   | 2           | TCTGCTGGTGGT       | 0.596 |                    |
| + | 6  | 711_713 Y15_uc002zsr.2_In   | NM_001003891 | NP_001003891 | Q96RN5 | MED15_HUMAN  | Poly-Gln.                   | 1           | gcagctccagcagcagc  | 0.187 |                    |
| - | 3  | 428_430 _19DD>D TFIP11_     | NM_012143    | NP_036275    | Q9UBB9 | TFP11_HUMAN  | Poly-Asp.                   | 0           | GCTCGTCATCAT       | 0.532 | rs145794160        |
| + | 2  | 378_380                     | NM_033318    | NP_201575    | Q9H4I9 | CV032_HUMAN  | Asp/Glu-rich.               | 1           | TAGAGGATGATG       | 0.478 | rs141840500        |
| + | 2  | 2642_2643 WDR6_uc010hkn.2   | NM_018031    | NP_060501    | Q9NNW5 | WDR6_HUMAN   |                             | 1           | TCTGCGGGGGGC       | 0.639 |                    |
| + | 13 | 2407_2408 p.L357fs BBX_uc   | NM_001142568 | NP_001136040 | Q8WY36 | BBX_HUMAN    | Lys-rich.                   | 4           | TAAATTTGAAAAAA     | 0.381 |                    |
| - | 7  | 2209_2211 lbc.1_In_Frame_   | NM_001017395 | NP_001017395 | O94876 | TMCC1_HUMAN  | Potential.                  | 1           | TCCACCTGCTGC       | 0.581 |                    |
| + | 21 | 2524_2526 lbuy.1_In_Frame_  | NM_000283    | NP_000274    | P35913 | PDE6B_HUMAN  |                             | 0           | GAGAAGGAGGA        | 0.562 |                    |
| + | 7  | 528_529 _p.C62fs TMEM17     | NM_032326    | NP_115702    | Q9BSA9 | TM175_HUMAN  | ical; (Potential).          | 0           | TGTTCTGTGTGT       | 0.406 |                    |
| + | 1  | 3718_3719                   | NM_175918    | NP_787114    | Q8N1N5 | CRPAK_HUMAN  | 7                           | GCTCACGTGCC | 0.683              |       |                    |
| + | 1  | 3991_3992                   | NM_175918    | NP_787114    | Q8N1N5 | CRPAK_HUMAN  |                             | 0           | CTGCTCACACGT       | 0.658 |                    |
| + | 9  | 1377 p.L385fs C4orf23_      | NM_152544    | NP_689757    | Q8IYL2 | TRM44_HUMAN  |                             | 0           | TAGCAATTAAC        | 0.493 |                    |
| - | 10 | 5094_5095 ldr.1_Frame_Shift | NM_148894    | NP_683692    | Q8NFC6 | BOD1L_HUMAN  |                             | 6           | TTCTTCAGAGCC       | 0.406 |                    |
| + | 11 | 1711 gnl.1_Frame_Shift      | NM_182485    | NP_872291    | Q7Z5Q1 | CPEB2_HUMAN  |                             | 1           | TCTCCCTTTTTTT      | 0.443 |                    |
| + | 4  | 1023 tg.2_Frame_Shift_      | NM_016531    | NP_057615    | P57682 | KLF3_HUMAN   | Pro-rich.                   | 2           | TGTTGCAAGAG        | 0.453 |                    |
| + | 8  | 1054 J03hhu.2_RNA uc        | NM_001144978 | NP_001138450 | Q9H903 | MTD2L_HUMAN  |                             | 2           | TACAGTAAAAAA       | 0.378 |                    |

|   |    |           |                   |              |              |        |             |                                |     |                  |       |             |
|---|----|-----------|-------------------|--------------|--------------|--------|-------------|--------------------------------|-----|------------------|-------|-------------|
| + | 4  | 994_996   | i.Q279del MMRN1   | NM_007351    | NP_031377    | Q13201 | MMRN1_HUMAN | Poly-Gln.                      | 4   | .GCTGAGCAGCA     | 0.448 |             |
| + | 3  | 335       | ic9_uc003ieb.2_F  | NM_005033    | NP_005024    | Q06265 | EXOS9_HUMAN | ARE binding.                   | 0   | iGTATTCTTTTTT    | 0.383 |             |
| + | 1  | 3100_3102 | i3igz.2_In_Frame_ | NM_032961    | NP_116586    | Q9P2E7 | PCD10_HUMAN | ytoplasmic (Potential).        | 2   | GCCTCTGCTGC      | 0.581 |             |
| + | 2  | 759_761   |                   | NM_004575    | NP_004566    | Q12837 | PO4F2_HUMAN | Poly-His.                      | 1   | GGCACGcaccacc    | 0.552 |             |
| + | 9  | 1679      | uc003kwr.3_Intron | NM_003059    | NP_003050    | Q9H015 | S22A4_HUMAN | lame=12; (Potential).          | 0   | TCACCCTTTTTTT    | 0.418 |             |
| + | 23 | 3406      | NJ2_uc003qqz.1_f  | NM_003898    | NP_003889    | O15056 | SYNJ2_HUMAN | atalytic (By similarity).      | 1   | AGAGACCCCCC      | 0.637 |             |
| + | 6  | 690       | JN1_uc003sjf.2_F  | NM_001130965 | NP_001124437 | O94901 | SUN1_HUMAN  | Nuclear.                       | 0   | CGCGGCCCCCG      | 0.557 |             |
| + | 8  | 2132_2134 |                   | NM_138426    | NP_612435    | Q86VQ1 | GLC11_HUMAN | Poly-Gln.                      | 0   | ATCCCAGCAGC      | 0.562 |             |
| - | 1  | 310_312   | ame_Del_p.72_73   | NM_005522    | NP_005513    | P49639 | HXA1_HUMAN  | Poly-His.                      | 3   | ggggggcggatgggg  | 0.527 | rs10951154  |
| + | 5  | 601_603   | 0kxo.2_In_Frame_  | NM_007252    | NP_009183    | P78424 | PO6F2_HUMAN | Gln-rich.                      | 1   | cagctccagcagcagc | 0.365 |             |
| + | 19 | 5175_5176 | i.S1650fs AKAP9_  | NM_005751    | NP_005742    | Q99996 | AKAP9_HUMAN |                                | 26  | GTTTCAGAGAGA     | 0.411 |             |
| - | 5  | 5440      | D9L_uc003umk.1_   | NM_152703    | NP_689916    | Q8IVG5 | SAM9L_HUMAN |                                | 4   | GAGTTGTTTTTTT    | 0.408 |             |
| + | 14 | 1294_1295 | p.Q359fs CCDC1    | NM_017667    | NP_060137    | Q96JG6 | CC132_HUMAN |                                | 0   | TATGGCAGGTTT     | 0.272 | rs140810598 |
| - | 5  | 964       | 2_Intron GPC2_uc  | NM_152742    | NP_689955    | Q8N158 | GPC2_HUMAN  |                                | 2   | GGGGACCCCCC      | 0.642 |             |
| + | 6  | 569_571   | RIP1_uc011kkq.1_  | NM_024653    | NP_078929    | Q9H875 | PKR11_HUMAN | Poly-Glu.                      | 1   | AACAGAGGAGG      | 0.567 |             |
| - | 7  | 1282_1284 | 1kvs.1_In_Frame_  | NM_007349    | NP_031375    | Q6ZW49 | PAX11_HUMAN | Gln-rich.                      | 5   | ACCGGGtGtGtGtG   | 0.369 |             |
| - | 9  | 2677_2679 | wwl.1_In_Frame_l  | NM_182643    | NP_872584    | Q96QB1 | RHG07_HUMAN | Poly-Ser.                      | 7   | ACTGGCTGCTG      | 0.621 | rs137989738 |
| - | 60 | 8167      | Shift_Del_p.R2704 | NM_006904    | NP_008835    | P78527 | PRKDC_HUMAN | KIP-binding.                   | 34  | CCAGCCTTTTTT     | 0.498 |             |
| - | 9  | 2947_2949 | R2_uc004ari.1_Inl | NM_004560    | NP_004551    | Q01974 | ROR2_HUMAN  | lasmic (Potential).            | 20  | AGCCTTCTCTCT     | 0.645 |             |
| + | 3  | 630       |                   | NM_021619    | NP_067632    | Q9H4Q4 | PRD12_HUMAN |                                | 0   | TTGAGGTGTGTC     | 0.594 |             |
| + | 11 | 1816_1818 | ozv.2_In_Frame_D  | NM_005157    | NP_005148    | P00519 | ABL1_HUMAN  | n signal 1 (Potential). Poly-  | 817 | GTATCAAGAAGA     | 0.616 |             |
| + | 5  | 1490      | p.I228fs NHS_uc   | NM_198270    | NP_938011    | Q6T4R5 | NHS_HUMAN   |                                | 7   | iGGTATCCCCAG     | 0.418 |             |
| - | 2  | 264       | _Intron ACOT9_uc  | NM_001033583 | NP_001028755 | Q9Y305 | ACOT9_HUMAN |                                | 3   | ATGCTTGCCTTC     | 0.438 |             |
| + | 1  | 385_386   |                   | NM_022076    | NP_071359    | Q9H596 | DUS21_HUMAN | ient for mitochondrial local   | 2   | TTTTTTGACCCC     | 0.54  |             |
| - | 3  | 268       | alice_Site ZNF630 | NM_001037735 | NP_001032824 | Q2M218 | ZN630_HUMAN |                                | 2   | iGTTCTATAACA     | 0.465 |             |
| - | 1  |           |                   | NM_018159    | NP_060629    | Q96G61 | NUD11_HUMAN |                                | 0   | CTCGAGGCAGC      | 0.584 |             |
| - | 54 | 7719_7721 | .2_In_Frame_Del_  | NM_031407    | NP_113584    | Q7Z6Z7 | HUWE1_HUMAN | p-rich. Glu-rich.              | 17  | cctcatctcctcctc  | 0.438 |             |
| + | 2  | 92        | HEPH_uc010nkr.2   | NM_138737    | NP_620074    | Q9BQS7 | HEPH_HUMAN  |                                | 9   | CCTCTGGGCTC      | 0.527 |             |
| + | 12 | 1981      | i TAF1_uc004dzt.3 | NM_138923    | NP_620278    | P21675 | TAF1_HUMAN  |                                | 17  | ACATCAAAAAAA     | 0.313 |             |
| + | 5  | 716_718   | 04eib.1_In_Frame  | NM_016607    | NP_057691    | Q9UH62 | ARMX3_HUMAN |                                | 2   | FGGTCTGATGAT     | 0.448 |             |
| + | 4  | 1067_1069 | 1mrt.1_In_Frame   | NM_001142526 | NP_001135998 | Q6PI77 | BHLH9_HUMAN | Poly-Glu.                      | 2   | GGCTGAGGAGG      | 0.488 |             |
| - | 4  | 413       | ID7_uc011muy.1_l  | NM_194277    | NP_919253    | Q6ZUT3 | FRMD7_HUMAN | FERM.                          | 1   | ATTCACCATAAA     | 0.323 |             |
| + | 6  | 1104_1106 | 4ezx.2_In_Frame   | NM_001163280 | NP_001156752 | O43719 | HTSF1_HUMAN | Poly-Lys.                      | 3   | CTCAAGAAGA       | 0.335 |             |
| - | 4  | 396_398   | _In_Frame_Del_p.  | NM_001042663 | NP_001036128 | O94827 | PKHG5_HUMAN | Poly-Glu.                      | 1   | AGCTCTCCTCC      | 0.631 |             |
| - | 4  | 449_450   | 1aog.2_Frame_Shi  | NM_018198    | NP_060668    | Q9NVH1 | DJC11_HUMAN |                                | 2   | TCTTCTCTCT       | 0.505 |             |
| + | 4  | 381_383   |                   | NM_004781    | NP_004772    | Q15836 | VAMP3_HUMAN | IV membrane protein; (Pc       | 0   | TATCTTCATCATC    | 0.365 |             |
| - | 7  | 1113      | oba.1_Frame_Shif  | NM_000831    | NP_000822    | Q13003 | GRIK3_HUMAN | ellular (Potential).           | 7   | TCGTACAGTAA      | 0.647 |             |
| - | 4  | 577_578   | cmv.1_Frame_Shif  | NM_020365    | NP_065098    | Q9NR50 | EI2BG_HUMAN |                                | 1   | ACCTGCTTTTTT     | 0.317 | rs148977100 |
| + | 13 | 1428      | ddf.2_Frame_Shif  | NM_001077700 | NP_001071168 | Q8N108 | MIER1_HUMAN |                                | 1   | CCCCTCCCCCA      | 0.383 |             |
| - | 5  | 924_925   | lIQ3_uc001dfz.3_f | NM_001105659 | NP_001099129 | A6PVS8 | LRIQ3_HUMAN |                                | 2   | CTGCTGTTTTTT     | 0.327 |             |
| + | 23 | 2276_2278 | 1dge.1_In_Frame_  | NM_015978    | NP_057062    | Q59H18 | TNI3K_HUMAN | Poly-Ser.                      | 10  | TCACCTTCTCT      | 0.473 |             |
| - | 3  | 841       |                   | NM_003921    | NP_003912    | O95999 | BCL10_HUMAN | CARD.                          | 2   | TGAGTATTTTTT     | 0.343 |             |
| + | 4  | 327_329   | 326_uc009wda.1_   | NM_182976    | NP_892021    | Q5BKZ1 | ZN326_HUMAN | il activation (By similarity). | 1   | CACAGTGGTGG      | 0.409 |             |
| - | 9  | 1232      | _Shift_Del_p.M408 | NM_005665    | NP_005656    | O60447 | EVI5_HUMAN  | Interaction with alpha-tubul   | 2   | TTTTCATTTTTT     | 0.318 |             |
| - | 64 | 5252      | G1657fs COL11A1   | NM_001854    | NP_001845    | P12107 | COBA1_HUMAN | lar collagen NC1.              | 12  | CTCACCACCA       | 0.378 |             |
| - | 9  | 1607      | 0ovy.1_Frame_Sh   | NM_004696    | NP_004687    | O15374 | MOT5_HUMAN  | ical; (Potential).             | 3   | GGTACAAAAAA      | 0.388 |             |
| + | 32 | 3100_3101 | ie_Shift_Ins_p.R9 | NM_003176    | NP_003167    | Q15431 | SYCP1_HUMAN | Lys-rich (basic).              | 1   | GGATAGAAAAAA     | 0.356 |             |

|   |    |           |                   |              |              |        |             |                           |     |                   |       |                              |
|---|----|-----------|-------------------|--------------|--------------|--------|-------------|---------------------------|-----|-------------------|-------|------------------------------|
| + | 3  | 513_515   | nj.2_Intron HFE2_ | NM_213653    | NP_998818    | Q6ZVN8 | RGMC_HUMAN  | Poly-Gly.                 | 1   | .CTTCGAGGAGG.     | 0.626 |                              |
| + | 6  | 910       | 09wlv.2_Frame_S   | NM_019032    | NP_061905    | Q6UY14 | ATL4_HUMAN  |                           | 2   | :CCCATCCCCC.      | 0.622 | rs145240194                  |
| - | 1  | 643_645   | o.E61del MCL1_uc  | NM_021960    | NP_068779    | Q07820 | MCL1_HUMAN  | PEST-like.                | 0   | \CTCGTCTCTCT      | 0.635 |                              |
| - | 2  | 1111_1113 | wne.1_In_Frame_I  | NM_007113    | NP_009044    | Q07283 | TRHY_HUMAN  | of R-R-E-Q-E-E- E-R-R-E-  | 5   | togcgctctctctctct | 0     | rs71757496                   |
| - | 2  | 245       | R2A_uc001fbf.2_l  | NM_001017418 | NP_001017418 | P35325 | SPR2B_HUMAN |                           | 0   | :AGGGTGGGGAA      | 0.567 |                              |
| - | 2  | 985       | 2_Frame_Shift_De  | NM_001111    | NP_001102    | P55265 | DSRAD_HUMAN |                           | 6   | :TGTCTGGTCTT/     | 0.493 |                              |
| - | 4  | 1309      |                   | NM_006617    | NP_006608    | P48681 | NEST_HUMAN  | Tail.                     | 6   | GGTGTGGGGGG       | 0.597 |                              |
| + | 3  | 338_340   |                   | NM_001102566 | NP_001096036 | A6NKN8 | PC4L1_HUMAN |                           | 0   | AGGCGGAGGAG       | 0.488 |                              |
| + | 17 | 2363_2365 | J2F1_uc010pjh.1_l | NM_002697    | NP_002688    | P14859 | PO2F1_HUMAN |                           | 5   | :GCGTCCACCAC      | 0.601 |                              |
| + | 7  | 1724_1726 | ie_Del_p.E466del  | NM_005807    | NP_005798    | Q92954 | PRG4_HUMAN  | peats of K-X-P-X-P-T-T-X  | 1   | :ACCAAGGAGCC      | 0.635 |                              |
| + | 10 | 1834      | p.C507fs PKP1_uc  | NM_000299    | NP_000290    | Q13835 | PKP1_HUMAN  | ARM 6.                    | 2   | :TGACTGCCCC       | 0.572 |                              |
| - | 1  | 89_91     |                   | NM_000537    | NP_000528    | P00797 | RENI_HUMAN  |                           | 4   | :CCAGAGCAGCA      | 0.581 | 917743;rs142739309           |
| - | 1  | 895       |                   | NM_203376    | NP_976310    | Q6P7N7 | TMM81_HUMAN | lasmic (Potential).       | 0   | :GCAGGCCCCCC      | 0.537 |                              |
| + | 4  | 635_646   |                   | NM_001104548 | NP_001098018 |        |             |                           | 0   | jTagcagcagcagcaç  | 0.283 | 30217;rs72359595;rs150848171 |
| + | 2  | 420       | Shift_Del_p.S42fs | NM_016121    | NP_057205    | Q9Y597 | KCTD3_HUMAN | BTB.                      | 3   | AGATTCTTTTTT      | 0.229 |                              |
| + | 4  | 3146_3147 | ea.1_Frame_Shift  | NM_198551    | NP_940953    | Q5JRA6 | MIA3_HUMAN  | ellular (Potential).      | 5   | ACCACCTCTAGA      | 0.545 |                              |
| + | 3  | 384_386   | tron FAM177B_uc   | NM_207468    | NP_997351    | A6PVY3 | F177B_HUMAN | Poly-Glu.                 | 1   | :GCACAgaggagga    | 0.36  |                              |
| + | 5  | 775       | _p.*180fs FBXO28  | NM_015176    | NP_055991    | Q9NVF7 | FBX28_HUMAN |                           | 5   | :AGCCCTAACAA      | 0.423 |                              |
| + | 27 | 7308      | CN_uc001hsp.1_F   | NM_001098623 | NP_001092093 | Q5VST9 | OBSCN_HUMAN |                           | 28  | AGGCTGGGGGG       | 0.662 |                              |
| - | 1  | 2019_2020 |                   | NM_175876    | NP_787072    | Q8IYI6 | EXOC8_HUMAN |                           | 1   | GCTCTCCAAAAC      | 0.455 |                              |
| + | 3  | 710       | lhvy.1_Frame_Shi  | NM_173508    | NP_775779    | Q8IY50 | S35F3_HUMAN | ical; (Potential).        | 2   | TTCTTTGGACAC      | 0.413 |                              |
| + | 20 | 2516      | rR_uc010pxx.1_Inl | NM_000254    | NP_000245    | Q99707 | METH_HUMAN  | inding N-terminal.        | 3   | TAAACCAAAAAA      | 0.279 |                              |
| + | 99 | 14329     | iyb.1_Frame_Shift | NM_001035    | NP_001026    | Q92736 | RYR2_HUMAN  | lame=M7; (Potential).     | 33  | \ACAACTTTTTTT     | 0.403 |                              |
| + | 3  | 422_423   | Opzb.1_Frame_Shi  | NM_001001957 | NP_001001957 | Q7Z3T1 | OR2W3_HUMAN | lasmic (Potential).       | 3   | :GGCTGGACCCC      | 0.594 |                              |
| + | 1  | 246       | L13_uc001ids.2_l  | NM_001004686 | NP_001004686 | Q8NH16 | OR2L2_HUMAN | lasmic (Potential).       | 3   | :TTTTTTGGACATC    | 0.363 |                              |
| + | 1  | 595       | L13_uc001ids.2_l  | NM_001004687 | NP_001004687 | Q8NG85 | OR2L3_HUMAN | Name=5; (Potential).      | 0   | \CAGTGTTTTTG/     | 0.488 | rs60743763                   |
| - | 1  | 707       |                   | NM_001004693 | NP_001004693 | Q8NGZ9 | O2T10_HUMAN | lasmic (Potential).       | 1   | \AGGCCTTTTTTC     | 0.478 |                              |
| + | 5  | 471_473   | _p.L92del TSPAN4  | NM_003271    | NP_003262    | O14817 | TSN4_HUMAN  | ical; (Potential).        | 1   | :CTTCTGCTGC       | 0.65  | rs61867552                   |
| - | 25 | 4223      | i.N1311fs NUP98_  | NM_016320    | NP_057404    | P52948 | NUP98_HUMAN |                           | 12  | :GGCTGTTTTTT1     | 0.512 |                              |
| - | 1  | 429       | v5_uc001mbq.1_l   | NM_001005168 | NP_001005168 | Q6IFG1 | O52E8_HUMAN | lasmic (Potential).       | 2   | TTGCTGGTGAG       | 0.512 |                              |
| + | 1  | 310_312   |                   | NM_178168    | NP_835462    | Q9H207 | O10A5_HUMAN | Name=3; (Potential).      | 3   | :GTATTCTTCTT      | 0.517 |                              |
| + | 9  | 842       | rck.1_Frame_Shift | NM_018222    | NP_060692    | Q9NVD7 | PARVA_HUMAN | CH 2.                     | 3   | :TGGTAAAAAG       | 0.522 |                              |
| + | 1  | 525       |                   | NM_001003750 | NP_001003750 | Q8N0Y5 | OR8I2_HUMAN | ellular (Potential).      | 1   | CAATCATTTTTTT     | 0.443 | rs112181516                  |
| + | 1  | 62_64     | orld.1_In_Frame_  | NM_001079807 | NP_001073275 |        |             |                           | 2   | :AGTGGCTGCTG      | 0.567 |                              |
| + | 3  | 548_550   | Orlo.1_In_Frame_C | NM_004265    | NP_004256    | Q95864 | FADS2_HUMAN | ical; (Potential).        | 2   | :TTCTTCTCTCT      | 0.537 |                              |
| + | 2  | 185_187   |                   | NM_015516    | NP_056331    | Q8WUA8 | TSK_HUMAN   |                           | 0   | :GCCCTGCTGC       | 0.616 |                              |
| - | 2  | 682       |                   | NM_004549    | NP_004540    | Q95298 | NDUC2_HUMAN | ical; (Potential).        | 0   | CCAGCAAAAAAA      | 0.358 |                              |
| - | 2  | 60        | ntron CASP5_uc0   | NM_004347    | NP_004338    | P51878 | CASP5_HUMAN |                           | 3   | TACGCTTTTTTTI     | 0.388 |                              |
| - | 8  | 1187_1189 | CADM1_uc001ppj.   | NM_014333    | NP_055148    | Q9BY67 | CADM1_HUMAN | ellular (Potential).      | 2   | gtaaggatgggggtg   | 0.266 |                              |
| - | 4  | 537_539   | .D104del IFT46_u  | NM_020153    | NP_064538    | Q9NQC8 | IFT46_HUMAN | i-rich (highly acidic).   | 0   | GCTCTTCATCAT      | 0.419 |                              |
| + | 9  | 1502_1504 |                   | NM_005188    | NP_005179    | P22681 | CBL_HUMAN   | Glu-rich (ac)l(1)p.E366_K | 149 | AAATTATGATGAT     | 0.473 |                              |
| + | 16 | 2803      |                   | NM_005188    | NP_005179    | P22681 | CBL_HUMAN   | on with CD2AP UBA.        | 149 | ATGGCCAAAAAC      | 0.507 |                              |
| - | 3  | 319_320   |                   | NM_006248    | NP_006239    |        |             |                           | 0   | TTTCTGGAGGT       | 0.614 |                              |
| - | 3  | 314_315   |                   | NM_006248    | NP_006239    |        |             |                           | 0   | :GGAGGTGGGG       | 0.614 |                              |
| - | 18 | 2595      | 1rlx.2_Frame_Shif | NM_017641    | NP_060111    | Q7Z4S6 | KI21A_HUMAN |                           | 7   | :GTTTCTTTTTTG     | 0.323 |                              |
| - | 6  | 782       | _p.K63fs RPAP3_u  | NM_024604    | NP_078880    | Q9H6T3 | RPAP3_HUMAN | TPR 4.                    | 1   | AATACCTTTTTTG     | 0.363 |                              |
| + | 9  | 664       | 1ruq.1_Frame_Sh   | NM_001031698 | NP_001026868 | Q6NWX9 | PR40B_HUMAN |                           | 5   | :CTGACCCCCC.      | 0.637 |                              |

|   |    |           |                     |              |              |        |             |                            |    |                   |       |             |
|---|----|-----------|---------------------|--------------|--------------|--------|-------------|----------------------------|----|-------------------|-------|-------------|
| + | 3  | 427_428   | _Shift_Del_p.G91f   | NM_173602    | NP_775873    | Q9P265 | DIP2B_HUMAN |                            | 6  | 3ATCTGGGGGAC      | 0.48  |             |
| - | 1  | 193       |                     | NM_175068    | NP_778238    | Q86Y46 | K2C73_HUMAN | lead. Gly-rich.            | 6  | GGGCACCCCC        | 0.637 |             |
| + | 1  | 298       |                     | NM_001005497 | NP_001005497 | A6NL08 | O6C75_HUMAN | Name=3; (Potential).       | 3  | CAGCTATTTTTT      | 0.438 |             |
| + | 5  | 442_443   | _Shift_Del_p.L74f   | NM_001089704 | NP_001083173 | P61224 | RAP1B_HUMAN |                            | 0  | GATTTACAAGAC      | 0.327 |             |
| - | 25 | 3416      | SBNO1_uc010taq      | NM_018183    | NP_060653    | A3KN83 | SBNO1_HUMAN |                            | 9  | TTCCATTTTTTT      | 0.388 |             |
| - | 8  | 694       | E2_uc001ume.2_lr    | NM_199254    | NP_954863    | Q6XPS3 | TPTE2_HUMAN | ical; (Potential).         | 0  | ATGTCAAAAAA       | 0.303 |             |
| - | 9  | 1177_1178 | p.I309fs DIAPH3_    | NM_001042517 | NP_001035982 | Q9NSV4 | DIAP3_HUMAN | GBD/FH3.                   | 2  | TGTCAATTTTTT      | 0.322 |             |
| + | 20 | 3706_3707 | h.A881fs LMO7_uc    | NM_015842    | NP_056667    | Q8WW11 | LMO7_HUMAN  |                            | 5  | AGGCAGAGAG        | 0.386 |             |
| - | 15 | 2201_2202 | _p.K703fs RBM26_    | NM_022118    | NP_071401    | Q5T8P6 | RBM26_HUMAN | Potential.                 | 1  | TACCTGTTTTTT      | 0.332 |             |
| + | 16 | 4738_4740 | h1xmv.2_In_Frame    | NM_015556    | NP_056371    | O43166 | SI1L1_HUMAN | Ser-rich.                  | 4  | ctctctctctctctct  | 0.468 |             |
| - | 2  | 400       | 02ctw.1_Intron ZS   | NM_032805    | NP_116194    | Q96SZ4 | ZSC10_HUMAN | Pro-rich.                  | 1  | TGGCTGGGGAC       | 0.582 |             |
| - | 7  | 1766      |                     | NM_000243    | NP_000234    | O15553 | MEFV_HUMAN  |                            | 6  | CATCTACCTGAC      | 0.502 |             |
| + | 7  | 1037_1039 | h.K238del UBN1_u    | NM_001079514 | NP_001072982 | Q9NPG3 | UBN1_HUMAN  | Lys-rich.                  | 2  | AAGGAGAAGAA       | 0.453 |             |
| - | 11 | 1628_1630 | h.H3_uc002die.2_lr  | NM_017539    | NP_060009    | Q8TD57 | DYH3_HUMAN  | n (By similarity).         | 18 | CGATCAGCAGC       | 0.498 |             |
| + | 9  | 3655      | h.K928fs TNRC6A_    | NM_014494    | NP_055309    | Q8NDV7 | TNR6A_HUMAN | ction with EIF2C1 and EIF2 | 2  | GTGGCAAAAAA       | 0.224 |             |
| + | 25 | 5954      | _Shift_Del_p.P16    | NM_006662    | NP_006653    | Q6ZRS2 | SRCAP_HUMAN | Pro-rich.                  | 4  | CTGGTCCCCCC       | 0.612 |             |
| + | 13 | 3813_3815 |                     | NM_014712    | NP_055527    | O15047 | SET1A_HUMAN | Ser-rich.                  | 3  | Gctctctctctctct   | 0.389 |             |
| + | 3  | 278_280   | h.vho.1_In_Frame_   | NM_020312    | NP_064708    | O75208 | COQ9_HUMAN  |                            | 1  | CGGCAGGAGG        | 0.576 | rs149029279 |
| - | 14 | 1166_1168 | h.2_In_Frame_Del    | NM_001297    | NP_001288    | Q14028 | CNGB1_HUMAN | cytoplasmic (Potential).   | 4  | ctctctctctctctct  | 0.414 |             |
| - | 6  | 1372_1373 | XOC3L_uc002ery.     | NM_178516    | NP_848611    | Q86V11 | EX3L1_HUMAN |                            | 0  | FGCTCCAGCTG       | 0.545 |             |
| + | 15 | 2170_2172 | h.E413del SLC9A5    | NM_004594    | NP_004585    | Q14940 | SL9A5_HUMAN |                            | 2  | GTCTGAGGAGG       | 0.571 |             |
| + | 3  | 433       | _p.T16fs KIAA01E    | NM_014615    | NP_055430    | Q14687 | GSE1_HUMAN  |                            | 5  | CAGCACCCCC        | 0.687 |             |
| - | 10 | 1079_1081 | _63EE>E C17orf85    | NM_001114118 | NP_001107590 | Q53F19 | CQ085_HUMAN | Glu-rich.                  | 1  | ctctctctctctctct  | 0.379 |             |
| + | 6  | 719       | _p.N140fs MYOCD     | NM_153604    | NP_705832    | Q8IZQ8 | MYCD_HUMAN  |                            | 5  | GGTAACCAAGT       | 0.468 |             |
| + | 9  | 1291      | _p.L457fs SLC13A    | NM_003984    | NP_003975    | Q13183 | S13A2_HUMAN |                            | 0  | CTCCTCGACTG       | 0.562 |             |
| + | 3  | 202_204   | h.10crt.2_In_Frame_ | NM_003170    | NP_003161    | Q7KZ85 | SPT6H_HUMAN | Asp/Glu-rich.              | 3  | AGATGAGGAGG       | 0.453 |             |
| + | 34 | 4663_4665 | h.10crt.2_In_Frame_ | NM_003170    | NP_003161    | Q7KZ85 | SPT6H_HUMAN | Poly-Ser.                  | 3  | CCTAGCAGCAC       | 0.537 |             |
| - | 1  | 40_41     |                     | NM_031960    | NP_114166    | Q9BYQ9 | KRA48_HUMAN |                            | 0  | TGACCATGGTGT      | 0.55  |             |
| - | 2  | 516_517   |                     | NM_004645    | NP_004636    | P38432 | COIL_HUMAN  |                            | 1  | CTCTGTTTTTTT      | 0.366 |             |
| - | 33 | 4884      | yn.1_Frame_Shift    | NM_032582    | NP_115971    | Q8NFA0 | UBP32_HUMAN |                            | 5  | TTTGGGTTTTTT      | 0.423 |             |
| + | 9  | 1570_1571 | NF236_uc002lmk.     | NM_007345    | NP_031371    | Q9UL36 | ZN236_HUMAN |                            | 4  | AAAAGAAAAAA       | 0.381 |             |
| - | 11 | 1320_1321 | nfg.1_Frame_Shift   | NM_033417    | NP_219485    | Q9BT25 | HAUS8_HUMAN |                            | 0  | GAACGAGAGAG       | 0.495 |             |
| + | 17 | 1944_1945 | h.iu.2_Frame_Shift  | NM_000540    | NP_000531    | P21817 | RYR1_HUMAN  | smic. B30.2/SPRY 1.        | 12 | CTCCCTGTGTGT      | 0.53  |             |
| - | 6  | 1386      | PSG1_uc002our.1     | NM_006905    | NP_008836    | P11464 | PSG1_HUMAN  |                            | 2  | ggaactgtccagtctac | 0     |             |
| - | 1  | 1886      |                     | NM_032040    | NP_114429    | Q9H0W5 | CCDC8_HUMAN |                            | 3  | CCCCTGCCCTC       | 0.627 |             |
| - | 9  | 2408_2410 | Oxvr.1_In_Frame_    | NM_015063    | NP_055878    | Q9UPR5 | NAC2_HUMAN  | lasmic (Potential).        | 4  | ACCCGTCTCCT       | 0.616 |             |
| - | 6  | 547_548   | h.2pkf.2_Frame_Sh   | NM_001130915 | NP_001124387 | Q6ZN01 | MASTR_HUMAN | Pro-rich.                  | 1  | TGTGTGGGGGG       | 0.569 |             |
| + | 9  | 1040      | _Shift_Del_p.P156f  | NM_014516    | NP_055331    | O75175 | CNOT3_HUMAN |                            | 3  | TCCCCCTCCAG       | 0.632 | rs36665     |
| - | 2  | 333_335   | h.qdo.2_In_Frame_   | NM_001145303 | NP_001138775 | Q72404 | TMC4_HUMAN  | extracellular (Potential). | 1  | TCCATCCTCCT       | 0.645 |             |
| + | 11 | 1043_1044 | V1C2_uc002rat.2     | NM_001039362 | NP_001034451 | Q8NEY4 | VATC2_HUMAN |                            | 1  | CGACAGAGAG        | 0.604 |             |
| + | 9  | 1268      | _p.T214fs RASGR1    | NM_170672    | NP_733772    | Q8IV61 | GRP3_HUMAN  | Ras-GEF.                   | 5  | ACCAACCCCC        | 0.428 |             |
| - | 4  | 557       | Oyoq.1_Splice_Sit   | NM_014614    | NP_055429    | Q14997 | PSME4_HUMAN |                            | 5  | GAACGTGGGGG       | 0.347 |             |
| + | 1  | 96_98     | h.2sda.2_In_Frame_  | NM_203437    | NP_982261    | Q6ULP2 | AFTIN_HUMAN |                            | 2  | CAGAGGATGATG      | 0.409 |             |
| - | 5  | 659_660   | h.sud.1_Frame_Shil  | NM_032788    | NP_116177    | Q96K75 | ZN514_HUMAN |                            | 0  | TACCTGGAATAA      | 0.381 |             |
| + | 8  | 1145      | h.2_Intron ANKRD3   | NM_001164315 | NP_001157787 | A6QL64 | AN36A_HUMAN |                            | 0  | CACAGGTATTTTC     | 0.302 |             |
| + | 8  | 1227      |                     | NM_152945    | NP_694453    | Q8IUH3 | RBM45_HUMAN |                            | 0  | CATGCAAAAAA       | 0.353 |             |
| - | 2  | 611_612   | h.2upb.2_Frame_Sh   | NM_013436    | NP_038464    | Q9Y2A7 | NCKP1_HUMAN |                            | 2  | TTGTTGGGGTT       | 0.371 |             |



|   |    |           |                    |              |              |        |              |                                |    |                    |       |                        |
|---|----|-----------|--------------------|--------------|--------------|--------|--------------|--------------------------------|----|--------------------|-------|------------------------|
| + | 7  | 2036      | p.L641fs SGOL2_    | NM_152524    | NP_689737    | Q562F6 | SGOL2_HUMAN  |                                | 4  | GGCCATAAAAAA       | 0.333 |                        |
| + | 17 | 2334_2335 | M8_uc010fyj_2_In   | NM_024080    | NP_076985    | Q7Z2W7 | TRPM8_HUMAN  | Name=3; (Potential).           | 4  | CCACACCCCCC        | 0.574 |                        |
| + | 2  | 175_177   |                    | NM_022134    | NP_071417    | Q9H3Q3 | G3ST2_HUMAN  | type II membrane protein;      | 0  | GCATCCTCCTC        | 0.631 |                        |
| - | 14 | 1294      | L1L2_uc010zrl.1_f  | NM_025229    | NP_079505    | Q5TEA6 | SE1L2_HUMAN  | r (Potential). Sel1-like 7.    | 2  | CCACCCTTTTTC       | 0.393 |                        |
| + | 10 | 1729      | zwwj.1_Frame_Shift | NM_002466    | NP_002457    | P10244 | MYBB_HUMAN   |                                | 5  | TTGTAACCCCGA       | 0.622 |                        |
| + | 20 | 3995_3997 | ctm.2_In_Frame_C   | NM_181659    | NP_858045    | Q9Y6Q9 | NCOA3_HUMAN  | Acetyltransferase.             | 5  | cagcagcaacagcaa    | 0.31  | rs11472494;rs112826888 |
| - | 1  | 737       | ie_Shift_Del_p.K2! | NM_080618    | NP_542185    | Q8NI51 | CTCFL_HUMAN  |                                | 4  | AGCCCTTTTTTC       | 0.502 |                        |
| - | 11 | 905       | TPE_uc002yir.1_f   | NM_199261    | NP_954870    | P56180 | TPTE_HUMAN   | ical; (Potential).             | 5  | ATGTCAAAAAA        | 0.299 |                        |
| - | 7  | 2832      |                    | NM_007038    | NP_008969    | Q9UNA0 | ATS5_HUMAN   | Cys-rich.                      | 4  | CACTTCCCCCG        | 0.493 |                        |
| - | 3  | 428_430   | _19DD>D TFIP11_    | NM_012143    | NP_036275    | Q9UBB9 | TFP11_HUMAN  | Poly-Asp.                      | 0  | GCTCGTCATCAT       | 0.532 | rs145794160            |
| - | 1  | 2553_2554 |                    | NM_002430    | NP_002421    | Q10571 | MN1_HUMAN    | Poly-Gln.                      | 10 | ctgctgctgtgctgctgc | 0.391 | rs34890218             |
| - | 1  | 130       | _RNA INPP5J_uc     | NM_080430    | NP_536355    | Q8WWX9 | SELM_HUMAN   |                                | 0  | AGTGGCGGCTG        | 0.701 |                        |
| + | 7  | 686_688   | Del_p.E197del SH   | NM_018957    | NP_061830    | Q9Y3L3 | 3BP1_HUMAN   | BAR.                           | 1  | CTGAAGGAGGA        | 0.498 |                        |
| + | 7  | 1953_1961 | atq.1_In_Frame_D   | NM_001039141 | NP_001034230 | Q9H2D6 | TARA_HUMAN   |                                | 1  | GCCTCCAGAAC        | 0.589 |                        |
| + | 2  | 1850      | i_3_intron SYNGR1  | NM_006116    | NP_006107    | Q15750 | TAB1_HUMAN   |                                | 1  | CCCTCCCCCA         | 0.612 |                        |
| - | 4  | 1073      | Shift_Del_p.D212f  | NM_001001331 | NP_001001331 | Q01814 | AT2B2_HUMAN  | lasmic (Potential).            | 6  | CTATGTCCCCAA       | 0.587 |                        |
| + | 1  | 263_265   | bwf.1_In_Frame_I   | NM_133625    | NP_598328    | Q92777 | SYN2_HUMAN   |                                | 2  | CAGCAAGCGCC        | 0.345 | 272937;rs74800608      |
| - | 1  | 205_207   | vg.1_In_Frame_De   | NM_004628    | NP_004619    | Q01831 | XPC_HUMAN    | lu. Glu-rich (acidic).         | 3  | TCACCTCCTCT        | 0.734 | rs72561774             |
| - | 19 | 1979_1980 | kw.2_Frame_Shift   | NM_017886    | NP_060356    | Q96C45 | ULK4_HUMAN   |                                | 0  | GGGTTCTTTTT        | 0.45  |                        |
| + | 13 | 1986_1987 | NKTR_uc003clq.1    | NM_005385    | NP_005376    | P30414 | NKTR_HUMAN   |                                | 3  | GACAGTCCCCC        | 0.421 |                        |
| + | 72 | 11844     | ddv.2_Frame_Shift  | NM_015512    | NP_056327    | Q9P2D7 | DYH1_HUMAN   |                                | 3  | TTCTCTGGACGA       | 0.602 |                        |
| + | 14 | 1647      | dgm.2_Frame_Shift  | NM_006254    | NP_006245    | Q05655 | KPCD_HUMAN   | rotein kinase.                 | 9  | TCAACGGGGGG        | 0.602 |                        |
| - | 16 | 3037_3039 | C2_uc003dhq.1_F    | NM_015576    | NP_056391    | O15083 | ERC2_HUMAN   | Poly-His.                      | 2  | gtggtgatggtggtggt  | 0.389 |                        |
| - | 13 | 1581_1583 | _Frame_Del_p.S1!   | NM_015541    | NP_056356    | Q96JA1 | LRIG1_HUMAN  | tial). Ig-like C2-type 1. Poly | 5  | GGGAGCTGCTG        | 0.547 |                        |
| - | 3  | 457_458   | 717_uc003dpw.3_    | NM_001128223 | NP_001121695 | C9JSV9 | C9JSV9_HUMAN |                                | 0  | TACAGGTCCTC        | 0.51  | rs76346895             |
| - | 7  | 2209_2211 | blc.1_In_Frame_    | NM_001017395 | NP_001017395 | O94876 | TMCC1_HUMAN  | Potential.                     | 1  | CCACCTGCTGC        | 0.581 |                        |
| - | 6  | 2336      | ATP2C1_uc003e      | NM_014065    | NP_054784    | Q2TB18 | ASTE1_HUMAN  |                                | 0  | TCTGCCTTTTTT       | 0.403 |                        |
| + | 4  | 1562      |                    | NM_139209    | NP_631948    | Q8WTQ7 | GRK7_HUMAN   | kinase C-terminal.             | 5  | GGTTCGGGGGG        | 0.463 |                        |
| - | 6  | 783       | RL_uc003fme.2_In   | NM_018622    | NP_061092    | Q9H300 | PARL_HUMAN   | intermembrane (Potential).     | 0  | CTCTTGACCCA        | 0.418 |                        |
| + | 1  | 3715_3716 |                    | NM_175918    | NP_787114    | Q8N1N5 | CRPAK_HUMAN  | 7                              | 0  | CCTGCTCACGTC       | 0.693 | rs144861850            |
| + | 1  | 3718_3719 |                    | NM_175918    | NP_787114    | Q8N1N5 | CRPAK_HUMAN  | 7                              | 0  | GCTCACGTGCC        | 0.683 |                        |
| + | 1  | 3991_3992 |                    | NM_175918    | NP_787114    | Q8N1N5 | CRPAK_HUMAN  |                                | 0  | CTGCTCACACGT       | 0.658 |                        |
| - | 5  | 1026_1028 |                    | NM_000730    | NP_000721    | P32238 | CCKAR_HUMAN  | lasmic (Potential).            | 4  | GGCCCTGCTGC        | 0.606 |                        |
| - | 9  | 1294_1295 | hba.1_Frame_Shift  | NM_004898    | NP_004889    | O15516 | CLOCK_HUMAN  | PAS 1.                         | 3  | ATTGCTAAAAAA       | 0.287 |                        |
| + | 4  | 994_996   | Q279del MMRN1      | NM_007351    | NP_031377    | Q13201 | MMRN1_HUMAN  | Poly-Gln.                      | 4  | GCTGAGCAGCA        | 0.448 |                        |
| + | 22 | 2560_2562 | cgc.1_In_Frame_C   | NM_001148    | NP_001139    | Q01484 | ANK2_HUMAN   |                                | 14 | AGGTCACCACC        | 0.443 |                        |
| + | 32 | 3975      | Shift_Del_p.T468f  | NM_001148    | NP_001139    | Q01484 | ANK2_HUMAN   |                                | 14 | CTTTACAACAAA       | 0.378 |                        |
| - | 18 | 1757      | ijz.3_Frame_Shift  | NM_001102653 | NP_001096123 | Q01804 | OTUD4_HUMAN  |                                | 3  | TTGGTCCAAAAA       | 0.478 |                        |
| - | 5  | 1095      | p.F207fs LRBA_uc   | NM_006726    | NP_006717    | P50851 | LRBA_HUMAN   |                                | 7  | AAAGTTAAAAAA       | 0.408 |                        |
| + | 9  | 624_625   | ijqh.3_Frame_Shift | NM_001136034 | NP_001129506 | Q9NQI0 | DDX4_HUMAN   | Gly-rich.                      | 2  | TTGGTTCTAGAA       | 0.342 |                        |
| - | 2  | 1109_1111 | 60DD>D TAF9_uc     | NM_003187    | NP_003178    | Q16594 | TAF9_HUMAN   | Poly-Asp.                      | 0  | atcatagtcatcatcatc | 0.256 |                        |
| + | 17 | 2312_2314 | uc003kgl.3_Intron  | NM_003248    | NP_003239    | P35443 | TSP4_HUMAN   | SP type-3 7.                   | 0  | AGTGTGATGAT        | 0.562 |                        |
| - | 1  | 189_191   | ilwl.2_In_Frame_D  | NM_032782    | NP_116171    | Q8TDQ0 | HAVR2_HUMAN  |                                | 0  | ITAGTAGCAGCAC      | 0.291 |                        |
| + | 13 | 4948      | ifs.1_Frame_Shift  | NM_022455    | NP_071900    | Q96L73 | NSD1_HUMAN   | PHD-type 2.                    | 3  | ATGTTAAAAGG        | 0.423 |                        |
| + | 11 | 1475      | mkf.2_Frame_Shift  | NM_001746    | NP_001737    | P27824 | CALX_HUMAN   | renal (Potential).             | 0  | CTGACATTTTTT       | 0.423 |                        |
| - | 1  | 357       | Shift_Del_p.P20fs  | NM_175062    | NP_778232    | Q8N431 | RGF1C_HUMAN  |                                | 1  | TCGGTGGGGGG        | 0.652 |                        |
| - | 8  | 1068_1069 | nwm.2_Frame_Shift  | NM_006638    | NP_006629    | O75818 | RPP40_HUMAN  |                                | 0  | IGATTATAAAAA       | 0.356 |                        |

|   |    |                                                      |              |              |        |             |                            |    |                    |       |                   |
|---|----|------------------------------------------------------|--------------|--------------|--------|-------------|----------------------------|----|--------------------|-------|-------------------|
| - | 8  | 1612_1613_Ins_p.214_214Q>                            | NM_000332    | NP_000323    | P54253 | ATX1_HUMAN  | Poly-Gln.                  | 4  | tgctgctgctgctgctga | 0.381 | 806515;rs66949327 |
| - | 8  | 1604_1606me_Del_p.H211de                             | NM_000332    | NP_000323    | P54253 | ATX1_HUMAN  | Poly-Gln.                  | 4  | jctgctgctgatgctgat | 0.384 | rs59310777        |
| - | 3  | 444_p.M121fs SLC17A2_uc003nfl.2_Frame_Shift_Del_p.M1 |              |              | O00624 | NPT3_HUMAN  |                            | 1  | CAAGCATTTTTTTT     | 0.453 |                   |
| - | 3  | 544_3BR1_uc011dlr.1_!                                | NM_001470    | NP_001461    | Q9UBS5 | GABR1_HUMAN | xtracellular (Potential).  | 7  | GCGCTCCCCC         | 0.632 |                   |
| + | 7  | 1303_1304tron LOC285830_u                            | NM_001098479 | NP_001091949 | P30511 | HLAF_HUMAN  |                            | 0  | ATCTTGTTTTTT       | 0.535 |                   |
| + | 7  | 1034                                                 | NR_027822    |              |        |             |                            | 0  | GAGTCATTTTTTC      | 0.488 |                   |
| + | 5  | 704_705_p.S170fs RING1_u                             | NM_002931    | NP_002922    | Q06587 | RING1_HUMAN | ptional repression (By sim | 2  | ATGAGTGGGGGC       | 0.619 |                   |
| + | 8  | 1146_1148n.1_RNA UHRF1E                              | NM_017754    | NP_060224    | Q6BDS2 | URFB1_HUMAN |                            | 3  | .GCAACAGCAGC,      | 0.552 |                   |
| + | 14 | 3278_3279>.H1068fs CUL9_u                            | NM_015089    | NP_055904    | Q8IWT3 | CUL9_HUMAN  |                            | 12 | :GATGCATAAGG&      | 0.52  |                   |
| + | 1  | 73_1dwh.1_Frame_Sh                                   | NM_005588    | NP_005579    | Q16819 | MEP1A_HUMAN |                            | 3  | ATTCTCTTTTTTA      | 0.388 | rs146460388       |
| + | 2  | 226                                                  | NM_014051    | NP_054770    | Q9Y6G1 | TM14A_HUMAN | ical; (Potential).         | 0  | GAAGCATTTTTGC      | 0.433 |                   |
| - | 5  | 501                                                  | NM_145740    | NP_665683    | P08263 | GSTA1_HUMAN | ST C-terminal.             | 1  | iTAGCGATTTTTT/     | 0.433 |                   |
| - | 2  | 453                                                  | NM_001003760 | NP_001003760 | Q9H511 | KLH31_HUMAN | BTB.                       | 1  | GGGTCTTTTTTT       | 0.423 |                   |
| + | 26 | 3021_3022_p.Q914fs MYO6_u                            | NM_004999    | NP_004990    | Q9UM54 | MYO6_HUMAN  | Potential.                 | 2  | TTACAGAAAAAA       | 0.381 |                   |
| - | 13 | 1115_>.2_Frame_Shift_C                               | NM_020320    | NP_064716    | Q5T160 | SYRM_HUMAN  |                            | 3  | AAATGCTTTTTTT      | 0.333 |                   |
| + | 9  | 3522_3524>.3'UTR GRM1_uc                             | NM_000838    | NP_000829    | Q13255 | GRM1_HUMAN  | Cytoplasmic (Potential).   | 19 | :TCTCCAGCAGC,      | 0.66  |                   |
| + | 11 | 970_p.L246fs IQCE_uc                                 | NM_152558    | NP_689771    | Q6IPM2 | IQCE_HUMAN  | Potential.                 | 0  | CGTCTCCAGAC        | 0.473 | rs7786703         |
| + | 6  | 694_695_p.L112fs ZDHC4                               | NM_001134388 | NP_001127860 | Q9NPG8 | ZDHC4_HUMAN | ical; (Potential).         | 2  | AACCTGTTTTTTT      | 0.45  |                   |
| + | 8  | 2004_2005srz.2_Frame_Shift                           | NM_014660    | NP_055475    | O94880 | PHF14_HUMAN |                            | 3  | TTGCAAGAGAGA       | 0.376 |                   |
| + | 9  | 1209_Shift_Del_p.K304l                               | NM_016447    | NP_057531    | Q9NZW5 | MPP6_HUMAN  |                            | 0  | .GTAGCAAAAAAA      | 0.299 |                   |
| - | 21 | 2723_Site_p.N737_splicε                              | NM_015550    | NP_056365    | Q9H4L5 | OSBL3_HUMAN |                            | 1  | TAGGATCTAAGA       | 0.366 |                   |
| + | 1  | 403_405_uc003tbl.3_5'Flank                           | NM_002047    | NP_002038    | P41250 | SYG_HUMAN   |                            | 1  | CGCTCTGCTGC        | 0.749 |                   |
| + | 3  | 337_rf16_uc011kaf.1_lr                               | NM_006658    | NP_006649    | O96001 | GSUB_HUMAN  |                            | 3  | AGACCAAAAAAA       | 0.438 |                   |
| + | 3  | 559_εl_p.1179fs FKBP9                                | NM_007270    | NP_009201    | O95302 | FKBP9_HUMAN | ise FKBP-type 1.           | 14 | GTGATCCCCCC        | 0.443 |                   |
| + | 3  | 342_uc011kby.1_Intror                                | NM_002541    | NP_002532    | Q02218 | ODO1_HUMAN  |                            | 2  | GGACATTTTTTT       | 0.577 |                   |
| + | 18 | 7513_7514\13_uc010kys.1_5                            | NM_152701    | NP_689914    | Q86UQ4 | ABCAD_HUMAN |                            | 10 | :CTCTAGAAATG       | 0.421 |                   |
| + | 3  | 211_3trb.2_Frame_Shif                                | NM_015969    | NP_057053    | Q9Y2R5 | RT17_HUMAN  |                            | 0  | ACAGTTGGGGAT       | 0.438 |                   |
| + | 5  | 1249_p.P231fs DTX2_u                                 | NM_020892    | NP_065943    | Q86UW9 | DTX2_HUMAN  |                            | 2  | :CCCCACACAC        | 0.657 | rs147779783       |
| - | 10 | 1091_1092_p.S339fs ABCB4_u                           | NM_018849    | NP_061337    | P21439 | MDR3_HUMAN  | ); ABC transmembrane typ   | 6  | GGATTGAAAAAA       | 0.347 |                   |
| - | 5  | 1204_>.2_Frame_Shift_D                               | NM_000466    | NP_000457    | O43933 | PEX1_HUMAN  |                            | 2  | ACCTAATTTTTTT      | 0.353 |                   |
| - | 16 | 1707_PW1_uc003uus.2                                  | NM_017984    | NP_060454    | Q9H0M4 | ZCPW1_HUMAN |                            | 0  | CTTGTTTTTTTC       | 0.478 |                   |
| - | 12 | 1337_1338>.3_Shift_Ins_p.F24ε                        | NM_017984    | NP_060454    | Q9H0M4 | ZCPW1_HUMAN | PWWP.                      | 0  | TTCTCAAAAAAA       | 0.48  |                   |
| + | 8  | 1077_1079>.1xa.2_In_Frame_D                          | NM_015908    | NP_056992    | Q9BXP5 | SRRT_HUMAN  | Glu-rich.                  | 2  | GAGCAGGAGGA        | 0.596 |                   |
| + | 12 | 2008_ljj.1_Frame_Shift_                              | NM_021930    | NP_068749    | Q6NUQ1 | RINT1_HUMAN | RINT1/TIP20.               | 4  | GTCTTTGATGAC/      | 0.398 |                   |
| - | 20 | 2915_p.P781fs TNPO3                                  | NM_012470    | NP_036602    | Q9Y5L0 | TNPO3_HUMAN |                            | 5  | :GTATAGGGGGG       | 0.483 |                   |
| + | 11 | 2081_2082kvv.1_Frame_Shift                           | NM_053043    | NP_444271    | Q96EV2 | RBM33_HUMAN | Pro-rich.                  | 1  | CTGCCACACAC        | 0.53  |                   |
| - | 15 | 2035                                                 | NM_001010906 | NP_001010906 | Q68CJ6 | SLIP_HUMAN  |                            | 2  | AGGAAATTTTTTT      | 0.453 |                   |
| - | 2  | 417_v66_uc003xhu.2_I                                 | NM_016127    | NP_057211    | Q96BY9 | TMM66_HUMAN |                            | 0  | CTTTTGGGGTAT       | 0.458 |                   |
| - | 16 | 3521_3523.E993del MYST3_u                            | NM_001099412 | NP_001092882 | Q92794 | MYST3_HUMAN | Poly-Glu.                  | 7  | CCGGCTCCTCC        | 0.567 |                   |
| - | 7  | 1563_xon.3_Frame_Shif                                | NM_001099412 | NP_001092882 | Q92794 | MYST3_HUMAN | tion with RUNX1-1.         | 7  | ACCTGTTTTTTG       | 0.398 |                   |
| + | 12 | 1709_1710p.R537fs POP1_uc                            | NM_001145860 | NP_001139332 | Q99575 | POP1_HUMAN  |                            | 2  | AAGTTAGACAGC       | 0.406 |                   |
| - | 6  | 1215                                                 | NM_001385    | NP_001376    | Q14117 | DPYS_HUMAN  |                            | 2  | CAGCCTTTTTTC       | 0.478 |                   |
| + | 3  | 444_445_lim.1_Frame_Shif                             | NM_005005    | NP_004996    | Q9Y6M9 | NDUB9_HUMAN |                            | 2  | TTTGCCAAGAG        | 0.465 |                   |
| - | 15 | 2303_mdt.2_Frame_Shif                                | NM_004519    | NP_004510    | O43525 | KCNQ3_HUMAN |                            | 5  | iGTTCCGGGGGC       | 0.547 |                   |
| + | 23 | 3289_3290>.A1064fs SMARCB                            | NM_003070    | NP_003061    | P51531 | SMCA2_HUMAN | case C-terminal.           | 3  | TGAGAGCGACTA       | 0.441 |                   |
| + | 13 | 2110_2112E598del GRIN1_uc                            | NM_007327    | NP_015566    | Q05586 | NMDZ1_HUMAN | lasmic (Potential).        | 1  | CAGCGAGGAGG        | 0.739 |                   |
| - | 6  | 2189_rHGAP6_uc004ci                                  | NM_013427    | NP_038286    | O43182 | RHG06_HUMAN | Rho-GAP.                   | 2  | ACTCTTTTTTTTC      | 0.368 |                   |

|   |    |           |                    |              |              |        |             |                                  |    |                     |       |
|---|----|-----------|--------------------|--------------|--------------|--------|-------------|----------------------------------|----|---------------------|-------|
| + | 8  | 1061      | OFD1_uc004cvs.3    | NM_003611    | NP_003602    | O75665 | OFD1_HUMAN  | Potential.                       | 0  | GAAGCAAAAAA         | 0.299 |
| + | 16 | 2457      | O1_uc010nen.2_Fi   | NM_003611    | NP_003602    | O75665 | OFD1_HUMAN  | Interaction with SDCCAG8.        | 0  | TCTCTGAGCAG         | 0.537 |
| + | 1  | 1497_1499 |                    | NM_001136234 | NP_001129706 |        |             |                                  | 1  | gctgctattgctgctgctg | 0.202 |
| - | 18 | 2564_2566 | sw.2_In_Frame_C    | NM_015107    | NP_055922    | Q9UUP1 | PHF8_HUMAN  |                                  | 3  | CGTTCTCCTCC         | 0.591 |
| + | 5  | 716_718   | 04eib.1_In_Frame   | NM_016607    | NP_057691    | Q9UH62 | ARMX3_HUMAN |                                  | 2  | GGTCTGATGAT         | 0.448 |
| - | 3  | 652_653   | 39B_uc004eli.1_In  | NM_016370    | NP_057454    | Q9NP90 | RAB9B_HUMAN |                                  | 3  | TGTTACCCAGAA        | 0.45  |
| - | 1  | 1805_1806 |                    | NM_003604    | NP_003595    | O14654 | IRS4_HUMAN  |                                  | 10 | CCTTTGCCCCCC        | 0.545 |
| - | 2  | 203       | _p.R4fsjCXorf56_u  | NM_022101    | NP_071384    | Q9H5V9 | CX056_HUMAN |                                  | 0  | GTCCCGGGGCC         | 0.463 |
| - | 13 | 1536_1537 | 4evh.2_Frame_Shi   | NM_004208    | NP_004199    | O95831 | AIFM1_HUMAN | Oxidoreductase (By similarity)   | 5  | TGGTGCTCTACC        | 0.431 |
| - | 1  | 159       |                    | NM_001009609 | NP_001009609 | Q5MJ09 | SPXN3_HUMAN |                                  | 2  | TCATCATTTTTTT       | 0.239 |
| - | 1  | 825       |                    | NM_001009615 | NP_001009615 | Q5MJ10 | SPXN2_HUMAN |                                  | 1  | TCATCATTTTTTT       | 0.239 |
| + | 3  | 1556_1558 | Q477del MAMLD1     | NM_005491    | NP_005482    | Q13495 | MAMD1_HUMAN | Poly-Gln.                        | 0  | acagcaacagcagca     | 0.433 |
| + | 3  | 1864_1866 | Q581del MAMLD1     | NM_005491    | NP_005482    | Q13495 | MAMD1_HUMAN | Poly-Gln.                        | 0  | Tgcagctgcagcagca    | 0.488 |
| + | 5  | 666_668   | HMGB3_uc004fer     | NM_005342    | NP_005333    | O15347 | HMGB3_HUMAN | Glu-rich (acidic).               | 0  | gaagaagaggaggag     | 0.281 |
| + | 9  | 1017_1019 |                    | NM_173493    | NP_775764    | Q8IV76 | PASD1_HUMAN | Poly-Ala.                        | 3  | GAACCCgctgctg       | 0.355 |
| - | 14 | 4550      |                    | NM_000132    | NP_000123    | P00451 | FA8_HUMAN   | B.                               | 11 | AGGTTATTTTTTT       | 0.413 |
| - | 35 | 4931      | bm.1_Frame_Shift   | NM_020765    | NP_065816    | Q5T4S7 | UBR4_HUMAN  |                                  | 25 | CTCTCCACCCG         | 0.507 |
| - | 9  | 1622_1624 | _RNA uc001ive.1_   | NM_018109    | NP_060579    | Q9NVV4 | PAPD1_HUMAN |                                  | 1  | GATGTCTCTCT         | 0.507 |
| + | 4  | 1819_1821 | Qvt.1_In_Frame_I   | NM_138329    | NP_612202    | P59044 | NALP6_HUMAN | Poly-Glu.                        | 2  | GCCAGAGGAGG         | 0.67  |
| - | 2  | 955_957   | 32_uc001mak.1_Ir   | NM_017481    | NP_059509    | Q9H347 | UBQL3_HUMAN |                                  | 3  | TGGCTGGTGGT         | 0.537 |
| + | 9  | 1630      |                    | NM_006108    | NP_006099    | Q9HCB6 | SPON1_HUMAN |                                  | 0  | ATGAGGTGTGTG        | 0.594 |
| - | 2  | 369       | i.1_5'UTR RIN1_u   | NM_004292    | NP_004283    | Q13671 | RIN1_HUMAN  | SH2.                             | 3  | GCATGTGCAGT         | 0.726 |
| - | 1  | 174_176   | _RNA MMP1_uc01     | NM_002421    | NP_002412    | P03956 | MMP1_HUMAN  |                                  | 4  | AGAACAGCAGC         | 0.498 |
| - | 2  | 308_322   | lprt.1_5'UTR TMP1  | NM_001077263 | NP_001070731 | Q9BYE2 | TMPSD_HUMAN | -A-[GLQR], Cytoplasmic (F        | 1  | GGAGATGCCCG         | 0.67  |
| - | 4  | 372       | _p.E78fsjRERG_u    | NM_032918    | NP_116307    | Q96A58 | RERG_HUMAN  |                                  | 1  | GCCTTCCCCC          | 0.458 |
| + | 23 | 5212_5213 | 3cj.2_Frame_Shift  | NM_012291    | NP_036423    | Q14674 | ESPL1_HUMAN |                                  | 3  | GTGACTGTGTG         | 0.436 |
| + | 1  | 298       |                    | NM_001005518 | NP_001005518 | A6NJZ3 | O6C65_HUMAN | Name=3; (Potential).             | 0  | CAAGTATTTTTT        | 0.358 |
| - | 19 | 2421      | 5.R523fsjR3HDM2    | NM_014925    | NP_055740    | Q9Y2K5 | R3HD2_HUMAN |                                  | 2  | AGGCCGGGGGA         | 0.557 |
| - | 1  | 39        | uc001srx.2_Intron  | NM_001099676 | NP_001093146 | Q8IXR9 | CL056_HUMAN |                                  | 0  | CTGTTCTGCG          | 0.716 |
| + | 35 | 4504      |                    | NM_014503    | NP_055318    | O75691 | UTP20_HUMAN |                                  | 4  | TTCGCTTGAG          | 0.333 |
| + | 12 | 1457_1459 | ame_Del_p.Q445d    | NM_001143779 | NP_001137251 | Q8WYA0 | IFT81_HUMAN | Potential.                       | 1  | TATTAACAACA         | 0.345 |
| + | 7  | 941       | iF3_uc001uqw.2_I   | NM_006646    | NP_006637    | Q9UPY6 | WASF3_HUMAN |                                  | 1  | ACTAGGTGTGTG        | 0.475 |
| - | 2  | 2237      | _Shift_Del_p.N674  | NM_001040108 | NP_001035197 | Q9UHC1 | MLH3_HUMAN  |                                  | 2  | CTGCAATTTTTT        | 0.348 |
| + | 10 | 1130      | rop.1_Frame_Shift  | NM_001080464 | NP_001073933 | Q86U10 | LPP60_HUMAN |                                  | 0  | CCTCGGGGGG          | 0.682 |
| + | 8  | 3011_3013 | Q981del MGA_uc     | NM_001080541 | NP_001074010 | Q8IW19 | MGAP_HUMAN  | Gln-rich.                        | 12 | GGCACAGCAGC         | 0.458 |
| + | 4  | 1969      | 592_uc010upb.1_    | NM_014630    | NP_055445    | Q92610 | ZN592_HUMAN |                                  | 6  | AGGTGAAAAAG         | 0.577 |
| + | 19 | 3331      | ae_Shift_Del_p.D8  | NM_006662    | NP_006653    | Q6ZRS2 | SRCAP_HUMAN | Pro-rich.                        | 4  | CCTGACCCCC          | 0.567 |
| + | 5  | 636       | fsjRNF167_uc002i   | NM_015528    | NP_056343    | Q9H6Y7 | RN167_HUMAN | PA.                              | 0  | CACCACCCCA          | 0.537 |
| + | 10 | 2188_2189 | 2gjr.2_Frame_Shift | NM_053051    | NP_444279    | Q8N137 | CNTRB_HUMAN | Site for centrosome localization | 2  | CTCGGAGAGAG         | 0.579 |
| - | 4  | 595_607   | _Shift_Del_p.P13f  | NM_006470    | NP_006461    | O95361 | TRI16_HUMAN |                                  | 3  | CAGTGGCCCTG         | 0.629 |
| + | 1  | 158_160   | ime_Del_p.K7del z  | NM_003457    | NP_003448    | O43670 | ZN207_HUMAN |                                  | 0  | TCGCAAGAAGA         | 0.542 |
| - | 21 | 4684_4686 | 12EE>E BZRAP1      | NM_004758    | NP_004749    | O95153 | RIMB1_HUMAN | Poly-Glu.                        | 3  | Gtctctctctctctct    | 0.468 |
| - | 14 | 1600_1602 | 3ca.2_In_Frame_C   | NM_017647    | NP_060117    | Q8IY81 | RRMJ3_HUMAN |                                  | 1  | GATTCTCCTCC         | 0.537 |
| - | 7  | 1257_1277 | del_p.SGPSGPS2     | NM_015476    | NP_056291    | Q68CL5 | TPGS2_HUMAN |                                  | 1  | GACCGGAGGGT         | 0.552 |
| - | 1  | 468_470   | 2utd.1_In_Frame    | NM_016192    | NP_057276    | Q9UIK5 | TEFF2_HUMAN |                                  | 5  | ACGGGCAGCAG         | 0.601 |
| - | 1  | 224_226   | ig.1_In_Frame_De   | NM_001485    | NP_001476    | P52951 | GBX2_HUMAN  | Poly-Pro.                        | 0  | AGCGCGggcgcg        | 0.626 |
| + | 2  | 1350_1352 | .1_Intron KIF3B_u  | NM_004798    | NP_004789    | O15066 | KIF3B_HUMAN | γ-Glu. Potential.                | 5  | GGgaagaggagge       | 0.433 |

rs2234451

805698;rs117567703

|   |    |           |                    |              |              |        |             |                               |    |                    |       |             |
|---|----|-----------|--------------------|--------------|--------------|--------|-------------|-------------------------------|----|--------------------|-------|-------------|
| - | 21 | 3201_3203 | 1agl.1_In_Frame_   | NM_015241    | NP_056056    | Q7RTP6 | MICA3_HUMAN | Glu-rich.                     | 0  | 3GCGAGGctctccc     | 0.453 |             |
| + | 6  | 591       |                    | NM_000496    | NP_000487    | P43320 | CRBB2_HUMAN | α crystallin 'Greek key' 4.   | 0  | 3CCTCACCCCCA       | 0.647 |             |
| - | 3  | 496_498   |                    | NM_005877    | NP_005868    | Q15459 | SF3A1_HUMAN | Poly-Gln.                     | 5  | 3TGGTCTGCTGC       | 0.596 | rs141985009 |
| + | 13 | 1533_1535 | aus.2_In_Frame_I   | NM_012407    | NP_036539    | Q9NRD5 | PICK1_HUMAN | Poly-Glu.                     | 0  | AGATGGggaggagg     | 0.562 |             |
| + | 3  | 406_408   | me_Del_p.E76del    | NM_012324    | NP_036456    | Q13387 | JIP2_HUMAN  | Glu-rich (acidic).            | 3  | gaggaagaggaggag    | 0.483 |             |
| + | 8  | 2694      | Del_p.I807fs GRM   | NM_000844    | NP_000835    | Q14831 | GRM7_HUMAN  | Name=6; (Potential).          | 7  | TTCCAATTTTTTTT     | 0.383 |             |
| - | 1  | 205_207   | rg.1_In_Frame_De   | NM_004628    | NP_004619    | Q01831 | XPC_HUMAN   | lu. Glu-rich (acidic).        | 3  | 3TCACCCTCCTC       | 0.734 | rs72561774  |
| + | 13 | 1544      | 3_Shift_Del_p.T25  | NM_000249    | NP_000240    | P40692 | MLH1_HUMAN  | action with ET495A(1) p.0?    | 77 | 3TTGTACCCCCC       | 0.473 |             |
| + | 7  | 1229      |                    | NM_017875    | NP_060345    | Q96DW6 | S2538_HUMAN | Solcar 3.                     | 0  | GGCATCCCCCG        | 0.488 |             |
| - | 6  | 513_515   | x.2_In_Frame_Del   | NM_020707    | NP_065758    | Q9HCP6 | HHATL_HUMAN |                               | 3  | ACCAAGCAGCA        | 0.621 |             |
| + | 1  | 221_223   |                    | NM_014240    | NP_055055    | Q9UGP4 | LIMD1_HUMAN | tes nuclear export.           | 1  | CCTCCAGCAGC        | 0.626 |             |
| - | 3  | 456_458   | ame_Del_p.L89de    | NM_147129    | NP_667340    | Q60I27 | AL2CL_HUMAN |                               | 5  | CCTCGCAGCAG        | 0.611 |             |
| - | 14 | 3144      | dbf.1_Frame_Shif   | NM_014703    | NP_055518    | Q9Y4B6 | VRBPB_HUMAN |                               | 2  | CAGCTGTTTTTTT      | 0.498 |             |
| + | 11 | 1711      | jnl.1_Frame_Shift  | NM_182485    | NP_872291    | Q7Z5Q1 | CPEB2_HUMAN |                               | 1  | 3CTCCCTTTTTTT      | 0.443 |             |
| - | 7  | 944       |                    | NM_173536    | NP_775807    | Q8N1C3 | GBRG1_HUMAN | ellular (Probable).           | 2  | AGGTCAA AAAA       | 0.294 |             |
| - | 25 | 3483      | I1107fs SEC31A_1   | NM_001077207 | NP_001070675 | O94979 | SC31A_HUMAN | ction with PDCD6.             | 8  | TGGTAATTTTTTTT     | 0.388 |             |
| + | 44 | 7494_7503 | .V418fs KIAA110E   | NM_015312    | NP_056127    | Q2LD37 | K1109_HUMAN |                               | 12 | FGGATTCAGACA       | 0.386 |             |
| + | 2  | 574       | ljhm.2_Frame_Shif  | NM_178140    | NP_835260    | O15018 | PDZD2_HUMAN |                               | 9  | CACAGCCCCCC        | 0.587 |             |
| + | 8  | 2216      | p.F486fs JARID2_   | NM_004973    | NP_004964    | Q92833 | JARD2_HUMAN | ARID.                         | 4  | 3CCTGCTTTTTTC      | 0.493 |             |
| - | 8  | 1420      | _Shift_Del_p.P150f | NM_000332    | NP_000323    | P54253 | ATX1_HUMAN  |                               | 4  | CGGTTGGGGGG        | 0.632 |             |
| + | 3  | 631       | ame_Shift_Del_p.   | NM_002121    | NP_002112    | P04440 | DPB1_HUMAN  | -type. Extracellular (Potenti | 1  | AATGACCCCCC        | 0.562 |             |
| + | 15 | 1702      | e_Shift_Del_p.P45  | NM_024165    | NP_077084    | O43189 | PHF1_HUMAN  |                               | 0  | AAGTGCCCCCC        | 0.532 |             |
| + | 6  | 808       | 10khi.2_Frame_St   | NM_014721    | NP_055536    | O75167 | PHAR2_HUMAN |                               | 2  | TCATTCAAAAAA       | 0.398 |             |
| + | 9  | 3522_3524 | 2_3'UTR GRM1_uc    | NM_000838    | NP_000829    | Q13255 | GRM1_HUMAN  | Cytoplasmic (Potential).      | 19 | TCTCCAGCAGC        | 0.66  |             |
| + | 8  | 2132_2134 |                    | NM_138426    | NP_612435    | Q86VQ1 | GLC1_HUMAN  | Poly-Gln.                     | 0  | ATCCAGCAGC         | 0.562 |             |
| + | 8  | 2004_2005 | srz.2_Frame_Shift  | NM_014660    | NP_055475    | O94880 | PHF14_HUMAN |                               | 3  | TTGCAAGAGAGA       | 0.376 |             |
| + | 15 | 1878      | bl.1_RNA LIMK1_    | NM_002314    | NP_002305    | P53667 | LIMK1_HUMAN | rotein kinase.                | 3  | 3TACTGCCCCCC       | 0.647 |             |
| - | 3  | 284       | _p.K62fs KIAA002   | NM_014878    | NP_055693    | Q15397 | K0020_HUMAN |                               | 1  | CACCCCTTTTTCC      | 0.388 |             |
| - | 3  | 2403_2404 |                    | NM_001017969 | NP_001017969 | Q5HYC2 | K2026_HUMAN | Lys-rich.                     | 3  | 3TTTTGCTTTTTT      | 0.327 |             |
| - | 4  | 473       |                    | NM_001561    | NP_001552    | Q07011 | TNR9_HUMAN  | (Potential). TNFR-Cys 3.      | 4  | CGTACCTTTTTTTI     | 0.413 | rs9657965   |
| - | 3  | 882_883   | _p.E24fs RERE_uc   | NM_012102    | NP_036234    | Q9P2R6 | RERE_HUMAN  |                               | 2  | 3TCTCTTTTctctct    | 0.342 |             |
| - | 2  | 283_284   |                    | NM_004102    | NP_004093    | P05413 | FABPH_HUMAN |                               | 1  | GCTGTTGTCTCA       | 0.475 |             |
| - | 7  | 1080      | am.1_Frame_Shift   | NM_002227    | NP_002218    | P23458 | JAK1_HUMAN  | FERM.                         | 61 | TTTTGTCAAAGTI      | 0.393 |             |
| + | 10 | 2124      | ova.1_Frame_Shif   | NM_001144937 | NP_001138409 | Q5VTL7 | FNDC7_HUMAN | onnectin type-III 8.          | 2  | 3TGTCCAAAAAA       | 0.363 |             |
| - | 2  | 3480_3482 | rne.1_In_Frame_C   | NM_007113    | NP_009044    | Q07283 | TRHY_HUMAN  | 30 AA tandem repeats.         | 5  | 3CCTTCTCTTCTC      | 0.172 |             |
| - | 2  | 1203_1204 | ie.1_In_Frame_Ins  | NM_007113    | NP_009044    | Q07283 | TRHY_HUMAN  | repeats of R-R-E-Q-Q-L. 2     | 5  | ctcgcgcctcagctgctc | 0.094 |             |
| - | 3  | 1792_1795 |                    | NM_001122965 | NP_001116437 | Q6XPR3 | RPTN_HUMAN  | Gln-rich.                     | 0  | GCCTTGCTCTGTC      | 0.466 |             |
| + | 17 | 2363_2365 | J2F1_uc010ph.1_I   | NM_002697    | NP_002688    | P14859 | PO2F1_HUMAN |                               | 5  | FGCGTCCACCAC       | 0.601 |             |
| + | 14 | 5165      | PA2_uc009www.2     | NM_020318    | NP_064714    | Q9BXP8 | PAPP2_HUMAN |                               | 16 | ATGTCCTTTTTCC      | 0.483 |             |
| + | 7  | 1574_1576 | ie_Del_p.T418del   | NM_005807    | NP_005798    | Q92954 | PRG4_HUMAN  | ats of K-X-P-X-P-T-T-X. 21    | 1  | GCACCACCAC         | 0.645 |             |
| - | 1  | 774_775   |                    | NM_001004734 | NP_001004734 | A6ND48 | O1411_HUMAN | Name=6; (Potential).          | 0  | TGGTCCTAAGGC       | 0.47  |             |
| - | 10 | 4927      | _Shift_Del_p.Q13f  | NM_032776    | NP_116165    | Q15652 | JHD2C_HUMAN |                               | 6  | TGGTTGACTTGTI      | 0.398 |             |
| - | 20 | 2483      | 1jxl.1_Frame_Shift | NM_001161352 | NP_001154824 | Q12791 | KCMA1_HUMAN | lasmic (Potential).           | 3  | 3GTTGCTTTTTTTT     | 0.502 |             |
| + | 25 | 3716      | _p.D924fs ZMIZ1_u  | NM_020338    | NP_065071    | Q9ULJ6 | ZMIZ1_HUMAN |                               | 4  | CTGGACCCCCCC       | 0.557 |             |
| - | 9  | 1499_1501 | XM2_uc001lhj.2_F   | NM_198148    | NP_937791    | Q8N436 | CPXM2_HUMAN | Poly-Leu.                     | 2  | GCACCAGCAGC        | 0.626 |             |
| - | 3  | 564       |                    | NM_002032    | NP_002023    | P02794 | FRIH_HUMAN  | ritin-like diiron.            | 1  | TTCACATTTTTTTT     | 0.423 |             |
| + | 22 | 2658      | _l_5'Flank PACS1_u | NM_006842    | NP_006833    | Q13435 | SF3B2_HUMAN |                               | 3  | ACAGCAAAAAAA       | 0.512 |             |

|   |    |           |                    |              |              |        |             |                               |    |                   |       |                                                |
|---|----|-----------|--------------------|--------------|--------------|--------|-------------|-------------------------------|----|-------------------|-------|------------------------------------------------|
| + | 7  | 644_645   | CS_uc001ois.2_Rf   | NM_005125    | NP_005116    | O14618 | CCS_HUMAN   | xide dismutase-like.          | 0  | TTATTGATGAGG      | 0.574 |                                                |
| - | 5  | 674_675   |                    | NM_002426    | NP_002417    | P39900 | MMP12_HUMAN |                               | 0  | CAAGTGGTGCC       | 0.416 | 192524;rs33924686                              |
| - | 1  | 327_328   | H1_uc001qzc.2_lr   | NM_176885    | NP_795366    | P59538 | T2R31_HUMAN | ellular (Potential).          | 0  | GACATTATAAGC      | 0.381 |                                                |
| - | 3  | 258_259   | _74P>PP PRB1_u     | NM_005039    | NP_005030    | P04280 | PRP1_HUMAN  | -P-[PAQ]-Q-[GE]-[GD]-[NK      | 0  | TTTCCTGGAGGT      | 0.619 |                                                |
| - | 3  | 502_503   |                    | NM_006248    | NP_006239    |        |             |                               | 0  | TTTCCTGGAGGT      | 0.594 |                                                |
| - | 2  | 1302      | raq.2_Frame_Shift  | NM_006143    | NP_006134    | Q15760 | GPR19_HUMAN | lasmic (Potential).           | 1  | ACGTAGTTTTTTT     | 0.398 |                                                |
| - | 11 | 1445      | p.L408fs KIAA052   | NM_014802    | NP_055617    | Q86YS7 | K0528_HUMAN |                               | 4  | AGCCTAATGCT       | 0.353 |                                                |
| + | 3  | 227       | nk MARS_uc001sc    | NM_004990    | NP_004981    | P56192 | SYMC_HUMAN  |                               | 5  | CAGATATTTTTTT     | 0.488 |                                                |
| - | 14 | 2248      | p.K669fs MDM1_u    | NM_017440    | NP_059136    | Q8TC05 | MDM1_HUMAN  |                               | 5  | CTTTTCTTAGCT      | 0.408 |                                                |
| - | 19 | 3106      | zux.1_Frame_Shift  | NM_014706    | NP_055521    | Q15020 | SART3_HUMAN |                               | 1  | AGCTTGGCAA        | 0.627 |                                                |
| + | 4  | 646_648   | p.L194del TPCN1_   | NM_017901    | NP_060371    | Q9ULQ1 | TPC1_HUMAN  | =S1 of repeat I; (Potential). | 3  | GGCCCTGCTGC       | 0.64  |                                                |
| + | 16 | 2686_2688 | tb.1_In_Frame_I    | NM_004592    | NP_004583    | Q12872 | SFSWA_HUMAN | g/Ser-rich (RS domain).       | 0  | CACGAGAAGAA       | 0.493 |                                                |
| - | 34 | 4381_4382 | p.V250fs POLE_u    | NM_006231    | NP_006222    | Q07864 | DPOE1_HUMAN |                               | 8  | TTGACCACACAC      | 0.604 |                                                |
| - | 1  | 321       | _5'Flank KIAA170   | NM_012345    | NP_036477    | Q9UHK0 | NUFP1_HUMAN | Pro-rich.                     | 0  | GCGTCGAAGGG       | 0.627 |                                                |
| - | 11 | 2278_2279 | p.R758fs ZC3H13    | NM_015070    | NP_055885    | Q5T200 | ZC3HD_HUMAN | lu-rich. Potential.           | 2  | tctctccctctctctc  | 0.153 |                                                |
| - | 9  | 1177_1178 | p.I309fs DIAPH3_   | NM_001042517 | NP_001035982 | Q9NSV4 | DIAP3_HUMAN | GBD/FH3.                      | 2  | TGTCAATTTTTT      | 0.322 |                                                |
| - | 2  | 1567_1569 | orf43_uc010tud.1_  | NM_194278    | NP_919254    | Q6PJG2 | CN043_HUMAN | -rich. Gln-rich.              | 5  | GGgctgcctgctgctg  | 0.473 |                                                |
| - | 24 | 6379_6380 | ify.1_Frame_Shift  | NM_015263    | NP_056078    | Q8TDJ6 | DMXL2_HUMAN |                               | 9  | CAGTCATAAGGA      | 0.371 |                                                |
| + | 7  | 4096_4098 |                    | NM_015042    | NP_055857    | O15014 | ZN609_HUMAN | Poly-His.                     | 3  | CACACACCACC       | 0.576 |                                                |
| + | 7  | 861       | IS3L_uc002apq.2_   | NM_001143688 | NP_001137160 | Q8TF46 | DI3L1_HUMAN |                               | 2  | GGGATGAAGGC       | 0.483 |                                                |
| - | 5  | 697_698   | 002atw.1_Frame_!   | NM_182471    | NP_872271    | P14618 | KPYM_HUMAN  |                               | 1  | CTCGTCACACTT      | 0.51  |                                                |
| + | 5  | 1216_1217 |                    | NM_000761    | NP_000752    | P05177 | CP1A2_HUMAN |                               | 4  | CCCTTCACCATC      | 0.629 |                                                |
| + | 3  | 434_436   |                    | NM_001030005 | NP_001025176 | Q8VWH0 | CPLX3_HUMAN |                               | 0  | CACAGAGGAGG       | 0.616 |                                                |
| - | 11 | 4245      |                    | NM_001116    | NP_001107    | O60503 | ADCY9_HUMAN | lasmic (Potential).           | 6  | CATCTGGCCCTT      | 0.577 |                                                |
| - | 3  | 178       | _p.F47fs GLYR1_u   | NM_032569    | NP_115958    | Q49A26 | GLYR1_HUMAN | PWWP.                         | 0  | TGTTCCAAAAAA      | 0.433 |                                                |
| - | 19 | 2594_2595 | p.S358fs ARHGA     | NM_001006634 | NP_001006635 | Q68EM7 | RHG17_HUMAN |                               | 0  | CTTTGGAAGCT       | 0.505 |                                                |
| + | 4  | 3080      | 8R_uc010byg.1_F    | NM_018690    | NP_061160    | Q0VD83 | APOBR_HUMAN |                               | 0  | CCCCAACCCCT       | 0.677 |                                                |
| + | 13 | 3813_3815 |                    | NM_014712    | NP_055527    | O15047 | SET1A_HUMAN | Ser-rich.                     | 3  | Gctcctcatcctcctc  | 0.389 |                                                |
| + | 12 | 2232_2234 | gpz.2_In_Frame_    | NM_016113    | NP_057197    | Q9Y5S1 | TRPV2_HUMAN | ical; (Potential).            | 1  | ATGGGTGCTGCT      | 0.596 |                                                |
| - | 8  | 926_927   | p.S305fs MYO1D_    | NM_015194    | NP_056009    | O94832 | MYO1D_HUMAN | osin head-like.               | 3  | TTAGTAGAGAGC      | 0.426 |                                                |
| - | 3  | 566       | _hjz.1_RNA MMP2i   | NM_024302    | NP_077278    | Q9H239 | MMP28_HUMAN |                               | 1  | CTCAGCCCAGG       | 0.572 |                                                |
| + | 2  | 497       | _p.F113fs KLHL10   | NM_152467    | NP_689680    | Q6JEL2 | KLH10_HUMAN |                               | 4  | GACCAGTTTAAAC     | 0.483 |                                                |
| + | 20 | 6727_6729 | i.T2353del BPTF_u  | NM_182641    | NP_872579    | Q12830 | BPTF_HUMAN  | Thr-rich.                     | 4  | CCAGCACCACC       | 0.542 | rs143937013                                    |
| + | 9  | 1438_1439 | 2jgl.2_Frame_Shift | NM_002266    | NP_002257    | P52292 | IMA2_HUMAN  | ARM 9.                        | 2  | CCAAGATTATTC      | 0.366 |                                                |
| + | 6  | 895_896   |                    | NM_152721    | NP_689934    | Q6PKX4 | DOK6_HUMAN  | RS-type PTB.                  | 3  | CATGAAAGATTA      | 0.45  |                                                |
| - | 5  | 1002_1052 | uc010xsw.1_5'Flai  | NM_033317    | NP_201574    | Q6E0U4 | DMKN_HUMAN  | Gly-rich. S274_S290del        | 3  | gccgccactgctgccgc | 0.303 | 79970;rs144877871;rs147522263;rs140071083;rs13 |
| - | 5  | 1929      | xwy.1_Frame_Shif   | NM_001083335 | NP_001076804 | Q9JUJ3 | ZF112_HUMAN |                               | 5  | TTTTTCTCCAGT      | 0.463 |                                                |
| + | 7  | 954_955   | pfy.2_Frame_Shift  | NM_002517    | NP_002508    | Q99742 | NPAS1_HUMAN |                               | 0  | GAAATCCACGCT      | 0.604 |                                                |
| + | 3  | 136_138   | In_Frame_Del_p.L   | NM_001459    | NP_001450    | P49771 | FLT3L_HUMAN |                               | 0  | CCTCTGCTGCT       | 0.621 |                                                |
| - | 7  | 1721_1722 | p.R435fs ZNF160    | NM_00102603  | NP_001096073 | Q9HCG1 | ZN160_HUMAN | 2H2-type 7.                   | 1  | ATTGTACTAAAC      | 0.426 | rs145975178                                    |
| - | 4  | 719       | ido.2_Frame_Shift  | NM_001145303 | NP_001138775 | Q72404 | TMC4_HUMAN  | lasmic (Potential).           | 1  | GGCCTGGGGGA       | 0.647 |                                                |
| - | 3  | 316       | _p.P92fs HS1BP3    | NM_022460    | NP_071905    | Q53T59 | H1BP3_HUMAN | PX.                           | 1  | GTAGTGGGGGG       | 0.537 | rs77941615                                     |
| - | 67 | 7984      |                    | NM_014709    | NP_055524    | Q70CQ2 | UBP34_HUMAN |                               | 19 | GCCAGTTTATTT      | 0.413 |                                                |
| + | 3  | 1397_1398 |                    | NM_001011552 | NP_001011552 | Q6AI14 | SL9A4_HUMAN | ame=I/M7; (Potential).        | 3  | TGTCTTACTTAG      | 0.406 |                                                |
| + | 8  | 2074      | 02udy.2_Frame_Sl   | NM_152381    | NP_689594    | A4UGR9 | XIRP2_HUMAN |                               | 14 | TAAGTGGGGGG       | 0.418 |                                                |
| - | 15 | 1867      | HD1_uc010gft.1_    | NM_015474    | NP_056289    | Q9Y3Z3 | SAMH1_HUMAN |                               | 0  | GGCTTGGTGAA       | 0.383 |                                                |
| - | 11 | 905       | PTE_uc002yir.1_f   | NM_199261    | NP_954870    | P56180 | TPTE_HUMAN  | ical; (Potential).            | 5  | ATGTCAAAAAA       | 0.299 |                                                |



|   |    |           |                    |                                |              |             |             |                          |    |                     |       |                      |
|---|----|-----------|--------------------|--------------------------------|--------------|-------------|-------------|--------------------------|----|---------------------|-------|----------------------|
| - | 1  | 1882_1884 |                    | NM_002430                      | NP_002421    | Q10571      | MN1_HUMAN   |                          | 10 | CACACCAAtgctgctc    | 0.463 |                      |
| + | 13 | 1587      | p.T420fs MTMR3_    | NM_021090                      | NP_066576    | Q13615      | MTMR3_HUMAN | ularin phosphatase.      | 5  | ACCGCACCCCCC        | 0.547 |                      |
| + | 7  | 1953_1961 | atq.1_In_Frame_D   | NM_001039141                   | NP_001034230 | Q9H2D6      | TARA_HUMAN  |                          | 1  | GCCTCCAGAAC         | 0.589 |                      |
| - | 13 | 1723_1724 | GRIP2_uc011avh.    | NM_001080423                   | NP_001073892 | Q9C0E4      | GRIP2_HUMAN | PDZ 4. p.A478T(1)        | 1  | CGGTGGCGAAG         | 0.678 | rs61731933           |
| + | 3  | 622       |                    | NM_005513                      | NP_005504    | P29083      | T2EA_HUMAN  |                          | 1  | ATGCCCAAAAAA        | 0.418 |                      |
| + | 1  | 3006_3007 |                    | NM_175918                      | NP_787114    | Q8N1N5      | CRPAK_HUMAN |                          | 0  | CTGCTCACACGT        | 0.465 |                      |
| + | 1  | 3808_3809 |                    | NM_175918                      | NP_787114    | Q8N1N5      | CRPAK_HUMAN | 8                        | 0  | CTCACATGTGCC        | 0.683 | 123539;rs79888804    |
| + | 1  | 3836_3837 |                    | NM_175918                      | NP_787114    | Q8N1N5      | CRPAK_HUMAN |                          | 0  | CTGCTCACACGT        | 0.683 |                      |
| + | 1  | 3897_3898 |                    | NM_175918                      | NP_787114    | Q8N1N5      | CRPAK_HUMAN |                          | 0  | CCTGCTCACGTC        | 0.663 |                      |
| + | 1  | 4086_4087 |                    | NM_175918                      | NP_787114    | Q8N1N5      | CRPAK_HUMAN | raction with PAK1.       | 0  | CTGCTCACACGT        | 0.639 |                      |
| + | 2  | 203_205   |                    | NM_002111                      | NP_002102    | P42858      | HD_HUMAN    |                          | 4  | TCCTTCcagcagc       | 0.335 | rs10618869           |
| + | 2  | 790       | iov.2_Frame_Shift  | NM_005900                      | NP_005891    | Q15797      | SMAD1_HUMAN | MH1.                     | 1  | ATCCCTACCACT        | 0.438 |                      |
| - | 1  | 1032_1034 | rj.2_5'Flank NBLA  | NM_021973                      | NP_068808    | P61296      | HAND2_HUMAN | Poly-Ala.                | 1  | gcggctggcggcggc     | 0.473 |                      |
| + | 21 | 2550_2551 | p.F793fs TNPO1_    | NM_002270                      | NP_002261    | Q92973      | TNPO1_HUMAN |                          | 7  | CAGTTTATAAGA        | 0.366 |                      |
| + | 19 | 3557      | R98_uc003kjt.2_5'  | NM_032119                      | NP_115495    | Q8WXG9      | GPR98_HUMAN | ellular (Potential).     | 16 | TATCTTGGCAGC        | 0.378 |                      |
| + | 4  | 322       | uc003kqe.1_Intron  | REEP5_uc011cvx.1_Intron        | REEP5_       | P09132      | SRP19_HUMAN |                          | 0  | CGCGTGTCTGGC        | 0.363 |                      |
| + | 9  | 1679      | uc003kwr.3_Intron  | NM_003059                      | NP_003050    | Q9H015      | S22A4_HUMAN | name=12; (Potential).    | 0  | TCACCCTTTTTTT       | 0.418 |                      |
| - | 2  | 238_239   | me_Shift_Del_p.E   | NM_007054                      | NP_008985    | Q9Y496      | KIF3A_HUMAN | inesin-motor.            | 1  | TGATTTCTCTCT        | 0.411 |                      |
| + | 10 | 2092      | p.G568fs RREB1_    | NM_001003698                   | NP_001003698 | Q92766      | RREB1_HUMAN |                          | 11 | AGTCCGGGACC         | 0.711 |                      |
| + | 8  | 2004_2005 | srz.2_Frame_Shift  | NM_014660                      | NP_055475    | O94880      | PHF14_HUMAN |                          | 3  | TTGCAAGAGAGA        | 0.376 |                      |
| + | 4  | 952_953   |                    | NM_001159279                   | NP_001152751 |             |             |                          | 2  | AGCCGCTCAACA        | 0.416 |                      |
| + | 4  | 1034_1036 |                    | NM_001159279                   | NP_001152751 |             |             |                          | 2  | CCGCTCTTCAA         | 0.419 |                      |
| - | 20 | 2915      | _p.P781fs TNPO3    | NM_012470                      | NP_036602    | Q9Y5L0      | TNPO3_HUMAN |                          | 5  | GTATAGGGGGG         | 0.483 |                      |
| + | 1  | 528       |                    | NM_001001656                   | NP_001001656 | Q8NGU2      | OR9A4_HUMAN | ellular (Potential).     | 1  | GAACAATTTTTT        | 0.383 |                      |
| + | 21 | 2194      | l_uc003xjw.2_Spli  | NM_001031836                   | NP_001027006 | A8MYU2      | KCNU1_HUMAN |                          | 1  | TCCTTAGAAACG        | 0.46  |                      |
| + | 10 | 1740      | LF1_uc003xyf.2_F   | NM_015170                      | NP_055985    | Q8IWU6      | SULF1_HUMAN |                          | 7  | TGTGCCTTTTTT        | 0.408 |                      |
| - | 2  | 284       |                    | NM_001033723                   | NP_001028895 | Q6ZNC4      | ZN704_HUMAN |                          | 0  | GAGACATTTTTT        | 0.423 |                      |
| - | 10 | 1506      | p.R384fs NBN_ucl   | NM_002485                      | NP_002476    | O60934      | NBN_HUMAN   | r localization signal.   | 7  | GAGACCTTTTTT        | 0.338 |                      |
| - | 10 | 978_979   | yhd.2_Frame_Shift  | NM_057749                      | NP_477097    | O96020      | CCNE2_HUMAN |                          | 0  | TGGAACTCTAAT        | 0.376 |                      |
| - | 3  | 534_536   | if.2_Intron TP53IN | NM_033285                      | NP_150601    | Q96A56      | T5311_HUMAN | Glu-rich.                | 0  | CCTCCTCTCTCT        | 0.458 |                      |
| - | 3  | 991       | 3yjk.1_Splice_Site | NM_015435                      | NP_056250    | Q9NV58      | RN19A_HUMAN |                          | 4  | TTCTTACCACA         | 0.338 |                      |
| - | 6  | 1215      |                    | NM_001385                      | NP_001376    | Q14117      | DPYS_HUMAN  |                          | 2  | CACGCCTTTTTC        | 0.478 |                      |
| + | 12 | 1287      | _p.L350fs HEATR    | NM_032450                      | NP_115826    | Q8NDA8      | HTR7A_HUMAN | HEAT 3.                  | 0  | CGCCTACTGGC         | 0.592 | rs144186714          |
| + | 4  | 766_768   | Q238del SMARCA     | NM_003070                      | NP_003061    | P51531      | SMCA2_HUMAN | Poly-Gln.                | 3  | cagcaacagcagcag     | 0.271 | rs1070757;rs62639301 |
| - | 5  | 724_726   | re_Del_p.152_153   | NM_004529                      | NP_004520    | P42568      | AF9_HUMAN   | Poly-Ser.                | 3  | tgctgctactgctgctgcl | 0.148 |                      |
| - | 2  | 902       | awg.2_Frame_Shift  | NM_153695                      | NP_710162    | Q7RTV3      | ZN367_HUMAN | C2H2-type 1.             | 0  | AGCCTGGAGCG         | 0.353 |                      |
| + | 23 | 2412      | _Shift_Del_p.P365  | NM_020893                      | NP_065944    |             |             |                          | 7  | TCCTGCCCCCC         | 0.507 |                      |
| - | 39 | 9961_9962 | nty.2_Frame_Shift  | NM_153366                      | NP_699197    | Q4LDE5      | SVEP1_HUMAN | Sushi 30.                | 7  | CCCTTCTGCACA        | 0.386 |                      |
| + | 6  | 785       | _p.E225fs NUP214   | NM_005085                      | NP_005076    | P35658      | NU214_HUMAN |                          | 16 | GCAGGAAAAAA         | 0.363 |                      |
| + | 42 | 6348_6350 | 4dza.2_In_Frame_   | NM_005120                      | NP_005111    | Q93074      | MED12_HUMAN | Gln-rich.                | 4  | TACCTGagcagcag      | 0.281 |                      |
| + | 3  | 306       | uc011msx.1_5'UTR   | ALG13_uc011msz.1_Frame_Shift_C | Q9NP73       | ALG13_HUMAN |             |                          | 1  | CTGGAAAAAG          | 0.388 |                      |
| - | 3  | 866_868   | v.2_In_Frame_Del   | NM_003588                      | NP_003579    | Q13620      | CUL4B_HUMAN | Ser-rich.                | 3  | GAAGATgaggagg       | 0.424 |                      |
| - | 1  | 729       | uc004fbf.1_RNA     | NM_004065                      | NP_004056    | P51861      | CDR1_HUMAN  | pproximate repeats.[1.   | 0  | GTCTTCCAGTA         | 0.433 |                      |
| + | 4  | 381_383   |                    | NM_004781                      | NP_004772    | Q15836      | VAMP3_HUMAN | IV membrane protein; (Pc | 0  | TATCTTCATCATC       | 0.365 |                      |
| - | 3  | 882_883   | _p.E24fs RERE_u    | NM_012102                      | NP_036234    | Q9P2R6      | RERE_HUMAN  |                          | 2  | TCTCTTTTctctct      | 0.342 |                      |
| + | 4  | 817       | 1aug.1_Frame_Sh    | NM_001103170                   | NP_001096640 | Q5VUY0      | ADCL3_HUMAN |                          | 0  | CTACTGTTTTTT        | 0.458 | rs7513079            |
| + | 5  | 613_615   |                    | NM_152493                      | NP_689706    | Q5T0B9      | ZN362_HUMAN |                          | 0  | ACACCCACCAC         | 0.675 |                      |

|   |    |                             |              |              |        |             |                               |     |                    |       |                   |
|---|----|-----------------------------|--------------|--------------|--------|-------------|-------------------------------|-----|--------------------|-------|-------------------|
| + | 34 | 4444_4446>.E504del MACF1_   | NM_012090    | NP_036222    | Q9UPN3 | MACF1_HUMAN | Poly-Glu.                     | 16  | GTCTGGAGGAG        | 0.389 |                   |
| + | 7  | 1426_1427me_Shift_Del_p.H.  | NM_005012    | NP_005003    | Q01973 | ROR1_HUMAN  | xtracellular (Potential).     | 19  | ATCCCCACACAC       | 0.554 |                   |
| + | 2  | 248_249>sw.1_Frame_Shif     | NM_003503    | NP_003494    | O00311 | CDC7_HUMAN  |                               | 5   | CTCTTTTAAAAAA      | 0.406 |                   |
| + | 12 | 2267_2269.S575del BRDT_ur   | NM_207189    | NP_997072    | Q58F21 | BRDT_HUMAN  | Ser-rich.                     | 4   | AGTGAGgagcagca     | 0.35  |                   |
| - | 59 | 4728 K1482fs COL11A1        | NM_001854    | NP_001845    | P12107 | COBA1_HUMAN | le-helical region.            | 12  | CTCACCTTTTTTC      | 0.403 |                   |
| - | 3  | 5776_5777 uc001ezv.2_Intron | NM_001014342 | NP_001014364 | Q5D862 | FILA2_HUMAN |                               | 17  | TTGGCTGTGTGT       | 0.515 | rs140875805       |
| + | 2  | 99                          | NM_178428    | NP_848515    | Q5TA79 | LCE2A_HUMAN | Cys-rich.                     | 0   | AAGTGCCCCCC        | 0.572 | rs138365632       |
| - | 6  | 1404_1406>.V48del PVRL4_u   | NM_030916    | NP_112178    | Q96NY8 | PVRL4_HUMAN | ical; (Potential).            | 2   | TGAGCACCACC        | 0.571 |                   |
| - | 6  | 1357_1359p.V32del PVRL4_u   | NM_030916    | NP_112178    | Q96NY8 | PVRL4_HUMAN | ical; (Potential).            | 2   | ACACCACCACC        | 0.606 |                   |
| + | 17 | 2363_2365J2F1_uc010ph.1_l   | NM_002697    | NP_002688    | P14859 | PO2F1_HUMAN |                               | 5   | GCGTCCACCAC        | 0.601 |                   |
| + | 3  | 348_349 SD1_uc010pli.1_In   | NM_052862    | NP_443094    | Q6JBY9 | CPZIP_HUMAN |                               | 5   | CCTGTTCCCCC        | 0.554 | rs144007158       |
| - | 4  | 615 3LUL_uc001gpc.1         | NM_001033056 | NP_001028228 | P15104 | GLNA_HUMAN  |                               | 0   | CTCCTGCTCCAT       | 0.522 |                   |
| + | 7  | 1327_1328_Ins_p.333_334ins  | NM_005807    | NP_005798    | Q92954 | PRG4_HUMAN  | <-X-P-X-P-T-T-X. 11; appro    | 1   | CCACCAAGTCTG       | 0.658 |                   |
| + | 7  | 1574_1576ie_Del_p.T418del   | NM_005807    | NP_005798    | Q92954 | PRG4_HUMAN  | ats of K-X-P-X-P-T-T-X. 21    | 1   | GCACCACCAC         | 0.645 |                   |
| + | 7  | 1586_1588ie_Del_p.E420del   | NM_005807    | NP_005798    | Q92954 | PRG4_HUMAN  | ats of K-X-P-X-P-T-T-X. 22    | 1   | ACCAAGGAGCC        | 0.64  |                   |
| - | 3  | 472_474 ame_Del_p.K93de     | NM_001136504 | NP_001129976 | Q8N9I0 | SYT2_HUMAN  | lasmic (Potential).           | 3   | ctccttctgtctctcttc | 0.483 |                   |
| - | 3  | 588                         | NM_003395    | NP_003386    | O14904 | WNT9A_HUMAN | p.C168fs*6(1)                 | 2   | CGCAGCCCCC         | 0.627 |                   |
| + | 9  | 1195_1196 p.Y273fs CDH23_   | NM_022124    | NP_071407    | Q9H251 | CAD23_HUMAN | Extracellular (Potential).    | 11  | TGGCTACACCAT       | 0.594 |                   |
| + | 11 | 1237 HECTD2_uc001kh         | NM_182765    | NP_877497    | Q5U5R9 | HECD2_HUMAN |                               | 1   | GCTGCAAAAAA        | 0.318 |                   |
| + | 16 | 2167                        | NM_014633    | NP_055448    | Q6PD62 | CTR9_HUMAN  | TPR 14.                       | 2   | CCAAGTAAGAG        | 0.403 |                   |
| - | 4  | 616 BTBD10_uc010rcr         | NM_032320    | NP_115696    | Q9BSF8 | BTBDA_HUMAN | Ser-rich.                     | 0   | CCATTTGGGGAT       | 0.433 |                   |
| - | 5  | 674_675                     | NM_002426    | NP_002417    | P39900 | MMP12_HUMAN |                               | 0   | CAAGTGGTGCC        | 0.416 | 192524;rs33924686 |
| + | 9  | 1502_1504                   | NM_005188    | NP_005179    | P22681 | CBL_HUMAN   | Glu-rich (ac3(1))p.E366_K     | 149 | AAATTATGATGAT      | 0.473 |                   |
| - | 2  | 1302 raq.2_Frame_Shift      | NM_006143    | NP_006134    | Q15760 | GPR19_HUMAN | lasmic (Potential).           | 1   | ACGTAGTTTTTTI      | 0.398 |                   |
| - | 7  | 1152_1153                   | NM_024829    | NP_079105    | Q6P4A8 | PLBL1_HUMAN |                               | 0   | CCATCATATTGG       | 0.441 |                   |
| - | 12 | 4127_4129w.2_In_Frame_De    | NM_004719    | NP_004710    | Q99590 | SCAFB_HUMAN | Pro-rich.                     | 0   | AGGGGGTGGTG        | 0.483 |                   |
| + | 3  | 227 nk MARS_uc001sc         | NM_004990    | NP_004981    | P56192 | SYMC_HUMAN  |                               | 5   | CAGATATTTTTTI      | 0.488 |                   |
| + | 4  | 646_648 p.L194del TPCN1_    | NM_017901    | NP_060371    | Q9ULQ1 | TPC1_HUMAN  | =S1 of repeat I; (Potential). | 3   | GGCCCTGCTGC        | 0.64  |                   |
| + | 16 | 2686_2688lbn.1_In_Frame_I   | NM_004592    | NP_004583    | Q12872 | SFSWA_HUMAN | g/Ser-rich (RS domain).       | 0   | CACGAGAAGAA        | 0.493 |                   |
| - | 34 | 4381_4382 p.V250fs POLE_u   | NM_006231    | NP_006222    | Q07864 | DPOE1_HUMAN |                               | 8   | TTGACCACACAC       | 0.604 |                   |
| - | 20 | 2640_2641 vme.2_Frame_Shi   | NM_005845    | NP_005836    | O15439 | MRP4_HUMAN  | ABC transmembrane type-       | 4   | AATCTAAAAACG       | 0.406 |                   |
| + | 2  | 666_667 1_Intron RNASE7_    | NM_032572    | NP_115961    | Q9H1E1 | RNAS7_HUMAN |                               | 1   | AGCCTCCCCAGA       | 0.505 |                   |
| - | 3  | 294 K32fs RBM23_uc0         | NM_001077351 | NP_001070819 | Q86U06 | RBM23_HUMAN |                               | 1   | TAATCCTTTTTAA      | 0.483 |                   |
| + | 13 | 2290_2291 M_uc001wwe.3_F    | NM_020937    | NP_065988    | Q81YD8 | FANCM_HUMAN |                               | 7   | ATCAACTCTCTC       | 0.347 |                   |
| + | 1  | 809_811 !06del FAM63B_uc    | NM_001040450 | NP_001035540 | Q8NBR6 | FA63B_HUMAN |                               | 1   | CCCTGAGGAGG        | 0.621 |                   |
| + | 7  | 4096_4098                   | NM_015042    | NP_055857    | O15014 | ZN609_HUMAN | Poly-His.                     | 3   | CACACACCACC        | 0.576 |                   |
| + | 8  | 4222                        | NM_015042    | NP_055857    | O15014 | ZN609_HUMAN |                               | 3   | ACCACCCCCC         | 0.338 |                   |
| - | 5  | 728 LPX_uc010bhg.1_         | NM_006660    | NP_006651    | O76031 | CLPX_HUMAN  |                               | 0   | TGATGTCTGCT        | 0.343 |                   |
| - | 6  | 1160_1162_188LL>L PARP16    | NM_017851    | NP_060321    | Q8N5Y8 | PAR16_HUMAN | (Potential). Poly-Leu.        | 2   | TATGAGCAGCAC       | 0.488 |                   |
| - | 11 | 1628_1630\H3_uc002die.2_Ir  | NM_017539    | NP_060009    | Q8TD57 | DYH3_HUMAN  | n (By similarity).            | 18  | CGATCAGCAGC        | 0.498 |                   |
| + | 5  | 400_402 C6A_uc010bxs.2_£    | NM_014494    | NP_055309    | Q8NDV7 | TNR6A_HUMAN | Gln-rich.                     | 2   | cagccacagcagcag    | 0.241 |                   |
| - | 12 | 1595 Shift_Del_p.A445fs     | NM_024816    | NP_079092    | Q9H5N1 | RABE2_HUMAN | Potential.                    | 3   | GCTCTGCCTGC        | 0.672 |                   |
| + | 5  | 540 p.P104fs STX4_ur        | NM_004604    | NP_004595    | Q12846 | STX4_HUMAN  | ic (Potential). Potential.    | 0   | TAGAGCCCAG         | 0.423 |                   |
| + | 5  | 1317_1319>hx.2_In_Frame_D   | NM_024335    | NP_077311    | P78412 | IRX6_HUMAN  |                               | 6   | gaggaagaggagga     | 0.493 |                   |
| + | 12 | 2232_2234?gpz.2_In_Frame_   | NM_016113    | NP_057197    | Q9Y5S1 | TRPV2_HUMAN | ical; (Potential).            | 1   | TATGGTGTGCT        | 0.596 |                   |
| + | 5  | 825                         | NM_001070    | NP_001061    | P23258 | TBG1_HUMAN  | TP (Potential).               | 1   | TTGCTGGGGGG        | 0.507 |                   |
| + | 3  | 443_445 wla.1_In_Frame_I    | NM_018129    | NP_060599    | Q9NV59 | PNPO_HUMAN  |                               | 0   | TATGTTGCTGCT       | 0.498 |                   |

|   |     |                               |              |              |        |             |                               |     |                    |       |                    |
|---|-----|-------------------------------|--------------|--------------|--------|-------------|-------------------------------|-----|--------------------|-------|--------------------|
| - | 2   | 1371_1372                     | NM_004645    | NP_004636    | P38432 | COIL_HUMAN  | \ repeats of S-L-P-A.         | 1   | ATAGTAGATGAA       | 0.411 |                    |
| + | 2   | 1067 N_uc002jqo.2_5'F         | NM_003857    | NP_003848    | O43603 | GALR2_HUMAN | lasmic (Potential).           | 0   | GGGCACCCACA        | 0.726 |                    |
| - | 20  | 3375_3378                     | NM_005406    | NP_005397    | Q13464 | ROCK1_HUMAN | Glu-rich.                     | 5   | AAAGTATTTATT       | 0.309 |                    |
| + | 6   | 895_896                       | NM_152721    | NP_689934    | Q6PKX4 | DOK6_HUMAN  | RS-type PTB.                  | 3   | CATGAAAGATTA       | 0.45  |                    |
| + | 20  | 2554                          | NM_014975    | NP_055790    | Q9Y2H9 | MAST1_HUMAN |                               | 7   | CAGCGCCCCC         | 0.721 |                    |
| - | 2   | 202_204                       | NM_013376    | NP_037508    | Q9UHV2 | SRTD1_HUMAN |                               | 0   | TCCTTCTCCTCC       | 0.453 |                    |
| - | 5   | 1929 xwy.1_Frame_Shif         | NM_001083335 | NP_001076804 | Q9UJU3 | ZF112_HUMAN |                               | 5   | TTTTTCTCCAGT       | 0.463 |                    |
| - | 9   | 974_975 pni.2_Frame_Shift     | NM_003598    | NP_003589    | Q15562 | TEAD2_HUMAN | nal activation (Potential).   | 3   | GGCATGGGGGC        | 0.564 |                    |
| + | 3   | 136_138 In_Frame_Del_p.L      | NM_001459    | NP_001450    | P49771 | FLT3L_HUMAN |                               | 0   | CCTCTGCTGCT        | 0.621 |                    |
| - | 2   | 333_335 ?qdo.2_In_Frame_      | NM_001145303 | NP_001138775 | Q7Z404 | TMC4_HUMAN  | extracellular (Potential).    | 1   | TCCATCCTCCTC       | 0.645 |                    |
| - | 7   | 765 2qxs.2_Frame_Sh           | NM_002936    | NP_002927    | O60930 | RNH1_HUMAN  | RNase H.                      | 1   | TTCTTCCAACCT       | 0.403 |                    |
| - | 2   | 234_236 HX57_uc002rrg.2_      | NM_198963    | NP_945314    | Q6P158 | DHX57_HUMAN | Gly-rich.                     | 3   | gccacctccaccacca   | 0.384 |                    |
| - | 4   | 575_576 _p.P21fs ST3GAL5      | NM_003896    | NP_003887    | Q9UNP4 | SIAT9_HUMAN | renal (Potential).            | 0   | TCTTTGGGGGCC       | 0.505 |                    |
| + | 23  | 3012_3013                     | NM_001080527 | NP_001073996 | Q6PIF6 | MYO7B_HUMAN |                               | 2   | CCAGCCACACAC       | 0.574 |                    |
| + | 8   | 2074 02udy.2_Frame_Sl         | NM_152381    | NP_689594    | A4UGR9 | XIRP2_HUMAN |                               | 14  | TAACTGGGGGG        | 0.418 |                    |
| - | 205 | 40489 fi.1_Frame_Shift_I      | NM_133378    | NP_596869    | Q8WZ42 | TITIN_HUMAN |                               | 153 | GGCTTGGATAG        | 0.428 |                    |
| - | 7   | 1855 _p.P346fs SATB2_         | NM_015265    | NP_056080    | Q9UPW6 | SATB2_HUMAN |                               | 1   | GCTCTGGGGATC       | 0.542 |                    |
| + | 1   | 209_211 Translation_Start_:   | NM_005759    | NP_005750    | Q9NYB9 | ABI2_HUMAN  |                               | 0   | CTGTATgaggagge     | 0.601 |                    |
| - | 4   | 1070_1071                     | NM_000214    | NP_000205    | P78504 | JAG1_HUMAN  | ular (Potential). DSL.        | 9   | GAGTCCACGCGC       | 0.52  |                    |
| - | 12  | 5661_5663 2_In_Frame_Del_     | NM_014071    | NP_054790    | Q14686 | NCOA6_HUMAN | . Gln-rich. CREBBP-binding    | 7   | TCATTgtgtctgtctgc  | 0.498 | 895426;rs140426729 |
| - | 4   | 1934_1936 1aaq.1_In_Frame_    | NM_017798    | NP_060268    | Q9BYJ9 | YTHD1_HUMAN |                               | 2   | ACCACCTCCTC        | 0.557 |                    |
| - | 11  | 905 TPTE_uc002yir.1_f         | NM_199261    | NP_954870    | P56180 | TPTE_HUMAN  | ical; (Potential).            | 5   | ATGTCAAAAAA        | 0.299 |                    |
| - | 1   | 48_50                         | NM_181610    | NP_853641    | Q3LI73 | KR194_HUMAN |                               | 2   | AAAGCCTCCAC        | 0.557 |                    |
| + | 4   | 1162 0gma.2_Frame_S           | NM_005534    | NP_005525    | P38484 | INGR2_HUMAN | ential). Fibronectin type-III | 0   | ACGGCCTTTTTT       | 0.458 |                    |
| + | 11  | 1903_1905<1A_uc002ywl.2_3     | NM_001396    | NP_001387    | Q13627 | DYR1A_HUMAN | Poly-His.                     | 4   | tcaccatcaccaccacc  | 0.384 |                    |
| - | 2   | 475 70_uc002zxr.1_5'F         | NM_021916    | NP_068735    | Q9UC06 | ZNF70_HUMAN |                               | 2   | TTGCTGGGGGA        | 0.448 |                    |
| + | 7   | 1953_1961 atq.1_In_Frame_D    | NM_001039141 | NP_001034230 | Q9H2D6 | TARA_HUMAN  |                               | 1   | GCCTCCAGAAC        | 0.589 |                    |
| - | 10  | 2571_2573 E>E RANGAP1_u       | NM_002883    | NP_002874    | P46060 | RAGP1_HUMAN | idic). Asp/Glu-rich (highly.  | 0   | tttctctctctctctctc | 0.266 |                    |
| + | 1   | Translation_Start_Site CACNA: | NM_001128840 | NP_001122312 | Q01668 | CAC1D_HUMAN |                               | 11  | gttctgtGgatgatgatg | 0.246 |                    |
| - | 38  | 5712_5713 >.Q1866fs ADAMT:    | NM_182920    | NP_891550    | Q9P2N4 | ATS9_HUMAN  | GON.                          | 4   | TCCCTTGATATA       | 0.401 |                    |
| - | 4   | 757 3dmh.1_Frame_St           | NM_182920    | NP_891550    | Q9P2N4 | ATS9_HUMAN  |                               | 4   | CATTTTCTTGCTC      | 0.388 |                    |
| + | 10  | 1609 _p.S482fs MITF_uc        | NM_198159    | NP_937802    | O75030 | MITF_HUMAN  |                               | 2   | AGTGTCCCCCG        | 0.527 |                    |
| - | 2   | 584_586                       | NM_016206    | NP_057290    | A8MV65 | VGLL3_HUMAN |                               | 0   | TGTctttctctctctcc  | 0.394 |                    |
| - | 7   | 2209_2211 1blc.1_In_Frame_    | NM_001017395 | NP_001017395 | O94876 | TMCC1_HUMAN | Potential.                    | 1   | CCACCTGCTGC        | 0.581 |                    |
| + | 1   | 3775_3776                     | NM_175918    | NP_787114    | Q8N1N5 | CRPAK_HUMAN | 8                             | 0   | CCTGCTCACGTC       | 0.688 |                    |
| + | 1   | 3808_3809                     | NM_175918    | NP_787114    | Q8N1N5 | CRPAK_HUMAN | 8                             | 0   | CTCACATGTGCC       | 0.683 | 123539;rs79888804  |
| + | 1   | 3897_3898                     | NM_175918    | NP_787114    | Q8N1N5 | CRPAK_HUMAN |                               | 0   | CCTGCTCACGTC       | 0.663 |                    |
| + | 1   | 4086_4087                     | NM_175918    | NP_787114    | Q8N1N5 | CRPAK_HUMAN | raction with PAK1.            | 0   | CTGCTCACACGT       | 0.639 |                    |
| + | 2   | 865 _l_p.L108fs RUFY3         | NM_014961    | NP_055776    | Q7L099 | RUFY3_HUMAN |                               | 0   | AACCTGGGGGAG       | 0.478 |                    |
| + | 4   | 994_996 _l.Q279del MMRN1      | NM_007351    | NP_031377    | Q13201 | MMRN1_HUMAN | Poly-Gln.                     | 4   | .GCTGAGCAGCA       | 0.448 |                    |
| + | 1   | 413_414                       | NM_004575    | NP_004566    | Q12837 | PO4F2_HUMAN |                               | 1   | iCTggtggtggcgcg    | 0.386 | 907220;rs72269802  |
| - | 41  | 6826 _p.l766fs LRBA_uc        | NM_006726    | NP_006717    | P50851 | LRBA_HUMAN  |                               | 7   | GTGATTTTTTT        | 0.453 | rs34237929         |
| - | 4   | 411                           | NM_017631    | NP_060101    | Q8IY21 | DDX60_HUMAN |                               | 3   | TCAATCAAAAAA       | 0.308 |                    |
| - | 10  | 1909 -110_uc011cnu.1_F        | NM_006727    | NP_006718    | Q9Y6N8 | CAD10_HUMAN | Extracellular (Potential).    | 12  | AAACTGAAAAAA       | 0.313 |                    |
| - | 3   | 512_514 0jii.2_In_Frame_D     | NM_138379    | NP_612388    | Q96H15 | TIMD4_HUMAN | ar (Potential). Thr-rich.     | 2   | GGGCTTGTGT         | 0.537 |                    |
| - | 4   | 349_350 BC1D7_uc003nac        | NM_016495    | NP_057579    | Q9P0N9 | TBCD7_HUMAN | ab-GAP TBC.                   | 1   | GACATCCAAGTA       | 0.475 |                    |
| - | 4   | 884 _p.K228fs NUP153          | NM_005124    | NP_005115    | P49790 | NU153_HUMAN |                               | 9   | FGCTGGTTTTTTT      | 0.413 |                    |

|   |    |           |                    |                                |              |             |             |                              |    |                  |       |                    |
|---|----|-----------|--------------------|--------------------------------|--------------|-------------|-------------|------------------------------|----|------------------|-------|--------------------|
| + | 2  | 128_130   | p.L24del BTN2A2_   | NM_006995                      | NP_008926    | Q8WVV5      | BT2A2_HUMAN |                              | 0  | CAGCCTCctctctc   | 0.483 |                    |
| + | 7  | 1095      | S1A_uc011dst.1_5   | NM_015245                      | NP_056060    | Q92625      | ANS1A_HUMAN |                              | 4  | ATAAAACCCCCCC    | 0.418 |                    |
| - | 1  | 210_212   |                    | NM_024807                      | NP_079083    | Q5T2D2      | TRML2_HUMAN |                              | 2  | GCCACAGCAGC      | 0.631 |                    |
| + | 6  | 926_928   | ∫.C204del MDFI_ur  | NM_005586                      | NP_005577    | Q99750      | MDFI_HUMAN  | Cys-rich.                    | 0  | GCCTCTGCTGC      | 0.655 |                    |
| + | 22 | 2625_2626 | jb.3_Frame_Shift_  | NM_003318                      | NP_003309    | P33981      | TTK_HUMAN   | p.R838fs*4(3)                | 11 | .CTTTTGAAAAAA    | 0.302 |                    |
| - | 12 | 1315      | l009_uc003pkk.2_   | NM_014895                      | NP_055710    | Q5TB80      | QN1_HUMAN   |                              | 1  | TTGTCAAAAAAA     | 0.358 |                    |
| + | 6  | 690       | JN1_uc003sjf.2_F   | NM_001130965                   | NP_001124437 | O94901      | SUN1_HUMAN  | Nuclear.                     | 0  | CGCGGCCCCCG      | 0.557 |                    |
| + | 22 | 3420      | .so.2_Frame_Shift  | NM_152744                      | NP_689957    | Q7Z5N4      | SDK1_HUMAN  | ∫nnectin type-III 5.         | 6  | ∫AGGCTATGACG     | 0.577 |                    |
| + | 3  | 425_426   | wp.1_Frame_Shift   | NM_032172                      | NP_115548    | Q9H9J4      | UBP42_HUMAN |                              | 5  | TTGTCTTAAGTG     | 0.446 |                    |
| - | 2  | 967_968   | ∫11_uc003syy.2_R   | NM_005523                      | NP_005514    | P31270      | HXA11_HUMAN | Homeobox.                    | 2  | ∫TGTTAATTTTTT    | 0.446 |                    |
| + | 4  | 952_953   |                    | NM_001159279                   | NP_001152751 |             |             |                              | 2  | AGCCGCTCAACA     | 0.416 |                    |
| + | 4  | 475       | ∫TAG3_uc011kjk.1   | NM_012447                      | NP_036579    | Q9UJ98      | STAG3_HUMAN |                              | 8  | AGCCGCCAAAAA     | 0.458 |                    |
| - | 20 | 2915      | _p.P781fs TNPO3    | NM_012470                      | NP_036602    | Q9Y5L0      | TNPO3_HUMAN |                              | 5  | ∫GATAGGGGGG      | 0.483 |                    |
| - | 3  | 579       | .P6_uc010lmv.2_Ir  | NM_145808                      | NP_665807    | Q538Z0      | LUZP6_HUMAN |                              | 0  | GACAGCAGACA      | 0.338 |                    |
| + | 1  | 528       |                    | NM_001001656                   | NP_001001656 | Q8NGU2      | OR9A4_HUMAN | ∫ellular (Potential).        | 1  | GAACAATTTTTTT    | 0.383 |                    |
| - | 60 | 8167      | Shift_Del_p.R2704  | NM_006904                      | NP_008835    | P78527      | PRKDC_HUMAN | KIP-binding.                 | 34 | CCAGCCTTTTTTT    | 0.498 |                    |
| - | 11 | 2018_2019 | Is.1_Frame_Shift_  | NM_014682                      | NP_055497    | O60284      | ST18_HUMAN  |                              | 5  | ∫ATTTCGATTTTT    | 0.411 |                    |
| - | 10 | 1666_1667 | p.N420fs MYBL1_u   | NM_001080416                   | NP_001073885 | P10243      | MYBA_HUMAN  | ∫tory domain (By similarity) | 3  | CAAGTGTTTTTTT    | 0.406 |                    |
| + | 10 | 1740      | LF1_uc003xyf.2_F   | NM_015170                      | NP_055985    | Q8IWU6      | SULF1_HUMAN |                              | 7  | TGTGCCTTTTTTT    | 0.408 |                    |
| + | 2  | 604       |                    | NM_004770                      | NP_004761    | Q92953      | KCNB2_HUMAN | ∫asmic (Potential).          | 7  | AGGCTCCCCCG      | 0.502 |                    |
| - | 10 | 1506      | p.R384fs NBN_ucf   | NM_002485                      | NP_002476    | O60934      | NBN_HUMAN   | r localization signal.       | 7  | ∫AGACCTTTTTTT    | 0.338 |                    |
| + | 8  | 954       | _Shift_Del_p.L262  | NM_001359                      | NP_001350    | Q16698      | DECR_HUMAN  |                              | 0  | ∫CGCCTGGGGAC     | 0.413 |                    |
| - | 1  | 150       | o.2_5'UTR RUNX1    | NM_175634                      | NP_783552    | Q06455      | MTG8_HUMAN  |                              | 16 | ∫TTCCTTTTTTTC    | 0.343 |                    |
| - | 3  | 534_536   | if.2_Intron TP53IN | NM_033285                      | NP_150601    | Q96A56      | T5311_HUMAN | Glu-rich.                    | 0  | ∫CTCCTCTTCTT     | 0.458 |                    |
| + | 8  | 1488_1489 | lhs.1_Frame_Shift  | NM_012082                      | NP_036214    | Q8WW38      | FOG2_HUMAN  |                              | 5  | ∫ATATTGGGCCTT    | 0.436 |                    |
| + | 25 | 3326      | ∫yoy.2_Frame_Sh    | NM_021110                      | NP_066933    | Q05707      | COEA1_HUMAN |                              | 12 | ∫TCCACCAGCA      | 0.388 |                    |
| + | 3  | 610_612   | ∫ysi.2_In_Frame_D  | NM_002467                      | NP_002458    | P01106      | MYC_HUMAN   | Poly-Gln.                    | 6  | ∫TACCAGCAGCA     | 0.611 | rs61752959         |
| - | 30 | 4625      | ∫ae.1_Splice_Site_ | NM_201380                      | NP_958782    | Q15149      | PLEC_HUMAN  |                              | 9  | ∫TGACCTCCTC      | 0.621 |                    |
| + | 10 | 3752_3754 | .1_In_Frame_Del_   | NM_015158                      | NP_055973    | Q14678      | KANK1_HUMAN |                              | 4  | AGAAGAGGAGG      | 0.463 |                    |
| + | 4  | 766_768   | Q238del SMARCA     | NM_003070                      | NP_003061    | P51531      | SMCA2_HUMAN | Poly-Gln.                    | 3  | cagcaacagcagcag  | 0.271 | ∫070757;rs62639301 |
| + | 25 | 4030      | _Shift_Del_p.G127f | NM_020829                      | NP_065880    | Q4ADV7      | RIC1_HUMAN  |                              | 0  | ∫AAGTTGGAAGC     | 0.547 |                    |
| - | 5  | 724_726   | ∫e_Del_p.152_153   | NM_004529                      | NP_004520    | P42568      | AF9_HUMAN   | Poly-Ser.                    | 3  | tgctgctactgctgct | 0.148 |                    |
| + | 2  | 218_219   |                    | NM_001145249                   | NP_001138721 | P0CG42      | F157B_HUMAN | Gln-rich.                    | 0  | cagcggcggcagcag  | 0.386 |                    |
| + | 20 | 2671_2673 | ∫.E837del CNKSR∫   | NM_014927                      | NP_055742    | Q8WXI2      | CNKR2_HUMAN | ential. Poly-Glu.            | 2  | ∫aggaagaggaggag  | 0.379 |                    |
| - | 18 | 2564_2566 | ∫sw.2_In_Frame_C   | NM_015107                      | NP_055922    | Q9UPP1      | PHF8_HUMAN  |                              | 3  | ∫CGTTCTCCTCC     | 0.591 |                    |
| - | 31 | 7024_7026 | ∫27EE>E ATRX_uc    | NM_000489                      | NP_000480    | P46100      | ATRX_HUMAN  | Poly-Glu.                    | 30 | TCAACTCTTCTT     | 0.369 |                    |
| + | 24 | 2831_2833 | me_Del_p.P867del   | ALG13_uc011mta.1_Intron ALG13_ | Q9NP73       | ALG13_HUMAN |             | Pro-rich.                    | 1  | ∫accaccacctctctc | 0.197 | rs13440710         |
| - | 25 | 5169      | .A1708fs ODZ1_u    | NM_014253                      | NP_055068    | Q9UKZ4      | TEN1_HUMAN  | ∫ellular (Potential).        | 23 | ∫TAGTTGCCGTC     | 0.438 |                    |
| - | 8  | 1013      | mwc.1_Frame_Shi    | NM_024597                      | NP_078873    | Q8IWC1      | MA7D3_HUMAN |                              | 4  | CACCTGGGGGG      | 0.532 |                    |
| + | 6  | 1104_1106 | ∫ezx.2_In_Frame_   | NM_001163280                   | NP_001156752 | Q43719      | HTSF1_HUMAN | Poly-Lys.                    | 3  | ∫CTCAAAGAAGA     | 0.335 |                    |
| - | 1  | 825       |                    | NM_001009615                   | NP_001009615 | Q5MJ10      | SPXN2_HUMAN |                              | 1  | TCATCATTTTTTT    | 0.239 |                    |
| + | 2  | 215       |                    | NM_017514                      | NP_059984    | P51805      | PLXA3_HUMAN |                              | 3  | ∫CCGTGGGGGG      | 0.682 |                    |
| - | 7  | 811_812   | 1_Intron MST1P9_   | NR_002729                      |              |             |             | NA                           | 0  | ∫GTACGCCGCGC     | 0.649 |                    |
| + | 23 | 2276_2278 | lidge.1_In_Frame_  | NM_015978                      | NP_057062    | Q59H18      | TNI3K_HUMAN | Poly-Ser.                    | NA | ∫TACCTTCTCT      | 0.473 |                    |
| - | 9  | 1732_1734 | ∫ows.1_In_Frame_   | NM_015906                      | NP_056990    | Q9UPN9      | TRI33_HUMAN | Poly-Thr.                    | NA | ∫GTTGTGTTGTT     | 0.429 |                    |
| - | 1  | 2523      |                    | NM_021794                      | NP_068566    | Q9UKF2      | ADA30_HUMAN | ∫asmic (Pote                 | NA | GGTTACTTTTTTT    | 0.358 |                    |
| - | 2  | 2734_2736 | ∫wne.1_In_Frame_I  | NM_007113                      | NP_009044    | Q07283      | TRHY_HUMAN  | ∫0 AA tandei                 | NA | ∫GTAGCTCCTCC     | 0.586 | rs143222885        |

|   |    |             |                    |              |              |        |              |               |    |             |                 |       |                                            |
|---|----|-------------|--------------------|--------------|--------------|--------|--------------|---------------|----|-------------|-----------------|-------|--------------------------------------------|
| + | 4  | 1420_1421   | CC_uc001fqb.2_In   | NM_005973    | NP_005964    | Q92733 | PRCC_HUMAN   | NA            | 27 | CCTGGTCCCCC | 0.53            |       |                                            |
| - | 15 | 2113        | Shift_Del_p.V623f  | NM_001135050 | NP_001128522 | Q9P2J2 | TUTLA_HUMAN  | III 2. Extrac | NA | 5           | AGTACCCCCC      | 0.672 |                                            |
| - | 4  | 570_571     | tron NR113_uc001   | NM_001077480 | NP_001070948 | Q14994 | NR113_HUMAN  |               | NA | 2           | GTGGCGGGTGT     | 0.564 | rs139473535                                |
| + | 8  | 1233_1234   | 9wxs.2_Frame_St    | NM_000721    | NP_000712    | Q15878 | CAC1E_HUMAN  | lasmic (Pote  | NA | 6           | CCAAAGAGAGA     | 0.51  |                                            |
| - | 19 | 9119        | 3K1369fs ASPM_L    | NM_018136    | NP_060606    | Q8IZT6 | ASPM_HUMAN   | IQ 35. IQ 34  | NA | 6           | TTTCACTTTACA    | 0.313 |                                            |
| - | 5  | 1798        | AGT_uc009xf.2_F    | NM_000029    | NP_000020    | P01019 | ANGT_HUMAN   |               | NA | 0           | AGCTCAAAAAA     | 0.562 |                                            |
| + | 30 | 3927        | .1_intron MYO3A_   | NM_017433    | NP_059129    | Q8NEV4 | MYO3A_HUMAN  |               | NA | 18          | ACTCCAAAAAA     | 0.403 |                                            |
| - | 32 | 4715_4717   | Del_p.1437_1438F   | NM_033056    | NP_149045    | Q96QU1 | PCD15_HUMAN  | cytoplasmic   | NA | 13          | ggcggaggcggcgg  | 0.438 | rs12246234                                 |
| + | 4  | 743         | c010qnb.1_intron   | NM_000043    | NP_000034    | P25445 | TNR6_HUMAN   | . Extracellu  | NA | 2           | CCAAACTTTTTT    | 0.368 |                                            |
| + | 8  | 1043        |                    | NM_000392    | NP_000383    | Q92887 | MRP2_HUMAN   | smic (By sin  | NA | 1           | GGACCAAAAAA     | 0.403 |                                            |
| + | 19 | 2126_2128   | Q620del PTPRE_     | NM_006504    | NP_006495    | P23469 | PTPRE_HUMAN  | phatase 2. C  | NA | 1           | CAGAAGCAGCA     | 0.65  |                                            |
| + | 2  | 1024_1053   | _uc001ltv.2_In_Fr  | NR_021489    |              |        |              |               | NA | 0           | AGCCACAGCCC     | 0.657 | 4;rs36134435;rs61869706                    |
| + | 10 | 1289        | pkl.1_Splice_Site_ | NM_004398    | NP_004389    | Q13206 | DDX10_HUMAN  |               | NA | 4           | TTGTTTAGGTACA   | 0.353 | rs150843730                                |
| + | 16 | 2803        |                    | NM_005188    | NP_005179    | P22681 | CBL_HUMAN    | on with CD2,  | NA | 149         | ATGGCCAAAAAC    | 0.507 |                                            |
| - | 3  | 539_541     |                    | NM_006248    | NP_006239    |        |              |               | NA | 0           | GGACTTGTGTG     | 0.596 |                                            |
| + | 87 | 13755_13757 |                    | NM_002332    | NP_002323    | Q07954 | LRP1_HUMAN   | ical; (Potent | NA | 22          | CTGTTGCTGCT     | 0.557 |                                            |
| + | 8  | 893         | q.2_Frame_Shift_   | NM_005269    | NP_005260    | P08151 | GLI1_HUMAN   | C2H2-type 2   | NA | 15          | CCACTGGGGGG     | 0.597 |                                            |
| + | 16 | 2686_2688   | lbn.1_In_Frame_I   | NM_004592    | NP_004583    | Q12872 | SFSWA_HUMAN  | g/Ser-rich (f | NA | 0           | CACGAGAAGAA     | 0.493 |                                            |
| + | 1  | 123_124     | i.p.A30fs EP400_   | NM_015409    | NP_056224    | Q96L91 | EP400_HUMAN  |               | NA | 12          | AGCCGGCCCA      | 0.649 | rs71453134                                 |
| - | 34 | 4381_4382   | p.V250fs POLE_u    | NM_006231    | NP_006222    | Q07864 | DPOE1_HUMAN  |               | NA | 8           | TTGACCACACAC    | 0.604 |                                            |
| - | 1  | 1123        |                    | NM_001080396 | NP_001073865 | B1AL88 | F155A_HUMAN  |               | NA | 1           | CCCGTCCCCC      | 0.607 |                                            |
| + | 1  | 568_570     | l0_uc001whe.2_5'   | NM_014045    | NP_054764    | Q724F1 | LRP10_HUMAN  |               | NA | 1           | CCACCCCTCCT     | 0.67  |                                            |
| - | 18 | 1872        | l0apo.2_Frame_Sh   | NM_174978    | NP_777638    | Q08AQ4 | Q08AQ4_HUMAN |               | NA | 4           | TAGCTCAAAAAA    | 0.289 |                                            |
| - | 2  | 1567_1569   | orf43_uc010tud.1_  | NM_194278    | NP_919254    | Q6PJG2 | CN043_HUMAN  | rich. Gln-ri  | NA | 5           | GGgctgcctgctg   | 0.473 |                                            |
| - | 6  | 961_963     | i.E208del BEGAIN   | NM_001159531 | NP_001153003 | Q9BUH8 | BEGIN_HUMAN  |               | NA | 0           | TCGGCCTCCTC     | 0.724 |                                            |
| + | 4  | 2193_2194   |                    | NM_015042    | NP_055857    | O15014 | ZN609_HUMAN  | Poly-Lys.     | NA | 3           | AAAGACAAAAA     | 0.49  |                                            |
| + | 7  | 2928_2930   | 10ujg.1_In_Frame   | NM_004727    | NP_004718    | O60721 | NCKX1_HUMAN  | ic (Potential | NA | 0           | gaggaagaggaggag | 0.281 |                                            |
| + | 6  | 864_865     | ts.3_Frame_Shift   | NM_004221    | NP_004212    | P24001 | IL32_HUMAN   |               | NA | 1           | GGGGACAAGG      | 0.574 | rs2981599                                  |
| + | 12 | 3846_3848   | ie_Del_p.Q812del   | NM_006599    | NP_006590    | O94916 | NFAT5_HUMAN  | Poly-Gln.     | NA | 0           | AATcaacagcagca  | 0.389 |                                            |
| - | 10 | 10282_1028  | i_In_Frame_Del_p   | NM_006885    | NP_008816    | Q15911 | ZFH3_HUMAN   | Poly-Gln.     | NA | 4           | cctgtgtgtgctgct | 0.522 |                                            |
| - | 9  | 3770        | 2fnc.1_Frame_Shi   | NM_013275    | NP_037407    | Q6UB99 | ANR11_HUMAN  | Lys-rich.     | NA | 6           | GTCATCTTTTTT    | 0.468 |                                            |
| - | 10 | 1079_1081   | _63EE>E C17orf85   | NM_001114118 | NP_001107590 | Q53F19 | CQ085_HUMAN  | Glu-rich.     | NA | 1           | tcttcttctctctct | 0.379 |                                            |
| + | 11 | 2629_2631   | l2gix.2_In_Frame   | NM_001080424 | NP_001073893 | O15054 | KDM6B_HUMAN  | rich. Thr-ri  | NA | 2           | CGCGTcaccacc    | 0.369 |                                            |
| + | 34 | 4663_4665   | 0crt.2_In_Frame_I  | NM_003170    | NP_003161    | Q7KZ85 | SPT6H_HUMAN  | Poly-Ser.     | NA | 3           | CCTAGCAGACA     | 0.537 |                                            |
| - | 2  | 287         |                    | NM_033060    | NP_149049    | Q9BYQ7 | KRA41_HUMAN  |               | NA | 0           | CTGGGGTGGC      | 0.646 | l9;rs483893;rs2320229;rs79048996;rs2320230 |
| - | 7  | 527         | _Del_p.P94fs ETV   | NM_001986    | NP_001977    | P43268 | ETV4_HUMAN   |               | NA | 7           | TGTCTGGGGGG     | 0.577 |                                            |
| + | 7  | 711         | l0xia.1_Frame_Sh   | NM_170678    | NP_733778    | Q9NP15 | NRK2_HUMAN   |               | NA | 2           | CTGATCCCCC      | 0.587 |                                            |
| - | 11 | 1320_1321   | nfg.1_Frame_Shift  | NM_033417    | NP_219485    | Q9BT25 | HAUS8_HUMAN  |               | NA | 0           | GAAACGAGAGAC    | 0.495 |                                            |
| - | 2  | 134         | Splice_Site ZNF43  | NM_003423    | NP_003414    | P17038 | ZNF43_HUMAN  |               | NA | 2           | GTCCCTAAAAA     | 0.386 |                                            |
| - | 7  | 4346_4348   | Del_p.1220_1221E   | NM_181882    | NP_870998    | Q9BXM0 | PRAX_HUMAN   | Poly-Glu.     | NA | 2           | TGccttctctctcc  | 0.606 |                                            |
| + | 11 | 1043_1044   | V1C2_uc002rat.2_   | NM_001039362 | NP_001034451 | Q8NEY4 | VATC2_HUMAN  |               | NA | 1           | CGACAGAGAG      | 0.604 |                                            |
| + | 12 | 2379        |                    | NM_003048    | NP_003039    | Q9UBY0 | SL9A2_HUMAN  | lasmic (Pote  | NA | 8           | CAGCACCCCC      | 0.527 |                                            |
| + | 12 | 1452_1453   | p.V341fs DCAF17    | NM_025000    | NP_079276    | Q5H9S7 | DCA17_HUMAN  |               | NA | 0           | GGTGGTAAAAA     | 0.371 |                                            |
| - | 1  | 139         | c002uml.2_RNA F    | NM_181342    | NP_851939    | Q9Y680 | FKBP7_HUMAN  |               | NA | 0           | CATGGTTTTTGC    | 0.522 |                                            |
| - | 56 | 13909       | N_uc010zjf.1_Intri | NM_133378    | NP_596869    | Q8WZ42 | TITIN_HUMAN  |               | NA | 153         | CATCATTTTTTGC   | 0.408 |                                            |
| - | 29 | 3477_3478   | vul.2_Frame_Shift  | NM_018218    | NP_060688    | Q9NVE5 | UBP40_HUMAN  |               | NA | 3           | ATCTTGTTTTTT    | 0.317 |                                            |
| + | 2  | 175_177     |                    | NM_022134    | NP_071417    | Q9H3Q3 | G3ST2_HUMAN  | type II mem   | NA | 0           | GTCATCCTCCT     | 0.631 |                                            |



|   |    |           |                                                                                                            |              |              |        |              |                           |    |            |                  |            |             |
|---|----|-----------|------------------------------------------------------------------------------------------------------------|--------------|--------------|--------|--------------|---------------------------|----|------------|------------------|------------|-------------|
| + | 7  | 739       | PL2_uc011aah.1_F                                                                                           | NM_144498    | NP_653081    | Q9H1P3 | OSBL2_HUMAN  | NA                        | 2  | ACCACCCCCC | 0.463            | rs79735057 |             |
| + | 4  | 1162      | Ogma.2_Frame_S                                                                                             | NM_005534    | NP_005525    | P38484 | INGR2_HUMAN  | tential), Fibr            | NA | 0          | ACGGCCTTTTTT     | 0.458      |             |
| - | 22 | 3016_3018 | aph.1_In_Frame_I                                                                                           | NM_002473    | NP_002464    | P35579 | MYH9_HUMAN   | Potential.                | NA | 11         | AGCGCTCCTCC      | 0.665      |             |
| - | 7  | 1050_1052 | gye.1_In_Frame_I                                                                                           | NM_020831    | NP_065882    | Q969V6 | MKL1_HUMAN   | Gln-rich.                 | NA | 5          | GTGGTGCTGCT      | 0.66       |             |
| + | 2  | 372_374   | _Intron LOC33967                                                                                           | NM_004599    | NP_004590    | Q12772 | SRBP2_HUMAN  | h. Cytoplas               | NA | 4          | gcagtggcagcagca  | 0.365      |             |
| + | 5  | 477_479   |                                                                                                            | NM_001197    | NP_001188    | Q13323 | BIK_HUMAN    | potential), H             | NA | 0          | tgctggcgtgctgctg | 0.562      |             |
| - | 19 | 1979      | kw.2_Frame_Shift                                                                                           | NM_017886    | NP_060356    | Q96C45 | ULK4_HUMAN   |                           | NA | 0          | GGTTCTTTTTTT     | 0.448      |             |
| + | 14 | 1647      | lgm.2_Frame_Shift                                                                                          | NM_006254    | NP_006245    | Q05655 | KPCD_HUMAN   | rotein kinase             | NA | 9          | TCAACGGGGGG      | 0.602      |             |
| - | 5  | 499       | PPA4_uc011bhp.                                                                                             | NM_018189    | NP_060659    | Q7L190 | DPPA4_HUMAN  |                           | NA | 1          | CTTTAATTTTTT     | 0.413      |             |
| + | 7  | 796       | TELC1_uc011bja.                                                                                            | NM_152305    | NP_689518    | Q8NBL1 | PGLT1_HUMAN  |                           | NA | 0          | ACACCAAAACC      | 0.408      |             |
| + | 4  | 1562      |                                                                                                            | NM_139209    | NP_631948    | Q8WTQ7 | GRK7_HUMAN   | kinase C-ter              | NA | 5          | GGTTCGGGGGG      | 0.463      |             |
| + | 29 | 4276_4278 | a.1_Intron P2RY12                                                                                          | NM_053002    | NP_443728    | Q86YW9 | MD12L_HUMAN  |                           | NA | 7          | TGGTTGGTGGC      | 0.527      |             |
| + | 1  | 59_61     | oicw.2_In_Frame_                                                                                           | NM_001528    | NP_001519    | Q04756 | HGFA_HUMAN   |                           | NA | 2          | CCCTTCTCTCT      | 0.729      |             |
| - | 3  | 304       | 378fs ADH1A_uc0                                                                                            | NM_000667    | NP_000658    | P07327 | ADH1A_HUMAN  |                           | NA | 2          | CTTCTCCAACA      | 0.473      |             |
| - | 3  | 299       | oir.2_Frame_Shift                                                                                          | NM_020395    | NP_065128    | Q96CB8 | INT12_HUMAN  |                           | NA | 0          | CTTTCAAAAAA      | 0.383      |             |
| + | 3  | 351       |                                                                                                            | NM_006583    | NP_006574    | O14718 | OPX_HUMAN    | Name=3; (P                | NA | 1          | TGAATATTTTTT     | 0.393      |             |
| - | 1  | 1220      |                                                                                                            | NM_152402    | NP_689615    | Q8N609 | TR1L1_HUMAN  | lasmic (Pote              | NA | 1          | CTGTTCTTTTTT     | 0.383      |             |
| - | 2  | 1076_1078 | me_Del.p.P343de                                                                                            | NM_178835    | NP_849157    | Q17R98 | ZN827_HUMAN  | Pro-rich.                 | NA | 0          | AGGATTgtggtggt   | 0.35       |             |
| + | 6  | 626_627   |                                                                                                            | NM_004477    | NP_004468    | Q14331 | FRG1_HUMAN   |                           | NA | 0          | TAGGGGAAATG      | 0.351      |             |
| - | 7  | 919       | AH5_uc003jfe.1_F                                                                                           | NM_001369    | NP_001360    | Q8TE73 | DYH5_HUMAN   | . Stem (By s              | NA | 31         | AGAGTCTTTTTT     | 0.517      |             |
| + | 1  | 453_455   | cyu.1_In_Frame_I                                                                                           | NM_001964    | NP_001955    | P18146 | EGR1_HUMAN   | Gly/Ser-rich              | NA | 1          | cagcaacagcagcag  | 0.394      |             |
| + | 26 | 4712      | n.1_Frame_Shift_I                                                                                          | NM_020690    | NP_065741    | Q8IWZ2 | Q8IWZ2_HUMAN |                           | NA | 6          | TTGGGAAAAAA      | 0.423      |             |
| + | 11 | 2401      | p.G581fs LARP1_                                                                                            | NM_033551    | NP_291029    | Q6PKG0 | LARP1_HUMAN  |                           | NA | 4          | ACCCAGGGGGG      | 0.547      |             |
| - | 1  | 506_508   | c003mnq.2_5'Flan                                                                                           | NM_032765    | NP_116154    | Q96A61 | TRI52_HUMAN  | Glu-rich.                 | NA | 0          | CTtctctgctctctct | 0.404      | rs146030758 |
| - | 1  | 523_524   |                                                                                                            | NM_052967    | NP_443199    | P35410 | MAS1L_HUMAN  | lasmic (Pote              | NA | 9          | AGAGGACACAC      | 0.495      |             |
| + | 9  | 1106_1107 | rc.3_Frame_Shift_                                                                                          | NM_080686    | NP_542417    | P48634 | PRC2A_HUMAN  | 57 AA type A              | NA | 0          | GTGGCGGGCCC      | 0.495      | rs147717718 |
| + | 3  | 406_408   | p.Q71del RUNX2_                                                                                            | NM_001024630 | NP_001019801 | Q13950 | RUNX2_HUMAN  | Poly-Gln.                 | NA | 3          | cagcaacagcagcag  | 0.276      |             |
| + | 15 | 2788      | p.K847fs GRIK2_                                                                                            | NM_021956    | NP_068775    | Q13002 | GRIK2_HUMAN  | lasmic (Pote              | NA | 5          | AATCAAAAAAA      | 0.348      |             |
| + | 2  | 688       |                                                                                                            | NM_198570    | NP_940972    | Q2TAL6 | VWC2_HUMAN   |                           | NA | 0          | CCGGGCCAGGA      | 0.716      |             |
| - | 7  | 1188      | p.K237fs CYP51A                                                                                            | NM_000786    | NP_000777    | Q16850 | CP51A_HUMAN  |                           | NA | 0          | ATAACATTTTTT     | 0.398      |             |
| - | 9  | 2023_2025 |                                                                                                            | NM_022574    | NP_072096    | O75420 | PERQ1_HUMAN  | Poly-Glu.                 | NA | 2          | AGGTTCTCTCT      | 0.675      | rs142340746 |
| + | 8  | 1077_1079 | ixa.2_In_Frame_D                                                                                           | NM_015908    | NP_056992    | Q9BXP5 | SRRT_HUMAN   | Glu-rich.                 | NA | 2          | GAGCAGGAGGA      | 0.596      |             |
| + | 1  | 528       |                                                                                                            | NM_001001656 | NP_001001656 | Q8NGU2 | OR9A4_HUMAN  | ellular (Pote             | NA | 1          | GAACAATTTTTT     | 0.383      |             |
| + | 1  |           | _Intron uc010loj.1_Intron uc003wad.2_Intron uc003wag.1_Intron TRY6_uc011ksn.1_Intron uc003wan.1_Intron uc0 |              |              |        |              |                           | NA | 0          | GCTGGCGAGTT      | 0.535      |             |
| - | 60 | 8167      | Shift_Del.p.R2704                                                                                          | NM_006904    | NP_008835    | P78527 | PRKDC_HUMAN  | KIP-binding.              | NA | 34         | CCAGCCTTTTTT     | 0.498      |             |
| + | 3  | 780_781   |                                                                                                            | NM_014943    | NP_055758    | Q9Y6X8 | ZHX2_HUMAN   |                           | NA | 2          | CAGTCAAAAAA      | 0.49       |             |
| + | 5  | 332       | _Intron ARHGAP6                                                                                            | NM_001142    | NP_001133    | Q99217 | AMELX_HUMAN  |                           | NA | 0          | .GTGGTGCCAGC     | 0.617      |             |
| - | 18 | 2564_2566 | lsw.2_In_Frame_C                                                                                           | NM_015107    | NP_055922    | Q9UPP1 | PHF8_HUMAN   |                           | NA | 3          | CGTTCTCCTCC      | 0.591      |             |
| + | 12 | 1981      | TAF1_uc004dzt.3                                                                                            | NM_138923    | NP_620278    | P21675 | TAF1_HUMAN   |                           | NA | 17         | CACATCAAAAAA     | 0.313      |             |
| - | 15 | 4609_4611 | t22EE>E ATRX_uc                                                                                            | NM_000489    | NP_000480    | P46100 | ATRX_HUMAN   | Poly-Glu.                 | NA | 30         | ctctctctctctctct | 0.212      |             |
| - | 1  | 1805_1806 |                                                                                                            | NM_003604    | NP_003595    | O14654 | IRS4_HUMAN   |                           | NA | 10         | CCTTTGCCCCCC     | 0.545      |             |
| - | 14 | 2723      | p.A823fs IGSF1_                                                                                            | NM_001555    | NP_001546    | Q8N6C5 | IGSF1_HUMAN  | potential), lg            | NA | 5          | ACTGGCCCCCG      | 0.488      |             |
| - | 3  | 645       | exp.1_Frame_Shift                                                                                          | NM_021796    | NP_068568    | Q9HBJ0 | PLAC1_HUMAN  |                           | NA | 1          | GGGACTTTTGGC     | 0.527      |             |
| - | 1  | 159       |                                                                                                            | NM_001009609 | NP_001009609 | Q5MJ09 | SPXN3_HUMAN  |                           | NA | 2          | TCATCATTTTTT     | 0.239      |             |
| + | 3  | 1864_1866 | Q581del MAMLD1                                                                                             | NM_005491    | NP_005482    | Q13495 | MAMD1_HUMAN  | Poly-Gln.                 | NA | 0          | Tgcagctgcagcagca | 0.488      |             |
| - | 8  | 877_879   |                                                                                                            | NM_001561    | NP_001552    | Q07011 | TNR9_HUMAN   | ential), Inter p.E250G(1) | NA | 4          | CTCTCTTCTCT      | 0.379      |             |
| + | 10 | 1424      | vni.2_Splice_Site_                                                                                         | NM_014874    | NP_055689    | O95140 | MFN2_HUMAN   |                           | NA | 1          | CTCCTAGGGGCG     | 0.48       |             |

|   |    |           |                     |              |              |        |              |                                |     |                   |       |
|---|----|-----------|---------------------|--------------|--------------|--------|--------------|--------------------------------|-----|-------------------|-------|
| + | 11 | 10149     | op.1_Frame_Shift    | NM_015001    | NP_055816    | Q96T58 | MINT_HUMAN   | Pro-rich.                      | 15  | :TACCACCCCCC      | 0.627 |
| - | 6  | 632       | lble.3_Frame_Shif   | NM_000437    | NP_000428    | Q99487 | PAFA2_HUMAN  |                                | 2   | :CTTCTGGGGCC      | 0.498 |
| + | 14 | 1261      | p.I350fs RPS6KA     | NM_002953    | NP_002944    | Q15418 | KS6A1_HUMAN  | kinase C-terminal.             | 1   | .GGCATCCCCC       | 0.672 |
| + | 20 | 6238_6239 | p.L801fs ARID1A     | NM_006015    | NP_006006    | O14497 | ARI1A_HUMAN  |                                | 142 | ATCCTAGAGGAC      | 0.535 |
| - | 9  | 1564_1565 | vup.2_Frame_Shif    | NM_007167    | NP_009098    | O95789 | ZMYM6_HUMAN  |                                | 3   | CCTTGTAATAAAA     | 0.351 |
| + | 6  | 520_521   | _RNA ST3GAL3_L      | NM_006279    | NP_006270    | Q11203 | SIAT6_HUMAN  | lenal (Potential).             | 3   | CCTTTCGCAAGT      | 0.515 |
| + | 13 | 1543_1544 | TA1_uc001dij.1_f    | NM_001081472 | NP_001074941 |        |              |                                | 1   | GCACAGAAAAA       | 0.228 |
| + | 4  | 327_329   | 326_uc009wda.1_     | NM_182976    | NP_892021    | Q5BKZ1 | ZN326_HUMAN  | al activation (By similarity). | 1   | CACAGTGGTGG       | 0.409 |
| + | 6  | 1737      | p.S374fs PRPF38     | NM_018061    | NP_060531    | Q5VTL8 | PR38B_HUMAN  |                                | 0   | AAATCAAAAAA       | 0.343 |
| + | 21 | 3910      | r.1_3'UTR MAGI3     | NM_001142782 | NP_001136254 | Q5TCQ9 | MAGI3_HUMAN  |                                | 6   | TCCTCTAAAAAA      | 0.453 |
| - | 9  | 1732_1734 | rows.1_In_Frame_    | NM_015906    | NP_056990    | Q9UPN9 | TRI33_HUMAN  | Poly-Thr.                      | 11  | TGTTGTGTTGTT      | 0.429 |
| - | 5  | 848_849   | ehg.2_Frame_Shif    | NM_017686    | NP_060156    | Q9NXN4 | GDAP2_HUMAN  | Macro.                         | 2   | :TGCTATGTGTGT     | 0.292 |
| + | 8  | 2280      | zr.1_Frame_Shift    | NM_004326    | NP_004317    | O00512 | BCL9_HUMAN   | y-Pro. Pro-rich.               | 6   | :GAGGACCCCCC      | 0.582 |
| - | 2  | 4365_4366 | i.1_In_Frame_Ins    | NM_007113    | NP_009044    | Q07283 | TRHY_HUMAN   | proximate tandem repeats.      | 5   | CTGGCGCAGCTC      | 0.559 |
| - | 2  | 1035_1036 | ie.1_In_Frame_Ins   | NM_007113    | NP_009044    | Q07283 | TRHY_HUMAN   | -E-Q-E-E- E-R-R-E-Q-Q-L.       | 5   | ctcgcgctctcctcctg | 0     |
| + | 4  | 1420_1421 | CC_uc001fqb.2_In    | NM_005973    | NP_005964    | Q92733 | PRCC_HUMAN   |                                | 27  | CCTGGTCCCCC       | 0.53  |
| + | 8  | 1233_1234 | 9wxs.2_Frame_St     | NM_000721    | NP_000712    | Q15878 | CAC1E_HUMAN  | lasmic (Potential).            | 6   | :CCAAAGAGAGA      | 0.51  |
| + | 9  | 1102_1103 | gqh.2_Frame_Shif    | NM_173156    | NP_775179    | Q92540 | SMG7_HUMAN   |                                | 3   | .GCTATGTTGGAC     | 0.391 |
| - | 15 | 1913      | DEM3_uc010pom.      | NM_025191    | NP_079467    | Q9BZQ6 | EDEM3_HUMAN  |                                | 1   | :CCACATTTTTCA     | 0.363 |
| + | 7  | 1256_1258 | ne_Del_p.E310del    | NM_005807    | NP_005798    | Q92954 | PRG4_HUMAN   | ats of K-X-P-X-P-T-T-X. 8.     | 1   | :ACCAAGGAGCC      | 0.65  |
| + | 7  | 1327_1328 | _Ins_p.333_334ins   | NM_005807    | NP_005798    | Q92954 | PRG4_HUMAN   | <-X-P-X-P-T-T-X. 11; appro     | 1   | CCACCAAGTCTG      | 0.658 |
| + | 7  | 1633_1634 | _Ins_p.435_436ins   | NM_005807    | NP_005798    | Q92954 | PRG4_HUMAN   | <-X-P-X-P-T-T-X. 24; appro     | 1   | CCACCAAGTCTG      | 0.639 |
| - | 2  | 850       | 1hha.3_Frame_Sh     | NM_025179    | NP_079455    | O75051 | PLXA2_HUMAN  |                                | 3   | CTGCTGGGGGG       | 0.652 |
| + | 18 | 2704      | ub.1_Frame_Shif     | NM_016121    | NP_057205    | Q9Y597 | KCTD3_HUMAN  |                                | 3   | :GGCATAAAAAA      | 0.418 |
| - | 61 | 12429     |                     | NM_206933    | NP_996816    | O75445 | USH2A_HUMAN  | II 25. Extracellular (Potenti  | 26  | :ACGGTAGGGCT      | 0.423 |
| + | 4  | 474       | hpl.2_Frame_Shift   | NM_001136018 | NP_001129490 | P07099 | HYEP_HUMAN   |                                | 4   | :TGAAGCCCCC       | 0.627 |
| + | 4  | 883       | .1_Intron ZNF678    | NM_178549    | NP_848644    | F5GXA7 | F5GXA7_HUMAN |                                | 1   | :AGAAACCCCTAC     | 0.363 |
| - | 8  | 852_853   | p.Q174fs RGS7_u     | NM_002924    | NP_002915    | P49802 | RGS7_HUMAN   |                                | 7   | CTTTGCTTGTGC      | 0.441 |
| - | 1  | 679       | V3_uc001hzb.2_In    | NM_001821    | NP_001812    | P26374 | RAE2_HUMAN   |                                | 6   | TCCTCTACATCAC     | 0.358 |
| - | 1  | 1608      | KG1_uc001ijn.2_Ir   | NM_015235    | NP_056050    | Q9H0L4 | CSTFT_HUMAN  | peats of G-[AT]-G-[MI]- Q.     | 1   | igtatgctgctcctgca | 0.214 |
| - | 22 | 4568_4569 | S605fs USP54_uc     | NM_152586    | NP_689799    | Q70EL1 | UBP54_HUMAN  |                                | 6   | CCCTTGGGAAG1      | 0.52  |
| - | 5  | 914       | Splice_Site_p.Q18   | NM_000770    | NP_000761    | P10632 | CP2C8_HUMAN  |                                | 0   | TATCTTACCTGCT     | 0.368 |
| - | 9  | 1499_1501 | XM2_uc001lhj.2_F    | NM_198148    | NP_937791    | Q8N436 | CPXM2_HUMAN  | Poly-Leu.                      | 2   | GCACCAGCAGC.      | 0.626 |
| + | 10 | 2005      |                     | NM_007183    | NP_009114    | Q9Y446 | PKP3_HUMAN   |                                | 1   | TGGGCGGGGGT       | 0.682 |
| + | 2  | 1024_1053 | _uc001ltv.2_In_Fri  | NR_021489    |              |        |              |                                | 0   | :AGCCACAGCCC      | 0.657 |
| - | 1  | 194       |                     | NM_001005160 | NP_001005160 | Q9H2C5 | O52A5_HUMAN  | Name=2; (Potential).           | 4   | :TGGCCAAAAAA      | 0.383 |
| - | 5  | 1326      | p.V323fs FAM160     | NM_001098794 | NP_001092264 | Q8N612 | F16A2_HUMAN  |                                | 2   | ATCAACCAACTC      | 0.542 |
| - | 4  | 465       | lyii.2_Splice_Site_ | NM_018362    | NP_060832    | Q9NUP9 | LIN7C_HUMAN  |                                | 0   | TCCTTACCACTC      | 0.404 |
| - | 6  | 1027      | p.P341fs CPSF7      | NM_001136040 | NP_001129512 | Q8N684 | CPSF7_HUMAN  | Pro-rich.                      | 1   | TTGGTGGGGGG       | 0.557 |
| + | 5  | 419       | nyx.2_Frame_Shif    | NM_003377    | NP_003368    | P49765 | VEGFB_HUMAN  |                                | 0   | :GACCTAAAAAA      | 0.388 |
| + | 15 | 1523      | p.L384fs TPCN2      | NM_139075    | NP_620714    | Q8NHX9 | TPC2_HUMAN   | :S2 of repeat II; (Potential). | 0   | :ATCCTGGGGGT      | 0.637 |
| + | 1  | 521       | 1_Intron PIWIL4_u   | NM_002033    | NP_002024    | P22083 | FUT4_HUMAN   | lasmic (Potential).            | 1   | :ATTCTGGGACCC     | 0.741 |
| - | 5  | 674_675   |                     | NM_002426    | NP_002417    | P39900 | MMP12_HUMAN  |                                | 0   | CAAGTGGTGCC       | 0.416 |
| + | 3  | 358       | uc001qmv.2_5'UTR    | NM_001130862 | NP_001124334 | Q96B01 | R51A1_HUMAN  |                                | 0   | :CCCTAAAAAA       | 0.348 |
| + | 5  | 2042_2043 | rx.1_Frame_Shift    | NM_001007026 | NP_001007027 | P54259 | ATN1_HUMAN   |                                | 6   | TTTCCCACCGGT      | 0.619 |
| - | 1  | 33        |                     | NM_023921    | NP_076410    | Q9NYW0 | T2R10_HUMAN  | Name=1; (Potential).           | 0   | :ACAACAAAAATC     | 0.378 |
| - | 3  | 441_442   | i.1_Intron PRB1_u   | NM_005039    | NP_005030    | P04280 | PRP1_HUMAN   | -[PAQ]-Q-[GE]-[GD]- [NKS]      | 0   | TTTCTGGAGGT       | 0.604 |

rs139084037

4;rs36134435;rs61869706

192524;rs33924686

rs34810644

|   |    |             |                    |              |              |        |             |                              |    |                   |       |                                            |
|---|----|-------------|--------------------|--------------|--------------|--------|-------------|------------------------------|----|-------------------|-------|--------------------------------------------|
| - | 3  | 258_259     | _74P>PP PRB1_u     | NM_005039    | NP_005030    | P04280 | PRP1_HUMAN  | '-P-[PAQ]-Q-[GE]-[GD]- [NH   | 0  | TTTCCTGGAGGT      | 0.619 |                                            |
| - | 3  | 502_503     |                    | NM_006248    | NP_006239    |        |             |                              | 0  | TTTCCTGGAGGT      | 0.594 |                                            |
| - | 3  | 257_259     |                    | NM_006248    | NP_006239    |        |             |                              | 0  | TCCTGGAGGAGG      | 0.601 |                                            |
| - | 6  | 542         | _Shift_Del_p.A150f | NM_004447    | NP_004438    | Q12929 | EPS8_HUMAN  |                              | 4  | ACAGTGAAGAA       | 0.388 |                                            |
| + | 4  | 669         | FAR2_uc009zjm.2    | NM_018099    | NP_060569    | Q96K12 | FACR2_HUMAN |                              | 0  | AGAGCCAAAAA       | 0.388 |                                            |
| + | 31 | 4582_4583   | _p.F325fs LRRK2_   | NM_198578    | NP_940980    | Q5S007 | LRRK2_HUMAN | Roc.                         | 24 | CACTTTGTGAAT      | 0.441 |                                            |
| + | 10 | 1054_1055   | ie_Shift_Del_p.V3: | NM_006431    | NP_006422    | P78371 | TCPB_HUMAN  |                              | 3  | AGTGTGGAACGC      | 0.351 |                                            |
| + | 8  | 1314        | _C3_uc009zsm.2_l   | NM_181783    | NP_861448    | Q6ZXV5 | TMTC3_HUMAN | ical; (Potential).           | 1  | CGAACCTTTTTT      | 0.303 |                                            |
| + | 16 | 1595_1596   | p.H504fs KIAA103   | NM_015275    | NP_056090    | Q2M389 | WAHS7_HUMAN |                              | 2  | TTACACATAAAC      | 0.332 |                                            |
| - | 3  | 263         |                    | NM_005719    | NP_005710    | O15145 | ARPC3_HUMAN |                              | 1  | GCATAGTTTTTGA     | 0.244 |                                            |
| - | 34 | 4381_4382   | _p.V250fs POLE_u   | NM_006231    | NP_006222    | Q07864 | DPOE1_HUMAN |                              | 8  | TTGACCACACAC      | 0.604 |                                            |
| - | 2  | 595_596     | RPC4_uc010abw.     | NM_016179    | NP_057263    | Q9UBN4 | TRPC4_HUMAN | al). Multimerization domain  | 6  | ACTAGGTTTTTTT     | 0.297 |                                            |
| + | 9  | 2007        | _p.K603fs CKAP2_   | NM_001098525 | NP_001091995 | Q8WWW9 | CKAP2_HUMAN |                              | 2  | AGTGTGAAAAAA      | 0.318 |                                            |
| + | 20 | 3706_3707   | o.A881fs LMO7_uc   | NM_015842    | NP_056667    | Q8WW11 | LMO7_HUMAN  |                              | 5  | AGGCAGAGAGAG      | 0.386 |                                            |
| - | 58 | 9857_9858   | laev.2_Frame_Shif  | NM_015057    | NP_055872    | O75592 | MYCB2_HUMAN |                              | 14 | AAGTGCTTCTCTC     | 0.465 |                                            |
| - | 1  | 825         | R_P1_uc001vni.2_lr | NM_178861    | NP_849192    | Q8IZP6 | R113B_HUMAN | RING-type.                   | 3  | CTGGGTTTTTGG      | 0.567 |                                            |
| - | 1  | 1123        |                    | NM_001080396 | NP_001073865 | B1AL88 | F155A_HUMAN |                              | 1  | CCCGTCCCCCCC      | 0.607 |                                            |
| + | 1  | 96_97       |                    | NM_172194    | NP_751944    | Q8NH05 | OR4Q3_HUMAN | Name=1; (Potential).         | 3  | ATTTTTGTTTTTTT    | 0.381 |                                            |
| + | 1  | 568_570     | lO_uc001whe.2_5'   | NM_014045    | NP_054764    | Q7Z4F1 | LRP10_HUMAN |                              | 1  | ACACCCCTCCTC      | 0.67  |                                            |
| - | 2  | 421_422     | o.1_Frame_Shift_l  | NM_017917    | NP_060387    | Q969Q6 | P2R3C_HUMAN |                              | 1  | GTTCACTTTTTT      | 0.262 |                                            |
| - | 8  | 1800        | kmk.2_Frame_Shif   | NM_033141    | NP_149132    | P80192 | M3K9_HUMAN  |                              | 5  | CCTGGCCCCCA       | 0.493 |                                            |
| + | 13 | 3597        | te_p.S940_splice f | NM_014982    | NP_055797    | Q96RV3 | PCX1_HUMAN  |                              | 1  | TTTTTAGAGTGT      | 0.312 | rs79889635                                 |
| + | 12 | 1357_1358   | ttts.1_Frame_Shift | NM_015604    | NP_056419    | Q8WV16 | DCAF4_HUMAN | WD 1.                        | 3  | ATCCTCCAAGAT      | 0.545 | rs148311071                                |
| + | 1  | 707         | l_5'Flank TMED8_   | NM_001010860 | NP_001010860 | Q9P1V8 | SAM15_HUMAN |                              | 0  | GATGACCAAAAC      | 0.478 |                                            |
| - | 5  | 633_635     | o.3_In_Frame_Del   | NM_005065    | NP_005056    | Q9UBV2 | SE1L1_HUMAN | action with ERLEC1, OS9 a    | 1  | AGCCTCTTCTTC      | 0.345 |                                            |
| - | 1  | 115_116     |                    | NM_001080490 | NP_001073959 | Q3MJ16 | PA24E_HUMAN |                              | 0  | ACTGGCCCCCC       | 0.594 | 746726;rs72237204                          |
| - | 2  | 1779        | on ZFP106_uc010    | NM_022473    | NP_071918    | Q9H2Y7 | ZF106_HUMAN |                              | 3  | AGGGGAAAAAA       | 0.393 |                                            |
| + | 12 | 1375_1377   |                    | NM_007347    | NP_031373    | Q9UPM8 | AP4E1_HUMAN |                              | 0  | TTATTCAGACAAT     | 0.365 |                                            |
| + | 4  | 1018        |                    | NM_015554    | NP_056369    | O94923 | GLCE_HUMAN  | lenal (Potential).           | 2  | GCTGATAAGTCT      | 0.403 |                                            |
| + | 9  | 2591        | _p.Q769fs PML_uc   | NM_033238    | NP_150241    | P29590 | PML_HUMAN   |                              | 5  | CGGCAGGGGGG       | 0.647 |                                            |
| - | 3  | 247_248     | lG4_uc010bkn.2_F   | NM_138573    | NP_612640    | Q8WWG1 | NRG4_HUMAN  | ar (Potential). EGF-like.    | 0  | ACAAAGCCCCCC      | 0.381 |                                            |
| + | 5  | 1049        | HD1_uc010ble.2_l   | NM_001013619 | NP_001013641 | A2RU49 | AGPD1_HUMAN |                              | 0  | AGTCGTTTTTGT      | 0.458 |                                            |
| + | 6  | 864_865     | cts.3_Frame_Shift  | NM_004221    | NP_004212    | P24001 | IL32_HUMAN  |                              | 1  | AGGGGACAAGGA      | 0.574 | rs2981599                                  |
| - | 3  | 512         | l_5'Flank ATP6V0l  | NM_001138    | NP_001129    | O00253 | AGRP_HUMAN  |                              | 0  | CCTCTGCCAAGC      | 0.607 |                                            |
| - | 10 | 10282_10283 | o_In_Frame_Del_p   | NM_006885    | NP_008816    | Q15911 | ZFH3_HUMAN  | Poly-Gln.                    | 4  | cctgtggtgctgctgct | 0.522 |                                            |
| - | 14 | 2504        | _p.F283fs ADAMT:   | NM_199355    | NP_955387    | Q8TE60 | ATS18_HUMAN | Cys-rich. p.A696fs*18(2)     | 18 | CATTGCAAAAAA      | 0.403 |                                            |
| + | 2  | 617         |                    | NM_001406    | NP_001397    | Q15768 | EFNB3_HUMAN | cellular (Potential).        | 1  | TCCTCTCCTAAT      | 0.627 |                                            |
| - | 36 | 5385        |                    | NM_003802    | NP_003793    | Q9UKX3 | MYH13_HUMAN |                              | 6  | GAGCTCACATCC      | 0.436 | rs112383245                                |
| + | 34 | 4663_4665   | ocrt.2_In_Frame_l  | NM_003170    | NP_003161    | Q7KZ85 | SPT6H_HUMAN | Poly-Ser.                    | 3  | CCCTAGCAGCAC      | 0.537 |                                            |
| - | 2  | 287         |                    | NM_033060    | NP_149049    | Q9BYQ7 | KRA41_HUMAN |                              | 0  | AGTGGGGTGGC       | 0.646 | l9;rs483893;rs2320229;rs79048996;rs2320230 |
| - | 2  | 522_524     | lDC_uc002hze.3_l   | NM_032484    | NP_115873    | Q8N2G8 | GHDC_HUMAN  |                              | 0  | ATGTTGgcagcagc    | 0.502 |                                            |
| - | 2  | 973         | _Shift_Del_p.G170  | NM_001145365 | NP_001138837 | Q9Y2D9 | ZN652_HUMAN | Glu-rich.                    | 1  | TTCTCTCCATAG      | 0.473 |                                            |
| + | 4  | 505_507     | l0wsa.1_In_Fram    | NM_014738    | NP_055553    | Q12767 | K0195_HUMAN | ical; (Potential).           | 1  | GCCGTGCTGCT       | 0.675 |                                            |
| - | 4  | 1782        |                    | NM_052947    | NP_443179    | Q86TB3 | ALPK2_HUMAN |                              | 14 | AGTCCTTTCCCC      | 0.522 |                                            |
| + | 3  | 617         | AG_uc010drr.2_Fri  | NM_001728    | NP_001719    | P35613 | BASI_HUMAN  | Potential). lg-like C2-type. | 0  | CTGAAGGGGGG       | 0.617 |                                            |
| + | 6  | 896         | o_Shift_Del_p.D19  | NM_012218    | NP_036350    | Q12906 | ILF3_HUMAN  | DZF.                         | 3  | AACGACCCCCC       | 0.502 |                                            |
| + | 3  | 316         | is.1_RNA ZNF90_l   | NM_007138    | NP_009069    | Q03938 | ZNF90_HUMAN | KRAB.                        | 2  | CAAGGAAAAAA       | 0.393 |                                            |

|   |    |                             |              |              |        |             |                          |     |                   |       |                                             |
|---|----|-----------------------------|--------------|--------------|--------|-------------|--------------------------|-----|-------------------|-------|---------------------------------------------|
| + | 6  | 1442_1443714_uc010ecp.1_F   | NM_182515    | NP_872321    | Q96N38 | ZN714_HUMAN | 2H2-type 9.              | 0   | ATAAGATGATTCA     | 0.356 |                                             |
| + | 5  | 839_840                     | NM_018025    | NP_060495    | Q9BRR8 | GPTC1_HUMAN | G-patch.                 | 1   | CGAGTAAAGAGA      | 0.361 |                                             |
| - | 5  | 1009_1020c002nzv.2_5'Flank  | NM_033317    | NP_201574    | Q6E0U4 | DMKN_HUMAN  | Gly-rich. S274_S290del   | 3   | jccgccactgctgctgc | 0.241 | rs22263;rs140071083;rs138902616;rs113540509 |
| + | 7  | 712_714                     | NM_001039887 | NP_001034976 | Q2NL68 | CS055_HUMAN | Ser-rich.                | 1   | CCATCTCCTCC       | 0.631 |                                             |
| + | 17 | 1944_1945iu.2_Frame_Shift   | NM_000540    | NP_000531    | P21817 | RYR1_HUMAN  | mic.1B30.2/SPRY 1.       | 12  | CTCCCTGTGTGT      | 0.53  |                                             |
| + | 7  | 1250_1251exp.3_Frame_Shift  | NM_181845    | NP_862828    | Q8N7M2 | ZN283_HUMAN | 2H2-type 5.              | 0   | AGGCCTTTTTTTI     | 0.408 |                                             |
| - | 4  | 318_319e_Shift_Del_p.S6f    | NM_000234    | NP_000225    | P18858 | DNL1_HUMAN  |                          | 3   | CCTTCGCTGCC       | 0.584 | rs149883221                                 |
| + | 3  | 612_613RT_uc002pof.1_5'UTR  | NM_001136019 | NP_001129491 | P55899 | FCGRN_HUMAN | ar (Potential). Alpha-1. | 1   | GCCCCGGGGAC       | 0.652 | rs11551281                                  |
| + | 3  | 238_239808_uc002pzq.2_1     | NM_001039886 | NP_001034975 | Q8N4W9 | ZN808_HUMAN |                          | 0   | TTCTCAGGTG        | 0.378 |                                             |
| + | 11 | 1043_1044V1C2_uc002rat.2_1  | NM_001039362 | NP_001034451 | Q8NEY4 | VATC2_HUMAN |                          | 1   | CGACAGAGAG        | 0.604 |                                             |
| - | 1  | 1479_1481                   | NM_001029883 | NP_001025054 | A6NGG8 | CB071_HUMAN |                          | 1   | GTCTTCTCTC        | 0.542 |                                             |
| + | 12 | 2379                        | NM_003048    | NP_003039    | Q9UBY0 | SL9A2_HUMAN | lasmic (Potential).      | 8   | CAGCACCCCC        | 0.527 |                                             |
| + | 21 | 2570_2571KD_uc010fyh.1_F    | NM_152879    | NP_690618    | Q16760 | DGKD_HUMAN  |                          | 5   | CTTCTGGGGGG       | 0.582 |                                             |
| + | 8  | 1134_1135gal.1_Frame_Shift  | NM_198994    | NP_945345    | O95932 | TGM3L_HUMAN |                          | 4   | TGCCACCCCC        | 0.582 |                                             |
| + | 9  | 1585_1586mil.2_Frame_Shift  | NM_139321    | NP_647537    | O75882 | ATRN_HUMAN  | ar (Potential). Kelch 3. | 2   | TGCAAGGGGGT       | 0.502 |                                             |
| + | 30 | 4617_4618APB_uc002xiy.1_1   | NM_020336    | NP_065069    | Q86X10 | RLGPB_HUMAN |                          | 2   | ACAGTCCCCC        | 0.428 |                                             |
| + | 1  | 368_369xjf.2_In_Frame_In    | NM_030919    | NP_112181    | Q9H4H8 | FA83D_HUMAN |                          | 3   | GGAGGGCgcggc      | 0.619 |                                             |
| - | 7  | 859_860                     | NM_020820    | NP_065871    | Q8TCU6 | PREX1_HUMAN | PH.                      | 6   | ATCTTTAACAAA      | 0.545 |                                             |
| - | 2  | 2489_2490xus.1_Frame_Shift  | NM_004975    | NP_004966    | Q14721 | KCNB1_HUMAN | lasmic (Potential).      | 2   | GCTTTTGGGGG       | 0.545 |                                             |
| - | 12 | 2865_2866                   | NM_003185    | NP_003176    | O00268 | TAF4_HUMAN  |                          | 3   | CCTCTGTTTTC       | 0.525 | rs138584893                                 |
| + | 4  | 334_335I_p.T11fs KCNJ15     | NM_002243    | NP_002234    | Q99712 | IRK15_HUMAN | smic (By similarity).    | 6   | CAGCACCCCC        | 0.522 |                                             |
| - | 42 | 7065_7066lgoc.1_Frame_Shift | NM_018963    | NP_061836    | Q9NSI6 | BRWD1_HUMAN |                          | 4   | CCCTTAAAAAA       | 0.323 |                                             |
| + | 5  | 602_603.S140fs DIP2A_uc     | NM_015151    | NP_055966    | Q14689 | DIP2A_HUMAN |                          | 2   | TGCCTCAGAG        | 0.592 |                                             |
| + | 2  | 884_885KL_uc002ztg.1_R      | NM_005207    | NP_005198    | P46109 | CRKL_HUMAN  | SH3 1.                   | 0   | TAACTGGAATA       | 0.433 |                                             |
| - | 7  | 789_791                     | NM_016449    | NP_057533    | Q6PGQ1 | CV043_HUMAN | Asp-rich.                | 1   | CCTGGGcatcatc     | 0.261 |                                             |
| + | 8  | 1121_1122I.3_RNA NF2_uc0    | NM_000268    | NP_000259    | P35240 | MERL_HUMAN  | FERM. i_E270del(1) p     | 728 | CAGAATAAAAA       | 0.48  |                                             |
| - | 27 | 3737_3738                   | NM_002473    | NP_002464    | P35579 | MYH9_HUMAN  | Potential.               | 11  | ATGTTACCTCC       | 0.614 |                                             |
| - | 22 | 3016_3018aph.1_In_Frame_I   | NM_002473    | NP_002464    | P35579 | MYH9_HUMAN  | Potential.               | 11  | AGCGCTCCTCC       | 0.665 |                                             |
| + | 3  | 268_2693L_uc011ann.1_Fr     | NM_016091    | NP_057175    | Q9Y262 | EIF3L_HUMAN |                          | 1   | TCCACAAAAC        | 0.443 |                                             |
| + | 2  | 378_380                     | NM_033318    | NP_201575    | Q9H4I9 | CV032_HUMAN | Asp/Glu-rich.            | 1   | AGAGGATGATG       | 0.478 | rs141840500                                 |
| - | 1  | 871_873_1.S246del TCF20_1   | NM_005650    | NP_005641    | Q9UGU0 | TCF20_HUMAN | Ser-rich.                | 5   | AGGGAaggagga      | 0.438 |                                             |
| - | 7  | 1008_10093_uc011apq.1_Fra   | NM_032311    | NP_115687    | Q9BY77 | PDIP3_HUMAN | RRM.                     | 0   | GGCCACACAC        | 0.559 |                                             |
| + | 4  | 644_646_1hce.1_5'Flank BHL  | NM_003670    | NP_003661    | O14503 | BHE40_HUMAN |                          | 1   | TGATCAGCAGC       | 0.438 | rs147291233                                 |
| + | 16 | 2116                        | NM_014296    | NP_055111    | Q9Y6W3 | CAN7_HUMAN  | Domain III.              | 1   | ATGGGAAAAAA       | 0.289 |                                             |
| - | 16 | 3037_3039C2_uc003dhq.1_F    | NM_015576    | NP_056391    | O15083 | ERC2_HUMAN  | Poly-His.                | 2   | gtggtgatggtggt    | 0.389 |                                             |
| - | 16 | 4234_4236eed.2_In_Frame_I   | NM_199420    | NP_955452    | O75417 | DPOLQ_HUMAN |                          | 11  | ACTCCTTCTGA       | 0.448 |                                             |
| + | 6  | 1298_1299me_Shift_Del_p.I1  | NM_017554    | NP_060024    | Q460N5 | PAR14_HUMAN |                          | 6   | CACCATAAAAA       | 0.398 |                                             |
| - | 3  | 790_791_1Shift_Del_p.S205f  | NM_003925    | NP_003916    | O95243 | MBD4_HUMAN  |                          | 2   | AAGTTAGAGAG       | 0.416 |                                             |
| + | 11 | 1582_1583I_p.L332fs CEP63   | NM_025180    | NP_079456    | Q96MT8 | CEP63_HUMAN | Potential.               | 1   | AGAACTGAAGAG      | 0.351 |                                             |
| + | 29 | 4276_4278a.1_Intron P2RY12  | NM_053002    | NP_443728    | Q86YW9 | MD12L_HUMAN |                          | 7   | TGTTGTGGG         | 0.527 |                                             |
| + | 2  | 800_801fgv.2_Frame_Shift    | NM_005414    | NP_005405    | P12757 | SKIL_HUMAN  |                          | 3   | CAGCGAAAAAA       | 0.438 |                                             |
| - | 2  | 5329_5330C4_uc003fvp.2_Int  | NM_018406    | NP_060876    | Q99102 | MUC4_HUMAN  |                          | 0   | GCTGAGGAAGT       | 0.567 |                                             |
| + | 1  | 3006_3007                   | NM_175918    | NP_787114    | Q8N1N5 | CRPAK_HUMAN |                          | 0   | CTGCTCACACG       | 0.465 |                                             |
| + | 1  | 3102_3103                   | NM_175918    | NP_787114    | Q8N1N5 | CRPAK_HUMAN | 1                        | 0   | CACACATGCCA       | 0.644 | rs144787346                                 |
| + | 1  | 3344_3345                   | NM_175918    | NP_787114    | Q8N1N5 | CRPAK_HUMAN |                          | 0   | CTGCTCACACG       | 0.693 |                                             |
| + | 1  | 4053_4054                   | NM_175918    | NP_787114    | Q8N1N5 | CRPAK_HUMAN |                          | 0   | CTGCTCACAC        | 0.658 |                                             |
| + | 17 | 3256_3257Iifd.2_Frame_Shift | NM_015173    | NP_055988    | Q86TI0 | TBCD1_HUMAN | ab-GAP TBC.              | 1   | TTCTCACCATC       | 0.535 |                                             |

|   |    |             |                    |              |              |        |             |                           |       |                      |       |
|---|----|-------------|--------------------|--------------|--------------|--------|-------------|---------------------------|-------|----------------------|-------|
| - | 5  | 391         | et.3_Frame_Shift   | NM_001891    | NP_001882    | P05814 | CASB_HUMAN  |                           | 0     | .GGGTCAAAAAA         | 0.473 |
| + | 4  | 994_996     | Q279del MMRN1      | NM_007351    | NP_031377    | Q13201 | MMRN1_HUMAN | Poly-Gln.                 | 4     | .GCTGAGCAGCA         | 0.448 |
| - | 3  | 2265        | IL3_uc011chd.1_li  | NM_018717    | NP_061187    | Q96JK9 | MAML3_HUMAN |                           | 1     | itgctgttgctgctgctgcl | 0.263 |
| + | 17 | 2312_2314   | uc003kgi.3_Intron  | NM_003248    | NP_003239    | P35443 | TSP4_HUMAN  | TSP type-3 7.             | 0     | AGTGTGTGATGAT        | 0.562 |
| + | 4  | 1030_1031   |                    | NM_002439    | NP_002430    | P20585 | MSH3_HUMAN  | action with EXO1.         | 4     | TTCTTTGGGGAA         | 0.347 |
| + | 15 | 2297_2299   | 3RF2_uc011ctn.1_   | NM_006909    | NP_008840    | O14827 | RGRF2_HUMAN |                           | 12    | AGTCCCACCAC          | 0.562 |
| + | 21 | 2611_2613   | R36_uc010jbu.2_Ir  | NM_139281    | NP_644810    | Q8NI36 | WDR36_HUMAN |                           | 2     | ACTTGAAGAAG          | 0.251 |
| + | 6  | 912_914     | ame_Del_p.G153d    | NM_001903    | NP_001894    | P35221 | CTNA1_HUMAN |                           | 11    | GGGTGGAGGAG          | 0.512 |
| + | 6  | 1328        | _p.A223fs LARP1_   | NM_033551    | NP_291029    | Q6PKG0 | LARP1_HUMAN |                           | 4     | CGTGGCCCCC           | 0.642 |
| + | 4  | 629_630     |                    | NM_145049    | NP_659486    | Q8WVY7 | UBCP1_HUMAN |                           | 1     | GATATTGAAGAT         | 0.312 |
| + | 5  | 996         |                    | NM_003862    | NP_003853    | O76093 | FGF18_HUMAN |                           | 0     | GGCTTCACCAA          | 0.607 |
| + | 5  | 1860        | nfs.1_Frame_Shift  | NM_022455    | NP_071900    | Q96L73 | NSD1_HUMAN  |                           | 3     | TGTGGAAAAAA          | 0.423 |
| - | 4  | 1510_1512   | _Frame_Del_p.E3f   | NM_178012    | NP_821080    | Q9BVA1 | TBB2B_HUMAN |                           | 1     | TCGCCCTCCTC          | 0.65  |
| - | 14 | 1681_1682   | ame_Shift_Del_p.E  | NM_001144769 | NP_001138241 | Q03001 | DYST_HUMAN  |                           | 14    | GGCCTTCTCTC          | 0.441 |
| - | 2  | 894         |                    | NM_002031    | NP_002022    | P42685 | FRK_HUMAN   | SH2.                      | 6     | TTCTCCTTTTTGC        | 0.398 |
| - | 2  | 894         | PRH_uc003qlg.1_!   | NM_001042683 | NP_001036148 | Q149N8 | SHPRH_HUMAN | p.E166fs*7(1)             | 3     | CGGTTCTTTTTTI        | 0.363 |
| + | 26 | 3025_3026   | ame_Shift_Ins_p.D  | NM_015440    | NP_056255    | Q6UB35 | C1TM_HUMAN  | hydrofolate synthetase.   | 4     | CCTGACAAAAAA         | 0.48  |
| - | 12 | 1527_1528   | legw.1_5'Flank WI  | NM_018288    | NP_060758    | Q8WUB8 | PHF10_HUMAN |                           | 1     | GTGTTGGGGGC          | 0.391 |
| + | 2  | 1295        | ame_Shift_Del_p.   | NM_001098201 | NP_001091671 | Q99527 | GPFR_HUMAN  | cellular (Potential).     | 1     | GCCCACCCCTC          | 0.627 |
| + | 8  | 2004_2005   | srz.2_Frame_Shift  | NM_014660    | NP_055475    | O94880 | PHF14_HUMAN |                           | 3     | TTGCAAGAGAGA         | 0.376 |
| - | 4  | 706         | _p.F63fs TRA2A_u   | NM_013293    | NP_037425    | Q13595 | TRA2A_HUMAN | RRM.                      | 1     | ATACACAAAAGC         | 0.368 |
| + | 3  | 342         | _uc011kby.1_Intror | NM_002541    | NP_002532    | Q02218 | ODO1_HUMAN  |                           | 2     | GGACATTTTTTT         | 0.577 |
| + | 4  | 952_953     |                    | NM_001159279 | NP_001152751 |        |             |                           | 2     | AGCCGCTCAACA         | 0.416 |
| + | 4  | 1034_1036   |                    | NM_001159279 | NP_001152751 |        |             |                           | 2     | CCGCTCTTCAA          | 0.419 |
| - | 7  | 1188        | _p.K237fs CYP51A   | NM_000786    | NP_000777    | Q16850 | CP51A_HUMAN |                           | 0     | ATAACATTTTTTT        | 0.398 |
| - | 21 | 3334        | ay.2_Frame_Shift_l | NM_000466    | NP_000457    | O43933 | PEX1_HUMAN  |                           | 2     | CAGACTTAGGT          | 0.373 |
| + | 72 | 11555_11556 | AP_uc003upr.2_Fri  | NM_003496    | NP_003487    | Q9Y4A5 | TRRAP_HUMAN | PI3K/PI4K.                | 37    | TGGCACAAAAAA         | 0.55  |
| - | 2  | 390_392     | kiw.1_In_Frame_l   | NM_015545    | NP_056360    | O75127 | PTCD1_HUMAN |                           | 1     | AACTCTCCTCC          | 0.606 |
| - | 13 | 2332        | ir-25 M10000082_E  | NM_005916    | NP_005907    | P33993 | MCM7_HUMAN  | action with ATRIP.        | 0     | GATAGCCAGCA          | 0.547 |
| + | 1  | 924_926     | u.1_5'Flank ZCWP'  | NM_019606    | NP_062552    | Q7L2J0 | MEPCE_HUMAN |                           | 1     | CCACCAGCAGC.         | 0.65  |
| + | 4  | 467         |                    | NM_001283    | NP_001274    | P61966 | AP1S1_HUMAN |                           | 0     | TTGATGGGGGG          | 0.562 |
| + | 5  | 743         | _p.E17fs CBLL1_u   | NM_024814    | NP_079090    | Q75N03 | HAKAI_HUMAN | RING-type.                | 5     | ACATGAAAAAAA         | 0.269 |
| - | 4  | 1558_1559   |                    | NM_033427    | NP_219499    | Q8WZ74 | CTTB2_HUMAN | Pro-rich.                 | 5     | GTATTCCGAGCT         | 0.535 |
| + | 4  | 1161        | CHRM2_uc003vtm     | NM_001006630 | NP_001006631 | P08172 | ACM2_HUMAN  | llular (By similarity).   | 5     | ATTCAGTTTTTTT        | 0.498 |
| - | 10 | 1269        |                    | NM_004333    | NP_004324    | P15056 | BRAF_HUMAN  |                           | 18290 | AGGCAGGGGGG          | 0.428 |
| + | 1  | 528         |                    | NM_001001656 | NP_001001656 | Q8NGU2 | OR9A4_HUMAN | cellular (Potential).     | 1     | GAACAATTTTTTT        | 0.383 |
| - | 9  | 2677_2679   | wwl.1_In_Frame_l   | NM_182643    | NP_872584    | Q96QB1 | RHG07_HUMAN | Poly-Ser.                 | 7     | ACTGGCTGCTG          | 0.621 |
| - | 60 | 8167        | Shift_Del_p.R2704  | NM_006904    | NP_008835    | P78527 | PRKDC_HUMAN | KIP-binding.              | 34    | CCAGCCTTTTTT         | 0.498 |
| - | 4  | 555_556     | ixyp.2_Frame_Shil  | NM_016027    | NP_057111    | Q53H82 | LACB2_HUMAN |                           | 1     | CCTCTTCTAAGA         | 0.371 |
| - | 2  | 284         |                    | NM_001033723 | NP_001028895 | Q6ZNC4 | ZN704_HUMAN |                           | 0     | GAGACATTTTTTT        | 0.423 |
| - | 5  | 730_731     |                    | NM_018710    | NP_061180    | Q8N4L2 | TM55A_HUMAN |                           | 0     | AGTGTGGAACCT         | 0.317 |
| + | 12 | 1711        | u.K510fs ESRP1_u   | NM_017697    | NP_060167    | Q6NXG1 | ESRP1_HUMAN | RRM 3.                    | 4     | TGTCATAAAAAA         | 0.438 |
| - | 38 | 5023        | ks.1_Frame_Shift_  | NM_015902    | NP_056986    | O95071 | UBR5_HUMAN  |                           | 28    | AATCATCTTCAG         | 0.353 |
| - | 56 | 8985        | ynt.2_Frame_Shift  | NM_198123    | NP_937756    | Q72407 | CSMD3_HUMAN | ar (Potential). Sushi 20. | 63    | CTTTTAGAATTG         | 0.303 |
| + | 3  | 780_781     |                    | NM_014943    | NP_055758    | Q9Y6X8 | ZHX2_HUMAN  |                           | 2     | CAGTCAAAAAAA         | 0.49  |
| - | 13 | 1698        | D2_uc003yqi.3_Rl   | NM_014109    | NP_054828    | Q6PL18 | ATAD2_HUMAN |                           | 2     | TCGTCAAAAAA          | 0.413 |
| + | 14 | 2027        | uc003yqx.1_Intron  | NM_001039112 | NP_001034201 | Q2WJ9  | FR1L6_HUMAN |                           | 11    | CTGGTAGGTG.          | 0.488 |

rs137989738



|   |    |           |                    |              |              |        |             |                                |    |     |                  |       |                    |
|---|----|-----------|--------------------|--------------|--------------|--------|-------------|--------------------------------|----|-----|------------------|-------|--------------------|
| - | 32 | 9448_9450 | zae.1_In_Frame_I   | NM_201380    | NP_958782    | Q15149 | PLEC_HUMAN  | Globular 2.                    |    | 9   | 3ATCTTGATGATC    | 0.616 |                    |
| - | 10 | 1683      | mc.3_Frame_Shift   | NM_006521    | NP_006512    | P19532 | TFE3_HUMAN  |                                |    | 197 | 3CAGGTCCCCC      | 0.647 |                    |
| - | 18 | 2564_2566 | sw.2_In_Frame_C    | NM_015107    | NP_055922    | Q9UPP1 | PHF8_HUMAN  |                                |    | 3   | 3CGTTCCTCTCC     | 0.591 |                    |
| + | 1  | 595       |                    | NM_015686    | NP_056501    | O75949 | F155B_HUMAN |                                |    | 2   | FCGCCCCAAAAA     | 0.592 |                    |
| + | 16 | 2323      | s OGT_uc004eac.2   | NM_181672    | NP_858058    | O15294 | OGT1_HUMAN  |                                |    | 5   | CCACACTTTTTT     | 0.398 |                    |
| - | 3  | 364       |                    | NM_001006938 | NP_001006939 | Q6IPX3 | TCAL6_HUMAN | Glu-rich.                      |    | 1   | 3CCTGCTTTTCC1    | 0.418 |                    |
| + | 3  | 1003_1004 | msr.1_Frame_Shif   | NM_020769    | NP_065820    | Q8NET4 | RGAG1_HUMAN |                                |    | 4   | CCTCTGGAGAG/     | 0.5   |                    |
| + | 3  | 421       | ieuc.2_Frame_Shif  | NM_006603    | NP_006594    | Q8N3U4 | STAG2_HUMAN |                                |    | 5   | GATTTTGAAGAT/    | 0.308 |                    |
| + | 15 | 8000      | asb.1_Frame_Shif   | NM_153834    | NP_722576    | Q8IZF6 | GP112_HUMAN | cellular (Potential).          |    | 12  | GCTGCGGGGGG      | 0.532 |                    |
| + | 4  | 1210_1212 | EC1_uc010nsl.1_I   | NM_005462    | NP_005453    | O60732 | MAGC1_HUMAN |                                |    | 4   | 3TGAGCTCCTCC     | 0.483 | 660605;rs141900922 |
| + | 7  | 512_514   | j.1_In_Frame_Del   | NM_007150    | NP_009081    | O15231 | ZN185_HUMAN | Poly-Glu.                      |    | 3   | GACACCgaggagg    | 0.522 |                    |
| - | 23 | 3222      | P1038fs L1CAM_u    | NM_000425    | NP_000416    | P32004 | L1CAM_HUMAN | III 5. Extracellular (Potentia |    | 9   | 3TCCTTGGGGAC     | 0.587 |                    |
| - | 14 | 3808_3809 |                    | NM_000132    | NP_000123    | P00451 | FA8_HUMAN   | B.                             |    | 11  | 3CCTGAATTTTTT    | 0.327 |                    |
| + | 3  | 2072      | omu.1_Frame_Shif   | NM_006015    | NP_006006    | O14497 | ARI1A_HUMAN | Poly-Gln.                      | NA | 142 | 3CTCAGCAGCCA/    | 0.637 |                    |
| - | 4  | 361_362   | ogr.1_Frame_Shift  | NM_006912    | NP_008843    | Q92963 | RIT1_HUMAN  |                                | NA | 1   | 3GATCTTATAAGC    | 0.371 |                    |
| + | 5  | 534_535   | 1_5'Flank MBD6_u   | NM_052897    | NP_443129    | Q96DN6 | MBD6_HUMAN  |                                | NA | 4   | 3ACCACCGCGG/     | 0.579 |                    |
| - | 38 | 5554      | ltaq.2_Frame_Shif  | NM_025114    | NP_079390    | O15078 | CE290_HUMAN | Potential.                     | NA | 7   | 3TCTCCTTCAAGC    | 0.313 |                    |
| - | 5  | 538_539   | lwmv.1_5'UTR IPC   | NM_024658    | NP_078934    | Q8TEX9 | IPO4_HUMAN  |                                | NA | 1   | GGTACCTCTCTC     | 0.559 |                    |
| - | 4  | 1894_1896 | 1ygb.2_In_Frame_   | NM_138576    | NP_612808    | Q9C0K0 | BC11B_HUMAN | Glu-rich.                      | NA | 10  | GTAGCAGctctctct  | 0.517 |                    |
| + | 15 | 1583      | 0bnd.2_Frame_St    | NM_002605    | NP_002596    | O60658 | PDE8A_HUMAN |                                | NA | 4   | 3TTCAACAAAAAC    | 0.303 |                    |
| + | 13 | 1393      | ivv.1_Frame_Shift  | NM_000548    | NP_000539    | P49815 | TSC2_HUMAN  |                                | NA | 10  | 3TCCTATAGAGCC    | 0.602 | rs45493394         |
| + | 5  | 712       | Jvnq.1_Splice_Site | NM_198390    | NP_938204    | Q8IY22 | CMIP_HUMAN  |                                | NA | 0   | CCTTTAGAACAC     | 0.446 |                    |
| + | 10 | 1094      | _Shift_Del_p.L266f | NM_001130021 | NP_001123493 | Q93050 | VPP1_HUMAN  | lasmic (Pote                   | NA | 1   | 3AACCTGTGCAA     | 0.527 |                    |
| + | 3  | 1547      | :C1_uc002kae.2_5   | NM_001080519 | NP_001073988 | Q9P281 | BAHC1_HUMAN |                                | NA | 1   | 3GAAGGCCCCCC     | 0.652 |                    |
| - | 4  | 1505      | _2B_uc010dsw.1_I   | NM_198532    | NP_940934    | Q6ZS72 | CS035_HUMAN |                                | NA | 1   | CAGCGCCAGGG      | 0.682 |                    |
| - | 12 | 1196_1197 | p.G413fs STAP2_u   | NM_001013841 | NP_001013863 | Q9UGK3 | STAP2_HUMAN |                                | NA | 1   | TCCTGCCCAAGC     | 0.337 |                    |
| - | 11 | 1313_1315 |                    | NM_001080421 | NP_001073890 | Q9UPW8 | UN13A_HUMAN | i-rich. Poten                  | NA | 3   | TCAGGCActctctct  | 0.433 |                    |
| + | 11 | 1633_1634 | p.T424fs KIRREL    | NM_199180    | NP_954649    | Q6UWL6 | KIRR2_HUMAN | 5. Extracell                   | NA | 3   | 3GGGACCCAGG/     | 0.668 |                    |
| + | 18 | 5228      |                    | NM_015073    | NP_055888    | O60292 | SI1L3_HUMAN |                                | NA | 2   | 3CTCTTACCAG/     | 0.756 |                    |
| - | 8  | 1171_1172 | 2utu.2_Frame_St    | NM_012086    | NP_036218    | Q9Y5Q9 | TF3C3_HUMAN | TPR 6.                         | NA | 7   | 3CTGAAGTTTTTT    | 0.337 |                    |
| - | 23 | 3555      | E513fs CADPS_uc    | NM_003716    | NP_003707    | Q9ULU8 | CAPS1_HUMAN | teraction wi                   | NA | 3   | 3AGATCTTCTGAC    | 0.488 |                    |
| + | 4  | 1374_1375 |                    | NM_021620    | NP_067633    | Q9H4Q3 | PRD13_HUMAN |                                | NA | 0   | 3TGGGACccgccc    | 0.505 |                    |
| - | 4  | 773_774   | 3H_uc010mfk.1_5    | NM_198488    | NP_940890    | Q6ZRV2 | FA83H_HUMAN |                                | NA | 3   | CAGTCCACCAGC     | 0.658 |                    |
| + | 14 | 1705      | IC22_uc004dnc.1_   | NM_014008    | NP_054727    | O60826 | CCD22_HUMAN | Potential.                     | NA | 1   | 3TGTCTGATACG/    | 0.567 |                    |
| + | 8  | 892_893   | lafx.2_Frame_Shif  | NM_031921    | NP_114127    | Q5T9A4 | ATD3B_HUMAN |                                |    | 0   | CTCAGCCAAGAA     | 0.683 |                    |
| + | 6  | 1188      | uc001gof.1_Intron  | NM_033343    | NP_203129    | Q969G2 | LHX4_HUMAN  |                                |    | 1   | 3GCCATCCCACG/    | 0.562 |                    |
| + | 3  | 638       | GBD2_uc009xhd.2    | NM_170725    | NP_733843    | Q6P3X8 | PGBD2_HUMAN |                                |    | 1   | 3TCGTTATGCTTC    | 0.378 |                    |
| + | 15 | 2195      | AT_uc001jhy.1_Fr   | NM_020549    | NP_065574    | P28329 | CLAT_HUMAN  |                                |    | 3   | 3TGCCTGCTACA/    | 0.522 |                    |
| + | 23 | 3324      | _p.P794fs ZMIZ1_   | NM_020338    | NP_065071    | Q9ULJ6 | ZMIZ1_HUMAN | Pro-rich.                      |    | 4   | ACGGGCCCCCC      | 0.597 |                    |
| + | 2  | 1449      | kvi.1_5'Flank FBXl | NM_024326    | NP_077302    | Q9H469 | FXL15_HUMAN | F-box.                         |    | 1   | 3GGCTGCAGCGC     | 0.711 |                    |
| - | 2  | 955_957   | 32_uc001mak.1_Ir   | NM_017481    | NP_059509    | Q9H347 | UBQL3_HUMAN |                                |    | 3   | 3TGGCTGGTGGT/    | 0.537 | rs2234451          |
| - | 7  | 1231_1232 | .1_Intron AMBRA1   | NM_017749    | NP_060219    | Q9C0C7 | AMRA1_HUMAN |                                |    | 3   | GCTGTCGGAGC/     | 0.629 |                    |
| - | 27 | 3487      | ndj.1_Frame_Shif   | NM_001008938 | NP_001008938 | Q14008 | CKAP5_HUMAN |                                |    | 2   | 3TGGCCTTTTTTC    | 0.323 |                    |
| + | 4  | 544       |                    | NM_004585    | NP_004576    | Q9UL19 | TIG3_HUMAN  |                                |    | 1   | 3ATACCAAAAAA/    | 0.537 |                    |
| + | 5  | 419       | nyx.2_Frame_Shif   | NM_003377    | NP_003368    | P49765 | VEGFB_HUMAN |                                |    | 0   | 3GACCTAAAAAA/    | 0.388 |                    |
| - | 30 | 5914      | _p.K42fs ODZ4_uc   | NM_001098816 | NP_001092286 | Q6N022 | TEN4_HUMAN  | cellular (Potential).          |    | 4   | 3TGCTCTTTGCG/    | 0.672 |                    |
| - | 1  | 420_422   |                    | NM_007037    | NP_008968    | Q9UP79 | ATS8_HUMAN  |                                |    | 1   | 3ccagcggcagcagca | 0.374 | 548872;rs11222097  |

|   |    |           |                                                  |              |              |        |              |                             |    |                |       |                              |
|---|----|-----------|--------------------------------------------------|--------------|--------------|--------|--------------|-----------------------------|----|----------------|-------|------------------------------|
| - | 11 | 1272_1273 | J52_uc001qiu.1_F                                 | NM_134424    | NP_602296    | P43351 | RAD52_HUMAN  |                             | 1  | 3AGGTCCCAAGA   | 0.465 |                              |
| - | 3  | 297       | lcr.1_Frame_Shift                                | NM_022459    | NP_071904    | Q9C0E2 | XPO4_HUMAN   |                             | 3  | 3CTACCTTTTTCC  | 0.433 |                              |
| + | 1  | 31_33     | RG2_uc010tll.1_in                                | NM_138331    | NP_612204    | Q8TDE3 | RNAS8_HUMAN  |                             | 0  | icCCCCTGCTGC   | 0.557 |                              |
| - | 11 | 2887      | IH5_uc001xfy.2_3'                                | NM_139318    | NP_647479    | Q8NCM2 | KCNH5_HUMAN  | ibly) (By similarity). Cyto | 9  | 3TACGCTTTTTTC  | 0.473 |                              |
| - | 36 | 6843      | FYVE26_uc001xkl                                  | NM_015346    | NP_056161    | Q68DK2 | ZFY26_HUMAN  |                             | 11 | FACTTTCCCCAG   | 0.433 |                              |
| - | 21 | 6718      | auf.1_Frame_Shift                                | NM_004239    | NP_004230    | Q15643 | TRIPB_HUMAN  |                             | 13 | FGCTTTAAAGG    | 0.423 |                              |
| - | 4  | 1894_1896 | 1ygb.2_in_Frame_                                 | NM_138576    | NP_612808    | Q9C0K0 | BC11B_HUMAN  | Glu-rich.                   | 10 | GTAGCAGctctcct | 0.517 |                              |
| + | 11 | 1696_1698 | 1znc.2_in_Frame_                                 | NM_181642    | NP_857593    | O43278 | SPIT1_HUMAN  |                             | 1  | CGGACACCACC    | 0.586 |                              |
| - | 65 | 8481_8482 | N1_uc010beo.1_R                                  | NM_000138    | NP_000129    | P35555 | FBN1_HUMAN   |                             | 3  | ATCTTACACTCG   | 0.51  |                              |
| - | 14 | 1841_1842 | p.M465fs SCAPEF                                  | NM_020843    | NP_065894    | Q9BY12 | SCAPE_HUMAN  | Glu-rich.                   | 3  | TTCTTCCATCAT   | 0.371 |                              |
| + | 19 | 2026      | POLR3E_uc002dk                                   | NM_018119    | NP_060589    | Q9NVU0 | RPC5_HUMAN   |                             | 2  | AGTTTCCCCCC    | 0.562 |                              |
| + | 4  | 271       | Shift_Del_p.R87fs                                | NM_005796    | NP_005787    | P61970 | NTF2_HUMAN   |                             | 0  | CTTGTAGAGCCT   | 0.554 | rs111772962                  |
| - | 7  | 934       | ggo.1_Frame_Shif                                 | NM_020360    | NP_065093    | Q9NRY6 | PLS3_HUMAN   | smic (By similarity).       | 0  | CCAGGCCCCCC    | 0.612 |                              |
| - | 14 | 1854      | 2itf.2_Frame_Shift                               | NM_001130528 | NP_001124000 | O60271 | JIP4_HUMAN   |                             | 5  | TTGACCTTTTTT   | 0.323 |                              |
| - | 6  | 1372_1373 | xmk.1_Frame_Shif                                 | NM_030824    | NP_110451    | Q9H7R0 | ZN442_HUMAN  | 2H2-type 3.                 | 4  | TCATGTCTTAGA   | 0.401 |                              |
| + | 1  | 303       |                                                  | NM_002446    | NP_002437    | Q02779 | M3K10_HUMAN  | Poly-Glu.                   | 6  | GAGGAGGGGGC    | 0.667 |                              |
| - | 5  | 1643      | 2_5'Flank ZNF577                                 | NM_023074    | NP_075562    | Q9BS31 | ZN649_HUMAN  |                             | 3  | TGAATCCCCCC    | 0.448 |                              |
| - | 11 | 2354      | _Shift_Del_p.P507                                | NM_015025    | NP_055840    | Q9UL68 | MYT1L_HUMAN  | 2HC-type 2.                 | 6  | CACCCGGGGGT    | 0.502 | rs114191331                  |
| - | 3  | 1031      |                                                  | NM_012344    | NP_036476    | O95665 | NTR2_HUMAN   | ellular (Potential).        | 0  | CAGTACATGAG    | 0.597 |                              |
| - | 5  | 632       | .1_Intron MRPL30                                 | NM_138798    | NP_620153    | Q8WV92 | MITD1_HUMAN  |                             | 2  | ATTTCTCGGTCA   | 0.289 | rs141265262                  |
| - | 13 | 2241      | zlm.1_Frame_Shif                                 | NM_004438    | NP_004429    | P54764 | EPHA4_HUMAN  | cytoplasmic (Potential).    | 12 | TTCATCCCAGAC   | 0.453 |                              |
| + | 1  | 776_805   | n_Frame_Del_p.V                                  | NM_053277    | NP_444507    | Q96NY7 | CLIC6_HUMAN  | ]-[VIM]-[DEQ]-A-[EAG]-[C    | 2  | CGGGGTCGCC     | 0.761 | 358718;rs13049745;rs13048804 |
| + | 7  | 2100_2108 | atq.1_in_Frame_D                                 | NM_001039141 | NP_001034230 | Q9H2D6 | TARA_HUMAN   |                             | 1  | GCCTCCAGAAC    | 0.579 |                              |
| - | 27 | 3223      | t.2_RNA CLASP2_                                  | NM_015097    | NP_055912    | B2RTR1 | B2RTR1_HUMAN |                             | 4  | CACCCATTTTTT   | 0.343 |                              |
| + | 23 | 3432      | _Shift_Del_p.S114                                | NM_007335    | NP_031361    | Q9Y238 | DLEC1_HUMAN  |                             | 9  | GGGAGCCCCCA    | 0.552 |                              |
| - | 20 | 3118      | dIm.2_Frame_Shif                                 | NM_003716    | NP_003707    | Q9ULU8 | CAPS1_HUMAN  | action with DRD2.           | 3  | CATGCTCCACCA   | 0.448 |                              |
| + | 1  | 3808_3809 |                                                  | NM_175918    | NP_787114    | Q8N1N5 | CRPAK_HUMAN  | 8                           | 0  | CTCACATGTGCC   | 0.683 | 123539;rs79888804            |
| + | 4  | 416       |                                                  | NM_144725    | NP_653326    | Q6PF05 | TT23L_HUMAN  |                             | 1  | TTTTTGGGGAC    | 0.453 |                              |
| - | 6  | 1240      | ame_Shift_Del_p.F                                | NM_173488    | NP_775759    | Q86UG4 | SO6A1_HUMAN  | lasmic (Potential).         | 7  | 3CTGTCAAAAAA   | 0.299 |                              |
| + | 32 | 7837_7838 | jcl.1_Frame_Shift                                | NM_005509    | NP_005500    | Q9Y485 | DMXL1_HUMAN  |                             | 2  | TATATCGCAAGT   | 0.441 |                              |
| + | 14 | 1795_1796 |                                                  | NM_018214    | NP_060684    | Q9BTT6 | LRRC1_HUMAN  | Potential.                  | 1  | 3GACTGGACTCA   | 0.465 |                              |
| + | 4  | 1374_1375 |                                                  | NM_021620    | NP_067633    | Q9H4Q3 | PRD13_HUMAN  |                             | 0  | TGGGGACccgcc   | 0.505 |                              |
| - | 7  | 1235_1236 | edm.1_Frame_Shif                                 | NM_000416    | NP_000407    | P15260 | INGR1_HUMAN  | lasmic (Potential).         | 1  | AAGAACTCTCTC   | 0.431 |                              |
| + | 6  | 808       | 10khi.2_Frame_St                                 | NM_014721    | NP_055536    | O75167 | PHAR2_HUMAN  |                             | 2  | TCATTCAAAAAA   | 0.398 |                              |
| + | 8  | 1473_1474 | 3qvr.2_Frame_Shif                                | NM_018974    | NP_061847    | Q86WB7 | UN93A_HUMAN  |                             | 0  | 3GAGTCCAAGAA   | 0.545 |                              |
| + | 13 | 1827_1828 | p.F529fs PHTF2_1                                 | NM_001127357 | NP_001120829 | Q8N3S3 | PHTF2_HUMAN  |                             | 1  | 3ATTTTCTTTTTT  | 0.307 |                              |
| + | 2  | 1645      | p.L520fs PIK3CG_                                 | NM_002649    | NP_002640    | P48736 | PK3CG_HUMAN  |                             | 38 | ICTTCTGGACAA   | 0.537 |                              |
| + | 6  | 972       | ce_Site_p.Q108_s                                 | NM_014491    | NP_055306    | O15409 | FOXP2_HUMAN  |                             | 8  | TGATACcagcagca | 0.414 | rs111544687                  |
| + | 8  | 921       | lar.1_Frame_Shift                                | NM_018091    | NP_060561    | Q9H9T3 | ELP3_HUMAN   |                             | 0  | AGACACCAACA    | 0.463 |                              |
| - | 11 | 1327      | ixzp.2_Frame_Shif                                | NM_014393    | NP_055208    | Q9NUL3 | STAU2_HUMAN  | DRBM 4.                     | 0  | 3CAGCATTTTTTT  | 0.328 |                              |
| - | 5  | 1330      |                                                  | NM_002546    | NP_002537    | O00300 | TR11B_HUMAN  | Death 2.                    | 2  | TCGCCATTTTTT   | 0.458 |                              |
| + | 4  | 1521      | hifft_Del_p.D285fs                               | NM_181872    | NP_870987    | Q9Y5R5 | DMRT2_HUMAN  |                             | 0  | ATTGTTGACACG   | 0.532 |                              |
| + | 9  | 7065      | p.C2167fs ZNF46                                  | NM_021224    | NP_067047    | Q96JM2 | ZN462_HUMAN  | 2H2-type 24.                | 5  | CTCTCTGCCTCT   | 0.532 |                              |
| + | 5  | 602       | uc010ncd.1_RNA C9orf173_uc011mev.1_Intron C9orf1 | NM_000216    | NP_000207    | Q8N7X2 | C1173_HUMAN  |                             | 1  | CCACACCCACC    | 0.682 |                              |
| - | 4  | 675       |                                                  | NM_000216    | NP_000207    | P23352 | KALM_HUMAN   | WAP.                        | 4  | AGTCTTGGGTAC   | 0.507 |                              |
| - | 7  | 878_879   | NRNP40_uc010oc                                   | NM_004814    | NP_004805    | Q96DI7 | SNR40_HUMAN  |                             | 0  | TTCTTGAATA     | 0.391 |                              |
| - | 3  | 127       | AD1_uc010ooa.1_                                  | NM_001010978 | NP_001010978 | Q57700 | LRAD1_HUMAN  |                             | 3  | GCAGGCCCCGC    | 0.672 |                              |

|   |    |             |                    |              |              |         |             |                              |       |                    |       |             |
|---|----|-------------|--------------------|--------------|--------------|---------|-------------|------------------------------|-------|--------------------|-------|-------------|
| + | 2  | 248_249     | osw.1_Frame_Shif   | NM_003503    | NP_003494    | O00311  | CDC7_HUMAN  |                              | 5     | CTCTTTAAAAAA       | 0.406 |             |
| + | 31 | 8393_8394   |                    | NM_001408    | NP_001399    | Q9HCU4  | CELR2_HUMAN | lasmic (Potential).          | 8     | GTACTCCCAAGG       | 0.594 |             |
| + | 9  | 905         | D1splice FAM40A    | NM_033088    | NP_149079    | Q5VSL9  | FA40A_HUMAN |                              | 4     | TGATGCAGTGCA       | 0.564 |             |
| - | 2  | 1361_1363   | .2_Intron RGL1_u   | NM_203454    | NP_982279    | Q8WWW27 | ABEC4_HUMAN |                              | 0     | CCCTTTCTTCTT       | 0.419 | rs141411396 |
| - | 38 | 5610        | hgh.1_Frame_Shi    | NM_018072    | NP_060542    | Q9H583  | HEAT1_HUMAN |                              | 3     | TGTAAGTTTTTTT      | 0.438 |             |
| - | 14 | 1762        | p.S486fs FOLH1_u   | NM_004476    | NP_004467    | Q04609  | FOLH1_HUMAN | Extracellular (Probable).    | 3     | AAGGACTTTTTTT      | 0.353 |             |
| + | 6  | 694_695     |                    | NM_014224    | NP_055039    | P00790  | PEPA_HUMAN  |                              | 1     | ATGACAAGAGTG       | 0.505 |             |
| - | 2  | 362_364     | _p.P33del PDE2A    | NM_002599    | NP_002590    | O00408  | PDE2A_HUMAN |                              | 4     | GGCTGCGGCGG        | 0.724 |             |
| - | 39 | 11819_11827 |                    | NM_003482    | NP_003473    | O14686  | MLL2_HUMAN  | ential. Gln-rich.            | 41    | ctgctgttgtagagctgc | 0.014 | rs112586166 |
| + | 2  | 226         | el_p.S9fs ACAD10   | NM_025247    | NP_079523    | Q6JQN1  | ACD10_HUMAN |                              | 2     | CCAGTCCCCCCT       | 0.617 |             |
| + | 3  | 344_345     | i_p.S78fs RFC3_u   | NM_002915    | NP_002906    | P40938  | RFC3_HUMAN  |                              | 0     | CCATCTAAAAAA       | 0.267 |             |
| + | 20 | 3443_3444   | xdq.2_Frame_Shif   | NM_002892    | NP_002883    | P29374  | ARI4A_HUMAN |                              | 6     | ATACAAGAGAGA       | 0.381 |             |
| - | 1  | 985         | 1_Intron TMEM30    | NM_001017970 | NP_001017970 | Q3MIR4  | CC50B_HUMAN |                              | 0     | CACTGGGCCCC        | 0.697 |             |
| - | 18 | 2031        |                    | NM_178034    | NP_828848    | Q86XP0  | PA24D_HUMAN | PLA2c.                       | 2     | GTCCACCAGGC        | 0.642 |             |
| - | 7  | 1499_1501   | il.1_In_Frame_De   | NM_005078    | NP_005069    | Q04726  | TLE3_HUMAN  | Gln-rich.                    | 2     | TGGAGCTGCTG        | 0.665 |             |
| - | 1  | 293_295     | Del_p.15_16GG      | NM_002094    | NP_002085    | P15170  | ERF3A_HUMAN |                              | 3     | gctgctcccgccgc     | 0.34  |             |
| + | 3  | 715         | C1_uc002ebo.2_5'   | NM_001008274 | NP_001008275 | Q6ZMU5  | TRI72_HUMAN |                              | 0     | TGGAGGTGAGG        | 0.599 |             |
| + | 10 | 815_816     | fof.2_Frame_Shift  | NM_052988    | NP_443714    | Q15131  | CDK10_HUMAN | rotein kinase.               | 1     | GCACGCCCAGTC       | 0.47  |             |
| - | 9  | 1040_1041   | ocjf.2_Intron PRDA | NM_001098173 | NP_001091643 | Q9NQW5  | PRDM7_HUMAN | SET.                         | 1     | TCTATAGAAGAT       | 0.535 |             |
| - | 4  | 502_503     | fs TP53_uc010cni   | NM_001126112 | NP_001119584 | P04637  | P53_HUMAN   | y similarity).W91fs*13(1) p. | 22245 | CCCTGGTAGGTT       | 0.639 |             |
| - | 2  | 260         | _p.G55fs MYH10_    | NM_005964    | NP_005955    | P35580  | MYH10_HUMAN | osin head-like.              | 2     | GCATCTCCCGCT       | 0.443 |             |
| - | 1  | 174         | P10_uc010cq.1_I    | NM_007202    | NP_009133    | O43572  | AKA10_HUMAN |                              | 1     | GGTGCGGGGGC        | 0.746 |             |
| + | 2  | 177         | 15_uc002hed.1_5    | NM_138349    | NP_612358    | Q8NBR0  | P5113_HUMAN | ellular (Potential).         | 0     | CTCCGAGGTA         | 0.662 |             |
| - | 2  | 588         |                    | NM_020805    | NP_065856    | Q9P2G3  | KLH14_HUMAN | BTB.                         | 1     | CGAGAGGGGGG        | 0.527 |             |
| - | 8  | 855         |                    | NM_005570    | NP_005561    | P49257  | LMAN1_HUMAN |                              | 1     | TGGGCTTTTTT        | 0.294 |             |
| + | 7  | 897         | 10xeo.1_Frame_S    | NM_080474    | NP_536722    | Q96P63  | SPB12_HUMAN |                              | 0     | TCCTTCCCCCG        | 0.448 |             |
| + | 1  | 120_121     | ebv.2_Frame_Shi    | NM_015321    | NP_056136    | Q6UUUV9 | CRTC1_HUMAN |                              | 519   | ATTCAGCGAGAA       | 0.545 |             |
| - | 6  | 472         | _p.P16fs C19orf47  | NM_178830    | NP_849152    | Q8N9M1  | CS047_HUMAN |                              | 2     | CGCCTGGGGGG        | 0.612 |             |
| - | 13 | 1476        | rcp.1_Frame_Shift  | NM_001142286 | NP_001135758 | Q96SB8  | SMC6_HUMAN  | Potential.                   | 6     | CTACCTTTTTTT       | 0.294 |             |
| + | 17 | 10335_10337 | sjg.2_In_Frame_D   | NM_015120    | NP_055935    | Q8TCU4  | ALMS1_HUMAN |                              | 9     | CCAGTGCTGCTC       | 0.414 |             |
| - | 1  | 263_265     | uc002std.1_5'Flanl | NM_004836    | NP_004827    | Q9NZJ5  | E2AK3_HUMAN |                              | 3     | AGCCCcagcagca      | 0.32  | rs72416210  |
| + | 8  | 7114_7116   | rame_Del_p.P219    | NM_152381    | NP_689594    | A4UGR9  | XIRP2_HUMAN | Pro-rich.                    | 14    | GCCGCTCCTCT        | 0.468 |             |
| + | 9  | 1518        | 20A1_uc002uzy.3_   | NM_177538    | NP_803882    | Q6UW02  | CP20A_HUMAN |                              | 0     | AAGTTCAAAAA        | 0.348 |             |
| + | 2  | 555_556     | _p.M83fs DSTN_u    | NM_006870    | NP_006861    | P60981  | DEST_HUMAN  | ADF-H.                       | 2     | TGATGTTTTTT        | 0.356 |             |
| + | 2  | 1083_1085   |                    | NM_024893    | NP_079169    | Q9H7V2  | SYNG1_HUMAN | cytoplasmic (Potential).     | 0     | ATGTGGAGGAG        | 0.547 |             |
| + | 1  | 216         | 3GR_uc002yxz.2_I   | NM_007341    | NP_031367    | P55822  | SH3BG_HUMAN |                              | 0     | TGTTGGGGGG         | 0.552 |             |
| + | 35 | 4221        | _Del_p.G1165fs SL  | NM_130444    | NP_569711    | P39060  | COIA1_HUMAN | lical region 9 (COL9).       | 1     | CCCGCCCCCCC        | 0.736 |             |
| + | 39 | 5384        | R1_uc011asu.1_Ir   | NM_001099952 | NP_001093422 | Q14643  | ITPR1_HUMAN | lasmic (Potential).          | 21    | GACCTGAGGG         | 0.413 |             |
| - | 1  | 102         | el_p.R3fs NCKIPS   | NM_016453    | NP_057537    | Q9NZQ3  | SPN90_HUMAN | SH3.                         | 0     | GCGCGCGGTAC        | 0.741 |             |
| - | 1  | 82          | 0hsi.1_Frame_Shi   | NM_144639    | NP_653240    | Q96N76  | HUTU_HUMAN  |                              | 1     | TCTCTGGGAGG        | 0.682 |             |
| + | 6  | 1112_1114   | esi.3_In_Frame_C   | NM_012219    | NP_036351    | O14807  | RASM_HUMAN  | Poly-Lys.                    | 4     | AGCCAGAAGAA        | 0.522 |             |
| - | 20 | 3897_3898   |                    | NM_001184    | NP_001175    | Q13535  | ATR_HUMAN   |                              | 20    | ATTCTGGATGAT       | 0.287 |             |
| - | 6  | 1009        |                    | NM_013363    | NP_037495    | Q9UKZ9  | PCOC2_HUMAN |                              | 3     | GCGAGTTTTTT        | 0.383 |             |
| + | 4  | 868_869     |                    | NM_207352    | NP_997235    | Q6ZWL3  | CP4V2_HUMAN |                              | 0     | AACTGCTTTTT        | 0.322 |             |
| + | 1  | 177_178     |                    | NM_001080478 | NP_001073947 | A6NHZ5  | LR14B_HUMAN |                              | 1     | TGACGCGCGC         | 0.703 |             |
| - | 3  | 473_475     | 1_In_Frame_Del_f   | NM_016107    | NP_057191    | Q96KR1  | ZFR_HUMAN   | Ala-rich.                    | 0     | TGGGGGTGGTG        | 0.483 |             |
| - | 1  | 479_480     |                    | NM_001085377 | NP_001078846 | P23508  | CRCM_HUMAN  |                              | 1     | ctgccgctgccgcgc    | 0.391 |             |

|   |    |           |                       |              |              |        |             |                             |       |                   |       |
|---|----|-----------|-----------------------|--------------|--------------|--------|-------------|-----------------------------|-------|-------------------|-------|
| - | 1  | 991_993   | Frame_Del_p.E29       | NM_020747    | NP_065798    | Q9ULD9 | ZN608_HUMAN | Potential.                  | 6     | GGCTCTCCTCC       | 0.522 |
| - | 5  | 741       |                       | NM_005649    | NP_005640    | O60765 | Z354A_HUMAN |                             | 3     | TCTCTGGGAG        | 0.358 |
| - | 4  | 239       | P1_uc003okw.3_lr      | NM_003322    | NP_003313    | O00294 | TULP1_HUMAN |                             | 3     | GGTCTGGGGAA       | 0.721 |
| - | 16 | 1855      | psb.3_Frame_Shift     | NM_007214    | NP_009145    | Q9UGP8 | SEC63_HUMAN | Cytoplasmic (Potential).    | 2     | GGTTTCTTTTTT      | 0.368 |
| + | 5  | 1958      | kee.2_Frame_Shift     | NM_001010892 | NP_001010892 | Q5TD94 | RSH4A_HUMAN |                             | 0     | AATATACCCCCCT     | 0.378 |
| + | 2  | 681       |                       | NM_001128636 | NP_001122108 |        |             |                             | 0     | TACATCGAGGAC      | 0.637 |
| - | 5  | 1204      | r.2_Frame_Shift_D     | NM_000466    | NP_000457    | O43933 | PEX1_HUMAN  |                             | 2     | ACCTAATTTTTT      | 0.353 |
| + | 7  | 1118_1119 | vuy.2_Frame_Shift     | NM_016019    | NP_057103    | Q9Y383 | LC7L2_HUMAN | Arg/Ser-rich.               | 0     | AGAGAAGAGAGA      | 0.391 |
| - | 38 | 8609      | o.K1858fsj MLL3_u     | NM_170606    | NP_733751    | Q8NEZ4 | MLL3_HUMAN  | p.K2797fs*26(11)            | 63    | TGTTCCTTTTTT      | 0.348 |
| + | 3  | 299_300   | .72fs ADAM28_ucl      | NM_014265    | NP_055080    | Q9UKQ2 | ADA28_HUMAN |                             | 5     | TATTTGAAAAAA      | 0.332 |
| - | 3  | 534_536   | if.2_Intron TP53IN    | NM_033285    | NP_150601    | Q96A56 | T5311_HUMAN | Glu-rich.                   | 0     | CCTCCTCTTCTT      | 0.458 |
| - | 2  | 136       | 26fs CPSF3L_uc0       | NM_017871    | NP_060341    | Q5TA45 | INT11_HUMAN |                             | 0     | TTCTTGCCCGC       | 0.652 |
| - | 5  | 596_597   | chg.2_Frame_Shift     | NM_014947    | NP_055762    | Q9UPW0 | FOXJ3_HUMAN | Fork-head.                  | 2     | TTTTTGGGTGAG      | 0.381 |
| - | 22 | 3517      | olg.1_Frame_Shift     | NM_003738    | NP_003729    | Q9Y6C5 | PTC2_HUMAN  | lasmic (Potential).         | 18    | AGGCAGGGGGGG      | 0.657 |
| + | 29 | 4304      | l.1_Frame_Shift_D     | NM_000642    | NP_000633    | P35573 | GDE_HUMAN   | glucanotransferase.         | 3     | TTATCCAAAAAA      | 0.323 |
| - | 3  | 1569_1570 |                       | NM_001008536 | NP_001008536 | Q5QJ38 | TCHL1_HUMAN |                             | 2     | GTGCTAAATCTT      | 0.5   |
| - | 3  | 2327_2328 |                       | NM_001122965 | NP_001116437 | Q6XPR3 | RPTN_HUMAN  | Gln-rich.                   | 0     | TCTCTGATGGCT      | 0.52  |
| - | 8  | 1048      | ne_Shift_Del_p.R2     | NM_025191    | NP_079467    | Q9BZQ6 | EDEM3_HUMAN |                             | 1     | CTGTCTTTTTTC      | 0.313 |
| + | 7  | 1633_1634 | Ins_p.435_436ins      | NM_005807    | NP_005798    | Q92954 | PRG4_HUMAN  | C-X-P-X-P-T-X 24; appro     | 1     | CCACCAAGTCTG      | 0.639 |
| + | 22 | 2922_2924 |                       | NM_018085    | NP_060555    | Q96P70 | IPO9_HUMAN  |                             | 2     | gaggaagaggaggag   | 0.33  |
| + | 2  | 208       | _p.V29fs TBCE_uc      | NM_003193    | NP_003184    | Q15813 | TBCE_HUMAN  | CAP-Gly.                    | 0     | GTGTTGTCCCTT      | 0.308 |
| - | 22 | 3166_3167 | 3xgh.1_Frame_Shift    | NM_018072    | NP_060542    | Q9H583 | HEAT1_HUMAN |                             | 3     | TTTGTATATAAC      | 0.347 |
| + | 20 | 5628      | _p.A1148fs KIAA1      | NM_019590    | NP_062536    | Q5T5P2 | SKT_HUMAN   |                             | 7     | CGGGGCCCCAC       | 0.612 |
| + | 1  | 296_298   |                       | NM_199461    | NP_955631    | Q8WY41 | NANO1_HUMAN |                             | 0     | GGAACGGCGGC       | 0.562 |
| - | 7  | 1352      | 3fs APBB1_uc01C       | NM_001164    | NP_001155    | O00213 | APBB1_HUMAN | PID 1.                      | 2     | TACTTCCCCCCT      | 0.582 |
| - | 4  | 1327      | _Intron KBTBD4_u      | NM_016506    | NP_057590    | Q9NVX7 | KBTB4_HUMAN | Kelch 4.                    | 2     | CTCCTCCCCCCT      | 0.517 |
| - | 15 | 2895_2897 | 229PP>P FNBP4_u       | NM_015308    | NP_056123    | Q8N3X1 | FNBP4_HUMAN | Pro-rich.                   | 1     | gggtggaggaggaggag | 0.32  |
| - | 1  | 325_330   | i.2_5'UTR FNBP4_u     | NM_015308    | NP_056123    | Q8N3X1 | FNBP4_HUMAN |                             | 1     | CGCGGTGGTGGT      | 0.748 |
| - | 3  | 257_259   |                       | NM_006248    | NP_006239    |        |             |                             | 0     | TCCTGGAGGAGC      | 0.601 |
| - | 20 | 2758      | o.W621fs GRIP1_u      | NM_021150    | NP_066973    | Q9Y3R0 | GRIP1_HUMAN |                             | 2     | TTGAGACCAGAA      | 0.468 |
| - | 2  | 1245_1246 | 3P6_uc001taz.2_lr     | NM_001946    | NP_001937    | Q16828 | DUS6_HUMAN  | protein phosphatase.        | 0     | TTTGCTTGATTT      | 0.465 |
| + | 5  | 1001_1003 | 1vhk.1_In_Frame_Shift | NM_006418    | NP_006409    | Q6UX06 | OLFM4_HUMAN | actomedin-like.             | 1     | AGTTTACAACAA      | 0.433 |
| - | 23 | 3282      | f.1_RNA TEP1_ucl      | NM_007110    | NP_009041    | Q99973 | TEP1_HUMAN  |                             | 5     | CCACACCCCCC       | 0.587 |
| + | 1  | 238_239   |                       | NM_001001912 | NP_001001912 | Q8NGC2 | OR4E2_HUMAN | cellular (Potential).       | 4     | TGCCTAAGATGT      | 0.441 |
| - | 4  | 507       | _p.Q63fs MAP4KE       | NM_006575    | NP_006566    | Q9Y4K4 | M4K5_HUMAN  | rotein kinase.              | 1     | TTGTTGAATCAA      | 0.289 |
| - | 8  | 2219      | two.1_Frame_Shift     | NM_001002860 | NP_001002860 | Q9P203 | BTBD7_HUMAN |                             | 1     | CTGCTGATCTGT      | 0.438 |
| + | 9  | 1762_1764 | 1_Frame_Del_p.Q       | NM_006291    | NP_006282    | Q03169 | TNAP2_HUMAN |                             | 1     | GCCGAGCAGCA       | 0.626 |
| + | 8  | 3011_3013 | .Q981del MGAP_uc      | NM_001080541 | NP_001074010 | Q8IW19 | MGAP_HUMAN  | Gln-rich.                   | 12    | GGCACAGCAGC       | 0.458 |
| + | 3  | 438_439   | 2bdz.2_Frame_Shift    | NM_000745    | NP_000736    | P30532 | ACHA5_HUMAN | cellular (Potential).       | 3     | CAGTTAATGACA      | 0.267 |
| + | 6  | 1090      | _p.Q172fs CHD2_L      | NM_001271    | NP_001262    | O14647 | CHD2_HUMAN  |                             | 2     | CAGAACAAAAAA      | 0.418 |
| - | 8  | 1385_1387 | ARF1_uc002fta.1_L     | NM_003693    | NP_003684    | Q14162 | SREC_HUMAN  | lasmic (Potential).         | 1     | GGCCAGCAGC        | 0.67  |
| - | 16 | 2618      | vsf.1_Frame_Shift     | NM_014389    | NP_055204    | Q8IZL8 | PELP1_HUMAN | Pro-rich.                   | 2     | TGGCAGGGGGC       | 0.617 |
| + | 10 | 1188      | ss.1_Frame_Shift      | NM_053013    | NP_443739    | P13929 | ENOB_HUMAN  |                             | 1     | TGGCTGGGGGG       | 0.567 |
| - | 4  | 502_503   | fs TP53_uc010cni      | NM_001126112 | NP_001119584 | P04637 | P53_HUMAN   | y similarity).W91fs*13(1) p | 22245 | CCCTGGTAGGT       | 0.639 |
| + | 11 | 2629_2631 | 2gix.2_In_Frame_Shift | NM_001080424 | NP_001073893 | O15054 | KDM6B_HUMAN | o-rich. Thr-rich.           | 2     | CGCCGTcaccacc     | 0.369 |
| - | 1  | 42_44     |                       | NM_018143    | NP_060613    | Q9NVR0 | KLH11_HUMAN |                             | 0     | Agccggcgccgccc    | 0.537 |
| - | 9  | 1623_1625 |                       | NM_133373    | NP_588614    | Q8N3E9 | PLCD3_HUMAN |                             | 3     | cctgtcatcctcctc   | 0.527 |

rs59413596

|   |    |           |                     |                       |              |        |             |                             |    |                 |       |
|---|----|-----------|---------------------|-----------------------|--------------|--------|-------------|-----------------------------|----|-----------------|-------|
| - | 9  | 1430      |                     | NM_032043             | NP_114432    | Q9BX63 | FANCI_HUMAN | ase ATP-binding.            | 1  | :TTCCTTATATTAT  | 0.398 |
| + | 5  | 423_426   | wpe.1_Frame_Shi     | NM_025185             | NP_079461    | Q9HCD6 | TANC2_HUMAN |                             | 2  | CACTCTGACTAG    | 0.466 |
| + | 9  | 1449      | Flank ACE_uc010c    | NM_000789             | NP_000780    | P12821 | ACE_HUMAN   | Potential). Peptidase M2 1. | 4  | :GCGCTGGGGGC    | 0.532 |
| - | 21 | 3612      | _Shift_Del_p.P415fs | DNAH17_uc002jvs.2_RNA |              |        |             |                             | 9  | :AGGTTGGGGGC    | 0.582 |
| - | 16 | 2743_2744 | _Shift_Ins_p.Q418f  | NM_025090             | NP_079366    | Q9P275 | UBP36_HUMAN |                             | 5  | :GGGCTCTGGGC    | 0.634 |
| + | 5  | 489       |                     | NM_032482             | NP_115871    | Q8TEK3 | DOT1L_HUMAN |                             | 4  | :GAGATCAAGATC   | 0.622 |
| + | 14 | 2041      |                     | NM_000453             | NP_000444    | Q92911 | SC5A5_HUMAN | lasmic (Potential).         | 4  | GTGGTGGGACC     | 0.597 |
| + | 2  | 648_650   | Segn.1_In_Frame_    | NM_003407             | NP_003398    | P26651 | TTP_HUMAN   | P-P-P-P-G.                  | 1  | :ACCTCACCACC    | 0.685 |
| - | 5  | 1989_1991 | 2omv.2_In_Frame     | NM_001005851          | NP_001005851 | Q9Y6R6 | Z780B_HUMAN | :2H2-type 18.               | 2  | TTACATTTAAATG   | 0.414 |
| + | 7  | 900       | _uc002pqp.2_5'UT    | NM_024682             | NP_078958    | Q9HA65 | TBC17_HUMAN |                             | 0  | :ACCTTCCCCCG    | 0.537 |
| - | 3  | 425       | 18_splice PTPRH_    | NM_002842             | NP_002833    | Q9HD43 | PTPRH_HUMAN |                             | 4  | :CTCTTACCTGTC   | 0.473 |
| + | 12 | 2844      |                     | NM_001011552          | NP_001011552 | Q6AI14 | SL9A4_HUMAN | lasmic (Potential).         | 3  | FGCTCCAAAAAA    | 0.473 |
| - | 11 | 1630      | lzgu.1_Frame_Shi    | NM_012086             | NP_036218    | Q9Y5Q9 | TF3C3_HUMAN | TPR 9.                      | 7  | TGGTTCAGAGC     | 0.473 |
| - | 1  | 157_158   |                     | NM_003284             | NP_003275    | P09430 | STP1_HUMAN  |                             | 0  | GTCATCGCCCC     | 0.55  |
| + | 2  | 889_890   | Shift_Del_p.D180f   | NM_022720             | NP_073557    | Q8WYQ5 | DGCR8_HUMAN | rd retention. Necessary for | 0  | :TGCTGATAAGAA   | 0.515 |
| - | 4  | 542       | :_p.G31fs TBC1D     | NM_031937             | NP_114143    | Q9BXI6 | TB10A_HUMAN | ab-GAP TBC.                 | 1  | CGTGGCCCCCG     | 0.607 |
| - | 11 | 1334      |                     | NM_173050             | NP_766638    | Q8IWI4 | SCUB1_HUMAN |                             | 5  | GGCCCGGGGGG     | 0.647 |
| + | 6  | 1060      | p.C217fs ABHD6_     | NM_020676             | NP_065727    | Q9BV23 | ABHD6_HUMAN | lasmic (Potential).         | 2  | :GCTCTGCTCCT    | 0.577 |
| - | 5  | 1253_1254 |                     | NM_000097             | NP_000088    | P36551 | HEM6_HUMAN  |                             | 0  | CTTCTGAGCTGC    | 0.495 |
| - | 29 | 3946      |                     | NM_014981             | NP_055796    | Q9Y2K3 | MYH15_HUMAN |                             | 7  | TTACTTACCACTC   | 0.468 |
| + | 6  | 1112_1114 | lesi.3_In_Frame_C   | NM_012219             | NP_036351    | O14807 | RASM_HUMAN  | Poly-Lys.                   | 4  | :AGCCAGAAGAA    | 0.522 |
| + | 1  | 355_357   |                     | NM_000297             | NP_000288    | Q13563 | PKD2_HUMAN  | Cytoplasmic (Potential).    | 1  | :AGGCCgaggagg   | 0.498 |
| - | 1  | 372_374   | 'Flank CXXC4_uc     | NM_025212             | NP_079488    | Q9H2H0 | CXXC4_HUMAN | Poly-Ser.                   | 1  | GGACGAGGAGG     | 0.606 |
| - | 17 | 2126      | _.2_Frame_Shift_D   | NM_144643             | NP_653244    | Q96NL6 | SCLT1_HUMAN | Potential.                  | 5  | TTTGGCTTTTTT    | 0.353 |
| + | 4  | 576       | Shift_Del_p.P167f   | NM_003687             | NP_003678    | P50479 | PDLI4_HUMAN |                             | 2  | :CTCCACCCCCC    | 0.592 |
| + | 4  | 1418_1419 | y.1_RNA TXNDC1      | NM_024715             | NP_078991    | Q96J42 | TXD15_HUMAN | (Potential). Thioredoxin.   | 2  | GCCTTCTACCA     | 0.351 |
| + | 1  | 404       | ic003lhh.1_Intron f | NM_018909             | NP_061732    | Q9UN73 | PCDA6_HUMAN | Extracellular (Potential).  | 2  | :GGACATTAAACG   | 0.587 |
| + | 5  | 1152      | _uc011dmz.1_Fra     | NM_020442             | NP_065175    | Q5ST30 | SYVM_HUMAN  |                             | 4  | :TGCGTGGGGAT    | 0.473 |
| - | 23 | 1745      | p.G102fs COL9A1     | NM_001851             | NP_001842    | P20849 | CO9A1_HUMAN | alical region (COL2).       | 4  | :GAGACACCAGGA   | 0.428 |
| - | 85 | 14337     |                     | NM_014611             | NP_055426    | Q9NU22 | MDN1_HUMAN  |                             | 10 | :AAGCTCCCATC    | 0.358 |
| + | 6  | 690       | JN1_uc003srf.2_F    | NM_001130965          | NP_001124437 | O94901 | SUN1_HUMAN  | Nuclear.                    | 0  | CGCGGCCCCCG     | 0.557 |
| - | 1  | 616_618   | <1_uc010lqq.1_5'F   | NM_005515             | NP_005506    | P50219 | MNX1_HUMAN  | Poly-Gly.                   | 0  | :gcccgtgcccgccg | 0.537 |
| - | 3  | 534_536   | if.2_Intron TP53IN  | NM_033285             | NP_150601    | Q96A56 | T53I1_HUMAN | Glu-rich.                   | 0  | :CTCCTCTTCTT    | 0.458 |
| + | 7  | 921_923   | zay.2_In_Frame_C    | NM_001916             | NP_001907    | P08574 | CY1_HUMAN   | ors to the membrane; (Pote  | 0  | :ATGTTGATGATC   | 0.581 |
| - | 5  | 955       | p.P227fs ELAVL2_    | NM_004432             | NP_004423    | Q12926 | ELAV2_HUMAN |                             | 3  | :GTCCTGGATAC    | 0.478 |
| - | 7  | 2587      | PIGO_uc003zwf.2_    | NM_032634             | NP_116023    | Q8TEQ8 | PIGO_HUMAN  |                             | 3  | GAGACGGGGGG     | 0.662 |
| + | 20 | 2842_2844 | l44_uc010mwo.1_     | NM_001161808          | NP_001155280 | Q7Z7M1 | GP144_HUMAN | lasmic (Potential).         | 0  | CTTTCTGCCCC     | 0.645 |
| - | 2  | 1154      | PS1_uc011mac.1_     | NM_012098             | NP_036230    | Q9UKU9 | ANGL2_HUMAN |                             | 0  | GCAGCGGGGGC     | 0.637 |
| - | 2  | 826_828   | r69_uc004cgy.2_I    | NM_152833             | NP_690046    |        |             |                             | 0  | :GGCCAGCAGC     | 0.685 |
| + | 12 | 1735_1736 | .G228fs GYG2_uc     | NM_003918             | NP_003909    | O15488 | GLYG2_HUMAN |                             | 2  | :CATGGGGAAGG    | 0.564 |
| + | 2  | 113_114   | _p.L36fs TARS2_L    | NM_025150             | NP_079426    | Q9BW92 | SYTM_HUMAN  | NA                          | 1  | AGCGCTTGGC      | 0.51  |
| + | 8  | 2096_2097 | glg.2_Frame_Shift   | NM_021165             | NP_066988    | Q9C0B6 | FAM5B_HUMAN | NA                          | 6  | GGGGGCAGCC      | 0.564 |
| + | 5  | 471_473   | _p.L92del TSPAN4    | NM_003271             | NP_003262    | O14817 | TSN4_HUMAN  | ical; (Potent               | NA | :CTTCTGTGTC     | 0.65  |
| + | 3  | 771       | AN10_uc010did.1_    | NM_031945             | NP_114151    | Q9H1Z9 | TSN10_HUMAN | NA                          | 1  | :ACTTTAACTAAC   | 0.637 |
| + | 2  | 475_499   | td.2_Frame_Shift    | NM_001130072          | NP_001123544 | Q9Y6I3 | EPN1_HUMAN  | ENTH.                       | NA | :CCTACAACGTT    | 0.569 |
| - | 2  | 300       | .2_Frame_Shift_D    | NM_006698             | NP_006689    | P62952 | BLCAP_HUMAN | ical; (Potent               | NA | :GAGCAGGTAGA    | 0.557 |
| - | 4  | 298_301   | :_5'Flank PHF7_uc   | NM_004656             | NP_004647    | Q92560 | BAP1_HUMAN  | NA                          | 65 | TAGAGACCTTTC    | 0.51  |

rs146939312

rs148341577

394323;rs150183035

rs61867552

rs137956393



|   |    |             |                    |              |              |        |              |                              |              |     |                 |       |                               |
|---|----|-------------|--------------------|--------------|--------------|--------|--------------|------------------------------|--------------|-----|-----------------|-------|-------------------------------|
| + | 3  | 618         | i_Del_p.T206fs HL  | NM_002116    | NP_002107    | P30443 | 1A01_HUMAN   | ar (Potential)               | NA           | 2   | CGCACGGGTAC     | 0.637 | rs115073453                   |
| + | 2  | 676_705     | _In_Frame_Del_p.   | NM_153362    | NP_699193    | Q8N3Z0 | PRS35_HUMAN  | peptidase S1                 | NA           | 1   | AAAGGACTATGT    | 0.47  | 739716;rs151268050            |
| + | 39 | 7196_7230   | ZAN_uc010lh.2_F    | NM_003386    | NP_003377    | Q9Y493 | ZAN_HUMAN    | extracellular                | NA           | 11  | GCTTGCAAGGC     | 0.506 | 029369;rs112538235;rs59541653 |
| - | 4  | 396_398     | _In_Frame_Del_p.   | NM_001042663 | NP_001036128 | O94827 | PKHG5_HUMAN  | Poly-Glu.                    |              | 1   | AGCTCTCCTCC     | 0.631 |                               |
| + | 20 | 4967        | 1aaj.2_Frame_Shif  | NM_015215    | NP_056030    | Q9Y6Y1 | CMTA1_HUMAN  | IQ 2.                        |              | 9   | TGAACAAAAAA     | 0.473 |                               |
| + | 8  | 5315        | .2_Intron PRDM2_   | NM_012231    | NP_036363    | Q13029 | PRDM2_HUMAN  |                              |              | 1   | CTCCCAAAAAA     | 0.463 | rs141416335                   |
| - | 7  | 901_902     | 1_Intron MST1P9_   | NR_002729    |              |        |              |                              |              | 0   | GCCCCGCCCCC     | 0.658 |                               |
| - | 7  | 811_812     | 1_Intron MST1P9_   | NR_002729    |              |        |              |                              |              | 0   | GTACGCCGCGC     | 0.649 |                               |
| + | 12 | 2906_2908   | 9vqi.1_In_Frame_   | NM_001083621 | NP_001077090 | Q9NUA8 | ZBT40_HUMAN  |                              |              | 1   | CCCCAAGAAGA     | 0.517 |                               |
| + | 16 | 4351_4353   | v.1_In_Frame_Del   | NM_006015    | NP_006006    | O14497 | ARI1A_HUMAN  | Gln-rich.                    | 334_R1335ins | 142 | CCCCCGcagcagc   | 0.512 |                               |
| - | 6  | 1559_1561   | :S4_uc010fy.1_3'   | NM_005626    | NP_005617    | Q08170 | SRSF4_HUMAN  | r-rich (RS domain).          |              | 0   | TCTTCTTCTTC     | 0.325 | rs138237342                   |
| + | 1  | 136_137     |                    | NM_001008740 | NP_001008740 | Q7Z6W1 | TMCO2_HUMAN  |                              |              | 1   | TAGAGTCTCTCT    | 0.406 |                               |
| + | 2  | 155_156     | i CCDC30_uc010c    | NM_001080850 | NP_001074319 | Q5VVM6 | CCD30_HUMAN  |                              |              | 0   | TCAAAAGAGAGA    | 0.356 |                               |
| - | 4  | 577         | mv.1_Frame_Shif    | NM_020365    | NP_065098    | Q9NR50 | EI2BG_HUMAN  |                              |              | 1   | ACCTGCTTTTTT    | 0.318 |                               |
| - | 6  | 1430_1431   | is.3_Frame_Shift_  | NM_005897    | NP_005888    | Q9Y573 | IPP_HUMAN    | Kelch 2.                     |              | 1   | CCATAACACACA    | 0.317 |                               |
| - | 5  | 1172        | is.3_Frame_Shift_  | NM_005897    | NP_005888    | Q9Y573 | IPP_HUMAN    | Kelch 1.                     |              | 1   | AGCGACCCCCC     | 0.428 |                               |
| - | 4  | 444         | p.S134fs LRRC41    | NM_006369    | NP_006360    | Q15345 | LRC41_HUMAN  |                              |              | 4   | ATGGGAAAAAA     | 0.483 |                               |
| - | 5  | 1096_1097   | AGBL4_uc001crv.    | NM_024603    | NP_078879    | Q7L4P6 | BEND5_HUMAN  | BEN.                         |              | 1   | ATCTTTCTTTTT    | 0.46  |                               |
| - | 5  | 924_925     | i IQ3_uc001dfz.3_f | NM_001105659 | NP_001099129 | A6PVS8 | LRIQ3_HUMAN  |                              |              | 2   | CTGCTGTTTTTT    | 0.327 |                               |
| + | 23 | 2276_2278   | 1dge.1_In_Frame_   | NM_015978    | NP_057062    | Q59H18 | TNI3K_HUMAN  | Poly-Ser.                    |              | 10  | CTCACCTTCTCT    | 0.473 |                               |
| - | 3  | 1621_1622   | :CBL2_uc001dmr.2   | NM_001162536 | NP_001156008 | Q96E39 | RBMXL_HUMAN  | Ser-rich.                    |              | 0   | GAAGATGGCGGG    | 0.475 |                               |
| - | 3  | 717         | CCBL2_uc001dmr.    | NM_001162536 | NP_001156008 | Q96E39 | RBMXL_HUMAN  |                              |              | 0   | CAACCATTTTTT    | 0.498 | rs78548172                    |
| - | 9  | 1232        | Shift_Del_p.M408   | NM_005665    | NP_005656    | O60447 | EVI5_HUMAN   | Interaction with alpha-tubul |              | 2   | TTTTCATTTTTT    | 0.318 |                               |
| + | 9  | 1146_1147   | .2_Intron KIAA132  | NM_020775    | NP_065826    | Q6UXG2 | K1324_HUMAN  | cellular (Potential).        |              | 5   | TTTCTACACACA    | 0.49  |                               |
| - | 7  | 777         | p.K153fs GSTM3_    | NM_000849    | NP_000840    | P21266 | GSTM3_HUMAN  | ST C-terminal.               |              | 0   | CTACCTTTTCCC    | 0.438 |                               |
| - | 3  | 1756_1759   |                    | NM_001122965 | NP_001116437 | Q6XPR3 | RPTN_HUMAN   | Gln-rich.                    |              | 0   | GCCTTGCTGTCT    | 0.485 |                               |
| - | 27 | 9178_9179   | ASH1L_uc001fkt.    | NM_018489    | NP_060959    | Q9NR48 | ASH1L_HUMAN  |                              |              | 11  | CCTCTGTTTTTT    | 0.52  |                               |
| - | 12 | 1570_1571   | 0907_uc009wrk.1_   | NM_014949    | NP_055764    | Q7Z7F0 | K0907_HUMAN  |                              |              | 0   | TGTCCTCTCTCT    | 0.396 |                               |
| - | 5  | 1175        | MF1_uc010pjl.1_lr  | NM_003037    | NP_003028    | Q13291 | SLAF1_HUMAN  | (Potential). Ig-like V-type. |              | 2   | TAAGGCTTTTTT    | 0.433 |                               |
| - | 6  | 1404_1406   | v.V48del PVRL4_u   | NM_030916    | NP_112178    | Q96NY8 | PVRL4_HUMAN  | ical; (Potential).           |              | 2   | TGAGCACCACC     | 0.571 |                               |
| + | 17 | 2363_2365   | I2F1_uc010ph.1_l   | NM_002697    | NP_002688    | P14859 | PO2F1_HUMAN  |                              |              | 5   | TCGCTCCACCAC    | 0.601 |                               |
| + | 8  | 1233_1234   | 9wxs.2_Frame_St    | NM_000721    | NP_000712    | Q15878 | CAC1E_HUMAN  | lasmic (Potential).          |              | 6   | CCAAAGAGAGA     | 0.51  |                               |
| - | 2  | 1361_1363   | .2_Intron RGL1_u   | NM_203454    | NP_982279    | Q8VW27 | ABEC4_HUMAN  |                              |              | 0   | TCCTTTCTTCTT    | 0.419 | rs141411396                   |
| + | 7  | 1724_1726   | ie_Del_p.E466del   | NM_005807    | NP_005798    | Q92954 | PRG4_HUMAN   | peats of K-X-P-X-P-T-T-X     |              | 1   | ACCAAGGAGCC     | 0.635 |                               |
| + | 22 | 2922_2924   |                    | NM_018085    | NP_060555    | Q96P70 | IPO9_HUMAN   |                              |              | 2   | gaggaagaggaggag | 0.33  |                               |
| - | 24 | 2573_2575   |                    | NM_014698    | NP_055513    | O94886 | TM63A_HUMAN  |                              |              | 2   | AGGTCTGCTGC     | 0.626 |                               |
| - | 32 | 4715_4717   | Del_p.1437_1438F   | NM_033056    | NP_149045    | Q96QU1 | PCD15_HUMAN  | cytoplasmic (Potential).     |              | 13  | ggcggaggcggcgg  | 0.438 | rs12246234                    |
| - | 37 | 12084_12088 | K3_uc010qih.1_In   | NM_020987    | NP_066267    | Q12955 | ANK3_HUMAN   | Thr-rich.                    |              | 19  | ggtgccagtggtggg | 0.32  |                               |
| + | 4  | 743         | c010qnb.1_Intron   | NM_000043    | NP_000034    | P25445 | TNR6_HUMAN   | . Extracellular (Potential). |              | 2   | CCAAACTTTTTT    | 0.368 |                               |
| - | 2  | 431         | 0qot.1_Frame_Shi   | NM_020123    | NP_064508    | Q9HD45 | TM9S3_HUMAN  |                              |              | 0   | TGATACTTTTTT    | 0.363 |                               |
| + | 1  | 753_754     | y.2_Intron DHDP    | NM_001009997 | NP_001009997 | Q5T681 | CJ062_HUMAN  | His-rich.                    |              | 0   | GCCAAATCACACA   | 0.545 |                               |
| + | 1  | 735_736     |                    | NM_001127389 | NP_001120861 | F5GZ66 | F5GZ66_HUMAN |                              |              | 0   | GGGCCAGGCAC     | 0.708 | rs138894859                   |
| + | 1  | 758         |                    | NM_001127389 | NP_001120861 | F5GZ66 | F5GZ66_HUMAN |                              |              | 0   | TGGCAGGGCGC     | 0.736 |                               |
| + | 5  | 471_473     | p.L92del TSPAN4    | NM_003271    | NP_003262    | O14817 | TSN4_HUMAN   | ical; (Potential).           |              | 1   | CTTCTGCTGCT     | 0.65  | rs61867552                    |
| + | 1  | 310_312     |                    | NM_178168    | NP_835462    | Q9H207 | O10A5_HUMAN  | Name=3; (Potential).         |              | 3   | TGTATTTCTTCTT   | 0.517 |                               |
| + | 4  | 544         |                    | NM_004585    | NP_004576    | Q9UL19 | TIG3_HUMAN   |                              |              | 1   | ATACCAAAAAA     | 0.537 |                               |
| + | 5  | 419         | nyx.2_Frame_Shif   | NM_003377    | NP_003368    | P49765 | VEGFB_HUMAN  |                              |              | 0   | GACCTAAAAAA     | 0.388 |                               |

|   |    |           |                   |              |              |        |              |                              |    |                    |       |                    |
|---|----|-----------|-------------------|--------------|--------------|--------|--------------|------------------------------|----|--------------------|-------|--------------------|
| + | 12 | 1367      | ne_Shift_Del_p.F4 | NM_003369    | NP_003360    | Q9P2Y5 | UVRAG_HUMAN  |                              | 6  | ATTCCTTTTTCC       | 0.383 |                    |
| + | 3  | 285       | zaa.1_Frame_Shi   | NM_000073    | NP_000064    | P09693 | CD3G_HUMAN   | ilar (Potential), lg-like.   | 0  | AAAGATAAAAAA/      | 0.403 |                    |
| + | 3  | 2334_2335 | L_uc001psz.1_Fr   | NM_005933    | NP_005924    | Q03164 | MLL1_HUMAN   |                              | 25 | CTCTCACCCCCC       | 0.45  |                    |
| + | 7  | 1559_1560 | :K1_uc009zbp.2_F  | NM_001114122 | NP_001107594 | O14757 | CHK1_HUMAN   | rotein kinase.               | 6  | GGAAAGAAAAAA       | 0.361 | rs35817404         |
| - | 4  | 560       | 010sbo.1_5'Flank  | NM_003139    | NP_003130    | P08240 | SRPR_HUMAN   |                              | 0  | CCCCCTTTTTT        | 0.438 |                    |
| - | 22 | 3672_3674 | 1qfl.2_In_Frame_L | NM_020228    | NP_064613    | Q9NQV6 | PRD10_HUMAN  | Poly-Thr.                    | 1  | :CCGTTGGTGGT       | 0.547 |                    |
| + | 13 | 1588      | .1_3'UTR GLB1L3   | NM_001080407 | NP_001073876 | Q8NCI6 | GLBL3_HUMAN  |                              | 1  | GTGATCCCCC         | 0.602 |                    |
| + | 4  | 775       | ame_Shift_Del_p./ | NM_001135217 | NP_001128689 | Q53EV4 | LRC23_HUMAN  | LRR 2.                       | 1  | AAAGTGCCAGA        | 0.488 |                    |
| - | 3  | 539_541   |                   | NM_006248    | NP_006239    |        |              |                              | 0  | GGACTTGTGT         | 0.596 |                    |
| - | 2  | 149_151   | 5'UTR CASC1_uc    | NM_001082973 | NP_001076442 | Q6TDU7 | CASC1_HUMAN  | Glu-rich.                    | 2  | GTCTCTCCTC         | 0.365 |                    |
| - | 11 | 3063_3064 | p.E611fs SFRS2IP  | NM_004719    | NP_004710    | Q99590 | SCAFB_HUMAN  | Arg-rich.                    | 0  | :TCCTTCTCTCT       | 0.446 |                    |
| - | 9  | 1884_1886 | rk CCNT1_uc009z   | NM_001240    | NP_001231    | O60563 | CCNT1_HUMAN  | His-rich.                    | 6  | TGATTATGATGA       | 0.443 |                    |
| + | 1  | 306_308   |                   | NM_001005280 | NP_001005280 | Q8NGE5 | O10A7_HUMAN  | Name=3; (Potential).         | 4  | ATGTACTTCTTC       | 0.414 |                    |
| + | 9  | 1779_1780 | sjd.1_Frame_Shift | NM_022465    | NP_071910    | Q9H2S9 | IKZF4_HUMAN  | 2H2-type 5.                  | 1  | TTCTGGACCAC        | 0.574 |                    |
| - | 3  | 695_696   | ame_Shift_Ins_p.  | NM_001478    | NP_001469    | Q00973 | B4GN1_HUMAN  | ienal (Potential).           | 0  | GGAGGCCCCC         | 0.589 |                    |
| - | 6  | 409_410   |                   | NM_002442    | NP_002433    | O43347 | MS1H_HUMAN   | RRM 2.                       | 3  | GACAGCCCCC         | 0.564 |                    |
| - | 5  | 489_491   | tyt.2_In_Frame_D  | NM_015918    | NP_057002    | Q969H6 | POP5_HUMAN   |                              | 0  | :CTGACTCCTC        | 0.517 |                    |
| - | 25 | 3416      | SBNO1_uc010taq    | NM_018183    | NP_060653    | A3KN83 | SBNO1_HUMAN  |                              | 9  | TTCCATTTTTTT       | 0.388 |                    |
| - | 34 | 4381_4382 | p.V250fs POLE_u   | NM_006231    | NP_006222    | Q07864 | DPOE1_HUMAN  |                              | 8  | TGACCACACAC        | 0.604 |                    |
| - | 1  | 1994_1996 | zo.1_In_Frame_De  | NM_183422    | NP_904358    | Q15714 | T22D1_HUMAN  | Gln-rich.                    | 0  | gtgtgtgtgtgtgtgtgt | 0.409 | 613609;rs146722477 |
| - | 10 | 1917_1918 | p.R637fs ZC3H13   | NM_015070    | NP_055885    | Q5T200 | ZC3HD_HUMAN  | Arg/Ser-rich.                | 2  | CAAACCTCTCTC       | 0.337 |                    |
| + | 3  | 707_710   | vbk.2_Frame_Shif  | NM_015116    | NP_055931    | Q9Y2L9 | LRCH1_HUMAN  | LRR 3.                       | 2  | CGCCCTGCCTC        | 0.436 |                    |
| + | 1  | 690_692   |                   | NM_007129    | NP_009060    | O95409 | ZIC2_HUMAN   | criptional activation or rep | 0  | CGCGGCccaccac      | 0.522 |                    |
| + | 1  | 568_570   | I0_uc001whe.2_5'  | NM_014045    | NP_054764    | Q7Z4F1 | LRP10_HUMAN  |                              | 1  | :CCACCCTCCTC       | 0.67  |                    |
| - | 6  | 2422      | p.A167fs JPH4_uc  | NM_032452    | NP_115828    | Q96J6  | JPH4_HUMAN   | lasmic (Potep.A502fs*12(1)   | 2  | :GCCTGCCCCCC       | 0.687 | rs144738828        |
| + | 5  | 648       | me_Shift_Del_p.E  | NM_002791    | NP_002782    | P60900 | PSA6_HUMAN   |                              | 0  | TCCTGAAAAAA/       | 0.403 |                    |
| - | 11 | 2527      |                   | NM_018353    | NP_060823    | Q6P0N0 | M18BP_HUMAN  |                              | 0  | TGGACTTTTTTT       | 0.373 |                    |
| + | 1  | 839       | 1_Intron RPL36AL  | NM_002408    | NP_002399    | Q10469 | MGAT2_HUMAN  | ienal (Potential).           | 0  | CTGGGCCCCCC        | 0.602 |                    |
| + | 13 | 2141      | <CH_uc010tsb.1_f  | NM_006255    | NP_006246    | P24723 | KPCL_HUMAN   | rotein kinase.               | 6  | ACATCCTTTTTTT      | 0.522 |                    |
| + | 16 | 4738_4740 | 1xmv.2_In_Frame   | NM_015556    | NP_056371    | O43166 | SI1L1_HUMAN  | Ser-rich.                    | 4  | ccctcctctcctcctc   | 0.468 |                    |
| - | 1  | 61_63     | .2_5'UTR PGBD4_   | NM_020154    | NP_064539    | Q9NPA0 | CO024_HUMAN  |                              | 0  | :CGATAGCAGCA       | 0.665 |                    |
| - | 3  | 310       | _5'UTR C15orf52_  | NM_207380    | NP_997263    | Q6ZUT6 | CO052_HUMAN  |                              | 1  | :GCCATCCCCC        | 0.647 |                    |
| - | 15 | 2082_2083 | p.E647fs SLTM_uc  | NM_024755    | NP_079031    | Q9NWH9 | SLTM_HUMAN   | lu-rich. Potential.          | 1  | AGCGCCTCTCTC       | 0.475 |                    |
| + | 6  | 1825_1827 | 2afu.2_In_Frame_  | NM_017610    | NP_060080    | Q6ZNA4 | RN111_HUMAN  | His-rich.                    | 2  | TCATCACACCAC/      | 0.512 |                    |
| + | 7  | 4096_4098 |                   | NM_015042    | NP_055857    | O15014 | ZN609_HUMAN  | Poly-His.                    | 3  | :CACACACCACC/      | 0.576 |                    |
| + | 2  | 2046_2048 | .L591del SLC24A   | NM_004727    | NP_004718    | O60721 | NCKX1_HUMAN  | ical; (Potential).           | 0  | :GAGCCTGCTGC       | 0.547 |                    |
| + | 3  | 434_436   |                   | NM_001030005 | NP_001025176 | Q8VWH0 | CPLX3_HUMAN  |                              | 0  | :CACAGAGGAGG       | 0.616 |                    |
| + | 7  | 1037_1039 | .K238del UBN1_u   | NM_001079514 | NP_001072982 | Q9NPG3 | UBN1_HUMAN   | Lys-rich.                    | 2  | AAAGGAGAAGAA       | 0.453 |                    |
| - | 3  | 553_555   | 20GG>G KIAA043    | NM_014647    | NP_055462    | Q9Y4F3 | LKAP_HUMAN   | Poly-Gly.                    | 0  | :ACCGCACCCAC       | 0.532 |                    |
| + | 9  | 960_962   | ne_Del_p.E294del  | NM_001099661 | NP_001093131 | B5ME19 | B5ME19_HUMAN |                              | 0  | GGATGAGGAGG        | 0.562 |                    |
| + | 30 | 3476_3478 | L1022del ITGAL_u  | NM_002209    | NP_002200    | P20701 | ITAL_HUMAN   | ical; (Potential).           | 10 | GGGGGCTGCTG        | 0.601 |                    |
| + | 25 | 6010_6011 | Shift_Ins_p.Q16   | NM_006662    | NP_006653    | Q6ZRS2 | SRCAP_HUMAN  | Pro-rich.                    | 4  | :CGCAGCCCCC        | 0.569 |                    |
| - | 8  | 897_898   | ge.1_Frame_Shift  | NM_013263    | NP_037395    | Q9NP11 | BRD7_HUMAN   |                              | 0  | GAGTCTCTCTC        | 0.47  |                    |
| + | 3  | 278_280   | 0vho.1_In_Frame_  | NM_020312    | NP_064708    | O75208 | COQ9_HUMAN   |                              | 1  | CGCGGAGGAGG        | 0.576 | rs149029279        |
| + | 2  | 250       | .2_Frame_Shift_D  | NM_016951    | NP_058647    | Q9UBR5 | CKLF_HUMAN   | MARVEL.                      | 0  | ATGACCTTTTTTA      | 0.318 |                    |
| + | 5  | 2064_2065 | 02ewd.2_Frame_    | NM_133458    | NP_597715    | Q8TF47 | ZFP90_HUMAN  | :2H2-type 12.                | 1  | :CTCCGAAAAAA       | 0.411 |                    |
| - | 6  | 583_585   |                   | NM_014062    | NP_054781    | Q9ULX3 | NOB1_HUMAN   | Poly-Glu.                    | 0  | TTTCTCTCTCTC       | 0.522 |                    |

|   |    |           |                                                      |              |              |        |             |                              |                |    |                  |       |                                    |
|---|----|-----------|------------------------------------------------------|--------------|--------------|--------|-------------|------------------------------|----------------|----|------------------|-------|------------------------------------|
| - | 14 | 2504      | _p.F283fs ADAMT:                                     | NM_199355    | NP_955387    | Q8TE60 | ATS18_HUMAN | Cys-rich.                    | p.A696fs*18(2) | 18 | CATTGCAAAAAA     | 0.403 |                                    |
| - | 13 | 1822      | ime_Shift_Del_p.K                                    | NM_002532    | NP_002523    | Q99567 | NUP88_HUMAN | Potential.                   |                | 1  | TGTTTCTTTTTT     | 0.363 |                                    |
| - | 15 | 2000_2002 | 15_uc002ghy.1_5'                                     | NM_004860    | NP_004851    | P51116 | FXR2_HUMAN  | Poly-Arg.                    |                | 0  | GTTACGGCGGGC     | 0.547 |                                    |
| + | 34 | 4663_4665 | 0crt.2_In_Frame_I                                    | NM_003170    | NP_003161    | Q7KZ85 | SPT6H_HUMAN | Poly-Ser.                    |                | 3  | CCCTAGCAGCA      | 0.537 |                                    |
| + | 37 | 5115      | lcr.2_Frame_Shift                                    | NM_003170    | NP_003161    | Q7KZ85 | SPT6H_HUMAN |                              |                | 3  | TGGGGAAAAATC     | 0.567 |                                    |
| - | 12 | 1542      | hif.2_Del_p.G471fs                                   | NM_001256    | NP_001247    | P30260 | CDC27_HUMAN |                              |                | 5  | AAATAACCTTTCC    | 0.368 |                                    |
| - | 14 | 1854      | 2if.2_Frame_Shift                                    | NM_001130528 | NP_001124000 | O60271 | JIP4_HUMAN  |                              |                | 5  | TTGACCTTTTTT     | 0.323 |                                    |
| - | 21 | 4684_4686 | 21EE>E BZRAP1                                        | NM_004758    | NP_004749    | O95153 | RIMB1_HUMAN | Poly-Glu.                    |                | 3  | Gctcctctcctcctc  | 0.468 |                                    |
| - | 14 | 1600_1602 | 2jca.2_In_Frame_I                                    | NM_017647    | NP_060117    | Q8IY81 | RRMJ3_HUMAN |                              |                | 1  | 3GATTCTCCTCC     | 0.537 |                                    |
| + | 20 | 6727_6729 | 1.T2353del BPTF_u                                    | NM_182641    | NP_872579    | Q12830 | BPTF_HUMAN  | Thr-rich.                    |                | 4  | CCAGCACCACC      | 0.542 | rs143937013                        |
| + | 9  | 1570_1571 | NF236_uc002lmk.                                      | NM_007345    | NP_031371    | Q9UL36 | ZN236_HUMAN |                              |                | 4  | AAAAAGAAAAAA     | 0.381 |                                    |
| - | 9  | 1668_1669 | 9orf29_uc002lyi.3                                    | NM_001080543 | NP_001074012 | Q8WUQ7 | CS029_HUMAN |                              |                | 0  | 3CACCGCCTCGC     | 0.748 |                                    |
| + | 20 | 2639      | ne_Shift_Del_p.F8                                    | NM_001005361 | NP_001005361 | P50570 | DYN2_HUMAN  | Pro-rich.                    |                | 6  | CTCTTCCCAGCC     | 0.667 |                                    |
| - | 4  | 860       | 563_uc002mtq.2_I                                     | NM_145276    | NP_660319    | Q8TA94 | ZN563_HUMAN | 2H2-type 3.                  |                | 0  | GGGCCAAAAAA      | 0.393 |                                    |
| - | 8  | 1079_1081 | 26_uc002nee.2_I                                      | NM_006387    | NP_006378    | Q8IWX8 | CHERP_HUMAN | Gln-rich.                    |                | 2  | gctgctgtgctgctg  | 0.552 |                                    |
| + | 1  | 111_113   |                                                      | NM_021175    | NP_066998    | P81172 | HEPC_HUMAN  |                              |                | 1  | CCTGCTCCTCC      | 0.64  |                                    |
| + | 7  | 712_714   |                                                      | NM_001039887 | NP_001034976 | Q2NL68 | CS055_HUMAN | Ser-rich.                    |                | 1  | CCATCTCCTCC      | 0.631 |                                    |
| - | 1  | 177_179   | nm.2_In_Frame_D                                      | NM_014400    | NP_055215    | O95274 | LYPD3_HUMAN |                              |                | 1  | GCGAAGCAGCA      | 0.675 | rs141441894                        |
| - | 6  | 2275_2277 | 2pdl.2_In_Frame_                                     | NM_030785    | NP_110412    | Q9H0K4 | RSH6A_HUMAN | Glu-rich.                    |                | 2  | ctcctgcctcctcctc | 0.409 |                                    |
| - | 6  | 2257_2259 | 2pdl.2_In_Frame_                                     | NM_030785    | NP_110412    | Q9H0K4 | RSH6A_HUMAN | Glu-rich.                    |                | 2  | ctcctgcctcctcctc | 0.438 | rs62639328                         |
| - | 9  | 2408_2410 | 0xyr.1_In_Frame_                                     | NM_015063    | NP_055878    | Q9UPR5 | NAC2_HUMAN  | lasmic (Potential).          |                | 4  | ACCCGTCTCCT      | 0.616 |                                    |
| - | 4  | 572_574   |                                                      | NM_018263    | NP_060733    | Q76L83 | ASXL2_HUMAN | Ser-rich.                    |                | 1  | ATCACTGCTGC      | 0.463 |                                    |
| - | 2  | 234_236   | HX57_uc002rrg.2_                                     | NM_198963    | NP_945314    | Q6P158 | DHX57_HUMAN | Gly-rich.                    |                | 3  | gccacctccaccacca | 0.384 |                                    |
| - | 4  | 557       | 0yoq.1_Splice_Sit                                    | NM_014614    | NP_055429    | Q14997 | PSME4_HUMAN |                              |                | 5  | GAACTGGGGGG      | 0.347 |                                    |
| - | 16 | 2711      | _p.K327fs MTIF2_u                                    | NM_001005369 | NP_001005369 | P46199 | IF2M_HUMAN  |                              |                | 1  | TTTAAATTTTTT     | 0.378 |                                    |
| + | 3  | 460       | _p.K41fs UGP2_uc                                     | NM_006759    | NP_006750    | Q16851 | UGPA_HUMAN  |                              |                | 0  | ACACCAAAAAAA     | 0.358 |                                    |
| - | 4  | 737_739   | 02svr.2_In_Frame_                                    | NM_017849    | NP_060319    | O75204 | TM127_HUMAN |                              |                | 0  | CTTATGCTGCTC     | 0.557 |                                    |
| + | 3  | 759_761   | 02svy.2_In_Frame_                                    | NM_001008949 | NP_001008949 | Q6GPH6 | IPIL1_HUMAN | lasmic (Potential).          |                | 3  | CAGTGAGGAGG      | 0.532 |                                    |
| + | 3  | 146_148   |                                                      | NM_014440    | NP_055255    | Q9UHA7 | IL36A_HUMAN |                              |                | 0  | TCATGCCGACAT     | 0.512 |                                    |
| - | 7  | 936       | uc002tnj.1_Intron                                    | NM_032390    | NP_115766    | Q9BYG3 | MK671_HUMAN |                              |                | 0  | TTCGTCTTTTTT     | 0.294 |                                    |
| - | 28 | 4326_4327 | zcp.1_Frame_Shif                                     | NM_007366    | NP_031392    | Q13018 | PLA2R_HUMAN | Potential). C-type lectin 8. |                | 3  | AAAGCCTTTTTT     | 0.401 |                                    |
| + | 12 | 1368      | B_uc002ufz.2_Fra                                     | NM_138995    | NP_620482    | Q8WXR4 | MYO3B_HUMAN | rosin head-like.             |                | 19 | CCAATCCCCCCC     | 0.463 |                                    |
| + | 8  | 1227      |                                                      | NM_152945    | NP_694453    | Q8IUH3 | RBM45_HUMAN |                              |                | 0  | CATGCAAAAAAA     | 0.353 |                                    |
| + | 17 | 1951_1952 | p.R523fs TGAV_u                                      | NM_002210    | NP_002201    | P06756 | ITAV_HUMAN  | cellular (Potential).        |                | 4  | TTCAAGGGGGGG     | 0.431 |                                    |
| + | 7  | 931       | .1_Frame_Shift_D                                     | NM_000578    | NP_000569    | P49279 | NRAM1_HUMAN | ical; (Potential).           |                | 4  | 3GAAGCTTTTTT     | 0.418 |                                    |
| + | 19 | 2288_2290 | 3_In_Frame_Del_I                                     | NM_015575    | NP_056390    | Q6Y7W6 | PERQ2_HUMAN | Gln-rich.                    |                | 7  | TTCCAGCAGCA      | 0.424 |                                    |
| + | 2  | 175_177   |                                                      | NM_022134    | NP_071417    | Q9H3Q3 | G3ST2_HUMAN | type II membrane protein;    |                | 0  | 3GTCATCCTCCT     | 0.631 |                                    |
| + | 3  | 173_174   | ij.1_RNA FRG1B_uc010gdr.1_RNA FRG1B_uc010ztk.1_5'UTR |              |              |        |             |                              |                | 0  | TAGGGGAAAAATG    | 0.322 |                                    |
| - | 12 | 5661_5663 | 2_In_Frame_Del_                                      | NM_014071    | NP_054790    | Q14686 | NCOA6_HUMAN | . Gln-rich. CREBBP-binding   |                | 7  | TCATTgtgtgctgctg | 0.498 | 895426;rs140426729                 |
| - | 2  | 2489_2490 | xus.1_Frame_Shif                                     | NM_004975    | NP_004966    | Q14721 | KCNB1_HUMAN | lasmic (Potential).          |                | 2  | GCTTTTGGGGGG     | 0.545 |                                    |
| - | 4  | 1934_1936 | 1aaq.1_In_Frame_                                     | NM_017798    | NP_060268    | Q9BYJ9 | YTHD1_HUMAN |                              |                | 2  | ACCACCTCCTC      | 0.557 |                                    |
| - | 11 | 905       | TPTE_uc002yir.1_f                                    | NM_199261    | NP_954870    | P56180 | TPTE_HUMAN  | ical; (Potential).           |                | 5  | ATGTCAAAAAAA     | 0.299 |                                    |
| - | 3  | 302       | _p.Q71fs C21orf91                                    | NM_001100420 | NP_001093890 | Q9NYK6 | EUURL_HUMAN |                              |                | 1  | AACCCTGGTTTG     | 0.353 |                                    |
| - | 20 | 3323_3325 | 1.Q944del SFRS15                                     | NM_020706    | NP_065757    | O95104 | SFR15_HUMAN | Poly-Gln.                    |                | 0  | GGTGgtgctgctgctg | 0.291 |                                    |
| - | 3  | 496_498   |                                                      | NM_005877    | NP_005868    | Q15459 | SF3A1_HUMAN | Poly-Gln.                    |                | 5  | 3GGTCTGCTGC      | 0.596 | rs141985009                        |
| - | 30 | 4280_4282 |                                                      | NM_002473    | NP_002464    | P35579 | MYH9_HUMAN  | Potential.                   |                | 11 | TTGGCTCCTCCTC    | 0.65  |                                    |
| + | 3  | 1161_1181 |                                                      | NM_152243    | NP_689449    | Q00587 | BORG5_HUMAN | s of [PT]-[AT]-A-[ENT]-[PT]  |                | 0  | 3CCTGCTGCAAAA    | 0.665 | 0;rs62235033;rs13056859;rs62235034 |

|   |    |                              |              |              |        |             |                               |    |                     |       |             |
|---|----|------------------------------|--------------|--------------|--------|-------------|-------------------------------|----|---------------------|-------|-------------|
| - | 1  | 1016_1017:P3_uc011aoy.1_5    | NM_145174    | NP_660157    | Q7Z6W7 | DNJB7_HUMAN | Poly-Lys.                     | 1  | .CGCTTCTTTTTT       | 0.381 |             |
| - | 10 | 2571_2573>E>E RANGAP1_u      | NM_002883    | NP_002874    | P46060 | RAGP1_HUMAN | acidic). Asp/Glu-rich (highly | 0  | tcttctctctctctctctc | 0.266 |             |
| + | 2  | 372_374  _Intron LOC33967    | NM_004599    | NP_004590    | Q12772 | SRBP2_HUMAN | sh.  Cytoplasmic (Potential). | 4  | igcagtggcagcagca    | 0.365 |             |
| - | 10 | 1116 p.N255fs ARFGAP         | NM_014570    | NP_055385    | Q9NP61 | ARFG3_HUMAN |                               | 1  | TCAACATTTTTTTT      | 0.224 |             |
| + | 2  | 818_820 tr.1_In_Frame_Del    | NM_014760    | NP_055575    | Q93075 | TATD2_HUMAN |                               | 2  | AATAACTCCTCC        | 0.635 |             |
| + | 13 | 2715 NKTR_uc003clq.1         | NM_005385    | NP_005376    | P30414 | NKTR_HUMAN  |                               | 3  | TCATTCAAAAAA        | 0.373 |             |
| - | 2  | 303 el_p.K44fs ANO10         | NM_018075    | NP_060545    | Q9NW15 | ANO10_HUMAN | lasmic (Potential).           | 2  | .TCCATCTTTTTTT      | 0.408 |             |
| - | 7  | 2318_2319>bf.1_Frame_Shift   | NM_002375    | NP_002366    | P27816 | MAP4_HUMAN  |                               | 3  | CTTTTTGTGTTTC       | 0.455 |             |
| + | 11 | 2031 p.R565fs ALAS1_u        | NM_000688    | NP_000679    | P13196 | HEM1_HUMAN  |                               | 3  | GCCCCGGGGGAG        | 0.517 | rs139914359 |
| + | 2  | 1293_1295y.3_RNA LNP1_uc     | NM_001085451 | NP_001078920 | A1A4G5 | LNP1_HUMAN  | Poly-Asp.                     | 0  | ACAAAGATGATG        | 0.507 |             |
| + | 3  | 425_426 =2_uc003eeo.2_In     | NM_018456    | NP_060926    | Q96CJ1 | EAF2_HUMAN  |                               | 0  | CACTGTAAAAAA        | 0.243 |             |
| + | 42 | 6369_6371 bnz.1_In_Frame_I   | NM_053002    | NP_443728    | Q86YW9 | MD12L_HUMAN | Gln-rich.                     | 7  | .GACCCAGCAGC        | 0.527 |             |
| - | 2  | 132_134 ame_Del_p.T35de      | NM_024947    | NP_079223    | Q8NDX5 | PHC3_HUMAN  | Poly-Thr.                     | 2  | Agtggtgatggtggtgg   | 0.424 |             |
| + | 5  | 690 _p.S38fs FETUB_u         | NM_014375    | NP_055190    | Q9UGM5 | FETUB_HUMAN |                               | 2  | .AGTTTCAAAAAA       | 0.418 |             |
| - | 3  | 1028 168_uc010iah.2_5        | NM_152617    | NP_689830    | Q8IYW5 | RN168_HUMAN | Glu-rich.                     | 0  | TTGCCTTTTTTT        | 0.448 |             |
| + | 1  | 3159_3160                    | NM_175918    | NP_787114    | Q8N1N5 | CRPAK_HUMAN |                               | 0  | CTGCTCACACAC        | 0.634 |             |
| + | 1  | 3283_3284                    | NM_175918    | NP_787114    | Q8N1N5 | CRPAK_HUMAN | 2                             | 0  | CCTGCTCACGTC        | 0.668 | rs79704405  |
| - | 15 | 1909 u.N566fs PROM1_u        | NM_006017    | NP_006008    | O43490 | PROM1_HUMAN | cellular (Potential).         | 7  | CCTCTATTTTTTT       | 0.428 |             |
| + | 4  | 1003 itg.2_Frame_Shift       | NM_016531    | NP_057615    | P57682 | KLF3_HUMAN  | Pro-rich.                     | 2  | .AGTGTCCCCC         | 0.423 |             |
| + | 16 | 1633_1634 el_p.R448fs FIP1L  | NM_030917    | NP_112179    | Q6UN15 | FIP1_HUMAN  | ction with CPSF1 and CST      | 2  | .CACCAGAGAGA        | 0.292 |             |
| - | 8  | 1472 _p.L340fs AASDH_u       | NM_181806    | NP_861522    | Q4L235 | ACSF4_HUMAN |                               | 4  | .GTCCCAAAAAA        | 0.363 | rs148777026 |
| + | 4  | 994_996 u.Q279del MMRN1      | NM_007351    | NP_031377    | Q13201 | MMRN1_HUMAN | Poly-Gln.                     | 4  | .GCTGAGCAGCA        | 0.448 |             |
| + | 3  | 335 C9_uc003ieb.2_F          | NM_005033    | NP_005024    | Q06265 | EXOS9_HUMAN | ARE binding.                  | 0  | .GTATTCTTTTTT       | 0.383 |             |
| - | 8  | 596_598 3ijz.3_In_Frame_I    | NM_001102653 | NP_001096123 | Q01804 | OTUD4_HUMAN |                               | 3  | .ACATCAGCAGC/       | 0.34  |             |
| - | 41 | 6826 p.I766fs LRBA_uc        | NM_006726    | NP_006717    | P50851 | LRBA_HUMAN  |                               | 7  | .GTCGATTTTTTT       | 0.453 | rs34237929  |
| + | 13 | 1713_1714 _p.K518fs PAPD7    | NM_006999    | NP_008930    | Q5XG87 | PAPD7_HUMAN |                               | 1  | .AAAAAACACACA       | 0.653 |             |
| - | 14 | 2587_2589VD2_uc011cmz.1_     | NM_001332    | NP_001323    | Q9UQB3 | CTND2_HUMAN | Poly-Lys.                     | 8  | TCTTTTTCTCTT        | 0.502 |             |
| - | 77 | 13500 3jfc.2_Frame_Shift     | NM_001369    | NP_001360    | Q8TE73 | DYH5_HUMAN  |                               | 31 | .GGGTTAAAAAA        | 0.423 |             |
| - | 10 | 1909 -110_uc011cnu.1_F       | NM_006727    | NP_006718    | Q9Y6N8 | CAD10_HUMAN | Extracellular (Potential).    | 12 | .AAACTGAAAAAA       | 0.313 |             |
| - | 11 | 1838_1839il.1_Frame_Shift_I  | NM_000065    | NP_000056    | P13671 | CO6_HUMAN   | EGF-like.                     | 7  | CTCTGACACACA        | 0.475 |             |
| - | 2  | 1109_1111 60DD>D TAF9_uc     | NM_003187    | NP_003178    | Q16594 | TAF9_HUMAN  | Poly-Asp.                     | 0  | atcatagatcatcatc    | 0.256 |             |
| + | 17 | 2312_2314 uc003kqi.3_Intron  | NM_003248    | NP_003239    | P35443 | TSP4_HUMAN  | rSP type-3 7.                 | 0  | .GAGTGTGATGAT       | 0.562 |             |
| + | 7  | 1394                         | NM_002439    | NP_002430    | P20585 | MSH3_HUMAN  |                               | 4  | GGGACAAAAAA         | 0.348 |             |
| + | 2  | 237_240 _p.K19fs AP3S1_L     | NM_001284    | NP_001275    | Q92572 | AP3S1_HUMAN |                               | 0  | ATCTAAGAGAGA        | 0.304 | rs80118146  |
| + | 1  | 1731_1743 uc003lin.2_5'Flank | NM_018937    | NP_061760    | Q9Y5E6 | PCDB3_HUMAN | r (Potential). Cadherin 6.    | 2  | CGGGCGGCTGA         | 0.709 |             |
| - | 3  | 512_514 0jii.2_In_Frame_D    | NM_138379    | NP_612388    | Q96H15 | TIMD4_HUMAN | ar (Potential). Thr-rich.     | 2  | .GGGCTTGTTGT        | 0.537 |             |
| - | 3  | 567 ddz.1_Frame_Shif         | NM_144726    | NP_653327    | Q96MT1 | RN145_HUMAN | ical; (Potential).            | 5  | GCAGTCAAAAAA        | 0.343 |             |
| + | 11 | 1475 mkl.2_Frame_Shif        | NM_001746    | NP_001737    | P27824 | CALX_HUMAN  | renal (Potential).            | 0  | CTGACATTTTTTT       | 0.423 |             |
| + | 18 | 2852 xq.1_Frame_Shift        | NM_004415    | NP_004406    | P15924 | DESP_HUMAN  | ular 1. Spectrin 2.           | 9  | .CGGTGAAAAAG        | 0.493 |             |
| + | 2  | 128_130 p.L24del BTN2A2_u    | NM_006995    | NP_008926    | Q8WVV5 | BT2A2_HUMAN |                               | 0  | CAGCCTCctctctc      | 0.483 |             |
| + | 1  | 72_74 2A3_uc011dkm.1_RNA     |              |              |        |             |                               | 0  | .CCTCCCTCCTC        | 0.586 | rs113134648 |
| + | 3  | 618 t_Del_p.T206fs HL        | NM_002116    | NP_002107    | P30443 | 1A01_HUMAN  | ar (Potential). Alpha-2.      | 2  | CGCACGGGTAC         | 0.637 | rs115073453 |
| + | 26 | 5893 /c.3_Frame_Shift        | NM_080686    | NP_542417    | P48634 | PRC2A_HUMAN |                               | 0  | ACCTACCCCCC         | 0.522 |             |
| - | 4  | 658 p.P115fs BAT3_uc         | NM_004639    | NP_004630    | P46379 | BAG6_HUMAN  |                               | 0  | .TACCAGGGGGG        | 0.592 |             |
| - | 2  | 742 2_5'Flank ATF6B_u        | NM_022110    | NP_071393    | Q9UIM3 | FKBPL_HUMAN |                               | 0  | GAGCTCCCCC          | 0.587 |             |
| - | 2  | 290 iKBP5_uc003oky.2         | NM_001145776 | NP_001139248 | Q13451 | FKBP5_HUMAN |                               | 1  | .CTGTCTTTTTTT       | 0.468 | rs143557566 |
| - | 4  | 1648 318_uc003ouw.2_u        | NM_014345    | NP_055160    | Q5VUA4 | ZN318_HUMAN |                               | 7  | .TCGCCTTTTTTT       | 0.493 |             |

|   |    |           |                     |              |              |        |             |                              |    |                     |       |             |
|---|----|-----------|---------------------|--------------|--------------|--------|-------------|------------------------------|----|---------------------|-------|-------------|
| + | 16 | 2191      |                     | NM_012120    | NP_036252    | Q9Y5K6 | CD2AP_HUMAN | Potential.                   | 2  | 3ATGTGAAAAAA        | 0.388 |             |
| - | 12 | 1315      | I009_uc003pkk.2_    | NM_014895    | NP_055710    | Q5TB80 | QN1_HUMAN   |                              | 1  | TTGTCAAAAAAA        | 0.358 |             |
| + | 9  | 3522_3524 | 2_3'UTR GRM1_uc     | NM_000838    | NP_000829    | Q13255 | GRM1_HUMAN  | Cytoplasmic (Potential).     | 19 | :TCTCCAGCAGC        | 0.66  |             |
| - | 3  | 360       | 1P1_uc010ksc.2_lr   | NM_001031617 | NP_001026788 | Q49B96 | COX19_HUMAN |                              | 0  | AATTCATTTTTTT       | 0.463 | rs75087611  |
| + | 3  | 337       | rf16_uc011kaf.1_lr  | NM_006658    | NP_006649    | O96001 | GSUB_HUMAN  |                              | 3  | :AGACCAAAAAA        | 0.438 |             |
| + | 5  | 601_603   | 0kxo.2_in_Frame_    | NM_007252    | NP_009183    | P78424 | PO6F2_HUMAN | Gln-rich.                    | 1  | :cagctccagcagcagc   | 0.365 |             |
| + | 3  | 342       | _uc011kby.1_Intron  | NM_002541    | NP_002532    | Q02218 | ODO1_HUMAN  |                              | 2  | 3GGACATTTTTTT       | 0.577 |             |
| + | 5  | 1249      | _p.P231fs DTX2_u    | NM_020892    | NP_065943    | Q86UW9 | DTX2_HUMAN  |                              | 2  | :CCCCCACACAG        | 0.657 | rs147779783 |
| - | 7  | 1188      | _p.K237fs CYP51A    | NM_000786    | NP_000777    | Q16850 | CP51A_HUMAN |                              | 0  | ATAACATTTTTTT       | 0.398 |             |
| - | 3  | 436       |                     | NM_005431    | NP_005422    | O43543 | XRCC2_HUMAN |                              | 2  | TACACCAAAAAA        | 0.393 |             |
| + | 2  | 273_275   | 1lank BMP1_uc003    | NM_003018    | NP_003009    | P11686 | PSPC_HUMAN  |                              | 0  | TATCGTGGTGGT        | 0.601 |             |
| - | 15 | 2035      |                     | NM_001010906 | NP_001010906 | Q68CJ6 | SLIP_HUMAN  |                              | 2  | AGGAAATTTTTTT       | 0.453 |             |
| - | 16 | 3521_3523 | E993del MYST3_u     | NM_001099412 | NP_001092882 | Q92794 | MYST3_HUMAN | Poly-Glu.                    | 7  | :CCGGCTCCTCC        | 0.567 |             |
| - | 3  | 971_972   | _1_Shift_Ins_p.E111 | NM_002568    | NP_002559    | P11940 | PABP1_HUMAN | RRM 2.                       | 0  | :ATTTTTTCAATAC      | 0.337 |             |
| - | 3  | 363_367   | 3yqd.2_Frame_Shi    | NM_032847    | NP_116236    | Q96K31 | CH076_HUMAN |                              | 2  | :CAGCGCCTCCA        | 0.424 |             |
| - | 6  | 524_525   | 3yqt.2_Frame_Shi    | NM_004306    | NP_004297    | P27216 | ANX13_HUMAN | Annexin 2.                   | 3  | :CCAGGATTTTTT       | 0.411 |             |
| - | 30 | 4625      | ae.1_Splice_Site_   | NM_201380    | NP_958782    | Q15149 | PLEC_HUMAN  |                              | 9  | CTGTACCTCCTC        | 0.621 |             |
| - | 5  | 724_726   | 1e_Del_p.152_153    | NM_004529    | NP_004520    | P42568 | AF9_HUMAN   | Poly-Ser.                    | 3  | tgctgctactgctgctgcl | 0.148 |             |
| - | 1  | 2084      | uc003zrh.1_RNA      | NM_153809    | NP_722516    | Q8IZX4 | TAF1_HUMAN  | p.K665fs*4(2)                | 26 | TTGGCCTTTTTTT       | 0.478 |             |
| - | 14 | 2236_2237 | e_Shift_Ins_p.N28   | NM_007126    | NP_009057    | P55072 | TERA_HUMAN  |                              | 1  | :AACACATTTTTTT      | 0.515 |             |
| - | 12 | 1637      |                     | NM_006289    | NP_006280    | Q9Y490 | TLN1_HUMAN  | with LAYN (By similarity).   | 13 | TCGTACTTTTTTGC      | 0.498 |             |
| - | 3  | 128_129   | _Shift_Ins_p.K34fs  | NM_016390    | NP_057474    | Q5T280 | CI114_HUMAN |                              | 0  | :CTTCCATTTTTTT      | 0.525 |             |
| + | 24 | 2526      | bwu.2_Frame_Shi     | NM_015354    | NP_056169    | Q5SRE5 | NU188_HUMAN |                              | 7  | GGTGTCCCCCCC        | 0.473 |             |
| + | 5  | 647       | ddo.2_Frame_Shif    | NM_000950    | NP_000941    | O14668 | TMG1_HUMAN  | ic (Potential). Poly-Pro.    | 2  | CCCCACCCCCC         | 0.488 |             |
| - | 18 | 2564_2566 | 1sw.2_in_Frame_C    | NM_015107    | NP_055922    | Q9UPP1 | PHF8_HUMAN  |                              | 3  | :CGTTTCTCCTCC       | 0.591 |             |
| - | 1  | 1805_1806 |                     | NM_003604    | NP_003595    | O14654 | IRS4_HUMAN  |                              | 10 | CCTTTGCCCCCC        | 0.545 |             |
| + | 2  | 310_311   | 1_5'Flank LOC100:   | NM_001152    | NP_001143    | P05141 | ADT2_HUMAN  | Solcar 1.                    | 1  | 3GAGCAGGGAG         | 0.49  | rs113356560 |
| + | 4  | 1735_1737 | EC1_uc010nsl.1_l    | NM_005462    | NP_005453    | O60732 | MAGC1_HUMAN |                              | 4  | :TGAGCTCCTCC        | 0.473 | rs144357389 |
| - | 1  | 159       |                     | NM_001009609 | NP_001009609 | Q5MJ09 | SPXN3_HUMAN |                              | 2  | TCATCATTTTTTT       | 0.239 |             |
| + | 20 | 4967      | 1aoj.2_Frame_Shil   | NM_015215    | NP_056030    | Q9Y6Y1 | CMTA1_HUMAN | IQ 2.                        | 9  | :TGAACAAAAAA        | 0.473 |             |
| - | 4  | 473       |                     | NM_001561    | NP_001552    | Q07011 | TNR9_HUMAN  | (Potential). TNFR-Cys 3.     | 4  | CGTACCTTTTTTT       | 0.413 | rs9657965   |
| + | 8  | 5315      | .2_Intron PRDM2_    | NM_012231    | NP_036363    | Q13029 | PRDM2_HUMAN |                              | 1  | :CTCCCAAAAAA        | 0.463 | rs141416335 |
| - | 7  | 811_812   | 1_Intron MST1P9_    | NR_002729    |              |        |             |                              | 0  | 3GTACGCCGCGC        | 0.649 |             |
| + | 12 | 2906_2908 | 19vqi.1_in_Frame_   | NM_001083621 | NP_001077090 | Q9NUA8 | ZBT40_HUMAN |                              | 1  | :CCCCAAGAAGA        | 0.517 |             |
| + | 2  | 155_156   | 1 CCDC30_uc010c     | NM_001080850 | NP_001074319 | Q5VVM6 | CCD30_HUMAN |                              | 0  | TCAAAAGAGAGA        | 0.356 |             |
| - | 5  | 924_925   | 1 Q3_uc001dfz.3_f   | NM_001105659 | NP_001099129 | A6PVS8 | LRIQ3_HUMAN |                              | 2  | :CTGCTGTTTTTT       | 0.327 |             |
| - | 3  | 841       |                     | NM_003921    | NP_003912    | O95999 | BCL10_HUMAN | CARD.                        | 2  | TGAGTATTTTTTT       | 0.343 |             |
| - | 11 | 1958_1959 | 3_uc001dmu.2_F      | NM_018284    | NP_060754    | Q9H0R5 | GBP3_HUMAN  | Potential.                   | 2  | :TCTTGGTTTTTT       | 0.371 |             |
| - | 9  | 1232      | _Shift_Del_p.M408:  | NM_005665    | NP_005656    | O60447 | EVI5_HUMAN  | Interaction with alpha-tubul | 2  | TTTTCATTTTTTT       | 0.318 |             |
| - | 9  | 1732_1734 | 1jows.1_in_Frame_   | NM_015906    | NP_056990    | Q9UPN9 | TRI33_HUMAN | Poly-Thr.                    | 11 | TGTTGTGTGTTT        | 0.429 |             |
| - | 4  | 601       | 160_uc001eom.1_     | NM_007053    | NP_008984    | O95971 | BY55_HUMAN  |                              | 0  | :TGGAGAAAAAAT       | 0.498 |             |
| + | 8  | 2280      | 1zr.1_Frame_Shift   | NM_004326    | NP_004317    | O00512 | BCL9_HUMAN  | y-Pro. Pro-rich.             | 6  | :GAGGACCCCCC        | 0.582 |             |
| + | 14 | 2499      | _Shift_Del_p.G778   | NM_019032    | NP_061905    | Q6UY14 | ATL4_HUMAN  | 1SP type-1 2.                | 2  | :AATTTGGGGGG        | 0.692 | rs149280379 |
| - | 3  | 1792_1795 |                     | NM_001122965 | NP_001116437 | Q6XPR3 | RPTN_HUMAN  | Gln-rich.                    | 0  | GCCTTGCTGTCT        | 0.466 |             |
| - | 3  | 1756_1759 |                     | NM_001122965 | NP_001116437 | Q6XPR3 | RPTN_HUMAN  | Gln-rich.                    | 0  | GCCTTGCTGTCT        | 0.485 |             |
| - | 3  | 1720_1723 |                     | NM_001122965 | NP_001116437 | Q6XPR3 | RPTN_HUMAN  | Gln-rich.                    | 0  | GCCTTGCTGTCT        | 0.505 |             |
| + | 11 | 2233      | _p.D350fs NPR1_u    | NM_000906    | NP_000897    | P16066 | ANPRA_HUMAN | Potential). Protein kinase.  | 7  | :ACCGACCCCCC        | 0.493 |             |



|   |    |           |                    |              |              |         |              |                               |     |                  |       |             |
|---|----|-----------|--------------------|--------------|--------------|---------|--------------|-------------------------------|-----|------------------|-------|-------------|
| - | 12 | 1570_1571 | 0907_uc009wrk.1    | NM_014949    | NP_055764    | Q7Z7F0  | K0907_HUMAN  |                               | 0   | TGTCCTCTCTC      | 0.396 |             |
| - | 5  | 1175      | MF1_uc010pjl.1_lr  | NM_003037    | NP_003028    | Q13291  | SLAF1_HUMAN  | (Potential). Ilg-like V-type. | 2   | TAAGGCTTTTTT     | 0.433 |             |
| - | 6  | 1404_1406 | >.V48del PVRL4_u   | NM_030916    | NP_112178    | Q96NY8  | PVRL4_HUMAN  | ical; (Potential).            | 2   | ATGAGCACCACC     | 0.571 |             |
| + | 3  | 338_340   |                    | NM_001102566 | NP_001096036 | A6NKN8  | PC4L1_HUMAN  |                               | 0   | AGGCGGAGGAG      | 0.488 |             |
| - | 12 | 2285      | ng.3_Frame_Shift   | NM_007314    | NP_009298    | P42684  | ABL2_HUMAN   |                               | 14  | iCGTTTGGGGGG     | 0.502 | rs138240636 |
| - | 2  | 1361_1363 | .2_Intron RGL1_u   | NM_203454    | NP_982279    | Q8WWW27 | ABEC4_HUMAN  |                               | 0   | FCCTTTCTTCTT     | 0.419 | rs141411396 |
| + | 7  | 1574_1576 | ie_Del_p.T418del   | NM_005807    | NP_005798    | Q92954  | PRG4_HUMAN   | ats of K-X-P-X-P-T-T-X. 21    | 1   | GCACCACCAC       | 0.645 |             |
| - | 6  | 886       | _Shift_Del_p.K69fs | NM_001031685 | NP_001026855 | Q13625  | ASPP2_HUMAN  |                               | 3   | TCTCACTTTTTT     | 0.368 |             |
| - | 19 | 2548      |                    | NM_001081    | NP_001072    | O60494  | CUBN_HUMAN   | CUB 4.                        | 19  | TTAGGAAAAAA      | 0.413 |             |
| - | 15 | 1912_1913 | p.K570fs FRMPD:    | NM_001018071 | NP_001018081 | Q68DX3  | FRPD2_HUMAN  | FERM.                         | 1   | GTGAACTTTTTT     | 0.465 |             |
| + | 2  | 237       |                    | NM_001080512 | NP_001073981 | Q9H694  | BICC1_HUMAN  |                               | 4   | AAAGGTAAGTT      | 0.388 |             |
| - | 4  | 784       | iod.1_Frame_S      | NM_017987    | NP_060457    | Q8WXA3  | RUFY2_HUMAN  | RUN.                          | 1   | GGCCATTTTTTT     | 0.398 |             |
| - | 2  | 431       | oqot.1_Frame_Shi   | NM_020123    | NP_064508    | Q9HD45  | TM9S3_HUMAN  |                               | 0   | TGATACTTTTTT     | 0.363 |             |
| + | 3  | 629_631   | ame_Del_p.S197d    | NM_032429    | NP_115805    | Q9BRK4  | LZTS2_HUMAN  | ntosomal localization (By :   | 4   | GGCCCTGcctcctc   | 0.557 |             |
| - | 2  | 955_957   | 32_uc001mak.1_lr   | NM_017481    | NP_059509    | Q9H347  | UBQL3_HUMAN  |                               | 3   | TGGCTGGTGGT      | 0.537 | rs2234451   |
| - | 8  | 920       |                    | NM_006292    | NP_006283    | Q99816  | TS101_HUMAN  | Potential.                    | 0   | FGACCCTTTTTCT    | 0.438 |             |
| - | 4  | 391       | eo.1_Frame_Shift   | NM_015957    | NP_057041    | Q96GX9  | MTNB_HUMAN   |                               | 0   | ACTGGCTTTTTTT    | 0.343 |             |
| - | 3  | 345       | orew.1_Frame_Shi   | NM_001001991 | NP_001001991 | Q6UXH9  | PAMR1_HUMAN  |                               | 2   | AGGTACCCCCC      | 0.517 |             |
| + | 7  | 728       | CS_uc010rfrn.1_3   | NM_001127219 | NP_001120691 | Q96QU6  | 1A1L1_HUMAN  |                               | 4   | CTTACTATGGCG     | 0.577 |             |
| + | 2  | 185_187   |                    | NM_015516    | NP_056331    | Q8WUA8  | TSK_HUMAN    |                               | 0   | GCCCTGCTGC       | 0.616 |             |
| - | 3  | 483       | AF1D_uc001pdz.2    | NM_024116    | NP_077021    | Q9H5J8  | TAF1D_HUMAN  |                               | 0   | TTTTTCTTTTTTT    | 0.348 |             |
| + | 3  | 285       | zaa.1_Frame_Shi    | NM_000073    | NP_000064    | P09693  | CD3G_HUMAN   | ilar (Potential). Ilg-like.   | 0   | AAAGATAAAAAA     | 0.403 |             |
| + | 9  | 1502_1504 |                    | NM_005188    | NP_005179    | P22681  | CBL_HUMAN    | Glu-rich (ac3(1))p.E366_K.    | 149 | AAATTATGATGAT    | 0.473 |             |
| - | 4  | 1425      | Jsap.1_Frame_Shi   | NM_024631    | NP_078907    | Q6P1R3  | CKO61_HUMAN  |                               | 0   | TGGGTCTATTTT     | 0.488 |             |
| + | 7  | 1559_1560 | :K1_uc009zbp.2_F   | NM_001114122 | NP_001107594 | O14757  | CHK1_HUMAN   | rotein kinase.                | 6   | GGAAAGAAAAAA     | 0.361 | rs35817404  |
| - | 4  | 560       | 010sbo.1_5'Flank   | NM_003139    | NP_003130    | P08240  | SRPR_HUMAN   |                               | 0   | CCCCCTTTTTTT     | 0.438 |             |
| - | 3  | 258_259   | _74P>PPIPRB1_u     | NM_005039    | NP_005030    | P04280  | PRP1_HUMAN   | -P-[PAQ]-Q-[GE]-[GD]-[NK      | 0   | TTTCTGGAGGT      | 0.619 |             |
| - | 11 | 3063_3064 | p.E611fs SFRS2IP   | NM_004719    | NP_004710    | Q99590  | SCAFB_HUMAN  | Arg-rich.                     | 0   | TCCTTCTCTCT      | 0.446 |             |
| - | 9  | 1884_1886 | rk CCNT1_uc009z    | NM_001240    | NP_001231    | O60563  | CCNT1_HUMAN  | His-rich.                     | 6   | TGATTATGATGAT    | 0.443 |             |
| - | 9  | 1781_1782 | v.1_In_Frame_Ins   | NM_006121    | NP_006112    | P04264  | K2C1_HUMAN   | y/Ser-rich. Tail.             | 2   | ctgccatggccgccgc | 0.084 |             |
| + | 1  | 306_308   |                    | NM_001005280 | NP_001005280 | Q8NGE5  | O10A7_HUMAN  | Name=3; (Potential).          | 4   | ATGTACTTCTTC     | 0.414 |             |
| + | 5  | 734       | sjr.2_Frame_Shift  | NM_015292    | NP_056107    | Q9BSJ8  | ESYT1_HUMAN  |                               | 5   | GAAATATTTTTGC    | 0.478 |             |
| - | 12 | 1669      | p.P480fs UHHRF1B   | NM_015054    | NP_055869    | A0JNW5  | UH1BL_HUMAN  |                               | 2   | iCTTTGGGGGA      | 0.348 |             |
| - | 25 | 3416      | SBNO1_uc010taq     | NM_018183    | NP_060653    | A3KN83  | SBNO1_HUMAN  |                               | 9   | TTCCATTTTTTT     | 0.388 |             |
| - | 34 | 4381_4382 | p.V250fs POLE_u    | NM_006231    | NP_006222    | Q07864  | DPOE1_HUMAN  |                               | 8   | TTGACCACACAC     | 0.604 |             |
| - | 10 | 3917      | I963fs SACS_uc0C   | NM_014363    | NP_055178    | Q9NZJ4  | SACS_HUMAN   |                               | 12  | CTTCAATTTTTTT    | 0.383 |             |
| + | 3  | 707_710   | vbk.2_Frame_Shif   | NM_015116    | NP_055931    | Q9Y2L9  | LRCH1_HUMAN  | LRR 3.                        | 2   | CGCCCTGCCTC      | 0.436 |             |
| - | 29 | 3774      | BCC4_uc010afk.2    | NM_005845    | NP_005836    | O15439  | MRP4_HUMAN   | C transporter 2.              | 4   | CCGGATTTTTTT     | 0.378 |             |
| + | 1  | 568_570   | IO_uc001whe.2_5'   | NM_014045    | NP_054764    | Q7Z4F1  | LRP10_HUMAN  |                               | 1   | CCACCCTCCTC      | 0.67  |             |
| - | 11 | 2527      |                    | NM_018353    | NP_060823    | Q6P0N0  | M18BP_HUMAN  |                               | 0   | TGGGACTTTTTTT    | 0.373 |             |
| + | 1  | 839       | 1_Intron RPL36AL   | NM_002408    | NP_002399    | Q10469  | MGAT2_HUMAN  | lenal (Potential).            | 0   | CTGGGCCCCCC      | 0.602 |             |
| - | 1  | 61_63     | .2_5'UTR PGBD4_    | NM_020154    | NP_064539    | Q9NPA0  | COO24_HUMAN  |                               | 0   | CGATAGCAGCA      | 0.665 |             |
| - | 15 | 2082_2083 | p.E647fs SLTM_uc   | NM_024755    | NP_079031    | Q9NWH9  | SLTM_HUMAN   | lu-rich. Potential.           | 1   | AGGCGCTCTCTC     | 0.475 |             |
| + | 3  | 434_436   |                    | NM_001030005 | NP_001025176 | Q8WVH0  | CPLX3_HUMAN  |                               | 0   | CACAGAGGAGG      | 0.616 |             |
| - | 1  | 929       | jr.2_3'UTR TIGD7   | NM_033208    | NP_149985    | Q6NT04  | TIGD7_HUMAN  | y similarity). HTH psq-type.  | 0   | TTCTTATTTTTTT    | 0.358 |             |
| - | 3  | 972_973   |                    | NM_001012991 | NP_001013009 | Q1ED39  | CP088_HUMAN  | th ZFP106 (By similarity).    | 0   | TTGCCTTTTTTT     | 0.564 |             |
| + | 9  | 960_962   | ne_Del_p.E294del   | NM_001099661 | NP_001093131 | B5ME19  | B5ME19_HUMAN |                               | 0   | GGATGAGGAGG      | 0.562 |             |

|   |    |           |                                                      |              |              |        |             |                               |    |                  |       |                                    |
|---|----|-----------|------------------------------------------------------|--------------|--------------|--------|-------------|-------------------------------|----|------------------|-------|------------------------------------|
| + | 30 | 3476_3478 | L1022del ITGAL_u                                     | NM_002209    | NP_002200    | P20701 | ITAL_HUMAN  | ical; (Potential).            | 10 | GGGGGCTGCTG      | 0.601 |                                    |
| + | 25 | 6010_6011 | Shift_Ins_p.Q16                                      | NM_006662    | NP_006653    | Q6ZRS2 | SRCAP_HUMAN | Pro-rich.                     | 4  | GCCAGCCCCC       | 0.569 |                                    |
| - | 8  | 897_898   | ge.1_Frame_Shift                                     | NM_013263    | NP_037395    | Q9NPI1 | BRD7_HUMAN  |                               | 0  | GAGTCCTCTCTC     | 0.47  |                                    |
| + | 5  | 1317_1319 | hx.2_In_Frame_D                                      | NM_024335    | NP_077311    | P78412 | IRX6_HUMAN  |                               | 6  | gaggaagaggaggag  | 0.493 |                                    |
| + | 6  | 773_774   | p.Y208fs CPNE2_u                                     | NM_152727    | NP_689940    | Q96FN4 | CPNE2_HUMAN | C2.                           | 2  | AGTTTTATAAGC     | 0.599 |                                    |
| - | 3  | 393       | IAPIN1_uc010cda                                      | NM_020313    | NP_064709    | Q6FI81 | CPIN1_HUMAN |                               | 0  | CTGTGCAGAGT      | 0.473 |                                    |
| + | 3  | 278_280   | vho.1_In_Frame_                                      | NM_020312    | NP_064708    | O75208 | COQ9_HUMAN  |                               | 1  | CGGCGAGGAGG      | 0.576 | rs149029279                        |
| + | 15 | 2170_2172 | p.E413del SLC9A5                                     | NM_004594    | NP_004585    | Q14940 | SL9A5_HUMAN |                               | 2  | GTCTGAGGAGG      | 0.571 |                                    |
| + | 3  | 433       | p.T16fs KIAA01E                                      | NM_014615    | NP_055430    | Q14687 | GSE1_HUMAN  |                               | 5  | CAGCACCCCCC      | 0.687 |                                    |
| - | 15 | 2000_2002 | 15_uc002ghy.1_5'                                     | NM_004860    | NP_004851    | P51116 | FXR2_HUMAN  | Poly-Arg.                     | 0  | GTTACGGCGGC      | 0.547 |                                    |
| + | 10 | 2188_2189 | 2gjr.2_Frame_Shift                                   | NM_053051    | NP_444279    | Q8N137 | CNTRB_HUMAN | id for centrosome localizati  | 2  | CTCGGAGAGAG      | 0.579 |                                    |
| + | 6  | 2233      | p.L615fs CYTSB                                       | NM_001033553 | NP_001028725 | Q5M775 | CYTSB_HUMAN | Potential.                    | 0  | AAGCTGGAGGA      | 0.478 |                                    |
| + | 34 | 4663_4665 | 0crt.2_In_Frame_I                                    | NM_003170    | NP_003161    | Q7KZ85 | SPT6H_HUMAN | Poly-Ser.                     | 3  | CCTAGCAGCA       | 0.537 |                                    |
| - | 15 | 2756      | rbh.1_Frame_Shift                                    | NM_033389    | NP_203747    | Q76I76 | SSH2_HUMAN  |                               | 2  | GTTCTGGGGGG      | 0.483 |                                    |
| - | 8  | 2163_2164 | p.S622fs GPATCH                                      | NM_001002909 | NP_001002909 | Q9UKJ3 | GPTC8_HUMAN | Lys-rich.                     | 4  | GCCTTAGAGCTT     | 0.45  |                                    |
| - | 5  | 690       | C43_uc010czw.1_3'                                    | NM_144609    | NP_653210    | Q96MW1 | CCD43_HUMAN | Potential.                    | 0  | GTGTCCTTTTTT     | 0.463 |                                    |
| + | 5  | 488_489   | ilh.2_Frame_Shift                                    | NM_001002841 | NP_001002841 | P12829 | MYL4_HUMAN  |                               | 2  | ATCCTGCAGCAC     | 0.53  |                                    |
| - | 4  | 843       | X11_uc010wnf.1_                                      | NM_004375    | NP_004366    | Q9Y6N1 | COX11_HUMAN | Potential) Mitochondrial m    | 1  | GCTTCAAAAAA      | 0.353 |                                    |
| + | 6  | 1129      | 02 p.2_Frame_Sh                                      | NM_004252    | NP_004243    | O14745 | NHRF1_HUMAN |                               | 0  | GACAGCCCCC       | 0.597 |                                    |
| - | 8  | 1079_1081 | 26_uc002nee.2_1'                                     | NM_006387    | NP_006378    | Q8IWX8 | CHERP_HUMAN | Gln-rich.                     | 2  | gctgctgtgctgctg  | 0.552 |                                    |
| + | 7  | 1022      | 0xru.1_Frame_Shi                                     | NM_001114093 | NP_001107565 | Q8ND56 | LS14A_HUMAN |                               | 1  | GTCATCGGGGT      | 0.438 |                                    |
| + | 1  | 111_113   |                                                      | NM_021175    | NP_066998    | P81172 | HEPC_HUMAN  |                               | 1  | CCTGCTCCTCC      | 0.64  |                                    |
| - | 1  | 177_179   | vm.2_In_Frame_D                                      | NM_014400    | NP_055215    | O95274 | LYPD3_HUMAN |                               | 1  | GCGAAGCAGCA      | 0.675 | rs141441894                        |
| - | 2  | 1402_1404 | 2per.3_In_Frame_                                     | NM_018215    | NP_060685    | Q86V59 | PNML1_HUMAN |                               | 0  | CTCACCTTCTTC     | 0.562 |                                    |
| - | 4  | 572_574   |                                                      | NM_018263    | NP_060733    | Q76L83 | ASXL2_HUMAN | Ser-rich.                     | 1  | ATCACTGCTGC      | 0.463 |                                    |
| - | 15 | 2287_2289 |                                                      | NM_014709    | NP_055524    | Q70CQ2 | UBP34_HUMAN |                               | 19 | gtggtgatggtggtg  | 0.281 |                                    |
| + | 30 | 3643_3645 | k.2_In_Frame_De                                      | NM_003494    | NP_003485    | O75923 | DYSF_HUMAN  | ic (Potential) Arg-rich.      | 7  | CCTCCGCCGC       | 0.655 |                                    |
| + | 3  | 759_761   | 02svy.2_In_Frame                                     | NM_001008949 | NP_001008949 | Q6GPH6 | IPIL1_HUMAN | lasmic (Potential).           | 3  | CAGTGAGGAGG      | 0.532 |                                    |
| + | 5  | 1001      | _Shift_Del_p.T237                                    | NM_022826    | NP_073737    | Q9H992 | MARH7_HUMAN | Ser-rich.                     | 0  | ATCTACTTTTTT     | 0.393 |                                    |
| - | 7  | 1432      | _Shift_Del_p.K210f                                   | NM_004490    | NP_004481    | Q14449 | GRB14_HUMAN | PH.                           | 7  | TCCATGTTTTTT     | 0.373 |                                    |
| + | 8  | 1227      |                                                      | NM_152945    | NP_694453    | Q8IUH3 | RBM45_HUMAN |                               | 0  | CATGCAAAAAA      | 0.353 |                                    |
| + | 4  | 842       |                                                      | NM_019048    | NP_061921    | Q9NWL6 | ASND1_HUMAN | imidotransferase type-2.      | 3  | TAGGGATTTTTT     | 0.393 |                                    |
| + | 9  | 1518      | 20A1_uc002uzy.3                                      | NM_177538    | NP_803882    | Q6UW02 | CP20A_HUMAN |                               | 0  | AAGTTCAAAAA      | 0.348 |                                    |
| + | 4  | 350       | p.L117fs RQCD1_                                      | NM_005444    | NP_005435    | Q92600 | RCD1_HUMAN  |                               | 2  | TCCCACTTTTTT     | 0.413 |                                    |
| + | 2  | 364_365   | s_p.120fs DSTN_u                                     | NM_006870    | NP_006861    | P60981 | DEST_HUMAN  | ADF-H.                        | 2  | CTGTCATTTTTT     | 0.386 |                                    |
| + | 3  | 173_174   | ij.1_RNA FRG1B_uc010gdr.1_RNA FRG1B_uc010ztk.1_5'UTR |              |              |        |             |                               | 0  | TAGGGGAAAAATG    | 0.322 |                                    |
| - | 2  | 797       | 002wvn.2_Frame_                                      | NM_138578    | NP_612815    | Q07817 | B2CL1_HUMAN | BH1.                          | 2  | AGGAGAAAAAG      | 0.542 |                                    |
| + | 3  | 213       |                                                      | NM_033118    | NP_149109    | Q9H1R3 | MYLK2_HUMAN |                               | 6  | CCTGGCCCCC       | 0.587 |                                    |
| - | 8  | 665       | gju.1_Frame_Shif                                     | NM_014258    | NP_055073    | Q9BX26 | SYCP2_HUMAN |                               | 5  | CATTCATTTTTT     | 0.289 |                                    |
| - | 20 | 3323_3325 | .Q944del SFRS15                                      | NM_020706    | NP_065757    | O95104 | SFR15_HUMAN | Poly-Gln.                     | 0  | GGTGgtgctgctgc   | 0.291 |                                    |
| - | 5  | 757       |                                                      | NM_144659    | NP_653260    | Q9NV44 | CU077_HUMAN |                               | 0  | AGACCCCCC        | 0.478 |                                    |
| + | 4  | 1162      | Ogma.2_Frame_S                                       | NM_005534    | NP_005525    | P38484 | INGR2_HUMAN | tential) Fibronectin type-III | 0  | ACGGCCTTTTTT     | 0.458 |                                    |
| + | 33 | 3643      | p.K1180fs TTC3_u                                     | NM_001001894 | NP_001001894 | P53804 | TTC3_HUMAN  | Lys-rich (basic).             | 9  | CAAGAAAAAA       | 0.383 |                                    |
| - | 3  | 496_498   |                                                      | NM_005877    | NP_005868    | Q15459 | SF3A1_HUMAN | Poly-Gln.                     | 5  | TGGTCTGCTGC      | 0.596 | rs141985009                        |
| + | 3  | 1161_1181 |                                                      | NM_152243    | NP_689449    | Q00587 | BORG5_HUMAN | s of [PT]-[AT]-A- [ENT]-[PT]  | 0  | CTGTGTCAAA       | 0.665 | 0;rs62235033;rs13056859;rs62235034 |
| - | 10 | 2571_2573 | E>E>E RANGAP1_u                                      | NM_002883    | NP_002874    | P46060 | RAGP1_HUMAN | idic) Asp/Glu-rich (highly.   | 0  | tcttctctctctctct | 0.266 |                                    |
| - | 10 | 1116      | p.N255fs ARFGAP                                      | NM_014570    | NP_055385    | Q9NP61 | ARFG3_HUMAN |                               | 1  | TCAACATTTTTT     | 0.224 |                                    |

|   |    |           |                    |              |              |        |             |                            |    |                   |       |                   |
|---|----|-----------|--------------------|--------------|--------------|--------|-------------|----------------------------|----|-------------------|-------|-------------------|
| - | 9  | 2343      | _uc010has.1_RNA    | NM_020461    | NP_065194    | Q96RT7 | GCP6_HUMAN  |                            | 4  | CACCCGGGGGC       | 0.597 |                   |
| + | 11 | 1513      | o.K344fs CNTN6_u   | NM_014461    | NP_055276    | Q9UQ52 | CNTN6_HUMAN | like C2-type 5.            | 8  | CCAGTTAAAAAA/     | 0.393 |                   |
| + | 13 | 1986_1987 | NKTR_uc003clq.1    | NM_005385    | NP_005376    | P30414 | NKTR_HUMAN  |                            | 3  | GACAGTCCCCC       | 0.421 |                   |
| - | 2  | 303       | el_p.K44fs ANO10   | NM_018075    | NP_060545    | Q9NW15 | ANO10_HUMAN | lasmic (Potential).        | 2  | TCCATCTTTTTT      | 0.408 |                   |
| + | 5  | 867       |                    | NM_016006    | NP_057090    | Q8WTS1 | ABHD5_HUMAN |                            | 1  | ACTGTAATGTGC      | 0.299 |                   |
| - | 25 | 4571      | ae_Site_p.E1361_ε  | NM_053025    | NP_444253    | Q15746 | MYLK_HUMAN  |                            | 9  | GGCTCTGGGGG       | 0.624 | rs41431347        |
| - | 25 | 4273      |                    | NM_007027    | NP_008958    | Q92547 | TOPB1_HUMAN |                            | 7  | CTGGATTTTTT       | 0.343 |                   |
| - | 8  | 1759_1761 | 191DD>D DBR1_u     | NM_016216    | NP_057300    | Q9UK59 | DBR1_HUMAN  |                            | 0  | TCGATCGTCAT       | 0.251 | 0114751;rs2622736 |
| + | 42 | 6369_6371 | bnz.1_In_Frame_I   | NM_053002    | NP_443728    | Q86YW9 | MD12L_HUMAN | Gln-rich.                  | 7  | GACCCAGCAGC       | 0.527 |                   |
| - | 2  | 132_134   | ame_Del_p.T35de    | NM_024947    | NP_079223    | Q8NDX5 | PHC3_HUMAN  | Poly-Thr.                  | 2  | Agtggtgatggtggtg  | 0.424 |                   |
| - | 2  | 355       | fme.2_Frame_Shif   | NM_018622    | NP_061092    | Q9H300 | PARL_HUMAN  | trial matrix (Potential).  | 0  | GTTTTATGAGAC      | 0.418 |                   |
| + | 5  | 690       | _p.S38fs FETUB_u   | NM_014375    | NP_055190    | Q9UGM5 | FETUB_HUMAN |                            | 2  | AGTTTCAAAAAA/     | 0.418 |                   |
| - | 15 | 1909      | o.N566fs PROM1_    | NM_006017    | NP_006008    | O43490 | PROM1_HUMAN | ellular (Potential).       | 7  | CCTCTATTTTTT      | 0.428 |                   |
| + | 16 | 1633_1634 | el_p.R448fs FIP1L  | NM_030917    | NP_112179    | Q6UN15 | FIP1_HUMAN  | ction with CPSF1 and CST   | 2  | ACCAGAGAGA        | 0.292 |                   |
| - | 10 | 1336      | ft.1_Frame_Shift_I | NM_000204    | NP_000195    | P05156 | CFAL_HUMAN  | peptidase S1.              | 0  | GCAGTCAGAA/       | 0.418 |                   |
| + | 6  | 700       | ISC9_uc003ieb.2_   | NM_005033    | NP_005024    | Q06265 | EXOS9_HUMAN | ARE binding.               | 0  | TTTGCCTTTTTC      | 0.358 |                   |
| - | 14 | 1840      | iii.2_Frame_Shift  | NM_001130675 | NP_001124147 | O14967 | CLGN_HUMAN  | lasmic (Potential).        | 3  | TTTGTCTTTTTT      | 0.378 |                   |
| - | 8  | 596_598   | 3ijz.3_In_Frame_I  | NM_001102653 | NP_001096123 | Q01804 | OTUD4_HUMAN |                            | 3  | ACATCAGCAGC/      | 0.34  |                   |
| - | 4  | 702_704   | B2_uc003itb.2_In   | NM_001130689 | NP_001124161 | P26583 | HMGB2_HUMAN | Glu-rich (acidic).         | 0  | tcttcttctcctctctc | 0.286 |                   |
| - | 14 | 2587_2589 | VD2_uc011cmz.1_    | NM_001332    | NP_001323    | Q9UQB3 | CTND2_HUMAN | Poly-Lys.                  | 8  | TCTTTTCTTCTT      | 0.502 |                   |
| - | 27 | 4142_4143 | p.G582fs MYO10_    | NM_012334    | NP_036466    | Q9HD67 | MYO10_HUMAN | PH 1. o.S1226fs*25(1       | 3  | GAGGAGCCCCC       | 0.564 |                   |
| - | 10 | 1909      | -10_uc011cnu.1_f   | NM_006727    | NP_006718    | Q9Y6N8 | CAD10_HUMAN | Extracellular (Potential). | 12 | AAACTGAAAAAA      | 0.313 |                   |
| + | 17 | 2312_2314 | uc003kgi.3_Intron  | NM_003248    | NP_003239    | P35443 | TSP4_HUMAN  | TSP type-3 7.              | 0  | AGTGTGATGAT       | 0.562 |                   |
| + | 7  | 1394      |                    | NM_002439    | NP_002430    | P20585 | MSH3_HUMAN  |                            | 4  | GGGACAAAAAA/      | 0.348 |                   |
| + | 2  | 237_240   | _p.K19fs AP3S1_u   | NM_001284    | NP_001275    | Q92572 | AP3S1_HUMAN |                            | 0  | ATCTAAGAGAGA      | 0.304 | rs80118146        |
| - | 1  | 991_993   | Frame_Del_p.E29    | NM_020747    | NP_065798    | Q9ULD9 | ZN608_HUMAN | Potential.                 | 6  | TGGCTCTCCTCC      | 0.522 |                   |
| - | 22 | 3471      | _Shift_Del_p.R109  | NM_016340    | NP_057424    | Q8TEU7 | RPGF6_HUMAN |                            | 3  | GTGCCCTTTTTT      | 0.453 |                   |
| + | 9  | 1679      | uc003kwr.3_Intron  | NM_003059    | NP_003050    | Q9H015 | S22A4_HUMAN | name=12; (Potential).      | 0  | TCACCCTTTTTT      | 0.418 |                   |
| + | 5  | 378_379   | k.1_Frame_Shift_I  | NM_006083    | NP_006074    | Q13123 | RED_HUMAN   |                            | 1  | AAATTGAGAGAG      | 0.46  |                   |
| - | 3  | 1571      | p.P485fs PCDH1_    | NM_002587    | NP_002578    | Q08174 | PCDH1_HUMAN | r (Potential). Cadherin 4. | 5  | AGAGTGGGGGG       | 0.532 |                   |
| + | 6  | 1327_1328 | p.A223fs LARP1_    | NM_033551    | NP_291029    | Q6PKG0 | LARP1_HUMAN |                            | 4  | CGTGGCCCCC        | 0.644 |                   |
| + | 5  | 351       | l3lvz.3_Frame_Shi  | NM_014180    | NP_054899    | Q9NWU5 | RM22_HUMAN  |                            | 0  | ATGACAAAAAAG      | 0.378 |                   |
| + | 2  | 128_130   | p.L24del BTN2A2_   | NM_006995    | NP_008926    | Q8WVV5 | BT2A2_HUMAN |                            | 0  | CAGCCTCctctctc    | 0.483 |                   |
| + | 1  | 72_74     | 2A3_uc011dkm.1_RNA |              |              |        |             |                            | 0  | CCCTCCCTCCTC      | 0.586 | rs113134648       |
| + | 3  | 618       | t_Del_p.T206fs HL  | NM_002116    | NP_002107    | P30443 | 1A01_HUMAN  | ar (Potential). Alpha-2.   | 2  | CGCACGGGTAC       | 0.637 | rs115073453       |
| + | 26 | 5893      | vc.3_Frame_Shift_  | NM_080686    | NP_542417    | P48634 | PRC2A_HUMAN |                            | 0  | ACCTACCCCCC       | 0.522 |                   |
| - | 20 | 3156      | vi.3_Frame_Shift_  | NM_004639    | NP_004630    | P46379 | BAG6_HUMAN  |                            | 0  | TACCTGGGGGG       | 0.532 |                   |
| + | 7  | 1416      | dfr.1_Frame_Shift  | NM_002263    | NP_002254    | Q9BW19 | KIFC1_HUMAN | inesin-motor.              | 0  | CTGCCGGGGGA       | 0.652 | rs116903030       |
| - | 4  | 1648      | 318_uc003ouw.2_    | NM_014345    | NP_055160    | Q5VUA4 | ZN318_HUMAN |                            | 7  | TCGCCCTTTTTT      | 0.493 |                   |
| + | 11 | 1515      | _p.K287fs C6orf16  | NM_001031743 | NP_001026913 | Q8IYR0 | CF165_HUMAN |                            | 1  | AGGCCAAAAAA       | 0.269 |                   |
| + | 14 | 3679      | o.T1136fs ARID1B_  | NM_017519    | NP_059989    | Q8NFD5 | ARI1B_HUMAN |                            | 2  | ACAGACCCCCC       | 0.547 |                   |
| + | 3  | 945       | ug.2_Frame_Shift_  | NM_006775    | NP_006766    | Q96PU8 | QKI_HUMAN   | KH.                        | 2  | GGGATAAAAAA/      | 0.363 |                   |
| - | 3  | 360       | AP1_uc010ksc.2_Ir  | NM_001031617 | NP_001026788 | Q49B96 | COX19_HUMAN |                            | 0  | AATTCATTTTTT      | 0.463 | rs75087611        |
| + | 8  | 2132_2134 |                    | NM_138426    | NP_612435    | Q86VQ1 | GLC11_HUMAN | Poly-Gln.                  | 0  | ATCCAGCAGC        | 0.562 |                   |
| + | 3  | 337       | rf16_uc011kaf.1_Ir | NM_006658    | NP_006649    | O96001 | GSUB_HUMAN  |                            | 3  | AGACAAAAAA        | 0.438 |                   |
| + | 3  | 342       | _uc011kby.1_Intror | NM_002541    | NP_002532    | Q02218 | ODO1_HUMAN  |                            | 2  | GGACATTTTTT       | 0.577 |                   |
| + | 5  | 1249      | _p.P231fs DTX2_u   | NM_020892    | NP_065943    | Q86UW9 | DTX2_HUMAN  |                            | 2  | CCCCACACAG        | 0.657 | rs147779783       |

|   |    |           |                    |              |              |        |             |                             |    |                   |       |                    |
|---|----|-----------|--------------------|--------------|--------------|--------|-------------|-----------------------------|----|-------------------|-------|--------------------|
| - | 2  | 458       |                    | NM_032936    | NP_116325    | Q9H2L4 | TMM60_HUMAN |                             | 0  | CCAGGCTTTTTT      | 0.408 |                    |
| + | 13 | 1828      | p.F530fs PHTF2_i   | NM_001127357 | NP_001120829 | Q8N3S3 | PHTF2_HUMAN |                             | 1  | ATTTCTTTTTTT      | 0.303 |                    |
| - | 2  | 1795      | ihv.2_Frame_Shift  | NM_033026    | NP_149015    | Q9Y6V0 | PCLO_HUMAN  | n approximate repeats of P  | 7  | GGCTGTTGAGA       | 0.607 |                    |
| - | 5  | 585       |                    | NM_018843    | NP_061331    | Q8TBP6 | S2540_HUMAN | Solcar 1.                   | 1  | CTTCTTATACCAI     | 0.323 |                    |
| - | 7  | 1188      | p.K237fs CYP51A    | NM_000786    | NP_000777    | Q16850 | CP51A_HUMAN |                             | 0  | ATAACATTTTTTT     | 0.398 |                    |
| + | 14 | 1294_1295 | p.Q359fs CCDC1     | NM_017667    | NP_060137    | Q96JG6 | CC132_HUMAN |                             | 0  | TATGGCAGGTTT      | 0.272 | rs140810598        |
| - | 2  | 390_392   | lkiw.1_In_Frame_I  | NM_015545    | NP_056360    | O75127 | PTCD1_HUMAN |                             | 1  | AACTCTCCTCC       | 0.606 |                    |
| - | 5  | 964       | 2_Intron GPC2_uc   | NM_152742    | NP_689955    | Q8N158 | GPC2_HUMAN  |                             | 2  | GGGGACCCCCC       | 0.642 |                    |
| - | 6  | 841       | lix.2_Frame_Shift  | NM_014377    | NP_055192    | Q99543 | DNJC2_HUMAN | ZRF1-UBD.                   | 1  | GGAACATTTTTTI     | 0.234 |                    |
| - | 2  | 110       | 3vey.2_Frame_Sh    | NM_007356    | NP_031382    | A4D0S4 | LAMB4_HUMAN |                             | 8  | GGTGCAAAAAA       | 0.308 |                    |
| + | 1  | 528       |                    | NM_001001656 | NP_001001656 | Q8NGU2 | OR9A4_HUMAN | cellular (Potential).       | 1  | GAACAATTTTTTI     | 0.383 |                    |
| - | 3  | 341       |                    | NM_001103176 | NP_001096646 | Q3B7I2 | CNPY1_HUMAN |                             | 0  | CTCCTGGGCGA       | 0.443 |                    |
| - | 4  | 4130_4131 |                    | NM_178857    | NP_849188    | Q8IWN7 | RP1L1_HUMAN |                             | 8  | ATTGCACCTCTT      | 0.297 |                    |
| - | 9  | 1257      | 119fs MTMR7_uc     | NM_004686    | NP_004677    | Q9Y216 | MTMR7_HUMAN | se. Substrate binding (By s | 1  | GCCATCAGAAC       | 0.552 |                    |
| - | 15 | 2035      |                    | NM_001010906 | NP_001010906 | Q68CJ6 | SLIP_HUMAN  |                             | 2  | AGGAAATTTTTTI     | 0.453 |                    |
| - | 9  | 1343_1344 |                    | NM_152413    | NP_689626    | Q8NHS2 | AATC2_HUMAN |                             | 1  | TCAGTGTTTTTT      | 0.371 |                    |
| + | 9  | 940_941   | AM9_uc0111cg.1_F   | NM_003816    | NP_003807    | Q13443 | ADAM9_HUMAN | potential). Peptidase M12B. | 2  | AGTGGCGGGAA       | 0.376 |                    |
| - | 60 | 8167      | Shift_Del_p.R2704  | NM_006904    | NP_008835    | P78527 | PRKDC_HUMAN | KIP-binding.                | 34 | CCAGCCTTTTTT      | 0.498 |                    |
| + | 4  | 614       |                    | NM_000067    | NP_000058    | P00918 | CAH2_HUMAN  |                             | 1  | TAGGTATTTTTTT     | 0.388 |                    |
| - | 3  | 534_536   | if.2_Intron TP53IN | NM_033285    | NP_150601    | Q96A56 | T5311_HUMAN | Glu-rich.                   | 0  | CCTCCTCTCTCT      | 0.458 |                    |
| - | 8  | 1503      | _Shift_Del_p.K28E  | NM_002568    | NP_002559    | P11940 | PABP1_HUMAN | RRM 4.                      | 0  | AAACCTTTGCTC      | 0.383 | rs112966887        |
| - | 3  | 363_367   | 3yqd.2_Frame_Shi   | NM_032847    | NP_116236    | Q96K31 | CH076_HUMAN |                             | 2  | CAGCGCCTCCA       | 0.424 |                    |
| - | 13 | 1637_1639 | 1506del TSNARE     | NM_145003    | NP_659440    | Q96NA8 | TSNA1_HUMAN | . Helical; (Potential).     | 0  | TGGCGATGATG       | 0.414 | rs142964918        |
| - | 5  | 724_726   | 1e_Del_p.152_153   | NM_004529    | NP_004520    | P42568 | AF9_HUMAN   | Poly-Ser.                   | 3  | tgctgctactgctgct  | 0.148 |                    |
| - | 2  | 633       |                    | NM_005384    | NP_005375    | Q16649 | NFIL3_HUMAN | Basic motif.                | 0  | CCGCCTTTTTTC      | 0.423 |                    |
| - | 4  | 884_886   | Del_p.E251del EC   | NM_001393    | NP_001384    | O94769 | ECM2_HUMAN  | Poly-Glu.                   | 2  | cctctcatcctcctctc | 0.399 | rs137929518        |
| - | 3  | 128_129   | _Shift_Ins_p.K34fs | NM_016390    | NP_057474    | Q5T280 | CI114_HUMAN |                             | 0  | CTTCCATTTTTT      | 0.525 |                    |
| + | 6  | 1019_1020 | Shift_Del_p.Q191f  | NM_018360    | NP_060830    | Q9NUQ3 | TXLNG_HUMAN | Potential.                  | 1  | ACATCAGAGAGA      | 0.386 |                    |
| + | 5  | 647       | ddo.2_Frame_Shif   | NM_000950    | NP_000941    | O14668 | TMG1_HUMAN  | ic (Potential). Poly-Pro.   | 2  | CCCCACCCCCC       | 0.488 |                    |
| - | 18 | 2564_2566 | 1sw.2_In_Frame_C   | NM_015107    | NP_055922    | Q9UPP1 | PHF8_HUMAN  |                             | 3  | CGTTCTCCTCC       | 0.591 |                    |
| - | 6  | 725       | p.L144fs OPHN1_    | NM_002547    | NP_002538    | O60890 | OPHN1_HUMAN |                             | 2  | TCCAGTAAAGAA      | 0.413 |                    |
| - | 38 | 4617_4618 | e_Shift_Del_p.L11  | NM_153252    | NP_694984    | Q6RI45 | BRWD3_HUMAN |                             | 4  | TTCTTAGACGTT      | 0.361 |                    |
| + | 5  | 716_718   | 04eib.1_In_Frame   | NM_016607    | NP_057691    | Q9UH62 | ARMX3_HUMAN |                             | 2  | FGGTCTGATGAT      | 0.448 |                    |
| - | 3  | 383       | _Shift_Del_p.K95fs | NM_002814    | NP_002805    | O75832 | PSD10_HUMAN | in with RELA. ANK 3.        | 1  | GCACCTTTTCC       | 0.453 |                    |
| + | 2  | 310_311   | 1_5'Flank LOC100:  | NM_001152    | NP_001143    | P05141 | ADT2_HUMAN  | Solcar 1.                   | 1  | GGAGCAGGGAG       | 0.49  | rs113356560        |
| + | 6  | 1104_1106 | 4ezx.2_In_Frame    | NM_001163280 | NP_001156752 | O43719 | HTSF1_HUMAN | Poly-Lys.                   | 3  | CTCAAAGAAGA       | 0.335 |                    |
| + | 4  | 1210_1212 | EC1_uc010nsl.1_I   | NM_005462    | NP_005453    | O60732 | MAGC1_HUMAN |                             | 4  | TGAGCTCCTCC       | 0.483 | 660605;rs141900922 |
| - | 2  | 1111_1113 | wne.1_In_Frame_I   | NM_007113    | NP_009044    | Q07283 | TRHY_HUMAN  | of R-R-E-Q                  | 5  | tcgcctctctctctct  | 0     | rs71757496         |
| + | 7  | 1104      | uct.1_Frame_Shift  | NM_001211    | NP_001202    | O60566 | BUB1B_HUMAN |                             | 4  | TAGCACCCCCC       | 0.478 |                    |
| + | 3  | 3566      | n.1_Frame_Shift_I  | NM_030665    | NP_109590    | Q725J4 | RAI1_HUMAN  |                             | 2  | CAGGGCCCCCC       | 0.697 |                    |
| - | 2  | 210       | 199_uc002hba.2_ξ   | NM_015584    | NP_056399    | Q9Y2S7 | PDIP2_HUMAN |                             | 0  | GGCTTTGCCACC      | 0.762 | rs113730440        |
| - | 16 | 2136      | _Shift_Del_p.H700  | NM_032108    | NP_115484    | Q9H3T3 | SEM6B_HUMAN | lasmic (Pote                | 1  | GTCGTGGGGCC       | 0.701 |                    |
| - | 2  | 1021_1023 | :2_In_Frame_Del_   | NM_002192    | NP_002183    | P08476 | INHBA_HUMAN |                             | 6  | ctctctctctctctctc | 0.355 |                    |
| + | 9  | 2353_2354 | Shift_Ins_p.H537fs | NM_015570    | NP_056385    | Q8WXX7 | AUTS2_HUMAN | His-rich.                   | 3  | caccagcacagcacc   | 0.51  |                    |
| + | 14 | 1576_1588 | .W382fs POMT1_u    | NM_007171    | NP_009102    | Q9Y6A1 | POMT1_HUMAN | MIR 3.                      | 1  | AAGACCATCTC       | 0.451 |                    |
| - | 2  | 1659_1661 | .2_In_Frame_Del_   | NM_173691    | NP_775962    | Q4KMQ1 | TPRN_HUMAN  | Glu-rich.                   | 0  | tctctctctctctctc  | 0.374 |                    |
| - | 1  | 702_704   |                    | NM_001080418 | NP_001073887 | O95886 | DLGP3_HUMAN | Poly-His.                   | 3  | CGGGACTggtggt     | 0.537 |                    |

|   |    |           |                                                  |              |              |        |             |                |    |    |                   |       |             |
|---|----|-----------|--------------------------------------------------|--------------|--------------|--------|-------------|----------------|----|----|-------------------|-------|-------------|
| - | 4  | 1248_1250 | IP1_uc010oid.1_R                                 | NM_024700    | NP_078976    | Q8TAD8 | SNIP1_HUMAN | Poly-Glu.      | NA | 2  | AGACACTTCTTC      | 0.453 |             |
| - | 3  | 841       |                                                  | NM_003921    | NP_003912    | O95999 | BCL10_HUMAN | CARD.          | NA | 2  | TGAGTATTTTTT      | 0.343 |             |
| - | 9  | 1232      | _Shift_Del_p.M408                                | NM_005665    | NP_005656    | O60447 | EV15_HUMAN  | Interaction v  | NA | 2  | TTTTCATTTTTT      | 0.318 |             |
| - | 59 | 4728      | K1482fs COL11A1                                  | NM_001854    | NP_001845    | P12107 | COBA1_HUMAN | le-helical req | NA | 12 | ATCACCTTTTTT      | 0.403 |             |
| + | 2  | 267_269   | ieE40del HAX1_uc                                 | NM_006118    | NP_006109    | O00165 | HAX1_HUMAN  | sd for localiz | NA | 0  | ATGAGGAAGAAG      | 0.522 | rs11556342  |
| + | 4  | 474       | hpl2_Frame_Shift                                 | NM_001136018 | NP_001129490 | P07099 | HYEP_HUMAN  |                | NA | 4  | ATGAAGCCCCCC      | 0.627 |             |
| - | 2  | 955_957   | 32_uc001mak.1_lr                                 | NM_017481    | NP_059509    | Q9H347 | UBQL3_HUMAN |                | NA | 3  | TGGCTGGTGGT       | 0.537 | rs2234451   |
| - | 4  | 499_501   | p.D92del IFT46_u                                 | NM_020153    | NP_064538    | Q9NQC8 | IFT46_HUMAN | i-rich (highly | NA | 0  | ATAGTGAatcatcat   | 0.424 |             |
| - | 11 | 3063_3064 | p.E611fs SFRS2IP                                 | NM_004719    | NP_004710    | Q99590 | SCAFB_HUMAN | Arg-rich.      | NA | 0  | ATCTTTTCTCTCT     | 0.446 |             |
| + | 7  | 948_950   | .L125del SLC39A4                                 | NM_173596    | NP_775867    | Q6ZMH5 | S39A5_HUMAN | lasmic (Pote   | NA | 2  | ATCCCTGCCTGC      | 0.635 |             |
| + | 8  | 1314      | C3_uc009zsm.2_l                                  | NM_181783    | NP_861448    | Q6ZXV5 | TMTC3_HUMAN | ical; (Potent  | NA | 1  | CGAACCTTTTTT      | 0.303 |             |
| + | 18 | 2223      | aba.2_Frame_Shif                                 | NM_130806    | NP_570718    | Q8WXD0 | RXFP2_HUMAN | lasmic (Pote   | NA | 0  | AAAAATAAAAAAA     | 0.348 |             |
| + | 1  | 314_316   | l1vbk.2_In_Frame_                                | NM_015116    | NP_055931    | Q9Y2L9 | LRCH1_HUMAN | His-rich.      | NA | 2  | ATCATCCcaccacc    | 0.409 |             |
| + | 3  | 707_710   | vbk.2_Frame_Shil                                 | NM_015116    | NP_055931    | Q9Y2L9 | LRCH1_HUMAN | LRR 3.         | NA | 2  | ATCGCCCTGCCTC     | 0.436 |             |
| + | 16 | 4738_4740 | 1xmv.2_In_Frame                                  | NM_015556    | NP_056371    | O43166 | SI1L1_HUMAN | Ser-rich.      | NA | 4  | atctctctctctctct  | 0.468 |             |
| - | 2  | 1567_1569 | orf43_uc010tud.1_                                | NM_194278    | NP_919254    | Q6PJG2 | CN043_HUMAN | o-rich. Gln-ri | NA | 5  | ATGGctgcctgctgctg | 0.473 |             |
| - | 3  | 499       | lybp.2_Intron BTB                                | NM_001002860 | NP_001002860 | Q9P203 | BTBD7_HUMAN |                | NA | 1  | GTTCTCTTTTTT      | 0.438 |             |
| - | 9  | 996_998   | ieE123del VPS33B                                 | NM_018668    | NP_061138    | Q9H267 | VP33B_HUMAN |                | NA | 2  | ATGCCATCCTCCT     | 0.522 | rs147271815 |
| + | 13 | 3813_3815 |                                                  | NM_014712    | NP_055527    | O15047 | SET1A_HUMAN | Ser-rich.      | NA | 3  | atctctctctctctct  | 0.389 |             |
| - | 10 | 1079_1081 | 63EE>E C17orf85                                  | NM_001114118 | NP_001107590 | Q53F19 | CQ085_HUMAN | Glu-rich.      | NA | 1  | atctctctctctctct  | 0.379 |             |
| - | 1  | 71        | ank SDF2_uc002h                                  | NM_006923    | NP_008854    | Q99470 | SDF2_HUMAN  |                | NA | 0  | ATACAAACCCCCC     | 0.582 |             |
| + | 1  | 158_160   | ime_Del_p.K7del z                                | NM_003457    | NP_003448    | O43670 | ZN207_HUMAN |                | NA | 0  | ATTCGCAAGAAGA     | 0.542 |             |
| - | 6  | 825_826   | 2iam.1_Frame_St                                  | NM_178126    | NP_835227    | Q86VR2 | F134C_HUMAN |                | NA | 2  | CATTGTCTCTCT      | 0.515 |             |
| - | 9  | 1623_1625 |                                                  | NM_133373    | NP_588614    | Q8N3E9 | PLCD3_HUMAN |                | NA | 3  | atctgcatctctctct  | 0.527 |             |
| + | 1  | 140_142   |                                                  | NM_003811    | NP_003802    | P41273 | TNFL9_HUMAN | or for type II | NA | 1  | ATCGCGGGgctgctg   | 0.66  |             |
| + | 11 | 1321      | om.1_Frame_Shil                                  | NM_000896    | NP_000887    | Q08477 | CP4F3_HUMAN |                | NA | 3  | ATCAGTGTTTTTGC    | 0.622 |             |
| + | 16 | 3826      | o.V1000fs NWD1_uc002nev.3_Frame_Shift_Del_p.V92f | NM_000896    | NP_000887    | Q149M9 | NWD1_HUMAN  | WD 8.          | NA | 7  | ATCGGCTGTTTTTG    | 0.552 |             |
| + | 2  | 252_254   | 0eea.2_In_Frame_                                 | NM_005306    | NP_005297    | O15552 | FFAR2_HUMAN | Name=2; (P     | NA | 1  | ATCTCCTGCCTGC     | 0.645 |             |
| - | 15 | 2287_2289 |                                                  | NM_014709    | NP_055524    | Q70CQ2 | UBP34_HUMAN |                | NA | 19 | atgttgatgttggtgt  | 0.281 |             |
| - | 14 | 2158      | _p.K662fs ZMYNC                                  | NM_012408    | NP_036540    | Q9ULU4 | PKCB1_HUMAN |                | NA | 5  | ATGGGCTTTTTT      | 0.488 |             |
| - | 32 | 3210_3211 |                                                  | NM_014258    | NP_055073    | Q9BX26 | SYCP2_HUMAN |                | NA | 5  | ATTTATAGTTTTTT    | 0.327 |             |
| - | 7  | 789_791   |                                                  | NM_016449    | NP_057533    | Q6PGQ1 | CV043_HUMAN | Asp-rich.      | NA | 1  | ATCTGGGcatcatca   | 0.261 |             |
| + | 7  | 600       | p.S151fs APPL1_l                                 | NM_012096    | NP_036228    | Q9UKG1 | DP13A_HUMAN | d for RAB5A    | NA | 1  | ATTTATCAAAAAAA    | 0.299 |             |
| - | 8  | 1092      | py.2_Frame_Shift_                                | NM_004454    | NP_004445    | P41161 | ETV5_HUMAN  |                | NA | 5  | ATGCTGGGGGGC      | 0.547 |             |
| - | 3  | 541_543   |                                                  | NM_024524    | NP_078800    | Q9H7F0 | AT133_HUMAN | ical; (Potent  | NA | 1  | ATAAGAGGAGGA      | 0.463 |             |
| + | 11 | 1711      | gnl.1_Frame_Shift_                               | NM_182485    | NP_872291    | Q7Z5Q1 | CPEB2_HUMAN |                | NA | 1  | ATCTCCCTTTTTTT    | 0.443 |             |
| - | 13 | 2807_2809 | 11ckv.1_In_Frame                                 | NM_021069    | NP_066547    | O94875 | SRBS2_HUMAN | His-rich.      | NA | 1  | ATAggtggcggtggt   | 0.384 |             |
| + | 13 | 1713_1714 | _p.K518fs PAPD7                                  | NM_006999    | NP_008930    | Q5XG87 | PAPD7_HUMAN |                | NA | 1  | ATAAAAAACACAA     | 0.653 |             |
| + | 10 | 2300      | p.K601fs NIPBL_u                                 | NM_133433    | NP_597677    | Q6KC79 | NIPBL_HUMAN |                | NA | 9  | ATCACCTAAAAAA     | 0.353 |             |
| - | 2  | 331_333   | e_Del_p.46_47EE                                  | NM_003472    | NP_003463    | P35659 | DEK_HUMAN   | i-rich (highly | NA | 1  | ATACCTTTTctctct   | 0.365 |             |
| + | 8  | 1034_1035 | 1dpb.1_Frame_Shift_Ins_p.V276fs                  | NM_003472    | NP_003463    | P08686 | CP21A_HUMAN |                | NA | 0  | ATCGTGGTTTTTT     | 0.614 |             |
| - | 3  | 477       | 3LC17A5_uc011dy                                  | NM_012434    | NP_036566    | Q9NRA2 | S17A5_HUMAN | ical; (Potent  | NA | 6  | ATGCATAAAAAAA     | 0.423 |             |
| - | 3  | 577_578   | 11ebw.1_Frame_S                                  | NM_033515    | NP_277050    | Q8N392 | RHG18_HUMAN |                | NA | 3  | ATGTTTGTTTTTT     | 0.421 |             |
| + | 11 | 1744      |                                                  | NM_152744    | NP_689957    | Q7Z5N4 | SDK1_HUMAN  | like C2-type   | NA | 6  | ATAATCGGGGGG      | 0.542 |             |
| - | 2  | 601_602   |                                                  | NM_022728    | NP_073565    | Q96NK8 | NDF6_HUMAN  | lization signi | NA | 2  | ATGTTGCTTTTTTT    | 0.396 |             |
| - | 2  | 1021_1023 | :2_In_Frame_Del_                                 | NM_002192    | NP_002183    | P08476 | INHBA_HUMAN |                | NA | 6  | atctctctctctctct  | 0.355 |             |
| + | 9  | 1443      | 3tvz.2_Frame_Sh                                  | NM_022479    | NP_071924    | Q6IS24 | GLTL3_HUMAN | ectin. Lumer   | NA | 7  | ATGACCAGGGGCC     | 0.532 |             |



|   |    |           |                    |              |              |        |             |                              |    |    |                 |       |             |
|---|----|-----------|--------------------|--------------|--------------|--------|-------------|------------------------------|----|----|-----------------|-------|-------------|
| - | 2  | 83_85     | _uc010bj.1_in_Fr   | NM_004603    | NP_004594    | Q16623 | STX1A_HUMAN | lasmic (Pote                 | NA | 0  | AGCGACATCATC    | 0.586 |             |
| + | 1  | 1295_1297 | .i.1_5'Flank ZCWP' | NM_019606    | NP_062552    | Q7L2J0 | MEPCE_HUMAN |                              | NA | 1  | AGCCGCCACCCAC   | 0.581 | rs71555278  |
| + | 8  | 1077_1079 | ix.a.2_in_Frame_D  | NM_015908    | NP_056992    | Q9BXP5 | SRRT_HUMAN  | Glu-rich.                    | NA | 2  | GAGCAGGAGGAA    | 0.596 |             |
| + | 4  | 1653_1654 | l_intron FBXL13_u  | NM_001031692 | NP_001026862 | Q8N6Y2 | LRC17_HUMAN |                              | NA | 1  | AATGGGAAAAAA    | 0.337 |             |
| - | 3  | 838_842   | ivja.2_Frame_Shift | NM_003391    | NP_003382    | P09544 | WNT2_HUMAN  |                              | NA | 7  | TCTGGCActcttcc  | 0.424 |             |
| + | 6  | 1464      | o.P226fs ZNF398_u  | NM_170686    | NP_733787    | Q8TD17 | ZN398_HUMAN |                              | NA | 1  | AGACACCCCCC     | 0.587 |             |
| - | 2  | 129       | Shift_Del_p.N23fs  | NM_004935    | NP_004926    | Q00535 | CDK5_HUMAN  | rotein kinase                | NA | 2  | TCCCGTTTTTGT    | 0.582 |             |
| + | 1  | 793_795   |                    | NM_138400    | NP_612409    | Q5C9Z4 | NOM1_HUMAN  | ization and i                | NA | 0  | gaaagtgaggaggag | 0.236 |             |
| + | 12 | 1731      | 'DR60_uc010lqw.2   | NM_018051    | NP_060521    | Q8WVS4 | WDR60_HUMAN |                              | NA | 4  | TTTGGGAAAAAA    | 0.328 |             |
| - | 16 | 3521_3523 | E993del MYST3_u    | NM_001099412 | NP_001092882 | Q92794 | MYST3_HUMAN | Poly-Glu.                    | NA | 7  | CCGGCTCCTCC     | 0.567 |             |
| + | 10 | 1740      | LF1_uc003xyf.2_F   | NM_015170    | NP_055985    | Q8IWU6 | SULF1_HUMAN |                              | NA | 7  | TGTGCCTTTTTT    | 0.408 |             |
| + | 27 | 3072_3073 | gr.1_RNA INTS8_u   | NM_017864    | NP_060334    | Q75QN2 | INT8_HUMAN  |                              | NA | 0  | AGAAGGAAAAAA    | 0.332 |             |
| + | 2  | 1053      | 3zv.2_Frame_Shi    | NM_203299    | NP_976044    | Q5VYM1 | CI131_HUMAN |                              | NA | 0  | TGCCACCCCCC     | 0.527 |             |
| - | 2  | 633       |                    | NM_005384    | NP_005375    | Q16649 | NFIL3_HUMAN | Basic motif.                 | NA | 0  | CCGCCTTTTTTC    | 0.423 |             |
| + | 14 | 1576_1588 | .W382fs POMT1_u    | NM_007171    | NP_009102    | Q9Y6A1 | POMT1_HUMAN | MIR 3.                       | NA | 1  | AGACCATCCTC     | 0.451 |             |
| - | 1  | 160_162   | z.2_in_Frame_De    | NM_020871    | NP_065922    | Q5VUJ6 | LRCH2_HUMAN | Gly-rich.                    | NA | 1  | AGGGTCccgccgc   | 0.34  | rs111707157 |
| - | 2  | 574_575   | .P_uc004esg.2_5'F  | NM_024528    | NP_078804    | Q8N5F7 | NKAP_HUMAN  |                              | NA | 2  | CCAATTCTCTCT    | 0.317 |             |
| + | 2  | 555       | for.2_Frame_Shift  | NM_002025    | NP_002016    | P51816 | AFF2_HUMAN  |                              | NA | 5  | CACCTAAAAAAA    | 0.378 |             |
| - | 4  | 1243_1245 | IP1_uc010oid.1_R   | NM_024700    | NP_078976    | Q8TAD8 | SNIP1_HUMAN | Poly-Glu.                    | NA | 2  | CTTCTCCTCCTC    | 0.448 |             |
| + | 3  | 634       | ne_Shift_Del_p.Y4  | NM_003672    | NP_003663    | Q9UNH5 | CC14A_HUMAN | A.                           | NA | 1  | GTTTCTATGCAG    | 0.284 |             |
| - | 4  | 796       | epj.2_Frame_Shift  | NM_001461    | NP_001452    | P49326 | FMO5_HUMAN  |                              | NA | 3  | ATCTCCTTTTTCC   | 0.473 |             |
| - | 2  | 4369_4370 | .i.1_in_Frame_Ins_ | NM_007113    | NP_009044    | Q07283 | TRHY_HUMAN  | proximate tandem repeats.    | NA | 5  | CTCCTGGCGC      | 0.564 |             |
| - | 2  | 3480_3482 | vne.1_in_Frame_C   | NM_007113    | NP_009044    | Q07283 | TRHY_HUMAN  | 30 AA tandem repeats.        | NA | 5  | CCCTTCTCTCTC    | 0.172 |             |
| + | 20 | 6213      | PA2_uc009www.2_    | NM_020318    | NP_064714    | Q9BXP8 | PAPP2_HUMAN | Sushi 5.                     | NA | 16 | GTAATCCCCCCC    | 0.468 |             |
| + | 7  | 1345      | .p.K95fs FAM5B_u   | NM_021165    | NP_066988    | Q9C0B6 | FAM5B_HUMAN |                              | NA | 6  | TGCTGAAAAGG     | 0.592 |             |
| - | 1  | 369       | IK2_uc010pqs.1_F   | NM_018208    | NP_060678    | Q9NVF9 | EKI2_HUMAN  |                              | NA | 2  | AGGTGAAAGGA     | 0.672 |             |
| - | 15 | 2268      |                    | NM_001618    | NP_001609    | P09874 | PARP1_HUMAN | 3P alpha-helical.            | NA | 10 | AGCTTCCCCAAC    | 0.597 |             |
| + | 1  | 408       | L13_uc001ids.2_li  | NM_001004686 | NP_001004686 | Q8NH16 | OR2L2_HUMAN | Name=3; (Potential).         | NA | 3  | TTCTTGACTTTA    | 0.308 |             |
| + | 5  | 1149      | ZNF365_uc001jiz.   | NM_014951    | NP_055766    | Q70YC4 | TALAN_HUMAN |                              | NA | 2  | ACCTGAAAAGG     | 0.567 |             |
| - | 4  | 1313      | p.S264fs FAM53B_u  | NM_014661    | NP_055476    | Q14153 | FA53B_HUMAN |                              | NA | 2  | GCGGGAAGGC      | 0.572 |             |
| - | 25 | 4223      | .i.N1311fs NUP98_u | NM_016320    | NP_057404    | P52948 | NUP98_HUMAN |                              | NA | 12 | GGCTGTTTTTTT    | 0.512 |             |
| - | 2  | 491_492   |                    | NM_003737    | NP_003728    | Q96JQ0 | PCD16_HUMAN |                              | NA | 5  | agcagcagcagc    | 0.52  |             |
| + | 1  | 84_85     | rf80_uc001ojh.2_E  | NM_024650    | NP_078926    | Q8N6T0 | CK080_HUMAN |                              | NA | 0  | AGGAGGggcgcg    | 0.569 |             |
| + | 5  | 552       | rf54_uc001peh.2_   | NM_014039    | NP_054758    | Q9H0W9 | CK054_HUMAN |                              | NA | 0  | TAAACCAAAAAA    | 0.353 |             |
| + | 3  | 1103      |                    | NM_018039    | NP_060509    | Q6B0I6 | KDM4D_HUMAN | Poly-Lys.                    | NA | 0  | TACCATAAAAAAA   | 0.453 |             |
| - | 17 | 3723_3726 | vv.1_Frame_Shift   | NM_002519    | NP_002510    | Q14207 | NPAT_HUMAN  |                              | NA | 2  | TTTTGGTCATTT    | 0.358 |             |
| - | 10 | 1165      | .p.G89fs TMPRSS    | NM_030770    | NP_110397    | Q9H3S3 | TMPS5_HUMAN | . Extracellular (Potential). | NA | 1  | TGTGGCCCCAG     | 0.652 |             |
| - | 4  | 745_747   | .i.1_intron PRB1_u | NM_005039    | NP_005030    | P04280 | PRP1_HUMAN  | 2-P-[PAQ]-Q-[GE]-[GD]-[NI    | NA | 0  | TCCTGGAGGAG     | 0.611 |             |
| - | 4  | 562_564   | .i.1_intron PRB1_u | NM_005039    | NP_005030    | P04280 | PRP1_HUMAN  | [PAQ]-Q-[GE]-[GD]-[NKS]-     | NA | 0  | TCCTGGAGGAG     | 0.606 |             |
| - | 3  | 441_442   | .i.1_intron PRB1_u | NM_005039    | NP_005030    | P04280 | PRP1_HUMAN  | -[PAQ]-Q-[GE]-[GD]-[NKS]     | NA | 0  | TTTCTGGAGGT     | 0.604 |             |
| - | 3  | 626_628   |                    | NM_006248    | NP_006239    |        |             |                              | NA | 0  | TCCTGGAGGAG     | 0.591 |             |
| - | 2  | 149_151   | 5'UTR CASC1_uc     | NM_001082973 | NP_001076442 | Q6TDU7 | CASC1_HUMAN | Glu-rich.                    | NA | 2  | GTCTCTCCTCC     | 0.365 |             |
| - | 8  | 3259_3261 | 224YQ>* NCKAP5     | NM_001037806 | NP_001032895 | Q9HCH0 | NCK5L_HUMAN |                              | NA | 1  | ACCTTGGTACA     | 0.66  |             |
| + | 1  | 298       |                    | NM_001005497 | NP_001005497 | A6NL08 | O6C75_HUMAN | Name=3; (Potential).         | NA | 3  | CAGCTATTTTTT    | 0.438 |             |
| + | 3  | 227       | nk MARS_uc001sr    | NM_004990    | NP_004981    | P56192 | SYMC_HUMAN  |                              | NA | 5  | CAGATATTTTTT    | 0.488 |             |
| - | 13 | 2872      |                    | NM_024312    | NP_077288    | Q3T906 | GNPTA_HUMAN |                              | NA | 2  | AAATACTTTTTT    | 0.353 |             |
| - | 9  | 807       | ie_Shift_Del_p.Q5  | NM_138341    | NP_612350    | Q8NCL8 | TM116_HUMAN |                              | NA | 1  | AGTTTTGGAAC     | 0.368 |             |

|   |    |           |                     |              |              |        |             |                              |     |                   |       |             |
|---|----|-----------|---------------------|--------------|--------------|--------|-------------|------------------------------|-----|-------------------|-------|-------------|
| - | 8  | 694       | E2_uc001ume.2_lr    | NM_199254    | NP_954863    | Q6XPS3 | TPTE2_HUMAN | ical; (Potential).           | 0   | AATGTCAAAAAA/     | 0.303 |             |
| + | 18 | 2222_2223 | laba.2_Frame_Shi    | NM_130806    | NP_570718    | Q8WXD0 | RXFP2_HUMAN | lasmic (Potential).          | 0   | AAAATTAaaaaaa/    | 0.351 |             |
| + | 2  | 318       |                     | NM_015678    | NP_056493    | Q8NFP9 | NBEA_HUMAN  |                              | 11  | cgccaccggggggcag  | 0.557 |             |
| - | 29 | 3774      | BCC4_uc010afk.2     | NM_005845    | NP_005836    | O15439 | MRP4_HUMAN  | C transporter 2.             | 4   | CCCGGATTTTTTTI    | 0.378 |             |
| + | 1  | 371       | M_uc010agc.2_In     | NM_000123    | NP_000114    | P28715 | ERCC5_HUMAN |                              | 7   | AATCTATAAAACT     | 0.428 |             |
| - | 2  | 376       | l1wrg.1_5'UTR HE    | NM_015473    | NP_056288    | Q86XA9 | HTR5A_HUMAN |                              | 1   | ACTTTCTTTAGCT     | 0.373 |             |
| + | 2  | 609       | 3C_uc001wss.2_5     | NM_014672    | NP_055487    | O15091 | MRRP3_HUMAN |                              | 0   | TCCTCATTTTTTTI    | 0.423 |             |
| - | 16 | 3454      | ?cvw.2_Frame_Shi    | NM_004380    | NP_004371    | Q92793 | CBP_HUMAN   | p.11084fs*15(1               | 127 | CCCTACTTTTTTTT    | 0.398 |             |
| + | 7  | 1037_1039 | .K238del UBN1_u     | NM_001079514 | NP_001072982 | Q9NPG3 | UBN1_HUMAN  | Lys-rich.                    | 2   | FAAGGAGAAGAA/     | 0.453 |             |
| - | 6  | 570_571   | ?dxx.2_5'UTR SEP    | NM_052838    | NP_443070    | Q8WYJ6 | SEPT1_HUMAN |                              | 1   | TGGATGTCTCTTC     | 0.594 |             |
| + | 3  | 278_280   | 0vho.1_In_Frame_    | NM_020312    | NP_064708    | O75208 | COQ9_HUMAN  |                              | 1   | CGGCGAGGAGG       | 0.576 | rs149029279 |
| + | 8  | 752       | p.A123fs LGALS9_    | NM_009587    | NP_033665    | O00182 | LEG9_HUMAN  |                              | 0   | ACTCCCGCCATC/     | 0.587 |             |
| - | 14 | 1854      | ?lff.2_Frame_Shift  | NM_001130528 | NP_001124000 | O60271 | JIP4_HUMAN  |                              | 5   | TTGACCTTTTTTTI    | 0.323 |             |
| + | 1  | 434       | l1D_uc010ddm.1_     | NM_003620    | NP_003611    | O15297 | PPM1D_HUMAN | with CHEK1. PP2C-like.       | 1   | GGTGGCAGCCC       | 0.522 |             |
| + | 1  | 455_457   | E138del BPTF_uc     | NM_182641    | NP_872579    | Q12830 | BPTF_HUMAN  |                              | 4   | AGAGCGaggagg/     | 0.384 |             |
| - | 20 | 2662      | 1_uc002 zo.1_Fra    | NM_014984    | NP_055799    | Q9UPN4 | AZI1_HUMAN  |                              | 4   | GCCTCAGCTCT       | 0.662 |             |
| - | 8  | 855       |                     | NM_005570    | NP_005561    | P49257 | LMAN1_HUMAN |                              | 1   | ETGGGCTTTTTTTI    | 0.294 |             |
| - | 5  | 625_626   | _Shift_Del_p.A42fs  | NM_016368    | NP_057452    | Q9NPH2 | INO1_HUMAN  |                              | 2   | TTGTCCGCGCGC      | 0.644 |             |
| - | 6  | 472       | _p.P16fs C19orf47   | NM_178830    | NP_849152    | Q8N9M1 | CS047_HUMAN |                              | 2   | CGCCTGGGGGGC      | 0.612 |             |
| - | 1  |           |                     | NM_002516    | NP_002507    | Q9UNW9 | NOVA2_HUMAN |                              | 0   | CTCCATGGGGGC      | 0.401 |             |
| + | 2  | 1058      |                     | NM_002030    | NP_002021    | P25089 | FPR3_HUMAN  | Name=7; (Potential).         | 6   | TTGGCCTTTTTTT/    | 0.428 |             |
| - | 32 | 4507      |                     | NM_004850    | NP_004841    | O75116 | ROCK2_HUMAN |                              | 4   | AGAGCTGGGGGC      | 0.438 |             |
| - | 2  | 718       | l2rqx.2_Splice_Site | NM_138394    | NP_612403    | Q8WVV9 | HNRL1_HUMAN |                              | 1   | ATCCTTACCATAT     | 0.408 |             |
| + | 1  | 202       | fez.1_Frame_Shift   | NM_144993    | NP_659430    | O43151 | TET3_HUMAN  |                              | 0   | ETGGCCTTTTTCG/    | 0.607 |             |
| - | 2  | 111       | ir.2_Intron DOK1_u  | NM_032603    | NP_115992    | P58215 | LOXL3_HUMAN |                              | 0   | AGCAGCCCCCA/      | 0.557 |             |
| - | 27 | 5465      | uc002udp.2_Intron   | NM_002977    | NP_002968    | Q15858 | SCN9A_HUMAN | IV.                          | 13  | ATGAACTTTTTTTT    | 0.423 |             |
| + | 8  | 1077_1079 | AJC10_uc002uoz.     | NM_018981    | NP_061854    | Q8IXB1 | DJC10_HUMAN | hioredoxin 1.                | 4   | AGATCAAAGGA       | 0.32  |             |
| - | 6  | 598_600   | Jgdo.1_In_Frame_    | NM_025176    | NP_079452    | Q9Y2I6 | NINL_HUMAN  |                              | 5   | GTCTGCAGCTG       | 0.429 |             |
| - | 15 | 1983      | ejRBL1_uc002xgj.    | NM_002895    | NP_002886    | P28749 | RBL1_HUMAN  |                              | 10  | GCATATCtaaaaaa/   | 0.282 |             |
| + | 1  | 368_369   | xjf.2_In_Frame_In   | NM_030919    | NP_112181    | Q9H4H8 | FA83D_HUMAN |                              | 3   | GGAGGGCgcggc/     | 0.619 |             |
| + | 16 | 2099      | JT10_uc010hfv.1_I   | NM_015442    | NP_056257    | Q9H9A5 | CNOTA_HUMAN |                              | 2   | AGGATCAGACA/      | 0.368 |             |
| + | 13 | 3220_3222 | NKTR_uc003clq.1     | NM_005385    | NP_005376    | P30414 | NKTR_HUMAN  |                              | 3   | TGAAGAGGAGG/      | 0.355 |             |
| - | 2  | 584_586   |                     | NM_016206    | NP_057290    | A8MV65 | VGLL3_HUMAN |                              | 0   | TGTctttctcctctcc  | 0.394 |             |
| - | 4  | 709       | me_Shift_Del_p.A    | NM_178824    | NP_849146    | Q8IV35 | WDR49_HUMAN |                              | 3   | CATTGCCAACAA/     | 0.408 |             |
| - | 2  | 5455      | C4_uc003fvp.2_Inl   | NM_018406    | NP_060876    | Q99102 | MUC4_HUMAN  |                              | 0   | ACAGGAAGAGG       | 0.587 |             |
| - | 2  | 2132      | vp.2_Intron MUC4    | NM_018406    | NP_060876    | Q99102 | MUC4_HUMAN  |                              | 0   | CTGTTGTTTTTGC     | 0.547 |             |
| - | 3  | 1028      | 168_uc010iah.2_5    | NM_152617    | NP_689830    | Q8IYW5 | RN168_HUMAN | Glu-rich.                    | 0   | TTGCCTTTTTTTC     | 0.448 |             |
| - | 2  | 838_839   | uc003hei.1_Intron   | NM_001073    | NP_001064    | O75310 | UDB11_HUMAN |                              | 3   | CTCCAACAAAAT      | 0.391 |             |
| + | 1  | 71        |                     | NM_001133    | NP_001124    | P43652 | AFAM_HUMAN  |                              | 3   | TTCTTGTTTTTTTT    | 0.313 | rs145217978 |
| + | 5  | 949_950   | _p.Y271fs ADAMT3    | NM_139056    | NP_620687    | Q8TE57 | ATS16_HUMAN |                              | 8   | ATGAGTATAAGT      | 0.48  |             |
| + | 13 | 1510_1512 | .E383del PAM_uc     | NM_000919    | NP_000910    | P19021 | AMD_HUMAN   | ioxygenase (By similarity)   | 0   | AACGAGAAGAA/      | 0.325 |             |
| - | 1  | 94_96     | ?9506_uc010jfe.2_   | NM_016459    | NP_057543    | Q8WU39 | PERP1_HUMAN |                              | 0   | GGCTCCcagcagc/    | 0.527 |             |
| - | 7  | 1054      | M26_uc010jry.2_5'   | NM_003449    | NP_003440    | Q12899 | TRI26_HUMAN |                              | 3   | CCGGTCTTTTTTTI    | 0.483 |             |
| + | 1  | 184_185   | _uc003nyt.2_5'UTF   | NM_032454    | NP_115830    | P49842 | STK19_HUMAN |                              | 4   | CCGGGCAAAACC/     | 0.634 |             |
| - | 5  | 1557_1559 | '6_377EE>E DAX      | NM_001350    | NP_001341    | Q9UER7 | DAXX_HUMAN  | ial. Necessary for interacti | 23  | ctctctctctcctctcc | 0.251 |             |
| - | 1  | 195_197   | job.1_In_Frame_C    | NM_145331    | NP_663304    | O43318 | M3K7_HUMAN  | Poly-Ser.                    | 6   | AGACGAGGAGG       | 0.655 |             |
| + | 2  | 481       |                     | NM_001198    | NP_001189    | O75626 | PRDM1_HUMAN | p.?(1)                       | 56  | GCATCCTTACCA/     | 0.498 |             |

|   |    |           |                    |              |              |        |             |                            |   |                 |       |                   |
|---|----|-----------|--------------------|--------------|--------------|--------|-------------|----------------------------|---|-----------------|-------|-------------------|
| + | 3  | 337       | rf16_uc011kaf.1_lr | NM_006658    | NP_006649    | O96001 | GSUB_HUMAN  |                            | 3 | AGACCAAAAAA     | 0.438 |                   |
| - | 2  | 382       | LM_uc003tka.1_5    | NM_013284    | NP_037416    | Q9NP87 | DPOLM_HUMAN | BRCT.                      | 3 | GAGCTGGGGGG     | 0.637 |                   |
| - | 2  | 458       |                    | NM_032936    | NP_116325    | Q9H2L4 | TMM60_HUMAN |                            | 0 | CCAGGCTTTTTT    | 0.408 |                   |
| - | 7  | 12205     | p.P3972fs PCLO_u   | NM_033026    | NP_149015    | Q9Y6V0 | PCLO_HUMAN  |                            | 7 | TATCTTGGGCTC    | 0.423 |                   |
| + | 3  | 535       | Shift_Del_p.V114fs | NM_000602    | NP_000593    | P05121 | PAI1_HUMAN  |                            | 3 | CTGGTCCAGGG     | 0.567 |                   |
| - | 20 | 2915      | _p.P781fs TNPO3    | NM_012470    | NP_036602    | Q9Y5L0 | TNPO3_HUMAN |                            | 5 | GTATAGGGGGG     | 0.483 |                   |
| - | 5  | 4079_4081 |                    | NM_001080826 | NP_001074295 | Q86YV5 | SG223_HUMAN |                            | 0 | AAACTTCATCATC   | 0.675 |                   |
| + | 3  | 299_300   | .72fs ADAM28_ucl   | NM_014265    | NP_055080    | Q9UKQ2 | ADA28_HUMAN |                            | 5 | TATTTGAAAAAA    | 0.332 |                   |
| + | 19 | 2164      | ame_Shift_Del_p.l  | NM_052832    | NP_439897    | Q8TE54 | S26A7_HUMAN | cytoplasmic (Potential).   | 2 | AACCAATTTTTTI   | 0.343 |                   |
| - | 23 | 3681_3682 | p.K981fs RGS22_u   | NM_015668    | NP_056483    | Q8NE09 | RGS22_HUMAN | Potential.                 | 7 | TGCCAATTTTTT    | 0.312 | rs7841915         |
| - | 5  | 777_778   | p.G144fs CRAT_u    | NM_000755    | NP_000746    | P43155 | CACP_HUMAN  |                            | 1 | TGGCTTCCCCCC    | 0.609 |                   |
| + | 4  | 514       | uc004bxn.1_Intron  | NM_178001    | NP_821068    | Q15257 | PTPA_HUMAN  |                            | 3 | aaaggagcaggctgc | 0.154 |                   |
| + | 1  | 788       | ix.1_Frame_Shift   | NM_198270    | NP_938011    | Q6T4R5 | NHS_HUMAN   |                            | 7 | CTCTTCCAGGA     | 0.692 |                   |
| - | 1  | 573_574   | 33A_uc004efr.1_5   | NM_004538    | NP_004529    | Q99457 | NP1L3_HUMAN |                            | 2 | CGGGGCCCGCC     | 0.386 |                   |
| + | 4  | 1067_1069 | 1mrt.1_In_Frame    | NM_001142526 | NP_001135998 | Q6PI77 | BHLH9_HUMAN | Poly-Glu.                  | 2 | GGCTGAGGAGG     | 0.488 |                   |
| + | 3  | 557_558   | tek.2_Frame_Sh     | NM_024863    | NP_079139    | Q96E15 | TCAL4_HUMAN | Glu-rich.                  | 0 | jaggatcagagagag | 0.144 |                   |
| + | 17 | 2287      | p.A621fs SCNN1C    | NM_002978    | NP_002969    |        |             |                            | 0 | CTTCTGCCCTC     | 0.701 |                   |
| - | 23 | 2999_3000 | vqd.2_Frame_Shif   | NM_005529    | NP_005520    | P98160 | PGBM_HUMAN  | inin IV type A 2.          | 9 | AGGGTCCAGATA    | 0.396 |                   |
| - | 17 | 2052      | wdz.2_Frame_Shif   | NM_194292    | NP_919268    | Q6UVJ0 | SAS6_HUMAN  |                            | 2 | GGTTTGAAGA      | 0.388 |                   |
| + | 10 | 2124      | ova.1_Frame_Shif   | NM_001144937 | NP_001138409 | Q5VTL7 | FNDC7_HUMAN | nectin type-III 8.         | 2 | TGTCCAAAAAA     | 0.363 |                   |
| + | 7  | 1724_1726 | ie_Del_p.E466del   | NM_005807    | NP_005798    | Q92954 | PRG4_HUMAN  | peats of K-X-P-X-P-T-T-X   | 1 | ACCAAGGAGCC     | 0.635 |                   |
| - | 4  | 459_460   | omp.3_Frame_Shil   | NM_138789    | NP_620144    | Q8WWB5 | PIHD2_HUMAN |                            | 1 | AACTGATTTTTT    | 0.376 |                   |
| - | 7  | 2967      | _Shift_Del_p.Q25C  | NM_014758    | NP_055573    | Q92543 | SNX19_HUMAN |                            | 4 | GTCTTGGGCTG     | 0.562 |                   |
| - | 20 | 2170      | 3_5'Flank DDX12_   | NM_004400    | NP_004391    |        |             |                            | 0 | GGGCAGGATGT     | 0.572 |                   |
| - | 4  | 745_747   | i.1_Intron PRB1_u  | NM_005039    | NP_005030    | P04280 | PRP1_HUMAN  | 2-P-[PAQ]-Q-[GE]-[GD]-[NI] | 0 | TCCTGGAGGAG     | 0.611 |                   |
| - | 3  | 441_442   | i.1_Intron PRB1_u  | NM_005039    | NP_005030    | P04280 | PRP1_HUMAN  | -[PAQ]-Q-[GE]-[GD]-[NKS]   | 0 | TTTCTGGAGGT     | 0.604 |                   |
| - | 4  | 372       | _p.E78fs RERG_u    | NM_032918    | NP_116307    | Q96A58 | RERG_HUMAN  |                            | 1 | GCCTTCCCCCC     | 0.458 |                   |
| + | 4  | 1266      | xex.3_Frame_Shil   | NM_021003    | NP_066283    | P35813 | PPM1A_HUMAN |                            | 1 | GATTTTGATCTG    | 0.403 |                   |
| - | 4  | 714       | 1xqc.2_Frame_Sh    | NM_001039479 | NP_001034568 | O15033 | K0317_HUMAN | Filamin.                   | 5 | ACTCATAGGGG     | 0.557 |                   |
| + | 1  | 1107_1108 | i_5'Flank TMED8_   | NM_001010860 | NP_001010860 | Q9P1V8 | SAM15_HUMAN |                            | 0 | AATGAGAAAAAA    | 0.386 | 1283439;rs4903576 |
| + | 13 | 1457_1459 | latj.2_In_Frame_D  | NM_198309    | NP_938051    | Q8TAM2 | TTC8_HUMAN  | TPR 7.                     | 0 | TGGTCAACAAC     | 0.537 |                   |
| - | 1  | 65        | rf102_uc001xyj.1_! | NM_017970    | NP_060440    | Q9H7Z3 | CN102_HUMAN |                            | 3 | AGCCTCACTAA     | 0.627 |                   |
| + | 6  | 2496      | Q354fs NFAT5_u     | NM_006599    | NP_006590    | Q94916 | NFAT5_HUMAN | RHD.                       | 0 | CACTGCAACA      | 0.378 |                   |
| + | 6  | 508_509   | p.W26fs STXBP4_    | NM_178509    | NP_848604    | Q6ZWJ1 | STXB4_HUMAN | PDZ.                       | 1 | CTGCTTGGGAG     | 0.337 |                   |
| - | 4  | 506       | _p.N137fs EXOC7    | NM_001145297 | NP_001138769 | Q9UPT5 | EXOC7_HUMAN |                            | 0 | ACTTTGTTGAGT    | 0.542 |                   |
| - | 2  | 1458      |                    | NM_005760    | NP_005751    | Q03701 | CEBPZ_HUMAN |                            | 1 | AACATCTTTTTT    | 0.368 |                   |
| - | 9  | 1986      |                    | NM_022168    | NP_071451    | Q9BYX4 | IFIH1_HUMAN |                            | 1 | ATTACCTTTTTT    | 0.328 |                   |
| + | 18 | 2301      | p.F610fs OSBPL6_   | NM_032523    | NP_115912    | Q9BZF3 | OSBL6_HUMAN |                            | 1 | TATTTTCAGAGC    | 0.453 |                   |
| - | 17 | 2265      | _p.S623fs TNS1_u   | NM_022648    | NP_072174    | Q9HBL0 | TENS1_HUMAN |                            | 4 | TTCGAAAAGG      | 0.587 |                   |
| + | 4  | 350       | _p.L117fs RQCD1_   | NM_005444    | NP_005435    | Q92600 | RCD1_HUMAN  |                            | 2 | TCCACTTTTTTI    | 0.413 |                   |
| - | 5  | 552_553   | ..2_5'UTR C20orf1  | NM_001009984 | NP_001009984 | Q5TEA3 | CT194_HUMAN |                            | 0 | ACTTGGGAGCT     | 0.436 |                   |
| + | 8  | 1224      | _Shift_Del_p.G299  | NM_022098    | NP_071381    | Q9NQH7 | XPP3_HUMAN  |                            | 0 | TCCCTGGGACA     | 0.473 |                   |
| - | 5  | 1900      | 33fs TUBGCP6_uc    | NM_020461    | NP_065194    | Q96RT7 | GCP6_HUMAN  |                            | 4 | TCTTGAAGAGA     | 0.622 |                   |
| + | 1  | 3897_3898 |                    | NM_175918    | NP_787114    | Q8N1N5 | CRPAK_HUMAN |                            | 0 | CCTGCTCACGTC    | 0.663 |                   |
| + | 1  | 3958_3959 |                    | NM_175918    | NP_787114    | Q8N1N5 | CRPAK_HUMAN | 9                          | 0 | CTGCTCACACAC    | 0.668 |                   |
| - | 7  | 944       |                    | NM_173536    | NP_775807    | Q8N1C3 | GBRG1_HUMAN | ellular (Probable).        | 2 | AGGTCAAAAAA     | 0.294 |                   |
| + | 8  | 715_716   |                    | NM_015325    | NP_056140    | Q9Y2F5 | K0947_HUMAN | Potential.                 | 2 | AGGAATTAAGA     | 0.406 |                   |

|   |    |           |                    |              |              |        |             |                |            |     |                   |       |                    |
|---|----|-----------|--------------------|--------------|--------------|--------|-------------|----------------|------------|-----|-------------------|-------|--------------------|
| - | 1  | 929_931   | I_intron HNRNPAC   | NM_006805    | NP_006796    | Q13151 | ROA0_HUMAN  | Gly-rich.      |            | 0   | gttgaaccgccgcccgc | 0.261 |                    |
| + | 2  | 128_130   | p.L24del BTN2A2_   | NM_006995    | NP_008926    | Q8WVV5 | BT2A2_HUMAN |                |            | 0   | CAGCCTCcctctcc    | 0.483 |                    |
| - | 1  | 349_351   | I10kcc.2_Translati | NM_021244    | NP_067067    | Q9NQL2 | RRAGD_HUMAN |                |            | 3   | CCAGctcatcctctcc  | 0.493 |                    |
| + | 11 | 1314_1315 | vPCB_uc010liv.2_   | NM_004279    | NP_004270    | O75439 | MPPB_HUMAN  |                |            | 4   | AAATGTTATGCTA     | 0.347 |                    |
| + | 11 | 2081_2082 | kvv.1_Frame_Shift  | NM_053043    | NP_444271    | Q96EV2 | RBM33_HUMAN | Pro-rich.      |            | 1   | CTGCCACACAC       | 0.53  |                    |
| - | 1  | 1746      | p.E227fs RANBP6    | NM_012416    | NP_036548    | O60518 | RNBP6_HUMAN |                | p.E579K(1) | 3   | ATTTTTCTTCCC      | 0.393 |                    |
| - | 13 | 2033_2034 | p.P587fs MAP3K6    | NM_004672    | NP_004663    | O95382 | M3K6_HUMAN  |                | NA         | 9   | GAGCCGGGGG        | 0.663 | 793155;rs139401154 |
| + | 3  | 249       | c.C1_uc010ohe.1_E  | NM_004964    | NP_004955    | Q13547 | HDAC1_HUMAN | one deacetyl   |            | 3   | GCTGAGGAGAT       | 0.458 |                    |
| + | 9  | 1706      | 01dur.2_Frame_Sl   | NM_020978    | NP_066188    | P19961 | AMY2B_HUMAN |                | NA         | 0   | CAGTTTCAAATC      | 0.333 |                    |
| + | 10 | 1080_1081 |                    | NM_001010883 | NP_001010883 | Q5T8I3 | F102B_HUMAN |                | NA         | 1   | GTCTGGGGGA        | 0.302 |                    |
| - | 4  | 848       | 0pbv.1_Frame_Sh    | NM_030920    | NP_112182    | Q9BTT0 | AN32E_HUMAN | highly acic    |            | 0   | CTCCTCTTCAG       | 0.393 |                    |
| - | 13 | 1089      | p.A298fs ILF2_uc   | NM_004515    | NP_004506    | Q12905 | ILF2_HUMAN  | DZF.           |            | 0   | CAGCTGGCATC       | 0.463 |                    |
| + | 14 | 1753_1755 | 0pos.1_In_Frame_   | NM_024420    | NP_077734    | P47712 | PA24A_HUMAN | PLA2c.         |            | 3   | TCCTTTGATGAT      | 0.433 |                    |
| - | 17 | 3001      | p.E871fs LAMB3_    | NM_001017402 | NP_001017402 | Q13751 | LAMB3_HUMAN | nain I. Poter  |            | 6   | GGTCTCCAAGC       | 0.582 |                    |
| - | 4  | 784       | I01jod.1_Frame_S   | NM_017987    | NP_060457    | Q8WXA3 | RUFY2_HUMAN | RUN.           |            | 1   | GGCCATTTTTTT      | 0.398 |                    |
| + | 7  | 1229      | Z_uc001nck.1_5'l   | NM_001105540 | NP_001099010 | Q13574 | DGKZ_HUMAN  | I-ester/DAG    |            | 3   | CGACGCCAGGA       | 0.642 |                    |
| - | 1  | 174_176   | _RNA MMP1_uc01     | NM_002421    | NP_002412    | P03956 | MMP1_HUMAN  |                | NA         | 4   | AGAACAGCAGC       | 0.498 |                    |
| + | 1  | 422       |                    | NM_175854    | NP_787050    | Q58A45 | PAN3_HUMAN  | olyadenylat    |            | 1   | GCTCTGGCTGG       | 0.746 |                    |
| + | 1  | 310       |                    | NM_021999    | NP_068839    | Q9Y287 | ITM2B_HUMAN | lasmic (Pote   |            | 0   | ATCATCCCCCC       | 0.721 |                    |
| - | 7  | 1217_1219 | 339SS>S FOXN3_     | NM_001085471 | NP_001078940 | O00409 | FOXN3_HUMAN |                | NA         | 3   | GGCTGAGGAGG       | 0.65  | rs139532153        |
| - | 7  | 2023      | wo.1_Frame_Shift   | NM_001002860 | NP_001002860 | Q9P203 | BTBD7_HUMAN |                | NA         | 1   | CAGCATTTTTTT      | 0.383 |                    |
| - | 1  | 346       | .1_intron SEPHS2   | NM_012248    | NP_036380    | Q99611 | SPS2_HUMAN  |                | NA         | 2   | CTTCATGCCG        | 0.726 |                    |
| + | 2  | 473_475   | CD1_uc002gco.2_    | NM_015253    | NP_056068    | Q658N2 | WSCD1_HUMAN | ical; (Potent  |            | 0   | CAGCCTGCTGC       | 0.68  |                    |
| + | 15 | 2007_2009 | ne_Del_p.P190de    | NM_005892    | NP_005883    | O95466 | FMNL_HUMAN  | Pro-rich.      |            | 1   | GGTgcctccgcccq    | 0.3   |                    |
| - | 14 | 2528      | AP3K14_uc002iui.   | NM_003954    | NP_003945    | Q99558 | M3K14_HUMAN |                | NA         | 8   | GTCATCCGACAC      | 0.582 |                    |
| + | 25 | 3766      | E_uc010wpj.1_Fra   | NM_000789    | NP_000780    | P12821 | ACE_HUMAN   | ellular (Pote  |            | 4   | GGCCTGGACCT       | 0.612 |                    |
| + | 11 | 1514_1515 |                    | NM_001001664 | NP_001001664 | Q6IQ16 | SPOPL_HUMAN |                | NA         | 3   | CCTTCGAGCAC       | 0.421 |                    |
| - | 1  | 1023_1024 | HBD_uc002wsu.1     | NM_000361    | NP_000352    | P07204 | TRBM_HUMAN  | Extracellular  |            | 0   | TCGTTGCAGGAC      | 0.713 | rs151272584        |
| + | 7  | 1073      | o.Q177fs DOK5_uc   | NM_018431    | NP_060901    | Q9P104 | DOK5_HUMAN  |                | NA         | 1   | GCTTGCAAGGT       | 0.667 |                    |
| + | 28 | 5463      | jj.2_Frame_Shift_I | NM_006031    | NP_006022    | O95613 | PCNT_HUMAN  | Potential.     |            | 8   | GTGGCAGGCC        | 0.706 |                    |
| + | 7  | 1806_1817 | ttq.1_In_Frame_De  | NM_001039141 | NP_001034230 | Q9H2D6 | TARA_HUMAN  |                | NA         | 1   | CCTCCAGAACCT      | 0.599 |                    |
| + | 7  | 1953_1961 | atq.1_In_Frame_D   | NM_001039141 | NP_001034230 | Q9H2D6 | TARA_HUMAN  |                | NA         | 1   | GCCTCCAGAAC       | 0.589 |                    |
| - | 10 | 1116      | p.N255fs ARFGAP    | NM_014570    | NP_055385    | Q9NP61 | ARFG3_HUMAN |                | NA         | 1   | TCAACATTTTTT      | 0.224 |                    |
| - | 4  | 998       | Jhtg.2_Frame_Shif  | NM_001017395 | NP_001017395 | O94876 | TMCC1_HUMAN |                | NA         | 1   | TAGCAGAGCTG       | 0.438 |                    |
| + | 1  | 185       | iar.2_Frame_Shift  | NM_033029    | NP_149018    | Q96KR4 | LMNL_HUMAN  |                | NA         | 1   | CTACTCCCCTC       | 0.687 |                    |
| + | 1  | 3897_3898 |                    | NM_175918    | NP_787114    | Q8N1N5 | CRPAK_HUMAN |                | NA         | 0   | CCTGCTCACGTC      | 0.663 |                    |
| + | 5  | 786_787   | p.V207fs WFS1_     | NM_001145853 | NP_001139325 | O76024 | WFS1_HUMAN  |                | NA         | 2   | CCAGGTCAACGA      | 0.649 |                    |
| - | 6  | 1359_1360 |                    | NM_001237    | NP_001228    | P20248 | CCNA2_HUMAN |                | NA         | 1   | CTGATGGCAAAT      | 0.391 |                    |
| - | 16 | 2171      | p.P668fs DIAPH1_   | NM_005219    | NP_005210    | O60610 | DIAP1_HUMAN | FH1.           |            | 1   | GAGGTGGGGGG       | 0.612 |                    |
| + | 6  | 824       | LHDC3_uc003otn.    | NM_057161    | NP_476502    | Q9BQ90 | KLDC3_HUMAN | Kelch 4.       |            | 1   | GAGTCTTTGAC       | 0.567 |                    |
| - | 2  | 394       | 35_uc003prg.2_5'l  | NM_004849    | NP_004840    | Q9H1Y0 | ATG5_HUMAN  |                | NA         | 1   | ATTCGTCCAAAC      | 0.383 |                    |
| - | 3  | 371_372   | 3CL7B_uc003tyg.1   | NM_001707    | NP_001698    | Q9BQE9 | BCL7B_HUMAN |                | NA         | 1   | GAATTCAGAAG       | 0.366 |                    |
| - | 2  | 609_611   | ie_Del_p.34_35Sl>  | NM_006379    | NP_006370    | Q99985 | SEM3C_HUMAN |                | NA         | 1   | ACAGATAGAACA      | 0.355 |                    |
| - | 37 | 4148      | p.S200fs DOCK4_    | NM_014705    | NP_055520    | Q8N110 | DOCK4_HUMAN | DHR-2.         |            | 4   | CATCTTGCTCAG      | 0.443 |                    |
| + | 2  | 644       | nh.1_Frame_Shift   | NM_000245    | NP_000236    | P08581 | MET_HUMAN   | ilar (Potentiz |            | 159 | CTGCTGACATAC      | 0.522 |                    |
| + | 4  | 582_583   | o.1_RNA IDO2_uc    | NM_194294    | NP_919270    | Q6ZQW0 | I23O2_HUMAN |                | NA         | 2   | CAGAGCGCAGC       | 0.624 |                    |
| + | 10 | 1740      | LF1_uc003xyf.2_F   | NM_015170    | NP_055985    | Q8IWU6 | SULF1_HUMAN |                | NA         | 7   | TGTGCCTTTTTT      | 0.408 |                    |

|   |    |           |                    |              |              |        |             |                                |    |      |                    |       |                      |
|---|----|-----------|--------------------|--------------|--------------|--------|-------------|--------------------------------|----|------|--------------------|-------|----------------------|
| - | 13 | 1698      | D2_uc003yqi.3_RI   | NM_014109    | NP_054828    | Q6PL18 | ATAD2_HUMAN |                                | NA | 2    | TTCGTCAAAAAA       | 0.413 |                      |
| - | 2  | 154       | 3yqt.2_Frame_Shi   | NM_004306    | NP_004297    | P27216 | ANX13_HUMAN | Annexin 1.                     | NA | 3    | TCCTTTGCAGGC       | 0.408 |                      |
| + | 3  | 610_612   | yisi.2_In_Frame_D  | NM_002467    | NP_002458    | P01106 | MYC_HUMAN   | Poly-Gln.                      | NA | 6    | CTACCAGCAGC/       | 0.611 | rs61752959           |
| - | 11 | 3440      | 24_uc010mkb.2_Ir   | NM_194313    | NP_919289    | Q577B8 | KIF24_HUMAN |                                | NA | 1    | TTGCTGAAGAC/       | 0.582 |                      |
| - | 9  | 948       | p.Q220fs ALDH1A    | NM_000689    | NP_000680    | P00352 | AL1A1_HUMAN |                                | NA | 4    | GCCCTGGTGGT        | 0.368 |                      |
| - | 2  | 1659_1661 | .2_In_Frame_Del_   | NM_173691    | NP_775962    | Q4KMQ1 | TPRN_HUMAN  | Glu-rich.                      | NA | 0    | tcttctcttctctctctc | 0.374 |                      |
| + | 15 | 2470      | cyn.2_Frame_Shif   | NM_003159    | NP_003150    | O76039 | CDKL5_HUMAN |                                | NA | 6    | TCTCTACCATCA       | 0.373 |                      |
| + | 2  | 1213_1215 | hnm.1_In_Frame_    | NM_006777    | NP_006768    | Q86T24 | KAISO_HUMAN |                                | NA | 3    | TGAAGAGGAGG,       | 0.433 |                      |
| + | 4  | 877_878   |                    | NM_024082    | NP_076987    | Q9BZD7 | TMG3_HUMAN  | lasmic (Pote                   | NA | 4    | CAGTCGGGGG         | 0.673 | rs139807152          |
| + | 3  | 432_433   | PHACTR4_uc001b     | NM_001048183 | NP_001041648 | Q8IZ21 | PHAR4_HUMAN |                                |    | 0    | TGGAGGAAAAAA       | 0.391 |                      |
| + | 7  | 1426_1427 | me_Shift_Del_p.H   | NM_005012    | NP_005003    | Q01973 | ROR1_HUMAN  | xtracellular (Potential).      |    | 19   | ATCCCCACACAC       | 0.554 |                      |
| + | 10 | 2124      | ova.1_Frame_Shif   | NM_001144937 | NP_001138409 | Q5VTL7 | FNDC7_HUMAN | onnectin type-III 8.           |    | 2    | CTGTCCAAAAAA       | 0.363 |                      |
| + | 3  | 278       | cj.2_Intron S100A1 | NM_006271    | NP_006262    | P23297 | S10A1_HUMAN | EF-hand 2.                     |    | 0    | GCTGTGGACAA        | 0.557 |                      |
| - | 5  | 1175      | MF1_uc010pjl.1_Ir  | NM_003037    | NP_003028    | Q13291 | SLAF1_HUMAN | (Potential). lg-like V-type.   |    | 2    | TAAGGCTTTTTT       | 0.433 |                      |
| + | 7  | 1748_1750 | ie_Del_p.E474del   | NM_005807    | NP_005798    | Q92954 | PRG4_HUMAN  | ats of K-X-P-X-P-T-T-X. 29     |    | 1    | CCCAAGGAGCC        | 0.635 |                      |
| + | 5  | 637       | _p.G173fs CTSE_L   | NM_001910    | NP_001901    | P14091 | CATE_HUMAN  |                                |    | 1    | CCAGGCCAGAC        | 0.542 |                      |
| - | 4  | 784       | l01jod.1_Frame_S   | NM_017987    | NP_060457    | Q8WXA3 | RUFY2_HUMAN | RUN.                           |    | 1    | CGCCATTTTTTT       | 0.398 |                      |
| - | 1  | 106_108   | AL1_uc001mns.2_    | NM_138421    | NP_612430    | Q96ER3 | SAAL1_HUMAN |                                |    | 0    | GCCACCTCCTC        | 0.67  |                      |
| + | 3  | 548_550   | Jrlo.1_In_Frame_C  | NM_004265    | NP_004256    | O95864 | FADS2_HUMAN | ical; (Potential).             |    | 2    | TTTCTCTCTCTC       | 0.537 |                      |
| - | 9  | 1657_1659 | 3_554PP>P FFFO1    | NM_080730    | NP_542768    | Q0D2I5 | IFFO1_HUMAN | Poly-Pro.                      |    | 0    | GCTTGGCGGCG        | 0.601 | rs144019095          |
| - | 1  | 174       |                    | NM_032656    | NP_116045    | Q8IY37 | DHX37_HUMAN |                                |    | 1    | GGCTCGGGGGG        | 0.711 |                      |
| - | 2  | 1785_1786 | _p.S437fs LIG4_uc  | NM_002312    | NP_002303    | P49917 | DNLI4_HUMAN |                                |    | 0    | AACACGAGAGAC       | 0.48  |                      |
| + | 2  | 503       |                    | NM_020857    | NP_065908    | Q9P253 | VPS18_HUMAN |                                |    | 3    | TTCCGAGCGCA        | 0.507 |                      |
| - | 1  | 348_353   | 174B_uc002bsl.3_   | NM_207446    | NP_997329    | Q3ZCQ3 | F174B_HUMAN | cellular (Potential).          |    | 0    | TGTTGGAGCTGC       | 0.578 | rs156278;rs111725167 |
| + | 1  | 96_98     | 2sda.2_In_Frame_   | NM_203437    | NP_982261    | Q6ULP2 | AFTIN_HUMAN |                                |    | 2    | CAGAGGATGATG       | 0.409 |                      |
| - | 12 | 1561_1562 | zdf.1_Frame_Shift  | NM_004525    | NP_004516    | P98164 | LRP2_HUMAN  | s B 1. Extracellular (Potenti  |    | 29   | CAACTGAAAAAA       | 0.317 |                      |
| - | 6  | 791       | PKRAG3_uc010fvy    | NM_017431    | NP_059127    | Q9UGI9 | AAKG3_HUMAN | CBS 1.                         |    | 2    | CACCAGGGGGG        | 0.652 |                      |
| + | 1  | 228_230   |                    | NM_138983    | NP_620450    | Q8TAK6 | OLIG1_HUMAN | Ser-rich.                      |    | 1    | CAGCCGCctctctc     | 0.552 |                      |
| - | 1  | 1016_1017 | :P3_uc011aoy.1_5   | NM_145174    | NP_660157    | Q7Z6W7 | DNJB7_HUMAN | Poly-Lys.                      |    | 1    | CGCTTCTTTTTT       | 0.381 |                      |
| + | 7  | 1464      | 39674_uc003bba.    | NM_004599    | NP_004590    | Q12772 | SRBP2_HUMAN | ly similarity). Cytoplasmic (l |    | 4    | GATGTCCCCCCC       | 0.522 |                      |
| - | 1  | 668_670   | 79QQ>Q TCF20_u     | NM_005650    | NP_005641    | Q9UGU0 | TCF20_HUMAN | Poly-Gln.                      |    | 5    | GACTTGCTGCTC       | 0.571 |                      |
| - | 10 | 1116      | p.N255fs ARFGAP    | NM_014570    | NP_055385    | Q9NP61 | ARFG3_HUMAN |                                |    | 1    | TCAACATTTTTTT      | 0.224 |                      |
| - | 2  | 451       | l05fs NCEH1_uc0    | NM_001146276 | NP_001139748 | Q6PIU2 | NCEH1_HUMAN | renal (Potential).             |    | 0    | ACGCGCTTTTTT       | 0.507 |                      |
| - | 8  | 1472      | _p.L340fs AASDH    | NM_181806    | NP_861522    | Q4L235 | ACSF4_HUMAN |                                |    | 4    | GTCCCAAAAAA        | 0.363 | rs148777026          |
| - | 1  | 169       | :NO_uc003jpv.2_R   | NM_021147    | NP_066970    | P22674 | CCNO_HUMAN  |                                |    | 0    | GGACAGGGGGT        | 0.716 |                      |
| - | 6  | 830       | 53_splice DEPDC    | NM_018369    | NP_060839    | Q8WUY9 | DEP1B_HUMAN |                                |    | 1    | GTAATTACAATT       | 0.351 |                      |
| + | 7  | 1394      |                    | NM_002439    | NP_002430    | P20585 | MSH3_HUMAN  |                                |    | 4    | GGGACAAAAAA        | 0.348 |                      |
| + | 6  | 1327_1328 | _p.A223fs LARP1    | NM_033551    | NP_291029    | Q6PKG0 | LARP1_HUMAN |                                |    | 4    | CGTGGCCCCC         | 0.644 |                      |
| - | 2  | 222       | fs MIR1236_hsa-m   | NM_002904    | NP_002895    | P18615 | NELFE_HUMAN |                                |    | 0    | AGTCCGGGGGG        | 0.547 |                      |
| + | 7  | 1137      | 3pxy.1_Frame_Shi   | NM_001029858 | NP_001025029 | Q5T1Q4 | S35F1_HUMAN | ical; (Potential).             |    | 1    | TCAGTCAACCTC       | 0.473 |                      |
| + | 30 | 5366      |                    | NM_003777    | NP_003768    | Q96DT5 | DYH11_HUMAN | n (By similarity).             |    | 15   | TTCCATAAAAAAC      | 0.338 |                      |
| + | 7  | 1038      | 64fs EGFR_uc010    | NM_005228    | NP_005219    | P00533 | EGFR_HUMAN  | . ExtracellularV30_R297>G(     |    | 9571 | ACCTGCCCCCC        | 0.582 |                      |
| - | 5  | 1204      | _2_Frame_Shift_D   | NM_000466    | NP_000457    | O43933 | PEX1_HUMAN  |                                |    | 2    | ACCTAATTTTTTT      | 0.353 |                      |
| - | 12 | 1587      |                    | NM_144651    | NP_653252    | A1KZ92 | PXDNL_HUMAN | like C2-type 3.                |    | 2    | TTTCAACCCCA        | 0.453 |                      |
| + | 10 | 1740      | LF1_uc003xyf.2_F   | NM_015170    | NP_055985    | Q8IWU6 | SULF1_HUMAN |                                |    | 7    | TGTGCCTTTTTT       | 0.408 |                      |
| - | 2  | 284       |                    | NM_001033723 | NP_001028895 | Q6ZNC4 | ZN704_HUMAN |                                |    | 0    | CAGACATTTTTTT      | 0.423 |                      |
| - | 3  | 1842      | _p.K471fs ZHX1_u   | NM_007222    | NP_009153    | Q9UKY1 | ZHX1_HUMAN  | ired for interaction with NF   |    | 1    | TTGTCTTTTTTG       | 0.393 |                      |



|   |    |           |                    |              |              |        |              |                             |    |                  |       |                                       |
|---|----|-----------|--------------------|--------------|--------------|--------|--------------|-----------------------------|----|------------------|-------|---------------------------------------|
| - | 13 | 1698      | D2_uc003yqi.3_RI   | NM_014109    | NP_054828    | Q6PL18 | ATAD2_HUMAN  |                             | 2  | TTCGTCAAAAAA/    | 0.413 |                                       |
| + | 3  | 610_612   | ysi.2_In_Frame_D   | NM_002467    | NP_002458    | P01106 | MYC_HUMAN    | Poly-Gln.                   | 6  | CTACCAGCAGC/     | 0.611 | rs61752959                            |
| + | 20 | 2671_2673 | E837del CNKSR      | NM_014927    | NP_055742    | Q8WXI2 | CNKR2_HUMAN  | ential. Poly-Glu.           | 2  | jaggaagaggaggag  | 0.379 |                                       |
| + | 4  | 756       |                    | NM_001136273 | NP_001129745 | A6NM28 | ZFP92_HUMAN  | 2H2-type 4.                 | 0  | iCTCCTGGAGCA/    | 0.697 |                                       |
| - | 4  | 396_398   | _In_Frame_Del_p.   | NM_001042663 | NP_001036128 | O94827 | PKHG5_HUMAN  | Poly-Glu.                   | 1  | AGCTCTCTCTCC     | 0.631 |                                       |
| - | 7  | 901_902   | 1_Intron MST1P9_   | NR_002729    |              |        |              |                             | 0  | CGCCCGCCCCC      | 0.658 |                                       |
| - | 6  | 1559_1561 | S4_uc010ofy.1_3'   | NM_005626    | NP_005617    | Q08170 | SRSF4_HUMAN  | r-rich (RS domain).         | 0  | TCTTCCTTCTTC     | 0.325 | rs138237342                           |
| + | 1  | 136_137   |                    | NM_001008740 | NP_001008740 | Q7Z6W1 | TMCO2_HUMAN  |                             | 1  | TAGAGTCTCTCT     | 0.406 |                                       |
| + | 4  | 1436_1453 |                    | NM_000098    | NP_000089    | P23786 | CPT2_HUMAN   | ial matrix (By similarity). | 0  | TAGTGGCAATGA/    | 0.546 | rs142790440                           |
| - | 12 | 1182_1183 |                    | NM_015306    | NP_056121    | Q9UPU5 | UBP24_HUMAN  |                             | 13 | iCTGATCTGAATT    | 0.337 |                                       |
| - | 2  | 1873_1875 | wne.1_In_Frame_I   | NM_007113    | NP_009044    | Q07283 | TRHY_HUMAN   | roximate tandem repeats.    | 5  | CCTCCGGCTCC1     | 0.68  |                                       |
| - | 1  | 422_424   | ox.1_In_Frame_De   | NM_002249    | NP_002240    | Q9UGI6 | KCNN3_HUMAN  | Poly-Gln.                   | 1  | gctgctgtgctgctg  | 0.236 |                                       |
| - | 12 | 1570_1571 | 0907_uc009wrk.1_   | NM_014949    | NP_055764    | Q7Z7F0 | K0907_HUMAN  |                             | 0  | TGTCCTCTCTC      | 0.396 |                                       |
| + | 4  | 635_646   |                    | NM_001104548 | NP_001098018 |        |              |                             | 0  | jTagcagcagcagca  | 0.283 | 30217;rs72359595;rs150848171          |
| - | 24 | 2573_2575 |                    | NM_014698    | NP_055513    | O94886 | TM63A_HUMAN  |                             | 2  | AGGCTCTGCTGC     | 0.626 |                                       |
| - | 5  | 1798      | AGT_uc009xff.2_F   | NM_000029    | NP_000020    | P01019 | ANGT_HUMAN   |                             | 0  | AGCTCAAAAAA/     | 0.562 |                                       |
| - | 9  | 1499_1501 | XM2_uc001lhj.2_F   | NM_198148    | NP_937791    | Q8N436 | CPXM2_HUMAN  | Poly-Leu.                   | 2  | GCACCAGCAGC.     | 0.626 |                                       |
| - | 3  | 345       | 0rew.1_Frame_Shi   | NM_001001991 | NP_001001991 | Q6UXH9 | PAMR1_HUMAN  |                             | 2  | AGGTACCCCCC/     | 0.517 |                                       |
| - | 2  | 584       | hifT_Del_p.L154fs  | NM_016506    | NP_057590    | Q9NVX7 | KBTB4_HUMAN  |                             | 2  | GGGCCAAAAAC/     | 0.517 |                                       |
| - | 2  | 285_286   | .2_Splice_Site ST  | NM_003164    | NP_003155    | Q13190 | STX5_HUMAN   | lasmic (Potential).         | 2  | CTCACTGGGGGC     | 0.629 |                                       |
| - | 9  | 1226      | DX6_uc001puc.2     | NM_004397    | NP_004388    | P26196 | DDX6_HUMAN   |                             | 1  | ATTCTGGGGGG      | 0.426 |                                       |
| + | 7  | 1559_1560 | K1_uc009zbp.2_F    | NM_001114122 | NP_001107594 | O14757 | CHK1_HUMAN   | rotein kinase.              | 6  | GGAAAGAAAAAA     | 0.361 | rs35817404                            |
| - | 3  | 539_541   |                    | NM_006248    | NP_006239    |        |              |                             | 0  | GGACTTGTGTG/     | 0.596 |                                       |
| - | 12 | 4127_4129 | w.2_In_Frame_De    | NM_004719    | NP_004710    | Q99590 | SCAFB_HUMAN  | Pro-rich.                   | 0  | AGGGGTGGTG       | 0.483 |                                       |
| - | 8  | 775       | ne_Shift_Del_p.I2  | NM_153694    | NP_710161    | Q8IZU3 | SYCP3_HUMAN  | ential. Gln-rich.           | 0  | TCATAATTTTTT     | 0.259 |                                       |
| - | 34 | 4381_4382 | p.V250fs POLE_u    | NM_006231    | NP_006222    | Q07864 | DPOE1_HUMAN  |                             | 8  | TTGACCACACAC     | 0.604 |                                       |
| + | 1  | 1529_1531 |                    | NM_030979    | NP_112241    | Q9H361 | PABP3_HUMAN  |                             | 4  | TCctgcagctgctgct | 0.414 |                                       |
| - | 23 | 3282      | f.1_RNA TEP1_ucl   | NM_007110    | NP_009041    | Q99973 | TEP1_HUMAN   |                             | 5  | CCACACCCCCC      | 0.587 |                                       |
| + | 2  | 348       | si APEX1_uc001vx   | NM_001641    | NP_001632    | P27695 | APEX1_HUMAN  | iation with rRNA, endoriboi | 4  | GTGGGAAAAAG/     | 0.557 |                                       |
| + | 1  | 568_570   | IO_uc001whe.2_5'   | NM_014045    | NP_054764    | Q7Z4F1 | LRP10_HUMAN  |                             | 1  | CCACCTCTCTC/     | 0.67  |                                       |
| + | 5  | 647_648   | ime_Shift_Ins_p.E' | NM_002791    | NP_002782    | P60900 | PSA6_HUMAN   |                             | 0  | TCCTTGAAAAAA     | 0.406 |                                       |
| - | 11 | 2527      |                    | NM_018353    | NP_060823    | Q6P0N0 | M18BP_HUMAN  |                             | 0  | TGGACTTTTTTT/    | 0.373 |                                       |
| + | 7  | 4096_4098 |                    | NM_015042    | NP_055857    | O15014 | ZN609_HUMAN  | Poly-His.                   | 3  | CACACACCACC/     | 0.576 |                                       |
| + | 2  | 2046_2048 | L591del SLC24A'    | NM_004727    | NP_004718    | O60721 | NCKX1_HUMAN  | ical; (Potential).          | 0  | GAGCCTGCTGC      | 0.547 |                                       |
| + | 2  | 1053      | on APOB48R_uc0     | NM_018690    | NP_061160    | Q0VD83 | APOBR_HUMAN  |                             | 0  | CTCAGGAGGGG      | 0.705 | 365499;rs67465726;rs71657822;rs441214 |
| + | 9  | 960_962   | ne_Del_p.E294del   | NM_001099661 | NP_001093131 | B5ME19 | B5ME19_HUMAN |                             | 0  | GGATGAGGAGG      | 0.562 |                                       |
| + | 13 | 3813_3815 |                    | NM_014712    | NP_055527    | O15047 | SET1A_HUMAN  | Ser-rich.                   | 3  | Gctcctcatcctcct  | 0.389 |                                       |
| + | 15 | 2170_2172 | p.E413del SLC9A    | NM_004594    | NP_004585    | Q14940 | SL9A5_HUMAN  |                             | 2  | GTCTGAGGAGG.     | 0.571 |                                       |
| + | 10 | 1188      | ss.1_Frame_Shift   | NM_053013    | NP_443739    | P13929 | ENOB_HUMAN   |                             | 1  | TGGCTGGGGGG      | 0.567 |                                       |
| + | 11 | 2629_2634 | 2gix.2_In_Frame_I  | NM_001080424 | NP_001073893 | O15054 | KDM6B_HUMAN  | o-rich. Thr-rich.           | 2  | GCCGTcaccaccac   | 0.364 |                                       |
| + | 12 | 2232_2234 | 2gpx.2_In_Frame_   | NM_016113    | NP_057197    | Q9Y5S1 | TRPV2_HUMAN  | ical; (Potential).          | 1  | ATGGTGCTGCT      | 0.596 |                                       |
| + | 14 | 4391      | rw.3_Frame_Shift   | NM_016507    | NP_057591    | Q9NYV4 | CDK12_HUMAN  | Poly-Pro.                   | 19 | CTGAGCCCCC       | 0.562 |                                       |
| - | 1  | 96_98     | 2_5'Flank TMEM9    | NM_000421    | NP_000412    | P13645 | K1C10_HUMAN  | lead. Gly-rich.             | 0  | cctccatcctcctcct | 0.409 |                                       |
| - | 1  | 279_280   |                    | NM_033188    | NP_149445    | Q9BYR2 | KRA45_HUMAN  | -C-[GRQVCHIEK]- [SPTR]      | 0  | ggtggtctggcagcag | 0.139 | 265645;rs146438235                    |
| + | 15 | 2006_2007 | 3_Ins_p.190_191in  | NM_005892    | NP_005883    | O95466 | FMNL_HUMAN   | Pro-rich.                   | 1  | CGGTgctccgcgr    | 0.292 |                                       |
| + | 11 | 1588      | l0wku.1_Splice_Si  | NM_006310    | NP_006301    | P55786 | PSA_HUMAN    |                             | 0  | TAAGGTAAAAAA     | 0.337 | rs142614305                           |
| - | 5  | 1214_1216 | 2161del CXXC1_u    | NM_014593    | NP_055408    | Q9P0U4 | CXXC1_HUMAN  | CXXC-type.                  | 2  | GTTTGATctgctgct  | 0.468 |                                       |

|   |    |           |                    |              |              |        |             |                                |              |                     |       |                    |
|---|----|-----------|--------------------|--------------|--------------|--------|-------------|--------------------------------|--------------|---------------------|-------|--------------------|
| + | 4  | 651       | .1120fs LDR_uc01   | NM_000527    | NP_000518    | P01130 | LDLR_HUMAN  | s A 4. Extracellular (Potenti  | 4            | TCATCCCCCA          | 0.642 |                    |
| + | 1  | 111_113   |                    | NM_021175    | NP_066998    | P81172 | HEPC_HUMAN  |                                | 1            | CCTGCTCCTCC         | 0.64  |                    |
| + | 2  | 648_650   | Jegn.1_In_Frame_   | NM_003407    | NP_003398    | P26651 | TTP_HUMAN   | P-P-P-P-G.                     | 1            | ACCTCACCACC         | 0.685 |                    |
| - | 1  | 177_179   | rm.2_In_Frame_D    | NM_014400    | NP_055215    | O95274 | LYPD3_HUMAN |                                | 1            | GCGAAGCAGCA         | 0.675 | rs141441894        |
| - | 9  | 2408_2410 | Oxyl.1_In_Frame_   | NM_015063    | NP_055878    | Q9UPR5 | NAC2_HUMAN  | lasmic (Potential).            | 4            | ACCCGTCCTCCT        | 0.616 |                    |
| - | 2  | 333_335   | !qdo.2_In_Frame_   | NM_001145303 | NP_001138775 | Q7Z404 | TMC4_HUMAN  | extracellular (Potential).     | 1            | TCATCCTCCTC         | 0.645 |                    |
| - | 10 | 1701_1703 | 10erj.2_RNA LILRf  | NM_005874    | NP_005865    | Q8N423 | LIRB2_HUMAN | ical; (Potential).             | 1            | gaggaagaggaggag     | 0.488 |                    |
| + | 11 | 1757_1759 | me_Del_p.L480del   | NM_006669    | NP_006660    | Q8NHL6 | LIRB1_HUMAN | ical; (Potent p.L479del(1)     | 3            | ttctactgctcctctcc   | 0.458 |                    |
| - | 2  | 1150_1151 |                    | NM_152600    | NP_689813    | Q8NAF0 | ZN579_HUMAN | Gly-rich.                      | 0            | TTCTGCCCTTCT        | 0.574 | 478862;rs144853314 |
| - | 1  | 1479_1481 |                    | NM_001029883 | NP_001025054 | A6NGG8 | CB071_HUMAN |                                | 1            | GTCTTCTCCTC         | 0.542 |                    |
| + | 3  | 759_761   | 02svy.2_In_Frame_  | NM_001008949 | NP_001008949 | Q6GPH6 | IPIL1_HUMAN | lasmic (Potential).            | 3            | CAGTGAGGAGG         | 0.532 |                    |
| + | 7  | 1430_1431 | !2tic.1_Frame_Shil | NM_005415    | NP_005406    | Q8WUM9 | S20A1_HUMAN | lasmic (Potential).            | 2            | CTCCAGAGAG          | 0.515 |                    |
| + | 36 | 4261      | tpr.2_Splice_Site_ | NM_020120    | NP_064505    | Q9NYU2 | UGGG1_HUMAN |                                | 1            | TCAGGTAGGCC         | 0.376 |                    |
| - | 12 | 5661_5663 | 2_In_Frame_Del_    | NM_014071    | NP_054790    | Q14686 | NCOA6_HUMAN | . Gln-rich. CREBBP-binding     | 7            | TCATTgtgtgctgctgc   | 0.498 | 895426;rs140426729 |
| - | 20 | 3323_3325 | Q944del SFRS15     | NM_020706    | NP_065757    | O95104 | SFR15_HUMAN | Poly-Gln.                      | 0            | GGTGgtggtgctgctgc   | 0.291 |                    |
| + | 7  | 1737_1739 | 3atq.1_In_Frame_   | NM_001039141 | NP_001034230 | Q9H2D6 | TARA_HUMAN  |                                | 1            | AGAGCCTCCTC         | 0.601 |                    |
| + | 7  | 2031_2033 | 3atq.1_In_Frame_   | NM_001039141 | NP_001034230 | Q9H2D6 | TARA_HUMAN  |                                | 1            | AGAGCCTCCTC         | 0.596 |                    |
| - | 10 | 2571_2573 | EE>E RANGAP1_u     | NM_002883    | NP_002874    | P46060 | RAGP1_HUMAN | cidic). Asp/Glu-rich (highly . | 0            | tttctctctctctctctct | 0.266 |                    |
| - | 1  | 205_207   | rg.1_In_Frame_De   | NM_004628    | NP_004619    | Q01831 | XPC_HUMAN   | lu. Glu-rich (acidic).         | 3            | TCACCTCCTC          | 0.734 | rs72561774         |
| - | 4  | 1615_1616 | 40Q>QQ QRICH1      | NM_198880    | NP_942581    | Q2TAL8 | QRIC1_HUMAN | Gln-rich.                      | 1            | CTTGGAggtgctgct     | 0.361 |                    |
| + | 21 | 3869      | OBO2_uc011bgk.1    | NM_002942    | NP_002933    | Q9HCK4 | ROBO2_HUMAN | lasmic (Potential).            | 11           | TACCTCCCCC          | 0.433 |                    |
| + | 2  | 1293_1295 | y.3_RNA LNP1_uc    | NM_001085451 | NP_001078920 | A1A4G5 | LNP1_HUMAN  | Poly-Asp.                      | 0            | ACAAGATGATG         | 0.507 |                    |
| + | 1  | 3561_3562 |                    | NM_175918    | NP_787114    | Q8N1N5 | CRPAK_HUMAN | 5                              | CTGCTCACACGT | 0.658               |       |                    |
| + | 1  | 4053_4054 |                    | NM_175918    | NP_787114    | Q8N1N5 | CRPAK_HUMAN |                                | 0            | CTGCTCACACAC        | 0.658 |                    |
| - | 15 | 1909      | u.N566fs PROM1_    | NM_006017    | NP_006008    | O43490 | PROM1_HUMAN | ellular (Potential).           | 7            | CCTCTATTTTTTT       | 0.428 |                    |
| + | 4  | 994_996   | u.Q279del MMRN1    | NM_007351    | NP_031377    | Q13201 | MMRN1_HUMAN | Poly-Gln.                      | 4            | GCTGAGCAGCA         | 0.448 |                    |
| + | 3  | 351       |                    | NM_006583    | NP_006574    | O14718 | OPSX_HUMAN  | Name=3; (Potential).           | 1            | TGAATATTTTTTT       | 0.393 |                    |
| + | 15 | 2059_2060 | p.T567fs SDHA_u    | NM_004168    | NP_004159    | P31040 | DHSA_HUMAN  |                                | 0            | AAAACTTTGAAC        | 0.431 | rs112307877        |
| + | 7  | 1303_1304 | tron LOC285830_u   | NM_001098479 | NP_001091949 | P30511 | HLAF_HUMAN  |                                | 0            | ATCTTGTTTTTTT       | 0.535 |                    |
| - | 2  | 531_533   | rb.3_In_Frame_De   | NM_001134870 | NP_001128342 | Q6NYC8 | PHTNS_HUMAN | Poly-Gln.                      | 0            | GTgtgtgtgctgctgct   | 0.547 |                    |
| - | 2  | 1592_1593 | odz.2_5'Flank TAF  | NM_005453    | NP_005444    | O15209 | ZBT22_HUMAN |                                | 1            | CCGTCCTCCTC         | 0.629 |                    |
| - | 40 | 6082_6083 |                    | NM_014611    | NP_055426    | Q9NU22 | MDN1_HUMAN  |                                | 10           | CTCACCTTTTTTT       | 0.401 |                    |
| - | 1  | 195_197   | ob.1_In_Frame_C    | NM_145331    | NP_663304    | O43318 | M3K7_HUMAN  | Poly-Ser.                      | 6            | AGACGAGGAGG         | 0.655 |                    |
| - | 1  | 310_312   | ame_Del_p.72_73    | NM_005522    | NP_005513    | P49639 | HXA1_HUMAN  | Poly-His.                      | 3            | ggggggcgatgggtgg    | 0.527 | rs10951154         |
| + | 1  | 403_405   | uc003tbl.3_5'Flank | NM_002047    | NP_002038    | P41250 | SYG_HUMAN   |                                | 1            | CGCTCTGCTGC         | 0.749 |                    |
| + | 5  | 1249      | p.P231fs DTX2_u    | NM_020892    | NP_065943    | Q86UW9 | DTX2_HUMAN  |                                | 2            | CCCCCACACAG         | 0.657 | rs147779783        |
| + | 1  | 478_480   | 3ugm.2_5'Flank uc  | NM_198467    | NP_940869    | Q6PCB5 | RSBNL_HUMAN | Poly-Ala.                      | 1            | CTGCCCGCCGC         | 0.685 |                    |
| - | 9  | 1592      | p.G185fs MCM7_u    | NM_005916    | NP_005907    | P33993 | MCM7_HUMAN  | MCM.                           | 0            | CCACACCCCG          | 0.502 |                    |
| + | 3  | 9487_9489 | C17_uc010lho.1_F   | NM_001040105 | NP_001035194 | Q685J3 | MUC17_HUMAN | ch. 59 X approximate tandr     | 27           | TCATCTCTACTA        | 0.493 |                    |
| + | 3  | 9663_9664 | C17_uc010lho.1_F   | NM_001040105 | NP_001035194 | Q685J3 | MUC17_HUMAN | ch. 59 X approximate tandr     | 27           | CTTATCTACAA         | 0.5   |                    |
| - | 15 | 1999_2001 | u.1_In_Frame_Del   | NM_015356    | NP_056171    | Q14160 | SCRIB_HUMAN | g to adherens junction and     | 5            | tacctctctctctctct   | 0.478 |                    |
| + | 10 | 3752_3754 | .1_In_Frame_Del_   | NM_015158    | NP_055973    | Q14678 | KANK1_HUMAN |                                | 4            | AGAAGAGGAGG         | 0.463 |                    |
| - | 1  | 2084      | uc003zrh.1_RNA     | NM_153809    | NP_722516    | Q8IZX4 | TAF1L_HUMAN | p.K665fs*4(2)                  | 26           | TTGCCTTTTTTT        | 0.478 |                    |
| + | 3  | 1021_1023 | 4bag.1_In_Frame_   | NM_006981    | NP_008912    | Q92570 | NR4A3_HUMAN | Poly-His.                      | 173          | ccaccatcaccaccacc   | 0.483 |                    |
| + | 3  | 630       |                    | NM_021619    | NP_067632    | Q9H4Q4 | PRD12_HUMAN |                                | 0            | TTGAGGTGTGTC        | 0.594 |                    |
| + | 5  | 629       |                    | NM_001807    | NP_001798    | P19835 | CEL_HUMAN   |                                | 1            | CTTGGGGGGG          | 0.642 |                    |
| + | 3  | 392       | lmkk.1_Frame_Sh    | NM_004615    | NP_004606    | P41732 | TSN7_HUMAN  | ical; (Potential).             | 1            | TCATTCAGGGT         | 0.423 |                    |

|   |    |           |                    |              |              |        |             |                               |    |                  |       |                              |
|---|----|-----------|--------------------|--------------|--------------|--------|-------------|-------------------------------|----|------------------|-------|------------------------------|
| - | 18 | 2564_2566 | sw.2_In_Frame_C    | NM_015107    | NP_055922    | Q9UUP1 | PHF8_HUMAN  |                               | 3  | 3CGTTCTCCTCC     | 0.591 |                              |
| + | 4  | 1067_1069 | 1mrt.1_In_Frame_   | NM_001142526 | NP_001135998 | Q6PI77 | BHLH9_HUMAN | Poly-Glu.                     | 2  | GGCTGAGGAGG      | 0.488 |                              |
| + | 5  | 1012_1014 | 4elx.2_In_Frame_   | NM_207318    | NP_997201    | Q6PEV8 | F199X_HUMAN | Ser-rich.                     | 1  | .GCGCCAGCAGC     | 0.567 |                              |
| + | 2  | 310_311   | I_5'Flank LOC100:  | NM_001152    | NP_001143    | P05141 | ADT2_HUMAN  | Solcar 1.                     | 1  | 3GAGCAGGGAG      | 0.49  | rs113356560                  |
| - | 3  | 274_276   | fen.2_Intron CD9E  | NM_031462    | NP_113650    | Q8TCZ2 | C99L2_HUMAN | ar (Potential). Poly-Thr.     | 3  | GGTTGTGGTGG      | 0.552 |                              |
| - | 4  | 451_460   | p.A166fs BCAP31    | NM_001139441 | NP_001132913 | P51572 | BAP31_HUMAN | lenal (Potential).            | 0  | TCCTCTGGGCA      | 0.552 |                              |
| - | 2  | 90        | ame.2_Frame_Shi    | NM_000983    | NP_000974    | P35268 | RL22_HUMAN  |                               | 0  | TGCTTCTTTTTT     | 0.398 |                              |
| - | 4  | 396_398   | _In_Frame_Del_p.   | NM_001042663 | NP_001036128 | O94827 | PKHG5_HUMAN | Poly-Glu.                     | 1  | 3AGCTCTCCTCC     | 0.631 |                              |
| + | 4  | 817       | 1aug.1_Frame_Sh    | NM_001103170 | NP_001096640 | Q5VUY0 | ADCL3_HUMAN |                               | 0  | 3CTACTGTTTTT     | 0.458 | rs7513079                    |
| - | 7  | 901_902   | 1_Intron MST1P9_   | NR_002729    |              |        |             |                               | 0  | 3GCCCGCCCCC      | 0.658 |                              |
| + | 14 | 1261      | p.I350fs RPS6KA    | NM_002953    | NP_002944    | Q15418 | KS6A1_HUMAN | kinase C-terminal.            | 1  | .GGCATCCCCC      | 0.672 |                              |
| + | 3  | 699_701   |                    | NM_018053    | NP_060523    | Q9H6D3 | XKR8_HUMAN  | ical; (Potential).            | 0  | 3GAACCTGCTGC     | 0.665 |                              |
| - | 6  | 1559_1561 | :S4_uc010ofy_1_3'  | NM_005626    | NP_005617    | Q08170 | SRSF4_HUMAN | r-rich (RS domain).           | 0  | TCTTCCTTCTTC     | 0.325 | rs138237342                  |
| - | 6  | 1205      | :S4_uc010ofy_1_3'  | NM_005626    | NP_005617    | Q08170 | SRSF4_HUMAN | r-rich (RS domain).           | 0  | FGTTTTGGATCTT    | 0.443 |                              |
| - | 4  | 520       | _p.M98fs ZMYM6_    | NM_007167    | NP_009098    | O95789 | ZMYM6_HUMAN |                               | 3  | 3AAGCATTTTTT     | 0.453 |                              |
| + | 8  | 1361_1362 | byu.2_Frame_Shi    | NM_005095    | NP_005086    | Q5VZL5 | ZMYM4_HUMAN | MYM-type 2.                   | 5  | 3AACTGAAAAAA     | 0.342 |                              |
| - | 3  | 179       | 1_5'UTR INPP5B_    | NM_005540    | NP_005531    | P32019 | I5P2_HUMAN  |                               | 1  | 3GCTGTCCCCCT     | 0.687 |                              |
| + | 1  | 136_137   |                    | NM_001008740 | NP_001008740 | Q7Z6W1 | TMCO2_HUMAN |                               | 1  | TAGAGTCTCTCT     | 0.406 |                              |
| - | 4  | 379       | 3 STIL_uc001crd.1  | NM_003035    | NP_003026    | Q15468 | STIL_HUMAN  |                               | 3  | GACGAATTTTTT     | 0.303 | rs144192357                  |
| + | 4  | 1436_1453 |                    | NM_000098    | NP_000089    | P23786 | CPT2_HUMAN  | ial matrix (By similarity).   | 0  | TAGTGGCAATGA     | 0.546 | rs142790440                  |
| - | 12 | 1182_1183 |                    | NM_015306    | NP_056121    | Q9UPU5 | UBP24_HUMAN |                               | 13 | 3CTGATCTGAATT    | 0.337 |                              |
| + | 23 | 2276_2278 | 1dge.1_In_Frame_   | NM_015978    | NP_057062    | Q59H18 | TNI3K_HUMAN | Poly-Ser.                     | 10 | 3TCACCTTCTCT     | 0.473 |                              |
| - | 3  | 841       |                    | NM_003921    | NP_003912    | O95999 | BCL10_HUMAN | CARD.                         | 2  | TGAGTATTTTTT     | 0.343 |                              |
| + | 2  | 248_249   | sw.1_Frame_Shif    | NM_003503    | NP_003494    | O00311 | CDC7_HUMAN  |                               | 5  | 3CTCTTAAAAAA     | 0.406 |                              |
| - | 10 | 3781_3783 | gq.1_In_Frame_D    | NM_001007237 | NP_001007238 | O75054 | IGSF3_HUMAN | 8. Extracellular (Potential). | 2  | 3TGTGGGgtcgtcgt  | 0.478 | rs55719879                   |
| - | 1  | 2523      |                    | NM_021794    | NP_068566    | Q9UKF2 | ADA30_HUMAN | lasmic (Potential).           | 3  | GGTTACTTTTTT     | 0.358 |                              |
| + | 3  | 190       | 0oyd.1_Intron NBF  | NM_001037675 | NP_001032764 | Q3BBV1 | NBPFK_HUMAN |                               | 0  | CCTCAAAGAGAT     | 0.47  |                              |
| + | 3  | 513_515   | nj.2_Intron HFE2_  | NM_213653    | NP_998818    | Q6ZVN8 | RGMC_HUMAN  | Poly-Gly.                     | 1  | .CTTCGAGGAGG     | 0.626 |                              |
| + | 14 | 2499      | _Shift_Del_p.G778  | NM_019032    | NP_061905    | Q6UY14 | ATL4_HUMAN  | rSP type-1 2.                 | 2  | 3AATTTGGGGGG     | 0.692 | rs149280379                  |
| - | 1  | 643_645   | 3.E61del MCL1_uc   | NM_021960    | NP_068779    | Q07820 | MCL1_HUMAN  | PEST-like.                    | 0  | 3CTCGCTCCTCT     | 0.635 |                              |
| - | 2  | 2734_2736 | wne.1_In_Frame_I   | NM_007113    | NP_009044    | Q07283 | TRHY_HUMAN  | 30 AA tandem repeats.         | 5  | 3GTAGCTCCTCC     | 0.586 | rs143222885                  |
| + | 1  | 171_176   |                    | NM_178356    | NP_848133    | Q5TA78 | LCE4A_HUMAN | Cys-rich.                     | 0  | GGCTGTGGTTGC     | 0.578 | 269814;rs74871420;rs79268808 |
| + | 9  | 1991_1992 | 7A3_uc009won.2_    | NM_024330    | NP_077306    | Q5K4L6 | S27A3_HUMAN |                               | 1  | 3TGCGTCCCCC      | 0.619 |                              |
| - | 12 | 1570_1571 | 0907_uc009wrk.1_   | NM_014949    | NP_055764    | Q7Z7F0 | K0907_HUMAN |                               | 0  | TGTCCTCTCTC      | 0.396 |                              |
| - | 2  | 1126      | 1fpt.1_Frame_Shif  | NM_030980    | NP_112242    | Q9H9L3 | I20L2_HUMAN | Exonuclease.                  | 2  | GTTGAGGGGGG      | 0.557 |                              |
| - | 1  | 400       | 3c001fxm.2_5'UTR   | NM_001025598 | NP_001020769 | Q7Z616 | RHG30_HUMAN |                               | 3  | 3CACCCAAAAAC     | 0.632 |                              |
| - | 6  | 1404_1406 | 3.V48del PVRL4_u   | NM_030916    | NP_112178    | Q96NY8 | PVRL4_HUMAN | ical; (Potential).            | 2  | 3TGAGCACCACC     | 0.571 |                              |
| - | 6  | 1357_1359 | p.V32del PVRL4_u   | NM_030916    | NP_112178    | Q96NY8 | PVRL4_HUMAN | ical; (Potential).            | 2  | 3ACACCACCAC      | 0.606 |                              |
| - | 6  | 1125_1127 |                    | NM_005814    | NP_005805    | Q99795 | GPA33_HUMAN | ic (Potential). Poly-Cys.     | 0  | CTCGGCAGCAG      | 0.567 |                              |
| - | 5  | 1433      | 3.K421fs C1orf114. | NM_021179    | NP_067002    | Q5TID7 | CA114_HUMAN |                               | 0  | TCGTGCTTTTTT     | 0.363 |                              |
| + | 20 | 6213      | 3A2_uc009www.2_    | NM_020318    | NP_064714    | Q9BXP8 | PAPP2_HUMAN | Sushi 5.                      | 16 | 3GTAATCCCCC      | 0.468 |                              |
| + | 8  | 1233_1234 | 9wxs.2_Frame_St    | NM_000721    | NP_000712    | Q15878 | CAC1E_HUMAN | lasmic (Potential).           | 6  | 3CCAAAGAGAGA     | 0.51  |                              |
| - | 2  | 1361_1363 | .2_Intron RGL1_u   | NM_203454    | NP_982279    | Q8VW27 | ABEC4_HUMAN |                               | 0  | TCCTTCTCTCT      | 0.419 | rs141411396                  |
| + | 14 | 4052      | Q1250fs CAMSAF     | NM_203459    | NP_982284    | Q08AD1 | CAMP2_HUMAN |                               | 4  | 3AAAACAAAAAA     | 0.368 |                              |
| + | 22 | 2922_2924 |                    | NM_018085    | NP_060555    | Q96P70 | IPO9_HUMAN  |                               | 2  | gaggaagaggaggag  | 0.33  |                              |
| + | 4  | 635_646   |                    | NM_001104548 | NP_001098018 |        |             |                               | 0  | 3jTagcagcagcagca | 0.283 | 30217;rs72359595;rs150848171 |
| - | 20 | 2967_2969 | 31QQ>Q INTS7_L     | NM_015434    | NP_056249    | Q9NVH2 | INT7_HUMAN  | Gln-rich.                     | 0  | 3GGTTGCTGCT      | 0.443 |                              |

|   |    |            |                    |              |              |             |              |               |                     |       |                             |                             |
|---|----|------------|--------------------|--------------|--------------|-------------|--------------|---------------|---------------------|-------|-----------------------------|-----------------------------|
| - | 24 | 2573_2575  | NM_014698          | NP_055513    | O94886       | TM63A_HUMAN | 2            | 'AGGTCTGCTGC' | 0.626               |       |                             |                             |
| - | 5  | 1798       | AGT_uc009xff.2_F   | NM_000029    | NP_000020    | P01019      | ANGT_HUMAN   | 0             | 'AGCTCAAAAAA'       | 0.562 |                             |                             |
| + | 14 | 1271       | p.T389fs KMO_uc    | NM_003679    | NP_003670    | O15229      | KMO_HUMAN    | 2             | 'GTCACATTTTTC'      | 0.348 | ical; (Potential).          |                             |
| - | 37 | 12102_1210 | K3_uc010qih.1_in   | NM_020987    | NP_066267    | Q12955      | ANK3_HUMAN   | 19            | 'gggtgtagtggtggtgg' | 0.291 | Thr-rich.                   |                             |
| + | 25 | 3716       | p.D924fs ZMIZ1_u   | NM_020338    | NP_065071    | Q9ULJ6      | ZMIZ1_HUMAN  | 4             | 'CTGGACCCCCC'       | 0.557 |                             |                             |
| - | 3  | 1355       | kgo.1_Frame_Shif   | NM_148977    | NP_683878    | Q8TE04      | PANK1_HUMAN  | 0             | 'TACGGCTTTTTT'      | 0.438 |                             |                             |
| + | 14 | 2864       | _43_uc010qpu.1_li  | NM_017893    | NP_060363    | Q9NTN9      | SEM4G_HUMAN  | 1             | 'CCTGGAAAAAA'       | 0.562 | lasmic (Potential).         |                             |
| + | 3  | 629_631    | ame_Del_p.S197d    | NM_032429    | NP_115805    | Q9BRK4      | LZTS2_HUMAN  | 4             | 'GGCCCTGcctcctc'    | 0.557 | ntosomal localization (By : |                             |
| + | 9  | 6800       | :001lfz.2_Frame_S  | NM_206862    | NP_996744    | O95359      | TACC2_HUMAN  | 10            | 'AGAGACCCCCC'       | 0.522 |                             |                             |
| - | 9  | 1499_1501  | XM2_uc001lhj.2_F   | NM_198148    | NP_937791    | Q8N436      | CPXM2_HUMAN  | 2             | 'GCACCAGCAGC'       | 0.626 | Poly-Leu.                   |                             |
| + | 1  | 735_736    |                    | NM_001127389 | NP_001120861 | F5GZ66      | F5GZ66_HUMAN | 0             | 'GGGCCAGGCAC'       | 0.708 | rs138894859                 |                             |
| + | 5  | 471_473    | _p.L92del TSPAN4   | NM_003271    | NP_003262    | O14817      | TSN4_HUMAN   | 1             | 'CTTCTGCTGC'        | 0.65  | rs61867552                  | ical; (Potential).          |
| + | 1  | 310_312    |                    | NM_178168    | NP_835462    | Q9H207      | O10A5_HUMAN  | 3             | 'TGATTTCTTCTT'      | 0.517 | Name=3; (Potential).        |                             |
| + | 1  | 268_270    |                    | NM_001004460 | NP_001004460 | Q9H208      | O10A2_HUMAN  | 1             | 'TGATTTCTTCTT'      | 0.517 | Name=3; (Potential).        |                             |
| + | 2  | 423        |                    | NM_152316    | NP_689529    | Q8N8R7      | CK046_HUMAN  | 0             | 'TAGCCAAAAAA'       | 0.338 |                             |                             |
| + | 1  | 525        |                    | NM_001003750 | NP_001003750 | Q8N0Y5      | OR8I2_HUMAN  | 1             | 'CAATCATTTTTT'      | 0.443 | rs112181516                 | cellular (Potential).       |
| + | 3  | 548_550    | rl.1_in_Frame_C    | NM_004265    | NP_004256    | O95864      | FADS2_HUMAN  | 2             | 'TTCTTCTCCTC'       | 0.537 | ical; (Potential).          |                             |
| + | 4  | 543_544    |                    | NM_004585    | NP_004576    | Q9UL19      | TIG3_HUMAN   | 1             | 'GATACCAAAAAA'      | 0.54  | rs74932327                  |                             |
| - | 5  | 412_414    | _uc001ocz.1_5'Fl   | NM_001997    | NP_001988    | P35544      | UBIM_HUMAN   | 0             | 'ACCTGTCTTCTT'      | 0.542 | rs1065065                   |                             |
| + | 17 | 3442_3444  | rn.1_in_Frame_D    | NM_012308    | NP_036440    | Q9Y2K7      | KDM2A_HUMAN  | 9             | 'gaggaagaggaggag'   | 0.473 |                             |                             |
| + | 3  | 321_323    | me_Del_p.E98del    | NM_033388    | NP_203746    | Q8NAA4      | A16L2_HUMAN  | 0             | 'TGCGAGGAGGA'       | 0.591 |                             |                             |
| + | 9  | 1297       | me_Shift_Del_p.S   | NM_020193    | NP_064578    | Q7Z589      | EMSY_HUMAN   | 6             | 'TCTTCCCCCA'        | 0.408 | teraction with BRCA2.       |                             |
| - | 5  | 675        |                    | NM_002426    | NP_002417    | P39900      | MMP12_HUMAN  | 0             | 'AACAAAGTGGTGC'     | 0.416 | rs197361;rs35342965         |                             |
| + | 17 | 2405_2407  | l.pkl.1_in_Frame_I | NM_004398    | NP_004389    | Q13206      | DDX10_HUMAN  | 4             | 'ATTGGAGtgatgatg'   | 0.31  |                             |                             |
| + | 7  | 1559_1560  | :K1_uc009zbp.2_F   | NM_001114122 | NP_001107594 | O14757      | CHK1_HUMAN   | 6             | 'GGAAAGAAAAAA'      | 0.361 | rs35817404                  | rotein kinase.              |
| - | 22 | 3672_3674  | 1qfl.2_in_Frame_C  | NM_020228    | NP_064613    | Q9NQV6      | PRD10_HUMAN  | 1             | 'CCGTTGGTGGT'       | 0.547 | Poly-Thr.                   |                             |
| + | 3  | 1265       | lDC5_uc009zjj.2_f  | NM_020782    | NP_065833    | Q9P2K6      | KLDC5_HUMAN  | 2             | 'ATCGTGGGGGG'       | 0.592 | rs145908611                 | Kelch 5.                    |
| + | 4  | 669        | FAR2_uc009zjm.2    | NM_018099    | NP_060569    | Q96K12      | FACR2_HUMAN  | 0             | 'GAGCCAAAAAA'       | 0.388 |                             |                             |
| + | 4  | 1243_1245  |                    | NM_018169    | NP_060639    | Q9HCM1      | CL035_HUMAN  | 2             | 'AAGACCTCCTC'       | 0.414 | rs79406084                  |                             |
| - | 14 | 2006_2008  | :21A_uc001riz.2_l  | NM_017641    | NP_060111    | Q7Z4S6      | KI21A_HUMAN  | 7             | 'TGTCAtcttctctccc'  | 0.281 |                             |                             |
| + | 1  | 371_373    | ANO6_uc010sfl.1    | NM_001025356 | NP_001020527 | Q4KMQ2      | ANO6_HUMAN   | 2             | 'AAATGGAGGAGC'      | 0.626 | lasmic (Potential).         |                             |
| - | 12 | 4127_4129  | w.2_in_Frame_De    | NM_004719    | NP_004710    | Q99590      | SCAFB_HUMAN  | 0             | 'AGGGGTGGTGC'       | 0.483 | Pro-rich.                   |                             |
| - | 11 | 3063_3064  | p.E611fs SFRS2IP   | NM_004719    | NP_004710    | Q99590      | SCAFB_HUMAN  | 0             | 'TCTTTCTCTCT'       | 0.446 | Arg-rich.                   |                             |
| + | 2  | 157        | 40B_uc001ruq.1_f   | NM_001031698 | NP_001026868 | Q6NWX9      | PR40B_HUMAN  | 5             | 'AGTATCCCCC'        | 0.607 | Pro-rich.                   |                             |
| + | 13 | 1098       | c001sbo.1_Frame    | NM_170754    | NP_736610    | Q63HR2      | TENC1_HUMAN  | 2             | 'GGCTCCAGCC'        | 0.572 | 2 tensin-type.              |                             |
| + | 4  | 553_555    | zmy.1_in_Frame_    | NM_020547    | NP_065434    | Q16671      | AMHR2_HUMAN  | 2             | 'CCTCTGCTGC'        | 0.591 | ical; (Potential).          |                             |
| + | 1  | 306_308    |                    | NM_001005280 | NP_001005280 | Q8NGE5      | O10A7_HUMAN  | 4             | 'ATGTACTTCTT'       | 0.414 | Name=3; (Potential).        |                             |
| + | 7  | 948_950    | .L125del SLC39A2   | NM_173596    | NP_775867    | Q6ZMH5      | S39A5_HUMAN  | 2             | 'ATCCCTGCTGC'       | 0.635 | lasmic (Potential).         |                             |
| - | 3  | 467_469    | GOLGA2B_uc001      | NM_017600    | NP_060070    |             |              | 0             | 'AGCACCTCCTC'       | 0.635 |                             |                             |
| + | 17 | 2575_2577  |                    | NM_015267    | NP_056082    | O14529      | CUX2_HUMAN   | 6             | 'GCTGTCTCCTC'       | 0.749 | Poly-Ser.                   |                             |
| - | 26 | 3014_3016  |                    | NM_006836    | NP_006827    | Q92616      | GCN1L_HUMAN  | 4             | 'ATCCACTCCTCC'      | 0.631 |                             |                             |
| - | 25 | 3416       | SBNO1_uc010taq     | NM_018183    | NP_060653    | A3KN83      | SBNO1_HUMAN  | 9             | 'TCCATTTTTT'        | 0.388 |                             |                             |
| - | 21 | 3042       | ttbb.1_Frame_Shif  | NM_001077261 | NP_001070729 | Q9Y618      | NCOR2_HUMAN  | 4             | 'ACGATGGGGGG'       | 0.652 | rs12321697                  |                             |
| + | 46 | 8261_8262  | 30_uc001ujm.2_in   | NM_015409    | NP_056224    | Q96L91      | EP400_HUMAN  | 12            | 'agcagcaacagcagc'   | 0.327 | rs111782215                 | with ZNF42 (By similarity). |
| - | 34 | 4381_4382  | p.V250fs POLE_u    | NM_006231    | NP_006222    | Q07864      | DPOE1_HUMAN  | 8             | 'TGACCACACAC'       | 0.604 |                             |                             |
| - | 8  | 694        | E2_uc001ume.2_lr   | NM_199254    | NP_954863    | Q6XPS3      | TPTE2_HUMAN  | 0             | 'ATGTCAAAAAA'       | 0.303 | ical; (Potential).          |                             |
| + | 1  | 1529_1531  |                    | NM_030979    | NP_112241    | Q9H361      | PABP3_HUMAN  | 4             | 'TCTctgagctgctgct'  | 0.414 |                             |                             |

|   |    |             |                    |              |              |        |              |                            |    |                     |       |                    |
|---|----|-------------|--------------------|--------------|--------------|--------|--------------|----------------------------|----|---------------------|-------|--------------------|
| + | 12 | 1143_1145   | .Q376del CDK8_u    | NM_001260    | NP_001251    | P49336 | CDK8_HUMAN   | Poly-Gln.                  | 5  | .GAACCAGCAGC,       | 0.463 |                    |
| + | 7  | 941         | iF3_uc001uqw.2_l   | NM_006646    | NP_006637    | Q9UPY6 | WASF3_HUMAN  |                            | 1  | ACTAGGTGTGTG        | 0.475 |                    |
| + | 18 | 2223        | aba.2_Frame_Shif   | NM_130806    | NP_570718    | Q8WXD0 | RXFP2_HUMAN  | lasmic (Potential).        | 0  | AAAATTAATAAAAA      | 0.348 |                    |
| - | 14 | 3949_3950   | C3H13_uc001vas.    | NM_015070    | NP_055885    | Q5T200 | ZC3HD_HUMAN  | Potential.                 | 2  | gtatctctctctctctctc | 0.178 |                    |
| + | 3  | 707_710     | vbk.2_Frame_Shif   | NM_015116    | NP_055931    | Q9Y2L9 | LRCH1_HUMAN  | LRR 3.                     | 2  | CGCCCTGCCTC         | 0.436 |                    |
| - | 15 | 2201_2202   | _p.K703fs RBM26    | NM_022118    | NP_071401    | Q5T8P6 | RBM26_HUMAN  | Potential.                 | 1  | TTACCTGTTTTTTT      | 0.332 |                    |
| + | 7  | 1388_1390   | Site TOX4_uc010tl  | NM_014828    | NP_055643    | O94842 | TOX4_HUMAN   | Pro-rich. Poly-Ala.        | 1  | AGCAGCTGCTG         | 0.581 |                    |
| + | 1  | 568_570     | IO_uc001whe.2_5'   | NM_014045    | NP_054764    | Q7Z4F1 | LRP10_HUMAN  |                            | 1  | CCACCCTCCTC         | 0.67  |                    |
| + | 5  | 668_670     | A IRF9_uc010alj.2  | NM_006084    | NP_006075    | Q00978 | IRF9_HUMAN   | Poly-Ser.                  | 1  | ATTGGGgagcagca      | 0.448 |                    |
| + | 11 | 1225_1226   | G2E3_uc010tpf.1_   | NM_017769    | NP_060239    | Q7L622 | G2E3_HUMAN   |                            | 3  | :CAAATTAATAAAAA     | 0.272 |                    |
| + | 2  | 505         | _Shift_Del_p.F28f  | NM_005930    | NP_005921    | O15320 | CTGE5_HUMAN  |                            | 0  | GTTCTCTTTTTTTT      | 0.373 | rs75842899         |
| - | 11 | 2527        |                    | NM_018353    | NP_060823    | Q6P0N0 | M18BP_HUMAN  |                            | 0  | TGGGACTTTTTTTT      | 0.373 |                    |
| + | 16 | 1934        | _p.D676fs PLEKH    | NM_015549    | NP_056364    | A1L390 | PKHG3_HUMAN  |                            | 1  | ATGGACCCCCC         | 0.612 |                    |
| - | 2  | 1567_1569   | orf43_uc010tud.1_  | NM_194278    | NP_919254    | Q6PJG2 | CN043_HUMAN  | Gln-rich. Gln-rich.        | 5  | GGgctgcctgctgctg    | 0.473 |                    |
| + | 2  | 1168        |                    | NM_018228    | NP_060698    | Q9H8Y1 | VRTN_HUMAN   |                            | 0  | CCACCGGGGGGG        | 0.642 |                    |
| - | 2  | 1971        | _Shift_Del_p.K585  | NM_001040108 | NP_001035197 | Q9UHC1 | MLH3_HUMAN   |                            | 2  | AGATTCTTTTTTTT      | 0.358 |                    |
| - | 13 | 2476_2478   | 0twc.1_In_Frame_   | NM_007039    | NP_008970    | Q16825 | PTN21_HUMAN  | Poly-Glu.                  | 4  | CTCGTCTCTCTC        | 0.704 |                    |
| + | 13 | 1457_1459   | atj.2_In_Frame_D   | NM_198309    | NP_938051    | Q8TAM2 | TTC8_HUMAN   | TPR 7.                     | 0  | TGGTCAACAAAC        | 0.537 |                    |
| - | 10 | 982_984     | .Q250del ATXN3_u   | NM_004993    | NP_004984    | P54252 | ATX3_HUMAN   | Poly-Gln.                  | 0  | GTCCCcctgctgct      | 0.325 | I74612;rs147904130 |
| + | 1  | 607_609     |                    | NM_003403    | NP_003394    | P25490 | TYY1_HUMAN   | Glu-rich (acidic).         | 0  | gtggggcaggaggag     | 0.34  |                    |
| - | 3  | 310         | _5'UTR C15orf52_   | NM_207380    | NP_997263    | Q6ZUT6 | CO052_HUMAN  |                            | 1  | GCCATCCCCCCT        | 0.647 |                    |
| - | 2  | 1779        | on ZFP106_uc010    | NM_022473    | NP_071918    | Q9H2Y7 | ZF106_HUMAN  |                            | 3  | AGGGGAAAAAAA        | 0.393 |                    |
| + | 10 | 1137        | _p.Q215fs ADAL_u   | NM_001159280 | NP_001152752 | Q6DHV7 | ADAL_HUMAN   |                            | 0  | AAACCAAAAAAA        | 0.453 |                    |
| + | 11 | 1380        | _Shift_Del_p.L380l | NM_014444    | NP_055259    | Q9UGJ1 | GCP4_HUMAN   |                            | 3  | ATGTTGAAAAAC        | 0.428 |                    |
| - | 17 | 3106        | _K1025fs SPG11_    | NM_025137    | NP_079413    | Q96J17 | SPTCS_HUMAN  | cellular (Potential).      | 5  | TAACTCTTTTTTTT      | 0.328 |                    |
| + | 7  | 4096_4098   |                    | NM_015042    | NP_055857    | O15014 | ZN609_HUMAN  | Poly-His.                  | 3  | CACACACCACC         | 0.576 |                    |
| - | 6  | 580         | 0bhb.2_Frame_St    | NM_001127889 | NP_001121361 | Q9NZD8 | SPG21_HUMAN  |                            | 0  | GAACTATTTTTTTT      | 0.378 |                    |
| + | 2  | 2046_2048   | .L591del SLC24A    | NM_004727    | NP_004718    | O60721 | NCKX1_HUMAN  | ical; (Potential).         | 0  | GAGCCTGCTGC         | 0.547 |                    |
| + | 7  | 1140_1142   | ame_Del_p.L345d    | NM_024505    | NP_078781    | Q96PH1 | NOX5_HUMAN   | oreductase. Helical; (Pote | 2  | CGCTCTGCTGC         | 0.626 |                    |
| - | 8  | 1968_1970   | ipw.1_In_Frame_D   | NM_198525    | NP_940927    | Q2M1P5 | KIF7_HUMAN   | Poly-Glu.                  | 3  | TGGGCGGctctccc      | 0.567 |                    |
| + | 6  | 919_920     | Shift_Ins_p.S249fs | NM_021168    | NP_066991    | Q96S21 | RB40C_HUMAN  |                            | 0  | CAGAGCCCCC          | 0.678 |                    |
| - | 10 | 895         | NTAN1_uc010uzo.    | NM_173474    | NP_775745    | Q96AB6 | NTAN1_HUMAN  |                            | 0  | TCTTCATTTTTTTT      | 0.383 |                    |
| + | 3  | 184_186     | f62_uc010vas.1_5'  | NM_020314    | NP_064710    | Q7Z3J2 | CP062_HUMAN  | Ser-rich.                  | 1  | CACGTCTCTCTC        | 0.562 |                    |
| - | 2  | 667_668     | _5'Flank IQCK_uc   | NM_001012991 | NP_001013009 | Q1ED39 | CP088_HUMAN  | Lys-rich.                  | 0  | GGTGGATTTTTTTT      | 0.535 |                    |
| - | 11 | 1628_1630   | h3_uc002die.2_l    | NM_017539    | NP_060009    | Q8TD57 | DYH3_HUMAN   | n (By similarity).         | 18 | CGATCAGCAGC         | 0.498 |                    |
| + | 11 | 1356_1358   | xy.2_In_Frame_D    | NM_000418    | NP_000409    | P24394 | IL4RA_HUMAN  | cytoplasmic (Potential).   | 2  | GTGTGAGGAGG         | 0.591 |                    |
| + | 9  | 960_962     | ne_Del_p.E294del   | NM_001099661 | NP_001093131 | B5ME19 | B5ME19_HUMAN |                            | 0  | GGATGAGGAGG         | 0.562 |                    |
| + | 17 | 2641        | Shift_Del_p.R819fs | NM_173201    | NP_775293    | O14983 | AT2A1_HUMAN  | smic (By similarity).      | 4  | GACCGCCCCCCT        | 0.657 |                    |
| + | 30 | 3476_3478   | L1022del ITGAL_u   | NM_002209    | NP_002200    | P20701 | ITAL_HUMAN   | ical; (Potential).         | 10 | GGGGGCTGCTG         | 0.601 |                    |
| + | 13 | 3813_3815   |                    | NM_014712    | NP_055527    | O15047 | SET1A_HUMAN  | Ser-rich.                  | 3  | Gctctcatctctctct    | 0.389 |                    |
| - | 2  | 749_751     | ne_Del_p.Q143de    | NM_002968    | NP_002959    | Q9NSC2 | SALL1_HUMAN  | Poly-Gln.                  | 8  | TGGATCTGCTGC        | 0.562 |                    |
| + | 3  | 278_280     | 0vho.1_In_Frame_   | NM_020312    | NP_064708    | O75208 | COQ9_HUMAN   |                            | 1  | CGGCGAGGAGG         | 0.576 | rs149029279        |
| + | 15 | 2170_2172   | p.E413del SLC9A5   | NM_004594    | NP_004585    | Q14940 | SL9A5_HUMAN  |                            | 2  | GTCTGAGGAGG         | 0.571 |                    |
| + | 3  | 1005        | .2_Intron MARVEL   | NM_052858    | NP_443090    | Q96A59 | MALD3_HUMAN  | . Helical; (Potential).    | 1  | ATCGCGGGGGGG        | 0.582 | rs150498655        |
| - | 10 | 10282_10284 | _In_Frame_Del_p    | NM_006885    | NP_008816    | Q15911 | ZFH3_HUMAN   | Poly-Gln.                  | 4  | cctgtgtgtgctgctg    | 0.522 |                    |
| + | 11 | 2629_2634   | 2gix.2_In_Frame_l  | NM_001080424 | NP_001073893 | O15054 | KDM6B_HUMAN  | Gln-rich. Thr-rich.        | 2  | GCCGTcaccaccac      | 0.364 |                    |
| + | 13 | 2245_2247   | .K762del CHD3_u    | NM_001005273 | NP_001005273 | Q12873 | CHD3_HUMAN   | Poly-Lys.                  | 1  | AGTATAAGAAAGA       | 0.488 |                    |



|   |    |           |                                |              |              |        |             |                              |    |                    |       |                    |
|---|----|-----------|--------------------------------|--------------|--------------|--------|-------------|------------------------------|----|--------------------|-------|--------------------|
| + | 12 | 2232_2234 | !gpz.2_In_Frame_               | NM_016113    | NP_057197    | Q9Y5S1 | TRPV2_HUMAN | ical; (Potential).           | 1  | ATGGGTGCTGCT       | 0.596 |                    |
| + | 2  | 393_395   |                                | NM_018019    | NP_060489    | Q9NWA0 | MED9_HUMAN  | Potential.                   | 0  | CGAACAGCAGC        | 0.581 |                    |
| - | 1  | 233_235   | dx.3_In_Frame_De               | NM_020772    | NP_065823    | Q7Z417 | NUFP2_HUMAN | His-rich.                    | 4  | ggtgatgatggtggtggt | 0.276 | rs1054145          |
| + | 14 | 4391      | rw.3_Frame_Shift               | NM_016507    | NP_057591    | Q9NYV4 | CDK12_HUMAN | Poly-Pro.                    | 19 | CTGAGCCCCCCC       | 0.562 |                    |
| - | 1  | 96_98     | ?_5'Flank TMEM9E               | NM_000421    | NP_000412    | P13645 | K1C10_HUMAN | lead. Gly-rich.              | 0  | ctccacatctctctctct | 0.409 |                    |
| - | 1  | 279_280   |                                | NM_033188    | NP_149445    | Q9BYR2 | KRA45_HUMAN | -C-[GRQVCHIEK]- [SPTR]       | 0  | igggtggtctggcagcag | 0.139 | 265645;rs146438235 |
| - | 9  | 1271      | ?hzi.3_Frame_Shift             | NM_012448    | NP_036580    | P51692 | STA5B_HUMAN |                              | 6  | CACCTGGGGGGG       | 0.577 | rs144993426        |
| - | 12 | 1542      | hif1_Del_p.G471fs              | NM_001256    | NP_001247    | P30260 | CDC27_HUMAN |                              | 5  | AAATAACCTTTTCC     | 0.368 |                    |
| + | 11 | 1588      | l0wku.1_Splice_Si              | NM_006310    | NP_006301    | P55786 | PSA_HUMAN   |                              | 0  | ATAAGGTAAAAAA      | 0.337 | rs142614305        |
| - | 1  | 262_264   |                                | NM_002145    | NP_002136    | P14652 | HXB2_HUMAN  |                              | 0  | CGAAAGGAGGAA       | 0.542 |                    |
| - | 21 | 4684_4686 | ?12EE>E BZRAP1                 | NM_004758    | NP_004749    | O95153 | RIMB1_HUMAN | Poly-Glu.                    | 3  | Gctctctctctctctct  | 0.468 |                    |
| - | 6  | 506       | _Shift_Del_p.N94f              | NM_138619    | NP_619525    | Q9NZ52 | GGA3_HUMAN  | RF1 (in long isoform).       | 2  | CAGGGTTTTTTC       | 0.542 |                    |
| + | 9  | 844_846   | 02lhb.2_In_Frame               | NM_001144967 | NP_001138439 | Q96PU5 | NED4L_HUMAN | VW 1.                        | 4  | AAACTTCTCTCT       | 0.498 |                    |
| - | 6  | 1132_1134 |                                | NM_005934    | NP_005925    | Q03111 | ENL_HUMAN   | Poly-Ser.                    | 1  | GAGAAGGAGGAA       | 0.65  |                    |
| - | 11 | 1320_1321 | nfg.1_Frame_Shift              | NM_033417    | NP_219485    | Q9BT25 | HAUS8_HUMAN |                              | 0  | GGAACGAGAGAC       | 0.495 |                    |
| - | 13 | 1932_1934 | O8_uc010eap.2_F                | NM_020959    | NP_066010    | Q9HCE9 | ANO8_HUMAN  | cytoplasmic (Potential).     | 3  | ctctctctctctctctct | 0.197 |                    |
| - | 2  | 165_166   | 2nhx.1_Frame_Sh                | NM_005535    | NP_005526    | P42701 | I12R1_HUMAN | cellular (Potential).        | 1  | TATGGCGGGTCC       | 0.564 | 978336;rs113524129 |
| + | 7  | 1022      | 0xru.1_Frame_Shi               | NM_001114093 | NP_001107565 | Q8ND56 | LS14A_HUMAN |                              | 1  | GTCATCGGGGT        | 0.438 |                    |
| + | 1  | 111_113   |                                | NM_021175    | NP_066998    | P81172 | HEPC_HUMAN  |                              | 1  | TCTGTCTCTCTC       | 0.64  |                    |
| - | 5  | 751_753   | ZNF569_uc002og                 | NM_152484    | NP_689697    | Q5MCW4 | ZN569_HUMAN | KRAB.                        | 3  | ATGGTTCTTCTT       | 0.433 |                    |
| + | 8  | 1049_1051 | me_Del_p.K267de                | NM_174905    | NP_777565    | Q17RN3 | FA98C_HUMAN |                              | 1  | TCGCAAGAAGA        | 0.606 |                    |
| + | 2  | 648_650   | Jegn.1_In_Frame_               | NM_003407    | NP_003398    | P26651 | TTP_HUMAN   | P-P-P-P-G.                   | 1  | ACCTCACCACC        | 0.685 |                    |
| - | 2  | 202_204   |                                | NM_013376    | NP_037508    | Q9UHV2 | SRTD1_HUMAN |                              | 0  | TCCTTCTCTCTC       | 0.453 |                    |
| - | 1  | 177_179   | wm.2_In_Frame_D                | NM_014400    | NP_055215    | O95274 | LYPD3_HUMAN |                              | 1  | GCGAAGCAGCA        | 0.675 | rs141441894        |
| + | 17 | 1960      | pba.1_Frame_Shift_Del_p.P679fs |              |              | Q96L34 | MARK4_HUMAN |                              | 3  | AACCGCCCCCCC       | 0.642 |                    |
| - | 6  | 2257_2259 | i2pd.2_In_Frame_               | NM_030785    | NP_110412    | Q9H0K4 | RSH6A_HUMAN | Glu-rich.                    | 2  | ctctctgacctctctctc | 0.438 | rs62639328         |
| - | 2  | 1402_1404 | i2per.3_In_Frame_              | NM_018215    | NP_060685    | Q86V59 | PNML1_HUMAN |                              | 0  | CTCACCTTCTTC       | 0.562 |                    |
| - | 9  | 2408_2410 | Oxyr.1_In_Frame_               | NM_015063    | NP_055878    | Q9UPR5 | NAC2_HUMAN  | lasmic (Potential).          | 4  | ACCCGTCTCTCT       | 0.616 |                    |
| - | 2  | 333_335   | ?qdo.2_In_Frame_               | NM_001145303 | NP_001138775 | Q7Z404 | TMC4_HUMAN  | extracellular (Potential).   | 1  | TTCATCTCTCTC       | 0.645 |                    |
| - | 10 | 1701_1703 | 10erj.2_RNA LILR               | NM_005874    | NP_005865    | Q8N423 | LIRB2_HUMAN | ical; (Potential).           | 1  | gaggaagaggaggag    | 0.488 |                    |
| + | 11 | 1757_1759 | me_Del_p.L480del               | NM_006669    | NP_006660    | Q8NHL6 | LIRB1_HUMAN | ical; (Potent p.L479del(1))  | 3  | ctctactgctctctctcc | 0.458 |                    |
| - | 1  | 1479_1481 |                                | NM_001029883 | NP_001025054 | A6NGG8 | CB071_HUMAN |                              | 1  | TCTTCTCTCTCT       | 0.542 |                    |
| - | 2  | 234_236   | HX57_uc002rrg.2_               | NM_198963    | NP_945314    | Q6P158 | DHX57_HUMAN | Gly-rich.                    | 3  | gccacctccaccacca   | 0.384 |                    |
| - | 12 | 1400      |                                | NM_014709    | NP_055524    | Q70CQ2 | UBP34_HUMAN |                              | 19 | GTGTCTAAAAAA       | 0.342 |                    |
| + | 1  | 96_98     | 2sda.2_In_Frame_               | NM_203437    | NP_982261    | Q6ULP2 | AFTIN_HUMAN |                              | 2  | CAGAGGATGATG       | 0.409 |                    |
| - | 3  | 1648_1650 | 02sit.3_In_Frame               | NM_015470    | NP_056285    | Q9BXF6 | RFIP5_HUMAN |                              | 0  | GCCTTGTTGGTC       | 0.635 |                    |
| + | 1  | 147_152   | 2sjf.1_In_Frame_C              | NM_015120    | NP_055935    | Q8TCU4 | ALMS1_HUMAN | Glu-rich.                    | 9  | CAGCTggaggagg      | 0.403 | rs72319667         |
| - | 4  | 737_739   | 02svr.2_In_Frame_              | NM_017849    | NP_060319    | O75204 | TM127_HUMAN |                              | 0  | TCTTATGCTGCTC      | 0.557 |                    |
| + | 3  | 759_761   | 02svy.2_In_Frame               | NM_001008949 | NP_001008949 | Q6GPH6 | IPIL1_HUMAN | lasmic (Potential).          | 3  | CAGTGAGGAGG        | 0.532 |                    |
| - | 6  | 1386      | p.M392fs REV1_uc               | NM_016316    | NP_057400    | Q9UBZ9 | REV1_HUMAN  |                              | 2  | TTTTTCATTTTTTT     | 0.348 |                    |
| + | 6  | 2252_2253 | ed.2_Frame_Shift               | NM_181453    | NP_852118    | Q8IWJ2 | GCC2_HUMAN  | Potential.                   | 1  | GTTCAGAAAAAA       | 0.307 |                    |
| - | 7  | 738_740   | ?tfo.3_In_Frame_C              | NM_207181    | NP_997064    | O15259 | NPHP1_HUMAN | Glu-rich.                    | 2  | TTGGCCTTCTTC       | 0.404 |                    |
| + | 7  | 1430_1431 | i2tic.1_Frame_Shil             | NM_005415    | NP_005406    | Q8WUM9 | S20A1_HUMAN | lasmic (Potential).          | 2  | CTCCAGAGAGA        | 0.515 |                    |
| + | 36 | 4261      | tpr.2_Splice_Site_             | NM_020120    | NP_064505    | Q9NYU2 | UGGG1_HUMAN |                              | 1  | TCAGGTAGGCC        | 0.376 |                    |
| + | 13 | 1538      | ?1_uc002txn.2_Fre              | NM_018151    | NP_060621    | Q5UIP0 | RIF1_HUMAN  |                              | 15 | CCTTCTTTTTTTT      | 0.343 |                    |
| - | 28 | 4326_4327 | zcp.1_Frame_Shift              | NM_007366    | NP_031392    | Q13018 | PLA2R_HUMAN | Potential). C-type lectin 8. | 3  | AAAGCCTTTTTT       | 0.401 |                    |
| + | 2  | 422       | el_p.N45fs PPP1R               | NM_001080545 | NP_001074014 | Q8WV17 | PPR1C_HUMAN |                              | 0  | CTATAACCCCC        | 0.388 |                    |

|   |    |           |                                                       |              |              |        |              |                                |              |                   |       |                    |
|---|----|-----------|-------------------------------------------------------|--------------|--------------|--------|--------------|--------------------------------|--------------|-------------------|-------|--------------------|
| + | 7  | 931       | .1_Frame_Shift_D                                      | NM_000578    | NP_000569    | P49279 | NRAM1_HUMAN  | ical; (Potential).             | 4            | 3GAAGCTTTTTT      | 0.418 |                    |
| - | 12 | 1511      | p.F418fs DOCK10                                       | NM_014689    | NP_055504    | Q96BY6 | DOC10_HUMAN  |                                | 2            | ACTCACAAAAAA      | 0.398 |                    |
| - | 29 | 3477_3478 | vul.2_Frame_Shift                                     | NM_018218    | NP_060688    | Q9NVE5 | UBP40_HUMAN  |                                | 3            | ATCTTGTTTTTT      | 0.317 |                    |
| + | 2  | 175_177   |                                                       | NM_022134    | NP_071417    | Q9H3Q3 | G3ST2_HUMAN  | type II membrane protein;      | 0            | 3GTCATCCTCCT      | 0.631 |                    |
| + | 2  | 85_86     | tj.1_RNA FRG1B_uc010gdr.1_RNA FRG1B_uc010ztk.1_Intron |              |              |        |              |                                | 0            | TGGAAAAATATCT     | 0.342 |                    |
| - | 12 | 5661_5663 | .2_In_Frame_Del_                                      | NM_014071    | NP_054790    | Q14686 | NCOA6_HUMAN  | . Gln-rich. CREBBP-binding     | 7            | TCATTtggtgctgctgc | 0.498 | 895426;rs140426729 |
| - | 2  | 2489_2490 | xus.1_Frame_Shif                                      | NM_004975    | NP_004966    | Q14721 | KCNB1_HUMAN  | lasmic (Potential).            | 2            | GCTTTTGGGGGC      | 0.545 |                    |
| - | 1  | 737       | ie_Shift_Del_p.K2!                                    | NM_080618    | NP_542185    | Q8NI51 | CTCFL_HUMAN  |                                | 4            | AGGCCTTTTTCC      | 0.502 |                    |
| + | 30 | 1616      | 2ydn.2_Frame_Sh                                       | NM_001853    | NP_001844    | Q14050 | CO9A3_HUMAN  | ical region 3 (NC3).           | 0            | AATTGCACAGT       | 0.552 |                    |
| - | 20 | 3323_3325 | i.Q944del SFRS15                                      | NM_020706    | NP_065757    | O95104 | SFR15_HUMAN  | Poly-Gln.                      | 0            | GGTGgtgctgctgc    | 0.291 |                    |
| - | 1  | 167_168   | .1_Intron C21orf29                                    | NM_198688    | NP_941961    | P60371 | KR106_HUMAN  | A repeats of C-C-X(3).         | 0            | 3GGCCGGGGGC       | 0.688 |                    |
| - | 24 | 5314      | MCM3AP_uc002z                                         | NM_003906    | NP_003897    | O60318 | MCM3A_HUMAN  |                                | 5            | AAGCCGGGGGG       | 0.527 |                    |
| - | 7  | 789_791   |                                                       | NM_016449    | NP_057533    | Q6PGQ1 | CV043_HUMAN  | Asp-rich.                      | 1            | CCTGGGcatcatca    | 0.261 |                    |
| - | 30 | 4280_4282 |                                                       | NM_002473    | NP_002464    | P35579 | MYH9_HUMAN   | Potential.                     | 11           | TGGCCTCCTC        | 0.65  |                    |
| + | 7  | 2031_2033 | 3atq.1_In_Frame_                                      | NM_001039141 | NP_001034230 | Q9H2D6 | TARA_HUMAN   |                                | 1            | AGAGCCTCCTC       | 0.596 |                    |
| - | 12 | 2566      | gye.1_Frame_Shift                                     | NM_020831    | NP_065882    | Q969V6 | MKL1_HUMAN   | Pro-rich.                      | 5            | TGCCAGGGGGGG      | 0.612 |                    |
| - | 10 | 2571_2573 | E>E RANGAP1_u                                         | NM_002883    | NP_002874    | P46060 | RAGP1_HUMAN  | cidic). Asp/Glu-rich (highly . | 0            | tcttctctctctctctc | 0.266 |                    |
| - | 1  | 871_873   | i.S246del TCF20_u                                     | NM_005650    | NP_005641    | Q9UGU0 | TCF20_HUMAN  | Ser-rich.                      | 5            | AGGGAaggagga      | 0.438 |                    |
| - | 1  | 668_670   | 79QQ>Q TCF20_u                                        | NM_005650    | NP_005641    | Q9UGU0 | TCF20_HUMAN  | Poly-Gln.                      | 5            | GACTTGCTGCT       | 0.571 |                    |
| + | 5  | 477_479   |                                                       | NM_001197    | NP_001188    | Q13323 | BIK_HUMAN    | Potential). Helical; (Potentia | 0            | tgctggcgtgctgctg  | 0.562 |                    |
| + | 8  | 2694      | Del_p.I807fs GRM                                      | NM_000844    | NP_000835    | Q14831 | GRM7_HUMAN   | Name=6; (Potential).           | 7            | TTCCAATTTTTTT     | 0.383 |                    |
| - | 1  | 205_207   | vg.1_In_Frame_De                                      | NM_004628    | NP_004619    | Q01831 | XPC_HUMAN    | lu. Glu-rich (acidic).         | 3            | TCACCTCCTC        | 0.734 | rs72561774         |
| + | 2  | 804       |                                                       | NM_003884    | NP_003875    | Q92831 | KAT2B_HUMAN  |                                | 3            | CCTCCCTCCCTC      | 0.448 |                    |
| - | 27 | 3223      | t.2_RNA CLASP2_                                       | NM_015097    | NP_055912    | B2RTR1 | B2RTR1_HUMAN |                                | 4            | CACCCATTTTTT      | 0.343 |                    |
| + | 5  | 750       | p.F199fs PDCD6I                                       | NM_013374    | NP_037506    | Q8WUM4 | PDC6I_HUMAN  | with CHMP4A, CHMP4B e          | 2            | GAAGTATTTTTT      | 0.368 |                    |
| + | 13 | 1544      | i_Shift_Del_p.T25z                                    | NM_000249    | NP_000240    | P40692 | MLH1_HUMAN   | action with ET495A(1) p.0?(    | 77           | TGTGACCCCCC       | 0.473 |                    |
| - | 7  | 802_804   | 3cx.2_In_Frame_I                                      | NM_020707    | NP_065758    | Q9HCP6 | HHATL_HUMAN  |                                | 3            | GCCCCAAGAAG       | 0.552 |                    |
| - | 14 | 1709_1710 | 3csi.1_Frame_Shif                                     | NM_001789    | NP_001780    | P30304 | MPIP1_HUMAN  | Rhodanese.                     | 5            | GGCGATCTCTCT      | 0.515 |                    |
| - | 4  | 1615_1616 | 40Q>QQ QRICH1                                         | NM_198880    | NP_942581    | Q2TAL8 | QRIC1_HUMAN  | Gln-rich.                      | 1            | CTTGGAgttgctgct   | 0.361 |                    |
| - | 18 | 2397_2399 | cwp.2_In_Frame_I                                      | NM_003363    | NP_003354    | Q13107 | UBP4_HUMAN   |                                | 4            | TGTGGTCTTCTT      | 0.532 |                    |
| + | 3  | 1740_1742 |                                                       | NM_004393    | NP_004384    | Q14118 | DAG1_HUMAN   | . Mucin-like domain.           | 2            | GACTCCACCAC       | 0.581 |                    |
| - | 11 | 1563      | ame_Shift_Del_p.L                                     | NM_032682    | NP_116071    | Q9H334 | FOXP1_HUMAN  |                                | 2            | AGTCAGGGGGG       | 0.572 |                    |
| - | 2  | 497_499   | IXP1_uc003dop.2_                                      | NM_032682    | NP_116071    | Q9H334 | FOXP1_HUMAN  | Gln-rich.                      | 2            | CTGTTGCTGCT       | 0.586 |                    |
| - | 2  | 584_586   |                                                       | NM_016206    | NP_057290    | A8MV65 | VGLL3_HUMAN  |                                | 0            | TGgtcttctctctctcc | 0.394 |                    |
| + | 18 | 2116      | p.K632fs TBC1D2                                       | NM_018309    | NP_060779    | Q9NUY8 | TBC23_HUMAN  |                                | 2            | CATCAAAAAAA       | 0.353 |                    |
| + | 2  | 1293_1295 | y.3_RNA LNP1_uc                                       | NM_001085451 | NP_001078920 | A1A4G5 | LNP1_HUMAN   | Poly-Asp.                      | 0            | ACAAGATGATG       | 0.507 |                    |
| - | 10 | 1345_1348 | i.LC9A10_uc010hq                                      | NM_183061    | NP_898884    | Q4G0N8 | S9A10_HUMAN  | ical; (Potential).             | 5            | TTAGGCATCCCC      | 0.377 | 170229;rs141074336 |
| - | 7  | 850       | 03eal.2_Frame_Sl                                      | NM_001009899 | NP_001009899 | Q68DE3 | K2018_HUMAN  |                                | 3            | CAATAATTTTTT      | 0.373 |                    |
| - | 9  | 2364      | lbgj.1_Frame_Shif                                     | NM_153002    | NP_694547    | Q8NFN8 | GP156_HUMAN  | lasmic (Potential).            | 2            | GCCAGCCCCCC       | 0.552 |                    |
| + | 12 | 4015      | a_Shift_Del_p.E10                                     | NM_017554    | NP_060024    | Q460N5 | PAR14_HUMAN  | Macro 3.                       | 6            | AGTGTGAAAAAA      | 0.423 |                    |
| - | 7  | 2240      | i.2_Intron ZXDC_u                                     | NM_025112    | NP_079388    | Q2QGD7 | ZXDC_HUMAN   |                                | 1            | CTCTGCTTTTTT      | 0.522 |                    |
| - | 4  | 1041_1043 | itg.2_In_Frame_De                                     | NM_001017395 | NP_001017395 | O94876 | TMCC1_HUMAN  |                                | 1            | AGACATgcagcagc    | 0.404 |                    |
| - | 8  | 1759_1761 | i91DD>D DBR1_u                                        | NM_016216    | NP_057300    | Q9UK59 | DBR1_HUMAN   |                                | 0            | TGCATCGTCAT       | 0.251 | 0114751;rs2622736  |
| + | 5  | 386       | p.K36fs FXR1_uc                                       | NM_005087    | NP_005078    | P51114 | FXR1_HUMAN   |                                | 1            | CTGTCAAAAAAA      | 0.333 |                    |
| - | 3  | 541_543   |                                                       | NM_024524    | NP_078800    | Q9H7F0 | AT133_HUMAN  | ical; (Potential).             | 1            | AATAGAGGAGG       | 0.463 |                    |
| - | 12 | 2438      | 1_Frame_Shift_De                                      | NM_005781    | NP_005772    | Q07912 | ACK1_HUMAN   | ed for interaction with NED    | 10           | GGCGGGGGGG        | 0.726 |                    |
| + | 1  | 3561_3562 |                                                       | NM_175918    | NP_787114    | Q8N1N5 | CRPAK_HUMAN  | 5                              | CTGCTCACACGT | 0.658             |       |                    |

|   |    |           |                    |              |              |             |                    |                              |              |                   |       |                   |
|---|----|-----------|--------------------|--------------|--------------|-------------|--------------------|------------------------------|--------------|-------------------|-------|-------------------|
| + | 1  | 4117_4118 | NM_175918          | NP_787114    | Q8N1N5       | CRPAK_HUMAN | raction with PAK1. | 0                            | CTGCTCACACAC | 0.639             |       |                   |
| + | 8  | 1111      | igp.1_Frame_Shift  | NM_182982    | NP_892027    | P32298      | GRK4_HUMAN         | rotein kinase.               | 1            | AGCTACAAAAAA      | 0.393 |                   |
| - | 1  | 340_348   |                    | NM_177998    | NP_819056    | Q7RTM1      | OTOP1_HUMAN        | ical; (Potential).           | 3            | TCCACAGCAGC       | 0.727 | 245977;rs75328065 |
| - | 7  | 900_902   | 1.K136del LYAR_uc  | NM_001145725 | NP_001139197 | Q9NX58      | LYAR_HUMAN         | Lys-rich.                    | 0            | CGCTGCTTCTTC      | 0.601 |                   |
| - | 15 | 1909      | 1.N566fs PROM1_    | NM_006017    | NP_006008    | O43490      | PROM1_HUMAN        | ellular (Potential).         | 7            | CCTCTATTTTTT      | 0.428 |                   |
| - | 7  | 944       |                    | NM_173536    | NP_775807    | Q8N1C3      | GBRG1_HUMAN        | ellular (Probable).          | 2            | AGGTCAAAAAA       | 0.294 |                   |
| + | 8  | 2988_2990 | 1bzz.1_In_Frame_   | NM_020722    | NP_065773    | Q6ZU35      | K1211_HUMAN        | Poly-Lys.                    | 2            | GAACAGAAGAA       | 0.567 |                   |
| + | 1  | 425_427   |                    | NM_020368    | NP_065101    | Q9NQZ2      | SAS10_HUMAN        | Glu-rich.                    | 0            | gatggcgaggaggag   | 0.291 |                   |
| - | 25 | 3483      | 11107fs SEC31A_u   | NM_001077207 | NP_001070675 | O94979      | SC31A_HUMAN        | ction with PDCD6.            | 8            | TGGTAATTTTTT      | 0.388 |                   |
| - | 11 | 1548      | hnj.2_Frame_Shift  | NM_001077207 | NP_001070675 | O94979      | SC31A_HUMAN        | ction with SEC13.            | 8            | CATCAATTTTTT      | 0.353 |                   |
| - | 61 | 9721_9722 |                    | NM_014991    | NP_055806    | Q8IZQ1      | WDFY3_HUMAN        | WD 1.                        | 3            | TCTCCACACAC       | 0.51  |                   |
| - | 1  | 591_593   | 1C3_uc011cdn.1_l   | NM_153757    | NP_715638    | Q96NT1      | NP1L5_HUMAN        | Glu-rich.                    | 1            | CCCGCAGcctctcc    | 0.389 |                   |
| + | 3  | 351       |                    | NM_006583    | NP_006574    | O14718      | OPXS_HUMAN         | Name=3; (Potential).         | 1            | TGAATATTTTTT      | 0.393 |                   |
| + | 10 | 2336_2338 | V692del GAB1_uc    | NM_002039    | NP_002030    | Q13480      | GAB1_HUMAN         |                              | 4            | GATTATGTTGTT      | 0.458 |                   |
| - | 8  | 596_598   | 3ijz.3_In_Frame_I  | NM_001102653 | NP_001096123 | Q01804      | OTUD4_HUMAN        |                              | 3            | ACATCAGCAGC/      | 0.34  |                   |
| + | 15 | 2059_2060 | p.T567fs SDHA_u    | NM_004168    | NP_004159    | P31040      | DHSA_HUMAN         |                              | 0            | AAAACTTTGAAC      | 0.431 | rs112307877       |
| + | 13 | 1713_1714 | p.K518fs PAPD7_    | NM_006999    | NP_008930    | Q5XG87      | PAPD7_HUMAN        |                              | 1            | AAAAAACACAC/      | 0.653 |                   |
| + | 13 | 2025      | 1f.2_Frame_Shift_I | NM_012343    | NP_036475    | Q13423      | NNTM_HUMAN         | chondrial matrix.            | 3            | ACTGACCCCCC       | 0.463 |                   |
| - | 3  | 349       |                    | NM_003664    | NP_003655    | O00203      | AP3B1_HUMAN        |                              | 1            | GATGCATTTTTCC     | 0.294 |                   |
| + | 3  | 1200_1201 | TNFAIP8_uc011cw    | NM_014350    | NP_055165    | O95379      | TFIP8_HUMAN        |                              | 1            | TGCCTTGATAAA      | 0.376 |                   |
| - | 12 | 1247      | H7A1_uc003kty.2_   | NM_001182    | NP_001173    | P49419      | AL7A1_HUMAN        |                              | 3            | TAGCCCTTTTTA/     | 0.383 |                   |
| + | 1  | 725_727   | c003kuq.1_5'Flank  | NM_001046    | NP_001037    | P55011      | S12A2_HUMAN        | cytoplasmic (Potential).     | 3            | ACTCCGCGCGC       | 0.65  |                   |
| - | 22 | 3471      | 1Shift_Del_p.R109  | NM_016340    | NP_057424    | Q8TEU7      | RPGF6_HUMAN        |                              | 3            | GTGCCCTTTTTT      | 0.453 |                   |
| - | 16 | 2124_2125 | 1Shift_Ins_p.S640f | NM_016340    | NP_057424    | Q8TEU7      | RPGF6_HUMAN        |                              | 3            | CGATTACTTTTTT     | 0.366 |                   |
| + | 9  | 1679      | uc003kwr.3_Intron  | NM_003059    | NP_003050    | Q9H015      | S22A4_HUMAN        | Name=12; (Potential).        | 0            | TCACCCTTTTTT      | 0.418 |                   |
| + | 5  | 378_379   | k.1_Frame_Shift_I  | NM_006083    | NP_006074    | Q13123      | RED_HUMAN          |                              | 1            | AAATTGAGAGAG      | 0.46  |                   |
| + | 4  | 1770      | 3lnn.1_Frame_Shif  | NM_020768    | NP_065819    | Q68DU8      | KCD16_HUMAN        |                              | 4            | GCAGCAAAAAA/      | 0.468 |                   |
| - | 19 | 2076      | lbr.1_Frame_Shift_ | NM_020117    | NP_064502    | Q9P2J5      | SYLC_HUMAN         |                              | 0            | AGTTACCCCCC       | 0.453 |                   |
| - | 1  | 189_191   | 1lwl.2_In_Frame_D  | NM_032782    | NP_116171    | Q8TDQ0      | HAVR2_HUMAN        |                              | 0            | iTAGTAGCAGCAC     | 0.291 |                   |
| + | 2  | 364_366   | 3mxm.1_Translati   | NM_031480    | NP_113668    | Q9BRS2      | RIOK1_HUMAN        |                              | 4            | gggttatgacgatgatg | 0.3   | rs2274212         |
| + | 8  | 2216      | p.F486fs JARID2_   | NM_004973    | NP_004964    | Q92833      | JARD2_HUMAN        | ARID.                        | 4            | CCCTGCTTTTTCC     | 0.493 |                   |
| - | 2  | 1369_1371 | 1l0jte.2_In_Frame_ | NM_005527    | NP_005518    | P34931      | HS71L_HUMAN        |                              | 6            | CGTCCAGCAGC.      | 0.596 |                   |
| + | 1  | 184_185   | uc003nyt.2_5'UTF   | NM_032454    | NP_115830    | P49842      | STK19_HUMAN        |                              | 4            | CGGGCAAACCC       | 0.634 |                   |
| + | 15 | 3067_3069 | H937del SYNGAF     | NM_006772    | NP_006763    | Q96PV0      | SYGP1_HUMAN        |                              | 4            | TCcatcaccaccac    | 0.547 |                   |
| - | 5  | 372_374   | 1w.3_In_Frame_De   | NM_003322    | NP_003313    | O00294      | TULP1_HUMAN        | Poly-Glu.                    | 3            | ctctctctctctctctc | 0.389 |                   |
| + | 6  | 926_928   | 1C204del MDFI_u    | NM_005586    | NP_005577    | Q99750      | MDFI_HUMAN         | Cys-rich.                    | 0            | GCCTCTGCTGC       | 0.655 |                   |
| - | 8  | 1307_1309 | 1dzv.1_In_Frame_   | NM_002042    | NP_002033    | P24046      | GBRR1_HUMAN        | ical; (Probable).            | 1            | GAGCAAGAAGA/      | 0.522 |                   |
| - | 7  | 875_877   | 1dzx.1_In_Frame_   | NM_002043    | NP_002034    | P28476      | GBRR2_HUMAN        | ical; (Potential).           | 0            | GAGCAAGAAGA/      | 0.517 |                   |
| - | 13 | 5977      | 1P1807fs REV3L_u   | NM_002912    | NP_002903    | O60673      | DPOLZ_HUMAN        | teraction with MAD2L2.       | 6            | TACTTGGGGGG       | 0.428 |                   |
| + | 2  | 498       | 1c003qid.1_5'Flan  | NM_015439    | NP_056254    | Q8IWP9      | CC28A_HUMAN        |                              | 0            | ATGCCAAAAAA/      | 0.413 |                   |
| + | 26 | 3025_3026 | 1me_Shift_Ins_p.D  | NM_015440    | NP_056255    | Q6UB35      | C1TM_HUMAN         | hydrofolate synthetase.      | 4            | CCTGACAAAAAA      | 0.48  |                   |
| + | 3  | 945       | 1ug.2_Frame_Shift_ | NM_006775    | NP_006766    | Q96PU8      | QKI_HUMAN          | KH.                          | 2            | GGGATAAAAAA/      | 0.363 |                   |
| - | 15 | 2268_2270 |                    | NM_032415    | NP_115791    | Q9BXL7      | CAR11_HUMAN        |                              | 50           | GTGGGAGGAG        | 0.616 |                   |
| + | 8  | 2004_2005 | 1srz.2_Frame_Shift | NM_014660    | NP_055475    | O94880      | PHF14_HUMAN        |                              | 3            | TTGCAAGAGAGA      | 0.376 |                   |
| - | 1  | 310_312   | 1ame_Del_p.72_73   | NM_005522    | NP_005513    | P49639      | HXA1_HUMAN         | Poly-His.                    | 3            | gggtggcgatgtgg    | 0.527 | rs10951154        |
| - | 2  | 601       |                    | NM_022728    | NP_073565    | Q96NK8      | NDF6_HUMAN         | lization signal (Potential). | 2            | GTTGCTTTTTTT      | 0.398 |                   |
| + | 5  | 601_603   | 1Okxo.2_In_Frame_  | NM_007252    | NP_009183    | P78424      | PO6F2_HUMAN        | Gln-rich.                    | 1            | cagctccagcagcagc  | 0.365 |                   |

|   |    |           |                    |              |              |        |             |                                |     |                   |       |             |
|---|----|-----------|--------------------|--------------|--------------|--------|-------------|--------------------------------|-----|-------------------|-------|-------------|
| + | 21 | 3700_3702 | .K708del AEBP1_    | NM_001129    | NP_001120    | Q8IUX7 | AEBP1_HUMAN | y). Glu-rich. Interaction with | 0   | aggaggagaaagagg   | 0.458 | rs13928     |
| - | 2  | 83_85     | _uc010lbj.1_in_Fr  | NM_004603    | NP_004594    | Q16623 | STX1A_HUMAN | lasmic (Potential).            | 0   | AGCGACATCATC      | 0.586 |             |
| + | 5  | 714       | IK1_uc003uab.2_F   | NM_002314    | NP_002305    | P53667 | LIMK1_HUMAN | PDZ.                           | 3   | :ATTGACCCCCC      | 0.677 | rs150491142 |
| + | 5  | 1249      | _p.P231fs DTX2_u   | NM_020892    | NP_065943    | Q86UW9 | DTX2_HUMAN  |                                | 2   | :CCCCCACACAG      | 0.657 | rs147779783 |
| - | 2  | 458       |                    | NM_032936    | NP_116325    | Q9H2L4 | TMM60_HUMAN |                                | 0   | CCAGGCTTTTTT      | 0.408 |             |
| - | 11 | 1360      | _p.F440fs SEMA3I   | NM_152754    | NP_689967    | O95025 | SEM3D_HUMAN | Sema.                          | 5   | :CTCTTGAACGTI     | 0.438 |             |
| + | 19 | 5175_5176 | .S1650fs AKAP9_    | NM_005751    | NP_005742    | Q99996 | AKAP9_HUMAN |                                | 26  | GTTTCAGAGAGA      | 0.411 |             |
| + | 46 | 11454     | .M3366fs AKAP9_    | NM_005751    | NP_005742    | Q99996 | AKAP9_HUMAN |                                | 26  | CGGATGGGGGG       | 0.537 | rs143306820 |
| + | 1  | 137_138   | 3_uc003utj.2_5'Fla | NM_152755    | NP_689968    | Q8N129 | CNPY4_HUMAN |                                | 0   | :TTTTCTTTTTTTI    | 0.525 |             |
| + | 4  | 574       | AGFG2_uc010lgy     | NM_006076    | NP_006067    | O95081 | AGFG2_HUMAN | Arf-GAP.                       | 1   | 3TATGTCCCCC       | 0.517 |             |
| + | 1  | 1875_1876 |                    | NM_012281    | NP_036413    | Q9NZV8 | KCND2_HUMAN | ir; Name=Segment S4; (Po       | 5   | AGTTTTCCCGCC      | 0.52  | rs143247237 |
| - | 20 | 2915      | _p.P781fs TNPO3    | NM_012470    | NP_036602    | Q9Y5L0 | TNPO3_HUMAN |                                | 5   | :GTATAGGGGGG      | 0.483 |             |
| + | 1  | 528       |                    | NM_001001656 | NP_001001656 | Q8NGU2 | OR9A4_HUMAN | ellular (Potential).           | 1   | GAACAATTTTTTTI    | 0.383 |             |
| - | 5  | 4079_4081 |                    | NM_001080826 | NP_001074295 | Q86YV5 | SG223_HUMAN |                                | 0   | AAACTTCATCATC     | 0.675 |             |
| - | 9  | 2293      | owl.1_Frame_Shift  | NM_182643    | NP_872584    | Q96QB1 | RHG07_HUMAN |                                | 7   | AGTCCGGGGGG       | 0.652 |             |
| + | 8  | 1102_1104 | 3_uc003www.2_In    | NM_006765    | NP_006756    | Q13454 | TUSC3_HUMAN |                                | 3   | TTCTTCTAAATGA     | 0.384 |             |
| - | 15 | 2035      |                    | NM_001010906 | NP_001010906 | Q68CJ6 | SLIP_HUMAN  |                                | 2   | AGGAAATTTTTTTI    | 0.453 |             |
| - | 16 | 3521_3523 | .E993del MYST3_    | NM_001099412 | NP_001092882 | Q92794 | MYST3_HUMAN | Poly-Glu.                      | 7   | :CCGGCTCCTCC      | 0.567 |             |
| - | 60 | 8167      | Shift_DeL_p.R2704  | NM_006904    | NP_008835    | P78527 | PRKDC_HUMAN | KIP-binding.                   | 34  | CCAGCCTTTTTT      | 0.498 |             |
| - | 10 | 1666_1667 | p.N420fs MYBL1_    | NM_001080416 | NP_001073885 | P10243 | MYBA_HUMAN  | atory domain (By similarity)   | 3   | CAAGTGTTTTTT      | 0.406 |             |
| + | 10 | 1740      | LF1_uc003xyf.2_F   | NM_015170    | NP_055985    | Q8IWU6 | SULF1_HUMAN |                                | 7   | TGTGCCTTTTTT      | 0.408 |             |
| - | 10 | 1506      | p.R384fs NBN_uc    | NM_002485    | NP_002476    | O60934 | NBN_HUMAN   | r localization signal.         | 7   | CAGACCTTTTTTI     | 0.338 |             |
| - | 6  | 1215      |                    | NM_001385    | NP_001376    | Q14117 | DPYS_HUMAN  |                                | 2   | CACGCCTTTTTC      | 0.478 |             |
| + | 14 | 1975      | _Splice_Site WDR6  | NM_145647    | NP_663622    | Q96DN5 | WDR67_HUMAN |                                | 1   | :TTACAGTTTTTT     | 0.322 |             |
| - | 13 | 1698      | D2_uc003yqi.3_RI   | NM_014109    | NP_054828    | Q6PL18 | ATAD2_HUMAN |                                | 2   | TTGTCAAAAAA       | 0.413 |             |
| - | 14 | 1846      | p.P525fs EIF2C2_   | NM_012154    | NP_036286    | Q9UKV8 | AGO2_HUMAN  | Piwi.                          | 0   | C CGCGGGGGGG      | 0.647 | rs148575703 |
| - | 13 | 1637_1639 | .I506del TSNARE    | NM_145003    | NP_659440    | Q96NA8 | TSNA1_HUMAN | . Helical; (Potential).        | 0   | 3TGGCGATGATG      | 0.414 | rs142964918 |
| + | 10 | 3752_3754 | .1_In_Frame_DeL    | NM_015158    | NP_055973    | Q14678 | KANK1_HUMAN |                                | 4   | AGAAGAGGAGG       | 0.463 |             |
| - | 1  | 2929      | p.N621fs RANBP6    | NM_012416    | NP_036548    | O60518 | RNBP6_HUMAN | HEAT 7.                        | 3   | ATGACATTTTTTTI    | 0.358 |             |
| - | 1  | 2084      | uc003zrh.1_RNA     | NM_153809    | NP_722516    | Q8IZX4 | TAF1L_HUMAN | p.K665fs*4(2)                  | 26  | TTGGCCTTTTTTI     | 0.478 |             |
| - | 11 | 2102      | 24_uc010mkb.2_Ir   | NM_194313    | NP_919289    | Q5T7B8 | KIF24_HUMAN |                                | 1   | CTGGCCTTTTTTTI    | 0.527 |             |
| + | 1  | 417_419   | 8376_uc003zys.1    | NM_001039792 | NP_001034881 | Q6UXD1 | HRCT1_HUMAN | His-rich.                      | 0   | acccccaccgccacca  | 0.389 | rs138232567 |
| - | 9  | 2947_2949 | R2_uc004ari.1_In   | NM_004560    | NP_004551    | Q01974 | ROR2_HUMAN  | lasmic (Potential).            | 20  | AGCCTTCCTCTI      | 0.645 |             |
| - | 2  | 367_369   | 3A_uc004axs.3_Rf   | NM_000380    | NP_000371    | P23025 | XPA_HUMAN   | :EP164 and required for UV     | 1   | TTCTGTCTCTCTI     | 0.34  |             |
| + | 3  | 1021_1023 | 4bag.1_In_Frame_   | NM_006981    | NP_008912    | Q92570 | NR4A3_HUMAN | Poly-His.                      | 173 | tcaccatcaccaccacc | 0.483 |             |
| - | 22 | 6093      | rf.2_Frame_Shift_I | NM_002160    | NP_002151    | P24821 | TENA_HUMAN  | nectin type-III 15.            | 7   | TGCCCGGGGGGG      | 0.478 | rs148674204 |
| - | 3  | 762_764   | .L221del ASTN2_    | NM_198187    | NP_937830    | O75129 | ASTN2_HUMAN | ical; (Potential).             | 9   | :ACACCAGCAGC      | 0.601 |             |
| - | 3  | 561_562   |                    | NM_016322    | NP_057406    | P61106 | RAB14_HUMAN |                                | 0   | :CTTACATTTTTT     | 0.292 |             |
| + | 6  | 826_828   | 4blo.2_In_Frame_   | NM_032552    | NP_115941    | Q5VWQ8 | DAB2P_HUMAN | C2.                            | 2   | :CGACAAGAAGA      | 0.601 |             |
| + | 3  | 630       |                    | NM_021619    | NP_067632    | Q9H4Q4 | PRD12_HUMAN |                                | 0   | .TTGAGGTGTGTC     | 0.594 |             |
| + | 13 | 2110_2112 | E598del GRIN1_uc   | NM_007327    | NP_015566    | Q05586 | NMDZ1_HUMAN | lasmic (Potential).            | 1   | CAGCGAGGAGG       | 0.739 |             |
| - | 3  | 1135_1137 | 4dsc.2_In_Frame_   | NM_001111125 | NP_001104595 | Q5JU85 | IQEC2_HUMAN | Poly-Glu.                      | 3   | TTTATCTCCTCC1     | 0.635 |             |
| - | 18 | 2564_2566 | 1sw.2_In_Frame_C   | NM_015107    | NP_055922    | Q9UPP1 | PHF8_HUMAN  |                                | 3   | 3GTTCTCCTCC       | 0.591 |             |
| - | 1  | 1019_1021 | 1mqj.1_In_Frame_   | NM_021963    | NP_068798    | Q9ULW6 | NP1L2_HUMAN | u-rich (acidic).               | 1   | AATGTCGtccctcctc  | 0.33  |             |
| + | 5  | 716_718   | 04eib.1_In_Frame_  | NM_016607    | NP_057691    | Q9UH62 | ARMX3_HUMAN |                                | 2   | FGGTCTGATGATC     | 0.448 |             |
| + | 4  | 1067_1069 | 1mrt.1_In_Frame_   | NM_001142526 | NP_001135998 | Q6PI77 | BHLH9_HUMAN | Poly-Glu.                      | 2   | GGCTGAGGAGG       | 0.488 |             |
| + | 9  | 1337_1338 |                    | NM_007231    | NP_009162    | Q9UN76 | S6A14_HUMAN | Name=8; (Potential).           | 3   | CATATTATTTTTT     | 0.361 |             |

|   |    |           |                    |              |              |        |              |                                 |              |                  |             |                    |
|---|----|-----------|--------------------|--------------|--------------|--------|--------------|---------------------------------|--------------|------------------|-------------|--------------------|
| + | 2  | 310_311   | I_5'Flank LOC100:  | NM_001152    | NP_001143    | P05141 | ADT2_HUMAN   | Solcar 1.                       | 1            | 3GAGCAGGGAG      | 0.49        | rs113356560        |
| + | 2  | 339_340   | 0nqm.1_Frame_St    | NM_006777    | NP_006768    | Q86T24 | KAISO_HUMAN  | y similarity). Interaction with | 3            | GTTATTGTGGAA     | 0.45        |                    |
| - | 3  | 866_868   | v.2_In_Frame_Del   | NM_003588    | NP_003579    | Q13620 | CUL4B_HUMAN  | Ser-rich.                       | 3            | GAAGATgaggagg    | 0.424       |                    |
| - | 6  | 1931      | mvf.1_Frame_Shift  | NM_031907    | NP_114113    | Q9BXU7 | UBP26_HUMAN  | p.G488fs*6(2) p.F487            | 8            | GCTCCAAAAAA      | 0.383       |                    |
| - | 3  | 474       | exp.1_Frame_Shift  | NM_021796    | NP_068568    | Q9HBJ0 | PLAC1_HUMAN  |                                 | 1            | GGTTTGGGGGG      | 0.507       |                    |
| + | 4  | 1210_1212 | EC1_uc010nsl.1_I   | NM_005462    | NP_005453    | O60732 | MAGC1_HUMAN  |                                 | 4            | TGAGCTCCTCC      | 0.483       | 660605;rs141900922 |
| + | 3  | 1556_1558 | Q477del MAMLD1     | NM_005491    | NP_005482    | Q13495 | MAMD1_HUMAN  | Poly-Gln.                       | 0            | ccagcaacagcagca  | 0.433       |                    |
| - | 3  | 274_276   | fen.2_Intron CD9E  | NM_031462    | NP_113650    | Q8TCZ2 | C99L2_HUMAN  | ar (Potential). Poly-Thr.       | 3            | GGTTGTGGTGG      | 0.552       |                    |
| + | 7  | 512_514   | j.1_In_Frame_Del   | NM_007150    | NP_009081    | O15231 | ZN185_HUMAN  | Poly-Glu.                       | 3            | GACACCgaggagg    | 0.522       |                    |
| - | 4  | 451_460   | p.A166fs BCAP31    | NM_001139441 | NP_001132913 | P51572 | BAP31_HUMAN  | renal (Potential).              | 0            | TCCTCTGGGCA      | 0.552       |                    |
| - | 14 | 4550      |                    | NM_000132    | NP_000123    | P00451 | FA8_HUMAN    | B.                              | 11           | AGGTTATTTTTT     | 0.413       |                    |
| - | 6  | 4241_4243 | vsz.1_In_Frame_I   | NM_001029882 | NP_001025053 | Q5TGY3 | AHDC1_HUMAN  |                                 | 1            | GCTGGAaggagga    | 0.596       |                    |
| + | 4  | 654_655   | p.R144fs THRAP3    | NM_005119    | NP_005110    | Q9Y2W1 | TR150_HUMAN  | g-rich. Ser-rich.               | 9            | ATTCTAGAAACT     | 0.535       |                    |
| + | 7  | 1426_1427 | me_Shift_Del_p.H   | NM_005012    | NP_005003    | Q01973 | ROR1_HUMAN   | xtracellular (Potential).       | 19           | ATCCCCACACAC     | 0.554       |                    |
| + | 7  | 1343_1345 | ie_Del_p.P339del   | NM_005807    | NP_005798    | Q92954 | PRG4_HUMAN   | C-X-P-X-P-T-T-X. 11; appro      | 1            | ACCACTCCCAA      | 0.655       |                    |
| - | 20 | 2967_2969 | i31QQ>Q INTS7_L    | NM_015434    | NP_056249    | Q9NVH2 | INT7_HUMAN   | Gln-rich.                       | 0            | GCGTTGCTGCT      | 0.443       |                    |
| + | 2  | 983_984   |                    | NM_014053    | NP_054772    | Q9Y5Y0 | FLVC1_HUMAN  |                                 | 0            | ACCAACACACA      | 0.361       |                    |
| + | 3  | 629_631   | ame_Del_p.S197d    | NM_032429    | NP_115805    | Q9BRK4 | LZTS2_HUMAN  | ntosomal localization (By :     | 4            | GGCCCTGcctcctc   | 0.557       |                    |
| + | 1  | 758       |                    | NM_001127389 | NP_001120861 | F5GZ66 | F5GZ66_HUMAN |                                 | 0            | TGGCAGGGCGC      | 0.736       |                    |
| + | 5  | 886       | rlo.1_Frame_Shift  | NM_004265    | NP_004256    | O95864 | FADS2_HUMAN  | lasmic (Potential).             | 2            | GGCAGCCCATC      | 0.527       |                    |
| - | 5  | 1096      |                    | NM_001039548 | NP_001034637 | Q6PF15 | KLH35_HUMAN  | Kelch 5.                        | 0            | TGCCCTCCCCC      | 0.562       |                    |
| - | 3  | 539_541   |                    | NM_006248    | NP_006239    |        |              |                                 | 0            | GACTTGTGT        | 0.596       |                    |
| - | 2  | 665       | 31_splice DACH1_   | NM_080759    | NP_542937    | Q9UI36 | DACH1_HUMAN  |                                 | 1            | ccgctgccgccgccc  | 0.262       |                    |
| - | 2  | 57        | 6_uc010tpm.1_5'L   | NM_152233    | NP_689419    | Q9UNH7 | SNX6_HUMAN   |                                 | 0            | TGCCAGGCCTT      | 0.592       |                    |
| + | 13 | 2290_2291 | M_uc001wwe.3_F     | NM_020937    | NP_065988    | Q8IYD8 | FANCM_HUMAN  |                                 | 7            | ATCAACTCTCTC     | 0.347       |                    |
| - | 18 | 1872      | 0apo.2_Frame_Sh    | NM_174978    | NP_777638    | Q08AQ4 | Q08AQ4_HUMAN |                                 | 4            | TAGCTCAAAAAA     | 0.289       |                    |
| + | 9  | 960_962   | ne_Del_p.E294del   | NM_001099661 | NP_001093131 | B5ME19 | B5ME19_HUMAN |                                 | 0            | GGATGAGGAGG      | 0.562       |                    |
| - | 2  | 423_425   | 2dxs.2_In_Frame    | NM_006110    | NP_006101    | O95400 | CD2B2_HUMAN  |                                 | 1            | CCCCCATCATC      | 0.532       |                    |
| - | 5  | 412       | 2lbq.3_Frame_Shift | NM_024430    | NP_077748    | Q9H939 | PPIP2_HUMAN  | Potential.                      | 1            | ATTCTTCCATCTT    | 0.378       |                    |
| + | 9  | 977       | sl_p.S299fs SPPL2  | NM_152988    | NP_694533    | Q8TCT7 | PSL1_HUMAN   | ical; (Potential).              | 0            | CTGCTCCTGGC      | 0.697       |                    |
| + | 7  | 641_642   | E1_uc010eal.1_Inl  | NM_018467    | NP_060937    | Q9NZ43 | USE1_HUMAN   | ic (Potential). Potential.      | 0            | agtgcatcaagaagg  | 0.262       |                    |
| - | 1  | 1479_1481 |                    | NM_001029883 | NP_001025054 | A6NGG8 | CB071_HUMAN  |                                 | 1            | GTCTTCTCTCTC     | 0.542       |                    |
| + | 2  | 483       | AP25_uc002sev.2    | NM_001007231 | NP_001007232 | P42331 | RHG25_HUMAN  |                                 | 4            | TCCACCCCCA       | 0.592       |                    |
| + | 8  | 1145      | 2_Intron ANKRD3    | NM_001164315 | NP_001157787 | A6QL64 | AN36A_HUMAN  |                                 | 0            | ACAGGTATTTTC     | 0.302       |                    |
| + | 2  | 495       | o.1_Intron CD28_u  | NM_006139    | NP_006130    | P10747 | CD28_HUMAN   | (Potential). Ig-like V-type.    | 0            | ATTGGGCAATGA     | 0.403       |                    |
| - | 1  | 5854      | E2_uc002yyx.2_I    | NM_182832    | NP_878252    | Q8WY50 | PLAC4_HUMAN  |                                 | 0            | gagggtatccagggtg | 0.159       |                    |
| - | 1  | 80_82     | 15_uc011akw.1_5    | NM_001017981 | NP_001017981 | Q9Y6U7 | RN215_HUMAN  | ical; (Potential).              | 1            | gcaggggcagcagca  | 0.266       |                    |
| - | 1  | 1195      | p.A311fs MST1R_    | NM_002447    | NP_002438    | Q04912 | RON_HUMAN    | ilar (Potential). Sema.         | 6            | TGGGGCCCCC       | 0.667       |                    |
| + | 2  | 1293_1295 | y.3_RNA LNP1_uc    | NM_001085451 | NP_001078920 | A1A4G5 | LNP1_HUMAN   | Poly-Asp.                       | 0            | ACAAGATGATG      | 0.507       |                    |
| + | 12 | 1247      | p.Q316fs ACTL6A    | NM_004301    | NP_004292    | O96019 | ACL6A_HUMAN  |                                 | 1            | AATACAGATTTT     | 0.353       |                    |
| + | 1  | 3102_3103 |                    | NM_175918    | NP_787114    | Q8N1N5 | CRPAK_HUMAN  | 1                               | CACACATGCCCA | 0.644            | rs144787346 |                    |
| + | 1  | 3804_3805 |                    | NM_175918    | NP_787114    | Q8N1N5 | CRPAK_HUMAN  | 8                               | CCTGCTCACATC | 0.693            |             |                    |
| - | 16 | 3651      | 3lps.2_RNA SH3TC   | NM_024577    | NP_078853    | Q8TF17 | S3TC2_HUMAN  | TPR 7.                          | 2            | GGCCACCAGCT      | 0.453       |                    |
| - | 25 | 3048_3049 | ijg.2_Frame_Shift  | NM_003062    | NP_003053    | O75094 | SLIT3_HUMAN  | LRRCT 4.                        | 4            | CTCCTGTACCC      | 0.639       |                    |
| + | 1  | 1337_1338 |                    | NM_001453    | NP_001444    | Q12948 | FOXC1_HUMAN  |                                 | 1            | TGAGTCAcggcgg    | 0.54        |                    |
| + | 2  | 364_366   | 3mxm.1_Translati   | NM_031480    | NP_113668    | Q9BRS2 | RIOK1_HUMAN  |                                 | 4            | gggtatgacgatgatg | 0.3         | rs2274212          |
| - | 8  | 1612_1613 | Ins_p.214_214Q>    | NM_000332    | NP_000323    | P54253 | ATX1_HUMAN   | Poly-Gln.                       | 4            | tgctgctgctgctg   | 0.381       | 806515;rs66949327  |



|   |    |                             |              |              |        |              |                          |    |      |                     |       |             |
|---|----|-----------------------------|--------------|--------------|--------|--------------|--------------------------|----|------|---------------------|-------|-------------|
| - | 8  | 1604_1606me_Del_p.H211de    | NM_000332    | NP_000323    | P54253 | ATX1_HUMAN   | Poly-Gln.                |    | 4    | ꞵctgctgctgatgctgat  | 0.384 | rs59310777  |
| - | 19 | 2712_2714ꞵc.1_In_Frame_De   | NM_002714    | NP_002705    | Q96QC0 | PP1RA_HUMAN  | Gly-rich.                |    | 4    | CGGAATggaggag       | 0.601 |             |
| + | 13 | 1843 ru.2_Intron DDR1_      | NM_013993    | NP_054699    | Q08345 | DDR1_HUMAN   | Cytoplasmic (Potential). |    | 9    | :CCGGGCCCCCC        | 0.682 |             |
| + | 1  | 284 J3nyf.2_Frame_Sh        | NM_001710    | NP_001701    | P00751 | CFAB_HUMAN   |                          |    | 1    | FGGTTCTTTTTTTC      | 0.582 |             |
| - | 5  | 372_374 ꞵw.3_In_Frame_De    | NM_003322    | NP_003313    | O00294 | TULP1_HUMAN  | Poly-Glu.                |    | 3    | lctctcttctctctctctc | 0.389 |             |
| + | 24 | 2661                        | NM_015050    | NP_055865    | Q8N1G2 | MTR1_HUMAN   | tion with POLR2A.        |    | 5    | GGAGTGGGGGG         | 0.572 |             |
| + | 6  | 926_928 ꞵ.C204del MDFI_u    | NM_005586    | NP_005577    | Q99750 | MDFI_HUMAN   | Cys-rich.                |    | 0    | 'GCCTCTGCTGC'       | 0.655 |             |
| + | 14 | 2482_2484                   | NM_032538    | NP_115927    | Q5TCY1 | TTBK1_HUMAN  | r-rich. Potential.       |    | 9    | gaggaagaggaggag     | 0.291 |             |
| - | 6  | 2278_2279                   | NM_014452    | NP_055267    | O75509 | TNR21_HUMAN  | lasmic (Potential).      |    | 0    | CTCTTCAATCAC'       | 0.52  |             |
| + | 2  | 1016                        | NM_004770    | NP_004761    | Q92953 | KCNB2_HUMAN  | lasmic (Potential).      |    | 7    | 'ATCATCAAAAAA       | 0.448 |             |
| + | 10 | 1284_1286 bhp.2_In_Frame_   | NM_152786    | NP_689999    | Q8TAL5 | CI043_HUMAN  | Gln-rich.                |    | 0    | gcagcggcagcagca     | 0.438 |             |
| - | 3  | 1637_1638 vf.2_Frame_Shift_ | NM_002160    | NP_002151    | P24821 | TENA_HUMAN   | EGF-like 9.              |    | 7    | CTCATCACACAC        | 0.579 |             |
| + | 3  | 627 'H2_uc010okk.1_Ir       | NM_001384    | NP_001375    | Q9BQC3 | DPH2_HUMAN   |                          | NA | 1    | :CCAGACCCCAA        | 0.602 |             |
| + | 1  | 758                         | NM_001127389 | NP_001120861 | F5GZ66 | F5GZ66_HUMAN |                          | NA | 0    | TGGCAGGGCGC         | 0.736 |             |
| - | 3  | 539_541                     | NM_006248    | NP_006239    |        |              |                          | NA | 0    | ꞵGGACTTGTGTG'       | 0.596 |             |
| + | 87 | 13755_13757                 | NM_002332    | NP_002323    | Q07954 | LRP1_HUMAN   | ical; (Potent            | NA | 22   | ꞵCTGTTGCTGCT'       | 0.557 |             |
| - | 1  | 1385_1387                   | NM_024496    | NP_078772    | Q9H1B7 | I2BPL_HUMAN  | Poly-Ala.                | NA | 0    | ACCgcagcggcggc      | 0.581 |             |
| - | 5  | 891 ꞵn DYX1C1_uc002         | NM_130810    | NP_570722    | Q8WXU2 | DYXC1_HUMAN  |                          | NA | 1    | tctctgaaatTTTTTgc   | 0.045 |             |
| - | 1  | 253_255 CHRNA3_uc002bꞵ      | NM_000743    | NP_000734    | P32297 | ACHA3_HUMAN  |                          | NA | 4    | cagagacagcagcag     | 0.601 | rs66793222  |
| - | 9  | 1952 a.3_RNA CCDC14         | NM_182568    | NP_872374    |        |              |                          | NA | 2    | 'TTGTTTCATCAGC      | 0.406 | rs66528329  |
| + | 3  | 759_761 02svy.2_In_Frame_   | NM_001008949 | NP_001008949 | Q6GPH6 | IPIL1_HUMAN  | lasmic (Pote             | NA | 3    | CAGTGAGGAGG         | 0.532 |             |
| + | 5  | 757 ow.2_Frame_Shift        | NM_020194    | NP_064579    | Q9GZY8 | MFF_HUMAN    | lasmic (Pote             | NA | 1    | ꞵGCACTGAAAAAC       | 0.393 |             |
| - | 7  | 1050_1052 gye.1_In_Frame_   | NM_020831    | NP_065882    | Q969V6 | MKL1_HUMAN   | Gln-rich.                | NA | 5    | GTGGTGCTGCT'        | 0.66  |             |
| - | 1  | 135 v.1_Intron LOC400       | NM_018280    | NP_060750    | Q9NV39 | CV026_HUMAN  | Pro-rich.                | NA | 0    | GGGTTGGGGGG         | 0.751 |             |
| + | 2  | 1293_1295 y.3_RNA LNP1_uc   | NM_001085451 | NP_001078920 | A1A4G5 | LNP1_HUMAN   | Poly-Asp.                | NA | 0    | ACAAGATGATG         | 0.507 |             |
| + | 12 | 1247 p.Q316fs ACTL6A        | NM_004301    | NP_004292    | O96019 | ACL6A_HUMAN  |                          | NA | 1    | 'AATACAGAGTTT       | 0.353 |             |
| + | 1  | 3102_3103                   | NM_175918    | NP_787114    | Q8N1N5 | CRPAK_HUMAN  | 1                        | NA | 0    | CACACATGCCCA        | 0.644 | rs144787346 |
| + | 1  | 1337_1338                   | NM_001453    | NP_001444    | Q12948 | FOXC1_HUMAN  |                          | NA | 1    | :TGAGTCAcggcgg      | 0.54  |             |
| + | 2  | 364_366 3mxm.1_Translati    | NM_031480    | NP_113668    | Q9BRS2 | RIOK1_HUMAN  |                          | NA | 4    | ꞵgggtatgacgatgatg   | 0.3   | rs2274212   |
| + | 6  | 926_928 ꞵ.C204del MDFI_u    | NM_005586    | NP_005577    | Q99750 | MDFI_HUMAN   | Cys-rich.                | NA | 0    | 'GCCTCTGCTGC'       | 0.655 |             |
| + | 12 | 2906_2908 9vqi.1_In_Frame_  | NM_001083621 | NP_001077090 | Q9NUA8 | ZBT40_HUMAN  |                          |    | 1    | :CCCCAAGAAGA        | 0.517 |             |
| + | 3  | 433 ꞵHACTR4_uc001b          | NM_001048183 | NP_001041648 | Q8IZ21 | PHAR4_HUMAN  |                          |    | 0    | 'GGAGGAAAAAA        | 0.393 |             |
| + | 3  | 513_515 nj.2_Intron HFE2_   | NM_213653    | NP_998818    | Q6ZVN8 | RGMC_HUMAN   | Poly-Gly.                |    | 1    | .CTTCGAGGAGG        | 0.626 |             |
| + | 2  | 1178 ftp.3_Frame_Shift_     | NM_002036    | NP_002027    | Q16570 | DUFFY_HUMAN  | lasmic (Potential).      |    | 2    | :CACCCGCACCC        | 0.582 |             |
| - | 6  | 746 '141_uc009yga.1_        | NM_016422    | NP_057506    | Q8WVD5 | RN141_HUMAN  |                          |    | 0    | TCATTTGCTCCAC       | 0.428 |             |
| + | 7  | 1028 '121_uc001orb.2_f      | NM_018320    | NP_060790    | Q9H920 | RN121_HUMAN  | G-type; atypical.        |    | 0    | 'TGGTGGGCAG         | 0.502 |             |
| - | 3  | 539_541                     | NM_006248    | NP_006239    |        |              |                          |    | 0    | ꞵGGACTTGTGTG'       | 0.596 |             |
| - | 1  | 61_63 .2_5'UTR PGBD4_       | NM_020154    | NP_064539    | Q9NPA0 | CO024_HUMAN  |                          |    | 0    | :CGATAGCAGCAC       | 0.665 |             |
| + | 6  | 1090 p.Q172fs CHD2_L        | NM_001271    | NP_001262    | O14647 | CHD2_HUMAN   |                          |    | 2    | ꞵAGAACAAAAAA        | 0.418 |             |
| - | 5  | 1214_1216ꞵ161del CXXC1_u    | NM_014593    | NP_055408    | Q9P0U4 | CXXC1_HUMAN  | CXXC-type.               |    | 2    | GTTTGTctgctgct      | 0.468 |             |
| - | 67 | 12634_12635                 | NM_004525    | NP_004516    | P98164 | LRP2_HUMAN   | ꞵellular (Potential).    |    | 29   | 'GCATTACGTATT       | 0.47  | rs150382715 |
| + | 4  | 301                         | NM_178456    | NP_848551    | Q9H1P6 | CT085_HUMAN  |                          |    | 1    | 'TCCATCCCCCC'       | 0.582 |             |
| - | 1  | 5854 ꞵE2_uc002yyx.2_I       | NM_182832    | NP_878252    | Q8WY50 | PLAC4_HUMAN  |                          |    | 0    | ꞵagggatccagggtg     | 0.159 |             |
| + | 7  | 1737_1739 3atq.1_In_Frame_  | NM_001039141 | NP_001034230 | Q9H2D6 | TARA_HUMAN   |                          |    | 1    | 'AGAGCTCCTC'        | 0.601 |             |
| + | 4  | 287_289 J03ckr.2_In_Frame   | NM_001904    | NP_001895    | P35222 | CTNB1_HUMAN  | ꞵ_Y142>V(1) p.A20_L148d  |    | 3166 | ꞵCTCCTTCTCT'        | 0.502 | rs121913407 |
| + | 1  | 3561_3562                   | NM_175918    | NP_787114    | Q8N1N5 | CRPAK_HUMAN  | 5                        |    | 0    | CTGCTCACACGT        | 0.658 |             |
| - | 6  | 585_592                     | NM_152680    | NP_689893    | Q6P9G4 | TM154_HUMAN  | lasmic (Potential).      |    | 0    | ꞵCAAAGTCGGCT        | 0.409 |             |

|   |    |           |                    |              |              |        |             |                              |      |                   |       |             |
|---|----|-----------|--------------------|--------------|--------------|--------|-------------|------------------------------|------|-------------------|-------|-------------|
| + | 3  | 500       | .T70fs PHF3_uc01   | NM_015153    | NP_055968    | Q92576 | PHF3_HUMAN  |                              | 5    | GAACACAAAAAA/     | 0.383 |             |
| - | 2  | 171       | CDCA7L_uc003sv     | NM_018719    | NP_061189    | Q96GN5 | CDA7L_HUMAN |                              | 0    | 3GCGTTAAAGAT/     | 0.468 |             |
| + | 3  | 9487_9489 | C17_uc010lho.1_F   | NM_001040105 | NP_001035194 | Q685J3 | MUC17_HUMAN | ch.[59 X approximate tand    | 27   | TTCATCTCCTAC/     | 0.493 |             |
| - | 5  | 1878      | g.2_RNA CSGALN     | NM_001130518 | NP_001123990 | Q8TDX6 | CGAT1_HUMAN | lenal (Potential).           | 3    | 3CACCCTTTTTG/     | 0.433 |             |
| - | 16 | 3521_3523 | .E993del MYST3_u   | NM_001099412 | NP_001092882 | Q92794 | MYST3_HUMAN | Poly-Glu.                    | 7    | CCGGCTCCTCC       | 0.567 |             |
| + | 12 | 2906_2908 | 9vqi.1_In_Frame_   | NM_001083621 | NP_001077090 | Q9NUA8 | ZBT40_HUMAN |                              | 1    | CCCCAAGAAGA       | 0.517 |             |
| + | 6  | 796       | zqm.1_Frame_Shif   | NM_007235    | NP_009166    | O43592 | XPOT_HUMAN  | tan, nuclear localization an | 2    | CCCAAGTTTTTT      | 0.443 |             |
| - | 3  | 1787      | .i291fs RTN4_uc0   | NM_020532    | NP_065393    | Q9NQC3 | RTN4_HUMAN  | lasmic (Potential).          | 3    | CTTCTATTTTTTT     | 0.378 |             |
| - | 10 | 1758      | F160_uc010gll.1_F  | NM_015565    | NP_056380    | O94822 | LTN1_HUMAN  |                              | 0    | TTACCATTTTTTT     | 0.378 |             |
| - | 1  | 5854      | DE2_uc002yyx.2_l   | NM_182832    | NP_878252    | Q8WY50 | PLAC4_HUMAN |                              | 0    | gagggtatccaggggtg | 0.159 |             |
| - | 30 | 4280_4282 |                    | NM_002473    | NP_002464    | P35579 | MYH9_HUMAN  | Potential.                   | 11   | TTGGCCTCCTC/      | 0.65  |             |
| + | 7  | 1737_1739 | 3atq.1_In_Frame_   | NM_001039141 | NP_001034230 | Q9H2D6 | TARA_HUMAN  |                              | 1    | AGAGCCTCCTC       | 0.601 |             |
| + | 4  | 287_289   | 03ckr.2_In_Frame   | NM_001904    | NP_001895    | P35222 | CTNB1_HUMAN | Y142>V(1) p.A20_L148d        | 3166 | AGCTCCTTCTCT/     | 0.502 | rs121913407 |
| - | 6  | 585_592   |                    | NM_152680    | NP_689893    | Q6P9G4 | TM154_HUMAN | lasmic (Potential).          | 0    | GCAAAGTCGGCT.     | 0.409 |             |
| + | 9  | 1208_1209 | Shift_Ins_p.S303f  | NM_016447    | NP_057531    | Q9NZW5 | MPP6_HUMAN  |                              | 0    | AGTAGCAAAAAA      | 0.302 |             |
| + | 3  | 9487_9489 | C17_uc010lho.1_F   | NM_001040105 | NP_001035194 | Q685J3 | MUC17_HUMAN | ch.[59 X approximate tand    | 27   | TTCATCTCCTAC/     | 0.493 |             |
| - | 1  | 549       |                    | NM_020710    | NP_065761    | Q8N1G4 | LRC47_HUMAN | LRR 4.                       | 2    | CGGGGCGAAAG       | 0.692 |             |
| - | 4  | 449_450   | 1aog.2_Frame_Shi   | NM_018198    | NP_060668    | Q9NVH1 | DJC11_HUMAN |                              | 2    | TCTCTTCTCTCT      | 0.505 |             |
| + | 3  | 513_515   | nj.2_Intron HFE2_u | NM_213653    | NP_998818    | Q6ZVN8 | RGMC_HUMAN  | Poly-Gly.                    | 1    | CTTCGAGGAGG.      | 0.626 |             |
| - | 3  | 393       | lank POLR3C_uc0    | NM_006468    | NP_006459    | Q9BUI4 | RPC3_HUMAN  |                              | 1    | TGCACTGGGCTT      | 0.468 |             |
| + | 7  | 866       | _Shift_Del_p.C51f  | NM_001080471 | NP_001073940 | Q5VY43 | PEAR1_HUMAN | EGF-like 2.                  | 3    | AGTGCCCCCCC       | 0.612 | rs77456537  |
| - | 6  | 1357_1359 | p.V32del PVRL4_u   | NM_030916    | NP_112178    | Q96NY8 | PVRL4_HUMAN | ical; (Potential).           | 2    | ACACCCACCAC/      | 0.606 |             |
| + | 3  | 338_340   |                    | NM_001102566 | NP_001096036 | A6NKN8 | PC4L1_HUMAN |                              | 0    | AGGCGGAGGAG       | 0.488 |             |
| + | 17 | 2363_2365 | 2F1_uc010ph.1_I    | NM_002697    | NP_002688    | P14859 | PO2F1_HUMAN |                              | 5    | TGCGTCCACCAC      | 0.601 |             |
| - | 12 | 1603      | L3_uc001ggt.2_In   | NM_181093    | NP_851607    | Q8IZE3 | PACE1_HUMAN |                              | 2    | TGCCAGAAAAAG      | 0.413 |             |
| + | 10 | 1695      | p.Q317fs KLHL20_   | NM_014458    | NP_055273    | Q9Y2M5 | KLH20_HUMAN | Kelch 4.                     | 1    | GTATATCAGGAC/     | 0.507 |             |
| + | 22 | 6427      | 2A2_uc009www.2_    | NM_020318    | NP_064714    | Q9BXP8 | PAPP2_HUMAN |                              | 16   | ATGACGGGGGA/      | 0.532 |             |
| + | 1  | 611_613   |                    | NM_005298    | NP_005289    | O00155 | GPR25_HUMAN | 3=5; (Potential). Poly-Leu.  | 1    | AGCTTGCTGCT/      | 0.724 |             |
| + | 13 | 2034      | Optd.1_Frame_Sh    | NM_006243    | NP_006234    | Q15172 | 2A5A_HUMAN  |                              | 1    | CGAATAAAAAA/      | 0.328 | rs71759537  |
| - | 3  | 1355      | kgo.1_Frame_Shif   | NM_148977    | NP_683878    | Q8TE04 | PANK1_HUMAN |                              | 0    | TACGGCTTTTTT      | 0.438 |             |
| - | 13 | 4574      | av.1_Frame_Shift_  | NM_002417    | NP_002408    | P46013 | KI67_HUMAN  | approximate repeats.[4.      | 7    | TGGCCTTTTCC       | 0.488 |             |
| + | 9  | 1225      | Del_p.A352fs TNN   | NM_138567    | NP_612634    | Q8NBV8 | SYT8_HUMAN  | lasmic (Potential).          | 1    | CCACGCCCGGC       | 0.756 |             |
| + | 6  | 839       | 9ykr.2_Frame_Shil  | NM_001031854 | NP_001027025 | Q4AC99 | 1A1L2_HUMAN |                              | 5    | TTCTCTGGTCCC      | 0.537 |             |
| + | 11 | 1217      | oks.2_Frame_Shif   | NM_004584    | NP_004575    | Q99638 | RAD9A_HUMAN | r interaction with ABL1.     | 0    | ACGCTCCCCC/       | 0.612 |             |
| + | 9  | 928_929   | 58fs TCIRG1_uc0    | NM_006019    | NP_006010    | Q13488 | VPP3_HUMAN  | lasmic (Potential).          | 1    | 3GGAGACAGAC/      | 0.708 |             |
| + | 8  | 1369_1389 |                    | NM_025004    | NP_079280    | Q0P6D6 | CCD15_HUMAN |                              | 2    | CAGAAGGCCAG/      | 0.475 |             |
| + | 16 | 2686_2688 | tbn.1_In_Frame_I   | NM_004592    | NP_004583    | Q12872 | SFSWA_HUMAN | g/Ser-rich (RS domain).      | 0    | CACGAGAAGAA       | 0.493 |             |
| - | 5  | 538_539   | 1wmy.1_5'UTR IPC   | NM_024658    | NP_078934    | Q8TEX9 | IPO4_HUMAN  |                              | 1    | GGTACCTCTCTC      | 0.559 |             |
| - | 3  | 462_463   | 10asg.1_RNA TME    | NM_006827    | NP_006818    | P49755 | TMEDA_HUMAN | il (Potential). GOLD.        | 0    | TTTTTCGCCTCC      | 0.485 |             |
| - | 22 | 5408      | .F1728fs DMXL2_    | NM_015263    | NP_056078    | Q8TDJ6 | DMXL2_HUMAN |                              | 9    | GCAAGAAAAAA/      | 0.348 |             |
| + | 1  | 150       | ACTP2_uc010bok.    | NM_018349    | NP_060819    | Q6DN12 | MCTP2_HUMAN |                              | 3    | AGGTGAAAAAG.      | 0.532 |             |
| - | 2  | 1377_1378 | p.G470fs GFALS     | NM_004970    | NP_004961    | P35858 | ALS_HUMAN   |                              | 0    | CGCACCCCC/        | 0.678 |             |
| - | 7  | 1266      | lbsl.1_Frame_Shift | NM_001089    | NP_001080    | Q99758 | ABCA3_HUMAN |                              | 16   | GCGGGAAAAGG       | 0.527 |             |
| + | 9  | 1085      |                    | NM_006612    | NP_006603    | O43896 | KIF1C_HUMAN | inesin-motor.                | 2    | AGTGAGCGAGC       | 0.617 |             |
| + | 8  | 1209_1211 | 2gnp.1_In_Frame    | NM_153604    | NP_705832    | Q8IZQ8 | MYCD_HUMAN  | Gln-rich.                    | 5    | CTCAGCagcagca     | 0.527 |             |
| - | 15 | 2100_2101 | p.A154fs TOP3A_u   | NM_004618    | NP_004609    | Q13472 | TOP3A_HUMAN |                              | 3    | TTCTTTGCTTTA/     | 0.248 |             |
| + | 12 | 1003      | wjd.1_Frame_Shi    | NM_002390    | NP_002381    | O75078 | ADA11_HUMAN | potential). Peptidase M12B.  | 1    | AGGACCTCCAG       | 0.697 |             |

|   |    |             |                    |              |              |             |                    |                                |              |                  |       |                     |
|---|----|-------------|--------------------|--------------|--------------|-------------|--------------------|--------------------------------|--------------|------------------|-------|---------------------|
| - | 7  | 1092        | NM_080284          | NP_525023    | Q8N139       | ABCA6_HUMAN | ical; (Potential). | 7                              | CCATATAAAAAA | 0.308            |       |                     |
| - | 13 | 3301_3302   | N2C_uc010wrh.1_    | NM_000835    | NP_000826    | Q14957      | NMDE3_HUMAN        | lasmic (Potential).            | 4            | CTCCAGCTCCG      | 0.762 | rs495021;rs67510083 |
| - | 2  | 402         | _Shift_Del_p.G102  | NM_001930    | NP_001921    | P49366      | DHYS_HUMAN         |                                | 1            | GTATATCCCAGG     | 0.577 |                     |
| - | 1  | 142_143     |                    | NM_013940    | NP_039228    | Q9Y4A9      | O10H1_HUMAN        | ellular (Potential).           | 0            | AAGACAGAGAAC     | 0.574 | rs147833765         |
| - | 2  | 412_413     | owf.3_Frame_Shift  | NM_002784    | NP_002775    | Q00887      | PSG9_HUMAN         | g-like V-type.                 | 2            | .GGGATGCGTTG     | 0.406 |                     |
| - | 4  | 491         | _Shift_Del_p.L127I | NM_006840    | NP_006831    | O75023      | LIRB5_HUMAN        | potential). lg-like C2-type 2. | 2            | .GGGCTAAAAGA     | 0.547 |                     |
| - | 3  | 1648_1650   | J02sit.3_In_Frame  | NM_015470    | NP_056285    | Q9BXF6      | RFIP5_HUMAN        |                                | 0            | GCCTTGGTGGT      | 0.635 |                     |
| + | 8  | 1227        |                    | NM_152945    | NP_694453    | Q8IUH3      | RBM45_HUMAN        |                                | 0            | TCATGCAAAAAA     | 0.353 |                     |
| + | 1  | 209_211     | Translation_Start_ | NM_005759    | NP_005750    | Q9NYB9      | ABI2_HUMAN         |                                | 0            | CTGTATgaggagg    | 0.601 |                     |
| - | 21 | 3762_3763   | Shift_Del_p.Q881fs | NM_025176    | NP_079452    | Q9Y2I6      | NINL_HUMAN         | Potential.                     | 5            | GGTCTTGACTTT     | 0.569 |                     |
| - | 23 | 2501        |                    | NM_014258    | NP_055073    | Q9BX26      | SYCP2_HUMAN        |                                | 5            | TCACCATTTTTT     | 0.323 |                     |
| - | 20 | 3610_3611   | id1040fs SFRS15    | NM_020706    | NP_065757    | O95104      | SFR15_HUMAN        |                                | 0            | TAGAATCTCTCT     | 0.525 |                     |
| + | 5  | 1336_1337   | p.E279fs HMGXB     | NM_001003681 | NP_001003681 | Q9UGU5      | HMGX4_HUMAN        |                                | 2            | TCATAGTGAAAA     | 0.406 | rs76572304          |
| - | 6  | 579_580     | o.2_Frame_Shift    | NM_005677    | NP_005668    | Q9Y2I5      | COLQ_HUMAN         | ollagen-like 1.                | 0            | TCCTTCAGGGCC     | 0.584 |                     |
| - | 7  | 850         | 03eal.2_Frame_Sl   | NM_001009899 | NP_001009899 | Q68DE3      | K2018_HUMAN        |                                | 3            | CAATAATTTTTT     | 0.373 |                     |
| - | 9  | 2364        | lbg.1_Frame_Shif   | NM_153002    | NP_694547    | Q8NFN8      | GP156_HUMAN        | lasmic (Potential).            | 2            | .GCCAGCCCCCC     | 0.552 |                     |
| + | 9  | 1470        | l10hrm.2_Frame_ξ   | NM_032839    | NP_116228    | Q96SL1      | DIRC2_HUMAN        | ical; (Potential).             | 0            | GTCTTTGGTTCA     | 0.458 |                     |
| - | 1  | 150_152     | 94A_uc003eyh.2_    | NM_152394    | NP_689607    | Q7L0X2      | F194A_HUMAN        | Glu-rich.                      | 3            | ccacctctcctcctc  | 0.232 |                     |
| - | 2  | 132_134     | ame_Del_p.T35de    | NM_024947    | NP_079223    | Q8NDX5      | PHC3_HUMAN         | Poly-Thr.                      | 2            | Agtggtgatggtggtg | 0.424 |                     |
| - | 1  | 218         | _p.P13fs EMCN_u    | NM_016242    | NP_057326    | Q9ULC0      | MUCEN_HUMAN        |                                | 0            | ATACTGGGCAG      | 0.458 |                     |
| + | 3  | 351         |                    | NM_006583    | NP_006574    | O14718      | OPSX_HUMAN         | Name=3; (Potential).           | 1            | TGAATATTTTTT     | 0.393 |                     |
| + | 13 | 2105        | lly.2_Frame_Shift  | NM_018989    | NP_061862    | Q9P2N5      | RBM27_HUMAN        | RRM.                           | 3            | TATCTTACCAATG    | 0.378 |                     |
| - | 9  | 1715_1716   | 3loh.3_Frame_Shi   | NM_004576    | NP_004567    | Q00005      | 2ABB_HUMAN         |                                | 2            | CGCTTGCCCCCC     | 0.5   |                     |
| - | 39 | 4906        | o.S1566fs KIF13A_  | NM_022113    | NP_071396    | Q9H1H9      | KI13A_HUMAN        |                                | 4            | GTGGGAAAAGT      | 0.522 |                     |
| + | 7  | 1303_1304   | tron LOC285830_u   | NM_001098479 | NP_001091949 | P30511      | HLAF_HUMAN         |                                | 0            | ATCTTGTTTTTT     | 0.535 |                     |
| - | 4  | 649         | _p.Q229fs CCHCR    | NM_019052    | NP_061925    | Q8TD31      | CCHCR_HUMAN        | Potential.                     | 1            | CTCTTGGTGCA      | 0.557 |                     |
| - | 2  | 1782_1783   | Jjte.2_Frame_Shif  | NM_005527    | NP_005518    | P34931      | HS71L_HUMAN        |                                | 6            | CCTCTGGACCTC     | 0.446 |                     |
| + | 4  | 418         | T1_uc003oag.2_5'   | NM_006913    | NP_008844    | Q99942      | RNF5_HUMAN         |                                | 0            | CCCCGCCCCCA      | 0.522 |                     |
| - | 61 | 11385_11386 |                    | NM_138694    | NP_619639    | P08F94      | PKHD1_HUMAN        | ellular (Potential).           | 44           | AACATTCTCTAG     | 0.406 |                     |
| - | 8  | 1152        | _p.K221fs ICK_uc0  | NM_016513    | NP_057597    | Q9UPZ9      | ICK_HUMAN          | rotein kinase.                 | 5            | ATTACCTTTTTTG    | 0.502 |                     |
| + | 8  | 2132_2134   |                    | NM_138426    | NP_612435    | Q86VQ1      | GLC11_HUMAN        | Poly-Gln.                      | 0            | ATCCCAGCAGC      | 0.562 |                     |
| + | 5  | 601_603     | 0kxo.2_In_Frame_   | NM_007252    | NP_009183    | P78424      | PO6F2_HUMAN        | Gln-rich.                      | 1            | cagctccagcagcagc | 0.365 |                     |
| + | 15 | 1890        | bl.1_RNA LIMK1_    | NM_002314    | NP_002305    | P53667      | LIMK1_HUMAN        | rotein kinase.                 | 3            | AACTGCCCCCC      | 0.657 |                     |
| - | 18 | 3149_3151   |                    | NM_022574    | NP_072096    | O75420      | PERQ1_HUMAN        |                                | 2            | CCTCTGTGTC       | 0.65  |                     |
| - | 12 | 2387        | _p.G539fs EPHB4_   | NM_004444    | NP_004435    | P54760      | EPHB4_HUMAN        | Potential). Protein kinase.    | 15           | AGCCGCCCCCG      | 0.642 |                     |
| - | 4  | 2096        |                    | NM_002711    | NP_002702    | Q16821      | PPR3A_HUMAN        |                                | 34           | TATCTTTTTTCC     | 0.393 |                     |
| + | 7  | 1118_1119   | vuy.2_Frame_Shif   | NM_016019    | NP_057103    | Q9Y383      | LC7L2_HUMAN        | Arg/Ser-rich.                  | 0            | AGAGAAGAGAGA     | 0.391 |                     |
| + | 1  | 528         |                    | NM_001001656 | NP_001001656 | Q8NGU2      | OR9A4_HUMAN        | ellular (Potential).           | 1            | GAACAATTTTTT     | 0.383 |                     |
| + | 8  | 1621        |                    | NM_014141    | NP_054860    | Q9UHC6      | CNTP2_HUMAN        | ellular (Potential).           | 11           | CTTGTGTGGAA      | 0.438 |                     |
| + | 57 | 8246        |                    | NM_198455    | NP_940857    | A2VEC9      | SSPO_HUMAN         | SP type-1 6.                   | 0            | AGCCTGGGGGG      | 0.667 |                     |
| - | 6  | 524_525     | 3yqt.2_Frame_Shi   | NM_004306    | NP_004297    | P27216      | ANX13_HUMAN        | Annexin 2.                     | 3            | CCAGGATTTTTT     | 0.411 |                     |
| - | 4  | 505_506     | .1_RNA FLJ43860    | NM_207414    | NP_997297    | Q6ZUA9      | Q6ZUA9_HUMAN       |                                | 0            | GGAACCTGTGCC     | 0.594 |                     |
| + | 22 | 3293        | J1_uc010nen.2_Fi   | NM_003611    | NP_003602    | O75665      | OFD1_HUMAN         | nteraction with SDCCAG8.       | 0            | AGCTCAAAAAA      | 0.348 |                     |
| - | 3  | 1261_1262   | 1_uc011moi.1_5'F   | NM_004463    | NP_004454    | P98174      | FGD1_HUMAN         | g (Potential). Pro-rich.       | 6            | TCCAGTGGGGG      | 0.658 |                     |
| - | 3  | 361         | XF5_uc004ejj.1_RI  | NM_032946    | NP_116564    | Q9H1B4      | NXF5_HUMAN         |                                | 1            | CCCTCATTTTTT     | 0.368 |                     |
| - | 3  | 564         |                    | NM_001013403 | NP_001013421 | Q5JRM2      | CX066_HUMAN        | lasmic (Potential).            | 0            | GTGCCTTTTCCA     | 0.413 |                     |
| - | 6  | 1404_1406   | o.V48del PVRL4_u   | NM_030916    | NP_112178    | Q96NY8      | PVRL4_HUMAN        | ical; (Potent NA               | 2            | ATGAGCACCACC     | 0.571 |                     |

|   |    |           |                    |              |              |        |             |                |    |              |                   |       |             |
|---|----|-----------|--------------------|--------------|--------------|--------|-------------|----------------|----|--------------|-------------------|-------|-------------|
| - | 12 | 1603      | 'L3_uc001ggt.2_In  | NM_181093    | NP_851607    | Q8IZE3 | PACE1_HUMAN | NA             | 2  | FGCCAGAAAAGA | 0.413             |       |             |
| + | 8  | 1369_1389 |                    | NM_025004    | NP_079280    | Q0P6D6 | CCD15_HUMAN | NA             | 2  | CAGAAGGCCAG  | 0.475             |       |             |
| + | 16 | 2686_2688 | tbm.1_In_Frame_I   | NM_004592    | NP_004583    | Q12872 | SFSWA_HUMAN | g/Ser-rich (f  | NA | 0            | :CACGAGAAGAA      | 0.493 |             |
| + | 12 | 931       | 10cke.2_Frame_Sl   | NM_015085    | NP_055900    | Q684P5 | RPGP2_HUMAN | Rap-GAP.       | NA | 1            | GGAACAATGAGC      | 0.473 |             |
| - | 1  | 142_143   |                    | NM_013940    | NP_039228    | Q9Y4A9 | O10H1_HUMAN | cellular (Pote | NA | 0            | AAGACAGAGAAC      | 0.574 | rs147833765 |
| - | 1  | 725       | xz.1_5'Flank LGI4  | NM_139284    | NP_644813    | Q8N135 | LGI4_HUMAN  |                | NA | 1            | .GGTCCGGGGAC      | 0.662 |             |
| - | 1  | 207_208   | oad.1_Frame_Shif   | NM_198538    | NP_940940    | Q6UWP8 | SBSN_HUMAN  |                | NA | 1            | CCCACCTCTCTC      | 0.579 |             |
| - | 2  | 412_413   | owf.3_Frame_Shift  | NM_002784    | NP_002775    | Q00887 | PSG9_HUMAN  | g-like V-type  | NA | 2            | .GGGATGCGTTG      | 0.406 |             |
| - | 4  | 491       | _Shift_Del_p.L127I | NM_006840    | NP_006831    | O75023 | LIRB5_HUMAN | potential). lg | NA | 2            | .GGGCTAAAAGA      | 0.547 |             |
| - | 2  | 132_134   | ame_Del_p.T35de    | NM_024947    | NP_079223    | Q8NDX5 | PHC3_HUMAN  | Poly-Thr.      | NA | 2            | Agtggtgatggtggtgg | 0.424 |             |
| - | 5  | 1565      | 1ebt.1_Frame_Shi   | NM_001010923 | NP_001010923 | Q8N1K5 | THMS1_HUMAN | CABIT 2.       | NA | 4            | AGAGATTTTTTC      | 0.453 |             |
